# Supplementary material for: Giardia lamblia miRNAs as a new diagnostic tool for human giardiasis
Source: PubMed Central journal article supplement (PMC6597124; doi:10.1371/journal.pntd.0007398), 2019-06-17
Supplement: pntd.0007398.s003.pdf [file pntd.0007398.s003.pdf]

|                                          |                              |   |
|------------------------------------------|------------------------------|---|
| Gi5_4466747_x2732.....                   | guucgauucccggcgccgga.....    | 0 |
| Gi1_2098525_x2672.....                   | Uuucgauucccggcgccgg.....     | 1 |
| Gi1_2106457_x2553.....                   | guucgauucccggcgccggagcC..... | 1 |
| Gi5_4584884_x2359.....                   | ggucgauucccggcgccgg.....     | 0 |
| Gi2_4550526_x2301.....                   | gUuucgauucccggcgccggagc..... | 1 |
| Gi3_16719768_x2271.....                  | ucgauucccggcgccggagcC.....   | 1 |
| Gi1_2160670_x2236.....                   | guucgauucccggcgccgga.....    | 0 |
| Gi2_4659874_x2088.....                   | guucgauucccggcgccgga.....    | 0 |
| Gi5_4689295_x2063.....                   | guucgauucccggcgccggagcC..... | 1 |
| Gi2_4678540_x2059.....                   | guucgauucccggcgccggag.....   | 0 |
| Gi5_4746918_x1924.....                   | ggucgauucccggcgcc.....       | 0 |
| Gi5_4797320_x1809.....                   | guucgauucccggcgccggagc.....  | 0 |
| Gi5_4829364_x1752.....                   | ggucgauucccggcgccggag.....   | 0 |
| Gi5_4856838_x1692cucacccaacagauccgg..... | .....                        | 0 |
| Gi3_17723670_x1584.....                  | Uguucgauucccggcgccgga.....   | 1 |
| Gi1_2263260_x1508.....                   | guucgauucccggcgccgg.....     | 0 |
| Gi1_2279516_x1437.....                   | gGucgauucccggcgccgg.....     | 1 |
| Gi3_18002792_x1423.....                  | ucgauucccggcgccggagc.....    | 0 |
| Gi3_18114895_x1376.....                  | Uguucgauucccggcgccggag.....  | 1 |
| Gi2_5265076_x1323.....                   | ucgauucccggcgccggagc.....    | 0 |
| Gi3_18253831_x1317.....                  | Uuucgauucccggcgccgg.....     | 1 |
| Gi1_2332554_x1264.....                   | ggucgauucccggcgccggagc.....  | 0 |
| Gi1_2340050_x1226.....                   | guucgauucccggcgccggagc.....  | 0 |
| Gi3_18631876_x1148.....                  | Uuucgauucccggcgccgga.....    | 1 |
| Gi5_5178308_x1083.....                   | Uuucgauucccggcgccgg.....     | 1 |
| Gi5_5191186_x1059.....                   | Uuucgauucccggcgccgg.....     | 1 |
| Gi3_18881639_x1044.....                  | gUuucgauucccggcgccgga.....   | 1 |
| Gi2_5612893_x1032.....                   | Uuucgauucccggcgccggagc.....  | 1 |
| Gi3_18985137_x1003.....                  | Uuucgauucccggcgccggagc.....  | 1 |
| Gi3_19108956_x964.....                   | gUuucgauucccggcgccggag.....  | 1 |
| Gi5_5277356_x931.....                    | Uguucgauucccggcgccggagc..... | 1 |
| Gi3_19223083_x923.....                   | uucgauucccggcgccggagc.....   | 0 |
| Gi3_19277081_x906.....                   | gauucccggcgccggagc.....      | 0 |
| Gi2_5857907_x868.....                    | Uuucgauucccggcgccgg.....     | 1 |
| Gi1_2480982_x805.....                    | ggucgauucccggcgccgg.....     | 0 |
| Gi3_19615623_x803.....                   | Uguucgauucccggcgccgg.....    | 1 |
| Gi1a_3739453_x774.....                   | ggucgauucccggcgccggagc.....  | 0 |
| Gi2_6110175_x725.....                    | ggucgauucccggcgccgg.....     | 0 |
| Gi3_20044512_x691.....                   | gGucgauucccggcgccgg.....     | 1 |
| Gi3_20062420_x686.....                   | guucgauucccggcgccggC.....    | 1 |
| Gi5_5504875_x652.....                    | gUuucgauucccggcgccggagc..... | 1 |
| Gi1_2562309_x634.....                    | ggucgauucccggcgccgga.....    | 0 |
| Gi3_20331714_x633.....                   | Aguucgauucccggcgccggagc..... | 1 |
| Gi3_20356944_x628.....                   | cgauucccggcgccggagc.....     | 0 |
| Gi3_20450237_x607.....                   | uucgauucccggcgccgga.....     | 0 |
| Gi3_20477458_x603.....                   | uucgauucccggcgccggagcC.....  | 1 |
| Gi3_20490687_x600.....                   | gGucgauucccggcgccgga.....    | 1 |

|                                                     |   |
|-----------------------------------------------------|---|
| Gi3_20592804_x574.....gauuccggcgccggagcC.....       | 1 |
| Gi3_20641249_x565.....gguucgauuccggcgccgC.....      | 1 |
| Gi2_6524433_x562.....gGucgauuccggcgccggagc.....     | 1 |
| Gi3_20654213_x562.....guucgaCuccggcgccggagc.....    | 1 |
| Gi3_20711587_x552.....gguucgauNcccgcgccggagc.....   | 1 |
| Gi3_20742876_x547.....gUuucgauuccggcgccg.....       | 1 |
| Gi5_5635437_x543.....gGucgauuccggcgccg.....         | 1 |
| Gi3_20766281_x542.....ucgauuccggcgccggag.....       | 0 |
| Gi3_20813076_x534.....Uuucgauuccggcgccggag.....     | 1 |
| Gi1_2629414_x520.....Uguucgauuccggcgccg.....        | 1 |
| Gi3_20890919_x518.....ucgauuccggcgccgga.....        | 0 |
| Gi3_20912056_x514.....Uguucgauuccggcgccg.....       | 1 |
| Gi3_20940158_x508cucaccaacagauccg.....              | 0 |
| Gi2_6718036_x497.....gauuccggcgccggagc.....         | 0 |
| Gi2_6721016_x496.....gGucgauuccggcgccg.....         | 1 |
| Gi3_21017851_x495.....auuccggcgccggagcC.....        | 1 |
| Gi3_21069318_x486.....gguucgauuccggcgccggCgc.....   | 1 |
| Gi2_6751449_x486.....Uguucgauuccggcgcc.....         | 1 |
| Gi2_6769824_x481.....Uguucgauuccggcgccggag.....     | 1 |
| Gi2_6779412_x478.....ucgauuccggcgccggagcC.....      | 1 |
| Gi1_2664335_x471cucaccaacagauccg.....               | 0 |
| Gi5_5742002_x468.....gGucgauuccggcgccg.....         | 1 |
| Gi3_21241144_x461.....gGucgauuccggcgccggagc.....    | 1 |
| Gi1_2686601_x437.....uucgauuccggcgccg.....          | 0 |
| Gi5_5802448_x432.....Uguucgauuccggcgccg.....        | 1 |
| Gi3_21433943_x429.....ggCucgauuccggcgccggagc.....   | 1 |
| Gi2_7002965_x415.....Uguucgauuccggcgccg.....        | 1 |
| Gi1_4132002_x412.....gguucgauuccggcgccggag.....     | 0 |
| Gi3_21767117_x381.....Uguucgauuccggcgcc.....        | 1 |
| Gi5_5902217_x373.....Uguucgauuccggcgccgga.....      | 1 |
| Gi3_21824415_x373.....gUuucgauuccggcgccg.....       | 1 |
| Gi3_21849616_x369.....cgauuccggcgccggagcC.....      | 1 |
| Gi3_21850354_x369.....gguucgauuccggcgccggagcCu..... | 1 |
| Gi1_2749901_x367.....gguucgauuccggcgccggag.....     | 0 |
| Gi5_5915080_x362.....gauuccggcgccggagc.....         | 0 |
| Gi2_7279530_x347.....gauuccggcgccggagcC.....        | 1 |
| Gi3_22045248_x341.....cagaucggguucgauucc.....       | 0 |
| Gi1_2780262_x336.....gUuucgauuccggcgccg.....        | 1 |
| Gi2_7348465_x332.....Aguucgauuccggcgccggagc.....    | 1 |
| Gi2_7360380_x330.....gUuucgauuccggcgccggag.....     | 1 |
| Gi5_6005812_x327.....gUuucgauuccggcgccg.....        | 1 |
| Gi2_7428877_x314.....Uuucgauuccggcgccg.....         | 1 |
| Gi3_22310260_x308.....gguucgauuccggcgccggGgc.....   | 1 |
| Gi2_7451906_x308.....guucgaCuccggcgccggagc.....     | 1 |
| Gi3_22313956_x308.....gUuucgauuccggcgcc.....        | 1 |
| Gi3_22350015_x303.....uccggguucgauuccggcgccgga..... | 0 |
| Gi3_22369960_x301.....gGucgauuccggcgccggag.....     | 1 |

|                                         |                              |   |
|-----------------------------------------|------------------------------|---|
| Gi1a_4343709_x299.....                  | gguucgauucccggcgcggagcC..... | 1 |
| Gi3_22406772_x297.....                  | gguucgauuccUggcgccggagc..... | 1 |
| Gi3_22426894_x295.....                  | Uuucgauucccggcgcgg.....      | 1 |
| Gi3_22440421_x293.....                  | Cguucgauucccggcgcggagc.....  | 1 |
| Gi3_22470199_x290.....                  | uucgauucccggcgcgg.....       | 0 |
| Gi1_2833307_x289Uucacccaacagauccgg..... | .....                        | 1 |
| Gi1_2837629_x286.....                   | gguucgauucccggcgcggagcC..... | 1 |
| Gi2_7584647_x283.....                   | gUuucgauucccggcgcgg.....     | 1 |
| Gi2_7604625_x280.....                   | uucgauucccggcgcgg.....       | 0 |
| Gi2_7623265_x277.....                   | Uguucgauucccggcgcggga.....   | 1 |
| Gi2_7633467_x275.....                   | gguucgauNcccggcgcggagc.....  | 1 |
| Gi3_22667789_x270.....                  | guucgauucccggcgcggagcCu..... | 1 |
| Gi1_2865516_x267.....                   | guucgauucccggcgcggagcCu..... | 1 |
| Gi5_6179994_x266.....                   | Uuucgauucccggcgcggga.....    | 1 |
| Gi1a_4422156_x265.....                  | gguucgauucccggcgcggga.....   | 0 |
| Gi3_22715945_x265.....                  | agaucggguucgauucc.....       | 0 |
| Gi1_2868710_x265.....                   | ucgauucccggcgcggagc.....     | 0 |
| Gi3_22720450_x265.....                  | gguucgaCuuccgggcgcggagc..... | 1 |
| Gi2_7692801_x265.....                   | gUuucgauucccggcgcgg.....     | 1 |
| Gi1_2876324_x260.....                   | guucgaCuuccgggcgcgg.....     | 1 |
| Gi5_6222628_x254.....                   | agaucggguucgauucc.....       | 0 |
| Gi5_6228460_x253.....                   | ccaacagauccggguuc.....       | 0 |
| Gi3_22899164_x248.....                  | guucgaCuuccgggcgcggga.....   | 1 |
| Gi5_6245734_x248.....                   | Uguucgauucccggcgcgg.....     | 1 |
| Gi4_339684_x242.....                    | gguucgauucccggcgcgg.....     | 0 |
| Gi3_22994850_x240.....                  | gguucgGuucccggcgcggagc.....  | 1 |
| Gi1_2928825_x236.....                   | uucgauucccggcgcggagcC.....   | 1 |
| Gi3_23052063_x235.....                  | caccaacagauccggguuc.....     | 0 |
| Gi5_6308565_x232.....                   | Uguucgauucccggcgcgg.....     | 1 |
| Gi5_6317809_x230.....                   | ucgauucccggcgcggag.....      | 0 |
| Gi2_7899826_x230.....                   | uucgauucccggcgcggagcC.....   | 1 |
| Gi1_2938596_x230.....                   | Cguucgauucccggcgcgg.....     | 1 |
| Gi5_6326282_x228.....                   | ucgauucccggcgcggagc.....     | 0 |
| Gi5_6331966_x226.....                   | guucgauucccggcgcggag.....    | 0 |
| Gi2_7938475_x225.....                   | gguucgauucccggcgcggCgc.....  | 1 |
| Gi3_23193875_x224.....                  | gguucgauuccUggcgccggag.....  | 1 |
| Gi3_23200799_x223.....                  | guucgaCuuccgggcgcgg.....     | 1 |
| Gi1_2963766_x219.....                   | gCucgauucccggcgcgg.....      | 1 |
| Gi1a_4546649_x218.....                  | gguucgauucccggcgcgg.....     | 0 |
| Gi2_7994399_x217.....                   | Uuucgauucccggcgcggag.....    | 1 |
| Gi1a_4557874_x214.....                  | gguucgauucccggcgcgg.....     | 0 |
| Gi5_6398702_x214.....                   | gUuucgauucccggcgcggga.....   | 1 |
| Gi2_8017908_x214.....                   | uucgauucccggcgcggagc.....    | 0 |
| Gi5_6417005_x211.....                   | ucgauucccggcgcggagcC.....    | 1 |
| Gi3_23382327_x210.....                  | guucgauucccggcgcggA.....     | 1 |
| Gi1_2985636_x210.....                   | Uuucgauucccggcgcggga.....    | 1 |
| Gi5_6461919_x203.....                   | Uguucgauucccggcgcggag.....   | 1 |

|                                                    |   |
|----------------------------------------------------|---|
| Gi1_3010075_x201.....uucgauucccgcgccggagc.....     | 0 |
| Gi3_23506713_x201.....caacagauccggguucgauucc.....  | 0 |
| Gi2_8127732_x200.....ggCucgauucccgcgccggagc.....   | 1 |
| Gi3_23516931_x200.....gguCcgauucccgcgccggagc.....  | 1 |
| Gi2_8144076_x198.....Uuucgauucccgcgccgga.....      | 1 |
| Gi3_23560200_x197.....gauccggguucgauucc.....       | 0 |
| Gi3_23573973_x196.....gCuucgauucccgcgccggagc.....  | 1 |
| Gi3_23641643_x191.....guucgauucccgUgccggag.....    | 1 |
| Gi1a_4632800_x191.....guucgauucccgcgccggagcC.....  | 1 |
| Gi3_23694905_x188.....Agguucgauucccgcgccggagc..... | 1 |
| Gi3_23697725_x188.....ggGucgauucccgcgccggagc.....  | 1 |
| Gi1a_4644493_x187.....guucgauucccgcgccggagc.....   | 0 |
| Gi5_6557180_x187.ucacccaacagauccggguu.....         | 0 |
| Gi2_8259226_x185.....cccaacagauccggguuc.....       | 0 |
| Gi3_23749033_x184.....gAuucgauucccgcgccggagc.....  | 1 |
| Gi1a_4658536_x183.....gguucgauucccgcgcc.....       | 0 |
| Gi4_367620_x179.....guucgauucccgcgccgg.....        | 0 |
| Gi5_6615364_x179.....Uuucgauucccgcgccggagc.....    | 1 |
| Gi1_3070143_x179.....agauccggguucgauucc.....       | 0 |
| Gi5_6632435_x177.....gguucgauucccgcgccggagcCu..... | 1 |
| Gi3_23865777_x176.....cgauucccgcgccggag.....       | 0 |
| Gi1_3086057_x175.....Uuucgauucccgcgccg.....        | 1 |
| Gi3_23948305_x171.....guucgaCuucccgcgccggag.....   | 1 |
| Gi2_8390578_x170.....gUuucgauucccgcgccgga.....     | 1 |
| Gi5_6685354_x169.....gUuucgauucccgcgccgg.....      | 1 |
| Gi1_3103256_x169.ucacccaacagauccgggu.....          | 0 |
| Gi2_8419886_x166.....gGucgauucccgcgccg.....        | 1 |
| Gi2_8436782_x165.....gguucgauucccgcgccggGgc.....   | 1 |
| Gi5_6719756_x164.....gauucccgcgccggagcC.....       | 1 |
| Gi1a_4721617_x163.....guucgauucccgcgccgg.....      | 0 |
| Gi3_24072831_x163.....gguucgauucccgUgccggagc.....  | 1 |
| Gi5_6738710_x162.....guucgaCuucccgcgccgg.....      | 1 |
| Gi3_24090728_x162.....cggguucgauucccgcgccgga.....  | 0 |
| Gi3_24111706_x161.....gGucgauucccgcgccg.....       | 1 |
| Gi3_24113960_x161.....gguucgauCucccgcgccggagc..... | 1 |
| Gi2_8472510_x161.....ucgauucccgcgccggag.....       | 0 |
| Gi5_6756601_x160.....uucgauucccgcgccgg.....        | 0 |
| Gi3_24142553_x159.....gguucgauuccAgcgccggagc.....  | 1 |
| Gi3_24150185_x159.ucacccaacagauccgggu.....         | 0 |
| Gi5_6778507_x158.....uccggguucgauucccggc.....      | 0 |
| Gi2_8512592_x157.....gguucgaCuucccgcgccggagc.....  | 1 |
| Gi2_8518708_x156.....cgauucccgcgccggagcC.....      | 1 |
| Gi1_3162430_x154.....gguucgauucccgcgccggagcCu..... | 1 |
| Gi5_6811730_x153.....guucgauucccgcgccggaCc.....    | 1 |
| Gi1_3167020_x152.....Auucgauucccgcgccgg.....       | 1 |
| Gi3_24257654_x151.....Agucgauucccgcgccggag.....    | 1 |
| Gi3_24263996_x151.....gguucgauucccgcgccggagcA..... | 1 |

|                                         |                               |   |
|-----------------------------------------|-------------------------------|---|
| Gi2_8579332_x150.....                   | agaucggguucgauucc.....        | 0 |
| Gi3_24312302_x148.....                  | gguucgauuccggcgAcggagc.....   | 1 |
| Gi3_24331334_x147.....                  | aucggguucgauuccggcgccgga..... | 0 |
| Gi1_3193841_x145.....                   | guucgauuNccggcgccgg.....      | 1 |
| Gi3_24415889_x142.....                  | gguucAauuccggcgccggagc.....   | 1 |
| Gi3_24417877_x142.....                  | guucgauuccggcgccggaC.....     | 1 |
| Gi2_8670143_x142.....                   | Cguucgauuccggcgccggagc.....   | 1 |
| Gi5_6930592_x139.....                   | auuccggcgccggagcC.....        | 1 |
| Gi5_6938237_x139.....                   | guucgauuccggcgccggagcCu.....  | 1 |
| Gi3_24512108_x136.....                  | ggAucgauuccggcgccggagc.....   | 1 |
| Gi2_8736673_x136.....                   | gGucgauuccggcgccgga.....      | 1 |
| Gi2_8744776_x135.....                   | guuUgauuccggcgccggag.....     | 1 |
| Gi3_24551410_x134.....                  | ggguucgauuccggcgccggagc.....  | 0 |
| Gi5_6979068_x134.....                   | gguucgauuUccggcgccgg.....     | 1 |
| Gi5_6975584_x134.....                   | gUuucgauuccggcgccggag.....    | 1 |
| Gi1_3244829_x134.....                   | Uuucgauuccggcgccggagc.....    | 1 |
| Gi3_24613453_x131.....                  | gguuUgauuccggcgccggagc.....   | 1 |
| Gi1_3258716_x131cucacccaacagauccCg..... |                               | 1 |
| Gi5_7003636_x131.....                   | gGucgauuccggcgccgga.....      | 1 |
| Gi5_7008202_x130.....                   | gUuucgauuccggcgcc.....        | 1 |
| Gi5_7036657_x127.....                   | guucgaCuccggcgccgg.....       | 1 |
| Gi1_3271991_x127.....                   | guCcgauuccggcgccgg.....       | 1 |
| Gi3_24687352_x126.....                  | Aguucgauuccggcgccgga.....     | 1 |
| Gi3_24694660_x126.....                  | gguucgauuccggcgccggagA.....   | 1 |
| Gi3_24739411_x123.....                  | gguucgauNccggcgccgga.....     | 1 |
| Gi3_24749611_x122.....                  | gguucgauuccggcgUggagc.....    | 1 |
| Gi2_8905500_x121.....                   | gguCcgauuccggcgccggagc.....   | 1 |
| Gi3_24812582_x119.....                  | caacagauccggguucga.....       | 0 |
| Gi1_3311683_x118.....                   | Uguucgauuccggcgccggagc.....   | 1 |
| Gi5_7131131_x117.....                   | Cguucgauuccggcgcc.....        | 1 |
| Gi3_24835557_x117.....                  | gguucgauNccggcgccggag.....    | 1 |
| Gi2_8951030_x117.....                   | Uguucgauuccggcgccgg.....      | 1 |
| Gi3_24942169_x111.....                  | gguucgauuccggcgccggaCc.....   | 1 |
| Gi2_9037156_x110.....                   | ucgauuccggcgccgga.....        | 0 |
| Gi3_25015334_x107.....                  | ggguucgauuccggcgccggag.....   | 0 |
| Gi3_25009663_x107.....                  | Uauuccggcgccggagc.....        | 1 |
| Gi3_25019293_x107.....                  | guucgaCuccggcgccg.....        | 1 |
| Gi1a_4940392_x105.....                  | uucgauuccggcgccggagc.....     | 0 |
| Gi4_415438_x105.....                    | gguucgauuccggcgccggagc.....   | 0 |
| Gi1_3372775_x105.....                   | gGucgauuccggcgccgga.....      | 1 |
| Gi2_9109341_x104.....                   | gGucgauuccggcgccggag.....     | 1 |
| Gi2_9115834_x103.....                   | gguucgGuuccggcgccggagc.....   | 1 |
| Gi3_25104011_x102.....                  | gguAcgauuccggcgccggagc.....   | 1 |
| Gi3_25119990_x101.....                  | gguucgCuuccggcgccggagc.....   | 1 |
| Gi5_7296674_x101.....                   | gguucgauuccggcgccggagcgu..... | 0 |
| Gi2_9144974_x100.....                   | cgauuccggcgccggagcguuA.....   | 1 |
| Gi1_3403571_x98.....                    | gUuucgauuccggcgccggagc.....   | 1 |

|                                       |                                 |   |
|---------------------------------------|---------------------------------|---|
| Gi1_3410380_x97.....                  | gguucgauucccgcgcccgagcU.....    | 1 |
| Gi2_9186957_x97.....                  | guucgaCuccggcgccgg.....         | 1 |
| Gi1_3412405_x96.....                  | gguucgauucccgcgcc.....          | 0 |
| Gi1_3412885_x96.....                  | gguucgauucccgcgccAg.....        | 1 |
| Gi3_25246829_x94.....                 | agaucggguucgauucc.....          | 0 |
| Gi5_7369994_x94.....                  | gCucgauucccgcgccg.....          | 1 |
| Gi3_25254537_x94.....                 | gguucgauucUcggcgccggagc.....    | 1 |
| Gi1_3431858_x93.....                  | Cuucgauucccgcgccgg.....         | 1 |
| Gi3_25304938_x91.....                 | gguucgauucccgcgUcggagc.....     | 1 |
| Gi3_25293472_x91.....                 | .Auucgauucccgcgccgga.....       | 1 |
| Gi1_3443389_x90.....                  | Agguucgauucccgcgccgg.....       | 1 |
| Gi2_9277568_x89.....                  | gAuucgauucccgcgccggagc.....     | 1 |
| Gi5_7424212_x89.....                  | acagaucggguucgauucccgcg.....    | 0 |
| Gi1_3455056_x88.....                  | guucgGuucccgcgccgg.....         | 1 |
| Gi5_7436018_x88.....                  | gGucgauucccgcgccggagc.....      | 1 |
| Gi2_9296624_x87.....                  | ggGucgauucccgcgccggagc.....     | 1 |
| Gi1_3464465_x86.....                  | Uguucgauucccgcgccg.....         | 1 |
| Gi3_25413852_x85.....                 | cccaacagaucggguucgauucc.....    | 0 |
| Gi3_25425115_x84.....                 | cagaucggguucgauucccgcgccgg..... | 0 |
| Gi3_25423855_x84.....                 | gguucgauucccgcgAccggagc.....    | 1 |
| Gi3_25418899_x84.....                 | .Auucgauucccgcgccggagc.....     | 1 |
| Gi3_25424863_x84.....                 | gguucgauucccgcgccAggagc.....    | 1 |
| Gi5_7492827_x83.....                  | Aguucgauucccgcgccggagc.....     | 1 |
| Gi2_9348290_x83cucacccaacagaucgg..... |                                 | 0 |
| Gi1a_5050925_x83.....                 | Uguucgauucccgcgccggagc.....     | 1 |
| Gi1_3484149_x82.....                  | guucAauucccgcgccgg.....         | 1 |
| Gi5_7506722_x82.....                  | gguucgauucccgcgccggagcguu.....  | 0 |
| Gi3_25483214_x81.....                 | gguucgauucccgcgccggG.....       | 1 |
| Gi3_25483376_x81.....                 | gguucgauucccgcgccAgagc.....     | 1 |
| Gi1_3491081_x81.....                  | guucgauucccgcgccAg.....         | 1 |
| Gi3_25469201_x81.....                 | gguucgauuccUcggcgccggagc.....   | 1 |
| Gi2_9378699_x80.....                  | uucgauucccgcgccggag.....        | 0 |
| Gi3_25486936_x80.....                 | ggCucgauucccgcgccgga.....       | 1 |
| Gi3_25504765_x79.....                 | guucgauucccgcgccggGg.....       | 1 |
| Gi1_3501457_x78.....                  | guuUgauucccgcgccgg.....         | 1 |
| Gi2_9414179_x77.....                  | .Auucgauucccgcgccgg.....        | 1 |
| Gi1_3510223_x77.....                  | gGucgauucccgcgccg.....          | 1 |
| Gi2_9417028_x77.....                  | ggAucgauucccgcgccggagc.....     | 1 |
| Gi5_7559961_x77.....                  | cgauucccgcgccggagcguuuc.....    | 0 |
| Gi1_3506604_x77.....                  | guucUauucccgcgccgg.....         | 1 |
| Gi4_442433_x77.....                   | guucgauucccgcgccgga.....        | 0 |
| Gi3_25568178_x76.....                 | gguucgauucccgcgccggagU.....     | 1 |
| Gi2_9443182_x75.....                  | gguuUgauucccgcgccggagc.....     | 1 |
| Gi3_25594935_x75.....                 | guucgauuNccggcgccgga.....       | 1 |
| Gi5_7589840_x74.....                  | guucgaCuccggcgccggagc.....      | 1 |
| Gi3_25620397_x73.....                 | guucgauuNccggcgccgg.....        | 1 |
| Gi3_25621492_x73.....                 | .Auucgauucccgcgccgg.....        | 1 |

|                                            |                                   |   |
|--------------------------------------------|-----------------------------------|---|
| Gi2_9477623_x72.....                       | cgauucccgggcgccggagcguuuc.....    | 0 |
| Gi3_25652418_x72.....                      | gguucgauUccggcgccggagc.....       | 1 |
| Gi3_25661387_x71.....                      | Cguucgauucccgggcgccgga.....       | 1 |
| Gi1_3536125_x71.....                       | Uguucgauucccgggcgccgga.....       | 1 |
| Gi3_25659541_x71.....                      | ggguucgauucccgggcgccgga.....      | 0 |
| Gl1a_5110245_x71.....                      | cgauucccgggcgccggagcC.....        | 1 |
| Gi1_3538184_x71.....                       | gGucgauucccgggcgccggagc.....      | 1 |
| Gi2_9490621_x71.....                       | gCuucgauucccgggcgccggagc.....     | 1 |
| Gi1_3539746_x71.....                       | guucgauucccgUgcccgg.....          | 1 |
| Gi4_448843_x70cucacccaacagauccggguucg..... | .....                             | 0 |
| Gi2_9498941_x70.....                       | gguucgauucccgggcgAcggagc.....     | 1 |
| Gl1a_5117872_x70.....                      | guucgauucccgggcgccg.....          | 0 |
| Gi3_25690730_x70.....                      | guucgGuucccgggcgccgga.....        | 1 |
| Gi2_9511814_x69.....                       | gUuucgauucccgggcgccgg.....        | 1 |
| Gi3_25706398_x69.....                      | guucgauucccgggcgccggG.....        | 1 |
| Gi3_25697014_x69.....                      | ggCucgauucccgggcgccggag.....      | 1 |
| Gi3_25693495_x69.....                      | gCucgauucccgggcgccgg.....         | 1 |
| Gi2_9507881_x69.....                       | gguucgauucccgggcgccggagA.....     | 1 |
| Gi5_7667663_x68.....                       | Auucgauucccgggcgccg.....          | 1 |
| Gi5_7659095_x68.....                       | gguucgauNcccggcgccggagc.....      | 1 |
| Gi3_25725127_x68.....                      | Aguucgauucccgggcgccg.....         | 1 |
| Gi2_9519724_x68.....                       | gguucgauucccAgcgccggagc.....      | 1 |
| Gi2_9536503_x67.....                       | gguucgauCcccggcgccggagc.....      | 1 |
| Gi5_7668269_x67.....                       | gguucgauucccgggcgccAg.....        | 1 |
| Gi2_9546257_x66.....                       | gguucAauuccggcgccggagc.....       | 1 |
| Gi5_7691722_x66.....                       | cagauccggguucgauucccgggcgccg..... | 0 |
| Gi1_3561746_x66.....                       | guucgauCcccggcgccgg.....          | 1 |
| Gi1_3559898_x66.....                       | guucgauucccAgcgccgg.....          | 1 |
| Gi5_7680238_x66.....                       | ggguucgauuccggcgccggagc.....      | 0 |
| Gi5_7687168_x66.....                       | ucgauuccggcgccgga.....            | 0 |
| Gi5_7698366_x65.....                       | ccggguucgauucccgggcgccgga.....    | 0 |
| Gi3_25769037_x65.....                      | gCucgauucccgggcgccggagc.....      | 1 |
| Gi3_25791259_x64.....                      | Cguucgauucccgggcgccggag.....      | 1 |
| Gi1_3572008_x64.....                       | caacagauccggguucgauucccggc.....   | 0 |
| Gi2_9577273_x64.....                       | Auucgauucccgggcgccggagc.....      | 1 |
| Gi1_3573800_x64.....                       | guucgauucccgggcgUgg.....          | 1 |
| Gi2_9578297_x64.....                       | cgauuccggcgccggagcguuu.....       | 0 |
| Gi3_25813920_x63.....                      | guucgauucccgggcgccggCgc.....      | 1 |
| Gi3_25805856_x63.....                      | gguucgauucccgggcgccggagcgcA.....  | 1 |
| Gi2_9582921_x63.....                       | guucgaCuccggcgccg.....            | 1 |
| Gi5_7721679_x63.....                       | gguucgauuccggcgccggagcguuu.....   | 0 |
| Gi5_7726656_x63.....                       | Auucgauucccgggcgccgg.....         | 1 |
| Gi1_3575068_x63.....                       | gUuucgauucccgggcgccg.....         | 1 |
| Gi3_25836223_x62.....                      | gguucgauucccgggcgAc.....          | 1 |
| Gi3_25833123_x62.....                      | gguucgauucccgUgccc.....           | 1 |
| Gi3_25826303_x62.....                      | guucgGuucccgggcgccggagc.....      | 1 |
| Gi3_25833619_x62.....                      | gguucgauucccgggcgccgAagc.....     | 1 |



|                       |                                 |   |
|-----------------------|---------------------------------|---|
| Gi2_9593361_x62.....  | gguucgauucccgcgcccgGg.....      | 1 |
| Gi1_3588651_x61.....  | cagauccggguucgauucccgcgcc.....  | 0 |
| Gi1_3588041_x61.....  | guucgauuccUggcgccgg.....        | 1 |
| Gi1_3585662_x61.....  | cacccaacagauccggguucgauucc..... | 0 |
| Gi3_25847533_x61..... | gguucgauucccgcgcccgGg.....      | 1 |
| Gi2_9614597_x61.....  | gguucgauuccUggcgccggagc.....    | 1 |
| Gi3_25867609_x60..... | gguucgauNcccgcgccg.....         | 1 |
| Gi3_25870549_x60..... | gguucgauuccAggcgccggagc.....    | 1 |
| Gi5_7768413_x59.....  | cgauucccgcgccggagcguuuA.....    | 1 |
| Gi2_9636740_x59.....  | guucgauucccgcgccggagcCu.....    | 1 |
| Gi5_7785515_x58.....  | gguucgauucccgcgccggCgc.....     | 1 |
| Gi3_25913050_x58..... | gCucgauucccgcgccgga.....        | 1 |
| Gi2_9646919_x58.....  | Aguucgauucccgcgccggag.....      | 1 |
| Gi2_9663188_x57.....  | guucgauuNccggcgccggagc.....     | 1 |
| Gi3_25956726_x56..... | Aguucgauucccgcgccgg.....        | 1 |
| Gi3_25942054_x56..... | gguucgauucccgcgccggaAc.....     | 1 |
| Gi2_9671918_x56.....  | Uauucccgcgcccgagc.....          | 1 |
| Gi3_25948550_x56..... | guCcgauucccgcgccgg.....         | 1 |
| Gi2_9670686_x56.....  | gCucgauucccgcgccggagc.....      | 1 |
| Gi3_25940150_x56..... | guucgauucccgcgccggagcA.....     | 1 |
| Gi3_25954822_x56..... | gguucgaCucccgcgccgga.....       | 1 |
| Gi2_9670070_x56.....  | uucgauucccgcgccgga.....         | 0 |
| Gi5_7824359_x55.....  | gCucgauucccgcgccgg.....         | 1 |
| Gi3_25969945_x55..... | gguucgauucccgcgccUggag.....     | 1 |
| Gi3_25983306_x54..... | cUauucccgcgccggagc.....         | 1 |
| Gi2_9702216_x54.....  | gguucgauucccggcAccggagc.....    | 1 |
| Gi3_26016048_x53..... | gguucgauucccgAgccggagc.....     | 1 |
| Gi3_26032808_x52..... | cgauucccgcgccggagcguuucA.....   | 1 |
| Gi3_26031092_x52..... | Gcgauucccgcgccggagc.....        | 1 |
| Gi3_26033432_x52..... | Cuucgauucccgcgccgga.....        | 1 |
| Gi1_3633854_x52.....  | guucgauucccggcAccgg.....        | 1 |
| Gi5_7864261_x51.....  | ggCucgauucccgcgccggagc.....     | 1 |
| Gi1_3640695_x51.....  | guucgauucccgcgccAgg.....        | 1 |
| Gi5_7874053_x51.....  | gguucgauucccgcgccggagcA.....    | 1 |
| Gi3_26052100_x51..... | gguucgauucccgAcgccggagc.....    | 1 |
| Gi3_26049448_x51..... | Cuucgauucccgcgccgg.....         | 1 |
| Gi3_26058286_x50..... | gCuucgauucccgcgccggag.....      | 1 |
| Gi1_3642664_x50.....  | guucgauucUcgcgccgg.....         | 1 |
| Gi3_26064286_x50..... | gguucgauNcccgcgccgg.....        | 1 |
| Gi3_26077036_x50..... | guucgauuNccggcgccggagc.....     | 1 |
| Gi3_26069236_x50..... | Cguucgauucccgcgccg.....         | 1 |
| Gi2_9747145_x50.....  | gguucgauucccgcgccAggagc.....    | 1 |
| Gi3_26057686_x50..... | gguuGgauucccgcgccggagc.....     | 1 |
| Gi3_26077436_x50..... | gguucgauucccgcgccggagcU.....    | 1 |
| Gi3_26081820_x49..... | gAuucgauucccgcgccggag.....      | 1 |
| Gi1_3647644_x49.....  | auccggguucgauucccgcgccgga.....  | 0 |
| Gi5_7897160_x49.....  | Uauucccgcgccggagc.....          | 1 |

|                       |                                  |   |
|-----------------------|----------------------------------|---|
| Gi2_9757944_x49.....  | guucgauucccgcgccAga.....         | 1 |
| Gi1_3647301_x49.....  | gguucgauNcccgcgccgg.....         | 1 |
| Gi3_26079272_x49..... | guucgGuucccgcgccgg.....          | 1 |
| Gi2_9755445_x49.....  | gguucgauucccgcgccggagcCu.....    | 1 |
| Gi1_3652936_x49.....  | gguucgauCcccgcgccgg.....         | 1 |
| Gi2_9773741_x48.....  | Aguucgauucccgcgcc.....           | 1 |
| Gi1_3653081_x48.....  | guucgauucccgcgccggagcA.....      | 1 |
| Gi1_3657785_x48.....  | Aguucgauucccgcgccgg.....         | 1 |
| Gi2_9777389_x48.....  | guCcgauucccgcgccgg.....          | 1 |
| Gi3_26113280_x48..... | gguucgauCcccgcgccgga.....        | 1 |
| Gi2_9772973_x48.....  | gguucgCuucccgcgccggagc.....      | 1 |
| Gi3_26130456_x47..... | gguucgGuucccgcgccggag.....       | 1 |
| Gi2_9784714_x47.....  | gguucgauucccgcgccggagU.....      | 1 |
| Gi1_3662555_x47.....  | guucgauucccgcgUcgg.....          | 1 |
| Gi2_9784902_x47.....  | guucgauucccgcgccggCgc.....       | 1 |
| Gi5_7923906_x47.....  | gguucgauucccCgcgccggag.....      | 1 |
| Gi5_7937975_x46.....  | Cuucgauucccgcgccgg.....          | 1 |
| Gi3_26153651_x46..... | gguucgauUcccgcgccggag.....       | 1 |
| G1a_5280140_x46.....  | gUuucgauucccgcgccggagc.....      | 1 |
| Gi5_7940367_x46.....  | guucgGuucccgcgccg.....           | 1 |
| Gi3_26152501_x46..... | gguucgauCcccgcgccggag.....       | 1 |
| Gi2_9805034_x46.....  | gguucgauucccgUgcggagc.....       | 1 |
| Gi2_9796478_x46.....  | guucgauucccgcgccggGgc.....       | 1 |
| Gi3_26153973_x46..... | ggguucgauucccgcgccg.....         | 0 |
| Gi5_7938021_x46.....  | guucgauNcccgcgccg.....           | 1 |
| Gi2_9809439_x45.....  | Gcgauucccgcgccggagc.....         | 1 |
| Gi5_7946502_x45.....  | guCcgauucccgcgccgg.....          | 1 |
| Gi2_9809574_x45.....  | gguucgauucccgAcgccggagc.....     | 1 |
| Gi2_9814704_x45.....  | gguucgauucccgcgccUggagc.....     | 1 |
| Gi3_26186901_x44..... | gguucgauucccAgcgccgga.....       | 1 |
| Gi1_3679485_x44.....  | guGcgauucccgcgccgg.....          | 1 |
| Gi2_9825942_x44.....  | gguucgauucccgcgccggagcA.....     | 1 |
| G1a_5301606_x43.....  | Uguucgauucccgcgccggag.....       | 1 |
| Gi5_7973936_x43.....  | guucgauNcccgcgccgg.....          | 1 |
| Gi2_9841797_x43.....  | guCcgauucccgcgccggagc.....       | 1 |
| Gi5_7989610_x42.....  | gguucgauucccgcgccggagcGA.....    | 1 |
| Gi2_9852685_x42.....  | gguucgauUcggcgccggagc.....       | 1 |
| Gi5_7984822_x42.....  | cacccaacagauccggguucga.....      | 0 |
| Gi2_9858523_x42.....  | gguucgauucccgcgccAgagc.....      | 1 |
| Gi3_26228521_x42..... | guCcgauucccgcgccggagc.....       | 1 |
| Gi2_9851257_x42.....  | cgguucgauucccgcgccgga.....       | 0 |
| Gi2_9863452_x41.....  | guucgaCucccgcgccggag.....        | 1 |
| Gi1_3695766_x41.....  | guAcgauucccgcgccgg.....          | 1 |
| Gi5_7996569_x41.....  | gguucgauNcccgcgccg.....          | 1 |
| Gi3_26252492_x41..... | gguucgauucccgcgccggUgc.....      | 1 |
| Gi3_26260364_x41..... | auccggguucgauucccgcgccggagc..... | 0 |
| Gi5_7993863_x41.....  | Aguucgauucccgcgccg.....          | 1 |

|                                                  |                                      |   |
|--------------------------------------------------|--------------------------------------|---|
| Gi3_26276010_x40.....                            | gguucgauAcccggcgccggagc.....         | 1 |
| Gi1_3697317_x40.....                             | gUuucgauucccggcgccgga.....           | 1 |
| Gi3_26276090_x40.....                            | guucgauucccggcgccAga.....            | 1 |
| Gi1_3698477_x40.....                             | guucgauucccgAcgccgg.....             | 1 |
| Gi3_26263930_x40.....                            | gCuucgauucccggcgccgga.....           | 1 |
| Gi2_9893236_x39.....                             | Cuucgauucccggcgccgg.....             | 1 |
| Gi3_26283693_x39.....                            | gguucgaCucccggcgccggag.....          | 1 |
| Gi3_26299059_x39.....                            | .Cuucgauucccggcgccggagc.....         | 1 |
| Gi5_8026280_x39.....                             | guucgauucccggcAccgg.....             | 1 |
| Gi3_26305572_x39.....                            | gguucgauucAcggcgccggagc.....         | 1 |
| Gi3_26305026_x39.....                            | agauccggguucgauucccggcgccggagcC..... | 1 |
| Gi2_9912081_x38.....                             | guucgaCucccggcgccgga.....            | 1 |
| Gi5_8031125_x38.....                             | guucgauucccggcgccA.....              | 1 |
| Gi2_9911093_x38.....                             | guucgauuNccggcgccgg.....             | 1 |
| Gi3_26318608_x38.....                            | gguucgGuucccggcgccgga.....           | 1 |
| Gi3_26320318_x38.....                            | gguucgauucccggcAccgg.....            | 1 |
| Gi3_26311426_x38.....                            | gguucgauucccggcgccggCg.....          | 1 |
| Gi2_9909383_x38.....                             | guucgGuucccggcgccggagc.....          | 1 |
| Gi2_9905051_x38.....                             | uccggguucgauucccggcgccgga.....       | 0 |
| Gi2_9913069_x38.....                             | gguucgauNcccgcgccggag.....           | 1 |
| Gi1_3709984_x38.....                             | gUuucgauucccggcgccggag.....          | 1 |
| Gi5_8033481_x38.....                             | accacagauccggguucgauucc.....         | 0 |
| Gi3_26326702_x38.....                            | guucgauucccggUgccgg.....             | 1 |
| Gi3_26345147_x37.....                            | ggAucgauucccggcgccgga.....           | 1 |
| Gi3_26335638_x37.....                            | gguucgauucccggcgccA.....             | 1 |
| Gi5_8046744_x37.....                             | gguucgauNcccgcgccgga.....            | 1 |
| Gi5_8052664_x37.....                             | Cguucgauucccggcgccggagc.....         | 1 |
| Gi2_9916965_x37.....                             | Aguucgauucccggcgccg.....             | 1 |
| Gi3_26331161_x37.....                            | .Auucgauucccggcgccggag.....          | 1 |
| Gi1_3717732_x37.....                             | guucgauucccggcgAcgg.....             | 1 |
| Gi3_26349402_x37.....                            | gguucgauucccggcgccgAag.....          | 1 |
| Gi2_9924698_x37.....                             | gguucgauucccggcgAc.....              | 1 |
| Gi2_9923107_x37.....                             | gguucgauNcccgcgcc.....               | 1 |
| Gi1_3715031_x37.....                             | guucgauucccggcgccggag.....           | 0 |
| Gi3_26352767_x36.....                            | gguucgauucccggUgccgga.....           | 1 |
| Gi3_26372855_x36.....                            | gguucgauucccggcgccggC.....           | 1 |
| Gi3_26359031_x36.....                            | gguucgauucccggcAccgga.....           | 1 |
| Gi5_8055436_x36.....                             | .....guuuccgccuuuccuucgucu.....      | 0 |
| Gi2_9929187_x36.....                             | gguucgauucccggAgccggagc.....         | 1 |
| Gi2_9939159_x36.....                             | gguucgauucccggcgccgAagc.....         | 1 |
| Gi1_3721587_x36cucacccaacagauccggguucgauucc..... |                                      | 0 |
| Gi3_26361443_x36.....                            | gguCcgauucccggcgccggag.....          | 1 |
| Gi5_8058424_x36cucacccCacagauccgg.....           |                                      | 1 |
| Gi3_26352083_x36.....                            | guucgauucccggcgccggGgc.....          | 1 |
| Gi2_9939771_x36.....                             | gguucgauucccggcgccggaAc.....         | 1 |
| Gi2_9949979_x35.....                             | gguuGgauucccggcgccggagc.....         | 1 |
| Gi3_26384355_x35.....                            | ggCucgauucccggcgccg.....             | 1 |

|                                                        |   |
|--------------------------------------------------------|---|
| Gi5_8068229_x35.....guucgaCucccgcgccgga.....           | 1 |
| Gi1_3728247_x35.....guucgauucccgAgccgg.....            | 1 |
| G1a_5365600_x35.....guucgauucccgcgccgga.....           | 0 |
| Gi3_26393525_x35.....guucgauuccAgcgccgg.....           | 1 |
| Gi5_8077714_x35.....guucUauucccgcgccgg.....            | 1 |
| Gi3_26381415_x35.....agaucggguucgauucccgcgccgagc.....  | 0 |
| Gi3_26377950_x35.....guCcgauucccgcgccgga.....          | 1 |
| Gi3_26394120_x35.....uccggguucgauucccgcgccg.....       | 0 |
| Gi3_26394540_x35.....guucAauucccgcgccgg.....           | 1 |
| Gi5_8072429_x35.....Cuucgauucccgcgccg.....             | 1 |
| Gi2_9967459_x34.....gguucgauUccggcgccggagc.....        | 1 |
| Gi2_9956477_x34.....gguucgauuccUcgccggagc.....         | 1 |
| Gi5_8085535_x34.....guCcgauucccgcgccg.....             | 1 |
| Gi2_9965147_x34.....gguucgauNcccgcgccg.....            | 1 |
| Gi5_8085025_x34cGacccaacagauccgg.....                  | 1 |
| Gi3_26414972_x34.....guucgauucccgUgcccga.....          | 1 |
| Gi2_9958755_x34.....Aguucgauucccgcgccgga.....          | 1 |
| Gi3_26413068_x34.....gguucgauuccAgcgccggag.....        | 1 |
| Gi3_26424136_x33.....gguCcgauucccgcgccgga.....         | 1 |
| Gi1_3738717_x33.....uccggguucgauucccgcgccgga.....      | 0 |
| Gi5_8097372_x33.....gguucgauucccgcgccggGgc.....        | 1 |
| Gi3_26426809_x33.....Aguucgauucccgcgcc.....            | 1 |
| Gi5_8105061_x33.....gguucgGuucccgcgccggagc.....        | 1 |
| Gi2_9982581_x33.....gguucgauAccggcgccggagc.....        | 1 |
| Gi5_8099451_x33.....guucgauucccgcgccUg.....            | 1 |
| Gi3_26428129_x33.....gguucgauuccUggcgccgga.....        | 1 |
| Gi2_9978951_x33.....gguucgauucccgcgccggCg.....         | 1 |
| Gi3_26426050_x33.....guucUauucccgcgccgg.....           | 1 |
| Gi3_26434465_x33.....guucgauucccgcgccA.....            | 1 |
| Gi2_9980106_x33.....gguucgauucccgcgUcggagc.....        | 1 |
| Gi3_26442022_x33.....guucgauucccgcgccAg.....           | 1 |
| Gi3_26460286_x32.....gAuucgauucccgcgccgga.....         | 1 |
| Gi3_26450590_x32.....guuUgauucccgcgccgga.....          | 1 |
| Gi3_26446270_x32.....acagauccggguucgauucccgcgccgg..... | 0 |
| Gi5_8108550_x32.....gAuucgauucccgcgccggagc.....        | 1 |
| Gi3_26457758_x32.....gguucgauAccggcgccggagc.....       | 1 |
| Gi3_26466494_x32.....ggGucgauucccgcgccggag.....        | 1 |
| Gi3_26457918_x32.....ggGucgauucccgcgccgga.....         | 1 |
| Gi1_3745344_x32.....guucgauucccgUcgccgg.....           | 1 |
| Gi3_26469278_x32.....gguucgauucccgcgccUgga.....        | 1 |
| Gi5_8111366_x32cucacccaNeagauccgg.....                 | 1 |
| Gi3_26491728_x31.....guucgauuccUggcgccgg.....          | 1 |
| Gi1_3754578_x31.....ggguucgauucccgcgccgga.....         | 0 |
| Gi5_8130315_x31.....guucgauucccggcAccg.....            | 1 |
| Gi2_10011860_x31.....guucgauucccgcgccgC.....           | 1 |
| Gi3_26487574_x31.....gguuAgauucccgcgccggagc.....       | 1 |
| Gi3_26480072_x31.....gguucgaCucccgcgccgg.....          | 1 |

|                                                         |   |
|---------------------------------------------------------|---|
| Gi3_26475019_x31.....guucgauCcccggcgccgga.....          | 1 |
| Gi3_26478336_x31.....guucUauucccgcgccgga.....           | 1 |
| Gi3_26477902_x31.....agauccggguucgauucccgcgccggag.....  | 0 |
| Gi5_8126192_x31.....gguucgaCuccggcgccggagc.....         | 1 |
| Gi3_26473655_x31.....guucgauCcccggcgccgg.....           | 1 |
| Gi3_26472911_x31.....guuUgauucccgcgccgg.....            | 1 |
| Gi2_9999863_x31.....Cuucgauucccgcgccggagc.....          | 1 |
| Gi5_8137855_x30.....guucgauuccUggcgccg.....             | 1 |
| Gi2_10018675_x30.....guucgauuccAgcgccggagc.....         | 1 |
| Gi3_26516520_x30.....guucgauucccgcgUcgga.....           | 1 |
| Gi3_26512770_x30.....guucgauuccAgcgccgga.....           | 1 |
| Gi3_26506200_x30.....gguucAauucccgcgccgga.....          | 1 |
| Gi2_10028005_x30.....Cguucgauucccgcgcc.....             | 1 |
| Gi1_3758705_x30cucacccaacagauccggguucga.....            | 0 |
| Gi5_8141425_x30.....gguucgauucccgcgccggC.....           | 1 |
| Gi1a_5399946_x30.....Uguucgauucccgcgccg.....            | 1 |
| Gi1_3758915_x30.....auccggguucgauucccgcgccgg.....       | 0 |
| Gi1_3756845_x30.....aacagauccggguucgauucccgcgccgg.....  | 0 |
| Gi5_8148740_x29.....acccaacagauccggguucgauucc.....      | 0 |
| Gi3_26542980_x29.....gguucgauucccgcgAcggag.....         | 1 |
| Gi2_10032948_x29.....cagauccggguucgauucccgcgccggag..... | 0 |
| Gi3_26527030_x29.....guucgauucccgcgUgga.....            | 1 |
| Gi5_8152887_x29.....guucgauuccUggcgccgg.....            | 1 |
| Gi1_3764407_x29.....acccaacagauccggguucgauuccg.....     | 0 |
| Gi3_26528828_x29.....guucAauucccgcgccgga.....           | 1 |
| Gi3_26539645_x29.....Gucgauucccgcgccggagc.....          | 1 |
| Gi2_10029874_x29.....gguCcgauucccgcgcc.....             | 1 |
| Gi1_3767597_x29.....guucgauUccggcgccgg.....             | 1 |
| Gi1_3764610_x29.....guucgauucccgcgccggagcgA.....        | 1 |
| Gi5_8144825_x29.....guucgGuucccgcgccgg.....             | 1 |
| Gi3_26538688_x29.....gguucgauucccgcgGcggagc.....        | 1 |
| Gi1_3767858_x29.....guucgauucccgcgccCg.....             | 1 |
| Gi3_26537209_x29.....guucgauNccggcgccggag.....          | 1 |
| Gi2_10045729_x28.....guucgauuccUggcgccggagc.....        | 1 |
| Gi2_10045757_x28.....gguuAgauucccgcgccggagc.....        | 1 |
| Gi3_26555953_x28.....guucgauuccUggcgccggagc.....        | 1 |
| Gi3_26556541_x28.....guucgauucccgcgAccgga.....          | 1 |
| Gi3_26554693_x28.....gguucgauucccgcgAcgga.....          | 1 |
| Gi3_26547861_x28.....guucgGuucccgcgccggag.....          | 1 |
| Gi5_8162657_x28.....gCuucgauucccgcgccggagc.....         | 1 |
| Gi2_10055053_x28.....gguucgauucccgcgccggG.....          | 1 |
| Gi2_10046429_x28.....gguucgauuccAcggcgccggagc.....      | 1 |
| Gi5_8160949_x28.....gguucgauNccggcgccggag.....          | 1 |
| Gi1_3770940_x28.....Uguucgauucccgcgccggag.....          | 1 |
| Gi5_8166913_x28.....gguucgauucccgcgAc.....              | 1 |
| Gi3_26554441_x28cucacccaacagauccggguucgauucc.....       | 0 |
| Gi5_8156945_x28.....guucgauucccgcgUcgg.....             | 1 |

|                                                           |   |
|-----------------------------------------------------------|---|
| Gi5_8169947_x27.....gaucggguucgauucccgcgccgga.....        | 0 |
| Gi3_26592168_x27.....guucgauuccAgcgccggagc.....           | 1 |
| Gi1_3776601_x27.....guucgaCucccgggcgccgga.....            | 1 |
| Gi2_10067744_x27.....guucgauucccggcAccgg.....             | 1 |
| Gi3_26587578_x27.....gguucgauucccgcgccAga.....            | 1 |
| Gi2_10059158_x27.....guucUauucccgcgccgg.....              | 1 |
| Gi3_26588604_x27.....gguucgauucccggcAccggag.....          | 1 |
| Gi1_3780354_x27.....gguucgauucccgcgccgU.....              | 1 |
| Gi3_26577156_x27.....guucgaGucccgggcgccggagc.....         | 1 |
| Gi3_26578533_x27cucacccaacagauccggguucgauu.....           | 0 |
| Gi3_26585094_x27.....ggAucgauucccgcgccggag.....           | 1 |
| Gi5_8170649_x27.....guucgauCcccggcgccg.....               | 1 |
| G1a_5426177_x27.....Uguucgauucccgcgccgg.....              | 1 |
| Gi3_26590710_x27.....aacagauccggguucgauucccgcgccgga.....  | 0 |
| Gi3_26601935_x26.....gguucgauucUcggcgccggag.....          | 1 |
| Gi1_3781945_x26.....guucgauucccgcgccgA.....               | 1 |
| Gi5_8186590_x26.....guucgauuccAgcgccg.....                | 1 |
| Gi5_8191868_x26Gucacccaacagauccgg.....                    | 1 |
| Gi3_26596267_x26.....guucgauucccgcgAcgg.....              | 1 |
| Gi3_26600531_x26.....acagauccggguucgauucccgcgccggagc..... | 0 |
| Gi3_26621123_x26.....Gucgauucccgcgccgga.....              | 1 |
| Gi2_10076679_x26.....guucgGuucccgcgccgg.....              | 1 |
| Gi5_8183444_x26.....guGcgauucccgcgccg.....                | 1 |
| Gi5_8186200_x26.....guucgauucccgUgccc.....                | 1 |
| Gi5_8194208_x26.....gguucgauucccgUgccc.....               | 1 |
| Gi2_10097647_x25.....gguucgauucccgUgccc.....              | 1 |
| Gi2_10095222_x25.....guuUgauucccgcgccggagc.....           | 1 |
| Gi2_10090447_x25.....guucgauuccUggcgccgg.....             | 1 |
| Gi5_8203184_x25.....gguuUgauucccgcgccggagc.....           | 1 |
| Gi1_3790881_x25.....gAucgauucccgcgccgg.....               | 1 |
| Gi3_26624893_x25.....guucgauucUcggcgccg.....              | 1 |
| G1a_5450987_x25.....Uguucgauucccgcgccgga.....             | 1 |
| Gi3_26647618_x25.....gguuUgauucccgcgccggag.....           | 1 |
| G1a_5444687_x25.....gUuucgauucccgcgccggag.....            | 1 |
| Gi2_10100297_x25.....aacagauccggguucgauucccgcgccg.....    | 0 |
| Gi5_8207059_x25.....guucgauucccgcgccAg.....               | 1 |
| Gi3_26633193_x25.....gguucgauNcccggcgcc.....              | 1 |
| Gi2_10104647_x25.....guucgauucccgcgccAg.....              | 1 |
| Gi3_26638018_x25.....gguucgauuccAgcgccgg.....             | 1 |
| Gi3_26649193_x25.....gguucgauucccgUgcccggag.....          | 1 |
| Gi2_10100072_x25.....gguucgauNcccggcgccgga.....           | 1 |
| Gi3_26640343_x25.....guucgauucGcgcgccggagc.....           | 1 |
| Gi3_26645368_x25.....guucgauucccggcAccgg.....             | 1 |
| Gi5_8197809_x25.....Aguucgauucccgcgccgga.....             | 1 |
| Gi1_3790131_x25.....guucgaCucccgggcgccg.....              | 1 |
| Gi3_26621768_x25.....gguucgCuucccgcgccgga.....            | 1 |
| Gi3_26674952_x24.....gguucgauucccgcgUcggga.....           | 1 |

|                                      |                                  |   |
|--------------------------------------|----------------------------------|---|
| Gi3_26663672_x24.....                | gguucAuuucccggcgcggag.....       | 1 |
| Gi3_26666672_x24.....                | aUauccgguucgauucc.....           | 1 |
| Gi3_26675528_x24.....                | gguucgauucccggcgcggUg.....       | 1 |
| Gi2_10115803_x24.....                | gguucgauucccggcgcggagc.....      | 1 |
| Gi1_3798686_x24.....                 | gguucgaCucccggcgcgg.....         | 1 |
| Gi3_26665520_x24.....                | gguucgaCucccggcgcgg.....         | 1 |
| Gi5_8218584_x24.....                 | guucgauucccggcgcggagcguuucc..... | 0 |
| Gi3_26671712_x24.....                | gguuUgauucccggcgcggga.....       | 1 |
| Gi3_26658896_x24.....                | guucgauucccggcgcggUcgg.....      | 1 |
| Gi3_26675624_x24.....                | guucgauCcccggcgcggagc.....       | 1 |
| Gi5_8228700_x23.....                 | guucAuuucccggcgcgg.....          | 1 |
| Gi4_499827_x23.....                  | Uguucgauucccggcgcgg.....         | 1 |
| Gi3_26687529_x23.....                | gguAcgauucccggcgcggag.....       | 1 |
| Gi5_8231069_x23.....                 | guucUauucccggcgcgg.....          | 1 |
| Gi3_26687230_x23.....                | ggGucgauucccggcgcgg.....         | 1 |
| Gi5_8229942_x23.....                 | Cguucgauucccggcgcgg.....         | 1 |
| Gi3_26697833_x23.....                | gguucgauCcccggcgcgg.....         | 1 |
| Gi1_3799979_x23.....                 | guucgCuucccggcgcgg.....          | 1 |
| Gi5_8227343_x23.....                 | gguucgauucccAgcgcggagc.....      | 1 |
| Gi1_3800485_x23.....                 | guucgauucccggcgcgggaU.....       | 1 |
| Gi2_10137065_x23.....                | gCucgauucccggcgcgg.....          | 1 |
| Gi4_499091_x23.....                  | gUuucgauucccggcgcgg.....         | 1 |
| Gi3_26697948_x23.....                | gguucgauucUcgggcgcggga.....      | 1 |
| Gi3_26701122_x23.....                | guucgauucccgAcgcggagc.....       | 1 |
| Gi5_8222398_x23.....                 | guucgauucccggcgcggagcA.....      | 1 |
| Gi5_8228263_x23.....                 | gguucgauuccUgggcgcggagc.....     | 1 |
| Gi2_10128003_x23.....                | guucUauucccggcgcggagc.....       | 1 |
| Gi5_8223571_x23.....                 | guucgauucccggcgcggagcGA.....     | 1 |
| Gi5_8220144_x23.....                 | guuUgauucccggcgcgg.....          | 1 |
| Gi1_3813437_x22.....                 | gAuucgauucccggcgcgg.....         | 1 |
| Gi2_10138452_x22.....                | guuUgauucccggcgcgg.....          | 1 |
| Gi5_8240427_x22.....                 | gguucgauNcccgcgcgg.....          | 1 |
| Gi3_26727450_x22cGcaccacagauccg..... |                                  | 1 |
| Gi3_26709784_x22.....                | guAcgauucccggcgcgg.....          | 1 |
| Gi1_3812227_x22.....                 | guucgauucccggcgcggC.....         | 1 |
| Gi3_26716120_x22.....                | gCucgauucccggcgcggag.....        | 1 |
| Gi3_26725954_x22.....                | gguucgauucccggcgcAgga.....       | 1 |
| Gi3_26711566_x22.....                | guucgauucccAgcgcggag.....        | 1 |
| Gi5_8234575_x22.....                 | Aguucgauucccggcgc.....           | 1 |
| Gi2_10139948_x22.....                | guucgauucccggcgcggG.....         | 1 |
| Gi3_26730772_x22.....                | gguucgauuccUgcgcggga.....        | 1 |
| Gi3_26717924_x22.....                | uGcgauucccggcgcggga.....         | 1 |
| Gi3_26717066_x22.....                | gguucgGuucccggcgcgg.....         | 1 |
| Gi3_26740848_x22.....                | gguCcgauucccggcgcgg.....         | 1 |
| Gi3_26718166_x22.....                | guAcgauucccggcgcggga.....        | 1 |
| Gi2_10147758_x22.....                | Cguucgauucccggcgcggag.....       | 1 |
| Gi3_26731828_x22.....                | gguCcgauucccggcgcgg.....         | 1 |

|                                       |                                      |   |
|---------------------------------------|--------------------------------------|---|
| Gi3_26728088_x22.....                 | guucgauuuccggcgAgga.....             | 1 |
| Gi3_26728792_x22.....                 | gguNcgauuuccggcgccggagc.....         | 1 |
| Gi2_10140696_x22.....                 | guGcgauuuccggcgccgg.....             | 1 |
| Gi2_10151036_x22.....                 | uGgauuuccggcgccggagc.....            | 1 |
| Gi3_26727098_x22.....                 | guucAauuuccggcgccggagc.....          | 1 |
| Gi3_26726196_x22.....                 | Cguucgauuuccggcgccgg.....            | 1 |
| Gi1_3814533_x21.....                  | gguucgauuuccggcgccggaU.....          | 1 |
| Gi2_10157743_x21.....                 | gguucgauuuccAggcgccggagc.....        | 1 |
| Gi3_26765145_x21.....                 | cagaucggguucgauuuccggcgccggagcC..... | 1 |
| Gi5_8252838_x21.....                  | gguCcgauuuccggcgccggagc.....         | 1 |
| Gi5_8253741_x21.....                  | guucgauuuccggcgccgC.....             | 1 |
| Gi5_8251956_x21.....                  | ggAucgauuuccggcgccggagc.....         | 1 |
| Gi3_26755716_x21.....                 | Uaucggguucgauuucc.....               | 1 |
| Gi2_10171771_x21.....                 | gguucgauuuccAgcgccggag.....          | 1 |
| Gi5_8254014_x21.....                  | gguucgauuuccggcgccggagA.....         | 1 |
| Gi2_10171897_x21.....                 | guucgauuuccggcgUcggagc.....          | 1 |
| Gi5_8257437_x21.....                  | gguucgauCcccggcgccggagc.....         | 1 |
| Gi5_8255085_x21.....                  | guucgaCuuccggcgccggag.....           | 1 |
| Gi5_8255211_x21.....                  | gguucAauuuccggcgccggagc.....         | 1 |
| Gi1a_5485777_x21.....                 | gUuucgauuuccggcgccg.....             | 1 |
| Gi2_10163098_x21.....                 | gguucgauuuccggcgUg.....              | 1 |
| Gi1_3818985_x21Gucaccaacagauccgg..... | .....                                | 1 |
| Gi5_8258970_x21.....                  | ggGucgauuuccggcgccggagc.....         | 1 |
| Gi3_26754267_x21.....                 | guGcgauuuccggcgccgga.....            | 1 |
| Gi2_10183169_x20.....                 | guucgauCcccggcgccgg.....             | 1 |
| Gi3_26804425_x20.....                 | Ugguucgauuuccggcgccggagc.....        | 1 |
| Gi5_8268609_x20.....                  | guucgauuuccggcgAcgg.....             | 1 |
| Gi2_10175769_x20.....                 | Aguucgauuuccggcgccgg.....            | 1 |
| Gi2_10186169_x20.....                 | gguucgauuuccggcgccggaCc.....         | 1 |
| Gi5_8276429_x20.....                  | guucAauuuccggcgccgg.....             | 1 |
| Gi5_8271389_x20.....                  | guuUgauuuccggcgccg.....              | 1 |
| Gi2_10173549_x20.....                 | guucgauuuccggcgccggagcA.....         | 1 |
| Gi3_26799545_x20.....                 | gguucgauuuccgAcgcccga.....           | 1 |
| Gi3_26802185_x20.....                 | gguucgCuuccggcgccggag.....           | 1 |
| Gi3_26786165_x20.....                 | gaucggguucgauuuccggcgccgga.....      | 0 |
| Gi2_10181629_x20.....                 | guucgauCcccggcgccggagc.....          | 1 |
| Gi3_26801825_x20.....                 | gAucgauuuccggcgccgg.....             | 1 |
| Gi2_10185989_x20.....                 | gguucgauuuccggcgccggagcU.....        | 1 |
| Gi1_3825530_x20.....                  | ggCucgauuuccggcgccgg.....            | 1 |
| Gi1_3821550_x20.....                  | guucgauAcccgcgccgg.....              | 1 |
| Gi2_10187089_x20.....                 | ggGucgauuuccggcgccggag.....          | 1 |
| Gi3_26803925_x20.....                 | gguucgauuuccggcgccAgag.....          | 1 |
| Gi1_3823770_x20.....                  | gguucgauuuccggcgAcgg.....            | 1 |
| Gi5_8287020_x19.....                  | guucgauCcccggcgccgg.....             | 1 |
| Gi2_10206731_x19.....                 | gguucgauuAccggcgccggagc.....         | 1 |
| Gi3_26808840_x19.....                 | gguucgauuuccggcgccAg.....            | 1 |
| Gi5_8291903_x19.....                  | gguucgauuuccggcAccggagc.....         | 1 |



|                                                          |   |
|----------------------------------------------------------|---|
| Gi1_3834930_x19.....Auucgauuucccgccgagc.....             | 1 |
| Gi3_26805230_x19.....guCcgauuucccgccgag.....             | 1 |
| Gi2_10199340_x19.....guucgauuucccgccgAgcg.....           | 1 |
| Gi2_10199530_x19.....guAcgauuucccgccgagc.....            | 1 |
| Gi3_26832894_x19.....guucgauuUcggcgccgg.....             | 1 |
| Gi3_26820183_x19.....guucgauuuccgAcgccgg.....            | 1 |
| Gi1_3830427_x19.ucacccaacagauccggguucga.....             | 0 |
| Gi3_26819936_x19.....cUauuuccggcgccgag.....              | 1 |
| Gi1_3831985_x19.....ggauucgauuuccggcgUgg.....            | 1 |
| Gi3_26828410_x19.....ggauucgauuuccggcgAcg.....           | 1 |
| Gi3_26815452_x19.....gAuucgauuuccggcgccg.....            | 1 |
| Gi3_26830880_x19.....Cuucgauuuccggcgccgag.....           | 1 |
| Gi3_26822102_x19.....guucgauuuccggcgAcgga.....           | 1 |
| Gi2_10206845_x19.....ggauucGauuuccggcgcc.....            | 1 |
| Gi3_26821722_x19.....guucgauuuccUggcgccgga.....          | 1 |
| Gi2_10196756_x19.....guucgauuuccggcgccgCagc.....         | 1 |
| Gi2_10215526_x18.....guucgauuuccggcgUcgg.....            | 1 |
| Gi2_10218298_x18.....agauccggguucgauuuccggcgccgagcC..... | 1 |
| Gi3_26842750_x18.....guucgauuuccggUgcccggagc.....        | 1 |
| Gi3_26859778_x18.....guucgauuuccggcgUgg.....             | 1 |
| Gi3_26850778_x18.....ggauucgauuuccggcgccgCagc.....       | 1 |
| Gi3_26843128_x18.....guCcgauuuccggcgccgg.....            | 1 |
| Gi1_3840465_x18.....guucgauuuccggcgccggG.....            | 1 |
| Gi1_3842463_x18.....Gucgauuuccggcgccgg.....              | 1 |
| Gi2_10224454_x18.....gguuUgauuuccggcgccgga.....          | 1 |
| Gi3_26844622_x18.....uGcgauuuccggcgccgagc.....           | 1 |
| Gi5_8302311_x18.....guucgauuuccggcgUcg.....              | 1 |
| Gi3_26873890_x18.....uGgauuuccggcgccgagc.....            | 1 |
| Gi2_10218010_x18.....ggauucgauuuccggcgUgga.....          | 1 |
| Gi1a_5511635_x18.....Uguucgauuuccggcgcc.....             | 1 |
| Gi4_506352_x18.....ggauucgauuuccggcgccgagcC.....         | 1 |
| Gi3_26846368_x18.....gguuUgauuuccggcgccg.....            | 1 |
| Gi2_10223176_x18.....guucAauuuccggcgccgagc.....          | 1 |
| Gi2_10224562_x18.....guucgauuuccggcgUgg.....             | 1 |
| Gi3_26859400_x18.....ggauucgauuuccggcgccUgagc.....       | 1 |
| Gi3_26866942_x18.....guucgauuuccggAgccgg.....            | 1 |
| Gi3_26870074_x18.....guucgauuuccUggcgccgag.....          | 1 |
| Gi3_26896844_x17.....guucgauuUccggcgccgg.....            | 1 |
| Gi3_26878246_x17.....ggauucGauuuccggcgccgagc.....        | 1 |
| Gi5_8318266_x17.....aUauccggguucgauuucc.....             | 1 |
| Gi5_8310769_x17.....caacagauccggguucgauuuccggcgccg.....  | 0 |
| Gi5_8315223_x17.....gAuucgauuuccggcgccgg.....            | 1 |
| Gi1_3854747_x17.....ggauucgauuuccggUgcccgg.....          | 1 |
| Gi3_26909917_x17.....guucgauuuccggcgAgg.....             | 1 |
| Gi4_508099_x17.....Uuucgauuuccggcgccgg.....              | 1 |
| Gi1_3850973_x17.....aUauccggguucgauuucc.....             | 1 |
| Gi2_10243414_x17.....guucgauuuccUggcgccgg.....           | 1 |

|                  |                          |   |
|------------------|--------------------------|---|
| Gi5_8319694_x17  | .guucgauucccggcgUgg      | 1 |
| Gi2_10238654_x17 | .ggCucgauucccggcgc       | 1 |
| Gi1_3850905_x17  | .Auucgauucccggcgcgga     | 1 |
| Gi2_10230664_x17 | .gguucgauucccggcgcgUgc   | 1 |
| Gi3_26878059_x17 | .gGuucccggcgcgagc        | 1 |
| Gi5_8310820_x17  | .guucgauUccggcgccg       | 1 |
| Gi3_26901825_x17 | .gguucgauucccgAgccgga    | 1 |
| Gi1_3848525_x17  | .guucgauucccggcgGgg      | 1 |
| Gi3_26882904_x17 | .guucgauucccggcgcUga     | 1 |
| Gi3_26912263_x17 | .Ugguucgauucccggcgcgag   | 1 |
| Gi3_26877923_x17 | .guucgauAcccggcgcg       | 1 |
| Gi2_10229746_x17 | .gguucgauucccggcgAcg     | 1 |
| Gi3_26882003_x17 | .gguucgGuucccggcgcg      | 1 |
| Gi2_10246083_x17 | .guucgauucccggcgcAgagc   | 1 |
| Gi3_26893376_x17 | .guucgauucccggcgcgAa     | 1 |
| Gi3_26903763_x17 | .guucgauucccggcgcgagcgA  | 1 |
| Gi1_3848746_x17  | .guucgaCucccggcgcgagc    | 1 |
| Gi3_26882054_x17 | .gguucgauucccgGcccgagc   | 1 |
| Gi2_10232534_x17 | .gguucgauucccggcAcc      | 1 |
| Gi2_10238671_x17 | .guucgauucUcggcgccggagc  | 1 |
| Gi2_10239453_x17 | .Auucgauucccggcgcgga     | 1 |
| Gi1_3846808_x17  | .guucgauuAccggcgccg      | 1 |
| Gi1_3862977_x16  | .guucgauuccAggcgcg       | 1 |
| Gi3_26935261_x16 | .gguucgauucccgAcgccggag  | 1 |
| Gi2_10263641_x16 | .guAcgauucccggcgcg       | 1 |
| Gi3_26932605_x16 | .gguucgauucccggcgcggaA   | 1 |
| Gi3_26943453_x16 | .gguucgauCcccggcgcg      | 1 |
| Gi2_10261465_x16 | .gguucgauucccAgcgc       | 1 |
| Gi3_26916285_x16 | .gguucgauuccGggcgccggagc | 1 |
| Gi3_26946093_x16 | .guucgauucccggcgcgC      | 1 |
| Gi3_26920877_x16 | .guucgauAcccggcgcgga     | 1 |
| Gi2_10267577_x16 | .Cguucgauucccggcgcg      | 1 |
| Gi3_26925405_x16 | .gguucgauucccgAgccg      | 1 |
| Gl1a_5537341_x16 | .gUuucgauucccggcgcgga    | 1 |
| Gi1_3857777_x16  | .gguucgCuucccggcgcg      | 1 |
| Gi5_8333760_x16  | .ggCucgauucccggcgcg      | 1 |
| Gi3_26948301_x16 | .gAuucgauucccggcgcg      | 1 |
| Gi3_26919517_x16 | .cUgguucgauucccggcgcgga  | 1 |
| Gi5_8335584_x16  | .guucgauucccgUgccg       | 1 |
| Gi1_3856657_x16  | .gCucgauucccggcgcgga     | 1 |
| Gi2_10252361_x16 | .gguucgUuucccggcgcgagc   | 1 |
| Gi1_3861793_x16  | .Uguucgauucccggcgc       | 1 |
| Gi1_3858289_x16  | .gguucgGuucccggcgcg      | 1 |
| Gi2_10258249_x16 | .gguucgaCucccggcgcg      | 1 |
| Gi5_8323808_x16  | .guucgauucUcggcgccg      | 1 |
| Gi5_8337504_x16  | .Aguucgauucccggcgcgag    | 1 |
| Gi3_26942765_x16 | .gAucgauucccggcgcgagc    | 1 |

|                                     |                                     |   |
|-------------------------------------|-------------------------------------|---|
| Gi5_8331232_x16.....                | Auucgauuucccgcccgga.....            | 1 |
| Gi3_26941533_x16.....               | .guucgauucUcggcgccgga.....          | 1 |
| Gi3_26919165_x16.....               | .ggCucgauuucccgcccg.....            | 1 |
| Gi3_26921565_x16.....               | .ggAucgauuucccgcccg.....            | 1 |
| Gi2_10268377_x16.....               | .guucgauuucccgcgAcgggagc.....       | 1 |
| Gi2_10269849_x16.....               | .guucgauuucccgcgGcgggagc.....       | 1 |
| Gi1_3858945_x16.....                | .ggguucgauuucccgAcgccg.....         | 1 |
| Gi2_10257705_x16.....               | .guucgauuucccgcgUgggagc.....        | 1 |
| Gi5_8336528_x16.....                | .Aguucgauuucccgcgccgg.....          | 1 |
| Gi2_10256521_x16.....               | .ggguucgauuucccgccAga.....          | 1 |
| Gi5_8327520_x16.....                | .guAcgauuucccgcccg.....             | 1 |
| Gi1_3861985_x16.....                | .guucgauucAcggcgccgg.....           | 1 |
| Gi3_26935277_x16.....               | .gAucgauuucccgcccgga.....           | 1 |
| Gi2_10263561_x16.....               | .ggguucgauuuccGggcgccggagc.....     | 1 |
| Gi1_3870362_x15.....                | .ggGucgauuucccgcccg.....            | 1 |
| Gi2_10287895_x15.....               | .guucAauuucccgcccg.....             | 1 |
| Gi2_10287565_x15.....               | .guGcgauuucccgccggagc.....          | 1 |
| Gi2_10281325_x15.....               | .gAaucgauuucccgcccgag.....          | 1 |
| Gi3_26953060_x15.....               | .guucUauuucccgccggagc.....          | 1 |
| Gi2_10287145_x15.....               | .guucgauuucccgcccgA.....            | 1 |
| Gi3_26983810_x15.....               | .ggguucgauuuccUgcccggag.....        | 1 |
| Gi3_26981320_x15.....               | .ggCucgauuucccgcc.....              | 1 |
| Gi2_10274605_x15.....               | .guCcgauuucccgcccg.....             | 1 |
| Gi5_8340467_x15.....                | .guucgauuucccgccCg.....             | 1 |
| Gi5_8338577_x15.....                | .guucgauuccAgcccg.....              | 1 |
| Gi3_26985805_x15.....               | .guucgauuUccggcgccggag.....         | 1 |
| Gi3_26966755_x15.....               | .gCuucgauuucccgcccg.....            | 1 |
| Gi2_10291720_x15.....               | .guucgauAcccgcccgagc.....           | 1 |
| Gi5_8349707_x15.....                | .guucgauucccgAgccg.....             | 1 |
| Gi3_26960050_x15.....               | .guucgauuAccggcgccggagc.....        | 1 |
| Gi3_26977105_x15.....               | .cagauccggguucgauuucccgccggagc..... | 0 |
| Gi3_26953450_x15.....               | .guucgauuucccgccCg.....             | 1 |
| Gi5_8354912_x15.....                | .ggguucgauuucccgcgUgggagc.....      | 1 |
| Gi2_10275640_x15.....               | .gCucgauuucccgcccg.....             | 1 |
| Gi3_26969215_x15.....               | .guAcgauuucccgccggagc.....          | 1 |
| Gi1a_5552324_x15.....               | .gUucgauuucccgcc.....               | 1 |
| Gi5_8344007_x15.....                | .ggguucgauuuccggUgcccggagc.....     | 1 |
| Gi3_26986465_x15.....               | .guucgauuucccgccAgggagc.....        | 1 |
| Gi3_26957575_x15.....               | .Auucgauuucccgcccg.....             | 1 |
| Gi3_26975290_x15.....               | .guucgauucUcggcgccggagc.....        | 1 |
| Gi5_8339057_x15.....                | .ggguucgauuuccAgcccgga.....         | 1 |
| Gi2_10292530_x15.....               | .guucgauuucccgccAccggagc.....       | 1 |
| Gi3_26978710_x15.....               | .acagauccggguucgauuucccgcccgga..... | 0 |
| Gi5_8351162_x15Ccaccacagauccgg..... | .....                               | 1 |
| Gi1_3870317_x15.....                | .gCuucgauuuccggcgcccg.....          | 1 |
| Gi2_10293895_x15.....               | .ggguucgGuuuccggcgccggag.....       | 1 |
| Gi3_26972620_x15.....               | .ggguucgauuuccAgggcgccgga.....      | 1 |

|                       |                               |   |
|-----------------------|-------------------------------|---|
| Gi3_26954470_x15..... | gguucgauuGccggcgccggagc.....  | 1 |
| Gi5_8346857_x15.....  | gguucgauNcccggcgcc.....       | 1 |
| Gi2_10273030_x15..... | guucgGuucccgggcgccgga.....    | 1 |
| Gi1a_5544824_x15..... | Uuucgauucccgggcgccggagc.....  | 1 |
| Gi3_26952685_x15..... | gguucgauuUccggcgccgga.....    | 1 |
| Gi2_10291690_x15..... | ggCucgauucccgggcgccggag.....  | 1 |
| Gi2_10284595_x15..... | guucgauucccgUgcccgg.....      | 1 |
| Gi3_27029341_x14..... | .uucgauucccgggcgccgC.....     | 1 |
| Gi3_27021501_x14..... | .guGcgauucccgggcgccggag.....  | 1 |
| Gi5_8372561_x14.....  | .guGcgauucccgggcgccgg.....    | 1 |
| Gi3_27010399_x14..... | ggNucgauucccgggcgccggagc..... | 1 |
| Gi2_10316595_x14..... | .gAuucgauucccgggcgcc.....     | 1 |
| Gi3_27002125_x14..... | gguucgauucccgggcgAccg.....    | 1 |
| Gi5_8368865_x14.....  | ggCucgauucccgggcgcc.....      | 1 |
| Gi2_10297023_x14..... | gguucgauCcccggcgccgga.....    | 1 |
| Gi3_27005429_x14..... | .gCuucgauucccgggcgccgg.....   | 1 |
| Gi5_8363433_x14.....  | .Cuucgauucccgggcgccgga.....   | 1 |
| Gi3_27000333_x14..... | gguucgauucccgggcgccCgagc..... | 1 |
| Gi2_10296631_x14..... | .guucgauuNccggcgccg.....      | 1 |
| Gi3_27019345_x14..... | .guucgauuccAgggcgccgg.....    | 1 |
| Gi5_8360045_x14.....  | .gAuucgauucccgggcgccg.....    | 1 |
| Gi3_27018169_x14..... | .guuUgauucccgggcgccggagc..... | 1 |
| Gi5_8363685_x14.....  | gguucgauucccgggcgccggagU..... | 1 |
| Gi3_27015145_x14..... | gguucgauAcccgggcgccggag.....  | 1 |
| Gi2_10306039_x14..... | .guucgauucccgAgccggagc.....   | 1 |
| Gi5_8365253_x14.....  | Cguucgauucccgggcgccgga.....   | 1 |
| Gi3_27016139_x14..... | gguuGgauucccgggcgccgga.....   | 1 |
| Gi2_10298059_x14..... | .guucgauuUccggcgccgg.....     | 1 |
| Gi5_8356405_x14.....  | gguucgauucccAgcgccg.....      | 1 |
| Gi3_27000277_x14..... | .uucgauucccgggcgccggCgc.....  | 1 |
| Gi5_8362635_x14.....  | gguucgauucccgggcgccggGg.....  | 1 |
| Gi5_8363755_x14.....  | gguucAauucccgggcgccg.....     | 1 |
| Gi2_10313193_x14..... | .guucgauucccgggcgccA.....     | 1 |
| Gi3_27012821_x14..... | .gCucgauucccgggcgccg.....     | 1 |
| Gi3_27005163_x14..... | .guucgauucccgggcgccgAagc..... | 1 |
| Gi1_3877780_x14.....  | ggCucgauucccgggcgccggagc..... | 1 |
| Gi5_8358995_x14.....  | .gCucgauucccgggcgccgga.....   | 1 |
| Gi5_8359135_x14.....  | ggCucgauucccgggcgccgga.....   | 1 |
| Gi3_26999605_x14..... | gguucgauuccUggcgccgg.....     | 1 |
| Gi3_26999759_x14..... | gguucgauucccgUgcccg.....      | 1 |
| Gi5_8360829_x14.....  | gguucgauucccUgcccggagc.....   | 1 |
| Gi2_10313039_x14..... | .guucgauucccgggcgccUg.....    | 1 |
| Gi3_27015621_x14..... | .guGcgauucccgggcgccggagc..... | 1 |
| Gi3_27004211_x14..... | gguucgauucccgggcgUccggag..... | 1 |
| Gi2_10316175_x14..... | .guucgauucccgggcgccgAagc..... | 1 |
| Gi1_3875372_x14.....  | gguucgauucccgggcAccgg.....    | 1 |
| Gi5_8363377_x14.....  | gguucgCuucccgggcgccg.....     | 1 |

Gi3\_27001719\_x14.....gAuucgauucccgcgcc..... 1  
Gi3\_27022649\_x14.....guucgauucccgcgGcggagc..... 1  
Gi3\_27000123\_x14.....gguucgauucccgcgccgAa..... 1  
Gi3\_27009573\_x14.....guucgauucccgcgAcggagc..... 1  
Gi5\_8383855\_x13.....guucgauucUcggcgccgg..... 1  
Gi5\_8373858\_x13.....Cguucgauucccgcgccgg..... 1  
Gi5\_8373910\_x13.....ggGucgauucccgcgccg..... 1  
Gi1\_3885592\_x13.....guucgauucccgcgGcgg..... 1  
Gi2\_10336390\_x13.....gguucgauucccgcgccgCagc..... 1  
Gi1\_3891845\_x13.....gguucgauNcccggcgccggagc..... 1  
Gi2\_10332919\_x13.....aUauccggguucgauucc..... 1  
Gi3\_27046542\_x13.....gguuGgauucccgcgccggag..... 1  
Gi3\_27063065\_x13.....gguucgauucccgcgccgA..... 1  
Gi2\_10330592\_x13.....guucgauucccgcgccggaAc..... 1  
Gi3\_27072802\_x13.....gguucgauucccCgcgccggagc..... 1  
Gi5\_8389601\_x13.....gguucgaCucccgcgccg..... 1  
Gi5\_8384674\_x13.....gguucgauucccgcgAcggagc..... 1  
Gi3\_27062818\_x13.....gguucgauuccUggcgcc..... 1  
Gi1\_3884643\_x13.....guucgauucccAgcgccgga..... 1  
Gi3\_27045437\_x13.....guucgauucccgcgccAgagc..... 1  
Gi2\_10322298\_x13.....gguucgauucccgcgAccgga..... 1  
Gi2\_10324222\_x13.....gguucgauucccgcgccAgag..... 1  
Gi1\_3892261\_x13.....guucgauucccgcgccggU..... 1  
Gi3\_27062961\_x13.....guucgauCcccggcgccggag..... 1  
Gi3\_27042083\_x13.....Cguucgauucccgcgcc..... 1  
Gi5\_8376926\_x13.....gguucgauucUcggcgccg..... 1  
Gi3\_27048310\_x13.....gguucgauuccUggcgccg..... 1  
Gi5\_8373351\_x13.....gguucgauucccgcgccggG..... 1  
Gi3\_27043669\_x13.....guucgauuccAgcgccgga..... 1  
Gi2\_10328811\_x13.....ggCucgauucccgcgccg..... 1  
Gi5\_8380410\_x13.....guucgauucccgcgGcgg..... 1  
Gi3\_27077092\_x13.....gguucgauucccgcgccggaUc..... 1  
Gi2\_10322532\_x13.....gguucgauucccgcgccggagcgA..... 1  
Gi4\_514174\_x13.....Uguucgauucccgcgccggagc..... 1  
Gi1\_3885540\_x13.....guuNgauucccgcgccgg..... 1  
Gi3\_27057319\_x13.....guucgCuucccgcgccggagc..... 1  
Gi3\_27067030\_x13.....gguuAgauucccgcgccgga..... 1  
Gi5\_8373884\_x13.....gguucgauucccgcgccAgagc..... 1  
Gi3\_27052301\_x13.....gguucgauucccgcgAggag..... 1  
Gi2\_10322402\_x13.....guucgauucccgcgccggagcU..... 1  
Gi3\_27044670\_x13.....guucgauUcggcgccggagc..... 1  
Gi5\_8390368\_x13.....guucgauucccgUcggcg..... 1  
Gi5\_8376679\_x13.....guucgauNccggcgccgga..... 1  
Gi2\_10338912\_x13.....guucgaGucccggcgccggagc..... 1  
Gi2\_10338106\_x13.....gCuucgauucccgcgccggag..... 1  
Gi2\_10332256\_x13.....gguAcgauucccgcgccggagc..... 1  
Gi5\_8382022\_x13.....guucgauucccgcgccggCgc..... 1

|                                        |                             |   |
|----------------------------------------|-----------------------------|---|
| Gi3_27065327_x13.....                  | guucgGuucccgccg             | 1 |
| Gi5_8385636_x13.....                   | guAcgauucccgccg             | 1 |
| Gi3_27059906_x13.....                  | gguucUauucccgccg            | 1 |
| Gi4_513719_x13.....                    | guucgauucccgccg             | 0 |
| Gi3_27039015_x13.....                  | gguucgauUccggccg            | 1 |
| Gi2_10321648_x13.....                  | guucgauucccgccg             | 1 |
| Gi3_27063494_x13.....                  | uGgauucccgccg               | 1 |
| Gi3_27050338_x13.....                  | guucgauucccgccg             | 1 |
| Gi1a_5572419_x13.....                  | gUuucgauucccgccg            | 1 |
| Gi3_27064742_x13Gucacccaacagauccg..... |                             | 1 |
| Gi3_27052756_x13.....                  | gguucgauucccgccg            | 1 |
| Gi3_27043162_x13.....                  | gguucgauucccgccg            | 1 |
| Gi3_27117285_x12.....                  | gguucgauucAcggccg           | 1 |
| Gi3_27113469_x12.....                  | uUgauucccgccg               | 1 |
| Gi2_10345018_x12.....                  | guucgauuNccggccg            | 1 |
| Gi2_10367230_x12.....                  | guucgauucccAgccg            | 1 |
| Gi3_27110877_x12.....                  | guucgauucccgccg             | 1 |
| Gi3_27097029_x12.....                  | gguucgauucccgccg            | 1 |
| Gi5_8404434_x12.....                   | gCucgauucccgccg             | 1 |
| Gi3_27123429_x12.....                  | guucgauucccgccg             | 1 |
| Gi5_8401218_x12.....                   | gUuucgauucccgccg            | 1 |
| Gi3_27087333_x12.....                  | caacagauccggguucgauucccgccg | 0 |
| Gi1_3899774_x12.....                   | uGcgauucccgccg              | 1 |
| Gi3_27118293_x12.....                  | guucUauucccgccg             | 1 |
| Gi2_10349386_x12.....                  | gAucgauucccgccg             | 1 |
| Gi2_10359070_x12.....                  | Cuucgauucccgccg             | 1 |
| Gi5_8400042_x12.....                   | gAuucgauucccgccg            | 1 |
| Gi3_27131349_x12.....                  | guucgauuUccggccg            | 1 |
| Gi5_8393478_x12.....                   | gguucgCuucccgccg            | 1 |
| Gi2_10354906_x12.....                  | guucgauucccAgccg            | 1 |
| Gi2_10356202_x12.....                  | gGuucccgccg                 | 1 |
| Gi5_8394774_x12.....                   | guucgauucccgccg             | 1 |
| Gi3_27127785_x12.....                  | guucgauucccgccg             | 1 |
| Gi3_27088305_x12.....                  | gguucgauucccgccg            | 1 |
| Gi3_27122361_x12.....                  | gguucgauuUccggccg           | 1 |
| Gi2_10350382_x12.....                  | Auucgauucccgccg             | 1 |
| Gi1_3897482_x12.....                   | guucgAuucccgccg             | 1 |
| Gi5_8394810_x12.....                   | guucgauucccgAgccg           | 1 |
| Gi5_8400306_x12.....                   | guucgauucccgccg             | 1 |
| Gi1_3895370_x12.....                   | gguucgauucccAgccg           | 1 |
| Gi5_8402034_x12.....                   | guucgauucccgccg             | 1 |
| Gi5_8407494_x12.....                   | guucgauucccgccg             | 1 |
| Gi3_27112941_x12.....                  | gguucgAuucccgccg            | 1 |
| Gi5_8403234_x12.....                   | gguucgauucccgccg            | 1 |
| Gi3_27093009_x12.....                  | gguucgauucccgccg            | 1 |
| Gi2_10344394_x12.....                  | guucgauucccgccg             | 1 |
| Gi2_10353190_x12.....                  | gguucgauuccUggcc            | 1 |

|                                                   |                                      |   |
|---------------------------------------------------|--------------------------------------|---|
| Gi2_10354426_x12.....                             | gguucgGuuuccggcgccgga.....           | 1 |
| Gi3_27126693_x12.....                             | guucgauuccCgcgcggagc.....            | 1 |
| Gi2_10364326_x12.....                             | gguucgauuccggGgccggagc.....          | 1 |
| Gi1_3897854_x12.....                              | guucgauuccUgcgccgg.....              | 1 |
| Gi5_8395722_x12.....                              | gguucgauuccggcgUgga.....             | 1 |
| Gi2_10356154_x12.....                             | ggGucgauuccggcgccgga.....            | 1 |
| Gi3_27117369_x12.....                             | gguucgauuccggcgAg.....               | 1 |
| Gi5_8404902_x12.....                              | gguucgauuccggcgccggCg.....           | 1 |
| Gi5_8407074_x12.....                              | gguucgauuccggcgAggagc.....           | 1 |
| Gi5_8404566_x12.....                              | gguucgaCuccggcgccgg.....             | 1 |
| Gi3_27124785_x12.....                             | gguucgauuccggUgccgg.....             | 1 |
| Gi1_3900650_x12.....                              | guucgauuccCgcgccgg.....              | 1 |
| Gi2_10344010_x12.....                             | guuUgauuccggcgccg.....               | 1 |
| Gi2_10365874_x12.....                             | gguNcgauuccggcgccggagc.....          | 1 |
| Gi5_8401914_x12.....                              | Uuucgauuccggcgccggag.....            | 1 |
| Gi3_27096909_x12.....                             | guucgauuccggcgGcgg.....              | 1 |
| Gi2_10363918_x12.....                             | gguucgCuuccggcgccggag.....           | 1 |
| Gi5_8431057_x11.....                              | guucgauucAcggcgccg.....              | 1 |
| Gi3_27151873_x11.....                             | guucgauuccggcgUcggagc.....           | 1 |
| Gi5_8426822_x11.....                              | gguucgauuccggcgUg.....               | 1 |
| Gi5_8420024_x11.....                              | gguucgauuccggcgccA.....              | 1 |
| Gi2_10388832_x11.....                             | ggAucgauuccggcgcc.....               | 1 |
| Gi1_3905453_x11.....                              | Aguucgauuccggcgccgga.....            | 1 |
| Gi2_10385290_x11.....                             | gCucgauuccggcgccggag.....            | 1 |
| Gi3_27186776_x11.....                             | uuUgauuccggcgccggagc.....            | 1 |
| Gi5_8429264_x11.....                              | guucgauuUccggcgccg.....              | 1 |
| Gi3_27168615_x11.....                             | ucgauuccNggcgccggagc.....            | 1 |
| Gi1_3909710_x11.....                              | Aguucgauuccggcgccggagc.....          | 1 |
| Gi2_10369868_x11.....                             | ucgauuccNggcgccggagc.....            | 1 |
| Gi3_27167878_x11.....                             | guucgCuuccggcgccgg.....              | 1 |
| Gi2_10381913_x11.....                             | Auucgauuccggcgccggag.....            | 1 |
| Gi3_27142325_x11.....                             | ccaacagauccggguucgauuccggcgccgg..... | 0 |
| Gi1_3909963_x11.....                              | guucgauuccggcgccAga.....             | 1 |
| Gi3_27162972_x11.....                             | Gccggguucgauuccggcgccgga.....        | 1 |
| Gi5_8414458_x11.....                              | gguucgauuUccggcgccggagc.....         | 1 |
| Gi5_8418066_x11.....                              | gCuucgauuccggcgccg.....              | 1 |
| Gi3_27172443_x11.....                             | guucgauuccggcgccgCagc.....           | 1 |
| Gi3_27173730_x11.....                             | guucgauuccggcgccgU.....              | 1 |
| Gi3_27156955_x11cucacccaacagauccggguucgauucc..... | .....                                | 0 |
| Gi2_10391307_x11.....                             | Cuucgauuccggcgccg.....               | 1 |
| Gi2_10395916_x11.....                             | guucgauuccggcgccggagcgA.....         | 1 |
| Gi5_8419232_x11cucacccaacagGuccgg.....            | .....                                | 1 |
| Gi3_27179593_x11.....                             | guucgauuAccggcgccgga.....            | 1 |
| Gi2_10373432_x11.....                             | gguucgauuUccggcgcc.....              | 1 |
| Gi5_8418286_x11.....                              | gguucgauuccUggcgccg.....             | 1 |
| Gi2_10376468_x11.....                             | guucgauuccUggcgccggag.....           | 1 |
| Gi1_3907752_x11.....                              | guucAauuccggcgccgga.....             | 1 |

|                                                   |   |
|---------------------------------------------------|---|
| Gi3_27166690_x11.....Gcgauucccgcgccgga.....       | 1 |
| Gi3_27178779_x11.....gguucgauuAccggcgccggag.....  | 1 |
| Gi2_10392935_x11.....gguucgaAuucccgcgccggagc..... | 1 |
| Gi2_10379944_x11.....ggGucgauucccgcgcc.....       | 1 |
| Gi3_27138805_x11.....ggGucgauucccgcgcc.....       | 1 |
| Gi1_3908324_x11.....guucgauucccgcgccggagcU.....   | 1 |
| Gi5_8422455_x11.....gAucgauucccgcgccg.....        | 1 |
| Gi2_10384201_x11.....guucgauucccgcgccAgg.....     | 1 |
| Gi5_8428120_x11.Gcaccacacagaucggguu.....          | 1 |
| Gi3_27157648_x11.....uGcgauucccgcgccgg.....       | 1 |
| G1a_5613319_x11.....Uuucgauucccgcgccgg.....       | 1 |
| Gi3_27180308_x11.....guuAgauucccgcgccgg.....      | 1 |
| Gi3_27164699_x11.....gguucgauAcccgcgccgga.....    | 1 |
| Gi3_27169121_x11.....gguucgauucccAgcgccgg.....    | 1 |
| Gi3_27167482_x11.....gguucgauucccAgcgccg.....     | 1 |
| Gi1_3907873_x11.....guucgauucccgcgccUgga.....     | 1 |
| Gi3_27183982_x11.....guucgauucccgAgccggagc.....   | 1 |
| Gi2_10373322_x11.....guGcgauucccgcgccg.....       | 1 |
| Gi2_10394222_x11.....gguucgaCuucccgcgccgga.....   | 1 |
| Gi5_8420310_x11.....guucgauucccgcgccgA.....       | 1 |
| Gi3_27178009_x11.....Ugguucgauucccgcgccgga.....   | 1 |
| Gi3_27144360_x11.....aUaucggguucgauucc.....       | 1 |
| Gi5_8423874_x11.....guucgauucccgAcgccgga.....     | 1 |
| Gi2_10393540_x11.....gguucgauucccgcgccUc.....     | 1 |
| Gi2_10376281_x11.....guucgauucccgcgccggCg.....    | 1 |
| Gi1_3909952_x11.....gguucgauuccUggcgccgg.....     | 1 |
| Gi2_10397588_x11.....gguucgauCcccgcgcc.....       | 1 |
| Gi3_27183586_x11.....guucgauucccggcAccggag.....   | 1 |
| Gi2_10371342_x11.....guucgauucccgUgcccga.....     | 1 |
| Gi3_27167427_x11.....guucgauucccgUcgccgga.....    | 1 |
| Gi3_27177382_x11.....guucgauuNccggcgccg.....      | 1 |
| Gi1_3905156_x11.....gguucgauucccgcgccAgg.....     | 1 |
| Gi5_8419903_x11.....guuUgauucccgcgccgga.....      | 1 |
| Gi2_10405312_x10.....guucgauucccgcgccAggagc.....  | 1 |
| Gi5_8452576_x10.....gguucgauucccgAgccggagc.....   | 1 |
| Gi5_8447786_x10.....gguucgauucccgAcgcccggagc..... | 1 |
| Gi5_8435356_x10.....gguCcgauucccgcgccg.....       | 1 |
| Gi5_8434636_x10.....ggAucgauucccgcgccg.....       | 1 |
| Gi5_8447406_x10.....guucgCuucccgcgccg.....        | 1 |
| Gi1_3916754_x10.....gguucAauucccgcgccgg.....      | 1 |
| Gi3_27204082_x10.....guucgauucccgcgccUggagc.....  | 1 |
| Gi3_27209772_x10.....gguucgauucccggcAccg.....     | 1 |
| Gi2_10412472_x10.....gguucAauucccgcgcc.....       | 1 |
| Gi3_27210902_x10.....guucgauAcccgcgccggagc.....   | 1 |
| Gi2_10411892_x10.....guucgGuucccgcgccg.....       | 1 |
| Gi3_27239182_x10.....Gcgauucccgcgccggag.....      | 1 |
| Gi3_27204172_x10.....gguucAauucccgcgccg.....      | 1 |



|                                                           |   |
|-----------------------------------------------------------|---|
| Gi3_27240502_x10.....Cuucgauucccgcgccg.....               | 1 |
| Gi5_8447646_x10.....guucgauucAcggcgccgg.....              | 1 |
| Gi3_27206282_x10.....gguucgauucccgAcgccg.....             | 1 |
| Gi3_27197082_x10.....guAcgauucccgcgccggag.....            | 1 |
| Gi4_520909_x10.....gGucgauucccgcgccgg.....                | 1 |
| Gi3_27204492_x10.....guucgauucccgAcgccgga.....            | 1 |
| Gi5_8449856_x10.....gguucgGuucccgcgccg.....               | 1 |
| Gi2_10409622_x10.....gguucgauucccgcgccggC.....            | 1 |
| Gi1_3923774_x10.....gguucgauUccggcgccgg.....              | 1 |
| Gi2_10403512_x10.....gguucgauucccgcgccggUagc.....         | 1 |
| Gi2_10419612_x10.....cUauucccgcgccggagcguuu.....          | 1 |
| Gi1_3928104_x10cGcaccacagauccgg.....                      | 1 |
| Gi3_27191172_x10.....gguucgCuucccgcgccgg.....             | 1 |
| Gi2_10412292_x10.....gguucgUuucccgcgccggag.....           | 1 |
| Gi2_10397762_x10.....guucgauUccggcgccggagc.....           | 1 |
| Gi5_8452316_x10.....guucgauNccggcgccggagc.....            | 1 |
| Gi2_10404252_x10.....gguucgauUccggcgccgga.....            | 1 |
| Gi5_8448436_x10.....guucgauucccgcgccggGgc.....            | 1 |
| Gi2_10417302_x10.....gguucgauucccgcgccGggagc.....         | 1 |
| Gi2_10410772_x10.....gguucgauucccgcgUcggga.....           | 1 |
| Gi2_10403522_x10.....gguucgCuucccgcgcc.....               | 1 |
| Gi3_27217412_x10.....gguucgauuccAggcccgag.....            | 1 |
| Gi2_10401452_x10.....guucgauucccgccAccg.....              | 1 |
| Gi2_10403692_x10.....guucgauucccgAcgccg.....              | 1 |
| Gi3_27190712_x10.....gguucgauucAcggcgccgga.....           | 1 |
| Gi3_27220262_x10.....guucgauucccgcgccC.....               | 1 |
| Gi3_27209272_x10.....guucgauucccgcgccggUgc.....           | 1 |
| Gi2_10409192_x10.....gguuUgauucccgcgcc.....               | 1 |
| Gi3_27220922_x10.....gguucgauuccUgcggcg.....              | 1 |
| Gi1_3923174_x10.....guucgaAuucccgcgccgg.....              | 1 |
| Gi3_27233622_x10.....gCguucgauucccgcgccggagc.....         | 1 |
| Gi3_27205472_x10.....guuUgauucccgcgccggag.....            | 1 |
| Gi1_3921274_x10.....guCcgauucccgcgccg.....                | 1 |
| Gi2_10407042_x10.....gguucgauuccUggcgccggag.....          | 1 |
| Gi3_27226722_x10.....guucgauucccgccAccggagc.....          | 1 |
| Gi2_10413142_x10.....guucgauucccgcgccggGg.....            | 1 |
| Gi2_10407172_x10.....guucgauucccgAcgccggagc.....          | 1 |
| Gi2_10427882_x10.....gguucgauucccgcgccCgagc.....          | 1 |
| Gi2_10419012_x10.....gCuucgauucccgcgcc.....               | 1 |
| Gi3_27192892_x10.....guucgauucccgUcggcg.....              | 1 |
| Gi3_27188212_x10.....guucgCuucccgcgccgga.....             | 1 |
| Gi1_3920724_x10.....aacagauccggguucgauucccgcgccggagc..... | 0 |
| Gi2_10434306_x9.....gguucgauucccgcgccggUc.....            | 1 |
| Gi3_27283429_x9.....guucgauucccgAgccgga.....              | 1 |
| Gi2_10438842_x9.....guucgauucccgcgUcggga.....             | 1 |
| Gi5_8459643_x9.....gguucgGuucccgcgccgg.....               | 1 |
| Gi5_8453325_x9cucaccUaacagauccgg.....                     | 1 |

|                      |                                  |   |
|----------------------|----------------------------------|---|
| Gi5_8476581_x9.....  | .guucgauuuccAgcgccgga.....       | 1 |
| Gi1_3931120_x9.....  | .ucgauuuccggcgccggagcC.....      | 1 |
| Gi5_8458428_x9.....  | .gguucgauuuccggcgccgC.....       | 1 |
| Gi2_10448607_x9..... | .guucgauuuccggcgAcg.....         | 1 |
| Gi1_3932884_x9.....  | .gCucgauuuccggcgccggagc.....     | 1 |
| Gi3_27260965_x9..... | .guucgauuuccAgcgccg.....         | 1 |
| Gi3_27256195_x9..... | .gguucgauuuccggcgccgUagc.....    | 1 |
| Gi3_27281638_x9..... | .Ggauuccggcgccggagc.....         | 1 |
| Gi2_10457346_x9..... | .gguucgauCcccggcgccg.....        | 1 |
| Gi3_27290737_x9..... | .gguucgauuuccGggcgccgga.....     | 1 |
| Gi2_10447860_x9..... | .guucgauuuccAgcgccgg.....        | 1 |
| Gi5_8460930_x9.....  | .guucgauuuccggcgccgUgga.....     | 1 |
| Gi3_27297991_x9..... | .ggAucgauuuccggcgccgg.....       | 1 |
| Gi2_10443045_x9..... | .guucgauuuccggcgccggagA.....     | 1 |
| Gi5_8470668_x9.....  | .gguucgauuuccggcgccggaCc.....    | 1 |
| Gi4_521253_x9.....   | .guucgauuuccggcgccggagc.....     | 0 |
| Gi2_10443882_x9..... | .gguucAauuccggcgccggag.....      | 1 |
| Gi1_3936475_x9.....  | .gguucgauNcccggcgccg.....        | 1 |
| Gi3_27271405_x9..... | .guucgauuuccCcgccgg.....         | 1 |
| Gi3_27296749_x9..... | .ggguucgauuuccggcgccggagcC.....  | 1 |
| Gi3_27268903_x9..... | .ggGcgauuuccggcgccggagc.....     | 1 |
| Gi5_8472180_x9.....  | .gguucgauuuccUggcgccgg.....      | 1 |
| Gi5_8469930_x9.....  | .gguucgauuuccggcAccgga.....      | 1 |
| Gi2_10447644_x9..... | .gguucgCuuccggcgccg.....         | 1 |
| Gi1_3932146_x9.....  | .gguucgauuuccggcgccggagcgA.....  | 1 |
| Gi3_27247375_x9..... | .gguucgauuuccggcCccggagc.....    | 1 |
| Gi1_3936016_x9.....  | .guuUgauuuccggcgccgga.....       | 1 |
| Gi3_27245107_x9..... | .ggGucgauuuccggcgccgg.....       | 1 |
| Gi5_8467230_x9.....  | .gguucgCuuccggcgccggag.....      | 1 |
| G1a_5648809_x9.....  | .acccaacagauccggguucgauuucc..... | 0 |
| Gi2_10446852_x9..... | .gguucgauuuccggUgccc.....        | 1 |
| Gi5_8467374_x9.....  | .guucgauuuccCcgccgg.....         | 1 |
| Gi5_8458752_x9.....  | .gguucgauuuccggcgccAga.....      | 1 |
| Gi3_27263017_x9..... | .guucgauuuccCcgccggga.....       | 1 |
| Gi2_10450506_x9..... | .Cguucgauuuccggcgccgga.....      | 1 |
| Gi2_10434270_x9..... | .gguucgauuuccCcgccggagc.....     | 1 |
| Gi5_8454351_x9.....  | .ggGucgauuuccggcgccgg.....       | 1 |
| Gi3_27302113_x9..... | .gguuAgauuuccggcgccggag.....     | 1 |
| Gi5_8463774_x9.....  | .gGuuccggcgccggagc.....          | 1 |
| Gi2_10458642_x9..... | .gguucgauuuccggAgccc.....        | 1 |
| Gi2_10432020_x9..... | .guucAauuccggcgccgga.....        | 1 |
| Gi3_27249112_x9..... | .guGcgauuuccggcgccg.....         | 1 |
| Gi5_8469489_x9.....  | .guucgauAcccgcgccg.....          | 1 |
| Gi5_8461218_x9.....  | .ggGucgauuuccggcgcc.....         | 1 |
| Gi3_27288757_x9..... | .guucAauuccggcgccggag.....       | 1 |
| Gi5_8454072_x9.....  | .Ggauccggguucgauuucc.....        | 1 |
| G1a_5644426_x9.....  | .guucgauuuccggcgccggag.....      | 0 |

|                      |                                 |   |
|----------------------|---------------------------------|---|
| Gi5_8461515_x9.....  | .guucUauucccggcgccga.....       | 1 |
| Gi2_10437555_x9..... | .guucgauucccggcgccCg.....       | 1 |
| Gi5_8461047_x9.....  | Uguucgauucccggcgccgagcgu.....   | 1 |
| Gi5_8466123_x9.....  | .guucgauucccgAgccg.....         | 1 |
| Gi5_8464125_x9.....  | .Gucgauucccggcgccg.....         | 1 |
| Gi1_3947309_x8.....  | .guucgauucccggcgccgGgc.....     | 1 |
| Gi3_27320697_x8..... | .guucgauucccgGgccg.....         | 1 |
| Gi4_525296_x8.....   | .gUuucgauucccggcgccgagc.....    | 1 |
| Gi5_8497897_x8.....  | .guucgGuucccggcgccgagc.....     | 1 |
| Gi3_27331577_x8..... | .gguucgCuucccggcgcc.....        | 1 |
| Gi3_27360993_x8..... | .guucgauucccggcgccgUg.....      | 1 |
| Gi2_10487602_x8..... | .guucgauuccAggcgccg.....        | 1 |
| Gi2_10483890_x8..... | .ggCucgauucccggcgccga.....      | 1 |
| Gi4_526408_x8.....   | .gguucgauucccggcgccga.....      | 0 |
| Gi5_8493065_x8.....  | .gguucgauucUcggcgccgagc.....    | 1 |
| Gi3_27359665_x8..... | .gguucgauuccGggcgccg.....       | 1 |
| Gi5_8496041_x8.....  | .gguucgauucccggcgAcgga.....     | 1 |
| Gi2_10487410_x8..... | .gguucgauucUcggcgcc.....        | 1 |
| Gi5_8490161_x8.....  | .ggGucgauucccggcgccgag.....     | 1 |
| Gi5_8481609_x8.....  | .....Uuuucccgccuuccuucgucu..... | 1 |
| Gi3_27362081_x8..... | .guucgauucccggcgcGgga.....      | 1 |
| Gi2_10466082_x8..... | .gguucgauucccggcgcUcg.....      | 1 |
| Gi3_27374497_x8..... | .gAucgauucccggcgccgag.....      | 1 |
| Gi3_27328017_x8..... | .guucgaGuucccggcgccga.....      | 1 |
| Gi3_27328089_x8..... | .guucgauucAcggcgccg.....        | 1 |
| Gi1_3942421_x8.....  | .gguucgauucUcggcgccg.....       | 1 |
| Gi2_10487194_x8..... | .Gucgauucccggcgccg.....         | 1 |
| Gi3_27342481_x8..... | .gguucgauuccAggcgccg.....       | 1 |
| Gi5_8488025_x8.....  | .ggAucgauucccggcgccga.....      | 1 |
| Gi2_10472418_x8..... | .gguCcgauucccggcgccgag.....     | 1 |
| Gi3_27346385_x8..... | .guucgauucccggcgccCgagc.....    | 1 |
| Gi2_10492594_x8..... | .guucgauCcccggcgccgga.....      | 1 |
| Gi1_3955053_x8.....  | .gguucgauucccggcgccgagcA.....   | 1 |
| Gi5_8496129_x8.....  | .ggCucgauucccggcgccg.....       | 1 |
| Gi2_10495786_x8..... | .guucgauucAcggcgccgagc.....     | 1 |
| Gi2_10494178_x8..... | .gguucgauuccggcAccgag.....      | 1 |
| Gi2_10479218_x8..... | .gguucgauuccggcAcgga.....       | 1 |
| Gi2_10479466_x8..... | .guucgauuccCgcgccgagc.....      | 1 |
| Gi5_8493233_x8.....  | .gCuucgauucccggcgccg.....       | 1 |
| Gi2_10487810_x8..... | .guCcgauucccggcgccgag.....      | 1 |
| Gi3_27356329_x8..... | .....gauuccAcgcgccgagc.....     | 1 |
| Gi5_8479537_x8.....  | .gguucgauucccgAgccgga.....      | 1 |
| Gi3_27359369_x8..... | .guucgauucccggcgccggaAc.....    | 1 |
| Gi1_3943421_x8.....  | .gguucgauucccggcgccgU.....      | 1 |
| Gi3_27363793_x8..... | .guucgauuccggcGccgga.....       | 1 |
| Gi2_10486802_x8..... | .....ucgauucUcggcgccgagc.....   | 1 |
| Gi3_27364521_x8..... | .gguucgauucccgAgccgag.....      | 1 |

|                                                   |   |
|---------------------------------------------------|---|
| Gi3_27335497_x8.....cgUuucccgggcgccggagc.....     | 1 |
| Gi3_27320833_x8.....cgauucccgggcgccggCgc.....     | 1 |
| Gi5_8486097_x8.....guuUgauucccgggcgccggagc.....   | 1 |
| Gi2_10494842_x8.....ucgauucccgggcgccggGgc.....    | 1 |
| Gi5_8481825_x8.....ggCucgauucccgggcgccggag.....   | 1 |
| Gi2_10472842_x8.....guucgauuNccggcgccgga.....     | 1 |
| Gi3_27348209_x8.....gguuUgauucccgggcgcc.....      | 1 |
| Gi2_10486738_x8.....gguucgauucccgggcgGcggagc..... | 1 |
| Gi1_3946141_x8.....gguCcgauucccgggcgccgg.....     | 1 |
| Gi2_10476746_x8.....gguucgauNccggcgccgg.....      | 1 |
| Gi5_8501385_x8.....gguucgauuccAgggcgccggagc.....  | 1 |
| Gi2_10478338_x8.....gguucgauucccgggAgcc.....      | 1 |
| Gi1_3947829_x8.....gguuUgauucccgggcgccgg.....     | 1 |
| Gi2_10481186_x8.....gguucgauucUcggcgccggag.....   | 1 |
| Gi5_8494609_x8.....gguucgauucccgggcgUc.....       | 1 |
| Gi5_8493593_x8.....gguucgauucccgggcgUcgga.....    | 1 |
| Gi2_10477890_x8.....gguuUgauucccgggcgccg.....     | 1 |
| Gi3_27310729_x8.....gguucgauucccgggcgccgCag.....  | 1 |
| Gi2_10467834_x8.....guucgauucccgggCccggagc.....   | 1 |
| Gi2_10475850_x8.....gguucAauucccgggcgccgga.....   | 1 |
| Gi2_10497218_x8.....guucgauucccAgcgccgga.....     | 1 |
| Gi5_8476993_x8.....agauccggNuucgauucc.....        | 1 |
| Gi5_8479161_x8cucGcccaacagauccgg.....             | 1 |
| Gi5_8486489_x8.....gGucgauucccgggcgccggag.....    | 1 |
| Gi2_10469946_x8.....guucgUuucccgggcgccgg.....     | 1 |
| Gi2_10464722_x8.....gguucgGuucccgggcgccg.....     | 1 |
| Gi2_10482586_x8.....guucgauucccgggcgccUgagc.....  | 1 |
| Gi2_10466818_x8.....Cuucgauucccgggcgccgga.....    | 1 |
| Gi2_10480930_x8.....gguucgCuucccgggcgccgga.....   | 1 |
| Gi5_8487297_x8.....guucgauuccAgggcgccg.....       | 1 |
| Gi2_10480546_x8.....gguucgauucccgggUgcccga.....   | 1 |
| Gi1_3943365_x8.....gguucgauucccgggcgccggagU.....  | 1 |
| Gi2_10474298_x8.....gguucgauucccgggcgccggagG..... | 1 |
| Gi2_10469098_x8.....gguucgauucccgggcgccA.....     | 1 |
| Gi5_8487249_x8.....guucgauucccgggcgccggG.....     | 1 |
| Gi2_10467634_x8.....guucgauucccgUcgccggagc.....   | 1 |
| Gi2_10472362_x8.....gguucgauucccAgcgccgga.....    | 1 |
| Gi5_8493825_x8.....ggGucgauucccgggcgccgga.....    | 1 |
| Gi2_10486098_x8.....gguucgaCuuccggcgccgg.....     | 1 |
| Gi1_3945037_x8.....gguucgauucccgggcgccggG.....    | 1 |
| Gi5_8498865_x8.....guucgUuucccgggcgccg.....       | 1 |
| Gi2_10488730_x8.....gguucgauucccgggcAccgg.....    | 1 |
| Gi5_8482345_x8.....gAuucgauucccgggcgcc.....       | 1 |
| Gi5_8477785_x8.....guCcgauucccgggcgccgga.....     | 1 |
| Gi2_10493754_x8.....guucgauuAccggcgccggagc.....   | 1 |
| Gi1a_5671057_x8.....Aguucgauucccgggcgccggagc..... | 1 |
| Gi1_3943805_x8.....guucgUuucccgggcgccgg.....      | 1 |

|                                                                |   |
|----------------------------------------------------------------|---|
| Gi2_10471362_x8.....aacagauccggguucgauucccgcgcccg.....         | 0 |
| Gi3_27324385_x8.....Gucgauucccgcgcccg.....                     | 1 |
| Gi5_8523577_x7.....guucgauucccgcgccUg.....                     | 1 |
| Gi2_10523505_x7.....uGcgauucccgcgcccg.....                     | 1 |
| Gi3_27407679_x7.....gguucgauucccgcgccGggag.....                | 1 |
| Gi3_27409758_x7.....ucgGuucccgcgccggagc.....                   | 1 |
| Gi5_8527161_x7.....Ugguucgauucccgcgccggagc.....                | 1 |
| Gi2_10524779_x7.....gguucgauucccgUgcccggag.....                | 1 |
| Gi1_3957976_x7.....Cuucgauucccgcgccgga.....                    | 1 |
| Gi2_10517688_x7.....gguucgauCcccggcgccggag.....                | 1 |
| Gi3_27441874_x7.....guucAauucccgcgccg.....                     | 1 |
| Gi2_10525038_x7.....guucUauucccgcgccg.....                     | 1 |
| Gi2_10501994_x7.....guucgCuucccgcgccgg.....                    | 1 |
| Gi5_8514904_x7.....Auucgauucccgcgccggagc.....                  | 1 |
| Gi5_8506868_x7.....gguucgCuucccgcgccgga.....                   | 1 |
| Gi5_8521162_x7.....gguucgauucccgcgccggUgc.....                 | 1 |
| Gi3_27427111_x7.....guucgauucccgcgccGggagc.....                | 1 |
| Gi2_10501630_x7.....guucgauucccgUgcccggag.....                 | 1 |
| Gi3_27446081_x7.....gguucgauuccAgggcgc.....                    | 1 |
| Gi3_27426285_x7.....guucgauuccUggcgccg.....                    | 1 |
| Gi2_10535055_x7.....ucgauUcccggcgccggagc.....                  | 1 |
| Gi3_27420545_x7.....gguucgauGcccggcgccggagc.....               | 1 |
| Gi1_3962561_x7.....ggAucgauucccgcgcccg.....                    | 1 |
| Gi2_10499642_x7.....Gucgauucccgcgccggagc.....                  | 1 |
| Gi1_3963688_x7.....guuAgauucccgcgcccg.....                     | 1 |
| Gi3_27444233_x7.....guucgauuccAgcgcgccgga.....                 | 1 |
| Gi3_27405824_x7.....gguucgauucccgcgccGcgga.....                | 1 |
| Gi5_8506252_x7.....gguucgauucccgcgccgAagc.....                 | 1 |
| Gi1_3967076_x7.....gguucgauucccgcgccggGgc.....                 | 1 |
| Gi1_3958641_x7.....gguucgauucccgcgccAccggagc.....              | 1 |
| Gi1a_5688204_x7.....gGucgauucccgcgccggagc.....                 | 1 |
| Gi5_8515569_x7.....guucgauucccgUgcccgga.....                   | 1 |
| Gi3_27386308_x7.....gguucgauucccgUcccggagc.....                | 1 |
| Gi1a_5682142_x7.....gguucgauNcccggcgccggagc.....               | 1 |
| Gi3_27414959_x7.....gguucgCuucccgcgccg.....                    | 1 |
| Gi3_27423527_x7.....cgauucccNggcgccggagc.....                  | 1 |
| Gi3_27447873_x7.....gguucgauucccgcgccCa.....                   | 1 |
| Gi5_8529632_x7.....ggAucgauucccgcgcccg.....                    | 1 |
| Gi5_8507155_x7.....Gcgauucccgcgccggagc.....                    | 1 |
| Gi5_8514484_x7.....gguucgauucccgcgccAccg.....                  | 1 |
| Gi3_27445787_x7.....gguucgauucccgcgccUg.....                   | 1 |
| Gi5_8521729_x7.....gCuucgauucccgcgccggag.....                  | 1 |
| Gi2_10499586_x7.....gguucgauucccgcgccUgcccggag.....            | 1 |
| Gi3_27405733_x7.....guucgAGucccgcgcccg.....                    | 1 |
| Gi2_10525598_x7.....gguucgauucccgcgccC.....                    | 1 |
| Gi5_8526216_x7cucacUcaacagauccgg.....x7cucacUcaacagauccgg..... | 1 |
| Gi2_10522161_x7.....gguCcgauucccgcgccg.....                    | 1 |

Gi2\_10509813\_x7.....guuUgauuucccggcgcgga..... 1  
Gi3\_27442532\_x7.....gguucgauuucAcggcgccg..... 1  
Gi2\_10534873\_x7.....guucCauuucccggcgcg..... 1  
Gi2\_10516162\_x7.....Cguucgauuucccggcgcg..... 1  
Gi3\_27396451\_x7.....guucgCuucccggcgcg..... 1  
Gi1\_3962540\_x7.....gguAcgauuucccggcgcg..... 1  
Gi3\_27425508\_x7.....guCcgauuucccggcgcg..... 1  
Gi5\_8521813\_x7.....gguucgauCcccggcgccg..... 1  
Gi5\_8519272\_x7.....gguCcgauuucccggcgcg..... 1  
Gi1\_3973922\_x7.....uuUgauuucccggcgcg..... 1  
Gi2\_10536210\_x7.....gguucgauuucccgUgcccg..... 1  
Gi2\_10507881\_x7.....guCcgauuucccggcgcgga..... 1  
Gi3\_27447943\_x7.....uucgauuucNcggcgcgagc..... 1  
Gi5\_8505811\_x7.....guucgauuucccgAcgccc..... 1  
Gi3\_27453277\_x7.....gguucgauuucUcggcgcg..... 1  
Gi5\_8511859\_x7.....gguucgauuucccggcgAcg..... 1  
Gi5\_8516486\_x7.....guucgauuucccggcgcgC..... 1  
Gi1\_3961980\_x7.....gguuGgauuucccggcgcg..... 1  
Gi1\_3961497\_x7.....gUuucgauuucccggcgc..... 1  
Gi3\_27381107\_x7.....gguucgauuucccggcgUcgg..... 1  
Gi3\_27382605\_x7.....uucgauuucccggcgcAgagc..... 1  
Gi5\_8521939\_x7.....guucgauuucccggcgGcg..... 1  
Gi2\_10514692\_x7.....guuAgauuucccggcgcg..... 1  
Gi3\_27451499\_x7.....guucgauuucccgUgcccg..... 1  
Gi3\_27446438\_x7.....guucgauuAccggcgccc..... 1  
Gi3\_27379581\_x7.....gguucgauuucccggcgUc..... 1  
Gi2\_10517387\_x7.....ggGucgauuucccggcgcg..... 1  
Gi3\_27449252\_x7.....guucgauuucccggcgcggaC..... 1  
Gi2\_10525304\_x7.....gguucgauuucccggcgCg..... 1  
Gi5\_8512132\_x7.....guuAgauuucccggcgcg..... 1  
Gi3\_27451051\_x7.....gguCcgauuucccggcgc..... 1  
Gi3\_27381044\_x7.....guucgauuucccggcgcAggag..... 1  
Gi1\_3967965\_x7.....guucgauuucccggcgcUg..... 1  
Gi2\_10529371\_x7.....gguucgaCuucccggcgcgag..... 1  
Gi1\_3960671\_x7.....guucCauuucccggcgcg..... 1  
Gi3\_27448888\_x7.....gguucgauuucccggcgcgagG..... 1  
Gi3\_27434055\_x7.....gguucgauuucccggcgcgagcg..... 0  
Gi2\_10509617\_x7.....guucgauuuccUggcgccgga..... 1  
Gi3\_27424451\_x7cucacccaNcagauccg..... 1  
Gi3\_27418193\_x7.....Nguucgauuucccggcgcgagc..... 1  
Gi5\_8523892\_x7.....guucgauuucccggcgcAgagc..... 1  
Gi2\_10529735\_x7.....guucUauuucccggcgcgag..... 1  
Gi5\_8528449\_x7.....gguucgauuuccAgcgc..... 1  
Gi3\_27407525\_x7.....guucgauuucccggcgcgCg..... 1  
Gi3\_27425942\_x7.....guucgauuucccggcgcgagcC..... 1  
Gi3\_27448104\_x7.....ucgaCuucccggcgcgagc..... 1  
Gi5\_8507673\_x7.....guucAauuucccggcgcgagc..... 1

Gi5\_8530185\_x7.....Uguucgauucccgcgccggagcguu..... 1  
Gi1\_3973369\_x7.....gguucgauucccgcgccggCgc..... 1  
Gi2\_10522343\_x7.....uGcgauucccgcgccggagc..... 1  
Gi3\_27447810\_x7.....gguucgauucUcgcgccg..... 1  
Gi3\_27386875\_x7.....guucgauucccgcgccggaA..... 1  
Gi2\_10512207\_x7.....guucgauucccgcgccCgagc..... 1  
Gi5\_8508282\_x7.....gguucgauucccgAcgcccga..... 1  
Gi5\_8504460\_x7.....gguuUgauucccgcgccg..... 1  
Gi1a\_5701007\_x7.....gguucgauucccgUgcc..... 1  
Gi2\_10503373\_x7.....ucgaCucccgcgccggagc..... 1  
Gi3\_27382640\_x7.....guucgauucccgcgccUg..... 1  
Gi5\_8512580\_x7.....gguucgGuucccgcgccggag..... 1  
Gi2\_10508350\_x7.....gguucgauuccUcgccggag..... 1  
Gi2\_10515833\_x7.....gguucgauuccUggcgccg..... 1  
Gi3\_27423296\_x7.....guuUgauucccgcgccg..... 1  
Gi3\_27411417\_x7.....guucgauucAcgcgccggagc..... 1  
Gi3\_27416485\_x7.....gguucgauuccggAgcc..... 1  
Gi3\_27394498\_x7.....gguucgauucccgAgccgg..... 1  
Gi1\_3967475\_x7.....ggCucgauucccgcgccgga..... 1  
Gi5\_8503165\_x7.....guucgauuAcccgcgccg..... 1  
Gi5\_8529464\_x7.....Uguucgauucccgcgccggagcguuu..... 1  
Gi5\_8503200\_x7.....guucgCuucccgcgccg..... 1  
Gi3\_27445290\_x7.....guucgauucccgcgccCga..... 1  
Gi2\_10568933\_x6.....gguucgauucccgGgcc..... 1  
Gi2\_10549907\_x6.....guucgauuccgAcgcccga..... 1  
Gi5\_8550985\_x6.....gguucgauucccgcgccUgg..... 1  
Gi3\_27511798\_x6.....guucgauucccgcgccUcggg..... 1  
Gi5\_8541073\_x6.....guucgauucccgUcgccg..... 1  
Gi2\_10569353\_x6.....cUcaacagauccggguuc..... 1  
Gi2\_10583597\_x6.....gguCcgauucccgcgccgga..... 1  
Gi3\_27511150\_x6.....gguuGgauucccgcgccg..... 1  
Gi1\_3988279\_x6.....Gucgauucccgcgccggagc..... 1  
Gi5\_8558725\_x6.....gguucgauuccUcgccgg..... 1  
Gi5\_8532871\_x6.....gguucgauucccgcgccAg..... 1  
Gi1\_3992917\_x6.....ucgauuAcccgcgccggagc..... 1  
Gi3\_27459346\_x6.....gguucgauuccGggcgccggag..... 1  
Gi3\_27520444\_x6.....gaCucccgcgccggagc..... 1  
Gi2\_10587971\_x6.....gguucgauucAcgcgccggag..... 1  
Gi2\_10574765\_x6.....gguucgauucccgcgccA..... 1  
Gi1\_3981253\_x6.....guuGgauucccgcgccgg..... 1  
Gi5\_8554057\_x6.....gguGcgauucccgcgccg..... 1  
Gi2\_10551425\_x6.....cgauucccgcgccggagc..... 0  
Gi3\_27521662\_x6.....gguucgGuucccgcgcc..... 1  
Gi2\_10574453\_x6.....gguCcgauucccgcgccgg..... 1  
Gi2\_10558439\_x6.....cgauucccgcgccggagcguuG..... 1  
Gi3\_27542590\_x6.....ucgauucccgcgccggGgc..... 1  
Gi3\_27525220\_x6.....uucgauucccgcgccggC..... 1

Gi5\_8535757\_x6.....Cguucgauucccggcgccggag..... 1  
Gi5\_8545987\_x6.....gguAcgauucccggcgccggagc..... 1  
Gi5\_8551537\_x6.....gguucgauucccAgcgccgg..... 1  
Gi2\_10567661\_x6.....guucgauCcccggcgcgg..... 1  
Gi1\_3993187\_x6.....gCucgauucccggcgcgg..... 1  
Gi1\_3986059\_x6.....guucgauucccggcgccgU..... 1  
Gi3\_27501688\_x6.....uGgauucccggcgccgga..... 1  
Gi3\_27507706\_x6.....guAcgauucccggcgcgg..... 1  
Gi3\_27484174\_x6.....gguucgauucccggcgccU..... 1  
Gi1\_3980503\_x6.....gguucgauCcccggcgcggagc..... 1  
Gi5\_8549311\_x6.....gguuAgauucccggcgccggagc..... 1  
Gi1\_3980479\_x6.....guucgauucccggcgccA..... 1  
Gi2\_10585691\_x6.....gguucgauucccggcgcAgga..... 1  
Gi1\_3992587\_x6.....guAcgauucccggcgccgga..... 1  
Gi5\_8533621\_x6.....guucgauCcccggcgcggga..... 1  
Gi5\_8554297\_x6.....gguucgauucccggcgccggaAc..... 1  
Gi1\_3985861\_x6.....guCcgauucccggcgccggagc..... 1  
Gi5\_8536891\_x6.....gguucAauucccggcgcgg..... 1  
Gi1\_3992161\_x6.....guucgauucccggcAccgga..... 1  
Gi3\_27495448\_x6Ccaccacaacagauccgg..... 1  
Gi1\_3984025\_x6.....guucgauuNccggcgccgga..... 1  
Gi5\_8550685\_x6.....ucUggguucgauucccggc..... 1  
Gi5\_8542951\_x6cucaccaacagaCccgg..... 1  
Gi1\_3984469\_x6.....guuUgauucccggcgccggagc..... 1  
Gi2\_10566755\_x6.....guucgauucccUgcgccggagc..... 1  
Gi2\_10575779\_x6.....gAucgauucccggcgccgga..... 1  
Gi3\_27488302\_x6.....ucgauucccggcgccggCgc..... 1  
Gi1\_3986503\_x6.....Aguucgauucccggcgcgg..... 1  
Gi3\_27527164\_x6.....gguucgauucccgAcgccgg..... 1  
Gi2\_10576583\_x6.....ggAucgauucccggcgccggag..... 1  
Gi3\_27510196\_x6.....gguucgauucccAgcgcc..... 1  
Gi5\_8545291\_x6Ucaccacaacagauccgg..... 1  
Gi2\_10569701\_x6.....gguucgauucccggcAccg..... 1  
Gi3\_27477280\_x6.....Ugguucgauucccggcgccg..... 1  
Gi2\_10556015\_x6.....guucgauucccggcAccggag..... 1  
Gi2\_10578713\_x6.....Gagauccggguucgauucc..... 1  
Gi3\_27464092\_x6.....guucgauucccggcgcAg..... 1  
Gi3\_27541582\_x6.....uucgauucNccggcgccgga..... 1  
Gi3\_27536362\_x6.....guucgauucccggcgccUg..... 1  
Gi3\_27521374\_x6.....guucgauucccggcCccgga..... 1  
Gi3\_27470788\_x6.....gguucgaGuccggcgccggagc..... 1  
Gi3\_27525706\_x6.....guucgauucccUgcgccgg..... 1  
Gi3\_27518572\_x6.....gguucgauuAccggcgccgga..... 1  
Gi1\_3988993\_x6.....gguucgauucccggcgccCg..... 1  
Gi5\_8531353\_x6.....gguucgauucAcggcgccggagc..... 1  
Gi5\_8543503\_x6.....gguucgauAcccggcgccggagc..... 1  
Gi3\_27509530\_x6.....acagauccggguucgauucccggcgccggagcC..... 1



|                                         |                                  |   |
|-----------------------------------------|----------------------------------|---|
| Gi3_27482182_x6.....                    | gguucgauucccggcgccgU.....        | 1 |
| Gi3_27463690_x6.....                    | gguucgAuucccggcgccgga.....       | 1 |
| Gi5_8532547_x6.....                     | gguuUgauucccggcgccggagcguu.....  | 1 |
| Gi5_8548093_x6.....                     | guucgauucccggcAccgga.....        | 1 |
| Gi2_10561487_x6.....                    | guucUauucccggcgccgga.....        | 1 |
| Gi3_27487786_x6.....                    | gguucUauucccggcgccgga.....       | 1 |
| Gi5_8543557_x6cuUacccaacagauccg.....    |                                  | 1 |
| Gi2_10544189_x6.....                    | gguuGgauucccggcgccg.....         | 1 |
| Gi5_8555773_x6.....                     | gguucgauucccggcAccggag.....      | 1 |
| Gi3_27472150_x6.....                    | guucgauucccggUcgccggagc.....     | 1 |
| Gi3_27548074_x6.....                    | cgauucccggcgccAgagc.....         | 1 |
| Gi2_10580399_x6.....                    | guucgauucccggcgccAg.....         | 1 |
| Gi2_10562117_x6.....                    | gguucgauucccAgcgccg.....         | 1 |
| Gi1_3991867_x6.....                     | guucgauucccggUgcccga.....        | 1 |
| Gi5_8562331_x6.....                     | guucgauucccCgcccg.....           | 1 |
| Gi3_27509992_x6.....                    | guucgauuccAgcgccggagc.....       | 1 |
| Gi1_3991351_x6.....                     | gauucccggcgccggagc.....          | 0 |
| Gi5_8533807_x6.....                     | gguucgauucccggcgccgAa.....       | 1 |
| Gi2_10580027_x6.....                    | Gcgauucccggcgccggag.....         | 1 |
| Gi2_10567193_x6.....                    | gguucgauucccggcgAccggag.....     | 1 |
| Gi2_10574429_x6.....                    | Ccgauucccggcgccggagc.....        | 1 |
| Gi5_8561839_x6.....                     | gCuucgauucccggcgccgga.....       | 1 |
| Gi1_3985681_x6.....                     | guNcgauucccggcgccgg.....         | 1 |
| Gi3_27511738_x6.....                    | guucgauucccggcAccg.....          | 1 |
| Gi2_10590599_x6.....                    | gguucgauucccUgcccg.....          | 1 |
| Gi3_27501868_x6.....                    | gguucgauucccggGgcccggag.....     | 1 |
| Gi3_27465052_x6.....                    | guucgauucccggcgccggU.....        | 1 |
| Gi5_8560213_x6.....                     | gUuucgauucccggcgccggagcguuu..... | 1 |
| Gi3_27535378_x6.....                    | gguuGgauucccggcgccgg.....        | 1 |
| Gi1_3993481_x6.....                     | guucgauucccggcgUcg.....          | 1 |
| Gi2_10546109_x6.....                    | gguucgauucccggcgccUgagc.....     | 1 |
| Gi2_10548545_x6.....                    | guucgauuccAgcgccggagc.....       | 1 |
| Gi5_8547775_x6.....                     | guucgauAcccggcgccgg.....         | 1 |
| Gi5_8548675_x6.....                     | guucgauucccggGgccc.....          | 1 |
| Gi3_27478264_x6.....                    | guucUauucccggcgccg.....          | 1 |
| Gi3_27531694_x6.....                    | guuGgauucccggcgccggagc.....      | 1 |
| Gi2_10549547_x6.....                    | gguucgauucccggcgccggaA.....      | 1 |
| Gi3_27484798_x6.....                    | uCcgauucccggcgccgga.....         | 1 |
| Gi5_8562223_x6.....                     | guucgaGucccggcgccgg.....         | 1 |
| Gi1_3980713_x6.Gcaccacaacagauccggu..... |                                  | 1 |
| Gi5_8556733_x6.....                     | gguucgauuccUggcgccgga.....       | 1 |
| Gi2_10578299_x6.....                    | cUauucccggcgccggagcguuuc.....    | 1 |
| Gi5_8547289_x6.....                     | gguucgauucccggAgccc.....         | 1 |
| Gi3_27469624_x6.....                    | Gagauccggguucgauuccc.....        | 1 |
| Gi2_10558097_x6.....                    | gguucgauucccggcgUggag.....       | 1 |
| Gi5_8563561_x6.....                     | gguuUgauucccggcgccggag.....      | 1 |
| Gi1_3975169_x6.....                     | Cuucgauucccggcgccg.....          | 1 |

|                                                           |   |
|-----------------------------------------------------------|---|
| Gi3_27515596_x6.....gauucccgGgccggagc.....                | 1 |
| Gi2_10589573_x6.....guucgauucccgUcgccgg.....              | 1 |
| Gi1_3975235_x6.....guucgauucccgcgccggCgc.....             | 1 |
| Gi5_8558587_x6cucacccaCcagauccgg.....                     | 1 |
| Gi5_8544295_x6.....ccUaacagauccggguuc.....                | 1 |
| Gi2_10569563_x6.....guucgauucccgcgccggC.....              | 1 |
| Gi2_10585175_x6.....gguucgauucccgcgccU.....               | 1 |
| Gi1_3982381_x6.....guucgauuccUggcgccg.....                | 1 |
| Gi5_8548669_x6.....gguuUgauucccgcgccgga.....              | 1 |
| Gi2_10565009_x6.....gguucgauucccgUcgccgga.....            | 1 |
| Gi5_8534767_x6.....guucgUuucccgcgccgg.....                | 1 |
| G1a_5702458_x6.....Cguucgauucccgcgccggag.....             | 1 |
| G1a_5719582_x6.....Uuucgauucccgcgccg.....                 | 1 |
| Gi2_10576511_x6.....gCuucgauucccgcgccgga.....             | 1 |
| Gi2_10563647_x6.....gguuUgauucccgcgccggag.....            | 1 |
| Gi1_3978103_x6.....Cguucgauucccgcgccggagc.....            | 1 |
| Gi5_8531137_x6.....gguucgGuucccgcgccgga.....              | 1 |
| Gi1_3990205_x6.....Aguucgauucccgcgccggag.....             | 1 |
| Gi4_530649_x6.....Uuucgauucccgcgccgga.....                | 1 |
| Gi5_8550865_x6.....guucgaGuucccgcgccg.....                | 1 |
| Gi3_27509242_x6.....aacagauccggguucgauucccgcgccggagc..... | 0 |
| Gi2_10545881_x6.....guucgauucccgcgUcg.....                | 1 |
| Gi5_8555503_x6.....guucgauuccAgcgccggagc.....             | 1 |
| Gi2_10542875_x6.....guucgauucccgcgUgga.....               | 1 |
| Gi2_10630340_x5.....gguuGgauucccgcgccggag.....            | 1 |
| Gi2_10622855_x5.....gguucgauucccgcgccgCag.....            | 1 |
| Gi2_10599780_x5.....gguucgauucccgcgCaggag.....            | 1 |
| Gi1_4014305_x5.....guucgauuGccggcgccgg.....               | 1 |
| Gi2_10598525_x5.....guucgauucccgcgccggUgc.....            | 1 |
| Gi3_27655387_x5.....Gaacagauccggguucgauucc.....           | 1 |
| Gi2_10602855_x5.....guuAgauucccgcgccggagc.....            | 1 |
| Gi2_10622310_x5.....gCuucgauucccgcgccg.....               | 1 |
| Gi3_27599387_x5.....uucgauucccgcgccggG.....               | 1 |
| G1a_5735567_x5.....guCcgauucccgcgccgg.....                | 1 |
| Gi5_8597282_x5cucacccaacagCuccgg.....                     | 1 |
| Gi2_10594165_x5.....gguucgauuccAgcgcc.....                | 1 |
| Gi2_10645415_x5.....guucAauucccgcgccg.....                | 1 |
| Gi5_8594042_x5.....gguucgauucccgUgcccga.....              | 1 |
| Gi3_27611272_x5.....guucgUuucccgcgccgga.....              | 1 |
| Gi2_10613545_x5.....ucgauucccgcgccggUgc.....              | 1 |
| Gi3_27654967_x5.....gguucgauucccgcgccCga.....             | 1 |
| Gi5_8575022_x5.....gguucgaCuucccgcgccggag.....            | 1 |
| Gi5_8575227_x5.....guucgaAuucccgcgccg.....                | 1 |
| Gi3_27622827_x5.....gguucgauucccgcgCccgga.....            | 1 |
| Gi3_27653367_x5.....uucgaCuucccgcgccggagc.....            | 1 |
| Gi1_4003445_x5.....gguucgauNcccgcgccggag.....             | 1 |
| Gi3_27650387_x5.....gguNcgauucccgcgccgga.....             | 1 |

|                                      |                                    |   |
|--------------------------------------|------------------------------------|---|
| Gi2_10604695_x5.....                 | ..gguucgauucccgGgcccggag.....      | 1 |
| Gi2_10630375_x5.....                 | ..gguucgauCcccggcgccgg.....        | 1 |
| Gi3_27635117_x5.....                 | ..gguucAauucccgcgcc.....           | 1 |
| Gi3_27601762_x5.....                 | ..gguucgauucccgGgcccgga.....       | 1 |
| Gi5_8592097_x5.....                  | ..gguuGgauucccgcgcccggagc.....     | 1 |
| Gi3_27551832_x5.....                 | ..gguucgauCcccggcgcc.....          | 1 |
| Gi1_4017635_x5.....                  | ..guucgauucccgcgcccggC.....        | 1 |
| Gi3_27555052_x5.....                 | ..agauccggguucgauucccgcgcccgg..... | 0 |
| Gi3_27644187_x5.....                 | ..guucgUuucccgcgcccggag.....       | 1 |
| Gi3_27641547_x5.....                 | ..ucUauucccgcgcccggag.....         | 1 |
| Gi3_27608742_x5.....                 | ..ggAucgauucccgcgcc.....           | 1 |
| Gi5_8577467_x5.....                  | ..guAcgauucccgcgcccggagc.....      | 1 |
| Gi1_4015470_x5.....                  | ..guucgauucGcgcgcccgg.....         | 1 |
| Gi5_8576632_x5cucaccaGcagauccgg..... | .....                              | 1 |
| Gi1_4009640_x5.....                  | ..ucgauuccNgcgcccggagc.....        | 1 |
| Gi1a_5760217_x5.....                 | ..ggCucgauucccgcgcccggagc.....     | 1 |
| Gi2_10596120_x5.....                 | ..guucgCuucccgcgcccggagc.....      | 1 |
| Gi3_27610652_x5.....                 | ..ucgauucUcgcgcccggagc.....        | 1 |
| Gi5_8594457_x5.....                  | ..guucgauuccUggcgcccgga.....       | 1 |
| Gi2_10614235_x5.....                 | ..guucgauucccgUgcccg.....          | 1 |
| Gi5_8565527_x5.....                  | ..cccaacagNuccggguuc.....          | 1 |
| Gi2_10617540_x5.....                 | ..uUgauucccgcgcccggagc.....        | 1 |
| Gi3_27574032_x5..                    | Gacccaacagauccggguuc.....          | 1 |
| Gi1_3998275_x5.....                  | ..guucgauucccgcgAcgga.....         | 1 |
| Gi5_8601592_x5.....                  | ..guucgauucccgcgccc.....           | 1 |
| Gi4_536278_x5.....                   | ..gguucgauucccgcgcccg.....         | 0 |
| Gi2_10606795_x5.....                 | ..gguucgauuccUggcgcccgga.....      | 1 |
| Gi5_8571622_x5.....                  | ..gguucgauCcccggcgcccggag.....     | 1 |
| Gi5_8594797_x5.....                  | ..guAcgauucccgcgcccgga.....        | 1 |
| Gi3_27584367_x5.....                 | ..gguucgauucccgCcgcccggagc.....    | 1 |
| Gi1_3995530_x5.....                  | ..gguucgauucccgcgAcgagc.....       | 1 |
| Gi5_8591757_x5.....                  | ..gguucgauucccgGcAccgg.....        | 1 |
| Gi2_10627645_x5.....                 | ..guucgauAcccgcgcccgg.....         | 1 |
| Gi2_10602770_x5.....                 | ..gguucgauucccgUcgcccggagc.....    | 1 |
| Gi1_4006125_x5.....                  | ..guucgauucccgcgcccGaa.....        | 1 |
| Gi2_10624170_x5.....                 | ..gguucgauucccgGcccAg.....         | 1 |
| Gi1_4011340_x5.....                  | ..gguucgCuucccgcgcccg.....         | 1 |
| Gi1_4005055_x5.....                  | ..agUuccggguucgauucc.....          | 1 |
| Gi3_27595842_x5.....                 | ..gguucgUuucccgcgcccgga.....       | 1 |
| Gi5_8598442_x5.....                  | ..guucgaGucccggcgcccggagc.....     | 1 |
| Gi3_27566502_x5.....                 | ..ggguucgauucccgGcgUcg.....        | 1 |
| Gi1_4008040_x5.....                  | ..guucgauucccgGcgGcggagc.....      | 1 |
| Gi2_10615215_x5.....                 | ..gguucgauucccgCcgcccggagc.....    | 1 |
| Gi2_10626655_x5.....                 | ..gguucgauucccgGgcccgga.....       | 1 |
| Gi3_27640812_x5.....                 | ..cccaacagaGccggguucgauucc.....    | 1 |
| Gi5_8592172_x5.....                  | ..gguucgauucccgGcgcccggU.....      | 1 |
| Gi1_4012755_x5.....                  | ..uGcgauucccgcgcccggagc.....       | 1 |

|                      |                                       |   |
|----------------------|---------------------------------------|---|
| Gi2_10626120_x5..... | gguGcgauucccgcgcccgagc.....           | 1 |
| Gi3_27572302_x5..... | gguucgauucccUgcgcc.....               | 1 |
| Gi2_10616180_x5..... | guucgauucccgUcgccg.....               | 1 |
| Gi5_8582857_x5.....  | gguucgauuAccggcgccggagc.....          | 1 |
| Gi1_4000445_x5.....  | gguucgauucccgcgccgA.....              | 1 |
| Gi5_8566167_x5.....  | gUguucgauucccgcgccggagc.....          | 1 |
| Gi2_10628225_x5..... | gguucgaGucccgcgccggagc.....           | 1 |
| Gi3_27642202_x5..... | gguAcgauucccgcgccgga.....             | 1 |
| Gi5_8602037_x5.....  | ucaccaacGgauccggguu.....              | 1 |
| Gi5_8588572_x5.....  | acagauccggguucgauucccgcgccggagcC..... | 1 |
| Gi2_10591920_x5..... | gguucgauucccgcgccUgg.....             | 1 |
| Gi3_27567322_x5..... | gauucccgcgcccgCgc.....                | 1 |
| Gi2_10630885_x5..... | ucgauucccgcgcccgCgc.....              | 1 |
| Gi5_8586612_x5.....  | gguucgauucccgUgcccg.....              | 1 |
| Gi5_8584982_x5.....  | gguucgauucccgUgccc.....               | 1 |
| Gi5_8575312_x5.....  | guucgauuccUggcgccggagc.....           | 1 |
| Gi3_27593912_x5..... | gguucgauuUccggcgcc.....               | 1 |
| Gi5_8600352_x5.....  | guucgauCcccggcgccggagc.....           | 1 |
| Gi3_27574737_x5..... | guucgauucccgcgccgCa.....              | 1 |
| Gi5_8589032_x5.....  | gguucgauucccgcgccggagcU.....          | 1 |
| Gi1_4002880_x5.....  | guucgauucccgcgUcgggagc.....           | 1 |
| Gi3_27607117_x5..... | ucgauucccgcgccgAagc.....              | 1 |
| Gi1_4017240_x5.....  | guucgauuNccggcgccggagc.....           | 1 |
| Gi5_8596607_x5.....  | ggAucgauucccgcgccc.....               | 1 |
| Gi2_10627080_x5..... | guucgauucccgAgccc.....                | 1 |
| Gi3_27550742_x5..... | guucgaAucccgcgccggagc.....            | 1 |
| Gi1_3994800_x5.....  | cucaccaacagGucccg.....                | 1 |
| Gi1_4011460_x5.....  | aUagauccggguucgauucc.....             | 1 |
| Gi1a_5753682_x5..... | gguuUgauucccgcgccggagc.....           | 1 |
| Gi3_27618362_x5..... | Gcaccaacagauccggguuc.....             | 1 |
| Gi3_27581747_x5..... | gguucgauucccgcgccAgg.....             | 1 |
| Gi1a_5763772_x5..... | gGucgauucccgcgccc.....                | 1 |
| Gi2_10642120_x5..... | guucgauucccgcgccGggagc.....           | 1 |
| Gi3_27589007_x5..... | guucgauucccgUcgccggag.....            | 1 |
| Gi3_27586067_x5..... | gUguucgauucccgcgccggag.....           | 1 |
| Gi3_27595807_x5..... | ucgauucccgUgcccggagc.....             | 1 |
| Gi5_8591027_x5.....  | guucgauucccgcgcccggU.....             | 1 |
| Gi5_8579392_x5.....  | guucgauuAccggcgcccg.....              | 1 |
| Gi5_8581037_x5.....  | gguucgauCcccggcgcc.....               | 1 |
| Gi2_10634505_x5..... | guucgauucccgcgAcgga.....              | 1 |
| Gi3_27623577_x5..... | gguucgauucccgUcccga.....              | 1 |
| Gi3_27651732_x5..... | guucgauucccgAgcccggag.....            | 1 |
| Gi2_10645020_x5..... | gguucgauuUccggcgccggag.....           | 1 |
| Gi2_10631330_x5..... | gguucgauucccgGgccc.....               | 1 |
| Gi3_27619017_x5..... | gguucgauucccgcgcccCg.....             | 1 |
| Gi1_3995685_x5.....  | Gcgauucccgcgccggagc.....              | 1 |
| Gi3_27559772_x5..... | cagauccgggGucgauucc.....              | 1 |

|                                                |   |
|------------------------------------------------|---|
| Gi2_10642000_x5.....ggNucgauucccgccgagc.....   | 1 |
| Gi2_10615105_x5.....agUuccggguucgauucc.....    | 1 |
| Gi2_10623165_x5.....gCucgauucccgccgga.....     | 1 |
| Gi2_10646650_x5.....cUggauucgauucccgccgga..... | 1 |
| Gi1_3999215_x5.....uucgauucNcgccgagc.....      | 1 |
| Gi1_4001215_x5.....gguucgauucccgccgagc.....    | 1 |
| Gi1_4010650_x5.....guucgauucccgccgagc.....     | 1 |
| Gi5_8577237_x5.....cGcaacagauccggguuc.....     | 1 |
| Gi3_27591427_x5.....ucgauuccNggcgccgga.....    | 1 |
| Gi2_10643425_x5.....guucgauucccgccggaCc.....   | 1 |
| Gi2_10642580_x5.....gAucgauucccgccgagc.....    | 1 |
| Gi1_4015505_x5.....guucgauucccgccgagc.....     | 1 |
| Gi3_27621692_x5.....gguuUgauucccgccgagc.....   | 1 |
| Gi5_8590282_x5.....gguCcgauucccgccgagc.....    | 1 |
| Gi3_27651257_x5.....gguucAauucccgccgagc.....   | 1 |
| Gi5_8597617_x5.....gguucgauucccgccgagc.....    | 1 |
| Gi1a_5752867_x5.....gguucgauucccgccgagc.....   | 1 |
| Gi3_27612727_x5.....gguucgauucGcgccgagc.....   | 1 |
| Gi3_27549482_x5.....gCuucgauucccgccgagc.....   | 1 |
| Gi2_10605435_x5.....ucgauuccNggcgccgagc.....   | 1 |
| Gi1_3996520_x5.....guucUauucccgccgagc.....     | 1 |
| Gi3_27577512_x5.....guucgauucccgccgagc.....    | 1 |
| Gi5_8569292_x5.....gguucgaCucccgccgagc.....    | 1 |
| Gi5_8592012_x5.....Cuucgauucccgccgagc.....     | 1 |
| Gi2_10604880_x5.....gguucgauucccgccgagc.....   | 1 |
| Gi5_8568342_x5.....gUuucgauucccgccgagc.....    | 1 |
| Gi5_8571147_x5.....guucgauucccgccgagc.....     | 1 |
| Gi1_4003015_x5.....guucgauucccgccgagc.....     | 1 |
| Gi3_27588207_x5.....agUuccggguucgauucc.....    | 1 |
| Gi2_10638655_x5.....guucgauucccgccgagc.....    | 1 |
| Gi3_27613417_x5.uGacccaacagauccggguuc.....     | 1 |
| Gi1_3995375_x5.....gguucgauucccgccgagc.....    | 1 |
| Gi1_4005155_x5.....gguucgauNcccgccgagc.....    | 1 |
| Gi5_8590502_x5.....gguucgauucccgccgagc.....    | 1 |
| Gi1_3996170_x5.....gguucgauucccgccgagc.....    | 1 |
| Gi2_10633035_x5.....guAcgauucccgccgagc.....    | 1 |
| Gi2_10592830_x5.....guucgUuucccgccgagc.....    | 1 |
| Gi3_27581737_x5.....guucgauucccgccgagc.....    | 1 |
| Gi1_4010410_x5.....Auucgauucccgccgagc.....     | 1 |
| Gi3_27574422_x5.....uucgauucccgccgagc.....     | 1 |
| Gi5_8590737_x5.....gAuucgauucccgccgagc.....    | 1 |
| Gi3_27588697_x5.....guucgauucccgAcgccgagc..... | 1 |
| Gi3_27600652_x5.....ucgauuccNggcgccgagc.....   | 1 |
| Gi3_27678893_x4.....guucgauucccgccgagc.....    | 1 |
| Gi3_27681081_x4.....ucgauuccUggcgccgagc.....   | 1 |
| Gi5_8623915_x4.....gguucgauucccgAgccgagc.....  | 1 |
| Gi1_4046500_x4cucacccaacGauccgg.....           | 1 |

|                                      |                                    |   |
|--------------------------------------|------------------------------------|---|
| Gi2_10693463_x4.....                 | gguucgauuccAgggcccg.....           | 1 |
| Gi4_538906_x4.....                   | guucgauucccgcgccggagcCu.....       | 1 |
| Gi1_4042944_x4.....                  | gguucgauucccgcgccAggagc.....       | 1 |
| Gi2_10655231_x4.....                 | gguucgauucccgcgUccggagc.....       | 1 |
| Gi3_27766557_x4.....                 | cgUuucccgggcgccggag.....           | 1 |
| Gi1_4033416_x4.....                  | ggguucgauucccgcgcccg.....          | 0 |
| Gi3_27696305_x4.....                 | guucgauucccgAgccg.....             | 1 |
| Gi2_10659599_x4.....                 | guucgauuAccggcgcccg.....           | 1 |
| Gi3_27735613_x4.....                 | guucgauucccgcgUggag.....           | 1 |
| Gi3_27771121_x4.....                 | Cgguucgauucccgcgccggagc.....       | 1 |
| Gi3_27721721_x4.....                 | gguucgauuGccggcgccggag.....        | 1 |
| Gi1_4026548_x4.....                  | guGcgauucccgcgccggagc.....         | 1 |
| Gi3_27791545_x4.....                 | guucgauuccGggcgccgga.....          | 1 |
| Gi5_8616915_x4.....                  | gauucccgNcgccggagc.....            | 1 |
| Gi2_10706091_x4.....                 | ggAucgauucccgcgccg.....            | 1 |
| Gi3_27701357_x4.....                 | Ggauccggguucgauucc.....            | 1 |
| Gi3_27739361_x4.....                 | Uguucgauuccggcgccggagc.....        | 1 |
| Gi1_4028852_x4.....                  | guucgGuucccgcgccgga.....           | 1 |
| Gi5_8631527_x4.....                  | uGcgauucccgcgcccg.....             | 1 |
| Gi3_27731089_x4.....                 | Ccgauucccgcgccggagc.....           | 1 |
| Gi5_8604751_x4.....                  | gguucgauucccgUccg.....             | 1 |
| Gi2_10688451_x4.....                 | guucgauucccgcgGcgg.....            | 1 |
| Gi4_539122_x4.....                   | guucgauucccgcgccggagcC.....        | 1 |
| Gi3_27743185_x4.....                 | uucgauucccgcgccggagcCu.....        | 1 |
| Gi1_4028916_x4.....                  | gguucgauucccgcgccA.....            | 1 |
| Gi5_8623479_x4.....                  | gguCcgauucccgcgccggag.....         | 1 |
| Gi1a_5801486_x4.....                 | cagauccggguucgauucccgcgccggag..... | 0 |
| Gi3_27772357_x4.....                 | guucgCuucccgcgccggag.....          | 1 |
| Gi3_27667689_x4.....                 | caacagauNcggguucga.....            | 1 |
| Gi2_10677995_x4.....                 | gguucgauucccgAcgccg.....           | 1 |
| Gi2_10653131_x4.....                 | guGcgauucccgcgccgga.....           | 1 |
| Gi3_27761817_x4.....                 | guucgauucccgGgccgga.....           | 1 |
| Gi2_10695131_x4.....                 | gguucgauucccgAcgccgga.....         | 1 |
| Gi2_10703143_x4.....                 | gguucgauucccgcgCccggagc.....       | 1 |
| Gi1_4029416_x4.....                  | uGgauucccgcgccggagc.....           | 1 |
| Gi5_8635099_x4cucacccaaUagauccg..... | .....                              | 1 |
| Gi1_4037048_x4.....                  | guucgauCcccggcgccggagc.....        | 1 |
| Gi3_27730749_x4.....                 | Auuuccggcgccggagc.....             | 1 |
| Gi2_10711727_x4.....                 | guucAauuccggcgccggag.....          | 1 |
| Gi5_8619295_x4.....                  | guucgauucAcggcgccggagc.....        | 1 |
| Gi2_10681647_x4.....                 | gguucCauuccggcgccggagc.....        | 1 |
| Gi1a_5790914_x4.....                 | gguucgGuucccgcgccggagc.....        | 1 |
| Gi5_8640951_x4cucacccaacGgauccg..... | .....                              | 1 |
| Gi2_10689443_x4.....                 | gguucUauuccggcgccggagc.....        | 1 |
| Gi2_10695635_x4.....                 | ucgauucccgUgccggagc.....           | 1 |
| Gi1_4035960_x4.....                  | agauccggguucgCuucc.....            | 1 |
| Gi1_4030560_x4.....                  | Cguucgauucccgcgccg.....            | 1 |

Gi5\_8629787\_x4.....gguucgauucccUgcgccga..... 1  
Gi1\_4039608\_x4.....ucgauucccgcgccggagcCu..... 1  
G1a\_5767494\_x4.....gguucgauNcccgcgccgg..... 1  
Gi2\_10665975\_x4.....gguucgauucUcgccgccga..... 1  
Gi5\_8650211\_x4.....gguucgauuccAgcgccg..... 1  
Gi3\_27795865\_x4.....gguucgauucccgcgccCgag..... 1  
Gi1\_4043420\_x4.....gguucgCuucccgcgccggagc..... 1  
Gi1\_4017968\_x4.....gguucgauuAcccgcgccgg..... 1  
Gi3\_27739557\_x4.....gguucgauucccgcgccC..... 1  
Gi3\_27753053\_x4.....caUcagauccggguucgauucc..... 1  
Gi1\_4047284\_x4.....guucgGuucccgcgccggagc..... 1  
Gi2\_10684211\_x4.....gguucgauuccUggcgccgg..... 1  
Gi5\_8627359\_x4.....gguucgauucccgAgcc..... 1  
Gi2\_10660771\_x4.....guucgauucccgAgccgg..... 1  
Gi2\_10670415\_x4.....Gccggguucgauucccgcgccgga..... 1  
Gi3\_27779217\_x4.....guucgauAcccgcgccggag..... 1  
Gi3\_27773113\_x4.....gUguucgauucccgcgccgga..... 1  
Gi1\_4031772\_x4.....guucgauucccgcgccgCagc..... 1  
Gi5\_8647743\_x4.ucaccaacagauccgggCu..... 1  
Gi1\_4025808\_x4.....guucgauuccAgcgccg..... 1  
Gi2\_10712155\_x4.....ucgaGucccgcgccggagc..... 1  
Gi1\_4023416\_x4.cCaccaacagauccgg..... 1  
Gi5\_8620595\_x4.....gguAcgauucccgcgccg..... 1  
Gi3\_27792825\_x4.....guucCauucccgcgccgg..... 1  
Gi3\_27769641\_x4.....gguucUauucccgcgccggag..... 1  
Gi3\_27764721\_x4.....gauucccgcgCUggagc..... 1  
Gi2\_10685383\_x4.....gguucgauucccgAgccggag..... 1  
Gi3\_27668109\_x4.....guucgauucccgcgCag..... 1  
Gi5\_8632635\_x4.....gguucgauucccgcgccU..... 1  
Gi5\_8633523\_x4.....guucAauucccgcgccgga..... 1  
Gi3\_27680801\_x4.....gguucgauucccgCccggag..... 1  
G1a\_5776354\_x4.....gguucgauucccgcgccggagcCu..... 1  
Gi3\_27734441\_x4.....cgauucccgcgccggagcA..... 1  
Gi3\_27749101\_x4.....uucgauCcccgcgccgga..... 1  
Gi5\_8607155\_x4...Gccaacagauccggguuc..... 1  
Gi2\_10666835\_x4.....Acgauucccgcgccggagc..... 1  
Gi2\_10704539\_x4.....Agguucgauucccgcgccggagc..... 1  
Gi2\_10661863\_x4.....guucgauuAcccgcgccg..... 1  
Gi2\_10697727\_x4.....guucgauuccCcgccgg..... 1  
Gi3\_27664693\_x4.....cGgauccggguucgauucccgcgccgg..... 1  
Gi3\_27778965\_x4cuUaccaacagauccgg..... 1  
Gi2\_10718583\_x4.....ggAucgauucccgcgccgga..... 1  
Gi5\_8623607\_x4.....guucgauucccgcgCggagc..... 1  
Gi2\_10678799\_x4.....uuUgauucccgcgccgg..... 1  
Gi3\_27787413\_x4.....ucgauucccgAgccggagc..... 1  
Gi3\_27683097\_x4.....guNcgauucccgcgccgga..... 1  
Gi5\_8648907\_x4.....guucgauucccgcgCgG..... 1

|                                                  |   |
|--------------------------------------------------|---|
| Gi3_27778913_x4.....guucgauuucccgGcg.....        | 1 |
| G1a_5786382_x4.....guucgaCucccgcgccgga.....      | 1 |
| Gi5_8633619_x4.....guucgauuucccgcgccggagcU.....  | 1 |
| Gi3_27730345_x4.....gguucgauuAccggcgccgg.....    | 1 |
| G1a_5807290_x4.....guucgauuucccgcgccggCgc.....   | 1 |
| Gi3_27795609_x4.....uCcgauuucccgcgccggagc.....   | 1 |
| Gi2_10706115_x4.....gguucgauuucccgAcgccc.....    | 1 |
| G1a_5812030_x4.....guucgaCucccgcgccc.....        | 1 |
| Gi5_8622683_x4.....guCcgauuucccgcgccggagc.....   | 1 |
| Gi2_10687567_x4.....guucCauuucccgcgccgg.....     | 1 |
| Gi1_4022432_x4.....gguucgauuucccgcgccGgg.....    | 1 |
| Gi5_8639583_x4.....gguuUgauuucccgcgccgg.....     | 1 |
| Gi3_27746029_x4.....gguucgUuucccgcgccggag.....   | 1 |
| Gi1_4024384_x4.....gauuucccgcgccggagcC.....      | 1 |
| G1a_5787674_x4.....ggGucgauuucccgcgccc.....      | 1 |
| Gi5_8624019_x4.....guucgauuUcggcgccggagc.....    | 1 |
| Gi5_8602619_x4.....guucgGuuucccgcgccgga.....     | 1 |
| Gi1_4039752_x4cucaccaNcagauccgg.....             | 1 |
| Gi2_10670995_x4.....guucgGuuucccgcgccggag.....   | 1 |
| Gi2_10681731_x4.....guucgauuuccUgcccgg.....      | 1 |
| Gi1_4031176_x4.....guucgauuuccAgcggccggagc.....  | 1 |
| Gi3_27771089_x4.....gguucgauAcccgcgccg.....      | 1 |
| Gi3_27695869_x4.....gguucCauuucccgcgccggagc..... | 1 |
| Gi3_27753009_x4.....cGacagauccggguucgauuucc..... | 1 |
| G1a_5768570_x4.....Aguucgauuucccgcgccggag.....   | 1 |
| Gi2_10657263_x4.....guucgauuucccgAcgccc.....     | 1 |
| Gi1_4034080_x4.....guucgauuNccggcgccc.....       | 1 |
| G1a_5784282_x4.....gguucgauNcccgcgccggag.....    | 1 |
| Gi3_27778521_x4.....guucgauuuccggcgccUgagc.....  | 1 |
| Gi2_10682415_x4.....guucgauuUccggcgccgga.....    | 1 |
| Gi5_8624351_x4.....gguucgauuucccgcgccggUg.....   | 1 |
| Gi2_10666019_x4.....guucgauuuccggcgccAgga.....   | 1 |
| Gi1_4028676_x4.....gguucgauuuccAgcgcccgg.....    | 1 |
| Gi5_8623143_x4.....gguCcgauuucccgcgccc.....      | 1 |
| Gi5_8638887_x4.....guucgauuUccggcgccgga.....     | 1 |
| Gi3_27685973_x4.....agaucggNuucgauuucc.....      | 1 |
| Gi2_10700483_x4.....gguucgauuUcggcgccc.....      | 1 |
| Gi5_8603079_x4.....gguucgauuuccCcgccc.....       | 1 |
| Gi1_4036324_x4.....gCuucgauuucccgcgccgga.....    | 1 |
| Gi3_27784853_x4.....gguucgauuAccggcgccc.....     | 1 |
| Gi5_8619903_x4.....gguGgauuucccgcgccc.....       | 1 |
| Gi1_4037176_x4.....gguCcgauuucccgcgccggagc.....  | 1 |
| Gi3_27752297_x4.....guucgauuuccggcgccGg.....     | 1 |
| Gi1_4025512_x4.....guucgauuuccUgcccggagc.....    | 1 |
| Gi1_4046608_x4.....gguucgauAcccgcgcccgg.....     | 1 |
| Gi5_8611723_x4.....gauccggguucgauuucc.....       | 0 |
| Gi5_8642475_x4.....gguucgauuucccgcgccgA.....     | 1 |



|                                        |                                  |   |
|----------------------------------------|----------------------------------|---|
| Gi1_4047016_x4.....                    | gguucgauucccgcgUggagc.....       | 1 |
| Gi1_4039380_x4.....                    | guucgauucccgcgccggagU.....       | 1 |
| Gi5_8605199_x4cucaccaacCgauccgg.....   |                                  | 1 |
| Gi2_10677467_x4.....                   | gAucgauucccgcgccg.....           | 1 |
| Gi3_27763597_x4.....                   | cagaucggguucgGuuccc.....         | 1 |
| Gi5_8608147_x4cucaccGacagauccgg.....   |                                  | 1 |
| Gi5_8614263_x4.....                    | gguucgauucccgcgAcgg.....         | 1 |
| Gi1_4043404_x4.....                    | guucgauucccgCcgccgg.....         | 1 |
| Gi2_10660663_x4.....                   | uucgauucNcggcgccgg.....          | 1 |
| Gi5_8612051_x4cucaccaacagauccAg.....   |                                  | 1 |
| Gi5_8609459_x4.....                    | gguucgCuucccgcgccgg.....         | 1 |
| Gi3_27685073_x4.....                   | gguucgauuAccggcgccg.....         | 1 |
| Gi1_4033656_x4.....                    | agaucggNuucgauucc.....           | 1 |
| Gi5_8611627_x4.....                    | guucgauucccgcgccgAa.....         | 1 |
| Gi3_27781409_x4.....                   | ucgauucccgcgccAga.....           | 1 |
| Gi3_27694377_x4.....                   | guucgauucUcgcgccggag.....        | 1 |
| Gi3_27715681_x4.....                   | gguucgauucccgAcgcc.....          | 1 |
| Gi1_4032704_x4.....                    | gguucgauucccgAgccggagc.....      | 1 |
| Gi2_10672991_x4.....                   | guAcgauucccgcgccgga.....         | 1 |
| Gi1_4043464_x4.....                    | ggCucgauucccgcgccg.....          | 1 |
| Gi1_4025668_x4.....                    | guucgauucccgcgUcgga.....         | 1 |
| Gi1_4022416_x4.....                    | gguucgauuccAgcgccggagc.....      | 1 |
| Gi3_27713285_x4.....                   | Gggguucgauucccgcgccgga.....      | 1 |
| Gi2_10721295_x4.....                   | cagaucggguucgauucccgcgccgga..... | 0 |
| Gi5_8632475_x4.....                    | gguuUgauucccgcgcc.....           | 1 |
| Gi3_27672645_x4.....                   | gauuUcggcgccggagc.....           | 1 |
| Gi3_27790573_x4.....                   | guucgaGucccggcgccggag.....       | 1 |
| Gi3_27735701_x4.....                   | guucgauuccGggcgccgg.....         | 1 |
| Gi2_10685011_x4.....                   | gAuucgauucccgcgccg.....          | 1 |
| Gi2_10690695_x4.....                   | gguucgGuucccgcgccgg.....         | 1 |
| Gi3_27683689_x4.....                   | ucgGuucccgcgccgga.....           | 1 |
| Gi2_10723707_x4.....                   | ucgauuccUggcgccggagc.....        | 1 |
| Gi1_4026372_x4.ucaccaacagauccgggC..... |                                  | 1 |
| Gi3_27718133_x4.....                   | gguucgauAcccgcgcc.....           | 1 |
| Gi2_10700555_x4.....                   | gguucgauucccgcgccgAag.....       | 1 |
| Gi2_10657371_x4.....                   | guucgauucccgcgccAgag.....        | 1 |
| Gi2_10717623_x4.....                   | gguucgauuGccggcgccggagc.....     | 1 |
| Gi3_27754773_x4.....                   | uUgauucccgcgccgga.....           | 1 |
| Gi3_27745305_x4.....                   | gguucgaGucccggcgccgga.....       | 1 |
| Gi2_10702083_x4.....                   | gguAcgauucccgcgccggag.....       | 1 |
| Gi2_10683207_x4cGacccaacagauccgg.....  |                                  | 1 |
| Gi3_27737637_x4.....                   | gguucgauucccgcgccggaC.....       | 1 |
| Gi2_10669571_x4.....                   | ggguucgauucccgcgccggagc.....     | 0 |
| Gi1_4040124_x4.....                    | guCcgauucccgcgccgga.....         | 1 |
| Gi1_4018196_x4.....                    | uucgauucccgcgUgg.....            | 1 |
| Gi5_8615995_x4.....                    | gAuucgauucccgcgccggag.....       | 1 |
| Gi5_8625803_x4.....                    | gguucgCuucccgcgcc.....           | 1 |

|                                      |                                        |   |
|--------------------------------------|----------------------------------------|---|
| Gi2_10724311_x4.....                 | gguucgauucccAgcgccgg.....              | 1 |
| Gi2_10693895_x4.....                 | guucgauucccgcgUcggag.....              | 1 |
| Gi3_27780217_x4.....                 | Ccgauucccgcgccgga.....                 | 1 |
| Gi5_8638219_x4.....                  | guucgaAucccgcgccg.....                 | 1 |
| Gi5_8644247_x4.....                  | gguuGgauucccgcgccg.....                | 1 |
| Gl1a_5773650_x4.....                 | Uuucgauucccgcgccgga.....               | 1 |
| Gi3_27937088_x3.....                 | Nuucgauucccgcgccggagc.....             | 1 |
| Gi5_8685113_x3.....                  | guucgauucccgcgccggaAc.....             | 1 |
| Gi3_27970415_x3.....                 | uGcggguucgauucccgcgccgga.....          | 1 |
| Gi3_27834023_x3.....                 | guuNgauucccgcgccgga.....               | 1 |
| Gi3_27933464_x3.....                 | ucgauucccgcgccggagcCu.....             | 1 |
| Gi3_27888362_x3.....                 | gguucgauucccgCcgccgg.....              | 1 |
| Gi2_10795600_x3.....                 | gguucgauucccgcgccUgag.....             | 1 |
| Gi2_10730596_x3.....                 | guucgauucccgcgccC.....                 | 1 |
| Gi3_27804551_x3.....                 | gguucgauucccgGgccc.....                | 1 |
| Gl1a_5875426_x3.....                 | gguCcgauucccgcgccgg.....               | 1 |
| Gi2_10765123_x3.....                 | guucCauucccgcgccgga.....               | 1 |
| Gi1_4074720_x3.....                  | auccggguucgauucccgcgccAg.....          | 1 |
| Gi1_4063590_x3.....                  | guucgauucccgcgccCga.....               | 1 |
| Gi3_27870452_x3.....                 | gguucgauucccgcgccU.....                | 1 |
| Gi1_4075323_x3.....                  | ucgauucccgcgccggag.....                | 0 |
| Gi2_10794589_x3.....                 | ucgauucccgcgccgAagc.....               | 1 |
| Gi5_8664269_x3.....                  | gguucgauuccUggcgccggag.....            | 1 |
| Gi3_27912119_x3.....                 | aacagauccggguucgauucccgcgccggagcC..... | 1 |
| Gi3_27835121_x3.....                 | uucgauucccgAcgcccggagc.....            | 1 |
| Gi3_27893261_x3.....                 | guucgauuAccggcgccggag.....             | 1 |
| Gi5_8686355_x3.....                  | aacagauccggguucgauucccgcgccggagc.....  | 0 |
| Gi5_8675351_x3.....                  | gguucgauuccAcggcgccgga.....            | 1 |
| Gi5_8661461_x3.....                  | Auucgauucccgcgccggag.....              | 1 |
| Gi2_10781692_x3.....                 | guucgauuccUcggcgccggag.....            | 1 |
| Gi2_10786429_x3.....                 | uGgauucccgcgccggag.....                | 1 |
| Gi2_10790677_x3.....                 | guucgauucccgGgcccggagc.....            | 1 |
| Gi3_27917921_x3.....                 | ggguucgauucccgcgccgg.....              | 0 |
| Gi1_4056333_x3.....                  | gguucgauuccUggcgccg.....               | 1 |
| Gi3_27849311_x3.....                 | guucgauucccgcgccggagG.....             | 1 |
| Gi2_10779409_x3.....                 | guucgCuucccgcgccggag.....              | 1 |
| Gi5_8699609_x3.....                  | ucgauucccgAcgcccgga.....               | 1 |
| Gi5_8673644_x3.....                  | gguucgauucccgcgccAggag.....            | 1 |
| Gi2_10803289_x3.....                 | gguucgauuccAcggcgccg.....              | 1 |
| Gi5_8656658_x3.....                  | gguNcgauucccgcgccggagc.....            | 1 |
| Gi2_10779490_x3.....                 | guucgaGucccggcgccgg.....               | 1 |
| Gi5_8669315_x3.....                  | ccaacagauccggguCc.....                 | 1 |
| Gi3_27967724_x3.....                 | ucUauucccgcgccgga.....                 | 1 |
| Gi5_8717162_x3Aucaccaacagauccgg..... | ucUauucccgcgccgga.....                 | 1 |
| Gi2_10748152_x3.....                 | Gucgauucccgcgccggag.....               | 1 |
| Gi3_27829070_x3.....                 | gguucgauucccgcgUccggag.....            | 1 |
| Gi1_4057449_x3.....                  | gguucgauucccgcgccAgagc.....            | 1 |

Gi2\_10792240\_x3.....gguucgauuucccgcgccgA..... 1  
Gi2\_10794754\_x3.....gguucAauucccgcgccg..... 1  
Gi2\_10798258\_x3.....gguucgauuucccgcgGcgg..... 1  
Gi5\_8675369\_x3.....Gcgauucccgcgccgga..... 1  
Gi3\_27949205\_x3.....guucgauAcccgcgccg..... 1  
Gi5\_8709440\_x3.....gguucgauAcccgcgccg..... 1  
Gi1\_4085742\_x3.....guucUauucccgcgccggagc..... 1  
Gi5\_8666963\_x3.....gguucgauucccgcgccggaUc..... 1  
Gi1\_4076667\_x3.....guucgauucccgAgccg..... 1  
Gi3\_27818741\_x3.....guucgUuucccgcgccggagc..... 1  
Gi5\_8669591\_x3.....gguucgauucccgAgccg..... 1  
Gi2\_10730764\_x3.....uCcgauucccgcgccg..... 1  
Gi1\_4075806\_x3.....Nuucgauucccgcgccg..... 1  
Gi2\_10761703\_x3.....guucgauucccgcgGgga..... 1  
Gi2\_10749778\_x3.....gguAcgauucccgcgccgga..... 1  
Gi3\_27911471\_x3.....gUguucgauucccgcgccggagc..... 1  
Gi5\_8698340\_x3.....gguucgauucccgcgccCg..... 1  
Gi3\_27886430\_x3.....guuGgauucccgcgccgga..... 1  
Gi5\_8680985\_x3.....gGuucccgccuuccuugcu..... 1  
Gi5\_8658599\_x3.....cgauucccgcgccggagcCu..... 1  
Gi1\_4083423\_x3.....gguucgauucccgUgcccggagc..... 1  
Gi5\_8663858\_x3.....gguucgauCcccgcgccgga..... 1  
Gi3\_27948005\_x3.....guucgauucccgGgcccggagc..... 1  
Gi5\_8652935\_x3.....guucgauuccAggcccggga..... 1  
Gi2\_10767859\_x3.....Nguucgauucccgcgccggagc..... 1  
Gi3\_27975029\_x3.....gUuucccgcgccggagc..... 1  
Gi2\_10816255\_x3.....cccaacagaCccggguuc..... 1  
Gi4\_550752\_x3.....ggGucgauucccgcgccg..... 1  
Gi3\_27925016\_x3.....gguucgauuGcccggccgga..... 1  
Gi3\_27849674\_x3.....gguucgauuGcccggccg..... 1  
Gi1\_4067886\_x3.....auccggguucgauuccAggcccgg..... 1  
Gi3\_27859577\_x3.....uccggguucgauucccgcgccgAa..... 1  
Gi5\_8679263\_x3.....gguucgauuUcggcgcc..... 1  
Gi5\_8653355\_x3.....gguucgauuAcccgcgccgga..... 1  
Gi2\_10750684\_x3.....gguucgauucccgAgccgga..... 1  
Gi3\_27877115\_x3.....Nuucgauucccgcgccggag..... 1  
Gi5\_8652497\_x3.....guucgauucccgcgccCga..... 1  
Gi5\_8682884\_x3.....cagauccgggCucgauucccgcgccg..... 1  
Gi5\_8672801\_x3.....gguucgauucccgAcgcccg..... 1  
Gi3\_27936176\_x3.....gauucccgAcgcccgagc..... 1  
Gi5\_8712632\_x3.....guuNgaucccgcgccg..... 1  
Gi5\_8678831\_x3.....gguucgaAuucccgccg..... 1  
Gi1\_4082253\_x3.....guucgauCcccggccgga..... 1  
Gi5\_8676506\_x3.Acaccaacagauccgggu..... 1  
Gi1\_4058463\_x3.....guucgauucccgUcggccgga..... 1  
Gi3\_27911921\_x3.....gguucgauGcccggccg..... 1  
Gi2\_10783765\_x3.....guucgauucccgcgccgU..... 1

|                                                         |   |
|---------------------------------------------------------|---|
| Gi2_10800736_x3.....gguucCauucccggcgcccgag.....         | 1 |
| Gi3_27926360_x3.....Aucgauucccggcgccggagc.....          | 1 |
| Gi1_4085529_x3.....guuUgauucccggcgccg.....              | 1 |
| Gi5_8708984_x3.....Ccgauucccggcgccggagc.....            | 1 |
| Gi1_4076907_x3.....gguucgauucccggUgccgga.....           | 1 |
| Gi3_27845336_x3cucacccaacagGuccgg.....                  | 1 |
| Gi1_4051002_x3.....guucgauuccGggcgccgg.....             | 1 |
| Gi3_27922640_x3.....ucgauucccggUgccgga.....             | 1 |
| Gi3_27911900_x3.....guucCauucccggcgcccgga.....          | 1 |
| Gi2_10756783_x3.....gguucgauAcccggcgcc.....             | 1 |
| Gi5_8684030_x3.ucacccaacagauccgggGu.....                | 1 |
| Gi3_27867647_x3.....Nguucgauucccggcgccggag.....         | 1 |
| G1a_5836006_x3.....gguucgauucccggcAccggagc.....         | 1 |
| Gi2_10762363_x3.....uucgaCucccggcgccggagc.....          | 1 |
| Gi3_27875945_x3.....agaucggguCcgauucc.....              | 1 |
| Gi2_10811437_x3.....guucgauuccAcggcgccg.....            | 1 |
| Gi2_10759840_x3.....ucUauucccggcgccggagc.....           | 1 |
| Gi3_27937673_x3.....Uauccggguucgauucccggcgccgga.....    | 1 |
| Gi4_547647_x3.....gguucgauucccggcgccggag.....           | 0 |
| Gi3_27827708_x3.....guucgUuucccggcgccgg.....            | 1 |
| Gi2_10761202_x3.....gguucgauuccUcggcgccg.....           | 1 |
| Gi3_27821375_x3.....ucgauCcccggcgccggagc.....           | 1 |
| Gi1_4082823_x3.....gAuucgauucccggcgccgga.....           | 1 |
| G1a_5840212_x3.....gguucgGuucccggcgcc.....              | 1 |
| Gi2_10743808_x3.....Gcgauucccggcgccgga.....             | 1 |
| Gi3_27869762_x3.....gauucccgNcgccggagc.....             | 1 |
| Gi5_8672123_x3.....gguucgauuccUcggcgccg.....            | 1 |
| Gi3_27896120_x3.....uucgauuccUggcgccgga.....            | 1 |
| G1a_5850052_x3.....guucgaCucccggcgccggagc.....          | 1 |
| Gi3_27905309_x3.....cagaucggNguucgauucc.....            | 1 |
| Gi5_8693288_x3.....gauucccggcgccggGgc.....              | 1 |
| Gi5_8657537_x3.....Gcgauucccggcgccggag.....             | 1 |
| Gi3_27890375_x3.....cggguucgauucccggcgccgC.....         | 1 |
| G1a_5853931_x3.....guucgGuucccggcgccggagc.....          | 1 |
| Gi3_27813977_x3.....ucgaCucccggcgccgga.....             | 1 |
| Gi3_27887441_x3cucacccGacagauccgg.....                  | 1 |
| Gi1_4048029_x3.....gguucgauucccggcgccggagA.....         | 1 |
| G1a_5858230_x3.....gGucgauucccggcgccgg.....             | 1 |
| Gi1_4080300_x3.....gguuAgauucccggcgccgg.....            | 1 |
| Gi3_27821048_x3.....gguucgauucccgUcggccggagc.....       | 1 |
| Gi3_27884132_x3.....guucgaAuucccggcgccgga.....          | 1 |
| Gi1_4088190_x3.....gguucgauuccUcggcgccgga.....          | 1 |
| Gi2_10779472_x3.....gguucgauucccggcgccAg.....           | 1 |
| Gi1_4057824_x3.....guucgauCcccggcgccg.....              | 1 |
| Gi1_4088490_x3.....gguucgauucccggcgccggGg.....          | 1 |
| Gi3_27834674_x3.....aUauccggguucgauucccggcgccggagc..... | 1 |
| Gi5_8658845_x3.....gguucgauuccUggcgcc.....              | 1 |

Gi5\_8663273\_x3.....Uuucgauucccgcgccggagcguuucc..... 1  
Gi1\_4081971\_x3.....ggGucgauucccgcgccggagc..... 1  
Gi2\_10824061\_x3.....gguucgauucAcggcgcc..... 1  
Gi5\_8671412\_x3.....ccggguucgauucccgcgccggC..... 1  
Gi2\_10804873\_x3.....gguucgauucccgggcAcgg..... 1  
Gi2\_10796326\_x3.....gUuucccgcgccggagc..... 1  
Gi3\_27883871\_x3.....uucgauucccgcgccggagcGA..... 1  
Gi2\_10791523\_x3.....gguucgauuUccggcgccgg..... 1  
Gi2\_10726432\_x3.....gguucgauucGcggcgccggagc..... 1  
Gi5\_8656268\_x3.....guGcgauucccgcgccggagc..... 1  
Gi5\_8701292\_x3.....guucgauuccUcgccgg..... 1  
Gi3\_27830687\_x3.....gguucgauucccCgcgccgga..... 1  
Gi2\_10736971\_x3.....gguucgauucccgcgccggC..... 1  
Gi5\_8683811\_x3.....gCuucgauucccgcgcc..... 1  
Gi2\_10784854\_x3.....gguucgauAucccgcgccg..... 1  
Gi5\_8658503\_x3.....ggAucgauucccgcgccggag..... 1  
Gi5\_8698208\_x3cucAGccaacagauccgg..... 1  
Gi2\_10785745\_x3.....gguucgauucccgcgccGgga..... 1  
Gi5\_8672588\_x3.....gguucgauucccCgcgccggagc..... 1  
Gi5\_8657915\_x3.....gguucgauuccUcgccgg..... 1  
Gi3\_27955169\_x3.....gguucUauucccgcgccg..... 1  
Gi1\_4089084\_x3.....guucgauuUccggcgccg..... 1  
Gi5\_8692604\_x3cucUcccaacagauccgg..... 1  
Gi5\_8714339\_x3.....ucUauucccgcgccggagc..... 1  
Gi5\_8695913\_x3.....gguucgauucccgcgccgCa..... 1  
Gi1\_4079901\_x3.....ggAucgauucccgcgccggagc..... 1  
Gi3\_27941390\_x3.....uucgauCcccggcgccggagc..... 1  
Gi3\_27818801\_x3.....guucgauuccAggcgccg..... 1  
Gi5\_8715362\_x3.....guucgauucccgcgUcgga..... 1  
Gi3\_27931829\_x3.....ucgauuUccggcgccggag..... 1  
Gi2\_10811659\_x3.....gguucgauucccgcgGc..... 1  
Gi5\_8684414\_x3.....agauccgggGucgauucc..... 1  
Gi3\_27828017\_x3.....aUauccggguucgauucccgcgccggag..... 1  
G1a\_5854144\_x3.....gguucgauucccgcgccggCgc..... 1  
Gi2\_10779790\_x3.....gguucgauuccggcCccggag..... 1  
Gi5\_8688299\_x3.....guucgCuucccgcgccggagc..... 1  
Gi2\_10746955\_x3.....guucgAGuccggcgccgga..... 1  
Gi2\_10745776\_x3.....gguuAgauucccgcgccgga..... 1  
Gi4\_544908\_x3.....gguucgauNcccggcgccgg..... 1  
Gi5\_8702387\_x3cucaccaacagauUgg..... 1  
Gi1\_4073718\_x3.....guucgauuUccggcgccggagc..... 1  
Gi2\_10743196\_x3.....guucgauCcccggcgccggag..... 1  
Gi5\_8673065\_x3.....ucgauucccgcgccggagcCu..... 1  
Gi5\_8673704\_x3.....gguucgauucccgcgccggagcCu..... 1  
Gi5\_8711294\_x3.....gguucgauucccgcgccAgag..... 1  
Gi1\_4065948\_x3.....gguCcgauucccgcgccg..... 1  
Gi2\_10751776\_x3.....guucgauucccgcgccggU..... 1

|                                                   |   |
|---------------------------------------------------|---|
| Gi3_27958253_x3.....uUgauuucccggcgcggag.....      | 1 |
| Gi1_4074957_x3.....guucgauucccCgcgcgga.....       | 1 |
| Gi3_27892247_x3.....gguucgauucccggcgcGgga.....    | 1 |
| Gi2_10746802_x3.....gAuucgauucccggcgcgga.....     | 1 |
| Gi3_27836450_x3.....guucgauucccggcgcgUag.....     | 1 |
| Gi3_27812366_x3.....gguucgauucGcggcgccggag.....   | 1 |
| Gi5_8666495_x3.ucacccaGcagaucggguu.....           | 1 |
| Gi5_8680913_x3.....guucgauucccgUgcccggagc.....    | 1 |
| Gi5_8688164_x3.....guucgauucUcggcgccgga.....      | 1 |
| Gi2_10816390_x3.....guuNguuucccggcgcggagc.....    | 1 |
| Gi3_27813704_x3.....uccgggCucgauucccggcgcgga..... | 1 |
| Gi3_27838577_x3.....uuccggcgccggagcCu.....        | 1 |
| Gi1_4079502_x3.....uucgaCucccggcgcgg.....         | 1 |
| Gi5_8676110_x3.....ucgauuccNggcgccggag.....       | 1 |
| Gi5_8711684_x3.....gguucAuuucccggcgcgga.....      | 1 |
| Gi2_10796617_x3.....guucgauucccggcgcGgg.....      | 1 |
| Gi5_8694449_x3.....gguucgauucccggcgcCgagc.....    | 1 |
| Gi5_8697125_x3.....guucgauucccgUcggcgagc.....     | 1 |
| Gi2_10803223_x3.....guuGgauucccggcgcgga.....      | 1 |
| Gi2_10769323_x3.....auuccggcgccggagcCu.....       | 1 |
| Gi3_27813083_x3.....cggguucgNuucccggcgcgga.....   | 1 |
| Gi2_10753882_x3.....gguucgauucccggcgcggaC.....    | 1 |
| Gi2_10822213_x3.....cgauuccNgcgcggagcguu.....     | 1 |
| Gi3_27932771_x3.....gguucgauucccCgcgcg.....       | 1 |
| Gi5_8705831_x3.....gAuucgauucccggcgcgga.....      | 1 |
| Gi4_552126_x3.....guucgaCucccggcgcggagc.....      | 1 |
| Gi1_4071663_x3.....gguucgauucccggcgcUgga.....     | 1 |
| Gi3_27947888_x3.....gguucgauucccgCcgccg.....      | 1 |
| Gi1_4048947_x3cuUacccaacagaucgg.....              | 1 |
| Gi2_10804204_x3.....guucgauucccggcgcgUagc.....    | 1 |
| Gi1a_5872276_x3.....gguucgaCucccggcgcggagc.....   | 1 |
| Gi3_27876740_x3.....guuAgauucccggcgcgga.....      | 1 |
| Gi5_8713547_x3.....guucgauuGccggcgccgg.....       | 1 |
| Gi1_4063098_x3.....gguucgauuccGggcgccgg.....      | 1 |
| Gi1_4071303_x3cucacccaacagaucUgg.....             | 1 |
| Gi1a_5855329_x3.....Aguucgauucccggcgcg.....       | 1 |
| Gi1_4078809_x3.....gguucgauucccggcgcggagcCuu..... | 1 |
| Gi2_10755211_x3...cGcaacagaucggguuc.....          | 1 |
| Gi3_27939230_x3.....ggguucgauucccggcgcggCgc.....  | 1 |
| Gi3_27963530_x3.....gguucgauucccggcgcA.....       | 1 |
| Gi3_27940733_x3.....gguuAgauucccggcgc.....        | 1 |
| Gi3_27874355_x3.....uccggguuNguuucccggcgcgga..... | 1 |
| Gi2_10822219_x3.....gguucgauucccggcgcggagc.....   | 0 |
| Gi3_27944972_x3.....ucUauucccggcgcggagc.....      | 1 |
| Gi1_4077564_x3.....gguucgGuucccggcgcggagc.....    | 1 |
| Gi3_27881726_x3.....gguucgauucccgUcggcgag.....    | 1 |
| Gi5_8716589_x3.....guucgauucccgAgccgga.....       | 1 |

Gi3\_27822023\_x3.....auUcggguucgauucccgcgccgga..... 1  
Gi3\_27846707\_x3.....Acgauucccgcgccgga..... 1  
Gi3\_27843638\_x3.....ggUAcgauucccgcgccgga..... 1  
Gi1\_4057752\_x3.....gguucgaCucccgcgccgga..... 1  
Gi1\_4087377\_x3.....gAuucgauucccgcgccgga..... 1  
Gi2\_10791622\_x3.....gguuAgauucccgcgccgga..... 1  
Gi1\_4059540\_x3.....gguucAauucccgcgccg..... 1  
Gi2\_10790146\_x3.....gguucgauucccgcgccgAa..... 1  
Gi5\_8701718\_x3.....Gccggguucgauucccggc..... 1  
Gi3\_27913643\_x3.....agauccggguucgUuucc..... 1  
Gi5\_8700377\_x3.....uuUgauucccgcgccg..... 1  
Gi2\_10776085\_x3.....gguucUauucccgcgcc..... 1  
Gi3\_27864263\_x3.....guucgauucccgcgccU..... 1  
Gi1\_4072857\_x3.....guucgauucccgcgccCa..... 1  
Gi3\_27820343\_x3.....ucAauucccgcgccgga..... 1  
Gi3\_27864914\_x3.....uucgaCucccgcgccg..... 1  
Gi1\_4054593\_x3cucacccGacagaucgg..... 1  
Gi1\_4075113\_x3.caccaaacagaucgggGucgauucc..... 1  
Gi3\_27950240\_x3.....aGccggguucgauucccgcgccgga..... 1  
Gi5\_8669648\_x3.....guucgauucccgcgccUgagc..... 1  
Gi1\_4073901\_x3.....uUgauucccgcgccgga..... 1  
Gi2\_10813018\_x3.....ccUaacagaucggguuc..... 1  
Gi1\_4060719\_x3.....gguucgauucAcggcgccg..... 1  
Gi2\_10745017\_x3.....gguucgauucccgcgccCgag..... 1  
Gi3\_27869522\_x3.....guucgauucccgCcgccg..... 1  
Gi2\_10743235\_x3.....gguucgauucccgcgccGggag..... 1  
Gi5\_8653064\_x3.....Cauucccgcgccgga..... 1  
Gi5\_8658149\_x3.....guGcgauucccgcgccgga..... 1  
Gi1\_4089273\_x3.....gguucgaCucccgcgccg..... 1  
Gi5\_8706995\_x3.....gguucgauucccgcgccA..... 1  
Gi1\_4063026\_x3.....gAucgauucccgcgccgga..... 1  
Gi2\_10828222\_x3.....gguucgauuccCcgccgga..... 1  
Gi3\_27892118\_x3.....guuNgauucccgcgccg..... 1  
Gi3\_27816947\_x3.....ggNucgauucccgcgcc..... 1  
Gi1\_4057833\_x3.....gguucgauuccUgcgccg..... 1  
Gi3\_27954461\_x3.....gguuAgauucccgcgccg..... 1  
Gi2\_10785715\_x3.....ucgauucAcggcgccgga..... 1  
Gi3\_27914537\_x3.....guucgauuccUgcgccgga..... 1  
Gi3\_27868535\_x3.....cagaucggguCcgauucc..... 1  
Gi5\_8653847\_x3.....uCcgauucccgcgccg..... 1  
Gi3\_27909551\_x3.....uucgauuccUggcgccgga..... 1  
Gi3\_27935387\_x3.....Cauucccgcgccgga..... 1  
Gi3\_27827657\_x3.....gAucgauucccgcgccg..... 1  
Gi2\_10776802\_x3.....guucgauucccgAgccgga..... 1  
Gi2\_10778767\_x3.....gguucgauuccAgcgccgga..... 1  
Gi5\_8660549\_x3.....guucgauuccAgcgccg..... 1  
Gi2\_10821682\_x3.....gguucgauuccUgcgcc..... 1

|                      |                                 |   |
|----------------------|---------------------------------|---|
| Gi1_4055508_x3.....  | gguucgauucccgAcgccgg.....       | 1 |
| Gi2_10823227_x3..... | .guucgauucccAgcgcggag.....      | 1 |
| Gi3_27834272_x3..... | .guuAgauucccggcgcggagc.....     | 1 |
| Gi2_10784119_x3..... | .gguAcgauucccggcgcgg.....       | 1 |
| Gi3_27814679_x3..... | .ucgauucccggcgcAggagc.....      | 1 |
| Gi3_27954134_x3..... | .guucgauucccUgcgcggagc.....     | 1 |
| Gi3_27925910_x3..... | .cgauuccUgggcgcggagc.....       | 1 |
| Gi1a_5845960_x3..... | .guucgauucccggcgcggagcCu.....   | 1 |
| Gi3_27851090_x3..... | .Gggguucgauucccggcgcggag.....   | 1 |
| Gi3_27906098_x3..... | .uucgauuUccggcgcggga.....       | 1 |
| Gi5_8680364_x3.....  | .gguucgauucUcggcgcgg.....       | 1 |
| Gi1_4087308_x3.....  | .guucgGuucccggcgcgg.....        | 1 |
| Gi2_10783159_x3..... | .guucgauuccGggcgcgg.....        | 1 |
| Gi2_10790641_x3..... | .gguucgauuUccggcgcgg.....       | 1 |
| Gi1_4068717_x3.....  | .gguucgauucccggcgcUcgga.....    | 1 |
| Gi2_10780225_x3..... | .Aauucccggcgcggagc.....         | 1 |
| Gi5_8716610_x3.....  | .gguucgauucccggcgcU.....        | 1 |
| Gi5_8692454_x3.....  | .gguucgauucccgUgcggag.....      | 1 |
| Gi2_10801846_x3..... | .guucgaAuucccggcgcggagc.....    | 1 |
| Gi3_27842411_x3..... | .gguucgauuccGggcgcgg.....       | 1 |
| Gi3_27964262_x3..... | .gguucgauucccggcgcUa.....       | 1 |
| Gi3_27913328_x3..... | .caacagauNcggguucgauucc.....    | 1 |
| Gi5_8655605_x3.....  | .guucgauucccggcgcAga.....       | 1 |
| Gi3_27884855_x3..... | .uucgauuUccggcgcggagc.....      | 1 |
| Gi1_4073733_x3.....  | .uuUgauucccggcgcggagc.....      | 1 |
| Gi2_10795651_x3..... | .gguucgauuAccggcgcggga.....     | 1 |
| Gi4_548499_x3.....   | .gguucgauucccggcgc.....         | 0 |
| Gi2_10788475_x3..... | .ucgauucccggcgcAgagc.....       | 1 |
| Gi5_8652128_x3.....  | .guucgauucccgUcgcggga.....      | 1 |
| Gi3_27819824_x3..... | .gguuAgauucccggcgcgg.....       | 1 |
| Gi1_4065504_x3.....  | .guucAauucccggcgcgg.....        | 1 |
| Gi5_8655893_x3.....  | .guucCauucccggcgcgg.....        | 1 |
| Gi5_8653148_x3.....  | .guucgauucccggcgcAggagc.....    | 1 |
| Gi1_4048995_x3.....  | .gguucgaCuucccggcgcggagc.....   | 1 |
| Gi2_10822114_x3..... | .gguuGgauucccggcgcggga.....     | 1 |
| Gi2_10753012_x3..... | .ggguucgauucccggcgcggagcC.....  | 1 |
| Gi1_4128985_x2.....  | .Cuuccggguucgauucccggcgcgg..... | 1 |
| Gi3_28231734_x2..... | .cgauucccggcgcGcggagc.....      | 1 |
| Gi3_28114184_x2..... | .cagaucggguucgauuUcc.....       | 1 |
| Gi5_8808605_x2.....  | .ucacAcaacagaucggguu.....       | 1 |
| Gi5_8777695_x2.....  | .gguucgauuccGggcgcgg.....       | 1 |
| Gi3_28086514_x2..... | .cagaucggguucgauCccc.....       | 1 |
| Gi2_10975085_x2..... | .ucgauucccggcgcggG.....         | 1 |
| Gi3_28062226_x2..... | .guucgauucccggcgcGcggag.....    | 1 |
| Gi5_8800855_x2.....  | .guucgauuAcccggcgcggagc.....    | 1 |
| Gi1a_5955404_x2..... | .uucgGuucccggcgcggagc.....      | 1 |
| Gi2_10883591_x2..... | .ucgauucccggcgcUga.....         | 1 |



Gi2\_10905121\_x2.....cgauucccgAcgccggagcguuu..... 1  
Gi1\_4140307\_x2.....guucgauucccgAcgccg..... 1  
Gi1\_4147109\_x2cucacccaacagauccgA..... 1  
Gi5\_8808483\_x2.....gguucgaGucccggcgcg..... 1  
Gi4\_560646\_x2.....gguucgauuccUcgcccg..... 1  
Gi2\_10932017\_x2cucacccaacGgauccgg..... 1  
Gi3\_28146306\_x2.....cgauucccggcgcggGgc..... 1  
Gi5\_8759113\_x2.....cUauucccggcgcggagcguuuc..... 1  
Gi5\_8718575\_x2.....gguucgauucccggcgcggagG..... 1  
Gi1\_4153047\_x2.....guAcgauucccggcgcggagc..... 1  
Gi3\_28144720\_x2cucacccaacagaucUgg..... 1  
Gi5\_8732521\_x2.....uccggguucgGuucccg..... 1  
Gi1\_4111627\_x2.....gguucgauucccgUgccc..... 1  
Gi2\_10858823\_x2.....guucgauucUcggcgcg..... 1  
Gi3\_28057976\_x2.....auccUggguucgauucccggcgcgga..... 1  
Gi5\_8785603\_x2.....ucgauucccgAcgccggag..... 1  
Gi5\_8729459\_x2.....guucgauuccAggcgcgcgagc..... 1  
Gi3\_28212126\_x2.....gauucccgAcgccggagc..... 1  
Gi2\_10832883\_x2.....guucgauGccggcgcgg..... 1  
Gi5\_8826375\_x2.....Nuucgauucccggcgcgg..... 1  
Gi2\_10882565\_x2.....gauucccggcgcUggagc..... 1  
Gi5\_8812831\_x2.....guucgauucccgAcgccggagc..... 1  
Gi1\_4133053\_x2.....ggGucgauucccggcgcg..... 1  
Gi2\_10984659\_x2.....guucgauucccggcgcggagG..... 1  
Gi3\_28067814\_x2.....gguucgauucccggcGcggag..... 1  
Gi5\_8745705\_x2.....gguucgauuAccggcgcggag..... 1  
Gi5\_8793103\_x2.....cgauucccggcgcggagcC..... 1  
Gi2\_10981085\_x2.....guucgauucccggcgccUg..... 1  
Gi5\_8829199\_x2.....Ccgauucccggcgcggag..... 1  
G1a\_5959402\_x2.....ggCucgauucccggcgcg..... 1  
Gi1\_4152497\_x2cucaccUaacagauccgg..... 1  
Gi2\_10908019\_x2.....gguucgauuccAggcgcgg..... 1  
Gi2\_10838901\_x2.....guucgauucccgAcgccggag..... 1  
Gi5\_8782019\_x2.....gguucAauucccggcgcggag..... 1  
Gi3\_28079716\_x2.....gguucgauucccggcgcGgg..... 1  
Gi3\_27984986\_x2.....agauccggguucAauucc..... 1  
Gi3\_27993194\_x2.....gguucgaGucccggcgcggag..... 1  
Gi3\_28173668\_x2.....uucgauucccggcUcgga..... 1  
Gi1\_4114517\_x2.....gAucgauucccggcgcggagc..... 1  
Gi4\_565016\_x2\_cucacccaNcagauccggguucg..... 1  
Gi3\_28023594\_x2..Uaccacaacagauccggguuc..... 1  
Gi3\_28013354\_x2.....uucgauuccAgcgcggga..... 1  
Gi3\_27989860\_x2....cccaacagNuccggguucgauucc..... 1  
Gi5\_8797229\_x2.....gguucgauucccggcAcc..... 1  
Gi2\_10851903\_x2.....gguAcgauucccggcgcgg..... 1  
Gi2\_10893279\_x2.....agauccgggAucgauucc..... 1  
Gi5\_8719757\_x2.....gguuUgauucccggcgcggagcgu..... 1

|                                                           |   |
|-----------------------------------------------------------|---|
| Gi1_4119445_x2.....uucgauuccUggcgcccg.....                | 1 |
| Gi1_4129275_x2.....gguucgauuccCgcgcccggagc.....           | 1 |
| Gi2_10911591_x2.....gauucccgUcgcgggagc.....               | 1 |
| Gi1_4147021_x2.....guucgauucccgcgAg.....                  | 1 |
| Gi5_8754843_x2.....agUuccggguucgauucc.....                | 1 |
| Gi1_4106429_x2Aucaccaacagauccg.....                       | 1 |
| Gi2_10980421_x2.....guucgCuucccgggcgcgga.....             | 1 |
| Gi3_28154320_x2.....caacagauccggguucgCuucc.....           | 1 |
| Gi5_8738921_x2.....guucgauucccgcgAgcggagc.....            | 1 |
| Gi3_28167666_x2.....cagauccggguucgauuccU.....             | 1 |
| Gi3_28073120_x2.....uccggguucgauucccgAgcgcgga.....        | 1 |
| Gi1_4097929_x2.....guucgauucccgAgcgcgga.....              | 1 |
| Gi5_8775529_x2cucacccUacagauccg.....                      | 1 |
| Gi3_28053262_x2.....Cucgauucccgggcgcgga.....              | 1 |
| Gi5_8772669_x2.....uucgauucccgcgcccggagcC.....            | 1 |
| Gi1_4138577_x2.....guucgauuccUggcgcccga.....              | 1 |
| Gi1_4106031_x2cucacccaNcagauccggguucga.....               | 1 |
| Gi1_4106033_x2.....gguucgauuccAgcgcccga.....              | 1 |
| Gi4_564836_x2.....gguucgauucccgcgcccggCgc.....            | 1 |
| Gi5_8789299_x2.....guucCauucccgcgcccg.....                | 1 |
| Gi2_10928843_x2.....uucgauucccgcgcgAgg.....               | 1 |
| Gi3_28146416_x2.....gguucgauucccgcgcccggagcAu.....        | 1 |
| Gi3_28174612_x2.....gauucccgcgcccggagcCu.....             | 1 |
| Gi1a_5925080_x2.....gguucgauuccAgcgcccggagc.....          | 1 |
| Gi5_8819591_x2.....gguucgauucccgAgccccggag.....           | 1 |
| Gi1_4125299_x2.....ucgauucccgcgcccgggaU.....              | 1 |
| Gi3_28027990_x2.....cgauucccgcgcccAgag.....               | 1 |
| Gi1a_5929114_x2.....gguucgauuccAgcgcccggag.....           | 1 |
| Gi5_8757575_x2.....gguucgauuccUgcgcccggag.....            | 1 |
| Gi2_10977695_x2.....guucgauucccgcgcccgggaA.....           | 1 |
| Gi5_8811325_x2.....guucgauuccGggcgcccg.....               | 1 |
| Gi1_4141445_x2.....gguucgUuucccgcgcccggagc.....           | 1 |
| Gi5_8742179_x2.....gguucgauAcccgcgcccggag.....            | 1 |
| Gi3_28016178_x2.....ccaacagauccggguucgauucccgcgcccga..... | 0 |
| Gi2_10861221_x2.....guucgauGcccggcgcccggagc.....          | 1 |
| Gi1a_5905292_x2.....gguucgauucccgcgcccgc.....             | 1 |
| Gi3_28096670_x2cuUacccaacagauccggguucgau.....             | 1 |
| Gi3_28169190_x2.....uuUgauucccgggcgcgga.....              | 1 |
| Gi1a_5954434_x2.....gGucgauucccgcgcccggag.....            | 1 |
| Gi3_28096924_x2.....guucgauuccAgcgcccgc.....              | 1 |
| Gi5_8822577_x2.....gguucgauuccAgcgcccgc.....              | 1 |
| Gi5_8757095_x2.....Ggauucccgcgcccggagcguuuc.....          | 1 |
| Gi3_28028530_x2cucacccaacagauccggguCcgau.....             | 1 |
| Gi2_10991491_x2.....gguuAgauucccgggcgcg.....              | 1 |
| Gi1_4149379_x2.....gguucgauucccgAgcgc.....                | 1 |
| Gi1_4107127_x2.....Gccggguucgauucccgcgcccga.....          | 1 |
| Gi2_10886403_x2.....guucgauAcccgcgcccga.....              | 1 |

|                                                    |   |
|----------------------------------------------------|---|
| Gi3_28084158_x2.....Cgguucgauucccgccgag.....       | 1 |
| Gi1_4148397_x2cucaccaacagCuccgg.....               | 1 |
| Gi3_28038396_x2.....ucgauucccgccgGggagc.....       | 1 |
| Gi3_28134604_x2.....cGacagauccggguucga.....        | 1 |
| Gi5_8721603_x2.....uGgauucccgccgag.....            | 1 |
| Gi3_28026106_x2.....Cgauccggguucgauucc.....        | 1 |
| Gi3_28141704_x2.....guucgauuccAgggccgag.....       | 1 |
| Gi3_28001584_x2Gucaccaacagauccggguucgauu.....      | 1 |
| Gi5_8812521_x2.....guucgauuccAcggccgga.....        | 1 |
| Gi5_8745639_x2.....gguucgauucccgccgGccgagc.....    | 1 |
| Gi1_4129793_x2.....gguucgCuucccgccgag.....         | 1 |
| Gi3_28218068_x2.....gguucgaAucccgccgag.....        | 1 |
| Gi1_4134587_x2.....guucgauucccgccUga.....          | 1 |
| G1a_5953700_x2.....guucgauucccgccUcggagc.....      | 1 |
| Gi5_8812953_x2.....gaCucccgccgagc.....             | 1 |
| Gi5_8827803_x2.....gauuccAgccgagc.....             | 1 |
| Gi3_28194368_x2.....gguucgauucccgccgagcG.....      | 1 |
| Gi5_8730235_x2.....ucgauuccNggccgagc.....          | 1 |
| Gi3_28210346_x2.....gguucgauucccgGccg.....         | 1 |
| Gi1_4123847_x2.....Gaacagauccggguucgauucccgcc..... | 1 |
| G1a_5934562_x2.....gguucUauucccgcc.....            | 1 |
| G1a_5976424_x2.....gguucgCuucccgccg.....           | 1 |
| Gi2_10922353_x2.....cgauucccgccgag.....            | 0 |
| Gi2_10988729_x2.....cgauUccggccgagcguuc.....       | 1 |
| Gi5_8745417_x2.....gguucgauucccgAcgcc.....         | 1 |
| Gi2_10840491_x2.....guucgauucccgAgccgag.....       | 1 |
| Gi1_4095373_x2.....ucgauCcccgccgagc.....           | 1 |
| Gi1_4118757_x2.....Cucgauucccgccgagc.....          | 1 |
| Gi5_8817329_x2.....cccaacGgauccggguuc.....         | 1 |
| Gi3_28241752_x2.....cagauccgAguucgauucc.....       | 1 |
| Gi3_28076800_x2..caccacagauccggguCc.....           | 1 |
| Gi1_4151871_x2.....ggguucgaNuucccgccgga.....       | 1 |
| Gi3_28000816_x2.....guucgauucccgccgUa.....         | 1 |
| Gi1_4134717_x2.....guucgauucccgUgccc.....          | 1 |
| Gi1_4123089_x2cucaGccaacagauccgg.....              | 1 |
| Gi3_28181902_x2.....gguucgauucccgccUg.....         | 1 |
| Gi2_10964051_x2.....guucgauucccgccgUg.....         | 1 |
| Gi2_10974063_x2.....uccggguuNgauucccgccgga.....    | 1 |
| Gi5_8731855_x2.....Gcagauccggguucgauucccgcc.....   | 1 |
| Gi2_10926921_x2.....guucgauucccgccCga.....         | 1 |
| Gi4_554144_x2 cGaccaacagauccggguucg.....           | 1 |
| Gi5_8808045_x2cucaccaacagauAcgg.....               | 1 |
| Gi3_27997574_x2.....gauucccgccgagU.....            | 1 |
| Gi3_28241054_x2.....uucgauucccgccAga.....          | 1 |
| Gi5_8765215_x2.....guuNgauucccgccg.....            | 1 |
| Gi5_8763795_x2.....gguucgauucccgAcgcc.....         | 1 |
| Gi1_4120257_x2.....ggguucgauCcccgccgga.....        | 1 |

Gi3\_28051586\_x2.....ucgauucccgccgcccgaA..... 1  
Gi2\_10835117\_x2.....ucgauCcccggcgccggagc..... 1  
Gi3\_28251356\_x2.....cgauCcccggcgccggagc..... 1  
Gi3\_28236582\_x2.....guucgauCcccggcgccg..... 1  
Gi3\_28021150\_x2.....gNucgauucccgccgcccga..... 1  
Gi2\_10836725\_x2.....gauucccgNcgccggagc..... 1  
Gi3\_27980764\_x2Uucacccaacagauccgg..... 1  
Gi5\_8746429\_x2cucacccaacagauUcgg..... 1  
Gi3\_28162802\_x2.....gauucAcggcgccggagc..... 1  
Gi1\_4153353\_x2.....ggGucgauucccgccgcccga..... 1  
Gi3\_28199080\_x2.....gguucgauucccgccgcccUgag..... 1  
Gi3\_28016184\_x2.....Nguucgauucccgccgcccga..... 1  
Gi3\_28108166\_x2.....ucgauucccgccgcccggagcU..... 1  
Gi2\_10831301\_x2.....guucgauucAcggcgcccga..... 1  
Gi2\_10913593\_x2.....agauccggguCcgauucc..... 1  
G1a\_5954188\_x2.....guucgGuucccgccgcccg..... 1  
Gi3\_28094734\_x2.ucacccaNagauccggguuc..... 1  
Gi2\_10890015\_x2.....guGcgauucccgccgcccgag..... 1  
G1a\_5954946\_x2.....gguucgGuucccgccgcccga..... 1  
Gi1\_4145965\_x2cucacccaacagauAgg..... 1  
Gi1\_4153575\_x2.....ucgauucccgccgcccggCgc..... 1  
Gi3\_28194068\_x2.....ucgauucccgccgAcggagc..... 1  
Gi1\_4138575\_x2.....guucgauucAcggcgcccga..... 1  
G1a\_5965278\_x2.....gguucgauucccgccgUcggagc..... 1  
Gi3\_28022676\_x2.....uucgauucccgccgcccggagcA..... 1  
Gi1\_4152189\_x2.....gguucgauucccUgcgcccg..... 1  
Gi1\_4093929\_x2.....guucUauucccgccgcccg..... 1  
G1a\_5955874\_x2.....gguucgauucccgccgcccgCg..... 1  
Gi2\_10960141\_x2.....uucgauucccgccAccgga..... 1  
Gi2\_10854593\_x2.....Cgguucgauucccgccgcccg..... 1  
Gi3\_28012736\_x2.....ggNucgauucccgccgcccg..... 1  
Gi3\_28178876\_x2cAcacccaacagauccgg..... 1  
Gi5\_8811253\_x2.....cgUuucccgccgcccggagcguuuc..... 1  
Gi1\_4148939\_x2.....guGcgauucccgccgcccga..... 1  
Gi3\_28140802\_x2.....gguucCauucccgccgcccga..... 1  
Gi3\_28002086\_x2.....guucgauucccgccgGccggag..... 1  
Gi2\_10886137\_x2.....gAuucgauucccgccgcccg..... 1  
G1a\_5974960\_x2.....ggCucgauucccgccgcccggag..... 1  
Gi1\_4106883\_x2cucacccaCagauccgg..... 1  
Gi1\_4150583\_x2.....guucgauucccgAcgcccga..... 1  
G1a\_5889316\_x2.....guucgCucccgccgcccg..... 1  
Gi5\_8756105\_x2.....Uauccggguucgauucccgccgcccga..... 1  
Gi5\_8791119\_x2.....Gcgguucgauucccgccgcccga..... 1  
Gi2\_10873443\_x2.....gguucgUuucccgccgcccg..... 1  
Gi1\_4123129\_x2.cacccaacNgaucggguucgauucc..... 1  
Gi3\_28198142\_x2.....uucgauucccgccgcccga..... 1  
Gi3\_28117386\_x2.....gguucgauucccgccUccg..... 1

|                                                    |   |
|----------------------------------------------------|---|
| Gi1_4147217_x2.....guucgauucccgUgccggagc.....      | 1 |
| Gi3_28017590_x2.....gauccgggNucgauuccc.....        | 1 |
| Gi1a_5966336_x2.....gguucgauucccgccAgagc.....      | 1 |
| Gi4_554608_x2.....guucgaCucccgccgcccgg.....        | 1 |
| Gi5_8770651_x2.....guucgauucccgccgAagc.....        | 1 |
| Gi2_10947541_x2...Uccaacagauccggguuc.....          | 1 |
| Gi2_10964813_x2.ucaccaacagauccggguu.....           | 0 |
| Gi3_28119816_x2.....Cucgauucccgccgcccggagc.....    | 1 |
| Gi2_10924103_x2.....uucgauucNcgccgcccggagc.....    | 1 |
| Gi3_28247670_x2.....cagauccAgguucgauuccc.....      | 1 |
| Gi1_4156275_x2.ucaccaacagaCccgggu.....             | 1 |
| Gi2_10952571_x2.....guucgauucccgccgcccggaUc.....   | 1 |
| Gi3_28150320_x2.....gguucgauucccgccgcccggaA.....   | 1 |
| Gi3_28229644_x2.....cgauucccgccgcccggagcCu.....    | 1 |
| Gi1_4121371_x2.....gguucgauucccgccAgag.....        | 1 |
| Gi4_558418_x2.....gguucgauucccgAgccgg.....         | 1 |
| Gi5_8765217_x2.....guucgauucccgCccgccc.....        | 1 |
| Gi5_8719451_x2.....gguucgauucccgccgGccgga.....     | 1 |
| Gi4_557714_x2.....guucgauCcccgccgcccgg.....        | 1 |
| Gi3_28078074_x2.....guucgauUcccgccgcccgg.....      | 1 |
| Gi3_27994084_x2.....uucgCuucccgccgcccgga.....      | 1 |
| Gi5_8798343_x2.....gguucgauUcccgccgcccgga.....     | 1 |
| Gi3_28107384_x2.....ucgauucccgccCccggagc.....      | 1 |
| Gi3_28018856_x2.....guucgaAucccgccgcccgg.....      | 1 |
| Gi5_8764685_x2.....guucgauAcccgccgcccgga.....      | 1 |
| Gi2_10830241_x2.....gguucgauucccgccUccggag.....    | 1 |
| Gi1_4118337_x2..caUccaacagauccggguucgauucc.....    | 1 |
| Gi2_10973233_x2.....guucgauucccgGgcccgg.....       | 1 |
| Gi1a_5894674_x2.....gguucgauucccgccgUc.....        | 1 |
| Gi3_28229778_x2.....gggGucgauucccgccgcccggagc..... | 1 |
| Gi3_28130614_x2.....agauccggguucgCuuccc.....       | 1 |
| Gi5_8763973_x2.....gguucgauucccgccgcccggagcAu..... | 1 |
| Gi5_8724119_x2.....Nguucgauucccgccgcccggagc.....   | 1 |
| Gi5_8780981_x2.....gguucgauucccgccgGccg.....       | 1 |
| Gi3_28185408_x2.....uucgauucUccgcccgg.....         | 1 |
| Gi1_4135867_x2.....Cguucgauucccgccgcccgga.....     | 1 |
| Gi2_10869407_x2.....guucCauucccgccgcccggagc.....   | 1 |
| Gi3_28051810_x2.....gguucgauucccgccgcccUga.....    | 1 |
| Gi5_8803327_x2.....agaucUggguucgauuccc.....        | 1 |
| Gi1_4120567_x2.....guucgauucccgccgAgga.....        | 1 |
| Gi3_28204358_x2.....cgaCucccgccgcccggagc.....      | 1 |
| Gi2_10952191_x2.....gguucgauucccgccgcccCg.....     | 1 |
| Gi3_28149672_x2.....gggGucgauucccgccgcccgg.....    | 1 |
| Gi4_556180_x2.....Auucgauucccgccgcccgg.....        | 1 |
| Gi1_4145737_x2.....cgguucgauucccgccgcccgg.....     | 0 |
| Gi2_10831105_x2.....uGcgauucccgccgcccgga.....      | 1 |
| Gi5_8730009_x2.....gguucgauAcccgccgcccgg.....      | 1 |

Gi3\_27984222\_x2.....guucgauucccgcgccggaU..... 1  
Gi5\_8826953\_x2.....uGgauucccgcgccggagc..... 1  
Gi5\_8762963\_x2.....gguucgauucccgcgccAgga..... 1  
Gi3\_28169138\_x2.....uAcgauucccgcgccggagc..... 1  
Gi4\_560504\_x2.....gguCcgauucccgcgccggagc..... 1  
Gi2\_10935317\_x2.....guucgauucccgcgccgAag..... 1  
Gi3\_28154844\_x2.....cgguucgauucccAgcgccgga..... 1  
Gi3\_28204134\_x2.....ucgauucccgcgccggagU..... 1  
Gi3\_28152912\_x2.....gguucgauucccCgcgccggag..... 1  
Gi1\_4103481\_x2.....gguucgauucccgcgccU..... 1  
Gi2\_10912907\_x2.....gguNcgauucccgcgcc..... 1  
Gi5\_8754887\_x2.....uucgaCucccgcgccgg..... 1  
Gi1\_4091359\_x2.....Cuucgauucccgcgccggagc..... 1  
Gi2\_10919851\_x2.....gauucccgcgccggagcCu..... 1  
G1a\_5966242\_x2.....uucgaCucccgcgccggagc..... 1  
Gi1\_4153439\_x2.....gguucgauucccgAcgccgga..... 1  
Gi5\_8748139\_x2.....Gagaucggguucgauucccgcgccg..... 1  
Gi2\_10914825\_x2.....uUgauucccgcgccggag..... 1  
Gi3\_28160534\_x2.....uucgGuucccgcgccggagc..... 1  
Gi3\_28140736\_x2.....ucgaGuucccgcgccggag..... 1  
Gi2\_10869631\_x2.....gguucgauucccgGgcccggag..... 1  
Gi3\_28226426\_x2.....uucgauucccgcgccgGcgga..... 1  
Gi3\_28236300\_x2.....Guuccggguucgauucccgcgccggagc..... 1  
Gi2\_10925471\_x2.....gguucgauucccgcgccCga..... 1  
G1a\_5952986\_x2.....guucgauucccgcgccggagU..... 1  
G1a\_5909814\_x2.....gguucgauucccgcgccggC..... 1  
Gi3\_28141006\_x2.....ggguCcgauucccgcgccg..... 1  
Gi5\_8766929\_x2.....cagaucgggGucgauucccgcgccg..... 1  
Gi3\_28053326\_x2.....gguucgauucccgCcgccgga..... 1  
Gi2\_10976811\_x2.....gguucgauucccgcgccUga..... 1  
Gi2\_10890847\_x2.....guucgauucccgcgccCgag..... 1  
Gi5\_8810763\_x2.....gguuGgauucccgcgccgg..... 1  
Gi1\_4135311\_x2.....gguucgauNcccggcgcc..... 1  
Gi3\_28166684\_x2.....guucgauucccgUcgccg..... 1  
Gi5\_8785053\_x2.....gguuGgauucccgcgccgga..... 1  
Gi2\_10922863\_x2.....guucgauAcccgcgccg..... 1  
Gi2\_10921797\_x2.....uuUgauucccgcgccgga..... 1  
Gi5\_8752639\_x2.....ggGucgauucccgcgccggagcguu..... 1  
Gi1\_4095171\_x2.....gguucgauuccUggcgccggagc..... 1  
Gi1\_4106855\_x2.....gguucgauucccgcgAcg..... 1  
Gi1\_4158449\_x2.....gguucgauCcccggcgccgga..... 1  
G1a\_5936950\_x2.....Cguucgauucccgcgccgga..... 1  
Gi1\_4142901\_x2.....gguuUgauucccgcgccgga..... 1  
Gi3\_28175422\_x2.....uucgauucccgcgccUggagc..... 1  
Gi3\_28108420\_x2.....cagaucgggCucgauucc..... 1  
Gi3\_28254678\_x2.....Ugauucccgcgccggagc..... 1  
Gi2\_10990005\_x2.....gguucgauuccGggcgcc..... 1

|                                                          |   |
|----------------------------------------------------------|---|
| Gi3_28180718_x2.....aCaucggguucgauucc.....               | 1 |
| Gi2_10897531_x2.....guucgauAccggcgccggag.....            | 1 |
| Gi5_8774561_x2.....gguucgauNccggcgccggagcgu.....         | 1 |
| Gi3_28224872_x2.....uucAauuccggcgccggagc.....            | 1 |
| Gi3_28083252_x2.....guucgauucAcggcgccggag.....           | 1 |
| Gi5_8739787_x2.....guuGgauuccggcgccgg.....               | 1 |
| Gi2_10969409_x2.....guuGgauuccggcgccgg.....              | 1 |
| Gi5_8820787_x2.....gguucgauuccggcgUcggag.....            | 1 |
| Gi1_4104675_x2.....gguucgauuccggcgccggCg.....            | 1 |
| Gi5_8824933_x2.....gguucgauCccggcgccgg.....              | 1 |
| Gi5_8730799_x2.....guucgauucGcggcgccg.....               | 1 |
| Gi3_28014692_x2..cacccaacNgauccggguuc.....               | 1 |
| Gi3_28133342_x2.....ucgauuccggcgccgCagc.....             | 1 |
| Gi4_560328_x2 cuUaccaacagauccggguucg.....                | 1 |
| Gi4_564144_x2 ..guucgauuccggcgccggagcA.....              | 1 |
| Gi5_8718507_x2.....guucgauuccggcgccggagA.....            | 1 |
| Gi1a_5938360_x2.....gguNcgauuccggcgccg.....              | 1 |
| Gi5_8741773_x2.....uucgauuccggcgccggagc.....             | 0 |
| Gi3_28150636_x2.....gaGucccggcgccggagc.....              | 1 |
| Gi1_4131383_x2.....guucgauuccggcgAcggagc.....            | 1 |
| Gi3_28247674_x2.....uucgauuccggcgccgAa.....              | 1 |
| Gi3_28130308_x2.....cAuuccggcgccggagc.....               | 1 |
| Gi5_8731359_x2.....gguucgauuccggcgccC.....               | 1 |
| Gi1_4099341_x2.....gguucgauuccUggcgccgga.....            | 1 |
| Gi5_8790799_x2.....guucUauuccggcgccggag.....             | 1 |
| Gi2_10883617_x2.....ggAucgauuccggcgccgg.....             | 1 |
| Gi1_4101425_x2.....gguucgauuccggcgGcgg.....              | 1 |
| Gi1_4107525_x2.....uCcgauuccggcgccgg.....                | 1 |
| Gi1_4155703_x2.....guucgauuUccggcgccgga.....             | 1 |
| Gi3_28166900_x2.....cgauucAcggcgccggagc.....             | 1 |
| Gi2_10871971_x2.....guucgauuccggcgccgCag.....            | 1 |
| Gi3_28174380_x2.....ucgauuccggcgAccgga.....              | 1 |
| Gi2_10940445_x2.....guuNgauuccggcgccgg.....              | 1 |
| Gi3_28115858_x2.....uUcggguucgauuccggcgccgga.....        | 1 |
| Gi5_8801793_x2.....ggCucgauuccggcgccggagcguu.....        | 1 |
| Gi2_10904063_x2.....gauuccggUgccggagc.....               | 1 |
| Gi4_559956_x2 ..guucgauuccggcgUcgg.....                  | 1 |
| Gi5_8795627_x2.....caacagaucggguucgauuccggcgccggagc..... | 0 |
| Gi1_4143387_x2.....gguuGgauuccggcgccg.....               | 1 |
| Gi1_4156181_x2.....guucgauuccggcgccUgagc.....            | 1 |
| Gi2_10869777_x2.....guucgauucGcggcgccggagc.....          | 1 |
| Gi5_8822741_x2.....guucgauuccggcgccgCa.....              | 1 |
| Gi2_10906983_x2.....gguucgauuccggcgUcc.....              | 1 |
| Gi3_27992666_x2.....guucgauuccggcgccggagcAu.....         | 1 |
| Gi3_28128564_x2.....uucgauuccggcgccggag.....             | 0 |
| Gi3_28091478_x2cucaccaacCgauccgg.....                    | 1 |
| Gi3_28132424_x2.....gauccggguucgGuucc.....               | 1 |

Gi5\_8746507\_x2.....guucgauucccgGcCccggagc..... 1  
Gi5\_8753995\_x2.....guucgauucccgCcgccgg..... 1  
G1a\_5885002\_x2.....ggAucgauucccgGcCccggagc..... 1  
Gi3\_28006938\_x2.....cAgguucgauucccgGcCccggga..... 1  
Gi3\_28147408\_x2.....cagGuccggguucgauucc..... 1  
Gi1\_4141471\_x2.....guucgauucccgGcCccggagA..... 1  
Gi5\_8808217\_x2.....gguucgauucccgGcCccggag..... 1  
Gi1\_4148503\_x2.....UuucgauucccgGcCccggag..... 1  
Gi1\_4142627\_x2.....gguucgauucccAgcgcCcgga..... 1  
Gi3\_28234392\_x2.....gguucgauucccgGcCccgggaU..... 1  
Gi1\_4108265\_x2.....gCuucgauucccgGcCccggagc..... 1  
Gi3\_28174226\_x2.....gauucccgGcCccgAagc..... 1  
Gi1\_4132611\_x2.....ucgGuucccgGcCccggagc..... 1  
Gi3\_28239860\_x2.....gauccggguucgaCucc..... 1  
Gi5\_8743865\_x2.....AauucccgGcCccggagc..... 1  
Gi5\_8784921\_x2.....guucgauucccgGcCccggagcgC..... 1  
Gi1\_4118663\_x2.....gguucgauucccgGcCccgga..... 1  
Gi3\_28079074\_x2.....ucgauuccAggCcgccgga..... 1  
Gi2\_10888181\_x2.....gguucgUuucccgGcCccgga..... 1  
Gi3\_28147456\_x2.....uuUgauucccgGcCccgg..... 1  
Gi3\_28168954\_x2.....agauccggguucgauCccc..... 1  
Gi5\_8738045\_x2.....uUgauucccgGcCccggagc..... 1  
Gi2\_10853421\_x2.....cggguucgauucccgGcCccggagc..... 0  
Gi5\_8779869\_x2.....gguucgGuucccgGcCcc..... 1  
Gi1\_4100149\_x2cAcacccaacagauccgg..... 1  
Gi3\_28164796\_x2.....gguucgauuccGggcgcc..... 1  
Gi5\_8735137\_x2.....guucgauucccgGcCccggagc..... 1  
Gi5\_8723867\_x2.....gguucgauucccgCcgccggagc..... 1  
Gi1\_4151121\_x2.ucacccaaNagauccgggu..... 1  
Gi3\_28147466\_x2.....ucgauucccgGcCcgUggagc..... 1  
Gi1\_4154003\_x2.....guucgauAcccgGcCccggagc..... 1  
Gi3\_28078132\_x2.....gauAcccgGcCccggagc..... 1  
G1a\_5911486\_x2.....gguucgauucccgGcCccggUgc..... 1  
Gi2\_10846981\_x2.....ucgauucccgGcCccggagc..... 1  
Gi2\_10929055\_x2.....guucgauucccgGcCccggag..... 1  
Gi2\_10950493\_x2.....gguucgauucccgGgcccgg..... 1  
Gi3\_28048188\_x2.....gguucCauucccgGcCccgg..... 1  
Gi3\_28233852\_x2.....gUguucgauucccgGcCccg..... 1  
Gi1\_4142341\_x2.....guucgauucccgGcCccAgag..... 1  
Gi1\_4145897\_x2..acccaacaNauccggguucgauucccg..... 1  
Gi3\_28104480\_x2.....uucgauucccAgcgcCccggagc..... 1  
Gi3\_28231186\_x2.....ucgauAcccgGcCccggagc..... 1  
Gi2\_10847523\_x2.....guucgauucccgCcgccggagc..... 1  
Gi5\_8801251\_x2.....uucccgGcCccggagcCu..... 1  
G1a\_5921074\_x2.....gguucgauucccgGcCccggagA..... 1  
Gi3\_28230940\_x2.....ucgauucccgCcgccggagc..... 1  
Gi3\_28077110\_x2.....ucgauAcccgGcCccgga..... 1



|                                                         |   |
|---------------------------------------------------------|---|
| Gi3_28040844_x2.....ucgauucccggcgcggaAc.....            | 1 |
| Gi1_4094027_x2.....gguucgauucccggcgcU.....              | 1 |
| Gi5_8744671_x2.....guucgauucccggcgAcgga.....            | 1 |
| Gi2_10948143_x2.....Cgguucgauucccggcgcgagc.....         | 1 |
| Gi3_28139806_x2.....Gacagauccggguucgauucccggcgcgga..... | 1 |
| Gi3_28217236_x2.....uucgauucccgAgccgga.....             | 1 |
| Gi3_28052776_x2cucacccaaUagauccgg.....                  | 1 |
| Gi1_4118677_x2.....guucgauucccgUcgcg.....               | 1 |
| G1a_5930474_x2.....gguucgauucccggcgAc.....              | 1 |
| Gi3_28164826_x2.....guucgauucGcggcgccgga.....           | 1 |
| Gi2_10948229_x2.....auucccggcgcgagcgA.....              | 1 |
| G1a_5882038_x2.....Auucgauucccggcgcgagc.....            | 1 |
| Gi4_556122_x2.....guucgauuNccggcgccg.....               | 1 |
| Gi3_28065536_x2.....agauUggguucgauucc.....              | 1 |
| Gi2_10924427_x2.....guucgCuucccggcgcg.....              | 1 |
| Gi2_10991033_x2.....gguuGgauucccggcgc.....              | 1 |
| Gi1_4127477_x2.....uucgauuccAgcgcg.....                 | 1 |
| Gi1_4139407_x2.....gguucgauucccggcgUcgg.....            | 1 |
| Gi2_10918135_x2.....gguucgauucccggcgUcgg.....           | 1 |
| Gi1_4140105_x2.....cgauucccggcgcgagc.....               | 1 |
| Gi3_28005272_x2.....guucgauucccggcUccg.....             | 1 |
| Gi2_10833539_x2.....guucgauucUcggcgccgga.....           | 1 |
| Gi5_8754285_x2.....gguucgauucccgGgcg.....               | 1 |
| Gi1_4148309_x2.....caGcagauccggguucgauu.....            | 1 |
| Gi3_28024186_x2.....gguucgauuccUgcgcg.....              | 1 |
| Gi1_4100751_x2.....gguucgauucccggcgcgAa.....            | 1 |
| Gi1_4100873_x2.....guucgauucccggcAccggagc.....          | 1 |
| Gi3_28041284_x2.....cgauucccggcgcggaAc.....             | 1 |
| Gi3_28203820_x2.....cgauucccggcgcGggagc.....            | 1 |
| Gi2_10980637_x2.....uccggguucgauucccggc.....            | 0 |
| G1a_5913426_x2.....Gucgauucccggcgcgagc.....             | 1 |
| Gi3_28171068_x2.....gguucgauucccggcgGcg.....            | 1 |
| Gi2_10947365_x2.....guucgauuAccggcgccgag.....           | 1 |
| Gi3_28150738_x2.....guuAgauucccggcgcgag.....            | 1 |
| Gi4_553470_x2.....guucgauucccggcgcAg.....               | 1 |
| Gi3_28089238_x2.....uucgauucAcggcgccgga.....            | 1 |
| Gi3_28051960_x2.....gguucgauucUcgggc.....               | 1 |
| Gi2_10897681_x2.....uuUgauucccggcgcgag.....             | 1 |
| Gi1_4131255_x2.....uucgauucccggcgcgCgc.....             | 1 |
| Gi3_28239946_x2.....ucgauucccggcgcgC.....               | 1 |
| Gi5_8789659_x2.....guucgaAuucccggcgcgga.....            | 1 |
| Gi2_10978487_x2.....gaAuucccggcgcgagc.....              | 1 |
| Gi2_10858249_x2.....uucgauucccggcgcgCg.....             | 1 |
| Gi2_10868905_x2.....gguucgauucccggcgcgU.....            | 1 |
| G1a_5911236_x2.....uGcgauucccggcgcgagc.....             | 1 |
| Gi5_8772665_x2.....agauccggguucgCuucc.....              | 1 |
| Gi1_4116277_x2.....uucgauucccggcgcggaU.....             | 1 |

Gi2\_10922609\_x2.....gauucccgggcgccggagU..... 1  
 Gi2\_10831947\_x2.....Gucgauucccgggcgccgga..... 1  
 Gi2\_10959617\_x2.....gauucccgggcgccggUgc..... 1  
 Gi3\_28254224\_x2.....guucgaGucccgggcgccg..... 1  
 G1a\_5904370\_x2.....gCucgauucccgggcgccgg..... 1  
 Gi2\_10853099\_x2.....ucgauucccgCcgccggag..... 1  
 Gi3\_28063662\_x2cGcaccacaacagauccggguucgauu..... 1  
 Gi2\_10868073\_x2.....guucgauuccAggcgcccggag..... 1  
 Gi1\_4138259\_x2.....gguucgauuccUgcgcccga..... 1  
 Gi2\_10945881\_x2.....uucgaCucccgggcgccgg..... 1  
 G1a\_5930724\_x2.....ggGucgauucccgggcgccggagc..... 1  
 G1a\_5899828\_x2.....gguuUgauucccgggcgccgg..... 1  
 Gi5\_8718193\_x2.....auucccgggcgccggagcA..... 1  
 Gi5\_8823847\_x2...acccaacaNauccggguucgauucc..... 1  
 Gi2\_10856589\_x2.....cgauucccgggcgccggagcgCuuc..... 1  
 Gi2\_10940653\_x2.....Cucgauucccgggcgccggagc..... 1  
 Gi1\_4153405\_x2.....agauccgggCucgauucc..... 1  
 Gi1\_4118443\_x2.....uucgGuucccgggcgccgg..... 1  
 Gi3\_28135542\_x2.....guucgauucGcggcgccgg..... 1  
 Gi3\_28098530\_x2.....cgauucccgggcgccggGg..... 1  
 Gi5\_8732703\_x2.....gguucgauucccgggcgccAgg..... 1  
 G1a\_5897474\_x2.....guucgauucccgggcgccUggagc..... 1  
 Gi1\_4112609\_x2.....gguucgauucccgggcgUcggagc..... 1  
 Gi5\_8802831\_x2.....gguuAgauucccgggcgccg..... 1  
 Gi5\_8782065\_x2.....uucgauucccgggcgccggagcCu..... 1  
 Gi5\_8728773\_x2.....guucgauucccgggcgccGgg..... 1  
 Gi5\_8723713\_x2.....gUuucccgggcgccggagc..... 1  
 Gi3\_28190458\_x2.....guucgauucccgggcgccGgg..... 1  
 Gi5\_8823089\_x2.....uUcggguucgauucccggc..... 1  
 Gi2\_10984877\_x2...cccaacGgauccggguuc..... 1  
 Gi5\_8745723\_x2.....gguucgauAcccgggcgc..... 1  
 Gi3\_28160030\_x2.....Gcagauccggguucgauucc..... 1  
 Gi2\_10951235\_x2.....ucgauucccgggcgccggagU..... 1  
 Gi3\_28145154\_x2.....cggguucgGuucccgggcgccgga..... 1  
 Gi3\_28175786\_x2.....Ggauccggguucgauucc..... 1  
 G1a\_5977690\_x2.....gguucgauNcccgggcgccgga..... 1  
 Gi5\_8748009\_x2.ucacccaacagUuccgggu..... 1  
 Gi3\_28243286\_x2.....ucgauucccgggcgccAgga..... 1  
 Gi5\_8747675\_x2.....gguucgauucAcggcgccgg..... 1  
 Gi3\_28030324\_x2.....ucgauucccgggcgccggagcgA..... 1  
 Gi1\_4145445\_x2.....uucgauucUcggcgccgg..... 1  
 Gi5\_8789839\_x2.....cggguucgauucccgUgccc..... 1  
 Gi1\_4124623\_x2cucacccaacagUuccgg..... 1  
 Gi3\_28071682\_x2.....gguGcgauucccgggcgccg..... 1  
 Gi3\_28133844\_x2.....gNucgauucccgggcgccggagc..... 1  
 Gi2\_10884795\_x2.....ucgauucccgggcgAcggagc..... 1  
 Gi2\_10852143\_x2.....cgauucccgggcgccggGgcguu..... 1

|                                                   |   |
|---------------------------------------------------|---|
| Gi1_4122019_x2.....uucgauucccgcgccgga.....        | 0 |
| Gi3_28146992_x2.....caacagauccggguucgauuccA.....  | 1 |
| Gi2_10872295_x2.....gCuucgauucccgcgccgg.....      | 1 |
| Gi1a_5951118_x2.....gguucgauucccgAgccggagc.....   | 1 |
| Gi1a_5946596_x2.....gguucgauucccgcgAg.....        | 1 |
| Gi2_10830341_x2.....ggGucgauucccgcgccgg.....      | 1 |
| Gi1_4092719_x2.....gguucgauucccgcgccUg.....       | 1 |
| Gi2_10858231_x2.....uccgAguucgauucccgcgccgga..... | 1 |
| Gi2_10973467_x2.....caacagauccggguucgauucc.....   | 0 |
| Gi1_4143113_x2.....uucgauucNcgcgccggagc.....      | 1 |
| Gi1a_5900034_x2.....Aguucgauucccgcgccgga.....     | 1 |
| Gi5_8734655_x2.....gguucgauucccgcgccgAag.....     | 1 |
| Gi3_28056430_x2.....uucgGuucccgcgccgg.....        | 1 |
| Gi2_10965185_x2.....ucgGuucccgcgccggagc.....      | 1 |
| Gi3_28034016_x2.....gguucgUuucccgcgcc.....        | 1 |
| Gi3_28059142_x2.....cgauucccAgcgccggag.....       | 1 |
| Gi3_28211802_x2.....aucggguucgauucccgcg.....      | 0 |
| Gi3_28028268_x2.....uuGgauucccgcgccgg.....        | 1 |
| Gi1_4096007_x2.Gcaccacaacagauccggguucga.....      | 1 |
| Gi3_28253028_x2.....gggCucgauucccgcgccggag.....   | 1 |
| Gi4_564000_x2.....gCucgauucccgcgccgga.....        | 1 |
| Gi2_10850305_x2.....guucgaGuucccgcgccg.....       | 1 |
| Gi3_28162628_x2.....gguuGgauucccgcgcc.....        | 1 |
| Gi3_28257636_x2.....guuNgauucccgcgccg.....        | 1 |
| Gi3_28128796_x2cucacccaacagaCccgg.....            | 1 |
| Gi3_28038154_x2.....caacagauccggUuucga.....       | 1 |
| Gi5_8737139_x2.....gguucgauucccgcgccgCagc.....    | 1 |
| Gi4_562044_x2.....ggCucgauucccgcgccgg.....        | 1 |
| Gi5_8788193_x2.....gguuAgauucccgcgccgga.....      | 1 |
| Gi1_4114789_x2.....gguuUgauucccgcgccggagc.....    | 1 |
| Gi1_4118461_x2.....ggAucgauucccgcgccgga.....      | 1 |
| Gi3_28236100_x2.....caacagauccggguucAauucc.....   | 1 |
| Gi1_4127809_x2.....guucgauucUcggcgccgga.....      | 1 |
| Gi2_10893647_x2.....gguucgaAuucccgcgccgga.....    | 1 |
| Gi3_28257730_x2.....gguGcgauucccgcgccgga.....     | 1 |
| Gi4_553262_x2.....gguucgauNcccgcgccggagc.....     | 1 |
| Gi3_28149006_x2Aucacccaacagauccgg.....            | 1 |
| Gi5_8731585_x2.....guucgaAuucccgcgccggagc.....    | 1 |
| Gi3_28086048_x2.....cgauucccgAgccggagc.....       | 1 |
| Gi2_10955977_x2.....uucgaCuucccgcgccgga.....      | 1 |
| Gi2_10982175_x2.....Cucgauucccgcgccgg.....        | 1 |
| Gi1_4091203_x2.....guucgauucccgcgCccgga.....      | 1 |
| Gi3_28096882_x2.....guucgauucccgcgccUgag.....     | 1 |
| Gi5_8759301_x2.....guucgauuccUcggccg.....         | 1 |
| Gi5_8722591_x2.....ucgauucccgcgccggCgc.....       | 1 |
| Gi3_27997186_x2.....cagauccggguucgauucUc.....     | 1 |
| Gi1_4125441_x2.....guucgauucccgcgCcgga.....       | 1 |

|                      |                                   |   |
|----------------------|-----------------------------------|---|
| Gi1_4143699_x2.....  | agaucgguucgauucc.....             | 0 |
| Gi5_8770111_x2.....  | guucUauucccgcgccggagc.....        | 1 |
| Gi1_4129393_x2.....  | auUcggguucgauucccgcgccgga.....    | 1 |
| Gi2_10973301_x2..... | guucgauucccgcgGcg.....            | 1 |
| Gi1_4118543_x2.....  | guucgauucccgcgccC.....            | 1 |
| Gi4_555552_x2.....   | Uuucgauucccgcgccg.....            | 1 |
| Gi2_10849895_x2..... | agaucggNuucgauucc.....            | 1 |
| Gi1_4110277_x2.....  | gguucgauucccgcgccggC.....         | 1 |
| Gi3_28207296_x2..... | gguNcgauucccgcgccggag.....        | 1 |
| Gi3_27995030_x2..... | .....gauucccgcgccgUagc.....       | 1 |
| Gi3_28240662_x2..... | gguNcgauucccgcgccgg.....          | 1 |
| Gi3_28146482_x2..... | guucgauuccUgcgccg.....            | 1 |
| Gi5_8766899_x2.....  | gCucgauucccgcgccggag.....         | 1 |
| Gi1_4101387_x2.....  | gguucgauucccgcgccggA.....         | 1 |
| Gi1a_5898620_x2..... | gguucgauuccUgcgccggagc.....       | 1 |
| Gi5_8950806_x1.....  | guucgauUccgcgccggagc.....         | 1 |
| Gi5_8916664_x1.....  | caccaacagauccAgguucga.....        | 1 |
| Gi2_11323640_x1..... | gUguucgauucccgcgccggag.....       | 1 |
| Gi1_4174174_x1.....  | caacagUuccggguucgauucccggc.....   | 1 |
| Gi5_8868571_x1.....  | guuNgauucccgcgccgga.....          | 1 |
| Gi1_4325900_x1.....  | caacagGuccggguucgauucccggc.....   | 1 |
| Gi2_11157373_x1..... | agaucgggCucgauucc.....            | 1 |
| Gi1_4244347_x1.....  | Uauucccgcgccggagc.....            | 1 |
| Gi2_11031798_x1..... | gguucgauucccgcgccG.....           | 1 |
| Gi2_11338905_x1..... | gguucgauucccgcgccGg.....          | 1 |
| Gi1a_6027245_x1..... | gguuAgauucccgcgccg.....           | 1 |
| Gi3_28607525_x1..... | ggguucgauucccgcgAcggagc.....      | 1 |
| Gi3_28525479_x1..... | aGcagauccggguucgauucc.....        | 1 |
| Gi3_28920241_x1..... | caacagauccggguucGuucc.....        | 1 |
| Gi3_28596304_x1..... | uucgauucccgcgccggUgc.....         | 1 |
| Gi2_11158769_x1..... | uucgauucccgcgccAga.....           | 1 |
| Gi2_11337343_x1..... | gguucgauucGcgccgcc.....           | 1 |
| Gi3_28519263_x1..... | cagauccggguucgauucccggcAccgg..... | 1 |
| Gi5_9138174_x1.....  | ggguucgauucccgcgAcg.....          | 1 |
| Gi3_28979015_x1..... | Gucgauucccgcgccggag.....          | 1 |
| Gi1_4323646_x1.....  | Nuucgauucccgcgccgga.....          | 1 |
| Gi3_28321592_x1..... | Accggguucgauucccgcgccgga.....     | 1 |
| Gi1_4352148_x1.....  | gguucgauCcccggcgccg.....          | 1 |
| Gi5_9075623_x1.....  | guucgaCucccgcgccggagcgu.....      | 1 |
| Gi2_11354537_x1..... | ucgauuccAgcgccggagc.....          | 1 |
| Gi1_4274271_x1.....  | uucgauucccgcgccggagcA.....        | 1 |
| Gi1a_6038980_x1..... | gguucgauucccgUgcggagc.....        | 1 |
| Gi3_28923891_x1..... | Ugauccggguucgauucc.....           | 1 |
| Gi3_28548837_x1..... | cgggCucgauucccgcgccgga.....       | 1 |
| Gi5_8834483_x1.....  | gguucgauucccgGcgccggag.....       | 1 |
| Gi1_4167359_x1.....  | gUguucgauucccgcgccgg.....         | 1 |
| Gi3_28845590_x1..... | ggguuUgauucccgcgccg.....          | 1 |

Gi2\_11400291\_x1.....uccgggCucgauucccgcgccgga..... 1  
Gi4\_576983\_x1.....guucAauucccgcgccgg..... 1  
Gi5\_9026824\_x1.....agauAcggguucgauucc..... 1  
Gi1\_4366842\_x1cGcacccaacagauccggguucga..... 1  
Gi5\_8842286\_x1.....gguucgauuccAggcgcggagcguu..... 1  
Gi5\_8887075\_x1.....gguucgUuucccgcgccgg..... 1  
Gi5\_8960424\_x1.....gguucgauucAcggcgcc..... 1  
Gi3\_28281794\_x1.....ggguucgauuccUggcgccgga..... 1  
Gi2\_11193403\_x1.....cccaacagCuccggguuc..... 1  
Gi3\_28870627\_x1.....guucCauucccgcgccggagc..... 1  
Gi3\_28516877\_x1.....agauccggguCcgauucccgcgccggag..... 1  
Gi3\_28488094\_x1.....Gagauccggguucgauucccgcgccgg..... 1  
Gi2\_11144500\_x1.....guucgauucccgGgcccggag..... 1  
Gi3\_28668874\_x1.....caacagauccggguucgauucccgcgccggagc..... 0  
Gi3\_28552813\_x1.....guuNgauucccgcgccggag..... 1  
G1a\_6330265\_x1.....gguucgauucccgcgccUgga..... 1  
Gi2\_11263507\_x1.....gguucUauucccgcgccg..... 1  
Gi5\_8941812\_x1.....gguucgauucccgcgccggagcguuC..... 1  
Gi1\_4192941\_x1.....Aaacagauccggguucgauucccggc..... 1  
G1a\_6343388\_x1.....gguucUauucccgcgccg..... 1  
Gi5\_9018245\_x1.....gguucgauucccgcgccAgagcguu..... 1  
Gi3\_28440405\_x1.....cgNuucccgcgccggagc..... 1  
Gi2\_11201441\_x1.....guucgauucccgcgccgUag..... 1  
Gi3\_28500151\_x1.....ggguucgauucccgcgga..... 1  
G1a\_6330986\_x1.....guucgauuccCgcccg..... 1  
Gi3\_28771493\_x1.....caGcagauccggguucgauucc..... 1  
Gi4\_597138\_x1.....guucgauucccgUgcccga..... 1  
Gi2\_11361890\_x1.....ccggguucgauucccgcgccUcgga..... 1  
Gi3\_28625165\_x1cucacccaacagauUcgg..... 1  
Gi2\_11235190\_x1.....guucgauucccgcgccUgag..... 1  
Gi1\_4224993\_x1cucacccaacagauccggguucg..... 0  
Gi3\_28819375\_x1.....agauccgggCucgauucc..... 1  
Gi3\_28766235\_x1.....caacagauccggguucgC..... 1  
Gi3\_28311531\_x1.....Aagauccggguucgauucc..... 1  
Gi3\_28336392\_x1.....cccaacCgauccggguucgauucc..... 1  
Gi2\_11375064\_x1.....ccaacagaNccggguucgauucccgcgccggagc..... 1  
Gi2\_11271302\_x1.....Uggguucgauucccgcgcc..... 1  
Gi3\_28572412\_x1.....guucgauuGccggcgccgga..... 1  
Gi2\_11127044\_x1.....ucgauucccgcgccggagcA..... 1  
G1a\_6047477\_x1.....gCuucgauucccgcgccggag..... 1  
Gi3\_28789606\_x1.....gguucgauuccggcUcc..... 1  
Gi1\_4284495\_x1.....ucgauucccgcgccggagU..... 1  
Gi3\_28767525\_x1.....ucgCuucccgcgccggagc..... 1  
Gi1\_4358312\_x1.ucaccCacagauccgggu..... 1  
Gi1\_4237244\_x1.....uucgauucccgcgccAg..... 1  
Gi3\_28573061\_x1.....uccggguucgauucccggcAccgga..... 1  
Gi3\_28888618\_x1.....ucgauucccggcAccggagc..... 1

Gi2\_11055804\_x1.....aacagauccggguucgauCcccggcgccg..... 1  
Gi1\_4342867\_x1.....cgauucccgcgccggagcU..... 1  
Gi4\_584974\_x1.....Cuucgauucccgcgccgg..... 1  
Gi3\_28709223\_x1.....Acgauucccgcgccggag..... 1  
Gi3\_28822165\_x1.....guuGgauucccgcgccgg..... 1  
Gi4\_585899\_x1.....Aguucgauucccgcgccggagc..... 1  
Gi3\_28876647\_x1.....aAuccggguucgauucccgcgccggag..... 1  
Gi1\_4257203\_x1.....Ugguucgauucccgcgccggag..... 1  
Gi4\_572180\_x1.....gguucgauucccgcgGcggagc..... 1  
Gi1\_4373113\_x1.....cccaacUgauccggguuc..... 1  
Gi3\_28329919\_x1..cUcccaacagauccggguuc..... 1  
Gi5\_8997540\_x1.ucUcccaacagauccggguu..... 1  
Gi5\_9062050\_x1.....gguucgauucUcggcgccggagcgu..... 1  
Gi3\_28582943\_x1.....ggguucgauucccgAgccgga..... 1  
Gi5\_8956571\_x1.....ggguucgauuccUggcgccggagc..... 1  
G1a\_6322399\_x1.....gguucgGuucccgcgccg..... 1  
G1a\_6169776\_x1.....gguucgaCucccgcgccgga..... 1  
Gi1\_4330992\_x1.....guucgaGuucccgcgccg..... 1  
Gi3\_28493974\_x1..cacccaacagGuccggguuc..... 1  
Gi5\_9122889\_x1.....gguGcgauucccgcgccggagc..... 1  
Gi4\_606205\_x1.....guucgauucccgcgAgg..... 1  
G1a\_6035669\_x1.....ggguucgauuccUcggcgccgga..... 1  
Gi1\_4179955\_x1.....gguucgauucccgcgUg..... 1  
Gi3\_28590145\_x1.....guucgauuGccggcgccggag..... 1  
Gi5\_8992512\_x1.....gguucgauuccGggcgccgga..... 1  
Gi3\_28489770\_x1.....uucgauuccAgcgccgga..... 1  
Gi3\_28587312\_x1.....gauucccgcgccggUgc..... 1  
Gi3\_28971467\_x1.....ucgauucccgcgccCga..... 1  
Gi5\_9077938\_x1.....gauucccgcgccggagcCu..... 1  
Gi1\_4375213\_x1.....guucgauucccgcgccggagcg..... 0  
Gi2\_11072067\_x1.....ggguucgauucccgcgccg..... 0  
Gi1\_4215423\_x1.ucacccaacagauccgCgu..... 1  
Gi2\_11119670\_x1.....uCcgaucccgcgccggagc..... 1  
Gi3\_28276348\_x1.....ucgaCuucccgcgccggag..... 1  
Gi3\_28963298\_x1.....cgauucccgcgUcggagc..... 1  
Gi3\_28280924\_x1.....guucgauucccgcgCccggagc..... 1  
Gi2\_11394025\_x1.....uucgauucccgcgccgA..... 1  
Gi3\_28428452\_x1.....ucgaGuucccgcgccggagc..... 1  
Gi5\_9079622\_x1.....cccaacagauccgggCuc..... 1  
Gi1\_4348091\_x1.....gguucgauucccgcgccCga..... 1  
Gi3\_28954306\_x1.....ucgauucUcggcgccggag..... 1  
Gi3\_28833541\_x1.....cgauGcccggcgccggagc..... 1  
Gi4\_608663\_x1.....gguucgauucccgcgccgA..... 1  
Gi3\_28746704\_x1.....aCauccggguucgauucccgcgccgg..... 1  
Gi3\_28721884\_x1..cacccaacagauccAgguuc..... 1  
G1a\_6296102\_x1.....gguAcgauucccgcgccggagc..... 1  
Gi3\_28419247\_x1.ucacccaacagauccggguuU..... 1

|                                                        |   |
|--------------------------------------------------------|---|
| Gi3_28438278_x1.....gauucccgggcgcggagcU.....           | 1 |
| Gi1_4171949_x1.....uucgauucccgAcgcgg.....              | 1 |
| G1a_6183397_x1.....guucgauucccgcgccggagcU.....         | 1 |
| Gi5_8848946_x1.....ucgauucUcggcgccggag.....            | 1 |
| Gi5_8932518_x1.....ggguucgauuUcggcgccggagc.....        | 1 |
| Gi5_9053971_x1.....acagauccggguucgauucGcggcgc.....     | 1 |
| Gi4_610398_x1 cucaccaacagauccggguCcg.....              | 1 |
| Gi5_9051740_x1.....uucgauucccgUgcccg.....              | 1 |
| Gi5_8875925_x1.....Cucgauucccgcgccggag.....            | 1 |
| Gi5_9038163_x1.....gguucCauucccgcgccggagc.....         | 1 |
| Gi3_28361222_x1.....Ugauccggguucgauucccgcgccggag.....  | 1 |
| Gi3_28781900_x1.....acagauccggguucgauucccgcgccggG..... | 1 |
| Gi3_28331776_x1.....ucgauucccgcgGcggag.....            | 1 |
| Gi1_4169482_x1.....guucgauuccUgcgcgc.....              | 1 |
| G1a_6055536_x1.....gguucgauucccgAcgcc.....             | 1 |
| Gi5_9075210_x1.ucaccaacagauccggguC.....                | 1 |
| Gi2_11309983_x1.....Ugauucccgcgccggagc.....            | 1 |
| Gi3_28770490_x1.....guucgauucccgcgGggag.....           | 1 |
| Gi3_28940332_x1.....Ugauccggguucgauucc.....            | 1 |
| Gi3_28332991_x1.....aucUggguucgauucccgcgccggagc.....   | 1 |
| G1a_6328472_x1.....uucgauucNcggcgccggagc.....          | 1 |
| Gi1_4206857_x1.....uucgauucccgGgcgg.....               | 1 |
| G1a_6201526_x1.....gAuucgauucccgcgccggag.....          | 1 |
| Gi1_4172732_x1.....Ucagauccggguucgauucc.....           | 1 |
| Gi5_9107136_x1.....ucAgguucgauucccgcgccg.....          | 1 |
| G1a_6346247_x1.....gguucgauucccgAcgcgg.....            | 1 |
| Gi1_4380338_x1.....guucgaGucccgcgccggagc.....          | 1 |
| Gi1_4202460_x1.....uccAgguucgauucccgcgccgga.....       | 1 |
| Gi1_4159212_x1.....Ggauccggguucgauucc.....             | 1 |
| Gi2_11330651_x1.....uccggguucgauucccgcgUcggga.....     | 1 |
| Gi1_4388966_x1.....ucgauucccgcgUcggagc.....            | 1 |
| G1a_6100783_x1.....gguucgauucccgAcgcgc.....            | 1 |
| G1a_6004502_x1.....ggguucgauucccgUgc.....              | 1 |
| Gi3_28962457_x1...Gccaacagauccggguucgauucc.....        | 1 |
| Gi1_4380831_x1.....guucCauucccgcgccgga.....            | 1 |
| Gi5_8892467_x1...cUcaacagauccggguuc.....               | 1 |
| Gi3_28426008_x1.....ucgauuAccggcgccggagc.....          | 1 |
| Gi1_4170449_x1.....ucgaCuucccgcgccggagc.....           | 1 |
| Gi2_11284605_x1.....cagauccggCuucgauucccgcgccggag..... | 1 |
| G1a_6115971_x1.....Auucgauucccgcgccgga.....            | 1 |
| Gi3_28599906_x1.....aucggguNcgauccggcg.....            | 1 |
| Gi1_4349058_x1.....guucgGuucccgcgccggag.....           | 1 |
| Gi5_9084857_x1.....uGcggguucgauuccggc.....             | 1 |
| Gi5_9035518_x1.....ggguucgauucccgcgcc.....             | 0 |
| Gi1_4241720_x1.....gguucgauucUcggcgccggagc.....        | 1 |
| Gi2_11379186_x1.....cgauucccgcgccggagcguuuA.....       | 1 |
| Gi5_9116559_x1.....guucgauuccUgcgcggagc.....           | 1 |

|                                                     |   |
|-----------------------------------------------------|---|
| Gi1a_6256295_x1.....guucgauucUcggcgccgga.....       | 1 |
| Gi3_28552136_x1.....ucgauuccggcgccggU.....          | 1 |
| Gi5_8834311_x1.....guucgauuccggcgccggagU.....       | 1 |
| Gi1_4237845_x1cucacccaacagauccAgguucgauucc.....     | 1 |
| Gi1_4280231_x1.....guucgauGcccgcgccg.....           | 1 |
| Gi5_9027678_x1...accaacagauccggAuucgauucc.....      | 1 |
| Gi3_28375014_x1.....guucgauuccggcgccggagcg.....     | 0 |
| Gi5_9025560_x1.....gguucgauuccggcgccggaC.....       | 1 |
| Gi3_28728018_x1.....ggguucgauucAcggcgccggagc.....   | 1 |
| Gi2_11180345_x1.....Ugguucgauuccggcgccggagc.....    | 1 |
| Gi5_9067346_x1.....guucgauuccggcgGcgga.....         | 1 |
| Gi3_28367049_x1.....caacagauccgAguucga.....         | 1 |
| Gi1_4326623_x1.....guucgauAcccgcgccg.....           | 1 |
| Gi2_11136551_x1.....guucgaAuuccggcgccggag.....      | 1 |
| Gi4_571954_x1.....guAcgauuccggcgccgg.....           | 1 |
| Gi1a_6020043_x1.....guucgauCcccgcgccggagc.....      | 1 |
| Gi4_603804_x1cucacccaacagauccgg.....                | 0 |
| Gi2_11097809_x1.....uucgauucAcggcgccgg.....         | 1 |
| Gi5_9015306_x1.....guucgauGcccgcgccgg.....          | 1 |
| Gi1_4266472_x1.....ucgaGuuccggcgccggagc.....        | 1 |
| Gi1_4259666_x1.....gguucgauuccggcUccgg.....         | 1 |
| Gi3_28864523_x1.....ucgauuccggAgccgga.....          | 1 |
| Gi5_8872085_x1.....gguucgauuccggUcgccggag.....      | 1 |
| Gi5_9130071_x1.....agauccggguCcgauucc.....          | 1 |
| Gi5_9005679_x1.....gguucgauuccggcgccggagcgAu.....   | 1 |
| Gi3_28941386_x1cucacccaacagauccgggCucgau.....       | 1 |
| Gi5_8916686_x1.....uucgauuccggcgccAg.....           | 1 |
| Gi1_4234736_x1.....gguucgauuccggcgccgCagc.....      | 1 |
| Gi3_28565667_x1.....auuccggcgccggagcCu.....         | 1 |
| Gi5_8884803_x1.....guucgauuccggcgccggagcAuuucc..... | 1 |
| Gi2_11398309_x1cucacccaacagaCccgg.....              | 1 |
| Gi3_28519129_x1.....cgauAcccgcgccggagc.....         | 1 |
| Gi4_577047_x1.....gguucgauNcccgcgcc.....            | 1 |
| Gi3_28343661_x1.....uucgaCuuccggcgccggag.....       | 1 |
| Gi2_10999928_x1.....gguucgauuccGggcgccgga.....      | 1 |
| Gi3_28682260_x1.....gguucgauucGggcgccg.....         | 1 |
| Gi2_11031964_x1.....gguucgauucccgCcgccgg.....       | 1 |
| Gi3_28608323_x1.....gGuccggguucgauucccgcgccgga..... | 1 |
| Gi2_11146961_x1.....gguucgauuccggcgccggagcgC.....   | 1 |
| Gi1_4347531_x1.....uucgauuccggcgccggagcU.....       | 1 |
| Gi5_8935087_x1.....gguAcgauuccggcgccgg.....         | 1 |
| Gi2_11061560_x1.....gguucgauuccggcgccggagcAu.....   | 1 |
| Gi3_28269161_x1...ccaacagauccggguucgCuucc.....      | 1 |
| Gi2_10994031_x1.....gguucgauuccggcgCagg.....        | 1 |
| Gi5_8902831_x1.....cagauccggguucgauCcccgcgccg.....  | 1 |
| Gi1_4340501_x1.....gguNcgauuccggcgccg.....          | 1 |
| Gi5_9011318_x1.....gguucgauuccggcgccgUagc.....      | 1 |



|                                                            |   |
|------------------------------------------------------------|---|
| Gi3_28774530_x1.....uccgAguucgauucccgcgcccgga.....         | 1 |
| Gi3_28860126_x1....cccaacagauccggguucgauuGcc.....          | 1 |
| Gi5_8877369_x1.....guucgauucccgcgccgU.....                 | 1 |
| Gi5_8956102_x1.....cgauucccgcgccggagcA.....                | 1 |
| Gi2_11193724_x1.....gauuccAggcgccggagc.....                | 1 |
| Gi3_28322090_x1.....ggguucgauuccGggcgccgga.....            | 1 |
| Gi2_11018820_x1.....uAcgauucccgcgccggagc.....              | 1 |
| Gi4_610798_x1.....gguucgauucccgcgccgC.....                 | 1 |
| Gi3_28584641_x1.....ggguucgauucccgcgcc.....                | 0 |
| Gi5_8840835_x1.....uccggguucgauucUcggc.....                | 1 |
| Gi5_9056090_x1.....aacagauccgggCucgauucccgcgccggagc.....   | 1 |
| Gi3_28405878_x1.....cagauccggguucgauucccgcgccg.....        | 0 |
| Gi5_9049110_x1.ucacccaacagauccAgguu.....                   | 1 |
| Gi3_28349661_x1.ucacccaacagauccggAuuc.....                 | 1 |
| Gi1a_6177820_x1.....uucgauucccgcgccgAagc.....              | 1 |
| Gi2_11266359_x1.....cgauucccgcgccggagcCu.....              | 1 |
| Gi1_4282852_x1.....ggAucgauucccgcgccggag.....              | 1 |
| Gi3_28920230_x1cGcacccaacagauccggguucgauucc.....           | 1 |
| Gi5_8935297_x1.....guucgauuccCcgccgga.....                 | 1 |
| Gi3_28893665_x1.....cggguucgaCucccgcgccgga.....            | 1 |
| Gi2_11024313_x1.....gguucgauucccgcgccggagcguuA.....        | 1 |
| Gi1_4212124_x1.....aacagauccggguucgCuucccgcgccgg.....      | 1 |
| Gi2_11088551_x1.....cgauucccgcgccggagcU.....               | 1 |
| Gi3_28755984_x1cucacccaacagauccAgg.....                    | 1 |
| Gi2_11088895_x1.....Nuucgauucccgcgccggagc.....             | 1 |
| Gi3_28845316_x1....acccaGcagauccggguucgauucc.....          | 1 |
| Gi3_28281122_x1.....uucgauucccgcgccUgg.....                | 1 |
| Gi2_11357110_x1.....uucgGuucccgcgccgg.....                 | 1 |
| Gi2_11021314_x1.....ucgauucccAgcgccggagc.....              | 1 |
| Gi3_28630962_x1.....Nuucgauucccgcgccgg.....                | 1 |
| Gi1_4306787_x1cucacccaGcagauccggguucga.....                | 1 |
| Gi1a_6325166_x1.....ggAucgauucccgcgccggag.....             | 1 |
| Gi3_28606103_x1....Gcaacagauccggguucgauucccgcgccggagc..... | 1 |
| Gi5_8867078_x1....cccGacagauccggguuc.....                  | 1 |
| Gi1_4325094_x1.....guAcgauucccgcgccg.....                  | 1 |
| Gi2_11100270_x1.....cagaGccggguucgauucccgcgccggag.....     | 1 |
| Gi1a_6021407_x1.....gguucgauucccgcgccggagU.....            | 1 |
| Gi2_11020624_x1.....guucgauuccAggcgccgga.....              | 1 |
| Gi3_28815093_x1.....ucgauGcccgcgccggag.....                | 1 |
| Gi1_4361395_x1.....uucgauucccggcUccgg.....                 | 1 |
| Gi1_4241313_x1.....cCgauccggguucgauucccgcgcc.....          | 1 |
| Gi1_4380293_x1cucacccaacGgauccggguucgauucc.....            | 1 |
| Gi5_9087436_x1.....auucccgcgccggagcGA.....                 | 1 |
| Gi1_4213027_x1.....gguucgauucccgcgccggaCc.....             | 1 |
| Gi5_9127316_x1....cccaacagauccggguucgau.....               | 0 |
| Gi1a_6278848_x1.....gguucgauucccggcCccggagc.....           | 1 |
| Gi5_8857528_x1.....gguucgGuucccgcgccggagcguu.....          | 1 |

Gi3\_28478583\_x1.....ccGacagauccggguucgauucccgcgcccg..... 1  
Gi5\_9048280\_x1.....guucgGuucccgcgccggag..... 1  
Gi3\_28900399\_x1.....auccggguucgaGucccgcgccgga..... 1  
Gi5\_8849782\_x1.....gguucgauucccgcgccggGgCGuuu..... 1  
G1a\_6020147\_x1.....gguucgauuccAggcgcccggag..... 1  
Gi2\_11395991\_x1.....ucgauucccgUgcccggag..... 1  
Gi4\_592464\_x1.....guucgauucccgcgccgA..... 1  
Gi2\_11014138\_x1.....guucgauucccgUcgcggag..... 1  
G1a\_6295680\_x1.....uucgauucccgcgccggagcCu..... 1  
Gi3\_2840335\_x1.....aUauccggguucgauucccgcgccgg..... 1  
G1a\_6002738\_x1.....gCuucgauucccgcgccgg..... 1  
Gi5\_9106722\_x1.....cgauucccgcgUggagcguuuc..... 1  
Gi4\_570145\_x1.....gGucgauucccgcgccgga..... 1  
Gi2\_11279226\_x1.....cgauuccAgcgcggagcguu..... 1  
Gi4\_587679\_x1.....gauucccgcgccggagcC..... 1  
Gi5\_9077616\_x1.....uucgauucccgcgccggagcguuucc..... 0  
Gi1\_4261491\_x1.....gguucgauuccUggcgcccggag..... 1  
Gi1\_4353672\_x1.....agauAcggguucgauucc..... 1  
Gi2\_10997619\_x1.....ucgauucccgcgccggagcU..... 1  
Gi5\_9125235\_x1.....guuuccgccCuccuucgucu..... 1  
Gi1\_4240444\_x1.....gguucgauucccgcgAcggag..... 1  
G1a\_5996456\_x1.....ggguucgauucccgcgccggagcC..... 1  
Gi5\_8944125\_x1.....ggguucgauucccgcgA..... 1  
Gi2\_11278841\_x1.....gguGcgauucccgcgccggag..... 1  
Gi3\_28973498\_x1.....ucgauuccGggcgcccggagc..... 1  
Gi5\_8862066\_x1.....uGgauucccgcgccgga..... 1  
Gi5\_8935263\_x1.....cccaacagauUcggguuc..... 1  
Gi1\_4296745\_x1.....gguucgauucccgcgccggaC..... 1  
Gi3\_28968747\_x1.....uucgauuccggcAccgga..... 1  
Gi4\_570127\_x1.....guCcgauucccgcgccg..... 1  
Gi3\_28579118\_x1.....ucgauuccAgcgcggagc..... 1  
G1a\_6159216\_x1.....gguucgauuccAgcgcggag..... 1  
Gi1\_4327807\_x1.ucaNccaacagauccgggu..... 1  
Gi2\_11138380\_x1.....ucgauucccgcgGggagc..... 1  
G1a\_6071562\_x1.....Aguucgauucccgcgccg..... 1  
G1a\_6235090\_x1.....gguucgauucccgcgAccgg..... 1  
Gi5\_8950064\_x1.....gguuGgauucccgcgcc..... 1  
Gi1\_4240262\_x1.....uucgauuccGggcgcccgg..... 1  
Gi5\_9125988\_x1.....guCcgauucccgcgcccggag..... 1  
Gi3\_28392848\_x1.....gguucgauucccgcgccggagcUu..... 1  
Gi1\_4301381\_x1.....guucgauucccgcgccggaCc..... 1  
Gi1\_4359562\_x1.....caCcagauccggguucgauucccggc..... 1  
Gi2\_11129664\_x1.....ggguucgauucccgcgAcgga..... 1  
G1a\_6114946\_x1.....guucgauucccgcgccgA..... 1  
Gi1\_4165188\_x1.cucaccaacaAauccgg..... 1  
Gi2\_11000175\_x1.....gguucUauucccgcgcccggag..... 1  
Gi5\_8973379\_x1.....ucgauucccgcgAcggagc..... 1

|                                                      |   |
|------------------------------------------------------|---|
| Gi3_28475828_x1.....cagauccggguucgCuuccc.....        | 1 |
| Gi5_8848803_x1.....guGcgauucccgcgccggag.....         | 1 |
| Gi2_11231128_x1.....agaucggguucgauucccgcgccggag..... | 0 |
| Gi5_8970092_x1.....uucgauucccgcgccgUgg.....          | 1 |
| Gi2_11275391_x1.....ucgauucccgcgccggagA.....         | 1 |
| Gi2_11061990_x1.....ucgauuccNggcgccgga.....          | 1 |
| Gi5_9135537_x1.ucacccGacagauccggguu.....             | 1 |
| Gi2_11366978_x1.....ucgauAcccgcgccggagc.....         | 1 |
| G1a_6320710_x1.....guAcgauucccgcgccgg.....           | 1 |
| Gi1_4382342_x1.....agauccggguucgauCccc.....          | 1 |
| Gi5_9062397_x1.....ucgauucccgUgcccggag.....          | 1 |
| Gi5_8952778_x1.....gguucgauucccgcgccUgag.....        | 1 |
| Gi2_11319370_x1.....ucgGuucccgcgccggag.....          | 1 |
| Gi3_28795804_x1cucGcccaacagauccgg.....               | 1 |
| Gi5_9026658_x1.....aGagauccggguucgauucccgcgcc.....   | 1 |
| G1a_6176978_x1.....gguucgauCcccgcgccgga.....         | 1 |
| G1a_6274430_x1.....gguucgCuucccgcgccggagc.....       | 1 |
| Gi5_9067315_x1.....ccaacagauccgAguuc.....            | 1 |
| Gi1_4327164_x1.....aucggguucgauucccgcgccggU.....     | 1 |
| Gi5_9051218_x1.ucacccaacaAauccggguu.....             | 1 |
| Gi2_11037821_x1.....uucAauucccgcgccggag.....         | 1 |
| Gi2_11045741_x1.....guucgauucccgcgccgAa.....         | 1 |
| Gi1_4365740_x1.....ucgUuucccgcgccggagc.....          | 1 |
| Gi4_612542_x1.....gauucccgcgccggagc.....             | 0 |
| Gi5_8837373_x1.....Nuucgauucccgcgccg.....            | 1 |
| Gi3_28872991_x1.....guucgauucccgcgUccgga.....        | 1 |
| Gi5_9056183_x1..accaacagauccggguucgauCcc.....        | 1 |
| Gi2_11133986_x1.....cggguucgauucccAgcgccgga.....     | 1 |
| Gi3_28428151_x1.....guucgauucccgCcgccgga.....        | 1 |
| Gi5_8977529_x1.....gguucgauUccggcgcc.....            | 1 |
| Gi3_28524515_x1.....uccggguucUauucccgcgccgga.....    | 1 |
| Gi1_4162336_x1.....uccggguucgauucccgcgccgg.....      | 0 |
| Gi2_11246227_x1.....gguNcgauucccgcgccg.....          | 1 |
| Gi3_28339293_x1.ucacccUacagauccggguuc.....           | 1 |
| Gi1_4371333_x1.....uucgauuccUggcgccggagc.....        | 1 |
| Gi4_598390_x1.....gguucgauucccgGgcccgg.....          | 1 |
| Gi5_9112221_x1.....gguucgauucccgcgccggCgcggu.....    | 1 |
| Gi2_11066010_x1.....uucgauucccgcgAcggagc.....        | 1 |
| Gi1_4191855_x1Gucacccaacagauccggguucgauucc.....      | 1 |
| Gi3_28680340_x1.....Nuucgauucccgcgccg.....           | 1 |
| Gi5_9129461_x1.....gguucgauucccgCcgcccgg.....        | 1 |
| Gi5_8843127_x1.....Ucagauccggguucgauucccgcgcc.....   | 1 |
| Gi3_28652401_x1.....ucgauucccgcgccggagA.....         | 1 |
| Gi2_10996523_x1.....gguucgauucccCgcccgg.....         | 1 |
| Gi1_4271575_x1.....gAuucgauucccgcgccggag.....        | 1 |
| Gi5_8892905_x1.....agauccggguucgaCuucc.....          | 1 |
| Gi5_9070968_x1.....ucgaCuucccgcgccggagc.....         | 1 |

|                                                       |   |
|-------------------------------------------------------|---|
| Gi5_8895369_x1.....gauucccgcgAggagc.....              | 1 |
| Gi3_28467228_x1.....gguucgauucccgCcgccggag.....       | 1 |
| Gi2_11273501_x1.....gguucgauucccgCcgccggag.....       | 1 |
| Gi4_574948_x1.....gguucgauCcccgcgccggagc.....         | 1 |
| Gi1_4389669_x1.....gguucUauucccgcgccgg.....           | 1 |
| Gi3_28778243_x1....cccaacagaucUggguucgauucc.....      | 1 |
| Gi3_28336947_x1.....guucgauucccgcgccgAag.....         | 1 |
| Gi1_4272720_x1.....gCuucgauucccgcgccg.....            | 1 |
| Gi2_11248818_x1.....aacUgaucggguucgauucccgcgccg.....  | 1 |
| Gi3_28381888_x1.....ucgauucccUgcgccggagc.....         | 1 |
| Gi1_4234834_x1.....aucggguucgauucccgcgUgga.....       | 1 |
| Gi3_28712821_x1.....guucgauucccCcgccg.....            | 1 |
| Gi2_11189622_x1.....uucgauucccgcgUcgg.....            | 1 |
| Gi2_11268373_x1.....ucgauucccgcgccggaAc.....          | 1 |
| Gi2_11180185_x1...Gccaacagauccggguuc.....             | 1 |
| Gi5_9122369_x1.ucaccaacagauccgCguu.....               | 1 |
| Gi1_4271800_x1cucaccaacUgaucgg.....                   | 1 |
| Gi4_604592_x1.....gguucgauUccggcgccgg.....            | 1 |
| Gi3_28676654_x1...cGcaacagauccggguucgauucc.....       | 1 |
| Gi5_8885001_x1.....Uuucgauucccgcgccggagcguu.....      | 1 |
| Gi3_28294130_x1.....guucgauucccgcgccgCag.....         | 1 |
| Gi5_8913613_x1...caccgaGcagauccggguucga.....          | 1 |
| Gi5_8866384_x1.....ucgauucccgcgccggC.....             | 1 |
| Gi3_28447617_x1.....uucgauucccgAcgcccga.....          | 1 |
| Gi3_28686517_x1cucaccaacagauccUg.....                 | 1 |
| Gi1_4214623_x1.....cgauucccgcgccggagcguuuc.....       | 0 |
| Gi2_11154278_x1.....gguucgauAccggcgccg.....           | 1 |
| Gi5_8902008_x1.ucacUcaacagauccggguu.....              | 1 |
| Gi3_28821354_x1.....cggguucgauucccgcgccggagcA.....    | 1 |
| Gi1_4301285_x1.....gguucgauUccggcgccggagc.....        | 1 |
| Gi2_11077824_x1.....aUcagauccggguucgauucccgcgccg..... | 1 |
| Gi2_11396827_x1.....guucgauucccCcgccggag.....         | 1 |
| Gi5_8997089_x1.....ccggguucgGuucccgcgccgga.....       | 1 |
| Gi5_8873427_x1cucaccaacagauccUg.....                  | 1 |
| Gi3_28459116_x1.....uucNauucccgcgccgga.....           | 1 |
| Gi5_8925876_x1.....gguucgauucccgcgccgGggagc.....      | 1 |
| Gi3_28446139_x1.....Uggguucgauucccgcgccggagc.....     | 1 |
| Gi4_579019_x1.....gGucgauucccgcgccggagc.....          | 1 |
| Gi1a_6250668_x1.....guucgauucccgUgcccg.....           | 1 |
| Gi3_28881241_x1.....gauucccgcgccggagG.....            | 1 |
| Gi1_4175616_x1.....gguCcgauucccgcgccgga.....          | 1 |
| Gi1_4159385_x1.....aGccggguucgauucccgcgccgga.....     | 1 |
| Gi3_28481643_x1.....Cccggguucgauucccgcgccgga.....     | 1 |
| Gi5_9045279_x1.....gAuucgauucccgcgccggagcguuu.....    | 1 |
| Gi3_28538480_x1.....gguucgauucccgcgCc.....            | 1 |
| Gi3_28644290_x1.....gggGucgauucccgcgccgga.....        | 1 |
| Gi2_11308489_x1.....cgUuucccgcgccggagcguuuc.....      | 1 |

|                                                          |   |
|----------------------------------------------------------|---|
| Gi2_11039943_x1.....guucgauucccUgcgccg.....              | 1 |
| Gi2_11154360_x1.....Ggauucccggcgcggagcguuuc.....         | 1 |
| Gl1a_5986143_x1.....gCuucgauucccgcgcc.....               | 1 |
| Gl1a_6321473_x1.....uucgauucccgAgcgggagc.....            | 1 |
| Gi1_4240077_x1.....cagaucgNguucgauucccgcgcc.....         | 1 |
| Gi2_11130540_x1.....ucgauucccgAcgccgga.....              | 1 |
| Gi3_28586589_x1.....uccggguucgauucccggcgcggagc.....      | 0 |
| Gi5_9103529_x1.....guucgauucGcggcgccgg.....              | 1 |
| Gi1_4241493_x1.....aucggguCcgauucccgcgccgg.....          | 1 |
| Gl1a_6104029_x1.....gguucgauucccCgcgcgggagc.....         | 1 |
| Gi5_9017302_x1.....Ucggguucgauucccgcgccgga.....          | 1 |
| Gi1_4175261_x1.....gguucgauucccggcgcgAag.....            | 1 |
| Gi2_11241331_x1.....auucccggcgcggagcC.....               | 1 |
| Gi5_9101242_x1.....uccggguucgauuccUggc.....              | 1 |
| Gi3_28319896_x1Gucacccaacagaucggguucgauucc.....          | 1 |
| Gl1a_6186067_x1.....gguuAgauucccggcgcggagc.....          | 1 |
| Gi3_28448279_x1.....guucCauucccggcgcggag.....            | 1 |
| Gi3_28683435_x1.....acagaucggguucgauCcccggcgccggagc..... | 1 |
| Gi1_4368857_x1.....ggNucgauucccggcgcgg.....              | 1 |
| Gi2_11056791_x1.....agaucggAuucgauucc.....               | 1 |
| Gi4_609748_x1.....gguucgauucccggcgcggagcCu.....          | 1 |
| Gi2_11294708_x1Ccacccaacagaucgg.....                     | 1 |
| Gi3_28439530_x1.....uccggguucgauCcccgggcggga.....        | 1 |
| Gi2_11383158_x1.....guucgauucccggcgcgUa.....             | 1 |
| Gi2_11016792_x1.....cagaucggguucgauucc.....              | 0 |
| Gi3_28970858_x1.....ucgauucccggcgcUgga.....              | 1 |
| Gi2_11295088_x1.....gguNcgauucccggcgcggga.....           | 1 |
| Gi1_4295070_x1.....caacagaucggguucgauuccUggc.....        | 1 |
| Gi3_28361274_x1.....agaucggguucgauucUc.....              | 1 |
| Gi2_11365551_x1.....gauuccUggcgccggagc.....              | 1 |
| Gi5_9011185_x1.....ucgauCcccggcgccggagc.....             | 1 |
| Gi3_28723782_x1.....Aggguucgauucccggcgcggga.....         | 1 |
| Gi5_8884316_x1.....cggguucgauucccgUgc.....               | 1 |
| Gi3_28914915_x1.....cggguucgauucccggcAccgga.....         | 1 |
| Gi2_11289243_x1.....gguucgauucccgCcgcc.....              | 1 |
| Gl1a_6154963_x1.....uuUgauucccggcgcggagc.....            | 1 |
| Gi3_28607845_x1.....cggNucgauucccggcgcggga.....          | 1 |
| Gi1_4222424_x1.....guucgauuccAggcgcggagc.....            | 1 |
| Gi2_11082774_x1.....guuGgauucccggcgcggag.....            | 1 |
| Gi4_567782_x1Gucacccaacagaucggguucg.....                 | 1 |
| Gi5_8942041_x1.....acagGuccggguucgauucccggcg.....        | 1 |
| Gi5_9097109_x1.....aUagaucggguucgauucccggcg.....         | 1 |
| Gi3_28883816_x1.....gguucgauucccgNgccggagc.....          | 1 |
| Gi2_11151932_x1.....uccggguucgauuccUggcgccgga.....       | 1 |
| Gi2_11321425_x1.....agaucggguucUauucc.....               | 1 |
| Gi3_28350522_x1.....agaucggguucUauucccggcgcgg.....       | 1 |
| Gi4_572457_x1.....gguucgCuucccggcgcgg.....               | 1 |

|                                                        |   |
|--------------------------------------------------------|---|
| Gi3_28353381_x1.....uccggguucgauucccggcUccgga.....     | 1 |
| Gi3_28917137_x1.....ucgauucGcggcgccggagc.....          | 1 |
| Gi1_4332510_x1.....gguucgaGucccgcgccgga.....           | 1 |
| Gi2_11222279_x1.....gauUccggcgccggagc.....             | 1 |
| Gi2_11107148_x1.....aacagaucggguuAgaucuccggcgccg.....  | 1 |
| Gi3_28480317_x1.....uucgauucccgAcgccgg.....            | 1 |
| Gi5_9001980_x1.....guucgauGcccgcgccg.....              | 1 |
| Gi2_11282668_x1.....uccgggAucgauucccggcgcccga.....     | 1 |
| Gi4_593486_x1.....Cguucgauucccggcgcccg.....            | 1 |
| Gi5_8901041_x1.....gguucgauucccggcgcccGag.....         | 1 |
| Gi3_28425353_x1.....caacagaucgggCucgauuccc.....        | 1 |
| Gi3_28399980_x1.....guucgauucccCgcgcccggag.....        | 1 |
| Gi3_28897627_x1.....cagaucUggguucgauuccc.....          | 1 |
| Gi3_28348367_x1.....gguucgaAucccggcgcc.....            | 1 |
| Gi2_11013948_x1.....guucgauGcccgcgcccga.....           | 1 |
| Gi2_11405600_x1.....cggguucgauucccggcgcccG.....        | 1 |
| Gi5_8873261_x1cucaUccaacagaucgg.....                   | 1 |
| Gi5_9120349_x1.....ucgauAcccgcgcccggagc.....           | 1 |
| Gi2_11333413_x1.....guucgaAucccggcgcccga.....          | 1 |
| Gi5_8890193_x1.....guucgauucccggcgcccGg.....           | 1 |
| Gi1_4217158_x1cucaccaacagaucggguucAa.....              | 1 |
| Gi3_28943427_x1.....caacagaucUggguucgauuccc.....       | 1 |
| Gi2_11331612_x1.....uucAauucccggcgcccg.....            | 1 |
| Gi2_11314643_x1.....uucgauucccggcgcccGg.....           | 1 |
| Gi3_28806175_x1.....ggguucgGuucccggcgcccga.....        | 1 |
| Gi2_11038569_x1.....gguucgauucccggcgcccUa.....         | 1 |
| Gi3_28585848_x1.....Uuccggguucgauucccggcgcccga.....    | 1 |
| Gi3_28813952_x1.....ucgGuucccggcgcccggag.....          | 1 |
| Gi3_28489861_x1.....agaucggguuAgaucuccggcgcccggag..... | 1 |
| Gi3_28332252_x1.....aCaucggguucgauucccggcgcccggag..... | 1 |
| Gi3_28446037_x1.....cccaacagGuccggguucgauuccc.....     | 1 |
| Gi3_28369938_x1.....gaucUggguucgauuccc.....            | 1 |
| Gi3_28547069_x1.....gauucccUgcgcccggagc.....           | 1 |
| Gi3_28435967_x1.....caacagaucgggGucga.....             | 1 |
| Gi3_28271680_x1.....gguucgauucccgGgcc.....             | 1 |
| Gi3_28987072_x1.....aaUagaucggguucgauucc.....          | 1 |
| Gi5_8965334_x1.....gguucgauUccggcgcccggagcguu.....     | 1 |
| Gi3_28897993_x1.....gaGccggguucgauuccc.....            | 1 |
| Gi5_9076870_x1.....uucgauucccggcgcccC.....             | 1 |
| Gi5_8857640_x1.....gguucgUuucccggcgcccggag.....        | 1 |
| Gi3_28502031_x1.....ucgauucccggcgcccGg.....            | 1 |
| Gi5_8937867_x1.....guucCauucccggcgcccggag.....         | 1 |
| Gi3_28584321_x1.....agaucggguucgauucccggcgcccGg.....   | 1 |
| Gi1_4364029_x1cucaccaacagaucggguucgauuUc.....          | 1 |
| Gi2_11168535_x1.....uucgauucccggcgcccUga.....          | 1 |
| Gi1_4278672_x1.....caGcagaucggguucgauucccggc.....      | 1 |
| Gi1_4324906_x1.....cagaucggguucgCuucccggcgcc.....      | 1 |

|                                                        |   |
|--------------------------------------------------------|---|
| Gl1_6152621_x1.....Cguucgauucccgcgccgg.....            | 1 |
| Gi1_4221503_x1.....agauccggguucgauucccgcgccggagc.....  | 0 |
| Gi2_11261593_x1.....cagaucggguucgauucccgcgccggagc..... | 0 |
| Gi3_28328436_x1..cGcccaacagauccggguuc.....             | 1 |
| Gi3_28449308_x1.....uucgaCucccgggcgcggga.....          | 1 |
| Gl1_6005304_x1.....uucgauuccUggcgccggagc.....          | 1 |
| Gi3_28712356_x1.....guucgauuccGggcgccggag.....         | 1 |
| Gi2_11319089_x1.....gguucgauucccCgcgccggag.....        | 1 |
| Gi1_4313092_x1.....gguucgauucccAgcgcggag.....          | 1 |
| Gi3_28890204_x1.....ucAgggguucgauucccgcgccggga.....    | 1 |
| Gi2_11288815_x1.....gguAcgauucccgcgcc.....             | 1 |
| Gi3_28572390_x1.....gguucgauAcccgcgccgg.....           | 1 |
| Gi2_11397560_x1.....guucgauucccgcgGcgga.....           | 1 |
| Gi1_4201107_x1.....guucgauuccUggcgccggagc.....         | 1 |
| Gi1_4186633_x1.uGaccaacagauccgggu.....                 | 1 |
| Gi1_4159395_x1.....guuNgauucccgcgccggagc.....          | 1 |
| Gi3_28501653_x1.....cUacagauccggguucga.....            | 1 |
| Gi3_28759870_x1.....agauccggguucgauuccU.....           | 1 |
| Gi1_4225088_x1.....gguucgauucccgAgccg.....             | 1 |
| Gi3_28362273_x1.cucaGcccaacagauccgg.....               | 1 |
| Gl1_6355749_x1.....guucgauAcccgcgccggagc.....          | 1 |
| Gi2_11199524_x1.....Gggguucgauucccgcgccggga.....       | 1 |
| Gi1_4323896_x1.....auccggAuucgauucccgcgccgg.....       | 1 |
| Gi2_11133795_x1.....gauucAcggcgccggagc.....            | 1 |
| Gi3_28662191_x1.....acagauccggguucgauuccgUcgccgg.....  | 1 |
| Gi5_9103469_x1.....aCauccggguucgauucc.....             | 1 |
| Gi3_28439206_x1.....cagaucggguucgauuGcc.....           | 1 |
| Gi5_8933169_x1..caccGacagauccggguucga.....             | 1 |
| Gl1_6220951_x1.....uAcgauucccgcgccggagc.....           | 1 |
| Gi1_4364403_x1.ucUcccaacagauccgggu.....                | 1 |
| Gi4_574850_x1.....guucgGuucccgcgccggga.....            | 1 |
| Gi1_4336294_x1.....gguuAgauucccgcgccggag.....          | 1 |
| Gi3_28426142_x1.....uccggguucgCuucccgcgccggga.....     | 1 |
| Gi2_11358108_x1.....agauccggguucgGuucc.....            | 1 |
| Gi2_11210225_x1.....ucAauucccgcgccggagc.....           | 1 |
| Gi3_28868060_x1.....cagaGccggguucgauucc.....           | 1 |
| Gl1_6201313_x1.....uucgauucccgcgccggCgc.....           | 1 |
| Gi3_28284791_x1.....gauccgAguucgauucc.....             | 1 |
| Gi3_28659909_x1.....uucgauucNcgcgccgg.....             | 1 |
| Gi5_9017239_x1.....guucUauucccgcgccggagcguuucc.....    | 1 |
| Gi3_28519252_x1.cucacccaNcagauccggguucgau.....         | 1 |
| Gi3_28529026_x1.....guucgauGcccggcgccggga.....         | 1 |
| Gi3_28494870_x1.....ggguucgauucccgcgccggGgc.....       | 1 |
| Gi2_11384950_x1.....agaCccggguucgauucc.....            | 1 |
| Gi1_4331175_x1.....gguucgauucccgcgccUga.....           | 1 |
| Gi5_8887625_x1.....caacagauccgggCucgauucccgcgccg.....  | 1 |
| Gi5_8877325_x1.....guucgUuucccgcgccggagc.....          | 1 |

|                                                       |   |
|-------------------------------------------------------|---|
| Gi5_9128815_x1.....guucgauucccgAgccggagc.....         | 1 |
| Gi1_4249212_x1.....gguucgaCucccgcgccggag.....         | 1 |
| Gi3_28473247_x1.....uUcggguucgauucccgcgccg.....       | 1 |
| Gi3_28714050_x1.....cagauccggguucgaCucccgcgccgg.....  | 1 |
| Gi2_11386665_x1.....ucgauucccgGgcccga.....            | 1 |
| Gi5_8925769_x1.....guucgaAucccgcgccggagcguuu.....     | 1 |
| Gi1_4376981_x1.....uucgGuucccgcgccggagc.....          | 1 |
| Gi2_11311669_x1.....gauucccgcgGggagc.....             | 1 |
| Gi1_4339970_x1.....guucgauucccgcgccAgagc.....         | 1 |
| Gi1_4158953_x1.....gguucgGuucccgcgccg.....            | 1 |
| Gi5_8888853_x1.....guucgauucccgcgGcggagc.....         | 1 |
| Gi5_8940077_x1.....uucgauucccgcgccggagc.....          | 0 |
| Gi5_9000256_x1.....cgauucccgcgccggagcguu.....         | 0 |
| Gi2_11325663_x1.....uGcggguucgauucccgcgccggagc.....   | 1 |
| Gi1_4248954_x1.ucaccUacagauccgggu.....                | 1 |
| Gi3_28940951_x1.....uccggguucgauuccAgcgccggagc.....   | 1 |
| Gi2_11368171_x1.....gguucgauAucccgcgccggag.....       | 1 |
| Gi2_11302589_x1.....cggguucgauuccAgcgccggagc.....     | 1 |
| Gi3_28643184_x1.....uucgauucccgcgGcggagc.....         | 1 |
| Gi5_9104398_x1.cUccaacagauccggguucga.....             | 1 |
| Gi5_9019263_x1.....gguucgauuccUcggcgccggagc.....      | 1 |
| Gi1_4264589_x1.....ucgauucccgUgcccggagc.....          | 1 |
| Gi5_9011958_x1.....aacagauccggguucgauucccgcgccgg..... | 0 |
| Gi1_4191986_x1.....aCccggguucgauucccgcgccgg.....      | 1 |
| Gi2_11291518_x1.cucacccaacagauccgC.....               | 1 |
| Gi3_28714124_x1..caccacagauccgAguuc.....              | 1 |
| Gi3_28603845_x1.....uccggguucgauucccgccg.....         | 0 |
| Gi3_28580361_x1.....ucgauucccgcgccggagcA.....         | 1 |
| Gi4_598994_x1.....gguucgauucccgUgcccgg.....           | 1 |
| Gi2_11000590_x1.....gauuAccggcgccggagc.....           | 1 |
| Gi5_9124832_x1.....gguucgauucccgGgcccggagc.....       | 1 |
| Gi1_4201748_x1.....uucgauucccgcgccggagcA.....         | 1 |
| Gi1a_6053965_x1.....gguucgGuucccgcgccgg.....          | 1 |
| Gi5_9133714_x1.....ucgauucccgUgcccggagc.....          | 1 |
| Gi3_28910686_x1.....Auccggguucgauucccgcgccggag.....   | 1 |
| Gi4_595660_x1.cucacccaacagauccggguucA.....            | 1 |
| Gi5_8970024_x1.....acagauccggguucgauucccgAgc.....     | 1 |
| Gi5_9051916_x1.....guNcgauucccgcgccggagc.....         | 1 |
| Gi4_569927_x1.....gguucgauucccgcgccggagcA.....        | 1 |
| Gi3_28792058_x1.....guucgaAucccgcgccg.....            | 1 |
| Gi2_11237360_x1.....gguucgauGccggcgccggag.....        | 1 |
| Gi1a_6096632_x1.....Uuucgauucccgcgccggag.....         | 1 |
| Gi4_589114_x1.....gguucgauucccgcgccggagAc.....        | 1 |
| Gi5_9053569_x1.....guNcgauucccgcgccg.....             | 1 |
| Gi3_28630680_x1.....guucgauucccgcgccgUagc.....        | 1 |
| Gi1_4324529_x1.....gguucAauucccgcgccggagc.....        | 1 |
| Gi3_28846220_x1.....ggguucgaNuucccgcgccggagc.....     | 1 |



Gi3\_28529579\_x1.....uucgauuAccggcgccggagc..... 1  
Gi1\_4225951\_x1.ucacAcaacagauccgggu..... 1  
Gi3\_28527212\_x1.....gguucCauucccgcgcc..... 1  
Gi1\_4215116\_x1.....gguucgauucccgGgcccga..... 1  
Gi3\_28509361\_x1.....gCucgauucccgcgccggagcg..... 1  
Gi5\_9110155\_x1.....gguucgauucUcggcgccggag..... 1  
G1a\_6286866\_x1.....Cguucgauucccgcgccg..... 1  
Gi3\_28555333\_x1.....ucgauucccgcgccgggaC..... 1  
Gi3\_28783069\_x1.....ucgauucccggcUccggagc..... 1  
Gi1\_4365183\_x1cucacccaacagauccggguucgauU..... 1  
Gi3\_28795788\_x1.....gaAuucccgcgccggagc..... 1  
Gi2\_11372011\_x1.....cgauucccgUgcccggagcguu..... 1  
Gi5\_8909169\_x1.....gauucccgcgccgAagc..... 1  
Gi2\_11103065\_x1....cccaacagauccggguGc..... 1  
Gi3\_28427369\_x1.ucacccaacagGuccggguuc..... 1  
Gi3\_28376183\_x1.....gguucgUuucccgcgccgg..... 1  
Gi3\_28376579\_x1.....guucgauUccggcgccg..... 1  
Gi3\_28335349\_x1.....acagauccNggauucgauucccgcgccgga..... 1  
Gi3\_28378752\_x1.....gauccggguucgauuccA..... 1  
Gi3\_28684600\_x1.....uucgauuUccggcgccgg..... 1  
Gi1\_4202196\_x1.....cgauucccgcgccggag..... 0  
Gi2\_11226528\_x1.....agGuccggguucgauucc..... 1  
Gi4\_585429\_x1.....Aguucgauucccgcgccgg..... 1  
Gi3\_28311070\_x1.....ucgauucccgcgcgUggag..... 1  
G1a\_6327152\_x1.....gguucgauuccUggcgccgga..... 1  
Gi2\_11022829\_x1....cccaCcagauccggguuc..... 1  
Gi5\_9097006\_x1.....gguucgUuucccgcgccgga..... 1  
Gi3\_28420422\_x1.....agauccggguucgauucccgcgccggaA..... 1  
Gi5\_9129558\_x1.....gguucgaGucccgcgccgga..... 1  
Gi3\_28419933\_x1.....agauccggNuucgauucc..... 1  
Gi3\_28381752\_x1.....ucgauucccgAgcccggag..... 1  
Gi4\_592725\_x1.....guucgauucGcggcgccggagc..... 1  
G1a\_6024901\_x1.....gguucgauuAccggcgccggag..... 1  
G1a\_6126895\_x1.....guucgauuNccggcgccgg..... 1  
Gi2\_11377995\_x1.....guucgauuccGggcgccg..... 1  
Gi3\_28282524\_x1.uUacccaacagauccggguuc..... 1  
Gi2\_11361035\_x1.....guucgauuGccggcgccg..... 1  
Gi1\_4277007\_x1.....guucgauucccggcUccgg..... 1  
Gi1\_4316704\_x1.....gguucgauucccgcgccgUag..... 1  
Gi5\_9001791\_x1.....cUauucccgcgccggagcguuucc..... 1  
Gi2\_11135237\_x1.....guucgauuccUggcgccg..... 1  
Gi2\_11121073\_x1.....gguucgauucccgAcgcc..... 1  
Gi5\_8841715\_x1....Accaacagauccggguucgauucc..... 1  
Gi5\_8921644\_x1.....guucgauucccgcgccUggag..... 1  
G1a\_6212261\_x1.....guucgauucccgcgAcg..... 1  
Gi2\_11051947\_x1....cccaacaUauccggguuc..... 1  
Gi5\_8920249\_x1.....gguucgauucccgCccggagc..... 1

Gi1\_4311669\_x1.....gguucgauuccAggcgccg..... 1  
Gi5\_9047258\_x1.....gguucgauucccgAcgccggagcgu..... 1  
Gi1\_4264243\_x1.....uccggguucgauuccAgcgcgccga..... 1  
Gi3\_28467549\_x1.....gguucgUuuccggcgccg..... 1  
Gi3\_28782586\_x1.....guucgaAuuccggcgccggag..... 1  
Gi2\_11114347\_x1.....cAuucccgcgccggagcguu..... 1  
Gi3\_28901503\_x1.....caacagauccggguCcga..... 1  
Gi3\_28618792\_x1.....gguucgauucAcggcgcc..... 1  
Gi5\_8940859\_x1.....gaGuuccggcgccggagc..... 1  
G1a\_6044083\_x1.....guucAauucccgcgccggag..... 1  
Gi3\_28269762\_x1..caccacaacagauccgggGuc..... 1  
Gi3\_28872324\_x1.....ucUggguucgauuccggcgccgga..... 1  
Gi1\_4312696\_x1.....uucccgcgccggagcgA..... 1  
Gi5\_8974423\_x1..caccacaacagauccgggAucga..... 1  
Gi1\_4185539\_x1.....gauuccggcgccggagU..... 1  
Gi3\_28846649\_x1.....cgauuccggcgccggagcgC..... 1  
Gi5\_8953659\_x1.....guucgauuccUgcgccgga..... 1  
Gi5\_8834769\_x1..aGccaacagauccggguucgauucc..... 1  
Gi2\_11000963\_x1.....guucgauGccggcgccggagc..... 1  
Gi3\_28495574\_x1.....agauGcggguucgauucc..... 1  
Gi3\_28646600\_x1.....uucgauAcccgcgccgga..... 1  
Gi1\_4175368\_x1.....gguucgauucccggcAccggag..... 1  
Gi5\_9118019\_x1.....uccggguucgauucccgA..... 1  
Gi4\_568672\_x1.....gUuucgauucccgcgccgga..... 1  
Gi1\_4199628\_x1.....guucgauuccggcgccCgagc..... 1  
Gi3\_28368155\_x1.....ggNucgauucccgcgccgga..... 1  
Gi1\_4323736\_x1.....cgauuccggcgccggagcguuA..... 1  
Gi1\_4274502\_x1.....caacUgauccggguucgauucccggc..... 1  
Gi4\_589084\_x1.....gguucgauucccggcAccgg..... 1  
Gi3\_28923520\_x1.....cAuucccgcgccggag..... 1  
Gi5\_8956080\_x1.....gguucgauucccggcCccgga..... 1  
Gi1\_4289002\_x1cucacccaacagaucGgg..... 1  
Gi5\_8964200\_x1.....ggNucgauuccggcgccg..... 1  
G1a\_6158177\_x1.....gguucgauucccgcgccAgga..... 1  
Gi1\_4351216\_x1.....gguAcgauucccgcgccggagc..... 1  
Gi1\_4229021\_x1.....ucgauucccgcgccggGgc..... 1  
Gi4\_595029\_x1.....guucgauucccgcgAcgg..... 1  
Gi4\_586628\_x1 cucacccaacagGuccggguucg..... 1  
Gi1\_4253110\_x1.....guucAauuccggcgccggagc..... 1  
Gi2\_11373735\_x1.....Acgauuccggcgccggag..... 1  
Gi1\_4315660\_x1.....cUggguucgauuccggcgccg..... 1  
Gi1\_4269826\_x1..cGccaacagauccggguucgauucc..... 1  
Gi3\_28297674\_x1.....guNcgauuccggcgccg..... 1  
Gi1\_4214366\_x1.....gguucgauuAccggcgccggag..... 1  
Gi5\_8891075\_x1cucacccaaAagauccgg..... 1  
Gi3\_28874542\_x1.....gguucgauucAcggcgccg..... 1  
Gi1\_4388420\_x1.....gguucgaAuuccggcgccg..... 1

Gi3\_28716628\_x1.....uucgauuucccgccUgagc..... 1  
Gi3\_28868449\_x1.....aucgggCucgauuuccggcgccgga..... 1  
Gi2\_11031774\_x1.....cAauucccgccgagcguuuc..... 1  
Gi3\_28318453\_x1.....gguNcgauuuccggcgccg..... 1  
Gi2\_11295613\_x1.....guuGgauuuccggcgccgagc..... 1  
Gi2\_11350215\_x1.....gguucgauuuccggUgcccggagcguu..... 1  
Gi5\_9030840\_x1.....gauuucccgccgagA..... 1  
Gi1\_4179217\_x1.....agauccggguCcgauucc..... 1  
Gi5\_8959505\_x1.....guucgauuuccggcgGgga..... 1  
Gi3\_28742968\_x1....cccNacagauccggguucgauucc..... 1  
Gi5\_8988260\_x1.ucacccaNagauccggguu..... 1  
G1a\_6130507\_x1.....gguucgauuuccggcAccg..... 1  
Gi2\_11311502\_x1.....uccggguucgCuuccggcgccgga..... 1  
Gi3\_28605773\_x1.....gguGcgauuuccggcgccgag..... 1  
Gi2\_11024176\_x1.....ggguucgauuuccggUgcc..... 1  
Gi5\_8915546\_x1.....gguucgUuuccggcgccgagc..... 1  
Gi3\_28573501\_x1.ucacccaGcagauccggguuc..... 1  
Gi1\_4261801\_x1.....guucgauuuccggAgccggagc..... 1  
Gi5\_8877020\_x1.....uucgauuuccggcgccgagcA..... 1  
Gi5\_8843088\_x1.....Agguucgauuuccggcgccg..... 1  
Gi3\_28403797\_x1.....agauccggguucgauGc..... 1  
Gi5\_8949105\_x1.....gguucgauuuccggcgccgGcgguuu..... 1  
Gi5\_8884712\_x1.....uucgauuAccggcgccg..... 1  
Gi3\_28335134\_x1.....caacagGuccggguucga..... 1  
G1a\_6024655\_x1.....guucgauuuccggcgccgC..... 1  
Gi5\_9020591\_x1.....acagauccgAguucgauuuccggcg..... 1  
Gi3\_28323193\_x1.....Cauccggguucgauucc..... 1  
Gi2\_11157678\_x1.....gguucgauuuccgUcgccgag..... 1  
Gi1\_4194882\_x1.....uGcggguucgauuuccggcgccgga..... 1  
Gi3\_28438328\_x1.....ucgauuuccggcgccgagc..... 1  
Gi2\_11282194\_x1.....uucgauuuccggcgccgag..... 1  
Gi5\_8863732\_x1.....gguucgauuuccggcgccgagcguC..... 1  
Gi5\_8975422\_x1.....guucgaCuccggcgccgagcguu..... 1  
Gi1\_4308261\_x1.....gguucgauuuccAgcgccg..... 1  
Gi3\_28411947\_x1.....cggguucgauuuccggcgccgCa..... 1  
G1a\_6305575\_x1.....guucgauuuccgCcgccg..... 1  
Gi5\_9012390\_x1.....gguucgauuuccggcgUggagcguu..... 1  
Gi5\_8965890\_x1.....Agauuuccggcgccgagcguuuc..... 1  
Gi5\_9114512\_x1.....gguucgauuuccggcgccgagcguu..... 1  
Gi4\_604906\_x1.....guucgauuuccAgcgccg..... 1  
Gi5\_9003046\_x1.....guucgauuuccggcgccUga..... 1  
Gi4\_609235\_x1.....Gcgauuuccggcgccgagc..... 1  
Gi4\_612632\_x1.....gGuucgauuuccggcgccg..... 1  
Gi3\_28418808\_x1.....guucgauuuccGggcgccg..... 1  
Gi2\_11326604\_x1.....Nguucgauuuccggcgccg..... 1  
Gi5\_8934544\_x1.....guucgauCcccggcgccgag..... 1  
Gi2\_11234487\_x1.....ucgauuuccggcgccgUagc..... 1

Gi3\_28941279\_x1.....gguucgauucccgcgccgUag..... 1  
Gi5\_8880505\_x1.....ucgauucccgUgcccga..... 1  
Gi3\_28715958\_x1.....ggguCcgauucccgcgccggag..... 1  
Gi2\_11271529\_x1.....cagauccggguucgCuucccgcgccggag..... 1  
Gi5\_8861140\_x1.....uccggguucgauucccCgc..... 1  
Gi2\_11009016\_x1.....uGcgauucccgcgccggag..... 1  
Gi5\_9110145\_x1.....gguucgauuccAgcgcccgga..... 1  
Gi3\_28983925\_x1.....agauccggAuucgauucccgcgccggagc..... 1  
G1a\_6317276\_x1.....gguucgauucccgAgccg..... 1  
Gi2\_11381308\_x1.....guucgauucccgcgccU..... 1  
Gi3\_28670617\_x1....cccaacagauccggguuc..... 0  
Gi1\_4165399\_x1.....Nuucgauucccgcgccggagc..... 1  
Gi5\_8876818\_x1....cccaacagaucGggguuc..... 1  
Gi5\_8872269\_x1.....guucgauucccgcgUcgag..... 1  
Gi3\_28594514\_x1.....ggguucgauucccgcgccggG..... 1  
Gi3\_28557731\_x1.....cagauccggguucgaCuccc..... 1  
Gi5\_9050029\_x1.....gauccggguucgauucccgUgcccga..... 1  
Gi3\_28395763\_x1.....caacagaCccggguucga..... 1  
Gi1\_4247162\_x1.....gguucgauucccgAgccggag..... 1  
Gi3\_28534528\_x1.....aUagauccggguucgauu..... 1  
G1a\_6015802\_x1.....gguucgauucccgcgUcg..... 1  
Gi1\_4313075\_x1.....guucgauucccgAcg..... 1  
Gi2\_11284343\_x1.....ucgaAuucccgcgccggagc..... 1  
Gi3\_28951653\_x1.....agauccAgguucgauucc..... 1  
Gi3\_28912144\_x1.....auccggguuAgauucccgcgccgga..... 1  
Gi1\_4194051\_x1.....guGcgauucccgcgccg..... 1  
Gi5\_8990492\_x1.....gguCcgauucccgcgccggagcguu..... 1  
Gi1\_4242195\_x1.....ggguucgauucccgcgccgU..... 1  
Gi2\_11053413\_x1.....ggCucgauucccgcgccgg..... 1  
Gi5\_8840570\_x1.....guucgauucccgcgGcggag..... 1  
Gi3\_28943001\_x1.....auccggguucgauucccgAcggga..... 1  
Gi1\_4207462\_x1.....uucgauucccgcgccggagcCu..... 1  
Gi4\_594417\_x1 cucacccaacagauccggguUg..... 1  
Gi5\_8852998\_x1.....gguucAauucccgcgcc..... 1  
Gi5\_8899033\_x1.....uccggguuNgauuccggc..... 1  
G1a\_6239732\_x1.....gguucgauucccgcgccUgagc..... 1  
Gi4\_582858\_x1.....ggAucgauucccgcgccgg..... 1  
Gi5\_9045643\_x1.....agauccggguucgUuuccc..... 1  
Gi5\_8908215\_x1.....gguucgUuuucccgcgccg..... 1  
Gi5\_8862734\_x1.....guucgauucccgcgccAgag..... 1  
Gi1\_4369953\_x1.....gguucgauuccAgcgccggagc..... 1  
Gi3\_28434038\_x1cucacccaacagauccAg..... 1  
G1a\_6031264\_x1.....guucgauucccgcgAggagc..... 1  
Gi1\_4193613\_x1.....gguucgauucccgcgccgAagc..... 1  
Gi3\_28876879\_x1.....Aguucgauucccgcgccggagc..... 1  
Gi5\_8872509\_x1.....ggguucgCuucccgcgccggagc..... 1  
Gi3\_28469741\_x1.....Nguucgauucccgcgcc..... 1

|                 |                                      |   |
|-----------------|--------------------------------------|---|
| Gi1_4323888_x1  | .....gGucgauucccgcgccggag            | 1 |
| Gi5_8911690_x1  | .....caacagauccggguucgauucccgcgccgg  | 0 |
| Gi2_11403150_x1 | .....cgauucccgggcgccggagcguuC        | 1 |
| Gi5_8897780_x1  | .....gguuAgaaucccgcgcc               | 1 |
| Gi3_28593613_x1 | .....Ncgauucccgggcgccggagc           | 1 |
| Gi3_28615613_x1 | .....Ugauccggguucgauucccgcgccgg      | 1 |
| Gi1_4176742_x1  | .....aacagauccggguucgauucccgUgcccgg  | 1 |
| Gi5_9013166_x1  | .....Cgauccggguucgauuccc             | 1 |
| Gi1_4248429_x1  | .....guucgauuccGggcgccg              | 1 |
| Gi4_582552_x1   | .....gguCcgauucccgcgccgg             | 1 |
| Gi5_9086160_x1  | .....uucgauucccgcgccggagcAu          | 1 |
| Gi3_28737614_x1 | .....ucAauucccgggcgccgga             | 1 |
| Gi3_28725190_x1 | .....guucgauuGccggcgccg              | 1 |
| Gi2_11218470_x1 | .....ggguucgauucccgggcgccggagcgaA    | 1 |
| Gi5_9128802_x1  | .....gguucgauucccgCcgccgga           | 1 |
| Gi5_9131642_x1  | .....gguucgauucccgcgccggaA           | 1 |
| Gi2_11007588_x1 | .....guucgaGucccgggcgccggag          | 1 |
| Gi1_4172795_x1  | .....guucgUuucccgcgccg               | 1 |
| Gi3_28552848_x1 | .....guucgauucccgUccg                | 1 |
| Gi1_4290332_x1  | .....guucgauucccgcgccggaC            | 1 |
| Gi5_8952807_x1  | .....uucgauCcccggcgccgg              | 1 |
| Gi3_28467988_x1 | .....cgauucccgggcgccggagcguu         | 0 |
| Gi3_28555814_x1 | .....uucgauuUcggcgccggagc            | 1 |
| Gi3_28987564_x1 | .....gguucgauGcccggcgcc              | 1 |
| Gi5_8899476_x1  | .....gguucgauucccgcgUcg              | 1 |
| Gi1_4297345_x1  | .....uucgauucccgcgccggGgc            | 1 |
| Gi3_28838892_x1 | .....auccgAguucgauucccgggcgccgga     | 1 |
| Gi1_4186097_x1  | .....agauccggguucgaCuccc             | 1 |
| Gi1_4264100_x1  | .....aacagauccggguucgauuccAgcgccgg   | 1 |
| Gi3_28743439_x1 | .....acagauccggguucgauucccgcgccgAa   | 1 |
| Gi3_28366159_x1 | .....gauccggguucgauucccgggcgccggagcC | 1 |
| Gi2_11292939_x1 | .....guucgauuUccggcgccggag           | 1 |
| Gi3_28827616_x1 | .....agauccggguAcgauuccc             | 1 |
| Gi2_11264536_x1 | .....gauucccgggcgccgAagc             | 1 |
| Gi2_11351729_x1 | .....uccggguucgauucccgggcgUgga       | 1 |
| Gi2_11301148_x1 | .....uucAauucccgggcgccggagc          | 1 |
| Gi5_9030671_x1  | .....gguucgauucccgGgcc               | 1 |
| Gi1_4388547_x1  | .....Gacagauccggguucgauucccgcgccgg   | 1 |
| Gi3_28968230_x1 | ucacccaacCgauccggguuc                | 1 |
| Gi1_4202183_x1  | .....ucgauuccAgcgccggagc             | 1 |
| Gi4_598497_x1   | .....gguucgauucccgAcgcccgg           | 1 |
| Gi3_28756476_x1 | .....gguucgauucccgCcgcc              | 1 |
| Gi2_11144303_x1 | .....guucCauucccgggcgccggag          | 1 |
| Gi3_28608683_x1 | .....Cgguucgauucccgggcgccg           | 1 |
| Gi3_28975968_x1 | .....auccggguucAauuccggcgccgga       | 1 |
| Gi1_4338121_x1  | .....auccggguucGuucccgcgccgg         | 1 |
| Gi2_11016230_x1 | .....uucgauucccgggcgccAg             | 1 |

Gi2\_11376939\_x1.....ggNucgauucccggcgccgga..... 1  
 Gl1a\_6302868\_x1.....aucggguucgaCucccggc..... 1  
 Gi2\_11403411\_x1cucacccaacUgaucgg..... 1  
 Gi5\_9007389\_x1.....guucgauucccggcgccgUagc..... 1  
 Gi1\_4171915\_x1.....guucgauucUcggcgcg..... 1  
 Gi2\_11304308\_x1.....guucgauuGccggcgccggag..... 1  
 Gi5\_8979444\_x1.....Cucgauucccggcgccg..... 1  
 Gi3\_28282996\_x1.....gguucgauucccggcUccgg..... 1  
 Gi5\_9077290\_x1.....uucgaCucccggcgccggagc..... 1  
 Gi1\_4341708\_x1.....gguucgauucccggcgccggagcgG..... 1  
 Gi5\_9000220\_x1.....guucgaCucccggcgccggagcguuuc..... 1  
 Gi5\_9035748\_x1.....gNuucgauucccggcgccggagc..... 1  
 Gl1a\_6271337\_x1...Gcccaacagauccggguucgauucc..... 1  
 Gi1\_4280151\_x1.....guucgUuucccggcgccgga..... 1  
 Gi1\_4333951\_x1.....gAucgauucccggcgcg..... 1  
 Gi3\_28323073\_x1...cccaacagauccgggCucgauucc..... 1  
 Gi2\_11075509\_x1.....uucgaAucccggcgccggag..... 1  
 Gi2\_11311014\_x1.....uucgauucccggcgccUgag..... 1  
 Gl1a\_6322424\_x1.....ucgauucccggcgccggagcCu..... 1  
 Gi3\_28369503\_x1.....aucggguucgauucccggcUccgga..... 1  
 Gi2\_11212311\_x1.....gguucgauuccGggcgccggag..... 1  
 Gi3\_28851276\_x1...caacagauccggguucAa..... 1  
 Gi5\_8994404\_x1.....Cuucgauucccggcgccggag..... 1  
 Gi2\_11258334\_x1...cccaacagauGcgguuc..... 1  
 Gi5\_9116846\_x1.....guuucccgccuuccuucgCcu..... 1  
 Gi3\_28665053\_x1...agauccggguucgauuAcc..... 1  
 Gi5\_8916156\_x1.....guucgauuNccggcgccggag..... 1  
 Gi2\_11239010\_x1.....guucgauucccCgcgccgga..... 1  
 Gi2\_11071155\_x1cucacccaacagauccCg..... 1  
 Gi2\_11387804\_x1.....gaCucccggcgccggagc..... 1  
 Gi4\_591759\_x1.....guucgauucccggcgccC..... 1  
 Gi3\_28554081\_x1.....ggguucgGuucccggcgccg..... 1  
 Gi3\_28681081\_x1...caacagauccggguucgGuucccggcgccg..... 1  
 Gi5\_9000909\_x1.....guucgauucccggcgccggaUc..... 1  
 Gi5\_9096651\_x1...acccaacagauccggguucgaCuccc..... 1  
 Gi2\_11297972\_x1.....ggNucgauucccggcgccggag..... 1  
 Gi3\_28578239\_x1...caccacagauccAgggguuc..... 1  
 Gi4\_569785\_x1 cCaccacagauccggguucg..... 1  
 Gi1\_4275504\_x1.....gguucgauucccgAcgcc..... 1  
 Gi3\_28759523\_x1.....gAguucgauucccggcgccggagc..... 1  
 Gi5\_8903697\_x1.....gguucgauucccggcUccggagc..... 1  
 Gi2\_11168067\_x1.....gNucgauucccggcgccggagc..... 1  
 Gl1a\_6262994\_x1.....gguAcgauucccggcgccggag..... 1  
 Gi2\_11086499\_x1.....cggguucgaGuucccggcgccgga..... 1  
 Gi5\_9092387\_x1.....gguucgauucccgCcgccg..... 1  
 Gi2\_11219074\_x1...cccaacagGuccggguuc..... 1  
 Gi3\_28544967\_x1.....Guccggguucgauucccggcgccgga..... 1

|                 |                                |   |
|-----------------|--------------------------------|---|
| Gi1_4224178_x1  | .....gguucgauucccCgcgccg       | 1 |
| Gi2_11055791_x1 | .....gUucgauucccgccgagcguu     | 1 |
| Gi1_4328204_x1  | .....gguucgauucccCgcgcc        | 1 |
| G1a_6153473_x1  | .....gguucgauucAcggcgccgga     | 1 |
| Gi2_11271428_x1 | .....gguucgaGucccgccg          | 1 |
| Gi1_4374162_x1  | ...accaacagaucggguucgauucUcg   | 1 |
| Gi1_4283066_x1  | .....gAuucgauucccgccg          | 1 |
| Gi3_28845642_x1 | .....agaucAgguucgauucc         | 1 |
| G1a_6138565_x1  | .....gguucgauucccgccgagcU      | 1 |
| Gi2_11390964_x1 | .....aacagaucggguucgGuucccgccg | 1 |
| Gi2_11274941_x1 | .....guucgauucccgccCccgga      | 1 |
| Gi2_11294474_x1 | .....uucgauucccgccAccg         | 1 |
| Gi2_11394664_x1 | .....gguucgauuccGggcgccg       | 1 |
| Gi2_11204160_x1 | .....gguucgauucccCgcgccg       | 1 |
| Gi5_8968586_x1  | .....gguucgauGcccgccg          | 1 |
| Gi3_28725258_x1 | cucacccaNcagaucggguucgauucc    | 1 |
| Gi3_28383338_x1 | .....cgUguucgauucccgccg        | 1 |
| Gi3_28593556_x1 | .....auccAgguucgauucccgccgga   | 1 |
| G1a_6029100_x1  | .....gguucgauucccAgcgccg       | 1 |
| G1a_6258115_x1  | .....Auucgauucccgccg           | 1 |
| Gi3_28658183_x1 | .....cggguucgauucccgccgG       | 1 |
| Gi3_28671000_x1 | .....gguucgauucccgccgagcgG     | 1 |
| Gi4_572129_x1   | .....gguuAgauucccgccgagc       | 1 |
| Gi1_4234343_x1  | .....gguucUauucccgccg          | 1 |
| Gi5_9087095_x1  | .....gguucgCuucccgccgagcg      | 1 |
| Gi3_28344005_x1 | ...cccaacagaucUgguucgauucc     | 1 |
| Gi3_28420742_x1 | cucacccaacagaucggC             | 1 |
| Gi5_8850989_x1  | .....gguucgauucccgccgUggag     | 1 |
| G1a_6104292_x1  | .....gguucgauuccUggcgcc        | 1 |
| G1a_6280602_x1  | .....gguucgGuucccgccgag        | 1 |
| Gi5_9038510_x1  | .....gguucgaAuucccgccg         | 1 |
| Gi1_4367709_x1  | .....cGgaucggguucgauucccgcc    | 1 |
| Gi2_11388017_x1 | .....gNucgauucccgccg           | 1 |
| Gi3_28394896_x1 | .....uucgauucccUgcgcca         | 1 |
| Gi3_28516924_x1 | .....gaucggguucgauCccc         | 1 |
| Gi4_600480_x1   | .....guucgUuucccgccg           | 1 |
| Gi5_9104674_x1  | .....guucgauucccgCcgccgga      | 1 |
| Gi5_8971807_x1  | .....cagaucgNguucgauucccgccg   | 1 |
| Gi1_4236171_x1  | .....aAuuccggguucgauucc        | 1 |
| Gi2_11132369_x1 | .....gauucUcggcgccgagc         | 1 |
| Gi5_9022843_x1  | ...cccaacagaucAgguuc           | 1 |
| Gi3_28724358_x1 | ...caccGacagaucggguuc          | 1 |
| Gi3_28505496_x1 | .....Uaacagaucggguucga         | 1 |
| Gi1_4217533_x1  | .....gguCcgauucccgcc           | 1 |
| Gi2_11039119_x1 | .....aucggguucgauucccgccgagc   | 0 |
| Gi3_28584662_x1 | .....gauuccAgggcgccgagc        | 1 |
| Gi2_11134767_x1 | cucacccaacagGuccg              | 1 |

|                 |                                       |   |
|-----------------|---------------------------------------|---|
| Gi4_575170_x1   | .....ggCucgauucccgcgccggagc           | 1 |
| Gi4_590903_x1   | .....gguucgaCucccgcgccgg              | 1 |
| Gi2_11099575_x1 | .....guucgauuccAgggcgccg              | 1 |
| Gi5_9001238_x1  | .....gguNcgauucccgcgccg               | 1 |
| Gi3_28444929_x1 | .....uGcggguucgauucccgcgccg           | 1 |
| Gi5_8913058_x1  | .....ucgauucccgcgccggGg               | 1 |
| Gi2_11301120_x1 | .....cgauucccNgcgcccggagcguuuc        | 1 |
| Gi5_9045519_x1  | .....aacagauccgggGucgauucccgcgccggagc | 1 |
| Gi2_11168775_x1 | .....cccaacagauccgggCuc               | 1 |
| Gi3_28921023_x1 | .....uucAauucccgcgccgga               | 1 |
| Gi2_11330095_x1 | .....gguGcgauucccgcgccgga             | 1 |
| Gi3_28441267_x1 | .....uucgauucccAgcgccgg               | 1 |
| Gi2_11252634_x1 | .....gguucgauucccgcgccU               | 1 |
| Gi3_28931829_x1 | .....caacagauccUgguucgauucc           | 1 |
| Gi1_4218397_x1  | .....uccggguucgauGcccgcgccgga         | 1 |
| Gi2_11106519_x1 | ucacccaacagauccggguuc                 | 0 |
| Gi5_9080958_x1  | .....gCuucgauucccgcgccggagcgu         | 1 |
| Gi3_28617586_x1 | .....uccggguucgauucccgcgccggC         | 1 |
| Gi5_8968028_x1  | .....gguucgauuccGggcgccggagc          | 1 |
| G1a_6301306_x1  | .....gguucgauCcccgcgccggagc           | 1 |
| Gi5_9082997_x1  | .....guucgauucccgcgccggagcg           | 0 |
| G1a_6044462_x1  | .....ucgauucccgcgccggagc              | 0 |
| Gi3_28471226_x1 | .....cggAuucgauucccgcgccgga           | 1 |
| Gi2_11358279_x1 | .....guucgauucccgcgccggagcgC          | 1 |
| Gi3_28803494_x1 | .....gauccggguucgauucAc               | 1 |
| Gi1_4354265_x1  | .....guuucccgccuuccuucgucuu           | 0 |
| Gi4_583134_x1   | .....guucgauuccUggcgccgg              | 1 |
| Gi5_8981725_x1  | .....Gucgauucccgcgccggagc             | 1 |
| Gi1_4329538_x1  | .....guucgauuccAgggcgccg              | 1 |
| Gi3_28344517_x1 | .....caccacaacUgauccggguuc            | 1 |
| G1a_6026247_x1  | .....guucUauucccgcgccgg               | 1 |
| Gi2_11112269_x1 | .....agauccGggguucgauucc              | 1 |
| Gi1_4211252_x1  | .....gUguucgauucccgcgccgga            | 1 |
| Gi2_11120609_x1 | .....ucgauuccAgggcgccggag             | 1 |
| Gi3_28831761_x1 | .....Aauccggguucgauucccgcgccgga       | 1 |
| Gi3_28955418_x1 | .....gauuAccggcgccggagc               | 1 |
| Gi1_4267734_x1  | .....auccgAguucgauucccgcgccgg         | 1 |
| Gi3_28809496_x1 | .....cgauucccAgcgccggagc              | 1 |
| Gi5_9106455_x1  | .....auccggguucgauucccgcgccggagc      | 0 |
| Gi3_28310326_x1 | .....gauccggguCcgauucc                | 1 |
| Gi2_11303749_x1 | .....guucgaAuucccgcgccgg              | 1 |
| Gi3_28558286_x1 | .....guucgauucccgAcgccc               | 1 |
| Gi3_28692740_x1 | cucacccaacaAauccgg                    | 1 |
| Gi1_4319907_x1  | .....guuNgauucccgcgccgga              | 1 |
| Gi1_4347019_x1  | .....guucgauuAccggcgccg               | 1 |
| Gi3_28281105_x1 | cucacccaacagauccAgguucgauu            | 1 |
| Gi2_11077411_x1 | cAcacccaacagauccgg                    | 1 |



|                                                        |   |
|--------------------------------------------------------|---|
| Gi1_4193508_x1.....caacagauccggguucgauucUcggc.....     | 1 |
| Gi5_9073493_x1.....cagauccggguucgauucccgAgccg.....     | 1 |
| Gi2_11053440_x1.....ucgauucccggcgcUggagc.....          | 1 |
| Gi3_28955718_x1.caUccaacagauccggguuc.....              | 1 |
| G1a_6016120_x1.....uucgauucccggcgcgcGgc.....           | 1 |
| Gi2_11222589_x1.....ucgauucccAgcgcggga.....            | 1 |
| Gi4_595506_x1.....gguuUgauucccggcgcgg.....             | 1 |
| Gi1_4338588_x1.....cagauccggguucgauucc.....            | 0 |
| Gi3_28383516_x1.....gguucgauucccCgcgcgg.....           | 1 |
| Gi1_4320439_x1.....auccAgguucgauucccggcgcgg.....       | 1 |
| Gi3_28964329_x1.....ggguGcgauucccggcgcgg.....          | 1 |
| Gi1_4220275_x1.....guuGgauucccggcgcggagc.....          | 1 |
| Gi2_11059354_x1.....gguucgaAuuccgggcgc.....            | 1 |
| Gi3_28283115_x1.....aAauccggguucgauucc.....            | 1 |
| Gi5_8985201_x1.....gGuccggguucgauucccggcgcggga.....    | 1 |
| Gi2_11185963_x1.....gguucgauucccggcgcgcggagcAuuuc..... | 1 |
| Gi2_11218958_x1.....gauuccggcAccggagc.....             | 1 |
| Gi2_11328523_x1.....cagauccgNguucgauucc.....           | 1 |
| Gi5_8957435_x1.....guucgauuccGggcgcgg.....             | 1 |
| Gi5_9099443_x1.....acagauccggguucAauucccggcgc.....     | 1 |
| Gi5_8984487_x1.Uaccaacagauccggguucga.....              | 1 |
| Gi2_11059842_x1.....gguucgauucccggcgcgcCa.....         | 1 |
| Gi3_28633401_x1.....ggguucgauucccgGgcggga.....         | 1 |
| Gi2_11134506_x1.....cccaacagauccgggGuc.....            | 1 |
| G1a_6047473_x1.....guucgauucccggcgcgcCagc.....         | 1 |
| Gi2_11294532_x1.....uucgauucccgAgcgcggga.....          | 1 |
| G1a_6170784_x1.....guucgauucccggcgcAg.....             | 1 |
| Gi1_4205118_x1.....guucgauucccgUcgccggagc.....         | 1 |
| Gi3_28636057_x1.....gggCucgauucccggcgcgg.....          | 1 |
| Gi2_11407350_x1.....ucgauucccCgcgcgggagc.....          | 1 |
| Gi2_11222338_x1.....guNcgauucccggcgcggagc.....         | 1 |
| Gi5_9119606_x1.ucaccUaacagauccggguu.....               | 1 |
| Gi3_28827725_x1.....uccggguucgauAcccggcgcggga.....     | 1 |
| G1a_6160626_x1.....gAuucgauucccggcgcgggagc.....        | 1 |
| Gi4_581032_x1.....gCuucgauucccggcgcggagc.....          | 1 |
| Gi3_28784225_x1.....uucgUuucccggcgcgg.....             | 1 |
| Gi5_8958892_x1.....ucgGuucccggcgcggag.....             | 1 |
| Gi3_28816522_x1.....uAcgauucccggcgcgg.....             | 1 |
| Gi5_9050165_x1.....guuAgauucccggcgcgg.....             | 1 |
| Gi5_9084990_x1.....guucgauucccggcgcggCagc.....         | 1 |
| Gi1_4376683_x1.....gguucgauUccgggcgg.....              | 1 |
| Gi1_4308228_x1.....Agguucgauucccggcgcgg.....           | 1 |
| Gi3_28627834_x1.....uNcgauucccggcgcgggagc.....         | 1 |
| G1a_6100600_x1.....gguucgauucccAgcgcgg.....            | 1 |
| G1a_6353152_x1.....gguucAauucccggcgcggagc.....         | 1 |
| Gi4_604495_x1.....gGuucccggcgcgggagc.....              | 1 |
| Gi2_11033012_x1.....cgaCuucccggcgcgggagcguu.....       | 1 |

|                                                         |   |
|---------------------------------------------------------|---|
| Gi3_28596156_x1.....cgaNucccggcgccggagc.....            | 1 |
| Gi5_8941816_x1.....gguucUauucccgcgccgg.....             | 1 |
| Gi1_4308627_x1.....guucgauucccgGgccg.....               | 1 |
| Gi1_4374259_x1cucaccAaacagauccgg.....                   | 1 |
| Gi2_11312496_x1.....ucgauAcccgggcgccggag.....           | 1 |
| Gi5_8840045_x1.....ucgauucccgcgccgAa.....               | 1 |
| Gi1_4358284_x1.....gguuAgauucccgcgccg.....              | 1 |
| Gi1_4335481_x1.....gguNcgauucccgcgccgg.....             | 1 |
| Gi3_28284425_x1.....acagauccggguucgaCucccgggcgccgg..... | 1 |
| Gi3_28402350_x1.....auccggguNcgauucccgcgccggagc.....    | 1 |
| Gi2_11303602_x1.....gguucgauucccgggcgccggagcguuu.....   | 0 |
| Gi3_28546806_x1.....cgauucccgAcgccggagc.....            | 1 |
| Gi1_4217748_x1cucacccaaAagaucgg.....                    | 1 |
| Gi2_11100601_x1.....ucgauucccggcUccggag.....            | 1 |
| Gi1_4257778_x1.....gguucgauucccgcgcgAg.....             | 1 |
| Gi1_4201497_x1.....aacaUauccggguucgauucccgcgccgg.....   | 1 |
| Gi3_28686905_x1.....uucgauucccggcAccgg.....             | 1 |
| Gi5_8876071_x1.....guucgaGucccgcgccgga.....             | 1 |
| Gi2_11269785_x1.....guucgauucccgcgGcggag.....           | 1 |
| Gi5_8904963_x1.....cgauucccgcgccggagcg.....             | 0 |
| Gi3_28748580_x1.....cgauuccggcgccggagU.....             | 1 |
| Gi5_8865448_x1.....uccggguucgauuAccggc.....             | 1 |
| Gi3_28563903_x1.....ggguucgauucccgggcgccggGg.....       | 1 |
| Gi3_28682632_x1cucacccaacagauccGg.....                  | 1 |
| Gi3_28559884_x1....ccUaacagauccggguucgauucc.....        | 1 |
| Gi5_9095907_x1.....guNcgauucccgcgccgg.....              | 1 |
| Gi3_28341037_x1.....guucgauucccgCcgccggagc.....         | 1 |
| Gi1_4247730_x1.....uucgCuucccgcgccgg.....               | 1 |
| Gi3_28576477_x1.....ucAauuccggcgccggag.....             | 1 |
| Gi3_28960986_x1.....ucgauucAcggcgccggag.....            | 1 |
| Gi3_28782911_x1.....ggguucgGuuccggcgccggag.....         | 1 |
| Gi1_4218610_x1.....uucgauuccAggcggccgg.....             | 1 |
| Gi3_28584570_x1.....Cucgauuccggcgccgg.....              | 1 |
| Gi2_11218230_x1.....gguucgauucccgAgccgg.....            | 1 |
| Gi1_6151198_x1.....gguucgauuUccggcgccggagc.....         | 1 |
| Gi3_28604818_x1.....ucgauCcccggcgccggag.....            | 1 |
| Gi2_11300518_x1.....Gagauccggguucgauuccggcgccggag.....  | 1 |
| Gi5_8867507_x1.....acagaucGggguucgauucccgcgcc.....      | 1 |
| Gi1_4377282_x1.ucacccaacagauccggAu.....                 | 1 |
| Gi3_28346100_x1.....auccggguucgauuccggcgC.....          | 1 |
| Gi5_9066493_x1.....guucgauucccgcgccgUa.....             | 1 |
| Gi3_28337109_x1.....guucgauGcccggcgccgg.....            | 1 |
| Gi2_11238491_x1.....guucgauuccggcgccggagC.....          | 1 |
| Gi5_9119065_x1..acccaacagauccgggCucgauucc.....          | 1 |
| Gi2_11298164_x1.....uGgauuccggcgccggag.....             | 1 |
| Gi5_8974533_x1....cccaacagCuccggguuc.....               | 1 |
| Gi3_28352573_x1.....Ggauuccggcgccggag.....              | 1 |

Gi2\_11299054\_x1.....ucgauuAccggcgcccgagc..... 1  
 Gi2\_11164530\_x1.....guucgauucccUgcgcgga..... 1  
 Gi5\_8895238\_x1.....gguucgauCcccggcgccggagcguuu..... 1  
 Gi2\_11231686\_x1.....gauuccggcgcccgCgc..... 1  
 Gi1a\_6308753\_x1.....guucgauuNccggcgccggagc..... 1  
 Gi3\_28728177\_x1.....agauccgggCucgauucc..... 1  
 Gi2\_11092858\_x1.....guucgauucccgUccgga..... 1  
 Gi1\_4307504\_x1.....Aucgauucccgcgccgg..... 1  
 Gi2\_11275583\_x1.....cagaucggguucgauucccgcgccggCg..... 1  
 Gi5\_8878709\_x1cucaccaacagauccCg..... 1  
 Gi2\_11182677\_x1.....Uggguucgauucccgcgccggagc..... 1  
 Gi2\_11311702\_x1.....guucgauucccgUcgcgga..... 1  
 Gi5\_9082065\_x1.....gguucgauuGccggcgccgg..... 1  
 Gi1\_4171366\_x1.....gguucgauucccgcgCgAgga..... 1  
 Gi4\_606396\_x1.....guucgaGucccggcgccgg..... 1  
 Gi1\_4364259\_x1.....gguucgauucAcggcgccggag..... 1  
 Gi1\_4228899\_x1.....gguucgauuccGggcgccggag..... 1  
 Gi4\_594121\_x1.....gguucgaCucccgcgccggagc..... 1  
 Gi1a\_6344008\_x1.....gguucgauucccgcgcca..... 1  
 Gi2\_11273164\_x1.....uucgauucccgcgccgC..... 1  
 Gi3\_28647113\_x1.....ggguucgauucccgcgUcggga..... 1  
 Gi3\_28688297\_x1.....gguAcgauucccgcgcc..... 1  
 Gi5\_8946289\_x1.uGaccaacagauccggguu..... 1  
 Gi5\_9082625\_x1.....uucgCuucccgcgccgg..... 1  
 Gi5\_8865141\_x1.....guuNgauucccgcgccggagc..... 1  
 Gi3\_28562024\_x1.....uucgauuccAggcgcggagc..... 1  
 Gi2\_11144917\_x1.....cgauuccggcgccggaAcguuu..... 1  
 Gi5\_8889832\_x1.....guucgauuccCgcgcggagc..... 1  
 Gi4\_575202\_x1.....cgauuccggcgccggagcC..... 1  
 Gi3\_28526016\_x1.....cgauuccggcgUcggag..... 1  
 Gi1\_4368827\_x1.....gguucgauucccgcgccCgagc..... 1  
 Gi5\_8893376\_x1.....gguuGgauucccgcgccggag..... 1  
 Gi3\_28482553\_x1.Ccaccaacagauccggguuc..... 1  
 Gi2\_11278047\_x1.....ccCgguucgauucccgcgccggagc..... 1  
 Gi3\_28459091\_x1.....uucgGuuccggcgccgga..... 1  
 Gi3\_28619795\_x1.....cgguucgauuGccggcgccgga..... 1  
 Gi1a\_6174982\_x1.....gguucgauuccCgcgcggag..... 1  
 Gi3\_28530015\_x1.....ccaacagauccggguucgauucccgcgccggagc..... 0  
 Gi1\_4257465\_x1.....gguucgauAcccgcgccggag..... 1  
 Gi3\_28663955\_x1.....caUcagauccggguucgauucccgcgccgg..... 1  
 Gi3\_28876102\_x1.....uccggguucgauucccgUgcgga..... 1  
 Gi3\_28881903\_x1.....Cccggguucgauucccgcgccg..... 1  
 Gi5\_9126598\_x1.....ccaGcagauccggguucgau..... 1  
 Gi3\_28984545\_x1.ucaccaacagauccgAguuc..... 1  
 Gi2\_11058683\_x1.....cagaucggguucgauucccgcgccggagcC..... 1  
 Gi5\_9120741\_x1.....gguNcgauucccgcgcc..... 1  
 Gi3\_28577470\_x1.....agauccggguuAgauccc..... 1

|                                                          |   |
|----------------------------------------------------------|---|
| Gi1a_6310241_x1.....Cuucgauucccgcgccg.....               | 1 |
| Gi5_9124154_x1.....guuAgaucccgcgccgga.....               | 1 |
| Gi4_573755_x1.....uucgauucccgcgccg.....                  | 0 |
| Gi3_28709885_x1.....guucgauuGccggcgccggagc.....          | 1 |
| Gi2_11209690_x1.....guucgauuccGggcgccgga.....            | 1 |
| Gi2_11130143_x1.....cagaucggguucgauucccgcgccAgag.....    | 1 |
| Gi3_28545311_x1.....aacagaucggguucgauucccgcgccUcgga..... | 1 |
| Gi2_11244713_x1.....ucgauucccgcgccAga.....               | 1 |
| Gi3_28373286_x1.....aucgggGucgauucccgcgccgga.....        | 1 |
| Gi3_28963190_x1cucacccaacGgaucgg.....                    | 1 |
| Gi5_8994262_x1.....ggguucgauucccgcgccggagcC.....         | 1 |
| Gi5_9069420_x1.ucacccUacagaucggguu.....                  | 1 |
| Gi1_4355106_x1.....gCuucgauucccgcgccgga.....             | 1 |
| Gi4_569538_x1.....guucUauucccgcgccgga.....               | 1 |
| Gi3_28740307_x1.....gauucccgcgccggagcgA.....             | 1 |
| Gi2_11010459_x1.....ucgaCucccgcgccgga.....               | 1 |
| Gi5_9119908_x1.....uucgauucccgcgccAgg.....               | 1 |
| Gi3_28908752_x1cucacccaCcagaucgg.....                    | 1 |
| Gi4_570039_x1.....guucgauucccggcAccggag.....             | 1 |
| Gi3_28423031_x1.....cagaucggguucgauucccgcgccgC.....      | 1 |
| Gi5_8961465_x1.....gguuUgauucccgcgccggagcguuu.....       | 1 |
| Gi5_9107189_x1cAcacccaacagaucgg.....                     | 1 |
| Gi2_11358228_x1.....ucgauuccGggcgccggagc.....            | 1 |
| Gi3_28905466_x1cucUcccaacagaucgg.....                    | 1 |
| Gi1_4278280_x1cucacccaacagaucggguucgauucA.....           | 1 |
| Gi1a_6202501_x1.....gguucgauNcccgcgcc.....               | 1 |
| Gi5_8985112_x1.....ucgauucccgAgccggag.....               | 1 |
| Gi2_11285736_x1.....cgauucccgcgccggCgcguuu.....          | 1 |
| Gi3_28313780_x1....cccaacagaucggguucgauucUc.....         | 1 |
| Gi2_11287437_x1.....gaucggguucgauucccgcgccgga.....       | 0 |
| Gi1_4266129_x1.....gguucgauucccggcCccggagc.....          | 1 |
| Gi1a_6079268_x1.....gguucgauuAcccgcgccggagc.....         | 1 |
| Gi3_28903629_x1.....uccggguucgaCucccgcgccgga.....        | 1 |
| Gi3_28552888_x1cucacccaacagaucGgg.....                   | 1 |
| Gi2_11046574_x1.....gguucgauGcccgcgcc.....               | 1 |
| Gi2_11362987_x1.....gguucgauucccCgcgcc.....              | 1 |
| Gi2_11060389_x1.....uucgauucccgcgccGcgagc.....           | 1 |
| Gi2_11009191_x1....cccaacagNuccggguuc.....               | 1 |
| Gi2_11160678_x1.....uccggguucgauucccgcgccggagc.....      | 0 |
| Gi3_28507336_x1.....ucgauucccgcgccAggga.....             | 1 |
| Gi5_8948057_x1.....Cgguucgauucccgcgccggagc.....          | 1 |
| Gi5_8907107_x1.....gguuAgaucccgcgccgg.....               | 1 |
| Gi5_8907632_x1.ucacccaCcagaucggguu.....                  | 1 |
| Gi1_4218050_x1.....gguucgauucccgcgccgCag.....            | 1 |
| Gi2_11037431_x1.....agaucggguucgCuucc.....               | 1 |
| Gi1_4350415_x1.....uucgauucccgcgccAgagc.....             | 1 |
| Gi1_4295786_x1.....guuAgaucccgcgccgga.....               | 1 |

|                 |                                 |   |
|-----------------|---------------------------------|---|
| Gi1_4316550_x1  | .....gguucgauAcccggcgccggagc    | 1 |
| Gi3_28688159_x1 | .....cAauuccggcgccggag          | 1 |
| Gi5_9017324_x1  | ..cacccaaUagauccggguucga        | 1 |
| Gi1_4317254_x1  | .....gguuAgaauccggcgccggagc     | 1 |
| Gi5_9019155_x1  | .....uucgauucccggcgcgA          | 1 |
| G1a_6108774_x1  | .....gguucgauGcccggcgccgga      | 1 |
| Gi2_11059441_x1 | .....gguucgauucAcggcgccgg       | 1 |
| Gi3_28890051_x1 | .....guucgauucccUgcgccggag      | 1 |
| Gi1_4175714_x1  | .....gguucgauucccggcgGcggagc    | 1 |
| Gi3_28765865_x1 | .....gauucccgUcgcggagc          | 1 |
| Gi2_11000074_x1 | .....ucgaGucccggcgccggag        | 1 |
| Gi2_11111681_x1 | .....guucgauuccGggcgccggagc     | 1 |
| Gi5_8838262_x1  | .....gguucgauAcccggcgcgga       | 1 |
| G1a_6035510_x1  | .....guucgaCucccggcgccggag      | 1 |
| Gi3_28543581_x1 | .....caacGgaucggguucga          | 1 |
| Gi5_9038197_x1  | .....gguucUauucccggcgcc         | 1 |
| Gi2_11215724_x1 | .....guuNgauuccggcgccggag       | 1 |
| Gi1_4202829_x1  | .....gguuGgauucccggcgccggagc    | 1 |
| Gi3_28609483_x1 | .....ucgauuccggcgccggUgc        | 1 |
| Gi5_8857226_x1  | .....guucgauucccggcgccggagcgu   | 0 |
| Gi2_11360205_x1 | .....cgauuccggcgUggagcguuu      | 1 |
| Gi1_4275075_x1  | .....cagaucgggCucgauucccggcgcc  | 1 |
| Gi3_28915508_x1 | .....gauuccggcgccAgagc          | 1 |
| Gi4_594361_x1   | Aucaccaacagauccggguucg          | 1 |
| G1a_6084214_x1  | .....gguucgauucccggcgUcggag     | 1 |
| Gi3_28565650_x1 | .....caacagauccggguucgauCccc    | 1 |
| Gi5_9127215_x1  | .....gguucUauuccggcgccg         | 1 |
| Gi3_28873117_x1 | cucGcccaacagauccggguucgauu      | 1 |
| Gi5_9107706_x1  | .....guucgauuccGggcgccgga       | 1 |
| Gi3_28987095_x1 | .....cccaacagauccggguucgaCuccc  | 1 |
| Gi1_4262903_x1  | .....guucgCuuccggcgccggagc      | 1 |
| Gi1_4228821_x1  | cGcacccaacagauccggguucgauucc    | 1 |
| Gi3_28405141_x1 | .....aucggguCcgauuccggcgccggagc | 1 |
| Gi1_4191676_x1  | .....ucgauucccggcgcgga          | 0 |
| Gi5_8902325_x1  | .....Agguucgauuccggcgccggag     | 1 |
| Gi3_28492981_x1 | .....uccggguucgGuuccggcgccg     | 1 |
| Gi5_9063088_x1  | .....guucgauuccggcCccgga        | 1 |
| G1a_6087353_x1  | .....gguucgauucccCgcgcgga       | 1 |
| Gi1_4220382_x1  | .....guuAgaauccggcgccggagc      | 1 |
| Gi3_28550482_x1 | cucaUccaacagauccgg              | 1 |
| Gi5_8923941_x1  | cucacAcaacagauccgg              | 1 |
| Gi3_28370921_x1 | .....gguuAgaauccggcgccggagc     | 1 |
| Gi4_586758_x1   | .....gguucgauucUcggcgccgg       | 1 |
| Gi3_28412858_x1 | .....cgauuccggcgccggagcU        | 1 |
| Gi3_28702826_x1 | .....cgGuuccggcgccggag          | 1 |
| Gi2_11122381_x1 | .....uucgauucccgUgcggag         | 1 |
| Gi5_9048020_x1  | .....gguucgauucccgUcgcggagc     | 1 |

|                                                       |   |
|-------------------------------------------------------|---|
| Gi2_11114223_x1.....Ggaucggguucgauucc.....            | 1 |
| Gi2_11272735_x1.....cgguucgauCccggcgccgga.....        | 1 |
| Gi3_28628330_x1.....uccggguucgauucccgggcgccggG.....   | 1 |
| Gi3_28751554_x1.....Acgauuccggcgccggagc.....          | 1 |
| Gi2_11134309_x1.....cgggGucgauucccgggcgccgga.....     | 1 |
| Gi1_4166191_x1cucacccaacagauccggguucgG.....           | 1 |
| Gi2_11164250_x1.....gguucgauucccgggcgccggaU.....      | 1 |
| Gi5_9018585_x1.....gguucgaAucccggcgcccggag.....       | 1 |
| Gi2_11228306_x1.....ucAauuccggcgccggag.....           | 1 |
| Gi2_11227077_x1.....guucgauucccgggcgccGg.....         | 1 |
| Gi2_11289923_x1.....ucgNuuccggcgccggagc.....          | 1 |
| Gi3_28538696_x1.....gauccggguucgauAccc.....           | 1 |
| Gi5_8915832_x1...cccaacagauccggguAc.....              | 1 |
| Gi5_8833470_x1.....acUgauccggguucgauucccggcg.....     | 1 |
| Gi5_8891167_x1cucacccaUcagauccgg.....                 | 1 |
| Gi5_8947925_x1.....guucgauucccggcgcccAag.....         | 1 |
| Gi5_8906643_x1.....gauccggguucgCuuccggcgcccga.....    | 1 |
| Gi3_28962402_x1.....ucgauucccgggcgcccGg.....          | 1 |
| Gi1_4367466_x1..accaacaAauccggguucgauucc.....         | 1 |
| Gi3_28324364_x1.....gguucgauucccgggcgccGg.....        | 1 |
| Gi4_583265_x1.....guucgauucUcggcgcccga.....           | 1 |
| Gi3_28767597_x1.....gauuccggcgUcggagc.....            | 1 |
| Gi4_595786_x1.....guucgCuuccggcgcccg.....             | 1 |
| Gi5_9068058_x1.....cgauuccCgcgcccggagcguuuc.....      | 1 |
| Gi2_11372612_x1.....gauccggguucgauucc.....            | 0 |
| Gi2_11022110_x1.....cgauuccUggcgcccggagcguuuc.....    | 1 |
| Gi1a_6299274_x1.....gguucgauuccUcgccccggag.....       | 1 |
| Gi1a_6130492_x1.....guucUauucccggcgcccggagc.....      | 1 |
| Gi1_4195490_x1.....guucgauucccggcgcccgaAc.....        | 1 |
| Gi2_11261799_x1.....gguucgauuAccggcgcccggag.....      | 1 |
| Gi2_11237992_x1.....uucgauuccUggcgcccggagc.....       | 1 |
| Gi5_9088187_x1.....ccggguucgauucccggcgcccGgU.....     | 1 |
| Gi3_28973006_x1.....cagauccgggGucgauuccggcgcccgg..... | 1 |
| Gi2_11070776_x1.....ucgauucccggcgcccUgag.....         | 1 |
| Gi1_4323829_x1.....gguucgauGcccggcgcccga.....         | 1 |
| Gi3_28378571_x1.....ggguucgGuuccggcgcccggagc.....     | 1 |
| Gi3_28466710_x1.....Nguucgauuccggcgcccg.....          | 1 |
| Gi2_11324069_x1.....cAgguucgauucccggcgcccgga.....     | 1 |
| Gi3_28985193_x1.....ggguucgauuccggcgcccggaCc.....     | 1 |
| Gi3_28678017_x1.....ggguucgauuccggcgcccAgagc.....     | 1 |
| Gi5_9129758_x1.....gguucgauuccggcgcccGg.....          | 1 |
| Gi3_28742472_x1.....gauuccGggcgcccggagc.....          | 1 |
| Gi3_28632715_x1cucacccaacagauccggCu.....              | 1 |
| Gi2_11386878_x1.....guucgauucGcggcgcccg.....          | 1 |
| Gi1_4278256_x1.....guucgauuGcccggcgcccggagc.....      | 1 |
| Gi4_588102_x1.....guucgauuccggcgcccggag.....          | 0 |
| Gi2_11115133_x1.....gguuAgaucccggcgccc.....           | 1 |

|                                                         |   |
|---------------------------------------------------------|---|
| Gi1_4274785_x1.....caacagauccgAguucgauucccggc.....      | 1 |
| Gi2_11355533_x1.....uccggguucgauAcccggcgcgcgga.....     | 1 |
| Gi1_4352544_x1...ccaacagauccggguuc.....                 | 0 |
| Gi3_28628149_x1.....gUuucgauucccggcgcgcggagcg.....      | 1 |
| Gi5_8921422_x1...accaacagGuccggguucgauucc.....          | 1 |
| Gi3_28944552_x1.....Aucgauucccggcgcgcgga.....           | 1 |
| Gi3_28980890_x1.....agGuccggguucgauuccc.....            | 1 |
| Gi1_4160066_x1.....gguucgUuucccggcgcgcggag.....         | 1 |
| Gi5_8982493_x1.....gguucgauucccggcgcGcg.....            | 1 |
| Gi3_28440888_x1.....cagauccggguucgauucccggcgcGcgg.....  | 1 |
| Gi2_11291313_x1.....gguucgauucccggcCccgga.....          | 1 |
| G1a_6239905_x1.....gguucgauuccUggcgcgcggagc.....        | 1 |
| Gi2_11005910_x1.....caUauccggguucgauucccggcgcgcgga..... | 1 |
| Gi5_8947288_x1.....gguucgaAuucccggcgcgcggagc.....       | 1 |
| Gi2_11054287_x1.....gguucgauucccgUcgccg.....            | 1 |
| Gi5_9045459_x1.....Agguucgauucccggcgcgcggagc.....       | 1 |
| Gi5_8857061_x1.....guucgauucccggcgcgcggCg.....          | 1 |
| Gi5_8907661_x1.....Aguucgauucccggcgcgcggagcguu.....     | 1 |
| Gi5_8906375_x1cucaccaacagauccgA.....                    | 1 |
| Gi3_28837471_x1.....gauCcccggcgcgcggagc.....            | 1 |
| Gi5_8893444_x1.....ucgauucccggcgcgcCagc.....            | 1 |
| Gi3_28787178_x1.....ucgauuAccgggcgcgcggag.....          | 1 |
| Gi2_11271538_x1.....ucgauucAcgggcgcgcgga.....           | 1 |
| Gi2_11390696_x1.....agauccggguucAauucc.....             | 1 |
| Gi1_4354254_x1.....guucgCuucccggcgcgcg.....             | 1 |
| Gi5_9050629_x1...accCacagauccggguucgauuccc.....         | 1 |
| Gi2_11110040_x1.....guucgauucccgGgccg.....              | 1 |
| Gi1_4250698_x1.....cagauccggguucgauucccggcAc.....       | 1 |
| Gi5_8981188_x1.....guucgauuGccgggcgcgcggagc.....        | 1 |
| Gi1_4390598_x1.....guucgauGcccggcgcgcgg.....            | 1 |
| Gi3_28689156_x1.....ucgauucccgAcgcccggag.....           | 1 |
| Gi3_28424338_x1.....gauccggguucgauucccgGU.....          | 1 |
| Gi2_11089352_x1.....Cauuccgggcgcgcggagc.....            | 1 |
| G1a_6183164_x1.....Aguucgauucccggcgcgc.....             | 1 |
| Gi5_9048238_x1.....gguucgaAuucccggcgcgcgga.....         | 1 |
| Gi3_28398881_x1.ucaccaacagauccggguCc.....               | 1 |
| Gi4_592962_x1.....gAuucgauucccggcgcgcggagc.....         | 1 |
| Gi3_28624239_x1cCaccaacagauccggguucgauucc.....          | 1 |
| Gi2_11362498_x1.....gguucgauuccUgcgcgcg.....            | 1 |
| Gi5_9023466_x1.....gguucgauuccAggcgcgcg.....            | 1 |
| G1a_6272640_x1.....guCcgauucccggcgcgcggagc.....         | 1 |
| Gi4_575011_x1.....auucccggcgcgcggagcC.....              | 1 |
| Gi2_11276863_x1cucacccaaUagauccgg.....                  | 1 |
| G1a_6340938_x1.....gguCcgauucccggcgcgcggagc.....        | 1 |
| G1a_6280899_x1.....gguucgauucccggcgcgcggagcA.....       | 1 |
| Gi1_4190703_x1.....agauccggguucgauuAcc.....             | 1 |
| G1a_6098600_x1.....gguucgauucccggcAcc.....              | 1 |

|                                                           |   |
|-----------------------------------------------------------|---|
| Gi2_11365591_x1.....ucgauucccggcgcggGg.....               | 1 |
| Gi3_28728864_x1.....Agguucgauucccggcgcggga.....           | 1 |
| Gi3_28582693_x1.....Uggguucgauucccggcgcggag.....          | 1 |
| Gi5_8886831_x1.....gguucgauuccUggcgccggagcguu.....        | 1 |
| Gi3_28399065_x1.....uccggguuUgauucccggcgcggga.....        | 1 |
| Gi2_11271890_x1.....ucgauucccggcgcggAa.....               | 1 |
| Gi2_11386236_x1.....agaNccggguucgauucc.....               | 1 |
| Gi3_28974909_x1.....uucgauucccgAgccgggagc.....            | 1 |
| Gi3_28835913_x1.....uccggguucgauucccggcgcgAga.....        | 1 |
| Gl1_6216070_x1.....Cguucgauucccggcgcg.....                | 1 |
| Gi5_8878632_x1cucaccaacaAauccgg.....                      | 1 |
| Gi1_4374816_x1.....Ccgauucccggcgcgggagc.....              | 1 |
| Gi3_28625718_x1.....ggguucgaCucccggcgcggag.....           | 1 |
| Gi1_4295209_x1.....gguGcgauucccggcgcgg.....               | 1 |
| Gi2_11124518_x1.....gguucgauAucccggcgcggga.....           | 1 |
| Gi3_28607644_x1cucaccaacUgauccgg.....                     | 1 |
| Gi3_28652680_x1.....cgauucccggcgcggCg.....                | 1 |
| Gi1_4356054_x1cucaccaacagauccggguucgauuccU.....           | 1 |
| Gi1_4346213_x1.....guucgaAucccggcgcg.....                 | 1 |
| Gi1_4356775_x1.....guuAgaucccggcgcg.....                  | 1 |
| Gi2_11015154_x1..accaacagauccggguucgauucc.....            | 0 |
| Gi3_28528581_x1.....cAauucccggcgcgggagc.....              | 1 |
| Gi3_28851294_x1..caccUaacagauccggguuc.....                | 1 |
| Gi1_4203173_x1Nucaccaacagauccgg.....                      | 1 |
| Gi1_4207197_x1.....gguucgauCcccggcgcggag.....             | 1 |
| Gi3_28462976_x1.....gguuNgaucccggcgcgggagc.....           | 1 |
| Gi5_9135834_x1.....guucgauGccgcgcggga.....                | 1 |
| Gi5_8853453_x1.....guucgauucccgUcgccggag.....             | 1 |
| Gi1_4186427_x1.....guucAauucccggcgcggag.....              | 1 |
| Gl1_6336195_x1.....gGucgauucccggcgcggga.....              | 1 |
| Gi5_8957526_x1.....aacagauccggAuucgauucccggcgcgggagc..... | 1 |
| Gi2_11173314_x1.....gNuucgauucccggcgcgggagc.....          | 1 |
| Gi2_11118619_x1.....cgUuucccggcgcgggagcguu.....           | 1 |
| Gi1_4321648_x1..caccacagauccggguucgCuucc.....             | 1 |
| Gi1_4223970_x1.....guucgauucccggcgcGgga.....              | 1 |
| Gi3_28811273_x1.....gguucCauucccggcgcgggag.....           | 1 |
| Gi2_11041101_x1.....gguucgauucAcggcgccggga.....           | 1 |
| Gi5_8965383_x1.....gguucgauuccUcgcc.....                  | 1 |
| Gi1_4349061_x1.....Gcagauccggguucgauucc.....              | 1 |
| Gi1_4316738_x1.....uucccggcgcgggagcCu.....                | 1 |
| Gi5_9020413_x1..accaacagauccggguucgauuccUc.....           | 1 |
| Gi3_28865077_x1.....agauccgggAucgauucc.....               | 1 |
| Gi1_4343697_x1cucaccaacagauccggU.....                     | 1 |
| Gi3_28439388_x1.....gNuucgauucccggcgcgggagc.....          | 1 |
| Gi4_596185_x1.....ucgauucccggcgcgggagc.....               | 1 |
| Gi5_9112113_x1.....ccgggCucgauucccggcgcggga.....          | 1 |
| Gi1_4280852_x1.....uccggguucgaCucccggcgcggga.....         | 1 |



|                 |                                        |   |
|-----------------|----------------------------------------|---|
| Gi4_612650_x1   | .....guucgauucccgcgUcggA.....          | 1 |
| Gi1_4378852_x1  | .....agauccggguucgauucUc.....          | 1 |
| Gi1_4195659_x1  | .....Uuccggguucgauucccgcgccgga.....    | 1 |
| Gi3_28418507_x1 | .....uucgauuGccggcgcccgagc.....        | 1 |
| Gi2_11150518_x1 | .....gguucgauucccgcgGcggag.....        | 1 |
| Gi5_9082398_x1  | .....uucgGuucccgcgccgg.....            | 1 |
| Gi1_4329162_x1  | .....Guccggguucgauucccgcgccgga.....    | 1 |
| Gi5_8871802_x1  | cucacccaacagauccAgg.....               | 1 |
| Gi3_28829414_x1 | cucacccaacagauccgA.....                | 1 |
| Gi3_28675635_x1 | .....caacagauccAgguucga.....           | 1 |
| Gi3_28419469_x1 | .....uccggguucgauucccgAgccgga.....     | 1 |
| Gi3_28686329_x1 | .....agCuccggguucgauucc.....           | 1 |
| Gi5_8918949_x1  | .....ucgGuucccgcgcccgagc.....          | 1 |
| G1a_6037754_x1  | .....gguucgauucccgcgccgAag.....        | 1 |
| Gi3_28391790_x1 | .....Uguucgauucccgcgcccgagcguu.....    | 1 |
| Gi2_11295437_x1 | .....aacagauccggguAcgauucccgcgccg..... | 1 |
| Gi4_571218_x1   | .....gguucgauucccgcgca.....            | 1 |
| Gi3_28333127_x1 | .....Ucagauccggguucgauucc.....         | 1 |
| Gi2_11264212_x1 | .....gguucgauucccgcgcccgUg.....        | 1 |
| G1a_6083325_x1  | .....gguucgauucccgAgccgg.....          | 1 |
| G1a_6330116_x1  | .....guucgauucccgcgGcggagc.....        | 1 |
| Gi3_28632935_x1 | ucaccUaacagauccggguuc.....             | 1 |
| Gi3_28310905_x1 | .....ucgauucUcggcgccgga.....           | 1 |
| Gi3_28315274_x1 | .....cagaGccggguucgauucccgcgccgg.....  | 1 |
| G1a_6289377_x1  | .....gguucgauucccgcgcccgGg.....        | 1 |
| Gi2_11034387_x1 | .....uccggguucgaCucccgcgccgga.....     | 1 |
| Gi3_28972842_x1 | .....gauuccCgcgcccgagc.....            | 1 |
| Gi2_11062455_x1 | .....guucgauucccgcgcccgagcg.....       | 0 |
| Gi3_28293012_x1 | .....ucgauuccAgggcgccggag.....         | 1 |
| Gi2_11331587_x1 | .....guNcgauucccgcgccgg.....           | 1 |
| Gi2_11346832_x1 | .....agauccggguucgCuucc.....           | 1 |
| Gi5_8954286_x1  | .....gauucccgcgccggaUc.....            | 1 |
| G1a_6279999_x1  | .....guucgauuccAgcgccggagc.....        | 1 |
| Gi2_11299356_x1 | .....agauccgAguucgauucc.....           | 1 |
| Gi1_4328694_x1  | .....cgauucccgcgcccgagc.....           | 0 |
| Gi2_11043616_x1 | .....guucgUuucccgcgccgga.....          | 1 |
| Gi5_9068649_x1  | .....gguucgauucGcggcgccggagc.....      | 1 |
| Gi3_28912503_x1 | .....gauucccgcgccggaAc.....            | 1 |
| Gi2_11223709_x1 | .....ucgauuUccggcgccggag.....          | 1 |
| Gi2_11161412_x1 | cucacccaacagauccAg.....                | 1 |
| Gi3_28458350_x1 | .....guucgauuccggcUccggag.....         | 1 |
| Gi4_591325_x1   | .....guucgauucUcggcgccgg.....          | 1 |
| Gi1_4197287_x1  | .....auucccgcgccggagcU.....            | 1 |
| Gi2_11340941_x1 | .....uucgCuucccgcgccgg.....            | 1 |
| G1a_6257853_x1  | .....gguucgauCcccggcgccggag.....       | 1 |
| Gi5_9086464_x1  | .....Aguucgauucccgcgccggagcgu.....     | 1 |
| Gi3_28894200_x1 | cucacccaGcagauccgg.....                | 1 |



|                    |                                |   |
|--------------------|--------------------------------|---|
| Gi2_3883487_x4338  | .....gguucgauuccggcgcc         | 0 |
| Gi5_4133188_x4096  | .....gguucgauuccggcgccg        | 0 |
| Gi3_15101518_x4074 | .....uccggcguaguauaacggcuag    | 0 |
| Gi1_1995350_x4001  | .....uccggcguaguauaacggcuag    | 0 |
| Gi3_15217882_x3936 | .....gguucucacccaacagauccg     | 0 |
| Gi5_4205184_x3893  | .....uccggcguaguauaacggcua     | 0 |
| Gi5_4228222_x3725  | .....uccggcguaguauaacgg        | 0 |
| Gi3_15427175_x3678 | .....uccggcguaguauaacggcuagaau | 0 |
| Gi5_4301044_x3513  | .....uccggcguaguauaacggcuagaau | 0 |
| Gi3_15580261_x3458 | .....gguucgauuccggcgcc         | 0 |
| Gi2_4129219_x3450  | .....gguucgauuccggcgccg        | 0 |
| Gi5_4325292_x3416  | .....uccggcguaguauaacggc       | 0 |
| Gi5_4342263_x3360  | .....gguucgauuccggcgccgga      | 0 |
| Gi1_2046517_x3321  | .....ugguucucacccaacagauccg    | 0 |
| Gi1_2049838_x3306  | .....guucucacccaacagauccg      | 0 |
| Gi1_2059731_x3261  | .....uucucacccaacagauccg       | 0 |
| Gi2_4175715_x3240  | .....Uguucgauuccggcgccggagc    | 1 |
| Gi3_15854949_x3080 | .....uucucacccaacagauccg       | 0 |
| Gi2_4263674_x3014  | .....uccggcguaguauaacggc       | 0 |
| Gi2_4266688_x3008  | .....guucgauuccggcgccg         | 0 |
| Gi1_2084611_x2882  | .....uucucacccaacagauccg       | 0 |
| Gi3_16166426_x2766 | .....uccggcguaguauaacgA        | 1 |
| Gi2_4338576_x2763  | .....gguucgauuccggcgccgga      | 0 |
| Gi3_16196749_x2745 | .....guucgauuccggcgccg         | 0 |
| Gi5_4464014_x2733  | .....uucucacccaacagauccg       | 0 |
| Gi5_4466747_x2732  | .....guucgauuccggcgccgga       | 0 |
| Gi1_2098525_x2672  | .....Uuucgauuccggcgccgg        | 1 |
| Gi1_2106457_x2553  | .....guucgauuccggcgccggagcC    | 1 |
| Gi3_16419246_x2520 | .....uccggcguaguauaacggcuagaa  | 0 |
| Gi1_2118934_x2435  | .....uccggcguaguauaacggcua     | 0 |
| Gi5_4584884_x2359  | .....gguucgauuccggcgccgg       | 0 |
| Gi2_4550526_x2301  | .....gUuucgauuccggcgccggagc    | 1 |
| Gi3_16719768_x2271 | .....ucgauuccggcgccggagcC      | 1 |
| Gi1_2160670_x2236  | .....guucgauuccggcgccgga       | 0 |
| Gi1_2162906_x2212  | .....gguucucacccaacagauccg     | 0 |
| Gi2_4595781_x2187  | .....uccggcguaguauaacggcua     | 0 |
| Gi2_4659874_x2088  | .....guucgauuccggcgccgga       | 0 |
| Gi5_4689295_x2063  | .....guucgauuccggcgccggagcC    | 1 |
| Gi2_4678540_x2059  | .....guucgauuccggcgccggag      | 0 |
| Gi1_2196056_x1931  | .....uccggcguaguauaacggcuaga   | 0 |
| Gi5_4746918_x1924  | .....gguucgauuccggcgcc         | 0 |
| Gi3_17173976_x1910 | .....guucucacccaacagauccg      | 0 |
| Gi3_17258833_x1863 | .....uucucacccaacagauccg       | 0 |
| Gi5_4797320_x1809  | .....guucgauuccggcgccggagc     | 0 |
| Gi5_4829364_x1752  | .....gguucgauuccggcgccggag     | 0 |
| Gi1_2219646_x1714  | .....guucucacccaacagauccg      | 0 |
| Gi2_4889877_x1702  | .....uccggcguaguauaacgg        | 0 |

|                         |                               |   |
|-------------------------|-------------------------------|---|
| Gi5_4856838_x1692.....  | .cucacccaacagauccgg.....      | 0 |
| Gi3_17723670_x1584..... | .Uguucgauucccgccgcca.....     | 1 |
| Gi2_5042785_x1544.....  | .gguucucacccaacagauccg.....   | 0 |
| Gi1_2263260_x1508.....  | .guucgauucccgccgcca.....      | 0 |
| Gi2_5126744_x1455.....  | .uccggcguaguauaacggcuag.....  | 0 |
| Gi5_4974773_x1454.....  | .ugguucucacccaacagauccg.....  | 0 |
| Gi1_2279516_x1437.....  | .gGucgauucccgccgcca.....      | 1 |
| Gi3_18002792_x1423..... | .ucgauucccgccgcca.....        | 0 |
| Gi2_5159750_x1419.....  | .uccggcguaguauaacggcuaga..... | 0 |
| Gi2_5190590_x1386.....  | .uucucacccaacagauccg.....     | 0 |
| Gi3_18114895_x1376..... | .Uguucgauucccgccgcca.....     | 1 |
| Gi1_2308841_x1354.....  | .ugguucucacccaacagauccg.....  | 0 |
| Gi3_18209951_x1340..... | .Gccggcguaguauaacggcuaga..... | 1 |
| Gi2_5265076_x1323.....  | .ucgauucccgccgcca.....        | 0 |
| Gi3_18253831_x1317..... | .Uuucgauucccgccgcca.....      | 1 |
| Gi2_5286105_x1300.....  | .guucucacccaacagauccg.....    | 0 |
| Gi1_2332554_x1264.....  | .gguucgauucccgccgcca.....     | 0 |
| Gi5_5082952_x1247.....  | .guucucacccaacagauccg.....    | 0 |
| Gi1_2340050_x1226.....  | .guucgauucccgccgcca.....      | 0 |
| Gi3_18631876_x1148..... | .Uuucgauucccgccgcca.....      | 1 |
| Gi5_5178308_x1083.....  | .Uuucgauucccgccgcca.....      | 1 |
| Gi5_5191186_x1059.....  | .Uuucgauucccgccgcca.....      | 1 |
| Gi3_18881639_x1044..... | .gUuucgauucccgccgcca.....     | 1 |
| Gi2_5612893_x1032.....  | .Uuucgauucccgccgcca.....      | 1 |
| Gi3_18985137_x1003..... | .Uuucgauucccgccgcca.....      | 1 |
| Gi5_5228053_x994.....   | .uccggcguaguauaacggcuaga..... | 0 |
| Gi2_5713753_x968.....   | .uccggcguaguauaacggcuaga..... | 0 |
| Gi3_19108956_x964.....  | .gUuucgauucccgccgcca.....     | 1 |
| Gi3_19131046_x956.....  | .ugguucucacccaacagauccg.....  | 0 |
| Gi1_2424457_x950.....   | .uccggcguaguauaacggc.....     | 0 |
| Gi5_5277356_x931.....   | .Uguucgauucccgccgcca.....     | 1 |
| Gi3_19223083_x923.....  | .uucgauucccgccgcca.....       | 0 |
| Gi3_19277081_x906.....  | .gauucccgccgcca.....          | 0 |
| Gi2_5857907_x868.....   | .Uuucgauucccgccgcca.....      | 1 |
| Gi5_5341340_x840.....   | .ucucacccaacagauccg.....      | 0 |
| Gl1_3705913_x820.....   | .uccggcguaguauaacggcuaga..... | 0 |
| Gi2_5947887_x817.....   | .ugguucucacccaacagauccg.....  | 0 |
| Gi1_2480982_x805.....   | .gguucgauucccgccgcca.....     | 0 |
| Gi3_19615623_x803.....  | .Uguucgauucccgccgcca.....     | 1 |
| Gl1_3739453_x774.....   | .gguucgauucccgccgcca.....     | 0 |
| Gi3_19734571_x772.....  | .guucucacccaacagauccg.....    | 0 |
| Gi2_6110175_x725.....   | .gguucgauucccgccgcca.....     | 0 |
| Gi5_5431764_x722.....   | .Uguucucacccaacagauccg.....   | 1 |
| Gi5_5453834_x702.....   | .uucucacccaacagauccg.....     | 0 |
| Gi3_20044512_x691.....  | .gGucgauucccgccgcca.....      | 1 |
| Gi3_20062420_x686.....  | .guucgauucccgccgcca.....      | 1 |
| Gi2_6221840_x679.....   | .uccggcguaguauaacgA.....      | 1 |

|                        |                                 |   |
|------------------------|---------------------------------|---|
| Gi5_5504875_x652.....  | .gUuucgauucccgccgaggc.....      | 1 |
| Gi1_2562309_x634.....  | .gguucgauucccgccgaggc.....      | 0 |
| Gi3_20331714_x633..... | .Aguucgauucccgccgaggc.....      | 1 |
| Gi3_20356944_x628..... | .cgauucccgccgaggc.....          | 0 |
| Gl1a_3873470_x626..... | .uccggcguaguauaacggcuag.....    | 0 |
| Gi3_20450237_x607..... | .uucgauucccgccgaggc.....        | 0 |
| Gi3_20477458_x603..... | .uucgauucccgccgaggcC.....       | 1 |
| Gi3_20490687_x600..... | .gGucgauucccgccgaggc.....       | 1 |
| Gi3_20592804_x574..... | .gauucccgccgaggcC.....          | 1 |
| Gi3_20641249_x565..... | .gguucgauucccgccgaggc.....      | 1 |
| Gi3_20654213_x562..... | .guucgaCucccgccgaggc.....       | 1 |
| Gi2_6524433_x562.....  | .gGucgauucccgccgaggc.....       | 1 |
| Gi3_20695535_x555..... | .uGcggcguaguauaacggcuaga.....   | 1 |
| Gi3_20711587_x552..... | .gguucgauNcccgccgaggc.....      | 1 |
| Gi3_20742876_x547..... | .gUuucgauucccgccgaggc.....      | 1 |
| Gi5_5635437_x543.....  | .gGucgauucccgccgaggc.....       | 1 |
| Gi3_20766281_x542..... | .ucgauucccgccgaggc.....         | 0 |
| Gi1_2621476_x538.....  | .uccggcguaguauaacggcuagaau..... | 0 |
| Gi3_20813076_x534..... | .Uuucgauucccgccgaggc.....       | 1 |
| Gi1_2629414_x520.....  | .Uguucgauucccgccgaggc.....      | 1 |
| Gi3_20890919_x518..... | .ucgauucccgccgaggc.....         | 0 |
| Gi3_20912056_x514..... | .Uguucgauucccgccgaggc.....      | 1 |
| Gi5_5680282_x510.....  | .gUuucucacccaacagauccg.....     | 1 |
| Gi3_20940158_x508..... | .cucacccaacagauccg.....         | 0 |
| Gi1_2635580_x506.....  | .uccggcguaguauaacggcu.....      | 0 |
| Gi2_6718036_x497.....  | .gauucccgccgaggc.....           | 0 |
| Gi2_6721016_x496.....  | .gGucgauucccgccgaggc.....       | 1 |
| Gi3_21017851_x495..... | .auucccgccgaggcC.....           | 1 |
| Gi3_21069318_x486..... | .gguucgauucccgccgaggcCg.....    | 1 |
| Gi2_6751449_x486.....  | .Uguucgauucccgccgaggc.....      | 1 |
| Gi2_6769824_x481.....  | .Uguucgauucccgccgaggc.....      | 1 |
| Gi2_6779412_x478.....  | .ucgauucccgccgaggcC.....        | 1 |
| Gi1_2664335_x471.....  | .cucacccaacagauccg.....         | 0 |
| Gi3_21175959_x470..... | .ucucacccaacagauccg.....        | 0 |
| Gi5_5742002_x468.....  | .gGucgauucccgccgaggc.....       | 1 |
| Gi5_5754997_x462.....  | .Uuucucacccaacagauccg.....      | 1 |
| Gi3_21241144_x461..... | .gGucgauucccgccgaggc.....       | 1 |
| Gi3_21272709_x455..... | .Uguucucacccaacagauccg.....     | 1 |
| Gi1_2680859_x446.....  | .ucucacccaacagauccg.....        | 0 |
| Gi1_2686601_x437.....  | .uucgauucccgccgaggc.....        | 0 |
| Gi5_5802448_x432.....  | .Uguucgauucccgccgaggc.....      | 1 |
| Gi3_21433943_x429..... | .ggCucgauucccgccgaggc.....      | 1 |
| Gi5_5815709_x425.....  | .uccggcguaguauaacggcu.....      | 0 |
| Gi3_21502240_x419..... | .uccggcguaguauaacAgcuaga.....   | 1 |
| Gi2_7002965_x415.....  | .Uguucgauucccgccgaggc.....      | 1 |
| Gi3_21540181_x414..... | .uccggcguaguauaacggcu.....      | 0 |
| Gl1a_4132002_x412..... | .gguucgauucccgccgaggc.....      | 0 |

|                   |                          |   |
|-------------------|--------------------------|---|
| Gi3_21582156_x408 | ucUggcguaguauaacggcuaga  | 1 |
| Gi3_21603665_x404 | uccggcguaguauaacggcuGga  | 1 |
| Gi1_2728696_x387  | uccggcguaguauaacggcuagG  | 0 |
| Gi3_21757565_x383 | uccggcguaguauaacggcuagG  | 1 |
| Gi3_21767117_x381 | Uguucgauucccgcgcc        | 1 |
| Gi3_21824415_x373 | gUuucgauucccgcgccgg      | 1 |
| Gi5_5902217_x373  | Uguucgauucccgcgccgga     | 1 |
| Gi3_21849616_x369 | cgauucccgcgccggagcC      | 1 |
| Gi3_21850354_x369 | gguucgauucccgcgccggagcCu | 1 |
| Gi1_2749901_x367  | gguucgauucccgcgccggag    | 0 |
| Gi5_5915080_x362  | gauucccgcgccggagc        | 0 |
| Gi3_21945585_x355 | ugguucucacccaacagauc     | 0 |
| Gi3_21982977_x351 | Gccggcguaguauaacggcua    | 1 |
| Gi1_2772066_x347  | Uuucucacccaacagauccg     | 1 |
| Gi2_7279530_x347  | gauucccgcgccggagcC       | 1 |
| Gi3_22011911_x347 | ccggcguaguauaacggc       | 0 |
| Gi3_22045248_x341 | cagauccggguucgauucc      | 0 |
| Gi1_2780262_x336  | gUuucgauucccgcgccgg      | 1 |
| Gi5_5989302_x333  | gguucucacccaacagauccg    | 0 |
| Gi2_7348465_x332  | Aguucgauucccgcgccggagc   | 1 |
| Gi2_7360380_x330  | gUuucgauucccgcgccggag    | 1 |
| Gi5_6005812_x327  | gUuucgauucccgcgccg       | 1 |
| Gi3_22176246_x324 | uccggcguaguauaacggcCaga  | 1 |
| Gi3_22209728_x320 | uccggcguaguauaacggcuaA   | 1 |
| Gi2_7428877_x314  | Uuucgauucccgcgccg        | 1 |
| Gi3_22313956_x308 | gUuucgauucccgcgcc        | 1 |
| Gi3_22310260_x308 | gguucgauucccgcgccggGgc   | 1 |
| Gi2_7451906_x308  | guucgaCucccgcgccggagc    | 1 |
| Gi1_2813435_x304  | uccggcguaguauaacgA       | 1 |
| Gi3_22350015_x303 | uccggguucgauucccgcgccgga | 0 |
| Gi3_22355469_x303 | gUuucucacccaacagauccg    | 1 |
| Gi3_22369960_x301 | gGucgauucccgcgccggag     | 1 |
| Gi1a_4343709_x299 | gguucgauucccgcgccggagcC  | 1 |
| Gi3_22406772_x297 | gguucgauuccUggcgccggagc  | 1 |
| Gi3_22426894_x295 | Uuucgauucccgcgccg        | 1 |
| Gi3_22440421_x293 | Cguucgauucccgcgccggagc   | 1 |
| Gi3_22470199_x290 | uucgauucccgcgccg         | 0 |
| Gi1_2833307_x289  | Uucacccaacagauccg        | 1 |
| Gi1_2837629_x286  | gguucgauucccgcgccggagcC  | 1 |
| Gi2_7584647_x283  | gUuucgauucccgcgcc        | 1 |
| Gi3_22550896_x282 | Gccggcguaguauaacgg       | 1 |
| Gi2_7604625_x280  | uucgauucccgcgccg         | 0 |
| Gi2_7623265_x277  | Uguucgauucccgcgccgga     | 1 |
| Gi3_22591439_x277 | Gccggcguaguauaacggc      | 1 |
| Gi2_7633467_x275  | gguucgauNcccgcgccggagc   | 1 |
| Gi3_22625362_x274 | uccggcguNguauaacggcuaga  | 1 |
| Gi3_22667789_x270 | guucgauucccgcgccggagcCu  | 1 |

|                   |                                    |   |
|-------------------|------------------------------------|---|
| Gi1_2865516_x267  | .....guucgauucccgcgccggagcCu.....  | 1 |
| Gi5_6179994_x266  | .....Uuucgauucccgcgccgga.....      | 1 |
| Gi3_22720450_x265 | .....gguucgaCucccgcgccggagc.....   | 1 |
| Gi3_22715945_x265 | .....agauccggguucgauucc.....       | 0 |
| Gi1a_4422156_x265 | .....gguucgauucccgcgccgga.....     | 0 |
| Gi2_7692801_x265  | .....gUuucgauucccgcgccg.....       | 1 |
| Gi1_2868710_x265  | .....ucgauucccgcgccggagc.....      | 0 |
| Gi2_7696235_x264  | .....Gccggcguaguauaacggcuaga.....  | 1 |
| Gi1_2876324_x260  | .....guucgaCucccgcgccgg.....       | 1 |
| Gi5_6222628_x254  | .....agauccggguucgauucc.....       | 0 |
| Gi5_6228460_x253  | .....cccaacagauccggguuc.....       | 0 |
| Gi1_2891471_x253  | .....Uguucucacccaacagauccg.....    | 1 |
| Gi5_6235510_x251  | .....ucucacccaacagauccg.....       | 0 |
| Gi3_22899164_x248 | .....guucgaCucccgcgccgga.....      | 1 |
| Gi5_6245734_x248  | .....Uguucgauucccgcgcc.....        | 1 |
| Gi1_2903961_x247  | .....uUguucucacccaacagauccg.....   | 1 |
| Gi5_6257064_x245  | .....ccggcguaguauaacggcuag.....    | 0 |
| Gi4_339684_x242   | .....gguucgauucccgcgccgg.....      | 0 |
| Gi3_22994850_x240 | .....gguucgGuucccgcgccggagc.....   | 1 |
| Gi1_2928825_x236  | .....uucgauucccgcgccggagcC.....    | 1 |
| Gi3_23052063_x235 | .....cacccaacagauccggguuc.....     | 0 |
| Gi3_23081319_x233 | .....uccggcguaguauaacgAcuaga.....  | 1 |
| Gi5_6308565_x232  | .....Uguucgauucccgcgccgg.....      | 1 |
| Gi5_6317809_x230  | .....ucgauucccgcgccggag.....       | 0 |
| Gi2_7899826_x230  | .....uucgauucccgcgccggagcC.....    | 1 |
| Gi1_2938596_x230  | .....Cguucgauucccgcgccgg.....      | 1 |
| Gi5_6326282_x228  | .....ucgauucccgcgccggagc.....      | 0 |
| Gi5_6331966_x226  | .....guucgauucccgcgccggag.....     | 0 |
| Gi3_23176138_x225 | .....uUcggcguaguauaacggcuaga.....  | 1 |
| Gi2_7938475_x225  | .....gguucgauucccgcgccggCgc.....   | 1 |
| Gi3_23193875_x224 | .....gguucgauuccUggcgccggag.....   | 1 |
| Gi3_23200799_x223 | .....guucgaCucccgcgccgg.....       | 1 |
| Gi5_6359700_x221  | .....ccggcguaguauaacggcua.....     | 0 |
| Gi1a_4538766_x220 | .....uucucacccaacagauccg.....      | 0 |
| Gi1_2963766_x219  | .....gCucgauucccgcgccgg.....       | 1 |
| Gi1a_4546649_x218 | .....gguucgauucccgcgccgg.....      | 0 |
| Gi1a_4549477_x217 | .....guucucacccaacagauccg.....     | 0 |
| Gi2_7994399_x217  | .....Uuucgauucccgcgccggag.....     | 1 |
| Gi1_2970519_x216  | .....uccggcguaguauaacggcuagaa..... | 0 |
| Gi3_23309690_x215 | .....uccggcguaguauaGcggcuaga.....  | 1 |
| Gi3_23304530_x215 | .....ucucacccaacagauccg.....       | 0 |
| Gi2_8017908_x214  | .....uucgauucccgcgccggagc.....     | 0 |
| Gi1a_4557874_x214 | .....gguucgauucccgcgccgg.....      | 0 |
| Gi5_6398702_x214  | .....gUuucgauucccgcgccgga.....     | 1 |
| Gi5_6408310_x213  | .....Gccggcguaguauaacggcuag.....   | 1 |
| Gi5_6417005_x211  | .....ucgauucccgcgccggagcC.....     | 1 |
| Gi3_23359579_x211 | .....ccggcguaguauaacggcuaga.....   | 0 |

|                        |                                |   |
|------------------------|--------------------------------|---|
| Gi1_2985636_x210.....  | Uuucgauucccgcgccgga.....       | 1 |
| Gi3_23382327_x210..... | guucgauucccgcgccgA.....        | 1 |
| Gi3_23458130_x204..... | uccggcguGguauaacggcuaga.....   | 1 |
| Gi5_6461919_x203.....  | Uguucgauucccgcgccggag.....     | 1 |
| Gi5_6465567_x202.....  | ugguucucacccaacagauccgggu..... | 0 |
| Gi1_3010075_x201.....  | uucgauucccgcgccggagc.....      | 0 |
| Gi3_23506713_x201..... | caacagauccggguucgauucc.....    | 0 |
| Gi2_8127732_x200.....  | ggCucgauucccgcgccggagc.....    | 1 |
| Gi3_23516931_x200..... | gguCcgauucccgcgccggagc.....    | 1 |
| Gi2_8144076_x198.....  | Uuucgauucccgcgccgga.....       | 1 |
| Gi3_23560200_x197..... | gauccggguucgauucc.....         | 0 |
| Gi3_23573973_x196..... | gCuucgauucccgcgccggagc.....    | 1 |
| Gi3_23572013_x196..... | uccggcguaguGuaacggcuaga.....   | 1 |
| Gi5_6501422_x196.....  | gguucucacccaacagauc.....       | 0 |
| Gi3_23604809_x194..... | uGcggcguaguauaacggcua.....     | 1 |
| Gi5_6522813_x193.....  | Gccggcguaguauaacggcuaga.....   | 1 |
| Gi3_23634928_x192..... | gguucucacccaacagaucc.....      | 0 |
| Gi5_6534139_x191.....  | gGucucacccaacagauccg.....      | 1 |
| G1a_4632800_x191.....  | guucgauucccgcgccggagcC.....    | 1 |
| Gi3_23641643_x191..... | guucgauucccgGgccggag.....      | 1 |
| Gi3_23661655_x190..... | Uuucucacccaacagauccg.....      | 1 |
| Gi2_8225747_x189.....  | Uguucucacccaacagauccg.....     | 1 |
| Gi3_23694905_x188..... | Agguucgauucccgcgccggagc.....   | 1 |
| Gi3_23697725_x188..... | ggGucgauucccgcgccggagc.....    | 1 |
| G1a_4644493_x187.....  | guucgauucccgcgccggagc.....     | 0 |
| Gi5_6557180_x187.....  | ucacccaacagauccggguu.....      | 0 |
| Gi3_23707837_x187..... | Cccggcguaguauaacggcuaga.....   | 1 |
| Gi3_23739640_x185..... | uccggcguaguauaacggA.....       | 1 |
| Gi2_8259226_x185.....  | cccaacagauccggguuc.....        | 0 |
| Gi3_23749033_x184..... | gAuucgauucccgcgccggagc.....    | 1 |
| G1a_4658536_x183.....  | gguucgauucccgcgcc.....         | 0 |
| Gi1_3057106_x183.....  | gguucucacccaacagauccgg.....    | 0 |
| Gi4_367620_x179.....   | guucgauucccgcgccgg.....        | 0 |
| Gi1_3070143_x179.....  | agauccggguucgauucc.....        | 0 |
| Gi5_6615364_x179.....  | Uuucgauucccgcgccggagc.....     | 1 |
| Gi5_6612679_x179.....  | ggcguaguauaacggcuag.....       | 0 |
| Gi1_3071396_x179.....  | gUuucucacccaacagauccg.....     | 1 |
| Gi3_23840974_x178..... | uugguucucacccaacagaucc.....    | 0 |
| Gi5_6632435_x177.....  | gguucgauucccgcgccggagcCu.....  | 1 |
| Gi3_23865777_x176..... | cgauucccgcgccggag.....         | 0 |
| Gi5_6646480_x175.....  | ugguucucacccaacagauccg.....    | 0 |
| Gi1_3086057_x175.....  | Uuucgauucccgcgccg.....         | 1 |
| Gi1_3085182_x175.....  | Uuucucacccaacagauccgg.....     | 1 |
| Gi3_23894898_x174..... | gguucucacccaacagauccgggu.....  | 0 |
| Gi1_3095764_x172.....  | Ggguucucacccaacagauccgg.....   | 1 |
| Gi3_23948305_x171..... | guucGaCucccgcgccggag.....      | 1 |
| Gi2_8390578_x170.....  | gUuucgauucccgcgccgga.....      | 1 |



|                                                     |   |
|-----------------------------------------------------|---|
| Gi3_23962653_x170.....ucUggcguaguauaacggcua.....    | 1 |
| Gi5_6685354_x169.....gUuucgauucccggcgcgcg.....      | 1 |
| Gi1_3103256_x169.....ucaccaacagauccgggu.....        | 0 |
| Gi3_24013811_x167.....uccgUcguaguauaacggcuaaga..... | 1 |
| Gi2_8419886_x166.....gGucgauucccggcgcg.....         | 1 |
| Gi3_24044896_x165.....uccggcguaguauaacggcuaAa.....  | 1 |
| Gi2_8436782_x165.....gguucgauucccggcgcgGgc.....     | 1 |
| Gi5_6719756_x164.....gauucccggcgcgagcC.....         | 1 |
| Gi3_24072831_x163.....gguucgauucccgUgcccggagc.....  | 1 |
| Gi1a_4721617_x163.....guucgauucccggcgcg.....        | 0 |
| Gi5_6738710_x162.....guucgaCucccggcgcg.....         | 1 |
| Gi3_24090728_x162.....cggguucgauucccggcgcgga.....   | 0 |
| Gi3_24111706_x161.....gGucgauucccggcgcg.....        | 1 |
| Gi2_8472510_x161.....ucgauucccggcgcgag.....         | 0 |
| Gi3_24113960_x161.....gguucgauCcccgggcgcgagc.....   | 1 |
| Gi5_6747445_x161.....uucucaccaacagauccgggu.....     | 0 |
| Gi5_6756601_x160.....uucgauucccggcgcg.....          | 0 |
| Gi5_6755161_x160.....Uuucucaccaacagauccgg.....      | 1 |
| Gi3_24132052_x160.....gguucucaccaacagauccgg.....    | 0 |
| Gi1_3143858_x159.....gGucucaccaacagauccg.....       | 1 |
| Gi3_24150185_x159.....ucaccaacagauccggguuc.....     | 0 |
| Gi3_24143030_x159.....uccggcguaguauaaUggcuaaga..... | 1 |
| Gi3_24142553_x159.....gguucgauuccAgcgcgagc.....     | 1 |
| Gi5_6778507_x158.....uccggguucgauucccggc.....       | 0 |
| Gi2_8512592_x157.....gguucgaCucccggcgcgagc.....     | 1 |
| Gi1a_4740628_x157.....ucucaccaacagauccg.....        | 0 |
| Gi2_8518708_x156.....cgauucccggcgcgagcC.....        | 1 |
| Gi1_3155014_x156.....guucucaccaacaCauccgg.....      | 1 |
| Gi1_3162430_x154.....gguucgauucccggcgcgagcCu.....   | 1 |
| Gi5_6811730_x153.....guucgauucccggcgcggaC.....      | 1 |
| Gi3_24232226_x153.....uccggcguagCauaacggcuaaga..... | 1 |
| Gi1_3167020_x152.....Auucgauucccggcgcg.....         | 1 |
| Gi3_24258258_x151.....uccggUguaguauaacggc.....      | 1 |
| Gi3_24263996_x151.....gguucgauucccggcgcgagcA.....   | 1 |
| Gi3_24257654_x151.....Aguucgauucccggcgcgag.....     | 1 |
| Gi2_8579332_x150.....agauccggguucgauucc.....        | 0 |
| Gi3_24312302_x148.....gguucgauucccggcgAcgagc.....   | 1 |
| Gi2_8603634_x148.....agaaugguugguucucacc.....       | 0 |
| Gi3_24331334_x147.....aucggguucgauucccggcgcgga..... | 0 |
| Gi1_3193841_x145.....guucgauuNccgggcgcg.....        | 1 |
| Gi2_8651444_x144.....Uuucucaccaacagauccg.....       | 1 |
| Gi1_3205093_x143.....ccggcguaguauaacggcua.....      | 0 |
| Gi3_24417877_x142.....guucgauucccggcgcggaC.....     | 1 |
| Gi3_24415889_x142.....gguucAauucccggcgcgagc.....    | 1 |
| Gi2_8670143_x142.....Cguucgauucccggcgcgagc.....     | 1 |
| Gi1_3216716_x141.....Gccggcguaguauaacgg.....        | 1 |
| Gi2_8681736_x141.....ugguucucaccaacagaucc.....      | 0 |

|                        |                                    |   |
|------------------------|------------------------------------|---|
| Gi1a_4799734_x141..... | .uccggcguaguauaacgg.....           | 0 |
| Gi3_24449273_x140..... | .guucucacccaacagauccggg.....       | 0 |
| Gi5_6930592_x139.....  | .....auucccggcgcgggagcC.....       | 1 |
| Gi2_8698787_x139.....  | .uccggcguaguauaacggcuaAaa.....     | 1 |
| Gi5_6938237_x139.....  | .....guucgauucccggcgcgggagcCu..... | 1 |
| Gi3_24512108_x136..... | .....ggAucgauucccggcgcgggagc.....  | 1 |
| Gi2_8736673_x136.....  | .....gGucgauucccggcgcggga.....     | 1 |
| Gi2_8744776_x135.....  | .....guuUgauucccggcgcgggag.....    | 1 |
| Gi3_24559584_x134..... | .....uucucacccaacagauccggguuc..... | 0 |
| Gi5_6979068_x134.....  | .....gguucgauUccgggcgcgg.....      | 1 |
| Gi3_24551410_x134..... | .....ggguucgauucccggcgcgggagc..... | 0 |
| Gi1_3244829_x134.....  | .....Uuucgauucccggcgcgggagc.....   | 1 |
| Gi5_6975584_x134.....  | .....gUuucgauucccggcgcgggag.....   | 1 |
| Gi1_3250029_x133.....  | .....ccggcguaguauaacggcuaga.....   | 0 |
| Gi3_24613453_x131..... | .....gguuUgauucccggcgcgggagc.....  | 1 |
| Gi5_7003636_x131.....  | .....gGucgauucccggcgcggga.....     | 1 |
| Gi1_3258716_x131.....  | .....cucacccaacagauccGg.....       | 1 |
| Gi5_7008202_x130.....  | .....gUuucgauucccggcgcgc.....      | 1 |
| Gi1a_4841853_x129..... | .uccggcguaguauaacggc.....          | 0 |
| Gi3_24642742_x129..... | .uccggcguaguauCacggcuaga.....      | 1 |
| Gi1_3271991_x127.....  | .....guCcgauucccggcgcgg.....       | 1 |
| Gi5_7036657_x127.....  | .....guucgaCucccggcgcgg.....       | 1 |
| Gi3_24687352_x126..... | .....Aguucgauucccggcgcggga.....    | 1 |
| Gi3_24694660_x126..... | .....gguucgauucccggcgcgggagA.....  | 1 |
| Gi5_7068052_x124.....  | .....ccggcguaguauaacggcuaga.....   | 0 |
| Gi3_24739411_x123..... | .....gguucgauNcccggcgcggga.....    | 1 |
| Gi3_24759981_x122..... | .....uGcggcguaguauaacggc.....      | 1 |
| Gi3_24749611_x122..... | .....gguucgauucccggcgcUggagc.....  | 1 |
| Gi2_8905500_x121.....  | .....gguCcgauucccggcgcgggagc.....  | 1 |
| Gi5_7102542_x121.....  | .....uugguucucacccaacagauccg.....  | 0 |
| Gi1_3298259_x121.....  | .....ccggcguaguauaacggc.....       | 0 |
| Gi5_7117155_x119.....  | .....Gccggcguaguauaacgg.....       | 1 |
| Gi3_24812582_x119..... | .....caacagauccggguucga.....       | 0 |
| Gi1_3311683_x118.....  | .....Uguucgauucccggcgcgggagc.....  | 1 |
| Gi3_24828166_x118..... | .....guucucacccaacagauccgggu.....  | 0 |
| Gi4_406299_x117.....   | .uccggcguaguauaacggcuaga.....      | 0 |
| Gi2_8951030_x117.....  | .....Uguucgauucccggcgcgg.....      | 1 |
| Gi3_24835557_x117..... | .....gguucgauNcccggcgcgggag.....   | 1 |
| Gi5_7131131_x117.....  | .....Cguucgauucccggcgcgc.....      | 1 |
| Gi3_24857697_x116..... | .uccggUguaguauaacggcuaga.....      | 1 |
| Gi3_24876850_x115..... | .uccggcguGguauaacggcua.....        | 1 |
| Gi1_3326847_x115.....  | .....Gucucacccaacagauccg.....      | 1 |
| Gi5_7166130_x114.....  | .....Gccggcguaguauaacggc.....      | 1 |
| Gi1_3331080_x114.....  | .....Gccggcguaguauaacggcuag.....   | 1 |
| Gi3_24942169_x111..... | .....gguucgauucccggcgcgggaCc.....  | 1 |
| Gi2_9037156_x110.....  | .....ucgauucccggcgcggga.....       | 0 |
| Gi5_7202873_x110.....  | .....uUguucucacccaacagauccg.....   | 1 |

|                        |                                |   |
|------------------------|--------------------------------|---|
| Gi3_24965152_x110..... | uGcggcguaguauaacgg.....        | 1 |
| Gi5_7222001_x108.....  | Gccggcguaguauaacggcuagaau..... | 1 |
| Gi5_7223837_x108.....  | Gucucacccaacagauccg.....       | 1 |
| Gi3_24998583_x108..... | uccggcguaguauaacggUuaga.....   | 1 |
| Gi3_24991239_x108..... | Gccggcguaguauaacggcuagaau..... | 1 |
| Gi1_3358450_x107.....  | Gucucacccaacagauccgg.....      | 1 |
| Gi3_25019293_x107..... | guucgaCucccggcgccg.....        | 1 |
| Gi3_25009663_x107..... | Uauucccggcgccggagc.....        | 1 |
| Gi5_7233480_x107.....  | uGcggcguaguauaacggcuaga.....   | 1 |
| Gi3_25015334_x107..... | ggguucgauucccggcgccggag.....   | 0 |
| Gi2_9076486_x106.....  | aguccggcguaguauaacgg.....      | 0 |
| Gi4_415438_x105.....   | gguucgauucccggcgccggagc.....   | 0 |
| Gi1a_4940392_x105..... | uucgauucccggcgccggagc.....     | 0 |
| Gi5_7247474_x105.....  | ucucacccaacagauccgggu.....     | 0 |
| Gi1_3372775_x105.....  | gGucgauucccggcgccgga.....      | 1 |
| Gi2_9109341_x104.....  | gGucgauucccggcgccggag.....     | 1 |
| Gi5_7261905_x104.....  | Gccggcguaguauaacggcua.....     | 1 |
| Gi3_25095319_x103..... | ccggcguaguauaacggcuag.....     | 0 |
| Gi3_25091096_x103..... | Gccggcguaguauaacggcuag.....    | 1 |
| Gi2_9115834_x103.....  | gguucgGuucccggcgccggagc.....   | 1 |
| Gi3_25104011_x102..... | gguAcgauucccggcgccggagc.....   | 1 |
| Gi3_25119990_x101..... | gguucgCuucccggcgccggagc.....   | 1 |
| Gi5_7296674_x101.....  | gguucgauucccggcgccggagcgu..... | 0 |
| Gi2_9144974_x100.....  | cgauucccggcgccggagcguuA.....   | 1 |
| Gi3_25149226_x100..... | uccggcguaguauaacggcuagC.....   | 1 |
| Gi2_9150774_x100.....  | uGcggcguaguauaacggcuaga.....   | 1 |
| Gi3_25155666_x99.....  | Gucucacccaacagauccg.....       | 1 |
| Gi1_3403571_x98.....   | gUuucgauucccggcgccggagc.....   | 1 |
| Gi3_25180281_x98.....  | ggcguaguauaacggcuaga.....      | 0 |
| Gi1_3407858_x97.....   | uUguucucacccaacagauccg.....    | 1 |
| Gi3_25193808_x97.....  | uGcucacccaacagauccg.....       | 1 |
| Gi1_3410380_x97.....   | gguucgauucccggcgccggagcU.....  | 1 |
| Gi2_9186957_x97.....   | guucgaCucccggcgccgg.....       | 1 |
| Gi1_3412405_x96.....   | gguucgauucccggcgcc.....        | 0 |
| Gi1_3412885_x96.....   | gguucgauucccggcgccAg.....      | 1 |
| Gi3_25219584_x95.....  | uccggcguaguaCaacggcuaga.....   | 1 |
| Gi5_7369994_x94.....   | gCucgauucccggcgccg.....        | 1 |
| Gi3_25254537_x94.....  | gguucgauucUcggcgccggagc.....   | 1 |
| Gi3_25246829_x94.....  | agauccggguucgauucc.....        | 0 |
| Gi1_3431858_x93.....   | Cuucgauucccggcgccgg.....       | 1 |
| Gi3_25280139_x92.....  | gGucucacccaacagauccg.....      | 1 |
| Gi3_25304938_x91.....  | gguucgauucccggcgUcggagc.....   | 1 |
| Gi3_25293472_x91.....  | Auucgauucccggcgccgga.....      | 1 |
| Gi1_3443389_x90.....   | Agguucgauucccggcgccgg.....     | 1 |
| Gi3_25328468_x89.....  | Uuucacccaacagauccgg.....       | 1 |
| Gi5_7424212_x89.....   | acagauccggguucgauucccggcg..... | 0 |
| Gi2_9277568_x89.....   | gAuucgauucccggcgccggagc.....   | 1 |

|                       |                                       |   |
|-----------------------|---------------------------------------|---|
| Gi1_3455056_x88.....  | .....guucgGuucccggcgcgg.....          | 1 |
| Gi3_25349424_x88..... | .....uccggcguaguauaacggcuagaaA.....   | 1 |
| Gi5_7436018_x88.....  | .....gGucgauucccggcgcgggagc.....      | 1 |
| Gi1_3460306_x87.....  | .....ggcguaguauaacggcuag.....         | 0 |
| Gi5_7437946_x87.....  | .....uGcggcguaguauaacggcuag.....      | 1 |
| Gi1_3459958_x87.....  | .....gGucucacccaacagauccgg.....       | 1 |
| Gi2_9296624_x87.....  | .....ggGucgauucccggcgcgggagc.....     | 1 |
| Gi3_25380784_x86..... | .....uccggcgCaguauaacggcuaga.....     | 1 |
| Gi1_3464465_x86.....  | .....Uguucgauucccggcgcgg.....         | 1 |
| Gi2_9316258_x86.....  | .....cggcguaguauaacggcua.....         | 0 |
| Gi3_25413852_x85..... | .....cccaacagauccggguucgauucc.....    | 0 |
| Gi3_25408497_x85..... | .....uccggcguaguauaacggcuagaaU.....   | 1 |
| Gi2_9323159_x85.....  | .....Gccggcguaguauaacggc.....         | 1 |
| Gi1a_5035827_x85..... | .....uccggcguaguauaacggcua.....       | 0 |
| Gi3_25425115_x84..... | .....cagauccggguucgauucccggcgcgg..... | 0 |
| Gi3_25418899_x84..... | .....Auucgauucccggcgcgggagc.....      | 1 |
| Gi3_25424863_x84..... | .....gguucgauucccggcgcAggagc.....     | 1 |
| Gi3_25423855_x84..... | .....gguucgauucccggcAccggagc.....     | 1 |
| Gi4_435328_x83.....   | .....uugguucucacccaacaga.....         | 0 |
| Gi2_9348290_x83.....  | .....cucacccaacagauccgg.....          | 0 |
| Gi1a_5050925_x83..... | .....Uguucgauucccggcgcgggagc.....     | 1 |
| Gi3_25442693_x83..... | .....Gccggcguaguauaacggcuagaa.....    | 1 |
| Gi5_7492827_x83.....  | .....Aguucgauucccggcgcgggagc.....     | 1 |
| Gi1_3484149_x82.....  | .....guucAauucccggcgcgg.....          | 1 |
| Gi5_7506722_x82.....  | .....gguucgauucccggcgcgggagcguu.....  | 0 |
| Gi1_3491081_x81.....  | .....guucgauucccggcgcAg.....          | 1 |
| Gi3_25469201_x81..... | .....gguucgauucccUgcgcgggagc.....     | 1 |
| Gi3_25483376_x81..... | .....gguucgauucccggcgcAgagc.....      | 1 |
| Gi3_25483214_x81..... | .....gguucgauucccggcgcggG.....        | 1 |
| Gi3_25500696_x80..... | .....ucUggcguaguauaacggc.....         | 1 |
| Gi2_9378699_x80.....  | .....uucgauucccggcgcgggag.....        | 0 |
| Gi3_25486936_x80..... | .....ggCucgauucccggcgcggga.....       | 1 |
| Gi2_9385499_x80.....  | .....gUuucucacccaacagauccg.....       | 1 |
| Gi3_25504765_x79..... | .....guucgauucccggcgcggGg.....        | 1 |
| Gi3_25536986_x78..... | .....uUguucucacccaacagauccg.....      | 1 |
| Gi1_3506059_x78.....  | .....uGcucacccaacagauccg.....         | 1 |
| Gi1_3501457_x78.....  | .....guuUgauucccggcgcgg.....          | 1 |
| Gi1_3501301_x78.....  | .....uccggcguaguauaacggcuagaaU.....   | 1 |
| Gi1_3510223_x77.....  | .....gGucgauucccggcgcgg.....          | 1 |
| Gi5_7559961_x77.....  | .....cgauucccggcgcgggagcguuuc.....    | 0 |
| Gi4_442433_x77.....   | .....guucgauucccggcgcggga.....        | 0 |
| Gi1_3506604_x77.....  | .....guucUauucccggcgcgg.....          | 1 |
| Gi2_9414179_x77.....  | .....Auucgauucccggcgcgg.....          | 1 |
| Gi2_9417028_x77.....  | .....ggAucgauucccggcgcgggagc.....     | 1 |
| Gi3_25563010_x76..... | .....Cguucucacccaacagauccg.....       | 1 |
| Gi2_9423957_x76.....  | .....uccggcguaguauaacggcu.....        | 0 |
| Gi1_3511686_x76.....  | .....uGcucacccaacagauccgg.....        | 1 |

|                  |                                |   |
|------------------|--------------------------------|---|
| Gi3_25568178_x76 | .....gguucgauucccgcgccggagU    | 1 |
| Gi3_25594935_x75 | .....gguucgauuNccggcgccgga     | 1 |
| Gi2_9443182_x75  | .....gguuUgauucccgcgccggagc    | 1 |
| Gi2_9445432_x75  | .....cgggcguaguauaacggcuaga    | 0 |
| Gi5_7589840_x74  | .....guucgaCucccgcgccggagc     | 1 |
| Gi5_7588434_x74  | .....cgggcguaguauaacggcuaga    | 0 |
| Gi3_25627916_x73 | .....uccggcguUguauaacggcuaga   | 1 |
| Gi3_25620397_x73 | .....gguucgauuNccggcgccgg      | 1 |
| Gi2_9465654_x73  | .....uccggcguaguauaacggcuGga   | 1 |
| Gi5_7599143_x73  | .....uccggcguaguauaacggcuagG   | 1 |
| Gi3_25621492_x73 | .....Auucgauucccgcgccgg        | 1 |
| Gi3_25652418_x72 | .....gguucgauuUccggcgccggagc   | 1 |
| Gi5_7616829_x72  | .....uucucacccaacagauccggguuc  | 0 |
| Gi3_25641906_x72 | .....ucUggcguaguauaacgg        | 1 |
| Gl1a_5103639_x72 | .....uccggcguaguauaacggcuagaa  | 0 |
| Gi5_7618053_x72  | .....ggcguaguauaacggcuaga      | 0 |
| Gi3_25636938_x72 | .....ggcguaguauaacggcuag       | 0 |
| Gi3_25635066_x72 | .....ugguucucacccaacagauccgg   | 0 |
| Gi2_9477623_x72  | .....cgauucccgcgccggagcguuuc   | 0 |
| Gi3_25652994_x72 | .....uccggcguNguauaacggcua     | 1 |
| Gi3_25661387_x71 | .....Cguucgauucccgcgccgga      | 1 |
| Gi1_3536906_x71  | .....uccggcguaguauaacggcuagaU  | 1 |
| Gi2_9490621_x71  | .....gCuucgauucccgcgccggagc    | 1 |
| Gi1_3536125_x71  | .....Uguucgauucccgcgccgga      | 1 |
| Gi1_3538184_x71  | .....gGucgauucccgcgccggagc     | 1 |
| Gi1_3539746_x71  | .....gguucgauucccgUgccgg       | 1 |
| Gi3_25659541_x71 | .....ggguucgauucccgcgccgga     | 0 |
| Gl1a_5110245_x71 | .....cgauucccgcgccggagcC       | 1 |
| Gi4_448843_x70   | .....cucacccaacagauccggguucg   | 0 |
| Gi2_9500831_x70  | .....guucucacccaacagauccgg     | 0 |
| Gi1_3542696_x70  | .....ggcguaguauaacggcua        | 0 |
| Gi3_25690730_x70 | .....gguucgGuucccgcgccgga      | 1 |
| Gi2_9499641_x70  | .....uucucacccaacagauccgg      | 0 |
| Gi2_9498941_x70  | .....gguucgauucccgcgAcggagc    | 1 |
| Gi5_7641508_x70  | .....gguucucacccaacagauccggguu | 0 |
| Gl1a_5117872_x70 | .....gguucgauucccgcgccg        | 0 |
| Gi3_25682750_x70 | .....uccggcguCguauaacggcuaga   | 1 |
| Gl1a_5115352_x70 | .....uccggcguaguauaacggcuagaa  | 0 |
| Gi5_7642558_x70  | .....uccggcguaguauaacggcuGga   | 1 |
| Gi1_3541786_x70  | .....Gccggcguaguauaacggcua     | 1 |
| Gi5_7651960_x69  | .....Aguucucacccaacagauccg     | 1 |
| Gi2_9507881_x69  | .....gguucgauucccgcgccggagA    | 1 |
| Gi2_9515471_x69  | .....ucUggcguaguauaacggcuaga   | 1 |
| Gi3_25693495_x69 | .....gCucgauucccgcgccgg        | 1 |
| Gi5_7645819_x69  | .....uGcggcguaguauaacggcuagaa  | 1 |
| Gi3_25706398_x69 | .....gguucgauucccgcgccggG      | 1 |
| Gi2_9511814_x69  | .....gUuucgauucccgcgccg        | 1 |

|                  |                               |   |
|------------------|-------------------------------|---|
| Gi1_3549294_x69  | .Gccggcguaguauaacggcuaga      | 1 |
| Gi3_25697014_x69 | .ggCucgauucccggcgcggag        | 1 |
| Gi3_25713635_x68 | .uccggcguaguauaacggcuUga      | 1 |
| Gi5_7667663_x68  | .Auucgauucccggcgcgcg          | 1 |
| Gi5_7659095_x68  | .gguucgauNcccggcgccggagc      | 1 |
| Gi2_9519724_x68  | .gguucgauucccAgcgccggagc      | 1 |
| Gi5_7664807_x68  | .Ggguucucacccaacagauccg       | 1 |
| Gi3_25725127_x68 | .Aguucgauucccggcgcgcg         | 1 |
| Gi2_9536503_x67  | .gguucgauCcccggcgccggagc      | 1 |
| Gi5_7668269_x67  | .gguucgauucccggcgcgcAg        | 1 |
| Gi3_25740233_x67 | .Accggcguaguauaacggcuaga      | 1 |
| Gi2_9542198_x67  | .ccggcguaguauaacggcu          | 0 |
| Gi5_7691722_x66  | .cagaucggguucgauucccggcgcgcg  | 0 |
| Gi1_3559898_x66  | .guucgauucccAgcgccgg          | 1 |
| Gi2_9546257_x66  | .gguucAauucccggcgcgcggagc     | 1 |
| Gi1_3561746_x66  | .guucgauCcccggcgccgg          | 1 |
| Gi5_7680238_x66  | .ggguucgauucccggcgcgcggagc    | 0 |
| Gi5_7687168_x66  | .ucgauucccggcgcgcgga          | 0 |
| Gi2_9554639_x66  | .Gccggcguaguauaacggcu         | 1 |
| Gi1_3561548_x66  | .Ggguucucacccaacagauccg       | 1 |
| Gi3_25773912_x65 | .uccAgcguaguauaacggcuaga      | 1 |
| Gi2_9562796_x65  | .gGucucacccaacagauccg         | 1 |
| Gi3_25769037_x65 | .gCucgauucccggcgcgcggagc      | 1 |
| Gi5_7698366_x65  | .ccggguucgauucccggcgcgcgga    | 0 |
| Gi3_25791259_x64 | .Cguucgauucccggcgcgcggag      | 1 |
| Gi5_7709861_x64  | .cggcguaguauaacggcuag         | 0 |
| Gi1_3572008_x64  | .caacagauccggguucgauucccggc   | 0 |
| Gi2_9578297_x64  | .cgauucccggcgcgcggagcguuu     | 0 |
| Gi2_9577273_x64  | .Auucgauucccggcgcgcggagc      | 1 |
| Gi2_9571449_x64  | .aguccggcguaguauaacggcuaga    | 0 |
| Gi2_9571513_x64  | .uucucacccaacagauccggguucg    | 0 |
| Gi1_3573800_x64  | .guucgauucccggcgcgcUgg        | 1 |
| Gi5_7726656_x63  | .Auucgauucccggcgcgcgg         | 1 |
| Gi3_25805856_x63 | .gguucgauucccggcgcgcggagcga   | 1 |
| Gi1_3575068_x63  | .gUuucgauucccggcgcgcg         | 1 |
| Gi2_9582921_x63  | .guucgaCucccggcgcgcg          | 1 |
| Gi5_7721679_x63  | .gguucgauucccggcgcgcggagcguuu | 0 |
| Gi3_25815684_x63 | .ggcguaguauaacggcu            | 0 |
| Gi3_25813101_x63 | .uccggcguaguauaacggcuaga      | 1 |
| Gi3_25813920_x63 | .guucgauucccggcgcgcggCgc      | 1 |
| Gi3_25833619_x62 | .gguucgauucccggcgcgcgAagc     | 1 |
| Gi3_25833123_x62 | .gguucgauucccggcgcgcgUgcc     | 1 |
| Gi2_9593361_x62  | .gguucgauucccggcgcgcggGg      | 1 |
| Gi3_25836223_x62 | .gguucgauucccggcgcgcAc        | 1 |
| Gi3_25826303_x62 | .guucgGuucccggcgcgcggagc      | 1 |
| Gi3_25822955_x62 | .uccggcguGguauaacgg           | 1 |
| Gi3_25830829_x62 | .uccggcguaguauaacggcuCga      | 1 |

|                       |                                    |   |
|-----------------------|------------------------------------|---|
| Gi1a_5165112_x62..... | uucucacccaacagauccgg.....          | 0 |
| Gi5_7745403_x61.....  | ggcguaguauaacggcuagaau.....        | 0 |
| Gi1_3588651_x61.....  | .....cagaucggguucgauuccggcgcc..... | 0 |
| Gi5_7741133_x61.....  | .....cggcguaguauaacggcuagaau.....  | 0 |
| Gi1_3588041_x61.....  | .....guucgauuccUggcgccgg.....      | 1 |
| Gi1_3585662_x61.....  | .....caccacagauccggguucgauucc..... | 0 |
| Gi3_25847533_x61..... | .....gguucgauuccggcgccggGg.....    | 1 |
| Gi5_7750771_x61.....  | .....gGucucacccaacagauccgg.....    | 1 |
| Gi3_25845764_x61..... | .....uccggcguaguauaacggcCa.....    | 1 |
| Gi5_7750649_x61.....  | .....ggCucucacccaacagauccg.....    | 1 |
| Gi2_9613011_x61.....  | .....uccggcguaguauaacggcuagG.....  | 1 |
| Gi3_25842104_x61..... | .....uccggcguaguauaGcggcua.....    | 1 |
| Gi2_9614597_x61.....  | .....gguucgauuccUggcgccggagc.....  | 1 |
| Gi3_25870549_x60..... | .....gguucgauuccAgggcgccggagc..... | 1 |
| Gi5_7764076_x60.....  | .....uGcucacccaacagauccg.....      | 1 |
| Gi5_7760416_x60.....  | .....ucUggcguaguauaacggcuaga.....  | 1 |
| Gi3_25867609_x60..... | .....gguucgauNccggcgccg.....       | 1 |
| Gi2_9637625_x59.....  | .....Gccggcguaguauaacgg.....       | 1 |
| Gi5_7768413_x59.....  | .....cgauuccggcgccggagcguuuA.....  | 1 |
| Gi2_9636740_x59.....  | .....guucgauuccggcgccggagcCu.....  | 1 |
| Gi3_25881254_x59..... | .....uccggcguGguauaacggc.....      | 1 |
| Gi2_9631725_x59.....  | .....uccggcguNguauaacggcuaga.....  | 1 |
| Gi3_25895650_x59..... | .....cggcguaguauaacggcuaga.....    | 0 |
| Gi2_9646919_x58.....  | .....Aguucgauuccggcgccggag.....    | 1 |
| Gi3_25900812_x58..... | .....Gucucacccaacagauccgg.....     | 1 |
| Gi5_7786211_x58.....  | .....uccggcguNguauaacggcuag.....   | 1 |
| Gi3_25908468_x58..... | .....uccgAcguaguauaacggcuaga.....  | 1 |
| Gi3_25913050_x58..... | .....gCucgauuccggcgccggga.....     | 1 |
| Gi5_7785515_x58.....  | .....gguucgauuccggcgccggCgc.....   | 1 |
| Gi5_7790155_x58.....  | .....ucUggcguaguauaacggcuag.....   | 1 |
| Gi2_9663188_x57.....  | .....guucgauuNccggcgccggagc.....   | 1 |
| Gi1_3611657_x57.....  | .....uGcggcguaguauaacgg.....       | 1 |
| Gi2_9655550_x57.....  | .....uUguucacccaacagauccg.....     | 1 |
| Gi3_25948550_x56..... | .....guCcgauuccggcgccgg.....       | 1 |
| Gi2_9670070_x56.....  | .....uucgauuccggcgccggga.....      | 0 |
| Gi2_9670686_x56.....  | .....gCucgauuccggcgccggagc.....    | 1 |
| Gi2_9671918_x56.....  | .....Uauuccggcgccggagc.....        | 1 |
| Gi3_25954822_x56..... | .....gguucgaCuccggcgccggga.....    | 1 |
| Gi3_25942054_x56..... | .....gguucgauuccggcgccgggaAc.....  | 1 |
| Gi3_25956726_x56..... | .....Aguucgauuccggcgccgg.....      | 1 |
| Gi3_25940150_x56..... | .....guucgauuccggcgccggagcA.....   | 1 |
| Gi5_7823094_x55.....  | .....uGcggcguaguauaacgg.....       | 1 |
| Gi3_25969945_x55..... | .....gguucgauuccggcgccUggag.....   | 1 |
| Gi5_7824359_x55.....  | .....gCucgauuccggcgccgg.....       | 1 |
| Gi1_3622888_x55.....  | .....uGcggcguaguauaacggcuag.....   | 1 |
| Gi3_25976215_x55..... | .....uccggcguNguauaacgg.....       | 1 |
| Gi1_3627210_x54.....  | .....uccggcguGguauaacggcuag.....   | 1 |

|                       |                                   |   |
|-----------------------|-----------------------------------|---|
| Gi2_9702216_x54.....  | ..gguucgauucccggcAccggagc.....    | 1 |
| Gi2_9697464_x54.....  | ..Gucucacccaacagauccg.....        | 1 |
| Gi3_25983306_x54..... | ..cUauucccggcgcggagc.....         | 1 |
| Gi3_26015306_x53..... | ..Cuccggcguaguuaaacggcua.....     | 1 |
| Gi3_26000095_x53..... | ..cggcguaguuaaacggcuagaau.....    | 0 |
| Gi3_25997127_x53..... | ..uccggcguaguGuaaacggcua.....     | 1 |
| Gi3_26016048_x53..... | ..gguucgauucccgAgccggagc.....     | 1 |
| Gi3_26031092_x52..... | ..Gcgauucccggcgcggagc.....        | 1 |
| Gi1_3633854_x52.....  | ..guucgauucccggcAccgg.....        | 1 |
| Gi3_26032808_x52..... | ..cgauucccggcgcggagcguuucA.....   | 1 |
| Gi3_26033432_x52..... | ..Cuucgauucccggcgcggga.....       | 1 |
| Gi3_26030988_x52..... | ..Ggguucucacccaacagauccg.....     | 1 |
| Gi5_7864261_x51.....  | ..ggCucgauucccggcgcggagc.....     | 1 |
| Gi5_7872115_x51.....  | ..guCucacccaacagauccg.....        | 1 |
| Gi5_7874053_x51.....  | ..gguucgauucccggcgcggagcA.....    | 1 |
| Gi1_3640695_x51.....  | ..guucgauucccggcgcAgg.....        | 1 |
| Gi3_26052100_x51..... | ..gguucgauucccgAcgccggagc.....    | 1 |
| Gi3_26049448_x51..... | ..Cuucgauucccggcgcgg.....         | 1 |
| Gi1_3642664_x50.....  | ..guucgauucUcgggcgg.....          | 1 |
| Gi3_26067836_x50..... | ..ugguucucacccaUcagauc.....       | 1 |
| Gi2_9747145_x50.....  | ..gguucgauucccggcgcAggagc.....    | 1 |
| Gi3_26069236_x50..... | ..Cguucgauucccggcgcgg.....        | 1 |
| Gi3_26057686_x50..... | ..gguuGgauucccggcgcggagc.....     | 1 |
| Gi3_26077436_x50..... | ..gguucgauucccggcgcggagcU.....    | 1 |
| Gi3_26058286_x50..... | ..gCuucgauucccggcgcggag.....      | 1 |
| Gi3_26077036_x50..... | ..guucgauuNccgggcgcggagc.....     | 1 |
| Gi3_26076736_x50..... | ..uccggcguNguauaacggc.....        | 1 |
| Gi3_26064286_x50..... | ..gguucgauNccgggcgcgg.....        | 1 |
| Gi3_26057186_x50..... | ..Aguucucacccaacagauccg.....      | 1 |
| Gi3_26079272_x49..... | ..guucgGuucccggcgcgg.....         | 1 |
| Gi2_9757944_x49.....  | ..guucgauucccggcgcAga.....        | 1 |
| Gi1_3652936_x49.....  | ..gguucgauCccgggcgcgg.....        | 1 |
| Gi3_26081820_x49..... | ..gAuucgauucccggcgcggag.....      | 1 |
| Gi5_7894955_x49.....  | ..guaguuaaacggcuagaau.....        | 0 |
| Gi2_9755445_x49.....  | ..gguucgauucccggcgcggagcCu.....   | 1 |
| Gi1_3647644_x49.....  | ..auccggguucgauucccggcgcggga..... | 0 |
| Gi5_7897160_x49.....  | ..Uauucccggcgcggagc.....          | 1 |
| Gi3_26081134_x49..... | ..uccggcguaguauGacggcuaga.....    | 1 |
| Gi5_7894759_x49.....  | ..uccggcguaguuaacAgcuaga.....     | 1 |
| Gi1_3647301_x49.....  | ..gguucgauNccgggcgcgg.....        | 1 |
| Gi3_26116112_x48..... | ..uccggcguaguuaacAgc.....         | 1 |
| Gi3_26110784_x48..... | ..uccggcguaguCuaaacggcuaga.....   | 1 |
| Gi3_26101520_x48..... | ..uccggcguaguuaUcggcuaga.....     | 1 |
| Gi3_26103488_x48..... | ..uccggcguaguauCacggcua.....      | 1 |
| Gi2_9772973_x48.....  | ..gguucgCuucccggcgcggagc.....     | 1 |
| Gi2_9777389_x48.....  | ..guCcgauucccggcgcgg.....         | 1 |
| Gi3_26097632_x48..... | ..uccggcguaguuaacAgcua.....       | 1 |



|                       |                              |                               |   |
|-----------------------|------------------------------|-------------------------------|---|
| Gi2_9775181_x48.....  | uccggcguaguauaacAgcuaga..... |                               | 1 |
| Gi2_9773741_x48.....  |                              | Aguucgauucccggcgcc.....       | 1 |
| Gi3_26113280_x48..... |                              | gguucgauCcccggcgccgga.....    | 1 |
| Gi1_3657785_x48.....  |                              | Aguucgauucccggcgccgg.....     | 1 |
| Gi1_3653081_x48.....  |                              | guucgauucccggcgccggagcA.....  | 1 |
| Gi2_9784902_x47.....  |                              | guucgauucccggcgccggCgc.....   | 1 |
| Gi1_3662555_x47.....  |                              | guucgauucccggcgcUcgg.....     | 1 |
| Gi3_26130456_x47..... |                              | gguucgGuucccggcgccggag.....   | 1 |
| Gi2_9784714_x47.....  |                              | gguucgauucccggcgccggagU.....  | 1 |
| Gi5_7923906_x47.....  |                              | gguucgauucccCgcgccggag.....   | 1 |
| Gi2_9786124_x47.....  | Gccggcguaguauaacggcuag.....  |                               | 1 |
| Gi3_26125662_x47..... |                              | gGucucacccaacagauccgg.....    | 1 |
| Gi2_9805034_x46.....  |                              | gguucgauucccgUgcgccgagc.....  | 1 |
| Gi5_7940367_x46.....  |                              | guucgGuucccggcgccg.....       | 1 |
| Gi3_26145785_x46..... | uccggcguaguauaGcggc.....     |                               | 1 |
| Gi2_9796478_x46.....  |                              | guucgauucccggcgccggGgc.....   | 1 |
| Gi5_7931489_x46.....  | uGcggcguaguauaacggc.....     |                               | 1 |
| Gi1a_5280140_x46..... |                              | gGuucgauucccggcgccggagc.....  | 1 |
| Gi3_26153651_x46..... |                              | gguucgauuUccgggcgccggag.....  | 1 |
| Gi5_7937975_x46.....  |                              | Cuucgauucccggcgccgg.....      | 1 |
| Gi3_26142795_x46..... | uGcggcguaguauaacggcuag.....  |                               | 1 |
| Gi3_26153973_x46..... |                              | ggguucgauucccggcgccg.....     | 0 |
| Gi5_7938021_x46.....  |                              | guucgauuNccgggcgccg.....      | 1 |
| Gi3_26152501_x46..... |                              | gguucgauCcccggcgccggag.....   | 1 |
| Gi3_26161378_x45..... | uccggcguaguauCacgg.....      |                               | 1 |
| Gi2_9814704_x45.....  |                              | gguucgauucccggcgcUggagc.....  | 1 |
| Gi5_7946502_x45.....  |                              | guCcgauucccggcgccgg.....      | 1 |
| Gi2_9812634_x45.....  | uccggcguaguauaacggcuagC..... |                               | 1 |
| Gi2_9809439_x45.....  |                              | Gcgauucccggcgccggagc.....     | 1 |
| Gi3_26169523_x45..... | uccggcguaguauaacggcuG.....   |                               | 1 |
| Gi2_9809574_x45.....  |                              | gguucgauucccgAcgccggagc.....  | 1 |
| Gi3_26181005_x44..... | uccggcguaguauaacggcuagU..... |                               | 1 |
| Gi1_3679485_x44.....  |                              | guGcgauucccggcgccgg.....      | 1 |
| Gi3_26186901_x44..... |                              | gguucgauucccAgcgcgccga.....   | 1 |
| Gi5_7956443_x44.....  |                              | Cucucacccaacagauccg.....      | 1 |
| Gi2_9825942_x44.....  |                              | gguucgauucccggcgccggagcA..... | 1 |
| Gi2_9830694_x44.....  | uccggcguaguauaGcggcuaga..... |                               | 1 |
| Gi2_9841797_x43.....  |                              | guCcgauucccggcgccggagc.....   | 1 |
| Gi5_7971399_x43.....  | uccggcguaguauaacggcCaga..... |                               | 1 |
| Gi5_7973936_x43.....  |                              | guucgauuNccgggcgccg.....      | 1 |
| Gi5_7971012_x43.....  | uccggcguNguauaacggcuaga..... |                               | 1 |
| Gi1a_5301606_x43..... |                              | Uguucgauucccggcgccggag.....   | 1 |
| Gi2_9846570_x43.....  | uccggcguaguauaacggcCaga..... |                               | 1 |
| Gi5_7984822_x42.....  |                              | cacccaacagauccggguucga.....   | 0 |
| Gi2_9852685_x42.....  |                              | gguucgauuUcgggcgccggagc.....  | 1 |
| Gi3_26228227_x42..... | uccgUcguaguauaacggcua.....   |                               | 1 |
| Gi5_7990408_x42.....  | uccggcguaguauaacgAcua.....   |                               | 1 |

|                  |                                           |   |
|------------------|-------------------------------------------|---|
| Gi3_26226589_x42 | .....uGcggcguaguauaacggcuagaau.....       | 1 |
| Gi2_9855499_x42  | .....Gccggcguaguauaacggcuagaau.....       | 1 |
| Gi2_9856885_x42  | .....uccggcguGguauaacggc.....             | 1 |
| Gi2_9858523_x42  | .....gguucgauucccggcgccAgagc.....         | 1 |
| Gi2_9851257_x42  | .....cggguucgauucccggcgccgga.....         | 0 |
| Gi5_7979992_x42  | .....uGcggcguaguauaacggcua.....           | 1 |
| Gi2_9849745_x42  | .....ggcguaguauaacggcuaga.....            | 0 |
| Gi3_26229739_x42 | .....uccggcguaguauaGcgg.....              | 1 |
| Gi3_26228521_x42 | .....guCcgauucccggcgccggagc.....          | 1 |
| Gi1_3688259_x42  | .....ugguucucNcccaacagauccgg.....         | 1 |
| Gi2_9855625_x42  | .....uccggUguaguauaacggcuagaa.....        | 1 |
| Gi5_7989610_x42  | .....gguucgauucccggcgccggagcgA.....       | 1 |
| Gi5_8004564_x41  | .....gguucucaccccCacagauccg.....          | 1 |
| Gi5_8000628_x41  | .....Cccggcguaguauaacggcuag.....          | 1 |
| Gi3_26256018_x41 | .....uccggcguagCauaacggcua.....           | 1 |
| Gi5_7998250_x41  | .....gguucucacccaacGgauccg.....           | 1 |
| Gi5_7996774_x41  | .....aguccggcguaguauaacggcuagaugg.....    | 0 |
| Gi1_3695561_x41  | .....ccggcguaguauaacggcu.....             | 0 |
| Gi3_26241340_x41 | .....Cccggcguaguauaacggcua.....           | 1 |
| Gi5_7996569_x41  | .....gguucgauNcccggcgccg.....             | 1 |
| Gi5_7993863_x41  | .....Aguucgauucccggcgccg.....             | 1 |
| Gi1_3695766_x41  | .....guAcgauucccggcgccgg.....             | 1 |
| Gi3_26260364_x41 | .....auccggguucgauucccggcgccggagc.....    | 0 |
| Gi2_9863452_x41  | .....guucgaCucccgcgccggag.....            | 1 |
| Gi3_26252492_x41 | .....gguucgauucccggcgccggUgc.....         | 1 |
| Gi5_7993658_x41  | .....guucucaccccCacagauccg.....           | 1 |
| Gi2_9877330_x40  | .....Ggguucucacccaacagauccg.....          | 1 |
| Gi3_26276090_x40 | .....guucgauucccggcgccAga.....            | 1 |
| Gi1_3697317_x40  | .....gUuucgauucccggcgccgga.....           | 1 |
| Gi3_26276010_x40 | .....gguucgauAcccggcgccggagc.....         | 1 |
| Gi1_3698477_x40  | .....guucgauucccgAcgcccgg.....            | 1 |
| Gi3_26266650_x40 | .....uUcggcguaguauaacggc.....             | 1 |
| Gi3_26263370_x40 | .....uUguucucacccaacagauc.....            | 1 |
| Gi5_8014854_x40  | .....uccggcguaguauaacggcCag.....          | 1 |
| Gi3_26263930_x40 | .....gCuucgauucccggcgccgga.....           | 1 |
| Gi3_26275650_x40 | .....uUcggcguaguauaacgg.....              | 1 |
| Gi3_26282010_x40 | .....uccggAguaguauaacggcuaga.....         | 1 |
| Gi5_8026280_x39  | .....guucgauucccggcAccgg.....             | 1 |
| Gi3_26299059_x39 | .....Cuucgauucccggcgccggagc.....          | 1 |
| Gi1_3704321_x39  | .....guugguucucacccaacagauccgggu.....     | 0 |
| Gi3_26283693_x39 | .....gguucgaCucccgcgccggag.....           | 1 |
| Gi3_26305026_x39 | .....agauccggguucgauucccggcgccggagcC..... | 1 |
| Gi2_9893236_x39  | .....Cuucgauucccggcgccgg.....             | 1 |
| Gi3_26305572_x39 | .....gguucgauucAcggcgccggagc.....         | 1 |
| Gi3_26327082_x38 | .....uUcggcguaguauaacggcua.....           | 1 |
| Gi2_9912081_x38  | .....guucgaCucccgcgccgga.....             | 1 |
| Gi2_9905051_x38  | .....uccggguucgauucccggcgccgga.....       | 0 |

|                       |                             |   |
|-----------------------|-----------------------------|---|
| Gi3_26320546_x38..... | uccggUguaguauaacggcua.....  | 1 |
| Gi1_3714126_x38.....  | uccggcguNguauaacggcuag..... | 1 |
| Gi2_9913069_x38.....  | .....                       | 1 |
| Gi3_26326702_x38..... | .....                       | 1 |
| Gi3_26320318_x38..... | .....                       | 1 |
| Gi3_26318608_x38..... | .....                       | 1 |
| Gi1_3709984_x38.....  | .....                       | 1 |
| Gi3_26311426_x38..... | .....                       | 1 |
| Gi2_9911093_x38.....  | .....                       | 1 |
| Gi5_8033481_x38.....  | .....                       | 0 |
| Gi2_9909383_x38.....  | .....                       | 1 |
| Gi5_8031125_x38.....  | .....                       | 1 |
| Gi1_3713404_x38.....  | .....                       | 1 |
| Gi3_26331161_x37..... | .....                       | 1 |
| Gi1_3717732_x37.....  | .....                       | 1 |
| Gi5_8052664_x37.....  | .....                       | 1 |
| Gi2_9924698_x37.....  | .....                       | 1 |
| Gi5_8043118_x37.....  | .....                       | 1 |
| Gi3_26335638_x37..... | .....                       | 1 |
| Gi5_8046744_x37.....  | .....                       | 1 |
| Gi1_3718472_x37.....  | .....                       | 1 |
| Gi3_26345147_x37..... | .....                       | 1 |
| Gi3_26349402_x37..... | .....                       | 1 |
| Gi1_5352502_x37.....  | .....                       | 1 |
| Gi2_9921627_x37.....  | .....                       | 1 |
| Gi2_9916965_x37.....  | .....                       | 1 |
| Gi3_26332530_x37..... | .....                       | 1 |
| Gi2_9923107_x37.....  | .....                       | 1 |
| Gi1_3715031_x37.....  | .....                       | 0 |
| Gi5_8065660_x36.....  | .....                       | 1 |
| Gi5_8055436_x36.....  | .....                       | 0 |
| Gi1_3721587_x36.....  | .....                       | 0 |
| Gi3_26352767_x36..... | .....                       | 1 |
| Gi3_26352083_x36..... | .....                       | 1 |
| Gi3_26358887_x36..... | .....                       | 1 |
| Gi3_26372855_x36..... | .....                       | 1 |
| Gi2_9939771_x36.....  | .....                       | 1 |
| Gi5_8063536_x36.....  | .....                       | 1 |
| Gi5_8058424_x36.....  | .....                       | 1 |
| Gi3_26353271_x36..... | .....                       | 1 |
| Gi2_9939159_x36.....  | .....                       | 1 |
| Gi3_26361443_x36..... | .....                       | 1 |
| Gi2_9929187_x36.....  | .....                       | 1 |
| Gi5_8061016_x36.....  | .....                       | 1 |
| Gi3_26359031_x36..... | .....                       | 1 |
| Gi3_26393525_x35..... | .....                       | 1 |
| Gi1_3728247_x35.....  | .....                       | 1 |

|                  |                              |   |
|------------------|------------------------------|---|
| Gi3_26382465_x35 | uccggcguaAuauaacggcuaga      | 1 |
| G1a_5365600_x35  | guucgauucccgcgccgga          | 0 |
| Gi5_8068229_x35  | guucgaCucccgcgccgga          | 1 |
| Gi1_3728352_x35  | uccggcguaGuauaacggc          | 1 |
| Gi3_26394540_x35 | guucAauucccgcgccgg           | 1 |
| Gi5_8072429_x35  | Cuucgauucccgcgccg            | 1 |
| Gi2_9949979_x35  | gguuGgauucccgcgccggagc       | 1 |
| Gi3_26378230_x35 | uccggcguaGuauaacggcuagaC     | 1 |
| Gi2_9948054_x35  | uGcgcguaGuauaacggcua         | 1 |
| Gi5_8076769_x35  | uccggcguaGuauaacggcuaga      | 1 |
| G1a_5364060_x35  | ugguucucacccaacagauccg       | 0 |
| Gi3_26394120_x35 | uccggguucgauucccgcgccg       | 0 |
| Gi3_26381415_x35 | agaucggguucgauucccgcgccggagc | 0 |
| Gi3_26384355_x35 | ggCucgauucccgcgccg           | 1 |
| Gi5_8077714_x35  | guucUauucccgcgccgg           | 1 |
| Gi5_8069594_x35  | uccggcguaGuauaacAgcuag       | 1 |
| Gi3_26377950_x35 | guCcgauucccgcgccgga          | 1 |
| Gi1_3735733_x34  | ucUggcguaGuauaacgg           | 1 |
| Gi1_3737467_x34  | uccggcguaNguauaacgg          | 1 |
| Gi1_3735189_x34  | ccggcguaGuauaacggcuag        | 0 |
| Gi5_8088935_x34  | guucucacNcaacagauccg         | 1 |
| Gi3_26414972_x34 | guucgauucccgUgcccga          | 1 |
| Gi1_3735325_x34  | guucucaccccacagauccg         | 1 |
| Gi5_8090499_x34  | uccggcguaGuauaacggcuag       | 1 |
| Gi2_9958755_x34  | Aguucgauucccgcgccgga         | 1 |
| Gi3_26398108_x34 | uCcucacccaacagauccg          | 1 |
| Gi5_8084005_x34  | uccggcguaGuauaacgAcuaga      | 1 |
| Gi5_8085025_x34  | cGcaccacaacagauccg           | 1 |
| Gi5_8085535_x34  | guCcgauucccgcgccg            | 1 |
| Gi2_9967459_x34  | gguucgauuUccggcgccggagc      | 1 |
| Gi2_9965147_x34  | gguucgauNcccggcgccg          | 1 |
| Gi2_9956477_x34  | gguucgauucccUgcccggagc       | 1 |
| Gi5_8085263_x34  | ucUggcguaGuauaacggcua        | 1 |
| Gi3_26413068_x34 | gguucgauucccAgcgccggag       | 1 |
| Gi5_8088731_x34  | gguucucaccccGacagauccg       | 1 |
| Gi2_9982581_x33  | gguucgauAccggcgccggagc       | 1 |
| Gi3_26434465_x33 | guucgauucccgcgccA            | 1 |
| Gi3_26424796_x33 | uccggcguaGuauaacggcua        | 1 |
| Gi5_8099352_x33  | uUcgcguaGuauaacggcuag        | 1 |
| Gi3_26436412_x33 | ucUggcguaGuauaacggcuag       | 1 |
| Gi3_26426050_x33 | guucUauucccgcgccgg           | 1 |
| Gi3_26430076_x33 | cguaguauaacggcuaga           | 0 |
| Gi3_26424631_x33 | uccgUcguaGuauaacggc          | 1 |
| Gi3_26436082_x33 | uccggcguaGuauUacggcuaga      | 1 |
| Gi2_9980106_x33  | gguucgauucccgcgUcggagc       | 1 |
| Gi3_26424136_x33 | gguCcgauucccgcgccgga         | 1 |
| Gi1_3738717_x33  | uccggguucgauucccgcgccgga     | 0 |

|                  |                                   |   |
|------------------|-----------------------------------|---|
| Gi5_8097372_x33  | .....gguucgauucccgcgccggGgc       | 1 |
| Gi2_9978951_x33  | .....gguucgauucccgcgccggCg        | 1 |
| Gi1_3742776_x33  | .....Aguucucacccaacagauccg        | 1 |
| Gi5_8105061_x33  | .....gguucgGuucccgcgccgggagc      | 1 |
| Gi5_8099451_x33  | .....guucgauucccgcgccUg           | 1 |
| Gi5_8099088_x33  | .....uUcggcgaguauaacggcuaga       | 1 |
| Gi1_3743568_x33  | .....uucucaccNaacagauccg          | 1 |
| Gi3_26426809_x33 | .....Aguucgauucccgcgcc            | 1 |
| Gi3_26442022_x33 | .....guucgauucccgcgccAg           | 1 |
| Gi3_26428129_x33 | .....gguucgauuccUggcgccgga        | 1 |
| Gi3_26469278_x32 | .....gguucgauucccgcgccUgga        | 1 |
| Gi3_26460286_x32 | .....gAuucgauucccgcgccgga         | 1 |
| Gi5_8108550_x32  | .....gAuucgauucccgcgccggagc       | 1 |
| Gi3_26452766_x32 | .....ucAggcgaguauaacggcuaga       | 1 |
| Gi2_9993405_x32  | .....uGcggcgaguauaacggc           | 1 |
| Gi2_9996477_x32  | .....uccggcgaguGuaacggcuaga       | 1 |
| Gi3_26450590_x32 | .....guuUgauucccgcgccgga          | 1 |
| Gi2_9997213_x32  | .....uccggcguGguauaacggcuaga      | 1 |
| Gi1_3747552_x32  | .....ugguucucacccaacagaucc        | 0 |
| Gi5_8111366_x32  | .....cucacccaNcagauccgg           | 1 |
| Gi5_8114374_x32  | .....uccggcgaguauaGcgg            | 1 |
| Gi3_26457758_x32 | .....gguucgauuAccggcgccggagc      | 1 |
| Gi3_26457918_x32 | .....ggGucgauucccgcgccgga         | 1 |
| Gi5_8116710_x32  | .....uccggcgaguGuaacggcuag        | 1 |
| Gi3_26455070_x32 | .....Cccggcgaguauaacggc           | 1 |
| Gi1_3745344_x32  | .....guucgauucccgUcgccgg          | 1 |
| Gi3_26466494_x32 | .....ggGucgauucccgcgccggag        | 1 |
| Gi1_3744160_x32  | .....uccggcgaguauaacAgcuag        | 1 |
| Gi3_26468638_x32 | .....uucucacccaCcagauccg          | 1 |
| Gi3_26446270_x32 | .....acagauccggguucgauucccgcgccgg | 0 |
| Gi3_26487574_x31 | .....gguuAgauucccgcgccggagc       | 1 |
| Gi3_26478336_x31 | .....guucUauucccgcgccgga          | 1 |
| Gi5_8126192_x31  | .....gguucgaCucccgcgccggagc       | 1 |
| Gi2_10008326_x31 | .....guucucacccaacagauccgggu      | 0 |
| Gi5_8127401_x31  | .....uUcggcgaguauaacggcuagaau     | 1 |
| Gi3_26472911_x31 | .....guuUgauucccgcgccgg           | 1 |
| Gi5_8130315_x31  | .....guucgauucccgcgAccg           | 1 |
| Gi5_8120085_x31  | .....uccggcgaguauaGcggcuaga       | 1 |
| Gi1_3754020_x31  | .....uuUucacccaacagauccg          | 1 |
| Gi2_10011860_x31 | .....guucgauucccgcgccgC           | 1 |
| Gi1_3754578_x31  | .....ggguucgauucccgcgccgga        | 0 |
| Gi5_8118814_x31  | .....uccggcguGguauaacggcua        | 1 |
| Gi4_490729_x31   | .....uccggcgaguauaacggcuag        | 0 |
| Gi3_26491728_x31 | .....guucgauuccUggcgccgg          | 1 |
| Gi3_26471795_x31 | .....uccggcgaguGuaacgg            | 1 |
| Gi3_26473655_x31 | .....guucgauCcccgcgccgg           | 1 |
| Gi3_26477902_x31 | .....agauccggguucgauucccgcgccggag | 0 |

|                       |                                     |   |
|-----------------------|-------------------------------------|---|
| Gi2_9999863_x31.....  | .Cuucgauucccgcgccggagc.....         | 1 |
| Gi3_26480072_x31..... | .gguucgaCucccgcgccgg.....           | 1 |
| Gi2_10012480_x31..... | .Cccggcguaguauaacggcuaga.....       | 1 |
| Gi2_10002994_x31..... | .uccggcguaguauCacggcuaga.....       | 1 |
| Gi3_26475019_x31..... | .guucgauCcccgcgccgga.....           | 1 |
| Gi5_8141425_x30.....  | .gguucgauucccgcgccggC.....          | 1 |
| Gi5_8133235_x30.....  | .uccggcguaguauaacggcuagaCu.....     | 1 |
| Gi2_10024765_x30..... | .uucucacccaacGgauccg.....           | 1 |
| Gi1_3758915_x30.....  | .auccggguucgauucccgcgccgg.....      | 0 |
| Gi3_26516520_x30..... | .guucgauucccgcgUcggga.....          | 1 |
| Gi1_3756935_x30.....  | .uccggcguaguauaGcggcuag.....        | 1 |
| Gi2_10027315_x30..... | .Gccggcguaguauaacggcuagaa.....      | 1 |
| Gi1_3761195_x30.....  | .Gccggcguaguauaacggc.....           | 1 |
| Gi3_26506200_x30..... | .gguucAauucccgcgccgga.....          | 1 |
| Gi1_3756845_x30.....  | .aacagauccggguucgauucccgcgccgg..... | 0 |
| Gi5_8141005_x30.....  | .uccggcguaguauaacggcuagaaug.....    | 0 |
| Gi3_26512770_x30..... | .guucgauuccAgcgccgga.....           | 1 |
| Gi5_8140135_x30.....  | .gguucucGcccaacagauccg.....         | 1 |
| Gi5_8137855_x30.....  | .guucgauuccUggcgccg.....            | 1 |
| Gi3_26513970_x30..... | .uccggcguaguauUacgg.....            | 1 |
| Gi2_10028005_x30..... | .Cguucgauucccgcgcc.....             | 1 |
| Gi5_8136295_x30.....  | .ucUggcguaguauaacggc.....           | 1 |
| Gi1a_5399946_x30..... | .Uguucgauucccgcgccg.....            | 1 |
| Gi1_3758705_x30.....  | .cucacccaacagauccggguucga.....      | 0 |
| Gi2_10018675_x30..... | .guucgauuccAgcgccggagc.....         | 1 |
| Gi5_8140915_x30.....  | .uccggcguaguauaacggcuagC.....       | 1 |
| Gi3_26528828_x29..... | .guucAauucccgcgccgga.....           | 1 |
| Gi2_10032948_x29..... | .cagauccggguucgauucccgcgccggag..... | 0 |
| Gi5_8148972_x29.....  | .gCucucacccaacagauccg.....          | 1 |
| Gi5_8148740_x29.....  | .accaacagauccggguucgauucc.....      | 0 |
| Gi2_10036109_x29..... | .uccggcguGguauaacggcua.....         | 1 |
| Gi5_8143462_x29.....  | .uccgUcguaguauaacggcuaga.....       | 1 |
| Gi1_3764610_x29.....  | .guucgauucccgcgccggagcgA.....       | 1 |
| Gi3_26542980_x29..... | .gguucgauucccgcgAcggag.....         | 1 |
| Gi5_8145608_x29.....  | .ucUggcguaguauaacgg.....            | 1 |
| Gi1_3767597_x29.....  | .guucgauUccggcgccg.....             | 1 |
| Gi3_26538456_x29..... | .uccggcguaguauaacgAcua.....         | 1 |
| Gi5_8150915_x29.....  | .Gcucacccaacagauccg.....            | 1 |
| Gi1_3764407_x29.....  | .accaacagauccggguucgauuccg.....     | 0 |
| Gi1_3767858_x29.....  | .guucgauucccgcgccCg.....            | 1 |
| Gi3_26539384_x29..... | .uccggcguagCauaacggc.....           | 1 |
| Gi5_8151785_x29.....  | .uccggcguGguauaacggcuaga.....       | 1 |
| Gi5_8143752_x29.....  | .ucUggcguaguauaacggcuagaau.....     | 1 |
| Gi3_26539645_x29..... | .Gucgauucccgcgccggagc.....          | 1 |
| Gi3_26538688_x29..... | .gguucgauucccgcgGcgagc.....         | 1 |
| Gi5_8154772_x29.....  | .gguCucacccaacagauccg.....          | 1 |
| Gi2_10029874_x29..... | .gguCcgauucccgcgcc.....             | 1 |

|                       |                              |   |
|-----------------------|------------------------------|---|
| Gi5_8144825_x29.....  | guucgGuucccgccg              | 1 |
| Gi3_26527030_x29..... | guucgauucccgccgUgga          | 1 |
| Gi3_26537209_x29..... | guucgauuNccggcgccggag        | 1 |
| Gi5_8153061_x29.....  | uccggcguaguauaacggUuag       | 1 |
| Gi5_8152887_x29.....  | guucgauuccUggcgccg           | 1 |
| Gi3_26523260_x29..... | uccggcgCaguauaacgg           | 1 |
| Gi2_10057461_x28..... | uccggcguaguauaacggcuaAa      | 1 |
| Gi2_10045757_x28..... | gguuAgaucccgccgagc           | 1 |
| Gi5_8163133_x28.....  | gguucucacccaCcagaucgg        | 1 |
| Gi5_8162657_x28.....  | gCuucgauucccgccgagc          | 1 |
| Gi5_8158877_x28.....  | uucucaccNaacagaucgg          | 1 |
| Gi3_26554693_x28..... | gguucgauucccgccgAcgga        | 1 |
| Gi2_10055053_x28..... | gguucgauucccgccgG            | 1 |
| Gi3_26559173_x28..... | uccggcguaguauCacggc          | 1 |
| Gi3_26555953_x28..... | guucgauuccUggcgccgagc        | 1 |
| Gi5_8156945_x28.....  | guucgauucccgccgUcgg          | 1 |
| Gi3_26556541_x28..... | guucgauucccgccgAccgga        | 1 |
| Gi3_26554441_x28..... | cucacccaacagauccggguucgauucc | 0 |
| Gi5_8160949_x28.....  | gguucgauNcccgccgagc          | 1 |
| Gi2_10045729_x28..... | guucgauuccUggcgccgagc        | 1 |
| Gi3_26547861_x28..... | guucgGuucccgccgag            | 1 |
| Gi1_3770940_x28.....  | Uguucgauucccgccgag           | 1 |
| Gi3_26545705_x28..... | uccggcguaguauaacggcuGg       | 1 |
| Gi5_8166913_x28.....  | gguucgauucccgccgAC           | 1 |
| Gi2_10046429_x28..... | gguucgauucAcggcgccgagc       | 1 |
| Gi3_26545733_x28..... | Cccggcguaguauaacgg           | 1 |
| Gi1_3779598_x27.....  | uccggcguaguauaacggcCag       | 1 |
| Gi3_26582799_x27..... | Gcucacccaacagauccg           | 1 |
| Gi2_10059887_x27..... | ucUggcguaguauaacggc          | 1 |
| Gi3_26577156_x27..... | guucgaGucccgccgagc           | 1 |
| Gi3_26582178_x27..... | ucUggcguaguauaacggcuagaa     | 1 |
| Gi2_10066853_x27..... | Cgcguaguauaacggcuaga         | 1 |
| Gi1a_5426177_x27..... | Uguucgauucccgccg             | 1 |
| Gi5_8169947_x27.....  | gauccggguucgauucccgccgga     | 0 |
| Gi3_26588604_x27..... | gguucgauucccgccgAccggag      | 1 |
| Gi2_10059158_x27..... | guucUauucccgccg              | 1 |
| Gi3_26590710_x27..... | aacagauccggguucgauucccgccgga | 0 |
| Gi3_26578533_x27..... | cucacccaacagauccggguucgauu   | 0 |
| Gi1_3780354_x27.....  | gguucgauucccgccgU            | 1 |
| Gi3_26586768_x27..... | Ugcguaguauaacggcuaga         | 1 |
| Gi5_8178101_x27.....  | gguucucacccaGcagaucgg        | 1 |
| Gi5_8170649_x27.....  | guucgauCcccgccg              | 1 |
| Gi3_26585094_x27..... | ggAucgauucccgccgag           | 1 |
| Gi5_8171027_x27.....  | uccggcguaguauaaUggcuaga      | 1 |
| Gi3_26592168_x27..... | guucgauucccAgcggagc          | 1 |
| Gi3_26588037_x27..... | uccggcguaguauaacggcuGgaa     | 1 |
| Gi3_26587578_x27..... | gguucgauucccgccAga           | 1 |

|                       |                                      |   |
|-----------------------|--------------------------------------|---|
| Gi1_3776601_x27.....  | guucgaCucccggcgcgga.....             | 1 |
| Gi3_26593599_x27..... | ucUggcgaguauaacggcuagaau.....        | 1 |
| Gi5_8180396_x27.....  | uccggcgaguauaacAgcua.....            | 1 |
| Gi2_10067744_x27..... | guucgauucccggcAccgg.....             | 1 |
| Gi3_26600531_x26..... | acagauccggguucgauucccggcgcggagc..... | 0 |
| Gi5_8189398_x26.....  | uccggcgaguauCacggcuaga.....          | 1 |
| Gi5_8187812_x26.....  | uccgUcgaguauaacggcuag.....           | 1 |
| Gi5_8194208_x26.....  | gguucgauucccgUgcc.....               | 1 |
| Gi1_3786287_x26.....  | uccggcgaguGuaacggcuaga.....          | 1 |
| Gi5_8186200_x26.....  | guucgauucccgUgccg.....               | 1 |
| Gi1_3785741_x26.....  | uucucacccaCagauccg.....              | 1 |
| Gi1_3781945_x26.....  | guucgauucccggcgcgA.....              | 1 |
| Gi3_26619511_x26..... | uccggcgaguauaaUggcua.....            | 1 |
| Gi3_26620993_x26..... | uccggcgaguCaacgg.....                | 1 |
| Gi1_3784623_x26.....  | ugguucucGcccaacagauccg.....          | 1 |
| Gi5_8186590_x26.....  | guucgauucccAgcgccg.....              | 1 |
| Gi3_26621123_x26..... | Gucgauucccggcgcgga.....              | 1 |
| Gi5_8191868_x26.....  | Gucacccaacagauccg.....               | 1 |
| Gi5_8183444_x26.....  | guGcgauucccggcgcg.....               | 1 |
| Gi3_26601935_x26..... | gguucgauucUcggcgcggag.....           | 1 |
| Gi2_10082815_x26..... | uGcucacccaacagauccg.....             | 1 |
| Gi1_3786209_x26.....  | uccggUguaguauaacggcuag.....          | 1 |
| Gi2_10076679_x26..... | guucgGuucccggcgcg.....               | 1 |
| Gi3_26619537_x26..... | uccggcgaguauaGcggcuag.....           | 1 |
| Gi3_26596267_x26..... | guucgauucccggcgAccg.....             | 1 |
| Gi1_3784987_x26.....  | uGcggcgaguauaacggcuaga.....          | 1 |
| Gi1_3790881_x25.....  | gAucgauucccggcgcg.....               | 1 |
| Gi5_8198434_x25.....  | guucucacccaacagGuccg.....            | 1 |
| Gi5_8201084_x25.....  | Cguucucacccaacagauccg.....           | 1 |
| Gi3_26629968_x25..... | Uuucucacccaacagauccgg.....           | 1 |
| Gi5_8196184_x25.....  | uccggcgUngauaacggcuagaau.....        | 1 |
| Gi1_3792481_x25.....  | uuUucacccaacagauccg.....             | 1 |
| Gi3_26640343_x25..... | guucgauucGcgggcgcggagc.....          | 1 |
| Gi5_8203184_x25.....  | gguuUgauucccggcgcggagc.....          | 1 |
| Gi2_10097647_x25..... | gguucgauucccgUgcc.....               | 1 |
| Gi2_10104647_x25..... | guucgauucccggcgcAg.....              | 1 |
| Gi3_26629143_x25..... | uccggAguaguauaacggcua.....           | 1 |
| Gi5_8201009_x25.....  | guucucacccaCagauccg.....             | 1 |
| Gi3_26638018_x25..... | gguucgauuccAggcgcgg.....             | 1 |
| Gi5_8200709_x25.....  | uuUucacccaacagauccg.....             | 1 |
| Gi5_8207059_x25.....  | guucgauucccggcgcAg.....              | 1 |
| Gi3_26649193_x25..... | gguucgauucccgUgccggag.....           | 1 |
| Gi5_8199184_x25.....  | uccggcgaguauaacggcuagaaA.....        | 1 |
| Gi2_10100297_x25..... | aacagauccggguucgauucccggcgcg.....    | 0 |
| Gi5_8196384_x25.....  | gguucucacUcaacagauccg.....           | 1 |
| Gi3_26640368_x25..... | uccggcgaguGuaacggc.....              | 1 |
| Gi1_3790031_x25.....  | guucucacNcaacagauccg.....            | 1 |



|                  |                                    |   |
|------------------|------------------------------------|---|
| Gi2_10100072_x25 | .....gguucgauNccccggcgccgga        | 1 |
| G1a_5444687_x25  | .....gUuucgauucccgcgccggag         | 1 |
| Gi2_10095222_x25 | .....guuUgauucccgcgccggagc         | 1 |
| Gi5_8196534_x25  | .....uccggcguaguauaacgAcuag        | 1 |
| Gi3_26645368_x25 | .....guucgauucccgcgAccgg           | 1 |
| Gi3_26624893_x25 | .....guucgauucUcggcgccg            | 1 |
| Gi2_10097697_x25 | .....uccggcguaguauaacgAcuaga       | 1 |
| Gi1_3790131_x25  | .....guucgaCucccgggcgccg           | 1 |
| G1a_5450987_x25  | .....Uguucgauucccgcgccgga          | 1 |
| Gi3_26633193_x25 | .....gguucgauNccccggcgcc           | 1 |
| Gi3_26647618_x25 | .....gguuUgauucccgcgccggag         | 1 |
| Gi2_10090447_x25 | .....guucgauuccUggcgccg            | 1 |
| Gi3_26646318_x25 | .....uccggcguaguauaacAgcuagaa      | 1 |
| Gi5_8197809_x25  | .....Aguucgauucccgcgccgga          | 1 |
| Gi3_26621768_x25 | .....gguucgCuucccgcgccgga          | 1 |
| Gi1_3795686_x24  | .....uccggcguaguauaacggcuagG       | 1 |
| Gi5_8218152_x24  | .....uccggcguGguauaacgg            | 1 |
| Gi3_26665520_x24 | .....gguucgaCucccgggcgccg          | 1 |
| Gi5_8207976_x24  | .....Gccggcguaguauaacggcuagaa      | 1 |
| Gi3_26675528_x24 | .....gguucgauucccgggcgccggUg       | 1 |
| Gi3_26674952_x24 | .....gguucgauucccgggcgUcgga        | 1 |
| Gi3_26650424_x24 | .....ucGggcguaguauaacggcuaga       | 1 |
| Gi1_3795806_x24  | .....uccggcguaguauaacggcuGga       | 1 |
| Gi3_26671712_x24 | .....gguuUgauucccgcgccgga          | 1 |
| Gi2_10115803_x24 | .....guucgauucccgUgcccggagc        | 1 |
| Gi3_26679536_x24 | .....uccggcguagCauaacgg            | 1 |
| Gi5_8217048_x24  | .....Ugcguaguauaacggcuag           | 1 |
| Gi3_26660288_x24 | .....gguucuaNccaacagauccg          | 1 |
| Gi1_3795614_x24  | .....ugguucucNcccaacagauccg        | 1 |
| Gi3_26675624_x24 | .....guucgauCcccggcgccggagc        | 1 |
| Gi3_26668208_x24 | .....uccggcguaguauGacgg            | 1 |
| Gi5_8207304_x24  | .....uccggcguaguauaacggcuGgaa      | 1 |
| Gi3_26658896_x24 | .....guucgauucccgggcgUcgg          | 1 |
| Gi5_8208528_x24  | .....gguucucacccaacagGuccg         | 1 |
| Gi2_10120123_x24 | .....uccggcguaguauaacggUuaga       | 1 |
| Gi5_8209344_x24  | .....uccggcguaguaCaacggcuaga       | 1 |
| Gi3_26661824_x24 | .....gguCcucacccaacagauccg         | 1 |
| Gi5_8218584_x24  | .....guucgauucccgggcgccggagcguuucc | 0 |
| Gi3_26664320_x24 | .....uUcggcguaguauaacggcuag        | 1 |
| Gi3_26675888_x24 | .....uccgCccguaguauaacggcuaga      | 1 |
| Gi3_26666672_x24 | .....aUauccggguucgauucc            | 1 |
| Gi5_8219064_x24  | .....uUguucucacccaacagauccgggu     | 1 |
| Gi1_3798686_x24  | .....gguucgaCucccgggcgccg          | 1 |
| Gi2_10111627_x24 | .....uccggcguNguauaacggc           | 1 |
| Gi5_8207880_x24  | .....uccggcguagCauaacggcuaga       | 1 |
| Gi1_3794750_x24  | .....ucUggcguaguauaacggcuag        | 1 |
| Gi3_26663672_x24 | .....gguucAauucccgcgccggag         | 1 |

|                  |                            |   |
|------------------|----------------------------|---|
| Gi3_26663600_x24 | uccggcguGguauaacggcuag     | 1 |
| Gi3_26687230_x23 | ggGucgauucccggcgcg         | 1 |
| Gi5_8221616_x23  | guucucacccaGcagaucgg       | 1 |
| Gi1_3800485_x23  | guucgauucccggcgcggaU       | 1 |
| Gi4_499091_x23   | gUuucgauucccggcgcg         | 1 |
| Gi5_8223571_x23  | guucgauucccggcgcggaA       | 1 |
| Gi3_26697948_x23 | gguucgauucUcgggcgcgga      | 1 |
| Gi3_26708827_x23 | uuUucacccaacagaucgg        | 1 |
| Gi2_10130648_x23 | guucucacccCacagaucgg       | 1 |
| Gi5_8227987_x23  | uccggcguNguauaacggcua      | 1 |
| Gi5_8225756_x23  | Auucucacccaacagaucgg       | 1 |
| Gi5_8228700_x23  | guucAauucccggcgcg          | 1 |
| Gi3_26708482_x23 | gguucucacccaGcagaucgg      | 1 |
| Gi5_8229942_x23  | Cguucgauucccggcgcg         | 1 |
| Gi2_10137065_x23 | gCucgauucccggcgcg          | 1 |
| Gi5_8225825_x23  | uccggUguaguauaacggcuag     | 1 |
| Gi1_3799979_x23  | guucgCuucccggcgcg          | 1 |
| Gi5_8223433_x23  | Gucucacccaacagaucgg        | 1 |
| Gi5_8228263_x23  | gguucgauuccUgggcgcgga      | 1 |
| Gi5_8222398_x23  | guucgauucccggcgcggaA       | 1 |
| Gi2_10128003_x23 | guucUauucccggcgcgga        | 1 |
| Gi5_8232656_x23  | uccggcguaguauaacggcuagaugg | 0 |
| Gi3_26687529_x23 | ggUAcgauucccggcgcgga       | 1 |
| Gi5_8231069_x23  | guucUauucccggcgcg          | 1 |
| Gi5_8226906_x23  | Uguucucacccaacagauc        | 1 |
| Gi2_10122253_x23 | uccggcguaguauaacggcuGgaau  | 1 |
| Gi3_26684470_x23 | uccggcguaguauaacggcuagaCu  | 1 |
| Gi3_26686057_x23 | uccggcguNguauaacggcuag     | 1 |
| Gi2_10126186_x23 | uccggcguNguauaacggcua      | 1 |
| Gi3_26689323_x23 | uccggcguaguauaacggUua      | 1 |
| Gi5_8230356_x23  | uccggcguaguauaacggcuGg     | 1 |
| Gi4_499827_x23   | Uguucgauucccggcgcg         | 1 |
| Gi3_26682400_x23 | uccggcguNguauaacggcuagaa   | 1 |
| Gi3_26697833_x23 | gguucgauCcccggcgcg         | 1 |
| Gi1_3804694_x23  | guucucacccCacagaucgg       | 1 |
| Gi1_3805131_x23  | guCucacccaacagaucgg        | 1 |
| Gi5_8220144_x23  | guuUgauucccggcgcg          | 1 |
| Gi3_26688150_x23 | uccggcguaguauaacAg         | 1 |
| Gi5_8227343_x23  | gguucgauuccAgcgcgcgga      | 1 |
| Gi3_26701122_x23 | guucgauucccgAcgcgcgga      | 1 |
| Gi1_3813437_x22  | gAuucgauucccggcgcg         | 1 |
| Gi3_26729320_x22 | uccggcguaguauaacggAuaga    | 1 |
| Gi3_26737284_x22 | uccggcguaguauaacUgcuaga    | 1 |
| Gi3_26717924_x22 | uGcgauucccggcgcgga         | 1 |
| Gi3_26730772_x22 | gguucgauuccUgcgcgcgga      | 1 |
| Gi2_10151036_x22 | uGgauucccggcgcgga          | 1 |
| Gi5_8238293_x22  | uccggcguaguauCacggcuag     | 1 |

|                       |                                 |   |
|-----------------------|---------------------------------|---|
| Gi3_26740848_x22..... | ..gguCcgauucccggcgcgg.....      | 1 |
| Gi1_3811083_x22.....  | ..uucucacccaCagauccgg.....      | 1 |
| Gi2_10142500_x22..... | ..cggcguaguauaacggcuagaa.....   | 0 |
| Gi3_26721092_x22..... | ..Uguucucacccaacagauccgg.....   | 1 |
| Gi3_26731828_x22..... | ..gguCcgauucccggcgcgg.....      | 1 |
| Gi1_3808399_x22.....  | ..uucucaccUaacagauccgg.....     | 1 |
| Gi2_10139948_x22..... | ..guucgauucccggcgcggG.....      | 1 |
| Gi3_26716120_x22..... | ..gCucgauucccggcgcggag.....     | 1 |
| Gi3_26719574_x22..... | ..ggCucucacccaacagauccg.....    | 1 |
| Gi3_26713986_x22..... | ..uuUucacccaacagauccgg.....     | 1 |
| Gi3_26726196_x22..... | ..Cguucgauucccggcgcgg.....      | 1 |
| Gi3_26722500_x22..... | ..uccggcguaguUuaacggcuaga.....  | 1 |
| Gi3_26728792_x22..... | ..gguNcgauucccggcgcggagc.....   | 1 |
| Gi3_26729452_x22..... | ..uccggcguaguauaacggcuC.....    | 1 |
| Gi5_8240427_x22.....  | ..gguucgauNcccggcgcgg.....      | 1 |
| Gi2_10147758_x22..... | ..Cguucgauucccggcgcggag.....    | 1 |
| Gi5_8242539_x22.....  | ..ggcguaguauaacggcuagaa.....    | 0 |
| Gi3_26709784_x22..... | ..guAcgauucccggcgcgg.....       | 1 |
| Gi3_26725954_x22..... | ..gguucgauucccggcgcAgga.....    | 1 |
| Gi3_26717066_x22..... | ..gguucgGuucccggcgcgg.....      | 1 |
| Gi5_8243045_x22.....  | ..ccggcguaguauaacggcuagaa.....  | 0 |
| Gi3_26718562_x22..... | ..guucucacccaCagauccg.....      | 1 |
| Gi2_10138452_x22..... | ..guuUgauucccggcgcgg.....       | 1 |
| Gi3_26727098_x22..... | ..guucAauucccggcgcggagc.....    | 1 |
| Gi1_3808971_x22.....  | ..uUcggcguaguauaacggcuag.....   | 1 |
| Gi3_26728088_x22..... | ..guucgauucccggcgcAgga.....     | 1 |
| Gi3_26727450_x22..... | ..cGcacccaacagauccgg.....       | 1 |
| Gi3_26725008_x22..... | ..uccggcguaguaCaacggcu.....     | 1 |
| Gi5_8248083_x22.....  | ..gguucucacccaacagCuccg.....    | 1 |
| Gi2_10140696_x22..... | ..guGcgauucccggcgcgg.....       | 1 |
| Gi3_26718166_x22..... | ..guAcgauucccggcgcggga.....     | 1 |
| Gi3_26711566_x22..... | ..guucgauucccAgcgcggag.....     | 1 |
| Gi3_26725778_x22..... | ..uccggcguaguauaacggGuaga.....  | 1 |
| Gi1_3807937_x22.....  | ..Uguucucacccaacagauccgg.....   | 1 |
| Gi3_26726042_x22..... | ..uccggUguaguauaacgg.....       | 1 |
| Gi5_8234575_x22.....  | ..Aguucgauucccggcgc.....        | 1 |
| Gi1_3812227_x22.....  | ..guucgauucccggcgcC.....        | 1 |
| Gi1_3810995_x22.....  | ..uccggUguaguauaacgg.....       | 1 |
| Gl1_5485777_x21.....  | ..gUuucgauucccggcgcgg.....      | 1 |
| Gi1_3818985_x21.....  | ..Gucacccaacagauccgg.....       | 1 |
| Gi5_8254014_x21.....  | ..gguucgauucccggcgcggagA.....   | 1 |
| Gi1_3820980_x21.....  | ..Gccggcguaguauaacggcuagaa..... | 1 |
| Gl1_5481220_x21.....  | ..Uuucucacccaacagauccg.....     | 1 |
| Gi3_26764221_x21..... | ..uccggcguaguauaaUgg.....       | 1 |
| Gi5_8251242_x21.....  | ..uccggcgCaguauaacggcuaga.....  | 1 |
| Gi1_3813861_x21.....  | ..uucucacccaGacagauccgg.....    | 1 |
| Gi3_26754267_x21..... | ..guGcgauucccggcgcggga.....     | 1 |

|                  |                               |   |
|------------------|-------------------------------|---|
| Gi3_26768379_x21 | uccggcguaguauaaGggcuaga       | 1 |
| Gi3_26758068_x21 | uccggcguaguauaacAgcuag        | 1 |
| Gi5_8251956_x21  | ggAucgauucccgccgagc           | 1 |
| Gi3_26768988_x21 | uccggcguaguGuaacggcuag        | 1 |
| Gi5_8255085_x21  | guucgaCucccgccgag             | 1 |
| Gi5_8262477_x21  | uccggcguaguauaacggcCagaau     | 1 |
| Gi2_10166227_x21 | uccgUcguaguauaacggcuaga       | 1 |
| Gi2_10172401_x21 | uGcggcguaguauaacgg            | 1 |
| Gi2_10171771_x21 | gguucgauuccAgcgccgag          | 1 |
| Gi1_3816633_x21  | uUcggcguaguauaacggcua         | 1 |
| Gi5_8252838_x21  | gguCcgauucccgccgagc           | 1 |
| Gi5_8250171_x21  | guucucacccGacagauccg          | 1 |
| Gi2_10157638_x21 | uccggcguagCauaacggcuaga       | 1 |
| Gi3_26762877_x21 | uccggcguaguaCaacggc           | 1 |
| Gi5_8257437_x21  | gguucgauCcccgccgagc           | 1 |
| Gi5_8253804_x21  | gguucucacccaacagaCccg         | 1 |
| Gi2_10171645_x21 | uccggcguaguauaacggcA          | 1 |
| Gi1_3818649_x21  | uucucacccaacGgauccgg          | 1 |
| Gi3_26742633_x21 | uccggcguNguauaacggcuagau      | 1 |
| Gi3_26769219_x21 | uccggcguGguauaacggcuagau      | 1 |
| Gi1_3820434_x21  | uUcggcguaguauaacgg            | 1 |
| Gi3_26765145_x21 | cagauccggguucgauucccgccgagcC  | 1 |
| Gi3_26764158_x21 | uccggcgCaguauaacggcua         | 1 |
| Gi3_26755359_x21 | uccggcguaguauaaAggcuaga       | 1 |
| Gi5_8254728_x21  | gAuucucacccaacagauccg         | 1 |
| Gi5_8253741_x21  | guucgauucccgccgC              | 1 |
| Gi2_10171897_x21 | guucgauucccgccgUcggagc        | 1 |
| Gi2_10157743_x21 | gguucgauuccAgcgccgagc         | 1 |
| Gi5_8258970_x21  | ggGucgauucccgccgagc           | 1 |
| Gi1_3814533_x21  | gguucgauucccgccggaU           | 1 |
| Gi5_8254392_x21  | ugguucucacccaacagauccggguucga | 0 |
| Gi2_10163098_x21 | gguucgauucccgccgUg            | 1 |
| Gi2_10155790_x21 | uccggcguGguauaacgg            | 1 |
| Gi5_8255211_x21  | gguucAauucccgccgagc           | 1 |
| Gi3_26767035_x21 | uccggcguaguauaacGcuaga        | 1 |
| Gi1_3820035_x21  | uucucacccaacagauccggguucgau   | 0 |
| Gi3_26755716_x21 | Uauccggguucgauucc             | 1 |
| Gi2_10186169_x20 | gguucgauucccgccgCcc           | 1 |
| Gi5_8268609_x20  | guucgauucccgccgAcgg           | 1 |
| Gi2_10183269_x20 | Cccggcguaguauaacggc           | 1 |
| Gi3_26801825_x20 | gAucgauucccgccg               | 1 |
| Gi1_3821370_x20  | uccggcguaguaCaacgg            | 1 |
| Gi3_26804425_x20 | Ugguucgauucccgccgagc          | 1 |
| Gi3_26803925_x20 | gguucgauucccgccAgag           | 1 |
| Gi5_8271389_x20  | guuUgauucccgccg               | 1 |
| Gi3_26799545_x20 | gguucgauucccgAcgcccga         | 1 |
| Gi5_8265869_x20  | uccggcCuaguauaacggc           | 1 |

|                       |                                       |   |
|-----------------------|---------------------------------------|---|
| Gi1_3825750_x20.....  | .cggcguaguauaacggcu.....              | 0 |
| Gi1_3827030_x20.....  | .uucucaccNaacagauccgg.....            | 1 |
| Gi3_26786165_x20..... | .....gauccggguucgauucccggcgccgga..... | 0 |
| Gi2_10181629_x20..... | .....guucgauCcccggcgccggagc.....      | 1 |
| Gi1_3825530_x20.....  | .....ggCucgauucccggcgccgg.....        | 1 |
| Gi3_26795625_x20..... | .....uAcggcguaguauaacggcuaga.....     | 1 |
| Gi3_26802185_x20..... | .....gguucgCuucccggcgccggag.....      | 1 |
| Gi2_10187089_x20..... | .....ggGucgauucccggcgccggag.....      | 1 |
| Gi1_3825930_x20.....  | .....Cccggcguaguauaacgg.....          | 1 |
| Gi5_8270349_x20.....  | .....Cccggcguaguauaacggc.....         | 1 |
| Gi5_8265889_x20.....  | .....aguccggcguaguauaacggcu.....      | 0 |
| Gi1_3823770_x20.....  | .....gguucgauucccggcgAcgg.....        | 1 |
| Gi1_3824130_x20.....  | .....ugguucucacccaacGgauccgg.....     | 1 |
| Gi5_8276429_x20.....  | .....guucAauucccggcgccgg.....         | 1 |
| Gi2_10189489_x20..... | .....uccggcguaguauaacgAcua.....       | 1 |
| Gi5_8272489_x20.....  | .....uccggcguaguauaacggUuaga.....     | 1 |
| Gi2_10175769_x20..... | .....Aguucgauucccggcgccgg.....        | 1 |
| Gi3_26780245_x20..... | .....ugguucucaccUaacagauc.....        | 1 |
| Gi2_10183169_x20..... | .....guucgauCcccggcgccgg.....         | 1 |
| Gi2_10185989_x20..... | .....gguucgauucccggcgccggagcU.....    | 1 |
| Gi1_3821550_x20.....  | .....guucgauAcccggcgccgg.....         | 1 |
| Gi5_8274529_x20.....  | .....gCuucucacccaacagauccg.....       | 1 |
| Gi5_8271009_x20.....  | .....Cccggcguaguauaacggcuaga.....     | 1 |
| Gi5_8276009_x20.....  | .....Cccggcguaguauaacggcua.....       | 1 |
| Gi3_26772925_x20..... | .....ggcguaguauaacggcuagaa.....       | 0 |
| Gi3_26793365_x20..... | .....uccAgcguaguauaacggcua.....       | 1 |
| Gi2_10173549_x20..... | .....guucgauucccggcgccggagcA.....     | 1 |
| Gi1_3827510_x20.....  | .....Gcucacccaacagauccg.....          | 1 |
| Gi2_10208726_x19..... | .....uccggcguaguauaaUggcuaga.....     | 1 |
| Gi3_26830880_x19..... | .....Cuucgauucccggcgccggag.....       | 1 |
| Gi3_26810854_x19..... | .....Cucucacccaacagauccg.....         | 1 |
| Gi5_8291903_x19.....  | .....gguucgauucccggcAccggagc.....     | 1 |
| Gi3_26808840_x19..... | .....gguucgauucccggcgccAg.....        | 1 |
| Gi2_10199340_x19..... | .....guucgauucccggcgAcgg.....         | 1 |
| Gi2_10192918_x19..... | .....uUcggcguaguauaacggc.....         | 1 |
| Gi3_26822102_x19..... | .....guucgauucccggcgAcgga.....        | 1 |
| Gi2_10196756_x19..... | .....guucgauucccggcgccgCagc.....      | 1 |
| Gi1_3833676_x19.....  | .....ucUggcguaguauaacggcuaga.....     | 1 |
| Gi3_26836029_x19..... | .....uccggcguaguauaacggcuagGau.....   | 1 |
| Gi3_26808612_x19..... | .....Gguccggcguaguauaac.....          | 1 |
| Gi3_26806161_x19..... | .....uccggcguaguauaacgAc.....         | 1 |
| Gi5_8280085_x19.....  | .....uccggcguagCauaacgg.....          | 1 |
| Gi3_26835193_x19..... | .....uccggcguaguaGaacggcuaga.....     | 1 |
| Gi1_3831985_x19.....  | .....gguucgauucccggcgUgg.....         | 1 |
| Gi5_8287020_x19.....  | .....guucgauCcccggcgccgg.....         | 1 |
| Gi5_8291884_x19.....  | .....uccggcguGguauaacggc.....         | 1 |
| Gi3_26820943_x19..... | .....uccggUguaguauaacggcuag.....      | 1 |

|                       |                                       |   |
|-----------------------|---------------------------------------|---|
| Gi3_26832894_x19..... | guucgauuccUcggcgccgg.....             | 1 |
| Gi3_26816193_x19..... | uccggcguaguauaaUggc.....              | 1 |
| Gi3_26805230_x19..... | guCcgauucccgggcgccggag.....           | 1 |
| Gi1_3830807_x19.....  | Auucucacccaacagauccg.....             | 1 |
| Gi1_3834930_x19.....  | Auucgauucccgggcgccggagc.....          | 1 |
| Gi2_10206845_x19..... | gguucgGuucccgcgcc.....                | 1 |
| Gi3_26828410_x19..... | gguucgauucccgggcgAcg.....             | 1 |
| Gi3_26820183_x19..... | guucgauucccgAcgccgg.....              | 1 |
| Gi3_26821722_x19..... | guucgauuccUggcgccgga.....             | 1 |
| Gi1_3830617_x19.....  | uccgUcguaguauaacgg.....               | 1 |
| Gi5_8283296_x19.....  | ccggcguaguauaacggcu.....              | 0 |
| Gi1_3830427_x19.....  | ucacccaacagauccggguucga.....          | 0 |
| Gi3_26819936_x19..... | cUauucccgggcgccggag.....              | 1 |
| Gi5_8285652_x19.....  | uccggcguaguauaacggcuagaGu.....        | 1 |
| Gi2_10199530_x19..... | guAcgauucccgggcgccggagc.....          | 1 |
| Gi3_26815452_x19..... | gAuucgauucccgggcgccg.....             | 1 |
| Gi2_10206731_x19..... | gguucgauuAccggcgccggagc.....          | 1 |
| Gi3_26854252_x18..... | gcguaguauaacggcuaga.....              | 0 |
| Gi5_8302311_x18.....  | guucgauucccgggcgUcg.....              | 1 |
| Gi3_26850778_x18..... | gguucgauucccgggcgccgCagc.....         | 1 |
| Gi3_26873890_x18..... | uGgauucccgggcgccggagc.....            | 1 |
| Gi1_3838593_x18.....  | uucucacccaacGgauccg.....              | 1 |
| Gi5_8303733_x18.....  | uccggcguaguaCaacggc.....              | 1 |
| Gi5_8299737_x18.....  | uccggUguaguauaacggcua.....            | 1 |
| Gi2_10224454_x18..... | gguuUgauucccgggcgccgga.....           | 1 |
| Gi1_3837495_x18.....  | Cucucacccaacagauccg.....              | 1 |
| Gi5_8300925_x18.....  | uUcggcguaguauaacgg.....               | 1 |
| Gi1_3840465_x18.....  | guucgauucccgggcgccggG.....            | 1 |
| Gi1_3843633_x18.....  | uucCcacccaacagauccg.....              | 1 |
| Gi3_26842750_x18..... | guucgauucccgUgcccggagc.....           | 1 |
| Gi4_506352_x18.....   | gguucgauucccgggcgccggagcC.....        | 1 |
| Gi1_3843435_x18.....  | uccgUcguaguauaacggcuag.....           | 1 |
| Gi3_26859400_x18..... | gguucgauucccgggcgccUgagc.....         | 1 |
| Gi5_8297415_x18.....  | uccggcguaguauaacggcuCga.....          | 1 |
| Gi1a_5511635_x18..... | Uguucgauucccgggcgcc.....              | 1 |
| Gi2_10223590_x18..... | uccggcguaguauaacggcuagaauugguugg..... | 0 |
| Gi2_10226272_x18..... | uccggcgCaguauaacggcuaga.....          | 1 |
| Gi3_26870074_x18..... | guucgauuccUggcgccggag.....            | 1 |
| Gi5_8296209_x18.....  | ggAucucacccaacagauccg.....            | 1 |
| Gi2_10215526_x18..... | guucgauucccgggcgUcgg.....             | 1 |
| Gi3_26866942_x18..... | guucgauucccgAgccgg.....               | 1 |
| Gi5_8294553_x18.....  | uccAgcguaguauaacggcuag.....           | 1 |
| Gi1_3842463_x18.....  | Gucgauucccgggcgccgg.....              | 1 |
| Gi1_3841635_x18.....  | uccggcguaguauaacggcuGg.....           | 1 |
| Gi1_3842319_x18.....  | uccggcguNguauaacggcua.....            | 1 |
| Gi3_26844622_x18..... | uGcgauucccgggcgccggagc.....           | 1 |
| Gi1_3838809_x18.....  | gUucucacccaacagauccg.....             | 1 |

|                  |                                     |   |
|------------------|-------------------------------------|---|
| Gi2_10218010_x18 | .....gguucgauuuccggcgUgga           | 1 |
| Gi3_26865556_x18 | .....uccggcguaguCuaacggcua          | 1 |
| Gi3_26839870_x18 | .....Uguucucacccaacagauccgggu       | 1 |
| Gi2_10223176_x18 | .....guucAauucccgcgccggagc          | 1 |
| Gi2_10224562_x18 | .....guucgauuuccggcgUgg             | 1 |
| Gi5_8297325_x18  | .....uCcucacccaacagauccg            | 1 |
| Gi3_26846368_x18 | .....gguUgauuuccggcgccg             | 1 |
| Gi3_26859778_x18 | .....guucgauuuccggcgUgg             | 1 |
| Gi2_10218298_x18 | .....agaucggguucgauuuccggcgccggagcC | 1 |
| Gi5_8296497_x18  | .....uucucacccaCagauccg             | 1 |
| Gi3_26843128_x18 | .....guGcgauuuccggcgccg             | 1 |
| Gi1_3843075_x18  | .....ugguCcucacccaacagauccg         | 1 |
| Gi2_10230664_x17 | .....gguucgauuuccggcgccggUgc        | 1 |
| Gi5_8319660_x17  | .....gUuucucacccaacagauccg          | 1 |
| Gi1_3850905_x17  | .....Auucgauuuccggcgccgga           | 1 |
| Gi1_3851194_x17  | .....uCcucacccaacagauccg            | 1 |
| Gi3_26878059_x17 | .....gGuuccggcgccggagc              | 1 |
| Gi5_8315104_x17  | .....uccggcguaguauaacggcuagaugguu   | 0 |
| Gi1_3853115_x17  | .....ucUggcguaguauaacggcua          | 1 |
| Gi2_10246083_x17 | .....guucgauuuccggcgccAgagc         | 1 |
| Gi2_10232534_x17 | .....gguucgauuuccggcgAcc            | 1 |
| Gi2_10238654_x17 | .....ggCucgauuuccggcgcc             | 1 |
| Gi2_10238671_x17 | .....guucgauuUcggcgccggagc          | 1 |
| Gi3_26898238_x17 | .....uccggcguagAuaaacggcuaga        | 1 |
| Gi1_3850973_x17  | .....aUaucggguucgauucc              | 1 |
| Gi1_3847335_x17  | .....uAguucucacccaacagauccg         | 1 |
| Gi3_26882054_x17 | .....gguucgauuuccggGgcccggagc       | 1 |
| Gi3_26896538_x17 | .....uccggcgCaguauaacggc            | 1 |
| Gi5_8321479_x17  | .....uccggcguNguauaacggc            | 1 |
| Gi3_26876937_x17 | .....uccggcguaguauaacggcCagaau      | 1 |
| Gi3_26882904_x17 | .....guucgauuuccggcgccUga           | 1 |
| Gi3_26882003_x17 | .....gguucgGuuccggcgccg             | 1 |
| Gi2_10232636_x17 | .....uccggUguaguauaacggcuaga        | 1 |
| Gi5_8319592_x17  | .....uccgUcguaguauaacgg             | 1 |
| Gi3_26893376_x17 | .....guucgauuuccggcgccgAa           | 1 |
| Gi3_26907112_x17 | .....gcuaguauaacggcuagaa            | 0 |
| Gi2_10240048_x17 | .....uccggcguaguauaacAgc            | 1 |
| Gi4_508099_x17   | .....Uuucgauuuccggcgccg             | 1 |
| Gi1_3848661_x17  | .....ggCucucacccaacagauccg          | 1 |
| Gi3_26889806_x17 | .....uucucacccaacagaCccg            | 1 |
| Gi3_26909917_x17 | .....guucgauuuccggcgAgg             | 1 |
| Gi3_26878246_x17 | .....gguucgUuuccggcgccggagc         | 1 |
| Gi5_8308066_x17  | .....uccggcguaguauaaUggcuag         | 1 |
| Gi5_8311296_x17  | .....uccggcguaguauaGcggc            | 1 |
| Gi1_3850395_x17  | .....guucucacccaacagGuccg           | 1 |
| Gi5_8310820_x17  | .....guucgauuUccggcgccg             | 1 |
| Gi5_8315223_x17  | .....gAucgauuuccggcgccg             | 1 |

|                       |                                     |   |
|-----------------------|-------------------------------------|---|
| Gi3_26896844_x17..... | guucgauUccggcgccgg.....             | 1 |
| Gi5_8310769_x17.....  | caacagauccggguucgauccccggcgccg..... | 0 |
| Gi1_3848746_x17.....  | guucgaCuccggcgccggagc.....          | 1 |
| Gi3_26877923_x17..... | guucgauAccggcgccgg.....             | 1 |
| Gi1_3846808_x17.....  | guucgauAccggcgccgg.....             | 1 |
| Gi2_10243414_x17..... | guucgauUcggcgccgg.....              | 1 |
| Gi1_3847658_x17.....  | uccggcguaguauaacggcuaU.....         | 1 |
| Gi5_8308746_x17.....  | guucucGcccaacagauccg.....           | 1 |
| Gi5_8311126_x17.....  | uccggcguaguauaGcggcuagaau.....      | 1 |
| Gi3_26903763_x17..... | guucgauccccggcgccggagcga.....       | 1 |
| Gi2_10247120_x17..... | uccggcguUguauaacggcuaga.....        | 1 |
| Gi2_10238093_x17..... | uGcggcguaguauaacggcuag.....         | 1 |
| Gi2_10239453_x17..... | Auucgauccccggcgccgga.....           | 1 |
| Gi5_8313914_x17.....  | Gccggcguaguauaacggcu.....           | 1 |
| Gi5_8316906_x17.....  | uccggcguaguauaacggcuCg.....         | 1 |
| Gi3_26912263_x17..... | Ugguucgauccccggcgccggag.....        | 1 |
| Gi5_8319694_x17.....  | guucgauccccggcgUgg.....             | 1 |
| Gi4_506824_x17.....   | uccggcguaguauaacggc.....            | 0 |
| Gi5_8318266_x17.....  | aUauccggguucgauuccc.....            | 1 |
| Gi3_26892560_x17..... | gguucucacccaacagCuccg.....          | 1 |
| Gi2_10229746_x17..... | gguucgauccccggcgAcg.....            | 1 |
| Gi1_3854747_x17.....  | gguucgauccccggUgccgg.....           | 1 |
| Gi3_26901825_x17..... | gguucgauccccggAgccgga.....          | 1 |
| Gi1_3848525_x17.....  | guucgauccccggcgGgg.....             | 1 |
| Gi3_26935261_x16..... | gguucgauccccgAcgcccggag.....        | 1 |
| Gi2_10257705_x16..... | guucgauccccggcgUggagc.....          | 1 |
| Gi3_26916285_x16..... | gguucgauuccGggcgccggagc.....        | 1 |
| Gi3_26946093_x16..... | guucgauccccggcgccggC.....           | 1 |
| Gi1a_5537341_x16..... | gUuucgauccccggcgccgga.....          | 1 |
| Gi2_10267577_x16..... | Cguucgauccccggcgccg.....            | 1 |
| Gi5_8336528_x16.....  | Aguucgauccccggcgccgg.....           | 1 |
| Gi3_26942973_x16..... | gguucucacccaacagauccg.....          | 1 |
| Gi1_3862977_x16.....  | guucgauuccAgggcggcgg.....           | 1 |
| Gi5_8335344_x16.....  | uccAgcguaguauaacgg.....             | 1 |
| Gi3_26943453_x16..... | gguucgauCccccggcgccgg.....          | 1 |
| Gi2_10268377_x16..... | guucgauccccggcgAcggagc.....         | 1 |
| Gi3_26942173_x16..... | uccAgcguaguauaacgg.....             | 1 |
| Gi2_10261641_x16..... | uGcggcguaguauaacggcuagaau.....      | 1 |
| Gi2_10269849_x16..... | guucgauccccggcgGcggagc.....         | 1 |
| Gi2_10261465_x16..... | gguucgauuccAgcgcc.....              | 1 |
| Gi3_26926957_x16..... | uucucaccNaacagauccg.....            | 1 |
| Gi3_26921389_x16..... | uGcggcguaguauaacggcuagaa.....       | 1 |
| Gi1_3861857_x16.....  | gCucucacccaacagauccg.....           | 1 |
| Gi3_26931325_x16..... | uccggcguaguauaacgCcuaga.....        | 1 |
| Gi3_26942061_x16..... | gUuucucacccaacagaucc.....           | 1 |
| Gi3_26922189_x16..... | Uguucucacccaacagaucc.....           | 1 |
| Gi3_26936845_x16..... | gguucCcacccaacagauccg.....          | 1 |



|                       |                               |   |
|-----------------------|-------------------------------|---|
| Gi3_26942765_x16..... | gAucgauucccgcgccggagc.....    | 1 |
| Gi1_3858497_x16.....  | gguucucacccaCagauccg.....     | 1 |
| Gi5_8325104_x16.....  | uccggcguagCauaacggcuag.....   | 1 |
| Gi2_10256553_x16..... | uccggcCuaguauaacggcuaga.....  | 1 |
| Gi5_8323536_x16.....  | gguucucacccaacagauUg.....     | 1 |
| Gi3_26950013_x16..... | gguucucacccaacGgauccg.....    | 1 |
| Gi2_10259961_x16..... | uccgUcguaguauaacggc.....      | 1 |
| Gi2_10252361_x16..... | gguucgUuucccgcgccggagc.....   | 1 |
| Gi5_8327520_x16.....  | guAcgauucccgcgccg.....        | 1 |
| Gi3_26921565_x16..... | ggAucgauucccgcgccg.....       | 1 |
| Gi1_3861985_x16.....  | guucgauucAcggcgccgg.....      | 1 |
| Gi3_26919165_x16..... | ggCucgauucccgcgccgg.....      | 1 |
| Gi2_10256521_x16..... | gguucgauucccgcgccAga.....     | 1 |
| Gi5_8323808_x16.....  | guucgauucUcggcgccg.....       | 1 |
| Gi3_26935277_x16..... | gAucgauucccgcgccgga.....      | 1 |
| Gi1_3861793_x16.....  | Uguucgauucccgcgcc.....        | 1 |
| Gi1_3861281_x16.....  | uucucGcccaacagauccg.....      | 1 |
| Gi2_10263641_x16..... | guAcgauucccgcgccgg.....       | 1 |
| Gi1_3856657_x16.....  | gCucgauucccgcgccgga.....      | 1 |
| Gi3_26948301_x16..... | gAucgauucccgcgccgg.....       | 1 |
| Gi1_3860929_x16.....  | guucucacccaacGgauccg.....     | 1 |
| Gi2_10260585_x16..... | gguucucanccaacagauccg.....    | 1 |
| Gi5_8337504_x16.....  | Aguucgauucccgcgccggag.....    | 1 |
| Gi5_8335312_x16.....  | uccggcguNguauaacgg.....       | 1 |
| Gi3_26920877_x16..... | guucgauAcccgcgccgga.....      | 1 |
| Gi5_8333760_x16.....  | ggCucgauucccgcgccg.....       | 1 |
| Gi3_26944653_x16..... | uccggcguaguauaacggcuGgaa..... | 1 |
| Gi1_3858945_x16.....  | gguucgauucccgAcgccg.....      | 1 |
| Gi1_3858289_x16.....  | gguucgGuucccgcgccgg.....      | 1 |
| Gi5_8333488_x16.....  | uccggcguaguauaacggcuaAa.....  | 1 |
| Gi2_10263561_x16..... | gguucgauuccGggcgccggagc.....  | 1 |
| Gi3_26941533_x16..... | guucgauucUcggcgccgga.....     | 1 |
| Gi3_26945757_x16..... | uccggcguaguauaGcggcuagaa..... | 1 |
| Gi2_10266009_x16..... | uccggcguaguauaacggcuCga.....  | 1 |
| Gi1_3857777_x16.....  | gguucgCuucccgcgccgg.....      | 1 |
| Gi2_10267337_x16..... | aUaaugguugguucucacc.....      | 1 |
| Gi2_10258249_x16..... | gguucgaCucccgcgccg.....       | 1 |
| Gi3_26930301_x16..... | uucucacccaacagGuccg.....      | 1 |
| Gi3_26919517_x16..... | cUgguucgauucccgcgccgga.....   | 1 |
| Gi5_8324224_x16.....  | uccggcguaguauaacAgc.....      | 1 |
| Gi1_3855969_x16.....  | uucucacccaacagGuccgg.....     | 1 |
| Gi3_26925405_x16..... | gguucgauucccgAgccg.....       | 1 |
| Gi3_26932605_x16..... | gguucgauucccgcgccggaA.....    | 1 |
| Gi5_8331232_x16.....  | Auucgauucccgcgccgga.....      | 1 |
| Gi3_26947453_x16..... | uccggcguCguauaacgg.....       | 1 |
| Gi5_8335584_x16.....  | guucgauucccgUgcccg.....       | 1 |
| Gi1_3862593_x16.....  | ugguucucacccaCagauccg.....    | 1 |

|                       |                                       |   |
|-----------------------|---------------------------------------|---|
| Gi1_3860049_x16.....  | .uCcucacccaacagauccgg.....            | 1 |
| Gi1_3857521_x16.....  | .uccggcguGguauaacgg.....              | 1 |
| Gi2_10275640_x15..... | .....gCucgauucccgccg.....             | 1 |
| Gi3_26969215_x15..... | .....guAcgauucccgccgagc.....          | 1 |
| Gi2_10287145_x15..... | .....guucgauucccgccgA.....            | 1 |
| Gi5_8346857_x15.....  | .....gguucgauNcccggcgc.....           | 1 |
| Gi3_26981320_x15..... | .....ggCucgauucccgcc.....             | 1 |
| Gi1_3867872_x15.....  | .....guucucacNcaacagauccgg.....       | 1 |
| Gi2_10279780_x15..... | .....ucUggcguaguauaacggcua.....       | 1 |
| Gi5_8350472_x15.....  | .....uUcggcguaguauaacggcua.....       | 1 |
| Gi2_10287895_x15..... | .....guucAauucccgccg.....             | 1 |
| Gi2_10273030_x15..... | .....guucgGuucccgccgga.....           | 1 |
| Gi1a_5544824_x15..... | .....Uuucgauucccgccgagc.....          | 1 |
| Gi3_26960050_x15..... | .....guucgauuAccggcgcgagc.....        | 1 |
| Gi1_3872252_x15.....  | .....gguucucacccGacagauccg.....       | 1 |
| Gi5_8338427_x15.....  | .....uucucacccaacGgauccg.....         | 1 |
| Gi5_8344892_x15.....  | .....ucucacccGacagauccg.....          | 1 |
| Gi3_26955550_x15..... | .....Gccggcguaguauaacggcu.....        | 1 |
| Gi5_8345297_x15.....  | .....ggGucucacccaacagauccg.....       | 1 |
| Gi5_8351162_x15.....  | .....cCcacccaacagauccgg.....          | 1 |
| Gi1_3866552_x15.....  | .....uggCucucacccaacagauccgg.....     | 1 |
| Gi3_26975290_x15..... | .....guucgauuUcggcgcgagc.....         | 1 |
| Gi3_26954470_x15..... | .....gguucgauuGccggcgcgagc.....       | 1 |
| Gi3_26968030_x15..... | .....uucucacccaacGgauccg.....         | 1 |
| Gi3_26988265_x15..... | .....gguucucacccGacagauccg.....       | 1 |
| Gi2_10281595_x15..... | .....uccAgcguaguauaacggcuaga.....     | 1 |
| Gi1a_5552324_x15..... | .....gUuucgauucccgcc.....             | 1 |
| Gi1_3869582_x15.....  | .....uccggcguaguauaacggcuG.....       | 1 |
| Gi1_3870362_x15.....  | .....ggGucgauucccgccg.....            | 1 |
| Gi3_26977105_x15..... | .....cagauccggguucgauucccgccgagc..... | 0 |
| Gi3_26983810_x15..... | .....gguucgauuccUgcccggag.....        | 1 |
| Gi5_8341367_x15.....  | .....uccggcguagCauaacggc.....         | 1 |
| Gi2_10292530_x15..... | .....guucgauucccgccAccggagc.....      | 1 |
| Gi3_26953060_x15..... | .....guucUauucccgccgagc.....          | 1 |
| Gi2_10288225_x15..... | .....uUguucucacccaacagaucc.....       | 1 |
| Gi2_10281325_x15..... | .....gAuucgauucccgccgag.....          | 1 |
| Gi2_10291690_x15..... | .....ggCucgauucccgccgag.....          | 1 |
| Gi3_26957575_x15..... | .....Auucgauucccgccg.....             | 1 |
| Gi1_3870467_x15.....  | .....uccggcguaguauaacAg.....          | 1 |
| Gi3_26977270_x15..... | .....gguucucacUcaacagauccg.....       | 1 |
| Gi3_26953450_x15..... | .....guucgauucccgccCg.....            | 1 |
| Gi5_8339057_x15.....  | .....gguucgauuccAgcccgga.....         | 1 |
| Gi3_26978710_x15..... | .....acagauccggguucgauucccgccgga..... | 0 |
| Gi3_26988595_x15..... | .....guucucacNcaacagauccg.....        | 1 |
| Gi3_26961715_x15..... | .....uccAgcguaguauaacggc.....         | 1 |
| Gi4_510572_x15.....   | .....uccggcguaguauaacggcuaga.....     | 0 |
| Gi1_3865502_x15.....  | .....uccggcgcCaguauaacgg.....         | 1 |

|                  |                             |   |
|------------------|-----------------------------|---|
| Gi5_8351762_x15  | gUuucucacccaacagauc         | 1 |
| Gi3_26985805_x15 | guucgauUccggcgccggag        | 1 |
| Gi5_8352632_x15  | uccggcguaguauCacgg          | 1 |
| Gi2_10291720_x15 | guucgauAcccgcgccggagc       | 1 |
| Gi1_3870317_x15  | gCuucgauucccgcgccgg         | 1 |
| Gi1_3868877_x15  | uccggcguaguauaacgAcuag      | 1 |
| Gi1_3867737_x15  | Cguucucacccaacagauccg       | 1 |
| Gi3_26972620_x15 | gguucgauuccAggcgcggga       | 1 |
| Gi3_26986555_x15 | Gguuucucacccaacagauc        | 1 |
| Gi5_8349707_x15  | guucgauucccgAgccgg          | 1 |
| Gi1_3872102_x15  | uccggcguaguGuaacggcuag      | 1 |
| Gi3_26987620_x15 | uccggcguaguauaacgAcuagaau   | 1 |
| Gi3_26992975_x15 | uUcggcguaguauaacggcuagaau   | 1 |
| Gi5_8338577_x15  | guucgauucccAgcgccgg         | 1 |
| Gi5_8354912_x15  | gguucgauucccgcgUggagc       | 1 |
| Gi2_10293895_x15 | gguucgGuucccgcgccggag       | 1 |
| Gi3_26957860_x15 | uucCcacccaacagauccg         | 1 |
| Gi2_10277185_x15 | uccggcguaguaCaacggcuaga     | 1 |
| Gi2_10274605_x15 | guCcgauucccgcgccg           | 1 |
| Gi2_10284595_x15 | guucgauucccgUgcccgg         | 1 |
| Gi3_26966755_x15 | gCuucgauucccgcgccg          | 1 |
| Gi2_10291435_x15 | ugguucucNcccaacagauccg      | 1 |
| Gi2_10294195_x15 | uucucacccaCagauccg          | 1 |
| Gi5_8340467_x15  | guucgauucccgcgccCg          | 1 |
| Gi3_26986465_x15 | guucgauucccgcgAggagc        | 1 |
| Gi5_8344007_x15  | gguucgauucccgUgcccggagc     | 1 |
| Gi2_10287565_x15 | guGcgauucccgcgccggagc       | 1 |
| Gi3_26966170_x15 | uccggcguaguGuaacggcuagaau   | 1 |
| Gi3_26952685_x15 | gguucgauUccggcgccgga        | 1 |
| Gi1_3867422_x15  | uccggcguaguauaacggcC        | 1 |
| Gi5_8359135_x14  | ggCucgauucccgcgccgga        | 1 |
| Gi3_27009573_x14 | guucgauucccgcgAgcgagc       | 1 |
| Gi1_3873118_x14  | gguucucacccaacagaCccg       | 1 |
| Gi3_27012527_x14 | uccggcguaguauaCcggcua       | 1 |
| Gi5_8360829_x14  | gguucgauucccUgcccggagc      | 1 |
| Gi5_8363755_x14  | gguucAauucccgcgccg          | 1 |
| Gi2_10313039_x14 | guucgauucccgcgUg            | 1 |
| Gi3_27007347_x14 | Cccggcguaguauaacggcuagaau   | 1 |
| Gi5_8359835_x14  | uccggcguaguauaacAgcuagaau   | 1 |
| Gi3_26998135_x14 | uucucaccNaacagauccgg        | 1 |
| Gi2_10316595_x14 | gAuucgauucccgcgcc           | 1 |
| Gi5_8368683_x14  | uccgUcgaguauaacggcuua       | 1 |
| Gi5_8365309_x14  | cgaguauaacggcuagaugguugguuc | 0 |
| Gi5_8363433_x14  | Cuucgauucccgcgccgga         | 1 |
| Gi3_27011939_x14 | uucucacccaGcagauccg         | 1 |
| Gi3_27000277_x14 | uucgauucccgcgccggCgc        | 1 |
| Gi3_27005163_x14 | guucgauucccgcgccgAagc       | 1 |

|                       |                                      |   |
|-----------------------|--------------------------------------|---|
| Gi3_27016139_x14..... | ..gguUGauuucccgcgccgga.....          | 1 |
| Gi5_8363685_x14.....  | ..gguucgauucccgcgccggagU.....        | 1 |
| Gi3_26999759_x14..... | ..gguucgauucccgUgccg.....            | 1 |
| Gi3_27004211_x14..... | ..gguucgauucccgcgUcggag.....         | 1 |
| Gi5_8356405_x14.....  | ..gguucgauucccAgcgccg.....           | 1 |
| Gi3_27036425_x14..... | ..ugguucucacccaacagauccggguucga..... | 0 |
| Gi3_27012821_x14..... | ..gCucgauuucccgcgccg.....            | 1 |
| Gi1_3882092_x14.....  | ..guucucacccaacagGuccgg.....         | 1 |
| Gi3_27000333_x14..... | ..gguucgauucccgcgccCgagc.....        | 1 |
| Gi3_27002125_x14..... | ..gguucgauucccgcgAcgg.....           | 1 |
| Gi2_10308545_x14..... | ..uccggUguaguauaacggcua.....         | 1 |
| Gi1_3875372_x14.....  | ..gguucgauucccgAccgg.....            | 1 |
| Gi5_8368865_x14.....  | ..ggCucgauucccgcgcc.....             | 1 |
| Gi5_8371357_x14.....  | ..uccggcguaguauaGcggcua.....         | 1 |
| Gi5_8366779_x14.....  | ..uccggcguaguaCaacggcuag.....        | 1 |
| Gi2_10313193_x14..... | ..guucgauucccgcgccA.....             | 1 |
| Gi2_10304737_x14..... | ..uccggcguaguauaacggcuagGau.....     | 1 |
| Gi1_3877304_x14.....  | ..uucucacccaacagGuccg.....           | 1 |
| Gi3_27021501_x14..... | ..guGcgauuucccgcgccggag.....         | 1 |
| Gi2_10301433_x14..... | ..uccggcguaguGuaacggc.....           | 1 |
| Gi1a_5558613_x14..... | ..Gucucacccaacagauccg.....           | 1 |
| Gi3_27036271_x14..... | ..uccggcguaguauaacggcuaUa.....       | 1 |
| Gi1_3873146_x14.....  | ..uucucGcccaacagauccgg.....          | 1 |
| Gi3_27008271_x14..... | ..guucucacccaacagauccggguucgau.....  | 0 |
| Gi1_3878970_x14.....  | ..ugguucucaccccCacagauccgg.....      | 1 |
| Gi3_27018169_x14..... | ..guuUgauuucccgcgccggagc.....        | 1 |
| Gi2_10308713_x14..... | ..ucUggcguaguauaacggcuagaa.....      | 1 |
| Gi2_10316175_x14..... | ..guucgauuucccgcgccgAagc.....        | 1 |
| Gi5_8362635_x14.....  | ..gguucgauucccgcgccggGg.....         | 1 |
| Gi3_27023615_x14..... | ..uucucGcccaacagauccg.....           | 1 |
| Gi1_3877780_x14.....  | ..ggCucgauuucccgcgccggagc.....       | 1 |
| Gi5_8358995_x14.....  | ..gCucgauuucccgcgccgga.....          | 1 |
| Gi3_27010399_x14..... | ..ggNucgauuucccgcgccggagc.....       | 1 |
| Gi1_3876772_x14.....  | ..gguucucacccaacagCuccg.....         | 1 |
| Gi2_10296631_x14..... | ..guucgauuNccggcgccg.....            | 1 |
| Gi1a_5559747_x14..... | ..uccggcguaguauaacgAcuagaau.....     | 1 |
| Gi3_27021445_x14..... | ..uccggcguaguauaGcgguagaa.....       | 1 |
| Gi3_27015145_x14..... | ..gguucgauAcccgcgccggag.....         | 1 |
| Gi2_10305815_x14..... | ..gcguaguauaacggcuagaa.....          | 0 |
| Gi5_8362173_x14.....  | ..uccggcguaguauaacggcCa.....         | 1 |
| Gi5_8369299_x14.....  | ..Cccggcguaguauaacgg.....            | 1 |
| Gi1_3874140_x14.....  | ..Cucucacccaacagauccgg.....          | 1 |
| Gi2_10297023_x14..... | ..gguucgauCcccgcgccgga.....          | 1 |
| Gi5_8367703_x14.....  | ..guucucacccaacCgauccg.....          | 1 |
| Gi5_8365687_x14.....  | ..uGcgggcguaguauaacggcuagaa.....     | 1 |
| Gi5_8372561_x14.....  | ..guGcgauuucccgcgccgg.....           | 1 |
| Gi3_27006577_x14..... | ..uCcucacccaacagauccgg.....          | 1 |

Gi3\_27037237\_x14.....gguucucacccaCcagaucgg.....1  
 Gi3\_27005429\_x14.....gCuucgauucccgcgccgg.....1  
 Gi3\_27000123\_x14.....gguucgauucccgcgccgAa.....1  
 Gi3\_27029817\_x14.....uccggcgGaguauaacggcuaga.....1  
 Gi5\_8359107\_x14.....uccggcgCaguauaacggcuagaau.....1  
 Gi5\_8363377\_x14.....gguucgCuucccgcgccg.....1  
 Gi5\_8365253\_x14.....Cguucgauucccgcgccgga.....1  
 Gi3\_27002881\_x14.....uccNgcguaguauaacggcuaga.....1  
 Gi3\_27014207\_x14.....uccggcgUguauaacggc.....1  
 Gi2\_10303701\_x14.....uccggcgUguauaacggcuag.....1  
 Gi2\_10306039\_x14.....guucgauucccgAgccggagc.....1  
 Gi3\_27005527\_x14.....uccUgcguaguauaacggcuaga.....1  
 Gi3\_27019345\_x14.....guucgauuccAgcgccgg.....1  
 Gi5\_8360045\_x14.....gAuucgauucccgcgccg.....1  
 Gi3\_27024385\_x14.....uccggcgaguauaCcg.....ugguucucacccaacagaCccg.....1  
 Gi1\_3880440\_x14.....1  
 Gi3\_27022649\_x14.....guucgauucccgcgCcgagc.....1  
 Gi3\_27006661\_x14.....guCcuacccaacagaucgg.....1  
 Gi3\_27001719\_x14.....gAuucgauucccgcgcc.....1  
 Gi3\_27029341\_x14.....uucgauucccgcgccgC.....1  
 Gi3\_26999605\_x14.....gguucgauuccUggcgccgg.....1  
 Gi2\_10298059\_x14.....guucgauUccggcgccgg.....1  
 Gi3\_27015621\_x14.....guGcgauucccgcgccggagc.....1  
 Gi3\_27039015\_x13.....gguucgauUccggcgccgg.....1  
 Gi3\_27075623\_x13.....Gguccggcgaguauaacggcuagaau.....1  
 Gi1\_3886073\_x13.....Gccggcgaguauaacggcu.....1  
 Gi3\_27084086\_x13.....gguucucacccaacagauCg.....1  
 Gi3\_27063494\_x13.....uGgauucccgcgccggag.....1  
 Gi1\_3882914\_x13.....guucucGcccaacagaucgg.....1  
 Gi5\_8373884\_x13.....gguucgauucccgcgccAgagc.....1  
 Gi1\_3885072\_x13.....uccggcgaguauaacggcuagU.....1  
 Gi3\_27044670\_x13.....guucgauUccggcgccggagc.....1  
 Gi5\_8373143\_x13.....uccggcgaguauaacggcuagGau.....1  
 Gi3\_27064742\_x13.....Gucacccaacagaucgg.....1  
 Gi3\_27038209\_x13.....uccggcgaguauaacggcuAaau.....1  
 Gi1\_3889024\_x13.....ugguucucacccGacagaucgg.....1  
 Gi2\_10338106\_x13.....gCuucgauucccgcgccggag.....1  
 Gi3\_27065496\_x13.....gUuucucacccaacagaucgg.....1  
 Gi5\_8380410\_x13.....guucgauucccgcgGcgg.....1  
 Gi2\_10332919\_x13.....aUauccggguucgauucc.....1  
 Gi4\_514174\_x13.....Uguucgauucccgcgccggagc.....1  
 Gi3\_27065327\_x13.....guucgGuucccgcgccg.....1  
 Gi2\_10338912\_x13.....guucgaGucccgcgccggagc.....1  
 Gi1\_3891182\_x13.....guucucacccGacagaucgg.....1  
 Gi1\_3887464\_x13.....ugguucCacccaacagaucgg.....1  
 Gi3\_27072802\_x13.....gguucgauuccCcgcgccggagc.....1  
 Gi5\_8373910\_x13.....ggGucgauucccgcgccg.....1

|                       |                                |   |
|-----------------------|--------------------------------|---|
| Gi5_8373351_x13.....  | gguucgauucccggcgcggG.....      | 1 |
| Gi3_27069760_x13..... | uccggcguaguauaCcggc.....       | 1 |
| Gi3_27067030_x13..... | gguuAgauucccggcgcggga.....     | 1 |
| Gi1_3891559_x13.....  | Ugcguaguauaacggcuag.....       | 1 |
| Gi3_27043669_x13..... | guucgauuccAggcgcggga.....      | 1 |
| Gi2_10321648_x13..... | guucgauucccggcgcggagU.....     | 1 |
| Gi1_3892261_x13.....  | guucgauucccggcgcggU.....       | 1 |
| Gi2_10322532_x13..... | gguucgauucccggcgcggagcgA.....  | 1 |
| Gi3_27067238_x13..... | uccggcguaguauaacgUcuaga.....   | 1 |
| Gi3_27052301_x13..... | gguucgauucccggcgcAggag.....    | 1 |
| Gi3_27046542_x13..... | gguuGgauucccggcgcggag.....     | 1 |
| Gi3_27062818_x13..... | gguucgauuccUggcgcc.....        | 1 |
| Gi5_8389601_x13.....  | gguucgaCucccggcgcg.....        | 1 |
| Gi3_27047153_x13..... | uccggcAuaguauaacggcua.....     | 1 |
| Gi2_10322298_x13..... | gguucgauucccggcAccgga.....     | 1 |
| Gi1a_5572419_x13..... | gUuucgauucccggcgcgg.....       | 1 |
| Gi3_27060023_x13..... | uccggcguaguauaacggcuagaC.....  | 1 |
| Gi5_8382022_x13.....  | guucgauucccggcgcggCgc.....     | 1 |
| Gi2_10336663_x13..... | Cucucaccaacagauccg.....        | 1 |
| Gi2_10330592_x13..... | guucgauucccggcgcgggaAc.....    | 1 |
| Gi5_8385987_x13.....  | uccggcguaguauaacggcuagaaC..... | 1 |
| Gi3_27056617_x13..... | uccggcguaguauaacggAua.....     | 1 |
| Gi1_3891845_x13.....  | ugUuucucaccaacagauccgg.....    | 1 |
| Gi1_3888413_x13.....  | ggGucucaccaacagauccg.....      | 1 |
| Gi3_27079484_x13..... | guucgauuNccggcgccgga.....      | 1 |
| Gi5_8376679_x13.....  | gguucgauucccggcgcgggaUc.....   | 1 |
| Gi3_27077092_x13..... | guucgauucccggcgcggagA.....     | 1 |
| Gi3_27050338_x13..... | gguucucaNccaacagauccg.....     | 1 |
| Gi1_3892781_x13.....  | guucgauucccggcgcggagcU.....    | 1 |
| Gi2_10322402_x13..... | gguucgauucccggcgcggCagc.....   | 1 |
| Gi2_10336390_x13..... | ggCucgauucccggcgcg.....        | 1 |
| Gi2_10328811_x13..... | uccggcguaguauaacggU.....       | 1 |
| Gi3_27059763_x13..... | uccggcguCguauaacggc.....       | 1 |
| Gi3_27075558_x13..... | uccggcguaguauaacggcCag.....    | 1 |
| Gi3_27058840_x13..... | guucgCuucccggcgcggagc.....     | 1 |
| Gi3_27057319_x13..... | gguucgauucccggcgcggA.....      | 1 |
| Gi3_27063065_x13..... | gguucgauuccUggcgccg.....       | 1 |
| Gi3_27048310_x13..... | guucgauucccggcgcgg.....        | 1 |
| Gi1_3885592_x13.....  | gguucUauucccggcgcggagc.....    | 1 |
| Gi3_27059906_x13..... | gguucgauucccggcgcAgag.....     | 1 |
| Gi2_10324222_x13..... | Cguucgauucccggcgcg.....        | 1 |
| Gi3_27042083_x13..... | uccggcguaguGuaacggcuagaa.....  | 1 |
| Gi2_10342500_x13..... | guucucaccaCcagauccg.....       | 1 |
| Gi1_3885293_x13.....  | guucgauucccggcgcAgagc.....     | 1 |
| Gi3_27045437_x13..... | uccggcguagCauaacggcua.....     | 1 |
| Gi2_10324599_x13..... | guucgauuccAgcgccgga.....       | 1 |
| Gi1_3884643_x13.....  |                                |   |

|                       |                                 |   |
|-----------------------|---------------------------------|---|
| Gi2_10328044_x13..... | .uccggcguaguauaacAgcuagaau..... | 1 |
| Gi5_8380748_x13.....  | .uucucacccaacagGuccg.....       | 1 |
| Gi5_8373858_x13.....  | .Cguucgauucccggcgcgg.....       | 1 |
| Gi1a_5576280_x13..... | .uccggcguaguauaacggcu.....      | 0 |
| Gi3_27043162_x13..... | .gguucgauucccggcgcGggagc.....   | 1 |
| Gi3_27052756_x13..... | .gguucgauucccggcgUcg.....       | 1 |
| Gi3_27051573_x13..... | .uccgUcguaguauaacggcuag.....    | 1 |
| Gi3_27062961_x13..... | .guucgauCcccggcgcggag.....      | 1 |
| Gi3_27059126_x13..... | .gCuucucacccaacagauccg.....     | 1 |
| Gi1_3885540_x13.....  | .guuNgauucccggcgcgg.....        | 1 |
| Gi2_10333738_x13..... | .uccggcguaguGuaacggcu.....      | 1 |
| Gi3_27077807_x13..... | .Auucucacccaacagauccg.....      | 1 |
| Gi3_27063572_x13..... | .gguucucGcccaacagauccg.....     | 1 |
| Gi5_8376926_x13.....  | .gguucgauUccgggcgcg.....        | 1 |
| Gi5_8385636_x13.....  | .guAcgauucccggcgcgg.....        | 1 |
| Gi5_8383855_x13.....  | .guucgauucUcgggcgcgg.....       | 1 |
| Gi5_8384674_x13.....  | .gguucgauucccggcgAcggagc.....   | 1 |
| Gi5_8382412_x13.....  | .gguucucaccUaacagauccg.....     | 1 |
| Gi2_10332256_x13..... | .gguAcgauucccggcgcggagc.....    | 1 |
| Gi5_8381086_x13.....  | .guucCcacccaacagauccg.....      | 1 |
| Gi4_513719_x13.....   | .guucgauucccggcgcg.....         | 0 |
| Gi5_8390368_x13.....  | .guucgauucccgUcgccgg.....       | 1 |
| Gi2_10367230_x12..... | .guucgauucccAgcgcgg.....        | 1 |
| Gi3_27097293_x12..... | .gguucucacccaacagaCccg.....     | 1 |
| Gi2_10356154_x12..... | .ggGucgauucccggcgcggga.....     | 1 |
| Gi5_8399538_x12.....  | .Accggcguaguauaacggcuag.....    | 1 |
| Gi1_3902258_x12.....  | .gguucucGcccaacagauccg.....     | 1 |
| Gi2_10359070_x12..... | .Cuucgauucccggcgcggag.....      | 1 |
| Gi3_27124785_x12..... | .gguucgauucccgUgcccgg.....      | 1 |
| Gi3_27096909_x12..... | .guucgauucccggcgGcgg.....       | 1 |
| Gi1_3896822_x12.....  | .uccggcguaguGuaacgg.....        | 1 |
| Gi5_8406918_x12.....  | .uccggcguaguauaacggcuG.....     | 1 |
| Gi3_27106473_x12..... | .Accggcguaguauaacggc.....       | 1 |
| Gi3_27088305_x12..... | .gguucgauucccggcgcUgg.....      | 1 |
| Gi3_27092649_x12..... | .uccggcAuaguauaacgg.....        | 1 |
| Gi5_8401914_x12.....  | .Uuucgauucccggcgcggag.....      | 1 |
| Gi5_8404434_x12.....  | .gCucgauucccggcgcggagc.....     | 1 |
| Gi2_10361794_x12..... | .Aguucucacccaacagauccg.....     | 1 |
| Gi5_8400042_x12.....  | .gAuucgauucccggcgcggga.....     | 1 |
| Gi5_8407074_x12.....  | .gguucgauucccggcgcAggagc.....   | 1 |
| Gi2_10344394_x12..... | .guucgauucccggcAcggga.....      | 1 |
| Gi2_10349386_x12..... | .gAucgauucccggcgcggagc.....     | 1 |
| Gi5_8393478_x12.....  | .gguucgCuucccggcgcggagc.....    | 1 |
| Gi2_10364326_x12..... | .gguucgauucccgGgcccggagc.....   | 1 |
| Gi1_3900650_x12.....  | .guucgauucccCgcgcgg.....        | 1 |
| Gi2_10359730_x12..... | .uucucacccaacagGuccg.....       | 1 |
| Gi3_27117369_x12..... | .gguucgauucccggcgcAg.....       | 1 |

|                       |                                      |   |
|-----------------------|--------------------------------------|---|
| Gi3_27094065_x12..... | .uccggcguaguCuaacggc.....            | 1 |
| Gi1_3899774_x12.....  | .uGcgauuccggcgccgg.....              | 1 |
| Gi5_8401218_x12.....  | .gUuucgauuccggcgccggagcgu.....       | 1 |
| Gi2_10353190_x12..... | .gguucgauuccUggcgcc.....             | 1 |
| Gi3_27112941_x12..... | .gguucgaAuuccggcgccggagc.....        | 1 |
| Gi2_10345018_x12..... | .guucgauuNccggcgccggag.....          | 1 |
| Gi1_3897482_x12.....  | .guucgaGuuccggcgccgg.....            | 1 |
| Gi5_8395722_x12.....  | .gguucgauuccggcgUgga.....            | 1 |
| Gi1_3896510_x12.....  | .uccggUguaguauaacggcua.....          | 1 |
| Gi4_515028_x12.....   | .uccggcguaguauaacggcuagaa.....       | 0 |
| Gi5_8393466_x12.....  | .gguucucacccaacagaucAg.....          | 1 |
| Gi5_8401998_x12.....  | .guucucaccUaacagauccg.....           | 1 |
| Gi5_8401710_x12.....  | .uGucacccaacagauccg.....             | 1 |
| Gi2_10356202_x12..... | .gGuuccggcgccggagc.....              | 1 |
| Gi5_8400198_x12.....  | .uccggcgCaguauaacggcuag.....         | 1 |
| Gi3_27101517_x12..... | .gguucucacccaacagGuccg.....          | 1 |
| Gi3_27104649_x12..... | .uucCcacccaacagauccgg.....           | 1 |
| Gi3_27110877_x12..... | .guucgauuccggcgccAgag.....           | 1 |
| Gi1_3898454_x12.....  | .guucucacccaacGgauccgg.....          | 1 |
| Gi3_27122361_x12..... | .gguucgauuUccggcgccg.....            | 1 |
| Gi3_27126693_x12..... | .guucgauucccCgcgccggagc.....         | 1 |
| Gi3_27131349_x12..... | .guucgauuUccggcgccgga.....           | 1 |
| Gi3_27103185_x12..... | .uccggcguaguauaacAgcuagaa.....       | 1 |
| Gi2_10363918_x12..... | .gguucgCuuccggcgccggag.....          | 1 |
| Gi3_27118293_x12..... | .guucUauuccggcgccggag.....           | 1 |
| Gi1_3901406_x12.....  | .uccggcguaguauaacggU.....            | 1 |
| Gi3_27117957_x12..... | .guucucacccaacCgauccg.....           | 1 |
| Gi5_8396058_x12.....  | .ggcguaguauaacggcua.....             | 0 |
| Gi3_27126453_x12..... | .gUuucucacccaacagauccgggu.....       | 1 |
| Gi3_27109329_x12..... | .uccggcguaguauaaAggcua.....          | 1 |
| Gi5_8394810_x12.....  | .guucgauucccgAcgcccgg.....           | 1 |
| Gi3_27102801_x12..... | .uccggcguUguauaacggcua.....          | 1 |
| Gi2_10347886_x12..... | .uGcggcguaguauaacggcuagaa.....       | 1 |
| Gi1_3894194_x12.....  | .uCguucucacccaacagauccgg.....        | 1 |
| Gi2_10344010_x12..... | .guuUgauuccggcgccg.....              | 1 |
| Gi5_8406114_x12.....  | .Gugguucucacccaacagauccg.....        | 1 |
| Gi3_27101049_x12..... | .ugguucucNcccaacagauccg.....         | 1 |
| Gi5_8404902_x12.....  | .gguucgauuccggcgccggCg.....          | 1 |
| Gi5_8404566_x12.....  | .gguucgaCuuccggcgccgg.....           | 1 |
| Gi3_27113469_x12..... | .uUgauuccggcgccggagc.....            | 1 |
| Gi2_10365874_x12..... | .gguNcgauuccggcgccggagc.....         | 1 |
| Gi1_3895478_x12.....  | .uccggcguaguauaacggcuagaaA.....      | 1 |
| Gi5_8402034_x12.....  | .guucgauuccggcgCagg.....             | 1 |
| Gi1_3898814_x12.....  | .uccggcguaguauaaUggcuaga.....        | 1 |
| Gi3_27087333_x12..... | .caacagauccggguucgauuccggcgccgg..... | 0 |
| Gi1_3897170_x12.....  | .uucCcacccaacagauccgg.....           | 1 |
| Gi1_3895370_x12.....  | .gguucgauucccAgcggccg.....           | 1 |



|                       |                                 |   |
|-----------------------|---------------------------------|---|
| Gi1_3895874_x12.....  | .uucucacccaacaAauccgg.....      | 1 |
| Gi5_8400306_x12.....  | .guucgauucccgggcAgc.....        | 1 |
| Gi2_10354426_x12..... | .gguucgGuucccgggcggga.....      | 1 |
| Gi3_27108045_x12..... | .uucucaccaGcagaucgg.....        | 1 |
| Gi5_8392722_x12.....  | .guucucacccaacagaCccg.....      | 1 |
| Gi3_27103977_x12..... | .Gugguucucacccaacagaucc.....    | 1 |
| Gi5_8408574_x12.....  | .uUcggcguaguauaacggc.....       | 1 |
| Gi5_8406570_x12.....  | .uccggcguaguGuaacggcuagaau..... | 1 |
| Gi5_8392854_x12.....  | .uccggcguaguauCacggcua.....     | 1 |
| Gi3_27117285_x12..... | .gguucgauucAcggcgccggag.....    | 1 |
| Gi3_27105573_x12..... | .uccggcguaguauaacggcuagCa.....  | 1 |
| Gi3_27093009_x12..... | .gguucgauucccgggcgcggU.....     | 1 |
| Gi5_8401206_x12.....  | .uccggcguaguaCaacggcua.....     | 1 |
| Gi5_8394774_x12.....  | .guucgauucccgggcAg.....         | 1 |
| Gi1_3897854_x12.....  | .guucgauuccUgcccgg.....         | 1 |
| Gi3_27097029_x12..... | .gguucgauucccgggcAcc.....       | 1 |
| Gi2_10348270_x12..... | .uCcucacccaacagaucgg.....       | 1 |
| Gi5_8392002_x12.....  | .uccggUguaguauaacgg.....        | 1 |
| Gi2_10354906_x12..... | .guucgauuccAgcggcgg.....        | 1 |
| Gi5_8404698_x12.....  | .uucCcacccaacagaucgg.....       | 1 |
| Gi1_3900710_x12.....  | .uccggcguaguauaacAgcuaga.....   | 1 |
| Gi3_27113829_x12..... | .Accggcguaguauaacggcua.....     | 1 |
| Gi1_3902114_x12.....  | .uccggcguaguauaGcggcua.....     | 1 |
| Gi3_27123429_x12..... | .guucgauucccgggcgcggagU.....    | 1 |
| Gi2_10350382_x12..... | .Auucgauucccgggcggc.....        | 1 |
| Gi5_8400258_x12.....  | .uccggcguaguauaacgAc.....       | 1 |
| Gi5_8403234_x12.....  | .gguucgauucccgggcUcggagc.....   | 1 |
| Gi1_3899882_x12.....  | .ccggcguGguauaacggcuag.....     | 1 |
| Gi3_27127785_x12..... | .guucgauucccgggcggcggagcU.....  | 1 |
| Gi5_8407494_x12.....  | .guucgauucccgggcUcggagc.....    | 1 |
| Gi5_8404746_x12.....  | .uccggUguaguauaacggcuaga.....   | 1 |
| Gi2_10355794_x12..... | .uccggcguaguauaacggcuagGa.....  | 1 |
| Gi1_3893738_x12.....  | .guucucacccaacagauccAg.....     | 1 |
| Gi3_27148716_x11..... | .uccggUguaguauaacggcuagaa.....  | 1 |
| Gi5_8412951_x11.....  | .guucucacccaacagauccA.....      | 1 |
| Gi3_27147528_x11..... | .uccggGguaguauaacggcuaga.....   | 1 |
| Gi3_27173730_x11..... | .guucgauucccgggcgcggU.....      | 1 |
| Gi5_8429264_x11.....  | .guucgauUccggcggc.....          | 1 |
| Gi5_8425271_x11.....  | .gguucucaUccaacagaucgg.....     | 1 |
| Gi5_8419232_x11.....  | .cucacccaacagGuccgg.....        | 1 |
| Gi5_8429451_x11.....  | .uUcggcguaguauaacggcuagaa.....  | 1 |
| Gi3_27179087_x11..... | .uccggcguaguauCacggcuag.....    | 1 |
| Gi2_10395388_x11..... | .uuUucacccaacagaucgg.....       | 1 |
| Gi1_3910568_x11.....  | .ugguucucacccaacagGuccgg.....   | 1 |
| Gi3_27164699_x11..... | .gguucgauAcccgggcggc.....       | 1 |
| Gi2_10376468_x11..... | .guucgauuccUggcggcggag.....     | 1 |
| Gl1a_5613319_x11..... | .Uuucgauucccgggcggc.....        | 1 |

|                       |                                    |   |
|-----------------------|------------------------------------|---|
| Gi1_3909710_x11.....  | Aguucgauucccgcgccggagc.....        | 1 |
| Gi2_10392935_x11..... | .gguucgaAucccgcgccggagc.....       | 1 |
| Gi3_27183982_x11..... | .guucgauucccgAgccggagc.....        | 1 |
| Gi1_3907873_x11.....  | .guucgauucccgcgCUGga.....          | 1 |
| Gi2_10393540_x11..... | .gguucgauucccgcgUc.....            | 1 |
| Gi3_27173664_x11..... | .Accggcguaguauaacgg.....           | 1 |
| Gi1_3908324_x11.....  | .guucgauucccgcgccggagcU.....       | 1 |
| Gi1_3905453_x11.....  | Aguucgauucccgcgccggga.....         | 1 |
| Gi2_10397588_x11..... | .gguucgauCcccgcgcc.....            | 1 |
| Gi3_27137221_x11..... | .Uuucucaccaacagauccgggu.....       | 1 |
| Gi3_27162972_x11..... | .Gccggguucgauucccgcgccggga.....    | 1 |
| Gi3_27169121_x11..... | .gguucgauucccAgcgccgg.....         | 1 |
| Gi3_27157802_x11..... | .ugguucucaccaacGgauccg.....        | 1 |
| Gi2_10389547_x11..... | .ccggcguaguauaacggcuagaau.....     | 0 |
| Gi3_27145449_x11..... | .gguucucaccaacagauccA.....         | 1 |
| Gi5_8420024_x11.....  | .gguucgauucccgcgccA.....           | 1 |
| Gi2_10392671_x11..... | .ggCucucaccaacagauccg.....         | 1 |
| Gi1_3915661_x11.....  | .uccggcguagCauaacgg.....           | 1 |
| Gi2_10388832_x11..... | .ggAucgauucccgcgcc.....            | 1 |
| Gi1_3909963_x11.....  | .guucgauucccgcgccAga.....          | 1 |
| Gi5_8420563_x11.....  | .uccggcguaguaCaacgg.....           | 1 |
| Gi3_27177382_x11..... | .guucgauuNccggcgccg.....           | 1 |
| Gi3_27183586_x11..... | .guucgauucccgcgAccggag.....        | 1 |
| Gi5_8413479_x11.....  | .gUcguaguauaacggcuag.....          | 1 |
| Gi5_8431057_x11.....  | .guucgauucAcggcgccg.....           | 1 |
| Gi5_8418451_x11.....  | .uccggUguaguauaacggc.....          | 1 |
| Gi3_27138805_x11..... | .ggGucgauucccgcgcc.....            | 1 |
| Gi3_27143898_x11..... | .uccggcguaguaAaacggcuaga.....      | 1 |
| Gi5_8418330_x11.....  | .guGcucaccaacagauccg.....          | 1 |
| Gi5_8410553_x11.....  | .Accggcguaguauaacggcuaga.....      | 1 |
| Gi3_27178779_x11..... | .gguucgauuAccggcgccggag.....       | 1 |
| Gi5_8424138_x11.....  | .Gcucaccaacagauccgg.....           | 1 |
| Gi3_27157648_x11..... | .uGcgauucccgcgccgg.....            | 1 |
| Gi3_27167482_x11..... | .gguucgauucccAgcgccg.....          | 1 |
| Gi2_10395916_x11..... | .guucgauucccgcgccggagcgA.....      | 1 |
| Gi2_10379944_x11..... | .ggGucgauucccgcgcc.....            | 1 |
| Gi3_27167427_x11..... | .guucgauucccgUcgccgga.....         | 1 |
| Gi2_10391230_x11..... | .cUgcguaguauaacggcua.....          | 1 |
| Gi3_27150520_x11..... | .uccggcguaguauGacggc.....          | 1 |
| Gi2_10394222_x11..... | .gguucgaCucccgcgccggga.....        | 1 |
| Gi5_8428120_x11.....  | .Gcacccaacagauccggguu.....         | 1 |
| Gi2_10391307_x11..... | .Cuucgauucccgcgccg.....            | 1 |
| Gi1_3907752_x11.....  | .guucAauucccgcgccggga.....         | 1 |
| Gi5_8414458_x11.....  | .gguucgauuUccggcgccggagc.....      | 1 |
| Gi2_10384421_x11..... | .uUcggcguaguauaacgg.....           | 1 |
| Gi3_27156955_x11..... | .cucaccaacagauccggguucgauuccc..... | 0 |
| Gi5_8420310_x11.....  | .guucgauucccgcgccgA.....           | 1 |

|                  |                             |   |
|------------------|-----------------------------|---|
| Gi2_10369868_x11 | ucgauuccNggcgccggagc        | 1 |
| Gi3_27151818_x11 | uccggcguaguauaacggcuagGa    | 1 |
| Gi1_3909952_x11  | gguucgauuccUggcgccgg        | 1 |
| Gi3_27178009_x11 | Ugguucgauucccgcgccgga       | 1 |
| Gi2_10396785_x11 | uccggcguaguauaacggcuGg      | 1 |
| Gi3_27166690_x11 | Gcgauucccgcgccgga           | 1 |
| Gi5_8413666_x11  | uccgAcguaguauaacgg          | 1 |
| Gi1_3910612_x11  | Cccggcguaguauaacggcua       | 1 |
| Gi3_27168615_x11 | ucgauuccNggcgccggagc        | 1 |
| Gi2_10371342_x11 | guucgauucccgUgcccga         | 1 |
| Gi2_10385290_x11 | gCucgauucccgcgccggag        | 1 |
| Gi3_27151873_x11 | guucgauucccgcgUcggagc       | 1 |
| Gi3_27144360_x11 | aUaucggguucgauucc           | 1 |
| Gi5_8422455_x11  | gAucgauucccgcgccg           | 1 |
| Gi5_8418671_x11  | uccggcguaguauaacggcuagauggu | 0 |
| Gi5_8419903_x11  | guuUgauucccgcgccgga         | 1 |
| Gi2_10376281_x11 | guucgauucccgcgccggCg        | 1 |
| Gi3_27184686_x11 | uccggAguaguauaacgg          | 1 |
| Gi1_3908104_x11  | uucucacccaGcagaucgg         | 1 |
| Gi5_8423874_x11  | guucgauucccgAcgcccga        | 1 |
| Gi5_8426338_x11  | uccggcguaguauaacAg          | 1 |
| Gi3_27180517_x11 | gCucucacccaacagaucgg        | 1 |
| Gi5_8426822_x11  | gguucgauucccgcgUg           | 1 |
| Gi3_27156548_x11 | uccggcguaguauaaUggcuag      | 1 |
| Gi5_8415030_x11  | guucucacccaacGgaucgg        | 1 |
| Gi2_10383827_x11 | uccggcguaguauaGcgg          | 1 |
| Gi1_3914561_x11  | Gcucacccaacagaucgg          | 1 |
| Gi2_10381913_x11 | Auucgauucccgcgccggag        | 1 |
| Gi5_8418066_x11  | gCuucgauucccgcgccg          | 1 |
| Gi3_27145086_x11 | uccggcguaguauaacggcuagCau   | 1 |
| Gi3_27183509_x11 | uccggcguaguauaacgAcuag      | 1 |
| Gi5_8410355_x11  | Uguucucacccaacagaucggguu    | 1 |
| Gi3_27169869_x11 | guucucacccaacagGuccg        | 1 |
| Gi3_27179593_x11 | guucgauuAccggcgccgga        | 1 |
| Gi2_10373322_x11 | guGcgauucccgcgccg           | 1 |
| Gi3_27178471_x11 | gguucucacccaacagauCAg       | 1 |
| Gi3_27149948_x11 | gUcguaguauaacggcua          | 1 |
| Gi1a_5609469_x11 | Gccggcguaguauaacggcuag      | 1 |
| Gi5_8418286_x11  | gguucgauuccUggcgccg         | 1 |
| Gi2_10377293_x11 | uccggcguaguauaGcggc         | 1 |
| Gi3_27167878_x11 | guucgCuucccgcgccgg          | 1 |
| Gi2_10373432_x11 | gguucgauuUccggcgcc          | 1 |
| Gi5_8410993_x11  | uccggcguaguGuaacggcua       | 1 |
| Gi3_27172443_x11 | guucgauucccgcgccgCagc       | 1 |
| Gi2_10378382_x11 | uccgAcguaguauaacggcuaga     | 1 |
| Gi1_3910887_x11  | uAcucacccaacagaucgg         | 1 |
| Gi3_27165073_x11 | uccggcguaguauaacggUuag      | 1 |

|                  |                                 |   |
|------------------|---------------------------------|---|
| Gi3_27142325_x11 | ccaacagauccggguucgauucccggcgcgg | 0 |
| Gi2_10377172_x11 | uccggcguaguauCacggc             | 1 |
| Gi1_3915683_x11  | cguaguauaacggcuagaau            | 0 |
| Gi2_10384201_x11 | guucgauucccggcgcAgg             | 1 |
| Gi3_27144250_x11 | uccggcguaguauCacggcuagaau       | 1 |
| Gi3_27186776_x11 | uuUgauucccggcgcggagc            | 1 |
| Gi5_8428219_x11  | guucucacUcaacagaucgg            | 1 |
| Gi5_8427636_x11  | uccggcguaguGuaacggc             | 1 |
| Gi1_3905156_x11  | gguucgauucccggcgcAgg            | 1 |
| Gi2_10387710_x11 | uccggcguaguauaacAgcuag          | 1 |
| Gi2_10384608_x11 | uccgUcguaguauaacggcua           | 1 |
| Gi3_27133789_x11 | uccggcguaguaGaacggcua           | 1 |
| Gi2_10397500_x11 | uccggcguCguauaacggcuaga         | 1 |
| Gi3_27180308_x11 | guuAgauucccggcgcgg              | 1 |
| Gi3_27225642_x10 | uccAgcguaguauaacggcuag          | 1 |
| Gi5_8444156_x10  | Cuucucacccaacagaucgg            | 1 |
| Gi3_27192892_x10 | guucgauucccgUcgccgg             | 1 |
| Gi1_3921274_x10  | guCcgauucccggcgcgg              | 1 |
| Gi2_10413142_x10 | guucgauucccggcgcggGg            | 1 |
| Gi2_10414892_x10 | ggGucucacccaacagaucgg           | 1 |
| Gi3_27235662_x10 | uccggcCuaguauaacggcuaga         | 1 |
| Gi4_520909_x10   | gGucgauucccggcgcgg              | 1 |
| Gi2_10415822_x10 | Auucucacccaacagaucgg            | 1 |
| Gi2_10415192_x10 | guucucacNcaacagaucgg            | 1 |
| Gi3_27205472_x10 | guuUgauucccggcgcggag            | 1 |
| Gi2_10419012_x10 | gCuucgauucccggcgc               | 1 |
| Gi2_10412482_x10 | uccggcguaguCuaacggcuaga         | 1 |
| Gi1_3924494_x10  | ugguCcucacccaacagaucgg          | 1 |
| Gi1_3926694_x10  | guucCcacccaacagaucgg            | 1 |
| Gi2_10407042_x10 | gguucgauuccUggcgcggag           | 1 |
| Gi2_10419612_x10 | cUauucccggcgcggagcguuu          | 1 |
| Gi3_27209772_x10 | gguucgauucccggcAccg             | 1 |
| Gi1_3927194_x10  | gguCcucacccaacagaucgg           | 1 |
| Gi2_10412472_x10 | gguucAauucccggcgc               | 1 |
| Gi1_3924034_x10  | Ugcguaguauaacggcua              | 1 |
| Gi2_10403692_x10 | guucgauucccgAcgcgg              | 1 |
| Gi5_8448436_x10  | guucgauucccggcgcggGgc           | 1 |
| Gi5_8436516_x10  | gguucucacAcaacagaucggguu        | 1 |
| Gi1_3927214_x10  | uccggcguaguauCacggcuaga         | 1 |
| Gi5_8447406_x10  | guucgCuucccggcgcgg              | 1 |
| Gi5_8435356_x10  | gguCcgauucccggcgc               | 1 |
| Gi3_27190342_x10 | uccggcguCguauaacggcua           | 1 |
| Gi5_8452316_x10  | guucgauuNccggcgcggagc           | 1 |
| Gi1_3920084_x10  | Cgguucucacccaacagaucgg          | 1 |
| Gi2_10427882_x10 | gguucgauucccggcgcCgagc          | 1 |
| Gi2_10405312_x10 | guucgauucccggcgcAggagc          | 1 |
| Gi5_8431736_x10  | uccggcguaguauaacggcuagCau       | 1 |

|                       |                                     |   |
|-----------------------|-------------------------------------|---|
| Gi3_27239032_x10..... | uccggcgCaguauaacggcuagaau.....      | 1 |
| Gi1_3928104_x10.....  | .cGcaccacaacagauccgg.....           | 1 |
| Gi5_8433596_x10.....  | .uucucacccaGcagaucgg.....           | 1 |
| Gi1_3926114_x10.....  | Cccggcgaguauaacggcuag.....          | 1 |
| Gi5_8442986_x10.....  | .uccgAcguaguauaacggcuagaau.....     | 1 |
| Gi2_10407172_x10..... | .....guucgauucccgAcgccggagc.....    | 1 |
| Gi3_27220262_x10..... | .....guucgauucccgccC.....           | 1 |
| Gi2_10411892_x10..... | .....guucgGuucccgccg.....           | 1 |
| Gi3_27220922_x10..... | .....gguucgauuccUgcgccc.....        | 1 |
| Gi2_10415872_x10..... | .uUcggcgaguauaacggcua.....          | 1 |
| Gi2_10411452_x10..... | .uccggcgaguauaacggcCa.....          | 1 |
| Gi3_27239182_x10..... | .....Gcgauucccgccgag.....           | 1 |
| Gi2_10399502_x10..... | .....guucucacccaacagGuccg.....      | 1 |
| Gi5_8452576_x10.....  | .....gguucgauucccgAgccggagc.....    | 1 |
| Gi3_27188212_x10..... | .....guucgCuucccgccgga.....         | 1 |
| Gi3_27198502_x10..... | .ccggcgaguauaacggcuagaau.....       | 0 |
| Gi3_27226722_x10..... | .....guucgauucccgAccggagc.....      | 1 |
| Gi3_27190712_x10..... | .....gguucgauucAcggccgga.....       | 1 |
| Gi3_27240502_x10..... | .....Cuucgauucccgccg.....           | 1 |
| Gi5_8439896_x10.....  | .uccggcAuaguauaacggcuagaau.....     | 1 |
| Gi3_27204172_x10..... | .....gguucAauucccgccg.....          | 1 |
| Gi3_27233622_x10..... | .....gCguucgauucccgccgagc.....      | 1 |
| Gi3_27191172_x10..... | .....gguucgCuucccgccg.....          | 1 |
| Gi3_27205302_x10..... | .uccggcgaguauaacggcuaCa.....        | 1 |
| Gi2_10401452_x10..... | .....guucgauucccgAccg.....          | 1 |
| Gi1_3920724_x10.....  | .aacagauccggguucgauucccgccgagc..... | 0 |
| Gi2_10397762_x10..... | .....guucgauuUccggccgagc.....       | 1 |
| Gi3_27217962_x10..... | .uccggAguaguauaacggc.....           | 1 |
| Gi5_8434636_x10.....  | .....ggAucgauucccgccg.....          | 1 |
| Gi2_10417612_x10..... | .uccggcgaguauaGcggcua.....          | 1 |
| Gi1_3917484_x10.....  | .uucucacccaacagauAccg.....          | 1 |
| Gi3_27217682_x10..... | .uggCucucacccaacagauccg.....        | 1 |
| Gi3_27231662_x10..... | .....gguucAcacccaacagauccg.....     | 1 |
| Gi2_10423752_x10..... | .uccggcgaguGuaacgg.....             | 1 |
| Gi2_10409482_x10..... | .uccggcgaguauaacggAc.....           | 1 |
| Gi5_8434526_x10.....  | .uGcucacccaacagauccgg.....          | 1 |
| Gi5_8452586_x10.....  | .uggCucucacccaacagauccg.....        | 1 |
| Gi3_27240962_x10..... | .....gguucucaccUaacagauccg.....     | 1 |
| Gi5_8435706_x10.....  | .uccggcgaguCuaacggcuag.....         | 1 |
| Gi1_3917414_x10.....  | .ccggcgaguauaacggcuagaa.....        | 0 |
| Gi1_3923774_x10.....  | .....gguucgauuUccggccg.....         | 1 |
| Gi1_3926524_x10.....  | .....guucucacccaCagauccgg.....      | 1 |
| Gi3_27206282_x10..... | .....gguucgauucccgAcgccc.....       | 1 |
| Gi2_10403512_x10..... | .....gguucgauucccgccgUagc.....      | 1 |
| Gi5_8449706_x10.....  | .....ucucaccccNacagauccg.....       | 1 |
| Gi3_27205052_x10..... | .uUcggcgaguauaacggcuagaa.....       | 1 |
| Gi2_10409192_x10..... | .....gguuUgauucccgcc.....           | 1 |

|                       |                                |   |
|-----------------------|--------------------------------|---|
| Gi1_3926564_x10.....  | .guucucacccaGcagaucgg.....     | 1 |
| Gi3_27217412_x10..... | .gguucgauuccAggcgcggag.....    | 1 |
| Gi1_3923174_x10.....  | .guucgaAucccgccgg.....         | 1 |
| Gi3_27209962_x10..... | .uccggcguagGauaacggcuaga.....  | 1 |
| Gi3_27189252_x10..... | .uccggcguaguGuaacggcuagaa..... | 1 |
| Gi1_3920124_x10.....  | .ugguucucacUcaacagaucgg.....   | 1 |
| Gi1_3928064_x10.....  | .uccggcguaguauaacgAcuaga.....  | 1 |
| Gi2_10412842_x10..... | .gguuUucacccaacagaucgg.....    | 1 |
| Gi5_8447646_x10.....  | .guucgauucAcggcgccgg.....      | 1 |
| Gi3_27209272_x10..... | .guucgauucccgccggUgc.....      | 1 |
| Gi3_27197082_x10..... | .guAcgauucccgccggag.....       | 1 |
| Gi1_3917474_x10.....  | .uccggcguaguauCacggcuag.....   | 1 |
| Gi5_8448566_x10.....  | .uccggcguaguauaCcgguaga.....   | 1 |
| Gi3_27222292_x10..... | .uccggcguaguauaaUggcuagaa..... | 1 |
| Gi2_10403602_x10..... | .gguucCcacccaacagaucgg.....    | 1 |
| Gi1_3925234_x10.....  | .gCucucacccaacagaucgg.....     | 1 |
| Gi1_3927234_x10.....  | .uccggcguGguauaacggcuaga.....  | 1 |
| Gi2_10410772_x10..... | .gguucgauucccgccgUcgg.....     | 1 |
| Gi3_27222132_x10..... | .uccggcguaguauaaUggcuagaa..... | 1 |
| Gi2_10404252_x10..... | .gguucgauUccggcgccgg.....      | 1 |
| Gi5_8448506_x10.....  | .uccggcguaguauGacggcuagaa..... | 1 |
| Gi5_8449856_x10.....  | .gguucgGuucccgccgg.....        | 1 |
| Gi3_27243812_x10..... | .uccgUcguaguauaacggcuagaa..... | 1 |
| Gi5_8447776_x10.....  | .ucUggcguaguauaacggcuagaa..... | 1 |
| Gi3_27204492_x10..... | .guucgauucccgAcgccgga.....     | 1 |
| Gi1_3916754_x10.....  | .gguucAauucccgccgg.....        | 1 |
| Gi5_8451806_x10.....  | .uccggcguauAuaaacggcuaga.....  | 1 |
| Gi3_27204082_x10..... | .guucgauucccgccgUggagc.....    | 1 |
| Gi5_8447786_x10.....  | .gguucgauucccgAcgccggagc.....  | 1 |
| Gi4_520139_x10.....   | .gguucucacccaacagaucgg.....    | 0 |
| Gi3_27210902_x10..... | .guucgauAcccgccggagc.....      | 1 |
| Gi5_8439926_x10.....  | .Cgguucucacccaacagaucgg.....   | 1 |
| Gi3_27221662_x10..... | .gGucucacccaacagaucgggu.....   | 1 |
| Gi1_3917614_x10.....  | .uccggcguaguauaaUggcu.....     | 1 |
| Gi2_10403522_x10..... | .gguucgCuucccgccg.....         | 1 |
| Gi2_10427752_x10..... | .uccggAguaguauaacggcuaga.....  | 1 |
| Gi2_10412292_x10..... | .gguucgUuucccgccggag.....      | 1 |
| Gi2_10417302_x10..... | .gguucgauucccgccgGggagc.....   | 1 |
| Gi2_10409622_x10..... | .gguucgauucccgccggc.....       | 1 |
| Gi2_10412052_x10..... | .uccggcguaguauaacggcuagaC..... | 1 |
| Gi1_3922454_x10.....  | .uccgUcguaguauaacggcu.....     | 1 |
| Gi3_27302113_x9.....  | .gguuAguauucccgccggag.....     | 1 |
| Gi2_10437555_x9.....  | .guucgauucccgccgC.....         | 1 |
| Gi5_8472180_x9.....   | .gguucgauuccUggcgccg.....      | 1 |
| Gi5_8466564_x9.....   | .uccggcguaguGuaacggcuagaa..... | 1 |
| Gi2_10446852_x9.....  | .gguucgauucccgUgcc.....        | 1 |
| Gi5_8458914_x9.....   | .gguucucacccaacUgaucgg.....    | 1 |

|                 |                            |   |
|-----------------|----------------------------|---|
| Gi3_27285409_x9 | .guucucacccaCcagaucgg      | 1 |
| Gi3_27297991_x9 | .ggAucgauucccgcgccgg       | 1 |
| Gi5_8461047_x9  | .Uguucgauucccgcgccggagcgu  | 1 |
| Gi5_8454072_x9  | .Ggaucggguucgauucc         | 1 |
| Gi2_10434306_x9 | .gguucgauucccgcgccggaUc    | 1 |
| Gi1_3936475_x9  | .gguucgauNcccgcgccg        | 1 |
| Gi3_27247375_x9 | .gguucgauucccgcgCccggagc   | 1 |
| Gi2_10446348_x9 | .uccggcguaAuauaacggcuaga   | 1 |
| Gi2_10447644_x9 | .gguucgCuucccgcgccg        | 1 |
| Gi3_27248194_x9 | .Ugcguaguauaacggcuag       | 1 |
| Gi3_27249112_x9 | .guGcgauucccgcgccg         | 1 |
| Gi3_27260965_x9 | .guucgauucccAgcgccg        | 1 |
| Gi5_8466123_x9  | .guucgauucccgAgccg         | 1 |
| Gi3_27273718_x9 | .uucucacccGacagaucgg       | 1 |
| Gi1_3932884_x9  | .gCucgauucccgcgccggagc     | 1 |
| Gi5_8465142_x9  | .guucucacccaacagaucUg      | 1 |
| Gi3_27296749_x9 | .ggguucgauucccgcgccggagcC  | 1 |
| Gi5_8473674_x9  | .uccgAcguaguauaacggcuaga   | 1 |
| Gi5_8470929_x9  | .Accggcguaquauaacgg        | 1 |
| Gi2_10450506_x9 | .Cguucgauucccgcgccgga      | 1 |
| Gi1_3931039_x9  | .ugguucucGcccaacagaucgg    | 1 |
| Gi3_27245278_x9 | .uucucUcccaacagaucgg       | 1 |
| Gi1_3940336_x9  | .uucucaccUaacagaucgg       | 1 |
| Gi2_10447860_x9 | .guucgauucAcggcgccgg       | 1 |
| Gi5_8462433_x9  | .uccggcguaquauaacggcuC     | 1 |
| Gi1a_5644372_x9 | .uGcgcguaquauaacggcuaga    | 1 |
| Gi5_8465457_x9  | .uccggUguaguauaacggcuagaau | 1 |
| Gi2_10448607_x9 | .guucgauucccgcgAcg         | 1 |
| Gi1_3932569_x9  | .uccggcguaGcauacggcuag     | 1 |
| Gi5_8460930_x9  | .guucgauucccgcgUgga        | 1 |
| Gi5_8476581_x9  | .guucgauucccAgcgccgga      | 1 |
| Gi5_8468166_x9  | .guucucacccaacagaucAg      | 1 |
| Gi1_3939337_x9  | .uccggcgUguauaacggc        | 1 |
| Gi5_8463774_x9  | .gGuucccgcgccggagc         | 1 |
| Gi1_3933739_x9  | .guucucacccaacCgaucgg      | 1 |
| Gi5_8461218_x9  | .ggGucgauucccgcgcc         | 1 |
| Gi5_8461515_x9  | .guucUauucccgcgccgga       | 1 |
| Gi1_3931111_x9  | .uucucacccaacagaucUg       | 1 |
| Gi1_3931120_x9  | .ucgauucccgcgccggagcC      | 1 |
| Gi5_8453280_x9  | .ugguucucNcccaacagaucgg    | 1 |
| Gi2_10439625_x9 | .ucUggcguaquauaacgg        | 1 |
| Gi5_8459643_x9  | .gguucgGuucccgcgccgg       | 1 |
| Gi5_8455422_x9  | .Ggguucucacccaacagaucgg    | 1 |
| Gi5_8465079_x9  | .uccggcguaquauaacggc       | 1 |
| Gi1a_5650780_x9 | .uGcgcguaquauaacggcuag     | 1 |
| Gi3_27271405_x9 | .guucgauucccCcgccgg        | 1 |
| Gi3_27245107_x9 | .ggGucgauucccgcgccgg       | 1 |

|                 |                           |   |
|-----------------|---------------------------|---|
| Gi3_27303679_x9 | .uucucacccaCcagaucgg      | 1 |
| Gi5_8473449_x9  | .Ugcguaguauaacggcuaga     | 1 |
| Gi5_8458428_x9  | .gguucgauucccgcgccgC      | 1 |
| Gi5_8458752_x9  | .gguucgauucccgcgccAga     | 1 |
| Gi5_8466249_x9  | .uccggcgCaguauaacggc      | 1 |
| Gi2_10432020_x9 | .guucAauucccgcgccgga      | 1 |
| Gi3_27290737_x9 | .gguucgauuccGggcgccgga    | 1 |
| Gi2_10454124_x9 | .uccggcgaguauaacggcuagaCu | 1 |
| Gi3_27270208_x9 | .uccgAcguaguauaacgg       | 1 |
| Gl1a_5644426_x9 | .guucgauucccgcgccgga      | 0 |
| Gi5_8473503_x9  | .uccggcgaguCuaaacggcua    | 1 |
| Gi5_8453325_x9  | .cucaccUaacagaucgg        | 1 |
| Gi4_521253_x9   | .guucgauucccgcgccgga      | 0 |
| Gi1_3932146_x9  | .gguucgauucccgcgccgga     | 1 |
| Gi1_3929473_x9  | .uccggcgaguauCacggcua     | 1 |
| Gi2_10438842_x9 | .guucgauucccgcgccgga      | 1 |
| Gi3_27256195_x9 | .gguucgauucccgcgccgga     | 1 |
| Gi5_8453658_x9  | .uccggcgaguauaacggcuaA    | 1 |
| Gi3_27264709_x9 | .uccggcgAaguauaacggcuaga  | 1 |
| Gi3_27268903_x9 | .gguucgauucccgcgccgga     | 1 |
| Gi5_8463549_x9  | .uccggcgaguauaaUggc       | 1 |
| Gi2_10447014_x9 | .gCucucacccaacagaucgg     | 1 |
| Gi3_27257707_x9 | .gguucucacccaaUagaucgg    | 1 |
| Gi2_10458642_x9 | .gguucgauucccggaAgccg     | 1 |
| Gi5_8453289_x9  | .gguucucCcccaacagaucgg    | 1 |
| Gi1_3933055_x9  | .uccggcgCaguauaacggcuag   | 1 |
| Gi3_27258040_x9 | .Cccggcgaguauaacggcuag    | 1 |
| Gi2_10451217_x9 | .uccggcgaguauaacAg        | 1 |
| Gi1_3937897_x9  | .uccggcgaguauGacgg        | 1 |
| Gi2_10457940_x9 | .uccggcgaguauaUcggcuaga   | 1 |
| Gi1_3929077_x9  | .gguucucacccaacGgaucgg    | 1 |
| Gi5_8469930_x9  | .gguucgauucccggaAccgga    | 1 |
| Gl1a_5648809_x9 | .accaacagaucggguucgauucc  | 0 |
| Gi2_10434270_x9 | .gguucgauuccCcgccgga      | 1 |
| Gi5_8467374_x9  | .guucgauuccCcgccgga       | 1 |
| Gi5_8454351_x9  | .ggGucgauucccgcgccgga     | 1 |
| Gi3_27263017_x9 | .guucgauuccCcgccgga       | 1 |
| Gi2_10443882_x9 | .gguucAauucccgcgccgga     | 1 |
| Gi1_3934828_x9  | .guucuaUccaacagaucgg      | 1 |
| Gi5_8455944_x9  | .uccggcgaguauaacggcuagU   | 1 |
| Gi5_8459157_x9  | .gguucAcacccaacagaucgg    | 1 |
| Gi1_3933244_x9  | .uucucacccaacagaucUgg     | 1 |
| Gi2_10455438_x9 | .uccggcgCaguauaacggcua    | 1 |
| Gi1_3941641_x9  | .uucucacUcaacagaucgg      | 1 |
| Gi2_10457346_x9 | .gguucgauCcccgcgccgga     | 1 |
| Gi5_8471865_x9  | .uccggcgagCauaacggcuagaau | 1 |
| Gi2_10443045_x9 | .guucgauucccgcgccgga      | 1 |



|                 |                                |   |
|-----------------|--------------------------------|---|
| Gi3_27306514_x9 | .....guucucacccaGcagauccg      | 1 |
| Gi1_3935098_x9  | .....uccggUguaguauaacggc       | 1 |
| Gi5_8470668_x9  | .....gguucgauucccgcgccggaCc    | 1 |
| Gi3_27283429_x9 | .....guucgauucccgGAgccgga      | 1 |
| Gi2_10461621_x9 | .....uccggcguagCauaacggc       | 1 |
| Gi1_3936016_x9  | .....guuUgauucccgcgccgga       | 1 |
| Gi5_8469489_x9  | .....guucgauAcccgcgccg         | 1 |
| Gi1_3934774_x9  | .....uccggcguaguauCacgg        | 1 |
| Gi5_8455935_x9  | .....uccggcguaguauGacgg        | 1 |
| Gi5_8464125_x9  | .....Gucgauucccgcgccgg         | 1 |
| Gi5_8463207_x9  | .....Ggguucucacccaacagauccgggu | 1 |
| Gi5_8467230_x9  | .....gguucgCuucccgcgccggag     | 1 |
| Gi5_8464548_x9  | .....guucucacccCacagauccg      | 1 |
| Gi3_27281638_x9 | .....Ggauucccgcgccggagc        | 1 |
| Gi3_27288757_x9 | .....guucAauucccgcgccggag      | 1 |
| Gi3_27257527_x9 | .....uccggcguaguauaacgC        | 1 |
| Gi2_10440687_x9 | .....cggcguaguauaacggcuagaaC   | 1 |
| Gi1_3940768_x9  | .....uccAgcguaguauaacgg        | 1 |
| Gi2_10495458_x8 | .....uccggUguaguauaacgg        | 1 |
| Gi5_8479161_x8  | .....cucGcccaacagauccg         | 1 |
| Gi5_8499257_x8  | .....gguucuUaccaacagauccg      | 1 |
| Gi3_27328089_x8 | .....guucgauucAcggcgccgg       | 1 |
| Gi2_10487194_x8 | .....Gucgauucccgcgccgg         | 1 |
| Gi3_27350665_x8 | .....uccggcguUguauaacggcuagaau | 1 |
| Gi2_10494178_x8 | .....gguucgauucccgGcAccggag    | 1 |
| Gi2_10474298_x8 | .....gguucgauucccgcgccggagG    | 1 |
| Gi1_3947829_x8  | .....gguuUgauucccgcgccgg       | 1 |
| Gi1_3949949_x8  | .....uccgAcguaguauaacgg        | 1 |
| Gi1_3946485_x8  | .....gguucucacccCacagauccg     | 1 |
| Gi3_27324993_x8 | .....ggAucucacccaacagauccg     | 1 |
| Gi1_3947997_x8  | .....uccggcguaguGuaacggcua     | 1 |
| Gi1_3951533_x8  | .....uGcggcguaguauaacggc       | 1 |
| Gi2_10486098_x8 | .....gguucgaCucccgcgccgg       | 1 |
| Gi3_27359369_x8 | .....guucgauucccgcgccggaAc     | 1 |
| Gi3_27360993_x8 | .....guucgauucccgcgccggUg      | 1 |
| Gi5_8498865_x8  | .....guucgUuucccgcgccg         | 1 |
| Gi2_10474722_x8 | .....uccggcguUguauaacggc       | 1 |
| Gi1_3952509_x8  | .....uccggcguaguauaacggUuaga   | 1 |
| Gi2_10475530_x8 | .....uccggcguaguauaacggcuaAaa  | 1 |
| Gi2_10487810_x8 | .....guCcgauucccgcgccggag      | 1 |
| Gi2_10478338_x8 | .....gguucgauucccgGAgcc        | 1 |
| Gi1_3943093_x8  | .....ucucGcccaacagauccg        | 1 |
| Gi4_524184_x8   | .....guucucacccaacagauccg      | 0 |
| Gi2_10479218_x8 | .....gguucgauucccgcgAcgga      | 1 |
| Gi2_10480930_x8 | .....gguucgCuucccgcgccgga      | 1 |
| Gi3_27317417_x8 | .....uccggcguaguCuaacggcuag    | 1 |
| Gi2_10488106_x8 | .....gguucucacccGacagauccg     | 1 |

|                      |                                   |   |
|----------------------|-----------------------------------|---|
| Gi3_27317057_x8..... | .gGucacaccaacagauccggg.....       | 1 |
| Gi3_27330617_x8..... | .ugguucucGcccaacagauccg.....      | 1 |
| Gi1_3950797_x8.....  | .gAuucacaccaacagauccg.....        | 1 |
| Gi3_27341417_x8..... | .uGcggcguaguauaacggcu.....        | 1 |
| Gi5_8490161_x8.....  | .....ggGucgauucccgcgccggag.....   | 1 |
| Gi5_8479537_x8.....  | .....gguucgauucccgAgccgga.....    | 1 |
| Gi2_10479466_x8..... | .....guucgauucccCgcgccggagc.....  | 1 |
| Gi2_10494842_x8..... | .....ucgauucccgcgccggGgc.....     | 1 |
| Gi3_27341601_x8..... | .uccggcguaguauGacggcuagaau.....   | 1 |
| Gi2_10488730_x8..... | .....gguucgauucccgAgccg.....      | 1 |
| Gi2_10466818_x8..... | .....Cuucgauucccgcgccgga.....     | 1 |
| Gi1_3954701_x8.....  | .uccggcguaguCuaacgg.....          | 1 |
| Gi2_10476746_x8..... | .....gguucgauNcccgcgccgg.....     | 1 |
| Gi1a_5671057_x8..... | .....Aguucgauucccgcgccggagc.....  | 1 |
| Gi5_8479753_x8.....  | .guucacaccaacUgauccg.....         | 1 |
| Gi1_3947309_x8.....  | .....guucgauucccgcgccggGgc.....   | 1 |
| Gi3_27346385_x8..... | .....guucgauucccgcgccCgagc.....   | 1 |
| Gi1_3954109_x8.....  | .gUcguaguuaacggcuag.....          | 1 |
| Gi1_3943317_x8.....  | .uccggcguaguuaacggcuaA.....       | 1 |
| Gi2_10475850_x8..... | .....gguucAauucccgcgccgga.....    | 1 |
| Gi5_8496129_x8.....  | .....ggCucgauucccgcgccgg.....     | 1 |
| Gi3_27356329_x8..... | .....gauuccAgcgccggagc.....       | 1 |
| Gi1_3950469_x8.....  | .uccggcguaguuaacggcuaAaa.....     | 1 |
| Gi2_10497218_x8..... | .....guucgauucccAgcgccgga.....    | 1 |
| Gi3_27348209_x8..... | .....gguuUgauucccgcgcc.....       | 1 |
| Gi2_10481186_x8..... | .....gguucgauucUcggcgccggag.....  | 1 |
| Gi1_3949389_x8.....  | .gguucacaccaGcagauccg.....        | 1 |
| Gi3_27361169_x8..... | .uccggcUuaguuaacggcuaga.....      | 1 |
| Gi2_10467834_x8..... | .....guucgauucccgcgccggagc.....   | 1 |
| Gi5_8487249_x8.....  | .....guucgauucccgcgccggG.....     | 1 |
| Gi2_10464722_x8..... | .....gguucGauucccgcgccg.....      | 1 |
| Gi4_526408_x8.....   | .....gguucgauucccgcgccgga.....    | 0 |
| Gi5_8479385_x8.....  | .uccggcguaguauCacggcuagaau.....   | 1 |
| Gi1_3957061_x8.....  | .ugguucacaccaacagauAcgg.....      | 1 |
| Gi1_3955053_x8.....  | .....gguucgauucccgcgccggagcA..... | 1 |
| Gi5_8488025_x8.....  | .....ggAucgauucccgcgccgga.....    | 1 |
| Gi2_10497954_x8..... | .uccggcguaguauGacggcuaga.....     | 1 |
| Gi3_27332217_x8..... | .....uucacaccaacagGuccgg.....     | 1 |
| Gi2_10481602_x8..... | .uccggcguaguuaacggcuagU.....      | 1 |
| Gi1_3942421_x8.....  | .....gguucgauucUcggcgccg.....     | 1 |
| Gi2_10495786_x8..... | .....guucgauucAcggcgccggagc.....  | 1 |
| Gi2_10482514_x8..... | .uccggcguaguuaacggcuC.....        | 1 |
| Gi2_10494290_x8..... | .uccggcguaguuaacAgcua.....        | 1 |
| Gi5_8476993_x8.....  | .....agauccgNuucgauucc.....       | 1 |
| Gi2_10482586_x8..... | .....guucgauucccgcgccUgagc.....   | 1 |
| Gi3_27337049_x8..... | .guucacaccUaacagauccg.....        | 1 |
| Gi5_8494881_x8.....  | .uccggcguaguuaaAggcuag.....       | 1 |

|                 |                                    |   |
|-----------------|------------------------------------|---|
| Gi5_8494609_x8  | .....gguucgauucccgcgUc             | 1 |
| Gi1_3945037_x8  | .....gguucgauucccgcgccggG          | 1 |
| Gi5_8481825_x8  | .....ggCucgauucccgcgccggag         | 1 |
| Gi2_10492602_x8 | .....ucucacccaacagauccg            | 0 |
| Gi1_3946141_x8  | .....gguCcgauucccgcgccgg           | 1 |
| Gi2_10483890_x8 | .....ggCucgauucccgcgccgga          | 1 |
| Gi2_10467634_x8 | .....guucgauucccgUcgccggagc        | 1 |
| Gi5_8486761_x8  | .....uccggcguaguCuaacggcuaga       | 1 |
| Gi2_10487602_x8 | .....guucgauuccAgggcgccgg          | 1 |
| Gi2_10487410_x8 | .....gguucgauuccUcgggcc            | 1 |
| Gi2_10462786_x8 | .....ucUggcguaguauaacggcuag        | 1 |
| Gi2_10483818_x8 | .....uccggcguGguauaacggcuagaau     | 1 |
| Gi5_8483369_x8  | .....uccggcguaguauaaUggcuagaau     | 1 |
| Gi3_27317361_x8 | .....uccggcguaguCaacggcuagaa       | 1 |
| Gi5_8482345_x8  | .....gAuucgauucccgcgcc             | 1 |
| Gi5_8485265_x8  | .....uccggcguaguauGacggcuag        | 1 |
| Gi1_3954469_x8  | .....guucucaccUaacagauccg          | 1 |
| Gi5_8493593_x8  | .....gguucgauucccgcgUcgga          | 1 |
| Gi1_3944557_x8  | .....gguucucacccaacagGuccg         | 1 |
| Gi2_10472362_x8 | .....gguucgauucccAgcgccgga         | 1 |
| Gi3_27363793_x8 | .....guucgauucccgcgGcgga           | 1 |
| Gi5_8498585_x8  | .....gguucucacAcaacagauccg         | 1 |
| Gi3_27342481_x8 | .....gguucgauuccAgggcgccg          | 1 |
| Gi3_27347513_x8 | .....uccggcguaguauaaAgg            | 1 |
| Gi2_10477890_x8 | .....gguUgauucccgcgccg             | 1 |
| Gi3_27324385_x8 | .....Gucgauucccgcgccgg             | 1 |
| Gi2_10486738_x8 | .....gguucgauucccgcgGcgagc         | 1 |
| Gi2_10471362_x8 | .....aacagauccggguucgauucccgcgccgg | 0 |
| Gi3_27318697_x8 | .....gguucucacccaacagauAccg        | 1 |
| Gi5_8486489_x8  | .....gGucgauucccgcgccggag          | 1 |
| Gi5_8488249_x8  | .....uccggcguagCauaacggcua         | 1 |
| Gi5_8493065_x8  | .....gguucgauuccUcgcgccggagc       | 1 |
| Gi5_8483649_x8  | .....gCGuaguauaacggcuaga           | 0 |
| Gi5_8477473_x8  | .....uccAgcgguaguauaacggc          | 1 |
| Gi1_3955573_x8  | .....uccggcguaguauaacggcuaAa       | 1 |
| Gi4_525296_x8   | .....gUuucgauucccgcgccggagc        | 1 |
| Gi1_3942557_x8  | .....uccggcguaguauaacggcCa         | 1 |
| Gi1_3952357_x8  | .....gguucucacccaacagauAccg        | 1 |
| Gi1a_5654737_x8 | .....gGucucacccaacagauccg          | 1 |
| Gi5_8488777_x8  | .....uccggcguCguauaacgg            | 1 |
| Gi1_3943805_x8  | .....guucgUuucccgcgccgg            | 1 |
| Gi5_8491289_x8  | .....uccggcguaguauCacggc           | 1 |
| Gi5_8493825_x8  | .....ggGucgauucccgcgccgga          | 1 |
| Gi5_8481609_x8  | .....Uuuucccgccuuccuucgucu         | 1 |
| Gi2_10492594_x8 | .....guucgauCcccgcgccgga           | 1 |
| Gi5_8488537_x8  | .....uucucaccAaacagauccg           | 1 |
| Gi1_3943365_x8  | .....gguucgauucccgcgccggagU        | 1 |

|                 |                                |   |
|-----------------|--------------------------------|---|
| Gi2_10472842_x8 | .....guucgauuNccggcgccgga      | 1 |
| Gi3_27328017_x8 | .....guucgaGuccggcgccgga       | 1 |
| Gi3_27335497_x8 | .....cgUuuccggcgccggagc        | 1 |
| Gi2_10495498_x8 | .....uccggUguaguauaacggc       | 1 |
| Gi3_27369817_x8 | .....ucGggcgaguauaacggcua      | 1 |
| Gi5_8497897_x8  | .....guucgGuuccggcgccggagc     | 1 |
| Gi3_27364521_x8 | .....gguucgauuccggAgccggag     | 1 |
| Gi3_27361201_x8 | .....uucucacccaacagauAcg       | 1 |
| Gi5_8493233_x8  | .....gCuucgauuccggcgcccg       | 1 |
| Gi2_10489418_x8 | .....uccggcgaguauaGcggcuagaau  | 1 |
| Gi5_8476985_x8  | .....gguucucacccaacagauAcg     | 1 |
| Gi2_10469098_x8 | .....gguucgauuccggcgccA        | 1 |
| Gi2_10472418_x8 | .....gguCcgauuccggcgccggag     | 1 |
| Gi5_8477785_x8  | .....guCcgauuccggcgccgga       | 1 |
| Gi3_27331577_x8 | .....gguucgCuuccggcgcc         | 1 |
| Gi5_8492497_x8  | .....ucCcacccaacagauccg        | 1 |
| Gi5_8500185_x8  | .....Cccggcgaguauaacggcuagaa   | 1 |
| Gi1_3948949_x8  | .....uccggcgaguauaacAgcua      | 1 |
| Gi3_27358193_x8 | .....uccggcgCaguauaacggcuagaa  | 1 |
| Gi3_27310729_x8 | .....gguucgauuccggcgccgCag     | 1 |
| Gi1_3943637_x8  | .....uccggcgaguauaacggUuag     | 1 |
| Gi2_10480546_x8 | .....gguucgauuccggUgccgga      | 1 |
| Gi5_8487297_x8  | .....guucgauuccAgcgccg         | 1 |
| Gi2_10469946_x8 | .....guucgUuuccggcgccg         | 1 |
| Gi3_27354289_x8 | .....guucucacccaacGgauccg      | 1 |
| Gi3_27320833_x8 | .....cgauuccggcgccggCgc        | 1 |
| Gi1_3943421_x8  | .....gguucgauuccggcgccgU       | 1 |
| Gi5_8488329_x8  | .....uccggcgaguauaaUggcua      | 1 |
| Gi3_27353129_x8 | .....uccggcgaguauaacggcCagaa   | 1 |
| Gi2_10493754_x8 | .....guucgauuAccggcgccggagc    | 1 |
| Gi2_10466082_x8 | .....gguucgauuccggcgUcg        | 1 |
| Gi5_8488553_x8  | .....uccggcgaguauGacggcuaga    | 1 |
| Gi3_27366841_x8 | .....uccgUcguaguauaacggcuagaau | 1 |
| Gi1_3952669_x8  | .....uccggcgUnguauaacggcuaga   | 1 |
| Gi3_27366081_x8 | .....uccgAcguaguauaacggcua     | 1 |
| Gi3_27359665_x8 | .....gguucgauuccGggcgccg       | 1 |
| Gi2_10498522_x8 | .....uccggcgUnguauaacggcuagaa  | 1 |
| Gi5_8501385_x8  | .....gguucgauuccAgcgccggagc    | 1 |
| Gi2_10486802_x8 | .....ucgauuccggcgccggagc       | 1 |
| Gi3_27323897_x8 | .....ugguucucacccaacagGuccg    | 1 |
| Gi5_8496041_x8  | .....gguucgauuccggcgAcgga      | 1 |
| Gi3_27374497_x8 | .....gAucgauuccggcgccggag      | 1 |
| Gi3_27362081_x8 | .....gguucgauuccggcgGgga       | 1 |
| Gi5_8482833_x8  | .....uccggcgaguCuaacgg         | 1 |
| Gi5_8486097_x8  | .....guuUgauuccggcgccggagc     | 1 |
| Gi3_27320697_x8 | .....guucgauuccggGgccgg        | 1 |
| Gi1_3952253_x8  | .....Cccggcgaguauaacggcuaga    | 1 |

|                 |                           |   |
|-----------------|---------------------------|---|
| Gi1_3943245_x8  | ucUggcguaguauaacggc       | 1 |
| Gi5_8504495_x7  | uccggcguaguauaCcg         | 1 |
| Gi1_3962561_x7  | ggAucgauucccgcgccg        | 1 |
| Gi1_3973922_x7  | uuUgauucccgcgccg          | 1 |
| Gi5_8503221_x7  | uccggcguCguauaacggcuaga   | 1 |
| Gi5_8514904_x7  | Auucgauucccgcgccggagc     | 1 |
| Gi1_3970982_x7  | Auucucaccaacagauccg       | 1 |
| Gi3_27424451_x7 | cucacccaNcagauccg         | 1 |
| Gi3_27386875_x7 | guucgauucccgcgccggaA      | 1 |
| Gi3_27449252_x7 | guucgauucccgcgccggaCc     | 1 |
| Gi2_10537645_x7 | uucucaccNaacagauccg       | 1 |
| Gi1_3962106_x7  | guucucGcccaacagauccg      | 1 |
| Gi3_27432732_x7 | uccggcguGguauaacggcuagaa  | 1 |
| Gi2_10536210_x7 | gguucgauucccgUgccg        | 1 |
| Gi1_3973369_x7  | gguucgauucccgcgccgGgc     | 1 |
| Gi3_27435749_x7 | uucuUacccaacagauccg       | 1 |
| Gi3_27447810_x7 | gguucgauucUcgcgccg        | 1 |
| Gi3_27385167_x7 | guucucaccaacagaCcg        | 1 |
| Gi2_10538863_x7 | uccggcguaguauaacggcuGgaa  | 1 |
| Gi2_10503373_x7 | ucgaCucccgcgccggagc       | 1 |
| Gi5_8511789_x7  | guuUucaccaacagauccg       | 1 |
| Gi2_10505571_x7 | uccggcguNguauaacggcuagaau | 1 |
| Gi1a_5682142_x7 | gguucgauNcccgcgccggagc    | 1 |
| Gi5_8525586_x7  | guucAcaccaacagauccg       | 1 |
| Gi1_3969239_x7  | gguucucaccaacagauAg       | 1 |
| Gi5_8518145_x7  | uccggcAuaguauaacggcuaga   | 1 |
| Gi3_27416485_x7 | gguucgauucccgAgcc         | 1 |
| Gi2_10525304_x7 | gguucgauucccgcgGcg        | 1 |
| Gi2_10529371_x7 | gguucgaCucccgcgccggag     | 1 |
| Gi2_10512207_x7 | guucgauucccgcgccCgagc     | 1 |
| Gi5_8512531_x7  | uGcucaccaacagauccggguuc   | 1 |
| Gi3_27448104_x7 | ucgaCucccgcgccggagc       | 1 |
| Gi1_3965249_x7  | uucucacccUacagauccg       | 1 |
| Gi3_27451499_x7 | guucgauucccgUgccg         | 1 |
| Gi1_3968728_x7  | uccggcGcaguauaacggcu      | 1 |
| Gi5_8530668_x7  | Ccucaccaacagauccg         | 1 |
| Gi5_8516255_x7  | uccggcguaguauaCcggu       | 1 |
| Gi3_27407007_x7 | ucUggcguaguauaacggcu      | 1 |
| Gi3_27423996_x7 | guucucacccCacagauccg      | 1 |
| Gi5_8511635_x7  | guucucacNcaacagauccg      | 1 |
| Gi3_27425508_x7 | guCcgauucccgcgccg         | 1 |
| Gi5_8515625_x7  | gguucucaccaacCgauccg      | 1 |
| Gi2_10517387_x7 | ggGucgauucccgcgccg        | 1 |
| Gi1_3967076_x7  | gguucgauucccgcgccgGgc     | 1 |
| Gi5_8526174_x7  | gguucucUcccaacagauccg     | 1 |
| Gi5_8504649_x7  | ugguucucGcccaacagauccg    | 1 |
| Gi3_27444058_x7 | gguAcucaccaacagauccg      | 1 |

|                 |                             |   |
|-----------------|-----------------------------|---|
| Gi1_3960223_x7  | ugguucucacccaacGgauccg      | 1 |
| Gi3_27445787_x7 | gguucgauucccggcgcUg         | 1 |
| Gi3_27411053_x7 | uccggcguaAuauaacggc         | 1 |
| Gi5_8503165_x7  | gguucgauuAccggcgccg         | 1 |
| Gi2_10525598_x7 | gguucgauucccggcgccC         | 1 |
| Gi3_27382640_x7 | gguucgauucccggcgcUg         | 1 |
| Gi5_8512132_x7  | guuAgauucccggcgccg          | 1 |
| Gi2_10515805_x7 | uccggcguaaguauaacggcuaUa    | 1 |
| Gi2_10525038_x7 | gguucgauucccggcgccg         | 1 |
| Gi1_3963856_x7  | ugguucucacAcaacagauccg      | 1 |
| Gi1_3970065_x7  | Gccggcguaaguauaacggcuagaa   | 1 |
| Gi3_27407525_x7 | gguucgauucccggcgccgCg       | 1 |
| Gi2_10504444_x7 | uccgUcguaaguauaacgg         | 1 |
| Gi1_3957976_x7  | Cuucgauucccggcgccgga        | 1 |
| Gi1_3963688_x7  | guuAgauucccggcgccg          | 1 |
| Gi1_3967559_x7  | Accggcguaaguauaacgg         | 1 |
| Gi3_27409758_x7 | ucgGuucccggcgccggagc        | 1 |
| Gi2_10501630_x7 | gguucgauucccgUgccggag       | 1 |
| Gi3_27427447_x7 | ugguucucacAcaacagauc        | 1 |
| Gi2_10513705_x7 | Accggcguaaguauaacggcuaga    | 1 |
| Gi5_8505391_x7  | cUgcguaguauaacggcuag        | 1 |
| Gi2_10537638_x7 | uccgAcguaguauaacggc         | 1 |
| Gi5_8505384_x7  | gUcguaaguauaacggcuaga       | 1 |
| Gi5_8524718_x7  | Cccggcguaaguauaacggcuagaau  | 1 |
| Gi3_27447943_x7 | uucgauucNcggcgccggagc       | 1 |
| Gi3_27422820_x7 | uccggcguaaguauUacggcua      | 1 |
| Gi3_27425942_x7 | gguucgauucccggcgccggagcgC   | 1 |
| Gi1_3960671_x7  | gguucgauucccggcgccgg        | 1 |
| Gi3_27448888_x7 | gguucgauucccggcgccggagG     | 1 |
| Gi1_3972865_x7  | ugguucucacccaCcagauccg      | 1 |
| Gi2_10524779_x7 | gguucgauucccgUgccggag       | 1 |
| Gi3_27393791_x7 | uccgCcguaaguauaacggc        | 1 |
| Gi1_3958641_x7  | gguucgauucccggcAccggagc     | 1 |
| Gi2_10509813_x7 | guuUgauucccggcgccgga        | 1 |
| Gi3_27414959_x7 | gguucgCuucccggcgccg         | 1 |
| Gi3_27382605_x7 | uucgauucccggcgccAgagc       | 1 |
| Gi3_27405824_x7 | gguucgauucccggcgccgga       | 1 |
| Gi3_27412663_x7 | uccggcguaagAauaacgg         | 1 |
| Gi5_8521813_x7  | gguucgauCcccgggcgccg        | 1 |
| Gi5_8529464_x7  | Uguucgauucccggcgccggagcguuu | 1 |
| Gi3_27395842_x7 | ucNggcguaaguauaacggcuaga    | 1 |
| Gi5_8506868_x7  | gguucgCuucccggcgccgga       | 1 |
| Gi2_10535055_x7 | ucgauuUccgggcgccggagc       | 1 |
| Gi3_27390683_x7 | Cuucucacccaacagauccg        | 1 |
| Gi5_8516486_x7  | gguucgauucccggcgccggC       | 1 |
| Gi1_3958452_x7  | uucucacccaacagaucAgg        | 1 |
| Gi3_27420545_x7 | gguucgauCcccgggcgccggagc    | 1 |

|                 |                                 |       |   |
|-----------------|---------------------------------|-------|---|
| Gi5_8511397_x7  | .....gguuUucacccaacagauccg      | ..... | 1 |
| Gi5_8504460_x7  | .....gguuUgauuccggcgccg         | ..... | 1 |
| Gi3_27422295_x7 | .....uccggcguaAuauaacgg         | ..... | 1 |
| Gi3_27408729_x7 | .....ugguucCcacccaacagauccg     | ..... | 1 |
| Gi3_27381044_x7 | .....guucgauuccggcgAggag        | ..... | 1 |
| Gi5_8507288_x7  | .....guucucacccaacagauAcg       | ..... | 1 |
| Gi1_3967475_x7  | .....ggCucgauuccggcgccgga       | ..... | 1 |
| Gi5_8507155_x7  | .....Gcgauuccggcgccggagc        | ..... | 1 |
| Gi3_27405733_x7 | .....guucgaGuuccggcgccgg        | ..... | 1 |
| Gi2_10503198_x7 | .....gguucucacccaacagauUg       | ..... | 1 |
| Gi3_27434055_x7 | .....gguucgauuccggcgccggagcg    | ..... | 0 |
| Gi5_8507673_x7  | .....guucAauuccggcgccggagc      | ..... | 1 |
| Gi3_27431339_x7 | .....uGgguucucacccaacagaucc     | ..... | 1 |
| Gi5_8527399_x7  | .....uccggcguaaguauaacggcCagaa  | ..... | 1 |
| Gi3_27398712_x7 | .....uucucacccaacGgauccgg       | ..... | 1 |
| Gi2_10527012_x7 | .....uccggcguaaguauaaUggc       | ..... | 1 |
| Gi3_27396451_x7 | .....guucgCuuccggcgccg          | ..... | 1 |
| Gi5_8521729_x7  | .....gCuucgauuccggcgccggag      | ..... | 1 |
| Gi1_3968938_x7  | .....uccggcguaaguauaacggcCaga   | ..... | 1 |
| Gi5_8503200_x7  | .....guucgCuuccggcgccg          | ..... | 1 |
| Gi1_3971206_x7  | .....uAcucacccaacagauccgg       | ..... | 1 |
| Gi5_8516479_x7  | .....guucucacccaacagGuccgg      | ..... | 1 |
| Gi3_27407679_x7 | .....gguucgauuccggcgGggag       | ..... | 1 |
| Gi3_27431668_x7 | .....uucucaccAaacagauccg        | ..... | 1 |
| Gi5_8506252_x7  | .....gguucgauuccggcgccgAagc     | ..... | 1 |
| Gi5_8528162_x7  | .....uccgUcguaguauaacggcuagaau  | ..... | 1 |
| Gi1_3967720_x7  | .....uccggcguaaguauaacggUua     | ..... | 1 |
| Gi3_27426285_x7 | .....guucgauuccUggcgccg         | ..... | 1 |
| Gi5_8527224_x7  | .....uccAgcguaaguauaacggcuaga   | ..... | 1 |
| Gi3_27416478_x7 | .....uccggcguaaguauaacgAcuagaa  | ..... | 1 |
| Gi2_10517688_x7 | .....gguucgauCcccggcgccggag     | ..... | 1 |
| Gi2_10537610_x7 | .....uUcggcguaaguauaacggcuag    | ..... | 1 |
| Gi1_3961238_x7  | .....guCucacccaacagauccgg       | ..... | 1 |
| Gi3_27444233_x7 | .....guucgauucAcggcgccgga       | ..... | 1 |
| Gi3_27445290_x7 | .....guucgauuccggcgccCga        | ..... | 1 |
| Gi2_10535097_x7 | .....uccggcguaaguauaacggcCagaau | ..... | 1 |
| Gi3_27436547_x7 | .....uccggcguaAuauaacggcua      | ..... | 1 |
| Gi2_10499642_x7 | .....Gucgauuccggcgccggagc       | ..... | 1 |
| Gi3_27441874_x7 | .....guucAauuccggcgccg          | ..... | 1 |
| Gi5_8510725_x7  | .....ugguucucacccaacGgauccg     | ..... | 1 |
| Gi5_8508282_x7  | .....gguucgauucccgAcgcccga      | ..... | 1 |
| Gi5_8523577_x7  | .....guucgauuccggcgccUg         | ..... | 1 |
| Gi2_10534873_x7 | .....guucCauuccggcgccg          | ..... | 1 |
| Gi3_27394498_x7 | .....gguucgauuccggAgccgg        | ..... | 1 |
| Gl1_5682051_x7  | .....uccggcgUgguauaacggcua      | ..... | 1 |
| Gi1_3960720_x7  | .....uccggcguaGcauacggcua       | ..... | 1 |
| Gi2_10499586_x7 | .....gguucgauuccggcgUcggag      | ..... | 1 |

|                 |                                     |   |
|-----------------|-------------------------------------|---|
| Gi1_3968056_x7  | .....uucucacccaacCgauccgg.....      | 1 |
| Gi3_27379581_x7 | .....gguucgauucccgcgUc.....         | 1 |
| Gi3_27423296_x7 | .....guuUgauucccgcgccg.....         | 1 |
| Gl1a_5701007_x7 | .....gguucgauucccgUgcc.....         | 1 |
| Gi3_27436477_x7 | .....uccggcguaguaCaacggcuagaau..... | 1 |
| Gi3_27407336_x7 | .....uccggcguUuauaacggcuaga.....    | 1 |
| Gi2_10516162_x7 | .....Cguucgauucccgcgccgg.....       | 1 |
| Gi2_10525864_x7 | .....uccggcgcCaguauaacggc.....      | 1 |
| Gi1_3959887_x7  | .....uccggcguaguauaacggcuagC.....   | 1 |
| Gi2_10514335_x7 | .....uccggcguNguauaacgg.....        | 1 |
| Gi1_3967965_x7  | .....guucgauucccgcgccUg.....        | 1 |
| Gi3_27446438_x7 | .....guucgauuAccggcgccgg.....       | 1 |
| Gi3_27456651_x7 | .....uccAgcguaguauaacggcuagaau..... | 1 |
| Gi5_8521162_x7  | .....gguucgauucccgcgccggUgc.....    | 1 |
| Gi1_3972557_x7  | .....uccggcguaguauaacAgc.....       | 1 |
| Gi3_27411417_x7 | .....guucgauuAcggcgccggagc.....     | 1 |
| Gi1_3961497_x7  | .....gUuucgauucccgcgcc.....         | 1 |
| Gi2_10522161_x7 | .....gguCcgauucccgcgccg.....        | 1 |
| Gi2_10508679_x7 | .....uccggcguNguauaacggcuag.....    | 1 |
| Gi3_27393896_x7 | .....ugguCcucacccaacagauccg.....    | 1 |
| Gi1_3973243_x7  | .....uucucacccaacagauccAg.....      | 1 |
| Gi5_8527161_x7  | .....Ugguucgauucccgcgccggagc.....   | 1 |
| Gi5_8512076_x7  | .....gguuGucacccaacagauccg.....     | 1 |
| Gi2_10529735_x7 | .....guucUauucccgcgccggag.....      | 1 |
| Gi5_8519342_x7  | .....ugguucucacccaCagauccg.....     | 1 |
| Gi1_3968819_x7  | .....guGcucacccaacagauccg.....      | 1 |
| Gi1_3958823_x7  | .....uucucacccaacagaCccg.....       | 1 |
| Gi1_3962540_x7  | .....gguAcgauucccgcgccgg.....       | 1 |
| Gi5_8530185_x7  | .....Uguucgauucccgcgccggagcguu..... | 1 |
| Gi2_10520985_x7 | .....gCuucucacccaacagauccg.....     | 1 |
| Gi2_10520656_x7 | .....uucucacccaacCgauccg.....       | 1 |
| Gi5_8507519_x7  | .....uccggcguaguauaGcggcuagaa.....  | 1 |
| Gi2_10522343_x7 | .....uGcgauucccgcgccggagc.....      | 1 |
| Gi3_27411676_x7 | .....uccggcguaguauGacggcuau.....    | 1 |
| Gi1_3967139_x7  | .....uucucacccaacagaAccg.....       | 1 |
| Gi3_27432172_x7 | .....uucucacccaacagauccUg.....      | 1 |
| Gi3_27386308_x7 | .....gguucgauucccggcUccggagc.....   | 1 |
| Gi1_3961980_x7  | .....gguuGgauucccgcgccgg.....       | 1 |
| Gi1_3959257_x7  | .....uGguucucacccaacagauccg.....    | 1 |
| Gi5_8515569_x7  | .....guucgauucccgUgcccga.....       | 1 |
| Gi5_8518824_x7  | .....uccggcguaguCuaacggcuagaau..... | 1 |
| Gi4_526928_x7   | .....uccggcguaguauaacgg.....        | 0 |
| Gi3_27386826_x7 | .....guucucacccaacagauccUg.....     | 1 |
| Gi2_10501994_x7 | .....guucgCuucccgcgccgg.....        | 1 |
| Gi5_8530850_x7  | .....ugguucucaccUaacagauccg.....    | 1 |
| Gi4_528594_x7   | .....uccggcguaguauaacggcuGga.....   | 1 |
| Gi5_8523892_x7  | .....guucgauucccgcgccAgagc.....     | 1 |



|                      |                                |   |
|----------------------|--------------------------------|---|
| Gi2_10502547_x7..... | uccggcguaguauaacggcuagCau..... | 1 |
| Gi5_8529632_x7.....  | ggAucgauucccgcgccgg.....       | 1 |
| Gi3_27447873_x7..... | gguucgauucccgcgccgCa.....      | 1 |
| Gi2_10534418_x7..... | uccggcguaguaCaacggcua.....     | 1 |
| Gi1_3972046_x7.....  | uucucacccaGcagaucgg.....       | 1 |
| Gi3_27381107_x7..... | gguucgauucccgcgUcgg.....       | 1 |
| Gi1a_5687742_x7..... | Gcucacccaacagaucgg.....        | 1 |
| Gi3_27402597_x7..... | uucucacccaacagaucggC.....      | 1 |
| Gi2_10515833_x7..... | gguucgauuccUggcgccg.....       | 1 |
| Gi5_8530052_x7.....  | uccggcguaguauaacggGuag.....    | 1 |
| Gi2_10530001_x7..... | uccggcguaguauaCcgguaga.....    | 1 |
| Gi5_8526216_x7.....  | cucacUcaacagaucgg.....         | 1 |
| Gi2_10508350_x7..... | gguucgauuccUgcgccggag.....     | 1 |
| Gi5_8512580_x7.....  | gguucgGuucccgcgccggag.....     | 1 |
| Gi2_10509617_x7..... | guucgauuccUggcgccgga.....      | 1 |
| Gi2_10512956_x7..... | uccggcguaguauaacggcuaA.....    | 1 |
| Gi5_8521939_x7.....  | guucgauucccgcgGcg.....         | 1 |
| Gi2_10507881_x7..... | guCcgauucccgcgccgga.....       | 1 |
| Gi3_27419789_x7..... | uccCcgguaguauaacggcuaga.....   | 1 |
| Gi2_10516757_x7..... | gguucucacccaacagCucgg.....     | 1 |
| Gi5_8528449_x7.....  | gguucgauucccAgcgcc.....        | 1 |
| Gi1_3973075_x7.....  | ccggcguaguauaacggcuagaau.....  | 0 |
| Gi3_27451051_x7..... | gguCcgauucccgcgcc.....         | 1 |
| Gi3_27423527_x7..... | cgauucccNgcgcccggagc.....      | 1 |
| Gi5_8511859_x7.....  | gguucgauucccgcgAcg.....        | 1 |
| Gi5_8505811_x7.....  | guucgauucccgAcgccc.....        | 1 |
| Gi2_10514692_x7..... | guuAgauucccgcgccgg.....        | 1 |
| Gi5_8519272_x7.....  | gguCcgauucccgcgccgg.....       | 1 |
| Gi5_8514484_x7.....  | gguucgauucccggcAccg.....       | 1 |
| Gi5_8516521_x7.....  | uccggcguaguCuaacggc.....       | 1 |
| Gi3_27453277_x7..... | gguucgauucUcggcgccgg.....      | 1 |
| Gi3_27446081_x7..... | gguucgauuccAgcgcc.....         | 1 |
| Gi3_27435574_x7..... | uccggcguagCauaacggcuag.....    | 1 |
| Gi2_10523505_x7..... | uGcgauucccgcgccgg.....         | 1 |
| Gi3_27427111_x7..... | guucgauucccgcgGggagc.....      | 1 |
| Gi3_27442532_x7..... | gguucgauucAcggcgccg.....       | 1 |
| Gi3_27437044_x7..... | uccggcguaguUuaacgg.....        | 1 |
| Gi3_27416835_x7..... | uccggAguaguauaacggcuagaa.....  | 1 |
| Gi3_27418193_x7..... | Nguucgauucccgcgccggagc.....    | 1 |
| Gi1a_5688204_x7..... | gGucgauucccgcgcccggagc.....    | 1 |
| Gi2_10508567_x7..... | Ugcguaguauaacggcuaga.....      | 1 |
| Gi5_8545291_x6.....  | Uucacccaacagaucgg.....         | 1 |
| Gi3_27518824_x6..... | uccggcgCaguauaacggcuag.....    | 1 |
| Gi5_8542951_x6.....  | cucacccaacagaCccgg.....        | 1 |
| Gi5_8538079_x6.....  | Cucucacccaacagaucgg.....       | 1 |
| Gi2_10570907_x6..... | uccgUcguaguauaacggcuag.....    | 1 |
| Gi1_3979981_x6.....  | gguucucacccUacagaucgg.....     | 1 |

|                      |                                     |   |
|----------------------|-------------------------------------|---|
| Gi5_8536669_x6.....  | uccggcguaAuuaacggcua.....           | 1 |
| Gi5_8537881_x6.....  | uccggcguaaguauaacgAcuagaau.....     | 1 |
| Gi3_27521662_x6..... | .....                               | 1 |
| Gi3_27462982_x6..... | .....gguucgGuucccgccgccc.....       | 0 |
| Gi2_10548773_x6..... | .....ccggcguaaguauaacggcua.....     | 1 |
| Gi2_10569563_x6..... | .....uucucacccaacagaCccg.....       | 1 |
| Gi5_8532547_x6.....  | .....gguucgguuucccgccgcccggc.....   | 1 |
| Gi5_8558725_x6.....  | .....gguucgguuucccgccgcccggc.....   | 1 |
| Gi2_10545881_x6..... | .....gguucgguuucccgccgcccggc.....   | 1 |
| Gi5_8553223_x6.....  | .....ucAggcguaguauaacggcuag.....    | 1 |
| Gi5_8536429_x6.....  | .....guCucacccaacagauccgg.....      | 1 |
| Gi5_8554213_x6.....  | .....uccggcguaaguauUacggcuag.....   | 1 |
| Gi2_10585175_x6..... | .....gguucgguuucccgccgcccU.....     | 1 |
| Gi2_10545575_x6..... | .....gguucucaccccCacagauccg.....    | 1 |
| Gi5_8546413_x6.....  | .....gguucucaccccAaacagauccg.....   | 1 |
| Gi1_3990703_x6.....  | .....gguucucacUcaacagauccg.....     | 1 |
| Gi1_3984469_x6.....  | .....guuUgguuucccgccgcccggagc.....  | 1 |
| Gi3_27491716_x6..... | .....uucucacccaacagauccgA.....      | 1 |
| Gi3_27532678_x6..... | .....uucucacccaacagauUgg.....       | 1 |
| Gi1_3987019_x6.....  | .....gguucucaccccAaacagauccg.....   | 1 |
| Gi1_3975613_x6.....  | .....ugguucucacccaacagauUgg.....    | 1 |
| Gi5_8536891_x6.....  | .....gguucAuuucccgccgcccgg.....     | 1 |
| Gi5_8550865_x6.....  | .....gguucgGuucccgccgcccgg.....     | 1 |
| Gi5_8554297_x6.....  | .....gguucgguuucccgccgcccggA.....   | 1 |
| Gi5_8534767_x6.....  | .....gguucgUuuucccgccgcccgg.....    | 1 |
| Gi5_8535937_x6.....  | .....uccggcguaaguauaaGggcuaga.....  | 1 |
| Gi1_3987505_x6.....  | .....Gcggcguaaguauaacggcuaga.....   | 1 |
| Gi1_3978553_x6.....  | .....ggAucucacccaacagauccg.....     | 1 |
| Gi3_27541582_x6..... | .....uucgguuucccgccgcccggA.....     | 1 |
| Gi1_3980713_x6.....  | .....Gcaccacacagauccgggu.....       | 1 |
| Gi3_27538150_x6..... | .....uccAgcguaaguauaacggcuagaa..... | 1 |
| Gi1_5705266_x6.....  | .....uccggcguaaguauCacggcuaga.....  | 1 |
| Gi3_27524956_x6..... | .....gAucucacccaacagauccg.....      | 1 |
| Gi2_10576511_x6..... | .....gCuucgguuucccgccgcccggA.....   | 1 |
| Gi1_3993481_x6.....  | .....gguucgguuucccgccgcccUcg.....   | 1 |
| Gi5_8555773_x6.....  | .....gguucgguuucccgccgcccggA.....   | 1 |
| Gi2_10568933_x6..... | .....gguucgguuucccgccgcccggc.....   | 1 |
| Gi5_8545813_x6.....  | .....Ucggcguaaguauaacggcuaga.....   | 1 |
| Gi3_27467050_x6..... | .....guGcucacccaacagauccg.....      | 1 |
| Gi5_8550685_x6.....  | .....ucUggguucgguuucccgcc.....      | 1 |
| Gi5_8531065_x6.....  | .....Uuaguauaacggcuagaa.....        | 1 |
| Gi2_10551671_x6..... | .....uccgUcguaguauaacggcuagaa.....  | 1 |
| Gi3_27468004_x6..... | .....gguucucacccaacagauccUgg.....   | 1 |
| Gi5_8549311_x6.....  | .....gguuAgauucccgccgcccggagc.....  | 1 |
| Gi1_3990541_x6.....  | .....ugguuAucacccaacagauccg.....    | 1 |
| Gi1_3992857_x6.....  | .....ugguuUucacccaacagauccg.....    | 1 |
| Gi1_3992917_x6.....  | .....ucgguuAcccgccgcccggagc.....    | 1 |

|                      |                                     |   |
|----------------------|-------------------------------------|---|
| Gi3_27478312_x6..... | .uAcucacccaacagauccg.....           | 1 |
| Gi5_8557789_x6.....  | .gguucucacccaacagauccA.....         | 1 |
| Gi5_8560399_x6.....  | .ugguucCcacccaacagauccg.....        | 1 |
| Gi3_27465052_x6..... | .....guucgauucccgcgccggU.....       | 1 |
| Gi3_27477280_x6..... | .....Ugguucgauucccgcgccg.....       | 1 |
| Gi5_8533417_x6.....  | .....uucucacAcaacagauccg.....       | 1 |
| Gi2_10554221_x6..... | .....uccggcguaguauaGcggcuag.....    | 1 |
| Gi1_3976795_x6.....  | .....guucucacccaacagauccA.....      | 1 |
| Gi5_8544061_x6.....  | .....uccggcguaguaCaacggcuagaau..... | 1 |
| Gi2_10551461_x6..... | .....gguucucacccaacGgauccg.....     | 1 |
| Gi2_10580399_x6..... | .....guucgauucccgcgccAg.....        | 1 |
| Gi1_3989029_x6.....  | .....ugguucucaUccaacagauccg.....    | 1 |
| Gi3_27521374_x6..... | .....guucgauucccgccCccgga.....      | 1 |
| Gi3_27495448_x6..... | .....cCcacccaacagauccgg.....        | 1 |
| Gi5_8547775_x6.....  | .....guucgauAcccgcgccgg.....        | 1 |
| Gi5_8542771_x6.....  | .....guAcucacccaacagauccg.....      | 1 |
| Gi1_3980503_x6.....  | .....gguucgauCcccgcgccggagc.....    | 1 |
| Gi1_3983311_x6.....  | .....uccggcguaguauaGcggcuaga.....   | 1 |
| Gi2_10562117_x6..... | .....gguucgauucccAgcggcg.....       | 1 |
| Gi5_8531629_x6.....  | .....guucucaccUacagauccg.....       | 1 |
| Gi1_3988279_x6.....  | .....Guccgauucccgcgccggagc.....     | 1 |
| Gi1a_5719582_x6..... | .....Uuucgauucccgcgccg.....         | 1 |
| Gi5_8535979_x6.....  | .....uAguucucacccaacagauccg.....    | 1 |
| Gi2_10586483_x6..... | .....guucCcacccaacagauccg.....      | 1 |
| Gi5_8534227_x6.....  | .....uccggcguaguauaaAggcuaga.....   | 1 |
| Gi3_27515596_x6..... | .....gauucccgGgcccggagc.....        | 1 |
| Gi1_3991123_x6.....  | .....uccggcguaguauaUcgg.....        | 1 |
| Gi3_27536362_x6..... | .....guucgauucccgcgccUg.....        | 1 |
| Gi3_27531646_x6..... | .....guucucacccaacagauAccg.....     | 1 |
| Gi5_8548093_x6.....  | .....guucgauucccgccAccgga.....      | 1 |
| Gi1_3990955_x6.....  | .....uccggcguaguaCaacggcuaga.....   | 1 |
| Gi2_10585691_x6..... | .....gguucgauucccgcgccAgga.....     | 1 |
| Gi1_3989257_x6.....  | .....uccggcguaguauaacAgcuagaau..... | 1 |
| Gi5_8555047_x6.....  | .....uccggcguaguauaacUgcuaa.....    | 1 |
| Gi1_3985957_x6.....  | .....Agguucucacccaacagauccgg.....   | 1 |
| Gi3_27527164_x6..... | .....gguucgauucccgAccgcccg.....     | 1 |
| Gi3_27501688_x6..... | .....uGgauucccgcgccgga.....         | 1 |
| Gi1_3985681_x6.....  | .....guNcgauucccgcgccgg.....        | 1 |
| Gi5_8550985_x6.....  | .....gguucgauucccgcgccUgg.....      | 1 |
| Gi2_10542875_x6..... | .....guucgauucccgcgccUgga.....      | 1 |
| Gi1_3992587_x6.....  | .....guAccgauucccgcgccgga.....      | 1 |
| Gi3_27478264_x6..... | .....guucUauucccgcgccg.....         | 1 |
| Gi3_27484126_x6..... | .....Ugcguaguauaacggcua.....        | 1 |
| Gi1_3991351_x6.....  | .....gauucccgcgccggagc.....         | 0 |
| Gi5_8545987_x6.....  | .....gguAccgauucccgcgccggagc.....   | 1 |
| Gi2_10566947_x6..... | .....uccggcguaguauaacggcuagaC.....  | 1 |
| Gi3_27511738_x6..... | .....guucgauucccgccAccg.....        | 1 |

|                      |                                       |   |
|----------------------|---------------------------------------|---|
| Gi5_8531137_x6.....  | gguucgGuucccgcgccgga.....             | 1 |
| Gi2_10588361_x6..... | uccggcguaguauCacggcuagaau.....        | 1 |
| Gi1_3990067_x6.....  | uccggcguaguauaacggcuagGau.....        | 1 |
| Gi2_10581317_x6..... | Cccggcguaguauaacggcuagaau.....        | 1 |
| Gi3_27511798_x6..... | guucgauucccgcgUcgag.....              | 1 |
| Gl1a_5716528_x6..... | Gccggcguaguauaacgg.....               | 1 |
| Gi2_10574453_x6..... | gguCcgauucccgcgccgg.....              | 1 |
| Gi5_8558587_x6.....  | cucaccaCcagauccgg.....                | 1 |
| Gi3_27525706_x6..... | guucgauuccUgcccgg.....                | 1 |
| Gi5_8538685_x6.....  | uccAgcguaguauaacggcuagaau.....        | 1 |
| Gi2_10565009_x6..... | gguucgauuccUgcccgga.....              | 1 |
| Gi5_8542441_x6.....  | uccgAcguaguauaacggcuag.....           | 1 |
| Gi1_3975235_x6.....  | guucgauucccgcgccgCgc.....             | 1 |
| Gi3_27533494_x6..... | uccggcGaguauaacggcua.....             | 1 |
| Gi2_10575779_x6..... | gAucgauucccgcgccgga.....              | 1 |
| Gi2_10546109_x6..... | gguucgauucccgcgccUgagc.....           | 1 |
| Gi5_8561119_x6.....  | Ugcuaguauaacggcuagaau.....            | 1 |
| Gi1_3991867_x6.....  | guucgauucccgUgcccga.....              | 1 |
| Gl1a_5726536_x6..... | uccggcguaguauaacggcuagG.....          | 1 |
| Gi3_27488302_x6..... | ucgauucccgcgccgCgc.....               | 1 |
| Gi3_27535378_x6..... | gguuGgauucccgcgccgg.....              | 1 |
| Gi5_8544295_x6.....  | ccUaacagauccggguuc.....               | 1 |
| Gi2_10578197_x6..... | uccggcguaguaCaacgg.....               | 1 |
| Gi5_8544565_x6.....  | uccggcguaguauaacggcAag.....           | 1 |
| Gi1_3990013_x6.....  | uccggcguaguauaacggcuagaaC.....        | 1 |
| Gi2_10590599_x6..... | gguucgauuccUgcccg.....                | 1 |
| Gi2_10566755_x6..... | guucgauuccUgcccggagc.....             | 1 |
| Gi3_27527308_x6..... | uccggcguauauaacggcuagaau.....         | 1 |
| Gi5_8543557_x6.....  | cuUaccaacagauccgg.....                | 1 |
| Gi1_3977671_x6.....  | guucucaccaacagauAcgg.....             | 1 |
| Gi3_27519514_x6..... | uugguCcucaccaacagaucc.....            | 1 |
| Gi2_10558439_x6..... | cgauucccgcgccggagcguuG.....           | 1 |
| Gi3_27509530_x6..... | acagauccggguucgauucccgcgccggagcC..... | 1 |
| Gi1_3987037_x6.....  | gguucucaccaacagauccgU.....            | 1 |
| Gi5_8544787_x6.....  | guucucaccaacagCuccg.....              | 1 |
| Gi1_3980473_x6.....  | uccggcguaguGuaacggcu.....             | 1 |
| Gi3_27475666_x6..... | ugguucucGcccaacagaucc.....            | 1 |
| Gi5_8556079_x6.....  | gguucucaccaacagauUcg.....             | 1 |
| Gi1_3978493_x6.....  | ugguucucaccaacagCuccg.....            | 1 |
| Gi2_10551425_x6..... | cgauucccgcgccggagc.....               | 0 |
| Gi2_10574765_x6..... | gguucgauucccgcgcA.....                | 1 |
| Gi3_27465964_x6..... | ccggcguaguauaCcggc.....               | 1 |
| Gi3_27544918_x6..... | uccggcAuaguauaacggc.....              | 1 |
| Gi2_10578713_x6..... | Gagauccggguucgauucc.....              | 1 |
| Gi5_8551537_x6.....  | gguucgauuccAgcccgg.....               | 1 |
| Gi5_8562907_x6.....  | uccUgcuaguauaacggcuag.....            | 1 |
| Gi2_10583597_x6..... | gguCcgauucccgcgccgga.....             | 1 |

|                 |                                  |   |
|-----------------|----------------------------------|---|
| Gi1_3980131_x6  | guucucacccGacagauccg             | 1 |
| Gi5_8548669_x6  | gguuUgauucccgcgccgga             | 1 |
| Gi5_8539447_x6  | guucucaUccaacagauccg             | 1 |
| Gi3_27510196_x6 | gguucgauucccAgcgcc               | 1 |
| Gi3_27459700_x6 | uccggcguagCauaacggcuagaau        | 1 |
| Gi2_10543823_x6 | Cccggcguaguauaacggcua            | 1 |
| Gi3_27509182_x6 | uccggcguaguUuaacggcua            | 1 |
| Gi2_10574855_x6 | uccggcguaguauaaAggcuaga          | 1 |
| Gi3_27463690_x6 | gguucgaAuuccggcgccgga            | 1 |
| Gi5_8547289_x6  | gguucgauucccgAgccg               | 1 |
| Gi1_3986503_x6  | Aguucgauucccgcgccg               | 1 |
| Gi5_8548675_x6  | guucgauucccgGgccg                | 1 |
| Gi5_8562469_x6  | guucucacccaacagauUcg             | 1 |
| Gi4_530649_x6   | Uuucgauucccgcgccgga              | 1 |
| Gi2_10578299_x6 | cUauuccggcgccggagcguuuc          | 1 |
| Gi1_3984025_x6  | guucgauuNccggcgccgga             | 1 |
| Gi3_27490564_x6 | gguucucacccaacCgauccg            | 1 |
| Gi1_3985861_x6  | guCcgauucccgcgccggagc            | 1 |
| Gi5_8543503_x6  | gguucgauAcccgcgccggagc           | 1 |
| Gi3_27484798_x6 | uCcgauuccggcgccgga               | 1 |
| Gi1_3975169_x6  | Cuucgauucccgcgccg                | 1 |
| Gi5_8561839_x6  | gCuucgauucccgcgccgga             | 1 |
| Gi2_10558097_x6 | gguucgauuccggcgUggag             | 1 |
| Gi1_3980905_x6  | guucucacccaacagauUg              | 1 |
| Gi2_10553141_x6 | uccggcAuaguauaacggcuaga          | 1 |
| Gi3_27493318_x6 | guucucacccaacagauAg              | 1 |
| Gi1_3981253_x6  | guuGgauucccgcgccg                | 1 |
| Gi3_27491776_x6 | uccggGguaguauaacgg               | 1 |
| Gi1_3976639_x6  | uccggcguGguauaacggcu             | 1 |
| Gi2_10563647_x6 | gguuUgauucccgcgccggag            | 1 |
| Gi3_27541906_x6 | uAcggcguaguauaacgg               | 1 |
| Gi2_10569353_x6 | cUcaacagauccggguuc               | 1 |
| Gi2_10541777_x6 | gguucucGcccaacagauccg            | 1 |
| Gi1_3980479_x6  | guucgauucccgcgccA                | 1 |
| Gi3_27509242_x6 | aacagauccggguucgauuccggcgccggagc | 0 |
| Gi5_8531617_x6  | gguucucacccaUcagauccg            | 1 |
| Gi2_10570739_x6 | Accggcguaguauaacggc              | 1 |
| Gi3_27547384_x6 | uucAcacccaacagauccgg             | 1 |
| Gi5_8533591_x6  | uccggcguaguauaacggcuGgaa         | 1 |
| Gi5_8556055_x6  | uccggcAuaguauaacggcuag           | 1 |
| Gi5_8548897_x6  | uccggcguaguGuaacgg               | 1 |
| Gi5_8542105_x6  | guucucacccaCcagauccgg            | 1 |
| Gi5_8544871_x6  | Auucucacccaacagauccgg            | 1 |
| Gi1_3986059_x6  | guucgauucccgcgccgU               | 1 |
| Gi1_3992161_x6  | guucgauucccgAccegga              | 1 |
| Gl1a_5723356_x6 | uccggcguagCauaacggcuaga          | 1 |
| Gi1_3986179_x6  | uccggUguaguauaacggcuagaau        | 1 |

|                      |                                  |   |
|----------------------|----------------------------------|---|
| Gi2_10567661_x6..... | .guucgauCcccggcgccg.....         | 1 |
| Gi2_10548545_x6..... | .guucgauuccAgggcgccggagc.....    | 1 |
| Gi2_10549547_x6..... | .gguucgauucccgccggcggaA.....     | 1 |
| Gi1_3989989_x6.....  | .ugguucucacccaacagauccAg.....    | 1 |
| Gi3_27509992_x6..... | .guucgauuccAgggcgccggagc.....    | 1 |
| Gi2_10547255_x6..... | .Gguccggcguaguauaacgg.....       | 1 |
| Gi3_27482182_x6..... | .gguucgauucccgccggcgU.....       | 1 |
| Gi3_27476716_x6..... | .uccggcguaguauaacggUuagaau.....  | 1 |
| Gi2_10586393_x6..... | .uucucaccccGacagauccg.....       | 1 |
| Gi5_8555503_x6.....  | .guucgauuccAgcgccggagc.....      | 1 |
| Gi5_8535757_x6.....  | .Cguucgauucccgccggag.....        | 1 |
| Gi1_3993703_x6.....  | .uccggcguaguauaacggcuagaGu.....  | 1 |
| Gi1_3978925_x6.....  | .uGucacccaacagauccgg.....        | 1 |
| Gi5_8531353_x6.....  | .gguucgauucAcggcgccggagc.....    | 1 |
| Gi3_27542590_x6..... | .ucgauucccgccggcgGgc.....        | 1 |
| Gi2_10547435_x6..... | .uccggcguaguauaacggU.....        | 1 |
| Gi2_10576583_x6..... | .ggAucgauucccgccggag.....        | 1 |
| Gi3_27481582_x6..... | .Gguccggcguaguauaacggcuagaa..... | 1 |
| Gi1_3975787_x6.....  | .uccgAcguaguauaacggcua.....      | 1 |
| Gi5_8552635_x6.....  | .uccggUguaguauaacggcuagaa.....   | 1 |
| Gi1_3983947_x6.....  | .gguucucacccaacagauccg.....      | 1 |
| Gi3_27498148_x6..... | .Cucucacccaacagauccgg.....       | 1 |
| Gi3_27531694_x6..... | .guuGgauucccgccggagc.....        | 1 |
| Gi2_10589573_x6..... | .guucgauucccgUcgccgg.....        | 1 |
| Gi3_27520810_x6..... | .uccggcguaguauaacggcAaga.....    | 1 |
| Gi5_8563561_x6.....  | .gguuUgauucccgccggag.....        | 1 |
| Gi2_10564247_x6..... | .guCucacccaacagauccg.....        | 1 |
| Gi1_3976723_x6.....  | .guucCcacccaacagauccgg.....      | 1 |
| Gi2_10556015_x6..... | .guucgauuccggcAccggag.....       | 1 |
| Gi1_3988993_x6.....  | .gguucgauucccgccggcCg.....       | 1 |
| Gi2_10549907_x6..... | .guucgauucccgAcgccgga.....       | 1 |
| Gi5_8533621_x6.....  | .guucgauCcccggcgccgga.....       | 1 |
| Gi1_3993187_x6.....  | .gCucgauucccgccggc.....          | 1 |
| G1a_5730928_x6.....  | .guucucaccccCacagauccg.....      | 1 |
| Gi3_27511150_x6..... | .gguuGgauucccgccggc.....         | 1 |
| Gi5_8556733_x6.....  | .gguucgauuccUggcgccgga.....      | 1 |
| Gi3_27487786_x6..... | .gguucUauucccgccggc.....         | 1 |
| Gi3_27518572_x6..... | .gguucgauuAccggcgccgga.....      | 1 |
| G1a_5702458_x6.....  | .Cguucgauucccgccggag.....        | 1 |
| Gi3_27472150_x6..... | .guucgauucccgUcgccggagc.....     | 1 |
| Gi5_8532835_x6.....  | .uccggcguCguauaacggcuag.....     | 1 |
| Gi3_27520444_x6..... | .gaCucccgccggagc.....            | 1 |
| Gi1_3977395_x6.....  | .guucucacccaacagauAcg.....       | 1 |
| Gi5_8560951_x6.....  | .uucucacccaacagauAcg.....        | 1 |
| Gi3_27515602_x6..... | .Gcucacccaacagauccgg.....        | 1 |
| Gi5_8549155_x6.....  | .ucucGcccaacagauccg.....         | 1 |
| Gi3_27534442_x6..... | .uccggcguaguCuaacgg.....         | 1 |

|                      |                                  |   |
|----------------------|----------------------------------|---|
| Gi3_27507706_x6..... | .guAcgauucccgcgccg.....          | 1 |
| Gi2_10580027_x6..... | .Gcgauucccgcgccggag.....         | 1 |
| Gi3_27459346_x6..... | .gguucgauuccGggcgccggag.....     | 1 |
| Gi5_8532871_x6.....  | .gguucgauucccgcgAg.....          | 1 |
| Gi2_10574429_x6..... | .Ccgauucccgcgccggagc.....        | 1 |
| Gi2_10587971_x6..... | .gguucgauucAcggcgccggag.....     | 1 |
| Gi1_3990205_x6.....  | .Aguucgauucccgcgccggag.....      | 1 |
| Gi5_8542753_x6.....  | .uccggcguUguauaacggcuaga.....    | 1 |
| Gi5_8533807_x6.....  | .gguucgauucccgcgccgAa.....       | 1 |
| Gi5_8562223_x6.....  | .guucgaGucccgcgccgg.....         | 1 |
| Gi5_8554093_x6.....  | .uUguucucacccaacagauccgg.....    | 1 |
| Gi3_27548074_x6..... | .cgauucccgcgccAgagc.....         | 1 |
| Gi3_27470788_x6..... | .gguucgaGucccgcgccggagc.....     | 1 |
| Gi2_10566929_x6..... | .guucucacccaacGgauccg.....       | 1 |
| Gi5_8551669_x6.....  | .ugguucucacccaacagauUg.....      | 1 |
| Gi3_27539296_x6..... | .Gcggcguaguauaacggc.....         | 1 |
| Gi3_27517384_x6..... | .uccgAcguaguauaacggc.....        | 1 |
| Gi2_10561487_x6..... | .guucUauucccgcgccgga.....        | 1 |
| Gi5_8537029_x6.....  | .uccggcguaguauaacggcuUg.....     | 1 |
| Gi3_27489004_x6..... | .ugguucucNcccaacagauc.....       | 1 |
| Gi3_27521212_x6..... | .ucAgggcguaguauaacgg.....        | 1 |
| Gi2_10580909_x6..... | .uccggcguaguauaUcggcuagaau.....  | 1 |
| Gi1_3978103_x6.....  | .Cguucgauucccgcgccggagc.....     | 1 |
| Gi2_10544189_x6..... | .gguuGgauucccgcgccg.....         | 1 |
| Gi5_8562331_x6.....  | .guucgauuccCcgccg.....           | 1 |
| Gi5_8560213_x6.....  | .gUuucgauucccgcgccggagcguuu..... | 1 |
| Gi5_8541073_x6.....  | .guucgauucccgUcgccg.....         | 1 |
| Gi3_27484174_x6..... | .gguucgauucccgcgccU.....         | 1 |
| Gi3_27525220_x6..... | .uucgauucccgcgccggC.....         | 1 |
| Gi5_8563153_x6.....  | .ugguucucacccGacagauccg.....     | 1 |
| Gi2_10567193_x6..... | .gguucgauucccgcgAcggag.....      | 1 |
| Gi3_27501868_x6..... | .gguucgauucccgGgcccggag.....     | 1 |
| Gi3_27523864_x6..... | .cUgcguaguauaacggcuagaau.....    | 1 |
| Gi3_27469624_x6..... | .Gagauccggguucgauuccc.....       | 1 |
| Gi3_27494680_x6..... | .uucucacAcaacagauccgg.....       | 1 |
| Gl1_5726860_x6.....  | .ucUggcguaguauaacggcuaga.....    | 1 |
| Gi2_10588049_x6..... | .guucucacAcaacagauccg.....       | 1 |
| Gi5_8554057_x6.....  | .ggUGcgauucccgcgccg.....         | 1 |
| Gi3_27464092_x6..... | .guucgauucccgcgAg.....           | 1 |
| Gi1_3982381_x6.....  | .guucgauuccUggcgccg.....         | 1 |
| Gi2_10569701_x6..... | .gguucgauuccggcAccg.....         | 1 |
| Gi1_3999010_x5.....  | .uccggcguaguauaaUggcuag.....     | 1 |
| Gi3_27595842_x5..... | .gguucgUuucccgcgccgga.....       | 1 |
| Gi2_10631330_x5..... | .gguucgauucccgGgccc.....         | 1 |
| Gi2_10606795_x5..... | .gguucgauuccUggcgccgga.....      | 1 |
| Gi2_10623935_x5..... | .uccggcguagCauaacggcuagaa.....   | 1 |
| Gi1_4008040_x5.....  | .guucgauucccgcgGcgagc.....       | 1 |

|                      |                                 |   |
|----------------------|---------------------------------|---|
| Gi2_10627080_x5..... | guucgauucccgAgccg.....          | 1 |
| Gi1_4004905_x5.....  | gUcguaguauaacggcua.....         | 1 |
| Gi1_4006725_x5.....  | uucAcaccaacagauccg.....         | 1 |
| Gi1_4011145_x5.....  | uggCucucaccaacagauccg.....      | 1 |
| Gi2_10605435_x5..... | ucgauuccNggcgccggag.....        | 1 |
| Gi3_27581747_x5..... | gguucgauucccggcAgg.....         | 1 |
| Gi1_3999765_x5.....  | uccggcguaguauaacggcuCg.....     | 1 |
| Gi1_4010535_x5.....  | ugguucucaccaacUgauccg.....      | 1 |
| Gi1_4007875_x5.....  | uucucaccaacagaCccg.....         | 1 |
| Gi1_4016545_x5.....  | guucucaccaacagaCccg.....        | 1 |
| Gi1_4002010_x5.....  | uccggcguaguauaacgAc.....        | 1 |
| Gi3_27574422_x5..... | uucgauucccgUgccggagc.....       | 1 |
| Gi3_27581737_x5..... | guucgauucccggcAgcgag.....       | 1 |
| Gi3_27599387_x5..... | uucgauucccggcgcggG.....         | 1 |
| Gi2_10645415_x5..... | guucAauucccggcgcg.....          | 1 |
| Gi3_27604427_x5..... | guccggcguaguauaacggcua.....     | 0 |
| Gi3_27640892_x5..... | uucucacccUacagauccg.....        | 1 |
| Gi5_8580147_x5.....  | gguucucaAccaacagauccg.....      | 1 |
| Gi5_8597617_x5.....  | gguucgauuccAgcgccggag.....      | 1 |
| Gi5_8592172_x5.....  | gguucgauucccggcgcggU.....       | 1 |
| Gi3_27583507_x5..... | guucucacAcaacagauccg.....       | 1 |
| Gi3_27559677_x5..... | uccggcguUguauaacggcuagaa.....   | 1 |
| Gi3_27549482_x5..... | gCuucgauucccggcgc.....          | 1 |
| Gi2_10628225_x5..... | gguucgaGucccggcgcggagc.....     | 1 |
| Gi1_4017635_x5.....  | guucgauucccggcgcggC.....        | 1 |
| Gi3_27636442_x5..... | Cuucucaccaacagauccg.....        | 1 |
| Gi3_27619477_x5..... | Aucucaccaacagauccg.....         | 1 |
| Gi1_4004260_x5.....  | ugguucucaccaacagauccg.....      | 1 |
| Gi5_8595782_x5.....  | gCucucaccaacagauccg.....        | 1 |
| Gi5_8594042_x5.....  | gguucgauucccgUgccgga.....       | 1 |
| Gi1_4013905_x5.....  | uccggcguaguauaacggcuagaC.....   | 1 |
| Gi5_8594797_x5.....  | guAcgauucccggcgcggga.....       | 1 |
| Gi5_8571147_x5.....  | guucgauucccggcAgga.....         | 1 |
| Gi3_27555052_x5..... | agauccggguucgauucccggcgcgg..... | 0 |
| Gi3_27614012_x5..... | guucucaccaacGgauccg.....        | 1 |
| Gi5_8590737_x5.....  | gAuucgauucccggcgcgg.....        | 1 |
| Gi2_10623165_x5..... | gCucgauucccggcgcggga.....       | 1 |
| Gi3_27621692_x5..... | gguuUgauucccggcgcgg.....        | 1 |
| Gi2_10615215_x5..... | gguucgauucccgCgcggagc.....      | 1 |
| Gi1_4006035_x5.....  | guucucaccaacagauUgg.....        | 1 |
| Gi1_4004885_x5.....  | uucucaccaacagauUcg.....         | 1 |
| Gi3_27651257_x5..... | gguucAauucccggcgcgg.....        | 1 |
| Gi3_27640812_x5..... | cccaacagaGccggguucgauucc.....   | 1 |
| Gi3_27600207_x5..... | uccggcguaguauUacggc.....        | 1 |
| Gi5_8573337_x5.....  | cUgcguaguauaacggcuagaa.....     | 1 |
| Gi1_3999595_x5.....  | gAucucaccaacagauccg.....        | 1 |
| G1a_5752502_x5.....  | uccggcguaguauGcggcuag.....      | 1 |



|                      |                                  |   |
|----------------------|----------------------------------|---|
| Gi3_27604932_x5..... | ucucacccaacagaCccg.....          | 1 |
| Gi3_27593912_x5..... | gguucgauUccggcgcc.....           | 1 |
| Gi1_4016980_x5.....  | uccggcguaguauUacgg.....          | 1 |
| Gi2_10629720_x5..... | uccggcguaguauUacggcuaga.....     | 1 |
| Gi5_8597282_x5.....  | cucacccaacagCuccgg.....          | 1 |
| Gi1_4011795_x5.....  | ugguucucacccaacagGuccg.....      | 1 |
| Gi1_4014305_x5.....  | gguucgauGccggcgccgg.....         | 1 |
| Gi1_4008310_x5.....  | guucuUacccaacagauccg.....        | 1 |
| Gi5_8593517_x5.....  | ugguucucacccaacagaCccg.....      | 1 |
| Gi2_10648380_x5..... | Cccggcguaguauaacggcuag.....      | 1 |
| Gi1_4016230_x5.....  | Uuugguucucacccaacagauccgggu..... | 1 |
| Gi1_3995650_x5.....  | ucGggcguaguauaacgg.....          | 1 |
| Gi5_8568342_x5.....  | gUuucgauuccggcgccggagcguu.....   | 1 |
| Gi2_10602855_x5..... | guuAgauuccggcgccggagc.....       | 1 |
| Gi2_10594165_x5..... | gguucgauuccAgggcc.....           | 1 |
| Gi2_10645020_x5..... | gguucgauUccggcgccggag.....       | 1 |
| Gi2_10626655_x5..... | gguucgauuccggGgcccga.....        | 1 |
| Gi2_10642120_x5..... | guucgauuccggcgGggagc.....        | 1 |
| Gi2_10628090_x5..... | agaugguugguCcucacc.....          | 1 |
| Gi5_8577957_x5.....  | uccggcguaguauaacggAuagaau.....   | 1 |
| Gi1a_5753682_x5..... | gguuUgauuccggcgccggagc.....      | 1 |
| Gi1_4011125_x5.....  | uccggcguaguauaCgg.....           | 1 |
| Gi1_4017165_x5.....  | uucucacAcaacagauccgg.....        | 1 |
| Gi2_10617425_x5..... | uccggcguaguaCaacggc.....         | 1 |
| Gi2_10617540_x5..... | uUgauuccggcgccggagc.....         | 1 |
| Gi2_10604695_x5..... | gguucgauuccggAgcccggag.....      | 1 |
| Gi2_10643425_x5..... | guucgauuccggcgccggaCc.....       | 1 |
| Gi2_10633100_x5..... | uccggcguaguauaaUgg.....          | 1 |
| Gi5_8588232_x5.....  | Ugcuaguauaacggcuagaa.....        | 1 |
| Gi5_8579392_x5.....  | guucgauuAccggcgccgg.....         | 1 |
| Gi3_27644187_x5..... | guucgUuuccggcgccggag.....        | 1 |
| Gi2_10626120_x5..... | gguGcgauuccggcgccggagc.....      | 1 |
| Gi3_27622827_x5..... | gguucgauuccggcCccgga.....        | 1 |
| Gi1_4004970_x5.....  | uccggcguaguaCaacggcuag.....      | 1 |
| Gi1_4005055_x5.....  | agUuccggguucgauucc.....          | 1 |
| Gi3_27601762_x5..... | gguucgauuccggGgcccgga.....       | 1 |
| Gi2_10648035_x5..... | uccggcguaguauaacggcuagUau.....   | 1 |
| Gi5_8591757_x5.....  | gguucgauuccggcAccgg.....         | 1 |
| Gi3_27621612_x5..... | uccggcguauauaacggcuag.....       | 1 |
| Gi2_10592560_x5..... | uucucacccaacagauccC.....         | 1 |
| Gi3_27608552_x5..... | uccggcgGaguauaacgg.....          | 1 |
| Gi3_27586067_x5..... | gUguucgauuccggcgccggag.....      | 1 |
| Gi3_27588697_x5..... | guucgauuccggAcgcccggag.....      | 1 |
| Gi1_4017240_x5.....  | guucgauuNccggcgccggagc.....      | 1 |
| Gi2_10615105_x5..... | agUuccggguucgauucc.....          | 1 |
| Gi5_8596682_x5.....  | uccggcguauauaacggcuag.....       | 1 |
| Gi2_10599780_x5..... | gguucgauuccggcgAggag.....        | 1 |

|                 |                           |                         |   |
|-----------------|---------------------------|-------------------------|---|
| Gi1_4006810_x5  | uccggcguaguUuaacgg        |                         | 1 |
| Gi3_27566502_x5 |                           | gguucgauucccgcgUcg      | 1 |
| Gi5_8571622_x5  |                           | gguucgauCcccgcgccggag   | 1 |
| Gi1_4001675_x5  |                           | Ccucaccaacagauccgg      | 1 |
| Gi3_27583602_x5 | uccggcguaguauaacggcuaC    |                         | 1 |
| Gi3_27641547_x5 |                           | ucUauucccgcgccggag      | 1 |
| Gi3_27630192_x5 | uccggcguaguauaUcgg        |                         | 1 |
| Gi5_8590502_x5  |                           | gguucgauucccgcgUcg      | 1 |
| Gi2_10623980_x5 | uccggcguUguauaacggcuagaau |                         | 1 |
| Gi1_4011340_x5  |                           | gguucgCuucccgcgccg      | 1 |
| Gi5_8585457_x5  | uccggcguaguauaacggcC      |                         | 1 |
| Gi3_27574032_x5 |                           | Gacccaacagauccggguuc    | 1 |
| Gi3_27551882_x5 | uccggcguaguUuaacggc       |                         | 1 |
| Gi3_27617207_x5 |                           | gguucucaccaacagauUcg    | 1 |
| Gi5_8576487_x5  |                           | uuUucaccaacagauccgg     | 1 |
| Gi1_3996660_x5  |                           | uucucaccaacagCuccg      | 1 |
| Gi2_10598525_x5 |                           | guucgauucccgcgccggUgc   | 1 |
| Gi2_10592830_x5 |                           | guucgUuucccgcgccggagc   | 1 |
| Gi2_10591920_x5 |                           | gguucgauucccgcgUgg      | 1 |
| Gi5_8575727_x5  |                           | gguucucaccaacagauccggA  | 1 |
| Gi1_4014530_x5  |                           | gCuucucaccaacagauccg    | 1 |
| Gi3_27635172_x5 |                           | gguucucaccaacUgauccg    | 1 |
| Gi3_27606822_x5 | ucAggcguaguauaacggcuagaa  |                         | 1 |
| Gi2_10633035_x5 |                           | guAcgauucccgcgccggag    | 1 |
| Gi2_10636470_x5 | uccCgcguaguauaacggcuaga   |                         | 1 |
| Gi2_10624170_x5 |                           | gguucgauucccgcgccAg     | 1 |
| Gi1_3995530_x5  |                           | gguucgauucccgcgAcggagc  | 1 |
| Gi1_3998275_x5  |                           | guucgauucccgcgAcgga     | 1 |
| Gi2_10642580_x5 |                           | gAucgauucccgcgccgg      | 1 |
| Gi1_4011460_x5  |                           | aUagauccggguucgauucc    | 1 |
| Gi1_4011240_x5  |                           | guucucaccaacagauccggU   | 1 |
| Gi3_27642202_x5 |                           | gguAcgauucccgcgccgga    | 1 |
| Gi5_8566407_x5  |                           | uucucacUcaacagauccg     | 1 |
| Gi5_8599527_x5  | uccggcguaguauaCcgguag     |                         | 1 |
| Gi1_3994800_x5  |                           | cucaccaacagGuccgg       | 1 |
| Gi3_27566402_x5 |                           | guucucacccGacagauccg    | 1 |
| Gi2_10603410_x5 | uccggcguaguauaaUggcua     |                         | 1 |
| Gi1_4012755_x5  |                           | uGcgauucccgcgccggagc    | 1 |
| Gi5_8592097_x5  |                           | gguuGgauucccgcgccggagc  | 1 |
| Gi4_536278_x5   |                           | gguucgauucccgcgccg      | 0 |
| Gi3_27605667_x5 |                           | uGcucaccaacagauccggguuc | 1 |
| Gi3_27559772_x5 |                           | cagauccggGucgauucc      | 1 |
| Gi5_8566427_x5  |                           | uucucGcccaacagauccg     | 1 |
| Gi3_27551832_x5 |                           | gguucgauCcccgcgcc       | 1 |
| Gi3_27651732_x5 |                           | guucgauucccgGgaccggag   | 1 |
| Gi3_27608742_x5 |                           | ggAucgauucccgcgcc       | 1 |
| Gi3_27585937_x5 |                           | uucucaccaacagauUcg      | 1 |

|                 |                                |   |
|-----------------|--------------------------------|---|
| Gi3_27653367_x5 | .....uucgaCucccgcgccggagc      | 1 |
| Gi2_10616180_x5 | .....guucgauucccgUcgccg        | 1 |
| Gi5_8590282_x5  | .....gguCcgauucccgcgccgga      | 1 |
| Gi3_27577512_x5 | .....guucgauucccgcgUcg         | 1 |
| Gi1_4002880_x5  | .....guucgauucccgcgUcggagc     | 1 |
| Gi5_8596177_x5  | .....ucucaccaacCgauccg         | 1 |
| Gi3_27633117_x5 | .....Cccggcguaguauaacggcuagaa  | 1 |
| Gi2_10630885_x5 | .....ucgauucccgcgccggCgc       | 1 |
| Gi3_27650387_x5 | .....gguNcgauucccgcgccgga      | 1 |
| Gi1_3995685_x5  | .....Gcgauucccgcgccggagc       | 1 |
| Gi1_4007795_x5  | .....ugguucuUaccaacagauccgg    | 1 |
| Gi5_8592582_x5  | .....gguucuAaccaacagauccg      | 1 |
| Gi1a_5760217_x5 | .....ggCucgauucccgcgccggagc    | 1 |
| Gi3_27606677_x5 | .....ugguucucacccGacagauccg    | 1 |
| Gi5_8567237_x5  | .....uccggcguNguauaacggcuagaa  | 1 |
| Gi1_4005990_x5  | .....uccAgcguaguauaacggcuag    | 1 |
| Gi1_4005280_x5  | .....uccggcguaguauGacggcuag    | 1 |
| Gi5_8591027_x5  | .....guucgauucccgcgccggU       | 1 |
| Gi3_27561792_x5 | .....uGucaccaacagauccg         | 1 |
| Gi1_4001215_x5  | .....gguucgauucccgAgccgg       | 1 |
| Gi1_3997850_x5  | .....guucucaccaaUagauccg       | 1 |
| Gi2_10620790_x5 | .....uccggcguaguauaacggcCag    | 1 |
| Gi1a_5752867_x5 | .....gguucgauucccgcgccggGgc    | 1 |
| Gi3_27591482_x5 | .....uccggUguaguauaacggcuagaa  | 1 |
| Gi1_4014775_x5  | .....uccggcguaguauaacggcuagCau | 1 |
| Gi3_27612727_x5 | .....gguucgauucGcgcgccggagc    | 1 |
| Gi5_8568887_x5  | .....uccNgcguaguauaacggcuag    | 1 |
| Gi2_10638655_x5 | .....guucgauucccgcgUggag       | 1 |
| Gi5_8592012_x5  | .....Cuucgauucccgcgccggagc     | 1 |
| Gi5_8586612_x5  | .....gguucgauucccgUgccgg       | 1 |
| Gi2_10617660_x5 | .....uccggcgCaguauaacgg        | 1 |
| Gi5_8591902_x5  | .....uccggcAuaguauaacggcuagaa  | 1 |
| Gi5_8579307_x5  | .....guucucaccaaUagauccg       | 1 |
| Gi2_10602770_x5 | .....gguucgauucccgUcgccggagc   | 1 |
| Gi2_10605510_x5 | .....uccNgcguaguauaacggcuaga   | 1 |
| Gi5_8580837_x5  | .....uccggcguaguauaCggcuagaa   | 1 |
| Gi3_27611272_x5 | .....guucgUuucccgcgccgga       | 1 |
| Gi5_8598052_x5  | .....uCuucucaccaacagauccg      | 1 |
| Gi2_10606495_x5 | .....gguucucaccaCagauccg       | 1 |
| Gi1_4015505_x5  | .....guucgauucccgGgccgg        | 1 |
| Gi1_3994160_x5  | .....Cgguucucaccaacagauccg     | 1 |
| Gi1_4005095_x5  | .....Cuucucaccaacagauccg       | 1 |
| Gi3_27613417_x5 | .....uGaccaacagauccggguuc      | 1 |
| Gi3_27572302_x5 | .....gguucgauuccUcgcc          | 1 |
| Gi3_27596067_x5 | .....uucucaccUaacagauccg       | 1 |
| Gi5_8570782_x5  | .....guucuUaccaacagauccg       | 1 |
| Gi5_8598692_x5  | .....uucucacccGacagauccg       | 1 |

|                 |                                  |   |
|-----------------|----------------------------------|---|
| Gi1_4010130_x5  | uucucacccaacagauAcg              | 1 |
| Gi1_3997125_x5  | guucAcacccaacagauccg             | 1 |
| Gi5_8588572_x5  | acagauccggguucgauucccgcgccggagcC | 1 |
| Gi5_8581037_x5  | gguucgauCcccgcgcc                | 1 |
| Gi1_4017445_x5  | ggcguaguauaacggcuagaau           | 0 |
| Gi2_10634505_x5 | guucgauucccgcgAcgga              | 1 |
| Gi5_8589032_x5  | gguucgauucccgcgccggagcU          | 1 |
| Gi1_4005840_x5  | cGggcguaguauaacggcua             | 1 |
| Gi3_27600652_x5 | ucgauuccNggcgccggag              | 1 |
| Gi1_4014320_x5  | uucucacccaacCgauccg              | 1 |
| Gi3_27610652_x5 | ucgauucUcggcgccggagc             | 1 |
| Gi5_8576632_x5  | cucacccaGcagauccgg               | 1 |
| Gi5_8577237_x5  | cGcaacagauccggguuc               | 1 |
| Gi2_10591075_x5 | uccggGguaguauaacggcuaga          | 1 |
| Gi1_4010650_x5  | guucgauucccgcgccggagcgC          | 1 |
| Gi3_27585387_x5 | uccggcguaguauaacggcuaAaa         | 1 |
| Gi5_8600352_x5  | guucgauCcccgcgccggagc            | 1 |
| Gi3_27655387_x5 | Gaacagauccggguucgauucc           | 1 |
| Gi2_10642000_x5 | ggNucgauucccgcgccggagc           | 1 |
| Gi1_4000445_x5  | gguucgauucccgcgccgA              | 1 |
| Gi1_4015315_x5  | uucucacccaacagauAcg              | 1 |
| Gi5_8575312_x5  | guucgauuccUggcgccggagc           | 1 |
| Gi3_27630187_x5 | uucucaccccGacagauccgg            | 1 |
| Gi1_4010015_x5  | guGcucacccaacagauccgg            | 1 |
| Gi1_4002305_x5  | uccgUcguaguauaacggcuaga          | 1 |
| Gi2_10604880_x5 | gguucgauuccAggcgccgga            | 1 |
| Gi1_4009640_x5  | ucgauuccNggcgccggagc             | 1 |
| Gi3_27588207_x5 | agUuccggguucgauucc               | 1 |
| Gi1_4003010_x5  | uucucacccaacagauccgA             | 1 |
| Gi1_3995895_x5  | ugguAcucacccaacagauccgg          | 1 |
| Gi1_4008185_x5  | uccAgcguaguauaacggcua            | 1 |
| Gi5_8601592_x5  | guucgauucccgcgccC                | 1 |
| Gi3_27654967_x5 | gguucgauucccgcgccCga             | 1 |
| Gi5_8574987_x5  | uccggcguaguauaacggUuagaau        | 1 |
| Gi3_27567322_x5 | gauucccgcgccggCgc                | 1 |
| Gi5_8588937_x5  | uccAgcguaguauaacggcua            | 1 |
| Gi5_8570127_x5  | uucucacccaCcagauccgg             | 1 |
| Gi3_27562322_x5 | uccggcguaguauaacggAuagaau        | 1 |
| Gi5_8596607_x5  | ggAucgauucccgcgcc                | 1 |
| Gi2_10622310_x5 | gCuucgauucccgcgccg               | 1 |
| Gi5_8571647_x5  | gUcguaguauaacggcuagaau           | 1 |
| Gi1_4000140_x5  | ugguAucucacccaacagauccgg         | 1 |
| Gi1_4010410_x5  | Auucgauucccgcgccg                | 1 |
| Gi2_10613545_x5 | ucgauucccgcgccggUgc              | 1 |
| Gi5_8593232_x5  | uccggcguaAuauaacggcuagaau        | 1 |
| Gi5_8587617_x5  | uccggcguaguauaacggcuagaC         | 1 |
| Gi1_3997310_x5  | uccgUcguaguauaacggc              | 1 |

|                      |                                |   |
|----------------------|--------------------------------|---|
| Gi3_27656182_x5..... | gguucucacccaacaAuucgg.....     | 1 |
| Gi2_10630205_x5..... | guucucacccaacCgauccg.....      | 1 |
| Gi1_3993955_x5.....  | uccggcguaguauaCggcuag.....     | 1 |
| Gi5_8566167_x5.....  | gUguucgauucccgcgccggagc.....   | 1 |
| Gi3_27584367_x5..... | gguucgauucccgCcgccggagc.....   | 1 |
| Gi5_8598067_x5.....  | uccggAguaguauaacggcuagaau..... | 1 |
| Gi5_8582857_x5.....  | gguucgauuAccggcgccggagc.....   | 1 |
| Gi1_4015470_x5.....  | guucgauucGcgcgccgg.....        | 1 |
| Gi2_10605985_x5..... | uccggcguaguauaacggcuUga.....   | 1 |
| Gi5_8598202_x5.....  | Cuucucacccaacagauccgg.....     | 1 |
| G1a_5746312_x5.....  | Gccggcguaguauaacggcua.....     | 1 |
| Gi1_3996275_x5.....  | uccggcguaguauaaUggcuagaau..... | 1 |
| Gi2_10602395_x5..... | uccggcguaguauaacgAcuagaau..... | 1 |
| Gi1_4006845_x5.....  | uggGucucacccaacagauccgg.....   | 1 |
| Gi1_4012760_x5.....  | uucucacccaacagauccA.....       | 1 |
| Gi5_8567422_x5.....  | uccggcguaguauaacggcuUga.....   | 1 |
| Gi3_27589007_x5..... | guucgauucccgUcgccggag.....     | 1 |
| Gi1_4011940_x5.....  | uccggcguUguauaacgg.....        | 1 |
| Gi1_4016660_x5.....  | guucucacccaacagauccAg.....     | 1 |
| Gi2_10644650_x5..... | gguucucacccaacagauccAg.....    | 1 |
| Gi2_10622855_x5..... | gguucgauucccgcgccggCag.....    | 1 |
| Gi2_10646650_x5..... | cUgguucgauucccgcgccggga.....   | 1 |
| G1a_5760192_x5.....  | uccggcgCaguauaacggcuaga.....   | 1 |
| Gi5_8600132_x5.....  | uccggcgCaguauaacgg.....        | 1 |
| Gi2_10632270_x5..... | uccggUguaguauaacggcuag.....    | 1 |
| Gi5_8602037_x5.....  | ucaccaacGgauccggguu.....       | 1 |
| Gi5_8584982_x5.....  | gguucgauucccgUgccc.....        | 1 |
| Gi2_10596120_x5..... | guucgCuucccgcgccggagc.....     | 1 |
| Gi3_27619017_x5..... | gguucgauucccgcgccCg.....       | 1 |
| Gi1_3995460_x5.....  | uuAucacccaacagauccg.....       | 1 |
| G1a_5739327_x5.....  | ucUggcguaguauaacggcuag.....    | 1 |
| Gi2_10610005_x5..... | Uuucucacccaacagauccgggu.....   | 1 |
| Gi3_27604532_x5..... | guCucacccaacagauccgg.....      | 1 |
| Gi1_4003445_x5.....  | gguucgauNcccgcgccggag.....     | 1 |
| Gi4_535038_x5.....   | Gugguucucacccaacaga.....       | 1 |
| Gi3_27626252_x5..... | uccggcguaguauaaGgg.....        | 1 |
| Gi2_10628725_x5..... | uccggcguaguCuaacggcua.....     | 1 |
| Gi5_8572457_x5.....  | ugguucucacccaGcagauccg.....    | 1 |
| Gi3_27567232_x5..... | uucucacccaacagauccC.....       | 1 |
| Gi2_10648950_x5..... | uccggcguaguauCacggcua.....     | 1 |
| Gi2_10646330_x5..... | uccggcguaguCuaacggc.....       | 1 |
| G1a_5735567_x5.....  | guCcgauucccgcgccgg.....        | 1 |
| Gi5_8594457_x5.....  | guucgauuccUggcgccggga.....     | 1 |
| Gi3_27591427_x5..... | ucgauuccNggcgccggga.....       | 1 |
| Gi3_27647232_x5..... | uccgAcguaguauaacggcuagaau..... | 1 |
| Gi5_8598442_x5.....  | guucgaGuucccgcgccggagc.....    | 1 |
| Gi1_4003600_x5.....  | uGcgcgguaguauaacggcuagaau..... | 1 |

|                 |                               |   |
|-----------------|-------------------------------|---|
| Gi3_27623577_x5 | .....gguucgauucccggcUccgga    | 1 |
| Gi3_27561947_x5 | .....uccggcgAaguauaacggcuagaa | 1 |
| Gi1_4006125_x5  | .....gguucgauucccggcgcccAa    | 1 |
| Gi5_8575227_x5  | .....gguucgauucccggcgccc      | 1 |
| Gi5_8573097_x5  | .....uccggcgCguauaacggc       | 1 |
| Gi2_10630340_x5 | .....gguuGgauucccggcgcccggag  | 1 |
| Gi3_27595807_x5 | .....ucgauucccgUgcccggagc     | 1 |
| Gi3_27618362_x5 | .....Gcaccacacagauccggguuc    | 1 |
| Gi5_8581882_x5  | .....Agguucucacccaacagauccg   | 1 |
| Gi2_10601940_x5 | .....ucUggcgaguauaacggcuagaa  | 1 |
| Gi1_4011745_x5  | .....uucuGacccaacagauccg      | 1 |
| Gi5_8568272_x5  | .....uccggcgaguauaacggU       | 1 |
| Gi1_3999215_x5  | .....uucgauucNcgcgccc         | 1 |
| Gi3_27607117_x5 | .....ucgauucccggcgcccAagc     | 1 |
| Gi2_10603755_x5 | .....guucucacccaCagauccg      | 1 |
| Gi3_27635117_x5 | .....gguucAauucccggcgccc      | 1 |
| Gi2_10607020_x5 | .....guucucacccaacagaCccg     | 1 |
| Gi2_10614235_x5 | .....gguucgauucccgUgccc       | 1 |
| Gi5_8573662_x5  | .....ugguCucacccaacagauccg    | 1 |
| Gi2_10622525_x5 | .....uccggcgGguauaacggcuagaa  | 1 |
| Gi1_3995375_x5  | .....gguucgauucccggcgcccAga   | 1 |
| Gi1_3996170_x5  | .....gguucgauucccggcgcccC     | 1 |
| Gi5_8571332_x5  | .....uccggcgUguauaacggcuag    | 1 |
| Gi1_5740252_x5  | .....uccggcgNguauaacggcuaga   | 1 |
| Gi5_8565527_x5  | .....cccaacagNuccggguuc       | 1 |
| Gi1_3996520_x5  | .....gguucUauucccggcgcccga    | 1 |
| Gi1_4013950_x5  | .....ugguucucacccaGcagauccg   | 1 |
| Gi5_8575022_x5  | .....gguucgaCucccggcgcccggag  | 1 |
| Gi5_8569292_x5  | .....gguucgaCucccggcgcccga    | 1 |
| Gi5_8598422_x5  | .....uccggcgaguauGacggcua     | 1 |
| Gi5_8577467_x5  | .....guAcgauucccggcgcccggagc  | 1 |
| Gi1_5747067_x5  | .....uccggcgaguauaacggcuagC   | 1 |
| Gi3_27574737_x5 | .....gguucgauucccggcgcccCa    | 1 |
| Gi5_8590952_x5  | .....gguucucacccaaAagauccg    | 1 |
| Gi1_4015240_x5  | .....uucucacAaacagauccg       | 1 |
| Gi5_8576682_x5  | .....uGgguucucacccaacagauccg  | 1 |
| Gi1_4005155_x5  | .....gguucgauNcccgggcgcccga   | 1 |
| Gi5_8578112_x5  | .....gguucucaccAaacagauccg    | 1 |
| Gi5_8601712_x5  | .....ugguucucacccaacagauAccg  | 1 |
| Gi2_10627645_x5 | .....gguucgauAcccggcgccc      | 1 |
| Gi2_10630375_x5 | .....gguucgauCcccgggcgccc     | 1 |
| Gi1_4003015_x5  | .....gguucgauucccggcgcccUg    | 1 |
| Gi3_27598827_x5 | .....gUcguaguauaacggcuag      | 1 |
| Gi2_10592435_x5 | .....gguCucacccaacagauccg     | 1 |
| Gi3_27605632_x5 | .....uccggcgaguauaacggcuCg    | 1 |
| Gi3_27574097_x5 | .....uccggcgaguauaacggcuag    | 1 |
| Gi5_8582642_x5  | .....uccggcgCaguauaacggcua    | 1 |

|                 |                                       |   |
|-----------------|---------------------------------------|---|
| Gi1_4009905_x5  | .....uucucacccGacagaucgg.....         | 1 |
| Gi3_27550742_x5 | .....guucgaAuccggcgccggagc.....       | 1 |
| G1a_5763772_x5  | .....gGucgauucccgcgccg.....           | 1 |
| Gi5_8637731_x4  | .....uccggcguaAuuaaacggcua.....       | 1 |
| Gi3_27753009_x4 | .....cGacagaucggguucgauuccc.....      | 1 |
| Gi5_8642743_x4  | .....uccggcguaAuuaaacgg.....          | 1 |
| Gi3_27772193_x4 | .....Ccucacccaacagauccg.....          | 1 |
| Gi1_4029016_x4  | .....ucucacccNacagauccg.....          | 1 |
| Gi1_4026056_x4  | .....ggGucucacccaacagauccg.....       | 1 |
| Gi1_4043464_x4  | .....ggCucgauucccgcgccg.....          | 1 |
| Gi5_8636555_x4  | .....uccggcguaGauaacggcuag.....       | 1 |
| Gi3_27686413_x4 | .....ugguucucacccaacagaCccg.....      | 1 |
| Gi2_10666019_x4 | .....guucgauucccgcgccAgga.....        | 1 |
| Gi2_10714383_x4 | .....uucCcacccaacagauccg.....         | 1 |
| G1a_5806874_x4  | .....uccggcguaGauaacAgc.....          | 1 |
| Gi1_4043600_x4  | .....uccggcguaGauaacggcuaga.....      | 1 |
| Gi3_27737637_x4 | .....gguucgauucccgcgccggaC.....       | 1 |
| Gi5_8642943_x4  | .....AccggcguaGauaacggcua.....        | 1 |
| Gi1_4045912_x4  | .....ucGggcguaGauaacggcuag.....       | 1 |
| Gi5_8609195_x4  | .....guucucacccaacagauAccg.....       | 1 |
| Gi2_10690695_x4 | .....gguucgGuucccgcgccgg.....         | 1 |
| Gi1_4037508_x4  | .....uccggcguaGauaacggAua.....        | 1 |
| Gi2_10660663_x4 | .....uucgauucNcgcgccgg.....           | 1 |
| Gi1_4021276_x4  | .....uccggcguaGauaacCggc.....         | 1 |
| Gi1_4040124_x4  | .....guCcgauucccgcgccgga.....         | 1 |
| Gi2_10723707_x4 | .....ucgauuccUggcgccggagc.....        | 1 |
| Gi5_8611723_x4  | .....gauccggguucgauuccc.....          | 0 |
| Gi3_27733425_x4 | .....uccgCcguaGauaacggcua.....        | 1 |
| Gi3_27777017_x4 | .....guucucacccaacagCuccg.....        | 1 |
| Gi3_27723821_x4 | .....ccggcguaGauaacggcuagG.....       | 1 |
| G1a_5790914_x4  | .....gguucgGuucccgcgccggagc.....      | 1 |
| Gi2_10671651_x4 | .....uccggcguaGauaacggAuaga.....      | 1 |
| Gi1_4025668_x4  | .....guucgauucccgcgUcgga.....         | 1 |
| Gi3_27735613_x4 | .....guucgauucccgcgUggag.....         | 1 |
| Gi5_8640951_x4  | .....cucacccaacGgauccgg.....          | 1 |
| Gi5_8624019_x4  | .....guucgauucUcgcgccggagc.....       | 1 |
| Gi2_10711235_x4 | .....uucucacccaacaAuccgg.....         | 1 |
| Gi3_27680801_x4 | .....gguucgauucccgcgCccggag.....      | 1 |
| Gi2_10679567_x4 | .....uccggcguaGauaacggcCagaa.....     | 1 |
| Gi2_10681647_x4 | .....gguucCauucccgcgccggagc.....      | 1 |
| Gi2_10658783_x4 | .....uccggcguaGauaaaUggcuagaau.....   | 1 |
| Gi1_4029512_x4  | .....ugguucucacccaacagauccUg.....     | 1 |
| Gi5_8645679_x4  | .....uccggcguaGaaacggcua.....         | 1 |
| Gi5_8636847_x4  | .....uucucacccaacagauccgAguuc.....    | 1 |
| Gi2_10724311_x4 | .....gguucgauucccAgcgccgg.....        | 1 |
| Gi3_27696025_x4 | .....guucucacccaacagauccggguucga..... | 0 |
| Gi5_8638887_x4  | .....guucgauucCcgcgccgga.....         | 1 |

|                 |                               |   |
|-----------------|-------------------------------|---|
| Gi2_10704539_x4 | Agguucgauucccgcgccggagc       | 1 |
| Gl1a_5776354_x4 | gguucgauucccgcgccggagcCu      | 1 |
| Gi5_8627359_x4  | gguucgauucccgAgcc             | 1 |
| Gi2_10684211_x4 | gguucgauuccUggcgccgg          | 1 |
| Gi1_4040728_x4  | guucucCcccaacagauccgg         | 1 |
| Gi3_27770765_x4 | cUggcgguaguauaacggc           | 1 |
| Gi3_27687713_x4 | uccggcgguaguauaacggcuagaauU   | 1 |
| Gi3_27680249_x4 | GguccggcgguaguauaacggcuagaauG | 1 |
| Gi2_10709991_x4 | uccAgcgguaguauaacgg           | 1 |
| Gi2_10665471_x4 | uccggcgguaguauaacggcua        | 1 |
| Gi3_27719873_x4 | uccggcgguaguauUacggcu         | 1 |
| Gi3_27730345_x4 | gguucgauuAccggcgccgg          | 1 |
| Gi5_8618779_x4  | uccggcgguGguauaacggcuagaau    | 1 |
| Gi3_27793401_x4 | uccggcgguaguauaacggcuCgaa     | 1 |
| Gi3_27790573_x4 | guucgaGucccggcgccggag         | 1 |
| Gi3_27757405_x4 | uccggcgguaguauaacggcuag       | 1 |
| Gi1_4028852_x4  | guucgGuucccgcgccgga           | 1 |
| Gi5_8612143_x4  | uucucaccaacagauCag            | 1 |
| Gi1_4019692_x4  | uGucaccaacagauccg             | 1 |
| Gi3_27739557_x4 | gguucgauucccgcgccC            | 1 |
| Gi5_8636211_x4  | ucNggcgguaguauaacggcuaga      | 1 |
| Gi5_8635967_x4  | uucucaUccaacagauccg           | 1 |
| Gi3_27667689_x4 | caacagauNcggguucga            | 1 |
| Gi5_8649707_x4  | uucucaccUaacagauccg           | 1 |
| Gi2_10666835_x4 | Acgauucccgcgccggagc           | 1 |
| Gl1a_5793414_x4 | uccggcgguaguauaacggcuGga      | 1 |
| Gi5_8623915_x4  | gguucgauucccgAgccggag         | 1 |
| Gi2_10693463_x4 | gguucgauuccAggcgccg           | 1 |
| Gi2_10672991_x4 | guAcgauucccgcgccgga           | 1 |
| Gi5_8607155_x4  | Gccaacagauccggguuc            | 1 |
| Gi1_4021920_x4  | uccggcgguaguauaaUggc          | 1 |
| Gi1_4041980_x4  | uccggcgguaguCuaacggcua        | 1 |
| Gi3_27734861_x4 | uccggcgguaguCuaacggcuagaau    | 1 |
| Gi3_27717393_x4 | uccggcgguaguauaacggcGa        | 1 |
| Gi5_8647855_x4  | uccggcgguUguauaacggcua        | 1 |
| Gi5_8608251_x4  | ucGggcgguaguauaacggcuaga      | 1 |
| Gi5_8631527_x4  | uGcgauucccgcgccgg             | 1 |
| Gi3_27754773_x4 | uUgauucccgcgccgga             | 1 |
| Gi2_10678799_x4 | uuUgauucccgcgccgg             | 1 |
| Gl1a_5767494_x4 | gguucgauNcccggcgccg           | 1 |
| Gi3_27663033_x4 | gguucucaccAaacagauccg         | 1 |
| Gi2_10663483_x4 | guucucacUaacagauccg           | 1 |
| Gi3_27778965_x4 | cuUacccaacagauccgg            | 1 |
| Gi2_10655315_x4 | uccggcgguagCauaacggcuag       | 1 |
| Gi2_10657263_x4 | gguucgauucccgAcgccg           | 1 |
| Gi1_4031480_x4  | uccggcgguaguCuaacggcuag       | 1 |
| Gi1_4043404_x4  | guucgauucccgCcgccg            | 1 |



|                 |                             |   |
|-----------------|-----------------------------|---|
| Gi1_4037432_x4  | uccggcguaguauaacAgcuagaa    | 1 |
| Gi5_8638903_x4  | ucAcaccaacagauccg           | 1 |
| Gi3_27791545_x4 | guucgauuccGggcgccgga        | 1 |
| Gi3_27711361_x4 | uccggcguaguauUcggcuagaa     | 1 |
| Gi3_27738193_x4 | uccggcguCguauaacggcuagaau   | 1 |
| Gi5_8602619_x4  | guucgGuucccgcgccgga         | 1 |
| Gi1_4018196_x4  | uucgauucccgcgUgg            | 1 |
| Gi2_10690995_x4 | uccggcguaguauaacggcuagaUu   | 1 |
| Gi3_27781409_x4 | ucgauucccgcgccAga           | 1 |
| Gi2_10675863_x4 | uccggcguaguauaacgAcuag      | 1 |
| Gi2_10701467_x4 | uccggcguaguGuaacggcuag      | 1 |
| Gi3_27664693_x4 | cGgauccggguucgauuccggcgccgg | 1 |
| Gi2_10669531_x4 | ugguucucGcccaacagauccg      | 1 |
| Gi2_10714971_x4 | uccggcguaguauaacggUuag      | 1 |
| Gi2_10712155_x4 | ucgaGucccggcgccggagc        | 1 |
| Gi1_4031972_x4  | uUcggcguaguauaacggcuaga     | 1 |
| Gi5_8629787_x4  | gguucgauuccUgcgcccga        | 1 |
| Gi1_4034080_x4  | guucgauuNccggcgccg          | 1 |
| Gi5_8619207_x4  | Gcggcguaguauaacggcua        | 1 |
| Gi3_27681081_x4 | ucgauuccUggcgccggagc        | 1 |
| Gi3_27740305_x4 | ugguucucacccaacagaCc        | 1 |
| Gi5_8650211_x4  | gguucgauuccAggcgccc         | 1 |
| Gi1_4036624_x4  | uccggAguaguauaacggcuag      | 1 |
| Gi2_10655231_x4 | gguucgauuccggcUccggagc      | 1 |
| Gi1_4031772_x4  | guucgauucccgcgccgCagc       | 1 |
| Gi2_10723675_x4 | uAguucucacccaacagauccg      | 1 |
| Gi2_10703143_x4 | gguucgauuccggcCccggagc      | 1 |
| Gi2_10652575_x4 | Gccggcguaguauaacggcu        | 1 |
| Gi2_10695131_x4 | gguucgauuccgAcgcccga        | 1 |
| Gi2_10718439_x4 | ugguucucacccaGcagauccg      | 1 |
| Gi2_10670903_x4 | uccggAguaguauaacgg          | 1 |
| Gi3_27744169_x4 | ugguucucacccaacCgauccg      | 1 |
| Gi3_27685973_x4 | agauccggNuucgauucc          | 1 |
| Gi5_8621407_x4  | guucucacccaacagauUcgg       | 1 |
| Gi1_4039380_x4  | guucgauucccgcgccggagU       | 1 |
| Gi5_8602203_x4  | uccggcCuaguauaacgg          | 1 |
| Gi1_4037176_x4  | gguCcgauucccgcgccggagc      | 1 |
| Gi3_27772357_x4 | guucgCuuccggcgccggag        | 1 |
| Gi1_4033128_x4  | ugguuUucacccaacagauccg      | 1 |
| Gi5_8615995_x4  | gAuucgauucccgcgccggag       | 1 |
| Gi3_27731089_x4 | Ccgauuccggcgccggagc         | 1 |
| Gi1_4023416_x4  | cCcaccaacagauccg            | 1 |
| Gi2_10653131_x4 | guGcgauuccggcgccgga         | 1 |
| Gi3_27764721_x4 | gauucccgcgUggagc            | 1 |
| Gi2_10650611_x4 | uccggcgAaguauaacggcuaga     | 1 |
| Gi1_4025384_x4  | uccggcguNguauaacggcu        | 1 |
| Gi1_4039176_x4  | ugguucucaccUaacagauccg      | 1 |

|                 |                                    |       |   |
|-----------------|------------------------------------|-------|---|
| Gi5_8636191_x4  | .....uucucaccccCacagauccg          | ..... | 1 |
| Gi2_10681731_x4 | .....guucgauucccUgcgccgg           | ..... | 1 |
| Gi3_27731845_x4 | .....uccggcguaguaAaacgg            | ..... | 1 |
| Gi5_8618571_x4  | .....uucucacccaacagauUg            | ..... | 1 |
| Gi5_8620595_x4  | .....gguAcgauucccgcgccg            | ..... | 1 |
| Gi2_10661571_x4 | .....uccggcguaguaaacggA            | ..... | 1 |
| Gi2_10660771_x4 | .....guucgauucccgAgccgg            | ..... | 1 |
| Gi2_10700483_x4 | .....gguucgauucUcggcgccg           | ..... | 1 |
| Gi1_4045972_x4  | .....uccAgcguaguaaacggcuaga        | ..... | 1 |
| Gi1_4046608_x4  | .....gguucgauAcccgcgccgg           | ..... | 1 |
| Gi2_10685383_x4 | .....gguucgauucccgAcgccggag        | ..... | 1 |
| Gi3_27677373_x4 | .....cGggcguaguaaacggcuaga         | ..... | 1 |
| Gi1_4025080_x4  | .....ugguucucacccaGcagauccg        | ..... | 1 |
| Gi1_4026508_x4  | .....guucucaccUaacagauccg          | ..... | 1 |
| Gi5_8642555_x4  | .....uGcggcguaguaaacggcu           | ..... | 1 |
| Gi3_27746597_x4 | .....uccggcguNguauaacggcu          | ..... | 1 |
| Gi3_27779217_x4 | .....guucgauAcccgcgccggag          | ..... | 1 |
| Gi3_27672645_x4 | .....gauUccggcgccggagc             | ..... | 1 |
| Gi3_27722585_x4 | .....uccggcgAaguaaacgg             | ..... | 1 |
| Gi2_10711727_x4 | .....guucAauucccgcgccggag          | ..... | 1 |
| Gi2_10670995_x4 | .....guucgGuucccgcgccggag          | ..... | 1 |
| Gi3_27718133_x4 | .....gguucgauAcccgcgcc             | ..... | 1 |
| Gi1a_5784282_x4 | .....gguucgauNcccgcgccggag         | ..... | 1 |
| Gi5_8644247_x4  | .....gguuGgauucccgcgccg            | ..... | 1 |
| Gi3_27665241_x4 | .....uucucacccaacagauccA           | ..... | 1 |
| Gi5_8625943_x4  | .....gguNcucacccaacagauccg         | ..... | 1 |
| Gi5_8604751_x4  | .....gguucgauucccgGuccg            | ..... | 1 |
| Gi3_27762773_x4 | .....uucucacccaacUgauccg           | ..... | 1 |
| Gi1_4030560_x4  | .....Cguucgauucccgcgccg            | ..... | 1 |
| Gi3_27734441_x4 | .....cgauucccgcgccggagcA           | ..... | 1 |
| Gi1_4039424_x4  | .....uucucaccAaacagauccg           | ..... | 1 |
| Gi2_10695635_x4 | .....ucgauucccgUgcgggagc           | ..... | 1 |
| Gi1a_5801486_x4 | .....cagauccggguucgauucccgcgccggag | ..... | 0 |
| Gi1_4026748_x4  | .....uccggUguaguaaacggcuaga        | ..... | 1 |
| Gi1_4033416_x4  | .....ggguucgauucccgcgccgg          | ..... | 0 |
| Gi1_4022416_x4  | .....gguucgauuccAgcgccggagc        | ..... | 1 |
| Gi2_10659599_x4 | .....guucgauAcccgcgccgg            | ..... | 1 |
| Gi1_4028676_x4  | .....gguucgauuccAgcgccgg           | ..... | 1 |
| Gi5_8608015_x4  | .....uccggAguaguaaacggcuag         | ..... | 1 |
| Gi3_27700177_x4 | .....Ugcguaguaaacggcuagaau         | ..... | 1 |
| Gi1_4039752_x4  | .....cucacccaNcagauccg             | ..... | 1 |
| Gi5_8616915_x4  | .....gauucccgNcgccggagc            | ..... | 1 |
| Gi2_10690783_x4 | .....uccggcguaguauCacggcuagaa      | ..... | 1 |
| Gi1_4024132_x4  | .....uccggcguaguaaacAgcu           | ..... | 1 |
| Gi5_8618407_x4  | .....guucucacccaacaAauccg          | ..... | 1 |
| Gi1a_5770894_x4 | .....uccgUcguaguaaacggcuaga        | ..... | 1 |
| Gi3_27678893_x4 | .....guucgauucccgcgccCgag          | ..... | 1 |

|                 |                                     |   |
|-----------------|-------------------------------------|---|
| Gi1_4029248_x4  | .....ugguucucacccaacagauccgC.....   | 1 |
| Gi2_10683207_x4 | .....cGcaccaacagauccgg.....         | 1 |
| Gi3_27789605_x4 | .....uccUgcguaguauaacggcua.....     | 1 |
| Gi1a_5768298_x4 | .....uUcggcguaguauaacggcuag.....    | 1 |
| Gi2_10693895_x4 | .....guucgauucccgcgUcggag.....      | 1 |
| Gi3_27713285_x4 | .....Gggguucgauucccgcgccgga.....    | 1 |
| Gi3_27787413_x4 | .....ucgauucccgAcgccggagc.....      | 1 |
| Gi3_27761817_x4 | .....guucgauucccgGgccgga.....       | 1 |
| Gi1_4046468_x4  | .....uucucacccaaUagauccg.....       | 1 |
| Gi2_10684895_x4 | .....uccggcguaguauaacggcuU.....     | 1 |
| Gi1_4032704_x4  | .....gguucgauucccgAgccggagc.....    | 1 |
| Gi2_10687567_x4 | .....guucCauucccgcgccg.....         | 1 |
| Gi5_8607547_x4  | .....uccggcguaguUuaacggcuaga.....   | 1 |
| Gi1_4027888_x4  | .....ucUggcguaguauaacggcuagaau..... | 1 |
| Gi3_27734069_x4 | .....uccggcCuaguauaacggcua.....     | 1 |
| Gi3_27687081_x4 | .....uucucacUaacagauccgg.....       | 1 |
| Gi1a_5786382_x4 | .....guucgaCucccgcgccgga.....       | 1 |
| Gi1_4021644_x4  | .....ugguucucacccaUcagauccgg.....   | 1 |
| Gi1_4026196_x4  | .....guucucacccaacagauccgU.....     | 1 |
| Gi5_8632635_x4  | .....gguucgauucccgcgccU.....        | 1 |
| Gi3_27773113_x4 | .....gUguucgauucccgcgccgga.....     | 1 |
| Gi1a_5789218_x4 | .....uGucacccaacagauccg.....        | 1 |
| Gi5_8608147_x4  | .....cucacccGacagauccgg.....        | 1 |
| Gi5_8614263_x4  | .....gguucgauucccgcgAcgg.....       | 1 |
| Gi2_10683051_x4 | .....uccggcguaguauaacGcucuaga.....  | 1 |
| Gi1_4018652_x4  | .....uccggcgGaguauaacgg.....        | 1 |
| Gi3_27746029_x4 | .....gguucgUuucccgcgccgag.....      | 1 |
| Gi5_8637387_x4  | .....ucucaccUaacagauccg.....        | 1 |
| Gi1_4039608_x4  | .....ucgauucccgcgccggagcCu.....     | 1 |
| Gi3_27795865_x4 | .....gguucgauucccgcgccCgag.....     | 1 |
| Gi1_4024384_x4  | .....gauucccgcgccggagcC.....        | 1 |
| Gi1a_5807306_x4 | .....uccggcguGguauaacggcuag.....    | 1 |
| Gi3_27690365_x4 | .....uccggcguaguauaacggcuaUaa.....  | 1 |
| Gi1a_5778542_x4 | .....uucucaccNaacagauccg.....       | 1 |
| Gi1_4026548_x4  | .....guGcgauucccgcgccggagc.....     | 1 |
| Gi1_4017968_x4  | .....gguucgauuAcccgcgccg.....       | 1 |
| Gi2_10670063_x4 | .....aguccggcNuaguauaacggcuaga..... | 1 |
| Gi2_10674299_x4 | .....uccggcguaguauaacgC.....        | 1 |
| Gi1a_5797642_x4 | .....uUguucucacccaacagauccg.....    | 1 |
| Gi3_27715681_x4 | .....gguucgauucccgAcgcc.....        | 1 |
| Gi4_544242_x4   | .....uGguucucacccaacaga.....        | 1 |
| Gi5_8646987_x4  | .....gguucucacccaacaAaucg.....      | 1 |
| Gi1_4033572_x4  | .....ugguucucaccUaacagauccg.....    | 1 |
| Gi1_4044292_x4  | .....uucAcacccaacagauccgg.....      | 1 |
| Gi1_4025512_x4  | .....guucgauuccUggcgccggagc.....    | 1 |
| Gi1_4029828_x4  | .....ugguucucacccaacagauUg.....     | 1 |
| Gi5_8622307_x4  | .....ucAggcguaguauaacgg.....        | 1 |

|                                                       |   |
|-------------------------------------------------------|---|
| Gi2_10662051_x4.....ucAggcguaguauaacggcuaga.....      | 1 |
| Gi1_4047284_x4.....guucgGuucccgcgccggagc.....         | 1 |
| Gi3_27780217_x4.....Ccgauucccgcgccgga.....            | 1 |
| Gi5_8622683_x4.....guCcgauucccgcgccggagc.....         | 1 |
| Gi1_4047544_x4.....gguuGucaccaacagauccg.....          | 1 |
| Gi3_27685289_x4.....uGguucucaccaacagauccg.....        | 1 |
| Gi5_8631027_x4.....ucAggcguaguauaacggcuaga.....       | 1 |
| Gi2_10662863_x4.....Cguucucaccaacagauccg.....         | 1 |
| Gi1_4037048_x4.....guucgauCcccgcgccggagc.....         | 1 |
| Gi2_10721295_x4.....cagauccggguucgauucccgcgccgga..... | 0 |
| Gi3_27695869_x4.....gguucCauucccgcgccggagc.....       | 1 |
| Gi5_8633619_x4.....guucgauucccgcgccggagcU.....        | 1 |
| G1a_5805290_x4.....uGcucaccaacagauccg.....            | 1 |
| Gi1_4031176_x4.....guucgauuccAgcgccggagc.....         | 1 |
| Gi2_10667263_x4.....ugUuucucaccaacagauccg.....        | 1 |
| Gi1_4045956_x4.....guucucaccaacagauUcg.....           | 1 |
| Gi1_4021344_x4.....uccggcguaguauCacggcuagaau.....     | 1 |
| Gi2_10677239_x4.....uucucaccUaacagauccg.....          | 1 |
| Gi5_8631047_x4.....guucuAaccaacagauccgg.....          | 1 |
| Gi5_8624183_x4.....guucucacAaacagauccg.....           | 1 |
| Gi5_8633971_x4.....guucuAaccaacagauccg.....           | 1 |
| Gi3_27679433_x4.....uccggcguaguauaacggcGag.....       | 1 |
| Gi2_10650651_x4.....aUuccggcguaguauaacgg.....         | 1 |
| Gi5_8638095_x4.....uccgCcgaguauaacggcuaga.....        | 1 |
| Gi2_10722963_x4.....gguucucacUaacagauccg.....         | 1 |
| Gi3_27786237_x4.....ggcguGguauaacggcua.....           | 1 |
| Gi5_8649635_x4.....guucucaccGacagauccgg.....          | 1 |
| Gi5_8611627_x4.....guucgauucccgcgccgAa.....           | 1 |
| G1a_5768570_x4.....Aguucgauucccgcgccggag.....         | 1 |
| Gi1_4027556_x4.....uUucaccaacagauccg.....             | 1 |
| Gi1_4044148_x4.....ucucaccaacagCuccg.....             | 1 |
| Gi5_8625755_x4.....guucucaccaacGgauccgg.....          | 1 |
| Gi2_10669571_x4.....ggguucgauucccgcgccggagc.....      | 0 |
| Gi2_10717675_x4.....gguucuUaccaacagauccg.....         | 1 |
| Gi2_10692995_x4.....gguucucaccaacagaucc.....          | 0 |
| Gi3_27786177_x4.....uccggcguaguauaacggcuUgaa.....     | 1 |
| Gi2_10659299_x4.....gguucucaccaGcagauccg.....         | 1 |
| Gi1_4026924_x4.....guucucaccAaacagauccg.....          | 1 |
| Gi3_27733409_x4.....Accggcguaguauaacggcuagaau.....    | 1 |
| G1a_5778154_x4.....uccggcguaguaCaacggcuaga.....       | 1 |
| Gi3_27763597_x4.....cagauccggguucgGuucc.....          | 1 |
| Gi5_8638219_x4.....guucgaAuucccgcgccg.....            | 1 |
| Gi2_10718583_x4.....ggAucgauucccgcgccgga.....         | 1 |
| Gi3_27683689_x4.....ucgGuucccgcgccgga.....            | 1 |
| G1a_5812030_x4.....guucgaCucccgcgccg.....             | 1 |
| Gi1_4020584_x4.....ugguucCaccaacagauccg.....          | 1 |
| Gi1_4046500_x4.....cucaccaacGgauccgg.....             | 1 |

|                 |                                |       |   |
|-----------------|--------------------------------|-------|---|
| Gi1_4046344_x4  | .....uucucacccaacagauUcgg      | ..... | 1 |
| Gi1_4043420_x4  | .....gguucgCuucccgcgccggagc    | ..... | 1 |
| G1a_5791562_x4  | .....uccggcguaguauaGcggcuaga   | ..... | 1 |
| Gi2_10683295_x4 | .....gcuaguauaacggcuagaau      | ..... | 0 |
| Gi1_4021004_x4  | .....Cccggcguaguauaacggcuagaau | ..... | 1 |
| Gi5_8636739_x4  | .....uccggcAuaguauaacggc       | ..... | 1 |
| Gi3_27734973_x4 | .....gguucucacAcaacagauccg     | ..... | 1 |
| Gi3_27768121_x4 | .....guucAcacccaacagauccg      | ..... | 1 |
| Gi2_10712851_x4 | .....gguucucacccaacagaCccg     | ..... | 1 |
| Gi1_4042952_x4  | .....uAguucucacccaacagauccg    | ..... | 1 |
| Gi5_8633523_x4  | .....guucAauucccgcgccgga       | ..... | 1 |
| Gi5_8648907_x4  | .....guucgauucccgcgccGg        | ..... | 1 |
| Gi3_27720869_x4 | .....uucucacccaacagaCccgg      | ..... | 1 |
| Gi5_8623135_x4  | .....uucucacccaacagCuccg       | ..... | 1 |
| Gi1_4033656_x4  | .....agauccggNuucgauucc        | ..... | 1 |
| Gi3_27793233_x4 | .....Cgguucucacccaacagauccgg   | ..... | 1 |
| Gi5_8647743_x4  | .....ucacccaacagauccgggCu      | ..... | 1 |
| Gi3_27685181_x4 | .....ccggcguaguauaGcggcuaga    | ..... | 1 |
| Gi2_10668255_x4 | .....uccggcguaguauaCcg         | ..... | 1 |
| Gi5_8609459_x4  | .....gguucgCuucccgcgccgg       | ..... | 1 |
| Gi1_4046576_x4  | .....guuUucacccaacagauccg      | ..... | 1 |
| Gi5_8621483_x4  | .....uccggcguaguauaacggcuagCa  | ..... | 1 |
| Gi2_10697727_x4 | .....guucgauucccCgcccgg        | ..... | 1 |
| Gi5_8634519_x4  | .....ccggcguaguauaacggc        | ..... | 0 |
| Gi2_10702083_x4 | .....gguAcgauucccgcgccggag     | ..... | 1 |
| Gi3_27713213_x4 | .....ugguucucacccaGcagauccg    | ..... | 1 |
| G1a_5812070_x4  | .....uccggcguGguauaacggcuaga   | ..... | 1 |
| Gi3_27788509_x4 | .....ugguucucacccaCcagauccg    | ..... | 1 |
| Gi1_4038864_x4  | .....ugguucucacccaacagauccgU   | ..... | 1 |
| Gi3_27771089_x4 | .....gguucgauAcccgcgccg        | ..... | 1 |
| Gi3_27750101_x4 | .....uuUucacccaacagauccggguuc  | ..... | 1 |
| Gi1_4021520_x4  | .....uccggcguaguauaacgUcuag    | ..... | 1 |
| G1a_5794926_x4  | .....uccggcguaguauaacggcCaga   | ..... | 1 |
| Gi1_4025804_x4  | .....uccggcguaguauaacggcuaAaa  | ..... | 1 |
| Gi2_10700555_x4 | .....gguucgauucccgcgccgAag     | ..... | 1 |
| Gi3_27672201_x4 | .....uggGucucacccaacagauccg    | ..... | 1 |
| G1a_5773650_x4  | .....Uuucgauucccgcgccgga       | ..... | 1 |
| Gi1_4029416_x4  | .....uGgauucccgcgccggagc       | ..... | 1 |
| Gi3_27735701_x4 | .....guucgauuccGggcgccg        | ..... | 1 |
| Gi5_8635099_x4  | .....cucacccaaUagauccg         | ..... | 1 |
| G1a_5784406_x4  | .....uccggcguaguauaacAgcuag    | ..... | 1 |
| Gi5_8620599_x4  | .....uccggcguagCauaacggcuagaa  | ..... | 1 |
| Gi3_27766449_x4 | .....uccggcguaguauGacggcuag    | ..... | 1 |
| Gi3_27755897_x4 | .....uccUgcguaguauaacgg        | ..... | 1 |
| Gi5_8606315_x4  | .....ugguGcucacccaacagauccg    | ..... | 1 |
| Gi3_27706561_x4 | .....guucucacccaGcagauccg      | ..... | 1 |
| Gi3_27761645_x4 | .....uUucacccaacagauccg        | ..... | 1 |

|                 |                               |   |
|-----------------|-------------------------------|---|
| Gi1_4047016_x4  | .....gguucgauucccgcgCgUggagc  | 1 |
| Gi3_27705597_x4 | .....ugguucCcacccaacagauc     | 1 |
| Gi2_10689443_x4 | .....gguucUauucccgcgccggagc   | 1 |
| Gi1_4019520_x4  | .....ugguucucCcccaacagauccgg  | 1 |
| Gi3_27740821_x4 | .....uccggcguaGaacgg          | 1 |
| Gi3_27693585_x4 | .....uccggcgUguauaacgg        | 1 |
| Gi3_27752297_x4 | .....guucgauucccgcgCgGg       | 1 |
| Gi3_27793009_x4 | .....uucucacccaacaAauccg      | 1 |
| Gi3_27701357_x4 | .....Ggauccggguucgauucc       | 1 |
| Gi5_8644263_x4  | .....uccggAguaguauaacggcua    | 1 |
| Gi1_4037732_x4  | .....ugAuucucacccaacagauccgg  | 1 |
| Gi5_8605199_x4  | .....cucacccaacCgauccgg       | 1 |
| Gi5_8639407_x4  | .....ugguucucacccaCagauccgg   | 1 |
| Gi3_27677229_x4 | .....uccggcgucGuaaacggcuag    | 1 |
| Gi2_10654171_x4 | .....Cuucucacccaacagauccg     | 1 |
| Gl1a_5787674_x4 | .....ggGucgauucccgcgCgCg      | 1 |
| Gi3_27766557_x4 | .....cgUuucccgcgCgCgGg        | 1 |
| Gi5_8627543_x4  | .....ucGcacccaacagauccg       | 1 |
| Gi5_8611827_x4  | .....uccggcguaGuaUacggcuaga   | 1 |
| Gi3_27779881_x4 | .....uccUgcguaguauaacggc      | 1 |
| Gi1_4033028_x4  | .....uucucacUcaacagauccgg     | 1 |
| Gi1_4042808_x4  | .....ugguucucacccaacagauccgA  | 1 |
| Gi3_27740369_x4 | .....ccggcgUguaaacggc         | 1 |
| Gi2_10677467_x4 | .....gAucgauucccgcgCgCg       | 1 |
| Gi3_27749661_x4 | .....uucuGacccaacagauccg      | 1 |
| Gi5_8605863_x4  | .....guucucacAcaacagauccgg    | 1 |
| Gi3_27685073_x4 | .....gguucgauuAccggcgCgCg     | 1 |
| Gi3_27778913_x4 | .....guucgauucccgcgCgCg       | 1 |
| Gi2_10682415_x4 | .....guucgauuUccggcgCgCgga    | 1 |
| Gi5_8623607_x4  | .....guucgauucccgcgCgUggagc   | 1 |
| Gi1_4029940_x4  | .....uUcggcguaGuaaacggcuagaau | 1 |
| Gi1_4043972_x4  | .....guucucacccaacagCuccgg    | 1 |
| Gi5_8625803_x4  | .....gguucgCuucccgcgCgCg      | 1 |
| Gi5_8630763_x4  | .....uccggcguaGuaaacggcuagaG  | 1 |
| Gi3_27730749_x4 | .....AauucccgcgCgCgGgagc      | 1 |
| Gi3_27745305_x4 | .....gguucgaGucccgcgCgCgga    | 1 |
| Gi3_27743185_x4 | .....uucgauucccgcgCgCgGgagcCu | 1 |
| Gi2_10716583_x4 | .....guucucacccaacagauccA     | 1 |
| Gl1a_5772702_x4 | .....uucucGcccaacagauccg      | 1 |
| Gi2_10672067_x4 | .....uccggcgucGuaaacggcua     | 1 |
| Gi1_4038728_x4  | .....uGcggcguaGuaaacggcu      | 1 |
| Gi2_10685011_x4 | .....gAuucgauucccgcgCgCg      | 1 |
| Gl1a_5768546_x4 | .....uccggcguaGuaaacggcuGg    | 1 |
| Gi2_10661671_x4 | .....ugguucucacccaacagGuccg   | 1 |
| Gi5_8623143_x4  | .....gguCcgauucccgcgCgCg      | 1 |
| Gi3_27695253_x4 | .....uccggcguaGuaGacggcuagaa  | 1 |
| Gl1a_5807290_x4 | .....guucgauucccgcgCgCgCgCg   | 1 |

|                      |                                  |   |
|----------------------|----------------------------------|---|
| Gi2_10670415_x4..... | Gccggguucgauucccggcgcgga.....    | 1 |
| Gi5_8634911_x4.....  | cGggcguaguauaacggcuaga.....      | 1 |
| Gi3_27749101_x4..... | ..uucgauCcccggcgccgga.....       | 1 |
| Gi5_8636855_x4.....  | uccggcguaguaCaacggcuagaa.....    | 1 |
| Gi2_10717975_x4..... | ..uccggcguCguauaacggc.....       | 1 |
| Gi1_4029868_x4.....  | ..uccggcguaguauaacgAcuagaau..... | 1 |
| Gi3_27769641_x4..... | ..gguucUauucccggcgcggag.....     | 1 |
| Gi5_8617559_x4.....  | ..uccgAcguaguauaacggc.....       | 1 |
| Gi3_27730525_x4..... | ..cUuaguauaacggcuaga.....        | 1 |
| Gi2_10706091_x4..... | ..ggAucgauucccggcgcg.....        | 1 |
| Gi5_8621807_x4.....  | ..uucucaccNaacagauccgg.....      | 1 |
| Gi5_8621503_x4.....  | ..uccUgcguaguauaacgg.....        | 1 |
| Gi5_8632299_x4.....  | ..uccgAcguaguauaacggcu.....      | 1 |
| Gi1_4036960_x4.....  | ..uccggcguaguauaacggcuagaCu..... | 1 |
| Gi1_4025808_x4.....  | ..guucgauucccAgcgcg.....         | 1 |
| Gi3_27696305_x4..... | ..guucgauucccgAgccg.....         | 1 |
| Gi5_8628479_x4.....  | ..cUgcguaguauaacggcuaga.....     | 1 |
| Gi3_27713505_x4..... | ..uccggcguaguauaCcgcuagaau.....  | 1 |
| Gi1_4036324_x4.....  | ..gCuucgauucccggcgcgga.....      | 1 |
| Gi1_4028916_x4.....  | ..gguucgauucccggcgccA.....       | 1 |
| Gi5_8619903_x4.....  | ..guuGgauucccggcgcg.....         | 1 |
| Gi5_8617791_x4.....  | ..uccggAguaguauaacggcuaga.....   | 1 |
| Gi3_27785053_x4..... | ..gguucucacGcaacagauccg.....     | 1 |
| Gi2_10657371_x4..... | ..guucgauucccggcgccAgag.....     | 1 |
| Gi2_10661863_x4..... | ..guucgauuAccggcgccg.....        | 1 |
| Gi2_10706115_x4..... | ..gguucgauucccgAcgcg.....        | 1 |
| Gi2_10700299_x4..... | ..Accggcguaguauaacggcuagaau..... | 1 |
| Gi4_539122_x4.....   | ..guucgauucccggcgcggagcC.....    | 1 |
| Gi1_4023456_x4.....  | ..uccggcguaguaGaacggcuag.....    | 1 |
| Gi3_27725249_x4..... | ..uUguucucacccaacagauccgg.....   | 1 |
| Gi2_10677995_x4..... | ..gguucgauucccgAcgcgg.....       | 1 |
| Gi1_4025360_x4.....  | ..uccggcguCguauaacggcu.....      | 1 |
| Gi3_27749889_x4..... | ..ggCucucacccaacagauccgg.....    | 1 |
| Gi5_8603079_x4.....  | ..gguucgauucccCgcgcg.....        | 1 |
| Gi3_27668109_x4..... | ..guucgauucccggcgAcg.....        | 1 |
| Gi3_27784729_x4..... | ..uucucacccaUcagauccgg.....      | 1 |
| Gi1_4028920_x4.....  | ..ucAcacccaacagauccgg.....       | 1 |
| Gi5_8650035_x4.....  | ..ugguucucacccaacUgauccg.....    | 1 |
| Gi2_10669251_x4..... | ..uucucacccaacagauUg.....        | 1 |
| Gi3_27778521_x4..... | ..guucgauucccggcgccUgagc.....    | 1 |
| Gi3_27792825_x4..... | ..guucCauucccggcgcgg.....        | 1 |
| Gi5_8639583_x4.....  | ..gguuUgauucccggcgcgg.....       | 1 |
| Gi5_8644719_x4.....  | ..uccggcguaguauaacggGuaga.....   | 1 |
| Gi3_27739361_x4..... | ..Uguucgauucccggcgcggagcg.....   | 1 |
| Gi5_8623479_x4.....  | ..gguCcgauucccggcgcggag.....     | 1 |
| Gi5_8621983_x4.....  | ..Aguucucacccaacagauccgg.....    | 1 |
| Gi5_8642475_x4.....  | ..gguucgauucccggcgcgA.....       | 1 |

|                 |                                |   |
|-----------------|--------------------------------|---|
| Gi1_4022432_x4  | .....gguucgauucccgcgGgg        | 1 |
| Gi1_4040120_x4  | .....gguucucaccUaacagauccg     | 1 |
| Gi3_27739937_x4 | .....uccgAcguaguauaacggcuagaa  | 1 |
| Gi3_27784853_x4 | .....gguucgauuAccggcgcc        | 1 |
| Gi4_538906_x4   | .....guucgauucccgcgccggagcCu   | 1 |
| Gi5_8643103_x4  | .....ggUguaguauaacggcuag       | 1 |
| Gi3_27713121_x4 | .....ccggcguaguauaacAgcuaga    | 1 |
| Gi2_10722047_x4 | .....aUuccggcguaguauaacggcuaga | 1 |
| Gi3_27753053_x4 | .....caUcagauccggguucgauucc    | 1 |
| Gi5_8609083_x4  | .....uccggGguaguauaacggcuag    | 1 |
| Gi1_4026372_x4  | .....ucaccaacagauccgggC        | 1 |
| Gi5_8647391_x4  | .....guucucaccaacUgauccg       | 1 |
| Gi3_27771121_x4 | .....Cgguucgauucccgcgccggagc   | 1 |
| Gi3_27721721_x4 | .....gguucgauuGccggcgccggag    | 1 |
| Gi3_27704205_x4 | .....uccggcguaguauaacggcGaga   | 1 |
| Gi1_4031320_x4  | .....uccggcguaguauaacGcuaga    | 1 |
| Gi3_27725409_x4 | .....Gggcguaguauaacggcuaga     | 1 |
| Gi5_8624351_x4  | .....gguucgauucccgcgccggUg     | 1 |
| Gi2_10674607_x4 | .....uUcggcguaguauaacggcuagaa  | 1 |
| Gi5_8632475_x4  | .....gguuUgauucccgcgcc         | 1 |
| Gi5_8631839_x4  | .....guucucaccUaacagauccg      | 1 |
| Gi5_8609607_x4  | .....uccggcguaguUuaacggcuag    | 1 |
| Gi5_8603259_x4  | .....uccggcGgaguauaacggcuag    | 1 |
| Gi5_8619295_x4  | .....guucgauuAcggcgccggagc     | 1 |
| Gi5_8612051_x4  | .....cucaccaacagauccAg         | 1 |
| Gi2_10653287_x4 | .....uccggcguaguauaacUgcuaga   | 1 |
| Gi2_10688451_x4 | .....guucgauucccgcgGcgg        | 1 |
| Gi3_27756361_x4 | .....Accggcguaguauaacggcuagaa  | 1 |
| Gi1_4027604_x4  | .....guAcucaccaacagauccg       | 1 |
| Gi5_8644299_x4  | .....uccggcguaguauaaAggcua     | 1 |
| Gi3_27683097_x4 | .....guNcgauucccgcgccgga       | 1 |
| Gi2_10717623_x4 | .....gguucgauuGccggcgccggagc   | 1 |
| Gi3_27694377_x4 | .....guucgauuUcggcgccggag      | 1 |
| Gi3_27795609_x4 | .....uCcgauucccgcgccggagc      | 1 |
| Gi2_10720347_x4 | .....guucucaccaacagauccAg      | 1 |
| Gi1_4042944_x4  | .....gguucgauucccgcgAggagc     | 1 |
| Gi2_10665975_x4 | .....gguucgauuUcggcgccgga      | 1 |
| Gi1_4035960_x4  | .....agauccggguucgCuucc        | 1 |
| Gi5_8673704_x3  | .....gguucgauucccgcgccggagcCu  | 1 |
| Gi5_8682932_x3  | .....uccggcguaguauaacUgcu      | 1 |
| Gi5_8694299_x3  | .....ugguucucaccaacagaAccg     | 1 |
| Gi2_10815952_x3 | .....gguucucacAcaacagauccg     | 1 |
| Gi3_27892118_x3 | .....guuNgauucccgcgccgg        | 1 |
| Gi1_4049865_x3  | .....uucucaccaacUgauccg        | 1 |
| Gi3_27935387_x3 | .....Cauuccggcgccggagc         | 1 |
| Gi1a_5855329_x3 | .....Aguucgauucccgcgccgg       | 1 |
| Gi3_27978053_x3 | .....ccggcguaNuaaacggcuaga     | 1 |



|                 |                                    |   |
|-----------------|------------------------------------|---|
| Gi5_8703620_x3  | .ucucaccaacagaucUg                 | 1 |
| Gi5_8651117_x3  | Gucucaccaacagauccggguuc            | 1 |
| Gi1_4071303_x3  | .cucaccaacagaucUgg                 | 1 |
| Gi2_10795318_x3 | .Gucucaccaacagauccgg               | 1 |
| Gi3_27859106_x3 | .Ucguaguauaacggcuaga               | 1 |
| Gi3_27823085_x3 | .uucucacAcaacagauccg               | 1 |
| Gi2_10751776_x3 | .guucgauucccgggcgcggU              | 1 |
| Gi2_10765123_x3 | .guucCauucccgggcgcggga             | 1 |
| Gi3_27950240_x3 | .aGccggguucgauucccgggcgcggga       | 1 |
| Gi2_10822495_x3 | .uccggcguaguagaGaacggcua           | 1 |
| Gi1_4069920_x3  | .guucucacUcaacagauccg              | 1 |
| Gi1_4057752_x3  | .gguucgaCucccggcgcggga             | 1 |
| Gi3_27845336_x3 | .cucaccaacagGuccgg                 | 1 |
| Gi3_27941390_x3 | .uucgauCcccggcgcgggagc             | 1 |
| Gi2_10816390_x3 | .guuNgauucccggcgcgggagc            | 1 |
| Gi5_8683016_x3  | .ugguucuUaccaacagauccg             | 1 |
| Gi5_8653355_x3  | .gguucgauuAccggcgcggga             | 1 |
| Gi5_8697125_x3  | .guucgauucccgUcgccggagc            | 1 |
| Gi5_8667383_x3  | .uccggcgGaguauaacggcuaga           | 1 |
| Gi5_8698208_x3  | .cucaGccaacagauccgg                | 1 |
| Gi1_4069074_x3  | .uccggcguaguauaacggGuagaau         | 1 |
| Gi5_8692274_x3  | .uccggcAuaguauaacgg                | 1 |
| Gi2_10794589_x3 | .ucgauucccgggcgcgAagc              | 1 |
| Gi2_10743235_x3 | .gguucgauucccggcgcGggag            | 1 |
| Gi2_10781692_x3 | .guucgauucUcggcgcggag              | 1 |
| Gi3_27823253_x3 | .Ucggcguaguauaacggcua              | 1 |
| Gi5_8664656_x3  | .ucucaccNacagauccgg                | 1 |
| Gi2_10821514_x3 | .gguucucacccaaUagauccg             | 1 |
| Gi5_8705780_x3  | .Aucucaccaacagauccg                | 1 |
| Gi3_27894176_x3 | .uccNgcguaguauaacggcuag            | 1 |
| Gi2_10826089_x3 | .gguucucacccaacUgauccg             | 1 |
| Gi1_4066989_x3  | .guuUucaccaacagauccgg              | 1 |
| Gi2_10745017_x3 | .gguucgauucccggcgcCgag             | 1 |
| Gi1_4055508_x3  | .gguucgauucccgAcgccgg              | 1 |
| Gi5_8657537_x3  | .Gcgauucccggcgcggag                | 1 |
| Gi1_4085529_x3  | .guuUgauucccggcgcg                 | 1 |
| Gi2_10762363_x3 | .uucgaCucccggcgcgggagc             | 1 |
| Gi3_27870452_x3 | .gguucgauucccggcgcU                | 1 |
| Gi2_10749043_x3 | .aguccggcguaguauaGcggcuaga         | 1 |
| Gi1_4055634_x3  | .ucucaccaacagauAccg                | 1 |
| Gi5_8686355_x3  | .aacagauccggguucgauucccggcgcggagc  | 0 |
| Gi1_4067886_x3  | .aucggguucgauuccAgcgccgg           | 1 |
| Gi5_8709440_x3  | .gguucgauAcccggcgcg                | 1 |
| Gi2_10792609_x3 | .uccggcguaguauaacggcAa             | 1 |
| Gi3_27829070_x3 | .gguucgauucccggcUccggag            | 1 |
| Gi1_4073733_x3  | .uuUgauucccggcgcggagc              | 1 |
| Gi3_27912119_x3 | .aacagauccggguucgauucccggcgcggagcC | 1 |

|                 |                                      |   |
|-----------------|--------------------------------------|---|
| Gi5_8717162_x3  | . . . . . Aucaccaacagauccgg          | 1 |
| Gi5_8661260_x3  | . . . . . uccggcguaguaGaacggcuaga    | 1 |
| Gi1a_5840212_x3 | . . . . . gguucgGuucccgcgcc          | 1 |
| Gi3_27869762_x3 | . . . . . gauucccgNcgccggagc         | 1 |
| Gi3_27970415_x3 | . . . . . uGcggguucgauucccgcgccgga   | 1 |
| Gi3_27896066_x3 | . . . . . ccggcguGguauaacggcua       | 1 |
| Gi5_8669315_x3  | . . . . . cccaacagauccggguCc         | 1 |
| Gi5_8671166_x3  | . . . . . gguucucaccaacagGuccgg      | 1 |
| Gi3_27869522_x3 | . . . . . guucgauucccgCcgccgg        | 1 |
| Gi5_8699177_x3  | . . . . . guuNucaccaacagauccg        | 1 |
| Gi5_8655155_x3  | . . . . . uccggcguaguaauaacUgcuag    | 1 |
| Gi5_8672801_x3  | . . . . . gguucgauucccgAcgccgg       | 1 |
| Gi1_4079256_x3  | . . . . . uccggcAuaguaauaacggcuag    | 1 |
| Gi3_27816947_x3 | . . . . . ggNucgauucccgcgcc          | 1 |
| Gi1_4079190_x3  | . . . . . ugguucucaccaacagaCccgg     | 1 |
| Gi1_4089102_x3  | . . . . . ugguucuUaccaacagauccg      | 1 |
| Gi5_8715362_x3  | . . . . . guucgauucccgcgUcgga        | 1 |
| Gi3_27899402_x3 | . . . . . Aguucucaccaacagauccgggu    | 1 |
| Gi1_4051395_x3  | . . . . . guucGcaccaacagauccgg       | 1 |
| Gi1_4075257_x3  | . . . . . ucucaccaacagauccA          | 1 |
| Gi5_8666963_x3  | . . . . . gguucgauucccgcgccggaUc     | 1 |
| Gi1_4057833_x3  | . . . . . gguucgauucccUcgccgg        | 1 |
| Gi3_27945962_x3 | . . . . . ugguucucaccaacagauUg       | 1 |
| Gi3_27881726_x3 | . . . . . gguucgauucccgUcgccggag     | 1 |
| Gi5_8702807_x3  | . . . . . uucucCcccaacagauccg        | 1 |
| Gi1_4051002_x3  | . . . . . guucgauuccGggcgccgg        | 1 |
| Gi2_10804873_x3 | . . . . . gguucgauucccgcgAcgg        | 1 |
| Gi2_10801846_x3 | . . . . . guucgaAucccgcgccggagc      | 1 |
| Gi3_27959249_x3 | . . . . . gguucucacccUacagauccg      | 1 |
| Gi3_27818801_x3 | . . . . . guucgauuccAgcgccg          | 1 |
| Gi3_27905579_x3 | . . . . . uccggcguCguauaacggcuagaa   | 1 |
| Gi3_27886160_x3 | . . . . . ucGggcguaguaauaacgg        | 1 |
| Gi5_8655605_x3  | . . . . . guucgauucccgcgccAga        | 1 |
| Gi2_10726432_x3 | . . . . . gguucgauuccGcggcgccggagc   | 1 |
| Gi1_4064631_x3  | . . . . . uccggcguaguauacggcu        | 1 |
| Gi5_8658845_x3  | . . . . . gguucgauuccUggcgcc         | 1 |
| Gi2_10815724_x3 | . . . . . guucucaccaacagauUg         | 1 |
| Gi1_4083897_x3  | . . . . . cggcguaguaauaacggcuagaauU  | 1 |
| Gi1_4087308_x3  | . . . . . guucgGuucccgcgccg          | 1 |
| Gi1_4057188_x3  | . . . . . uccggcguaguaauaacggcuGgaau | 1 |
| Gi5_8679263_x3  | . . . . . gguucgauuccUcgcgcc         | 1 |
| Gi3_27857555_x3 | . . . . . uccggcguUguauaacggcuag     | 1 |
| Gi2_10779409_x3 | . . . . . guucgCuucccgcgccggag       | 1 |
| Gi2_10730596_x3 | . . . . . guucgauucccgcgccC          | 1 |
| Gi5_8659796_x3  | . . . . . uucucaccaacagauUgg         | 1 |
| Gi1_4056333_x3  | . . . . . gguucgauuccUggcgccg        | 1 |
| Gi1_4059471_x3  | . . . . . ucucacccGacagauccg         | 1 |

|                      |                                    |   |
|----------------------|------------------------------------|---|
| Gi2_10759840_x3..... | ucUauucccggcgcggagc.....           | 1 |
| Gi5_8692985_x3.....  | uccggcguaguauaacggcuaCaau.....     | 1 |
| Gi1_4075299_x3.....  | gAucucaccaacagauccgg.....          | 1 |
| Gi1_4057344_x3.....  | uccggcguUguauaacggcuag.....        | 1 |
| Gi3_27925016_x3..... | gguucgauGccggcgccgga.....          | 1 |
| Gi1_4048947_x3.....  | cuUaccaacagauccgg.....             | 1 |
| Gi3_27834674_x3..... | aUauccggguucgauucccggcgcggagc..... | 1 |
| Gi3_27970070_x3..... | uucucacUcaacagauccg.....           | 1 |
| Gi5_8670206_x3.....  | gUcguaguauaacggcuagaa.....         | 1 |
| Gi1_4058496_x3.....  | gguucCcaccaacagauccgg.....         | 1 |
| Gi3_27927506_x3..... | uucucacccUacagauccg.....           | 1 |
| Gi5_8652335_x3.....  | ccggcguaNuauaacggcuaga.....        | 1 |
| Gi3_27967724_x3..... | ucUauucccggcgcggga.....            | 1 |
| Gi5_8711294_x3.....  | gguucgauucccggcgcAgag.....         | 1 |
| Gi5_8702387_x3.....  | cucaccaacagauUgg.....              | 1 |
| Gi2_10743196_x3..... | guucgauCcccggcgccggag.....         | 1 |
| Gi3_27805592_x3..... | ucNggcguaguauaacggcua.....         | 1 |
| Gi3_27827708_x3..... | guucgUuuccggcgccgg.....            | 1 |
| Gi3_27890375_x3..... | cgguucgauucccggcgcgcC.....         | 1 |
| Gi2_10744741_x3..... | uccggAguaguauaacggc.....           | 1 |
| Gi5_8708840_x3.....  | ggcguaguauaacggcuagG.....          | 1 |
| Gi3_27911921_x3..... | gguucgauGcccggcgccg.....           | 1 |
| Gi2_10811863_x3..... | uucucacAcaacagauccg.....           | 1 |
| Gi1_4064877_x3.....  | ugguucucaccAaacagauccgg.....       | 1 |
| Gi1a_5853619_x3..... | uUcggcguaguauaacggcuaga.....       | 1 |
| Gi5_8693198_x3.....  | Agcguaguauaacggcuaga.....          | 1 |
| Gi5_8656268_x3.....  | guGcgauucccggcgcggagc.....         | 1 |
| Gi1_4064754_x3.....  | uccgCcgaguauaacggcuaga.....        | 1 |
| Gi1_4054572_x3.....  | ucucacccGacagauccgg.....           | 1 |
| Gi5_8680883_x3.....  | ggcgCaguauaacggcuag.....           | 1 |
| Gi5_8709635_x3.....  | ugguucucaccaacagGuccg.....         | 1 |
| Gi1_4082253_x3.....  | guucgauCcccggcgccgga.....          | 1 |
| Gi5_8701718_x3.....  | Gccggguucgauucccggc.....           | 1 |
| Gi3_27835121_x3..... | uucgauucccgAcgccggagc.....         | 1 |
| Gi1_4075113_x3.....  | caccaacagauccgggGucgauucc.....     | 1 |
| Gi3_27954461_x3..... | gguuAgauucccggcgcgcg.....          | 1 |
| Gi5_8708984_x3.....  | Ccgauucccggcgcggagc.....           | 1 |
| Gi1_4080930_x3.....  | Accggcguaguauaacggcua.....         | 1 |
| Gi1_4060236_x3.....  | Ggguucucaccaacagaucc.....          | 1 |
| Gi3_27944390_x3..... | uccggcguCuauaacggcuaga.....        | 1 |
| Gi1_4077060_x3.....  | uucucacccaacUgauccgg.....          | 1 |
| Gi4_549507_x3.....   | ucucaccaacagauccg.....             | 0 |
| Gi3_27890729_x3..... | uccggcguaguauaaAggc.....           | 1 |
| Gi1_4052205_x3.....  | uucucaccaacagauccgC.....           | 1 |
| Gi3_27851090_x3..... | Gggguucgauucccggcgcggag.....       | 1 |
| Gi2_10784437_x3..... | uccAgcguaguauaacggcuag.....        | 1 |
| Gi1_4060665_x3.....  | uccggcguCguauaacgg.....            | 1 |

|                      |                                        |   |
|----------------------|----------------------------------------|---|
| Gi2_10743808_x3..... | .Gcgauucccgcgccgga.....                | 1 |
| Gi3_27841136_x3..... | ggUguaguauaacggcua.....                | 1 |
| Gi5_8693645_x3.....  | guucGcaccacaacagaucgg.....             | 1 |
| Gi5_8711072_x3.....  | ucAggCGuaguauaacggcua.....             | 1 |
| Gi2_10736971_x3..... | .....gguucgauucccgcgccgC.....          | 1 |
| Gi5_8667827_x3.....  | .....ucucacccaacagaucgggG.....         | 1 |
| Gi2_10783381_x3..... | .....uccggCGuagAuaaacgg.....           | 1 |
| Gi5_8686904_x3.....  | .....uccAgCGuaguauaacggcuagaa.....     | 1 |
| Gi3_27955472_x3..... | .....uAcucacccaacagaucgg.....          | 1 |
| Gi5_8695475_x3.....  | .....uccggCGuagGauaacggcuaga.....      | 1 |
| Gi5_8660549_x3.....  | .....guucgauuccAgcgccgg.....           | 1 |
| Gi2_10774735_x3..... | .....uGcucacccaacagaucgg.....          | 1 |
| Gi5_8672081_x3.....  | .....ugguucucacAcaacagaucgg.....       | 1 |
| Gi2_10790146_x3..... | .....gguucgauucccgcgccgAa.....         | 1 |
| Gi3_27963113_x3..... | .....AcggCGuaguauaacggc.....           | 1 |
| Gi5_8655068_x3.....  | .....uUcggCGuaguauaacggcu.....         | 1 |
| Gi5_8652935_x3.....  | .....guucgauuccAgcgccgga.....          | 1 |
| Gi3_27888362_x3..... | .....gguucgauucccgCcgccgg.....         | 1 |
| Gi3_27922772_x3..... | .....uccggCGuaguauaacggAuag.....       | 1 |
| Gi1_4065948_x3.....  | .....gguCcgauucccgcgccg.....           | 1 |
| Gi5_8669642_x3.....  | .....uGcucacccaacagaucggguu.....       | 1 |
| Gi3_27814679_x3..... | .....ucgauucccgcgCaggagc.....          | 1 |
| Gi3_27813704_x3..... | .....uccgggCucgauucccgcgccgga.....     | 1 |
| Gi5_8673644_x3.....  | .....gguucgauucccgcgCaggag.....        | 1 |
| Gi1a_5858230_x3..... | .....gGucgauucccgcgccgg.....           | 1 |
| Gi2_10772911_x3..... | .....uccggCGuaguauaacggcuG.....        | 1 |
| Gi3_27838577_x3..... | .....uuccggcgccggagcCu.....            | 1 |
| Gi2_10799161_x3..... | .....uccggCGAaguauaacgg.....           | 1 |
| Gi3_27947888_x3..... | .....gguucgauucccgCcgccg.....          | 1 |
| Gi5_8691176_x3.....  | .....uccggCGAaguauaacgg.....           | 1 |
| Gi5_8712632_x3.....  | .....guuNgauucccgcgccgg.....           | 1 |
| Gi2_10828222_x3..... | .....gguucgauucccCcgccgga.....         | 1 |
| Gi2_10783765_x3..... | .....guucgauucccgcgccgU.....           | 1 |
| Gi1_4068717_x3.....  | .....gguucgauucccgcgUcgga.....         | 1 |
| Gi1_4064415_x3.....  | .....AccggCGuaguauaacggcuaga.....      | 1 |
| Gi1_4061523_x3.....  | .....ccggCGuGguauaacggcua.....         | 1 |
| Gi3_27933464_x3..... | .....ucgauucccgcgccggagcCu.....        | 1 |
| Gi1_4076667_x3.....  | .....guucgauucccgAgccg.....            | 1 |
| Gi2_10734631_x3..... | .....AccggCGuaguauaacggcuagaa.....     | 1 |
| Gi5_8652134_x3.....  | .....uccggCGAaguauaacggcuag.....       | 1 |
| Gi5_8661995_x3.....  | .....guucucacccaaGagaucgg.....         | 1 |
| Gi5_8673773_x3.....  | .....Cgguucucacccaacagaucgg.....       | 1 |
| Gi3_27828017_x3..... | .....aUauccggguucgauucccgcgccggag..... | 1 |
| Gi2_10823227_x3..... | .....guucgauucccAgcgccggag.....        | 1 |
| Gi2_10792240_x3..... | .....gguucgauucccgcgccgA.....          | 1 |
| Gi1_4059540_x3.....  | .....gguucAauucccgcgccg.....           | 1 |
| Gi5_8700377_x3.....  | .....uuUgauucccgcgccg.....             | 1 |

|                 |                               |   |
|-----------------|-------------------------------|---|
| Gi5_8653064_x3  | .....Cauucccgcgccggagc        | 1 |
| Gi4_551532_x3   | .....uucucaccaacagauccgg      | 0 |
| Gi3_27925592_x3 | .....uccNgcguaguauaacggcua    | 1 |
| Gi3_27940733_x3 | .....gguuAgauucccgcgcc        | 1 |
| Gi3_27920717_x3 | .....ggAucucaccaacagaucc      | 1 |
| Gi3_27967733_x3 | .....uccggcgAaguauaacggcua    | 1 |
| Gi2_10791622_x3 | .....gguuAgauucccgcgccggag    | 1 |
| Gi1a_5845960_x3 | .....guucgauucccgcgccggagcCu  | 1 |
| Gi1_4057098_x3  | .....uccggcgaguauaacggAuag    | 1 |
| Gi2_10813858_x3 | .....ccggcgaguauaacggcuaga    | 0 |
| Gi3_27865328_x3 | .....ggcgaguauaGcgguagaau     | 1 |
| Gi2_10796617_x3 | .....guucgauucccgcgccggag     | 1 |
| Gi2_10800736_x3 | .....gguucCauucccgcgccggag    | 1 |
| Gi2_10785715_x3 | .....ucgauucAcggcgccggagc     | 1 |
| Gi5_8668376_x3  | .....uccggcgUguauaacggcuagaau | 1 |
| Gi2_10814320_x3 | .....uccggcgaguCuaacggcuagaa  | 1 |
| Gi5_8692454_x3  | .....gguucgauucccgUgccggag    | 1 |
| Gi2_10759252_x3 | .....Gcgcgaguauaacggcua       | 1 |
| Gi5_8689922_x3  | .....uccggcgagAuaaacggcuagaau | 1 |
| Gi3_27945524_x3 | .....guucucaccaacagauccA      | 1 |
| Gi5_8701349_x3  | .....uccggcgaguauaacggcAagaau | 1 |
| Gi5_8710403_x3  | .....ucuUaccaacagauccg        | 1 |
| Gi1_4058463_x3  | .....guucgauucccgUcgccgga     | 1 |
| Gi2_10821295_x3 | .....uccgAcguaguauaacggcua    | 1 |
| Gi5_8671748_x3  | .....uAcucaccaacagauccg       | 1 |
| Gi1_4075866_x3  | .....ugUuucucaccaacagauccg    | 1 |
| Gi3_27804551_x3 | .....gguucgauucccgGgccg       | 1 |
| Gi5_8663876_x3  | .....uucuUaccaacagauccg       | 1 |
| Gi5_8688164_x3  | .....guucgauucUcgcgccgga      | 1 |
| Gi3_27878051_x3 | .....gguuGucaccaacagauccg     | 1 |
| Gi2_10763971_x3 | .....uccgAcguaguauaacgg       | 1 |
| Gi1_4061901_x3  | .....ggUguaguauaacggcuag      | 1 |
| Gi4_549306_x3   | .....Gccggcgaguauaacggcuag    | 1 |
| Gi3_27834272_x3 | .....guuAgauucccgcgccggagc    | 1 |
| Gi2_10765033_x3 | .....uucucaccaacagauAccg      | 1 |
| Gi5_8705831_x3  | .....gAucgauucccgcgccgga      | 1 |
| Gi3_27812366_x3 | .....gguucgauucGcgcgccggag    | 1 |
| Gi2_10791523_x3 | .....gguucgauuUccggcgccgg     | 1 |
| Gi3_27884132_x3 | .....guucgaAucccgcgccgga      | 1 |
| Gi3_27818741_x3 | .....guucgUuucccgcgccggagc    | 1 |
| Gi5_8675351_x3  | .....gguucgauucAcggcgccgga    | 1 |
| Gi1_4081536_x3  | .....Cuucucaccaacagauccgg     | 1 |
| Gi2_10776085_x3 | .....gguucUauucccgcgcc        | 1 |
| Gi5_8667017_x3  | .....gguucucacccaaUagauccg    | 1 |
| Gi3_27849311_x3 | .....guucgauucccgcgccggagG    | 1 |
| Gi5_8661062_x3  | .....Gucucaccaacagauccggguu   | 1 |
| Gi5_8684414_x3  | .....agauccgggGucgauucc       | 1 |

|                 |                                |   |
|-----------------|--------------------------------|---|
| Gi5_8701292_x3  | .....guucgauuccUgcgccg         | 1 |
| Gi2_10788433_x3 | .....ggAucucacccaacagauccg     | 1 |
| Gl1a_5825536_x3 | .....uccggcguaguGuaacggcuaga   | 1 |
| Gi3_27876740_x3 | .....guuAgaucccggcgcgcgga      | 1 |
| Gi2_10761202_x3 | .....gguucgauucUcggcgccgg      | 1 |
| Gi1_4079502_x3  | .....uucgaCucccgcgccgg         | 1 |
| Gi1_4076907_x3  | .....gguucgauucccgUgcgcgga     | 1 |
| Gi5_8676506_x3  | .....Acaccaacagauccggguu       | 1 |
| Gi1_4053543_x3  | .....uUcggcguaguauaacggc       | 1 |
| Gi5_8718017_x3  | .....uccggcguaguUuaacggc       | 1 |
| Gi1_4089273_x3  | .....gguucgaCucccgcgccg        | 1 |
| Gi3_27957008_x3 | .....guucucacccaacagauAccg     | 1 |
| Gi3_27961436_x3 | .....uucucaccUaacagauccg       | 1 |
| Gl1a_5874976_x3 | .....uccggcguaguauaaUggcuag    | 1 |
| Gi3_27841766_x3 | .....guucCcacccaacagauccg      | 1 |
| Gi5_8700323_x3  | .....uccUgcguaguauaacggcuaga   | 1 |
| Gi3_27958253_x3 | .....uUgaucccggcgcgcggag       | 1 |
| Gi2_10803223_x3 | .....guuGgaucccggcgcgcgga      | 1 |
| Gi2_10803289_x3 | .....gguucgauucAccggcgccg      | 1 |
| Gi3_27949205_x3 | .....guucgauAcccggcgcgcg       | 1 |
| Gi5_8672588_x3  | .....gguucgauucccCgcgcgcggagc  | 1 |
| Gi2_10735141_x3 | .....uccggcguaguaCaacggcuagaau | 1 |
| Gi3_27917921_x3 | .....ggguucgauucccggcgcgcg     | 0 |
| Gi2_10814698_x3 | .....uccggcguaguauCacgg        | 1 |
| Gi3_27824288_x3 | .....uccggcguagAauaacggcua     | 1 |
| Gi4_551673_x3   | .....uccggcguaguauaacggcua     | 0 |
| Gi5_8683721_x3  | .....cggcguGguauaacggcua       | 1 |
| Gi3_27906098_x3 | .....uucgauUccggcgccgga        | 1 |
| Gi2_10816714_x3 | .....gguucucacccUacagauccg     | 1 |
| Gi3_27877115_x3 | .....Nuucgauucccggcgcgcggag    | 1 |
| Gi2_10817857_x3 | .....uccggcgGaguauaacggcuaga   | 1 |
| Gi5_8669591_x3  | .....gguucgauucccgAgccg        | 1 |
| Gi3_27798860_x3 | .....uucucacccaacagauAccg      | 1 |
| Gi5_8652497_x3  | .....guucgauucccggcgcgcCga     | 1 |
| Gi3_27978362_x3 | .....uccggcguaguauaacCg        | 1 |
| Gi3_27963530_x3 | .....gguucgauucccggcgcA        | 1 |
| Gi1_4083423_x3  | .....gguucgauucccgUgcgcgagc    | 1 |
| Gi5_8688872_x3  | .....Gggcguaguauaacggcuag      | 1 |
| Gi5_8657915_x3  | .....gguucgauucccUgcgcg        | 1 |
| Gi2_10725721_x3 | .....uccggcguaguauaacggcUgaau  | 1 |
| Gi1_4078875_x3  | .....guucucacccaaAagauccg      | 1 |
| Gi1_4065267_x3  | .....uccggcguaguauaacggcAa     | 1 |
| Gl1a_5850052_x3 | .....guucgaCucccggcgcgcggagc   | 1 |
| Gi5_8675003_x3  | .....ugUuucucacccaacagauccg    | 1 |
| Gi3_27843638_x3 | .....gguAccgauucccggcgcgcg     | 1 |
| Gi3_27911900_x3 | .....guucCauucccggcgcgcgga     | 1 |
| Gi3_27925910_x3 | .....cgauccUggcgccggagc        | 1 |

|                      |                                  |   |
|----------------------|----------------------------------|---|
| Gi2_10795651_x3..... | gguucgauuAccggcgccgga.....       | 1 |
| Gi5_8664269_x3.....  | gguucgauuccUggcgccggag.....      | 1 |
| Gi3_27821048_x3..... | gguucgauucccgUcgccggagc.....     | 1 |
| Gi5_8668877_x3.....  | Ucggcguaguauaacggcuag.....       | 1 |
| Gi1_4060656_x3.....  | uccggcguaguCuaacggc.....         | 1 |
| Gi5_8661461_x3.....  | Auucgauucccgcgccggag.....        | 1 |
| Gi2_10761232_x3..... | uccggcguaguauaacggUua.....       | 1 |
| Gi5_8663273_x3.....  | Uuucgauucccgcgccggagcguuucc..... | 1 |
| Gi2_10822213_x3..... | cgauucccNggcgccggagcguuu.....    | 1 |
| Gi1_4058412_x3.....  | ucucacccaacGgauccg.....          | 1 |
| Gi3_27842411_x3..... | gguucgauuccGggcgccgg.....        | 1 |
| G1a_5853931_x3.....  | guucgGuucccgcgccggagc.....       | 1 |
| Gi1_4073901_x3.....  | uUgauucccgcgccggagc.....         | 1 |
| Gi1_4074957_x3.....  | guucgauucccCgcgccgga.....        | 1 |
| Gi2_10796326_x3..... | gUuucccgcgccggagc.....           | 1 |
| Gi5_8708177_x3.....  | gAucucacccaacagauccg.....        | 1 |
| Gi3_27813083_x3..... | cgguucgNuucccgcgccgga.....       | 1 |
| Gi1_4057590_x3.....  | ugguucucacccaacagauc.....        | 0 |
| Gi5_8712719_x3.....  | uucucacAaacagauccgg.....         | 1 |
| Gi1_4060890_x3.....  | uccggcguCguauaacggcuag.....      | 1 |
| Gi3_27826490_x3..... | ccggcguaNuaaacggc.....           | 1 |
| Gi5_8657486_x3.....  | uucucacccaacagaCccgg.....        | 1 |
| Gi3_27932771_x3..... | gguucgauucccCgcgccg.....         | 1 |
| Gi5_8716610_x3.....  | gguucgauucccgcgccgU.....         | 1 |
| Gi1_4074375_x3.....  | ugguucucacccaacagauccA.....      | 1 |
| Gi3_27828476_x3..... | Auucucacccaacagauccgg.....       | 1 |
| Gi2_10753882_x3..... | gguucgauucccgcgccggaC.....       | 1 |
| Gi3_27846707_x3..... | Acgauucccgcgccgga.....           | 1 |
| Gi2_10809373_x3..... | uUcggcguaguauaacggcuagaa.....    | 1 |
| Gi3_27877406_x3..... | guucucacccaacagauUcg.....        | 1 |
| Gi5_8673065_x3.....  | ucgauucccgcgccggagcCu.....       | 1 |
| Gi4_547647_x3.....   | gguucgauucccgcgccggag.....       | 0 |
| Gi1_4049922_x3.....  | ucUggcguaguauaacggcu.....        | 1 |
| Gi1_4056942_x3.....  | guucucacccaacagCuccg.....        | 1 |
| Gi2_10755211_x3..... | cGcaacagauccggguuc.....          | 1 |
| Gi2_10773238_x3..... | uccggcguaguauaacggUuagaa.....    | 1 |
| Gi1_4057824_x3.....  | guucgauCcccggcgccg.....          | 1 |
| Gi3_27839147_x3..... | ccggcguaguauaacggcCaga.....      | 1 |
| Gi3_27949622_x3..... | uccggcguaguauaacggcuaCaau.....   | 1 |
| Gi1_4072857_x3.....  | guucgauucccgcgccgCa.....         | 1 |
| Gi2_10779490_x3..... | guucgaGucccggcgccg.....          | 1 |
| Gi1_4074498_x3.....  | Aucucacccaacagauccg.....         | 1 |
| G1a_5843290_x3.....  | uccgUcguaguauaacggcuag.....      | 1 |
| Gi4_550752_x3.....   | ggGucgauucccgcgccgg.....         | 1 |
| Gi2_10750684_x3..... | gguucgauucccgAgccgga.....        | 1 |
| Gi1_4075806_x3.....  | Nuucgauucccgcgccg.....           | 1 |
| Gi5_8683811_x3.....  | gCuucgauucccgcgcc.....           | 1 |

|                      |                                |   |
|----------------------|--------------------------------|---|
| Gi2_10799182_x3..... | uccggcgguaguauaacggcuagCa..... | 1 |
| Gi2_10769530_x3..... | uccggcgguaguaGaacggc.....      | 1 |
| Gi1_4085451_x3.....  | uucucaAccaacagauccg.....       | 1 |
| Gi2_10782331_x3..... | ugguucucaccccGacagauccg.....   | 1 |
| Gi2_10824061_x3..... | ggguucgauuAcggcgcc.....        | 1 |
| G1a_5875426_x3.....  | gguCcgauucccgcgccgg.....       | 1 |
| Gi3_27874355_x3..... | uccggguuNgauucccgcgccgga.....  | 1 |
| Gi2_10729030_x3..... | uccggcAuaguauaacggc.....       | 1 |
| Gi2_10753012_x3..... | ggguucgauucccgcgccggagcC.....  | 1 |
| Gi3_27960371_x3..... | guucucGcccaacagauccg.....      | 1 |
| Gi2_10795600_x3..... | ggguucgauucccgcgccUgag.....    | 1 |
| Gi3_27937088_x3..... | Nuucgauucccgcgccggagc.....     | 1 |
| Gi2_10776802_x3..... | guucgauucccgGAgccgga.....      | 1 |
| Gi2_10783849_x3..... | uccggcgCguauaacggcuagaa.....   | 1 |
| Gi2_10817479_x3..... | uccggcgguaguUuaacggc.....      | 1 |
| Gi5_8714924_x3.....  | uccggcgguaguauGacggc.....      | 1 |
| Gi3_27967205_x3..... | cUgcguaguauaacggcuaga.....     | 1 |
| Gi1_4082823_x3.....  | gAuucgauucccgcgccgga.....      | 1 |
| Gi3_27976247_x3..... | ugguCcucacccaacagauccgg.....   | 1 |
| Gi5_8694740_x3.....  | uucucacccaacagauccA.....       | 1 |
| Gi1_4081971_x3.....  | ggGucgauucccgcgccggagc.....    | 1 |
| Gi3_27813977_x3..... | ucgaCuucccgcgccgga.....        | 1 |
| Gi1_4087377_x3.....  | gAuucgauucccgcgccggagc.....    | 1 |
| Gi2_10813018_x3..... | ccUaacagauccggguuc.....        | 1 |
| Gi2_10767859_x3..... | Nguucgauucccgcgccggagc.....    | 1 |
| Gi2_10754527_x3..... | agaaugguugguucCcacc.....       | 1 |
| Gi3_27871745_x3..... | uccggcgguaguauaacCgcuagaa..... | 1 |
| Gi1_4065120_x3.....  | ucucacccNacagauccgg.....       | 1 |
| Gi2_10776658_x3..... | uCguucucacccaacagauccg.....    | 1 |
| Gi5_8705954_x3.....  | guucucacccaacagauUgg.....      | 1 |
| Gi5_8691035_x3.....  | gCuucucacccaacagauccgg.....    | 1 |
| Gi1_4051380_x3.....  | uccggcgguaguauaacggcuagCa..... | 1 |
| Gi3_27890927_x3..... | Cccggcgguaguauaacggcu.....     | 1 |
| Gi3_27923198_x3..... | uccNgcguaguauaacggc.....       | 1 |
| Gi5_8652026_x3.....  | gguucucacccaacagUuccg.....     | 1 |
| Gi2_10741264_x3..... | uccggcgguagAauaacggcuag.....   | 1 |
| Gi1_4077711_x3.....  | gguucucCcccaacagauccg.....     | 1 |
| Gi3_27843773_x3..... | uccggcgguaguauaacggcAa.....    | 1 |
| Gi5_8714861_x3.....  | uccggcgguaguauUcggcuaga.....   | 1 |
| Gi5_8669648_x3.....  | guucgauucccgcgccUgagc.....     | 1 |
| Gi3_27816380_x3..... | Nccggcgguaguauaacggcuaga.....  | 1 |
| Gi2_10825423_x3..... | uccggcgUguauaacggcu.....       | 1 |
| Gi3_27893051_x3..... | uAcggcgguaguauaacggc.....      | 1 |
| Gi2_10803628_x3..... | ugguucCcacccaacagauccg.....    | 1 |
| Gi2_10779790_x3..... | gguucgauucccgcgCccggag.....    | 1 |
| Gi3_27892247_x3..... | gguucgauucccgcgGgga.....       | 1 |
| Gi3_27849806_x3..... | uccggcgguagAauaacggc.....      | 1 |



|                      |                                      |   |
|----------------------|--------------------------------------|---|
| Gi5_8686973_x3.....  | uccggcguaquauaaAggc.....             | 1 |
| Gi2_10799380_x3..... | uccggcguaAuauaacggc.....             | 1 |
| G1a_5836006_x3.....  | .....gguucgauucccggcAccggagc.....    | 1 |
| Gi2_10759366_x3..... | .....gGucucacccaacagauccgg.....      | 1 |
| Gi4_552126_x3.....   | .....guucgaCucccggcgccggagc.....     | 1 |
| Gi3_27906026_x3..... | .....Gucucacccaacagauccggguuc.....   | 1 |
| Gi5_8684423_x3.....  | uccggcguaquauaacggAuaga.....         | 1 |
| Gi5_8699609_x3.....  | .....ucgauucccgAcgccgga.....         | 1 |
| Gi3_27913643_x3..... | .....agauccggguucGUuucc.....         | 1 |
| Gi2_10824511_x3..... | .....uggCucucacccaacagauccg.....     | 1 |
| Gi1_4082856_x3.....  | .....ccggcguaNuauaacggcuag.....      | 1 |
| Gi5_8697452_x3.....  | .....gUcguaguauaacggcu.....          | 1 |
| G1a_5864050_x3.....  | Accggcguaquauaacggcuag.....          | 1 |
| Gi2_10730764_x3..... | .....uCcgauucccggcgccgg.....         | 1 |
| Gi5_8676110_x3.....  | .....ucgauuccNgcgccggag.....         | 1 |
| Gi1_4074720_x3.....  | .....auccggguucgauucccggcgccAg.....  | 1 |
| Gi3_27821375_x3..... | .....ucgauCcccggcgccggagc.....       | 1 |
| Gi5_8669372_x3.....  | .....gguucucacccaacagaAccg.....      | 1 |
| Gi2_10792870_x3..... | .....ugguucucacccaCagauccg.....      | 1 |
| Gi1_4078809_x3.....  | .....gguucgauucccggcgccggagcCuu..... | 1 |
| Gi3_27974477_x3..... | .....gguuUucacccaacagauccg.....      | 1 |
| Gi2_10761703_x3..... | .....guucgauucccggcgcGgga.....       | 1 |
| Gi5_8675369_x3.....  | .....Gcgauucccggcgccgga.....         | 1 |
| Gi2_10780225_x3..... | .....Aauucccggcgccggagc.....         | 1 |
| Gi2_10804204_x3..... | .....guucgauucccggcgccGUagc.....     | 1 |
| Gi2_10760845_x3..... | .....uucucacccaUcagauccg.....        | 1 |
| G1a_5853448_x3.....  | .....uGcucacccaacagauccgg.....       | 1 |
| Gi1_4049988_x3.....  | .....guAcucacccaacagauccg.....       | 1 |
| Gi2_10783159_x3..... | .....guucgauuccGggcgccgg.....        | 1 |
| Gi2_10769323_x3..... | .....auucccggcgccggagcCu.....        | 1 |
| Gi1_4079901_x3.....  | .....ggAucgauucccggcgccggagc.....    | 1 |
| Gi3_27849674_x3..... | .....gguucgauuGccggcgccgg.....       | 1 |
| Gi3_27849536_x3..... | uccggcgguGguauaacggcu.....           | 1 |
| Gi3_27883871_x3..... | .....uucgauucccggcgccggagcGgA.....   | 1 |
| Gi3_27827657_x3..... | .....gAucgauucccggcgccg.....         | 1 |
| Gi1_4048995_x3.....  | .....gguucgaCucccggcgccggagc.....    | 1 |
| Gi3_27948239_x3..... | uccggcguaquauaacgCc.....             | 1 |
| Gi1_4071780_x3.....  | .....Cccggcguaquauaacggc.....        | 1 |
| Gi2_10788475_x3..... | .....ucgauucccggcgccAgagc.....       | 1 |
| Gi5_8666495_x3.....  | .....ucaccaGcagauccggguu.....        | 1 |
| Gi1_4075323_x3.....  | .....ucgauucccggcgccggag.....        | 0 |
| Gi5_8698340_x3.....  | .....gguucgauucccggcgccCg.....       | 1 |
| Gi3_27864263_x3..... | .....guucgauucccggcgccU.....         | 1 |
| Gi3_27860786_x3..... | uccggcguaquauaacggcuagaU.....        | 1 |
| Gi5_8716589_x3.....  | .....guucgauucccgAgccgga.....        | 1 |
| Gi3_27936176_x3..... | .....gauucccggcAccggagc.....         | 1 |
| Gi4_544908_x3.....   | .....gguucgauNcccggcgccgg.....       | 1 |

|                 |                                      |   |
|-----------------|--------------------------------------|---|
| Gi3_27893876_x3 | .....guucucCcccaacagauccg.....       | 1 |
| Gi5_8677196_x3  | .....ucucaccaacagGuccgggu.....       | 1 |
| Gi1_4074180_x3  | .....ucAcaccaacagauccg.....          | 1 |
| Gi5_8667416_x3  | .....uucucaccaacUgauccg.....         | 1 |
| Gi3_27832424_x3 | .....ugguucucaccaacGgauccgg.....     | 1 |
| Gi5_8684228_x3  | .....uccggcguaguauaacUgcuaaga.....   | 1 |
| Gi5_8658149_x3  | .....guGcgauucccgcgccgga.....        | 1 |
| Gi3_27834023_x3 | .....guuNguauucccgcgccgga.....       | 1 |
| Gi1_4080300_x3  | .....gguuAgauucccgcgccgg.....        | 1 |
| Gi5_8700176_x3  | .....ggCucucaccaacagauccgg.....      | 1 |
| Gi3_27805868_x3 | .....guuUucaccaacagauccgg.....       | 1 |
| Gi1_4051707_x3  | .....ucUggcguaguauaacggcuagaa.....   | 1 |
| Gi1a_5837905_x3 | .....uccggcguGguauaacggc.....        | 1 |
| Gi5_8682884_x3  | .....cagauccgggCucgauucccgcgccg..... | 1 |
| Gi2_10771150_x3 | .....uccgCcgaguauaacggcuaga.....     | 1 |
| Gi3_27937673_x3 | .....Uaucggguucgauucccgcgccgga.....  | 1 |
| Gi3_27836138_x3 | .....uucucaccaaaUagauccgg.....       | 1 |
| Gi5_8653148_x3  | .....guucgauucccgcgcgAggagc.....     | 1 |
| Gi3_27829607_x3 | .....ugUuucucaccaacagaucc.....       | 1 |
| Gi2_10759411_x3 | .....uccggcguaguauaacggcuCg.....     | 1 |
| Gi3_27830687_x3 | .....gguucgauucccCgcccggga.....      | 1 |
| Gi5_8699711_x3  | .....uccggcguaguauaacggcuagUau.....  | 1 |
| Gi3_27818648_x3 | .....ucAggcguaguauaacggc.....        | 1 |
| Gi5_8653427_x3  | .....uucucaccaCcagauccggguu.....     | 1 |
| Gi1_4080075_x3  | .....uucucCcccaacagauccg.....        | 1 |
| Gi2_10749778_x3 | .....gguAcgauucccgcgccgga.....       | 1 |
| Gi1_4089084_x3  | .....guucgauUccggcgccg.....          | 1 |
| Gi5_8674208_x3  | .....cggcguaguauaacggcuagaGu.....    | 1 |
| Gi3_27887441_x3 | .....cucacccGacagauccgg.....         | 1 |
| Gi3_27974735_x3 | .....ugUuucucaccaacagauccg.....      | 1 |
| Gi2_10821682_x3 | .....gguucgauucccUgcgcc.....         | 1 |
| Gi1_4077450_x3  | .....uucucaccaacagauccgU.....        | 1 |
| Gi3_27844193_x3 | .....ugguucucaccaacagCuccg.....      | 1 |
| Gi2_10822219_x3 | .....gguucgauucccgcgccggagcg.....    | 0 |
| Gi1_4064262_x3  | .....uccggcguaguauaacggcuGgaa.....   | 1 |
| Gi2_10740964_x3 | .....gguucucaccaacagauAccg.....      | 1 |
| Gi1_4065225_x3  | .....uccggcguaguauaacggcuUgaau.....  | 1 |
| Gi5_8665940_x3  | .....Gcucaccaacagauccgggu.....       | 1 |
| Gi5_8685422_x3  | .....uccggcguagAuaaacggcuaga.....    | 1 |
| Gi2_10784119_x3 | .....gguAcgauucccgcgccg.....         | 1 |
| Gi2_10804822_x3 | .....uccggcguaguauGacggcuagaau.....  | 1 |
| Gi5_8688299_x3  | .....guucgCuucccgcgccggagc.....      | 1 |
| Gi2_10784854_x3 | .....gguucgauAcccgcgccg.....         | 1 |
| Gi1_4059102_x3  | .....uccggcguaguauaaUgg.....         | 1 |
| Gi2_10746955_x3 | .....guucgaGucccggcgccgga.....       | 1 |
| Gi2_10751710_x3 | .....Accggcguaguauaacggcuag.....     | 1 |
| Gi5_8711684_x3  | .....gguucAauucccgcgccgga.....       | 1 |

|                 |                                |       |   |
|-----------------|--------------------------------|-------|---|
| Gi3_27798551_x3 | .....Cgguucucacccaacagauc      | ..... | 1 |
| Gi3_27896120_x3 | .....uucgauuccUggcgccgga       | ..... | 1 |
| Gi5_8657960_x3  | .....uccggcguaguauaacgCc       | ..... | 1 |
| Gi1_4077123_x3  | .....gguucucacAcaacagauccg     | ..... | 1 |
| Gi5_8705318_x3  | .....Acucaccaacagauccg         | ..... | 1 |
| Gi1_4055982_x3  | .....uccggcguagCauaacggcuaga   | ..... | 1 |
| Gi5_8663615_x3  | .....ucucacccGacagauccg        | ..... | 1 |
| Gi3_27804740_x3 | .....ugguucucacccaacGgauc      | ..... | 1 |
| Gi5_8668661_x3  | .....uccggcguaguauaacggAua     | ..... | 1 |
| Gi5_8652128_x3  | .....guucgauucccgUcgcgga       | ..... | 1 |
| Gi1_4077942_x3  | .....uccggcguaguauUacggcuaga   | ..... | 1 |
| Gi5_8658503_x3  | .....ggAucgauucccgcgccggag     | ..... | 1 |
| Gi5_8672123_x3  | .....gguucgauucUcggcgccg       | ..... | 1 |
| Gi2_10744147_x3 | .....uccggcguauAuaaacggcua     | ..... | 1 |
| Gi1_4054593_x3  | .....cucacccGacagauccg         | ..... | 1 |
| Gi1_4077459_x3  | .....ucAggcguaguauaacggcuag    | ..... | 1 |
| Gi5_8655893_x3  | .....guucCauucccgcgccg         | ..... | 1 |
| Gi5_8678831_x3  | .....gguucgaAuucccgcgccg       | ..... | 1 |
| Gi2_10790641_x3 | .....gguucgauuUcggcgccg        | ..... | 1 |
| Gi3_27867647_x3 | .....Nguucgauucccgcgccggag     | ..... | 1 |
| Gi4_548499_x3   | .....gguucgauucccgcgcc         | ..... | 0 |
| Gi5_8653847_x3  | .....uCcgauucccgcgccg          | ..... | 1 |
| Gi2_10751311_x3 | .....guucucacccaGcagauccg      | ..... | 1 |
| Gi5_8659568_x3  | .....ugguucucacccaacagauccggc  | ..... | 1 |
| Gi3_27926360_x3 | .....Aucgauucccgcgccggagc      | ..... | 1 |
| Gi3_27822023_x3 | .....auUcggguucgauucccgcgccgga | ..... | 1 |
| Gi5_8689874_x3  | .....ugguucucacccaacagCuccg    | ..... | 1 |
| Gi3_27797651_x3 | .....ugguucucNcccaacagauccg    | ..... | 1 |
| Gi3_27909551_x3 | .....uucgauuccUggcgccggagc     | ..... | 1 |
| Gi2_10816255_x3 | .....cccaacagaCccggguuc        | ..... | 1 |
| Gi5_8689247_x3  | .....Aguucucacccaacagauccggguu | ..... | 1 |
| Gi1_4071663_x3  | .....gguucgauucccgcgccUgga     | ..... | 1 |
| Gi1_4052016_x3  | .....uccggcguaguauaacgAcua     | ..... | 1 |
| Gi5_8671412_x3  | .....ccggguucgauucccgcgccgC    | ..... | 1 |
| Gi3_27821294_x3 | .....uAcggcguaguauaacggcuag    | ..... | 1 |
| Gi3_27930038_x3 | .....gguucucaUccaacagauccg     | ..... | 1 |
| Gi5_8695913_x3  | .....gguucgauucccgcgccgCa      | ..... | 1 |
| Gi2_10744057_x3 | .....Gucucacccaacagauccggguucg | ..... | 1 |
| Gi2_10754875_x3 | .....uccAgcguaguauaacggc       | ..... | 1 |
| Gi5_8656658_x3  | .....gguNcgauucccgcgccggagc    | ..... | 1 |
| Gi2_10744978_x3 | .....uccggcguaguCuaacggcuag    | ..... | 1 |
| Gi1_4062306_x3  | .....uccggcAuaguauaacggcua     | ..... | 1 |
| Gi5_8715050_x3  | .....guucucacccaacagaCccg      | ..... | 1 |
| Gi5_8702369_x3  | .....ccggcguaguauaacggcCaga    | ..... | 1 |
| Gi5_8703722_x3  | .....gguucucacccaacagaGccg     | ..... | 1 |
| Gi5_8692604_x3  | .....cucUccaacagauccg          | ..... | 1 |
| Gi1_4061478_x3  | .....guucucacAcaacagauccg      | ..... | 1 |

|                                                   |   |
|---------------------------------------------------|---|
| Gi3_27863351_x3.....ucAggcguaguauaacggcuag.....   | 1 |
| Gi2_10785745_x3.....gguucgauucccggcgcGgga.....    | 1 |
| Gi5_8703035_x3.....uccggcAuaguauaacggcua.....     | 1 |
| Gi1_4088490_x3.....gguucgauucccggcgcGg.....       | 1 |
| Gi5_8678750_x3.....uccggcguCguauaacggcuagaau..... | 1 |
| Gi5_8706569_x3.....guucucaccaGcagauccgg.....      | 1 |
| Gi1_4088190_x3.....gguucgauucUcggcgccgga.....     | 1 |
| Gi1_4060851_x3.....guucuAacccaacagauccgg.....     | 1 |
| Gi3_27975029_x3.....gUuucccggcgcGgagc.....        | 1 |
| Gi2_10822264_x3.....guucucacccaaAagauccg.....     | 1 |
| Gi5_8713547_x3.....gguucgauuGccggcgccgg.....      | 1 |
| Gi3_27911471_x3.....gUguucgauucccggcgcGgagc.....  | 1 |
| Gi1_4047990_x3.....uucGcaccacaacagauccg.....      | 1 |
| Gi2_10822114_x3.....gguuGgauucccggcgcGgga.....    | 1 |
| Gi1_4077564_x3.....gguucgGuucccggcgcGgagc.....    | 1 |
| Gi1_4058406_x3.....guucucaccUacagauccg.....       | 1 |
| Gi2_10745776_x3.....gguuAgauucccggcgcGgga.....    | 1 |
| Gi2_10794754_x3.....gguucAauucccggcgcGg.....      | 1 |
| Gi3_27948005_x3.....gguucgauucccgGgGccggagc.....  | 1 |
| Gi3_27914537_x3.....gguucgauucccUgGcccgga.....    | 1 |
| Gi1_4060380_x3.....uucucaUccaacagauccg.....       | 1 |
| Gi5_8714744_x3.....uccggcguaguaGaacggcuagaau..... | 1 |
| Gi3_27893261_x3.....gguucgauuAccggcgccggag.....   | 1 |
| Gi5_8680985_x3.....gGuucccgccuuccuucgucu.....     | 1 |
| Gi1_4083678_x3.....uGcggcguaguauaacggcuagaa.....  | 1 |
| Gi3_27886430_x3.....guuGgauucccggcgcGgga.....     | 1 |
| Gi1_4056021_x3.....ucAggcguaguauaacgg.....        | 1 |
| Gi5_8692295_x3.....cggcguaguauaacggcuCga.....     | 1 |
| Gi5_8715074_x3.....uccggcguaguUuaacgg.....        | 1 |
| Gi2_10790677_x3.....gguucgauucccgGgGccggagc.....  | 1 |
| Gi1_4063719_x3.....ccggUguaguauaacggcua.....      | 1 |
| Gi3_27884855_x3.....uucgauuUccggcgccggagc.....    | 1 |
| Gi5_8683430_x3.....uccggcguaguauaacggcuaAaau..... | 1 |
| Gi3_27804281_x3.....ucucacccaacagGuccg.....       | 1 |
| Gi1_5815924_x3.....uccggcgCaguauaacggcuag.....    | 1 |
| Gi5_8661392_x3.....uccgUcguaguauaacggc.....       | 1 |
| Gi3_27900356_x3.....guucucacUcaacagauccgg.....    | 1 |
| Gi5_8709053_x3.....uccgCcgguaguauaacggcua.....    | 1 |
| Gi1_4085040_x3.....ccggcguaguauaacggcCaga.....    | 1 |
| Gi2_10773382_x3.....uccggcguaguauaGcggcuagaa..... | 1 |
| Gi3_27808544_x3.....guucucacccaacagauccC.....     | 1 |
| Gi2_10748152_x3.....GucgauucccggcgcGgag.....      | 1 |
| Gi2_10786429_x3.....uGgauucccggcgcGgag.....       | 1 |
| Gi1_4060719_x3.....gguucgauucAcggcgccgg.....      | 1 |
| Gi5_8671859_x3.....uccggcguauuaaacggcuag.....     | 1 |
| Gi5_8706995_x3.....gguucgauucccggcgcA.....        | 1 |
| Gi2_10797733_x3.....gAuucucacccaacagauccg.....    | 1 |

|                 |                                |   |
|-----------------|--------------------------------|---|
| Gi3_27955169_x3 | .....gguucUauucccgcgccg        | 1 |
| Gi3_27875945_x3 | .....agauccggguCcgauuccc       | 1 |
| Gi3_27906479_x3 | .....uccgAcguaguauaacggcuag    | 1 |
| Gi3_27868535_x3 | .....cagauccggguCcgauuccc      | 1 |
| Gi2_10801753_x3 | .....uccggcguaguauaacggcuagaGu | 1 |
| Gi5_8704106_x3  | .....uccggcguaguauaaAggcuagaau | 1 |
| Gi3_27901448_x3 | .....ugguucAcacccaacagauccg    | 1 |
| Gi3_27905078_x3 | .....guucucacccUacagauccg      | 1 |
| Gi2_10783561_x3 | .....uucucacccCacagauccg       | 1 |
| Gi1_4060953_x3  | .....uucuUacccaacagauccg       | 1 |
| Gi1_4073718_x3  | .....guucgauUccggcgccggagc     | 1 |
| Gi1_4070532_x3  | .....ugguucucacccaacCgauccgg   | 1 |
| Gi2_10779721_x3 | .....uucuUacccaacagauccg       | 1 |
| Gi5_8683466_x3  | .....uccggcguUguauaacggc       | 1 |
| Gi5_8690372_x3  | .....uccggcguaguauaacggcuaC    | 1 |
| Gi1_4063026_x3  | .....gAucgauucccgcgccgga       | 1 |
| Gi3_27922640_x3 | .....ucgauucccgUgccgga         | 1 |
| Gi5_8681225_x3  | .....ggcguaguNuaacggcuag       | 1 |
| Gi2_10752562_x3 | .....Cccggcguaguauaacggcuagaa  | 1 |
| Gi3_27819824_x3 | .....gguuAgauucccgcgccgg       | 1 |
| Gi2_10762984_x3 | .....guucucGcccaacagauccg      | 1 |
| Gi3_27931829_x3 | .....ucgauUccggcgccggag        | 1 |
| Gi1_4065504_x3  | .....guucAauucccgcgccg         | 1 |
| Gi1_4073493_x3  | .....guucucacccaGcagauccg      | 1 |
| Gi3_27820343_x3 | .....ucAauucccgcgccggagc       | 1 |
| Gi5_8663858_x3  | .....gguucgauCcccgcgccgga      | 1 |
| Gi3_27905309_x3 | .....cagauccgNguucgauucc       | 1 |
| Gi2_10778767_x3 | .....gguucgauuccAggcgccggag    | 1 |
| Gi1_4063590_x3  | .....guucgauucccgcgccCga       | 1 |
| Gi1_4048029_x3  | .....gguucgauucccgcgccggagA    | 1 |
| Gi2_10746802_x3 | .....gAucgauucccgcgccgga       | 1 |
| Gi3_27874574_x3 | .....uccggcguaguauaacggcAag    | 1 |
| Gi5_8692001_x3  | .....guucucacccaacCgauccgg     | 1 |
| Gi2_10811659_x3 | .....gguucgauucccgcgGc         | 1 |
| Gi2_10811437_x3 | .....guucgauuccAggcgccg        | 1 |
| Gi3_27939230_x3 | .....ggguucgauucccgcgccggCgc   | 1 |
| Gi2_10756783_x3 | .....gguucgauUaccggcgcc        | 1 |
| Gi3_27913328_x3 | .....caacagauNcggguucgauuccc   | 1 |
| Gi5_8684030_x3  | .....ucacccaacagauccgggGu      | 1 |
| Gi1_4063806_x3  | .....gguucAcacccaacagauccg     | 1 |
| Gi1_4057449_x3  | .....gguucgauucccgcgccAgagc    | 1 |
| Gi1_4073049_x3  | .....uucucacccaacaAaucg        | 1 |
| Gi2_10781722_x3 | .....uccAgcguaguauaacggcuagaau | 1 |
| Gi3_27978749_x3 | .....uccggcAuaguauaacggcuag    | 1 |
| Gi1_4088958_x3  | .....guucuaUccaacagauccg       | 1 |
| Gi5_8694449_x3  | .....gguucgauucccgcgccCgagc    | 1 |
| Gi3_27796832_x3 | .....guucucacccaacagGuccggg    | 1 |

|                 |                           |                           |   |
|-----------------|---------------------------|---------------------------|---|
| Gi1_4064547_x3  | uccgCcguaguauaacgg        |                           | 1 |
| Gi5_8715332_x3  |                           | ucucacccaacagGuccg        | 1 |
| Gi1_4087317_x3  | uccggcguaguauaacggUuagaau |                           | 1 |
| Gi1_4085415_x3  | uccggcguaguauaacggcuUg    |                           | 1 |
| Gi1_4085742_x3  |                           | guucUauucccggcgccggagc    | 1 |
| G1a_5822464_x3  | Gccggcguaguauaacggc       |                           | 1 |
| G1a_5854144_x3  |                           | gguucgauucccggcgccgGgc    | 1 |
| Gi1_4078194_x3  | uccggcAuaguauaacgg        |                           | 1 |
| Gi3_27864914_x3 |                           | uucgaCucccggcgccgg        | 1 |
| Gi3_27815537_x3 |                           | uucucacccaacagauAg        | 1 |
| Gi3_27969116_x3 |                           | Aguucucacccaacagaucc      | 1 |
| Gi2_10779472_x3 |                           | gguucgauucccggcgcAg       | 1 |
| Gi3_27954134_x3 |                           | guucgauuccUgccccggagc     | 1 |
| Gi3_27837659_x3 |                           | gguucucacccaacagauAcgg    | 1 |
| Gi5_8680364_x3  |                           | gguucgauucUcggcgccg       | 1 |
| Gi2_10798258_x3 |                           | gguucgauucccggcgcGcg      | 1 |
| Gi2_10780153_x3 |                           | gguucucCcccaacagauccg     | 1 |
| Gi3_27887174_x3 |                           | uucucacccaacagCuccg       | 1 |
| Gi3_27964262_x3 |                           | gguucgauucccggcgccgUa     | 1 |
| Gi1_4085181_x3  | uccggcguaguauGacggcuagaau |                           | 1 |
| Gi5_8680913_x3  |                           | guucgauucccgUgccccggagc   | 1 |
| Gi2_10748833_x3 | uccggcguaguauaacggcuCgaa  |                           | 1 |
| Gi1_4074489_x3  | uccgAcguaguauaacggcuag    |                           | 1 |
| Gi5_8706638_x3  | uccggcUuaguauaacgg        |                           | 1 |
| Gi3_27822218_x3 | uccggcguaguauaacggcuagaG  |                           | 1 |
| Gi1_4057173_x3  | uccggcguaguauaCcggcuaga   |                           | 1 |
| Gi5_8691923_x3  | uccggcguagGauaacggcuag    |                           | 1 |
| Gi1_4056513_x3  |                           | uucucacccaacagCuccgg      | 1 |
| Gi5_8714339_x3  |                           | ucUauucccggcgccggagc      | 1 |
| G1a_5872276_x3  |                           | gguucgaCucccggcgccggagc   | 1 |
| Gi3_27939362_x3 | uccggcguacuauaacggcuau    |                           | 1 |
| Gi1_4063098_x3  |                           | gguucgauuccGggcgccgg      | 1 |
| Gi3_27836450_x3 |                           | guucgauucccggcgccgUag     | 1 |
| Gi3_27881060_x3 | Ucggcguaguauaacggcuaga    |                           | 1 |
| G1a_5829127_x3  |                           | ucucacccaacagGuccg        | 1 |
| Gi5_8654009_x3  | ccggcguaguauaGcggcuau     |                           | 1 |
| Gi3_27960362_x3 | uccgCcguaguauaacgg        |                           | 1 |
| Gi3_27944972_x3 |                           | ucUauucccggcgccggagc      | 1 |
| Gi5_8665886_x3  |                           | Nguucucacccaacagauccg     | 1 |
| Gi3_27859094_x3 |                           | guucucGcccaacagauccgg     | 1 |
| Gi5_8658599_x3  |                           | cgauucccggcgccggagcCu     | 1 |
| Gi3_27859577_x3 |                           | uccggguucgauucccggcgccgAa | 1 |
| Gi5_8685113_x3  |                           | guucgauucccggcgccggaAc    | 1 |
| Gi2_10730029_x3 |                           | gguucucacccaacagGuccg     | 1 |
| Gi5_8693288_x3  |                           | gauucccggcgccggGgc        | 1 |
| Gi3_28079716_x2 |                           | gguucgauucccggcgccgGgg    | 1 |
| Gi1_4133185_x2  | gUcguaguauaacggcuagaau    |                           | 1 |

|                      |                                 |   |
|----------------------|---------------------------------|---|
| Gi2_10980637_x2..... | uccggguucgauucccggc.....        | 0 |
| Gi5_8822941_x2.....  | Acggcguaguauaacggcuag.....      | 1 |
| Gi5_8826375_x2.....  | Nuucgauucccggcgcgg.....         | 1 |
| Gi1_4143699_x2.....  | agauccggguucgauucc.....         | 0 |
| Gi3_28028530_x2..... | cucacccaacagauccggguCcgaau..... | 1 |
| Gi5_8723713_x2.....  | gUuucccggcgcgggagc.....         | 1 |
| Gi1_4125441_x2.....  | guucgauucccggcGcgga.....        | 1 |
| Gi5_8752453_x2.....  | ccUgcguaguauaacggcua.....       | 1 |
| Gi1_4147217_x2.....  | guucgauucccgUgcccggagc.....     | 1 |
| Gi4_564144_x2.....   | guucgauucccggcgcgggagcA.....    | 1 |
| Gi5_8792971_x2.....  | ccggcguCguauaacggcuaga.....     | 1 |
| Gi1_4152177_x2.....  | uggGucucacccaacagauccg.....     | 1 |
| Gi5_8721245_x2.....  | uucCcacccaacagauccgg.....       | 1 |
| Gi3_28022676_x2..... | uucgauucccggcgcgggagcA.....     | 1 |
| Gi2_10990929_x2..... | aguccggcguaguauaacAg.....       | 1 |
| Gi1_4129793_x2.....  | gguucgCuucccggcgcggag.....      | 1 |
| Gi2_10924103_x2..... | uucgauuccNcggcgcgggagc.....     | 1 |
| Gi2_10922261_x2..... | uccggcGaguauaacggcua.....       | 1 |
| Gi2_10933207_x2..... | ugguucucaccUaacagaucc.....      | 1 |
| Gi1_5894674_x2.....  | gguucgauucccggcGuc.....         | 1 |
| Gi1_4135515_x2.....  | uccggcguaguauaacggcuC.....      | 1 |
| Gi2_10922863_x2..... | guucgauAcccggcgcgcg.....        | 1 |
| Gi1_4125299_x2.....  | ucgauucccggcgcgggaU.....        | 1 |
| Gi5_8752639_x2.....  | ggGucgauucccggcgcgggagcguu..... | 1 |
| Gi5_8753319_x2.....  | cUggcguaguauaacggcuag.....      | 1 |
| Gi1_5954188_x2.....  | guucgGuucccggcgcgcg.....        | 1 |
| Gi2_10874447_x2..... | uccggcguagCauaacggcuagaau.....  | 1 |
| Gi1_4147393_x2.....  | ugguucucUcccaacagauccg.....     | 1 |
| Gi4_560646_x2.....   | gguucgauuccUgcgcgcg.....        | 1 |
| Gi3_28198142_x2..... | uucgauucccgGgcccga.....         | 1 |
| Gi5_8812953_x2.....  | gaCucccggcgcgggagc.....         | 1 |
| Gi3_28044874_x2..... | uccggcCuaguauaacggc.....        | 1 |
| Gi1_5959402_x2.....  | ggCucgauucccggcgcgcg.....       | 1 |
| Gi2_10890015_x2..... | guGcgauucccggcgcgcggag.....     | 1 |
| Gi3_28133844_x2..... | gNucgauucccggcgcgggagc.....     | 1 |
| Gi1_4106855_x2.....  | gguucgauucccggcGAcg.....        | 1 |
| Gi5_8747139_x2.....  | uucucacccaacGgauccggguuc.....   | 1 |
| Gi5_8787061_x2.....  | ggcguaguauCacggcuaga.....       | 1 |
| Gi5_8779869_x2.....  | gguucgGuucccggcgcgc.....        | 1 |
| Gi2_10867705_x2..... | uccggcguaguauUacggcua.....      | 1 |
| Gi1_4131383_x2.....  | guucgauucccggcGAcggagc.....     | 1 |
| Gi3_28084690_x2..... | guucucacNcaacagauccgg.....      | 1 |
| Gi2_10886109_x2..... | uucucacccUacagauccg.....        | 1 |
| Gi1_4100149_x2.....  | cAcacccaacagauccgg.....         | 1 |
| Gi3_28253028_x2..... | gggCucgauucccggcgcgggag.....    | 1 |
| Gi1_4094725_x2.....  | guucucacccaacagauGcg.....       | 1 |
| Gi3_28254678_x2..... | Ugauucccggcgcgggagc.....        | 1 |

|                 |                               |   |
|-----------------|-------------------------------|---|
| Gi3_28098530_x2 | cgauucccgcgccggGg             | 1 |
| Gi2_10835159_x2 | guucucacNcaacagauccgg         | 1 |
| Gi3_28207296_x2 | gguNcgaaucccgcgccggag         | 1 |
| Gi2_10851117_x2 | ugguucucacccaacagauAg         | 1 |
| Gi2_10842717_x2 | gguucAcacccaacagauccg         | 1 |
| Gi3_28230496_x2 | Cugguucucacccaacagaucc        | 1 |
| Gi5_8818071_x2  | uccggcguaguauaacggcuagaGugguu | 1 |
| Gi1_4118663_x2  | gguucgauucccggcAccgga         | 1 |
| Gi3_28146898_x2 | uccggcguacuauaacggc           | 1 |
| Gi1_4129347_x2  | ucCcacccaacagauccg            | 1 |
| Gi5_8759113_x2  | cUauucccgcgccggagcguuuc       | 1 |
| Gi3_28172804_x2 | guucucacUcaacagauccggg        | 1 |
| Gi3_28134252_x2 | uucucacccCacagauccg           | 1 |
| Gi3_28134604_x2 | cGacagauccggguucga            | 1 |
| Gi1_4149101_x2  | uccCgcuaguauaacggcuag         | 1 |
| Gi1_4100309_x2  | uccggcguagCauaacggcuagaa      | 1 |
| Gi5_8741773_x2  | uucgauucccgcgccggagc          | 0 |
| Gi3_28133342_x2 | ucgauucccgcgccgCagc           | 1 |
| Gi1_4102229_x2  | cUggcguaguauaacggc            | 1 |
| Gi3_28048188_x2 | gguucCauucccgcgccgg           | 1 |
| Gi1_4106031_x2  | cucacccaNcagauccggguucga      | 1 |
| Gi3_28210084_x2 | uuggCucucacccaacagaucc        | 1 |
| Gi1_4121287_x2  | uugguucucacccaacagauccg       | 0 |
| Gi5_8738045_x2  | uUgauucccgcgccggagc           | 1 |
| Gl1a_5941946_x2 | uGcggcguaguauaacgg            | 1 |
| Gi3_28038906_x2 | uGucacccaacagauccgg           | 1 |
| Gi2_10850087_x2 | ccggcguaguauaacggcuag         | 0 |
| Gi3_28096924_x2 | guucgauucAcggcgccg            | 1 |
| Gi2_10904063_x2 | gauucccgUgcccggagc            | 1 |
| Gi1_4104675_x2  | gguucgauucccgcgccgCg          | 1 |
| Gi5_8806185_x2  | ucucaccUaacagauccgg           | 1 |
| Gi3_28034016_x2 | gguucgUuucccgcgcc             | 1 |
| Gl1a_5978784_x2 | uccggcguaguauaacggcuAA        | 1 |
| Gi3_28175422_x2 | uucgauucccgcgUggagc           | 1 |
| Gi3_28076800_x2 | cacccaacagauccggguCc          | 1 |
| Gi1_4152189_x2  | gguucgauuccUgcccg             | 1 |
| Gi3_28089238_x2 | uucgauucAcggcgccgga           | 1 |
| Gi3_28065536_x2 | agauucUggguucgauucc           | 1 |
| Gi3_28136160_x2 | guucucacccaacGgauccggg        | 1 |
| Gi5_8742179_x2  | gguucgauAcccgcgccggag         | 1 |
| Gi2_10885251_x2 | ugguucucacccaacagauccg        | 0 |
| Gl1a_5904370_x2 | gCucgauucccgcgccg             | 1 |
| Gi3_27993528_x2 | uucAcacccaacagauccg           | 1 |
| Gl1a_5899828_x2 | gguuUgauucccgcgccg            | 1 |
| Gi3_28000050_x2 | guucucaUccaacagauccg          | 1 |
| Gi5_8771865_x2  | uccggcguaguGaacgg             | 1 |
| Gi5_8789659_x2  | guucgaAuucccgcgccgga          | 1 |



|                      |                                |   |
|----------------------|--------------------------------|---|
| Gi2_10918135_x2..... | gguucgauucccgcgUcgg.....       | 1 |
| Gi1_4132839_x2.....  | uccggAguaguauaacggcuagaau..... | 1 |
| Gi3_28203820_x2..... | uucucaccAaacagauccg.....       | 1 |
| Gi2_10981625_x2..... | cgauucccgcgGggagc.....         | 1 |
| Gi3_28231734_x2..... | cgauucccgcgGcgagc.....         | 1 |
| Gi4_554144_x2.....   | cGcaccaacagauccggguucg.....    | 1 |
| Gi5_8765217_x2.....  | guucgauucccgCcgccg.....        | 1 |
| Gi3_28010828_x2..... | uccggcguagAauaacggcuagaa.....  | 1 |
| Gi5_8728071_x2.....  | uccNgcguaguauaacgg.....        | 1 |
| Gi1a_5939658_x2..... | guucucacccaacGgauccg.....      | 1 |
| Gi2_10890847_x2..... | guucgauucccgcgccCgag.....      | 1 |
| Gi1a_5881486_x2..... | uGcggcguaguauaacggcua.....     | 1 |
| Gi3_28233852_x2..... | gUguucgauucccgcgccg.....       | 1 |
| Gi3_28174146_x2..... | ucAcacccaacagauccg.....        | 1 |
| Gi3_28231186_x2..... | ucgauAcccgcgccggagc.....       | 1 |
| Gi1_4141445_x2.....  | gguucgUuucccgcgccggagc.....    | 1 |
| Gi3_28181902_x2..... | gguucgauucccgcgccUg.....       | 1 |
| Gi5_8720173_x2.....  | gguucucacccUacagauccg.....     | 1 |
| Gi2_10977773_x2..... | aguccggcguaguGuaacgg.....      | 1 |
| Gi3_28140802_x2..... | gguucCauucccgcgccgga.....      | 1 |
| Gi1_4135609_x2.....  | uucuGacccaacagauccg.....       | 1 |
| Gi5_8763973_x2.....  | gguucgauucccgcgccggagcAu.....  | 1 |
| Gi5_8812521_x2.....  | guucgauucAcggcgccgga.....      | 1 |
| Gi3_28114810_x2..... | ugguucucacccaacagauAcg.....    | 1 |
| Gi2_10906983_x2..... | gguucgauucccggcUcc.....        | 1 |
| Gi3_28001604_x2..... | gguucucacccCacagauccgggu.....  | 1 |
| Gi4_564836_x2.....   | gguucgauucccgcgccggCgc.....    | 1 |
| Gi5_8734655_x2.....  | gguucgauucccgcgccgAag.....     | 1 |
| Gi3_28250398_x2..... | uccggcguaguauaacCgcua.....     | 1 |
| Gi3_28107384_x2..... | ucgauucccgcgCccggagc.....      | 1 |
| Gi2_10978851_x2..... | uccggcguaguauUacggc.....       | 1 |
| Gi2_10897907_x2..... | ucGggcguaguauaacggcuaga.....   | 1 |
| Gi3_28149672_x2..... | gggGucgauucccgcgccg.....       | 1 |
| Gi2_10849895_x2..... | agaucggNuucgauucc.....         | 1 |
| Gi5_8743879_x2.....  | ucAggcguaguauaacggc.....       | 1 |
| Gi3_28017590_x2..... | gaucgggNucgauucc.....          | 1 |
| Gi1_4142341_x2.....  | guucgauucccgcgccAgag.....      | 1 |
| Gi3_28082106_x2..... | ccggcguaguauaacggU.....        | 1 |
| Gi3_28130878_x2..... | ucGggcguaguauaacggc.....       | 1 |
| Gi3_28194068_x2..... | ucgauucccgcgAcggagc.....       | 1 |
| Gi1_4118443_x2.....  | uucgGuucccgcgccgg.....         | 1 |
| Gi2_10858823_x2..... | guucgauucUcggcgccg.....        | 1 |
| Gi2_10853099_x2..... | ucgauucccgCcgccggag.....       | 1 |
| Gi2_10963211_x2..... | ucGggcguaguauaacggcua.....     | 1 |
| Gi1_4153439_x2.....  | gguucgauucccgAcgcccga.....     | 1 |
| Gi4_562044_x2.....   | ggCucgauucccgcgccgg.....       | 1 |
| Gi1_4128047_x2.....  | uAcggcguaguauaacgg.....        | 1 |

|                 |                                      |   |
|-----------------|--------------------------------------|---|
| Gi1_4091035_x2  | .....ugguucucacccUacagauccgg.....    | 1 |
| Gi1_4114517_x2  | .....gAucgauucccgcgccggagc.....      | 1 |
| Gi2_10928843_x2 | .....uucgauucccgcgccAgg.....         | 1 |
| Gi3_28019476_x2 | .....aguccggcguaguauaacA.....        | 1 |
| Gi1a_5934562_x2 | .....gguucUauucccgcgcc.....          | 1 |
| Gi2_10952571_x2 | .....guucgauucccgcgccggaUc.....      | 1 |
| Gi2_10941671_x2 | .....cggcguaguauaGcggcuaga.....      | 1 |
| Gi5_8728773_x2  | .....guucgauucccgcgccGgg.....        | 1 |
| Gi2_10869631_x2 | .....gguucgauucccgGgcccggag.....     | 1 |
| Gi2_10868905_x2 | .....gguucgauucccgcgccggU.....       | 1 |
| Gi1_4119237_x2  | .....uccggAguaguauaacggcua.....      | 1 |
| Gi5_8819693_x2  | .....uccggcguaguGuaacggcu.....       | 1 |
| Gi3_28035968_x2 | .....ccggcguaguaCaacggc.....         | 1 |
| Gi3_27984986_x2 | .....agaucggguucAauucc.....          | 1 |
| Gi1_4103171_x2  | .....uccggcguaguauaacggAuaga.....    | 1 |
| Gi2_10852143_x2 | .....cgauucccgcgccggGgcguuu.....     | 1 |
| Gi1_4116457_x2  | .....gguucucaccAaacagauccg.....      | 1 |
| Gi3_28154066_x2 | .....gguucucaNccaacagauccgggu.....   | 1 |
| Gi3_27997186_x2 | .....cagaucggguucgauucUc.....        | 1 |
| Gi2_10933965_x2 | .....ugguucuUacccaacagauccg.....     | 1 |
| Gi1a_5889500_x2 | .....uccggAguaguauaacggcuag.....     | 1 |
| Gi2_10990005_x2 | .....gguucgauuccGggcgcc.....         | 1 |
| Gi1_4101697_x2  | .....uccggcAuaguauaacggcuaga.....    | 1 |
| Gi5_8767991_x2  | .....uucuGacccaacagauccg.....        | 1 |
| Gi1a_5943254_x2 | .....ucucaccNacagauccg.....          | 1 |
| Gi3_28213472_x2 | .....guugguucucacccaacagauccggg..... | 0 |
| Gi4_558114_x2   | .....uccgUcguaguauaacggcuaga.....    | 1 |
| Gi3_28051586_x2 | .....ucgauucccgcgccggaA.....         | 1 |
| Gi1a_5942324_x2 | .....Gccggcguaguauaacggcuagaa.....   | 1 |
| Gi1_4158449_x2  | .....gguucgauCcccggcgccgga.....      | 1 |
| Gi2_10853421_x2 | .....cggguucgauucccgcgccggagc.....   | 0 |
| Gi3_28247670_x2 | .....cagaucAgguucgauucc.....         | 1 |
| Gi3_28249020_x2 | .....uucucacccaacagauUcgg.....       | 1 |
| Gi1_4134717_x2  | .....guucgauucccgUgccc.....          | 1 |
| Gi1_4106429_x2  | .....Aucacccaacagauccgg.....         | 1 |
| Gi1_4095373_x2  | .....ucgauCcccggcgccggagc.....       | 1 |
| Gi1_4137261_x2  | .....uccggcgCaguauaacggcuaga.....    | 1 |
| Gi5_8780779_x2  | .....ugguucucacccUacagauccg.....     | 1 |
| Gi3_28236496_x2 | .....uucucaccAaacagauccgg.....       | 1 |
| Gi1_4140037_x2  | .....uccggcguNguauaacggcuagaa.....   | 1 |
| Gi3_28128564_x2 | .....uucgauucccgcgccggag.....        | 0 |
| Gi1_4145965_x2  | .....cucacccaacagauccAgg.....        | 1 |
| Gi2_10980227_x2 | .....uccggcguaguauaacggcuagaU.....   | 1 |
| Gi2_10857755_x2 | .....uccggcguaguaGaacggcuag.....     | 1 |
| Gi3_28247674_x2 | .....uucgauucccgcgccgAa.....         | 1 |
| Gi1_4092719_x2  | .....gguucgauucccgcgccUg.....        | 1 |
| Gi5_8784113_x2  | .....ugAuucucacccaacagauccg.....     | 1 |

|                 |                              |   |
|-----------------|------------------------------|---|
| Gi1_4150379_x2  | ugAuucucacccaacagauccg       | 1 |
| Gi2_10882565_x2 | gauuccggcgUggagc             | 1 |
| Gi3_28246232_x2 | ugAuucucacccaacagauc         | 1 |
| Gi2_10954911_x2 | Cccggcguaguauaacgg           | 1 |
| Gi2_10982499_x2 | Ucguaguauaacggcuagaa         | 1 |
| Gi5_8748139_x2  | Gagauccggguucgauuccggcgccg   | 1 |
| G1a_5925080_x2  | gguucgauucccAgcgccggagc      | 1 |
| G1a_5949928_x2  | uccggcguaguUuaacggcuag       | 1 |
| Gi1_4151559_x2  | uccggcguaguauaacggcuCga      | 1 |
| Gi3_28229254_x2 | ucGcacccaacagauccg           | 1 |
| Gi3_28234392_x2 | gguucgauucccggcgccggaU       | 1 |
| Gi5_8827813_x2  | Gcggcguaguauaacggcuagaau     | 1 |
| Gi1_4111627_x2  | gguucgauucccgUgccg           | 1 |
| Gi3_28108420_x2 | cagauccgggCucgauucc          | 1 |
| Gi3_28040844_x2 | ucgauuccggcgccggaAc          | 1 |
| Gi2_10947365_x2 | guucgauuAccggcgccggag        | 1 |
| Gi2_10883591_x2 | ucgauuccggcgccUga            | 1 |
| Gi3_28216684_x2 | gguucucacccaCagauccgggu      | 1 |
| Gi5_8762963_x2  | gguucgauucccgcgCgAgga        | 1 |
| Gi4_566220_x2   | Uguucucacccaacagauccg        | 1 |
| Gi1_4128245_x2  | uggAucucacccaacagauccg       | 1 |
| Gi3_27993486_x2 | guucucacccaCagauccgg         | 1 |
| Gi1_4091359_x2  | Cuucgauuccggcgccggagc        | 1 |
| Gi2_10893647_x2 | gguucgaAuuccggcgccgga        | 1 |
| Gi5_8823847_x2  | accaacaNauccggguucgauucc     | 1 |
| G1a_5939924_x2  | uccggcguaguauGacggcuaga      | 1 |
| G1a_5921894_x2  | uccggcguaguauaacggcuagGa     | 1 |
| Gi3_28018490_x2 | guucucacccaacaAauccgg        | 1 |
| Gi3_28102444_x2 | gUcguaguauaacggcuaga         | 1 |
| Gi2_10846981_x2 | ucgauuccggcAccggagc          | 1 |
| Gi5_8757575_x2  | gguucgauucccUgcgccggag       | 1 |
| Gi3_28212126_x2 | gauucccgAcgccggagc           | 1 |
| Gi1_4125009_x2  | ucGcacccaacagauccg           | 1 |
| Gi2_10972823_x2 | gguucucacccaaAagauccg        | 1 |
| Gi2_10948143_x2 | Cgguucgauuccggcgccggagc      | 1 |
| Gi1_4091203_x2  | guucgauucccgCccgga           | 1 |
| Gi5_8724307_x2  | uccggcguaguauaacggA          | 1 |
| Gi2_10962109_x2 | uccggcguaguauaacggGua        | 1 |
| Gi1_4148503_x2  | Uuucgauuccggcgccggag         | 1 |
| Gi2_10992029_x2 | uccggcguaguaAaacggcuaga      | 1 |
| Gi3_27983194_x2 | uucucCcccaacagauccgg         | 1 |
| Gi2_10874581_x2 | uccggcguaguaCaacggcuagaa     | 1 |
| Gi3_28228472_x2 | ucAggcguaguauaacggcuagaau    | 1 |
| Gi5_8721603_x2  | uGgauuccggcgccggag           | 1 |
| Gi1_4103481_x2  | gguucgauucccgcgU             | 1 |
| Gi5_8772157_x2  | aUuccggcguaguauaacggcuagaugg | 1 |
| Gi2_10929055_x2 | guucgauuccggcgAcggag         | 1 |

|                 |                              |   |
|-----------------|------------------------------|---|
| Gi5_8731915_x2  | ..gguAcucaccaacagauccg       | 1 |
| Gi1_4142901_x2  | ..gguuUgauucccgcgccgga       | 1 |
| G1a_5930724_x2  | ..ggGucgauucccgcgccggagc     | 1 |
| Gi3_28137472_x2 | ..cUggcgguaguauaacggcuaga    | 1 |
| Gi1_4105631_x2  | ..uucNcaccaacagauccg         | 1 |
| Gi5_8721061_x2  | ..ucucaccaacGgauccg          | 1 |
| Gi1_4155703_x2  | ..guucgauUccggcgccgga        | 1 |
| Gi1_4115253_x2  | ..uccggAguaguauaacgg         | 1 |
| Gi3_28086048_x2 | ..cgauucccgAgccggagc         | 1 |
| Gi3_28162802_x2 | ..gauucAcggcgccggagc         | 1 |
| Gi3_28027976_x2 | ..uccggcgguaguaGaaccgc       | 1 |
| Gi3_28114184_x2 | ..cagauccggguucgauUcc        | 1 |
| Gi3_28218068_x2 | ..gguucgaAuuccggcgccgg       | 1 |
| Gi5_8822741_x2  | ..guucgauucccgcgccgCa        | 1 |
| Gi1_4118673_x2  | ..uccggcgguaguauUcggcuagaau  | 1 |
| Gi2_10988729_x2 | ..cgauUccggcgccggagcguuuc    | 1 |
| Gi2_10959557_x2 | ..uccggcgguNguauaacggcu      | 1 |
| Gi3_28236582_x2 | ..guucgauCcccgcgccg          | 1 |
| Gi4_562006_x2   | ..ucUggcgguaguauaacggcuaga   | 1 |
| Gi2_10978487_x2 | ..gaAuucccgcgccggagc         | 1 |
| Gi1_4156275_x2  | ..ucaccaacagaCccgggu         | 1 |
| Gi1_4118337_x2  | ..caUccaacagauccggguucgauucc | 1 |
| Gi1_4110277_x2  | ..gguucgauucccgcgccgC        | 1 |
| Gi5_8731855_x2  | ..Gcagauccggguucgauucccgcg   | 1 |
| Gi2_10978229_x2 | ..uucucaccaacUgauccg         | 1 |
| Gi3_28171068_x2 | ..gguucgauucccgcgGcg         | 1 |
| Gi5_8729115_x2  | ..Cguucucaccaacagauccg       | 1 |
| Gi5_8730009_x2  | ..gguucgauAcccgcgccg         | 1 |
| Gi2_10889355_x2 | ..uccggcgguaguauUcggc        | 1 |
| Gi3_28200538_x2 | ..uccggcgguaguauaacggcuagUa  | 1 |
| Gi4_564492_x2   | ..uccggcgguaguauaacggcuAaau  | 1 |
| G1a_5920410_x2  | ..cgauaguauaacggcuaga        | 0 |
| Gi5_8743365_x2  | ..ucCaccaacagauccg           | 1 |
| Gi3_28229644_x2 | ..cgauucccgcgccggagcCu       | 1 |
| G1a_5918792_x2  | ..Ggguucucaccaacagauccg      | 1 |
| Gi1_4100969_x2  | ..gguucuUaccaacagauccg       | 1 |
| Gi2_10832883_x2 | ..guucgauGccggcgccg          | 1 |
| Gi3_28257636_x2 | ..guuNguauuccggcgccg         | 1 |
| Gi3_28009626_x2 | ..uAguucucaccaacagauccg      | 1 |
| Gi2_10888181_x2 | ..gguucgUuuccggcgccgga       | 1 |
| G1a_5966336_x2  | ..gguucgauucccgcgccAgagc     | 1 |
| Gi5_8820989_x2  | ..uccggcgguaguauacCgcuag     | 1 |
| Gi5_8827803_x2  | ..gauuccAgcgccggagc          | 1 |
| Gi3_28144720_x2 | ..cucaccaacagauUgg           | 1 |
| Gi2_10976811_x2 | ..gguucgauuccggcgccUga       | 1 |
| Gi2_10833051_x2 | ..uAccggcuaguauaacggcuaga    | 1 |
| Gi4_560504_x2   | ..gguCcgauucccgcgccggagc     | 1 |

|                 |                          |   |
|-----------------|--------------------------|---|
| Gi3_28226266_x2 | uccggcgAaguauaacggcuag   | 1 |
| Gi3_28115858_x2 | uUcggguucgauucccgcgccgga | 1 |
| Gi1_4147955_x2  | uccggcguaguauaGcggcu     | 1 |
| Gi2_10944459_x2 | agaaugguNgguucucacc      | 1 |
| Gi3_27985310_x2 | uccggcguaguauaacggcC     | 1 |
| Gi3_28157448_x2 | guucucacccaacagaucAgg    | 1 |
| Gi1_4130011_x2  | guucucacccaacaAaucg      | 1 |
| Gi2_10964813_x2 | ucacccaacagauccggguu     | 0 |
| Gi3_28014692_x2 | cacccaacNgauccggguuc     | 1 |
| Gi1_4145445_x2  | uucgauucUcggcgccgg       | 1 |
| Gi4_556180_x2   | Auucgauucccgcgccgg       | 1 |
| Gi5_8770111_x2  | guucUauucccgcgccggagc    | 1 |
| Gi2_10885075_x2 | ccggcguaguauaacggcCa     | 1 |
| Gi1_4145883_x2  | uucucacGcaacagauccg      | 1 |
| Gi1_4157677_x2  | guucucacccaacagauccU     | 1 |
| Gi3_28097608_x2 | Ucguaguauaacggcuagaa     | 1 |
| Gi2_10890487_x2 | uccggAguaguauaacggcua    | 1 |
| Gi2_10944301_x2 | Agguucucacccaacagauccg   | 1 |
| Gi3_27980764_x2 | Uucacccaacagauccgg       | 1 |
| Gi2_10838125_x2 | ccggUguaguauaacggcua     | 1 |
| Gi3_28240662_x2 | gguNcgauucccgcgccgg      | 1 |
| Gi2_10919851_x2 | gauucccgcgccggagcCu      | 1 |
| Gi3_28180718_x2 | aCaucggguucgauucc        | 1 |
| Gi2_10868063_x2 | Accggcguaguauaacggcua    | 1 |
| Gi2_10991033_x2 | gguuGgauucccgcgcc        | 1 |
| Gi2_10847113_x2 | Ggguucucacccaacagaucc    | 1 |
| Gi1_4123089_x2  | cucaGccaacagauccgg       | 1 |
| Gi5_8746507_x2  | guucgauucccggcCccggagc   | 1 |
| Gi3_28189706_x2 | guucucGcccaacagauccggg   | 1 |
| Gi2_10948995_x2 | uccggcguUguauaacgg       | 1 |
| Gi1_4147109_x2  | cucacccaacagauccgA       | 1 |
| Gi3_28229778_x2 | gggGucgauucccgcgccggagc  | 1 |
| Gi5_8777695_x2  | gguucgauuccGggcgccg      | 1 |
| Gi3_28164600_x2 | uucucCcccaacagauccg      | 1 |
| Gi5_8829203_x2  | ccggcguGguauaacggcuag    | 1 |
| Gi3_28119816_x2 | Cucgauucccgcgccggagc     | 1 |
| Gi2_10848903_x2 | uGcggcguaguauaacggcu     | 1 |
| Gi3_28001188_x2 | gguucuAacccaacagauccg    | 1 |
| Gi1a_5909814_x2 | gguucgauucccgcgccggcC    | 1 |
| Gi5_8757095_x2  | Ggauucccgcgccggagcguuuc  | 1 |
| Gi5_8770651_x2  | guucgauucccgcgccgAagc    | 1 |
| Gi2_10974063_x2 | uccggguuNgauucccgcgccgga | 1 |
| Gi1a_5953700_x2 | guucgauucccgcgUcggagc    | 1 |
| Gi3_28132424_x2 | gauccggguucGuuccc        | 1 |
| Gi5_8723877_x2  | ccggcguaguauaaGggcuag    | 1 |
| Gi3_28056046_x2 | guucucacGcaacagauccg     | 1 |
| Gi5_8764301_x2  | uucucaccNaacagauccggguu  | 1 |

|                 |                      |                           |   |
|-----------------|----------------------|---------------------------|---|
| Gl1a_5965936_x2 | uccggcgCaguauaacggcu | guucgauucccgAcgccgga      | 1 |
| Gi1_4150583_x2  |                      | gguucgauAcccgcgcc         | 1 |
| Gi5_8745723_x2  |                      | gguucgauucccgcgccggagG    | 1 |
| Gi5_8718575_x2  |                      | cgauucccgcgccAgag         | 1 |
| Gi3_28027990_x2 |                      | ggguCcgauucccgcgccg       | 1 |
| Gi3_28141006_x2 |                      | uUucacccaacagauccgg       | 1 |
| Gi3_28007004_x2 |                      | caacagauccggguucgauuccA   | 1 |
| Gi3_28146992_x2 |                      | gguucgauucccgcgccgCagc    | 1 |
| Gi5_8737139_x2  |                      | gguucgauucccgcgUcggagc    | 1 |
| Gl1a_5965278_x2 |                      | guucgauucccgAcgccg        | 1 |
| Gi1_4140307_x2  |                      | uucgGuucccgcgccggagc      | 1 |
| Gi3_28160534_x2 |                      | uccggcgguaguauUcggc       | 1 |
| Gi5_8811289_x2  |                      | ugguGcucacccaacagauccgg   | 1 |
| Gi1_4109757_x2  |                      | ucgGuucccgcgccggagc       | 1 |
| Gi1_4132611_x2  |                      | uccgCcgguaguauaacggcuag   | 1 |
| Gi1_4157141_x2  |                      | gguucucacccaacGgauccgggu  | 1 |
| Gi3_27988624_x2 |                      | gauucccgcgccggagcCu       | 1 |
| Gi3_28174612_x2 |                      | ucNggcgguaguauaacgg       | 1 |
| Gi3_28238266_x2 |                      | uucgauucccgcgGcgga        | 1 |
| Gi3_28226426_x2 |                      | ggUguaguauaacggcuag       | 1 |
| Gi3_28109010_x2 |                      | gAuucucacccaacagaucc      | 1 |
| Gi5_8740929_x2  |                      | ugguucucacccGacagauccgg   | 1 |
| Gi5_8744349_x2  |                      | ucucacccaacagCuccg        | 1 |
| Gi5_8738131_x2  |                      | guucucacccaaGagauccgg     | 1 |
| Gi2_10831999_x2 |                      | guucUauucccgcgccg         | 1 |
| Gi1_4093929_x2  |                      | agauccggguCcgauucc        | 1 |
| Gi2_10913593_x2 |                      | cgauucccgcgccggagcC       | 1 |
| Gi5_8793103_x2  |                      | gguucgauucccgcgGcgga      | 1 |
| Gi5_8719451_x2  |                      | guucgauucccgcgccggagG     | 1 |
| Gi2_10984659_x2 |                      | uccggcgguaguauaaAgggcuag  | 1 |
| Gl1a_5911344_x2 |                      | Gccggcgguaguauaacggcuagaa | 1 |
| Gi4_561578_x2   |                      | uccggcgguaguauCacggcuagaa | 1 |
| Gi1_4134087_x2  |                      | Cgguucgauucccgcgccg       | 1 |
| Gi2_10854593_x2 |                      | ugguucucacccaacagauccA    | 1 |
| Gi3_28251546_x2 |                      | Uuucgauucccgcgccg         | 1 |
| Gi4_555552_x2   |                      | uccggcgguCguauaacggcuag   | 1 |
| Gi2_10864803_x2 |                      | ucgauucccgcgccggagcGA     | 1 |
| Gi3_28030324_x2 |                      | ugguucucCcccaacagauccg    | 1 |
| Gi1_4115131_x2  |                      | ucgauucccgcgccggagU       | 1 |
| Gi3_28204134_x2 |                      | gauucccgNcgccggagc        | 1 |
| Gi2_10836725_x2 |                      | uccggcgguaguUaacggcuag    | 1 |
| Gi2_10857619_x2 |                      | Cucgauucccgcgccggagc      | 1 |
| Gi2_10940653_x2 |                      | guucgaAuucccgcgccggagc    | 1 |
| Gi5_8731585_x2  |                      | uccggcgguaguauCacggcuagaa | 1 |
| Gi3_28202388_x2 |                      | gguucucacccCacagauccgg    | 1 |
| Gi5_8734339_x2  |                      | uccggcUuaguauaacggc       | 1 |
| Gi3_27998018_x2 |                      |                           | 1 |

Gi3\_28056430\_x2.....uucgGuucccgcgccgg..... 1  
 Gi4\_553470\_x2.....guucgauucccgcgccAg..... 1  
 Gi2\_10856589\_x2.....cgauucccgcgccggagcgCuuc..... 1  
 Gi3\_28155778\_x2.....Uguccggcguaguauaacggcuaga..... 1  
 Gi4\_565016\_x2.....cucacccaNcagauccggguucg..... 1  
 Gi2\_10859405\_x2.....uucucacccaacagauccA..... 1  
 Gi3\_28013498\_x2.....uccggcguaguauaacggGua..... 1  
 Gi2\_10960141\_x2.....uucgauucccggcAccgga..... 1  
 Gi5\_8754285\_x2.....gguucgauucccgGgccg..... 1  
 Gi2\_10922609\_x2.....gauucccgcgccggagU..... 1  
 Gi1\_4119445\_x2.....uucgauuccUggcgccgg..... 1  
 Gi5\_8744545\_x2.....uccggcguauauaacggc..... 1  
 Gi5\_8813375\_x2.....uUucacccaacagauccg..... 1  
 Gi1\_4147083\_x2.....ggcguaguNuaacggcuag..... 1  
 Gi5\_8732703\_x2.....gguucgauucccgcgAgg..... 1  
 Gi5\_8789587\_x2.....uucucaGccaacagauccg..... 1  
 Gi1\_4147021\_x2.....guucgauucccgcgAg..... 1  
 Gi5\_8785991\_x2.....ccggcguaNuaaacggcua..... 1  
 Gi3\_28184974\_x2.....uccggcguaguauaaAggcuagaau..... 1  
 Gi1\_4150551\_x2.....ugguucucaAccaacagauccg..... 1  
 Gi2\_10869407\_x2.....guucCauucccgcgccggagc..... 1  
 Gi3\_28086514\_x2.....cagauccggguucgauCccc..... 1  
 Gi2\_10851449\_x2.....Uuucucacccaacagauccg..... 1  
 Gi3\_28057528\_x2.....uccggAguaguauaacggcu..... 1  
 Gi1\_4114805\_x2.....Ccucacccaacagauccg..... 1  
 Gi1\_4123129\_x2.....cacccaacNgauccggguucgauucc..... 1  
 Gi2\_10981085\_x2.....guucgauucccgcgccUg..... 1  
 Gi5\_8769191\_x2.....cGggcguaguauaacggcuag..... 1  
 Gi3\_28224340\_x2.....guucucacccaacagauccgC..... 1  
 Gi1\_4134357\_x2.....guucucCccaacagauccg..... 1  
 Gi3\_28178876\_x2.....cAcacccaacagauccg..... 1  
 Gi1\_4099341\_x2.....gguucgauuccUggcgccgga..... 1  
 Gi3\_28251356\_x2.....cgauCcccggcgccggagc..... 1  
 Gi3\_27990064\_x2.....uccggcguaguUuaacggcuagaa..... 1  
 Gi1\_4128663\_x2.....uccggcguaguauUcggcua..... 1  
 Gi1\_4151389\_x2.....uccggcguagAuaaacggc..... 1  
 Gi3\_28079074\_x2.....ucgauuccAggcgccgga..... 1  
 Gi1\_4153745\_x2.....gguucucaUccaacagauccg..... 1  
 Gi2\_10835087\_x2.....uccggcguaguauGacggcuag..... 1  
 Gl1\_5900034\_x2.....Aguucgauucccgcgccgga..... 1  
 Gi2\_10911591\_x2.....gauucccgUcgccggagc..... 1  
 Gi1\_4109713\_x2.....uucucUccaacagauccg..... 1  
 Gi2\_10861221\_x2.....guucgauGcccggcgccggagc..... 1  
 Gi5\_8760729\_x2.....uccggcguaguauaacggUua..... 1  
 Gi2\_10918679\_x2.....uccggcguUguauaacggcuagaa..... 1  
 Gi1\_4117015\_x2.....cGggcguaguauaacggcu..... 1  
 Gi2\_10897681\_x2.....uuUgauucccgcgccggag..... 1

|                      |                                  |   |
|----------------------|----------------------------------|---|
| Gi2_10975085_x2..... | ucgauucccggcgcggG.....           | 1 |
| Gi3_28187862_x2..... | gguucucacccaUcagauccg.....       | 1 |
| Gi5_8817329_x2.....  | cccaacGgauccggguuc.....          | 1 |
| Gi5_8766929_x2.....  | cagauccggGucgauucccggcgcg.....   | 1 |
| Gi5_8743151_x2.....  | uccggcguagGauaacggc.....         | 1 |
| Gi3_28217236_x2..... | uucgauucccgGAgccgga.....         | 1 |
| Gi2_10964545_x2..... | gguucucUcccaacagauccg.....       | 1 |
| Gi3_27994084_x2..... | uucgCuucccggcgcggga.....         | 1 |
| Gi3_28185408_x2..... | uucgauucUcggcgcgg.....           | 1 |
| Gi1_4089331_x2.....  | uUcggcguaguauaacggcuagaa.....    | 1 |
| Gi3_27980270_x2..... | gguNcucacccaacagauccg.....       | 1 |
| Gi2_10932017_x2..... | cucacccaacGgauccg.....           | 1 |
| Gi3_28044656_x2..... | uccggcguaguauaGcggc.....         | 1 |
| Gi3_28123760_x2..... | uccggcguaguauaUcggcuag.....      | 1 |
| Gi2_10886137_x2..... | gAuucgauucccggcgcgg.....         | 1 |
| Gi5_8794179_x2.....  | ugguAcucacccaacagauccg.....      | 1 |
| Gl1a_5897474_x2..... | guucgauucccggcgcUggagc.....      | 1 |
| Gi3_28141704_x2..... | guucgauuccAggcgcggag.....        | 1 |
| Gi5_8829587_x2.....  | ugguucucacccaGcagauccgggu.....   | 1 |
| Gi1_4093469_x2.....  | uccggcguaguauaacggUu.....        | 1 |
| Gi1_4105501_x2.....  | uccggcguNguauaacggc.....         | 1 |
| Gi3_28183034_x2..... | uccggcguaguauaUcggc.....         | 1 |
| Gi1_4136671_x2.....  | gcuGguauaacggcuag.....           | 1 |
| Gi1_4107931_x2.....  | uucucaUccaacagauccg.....         | 1 |
| Gi2_10861727_x2..... | uucucacccaCagauccg.....          | 1 |
| Gi1_4122639_x2.....  | Aguucucacccaacagauccg.....       | 1 |
| Gl1a_5885892_x2..... | uccAgcguaguauaacggcuag.....      | 1 |
| Gi5_8817405_x2.....  | uccggcguaguauaacggcuagaaG.....   | 1 |
| Gi2_10930629_x2..... | uccggcguagGauaacggc.....         | 1 |
| Gi1_4124243_x2.....  | ccggcguaNuauaacggc.....          | 1 |
| Gi3_28117386_x2..... | gguucgauucccggcUccg.....         | 1 |
| Gi5_8798379_x2.....  | ucucacccaacaUauccg.....          | 1 |
| Gi2_10937331_x2..... | ugguucucacccaacagauccC.....      | 1 |
| Gi1_4140105_x2.....  | cgauucccggcgcggagcC.....         | 1 |
| Gi5_8785053_x2.....  | gguuGgauucccggcgcggga.....       | 1 |
| Gi1_4124623_x2.....  | cucacccaacagUuccg.....           | 1 |
| Gl1a_5946596_x2..... | gguucgauucccggcgcAg.....         | 1 |
| Gi1_4142993_x2.....  | ccggcguGguauaacggcuaga.....      | 1 |
| Gi2_10945881_x2..... | uucgaCuucccggcgcgg.....          | 1 |
| Gi2_10988189_x2..... | guucucacccaacaAauccg.....        | 1 |
| Gi1_4103203_x2.....  | gGugguucucacccaacagauccgggu..... | 1 |
| Gi1_4155181_x2.....  | uucucUcccaacagauccg.....         | 1 |
| Gi3_27984222_x2..... | guucgauucccggcgcgggaU.....       | 1 |
| Gi2_10886261_x2..... | guucucaccccacagauccgg.....       | 1 |
| Gi5_8729459_x2.....  | guucgauuccAggcgcggagc.....       | 1 |
| Gi1_4125815_x2.....  | gguucucacccaaUagauccg.....       | 1 |
| Gi2_10847523_x2..... | guucgauucccgCgcggagc.....        | 1 |



|                 |                           |   |
|-----------------|---------------------------|---|
| Gi1_4099169_x2  | uucucaccAaacagauccgg      | 1 |
| Gi3_28242240_x2 | guucuAaccaacagauccgg      | 1 |
| Gi1_4107127_x2  | Gccggguucgauucccgcgccgga  | 1 |
| Gi1_4122019_x2  | uucgauucccgcgccgga        | 0 |
| Gi1_4135311_x2  | gguucgauNcccgcgcc         | 1 |
| Gi5_8828365_x2  | uGucaccaacagauccgggu      | 1 |
| Gi5_8820837_x2  | Ucguaguauaacggcuaga       | 1 |
| Gi5_8739787_x2  | guuGgauucccgcgccgg        | 1 |
| Gi3_28211802_x2 | auccggguucgauucccgcg      | 0 |
| Gi1_4145897_x2  | accaacaNauccggguucgauuccg | 1 |
| Gi3_28184814_x2 | uccggcguagGauaacggcua     | 1 |
| Gi2_10878373_x2 | guGcucaccaacagauccg       | 1 |
| Gi2_10925909_x2 | agAccggcguaguauaacgg      | 1 |
| Gi1_4104341_x2  | uccggcguaguauaaGggcuag    | 1 |
| Gi3_28005272_x2 | guucgauucccgcgUccgg       | 1 |
| Gi3_28053262_x2 | Cucgauucccgcgccgga        | 1 |
| Gi1_4156181_x2  | guucgauucccgcgccUgagc     | 1 |
| Gi5_8744671_x2  | guucgauucccgcgAcgga       | 1 |
| Gi1_4095231_x2  | guucucaccaacagauccC       | 1 |
| Gi1_4113121_x2  | uccggcUuaguauaacggcuag    | 1 |
| Gl1a_5908756_x2 | uuUucaccaacagauccg        | 1 |
| Gi5_8808045_x2  | cucaccaacagauAcgg         | 1 |
| Gi5_8802339_x2  | uccggcguaguauaacggUuagaa  | 1 |
| Gi4_564000_x2   | gCucgauucccgcgccgga       | 1 |
| Gi3_28094166_x2 | gguucucaccaCcagauccgg     | 1 |
| Gi5_8723201_x2  | uccgAcguaguauaacggcua     | 1 |
| Gi3_28059142_x2 | cgauucccAgcgccggag        | 1 |
| Gl1a_5936410_x2 | uccggcguaguCuaacggcuag    | 1 |
| Gi5_8745705_x2  | gguucgauuAccggcgccggag    | 1 |
| Gi1_4143113_x2  | uucgauucNcgcgccggagc      | 1 |
| Gi2_10893279_x2 | agauccgggAucgauucc        | 1 |
| Gi3_28162628_x2 | gguuGgauucccgcgcc         | 1 |
| Gi1_4153575_x2  | ucgauucccgcgccggCgc       | 1 |
| Gl1a_5898620_x2 | gguucgauuccUgcggcgagc     | 1 |
| Gi5_8719757_x2  | gguuUgauucccgcgccggagcgu  | 1 |
| Gi1_4121371_x2  | gguucgauucccgcgccAgag     | 1 |
| Gi1_4116841_x2  | gguucucaccaacaAauccg      | 1 |
| Gi5_8768605_x2  | uccggcguaguauaaGggcuagaa  | 1 |
| Gi2_10851903_x2 | gguaCgauucccgcgccgg       | 1 |
| Gi5_8774561_x2  | gguucgauNcccgcgccggagcgu  | 1 |
| Gi1_4154957_x2  | guucucacAcaacagauccg      | 1 |
| Gi1_4158569_x2  | uccggcguaguauaaAggcua     | 1 |
| Gi3_28125892_x2 | uucucaUccaacagauccg       | 1 |
| Gi5_8764685_x2  | guucgauAcccgcgccgga       | 1 |
| Gi1_4149059_x2  | uccgAcguaguauaacggcuagaa  | 1 |
| Gl1a_5956184_x2 | uccAgcguaguauaacgg        | 1 |
| Gi2_10920215_x2 | uccggcguaguauaacggcC      | 1 |

|                 |                           |   |
|-----------------|---------------------------|---|
| Gi5_8829307_x2  | uccggcguaguauaacggcuagGa  | 1 |
| Gi2_10959413_x2 | uucucacGcaacagauccg       | 1 |
| Gi5_8735337_x2  | ugguucucacUcaacagauccg    | 1 |
| Gi1_4092761_x2  | uccggcguagCauaacggcuagaau | 1 |
| Gi2_10905121_x2 | cgauucccgAcgccggagcguuu   | 1 |
| Gi3_28150636_x2 | gaGucccggcgccggagc        | 1 |
| Gi2_10935317_x2 | guucgauucccggcgccgAag     | 1 |
| Gl1a_5952986_x2 | guucgauucccggcgccggagU    | 1 |
| Gi5_8828401_x2  | uccggcguaguUuaacggcu      | 1 |
| Gi3_28147466_x2 | ucgauucccggcgUggagc       | 1 |
| Gi3_28091478_x2 | cucacccaacCgauccgg        | 1 |
| Gi1_4143385_x2  | ucGcacccaacagauccg        | 1 |
| Gi5_8802831_x2  | gguuAgauucccggcgccg       | 1 |
| Gi3_28073174_x2 | uugguuGucacccaacagaucc    | 1 |
| Gi5_8786395_x2  | ucucaccAaacagauccg        | 1 |
| Gi1_4095171_x2  | gguucgauuccUggcgccggagc   | 1 |
| Gi5_8731359_x2  | gguucgauucccggcgccC       | 1 |
| Gi2_10977695_x2 | guucgauucccggcgccggaA     | 1 |
| Gi2_10848597_x2 | uucucacUcaacagauccg       | 1 |
| Gi3_28077110_x2 | ucgauuAccggcgccgga        | 1 |
| Gl1a_5954434_x2 | gGucgauucccggcgccggag     | 1 |
| Gi5_8791119_x2  | Gcggguucgauucccggcgccgga  | 1 |
| Gi2_10883617_x2 | ggAucgauucccggcgccgg      | 1 |
| Gi3_28136020_x2 | uucGcacccaacagauccg       | 1 |
| Gi5_8750825_x2  | Ucggcguaguauaacggcu       | 1 |
| Gi3_28236100_x2 | caacagauccggguucAauuccc   | 1 |
| Gi1_4107657_x2  | ugguucucacccUacagauccg    | 1 |
| Gi1_4101425_x2  | gguucgauucccggcgGcgg      | 1 |
| Gi1_4143387_x2  | gguuGgauucccggcgccg       | 1 |
| Gi5_8730121_x2  | ccggcguaNuuaacggcuag      | 1 |
| Gi3_28257730_x2 | gguGcgauucccggcgccgga     | 1 |
| Gi2_10926921_x2 | guucgauucccggcgccCga      | 1 |
| Gi3_28078132_x2 | gauAcccggcgccggagc        | 1 |
| Gi2_10884795_x2 | ucgauucccggcgAcggagc      | 1 |
| Gi3_28199080_x2 | gguucgauucccggcgccUgag    | 1 |
| Gi1_4123331_x2  | uucucacGcaacagauccg       | 1 |
| Gi5_8766899_x2  | gCucgauucccggcgccggag     | 1 |
| Gl1a_5917286_x2 | uccggcguaguauaacggGuagaa  | 1 |
| Gi3_28133550_x2 | uucucacccaacCgauccg       | 1 |
| Gi1_4151535_x2  | uucuUacccaacagauccg       | 1 |
| Gi3_28046310_x2 | ucucacccaacCgauccg        | 1 |
| Gi5_8789839_x2  | cgggguucgauucccggUgcc     | 1 |
| Gl1a_5927864_x2 | ucAggcguaguauaacggcuag    | 1 |
| Gi2_10846363_x2 | uccggcguaguauaacggAuagaau | 1 |
| Gl1a_5911236_x2 | uGcgauucccggcgccggagc     | 1 |
| Gi4_556122_x2   | guucgauuNccggcgccg        | 1 |
| Gi2_10955977_x2 | uucgaCuccggcgccgga        | 1 |

|                 |                            |   |
|-----------------|----------------------------|---|
| Gi5_8730235_x2  | ucgauuccNgcgcccgagc        | 1 |
| Gi2_10926639_x2 | uccggcguaguGuaacggcu       | 1 |
| Gi1_4128275_x2  | ucAggCGuaguauaacggcua      | 1 |
| Gi3_28229662_x2 | uccggcguaguauaacGU         | 1 |
| Gi5_8788193_x2  | gguuAgauucccgcgccgga       | 1 |
| Gi5_8777755_x2  | uccggcguaguauaacAgcuagaa   | 1 |
| Gi1_4148939_x2  | guGcgauucccgcgccgga        | 1 |
| Gi2_10835117_x2 | ucgauCcccggcgccggagc       | 1 |
| Gi3_28082596_x2 | ggAucucacccaacagauccgg     | 1 |
| Gi3_28154844_x2 | cgguucgauucccAgcgccgga     | 1 |
| Gi3_28019352_x2 | ccggcguaguauGacggcuaga     | 1 |
| Gi3_27997574_x2 | gauucccgcgccggagU          | 1 |
| Gi5_8763795_x2  | gguucgauucccgAcgcc         | 1 |
| Gi2_10973049_x2 | uccggcguauauaacggcuagaa    | 1 |
| Gl1a_5976028_x2 | uccggcguaguauaacGcuag      | 1 |
| Gi2_10986739_x2 | uccAgcgguaguauaacggcua     | 1 |
| Gi2_10842275_x2 | uccggcguaguauaaGggcuaga    | 1 |
| Gl1a_5915830_x2 | gCucucacccaacagauccg       | 1 |
| Gi3_28204358_x2 | cgaCucccgcgccggagc         | 1 |
| Gi2_10953299_x2 | ugguucucacccaacGgauccg     | 1 |
| Gi3_28166900_x2 | cgauucAcggcgccggagc        | 1 |
| Gi1_4153405_x2  | agauccgggCucgauuccc        | 1 |
| Gi2_10983297_x2 | cgcgcuaguauaacggcuag       | 0 |
| Gi2_10865509_x2 | cgcgcuaguauaGcggcua        | 1 |
| Gi3_28241054_x2 | uucgauucccgcgccAga         | 1 |
| Gi1_4148421_x2  | uccggcguaguauaacGU         | 1 |
| Gi5_8816703_x2  | guucucaGccaacagauccg       | 1 |
| Gl1a_5977690_x2 | gguucgauNcccggcgccgga      | 1 |
| Gi3_28063086_x2 | ucGggcguaguauaacggcuagaa   | 1 |
| Gi5_8770649_x2  | uccggcgGaguauaacgg         | 1 |
| Gi3_28060026_x2 | uucucacccaacCgauccgg       | 1 |
| Gl1a_5976424_x2 | gguucgCuucccgcgccg         | 1 |
| Gi1_4141471_x2  | guucgauucccgcgccggagA      | 1 |
| Gi3_28212010_x2 | Uguccggcguaguauaacggcuagaa | 1 |
| Gi1_4129275_x2  | gguucgauucccCgcgccggagc    | 1 |
| Gi1_4127809_x2  | guucgauucUcgcgccgga        | 1 |
| Gi2_10914271_x2 | uCguucucacccaacagaucc      | 1 |
| Gi5_8803873_x2  | gCGuaguauaacggcuag         | 0 |
| Gi2_10868131_x2 | uccggcguagGuaaacggcua      | 1 |
| Gl1a_5931608_x2 | uccggUguaguauaacggcuaga    | 1 |
| Gi3_28118232_x2 | guucucacAcaacagauccgg      | 1 |
| Gi3_28012268_x2 | ggcguaguauaacggcuagG       | 1 |
| Gi2_10949289_x2 | uucucacccaaUagauccg        | 1 |
| Gi3_28063662_x2 | cGcaccacagauccggguucgauu   | 1 |
| Gi3_28224872_x2 | uucAauucccgcgccggagc       | 1 |
| Gi2_10930853_x2 | uuUucacccaacagauccggguucg  | 1 |
| Gi4_554608_x2   | guucgaCucccgcgccgg         | 1 |

|                 |                          |                          |   |
|-----------------|--------------------------|--------------------------|---|
| Gi1_4118677_x2  |                          | guucgauucccgUcgccg       | 1 |
| Gl1a_5898922_x2 | uccggcguaguauaGcgg       |                          | 1 |
| Gi2_10921797_x2 |                          | uuUgauucccgccgga         | 1 |
| Gi1_4154003_x2  |                          | guucgauAcccgcgccggagc    | 1 |
| Gi5_8743487_x2  | uccggcgCaguauaacggcuagaa |                          | 1 |
| Gi5_8800855_x2  |                          | guucgauAcccgcgccggagc    | 1 |
| Gi1_4092961_x2  | uccggcguaguauaacggcuUga  |                          | 1 |
| Gi1_4128985_x2  |                          | Cuccggguucgauucccgcgccgg | 1 |
| Gi5_8789299_x2  |                          | guucCauucccgcgccg        | 1 |
| Gi3_28027372_x2 | ucucacccaacGgauccg       |                          | 1 |
| Gi4_553262_x2   |                          | gguucgauNcccgcgccggagc   | 1 |
| Gi1_4155657_x2  | uccggcguaguauaacCgcuag   |                          | 1 |
| Gi1_4109943_x2  |                          | gguucucacGcaacagauccg    | 1 |
| Gi2_10951235_x2 |                          | ucgauucccgcgccggagU      | 1 |
| Gi2_10865455_x2 | uAcggcguaguauaacggcuagaa |                          | 1 |
| Gi3_28166684_x2 |                          | guucgauucccgUcgccg       | 1 |
| Gi5_8822577_x2  |                          | gguucgauucAcggcgccg      | 1 |
| Gi1_4123745_x2  | uccggcguaguUuaacggcuag   |                          | 1 |
| Gi1_4109933_x2  | uccUgcguaguauaacggcuaga  |                          | 1 |
| Gi5_8718193_x2  |                          | auucccgcgccggagcA        | 1 |
| Gi3_28204080_x2 |                          | Nguucucacccaacagauccg    | 1 |
| Gi1_4150149_x2  |                          | gguucucacccaacCgauccg    | 1 |
| Gi1_4138259_x2  |                          | gguucgauuccUcgccgga      | 1 |
| Gi1_4105643_x2  |                          | uucucaccCacagauccg       | 1 |
| Gi5_8808483_x2  |                          | gguucgaGucccgcgccg       | 1 |
| Gi5_8797229_x2  |                          | gguucgauucccggcAcc       | 1 |
| Gi5_8782575_x2  |                          | gAucucacccaacagauccg     | 1 |
| Gi5_8770777_x2  | ucUggcguaguauaacggcu     |                          | 1 |
| Gi1_4150117_x2  | uccggcguaguauaacggcuagGa |                          | 1 |
| Gi3_28007158_x2 |                          | gguucCcacccaacagauccg    | 1 |
| Gi3_28236116_x2 |                          | uucucacccaacagauAccg     | 1 |
| Gi2_10871971_x2 |                          | guucgauucccgcgccgCag     | 1 |
| Gi2_10833539_x2 |                          | guucgauucUcgcgccgga      | 1 |
| Gi5_8755189_x2  |                          | Aucucacccaacagauccg      | 1 |
| Gi2_10938311_x2 |                          | uAcucacccaacagauccg      | 1 |
| Gi5_8799241_x2  |                          | guucucacccaaAagauccg     | 1 |
| Gi5_8798375_x2  |                          | guucucacccaacagauccgA    | 1 |
| Gi1_4133053_x2  |                          | ggGucgauucccgcgccg       | 1 |
| Gi1_4147755_x2  | ggUguaguauaacggcua       |                          | 1 |
| Gi2_10952191_x2 |                          | gguucgauucccgcgccCg      | 1 |
| Gi3_28141668_x2 | ccggcguaguCuaacggcuag    |                          | 1 |
| Gi1_4093181_x2  | ccggcguaNuaaacggcua      |                          | 1 |
| Gi3_28008200_x2 | ccggcguaguauaGcggcuag    |                          | 1 |
| Gi3_28016028_x2 | uccggcguaguauaacggUuagaa |                          | 1 |
| Gl1a_5897486_x2 | uccggcguNguauaacggcuag   |                          | 1 |
| Gi3_28024186_x2 |                          | gguucgauuccUcgcccg       | 1 |
| Gi5_8790001_x2  |                          | gguucucCcccaacagauccg    | 1 |

|                 |                                     |   |
|-----------------|-------------------------------------|---|
| Gi4_559956_x2   | .....guucgauucccgcgUcgg.....        | 1 |
| Gi3_28177218_x2 | .....ccggcguaguauCacggc.....        | 1 |
| Gi3_28130614_x2 | .....agaucggguucgCuuccc.....        | 1 |
| Gi1_4120257_x2  | .....gguucgauCcccggcgccgga.....     | 1 |
| Gi3_28239388_x2 | .....gCucucacccaacagauccgg.....     | 1 |
| Gi2_10968989_x2 | .....ugAuucucacccaacagauccg.....    | 1 |
| Gi3_28254224_x2 | .....guucgaGucccgcgccg.....         | 1 |
| Gi1_4135867_x2  | .....Cguucgauucccgcgccgga.....      | 1 |
| Gi5_8820439_x2  | .....uucucacAcaacagauccggguu.....   | 1 |
| Gi5_8801251_x2  | .....uucccgcgccggagcCu.....         | 1 |
| Gi3_28071682_x2 | .....gguGcgauucccgcgccg.....        | 1 |
| Gi5_8748173_x2  | .....guucCcaccaacagauccgg.....      | 1 |
| Gi3_28058190_x2 | .....gguucucCccaacagauccg.....      | 1 |
| Gi5_8756105_x2  | .....Uaucggguucgauucccgcgccgga..... | 1 |
| Gi1_4126001_x2  | .....ugguucAcaccaacagauccgg.....    | 1 |
| Gi5_8795605_x2  | .....ugguucucaccaacCgauccg.....     | 1 |
| Gi1_4143197_x2  | .....uucucaAccaacagauccgg.....      | 1 |
| Gi3_28068438_x2 | .....Cgguucucacccaacagauccg.....    | 1 |
| Gi3_28149690_x2 | .....uccgCcgaguauaacggcuagaau.....  | 1 |
| Gi3_28053326_x2 | .....gguucgauucccgCcgccgga.....     | 1 |
| Gi2_10896883_x2 | .....Nccggcguaguauaacggcuaga.....   | 1 |
| Gi3_28214384_x2 | .....Nuucucacccaacagauccg.....      | 1 |
| Gi1a_5954946_x2 | .....gguucgGuucccgcgccgga.....      | 1 |
| Gi3_28161772_x2 | .....gguucucacccaacagauccgggC.....  | 1 |
| Gi1_4138577_x2  | .....guucgauuccUggcgccgga.....      | 1 |
| Gi5_8805879_x2  | .....uccggcguaguauaaGgg.....        | 1 |
| Gi2_10831105_x2 | .....uGcgauucccgcgccgga.....        | 1 |
| Gi3_28243286_x2 | .....ucgauucccgcgcgAgga.....        | 1 |
| Gi3_28146306_x2 | .....cgauucccgcgcgccgGgc.....       | 1 |
| Gi2_10973233_x2 | .....guucgauucccgGgccg.....         | 1 |
| Gi3_28134518_x2 | .....uccggcguaguauaacggAuagaa.....  | 1 |
| Gi1a_5936588_x2 | .....uccggcguaguauaacggcCag.....    | 1 |
| Gi3_28028268_x2 | .....uuGgauucccgcgccg.....          | 1 |
| Gi3_28187008_x2 | .....Gcggcguaguauaacggcuaga.....    | 1 |
| Gi3_27996894_x2 | .....guucucacccaacagaCccgg.....     | 1 |
| Gi1_4095731_x2  | .....gguucucacccaacagUuccg.....     | 1 |
| Gi1_4148309_x2  | .....caGcagauccggguucgauu.....      | 1 |
| Gi2_10935313_x2 | .....uccggcguaguauaacggUuagaa.....  | 1 |
| Gi1_4142627_x2  | .....gguucgauuccAgcgccgga.....      | 1 |
| Gi2_10930911_x2 | .....uccggcguaguauaacggcG.....      | 1 |
| Gi2_10982175_x2 | .....Cucgauucccgcgccg.....          | 1 |
| Gi3_28175786_x2 | .....Ggauccggguucgauuccc.....       | 1 |
| Gi1_4129393_x2  | .....auUcggguucgauucccgcgccgga..... | 1 |
| Gi2_10840491_x2 | .....guucgauucccgAgccggag.....      | 1 |
| Gi5_8774761_x2  | .....uccggcguaguaAaacgg.....        | 1 |
| Gi3_28055514_x2 | .....Agcguaguauaacggcuagaau.....    | 1 |
| Gi5_8760047_x2  | .....Acggcguaguauaacggcua.....      | 1 |

|                 |                            |   |
|-----------------|----------------------------|---|
| Gi1a_5941006_x2 | guuUucacccaacagauccg       | 1 |
| Gi5_8797827_x2  | uCgguucucacccaacagauccg    | 1 |
| Gi1_4097929_x2  | uccggcguaguauaCcgguagaa    | 1 |
| Gi2_10872691_x2 | uccggcguaguauaCcgguagaa    | 1 |
| Gi5_8747733_x2  | Accggcguaguauaacggc        | 1 |
| Gi2_10844215_x2 | uccggcguagCauaacgg         | 1 |
| Gi2_10969409_x2 | guuGgauucccgccgg           | 1 |
| Gi2_10869777_x2 | guucgauucGcgccggagc        | 1 |
| Gi1_4122539_x2  | Accggcguaguauaacggc        | 1 |
| Gi3_28094734_x2 | ucacccaaNagauccggguuc      | 1 |
| Gi5_8760681_x2  | uccggcguaguauaacggCcuagaau | 1 |
| Gi3_28038396_x2 | ucgauucccgccgcGggagc       | 1 |
| Gi1_4153631_x2  | uucucacccaUcagauccg        | 1 |
| Gi1_4105013_x2  | uccggcguaguGuaacggc        | 1 |
| Gi1a_5974960_x2 | ggCucgauucccgccggag        | 1 |
| Gi2_10851779_x2 | ugguucucacccCacagaucc      | 1 |
| Gi3_28026106_x2 | Cgauccggguucgauucc         | 1 |
| Gi2_10967301_x2 | gguucucacccaacagauccC      | 1 |
| Gi3_27995408_x2 | ucGggcguaguauaacggcuagaa   | 1 |
| Gi2_10929383_x2 | uccggcguaguauUacggcuag     | 1 |
| Gi2_10981691_x2 | uccggcguaguaGaacggcuaga    | 1 |
| Gi2_10912907_x2 | ggauNcgauucccgccg          | 1 |
| Gi1_4156505_x2  | uccggcguaguauaacggcuagaG   | 1 |
| Gi3_28149006_x2 | Aucacccaacagauccgg         | 1 |
| Gi5_8741619_x2  | uGucacccaacagauccgg        | 1 |
| Gi5_8742463_x2  | ccggcguaguauaacggcCa       | 1 |
| Gi4_564356_x2   | guucucacccaacagauccgg      | 0 |
| Gi4_559706_x2   | uccggcguaguauaacggcCag     | 1 |
| Gi1a_5935670_x2 | ugguucucacccaacagaCccg     | 1 |
| Gi2_10947009_x2 | guucucaUccaacagauccg       | 1 |
| Gi2_10948229_x2 | auucccgccgagcgcgA          | 1 |
| Gi1_4145737_x2  | cgguucgauucccgccg          | 0 |
| Gi3_28006938_x2 | cAgguucgauucccgccg         | 1 |
| Gi2_10831301_x2 | guucgauucAcggccg           | 1 |
| Gi3_28135542_x2 | guucgauucGcgccg            | 1 |
| Gi3_28146416_x2 | ggauucgauucccgccgagcAu     | 1 |
| Gi2_10985957_x2 | guucuAacccaacagauccg       | 1 |
| Gi1_4112609_x2  | ggauucgauucccgccgUcggagc   | 1 |
| Gi2_10830341_x2 | ggGucgauucccgccg           | 1 |
| Gi1_4100751_x2  | ggauucgauucccgccgAa        | 1 |
| Gi1_4139401_x2  | aCuccggcguaguauaacggcuag   | 1 |
| Gi5_8798343_x2  | ggauucgauuUcggccg          | 1 |
| Gi2_10922353_x2 | cgauucccgccgag             | 0 |
| Gi1_4105975_x2  | uccggcguaguaCaacggcua      | 1 |
| Gi1_4156999_x2  | uucucacccaacagUuccgg       | 1 |
| Gi3_28083252_x2 | guucgauucAcggccg           | 1 |
| Gi2_10922159_x2 | gguucucaUccaacagauccg      | 1 |

|                 |                               |   |
|-----------------|-------------------------------|---|
| Gi3_28026004_x2 | .guucucacccaacagauccU         | 1 |
| Gi4_560328_x2   | .cuUaccaacagauccggguucg       | 1 |
| Gi2_10830033_x2 | .uccggcguaguCuaacgg           | 1 |
| Gi3_28023594_x2 | .Uaccaacagauccggguuc          | 1 |
| Gi5_8720847_x2  | .ggGucucacccaacagauccgg       | 1 |
| Gi5_8799665_x2  | .aguccggcguaguGuaacggcuagaugg | 1 |
| Gi1_4092259_x2  | .uccAgcguaguauaacggcu         | 1 |
| Gi5_8809121_x2  | .uccggcgAaguauaacggcuaga      | 1 |
| Gi1_4138575_x2  | .guucgauucAcggcgccgga         | 1 |
| Gi2_10965115_x2 | .guucucacccaaUagauccg         | 1 |
| Gi3_28149540_x2 | .uucucaccccUacagauccggguuc    | 1 |
| Gi3_28210346_x2 | .gguucgauucccgGgccgg          | 1 |
| Gi1a_5943884_x2 | .uucucacAcaacagauccg          | 1 |
| Gi3_28164796_x2 | .gguucgauuccGggcgcc           | 1 |
| Gi2_10830241_x2 | .gguucgauucccgUccggag         | 1 |
| Gi1a_5966242_x2 | .uucgaCucccgcgccggagc         | 1 |
| Gi1_4123151_x2  | .uccggcguaguUuaacggc          | 1 |
| Gi1_4107727_x2  | .gguucucacccaacagauccC        | 1 |
| Gi5_8803327_x2  | .agaucUggguucgauucc           | 1 |
| Gi2_10980179_x2 | .gguucucacccaacCgauccg        | 1 |
| Gi3_28018856_x2 | .guucgaAucccgcgccgg           | 1 |
| Gi1_4101767_x2  | .uccggAguaguauaacggc          | 1 |
| Gi1_4152773_x2  | .gguucucacccaacagaAccg        | 1 |
| Gi2_10959617_x2 | .gauucccgcgccggUgc            | 1 |
| Gi1_4154685_x2  | .uucucacccaaUagauccg          | 1 |
| Gi3_28062282_x2 | .ucucGcccaacagauccgg          | 1 |
| Gi5_8757139_x2  | .ugguucuUaccaacagauccgg       | 1 |
| Gi4_558418_x2   | .gguucgauucccgAgccgg          | 1 |
| Gi5_8745417_x2  | .gguucgauucccgAcgccg          | 1 |
| Gi3_28130308_x2 | .cCauucccgcgccggagc           | 1 |
| Gi3_28073120_x2 | .uccggguucgauucccgAcgccgga    | 1 |
| Gi5_8758435_x2  | .uucucaUccaacagauccgg         | 1 |
| Gi5_8808217_x2  | .gguucgauucccgcgAcggag        | 1 |
| Gi3_28127092_x2 | .uccggcguaguauaacggcA         | 1 |
| Gi3_28040690_x2 | .uucucacccaaUagauccg          | 1 |
| Gi1_4151121_x2  | .ucacccaaNagauccgggu          | 1 |
| Gi3_28174226_x2 | .gauucccgcgccgAagc            | 1 |
| Gi2_10927783_x2 | .ugguucucacccaacagCuccg       | 1 |
| Gi5_8740013_x2  | .uAcggcguaguauaacggcuaga      | 1 |
| Gi3_28174380_x2 | .ucgauucccgAcgga              | 1 |
| Gi1a_5977502_x2 | .ucUggcguaguauaacggcua        | 1 |
| Gi1_4127477_x2  | .uucgauuccAgcgccg             | 1 |
| Gi3_28048824_x2 | .uugguucucacccaacCgaucc       | 1 |
| Gi3_28150320_x2 | .ggguucgauucccgcgccggaA       | 1 |
| Gi3_28164826_x2 | .guucgauucGcgcgccgga          | 1 |
| Gi1_4142987_x2  | .ucucacccaCcagauccgg          | 1 |
| Gi3_28151816_x2 | .guucucacccaacagauAcggg       | 1 |

|                      |                                     |   |
|----------------------|-------------------------------------|---|
| Gi2_10973467_x2..... | caacagaucggguucgauuccc.....         | 0 |
| Gi1_4110413_x2.....  | uccggcguCguauaacggcuaga.....        | 1 |
| Gi5_8726267_x2.....  | .cgcgguaguauaacggcuagC.....         | 1 |
| Gi2_10982563_x2..... | .ugguuUucacccaacagauccg.....        | 1 |
| Gi3_28038154_x2..... | caacagaucggUuucga.....              | 1 |
| Gi1_4149379_x2.....  | .....gguucgauucccggcAccg.....       | 1 |
| Gi3_28021150_x2..... | .....gNucgauucccggcgcgga.....       | 1 |
| Gi1_4129407_x2.....  | .ugguucucacccaacagauCGgg.....       | 1 |
| Gi1_4143625_x2.....  | .ugguucucacccaaAagauccgg.....       | 1 |
| Gi3_28173668_x2..... | .....uucgauucccggcgUcgga.....       | 1 |
| Gi1_4106033_x2.....  | .....gguucgauuccAggcgcgga.....      | 1 |
| Gi3_28067814_x2..... | .....gguucgauucccggcgGcggag.....    | 1 |
| G1a_5882038_x2.....  | Auucgauucccggcgcggagc.....          | 1 |
| G1a_5900774_x2.....  | .ucGcacccaacagauccg.....            | 1 |
| Gi5_8807219_x2.....  | .uucucacGcaacagauccg.....           | 1 |
| Gi3_28118842_x2..... | .gguucucacccaaAagauccg.....         | 1 |
| Gi1_4124701_x2.....  | .ucCcacccaacagauccgg.....           | 1 |
| Gi1_4148397_x2.....  | .....cucacccaacagCuccgg.....        | 1 |
| Gi3_27989022_x2..... | .uccggcguaguauaacggcuagUau.....     | 1 |
| Gi5_8804723_x2.....  | .....uucucacccaGcagauccgg.....      | 1 |
| Gi1_4156325_x2.....  | .ccggcguaguauCacggcua.....          | 1 |
| G1a_5889684_x2.....  | .Accggcguaguauaacggcuaga.....       | 1 |
| Gi3_28034640_x2..... | .uggCucucacccaacagauC.....          | 1 |
| Gi1_4119473_x2.....  | .gguuUucacccaacagauccg.....         | 1 |
| Gi2_10868073_x2..... | .....guucgauuccAggcgcggag.....      | 1 |
| Gi5_8775383_x2.....  | .ccggcguaguGuaacggcuag.....         | 1 |
| Gi5_8759301_x2.....  | .....guucgauuccUgcgcg.....          | 1 |
| Gi5_8746535_x2.....  | .guucucaUccaacagauccgg.....         | 1 |
| Gi1_4129075_x2.....  | .gguucCcacccaacagauccg.....         | 1 |
| G1a_5919070_x2.....  | .uccggcguaguGuaacggcuag.....        | 1 |
| Gi2_10872295_x2..... | .....gCuucgauucccggcgcgg.....       | 1 |
| Gi5_8799585_x2.....  | .uuUguucucacccaacagauccg.....       | 1 |
| Gi5_8818769_x2.....  | .ucucacccaacagauUgg.....            | 1 |
| Gi2_10886403_x2..... | .....guucgauAccggcgcggga.....       | 1 |
| Gi3_28084158_x2..... | Cgguucgauucccggcgcggag.....         | 1 |
| Gi3_28233518_x2..... | .ucucacccaacagCuccg.....            | 1 |
| G1a_5907016_x2.....  | .ucUggcguaguauaacgg.....            | 1 |
| Gi2_10914825_x2..... | .....uUgauucccggcgcggag.....        | 1 |
| Gi3_28140736_x2..... | .....ucgaGucccggcgcggag.....        | 1 |
| Gi3_28108166_x2..... | .....ucgauucccggcgcggagcU.....      | 1 |
| Gi5_8738921_x2.....  | .....guucgauucccggcgAcggagc.....    | 1 |
| G1a_5953910_x2.....  | .Cccggcguaguauaacggcuag.....        | 1 |
| Gi2_10858231_x2..... | .....uccgAguucgauucccggcgcggga..... | 1 |
| Gi1_4126973_x2.....  | .uucucacccaacagauGcgg.....          | 1 |
| Gi2_10991491_x2..... | .....gguuAgaucccggcgcgg.....        | 1 |
| Gi2_10873443_x2..... | .....gguucgUucccggcgcgg.....        | 1 |
| Gi5_8765215_x2.....  | .....guuNgauucccggcgcgg.....        | 1 |



|                      |                                |                                |   |
|----------------------|--------------------------------|--------------------------------|---|
| Gi3_28187554_x2..... | ccggcguaguauaacAgc.....        |                                | 1 |
| Gi3_28145154_x2..... |                                | cggguucGGuucccgccgga.....      | 1 |
| Gi3_28000816_x2..... |                                | guucgauucccgccgUa.....         | 1 |
| Gi2_10950493_x2..... |                                | gguucgauucccgGgccg.....        | 1 |
| Gi2_10904223_x2..... | uccggcgCaguauaacggcuag.....    |                                | 1 |
| Gi5_8769155_x2.....  |                                | gguucucaNccaacagauc.....       | 1 |
| Gi2_10856813_x2..... | uccggcgGaguauaacgg.....        |                                | 1 |
| Gi1_4133331_x2.....  | uccggcguaguauaacggcAaga.....   |                                | 1 |
| Gi3_28241752_x2..... |                                | cagaucCGAuucgauucc.....        | 1 |
| Gi1_4089595_x2.....  | Accggcguaguauaacggcuag.....    |                                | 1 |
| Gi5_8730799_x2.....  |                                | guucgauucGcgccg.....           | 1 |
| Gi5_8826953_x2.....  |                                | uGgauucccgccgagc.....          | 1 |
| Gi2_10940445_x2..... |                                | guuNgauucccgccg.....           | 1 |
| Gi5_8782019_x2.....  |                                | gguucAauucccgccgag.....        | 1 |
| Gi5_8811253_x2.....  |                                | cgUuucccgccgagcguuuc.....      | 1 |
| Gi4_566174_x2.....   | uccggcguagCauaacggcuaga.....   |                                | 1 |
| G1a_5955874_x2.....  |                                | gguucgauucccgccgCg.....        | 1 |
| G1a_5889316_x2.....  |                                | guucgaCuucccgccg.....          | 1 |
| Gi4_557714_x2.....   |                                | guucgauCcccggccg.....          | 1 |
| Gi2_10858965_x2..... | uccggcguaguauGacgg.....        |                                | 1 |
| Gi3_28113126_x2..... | ggUguaguauaacggcuaga.....      |                                | 1 |
| Gi1_4120567_x2.....  |                                | guucgauucccgccAgga.....        | 1 |
| Gi5_8829199_x2.....  |                                | Ccgauucccgccgag.....           | 1 |
| Gi1_4151585_x2.....  | uccggcguagGauaacggc.....       |                                | 1 |
| Gi5_8811325_x2.....  |                                | guucgauuccGggccg.....          | 1 |
| G1a_5966164_x2.....  | uccggUguaguauaacggcuag.....    |                                | 1 |
| Gi2_10954433_x2..... | uccggcguGguauaacggcu.....      |                                | 1 |
| Gi5_8795541_x2.....  | Nccggcguaguauaacggcuag.....    |                                | 1 |
| Gi1_4153047_x2.....  |                                | guAcgauucccgccgagc.....        | 1 |
| G1a_5911486_x2.....  |                                | gguucgauucccgccgUgc.....       | 1 |
| Gi5_8783157_x2.....  |                                | ugguucCcacccaacagauccgg.....   | 1 |
| Gi3_28102078_x2..... | uccggcguaguauaacggcuCgaau..... |                                | 1 |
| G1a_5896606_x2.....  |                                | guucucacccaGcagauccg.....      | 1 |
| Gi1_4106883_x2.....  |                                | cucacccaCcagauccgg.....        | 1 |
| Gi5_8824933_x2.....  |                                | gguucgauCcccggccg.....         | 1 |
| Gi1_4115003_x2.....  | Cccggcguaguauaacggcu.....      |                                | 1 |
| Gi3_28001584_x2..... |                                | Gucacccaacagauccggguucgau..... | 1 |
| Gi3_28062436_x2..... | uccggcguCguauaacggcu.....      |                                | 1 |
| Gi5_8761219_x2.....  |                                | ugguucucacccaacGgauccgggu..... | 1 |
| Gi2_10838901_x2..... |                                | guucgauucccgAcgccgag.....      | 1 |
| Gi3_28113092_x2..... | uccggcguaguauaacgAcu.....      |                                | 1 |
| Gi1_4139407_x2.....  |                                | gguucgauucccgccUcg.....        | 1 |
| Gi2_10925471_x2..... |                                | gguucgauucccgccCga.....        | 1 |
| Gi1_4149689_x2.....  | uccggcguUguauaacggcua.....     |                                | 1 |
| Gi3_28147456_x2..... |                                | uuUgauucccgccg.....            | 1 |
| Gi2_10932327_x2..... |                                | guuUucacccaacagauccg.....      | 1 |
| Gi3_28033412_x2..... | uccggcguaguauaacggcAagaau..... |                                | 1 |

|                 |                            |   |
|-----------------|----------------------------|---|
| Gi5_8808605_x2  | ucacAcaacagauccggguu       | 1 |
| Gi3_28051960_x2 | gguucgauucUcggcgcc         | 1 |
| Gi2_10943205_x2 | uccgAcguaguauaacggcuag     | 1 |
| Gi3_28078084_x2 | guucucaccUaacagauccgg      | 1 |
| Gi2_10858249_x2 | uucgauucccgggcgcggCg       | 1 |
| Gi2_10840641_x2 | uccggcgGaguauaacggcuagaa   | 1 |
| Gi1_4102471_x2  | ugguucucaccGacagauccg      | 1 |
| Gi3_28170350_x2 | uccggAguaguauaacggcuag     | 1 |
| Gi3_28208094_x2 | uucucacccaacagauccgggCuc   | 1 |
| Gi1_4151871_x2  | ggguucgaNucccgcgccgga      | 1 |
| Gi5_8726993_x2  | ggcguaguNuaacggcuaga       | 1 |
| Gi1_4149361_x2  | uccggcguaGcauacggcu        | 1 |
| Gi1_4124833_x2  | ucucaAccaacagauccg         | 1 |
| Gi1a_5885002_x2 | ggAucgauucccgcgccggagc     | 1 |
| Gi2_10897531_x2 | guucgauAcccgcgccggag       | 1 |
| Gi3_28060866_x2 | ugguucucaccUaacagauccg     | 1 |
| Gi5_8743865_x2  | Aauucccgcgccggagc          | 1 |
| Gi5_8774441_x2  | uugguucucacccaCcagauccg    | 1 |
| Gi3_28220846_x2 | uucucacccaacagauccggguuc   | 1 |
| Gi3_28255850_x2 | uccggcgGaguauaacggc        | 1 |
| Gi2_10928561_x2 | uccggcguaGuauaacggAua      | 1 |
| Gi1_4108265_x2  | gCuucgauucccgcgccggagc     | 1 |
| Gi1_4096007_x2  | Gcacccaacagauccggguucga    | 1 |
| Gi3_28169138_x2 | uAcgauucccgcgccggagc       | 1 |
| Gi3_28057976_x2 | auccUggguucgauucccgcgccgga | 1 |
| Gi3_28147408_x2 | cagGuccggguucgauuccc       | 1 |
| Gi2_10981491_x2 | GggcguaGuauaacggcu         | 1 |
| Gi5_8753995_x2  | guucgauucccgCcgccgg        | 1 |
| Gi5_8801793_x2  | ggCucgauucccgcgccggagcguu  | 1 |
| Gi1_4155083_x2  | ucucacccaacCgauccg         | 1 |
| Gi5_8769593_x2  | ucGggcguaGuauaacggcuagaau  | 1 |
| Gi1a_5918104_x2 | uccggcguaAuauaacggcuaga    | 1 |
| Gi3_27993194_x2 | gguucgaGuucccgcgccggag     | 1 |
| Gi1_4125845_x2  | uccggcguaAuauaacggcu       | 1 |
| Gi5_8780981_x2  | gguucgauucccgcgGcgg        | 1 |
| Gi1_4152215_x2  | guucucacccaacagUuccg       | 1 |
| Gi1_4117409_x2  | uUguucucacccaacagaucc      | 1 |
| Gi5_8754887_x2  | uucgaCuucccgcgccgg         | 1 |
| Gi3_28239600_x2 | uucucacccaacagauccAg       | 1 |
| Gi3_28081378_x2 | ucucacccGacagauccg         | 1 |
| Gi5_8745639_x2  | gguucgauucccgcgGcggagc     | 1 |
| Gi2_10962979_x2 | ugguucucacccaacagauccUg    | 1 |
| Gi5_8747675_x2  | gguucgauucAcggcgccgg       | 1 |
| Gi3_28106474_x2 | gguucuUacccaacagauccg      | 1 |
| Gi3_28060622_x2 | UcggcguaGuauaacggc         | 1 |
| Gi3_28096670_x2 | cuUacccaacagauccggguucgauu | 1 |
| Gi5_8732521_x2  | uccggguucgGuucccg          | 1 |

|                 |                                       |   |
|-----------------|---------------------------------------|---|
| Gi5_8719709_x2  | .....uucAcaccaacagauccg.....          | 1 |
| Gi2_10965185_x2 | .....ucgGuucccgcgccggagc.....         | 1 |
| Gi5_8729477_x2  | .....uucucaccaacaAaucggguuc.....      | 1 |
| Gi1_4152497_x2  | .....cucaccUaacagauccgg.....          | 1 |
| Gi5_8748009_x2  | .....ucaccaacagGuccggguu.....         | 1 |
| Gi2_10908611_x2 | .....uucucaccaacagauAg.....           | 1 |
| Gi1_4137099_x2  | .....ucucGcccaacagauccgg.....         | 1 |
| Gi1_4101387_x2  | .....gguucgauucccgcgccggaA.....       | 1 |
| Gi1_4145699_x2  | .....Gcggcguaguauaacggcua.....        | 1 |
| Gi5_8744307_x2  | .....uccggcguaCuauaacggcua.....       | 1 |
| Gi5_8781511_x2  | .....gguucucaccaacagaCc.....          | 1 |
| Gi5_8814999_x2  | .....uAcggcguaguauaacggcuag.....      | 1 |
| Gi3_28041284_x2 | .....cgauucccgcgccggaAc.....          | 1 |
| Gi1_4094027_x2  | .....gguucgauucccgcgccU.....          | 1 |
| Gi3_28051810_x2 | .....gguucgauucccgcgccUga.....        | 1 |
| Gi3_28177132_x2 | .....ccggcguaguauaacggcUgga.....      | 1 |
| Gi1_4153889_x2  | .....guucucacGcaacagauccg.....        | 1 |
| Gi2_10844611_x2 | .....uccggcguaguauCacggcuag.....      | 1 |
| Gi2_10905607_x2 | .....ugguGcucaccaacagauccg.....       | 1 |
| Gi3_28201694_x2 | .....guucucaccaacagauccGg.....        | 1 |
| Gi1_4145687_x2  | .....uccggcguagCauaacggc.....         | 1 |
| Gi3_28194368_x2 | .....gguucgauucccgcgccggagcgC.....    | 1 |
| Gi1_4112899_x2  | .....ggcguaguauaGcggcuag.....         | 1 |
| Gi5_8754843_x2  | .....agUuccggguucgauucc.....          | 1 |
| Gi1a_5936950_x2 | .....Cguucgauucccgcgccgga.....        | 1 |
| Gi1_4123847_x2  | .....Gaacagauccggguucgauucccggc.....  | 1 |
| Gi5_8823089_x2  | .....uUcggguucgauucccggc.....         | 1 |
| Gi2_10973301_x2 | .....guucgauucccgcgGcg.....           | 1 |
| Gi3_28077204_x2 | .....uccggcguaguaGaacggcuagaa.....    | 1 |
| Gi3_28230940_x2 | .....ucgauucccgCcgccggagc.....        | 1 |
| Gi3_28012736_x2 | .....ggNucgauucccgcgccg.....          | 1 |
| Gi3_28154320_x2 | .....caacagauccggguucgCuuccc.....     | 1 |
| Gi5_8746429_x2  | .....cucaccaacagauUcgg.....           | 1 |
| Gi3_28168954_x2 | .....agauccggguucgauCccc.....         | 1 |
| Gi5_8772669_x2  | .....uucgauucccgcgccggagcC.....       | 1 |
| Gi1_4107525_x2  | .....uCcgauucccgcgccgg.....           | 1 |
| Gi5_8750557_x2  | .....uuUucaccaacagauccggguu.....      | 1 |
| Gi3_28197924_x2 | .....ucucaccUaacagauccgg.....         | 1 |
| Gi3_28190458_x2 | .....guucgauucccgcgGgg.....           | 1 |
| Gi3_28177260_x2 | .....uucuGaccaacagauccgg.....         | 1 |
| Gi2_10946935_x2 | .....uccggcgCaguauaacggcuagaau.....   | 1 |
| Gi5_8782065_x2  | .....uucgauucccgcgccggagcCu.....      | 1 |
| Gi2_10904021_x2 | .....uccggcguaCuauaacggcuaga.....     | 1 |
| Gi3_28236300_x2 | .....Guccggguucgauucccgcgccggagc..... | 1 |
| Gi5_8738783_x2  | .....uccggcguaguauaacggcuCgaau.....   | 1 |
| Gi3_28013354_x2 | .....uucgauuccAgcgccgga.....          | 1 |
| Gi3_28112812_x2 | .....ccggUguaguauaacggcuag.....       | 1 |

|                 |                               |   |
|-----------------|-------------------------------|---|
| Gi5_8785603_x2  | ucgauucccgAcgccggag           | 1 |
| Gi3_28155424_x2 | uccggcguagGauaacggc           | 1 |
| Gi5_8721945_x2  | uccggcguaguauaacggcAagaa      | 1 |
| Gl1a_5951118_x2 | gguucgauucccgAgccggagc        | 1 |
| Gi5_8728743_x2  | uucucacccaacaAaucgg           | 1 |
| Gi5_8740795_x2  | guucucacccaaAagaucgg          | 1 |
| Gi2_10858659_x2 | guucucacccaacagauAcg          | 1 |
| Gi3_27989860_x2 | cccaacagNuccggguucgauucc      | 1 |
| Gi2_10859403_x2 | uuUucacccaacagaucggg          | 1 |
| Gi3_28036522_x2 | ggGucucacccaacagaucc          | 1 |
| Gi3_28016178_x2 | ccaacagaucggguucgauucccgccgga | 0 |
| Gi1_4103711_x2  | uccggcguaguauaacCgcua         | 1 |
| Gi5_8786747_x2  | uucucacccaacagaucggAuu        | 1 |
| Gi1_4136617_x2  | ccggcguaguauaacAgcuaa         | 1 |
| Gi2_10850057_x2 | ugguucucNcccaacagaucc         | 1 |
| Gi1_4116277_x2  | ucgauucccgcgccggaU            | 1 |
| Gi2_10889625_x2 | uccggcguagCauaacggcu          | 1 |
| Gi3_28167666_x2 | cagaucggguucgauuccU           | 1 |
| Gi5_8746245_x2  | guucucaAccaacagaucgg          | 1 |
| Gi5_8740983_x2  | uccggAguaguauaacggc           | 1 |
| Gi1_4103413_x2  | ccggcguaNuauaacggcuaga        | 1 |
| Gi3_28104480_x2 | uucgauucccAgcgccggagc         | 1 |
| Gi3_28139806_x2 | Gacagaucggguucgauucccgccgga   | 1 |
| Gl1a_5905292_x2 | gguucgauucccgcgccgcC          | 1 |
| Gi1_4134587_x2  | guucgauucccgcgccUga           | 1 |
| Gl1a_5928082_x2 | uccAgcguaguauaacggcuaga       | 1 |
| Gi3_28194308_x2 | uccggAguaguauaacggcuagaau     | 1 |
| Gi5_8790799_x2  | guucUauucccgcgccggag          | 1 |
| Gi5_8795831_x2  | gguucucacccaacGgaucggg        | 1 |
| Gl1a_5921074_x2 | gguucgauucccgcgccggagA        | 1 |
| Gi5_8820787_x2  | gguucgauucccgcgUcggag         | 1 |
| Gi3_28175952_x2 | ccggcguaguaCaacggcuaga        | 1 |
| Gi1_4090145_x2  | uccgAcguaguauaacggcuaga       | 1 |
| Gi1_4118757_x2  | Cucgauucccgcgccggagc          | 1 |
| Gi1_4100873_x2  | guucgauucccggcAccggagc        | 1 |
| Gi1_4129415_x2  | ugguucucacccaaUagaucggg       | 1 |
| Gi2_10964051_x2 | guucgauucccgcgccggUg          | 1 |
| Gi5_8752755_x2  | Gcggcguaguauaacggcuag         | 1 |
| Gl1a_5891236_x2 | uccggcguaguauaacggcuag        | 1 |
| Gi5_8772665_x2  | agaucggguucgCuucc             | 1 |
| Gi5_8774521_x2  | gguucucaccGaacagaucgg         | 1 |
| Gi3_28148246_x2 | uucucacccaUcagaucgg           | 1 |
| Gi2_10905079_x2 | uucucacccaacagauGcg           | 1 |
| Gi3_28023314_x2 | Nccggcguaguauaacggcuag        | 1 |
| Gi3_28070692_x2 | cgggcguaguauaacggcua          | 0 |
| Gi3_28150738_x2 | guuAgauucccgcgccggag          | 1 |
| Gi2_10895625_x2 | guucuUacccaacagaucgg          | 1 |

|                 |                           |   |
|-----------------|---------------------------|---|
| Gi1a_5930474_x2 | gguucgauucccgcgAc         | 1 |
| Gi1_4118461_x2  | ggAucgauucccgcgccgga      | 1 |
| Gi1_4114789_x2  | gguUgauucccgcgccggagc     | 1 |
| Gi5_8774249_x2  | ugguucucGcccaacagauccgggu | 1 |
| Gi5_8738645_x2  | uucucacccaacagGuccgg      | 1 |
| Gi1a_5894212_x2 | uccggcguagCauaacggcuag    | 1 |
| Gi5_8811637_x2  | uccggcguaguauaacggAuag    | 1 |
| Gi5_8723867_x2  | gguucgauucccgCcgccggagc   | 1 |
| Gi1_4153353_x2  | ggGucgauucccgcgccgga      | 1 |
| Gi1_4139763_x2  | uccggcguaguauaaAggcuag    | 1 |
| Gi2_10908019_x2 | gguucgauuccAgggccgg       | 1 |
| Gi2_10957595_x2 | uccggcAuaguauaacggcuagaau | 1 |
| Gi5_8724119_x2  | Nguucgauucccgcgccggagc    | 1 |
| Gi2_10961799_x2 | uAcggcguaguauaacggc       | 1 |
| Gi3_28170812_x2 | uucucacGcaacagauccgg      | 1 |
| Gi5_8784921_x2  | guucgauucccgcgccggagcgC   | 1 |
| Gi5_8826979_x2  | cggcguGguauaacggcuag      | 1 |
| Gi5_8762007_x2  | uccggcguaguauaacggcuagaau | 1 |
| Gi2_10834057_x2 | ugguCcucacccaacagaucc     | 1 |
| Gi3_28239946_x2 | ucgauucccgcgccggcC        | 1 |
| Gi3_28088832_x2 | gcguaguauaacggcuGga       | 1 |
| Gi5_8775169_x2  | uccggcguaguauUacgg        | 1 |
| Gi5_8819389_x2  | uugguucucacccaacagauUg    | 1 |
| Gi5_8775529_x2  | cucacccUacagauccgg        | 1 |
| Gi2_10845877_x2 | uccggcguaguauaaUggcuag    | 1 |
| Gi3_28112010_x2 | ucCcacccaacagauccgg       | 1 |
| Gi1_4112635_x2  | uucucacccaacagauccCg      | 1 |
| Gi1a_5929114_x2 | gguucgauuccAgcgccggag     | 1 |
| Gi3_28067610_x2 | cggcguaguauaacggcuagaau   | 0 |
| Gi2_10901187_x2 | guucucacccGacagauccg      | 1 |
| Gi3_28146482_x2 | guucgauucccUgcgccg        | 1 |
| Gi3_28016184_x2 | Nguucgauucccgcgccgga      | 1 |
| Gi1_4132637_x2  | guucucacccaaUagauccg      | 1 |
| Gi3_28128796_x2 | cucacccaacagaCccgg        | 1 |
| Gi3_28078074_x2 | guucgauGccggcgccgg        | 1 |
| Gi3_28239860_x2 | gaucggguucgaCuccc         | 1 |
| Gi1_4118543_x2  | guucgauucccgcgccC         | 1 |
| Gi2_10831947_x2 | Gucgauucccgcgccgga        | 1 |
| Gi5_8787103_x2  | ucNggcguaguauaacgg        | 1 |
| Gi2_10847569_x2 | guucucaccAaacagauccg      | 1 |
| Gi2_10850305_x2 | guucgaGucccgcgccg         | 1 |
| Gi3_28096882_x2 | guucgauucccgcgccUgag      | 1 |
| Gi3_28052776_x2 | cucacccaaUagauccgg        | 1 |
| Gi1_4117525_x2  | ucuUacccaacagauccgg       | 1 |
| Gi1a_5913426_x2 | Gucgauucccgcgccggagc      | 1 |
| Gi2_10949321_x2 | uucucacccaacagauccAg      | 1 |
| Gi2_10947541_x2 | Uccaacagauccggguuc        | 1 |

|                      |                                        |   |
|----------------------|----------------------------------------|---|
| Gi3_28241838_x2..... | gUcguaguauaacggcuagaau.....            | 1 |
| Gi5_8812831_x2.....  | guucgauucccgAcgccggagc.....            | 1 |
| Gi3_28259230_x2..... | guucucacUcaacagauccg.....              | 1 |
| Gi5_8730133_x2.....  | uCguucucaccaacagauccg.....             | 1 |
| Gi5_8819591_x2.....  | gguucgauucccgAcgccggag.....            | 1 |
| G1a_5877838_x2.....  | uCcucaccaacagauccg.....                | 1 |
| Gi5_8741079_x2.....  | ggcguaguauaacggcuGga.....              | 1 |
| G1a_5955404_x2.....  | uucgGuucccgcgccggagc.....              | 1 |
| Gi3_27985358_x2..... | ucucacccNacagauccg.....                | 1 |
| Gi5_8722591_x2.....  | ucgauucccgcgccggCgc.....               | 1 |
| Gi3_28075606_x2..... | ugguucucaccAaacagauccg.....            | 1 |
| Gi3_28169190_x2..... | uuUgauucccgcgccggga.....               | 1 |
| Gi5_8795627_x2.....  | caacagauccggguucgauucccgcgccggagc..... | 0 |
| Gi2_10980421_x2..... | guucgCuucccgcgccggga.....              | 1 |
| Gi1_4144975_x2.....  | uccggcguaguauaacggcCagaa.....          | 1 |
| Gi3_28150512_x2..... | uccggcguauaacggc.....                  | 1 |
| Gi3_28160030_x2..... | Gcagauccggguucgauucc.....              | 1 |
| Gi3_28117744_x2..... | ugguucucaUccaacagauccg.....            | 1 |
| Gi2_10918517_x2..... | uucucaccaGcagauccg.....                | 1 |
| G1a_5938360_x2.....  | gguNcgauucccgcgccg.....                | 1 |
| Gi5_8720941_x2.....  | uccggcguaguauaacggcuU.....             | 1 |
| Gi3_28243794_x2..... | uccggcguaguauaacCgcuag.....            | 1 |
| Gi1_4091015_x2.....  | uccggcguauaacgg.....                   | 1 |
| Gi5_8735137_x2.....  | guucgauucccgAcAccggagc.....            | 1 |
| G1a_5964870_x2.....  | uccggcguaguauaacggcuagaugguug.....     | 0 |
| Gi1_4151033_x2.....  | uccggcguaguauaacgUcuaga.....           | 1 |
| Gi3_28118820_x2..... | uccggcguaguauUacggcuag.....            | 1 |
| Gi2_10967907_x2..... | ugguucuAacccaacagauccg.....            | 1 |
| Gi2_10898493_x2..... | guucucaccUaacagauccg.....              | 1 |
| Gi3_27992666_x2..... | guucgauucccgcgccggagcAu.....           | 1 |
| Gi5_8766853_x2.....  | guucucacccUacagauccg.....              | 1 |
| Gi3_28002086_x2..... | guucgauucccgGgccggag.....              | 1 |
| Gi3_28062226_x2..... | guucgauucccgcgGccggag.....             | 1 |
| Gi3_28152912_x2..... | gguucgauucccCgcgccggag.....            | 1 |
| Gi1_4107505_x2.....  | guucAcacccaacagauccg.....              | 1 |
| Gi3_27995030_x2..... | gauucccgcgccgUagc.....                 | 1 |
| Gi5_8718507_x2.....  | guucgauucccgcgccggagA.....             | 1 |
| Gi3_28200768_x2..... | gguucucaccaacagGucc.....               | 1 |
| Gi3_28201030_x2..... | cggUguaguauaacggcu.....                | 1 |
| Gi5_8807415_x2.....  | ugguucucaccAaacagauccg.....            | 1 |
| Gi1_4115211_x2.....  | cUgcguaguauaacggcu.....                | 1 |
| Gi5_8810763_x2.....  | gguuGgauucccgcgccgg.....               | 1 |
| Gi2_10984877_x2..... | cccaacGgauccggguuc.....                | 1 |
| Gi3_28123278_x2..... | uccggcguaguauaacggcuagaGu.....         | 1 |
| G1a_5918610_x2.....  | uccgAcguaguauaacggcuag.....            | 1 |
| Gi1_4118767_x2.....  | ucAggcguaguauaacggcuaga.....           | 1 |
| Gi5_8739661_x2.....  | uccggcguaguauaacggcu.....              | 1 |

|                 |                                  |   |
|-----------------|----------------------------------|---|
| Gi3_28061330_x2 | ucucacccaacagauccC               | 1 |
| Gi2_10924427_x2 | guucgCuucccgcgccg                | 1 |
| Gi1_4131255_x2  | uucgauucccgcgccgCgc              | 1 |
| Gi1_4143351_x2  | uccggcguaAuauaacggcuag           | 1 |
| Gi3_28552813_x1 | guuNgauucccgcgccggag             | 1 |
| Gi3_28729090_x1 | uuGucacccaacagauccg              | 1 |
| Gi5_9015306_x1  | guucgauGcccgcgccgg               | 1 |
| Gi5_8970024_x1  | acagauccggguucgauucccgAgc        | 1 |
| Gi3_28914915_x1 | cggguucgauucccggcAccgga          | 1 |
| Gi3_28965147_x1 | Agguucucacccaacagaucc            | 1 |
| Gi3_28883816_x1 | gguucgauucccgNgccggagc           | 1 |
| Gi3_28448279_x1 | guucCauucccgcgccggag             | 1 |
| Gi1a_6356277_x1 | uccggcguaaguauaacggcuagaUugguugg | 1 |
| Gi4_590903_x1   | gguucgaCuucccgcgccgg             | 1 |
| Gi3_28922194_x1 | guucucUcccaacagauccg             | 1 |
| Gi2_11176502_x1 | uccUgcguaguauaacggcuaga          | 1 |
| Gi3_28607644_x1 | cucacccaacUgauccgg               | 1 |
| Gi3_28608323_x1 | gGuccggguucgauucccgcgccgga       | 1 |
| Gi3_28425771_x1 | uccggcguaaguauaUcggcu            | 1 |
| Gi5_9071651_x1  | uucucaccAaacagauccggguuc         | 1 |
| Gi2_11042293_x1 | uccggcguaaguauaaGggcua           | 1 |
| Gi4_596980_x1   | cggcguaaguauaacggcuaga           | 0 |
| Gi5_9126598_x1  | ccaGcagauccggguucgau             | 1 |
| Gi5_9136247_x1  | uccggcguaaguauaacAgcuagaauugguu  | 1 |
| Gi3_28676654_x1 | cGcaacagauccggguucgauucc         | 1 |
| Gi3_28370586_x1 | uucucacccaacagauAcggguuc         | 1 |
| Gi5_8997230_x1  | gguucGacccaacagauccg             | 1 |
| Gi5_8979070_x1  | uugguucucCcccaacagauccg          | 1 |
| Gi5_9047390_x1  | uccggcguaaguauaaUgg              | 1 |
| Gi1_4274502_x1  | caacUgauccggguucgauucccgC        | 1 |
| Gi1_4241720_x1  | gguucgauucUcggcgccggagc          | 1 |
| Gi5_8842286_x1  | gguucgauuccAggcgcccggagcguu      | 1 |
| Gi2_11237360_x1 | gguucgauuGccggcgccggag           | 1 |
| Gi1a_6126895_x1 | guucgauuNccggcgccgg              | 1 |
| Gi1_4387861_x1  | ugguucucacccaacaAauccgg          | 1 |
| Gi2_11390964_x1 | aacagauccggguucgGuucccgcgccg     | 1 |
| Gi2_11289243_x1 | gguucgauucccgCcgcc               | 1 |
| Gi2_11030898_x1 | ugguucucacccaacagauUcg           | 1 |
| Gi3_28424382_x1 | uugguucucacccaacaga              | 0 |
| Gi5_9082007_x1  | uccggcguaGgauaacggcuagaau        | 1 |
| Gi1_4193194_x1  | gguucucacccaacagaucc             | 0 |
| Gi5_9111430_x1  | cggcguaaguauCacggcuaga           | 1 |
| Gi1_4290788_x1  | uccggcgGaguauaacggcuagaauugg     | 1 |
| Gi1_4331175_x1  | gguucgauucccgcgccUga             | 1 |
| Gi1_4323829_x1  | gguucgauGcccggcgccgga            | 1 |
| Gi1_4190688_x1  | gCuucucacccaacagauccg            | 1 |
| Gi2_11116921_x1 | uccggcguaaguauaacUcguag          | 1 |

|                 |                                      |   |
|-----------------|--------------------------------------|---|
| Gi5_8977628_x1  | .....ugguCcucacccaacagauccgg.....    | 1 |
| Gi5_9019155_x1  | .....uucgauucccgcgccgA.....          | 1 |
| Gi3_28288256_x1 | .....guucucaccccGacagauccgggu.....   | 1 |
| Gi1_4217601_x1  | .....gguucucacccaacCgauccgg.....     | 1 |
| Gi5_9120589_x1  | .....uccggcguaguauaaGggc.....        | 1 |
| Gi2_11004858_x1 | .....uccggcAuaguauaacggcuagaa.....   | 1 |
| Gi5_9075210_x1  | .....ucacccaacagauccggguC.....       | 1 |
| Gi2_11295088_x1 | .....gguNcgauucccgcgccgga.....       | 1 |
| Gi5_8865560_x1  | .....uccggcguaguauCacggcu.....       | 1 |
| Gi1_4374162_x1  | .....accaacagauccggguucgauucUcg..... | 1 |
| Gi3_28266730_x1 | .....guucucacccaGcagauccgggu.....    | 1 |
| Gi2_11393863_x1 | .....uccggAguaguauaacggcuag.....     | 1 |
| Gi2_11331612_x1 | .....uucAauucccgcgccgg.....          | 1 |
| Gi3_28744785_x1 | .....ucucacccaacagCuccgg.....        | 1 |
| Gi3_28467124_x1 | .....ugguucucacccaacagauccAg.....    | 1 |
| Gi5_8946059_x1  | .....uccUgcguaguauaacggcuagaa.....   | 1 |
| Gi3_28492538_x1 | .....uucucacccaacaCauccgg.....       | 1 |
| Gi2_11020624_x1 | .....gguucgauuccAggcgccgga.....      | 1 |
| Gi3_28313780_x1 | .....cccaacagauccggguucgauucUc.....  | 1 |
| Gi2_11322039_x1 | .....guuAucacccaacagauccg.....       | 1 |
| Gi5_8934544_x1  | .....guucgauCcccgcgccggag.....       | 1 |
| Gi4_572129_x1   | .....gguuAgauucccgcgccggagc.....     | 1 |
| Gi1_4382342_x1  | .....agauccggguucgauCccc.....        | 1 |
| Gi5_9122569_x1  | .....ccggUguaguauaacggcuag.....      | 1 |
| Gi4_604592_x1   | .....gguucgauuUccggcgccgg.....       | 1 |
| Gi5_8856754_x1  | .....Nccggcguaguauaacggcua.....      | 1 |
| Gi3_28908752_x1 | .....cucacccaCcagauccgg.....         | 1 |
| Gi1_6166156_x1  | .....uccggcguaguaGaacggcuag.....     | 1 |
| Gi1_4311669_x1  | .....gguucgauuccAggcgccg.....        | 1 |
| Gi1_4327164_x1  | .....auccggguucgauucccgcgccggU.....  | 1 |
| Gi3_28694185_x1 | .....uccggcguaguauaNcgguaga.....     | 1 |
| Gi1_4260712_x1  | .....ucucacccaacagGuccg.....         | 1 |
| Gi5_9132180_x1  | .....uccggcguaguauaaUggcuagaa.....   | 1 |
| Gi5_9095721_x1  | .....gguucucacccaacagGuc.....        | 1 |
| Gi3_28422376_x1 | .....uccggguucgauucccAgcgccgga.....  | 1 |
| Gi5_8941812_x1  | .....gguucgauucccgcgccggagcguuC..... | 1 |
| Gi3_28548837_x1 | .....cgggCucgauucccgcgccgga.....     | 1 |
| Gi2_11043616_x1 | .....guucgUuucccgcgccgga.....        | 1 |
| Gi1_4271575_x1  | .....gAuucgauucccgcgccggag.....      | 1 |
| Gi4_576983_x1   | .....guucAauucccgcgccgg.....         | 1 |
| Gi2_11189622_x1 | .....uucgauucccgcgUcgg.....          | 1 |
| Gi5_9016215_x1  | .....uccggcgGaguauaacggcuagaa.....   | 1 |
| Gi5_8872509_x1  | .....ggguucgCuucccgcgccggagc.....    | 1 |
| Gi4_600706_x1   | .....uccggcguNguauaacggcuag.....     | 1 |
| Gi5_9019263_x1  | .....gguucgauucUcggcgccgga.....      | 1 |
| Gi1_4354265_x1  | .....guuucccgccuuccuucgucuu.....     | 0 |
| Gi3_28658183_x1 | .....cggguucgauucccgcgccggG.....     | 1 |



|                 |                                        |   |
|-----------------|----------------------------------------|---|
| Gi4_575011_x1   | .....auucccgcgccggagcC.....            | 1 |
| Gi1_4230138_x1  | .....uccggGguaguauaacgg.....           | 1 |
| Gi3_28580965_x1 | .....uugguucucacccaUcagauc.....        | 1 |
| Gi3_28883800_x1 | .....uucucacGcaacagaucggguuc.....      | 1 |
| Gi1_4315732_x1  | .....uUcggcguaguauaacggcu.....         | 1 |
| Gi2_11036911_x1 | .....uccggcguaguauaaAggcua.....        | 1 |
| Gi3_28409719_x1 | .....uccggcCuaguauaacggcuag.....       | 1 |
| Gi1_4251497_x1  | .....guucucacccaacagaGccg.....         | 1 |
| Gi1_4319907_x1  | .....guuNgauucccgcgccgga.....          | 1 |
| Gi5_9049413_x1  | .....ugguuAucacccaacagaucgggu.....     | 1 |
| Gi1_4162336_x1  | .....uccggguucgauucccgcgccgg.....      | 0 |
| Gi5_8993100_x1  | .....guucucacccaacagauGcg.....         | 1 |
| Gi1_4227510_x1  | .....guucucacccaGagaucgg.....          | 1 |
| Gi2_11263507_x1 | .....gguucUauucccgcgccg.....           | 1 |
| Gi3_28426008_x1 | .....ucgauuAccggcgccggagc.....         | 1 |
| Gi4_573755_x1   | .....uucgauucccgcgccgg.....            | 0 |
| Gi5_9104674_x1  | .....guucgauucccgCcgccgga.....         | 1 |
| Gi2_11231128_x1 | .....agauccggguucgauucccgcgccggag..... | 0 |
| Gi2_11120609_x1 | .....ucgauuccAggcgccggag.....          | 1 |
| Gi1a_6139298_x1 | .....uucucaccAaacagaucgg.....          | 1 |
| Gi5_8867507_x1  | .....acagaucGggguucgauucccgcgcc.....   | 1 |
| Gi1_4373113_x1  | .....cccaacUgaucggguuc.....            | 1 |
| Gi2_11000074_x1 | .....ucgaGucccgcgccggag.....           | 1 |
| Gi5_8851114_x1  | .....ugguucucacccaacagaucggAu.....     | 1 |
| Gi2_11088895_x1 | .....Nuucgauucccgcgccggagc.....        | 1 |
| Gi2_11292939_x1 | .....guucgauuUccggcgccggag.....        | 1 |
| Gi2_11293023_x1 | .....uucAcacccaacagaucggguucg.....     | 1 |
| Gi2_11197426_x1 | .....uccggcguaguauaCcgguag.....        | 1 |
| Gi2_11314643_x1 | .....uucgauucccgcgccggUg.....          | 1 |
| Gi5_8876136_x1  | .....uccgUcguaguauaacggcu.....         | 1 |
| Gi1_4323888_x1  | .....gGucgauucccgcgccggag.....         | 1 |
| Gi3_28546806_x1 | .....cgauucccgAcgccggagc.....          | 1 |
| Gi3_28846220_x1 | .....ggguucgaNucccgcgccggagc.....      | 1 |
| Gi5_9012621_x1  | .....uucucacccaacagaucggguC.....       | 1 |
| Gi1_4352878_x1  | .....gguucucacccaacagaucAg.....        | 1 |
| Gi1_4201504_x1  | .....ggNucucacccaacagaucgg.....        | 1 |
| Gi2_11031774_x1 | .....cAauucccgcgccggagcguuuc.....      | 1 |
| Gi5_9084857_x1  | .....uGcggguucgauucccggc.....          | 1 |
| Gi2_11222338_x1 | .....guNcgauucccgcgccggagc.....        | 1 |
| Gi1a_6161345_x1 | .....uccggcguaguauaacAgcu.....         | 1 |
| Gi1_4199746_x1  | .....ucucacccaacagauUcg.....           | 1 |
| Gi3_28429230_x1 | .....uucucUcccaacagaucgg.....          | 1 |
| Gi3_28771419_x1 | .....ggcguaguauaacggcuagCau.....       | 1 |
| Gi4_569538_x1   | .....guucUauucccgcgccgga.....          | 1 |
| Gi1_4325991_x1  | .....uccggcguaguauaacggcuagaUu.....    | 1 |
| Gi3_28984872_x1 | .....ucucUcccaacagaucgg.....           | 1 |
| Gi3_28979015_x1 | .....Gucgauucccgcgccggag.....          | 1 |

|                      |                                     |   |
|----------------------|-------------------------------------|---|
| Gi2_11236544_x1..... | uccggcguaguauaacgUcuagaau.....      | 1 |
| Gi1_4333676_x1.....  | ugguucucaccaacUgauccg.....          | 1 |
| Gi2_1128815_x1.....  | gguaAcgauucccgccgccc.....           | 1 |
| Gi2_11116811_x1..... | cUgcguaguauaacggcuaga.....          | 1 |
| Gi2_11018820_x1..... | uAcgauucccgccgcccggagc.....         | 1 |
| Gi5_8928999_x1.....  | ugguucucacAcaacagauccgggu.....      | 1 |
| Gi5_9071109_x1.....  | uccggcguaguauaacggcuagaauaggGu..... | 1 |
| Gi5_9119908_x1.....  | uucgauucccgccgcAgg.....             | 1 |
| Gi3_28330811_x1..... | gguucucUcccaacagauccg.....          | 1 |
| Gi3_28266424_x1..... | Gugguucucaccaacaga.....             | 1 |
| Gi5_9125235_x1.....  | guuucccgccCuccuucgucu.....          | 1 |
| Gi1_4354254_x1.....  | guucgCuucccgccgccc.....             | 1 |
| Gi1_4312696_x1.....  | uucccgccgcccggagcA.....             | 1 |
| Gi1_4362114_x1.....  | ucucaccUacagauccgg.....             | 1 |
| Gi1_4373711_x1.....  | uccggcguacuauaacgg.....             | 1 |
| Gi1_4242184_x1.....  | Acggcguaguauaacggcuag.....          | 1 |
| Gi1_4322936_x1.....  | uugguucucaccaacagauccg.....         | 0 |
| Gi1_4285101_x1.....  | uccUgcguaguauaacggcuag.....         | 1 |
| Gi2_11164530_x1..... | guucgauucccUgcgcccga.....           | 1 |
| Gi5_8855431_x1.....  | uccggcguauauaacggc.....             | 1 |
| Gi5_8851787_x1.....  | uccggcguCguauaacggcu.....           | 1 |
| Gi3_28672800_x1..... | uccggcguaguaGaacggcuag.....         | 1 |
| Gi1a_6197386_x1..... | uccgUcguaguauaacggcuagaa.....       | 1 |
| Gi5_8980189_x1.....  | uccggcguaguCuaaacggcuagaa.....      | 1 |
| Gi4_598994_x1.....   | gguucgauucccgUgcccg.....            | 1 |
| Gi3_28670617_x1..... | cccaacagauccggguuc.....             | 0 |
| Gi2_11127044_x1..... | ucgauucccgccgcccggagcA.....         | 1 |
| Gi1a_6310241_x1..... | Cuucgauucccgccgccc.....             | 1 |
| Gi3_28622818_x1..... | cgccguaguauaacgAcuagaau.....        | 1 |
| Gi5_8947925_x1.....  | guucgauucccgccgcccAag.....          | 1 |
| Gi3_28554081_x1..... | ggguucgGuucccgccgccc.....           | 1 |
| Gi3_28391790_x1..... | Uguucgauucccgccgcccggagcguu.....    | 1 |
| Gi2_11016792_x1..... | cagauccggguucgauucc.....            | 0 |
| Gi5_9106455_x1.....  | auccggguucgauucccgccgcccggagc.....  | 0 |
| Gi1_4343697_x1.....  | cucaccaacagauccggU.....             | 1 |
| Gi5_9001673_x1.....  | ccggcguauauaacggcu.....             | 1 |
| Gi5_8960439_x1.....  | Gguccggcguaguauaacggcuagaauagg..... | 1 |
| Gi5_8943502_x1.....  | guucucaccaacaUaucg.....             | 1 |
| Gi2_11373101_x1..... | guucucaAccaacagauccg.....           | 1 |
| Gi2_11111681_x1..... | guucgauuccGggccgcccggagc.....       | 1 |
| Gi2_11294997_x1..... | gguucucaccaacagauccgggu.....        | 0 |
| Gi5_9067346_x1.....  | guucgauucccgccgcccGcga.....         | 1 |
| Gi5_8890299_x1.....  | ugguucucaccaacagauccAg.....         | 1 |
| Gi3_28723782_x1..... | Agguucgauucccgccgcccggga.....       | 1 |
| Gi3_28813720_x1..... | uggAucucaccaacagauccg.....          | 1 |
| Gi5_8907661_x1.....  | Aguucgauucccgccgcccggagcguu.....    | 1 |
| Gi1_4218610_x1.....  | uucgauuccAggcccgg.....              | 1 |

|                 |                             |   |
|-----------------|-----------------------------|---|
| Gi1_4205070_x1  | uccggcguaguauaGcggc         | 1 |
| Gi2_11134309_x1 | cgggGucgauuccggcgccgga      | 1 |
| Gi3_28617586_x1 | uccggguucgauuccggcgccggC    | 1 |
| Gi1_4366445_x1  | ucucacccaaUagauccgg         | 1 |
| Gi3_28420742_x1 | cucacccaacagauccgC          | 1 |
| Gi3_28746704_x1 | aCauccggguucgauuccggcgccgg  | 1 |
| Gi1_4306787_x1  | cucacccaGcagauccggguucga    | 1 |
| Gi4_595506_x1   | gguuUgauuccggcgccgg         | 1 |
| Gi3_28728177_x1 | agaucgggCucgauucc           | 1 |
| Gi3_28339293_x1 | ucacccUacagauccggguuc       | 1 |
| Gi3_28766235_x1 | caacagauccggguucgC          | 1 |
| Gi3_28323073_x1 | cccaacagauccgggCucgauucc    | 1 |
| Gi5_9138450_x1  | ucucacccaacagGuccg          | 1 |
| Gi1_4343275_x1  | ucucacccaacaAauccgg         | 1 |
| Gi1_4326623_x1  | guucgauAccggcgccg           | 1 |
| Gi3_28677760_x1 | ggcguaguNuaacggcua          | 1 |
| Gi2_11219074_x1 | cccaacagGuccggguuc          | 1 |
| Gi5_8877020_x1  | uucgauuccggcgccggagcgA      | 1 |
| Gi3_28593556_x1 | auccAgguucgauuccggcgccgga   | 1 |
| Gi3_28759482_x1 | uccggcguaguauaacggUu        | 1 |
| Gi1_4161951_x1  | uccggcguaguauaaGgg          | 1 |
| Gl1_5996456_x1  | ggguucgauuccggcgccggagcC    | 1 |
| Gi3_28843634_x1 | cggcguaguauaacggcuaAa       | 1 |
| Gi2_11366978_x1 | ucgauAccggcgccggagc         | 1 |
| Gi3_28578239_x1 | cacccaacagauAgggguuc        | 1 |
| Gi3_28912144_x1 | auccggguuAgauuccggcgccgga   | 1 |
| Gi5_9011318_x1  | gguucgauuccggcgccgUagc      | 1 |
| Gi2_10995462_x1 | uccggcgGaguauaacggcuag      | 1 |
| Gi3_28706486_x1 | ucucacccaacagauUgg          | 1 |
| Gi1_4215423_x1  | ucacccaacagauccgCgu         | 1 |
| Gi5_9071310_x1  | uAguucucacccaacagauccgg     | 1 |
| Gi5_8907153_x1  | gguucucaGccaacagauccg       | 1 |
| Gi5_9018245_x1  | gguucgauuccggcgccAgagcguu   | 1 |
| Gi2_11190614_x1 | uucucacccaacaAauccg         | 1 |
| Gi5_9063088_x1  | guucgauuccggcCccgga         | 1 |
| Gi5_8887622_x1  | uccggcguaguauaacgA          | 1 |
| Gi5_8957435_x1  | guucgauuccGggcgccg          | 1 |
| Gi3_28714050_x1 | cagauccggguucgaCuccggcgccgg | 1 |
| Gi2_11379186_x1 | cgauuccggcgccggagcguuuA     | 1 |
| Gl1_6208819_x1  | uccggcguCguauaacggcuag      | 1 |
| Gi3_28909169_x1 | ggcguagCauaacggcuaga        | 1 |
| Gi2_11041640_x1 | guaguGuaacggcuagaau         | 1 |
| Gi3_28309427_x1 | guuAucacccaacagauccgg       | 1 |
| Gi3_28589833_x1 | ugguucucacccaacagaucc       | 0 |
| Gi3_28351186_x1 | guucucacccaacagaucc         | 0 |
| Gi2_11278047_x1 | ccGguucgauuccggcgccggagc    | 1 |
| Gi4_593486_x1   | Cguucgauuccggcgccgg         | 1 |

|                 |                                    |   |
|-----------------|------------------------------------|---|
| Gi5_8857640_x1  | .....gguucgUuucccgcgccggag         | 1 |
| Gi2_11321386_x1 | ...uccggcguaguaAaacggcua           | 1 |
| Gi5_9011451_x1  | ...uccggcgAaguauaacggcuagaau       | 1 |
| Gi2_11005068_x1 | .....gguuAucacccaacagauccg         | 1 |
| Gi5_9082787_x1  | .....uucucacccUacagauccggguu       | 1 |
| Gi2_11373735_x1 | .....Acgauuccggcgccggag            | 1 |
| Gi2_11285736_x1 | .....cgauucccgcgccggGcgguu         | 1 |
| Gi5_8975325_x1  | .....uugguucucacUcaacagauccg       | 1 |
| Gi1_4188205_x1  | .....ccggcguGguauaacggc            | 1 |
| Gi5_9061607_x1  | .....ggAucucacccaacagauccg         | 1 |
| Gi1_4334308_x1  | .....ccggcguCguauaacggc            | 1 |
| Gi5_8857946_x1  | .....uugguucuaUccaacagauccg        | 1 |
| Gi5_8982493_x1  | .....gguucgauucccgcgGcg            | 1 |
| Gi3_28307645_x1 | .....ggcguaguaaacggcuaUa           | 1 |
| Gi2_11302589_x1 | .....cggguucgauucAcggcgccgga       | 1 |
| Gi3_28618792_x1 | .....gguucgauucAcggcgcc            | 1 |
| Gi1a_6149094_x1 | ...uccgAcguaguaaacggc              | 1 |
| Gi1_4301285_x1  | .....gguucgauUccggcgccggagc        | 1 |
| Gi1_4319024_x1  | .....gguucucacccaaAagauccg         | 1 |
| Gi1_4283066_x1  | .....gAuucgauucccgcgcc             | 1 |
| Gi2_11241331_x1 | .....auuccggcgccggagcC             | 1 |
| Gi1_4271800_x1  | .....cucacccaacUgauccg             | 1 |
| Gi2_11053440_x1 | .....ucgauucccgcgUggagc            | 1 |
| Gi3_28737614_x1 | .....ucAauucccgcgccgga             | 1 |
| Gi3_28395434_x1 | ...cggcgCaguauaacggcuagaau         | 1 |
| Gi2_11180345_x1 | .....Ugguucgauucccgcgccggagc       | 1 |
| Gi1_4367709_x1  | .....cGgauccggguucgauucccgcgcc     | 1 |
| Gi5_9107136_x1  | .....ucAgguucgauucccgcgccg         | 1 |
| Gi5_8942143_x1  | .....uucAcacccaacagauccg           | 1 |
| Gi5_8857528_x1  | .....gguucgGuucccgcgccggagcguu     | 1 |
| Gi5_9103469_x1  | .....aCauccggguucgauucc            | 1 |
| Gi5_8895251_x1  | .....gguucucaccUaacagauccg         | 1 |
| Gi5_9091215_x1  | ...uggAucucacccaacagauccg          | 1 |
| Gi3_28633437_x1 | ...cggcguaguaaacggUuaga            | 1 |
| Gi3_28743439_x1 | .....acagauccggguucgauucccgcgccgAa | 1 |
| Gi2_11346721_x1 | .....guucucacccaacagauUgg          | 1 |
| Gi1a_6154963_x1 | .....uuUgauucccgcgccggagc          | 1 |
| Gi1a_6021875_x1 | .....guucucacccaacagauAg           | 1 |
| Gi3_28985193_x1 | .....ggguucgauucccgcgccggaCc       | 1 |
| Gi4_604099_x1   | ...ugguucucacccaacagauccgggu       | 0 |
| Gi2_11051947_x1 | .....cccaacaUauccggguuc            | 1 |
| Gi1a_6280602_x1 | .....gguucgGuucccgcgccggag         | 1 |
| Gi5_9020509_x1  | .....gguucucacccaacagauccC         | 1 |
| Gi1_4358284_x1  | .....gguuAgauucccgcgccg            | 1 |
| Gi1a_6153473_x1 | .....gguucgauucAcggcgccgga         | 1 |
| Gi1_4196051_x1  | .....guucucacccaacagauccgC         | 1 |
| Gi1_4202460_x1  | .....uccAgguucgauucccgcgccgga      | 1 |

|                 |                                     |   |
|-----------------|-------------------------------------|---|
| Gi1_4175368_x1  | .....gguucgauucccggcAccggag         | 1 |
| Gi3_28921023_x1 | .....uucAauucccggcgccgga            | 1 |
| Gi1_4283334_x1  | .....Agguucucaccaacagauccg          | 1 |
| Gi3_28501653_x1 | .....cUacagauccggguucga             | 1 |
| Gi2_11110564_x1 | .....ugguucucaccaacagaCcc           | 1 |
| Gi5_8974533_x1  | .....ccaacagCuccggguuc              | 1 |
| Gi1_4352544_x1  | .....ccaacagauccggguuc              | 0 |
| Gi3_28283721_x1 | .....uugguucucaccaCcagauc           | 1 |
| Gi5_8983010_x1  | .....aguccggcguaguauaacgAcuagaau    | 1 |
| Gi3_28689156_x1 | .....ucgauucccgAcgccggag            | 1 |
| Gi5_9067315_x1  | .....ccaacagauccgAguuc              | 1 |
| Gi5_9114512_x1  | .....gguucgauucccggcgccggagcgCuu    | 1 |
| Gi2_11363201_x1 | .....cUgcguaguauaacggcuagaau        | 1 |
| Gi3_28335121_x1 | .....uccggcguagGauaacggcuagaa       | 1 |
| Gi2_10997984_x1 | .....uucucGcccaacagauccg            | 1 |
| Gi3_28625718_x1 | .....ggguucgaCucccggcgccggag        | 1 |
| Gi1_4360748_x1  | .....uccggcguaguaAaacgg             | 1 |
| Gi1_4224993_x1  | .....cucaccaacagauccggguucg         | 0 |
| Gi5_9054686_x1  | .....guucucaccaacagaucc             | 0 |
| Gi3_28552848_x1 | .....guucgauucccggcUccg             | 1 |
| Gi3_28501236_x1 | .....uNcggcguaguauaacggcuaga        | 1 |
| Gi2_11298164_x1 | .....uGgauucccggcgccgga             | 1 |
| Gi5_8903697_x1  | .....gguucgauucccggcUccggagc        | 1 |
| Gi2_11062455_x1 | .....guucgauucccggcgccggagcg        | 0 |
| Gi1_4319217_x1  | .....aguccggcguaguauaacgg           | 0 |
| Gi2_11300518_x1 | .....Gagauccggguucgauucccggcgccggag | 1 |
| Gi2_11397611_x1 | .....ccUgcguaguauaacggcu            | 1 |
| Gi5_9051131_x1  | .....uAcucaccaacagauccggguuc        | 1 |
| Gi3_28418808_x1 | .....guucgauuccGggcgccg             | 1 |
| Gi3_28426142_x1 | .....uccggguucgCuucccggcgccgga      | 1 |
| Gi1_4246433_x1  | .....uccggcguaguauaCcggu            | 1 |
| Gi3_28337109_x1 | .....guucgauGcccggcgccg             | 1 |
| Gi3_28504071_x1 | .....guucucaccaacagUuccgg           | 1 |
| Gi2_11279186_x1 | .....guucucacccaaGagauccg           | 1 |
| Gl1_6327152_x1  | .....guaguauaacCcuagaau             | 1 |
| Gi5_9038982_x1  | .....ggcguaguGuaacggcuag            | 1 |
| Gi5_9107204_x1  | .....uccggcguaguauaacggG            | 1 |
| Gi3_28962871_x1 | .....uNcggcguaguauaacggc            | 1 |
| Gi2_11233810_x1 | .....ucAauucccggcgccggagc           | 1 |
| Gi2_11210225_x1 | .....uccggcguaguauaacggcGa          | 1 |
| Gi5_8923647_x1  | .....cgauucccggcgccggagcgguC        | 1 |
| Gi2_11403150_x1 | .....guucucaccaacagauccGgg          | 1 |
| Gi3_28685562_x1 | .....ucgUuucccggcgccggagc           | 1 |
| Gi1_4365740_x1  | .....uccggcguaguauaacggcuagaUu      | 1 |
| Gi3_28713029_x1 | .....ucucacccCacagauccgg            | 1 |
| Gi1_4390025_x1  | .....uccggcguaguauaacggcCga         | 1 |
| Gl1_6140685_x1  | .....uccggcguaguauaacggcCga         | 1 |

|                 |                                  |   |
|-----------------|----------------------------------|---|
| Gi3_28329919_x1 | .....cUcccaacagauccggguuc        | 1 |
| Gi3_28898428_x1 | .....guucucacccaacagaGccg        | 1 |
| Gi5_8907632_x1  | .....ucaccaCcagauccggguu         | 1 |
| Gi1_4249945_x1  | .....Ucggcguaguauaacggcu         | 1 |
| Gi1_4308228_x1  | .....Agguucgauucccgcgccg         | 1 |
| Gi2_11237992_x1 | .....uucgauuccUggcgccggagc       | 1 |
| Gi1a_6083325_x1 | .....gguucgauucccgAgccgg         | 1 |
| Gi5_9096651_x1  | .....accaacagauccggguucgaCuccc   | 1 |
| Gi1_4237244_x1  | .....uucgauucccgcgccAg           | 1 |
| Gi2_11005910_x1 | .....caUaucggguucgauucccgcgccgga | 1 |
| Gi5_9056287_x1  | .....Cugguucucacccaacagauccg     | 1 |
| Gi3_28886212_x1 | .....gcuaguauaacggcuagG          | 1 |
| Gi5_8956571_x1  | .....ggguucgauuccUggcgccggagc    | 1 |
| Gi3_28493974_x1 | .....cacccaacagGuccggguuc        | 1 |
| Gi3_28784225_x1 | .....uucgUuucccgcgccgg           | 1 |
| Gi3_28943001_x1 | .....aucggguucgauucccgcgAccgga   | 1 |
| Gi5_9086408_x1  | .....guucucacccaacaCauccgg       | 1 |
| Gi2_11157678_x1 | .....gguucgauucccgUcgccggag      | 1 |
| Gi3_28298784_x1 | .....uucucacccaacagauGcgg        | 1 |
| Gi2_11236569_x1 | .....ugguucucaAcacaagaucc        | 1 |
| Gi5_9121068_x1  | .....ucucacccaacagauUcg          | 1 |
| Gi5_9116513_x1  | .....ucucacccaacGgauccgggu       | 1 |
| Gi3_28438278_x1 | .....gauucccgcgccggagcU          | 1 |
| Gi3_28343661_x1 | .....uucgaCucccgcgccggag         | 1 |
| Gi1a_6152621_x1 | .....Cguucgauucccgcgccgg         | 1 |
| Gi2_11111602_x1 | .....ccggcguaguauaacggcu         | 0 |
| Gi2_11323443_x1 | .....Ucggcguaguauaacggcuaga      | 1 |
| Gi5_8964280_x1  | .....ggcguaguCuaacggcuag         | 1 |
| Gi5_8884316_x1  | .....cggguucgauucccgUgc          | 1 |
| Gi1_4215364_x1  | .....ugguucucacccaacCgauccg      | 1 |
| Gi2_11335105_x1 | .....uccgCcgaguauaacggcu         | 1 |
| Gi2_11308415_x1 | .....uccggcguaCuauaacggcu        | 1 |
| Gi2_11317602_x1 | .....guucucacccaacagauGg         | 1 |
| Gi1_4300720_x1  | .....uAcggcguaguauaacggcuaga     | 1 |
| Gi1a_6043894_x1 | .....uUcggcguaguauaacggc         | 1 |
| Gi3_28682260_x1 | .....gguucgauuccGcgcgccg         | 1 |
| Gi1_4296745_x1  | .....gguucgauucccgcgccggaC       | 1 |
| Gi1_4199628_x1  | .....guucgauucccgcgccCgagc       | 1 |
| Gi1a_6082016_x1 | .....uccggcguaguauaacggcCagaa    | 1 |
| Gi3_28418507_x1 | .....uucgauuGccggcgccggagc       | 1 |
| Gi1_4265161_x1  | .....ucucacAcaacagauccgg         | 1 |
| Gi4_595786_x1   | .....guucgCuucccgcgccg           | 1 |
| Gi3_28803447_x1 | .....cgggcuGguauaacggcu          | 1 |
| Gi3_28268109_x1 | .....uccggcguaguaAaacggcu        | 1 |
| Gi4_591325_x1   | .....guucgauuccUcgcgccgg         | 1 |
| Gi2_11024176_x1 | .....ggguucgauucccgUgcc          | 1 |
| Gi2_11311669_x1 | .....gauucccgcgccggagc           | 1 |

Gi2\_11121073\_x1.....gguucgauucccgAcgcc..... 1  
 Gi3\_28882545\_x1.....ggcguaguauUacggcuag..... 1  
 Gi3\_28773590\_x1.....ggcguCguauaacggcuagaau..... 1  
 Gi3\_28545311\_x1.....aacagauccggguucgauucccggcgUcgga..... 1  
 Gi5\_8946036\_x1.....ccggcguaguauaaAggcua..... 1  
 Gi1\_4312727\_x1.....gguucucaccUaacagauccgg..... 1  
 Gi5\_8840045\_x1.....ucgauucccggcgcgAa..... 1  
 Gi2\_11240885\_x1.....cGggcguaguauaacggcuagaau..... 1  
 Gi2\_11352120\_x1.....ccggcguaguauaGcggcua..... 1  
 Gi2\_11275861\_x1.....aguccggUguaguauaacgg..... 1  
 Gi4\_584974\_x1.....Cuucgauucccggcgcg..... 1  
 Gi2\_11093458\_x1.....guucGcaccacagauccgg..... 1  
 Gi5\_9000461\_x1.....ggUguaguauaacggcuaga..... 1  
 Gi1\_4225088\_x1.....gguucgauucccgAgccg..... 1  
 Gi3\_28544544\_x1.....ugguucucacccUacagauccg..... 1  
 Gi5\_9062821\_x1.....ggcguaguauaacggcCag..... 1  
 Gi2\_11106519\_x1.....ucacccaacagauccggguuc..... 0  
 Gi5\_8946116\_x1.....uucucacccaacagaCccg..... 1  
 Gi4\_606396\_x1.....guucgaGucccggcgcg..... 1  
 Gi3\_28881524\_x1.....Gcggcguaguauaacggcuag..... 1  
 Gi3\_28418844\_x1.....uucucacccaacagauccgAguuc..... 1  
 Gi5\_9124826\_x1.....gguucGcaccacagauccg..... 1  
 Gi3\_28446037\_x1.....cccaacagUuccggguucgauucc..... 1  
 Gi4\_597138\_x1.....guucgauucccgUgcccga..... 1  
 Gi3\_28263261\_x1.....uccggcguaguauaacgCcuagaa..... 1  
 Gi5\_9088187\_x1.....ccggguucgauucccggcgcgU..... 1  
 Gi2\_11346832\_x1.....agauccggguucGcuucc..... 1  
 Gi2\_11021814\_x1.....uccggcguaguauaacggcuaCaa..... 1  
 Gi5\_8960465\_x1.....guucucacccaacagauccg..... 1  
 Gi5\_8906067\_x1.....ugguucucacccaacagauUcg..... 1  
 Gi1\_4307382\_x1.....aguccggUguaguauaacggcua..... 1  
 Gi5\_8908734\_x1.....guuGucacccaacagauccgg..... 1  
 Gi2\_11261799\_x1.....gguucgauuAccggcgccggag..... 1  
 Gl1a\_6213932\_x1.....uccggcguaguauaCcgg..... 1  
 Gi5\_8988260\_x1.....ucacccaANagauccggguu..... 1  
 Gi3\_28439388\_x1.....gNuucgauucccggcgcgagc..... 1  
 Gi3\_28683519\_x1.....ucucacccNacagauccg..... 1  
 Gi4\_582552\_x1.....gguCcgauucccggcgcg..... 1  
 Gl1a\_6080800\_x1.....uccggcguaguGuaacggcua..... 1  
 Gl1a\_6017759\_x1.....Gccggcguaguauaacggcuagaau..... 1  
 Gi5\_8965890\_x1.....Agauucccggcgcgagcguuuc..... 1  
 Gi3\_28759523\_x1.....gAguucgauucccggcgcgagc..... 1  
 Gi3\_28346019\_x1.....gguucuUacccaacagauccgggu..... 1  
 Gi3\_28787669\_x1.....uccCgcguaguauaacggcua..... 1  
 Gi1\_4180668\_x1.....Uguccggcguaguauaacggcuag..... 1  
 Gi5\_8925195\_x1.....ucucacccaacagauccgC..... 1  
 Gi2\_11200439\_x1.....Gggcguaguauaacggcuagaau..... 1

|                 |                              |   |
|-----------------|------------------------------|---|
| Gi1_4374990_x1  | guucucacccaacagauccgggu      | 0 |
| Gi3_28325103_x1 | ugguuUucacccaacagauccg       | 1 |
| Gi1_4316704_x1  | gguucgauucccgcgccgUag        | 1 |
| Gi5_8915832_x1  | ccaacagauccggguAc            | 1 |
| Gi1_4278973_x1  | uccggcguaguauaacgCcua        | 1 |
| Gi3_28538421_x1 | ccggcguaguauaacggcuaA        | 1 |
| Gi5_9064515_x1  | Aucucacccaacagauccgggu       | 1 |
| Gi5_8968586_x1  | gguucgauGcccgcgccgg          | 1 |
| Gi3_28348367_x1 | gguucgaAucccgcgcc            | 1 |
| Gi3_28603978_x1 | ggcguaguauaacAgcuaga         | 1 |
| Gi1_4374259_x1  | cucaccAaacagauccgg           | 1 |
| Gi3_28783069_x1 | ucgauucccggcUccggagc         | 1 |
| Gi1a_6095435_x1 | uGcggcguaguauaacggcu         | 1 |
| Gi2_11307595_x1 | guucucacccaacagauccgg        | 1 |
| Gi3_28396191_x1 | ugguucucUcccaacagaucc        | 1 |
| Gi5_9087095_x1  | gguucgCuucccgcgccggagc       | 1 |
| Gi5_9112409_x1  | gguucucacccaacGgauccgggu     | 1 |
| Gi5_9082933_x1  | gguucucacccaacagauccAg       | 1 |
| Gi3_28767525_x1 | ucgCuucccgcgccggagc          | 1 |
| Gi5_9097109_x1  | aUagauccggguucgauucccgcg     | 1 |
| Gi3_28528581_x1 | cAauucccgcgccggagc           | 1 |
| Gi5_8919154_x1  | cUggcguaguauaacggcuaga       | 1 |
| Gi1_4283760_x1  | ugguucuAaccaacagauccg        | 1 |
| Gi3_28590145_x1 | guucgauGccggcgccggag         | 1 |
| Gi2_11100601_x1 | ucgauucccggcUccggag          | 1 |
| Gi2_11236176_x1 | gguucgauucGcggcgcc           | 1 |
| Gi3_28963182_x1 | uccggcguaguauaacggcGagaau    | 1 |
| Gi4_604450_x1   | gguucucacccaacGgauccg        | 1 |
| Gi3_28488094_x1 | Gagauccggguucgauucccgcgccgg  | 1 |
| Gi5_8895369_x1  | gauucccgcgAggagc             | 1 |
| Gi1_4214280_x1  | guucucacccaacagauccgA        | 1 |
| Gi5_8866308_x1  | uccggcguaguauCacggcuagauggu  | 1 |
| Gi2_11357110_x1 | uucgGuucccgcgccgg            | 1 |
| Gi2_11236176_x1 | uccggcAuaguauaacggcuag       | 1 |
| Gi2_11407350_x1 | ucgauucccCcgccggagc          | 1 |
| Gi3_28269762_x1 | cacccaacagauccgggGuc         | 1 |
| Gi3_28302604_x1 | gAucucacccaacagauccg         | 1 |
| Gi2_11107148_x1 | aacagauccggguuAgauucccgcgccg | 1 |
| Gi1a_6049064_x1 | uucucacccaacagaCccgg         | 1 |
| Gi4_604894_x1   | uccAgcguaguauaacggcuaga      | 1 |
| Gi5_9099788_x1  | aguccggcguagGauaacggcu       | 1 |
| Gi5_9050913_x1  | ucucacUcaacagauccg           | 1 |
| Gi3_28686329_x1 | agCuccggguucgauucc           | 1 |
| Gi1_4224661_x1  | uucucacccaacagaGccgg         | 1 |
| Gi5_8887075_x1  | gguucgUucccgcgccgg           | 1 |
| Gi2_11162931_x1 | Auucucacccaacagauccgggu      | 1 |
| Gi3_28310326_x1 | gaucggguCcgauucc             | 1 |



|                 |                               |   |
|-----------------|-------------------------------|---|
| Gi3_28616757_x1 | ucAggcguaguauaacggcua         | 1 |
| Gi4_609748_x1   | gguucgauucccgcgccggagcCu      | 1 |
| Gi1_4386623_x1  | uucucCcccaacagauccgg          | 1 |
| Gi5_9007222_x1  | uccggcguagAuaaacggc           | 1 |
| Gi2_11070776_x1 | ucgauucccgcgccUgag            | 1 |
| Gi1_4191986_x1  | aCccggguucgauucccgcgccgg      | 1 |
| Gi5_9056183_x1  | accaacagauccggguucgauCcc      | 1 |
| Gi3_28976315_x1 | gguucucGcccaacagauccgg        | 1 |
| Gi3_28860126_x1 | cccaacagauccggguucgauGcc      | 1 |
| Gi3_28987095_x1 | cccaacagauccggguucgaCuccc     | 1 |
| Gi1_4173855_x1  | ccgAcguaguauaacggcuag         | 1 |
| G1a_6126156_x1  | uccggcguaguCuaacggcu          | 1 |
| Gi1_4368147_x1  | uAucacccaacagauccg            | 1 |
| Gi5_9129461_x1  | gguucgauucccgCcgccgg          | 1 |
| G1a_6103745_x1  | guGcucacccaacagauccg          | 1 |
| Gi3_28559884_x1 | ccUaacagauccggguucgauuccc     | 1 |
| Gi5_9062050_x1  | gguucgauucUcggcgccggagcgu     | 1 |
| Gi3_28874542_x1 | gguucgauucAcggcgccgg          | 1 |
| Gi1_4325900_x1  | caacagGuccggguucgauucccggc    | 1 |
| Gi3_28923891_x1 | Ugauccggguucgauuccc           | 1 |
| Gi2_11356522_x1 | gcuaguauaacggcuagaaA          | 1 |
| Gi2_11338905_x1 | gguucgauucccgcgcgGg           | 1 |
| Gi5_8935297_x1  | guucgauuccCcgcgccgga          | 1 |
| Gi3_28653418_x1 | guNcucacccaacagauccg          | 1 |
| Gi4_595029_x1   | guucgauucccgcgAcgg            | 1 |
| Gi3_28873117_x1 | cucGcccaacagauccggguucgauu    | 1 |
| Gi1_4201497_x1  | aacaUauccggguucgauucccgcgccgg | 1 |
| Gi2_11107469_x1 | agaauAguugguucucacc           | 1 |
| Gi4_592118_x1   | gguucucacccGacagauccg         | 1 |
| Gi3_28554705_x1 | gguucucaNccaacagauccgg        | 1 |
| Gi5_9107189_x1  | cAcacccaacagauccgg            | 1 |
| Gi1_4259723_x1  | gguucucCcccaacagauccgg        | 1 |
| G1a_5995027_x1  | ucucGcccaacagauccg            | 1 |
| Gi1_4292558_x1  | guucucacccaacUgauccgg         | 1 |
| G1a_6076007_x1  | uccggcguaguauaacAgcuagaau     | 1 |
| Gi3_28644085_x1 | uucuUacccaacagauccggguu       | 1 |
| Gi1_4353672_x1  | agauAcggguucgauuccc           | 1 |
| Gi3_28604818_x1 | ucgauCcccggcgccggag           | 1 |
| Gi4_583360_x1   | ucUggcguaguauaacggcuag        | 1 |
| Gi1_4219145_x1  | ggcguaguauaacgAcuag           | 1 |
| Gi3_28617574_x1 | gguuUucacccaacagaucc          | 1 |
| Gi1_4267136_x1  | gguucucacccaacagauccA         | 1 |
| Gi3_28690571_x1 | uccggcguaguauaacgCcuagaau     | 1 |
| Gi3_28688159_x1 | cAauucccgcgccggag             | 1 |
| Gi1_4248612_x1  | uccggcguaguGuaacggcuagaau     | 1 |
| Gi5_8877325_x1  | guucgUuucccgcgccggagc         | 1 |
| Gi3_28462976_x1 | gguuNgaucccgcgccggagc         | 1 |

|                 |                                      |   |
|-----------------|--------------------------------------|---|
| Gi2_11325663_x1 | .....uGcgggguucgauucccgcgccgga       | 1 |
| Gi3_28557731_x1 | .....cagauccggguucgaCuccc            | 1 |
| Gi5_8843088_x1  | .....Agguucgauucccgcgccgg            | 1 |
| Gi5_8846253_x1  | .....cggcguaguUuaacggcua             | 1 |
| Gi5_9110145_x1  | .....gguucgauuccAggcgccgga           | 1 |
| Gi2_11304308_x1 | .....guucgauGccggcgccggag            | 1 |
| Gi1_4185539_x1  | .....gauucccgcgccggagU               | 1 |
| Gi3_28363045_x1 | .....cggcguaguauaCcgguaga            | 1 |
| Gi2_11134506_x1 | .....cccaacagauccgggGuc              | 1 |
| Gi1_4360244_x1  | .....ugguucucacGcaacagauccg          | 1 |
| Gi2_11365551_x1 | .....gauuccUggcgccggagc              | 1 |
| Gi3_28734044_x1 | .....Cguccggcguaguauaac              | 1 |
| Gi1a_6211574_x1 | .....uccggcguaguauGacggcuagaa        | 1 |
| Gi3_28428452_x1 | .....ucgaGucccgcgccggagc             | 1 |
| Gi2_11231686_x1 | .....gauucccgcgccggCgc               | 1 |
| Gi2_11061990_x1 | .....ucgauuccNggcgccgga              | 1 |
| Gi4_604495_x1   | .....gGuucccgcgccggagc               | 1 |
| Gi3_28439206_x1 | .....cagauccggguucgauuGcc            | 1 |
| Gi4_571954_x1   | .....guAcgauucccgcgccgg              | 1 |
| Gi2_11306525_x1 | .....uccggcguagAuaacggc              | 1 |
| Gi5_8953895_x1  | .....uucucUcccaacagauccg             | 1 |
| Gi2_11345545_x1 | .....cAgcguaguauaacggcua             | 1 |
| Gi5_8837034_x1  | .....guuGucacccaacagauccg            | 1 |
| Gi3_28435245_x1 | .....gguCcucacccaacagauccgggu        | 1 |
| Gi5_8891900_x1  | .....uccggcguaguauaacggGuagaau       | 1 |
| Gi3_28419469_x1 | .....uccggguucgauucccgAgccgga        | 1 |
| Gi3_28668767_x1 | .....ugguucucUcccaacagauccg          | 1 |
| Gi3_28467341_x1 | .....ucucacUcaacagauccgg             | 1 |
| Gi5_8981725_x1  | .....Gucgauucccgcgccggagc            | 1 |
| Gi1_4378876_x1  | .....uccggcguaguauaacggGua           | 1 |
| Gi3_28399065_x1 | .....uccggguUgauucccgcgccgga         | 1 |
| Gi1_4336294_x1  | .....gguuAgauucccgcgccggag           | 1 |
| Gi1_4332412_x1  | .....uccggcguaguauaUcggcuaga         | 1 |
| Gi5_8915546_x1  | .....gguucgUuucccgcgccggagc          | 1 |
| Gi5_8869804_x1  | .....ggcguaguauaCcgguag              | 1 |
| Gi5_8839554_x1  | .....ucucacccUacagauccg              | 1 |
| Gi3_28521586_x1 | .....uucucGcccaacagauccgg            | 1 |
| Gi2_11058683_x1 | .....cagauccggguucgauucccgcgccggagcC | 1 |
| Gi5_8879346_x1  | .....guucacccaacagaAccg              | 1 |
| Gi1_4307754_x1  | .....uccggcguaguauaacggcuCgaa        | 1 |
| Gi3_28937902_x1 | .....ugguCcucacccaacagaucc           | 1 |
| Gi2_11403305_x1 | .....uccggcguagAuaacggcuaga          | 1 |
| Gi5_8911749_x1  | .....cggcguaguauaacggcuagaa          | 0 |
| Gi4_572180_x1   | .....gguucgauucccgcgGcggagc          | 1 |
| Gi2_11112269_x1 | .....agauccGggguucgauucc             | 1 |
| Gi2_11009016_x1 | .....uGcgauucccgcgccggag             | 1 |
| Gi3_28974909_x1 | .....uucgauucccgAgccggagc            | 1 |

|                 |                                    |   |
|-----------------|------------------------------------|---|
| Gi3_28632715_x1 | .....cucaccaacagauccggCu           | 1 |
| Gi5_9081632_x1  | .....ggcguaguauaacggcuagaGu        | 1 |
| Gi1_4388547_x1  | .....Gacagauccggguucgauucccgcgccgg | 1 |
| Gi2_11280951_x1 | .....aguccggcguaguauaGcgg          | 1 |
| Gi1a_6074540_x1 | .....Cuucucaccaacagauccg           | 1 |
| Gi5_8997540_x1  | .....ucUccaacagauccggguu           | 1 |
| Gi1a_6325166_x1 | .....ggAucgauucccgcgccggag         | 1 |
| Gi2_11317020_x1 | .....uccggcguaguauaacggcuagaugguu  | 0 |
| Gi2_11395804_x1 | .....uccggcguaguauaaAggcuagaa      | 1 |
| Gi3_28399320_x1 | .....guucucaccaacUgauccg           | 1 |
| Gi1_4310796_x1  | .....cggcguGguauaacggcu            | 1 |
| Gi3_28981538_x1 | .....guGcucaccaacagauccgggu        | 1 |
| Gi1_4380110_x1  | .....ccggcguaNuuaaacggcu           | 1 |
| Gi3_28944552_x1 | .....Aucgauucccgcgccgga            | 1 |
| Gi1a_6253918_x1 | .....ucucaccaacCgauccg             | 1 |
| Gi3_28593613_x1 | .....Ncgauucccgcgccggagc           | 1 |
| Gi3_28629367_x1 | .....ugguuAucaccaacagauccg         | 1 |
| Gi3_28381888_x1 | .....ucgauucccUgcgccggagc          | 1 |
| Gi1_4361419_x1  | .....uucucaccaacagauccUg           | 1 |
| Gi1a_6100600_x1 | .....gguucgauuccAgcgccg            | 1 |
| Gi1_4283531_x1  | .....ggcguaguauCacggcuag           | 1 |
| Gi1a_6257853_x1 | .....gguucgauCcccgcgccggag         | 1 |
| Gi5_8883673_x1  | .....ccggcguaguauaaUggcuag         | 1 |
| Gi2_11154551_x1 | .....ugguuAucaccaacagaucc          | 1 |
| Gi5_8855244_x1  | .....uccggcguaguauaacggG           | 1 |
| Gi1a_6004225_x1 | .....guucucaccaacagaCccg           | 1 |
| Gi1_4372687_x1  | .....uccggcgGaguauaacggcua         | 1 |
| Gi3_28972616_x1 | .....Ngguucucaccaacagauccg         | 1 |
| Gi5_8931323_x1  | .....aguccggcguaguauaacggcuagaugA  | 1 |
| Gi5_9050820_x1  | .....uuNucaccaacagauccg            | 1 |
| Gi3_28599939_x1 | .....ccggcguaguCuaacggcuaga        | 1 |
| Gi1a_6024798_x1 | .....uccggcguaAuuaaacggcuagaa      | 1 |
| Gi3_28940951_x1 | .....uccggguucgauuccAgcgccgga      | 1 |
| Gi1a_6183164_x1 | .....Aguucgauucccgcgcc             | 1 |
| Gi3_28759870_x1 | .....agauccggguucgauuccU           | 1 |
| Gi3_28613963_x1 | .....guucucacGcaacagauccgg         | 1 |
| Gi1a_6263421_x1 | .....uucucaUccaacagauccg           | 1 |
| Gi1_4217767_x1  | .....ggcguaguauaacggcuagU          | 1 |
| Gi5_8874790_x1  | .....uccggcguaguauaacggcuagaU      | 1 |
| Gi3_28716628_x1 | .....uucgauucccgcgccUgagc          | 1 |
| Gi2_11241927_x1 | .....uccggcguaguaAaacggc           | 1 |
| Gi1_4249870_x1  | .....guugguucucaccaacagauccggG     | 1 |
| Gi5_8962395_x1  | .....ugCuucucaccaacagauccg         | 1 |
| Gi1_4242935_x1  | .....aguccggcguagCauaacgg          | 1 |
| Gi5_9092387_x1  | .....gguucgauucccgCcgccg           | 1 |
| Gi3_28923004_x1 | .....uccggcguaCuuaaacgg            | 1 |
| Gi5_8990492_x1  | .....gguCcgauucccgcgccggagcguu     | 1 |

|                 |                                      |   |
|-----------------|--------------------------------------|---|
| Gi3_28909365_x1 | .....uccggcguaguauaacggcuaU          | 1 |
| Gi2_11267696_x1 | .....cggcguaguauCacggcua             | 1 |
| Gi1_4261801_x1  | .....guucgauucccgAgccggagc           | 1 |
| Gi1_4213027_x1  | .....gguucgauucccgcgccggaCc          | 1 |
| Gi5_9127316_x1  | .....cccaacagaucggguucgau            | 0 |
| Gi1_4170449_x1  | .....ucgaCucccgcgccggagc             | 1 |
| Gi3_28356424_x1 | .....cggcguaguauaaUggcuaga           | 1 |
| Gi5_8942041_x1  | .....acagGuccggguucgauucccgcg        | 1 |
| Gi2_11031628_x1 | .....aguccggUguaguauaacggcuaga       | 1 |
| Gi3_28562024_x1 | .....uucgauuccAggcgccggagc           | 1 |
| Gi2_11351729_x1 | .....uccggguucgauucccgcgUgga         | 1 |
| Gi2_11057976_x1 | .....uuNucaccaacagaucgg              | 1 |
| Gi3_28294130_x1 | .....guucgauucccgcgccgCag            | 1 |
| G1a_6201526_x1  | .....gAuucgauucccgcgccggag           | 1 |
| Gi3_28856543_x1 | .....cguaguauaacggcuGga              | 1 |
| Gi2_11136551_x1 | .....guucgaAuucccgcgccggag           | 1 |
| Gi3_28982503_x1 | .....guucCcacccaacagaucggg           | 1 |
| Gi5_8971504_x1  | .....ccggcguagAuaaacggcua            | 1 |
| G1a_6087353_x1  | .....gguucgauuccCgcgccgga            | 1 |
| Gi3_28495574_x1 | .....agauCggguucgauucc               | 1 |
| Gi3_28519129_x1 | .....cgauAcccgcgccggagc              | 1 |
| Gi1_4371846_x1  | .....uccggcUuaguauaacggcua           | 1 |
| Gi1_4257778_x1  | .....gguucgauucccgcgCag              | 1 |
| Gi3_28544578_x1 | .....uccggcguaguauaacggcuagaaG       | 1 |
| Gi5_9066794_x1  | .....uAcggcguaguauaacggc             | 1 |
| Gi1_4317254_x1  | .....gguuAgaucccgcgccggagc           | 1 |
| Gi2_11248282_x1 | .....ugUuucucacccaacagaucggguucga    | 1 |
| Gi2_11119338_x1 | .....guucucacccaacaCaucgg            | 1 |
| Gi3_28609946_x1 | .....uccggcguaguauaacggAu            | 1 |
| Gi5_8848803_x1  | .....guGcgauucccgcgccggag            | 1 |
| Gi3_28931829_x1 | .....caacagauccUgguucgauucc          | 1 |
| Gi3_28851294_x1 | .....caccUaacagaucggguuc             | 1 |
| Gi1_4217338_x1  | .....ucucacUcaacagaucgg              | 1 |
| Gi2_11214536_x1 | .....ucGggcguaguauaacggc             | 1 |
| Gi5_8837121_x1  | .....gNuucucacccaacagaucgg           | 1 |
| Gi3_28872324_x1 | .....ucUggguucgauucccgcgccgga        | 1 |
| Gi1_4203859_x1  | .....uuGucaccaacagaucgg              | 1 |
| Gi3_28529579_x1 | .....uucgauuAccggcgccggagc           | 1 |
| Gi3_28732519_x1 | .....uugguucucaccccCacagauc          | 1 |
| Gi5_8884803_x1  | .....guucgauucccgcgccggagcAuuucc     | 1 |
| Gi5_9023466_x1  | .....gguucgauuccAggcgccgg            | 1 |
| Gi3_28686517_x1 | .....cucaccaacagaucUg                | 1 |
| Gi1_4211070_x1  | .....ggcguaguauaacggcCa              | 1 |
| Gi1_4248954_x1  | .....ucacccUacagaucgggu              | 1 |
| Gi2_11045741_x1 | .....guucgauucccgcgccgAa             | 1 |
| Gi1_4188947_x1  | .....uccggAguaguauaacggcuaga         | 1 |
| Gi3_28862388_x1 | .....uccggcguaguauaacggcuagaugguuggu | 0 |

|                 |                                        |   |
|-----------------|----------------------------------------|---|
| Gi5_8933169_x1  | .....caccGacagauccggguucga.....        | 1 |
| Gi2_11171955_x1 | .....uccggcguaguauGacggc.....          | 1 |
| Gi1_4340501_x1  | .....gguNcgauucccgcgccg.....           | 1 |
| Gi3_28534135_x1 | .....uucucaccaacagauccU.....           | 1 |
| Gi1_4274271_x1  | .....uucgauucccgcgccggagcgA.....       | 1 |
| Gi3_28552888_x1 | .....cucaccaacagauccGgg.....           | 1 |
| Gi3_28816522_x1 | .....uAcgauucccgcgccgg.....            | 1 |
| G1a_6110384_x1  | .....uccggcguaguGuaacggcuagaau.....    | 1 |
| Gi2_11021809_x1 | .....uccggcguaguauaacggcuaUaa.....     | 1 |
| Gi3_28391138_x1 | .....uccggcguaguAaacggcuag.....        | 1 |
| Gi5_9011630_x1  | .....uucucCcccaacagauccgg.....         | 1 |
| G1a_6164324_x1  | .....uccggcguaguauaacggcC.....         | 1 |
| Gi2_11271538_x1 | .....ucgauucAcggcgccgga.....           | 1 |
| Gi5_8880505_x1  | .....ucgauucccgUgcccga.....            | 1 |
| G1a_6235090_x1  | .....gguucgauucccgAcccg.....           | 1 |
| Gi5_9026887_x1  | .....ucucaccaacagauccU.....            | 1 |
| Gi1_4202829_x1  | .....gguuGgauucccgcgccggagc.....       | 1 |
| Gi5_9086464_x1  | .....Aguucgauucccgcgccggagcgu.....     | 1 |
| Gi3_28374533_x1 | .....ucucaccaacaCauccg.....            | 1 |
| Gi4_585429_x1   | .....Aguucgauucccgcgccgg.....          | 1 |
| Gi3_28400264_x1 | .....guucucacccCacagauccggguucgau..... | 1 |
| Gi2_11396307_x1 | .....guucucacUaacagauccgg.....         | 1 |
| Gi5_8870938_x1  | .....ggCucucaccaacagaucc.....          | 1 |
| Gi5_8945493_x1  | .....Auaguauaacggcuagaau.....          | 1 |
| Gi2_11022110_x1 | .....cgauuccUggcgccggagcguuuc.....     | 1 |
| Gi2_11116924_x1 | .....uccggcguaguauaacggGuaga.....      | 1 |
| Gi3_28772100_x1 | .....ugguucucacccaaUagauccg.....       | 1 |
| Gi5_8887625_x1  | .....caacagauccggCucgauucccgcgccg..... | 1 |
| Gi5_8998405_x1  | .....uucucaccaacagauccggCu.....        | 1 |
| Gi3_28383516_x1 | .....gguucgauucccCgcccgg.....          | 1 |
| Gi5_9013907_x1  | .....ugguucucaccaacagauccAg.....       | 1 |
| Gi1_4371977_x1  | .....uccggcguNguauaacggcuagaa.....     | 1 |
| Gi5_9020413_x1  | .....accaacagauccggguucgauucUc.....    | 1 |
| Gi3_28945273_x1 | .....uugguucucUcccaacagaucc.....       | 1 |
| Gi5_9082802_x1  | .....ucucaccaacGgauccgg.....           | 1 |
| Gi1_4203577_x1  | .....ucucaccUaacagauccgg.....          | 1 |
| Gi2_11029933_x1 | .....ugguucucaccaacagauGcg.....        | 1 |
| Gi2_11226528_x1 | .....agGuccggguucgauucc.....           | 1 |
| Gi3_28419933_x1 | .....agauccggNuucgauucc.....           | 1 |
| Gi2_11138380_x1 | .....ucgauucccgcgGggagc.....           | 1 |
| Gi2_11308489_x1 | .....cgUuuccggcgccggagcguuuc.....      | 1 |
| Gi2_11094102_x1 | .....uucucaccaacagauccggguuc.....      | 0 |
| Gi1_4348404_x1  | .....guucucaccaGagauccg.....           | 1 |
| Gi5_9007676_x1  | .....uNcgcgguaguauaacgg.....           | 1 |
| Gi2_11129664_x1 | .....ggguucgauucccgcgAcgga.....        | 1 |
| Gi3_28311531_x1 | .....Aagauccggguucgauucc.....          | 1 |
| Gi3_28280924_x1 | .....guucgauucccgcgCccggagc.....       | 1 |

|                 |                                   |   |
|-----------------|-----------------------------------|---|
| Gi5_8952778_x1  | .....gguucgauucccgcgccUgag        | 1 |
| Gi2_11311014_x1 | .....uucgauucccgcgccUgag          | 1 |
| Gi3_28630680_x1 | .....gguucgauucccgcgccUgag        | 1 |
| Gi3_28378571_x1 | .....ggguucgGuucccgcgccggagc      | 1 |
| Gi5_8936068_x1  | .....uucucacccCacagaucggguu       | 1 |
| Gi5_9137971_x1  | .....uccggcguaCuuaaacggcuagaau    | 1 |
| Gi5_8961556_x1  | .....uccggcguaaguauaacCgc         | 1 |
| Gi3_28987564_x1 | .....gguucgauGcccggcgcc           | 1 |
| Gi3_28945706_x1 | .....cggcguaaguauaacAgcuagaauggu  | 1 |
| Gi1_4173683_x1  | .....Ucggcguaaguauaacggcuaga      | 1 |
| Gi3_28513443_x1 | .....uccggcAuaguauaacggcuagaa     | 1 |
| Gi2_11312496_x1 | .....ucgauAcccgcgccggag           | 1 |
| Gi1_4165399_x1  | .....Nuucgauucccgcgccggagc        | 1 |
| Gi4_594121_x1   | .....gguucgaCucccgcgccggagc       | 1 |
| Gi5_8990018_x1  | .....ggcguaGcauaaacggcuagaau      | 1 |
| Gi3_28407437_x1 | .....guucucacccaacagauccgggC      | 1 |
| Gi1a_6096632_x1 | .....Uuucgauucccgcgccggag         | 1 |
| Gi1_4280345_x1  | .....ccggcguaGuuaaacggcu          | 1 |
| Gi1_4380338_x1  | .....guucgaGuucccgcgccggagc       | 1 |
| Gi1a_6195582_x1 | .....uccggcguaaguauaacggcuAaa     | 1 |
| Gi1_4371992_x1  | .....uccggcguaaguauGacggcu        | 1 |
| Gi3_28773250_x1 | .....uccggcguaaguauUacggcuagaa    | 1 |
| Gi5_9030840_x1  | .....gauucccgcgccggagA            | 1 |
| Gi1_4205593_x1  | .....guucucaAccaacagauccg         | 1 |
| Gi5_8879089_x1  | .....gguucucacccaCagauccgg        | 1 |
| Gi1_4278280_x1  | .....cucacccaacagauccggguucgauuA  | 1 |
| Gi1_4359562_x1  | .....caCagauccggguucgauucccggc    | 1 |
| Gi1_4338588_x1  | .....cagauccggguucgauuccc         | 0 |
| Gi1a_6130507_x1 | .....gguucgauucccggcAccg          | 1 |
| Gi3_28284425_x1 | .....acagauccggguucgaCucccgcgccgg | 1 |
| Gi3_28403535_x1 | .....aUaucggguucgauucccgcgccgg    | 1 |
| Gi2_11021237_x1 | .....ccggcguaGuuaaacggcu          | 1 |
| Gi2_11331587_x1 | .....guNcgauucccgcgccgg           | 1 |
| Gi2_11328523_x1 | .....cagauccgNguucgauuccc         | 1 |
| Gi3_28700299_x1 | .....uccggcguaaguauaacgUcuag      | 1 |
| Gi5_8878709_x1  | .....cucacccaacagauccCg           | 1 |
| Gi2_11046574_x1 | .....gguucgauGcccggcgcc           | 1 |
| Gi2_11265027_x1 | .....agaaugguuAguucucacc          | 1 |
| Gi5_9056703_x1  | .....uuggGucucacccaacagauccg      | 1 |
| Gi5_9045931_x1  | .....gguucucacccaacagCuccgg       | 1 |
| Gi1_4349308_x1  | .....cggcguaaguauaacggcC          | 1 |
| Gi5_8970648_x1  | .....Cccggcguaaguauaacggcu        | 1 |
| Gi2_11203524_x1 | .....uggCucucacccaacagaucc        | 1 |
| Gi2_11177370_x1 | .....uccNcguaaguauaacggc          | 1 |
| Gi1_4240077_x1  | .....cagauccgNguucgauucccgcgcc    | 1 |
| Gi4_587679_x1   | .....gauucccgcgccggagcC           | 1 |
| Gi2_11393693_x1 | .....guucucacccaacaUaucgg         | 1 |

|                 |                                  |       |   |
|-----------------|----------------------------------|-------|---|
| Gi1_4243940_x1  | .....ccggcguaguauaacggUua        | ..... | 1 |
| Gi3_28269161_x1 | .....ccaacagauccggguucgCuucc     | ..... | 1 |
| Gi1_4307504_x1  | .....Aucgauucccgcgccgg           | ..... | 1 |
| Gi5_9044436_x1  | .....ucucaccaacagauccggguu       | ..... | 0 |
| Gi1_4367436_x1  | .....Acucaccaacagauccgg          | ..... | 1 |
| Gi3_28845316_x1 | .....acccaGcagauccggguucgauucc   | ..... | 1 |
| Gi5_8907434_x1  | .....ucucaccaCcagauccgg          | ..... | 1 |
| Gi1_4268271_x1  | .....gguucucacAcaacagauccgg      | ..... | 1 |
| Gi2_11193724_x1 | .....gauuccAgggcgggagc           | ..... | 1 |
| Gi1_4365183_x1  | .....cucaccaacagauccggguucgauuU  | ..... | 1 |
| Gi3_28433959_x1 | .....ccggcgCaguauaacggcuaga      | ..... | 1 |
| Gi3_28609483_x1 | .....ucgauucccgcgccggUgc         | ..... | 1 |
| Gi5_9102312_x1  | .....Cucucaccaacagauccggguu      | ..... | 1 |
| Gi3_28311232_x1 | .....ccUgcguaguauaacggc          | ..... | 1 |
| Gi2_11299578_x1 | .....cggcguagNauaacggcuagaau     | ..... | 1 |
| Gi3_28555814_x1 | .....uucgauucccgcgccgggagc       | ..... | 1 |
| Gi5_8923123_x1  | .....gUuucucaccaacagauccggguu    | ..... | 1 |
| Gi3_28764885_x1 | .....ugguucucaccaacagauA         | ..... | 1 |
| Gi1_4361395_x1  | .....uucgauucccggcUccgg          | ..... | 1 |
| Gi3_28755984_x1 | .....cucaccaacagauccAgg          | ..... | 1 |
| Gi3_28440000_x1 | .....ugguucucaccaacagauUcg       | ..... | 1 |
| G1a_6330986_x1  | .....guucgauuccCgcgccg           | ..... | 1 |
| Gi5_9110155_x1  | .....gguucgauucccgcgccggag       | ..... | 1 |
| Gi2_11077411_x1 | .....cAcaccaacagauccgg           | ..... | 1 |
| Gi5_9017239_x1  | .....guucUauucccgcgccggagcguuucc | ..... | 1 |
| Gi3_28682632_x1 | .....cucaccaacagauccCg           | ..... | 1 |
| Gi1_4295070_x1  | .....caacagauccggguucgauuccUggc  | ..... | 1 |
| Gi1_4217533_x1  | .....gguCcgauucccgcgcc           | ..... | 1 |
| Gi5_8848841_x1  | .....gguucucaccaacagaCccgg       | ..... | 1 |
| Gi5_8834483_x1  | .....gguucgauucccgGgcccggag      | ..... | 1 |
| Gi5_8944459_x1  | .....uucucaccaacagauccgC         | ..... | 1 |
| Gi3_28973498_x1 | .....ucgauuccGggcggcggagc        | ..... | 1 |
| Gi1_4310529_x1  | .....uccggcgAaguauaacggcuagaa    | ..... | 1 |
| Gi5_8873261_x1  | .....cucaUccaacagauccgg          | ..... | 1 |
| Gi5_8897594_x1  | .....uucucaccaacagauccgAguu      | ..... | 1 |
| G1a_6071562_x1  | .....Aguucgauucccgcgccg          | ..... | 1 |
| G1a_6317276_x1  | .....gguucgauucccgAgccg          | ..... | 1 |
| Gi5_8918949_x1  | .....ucgGuucccgcgccggagc         | ..... | 1 |
| Gi3_28435967_x1 | .....caacagauccgggGucga          | ..... | 1 |
| Gi5_9069029_x1  | .....ccggcguaguauCacggcua        | ..... | 1 |
| Gi4_570145_x1   | .....gGucgauucccgcgccgga         | ..... | 1 |
| Gi2_11383158_x1 | .....guucgauucccgcgccgUa         | ..... | 1 |
| Gi1_4291873_x1  | .....uccggcguaguauaacggcuagaauA  | ..... | 1 |
| Gi2_11391649_x1 | .....ugguucucaccaGcagaucc        | ..... | 1 |
| Gi5_9087774_x1  | .....ggcguaguauaacggcuGg         | ..... | 1 |
| G1a_6279999_x1  | .....guucgauuccAgcggccggagc      | ..... | 1 |
| Gi1_4164300_x1  | .....ggcguaguUaacggcua           | ..... | 1 |

|                 |                                         |   |
|-----------------|-----------------------------------------|---|
| Gi1_4175107_x1  | .....ugNuucucacccaacagauccgg.....       | 1 |
| Gi3_28446139_x1 | .....Uggguucgauuccggcgccggagc.....      | 1 |
| Gi2_11355533_x1 | .....uccggguucgauAccggcgccgga.....      | 1 |
| Gi4_581032_x1   | .....gCuucgauuccggcgccggagc.....        | 1 |
| Gi4_589372_x1   | .....uccAgcguaguauaacggcuag.....        | 1 |
| Gi3_28790025_x1 | .....ucucacUcaacagauccg.....            | 1 |
| Gi3_28813576_x1 | .....ucNggcguaguauaacggcuag.....        | 1 |
| Gi3_28351075_x1 | .....ugguAcucacccaacagauccg.....        | 1 |
| Gi1_4328097_x1  | .....uccggcguaUuauaacggcua.....         | 1 |
| Gi1_4295786_x1  | .....guuAgaauccggcgccgga.....           | 1 |
| Gi2_11161442_x1 | .....uucucacccaacagauccgC.....          | 1 |
| Gi2_11074341_x1 | .....Agguucucacccaacagaucc.....         | 1 |
| Gi1a_6167788_x1 | .....Ccucacccaacagauccg.....            | 1 |
| Gi4_572457_x1   | .....gguucgCuuccggcgccgg.....           | 1 |
| Gi3_28348399_x1 | .....ugguucucacccaacagUuccg.....        | 1 |
| Gi2_11397560_x1 | .....guucgauuccggcgccgga.....           | 1 |
| Gi5_8989993_x1  | .....Ggguucucacccaacagauccggguucga..... | 1 |
| Gi1a_6296102_x1 | .....gguAcgauuccggcgccggagc.....        | 1 |
| Gi3_28870627_x1 | .....guucCauuccggcgccggagc.....         | 1 |
| Gi3_28505496_x1 | .....Uaacagauccggguucga.....            | 1 |
| Gi4_568121_x1   | .....uugguucucaccUaacaga.....           | 1 |
| Gi1a_6331626_x1 | .....uccggcguaaguaCaacggcuag.....       | 1 |
| Gi1_4376379_x1  | .....uucucacccaacaCauccg.....           | 1 |
| Gi5_9068058_x1  | .....cgauucccCgcgccggagcguuuc.....      | 1 |
| Gi5_9122889_x1  | .....gguGcgauuccggcgccggagc.....        | 1 |
| Gi2_11340649_x1 | .....uucucacccaacGgauccgg.....          | 1 |
| Gi1a_6195412_x1 | .....uccggcguaaguaaacggcuagaGu.....     | 1 |
| Gi3_28727938_x1 | .....uCGguucucacccaacagaucc.....        | 1 |
| Gi3_28502031_x1 | .....ucgauucccgccggccggGg.....          | 1 |
| Gi3_28441267_x1 | .....uucgauucccAgcgccgg.....            | 1 |
| Gi3_28538696_x1 | .....gauccggguucgauAccc.....            | 1 |
| Gi1a_6104029_x1 | .....gguucgauucccCgcgccggagc.....       | 1 |
| Gi1_4174351_x1  | .....uccggcguaAuauaacggcuaga.....       | 1 |
| Gi2_11384375_x1 | .....uccggcguaaguCuaacggcuagaau.....    | 1 |
| Gi2_11022829_x1 | .....cccaCcagauccggguuc.....            | 1 |
| Gi3_28546804_x1 | .....guucucaccUaacagauccggg.....        | 1 |
| Gi2_11275583_x1 | .....cagauccggguucgauuccggcgccggCg..... | 1 |
| Gi3_28521686_x1 | .....uggNucucacccaacagauccg.....        | 1 |
| Gi1_4214623_x1  | .....cgauucccgccggagcguuuc.....         | 0 |
| Gi1_4193508_x1  | .....caacagauccggguucgauucUcggc.....    | 1 |
| Gi3_28809496_x1 | .....cgauucccAgcgccggagc.....           | 1 |
| Gi3_28900399_x1 | .....auccggguucgaGuuccggcgccgga.....    | 1 |
| Gi2_11372907_x1 | .....ugguucucCcccaacagauccg.....        | 1 |
| Gi4_610398_x1   | .....cucacccaacagauccggguCcg.....       | 1 |
| Gi3_28949480_x1 | .....uccggGguaguauaacggcua.....         | 1 |
| Gi1_4199363_x1  | .....gguucucacccaacUgauccg.....         | 1 |
| Gi1_4181418_x1  | .....uccggcguaaguaaacggcCagaau.....     | 1 |



|                 |                                              |   |
|-----------------|----------------------------------------------|---|
| Gi5_8955198_x1  | .....gguuAucacccaacagauccg.....              | 1 |
| Gi3_28714124_x1 | .....caccacacagauccgAguuc.....               | 1 |
| Gi4_591759_x1   | .....guucgauucccgcgccgC.....                 | 1 |
| Gi2_11009191_x1 | .....cccaacagNuccggguuc.....                 | 1 |
| Gi1_4364503_x1  | .....uccNgcguaguauaacggcuag.....             | 1 |
| Gi2_11218470_x1 | .....ggguucgauucccgcgccggagcgA.....          | 1 |
| Gi2_11318228_x1 | .....uccggcguaguauaaAgg.....                 | 1 |
| Gi3_28767597_x1 | .....gauucccgcgUcggagc.....                  | 1 |
| Gi1_4225951_x1  | .....ucacAcaacagauccgggu.....                | 1 |
| Gi5_9044106_x1  | .....Agcguaguauaacggcuagaa.....              | 1 |
| Gi5_9072391_x1  | .....ugguucucacccaaUagauccg.....             | 1 |
| Gi3_28682926_x1 | .....uccUgcguaguauaacggcuagaa.....           | 1 |
| Gi2_11138565_x1 | .....uccAgcguaguauaacggcuagaa.....           | 1 |
| Gi3_28920230_x1 | .....cGcaccacagauccggguucgauucc.....         | 1 |
| Gi5_9080958_x1  | .....gCuucgauucccgcgccggagcg.....            | 1 |
| Gi2_11161412_x1 | .....cucacccaacagauccAg.....                 | 1 |
| Gi5_9100593_x1  | .....uucucacccaaUagauccg.....                | 1 |
| Gi3_28503864_x1 | .....ugguucucacccaCcagaucc.....              | 1 |
| Gi1a_6108627_x1 | .....Agguucucacccaacagauccg.....             | 1 |
| Gi5_9026152_x1  | .....guucucaGccaacagauccg.....               | 1 |
| Gi1_4201748_x1  | .....uucgauucccgcgccggagcA.....              | 1 |
| Gi4_578696_x1   | .....uccggcguaguGuaacggcua.....              | 1 |
| Gi2_11314715_x1 | .....uuNucacccaacagauccgg.....               | 1 |
| Gi3_28492309_x1 | .....uccggcCuaguauaacggcuagaa.....           | 1 |
| Gi1a_6020147_x1 | .....gguucgauuccAggcgccggag.....             | 1 |
| Gi3_28530015_x1 | .....ccaacagauccggguucgauucccgcgccggagc..... | 0 |
| Gi5_9083523_x1  | .....ggNucucacccaacagauccg.....              | 1 |
| Gi3_28438328_x1 | .....ucgauuccAggcgccggagc.....               | 1 |
| Gi1a_6258115_x1 | .....Auucgauucccgcgccgg.....                 | 1 |
| Gi5_9020042_x1  | .....ccggcguGguauaacggcuagaa.....            | 1 |
| Gi3_28598908_x1 | .....guucucacccaCcagauccgggu.....            | 1 |
| Gi5_9112221_x1  | .....gguucgauucccgcgccggCgcguu.....          | 1 |
| Gi2_11398309_x1 | .....cucacccaacagaCccgg.....                 | 1 |
| Gi2_11006973_x1 | .....ugguAcucacccaacagauccg.....             | 1 |
| Gi5_9095907_x1  | .....guNcgauucccgcgccgg.....                 | 1 |
| Gi3_28586589_x1 | .....uccggguucgauucccgcgccggagc.....         | 0 |
| Gi1_4358148_x1  | .....Auccggcguaguauaacggc.....               | 1 |
| Gi3_28392848_x1 | .....gguucgauucccgcgccggagcUu.....           | 1 |
| Gi5_8932518_x1  | .....ggguucgauuUccggcgccggagc.....           | 1 |
| Gi5_9115682_x1  | .....gguucuGaccaacagauccg.....               | 1 |
| Gi5_9103529_x1  | .....guucgauuccGcgcgccgg.....                | 1 |
| Gi3_28395763_x1 | .....caacagaCccggguucga.....                 | 1 |
| Gi1_4280106_x1  | .....ccggcguaguauaaUggcuagaa.....            | 1 |
| Gi3_28525201_x1 | .....uugguucucacccaacaAuucc.....             | 1 |
| Gi3_28471226_x1 | .....cggAuucgauucccgcgccgg.....              | 1 |
| Gi5_8901742_x1  | .....cggcguaguauaCggcuaga.....               | 1 |
| Gi2_11178729_x1 | .....uucucacccaacagauccggguUg.....           | 1 |

|                 |                                      |   |
|-----------------|--------------------------------------|---|
| Gi1_4166191_x1  | .....cucacccaacagauccggguucgG.....   | 1 |
| Gi5_8886831_x1  | .....gguucgauuccUggcgccggagcguu..... | 1 |
| Gi3_28975968_x1 | .....aucggguucAauucccgccgcca.....    | 1 |
| Gi3_28614583_x1 | .....uccggcguaguauaCcgguagaa.....    | 1 |
| Gi2_11273164_x1 | .....uucgauucccgccgC.....            | 1 |
| Gi2_11311702_x1 | .....guucgauucccgUcgccgga.....       | 1 |
| Gi1_4358312_x1  | .....ucaccCacagauccgggu.....         | 1 |
| Gi2_11390656_x1 | .....ugguucCcacccaacagaucc.....      | 1 |
| Gi2_11095496_x1 | .....uccUgcguaguuaacggcuagaa.....    | 1 |
| Gi1_4323736_x1  | .....cgauucccgccgagcguuA.....        | 1 |
| Gi3_28316339_x1 | .....guucuUacccaacagauccgg.....      | 1 |
| Gi5_8834769_x1  | .....aGccaacagauccggguucgauuccc..... | 1 |
| Gi5_8985418_x1  | .....uccggcguaguUuaacggcuagaa.....   | 1 |
| Gi1a_6162908_x1 | .....uccggcguaguauCacggcuagaa.....   | 1 |
| Gi1_4203173_x1  | .....Nucacccaacagauccgg.....         | 1 |
| Gi2_11234487_x1 | .....ucgauucccgccgUagc.....          | 1 |
| Gi5_8929645_x1  | .....guucucacUcaacagauccgg.....      | 1 |
| Gi3_28579118_x1 | .....ucgauucccAgcgcggagc.....        | 1 |
| Gi5_8902325_x1  | .....Agguucgauucccgccgag.....        | 1 |
| Gi5_9079622_x1  | .....ccaacagauccggCuc.....           | 1 |
| Gi3_28799960_x1 | .....uugguucucacccaaUagaucc.....     | 1 |
| Gi5_8892016_x1  | .....ugguucuGacccaacagauccg.....     | 1 |
| Gi3_28549937_x1 | .....cggcguaguuaacggcuCga.....       | 1 |
| Gi5_8890773_x1  | .....guucucaAccaacagauccgg.....      | 1 |
| Gi2_11024313_x1 | .....gguucgauucccgccgagcguuA.....    | 1 |
| Gi1a_6044083_x1 | .....guucAauucccgccgag.....          | 1 |
| Gi3_28893665_x1 | .....cggguucgaCucccgccgga.....       | 1 |
| Gi5_8994404_x1  | .....Cuucgauucccgccgag.....          | 1 |
| Gi5_8857226_x1  | .....guucgauucccgccgagcgu.....       | 0 |
| Gi1_4373866_x1  | .....ggcguaguGuaacggcua.....         | 1 |
| Gi1_4324906_x1  | .....cagauccggguucgCuucccgcc.....    | 1 |
| Gi1_4272720_x1  | .....gCuucgauucccgccg.....           | 1 |
| Gi3_28405141_x1 | .....aucggguCcgauucccgccgagc.....    | 1 |
| Gi1_4270057_x1  | .....uccggcguagAuaacggcua.....       | 1 |
| Gi2_11100270_x1 | .....cagaGccggguucgauucccgccgag..... | 1 |
| Gi1_4195659_x1  | .....Uuccggguucgauucccgccgga.....    | 1 |
| Gi2_11059842_x1 | .....gguucgauucccgccgCa.....         | 1 |
| Gi3_28627834_x1 | .....uNcgauucccgccgagc.....          | 1 |
| Gi5_9119065_x1  | .....acccaacagauccggCucgauucc.....   | 1 |
| Gi2_11181027_x1 | .....uccggcguaguUuaacggcua.....      | 1 |
| Gi1a_6220951_x1 | .....uAcgauucccgccgagc.....          | 1 |
| Gi3_28335349_x1 | .....acagauccNggauucccgccgga.....    | 1 |
| Gi2_11055804_x1 | .....aacagauccggguucgaUcccggccg..... | 1 |
| Gi5_8902008_x1  | .....ucacUcaacagauccgggu.....        | 1 |
| Gi4_612650_x1   | .....guucgauucccgccgUcgga.....       | 1 |
| Gi2_11180185_x1 | .....Gccaacagauccggguuc.....         | 1 |
| Gi5_8979466_x1  | .....guaguuaacgAcuagaa.....          | 1 |

|                 |                                   |   |
|-----------------|-----------------------------------|---|
| Gi1a_6322399_x1 | .....gguucgGuucccgcgccg           | 1 |
| Gi5_9040313_x1  | .....ucucaccaCcagauccg            | 1 |
| Gi2_11096192_x1 | .....uccggcguaguauaacggG          | 1 |
| Gi1_4210347_x1  | .....uggNucucaccaacagauccg        | 1 |
| Gi2_11276217_x1 | .....uccggcguaguauaacggcuagauggGu | 1 |
| Gi3_28328912_x1 | .....ccggcguaguauaaUggcuag        | 1 |
| Gi1a_6115971_x1 | .....Auucgauucccgcgccgga          | 1 |
| Gi1a_6239905_x1 | .....gguucgauuccUggcgccggagc      | 1 |
| Gi2_11357651_x1 | .....uucucaccUaacagauccgg         | 1 |
| Gi1a_6020043_x1 | .....gguucgauCcccgcgccggagc       | 1 |
| Gi2_11294474_x1 | .....uucgauucccgcgAccgg           | 1 |
| Gi3_28960986_x1 | .....ucgauucAcggcgccggag          | 1 |
| Gi1_4377282_x1  | .....ucaccaacagauccggAu           | 1 |
| Gi2_11084435_x1 | .....ucAggcguaguauaacggcua        | 1 |
| Gi5_8934047_x1  | .....uugguCcucaccaacagauccg       | 1 |
| Gi5_9064252_x1  | .....uccggcguGguauaacggcuagaa     | 1 |
| Gi2_11095490_x1 | .....guucAcaccaacagauccgg         | 1 |
| Gi1_4324529_x1  | .....gguucAauucccgcgccggagc       | 1 |
| Gi1_4335481_x1  | .....gguNcgauucccgcgccgg          | 1 |
| Gi1_4178239_x1  | .....guucucaccaacagauUcgg         | 1 |
| Gi5_9075623_x1  | .....guucgaCucccgcgccggagcgu      | 1 |
| Gi2_11037821_x1 | .....uucAauucccgcgccggag          | 1 |
| Gi1_4237845_x1  | .....cucaccaacagauccAgguucgauucc  | 1 |
| Gi2_11037583_x1 | .....Ggaaugguugguucucacc          | 1 |
| Gi2_11239010_x1 | .....guucgauuccCgcgccgga          | 1 |
| Gi2_11114223_x1 | .....Ggauccggguucgauucc           | 1 |
| Gi1a_6272640_x1 | .....guCcgauucccgcgccggagc        | 1 |
| Gi5_9129030_x1  | .....uccggcguNguauaacggcuagaugg   | 1 |
| Gi1_4376683_x1  | .....gguucgauUccggcgccg           | 1 |
| Gi5_9038197_x1  | .....gguucUauucccgcgcc            | 1 |
| Gi1_4206593_x1  | .....guucucaccaacagaCccgg         | 1 |
| Gi2_11248524_x1 | .....gguucucacGcaacagauccg        | 1 |
| Gi1_4303009_x1  | .....guucucaccaacagaAccgg         | 1 |
| Gi1_4272790_x1  | .....uccggcguaguauaaAggcu         | 1 |
| Gi5_8947288_x1  | .....gguucgaAuucccgcgccggagc      | 1 |
| Gi2_11070767_x1 | .....gguucuAaccaacagauccg         | 1 |
| Gi2_11066010_x1 | .....uucgauucccgcgAcggagc         | 1 |
| Gi3_28284791_x1 | .....gauccgAguucgauucc            | 1 |
| Gi1_4185010_x1  | .....uUucaccaacagauccgg           | 1 |
| Gi1_4202196_x1  | .....cgauucccgcgccggag            | 0 |
| Gi2_11218230_x1 | .....gguucgauucccgGgaccg          | 1 |
| Gi5_9035518_x1  | .....ggguucgauucccgcgcc           | 0 |
| Gi1_4225206_x1  | .....guuNucaccaacagauccg          | 1 |
| Gi5_8993877_x1  | .....cggcguaguauaacggcAaga        | 1 |
| Gi2_11168067_x1 | .....gNucgauucccgcgccggagc        | 1 |
| Gi5_9000256_x1  | .....cgauucccgcgccggagcguu        | 0 |
| Gi3_28692859_x1 | .....guucucaccaacGgauccgggu       | 1 |

|                 |                                       |       |   |
|-----------------|---------------------------------------|-------|---|
| Gi3_28520573_x1 | .....Cuccggcgguaguauaacggcuaga        | ..... | 1 |
| Gi2_11008204_x1 | .....Aucucacccaacagauccg              | ..... | 1 |
| Gi3_28894219_x1 | .....ugguucucacccaUcagauccg           | ..... | 1 |
| Gi2_11026771_x1 | .....gcuaguauaacggcuaga               | ..... | 0 |
| Gi5_8910802_x1  | .....uAcggcgguaguauaacgg              | ..... | 1 |
| Gi3_28277343_x1 | .....uucucUcccaacagauccggguu          | ..... | 1 |
| Gi4_568345_x1   | .....uccggcgguaguGuaacggc             | ..... | 1 |
| Gi2_11135721_x1 | .....agaaugguugguucucaUc              | ..... | 1 |
| Gi5_8972409_x1  | .....cggcgguaguauaacAgcuagaau         | ..... | 1 |
| Gi5_9000909_x1  | .....guucgauucccgcgccggaUc            | ..... | 1 |
| Gi5_8835427_x1  | .....ugguuAucacccaacagauccg           | ..... | 1 |
| Gi5_8892777_x1  | .....ucucacccaacagauccAg              | ..... | 1 |
| Gi5_9053379_x1  | .....guucucacccaacagauccNg            | ..... | 1 |
| Gi2_11294708_x1 | .....cCcacccaacagauccgg               | ..... | 1 |
| Gi2_11372612_x1 | .....gauccggguucgauuccc               | ..... | 0 |
| Gi3_28652680_x1 | .....cgauucccgcgccggCg                | ..... | 1 |
| Gi3_28326683_x1 | .....uccggcgguaguauaaAggcuag          | ..... | 1 |
| Gi2_11350563_x1 | .....ucGggcgguaguauaacggcuagaau       | ..... | 1 |
| Gi5_9116846_x1  | .....guuucccgccuuccuucgCcu            | ..... | 1 |
| Gi3_28430870_x1 | .....ccggcAuaguauaacggc               | ..... | 1 |
| Gi4_571028_x1   | .....uccggcgguaguauaacAgcuaga         | ..... | 1 |
| Gi5_9006296_x1  | .....uccggcgguaguauaacggcuagaauaggA   | ..... | 1 |
| Gi1_4287339_x1  | .....ccNgcgguaguauaacggc              | ..... | 1 |
| Gi3_28419842_x1 | .....ggcuaguauaacggcuagaaC            | ..... | 1 |
| Gi3_28403797_x1 | .....agaucggguucgauuGc                | ..... | 1 |
| Gi3_28894200_x1 | .....cucacccaGcagauccgg               | ..... | 1 |
| Gi3_28951653_x1 | .....agaucAgguucgauuccc               | ..... | 1 |
| Gl1_6031264_x1  | .....guucgauucccgcgccAggagc           | ..... | 1 |
| Gi2_11376939_x1 | .....ggNucgauucccgcgccgga             | ..... | 1 |
| Gi5_9014789_x1  | .....guucucacccaacagauccAgg           | ..... | 1 |
| Gi3_28283115_x1 | .....aAaucggguucgauucc                | ..... | 1 |
| Gl1_6104292_x1  | .....gguucgauuccUggcgcc               | ..... | 1 |
| Gi5_9042488_x1  | .....ugguucCcacccaacagauccg           | ..... | 1 |
| Gi5_8916156_x1  | .....guucgauuNccggcgccggag            | ..... | 1 |
| Gi5_9045519_x1  | .....aacagauccgggGucgauucccgcgccggagc | ..... | 1 |
| Gi1_4374766_x1  | .....uccUgcuaguauaacgg                | ..... | 1 |
| Gi3_28628330_x1 | .....uccggguucgauucccgcgccggG         | ..... | 1 |
| Gl1_6245004_x1  | .....uccggcgguaguauaacggUuag          | ..... | 1 |
| Gi3_28633401_x1 | .....ggguucgauucccgggGgccgga          | ..... | 1 |
| Gl1_6029100_x1  | .....gguucgauuccAgcgccg               | ..... | 1 |
| Gi2_11295613_x1 | .....guuGgauucccgcgccggagc            | ..... | 1 |
| Gi1_4267799_x1  | .....gguucucacccaacagCuccgg           | ..... | 1 |
| Gi3_28827616_x1 | .....agaucggguAcgauuccc               | ..... | 1 |
| Gi1_4328858_x1  | .....uGcucacccaacagauccggguucgau      | ..... | 1 |
| Gi5_9118190_x1  | .....ugguucucNcccaacagauccgg          | ..... | 1 |
| Gi1_4262903_x1  | .....guucgCuucccgcgccggagc            | ..... | 1 |
| Gi5_8895229_x1  | .....ugguucucacccaacagauccA           | ..... | 1 |

|                 |                                     |   |
|-----------------|-------------------------------------|---|
| Gi1_4187177_x1  | .....ccggcguaguauaacggcuGgaau.....  | 1 |
| Gi3_28971467_x1 | .....ucgauucccgccCga.....           | 1 |
| Gi4_600522_x1   | .....Cuucucaccaacagauccg.....       | 1 |
| Gi5_9026656_x1  | .....uccggcguaguauaacGcuagaa.....   | 1 |
| G1a_6275200_x1  | .....guucucaccaCcagauccg.....       | 1 |
| Gi4_584701_x1   | .....ccggcguaguauaacggcuag.....     | 0 |
| Gi1_4323896_x1  | .....auccggAuucgauucccgccg.....     | 1 |
| G1a_6055536_x1  | .....gguucgauucccgAcgcc.....        | 1 |
| Gi2_11086499_x1 | .....cggguucgaGuccggcgcgga.....     | 1 |
| Gi2_11327666_x1 | .....gguucucaccaacagaucc.....       | 0 |
| Gi5_8975422_x1  | .....guucgaCucccgccgagcguu.....     | 1 |
| Gi5_8884338_x1  | .....cggcguagCauaacggcuag.....      | 1 |
| Gi1_4329162_x1  | .....Guccggguucgauucccgccgga.....   | 1 |
| Gi1_4165615_x1  | .....ugguucucaccaacagauAcg.....     | 1 |
| Gi3_28572412_x1 | .....guucgauGccggcgcgga.....        | 1 |
| G1a_6183397_x1  | .....guucgauucccgccgagcU.....       | 1 |
| Gi3_28675635_x1 | .....caacagauccAgguucga.....        | 1 |
| Gi5_8991978_x1  | .....gguucAcaccaacagauccg.....      | 1 |
| Gi5_9095572_x1  | .....uucucaccaacagauccg.....        | 1 |
| Gi1_4231488_x1  | .....gguucucaccaacagauUcg.....      | 1 |
| Gi5_8924373_x1  | .....Gccggcguaguauaacggcuagaug..... | 1 |
| Gi3_28868449_x1 | .....auccgggCucgauucccgccgga.....   | 1 |
| Gi5_9027007_x1  | .....uccggcguaguauaacCgcuaga.....   | 1 |
| Gi5_9061390_x1  | .....uAcggcguaguauaacggcuagaau..... | 1 |
| Gi5_9041570_x1  | .....uccNgcguaguauaacggcuaga.....   | 1 |
| Gi2_11174349_x1 | .....Uguucucaccaacagaucc.....       | 1 |
| Gi1_4371490_x1  | .....gguucUaccaacagauccg.....       | 1 |
| Gi5_8905012_x1  | .....uccggcguaguauaacggcAaga.....   | 1 |
| Gi3_28935120_x1 | .....guUcggcguaguauaacggcuaga.....  | 1 |
| G1a_6314845_x1  | .....guucucaccaacagGuccg.....       | 1 |
| Gi2_11370999_x1 | .....uucucCcccaacagauccg.....       | 1 |
| Gi3_28350522_x1 | .....agaucggguucUauucccgccg.....    | 1 |
| Gi4_582858_x1   | .....ggAucgauucccgccg.....          | 1 |
| Gi5_9086160_x1  | .....uucgauucccgccgagcAu.....       | 1 |
| G1a_6189935_x1  | .....uucucaccGacagauccg.....        | 1 |
| Gi2_11271890_x1 | .....ucgauucccgccgAa.....           | 1 |
| Gi5_8950064_x1  | .....gguuGgauucccgcc.....           | 1 |
| Gi3_28721884_x1 | .....caccaacagauccAgguuc.....       | 1 |
| Gi3_28817395_x1 | .....ccggcguaguauCacggcuaga.....    | 1 |
| Gi3_28331776_x1 | .....ucgauucccgccGcggag.....        | 1 |
| Gi5_8917411_x1  | .....guucucaccaGagauccg.....        | 1 |
| Gi1_4202183_x1  | .....ucgauuccAgcggcggagc.....       | 1 |
| Gi5_8866757_x1  | .....ucucaccaacagauccgg.....        | 0 |
| Gi1_4248204_x1  | .....uccggAguaguauaacggcuagaa.....  | 1 |
| Gi3_28367049_x1 | .....caacagauccgAguucga.....        | 1 |
| Gi1_4203726_x1  | .....ccggcguaguauaacggcuagaU.....   | 1 |
| Gi3_28646600_x1 | .....uucgauAcccgccgga.....          | 1 |

Gi5\_8854179\_x1.....uccggcguaCuauaacggcuag..... 1  
 Gi2\_11227077\_x1.....guucgauucccggcgcGg..... 1  
 Gi3\_28371487\_x1.....uucucacccaacaUaucgg..... 1  
 Gi5\_9043316\_x1.....cggcgguaguauaUcggcuag..... 1  
 Gi1\_4290332\_x1.....guucgauucccggcgcggaC..... 1  
 G1a\_6336195\_x1.....gGucgauucccggcgcgga..... 1  
 Gi3\_28320600\_x1.....uucucaUccaacagauccgg..... 1  
 Gi2\_11144303\_x1.....guucCauucccggcgcgag..... 1  
 Gi4\_608663\_x1.....gguucgauucccggcgcgA..... 1  
 Gi2\_11055791\_x1.....gUuucgauucccggcgcgagcguuu..... 1  
 Gi3\_28605773\_x1.....gguGcgauucccggcgcgag..... 1  
 Gi3\_28608683\_x1.....Cgguucgauucccggcgcg..... 1  
 Gi5\_8985589\_x1.....cggcgCaguauaacggcuaga..... 1  
 Gi1\_4305945\_x1.....uccggcgguaguauGacggcuaga..... 1  
 G1a\_6026247\_x1.....guucUauucccggcgcg..... 1  
 Gi3\_28963819\_x1.....gcuaguauaacAgcuagaa..... 1  
 Gi1\_4364784\_x1.....ucucacUcaacagauccg..... 1  
 Gi5\_8846416\_x1.....cggcgCaguauaacggcuag..... 1  
 Gi2\_11365591\_x1.....ucgauucccggcgcgGg..... 1  
 Gi1\_4191855\_x1.....Gucaccaacagauccggguucgauucc..... 1  
 Gi5\_9102028\_x1.....ugguucucNcccaacagauccgggu..... 1  
 Gi3\_28379045\_x1.....cggcgguaguauaacggcCagaau..... 1  
 Gi5\_9134259\_x1.....guucucacccaacagaGccgg..... 1  
 Gi2\_11000590\_x1.....gauuAccggcgccggagc..... 1  
 Gi5\_9097006\_x1.....gguucgUuucccggcgcgga..... 1  
 Gi2\_11394100\_x1.....cggcgguaguauaacggcuaAaau..... 1  
 G1a\_6151198\_x1.....gguucgauuUccggcgccggagc..... 1  
 Gi2\_11267230\_x1.....cggcUuaguauaacggcuag..... 1  
 Gi3\_28803494\_x1.....gauccggguucgauucAc..... 1  
 Gi3\_28482553\_x1.....Ccaccaacagauccggguuc..... 1  
 Gi3\_28681081\_x1.....caacagauccggguucgGuucccggcgcg..... 1  
 Gi4\_583078\_x1.....uccggcgguaguauaacggcuaAaa..... 1  
 Gi3\_28983925\_x1.....agaucggAuucgauucccggcgcgagc..... 1  
 Gi2\_11082774\_x1.....guuGgauucccggcgcgag..... 1  
 Gi5\_8832448\_x1.....guucucacccaacagauccAg..... 1  
 Gi3\_28554672\_x1.....guucucacccaacagGuccgg..... 1  
 Gi3\_28519263\_x1.....cagauccggguucgauucccggcAccgg..... 1  
 Gi1\_4190703\_x1.....agaucggguucgauuAcc..... 1  
 Gi5\_8855745\_x1.....ugguucucacccaGcagauccgg..... 1  
 Gi4\_579019\_x1.....gGucgauucccggcgcgagc..... 1  
 Gi3\_28782586\_x1.....guucgaAucccggcgcgag..... 1  
 Gi2\_11001856\_x1.....guucGcaccaacagauccg..... 1  
 Gi3\_28654841\_x1.....guucucacccaCagauccgg..... 1  
 Gi3\_28890204\_x1.....ucAgggguucgauucccggcgcgga..... 1  
 Gi2\_11037431\_x1.....agaucggguucgCuucc..... 1  
 Gi5\_8913613\_x1.....cacccaGcagauccggguucga..... 1  
 Gi5\_8859996\_x1.....uucucacccaacagauccgggAu..... 1

|                 |                                 |   |
|-----------------|---------------------------------|---|
| Gi1a_6058608_x1 | ucucacccaacagauUg               | 1 |
| Gi5_8923941_x1  | cucacAcaacagauccgg              | 1 |
| Gi3_28647113_x1 | ggguucgauucccgccgUcgga          | 1 |
| Gi1a_6297142_x1 | ucUggcguaguauaacggcuagaau       | 1 |
| Gi2_11258334_x1 | cccaacagauGcggguuc              | 1 |
| Gi5_8923861_x1  | guucAcaccaacagauccgg            | 1 |
| Gi5_9051740_x1  | uucgauucccgUgcccg               | 1 |
| Gi3_28625165_x1 | cucacccaacagauUcgg              | 1 |
| Gi2_11059354_x1 | gguucgaAuuccggcgcc              | 1 |
| Gi1_4321648_x1  | caccaacagauccggguucgCuuccc      | 1 |
| Gi2_11246227_x1 | gguNcgauucccgccg                | 1 |
| Gi3_28725258_x1 | cucacccaNcagauccggguucgauucc    | 1 |
| Gi5_8878519_x1  | uucAcaccaacagauccggguu          | 1 |
| Gi3_28423118_x1 | guucucacGcaacagauccggg          | 1 |
| Gi5_8862420_x1  | uCGuucucaccaacagauccgggu        | 1 |
| Gi3_28459116_x1 | uucNauucccgccg                  | 1 |
| Gi3_28328436_x1 | cGcccaacagauccggguuc            | 1 |
| Gi5_8906643_x1  | gauccggguucgCuucccgccgga        | 1 |
| Gi5_9032219_x1  | uccggcguaguaGaacggc             | 1 |
| Gi3_28400846_x1 | guucucacccGacagauccgg           | 1 |
| Gi4_570399_x1   | uccggcguaguauaGcggc             | 1 |
| Gi2_11225737_x1 | uccUgcguaguauaacggcuagaau       | 1 |
| Gi3_28659909_x1 | uucgauucNcggcgccg               | 1 |
| Gi5_9098234_x1  | ugguucucaccaacGgauccgg          | 1 |
| Gi1_4221503_x1  | agauccggguucgauucccgccgagc      | 0 |
| Gi5_8977196_x1  | cggcguaguauaacUgcua             | 1 |
| Gi2_11061751_x1 | cGggcguaguauaacggcua            | 1 |
| Gi5_8958892_x1  | ucgGuucccgccgag                 | 1 |
| Gi5_8965334_x1  | gguucgauUccggcgccgagcguu        | 1 |
| Gi3_28606103_x1 | Gcaacagauccggguucgauucccgccgagc | 1 |
| Gi5_9126998_x1  | ggcguaguGuaacggcuaga            | 1 |
| Gi3_28809061_x1 | Cguucucaccaacagauccgggu         | 1 |
| Gi2_11025721_x1 | guucucaccaCcagauccgg            | 1 |
| Gi4_570229_x1   | uccgAcguaguauaacggcuaga         | 1 |
| Gi2_11358108_x1 | agauccggguucgGuucc              | 1 |
| Gi2_11133795_x1 | gauucAcggcgccgagc               | 1 |
| Gi2_11400291_x1 | uccgggCucgauucccgccgga          | 1 |
| Gi3_28304608_x1 | Cgguucucaccaacagauccggguucga    | 1 |
| Gi3_28686905_x1 | uucgauuccggcAccgg               | 1 |
| Gi2_11077775_x1 | uucucaccaGcagauccgg             | 1 |
| Gi5_9087436_x1  | auuccggcgccgagcga               | 1 |
| Gi5_8938454_x1  | gguucucaccaacagCuccggguu        | 1 |
| Gi1_4269386_x1  | ugguucucaccaacagauccCg          | 1 |
| Gi2_11068295_x1 | guucucaccaacagauUcg             | 1 |
| Gi1_4308627_x1  | guucgauucccgGgccg               | 1 |
| Gi2_11235221_x1 | Gccggcguaguauaacggcuagaugguugg  | 1 |
| Gi5_9022843_x1  | cccaacagauccAgguuc              | 1 |

Gi5\_8877369\_x1.....guucgauucccgcgccgU..... 1  
 Gi5\_9045446\_x1.....gguucucaccaacaUaucg..... 1  
 Gi3\_28509361\_x1.....gCucgauucccgcgccggagcg..... 1  
 Gi2\_11343980\_x1.....uccNgcguaguauaacggcua..... 1  
 Gi4\_579821\_x1.....uccggcgCaguauaacggcuaga..... 1  
 Gi5\_9047439\_x1.....cggcguaguauaacggcuGgaau..... 1  
 Gi5\_9089016\_x1.....guucucCcccaacagauccgg..... 1  
 Gi5\_8916660\_x1.....uucucacccCacagauccgg..... 1  
 Gi3\_28481643\_x1.....Cccggguucgauucccgcgccgga..... 1  
 Gi5\_8940859\_x1.....gaGucccggcgccggagc..... 1  
 Gl1a\_6084214\_x1.....gguucgauucccgcgUcggag..... 1  
 Gi3\_28793977\_x1.....ggcguaguauaGcggcuaga..... 1  
 Gi4\_591882\_x1.....uccggUguaguauaacggcuagaau..... 1  
 Gi2\_11236505\_x1.....ugguucucUcccaacagauccg..... 1  
 Gi3\_28514188\_x1.....ucGcacccaacagauccgg..... 1  
 Gi1\_4172506\_x1.....uccggcAuaguauaacggcuagaa..... 1  
 Gi1\_4193613\_x1.....gguucgauucccgcgccgAagc..... 1  
 Gi5\_8981188\_x1.....guucgauuGcccggcgccggagc..... 1  
 Gi5\_9011185\_x1.....ucgauCcccggcgccggagc..... 1  
 Gi5\_9100445\_x1.....ucucacccCacagauccg..... 1  
 Gi5\_8936367\_x1.....guucucacGcaacagauccg..... 1  
 Gi5\_9021916\_x1.....guucucCcccaacagauccg..... 1  
 Gi1\_4250698\_x1.....cagauccggguucgauucccgcgAc..... 1  
 Gi3\_28770490\_x1.....guucgauucccgcgGggag..... 1  
 Gi2\_11154898\_x1.....cggcguGguauaacggcuaga..... 1  
 Gi5\_8916664\_x1.....cacccaacagauccAgguucga..... 1  
 Gl1a\_6053965\_x1.....gguucgGuucccgcgccgg..... 1  
 Gi4\_593467\_x1.....uccggcguaguauaacggcuagaG..... 1  
 Gi3\_28525479\_x1.....aGcagauccggguucgauucc..... 1  
 Gi3\_28699645\_x1.....Agcguaguauaacggcuaga..... 1  
 Gi2\_11054287\_x1.....gguucgauucccgUcggcg..... 1  
 Gi2\_11159583\_x1.....uccggcguaguauaacgCc..... 1  
 Gi1\_4297345\_x1.....uucgauucccgcgccggGgc..... 1  
 Gi4\_597091\_x1.....uGcucaccaacagauccgg..... 1  
 Gi5\_8870495\_x1.....guucucaccGaacagauccgg..... 1  
 Gi3\_28460388\_x1.....ugguucucaccaacaAaucg..... 1  
 Gi2\_11212311\_x1.....gguucgauuccGggcgccggag..... 1  
 Gi3\_28297674\_x1.....guNcgauucccgcgccgg..... 1  
 Gi3\_28845590\_x1.....ggguuUgauucccgcgccg..... 1  
 Gi2\_11125660\_x1.....Ngguuucucaccaacagaucc..... 1  
 Gi3\_28369503\_x1.....aucggguucgauucccgUccgga..... 1  
 Gi2\_11291313\_x1.....gguucgauucccgCccgga..... 1  
 Gl1a\_6341186\_x1.....uccggcguaguauaacggcCagaau..... 1  
 Gi5\_9135834\_x1.....guucgauuGccggcgccgga..... 1  
 Gi1\_4205118\_x1.....guucgauucccgUcggcgagc..... 1  
 Gi1\_4211252\_x1.....gUguucgauucccgcgccgga..... 1  
 Gi1\_4339288\_x1.....uccgAcguaguauaacggc..... 1



|                 |                                   |   |
|-----------------|-----------------------------------|---|
| Gi3_28577856_x1 | .....ggNucucacccaacagauccg        | 1 |
| Gi3_28561027_x1 | .....cggcguagCauaacggcuaga        | 1 |
| Gi3_28751554_x1 | .....Acgauucccgccgagc             | 1 |
| Gi5_9129558_x1  | .....gguucgaGucccgccgga           | 1 |
| Gi1_4217158_x1  | .....cucacccaacagauccggguucAa     | 1 |
| Gi3_28519252_x1 | .....cucacccaNcagauccggguucgauu   | 1 |
| Gi2_11348783_x1 | .....guucucacccaacagCuccg         | 1 |
| Gi1_4354556_x1  | .....gguucucaGccaacagauccgg       | 1 |
| Gi5_8862355_x1  | .....guucucacccaacaAauccgg        | 1 |
| Gi3_28955418_x1 | .....gauuAccggccgagc              | 1 |
| Gi2_11360205_x1 | .....cgauucccgccgUggagcguu        | 1 |
| Gi1_4319846_x1  | .....ucucacccaacagaCccg           | 1 |
| Gi3_28934251_x1 | .....uccggcgaguUuaacggcuagaau     | 1 |
| Gi5_9044427_x1  | .....ucucacGcaacagauccgggu        | 1 |
| Gi5_8875925_x1  | .....Cucgauucccgccgag             | 1 |
| Gi5_8911403_x1  | .....uccggcgGaguauaacggc          | 1 |
| Gi5_8979444_x1  | .....Cucgauucccgccg               | 1 |
| Gi1_4369953_x1  | .....gguucgauuccAggcgagc          | 1 |
| Gi5_8860021_x1  | .....ggcguaguauaaUggcuag          | 1 |
| Gi5_8866573_x1  | .....ugguucAcacccaacagauccg       | 1 |
| Gi3_28695765_x1 | .....uccggcgaguauaacgUcua         | 1 |
| Gi1_4368785_x1  | .....uucucacccaacagUuccggguucgau  | 1 |
| Gi5_9127215_x1  | .....gguucUauucccgccg             | 1 |
| Gi2_11039943_x1 | .....guucgauuccUgccc              | 1 |
| Gi5_9017324_x1  | .....cacccaaUagauccggguucga       | 1 |
| Gi5_9068649_x1  | .....gguucgauucGcggccgagc         | 1 |
| Gi5_8985932_x1  | .....uccggcgCaguauaacggcu         | 1 |
| Gi1_4275504_x1  | .....gguucgauucccgAcgcc           | 1 |
| Gi2_11223709_x1 | .....ucgauUccggccgag              | 1 |
| Gi2_11311502_x1 | .....uccggguucgCuucccgccgga       | 1 |
| Gi3_28381292_x1 | .....gguucucacccGacagaucc         | 1 |
| Gi3_28435059_x1 | .....ugguucucacccaGcagauc         | 1 |
| Gi2_11354062_x1 | .....uccggcgaguauaacgU            | 1 |
| Gi1_4174174_x1  | .....caacagUuccggguucgauucccgcc   | 1 |
| Gi1_4204272_x1  | .....ugguucucacUcaacagauccg       | 1 |
| Gi5_8837373_x1  | .....Nuucgauucccgccg              | 1 |
| Gi5_8846646_x1  | .....aguccggcNuaguauaacggcuagaugg | 1 |
| Gi1_4349061_x1  | .....Gcagauccggguucgauucc         | 1 |
| Gi3_28664228_x1 | .....ggcguaguauaCcgcuaga          | 1 |
| Gi3_28473247_x1 | .....uUcggguucgauucccgccg         | 1 |
| Gi3_28987072_x1 | .....aaUagauccggguucgauucc        | 1 |
| Gi3_28543581_x1 | .....caacGgauccggguucga           | 1 |
| Gi5_8850989_x1  | .....gguucgauucccgccgUggag        | 1 |
| Gl1_6264563_x1  | .....guucucacccaacUgauccg         | 1 |
| Gi3_28612011_x1 | .....guucAcacccaacagauccgggu      | 1 |
| Gi3_28325726_x1 | .....uccggcgaguCuaacggcuaga       | 1 |
| Gi3_28520908_x1 | .....ccggcgaguauaaUggcuaga        | 1 |

|                 |                                  |                                |   |
|-----------------|----------------------------------|--------------------------------|---|
| Gi2_11191680_x1 | .....cggcgguaguauaaUggcua        | .....                          | 1 |
| Gi3_28709885_x1 | .....                            | .....guucgauuGccggcgccggagc    | 1 |
| Gi3_28652401_x1 | .....                            | .....ucgauucccgcgccggagA       | 1 |
| Gi2_11168016_x1 | .....cggcgguGguauaacggc          | .....                          | 1 |
| Gi3_28557748_x1 | .....uccggcgGaguauaacggcuag      | .....                          | 1 |
| Gi2_11268373_x1 | .....                            | .....ucgauucccgcgccgggaAc      | 1 |
| Gi5_8892886_x1  | .....uccggcgguaguauaacggcuagaaAg | .....                          | 1 |
| Gi2_11031964_x1 | .....                            | .....gguucgauucccgCcgccgg      | 1 |
| Gi5_9116538_x1  | .....                            | .....ucucacccaacagauAcg        | 1 |
| Gi3_28621345_x1 | .....                            | .....gguucucacccaacagauUgggu   | 1 |
| Gi1_4327807_x1  | .....                            | .....ucaNccaacagauccgggu       | 1 |
| Gi3_28296806_x1 | .....                            | .....guAcucacccaacagauccggg    | 1 |
| Gi3_28963190_x1 | .....                            | .....cucacccaacGgauccgg        | 1 |
| Gi5_8977588_x1  | .....                            | .....uucucacccaacagauccC       | 1 |
| Gi3_28632935_x1 | .....                            | .....ucaccUaacagauccggguuc     | 1 |
| Gi3_28970858_x1 | .....                            | .....ucgauucccgcgcgUgga        | 1 |
| Gi3_28609217_x1 | .....                            | .....uucucacccaacagauccggguuA  | 1 |
| Gi3_28434038_x1 | .....                            | .....cucacccaacagauccAg        | 1 |
| Gi5_8840844_x1  | .....uccggcgguaguauUacggc        | .....                          | 1 |
| Gi5_9007798_x1  | .....                            | .....ucGcacccaacagauccgg       | 1 |
| Gi1_4371333_x1  | .....                            | .....uucgauuccUggcgccggagc     | 1 |
| Gi5_8960424_x1  | .....                            | .....gguucgauucAcggcgcc        | 1 |
| Gi5_8878632_x1  | .....                            | .....cucacccaacaAaucgg         | 1 |
| Gi1_4295209_x1  | .....                            | .....gguGcgauucccgcgccgg       | 1 |
| Gi3_28360332_x1 | .....                            | .....ugguucucacccaacagauccGg   | 1 |
| Gi3_28346336_x1 | .....                            | .....guucucacccaUcagauccgg     | 1 |
| Gi3_28763703_x1 | .....Nccggcgguaguauaacggc        | .....                          | 1 |
| Gi3_28839168_x1 | .....                            | .....guucucUcccaacagauccggg    | 1 |
| Gi3_28766511_x1 | .....cggcgguaguCuaacggc          | .....                          | 1 |
| Gi3_28828962_x1 | .....uccggUguaguauaacggcu        | .....                          | 1 |
| Gi3_28398881_x1 | .....                            | .....ucacccaacagauccggguCc     | 1 |
| Gi5_8923742_x1  | .....cggcgCaguauaacggcuag        | .....                          | 1 |
| Gi1_4266472_x1  | .....                            | .....ucgaGuuccggcgccggagc      | 1 |
| Gi2_11101619_x1 | .....cggcgguagCauaacggcua        | .....                          | 1 |
| Gi4_596185_x1   | .....                            | .....ucgauucccgcgccggagcC      | 1 |
| Gi5_8887714_x1  | .....uccggcgguaguauaacUg         | .....                          | 1 |
| Gi3_28765865_x1 | .....                            | .....gauucccgUcgccggagc        | 1 |
| Gi5_8983424_x1  | .....ggcgguaguauaacggcGag        | .....                          | 1 |
| Gi2_11019638_x1 | .....uccCgcuaguauaacggcua        | .....                          | 1 |
| Gi2_11234424_x1 | .....ggcgguaguauaacAgcuaga       | .....                          | 1 |
| Gi2_11085936_x1 | .....cggGguaguauaacggcua         | .....                          | 1 |
| Gi5_9062397_x1  | .....                            | .....ucgauucccgUgcccggag       | 1 |
| Gi1_4278122_x1  | .....uccggcgguaguauUacggc        | .....                          | 1 |
| Gi1_4218397_x1  | .....                            | .....uccggguucgauGcccggcgccgga | 1 |
| Gi2_11000175_x1 | .....                            | .....gguucUauucccgcgccggag     | 1 |
| Gi1_4390598_x1  | .....                            | .....guucgauGcccggcgccgg       | 1 |
| Gi3_28865077_x1 | .....                            | .....agaucgggAucgauucc         | 1 |

|                 |                                |   |
|-----------------|--------------------------------|---|
| Gi5_8851989_x1  | .....uucucGcccaacagauccgg      | 1 |
| Gi1_4320232_x1  | .....uccggcguaguauGacggc       | 1 |
| Gi5_9077938_x1  | .....gauucccgcgccggagcCu       | 1 |
| Gi1_4323646_x1  | .....Nuucgauucccgcgccgga       | 1 |
| Gi1a_6037754_x1 | .....gguucgauucccgcgccgAag     | 1 |
| Gi3_28362998_x1 | .....uccCgCGuaguauaacggcuagaau | 1 |
| Gi5_9092859_x1  | .....uccggcguaguauaacgCcu      | 1 |
| Gi1a_6246781_x1 | .....uUcggcguaguauaacggcua     | 1 |
| Gi2_11172346_x1 | .....uccggcguaguauaacggcuaUaau | 1 |
| Gi1_4324299_x1  | .....ggcguaguauaacggUua        | 1 |
| Gi3_28628149_x1 | .....gUuucgauucccgcgccggagcg   | 1 |
| Gi3_28707866_x1 | .....gguucucacccaaUagauccgg    | 1 |
| Gi5_8977507_x1  | .....gguucucacccGacagauccggguu | 1 |
| Gi5_8948110_x1  | .....Agcguaguauaacggcuagaau    | 1 |
| Gi2_11114347_x1 | .....cCauucccgcgccggagcguuu    | 1 |
| Gi3_28828058_x1 | .....uccggcguaguauaacgUcuagaa  | 1 |
| Gi2_11198248_x1 | .....uucucacccaaAagauccg       | 1 |
| Gi3_28399980_x1 | .....guucgauucccCgCGccggag     | 1 |
| Gi5_8953659_x1  | .....guucgauucccUcgccgga       | 1 |
| Gi5_8990706_x1  | .....ucucacccaacUgauccg        | 1 |
| Gi1_4179955_x1  | .....gguucgauucccgcgcgUg       | 1 |
| Gi2_11197936_x1 | .....ugguucucacccaacagauUc     | 1 |
| Gi5_9124154_x1  | .....guuAgauucccgcgccgga       | 1 |
| Gi4_574850_x1   | .....guucgGuucccgcgccgga       | 1 |
| Gi5_8991770_x1  | .....cggcguaguauaCggcguagaau   | 1 |
| Gi5_8956080_x1  | .....gguucgauucccgGcCcgga      | 1 |
| Gi5_8857061_x1  | .....guucgauucccgcgccgGg       | 1 |
| Gi2_11123658_x1 | .....uccggcguCguauaacgg        | 1 |
| Gi3_28772532_x1 | .....uccggcguaguauaUcggcuagaa  | 1 |
| Gi1a_6300659_x1 | .....uGcggcguaguauaacggc       | 1 |
| Gi1a_6006925_x1 | .....ugguucucacccaacagauccA    | 1 |
| Gi5_8904963_x1  | .....cgauucccgcgccggagcg       | 0 |
| Gi2_11144500_x1 | .....guucgauucccgGgccggag      | 1 |
| Gi4_583265_x1   | .....guucgauucUcggcgcgga       | 1 |
| Gi2_11199524_x1 | .....Gggguucgauucccgcgccgga    | 1 |
| Gi5_8868571_x1  | .....guuNgauucccgcgccgga       | 1 |
| Gi3_28872991_x1 | .....guucgauucccgGcUccgga      | 1 |
| Gi1a_6333977_x1 | .....uCcucacccaacagauccgg      | 1 |
| Gi3_28616852_x1 | .....guCcucacccaacagauccgggu   | 1 |
| Gi2_11226612_x1 | .....uccggcguaguauaacCgcuag    | 1 |
| Gi5_9100425_x1  | .....cggcguaguauaacGcuaga      | 1 |
| Gi2_11386878_x1 | .....guucgauucGcggcgccg        | 1 |
| Gi5_8907107_x1  | .....gguuAgauucccgcgccg        | 1 |
| Gi5_9029503_x1  | .....ucGggcguaguauaacggcua     | 1 |
| Gi1a_6345276_x1 | .....ugguucucacccaacagGuccg    | 1 |
| Gi3_28906139_x1 | .....ucucacccaacagGuccgg       | 1 |
| Gi3_28462880_x1 | .....uugguucucacccaacagCucc    | 1 |

|                 |                             |   |
|-----------------|-----------------------------|---|
| Gi2_11274935_x1 | uccggcgAaguauaacggcua       | 1 |
| Gi1_4329538_x1  | guucgauuccAggcgccg          | 1 |
| Gi2_11368469_x1 | gguucucaccAaacagaucgg       | 1 |
| Gi5_9108440_x1  | uccggcguNguauaacggcu        | 1 |
| Gi5_9003046_x1  | guucgauucccgccUga           | 1 |
| Gi2_11088396_x1 | uccggcgCaguauaacggcuagaa    | 1 |
| Gi3_28968747_x1 | Nucucacccaacagauccgg        | 1 |
| Gi5_8968009_x1  | uccgauucccgccAccgga         | 1 |
| Gi1_4197538_x1  | cgcgguaguauaacggcuagaa      | 0 |
| Gi3_28980890_x1 | agGuccggguucgauucc          | 1 |
| Gi2_11195649_x1 | uccggcguaCuauaacgg          | 1 |
| Gi3_28573501_x1 | ucacccaGcagauccggguuc       | 1 |
| Gi5_8988570_x1  | uccCgcguaguauaacggcuag      | 1 |
| Gi2_11137772_x1 | uccgCcgguaguauaacggcuag     | 1 |
| Gi2_11349207_x1 | Uggcguaguauaacggcua         | 1 |
| Gi3_28394896_x1 | uccgauucccUgcgccgga         | 1 |
| Gi2_10994031_x1 | gguucgauucccgccAgg          | 1 |
| Gi2_11064202_x1 | uccggcguaguauaacgCcuaga     | 1 |
| Gi4_609235_x1   | Gcgauucccgccggagc           | 1 |
| Gi3_28665053_x1 | agauccggguucgauuAcc         | 1 |
| Gi1_4223722_x1  | ggcAuaguauaacggcuag         | 1 |
| G1a_6079268_x1  | gguucgauuAccggccggagc       | 1 |
| Gi3_28926284_x1 | uccggcguaUuauaacggcuagaau   | 1 |
| Gi1_4225630_x1  | uccggcguaguUuaaacggcua      | 1 |
| Gi3_28709223_x1 | Accgauucccgccggag           | 1 |
| Gi4_569785_x1   | cCacccaacagauccggguucg      | 1 |
| Gi1_4172732_x1  | Ucagauccggguucgauucc        | 1 |
| G1a_6159216_x1  | gguucgauuccAgccgccgga       | 1 |
| Gi5_9012390_x1  | gguucgauucccgccUggagcguu    | 1 |
| Gi5_8978051_x1  | ugguuUucacccaacagauccgggu   | 1 |
| Gi1_4390133_x1  | guucucUcccaacagauccg        | 1 |
| Gi2_11098528_x1 | uccggcguaguauaacgUcuaga     | 1 |
| Gi1_4333951_x1  | gAucgauucccgccgccg          | 1 |
| Gi3_28659346_x1 | guGcucacccaacagauccggg      | 1 |
| Gi3_28334480_x1 | Uguccggcguaguauaac          | 1 |
| G1a_6021407_x1  | gguucgauucccgccggagU        | 1 |
| Gi2_11162569_x1 | uccggcguaguauaaAggc         | 1 |
| G1a_6138379_x1  | uccggcguaguauGacggcuag      | 1 |
| Gi4_598390_x1   | gguucgauucccgGgccgg         | 1 |
| Gi2_11271529_x1 | cagauccggguucgCuucccgccggag | 1 |
| Gi1_4373086_x1  | guugguucaccccGacagauccgggu  | 1 |
| Gi2_11362987_x1 | gguucgauucccCgcccc          | 1 |
| Gi3_28845642_x1 | agaucAgggguucgauucc         | 1 |
| G1a_6343388_x1  | gguucUauucccgccgccg         | 1 |
| Gi5_8841715_x1  | Accaacagauccggguucgauucc    | 1 |
| Gi1_4207462_x1  | uccgauucccgccggagcCu        | 1 |
| Gi1_4278303_x1  | ugguucucacGcaacagauccgg     | 1 |

|                 |                                            |   |
|-----------------|--------------------------------------------|---|
| Gi2_11036483_x1 | .....gguucucacccaacaCaucgg.....            | 1 |
| Gi2_11266359_x1 | .....cgauucccgggcgccggagcCu.....           | 1 |
| Gi2_11258655_x1 | .....uccgAcguaguauaacggcuagaau.....        | 1 |
| Gi2_11287437_x1 | .....gaucggguucgauuccggcgccgga.....        | 0 |
| Gi3_28323193_x1 | .....Caucggguucgauucc.....                 | 1 |
| Gi3_28623379_x1 | .....gGucucacccaacagauccggguucga.....      | 1 |
| Gi3_28745510_x1 | .....gguucucacccaacagauccAg.....           | 1 |
| Gi5_9027678_x1  | .....accaacagauccggAuucgauucc.....         | 1 |
| Gi5_8985532_x1  | .....uucucacccaacagauccU.....              | 1 |
| Gi5_8957526_x1  | .....aacagauccggAuucgauuccggcgccggagc..... | 1 |
| Gi5_8974330_x1  | .....guucucGcccaacagauccgg.....            | 1 |
| Gi3_28369938_x1 | .....gaucUggguucgauucc.....                | 1 |
| Gi1_4380831_x1  | .....guucCauuccggcgccgga.....              | 1 |
| Gi3_28671000_x1 | .....gguucgauuccggcgccggagcG.....          | 1 |
| Gi3_28500724_x1 | .....guucucacccaacagauccggA.....           | 1 |
| Gi2_11099575_x1 | .....guucgauuccAggcgccg.....               | 1 |
| Gi3_28647909_x1 | .....Cguucucacccaacagaucc.....             | 1 |
| Gi3_28539468_x1 | .....guucucacGcaacagauccgggu.....          | 1 |
| Gi1_4334700_x1  | .....uucucUcccaacagauccggguucgau.....      | 1 |
| Gi5_8851360_x1  | .....ugguucucacccaacagauAcgggu.....        | 1 |
| Gi5_9013177_x1  | .....uccggcguaguauaacggcuagaaCgguu.....    | 1 |
| Gi4_575202_x1   | .....cgauuccggcgccggagcC.....              | 1 |
| Gi5_9021819_x1  | .....ugguucucacccaacagauCgg.....           | 1 |
| Gi1a_6355749_x1 | .....guucgauAcccgcgccggagc.....            | 1 |
| Gi1a_6236295_x1 | .....uccggcguaCuuaaacggcuagaa.....         | 1 |
| Gi5_9124832_x1  | .....gguucgauuccggGgcccggagc.....          | 1 |
| Gi1_4262085_x1  | .....uccggcguaguauaacggcuac.....           | 1 |
| Gi5_8941978_x1  | .....aguccggcguaguauGacggcuagaauagg.....   | 1 |
| Gi1_4289002_x1  | .....cucacccaacagauCggg.....               | 1 |
| Gi2_11012929_x1 | .....guAcgauuccggcgccg.....                | 1 |
| Gi5_8871044_x1  | .....gguucucaUccaacagauccgg.....           | 1 |
| Gi1_4209480_x1  | .....uccggcgCaguauaacggcuagaau.....        | 1 |
| Gi5_8970092_x1  | .....uucgauuccggcgUgg.....                 | 1 |
| Gi3_28844265_x1 | .....ccUgcguaguauaacggcuaga.....           | 1 |
| Gi3_28580361_x1 | .....ucgauuccggcgccggagcA.....             | 1 |
| Gi5_8941816_x1  | .....gguucUauuccggcgccg.....               | 1 |
| Gi1_4352042_x1  | .....uccggcguaguauaacggcuagUa.....         | 1 |
| Gi2_11090457_x1 | .....uucucacUcaacagauccggguucg.....        | 1 |
| Gi3_28864523_x1 | .....ucgauuccggAgccgga.....                | 1 |
| Gi5_8867078_x1  | .....cccGacagauccggguuc.....               | 1 |
| Gi5_8985862_x1  | .....ccggcguaguauaacAgcua.....             | 1 |
| Gi3_28309903_x1 | .....gAucucacccaacagauccgg.....            | 1 |
| Gi3_28339002_x1 | .....ccggUguaguauaacggcu.....              | 1 |
| Gi2_11330095_x1 | .....gguGcgauuccggcgccgga.....             | 1 |
| Gi1a_6320710_x1 | .....guAcgauuccggcgccg.....                | 1 |
| Gi5_9023441_x1  | .....uccggcguaguauaacgUcuaga.....          | 1 |
| Gi1_4195597_x1  | .....cUuaguauaacggcuagaau.....             | 1 |

|                 |                                      |       |   |
|-----------------|--------------------------------------|-------|---|
| Gi2_11281917_x1 | .....gUcguaguauaacggcuaga            | ..... | 1 |
| Gi2_11002167_x1 | .....ugguucucacAcaacagauccg          | ..... | 1 |
| Gi5_9098832_x1  | .....uucucacccaaUagauccggguuc        | ..... | 1 |
| Gi3_28621467_x1 | .....uccggcgAaguauaacggc             | ..... | 1 |
| Gi1_4253110_x1  | .....guucAauucccggcgccggagc          | ..... | 1 |
| Gi1_4179217_x1  | .....agauccggguCcgauucc              | ..... | 1 |
| Gi5_8893376_x1  | .....gguuGgauucccggcgccggag          | ..... | 1 |
| Gi5_9092731_x1  | .....gguucucaccAaacagaucc            | ..... | 1 |
| Gi2_11013224_x1 | .....uggGucucacccaacagauccg          | ..... | 1 |
| Gi3_28908699_x1 | .....Ncucacccaacagauccgg             | ..... | 1 |
| Gi3_28365432_x1 | .....ugguucuAacccaacagauccg          | ..... | 1 |
| Gi2_11157230_x1 | .....ugguucucacccaacaAauccg          | ..... | 1 |
| Gi5_8876262_x1  | .....ugguucucaccccUacagauccgggu      | ..... | 1 |
| Gi4_585503_x1   | .....uugguucucUcccaacaga             | ..... | 1 |
| Gi3_28507220_x1 | .....uccggcgaguauaacggcuaUaaugguuggu | ..... | 1 |
| Gi3_28977093_x1 | .....gguucucacccaacagUuccg           | ..... | 1 |
| Gi5_9048020_x1  | .....gguucgauucccgUcgcgccgagc        | ..... | 1 |
| Gi3_28868060_x1 | .....cagaGccggguucgauucc             | ..... | 1 |
| Gi3_28962402_x1 | .....ucgauucccggcgccggCg             | ..... | 1 |
| Gi1_4231263_x1  | .....uuNucacccaacagauccg             | ..... | 1 |
| Gi1_4244347_x1  | .....Uauucccggcgccggagc              | ..... | 1 |
| Gi5_9107706_x1  | .....guucgauuccGggcgccgga            | ..... | 1 |
| Gi3_28296388_x1 | .....guucuAacccaacagauccg            | ..... | 1 |
| Gi3_28630962_x1 | .....Nuucgauucccggcgccgg             | ..... | 1 |
| Gi5_8985112_x1  | .....ucgauucccgAgccggag              | ..... | 1 |
| Gl1a_6295680_x1 | .....uucgauucccggcgccggagcCu         | ..... | 1 |
| Gi2_11328054_x1 | .....uccNgcguaguauaacggcuag          | ..... | 1 |
| Gi2_11395991_x1 | .....ucgauucccgUgccggag              | ..... | 1 |
| Gi5_8968028_x1  | .....gguucgauuccGggcgccggagc         | ..... | 1 |
| Gi5_9020591_x1  | .....acagauccgAguucgauucccgcg        | ..... | 1 |
| Gi5_9079014_x1  | .....ccggcgaguauaacggUuag            | ..... | 1 |
| Gl1a_6065574_x1 | .....uccgUcguaguauaacgg              | ..... | 1 |
| Gi1_4248327_x1  | .....uccggUguaguauaacggcu            | ..... | 1 |
| Gi3_28577158_x1 | .....Cuucucacccaacagauccgggu         | ..... | 1 |
| Gi1_4197881_x1  | .....uccUgcguaguauaacggcua           | ..... | 1 |
| Gi5_9071985_x1  | .....ucucacccaacagauGcgggu           | ..... | 1 |
| Gi1_4186427_x1  | .....guucAauucccggcgccggag           | ..... | 1 |
| Gi3_28728018_x1 | .....ggguucgauucAcggcgccggagc        | ..... | 1 |
| Gl1a_6024901_x1 | .....gguucgauuAccggcgccggag          | ..... | 1 |
| Gi2_11360589_x1 | .....ugguucucacccaacagaAccg          | ..... | 1 |
| Gi2_11361035_x1 | .....guucgauuGccggcgccg              | ..... | 1 |
| Gi1_4313092_x1  | .....gguucgauucccAgcgcgccggag        | ..... | 1 |
| Gi5_8962046_x1  | .....Cgguucucacccaacagauccgggu       | ..... | 1 |
| Gi5_8977529_x1  | .....gguucgauuUccggcgcc              | ..... | 1 |
| Gi2_11299054_x1 | .....ucgauuAccggcgccggagc            | ..... | 1 |
| Gi3_28595032_x1 | .....cggcguagNauaacggcuagaau         | ..... | 1 |
| Gi3_28748580_x1 | .....cgauucccggcgccggagU             | ..... | 1 |

|                 |                                     |   |
|-----------------|-------------------------------------|---|
| Gi5_9011958_x1  | .....aacagauccggguucgauucccgcgccgg  | 0 |
| Gi5_8978627_x1  | .....gguucucaccaacagauGcg           | 1 |
| Gi5_8864055_x1  | .....cgcgguaguauaacGcuag            | 1 |
| Gi5_9111668_x1  | .....uugguucucacccaaUagauccg        | 1 |
| Gi5_9021917_x1  | .....uucucacccGacagauccggguu        | 1 |
| Gi1_4236220_x1  | .....uccggGguaguauaacggcuag         | 1 |
| Gi2_11141503_x1 | .....uucucacccaacagauUcgg           | 1 |
| Gi3_28458350_x1 | .....guucgauucccggcUccggag          | 1 |
| Gi5_9078060_x1  | .....uccggcguaguauaacggUu           | 1 |
| Gi3_28678017_x1 | .....ggguucgauucccgcgccAgagc        | 1 |
| Gi1_4216481_x1  | .....uNcggcguaguauaacgg             | 1 |
| Gi3_28317217_x1 | .....gguucucacccaacagauccC          | 1 |
| Gi3_28524515_x1 | .....uccggguucUauucccgcgccgga       | 1 |
| Gi5_8833405_x1  | .....ugguucucacccaacagauUgggu       | 1 |
| Gi3_28792058_x1 | .....guucgaAucccgcgccg              | 1 |
| Gi1_4258694_x1  | .....ugguucucacccaacagUuccg         | 1 |
| Gi5_9131644_x1  | .....aguccggcguaguauaCcggu          | 1 |
| Gi3_28366366_x1 | .....uccggcgGaguauaacggcuagaa       | 1 |
| Gi2_11361367_x1 | .....uccUgcguaguauaacggc            | 1 |
| Gi1_4360605_x1  | .....uccggcguauauaacggcuagaau       | 1 |
| Gi5_8911690_x1  | .....caacagauccggguucgauucccgcgccgg | 0 |
| Gl1a_6005304_x1 | .....uucgauuccUggcgccggagc          | 1 |
| Gi4_592464_x1   | .....guucgauucccgcgccgA             | 1 |
| Gi2_11095148_x1 | .....ggcguaguauaacggcuagaau         | 0 |
| Gi5_8920249_x1  | .....gguucgauucccggcCccggagc        | 1 |
| Gi1_4374646_x1  | .....ugguucucacccaacagauUcgg        | 1 |
| Gi5_8997089_x1  | .....ccggguucgGuucccgcgccgga        | 1 |
| Gi5_9114652_x1  | .....uccggcguUguauaacgg             | 1 |
| Gi5_8991135_x1  | .....ccggUguaguauaacggcuaga         | 1 |
| Gi1_4311204_x1  | .....gguAcucacccaacagauccg          | 1 |
| Gi5_8908215_x1  | .....gguucgUuucccgcgccg             | 1 |
| Gl1a_6174982_x1 | .....gguucgauucccCgcgccggag         | 1 |
| Gi1_4206857_x1  | .....uucgauucccgGgcccgg             | 1 |
| Gl1a_6169655_x1 | .....ucucacccaacagauAcg             | 1 |
| Gi1_4171949_x1  | .....uucgauucccgAcgcccgg            | 1 |
| Gi5_8831624_x1  | .....gguucuAaccaacagaucc            | 1 |
| Gi1_4352148_x1  | .....gguucgauCcccggcgccg            | 1 |
| Gi3_28281105_x1 | .....cucacccaacagauccAgguucgauu     | 1 |
| Gi5_8935009_x1  | .....uucucacccaacagaCccggguuc       | 1 |
| Gi5_9070424_x1  | .....uccggcguaguauaacUgc            | 1 |
| Gi5_8865448_x1  | .....uccggguucgauuAccggc            | 1 |
| Gi3_28494870_x1 | .....ggguucgauucccgcgccggGgc        | 1 |
| Gi2_11014586_x1 | .....uccggcguauauaacggcuag          | 1 |
| Gi1_4337569_x1  | .....uccggcguagGauaacgg             | 1 |
| Gi3_28725190_x1 | .....guucgauuGccggcgccg             | 1 |
| Gi2_11252299_x1 | .....aguccggcguUguauaacgg           | 1 |
| Gi2_11267262_x1 | .....Accggcguaguauaacgg             | 1 |

|                 |                          |                              |   |
|-----------------|--------------------------|------------------------------|---|
| Gi2_11226846_x1 | ucNggcguaguauaacgg       |                              | 1 |
| Gi5_9118019_x1  |                          | uccggguucgauucccgA           | 1 |
| Gi1_4264100_x1  |                          | aacagauccggguucgauuccAgcgccg | 1 |
| Gi5_9076870_x1  |                          | uucgauucccgcgccgC            | 1 |
| Gi3_28281794_x1 |                          | ggguucgauuccUggcgccgga       | 1 |
| Gi2_11057050_x1 | gcuaguaNaacggcuagaa      |                              | 1 |
| Gi3_28911893_x1 |                          | guucucacUcaacagauccgggu      | 1 |
| Gi3_28565650_x1 |                          | caacagauccggguucgauCccc      | 1 |
| Gi1a_6303005_x1 | uccggcguaguauaacggcuUga  |                              | 1 |
| Gi5_8988332_x1  | ggcguaguNuaacggcua       |                              | 1 |
| Gi5_8909169_x1  |                          | gauucccgcgccgAagc            | 1 |
| Gi2_11279226_x1 |                          | cgauuccAgcgccggagcguu        | 1 |
| Gi2_11228306_x1 |                          | ucAauuccggcgccggag           | 1 |
| Gi1_4205937_x1  | ccggcguaguauaaAggcua     |                              | 1 |
| Gi3_28344790_x1 | uccggcguaguauaaGggcuagaa |                              | 1 |
| Gi1_4349058_x1  |                          | guucgGuucccgcgccggag         | 1 |
| Gi1_4367466_x1  |                          | accaacaAauccggguucgauucc     | 1 |
| Gi2_11384950_x1 |                          | agaCccggguucgauucc           | 1 |
| Gi5_9035748_x1  |                          | gNuucgauucccgcgccggagc       | 1 |
| Gi4_582105_x1   | uccggcguaguauaacggcuCga  |                              | 1 |
| Gi2_11089352_x1 |                          | Cauuccggcgccggagc            | 1 |
| Gi2_11179071_x1 | uccggcguaguauaacggcuUgaa |                              | 1 |
| Gi1_4201107_x1  |                          | guucgauucUcgcgccggagc        | 1 |
| Gi4_606205_x1   |                          | guucgauucccgcgAgg            | 1 |
| Gi2_11317674_x1 |                          | guucucaccAaacagauccgggu      | 1 |
| Gi1_4198238_x1  |                          | uucucaccaacagauccggU         | 1 |
| Gi3_28701100_x1 |                          | ugguucucCcccaacagaucc        | 1 |
| Gi3_28812310_x1 |                          | gguucucaccaacagauccGg        | 1 |
| Gi1_4360278_x1  | uccggcguUguauaacggc      |                              | 1 |
| Gi3_28789032_x1 |                          | ucucaccaUcagauccgg           | 1 |
| Gi5_8992771_x1  | uccggAguaguauaacggcuagaa |                              | 1 |
| Gi3_28333127_x1 |                          | Ucagauccggguucgauucc         | 1 |
| Gi1_4314438_x1  |                          | guucucaccaacaAauccgg         | 1 |
| Gi3_28565667_x1 |                          | auucccgcgccggagcCu           | 1 |
| Gi2_11374572_x1 | uccggcCuaguauaacggc      |                              | 1 |
| Gi1_4304370_x1  | uccggcguaguauaacgU       |                              | 1 |
| Gi3_28313959_x1 |                          | gguCcucaccaacagauccgg        | 1 |
| Gi3_28323628_x1 | uccggcguaguauaaGggcuag   |                              | 1 |
| Gi3_28466710_x1 |                          | Nguucgauuccggcgccg           | 1 |
| Gi1a_6056374_x1 | Cccggcguaguauaacggcuaga  |                              | 1 |
| Gi4_612542_x1   |                          | gauucccgcgccggagc            | 0 |
| Gi3_28449308_x1 |                          | uucgaCuccggcgccgga           | 1 |
| Gi3_28984545_x1 |                          | ucaccaacagauccgAguuc         | 1 |
| Gi2_11218958_x1 |                          | gauucccgcgAccggagc           | 1 |
| Gi5_8872085_x1  |                          | gguucgauucccgUcgccggag       | 1 |
| Gi1a_5987938_x1 | uccggcguCguauaacggcuagaa |                              | 1 |
| Gi5_9064949_x1  | uccUgcguaguauaacggc      |                              | 1 |



|                 |                                   |   |
|-----------------|-----------------------------------|---|
| Gi2_11309983_x1 | .....Ugauucccgcgccggagc           | 1 |
| Gi3_28742472_x1 | .....gauuccGggcgccggagc           | 1 |
| Gl1a_6252954_x1 | .....uucCcacccaacagauccg          | 1 |
| Gi5_8849782_x1  | .....gguucgauucccgcgccggGgCGuuu   | 1 |
| Gi5_9051916_x1  | .....guNcgauucccgcgccggagc        | 1 |
| Gi1_4234736_x1  | .....gguucgauucccgcgccgCagc       | 1 |
| Gi2_11387804_x1 | .....gaCucccgcgccggagc            | 1 |
| Gi3_28831761_x1 | .....Aauccggguucgauucccgcgccgga   | 1 |
| Gi2_11356626_x1 | .....cggUguaguauaacggcua          | 1 |
| Gi5_9066233_x1  | .....uccggcguaguauaacggcuaUa      | 1 |
| Gi3_28534528_x1 | .....aUagauccggguucgauu           | 1 |
| Gi3_28824909_x1 | .....uccggcguaguUuaacggcuag       | 1 |
| Gi4_571453_x1   | .....uccggcguaguauaacggAuagaau    | 1 |
| Gl1a_6057563_x1 | .....uccggcguaguauaaUggcuagaau    | 1 |
| Gi1_4280852_x1  | .....uccggguucgaCucccgcgccgga     | 1 |
| Gi3_28914095_x1 | .....guucucacccUacagauccgg        | 1 |
| Gl1a_6046161_x1 | .....uccggcguaguauCacggc          | 1 |
| Gi3_28457208_x1 | .....gguucucacccGacagauccgggu     | 1 |
| Gi1_4301381_x1  | .....guucgauucccgcgccggaCc        | 1 |
| Gi3_28547559_x1 | .....gguucucacccaacaCaucc         | 1 |
| Gi2_11061510_x1 | .....ucUggcguaguauaacggcu         | 1 |
| Gl1a_6344008_x1 | .....gguucgauucccgcgccA           | 1 |
| Gi2_11248818_x1 | .....aacUgauccggguucgauucccgcgccg | 1 |
| Gi3_28690276_x1 | .....uccNgcguaguauaacggcuagaau    | 1 |
| Gi5_9073696_x1  | .....uccgCcgguaguauaacggcuag      | 1 |
| Gi2_11075509_x1 | .....uucgaAucccgcgccggag          | 1 |
| Gl1a_6020122_x1 | .....uccggcguaguauaacgCcuag       | 1 |
| Gi1_4167359_x1  | .....gUguucgauucccgcgccgg         | 1 |
| Gi4_583134_x1   | .....guucgauuccUggcgccgg          | 1 |
| Gi5_8939812_x1  | .....uucucacccaacagauccGg         | 1 |
| Gi1_4213486_x1  | .....ugguucucUcccaacagauccgg      | 1 |
| Gi5_9101242_x1  | .....uccggguucgauuccUggc          | 1 |
| Gi5_8974423_x1  | .....cacccaacagauccgggAucga       | 1 |
| Gi5_9046109_x1  | .....cggcguUguauaacggcuagaau      | 1 |
| Gi5_9003694_x1  | .....uucucacccGacagauccgg         | 1 |
| Gl1a_6201313_x1 | .....uucgauucccgcgccgCgc          | 1 |
| Gi1_4325094_x1  | .....guAcgauucccgcgccg            | 1 |
| Gi3_28370921_x1 | .....ggguuAgauucccgcgccggagc      | 1 |
| Gi3_28474226_x1 | .....gCGuGguauaacggcuagaa         | 1 |
| Gi5_8839602_x1  | .....ucucacGcaacagauccg           | 1 |
| Gi3_28940114_x1 | .....cggcguaguauaacggUuagaau      | 1 |
| Gi5_9082065_x1  | .....gguucgauuGccgCGccgg          | 1 |
| Gl1a_6154052_x1 | .....uccgCcgguaguauaacggcuag      | 1 |
| Gi1_4197287_x1  | .....auucccgcgccggagcU            | 1 |
| Gl1a_6212261_x1 | .....guucgauucccgcgAcg            | 1 |
| Gi5_8922531_x1  | .....guucucacccaacagauccCg        | 1 |
| Gi5_8970598_x1  | .....uugguucGcacccaacagauccg      | 1 |

|                 |                                 |   |
|-----------------|---------------------------------|---|
| Gi5_8843127_x1  | .....Ucagauccggguucgauucccggcg  | 1 |
| Gi2_11297972_x1 | .....ggNucgauucccgcgccggag      | 1 |
| Gl1a_6321473_x1 | .....uucgauucccgAgccggagc       | 1 |
| Gi1_4183056_x1  | .....cggcguagNauaacggcu         | 1 |
| Gi3_28389825_x1 | .....Uggcguaguauaacggcuagaau    | 1 |
| Gi5_8890323_x1  | .....uccggAguaguauaacgg         | 1 |
| Gi5_8961465_x1  | .....gguuUgauucccgcgccggagcguuu | 1 |
| Gl1a_6265864_x1 | .....uAcggcguaguauaacggcuag     | 1 |
| Gi2_11204160_x1 | .....gguucgauucccCgcgccgg       | 1 |
| Gi5_9005679_x1  | .....gguucgauucccgcgccggagcgAu  | 1 |
| Gi2_11034520_x1 | .....uucucacccaacaUaucg         | 1 |
| Gl1a_5981303_x1 | .....Gccggcguaguauaacggcu       | 1 |
| Gi2_11078882_x1 | .....uccggcguaguauaacgAcuagaa   | 1 |
| Gi5_9120349_x1  | .....ucgauuAccggcgccggagc       | 1 |
| Gi3_28787178_x1 | .....ucgauuAccggcgccggag        | 1 |
| Gi3_28559303_x1 | .....guAcucacccaacagauccgg      | 1 |
| Gi1_4320439_x1  | .....aucAgguucgauucccgcgccgg    | 1 |
| Gi1_4382100_x1  | .....uccggcguCguauaacggcuagaau  | 1 |
| Gi5_9043186_x1  | .....uccggcguaguauaCgggcu       | 1 |
| Gi5_8879847_x1  | .....ccggcguaguauaacggcuUga     | 1 |
| Gi3_28270759_x1 | .....gcguaguauaacggUuaga        | 1 |
| Gi2_11394025_x1 | .....uucgauucccgcgccgA          | 1 |
| Gi3_28516924_x1 | .....gauccggguucgauCccc         | 1 |
| Gi1_4230010_x1  | .....ccggcguaguUuaaacggcuaga    | 1 |
| Gl1a_6287206_x1 | .....uucucacccaacagauUg         | 1 |
| Gi2_11235190_x1 | .....guucgauucccgcgccUgag       | 1 |
| Gi4_577047_x1   | .....gguucgauNcccgcgcc          | 1 |
| Gi5_9104398_x1  | .....cUcccaacagauccggguucga     | 1 |
| Gi5_9096554_x1  | .....uccggcguaguauaacCgcuagaau  | 1 |
| Gi5_8865141_x1  | .....guuNgauucccgcgccggagc      | 1 |
| Gi1_4276289_x1  | .....ugguucucacccaacagCuccg     | 1 |
| Gi1_4249968_x1  | .....gguucucacccaacagauccU      | 1 |
| Gi4_574948_x1   | .....gguucgauCcccggcgccggagc    | 1 |
| Gi1_4226254_x1  | .....guucucaccGaacagauccg       | 1 |
| Gi5_8927523_x1  | .....ugguucucacccaacagaCccgggu  | 1 |
| Gi3_28603845_x1 | .....uccggguucgauucccggc        | 0 |
| Gi3_28718778_x1 | .....guucucacccaUcagauccg       | 1 |
| Gi5_9027416_x1  | .....uucGcacccaacagauccg        | 1 |
| Gl1a_5986143_x1 | .....gCuucgauucccgcgcc          | 1 |
| Gi3_28607525_x1 | .....ggguucgauucccgcgAcggagc    | 1 |
| Gi5_8848946_x1  | .....ucgauucUcggcgccggag        | 1 |
| Gi3_28596156_x1 | .....cgaNuucccgcgccggagc        | 1 |
| Gi3_28943427_x1 | .....caacagauUggguucgauucc      | 1 |
| Gi1_4247741_x1  | .....ucAggcguaguauaacggcu       | 1 |
| Gi3_28350141_x1 | .....ggcguaguauaacggcuAa        | 1 |
| Gi2_11100384_x1 | .....uucucaGccaacagauccg        | 1 |
| Gi2_11134632_x1 | .....uccggcguaguauaacggAuagaa   | 1 |

|                 |                                    |   |
|-----------------|------------------------------------|---|
| Gi5_8921644_x1  | .....guucgauucccgcgCUGgag          | 1 |
| Gi1_4218202_x1  | .....uccggcguaguauaacgAcu          | 1 |
| Gi3_28480317_x1 | .....uucgauucccgAcgccgg            | 1 |
| Gi4_570039_x1   | .....guucgauucccgAcgccgg           | 1 |
| Gi3_28366159_x1 | .....gauccggguucgauucccgcgccggagcC | 1 |
| G1a_6302868_x1  | .....auccggguucgACuccggc           | 1 |
| Gi5_9048280_x1  | .....guucgGuucccgcgccggag          | 1 |
| Gi5_8961680_x1  | .....gguucucacccCacagauc           | 1 |
| Gi3_28692203_x1 | .....gguucuUacccaacagaucc          | 1 |
| Gi5_9116548_x1  | .....ugguucuUacccaacagauccgggu     | 1 |
| Gi3_28404516_x1 | .....uccggcguaguauaacggcuU         | 1 |
| Gi3_28582896_x1 | .....Ucggcguaguauaacggcuagaa       | 1 |
| Gi5_9067791_x1  | .....gguucuUacccaacagauc           | 1 |
| G1a_6027245_x1  | .....gguuAgaucccgcgccg             | 1 |
| G1a_6160626_x1  | .....gAuucgauucccgcgccggagc        | 1 |
| Gi2_11056791_x1 | .....agaucggAuucgauucc             | 1 |
| Gi3_28317100_x1 | .....ccggcguagGauaacggc            | 1 |
| Gi4_603168_x1   | .....ucUggcguaguauaacgg            | 1 |
| Gi2_11039119_x1 | .....auccggguucgauucccgcgccggagc   | 0 |
| Gi3_28967539_x1 | .....gguucucacccaacagauGcg         | 1 |
| Gi2_11110040_x1 | .....guucgauucccgGgccg             | 1 |
| Gi3_28518396_x1 | .....ggcguaguGuaacggcuaga          | 1 |
| Gi2_11060389_x1 | .....uucgauucccgcgGccggagc         | 1 |
| Gi1_4328694_x1  | .....cgauucccgcgccggagc            | 0 |
| Gi2_11043102_x1 | .....uccggcguaguauaacgUcuag        | 1 |
| Gi1_4269937_x1  | .....ggcguaguNuaacggcua            | 1 |
| Gi3_28855230_x1 | .....guucucacccaacUgaucgg          | 1 |
| Gi3_28811057_x1 | .....uccggcguauauaacggcuagaa       | 1 |
| Gi1_4268067_x1  | .....gguucucacccaacaAauccgg        | 1 |
| Gi5_8993165_x1  | .....ccggUguaguauaacggcua          | 1 |
| G1a_6322424_x1  | .....ucgauucccgcgccggagcCu         | 1 |
| Gi5_9053569_x1  | .....guNcgauucccgcgccg             | 1 |
| Gi2_11346556_x1 | .....ccggcguaguauaCggcua           | 1 |
| Gi5_8862066_x1  | .....uGgauucccgcgccgga             | 1 |
| Gi1_4269826_x1  | .....cGcccaacagauccggguucgauucc    | 1 |
| Gi1_4360840_x1  | .....uccggcguaguCuaacggcuaga       | 1 |
| Gi1_4264243_x1  | .....uccggguucgauuccAgcgccgga      | 1 |
| G1a_6088397_x1  | .....uccggcguaguaCaacggc           | 1 |
| Gi3_28522852_x1 | .....uAcggcguaguauaacggcua         | 1 |
| Gi2_11056875_x1 | .....gguucucacccaacaAauccg         | 1 |
| Gi5_8959505_x1  | .....guucgauucccgcgGgga            | 1 |
| Gi5_8843860_x1  | .....ccggcguagCauaacggcuag         | 1 |
| Gi5_8985201_x1  | .....gGuccggguucgauucccgcgccgga    | 1 |
| Gi1_4197516_x1  | .....uccggcguaguauaacCg            | 1 |
| Gi2_11303602_x1 | .....gguucgauucccgcgccggagcguuu    | 0 |
| G1a_6130492_x1  | .....guucUauucccgcgccggagc         | 1 |
| Gi1_4348403_x1  | .....uccggcguaguauaacUgc           | 1 |

|                 |                                        |   |
|-----------------|----------------------------------------|---|
| Gi2_11133468_x1 | .....Cgguucucacccaacagauccg            | 1 |
| Gi2_11299987_x1 | .....cggcgguaguauaacggc                | 0 |
| Gi5_8994205_x1  | .....cggcgguagNauaacggcuag             | 1 |
| Gi5_9017302_x1  | .....Ucggguucgauucccgcgccgga           | 1 |
| Gi2_11007067_x1 | .....gguucucacccaacagauccg             | 0 |
| Gi2_11132369_x1 | .....gauucUcggcgccggagc                | 1 |
| Gi5_9131642_x1  | .....gguucgauucccgcgccggaA             | 1 |
| Gi1a_6330959_x1 | .....guucucacccaacagaAccg              | 1 |
| Gi2_11207120_x1 | .....guucucCcccaacagauccg              | 1 |
| Gi2_11050879_x1 | .....uucucacccaGcagauccggguucg         | 1 |
| Gi5_9032630_x1  | .....gguucucacccaacagauccU             | 1 |
| Gi5_8961489_x1  | .....uucucacccaacGgauccg               | 1 |
| Gi2_11209690_x1 | .....guucgauuccGggcgccgga              | 1 |
| Gi5_8943072_x1  | .....uucucacccaacCgauccg               | 1 |
| Gi3_28964329_x1 | .....ggguGcgauucccgcgccg               | 1 |
| Gi3_28500151_x1 | .....ggguucgauucccgcgcgA               | 1 |
| Gi1a_6340938_x1 | .....gguCcgauucccgcgccggagc            | 1 |
| Gi3_28876647_x1 | .....aAauccggguucgauucccgcgccggag      | 1 |
| Gi5_8934898_x1  | .....uccgCcgguaguauaacgg               | 1 |
| Gi2_11269785_x1 | .....guucgauucccgcgcgGcggag            | 1 |
| Gi2_11122381_x1 | .....uucgauucccgGugccggag              | 1 |
| Gi1_4228821_x1  | .....cGcacccaacagauccggguucgauucc      | 1 |
| Gi2_11121269_x1 | .....cguaguauaacggcuagaugguugguuc      | 0 |
| Gi3_28584570_x1 | .....Cucgauucccgcgccg                  | 1 |
| Gi1_4335218_x1  | .....guucucaccccUacagauccg             | 1 |
| Gi3_28678496_x1 | .....gcuaguauaaUggcuaga                | 1 |
| Gi1a_6174368_x1 | .....uccggcgguaguauaacggGuag           | 1 |
| Gi3_28970556_x1 | .....uccNgcguaguauaacggcuagaa          | 1 |
| Gi2_11134767_x1 | .....cucacccaacagGuccgg                | 1 |
| Gi3_28668874_x1 | .....caacagauccggguucgauucccgcgccggagc | 0 |
| Gi1_4315660_x1  | .....cUggguucgauucccgcgccg             | 1 |
| Gi5_9138174_x1  | .....ggguucgauucccgcgAcg               | 1 |
| Gi2_11228118_x1 | .....aguccggcgguaguauaacggcua          | 0 |
| Gi3_28819375_x1 | .....agauccgggCucgauucc                | 1 |
| Gi3_28319896_x1 | .....Gucacccaacagauccggguucgauucc      | 1 |
| Gi3_28378752_x1 | .....gauccggguucgauuccA                | 1 |
| Gi3_28756476_x1 | .....gguucgauucccgCcgcc                | 1 |
| Gi3_28888554_x1 | .....ugguucucacAcaacagauccg            | 1 |
| Gi5_8839447_x1  | .....uccggGguaguauaacggcua             | 1 |
| Gi3_28656184_x1 | .....guucucacccaaAagauccg              | 1 |
| Gi2_11138958_x1 | .....aguccggcgguaguauCacggcuaga        | 1 |
| Gi5_9084668_x1  | .....uccggcgguagGauaacgg               | 1 |
| Gi1a_6308753_x1 | .....guucgauuNccggcgccggagc            | 1 |
| Gi1_4266347_x1  | .....guucucacccaacagaAccg              | 1 |
| Gi2_11197417_x1 | .....uccggcgguaguUaacggcuaga           | 1 |
| Gi1_4158953_x1  | .....gguucgGuucccgcgccg                | 1 |
| Gi2_11312903_x1 | .....uccgAcguaguauaacggcu              | 1 |

|                 |                                    |   |
|-----------------|------------------------------------|---|
| Gi5_9084990_x1  | .....guucgauucccggcgccCagc         | 1 |
| Gi1_4350415_x1  | .....uucgauucccggcgccAgagc         | 1 |
| Gi5_8969622_x1  | .....aguccggcguaguauaGcggcu        | 1 |
| Gi2_11000963_x1 | .....guucgauuGccggcgccggagc        | 1 |
| Gi4_600480_x1   | .....guucgUuucccggcgcg             | 1 |
| Gi5_8949105_x1  | .....gguucgauucccggcgcggCgcuuu     | 1 |
| Gi1_4192941_x1  | .....Aaacagauccggguucgauucccggc    | 1 |
| Gi1_4159395_x1  | .....guuNgauucccggcgcggagc         | 1 |
| Gi2_11163367_x1 | .....ugguucGcacccaacagauccg        | 1 |
| Gi1_4194882_x1  | .....uGcggguucgauucccggcgcggga     | 1 |
| Gi5_8919948_x1  | .....uugguucucacccaacaga           | 0 |
| Gi2_11291518_x1 | .....cucacccaacagauccgC            | 1 |
| Gi4_588732_x1   | .....Gccggcguaguauaacggcua         | 1 |
| Gi2_11394664_x1 | .....gguucgauuccGggcgccg           | 1 |
| Gi3_28692740_x1 | .....cucacccaacaAauccgg            | 1 |
| Gi5_8858148_x1  | .....ccggcguaguauaacggcuGga        | 1 |
| Gi5_9045459_x1  | .....Agguucgauucccggcgcggagc       | 1 |
| Gi3_28705800_x1 | .....gAuucucacccaacagauccgg        | 1 |
| Gi5_8928381_x1  | .....uccggcguagAuaaacgg            | 1 |
| Gi1_4205978_x1  | .....cUggcguaguauaacggcua          | 1 |
| Gi3_28481122_x1 | .....uccggcguaguauaacgCcuag        | 1 |
| Gi2_11405600_x1 | .....cggguucgauucccggcgcggU        | 1 |
| Gi2_11038569_x1 | .....gguucgauucccggcgcggUa         | 1 |
| Gi2_11222250_x1 | .....uAcggcguaguauaacggcuagaau     | 1 |
| Gi3_28923883_x1 | .....Gguccggcguaguauaacggcuagauggu | 1 |
| Gi3_28282996_x1 | .....gguucgauucccggcUccgg          | 1 |
| Gi5_8834311_x1  | .....guucgauucccggcgcggagU         | 1 |
| Gi2_11204646_x1 | .....ccggcguCguauaacggcua          | 1 |
| Gi1_4261491_x1  | .....gguucgauuccUggcgccggag        | 1 |
| Gi5_9020961_x1  | .....guucucacccaacagauGcgg         | 1 |
| Gi4_598497_x1   | .....gguucgauucccgAcgcgg           | 1 |
| Gi3_28263266_x1 | .....ggcguaguauaCcggcua            | 1 |
| Gi5_8866945_x1  | .....ugguucucacccaacagauUgg        | 1 |
| Gi3_28440888_x1 | .....cagaucggguucgauucccggcGcgg    | 1 |
| Gi2_11053014_x1 | .....ugguucucacccaacagGucc         | 1 |
| Gi5_8893944_x1  | .....uccggGguaguauaacggc           | 1 |
| Gi3_28946249_x1 | .....ugguucucaccccCacagauc         | 1 |
| Gi2_11103065_x1 | .....cccaacagauccggguGc            | 1 |
| Gi2_11237694_x1 | .....Ugcguaguauaacggcuagaau        | 1 |
| Gi1_4177121_x1  | .....uccggcAuaguauaacggcu          | 1 |
| Gi1_6044462_x1  | .....ucgauucccggcgcggagc           | 0 |
| Gi1_4222554_x1  | .....uccUgcguaguauaacggcuagaau     | 1 |
| Gi5_8969474_x1  | .....uccggcguaguGuaacggcuagauggu   | 1 |
| Gi5_8850834_x1  | .....ggcguaguauaacggUuag           | 1 |
| Gi3_28636057_x1 | .....gggCucgauucccggcgcgg          | 1 |
| Gi3_28383338_x1 | .....cgUguucgauucccggcgcggga       | 1 |
| Gi3_28815093_x1 | .....ucgauGcccggcgcggag            | 1 |

|                 |                                   |   |
|-----------------|-----------------------------------|---|
| Gi2_11282668_x1 | .....uccgggAucgauucccgcgccgga     | 1 |
| Gi2_11252634_x1 | .....gguucgauucccgcgccU           | 1 |
| Gi2_11118619_x1 | .....cgUuucccgcgccggagcguuu       | 1 |
| Gi1_4207197_x1  | .....gguucgauCcccggcgccggag       | 1 |
| Gi1_4207312_x1  | .....ggcguaguauaacAgcua           | 1 |
| Gi5_8965383_x1  | .....gguucgauuccUgcgcc            | 1 |
| Gi3_28402350_x1 | .....auccggguNcgauucccgcgccggagc  | 1 |
| G1a_6047477_x1  | .....gCuucgauucccgcgccggag        | 1 |
| Gi3_28822384_x1 | .....guucucacccaaAagaucgg         | 1 |
| Gi5_8935263_x1  | .....cccaacagauUcggguuc           | 1 |
| Gi5_9040047_x1  | .....guAcucacccaacagauccgg        | 1 |
| Gi2_11015154_x1 | .....acccaacagauccggguucgauucc    | 0 |
| Gi1_4366673_x1  | .....uccggcguaguauaacgC           | 1 |
| Gi1_4388420_x1  | .....gguucgaAuucccgcgccgg         | 1 |
| G1a_6309399_x1  | .....uccggcguaguauaacggcuagaCu    | 1 |
| G1a_6155221_x1  | .....guucucacNcaacagauccg         | 1 |
| Gi5_9036859_x1  | .....ucucacccNacagauccgggu        | 1 |
| Gi2_11296464_x1 | .....gguucucacccaacagaccg         | 1 |
| Gi2_11267232_x1 | .....ugguucucacUcaacagauccg       | 1 |
| Gi2_11403411_x1 | .....cucacccaacUgaucgg            | 1 |
| Gi3_28486264_x1 | .....gguucucacccaacGgaucgg        | 1 |
| Gi3_28588303_x1 | .....Nucucacccaacagauccg          | 1 |
| Gi5_8849804_x1  | .....ucAcacccaacagauccgg          | 1 |
| Gi5_9088288_x1  | .....uccNgcguaguauaacggcuagaa     | 1 |
| Gi1_4240262_x1  | .....uucgauuccGggcgccgg           | 1 |
| Gi2_11000793_x1 | .....uccggGguaguauaacggc          | 1 |
| G1a_6346630_x1  | .....uGcggcguaguauaacggcuagaau    | 1 |
| Gi1_4217748_x1  | .....cucacccaaAagaucgg            | 1 |
| Gi2_11312605_x1 | .....uccggcguagGauaacggcuaga      | 1 |
| Gi1_4220943_x1  | .....ccggcguaguauaacCgcuaga       | 1 |
| Gi3_28644478_x1 | .....Uuucucacccaacagauccggguucgau | 1 |
| Gi3_28390158_x1 | .....cguaguauaacAgcuaga           | 1 |
| Gi3_28353381_x1 | .....uccggguucgauucccggcUccgga    | 1 |
| Gi1_4388966_x1  | .....ucgauucccgcgUcggagc          | 1 |
| Gi2_11388762_x1 | .....gguucucacccaacGgauc          | 1 |
| G1a_6004502_x1  | .....ggguucgauucccgUgc            | 1 |
| Gi2_11119670_x1 | .....uCcgauucccgcgccggagc         | 1 |
| Gi2_11063689_x1 | .....gguucucaccUaacagauccg        | 1 |
| Gi5_8946318_x1  | .....Cccggcguaguauaacggcuagaau    | 1 |
| Gi3_28547069_x1 | .....gauuccUgcggcgagc             | 1 |
| Gi3_28281122_x1 | .....uucgauucccgcgUgg             | 1 |
| Gi2_11244944_x1 | .....uccggcguaguauaacUgcua        | 1 |
| Gi5_8901041_x1  | .....gguucgauucccgcgccgCag        | 1 |
| Gi3_28915508_x1 | .....gauucccgcgccAgagc            | 1 |
| Gi2_11121472_x1 | .....uccggcguagGauaacgg           | 1 |
| Gi3_28742968_x1 | .....cccNacagauccggguucgauucc     | 1 |
| Gi1_4347531_x1  | .....uucgauucccgcgccggagcU        | 1 |

|                 |                                       |   |
|-----------------|---------------------------------------|---|
| Gi1_4372239_x1  | .....guucucacccaacUgaucgg.....        | 1 |
| Gi2_11033285_x1 | .....ugguucucacccaaUagauccg.....      | 1 |
| Gi2_11201441_x1 | .....guucgauucccgccgUag.....          | 1 |
| Gi2_11098079_x1 | .....ugguucucacccaacagauccgggu.....   | 0 |
| Gi5_9045279_x1  | .....gAuucgauucccgccgagcguuu.....     | 1 |
| Gi1_4195531_x1  | .....uccggcguaguauaacggcuaUa.....     | 1 |
| Gi2_11271302_x1 | .....Uggauucgauucccgccg.....          | 1 |
| Gi5_8873427_x1  | .....cucacccaacagauccUg.....          | 1 |
| Gi5_8990686_x1  | .....ccggcguaguGuaacggcua.....        | 1 |
| Gi5_8952929_x1  | .....gguucucacccaacagauA.....         | 1 |
| Gi2_11171329_x1 | .....uccggcguaguauaacggcuaC.....      | 1 |
| Gi5_8897780_x1  | .....gguuAgaaucccgccg.....            | 1 |
| Gi1_4260476_x1  | .....Gcggcguaguauaacggc.....          | 1 |
| Gi5_9058656_x1  | .....uucucacccaacGgauccgggu.....      | 1 |
| Gi3_28529026_x1 | .....guucgauGcccggccgga.....          | 1 |
| Gi1_4284495_x1  | .....ucgauucccgccgagU.....            | 1 |
| Gi1_4256718_x1  | .....guucucacccaacagUuccgg.....       | 1 |
| Gi5_9082997_x1  | .....guucgauucccgccgagc.....          | 0 |
| Gi5_8899476_x1  | .....gguucgauucccgccgUcg.....         | 1 |
| Gi5_8843474_x1  | .....Cucacccaacagauccgg.....          | 1 |
| Gi3_28494622_x1 | .....guucucaccAaacagauccgg.....       | 1 |
| Gi1_4229021_x1  | .....ucgauucccgccgGgc.....            | 1 |
| Gi3_28852957_x1 | .....uucucacccaacagauccggguucga.....  | 0 |
| Gi3_28443901_x1 | .....uccggcguaguauaacggcUg.....       | 1 |
| Gi2_11222279_x1 | .....gauUccggccgagc.....              | 1 |
| Gi3_28332991_x1 | .....aucUggguucgauucccgccgagc.....    | 1 |
| Gi3_28897627_x1 | .....cagauUggguucgauucc.....          | 1 |
| Gi5_8956102_x1  | .....cgauucccgccgagcA.....            | 1 |
| Gi3_28272130_x1 | .....gGguaguauaacggcuaga.....         | 1 |
| Gi2_11001708_x1 | .....gAucucacccaacagauccg.....        | 1 |
| Gi2_11154360_x1 | .....Ggauucccgccgagcguuuc.....        | 1 |
| Gi5_8838283_x1  | .....ugUuucucacccaacagauccgggu.....   | 1 |
| Gi3_28647294_x1 | .....ugguGcucacccaacagauccg.....      | 1 |
| Gi5_9101593_x1  | .....guucucacccaacagCuccgg.....       | 1 |
| G1a_6123275_x1  | .....uccggcguaguauaGcggc.....         | 1 |
| Gi5_8949533_x1  | .....uggGucucacccaacagauccg.....      | 1 |
| G1a_6248764_x1  | .....uuUucacccaacagauccgg.....        | 1 |
| Gi1_4364029_x1  | .....cucacccaacagauccggguucgauUc..... | 1 |
| Gi4_589114_x1   | .....gguucgauucccgccggaAc.....        | 1 |
| Gi5_8858134_x1  | .....gguAcucacccaacagaucc.....        | 1 |
| Gi5_9022000_x1  | .....ccggcguaguauaGcggcuag.....       | 1 |
| Gi5_9063100_x1  | .....ggcguaAuauaacggcuagaau.....      | 1 |
| Gi1_4259666_x1  | .....gguucgauucccgccUccgg.....        | 1 |
| Gi1_4336743_x1  | .....uucUAacccaacagauccgg.....        | 1 |
| Gi5_8853453_x1  | .....guucgauucccgUcggcgag.....        | 1 |
| Gi4_594417_x1   | .....cucacccaacagauccggguUg.....      | 1 |
| Gi5_8932366_x1  | .....ccggcguGguauaacggcua.....        | 1 |

|                 |                                |   |
|-----------------|--------------------------------|---|
| Gi3_28310905_x1 | ucgauucUcggcgccgga             | 1 |
| Gi2_11320069_x1 | gcuaguauaacggcuGgaa            | 1 |
| Gi3_28702503_x1 | guucucacccaacagauccgggA        | 1 |
| Gi4_609932_x1   | Cccggcguaguauaacggcuaga        | 1 |
| Gi1_4362163_x1  | guugguucucacccaacaAauccgggu    | 1 |
| Gi5_9040621_x1  | ggcguaguauaacggcuagC           | 1 |
| Gi2_11355574_x1 | aguccggcguaguauaaUggcuaga      | 1 |
| Gi2_11130540_x1 | ucgauucccgAcgccgga             | 1 |
| Gi5_9030671_x1  | gguucgauucccgGgcc              | 1 |
| Gi1_4278256_x1  | guucgauuGccggcgccggagc         | 1 |
| Gi5_9103980_x1  | uccggcguaguauGacggcu           | 1 |
| Gi1_4371947_x1  | uccggcguaguauaacGC             | 1 |
| Gi5_8862734_x1  | guucgauucccgcgccAgag           | 1 |
| Gi5_8938031_x1  | uucucGcccaacagauccgggu         | 1 |
| Gi3_28365131_x1 | cggcguaguauGacggcuagaau        | 1 |
| Gi3_28461352_x1 | ggcguaguauCacggcu              | 1 |
| Gi5_8857495_x1  | ucuNacccaacagauccg             | 1 |
| G1a_6024655_x1  | guucgauucccgcgccggC            | 1 |
| Gi5_9000985_x1  | Cgcuaguauaacggcuaga            | 1 |
| G1a_6015802_x1  | gguucgauucccgcgUcg             | 1 |
| Gi5_9110281_x1  | uucNcaccaacagauccg             | 1 |
| Gi5_8927650_x1  | gguucucacccaCagaucc            | 1 |
| Gi3_28459091_x1 | uucGGuucccgcgccgga             | 1 |
| Gi1_4351216_x1  | gguAcgauucccgcgccggagc         | 1 |
| Gi3_28910896_x1 | ggcguaguauaacggcuagaaA         | 1 |
| Gi5_9072967_x1  | gguucucGcccaacagauccgg         | 1 |
| Gi5_9041740_x1  | uugguucucacccaacagauccA        | 1 |
| Gi1_4159385_x1  | aGccggguucgauucccgcgccgga      | 1 |
| Gi3_28752902_x1 | uugguucucacccGacagaucc         | 1 |
| Gi2_11261593_x1 | cagauccggguucgauucccgcgccggagc | 0 |
| Gi3_28962457_x1 | Gccaacagauccggguucgauuccc      | 1 |
| Gi3_28663955_x1 | caUcagauccggguucgauucccgcgccgg | 1 |
| Gi1_4172795_x1  | guucgUuucccgcgccg              | 1 |
| Gi3_28293012_x1 | ucgauuccAgggcccgag             | 1 |
| Gi4_608816_x1   | uccggcguaguauaacggcuagU        | 1 |
| Gi5_8871802_x1  | cucacccaacagauccAgg            | 1 |
| Gi5_9128802_x1  | gguucgauucccgCcgccgga          | 1 |
| Gi1_4284310_x1  | uucucacccaacagauccGg           | 1 |
| Gi3_28316960_x1 | ggcguaguauUcggcuagaau          | 1 |
| G1a_6330265_x1  | gguucgauucccgcgUgga            | 1 |
| G1a_6119872_x1  | uccggcguauaacggcuag            | 1 |
| Gi2_11013948_x1 | guucgauuGccggcgccgga           | 1 |
| Gi1_4229325_x1  | uccggcguaguauaaAggcuagaau      | 1 |
| Gi3_28526989_x1 | cGggcguaguauaacggc             | 1 |
| G1a_6328472_x1  | ucgauuccNcggcgccggagc          | 1 |
| Gi2_11132632_x1 | uccggcguaguauaaAggcuag         | 1 |
| Gi3_28582693_x1 | Uggguucgauucccgcgccggag        | 1 |



|                 |                                   |   |
|-----------------|-----------------------------------|---|
| Gi3_28489770_x1 | .....uucgauuccAgggcgcgga          | 1 |
| Gi3_28939063_x1 | .....guucucacccaaUagauccg         | 1 |
| Gi3_28957958_x1 | .....uccggcguagCauaacggcuagaa     | 1 |
| Gi3_28905466_x1 | .....cucUcccaacagauccgg           | 1 |
| Gi5_8993338_x1  | .....ugguucucGcccaacagauccgg      | 1 |
| Gi3_28672440_x1 | .....gguucucacccaacagauccggAu     | 1 |
| Gi1_4211759_x1  | .....gguucucUcccaacagauccgg       | 1 |
| Gi3_28526016_x1 | .....cgauucccgggcgUcggag          | 1 |
| Gi3_28321592_x1 | .....Accggguucgauucccgggcgcgga    | 1 |
| Gl1a_6358700_x1 | .....uucucacccaacaCauccg          | 1 |
| Gi1_4174400_x1  | .....guucucacccaUcagauccg         | 1 |
| Gi2_11104122_x1 | .....gGucucacccaacagauccgggu      | 1 |
| Gi4_586758_x1   | .....gguucgauucUcggcgcg           | 1 |
| Gi5_9072601_x1  | .....uccggcguaguauaacggcuagauggCu | 1 |
| Gi2_11072883_x1 | .....cUggcguaguauaacggcuagaau     | 1 |
| Gi2_11182677_x1 | .....Uggguucgauucccgggcgcggagc    | 1 |
| Gi1_4220382_x1  | .....guuAgauucccggcgcggagc        | 1 |
| Gi1_4246193_x1  | .....Agcguaguauaacggcua           | 1 |
| Gi2_11041101_x1 | .....gguucgauucAcggcgcgga         | 1 |
| Gi3_28469741_x1 | .....Nguucgauucccgggcgc           | 1 |
| Gi3_28467549_x1 | .....gguucgUuucccgggcgc           | 1 |
| Gi5_9000220_x1  | .....guucgCuucccggcgcggagcguuuc   | 1 |
| Gi2_10996523_x1 | .....gguucgauucccCgcgcg           | 1 |
| Gi3_28834179_x1 | .....uugguucucacGcaacagaucc       | 1 |
| Gi3_28587312_x1 | .....gauucccggcgcggUgc            | 1 |
| Gi2_11151215_x1 | .....ugguucucacccaacUgauccg       | 1 |
| Gl1a_6274430_x1 | .....gguucgCuucccggcgcggagc       | 1 |
| Gi2_11287223_x1 | .....uccgUcguaguauaacggcuagaau    | 1 |
| Gi1_4220275_x1  | .....guuGgauucccggcgcggagc        | 1 |
| Gi5_9124695_x1  | .....uucucaccUaacagauccgg         | 1 |
| Gi3_28584662_x1 | .....gauuccAgggcgcggagc           | 1 |
| Gi1_4175261_x1  | .....gguucgauucccggcgcgAag        | 1 |
| Gi3_28771493_x1 | .....caGcagauccggguucgauucc       | 1 |
| Gi2_11014138_x1 | .....guucgauucccgUcgcggag         | 1 |
| Gi1_4344470_x1  | .....ugguucucacccaacagaAccgg      | 1 |
| Gi2_11362498_x1 | .....gguucgauucccUgcgcgg          | 1 |
| Gi3_28290095_x1 | .....gguucucacccaacagauccgggA     | 1 |
| Gi1_4226524_x1  | .....uccgCcguaguauaacggc          | 1 |
| Gl1a_6114946_x1 | .....guucgauucccggcgcgA           | 1 |
| Gi5_8959181_x1  | .....gguGcucacccaacagauccg        | 1 |
| Gi2_11328496_x1 | .....ugAuucucacccaacagaucc        | 1 |
| Gi3_28740307_x1 | .....gauucccggcgcggagcga          | 1 |
| Gi3_28822165_x1 | .....guuGgauucccggcgcgg           | 1 |
| Gi1_4214366_x1  | .....gguucgauuAccggcgcggag        | 1 |
| Gi3_28940332_x1 | .....Ugauccggguucgauucc           | 1 |
| Gi5_9059061_x1  | .....uucucacccUacagauccg          | 1 |
| Gi2_11184244_x1 | .....cggcguaguauaacggcuagG        | 1 |

|                 |                               |   |
|-----------------|-------------------------------|---|
| Gi1a_6164369_x1 | uccggcguaguauaacAgcuagaa      | 1 |
| Gi3_28577470_x1 | agauccggguuAgauuccc           | 1 |
| Gi3_28373286_x1 | auccgggGucgauucccgccgga       | 1 |
| Gi2_11168775_x1 | cccaacagauccgggCuc            | 1 |
| Gi3_28876879_x1 | Aguucgauucccgccgagcg          | 1 |
| Gi3_28341037_x1 | guucgauucccgCcgccgagc         | 1 |
| Gi3_28688297_x1 | gguAcgauucccgcc               | 1 |
| Gi5_9056090_x1  | aacagauccgggCucgauucccgccgagc | 1 |
| Gi1a_6108774_x1 | gguucgauGcccgccgga            | 1 |
| Gi5_8918044_x1  | Gccggcguaguauaacggcuagaugguu  | 1 |
| Gi1_4191041_x1  | gguucucaccaUcagauccg          | 1 |
| Gi1_4321927_x1  | uccggcguaguaCaacggcuagaau     | 1 |
| Gi4_588625_x1   | uccggUguaguauaacggcuag        | 1 |
| Gi5_8931379_x1  | uccggcguaguauaUcgg            | 1 |
| Gi2_11092858_x1 | guucgauucccgUccgga            | 1 |
| Gi5_9065295_x1  | uccgCcgaguauaacggcuagaau      | 1 |
| Gi3_28492981_x1 | uccggguucgGuucccgccg          | 1 |
| Gi2_11393516_x1 | guucucaccaacGgauccgg          | 1 |
| Gi3_28339698_x1 | guucucaccaacCgauccgggu        | 1 |
| Gi3_28352247_x1 | guuAucaccaacagauccg           | 1 |
| Gi5_9051218_x1  | ucaccaacaAauccgggu            | 1 |
| Gi5_8898062_x1  | ggcguaguauaacggUuaga          | 1 |
| Gi5_8944332_x1  | Accggcguaguauaacggcuagaa      | 1 |
| Gi2_11358202_x1 | uccggcguaguauaacCgc           | 1 |
| Gi5_9050165_x1  | guuAgaaucccgccg               | 1 |
| Gi4_604630_x1   | uUcggcguaguauaacggcuag        | 1 |
| Gi3_28336392_x1 | cccaacCgauccggguucgauuccc     | 1 |
| Gi1_4382064_x1  | uccggcguaguUuaacggcuaga       | 1 |
| Gi4_603804_x1   | cucaccaacagauccgg             | 0 |
| Gi5_8896035_x1  | uucucaccaacagauccgggu         | 1 |
| Gi1_4169482_x1  | guucgauuccUgcgccg             | 1 |
| Gi3_28311635_x1 | ugguucucaccaacagGuc           | 1 |
| Gi5_9048238_x1  | gguucgaAucccgccgga            | 1 |
| Gi1_4260549_x1  | uccggcguauauaacggc            | 1 |
| Gi3_28624239_x1 | cCaccaacagauccggguucgauucc    | 1 |
| Gi3_28572390_x1 | gguucgauAcccgccg              | 1 |
| Gi1_4171915_x1  | guucgauuccUcggccg             | 1 |
| Gi1_4215116_x1  | gguucgauucccgGgccgga          | 1 |
| Gi3_28935762_x1 | uccggcguaguauaacggcuagauggC   | 1 |
| Gi4_609562_x1   | Gccggcguaguauaacggcuagaau     | 1 |
| Gi3_28412858_x1 | cgauucccgccgagcU              | 1 |
| Gi2_11113912_x1 | uccggcguaguauaacggcuaca       | 1 |
| Gi3_28876102_x1 | uccggguucgauucccgUgccgga      | 1 |
| Gi1_4181266_x1  | ucucaccaacagauccgg            | 1 |
| Gi2_11130143_x1 | cagauccggguucgauucccgccAgag   | 1 |
| Gi4_596994_x1   | uugguucucacAcaacaga           | 1 |
| Gi5_8946289_x1  | uGaccaacagauccgggu            | 1 |

|                 |                                 |   |
|-----------------|---------------------------------|---|
| Gi3_28806175_x1 | ggguucGGuucccgcccgga            | 1 |
| Gi4_586628_x1   | cucaccaacagGuccggguucg          | 1 |
| Gi2_11131159_x1 | aguccUgcguaguauaacggcuaga       | 1 |
| Gi3_28420422_x1 | agauccggguucgauuccggcgccggaA    | 1 |
| Gi1_4368857_x1  | ggNucgauucccgcccg               | 1 |
| Gi4_569927_x1   | gguucgauucccgcccgagcA           | 1 |
| Gi5_8837028_x1  | ccggcguaguauaacggUua            | 1 |
| Gi1_4339970_x1  | guucgauucccgccAgagc             | 1 |
| Gi5_9009059_x1  | ccggcguaguauaacggcuagC          | 1 |
| Gi3_28909124_x1 | uccggcguaguGuaacggcu            | 1 |
| Gi3_28821354_x1 | cgguucgauuccggcgccgagcA         | 1 |
| Gi5_9038163_x1  | gguucCauucccgcccgagc            | 1 |
| Gi5_8906375_x1  | cucaccaacagauccgA               | 1 |
| Gi5_9103621_x1  | uucucaccaacagauccggguCc         | 1 |
| Gi3_28383019_x1 | ggCucucaccaacagaucc             | 1 |
| Gl1a_6136401_x1 | uccggcCuaguauaacgg              | 1 |
| Gi3_28881241_x1 | gauucccgcccgagG                 | 1 |
| Gi2_11350215_x1 | gguucgauucccgUgccggagcguu       | 1 |
| Gi1_4339676_x1  | ugguuAucaccaacagauccg           | 1 |
| Gi3_28596304_x1 | uucgauuccggcgccggUgc            | 1 |
| Gi5_9097868_x1  | uccggcguaguauaacgCcuaga         | 1 |
| Gi5_9070968_x1  | ucgaCucccgcccgagc               | 1 |
| Gi1_4255742_x1  | ggcguaguauaacAgcuag             | 1 |
| Gi2_11301148_x1 | uucAauuccggcgccgagc             | 1 |
| Gi3_28805885_x1 | ggAguaguauaacggcuagaau          | 1 |
| Gi5_9017963_x1  | cggcguaguGuaacggcuagaau         | 1 |
| Gi4_573574_x1   | uucucaccaacagauccg              | 0 |
| Gi1_4292922_x1  | uucucaccUacagauccg              | 1 |
| Gi5_8946460_x1  | guucucUcccaacagauccg            | 1 |
| Gl1a_6098600_x1 | gguucgauuccggcAcc               | 1 |
| Gi1_4218549_x1  | ugguucucaccaacagauccggguucgauuc | 0 |
| Gi3_28594514_x1 | ggguucgauuccggcgccggG           | 1 |
| Gi5_9133169_x1  | ccggcguaguauaaUggcuaga          | 1 |
| Gi5_8903574_x1  | Cgcguaguauaacggcuag             | 1 |
| Gi5_9085182_x1  | gguucucaccAaacagauccgg          | 1 |
| Gi3_28607845_x1 | cggNuucgauuccggcgccgga          | 1 |
| Gi4_606285_x1   | uucucaccaacagauccggguuc         | 0 |
| Gi2_11219967_x1 | ucAggcguaguauaacgg              | 1 |
| Gl1a_6149789_x1 | guucucaccUaacagauccg            | 1 |
| Gi3_28544967_x1 | Guccggguucgauuccggcgccgga       | 1 |
| Gi2_11354537_x1 | ucgauuccAggcgccgagc             | 1 |
| Gi5_8884315_x1  | Cguucucaccaacagauccggguu        | 1 |
| Gl1a_6007522_x1 | uccggcguaguauaaUggcuaga         | 1 |
| Gi5_8861140_x1  | uccggguucgauucccCgc             | 1 |
| Gi5_9069420_x1  | ucaccUacagauccggguu             | 1 |
| Gi3_28795804_x1 | cucGcccaacagauccgg              | 1 |
| Gi1_4295372_x1  | ugguucucUcccaacagaucc           | 1 |

|                 |                                 |   |
|-----------------|---------------------------------|---|
| Gi3_28467228_x1 | .....gguucgauucccgCcgccggag     | 1 |
| Gi2_11071155_x1 | .....cucacccaacagauccCg         | 1 |
| Gi2_11377995_x1 | .....guucgauuccGggcgccg         | 1 |
| Gi1_4239349_x1  | .....uccggGguaguauaacggcua      | 1 |
| Gi5_9077327_x1  | .....gGaguauaacggcuagaau        | 1 |
| Gi3_28912503_x1 | .....gauuccggcgccggaAc          | 1 |
| Gi1a_6193663_x1 | .....Cccggcguaguauaacggcuagaa   | 1 |
| Gi2_11150518_x1 | .....gguucgauucccgcgGcggag      | 1 |
| Gi1_4191676_x1  | .....ucgauucccgcgccgga          | 0 |
| Gi5_8902456_x1  | .....uucucaUccaacagauccgggu     | 1 |
| Gi2_11390696_x1 | .....agaucggguucAauucc          | 1 |
| Gi2_11240438_x1 | .....uAcggcguaguauaacggcua      | 1 |
| Gi3_28728864_x1 | .....Agguucgauucccgcgccgga      | 1 |
| Gi4_600813_x1   | .....Cccggcguaguauaacggcua      | 1 |
| Gi5_8836994_x1  | .....uccggcguacuauaacggcuagaa   | 1 |
| Gi5_8884678_x1  | .....ucucCcccaacagauccgg        | 1 |
| Gi2_11404082_x1 | .....uccggcguaguUuaacggcuagaa   | 1 |
| Gi5_8971807_x1  | .....cagauccgNguucgauucccgcgccg | 1 |
| Gi5_8911201_x1  | .....uccAgcguaguauaacggcu       | 1 |
| Gi4_581976_x1   | .....uUcggcguaguauaacggcuaga    | 1 |
| Gi1a_6154480_x1 | .....uccggcguNguauaacggcua      | 1 |
| Gi5_8891167_x1  | .....cucacccaUcagauccgg         | 1 |
| Gi1_4222424_x1  | .....guucgauuccAggcgccggagc     | 1 |
| Gi2_11033012_x1 | .....cgaCucccgcgccggagcguu      | 1 |
| Gi2_11336996_x1 | .....guAcucacccaacagauccg       | 1 |
| Gi3_28815812_x1 | .....gguucucacccaacagauccAgg    | 1 |
| Gi5_8896571_x1  | .....uggCucucacccaacagauccgggu  | 1 |
| Gi1_4360267_x1  | .....uccggcguaguauaacggcuaUaau  | 1 |
| Gi5_8957344_x1  | .....uucucaAccaacagauccgg       | 1 |
| Gi3_28447617_x1 | .....uucgauucccgAcgccgga        | 1 |
| Gi1_4238223_x1  | .....ucucaAccaacagauccgg        | 1 |
| Gi1_4341708_x1  | .....gguucgauucccgcgccggagcgG   | 1 |
| Gi1a_6117902_x1 | .....uccggcguaguauCacggcuag     | 1 |
| Gi3_28366738_x1 | .....uccggcguaguauaacgCcu       | 1 |
| Gi1a_6262994_x1 | .....gguAcgauucccgcgccggag      | 1 |
| Gi3_28467988_x1 | .....cgauucccgcgccggagcguu      | 0 |
| Gi5_9049110_x1  | .....ucacccaacagauccAggu        | 1 |
| Gi3_28955718_x1 | .....caUccaacagauccggguuc       | 1 |
| Gi2_11274941_x1 | .....guucgauucccgcgCccgga       | 1 |
| Gi2_11266191_x1 | .....cUgcguaguauaacggcuag       | 1 |
| Gi2_11319089_x1 | .....gguucgauucccCgcgccggag     | 1 |
| Gi4_587775_x1   | .....Cccggcguaguauaacggcuagaa   | 1 |
| Gi5_8833470_x1  | .....acUgauccggguucgauucccgcg   | 1 |
| Gi2_11238491_x1 | .....guucgauucccgcgccggaC       | 1 |
| Gi3_28440405_x1 | .....cgNuucccgcgccggagc         | 1 |
| Gi1_4241493_x1  | .....auccggguCcgauucccgcgccg    | 1 |
| Gi5_9052472_x1  | .....ugguucucCcccaacagauccg     | 1 |

|                 |                                    |                                    |   |
|-----------------|------------------------------------|------------------------------------|---|
| Gi1_4281978_x1  | .....Ucggcguaguauaacggc            | .....ucgauuccGggcgccggagc          | 1 |
| Gi2_11358228_x1 | .....ucgauuccGggcgccggagc          | .....ucgauuccGggcgccggagc          | 1 |
| Gi5_9013166_x1  | .....Cgauccggguucgauucc            | .....Cgauccggguucgauucc            | 1 |
| Gi4_610798_x1   | .....gguucgauuccggcgccgC           | .....gguucgauuccggcgccgC           | 1 |
| Gi3_28322090_x1 | .....ggguucgauuccGggcgccgga        | .....ggguucgauuccGggcgccgga        | 1 |
| Gi2_11256551_x1 | .....uucucacccaacagaAccg           | .....uucucacccaacagaAccg           | 1 |
| Gi3_28795125_x1 | .....ccggcguaguauaaUggc            | .....cGcacccaacagauccggguucga      | 1 |
| Gi1_4366842_x1  | .....cGcacccaacagauccggguucga      | .....cGcacccaacagauccggguucga      | 1 |
| Gi4_588102_x1   | .....guucgauuccggcgccggag          | .....guucgauuccggcgccggag          | 0 |
| Gi1_4165188_x1  | .....cucacccaacaAaucgg             | .....cucacccaacaAaucgg             | 1 |
| Gi2_11146581_x1 | .....Cgguucucacccaacagaucc         | .....Cgguucucacccaacagaucc         | 1 |
| Gi5_8875077_x1  | .....gguucucGccaacagaucc           | .....gguucucGccaacagaucc           | 1 |
| Gi3_28381752_x1 | .....ucgauuccggAgccggag            | .....ucgauuccggAgccggag            | 1 |
| Gi5_8897113_x1  | .....gguCucacccaacagauccggguu      | .....gguCucacccaacagauccggguu      | 1 |
| Gi5_8838906_x1  | .....cggcguaguauaacggcuagG         | .....cggcguaguauaacggcuagG         | 1 |
| Gi1a_6186067_x1 | .....gguuAgauuccggcgccggagc        | .....gguuAgauuccggcgccggagc        | 1 |
| Gi1_4167615_x1  | .....agaugguugguucucacc            | .....agaugguugguucucacc            | 0 |
| Gi3_28375014_x1 | .....guucgauuccggcgccggagcg        | .....guucgauuccggcgccggagcg        | 0 |
| Gi3_28968230_x1 | .....ucacccaacCgauccggguuc         | .....ucacccaacCgauccggguuc         | 1 |
| Gi3_28941386_x1 | .....cucacccaacagauccgggCucgauu    | .....cucacccaacagauccgggCucgauu    | 1 |
| Gi3_28315274_x1 | .....cagaGccggguucgauuccggcgccgg   | .....cagaGccggguucgauuccggcgccgg   | 1 |
| Gi5_8935087_x1  | .....gguaCgauuccggcgccgg           | .....gguaCgauuccggcgccgg           | 1 |
| Gi5_9137140_x1  | .....uccCgcuaguauaacggcuaga        | .....uccCgcuaguauaacggcuaga        | 1 |
| Gi5_8964200_x1  | .....ggNucgauuccggcgccg            | .....ggNucgauuccggcgccg            | 1 |
| Gi3_28287707_x1 | .....gguucucacAaacagaucc           | .....gguucucacAaacagaucc           | 1 |
| Gi3_28817192_x1 | .....guAcucacccaacagauccg          | .....guAcucacccaacagauccg          | 1 |
| Gi2_11051528_x1 | .....ugguCcucacccaacagauccg        | .....ugguCcucacccaacagauccg        | 1 |
| Gi5_8852998_x1  | .....gguuAauuccggcgcc              | .....gguuAauuccggcgcc              | 1 |
| Gi3_28799809_x1 | .....uccggcAuaguauaacggcuagaau     | .....uccggcAuaguauaacggcuagaau     | 1 |
| Gi1a_6345035_x1 | .....ugguucCcacccaacagauccg        | .....ugguucCcacccaacagauccg        | 1 |
| Gi3_28489861_x1 | .....agauccggguuAgauuccggcgccggag  | .....agauccggguuAgauuccggcgccggag  | 1 |
| Gi5_9089275_x1  | .....ggcguGguauaacggcuaga          | .....ggcguGguauaacggcuaga          | 1 |
| Gi5_8848215_x1  | .....aUuccggcguaguauaacggcu        | .....aUuccggcguaguauaacggcu        | 1 |
| Gi2_11265383_x1 | .....ugguucucacccaacagauAccg       | .....ugguucucacccaacagauAccg       | 1 |
| Gi2_11264212_x1 | .....gguucgauuccggcgccggUg         | .....gguucgauuccggcgccggUg         | 1 |
| Gi2_11323640_x1 | .....gUguucgauuccggcgccggag        | .....gUguucgauuccggcgccggag        | 1 |
| Gi1_4356054_x1  | .....cucacccaacagauccggguucgauuccU | .....cucacccaacagauccggguucgauuccU | 1 |
| Gi3_28833541_x1 | .....cgauGcccggcgccggagc           | .....cgauGcccggcgccggagc           | 1 |
| Gi3_28662191_x1 | .....acagauccggguucgauuccggUcgccgg | .....acagauccggguucgauuccggUcgccgg | 1 |
| Gi3_28985309_x1 | .....ggcguaguauaacggGuaga          | .....ggcguaguauaacggGuaga          | 1 |
| Gi1_4316738_x1  | .....uuccggcgccggagcCu             | .....uuccggcgccggagcCu             | 1 |
| Gi1_4266129_x1  | .....gguucgauuccggcgccggagc        | .....gguucgauuccggcgccggagc        | 1 |
| Gi2_10996113_x1 | .....gguucucacccaacagauUcg         | .....gguucucacccaacagauUcg         | 1 |
| Gi3_28352573_x1 | .....Ggauuccggcgccggag             | .....Ggauuccggcgccggag             | 1 |
| Gi1_4361472_x1  | .....uccggcguGguauaacggcuagaa      | .....uccggcguGguauaacggcuagaa      | 1 |
| Gi1_4328204_x1  | .....gguucgauuccCgccc              | .....gguucgauuccCgccc              | 1 |
| Gi4_577890_x1   | .....Gccggcguaguauaacggcuaga       | .....Gccggcguaguauaacggcuaga       | 1 |

|                 |                                     |   |
|-----------------|-------------------------------------|---|
| Gi2_11295437_x1 | .....aacagaucggguAcgauuccggcgccg    | 1 |
| Gi3_28851934_x1 | .....guucuUaccaacagauccg            | 1 |
| Gi2_11068692_x1 | .....uccggcguCguauaacggcuagaau      | 1 |
| Gi3_28781900_x1 | .....acagaucggguucgauuccggcgccggG   | 1 |
| Gi1a_6271337_x1 | .....Gcccaacagauccggguucgauuccc     | 1 |
| Gi1a_5986255_x1 | .....uccggAguaguauaacggcuaga        | 1 |
| Gi3_28635101_x1 | .....uugguucucacccaacGgauc          | 1 |
| Gi1a_5985246_x1 | .....uccggcguaguGuaacggcuagaa       | 1 |
| Gi3_28391917_x1 | .....uccggcguaguauaaGggcua          | 1 |
| Gi1_4364403_x1  | .....ucUaccaacagauccgggu            | 1 |
| Gi3_28563903_x1 | .....ggguucgauuccggcgccggGg         | 1 |
| Gi5_8899033_x1  | .....uccggguNgauuccggc              | 1 |
| Gi2_11144807_x1 | .....ucucacccGacagauccgg            | 1 |
| Gi1_4195490_x1  | .....guucgauuccggcgccggaAc          | 1 |
| Gi3_28789606_x1 | .....gguucgauuccggcUcc              | 1 |
| Gi3_28857693_x1 | .....Agguucucacccaacagauccg         | 1 |
| Gi5_8992512_x1  | .....gguucgauuccGggcgccgga          | 1 |
| Gi5_8876946_x1  | .....uccggcCuaguauaacggcuagaau      | 1 |
| Gi5_8920815_x1  | .....Accggcguaguauaacggcuagaau      | 1 |
| Gi3_28282524_x1 | .....uUaccaacagauccggguuc           | 1 |
| Gi3_28835913_x1 | .....uccggguucgauuccggcgccAga       | 1 |
| Gi5_9053971_x1  | .....acagaucggguucgauucGcgcgc       | 1 |
| Gi2_11007780_x1 | .....uccggcUuaguauaacggc            | 1 |
| Gi5_9119606_x1  | .....ucaccUaacagauccggguu           | 1 |
| Gi3_28642877_x1 | .....guucCcacccaacagauccgg          | 1 |
| Gi2_11045545_x1 | .....Ucguaguauaacggcuaga            | 1 |
| Gi5_8925876_x1  | .....gguucgauuccggcgccGggagc        | 1 |
| Gi1_4355106_x1  | .....gCuucgauuccggcgccggag          | 1 |
| Gi3_28339637_x1 | .....ggcguaguGuaacggcua             | 1 |
| Gi5_9116559_x1  | .....guucgauuccUgcgccggagc          | 1 |
| Gi1_4272815_x1  | .....gAuucucacccaacagauccgg         | 1 |
| Gi2_11368171_x1 | .....gguucgauAccggcgccggag          | 1 |
| Gi5_9069093_x1  | .....ggcguaguauaacggcuagaC          | 1 |
| Gi5_9124004_x1  | .....Gguccggcguaguauaacggcu         | 1 |
| Gi3_28939267_x1 | .....ucucGcccaacagauccg             | 1 |
| Gi2_11292688_x1 | .....uucucacccaacagauUcg            | 1 |
| Gi3_28335134_x1 | .....caacagUuccggguucga             | 1 |
| Gi3_28933221_x1 | .....gguucucacccaacaUauccg          | 1 |
| Gi3_28508720_x1 | .....gguuAucacccaacagauccg          | 1 |
| Gi5_9125988_x1  | .....guCgauuccggcgccggag            | 1 |
| Gi3_28478583_x1 | .....ccGacagauccggguucgauuccggcgccg | 1 |
| Gi1_4218050_x1  | .....gguucgauuccggcgccgCag          | 1 |
| Gi5_9128815_x1  | .....guucgauuccggAgccggagc          | 1 |
| Gi1_4380293_x1  | .....cucacccaacGgaucggguucgauucc    | 1 |
| Gi3_28672092_x1 | .....uucucacGcaacagauccg            | 1 |
| Gi1_4175616_x1  | .....gguCcgauuccggcgccgga           | 1 |
| Gi5_8904536_x1  | .....uugguucucacccaacagCuccg        | 1 |

|                 |                                  |   |
|-----------------|----------------------------------|---|
| Gi5_9135537_x1  | ucaccGacagauccggguu              | 1 |
| Gi1_4387764_x1  | ugguucucaccaacagaGccg            | 1 |
| G1a_6216070_x1  | Cguucgauucccgcgcc                | 1 |
| Gi3_28404475_x1 | guucucaccaacagauUcgg             | 1 |
| Gi3_28756382_x1 | uucucaccaacUgauccg               | 1 |
| Gi3_28963298_x1 | cgauucccgcgUcggagc               | 1 |
| Gi3_28878569_x1 | gguucucaccaacagGuccgg            | 1 |
| Gi1_4347019_x1  | guucgauAcccgcgccg                | 1 |
| Gi5_8904088_x1  | uccggcguagAuaaacggcuagaa         | 1 |
| Gi3_28683435_x1 | acagauccggguucgauCcccggcgccggagc | 1 |
| Gi3_28837471_x1 | gauCcccggcgccggagc               | 1 |
| Gi3_28396531_x1 | ugguucucaUccaacagau              | 1 |
| Gi5_8853277_x1  | ccAgcguaguauaacggcua             | 1 |
| Gi5_8974191_x1  | ucAgcguaguauaacggcuagaa          | 1 |
| Gi5_8855737_x1  | gguucucaccaacagUuccgg            | 1 |
| Gi3_28732959_x1 | uccggcUuaguauaacggcuagaa         | 1 |
| Gi4_575170_x1   | ggCucgauucccgcgccggagc           | 1 |
| Gi2_11365196_x1 | uucuGaccaacagauccg               | 1 |
| Gi3_28428151_x1 | guucgauucccgCcgccgga             | 1 |
| Gi5_9077616_x1  | uucgauucccgcgccggagcguuucc       | 0 |
| Gi4_587799_x1   | uccggcguaguauaacAgcuagaa         | 1 |
| Gi3_28699586_x1 | gguucucacUcaacagauccgggu         | 1 |
| Gi3_28872144_x1 | guucucaccaacaAuccg               | 1 |
| Gi2_11053413_x1 | ggCucgauucccgcgccgg              | 1 |
| Gi5_8885001_x1  | Uuucgauucccgcgccggagcguu         | 1 |
| Gi2_11372011_x1 | cgauucccgUgcccggagcguuu          | 1 |
| Gi3_28817291_x1 | Nccggcguaguauaacggcuagaa         | 1 |
| Gi1_4249212_x1  | gguucgaCucccgcgccggag            | 1 |
| Gi5_9053210_x1  | gguucCcaccaacagauccg             | 1 |
| Gi2_11321425_x1 | agauccggguucUauucc               | 1 |
| Gi3_28643184_x1 | uucgauucccgcgAggagc              | 1 |
| Gi5_9003495_x1  | guucucaccaacaCauccg              | 1 |
| Gi1_4234834_x1  | auccggguucgauucccgcgUgga         | 1 |
| Gi2_11261549_x1 | uucucaUccaacagauccg              | 1 |
| Gi2_11273501_x1 | gguucgauucccgCcgccggag           | 1 |
| Gi3_28346108_x1 | ucCcaccaacagauccg                | 1 |
| Gi5_8876818_x1  | ccaacagauGggguuc                 | 1 |
| Gi2_11164250_x1 | gguucgauucccgcgccggaU            | 1 |
| Gi1_4247730_x1  | uucgCuucccgcgccgg                | 1 |
| Gi5_8965853_x1  | ugguucucaccaacagCuccgggu         | 1 |
| Gi5_9088549_x1  | uccggcguaguauUcggcu              | 1 |
| Gi2_11144917_x1 | cgauucccgcgccggaAcguuu           | 1 |
| Gi2_11284343_x1 | ucgaAucccgcgccggagc              | 1 |
| G1a_6035669_x1  | gguucgauuccUcggccgga             | 1 |
| G1a_6202501_x1  | gguucgauNcccggcgcc               | 1 |
| Gi3_28450955_x1 | ggcgGaguauaacggcua               | 1 |
| Gi5_8858258_x1  | ggcgGaguauaacggcuag              | 1 |

|                 |                                 |   |
|-----------------|---------------------------------|---|
| Gi3_28527212_x1 | .....gguucCauucccgcgcc          | 1 |
| Gi5_8921422_x1  | .....accaacagGuccgguucgauucc    | 1 |
| Gi5_8890709_x1  | .....uccggcguCguauaacggcuagaa   | 1 |
| Gi4_589084_x1   | .....gguucgauucccgGAccgg        | 1 |
| Gi1a_6183620_x1 | .....ugguucucacccaacagCuccg     | 1 |
| Gi5_8913058_x1  | .....ucgauucccgcgccggGg         | 1 |
| Gi5_8973379_x1  | .....ucgauucccgcgAccggagc       | 1 |
| Gi3_28917137_x1 | .....ucgauucGcgcgccggagc        | 1 |
| Gi5_8902831_x1  | .....cagaucggguucgauCcccgcgccg  | 1 |
| Gi5_9112113_x1  | .....ccgggCucgauucccgcgccgga    | 1 |
| Gi3_28276348_x1 | .....ucgaCucccgcgccggag         | 1 |
| Gi3_28972842_x1 | .....gauucccCcgcgccggagc        | 1 |
| Gi1_4246456_x1  | .....ucucacccaacaUaucg          | 1 |
| Gi3_28344517_x1 | .....cacccaacUgauccggguuc       | 1 |
| Gi3_28708828_x1 | .....ucucacccaacagauccgC        | 1 |
| Gi1_4375213_x1  | .....gguucgauucccgcgccggagcg    | 0 |
| Gi2_11299356_x1 | .....agaucgAguucgauucc          | 1 |
| Gi2_11160678_x1 | .....uccggguucgauucccgcgccggagc | 0 |
| Gi2_11267438_x1 | .....ucNggcguaguauaacggcuagaau  | 1 |
| Gi5_8964739_x1  | .....ccggcgCaguauaacggcua       | 1 |
| Gi2_11326604_x1 | .....Nguucgauucccgcgccg         | 1 |
| Gi5_8835091_x1  | .....uccggAguaguauaacggcu       | 1 |
| Gi5_9021911_x1  | .....uuUucacccaacagauccggguuc   | 1 |
| Gi2_11388017_x1 | .....gNucgauucccgcgccgg         | 1 |
| Gi3_28358554_x1 | .....uccggcguaCuauaacggcuagaau  | 1 |
| Gi1_4376981_x1  | .....uucgGuucccgcgccggagc       | 1 |
| Gi5_9001238_x1  | .....gguNcgauucccgcgccg         | 1 |
| Gi2_11289923_x1 | .....ucgNuucccgcgccggagc        | 1 |
| Gi3_28411947_x1 | .....cggguucgauucccgcgccgCa     | 1 |
| Gi5_9010274_x1  | .....uccggcguaguauaacggcuaAaa   | 1 |
| Gi5_8896414_x1  | .....ucucacccaacagauccAggu      | 1 |
| Gi5_9084290_x1  | .....uucNcacccaacagauccgg       | 1 |
| Gi5_9122369_x1  | .....ucacccaacagauccgCguu       | 1 |
| Gi2_11279772_x1 | .....ugguucucacccaacaUaucg      | 1 |
| Gi1_4326763_x1  | .....uccNgcguaguauaacgg         | 1 |
| Gi2_11085676_x1 | .....uucucacccaacagauccU        | 1 |
| Gi2_11154727_x1 | .....uccggcguaguauaCcgcuagaau   | 1 |
| Gi1_4242195_x1  | .....ggguucgauucccgcgccgU       | 1 |
| Gi3_28619795_x1 | .....cggguucgauGccggcgccgga     | 1 |
| Gi1a_6280899_x1 | .....gguucgauucccgcgccggagcgA   | 1 |
| Gi3_28569503_x1 | .....uccUgcguaguauaacggcuagaa   | 1 |
| Gi5_9042368_x1  | .....uccggcguaguauaacgCcuag     | 1 |
| Gi1_4356775_x1  | .....guuAgauucccgcgccg          | 1 |
| Gi1a_6016120_x1 | .....uucgauucccgcgccggGgc       | 1 |
| Gi1_4172546_x1  | .....uccAgcguaguauaacggc        | 1 |
| Gi1_4280231_x1  | .....guucgauGcccgcgccg          | 1 |
| Gi2_11034387_x1 | .....uccggguucgaCucccgcgccgga   | 1 |



|                 |                                        |   |
|-----------------|----------------------------------------|---|
| Gi4_594361_x1   | .....Aucacccaacagauccggguucg.....      | 1 |
| Gi2_11225171_x1 | .....ugguucucacGcaacagauccg.....       | 1 |
| Gi1_4257203_x1  | .....Ugguucgauucccgcgccgga.....        | 1 |
| Gi5_8948057_x1  | .....Cgguucgauucccgcgccggagc.....      | 1 |
| Gi1a_5999126_x1 | .....uccggcguaguauaacggcCa.....        | 1 |
| Gi3_28533199_x1 | .....uccggcguaguauaacgUc.....          | 1 |
| Gi5_9111585_x1  | .....uccggGguaguauaacgg.....           | 1 |
| Gi5_8944125_x1  | .....ggguucgauucccgcgA.....            | 1 |
| Gi5_9099443_x1  | .....acagauccggguucAauucccgcg.....     | 1 |
| Gi1_4308261_x1  | .....ggguucgauucccAgcgccg.....         | 1 |
| Gi3_28901503_x1 | .....caacagauccggguCcgA.....           | 1 |
| Gi2_11108052_x1 | .....uucucacccaacagauccgggCucg.....    | 1 |
| Gi1a_6346247_x1 | .....ggguucgauucccgAcgcccg.....        | 1 |
| Gi3_28795788_x1 | .....gaAucccgcgccggagc.....            | 1 |
| Gi5_8895238_x1  | .....ggguucgauCcccggcgccggagcguuu..... | 1 |
| Gi3_28954306_x1 | .....ucgauucUcggcgccggag.....          | 1 |
| Gi1a_6071110_x1 | .....uGcggcguaguauaacggcuagaa.....     | 1 |
| Gi2_11349991_x1 | .....agGaugguugguucucacc.....          | 1 |
| Gi1_4171366_x1  | .....ggguucgauucccgcgCAgga.....        | 1 |
| Gi2_11144940_x1 | .....uccggGguaguauaacggcuagaau.....    | 1 |
| Gi2_11109699_x1 | .....guucAcacccaacagauccg.....         | 1 |
| Gi2_11097809_x1 | .....uucgauucAcggcgccgg.....           | 1 |
| Gi5_8889832_x1  | .....guucgauucccCgcccggagc.....        | 1 |
| Gi1_4389669_x1  | .....ggguucUauucccgcgccgg.....         | 1 |
| Gi5_8994262_x1  | .....ggguucgauucccgcgccggagcC.....     | 1 |
| Gi2_11031798_x1 | .....ggguucgauucccgcgccG.....          | 1 |
| Gi3_28902693_x1 | .....uccggcguaguauaaGggcu.....         | 1 |
| Gi5_8942160_x1  | .....uccggcguaguauaUcggcuagaau.....    | 1 |
| Gi1a_6109479_x1 | .....uucucaccUaacagauccg.....          | 1 |
| Gi1_4170363_x1  | .....uccggcguGguauaacggcuagaau.....    | 1 |
| Gi2_11115133_x1 | .....gguuAgauucccgccg.....             | 1 |
| Gi5_9053092_x1  | .....ugguucucacccaacaUauccgggu.....    | 1 |
| Gi3_28439530_x1 | .....uccggguucgauCcccggcgccgga.....    | 1 |
| Gi3_28599906_x1 | .....aucggguNcgauucccgcg.....          | 1 |
| Gi3_28578201_x1 | .....guucucacccaacagauGcgg.....        | 1 |
| Gi3_28610467_x1 | .....Uuucucacccaacagauccggguucga.....  | 1 |
| Gi2_11016489_x1 | .....ugguucucaccAaacagauccg.....       | 1 |
| Gi1_4257465_x1  | .....ggguucgauAcccgcgccggag.....       | 1 |
| Gi1_4160066_x1  | .....ggguucgUuucccgcgccggag.....       | 1 |
| Gi2_11135237_x1 | .....guucgauuccUggcgccg.....           | 1 |
| Gi3_28838892_x1 | .....aucggAgauucgauucccgcgccgga.....   | 1 |
| Gi1a_6194525_x1 | .....Cccggcguaguauaacggcua.....        | 1 |
| Gi5_9050629_x1  | .....accCacagauccggguucgauucc.....     | 1 |
| Gi5_9066493_x1  | .....guucgauucccgcgccgUa.....          | 1 |
| Gi3_28361222_x1 | .....Ugauccggguucgauucccgcgccggag..... | 1 |
| Gi3_28336947_x1 | .....guucgauucccgcgccgAag.....         | 1 |
| Gi5_9007667_x1  | .....cgcgcuaguauaacggcuagaau.....      | 0 |

|                 |                              |   |
|-----------------|------------------------------|---|
| Gi2_11387347_x1 | uccggcguaguauaacgCcu         | 1 |
| Gi2_11158769_x1 | uucgauucccgccAga             | 1 |
| Gi3_28751347_x1 | ccggcguaguauaacggcuGga       | 1 |
| Gi3_28573061_x1 | uccggguucgauuccggcAccgga     | 1 |
| Gi4_568672_x1   | gUuucgauucccgccgga           | 1 |
| Gi5_9052619_x1  | uucucaccAaacagauccgg         | 1 |
| Gi1_4372665_x1  | ggcguaguauaacggcCag          | 1 |
| Gi4_606072_x1   | uuggCucucacccaacaga          | 1 |
| Gi5_8892905_x1  | agaucggguucgaCucc            | 1 |
| Gi2_11282194_x1 | uucgauucNcggcgccggag         | 1 |
| Gi3_28724358_x1 | caccGacagauccggguuc          | 1 |
| Gi5_8863732_x1  | ggucgauucccgccgagcguC        | 1 |
| Gi3_28633513_x1 | uccggcguacuauaacggcuag       | 1 |
| Gi3_28310110_x1 | ccgNcguaguauaacggc           | 1 |
| Gi2_11059441_x1 | ggucgauucAcggcgccgg          | 1 |
| Gi4_585899_x1   | Aguucgauucccgccgagc          | 1 |
| Gi5_9005272_x1  | uccggcguaguauaacggcuUga      | 1 |
| Gi3_28427369_x1 | ucacccaacagGuccggguuc        | 1 |
| Gi3_28571596_x1 | uUcggcguaguauaacggcu         | 1 |
| Gi3_28675988_x1 | ggcguaguauCacggcuaga         | 1 |
| Gi2_11301120_x1 | cgauuccNcggcgagcguuc         | 1 |
| Gi1_4332510_x1  | ggucgaGucccgccgga            | 1 |
| Gi1_4212311_x1  | ucucacccaacagauccAg          | 1 |
| Gi1_4380634_x1  | uucNcacccaacagauccgg         | 1 |
| Gi2_11319370_x1 | ucgGuucccgccgag              | 1 |
| Gi3_28970333_x1 | ugguucucacccaacagauAcgg      | 1 |
| Gi2_11063992_x1 | ccggcguaguauUcggcu           | 1 |
| Gi5_8883005_x1  | gguucucacccaacagauccggGu     | 1 |
| Gi1_4316550_x1  | ggucgauAcccgccgagc           | 1 |
| Gi3_28941279_x1 | ggucgauucccgccgUag           | 1 |
| Gi1_4240444_x1  | ggucgauucccgcgAcggag         | 1 |
| Gi5_8873819_x1  | uugguucucacccaacagGuccg      | 1 |
| Gi1_4212124_x1  | aacagauccggguucgCuucccgccg   | 1 |
| Gi3_28311070_x1 | ucgauucccgccgUggag           | 1 |
| Gi2_11340065_x1 | uccggcguauuauaacggcu         | 1 |
| Gi1_4336238_x1  | uugguucucacccaacagaucc       | 0 |
| Gi1_4205325_x1  | ccgAcguaguauaacggcuaga       | 1 |
| Gi3_28362273_x1 | cucaGccaacagauccgg           | 1 |
| Gi1a_6163184_x1 | uccggcguaguauaacggcuAa       | 1 |
| Gi1_4176742_x1  | aacagauccggguucgauucccgUgccg | 1 |
| Gi2_11026130_x1 | uccggGguaguauaacggcuag       | 1 |
| Gi2_11215724_x1 | guuNguucccgccgag             | 1 |
| Gi5_9033874_x1  | ugguucucacccaacagauAcgg      | 1 |
| Gi1a_6158177_x1 | ggucgauucccgccAgga           | 1 |
| Gi5_8870721_x1  | ugguucucaccUaacagauccgg      | 1 |
| Gi2_11185963_x1 | ggucgauucccgccgagcAuuuc      | 1 |
| Gi2_11016230_x1 | uucgauucccgccAg              | 1 |

G1a\_6038980\_x1.....gguucgauucccgUgcccggagc..... 1  
 Gi2\_11294964\_x1.....gcAuaguauaacggcuagaau..... 1  
 Gi3\_28400890\_x1.....uccggcguaguauaacUgcuag..... 1  
 Gi2\_11358279\_x1.....gguucgauucccggcgcggagcgC..... 1  
 Gi3\_28271680\_x1.....gguucgauucccgGgcc..... 1  
 G1a\_6137072\_x1.....uUcggcguaguauaacggcu..... 1  
 Gi3\_28813952\_x1.....ucgGuucccggcgcggag..... 1  
 Gi3\_28580755\_x1.....ucucacccaacagauccA..... 1  
 Gi5\_9097929\_x1.....gguucucacccaacUgauccg..... 1  
 Gi3\_28811273\_x1.....gguucCauucccggcgcggag..... 1  
 Gi3\_28764665\_x1.....gguucucGcccaacagauccgggu..... 1  
 Gi3\_28715958\_x1.....ggguCcgauucccggcgcggag..... 1  
 Gi5\_9003785\_x1.....uucucacccaacagauccAg..... 1  
 Gi5\_8840570\_x1.....gguucgauucccggcgcggag..... 1  
 Gi5\_9052659\_x1.....gguucucanccaacagauccg..... 1  
 Gi5\_9083362\_x1.....uucucacccaacagauUcgg..... 1  
 Gi5\_9088725\_x1.....uccggcguaguauaacAgcu..... 1  
 Gi5\_9056797\_x1.....ggUguaguauaacggcuagaau..... 1  
 Gi5\_9120741\_x1.....gguNcgauucccggcgc..... 1  
 Gi2\_11276863\_x1.....cucacccaUagauccg..... 1  
 Gi5\_9106722\_x1.....cgauucccggcgcUggagcguuuc..... 1  
 Gi1\_4346213\_x1.....gguucgauucccggcgcg..... 1  
 Gi3\_28973006\_x1.....cagauccgggGucgauucccggcgcg..... 1  
 Gi5\_9070166\_x1.....ucuUacccaacagauccg..... 1  
 Gi5\_8959419\_x1.....ccggcguaNuauaacggcuagaau..... 1  
 Gi4\_592725\_x1.....gguucgauucccggcgcggagc..... 1  
 Gi5\_9082398\_x1.....uucgGuucccggcgcg..... 1  
 Gi1\_4264312\_x1.....ucucaUccaacagauccg..... 1  
 Gi3\_28509370\_x1.....ugguucucaccccUacagaucc..... 1  
 Gi3\_28599412\_x1.....gguucucacAcaacagauccg..... 1  
 Gi2\_11366968\_x1.....uccggcguUguauaacggcuag..... 1  
 Gi3\_28481247\_x1.....uucucacccaacagCuccg..... 1  
 G1a\_6242963\_x1.....ucAcacccaacagauccg..... 1  
 Gi2\_11172189\_x1.....aguccAgcguaguauaacggcuaga..... 1  
 Gi1\_4368827\_x1.....gguucgauucccggcgcCgagc..... 1  
 Gi1\_4289921\_x1.....uccggcguaguUuaacggcuagaau..... 1  
 Gi1\_4213676\_x1.....uccggcguaguauaacCgcuagaau..... 1  
 Gi1\_4224178\_x1.....gguucgauucccggcgcg..... 1  
 Gi3\_28585848\_x1.....Uuccggguucgauucccggcgcgga..... 1  
 Gi2\_11352222\_x1.....ucNggcguaguauaacggcuaga..... 1  
 Gi2\_11107507\_x1.....uNcggcguaguauaacggcuaga..... 1  
 Gi4\_571218\_x1.....gguucgauucccggcgcA..... 1  
 Gi3\_28615613\_x1.....Ugauccggguucgauucccggcgcg..... 1  
 Gi5\_9007389\_x1.....gguucgauucccggcgcgUagc..... 1  
 Gi2\_11396827\_x1.....gguucgauucccggcgcg..... 1  
 G1a\_6002738\_x1.....gCuucgauucccggcgcg..... 1  
 Gi3\_28516877\_x1.....agaucggguCcgauucccggcgcg..... 1

|                 |                                   |   |
|-----------------|-----------------------------------|---|
| Gl1a_6353152_x1 | .....gguucAauucccgcgccggagc       | 1 |
| Gl1a_6289377_x1 | .....gguucgauucccgcgccggGg        | 1 |
| Gl1a_6256295_x1 | .....gguucgauucUcgcgccgga         | 1 |
| Gi1_4256719_x1  | .....gguucucaccaGcagauc           | 1 |
| Gi5_8883160_x1  | .....aguccggcguGguauaacgg         | 1 |
| Gi1_4372405_x1  | .....uccggcguaguauGacggcua        | 1 |
| Gi3_28778243_x1 | .....cccaacagaucUggguucgauuccc    | 1 |
| Gi2_11010459_x1 | .....ucgaCucccgcgccgga            | 1 |
| Gi3_28305474_x1 | .....ggcguaguauaaUggcuaga         | 1 |
| Gl1a_6305575_x1 | .....gguucgauucccgCcgccgg         | 1 |
| Gi5_8838262_x1  | .....gguucgauAcccgcgccgga         | 1 |
| Gi2_11264536_x1 | .....gauucccgcgccgAagc            | 1 |
| Gi2_11272262_x1 | .....uccggcUuaguauaacggcua        | 1 |
| Gi5_8979582_x1  | .....uccggcguaguaGaacggcuag       | 1 |
| Gi5_8866384_x1  | .....ucgauucccgcgccggC            | 1 |
| Gi5_8893444_x1  | .....ucgauucccgcgccgCagc          | 1 |
| Gi5_8855692_x1  | .....ucucaccaacagaucGg            | 1 |
| Gl1a_6330116_x1 | .....gguucgauucccgcgCcgaggc       | 1 |
| Gi5_9132765_x1  | .....ucucacGcaacagauccgg          | 1 |
| Gi2_11128906_x1 | .....guucucaccaacagauccgA         | 1 |
| Gi3_28297477_x1 | .....gguucucaAccaacagauccg        | 1 |
| Gl1a_6215091_x1 | .....uccggcguaguGuaacggc          | 1 |
| Gi4_604906_x1   | .....gguucgauuccAgcgccgg          | 1 |
| Gi2_11243308_x1 | .....uccggcCuaguauaacggcuag       | 1 |
| Gi3_28318453_x1 | .....gguNcgauucccgcgccg           | 1 |
| Gi2_11151932_x1 | .....uccggguucgauuccUggcgccgga    | 1 |
| Gi2_11001660_x1 | .....ugguucucaccccUacagauccg      | 1 |
| Gi5_8954286_x1  | .....gauucccgcgccggaUc            | 1 |
| Gi5_8915072_x1  | .....uucucaccaacagauUcg           | 1 |
| Gl1a_6035510_x1 | .....guucgaCucccgcgccggag         | 1 |
| Gi3_28897993_x1 | .....gaGccggguucgauuccc           | 1 |
| Gi3_28584321_x1 | .....agauccggguucgauucccgcgccggGg | 1 |
| Gi5_9037534_x1  | .....uucucaccaacagaGccg           | 1 |
| Gi2_11077824_x1 | .....aUcagaucggguucgauucccgcgccg  | 1 |
| Gi1_4247162_x1  | .....gguucgauucccgAgccggag        | 1 |
| Gi3_28346100_x1 | .....aucggguucgauucccgccC         | 1 |
| Gi5_9092870_x1  | .....uccggcguaguaGaacggcuagaa     | 1 |
| Gi5_8940077_x1  | .....uucgauucccgcgccgga           | 0 |
| Gi2_11257600_x1 | .....uucucaccaacagGuccgg          | 1 |
| Gi5_9036811_x1  | .....uccggcguaguauUacggcuagaa     | 1 |
| Gl1a_6278848_x1 | .....gguucgauucccgccCccggagc      | 1 |
| Gl1a_6150146_x1 | .....uucucaccaacGgauccg           | 1 |
| Gi1_4223970_x1  | .....gguucgauucccgcgCgGga         | 1 |
| Gi4_595660_x1   | .....cucaccaacagauccggguucA       | 1 |
| Gi4_567782_x1   | .....Gucaccaacagauccggguucg       | 1 |
| Gi2_11248111_x1 | .....gguuGucaccaacagauccg         | 1 |
| Gi2_11333413_x1 | .....guucgaAucccgcgccgga          | 1 |

|                 |                                          |   |
|-----------------|------------------------------------------|---|
| Gi5_9130071_x1  | ..... agauccggguCcgauucc                 | 1 |
| Gi1_4364259_x1  | ..... gguucgauucAcggcgccggag             | 1 |
| Gi2_11294532_x1 | ..... uucgauucccgAcgccgga                | 1 |
| Gi5_9119994_x1  | ..... cUggcguaguauaacggcua               | 1 |
| Gi1a_6021359_x1 | ..... uccggcguaguaAaacggcuaga            | 1 |
| Gi3_28424338_x1 | ..... gauccggguucgauuccggU               | 1 |
| Gi4_596825_x1   | ..... uccggcguaguauaacggUuag             | 1 |
| Gi3_28538480_x1 | ..... gguucgauucccgggcgGc                | 1 |
| Gi3_28568661_x1 | ..... gguucucacccaacagaCcc               | 1 |
| Gi1_4378852_x1  | ..... agauccggguucgauucUc                | 1 |
| Gi5_9050029_x1  | ..... gauccggguucgauucccgUgccgga         | 1 |
| Gi5_9053796_x1  | ..... uccggUguaguauaacggcu               | 1 |
| Gi1_4221446_x1  | ..... gguucucacccaacaCauccg              | 1 |
| Gi5_8876399_x1  | ..... uccggcguaguCuaacggcu               | 1 |
| Gi2_11155780_x1 | ..... guucucacccaacagCuccgg              | 1 |
| Gi1_4255937_x1  | ..... ccggUguaguauaacggcuag              | 1 |
| Gi5_9078320_x1  | ..... uucucacccaacUgauccgg               | 1 |
| Gi3_28662358_x1 | ..... uccggcguagAauaacggcu               | 1 |
| Gi2_11002141_x1 | ..... gGguaguauaacggcuagaa               | 1 |
| Gi1_4274575_x1  | ..... ccggcguagAauaacggcua               | 1 |
| Gi1a_6100783_x1 | ..... gguucgauucccgAcgccg                | 1 |
| Gi3_28555333_x1 | ..... ucgauucccgcgccggaC                 | 1 |
| Gi2_11146961_x1 | ..... gguucgauucccgcgccggagcgC           | 1 |
| Gi2_11386236_x1 | ..... agaNccggguucgauucc                 | 1 |
| Gi2_11386665_x1 | ..... ucgauucccgGgccgga                  | 1 |
| Gi1a_6047473_x1 | ..... guucgauucccgcgccgCagc              | 1 |
| Gi5_9116262_x1  | ..... uUucacccaacagauccgg                | 1 |
| Gi4_605653_x1   | ..... uccggcguaguauaGcggcuagaa           | 1 |
| Gi5_9001791_x1  | ..... cUauucccgcgccggagcguuucc           | 1 |
| Gi3_28684600_x1 | ..... uucgauuUccggcgccgg                 | 1 |
| Gi2_11023000_x1 | ..... uccggcguaguUuaacgg                 | 1 |
| Gi1_4342867_x1  | ..... cgauucccgcgccggagcU                | 1 |
| Gi3_28465680_x1 | ..... ccggcguGguauaacggcuaga             | 1 |
| Gi1_4214955_x1  | ..... ccggcguaguauaCcgccuaga             | 1 |
| Gi5_9082625_x1  | ..... uucgCuucccgcgccgg                  | 1 |
| Gi3_28320605_x1 | ..... gguucucacccaacUgaucc               | 1 |
| Gi5_9047258_x1  | ..... gguucgauucccgAcgccggagcgu          | 1 |
| Gi5_8884712_x1  | ..... uucgauuAccggcgccgg                 | 1 |
| Gi1_4250048_x1  | ..... ccggcguagGauaacggc                 | 1 |
| Gi2_11375064_x1 | ..... ccaacagaNccggguucgauucccgcgccggagc | 1 |
| Gi5_8847668_x1  | ..... ugguucucacccaacagauUcgggu          | 1 |
| Gi1a_6004882_x1 | ..... guucucacccaacCgauccg               | 1 |
| Gi3_28550482_x1 | ..... cucaUccaacagauccgg                 | 1 |
| Gi5_8911041_x1  | ..... cguaguauaacAgcuagaaugguugguuc      | 1 |
| Gi2_11395681_x1 | ..... uccggcguauuaaacggc                 | 1 |
| Gi1_4277007_x1  | ..... guucgauucccggcUccgg                | 1 |
| Gi3_28783571_x1 | ..... ccggcguGguauaacggcuagaa            | 1 |

|                 |                                   |   |
|-----------------|-----------------------------------|---|
| Gi1_4348091_x1  | .....gguucgauucccgcgccCga         | 1 |
| Gi1_4320148_x1  | .....Cgcguaguauaacggcua           | 1 |
| Gi3_28984927_x1 | .....uugguucucacccaacagGucc       | 1 |
| Gi2_11088551_x1 | .....cgauuccggcgccggagcU          | 1 |
| Gi1_4186097_x1  | .....agauccggguucgaCuccc          | 1 |
| Gi5_8883410_x1  | .....uucucacccaacagCuccgg         | 1 |
| Gi2_11193403_x1 | .....cccaacagCuccggguuc           | 1 |
| Gi1_4302283_x1  | .....guucucacccaacagaucAgg        | 1 |
| Gi3_28584641_x1 | .....ggguucgauucccgcgcc           | 0 |
| Gi5_8937867_x1  | .....guucCauucccgcgccggag         | 1 |
| Gi3_28594797_x1 | .....ggcAuaguauaacggcuag          | 1 |
| Gi2_11090701_x1 | .....uucucacccaacagaGccggguucg    | 1 |
| Gi3_28327543_x1 | .....guucucacccaacagaucUgg        | 1 |
| Gi3_28405878_x1 | .....cagaucggguucgauucccgcgccg    | 0 |
| Gi1_4228899_x1  | .....gguucgauuccGggcgccggag       | 1 |
| Gi4_579742_x1   | .....guCcgauucccgcgccgg           | 1 |
| Gi2_11021314_x1 | .....ucgauucccAgcgccggagc         | 1 |
| Gi3_28702826_x1 | .....cgGuucccgcgccggag            | 1 |
| Gi3_28748721_x1 | .....ugguucucaccccCacagauccg      | 1 |
| Gi3_28910686_x1 | .....Aauccggguucgauucccgcgccggag  | 1 |
| Gi3_28644290_x1 | .....gggGucgauucccgcgccgga        | 1 |
| Gi1_4278672_x1  | .....caGcagaucggguucgauucccggc    | 1 |
| Gi3_28680340_x1 | .....Nuucgauucccgcgccg            | 1 |
| Gi1a_6250668_x1 | .....guucgauucccgUgccg            | 1 |
| Gi1_4339347_x1  | .....uccggcguaguauaacggcAag       | 1 |
| Gi3_28923520_x1 | .....cCauucccgcgccggag            | 1 |
| Gi1_4236171_x1  | .....aAauccggguucgauucc           | 1 |
| Gi3_28444929_x1 | .....uGcggguucgauucccgcgccg       | 1 |
| Gi1_4186633_x1  | .....uGacccaacagauccgggu          | 1 |
| Gi5_8916686_x1  | .....uucgauucccgcgccAg            | 1 |
| Gi3_28332252_x1 | .....aCauccggguucgauucccgcgccggag | 1 |
| Gi1_4332899_x1  | .....ugguucucacccaUcagauccg       | 1 |
| Gi5_8956689_x1  | .....ucucGcccaacagauccgg          | 1 |
| Gi5_8890193_x1  | .....guucgauucccgcgccggGg         | 1 |
| Gi5_9016590_x1  | .....guuNucacccaacagauccgg        | 1 |
| Gi2_11222589_x1 | .....ucgauucccAgcgccgga           | 1 |
| Gi3_28582943_x1 | .....ggguucgauucccgGAgccgga       | 1 |
| Gi2_11303749_x1 | .....guucgaAuucccgcgccgg          | 1 |
| Gi4_578888_x1   | .....uccggcguNguauaacggcua        | 1 |
| Gi5_9134220_x1  | .....uccggcguaguauaaAggcuagaa     | 1 |
| Gi1a_6171124_x1 | .....uccggcguaguauaacgAc          | 1 |
| Gi2_11304603_x1 | .....uccggcguaguGuaacggcuagaa     | 1 |
| Gi5_9073159_x1  | .....guucuUacccaacagauccgg        | 1 |
| Gi5_8950806_x1  | .....guucgauuUccggcgccggagc       | 1 |
| Gi1_4165515_x1  | .....guugguucCcacccaacagauccgggu  | 1 |
| Gi2_11352187_x1 | .....uccggcguaguauaacggcAaga      | 1 |
| Gi2_11320157_x1 | .....uccggcguaguauaaGggcuagaa     | 1 |

|                 |                                   |   |
|-----------------|-----------------------------------|---|
| Gi5_8872269_x1  | .....guucgauucccgcgUcggag         | 1 |
| Gi1_4206479_x1  | .....ccggcguUguauaacggcua         | 1 |
| Gi5_9045801_x1  | .....ccggcguaguauCacggcuag        | 1 |
| Gi1_4240235_x1  | .....Nggucucaccaacagauccgg        | 1 |
| Gi1_4230805_x1  | .....ccggcguaguCuaacggc           | 1 |
| Gi3_28881903_x1 | .....Cccggguucgauuccggcgccg       | 1 |
| Gi3_28419247_x1 | .....ucacccaacagauccggguU         | 1 |
| Gi2_11074895_x1 | .....agGccggcguaguauaacgg         | 1 |
| Gi2_11251255_x1 | .....uccggcguaguauaacCgcuagaa     | 1 |
| Gi1_4313075_x1  | .....guucgauucccgGAccg            | 1 |
| Gi4_592962_x1   | .....gAuucgauucccgcgccggagc       | 1 |
| G1a_6175626_x1  | .....uccggcguaguauaacggcuagCa     | 1 |
| Gi5_9101401_x1  | .....ucGcaccacaacagauccgggu       | 1 |
| Gi2_11252747_x1 | .....uccggcguaguauaacggGuagaau    | 1 |
| Gi3_28855045_x1 | .....uccggcguaguauaacUgc          | 1 |
| Gi1_4338121_x1  | .....auccggguucgGuucccgcgccgg     | 1 |
| Gi2_11278841_x1 | .....gguGcgauuccggcgccggag        | 1 |
| Gi5_9038510_x1  | .....gguucgAuucccgcgccgg          | 1 |
| Gi5_9026824_x1  | .....agauAcggguucgauucc           | 1 |
| Gi3_28737152_x1 | .....uucucaccaacagauccgg          | 1 |
| G1a_6239732_x1  | .....gguucgauucccgcgccUgagc       | 1 |
| Gi5_8901004_x1  | .....cggcguGguauaacggcuagaau      | 1 |
| G1a_6170784_x1  | .....guucgauucccgcgccAg           | 1 |
| Gi1_4288143_x1  | .....Gcggcguaguauaacggcuag        | 1 |
| Gi2_11272735_x1 | .....cgggguucgauCcccggcgccgga     | 1 |
| Gi3_28641596_x1 | .....gguucucaccaGcagaucc          | 1 |
| Gi5_9073493_x1  | .....cagauccggguucgauucccgAgccg   | 1 |
| Gi3_28642363_x1 | .....guGcucaccaacagauccgg         | 1 |
| Gi5_8832460_x1  | .....gguCcucaccaacagaucc          | 1 |
| Gi5_9050163_x1  | .....uucuAaccaacagauccg           | 1 |
| Gi2_11271428_x1 | .....gguucgAuucccgcgccg           | 1 |
| Gi5_8888853_x1  | .....guucgauucccgcgGcggagc        | 1 |
| Gi1_4264589_x1  | .....ucgauucccgUgcccggagc         | 1 |
| Gi3_28890051_x1 | .....guucgauuccUgcccggag          | 1 |
| Gi1_4170752_x1  | .....ugguucucaccaacagauccC        | 1 |
| Gi5_8833944_x1  | .....uugguucuNaccaacagauccg       | 1 |
| Gi1_4266422_x1  | .....uucucaccaacagauccU           | 1 |
| Gi3_28922062_x1 | .....Auucucaccaacagauccggg        | 1 |
| Gi2_10999928_x1 | .....gguucgauuccGggcgccgga        | 1 |
| Gi5_9001980_x1  | .....guucgauGcccggcgccg           | 1 |
| Gi5_8902752_x1  | .....uccggcguaguauaaUggcuagaugguu | 1 |
| Gi5_9025860_x1  | .....ugguucAcaccaacagauccgggu     | 1 |
| Gi5_9031108_x1  | .....Gcggcguaguauaacggcuaga       | 1 |
| Gi5_8992574_x1  | .....uccgUcguaguauaacggcuagaug    | 1 |
| Gi3_28829414_x1 | .....cucaccaacagauccgA            | 1 |
| Gi5_9109561_x1  | .....uccggcCuaguauaacggcua        | 1 |
| Gi1_4260944_x1  | .....gguucucaccaacGgauccgg        | 1 |

|                 |                              |   |
|-----------------|------------------------------|---|
| Gi2_11072067_x1 | ggguucgauucccgcgccg          | 0 |
| Gi1_4175714_x1  | gguucgauucccgcgGcggagc       | 1 |
| G1a_5999775_x1  | Cucucaccaacagauccg           | 1 |
| Gi3_28351550_x1 | uccggcguaguaAaacggc          | 1 |
| Gi2_11381308_x1 | guucgauucccgcgccU            | 1 |
| Gi2_11133986_x1 | cgguucgauucccAgcgcgga        | 1 |
| Gi5_9120986_x1  | ugguucucaccAaacagauccg       | 1 |
| Gi2_11040866_x1 | uccggAguaguaaacggcuagaau     | 1 |
| Gi5_9025560_x1  | gguucgauucccgcgccggaC        | 1 |
| Gi2_11243515_x1 | guaguaaacggcuagaau           | 0 |
| Gi5_8840835_x1  | uccggguucgauucUcggc          | 1 |
| Gi1_4159212_x1  | Ggauuccggguucgauuccc         | 1 |
| Gi1_4221935_x1  | ggcguaguauCacggcua           | 1 |
| Gi3_28377151_x1 | ugguucucaccAaacagauccg       | 1 |
| Gi2_11366958_x1 | uccggcguauuaaacgg            | 1 |
| Gi1_4275615_x1  | uccggcguUguuaaacggcu         | 1 |
| Gi2_11139607_x1 | cggcCuaguaaacggcuaga         | 1 |
| Gi1_4246585_x1  | uccggcguagAuaaacggcuag       | 1 |
| Gi3_28888618_x1 | ucgauucccgcgAccggagc         | 1 |
| Gi3_28425353_x1 | caacagauccgggCucgauuccc      | 1 |
| Gi2_11142208_x1 | cggcguagCauaacggcua          | 1 |
| Gi3_28475828_x1 | cagauccggguucgCuuccc         | 1 |
| Gi3_28344005_x1 | cccaacagauccUggguucgauuccc   | 1 |
| Gi5_8849942_x1  | aguccggcguaguaaacggcuagaaAgg | 1 |
| Gi3_28361274_x1 | agaucggguucgauucUc           | 1 |
| Gi3_28558286_x1 | guucgauucccgAcgccg           | 1 |
| Gi2_11007588_x1 | guucgaGucccggcgccggag        | 1 |
| Gi3_28303949_x1 | guucucaccAaacagauccg         | 1 |
| Gi5_9026658_x1  | aGagauccggguucgauucccgcg     | 1 |
| Gi1_4267734_x1  | auccgAguucgauucccgcgccg      | 1 |
| Gi1_4248739_x1  | ccggcguaguauaGcggcuaga       | 1 |
| Gi2_11324069_x1 | cAgguucgauucccgcgccgga       | 1 |
| Gi5_9077290_x1  | uucgaCucccgcgccggagc         | 1 |
| Gi2_11148909_x1 | uccggcguaguauaCcggc          | 1 |
| Gi5_8886401_x1  | cggcguaguuaaacggcuagCau      | 1 |
| Gi3_28920241_x1 | caacagauccggguucgGuuccc      | 1 |
| Gi5_8969081_x1  | gguucucaccaacagauccAgguu     | 1 |
| Gi2_11344505_x1 | uccggcguaguuaaacggcuagaG     | 1 |
| G1a_6340775_x1  | uccggcguaguuaaacggcuagaG     | 1 |
| G1a_6301306_x1  | gguucgauCcccggcgccggagc      | 1 |
| Gi3_28570107_x1 | ccggcguaguauaaAggcua         | 1 |
| Gi3_28576477_x1 | ucAauucccgcgccggag           | 1 |
| G1a_6219977_x1  | ucAggcguaguuaaacggcuaga      | 1 |
| Gi2_11047646_x1 | Agcguaguuaaacggcuaga         | 1 |
| Gi4_570127_x1   | guCcgauucccgcgccg            | 1 |
| Gi5_9045643_x1  | agaucggguucgUuuccc           | 1 |
| Gi5_9129758_x1  | gguucgauucccgcgGg            | 1 |



|                 |                              |   |
|-----------------|------------------------------|---|
| Gi5_8910947_x1  | uccggcgGaguauaacggcua        | 1 |
| Gi5_8876071_x1  | guucgaGucccgcgccgga          | 1 |
| Gi5_8846494_x1  | uccggcguaAuauaacggcuagaa     | 1 |
| Gi3_28878353_x1 | uccNgcguaguauaacgg           | 1 |
| Gi1_4274906_x1  | uucucaccccCacagaucgg         | 1 |
| Gi5_9018585_x1  | gguucgaAuuccggcgccggag       | 1 |
| Gi3_28869815_x1 | uucuUacccaacagauccgg         | 1 |
| Gi2_11157373_x1 | agaucggggCucgauucc           | 1 |
| Gi1_4213675_x1  | uccggcgAaguauaacgg           | 1 |
| Gi3_28825253_x1 | uccggGguaguauaacggc          | 1 |
| Gi2_11310277_x1 | uccggcguaaguauaacgUcuagaa    | 1 |
| Gi2_11061560_x1 | gguucgauuccggcgccggagcAu     | 1 |
| Gi1_4296833_x1  | ccggcAuaguauaacggc           | 1 |
| Gi1_4248429_x1  | guucgauuccGggcgccg           | 1 |
| Gi2_11071232_x1 | uccggcguaaguauaacCg          | 1 |
| Gi5_9070817_x1  | ggcguaAuauaacggcuaga         | 1 |
| Gi3_28903629_x1 | uccggguucgaCucccgcgccgga     | 1 |
| Gi3_28851276_x1 | caacagauccggguucAa           | 1 |
| Gi5_8952807_x1  | uucgauCcccgcgccgg            | 1 |
| Gi3_28507336_x1 | ucgauucccgcgAcgga            | 1 |
| Gi2_11140477_x1 | uucucacccaacagauccgA         | 1 |
| Gi3_28323490_x1 | ugguucucacUaacagauccggguucga | 1 |
| Gi1_4176203_x1  | uccggcguaCaacggcuagaa        | 1 |
| Gi1_4330992_x1  | guucgaGucccgcgccg            | 1 |
| Gi5_8886018_x1  | Ucggcguaaguauaacggcu         | 1 |
| Gi2_11060369_x1 | uccggcguaaguauaacggcuagaaugu | 0 |
| Gi2_11318275_x1 | uGcucacccaacagauccggguucg    | 1 |
| Gi3_28263398_x1 | cguaguauaacggcuagC           | 1 |
| Gi5_8892467_x1  | cUaacagauccggguuc            | 1 |
| Gi1_4259039_x1  | guucuAacccaacagauccg         | 1 |
| Gi3_28376579_x1 | guucgauUccggcgccg            | 1 |
| Gi3_28684001_x1 | uccggcguaCuauaacggcuagaa     | 1 |
| Gi1a_6177820_x1 | uucgauucccgcgccgAagc         | 1 |
| Gi4_612632_x1   | gGucgauucccgcgccg            | 1 |
| Gi1_4185751_x1  | ggCucucacccaacagauccgg       | 1 |
| Gi3_28796834_x1 | uccggcguaaguauaaGggcuagaau   | 1 |
| Gi3_28846649_x1 | cgauucccgcgccggagcgC         | 1 |
| Gi2_11168535_x1 | uucgauucccgcgccUga           | 1 |
| Gi1_4274785_x1  | caacagauccgAguucgauucccg     | 1 |
| Gi3_28513235_x1 | uNcggcguaaguauaacgg          | 1 |
| Gi5_8925769_x1  | guucgaAuuccggcgccggagcguu    | 1 |
| Gi5_9102986_x1  | ccggcguaGcauacggcuaga        | 1 |
| Gi3_28552136_x1 | ucgauucccgcgccggU            | 1 |
| Gi4_578344_x1   | uugguucucaccccGacaga         | 1 |
| Gi3_28782911_x1 | ggguucgGuuccggcgccggag       | 1 |
| Gi3_28368155_x1 | ggNucgauucccgcgccgga         | 1 |
| Gi5_8984487_x1  | Uacccaacagauccggguucga       | 1 |

|                 |                                    |   |
|-----------------|------------------------------------|---|
| Gi1_4194051_x1  | .....guGcgauucccgcgccg             | 1 |
| Gi3_28983412_x1 | .....ucucacccaacagauUcgg           | 1 |
| Gi2_11173314_x1 | .....gNuucgauucccgcgccggagc        | 1 |
| Gi1_4250444_x1  | .....ccggcguaguaCaacggcua          | 1 |
| Gi5_8938866_x1  | .....uccggcguaguaaacggcuaU         | 1 |
| Gi1_4180272_x1  | .....ucucCcccaacagauccg            | 1 |
| Gi1a_6138565_x1 | .....gguucgauucccgcgccggagcU       | 1 |
| Gi1_4374816_x1  | .....Ccgauucccgcgccggagc           | 1 |
| Gi3_28712356_x1 | .....guucgauuccGggcgccggag         | 1 |
| Gi5_9047984_x1  | .....gCGuaguuaGcgguaga             | 1 |
| Gi1a_6299274_x1 | .....gguucgauuccUcgccggag          | 1 |
| Gi2_11054248_x1 | .....ccggcguaNuuaaacggcua          | 1 |
| Gi2_11154278_x1 | .....gguucgauAccggcgccg            | 1 |
| Gi3_28317899_x1 | .....gCucacccaacagauccgggu         | 1 |
| Gi5_8970129_x1  | .....uugguucucAcAacagauccg         | 1 |
| Gi1_4241313_x1  | .....cCgauccggguucgauucccgcgcc     | 1 |
| Gi2_11361890_x1 | .....ccggguucgauucccgcgUcgg        | 1 |
| Gi3_28712821_x1 | .....guucgauucccCgcgccg            | 1 |
| Gi2_10997619_x1 | .....ucgauucccgcgccggagcU          | 1 |
| Gi1_4286025_x1  | .....gguucucUcccaacagauccg         | 1 |
| Gi5_9133689_x1  | .....uccggcguaguaaacggcuaUaau      | 1 |
| Gi1_4354408_x1  | .....ucucacccaacagauccgA           | 1 |
| Gi5_9063159_x1  | .....gguucucacccaacagUuccgggu      | 1 |
| Gi1_4275075_x1  | .....cagauccgggCucgauucccgcgcc     | 1 |
| Gi2_11059949_x1 | .....uccggcguaguaaacAguagaa        | 1 |
| Gi3_28953674_x1 | .....ccggcguaguauaaAggc            | 1 |
| Gi1_4280151_x1  | .....guucgUuucccgcgccgga           | 1 |
| Gi5_9067202_x1  | .....uccggcguagCauaacggcu          | 1 |
| Gi3_28349661_x1 | .....ucacccaacagauccggAuuc         | 1 |
| Gi3_28827725_x1 | .....uccggguucgauAccggcgccgga      | 1 |
| Gi2_11330651_x1 | .....uccggguucgauucccgcgUcgg       | 1 |
| Gi3_28759380_x1 | .....Ggguucucacccaacagauccgg       | 1 |
| Gi3_28471742_x1 | .....ucucAcAacagauccgg             | 1 |
| Gi3_28902627_x1 | .....ccggcguaguauaacgAc            | 1 |
| Gi2_11244713_x1 | .....ucgauucccgcgccAga             | 1 |
| Gi5_8905453_x1  | .....uucucacccaacCgauccgggu        | 1 |
| Gi3_28376183_x1 | .....gguucgUuucccgcgccgg           | 1 |
| Gi3_28748657_x1 | .....ccAgcguaguaaacggcuag          | 1 |
| Gi5_8891075_x1  | .....cucacccaaAagauccg             | 1 |
| Gi5_8924460_x1  | .....ugguucucGccaacagauccg         | 1 |
| Gi2_11124518_x1 | .....gguucgauAcccgcgccgga          | 1 |
| Gi2_11209821_x1 | .....uccggcguauuaaacggcuagaa       | 1 |
| Gi2_11275391_x1 | .....ucgauucccgcgccggagA           | 1 |
| Gi2_11284605_x1 | .....cagauccggCuucgauucccgcgccggag | 1 |
| Gi3_28423031_x1 | .....cagauccggguucgauucccgcgccgC   | 1 |
| Gi3_28718085_x1 | .....ugguucucacccaacagauU          | 1 |
| Gi5_9125734_x1  | .....uucucacccaacagUuccggguuc      | 1 |



|                         |                                |   |
|-------------------------|--------------------------------|---|
| Gi5_3810050_x7380.....  | uccggcguaguauaacggcuag.....    | 0 |
| Gi3_13864308_x6910..... | gguucgauucccggcgcgcg.....      | 0 |
| Gi5_3872205_x6628.....  | gguucucacccaacagauccg.....     | 0 |
| Gi2_3537957_x6599.....  | guucgauucccggcgcgcggagcC.....  | 1 |
| Gi3_14018747_x6489..... | Uguucgauucccggcgcgcggagc.....  | 1 |
| Gi3_14430267_x5377..... | guucgauucccggcgcgcggag.....    | 0 |
| Gi5_3990121_x5185.....  | gguucgauucccggcgcgcggagcC..... | 1 |
| Gi3_14604826_x4914..... | gguucgauucccggcgcgcgg.....     | 0 |
| Gi1_1946380_x4673.....  | gguucgauucccggcgcgcgg.....     | 0 |
| Gi3_14790128_x4604..... | gUuucgauucccggcgcgcggagc.....  | 1 |
| Gi1_1960321_x4547.....  | uccggcguaguauaacgg.....        | 0 |
| Gi2_3825436_x4527.....  | gguucgauucccggcgcgcggag.....   | 0 |
| Gi5_4103580_x4349.....  | guucucacccaacagauccg.....      | 0 |
| Gi2_3883487_x4338.....  | gguucgauucccggcgcgc.....       | 0 |
| Gi5_4133188_x4096.....  | gguucgauucccggcgcgcg.....      | 0 |
| Gi3_15101518_x4074..... | uccggcguaguauaacggcuag.....    | 0 |
| Gi1_1995350_x4001.....  | uccggcguaguauaacggcuag.....    | 0 |
| Gi3_15217882_x3936..... | gguucucacccaacagauccg.....     | 0 |
| Gi5_4205184_x3893.....  | uccggcguaguauaacggcua.....     | 0 |
| Gi5_4228222_x3725.....  | uccggcguaguauaacgg.....        | 0 |
| Gi3_15427175_x3678..... | uccggcguaguauaacggcuagaau..... | 0 |
| Gi5_4301044_x3513.....  | uccggcguaguauaacggcuagaau..... | 0 |
| Gi3_15580261_x3458..... | gguucgauucccggcgcgc.....       | 0 |
| Gi2_4129219_x3450.....  | gguucgauucccggcgcgcg.....      | 0 |
| Gi5_4325292_x3416.....  | uccggcguaguauaacggc.....       | 0 |
| Gi5_4342263_x3360.....  | gguucgauucccggcgcgcgga.....    | 0 |
| Gi1_2046517_x3321.....  | ugguucucacccaacagauccg.....    | 0 |
| Gi1_2049838_x3306.....  | guucucacccaacagauccg.....      | 0 |
| Gi1_2059731_x3261.....  | uucucacccaacagauccg.....       | 0 |
| Gi2_4175715_x3240.....  | Uguucgauucccggcgcgcggagc.....  | 1 |
| Gi3_15854949_x3080..... | uucucacccaacagauccg.....       | 0 |
| Gi2_4263674_x3014.....  | uccggcguaguauaacggc.....       | 0 |
| Gi2_4266688_x3008.....  | guucgauucccggcgcgcg.....       | 0 |
| Gi1_2084611_x2882.....  | uucucacccaacagauccg.....       | 0 |
| Gi3_16166426_x2766..... | uccggcguaguauaacgA.....        | 1 |
| Gi2_4338576_x2763.....  | gguucgauucccggcgcgcgga.....    | 0 |
| Gi3_16196749_x2745..... | guucgauucccggcgcgcg.....       | 0 |
| Gi5_4464014_x2733.....  | uucucacccaacagauccg.....       | 0 |
| Gi5_4466747_x2732.....  | guucgauucccggcgcgcgga.....     | 0 |
| Gi1_2098525_x2672.....  | Uuucgauucccggcgcgcgg.....      | 1 |
| Gi1_2106457_x2553.....  | guucgauucccggcgcgcggagcC.....  | 1 |
| Gi3_16419246_x2520..... | uccggcguaguauaacggcuagaa.....  | 0 |
| Gi1_2118934_x2435.....  | uccggcguaguauaacggcua.....     | 0 |
| Gi5_4584884_x2359.....  | gguucgauucccggcgcgcgg.....     | 0 |
| Gi2_4550526_x2301.....  | gUuucgauucccggcgcgcggagc.....  | 1 |
| Gi3_16719768_x2271..... | ucgauucccggcgcgcggagcC.....    | 1 |
| Gi1_2160670_x2236.....  | guucgauucccggcgcgcgga.....     | 0 |

|                    |                                |   |
|--------------------|--------------------------------|---|
| Gi1_2162906_x2212  | .....gguucucacccaacagauccg     | 0 |
| Gi2_4595781_x2187  | .....uccggcguaguauaacggcua     | 0 |
| Gi2_4659874_x2088  | .....guucgauucccgcgccgga       | 0 |
| Gi5_4689295_x2063  | .....guucgauucccgcgccggagc     | 1 |
| Gi2_4678540_x2059  | .....guucgauucccgcgccggag      | 0 |
| Gi1_2196056_x1931  | .....uccggcguaguauaacggcuaga   | 0 |
| Gi5_4746918_x1924  | .....gguucgauucccgcgcc         | 0 |
| Gi3_17173976_x1910 | .....guucucacccaacagauccg      | 0 |
| Gi3_17258833_x1863 | .....uucucacccaacagauccgg      | 0 |
| Gi5_4797320_x1809  | .....guucgauucccgcgccggagc     | 0 |
| Gi5_4829364_x1752  | .....gguucgauucccgcgccggag     | 0 |
| Gi1_2219646_x1714  | .....guucucacccaacagauccg      | 0 |
| Gi2_4889877_x1702  | .....uccggcguaguauaacgg        | 0 |
| Gi5_4856838_x1692  | .....cucacccaacagauccgg        | 0 |
| Gi3_17723670_x1584 | .....Uguucgauucccgcgccgga      | 1 |
| Gi2_5042785_x1544  | .....gguucucacccaacagauccg     | 0 |
| Gi1_2263260_x1508  | .....guucgauucccgcgccg         | 0 |
| Gi2_5126744_x1455  | .....uccggcguaguauaacggcuag    | 0 |
| Gi5_4974773_x1454  | .....ugguucucacccaacagauccg    | 0 |
| Gi1_2279516_x1437  | .....gGucgauucccgcgccgg        | 1 |
| Gi3_18002792_x1423 | .....ucgauucccgcgccggagc       | 0 |
| Gi2_5159750_x1419  | .....uccggcguaguauaacggcuagaau | 0 |
| Gi2_5190590_x1386  | .....uucucacccaacagauccg       | 0 |
| Gi3_18114895_x1376 | .....Uguucgauucccgcgccggag     | 1 |
| Gi1_2308841_x1354  | .....ugguucucacccaacagauccg    | 0 |
| Gi3_18209951_x1340 | .....Gccggcguaguauaacggcuaga   | 1 |
| Gi2_5265076_x1323  | .....ucgauucccgcgccggagc       | 0 |
| Gi3_18253831_x1317 | .....Uuucgauucccgcgccgg        | 1 |
| Gi2_5286105_x1300  | .....guucucacccaacagauccg      | 0 |
| Gi1_2332554_x1264  | .....gguucgauucccgcgccggagc    | 0 |
| Gi5_5082952_x1247  | .....guucucacccaacagauccgg     | 0 |
| Gi1_2340050_x1226  | .....guucgauucccgcgccggagc     | 0 |
| Gi3_18631876_x1148 | .....Uuucgauucccgcgccgga       | 1 |
| Gi5_5178308_x1083  | .....Uuucgauucccgcgccgg        | 1 |
| Gi5_5191186_x1059  | .....Uuucgauucccgcgccg         | 1 |
| Gi3_18881639_x1044 | .....gUuucgauucccgcgccgga      | 1 |
| Gi2_5612893_x1032  | .....Uuucgauucccgcgccggagc     | 1 |
| Gi3_18985137_x1003 | .....Uuucgauucccgcgccggagc     | 1 |
| Gi5_5228053_x994   | .....uccggcguaguauaacggcuagaa  | 0 |
| Gi2_5713753_x968   | .....uccggcguaguauaacggcuagaa  | 0 |
| Gi3_19108956_x964  | .....gUuucgauucccgcgccggag     | 1 |
| Gi3_19131046_x956  | .....ugguucucacccaacagauccg    | 0 |
| Gi1_2424457_x950   | .....uccggcguaguauaacggc       | 0 |
| Gi5_5277356_x931   | .....Uguucgauucccgcgccggagc    | 1 |
| Gi3_19223083_x923  | .....uucgauucccgcgccggagc      | 0 |
| Gi3_19277081_x906  | .....gauucccgcgccggagc         | 0 |
| Gi2_5857907_x868   | .....Uuucgauucccgcgccgg        | 1 |

|                        |                                |   |
|------------------------|--------------------------------|---|
| Gi5_5341340_x840.....  | ucucacccaacagauccg.....        | 0 |
| G1a_3705913_x820.....  | uccggcguaguauaacggcuaga.....   | 0 |
| Gi2_5947887_x817.....  | ugguucucacccaacagauccg.....    | 0 |
| Gi1_2480982_x805.....  | gguucgauucccggcgcgcg.....      | 0 |
| Gi3_19615623_x803..... | Uguucgauucccggcgcgcg.....      | 1 |
| G1a_3739453_x774.....  | gguucgauucccggcgcgcgagc.....   | 0 |
| Gi3_19734571_x772..... | guucucacccaacagauccgg.....     | 0 |
| Gi2_6110175_x725.....  | gguucgauucccggcgcgcg.....      | 0 |
| Gi5_5431764_x722.....  | Uguucucacccaacagauccg.....     | 1 |
| Gi5_5453834_x702.....  | uucucacccaacagauccgg.....      | 0 |
| Gi3_20044512_x691..... | gGucgauucccggcgcgcccg.....     | 1 |
| Gi3_20062420_x686..... | guucgauucccggcgcgcccC.....     | 1 |
| Gi2_6221840_x679.....  | uccggcguaguauaacgA.....        | 1 |
| Gi5_5504875_x652.....  | gUuucgauucccggcgcgcgagc.....   | 1 |
| Gi1_2562309_x634.....  | gguucgauucccggcgcgcccga.....   | 0 |
| Gi3_20331714_x633..... | Aguucgauucccggcgcgcccgagc..... | 1 |
| Gi3_20356944_x628..... | cgauucccggcgcgcccgagc.....     | 0 |
| G1a_3873470_x626.....  | uccggcguaguauaacggcuag.....    | 0 |
| Gi3_20450237_x607..... | uucgauucccggcgcgcccga.....     | 0 |
| Gi3_20477458_x603..... | uucgauucccggcgcgcccgagcC.....  | 1 |
| Gi3_20490687_x600..... | gGucgauucccggcgcgcccga.....    | 1 |
| Gi3_20592804_x574..... | gauucccggcgcgcccgagcC.....     | 1 |
| Gi3_20641249_x565..... | gguucgauucccggcgcgcccC.....    | 1 |
| Gi2_6524433_x562.....  | gGucgauucccggcgcgcccgagc.....  | 1 |
| Gi3_20654213_x562..... | guucgaCucccggcgcgcccgagc.....  | 1 |
| Gi3_20695535_x555..... | uGcggcguaguauaacggcuaga.....   | 1 |
| Gi3_20711587_x552..... | gguucgauNcccggcgcgcccgagc..... | 1 |
| Gi3_20742876_x547..... | gUuucgauucccggcgcgccc.....     | 1 |
| Gi5_5635437_x543.....  | gGucgauucccggcgcgccc.....      | 1 |
| Gi3_20766281_x542..... | ucgauucccggcgcgcccgag.....     | 0 |
| Gi1_2621476_x538.....  | uccggcguaguauaacggcuagaau..... | 0 |
| Gi3_20813076_x534..... | Uuucgauucccggcgcgcccgag.....   | 1 |
| Gi1_2629414_x520.....  | Uguucgauucccggcgcgccc.....     | 1 |
| Gi3_20890919_x518..... | ucgauucccggcgcgcccga.....      | 0 |
| Gi3_20912056_x514..... | Uguucgauucccggcgcgccc.....     | 1 |
| Gi5_5680282_x510.....  | gUuucucacccaacagauccg.....     | 1 |
| Gi3_20940158_x508..... | cucacccaacagauccgg.....        | 0 |
| Gi1_2635580_x506.....  | uccggcguaguauaacggcu.....      | 0 |
| Gi2_6718036_x497.....  | gauucccggcgcgcccgagc.....      | 0 |
| Gi2_6721016_x496.....  | gGucgauucccggcgcgccc.....      | 1 |
| Gi3_21017851_x495..... | auucccggcgcgcccgagcC.....      | 1 |
| Gi2_6751449_x486.....  | Uguucgauucccggcgcgccc.....     | 1 |
| Gi3_21069318_x486..... | gguucgauucccggcgcgcccGgc.....  | 1 |
| Gi2_6769824_x481.....  | Uguucgauucccggcgcgcccgag.....  | 1 |
| Gi2_6779412_x478.....  | ucgauucccggcgcgcccgagcC.....   | 1 |
| Gi1_2664335_x471.....  | cucacccaacagauccgg.....        | 0 |
| Gi3_21175959_x470..... | ucucacccaacagauccg.....        | 0 |

|                   |                            |   |
|-------------------|----------------------------|---|
| Gi5_5742002_x468  | gGucgauucccggcgcgcg        | 1 |
| Gi5_5754997_x462  | Uuucucaccaacagauccg        | 1 |
| Gi3_21241144_x461 | gGucgauucccggcgcgcgagc     | 1 |
| Gi3_21272709_x455 | Uguucucaccaacagauccg       | 1 |
| Gi1_2680859_x446  | ucucaccaacagauccg          | 0 |
| Gi1_2686601_x437  | uucgauucccggcgcgcg         | 0 |
| Gi5_5802448_x432  | Uguucgauucccggcgcgcg       | 1 |
| Gi3_21433943_x429 | ggCucgauucccggcgcgcgagc    | 1 |
| Gi5_5815709_x425  | uccggcguaguauaacggcu       | 0 |
| Gi3_21502240_x419 | uccggcguaguauaacAgcuaaga   | 1 |
| Gi2_7002965_x415  | Uguucgauucccggcgcgcg       | 1 |
| Gi3_21540181_x414 | uccggcguaguauaacggcu       | 0 |
| Gi1a_4132002_x412 | ggauucgauucccggcgcgcgag    | 0 |
| Gi3_21582156_x408 | ucUggcguaguauaacggcuaga    | 1 |
| Gi3_21603665_x404 | uccggcguaguauaacggcuGga    | 1 |
| Gi1_2728696_x387  | ucucaccaacagauccg          | 0 |
| Gi3_21757565_x383 | uccggcguaguauaacggcuagG    | 1 |
| Gi3_21767117_x381 | Uguucgauucccggcgcgc        | 1 |
| Gi5_5902217_x373  | Uguucgauucccggcgcgcgga     | 1 |
| Gi3_21824415_x373 | gUuucgauucccggcgcgcg       | 1 |
| Gi3_21849616_x369 | cgauucccggcgcgcgagcC       | 1 |
| Gi3_21850354_x369 | ggauucgauucccggcgcgcgagcCu | 1 |
| Gi1_2749901_x367  | ggauucgauucccggcgcgcgag    | 0 |
| Gi5_5915080_x362  | gauucccggcgcgcgagc         | 0 |
| Gi3_21945585_x355 | ugguucucaccaacagauc        | 0 |
| Gi3_21982977_x351 | Gccggcguaguauaacggcua      | 1 |
| Gi1_2772066_x347  | Uuucucaccaacagauccg        | 1 |
| Gi3_22011911_x347 | ccggcguaguauaacggc         | 0 |
| Gi2_7279530_x347  | gauucccggcgcgcgagcC        | 1 |
| Gi3_22045248_x341 | cagauccggguucgauucc        | 0 |
| Gi1_2780262_x336  | gUuucgauucccggcgcgcg       | 1 |
| Gi5_5989302_x333  | ggauucucaccaacagauccg      | 0 |
| Gi2_7348465_x332  | Aguucgauucccggcgcgcgagc    | 1 |
| Gi2_7360380_x330  | gUuucgauucccggcgcgcgag     | 1 |
| Gi5_6005812_x327  | gUuucgauucccggcgcgcg       | 1 |
| Gi3_22176246_x324 | uccggcguaguauaacggcCaga    | 1 |
| Gi3_22209728_x320 | uccggcguaguauaacggcuaA     | 1 |
| Gi2_7428877_x314  | Uuucgauucccggcgcgcg        | 1 |
| Gi2_7451906_x308  | guucgaCucccggcgcgcgagc     | 1 |
| Gi3_22310260_x308 | ggauucgauucccggcgcgcgGgc   | 1 |
| Gi3_22313956_x308 | gUuucgauucccggcgcgc        | 1 |
| Gi1_2813435_x304  | uccggcguaguauaacgA         | 1 |
| Gi3_22350015_x303 | uccggguucgauucccggcgcgcgga | 0 |
| Gi3_22355469_x303 | gUuucucaccaacagauccg       | 1 |
| Gi3_22369960_x301 | gGucgauucccggcgcgcgag      | 1 |
| Gi1a_4343709_x299 | ggauucgauucccggcgcgcgagcC  | 1 |
| Gi3_22406772_x297 | ggauucgauuccUggcgcgcgagc   | 1 |

|                   |                                   |   |
|-------------------|-----------------------------------|---|
| Gi3_22426894_x295 | .....Uuucgauucccgcgccg            | 1 |
| Gi3_22440421_x293 | .....Cguucgauucccgcgccggagc       | 1 |
| Gi3_22470199_x290 | .....uucgauucccgcgccg             | 0 |
| Gi1_2833307_x289  | .....Uucaccaacagauccgg            | 1 |
| Gi1_2837629_x286  | .....gguucgauucccgcgccggagc       | 1 |
| Gi2_7584647_x283  | .....gUuucgauucccgcgcc            | 1 |
| Gi3_22550896_x282 | .....Gccggcguaguauaacgg           | 1 |
| Gi2_7604625_x280  | .....uucgauucccgcgccg             | 0 |
| Gi3_22591439_x277 | .....Gccggcguaguauaacggc          | 1 |
| Gi2_7623265_x277  | .....Uguucgauucccgcgccgga         | 1 |
| Gi2_7633467_x275  | .....gguucgauNcccgcgccggagc       | 1 |
| Gi3_22625362_x274 | .....uccggcguNguauaacggcuaga      | 1 |
| Gi3_22667789_x270 | .....guucgauucccgcgccggagcCu      | 1 |
| Gi1_2865516_x267  | .....guucgauucccgcgccggagcCu      | 1 |
| Gi5_6179994_x266  | .....Uuucgauucccgcgccgga          | 1 |
| Gi3_22715945_x265 | .....agauccggguucgauucc           | 0 |
| Gi1_2868710_x265  | .....ucgauucccgcgccggagc          | 0 |
| Gi2_7692801_x265  | .....gUuucgauucccgcgccg           | 1 |
| Gi3_22720450_x265 | .....gguucgaCucccgcgccggagc       | 1 |
| Gl1a_4422156_x265 | .....gguucgauucccgcgccgga         | 0 |
| Gi2_7696235_x264  | .....Gccggcguaguauaacggcuaga      | 1 |
| Gi1_2876324_x260  | .....guucgaCucccgcgccg            | 1 |
| Gi5_6222628_x254  | .....Uguuc.....agauccggguucgauucc | 0 |
| Gi1_2891471_x253  | .....Uguucucaccaacagauccg         | 1 |
| Gi5_6228460_x253  | .....ccaacagauccggguuc            | 0 |
| Gi5_6235510_x251  | .....ucucaccaacagauccg            | 0 |
| Gi5_6245734_x248  | .....Uguucgauucccgcgcc            | 1 |
| Gi3_22899164_x248 | .....guucgaCucccgcgccgga          | 1 |
| Gi1_2903961_x247  | .....uUguucucaccaacagauccg        | 1 |
| Gi5_6257064_x245  | .....ccggcguaguauaacggcuag        | 0 |
| Gi4_339684_x242   | .....gguucgauucccgcgccg           | 0 |
| Gi3_22994850_x240 | .....gguucgGuucccgcgccggagc       | 1 |
| Gi1_2928825_x236  | .....uucgauucccgcgccggagcC        | 1 |
| Gi3_23052063_x235 | .....caccacaacagauccggguuc        | 0 |
| Gi3_23081319_x233 | .....uccggcguaguauaacgAcuaga      | 1 |
| Gi5_6308565_x232  | .....Uguucgauucccgcgccg           | 1 |
| Gi1_2938596_x230  | .....Cguucgauucccgcgccg           | 1 |
| Gi5_6317809_x230  | .....ucgauucccgcgccggag           | 0 |
| Gi2_7899826_x230  | .....uucgauucccgcgccggagcC        | 1 |
| Gi5_6326282_x228  | .....ucgauucccgcgccggagc          | 0 |
| Gi5_6331966_x226  | .....guucgauucccgcgccggag         | 0 |
| Gi2_7938475_x225  | .....gguucgauucccgcgccggCgc       | 1 |
| Gi3_23176138_x225 | .....uUcggcguaguauaacggcuaga      | 1 |
| Gi3_23193875_x224 | .....gguucgauuccUgcgccggag        | 1 |
| Gi3_23200799_x223 | .....guucgaCucccgcgccg            | 1 |
| Gi5_6359700_x221  | .....ccggcguaguauaacggcua         | 0 |
| Gl1a_4538766_x220 | .....uucucaccaacagauccg           | 0 |



|                        |                               |   |
|------------------------|-------------------------------|---|
| Gi1_2963766_x219.....  | gCucgauucccggcgcgg.....       | 1 |
| G1a_4546649_x218.....  | gguucgauucccggcgcgg.....      | 0 |
| Gi2_7994399_x217.....  | Uuucgauucccggcgcggag.....     | 1 |
| G1a_4549477_x217.....  | guucacccaacagauccg.....       | 0 |
| Gi1_2970519_x216.....  | uccggcguaguauaacggcuagaa..... | 0 |
| Gi3_23304530_x215..... | ucucacccaacagauccg.....       | 0 |
| Gi3_23309690_x215..... | uccggcguaguauaGcggcuaga.....  | 1 |
| G1a_4557874_x214.....  | gguucgauucccggcgcgg.....      | 0 |
| Gi5_6398702_x214.....  | gUuucgauucccggcgcggga.....    | 1 |
| Gi2_8017908_x214.....  | uucgauucccggcgcggagc.....     | 0 |
| Gi5_6408310_x213.....  | Gccggcguaguauaacggcuag.....   | 1 |
| Gi5_6417005_x211.....  | ucgauucccggcgcggagc.....      | 1 |
| Gi3_23359579_x211..... | ccggcguaguauaacggcuaga.....   | 0 |
| Gi3_23382327_x210..... | guucgauucccggcgcggA.....      | 1 |
| Gi1_2985636_x210.....  | Uuucgauucccggcgcggga.....     | 1 |
| Gi3_23458130_x204..... | uccggcguGguauaacggcuaga.....  | 1 |
| Gi5_6461919_x203.....  | Uguucgauucccggcgcggag.....    | 1 |
| Gi5_6465567_x202.....  | ugguucacccaacagauccgggu.....  | 0 |
| Gi1_3010075_x201.....  | uucgauucccggcgcggagc.....     | 0 |
| Gi3_23506713_x201..... | caacagauccggguucgauucc.....   | 0 |
| Gi3_23516931_x200..... | gguCcgauucccggcgcggagc.....   | 1 |
| Gi2_8127732_x200.....  | ggCucgauucccggcgcggagc.....   | 1 |
| Gi2_8144076_x198.....  | Uuucgauucccggcgcggga.....     | 1 |
| Gi3_23560200_x197..... | gauccggguucgauucc.....        | 0 |
| Gi3_23572013_x196..... | uccggcguaguGuaacggcuaga.....  | 1 |
| Gi3_23573973_x196..... | gCuucgauucccggcgcggagc.....   | 1 |
| Gi5_6501422_x196.....  | gguucacccaacagaucc.....       | 0 |
| Gi3_23604809_x194..... | uGcggcguaguauaacggcua.....    | 1 |
| Gi5_6522813_x193.....  | Gccggcguaguauaacggcuaga.....  | 1 |
| Gi3_23634928_x192..... | gguucacccaacagaucc.....       | 0 |
| G1a_4632800_x191.....  | guucgauucccggcgcggagc.....    | 1 |
| Gi5_6534139_x191.....  | gGucacccaacagauccg.....       | 1 |
| Gi3_23641643_x191..... | guucgauucccgUgcccggag.....    | 1 |
| Gi3_23661655_x190..... | Uuucacccaacagauccg.....       | 1 |
| Gi2_8225747_x189.....  | Uguucacccaacagauccg.....      | 1 |
| Gi3_23694905_x188..... | Agguucgauucccggcgcggagc.....  | 1 |
| Gi3_23697725_x188..... | ggGucgauucccggcgcggagc.....   | 1 |
| Gi3_23707837_x187..... | Cccggcguaguauaacggcuaga.....  | 1 |
| Gi5_6557180_x187.....  | ucacccaacagauccgggu.....      | 0 |
| G1a_4644493_x187.....  | guucgauucccggcgcggagc.....    | 0 |
| Gi3_23739640_x185..... | uccggcguaguauaacggA.....      | 1 |
| Gi2_8259226_x185.....  | cccaacagauccggguuc.....       | 0 |
| Gi3_23749033_x184..... | gAuucgauucccggcgcggagc.....   | 1 |
| Gi1_3057106_x183.....  | gguucacccaacagauccg.....      | 0 |
| G1a_4658536_x183.....  | gguucgauucccggcgcgg.....      | 0 |
| Gi5_6615364_x179.....  | Uuucgauucccggcgcggagc.....    | 1 |
| Gi4_367620_x179.....   | guucgauucccggcgcgg.....       | 0 |

|                        |                               |   |
|------------------------|-------------------------------|---|
| Gi5_6612679_x179.....  | ggcguaguauaacggcuag.....      | 0 |
| Gi1_3071396_x179.....  | gUuucucacccaacagauccg.....    | 1 |
| Gi1_3070143_x179.....  | agauccggguucgauucc.....       | 0 |
| Gi3_23840974_x178..... | uugguucucacccaacagaucc.....   | 0 |
| Gi5_6632435_x177.....  | gguucgauucccggcgcggagcCu..... | 1 |
| Gi3_23865777_x176..... | cgauucccggcgcggag.....        | 0 |
| Gi1_3086057_x175.....  | Uuucgauucccggcgcgg.....       | 1 |
| Gi1_3085182_x175.....  | Uuucucacccaacagauccg.....     | 1 |
| Gi5_6646480_x175.....  | ugguucucacccaacagauccg.....   | 0 |
| Gi3_23894898_x174..... | gguucucacccaacagauccgggu..... | 0 |
| Gi1_3095764_x172.....  | Ggguucucacccaacagauccg.....   | 1 |
| Gi3_23948305_x171..... | guucgaCucccggcgcggag.....     | 1 |
| Gi2_8390578_x170.....  | gUuucgauucccggcgcggga.....    | 1 |
| Gi3_23962653_x170..... | ucUggcguaguauaacggcua.....    | 1 |
| Gi1_3103256_x169.....  | ucacccaacagauccgggu.....      | 0 |
| Gi5_6685354_x169.....  | gUuucgauucccggcgcgg.....      | 1 |
| Gi3_24013811_x167..... | uccgUcguaguauaacggcuaga.....  | 1 |
| Gi2_8419886_x166.....  | gGucgauucccggcgcgg.....       | 1 |
| Gi2_8436782_x165.....  | gguucgauucccggcgcggGgc.....   | 1 |
| Gi3_24044896_x165..... | uccggcguaguauaacggcuaAa.....  | 1 |
| Gi5_6719756_x164.....  | gauucccggcgcggagcC.....       | 1 |
| Gi3_24072831_x163..... | gguucgauucccggUgccggagc.....  | 1 |
| Gi1a_4721617_x163..... | guucgauucccggcgcgg.....       | 0 |
| Gi3_24090728_x162..... | cggguucgauucccggcgcggga.....  | 0 |
| Gi5_6738710_x162.....  | guucgaCucccggcgcgg.....       | 1 |
| Gi2_8472510_x161.....  | ucgauucccggcgcggag.....       | 0 |
| Gi5_6747445_x161.....  | uucucacccaacagauccgggu.....   | 0 |
| Gi3_24113960_x161..... | gguucgauCcccggcgcggagc.....   | 1 |
| Gi3_24111706_x161..... | gGucgauucccggcgcgg.....       | 1 |
| Gi5_6756601_x160.....  | uucgauucccggcgcgg.....        | 0 |
| Gi5_6755161_x160.....  | Uuucucacccaacagauccg.....     | 1 |
| Gi3_24132052_x160..... | gguucucacccaacagauccg.....    | 0 |
| Gi1_3143858_x159.....  | gGucucacccaacagauccg.....     | 1 |
| Gi3_24143030_x159..... | uccggcguaguauaaUggcuaga.....  | 1 |
| Gi3_24150185_x159..... | ucacccaacagauccggguuc.....    | 0 |
| Gi3_24142553_x159..... | gguucgauuccAgcgcggagc.....    | 1 |
| Gi5_6778507_x158.....  | uccggguucgauucccggc.....      | 0 |
| Gi2_8512592_x157.....  | gguucgaCucccggcgcggagc.....   | 1 |
| Gi1a_4740628_x157..... | ucucacccaacagauccg.....       | 0 |
| Gi1_3155014_x156.....  | guucucacccaacaCauccg.....     | 1 |
| Gi2_8518708_x156.....  | cgauucccggcgcggagcC.....      | 1 |
| Gi1_3162430_x154.....  | gguucgauucccggcgcggagcCu..... | 1 |
| Gi3_24232226_x153..... | uccggcguagCauaacggcuaga.....  | 1 |
| Gi5_6811730_x153.....  | guucgauucccggcgcgggaCc.....   | 1 |
| Gi1_3167020_x152.....  | Auucgauucccggcgcgg.....       | 1 |
| Gi3_24263996_x151..... | gguucgauucccggcgcggagcA.....  | 1 |
| Gi3_24257654_x151..... | Aguucgauucccggcgcggag.....    | 1 |

|                   |                          |   |
|-------------------|--------------------------|---|
| Gi3_24258258_x151 | uccggUguaguauaacggc      | 1 |
| Gi2_8579332_x150  | agaucggguucgauucc        | 0 |
| Gi2_8603634_x148  | agaauugguugguucaccc      | 0 |
| Gi3_24312302_x148 | gguucgauucccgcgAcggagc   | 1 |
| Gi3_24331334_x147 | aucggguucgauucccgcgccgga | 0 |
| Gi1_3193841_x145  | guucgauuNccggcgccgg      | 1 |
| Gi2_8651444_x144  | Uuucucacccaacagauccg     | 1 |
| Gi1_3205093_x143  | ccggcguaguauaacggcua     | 0 |
| Gi3_24415889_x142 | gguucAauucccgcgccggagc   | 1 |
| Gi2_8670143_x142  | Cguucgauucccgcgccggagc   | 1 |
| Gi3_24417877_x142 | guucgauucccgcgccggaC     | 1 |
| Gl1a_4799734_x141 | uccggcguaguauaacgg       | 0 |
| Gi1_3216716_x141  | Gccggcguaguauaacgg       | 1 |
| Gi2_8681736_x141  | ugguucucacccaacagaucc    | 0 |
| Gi3_24449273_x140 | guucucacccaacagauccggg   | 0 |
| Gi5_6938237_x139  | guucgauucccgcgccggagcCu  | 1 |
| Gi5_6930592_x139  | auucccgcgccggagcC        | 1 |
| Gi2_8698787_x139  | uccggcguaguauaacggcuaAaa | 1 |
| Gi3_24512108_x136 | ggAucgauucccgcgccggagc   | 1 |
| Gi2_8736673_x136  | gGucgauucccgcgccgga      | 1 |
| Gi2_8744776_x135  | guuUgauucccgcgccggag     | 1 |
| Gi1_3244829_x134  | Uuucgauucccgcgccggagc    | 1 |
| Gi3_24559584_x134 | uucucacccaacagauccggguuc | 0 |
| Gi5_6979068_x134  | gguucgauuUccggcgccgg     | 1 |
| Gi3_24551410_x134 | ggguucgauucccgcgccggagc  | 0 |
| Gi5_6975584_x134  | gUuucgauucccgcgccggag    | 1 |
| Gi1_3250029_x133  | ccggcguaguauaacggcuaga   | 0 |
| Gi5_7003636_x131  | gGucgauucccgcgccgga      | 1 |
| Gi1_3258716_x131  | cucacccaacagauccGg       | 1 |
| Gi3_24613453_x131 | gguuUgauucccgcgccggagc   | 1 |
| Gi5_7008202_x130  | gUuucgauucccgcgcc        | 1 |
| Gl1a_4841853_x129 | uccggcguaguauaacggc      | 0 |
| Gi3_24642742_x129 | uccggcguaguauCacggcuaga  | 1 |
| Gi1_3271991_x127  | guCcgauucccgcgccgg       | 1 |
| Gi5_7036657_x127  | guucgaCucccgcgccg        | 1 |
| Gi3_24687352_x126 | Aguucgauucccgcgccgga     | 1 |
| Gi3_24694660_x126 | gguucgauucccgcgccggagA   | 1 |
| Gi5_7068052_x124  | ccggcguaguauaacggcuaga   | 0 |
| Gi3_24739411_x123 | gguucgauNcccgcgccgga     | 1 |
| Gi3_24759981_x122 | uGcggcguaguauaacggc      | 1 |
| Gi3_24749611_x122 | gguucgauucccgcgUggagc    | 1 |
| Gi1_3298259_x121  | ccggcguaguauaacggc       | 0 |
| Gi5_7102542_x121  | uugguucucacccaacagauccg  | 0 |
| Gi2_8905500_x121  | gguCcgauucccgcgccggagc   | 1 |
| Gi5_7117155_x119  | Gccggcguaguauaacgg       | 1 |
| Gi3_24812582_x119 | caacagauccggguucga       | 0 |
| Gi3_24828166_x118 | guucucacccaacagauccgggu  | 0 |

Gi1\_3311683\_x118.....Uguucgauucccgcgccggagc..... 1  
 Gi4\_406299\_x117.....uccggcguaguauaacggcuaga..... 0  
 Gi3\_24835557\_x117.....gguucgauNcccgcgccggag..... 1  
 Gi5\_7131131\_x117.....Cguucgauucccgcgcc..... 1  
 Gi2\_8951030\_x117.....Uguucgauucccgcgccgg..... 1  
 Gi3\_24857697\_x116.....uccggUguaguauaacggcuaga..... 1  
 Gi1\_3326847\_x115.....Gucucacccaacagauccg..... 1  
 Gi3\_24876850\_x115.....uccggcguGguauaacggcua..... 1  
 Gi5\_7166130\_x114.....Gccggcguaguauaacggc..... 1  
 Gi1\_3331080\_x114.....Gccggcguaguauaacggcuag..... 1  
 Gi3\_24942169\_x111.....gguucgauucccgcgccgggAc..... 1  
 Gi2\_9037156\_x110.....ucgauucccgcgccggg..... 0  
 Gi5\_7202873\_x110.....uUguucacccaacagauccg..... 1  
 Gi3\_24965152\_x110.....uGcggcguaguauaacgg..... 1  
 Gi5\_7222001\_x108.....Gccggcguaguauaacggcuagaau..... 1  
 Gi3\_24998583\_x108.....uccggcguaguauaacggUuaga..... 1  
 Gi5\_7223837\_x108.....Gucucacccaacagauccg..... 1  
 Gi3\_24991239\_x108.....Gccggcguaguauaacggcuagaau..... 1  
 Gi3\_25019293\_x107.....guucgAcucccgcgccg..... 1  
 Gi3\_25009663\_x107.....Uauucccgcgccggagc..... 1  
 Gi3\_25015334\_x107.....ggguucgauucccgcgccggg..... 0  
 Gi1\_3358450\_x107.....Gucucacccaacagauccg..... 1  
 Gi5\_7233480\_x107.....uGcggcguaguauaacggcuaga..... 1  
 Gi2\_9076486\_x106.....aguccggcguaguauaacgg..... 0  
 Gi4\_415438\_x105.....gguucgauucccgcgccggagc..... 0  
 Gi5\_7247474\_x105.....ucucacccaacagauccgggu..... 0  
 Gi1\_3372775\_x105.....gGucgauucccgcgccggg..... 1  
 Gi1a\_4940392\_x105.....uucgauucccgcgccggagc..... 0  
 Gi2\_9109341\_x104.....gGucgauucccgcgccggg..... 1  
 Gi5\_7261905\_x104.....Gccggcguaguauaacggcua..... 1  
 Gi3\_25095319\_x103.....ccggcguaguauaacggcuag..... 0  
 Gi3\_25091096\_x103.....Gccggcguaguauaacggcuag..... 1  
 Gi2\_9115834\_x103.....gguucgGuucccgcgccggagc..... 1  
 Gi3\_25104011\_x102.....gguAcgauucccgcgccggagc..... 1  
 Gi3\_25119990\_x101.....gguucgCuucccgcgccggagc..... 1  
 Gi5\_7296674\_x101.....gguucgauucccgcgccggagcgu..... 0  
 Gi2\_9150774\_x100.....uGcggcguaguauaacggcuaga..... 1  
 Gi2\_9144974\_x100.....cgauucccgcgccggagcguuA..... 1  
 Gi3\_25149226\_x100.....uccggcguaguauaacggcuagC..... 1  
 Gi3\_25155666\_x99.....Gucucacccaacagauccg..... 1  
 Gi1\_3403571\_x98.....gUuucgauucccgcgccggagc..... 1  
 Gi3\_25180281\_x98.....ggcguaguauaacggcuaga..... 0  
 Gi1\_3407858\_x97.....uUguucacccaacagauccg..... 1  
 Gi1\_3410380\_x97.....gguucgauucccgcgccggagcU..... 1  
 Gi3\_25193808\_x97.....uGucacccaacagauccg..... 1  
 Gi2\_9186957\_x97.....guucgAcucccgcgccgg..... 1  
 Gi1\_3412885\_x96.....gguucgauucccgcgccAg..... 1

|                       |                                |                                  |   |
|-----------------------|--------------------------------|----------------------------------|---|
| Gi1_3412405_x96.....  | uccggcguaguaCaacggcuaga.....   | gguucgauucccggcgcc.....          | 0 |
| Gi3_25219584_x95..... | uccggcguaguaCaacggcuaga.....   |                                  | 1 |
| Gi5_7369994_x94.....  |                                | gCucgauucccggcgccg.....          | 1 |
| Gi3_25254537_x94..... |                                | gguucgauucUcggcgccggagc.....     | 1 |
| Gi3_25246829_x94..... |                                | agaucggguucgauucc.....           | 0 |
| Gi1_3431858_x93.....  |                                | Cuucgauucccggcgccg.....          | 1 |
| Gi3_25280139_x92..... |                                | gGucucacccaacagauccg.....        | 1 |
| Gi3_25293472_x91..... |                                | Auucgauucccggcgccgga.....        | 1 |
| Gi3_25304938_x91..... |                                | gguucgauucccggcgcUcggagc.....    | 1 |
| Gi1_3443389_x90.....  |                                | Agguucgauucccggcgccg.....        | 1 |
| Gi2_9277568_x89.....  |                                | gAuucgauucccggcgccggagc.....     | 1 |
| Gi3_25328468_x89..... |                                | Uuucacccaacagauccg.....          | 1 |
| Gi5_7424212_x89.....  |                                | acagauccggguucgauuccggcgc.....   | 0 |
| Gi5_7436018_x88.....  |                                | gGucgauucccggcgccggagc.....      | 1 |
| Gi3_25349424_x88..... | uccggcguaguauaacggcuagaaA..... |                                  | 1 |
| Gi1_3455056_x88.....  |                                | guucgGuucccggcgccg.....          | 1 |
| Gi1_3460306_x87.....  | ggcguaguauaacggcuag.....       |                                  | 0 |
| Gi1_3459958_x87.....  |                                | gGucucacccaacagauccg.....        | 1 |
| Gi2_9296624_x87.....  |                                | ggGucgauucccggcgccggagc.....     | 1 |
| Gi5_7437946_x87.....  | uGcggcguaguauaacggcuag.....    |                                  | 1 |
| Gi3_25380784_x86..... | uccggcgCaguauaacggcuaga.....   |                                  | 1 |
| Gi2_9316258_x86.....  | cggcguaguauaacggcua.....       |                                  | 0 |
| Gi1_3464465_x86.....  |                                | Uguucgauucccggcgccg.....         | 1 |
| Gi3_25408497_x85..... | uccggcguaguauaacggcuagaaA..... |                                  | 1 |
| Gi1_5035827_x85.....  | uccggcguaguauaacggcua.....     |                                  | 0 |
| Gi3_25413852_x85..... |                                | ccaacagauccggguucgauucc.....     | 0 |
| Gi2_9323159_x85.....  | Gccggcguaguauaacggc.....       |                                  | 1 |
| Gi3_25423855_x84..... |                                | gguucgauucccggcAccggagc.....     | 1 |
| Gi3_25425115_x84..... |                                | cagauccggguucgauucccggcgccg..... | 0 |
| Gi3_25418899_x84..... |                                | Auucgauucccggcgccggagc.....      | 1 |
| Gi3_25424863_x84..... |                                | gguucgauucccggcgcAggagc.....     | 1 |
| Gi1_5050925_x83.....  |                                | Uguucgauucccggcgccggagc.....     | 1 |
| Gi4_435328_x83.....   | uugguucucacccaacaga.....       |                                  | 0 |
| Gi3_25442693_x83..... | Gccggcguaguauaacggcuagaa.....  |                                  | 1 |
| Gi5_7492827_x83.....  |                                | Aguucgauucccggcgccggagc.....     | 1 |
| Gi2_9348290_x83.....  |                                | cucacccaacagauccg.....           | 0 |
| Gi5_7506722_x82.....  |                                | gguucgauucccggcgccggagcguu.....  | 0 |
| Gi1_3484149_x82.....  |                                | guucAauucccggcgccg.....          | 1 |
| Gi1_3491081_x81.....  |                                | guucgauucccggcgccAg.....         | 1 |
| Gi3_25483376_x81..... |                                | gguucgauucccggcgccAgagc.....     | 1 |
| Gi3_25469201_x81..... |                                | gguucgauuccUgcgccggagc.....      | 1 |
| Gi3_25483214_x81..... |                                | gguucgauucccggcgccggG.....       | 1 |
| Gi3_25500696_x80..... | ucUggcguaguauaacggc.....       |                                  | 1 |
| Gi3_25486936_x80..... |                                | ggCucgauucccggcgccgga.....       | 1 |
| Gi2_9378699_x80.....  |                                | uucgauucccggcgccggag.....        | 0 |
| Gi2_9385499_x80.....  | gUuucacccaacagauccg.....       |                                  | 1 |
| Gi3_25504765_x79..... |                                | guucgauucccggcgccggG.....        | 1 |

|                       |                                 |   |
|-----------------------|---------------------------------|---|
| Gi3_25536986_x78..... | uUguucacccaacagauccg.....       | 1 |
| Gi1_3501301_x78.....  | uccggcguaguauaacggcuagaauU..... | 1 |
| Gi1_3501457_x78.....  | guuUgauucccggcgccgg.....        | 1 |
| Gi1_3506059_x78.....  | uGcucacccaacagauccg.....        | 1 |
| Gi2_9414179_x77.....  | Auucgauucccggcgccgg.....        | 1 |
| Gi1_3506604_x77.....  | guucUauucccggcgccgg.....        | 1 |
| Gi1_3510223_x77.....  | gGucgauucccggcgccgg.....        | 1 |
| Gi5_7559961_x77.....  | .cgauucccggcgccggagcguuuc.....  | 0 |
| Gi2_9417028_x77.....  | .ggAucgauucccggcgccggagc.....   | 1 |
| Gi4_442433_x77.....   | .guucgauucccggcgccgga.....      | 0 |
| Gi3_25568178_x76..... | .gguucgauucccggcgccggagU.....   | 1 |
| Gi1_3511686_x76.....  | .uGcucacccaacagauccg.....       | 1 |
| Gi3_25563010_x76..... | .Cguucacccaacagauccg.....       | 1 |
| Gi2_9423957_x76.....  | uccggcguaguauaacggcu.....       | 0 |
| Gi3_25594935_x75..... | .guucgauuNccggcgccgga.....      | 1 |
| Gi2_9445432_x75.....  | .cggcguaguauaacggcuaga.....     | 0 |
| Gi2_9443182_x75.....  | .gguUgauucccggcgccggagc.....    | 1 |
| Gi5_7588434_x74.....  | .cggcguaguauaacggcuaga.....     | 0 |
| Gi5_7589840_x74.....  | .guucgaCuuccggcgccggagc.....    | 1 |
| Gi3_25620397_x73..... | .guucgauuNccggcgccgg.....       | 1 |
| Gi3_25627916_x73..... | uccggcguUguauaacggcuaga.....    | 1 |
| Gi5_7599143_x73.....  | uccggcguaguauaacggcuagG.....    | 1 |
| Gi3_25621492_x73..... | Auucgauucccggcgccgg.....        | 1 |
| Gi2_9465654_x73.....  | uccggcguaguauaacggcuGga.....    | 1 |
| Gi3_25641906_x72..... | ucUggcguaguauaacgg.....         | 1 |
| Gi3_25635066_x72..... | ugguucacccaacagauccgg.....      | 0 |
| Gi3_25652994_x72..... | uccggcguNguauaacggcua.....      | 1 |
| G1a_5103639_x72.....  | uccggcguaguauaacggcuagaa.....   | 0 |
| Gi2_9477623_x72.....  | .cgauucccggcgccggagcguuuc.....  | 0 |
| Gi5_7616829_x72.....  | .uucucacccaacagauccggguuc.....  | 0 |
| Gi5_7618053_x72.....  | .ggcguaguauaacggcuaga.....      | 0 |
| Gi3_25636938_x72..... | .ggcguaguauaacggcuag.....       | 0 |
| Gi3_25652418_x72..... | .gguucgauuUccggcgccggagc.....   | 1 |
| Gi1_3538184_x71.....  | .gGucgauucccggcgccggagc.....    | 1 |
| Gi3_25659541_x71..... | .ggguucgauucccggcgccgga.....    | 0 |
| Gi3_25661387_x71..... | .Cguucgauucccggcgccgga.....     | 1 |
| Gi1_3539746_x71.....  | .guucgauucccgGUccgg.....        | 1 |
| G1a_5110245_x71.....  | .cgauucccggcgccggagcC.....      | 1 |
| Gi2_9490621_x71.....  | .gCuucgauucccggcgccggagc.....   | 1 |
| Gi1_3536125_x71.....  | .Uguucgauucccggcgccgga.....     | 1 |
| Gi1_3536906_x71.....  | uccggcguaguauaacggcuagaU.....   | 1 |
| Gi2_9500831_x70.....  | .guucucacccaacagauccgg.....     | 0 |
| Gi2_9499641_x70.....  | .uucucacccaacagauccgg.....      | 0 |
| Gi3_25682750_x70..... | uccggcguCguauaacggcuaga.....    | 1 |
| G1a_5117872_x70.....  | .guucgauucccggcgccgg.....       | 0 |
| G1a_5115352_x70.....  | uccggcguaguauaacggcuagaau.....  | 0 |
| Gi3_25690730_x70..... | .guucgGuucccggcgccgga.....      | 1 |

|                  |                                 |       |   |
|------------------|---------------------------------|-------|---|
| Gi1_3541786_x70  | .....Gccggcguaguauaacggcua      | ..... | 1 |
| Gi4_448843_x70   | .....cucaccaacagauccggguucg     | ..... | 0 |
| Gi5_7641508_x70  | .....gguucucaccaacagauccggguu   | ..... | 0 |
| Gi2_9498941_x70  | .....gguucgauucccggcgAcggagc    | ..... | 1 |
| Gi1_3542696_x70  | .....ggcguaguauaacggcua         | ..... | 0 |
| Gi5_7642558_x70  | .....uccggcguaguauaacggcuGga    | ..... | 1 |
| Gi1_3549294_x69  | .....Gccggcguaguauaacggcuaga    | ..... | 1 |
| Gi3_25693495_x69 | .....gCucgauucccggcgcgcg        | ..... | 1 |
| Gi2_9515471_x69  | .....ucUggcguaguauaacggcuaga    | ..... | 1 |
| Gi3_25706398_x69 | .....guucgauucccggcgcgG         | ..... | 1 |
| Gi5_7645819_x69  | .....uGcggcguaguauaacggcuagaau  | ..... | 1 |
| Gi2_9511814_x69  | .....gUucgauucccggcgcg          | ..... | 1 |
| Gi3_25697014_x69 | .....ggCucgauucccggcgcgag       | ..... | 1 |
| Gi5_7651960_x69  | .....Aguucucaccaacagauccg       | ..... | 1 |
| Gi2_9507881_x69  | .....gguucgauucccggcgcgagA      | ..... | 1 |
| Gi5_7667663_x68  | .....Auucgauucccggcgcg          | ..... | 1 |
| Gi5_7659095_x68  | .....gguucgauNcccggcgcgagc      | ..... | 1 |
| Gi2_9519724_x68  | .....gguucgauuccAgcgccggagc     | ..... | 1 |
| Gi3_25725127_x68 | .....Aguucgauucccggcgcg         | ..... | 1 |
| Gi3_25713635_x68 | .....uccggcguaguauaacggcuUga    | ..... | 1 |
| Gi5_7664807_x68  | .....Ggguucucaccaacagauccg      | ..... | 1 |
| Gi5_7668269_x67  | .....gguucgauucccggcgccAg       | ..... | 1 |
| Gi2_9542198_x67  | .....ccggcguaguauaacggcua       | ..... | 0 |
| Gi3_25740233_x67 | .....Accggcguaguauaacggcuaga    | ..... | 1 |
| Gi2_9536503_x67  | .....gguucgauCcccggcgcgagc      | ..... | 1 |
| Gi5_7687168_x66  | .....ucgauucccggcgcgga          | ..... | 0 |
| Gi2_9554639_x66  | .....Gccggcguaguauaacggcua      | ..... | 1 |
| Gi5_7680238_x66  | .....ggguucgauucccggcgcgagc     | ..... | 0 |
| Gi5_7691722_x66  | .....cagauccggguucgauucccggcgcg | ..... | 0 |
| Gi1_3561746_x66  | .....gguucgauCcccggcgcg         | ..... | 1 |
| Gi1_3561548_x66  | .....Ggguucucaccaacagauccg      | ..... | 1 |
| Gi1_3559898_x66  | .....guucgauuccAgcgccg          | ..... | 1 |
| Gi2_9546257_x66  | .....gguucAauucccggcgcgagc      | ..... | 1 |
| Gi2_9562796_x65  | .....gGucucaccaacagauccg        | ..... | 1 |
| Gi5_7698366_x65  | .....ccggguucgauucccggcgcgga    | ..... | 0 |
| Gi3_25769037_x65 | .....gCucgauucccggcgcgagc       | ..... | 1 |
| Gi3_25773912_x65 | .....uccAgcguaguauaacggcuaga    | ..... | 1 |
| Gi1_3573800_x64  | .....guucgauucccggcgcUgg        | ..... | 1 |
| Gi3_25791259_x64 | .....Cguucgauucccggcgcgag       | ..... | 1 |
| Gi5_7709861_x64  | .....cggcguaguauaacggcuag       | ..... | 0 |
| Gi2_9578297_x64  | .....cgauucccggcgcgagcguuu      | ..... | 0 |
| Gi1_3572008_x64  | .....caacagauccggguucgauucccggc | ..... | 0 |
| Gi2_9577273_x64  | .....Auucgauucccggcgcgagc       | ..... | 1 |
| Gi2_9571513_x64  | .....uucucaccaacagauccggguucg   | ..... | 0 |
| Gi2_9571449_x64  | .....aguccggcguaguauaacggcuaga  | ..... | 0 |
| Gi1_3575068_x63  | .....gUucgauucccggcgcg          | ..... | 1 |
| Gi5_7726656_x63  | .....Auucgauucccggcgcg          | ..... | 1 |

|                       |                                |   |
|-----------------------|--------------------------------|---|
| Gi5_7721679_x63.....  | gguucgauucccgccgagcguuu.....   | 0 |
| Gi3_25815684_x63..... | ggcguaguauaacggcu.....         | 0 |
| Gi3_25805856_x63..... | gguucgauucccgccgagcgA.....     | 1 |
| Gi3_25813101_x63..... | uccggcguaguauaCggcuaga.....    | 1 |
| Gi3_25813920_x63..... | guucgauucccgccgCgc.....        | 1 |
| Gi2_9582921_x63.....  | guucgaCucccgccg.....           | 1 |
| Gi3_25833619_x62..... | gguucgauucccgccgAagc.....      | 1 |
| Gi3_25826303_x62..... | guucgGuucccgccgagc.....        | 1 |
| Gi2_9593361_x62.....  | gguucgauucccgccgGg.....        | 1 |
| Gi3_25830829_x62..... | uccggcguaguauaacggcuCga.....   | 1 |
| Gi3_25836223_x62..... | gguucgauucccgccgAc.....        | 1 |
| G1a_5165112_x62.....  | uucucaccaacagauccgg.....       | 0 |
| Gi3_25822955_x62..... | uccggcguGguauaacgg.....        | 1 |
| Gi3_25833123_x62..... | gguucgauucccgUgcc.....         | 1 |
| Gi5_7741133_x61.....  | cggcguaguauaacggcuagaau.....   | 0 |
| Gi3_25845764_x61..... | uccggcguaguauaacggcCa.....     | 1 |
| Gi1_3588041_x61.....  | guucgauuccUggcgccg.....        | 1 |
| Gi3_25842104_x61..... | uccggcguaguauaGcggcu.....      | 1 |
| Gi1_3585662_x61.....  | caccaacagauccggguucgauucc..... | 0 |
| Gi2_9613011_x61.....  | uccggcguaguauaacggcuagG.....   | 1 |
| Gi1_3588651_x61.....  | cagauccggguucgauucccgcc.....   | 0 |
| Gi5_7745403_x61.....  | ggcguaguauaacggcuagaau.....    | 0 |
| Gi2_9614597_x61.....  | gguucgauuccUggcgccgagc.....    | 1 |
| Gi5_7750771_x61.....  | gGucucaccaacagauccgg.....      | 1 |
| Gi5_7750649_x61.....  | ggCucucaccaacagauccg.....      | 1 |
| Gi3_25847533_x61..... | gguucgauucccgccgGg.....        | 1 |
| Gi3_25867609_x60..... | gguucgauNcccgccg.....          | 1 |
| Gi3_25870549_x60..... | gguucgauuccAggcgccgagc.....    | 1 |
| Gi5_7760416_x60.....  | ucUggcguaguauaacggcuaga.....   | 1 |
| Gi5_7764076_x60.....  | uGcucaccaacagauccg.....        | 1 |
| Gi5_7768413_x59.....  | cgauucccgccgagcguuuA.....      | 1 |
| Gi3_25881254_x59..... | uccggcguGguauaacggc.....       | 1 |
| Gi2_9636740_x59.....  | guucgauucccgccgagcCu.....      | 1 |
| Gi3_25895650_x59..... | cggcguaguauaacggcuaga.....     | 0 |
| Gi2_9637625_x59.....  | Gccggcguaguauaacgg.....        | 1 |
| Gi2_9631725_x59.....  | uccggcguNguauaacggcuaga.....   | 1 |
| Gi3_25900812_x58..... | Gucucaccaacagauccgg.....       | 1 |
| Gi2_9646919_x58.....  | Agucgauucccgccgag.....         | 1 |
| Gi5_7786211_x58.....  | uccggcguNguauaacggcuag.....    | 1 |
| Gi5_7790155_x58.....  | ucUggcguaguauaacggcuag.....    | 1 |
| Gi5_7785515_x58.....  | gguucgauucccgccgCgc.....       | 1 |
| Gi3_25908468_x58..... | uccgAcguaguauaacggcuaga.....   | 1 |
| Gi3_25913050_x58..... | gCucgauucccgccgga.....         | 1 |
| Gi1_3611657_x57.....  | uGcggcguaguauaacgg.....        | 1 |
| Gi2_9663188_x57.....  | guucgauNccggccgagc.....        | 1 |
| Gi2_9655550_x57.....  | uUguucucaccaacagauccg.....     | 1 |
| Gi3_25956726_x56..... | Agucgauucccgccg.....           | 1 |



|                       |                                 |   |
|-----------------------|---------------------------------|---|
| Gi2_9671918_x56.....  | .Uauuccggcgccggagc.....         | 1 |
| Gi3_25940150_x56..... | .guucgauucccgcgccggagcA.....    | 1 |
| Gi2_9670070_x56.....  | .uucgauucccgcgccgga.....        | 0 |
| Gi3_25954822_x56..... | .gguucgaCuuccggcgccgga.....     | 1 |
| Gi3_25948550_x56..... | .guCcgauuccggcgccgg.....        | 1 |
| Gi2_9670686_x56.....  | .gCucgauucccgcgccggagc.....     | 1 |
| Gi3_25942054_x56..... | .gguucgauucccgcgccggaAc.....    | 1 |
| Gi3_25976215_x55..... | .uccggcguNguauaacgg.....        | 1 |
| Gi5_7824359_x55.....  | .gCucgauuccggcgccgg.....        | 1 |
| Gi5_7823094_x55.....  | .uGcggcguaguauaacgg.....        | 1 |
| Gi3_25969945_x55..... | .gguucgauuccggcgUggag.....      | 1 |
| Gi1_3622888_x55.....  | .uGcggcguaguauaacggcuag.....    | 1 |
| Gi2_9702216_x54.....  | .gguucgauuccggcAccggagc.....    | 1 |
| Gi3_25983306_x54..... | .cUauuccggcgccggagc.....        | 1 |
| Gi2_9697464_x54.....  | .Gucucacccaacagauccg.....       | 1 |
| Gi1_3627210_x54.....  | .uccggcguGguauaacggcuag.....    | 1 |
| Gi3_25997127_x53..... | .uccggcguaguGuaacggcua.....     | 1 |
| Gi3_26015306_x53..... | .Cuccggcguaguauaacggcua.....    | 1 |
| Gi3_26016048_x53..... | .gguucgauuccgggAgccggagc.....   | 1 |
| Gi3_26000095_x53..... | .cggcguaguauaacggcuagaau.....   | 0 |
| Gi3_26033432_x52..... | .Cuucgauuccggcgccgga.....       | 1 |
| Gi1_3633854_x52.....  | .guucgauuccggcAccgg.....        | 1 |
| Gi3_26030988_x52..... | .Ggguucacccaacagauccg.....      | 1 |
| Gi3_26031092_x52..... | .Gcgauuccggcgccggagc.....       | 1 |
| Gi3_26032808_x52..... | .cgauuccggcgccggagcguuucA.....  | 1 |
| Gi5_7874053_x51.....  | .gguucgauuccggcgccggagcA.....   | 1 |
| Gi5_7864261_x51.....  | .ggCucgauuccggcgccggagc.....    | 1 |
| Gi3_26052100_x51..... | .gguucgauucccgAcgccggagc.....   | 1 |
| Gi1_3640695_x51.....  | .guucgauuccggcgAgg.....         | 1 |
| Gi3_26049448_x51..... | .Cuucgauuccggcgccgg.....        | 1 |
| Gi5_7872115_x51.....  | .guCucacccaacagauccg.....       | 1 |
| Gi3_26076736_x50..... | .uccggcguNguauaacggc.....       | 1 |
| Gi3_26077436_x50..... | .gguucgauuccggcgccggagcU.....   | 1 |
| Gi3_26067836_x50..... | .ugguucacccaUcagauc.....        | 1 |
| Gi3_26077036_x50..... | .guucgauuNccggcgccggagc.....    | 1 |
| Gi3_26058286_x50..... | .gCuucgauuccggcgccggag.....     | 1 |
| Gi3_26057686_x50..... | .gguuGgauuccggcgccggagc.....    | 1 |
| Gi3_26069236_x50..... | .Cguucgauuccggcgccg.....        | 1 |
| Gi2_9747145_x50.....  | .gguucgauuccggcgAggagc.....     | 1 |
| Gi1_3642664_x50.....  | .guucgauucUcggcgccgg.....       | 1 |
| Gi3_26064286_x50..... | .gguucgauNccggcgccgg.....       | 1 |
| Gi3_26057186_x50..... | .Aguucacccaacagauccg.....       | 1 |
| Gi3_26079272_x49..... | .guucgGuuccggcgccgg.....        | 1 |
| Gi5_7897160_x49.....  | .Uauuccggcgccggagc.....         | 1 |
| Gi3_26081820_x49..... | .gAuucgauuccggcgccggag.....     | 1 |
| Gi1_3647644_x49.....  | .auccggguucgauuccggcgccgga..... | 0 |
| Gi5_7894955_x49.....  | .guaguauaacggcuagaau.....       | 0 |

Gi1\_3652936\_x49.....gguucgauCcccggcgccgg..... 1  
 Gi5\_7894759\_x49.....uccggcguaguauaacAgcuaga..... 1  
 Gi2\_9757944\_x49.....guucgauuccggcgccAga..... 1  
 Gi2\_9755445\_x49.....gguucgauuccggcgccggagcCu..... 1  
 Gi1\_3647301\_x49.....gguucgauNcccggcgccgg..... 1  
 Gi3\_26081134\_x49.....uccggcguaguauGacggcuaga..... 1  
 Gi2\_9772973\_x48.....gguucgCuuccggcgccggagc..... 1  
 Gi3\_26116112\_x48.....uccggcguaguauaacAgc..... 1  
 Gi1\_3657785\_x48.....Aguucgauuccggcgccgg..... 1  
 Gi3\_26103488\_x48.....uccggcguaguauCacggcua..... 1  
 Gi2\_9773741\_x48.....Aguucgauuccggcgcc..... 1  
 Gi3\_26097632\_x48.....uccggcguaguauaacAgcua..... 1  
 Gi2\_9777389\_x48.....guCcgauuccggcgccgg..... 1  
 Gi2\_9775181\_x48.....uccggcguaguauaacAgcuaga..... 1  
 Gi1\_3653081\_x48.....guucgauuccggcgccggagcA..... 1  
 Gi3\_26101520\_x48.....uccggcguaguauaUcggcuaga..... 1  
 Gi3\_26110784\_x48.....uccggcguaguCuaacggcuaga..... 1  
 Gi3\_26113280\_x48.....gguucgauCcccggcgccgga..... 1  
 Gi2\_9784714\_x47.....gguucgauuccggcgccggagU..... 1  
 Gi2\_9784902\_x47.....guucgauuccggcgccggCgc..... 1  
 Gi2\_9786124\_x47.....Gccggcguaguauaacggcuag..... 1  
 Gi3\_26130456\_x47.....gguucgGuuccggcgccggag..... 1  
 Gi3\_26125662\_x47.....gGucucacccaacagauccgg..... 1  
 Gi5\_7923906\_x47.....gguucgauucccCgcgccggag..... 1  
 Gi1\_3662555\_x47.....guucgauuccggcgUcgg..... 1  
 Gi3\_26153973\_x46.....ggguucgauuccggcgccg..... 0  
 Gi3\_26142795\_x46.....uGcggcguaguauaacggcuag..... 1  
 Gi5\_7931489\_x46.....uGcggcguaguauaacggc..... 1  
 Gi2\_9796478\_x46.....guucgauuccggcgccggGgc..... 1  
 Gi2\_9805034\_x46.....gguucgauucccgUgccggagc..... 1  
 Gi3\_26153651\_x46.....gguucgauUccggcgccggag..... 1  
 Gi5\_7940367\_x46.....guucgGuuccggcgccg..... 1  
 Gi5\_7938021\_x46.....guucgauNccggcgccg..... 1  
 Gl1a\_5280140\_x46.....gUuucgauuccggcgccggagc..... 1  
 Gi3\_26152501\_x46.....gguucgauCcccggcgccggag..... 1  
 Gi5\_7937975\_x46.....Cuucgauuccggcgccgg..... 1  
 Gi3\_26145785\_x46.....uccggcguaguauaGcggc..... 1  
 Gi3\_26161378\_x45.....uccggcguaguauCacgg..... 1  
 Gi2\_9812634\_x45.....uccggcguaguauaacggcuagC..... 1  
 Gi2\_9809439\_x45.....Gcgauuccggcgccggagc..... 1  
 Gi5\_7946502\_x45.....guCcgauuccggcgccgg..... 1  
 Gi2\_9814704\_x45.....gguucgauuccggcgUggagc..... 1  
 Gi2\_9809574\_x45.....gguucgauucccgAcgccggagc..... 1  
 Gi3\_26169523\_x45.....uccggcguaguauaacggcuG..... 1  
 Gi2\_9825942\_x44.....gguucgauuccggcgccggagcA..... 1  
 Gi1\_3679485\_x44.....guCcgauuccggcgccgg..... 1  
 Gi2\_9830694\_x44.....uccggcguaguauaGcggcuaga..... 1

|                  |                                          |   |
|------------------|------------------------------------------|---|
| Gi3_26181005_x44 | .....uccggcguaguauaacggcuagU.....        | 1 |
| Gi3_26186901_x44 | .....gguucgauucccAgcgccgga.....          | 1 |
| Gi5_7956443_x44  | .....Cucucacccaacagauccg.....            | 1 |
| GlA_5301606_x43  | .....Uguucgauucccggcgccggag.....         | 1 |
| Gi5_7971012_x43  | .....uccggcguNguauaacggcuaga.....        | 1 |
| Gi5_7971399_x43  | .....uccggcguaguauaacggcCaga.....        | 1 |
| Gi2_9841797_x43  | .....guCcgauucccggcgccggagc.....         | 1 |
| Gi2_9846570_x43  | .....uccggcguaguauaacggcCaga.....        | 1 |
| Gi5_7973936_x43  | .....guucgauuNccggcgccgg.....            | 1 |
| Gi2_9855499_x42  | .....Gccggcguaguauaacggcuagaau.....      | 1 |
| Gi3_26228227_x42 | .....uccgUcguaguauaacggcua.....          | 1 |
| Gi2_9855625_x42  | .....uccggUguaguauaacggcuagaa.....       | 1 |
| Gi5_7984822_x42  | .....cacccaacagauccggguucga.....         | 0 |
| Gi2_9851257_x42  | .....cgguucgauucccggcgccgga.....         | 0 |
| Gi5_7989610_x42  | .....gguucgauucccggcgccggagcgA.....      | 1 |
| Gi1_3688259_x42  | .....ugguucucNcccaacagauccg.....         | 1 |
| Gi2_9858523_x42  | .....gguucgauucccggcgccAgagc.....        | 1 |
| Gi5_7990408_x42  | .....uccggcguaguauaacgAcua.....          | 1 |
| Gi2_9849745_x42  | .....ggcguaguauaacggcuaga.....           | 0 |
| Gi2_9852685_x42  | .....gguucgauucUcggcgccggagc.....        | 1 |
| Gi2_9856885_x42  | .....uccggcguGguauaacggc.....            | 1 |
| Gi5_7979992_x42  | .....uGcggcguaguauaacggcua.....          | 1 |
| Gi3_26226589_x42 | .....uGcggcguaguauaacggcuagaau.....      | 1 |
| Gi3_26228521_x42 | .....guCcgauucccggcgccggagc.....         | 1 |
| Gi3_26229739_x42 | .....uccggcguaguauaGcgg.....             | 1 |
| Gi5_7996774_x41  | .....aguccggcguaguauaacggcuagaauagg..... | 0 |
| Gi3_26252492_x41 | .....gguucgauucccggcgccggUgc.....        | 1 |
| Gi5_7996569_x41  | .....gguucgauNcccggcgccg.....            | 1 |
| Gi1_3695766_x41  | .....guAcgauucccggcgccg.....             | 1 |
| Gi3_26241340_x41 | .....Cccggcguaguauaacggcua.....          | 1 |
| Gi3_26256018_x41 | .....uccggcguagCauaacggcua.....          | 1 |
| Gi5_7993658_x41  | .....guucucaccccCacagauccg.....          | 1 |
| Gi5_7993863_x41  | .....Aguucgauucccggcgccg.....            | 1 |
| Gi2_9863452_x41  | .....guucgaCuccggcgccggag.....           | 1 |
| Gi5_7998250_x41  | .....gguucucacccaacGgauccg.....          | 1 |
| Gi5_8004564_x41  | .....gguucucaccccCacagauccg.....         | 1 |
| Gi5_8000628_x41  | .....Cccggcguaguauaacggcuag.....         | 1 |
| Gi3_26260364_x41 | .....auccggguucgauucccggcgccggagc.....   | 0 |
| Gi1_3695561_x41  | .....ccggcguaguauaacggcu.....            | 0 |
| Gi3_26266650_x40 | .....uUcggcguaguauaacggc.....            | 1 |
| Gi3_26275650_x40 | .....uUcggcguaguauaacgg.....             | 1 |
| Gi3_26276090_x40 | .....guucgauucccggcgccAga.....           | 1 |
| Gi3_26282010_x40 | .....uccggAguaguauaacggcuaga.....        | 1 |
| Gi3_26263370_x40 | .....uUguucucacccaacagauc.....           | 1 |
| Gi1_3698477_x40  | .....guucgauucccgAcgccgg.....            | 1 |
| Gi3_26263930_x40 | .....gCuucgauucccggcgccgga.....          | 1 |
| Gi3_26276010_x40 | .....gguucgauAcccggcgccggagc.....        | 1 |

Gi2\_9877330\_x40.....Ggguucucacccaacagauccg..... 1  
 Gi1\_3697317\_x40.....gUucgauuccggcgccgga..... 1  
 Gi5\_8014854\_x40.....uccggcguaguauaacggcCag..... 1  
 Gi1\_3704321\_x39.....guugguucucacccaacagauccgggu..... 0  
 Gi3\_26299059\_x39.....Cuucgauuccggcgccggagc..... 1  
 Gi3\_26305026\_x39.....agauccggguucgauuccggcgccggagcC..... 1  
 Gi2\_9893236\_x39.....Cuucgauuccggcgccgg..... 1  
 Gi3\_26305572\_x39.....gguucgauucAcggcgccggagc..... 1  
 Gi5\_8026280\_x39.....guucgauuccggcAccgg..... 1  
 Gi3\_26283693\_x39.....gguucgaCuccggcgccggag..... 1  
 Gi3\_26327082\_x38.....uUcggcguaguauaacggcua..... 1  
 Gi2\_9909383\_x38.....guucgGuuccggcgccggagc..... 1  
 Gi1\_3714126\_x38.....uccggcguNguauaacggcuag..... 1  
 Gi2\_9905051\_x38.....uccggguucgauuccggcgccgga..... 0  
 Gi2\_9911093\_x38.....guucgauuNccggcgccgg..... 1  
 Gi3\_26311426\_x38.....gguucgauuccggcgccggCg..... 1  
 Gi1\_3709984\_x38.....gUucgauuccggcgccggag..... 1  
 Gi1\_3713404\_x38.....uGcggcguaguauaacggcua..... 1  
 Gi2\_9913069\_x38.....gguucgauNccggcgccggag..... 1  
 Gi3\_26326702\_x38.....guucgauuccggUgcccgg..... 1  
 Gi5\_8031125\_x38.....guucgauuccggcgccA..... 1  
 Gi5\_8033481\_x38.....acccaacagauccggguucgauucc..... 0  
 Gi3\_26320318\_x38.....gguucgauuccggcAccgg..... 1  
 Gi3\_26318608\_x38.....gguucgGuuccggcgccggga..... 1  
 Gi2\_9912081\_x38.....guucgaCuccggcgccgga..... 1  
 Gi3\_26320546\_x38.....uccggUguaguauaacggcua..... 1  
 Gi3\_26349402\_x37.....gguucgauuccggcgccgAag..... 1  
 Gi1\_3717732\_x37.....guucgauuccggcgAcgg..... 1  
 Gi3\_26332530\_x37.....uccggcAuaguauaacggcuaga..... 1  
 Gi2\_9921627\_x37.....uUcggcguaguauaacggcuaga..... 1  
 Gi5\_8046744\_x37.....gguucgauNccggcgccgga..... 1  
 Gi3\_26345147\_x37.....ggAucgauuccggcgccgga..... 1  
 Gi5\_8052664\_x37.....Cguucgauuccggcgccggagc..... 1  
 Gi3\_26331161\_x37.....Auucgauuccggcgccggag..... 1  
 Gi1\_3718472\_x37.....uccggcguGguauaacggcua..... 1  
 Gi5\_8043118\_x37.....gguucCcacccaacagauccg..... 1  
 Gi1\_3715031\_x37.....guucgauuccggcgccggag..... 0  
 Gi1a\_5352502\_x37.....Gccggcguaguauaacggcuaga..... 1  
 Gi2\_9916965\_x37.....Aguucgauuccggcgccg..... 1  
 Gi2\_9924698\_x37.....gguucgauuccggcgAc..... 1  
 Gi2\_9923107\_x37.....gguucgauNccggcgcc..... 1  
 Gi3\_26335638\_x37.....gguucgauuccggcgccA..... 1  
 Gi5\_8063536\_x36.....uccggcguaguauaacggcuag..... 1  
 Gi3\_26361443\_x36.....gguCcgauuccggcgccggag..... 1  
 Gi3\_26352767\_x36.....gguucgauuccggUgcccgga..... 1  
 Gi3\_26372855\_x36.....gguucgauuccggcgccggC..... 1  
 Gi3\_26353271\_x36.....uGcucacccaacagauccg..... 1

|                  |                                   |   |
|------------------|-----------------------------------|---|
| Gi3_26359031_x36 | .....gguucgauucccgAccgga          | 1 |
| Gi3_26352083_x36 | .....guucgauucccgcccgGgc          | 1 |
| Gi5_8065660_x36  | ..Uguucucacccaacagauccgg          | 1 |
| Gi2_9929187_x36  | .....gguucgauucccgAgccggagc       | 1 |
| Gi2_9939159_x36  | .....gguucgauucccgcccgAagc        | 1 |
| Gi3_26358887_x36 | .....uccgUcguaguauaacgg           | 1 |
| Gi1_3721587_x36  | .....cucacccaacagauccggguucgauucc | 0 |
| Gi5_8061016_x36  | .....gguucucaNccaacagauccg        | 1 |
| Gi5_8058424_x36  | .....cucacccCacagauccgg           | 1 |
| Gi2_9939771_x36  | .....gguucgauucccgcccggaAc        | 1 |
| Gi3_26378230_x35 | .....uccggcguaguauaacggcuagaaC    | 1 |
| Gi5_8069594_x35  | .....uccggcguaguauaacAgcuag       | 1 |
| Gi5_8068229_x35  | .....guucGaCucccgcccgga           | 1 |
| Gi1_3728352_x35  | .....uccggcguaguauaGcgg           | 1 |
| Gi2_9948054_x35  | ..uGcggcguaguauaacggcua           | 1 |
| Gi5_8076769_x35  | .....uccggcguaguGuaacggcuaga      | 1 |
| Gi3_26377950_x35 | .....guCcgauuccggcccgga           | 1 |
| Gi3_26393525_x35 | .....guucgauuccAgcgcgg            | 1 |
| Gi3_26381415_x35 | .....agauccggguucgauuccggcccgagc  | 0 |
| Gi1a_5365600_x35 | .....guucgauuccggcccgga           | 0 |
| Gi3_26394540_x35 | .....guucAauuccggcccg             | 1 |
| Gi5_8072429_x35  | .....Cuucgauuccggcccg             | 1 |
| Gi3_26394120_x35 | .....uccggguucgauuccggcccg        | 0 |
| Gi1a_5364060_x35 | ..ugguucucacccaacagauccg          | 0 |
| Gi5_8077714_x35  | .....guucUauuccggcccg             | 1 |
| Gi3_26382465_x35 | .....uccggcguauaacggcuaga         | 1 |
| Gi1_3728247_x35  | .....guucgauucccgAgccgg           | 1 |
| Gi2_9949979_x35  | .....gguuGgauuccggcccgagc         | 1 |
| Gi3_26384355_x35 | .....ggCucgauuccggcccg            | 1 |
| Gi1_3735733_x34  | ..ucUggcguaguauaacgg              | 1 |
| Gi1_3735189_x34  | .....ccggcguaguauaacggcuag        | 0 |
| Gi5_8085535_x34  | .....guCcgauuccggcccg             | 1 |
| Gi5_8085025_x34  | .....cGcacccaacagauccg            | 1 |
| Gi5_8088731_x34  | .....gguucucacccGacagauccg        | 1 |
| Gi3_26414972_x34 | .....guucgauucccgUgcggga          | 1 |
| Gi3_26398108_x34 | .....uCcucacccaacagauccg          | 1 |
| Gi5_8090499_x34  | .....uccggcguGguauaacggcuag       | 1 |
| Gi2_9967459_x34  | .....gguucgauUccggcccgagc         | 1 |
| Gi5_8088935_x34  | .....guucucacNcaacagauccg         | 1 |
| Gi1_3735325_x34  | .....guucucacccCacagauccg         | 1 |
| Gi2_9958755_x34  | .....Aguucgauuccggcccgga          | 1 |
| Gi5_8084005_x34  | .....uccggcguaguauaacgAcuaga      | 1 |
| Gi2_9956477_x34  | .....gguucgauuccUgcggccgagc       | 1 |
| Gi1_3737467_x34  | .....uccggcguNguauaacgg           | 1 |
| Gi2_9965147_x34  | .....gguucgauNccggcccg            | 1 |
| Gi5_8085263_x34  | ..ucUggcguaguauaacggcua           | 1 |
| Gi3_26413068_x34 | .....gguucgauuccAgcgcggag         | 1 |

|                       |                                |   |
|-----------------------|--------------------------------|---|
| Gi1_3743568_x33.....  | uucucaccNaacagauccg.....       | 1 |
| Gi5_8097372_x33.....  | gguucgauucccgccgGgc.....       | 1 |
| Gi1_3742776_x33.....  | Aguucucacccaacagauccg.....     | 1 |
| Gi2_9978951_x33.....  | gguucgauucccgccgCg.....        | 1 |
| Gi3_26426809_x33..... | AguucgauucccgccgCg.....        | 1 |
| Gi5_8099451_x33.....  | gguucgauucccgccgUg.....        | 1 |
| Gi5_8105061_x33.....  | gguucgGuucccgccgagc.....       | 1 |
| Gi3_26424631_x33..... | uccgUcguaguauaacggc.....       | 1 |
| Gi3_26436082_x33..... | uccggcguaguauUacggcuaga.....   | 1 |
| Gi5_8099352_x33.....  | uUcggcguaguauaacggcuag.....    | 1 |
| Gi3_26426050_x33..... | guucUauucccgccgCg.....         | 1 |
| Gi3_26434465_x33..... | guucgauucccgccA.....           | 1 |
| Gi3_26424136_x33..... | gguCcgauucccgccgga.....        | 1 |
| Gi3_26428129_x33..... | gguucgauuccUggcgcgga.....      | 1 |
| Gi3_26424796_x33..... | uccggcguaguauUcggcua.....      | 1 |
| Gi5_8099088_x33.....  | uUcggcguaguauaacggcuaga.....   | 1 |
| Gi3_26436412_x33..... | ucUggcguaguauaacggcuag.....    | 1 |
| Gi2_9982581_x33.....  | gguucgauAcccgccgagc.....       | 1 |
| Gi3_26442022_x33..... | guucgauucccgccAg.....          | 1 |
| Gi3_26430076_x33..... | cguaguauaacggcuaga.....        | 0 |
| Gi2_9980106_x33.....  | gguucgauucccgccUcggagc.....    | 1 |
| Gi1_3738717_x33.....  | uccggguucgauucccgccgga.....    | 0 |
| Gi3_26460286_x32..... | gAuucgauucccgccgga.....        | 1 |
| Gi3_26446270_x32..... | acagauccggguucgauucccgccg..... | 0 |
| Gi3_26466494_x32..... | ggGucgauucccgccgag.....        | 1 |
| Gi1_3745344_x32.....  | guucgauucccgUcgcgg.....        | 1 |
| Gi3_26468638_x32..... | uucucacccaCcagauccg.....       | 1 |
| Gi3_26455070_x32..... | Cccggcguaguauaacggc.....       | 1 |
| Gi1_3744160_x32.....  | uccggcguaguauaacAgcuag.....    | 1 |
| Gi5_8116710_x32.....  | uccggcguaguGuaacggcuag.....    | 1 |
| Gi3_26457918_x32..... | ggGucgauucccgccgga.....        | 1 |
| Gi3_26452766_x32..... | ucAggcguaguauaacggcuaga.....   | 1 |
| Gi3_26457758_x32..... | gguucgauuAcccgccgagc.....      | 1 |
| Gi5_8114374_x32.....  | uccggcguaguauGcgg.....         | 1 |
| Gi2_9993405_x32.....  | uGcggcguaguauaacggc.....       | 1 |
| Gi5_8111366_x32.....  | cucacccaNcagauccg.....         | 1 |
| Gi2_9997213_x32.....  | uccggcguGguauaacggcuaga.....   | 1 |
| Gi2_9996477_x32.....  | uccggcguaguGuaacggcuaga.....   | 1 |
| Gi3_26469278_x32..... | gguucgauucccgccgUgga.....      | 1 |
| Gi3_26450590_x32..... | guuUgauucccgccgga.....         | 1 |
| Gi1_3747552_x32.....  | ugguucucacccaacagaucc.....     | 0 |
| Gi5_8108550_x32.....  | gAuucgauucccgccgagc.....       | 1 |
| Gi3_26477902_x31..... | gaucggguucgauucccgccgag.....   | 0 |
| Gi4_490729_x31.....   | uccggcguaguauaacggcuag.....    | 0 |
| Gi3_26478336_x31..... | guucUauucccgccgga.....         | 1 |
| Gi1_3754020_x31.....  | uuUucacccaacagauccg.....       | 1 |
| Gi1_3754578_x31.....  | gguucgauucccgccgga.....        | 0 |

|                       |                                          |   |
|-----------------------|------------------------------------------|---|
| Gi5_8127401_x31.....  | uUcggcguaguauaacggcuagaau.....           | 1 |
| Gi3_26471795_x31..... | uccggcguaguGuaacgg.....                  | 1 |
| Gi2_9999863_x31.....  | .....Cuucgauucccggcgccggagc.....         | 1 |
| Gi5_8130315_x31.....  | .....guucgauucccggcAccg.....             | 1 |
| Gi5_8120085_x31.....  | uccggcguaguauaGcggcuaga.....             | 1 |
| Gi3_26487574_x31..... | .....gguuAgauucccggcgccggagc.....        | 1 |
| Gi3_26480072_x31..... | .....gguucgaCucccggcgccgg.....           | 1 |
| Gi3_26475019_x31..... | .....guucgauCcccggcgccgga.....           | 1 |
| Gi2_10002994_x31..... | uccggcguaguauCacggcuaga.....             | 1 |
| Gi5_8118814_x31.....  | uccggcguGguauaacggcua.....               | 1 |
| Gi5_8126192_x31.....  | .....gguucgaCucccggcgccggagc.....        | 1 |
| Gi3_26472911_x31..... | .....guuUgauucccggcgccgg.....            | 1 |
| Gi2_10012480_x31..... | Cccggcguaguauaacggcuaga.....             | 1 |
| Gi2_10011860_x31..... | .....guucgauucccggcgccgC.....            | 1 |
| Gi3_26491728_x31..... | .....guucgauuccUggcgccgg.....            | 1 |
| Gi3_26473655_x31..... | .....guucgauCcccggcgccgg.....            | 1 |
| Gi2_10008326_x31..... | .....guucucacccaacagauccgggu.....        | 0 |
| Gi5_8137855_x30.....  | .....guucgauuccUggcgccg.....             | 1 |
| Gi1_3758915_x30.....  | .....auccggguucgauucccggcgccgg.....      | 0 |
| Gi1_3758705_x30.....  | .....cucacccaacagauccggguucga.....       | 0 |
| Gi3_26512770_x30..... | .....guucgauuccAgcgccgga.....            | 1 |
| Gi5_8140135_x30.....  | .....gguucucGcccaacagauccg.....          | 1 |
| Gi2_10028005_x30..... | .....Cguucgauucccggcgcc.....             | 1 |
| Gi1_3756845_x30.....  | .....aacagauccggguucgauucccggcgccgg..... | 0 |
| Gi3_26513970_x30..... | uccggcguaguauUacgg.....                  | 1 |
| Gi5_8136295_x30.....  | ucUggcguaguauaacggc.....                 | 1 |
| Gi5_8141005_x30.....  | uccggcguaguauaacggcuagaug.....           | 0 |
| Gi2_10027315_x30..... | .....Gccggcguaguauaacggcuagaa.....       | 1 |
| Gi1_3756935_x30.....  | uccggcguaguauaGcggcuag.....              | 1 |
| Gi2_10024765_x30..... | .....uucacccaacGgauccg.....              | 1 |
| Gi5_8133235_x30.....  | uccggcguaguauaacggcuagaCu.....           | 1 |
| Gi1_3761195_x30.....  | .....Gccggcguaguauaacggc.....            | 1 |
| Gi5_8140915_x30.....  | uccggcguaguauaacggcuagC.....             | 1 |
| Gi5_8141425_x30.....  | .....gguucgauucccggcgccggC.....          | 1 |
| Gi1a_5399946_x30..... | .....Uguucgauucccggcgccg.....            | 1 |
| Gi3_26516520_x30..... | .....guucgauucccggcgUcgga.....           | 1 |
| Gi2_10018675_x30..... | .....guucgauuccAgcgccggagc.....          | 1 |
| Gi3_26506200_x30..... | .....gguucAauucccggcgccgga.....          | 1 |
| Gi5_8153061_x29.....  | uccggcguaguauaacggUuag.....              | 1 |
| Gi5_8154772_x29.....  | .....gguCucacccaacagauccg.....           | 1 |
| Gi5_8143752_x29.....  | ucUggcguaguauaacggcuagaau.....           | 1 |
| Gi1_3767858_x29.....  | .....guucgauucccggcgccCg.....            | 1 |
| Gi5_8151785_x29.....  | uccggcguGguauaacggcuaga.....             | 1 |
| Gi1_3764610_x29.....  | .....gCucacccaacagauccg.....             | 1 |
| Gi5_8148972_x29.....  | .....gCucacccaacagauccg.....             | 1 |
| Gi5_8152887_x29.....  | .....guucgauuccUggcgccgg.....            | 1 |
| Gi2_10032948_x29..... | .....cagauccggguucgauucccggcgccggag..... | 0 |

|                       |                                  |   |
|-----------------------|----------------------------------|---|
| Gi1_3764407_x29.....  | acccaacagauccggguucgauucccg..... | 0 |
| Gi5_8144825_x29.....  | guucgGuuccggcgccgg.....          | 1 |
| Gi3_26527030_x29..... | guucgauuccggcgUgga.....          | 1 |
| Gi3_26537209_x29..... | guucgauuNccggcgccggag.....       | 1 |
| Gi3_26523260_x29..... | uccggcgCaguauaacgg.....          | 1 |
| Gi2_10029874_x29..... | gguCcgauuccggcgcc.....           | 1 |
| Gi5_8145608_x29.....  | ucUggcguaguauaacgg.....          | 1 |
| Gi5_8150915_x29.....  | Gcucaccaacagauccg.....           | 1 |
| Gi3_26539645_x29..... | Gucgauuccggcgccggagc.....        | 1 |
| Gi3_26538456_x29..... | uccggcguaguauaacgAcua.....       | 1 |
| Gi3_26538688_x29..... | gguucgauuccggcgGcgagc.....       | 1 |
| Gi3_26539384_x29..... | uccggcguagCauaacggc.....         | 1 |
| Gi2_10036109_x29..... | uccggcguGguauaacggcua.....       | 1 |
| Gi1_3767597_x29.....  | guucgauuUccggcgccgg.....         | 1 |
| Gi5_8148740_x29.....  | acccaacagauccggguucgauucc.....   | 0 |
| Gi5_8143462_x29.....  | uccgUcguaguauaacggcuaga.....     | 1 |
| Gi3_26528828_x29..... | guucAauuccggcgccgga.....         | 1 |
| Gi3_26542980_x29..... | gguucgauucccgcgAcggag.....       | 1 |
| Gi3_26554693_x28..... | gguucgauuccggcgAcgga.....        | 1 |
| Gi5_8160949_x28.....  | gguucgauNccggcgccggag.....       | 1 |
| Gi5_8158877_x28.....  | uucucaccNaacagauccg.....         | 1 |
| Gi2_10045729_x28..... | guucgauuccUggcgccggagc.....      | 1 |
| Gi2_10046429_x28..... | gguucgauuccAcggcgccggagc.....    | 1 |
| Gi3_26545733_x28..... | Cccggcguaguauaacgg.....          | 1 |
| Gi3_26556541_x28..... | guucgauuccggcAccgga.....         | 1 |
| Gi3_26559173_x28..... | uccggcguaguauCacggc.....         | 1 |
| Gi1_3770940_x28.....  | Uguucgauuccggcgccggag.....       | 1 |
| Gi2_10055053_x28..... | gguucgauucccgcgccggG.....        | 1 |
| Gi5_8166913_x28.....  | gguucgauuccggcgAc.....           | 1 |
| Gi5_8162657_x28.....  | gCuucgauuccggcgccggagc.....      | 1 |
| Gi5_8156945_x28.....  | guucgauuccggcgUcgg.....          | 1 |
| Gi2_10057461_x28..... | uccggcguaguauaacggcuAa.....      | 1 |
| Gi3_26554441_x28..... | cucaccaacagauccggguucgauucc..... | 0 |
| Gi3_26547861_x28..... | guucgGuuccggcgccggag.....        | 1 |
| Gi2_10045757_x28..... | gguuAgauuccggcgccggagc.....      | 1 |
| Gi3_26545705_x28..... | uccggcguaguauaacggcuGg.....      | 1 |
| Gi3_26555953_x28..... | guucgauuccUggcgccggagc.....      | 1 |
| Gi5_8163133_x28.....  | gguucucaccaCagauccg.....         | 1 |
| Gi3_26587578_x27..... | gguucgauuccggcgccAga.....        | 1 |
| Gi3_26588604_x27..... | gguucgauuccggcAccggag.....       | 1 |
| Gi3_26578533_x27..... | cucaccaacagauccggguucgauu.....   | 0 |
| Gi3_26593599_x27..... | ucUggcguaguauaacggcuagaau.....   | 1 |
| Gi5_8180396_x27.....  | uccggcguaguauaacAgcua.....       | 1 |
| Gi1_3779598_x27.....  | uccggcguaguauaacggcCag.....      | 1 |
| Gi2_10059158_x27..... | guucUauuccggcgccgg.....          | 1 |
| Gi2_10066853_x27..... | Cgcuaguauaacggcuaga.....         | 1 |
| Gi3_26577156_x27..... | guucgaGuuccggcgccggagc.....      | 1 |



|                       |                                      |   |
|-----------------------|--------------------------------------|---|
| Gi3_26590710_x27..... | aacagauccggguucgauuccggcgccgga.....  | 0 |
| Gi5_8171027_x27.....  | uccggcguaguauaaUggcuaga.....         | 1 |
| Gi3_26585094_x27..... | ggAucgauuccggcgccggag.....           | 1 |
| Gi1_3776601_x27.....  | guucgaCucccgggcgccgga.....           | 1 |
| Gi3_26592168_x27..... | guucgauucccAgcgccggagc.....          | 1 |
| Gi3_26582178_x27..... | ucUggcguaguauaacggcuagaa.....        | 1 |
| Gi2_10059887_x27..... | ucUggcguaguauaacggc.....             | 1 |
| Gi3_26586768_x27..... | Ugcguaguauaacggcuaga.....            | 1 |
| Gi2_10067744_x27..... | guucgauuccggcAccgg.....              | 1 |
| Gi1_3780354_x27.....  | gguucgauuccggcgccgU.....             | 1 |
| Gi3_26582799_x27..... | Gcucacccaacagauccg.....              | 1 |
| Gi3_26588037_x27..... | uccggcguaguauaacggcuGgaa.....        | 1 |
| Gi5_8170649_x27.....  | guucgauCcccggcgccg.....              | 1 |
| Gi5_8178101_x27.....  | gguucucacccaGcagauccg.....           | 1 |
| Gl1a_5426177_x27..... | Uguucgauuccggcgccgg.....             | 1 |
| Gi5_8169947_x27.....  | gauccggguucgauuccggcgccgga.....      | 0 |
| Gi5_8186200_x26.....  | guucgauucccgUgccg.....               | 1 |
| Gi3_26620993_x26..... | uccggcguaguaCaacgg.....              | 1 |
| Gi3_26600531_x26..... | acagauccggguucgauuccggcgccggagc..... | 0 |
| Gi3_26619537_x26..... | uccggcguaguauaGcggcuag.....          | 1 |
| Gi1_3786287_x26.....  | uccggcguaguGuaacggcuaga.....         | 1 |
| Gi3_26621123_x26..... | Gucgauuccggcgccgga.....              | 1 |
| Gi1_3785741_x26.....  | uucucacccaCcagauccg.....             | 1 |
| Gi2_10076679_x26..... | guucgGuuccggcgccg.....               | 1 |
| Gi1_3781945_x26.....  | guucgauuccggcgccgA.....              | 1 |
| Gi1_3784623_x26.....  | ugguucucGcccaacagauccg.....          | 1 |
| Gi1_3784987_x26.....  | uGcggcguaguauaacggcuaga.....         | 1 |
| Gi5_8194208_x26.....  | gguucgauucccgUgcc.....               | 1 |
| Gi5_8189398_x26.....  | uccggcguaguauCacggcuaga.....         | 1 |
| Gi5_8183444_x26.....  | guGcgauuccggcgccg.....               | 1 |
| Gi5_8186590_x26.....  | guucgauucccAgcgccg.....              | 1 |
| Gi5_8187812_x26.....  | uccgUcguaguauaacggcuag.....          | 1 |
| Gi3_26601935_x26..... | gguucgauucUcggcgccggag.....          | 1 |
| Gi1_3786209_x26.....  | uccggUguaguauaacggcuag.....          | 1 |
| Gi3_26596267_x26..... | guucgauuccggcgAcgg.....              | 1 |
| Gi3_26619511_x26..... | uccggcguaguauaaUggcua.....           | 1 |
| Gi5_8191868_x26.....  | Gucacccaacagauccg.....               | 1 |
| Gi2_10082815_x26..... | uGcucacccaacagauccg.....             | 1 |
| Gi5_8196534_x25.....  | uccggcguaguauaacgAcuag.....          | 1 |
| Gi1_3790881_x25.....  | gAucgauuccggcgccgg.....              | 1 |
| Gi3_26624893_x25..... | guucgauucUcggcgccg.....              | 1 |
| Gi3_26621768_x25..... | gguucgCuuccggcgccgga.....            | 1 |
| Gi3_26646318_x25..... | uccggcguaguauaacAgcuagaa.....        | 1 |
| Gi1_3790031_x25.....  | guucucacNcaacagauccg.....            | 1 |
| Gi2_10104647_x25..... | guucgauuccggcgccAg.....              | 1 |
| Gi2_10097697_x25..... | uccggcguaguauaacgAcuaga.....         | 1 |
| Gi5_8197809_x25.....  | Aguucgauuccggcgccgga.....            | 1 |

|                  |                                   |   |
|------------------|-----------------------------------|---|
| Gi2_10100072_x25 | .....gguucgauNcccggcgccgga        | 1 |
| Gi5_8203184_x25  | .....gguuUgauuccggcgccggagc       | 1 |
| Gi3_26629968_x25 | .....Uuucacccaacagauccggg         | 1 |
| Gi3_26633193_x25 | .....gguucgauNcccggcgcc           | 1 |
| Gi5_8199184_x25  | .....uccggcguaguauaacggcuagaaA    | 1 |
| Gi5_8198434_x25  | .....guucucacccaacagGuccg         | 1 |
| Gi3_26645368_x25 | .....guucgauuccggcgAccgg          | 1 |
| Gi1_3792481_x25  | .....uuUucacccaacagauccgg         | 1 |
| Gi1a_5444687_x25 | .....gUuucgauuccggcgccggag        | 1 |
| Gi5_8200709_x25  | .....uuUucacccaacagauccg          | 1 |
| Gi3_26640343_x25 | .....guucgauucGcggcgccggagc       | 1 |
| Gi5_8196184_x25  | .....uccggcguNguauaacggcuagaau    | 1 |
| Gi5_8201009_x25  | .....guucucacccaCagauccg          | 1 |
| Gi3_26629143_x25 | .....uccggAguaguauaacggcu         | 1 |
| Gi3_26647618_x25 | .....gguuUgauuccggcgccggag        | 1 |
| Gi2_10090447_x25 | .....guucgauuccUggcgccgg          | 1 |
| Gi2_10095222_x25 | .....guuUgauuccggcgccggagc        | 1 |
| Gi5_8201084_x25  | .....Cguucucacccaacagauccg        | 1 |
| Gi1a_5450987_x25 | .....Uguucgauuccggcgccgga         | 1 |
| Gi3_26640368_x25 | .....uccggcguaguGuaacggc          | 1 |
| Gi5_8207059_x25  | .....guucgauuccggcgccAg           | 1 |
| Gi2_10100297_x25 | .....aacagauccggguucgauuccggcgccg | 0 |
| Gi2_10097647_x25 | .....gguucgauuccggUgcc            | 1 |
| Gi3_26638018_x25 | .....gguucgauuccAgcgccgg          | 1 |
| Gi3_26649193_x25 | .....gguucgauuccggUgccggag        | 1 |
| Gi5_8196384_x25  | .....gguucucacUcaacagauccg        | 1 |
| Gi1_3790131_x25  | .....guucgaCuccggcgccg            | 1 |
| Gi2_10120123_x24 | .....uccggcguaguauaacggUuaga      | 1 |
| Gi3_26663600_x24 | .....uccggcguGguauaacggcuag       | 1 |
| Gi1_3794750_x24  | .....ucUggcguaguauaacggcuag       | 1 |
| Gi5_8218152_x24  | .....uccggcguGguauaacgg           | 1 |
| Gi3_26666672_x24 | .....aUaucggguucgauucc            | 1 |
| Gi3_26671712_x24 | .....gguuUgauuccggcgccgga         | 1 |
| Gi5_8219064_x24  | .....uUguucucacccaacagauccgggu    | 1 |
| Gi3_26674952_x24 | .....gguucgauuccggcgUcgga         | 1 |
| Gi3_26658896_x24 | .....guucgauuccggcgUcg            | 1 |
| Gi3_26675624_x24 | .....guucgauCccggcgccggagc        | 1 |
| Gi3_26660288_x24 | .....gguucucaNccaacagauccg        | 1 |
| Gi1_3795806_x24  | .....uccggcguaguauaacggcuGga      | 1 |
| Gi1_3795614_x24  | .....ugguucucNcccaacagauccg       | 1 |
| Gi3_26663672_x24 | .....gguucAauuccggcgccggag        | 1 |
| Gi5_8209344_x24  | .....uccggcguaguaCaacggcuaga      | 1 |
| Gi3_26675528_x24 | .....gguucgauuccggcgccggUg        | 1 |
| Gi5_8207304_x24  | .....uccggcguaguauaacggcuGgaau    | 1 |
| Gi3_26675888_x24 | .....uccgCcgaguauaacggcuaga       | 1 |
| Gi1_3795686_x24  | .....uccggcguaguauaacggcuagG      | 1 |
| Gi3_26661824_x24 | .....gguCucacccaacagauccg         | 1 |

|                                                        |   |
|--------------------------------------------------------|---|
| Gi3_26664320_x24.....uUcggcguaguauaacggcuag.....       | 1 |
| Gi5_8217048_x24.....Ugcguaguauaacggcuag.....           | 1 |
| Gi5_8207976_x24.....Gccggcguaguauaacggcuagaa.....      | 1 |
| Gi1_3798686_x24.....gguucgaCucccggcgccgg.....          | 1 |
| Gi3_26668208_x24.....uccggcguaguauGacgg.....           | 1 |
| Gi2_10111627_x24.....uccggcguNguauaacggc.....          | 1 |
| Gi5_8218584_x24.....gguucgauucccggcgccggagcguuucc..... | 0 |
| Gi5_8208528_x24.....gguucucacccaacagGuccg.....         | 1 |
| Gi5_8207880_x24.....uccggcguagCauaacggcuaga.....       | 1 |
| Gi3_26665520_x24.....gguucgaCucccggcgccg.....          | 1 |
| Gi2_10115803_x24.....gguucgauucccgUgccggagc.....       | 1 |
| Gi3_26679536_x24.....uccggcguagCauaacgg.....           | 1 |
| Gi3_26650424_x24.....ucGggcguaguauaacggcuaga.....      | 1 |
| Gi3_26682400_x23.....uccggcguNguauaacggcuagaa.....     | 1 |
| Gi1_3800485_x23.....gguucgauucccggcgccggaU.....        | 1 |
| Gi5_8225756_x23.....Auucucacccaacagauccg.....          | 1 |
| Gi5_8223433_x23.....Gucucacccaacagauccg.....           | 1 |
| Gi5_8221616_x23.....gguucacccaGcagaucgg.....           | 1 |
| Gi5_8230356_x23.....uccggcguaguauaacggcuGg.....        | 1 |
| Gi4_499827_x23.....Uguucgauucccggcgccgg.....           | 1 |
| Gi5_8229942_x23.....Cguucgauucccggcgccg.....           | 1 |
| Gi5_8223571_x23.....gguucgauucccggcgccggagcA.....      | 1 |
| Gi5_8232656_x23.....uccggcguaguauaacggcuagaugg.....    | 0 |
| Gi3_26697948_x23.....gguucgauuccUcgggcgccgga.....      | 1 |
| Gi3_26708827_x23.....uuUucacccaacagauccg.....          | 1 |
| Gi3_26689323_x23.....uccggcguaguauaacggUua.....        | 1 |
| Gi3_26687230_x23.....ggGucgauucccggcgccg.....          | 1 |
| Gi5_8227343_x23.....gguucgauuccAgcgccggagc.....        | 1 |
| Gi5_8225825_x23.....uccggUguaguauaacggcuag.....        | 1 |
| Gi3_26688150_x23.....uccggcguaguauaacAg.....           | 1 |
| Gi3_26701122_x23.....gguucgauuccAgcgccggagc.....       | 1 |
| Gi1_3804694_x23.....gguucaccccCacagauccg.....          | 1 |
| Gi3_26697833_x23.....gguucgauCcccgggcgccg.....         | 1 |
| Gi2_10128003_x23.....gguucUauucccggcgccggagc.....      | 1 |
| Gi2_10126186_x23.....uccggcguNguauaacggcu.....         | 1 |
| Gi5_8226906_x23.....Uguucucacccaacagauc.....           | 1 |
| Gi3_26708482_x23.....gguucucacccaGcagaucgg.....        | 1 |
| Gi3_26687529_x23.....gguAcgauucccggcgccggag.....       | 1 |
| Gi5_8220144_x23.....gguUgauucccggcgccgg.....           | 1 |
| Gi3_26686057_x23.....uccggcguNguauaacggcuag.....       | 1 |
| Gi2_10122253_x23.....uccggcguaguauaacggcuGgaa.....     | 1 |
| Gi4_499091_x23.....gUuucgauucccggcgccgg.....           | 1 |
| Gi1_3805131_x23.....guCcuacccaacagauccg.....           | 1 |
| Gi5_8231069_x23.....gguucUauucccggcgccg.....           | 1 |
| Gi5_8228263_x23.....gguucgauuccUgggcgccggagc.....      | 1 |
| Gi2_10130648_x23.....gguucaccccCacagauccg.....         | 1 |
| Gi2_10137065_x23.....gCucgauucccggcgccgg.....          | 1 |

|                       |                                |   |
|-----------------------|--------------------------------|---|
| Gi3_26684470_x23..... | uccggcguaguauaacggcuagaCu..... | 1 |
| Gi1_3799979_x23.....  | guucgCuuccggcgccgg.....        | 1 |
| Gi5_8222398_x23.....  | guucgauuccggcgccggagcA.....    | 1 |
| Gi5_8227987_x23.....  | uccggcguNguauaacggcua.....     | 1 |
| Gi5_8228700_x23.....  | guucAauuccggcgccgg.....        | 1 |
| Gi1_3812227_x22.....  | guucgauuccggcgccggC.....       | 1 |
| Gi3_26718166_x22..... | guAcgauuccggcgccggga.....      | 1 |
| Gi5_8248083_x22.....  | gguucucacccaacagCuccg.....     | 1 |
| Gi3_26718562_x22..... | guucucaccccCacagauccg.....     | 1 |
| Gi3_26709784_x22..... | guAcgauuccggcgccgg.....        | 1 |
| Gi3_26713986_x22..... | uuUucacccaacagauccgg.....      | 1 |
| Gi5_8238293_x22.....  | uccggcguaguauCacggcuag.....    | 1 |
| Gi5_8234575_x22.....  | Aguucgauuccggcgcc.....         | 1 |
| Gi5_8242539_x22.....  | ggcguaguauaacggcuagaa.....     | 0 |
| Gi5_8240427_x22.....  | gguucgauNcccggcgccgg.....      | 1 |
| Gi3_26719574_x22..... | ggCucucacccaacagauccg.....     | 1 |
| Gi2_10138452_x22..... | guuUgauuccggcgccgg.....        | 1 |
| Gi3_26727098_x22..... | guucAauuccggcgccggagc.....     | 1 |
| Gi1_3808399_x22.....  | uucucaccUaacagauccgg.....      | 1 |
| Gi3_26737284_x22..... | uccggcguaguauaacUgcuaga.....   | 1 |
| Gi3_26729452_x22..... | uccggcguaguauaacggcuC.....     | 1 |
| Gi5_8243045_x22.....  | ccggcguaguauaacggcuagaa.....   | 0 |
| Gi3_26716120_x22..... | gCucgauuccggcgccggag.....      | 1 |
| Gi3_26730772_x22..... | gguucgauucccUgcgccgga.....     | 1 |
| Gi1_3807937_x22.....  | Uguucucacccaacagauccgg.....    | 1 |
| Gi2_10140696_x22..... | guCcgauuccggcgccgg.....        | 1 |
| Gi3_26740848_x22..... | gguCcgauuccggcgccgg.....       | 1 |
| Gi3_26725954_x22..... | gguucgauuccggcgAgga.....       | 1 |
| Gi3_26717066_x22..... | gguucgGuuccggcgccgg.....       | 1 |
| Gi3_26728792_x22..... | gguNcgauuccggcgccggagc.....    | 1 |
| Gi1_3813437_x22.....  | gAuucgauuccggcgccgg.....       | 1 |
| Gi3_26727450_x22..... | cGcaccacacagauccgg.....        | 1 |
| Gi3_26722500_x22..... | uccggcguaguUuaacggcuaga.....   | 1 |
| Gi3_26728088_x22..... | guucgauuccggcgAgga.....        | 1 |
| Gi2_10139948_x22..... | guucgauuccggcgccggG.....       | 1 |
| Gi2_10151036_x22..... | uGgauuccggcgccggagc.....       | 1 |
| Gi1_3808971_x22.....  | uUcggcguaguauaacggcuag.....    | 1 |
| Gi1_3811083_x22.....  | uucucacccaCacagauccgg.....     | 1 |
| Gi3_26711566_x22..... | guucgauucccAgcgccggag.....     | 1 |
| Gi3_26721092_x22..... | Uguucucacccaacagauccgg.....    | 1 |
| Gi3_26726042_x22..... | uccggUguaguauaacgg.....        | 1 |
| Gi3_26729320_x22..... | uccggcguaguauaacggAuaga.....   | 1 |
| Gi3_26726196_x22..... | Cguucgauuccggcgccgg.....       | 1 |
| Gi3_26725778_x22..... | uccggcguaguauaacggGuaga.....   | 1 |
| Gi3_26725008_x22..... | uccggcguaguaCaacggcua.....     | 1 |
| Gi2_10142500_x22..... | cggcguaguauaacggcuagaa.....    | 0 |
| Gi2_10147758_x22..... | Cguucgauuccggcgccggag.....     | 1 |

|                       |                                         |   |
|-----------------------|-----------------------------------------|---|
| Gi3_26731828_x22..... | ..gguCcgauucccggcgcggg.....             | 1 |
| Gi1_3810995_x22.....  | ..uccggUguaguauaacgg.....               | 1 |
| Gi3_26717924_x22..... | ..uGcgauucccggcgcggga.....              | 1 |
| Gi5_8253804_x21.....  | ..gguucucacccaacagaCccg.....            | 1 |
| Gi2_10171897_x21..... | ..guucgauucccggcgcggagc.....            | 1 |
| Gi5_8253741_x21.....  | ..guucgauucccggcgcggcC.....             | 1 |
| Gi5_8257437_x21.....  | ..gguucgauCcccggcgcgggagc.....          | 1 |
| Gi1_3820035_x21.....  | ..uucucacccaacagauccggguucgau.....      | 0 |
| Gi3_26769219_x21..... | ..uccggcguGguauaacggcuagaau.....        | 1 |
| Gi2_10157743_x21..... | ..gguucgauuccAggcgcgggagc.....          | 1 |
| Gi2_10155790_x21..... | ..uccggcguGguauaacgg.....               | 1 |
| Gi2_10163098_x21..... | ..gguucgauucccggcgcUg.....              | 1 |
| Gi5_8250171_x21.....  | ..guucucaccccGacagauccg.....            | 1 |
| Gi1_3818985_x21.....  | ..Gucacccaacagauccgg.....               | 1 |
| G1a_5481220_x21.....  | ..Uuucucacccaacagauccg.....             | 1 |
| Gi5_8252838_x21.....  | ..gguCcgauucccggcgcgggagc.....          | 1 |
| Gi3_26764158_x21..... | ..uccggcgcCaguauaacggcua.....           | 1 |
| Gi3_26755716_x21..... | ..Uauccggguucgauucc.....                | 1 |
| Gi3_26754267_x21..... | ..guGcgauucccggcgcggga.....             | 1 |
| Gi5_8258970_x21.....  | ..ggGucgauucccggcgcgggagc.....          | 1 |
| Gi3_26768988_x21..... | ..uccggcguaguGuaaacggcuag.....          | 1 |
| Gi5_8262477_x21.....  | ..uccggcguaguauaacggcCagaau.....        | 1 |
| Gi5_8255211_x21.....  | ..gguucAauucccggcgcgggagc.....          | 1 |
| Gi2_10172401_x21..... | ..uGcggcguaguauaacgg.....               | 1 |
| Gi1_3820434_x21.....  | ..uUcggcguaguauaacgg.....               | 1 |
| Gi5_8255085_x21.....  | ..guucgaCucccggcgcgggag.....            | 1 |
| Gi5_8251956_x21.....  | ..ggAucgauucccggcgcgggagc.....          | 1 |
| Gi1_3818649_x21.....  | ..uucucacccaacGgauccgg.....             | 1 |
| Gi2_10171771_x21..... | ..gguucgauuccAgcgcgggag.....            | 1 |
| Gi1_3813861_x21.....  | ..uucucaccccGacagauccgg.....            | 1 |
| Gi3_26758068_x21..... | ..uccggcguaguauaacAgcuag.....           | 1 |
| Gi5_8254014_x21.....  | ..gguucgauucccggcgcgggagA.....          | 1 |
| Gi3_26764221_x21..... | ..uccggcguaguauaaUgg.....               | 1 |
| Gi3_26755359_x21..... | ..uccggcguaguauaaAggcuaaga.....         | 1 |
| Gi2_10157638_x21..... | ..uccggcguagCauaacggcuaga.....          | 1 |
| Gi2_10171645_x21..... | ..uccggcguaguauaacggcA.....             | 1 |
| Gi3_26765145_x21..... | ..cagauccggguucgauucccggcgcgggagcC..... | 1 |
| Gi2_10166227_x21..... | ..uccgUcguaguauaacggcuaga.....          | 1 |
| Gi1_3816633_x21.....  | ..uUcggcguaguauaacggcua.....            | 1 |
| Gi3_26762877_x21..... | ..uccggcguaguaCaacggc.....              | 1 |
| Gi1_3814533_x21.....  | ..gguucgauucccggcgcgggaU.....           | 1 |
| Gi3_26742633_x21..... | ..uccggcguNguauaacggcuagaau.....        | 1 |
| Gi3_26768379_x21..... | ..uccggcguaguauaaGggcuaga.....          | 1 |
| Gi5_8251242_x21.....  | ..uccggcgcCaguauaacggcuaga.....         | 1 |
| Gi5_8254392_x21.....  | ..ugguucucacccaacagauccggguucga.....    | 0 |
| G1a_5485777_x21.....  | ..gUuucgauucccggcgcgg.....              | 1 |
| Gi3_26767035_x21..... | ..uccggcguaguauaacCgcuaaga.....         | 1 |

|                  |                               |   |
|------------------|-------------------------------|---|
| Gi5_8254728_x21  | .gAuucucacccaacagauccg        | 1 |
| Gi1_3820980_x21  | .Gccggcguaguauaacggcuagaau    | 1 |
| Gi5_8270349_x20  | .Cccggcguaguauaacggc          | 1 |
| Gi1_3821550_x20  | .guucgauAcccgggcgccgg         | 1 |
| Gi2_10175769_x20 | .Aguucgauucccgggcgccgg        | 1 |
| Gi2_10173549_x20 | .guucgauucccgggcgccggagA      | 1 |
| Gi3_26786165_x20 | .gauccggguucgauucccgggcgccgga | 0 |
| Gi3_26780245_x20 | .ugguucucaccUaacagauc         | 1 |
| Gi2_10187089_x20 | .ggGucgauucccgggcgccggag      | 1 |
| Gi5_8276429_x20  | .guucAauucccgggcgccgg         | 1 |
| Gi5_8271389_x20  | .guuUgauucccgggcgccg          | 1 |
| Gi5_8274529_x20  | .gCuucucacccaacagauccg        | 1 |
| Gi3_26802185_x20 | .gguucgCuuccggcgccggag        | 1 |
| Gi2_10183169_x20 | .guucgauCcccgggcgccgg         | 1 |
| Gi5_8265889_x20  | .aguccggcguaguauaacggcu       | 0 |
| Gi3_26801825_x20 | .gAucgauucccgggcgccgg         | 1 |
| Gi3_26793365_x20 | .uccAgcguaguauaacggcua        | 1 |
| Gi2_10185989_x20 | .gguucgauucccgggcgccggagcU    | 1 |
| Gi2_10189489_x20 | .uccggcguaguauaacgAcua        | 1 |
| Gi1_3821370_x20  | .uccggcguaguaCaacgg           | 1 |
| Gi5_8271009_x20  | .Cccggcguaguauaacggcuaga      | 1 |
| Gi1_3827030_x20  | .uucucaccNaacagauccgg         | 1 |
| Gi1_3825530_x20  | .ggCucgauucccgggcgccgg        | 1 |
| Gi3_26804425_x20 | .Ugguucgauucccgggcgccggagc    | 1 |
| Gi1_3825930_x20  | .Cccggcguaguauaacgg           | 1 |
| Gi3_26772925_x20 | .ggcguaguauaacggcuagaau       | 0 |
| Gi1_3823770_x20  | .gguucgauucccgggcgAcgg        | 1 |
| Gi3_26799545_x20 | .gguucgauucccgAcgccgga        | 1 |
| Gi5_8272489_x20  | .uccggcguaguauaacggUuaga      | 1 |
| Gi2_10183269_x20 | .Cccggcguaguauaacggc          | 1 |
| Gi5_8265869_x20  | .uccggcCuaguauaacggc          | 1 |
| Gi5_8268609_x20  | .guucgauucccgggcgAcgg         | 1 |
| Gi2_10186169_x20 | .gguucgauucccgggcgccggaCc     | 1 |
| Gi1_3824130_x20  | .ugguucucacccaacGgauccgg      | 1 |
| Gi2_10181629_x20 | .guucgauCcccgggcgccggagc      | 1 |
| Gi3_26795625_x20 | .uAcggcguaguauaacggcuaga      | 1 |
| Gi1_3825750_x20  | .cggcguaguauaacggcu           | 0 |
| Gi5_8276009_x20  | .Cccggcguaguauaacggcua        | 1 |
| Gi3_26803925_x20 | .gguucgauucccgggcgccAgag      | 1 |
| Gi1_3827510_x20  | .Gcucacccaacagauccg           | 1 |
| Gi3_26835193_x19 | .uccggcguaguaGaacggcuaga      | 1 |
| Gi3_26808840_x19 | .gguucgauucccgggcgccAg        | 1 |
| Gi1_3830617_x19  | .uccgUcguaguauaacgg           | 1 |
| Gi5_8283296_x19  | .ccggcguaguauaacggcu          | 0 |
| Gi3_26830880_x19 | .Cuucgauucccgggcgccggag       | 1 |
| Gi5_8291903_x19  | .gguucgauucccggcAccggagc      | 1 |
| Gi5_8280085_x19  | .uccggcguagCauaacgg           | 1 |

|                       |                                |   |
|-----------------------|--------------------------------|---|
| Gi1_3830427_x19.....  | ucaccaacagauccggguuca.....     | 0 |
| Gi2_10199340_x19..... | guucgauucccgAcgg.....          | 1 |
| Gi3_26820943_x19..... | uccggUguaguauaacggcuag.....    | 1 |
| Gi2_10208726_x19..... | uccggcguaguauaaUggcuaga.....   | 1 |
| Gi5_8287020_x19.....  | guucgauCcccggcgccgg.....       | 1 |
| Gi3_26836029_x19..... | uccggcguaguauaacggcuagGau..... | 1 |
| Gi3_26832894_x19..... | guucgauucUcggcgccgg.....       | 1 |
| Gi3_26808612_x19..... | Gguccggcguaguauaac.....        | 1 |
| Gi3_26816193_x19..... | uccggcguaguauaaUggc.....       | 1 |
| Gi3_26820183_x19..... | guucgauucccgAcggcg.....        | 1 |
| Gi3_26821722_x19..... | guucgauuccUggcgccgga.....      | 1 |
| Gi2_10196756_x19..... | guucgauucccgcgccgCagc.....     | 1 |
| Gi1_3834930_x19.....  | Auucgauuccggcgccggagc.....     | 1 |
| Gi2_10206731_x19..... | gguucgauuAccggcgccggagc.....   | 1 |
| Gi3_26806161_x19..... | uccggcguaguauaacgAc.....       | 1 |
| Gi5_8285652_x19.....  | uccggcguaguauaacggcuagaGu..... | 1 |
| Gi2_10199530_x19..... | guAcgauuccggcgccggagc.....     | 1 |
| Gi1_3830807_x19.....  | Auucucaccaacagauccg.....       | 1 |
| Gi2_10192918_x19..... | uUcggcguaguauaacggc.....       | 1 |
| Gi1_3831985_x19.....  | gguucgauuccggcgUgg.....        | 1 |
| Gi3_26805230_x19..... | guCcgauuccggcgccggag.....      | 1 |
| Gi1_3833676_x19.....  | ucUggcguaguauaacggcuaga.....   | 1 |
| Gi3_26828410_x19..... | gguucgauuccggcgAcg.....        | 1 |
| Gi3_26822102_x19..... | guucgauuccggcgAcgga.....       | 1 |
| Gi3_26819936_x19..... | cUauuccggcgccggag.....         | 1 |
| Gi3_26815452_x19..... | gAuucgauuccggcgccg.....        | 1 |
| Gi3_26810854_x19..... | Cucucaccaacagauccg.....        | 1 |
| Gi2_10206845_x19..... | gguucgGuuccggcgcc.....         | 1 |
| Gi5_8291884_x19.....  | uccggcguGguauaacggc.....       | 1 |
| Gi5_8303733_x18.....  | uccggcguaguaCaacggc.....       | 1 |
| Gi1_3838809_x18.....  | gUuucucaccaacagauccg.....      | 1 |
| Gi1_3841635_x18.....  | uccggcguaguauaacggcuGg.....    | 1 |
| Gi2_10224454_x18..... | gguuUgauuccggcgccgga.....      | 1 |
| Gi3_26859778_x18..... | guucgauuccggcgUgg.....         | 1 |
| Gi3_26850778_x18..... | gguucgauuccggcgccgCagc.....    | 1 |
| Gi3_26843128_x18..... | guGcgauuccggcgccg.....         | 1 |
| Gi1a_5511635_x18..... | Uguucgauuccggcgcc.....         | 1 |
| Gi5_8299737_x18.....  | uccggUguaguauaacggcu.....      | 1 |
| Gi1_3842319_x18.....  | uccggcguNguauaacggcu.....      | 1 |
| Gi2_10218010_x18..... | gguucgauuccggcgUgga.....       | 1 |
| Gi1_3838593_x18.....  | uucucaccaacGgauccg.....        | 1 |
| Gi5_8297325_x18.....  | uCcucaccaacagauccg.....        | 1 |
| Gi5_8300925_x18.....  | uUcggcguaguauaacgg.....        | 1 |
| Gi1_3840465_x18.....  | guucgauuccggcgccggG.....       | 1 |
| Gi3_26846368_x18..... | gguuUgauuccggcgccg.....        | 1 |
| Gi5_8294553_x18.....  | uccAgcguaguauaacggcuag.....    | 1 |
| Gi2_10223176_x18..... | guucAauuccggcgccggagc.....     | 1 |

|                       |                                     |   |
|-----------------------|-------------------------------------|---|
| Gi1_3843435_x18.....  | uccgUcguaguauaacggcuag.....         | 1 |
| Gi3_26859400_x18..... | gguucgauucccgcgccUgagc.....         | 1 |
| Gi2_10224562_x18..... | guucgauucccgcgUgg.....              | 1 |
| Gi3_26844622_x18..... | uGcgauucccgcgccggagc.....           | 1 |
| Gi5_8296209_x18.....  | ggAucucacccaacagauccg.....          | 1 |
| Gi2_10215526_x18..... | guucgauucccgcgUcgg.....             | 1 |
| Gi1_3837495_x18.....  | Cucucacccaacagauccg.....            | 1 |
| Gi5_8302311_x18.....  | guucgauucccgcgUcg.....              | 1 |
| Gi2_10218298_x18..... | agauccggguucgauucccgcgccggagcC..... | 1 |
| Gi3_26865556_x18..... | uccggcguaguCuaacggcua.....          | 1 |
| Gi3_26842750_x18..... | guucgauucccgUgcccggagc.....         | 1 |
| Gi4_506352_x18.....   | gguucgauucccgcgccggagcC.....        | 1 |
| Gi2_10226272_x18..... | uccggcgcCaguauaacggcuaga.....       | 1 |
| Gi5_8297415_x18.....  | uccggcguaguauaacggcuCga.....        | 1 |
| Gi3_26839870_x18..... | Uguucacccaacagauccgggu.....         | 1 |
| Gi1_3842463_x18.....  | Gucgauucccgcgccgg.....              | 1 |
| Gi3_26866942_x18..... | guucgauucccgAgccgg.....             | 1 |
| Gi5_8296497_x18.....  | uucucacccaCcagauccg.....            | 1 |
| Gi3_26870074_x18..... | guucgauuccUggcgccggag.....          | 1 |
| Gi3_26854252_x18..... | gcuaguauaacggcuaga.....             | 0 |
| Gi2_10223590_x18..... | uccggcguaguauaacggcuagauggu.....    | 0 |
| Gi1_3843075_x18.....  | ugguCucacccaacagauccgg.....         | 1 |
| Gi3_26873890_x18..... | uGgauucccgcgccggagc.....            | 1 |
| Gi1_3843633_x18.....  | uucCacccaacagauccg.....             | 1 |
| Gi5_8315104_x17.....  | uccggcguaguauaacggcuagauggu.....    | 0 |
| Gi3_26882054_x17..... | gguucgauucccgGgcccggagc.....        | 1 |
| Gi3_26889806_x17..... | uucucacccaacagaCccg.....            | 1 |
| Gi1_3850973_x17.....  | aUauccggguucgauucc.....             | 1 |
| Gi5_8315223_x17.....  | gAucgauucccgcgccgg.....             | 1 |
| Gi4_506824_x17.....   | uccggcguaguauaacggc.....            | 0 |
| Gi5_8311296_x17.....  | uccggcguaguauaacggc.....            | 1 |
| Gi2_10238093_x17..... | uGcgcgguaguauaacggcuag.....         | 1 |
| Gi2_10246083_x17..... | guucgauucccgcgccAgagc.....          | 1 |
| Gi1_3850905_x17.....  | Auucgauucccgcgccgga.....            | 1 |
| Gi3_26876937_x17..... | uccggcguaguauaacggcCagaau.....      | 1 |
| Gi1_3853115_x17.....  | ucUggcguaguauaacggcua.....          | 1 |
| Gi4_508099_x17.....   | Uuucgauucccgcgccgg.....             | 1 |
| Gi2_10232534_x17..... | gguucgauucccgAcc.....               | 1 |
| Gi1_3847658_x17.....  | uccggcguaguauaacggcuaU.....         | 1 |
| Gi1_3848746_x17.....  | guucgaCucccgcgccggagc.....          | 1 |
| Gi5_8313914_x17.....  | Gccggcguaguauaacggcu.....           | 1 |
| Gi3_26882904_x17..... | guucgauucccgcgccUga.....            | 1 |
| Gi2_10232636_x17..... | uccggUguaguauaacggcuaga.....        | 1 |
| Gi5_8308066_x17.....  | uccggcguaguauaacggcuag.....         | 1 |
| Gi5_8310769_x17.....  | caacagauccggguucgauucccgcgccg.....  | 0 |
| Gi5_8319592_x17.....  | uccgUcguaguauaacgg.....             | 1 |
| Gi1_3850395_x17.....  | guucucacccaacagGuccg.....           | 1 |



|                       |                                |   |
|-----------------------|--------------------------------|---|
| Gi5_8316906_x17.....  | uccggcguaguauaacggcuCg.....    | 1 |
| Gi2_10238671_x17..... | guucgauucUcgggcgcggagc.....    | 1 |
| Gi5_8310820_x17.....  | guucgauuUccgggcgcgg.....       | 1 |
| Gi3_26896844_x17..... | guucgauuUccgggcgcgg.....       | 1 |
| Gi3_26877923_x17..... | guucgauAccgggcgcgg.....        | 1 |
| Gi2_10229746_x17..... | gguucgauuccgggcgcAcg.....      | 1 |
| Gi3_26912263_x17..... | Ugguucgauuccgggcgcggag.....    | 1 |
| Gi3_26898238_x17..... | uccggcguagAauaacggcuaga.....   | 1 |
| Gi1_3847335_x17.....  | uAguucucacccaacagauccgg.....   | 1 |
| Gi5_8308746_x17.....  | guucucGcccaacagauccg.....      | 1 |
| Gi5_8319660_x17.....  | gUuucucacccaacagauccgg.....    | 1 |
| Gi5_8311126_x17.....  | uccggcguaguauaGcggcuagaau..... | 1 |
| Gi1_3848661_x17.....  | ggCucucacccaacagauccg.....     | 1 |
| Gi3_26909917_x17..... | guucgauuccgggcgcAgg.....       | 1 |
| Gi3_26882003_x17..... | gguucgGuuccgggcgcgg.....       | 1 |
| Gi3_26878246_x17..... | gguucgUuuccgggcgcggagc.....    | 1 |
| Gi3_26893376_x17..... | guucgauuccgggcgcggAa.....      | 1 |
| Gi2_10230664_x17..... | gguucgauuccgggcgcggUgc.....    | 1 |
| Gi3_26878059_x17..... | gGuuccgggcgcggagc.....         | 1 |
| Gi1_3851194_x17.....  | uCcucacccaacagauccg.....       | 1 |
| Gi2_10247120_x17..... | uccggcguUguauaacggcuaga.....   | 1 |
| Gi2_10239453_x17..... | Auucgauuccgggcgcggga.....      | 1 |
| Gi3_26903763_x17..... | guucgauuccgggcgcggagcgA.....   | 1 |
| Gi2_10240048_x17..... | uccggcguaguauaacAgc.....       | 1 |
| Gi2_10243414_x17..... | guucgauucUcgggcgcgg.....       | 1 |
| Gi1_3846808_x17.....  | guucgauuAccgggcgcgg.....       | 1 |
| Gi1_3854747_x17.....  | gguucgauuccgggUgccgg.....      | 1 |
| Gi5_8318266_x17.....  | aUauccggguucgauucc.....        | 1 |
| Gi1_3848525_x17.....  | guucgauuccgggcgcGgg.....       | 1 |
| Gi3_26892560_x17..... | gguucucacccaacagCuccg.....     | 1 |
| Gi3_26907112_x17..... | gcguaguauaacggcuagaa.....      | 0 |
| Gi5_8321479_x17.....  | uccggcguNguauaacggc.....       | 1 |
| Gi2_10238654_x17..... | ggCucgauuccgggcgcgg.....       | 1 |
| Gi3_26896538_x17..... | uccggcgcCaguauaacggc.....      | 1 |
| Gi5_8319694_x17.....  | guucgauuccgggcgcUgg.....       | 1 |
| Gi3_26901825_x17..... | gguucgauuccgggAgccgga.....     | 1 |
| Gi3_26931325_x16..... | uccggcguaguauaacgCcuaga.....   | 1 |
| Gi5_8337504_x16.....  | Aguucgauuccgggcgcggag.....     | 1 |
| Gi3_26921565_x16..... | ggAucgauuccgggcgcgg.....       | 1 |
| Gi3_26926957_x16..... | uucucaccNaacagauccg.....       | 1 |
| Gi5_8325104_x16.....  | uccggcguagCauaacggcuag.....    | 1 |
| Gi3_26919517_x16..... | cUgguucgauuccgggcgcggga.....   | 1 |
| Gi1_3862977_x16.....  | guucgauuccAggcgcgg.....        | 1 |
| Gi1_3861793_x16.....  | Uguucgauuccgggcgcgg.....       | 1 |
| Gi1_3856657_x16.....  | gCucgauuccgggcgcggga.....      | 1 |
| Gi5_8327520_x16.....  | guAcgauuccgggcgcgg.....        | 1 |
| Gi5_8324224_x16.....  | uccggcguaguauaacAgc.....       | 1 |

Gi2\_10258249\_x16.....gguucgaCuccggcgccg..... 1  
 Gi2\_10256553\_x16.....uccggcCuaguauaacggcuaga..... 1  
 Gi3\_26943453\_x16.....gguucgauCccggcgccgg..... 1  
 Gi3\_26919165\_x16.....ggCucgauuccggcgccgg..... 1  
 Gi3\_26930301\_x16.....uucucacccaacagGuccg..... 1  
 Gi3\_26921389\_x16.....uGcggcguaguauaacggcuagaa..... 1  
 Gi3\_26935261\_x16.....gguucgauucccgAcgccggag..... 1  
 Gi3\_26945757\_x16.....uccggcguaguauaGcggcuagaau..... 1  
 Gi1\_3857777\_x16.....gguucgCuuccggcgccgg..... 1  
 Gi2\_10269849\_x16.....guucgauuccggcgGcggagc..... 1  
 Gi1\_3858497\_x16.....gguucucacccaCcagauccg..... 1  
 Gi3\_26942061\_x16.....gUuucacccaacagaucc..... 1  
 Gi1\_3858289\_x16.....gguucgGuuccggcgccgg..... 1  
 Gi1\_3861857\_x16.....gCucucacccaacagauccg..... 1  
 Gi5\_8333488\_x16.....uccggcguaguauaacggcuaAa..... 1  
 Gi1\_3857521\_x16.....uccggcguGguauaacgg..... 1  
 Gi2\_10263561\_x16.....gguucgauuccGggcgccggagc..... 1  
 Gi3\_26942173\_x16.....uccAgcguaguauaacgg..... 1  
 G1a\_5537341\_x16.....gUuucgauuccggcgccgga..... 1  
 Gi3\_26950013\_x16.....gguucucacccaacGgauccg..... 1  
 Gi2\_10268377\_x16.....guucgauuccggcgAcggagc..... 1  
 Gi2\_10267337\_x16.....aUaaugguugguucaccc..... 1  
 Gi3\_26922189\_x16.....Uguucucacccaacagaucc..... 1  
 Gi3\_26946093\_x16.....guucgauuccggcgccggC..... 1  
 Gi3\_26932605\_x16.....gguucgauuccggcgccggA..... 1  
 Gi3\_26942973\_x16.....gguucucaccccCacagauccg..... 1  
 Gi3\_26941533\_x16.....guucgauucUcggcgccgga..... 1  
 Gi1\_3861985\_x16.....guucgauucAcggcgccgg..... 1  
 Gi3\_26920877\_x16.....guucgauAccggcgccggA..... 1  
 Gi1\_3858945\_x16.....gguucgauucccgAcgccg..... 1  
 Gi5\_8335344\_x16.....uccAgcguaguauaacgg..... 1  
 Gi5\_8335584\_x16.....guucgauucccgUgccgg..... 1  
 Gi2\_10259961\_x16.....uccgUcguaguauaacggc..... 1  
 Gi1\_3861281\_x16.....uucucGcccaacagauccg..... 1  
 Gi5\_8333760\_x16.....ggCucgauuccggcgccg..... 1  
 Gi2\_10252361\_x16.....gguucgUuuccggcgccggagc..... 1  
 Gi3\_26916285\_x16.....gguucgauuccGggcgccggagc..... 1  
 Gi1\_3855969\_x16.....uucucacccaacagGuccg..... 1  
 Gi2\_10266009\_x16.....uccggcguaguauaacggcuCga..... 1  
 Gi3\_26925405\_x16.....gguucgauuccggAgccg..... 1  
 Gi5\_8331232\_x16.....Auucgauuccggcgccgga..... 1  
 Gi2\_10260585\_x16.....gguucucaNccaacagauccg..... 1  
 Gi3\_26936845\_x16.....gguucCcacccaacagauccg..... 1  
 Gi3\_26948301\_x16.....gAuucgauuccggcgccgg..... 1  
 Gi3\_26935277\_x16.....gAucgauuccggcgccgga..... 1  
 Gi2\_10256521\_x16.....gguucgauuccggcgccAga..... 1  
 Gi1\_3860049\_x16.....uCcucacccaacagauccg..... 1

|                       |                                       |   |
|-----------------------|---------------------------------------|---|
| Gi2_10263641_x16..... | guAcgauucccggcgccgg.....              | 1 |
| Gi2_10267577_x16..... | Cguucgauucccggcgccg.....              | 1 |
| Gi3_26944653_x16..... | uccggcguaguauaacggcuGgaau.....        | 1 |
| Gi1_3862593_x16.....  | ugguucucacccaCcagauccgg.....          | 1 |
| Gi2_10257705_x16..... | guucgauucccggcgcUggagc.....           | 1 |
| Gi5_8323808_x16.....  | guucgauucUcgggcgccc.....              | 1 |
| Gi5_8323536_x16.....  | gguucucacccaacagaucUg.....            | 1 |
| Gi2_10261465_x16..... | gguucgauucccAgcgcc.....               | 1 |
| Gi5_8335312_x16.....  | uccggcguNguauaacgg.....               | 1 |
| Gi5_8336528_x16.....  | Aguucgauucccggcgccc.....              | 1 |
| Gi2_10261641_x16..... | uGcggcguaguauaacggcuagaau.....        | 1 |
| Gi3_26947453_x16..... | uccggcguCguauaacgg.....               | 1 |
| Gi1_3860929_x16.....  | guucucacccaacGgauccg.....             | 1 |
| Gi3_26942765_x16..... | gAucgauucccggcgcccggagc.....          | 1 |
| Gi3_26985805_x15..... | guucgauuUcgggcgcccggag.....           | 1 |
| Gi5_8352632_x15.....  | uccggcguaguauCacgg.....               | 1 |
| Gi5_8338577_x15.....  | guucgauuccAgcgccc.....                | 1 |
| Gi3_26955550_x15..... | Gccggcguaguauaacggcu.....             | 1 |
| Gi3_26972620_x15..... | gguucgauuccAggcgcccga.....            | 1 |
| Gi1_3869582_x15.....  | uccggcguaguauaacggcuG.....            | 1 |
| Gi2_10281595_x15..... | uccAgcguaguauaacggcuaga.....          | 1 |
| Gi1_3872252_x15.....  | gguucucaccccGacagauccg.....           | 1 |
| Gi2_10287895_x15..... | guucAauucccggcgcccgg.....             | 1 |
| Gi5_8345297_x15.....  | ggGucucacccaacagauccg.....            | 1 |
| Gi2_10279780_x15..... | ucUggcguaguauaacggcua.....            | 1 |
| Gi2_10287565_x15..... | guGcgauucccggcgcccggagc.....          | 1 |
| Gi5_8340467_x15.....  | guucgauucccggcgcccCg.....             | 1 |
| Gi3_26966170_x15..... | uccggcguaguGuaacggcuagaau.....        | 1 |
| Gi2_10292530_x15..... | guucgauucccggcAccggagc.....           | 1 |
| Gi2_10277185_x15..... | uccggcguaguaCaacggcuaga.....          | 1 |
| Gi3_26957575_x15..... | Auucgauucccggcgccc.....               | 1 |
| Gi5_8351162_x15.....  | cCacccaacagauccgg.....                | 1 |
| Gi5_8351762_x15.....  | gUuucucacccaacagauc.....              | 1 |
| Gi3_26977105_x15..... | cagauccggguucgauucccggcgcccggagc..... | 0 |
| Gi2_10287145_x15..... | guucgauucccggcgcccGA.....             | 1 |
| Gi3_26986555_x15..... | Ggguucucacccaacagauc.....             | 1 |
| Gi1_3867872_x15.....  | guucucacNcaacagauccgg.....            | 1 |
| Gi3_26961715_x15..... | uccAgcguaguauaacggc.....              | 1 |
| Gi2_10275640_x15..... | gCucgauucccggcgccc.....               | 1 |
| Gi1_3870467_x15.....  | uccggcguaguauaacAg.....               | 1 |
| Gi3_26954470_x15..... | gguucgauuGccggcgcccggagc.....         | 1 |
| Gi3_26952685_x15..... | gguucgauuUcgggcgcccga.....            | 1 |
| Gi3_26992975_x15..... | uUcggcguaguauaacggcuagaau.....        | 1 |
| Gi3_26978710_x15..... | acagauccggguucgauucccggcgcccga.....   | 0 |
| Gi5_8344892_x15.....  | ucucaccccGacagauccgg.....             | 1 |
| Gi2_10274605_x15..... | guCcgauucccggcgccc.....               | 1 |
| Gi3_26983810_x15..... | gguucgauuccUgcgcccggag.....           | 1 |

|                       |                                   |   |
|-----------------------|-----------------------------------|---|
| Gi2_10294195_x15..... | uucucacccaCcagaucgg.....          | 1 |
| Gi4_510572_x15.....   | uccggcguaguauaacggcuagaau.....    | 0 |
| Gi1_3870362_x15.....  | ggGucgauucccggcgcgg.....          | 1 |
| Gi1_3868877_x15.....  | uccggcguaguauaacgAcuag.....       | 1 |
| Gi3_26977270_x15..... | gguucucacUcaacagaucgg.....        | 1 |
| Gi5_8354912_x15.....  | gguucgauucccggcUggagc.....        | 1 |
| Gi5_8341367_x15.....  | uccggcguagCauaacggc.....          | 1 |
| Gi1a_5544824_x15..... | Uuucgauucccggcgcggagc.....        | 1 |
| Gi2_10273030_x15..... | guucgGuucccggcgcggga.....         | 1 |
| Gi3_26968030_x15..... | uucucacccaacGgaucgg.....          | 1 |
| Gi3_26953060_x15..... | guucUauucccggcgcggagc.....        | 1 |
| Gi2_10291435_x15..... | ugguucucNcccaacagaucgg.....       | 1 |
| Gi3_26988265_x15..... | gguucucacccGacagaucgg.....        | 1 |
| Gi5_8349707_x15.....  | guucgauucccgAgccgg.....           | 1 |
| Gi3_26981320_x15..... | ggCucgauucccggcgc.....            | 1 |
| Gi1a_5552324_x15..... | gUuucgauucccggcgc.....            | 1 |
| Gi3_26960050_x15..... | guucgauuAccgggcgcggagc.....       | 1 |
| Gi5_8350472_x15.....  | uUcggcguaguauaacggcu.....         | 1 |
| Gi3_26987620_x15..... | uccggcguaguauaacgAcuagaau.....    | 1 |
| Gi1_3870317_x15.....  | gCuucgauucccggcgcgg.....          | 1 |
| Gi3_26953450_x15..... | guucgauucccggcgcCg.....           | 1 |
| Gi2_10291720_x15..... | guucgauAcccggcgcggagc.....        | 1 |
| Gi5_8344007_x15.....  | gguucgauucccgUgccggagc.....       | 1 |
| Gi2_10284595_x15..... | guucgauucccgUgccgg.....           | 1 |
| Gi1_3866552_x15.....  | uggCucucacccaacagaucgg.....       | 1 |
| Gi5_8339057_x15.....  | gguucgauucccAgcgccgga.....        | 1 |
| Gi2_10288225_x15..... | uUguucucacccaacagauc.....         | 1 |
| Gi2_10293895_x15..... | gguucgGuucccggcgcggag.....        | 1 |
| Gi3_26988595_x15..... | guucucacNcaacagaucgg.....         | 1 |
| Gi1_3867737_x15.....  | Cguucucacccaacagaucgg.....        | 1 |
| Gi3_26957860_x15..... | uucCcacccaacagaucgg.....          | 1 |
| Gi3_26975290_x15..... | guucgauucUcgggcgcggagc.....       | 1 |
| Gi3_26986465_x15..... | guucgauucccggcgcAggagc.....       | 1 |
| Gi1_3872102_x15.....  | uccggcguaguGuaacggcuag.....       | 1 |
| Gi2_10291690_x15..... | ggCucgauucccggcgcggag.....        | 1 |
| Gi2_10281325_x15..... | gAuucgauucccggcgcggag.....        | 1 |
| Gi3_26966755_x15..... | gCuucgauucccggcgcgg.....          | 1 |
| Gi5_8346857_x15.....  | gguucgauNcccggcgc.....            | 1 |
| Gi3_26969215_x15..... | guAcgauucccggcgcggagc.....        | 1 |
| Gi5_8338427_x15.....  | uucucacccaacGgaucgg.....          | 1 |
| Gi1_3865502_x15.....  | uccggcgCaguauaacgg.....           | 1 |
| Gi1_3867422_x15.....  | uccggcguaguauaacggcC.....         | 1 |
| Gi3_26998135_x14..... | uucucaccNaacagaucgg.....          | 1 |
| Gi3_27000277_x14..... | uucgauucccggcgcggCgc.....         | 1 |
| Gi3_27036425_x14..... | ugguucucacccaacagaucggguucga..... | 0 |
| Gi2_10305815_x14..... | gcguaguauaacggcuaga.....          | 0 |
| Gi2_10296631_x14..... | guucgauuNccgggcgcgg.....          | 1 |

|                       |                                   |   |
|-----------------------|-----------------------------------|---|
| Gi3_27007347_x14..... | Cccggcguaguauaacggcuagaau.....    | 1 |
| Gi5_8368683_x14.....  | uccgUcguaguauaacggcua.....        | 1 |
| Gi2_10313039_x14..... | guucgauucccggcgcUg.....           | 1 |
| Gi3_27018169_x14..... | guuUgauucccggcgcggagc.....        | 1 |
| Gi1_3882092_x14.....  | guucucacccaacagGuccgg.....        | 1 |
| Gi5_8371357_x14.....  | uccggcguaguauaGcggcua.....        | 1 |
| Gi2_10316595_x14..... | gAuucgauucccggcgcc.....           | 1 |
| Gi3_27015145_x14..... | gguucgauAcccggcgcggag.....        | 1 |
| Gi2_10308545_x14..... | uccggUguaguauaacggcua.....        | 1 |
| Gi3_27005527_x14..... | uccUgcguaguauaacggcuaga.....      | 1 |
| Gi5_8363685_x14.....  | gguucgauucccggcgcggagU.....       | 1 |
| Gi5_8366779_x14.....  | uccggcguaguauaCaacggcuag.....     | 1 |
| Gi2_10313193_x14..... | guucgauucccggcgccA.....           | 1 |
| Gi3_27023615_x14..... | uucucGcccaacagauccg.....          | 1 |
| Gi1_3880440_x14.....  | ugguucucacccaacagaCccg.....       | 1 |
| Gi3_26999759_x14..... | gguucgauucccggcgcggagc.....       | 1 |
| Gi3_27021445_x14..... | uccggcguaguauaGcggcuagaa.....     | 1 |
| Gi3_27005163_x14..... | guucgauucccggcgcggAagc.....       | 1 |
| Gi3_27001719_x14..... | gAuucgauucccggcgcc.....           | 1 |
| Gi3_27008271_x14..... | guucucacccaacagauccggguucgau..... | 0 |
| Gi5_8363433_x14.....  | Cuucgauucccggcgcggga.....         | 1 |
| Gi2_10304737_x14..... | uccggcguaguauaacggcuagGau.....    | 1 |
| Gi3_27010399_x14..... | ggNucgauucccggcgcggagc.....       | 1 |
| Gi3_27016139_x14..... | gguuGgauucccggcgcggga.....        | 1 |
| Gi1_3875372_x14.....  | gguucgauucccggcAccgg.....         | 1 |
| Gi5_8359135_x14.....  | ggCucgauucccggcgcggga.....        | 1 |
| Gi5_8362635_x14.....  | gguucgauucccggcgcggGg.....        | 1 |
| Gi2_10316175_x14..... | guucgauucccggcgcggAagc.....       | 1 |
| Gi3_27012821_x14..... | gCucgauucccggcgcgg.....           | 1 |
| Gi5_8368865_x14.....  | ggCucgauucccggcgcc.....           | 1 |
| Gi3_27000333_x14..... | gguucgauucccggcgccCgagc.....      | 1 |
| Gi1_3874140_x14.....  | Cucucacccaacagauccg.....          | 1 |
| Gi3_27037237_x14..... | gguucucacccaCagauccg.....         | 1 |
| Gi5_8363377_x14.....  | gguucgCuuccgggcggc.....           | 1 |
| Gi3_27029341_x14..... | uucgauucccggcgcggC.....           | 1 |
| Gi3_27002881_x14..... | uccNgcguaguauaacggcuaga.....      | 1 |
| Gi5_8356405_x14.....  | gguucgauuccAgcgcc.....            | 1 |
| Gi5_8369299_x14.....  | Cccggcguaguauaacgg.....           | 1 |
| Gi3_27036271_x14..... | uccggcguaguauaacggcuaUa.....      | 1 |
| Gi3_27015621_x14..... | guGcgauucccggcgcggagc.....        | 1 |
| Gi3_27019345_x14..... | guucgauuccAggcgcgg.....           | 1 |
| Gi2_10301433_x14..... | uccggcguaguGuaacggc.....          | 1 |
| Gi5_8365687_x14.....  | uGcggcguaguauaacggcuagaa.....     | 1 |
| Gi1_3878970_x14.....  | ugguucucacccaCacagauccg.....      | 1 |
| Gi2_10308713_x14..... | ucUggcguaguauaacggcuagaau.....    | 1 |
| Gi5_8358995_x14.....  | gCucgauucccggcgcggga.....         | 1 |
| Gi1_3877304_x14.....  | uucucacccaacagGuccg.....          | 1 |

|                       |                                     |   |
|-----------------------|-------------------------------------|---|
| Gi1a_5559747_x14..... | uccggcguaguauaacgAcuagaau.....      | 1 |
| Gi3_27011939_x14..... | uucucaccaGcagaucgg.....             | 1 |
| Gi5_8359107_x14.....  | uccggcgCaguauaacggcuagaau.....      | 1 |
| Gi3_27009573_x14..... | guucgauucccggcgAcggagc.....         | 1 |
| Gi2_10303701_x14..... | uccggcguGguauaacggcuag.....         | 1 |
| Gi1_3873146_x14.....  | uucucGcccaacagaucgg.....            | 1 |
| Gi5_8365253_x14.....  | Cguucgauucccggcgccgga.....          | 1 |
| Gi5_8360045_x14.....  | gAuucgauucccggcgccg.....            | 1 |
| Gi1_3873118_x14.....  | gguucucaccaacagaCccg.....           | 1 |
| Gi1a_5558613_x14..... | Gucucaccaacagaucgg.....             | 1 |
| Gi3_26999605_x14..... | gguucgauuccUggcgccgg.....           | 1 |
| Gi3_27005429_x14..... | gCuucgauucccggcgccg.....            | 1 |
| Gi3_27024385_x14..... | uccggcguaguauaCggg.....             | 1 |
| Gi5_8365309_x14.....  | cguaguauaacggcuagaauugguugguuc..... | 0 |
| Gi3_27012527_x14..... | uccggcguaguauaCgggcu.....           | 1 |
| Gi2_10297023_x14..... | gguucgauCccggcgccgga.....           | 1 |
| Gi5_8362173_x14.....  | uccggcguaguauaacggcCa.....          | 1 |
| Gi1_3877780_x14.....  | ggCucgauucccggcgccggagc.....        | 1 |
| Gi3_27029817_x14..... | uccggcgGaguauaacggcuaga.....        | 1 |
| Gi5_8367703_x14.....  | guucucaccaacCgaucgg.....            | 1 |
| Gi3_27002125_x14..... | gguucgauucccggcgAcgg.....           | 1 |
| Gi2_10298059_x14..... | guucgauuUccggcgccgg.....            | 1 |
| Gi3_27021501_x14..... | guGcgauucccggcgccggag.....          | 1 |
| Gi3_27004211_x14..... | gguucgauucccggcgUcggag.....         | 1 |
| Gi3_27022649_x14..... | guucgauucccggcgGcggagc.....         | 1 |
| Gi5_8363755_x14.....  | gguucAauucccggcgccg.....            | 1 |
| Gi2_10306039_x14..... | guucgauucccggAgcgggagc.....         | 1 |
| Gi5_8372561_x14.....  | guGcgauucccggcgccgg.....            | 1 |
| Gi3_27006661_x14..... | guCucaccaacagaucgg.....             | 1 |
| Gi5_8360829_x14.....  | gguucgauuccUgcgcccggagc.....        | 1 |
| Gi3_27006577_x14..... | uCucaccaacagaucgg.....              | 1 |
| Gi3_27014207_x14..... | uccggcguUguauaacggc.....            | 1 |
| Gi1_3876772_x14.....  | gguucucaccaacagCuccg.....           | 1 |
| Gi3_27000123_x14..... | gguucgauucccggcgccgAa.....          | 1 |
| Gi5_8359835_x14.....  | uccggcguaguauaacAgcuagaau.....      | 1 |
| Gi5_8373351_x13.....  | gguucgauucccggcgccggG.....          | 1 |
| Gi3_27060023_x13..... | uccggcguaguauaacggcuagaC.....       | 1 |
| Gi3_27077807_x13..... | Auucucaccaacagaucgg.....            | 1 |
| Gi3_27075623_x13..... | Gguccggcguaguauaacggcuagaau.....    | 1 |
| Gi3_27038209_x13..... | uccggcguaguauaacggcuAaa.....        | 1 |
| Gi3_27067238_x13..... | uccggcguaguauaacgUcuaga.....        | 1 |
| Gi1_3885592_x13.....  | guucgauucccggcgGcgg.....            | 1 |
| Gi3_27056617_x13..... | uccggcguaguauaacggAua.....          | 1 |
| Gi3_27067030_x13..... | gguuAgauucccggcgccgga.....          | 1 |
| Gi3_27075558_x13..... | uccggcguCguauaacggc.....            | 1 |
| Gi1_3882914_x13.....  | guucucGcccaacagaucgg.....           | 1 |
| Gi3_27048310_x13..... | gguucgauuccUggcgccg.....            | 1 |

|                       |                                 |   |
|-----------------------|---------------------------------|---|
| Gi3_27063572_x13..... | .gguucucGcccaacagauccg.....     | 1 |
| Gi3_27050338_x13..... | .guucgauucccgccgagA.....        | 1 |
| Gi3_27045437_x13..... | .guucgauucccgccAgagc.....       | 1 |
| Gi1_3888413_x13.....  | .ugUuucacccaacagauccg.....      | 1 |
| Gi5_8373884_x13.....  | .gguucgauucccgccAgagc.....      | 1 |
| Gi1a_5572419_x13..... | .gUuucgauucccgccg.....          | 1 |
| Gi5_8380748_x13.....  | .uucucacccaacagGuccg.....       | 1 |
| Gi2_10338106_x13..... | .gCuucgauucccgccgag.....        | 1 |
| Gi3_27046542_x13..... | .gguuGgauucccgccgag.....        | 1 |
| Gi1_3889024_x13.....  | .ugguucucacccGacagauccg.....    | 1 |
| Gi2_10338912_x13..... | .guucgaGucccgccgagc.....        | 1 |
| Gi2_10324599_x13..... | .uccggcguagCauaacggcua.....     | 1 |
| Gi2_10330592_x13..... | .guucgauucccgccggaAc.....       | 1 |
| Gi5_8389601_x13.....  | .gguucgaCuucccgccg.....         | 1 |
| Gi5_8385987_x13.....  | .uccggcguaguauaacggcuagaC.....  | 1 |
| Gi3_27057319_x13..... | .guucgCuucccgccgagc.....        | 1 |
| Gi5_8373858_x13.....  | .Cguucgauucccgccg.....          | 1 |
| Gi2_10322298_x13..... | .gguucgauucccgccAccgga.....     | 1 |
| Gi5_8380410_x13.....  | .guucgauucccgccGcgg.....        | 1 |
| Gi1_3891559_x13.....  | .Ugcguaguauaacggcuag.....       | 1 |
| Gi3_27064742_x13..... | .Gucaccaacagauccg.....          | 1 |
| Gi3_27059763_x13..... | .uccggcguaguauaacggU.....       | 1 |
| Gi2_10322402_x13..... | .guucgauucccgccgagcU.....       | 1 |
| Gi1_3885540_x13.....  | .guuNgauucccgccg.....           | 1 |
| Gi3_27063494_x13..... | .uGgauucccgccgag.....           | 1 |
| Gi2_10324222_x13..... | .gguucgauucccgccAgag.....       | 1 |
| Gi3_27062961_x13..... | .guucgauCcccgccgag.....         | 1 |
| Gi3_27065496_x13..... | .gUuucacccaacagauccg.....       | 1 |
| Gi5_8384674_x13.....  | .gguucgauucccgccAgcggagc.....   | 1 |
| Gi3_27044670_x13..... | .guucgauUccggccgagc.....        | 1 |
| Gi5_8381086_x13.....  | .guucCcacccaacagauccg.....      | 1 |
| Gi3_27069760_x13..... | .uccggcguaguauaCcggc.....       | 1 |
| Gi3_27043162_x13..... | .gguucgauucccgccGggagc.....     | 1 |
| Gi3_27062818_x13..... | .gguucgauuccUggcgc.....         | 1 |
| Gi1_3892781_x13.....  | .gguucucaNccaacagauccg.....     | 1 |
| Gi1_3892261_x13.....  | .guucgauucccgccgU.....          | 1 |
| Gi5_8382412_x13.....  | .gguucucaccUaacagauccg.....     | 1 |
| Gi1_3891182_x13.....  | .guucucacccGacagauccg.....      | 1 |
| Gi4_514174_x13.....   | .Uguucgauucccgccgagc.....       | 1 |
| Gi3_27059126_x13..... | .gCuucacccaacagauccg.....       | 1 |
| Gi3_27077092_x13..... | .gguucgauucccgccggaUc.....      | 1 |
| Gi3_27042083_x13..... | .Cguucgauucccgcc.....           | 1 |
| Gi3_27059906_x13..... | .gguucUauucccgccgagc.....       | 1 |
| Gi3_27065327_x13..... | .guucgGuucccgccg.....           | 1 |
| Gi2_10328044_x13..... | .uccggcguaguauaacAgcuagaau..... | 1 |
| Gi5_8373910_x13.....  | .ggGucgauucccgccg.....          | 1 |
| Gi2_10322532_x13..... | .gguucgauucccgccgagcA.....      | 1 |

|                       |                                |   |
|-----------------------|--------------------------------|---|
| Gi5_8390368_x13.....  | guucgauucccgUcgccgg.....       | 1 |
| Gi2_10336663_x13..... | Cucucacccaacagauccg.....       | 1 |
| Gi2_10342500_x13..... | uccggcguaguGuaacggcuagaau..... | 1 |
| Gi3_27084086_x13..... | gguucucacccaacagauccg.....     | 1 |
| Gi1_3885072_x13.....  | uccggcguaguauaacggcuagU.....   | 1 |
| Gi3_27063065_x13..... | gguucgauucccgcccgA.....        | 1 |
| Gi1a_5576280_x13..... | uccggcguaguauaacggcu.....      | 0 |
| Gi5_8383855_x13.....  | guucgauucccgcccg.....          | 1 |
| Gi5_8376679_x13.....  | guucgauuNccggcgcggga.....      | 1 |
| Gi1_3886073_x13.....  | Gccggcguaguauaacggcu.....      | 1 |
| Gi3_27079484_x13..... | ggGucucacccaacagauccg.....     | 1 |
| Gi5_8373143_x13.....  | uccggcguaguauaacggcuagGau..... | 1 |
| Gi5_8382022_x13.....  | guucgauucccgcccgCgc.....       | 1 |
| Gi1_3891845_x13.....  | gguucgauNccggcgcgggagc.....    | 1 |
| Gi2_10321648_x13..... | guucgauucccgcccgagU.....       | 1 |
| Gi3_27043669_x13..... | guucgauuccAggcgcggga.....      | 1 |
| Gi5_8385636_x13.....  | guAcgauucccgcccg.....          | 1 |
| Gi2_10333738_x13..... | uccggcguaguGuaacggcua.....     | 1 |
| Gi2_10332256_x13..... | gguAcgauucccgcccgagc.....      | 1 |
| Gi1_3887464_x13.....  | ugguucCacccaacagauccg.....     | 1 |
| Gi2_10328811_x13..... | ggCucgauucccgcccg.....         | 1 |
| Gi3_27072802_x13..... | gguucgauuccCgcgcgggagc.....    | 1 |
| Gi3_27052301_x13..... | gguucgauucccgccAggag.....      | 1 |
| Gi5_8376926_x13.....  | gguucgauuUccggcgcgg.....       | 1 |
| Gi2_10332919_x13..... | aUauccggguucgauucc.....        | 1 |
| Gi1_3884643_x13.....  | guucgauuccAggcgcggga.....      | 1 |
| Gi3_27052756_x13..... | gguucgauucccgccUcg.....        | 1 |
| Gi3_27051573_x13..... | uccgUcguaguauaacggcuag.....    | 1 |
| Gi1_3885293_x13.....  | guucucacccaCcagauccg.....      | 1 |
| Gi2_10336390_x13..... | gguucgauucccgcccgCagc.....     | 1 |
| Gi3_27039015_x13..... | gguucgauuUccggcgcgg.....       | 1 |
| Gi3_27058840_x13..... | uccggcguaguauaacggcCag.....    | 1 |
| Gi4_513719_x13.....   | guucgauucccgcccg.....          | 0 |
| Gi3_27047153_x13..... | uccggcAuaguauaacggcua.....     | 1 |
| Gi2_10345018_x12..... | guucgauuNccggcgcgggag.....     | 1 |
| Gi1_3901406_x12.....  | uccggcguaguauaacggU.....       | 1 |
| Gi5_8400258_x12.....  | uccggcguaguauaacgAc.....       | 1 |
| Gi3_27117369_x12..... | gguucgauucccgccAg.....         | 1 |
| Gi1_3895478_x12.....  | uccggcguaguauaacggcuagaaA..... | 1 |
| Gi5_8401206_x12.....  | uccggcguaguaCaacggcua.....     | 1 |
| Gi1_3902114_x12.....  | uccggcguaguauaGcggcua.....     | 1 |
| Gi5_8392722_x12.....  | guucucacccaacagaCccg.....      | 1 |
| Gi5_8396058_x12.....  | ggcguaguauaacggcua.....        | 0 |
| Gi5_8393478_x12.....  | gguucgCuuccggcgcgggagc.....    | 1 |
| Gi5_8392002_x12.....  | uccggUguaguauaacgg.....        | 1 |
| Gi3_27110877_x12..... | guucgauucccgccAgag.....        | 1 |
| Gi3_27126693_x12..... | guucgauuccCgcgcgggagc.....     | 1 |



|                       |                                |   |
|-----------------------|--------------------------------|---|
| Gi5_8402034_x12.....  | guucgauucccggcgcAgg.....       | 1 |
| Gi5_8406570_x12.....  | uccggcguaguGuaacggcuagaau..... | 1 |
| Gi1_3897482_x12.....  | guucgaGucccggcgccgg.....       | 1 |
| Gi5_8400198_x12.....  | uccggcgCaguauaacggcuag.....    | 1 |
| Gi3_27097293_x12..... | gguucucacccaacagaCccg.....     | 1 |
| Gi3_27124785_x12..... | gguucgauucccgUgccgg.....       | 1 |
| Gi3_27094065_x12..... | uccggcguaguCuaacggc.....       | 1 |
| Gi5_8400042_x12.....  | gAuucgauucccggcgccgga.....     | 1 |
| Gi1_3896822_x12.....  | uccggcguaguGuaacgg.....        | 1 |
| Gi1_3893738_x12.....  | guucucacccaacagauccAg.....     | 1 |
| Gi2_10364326_x12..... | gguucgauucccgGgccggagc.....    | 1 |
| Gi3_27097029_x12..... | gguucgauucccggcAcc.....        | 1 |
| Gi5_8404566_x12.....  | gguucgaCucccggcgccgg.....      | 1 |
| Gi1_3898814_x12.....  | uccggcguaguauaaUggcuaga.....   | 1 |
| Gi2_10354426_x12..... | gguucgGuuccggcgccgga.....      | 1 |
| Gi2_10359730_x12..... | uucucacccaacagGuccg.....       | 1 |
| Gi4_515028_x12.....   | uccggcguaguauaacggcuagaa.....  | 0 |
| Gi5_8401710_x12.....  | uGucacccaacagauccg.....        | 1 |
| Gi5_8394810_x12.....  | guucgauucccgAcgccgg.....       | 1 |
| Gi3_27103185_x12..... | uccggcguaguauaacAgcuagaa.....  | 1 |
| Gi1_3900650_x12.....  | guucgauucccCgcccgg.....        | 1 |
| Gi5_8407494_x12.....  | guucgauucccggcUcggagc.....     | 1 |
| Gi5_8404746_x12.....  | uccggUguaguauaacggcuaga.....   | 1 |
| Gi1_3895370_x12.....  | gguucgauuccAgccgccg.....       | 1 |
| Gi5_8393466_x12.....  | gguucucacccaacagauccAg.....    | 1 |
| Gi2_10356154_x12..... | ggGucgauucccggcgccgga.....     | 1 |
| Gi5_8406114_x12.....  | Gugguucucacccaacagauccg.....   | 1 |
| Gi2_10367230_x12..... | guucgauucccAgccgccg.....       | 1 |
| Gi3_27131349_x12..... | guucgauUccggcgccgga.....       | 1 |
| Gi1_3898454_x12.....  | guucucacccaacGgauccg.....      | 1 |
| Gi5_8394774_x12.....  | guucgauucccggcgcAg.....        | 1 |
| Gi3_27113469_x12..... | uUgauucccggcgccggagc.....      | 1 |
| Gi2_10359070_x12..... | Cuucgauucccggcgccggag.....     | 1 |
| Gi3_27101049_x12..... | ugguucucNcccaacagauccg.....    | 1 |
| Gi3_27127785_x12..... | guucgauucccggcgccggagcU.....   | 1 |
| Gi2_10353190_x12..... | gguucgauuccUggcgcc.....        | 1 |
| Gi3_27102801_x12..... | uccggcguUguauaacggcua.....     | 1 |
| Gi1_3899774_x12.....  | uGcgauucccggcgccgg.....        | 1 |
| Gi3_27108045_x12..... | uucucacccaGcagauccgg.....      | 1 |
| Gi1_3897170_x12.....  | uucCcacccaacagauccg.....       | 1 |
| Gi3_27109329_x12..... | uccggcguaguauaaAggcua.....     | 1 |
| Gi3_27088305_x12..... | gguucgauucccggcgcUgg.....      | 1 |
| Gi1_3902258_x12.....  | gguucucGcccaacagauccg.....     | 1 |
| Gi3_27103977_x12..... | Gugguucucacccaacagaucc.....    | 1 |
| Gi2_10354906_x12..... | guucgauucccAgccgccg.....       | 1 |
| Gi3_27112941_x12..... | gguucgaAuuccggcgccggagc.....   | 1 |
| Gi2_10350382_x12..... | Auucgauucccggcgccg.....        | 1 |

|                       |                                      |   |
|-----------------------|--------------------------------------|---|
| Gi3_27126453_x12..... | .gUuucacaccaacagauccgggu.....        | 1 |
| Gi5_8404698_x12.....  | .uucCaccaacagauccg.....              | 1 |
| Gi1_3897854_x12.....  | .guucgauuccUgcgccg.....              | 1 |
| Gi1_3895874_x12.....  | .uucacaccaacaAauccg.....             | 1 |
| Gi5_8407074_x12.....  | .gguucgauuccggcgAggagc.....          | 1 |
| Gi5_8401998_x12.....  | .guucucaccUaacagauccg.....           | 1 |
| Gi2_10361794_x12..... | .Aguucacaccaacagauccg.....           | 1 |
| Gi2_10347886_x12..... | .uGcggcguaguauaacggcuagaa.....       | 1 |
| Gi3_27122361_x12..... | .gguucgauuUccggcgccg.....            | 1 |
| Gi1_3899882_x12.....  | .ccggcguGguauaacggcuag.....          | 1 |
| Gi3_27092649_x12..... | .uccggcAuaguauaacgg.....             | 1 |
| Gi2_10349386_x12..... | .gAucgauuccggcgccggagc.....          | 1 |
| Gi3_27117285_x12..... | .gguucgauucAcggcgccggag.....         | 1 |
| Gi5_8406918_x12.....  | .uccggcguaguauaacggcuG.....          | 1 |
| Gi5_8408574_x12.....  | .uUcggcguaguauaacggc.....            | 1 |
| Gi1_3894194_x12.....  | .uGguucacaccaacagauccg.....          | 1 |
| Gi2_10365874_x12..... | .gguNcgauuccggcgccggagc.....         | 1 |
| Gi3_27104649_x12..... | .uucCaccaacagauccg.....              | 1 |
| Gi2_10344010_x12..... | .guuUgauuccggcgccg.....              | 1 |
| Gi3_27105573_x12..... | .uccggcguaguauaacggcuagCa.....       | 1 |
| Gi3_27117957_x12..... | .guucacaccaacCgauccg.....            | 1 |
| Gi5_8395722_x12.....  | .gguucgauuccggcgUgga.....            | 1 |
| Gi2_10348270_x12..... | .uCcucaccaacagauccg.....             | 1 |
| Gi3_27106473_x12..... | .Accggcguaguauaacggc.....            | 1 |
| Gi1_3900710_x12.....  | .uccggcguaguauaacAgcuaga.....        | 1 |
| Gi2_10355794_x12..... | .uccggcguaguauaacggcuagGa.....       | 1 |
| Gi3_27096909_x12..... | .guucgauuccggcgGcgg.....             | 1 |
| Gi3_27093009_x12..... | .gguucgauuccggcgccggU.....           | 1 |
| Gi5_8403234_x12.....  | .gguucgauuccggcgUcggagc.....         | 1 |
| Gi5_8392854_x12.....  | .uccggcguaguauCacggcua.....          | 1 |
| Gi5_8400306_x12.....  | .guucgauuccggcgAcg.....              | 1 |
| Gi2_10363918_x12..... | .gguucgCuuccggcgccggag.....          | 1 |
| Gi5_8399538_x12.....  | .Accggcguaguauaacggcuag.....         | 1 |
| Gi3_27101517_x12..... | .gguucacaccaacagGuccg.....           | 1 |
| Gi5_8401914_x12.....  | .Uuucgauuccggcgccggag.....           | 1 |
| Gi5_8404434_x12.....  | .gCucgauuccggcgccggagc.....          | 1 |
| Gi1_3896510_x12.....  | .uccggUguaguauaacggcua.....          | 1 |
| Gi2_10344394_x12..... | .guucgauuccggcAccgga.....            | 1 |
| Gi5_8401218_x12.....  | .gUuucgauuccggcgccggagcgu.....       | 1 |
| Gi3_27087333_x12..... | .caacagauccggguucgauuccggcgccgg..... | 0 |
| Gi3_27113829_x12..... | .Accggcguaguauaacggcua.....          | 1 |
| Gi5_8404902_x12.....  | .gguucgauuccggcgccggCg.....          | 1 |
| Gi2_10356202_x12..... | .gGuuccggcgccggagc.....              | 1 |
| Gi3_27123429_x12..... | .guucgauuccggcgccggagU.....          | 1 |
| Gi3_27118293_x12..... | .guucUauuccggcgccggag.....           | 1 |
| Gi2_10377172_x11..... | .uccggcguaguauCacggc.....            | 1 |
| Gi3_27144360_x11..... | .aUauccggguucgauucc.....             | 1 |

|                       |                                  |   |
|-----------------------|----------------------------------|---|
| Gi2_10391230_x11..... | cUgcguaguauaacggcua.....         | 1 |
| Gi3_27177382_x11..... | guucgauuNccggcgccg.....          | 1 |
| Gi3_27173730_x11..... | guucgauucccgccgU.....            | 1 |
| Gi1_3909963_x11.....  | guucgauuccggcgccAga.....         | 1 |
| Gi5_8428219_x11.....  | guucucacUcaacagauccg.....        | 1 |
| Gi2_10376281_x11..... | guucgauuccggcgccgCg.....         | 1 |
| Gi5_8419232_x11.....  | cucaccaacagGuccgg.....           | 1 |
| Gi2_10384421_x11..... | uUcggcguaguauaacgg.....          | 1 |
| Gi3_27166690_x11..... | Gcgauuccggcgccgga.....           | 1 |
| Gi5_8413666_x11.....  | uccgAcguaguauaacgg.....          | 1 |
| Gi2_10376468_x11..... | guucgauuccUggcgccggag.....       | 1 |
| Gi3_27183982_x11..... | guucgauuccggAgccggagc.....       | 1 |
| Gi3_27149948_x11..... | gUcguaguauaacggcua.....          | 1 |
| Gi3_27183509_x11..... | uccggcguaguauaacgAcuag.....      | 1 |
| Gi2_10384201_x11..... | guucgauuccggcgCagg.....          | 1 |
| Gi3_27183586_x11..... | guucgauuccggcAccggag.....        | 1 |
| Gi5_8410355_x11.....  | Uguucucaccaacagauccgggu.....     | 1 |
| Gi5_8418066_x11.....  | gCuucgauuccggcgccg.....          | 1 |
| Gi5_8418451_x11.....  | uccggUguaguauaacggc.....         | 1 |
| Gi1_5609469_x11.....  | Gccggcguaguauaacggcuag.....      | 1 |
| Gi3_27173664_x11..... | Accggcguaguauaacgg.....          | 1 |
| Gi3_27179087_x11..... | uccggcguaguauCacggcuag.....      | 1 |
| Gi5_8412951_x11.....  | guucucaccaacagauccA.....         | 1 |
| Gi2_10373432_x11..... | gguucgauuUccggcgcc.....          | 1 |
| Gi3_27169869_x11..... | guucucaccaacagGuccg.....         | 1 |
| Gi3_27137221_x11..... | Uuucaccaacagauccgggu.....        | 1 |
| Gi3_27169121_x11..... | gguucgauuccAgcgccgg.....         | 1 |
| Gi5_8423874_x11.....  | guucgauucccgAcgccgga.....        | 1 |
| Gi3_27180308_x11..... | guuAgauuccggcgccgg.....          | 1 |
| Gi5_8422455_x11.....  | gAucgauuccggcgccg.....           | 1 |
| Gi5_8414458_x11.....  | gguucgauuUccggcgccggagc.....     | 1 |
| Gi3_27167427_x11..... | guucgauucccgUcgccgga.....        | 1 |
| Gi1_3909710_x11.....  | Aguucgauuccggcgccggagc.....      | 1 |
| Gi5_8429264_x11.....  | guucgauuUccggcgccg.....          | 1 |
| Gi5_8410553_x11.....  | Accggcguaguauaacggcuaga.....     | 1 |
| Gi5_8413479_x11.....  | gUcguaguauaacggcuag.....         | 1 |
| Gi5_8418671_x11.....  | uccggcguaguauaacggcuagauggu..... | 0 |
| Gi1_3905453_x11.....  | Aguucgauuccggcgccgga.....        | 1 |
| Gi3_27145086_x11..... | uccggcguaguauaacggcuagCau.....   | 1 |
| Gi1_3909952_x11.....  | gguucgauuccUggcgccgg.....        | 1 |
| Gi5_8431057_x11.....  | guucgauuccAgggcgccg.....         | 1 |
| Gi2_10371342_x11..... | guucgauuccggUgcccga.....         | 1 |
| Gi3_27157802_x11..... | ugguucucaccaacGgauccg.....       | 1 |
| Gi3_27186776_x11..... | uuUgauuccggcgccggagc.....        | 1 |
| Gi3_27145449_x11..... | gguucucaccaacagauccA.....        | 1 |
| Gi3_27178009_x11..... | Ugguucgauuccggcgccgga.....       | 1 |
| Gi2_10392935_x11..... | gguucgaAuuccggcgccggagc.....     | 1 |

|                  |                                      |   |
|------------------|--------------------------------------|---|
| Gi2_10393540_x11 | .....gguucgauucccggcgUc              | 1 |
| Gi1_3907873_x11  | .....guucgauucccggcgUgga             | 1 |
| Gi3_27144250_x11 | .....uccggcguaguauCacggcuagaau       | 1 |
| Gi5_8415030_x11  | .....guucucacccaacGgauccg            | 1 |
| Gi3_27164699_x11 | .....gguucgauAccggcgccgga            | 1 |
| Gi3_27151818_x11 | .....uccggcguaguauaacggcuagGa        | 1 |
| Gi3_27147528_x11 | .....uccggGguaguauaacggcuaga         | 1 |
| Gi2_10391307_x11 | .....Cuucgauucccggcgccc              | 1 |
| Gi5_8428120_x11  | .....Gcaccacaacagauccggguu           | 1 |
| Gi3_27168615_x11 | .....ucgauuccNggcgccggagc            | 1 |
| G1a_5613319_x11  | .....Uuucgauucccggcgccc              | 1 |
| Gi5_8420310_x11  | .....guucgauucccggcgcccA             | 1 |
| Gi5_8418330_x11  | .....guGcucacccaacagauccg            | 1 |
| Gi2_10373322_x11 | .....guGcgauucccggcgccc              | 1 |
| Gi5_8418286_x11  | .....gguucgauuccUggcgccc             | 1 |
| Gi1_3905156_x11  | .....gguucgauucccggcgAgg             | 1 |
| Gi3_27167878_x11 | .....guucgCuucccggcgccc              | 1 |
| Gi2_10397588_x11 | .....gguucgauCcccggcgc               | 1 |
| Gi3_27143898_x11 | .....uccggcguaguaAaacggcuaga         | 1 |
| Gi2_10385290_x11 | .....gCucgauucccggcgcccag            | 1 |
| Gi2_10384608_x11 | .....uccgUcguaguauaacggcua           | 1 |
| Gi2_10388832_x11 | .....ggAucgauucccggcgccc             | 1 |
| Gi3_27142325_x11 | .....ccaacagauccggguucgauucccggcgccc | 0 |
| Gi5_8424138_x11  | .....Gcucacccaacagauccg              | 1 |
| Gi5_8420024_x11  | .....gguucgauucccggcgcccA            | 1 |
| Gi2_10381913_x11 | .....Auucgauucccggcgcccag            | 1 |
| Gi3_27151873_x11 | .....guucgauucccggcgUcggagc          | 1 |
| Gi1_3914561_x11  | .....Gcucacccaacagauccg              | 1 |
| Gi3_27165073_x11 | .....uccggcguaguauaacggUuag          | 1 |
| Gi2_10396785_x11 | .....uccggcguaguauaacggcuGg          | 1 |
| Gi2_10392671_x11 | .....ggCucucacccaacagauccg           | 1 |
| Gi3_27156955_x11 | .....cucacccaacagauccggguucgauucc    | 0 |
| Gi3_27184686_x11 | .....uccggAguaguauaacgg              | 1 |
| Gi3_27178471_x11 | .....gguucucacccaacagauAg            | 1 |
| Gi1_3910568_x11  | .....ugguucucacccaacagGuccgg         | 1 |
| Gi3_27162972_x11 | .....Gccggguucgauucccggcgcccga       | 1 |
| Gi1_3908324_x11  | .....guucgauucccggcgcccagcU          | 1 |
| Gi3_27156548_x11 | .....uccggcguaguauaaUggcuag          | 1 |
| Gi3_27150520_x11 | .....uccggcguaguauGacggc             | 1 |
| Gi2_10387710_x11 | .....uccggcguaguauaacAgcuag          | 1 |
| Gi2_10379944_x11 | .....ggGucgauucccggcgccc             | 1 |
| Gi5_8426822_x11  | .....gguucgauucccggcgUg              | 1 |
| Gi1_3915683_x11  | .....cguaguauaacggcuagaau            | 0 |
| Gi3_27138805_x11 | .....ggGucgauucccggcgccc             | 1 |
| Gi5_8427636_x11  | .....uccggcguaguGuaacggc             | 1 |
| Gi5_8419903_x11  | .....guuUgauucccggcgcccga            | 1 |
| Gi2_10378382_x11 | .....uccgAcguaguauaacggcuaga         | 1 |

|                       |                               |   |
|-----------------------|-------------------------------|---|
| Gi5_8420563_x11.....  | uccggcguaguaCaacgg.....       | 1 |
| Gi2_10369868_x11..... | ucgauuccNggcgccggagc.....     | 1 |
| Gi3_27133789_x11..... | uccggcguaguaGaacggcua.....    | 1 |
| Gi3_27157648_x11..... | uGcgauuccggcgccgg.....        | 1 |
| Gi2_10395916_x11..... | guucgauuccggcgccggagcgA.....  | 1 |
| Gi3_27179593_x11..... | guucgauuAccggcgccgga.....     | 1 |
| Gi2_10377293_x11..... | uccggcguaguaGcggc.....        | 1 |
| Gi5_8429451_x11.....  | uUcggcguaguaaacggcuagaa.....  | 1 |
| Gi5_8426338_x11.....  | uccggcguaguaaacAg.....        | 1 |
| Gi2_10397500_x11..... | uccggcguCguuaaacggcuaga.....  | 1 |
| Gi3_27178779_x11..... | gguucgauuAccggcgccggag.....   | 1 |
| Gi5_8425271_x11.....  | gguucucaUccaacagauccg.....    | 1 |
| Gi2_10394222_x11..... | gguucgaCuccggcgccgga.....     | 1 |
| Gi1_3910612_x11.....  | Cccggcguaguaaacggcua.....     | 1 |
| Gi3_27148716_x11..... | uccggUguaguaaacggcuagaa.....  | 1 |
| Gi1_3908104_x11.....  | uucucacccaGcagauccg.....      | 1 |
| Gi1_3910887_x11.....  | uAcucacccaacagauccg.....      | 1 |
| Gi1_3915661_x11.....  | uccggcguagCauaacgg.....       | 1 |
| Gi2_10389547_x11..... | ccggcguaguaaacggcuagaa.....   | 0 |
| Gi2_10383827_x11..... | uccggcguaguaGcgg.....         | 1 |
| Gi2_10395388_x11..... | uuUucacccaacagauccg.....      | 1 |
| Gi3_27172443_x11..... | guucgauuccggcgccgCagc.....    | 1 |
| Gi5_8410993_x11.....  | uccggcguaguGuaacggcua.....    | 1 |
| Gi3_27167482_x11..... | gguucgauuccAgcgccg.....       | 1 |
| Gi3_27180517_x11..... | gCucucacccaacagauccg.....     | 1 |
| Gi1_3907752_x11.....  | guucAauuccggcgccgga.....      | 1 |
| Gi3_27233622_x10..... | gCguucgauuccggcgccggagc.....  | 1 |
| Gi5_8442986_x10.....  | uccgAcguaguaaacggcuagaa.....  | 1 |
| Gi5_8434526_x10.....  | uGcucacccaacagauccg.....      | 1 |
| Gi5_8449856_x10.....  | gguucgGuuccggcgccg.....       | 1 |
| Gi3_27190342_x10..... | uccggcguCguuaaacggcua.....    | 1 |
| Gi3_27225642_x10..... | uccAgcguaguaaacggcuag.....    | 1 |
| Gi3_27204172_x10..... | gguucAauuccggcgccg.....       | 1 |
| Gi1_3925234_x10.....  | gCucucacccaacagauccg.....     | 1 |
| Gi3_27209772_x10..... | gguucgauuccggcgAccg.....      | 1 |
| Gi3_27189252_x10..... | uccggcguaguGuaacggcuagaa..... | 1 |
| Gi3_27205472_x10..... | guuUgauuccggcgccggag.....     | 1 |
| Gi5_8447786_x10.....  | gguucgauucccgAcgcccggagc..... | 1 |
| Gi2_10412292_x10..... | gguucgUuuccggcgccggag.....    | 1 |
| Gi2_10401452_x10..... | guucgauuccggcgAccg.....       | 1 |
| Gi1_3924494_x10.....  | ugguCcucacccaacagauccg.....   | 1 |
| Gi3_27220922_x10..... | gguucgauuccUgcgccc.....       | 1 |
| Gi5_8447776_x10.....  | ucUggcguaguaaacggcuagaa.....  | 1 |
| Gi2_10415192_x10..... | guucucacNcaacagauccg.....     | 1 |
| Gi2_10404252_x10..... | gguucgauuUccggcgccgga.....    | 1 |
| Gi2_10412482_x10..... | uccggcguaguCuaacggcuaga.....  | 1 |
| Gi2_10407172_x10..... | guucgauuccgAcgcccggagc.....   | 1 |

Gi1\_3923774\_x10.....gguucgauUccggcgccgg.....1  
 Gi1\_3920124\_x10.....ugguucucacUcaacagauccgg.....1  
 Gi1\_3921274\_x10.....guCcgauuccggcgccg.....1  
 Gi1\_3920724\_x10.....aacagauccggguucgauuccggcgccggagc.....0  
 Gi2\_10405312\_x10.....guucgauuccggcgcgAggagc.....1  
 Gi2\_10415872\_x10.....uUcggcgaguauaacggcua.....1  
 Gi1\_3926524\_x10.....guucucacccaCagauccgg.....1  
 Gi2\_10413142\_x10.....guucgauuccggcgccggGg.....1  
 Gi3\_27231662\_x10.....gguucAcaccaacagauccg.....1  
 Gi3\_27222132\_x10.....uccggcgaguauaaUggcuagaa.....1  
 Gi2\_10411452\_x10.....uccggcgaguauaacggcCa.....1  
 Gi2\_10427882\_x10.....gguucgauuccggcgccCgagc.....1  
 Gi2\_10409192\_x10.....gguuUgauuccggcgcc.....1  
 Gi2\_10397762\_x10.....guucgauuUccggcgccggagc.....1  
 Gi3\_27188212\_x10.....guucGcuuccggcgccgga.....1  
 Gi5\_8439926\_x10.....Cgguucucacccaacagauccg.....1  
 Gi3\_27239032\_x10.....uccggcgCaguauaacggcuagaau.....1  
 Gi2\_10417612\_x10.....uccggcgaguauaaGcggcua.....1  
 Gi3\_27217412\_x10.....gguucgauuccAgggcgccggag.....1  
 Gi2\_10409622\_x10.....gguucgauuccggcgccggC.....1  
 Gi3\_27192892\_x10.....guucgauuccggUcgccgg.....1  
 Gi2\_10410772\_x10.....gguucgauuccggcgUcgga.....1  
 Gi2\_10414892\_x10.....ggGucucacccaacagauccg.....1  
 Gi2\_10399502\_x10.....guucucacccaacagGuccg.....1  
 Gi3\_27205052\_x10.....uUcggcgaguauaacggcuagaa.....1  
 Gi2\_10412052\_x10.....uccggcgaguauaacggcuagaaC.....1  
 Gi3\_27209272\_x10.....guucgauuccggcgccggUgc.....1  
 Gi5\_8439896\_x10.....uccggcAuaguauaacggcuagaau.....1  
 Gi2\_10419612\_x10.....cUauuccggcgccggagcguuu.....1  
 Gi5\_8448436\_x10.....guucgauuccggcgccggGgc.....1  
 Gi1\_3927234\_x10.....uccggcgGguauaacggcuaga.....1  
 Gi5\_8447646\_x10.....guucgauuccAgggcgccgg.....1  
 Gi3\_27204082\_x10.....guucgauuccggcgcgUggagc.....1  
 Gi5\_8449706\_x10.....ucucacccNacagauccg.....1  
 Gi3\_27210902\_x10.....guucgauAcccgcgccggagc.....1  
 Gi2\_10407042\_x10.....gguucgauuccUggcgccggag.....1  
 Gi1\_3927194\_x10.....gguCcucacccaacagauccg.....1  
 Gi3\_27221662\_x10.....gGucucacccaacagauccgggu.....1  
 Gi2\_10403602\_x10.....gguucCcacccaacagauccg.....1  
 Gi5\_8448506\_x10.....uccggcgaguauGacggcuagaau.....1  
 Gi4\_520909\_x10.....gGucgauuccggcgccgg.....1  
 Gi5\_8452316\_x10.....guucgauuNccggcgccggagc.....1  
 Gi2\_10403512\_x10.....gguucgauuccggcgccgUagc.....1  
 Gi3\_27205302\_x10.....uccggcgaguauaacggcuaCa.....1  
 Gi3\_27226722\_x10.....guucgauuccggcAccggagc.....1  
 Gi2\_10409482\_x10.....uccggcgaguauaacgAc.....1  
 Gi1\_3923174\_x10.....guucgaAuuccggcgccgg.....1

|                       |                                |   |   |
|-----------------------|--------------------------------|---|---|
| Gi1_3926114_x10.....  | Cccggcguaguauaacggcuag.....    | 1 |   |
| Gi2_10427752_x10..... | uccggAguaguauaacggcuaga.....   |   | 1 |
| Gi3_27217682_x10..... | uggCucucacccaacagauccg.....    |   | 1 |
| Gi3_27206282_x10..... | gguucgauucccgAcgccg.....       |   | 1 |
| Gi1_3924034_x10.....  | Ugcguaguauaacggcuag.....       | 1 |   |
| Gi1_3917614_x10.....  | uccggcguaguauaaUggcuag.....    | 1 |   |
| Gi3_27191172_x10..... | guucucacccaGcagauccg.....      |   | 1 |
| Gi1_3926564_x10.....  | guucucacccaGcagauccg.....      | 1 |   |
| Gi3_27243812_x10..... | uccgUcguaguauaacggcuagaa.....  |   | 1 |
| Gi3_27239182_x10..... | Gcgauucccgcccgag.....          |   | 1 |
| Gi1_3922454_x10.....  | uccgUcguaguauaacggcuag.....    | 1 |   |
| Gi3_27235662_x10..... | uccggcCuaguauaacggcuaga.....   |   | 1 |
| Gi2_10403522_x10..... | gguucgCuuccggcgcc.....         |   | 1 |
| Gi3_27197082_x10..... | guAcgauuccggcgccgag.....       |   | 1 |
| Gi5_8448566_x10.....  | uccggcguaguauCcgguaga.....     | 1 |   |
| Gi2_10412472_x10..... | gguucAauuccggcgcc.....         |   | 1 |
| Gi1_3926694_x10.....  | guucCcacccaacagauccg.....      | 1 |   |
| Gi5_8452586_x10.....  | uggCucucacccaacagauccg.....    | 1 |   |
| Gi5_8431736_x10.....  | uccggcguaguauaacggcuagCau..... | 1 |   |
| Gi3_27240502_x10..... | Cuucgauuccggcgccg.....         |   | 1 |
| Gi5_8444156_x10.....  | Cuucucacccaacagauccg.....      | 1 |   |
| Gi2_10415822_x10..... | Auucucacccaacagauccg.....      |   | 1 |
| Gi1_3928064_x10.....  | uccggcguaguauaacgAcuaga.....   | 1 |   |
| Gi1_3920084_x10.....  | Cgguucucacccaacagauccg.....    | 1 |   |
| Gi3_27198502_x10..... | ccggcguaguauaacggcuagaa.....   |   | 0 |
| Gi3_27240962_x10..... | gguucucaccUaacagauccg.....     |   | 1 |
| Gi2_10412842_x10..... | gguUucacccaacagauccg.....      |   | 1 |
| Gi3_27217962_x10..... | uccggAguaguauaacggc.....       |   | 1 |
| Gi3_27209962_x10..... | uccggcguagGauaacggcuaga.....   |   | 1 |
| Gi3_27220262_x10..... | guucgauuccggcgccC.....         |   | 1 |
| Gi2_10403692_x10..... | guucgauucccgAcgccg.....        |   | 1 |
| Gi5_8433596_x10.....  | uucucacccaGcagauccg.....       | 1 |   |
| Gi5_8434636_x10.....  | ggAucgauuccggcgccg.....        | 1 |   |
| Gi3_27204492_x10..... | guucgauucccgAcgccga.....       |   | 1 |
| Gi1_3916754_x10.....  | gguucAauuccggcgccg.....        | 1 |   |
| Gi1_3927214_x10.....  | uccggcguaguauCacggcuaga.....   | 1 |   |
| Gi5_8451806_x10.....  | uccggcguauauaacggcuaga.....    | 1 |   |
| Gi5_8436516_x10.....  | gguucucacAaacagauccgggu.....   | 1 |   |
| Gi5_8447406_x10.....  | gguucgCuuccggcgccg.....        | 1 |   |
| Gi1_3917474_x10.....  | uccggcguaguauCacggcuag.....    | 1 |   |
| Gi2_10417302_x10..... | gguucgauuccggcgGggagc.....     |   | 1 |
| Gi2_10419012_x10..... | gCuucgauuccggcgcc.....         |   | 1 |
| Gi4_520139_x10.....   | gguucucacccaacagauccg.....     |   | 0 |
| Gi3_27190712_x10..... | gguucgauucAcggcgccgga.....     |   | 1 |
| Gi1_3917414_x10.....  | ccggcguaguauaacggcuagaa.....   |   | 0 |
| Gi3_27222292_x10..... | uccggcguaguauaaUggcuagaa.....  |   | 1 |
| Gi2_10423752_x10..... | uccggcguaguGuaacgg.....        |   | 1 |

Gi1\_3917484\_x10.....uucucacccaacagauAcgg.....1  
 Gi2\_10411892\_x10.....guucgGuucccgccg.....1  
 Gi5\_8435706\_x10.....uccggcguaguCuaacggcuag.....1  
 Gi5\_8452576\_x10.....gguucgauucccgAgccggagc.....1  
 Gi1\_3928104\_x10.....cGcaccaacagauccgg.....1  
 Gi5\_8435356\_x10.....gguCcgauucccgccg.....1  
 Gi5\_8473674\_x9.....uccgAcguaguauaacggcuaga.....1  
 Gi5\_8454351\_x9.....ggGucgauucccgccg.....1  
 Gi2\_10454124\_x9.....uccggcguaguauaacggcuagaCu.....1  
 Gi2\_10447860\_x9.....guucgauucAcggccg.....1  
 Gi3\_27258040\_x9.....Cccggcguaguauaacggcuag.....1  
 Gi2\_10443045\_x9.....guucgauucccgccgagA.....1  
 Gi3\_27264709\_x9.....uccggcgAaguauaacggcuaga.....1  
 Gi3\_27302113\_x9.....gguuAgauucccgccggag.....1  
 Gi5\_8467374\_x9.....guucgauuccCcgccg.....1  
 Gi2\_10437555\_x9.....guucgauucccgccCg.....1  
 Gi3\_27281638\_x9.....Ggauucccgccggagc.....1  
 Gi3\_27283429\_x9.....guucgauucccgAgccgga.....1  
 Gi5\_8462433\_x9.....uccggcguaguauaacggcuC.....1  
 Gi2\_10434306\_x9.....gguucgauucccgccggaUc.....1  
 Gi5\_8461515\_x9.....guucUauucccgccgga.....1  
 Gi5\_8465457\_x9.....uccggUguaguauaacggcuagaau.....1  
 Gi2\_10446852\_x9.....gguucgauucccgUgccg.....1  
 Gi3\_27249112\_x9.....guGcgauucccgccg.....1  
 Gi5\_8466249\_x9.....uccggcgCaguauaacggc.....1  
 Gi3\_27297991\_x9.....ggAucgauucccgccg.....1  
 Gi5\_8463774\_x9.....gGuucccgccggagc.....1  
 Gi1\_3940336\_x9.....uucucaccUaacagauccg.....1  
 Gi1\_3935098\_x9.....uccggUguaguauaacggc.....1  
 Gi5\_8472180\_x9.....gguucgauuccUggccg.....1  
 G1a\_5648809\_x9.....accacaacagauccggguucgauucc.....0  
 Gi2\_10455438\_x9.....uccggcgCaguauaacggcu.....1  
 Gi1\_3929473\_x9.....uccggcguaguauCacggcu.....1  
 Gi5\_8454072\_x9.....Ggauccggguucgauucc.....1  
 Gi1\_3936016\_x9.....guuUgauucccgccgga.....1  
 Gi2\_10446348\_x9.....uccggcguaAuauaacggcuaga.....1  
 Gi5\_8455422\_x9.....Ggguucucacccaacagauccgg.....1  
 Gi1\_3940768\_x9.....uccAgcguaguauaacgg.....1  
 Gi5\_8460930\_x9.....guucgauucccgccUgga.....1  
 Gi5\_8458752\_x9.....gguucgauucccgccAga.....1  
 Gi5\_8466123\_x9.....guucgauucccgAgccg.....1  
 Gi2\_10440687\_x9.....cggcguaguauaacggcuagaA.....1  
 Gi2\_10447644\_x9.....gguucgCuucccgccg.....1  
 Gi5\_8470929\_x9.....Accggcguaguauaacgg.....1  
 Gi2\_10461621\_x9.....uccggcguagCauaacggc.....1  
 Gi3\_27270208\_x9.....uccgAcguaguauaacgg.....1  
 Gi3\_27245107\_x9.....ggGucgauucccgccg.....1



Gi1\_3934828\_x9.....guucucaUccaacagauccg..... 1  
 Gi5\_8463549\_x9.....uccggcguaguauaaUggc..... 1  
 Gi5\_8458428\_x9.....uccggcguaguauaaacggcuagU..... 1  
 Gi5\_8455944\_x9.....uccggcguaguauaaacggcuagU..... 1  
 Gi5\_8469930\_x9.....uccggcguaguauaaacggcuagU..... 1  
 Gi1\_3932884\_x9.....uccggcguaguauaaacggcuagU..... 1  
 Gi3\_27263017\_x9.....uccggcguaguauaaacggcuagU..... 1  
 Gi2\_10432020\_x9.....uccggcguaguauaaacggcuagU..... 1  
 Gi3\_27296749\_x9.....uccggcguaguauaaacggcuagU..... 1  
 Gi2\_10457940\_x9.....uccggcguaguauaaacggcuagU..... 1  
 Gi2\_10457346\_x9.....uccggcguaguauaaacggcuagU..... 1  
 Gi2\_10438842\_x9.....uccggcguaguauaaacggcuagU..... 1  
 Gi5\_8470668\_x9.....uccggcguaguauaaacggcuagU..... 1  
 Gi5\_8455935\_x9.....uccggcguaguauaaacggcuagU..... 1  
 Gi3\_27260965\_x9.....uccggcguaguauaaacggcuagU..... 1  
 Gi2\_10458642\_x9.....uccggcguaguauaaacggcuagU..... 1  
 Gi1\_3929077\_x9.....uccggcguaguauaaacggcuagU..... 1  
 Gi1a\_5644426\_x9.....uccggcguaguauaaacggcuagU..... 0  
 Gi5\_8467230\_x9.....uccggcguaguauaaacggcuagU..... 1  
 Gi3\_27285409\_x9.....uccggcguaguauaaacggcuagU..... 1  
 Gi5\_8453289\_x9.....uccggcguaguauaaacggcuagU..... 1  
 Gi2\_10448607\_x9.....uccggcguaguauaaacggcuagU..... 1  
 Gi4\_521253\_x9.....uccggcguaguauaaacggcuagU..... 0  
 Gi3\_27288757\_x9.....uccggcguaguauaaacggcuagU..... 1  
 Gi2\_10447014\_x9.....uccggcguaguauaaacggcuagU..... 1  
 Gi5\_8458914\_x9.....uccggcguaguauaaacggcuagU..... 1  
 Gi1\_3931039\_x9.....uccggcguaguauaaacggcuagU..... 1  
 Gi1\_3937897\_x9.....uccggcguaguauaaacggcuagU..... 1  
 Gi1\_3934774\_x9.....uccggcguaguauaaacggcuagU..... 1  
 Gi5\_8453658\_x9.....uccggcguaguauaaacggcuagU..... 1  
 Gi1\_3933055\_x9.....uccggcguaguauaaacggcuagU..... 1  
 Gi5\_8473503\_x9.....uccggcguaguauaaacggcuagU..... 1  
 Gi2\_10451217\_x9.....uccggcguaguauaaacggcuagU..... 1  
 Gi3\_27257527\_x9.....uccggcguaguauaaacggcuagU..... 1  
 Gi3\_27248194\_x9.....uccggcguaguauaaacggcuagU..... 1  
 Gi5\_8476581\_x9.....uccggcguaguauaaacggcuagU..... 1  
 Gi3\_27247375\_x9.....uccggcguaguauaaacggcuagU..... 1  
 Gi5\_8459643\_x9.....uccggcguaguauaaacggcuagU..... 1  
 Gi1\_3936475\_x9.....uccggcguaguauaaacggcuagU..... 1  
 Gi1\_3932569\_x9.....uccggcguaguauaaacggcuagU..... 1  
 Gi5\_8471865\_x9.....uccggcguaguauaaacggcuagU..... 1  
 Gi5\_8465142\_x9.....uccggcguaguauaaacggcuagU..... 1  
 Gi2\_10434270\_x9.....uccggcguaguauaaacggcuagU..... 1  
 Gi3\_27245278\_x9.....uccggcguaguauaaacggcuagU..... 1  
 Gi5\_8459157\_x9.....uccggcguaguauaaacggcuagU..... 1  
 Gi1a\_5644372\_x9.....uccggcguaguauaaacggcuagU..... 1  
 Gi1\_3939337\_x9.....uccggcguaguauaaacggcuagU..... 1

Gi5\_8464548\_x9.....guucucacccCacagauccgg..... 1  
Gi1\_3931120\_x9.....ucgauucccgcgccggagcC..... 1  
Gi3\_27271405\_x9.....guucgauuccCgcgccgg..... 1  
Gi1\_3932146\_x9.....gguucgauucccgcgccggagcgA..... 1  
Gi1\_3931111\_x9.....uucucacccaacagauUg..... 1  
G1a\_5650780\_x9.....uGcggcguaguauaacggcuag..... 1  
Gi2\_10439625\_x9.....ucUggcguaguauaacgg..... 1  
Gi5\_8468166\_x9.....guucucacccaacagauAg..... 1  
Gi3\_27290737\_x9.....gguucgauuccGggcgccgga..... 1  
Gi1\_3933244\_x9.....uucucacccaacagauUgg..... 1  
Gi5\_8464125\_x9.....Gucgauucccgcgccgg..... 1  
Gi5\_8473449\_x9.....Ugcguaguauaacggcuaga..... 1  
Gi3\_27268903\_x9.....gguGcgauucccgcgccggagc..... 1  
Gi2\_10450506\_x9.....Cguucgauucccgcgccgga..... 1  
Gi1\_3933739\_x9.....guucucacccaacCgauccgg..... 1  
Gi5\_8453325\_x9.....cucaccUaacagauccgg..... 1  
Gi2\_10443882\_x9.....gguucAauucccgcgccggag..... 1  
Gi5\_8461047\_x9.....Uguucgauucccgcgccggagcgu..... 1  
Gi5\_8466564\_x9.....uccggcguaguGuaacggcuagaa..... 1  
Gi1\_3941641\_x9.....uucucacUcaacagauccg..... 1  
Gi3\_27303679\_x9.....uucucacccaCcagauccgg..... 1  
Gi3\_27256195\_x9.....gguucgauucccgcgccgUagc..... 1  
Gi5\_8453280\_x9.....ugguucucNcccaacagauccg..... 1  
Gi3\_27257707\_x9.....gguucucacccaaUagauccg..... 1  
Gi5\_8469489\_x9.....guucgauAcccgcgccg..... 1  
Gi3\_27306514\_x9.....guucucacccaGcagauccg..... 1  
Gi5\_8461218\_x9.....ggGucgauucccgcgcc..... 1  
Gi3\_27273718\_x9.....uucucacccGacagauccg..... 1  
Gi5\_8463207\_x9.....Ggguucucacccaacagauccgggu..... 1  
Gi5\_8465079\_x9.....uccggcguaguauCcggc..... 1  
Gi5\_8498585\_x8.....gguucucacAcaacagauccg..... 1  
Gi5\_8492497\_x8.....ucCcaccaacagauccg..... 1  
Gi5\_8501385\_x8.....gguucgauuccAggcgccggagc..... 1  
Gi1\_3942421\_x8.....gguucgauucccgcgccgg..... 1  
Gi5\_8479753\_x8.....guucucacccaacUgauccg..... 1  
Gi2\_10474298\_x8.....gguucgauucccgcgccggagG..... 1  
Gi5\_8488553\_x8.....uccggcguaguauGacggcuaga..... 1  
Gi2\_10492594\_x8.....guucgauCcccggcgccgga..... 1  
Gi5\_8488249\_x8.....uccggcguagCuaaacggcua..... 1  
Gi2\_10489418\_x8.....uccggcguaguauGcggcuagaa..... 1  
Gi1\_3943805\_x8.....guucgUuucccgcgccgg..... 1  
Gi1\_3947309\_x8.....guucgauucccgcgccggGgc..... 1  
Gi3\_27324385\_x8.....Gucgauucccgcgccgg..... 1  
Gi3\_27317361\_x8.....uccggcguaguCaacggcuagaa..... 1  
Gi2\_10466818\_x8.....Cuucgauucccgcgccgga..... 1  
Gi3\_27317417\_x8.....uccggcguaguCuaacggcuag..... 1  
G1a\_5671057\_x8.....Aguucgauucccgcgccggagc..... 1

Gi2\_10483818\_x8.....uccggcguGguauaacggcuagaau..... 1  
Gi2\_10487410\_x8.....gguucgauucUcgggcc..... 1  
Gi2\_10493754\_x8.....guucgauuAccggcgccggagc..... 1  
Gi5\_8479161\_x8.....cucGcccaacagauccgg..... 1  
Gi5\_8488329\_x8.....uccggcguaguauaaUggcua..... 1  
Gi5\_8476985\_x8.....gguucucaccaacagauAcg..... 1  
Gi2\_10480930\_x8.....gguucgCuuccggcgccgga..... 1  
Gi5\_8490161\_x8.....ggGucgauuccggcgccggag..... 1  
Gi1\_3952669\_x8.....uccggcguNguauaacggcuaga..... 1  
Gi2\_10466082\_x8.....gguucgauuccggcgUcg..... 1  
Gi2\_10482514\_x8.....uccggcguaguauaacggcuC..... 1  
Gi2\_10467834\_x8.....guucgauuccggcgCccggagc..... 1  
Gi5\_8500185\_x8.....Cccggcguaguauaacggcuagaa..... 1  
Gi5\_8486489\_x8.....gGucgauuccggcgccggag..... 1  
Gi3\_27348209\_x8.....gguUgauuccggcgcc..... 1  
Gi5\_8494609\_x8.....gguucgauuccggcgUc..... 1  
Gi5\_8487249\_x8.....guucgauuccggcgccggG..... 1  
G1a\_5654737\_x8.....gGucucaccaacagauccg..... 1  
Gi1\_3947997\_x8.....uccggcguaguGuaacggcua..... 1  
Gi1\_3954701\_x8.....uccggcguaguCuaacgg..... 1  
Gi3\_27353129\_x8.....uccggcguaguauaacggcCagaa..... 1  
Gi3\_27354289\_x8.....guucucaccaacGgauccg..... 1  
Gi5\_8479537\_x8.....gguucgauuccggAgccgga..... 1  
Gi1\_3942557\_x8.....uccggcguaguauaacggcCa..... 1  
Gi2\_10479218\_x8.....gguucgauuccggcgAcgga..... 1  
Gi2\_10497954\_x8.....uccggcguaguauGacggcuaga..... 1  
Gi1\_3943245\_x8.....ucUggcguaguauaacggc..... 1  
Gi3\_27310729\_x8.....gguucgauuccggcgccCag..... 1  
Gi2\_10480546\_x8.....gguucgauuccgggUgccgga..... 1  
Gi2\_10474722\_x8.....uccggcguUguauaacggc..... 1  
Gi1\_3952253\_x8.....Cccggcguaguauaacggcuaga..... 1  
Gi3\_27361201\_x8.....uucucaccaacagauAcg..... 1  
Gi5\_8477785\_x8.....guCcgauuccggcgccgga..... 1  
Gi1\_3952509\_x8.....uccggcguaguauaacggUuaga..... 1  
Gi3\_27358193\_x8.....uccggcgCaguauaacggcuagaa..... 1  
Gi2\_10482586\_x8.....guucgauuccggcgccUgagc..... 1  
Gi3\_27331577\_x8.....gguucgCuuccggcgcc..... 1  
Gi1\_3957061\_x8.....ugguucucaccaacagauAcgg..... 1  
Gi1\_3943317\_x8.....uccggcguaguauaacggcuaA..... 1  
Gi2\_10498522\_x8.....uccggcguNguauaacggcuagaa..... 1  
Gi3\_27350665\_x8.....uccggcguUguauaacggcuagaau..... 1  
Gi2\_10494290\_x8.....uccggcguaguauaacAgcua..... 1  
Gi3\_27359665\_x8.....gguucgauuccGggcgccg..... 1  
Gi5\_8488537\_x8.....uucucaccAaacagauccg..... 1  
Gi2\_10495498\_x8.....uccggUguaguauaacggc..... 1  
Gi2\_10477890\_x8.....gguUgauuccggcgccg..... 1  
Gi1\_3948949\_x8.....uccggcguaguauaacAgcua..... 1

Gi2\_10486098\_x8.....gguucgaCuccggcgccgg.....1  
 Gi3\_27362081\_x8.....guucgauuccggcgGgga.....1  
 Gi2\_10472362\_x8.....gguucgauuccAgcgccgga.....1  
 Gi2\_10486738\_x8.....gguucgauuccggcgGcgagc.....1  
 Gi3\_27359369\_x8.....guucgauuccggcgccggaAc.....1  
 Gi3\_27318697\_x8.....gguucucacccaacagauAcg.....1  
 Gi1\_3952357\_x8.....gguucucacccaacagauAcg.....1  
 Gi3\_27363793\_x8.....guucgauuccggcgGcgga.....1  
 Gi2\_10492602\_x8.....ucucacccaacagauccg.....0  
 Gi1\_3943421\_x8.....gguucgauuccggcgccggU.....1  
 Gi5\_8493593\_x8.....gguucgauuccggcgUcgga.....1  
 Gi5\_8485265\_x8.....uccggcguaguauGacggcuag.....1  
 Gi2\_10479466\_x8.....guucgauuccCcgccggagc.....1  
 Gi2\_10483890\_x8.....ggCucgauuccggcgccgga.....1  
 Gi1\_3944557\_x8.....gguucucacccaacagGuccg.....1  
 Gi2\_10469098\_x8.....gguucgauuccggcgccA.....1  
 Gi2\_10494178\_x8.....gguucgauuccggcAccggag.....1  
 Gi5\_8483649\_x8.....gcuaguauaacggcuaga.....0  
 Gi3\_27320833\_x8.....cgauuccggcgccggCgc.....1  
 Gi3\_27324993\_x8.....ggAucucacccaacagauccg.....1  
 Gi5\_8493065\_x8.....gguucgauucUcggcgccggagc.....1  
 Gi2\_10472842\_x8.....guucgauuNccggcgccgga.....1  
 Gi1\_3951533\_x8.....uGcggcguaguauaacggc.....1  
 Gi3\_27346385\_x8.....guucgauuccggcgccCgagc.....1  
 Gi1\_3945037\_x8.....gguucgauuccggcgccggG.....1  
 Gi3\_27361169\_x8.....uccggcUuaguauaacggcuaga.....1  
 Gi2\_10494842\_x8.....ucgauuccggcgccggGgc.....1  
 Gi2\_10475530\_x8.....uccggcguaguauaacggcuaAaau.....1  
 Gi5\_8477473\_x8.....uccAgcguaguauaacggc.....1  
 Gi2\_10487194\_x8.....Gucgauuccggcgccgg.....1  
 Gi5\_8486761\_x8.....uccggcguaguCuaacggcuaga.....1  
 Gi2\_10487810\_x8.....guCcgauuccggcgccggag.....1  
 Gi3\_27341601\_x8.....uccggcguaguauGacggcuagaau.....1  
 Gi3\_27328017\_x8.....guucgaGuuccggcgccgga.....1  
 Gi5\_8487297\_x8.....guucgauuccAgggcgccg.....1  
 Gi4\_525296\_x8.....gUuucgauuccggcgccggagc.....1  
 Gi2\_10481602\_x8.....uccggcguaguauaacggcuagU.....1  
 Gi5\_8494881\_x8.....uccggcguaguauaaAggcuag.....1  
 Gi3\_27332217\_x8.....uucucacccaacagGuccgg.....1  
 Gi5\_8488777\_x8.....uccggcguCguauaacgg.....1  
 Gi3\_27366841\_x8.....uccgUcguaguauaacggcuagaau.....1  
 Gi1\_3943365\_x8.....gguucgauuccggcgccggagU.....1  
 Gi2\_10495458\_x8.....uccggUguaguauaacgg.....1  
 Gi2\_10471362\_x8.....aacagauccggguucgauuccggcgccgg.....0  
 Gi3\_27342481\_x8.....gguucgauuccAgggcgccg.....1  
 Gi3\_27335497\_x8.....cgUuuccggcgccggagc.....1  
 Gi2\_10467634\_x8.....guucgauuccgUcgccggagc.....1

Gi5\_8486097\_x8.....guuUgauucccgcgccggagc..... 1  
Gi1\_3950797\_x8.....gAuucucacccaacagauccg..... 1  
Gi3\_27317057\_x8.....gGucucacccaacagauccggg..... 1  
Gi2\_10464722\_x8.....gguucgGuucccgcgccg..... 1  
Gi1\_3954469\_x8.....guucucaccUaacagauccg..... 1  
Gi1\_3943637\_x8.....uccggcguaguauaacggUuag..... 1  
Gi5\_8499257\_x8.....gguucuUaccaacagauccg..... 1  
Gi2\_10469946\_x8.....guucgUuucccgcgccg..... 1  
Gi3\_27369817\_x8.....ucGggcguaguauaacggcua..... 1  
Gi2\_10488730\_x8.....gguucgauucccggcAccgg..... 1  
Gi5\_8496129\_x8.....ggCucgauucccgcgccgg..... 1  
Gi3\_27366081\_x8.....uccgAcguaguauaacggcua..... 1  
Gi2\_10481186\_x8.....gguucgauucUcggcgccggag..... 1  
Gi2\_10486802\_x8.....ucgauucUcggcgccggagc..... 1  
Gi1\_3950469\_x8.....uccggcguaguauaacggcuaAaau..... 1  
Gi2\_10472418\_x8.....gguCcgauucccgcgccggag..... 1  
Gi1\_3946485\_x8.....gguucucacccCacagauccg..... 1  
Gi5\_8497897\_x8.....guucgGuucccgcgccggagc..... 1  
Gi5\_8481825\_x8.....ggCucgauucccgcgccggag..... 1  
Gi1\_3949389\_x8.....gguucucacccaGcagauccg..... 1  
Gi1\_3954109\_x8.....gUcguaguauaacggcuag..... 1  
Gi5\_8498865\_x8.....guucgUuucccgcgccg..... 1  
Gi3\_27347513\_x8.....uccggcguaguauaaAgg..... 1  
Gi1\_3946141\_x8.....gguCcgauucccgcgccgg..... 1  
Gi5\_8496041\_x8.....gguucgauucccgcgAccga..... 1  
Gi5\_8482833\_x8.....uccggcguaguCuaacgg..... 1  
Gi5\_8479385\_x8.....uccggcguaguauCacggcuagaau..... 1  
Gi4\_526408\_x8.....gguucgauucccgcgccgga..... 0  
Gi2\_10478338\_x8.....gguucgauucccgAgcc..... 1  
Gi1\_3955573\_x8.....uccggcguaguauaacggcuaAa..... 1  
Gi3\_27328089\_x8.....guucgauucAcggcgccgg..... 1  
Gi3\_27360993\_x8.....guucgauucccgcgccggUg..... 1  
Gi5\_8493825\_x8.....ggGucgauucccgcgccgga..... 1  
Gi2\_10487602\_x8.....guucgauuccAggcgccgg..... 1  
Gi1\_3943093\_x8.....ucucGcccaacagauccg..... 1  
Gi3\_27337049\_x8.....guucucaccUaacagauccg..... 1  
Gi2\_10495786\_x8.....guucgauucAcggcgccggagc..... 1  
Gi1\_3947829\_x8.....gguuUgauucccgcgccgg..... 1  
Gi1\_3955053\_x8.....gguucgauucccgcgccggagcA..... 1  
Gi3\_27320697\_x8.....guucgauucccgGgccgg..... 1  
Gi3\_27323897\_x8.....ugguucucacccaacagGuccg..... 1  
Gi2\_10475850\_x8.....gguucAauucccgcgccgga..... 1  
Gi5\_8476993\_x8.....agaucgggNuucgauucc..... 1  
Gi4\_524184\_x8.....guucucacccaacagauccg..... 0  
Gi2\_10497218\_x8.....guucgauuccAgcgccgga..... 1  
Gi2\_10462786\_x8.....ucUggcguaguauaacggcuag..... 1  
Gi3\_27356329\_x8.....gauuccAgcgccggagc..... 1

Gi5\_8482345\_x8.....gAuucgauucccgcgcc..... 1  
 Gi5\_8483369\_x8.....uccggcguaguauaaUggcuagaau..... 1  
 Gi2\_10488106\_x8.....gguucucaccccGacagauccg..... 1  
 Gi5\_8493233\_x8.....gCuucgauucccgcgccgg..... 1  
 Gi3\_27341417\_x8.....uGcggcguaguauaacggcu..... 1  
 Gi3\_27364521\_x8.....gguucgauucccgAgccggag..... 1  
 Gi3\_27330617\_x8.....ugguucucGcccaacagauccg..... 1  
 Gi5\_8488025\_x8.....ggAucgauucccgcgccgga..... 1  
 Gi3\_27374497\_x8.....gAucgauucccgcgccggag..... 1  
 Gi2\_10476746\_x8.....gguucgauNcccggcgccgg..... 1  
 Gi5\_8491289\_x8.....uccggcguaguauCacggc..... 1  
 Gi1\_3949949\_x8.....uccgAcguaguauaacgg..... 1  
 Gi3\_27409758\_x7.....ucgGuucccgcgccggagc..... 1  
 Gi5\_8511635\_x7.....guucucacNcaacagauccgg..... 1  
 Gi2\_10522161\_x7.....gguCcgauucccgcgccg..... 1  
 Gi5\_8529464\_x7.....Uguucgauucccgcgccggagcguuu..... 1  
 Gi5\_8527224\_x7.....uccAgcguaguauaacggcuaga..... 1  
 Gi2\_10516162\_x7.....Cguucgauucccgcgccgg..... 1  
 Gi2\_10537610\_x7.....uUcggcguaguauaacggcuag..... 1  
 Gi5\_8506252\_x7.....gguucgauucccgcgccgAagc..... 1  
 Gi2\_10527012\_x7.....uccggcguaguauaaUggc..... 1  
 Gi1\_3961238\_x7.....guCcucacccaacagauccgg..... 1  
 Gi5\_8530668\_x7.....Ccucacccaacagauccg..... 1  
 Gi3\_27445290\_x7.....guucgauucccgcgccCga..... 1  
 Gi1\_3967139\_x7.....uucucacccaacagaAccg..... 1  
 Gi2\_10525598\_x7.....gguucgauucccgcgccC..... 1  
 Gi1\_3967965\_x7.....guucgauucccgcgccUg..... 1  
 Gl1\_5688204\_x7.....gGucgauucccgcgccggagc..... 1  
 Gi1\_3973075\_x7.....ccggcguaguauaacggcuagaau..... 0  
 Gi5\_8504649\_x7.....ugguucucGcccaacagauccg..... 1  
 Gi1\_3962540\_x7.....gguAcgauucccgcgccgg..... 1  
 Gi3\_27426285\_x7.....guucgauuccUggcgccg..... 1  
 Gi2\_10499586\_x7.....gguucgauucccgcgUcggag..... 1  
 Gi2\_10534873\_x7.....guucCauucccgcgccg..... 1  
 Gi2\_10501994\_x7.....guucgCuucccgcgccgg..... 1  
 Gi3\_27437044\_x7.....uccggcguaguUuaacgg..... 1  
 Gi3\_27379581\_x7.....gguucgauucccgcgUc..... 1  
 Gi1\_3963688\_x7.....guuAgauucccgcgccgg..... 1  
 Gi5\_8528162\_x7.....uccgUcguaguauaacggcuagaau..... 1  
 Gi3\_27425942\_x7.....guucgauucccgcgccggagcgC..... 1  
 Gi5\_8530850\_x7.....ugguucucaccUaacagauccg..... 1  
 Gi1\_3959887\_x7.....uccggcguaguauaacggcuagC..... 1  
 Gi5\_8515569\_x7.....guucgauucccgUgccgga..... 1  
 Gi1\_3968819\_x7.....guGcucacccaacagauccg..... 1  
 Gi3\_27427447\_x7.....ugguucucacAaacagauc..... 1  
 Gi2\_10529371\_x7.....gguucgaCucccgcgccggag..... 1  
 Gi3\_27423527\_x7.....cgauuccNgcggcgagc..... 1

Gi3\_27431668\_x7.....uucucaccAaacagauccg.....1  
Gi3\_27382640\_x7.....guucgauucccggcUg.....1  
Gi2\_10535055\_x7.....uAcucaccaacagauccgg.....1  
Gi1\_3971206\_x7.....uAcucaccaacagauccgg.....1  
Gi3\_27416478\_x7.....uccggcguaguauaacgAcuagaa.....1  
Gi1\_3973922\_x7.....uuUgauucccggcgcgg.....1  
Gi5\_8529632\_x7.....ggAucgauucccggcgcgg.....1  
Gi2\_10538863\_x7.....uccggcguaguauaacggcuGgaa.....1  
Gi5\_8521813\_x7.....gguucgauCcccggcgcgg.....1  
Gi2\_10525038\_x7.....guucUauucccggcgcgg.....1  
Gi2\_10525304\_x7.....gguucgauucccggcGcg.....1  
Gi2\_10503198\_x7.....gguucucaccaacagauUg.....1  
Gi5\_8503200\_x7.....guucgCuucccggcgcgg.....1  
Gi1\_3961980\_x7.....gguuGgauucccggcgcgg.....1  
Gi3\_27446438\_x7.....guucgauuAccgggcgcgg.....1  
Gi1\_3967720\_x7.....uccggcguaguauaacggUua.....1  
Gi5\_8511859\_x7.....gguucgauucccggcGcg.....1  
Gi3\_27411417\_x7.....guucgauuAccgggcgcggagc.....1  
Gi2\_10520656\_x7.....uucucaccaacCgauccg.....1  
Gi3\_27381044\_x7.....guucgauucccggcGcgAggag.....1  
Gi3\_27447943\_x7.....uucgauuNcggcgcggagc.....1  
Gi1\_3960720\_x7.....uccggcguagCauaacggcua.....1  
Gi3\_27447873\_x7.....gguucgauucccggcgcGca.....1  
Gi5\_8506868\_x7.....gguucgCuucccggcgcggga.....1  
Gi3\_27411053\_x7.....uccggcguAuaauaacggc.....1  
Gi5\_8521939\_x7.....guucgauucccggcGcg.....1  
Gi2\_10514335\_x7.....uccggcguNguauaacgg.....1  
Gi3\_27424451\_x7.....cucaccaNcagauccgg.....1  
Gi3\_27407525\_x7.....guucgauucccggcgcggCg.....1  
Gi5\_8508282\_x7.....gguucgauucccgAcgccgga.....1  
Gi3\_27407336\_x7.....uccggcguAUuaaacggcuaga.....1  
Gi1\_3967559\_x7.....Accggcguaguauaacgg.....1  
Gi3\_27432732\_x7.....uccggcguGguauaacggcuagaa.....1  
Gi5\_8514484\_x7.....gguucgauucccggcAccg.....1  
Gi4\_526928\_x7.....uccggcguaguauaacgg.....0  
Gi1\_3972557\_x7.....uccggcguaguauaacAgc.....1  
Gi5\_8530052\_x7.....uccggcguaguauaacggGuag.....1  
Gi3\_27393896\_x7.....ugguCucaccaacagauccg.....1  
Gi5\_8503165\_x7.....guucgauuAccgggcgcgg.....1  
Gi2\_10507881\_x7.....guCcgauucccggcgcggga.....1  
Gi5\_8510725\_x7.....ugguucucaccaacGgauccg.....1  
Gi1\_3968056\_x7.....uucucaccaacCgauccgg.....1  
Gi3\_27436547\_x7.....uccggcguAuaauaacggcua.....1  
Gi2\_10502547\_x7.....uccggcguaguauaacggcuagCau.....1  
Gi2\_10508679\_x7.....uccggcguNguauaacggcuag.....1  
Gi1\_3965249\_x7.....uucucacccUacagauccgg.....1  
Gi3\_27393791\_x7.....uccgCcgaguauaacggc.....1

Gi2\_10514692\_x7.....guuAgaaucccggcgccgg.....1  
Gi2\_10515833\_x7.....gguucgauuccUggcgccg.....1  
Gi1\_3957976\_x7.....Cuucgauucccgcgccgga.....1  
Gi4\_528594\_x7.....uccggcguaguauaacggcuGga.....1  
Gi3\_27449252\_x7.....guucgauucccgcgccggaCc.....1  
Gi2\_10509813\_x7.....guuUgaaucccggcgccgga.....1  
Gi1\_3959257\_x7.....uGguucucacccaacagauccg.....1  
Gi5\_8523892\_x7.....guucgauucccgcgccAgagc.....1  
Gi5\_8505391\_x7.....cUgcguaguauaacggcuag.....1  
Gi5\_8515625\_x7.....gguucucacccaacCgauccg.....1  
Gi2\_10537638\_x7.....uccgAcguaguauaacggc.....1  
Gi5\_8524718\_x7.....Cccggcguaguauaacggcuagaau.....1  
Gi3\_27420545\_x7.....gguucgauGcccggcgccggagc.....1  
Gi2\_10501630\_x7.....guucgauucccgUgcccggag.....1  
Gi5\_8505811\_x7.....guucgauucccgAcgccc.....1  
Gi3\_27451051\_x7.....gguCcgauucccgcgccc.....1  
Gi5\_8525586\_x7.....guucAcacccaacagauccg.....1  
Gi1\_3970065\_x7.....Gccggcguaguauaacggcuagaa.....1  
Gi2\_10536210\_x7.....gguucgauucccgUgcccgg.....1  
Gi5\_8507155\_x7.....Gcgauucccgcgccggagc.....1  
Gi1\_3972865\_x7.....ugguucucacccaCcagauccg.....1  
Gi1\_3968938\_x7.....uccggcguaguauaacggcCaga.....1  
Gi5\_8526216\_x7.....cucacUcaacagauccgg.....1  
Gi5\_8503221\_x7.....uccggcguCguauaacggcuaga.....1  
Gi1\_3973369\_x7.....gguucgauucccgcgccggCgc.....1  
Gi1\_3958641\_x7.....gguucgauucccggcAccggagc.....1  
Gi5\_8512076\_x7.....gguuGucacccaacagauccg.....1  
Gi2\_10512956\_x7.....uccggcguaguauaacggcuA.....1  
Gi3\_27402597\_x7.....uucucacccaacagauccgC.....1  
Gi5\_8516486\_x7.....guucgauucccgcgccggC.....1  
Gi5\_8507519\_x7.....uccggcguaguauGcggcuagaa.....1  
Gi5\_8516255\_x7.....uccggcguaguauCcggcua.....1  
Gi3\_27445787\_x7.....gguucgauucccgcgccUg.....1  
Gi5\_8519342\_x7.....ugguucucacccaCcagauccg.....1  
Gi5\_8521162\_x7.....gguucgauucccgcgccggUgc.....1  
Gi3\_27405733\_x7.....guucgaGucccggcgccgg.....1  
Gi5\_8519272\_x7.....gguCcgauucccgcgccgg.....1  
Gi3\_27394498\_x7.....gguucgauucccgAgccgg.....1  
Gi2\_10530001\_x7.....uccggcguaguauCcggcua.....1  
Gi3\_27386826\_x7.....guucucacccaacagauUg.....1  
Gi1\_3958452\_x7.....uucucacccaacagauAgg.....1  
Gi3\_27385167\_x7.....guucucacccaacagaCccg.....1  
Gi1\_3960223\_x7.....ugguucucacccaacGgauccg.....1  
Gi3\_27398712\_x7.....uucucacccaacGgauccgg.....1  
Gi3\_27411676\_x7.....uccggcguaguauGacggcuA.....1  
Gi3\_27381107\_x7.....gguucgauucccgcgUcgg.....1  
Gi5\_8528449\_x7.....gguucgauuccAgcggc.....1



Gi3\_27414959\_x7.....gguucgCuucccgcgccg..... 1  
Gi2\_10513705\_x7.....Accggcguaguauaacggcuaga..... 1  
Gi3\_27418193\_x7.....Nguucgauucccgcgccggagc..... 1  
Gi1\_3963856\_x7.....ugguucucacAcaacagauccgg..... 1  
Gi1\_3960671\_x7.....guucCauucccgcgccgg..... 1  
Gi3\_27416835\_x7.....uccggAguaguauaacggcuagaa..... 1  
Gi5\_8516479\_x7.....guucucacccaacagGuccgg..... 1  
Gi2\_10525864\_x7.....uccggcgCaguauaacggc..... 1  
Gi3\_27382605\_x7.....uucgauucccgcgccAgagc..... 1  
Gi2\_10504444\_x7.....uccgUcguaguauaacgg..... 1  
Gi2\_10517387\_x7.....ggGucgauucccgcgccg..... 1  
Gi1\_3973243\_x7.....uucucacccaacagauccAg..... 1  
Gi2\_10508567\_x7.....Ugcguaguauaacggcuaga..... 1  
Gi3\_27390683\_x7.....Cuucucacccaacagauccg..... 1  
Gi3\_27446081\_x7.....gguucgauuccAggcgcc..... 1  
Gi2\_10499642\_x7.....Gucgauucccgcgccggagc..... 1  
Gi5\_8505384\_x7.....gUcguaguauaacggcuaga..... 1  
Gi2\_10503373\_x7.....ucgaCuucccgcgccggagc..... 1  
Gi3\_27453277\_x7.....gguucgauucUcggcgccgg..... 1  
Gi2\_10537645\_x7.....uucucaccNaacagauccg..... 1  
G1a\_5682051\_x7.....uccggcguGguauaacggcua..... 1  
Gi2\_10520985\_x7.....gCuucucacccaacagauccg..... 1  
Gi3\_27407007\_x7.....ucUggcguaguauaacggcu..... 1  
Gi1\_3969239\_x7.....gguucucacccaacagauccAg..... 1  
Gi1\_3968728\_x7.....uccggcgCaguauaacggcua..... 1  
Gi3\_27427111\_x7.....guucgauucccgcgccGggagc..... 1  
Gi3\_27448104\_x7.....ucgaCuucccgcgccggagc..... 1  
Gi5\_8512531\_x7.....uGcucacccaacagauccggguuc..... 1  
Gi2\_10517688\_x7.....gguucgauCcccggcgccggag..... 1  
Gi2\_10505571\_x7.....uccggcguNguauaacggcuagaau..... 1  
Gi5\_8511789\_x7.....guuUucacccaacagauccg..... 1  
Gi1\_3958823\_x7.....uucucacccaacagaCccg..... 1  
Gi3\_27386308\_x7.....gguucgauucccggcUccggagc..... 1  
Gi3\_27451499\_x7.....guucgauucccgUgccc..... 1  
Gi5\_8511397\_x7.....gguuUucacccaacagauccg..... 1  
Gi5\_8512132\_x7.....guuAgauucccgcgccgg..... 1  
Gi3\_27423296\_x7.....guuUgauucccgcgccg..... 1  
Gi3\_27431339\_x7.....uGgguucucacccaacagaucc..... 1  
Gi3\_27447810\_x7.....gguucgauucUcggcgccg..... 1  
Gi2\_10529735\_x7.....guucUauucccgcgccggag..... 1  
Gi1\_3972046\_x7.....uucucacccaGcagauccgg..... 1  
Gi3\_27448888\_x7.....gguucgauucccgcgccggagG..... 1  
Gi3\_27432172\_x7.....uucucacccaacagauccUg..... 1  
Gi5\_8516521\_x7.....uccggcguaguCuaacggc..... 1  
Gi2\_10509617\_x7.....guucgauuccUggcgccgga..... 1  
G1a\_5701007\_x7.....gguucgauucccgUgcc..... 1  
Gi3\_27422820\_x7.....uccggcguaguauUacggcua..... 1

Gi3\_27442532\_x7.....gguucgauucAcggcgccg..... 1  
Gi5\_8507673\_x7.....guucAauucccgcgccggagc..... 1  
Gi2\_10524779\_x7.....gguucgauucccgUgccggag..... 1  
Gi5\_8514904\_x7.....Auucgauucccgcgccggagc..... 1  
Gi3\_27436477\_x7.....uccggcguaguaCaacggcuagaau..... 1  
Gi3\_27434055\_x7.....gguucgauucccgcgccggagc..... 0  
Gi3\_27423996\_x7.....guucucaccccCacagauccgg..... 1  
Gi5\_8512580\_x7.....gguucgGuucccgcgccggag..... 1  
Gi5\_8530185\_x7.....Uguucgauucccgcgccggagcguu..... 1  
Gi5\_8518824\_x7.....uccggcguaguCuaacggcuagaau..... 1  
Gi3\_27435749\_x7.....uucuUacccaacagauccg..... 1  
Gi2\_10522343\_x7.....uGcgauucccgcgccggagc..... 1  
Gi3\_27408729\_x7.....ugguucCacccaacagauccg..... 1  
Gi3\_27386875\_x7.....guucgauucccgcgccggaA..... 1  
Gi3\_27407679\_x7.....gguucgauucccgcgccGggag..... 1  
Gi3\_27395842\_x7.....ucNggcguaguauaacggcuaga..... 1  
Gi3\_27444058\_x7.....gguAcucacccaacagauccg..... 1  
Gi2\_10512207\_x7.....guucgauucccgcgccCgagc..... 1  
Gi3\_27456651\_x7.....uccAgcguaguauaacggcuagaau..... 1  
Gi5\_8527161\_x7.....Ugguucgauucccgcgccggagc..... 1  
Gi5\_8507288\_x7.....guucucacccaacagauAcg..... 1  
Gi1\_3967475\_x7.....ggCucgauucccgcgccgga..... 1  
Gi2\_10534418\_x7.....uccggcguaguaCaacggcua..... 1  
Gi2\_10523505\_x7.....uGcgauucccgcgccgg..... 1  
Gi3\_27441874\_x7.....guucAauucccgcgccg..... 1  
Gi3\_27396451\_x7.....guucgCuucccgcgccg..... 1  
Gi2\_10508350\_x7.....gguucgauuccUgcgccggag..... 1  
Gi3\_27425508\_x7.....guCcgauucccgcgccg..... 1  
Gi5\_8523577\_x7.....guucgauucccgcgccUg..... 1  
Gi1\_3967076\_x7.....gguucgauucccgcgccggGgc..... 1  
Gi2\_10515805\_x7.....uccggcguaguauaacggcuaUa..... 1  
Gi3\_27444233\_x7.....guucgauucAcggcgccgga..... 1  
Gi5\_8527399\_x7.....uccggcguaguauaacggcCagaa..... 1  
G1a\_5682142\_x7.....gguucgauNcccgcgccggagc..... 1  
Gi1\_3962561\_x7.....ggAucgauucccgcgccgg..... 1  
Gi5\_8518145\_x7.....uccggcAuaguauaacggcuaga..... 1  
Gi2\_10535097\_x7.....uccggcguaguauaacggcCagaau..... 1  
Gi5\_8504460\_x7.....gguuUgauucccgcgccg..... 1  
Gi3\_27416485\_x7.....gguucgauucccgAgcc..... 1  
Gi1\_3970982\_x7.....Auucucacccaacagauccgg..... 1  
G1a\_5687742\_x7.....Gcucacccaacagauccg..... 1  
Gi3\_27419789\_x7.....uccCgcguaguauaacggcuaga..... 1  
Gi5\_8521729\_x7.....gCuucgauucccgcgccggag..... 1  
Gi3\_27405824\_x7.....gguucgauucccgcgccGcgga..... 1  
Gi3\_27422295\_x7.....uccggcguauauaacgg..... 1  
Gi3\_27435574\_x7.....uccggcguagCauaacggcuag..... 1  
Gi3\_27412663\_x7.....uccggcguagAauaacgg..... 1

Gi1\_3961497\_x7.....gUuucgauucccgcgcc..... 1  
 Gi2\_10516757\_x7.....gguucucacccaacagCuccg..... 1  
 Gi5\_8526174\_x7.....gguucucUcccaacagauccg..... 1  
 Gi5\_8504495\_x7.....uccggcguaguauaCcgg..... 1  
 Gi1\_3962106\_x7.....guucucGcccaacagauccg..... 1  
 Gi3\_27518572\_x6.....gguucgauuAccggcgccgga..... 1  
 G1a\_5726860\_x6.....ucUggcguaguauaacggcuaga..... 1  
 Gi3\_27532678\_x6.....uucucacccaacagauUgg..... 1  
 Gi3\_27527164\_x6.....gguucgauucccgAcgccg..... 1  
 Gi1\_3992857\_x6.....ugguuUucacccaacagauccg..... 1  
 Gi2\_10563647\_x6.....gguuUgauucccgcgccggag..... 1  
 Gi5\_8556733\_x6.....gguucgauuccUggcgccgga..... 1  
 Gi5\_8535937\_x6.....uccggcguaguauaaGggcuaga..... 1  
 Gi5\_8557789\_x6.....gguucucacccaacagauccA..... 1  
 Gi2\_10569353\_x6.....cUcaacagauccggguuc..... 1  
 Gi5\_8537029\_x6.....uccggcguaguauaacggcuUg..... 1  
 Gi1\_3980473\_x6.....uccggcguaguGuaacggcu..... 1  
 Gi2\_10542875\_x6.....guucgauucccgcgUgga..... 1  
 Gi3\_27465052\_x6.....guucgauucccgcgccggU..... 1  
 Gi3\_27524956\_x6.....gAuucucacccaacagauccg..... 1  
 Gi2\_10578299\_x6.....cUauucccgcgccggagcguuuc..... 1  
 Gi2\_10574453\_x6.....gguCcgauucccgcgccgg..... 1  
 Gi3\_27494680\_x6.....uucucacAcaacagauccg..... 1  
 Gi3\_27536362\_x6.....guucgauucccgcgccUg..... 1  
 Gi3\_27525220\_x6.....uucgauucccgcgccggC..... 1  
 Gi5\_8531353\_x6.....gguucgauucAcggcgccggagc..... 1  
 Gi5\_8554213\_x6.....uccggcguaguauUacggcuag..... 1  
 Gi2\_10569701\_x6.....gguucgauucccggcAccg..... 1  
 Gi1\_3989989\_x6.....ugguucucacccaacagauccAg..... 1  
 Gi2\_10568933\_x6.....gguucgauucccgGgcc..... 1  
 Gi2\_10585175\_x6.....gguucgauucccgcgU..... 1  
 Gi5\_8545813\_x6.....Ucggcguaguauaacggcuaga..... 1  
 Gi3\_27465964\_x6.....ccggcguaguauaCcggc..... 1  
 Gi1\_3975613\_x6.....ugguucucacccaacagauUgg..... 1  
 Gi2\_10547255\_x6.....Gguccggcguaguauaacgg..... 1  
 Gi5\_8533807\_x6.....gguucgauucccgcgccgAa..... 1  
 Gi1\_3990703\_x6.....gguucucacUcaacagauccg..... 1  
 Gi5\_8534227\_x6.....uccggcguaguauaaAgggcuaga..... 1  
 Gi1\_3987037\_x6.....gguucucacccaacagauccgU..... 1  
 Gi5\_8554093\_x6.....uUguucucacccaacagauccgg..... 1  
 G1a\_5730928\_x6.....guucucacccCacagauccg..... 1  
 Gi3\_27538150\_x6.....uccAgcguaguauaacggcuagaa..... 1  
 Gi3\_27489004\_x6.....ugguucucNcccaacagau..... 1  
 Gi2\_10553141\_x6.....uccggcAuaguauaacggcuaga..... 1  
 Gi3\_27515602\_x6.....Gcucacccaacagauccg..... 1  
 Gi3\_27488302\_x6.....ucgauucccgcgccggCgc..... 1  
 Gi3\_27521374\_x6.....guucgauucccggcCccgga..... 1

Gi3\_27478312\_x6.....uAcucacccaacagauccg..... 1  
Gi3\_27491776\_x6.....uccggGguaguauaacgg..... 1  
Gi5\_8536669\_x6.....uccggcguauuuacggcua..... 1  
Gi3\_27475666\_x6.....ugguucucGcccaacagauc..... 1  
Gi3\_27519514\_x6.....uugguCuacacccaacagaucc..... 1  
Gi2\_10567661\_x6.....guucgauCcccggcgccg..... 1  
Gi1\_3980905\_x6.....guucucacccaacagauUg..... 1  
Gi1\_3987019\_x6.....guucucacccaacCgauccg..... 1  
Gi1\_3978553\_x6.....ggAucucacccaacagauccg..... 1  
Gi3\_27462982\_x6.....ccggcguaguauaacggcua..... 0  
Gi3\_27531694\_x6.....guuGgauucccggcgccggagc..... 1  
Gi5\_8543503\_x6.....gguucgauAcccggcgccggagc..... 1  
Gi2\_10561487\_x6.....guucUauucccggcgccgga..... 1  
Gi5\_8550685\_x6.....ucUggguucgauucccggc..... 1  
Gi1\_3985681\_x6.....guNcgauucccggcgccgg..... 1  
Gi5\_8560399\_x6.....ugguucCcacccaacagauccg..... 1  
Gi2\_10554221\_x6.....uccggcguaguauaGcggcuag..... 1  
Gi3\_27468004\_x6.....gguucucacccaacagauccUggu..... 1  
Gi2\_10586483\_x6.....guucCcacccaacagauccg..... 1  
Gi3\_27509182\_x6.....uccggcguaguUuaacggcua..... 1  
Gi5\_8544871\_x6.....Auucucacccaacagauccgg..... 1  
Gi3\_27477280\_x6.....Ugguucgauucccggcgccg..... 1  
Gi1\_3990013\_x6.....uccggcguaguauaacggcuagaC..... 1  
Gi3\_27490564\_x6.....gguucucacccaacCgauccg..... 1  
Gi5\_8560213\_x6.....gUuucgauucccggcgccggagcguuu..... 1  
Gi5\_8562331\_x6.....guucgauucccCgcgccg..... 1  
Gi5\_8547775\_x6.....guucgauAcccggcgccgg..... 1  
Gi3\_27498148\_x6.....Cucucacccaacagauccgg..... 1  
Gi3\_27544918\_x6.....uccggcAuaguauaacggc..... 1  
Gi1\_3982381\_x6.....guucgauuccUggcgccg..... 1  
Gi5\_8562469\_x6.....guucucacccaacagauUcg..... 1  
Gi5\_8531137\_x6.....gguucgGuucccggcgccgga..... 1  
G1a\_5702458\_x6.....Cguucgauucccggcgccggag..... 1  
Gi3\_27531646\_x6.....guucucacccaacagauAcg..... 1  
Gi1\_3987505\_x6.....Gcggcguaguauaacggcuaga..... 1  
Gi5\_8562907\_x6.....uccUgcguaguauaacggcuag..... 1  
Gi5\_8531065\_x6.....Uuaguauaacggcuagaau..... 1  
Gi5\_8531617\_x6.....gguucucacccaUcagauccg..... 1  
Gi2\_10575779\_x6.....gAucgauucccggcgccgga..... 1  
Gi3\_27472150\_x6.....guucgauucccgUcgccggagc..... 1  
Gi3\_27518824\_x6.....uccggcgCaguauaacggcuag..... 1  
Gi1\_3992587\_x6.....guAcgauucccggcgccgga..... 1  
Gi5\_8534767\_x6.....guucgUuucccggcgccgg..... 1  
Gi2\_10566929\_x6.....guucucacccaacGgauccg..... 1  
Gi5\_8556055\_x6.....uccggcAuaguauaacggcuag..... 1  
Gi5\_8558725\_x6.....gguucgauucccUgcgccgg..... 1  
Gi5\_8539447\_x6.....guucucaUccaacagauccg..... 1

Gi3\_27459700\_x6.....uccggcguagCauaacggcuagaau..... 1  
 Gi1\_3986503\_x6.....Aguucgauucccggcgcg..... 1  
 Gi5\_8551669\_x6.....ugguucucacccaacagaucUg..... 1  
 Gi5\_8541073\_x6.....guucgauucccgUcgcg..... 1  
 Gi5\_8543557\_x6.....cuUaccaacagauccg..... 1  
 Gi5\_8553223\_x6.....ucAggcguaguauaacggcuag..... 1  
 Gi5\_8536891\_x6.....gguucAauucccggcgcg..... 1  
 Gi3\_27481582\_x6.....Gguccggcguaguauaacggcuagaa..... 1  
 Gi3\_27487786\_x6.....gguucUauucccggcgcgga..... 1  
 Gi2\_10574429\_x6.....Ccgauucccggcgcgagc..... 1  
 Gi3\_27459346\_x6.....gguucgauuccGggcgcgag..... 1  
 Gi5\_8562223\_x6.....guucgaGucccggcgcg..... 1  
 Gi5\_8550865\_x6.....guucgaGucccggcgcg..... 1  
 Gi5\_8531629\_x6.....guucucacccUacagauccg..... 1  
 Gi3\_27509992\_x6.....guucgauuccAggcgcgagc..... 1  
 Gi2\_10562117\_x6.....gguucgauuccAggcgcg..... 1  
 Gi5\_8549311\_x6.....gguuAgauucccggcgcgagc..... 1  
 Gi2\_10551425\_x6.....cgauucccggcgcgagc..... 0  
 Gi2\_10545575\_x6.....gguucucacccCacagauccg..... 1  
 Gi2\_10578713\_x6.....Gagauccggguucgauucc..... 1  
 Gi2\_10544189\_x6.....gguuGgauucccggcgcg..... 1  
 Gi3\_27542590\_x6.....ucgauucccggcgcgGgc..... 1  
 Gi5\_8542441\_x6.....uccgAcguaguauaacggcuag..... 1  
 Gi2\_10580399\_x6.....guucgauucccggcgcAg..... 1  
 Gi3\_27534442\_x6.....uccggcguaguCuaacgg..... 1  
 Gi5\_8547289\_x6.....gguucgauucccgAgccg..... 1  
 Gi3\_27521662\_x6.....gguucgGuucccggcgc..... 1  
 Gi5\_8536429\_x6.....guCcucacccaacagauccg..... 1  
 Gi5\_8538079\_x6.....Cucucacccaacagauccg..... 1  
 Gi3\_27507706\_x6.....guAcgauucccggcgcg..... 1  
 Gi2\_10587971\_x6.....gguucgauucAcggcgcgag..... 1  
 Gl1\_5705266\_x6.....uccggcguaguauCacggcuaga..... 1  
 Gi5\_8537881\_x6.....uccggcguaguauaacgAcuagaau..... 1  
 Gi2\_10548773\_x6.....uucucacccaacagaCccg..... 1  
 Gi1\_3980479\_x6.....guucgauucccggcgcA..... 1  
 Gl1\_5726536\_x6.....uccggcguaguauaacggcuagG..... 1  
 Gi5\_8542951\_x6.....cucacccaacagaCccg..... 1  
 Gi3\_27464092\_x6.....guucgauucccggcgcAg..... 1  
 Gi1\_3993703\_x6.....uccggcguaguauaacggcuagaGu..... 1  
 Gi1\_3976639\_x6.....uccggcguGguauaacggcu..... 1  
 Gi3\_27548074\_x6.....cgauucccggcgcAgagc..... 1  
 Gi5\_8533591\_x6.....uccggcguaguauaacggcuGgaa..... 1  
 Gi2\_10543823\_x6.....Cccggcguaguauaacggcu..... 1  
 Gi2\_10551671\_x6.....uccgUcguaguauaacggcuagaa..... 1  
 Gi1\_3989257\_x6.....uccggcguaguauaacAgcuagaau..... 1  
 Gi2\_10588049\_x6.....guucucacAcaacagauccg..... 1  
 Gi1\_3993187\_x6.....gCucgauucccggcgcg..... 1

Gi3\_27478264\_x6.....guucUauucccggcgccg..... 1  
Gi3\_27484126\_x6.....Ugcguaguauaacggcua..... 1  
Gi1\_3991123\_x6.....uccggcguaguauaUcgg..... 1  
Gi1\_3986179\_x6.....uccggUguaguauaacggcuagaau..... 1  
Gi2\_10558439\_x6.....cgauucccggcgccggagcguuG..... 1  
Gi5\_8532547\_x6.....gguuUgauucccggcgccggagcguu..... 1  
Gi2\_10547435\_x6.....uccggcguaguauaacggU..... 1  
Gi1\_3990067\_x6.....uccggcguaguauaacggcuagGau..... 1  
Gi5\_8544061\_x6.....uccggcguaguaCaacggcuagaau..... 1  
Gi2\_10583597\_x6.....gguCcgauucccggcgccgga..... 1  
Gi5\_8556079\_x6.....gguucucacccaacagauUcg..... 1  
Gi3\_27501868\_x6.....gguucgauucccgGgccggag..... 1  
Gi3\_27535378\_x6.....gguuGgauucccggcgccgg..... 1  
Gi5\_8545987\_x6.....gguAcgauucccggcgccggagc..... 1  
Gi1\_3991867\_x6.....guucgauucccgUgccgga..... 1  
Gi5\_8544787\_x6.....guucucacccaacagCuccg..... 1  
Gi3\_27509242\_x6.....aacagauccggguucgauucccggcgccggagc..... 0  
Gi1\_3980713\_x6.....Gcaccacacagauccgggu..... 1  
Gi3\_27470788\_x6.....gguucgaGucccgggcgccggagc..... 1  
Gi2\_10546109\_x6.....gguucgauucccggcgccUgagc..... 1  
Gi1\_3978493\_x6.....ugguucucacccaacagCuccgg..... 1  
Gi1\_3984469\_x6.....gguuUgauucccggcgccggagc..... 1  
Gi1\_3976795\_x6.....guucucacccaacagauccA..... 1  
Gi1\_3977671\_x6.....guucucacccaacagauAcgg..... 1  
Gi5\_8555773\_x6.....gguucgauucccggcAccggag..... 1  
Gi1\_3978925\_x6.....uGucacccaacagauccgg..... 1  
Gi3\_27520444\_x6.....gaCucccggcgccggagc..... 1  
Gi2\_10590599\_x6.....gguucgauuccUgcgccg..... 1  
Gi5\_8548675\_x6.....guucgauucccgGgccg..... 1  
Gi1\_3989029\_x6.....ugguucuaUccaacagauccgg..... 1  
Gi3\_27541582\_x6.....uucgauucNcgggcgccgga..... 1  
Gi2\_10578197\_x6.....uccggcguaguaCaacgg..... 1  
Gi2\_10566755\_x6.....guucgauuccUgcgccggagc..... 1  
Gi3\_27517384\_x6.....uccgAcguaguauaacggc..... 1  
Gi2\_10580909\_x6.....uccggcguaguauaUcggcuagaau..... 1  
Gi3\_27493318\_x6.....guucucacccaacagauAg..... 1  
Gi2\_10565009\_x6.....gguucgauuccUgcgccgga..... 1  
Gi1\_5723356\_x6.....uccggcguagCauaacggcuaga..... 1  
Gi5\_8548669\_x6.....gguuUgauucccggcgccgga..... 1  
Gi2\_10570739\_x6.....Accggcguaguauaacggc..... 1  
Gi1\_3975235\_x6.....guucgauucccggcgccggCgc..... 1  
Gi3\_27510196\_x6.....gguucgauuccAgcgc..... 1  
Gi2\_10541777\_x6.....gguucucGcccaacagauccg..... 1  
Gi5\_8542753\_x6.....uccggcguUguauaacggcuaga..... 1  
Gi1\_3988279\_x6.....Gucgauucccggcgccggagc..... 1  
Gi1\_3992917\_x6.....ucgauuAccgggcgccggagc..... 1  
Gi3\_27511738\_x6.....guucgauucccggcAccg..... 1

Gi1\_3976723\_x6.....guucCcacccaacagauccgg..... 1  
 Gi3\_27509530\_x6.....acagauccggguucgauuccggcgccggagcC..... 1  
 Gi5\_8544295\_x6.....ccUaacagauccggguuc..... 1  
 Gi1\_3977395\_x6.....guucucacccaacagauAcg..... 1  
 Gi3\_27511798\_x6.....guucgauucccgcgUcggag..... 1  
 Gi3\_27491716\_x6.....uucucacccaacagauccgA..... 1  
 Gi2\_10551461\_x6.....gguucucacccaacGgauccg..... 1  
 Gi2\_10566947\_x6.....uccggcguaguauaacggcuagaC..... 1  
 Gi5\_8538685\_x6.....uccAgcguaguauaacggcuagaau..... 1  
 Gi1\_3993481\_x6.....guucgauucccgcgUcg..... 1  
 Gi1\_3979981\_x6.....gguucucaccccUacagauccg..... 1  
 Gi5\_8552635\_x6.....uccggUguaguauaacggcuagaa..... 1  
 Gi2\_10581317\_x6.....Cccggcguaguauaacggcuagaau..... 1  
 Gi1\_3988993\_x6.....gguucgauucccgcgccCg..... 1  
 Gi3\_27482182\_x6.....gguucgauucccgcgccgU..... 1  
 Gi1\_3991351\_x6.....gauucccgcgccggagc..... 0  
 Gi2\_10548545\_x6.....guucgauuccAggcgcccggagc..... 1  
 Gi2\_10570907\_x6.....uccgUcguaguauaacggcuag..... 1  
 Gi3\_27469624\_x6.....Gagauccggguucgauucc..... 1  
 Gi5\_8542771\_x6.....guAcucacccaacagauccg..... 1  
 Gi1\_3992161\_x6.....guucgauucccggcAccgga..... 1  
 Gi5\_8555047\_x6.....uccggcguaguauaacUgcua..... 1  
 Gi2\_10586393\_x6.....uucucaccccGacagauccg..... 1  
 Gi5\_8542105\_x6.....guucucacccaCcagauccgg..... 1  
 Gi5\_8533621\_x6.....guucgauCcccggcgccgga..... 1  
 Gi3\_27484798\_x6.....uCcgauucccgcgccgga..... 1  
 Gi3\_27495448\_x6.....cCcacccaacagauccgg..... 1  
 Gi2\_10569563\_x6.....guucgauucccgcgccggC..... 1  
 Gi3\_27541906\_x6.....uAcggcguaguauaacgg..... 1  
 Gi5\_8532871\_x6.....gguucgauucccgcgcAg..... 1  
 Gi1\_3985861\_x6.....guCcgauucccgcgccggagc..... 1  
 Gi1\_3986059\_x6.....guucgauucccgcgccgU..... 1  
 Gi2\_10580027\_x6.....Gcgauucccgcgccggag..... 1  
 Gi1\_3980131\_x6.....guucucaccccGacagauccg..... 1  
 Gi2\_10576511\_x6.....gCuucgauucccgcgccgga..... 1  
 Gi3\_27533494\_x6.....uccggcgGaguauaacggcua..... 1  
 Gi1a\_5719582\_x6.....Uuucgauucccgcgccg..... 1  
 Gi3\_27527308\_x6.....uccggcguaAuauaacggcuagaau..... 1  
 Gi5\_8544565\_x6.....uccggcguaguauaacggcAag..... 1  
 Gi5\_8535979\_x6.....uAguucucacccaacagauccg..... 1  
 Gi2\_10567193\_x6.....gguucgauucccgcgAcggag..... 1  
 Gi3\_27547384\_x6.....uucAcacccaacagauccgg..... 1  
 Gi2\_10549547\_x6.....gguucgauucccgcgccggaA..... 1  
 Gi3\_27520810\_x6.....uccggcguaguauaacggcAaga..... 1  
 Gi2\_10558097\_x6.....gguucgauucccgcgUggag..... 1  
 Gi2\_10549907\_x6.....guucgauucccgAcgccgga..... 1  
 Gi2\_10574765\_x6.....gguucgauucccgcgcA..... 1

Gi1\_3990205\_x6.....Aguucgauucccgcgccggag..... 1  
 Gi1\_3990955\_x6.....uccggcguaguaCaacggcuaga..... 1  
 Gi3\_27515596\_x6.....gauucccgGgccggagc..... 1  
 Gi5\_8551537\_x6.....gguucgauuccAgcgccgg..... 1  
 Gi1\_3980503\_x6.....gguucgauCcccgcgccggagc..... 1  
 Gi5\_8561119\_x6.....Ugcguaguaaacggcuagaau..... 1  
 Gi5\_8533417\_x6.....uucucacAaacagauccg..... 1  
 Gi5\_8558587\_x6.....cucaccaCcagauccgg..... 1  
 Gi5\_8548093\_x6.....guucgauucccgGcAccgga..... 1  
 Gi5\_8545291\_x6.....Uucaccaacagauccgg..... 1  
 Gi1\_3984025\_x6.....guucgauNccggcgccgga..... 1  
 Gi5\_8563153\_x6.....ugguucucacccGacagauccg..... 1  
 Gi1\_3975787\_x6.....uccgAcguaguaaacggcua..... 1  
 Gl1\_5716528\_x6.....Gccggcguaguaaacgg..... 1  
 Gi3\_27525706\_x6.....guucgauuccUgcgccc..... 1  
 Gi5\_8532835\_x6.....uccggcguCguaaaacggcuag..... 1  
 Gi5\_8546413\_x6.....guucucaccAaacagauccg..... 1  
 Gi1\_3985957\_x6.....Agguucucaccaacagauccgg..... 1  
 Gi1\_3978103\_x6.....CguucgauucccgGcgccggagc..... 1  
 Gi5\_8548897\_x6.....uccggcguaguGuaacgg..... 1  
 Gi3\_27501688\_x6.....uGgauucccgGcgccgga..... 1  
 Gi4\_530649\_x6.....UuucgauucccgGcgccgga..... 1  
 Gi2\_10564247\_x6.....guCucaccaacagauccg..... 1  
 Gi5\_8549155\_x6.....ucucGcccaacagauccg..... 1  
 Gi3\_27476716\_x6.....uccggcguaguaaacggUuagaau..... 1  
 Gi5\_8561839\_x6.....gCuucgauucccgGcgccgga..... 1  
 Gi1\_3975169\_x6.....CuucgauucccgGcgccg..... 1  
 Gi2\_10589573\_x6.....guucgauucccgUcgccgg..... 1  
 Gi1\_3981253\_x6.....guGgauucccgGcgccgg..... 1  
 Gi3\_27511150\_x6.....gguGgauucccgGcgccg..... 1  
 Gi5\_8555503\_x6.....guucgauuccAgcgccggagc..... 1  
 Gi2\_10588361\_x6.....uccggcguaguaCacggcuagaau..... 1  
 Gi2\_10545881\_x6.....guucgauucccgGcgUcg..... 1  
 Gi5\_8560951\_x6.....uucucaccaacagauAcg..... 1  
 Gi2\_10574855\_x6.....uccggcguaguaaaaAgggcuaga..... 1  
 Gi3\_27463690\_x6.....gguucgaAuuccggcgccgga..... 1  
 Gi1\_3983947\_x6.....gguucucaccaacagauUg..... 1  
 Gi5\_8550985\_x6.....gguucgauucccgGcgUgg..... 1  
 Gi2\_10576583\_x6.....ggAucgauucccgGcgccggag..... 1  
 Gi3\_27467050\_x6.....guGcucaccaacagauccg..... 1  
 Gi5\_8535757\_x6.....CguucgauucccgGcgccggag..... 1  
 Gi5\_8554297\_x6.....gguucgauucccgGcgccggaAc..... 1  
 Gi5\_8554057\_x6.....gguGcgauucccgGcgccg..... 1  
 Gi1\_3990541\_x6.....ugguuAucaccaacagauccgg..... 1  
 Gi1\_3983311\_x6.....uccggcguaguaGcggcuaga..... 1  
 Gi2\_10556015\_x6.....guucgauucccgGcAccggag..... 1  
 Gi3\_27539296\_x6.....Gcggcguaguaaacggc..... 1



Gi3\_27523864\_x6.....cUgcguaguauaacggcuagaau.....1  
Gi3\_27521212\_x6.....ucAggcguaguauaacgg.....1  
Gi3\_27484174\_x6.....gguucgauucccggcgccU.....1  
Gi2\_10585691\_x6.....gguucgauucccggcgcAgga.....1  
Gi5\_8563561\_x6.....gguUgauucccggcgcggag.....1  
Gi3\_27613417\_x5.....uGacccaacagauccggguuc.....1  
Gi3\_27619017\_x5.....gguucgauucccggcgccCg.....1  
Gi1\_4008310\_x5.....guucuUacccaacagauccg.....1  
Gi3\_27598827\_x5.....gUcguaguauaacggcuag.....1  
Gi1\_4005095\_x5.....Cuucucacccaacagauccg.....1  
Gi1\_4017635\_x5.....uccNgcguaguauaacggcuaga.....1  
Gi2\_10605510\_x5.....uccNgcguaguauaacggcuaga.....1  
Gi1\_4004885\_x5.....uucucacccaacagauUcg.....1  
Gi1\_4006035\_x5.....guucucacccaacagauUgg.....1  
Gi1\_4012755\_x5.....uGcgauucccggcgcggagc.....1  
Gi1\_4010535\_x5.....ugguucucacccaacUgauccgg.....1  
Gi3\_27619477\_x5.....Aucucacccaacagauccg.....1  
Gi3\_27583507\_x5.....guucucacAaacagauccg.....1  
Gi2\_10617660\_x5.....uccggcgCaguauaacgg.....1  
Gi2\_10646650\_x5.....cUggucgauucccggcgccgga.....1  
Gi3\_27549482\_x5.....gCuucgauucccggcgcc.....1  
Gi5\_8571647\_x5.....gUcguaguauaacggcuagaau.....1  
Gi2\_10615215\_x5.....gguucgauucccgCcgccggagc.....1  
Gi3\_27595842\_x5.....gguucgUuucccggcgccgga.....1  
Gi5\_8594797\_x5.....guAcgauucccggcgcggga.....1  
Gi1\_4011795\_x5.....ugguucucacccaacagUuccg.....1  
Gi3\_27574032\_x5.....Gacccaacagauccggguuc.....1  
Gi5\_8577237\_x5.....cGcaacagauccggguuc.....1  
Gi1\_4002880\_x5.....guucgauucccggcgUcggagc.....1  
Gi1\_4015470\_x5.....guucgauucGcggcgcgg.....1  
Gi3\_27599387\_x5.....uucgauucccggcgccggG.....1  
Gi1\_4011940\_x5.....uccggcguUguauaacgg.....1  
Gi2\_10606495\_x5.....gguucucacccaCcagauccg.....1  
Gi3\_27608552\_x5.....uccggcgGaguauaacgg.....1  
Gi2\_10632270\_x5.....uccggUguaguauaacggcuag.....1  
Gi3\_27566502\_x5.....gguucgauucccggcgUcg.....1  
Gi3\_27610652\_x5.....ucgauucUcgggcgccggagc.....1  
Gi1\_3996520\_x5.....guucUauucccggcgccgga.....1  
Gi2\_10602855\_x5.....guuAgauucccggcgccggagc.....1  
Gi3\_27559677\_x5.....uccggcguUguauaacggcuagaa.....1  
Gi3\_27551882\_x5.....uccggcguaguUuaaacggc.....1  
Gi2\_10617540\_x5.....uUgauucccggcgccggagc.....1  
Gi1\_4015240\_x5.....uucucacAaacagauccg.....1  
Gi1\_4017445\_x5.....ggcguaguauaacggcuagaau.....0  
Gi1\_3994800\_x5.....cucacccaacagUuccgg.....1  
Gi5\_8589032\_x5.....gguucgauucccggcgccggagcU.....1  
Gi5\_8582642\_x5.....uccggcgCaguauaacggcua.....1

Gi3\_27640892\_x5.....uucucacccUacagauccgg.....1  
Gi1\_4002305\_x5.....uccgUcguaguauaacggcuaga.....1  
Gi3\_27651257\_x5.....gguucAauuccggcgccgg.....1  
Gi5\_8578112\_x5.....gguucucaccAaacagauccg.....1  
Gi1\_4005840\_x5.....cGggcguaguauaacggcua.....1  
Gi2\_10648950\_x5.....uccggcguaguauCacggcua.....1  
Gi1\_3995375\_x5.....gguucgauuccggcgccAga.....1  
Gi1\_4011460\_x5.....aUagauccggguucgauucc.....1  
Gi3\_27561792\_x5.....uGucaccaacagauccg.....1  
Gi3\_27630192\_x5.....uccggcguaguauUcgg.....1  
Gi3\_27644187\_x5.....guucgUuuccggcgccggag.....1  
Gi2\_10636470\_x5.....uccCgcguaguauaacggcuaga.....1  
Gi3\_27656182\_x5.....gguucucacccaacaAauccg.....1  
Gi5\_8579392\_x5.....guucgauuAccggcgccgg.....1  
Gi5\_8585457\_x5.....uccggcguaguauaacggcC.....1  
Gi2\_10633035\_x5.....guAcgauuccggcgccggag.....1  
Gi1\_4007875\_x5.....uucucacccaacagaCccg.....1  
Gi5\_8592012\_x5.....Cuucgauuccggcgccggagc.....1  
Gi5\_8590282\_x5.....gguCcgauuccggcgccgga.....1  
Gi3\_27601762\_x5.....gguucgauuccggGgccgga.....1  
Gi3\_27604427\_x5.....guccggcguaguauaacggcua.....0  
Gi2\_10602770\_x5.....gguucgauucccgUcgccggagc.....1  
Gi2\_10603755\_x5.....guucucacccaCcagauccg.....1  
Gi3\_27595807\_x5.....ucgauucccgUgccggagc.....1  
Gi5\_8596607\_x5.....ggAucgauuccggcgcc.....1  
Gi2\_10642580\_x5.....gAucgauuccggcgccgg.....1  
Gi3\_27581747\_x5.....gguucgauuccggcgccAgg.....1  
Gi1\_4015505\_x5.....guucgauuccggGgccgg.....1  
Gi3\_27604932\_x5.....ucucacccaacagaCccg.....1  
Gi5\_8566427\_x5.....uucucGcccaacagauccg.....1  
Gi1\_4006725\_x5.....uucAcacccaacagauccg.....1  
Gi3\_27585937\_x5.....uucucacccaacagauUcg.....1  
Gi1\_4016545\_x5.....guucucacccaacagaCccg.....1  
Gi5\_8570127\_x5.....uucucacccaCcagauccg.....1  
Gi5\_8590737\_x5.....gAuucgauuccggcgccgg.....1  
Gi5\_8600132\_x5.....uccggcgCaguauaacgg.....1  
Gi3\_27636442\_x5.....Cuucucacccaacagauccg.....1  
Gi1\_3994160\_x5.....Cgguucucacccaacagauccg.....1  
Gi5\_8567422\_x5.....uccggcguaguauaacggcuUga.....1  
Gi1\_4010130\_x5.....uucucacccaacagauAcg.....1  
Gi1\_4008185\_x5.....uccAgcguaguauaacggcua.....1  
Gi5\_8576682\_x5.....uGgguucucacccaacagauccg.....1  
Gi3\_27604532\_x5.....guCcuacccaacagauccg.....1  
Gi3\_27591482\_x5.....uccggUguaguauaacggcuagaau.....1  
Gi2\_10626120\_x5.....gguGcgauuccggcgccggagc.....1  
Gi1\_3999010\_x5.....uccggcguaguauaaUggcuag.....1  
Gi3\_27641547\_x5.....ucUauuccggcgccggag.....1

Gi2\_10642000\_x5.....ggNucgauucccggcgccggagc..... 1  
Gi1\_4017165\_x5.....uucucacAcaacagauccgg..... 1  
Gi4\_536278\_x5.....uccggcguaguauUacgg.....gguucgauucccggcgccg..... 0  
Gi1\_4016980\_x5.....uccggcguaguauUacgg..... 1  
Gi1\_3996275\_x5.....uccggcguaguauaaUggcuagaau..... 1  
Gi5\_8590502\_x5.....gguucgauucccggcgccgg..... 1  
Gi3\_27650387\_x5.....ggNcgauucccggcgccgga..... 1  
Gi5\_8565527\_x5.....cccaacagNuccggguuc..... 1  
Gi3\_27617207\_x5.....gguucucacccaacagauUcg..... 1  
Gi1\_3998275\_x5.....gguucgauucccggcgccgAacgga..... 1  
Gi3\_27589007\_x5.....gguucgauucccgUcgccggag..... 1  
Gi3\_27562322\_x5.....uccggcguaguauaacggAuagaau..... 1  
Gi2\_10615105\_x5.....agUuccggguucgauucc..... 1  
Gi5\_8599527\_x5.....uccggcguaguauaCcgguag..... 1  
Gi2\_10638655\_x5.....gguucgauucccggcgccUggag..... 1  
Gi5\_8592582\_x5.....gguucuAacccaacagauccg..... 1  
Gi2\_10628225\_x5.....gguucgaGucccggcgccggagc..... 1  
Gi1\_3995650\_x5.....ucGggcguaguauaacgg..... 1  
Gi2\_10623935\_x5.....uccggcguagCauaacggcuagaa..... 1  
Gi3\_27647232\_x5.....uccgAcguaguauaacggcuagaau..... 1  
Gi3\_27596067\_x5.....uucucaccUaacagauccgg..... 1  
Gi3\_27606822\_x5.....ucAggcguaguauaacggcuagaa..... 1  
Gi3\_27611272\_x5.....gguucgUuucccggcgccgga..... 1  
Gi1\_3997310\_x5.....uccgUcguaguauaacggc..... 1  
Gi2\_10606795\_x5.....gguucgauuccUggcgccgga..... 1  
Gi1a\_5740252\_x5.....uccggcguNguauaacggcuaga..... 1  
Gi5\_8581882\_x5.....Agguucucacccaacagauccg..... 1  
Gi1\_4000445\_x5.....gguucgauucccggcgccgA..... 1  
Gi5\_8580147\_x5.....gguucucaAcacaacagauccg..... 1  
Gi5\_8577467\_x5.....guAcgauucccggcgccggagc..... 1  
Gi5\_8593517\_x5.....ugguucucacccaacagaCccg..... 1  
Gi2\_10604880\_x5.....gguucgauuccAggcgccgga..... 1  
Gi2\_10591075\_x5.....uccggGguaguauaacggcuaga..... 1  
Gi3\_27640812\_x5.....cccaacagaGccggguucgauuccc..... 1  
Gi5\_8601712\_x5.....ugguucucacccaacagauAcg..... 1  
Gi1\_4014305\_x5.....gguucgauucccggcgccg..... 1  
Gi2\_10614235\_x5.....gguucgauucccgUgccc..... 1  
Gi1\_4017240\_x5.....gguucgauucccggcgccggagc..... 1  
Gi3\_27635117\_x5.....gguucAauucccggcgcc..... 1  
Gi1\_3999215\_x5.....uucgauuccNcggcgccg..... 1  
Gi1\_4001675\_x5.....Ccucacccaacagauccgg..... 1  
Gi1\_3996170\_x5.....gguucgauucccggcgccgC..... 1  
Gi5\_8574987\_x5.....uccggcguaguauaacggUuagaau..... 1  
Gi5\_8569292\_x5.....gguucgaCucccggcgccgga..... 1  
Gi5\_8573337\_x5.....cUgcguaguauaacggcuagaau..... 1  
Gi3\_27574422\_x5.....uucgauucccgUgcccggagc..... 1  
Gi1\_4000140\_x5.....uggAucucacccaacagauccgg..... 1

Gi5\_8570782\_x5.....guucuUaccaacagauccg..... 1  
Gi2\_10623165\_x5.....gCucgauuccggcgccgga..... 1  
Gi1\_4001215\_x5.....gguucgauuccggAgccgg..... 1  
Gi3\_27566402\_x5.....guucucacccGacagauccg..... 1  
Gi2\_10648035\_x5.....uccggcguaguauaacggcuagUau..... 1  
Gi2\_10644650\_x5.....gguucucacccaacagauAg..... 1  
Gi2\_10601940\_x5.....ucUggcguaguauaacggcuagaa..... 1  
Gi2\_10605985\_x5.....uccggcguaguauaacggcuUga..... 1  
Gi3\_27577512\_x5.....guucgauuccggcgUcg..... 1  
G1a\_5735567\_x5.....guCcgauuccggcgccgg..... 1  
Gi5\_8580837\_x5.....uccggcguaguauaCcgcuagaa..... 1  
Gi5\_8577957\_x5.....uccggcguaguauaacggAuagaa..... 1  
Gi3\_27651732\_x5.....guucgauuccggAgccggag..... 1  
Gi1\_3995685\_x5.....Gcgauuccggcgccggagc..... 1  
Gi3\_27588207\_x5.....agUuccggguucgauucc..... 1  
Gi5\_8597282\_x5.....cucacccaacagCuccgg..... 1  
Gi2\_10604695\_x5.....gguucgauuccggAgccggag..... 1  
Gi5\_8591757\_x5.....gguucgauuccggcAccgg..... 1  
Gi1\_4011240\_x5.....guucucacccaacagauccggU..... 1  
Gi5\_8587617\_x5.....uccggcguaguauaacggcuagAc..... 1  
Gi3\_27630187\_x5.....uucucacccGacagauccg..... 1  
Gi5\_8575312\_x5.....guucgauuccUggcgccggagc..... 1  
Gi3\_27567322\_x5.....gauuccggcgccggCgc..... 1  
Gi5\_8588937\_x5.....uccAgcguaguauaacggcua..... 1  
Gi3\_27600652\_x5.....ucgauuccNggcgccggag..... 1  
Gi2\_10627645\_x5.....guucgauAccggcgccgg..... 1  
Gi1\_4010015\_x5.....guGcucacccaacagauccg..... 1  
Gi1\_3999595\_x5.....gAucucacccaacagauccg..... 1  
Gi2\_10596120\_x5.....guucgCuuccggcgccggagc..... 1  
Gi1\_4009905\_x5.....uucucacccGacagauccg..... 1  
Gi3\_27655387\_x5.....Gaacagauccggguucgauucc..... 1  
Gi2\_10628090\_x5.....agaauuguugguCcucacc..... 1  
Gi1\_3995895\_x5.....ugguAcucacccaacagauccg..... 1  
Gi2\_10591920\_x5.....gguucgauuccggcgUgg..... 1  
Gi1\_3995530\_x5.....gguucgauuccggcgAccggagc..... 1  
Gi2\_10592560\_x5.....uucucacccaacagauccC..... 1  
Gi5\_8575727\_x5.....gguucucacccaacagauccggA..... 1  
Gi1\_4005055\_x5.....agUuccggguucgauucc..... 1  
Gi1\_4011125\_x5.....uccggcguaguauaCcg..... 1  
Gi3\_27555052\_x5.....agauccggguucgauuccggcgccgg..... 0  
Gi1\_4010410\_x5.....Auucgauuccggcgccg..... 1  
Gi5\_8598202\_x5.....Cuucucacccaacagauccg..... 1  
Gi2\_10630205\_x5.....guucucacccaacCgauccg..... 1  
Gi3\_27642202\_x5.....gguAcgauuccggcgccgga..... 1  
Gi3\_27605632\_x5.....uccggcguaguauaacggcuCg..... 1  
Gi1\_4003445\_x5.....gguucgauNccggcgccggag..... 1  
Gi2\_10622855\_x5.....gguucgauuccggcgccgCag..... 1

Gi1\_3997850\_x5.....guucucacccaaUagauccgg..... 1  
Gi5\_8591027\_x5.....guucgauucccgcgccggU..... 1  
Gi5\_8582857\_x5.....gguucgauuAccggcgccggagc..... 1  
Gi3\_27559772\_x5.....cagaucggggGucgauucc..... 1  
Gi1\_4013905\_x5.....uccggcguaguauaacggcuagA..... 1  
Gi2\_10626655\_x5.....gguucgauucccgGgccgga..... 1  
Gi5\_8598692\_x5.....uucucacccGacagauccg..... 1  
Gi2\_10624170\_x5.....gguucgauucccgGgccAg..... 1  
G1a\_5739327\_x5.....ucUggcguaguauaacggcuag..... 1  
Gi3\_27622827\_x5.....gguucgauucccgGcCccgga..... 1  
G1a\_5760192\_x5.....uccggcgCaguauaacggcuaga..... 1  
G1a\_5760217\_x5.....ggCucgauucccgGcgccggagc..... 1  
Gi1\_3993955\_x5.....uccggcguaguauaacggcuag..... 1  
Gi3\_27600207\_x5.....uccggcguaguauUacggc..... 1  
Gi2\_10607020\_x5.....guucucacccaacagaCccg..... 1  
Gi2\_10598525\_x5.....gguucgauucccgGcgccggUgc..... 1  
Gi2\_10592435\_x5.....gguCucacccaacagauccg..... 1  
Gi3\_27633117\_x5.....Cccggcguaguauaacggcuagaa..... 1  
Gi2\_10592830\_x5.....guucgUuucccgGcgccggagc..... 1  
Gi2\_10648380\_x5.....Cccggcguaguauaacggcuag..... 1  
Gi2\_10622310\_x5.....gCuucgauucccgGcgccg..... 1  
Gi3\_27653367\_x5.....uucgaCuucccgGcgccggagc..... 1  
Gi1\_4006810\_x5.....uccggcguaguUuaacgg..... 1  
Gi5\_8571147\_x5.....guucgauucccgGcgCAgga..... 1  
G1a\_5747067\_x5.....uccggcguaguauaacggcuagC..... 1  
Gi5\_8592172\_x5.....gguucgauucccgGcgccggU..... 1  
Gi5\_8593232\_x5.....uccggcguaAuuaaacggcuagaa..... 1  
Gi5\_8576487\_x5.....uuUucacccaacagauccgg..... 1  
Gi1\_4016230\_x5.....Uuugguucacccaacagauccggg..... 1  
Gi1\_4005155\_x5.....gguucgauNcccgGcgccgga..... 1  
Gi1\_3999765\_x5.....uccggcguaguauaacggcuCg..... 1  
Gi2\_10620790\_x5.....uccggcguaguauaacggcCag..... 1  
Gi2\_10645415\_x5.....guucAauucccgGcgccg..... 1  
Gi5\_8592097\_x5.....gguuGgauucccgGcgccggagc..... 1  
Gi5\_8575227\_x5.....guucgaAuucccgGcgccgg..... 1  
Gi5\_8566407\_x5.....uucucacUcaacagauccg..... 1  
Gi3\_27626252\_x5.....uccggcguaguauaaGgg..... 1  
Gi1\_4007795\_x5.....ugguucuUacccaacagauccgg..... 1  
Gi2\_10633100\_x5.....uccggcguaguauaaUgg..... 1  
Gi3\_27574737\_x5.....guucgauucccgGcgccgCa..... 1  
Gi2\_10594165\_x5.....gguucgauuccAgggcc..... 1  
Gi5\_8568342\_x5.....gUuucgauucccgGcgccggagcguu..... 1  
Gi1\_4010650\_x5.....guucgauucccgGcgccggagcgC..... 1  
Gi3\_27572302\_x5.....gguucgauuccUgcgcc..... 1  
Gi3\_27607117\_x5.....ucgauucccgGcgccgAagc..... 1  
Gi1\_4004970\_x5.....uccggcguaguaCaacggcuag..... 1  
Gi3\_27586067\_x5.....gUguucgauucccgGcgccggag..... 1

Gi1\_4002010\_x5.....uccggcguaguauaacgAc..... 1  
Gi3\_27621612\_x5.....uccggcguaAuauaacggcuag..... 1  
Gi5\_8598067\_x5.....uccggAguaguauaacggcuagaau..... 1  
Gi5\_8576632\_x5.....cucaccaGcagaucgg..... 1  
Gi2\_10629720\_x5.....uccggcguaguauUacggcuaga..... 1  
Gi3\_27623577\_x5.....gguucgauuccggcUccgga..... 1  
Gi1\_3996660\_x5.....uucucaccaacagCuccg..... 1  
Gi3\_27561947\_x5.....uccggcgAaguauaacggcuagaau..... 1  
Gi3\_27606677\_x5.....ugguucucacccGacagaucgg..... 1  
Gi3\_27585387\_x5.....uccggcguaguauaacggcuaAaa..... 1  
Gi3\_27550742\_x5.....guucgaAucccggcgccggagc..... 1  
Gi5\_8591902\_x5.....uccggcAuaguauaacggcuagaa..... 1  
Gi5\_8581037\_x5.....gguucgauCcccggcgcc..... 1  
Gi3\_27621692\_x5.....gguuUgauuccggcgccgg..... 1  
Gi2\_10599780\_x5.....gguucgauuccggcgccAggag..... 1  
Gi5\_8573662\_x5.....ugguCucaccaacagauccg..... 1  
Gi1\_4005990\_x5.....uccAgcguaguauaacggcuag..... 1  
Gi2\_10630375\_x5.....gguucgauCcccggcgccgg..... 1  
Gi3\_27583602\_x5.....uccggcguaguauaacggcuaC..... 1  
Gi5\_8602037\_x5.....ucaccaacGgaucggguu..... 1  
Gi1\_4011145\_x5.....uggCucucaccaacagauccg..... 1  
Gi5\_8601592\_x5.....guucgauuccggcgccC..... 1  
Gi1\_4004905\_x5.....gUcguaguauaacggcua..... 1  
Gi5\_8598442\_x5.....guucgaGucccggcgccggagc..... 1  
Gi5\_8586612\_x5.....gguucgauuccggUgccgg..... 1  
Gi5\_8594457\_x5.....guucgauuccUggcgccgga..... 1  
Gi1\_4016660\_x5.....guucucaccaacagauCag..... 1  
Gi5\_8597617\_x5.....gguucgauuccAgcgccggag..... 1  
Gi2\_10645020\_x5.....gguucgauUccggcgccggag..... 1  
Gi1\_4015315\_x5.....uucucaccaacagauCag..... 1  
Gi1\_4003015\_x5.....guucgauuccggcgccUg..... 1  
Gi3\_27593912\_x5.....gguucgauUccggcgcc..... 1  
Gi1\_4014320\_x5.....uucucaccaacCgaucgg..... 1  
Gi1\_3997125\_x5.....guucAcaccaacagauccg..... 1  
Gi2\_10643425\_x5.....guucgauuccggcgccggaCc..... 1  
Gi3\_27567232\_x5.....uucucaccaacagauccC..... 1  
Gi3\_27612727\_x5.....gguucgauucGggcgccggagc..... 1  
Gi1\_4014775\_x5.....uccggcguaguauaacggcuagCau..... 1  
Gi5\_8595782\_x5.....gCucucaccaacagauccgg..... 1  
G1a\_5753682\_x5.....gguuUgauuccggcgccggagc..... 1  
G1a\_5752867\_x5.....gguucgauuccggcgccggGgc..... 1  
Gi5\_8568887\_x5.....uccNgcguaguauaacggcuag..... 1  
Gi1\_4012760\_x5.....uucucaccaacagauccA..... 1  
Gi2\_10617425\_x5.....uccggcguaguCaacggc..... 1  
Gi1\_4011745\_x5.....uucuGaccaacagauccg..... 1  
Gi2\_10628725\_x5.....uccggcguaguCuaacggcua..... 1  
Gi5\_8568272\_x5.....uccggcguaguauaacggU..... 1

Gi5\_8566167\_x5.....gUguucgauucccgcgccggagc..... 1  
Gi2\_10610005\_x5.....Uuucucacccaacagauccgggu..... 1  
Gi3\_27574097\_x5.....uccggcguaguaCaacggcuag..... 1  
Gi5\_8572457\_x5.....ugguucucacccaGcagauccg..... 1  
Gi4\_535038\_x5.....Gugguucucacccaacaga..... 1  
Gi3\_27581737\_x5.....guucgauucccgcgAcggag..... 1  
Gi5\_8575022\_x5.....gguucgaCucccgcgccggag..... 1  
Gi2\_10605435\_x5.....ucgauuccNggcgccggag..... 1  
Gi1\_4004260\_x5.....ugguucucacccaacagauccAgg..... 1  
Gi5\_8596682\_x5.....uccggcguaAuauaacggcuag..... 1  
Gi3\_27605667\_x5.....uGcucacccaacagauccggguuc..... 1  
Gi1\_4011340\_x5.....gguucgCuucccgcgccg..... 1  
Gi2\_10623980\_x5.....uccggcguUguauaacggcuagaau..... 1  
Gi3\_27635172\_x5.....gguucucacccaacUgauccg..... 1  
Gi2\_10622525\_x5.....uccggcguGguauaacggcuagaa..... 1  
Gi5\_8571622\_x5.....gguucgauCcccggcgccggag..... 1  
Gi1\_4005280\_x5.....uccggcguaguauGacggcuag..... 1  
G1a\_5752502\_x5.....uccggcguaguauaGcggcuag..... 1  
Gi5\_8588232\_x5.....Ugcguaguauaacggcuagaa..... 1  
Gi5\_8596177\_x5.....ucucacccaacCgauccg..... 1  
Gi2\_10616180\_x5.....guucgauucccgUcgccg..... 1  
Gi1\_4006125\_x5.....guucgauucccgcgccgAa..... 1  
Gi1\_4006845\_x5.....uggGucucacccaacagauccgg..... 1  
Gi2\_10613545\_x5.....ucgauucccgcgccggUgc..... 1  
Gi5\_8600352\_x5.....guucgauCcccggcgccggagc..... 1  
Gi1\_4013950\_x5.....ugguucucacccaGcagauccgg..... 1  
G1a\_5763772\_x5.....gGucgauucccgcgccg..... 1  
Gi2\_10634505\_x5.....guucgauucccgcgAcgga..... 1  
G1a\_5746312\_x5.....Gccggcguaguauaacggcua..... 1  
Gi3\_27588697\_x5.....guucgauucccgAcgccggag..... 1  
Gi2\_10630340\_x5.....gguuGgauucccgcgccggag..... 1  
Gi5\_8594042\_x5.....gguucgauucccgUgccgga..... 1  
Gi3\_27614012\_x5.....guucucacccaacGgauccg..... 1  
Gi3\_27584367\_x5.....gguucgauucccgCcgccggagc..... 1  
Gi2\_10630885\_x5.....ucgauucccgcgccggCgc..... 1  
Gi2\_10627080\_x5.....guucgauucccgAgccg..... 1  
Gi5\_8590952\_x5.....gguucucacccaaAagauccg..... 1  
Gi3\_27608742\_x5.....ggAucgauucccgcgcc..... 1  
Gi1\_4009640\_x5.....ucgauuccNggcgccggagc..... 1  
Gi2\_10642120\_x5.....guucgauucccgcgCggagc..... 1  
Gi3\_27551832\_x5.....gguucgauCcccggcgcc..... 1  
Gi5\_8571332\_x5.....uccggcguUguauaacggcuag..... 1  
Gi5\_8598052\_x5.....uGguucucacccaacagauccg..... 1  
Gi2\_10646330\_x5.....uccggcguaguCuaacggc..... 1  
Gi3\_27591427\_x5.....ucgauuccNggcgccgga..... 1  
Gi5\_8598422\_x5.....uccggcguaguauGacggcua..... 1  
Gi5\_8588572\_x5.....acagauccggguucgauucccgcgccggagcC..... 1

Gi2\_10602395\_x5.....uccggcguaguauaacgAcuagaau.....guucgauucccgGcgagc..... 1  
Gi1\_4008040\_x5.....uccggcguCguauaacggc.....guucgauucccgGcgagc..... 1  
Gi5\_8573097\_x5.....uccggcguCguauaacggc..... 1  
Gi5\_8567237\_x5.....uccggcguNguauaacggcuagaa..... 1  
Gi1\_4014530\_x5.....gCuucucaccaacagauccg..... 1  
Gi3\_27654967\_x5.....ggucgauucccgGccCga..... 1  
Gi2\_10631330\_x5.....gguucgauucccgGgcc..... 1  
Gi1\_4003600\_x5.....uGcggcguaguauaacggcuagaa..... 1  
Gi1\_4003010\_x5.....uucucaccaacagauccgA..... 1  
Gi5\_8584982\_x5.....gguucgauucccgUgccg..... 1  
Gi5\_8579307\_x5.....guucucaccaaUagauccg..... 1  
Gi2\_10603410\_x5.....uccggcguaguauaaUggcua..... 1  
Gi3\_27618362\_x5.....Gcaccaacagauccggguuc..... 1  
Gi1\_3995460\_x5.....uuAucaccaacagauccg..... 1  
Gi5\_8636211\_x4.....ucNggcguaguauaacggcuaga..... 1  
Gi5\_8642475\_x4.....gguucgauucccgGccgA..... 1  
G1a\_5797642\_x4.....uUguucucaccaacagauccg..... 1  
Gi3\_27746029\_x4.....gguucgUuuccggcgccgag..... 1  
Gi2\_10661671\_x4.....ugguucucaccaacagGuccg..... 1  
Gi5\_8627359\_x4.....gguucgauucccgAgcc..... 1  
Gi2\_10700483\_x4.....gguucgauucUcggcgccg..... 1  
Gi1\_4043464\_x4.....ggCucgauucccgGccg..... 1  
Gi3\_27779881\_x4.....uccUgcguaguauaacggc..... 1  
G1a\_5801486\_x4.....cagauccggguucgauucccgGccgag..... 0  
Gi3\_27764721\_x4.....gauuccggGcgUggagc..... 1  
G1a\_5768546\_x4.....uccggcguaguauaacggcuGg..... 1  
Gi1\_4020584\_x4.....ugguucCcaccaacagauccg..... 1  
Gi2\_10674299\_x4.....uccggcguaguauaacgC..... 1  
Gi1\_4045956\_x4.....guucucaccaacagauUcg..... 1  
Gi3\_27687713\_x4.....uccggcguaguauaacggcuagaaU..... 1  
Gi3\_27663033\_x4.....gguucucaccAaacagauccg..... 1  
Gi1\_4031972\_x4.....uUcggcguaguauaacggcuaga..... 1  
Gi1\_4031772\_x4.....guucgauucccgGccgCagc..... 1  
Gi1\_4041980\_x4.....uccggcguaguCuaacggcua..... 1  
Gi5\_8638219\_x4.....guucgAucccgGccg..... 1  
Gi1\_4026924\_x4.....guucucaccAaacagauccg..... 1  
Gi5\_8611827\_x4.....uccggcguaguauUacggcuaga..... 1  
Gi5\_8621503\_x4.....uccUgcguaguauaacgg..... 1  
Gi2\_10655315\_x4.....uccggcguagCauaacggcuag..... 1  
Gi3\_27778521\_x4.....guucgauucccgGccUgagc..... 1  
Gi5\_8620595\_x4.....gguAcgauucccgGccg..... 1  
Gi2\_10681647\_x4.....gguucCauuccggcgccgagc..... 1  
Gi3\_27739937\_x4.....uccgAcguaguauaacggcuagaa..... 1  
Gi2\_10650651\_x4.....aUuccggcguaguauaacgg..... 1  
Gi3\_27792825\_x4.....guucCauuccggcgccg..... 1  
Gi5\_8625803\_x4.....gguucgCuuccggcgcc..... 1  
Gi1\_4046468\_x4.....uucucaccaaUagauccg..... 1



Gi3\_27722585\_x4.....uccggcgAguauaacgg..... 1  
Gi5\_8619207\_x4.....Gcggcguaguauaacggcua..... 1  
Gi1\_4018652\_x4.....uccggcgGaguauaacgg..... 1  
Gi3\_27719873\_x4.....uccggcguaguauUacggcu..... 1  
Gi2\_10677995\_x4.....gguucgauucccgAcgccgg..... 1  
G1a\_5812070\_x4.....uccggcguGguauaacggcuaga..... 1  
Gi2\_10688451\_x4.....guucgauucccggcgGcgg..... 1  
Gi2\_10711727\_x4.....guucAauucccggcgccggag..... 1  
Gi5\_8611723\_x4.....gauccggguucgauucc..... 0  
Gi2\_10672991\_x4.....guAcgauucccggcgccgga..... 1  
G1a\_5773650\_x4.....Uuucgauucccggcgccgga..... 1  
Gi2\_10700299\_x4.....Accggcguaguauaacggcuagaau..... 1  
Gi2\_10684211\_x4.....gguucgauuccUggcgccgg..... 1  
Gi5\_8638095\_x4.....uccgCcguguaguauaacggcuaga..... 1  
G1a\_5778542\_x4.....uucucaccNaacagauccg..... 1  
Gi3\_27791545\_x4.....guucgauuccGggcgccgga..... 1  
Gi5\_8635099\_x4.....cucacccaaUagauccgg..... 1  
Gi3\_27762773\_x4.....uucucacccaacUgauccg..... 1  
Gi1\_4029868\_x4.....uccggcguaguauaacgAcuagaau..... 1  
Gi2\_10720347\_x4.....guucucacccaacagauccg..... 1  
Gi5\_8627543\_x4.....ucGcacccaacagauccg..... 1  
Gi1\_4024132\_x4.....uccggcguaguauaacAgcu..... 1  
Gi2\_10722963\_x4.....gguucucacUcaacagauccg..... 1  
Gi3\_27793401\_x4.....uccggcguaguauaacggcuCgaa..... 1  
Gi3\_27700177\_x4.....Ugcguaguauaacggcuagaau..... 1  
Gi1\_4025512\_x4.....gguucgauuccUggcgccggagc..... 1  
Gi2\_10709991\_x4.....uccAgcguaguauaacgg..... 1  
Gi5\_8609195\_x4.....guucucacccaacagauAcgg..... 1  
Gi5\_8621483\_x4.....uccggcguaguauaacggcuagCa..... 1  
Gi1\_4033572\_x4.....ugguucucaccUaacagauccg..... 1  
Gi5\_8631027\_x4.....ucAggcguaguauaacggcuaga..... 1  
Gi5\_8614263\_x4.....gguucgauucccggcgAcgg..... 1  
Gi3\_27745305\_x4.....gguucgaGucccggcgccgga..... 1  
Gi1\_4036324\_x4.....gCuucgauucccggcgccgga..... 1  
Gi3\_27778913\_x4.....guucgauucccggcgGcg..... 1  
Gi1\_4037732\_x4.....ugAuucucacccaacagauccgg..... 1  
Gi3\_27744169\_x4.....ugguucucacccaacCgauccg..... 1  
Gi5\_8621807\_x4.....uucucaccNaacagauccgg..... 1  
Gi3\_27730345\_x4.....gguucgauuAccggcgccgg..... 1  
Gi1\_4025668\_x4.....guucgauucccggcgUcggga..... 1  
Gi1\_4035960\_x4.....agauccggguucgCuuccc..... 1  
Gi3\_27737637\_x4.....gguucgauucccggcgccggaC..... 1  
Gi1\_4034080\_x4.....guucgauuNccggcgccg..... 1  
Gi5\_8629787\_x4.....gguucgauucccUgcggccgga..... 1  
Gi2\_10723675\_x4.....uAguucucacccaacagauccg..... 1  
G1a\_5770894\_x4.....uccgUcguaguauaacggcuaga..... 1  
Gi2\_10714383\_x4.....uucCcacccaacagauccg..... 1

Gi2\_10685383\_x4.....gguucgauucccgAcgccggag..... 1  
Gi5\_8632475\_x4.....gguuUgauucccgcc..... 1  
Gi5\_8637731\_x4.....uccggcguCguauaacggcua..... 1  
G1a\_5789218\_x4.....uGucaccaacagauccg..... 1  
Gi5\_8618779\_x4.....uccggcguGguauaacggcuagaau..... 1  
Gi1\_4043420\_x4.....gguucgCuucccgccggagc..... 1  
G1a\_5778154\_x4.....uccggcguaguaCaacggcuaga..... 1  
Gi2\_10661571\_x4.....uccggcguaguauaacggA..... 1  
Gi4\_544242\_x4.....uGgguucucacccaacaga..... 1  
Gi3\_27731089\_x4.....Ccgauucccgccggagc..... 1  
Gi3\_27766449\_x4.....uccggcguaguauGacggcuag..... 1  
Gi3\_27664693\_x4.....cGgauccggguucgauucccgccgg..... 1  
Gi3\_27685073\_x4.....gguucgauuAccggcccg..... 1  
Gi1\_4033416\_x4.....gguucgauucccgccgg..... 0  
Gi1\_4037508\_x4.....uccggcguaguauaacggAua..... 1  
Gi3\_27793009\_x4.....uucucacccaacaAaucg..... 1  
Gi3\_27749661\_x4.....uucuGaccaacagauccg..... 1  
Gi3\_27730525\_x4.....cUaguauaacggcuaga..... 1  
Gi2\_10683207\_x4.....cGaccaacagauccg..... 1  
Gi5\_8636191\_x4.....uucucacccCacagauccg..... 1  
Gi1\_4037048\_x4.....guucgauCcccgccggagc..... 1  
Gi5\_8632299\_x4.....uccgAcguaguauaacggcu..... 1  
Gi5\_8609607\_x4.....uccggcguaguUuaacggcuag..... 1  
Gi3\_27725409\_x4.....Gggcguaguauaacggcuaga..... 1  
Gi1\_4021644\_x4.....ugguucucacccaUcagauccg..... 1  
Gi1\_4021920\_x4.....uccggcguaguauaaUggc..... 1  
Gi3\_27725249\_x4.....uUguucucacccaacagauccg..... 1  
Gi2\_10693463\_x4.....gguucgauuccAggcgccc..... 1  
Gi2\_10683295\_x4.....gcguaguauaacggcuagaau..... 0  
Gi1\_4043600\_x4.....uccggcguUguauaacggcuaga..... 1  
Gi5\_8615995\_x4.....gAuucgauucccgccggag..... 1  
Gi5\_8650211\_x4.....gguucgauuccAggcgccc..... 1  
Gi5\_8619295\_x4.....guucgauucAcggccggagc..... 1  
Gi5\_8623915\_x4.....gguucgauucccgAgccggag..... 1  
G1a\_5787674\_x4.....ggGucgauucccgccgg..... 1  
Gi2\_10657263\_x4.....guucgauucccgAcgccg..... 1  
Gi2\_10659299\_x4.....gguucucacccaGcagauccg..... 1  
Gi5\_8617791\_x4.....uccggAguaguauaacggcuaga..... 1  
Gi5\_8609083\_x4.....uccggGguaguauaacggcuag..... 1  
Gi3\_27733425\_x4.....uccgCcgaguauaacggcua..... 1  
Gi3\_27795609\_x4.....uCcgauucccgccggagc..... 1  
Gi5\_8616915\_x4.....gauucccgNcgccggagc..... 1  
Gi3\_27795865\_x4.....gguucgauucccgccCgag..... 1  
Gi2\_10650611\_x4.....uccggcgAguauaacggcuaga..... 1  
Gi2\_10724311\_x4.....gguucgauuccAggcgccc..... 1  
Gi5\_8644719\_x4.....uccggcguaguauaacggGuaga..... 1  
Gi1\_4047544\_x4.....gguuGucaccaacagauccg..... 1

Gi1\_4033128\_x4.....ugguuUucacccaacagauccgg..... 1  
Gi3\_27761645\_x4.....uUucacccaacagauccg..... 1  
Gi5\_8607155\_x4.....Gccaacagauccggguuc..... 1  
Gi1\_4019692\_x4.....uGucacccaacagauccg..... 1  
Gi2\_10677467\_x4.....gAucgauucccggcgcg..... 1  
Gi1\_4025808\_x4.....guucgauucccAgcgcg..... 1  
Gi1\_4044292\_x4.....uucAcacccaacagauccg..... 1  
Gi1\_4029940\_x4.....uUcggcguaguuaaacggcuagaau..... 1  
G1a\_5806874\_x4.....uccggcguaguuaaacAgc..... 1  
Gi1\_4043972\_x4.....guucucacccaacagCuccg..... 1  
Gi1\_4036960\_x4.....uccggcguaguuaaacggcuagaCu..... 1  
Gi3\_27721721\_x4.....gguucgauuGccggcgccggag..... 1  
Gi2\_10670995\_x4.....guucgGuucccggcgccggag..... 1  
Gi5\_8608015\_x4.....uccggAguaguuaaacggcuag..... 1  
Gi3\_27694377\_x4.....guucgauucUcggcgccggag..... 1  
Gi3\_27738193\_x4.....uccggcguCguuaaacggcuagaau..... 1  
Gi3\_27677373\_x4.....cGggcguaguuaaacggcuaga..... 1  
Gi3\_27705597\_x4.....ugguucCacccaacagauc..... 1  
Gi5\_8621407\_x4.....guucucacccaacagauUcgg..... 1  
Gi1\_4025804\_x4.....uccggcguaguuaaacggcuAaa..... 1  
Gi5\_8635967\_x4.....uucucaUccaacagauccg..... 1  
Gi2\_10717675\_x4.....gguucuUaccaacagauccg..... 1  
Gi2\_10665471\_x4.....uccggcguaguuaCcgguca..... 1  
Gi1\_4028676\_x4.....gguucgauuccAggcgcccgg..... 1  
Gi2\_10663483\_x4.....guucucacUcaacagauccg..... 1  
Gi2\_10654171\_x4.....Cuucucacccaacagauccg..... 1  
Gi2\_10661863\_x4.....guucgauuAccggcgccc..... 1  
Gi3\_27761817\_x4.....guucgauucccgGgcccga..... 1  
Gi3\_27734441\_x4.....cgauucccggcgcccggagcA..... 1  
Gi3\_27683689\_x4.....ucgGuucccggcgcccga..... 1  
Gi5\_8634911\_x4.....cGggcguaguuaaacggcuaga..... 1  
Gi3\_27734861\_x4.....uccggcguaguCuaaacggcuagaau..... 1  
Gi5\_8624351\_x4.....gguucgauucccggcgcccggUg..... 1  
Gi5\_8642943\_x4.....Accggcguaguuaaacggcu..... 1  
Gi2\_10679567\_x4.....uccggcguaguuaaacggcCagaa..... 1  
Gi2\_10718439\_x4.....ugguucucacccaGcagauccg..... 1  
Gi5\_8607547\_x4.....uccggcguaguUuaaacggcuaga..... 1  
Gi5\_8633523\_x4.....guucAauucccggcgcccga..... 1  
Gi5\_8632635\_x4.....gguucgauucccggcgcccU..... 1  
Gi5\_8608251\_x4.....ucGggcguaguuaaacggcuaga..... 1  
Gi5\_8605863\_x4.....guucucacAcaacagauccg..... 1  
Gi2\_10690783\_x4.....uccggcguaguauCacggcuagaa..... 1  
G1a\_5784282\_x4.....gguucgauNcccggcgcccggag..... 1  
Gi3\_27746597\_x4.....uccggcguNguuaaacggcu..... 1  
Gi3\_27681081\_x4.....ucgauuccUggcgcccggagc..... 1  
Gi3\_27739557\_x4.....gguucgauucccggcgccc..... 1  
Gi5\_8638903\_x4.....ucAcacccaacagauccg..... 1

Gi1\_4042944\_x4.....gguucgauuuccggcgAggagc..... 1  
Gi5\_8639407\_x4.....ugguucucacccaCagauccgg..... 1  
Gi5\_8619903\_x4.....uccggcguaguauaacAgcuagaa.....gguNcucacccaacagauccg..... 1  
Gi1\_4037432\_x4.....uccggcguaguauaacAgcuagaa.....gguNcucacccaacagauccg..... 1  
Gi5\_8625943\_x4.....gguNcucacccaacagauccg..... 1  
Gi1\_4038728\_x4.....uGcggcguaguauaacggcu.....gguucgauuuccggcUccggagc..... 1  
Gi2\_10706115\_x4.....gguucgauuuccggcUccggagc..... 1  
Gi2\_10655231\_x4.....gguucgauuuccggcUccggagc..... 1  
Gi3\_27734973\_x4.....gguucgauuuccggcUccggagc..... 1  
G1a\_5772702\_x4.....uucucGcccaacagauccg..... 1  
Gi3\_27686413\_x4.....ugguucucacccaacagaCccg..... 1  
Gi3\_27685289\_x4.....uGguucucacccaacagauccg..... 1  
Gi1\_4043404\_x4.....gguucgauuuccggcUccggagc..... 1  
Gi5\_8644263\_x4.....uccggAguaguauaacggcua..... 1  
Gi3\_27695869\_x4.....gguucCauuuccggcgccggagc..... 1  
Gi3\_27723821\_x4.....ccggcguaguauaacggcuagG..... 1  
Gi2\_10700555\_x4.....gguucgauuuccggcgccgAag..... 1  
Gi1\_4021276\_x4.....uccggcguaguauaacggc..... 1  
Gi3\_27763597\_x4.....cagauccggguucgGuucc..... 1  
Gi2\_10711235\_x4.....uucucacccaacaAauccg..... 1  
Gi2\_10682415\_x4.....gguucgauuuccggcgccgga..... 1  
Gi2\_10667263\_x4.....ugUuucucacccaacagauccg..... 1  
Gi2\_10662051\_x4.....ucAgggcguaguauaacggcuaga..... 1  
Gi1\_4022432\_x4.....gguucgauuuccggcgGgg..... 1  
Gi5\_8638887\_x4.....gguucgauuuccggcgccgga..... 1  
Gi2\_10695131\_x4.....gguucgauuuccggcUccggagc..... 1  
G1a\_5784406\_x4.....uccggcguaguauaacAgcuag.....gguucgauuuccggcgccgga..... 1  
Gi1\_4028852\_x4.....gguucgauuuccggcgccgga..... 1  
Gi1\_4025080\_x4.....ugguucucacccaGcagauccg..... 1  
Gi2\_10653287\_x4.....uccggcguaguauaacUgcuaga..... 1  
Gi3\_27753053\_x4.....caUcagauccggguucgauucc..... 1  
Gi2\_10703143\_x4.....gguucgauuuccggcCccggagc..... 1  
Gi1\_4031176\_x4.....gguucgauuuccAgcgccggagc..... 1  
Gi5\_8642743\_x4.....uccggcguaguauaacggc.....gguucgauuuccggcgccgga..... 1  
G1a\_5776354\_x4.....gguucgauuuccggcgccgga..... 1  
Gi1\_4045972\_x4.....uccAgcgguaguauaacggcuaga.....gguucgauuuccggcgccgga..... 1  
Gi5\_8644247\_x4.....gguucgauuuccggcgccgga..... 1  
Gi5\_8625755\_x4.....gguucgauuuccggcgccgga..... 1  
Gi5\_8644299\_x4.....uccggcguaguauaacggcua.....gguucgauuuccggcgccgga..... 1  
Gi5\_8604751\_x4.....gguucgauuuccggcgccgga..... 1  
Gi3\_27785053\_x4.....gguucgauuuccggcgccgga..... 1  
Gi5\_8611627\_x4.....gguucgauuuccggcgccgga..... 1  
Gi3\_27733409\_x4.....Accggcguaguauaacggcuagaau.....gguucgauuuccggcgccgga..... 1  
Gi3\_27672201\_x4.....ugGucucacccaacagauccg.....gguucgauuuccggcgccgga..... 1  
Gi3\_27769641\_x4.....gguucgauuuccggcgccgga..... 1  
Gi3\_27786237\_x4.....ggcguGguauaacggcua.....gguucgauuuccggcgccgga..... 1  
Gi2\_10716583\_x4.....gguucgauuuccggcgccgga..... 1

Gi2\_10685011\_x4.....gAuucgauucccgccg..... 1  
Gi1\_4031320\_x4.....uccggcguaguauaacgCcuaga..... 1  
Gi2\_10712851\_x4.....gguucucacccaacagaCccg..... 1  
Gi3\_27743185\_x4.....uucgauucccgccgagcCu..... 1  
Gi1\_4026748\_x4.....uccggUguaguauaacggcuaga..... 1  
G1a\_5767494\_x4.....gguucgauNcccgccgagc..... 1  
Gi3\_27690365\_x4.....uccggcguaguauaacggcuaUaa..... 1  
Gi3\_27665241\_x4.....uucucacccaacagauccA..... 1  
Gi2\_10669531\_x4.....ugguucucGcccaacagauccg..... 1  
Gi5\_8628479\_x4.....cUgcguaguauaacggcuaga..... 1  
Gi3\_27679433\_x4.....uccggcguaguauaacggcGag..... 1  
G1a\_5786382\_x4.....guucgaCucccgccgagc..... 1  
Gi3\_27687081\_x4.....uucucacUcaacagauccg..... 1  
Gi3\_27766557\_x4.....cgUuucccgccgagc..... 1  
Gi3\_27734069\_x4.....uccggcCuaguauaacggcua..... 1  
Gi2\_10689443\_x4.....gguucUauucccgccgagc..... 1  
Gi5\_8633619\_x4.....guucgauucccgccgagcU..... 1  
Gi1\_4025384\_x4.....uccggcguNguauaacggcu..... 1  
Gi3\_27680249\_x4.....Gguccggcguaguauaacggcuagaugg..... 1  
Gi5\_8637387\_x4.....ucucaccUaacagauccg..... 1  
G1a\_5794926\_x4.....uccggcguaguauaacggcCaga..... 1  
Gi3\_27787413\_x4.....ucgauucccgAcgccgagc..... 1  
Gi2\_10670415\_x4.....Gccggguucgauucccgccgagc..... 1  
Gi2\_10652575\_x4.....Gccggcguaguauaacggcu..... 1  
Gi5\_8636847\_x4.....uucucacccaacagauccgAguuc..... 1  
Gi1\_4039380\_x4.....guucgauucccgccgagcU..... 1  
Gi3\_27757405\_x4.....uccggcguaguauaacggcua..... 1  
Gi4\_538906\_x4.....guucgauucccgccgagcCu..... 1  
Gi1\_4029248\_x4.....ugguucucacccaacagauccgC..... 1  
G1a\_5791562\_x4.....uccggcguaguauaacggcua..... 1  
Gi5\_8631839\_x4.....guucucaccUaacagauccg..... 1  
Gi3\_27696025\_x4.....guucucacccaacagauccggguucga..... 0  
Gi1\_4028920\_x4.....ucAcacccaacagauccg..... 1  
Gi2\_10681731\_x4.....guucgauuccUgcgagc..... 1  
Gi1\_4042952\_x4.....uAguucucacccaacagauccg..... 1  
Gi1\_4022416\_x4.....gguucgauuccAgccgagc..... 1  
Gi3\_27768121\_x4.....guucAcacccaacagauccg..... 1  
Gi3\_27731845\_x4.....uccggcguaguauaacgg..... 1  
Gi3\_27693585\_x4.....uccggcguUguauaacgg..... 1  
Gi1\_4026548\_x4.....guGcgauucccgccgagc..... 1  
Gi2\_10658783\_x4.....uccggcguaguauaacggcuagaau..... 1  
Gi3\_27715681\_x4.....gguucgauucccgAcgcc..... 1  
Gi5\_8617559\_x4.....uccgAcguaguauaacggc..... 1  
Gi1\_4017968\_x4.....gguucgauAcccgccgagc..... 1  
Gi3\_27720869\_x4.....uucucacccaacagaCccg..... 1  
Gi5\_8622307\_x4.....ucAggcguaguauaacgg..... 1  
Gi1\_4029828\_x4.....ugguucucacccaacagauccg..... 1

Gi3\_27713505\_x4.....uccggcguaguauaCcgguagaau.....1  
Gi3\_27740821\_x4.....uccggcguaguaGaacgg.....1  
Gi5\_8634519\_x4.....ccggcguaguauaacggc.....0  
Gi5\_8642555\_x4.....uGcggcguaguauaacggcu.....1  
Gi3\_27713213\_x4.....ugguucucacccaGcagauccg.....1  
Gi3\_27667689\_x4.....caacagauNcggguucga.....1  
Gi1\_4040124\_x4.....uccggcguGguauaacggcuag.....1  
G1a\_5807306\_x4.....uccggcguGguauaacggcuag.....1  
G1a\_5807290\_x4.....guucgauucccggcgccggCgc.....1  
Gi1\_4026056\_x4.....ggGucucacccaacagauccg.....1  
G1a\_5812030\_x4.....guucgaCucccggcgccg.....1  
Gi2\_10706091\_x4.....ggAucgauucccggcgccg.....1  
Gi3\_27680801\_x4.....gguucgauucccggcCccggag.....1  
Gi2\_10662863\_x4.....Cguucucacccaacagauccg.....1  
Gi3\_27772193\_x4.....Ccucacccaacagauccg.....1  
Gi3\_27668109\_x4.....guucgauucccggcAcg.....1  
Gi2\_10675863\_x4.....uccggcguaguauaacgAcuag.....1  
Gi3\_27773113\_x4.....gUguucgauucccggcgccgga.....1  
Gi2\_10659599\_x4.....guucgauuAccgggcgccg.....1  
Gi2\_10660663\_x4.....uucgauucNcgggcgccg.....1  
Gi1\_4023416\_x4.....cCcaccaacagauccg.....1  
Gi3\_27701357\_x4.....Ggauccggguucgauucc.....1  
Gi5\_8605199\_x4.....cucaccaacCgaucgg.....1  
Gi3\_27789605\_x4.....uccUgcguaguauaacggcua.....1  
Gi5\_8633971\_x4.....guucuAaccaacagauccg.....1  
Gi1\_4046344\_x4.....uucucacccaacagauUcgg.....1  
Gi1\_4027556\_x4.....uUucaccaacagauccg.....1  
Gi1\_4026196\_x4.....guucucacccaacagauccgU.....1  
Gi3\_27771089\_x4.....gguucgauAcccggcgccg.....1  
Gi2\_10714971\_x4.....uccggcguaguauaacggUuag.....1  
Gi1\_4047284\_x4.....guucgGuucccggcgccggagc.....1  
Gi3\_27793233\_x4.....Cgguucucacccaacagauccg.....1  
Gi3\_27786177\_x4.....uccggcguaguauaacggcuUgaa.....1  
Gi3\_27755897\_x4.....uccUgcguaguauaacgg.....1  
Gi3\_27739361\_x4.....Uguucgauucccggcgccggagcg.....1  
Gi3\_27784853\_x4.....gguucgauuAccgggcgcc.....1  
Gi1\_4038864\_x4.....ugguucucacccaacagauccgU.....1  
Gi3\_27711361\_x4.....uccggcguaguauaUcggcuagaa.....1  
Gi2\_10723707\_x4.....ucgauuccUgggcgccggagc.....1  
Gi2\_10670903\_x4.....uccggAguaguauaacgg.....1  
Gi3\_27678893\_x4.....guucgauucccggcgccCgag.....1  
Gi2\_10701467\_x4.....uccggcguaguGuaacggcuag.....1  
Gi1\_4018196\_x4.....uucgauucccggcgcUgg.....1  
Gi1\_4037176\_x4.....gguCcgauucccggcgccggagc.....1  
Gi2\_10687567\_x4.....guucCauucccggcgccg.....1  
Gi2\_10704539\_x4.....Agguucgauucccggcgccggagc.....1  
Gi3\_27753009\_x4.....cGacagauccggguucgauucc.....1

Gi2\_10666835\_x4.....Acgauucccggcgccggagc..... 1  
Gi3\_27778965\_x4.....cuUacccaacagauccgg..... 1  
Gi2\_10690695\_x4.....gguucgGuucccggcgccgg..... 1  
Gi5\_8647391\_x4.....guucucacccaacUgauccgg..... 1  
Gi3\_27718133\_x4.....gguucgauAcccggcgcc..... 1  
Gi5\_8609459\_x4.....gguucgCuucccggcgccgg..... 1  
Gi1\_4045912\_x4.....ucGggcguaguauaacggcuag..... 1  
Gi3\_27788509\_x4.....ugguucucacccaCcagauccg..... 1  
Gi3\_27704205\_x4.....uccggcguaguauaacggcGaga..... 1  
Gi3\_27672645\_x4.....gauUccgggcgccggagc..... 1  
Gi2\_10668255\_x4.....uccggcguaguauaCcg..... 1  
Gi5\_8603079\_x4.....gguucgauucccCgcgcgg..... 1  
Gi2\_10717975\_x4.....uccggcguCguauaacggc..... 1  
Gi5\_8647743\_x4.....ucacccaacagauccggCu..... 1  
Gi2\_10671651\_x4.....uccggcguaguauaacggAuaga..... 1  
Gi3\_27781409\_x4.....ucgauucccggcgccAga..... 1  
Gi1\_4024384\_x4.....gauucccggcgccggagcC..... 1  
Gi3\_27777017\_x4.....guucucacccaacagCuccg..... 1  
Gi5\_8650035\_x4.....ugguucucacccaacUgauccg..... 1  
Gi5\_8624019\_x4.....gguucgauucUcgggcgccggagc..... 1  
Gi5\_8621983\_x4.....Aguucucacccaacagauccgg..... 1  
Gi3\_27756361\_x4.....Accggcguaguauaacggcuagaa..... 1  
Gi5\_8624183\_x4.....guucucacAcaacagauccg..... 1  
Gi1\_4027888\_x4.....ucUggcguaguauaacggcuagaau..... 1  
Gi3\_27713285\_x4.....Gggguucgauucccggcgccgga..... 1  
Gi1\_4039752\_x4.....cucacccaNcagauccgg..... 1  
Gi5\_8636739\_x4.....uccggcAuaguauaacggc..... 1  
Gi1\_4030560\_x4.....Cguucgauucccggcgccgg..... 1  
Gi2\_10670063\_x4.....aguuccggcNuaguauaacggcuaga..... 1  
Gi1\_4040120\_x4.....gguucucaccUaacagauccg..... 1  
Gi5\_8639583\_x4.....gguUgauucccggcgccgg..... 1  
Gi2\_10692995\_x4.....gguucucacccaacagauc..... 0  
Gi2\_10674607\_x4.....uUcggcguaguauaacggcuagaau..... 1  
Gi1\_4029016\_x4.....ucucaccNacagauccg..... 1  
Gi1\_4033028\_x4.....uucucacUcaacagauccgg..... 1  
Gi1\_4029512\_x4.....ugguucucacccaacagauccUg..... 1  
Gi1\_4019520\_x4.....ugguucucCcccaacagauccgg..... 1  
Gi5\_8603259\_x4.....uccggcGaguauaacggcuag..... 1  
Gi5\_8640951\_x4.....cucacccaacGgauccgg..... 1  
Gi2\_10653131\_x4.....guGcgauucccggcgccgga..... 1  
Gi5\_8602203\_x4.....uccggcCuaguauaacgg..... 1  
Gi1\_4039608\_x4.....ucgauucccggcgccggagcCu..... 1  
Gi1\_4047016\_x4.....gguucgauucccggcgcUggagc..... 1  
Gi5\_8622683\_x4.....guCcgauucccggcgccggagc..... 1  
Gi3\_27740369\_x4.....ccggcguGguauaacggc..... 1  
Gi2\_10722047\_x4.....aUuccggcguaguauaacggcuaga..... 1  
Gi1\_4023456\_x4.....uccggcguaguaGaacggcuag..... 1

Gi3\_27750101\_x4.....uuUucacccaacagauccggguuc.....1  
Gi2\_10721295\_x4.....cagauccggguucgauuccggcgccgga.....0  
Gi3\_27730749\_x4.....Aauuccggcgccggagc.....1  
Gi3\_27790573\_x4.....guucgaGuccggcgccggag.....1  
Gi2\_10684895\_x4.....uccggcguaguauaacggcuU.....1  
Gi2\_10678799\_x4.....uuUgauuccggcgccgg.....1  
Gi1\_4046608\_x4.....gguucgauAcccgcgccgg.....1  
Gi3\_27685973\_x4.....agauccggNuucgauucc.....1  
Gi3\_27784729\_x4.....uucucacccaUcagauccgg.....1  
G1a\_5805290\_x4.....uGcucacccaacagauccg.....1  
Gi2\_10660771\_x4.....guucgauuccggAgccgg.....1  
Gi1\_4040728\_x4.....guucucCcccaacagauccgg.....1  
Gi1\_4032704\_x4.....gguucgauuccggAgccggagc.....1  
Gi1\_4025360\_x4.....uccggcguCguauaacggcua.....1  
Gi2\_10718583\_x4.....ggAucgauuccggcgccgga.....1  
Gi3\_27677229\_x4.....uccggcguCguauaacggcuag.....1  
Gi1\_4021520\_x4.....uccggcguaguauaacgUcuag.....1  
Gi5\_8602619\_x4.....guucgGuuccggcgccgga.....1  
Gi3\_27749889\_x4.....ggCucucacccaacagauccgg.....1  
Gi3\_27713121\_x4.....ccggcguaguauaacAguaga.....1  
Gi5\_8623479\_x4.....gguCcgauuccggcgccggag.....1  
Gi2\_10657371\_x4.....guucgauuccggcgccAgag.....1  
Gi1\_4026372\_x4.....ucacccaacagauccgggC.....1  
Gi2\_10712155\_x4.....ucgaGuccggcgccggagc.....1  
Gi3\_27772357\_x4.....guucgCuuccggcgccggag.....1  
G1a\_5790914\_x4.....gguucgGuuccggcgccggagc.....1  
Gi2\_10717623\_x4.....gguucgauGccggcgccggagc.....1  
Gi3\_27780217\_x4.....Ccgauuccggcgccgga.....1  
Gi5\_8612051\_x4.....cucacccaacagauccAg.....1  
Gi2\_10672067\_x4.....uccggcguCguauaacggcua.....1  
Gi3\_27752297\_x4.....guucgauuccggcgccGg.....1  
Gi2\_10669571\_x4.....ggguucgauuccggcgccggagc.....0  
Gi5\_8631047\_x4.....guucuAacccaacagauccgg.....1  
G1a\_5768570\_x4.....Aguucgauuccggcgccggag.....1  
Gi3\_27749101\_x4.....uucgauCccggcgccgga.....1  
Gi3\_27754773\_x4.....uUgauuccggcgccgga.....1  
Gi1\_4026508\_x4.....guucucaccUaacagauccgg.....1  
Gi5\_8612143\_x4.....uucucacccaacagauccAg.....1  
Gi5\_8606315\_x4.....ugguGcucacccaacagauccg.....1  
Gi3\_27771121\_x4.....Cgguucgauuccggcgccggagc.....1  
Gi3\_27740305\_x4.....ugguucucacccaacagaCc.....1  
G1a\_5793414\_x4.....uccggcguaguauaacggcuGga.....1  
Gi1\_4046576\_x4.....guuUucacccaacagauccg.....1  
Gi1\_4036624\_x4.....uccggAguaguauaacggcuag.....1  
Gi5\_8636555\_x4.....uccggcguagAauaacggcuag.....1  
Gi3\_27706561\_x4.....guucucacccaGcagauccgg.....1  
Gi5\_8636855\_x4.....uccggcguaguaCaacggcuagaa.....1



Gi3\_27770765\_x4.....cUggcguaguauaacggc..... 1  
Gi5\_8648907\_x4.....guucgauucccggcgcGg..... 1  
Gi3\_27717393\_x4.....uccggcguaguauaacggcGa..... 1  
Gi2\_10695635\_x4.....ucgauucccgUgccggagc..... 1  
Gi1\_4044148\_x4.....ucucaccaacagCuccg..... 1  
Gi2\_10683051\_x4.....uccggcguaguauaacCgcuaga..... 1  
Gi5\_8645679\_x4.....uccggcguaguaGaacggcua..... 1  
Gi2\_10702083\_x4.....gguAcgauucccggcgccggag..... 1  
Gi3\_27735613\_x4.....guucgauucccggcgcUggag..... 1  
Gi1\_4039176\_x4.....ugguucucaccUaacagaucgg..... 1  
Gi1\_4028916\_x4.....gguucgauucccggcgcCA..... 1  
Gi5\_8620599\_x4.....uccggcguagCuaaacggcuagaa..... 1  
Gi3\_27695253\_x4.....uccggcguaguauGacggcuagaa..... 1  
Gi1\_4031480\_x4.....uccggcguaguCuaaacggcuag..... 1  
Gi5\_8608147\_x4.....cucaccGacagaucgg..... 1  
Gi3\_27683097\_x4.....guNcgauucccggcgccgga..... 1  
Gi5\_8618407\_x4.....guucucaccaacaAaucg..... 1  
Gi1\_4027604\_x4.....guAcucaccaacagaucgg..... 1  
Gi1\_4039424\_x4.....uucucaccAaacagaucgg..... 1  
Gi3\_27685181\_x4.....ccggcguaguauaGcggcuaga..... 1  
Gi5\_8631527\_x4.....uGcgauucccggcgccgg..... 1  
Gi1\_5768298\_x4.....uUcggcguaguauaacggcuag..... 1  
Gi5\_8630763\_x4.....uccggcguaguauaacggcuagaG..... 1  
Gi2\_10690995\_x4.....uccggcguaguauaacggcuagaUu..... 1  
Gi4\_539122\_x4.....guucgauucccggcgccggagcC..... 1  
Gi1\_4046500\_x4.....cucaccaacGgaucgg..... 1  
Gi1\_4029416\_x4.....uGgauucccggcgccggagc..... 1  
Gi5\_8623143\_x4.....gguCcgauucccggcgcc..... 1  
Gi5\_8649635\_x4.....guucucaccGacagaucgg..... 1  
Gi5\_8646987\_x4.....gguucucaccaacaAaucg..... 1  
Gi3\_27696305\_x4.....guucgauucccgAgccg..... 1  
Gi3\_27735701\_x4.....guucgauuccGgggcgccg..... 1  
Gi1\_4021004\_x4.....Cccggcguaguauaacggcuagaa..... 1  
Gi1\_4033656\_x4.....agauccggNuucgauucc..... 1  
Gi5\_8623135\_x4.....uucucaccaacagCuccg..... 1  
Gi2\_10666019\_x4.....guucgauucccggcgcAgga..... 1  
Gi3\_27779217\_x4.....guucgauAcccggcgccggag..... 1  
Gi2\_10697727\_x4.....guucgauuccCgcgccgg..... 1  
Gi5\_8623607\_x4.....guucgauucccggcgcUggagc..... 1  
Gi2\_10669251\_x4.....uucucaccaacagaucUg..... 1  
Gi5\_8618571\_x4.....uucucaccaacagaucUg..... 1  
Gi1\_4042808\_x4.....ugguucucaccaacagaucggA..... 1  
Gi5\_8643103\_x4.....ggUguaguauaacggcuag..... 1  
Gi2\_10693895\_x4.....guucgauucccggcgcUcggag..... 1  
Gi5\_8647855\_x4.....uccggcguUguauaacggcua..... 1  
Gi1\_4021344\_x4.....uccggcguaguauCacggcuagaa..... 1  
Gi2\_10677239\_x4.....uucucaccUaacagaucgg..... 1

Gi5\_8649707\_x4.....uucucaccUaacagauccg..... 1  
 Gi2\_10665975\_x4.....gguucgauucUcgggccgga..... 1  
 Gi1\_4058463\_x3.....guucgauucccgUcggccgga..... 1  
 Gi5\_8653148\_x3.....guucgauucccggcgAggagc..... 1  
 Gi1\_4060953\_x3.....uucuUacccaacagauccg..... 1  
 Gi3\_27843638\_x3.....gguAcgauucccggcgcccgg..... 1  
 Gi2\_10753882\_x3.....gguucgauucccggcgcccgaC..... 1  
 Gi3\_27849806\_x3.....uccggcguagAauaacggc..... 1  
 Gi1\_4060236\_x3.....Ggguucucacccaacagaucc..... 1  
 Gi2\_10782331\_x3.....ugguucucaccccGacagauccg..... 1  
 Gi3\_27834272\_x3.....guuAgauucccggcgcccggagc..... 1  
 Gi1\_4089273\_x3.....gguucgaCucccggcgcccgg..... 1  
 Gi1\_4083423\_x3.....gguucgauucccgUgcccggagc..... 1  
 Gi2\_10745776\_x3.....gguuAgauucccggcgcccgg..... 1  
 Gi3\_27874355\_x3.....uccggguuNgauucccggcgcccgg..... 1  
 Gi3\_27834674\_x3.....aUaucggguucgauucccggcgcccggagc..... 1  
 Gi5\_8684030\_x3.....ucacccaacagauccgggGu..... 1  
 Gi3\_27896066\_x3.....ccggcguGguauaacggcua..... 1  
 Gi5\_8714744\_x3.....uccggcguaguaGaacggcuagau..... 1  
 Gi3\_27816947\_x3.....ggNucgauucccggcgcc..... 1  
 Gi5\_8708177\_x3.....gAucucacccaacagauccg..... 1  
 Gi2\_10792240\_x3.....gguucgauucccggcgcccga..... 1  
 Gi5\_8693288\_x3.....gauucccggcgcccggGgc..... 1  
 Gi1\_4063719\_x3.....ccggUguaguauaacggcua..... 1  
 Gi2\_10759252\_x3.....Gcggcguaguauaacggcua..... 1  
 Gi3\_27922772\_x3.....uccggcguaguauaacggAuag..... 1  
 Gi2\_10803628\_x3.....ugguucCcacccaacagauccg..... 1  
 Gi2\_10779490\_x3.....guucgaGucccgggcgcccgg..... 1  
 Gi1\_4061478\_x3.....guucucacAcaacagauccg..... 1  
 Gi3\_27851090\_x3.....Gggguucgauucccggcgcccggag..... 1  
 Gi5\_8652026\_x3.....gguucucacccaacagUuccg..... 1  
 Gi5\_8683016\_x3.....ugguucuUacccaacagauccg..... 1  
 Gi5\_8672588\_x3.....gguucgauucccCgcgcccggagc..... 1  
 Gi1\_4068717\_x3.....gguucgauucccggcgUcggga..... 1  
 Gi2\_10751311\_x3.....guucucacccaGcagauccg..... 1  
 Gi3\_27815537\_x3.....uucucacccaacagauccAg..... 1  
 Gi5\_8658149\_x3.....guGcgauucccggcgcccgg..... 1  
 Gi5\_8686904\_x3.....uccAgcguaguauaacggcuagaa..... 1  
 Gi5\_8673773\_x3.....Cgguucucacccaacagauccgg..... 1  
 Gl1\_5815924\_x3.....uccggcgCaguauaacggcuag..... 1  
 Gi3\_27819824\_x3.....gguuAgauucccggcgcccgg..... 1  
 Gi2\_10769323\_x3.....auucccggcgcccggagcCu..... 1  
 Gi5\_8661062\_x3.....Gucucacccaacagauccggguu..... 1  
 Gi3\_27955169\_x3.....gguucUauucccggcgcccgg..... 1  
 Gi1\_4059471\_x3.....ucucaccccGacagauccg..... 1  
 Gi3\_27868535\_x3.....cagauccggguCcgauucc..... 1  
 Gi5\_8684414\_x3.....agaucgggGucgauucc..... 1

Gi3\_27843773\_x3.....uccggcguaguauaacggcAa.....1  
Gi3\_27863351\_x3.....ucAggcguaguauaacggcuag.....1  
Gi3\_27881060\_x3.....Ucggcguaguauaacggcuaga.....1  
Gi3\_27821375\_x3.....ucgauCcccggcgccggagc.....1  
Gi2\_10749043\_x3.....aguccggcguaguauaGcggcuaga.....1  
Gi5\_8714861\_x3.....uccggcguaguauaUcggcuaga.....1  
Gi5\_8700377\_x3.....uuUgauucccggcgccgg.....1  
Gi5\_8653064\_x3.....Cauucccggcgccggagc.....1  
Gi1\_4057833\_x3.....gguucgauucccUcggccgg.....1  
Gi3\_27945962\_x3.....ugguucucacccaacagaucUg.....1  
Gi5\_8655068\_x3.....uUcggcguaguauaacggcu.....1  
Gi5\_8680364\_x3.....gguucgauucUcggcgccg.....1  
Gi5\_8684228\_x3.....uccggcguaguauaacUgcuaagaa.....1  
Gi3\_27976247\_x3.....ugguucucacccaacagaucgg.....1  
Gi2\_10814698\_x3.....uccggcguaguauCacgg.....1  
Gi2\_10821514\_x3.....gguucucacccaUagaucgg.....1  
Gi3\_27967205\_x3.....cUgcguaguauaacggcuaga.....1  
Gi2\_10779409\_x3.....guucgCuuccggcgccggag.....1  
Gi1\_4062306\_x3.....uccggcAuaguauaacggcua.....1  
Gi1\_4075323\_x3.....ucgauucccggcgccggag.....0  
Gi5\_8708840\_x3.....ggcguaguauaacggcuagG.....1  
Gi5\_8685422\_x3.....uccggcguagAauaacggcuaga.....1  
Gi2\_10824061\_x3.....gguucgauucAcggcgcc.....1  
Gi1\_4085415\_x3.....uccggcguaguauaacggcuUg.....1  
Gi3\_27820343\_x3.....ucAauucccggcgccggagc.....1  
Gi2\_10785745\_x3.....gguucgauucccggcgGgga.....1  
Gi5\_8709053\_x3.....uccgCcguguaguauaacggcua.....1  
Gi2\_10815724\_x3.....guucucacccaacagaucUg.....1  
Gi1\_4057590\_x3.....ugguucucacccaacagauc.....0  
Gi5\_8652128\_x3.....gguucgauucccgUcggcgga.....1  
Gi5\_8702369\_x3.....ccggcguaguauaacggcCaga.....1  
Gi1\_4079190\_x3.....ugguucucacccaacagaCccgg.....1  
Gi1\_4081971\_x3.....ggGucgauucccggcgccggagc.....1  
Gi5\_8692001\_x3.....guucucacccaacCgauccgg.....1  
Gi3\_27948239\_x3.....uccggcguaguauaacgCc.....1  
Gi2\_10734631\_x3.....Accggcguaguauaacggcuagaa.....1  
Gi5\_8679263\_x3.....gguucgauucUcggcgcc.....1  
Gi1\_4049988\_x3.....guAcucacccaacagaucgg.....1  
Gi1\_4087308\_x3.....guucgGuucccggcgccg.....1  
Gi1\_4060380\_x3.....uucucaUccaacagaucgg.....1  
Gi4\_547647\_x3.....gguucgauucccggcgccggag.....0  
Gi3\_27932771\_x3.....gguucgauucccCgcgccg.....1  
Gi2\_10781722\_x3.....uccAgcguaguauaacggcuagaau.....1  
Gi5\_8705954\_x3.....guucucacccaacagaucUgg.....1  
Gi2\_10795318\_x3.....Gucucacccaacagaucgg.....1  
Gi2\_10771150\_x3.....uccgCcguguaguauaacggcuaga.....1  
Gi1\_4070532\_x3.....ugguucucacccaacCgauccgg.....1

Gi3\_27939230\_x3.....ggguucgauucccggcgccggCgc..... 1  
Gi1\_4055634\_x3.....ucucaccaacagauAcg..... 1  
Gi5\_8715362\_x3.....guucgauucccggcgUcgga..... 1  
Gi3\_27967733\_x3.....uccggcgAaguauaacggcua..... 1  
Gi5\_8711684\_x3.....gguucAuuucccggcgccgga..... 1  
Gi2\_10822219\_x3.....gguucgauucccggcgccggagcg..... 0  
Gi3\_27886160\_x3.....ucGggcguaguauaacgg..... 1  
G1a\_5822464\_x3.....Gccggcguaguauaacggc..... 1  
Gi1\_4083897\_x3.....cggcguaguauaacggcuagaaU..... 1  
Gi3\_27957008\_x3.....guucucaccaacagauAcgg..... 1  
Gi5\_8684423\_x3.....uccggcguaguauaacggAuaga..... 1  
Gi2\_10748833\_x3.....uccggcguaguauaacggcuCgaa..... 1  
Gi1\_4078194\_x3.....uccggcAuaguauaacgg..... 1  
Gi5\_8671166\_x3.....gguucucaccaacagGuccgg..... 1  
Gi5\_8705780\_x3.....Aucucaccaacagauccg..... 1  
Gi5\_8666963\_x3.....gguucgauucccggcgccggaUc..... 1  
Gi1\_4088490\_x3.....gguucgauucccggcgccggGg..... 1  
Gi3\_27814679\_x3.....ucgauucccggcgcAggagc..... 1  
Gi5\_8718017\_x3.....uccggcguaguUaacggc..... 1  
Gi3\_27813083\_x3.....cgguucgNuucccggcgccgga..... 1  
Gi5\_8663615\_x3.....ucucacccGacagauccg..... 1  
Gi5\_8657537\_x3.....Gcgauucccggcgccggag..... 1  
Gi2\_10754527\_x3.....agaugguugguucCacc..... 1  
Gi1\_4089084\_x3.....guucgauUccgggcgccg..... 1  
Gi2\_10785715\_x3.....ucgauucAcgggcgccggagc..... 1  
Gi3\_27906026\_x3.....Gucucaccaacagauccggguuc..... 1  
Gi3\_27864914\_x3.....uucgaCucccggcgccgg..... 1  
Gi2\_10780153\_x3.....gguucucCcccaacagauccg..... 1  
Gi3\_27822218\_x3.....uccggcguaguauaacggcuagaG..... 1  
Gi4\_552126\_x3.....guucgaCucccggcgccggagc..... 1  
Gi3\_27836450\_x3.....guucgauucccggcgccgUag..... 1  
Gi1\_4058496\_x3.....gguucCcacccaacagauccgg..... 1  
Gi3\_27892247\_x3.....gguucgauucccggcgcGgga..... 1  
Gi1\_4074375\_x3.....ugguucucaccaacagauccA..... 1  
Gi5\_8668661\_x3.....uccggcguaguauaacggAua..... 1  
Gi1\_4066989\_x3.....guuUucaccaacagauccgg..... 1  
Gi2\_10796326\_x3.....gUuucccggcgccggagc..... 1  
Gi3\_27941390\_x3.....uucgauCcccggcgccggagc..... 1  
Gi2\_10784437\_x3.....uccAgcguaguauaacggcuag..... 1  
Gi2\_10826089\_x3.....gguucucaccaacUgauccg..... 1  
Gi1\_4063590\_x3.....guucgauucccggcgccCga..... 1  
Gi2\_10822114\_x3.....gguuGgauucccggcgccgga..... 1  
Gi2\_10743235\_x3.....gguucgauucccggcgcGggag..... 1  
Gi3\_27890927\_x3.....Cccggcguaguauaacggcu..... 1  
Gi3\_27886430\_x3.....guuGgauucccggcgccgga..... 1  
Gi5\_8710403\_x3.....ucuUaccaacagauccg..... 1  
Gi5\_8716589\_x3.....guucgauucccgAgccgga..... 1

Gi5\_8668877\_x3.....Ucggcguaguauaacggcuag..... 1  
Gi2\_10751710\_x3.....Accggcguaguauaacggcuag..... 1  
Gi2\_10825423\_x3.....uccggcguUguauaacggcua..... 1  
Gi5\_8653355\_x3.....gguucgauuAccggcgccgga..... 1  
Gi5\_8704106\_x3.....uccggcguaguauaaAggcuagaau..... 1  
Gi2\_10753012\_x3.....ggguucgauuccggcgccggagcC..... 1  
Gi1\_4061901\_x3.....ggUguaguauaacggcuag..... 1  
Gi3\_27906098\_x3.....uucgauuUccggcgccgga..... 1  
Gi5\_8653427\_x3.....uucucaccaCcagauccggguu..... 1  
Gi5\_8690372\_x3.....uccggcguaguauaacggcuaC..... 1  
Gi2\_10735141\_x3.....uccggcguaguaCaacggcuagaau..... 1  
Gi3\_27812366\_x3.....gguucgauucGcggcgccggag..... 1  
Gi2\_10794754\_x3.....gguucAauuccggcgccg..... 1  
Gi5\_8694299\_x3.....ugguucucaccaacagaAccg..... 1  
G1a\_5840212\_x3.....gguucgGuuccggcgcc..... 1  
Gi3\_27969116\_x3.....Aguucucaccaacagaucc..... 1  
Gi3\_27849311\_x3.....guucgauuccggcgccggagG..... 1  
Gi3\_27913643\_x3.....agauccggguucgUuucc..... 1  
Gi2\_10759411\_x3.....uccggcguaguauaacggcuCg..... 1  
Gi3\_27949205\_x3.....guucgauAcccggcgccg..... 1  
Gi3\_27935387\_x3.....Cauuccggcgccggagc..... 1  
Gi5\_8702807\_x3.....uucucCcccaacagauccg..... 1  
Gi5\_8678750\_x3.....uccggcguCguauaacggcuagaau..... 1  
Gi5\_8701292\_x3.....guucgauucccUgcgcgga..... 1  
Gi2\_10809373\_x3.....uUcggcguaguauaacggcuagaa..... 1  
Gi1\_4051002\_x3.....guucgauuccGggcgccgga..... 1  
Gi5\_8717162\_x3.....Aucaccaacagauccgg..... 1  
Gi5\_8686973\_x3.....uccggcguaguauaaAggc..... 1  
Gi1\_4082823\_x3.....gAuucgauuccggcgccgga..... 1  
Gi5\_8676110\_x3.....ucgauuccNggcgccggag..... 1  
Gi1\_4075806\_x3.....Nuucgauuccggcgccgga..... 1  
Gi5\_8697452\_x3.....gUcguaguauaacggcua..... 1  
Gi1\_4082253\_x3.....guucgauCcccggcgccgga..... 1  
Gi3\_27900356\_x3.....guucucacUcaacagauccgg..... 1  
Gi5\_8661260\_x3.....uccggcguaguaGaacggcuaga..... 1  
Gi5\_8673704\_x3.....gguucgauuccggcgccggagcgCu..... 1  
Gi5\_8663273\_x3.....Uuucgauuccggcgccggagcguucc..... 1  
Gi5\_8676506\_x3.....Acaccaacagauccggguu..... 1  
Gi2\_10821682\_x3.....gguucgauuccUgcgcc..... 1  
Gi5\_8652935\_x3.....guucgauuccAggcgccgga..... 1  
Gi2\_10803223\_x3.....guuGgauuccggcgccgga..... 1  
Gi5\_8703722\_x3.....gguucucaccaacagaGccg..... 1  
G1a\_5850052\_x3.....guucgaCuccggcgccggagc..... 1  
Gi1\_4087317\_x3.....uccggcguaguauaacggUuagaau..... 1  
Gi3\_27841766\_x3.....guucCcacccaacagauccg..... 1  
Gi2\_10755211\_x3.....cGcaacagauccggguuc..... 1  
Gi5\_8680913\_x3.....guucgauuccggUgcggagc..... 1

Gi1\_4079256\_x3.....uccggcAuaguauaacggcuag..... 1  
Gi2\_10761703\_x3.....guucgauuccggcgGgga..... 1  
Gi3\_27865328\_x3.....ggcguaguauaGcggcuagaau..... 1  
Gi2\_10773382\_x3.....uccggcguaguauaGcggcuagaa..... 1  
Gi3\_27925592\_x3.....uccNgcguaguauaacggcua..... 1  
Gi2\_10772911\_x3.....uccggcguaguauaacggcuG..... 1  
Gi3\_27798551\_x3.....Cgguucucacccaacagauc..... 1  
Gi5\_8669372\_x3.....gguucucacccaacagaAccg..... 1  
Gi2\_10761202\_x3.....gguucgauucUcggcgccgg..... 1  
Gi3\_27869762\_x3.....gauuccgNcgccggagc..... 1  
Gi2\_10763971\_x3.....uccgAcguaguauaacgg..... 1  
Gi1\_4081536\_x3.....Cuucucacccaacagauccgg..... 1  
Gi1\_4047990\_x3.....uucGcacccaacagauccg..... 1  
Gi1\_4063026\_x3.....gAucgauuccggcgccgga..... 1  
Gi2\_10774735\_x3.....uGcucacccaacagauccgg..... 1  
Gi1\_4048029\_x3.....gguucgauuccggcgccggagA..... 1  
Gi3\_27867647\_x3.....Nguucgauuccggcgccggag..... 1  
Gi1\_4060851\_x3.....guucuAacccaacagauccgg..... 1  
Gi2\_10778767\_x3.....gguucgauuccAgggcgccggag..... 1  
Gi2\_10743808\_x3.....Gcgauuccggcgccgga..... 1  
Gi5\_8705831\_x3.....gAucgauuccggcgccgga..... 1  
Gi5\_8661461\_x3.....Auucgauuccggcgccggag..... 1  
Gi3\_27901448\_x3.....ugguucAcacccaacagauccg..... 1  
Gi1\_4077564\_x3.....gguucgGuuccggcgccggagc..... 1  
Gi5\_8651117\_x3.....Gucucacccaacagauccggguuc..... 1  
Gi1\_4052205\_x3.....uucucacccaacagauccgC..... 1  
Gi2\_10821295\_x3.....uccgAcguaguauaacggcua..... 1  
Gi3\_27896120\_x3.....uucgauuccUggcgccgga..... 1  
Gi1\_4059540\_x3.....gguucAauuccggcgccg..... 1  
Gi3\_27887174\_x3.....uucucacccaacagCuccg..... 1  
Gi5\_8714924\_x3.....uccggcguaguauGacggc..... 1  
Gi3\_27964262\_x3.....gguucgauuccggcgccgUa..... 1  
Gi5\_8712719\_x3.....uucucacAcaacagauccgg..... 1  
Gi4\_550752\_x3.....ggGucgauuccggcgccgg..... 1  
Gi1\_4078809\_x3.....gguucgauuccggcgccggagcCuu..... 1  
Gi5\_8656268\_x3.....guGcgauuccggcgccggagc..... 1  
Gi2\_10744741\_x3.....uccggAguaguauaacggc..... 1  
Gi1\_4077060\_x3.....uucucacccaacUgauccgg..... 1  
Gi1\_4058412\_x3.....ucucacccaacGgauccg..... 1  
Gi5\_8655893\_x3.....guucCauuccggcgccg..... 1  
Gi1\_4075257\_x3.....ucucacccaacagauccA..... 1  
Gi1\_4073733\_x3.....uuUgauuccggcgccggagc..... 1  
Gi2\_10804873\_x3.....gguucgauuccggcgAcgg..... 1  
Gi2\_10822213\_x3.....cgauuccNcgccggagcguuu..... 1  
Gi2\_10815952\_x3.....gguucucacAcaacagauccg..... 1  
Gi5\_8661392\_x3.....uccgUcguaguauaacggc..... 1  
Gi3\_27926360\_x3.....Aucgauuccggcgccggagc..... 1

Gi5\_8664269\_x3.....gguucgauuccUggcgccggag..... 1  
Gi5\_8697125\_x3.....gguucgauucccgUcgccggagc..... 1  
Gi5\_8682884\_x3.....uccggcguaguauaacggcuGgaau.....cagauccgggCucgauucccgccggc..... 1  
Gi1\_4057188\_x3.....uccggcguaguauaacggcuGgaau.....gguucGcacccaacagauccg..... 1  
Gi5\_8693645\_x3.....gguucGcacccaacagauccg.....ggAucgauucccgccggag..... 1  
Gi5\_8658503\_x3.....ggAucgauucccgccggag.....gguuGucacccaacagauccg..... 1  
Gi3\_27878051\_x3.....gguuGucacccaacagauccg.....guuUgauucccgccggc..... 1  
Gi1\_4085529\_x3.....guuUgauucccgccggc.....Accggcguaguauaacggcuaga..... 1  
Gi1\_4064415\_x3.....Accggcguaguauaacggcuaga.....gguucucaccaGcagauccg..... 1  
Gi1\_4073493\_x3.....gguucucaccaGcagauccg.....Ucggcguaguauaacggcua..... 1  
Gi3\_27823253\_x3.....Ucggcguaguauaacggcua.....Acggcguaguauaacggc..... 1  
Gi3\_27963113\_x3.....Acggcguaguauaacggc.....gguucGcacccaacagauccg..... 1  
Gi1\_4051395\_x3.....gguucGcacccaacagauccg.....ugUuucucaccaacagauc..... 1  
Gi3\_27829607\_x3.....ugUuucucaccaacagauc.....cggcguaguauaacggcuagaGu..... 1  
Gi5\_8674208\_x3.....cggcguaguauaacggcuagaGu.....gguucgauuccUgcgccggagc..... 1  
Gi3\_27954134\_x3.....gguucgauuccUgcgccggagc.....gguucgaCucccgccggagc..... 1  
Gi1\_4048995\_x3.....gguucgaCucccgccggagc.....cgauucccgccggagcCu..... 1  
Gi5\_8658599\_x3.....cgauucccgccggagcCu.....uccggcAuaguauaacggc..... 1  
Gi2\_10729030\_x3.....uccggcAuaguauaacggc.....Gccggcguaguauaacggcuag..... 1  
Gi4\_549306\_x3.....Gccggcguaguauaacggcuag.....gguucgCuucccgccggagc..... 1  
Gi5\_8688299\_x3.....gguucgCuucccgccggagc.....uucgaCucccgccggagc..... 1  
Gi2\_10762363\_x3.....uucgaCucccgccggagc.....gguucgauuccUcggcgccgga..... 1  
Gi5\_8688164\_x3.....gguucgauuccUcggcgccgga.....uccgAcguaguauaacggcuag..... 1  
Gi3\_27906479\_x3.....uccgAcguaguauaacggcuag.....uccggcguaguUuaacggc..... 1  
Gi2\_10817479\_x3.....uccggcguaguUuaacggc.....Accggcguaguauaacggcua..... 1  
Gi1\_4080930\_x3.....Accggcguaguauaacggcua.....ucUauucccgccggagc..... 1  
Gi5\_8714339\_x3.....ucUauucccgccggagc.....gguucgauucccgccgcU..... 1  
Gi5\_8716610\_x3.....gguucgauucccgccgcU.....Cccggcguaguauaacggcuagaa..... 1  
Gi2\_10752562\_x3.....Cccggcguaguauaacggcuagaa.....uucucacccUacagauccg..... 1  
Gi3\_27927506\_x3.....uucucacccUacagauccg.....ugguucucaccaCcagauccg..... 1  
Gi2\_10792870\_x3.....ugguucucaccaCcagauccg.....aUauccggguucgauucccgccggag..... 1  
Gi3\_27828017\_x3.....aUauccggguucgauucccgccggag.....uAcggcguaguauaacggc..... 1  
Gi3\_27893051\_x3.....uAcggcguaguauaacggc.....Aucucaccaacagauccg..... 1  
Gi1\_4074498\_x3.....Aucucaccaacagauccg.....gguucgauucccgccggCgc..... 1  
G1a\_5854144\_x3.....gguucgauucccgccggCgc.....gguucgauucccgccCga..... 1  
Gi5\_8652497\_x3.....gguucgauucccgccCga.....ucucaccaacagauccg..... 1  
Gi4\_549507\_x3.....ucucaccaacagauccg.....guuNgauucccgccggag..... 1  
Gi3\_27834023\_x3.....guuNgauucccgccggag.....cggcguaguauaacggcuCga..... 1  
Gi5\_8692295\_x3.....cggcguaguauaacggcuCga.....Acgauucccgccggag..... 1  
Gi3\_27846707\_x3.....Acgauucccgccggag.....gguucgauucccgccggUagc..... 1  
Gi2\_10804204\_x3.....gguucgauucccgccggUagc.....gguucgauuccAgcggag..... 1  
Gi2\_10823227\_x3.....gguucgauuccAgcggag.....uccggcguaguauaacggcua..... 1  
Gi1\_4064631\_x3.....uccggcguaguauaacggcua.....ugUuucucaccaacagauccg..... 1  
Gi5\_8654009\_x3.....ccggcguaguauaacggcua.....ugUuucucaccaacagauccg..... 1  
Gi1\_4075866\_x3.....ugUuucucaccaacagauccg.....uccggcguaguauaacggcua..... 1  
Gi3\_27939362\_x3.....uccggcguaguauaacggcua.....ugguucucaccaacagauccggc..... 1  
Gi5\_8659568\_x3.....ugguucucaccaacagauccggc.....

Gi5\_8688872\_x3.....Gggcgguaguauaacggcuag..... 1  
 Gi5\_8711072\_x3.....ucAggcgguaguauaacggcua..... 1  
 Gi2\_10801753\_x3.....uccggcgguaguauaacggcuagaGu..... 1  
 Gi1\_4057344\_x3.....uccggcgguUguauaacggcuag..... 1  
 Gi3\_27830687\_x3.....gguucgauucccCgcccggga..... 1  
 Gi3\_27824288\_x3.....uccggcgguagAauaacggcua..... 1  
 Gi1\_4056021\_x3.....ucAggcgguaguauaacgg..... 1  
 Gi5\_8675369\_x3.....Gcgauucccgggcgccgga..... 1  
 Gi2\_10746955\_x3.....guucgaGucccgggcgccgga..... 1  
 Gi1\_4089102\_x3.....ugguucuUacccaacagauccg..... 1  
 Gi1\_4087377\_x3.....gAuucgauucccgggcgccggagc..... 1  
 Gi5\_8652335\_x3.....ccggcguaNuauaacggcuaga..... 1  
 Gi2\_10788475\_x3.....ucgauucccgggcgccAgagc..... 1  
 Gi1\_4079901\_x3.....ggAucgauucccgggcgccggagc..... 1  
 Gi2\_10780225\_x3.....Aauucccgggcgccggagc..... 1  
 Gi3\_27888362\_x3.....gguucgauucccgCcgccgg..... 1  
 Gi5\_8700176\_x3.....ggCucucacccaacagauccgg..... 1  
 Gi1\_4077450\_x3.....uucucacccaacagauccgU..... 1  
 Gi3\_27818648\_x3.....ucAggcgguaguauaacggc..... 1  
 Gi3\_27887441\_x3.....cucacccGacagauccgg..... 1  
 Gi1\_4048947\_x3.....cuUacccaacagauccgg..... 1  
 Gi3\_27931829\_x3.....ucgauuUccggcgccggag..... 1  
 Gi3\_27818801\_x3.....guucgauuccAgggcgccg..... 1  
 Gi5\_8657486\_x3.....uucucacccaacagaCccgg..... 1  
 Gi1\_4072857\_x3.....guucgauucccgggcgccgCa..... 1  
 Gi1\_4060656\_x3.....uccggcgguaguCuaacggc..... 1  
 Gi3\_27899402\_x3.....Aguucucacccaacagauccgggu..... 1  
 Gl1\_5853448\_x3.....uGcucacccaacagauccgg..... 1  
 Gi1\_4067886\_x3.....auccggguucgauuccAgggcgccg..... 1  
 Gi2\_10761232\_x3.....uccggcgguaguauaacggUua..... 1  
 Gi3\_27805868\_x3.....guuUucacccaacagauccgg..... 1  
 Gi5\_8683721\_x3.....cggcgguGguauaacggcua..... 1  
 Gi5\_8675003\_x3.....ugUuucucacccaacagauccg..... 1  
 Gi2\_10784119\_x3.....gguAcgauucccgggcgccg..... 1  
 Gi5\_8683466\_x3.....uccggcgguUguauaacggc..... 1  
 Gi3\_27894176\_x3.....uccNgcguaguauaacggcuag..... 1  
 Gi2\_10744147\_x3.....uccggcguaAuauaacggcua..... 1  
 Gi2\_10799182\_x3.....uccggcgguaguauaacggcuagCa..... 1  
 Gi2\_10730764\_x3.....uCcgauucccgggcgccgg..... 1  
 Gi2\_10822264\_x3.....guucucacccaaAagauccg..... 1  
 Gi3\_27859577\_x3.....uccggguucgauucccgggcgccgAa..... 1  
 Gi2\_10741264\_x3.....uccggcgguagAauaacggcuag..... 1  
 Gi5\_8686355\_x3.....aacagauccggguucgauucccgggcgccggagc..... 0  
 Gi3\_27937088\_x3.....Nuucgauucccgggcgccggagc..... 1  
 Gi3\_27869522\_x3.....guucgauucccgCcgccgg..... 1  
 Gi3\_27914537\_x3.....guucgauucccUgcccggga..... 1  
 Gi2\_10725721\_x3.....uccggcgguaguauaacggcuUgaau..... 1



Gi3\_27890375\_x3.....cggguucgauucccggcgccgC..... 1  
Gi1\_4061523\_x3.....ccggcguGguauaacggcua..... 1  
Gi2\_10769530\_x3.....uccggcguaguaGaacggc..... 1  
Gi2\_10824511\_x3.....uggCucucacccaacagauccg..... 1  
Gi1\_4069074\_x3.....uccggcguaguauaaacggGuagaa..... 1  
G1a\_5825536\_x3.....uccggcguaguGuaacggcuaga..... 1  
Gi5\_8655605\_x3.....guucgauucccggcgccAga..... 1  
Gi2\_10792609\_x3.....uccggcguaguauaaacggcAa..... 1  
Gi2\_10744057\_x3.....Gucucacccaacagauccggguucg..... 1  
Gi3\_27813704\_x3.....uccgggCucgauucccggcgccgga..... 1  
Gi2\_10811659\_x3.....gguucgauucccggcgcGc..... 1  
Gi3\_27911900\_x3.....guucCauucccggcgccgga..... 1  
Gi5\_8657915\_x3.....gguucgauucccUgcgccg..... 1  
Gi3\_27890729\_x3.....uccggcguaguauaaaAggc..... 1  
Gi5\_8670206\_x3.....gUcguaguauaaacggcuagaa..... 1  
Gi1\_4051707\_x3.....ucUggcguaguauaaacggcuagaa..... 1  
Gi3\_27912119\_x3.....aacagauccggguucgauucccggcgccggagcC..... 1  
Gi2\_10730029\_x3.....gguucucacccaacagGuccg..... 1  
Gi5\_8715050\_x3.....guucucacccaacagaCccgg..... 1  
Gi2\_10816714\_x3.....gguucucaccccUacagauccg..... 1  
Gi2\_10783849\_x3.....uccggcguCguauaacggcuagaa..... 1  
Gi5\_8705318\_x3.....Acucacccaacagauccg..... 1  
Gi1\_4079502\_x3.....uucgaCucccggcgccgg..... 1  
Gi1\_4074957\_x3.....guucgauucccCgcgccgga..... 1  
Gi2\_10799380\_x3.....uccggcguAuaaacggc..... 1  
Gi1\_4080300\_x3.....gguuAgauucccggcgccgg..... 1  
Gi3\_27944972\_x3.....ucUauucccggcgccggagc..... 1  
Gi5\_8715332\_x3.....ucucacccaacagGuccg..... 1  
Gi1\_4074180\_x3.....ucAcacccaacagauccg..... 1  
Gi1\_4051380\_x3.....uccggcguaguauaaacggcuagCa..... 1  
Gi5\_8664656\_x3.....ucucacccNacagauccg..... 1  
Gi3\_27883871\_x3.....uucgauucccggcgccggagcgA..... 1  
Gi1\_4060719\_x3.....gguucgauucAcgggcgccg..... 1  
Gi3\_27818741\_x3.....guucgUuucccggcgccggagc..... 1  
Gi4\_551673\_x3.....uccggcguaguauaaacggcua..... 0  
Gi5\_8715074\_x3.....uccggcguaguUuaacgg..... 1  
Gi5\_8678831\_x3.....gguucgaAuucccggcgccg..... 1  
Gi3\_27937673\_x3.....Uauccggguucgauucccggcgccgga..... 1  
Gi2\_10743196\_x3.....guucgauCcccgggcgccggag..... 1  
Gi3\_27829070\_x3.....gguucgauucccggcUccggag..... 1  
Gi1\_4056942\_x3.....guucucacccaacagCuccg..... 1  
Gi5\_8652134\_x3.....uccggcgAaguaaacggcuag..... 1  
Gi5\_8672081\_x3.....ugguucucacAcaacagauccg..... 1  
Gi5\_8658845\_x3.....gguucgauuccUggcgcc..... 1  
Gi2\_10783381\_x3.....uccggcguagAuaaacgg..... 1  
Gi3\_27877406\_x3.....guucucacccaacagauUcg..... 1  
Gi5\_8656658\_x3.....gguNcgauucccggcgccggagc..... 1

Gi3\_27842411\_x3.....gguucgauuccGggcgccgg.....1  
Gi1\_4063806\_x3.....gguucAcacccaacagauccg.....1  
Gi3\_27975029\_x3.....gUuuccggcgccggagc.....1  
Gi5\_8695475\_x3.....uccggcguagGauaacggcuaga.....1  
Gi2\_10791622\_x3.....gguuAgauuccggcgccggag.....1  
Gi2\_10776085\_x3.....gguucUauuccggcgcc.....1  
Gi5\_8683430\_x3.....uccggcguaguauaacggcuaAaau.....1  
Gi3\_27849674\_x3.....gguucgauuGccggcgccgg.....1  
Gi2\_10740964\_x3.....gguucucacccaacagauAcg.....1  
Gi2\_10804822\_x3.....uccggcguaguauGacggcuagaau.....1  
Gi1\_4057752\_x3.....gguucgaCuccggcgccgga.....1  
Gi3\_27967724\_x3.....ucUauuccggcgccgga.....1  
Gi3\_27804551\_x3.....gguucgauuccggGgccg.....1  
Gi3\_27871745\_x3.....uccggcguaguauaacCgcuagaau.....1  
Gi2\_10748152\_x3.....Gucgauuccggcgccggag.....1  
Gi1\_4060890\_x3.....uccggcguCguauaacggcuag.....1  
Gi3\_27797651\_x3.....ugguucucNcccaacagauccgg.....1  
Gi5\_8667416\_x3.....uucucacccaacUgauccg.....1  
Gi1\_4085451\_x3.....uucucaAcacaacagauccg.....1  
Gi5\_8669648\_x3.....guucgauuccggcgccUgagc.....1  
Gi2\_10816255\_x3.....cccaacagaCccggguuc.....1  
Gi3\_27877115\_x3.....Nuucgauuccggcgccggag.....1  
Gi5\_8667383\_x3.....uccggcgGaguauaacggcuaga.....1  
Gi4\_544908\_x3.....gguucgauNccggcgccgg.....1  
Gi5\_8703620\_x3.....ucucacccaacagauUg.....1  
Gi1\_4065948\_x3.....gguCcgauuccggcgccg.....1  
Gi5\_8691035\_x3.....gCuucucacccaacagauccgg.....1  
Gi3\_27832424\_x3.....ugguucucacccaacGgauccgg.....1  
Gi3\_27893261\_x3.....guucgauuAccggcgccggag.....1  
Gi5\_8666495\_x3.....ucacccaGcagauccggguu.....1  
Gi2\_10781692\_x3.....guucgauucUcggcgccggag.....1  
Gi3\_27961436\_x3.....uucucaccUaacagauccg.....1  
Gi3\_27944390\_x3.....uccggcguCuauaacggcuaga.....1  
Gi5\_8673065\_x3.....ucgauuccggcgccggagcCu.....1  
Gi2\_10765033\_x3.....uucucacccaacagauAcg.....1  
Gi2\_10783159\_x3.....guucgauuccGggcgccgg.....1  
Gi2\_10756783\_x3.....gguucgauAccggcgcc.....1  
Gi3\_27911471\_x3.....gUguucgauuccggcgccggagc.....1  
G1a\_5853619\_x3.....uUcggcguaguauaacggcuaga.....1  
Gi3\_27925910\_x3.....cgauuccUggcgccggagc.....1  
Gi1\_4055982\_x3.....uccggcguagCauaacggcuaga.....1  
Gi5\_8712632\_x3.....guuNgauuccggcgccgg.....1  
Gi2\_10746802\_x3.....gAuucgauuccggcgccgga.....1  
Gi2\_10783765\_x3.....guucgauuccggcgccgU.....1  
Gi1\_4063098\_x3.....gguucgauuccGggcgccgg.....1  
Gi1\_4064547\_x3.....uccgCcguguauaacgg.....1  
Gi2\_10773238\_x3.....uccggcguaguauaacggUuagaau.....1

Gi3\_27884855\_x3.....uucgauUccggcgccggagc..... 1  
 Gi5\_8681225\_x3.....ggcguaguNuaacggcuag..... 1  
 Gi3\_27816380\_x3.....Nccggcguaguuaacggcuaga..... 1  
 Gi1\_4064877\_x3.....ugguucucaccAaacagauccgg..... 1  
 Gi1\_4088190\_x3.....gguucgauucUcggcgccgga..... 1  
 Gi1\_4053543\_x3.....uUcggcguaguuaacggc..... 1  
 Gi2\_10800736\_x3.....gguucCauucccgcgccggag..... 1  
 Gi5\_8653847\_x3.....uCcgauucccgcgccgg..... 1  
 Gi3\_27859106\_x3.....Ucguaguuaacggcuaga..... 1  
 Gi1\_4052016\_x3.....uccggcguaguuaacgAcua..... 1  
 Gi1\_4059102\_x3.....uccggcguaguuaaUgg..... 1  
 Gi2\_10788433\_x3.....ggAucucacccaacagauccg..... 1  
 Gi5\_8699177\_x3.....guuNucacccaacagauccg..... 1  
 Gi5\_8663876\_x3.....uucuUacccaacagauccg..... 1  
 Gi3\_27948005\_x3.....gguucgauucccgGgccggagc..... 1  
 Gi2\_10814320\_x3.....uccggcguaguCuaacggcuagaa..... 1  
 Gi2\_10811437\_x3.....gguucgauucAcggcgccg..... 1  
 Gi3\_27940733\_x3.....gguuAgauucccgcgcc..... 1  
 Gi5\_8706995\_x3.....gguucgauucccgcgcA..... 1  
 Gi1\_4073718\_x3.....gguucgauUccggcgccggagc..... 1  
 Gi3\_27864263\_x3.....gguucgauucccgcgccU..... 1  
 Gi2\_10779472\_x3.....gguucgauucccgcgcAg..... 1  
 Gi1a\_5858230\_x3.....gGucgauucccgcgccgg..... 1  
 Gi5\_8669591\_x3.....gguucgauucccgAgccgg..... 1  
 Gi3\_27959249\_x3.....gguucucacccUacagauccg..... 1  
 Gi2\_10730596\_x3.....gguucgauucccgcgccC..... 1  
 Gi3\_27949622\_x3.....uccggcguaguuaacggcuCaau..... 1  
 Gi5\_8706638\_x3.....uccggcUuaguuaacgg..... 1  
 Gi1\_4064754\_x3.....uccgCcgaguuaaacggcuaga..... 1  
 Gi5\_8689247\_x3.....Aguucucacccaacagauccgggu..... 1  
 Gi2\_10760845\_x3.....uucucacccaUcagauccg..... 1  
 Gi3\_27905309\_x3.....cagauccgNguucgauucc..... 1  
 Gi4\_551532\_x3.....uucucacccaacagauccg..... 0  
 Gi3\_27922640\_x3.....ucgauucccgUgccgga..... 1  
 Gi1\_4082856\_x3.....ccggcguaNuaaacggcuag..... 1  
 Gi3\_27945524\_x3.....guucucacccaacagauccA..... 1  
 Gi5\_8677196\_x3.....ucucacccaacagGuccgggu..... 1  
 Gi2\_10790146\_x3.....gguucgauucccgcgccgAa..... 1  
 Gi3\_27920717\_x3.....ggAucucacccaacagaucc..... 1  
 Gi5\_8694740\_x3.....uucucacccaacagauccA..... 1  
 Gi5\_8706569\_x3.....guucucacccaGcagauccg..... 1  
 Gi5\_8659796\_x3.....uucucacccaacagauccUgg..... 1  
 Gi1\_4064262\_x3.....uccggcguaguuaacggcuGgaa..... 1  
 Gi2\_10762984\_x3.....guucucGcccaacagauccg..... 1  
 Gi3\_27823085\_x3.....uucucacAaacagauccg..... 1  
 Gi4\_548499\_x3.....gguucgauucccgcgcc..... 0  
 Gi3\_27917921\_x3.....ggguucgauucccgcgccgg..... 0

Gi3\_27822023\_x3.....auUcggguucgauucccgcgccgga..... 1  
Gi5\_8702387\_x3.....cucaccaacagaucUgg..... 1  
Gi1\_4077123\_x3.....gguucucacAcaacagauccg..... 1  
G1a\_5837905\_x3.....uccggcguGguauaacggc..... 1  
Gi1\_4054572\_x3.....ucucacccGacagauccgg..... 1  
Gi2\_10794589\_x3.....ucgauucccgcgccgAagc..... 1  
Gi5\_8657960\_x3.....uccggcguaguauaacgCc..... 1  
Gi3\_27911921\_x3.....gguucgauGcccggcgccg..... 1  
Gi1\_4057098\_x3.....uccggcguaguauaacggAuag..... 1  
Gi3\_27978362\_x3.....uccggcguaguauaacCg..... 1  
Gi5\_8691923\_x3.....uccggcguagGauaacggcuag..... 1  
Gi2\_10783561\_x3.....uucucacccCacagauccg..... 1  
Gi3\_27827708\_x3.....guucgUuucccgcgccgg..... 1  
Gi1\_4085040\_x3.....ccggcguaguauaacggcCaga..... 1  
Gi2\_10797733\_x3.....gAuucucacccaacagauccg..... 1  
Gi5\_8701349\_x3.....uccggcguaguauaacggcAagaau..... 1  
Gi2\_10779721\_x3.....uucuUaccaacagauccg..... 1  
Gi3\_27828476\_x3.....Auucucacccaacagauccgg..... 1  
Gi3\_27955472\_x3.....uAcucacccaacagauccgg..... 1  
Gi3\_27905579\_x3.....uccggcguCguauaacggcuagaa..... 1  
Gi5\_8708984\_x3.....Ccgauucccgcgccggagc..... 1  
Gi3\_27947888\_x3.....gguucgauucccgCcgccg..... 1  
Gi2\_10799161\_x3.....uccggcgAaguauaacgg..... 1  
G1a\_5853931\_x3.....guucgGuucccgcgccggagc..... 1  
Gi5\_8669315\_x3.....cccaacagauccggguCc..... 1  
Gi5\_8703035\_x3.....uccggcAuaguauaacggcua..... 1  
G1a\_5843290\_x3.....uccgUcguaguauaacggcuag..... 1  
Gi3\_27849536\_x3.....uccggcguGguauaacggcu..... 1  
Gi1\_4080075\_x3.....uucucCcccaacagauccg..... 1  
Gi1\_4077459\_x3.....ucAggcguaguauaacggcuag..... 1  
Gi5\_8683811\_x3.....gCuucgauucccgcgcc..... 1  
Gi2\_10751776\_x3.....guucgauucccgcgccggU..... 1  
Gi2\_10786429\_x3.....uGgauucccgcgccggag..... 1  
Gi2\_10790641\_x3.....gguucgauUccggcgccg..... 1  
Gi3\_27845336\_x3.....cucaccaacagGuccgg..... 1  
Gi5\_8667017\_x3.....gguucucacccaaUagauccg..... 1  
Gi5\_8692985\_x3.....uccggcguaguauaacggcuaCaau..... 1  
Gi5\_8671748\_x3.....uAcucacccaacagauccg..... 1  
Gi3\_27876740\_x3.....gguAgauucccgcgccgga..... 1  
Gi3\_27881726\_x3.....gguucgauucccgUcgccggag..... 1  
Gi1\_4071663\_x3.....gguucgauucccgcgccUgga..... 1  
G1a\_5875426\_x3.....gguCcgauucccgcgccgg..... 1  
Gi5\_8692454\_x3.....gguucgauucccgUgccggag..... 1  
Gi3\_27841136\_x3.....ggUguaguauaacggcua..... 1  
Gi3\_27837659\_x3.....gguucucacccaacagauAcgg..... 1  
Gi1\_4078875\_x3.....guucucacccaaAagaucgg..... 1  
Gi5\_8709635\_x3.....ugguucucacccaacagGuccg..... 1

Gi5\_8673644\_x3.....gguucgauucccgcgAggag..... 1  
 Gi2\_10813018\_x3.....ccUaacagauccggguuc..... 1  
 Gi1\_4073901\_x3.....uUgauucccgcgccggagc..... 1  
 Gi2\_10784854\_x3.....gguucgauAcccgcgccg..... 1  
 Gi2\_10822495\_x3.....uccggcguaguaGaacggcua..... 1  
 Gi1\_4060665\_x3.....uccggcguCguauaacgg..... 1  
 Gi3\_27909551\_x3.....uucgauuccUggcgccggagc..... 1  
 Gi1\_4057173\_x3.....uccggcguaguaaCcgguaga..... 1  
 Gi5\_8667827\_x3.....ucucaccaacagauccggG..... 1  
 Gi5\_8689922\_x3.....uccggcguagAuaaacggcuagaau..... 1  
 Gi2\_10750684\_x3.....gguucgauucccgAgccgga..... 1  
 G1a\_5829127\_x3.....ucucaccaacagGuccg..... 1  
 Gi5\_8671859\_x3.....uccggcguUuauaacggcuag..... 1  
 Gi3\_27978749\_x3.....uccggcAuaguauaacggcuag..... 1  
 Gi3\_27930038\_x3.....gguucuaUccaacagauccg..... 1  
 Gi2\_10759366\_x3.....gGucucaccaacagauccg..... 1  
 Gi3\_27805592\_x3.....ucNggcguaguauaaacggcua..... 1  
 Gi1\_4074720\_x3.....auccggguucgauucccgcgccAg..... 1  
 Gi3\_27796832\_x3.....guucucaccaacagGuccggg..... 1  
 Gi5\_8672801\_x3.....gguucgauucccgAcgccgg..... 1  
 Gi2\_10744978\_x3.....uccggcguaguCuaaacggcuag..... 1  
 Gi2\_10803289\_x3.....gguucgauucAcggcgccg..... 1  
 Gi3\_27870452\_x3.....gguucgauucccgcgU..... 1  
 Gi3\_27892118\_x3.....guuNgauucccgcgccgg..... 1  
 Gi3\_27857555\_x3.....uccggcguUguauaacggcuag..... 1  
 Gi5\_8698340\_x3.....gguucgauucccgcgccCg..... 1  
 Gi1\_4088958\_x3.....guucuaUccaacagauccg..... 1  
 Gi3\_27963530\_x3.....gguucgauucccgcgCA..... 1  
 Gi3\_27838577\_x3.....uucccgcgccggagcCu..... 1  
 Gi5\_8685113\_x3.....guucgauucccgcgccggaAc..... 1  
 Gi1\_4065225\_x3.....uccggcguaguauaaacggcuUgaa..... 1  
 Gi5\_8693198\_x3.....Agcguaguauaaacggcuaga..... 1  
 Gi1\_4075113\_x3.....caccaacagauccggGucgauucc..... 1  
 Gi3\_27974477\_x3.....gguuUucaccaacagauccg..... 1  
 G1a\_5874976\_x3.....uccggcguaguauaaUggcuag..... 1  
 Gi1\_4071303\_x3.....cucaccaacagauUgg..... 1  
 Gi2\_10776658\_x3.....uGguucucaccaacagauccg..... 1  
 Gi5\_8699609\_x3.....ucgauucccgAcgccgga..... 1  
 Gi5\_8692604\_x3.....cucUcccaacagauccg..... 1  
 Gi2\_10736971\_x3.....gguucgauucccgcgccgC..... 1  
 Gi5\_8661995\_x3.....guucucaccaaGagauccg..... 1  
 Gi3\_27839147\_x3.....ccggcguaguauaaacggcCaga..... 1  
 Gi1\_4076667\_x3.....gguucgauucccgAgccg..... 1  
 Gi2\_10798258\_x3.....gguucgauucccgcgGcg..... 1  
 Gi2\_10759840\_x3.....ucUauucccgcgccggagc..... 1  
 Gi1\_4077711\_x3.....gguucucCcccaacagauccg..... 1  
 Gi2\_10776802\_x3.....guucgauucccgAgccgga..... 1

Gi1\_4054593\_x3.....cucacccGacagauccgg..... 1  
Gi3\_27798860\_x3.....uucucacccaacagauccgg..... 1  
Gi1\_4077942\_x3.....uccggcguaguauUaccggcuaga..... 1  
Gi3\_27836138\_x3.....uucucacccaauUagauccgg..... 1  
G1a\_5836006\_x3.....gguucgauucccggcAccggagc..... 1  
Gi3\_27970415\_x3.....uGcggguucgauucccggcgccgga..... 1  
Gi1\_4065504\_x3.....guucAauucccggcgccg..... 1  
Gi5\_8711294\_x3.....gguucgauucccggcgccAgag..... 1  
Gi3\_27844193\_x3.....ugguucucacccaacagCuccg..... 1  
Gi2\_10767859\_x3.....Nguucgauucccggcgccgagc..... 1  
Gi5\_8665940\_x3.....Gcucacccaacagauccgggu..... 1  
Gi3\_27875945\_x3.....agauccggguCcgauucc..... 1  
Gi3\_27960362\_x3.....uccgCcgaguauaacgg..... 1  
Gi3\_27905078\_x3.....guucucacccUacagauccg..... 1  
Gi5\_8672123\_x3.....gguucgauucccggcgccg..... 1  
Gi5\_8675351\_x3.....gguucgauucccggcgccgga..... 1  
Gi5\_8655155\_x3.....uccggcguaguauaacUgcua..... 1  
Gi2\_10796617\_x3.....guucgauucccggcgccGgg..... 1  
Gi5\_8680883\_x3.....ggcgCaguauaacggcuag..... 1  
G1a\_5855329\_x3.....Aguucgauucccggcgccg..... 1  
Gi3\_27960371\_x3.....guucucGcccaacagauccg..... 1  
G1a\_5872276\_x3.....gguucgaCucccggcgccgagc..... 1  
Gi1\_4073049\_x3.....uucucacccaacaAauccg..... 1  
Gi3\_27813977\_x3.....ucgaCucccggcgccgga..... 1  
Gi3\_27821294\_x3.....uAccggcguaguauaacggcuag..... 1  
Gi1\_4069920\_x3.....guucucacUcaacagauccg..... 1  
Gi3\_27936176\_x3.....gauucccggcAccggagc..... 1  
Gi2\_10795600\_x3.....gguucgauucccggcgccUgag..... 1  
Gi1\_4065120\_x3.....ucucacccNacagauccg..... 1  
Gi2\_10745017\_x3.....gguucgauucccggcgccCgag..... 1  
Gi3\_27978053\_x3.....ccggcguaNuauaacggcuaga..... 1  
Gi1\_4049865\_x3.....uucucacccaacUgaucg..... 1  
Gi1\_4058406\_x3.....guucucacccUacagauccg..... 1  
Gi2\_10754875\_x3.....uccAgcguaguauaacggc..... 1  
Gi1\_4075299\_x3.....gAucucacccaacagauccg..... 1  
Gi1\_4083678\_x3.....uGcggcguaguauaacggcuagaa..... 1  
Gi2\_10779790\_x3.....gguucgauucccggcCccggag..... 1  
Gi3\_27970070\_x3.....uucucacUcaacagauccg..... 1  
Gi2\_10811863\_x3.....uucucacAcaacagauccg..... 1  
Gi1\_4057449\_x3.....gguucgauucccggcgccAgagc..... 1  
Gi5\_8665886\_x3.....Nguucucacccaacagauccg..... 1  
Gi3\_27859094\_x3.....guucucGcccaacagauccg..... 1  
Gi3\_27804281\_x3.....ucucacccaacagGuccg..... 1  
Gi5\_8689874\_x3.....ugguucucacccaacagCuccg..... 1  
Gi3\_27950240\_x3.....aGccggguucgauucccggcgccgga..... 1  
Gi3\_27808544\_x3.....guucucacccaacagaucc..... 1  
Gi3\_27874574\_x3.....uccggcguaguauaacggcAag..... 1

Gi3\_27933464\_x3.....ucgauuccggcgccggagcCu..... 1  
 Gi3\_27925016\_x3.....gguucgauuGccggcgccgga..... 1  
 Gi1\_4055508\_x3.....uccggcguUguauaacggcuagaau.....gguucgauucccgAcgcccgg..... 1  
 Gi5\_8668376\_x3.....uccggcguUguauaacggcuagaau.....gguucgauucccgAcgcccgg..... 1  
 Gi3\_27893876\_x3.....guucucCcccaacagauccg..... 1  
 Gl1a\_5845960\_x3.....gguucgauuccggcgccggagcCu..... 1  
 Gi2\_10816390\_x3.....guuNgauuccggcgccggagc.....gguucgauucccgUgcccga..... 1  
 Gi1\_4076907\_x3.....gguucgauucccgUgcccga..... 1  
 Gi1\_4085181\_x3.....uccggcguaguauGacggcuagaau..... 1  
 Gi2\_10813858\_x3.....ccggcguaguauaacggcuaga..... 0  
 Gi3\_27827657\_x3.....gAucgauuccggcgccg..... 1  
 Gi1\_4057824\_x3.....gguucgauCcccgcgccg..... 1  
 Gi5\_8660549\_x3.....gguucgauuccAggcccgg..... 1  
 Gi3\_27923198\_x3.....uccNgcguaguauaacggc..... 1  
 Gi5\_8709440\_x3.....gguucgauAcccgcgccg..... 1  
 Gi5\_8669642\_x3.....uGcucaccaacagauccggguu..... 1  
 Gi3\_27826490\_x3.....ccggcguaNuauaacggc..... 1  
 Gi1\_4085742\_x3.....gguucUauuccggcgccggagc..... 1  
 Gi5\_8663858\_x3.....gguucgauCcccgcgccgga..... 1  
 Gi2\_10828222\_x3.....gguucgauuccCgcccggga..... 1  
 Gi2\_10749778\_x3.....gguAcgauuccggcgccgga..... 1  
 Gi1\_4071780\_x3.....Cccggcguaguauaacggc..... 1  
 Gi5\_8700323\_x3.....uccUgcguaguauaacggcuaga..... 1  
 Gi3\_27835121\_x3.....uccgauucccgAcgcccggagc..... 1  
 Gi5\_8682932\_x3.....uccggcguaguauaacUgcua..... 1  
 Gi2\_10791523\_x3.....gguucgauuUccggcgccg..... 1  
 Gi1\_4065267\_x3.....uccggcguaguauaacggcAa..... 1  
 Gi1\_4056513\_x3.....uucucaccaacagCuccgg..... 1  
 Gi5\_8698208\_x3.....cucaGccaacagauccgg..... 1  
 Gi3\_27954461\_x3.....gguuAgauuccggcgccg..... 1  
 Gi2\_10726432\_x3.....gguucgauucGccggcgccggagc..... 1  
 Gi5\_8701718\_x3.....Gccggguucgauuccggc..... 1  
 Gi3\_27958253\_x3.....uUgauuccggcgccggag..... 1  
 Gi3\_27804740\_x3.....ugguucucaccaacGgauc..... 1  
 Gi2\_10795651\_x3.....gguucgauuAccggcgccgga..... 1  
 Gi3\_27860786\_x3.....uccggcguaguauaacggcuagaU..... 1  
 Gi5\_8699711\_x3.....uccggcguaguauaacggcuagUau..... 1  
 Gl1a\_5864050\_x3.....Accggcguaguauaacggcuag..... 1  
 Gi1\_4056333\_x3.....gguucgauuccUggcgccg..... 1  
 Gi2\_10765123\_x3.....gguucCauuccggcgccgga..... 1  
 Gi3\_27913328\_x3.....caacagauNcggguucgauucc..... 1  
 Gi5\_8671412\_x3.....ccggguucgauuccggcgccgC..... 1  
 Gi5\_8694449\_x3.....gguucgauuccggcgccCgagc..... 1  
 Gi2\_10817857\_x3.....uccggcgGaguauaacggcuaga..... 1  
 Gi3\_27821048\_x3.....gguucgauucccgUgcccggagc..... 1  
 Gi3\_27884132\_x3.....gguucgauucccgUgcccggagc..... 1  
 Gi5\_8692274\_x3.....uccggcAuaguauaacgg..... 1

Gi5\_8713547\_x3.....guucgauuGccggcgccgg..... 1  
 Gi1\_4074489\_x3.....uccgAcguaguauaacggcuag..... 1  
 Gi5\_8691176\_x3.....uccggcgAaguauaacgg..... 1  
 Gi5\_8695913\_x3.....gguucgauucccgcgccgCa..... 1  
 Gi2\_10801846\_x3.....guucgaAucccgcgccggagc..... 1  
 Gi3\_27974735\_x3.....ugUuucucacccaacagauccg..... 1  
 Gi1\_4049922\_x3.....ucUggcguaguauaacggcu..... 1  
 Gi2\_10790677\_x3.....guucgauucccgGgccggagc..... 1  
 Gi3\_28062282\_x2.....ucucGcccaacagauccgg..... 1  
 Gl1a\_5936950\_x2.....Cguucgauucccgcgccgga..... 1  
 Gi3\_27997186\_x2.....cagauccggguucgauucUc..... 1  
 Gi3\_28063086\_x2.....ucGggcguaguauaacggcuagaau..... 1  
 Gi2\_10992029\_x2.....uccggcguaguaAaacggcuaga..... 1  
 Gi1\_4119445\_x2.....uucgauuccUggcgccg..... 1  
 Gi3\_28184974\_x2.....uccggcguaguauaaAggcuagaau..... 1  
 Gi3\_28155778\_x2.....Uguccggcguaguauaacggcuaga..... 1  
 Gi5\_8741079\_x2.....ggcguaguauaacggcuGga..... 1  
 Gi2\_10990005\_x2.....gguucgauuccGggcgcc..... 1  
 Gi2\_10834057\_x2.....ugguCucacccaacagaucc..... 1  
 Gl1a\_5959402\_x2.....ggCucgauucccgcgccg..... 1  
 Gi1\_4135311\_x2.....gguucgauNcccgcgcc..... 1  
 Gi2\_10949289\_x2.....uucucaccaaUagaucgg..... 1  
 Gi3\_28187862\_x2.....gguucucacccaUcagaucgg..... 1  
 Gi2\_10918135\_x2.....gguucgauucccgcgUcgg..... 1  
 Gi3\_28194308\_x2.....uccggAguaguauaacggcuagaau..... 1  
 Gi1\_4134087\_x2.....uccggcguaguauCacggcuagaa..... 1  
 Gi5\_8737139\_x2.....gguucgauucccgcgccgCagc..... 1  
 Gi5\_8780779\_x2.....ugguucucacccUacagauccg..... 1  
 Gi5\_8743865\_x2.....Aauucccgcgccggagc..... 1  
 Gi2\_10944459\_x2.....agaauugguNggucucacc..... 1  
 Gi5\_8718575\_x2.....gguucgauucccgcgccggagG..... 1  
 Gi2\_10952191\_x2.....gguucgauucccgcgccCg..... 1  
 Gi3\_28118842\_x2.....gguucucaccaaAgaucgg..... 1  
 Gi2\_10969409\_x2.....guuGgauucccgcgccg..... 1  
 Gi1\_4132611\_x2.....ucgGuucccgcgccggagc..... 1  
 Gi5\_8823847\_x2.....acccaacanauccggguucgauucc..... 1  
 Gi5\_8752453\_x2.....ccUgcguaguauaacggcua..... 1  
 Gi2\_10953299\_x2.....ugguucucacccaacGgaucgg..... 1  
 Gl1a\_5978784\_x2.....uccggcguaguauaacggcuaA..... 1  
 Gi3\_28172804\_x2.....guucucacUcaacagauccgg..... 1  
 Gi5\_8795541\_x2.....Nccggcguaguauaacggcuag..... 1  
 Gi5\_8752755\_x2.....Gcggcguaguauaacggcuag..... 1  
 Gi3\_28177260\_x2.....uucUGacccaacagauccgg..... 1  
 Gi2\_10844215\_x2.....uccggcguagCauaacgg..... 1  
 Gi1\_4132637\_x2.....guucucaccaaUagaucgg..... 1  
 Gi2\_10922159\_x2.....gguucucaUccaacagauccg..... 1  
 Gi1\_4107931\_x2.....uucucaUccaacagauccg..... 1



Gi5\_8805879\_x2.....uccggcguaguauaaGgg..... 1  
 Gi5\_8719757\_x2.....gguUgauucccggcgccggagcgu..... 1  
 Gi1\_4124833\_x2.....ucucaAccaacagauccg..... 1  
 Gi2\_10918517\_x2.....uucucacccaGcagauccg..... 1  
 Gi5\_8808217\_x2.....gguucgauucccggcgAcggag..... 1  
 Gi2\_10869777\_x2.....guucgauucGcggcgccggagc..... 1  
 Gi3\_28113092\_x2.....uccggcguaguauaacgAcu..... 1  
 Gi3\_28018856\_x2.....guucgaAuuccggcgccgg..... 1  
 Gi3\_28148246\_x2.....uucucacccaUcagauccg..... 1  
 Gi3\_28134518\_x2.....uccggcguaguauaacggAuagaa..... 1  
 Gi5\_8801251\_x2.....uucccggcgccggagcCu..... 1  
 Gi3\_28130878\_x2.....ucGggcguaguauaacggc..... 1  
 G1a\_5898620\_x2.....gguucgauuccUgcgccggagc..... 1  
 Gi5\_8748173\_x2.....guucCcacccaacagauccgg..... 1  
 Gi1\_4150149\_x2.....gguucucacccaacCgauccg..... 1  
 Gi1\_4143385\_x2.....ucGcacccaacagauccg..... 1  
 Gi5\_8789839\_x2.....cggguucgauucccgUgcc..... 1  
 Gi1\_4147755\_x2.....ggUguaguauaacggcua..... 1  
 Gi3\_28141006\_x2.....ggguCcgauuccggcgccg..... 1  
 Gi1\_4158449\_x2.....gguucgauCcccggcgccgga..... 1  
 Gi3\_28128564\_x2.....uucgauucccggcgccggag..... 0  
 Gi3\_28094734\_x2.....ucacccaanNagauccggguuc..... 1  
 Gi3\_28098530\_x2.....cgauucccggcgccggGg..... 1  
 Gi2\_10905121\_x2.....cgauucccgAcgccggagcguuu..... 1  
 Gi3\_28027990\_x2.....cgauucccggcgccAgag..... 1  
 Gi2\_10835117\_x2.....ucgauCcccggcgccggagc..... 1  
 Gi2\_10901187\_x2.....guucucaccccGacagauccg..... 1  
 Gi1\_4097929\_x2.....guucgauucccgAgccgga..... 1  
 Gi1\_4112899\_x2.....ggcguaguauaGcggcuag..... 1  
 Gi5\_8757139\_x2.....ugguucuUacccaacagauccgg..... 1  
 Gi5\_8753319\_x2.....cUggcguaguauaacggcuag..... 1  
 Gi5\_8767991\_x2.....uucuGacccaacagauccg..... 1  
 Gi1\_4109943\_x2.....gguucucacGcaacagauccg..... 1  
 Gi2\_10926921\_x2.....guucgauucccggcgccCga..... 1  
 G1a\_5911486\_x2.....gguucgauucccggcgccggUgc..... 1  
 Gi2\_10922261\_x2.....uccggcgGaguauaacggcua..... 1  
 G1a\_5920410\_x2.....cguaguauaacggcuaga..... 0  
 Gi2\_10904063\_x2.....gauucccgUgcccggagc..... 1  
 Gi3\_28082596\_x2.....ggAucucacccaacagauccgg..... 1  
 Gi3\_28241752\_x2.....cagauccgAguucgauucc..... 1  
 Gi2\_10830241\_x2.....gguucgauucccggcUcccggag..... 1  
 Gi1\_4121371\_x2.....gguucgauucccggcgccAgag..... 1  
 Gi3\_28048188\_x2.....gguucCauuccggcgccgg..... 1  
 Gi3\_27988624\_x2.....gguucucacccaacGgauccgggu..... 1  
 Gi3\_28220846\_x2.....uucucacccaacagauccggguuc..... 1  
 Gi1\_4147021\_x2.....guucgauucccggcgAg..... 1  
 Gi1\_4135867\_x2.....Cguucgauucccggcgccgga..... 1

Gi3\_28202388\_x2.....uccggcguaguauCacggcuagaa..... 1  
 Gl1a\_5897486\_x2.....uccggcguNguauaacggcuag..... 1  
 Gi2\_10960141\_x2.....uccggcguNguauaacggcuag..... 1  
 Gi2\_10908019\_x2.....uccggcguNguauaacggcuag..... 1  
 Gi2\_10830341\_x2.....uccggcguNguauaacggcuag..... 1  
 Gi4\_556122\_x2.....uccggcguaguGuaacggcu..... 1  
 Gi5\_8819693\_x2.....uccggcguaguGuaacggcu..... 1  
 Gi3\_28034016\_x2.....uccggcguaguGuaacggcu..... 1  
 Gi1\_4151121\_x2.....uccggcguaguGuaacggcu..... 1  
 Gi5\_8829203\_x2.....uccggcguaguGuaacggcuag..... 1  
 Gi5\_8726993\_x2.....uccggcguaguGuaacggcuag..... 1  
 Gi3\_28141704\_x2.....uccggcguaguGuaacggcuag..... 1  
 Gi5\_8798375\_x2.....uccggcguaguGuaacggcuag..... 1  
 Gl1a\_5953700\_x2.....uccggcguaguGuaacggcuag..... 1  
 Gi5\_8774249\_x2.....uccggcguaguGuaacggcuag..... 1  
 Gi5\_8721603\_x2.....uccggcguaguGuaacggcuag..... 1  
 Gi5\_8817405\_x2.....uccggcguaguauaacggcuagaaG..... 1  
 Gi3\_28210346\_x2.....uccggcguaguauaacggcuagaaG..... 1  
 Gi3\_28133342\_x2.....uccggcguaguauaacggcuagaaG..... 1  
 Gi5\_8744545\_x2.....uccggcguaguauaacggcuagaaG..... 1  
 Gi3\_28046310\_x2.....uccggcguaguauaacggcuagaaG..... 1  
 Gi3\_28028268\_x2.....uccggcguaguauaacggcuagaaG..... 1  
 Gi3\_28210084\_x2.....uccggcguaguauaacggcuagaaG..... 1  
 Gi1\_4145445\_x2.....uccggcguaguauaacggcuagaaG..... 1  
 Gi1\_4125299\_x2.....uccggcguaguauaacggcuagaaG..... 1  
 Gi1\_4148397\_x2.....uccggcguaguauaacggcuagaaG..... 1  
 Gi5\_8800855\_x2.....uccggcguaguauaacggcuagaaG..... 1  
 Gi1\_4136671\_x2.....uccggcguaguauaacggcuagaaG..... 1  
 Gi2\_10854593\_x2.....uccggcguaguauaacggcuagaaG..... 1  
 Gi5\_8816703\_x2.....uccggcguaguauaacggcuagaaG..... 1  
 Gi5\_8789587\_x2.....uccggcguaguauaacggcuagaaG..... 1  
 Gi5\_8772157\_x2.....uccggcguaguauaacggcuagaaG..... 1  
 Gi2\_10922609\_x2.....uccggcguaguauaacggcuagaaG..... 1  
 Gi5\_8738045\_x2.....uccggcguaguauaacggcuagaaG..... 1  
 Gi2\_10853421\_x2.....uccggcguaguauaacggcuagaaG..... 0  
 Gl1a\_5977690\_x2.....uccggcguaguauaacggcuagaaG..... 1  
 Gi5\_8788193\_x2.....uccggcguaguauaacggcuagaaG..... 1  
 Gi1\_4134717\_x2.....uccggcguaguauaacggcuagaaG..... 1  
 Gi5\_8761219\_x2.....uccggcguaguauaacggcuagaaG..... 1  
 Gi5\_8748009\_x2.....uccggcguaguauaacggcuagaaG..... 1  
 Gl1a\_5889500\_x2.....uccggcguaguauaacggcuagaaG..... 1  
 Gi2\_10842717\_x2.....uccggcguaguauaacggcuagaaG..... 1  
 Gi5\_8802831\_x2.....uccggcguaguauaacggcuagaaG..... 1  
 Gi3\_28038906\_x2.....uccggcguaguauaacggcuagaaG..... 1  
 Gi1\_4129393\_x2.....uccggcguaguauaacggcuagaaG..... 1  
 Gi2\_10968989\_x2.....uccggcguaguauaacggcuagaaG..... 1  
 Gi1\_4145687\_x2.....uccggcguaguauaacggcuagaaG..... 1

Gi5\_8769155\_x2.....gguucucanccaacagauc..... 1  
Gi4\_555552\_x2.....Uuucgauucccgcgccg..... 1  
Gi1\_4113121\_x2.....uccggcUuaguauaacggcuag..... 1  
Gi3\_28251356\_x2.....cgauCcccggcgccggagc..... 1  
Gi5\_8783157\_x2.....ugguucCcacccaacagauccgg..... 1  
Gi3\_28096924\_x2.....guucgauucAcggcgccg..... 1  
G1a\_5909814\_x2.....gguucgauucccgcgccggc..... 1  
Gi3\_27995030\_x2.....gauuccggcgccgUagc..... 1  
Gi5\_8741773\_x2.....uucgauucccgcgccggagc..... 0  
Gi3\_28057976\_x2.....aucUgguucgauucccgcgccgga..... 1  
Gi3\_28060622\_x2.....Ucggcguaguauaacggc..... 1  
Gi1\_4125845\_x2.....uccggcguauauaacggcua..... 1  
Gi1\_4143625\_x2.....ugguucucacccaaAagaucgg..... 1  
Gi2\_10914825\_x2.....uUgauuccggcgccggag..... 1  
Gi2\_10983297\_x2.....cggcguaguauaacggcuag..... 0  
Gi3\_28024186\_x2.....gguucgauuccUgcgccgg..... 1  
Gi1\_4110413\_x2.....uccggcguCguauaacggcuaga..... 1  
Gi2\_10846363\_x2.....uccggcguaguauaacggAuagaau..... 1  
Gi1\_4138575\_x2.....guucgauucAcggcgccgga..... 1  
Gi2\_10981085\_x2.....guucgauuccggcgccUg..... 1  
Gi5\_8743365\_x2.....ucCcacccaacagauccgg..... 1  
Gi1\_4148939\_x2.....guCcgauuccggcgccgga..... 1  
Gi3\_28056430\_x2.....uucAcacccaacagauccg..... 1  
Gi3\_27993528\_x2.....gguucucacccaacGgaucgg..... 1  
Gi5\_8795831\_x2.....gggCucgauuccggcgccggag..... 1  
Gi3\_28253028\_x2.....ugguucucacccaacagCuccg..... 1  
Gi2\_10927783\_x2.....gguucgauuAccggcgccggag..... 1  
Gi5\_8745705\_x2.....ucGcacccaacagauccg..... 1  
G1a\_5900774\_x2.....ugguucucCcccaacagauccg..... 1  
Gi1\_4115131\_x2.....ggGucucacccaacagaucc..... 1  
Gi3\_28036522\_x2.....guucgauucAcggcgccggag..... 1  
Gi3\_28083252\_x2.....cucacccaCcagauccgg..... 1  
Gi1\_4106883\_x2.....guucgaAuccggcgccgga..... 1  
Gi5\_8789659\_x2.....guucucacccaacagauAcg..... 1  
Gi2\_10858659\_x2.....guGcgauuccggcgccggag..... 1  
Gi2\_10890015\_x2.....guucucacccaCcagauccg..... 1  
Gi3\_27993486\_x2.....uccggcguUguauaacggcuagaa..... 1  
Gi2\_10918679\_x2.....aguccggcguaguauaacAg..... 1  
Gi2\_10990929\_x2.....agauccggguCcgauucc..... 1  
Gi2\_10913593\_x2.....gguucgGuuccggcgcc..... 1  
Gi5\_8779869\_x2.....gUcguaguauaacggcuagaau..... 1  
Gi3\_28241838\_x2.....cGacagauccggguucga..... 1  
Gi3\_28134604\_x2.....uccggcguaguauaacggA..... 1  
Gi5\_8724307\_x2.....gguucgauucccgcgUcggagc..... 1  
G1a\_5965278\_x2.....cagGuuccggguucgauucc..... 1  
Gi3\_28147408\_x2.....guucgauuccggcgccgCag..... 1  
Gi2\_10871971\_x2.....

Gi5\_8718507\_x2.....guucgauuccggcgccggagA..... 1  
 Gi3\_28016178\_x2.....ccaacagauccggguucgauuccggcgccgga..... 0  
 Gi5\_8730235\_x2.....ucgauuccNggcgccggagc..... 1  
 Gi5\_8785991\_x2.....ccggcguaNuuaaacggcua..... 1  
 Gi2\_10885075\_x2.....ccggcguaquauaacggcCa..... 1  
 Gi1\_4148309\_x2.....caGcagauccggguucgauu..... 1  
 Gi3\_28068438\_x2.....Cgguucucacccaacagauccg..... 1  
 Gi1\_4092761\_x2.....uccggcguagCauaacggcuagaau..... 1  
 Gi3\_28201030\_x2.....cggUguaguauaacggcua..... 1  
 Gi2\_10842275\_x2.....uccggcguaquauaaGggcuaga..... 1  
 Gi2\_10959413\_x2.....uucucacGcaacagauccg..... 1  
 Gi5\_8823089\_x2.....uUcggguucgauuccggc..... 1  
 Gi2\_10835159\_x2.....guucucacNcaacagauccg..... 1  
 Gi1\_4143387\_x2.....gguuGgauuccggcgccg..... 1  
 Gi5\_8734655\_x2.....gguucgauuccggcgccgAag..... 1  
 Gi3\_28086048\_x2.....cgauuccggAgccggagc..... 1  
 Gi2\_10858823\_x2.....guucgauucUcggcgccg..... 1  
 Gl1a\_5954188\_x2.....guucgGuuccggcgccg..... 1  
 Gi3\_28152912\_x2.....gguucgauuccCgcgccggag..... 1  
 Gl1a\_5915830\_x2.....gCucucaccaacagauccg..... 1  
 Gi5\_8750825\_x2.....Ucggcguaquauaacggcua..... 1  
 Gi2\_10951235\_x2.....ucgauuccggcgccggagU..... 1  
 Gi3\_28128796\_x2.....cucaccaacagaCccgg..... 1  
 Gi2\_10884795\_x2.....ucgauuccggcgAcggagc..... 1  
 Gi2\_10926639\_x2.....uccggcguaguGuaacggcu..... 1  
 Gi1\_4153405\_x2.....agauccgggCucgauucc..... 1  
 Gi1\_4149689\_x2.....uccggcguUguauaacggcua..... 1  
 Gi3\_28241054\_x2.....uucgauuccggcgccAga..... 1  
 Gi1\_4155703\_x2.....guucgauUccggcgccgga..... 1  
 Gi3\_28076800\_x2.....caccacaacagauccggguCc..... 1  
 Gi1\_4126001\_x2.....ugguucAcaccaacagauccg..... 1  
 Gi1\_4147109\_x2.....cucaccaacagauccgA..... 1  
 Gi5\_8765217\_x2.....guucgauucccgCcgccg..... 1  
 Gi1\_4128275\_x2.....ucAggcguaguauaacggcua..... 1  
 Gi5\_8754843\_x2.....agUuccggguucgauucc..... 1  
 Gi2\_10948143\_x2.....Cgguucgauuccggcgccggagc..... 1  
 Gi4\_558418\_x2.....gguucgauuccggAgccgg..... 1  
 Gi3\_28079716\_x2.....gguucgauuccggcgccGgg..... 1  
 Gi5\_8765215\_x2.....guuNgauccggcgccg..... 1  
 Gi5\_8811325\_x2.....guucgauuccGggcgccg..... 1  
 Gi3\_27992666\_x2.....guucgauuccggcgccggagcAu..... 1  
 Gi1\_4129793\_x2.....gguucgCuuccggcgccggag..... 1  
 Gi5\_8744671\_x2.....guucgauuccggcgAcgga..... 1  
 Gl1a\_5882038\_x2.....Auucgauuccggcgccggagc..... 1  
 Gi1\_4101767\_x2.....uccggAguaguauaacggc..... 1  
 Gl1a\_5930724\_x2.....ggGucgauuccggcgccggagc..... 1  
 Gi2\_10905607\_x2.....ugguGcucaccaacagauccg..... 1

Gi1a\_5954434\_x2.....gGucgauucccgcgccggag..... 1  
Gi3\_28127092\_x2.....uccggcguaguauaacggcA..... 1  
Gi2\_10937331\_x2.....ugguucucacccaacagauccC..... 1  
Gi2\_10888181\_x2.....gguucgUuuccggcgccgga..... 1  
Gi5\_8807415\_x2.....ugguucucaccAaacagauccg..... 1  
Gi3\_28136160\_x2.....guucucacccaacGgauccggg..... 1  
Gi2\_10861727\_x2.....uucucacccaCcagauccgg..... 1  
Gi5\_8764685\_x2.....guucgauAcccgggcgccgga..... 1  
Gi1\_4151535\_x2.....uucuUacccaacagauccgg..... 1  
Gi3\_28224340\_x2.....guucucacccaacagauccgC..... 1  
Gi5\_8804723\_x2.....uucucacccaGcagauccgg..... 1  
Gi5\_8732703\_x2.....gguucgauucccgggcgAgg..... 1  
Gi3\_28033412\_x2.....uccggcguaguauaacggcAagaau..... 1  
Gi1\_4143351\_x2.....uccggcguaAuuaaacggcuag..... 1  
Gi5\_8820837\_x2.....Ucguaguauaacggcuaga..... 1  
Gi3\_28197924\_x2.....ucucaccUaacagauccgg..... 1  
Gi1a\_5877838\_x2.....uCcucacccaacagauccg..... 1  
Gi5\_8731915\_x2.....gguAcucacccaacagauccg..... 1  
Gi3\_28038154\_x2.....caacagauccggUuucga..... 1  
Gi2\_10940653\_x2.....Cucgauucccgggcgccggagc..... 1  
Gi1\_4129407\_x2.....ugguucucacccaacagauccGgg..... 1  
Gi2\_10833051\_x2.....uAcggcguaguauaacggcuaga..... 1  
Gi5\_8798379\_x2.....ucucacccaacaUauccg..... 1  
Gi1\_4153889\_x2.....guucucacGcaacagauccg..... 1  
Gi1\_4128663\_x2.....uccggcguaguauaUcggcua..... 1  
Gi1a\_5919070\_x2.....uccggcguaguGuaacggcuag..... 1  
Gi1\_4123089\_x2.....cucaGccaacagauccgg..... 1  
Gi5\_8826979\_x2.....cggcguGguauaacggcuag..... 1  
Gi3\_28023594\_x2.....Uacccaacagauccggguuc..... 1  
Gi3\_27994084\_x2.....uucgCuuccggcgccgga..... 1  
Gi1\_4141445\_x2.....gguucgUuuccggcgccggagc..... 1  
Gi5\_8750557\_x2.....uuUucacccaacagauccggguu..... 1  
Gi2\_10858231\_x2.....uccgAguucgauuccggcgccgga..... 1  
Gi2\_10883617\_x2.....ggAucgauuccggcgccgg..... 1  
Gi3\_28150320\_x2.....gguucgauuccggcgccggaA..... 1  
Gi3\_28236116\_x2.....uucucacccaacagauAccg..... 1  
Gi3\_28075606\_x2.....ugguucucaccAaacagauccg..... 1  
Gi1\_4157141\_x2.....uccgCcguaguauaacggcuag..... 1  
Gi3\_28012736\_x2.....ggNucgauuccggcgccg..... 1  
Gi1\_4154685\_x2.....uucucacccaaUagauccgg..... 1  
Gi3\_28146306\_x2.....cgauuccggcgccggGgc..... 1  
Gi1\_4093469\_x2.....uccggcguaguauaacggUu..... 1  
Gi2\_10982175\_x2.....Cucgauuccggcgccgg..... 1  
Gi5\_8720941\_x2.....uccggcguaguauaacggcuU..... 1  
Gi3\_28213472\_x2.....guugguucucacccaacagauccgg..... 0  
Gi5\_8784113\_x2.....ugAuucucacccaacagauccg..... 1  
Gi3\_27996894\_x2.....guucucacccaacagaCccgg..... 1

Gi2\_10980227\_x2.....uccggcguaguauaacggcuagaU.....1  
 Gi3\_28181902\_x2.....gguucgauuccggcgccUg.....1  
 Gi3\_28060866\_x2.....ugguucucaccUaacagauccg.....1  
 Gi1\_4112635\_x2.....uucucacccaacagauccCg.....1  
 Gi3\_28096670\_x2.....cuUaccaacagauccggguucgauu.....1  
 Gi5\_8747733\_x2.....Accggcguaguauaacggc.....1  
 Gi5\_8786747\_x2.....uucucacccaacagauccggAuu.....1  
 G1a\_5976028\_x2.....uccggcguaguauaacgAcuag.....1  
 Gi2\_10924103\_x2.....uucgauucNcggcgccggagc.....1  
 Gi2\_10982499\_x2.....Ucguaguauaacggcuagaa.....1  
 Gi1\_4142987\_x2.....ucucacccaCcagauccgg.....1  
 Gi2\_10890847\_x2.....guucgauuccggcgccCgag.....1  
 Gi3\_28251546\_x2.....ugguucucacccaacagauccA.....1  
 Gi3\_28233852\_x2.....gUguucgauuccggcgccg.....1  
 Gi3\_28055514\_x2.....Agcguaguauaacggcuagaau.....1  
 Gi3\_28208094\_x2.....uucucacccaacagauccgggCuc.....1  
 Gi3\_28107384\_x2.....ucgauuccggcCccggagc.....1  
 Gi3\_28053262\_x2.....Cucgauuccggcgccgga.....1  
 Gi3\_28057528\_x2.....uccggAguaguauaacggcu.....1  
 Gi5\_8812831\_x2.....guucgauucccgAcgcccggagc.....1  
 Gi3\_27989860\_x2.....cccaacagNuccggguucgauucc.....1  
 Gi1\_4122639\_x2.....Aguucucacccaacagauccgg.....1  
 Gi2\_10964545\_x2.....gguucucUcccaacagauccg.....1  
 Gi2\_10885251\_x2.....ugguucucacccaacagauccg.....0  
 Gi2\_10967301\_x2.....gguucucacccaacagauccC.....1  
 Gi3\_28247674\_x2.....uucgauuccggcgccgAa.....1  
 Gi3\_28018490\_x2.....guucucacccaacaAauccgg.....1  
 Gi3\_28174612\_x2.....gauuccggcgccggagcCu.....1  
 Gi2\_10850087\_x2.....ccggcguaguauaacggcuag.....0  
 Gi2\_10924427\_x2.....guucgCuuccggcgccg.....1  
 Gi5\_8827803\_x2.....gauuccAgcgcggagc.....1  
 Gi5\_8817329\_x2.....cccaacGgauccggguuc.....1  
 Gi1\_4131383\_x2.....guucgauuccggcgAcggagc.....1  
 Gi1\_4131255\_x2.....uucgauuccggcgccggCgc.....1  
 Gi2\_10896883\_x2.....Nccggcguaguauaacggcuaga.....1  
 Gi1\_4118663\_x2.....gguucgauuccggcAccgga.....1  
 Gi5\_8754887\_x2.....uucgaCuccggcgccgg.....1  
 Gi2\_10984659\_x2.....guucgauuccggcgccggagG.....1  
 Gi5\_8740983\_x2.....uccggAguaguauaacggc.....1  
 Gi5\_8742463\_x2.....ccggcguaguauaacggcCa.....1  
 Gi2\_10840491\_x2.....guucgauuccggAgccggag.....1  
 G1a\_5930474\_x2.....gguucgauuccggcgAc.....1  
 Gi2\_10965115\_x2.....guucucacccaUagauccg.....1  
 Gi3\_28000050\_x2.....guucucaUccaacagauccg.....1  
 Gi3\_28149690\_x2.....uccgCcgaguauaacggcuagaau.....1  
 Gi2\_10865455\_x2.....uAcggcguaguauaacggcuagaa.....1  
 Gi4\_557714\_x2.....guucgauCcccggcgccg.....1

Gi1\_4147393\_x2.....ugguucucUcccaacagauccg..... 1  
Gi2\_10844611\_x2.....uccggcguaguauCacggcuag..... 1  
Gi5\_8770111\_x2.....uccggcguaguauaacggcuag..... .guucUauucccggcgccggagc..... 1  
Gi1\_4137261\_x2.....uccggcguaguauaacggcuag..... 1  
Gi1\_4099341\_x2.....uccggcguaguauaacggcuag..... .gguucgauuccUggcgccgga..... 1  
Gi5\_8746245\_x2.....uccggcguaguauaacggcuag..... .guucucaAccaacagauccg..... 1  
Gi1\_4095373\_x2.....uccggcguaguauaacggcuag..... .ucgauCcccggcgccggagc..... 1  
Gi2\_10978851\_x2.....uccggcguaguauUacggc..... 1  
G1a\_5911344\_x2.....uccggcguaguauaaAggcuag..... 1  
Gi3\_28117744\_x2.....uccggcguaguauaacggcuag..... .ugguucucaUcccaacagauccg..... 1  
Gi2\_10845877\_x2.....uccggcguaguauaaUggcuag..... 1  
Gi5\_8730121\_x2.....uccggcguaguauaacggcuag..... 1  
Gi2\_10851779\_x2.....uccggcguaguauaacggcuag..... .ugguucucacccCacagaucc..... 1  
Gi2\_10928843\_x2.....uccggcguaguauaacggcuag..... .uucgauucccggcgCagg..... 1  
Gi2\_10850305\_x2.....uccggcguaguauaacggcuag..... .guucgaGucccggcgccg..... 1  
G1a\_5918610\_x2.....uccgAcguaguauaacggcuag..... 1  
Gi1\_4123129\_x2.....uccggcguaguauaacggcuag..... .cacccaacNgauccggguucgauucc..... 1  
Gi2\_10975085\_x2.....uccggcguaguauaacggcuag..... .ucgauucccggcgccggG..... 1  
Gi5\_8745417\_x2.....uccggcguaguauaacggcuag..... .gguucgauucccgAcgccc..... 1  
Gi2\_10833539\_x2.....uccggcguaguauaacggcuag..... .guucgauucUcggcgccgga..... 1  
Gi2\_10973049\_x2.....uccggcguaguauaacggcuag..... 1  
Gi5\_8812953\_x2.....uccggcguaguauaacggcuag..... .gaCucccggcgccggagc..... 1  
Gi2\_10911591\_x2.....uccggcguaguauaacggcuag..... .gauucccgUcggcgagc..... 1  
Gi5\_8720847\_x2.....uccggcguaguauaacggcuag..... .ggGucucacccaacagauccgg..... 1  
Gi1\_4140105\_x2.....uccggcguaguauaacggcuag..... .cgauucccggcgccggagcC..... 1  
G1a\_5954946\_x2.....uccggcguaguauaacggcuag..... .gguucgGuucccggcgccgga..... 1  
Gi2\_10872691\_x2.....uccggcguaguauaacggcuag..... 1  
Gi5\_8719451\_x2.....uccggcguaguauaacggcuag..... .gguucgauucccggcgCcgga..... 1  
Gi1\_4092961\_x2.....uccggcguaguauaacggcuag..... 1  
Gi1\_4138259\_x2.....uccggcguaguauaacggcuag..... .gguucgauucccUcggcgccgga..... 1  
Gi3\_28071682\_x2.....uccggcguaguauaacggcuag..... .gguGcgauucccggcgccg..... 1  
Gi3\_28236496\_x2.....uccggcguaguauaacggcuag..... .uucucaccAaacagauccg..... 1  
Gi2\_10853099\_x2.....uccggcguaguauaacggcuag..... .ucgauucccgCcgccggag..... 1  
Gi3\_28051586\_x2.....uccggcguaguauaacggcuag..... .ucgauucccggcgccggaA..... 1  
Gi1\_4096007\_x2.....uccggcguaguauaacggcuag..... .Gcacccaacagauccggguucga..... 1  
Gi1\_4127809\_x2.....uccggcguaguauaacggcuag..... .guucgauucUcggcgccgga..... 1  
Gi3\_28141668\_x2.....uccggcguaguauaacggcuag..... 1  
Gi3\_28228472\_x2.....uccggcguaguauaacggcuag..... .ucAgggcguaguauaacggcuag..... 1  
Gi1\_4108265\_x2.....uccggcguaguauaacggcuag..... .gCuucgauucccggcgccggagc..... 1  
Gi2\_10974063\_x2.....uccggcguaguauaacggcuag..... .uccggguuNgauucccggcgccgga..... 1  
Gi5\_8721245\_x2.....uccggcguaguauaacggcuag..... .uucCcacccaacagauccg..... 1  
Gi2\_10954433\_x2.....uccggcguaguauaacggcuag..... 1  
Gi1\_4116841\_x2.....uccggcguaguauaacggcuag..... .gguucucacccaacaAuuccg..... 1  
Gi5\_8772669\_x2.....uccggcguaguauaacggcuag..... .uucgauucccggcgccggagcC..... 1  
Gi3\_28146416\_x2.....uccggcguaguauaacggcuag..... .gguucgauucccggcgccggagcAu..... 1  
Gi3\_28009626\_x2.....uccggcguaguauaacggcuag..... .uAguucucacccaacagauccg..... 1  
Gi1\_4136617\_x2.....uccggcguaguauaacggcuag..... 1

Gi5\_8824933\_x2.....gguucgauCcccggcgccgg..... 1  
Gi3\_28174380\_x2.....ucgauuccggcAccgga..... 1  
Gi3\_28239860\_x2.....gauccggguucgaCucc..... 1  
Gi3\_28108420\_x2.....cagaucgggCucgauucc..... 1  
Gi3\_28204134\_x2.....ucgauuccggcgccggagU..... 1  
Gi2\_10920215\_x2.....uccggcguaguauaacggcC..... 1  
Gi2\_10950493\_x2.....gguucgauuccggGgccg..... 1  
Gi3\_28249020\_x2.....uucucacccaacagauUcgg..... 1  
Gi4\_554144\_x2.....cGcacccaacagauccggguucg..... 1  
Gi2\_10851903\_x2.....gguAcgauuccggcgccg..... 1  
Gi5\_8777755\_x2.....uccggcguaguauaacAgcuagaa..... 1  
Gi1\_4153353\_x2.....ggGucgauuccggcgccgga..... 1  
Gi2\_10831999\_x2.....guucucacccaGagauccg..... 1  
Gi3\_28112812\_x2.....ccggUguaguauaacggcuag..... 1  
Gi2\_10897681\_x2.....uuUgauuccggcgccggag..... 1  
Gi1\_4089331\_x2.....uUcggcguaguauaacggcuagaa..... 1  
Gi5\_8797229\_x2.....gguucgauuccggcAcc..... 1  
G1a\_5898922\_x2.....uccggcguaguauaGcgg..... 1  
Gi1\_4150551\_x2.....ugguucucaAcacaacagauccg..... 1  
Gi1\_4152215\_x2.....guucucacccaacagUuccg..... 1  
Gi1\_4100873\_x2.....guucgauuccggcAccggagc..... 1  
Gi5\_8795605\_x2.....ugguucucacccaacCgauccg..... 1  
Gi5\_8762963\_x2.....gguucgauuccggcgCagga..... 1  
Gi3\_28008200\_x2.....ccggcguaguauaGcggcuag..... 1  
Gi3\_28173668\_x2.....uucgauuccggcgUcggga..... 1  
Gi3\_28051960\_x2.....gguucgauuccggcgcc..... 1  
Gi2\_10955977\_x2.....uucgaCuccggcgccgga..... 1  
Gi1\_4090145\_x2.....uccgAcguaguauaacggcuaga..... 1  
Gi5\_8766853\_x2.....guucucacccUacagauccg..... 1  
Gi3\_28139806\_x2.....Gacagauccggguucgauuccggcgccgga..... 1  
Gi3\_28067814\_x2.....gguucgauuccggcgGcggag..... 1  
G1a\_5917286\_x2.....uccggcguaguauaacggGuagaa..... 1  
Gi5\_8822941\_x2.....Acggcguaguauaacggcuag..... 1  
Gi1\_4103481\_x2.....gguucgauuccggcgU..... 1  
Gi1\_4124243\_x2.....ccggcguaNuaaacggc..... 1  
Gi2\_10846981\_x2.....ucgauuccggcAccggagc..... 1  
Gi1\_4122019\_x2.....uucgauuccggcgccgga..... 0  
Gi2\_10878373\_x2.....guGcucacccaacagauccg..... 1  
Gi2\_10832883\_x2.....guucgauGccggcgccg..... 1  
Gi1\_4092259\_x2.....uccAgcguaguauaacggcu..... 1  
Gi1\_4138577\_x2.....guucgauuccUggcgccgga..... 1  
Gi1\_4156275\_x2.....ucacccaacagaCccgggu..... 1  
Gi3\_27984986\_x2.....agaucggguucAauucc..... 1  
Gi2\_10938311\_x2.....uAcucacccaacagauccg..... 1  
Gi2\_10882565\_x2.....gauuccggcgUggagc..... 1  
Gi1\_4091359\_x2.....Cuucgauuccggcgccggagc..... 1  
Gi5\_8738783\_x2.....uccggcguaguauaacggcuCgaau..... 1



Gi2\_10889625\_x2.....uccggcguagCauaacggcu..... 1  
 Gi5\_8806185\_x2.....ucucaccUaacagauccgg..... 1  
 Gi2\_10914271\_x2.....uGguucucacccaacagaucc..... 1  
 Gi4\_560504\_x2.....gguCcgauucccggcgcggagc..... 1  
 Gi2\_10991491\_x2.....gguuAgauucccggcgcg..... 1  
 Gi5\_8724119\_x2.....Nguucgauucccggcgcggagc..... 1  
 Gi3\_28255850\_x2.....uccggcgGaguauaacggc..... 1  
 Gi5\_8813375\_x2.....uUucacccaacagauccg..... 1  
 Gi3\_28229644\_x2.....cgauucccggcgcggagcCu..... 1  
 Gl1a\_5928082\_x2.....uccAgcguaguauaacggcuaga..... 1  
 Gi2\_10847569\_x2.....guucucaccAaacagauccg..... 1  
 Gi3\_28203820\_x2.....cgauucccggcgcGggagc..... 1  
 Gi3\_28132424\_x2.....gauccggguucgGuucc..... 1  
 Gi2\_10949321\_x2.....uucucacccaacagauccAg..... 1  
 Gi3\_28016184\_x2.....Nguucgauucccggcgcggga..... 1  
 Gi2\_10906983\_x2.....gguucgauucccggcUcc..... 1  
 Gi2\_10889355\_x2.....uccggcguaguauaUcggc..... 1  
 Gi1\_4103711\_x2.....uccggcguaguauaacGgcua..... 1  
 Gi1\_4104675\_x2.....gguucgauucccggcgcggCg..... 1  
 Gi3\_28097608\_x2.....Ucguaguauaacggcuagaa..... 1  
 Gi5\_8758435\_x2.....uucucaUccaacagauccgg..... 1  
 Gi5\_8745639\_x2.....gguucgauucccggcgcGggagc..... 1  
 Gi5\_8763973\_x2.....gguucgauucccggcgcggagcAu..... 1  
 Gi1\_4126973\_x2.....uucucacccaacagauGcgg..... 1  
 Gi5\_8770651\_x2.....guucgauucccggcgcggAagc..... 1  
 Gi2\_10973301\_x2.....guucgauucccggcgcGg..... 1  
 Gi3\_28112010\_x2.....ucCcacccaacagauccgg..... 1  
 Gi4\_559956\_x2.....guucgauucccggcgcUcgg..... 1  
 Gi3\_28229662\_x2.....uccggcguaguauaacgU..... 1  
 Gi1\_4133185\_x2.....gUcguaguauaacggcuagaau..... 1  
 Gl1a\_5881486\_x2.....uGcggcguaguauaacggcu..... 1  
 Gi2\_10932017\_x2.....cucacccaacGgauccgg..... 1  
 Gi3\_28204358\_x2.....cgaCucccggcgcggagc..... 1  
 Gi1\_4158569\_x2.....uccggcguaguauaaAggcua..... 1  
 Gi1\_4149059\_x2.....uccgAcguaguauaacggcuagaau..... 1  
 Gi3\_28174226\_x2.....gauucccggcgcggAagc..... 1  
 Gi2\_10864803\_x2.....uccggcguCguauaacggcuag..... 1  
 Gi2\_10962979\_x2.....ugguucucacccaacagauUg..... 1  
 Gi5\_8747675\_x2.....gguucgauucAcgggcgg..... 1  
 Gi1\_4118757\_x2.....Cucgauucccggcgcggagc..... 1  
 Gi3\_28246232\_x2.....ugAuucucacccaacagau..... 1  
 Gi2\_10865509\_x2.....cggcguaguauaGcggcua..... 1  
 Gi3\_28207296\_x2.....gguNcgauucccggcgcggag..... 1  
 Gi2\_10977773\_x2.....aguccggcguaguGuaacgg..... 1  
 Gl1a\_5896606\_x2.....guucucacccaGcagauccg..... 1  
 Gi4\_562044\_x2.....ggCucgauucccggcgcgg..... 1  
 Gi3\_28149672\_x2.....gggGucgauucccggcgcgg..... 1

Gi3\_28102078\_x2.....uccggcguaguauaacggcuCgaau.....Uccaacagauccggguuc.....1  
Gi2\_10947541\_x2.....Uccaacagauccggguuc.....1  
Gi5\_8756105\_x2.....Uauccggguucgauuccggcgccgga.....1  
Gi3\_28194068\_x2.....ucgauuccggcgAcggagc.....1  
Gi1\_4153575\_x2.....ucgauuccggcgccggCgc.....1  
Gi5\_8777695\_x2.....gguucgauuccGggcgccg.....1  
Gi5\_8739661\_x2.....uccggcguaguauaaGggcua.....1  
Gi1\_4156505\_x2.....uccggcguaguauaacggcuagaG.....1  
Gi5\_8780981\_x2.....gguucgauuccggcgGcgg.....1  
Gi2\_10930853\_x2.....uuUucacccaacagauccggguucg.....1  
Gi4\_560328\_x2.....cuUaccaacagauccggguucg.....1  
Gi2\_10932327\_x2.....guuUucacccaacagauccg.....1  
Gi5\_8732521\_x2.....uccggguucgGuucccgcc.....1  
Gi3\_28082106\_x2.....ccggcguaguauaacggU.....1  
Gi3\_28230940\_x2.....ucgauucccgCcgccggagc.....1  
Gi2\_10963211\_x2.....ucGggcguaguauaacggcua.....1  
Gi2\_10961799\_x2.....uAcggcguaguauaacggc.....1  
Gi3\_27985310\_x2.....uccggcguaguauaacggcC.....1  
Gi5\_8799665\_x2.....aguccggcguaguGuaacggcuagaugg.....1  
Gi1\_4153439\_x2.....gguucgauucccgAcgcccga.....1  
G1a\_5885892\_x2.....uccAgcguaguauaacggcuag.....1  
Gi3\_28212010\_x2.....Uguccggcguaguauaacggcuagaa.....1  
Gi3\_28073120\_x2.....uccggguucgauucccgAcgcccga.....1  
Gi3\_28239388\_x2.....gCucucacccaacagauccg.....1  
Gi3\_28014692\_x2.....cacccaacNgauccggguuc.....1  
Gi4\_562006\_x2.....ucUggcguaguauaacggcuaga.....1  
Gi5\_8799585\_x2.....uuUguucucacccaacagauccg.....1  
Gi3\_28178876\_x2.....cAcacccaacagauccg.....1  
Gi5\_8746429\_x2.....cucacccaacagauUcgg.....1  
Gi5\_8774521\_x2.....gguucucaccGaacagauccg.....1  
Gi1\_4148421\_x2.....uccggcguaguauaacgUc.....1  
Gi1\_4152773\_x2.....gguucucacccaacagaAccg.....1  
Gi5\_8808483\_x2.....gguucgaGuuccggcgccg.....1  
Gi1\_4145883\_x2.....uucucacGcaacagauccg.....1  
Gi1\_4150117\_x2.....uccggcguaguauaacggcuagGa.....1  
G1a\_5929114\_x2.....gguucgauucccAgcgcggag.....1  
Gi2\_10946935\_x2.....uccggcgCaguauaacggcuagaau.....1  
Gi1\_4139401\_x2.....aCuccggcguaguauaacggcuag.....1  
Gi2\_10981491\_x2.....Gggcguaguauaacggcua.....1  
Gi1\_4129347\_x2.....ucCcacccaacagauccg.....1  
Gi1\_4114789\_x2.....gguuUgauuccggcgccggagc.....1  
Gi5\_8741619\_x2.....uGucacccaacagauccgg.....1  
Gi3\_28041284\_x2.....cgauuccggcgccggaAc.....1  
Gi1\_4152189\_x2.....gguucgauucccUgcgccc.....1  
Gi3\_28243286\_x2.....ucgauuccggcgCAgga.....1  
Gi1\_4118767\_x2.....ucAggcguaguauaacggcuaga.....1  
Gi3\_28056046\_x2.....guucucacGcaacagauccg.....1

Gi5\_8782019\_x2.....gguucAauucccgcgccggag..... 1  
Gi3\_28019352\_x2.....ccggcguaguauGacggcuaga..... 1  
G1a\_5889684\_x2.....Accggcguaguauaacggcuaga..... 1  
Gi2\_10980179\_x2.....gguucucacccaacCgauccg..... 1  
Gi5\_8728071\_x2.....uccNgcguaguauaacgg..... 1  
Gi3\_28187008\_x2.....Gcggcguaguauaacggcuaga..... 1  
Gi3\_28177218\_x2.....ccggcguaguauCacggc..... 1  
Gi2\_10948229\_x2.....auucccgcgccggagcgA..... 1  
Gi2\_10857755\_x2.....uccggcguaguaGaacggcuag..... 1  
Gi5\_8774561\_x2.....gguucgauNcccgcgccggagcgu..... 1  
Gi2\_10925471\_x2.....gguucgauucccgcgccCga..... 1  
G1a\_5943254\_x2.....ucucacccNacagauccg..... 1  
Gi2\_10980637\_x2.....uccggguucgauucccggc..... 0  
Gi1\_4135515\_x2.....uccggcguaguauaacggcuC..... 1  
Gi3\_28007004\_x2.....uUucacccaacagauccg..... 1  
Gi5\_8723713\_x2.....gUuucccgcgccggagc..... 1  
Gi3\_28119816\_x2.....Cucgauucccgcgccggagc..... 1  
Gi1\_4128047\_x2.....uAcggcguaguauaacgg..... 1  
Gi5\_8768605\_x2.....uccggcguaguauaacggcuaga..... 1  
Gi5\_8759301\_x2.....guucgauucccUgcgccc..... 1  
G1a\_5936410\_x2.....uccggcguaguCuaacggcuag..... 1  
Gi3\_28013498\_x2.....uccggcguaguauaacggGua..... 1  
Gi3\_28169190\_x2.....uuUgauucccgcgccgga..... 1  
Gi5\_8726267\_x2.....cggcguaguauaacggcuagC..... 1  
Gi3\_28006938\_x2.....cAgguucgauucccgcgccgga..... 1  
Gi2\_10948995\_x2.....uccggcguUguauaacgg..... 1  
Gi1\_4114517\_x2.....gAucgauucccgcgccggagc..... 1  
Gi1\_4123151\_x2.....uccggcguaguUuaacggc..... 1  
Gi5\_8803327\_x2.....agaucUggguucgauuccc..... 1  
Gi5\_8755189\_x2.....Aucucacccaacagauccg..... 1  
Gi5\_8763795\_x2.....gguucgauucccgAcgcc..... 1  
Gi2\_10922353\_x2.....cgauucccgcgccggag..... 0  
G1a\_5891236\_x2.....uccggcguaguauaacggcuag..... 1  
Gi1\_4109933\_x2.....uccUgcguaguauaacggcuaga..... 1  
Gi2\_10982563\_x2.....ugguuUucacccaacagauccg..... 1  
Gi2\_10859403\_x2.....uuUucacccaacagauccg..... 1  
Gi3\_28154844\_x2.....cggguucgauucccAgcgccgga..... 1  
Gi1\_4112609\_x2.....gguucgauucccgcgUcggagc..... 1  
Gi2\_10835087\_x2.....uccggcguaguauGacggcuag..... 1  
Gi5\_8738131\_x2.....ucucacccaacagCuccg..... 1  
Gi5\_8766929\_x2.....cagaucggggGucgauucccgcgccc..... 1  
Gi5\_8808605\_x2.....ucacAaacagauccggguu..... 1  
Gi1\_4150583\_x2.....guucgauucccgAcgcccga..... 1  
Gi2\_10886109\_x2.....uucucacccUacagauccg..... 1  
Gi3\_28149006\_x2.....Aucacccaacagauccg..... 1  
Gi5\_8746535\_x2.....guucucaUcacaacagauccg..... 1  
Gi5\_8762007\_x2.....uccggcguaguaAaacggcuagaau..... 1

Gi3\_28236100\_x2.....caacagauccggguucAauucc..... 1  
 Gi1\_4094725\_x2.....guucucacccaacagauGcg..... 1  
 Gi2\_10849895\_x2.....agauccggNuucgauucc..... 1  
 Gi3\_28168954\_x2.....agauccggguucgauCccc..... 1  
 Gi3\_28151816\_x2.....guucucacccaacagauAcggg..... 1  
 Gi5\_8792971\_x2.....ccggcguCguauaacggcuaga..... 1  
 Gi1\_4118337\_x2.....caUccaacagauccggguucgauucc..... 1  
 Gi5\_8774441\_x2.....uugguucucacccaCcagauccg..... 1  
 Gi3\_28019476\_x2.....aguccggcguaguauaacA..... 1  
 Gi1\_4120567\_x2.....guucgauucccggcAgga..... 1  
 Gi1\_4091015\_x2.....uccggcguAuuuacgg..... 1  
 Gi5\_8753995\_x2.....guucgauucccgCcgccgg..... 1  
 Gi2\_10868131\_x2.....uccggcguagGauaacggcua..... 1  
 Gi5\_8802339\_x2.....uccggcguaguauaacggUuagaa..... 1  
 Gi3\_28229778\_x2.....gggGucgauuccggcgccggagc..... 1  
 G1a\_5949928\_x2.....uccggcguaguUuuacggcuag..... 1  
 Gi3\_27989022\_x2.....uccggcguaguauaacggcuagUau..... 1  
 Gi4\_564836\_x2.....gguucgauucccggcCcgCgc..... 1  
 Gi3\_28070692\_x2.....cggcguaguauaacggcua..... 0  
 G1a\_5953910\_x2.....Cccggcguaguauaacggcuag..... 1  
 Gi2\_10952571\_x2.....guucgauuccggcgccggaUc..... 1  
 Gi2\_10836725\_x2.....gauucccgNcgccggagc..... 1  
 Gi3\_28144720\_x2.....cucacccaacagauUgg..... 1  
 Gi3\_28134252\_x2.....uucucacccCacagauccg..... 1  
 Gi5\_8827813\_x2.....Gcggcguaguauaacggcuagaau..... 1  
 G1a\_5925080\_x2.....gguucgauucccAgcgccggagc..... 1  
 G1a\_5921894\_x2.....uccggcguaguauaacggcuagGa..... 1  
 Gi1\_4105501\_x2.....uccggcguNguauaacggc..... 1  
 Gi5\_8720173\_x2.....gguucucacccUacagauccg..... 1  
 Gi2\_10957595\_x2.....uccggcAuaguauaacggcuagaau..... 1  
 Gi1\_4103171\_x2.....uccggcguaguauaacggAuaga..... 1  
 Gi4\_565016\_x2.....cucacccaNcagauccggguucg..... 1  
 Gi3\_28146482\_x2.....guucgauucccUgcgccg..... 1  
 Gi1\_4107505\_x2.....guucAcacccaacagauccgg..... 1  
 Gi1\_4124623\_x2.....cucacccaacagUuccgg..... 1  
 Gi3\_28001188\_x2.....gguucuAacccaacagauccg..... 1  
 Gi3\_28187554\_x2.....ccggcguaguauaacAgc..... 1  
 Gi1\_4157677\_x2.....guucucacccaacagauccU..... 1  
 Gi5\_8743487\_x2.....uccggcgCaguauaacggcuagaa..... 1  
 Gi1\_4109713\_x2.....uucucUccaacagauccgg..... 1  
 Gi2\_10893647\_x2.....gguucgaAuuccggcgccgga..... 1  
 Gi3\_27983194\_x2.....uucucCcccaacagauccgg..... 1  
 Gi3\_28040690\_x2.....uucucacccaaUagauccg..... 1  
 Gi3\_28086514\_x2.....cagauccggguucgauCccc..... 1  
 Gi5\_8795627\_x2.....caacagauccggguucgauucccgccggagc..... 0  
 Gi1\_4155657\_x2.....uccggcguaguauaacCgcuag..... 1  
 Gi3\_28216684\_x2.....gguucucacccaCcagauccgggu..... 1

Gi5\_8782065\_x2.....uucgauucccgcgccggagcCu..... 1  
 Gi2\_10947365\_x2.....guucgauuAccggcgccggag..... 1  
 Gi3\_28200768\_x2.....gguucucacccaacagGucc..... 1  
 Gi4\_566220\_x2.....Uguucucacccaacagauccg..... 1  
 Gi1\_4107727\_x2.....gguucucacccaacagauccC..... 1  
 Gi1\_4101425\_x2.....gguucgauucccgcgGcgg..... 1  
 Gi5\_8739787\_x2.....guuGgauucccgcgccgg..... 1  
 Gi2\_10886261\_x2.....guucucaccccacagauccg..... 1  
 Gi1\_4134587\_x2.....guucgauucccgcgccUga..... 1  
 Gi1\_4117525\_x2.....ucuUacccaacagauccg..... 1  
 Gi2\_10858965\_x2.....uccggcguaguauGacgg..... 1  
 Gi1\_4123745\_x2.....uccggcguaguUuaacggcuag..... 1  
 Gi2\_10868905\_x2.....gguucgauucccgcgccggU..... 1  
 Gi3\_28236300\_x2.....Guccggguucgauucccgcgccggagc..... 1  
 Gi1\_4103203\_x2.....gGugguucucacccaacagauccgggu..... 1  
 Gi5\_8828365\_x2.....uGucacccaacagauccgggu..... 1  
 Gi3\_28150738\_x2.....guuAgauucccgcgccggag..... 1  
 Gi1\_4106429\_x2.....Aucacccaacagauccg..... 1  
 Gi3\_28035968\_x2.....ccggcguaguauCaacggc..... 1  
 Gi1\_4089595\_x2.....Accggcguaguauaacggcuag..... 1  
 Gi1\_4101697\_x2.....uccggcAuaguauaacggcuaga..... 1  
 Gi2\_10919851\_x2.....gauucccgcgccggagcCu..... 1  
 Gi1\_4150379\_x2.....ugAuucucacccaacagauccg..... 1  
 Gi1\_4147955\_x2.....uccggcguaguauaGcggcu..... 1  
 Gi5\_8798343\_x2.....gguucgauuUccggcgccgga..... 1  
 Gi1\_4100969\_x2.....gguucuUacccaacagauccg..... 1  
 Gi3\_28240662\_x2.....gguNcgauucccgcgccgg..... 1  
 Gi2\_10929383\_x2.....uccggcguaguauUacggcuag..... 1  
 Gi5\_8766899\_x2.....gCucgauucccgcgccggag..... 1  
 Gi1\_4155083\_x2.....ucucacccaacCgauccg..... 1  
 Gi3\_28113126\_x2.....ggUguaguauaacggcuaga..... 1  
 Gi1\_4095171\_x2.....gguucgauuccUggcgccggagc..... 1  
 Gi2\_10925909\_x2.....agAccggcguaguauaacgg..... 1  
 Gi1\_4132839\_x2.....uccggAguaguauaacggcuagaau..... 1  
 Gi5\_8754285\_x2.....gguucgauucccgGgccg..... 1  
 Gl1\_5927864\_x2.....ucAggcguaguauaacggcuag..... 1  
 Gi4\_553470\_x2.....guucgauucccgcgccAg..... 1  
 Gi3\_28096882\_x2.....guucgauucccgcgccUgag..... 1  
 Gi3\_28016028\_x2.....uccggcguaguauaacggUuagaa..... 1  
 Gi2\_10943205\_x2.....uccgAcguaguauaacggcuag..... 1  
 Gl1\_5894674\_x2.....gguucgauucccgcgUc..... 1  
 Gi5\_8826953\_x2.....uGgauucccgcgccggagc..... 1  
 Gl1\_5918792\_x2.....Ggguucucacccaacagauccg..... 1  
 Gi3\_28133844\_x2.....gNucgauucccgcgccggagc..... 1  
 Gi1\_4105631\_x2.....uucNacccaacagauccg..... 1  
 Gi1\_4151033\_x2.....uccggcguaguauaacgUcuaga..... 1  
 Gi3\_28027372\_x2.....ucucacccaacGgauccg..... 1

Gi2\_10941671\_x2.....cggcguaguauaGcggcuaga.....1  
Gi5\_8746507\_x2.....guucgauucccggcCccggagc.....1  
G1a\_5931608\_x2.....uccggUguaguauaacggcuaga.....1  
Gi2\_10988729\_x2.....cgauUccggcgccggagcguuuc.....1  
Gi3\_28157448\_x2.....guucucacccaacagauAgg.....1  
Gi2\_10873443\_x2.....gguucgUuuccggcgccg.....1  
Gi2\_10929055\_x2.....guucgauucccggcgAcggag.....1  
Gi5\_8731359\_x2.....gguucgauucccggcgccC.....1  
Gi5\_8785053\_x2.....gguUggauucccggcgccgga.....1  
Gi3\_28077204\_x2.....uccggcguaguaGaacggcuagaa.....1  
G1i\_4118673\_x2.....uccggcguaguauaUcggcuagaa.....1  
Gi3\_28051810\_x2.....gguucgauucccggcgccUga.....1  
Gi3\_28001584\_x2.....Gucaccaacagauccggguucgauu.....1  
G1i\_4107657\_x2.....ugguucucacccUacagauccg.....1  
Gi5\_8820787\_x2.....gguucgauucccggcgUcggag.....1  
Gi2\_10930911\_x2.....uccggcguaguauaacggcG.....1  
Gi3\_28218068\_x2.....gguucgaAuuccggcgccgg.....1  
Gi5\_8728773\_x2.....guucgauucccggcgGgg.....1  
G1i\_4114805\_x2.....Ccucaccaacagauccg.....1  
Gi3\_28040844\_x2.....ucgauucccggcgccggaAc.....1  
Gi2\_10852143\_x2.....cgauucccggcgccggGgcuuu.....1  
G1i\_4151559\_x2.....uccggcguaguauaacggcuCga.....1  
G1i\_4118677\_x2.....guucgauucccgUcggcg.....1  
Gi5\_8757575\_x2.....gguucgauucccUgcgcggag.....1  
Gi5\_8772665\_x2.....agaucggguucgCuuccc.....1  
Gi5\_8807219\_x2.....uucucacGcaacagauccg.....1  
Gi2\_10988189\_x2.....guucucacccaacaAaucg.....1  
Gi5\_8759113\_x2.....cUauucccggcgccggagcguuuc.....1  
Gi3\_28254678\_x2.....Ugauucccggcgccggagc.....1  
Gi3\_28026106\_x2.....Cgauccggguucgauuccc.....1  
Gi3\_28161772\_x2.....gguucucacccaacagauccgggC.....1  
Gi4\_564000\_x2.....gCucgauucccggcgccgga.....1  
G1i\_4123847\_x2.....Gaacagauccggguucgauucccggc.....1  
Gi3\_28023314\_x2.....Nccggcguaguauaacggcuag.....1  
Gi3\_28198142\_x2.....uucgauucccggGgccgga.....1  
Gi3\_28088832\_x2.....gcguaguauaacggcuGga.....1  
Gi3\_28170350\_x2.....uccggAguaguauaacggcuag.....1  
Gi2\_10857619\_x2.....uccggcguaguUaacggcuag.....1  
G1i\_4140307\_x2.....guucgauucccgAcggcg.....1  
Gi5\_8735137\_x2.....guucgauucccggcAccggagc.....1  
Gi3\_28177132\_x2.....cggcguaguauaacggcuGga.....1  
Gi3\_28242240\_x2.....guucuAacccaacagauccgg.....1  
Gi3\_28211802\_x2.....aucggguucgauucccggcg.....0  
Gi3\_28013354\_x2.....uucgauucccAgcgccgga.....1  
Gi2\_10933207\_x2.....ugguucucaccUaacagaucc.....1  
Gi5\_8747139\_x2.....uucucacccaacGgauccggguuc.....1  
Gi3\_28062226\_x2.....guucgauucccggcgCcgag.....1

Gi2\_10981691\_x2.....uccggcguaguaGaacggcuaga..... 1  
Gi3\_28114184\_x2.....cagaucggguucgauuUcc..... 1  
Gi1\_4107127\_x2.....Gccggguucgauuccggcgccgga..... 1  
Gi3\_28133550\_x2.....uucucacccaacCgaucgg..... 1  
Gi3\_28170812\_x2.....uucucacGcaacagauccgg..... 1  
Gi3\_28250398\_x2.....uccggcguaguauaacCgcua..... 1  
Gi3\_28145154\_x2.....cgguucgGuuccggcgccgga..... 1  
Gi1\_4139763\_x2.....uccggcguaguaaaaAggcuag..... 1  
Gi1\_4143113\_x2.....uucgauucNcggcgccggagc..... 1  
Gi2\_10908611\_x2.....uucucacccaacagauAg..... 1  
Gi2\_10847113\_x2.....Gguucucacccaacagaucc..... 1  
Gi1\_4137099\_x2.....ucucGcccaacagauccgg..... 1  
Gi5\_8811289\_x2.....uccggcguaguauaUcggc..... 1  
Gi5\_8728743\_x2.....uucucacccaacaAauccg..... 1  
Gi3\_28005272\_x2.....guucgauuccggcUccgg..... 1  
G1a\_5889316\_x2.....guucgaCuuccggcgccgg..... 1  
Gi1\_4119473\_x2.....gguuUucacccaacagauccg..... 1  
G1a\_5955404\_x2.....uucgGuuccggcgccggagc..... 1  
Gi1\_4133331\_x2.....uccggcguaguaaaacggcAaga..... 1  
Gi3\_28189706\_x2.....guucucGcccaacagauccgg..... 1  
Gi5\_8787061\_x2.....ggcguaguauacggcuaga..... 1  
G1a\_5941946\_x2.....uGcggcguaguauaacgg..... 1  
Gi3\_28058190\_x2.....gguucucCcccaacagauccg..... 1  
Gi5\_8743151\_x2.....uccggcguagGauaacggc..... 1  
Gi3\_28226266\_x2.....uccggcgAaguaaacggcuag..... 1  
Gi1\_4128245\_x2.....uggAucucacccaacagauccg..... 1  
Gi1\_4133053\_x2.....ggGucgauuccggcgccg..... 1  
Gi3\_28130614\_x2.....agaucggguucgCuucc..... 1  
Gi3\_28190458\_x2.....guucgauuccggcgccgGgg..... 1  
Gi2\_10905079\_x2.....uucucacccaacagauGcg..... 1  
Gi1\_4134357\_x2.....guucucCcccaacagauccg..... 1  
Gi3\_28257636\_x2.....guuNgauuccggcgccg..... 1  
G1a\_5904370\_x2.....gCucgauuccggcgccg..... 1  
Gi5\_8789299\_x2.....guucCauuccggcgccg..... 1  
Gi5\_8722591\_x2.....ucgauuccggcgccggCgc..... 1  
G1a\_5885002\_x2.....ggAucgauuccggcgccggagc..... 1  
Gi3\_28226426\_x2.....uucgauuccggcgGcgga..... 1  
Gi3\_28184814\_x2.....uccggcguagGauaacggcua..... 1  
Gi5\_8801793\_x2.....ggCucgauuccggcgccggagcguu..... 1  
Gi5\_8818071\_x2.....uccggcguaguaaaacggcuagaGugguu..... 1  
Gi3\_28053326\_x2.....gguucgauucccgCcgccgga..... 1  
Gi3\_28137472\_x2.....cUggcguaguaaaacggcuaga..... 1  
Gi2\_10897907\_x2.....ucGggcguaguaaaacggcuaga..... 1  
Gi3\_27995408\_x2.....ucGggcguaguaaaacggcuagaa..... 1  
Gi5\_8760729\_x2.....uccggcguaguaaaacggUua..... 1  
Gi1\_4111627\_x2.....gguucgauucccgUgccc..... 1  
Gi2\_10856589\_x2.....cgauuccggcgccggagcgCuuc..... 1

Gi3\_28238266\_x2.....ucNggcguaguauaacgg.....1  
Gi1\_4142627\_x2.....gguucgauuccAgcgccgga.....1  
Gi5\_8814999\_x2.....uAcggcguaguauaacggcuag.....1  
G1a\_5939924\_x2.....uccggcguaguauGacggcuaga.....1  
Gi3\_28233518\_x2.....ucucacccaacagCuccg.....1  
Gi2\_10984877\_x2.....cccaacGgaucggguuc.....1  
G1a\_5938360\_x2.....gguNcgauuccggcgccg.....1  
G1a\_5966336\_x2.....gguucgauuccggcgccAgagc.....1  
Gi3\_28140802\_x2.....gguucCauuccggcgccgga.....1  
Gi3\_28185408\_x2.....uucgauucUcggcgccg.....1  
Gi5\_8723877\_x2.....ccggcguaguauaaGggcuag.....1  
Gi4\_554608\_x2.....guucgaCuccggcgccg.....1  
G1a\_5936588\_x2.....uccggcguaguauaacggcCag.....1  
Gi3\_28108166\_x2.....ucgauuccggcgccgagcU.....1  
Gi1\_4102229\_x2.....cUggcguaguauaacggc.....1  
Gi5\_8729477\_x2.....uucucacccaacaAauccggguuc.....1  
Gi3\_28118820\_x2.....uccggcguaguauUacggcuag.....1  
Gi1\_4156325\_x2.....ccggcguaguauCacggcua.....1  
G1a\_5934562\_x2.....gguucUauuccggcgcc.....1  
Gi5\_8775383\_x2.....ccggcguaguGuaacggcuag.....1  
Gi3\_28175952\_x2.....ccggcguaguCaacggcuaga.....1  
Gi2\_10868063\_x2.....Accggcguaguauaacggcua.....1  
Gi3\_28239600\_x2.....uucucacccaacagauccAg.....1  
Gi1\_4129075\_x2.....gguucCcaccaacagauccg.....1  
Gi1\_4095231\_x2.....guucucacccaacagauccC.....1  
Gi3\_28012268\_x2.....ggcguaguauaacggcuagG.....1  
Gi1\_4147217\_x2.....guucgauuccggUgcccggagc.....1  
Gi3\_28059142\_x2.....cgauuccAgcgccggag.....1  
Gi3\_27993194\_x2.....gguucgaGucccggcgccggag.....1  
Gi3\_28078084\_x2.....guucucaccUaacagauccg.....1  
Gi3\_28175422\_x2.....uucgauuccggcgUggagc.....1  
Gi2\_10868073\_x2.....guucgauuccAggcgcccggag.....1  
Gi3\_28106474\_x2.....gguucuUacccaacagauccg.....1  
Gi5\_8760047\_x2.....Acggcguaguauaacggcua.....1  
Gi3\_28007158\_x2.....gguucCcaccaacagauccg.....1  
Gi3\_28028530\_x2.....cucacccaacagauccggguCcgau.....1  
Gi1\_4155181\_x2.....uucucUcccaacagauccg.....1  
Gi1\_4104341\_x2.....uccggcguaguauaaGggcuag.....1  
Gi3\_28089238\_x2.....uucgauucAcggcgccgga.....1  
Gi2\_10895625\_x2.....guucuUacccaacagauccg.....1  
Gi1\_4099169\_x2.....uucucaccAaacagauccg.....1  
Gi1\_4094027\_x2.....gguucgauuccggcgccU.....1  
Gi5\_8730133\_x2.....uCguucucacccaacagauccg.....1  
Gi2\_10847523\_x2.....guucgauucccgCcgcccggagc.....1  
Gi2\_10985957\_x2.....guucuAacccaacagauccg.....1  
Gi4\_561578\_x2.....Gccggcguaguauaacggcuagaa.....1  
Gi5\_8818769\_x2.....ucucacccaacagauccUgg.....1



Gi1\_4105013\_x2.....uccggcguaguGuaacggc..... 1  
Gi1\_4093929\_x2.....guucUauucccgcgccg..... 1  
Gi1\_4143197\_x2.....uucucaAccaacagauccgg..... 1  
Gi3\_28231186\_x2.....ucgauAcccgggcgggagc..... 1  
Gi5\_8769191\_x2.....cGggcguaguauaacggcuag..... 1  
Gi1\_4110277\_x2.....gguucgauucccgcgccggC..... 1  
Gi3\_28150636\_x2.....gaGucccgggcgggagc..... 1  
Gi3\_28078132\_x2.....gauAcccgggcgggagc..... 1  
Gi2\_10869631\_x2.....gguucgauucccgGgcccggag..... 1  
Gi3\_28243794\_x2.....uccggcguaguauaacGgcuag..... 1  
Gi3\_28164826\_x2.....guucgauucGggcgccgga..... 1  
Gi5\_8718193\_x2.....auucccgggcgggagcA..... 1  
Gi2\_10890487\_x2.....uccggAguaguauaacggcua..... 1  
Gi5\_8820439\_x2.....uucucacAcaacagauccggguu..... 1  
Gi3\_28147456\_x2.....uuUgauucccgggcggc..... 1  
Gi2\_10850057\_x2.....ugguucucNcccaacagaucc..... 1  
Gi3\_28155424\_x2.....uccggcguagGauaacggc..... 1  
Gi3\_28234392\_x2.....gguucgauucccgggcgggaU..... 1  
Gi5\_8729115\_x2.....Cguucucacccaacagauccgg..... 1  
Gi1\_4145965\_x2.....cucaccaacagauccAgg..... 1  
Gi1\_4143699\_x2.....agaucgggguucgauucc..... 0  
Gi2\_10851449\_x2.....Uuucucacccaacagauccgg..... 1  
Gi1\_4156999\_x2.....uucucacccaacagUuccgg..... 1  
Gi3\_28160030\_x2.....Gcagauccggguucgauucc..... 1  
Gi1\_4152497\_x2.....cucaccUaacagauccgg..... 1  
Gi1\_4092719\_x2.....gguucgauucccgcgccUg..... 1  
Gi1\_4156181\_x2.....guucgauucccgcgccUgagc..... 1  
Gi3\_28001604\_x2.....gguucucaccccCacagauccgggu..... 1  
G1a\_5913426\_x2.....Gucgauucccgggcgggagc..... 1  
Gi5\_8723867\_x2.....gguucgauucccgCcgccggagc..... 1  
Gi2\_10962109\_x2.....uccggcguaguauaacggGua..... 1  
Gi3\_28000816\_x2.....guucgauucccgggcggcUa..... 1  
Gi5\_8819591\_x2.....gguucgauucccgAcgcccggag..... 1  
Gi3\_28109010\_x2.....ggUguaguauaacggcuag..... 1  
Gi5\_8770777\_x2.....ucUggcguaguauaacggcu..... 1  
Gi5\_8782575\_x2.....gAucucacccaacagauccgg..... 1  
Gi2\_10964051\_x2.....guucgauucccgggcggcUg..... 1  
Gi1\_4154003\_x2.....guucgauAcccgggcgggagc..... 1  
Gi5\_8769593\_x2.....ucGggcguaguauaacggcuagaa..... 1  
Gi5\_8734339\_x2.....gguucucaccccCacagauccgg..... 1  
Gi3\_28200538\_x2.....uccggcguaguauaacggcuagUa..... 1  
Gi2\_10861221\_x2.....guucgauGcccggcgccggagc..... 1  
Gi5\_8790001\_x2.....gguucucCcccaacagauccgg..... 1  
Gi5\_8829587\_x2.....ugguucucacccaGcagauccgggu..... 1  
G1a\_5907016\_x2.....ucUggcguaguauaacgg..... 1  
Gi3\_28224872\_x2.....uucAauuccggcgccggagc..... 1  
Gi4\_560646\_x2.....gguucgauucccUgcccgg..... 1

Gi3\_28164600\_x2.....uucucCcccaacagauccg.....1  
Gi1\_4093181\_x2.....ccggcguaNuuaaacggcua.....1  
Gi5\_8771865\_x2.....uccggcguaGaacgg.....1  
Gi3\_28114810\_x2.....ugguucucacccaacagauAcg.....1  
Gi2\_10858249\_x2.....uucgauucccggcgccggCg.....1  
Gi3\_28146898\_x2.....uccggcguaCuuaaacggc.....1  
Gi1\_4148503\_x2.....Uuucgauucccggcgccggag.....1  
Gi1\_4129415\_x2.....ugguucucacccaaUagauccgg.....1  
Gi3\_28214384\_x2.....Nuucucacccaacagauccg.....1  
Gi1\_4145737\_x2.....cggguucgauucccggcgccgg.....0  
Gi2\_10935317\_x2.....guucgauucccggcgccgAag.....1  
Gi2\_10840641\_x2.....uccggcgGaguauaacggcuagaa.....1  
Gi2\_10964813\_x2.....ucacccaacagauccggguu.....0  
Gi2\_10893279\_x2.....agauccgggAucgauucc.....1  
Gi1\_4105975\_x2.....uccggcguaGuaCaacggcua.....1  
G1a\_5899828\_x2.....gguuUgauucccggcgccgg.....1  
Gi3\_28130308\_x2.....cCauucccggcgccggagc.....1  
Gi1\_4106031\_x2.....cucaccaNcagauccggguucga.....1  
Gi1\_4149361\_x2.....uccggcguaGuaaacggcu.....1  
Gi1\_4117409\_x2.....uUguucucacccaacagaucc.....1  
Gi1\_4153047\_x2.....guAcgauucccggcgccggagc.....1  
Gi3\_27998018\_x2.....uccggcUuaguuaaacggc.....1  
Gi1\_4107525\_x2.....uCcgauucccggcgccgg.....1  
Gi3\_28030324\_x2.....ucgauucccggcgccggagcA.....1  
G1a\_5943884\_x2.....uucucacAcaacagauccg.....1  
Gi2\_10869407\_x2.....guucCauucccggcgccggagc.....1  
G1a\_5956184\_x2.....uccAgcguaguuaaacgg.....1  
Gi3\_28230496\_x2.....Cugguucucacccaacagaucc.....1  
Gi2\_10986739\_x2.....uccAgcguaguuaaacggcua.....1  
G1a\_5965936\_x2.....uccggcgCaguuaaacggcua.....1  
Gi1\_4152177\_x2.....uggGucucacccaacagauccg.....1  
Gi3\_28061330\_x2.....ucucacccaacagauccC.....1  
Gi5\_8828401\_x2.....uccggcguaGuaaacggcua.....1  
Gi1\_4102471\_x2.....ugguucucacccGacagauccg.....1  
Gi1\_4125441\_x2.....guucgauucccggcgccgga.....1  
Gi1\_4103413\_x2.....ccggcguaNuuaaacggcuaga.....1  
Gi2\_10883591\_x2.....ucgauucccggcgccUga.....1  
Gi5\_8829199\_x2.....Ccgauucccggcgccggag.....1  
Gi3\_28063662\_x2.....cGcaccacaacagauccggguucgauu.....1  
Gi5\_8797827\_x2.....uCgguucucacccaacagauccg.....1  
Gi2\_10930629\_x2.....uccggcguaGuaaacggc.....1  
Gi3\_28067610\_x2.....cggcguaGuaaacggcuagauggu.....0  
Gi2\_10856813\_x2.....uccggcgGaguuaaacgg.....1  
G1a\_5951118\_x2.....gguucgauucccgAgccggagc.....1  
Gi4\_566174\_x2.....uccggcguaGuaaacggcuaga.....1  
Gi1\_4142341\_x2.....guucgauucccggcgccAgag.....1  
Gi5\_8794179\_x2.....ugguAcucacccaacagauccg.....1

Gi1a\_5976424\_x2.....gguucgCuucccgccg..... 1  
Gi5\_8743879\_x2.....ucAggcguaguauaacggc..... 1  
Gi3\_28044874\_x2.....uccggcCuaguauaacggc..... 1  
Gi3\_28180718\_x2.....aCauccggguucgauucc..... 1  
Gi3\_28257730\_x2.....gguGcgauucccgccgga..... 1  
Gi1a\_5941006\_x2.....guuUucaccaacagauccg..... 1  
Gi5\_8740795\_x2.....guucucacccaaAagauccg..... 1  
Gi3\_28077110\_x2.....ucgauuAccggcgccgga..... 1  
Gi2\_10954911\_x2.....Cccggcguaguauaacgg..... 1  
Gi3\_28212126\_x2.....gauucccgAcgccggagc..... 1  
Gi3\_28017590\_x2.....gauccgggNucgauucc..... 1  
Gi2\_10872295\_x2.....gCuucgauucccgccg..... 1  
Gi2\_10874581\_x2.....uccggcguaguaCaacggcuagaa..... 1  
Gi1\_4141471\_x2.....guucgauucccgccgagA..... 1  
Gi1\_4123331\_x2.....uucucacGcaacagauccgg..... 1  
Gi5\_8760681\_x2.....uccggcguaguauaacgCcuagaau..... 1  
Gi3\_28102444\_x2.....gUcguaguauaacggcuaga..... 1  
Gi1a\_5900034\_x2.....Aguucgauucccgccgga..... 1  
Gi5\_8799241\_x2.....guucucacccaaAagauccg..... 1  
Gi5\_8735337\_x2.....ugguucucacUcaacagauccg..... 1  
Gi2\_10921797\_x2.....uuUgauucccgccgga..... 1  
Gi1a\_5935670\_x2.....ugguucucacccaacagaCccg..... 1  
Gi1\_4115253\_x2.....uccggAguaguauaacgg..... 1  
Gi5\_8829307\_x2.....uccggcguaguauaacggcuagGa..... 1  
Gi1a\_5942324\_x2.....Gccggcguaguauaacggcuagaa..... 1  
Gi3\_28065536\_x2.....agaucUggguucgauucc..... 1  
Gi3\_28062436\_x2.....uccggcguCguauaacggcu..... 1  
Gi2\_10912907\_x2.....gguNcgauucccgccg..... 1  
Gi5\_8742179\_x2.....gguucgauAcccgccgag..... 1  
Gi1\_4106855\_x2.....gguucgauucccgccgAcg..... 1  
Gi3\_28104480\_x2.....uucgauuccAgccgagc..... 1  
Gi5\_8721945\_x2.....uccggcguaguauaacggcAagaa..... 1  
Gi3\_28164796\_x2.....gguucgauuccGggcgc..... 1  
Gi1a\_5946596\_x2.....gguucgauucccgccgAg..... 1  
Gi5\_8810763\_x2.....gguuGgauucccgccg..... 1  
Gi1\_4129275\_x2.....gguucgauuccCgcccgagc..... 1  
Gi1\_4130011\_x2.....guucucacccaacaAauccg..... 1  
Gi3\_28021150\_x2.....gNucgauucccgccgga..... 1  
Gi2\_10897531\_x2.....guucgauAcccgccgag..... 1  
Gi2\_10991033\_x2.....gguuGgauucccgcc..... 1  
Gi3\_27997574\_x2.....gauuccggcggagU..... 1  
Gi1\_4151389\_x2.....uccggcguagAuaaacggc..... 1  
Gi3\_28162628\_x2.....gguuGgauucccgcc..... 1  
Gi4\_558114\_x2.....uccgUcguaguauaacggcuaga..... 1  
Gi5\_8757095\_x2.....Ggauuccggcggagcguuuc..... 1  
Gi5\_8744349\_x2.....ugguucucacccGacagauccg..... 1  
Gi2\_10940445\_x2.....guuNgauucccgccg..... 1

Gi1\_4153631\_x2.....uucucaccaUcagaucgg..... 1  
 Gi3\_28247670\_x2.....cagauccAgguucgauucc..... 1  
 Gi5\_8785603\_x2.....ucgauucccgAcgccggag..... 1  
 Gi3\_28010828\_x2.....uccggcguagAauaacggcuagaa..... 1  
 Gi1\_4149101\_x2.....uccCgcguaguauaacggcuag..... 1  
 Gi1\_4128985\_x2.....Cuccggguucgauucccgccgg..... 1  
 Gi3\_28125892\_x2.....uucucaUccaacagaucgg..... 1  
 Gi1\_4144975\_x2.....uccggcguaguauaacggcCagaa..... 1  
 Gi3\_28026004\_x2.....guucucaccaacagaucU..... 1  
 Gi2\_10838125\_x2.....ccggUguaguauaacggcua..... 1  
 Gi5\_8781511\_x2.....gguucucaccaacagaCc..... 1  
 Gi3\_28149540\_x2.....uucucacccUacagaucggguuc..... 1  
 Gi5\_8752639\_x2.....ggGucgauucccgccggcggagcguu..... 1  
 Gi5\_8784921\_x2.....gauucgauucccgccggcggagcgcC..... 1  
 Gi3\_27985358\_x2.....ucucacccNacagaucgg..... 1  
 Gi5\_8786395\_x2.....ucucaccAaacagaucgg..... 1  
 Gl1a\_5897474\_x2.....guucgauucccgccgcUggagc..... 1  
 Gi1\_4151871\_x2.....ggguucgaNuuccggcgcggga..... 1  
 Gi1\_4100149\_x2.....cAcaccaacagaucgg..... 1  
 Gi4\_556180\_x2.....Auucgauucccgccgg..... 1  
 Gi3\_28073174\_x2.....uugguuGucaccaacagauc..... 1  
 Gi5\_8770649\_x2.....uccggcgGaguauaacgg..... 1  
 Gi5\_8731855\_x2.....Gcagaucggguucgauucccgccgc..... 1  
 Gi1\_4139407\_x2.....gguucgauucccgccgcUcgg..... 1  
 Gi5\_8764301\_x2.....uucucaccNaacagaucggguu..... 1  
 Gi3\_28034640\_x2.....uggCucucaccaacagau..... 1  
 Gi1\_4121287\_x2.....uugguucucaccaacagaucgg..... 0  
 Gi3\_28060026\_x2.....uucucaccaacCgaucgg..... 1  
 Gi3\_28204080\_x2.....Nguucucaccaacagaucgg..... 1  
 Gi2\_10980421\_x2.....guucgCuuccggcgcggga..... 1  
 Gi2\_10959557\_x2.....uccggcguNguauaacggcu..... 1  
 Gi3\_27980764\_x2.....Uucaccaacagaucgg..... 1  
 Gi1\_4115003\_x2.....Cccggcguaguauaacggcu..... 1  
 Gi3\_28175786\_x2.....Ggaucggguucgauucc..... 1  
 Gi3\_28091478\_x2.....cucaccaacCgaucgg..... 1  
 Gi3\_28229254\_x2.....ucGcaccaacagaucgg..... 1  
 Gi2\_10945881\_x2.....uucgaCuuccggcgcgg..... 1  
 Gi3\_28135542\_x2.....guucgauucGcggcgcgg..... 1  
 Gi3\_28147466\_x2.....ucgauucccgccgcUggagc..... 1  
 Gi3\_28160534\_x2.....uucgGuuccggcgcggagc..... 1  
 Gl1a\_5977502\_x2.....ucUggcguaguauaacggcua..... 1  
 Gi3\_28079074\_x2.....ucgauuccAggcgcggga..... 1  
 Gi1\_4095731\_x2.....gguucucaccaacagUuccg..... 1  
 Gl1a\_5966164\_x2.....uccggUguaguauaacggcuag..... 1  
 Gi5\_8822741\_x2.....guucgauucccgccgcCa..... 1  
 Gi3\_28146992\_x2.....caacagaucggguucgauuccA..... 1  
 Gi1\_4149379\_x2.....gguucgauuccggcAccg..... 1

Gi2\_10867705\_x2.....uccggcguaguauUacggcua..... 1  
Gi1\_4119237\_x2.....uccggAguaguauaacggcua..... 1  
Gi5\_8744307\_x2.....uccggcguacuauaacggcua..... 1  
Gi1\_4109757\_x2.....ugguGcucacccaacagauccgg..... 1  
Gi1\_4145699\_x2.....Gcggcguaguauaacggcua..... 1  
Gi3\_28154320\_x2.....caacagauccggguucgCuucc..... 1  
Gi5\_8811637\_x2.....uccggcguaguauaacggAuag..... 1  
Gi2\_10848597\_x2.....uucucacUcaacagauccg..... 1  
Gi3\_28117386\_x2.....gguucgauucccggcUccg..... 1  
Gi5\_8826375\_x2.....Nuucgauucccggcgcgg..... 1  
Gi3\_28194368\_x2.....gguucgauucccggcgcggagcgC..... 1  
Gi5\_8822577\_x2.....gguucgauucAcgggcgcg..... 1  
Gi1\_4091203\_x2.....guucgauucccggcCccgga..... 1  
Gi3\_28002086\_x2.....guucgauucccggcGccggag..... 1  
Gi1\_4122539\_x2.....Accggcguaguauaacggc..... 1  
Gi2\_10978229\_x2.....uucucacccaacUgauccg..... 1  
G1a\_5966242\_x2.....uucgaCucccggcgcggagc..... 1  
Gi3\_28123278\_x2.....uccggcguaguauaacggcuagaGu..... 1  
Gi5\_8812521\_x2.....guucgauucAcgggcgcgga..... 1  
Gi5\_8787103\_x2.....ucNggcguaguauaacgg..... 1  
Gi5\_8791119\_x2.....Gcggguucgauucccggcgcgga..... 1  
Gi1\_4118443\_x2.....uucgGuucccggcgcgg..... 1  
Gi1\_4147083\_x2.....ggcguaguNuaacggcuag..... 1  
Gi4\_564492\_x2.....uccggcguaguauaacggcuaAaau..... 1  
Gi2\_10851117\_x2.....ugguucucacccaacagauAg..... 1  
Gi2\_10838901\_x2.....guucgauucccgAcgccggag..... 1  
Gi5\_8811253\_x2.....cgUuucccggcgcggagcguuuc..... 1  
Gi1\_4142993\_x2.....ccggcguGguauaacggcuaga..... 1  
Gi3\_28084690\_x2.....guucucacNcaacagauccgg..... 1  
Gi1\_4154957\_x2.....guucucacAcaacagauccgg..... 1  
Gi3\_28140736\_x2.....ucgaGuucccggcgcggag..... 1  
Gi1\_4118461\_x2.....ggAucgauucccggcgcggga..... 1  
Gi1\_4116457\_x2.....gguucucaccAaacagauccg..... 1  
Gi5\_8819389\_x2.....uugguucucacccaacagauUg..... 1  
Gi3\_28150512\_x2.....uccggcguauauaacggc..... 1  
Gi5\_8745723\_x2.....gguucgauAcccggcgc..... 1  
G1a\_5921074\_x2.....gguucgauucccggcgcggagA..... 1  
Gi3\_28183034\_x2.....uccggcguaguauUcggc..... 1  
Gi2\_10859405\_x2.....uucucacccaacagauccA..... 1  
Gi3\_28022676\_x2.....uucgauucccggcgcggagcA..... 1  
Gi2\_10973233\_x2.....guucgauucccggcGccgg..... 1  
Gi2\_10831947\_x2.....Gucgauucccggcgcggga..... 1  
Gi3\_28044656\_x2.....uccggcguaguauGcggcu..... 1  
Gi2\_10886137\_x2.....gAuucgauucccggcgcgg..... 1  
Gi1\_4127477\_x2.....uucgauucccAgcgcgg..... 1  
Gi1\_4106033\_x2.....gguucgauuccAggcgcggga..... 1  
Gi3\_28094166\_x2.....gguucucacccaCagauccgg..... 1

Gi1\_4151585\_x2.....uccggcguagGauaacggc..... 1  
 Gi3\_28166684\_x2.....guucgauucccgUcgccg..... 1  
 Gi5\_8809121\_x2.....uccggcgAaguaaacggcuaga..... 1  
 Gi2\_10904021\_x2.....uccggcguCuauaacggcuaga..... 1  
 Gi2\_10973467\_x2.....caacagauccggguucgauucc..... 0  
 Gi3\_27980270\_x2.....gguNcucaccaacagauccg..... 1  
 Gi1\_4125815\_x2.....gguucucacccaaUagauccg..... 1  
 Gi2\_10965185\_x2.....ucgGuucccgggcgcggagc..... 1  
 Gi5\_8723201\_x2.....uccgAcguaguauaacggcua..... 1  
 Gi3\_28078074\_x2.....guucgauGccggcgccgg..... 1  
 G1a\_5908756\_x2.....uuUucacccaacagauccg..... 1  
 Gi1\_4100751\_x2.....gguucgauucccgggcgcggAa..... 1  
 Gi1\_4117015\_x2.....cGggcguaguauaacggcu..... 1  
 Gi1\_4116277\_x2.....uucgauucccgggcgcgggaU..... 1  
 Gi3\_28259230\_x2.....guucucacUcaacagauccg..... 1  
 G1a\_5905292\_x2.....gguucgauucccgggcgcggC..... 1  
 Gi3\_28166900\_x2.....cgauucAcggcgccggagc..... 1  
 Gi3\_28084158\_x2.....Cgguucgauucccgggcgcggag..... 1  
 G1a\_5952986\_x2.....guucgauucccgggcgcggagU..... 1  
 Gi2\_10935313\_x2.....uccggcguaguauaacggUuagaa..... 1  
 Gi1\_4135609\_x2.....uucuGacccaacagauccgg..... 1  
 Gi3\_28115858\_x2.....uUcggguucgauucccgggcgcggga..... 1  
 Gi3\_28081378\_x2.....ucucacccGacagauccg..... 1  
 Gi4\_564144\_x2.....guucgauucccgggcgcggagcA..... 1  
 Gi2\_10922863\_x2.....guucgauAcccgggcgcgg..... 1  
 G1a\_5911236\_x2.....uGcgauucccgggcgcggagc..... 1  
 Gi2\_10978487\_x2.....gaAuuccggcgccggagc..... 1  
 Gi3\_28167666\_x2.....cagauccggguucgauuccU..... 1  
 Gi3\_28048824\_x2.....uugguucucacccaacCgaucc..... 1  
 Gi2\_10848903\_x2.....uGcggcguaguauaacggcu..... 1  
 Gi3\_28254224\_x2.....guucgaGuuccggcgccg..... 1  
 Gi5\_8775169\_x2.....uccggcguaguauUacgg..... 1  
 Gi2\_10928561\_x2.....uccggcguaguauaacggAua..... 1  
 G1a\_5974960\_x2.....ggCucgauucccgggcgcggag..... 1  
 Gi2\_10977695\_x2.....guucgauucccgggcgcgggaA..... 1  
 Gi5\_8774761\_x2.....uccggcguaguaAaacgg..... 1  
 Gi2\_10886403\_x2.....guucgauAcccgggcgcggga..... 1  
 Gi3\_28217236\_x2.....uucgauucccgAgccgga..... 1  
 Gi3\_28236582\_x2.....guucgauCccggcgccg..... 1  
 Gi5\_8730009\_x2.....gguucgauAcccgggcgcgg..... 1  
 Gi5\_8775529\_x2.....cucacccUacagauccg..... 1  
 Gi5\_8748139\_x2.....Gagauccggguucgauucccggcgg..... 1  
 Gi5\_8808045\_x2.....cucacccaacagauAcgg..... 1  
 Gi1\_4101387\_x2.....gguucgauucccgggcgcgggaA..... 1  
 Gi5\_8793103\_x2.....cgauucccgggcgcggagcC..... 1  
 Gi1\_4118543\_x2.....guucgauucccgggcgcggC..... 1  
 Gi4\_553262\_x2.....gguucgauNcccggcgcggagc..... 1

Gi3\_28199080\_x2.....gguucgauucccgccUgag..... 1  
 Gi3\_28118232\_x2.....guucucacAcaacagauccgg..... 1  
 Gi3\_28201694\_x2.....guucucacccaacagaucGg..... 1  
 Gi3\_28154066\_x2.....gguucucaNccaacagauccgggu..... 1  
 Gi5\_8730799\_x2.....guucgauucGcggcgcg..... 1  
 Gi1\_4125009\_x2.....ucGcaccaacagauccgg..... 1  
 Gi3\_28038396\_x2.....ucgauucccgccGggagc..... 1  
 Gi5\_8740929\_x2.....gAuucucacccaacagauc..... 1  
 Gi3\_28052776\_x2.....cucaccaaUagauccgg..... 1  
 Gi5\_8721061\_x2.....ucucacccaacGgauccg..... 1  
 Gi2\_10898493\_x2.....guucucaccUaacagauccg..... 1  
 Gi3\_28027976\_x2.....uccggcguaguaGaacggc..... 1  
 Gi2\_10830033\_x2.....uccggcguaguCuaacgg..... 1  
 Gi5\_8803873\_x2.....gcuaguauaacggcuag..... 0  
 Gl1\_5918104\_x2.....uccggcguauAuaaacggcuaga..... 1  
 Gi3\_28136020\_x2.....uucGcaccaacagauccg..... 1  
 Gi2\_10976811\_x2.....gguucgauucccgccUga..... 1  
 Gi3\_28231734\_x2.....cgauucccgccGcggagc..... 1  
 Gl1\_5955874\_x2.....gguucgauucccgccggCg..... 1  
 Gi2\_10874447\_x2.....uccggcguagCauaacggcuagaau..... 1  
 Gi2\_10933965\_x2.....ugguucuUaccaacagauccg..... 1  
 Gi1\_4124701\_x2.....ucCaccaacagauccgg..... 1  
 Gi2\_10959617\_x2.....gauucccgccggUgc..... 1  
 Gi1\_4140037\_x2.....uccggcguNguauaacggcuagaau..... 1  
 Gi2\_10981625\_x2.....uucucaccAaacagauccg..... 1  
 Gi5\_8740013\_x2.....uAcggcguaguauaacggcuaga..... 1  
 Gi1\_4142901\_x2.....gguuUgauucccgccggga..... 1  
 Gl1\_5964870\_x2.....uccggcguaguauaacggcuagaauugguug..... 0  
 Gi1\_4115211\_x2.....cUgcguaguauaacggcu..... 1  
 Gi1\_4105643\_x2.....uucucaccccCacagauccgg..... 1  
 Gi5\_8738645\_x2.....uucucacccaacagGuccgg..... 1  
 Gl1\_5894212\_x2.....uccggcguagCauaacggcuag..... 1  
 Gi4\_564356\_x2.....guucucacccaacagauccgg..... 0  
 Gl1\_5939658\_x2.....guucucacccaacGgauccg..... 1  
 Gi1\_4100309\_x2.....uccggcguagCauaacggcuagaa..... 1  
 Gi5\_8729459\_x2.....guucgauuccAggcccggagc..... 1  
 Gi3\_27984222\_x2.....guucgauucccgccgggaU..... 1  
 Gi3\_28169138\_x2.....uAcgauucccgccggagc..... 1  
 Gi5\_8719709\_x2.....uucAcaccaacagauccg..... 1  
 Gi3\_28174146\_x2.....ucAcaccaacagauccg..... 1  
 Gi3\_28162802\_x2.....gauucAcggcggcggagc..... 1  
 Gi5\_8820989\_x2.....uccggcguaguauaacCgcuag..... 1  
 Gi2\_10831301\_x2.....guucgauucAcggcggcggga..... 1  
 Gi2\_10947009\_x2.....guucucaUccaacagauccg..... 1  
 Gi2\_10944301\_x2.....Agguucucacccaacagauccg..... 1  
 Gi5\_8790799\_x2.....guucUauucccgccggag..... 1  
 Gi4\_559706\_x2.....uccggcguaguauaacggcCag..... 1

Gi3\_28123760\_x2.....uccggcguaguauaUcggcuag.....1  
Gi2\_10831105\_x2.....uGcgauuccggcgccgga.....1  
Gi3\_28239946\_x2.....ucgauuccggcgccggC.....1  
Gi1\_4120257\_x2.....ggguucgauCcccgcgccgga.....1  
Gi2\_10967907\_x2.....ugguucuAacccaacagauccg.....1  
Gi1\_4091035\_x2.....ugguucucaccccUacagauccgg.....1  
Gi5\_8731585\_x2.....guucgaAucccgcgccggagc.....1  
Gi3\_27990064\_x2.....uccggcguaguUuaacggcuagaa.....1  
Gi5\_8738921\_x2.....guucgauuccggcgAccggagc.....1  
Gi1\_4153745\_x2.....gguucucaUccaacagauccg.....1  
Gi1\_4145897\_x2.....accaacaNaucgggguucgauuccg.....1  
Gi3\_28171068\_x2.....gguucgauuccggcgGcg.....1  
Gi2\_10972823\_x2.....gguucucacccaaAagauccg.....1  
Gi2\_10904223\_x2.....uccggcgCaguauaacggcuag.....1  
Gi5\_9125734\_x1.....uucucacccaacagGuccggguuc.....1  
Gi1\_4329538\_x1.....guucgauuccAgggcgccg.....1  
Gi3\_28654841\_x1.....guucucacccaCcagauccggg.....1  
Gi3\_28909365\_x1.....uccggcguaguauaacggcuau.....1  
Gi5\_8946460\_x1.....guucucUcccaacagauccg.....1  
Gi3\_28766235\_x1.....caacagauccggguucgC.....1  
Gi1\_4283066\_x1.....gAuucgauuccggcgcc.....1  
Gi2\_11299054\_x1.....ucgauuAccggcgccggagc.....1  
Gi2\_11009191\_x1.....cccaacagNuccggguuc.....1  
Gi1\_4365740\_x1.....ucgUuuccggcgccggagc.....1  
Gi2\_11197426\_x1.....uccggcguaguauaCcgguag.....1  
Gi3\_28609483\_x1.....ucgauuccggcgccggUgc.....1  
Gi2\_11271890\_x1.....ucgauuccggcgccgAa.....1  
Gi2\_11384375\_x1.....uccggcguaguCuaacggcuagaau.....1  
Gi5\_8990686\_x1.....ccggcguaguGuaacggcua.....1  
Gi5\_8994205\_x1.....cggcguagNauaacggcuag.....1  
G1a\_6356277\_x1.....uccggcguaguauaacggcuagaUugguugg.....1  
Gi1\_4388420\_x1.....gguucgaAucccgcgccgg.....1  
Gi3\_28526989\_x1.....cGggcguaguauaacggc.....1  
Gi3\_28796834\_x1.....uccggcguaguauaaGggcuagaau.....1  
G1a\_6065574\_x1.....uccgUcguaguauaacgg.....1  
G1a\_6154052\_x1.....uccgCcgguaguauaacggcuag.....1  
Gi1\_4268067\_x1.....gguucucacccaacaAauccgg.....1  
Gi5\_9046109\_x1.....cggcguUguauaacggcuagaau.....1  
Gi1\_4361395\_x1.....uucgauuccggcUccgg.....1  
Gi2\_11002167\_x1.....ugguucucacAcaacagauccg.....1  
Gi1\_4382064\_x1.....uccggcguaguUuaacggcuaga.....1  
Gi5\_9037534\_x1.....uucucacccaacagaGccg.....1  
Gi2\_11350563\_x1.....ucGggcguaguauaacggcuagaau.....1  
Gi5\_8907107\_x1.....gguuAgauuccggcgccgg.....1  
Gi3\_28339698\_x1.....guucucacccaacCgauccgggu.....1  
Gi2\_11161412\_x1.....cucacccaacagauccAg.....1  
Gi1\_4327807\_x1.....ucanccaacagauccgggu.....1



Gi3\_28573501\_x1.....ucaccaGcagauccggguuc..... 1  
Gi5\_8929645\_x1.....guucucacUcaacagauccgg..... 1  
G1a\_6149789\_x1.....guucucaccUaacagauccg..... 1  
Gi2\_11323640\_x1.....GUGuucgauuccggcgccggag..... 1  
Gi5\_9026152\_x1.....guucucaGccaacagauccgg..... 1  
Gi5\_8901742\_x1.....cggcguaguauaCggcuaga..... 1  
Gi5\_9021819\_x1.....ugguucucacccaacagauCGg..... 1  
Gi2\_11138380\_x1.....ucgauuccggcgGggagc..... 1  
Gi1\_4271575\_x1.....gAuucgauuccggcgccggag..... 1  
Gi1\_4323736\_x1.....cgauuccggcgccggagcguuA..... 1  
Gi5\_8837034\_x1.....guuGucacccaacagauccg..... 1  
Gi2\_11203524\_x1.....uggCucucacccaacagaucc..... 1  
Gi5\_8843127\_x1.....Ucagauccggguucgauuccggcg..... 1  
Gi1\_4349061\_x1.....Gcagauccggguucgauucc..... 1  
Gi1\_4317254\_x1.....gguuAgauuccggcgccggagc..... 1  
Gi5\_8895369\_x1.....gauuccggcgGAggagc..... 1  
G1a\_6321473\_x1.....uucgauuccggAgccggagc..... 1  
Gi3\_28310326\_x1.....gauccggguCcgauucc..... 1  
Gi3\_28425353\_x1.....caacagauccgggCucgauucc..... 1  
Gi2\_11218470\_x1.....ggguucgauuccggcgccggagcGA..... 1  
Gi1\_4278122\_x1.....uccggcguaguauUacggc..... 1  
Gi3\_28392848\_x1.....gguucgauuccggcgccggagcUu..... 1  
Gi1\_4187177\_x1.....ccggcguaguauaacggcuGgaa..... 1  
Gi4\_574850\_x1.....guucgGuuccggcgccgga..... 1  
Gi2\_11077775\_x1.....uucucacccaGcagauccgg..... 1  
G1a\_6139298\_x1.....uucucaccAaacagauccg..... 1  
Gi3\_28856543\_x1.....cguaguauaacggcuGga..... 1  
Gi3\_28723782\_x1.....Agguucgauuccggcgccgga..... 1  
Gi3\_28920241\_x1.....caacagauccggguucgGuucc..... 1  
G1a\_6026247\_x1.....guucUauuccggcgccgg..... 1  
Gi5\_8923941\_x1.....cucacAcaacagauccgg..... 1  
Gi1\_4307754\_x1.....uccggcguaguauaacggcuCgaa..... 1  
Gi1\_4246193\_x1.....Agcguaguauaacggcu..... 1  
Gi1\_4220943\_x1.....ccggcguaguauaacCgcuaaga..... 1  
Gi5\_9020042\_x1.....ccggcguGguauaacggcuagaau..... 1  
Gi3\_28281794\_x1.....ggguucgauuccUggcgccgga..... 1  
Gi5\_8849782\_x1.....gguucgauuccggcgccggGgcguuu..... 1  
Gi5\_9037758\_x1.....ucNcaccacacagauccg..... 1  
Gi1\_4316550\_x1.....gguucgauAcccgcgccggagc..... 1  
Gi5\_8836994\_x1.....uccggcguCuauaacggcuagaa..... 1  
Gi5\_9100445\_x1.....ucucacccCacagauccg..... 1  
Gi1\_4173855\_x1.....ccgAcguaguauaacggcuag..... 1  
Gi1\_4274785\_x1.....caacagauccgAguucgauuccggc..... 1  
Gi2\_11291518\_x1.....cucacccaacagauccgC..... 1  
Gi5\_8898062\_x1.....ggcguaguauaacggUuaga..... 1  
Gi5\_8924460\_x1.....ugguucucaGccaacagauccg..... 1  
Gi5\_8907153\_x1.....gguucucaGccaacagauccg..... 1

Gi3\_28873117\_x1.....cucGcccaacagauccggguucgauu..... 1  
Gi3\_28894219\_x1.....ugguucucacccaUcagauccg..... 1  
Gi5\_8858134\_x1.....gguAcucacccaacagauc..... 1  
Gi5\_8974423\_x1.....caccaacagauccgggAucga..... 1  
Gi3\_28471742\_x1.....ucucacAaacagauccgg..... 1  
Gi3\_28311531\_x1.....Aagauccggguucgauucc..... 1  
Gi1\_4190688\_x1.....gCuucucacccaacagauccgg..... 1  
Gi5\_8952778\_x1.....gguucgauucccggcUgag..... 1  
Gi4\_604592\_x1.....gguucgauUccggcgccg..... 1  
Gi3\_28745510\_x1.....gguucucacccaacagauccAg..... 1  
Gi2\_11146581\_x1.....Cgguucucacccaacagaucc..... 1  
Gi3\_28346336\_x1.....guucucacccaUcagauccg..... 1  
Gi1\_4174400\_x1.....guucucacccaUcagauccg..... 1  
Gi3\_28690571\_x1.....uccggcguaguauaacgCcuagaau..... 1  
G1a\_5987938\_x1.....uccggcguCguauaacggcuagaau..... 1  
Gi2\_11130143\_x1.....cagauccggguucgauucccggcAgag..... 1  
Gi5\_9062397\_x1.....ucgauucccgUgcccggag..... 1  
Gi2\_11163367\_x1.....ugguucGcaccaacagauccg..... 1  
Gi5\_9027416\_x1.....uucGcacccaacagauccg..... 1  
Gi5\_9038197\_x1.....gguucUauucccggcg..... 1  
Gi2\_11274941\_x1.....guucgauucccggcCccgga..... 1  
Gi3\_28502031\_x1.....ucgauucccggcgcccggGg..... 1  
Gi3\_28683519\_x1.....ucucacccNacagauccg..... 1  
Gi5\_9001980\_x1.....guucgauGcccggcgccg..... 1  
Gi1\_4367709\_x1.....cGgauccggguucgauucccggcg..... 1  
Gi1\_4373113\_x1.....cccaacUgauccggguuc..... 1  
Gi3\_28578201\_x1.....guucucacccaacagauGcgg..... 1  
Gi5\_9050029\_x1.....gauccggguucgauucccgUgcccgga..... 1  
Gi5\_8978051\_x1.....ugguuUucacccaacagauccgggu..... 1  
G1a\_6235090\_x1.....gguucgauucccggcAccgg..... 1  
Gi4\_598497\_x1.....gguucgauucccgAcgcccg..... 1  
Gi5\_8887075\_x1.....gguucgUuucccggcgcccg..... 1  
Gi5\_9127316\_x1.....cccaacagauccggguucgau..... 0  
Gi4\_572457\_x1.....gguucgCuucccggcgcccg..... 1  
Gi1\_4186427\_x1.....guucAauucccggcgcccggag..... 1  
Gi5\_9108440\_x1.....uccggcguNguauaacggcu..... 1  
Gi5\_9088288\_x1.....uccNgcguaguauaacggcuaga..... 1  
Gi3\_28748580\_x1.....cgauucccggcgcccggagU..... 1  
Gi3\_28495574\_x1.....agauGcggguucgauucc..... 1  
Gi3\_28584321\_x1.....agauccggguucgauucccggcgcccggGg..... 1  
Gi5\_8946036\_x1.....ccggcguaguauaaAggcua..... 1  
Gi3\_28732519\_x1.....uugguucucacccCacagaucc..... 1  
Gi5\_8942160\_x1.....uccggcguaguauUcggcuagaau..... 1  
Gi2\_11292688\_x1.....uucucacccaacagauUcg..... 1  
Gi4\_578696\_x1.....uccggcguaguGuaacggcu..... 1  
G1a\_6160626\_x1.....gAuucgauucccggcgcccggagc..... 1  
G1a\_5999126\_x1.....uccggcguaguauaacggcCa..... 1

Gi1\_4325900\_x1.....caacagGuccggguucgauucccggc..... 1  
Gi5\_9038163\_x1.....gguucCauucccggcgaggagc..... 1  
Gi3\_28692859\_x1.....guucucacccaacGgauccggu..... 1  
Gi5\_8970648\_x1.....Cccggcguaguauaacggcu..... 1  
Gi5\_8897594\_x1.....uucucacccaacagauccGagu..... 1  
Gi3\_28467988\_x1.....cgauuccgggcgggagcguu..... 0  
Gi3\_28852957\_x1.....uucucacccaacagauccggguucga..... 0  
Gi3\_28967539\_x1.....gguucucacccaacagauGcg..... 1  
Gi5\_9089016\_x1.....guucucCcccaacagauccgg..... 1  
Gi5\_8962395\_x1.....ugCuucucacccaacagauccg..... 1  
Gi5\_9092731\_x1.....gguucucaccAaacagau..... 1  
Gi2\_11191680\_x1.....cggcguaguauaaUggcua..... 1  
G1a\_6333977\_x1.....uCcucacccaacagauccgg..... 1  
Gi3\_28617574\_x1.....gguuUucacccaacagaucc..... 1  
Gi5\_8853277\_x1.....ccAgcguaguauaacggcua..... 1  
Gi5\_8892886\_x1.....uccggcguaguauaacggcuagaaAg..... 1  
Gi5\_9015306\_x1.....guucgauGcccgggcggg..... 1  
Gi1\_4249945\_x1.....Ucggcguaguauaacggcu..... 1  
Gi3\_28501236\_x1.....uNcggcguaguauaacggcuaga..... 1  
Gi3\_28500151\_x1.....gguucgauucccgggcGA..... 1  
Gi3\_28816522\_x1.....uAcgauuccgggcggcgg..... 1  
Gi3\_28426142\_x1.....uccggguucgCuuccgggcggga..... 1  
Gi2\_11031774\_x1.....cAauuccgggcgggagcguuuc..... 1  
Gi3\_28430870\_x1.....ccggcAuaguauaacggc..... 1  
Gi2\_11125660\_x1.....Nggucucacccaacagaucc..... 1  
Gi5\_8838283\_x1.....ugUucucacccaacagauccggg..... 1  
Gi2\_11251255\_x1.....uccggcguaguauaacCgcuagaa..... 1  
Gi3\_28333127\_x1.....Ucagauccggguucgauucc..... 1  
Gi3\_28813576\_x1.....ucNggcguaguauaacggcuag..... 1  
Gi5\_8928999\_x1.....ugguucucacAaacagauccggg..... 1  
Gi2\_11075509\_x1.....uucgaAuuccgggcgggag..... 1  
Gi1\_4352042\_x1.....uccggcguaguauaacggcuagUa..... 1  
Gi5\_9018585\_x1.....gguucgaAuuccgggcgggag..... 1  
Gi5\_9118190\_x1.....ugguucucNcccaacagauccgg..... 1  
Gi2\_11404082\_x1.....uccggcguaguUuaacggcuagaa..... 1  
Gi2\_11168016\_x1.....ccggcguGguauaacggc..... 1  
Gi3\_28313780\_x1.....cccaacagauccggguucgauucUc..... 1  
Gi1\_4217533\_x1.....gguCcgauuccgggcgc..... 1  
Gi5\_9047258\_x1.....gguucgauucccgAcgcccggagcgu..... 1  
Gi5\_9077616\_x1.....uucgauuccgggcgggagcguuucc..... 0  
Gi5\_9091215\_x1.....uggAucucacccaacagauccg..... 1  
Gi5\_8946059\_x1.....uccUgcguaguauaacggcuagaa..... 1  
Gi5\_8866945\_x1.....ugguucucacccaacagauUgg..... 1  
Gi1\_4236220\_x1.....uccggGguaguauaacggcuag..... 1  
Gi5\_8843474\_x1.....Ccucacccaacagauccgg..... 1  
Gi1\_4368857\_x1.....ggNucgauuccgggcggcgg..... 1  
Gi3\_28972842\_x1.....gauuccCgcgggagc..... 1

Gl1a\_6336195\_x1.....gGucgauucccgcgccgga..... 1  
Gi3\_28457208\_x1.....gguucucaccccGacagauccgggu..... 1  
Gi2\_11039943\_x1.....uccggcguagGauaacggcuagaau.....guucgauucccUgcgccg..... 1  
Gi5\_9082007\_x1.....uccggcguagGauaacggcuagaau..... 1  
Gi2\_11189622\_x1.....uccggcguagGauaacggcuagaau.....uucgauucccgcgUcgg..... 1  
Gi2\_11362987\_x1.....gguucgauucccCgcgcc..... 1  
Gi3\_28625165\_x1.....cucacccaacagauUcgg..... 1  
Gi1\_4215364\_x1.....ugguucucacccaacCgauccg..... 1  
Gl1a\_6136401\_x1.....uccggcCuaguauaacgg..... 1  
Gi5\_8970092\_x1.....uucgauucccgcgUcgg..... 1  
Gi2\_11292939\_x1.....guucgauUccggcgccggag..... 1  
Gi5\_8947925\_x1.....guucgauucccgcgccgAag..... 1  
Gi5\_8916686\_x1.....uucgauucccgcgccAg..... 1  
Gi1\_4161951\_x1.....uccggcguaguauaaGgg..... 1  
Gi5\_9088549\_x1.....uccggcguaguauaaUcggcu..... 1  
Gi5\_8990706\_x1.....ucucacccaacUgauccg..... 1  
Gi4\_587679\_x1.....gauucccgcgccggagcC..... 1  
Gi3\_28525201\_x1.....uugguucucacccaacaAaucc..... 1  
Gi5\_9099788\_x1.....aguccggcguagGauaacggcu..... 1  
Gi2\_11077824\_x1.....aUcagauccggguucgauucccgcgccg..... 1  
Gi3\_28557731\_x1.....cagauccggguucgaCuccc..... 1  
Gi4\_595506\_x1.....gguuUgauucccgcgccg..... 1  
Gi1\_4193508\_x1.....caacagauccggguucgauUcggc..... 1  
Gi5\_9104398\_x1.....cUcccaacagauccggguucga..... 1  
Gi2\_11215724\_x1.....guuNgauucccgcgccggag..... 1  
Gi5\_8868571\_x1.....guuNgauucccgcgccgga..... 1  
Gi5\_9111668\_x1.....uugguucucacccaaUgauccg..... 1  
Gi2\_11104122\_x1.....gGucucacccaacagauccgggu..... 1  
Gi1\_4260944\_x1.....gguucucacccaacGgauccgg..... 1  
Gi3\_28629367\_x1.....ugguuAucacccaacagauccg..... 1  
Gi5\_8932518\_x1.....ggguucgauUccggcgccggagc..... 1  
Gi5\_9070166\_x1.....ucuUacccaacagauccgg..... 1  
Gi3\_28953674\_x1.....ccggcguaguauaaAggc..... 1  
Gi1\_4338121\_x1.....auccggguucgGuucccgcgccg..... 1  
Gl1a\_6087353\_x1.....gguucgauucccCgcgccgga..... 1  
Gi4\_603168\_x1.....ucUggcguaguauaacgg..... 1  
Gl1a\_6341186\_x1.....uccggcguaguauaacggcCagaau..... 1  
Gi2\_11066010\_x1.....uucgauucccgcgAcggagc..... 1  
Gi2\_11269785\_x1.....guucgauucccgcgGcggag..... 1  
Gi5\_9061390\_x1.....uAcggcguaguauaacggcuagaau..... 1  
Gi3\_28519129\_x1.....cgauAcccgcgccggagc..... 1  
Gi1\_4262085\_x1.....uccggcguaguauaacggcuaC..... 1  
Gi2\_11223709\_x1.....ucgauUccggcgccggag..... 1  
Gi3\_28767525\_x1.....ucgCuucccgcgccggagc..... 1  
Gl1a\_6038980\_x1.....gguucgauucccgUgcggagc..... 1  
Gi3\_28550482\_x1.....cuaUccaacagauccgg..... 1  
Gl1a\_6345035\_x1.....ugguucCacccaacagauccg..... 1

Gi1\_4368827\_x1.....gguucgauucccgcgccCgagc..... 1  
Gi5\_8895229\_x1.....ugguucucacccaacagauccA..... 1  
G1a\_6163184\_x1.....uccggcguaguauaacggcuaAa..... 1  
G1a\_6020122\_x1.....uccggcguaguauaacgCcuag..... 1  
Gi3\_28465157\_x1.....ugguucucacccaacagauccU..... 1  
Gi3\_28356424\_x1.....cggcguaguauaaUggcuaga..... 1  
Gi1\_4348404\_x1.....guucucacccaaGagauccg..... 1  
Gi1\_4206593\_x1.....guucucacccaacagaCccg..... 1  
Gi2\_10999928\_x1.....gguucgauuccGggcgccgga..... 1  
Gi4\_600522\_x1.....Cuucucacccaacagauccg..... 1  
Gi3\_28883800\_x1.....uucucacGcaacagauccggguuc..... 1  
Gi3\_28985309\_x1.....ggcguaguauaacggGuaga..... 1  
Gi3\_28934251\_x1.....uccggcguaguUuaacggcuagaau..... 1  
Gi4\_610398\_x1.....cucacccaacagauccggguCcg..... 1  
Gi3\_28376579\_x1.....guucgauUccggcgccg..... 1  
G1a\_6149094\_x1.....uccgAcguaguauaacggc..... 1  
Gi5\_8851989\_x1.....uucucGcccaacagauccg..... 1  
Gi2\_11118619\_x1.....cgUuuccggcgccggagcguuu..... 1  
Gi5\_8879346\_x1.....guucucacccaacagaAccg..... 1  
Gi5\_9067315\_x1.....ccaacagauccgAguuc..... 1  
Gi5\_8991770\_x1.....cggcguaguuaCcgguagaau..... 1  
Gi5\_9005272\_x1.....uccggcguaguauaacggcuUgaau..... 1  
Gi3\_28335121\_x1.....uccggcguagGauaacggcuagaa..... 1  
G1a\_6021875\_x1.....guucucacccaacagauccAg..... 1  
Gi2\_11301120\_x1.....cgauucccNgcgccggagcguuuc..... 1  
Gi2\_11078882\_x1.....uccggcguaguauaacgAcuagaa..... 1  
Gi3\_28280924\_x1.....guucgauuccggcgCccggagc..... 1  
Gi3\_28940332\_x1.....Ugauccggguucgauucc..... 1  
G1a\_6265864\_x1.....uAcggcguaguauaacggcuag..... 1  
Gi3\_28671000\_x1.....gguucgauuccggcgccggagcG..... 1  
Gi3\_28513235\_x1.....uNcggcguaguauaacgg..... 1  
Gi5\_8872269\_x1.....guucgauuccggcgUcggag..... 1  
Gi3\_28565650\_x1.....caacagauccggguucgauCccc..... 1  
Gi2\_11056791\_x1.....agauccggAuucgauucc..... 1  
Gi3\_28348399\_x1.....ugguucucacccaacagUuccg..... 1  
Gi2\_11236176\_x1.....uccggcAuaguauaacggcuag..... 1  
G1a\_6076007\_x1.....uccggcguaguauaacAgcuagaau..... 1  
Gi5\_8890299\_x1.....ugguucucacccaacagauccAg..... 1  
Gi5\_8888853\_x1.....guucgauuccggcgGcggagc..... 1  
Gi5\_9120349\_x1.....ucgauuAccggcgccggagc..... 1  
Gi5\_8938454\_x1.....gguucucacccaacagCuccgggu..... 1  
Gi2\_11097809\_x1.....uucgauucAcggcgccgg..... 1  
Gi3\_28945273\_x1.....uugguucucUcccaacagaucc..... 1  
Gi2\_11180345\_x1.....Ugguucgauuccggcgccggagc..... 1  
Gi3\_28365432\_x1.....ugguucuAacccaacagauccg..... 1  
Gi2\_11061510\_x1.....ucUggcguaguauaacggcu..... 1  
Gi1\_4325094\_x1.....guAcgauuccggcgccg..... 1

Gi3\_28315274\_x1.....cagaGccggguucgauuccggcgccgg.....1  
Gi3\_28263398\_x1.....cguaguauaacggcuagC.....1  
Gi1\_4159385\_x1.....aGccggguucgauuccggcgccgga.....1  
Gi3\_28665053\_x1.....agaucggguucgauuAcc.....1  
Gi1\_4369953\_x1.....gguucgauuccAggcgcccggagc.....1  
Gi1\_4176742\_x1.....aacagauccggguucgauuccggUgccgg.....1  
Gi1\_4217601\_x1.....gguucucacccaacCgauccgg.....1  
Gi1\_4274906\_x1.....uucucaccccCacgauccg.....1  
Gi5\_8978627\_x1.....gguucucacccaacagauGcg.....1  
Gi4\_582552\_x1.....gguCcgauuccggcgccgg.....1  
Gi3\_28404516\_x1.....uccggcguaguauaacggcuU.....1  
Gi3\_28448279\_x1.....guucCauuccggcgccggag.....1  
Gi1\_4314438\_x1.....gguucucacccaacaAauccgg.....1  
G1a\_6153473\_x1.....gguucgauucAcggcgccgga.....1  
Gi2\_11379186\_x1.....cgauuccggcgccggagcguuuA.....1  
Gi4\_584974\_x1.....Cuucgauuccggcgccgg.....1  
Gi5\_8873819\_x1.....uugguucucacccaacagGuccg.....1  
Gi1\_4171366\_x1.....gguucgauuccggcgCAgga.....1  
Gi5\_9071985\_x1.....ucucacccaacagauGcgggu.....1  
Gi4\_576983\_x1.....guucAauuccggcgccgg.....1  
Gi3\_28647294\_x1.....ugguGcucacccaacagauccg.....1  
Gi2\_11265383\_x1.....ugguucucacccaacagauAcc.....1  
Gi1\_4205978\_x1.....cUggcguaguauaacggcua.....1  
Gi5\_9042488\_x1.....uugguucCcacccaacagauccg.....1  
Gi3\_28419842\_x1.....ggcguaguauaacggcuagaaC.....1  
Gi5\_8941816\_x1.....gguucUauuccggcgccgg.....1  
Gi5\_9027678\_x1.....accaacagauccggAuucgauucc.....1  
Gi3\_28923891\_x1.....Ugauccggguucgauuccc.....1  
Gi5\_8878632\_x1.....cucacccaacaAauccgg.....1  
Gi1\_4288143\_x1.....Gcggcguaguauaacggcuag.....1  
Gi2\_11387347\_x1.....uccggcguaguauaacgCcu.....1  
Gi5\_9129758\_x1.....gguucgauuccggcgccGg.....1  
Gi3\_28886212\_x1.....gcguaguauaacggcuagG.....1  
Gi2\_11071155\_x1.....cucacccaacagauccCg.....1  
Gi3\_28926284\_x1.....uccggcguaUuauaacggcuagaa.....1  
Gi3\_28294130\_x1.....guucgauuccggcgccgCag.....1  
Gi3\_28668767\_x1.....ugguucucUcccaacagauccg.....1  
Gi5\_8948110\_x1.....Agcguaguauaacggcuagaa.....1  
Gi1\_4240077\_x1.....cagauccgNguucgauuccggcgcc.....1  
Gi5\_9007798\_x1.....ucGcacccaacagauccgg.....1  
Gi5\_9056183\_x1.....accaacagauccggguucgauCcc.....1  
Gi5\_9101593\_x1.....guucucacccaacagCuccgg.....1  
Gi1\_4160066\_x1.....gguucgUuuccggcgccggag.....1  
Gi1\_4387764\_x1.....ugguucucacccaacagaGccg.....1  
Gi1\_4316704\_x1.....gguucgauuccggcgccgUag.....1  
Gi2\_11355574\_x1.....aguccggcguaguauaaUggcuaga.....1  
Gi3\_28544578\_x1.....uccggcguaguauaacggcuagaaG.....1

Gi3\_28509361\_x1.....gCucgauucccgcgccggagcg..... 1  
Gi4\_570039\_x1.....guucgauucccggcAccggag..... 1  
Gi3\_28368155\_x1.....ggNucgauucccgcgccgga..... 1  
G1a\_6246781\_x1.....uUcggcguaguauaacggcua..... 1  
Gi2\_11323443\_x1.....Ucggcguaguauaacggcuaga..... 1  
Gi2\_11127044\_x1.....ucgauucccgcgccggagcA..... 1  
Gi1\_4171915\_x1.....guucgauucUcggcgccg..... 1  
Gi2\_11026130\_x1.....uccggGguaguauaacggcuag..... 1  
Gi1\_4248429\_x1.....guucgauuccGggcgccg..... 1  
Gi1\_4194882\_x1.....uGcggguucgauucccgcgccgga..... 1  
Gi5\_9116548\_x1.....ugguucuUaccaaacagauccgggu..... 1  
Gi3\_28668874\_x1.....caacagauccggguucgauucccgcgccggagc..... 0  
Gi3\_28799809\_x1.....uccggcAuaguauaacggcuagaau..... 1  
Gi2\_11060369\_x1.....uccggcguaguauaacggcuagauggu..... 0  
Gi5\_8913058\_x1.....ucgauucccgcgccggGg..... 1  
Gi3\_28682632\_x1.....cucacccaacagauccGg..... 1  
Gi3\_28310905\_x1.....ucgauucUcggcgccgga..... 1  
Gi5\_8935009\_x1.....uucucacccaacagaCccggguuc..... 1  
Gi3\_28624239\_x1.....cCacccaacagauccggguucgauucc..... 1  
Gi3\_28584570\_x1.....Cucgauucccgcgccgg..... 1  
Gi3\_28546806\_x1.....cgauucccgAcgccggagc..... 1  
G1a\_6024655\_x1.....guucgauucccgcgccggC..... 1  
Gi5\_8970129\_x1.....ugguucucacAcaacagauccg..... 1  
Gi5\_8982493\_x1.....gguucgauucccgcgccgGg..... 1  
G1a\_6272640\_x1.....guCcgauucccgcgccggagc..... 1  
Gi3\_28344005\_x1.....cccaacagauccUggguucgauucc..... 1  
Gi1\_4333676\_x1.....ugguucucacccaacUgaucgg..... 1  
Gi2\_11057976\_x1.....uuNucacccaacagauccg..... 1  
Gi5\_9061607\_x1.....ggAucucacccaacagauccgg..... 1  
Gi5\_9012621\_x1.....uucucacccaacagauccggguC..... 1  
Gi2\_11311502\_x1.....uccggguucgCuucccgcgccgga..... 1  
Gi1\_4348403\_x1.....uccggcguaguauaacUgc..... 1  
Gi3\_28426008\_x1.....ucgauuAccggcgccggagc..... 1  
Gi5\_9082065\_x1.....gguucgauuGccggcgccg..... 1  
Gi5\_8945493\_x1.....Auaguauaacggcuagaau..... 1  
Gi2\_11317674\_x1.....guucucaccAaacagauccgggu..... 1  
Gi2\_11146961\_x1.....gguucgauucccgcgccggagcgC..... 1  
Gi3\_28534135\_x1.....uucucacccaacagauccU..... 1  
Gi4\_604450\_x1.....gguucucacccaacGgaucgg..... 1  
Gi5\_8869804\_x1.....ggcguaguauaCcgguag..... 1  
Gi3\_28742968\_x1.....cccNacagauccggguucgauucc..... 1  
Gi5\_8873427\_x1.....cucacccaacagauccUg..... 1  
Gi5\_9012390\_x1.....gguucgauucccgcgccUggagcguu..... 1  
Gi3\_28565667\_x1.....auuccggcgccggagcCu..... 1  
G1a\_6256295\_x1.....guucgauucUcggcgccgga..... 1  
Gi5\_8877325\_x1.....guucgUuucccgcgccggagc..... 1  
Gi3\_28748721\_x1.....ugguucucaccccacagauccg..... 1

Gi1\_4224661\_x1.....uucucaccaacagaGccgg..... 1  
Gi1\_4328097\_x1.....uccggcguaUuuaaacggcua..... 1  
Gi1\_4352148\_x1.....gguucgauCcccggcgccg..... 1  
Gi5\_9063100\_x1.....ggcguaAuuaaacggcuagaau..... 1  
Gi3\_28623379\_x1.....gGucucaccaacagauccggguucga..... 1  
Gi5\_9042368\_x1.....uccggcguaaguuaaacgCcuag..... 1  
Gi1\_4272720\_x1.....gCuucgauuccggcgccg..... 1  
Gi3\_28970333\_x1.....ugguucucaccaacagauAccg..... 1  
Gi4\_581976\_x1.....uUcggcguaaguuaaacggcuaga..... 1  
Gi3\_28284425\_x1.....acagauccggguucgaCuccggcgccg..... 1  
Gi1\_4266472\_x1.....ucgaGucccggcgccggagc..... 1  
Gi3\_28941386\_x1.....cucaccaacagauccgggCucgauu..... 1  
Gi3\_28625718\_x1.....ggguucgaCuccggcgccggag..... 1  
Gi1\_4165188\_x1.....cucaccaacaAauccgg..... 1  
Gi3\_28467124\_x1.....ugguucucaccaacagauccAg..... 1  
Gi1\_4310796\_x1.....cggcguGguuaaacggcu..... 1  
Gi1\_4295786\_x1.....guuAgauuccggcgccgga..... 1  
G1a\_6126895\_x1.....guucgauuNccggcgccg..... 1  
Gi5\_9078060\_x1.....uccggcguaaguuaaacggUu..... 1  
Gi3\_28404475\_x1.....guucucaccaacagauUcgg..... 1  
Gi5\_8902831\_x1.....cagauccggguucgauCcccggcgccg..... 1  
Gi5\_8901004\_x1.....cggcguGguuaaacggcuagaau..... 1  
Gi5\_8984487\_x1.....Uaccaacagauccggguucga..... 1  
Gi3\_28870627\_x1.....guucCauuccggcgccggagc..... 1  
Gi1\_4188205\_x1.....ccggcguGguuaaacggc..... 1  
Gi5\_8866384\_x1.....ucgauuccggcgccggC..... 1  
Gi1\_4229021\_x1.....ucgauuccggcgccggGgc..... 1  
Gi1\_4356775\_x1.....guuAgauuccggcgccg..... 1  
Gi2\_11055804\_x1.....aacagauccggguucgauCcccggcgccg..... 1  
Gi1\_4271800\_x1.....cucaccaacUgauccgg..... 1  
Gi4\_585899\_x1.....Agauucgauuccggcgccggagc..... 1  
G1a\_6252954\_x1.....uucCcacccaacagauccg..... 1  
G1a\_6309399\_x1.....uccggcguaaguuaaacggcuagaCu..... 1  
Gi5\_8911749\_x1.....ccggcguaguuaaacggcuagaa..... 0  
Gi1\_4360244\_x1.....ugguucucacGcaacagauccg..... 1  
Gi4\_570399\_x1.....uccggcguaaguuaaGcggc..... 1  
Gi2\_11390656\_x1.....ugguucCcacccaacagaucc..... 1  
Gi1\_4225088\_x1.....gguucgauuccggAgccg..... 1  
Gi5\_8890709\_x1.....uccggcguGguuaaacggcuagaa..... 1  
Gi1\_4174174\_x1.....caacagUuccggguucgauuccggc..... 1  
Gi5\_8860021\_x1.....ggcguaaguuaaUggcuag..... 1  
Gi1\_4248739\_x1.....ccggcguaguuaaGcggcuaga..... 1  
Gi5\_8884803\_x1.....guucgauuccggcgccggagcAuuucc..... 1  
Gi2\_11053440\_x1.....ucgauuccggcgUggagc..... 1  
Gi3\_28439530\_x1.....uccggguucgauCcccggcgccgga..... 1  
Gi4\_575202\_x1.....cgauuccggcgccggagcC..... 1  
Gi2\_11193724\_x1.....gauuccAgggcgccggagc..... 1



Gi2\_11289923\_x1.....ucgNuucccggcgccggagc..... 1  
Gi3\_28346019\_x1.....gguucuUacccaacagauccgggu..... 1  
Gi4\_612632\_x1.....gGucgauucccggcgccg..... 1  
Gi2\_11133795\_x1.....gauucAcggcgccggagc..... 1  
Gi2\_11294708\_x1.....cCacccaacagauccgg..... 1  
Gi5\_8953895\_x1.....uucucUcccaacagauccg..... 1  
Gi2\_11136551\_x1.....guucgaAucccggcgccggag..... 1  
Gi5\_9017963\_x1.....cggcguaguGuaacggcuagaau..... 1  
Gi1\_4374646\_x1.....ugguucucacccaacagauUcgg..... 1  
G1a\_6044083\_x1.....guucAauucccggcgccggag..... 1  
Gi5\_8895238\_x1.....gguucgauCcccggcgccggagcguuu..... 1  
Gi3\_28519252\_x1.....cucacccaNcagauccggguucgauu..... 1  
Gi5\_9050913\_x1.....ucucacUcaacagauccg..... 1  
Gi5\_9001673\_x1.....ccggcguaNuuaaacggcu..... 1  
G1a\_6037754\_x1.....gguucgauucccggcgccgAag..... 1  
Gi5\_9056797\_x1.....ggUguaguauaacggcuagaau..... 1  
Gi3\_28833541\_x1.....cgauGcccggcgccggagc..... 1  
Gi3\_28297477\_x1.....gguucucaAccaacagauccg..... 1  
Gi1\_4250048\_x1.....ccggcguagGauaacggc..... 1  
Gi3\_28756382\_x1.....uucucacccaacUgaucgg..... 1  
Gi5\_9071651\_x1.....uucucaccAaacagauccggguuc..... 1  
Gi3\_28949480\_x1.....uccggGguaguauaacggcua..... 1  
G1a\_6330959\_x1.....guucucacccaacagaAccg..... 1  
Gi3\_28822165\_x1.....guuGgauucccggcgccgg..... 1  
G1a\_6169655\_x1.....ucucacccaacagauAcg..... 1  
Gi3\_28596304\_x1.....uucgauucccggcgccggUgc..... 1  
Gi1\_4260549\_x1.....uccggcguaAuuaaacggc..... 1  
Gi3\_28603978\_x1.....ggcguaguauaacAgcuaga..... 1  
Gi3\_28680340\_x1.....Nuucgauucccggcgccg..... 1  
Gi5\_8875077\_x1.....gguucucGcccaacagauc..... 1  
Gi2\_11193403\_x1.....cccaacagCuccggguuc..... 1  
Gi3\_28964329\_x1.....ggguGcgauucccggcgccg..... 1  
Gi5\_8891900\_x1.....uccggcguaguauaacggGuagaau..... 1  
G1a\_6109479\_x1.....uucucaccUaacagauccg..... 1  
Gi2\_11000175\_x1.....gguucUauucccggcgccggag..... 1  
Gi3\_28379045\_x1.....ccggcguaguauaacggcCagaau..... 1  
Gi2\_11053413\_x1.....ggCucgauucccggcgccg..... 1  
Gi3\_28920230\_x1.....cGcacccaacagauccggguucgauucc..... 1  
Gi2\_11002141\_x1.....gGguaguauaacggcuagaa..... 1  
Gi1\_4225206\_x1.....guuNucacccaacagauccg..... 1  
Gi3\_28603845\_x1.....uccggguucgauuccggc..... 0  
Gi2\_11086499\_x1.....cggguucgaGucccggcgccga..... 1  
G1a\_6024798\_x1.....uccggcguaAuuaaacggcuagaa..... 1  
Gi1\_4374259\_x1.....cucaccAaacagauccgg..... 1  
Gi1\_4240262\_x1.....uucgauuccGggcgccgg..... 1  
Gi5\_9053210\_x1.....gguucCacccaacagauccg..... 1  
Gi3\_28423031\_x1.....cagauccggguucgauucccggcgccgC..... 1

Gi2\_11051528\_x1.....ugguCcucacccaacagauccg..... 1  
Gi1\_4240235\_x1.....Ngguucucacccaacagauccgg..... 1  
Gi3\_28876879\_x1.....Aguucgauuccggcgccggagcg..... 1  
Gi3\_28424338\_x1.....gauccggguucgauucccggu..... 1  
Gi3\_28525479\_x1.....aGcagauccggguucgauucc..... 1  
Gi5\_8906643\_x1.....gauccggguucgCuuccggcgccgga..... 1  
Gi2\_11271538\_x1.....ucgauucAcggcgccgga..... 1  
Gi3\_28321592\_x1.....Accggguucgauuccggcgccgga..... 1  
Gi3\_28642363\_x1.....guGcucacccaacagauccgg..... 1  
Gi3\_28686905\_x1.....uucgauuccggcAccgg..... 1  
Gi5\_8965334\_x1.....gguucgauUccggcgccggagcguu..... 1  
Gi5\_8938866\_x1.....uccggcguaguuaaacggcuaU..... 1  
Gi5\_9126998\_x1.....ggcguaguGuaacggcuaga..... 1  
Gi2\_11295437\_x1.....aacagauccggguAcgauuccggcgccg..... 1  
Gi1\_4176203\_x1.....uccggcguaguaCaacggcuagaa..... 1  
Gi5\_9056703\_x1.....uuggGucucacccaacagauccg..... 1  
Gi1\_4280231\_x1.....guucgauGcccggcgccg..... 1  
Gi5\_8968009\_x1.....Nucucacccaacagauccgg..... 1  
Gi3\_28375014\_x1.....guucgauuccggcgccggagcg..... 0  
Gi3\_28678496\_x1.....gcguaguuaaaUggcuaga..... 1  
Gi3\_28817395\_x1.....ccggcguaguauCacggcuaga..... 1  
Gi5\_8878709\_x1.....cucacccaacagauccGg..... 1  
Gi2\_11236544\_x1.....uccggcguaguuaaacgUcuagaau..... 1  
Gi3\_28851934\_x1.....guucuUacccaacagauccg..... 1  
Gi1\_4347531\_x1.....uucgauuccggcgccggagcU..... 1  
Gi1\_4295209\_x1.....ggugcgaucggcgccgg..... 1  
Gi5\_8837373\_x1.....Nuucgauuccggcgccg..... 1  
Gi1\_6130492\_x1.....guucUauuccggcgccggagc..... 1  
Gi5\_9086160\_x1.....uucgauuccggcgccggagcAu..... 1  
Gi5\_8936367\_x1.....guucucacGcaacagauccg..... 1  
Gi5\_8865560\_x1.....uccggcguaguauCacggcu..... 1  
Gi4\_583078\_x1.....uccggcguaguuaaacggcuaAaa..... 1  
Gi2\_11368171\_x1.....gguucgauAccggcgccggag..... 1  
Gi1\_6171124\_x1.....uccggcguaguuaaacgAc..... 1  
Gi5\_8865448\_x1.....uccggguucgauAccggc..... 1  
Gi5\_9097929\_x1.....gguucucacccaacUgauccgg..... 1  
Gi5\_9007667\_x1.....cggcguaguuaaacggcuagaau..... 0  
Gi3\_28383516\_x1.....gguucgauucccCgcgcccgg..... 1  
Gi3\_28809496\_x1.....cgauucccAgcgccggagc..... 1  
Gi5\_9029503\_x1.....ucGggcguaguuaaacggcua..... 1  
Gi1\_4211070\_x1.....ggcguaguuaaacggcCa..... 1  
Gi5\_8849804\_x1.....ucAcacccaacagauccgg..... 1  
Gi2\_11349207\_x1.....Uggcguaguuaaacggcua..... 1  
Gi2\_11144940\_x1.....uccggGguaguuaaacggcuagaau..... 1  
Gi2\_11158769\_x1.....uucgauuccggcgccAga..... 1  
Gi1\_4234834\_x1.....auccggguucgauuccggcgUgga..... 1  
Gi3\_28805885\_x1.....ggAguaguuaaacggcuagaau..... 1

Gi3\_28973006\_x1.....cagaucgggGucgauuccggcgccgg.....1  
Gi3\_28330811\_x1.....gguucucUcccaacagauccg.....1  
Gi2\_11237992\_x1.....uucgauuccUggcgccggagc.....1  
Gi5\_8841715\_x1.....Accaacagauccggguucgauucc.....1  
Gi2\_11252747\_x1.....uccggcguaguauaacggGuagaau.....1  
Gi5\_9088187\_x1.....ccggguucgauuccggcgccggU.....1  
Gi1a\_6195582\_x1.....uccggcguaguauaacggcuaAaau.....1  
Gi5\_9064252\_x1.....uccggcguGguauaacggcuagaa.....1  
Gi2\_11161442\_x1.....uucucaccaacagauccgC.....1  
Gi3\_28633401\_x1.....gguucgauuccggGgccgga.....1  
Gi2\_11310277\_x1.....uccggcguaguauaacgUcuagaa.....1  
Gi2\_11397560\_x1.....guucgauuccggcgGccgga.....1  
Gi1\_4371992\_x1.....uccggcguaguauGacggcu.....1  
Gi1\_4226254\_x1.....guucucaccGaacagauccg.....1  
Gi5\_8873261\_x1.....cucaUccaacagauccgg.....1  
Gi1\_4331175\_x1.....gguucgauuccggcgccUga.....1  
Gi2\_11132632\_x1.....uccggcguaguauaaAggcuag.....1  
Gi2\_11142208\_x1.....cggcguagCauaacggcua.....1  
Gi1\_4175107\_x1.....ugNuucucaccaacagauccgg.....1  
Gi1a\_6024901\_x1.....gguucgauuAccggcgccggag.....1  
Gi5\_8840570\_x1.....guucgauuccggcgGccgag.....1  
Gi3\_28834179\_x1.....uugguucucacGcaacagaucc.....1  
Gi3\_28447617\_x1.....uucgauuccgAcgccgga.....1  
Gi5\_9119908\_x1.....uucgauuccggcgccAgg.....1  
Gi5\_9011630\_x1.....uucucCcccaacagauccgg.....1  
Gi5\_8833944\_x1.....uugguucucNaccaacagauccg.....1  
Gi3\_28538480\_x1.....gguucgauuccggcgGc.....1  
Gi2\_11358108\_x1.....agaucggguucgGuucc.....1  
Gi5\_8884316\_x1.....cggguucgauuccggUgc.....1  
Gi2\_11174349\_x1.....Uguucucaccaacagaucc.....1  
Gi5\_9106455\_x1.....aucggguucgauuccggcgccggagc.....0  
Gi3\_28683435\_x1.....acagauccggguucgauCccggcgccggagc.....1  
Gi2\_11111602\_x1.....ccggcguaguauaacggcu.....0  
Gi5\_9070968\_x1.....ucgaCuccggcgccggagc.....1  
Gi2\_11151215\_x1.....uugguucucaccaacUgauccg.....1  
Gi5\_8897780\_x1.....gguuAgauuccggcgcc.....1  
Gi2\_11352120\_x1.....ccggcguaguauaGcggcua.....1  
Gi2\_11299987\_x1.....ccggcguaguauaacggc.....0  
Gi3\_28520908\_x1.....ccggcguaguauaaUggcuaga.....1  
Gi1\_4352544\_x1.....cccaacagauccggguuc.....0  
Gi1\_4356054\_x1.....cucaccaacagauccggguucgauuccU.....1  
Gi3\_28987072\_x1.....aaUagauccggguucgauucc.....1  
Gi2\_11226528\_x1.....agGuccggguucgauucc.....1  
Gi2\_11157230\_x1.....uugguucucaccaacaAauccg.....1  
Gi3\_28572390\_x1.....gguucgauAccggcgccgg.....1  
Gi3\_28469741\_x1.....Nguucgauuccggcgcc.....1  
Gi3\_28819375\_x1.....agaucgggCucgauuccc.....1

Gi4\_598390\_x1 .....gguucgauucccgGgccgg..... 1  
Gi3\_28400264\_x1.....guucucaccccacagauccggguucgau..... 1  
Gi2\_11222250\_x1.....uAcggcguaguauaacggcuagaau..... 1  
Gi3\_28538421\_x1.....ccggcguaguauaacggcuaA..... 1  
Gi3\_28411947\_x1.....cgguucgauucccggcgccgCa..... 1  
Gi2\_11372907\_x1.....ugguucucCcccaacagauccg..... 1  
Gi3\_28598908\_x1.....guucucacccaCagauccgggu..... 1  
Gi1\_4386623\_x1.....uucucCcccaacagauccg..... 1  
Gi1\_4237244\_x1.....uucgauucccggcgccAg..... 1  
Gi2\_11168067\_x1.....gNucgauucccggcgccgagc..... 1  
Gi2\_11375064\_x1.....ccaacagaNccggguucgauucccggcgccgagc..... 1  
Gi5\_8850834\_x1.....ggcguaguauaacggUuag..... 1  
Gi2\_11330095\_x1.....gguGcgauucccggcgccgga..... 1  
Gi1\_4172546\_x1.....uccAgcguaguauaacggc..... 1  
Gi2\_11114223\_x1.....Ggauccggguucgauucc..... 1  
Gi3\_28793977\_x1.....ggcguaguauaacggcuaga..... 1  
Gi5\_9001791\_x1.....cUauucccggcgccggagcguuucc..... 1  
Gi3\_28652680\_x1.....cgauucccggcgccggCg..... 1  
Gi4\_579019\_x1.....gGucgauucccggcgccggagc..... 1  
Gi1\_4185010\_x1.....uUucacccaacagauccgg..... 1  
Gi2\_11190614\_x1.....uucucacccaacaAauccg..... 1  
G1a\_6004882\_x1.....guucucacccaacCgauccg..... 1  
Gi3\_28951653\_x1.....agauccAgguucgauucc..... 1  
Gi3\_28266424\_x1.....Gugguucucacccaacaga..... 1  
Gi4\_612542\_x1.....gauucccggcgccggagc..... 0  
Gi1\_4269826\_x1.....cGcccaacagauccggguucgauucc..... 1  
Gi3\_28569503\_x1.....uccUgcguaguauaacggcuagaa..... 1  
Gi2\_11212311\_x1.....gguucgauuccGggcgccggag..... 1  
Gi2\_11144303\_x1.....guucCauucccggcgccggag..... 1  
Gi2\_11160678\_x1.....uccggguucgauucccggcgccggagc..... 0  
Gi5\_9133714\_x1.....ucgauucccgUgcccggagc..... 1  
Gi3\_28605773\_x1.....gguGcgauucccggcgccggag..... 1  
Gi1\_4261491\_x1.....gguucgauuccUggcgccggag..... 1  
Gi5\_8990018\_x1.....ggcguagCauaacggcuagaau..... 1  
Gi1\_4388547\_x1.....Gacagauccggguucgauucccggcgccgg..... 1  
Gi3\_28706486\_x1.....ucucacccaacagauUgg..... 1  
Gi2\_11306525\_x1.....uccggcguagAauaacggc..... 1  
Gi5\_9035518\_x1.....ggguucgauucccggcgcc..... 0  
Gi3\_28588303\_x1.....Nucucacccaacagauccg..... 1  
G1a\_6002738\_x1.....gCuucgauucccggcgccgg..... 1  
Gi3\_28616757\_x1.....ucAggcguaguauaacggcua..... 1  
Gi3\_28458350\_x1.....guucgauucccggcUccggag..... 1  
Gi2\_11298164\_x1.....uGgauucccggcgccgga..... 1  
Gi1\_4214366\_x1.....gguucgauuAccggcgccggag..... 1  
Gi5\_8985201\_x1.....gGuccggguucgauucccggcgccgga..... 1  
Gi1\_4175368\_x1.....gguucgauucccggcAccggag..... 1  
Gi5\_9098832\_x1.....uucucacccaUagaucggguuc..... 1

Gi2\_11279226\_x1.....cgauucccAgcgccggagcguuu..... 1  
G1a\_6138379\_x1.....uccggcguaguauGacggcuag..... 1  
Gi1\_4220275\_x1.....uccggUguaguauaacggcu..... .guuGgauucccgcgccggagc..... 1  
Gi1\_4248327\_x1.....uccggUguaguauaacggcu..... 1  
Gi2\_11139607\_x1.....cggcCuaguauaacggcuaga..... 1  
Gi5\_8867507\_x1.....acagaucGggguucgauucccgcg..... 1  
Gi3\_28955418\_x1.....gauuAccggcgccggagc..... 1  
Gi2\_11088396\_x1.....uccggcgCaguauaacggcuagaa..... 1  
Gi3\_28516877\_x1.....agauccggguCcgauucccgcgccggag..... 1  
Gi5\_9067791\_x1.....gguucuUaccaacagauc..... 1  
Gi3\_28642877\_x1.....guucCaccaacagauccgg..... 1  
Gi5\_9025560\_x1.....gguucgauucccgcgccggaC..... 1  
Gi2\_11296464\_x1.....gguucucaccaacagaAccg..... 1  
G1a\_6006925\_x1.....ugguucucaccaacagauccA..... 1  
Gi3\_28486264\_x1.....gguucucaccaacGgauccgg..... 1  
Gi5\_8872509\_x1.....ggguucgCuucccgcgccggagc..... 1  
Gi2\_11058683\_x1.....cagauccggguucgauucccgcgccggagcC..... 1  
Gi5\_9071310\_x1.....uAguucucaccaacagauccgg..... 1  
Gi2\_11106519\_x1.....ucaccaacagauccggguuc..... 0  
Gi2\_11301148\_x1.....uucAauucccgcgccggagc..... 1  
Gi3\_28803447\_x1.....cggcguGguauaacggcua..... 1  
Gi2\_11151932\_x1.....uccggguucgauuccUggcgccgga..... 1  
Gi5\_8964280\_x1.....ggcguaguCuaacggcuag..... 1  
Gi3\_28467228\_x1.....gguucgauucccgCcgccggag..... 1  
Gi5\_9053796\_x1.....uccggUguaguauaacggcu..... 1  
Gi3\_28664228\_x1.....ggcguaguauaacggcuaga..... 1  
Gi5\_9119065\_x1.....accaacagauccgggCucgauucc..... 1  
Gi5\_8839447\_x1.....uccggGguaguauaacggcua..... 1  
Gi3\_28821354\_x1.....cggguucgauucccgcgccggagcA..... 1  
Gi5\_9137140\_x1.....uccCgcuaguauaacggcuaga..... 1  
Gi3\_28705800\_x1.....gAuucucaccaacagauccgg..... 1  
G1a\_6021359\_x1.....uccggcguaguaAaacggcuaga..... 1  
Gi1\_4378876\_x1.....uccggcguaguauaacggGua..... 1  
Gi2\_11162931\_x1.....Auucucaccaacagauccgggu..... 1  
Gi5\_8964739\_x1.....ccggcgCaguauaacggcua..... 1  
Gi5\_9031108\_x1.....Gcggcguaguauaacggcuaga..... 1  
G1a\_6343388\_x1.....gguucUauucccgcgccg..... 1  
Gi5\_8985589\_x1.....cggcgCaguauaacggcuaga..... 1  
Gi3\_28529579\_x1.....uucgauuAccggcgccggagc..... 1  
Gi5\_8883673\_x1.....ccggcguaguauaacggcuag..... 1  
Gi3\_28462976\_x1.....gguuNgauucccgcgccggagc..... 1  
Gi5\_8993165\_x1.....ccggUguaguauaacggcua..... 1  
Gi3\_28516924\_x1.....gauccggguucgauCccc..... 1  
Gi5\_9026824\_x1.....agauAccggguucgauuccc..... 1  
Gi1\_4220382\_x1.....guuAgauucccgcgccggagc..... 1  
Gi4\_606072\_x1.....uuggCucucaccaacaga..... 1  
Gi1\_4325991\_x1.....uccggcguaguauaacggcuagaUu..... 1

Gi3\_28521586\_x1.....uucucGcccaacagauccgg.....1  
Gi2\_11246227\_x1.....gguNcgauuccggcgccg.....1  
Gi5\_8953659\_x1.....guucgauuccUgcgccgga.....1  
Gi5\_8969622\_x1.....aguccggcguaguauaGcggcu.....1  
Gi3\_28962402\_x1.....ucgauuccggcgccggCg.....1  
Gi2\_11279186\_x1.....guucucacccaaGagauccg.....1  
G1a\_6167788\_x1.....Ccucacccaacagauccg.....1  
Gi3\_28869815\_x1.....uucuUacccaacagauccg.....1  
Gi2\_11162569\_x1.....uccggcguaguauaaAggc.....1  
Gi3\_28460388\_x1.....ugguucucacccaacaAauccg.....1  
Gi2\_11225737\_x1.....uccUgcguaguauaacggcuagaau.....1  
Gi2\_11218958\_x1.....gauuccggcAccggagc.....1  
Gi3\_28403535\_x1.....aUauccggguucgauuccggcgccg.....1  
Gi2\_11393516\_x1.....guucucacccaacGgauccg.....1  
G1a\_6248764\_x1.....uuUucacccaacagauccg.....1  
Gi3\_28910896\_x1.....ggcguaguauaacggcuagaaA.....1  
Gi1\_4172795\_x1.....guucgUuuccggcgccg.....1  
Gi2\_11154360\_x1.....Ggauuccggcgccggagcguuuc.....1  
Gi5\_8920815\_x1.....Accggcguaguauaacggcuagaa.....1  
Gi1\_4197538\_x1.....cggcguaguauaacggcuagaa.....0  
Gi3\_28901503\_x1.....caacagauccggguCcga.....1  
Gi2\_11304308\_x1.....guucgauGccggcgccggag.....1  
G1a\_6194525\_x1.....Cccggcguaguauaacggcua.....1  
Gi3\_28572412\_x1.....guucgauGccggcgccgga.....1  
Gi2\_11072883\_x1.....cUggcguaguauaacggcuagaau.....1  
Gi5\_9102028\_x1.....ugguucucNcccaacagauccgggu.....1  
Gi2\_11293023\_x1.....uucAcacccaacagauccggguucg.....1  
Gi3\_28653418\_x1.....guNcucacccaacagauccg.....1  
Gi3\_28462880\_x1.....uugguucucacccaacagCucc.....1  
Gi2\_11005068\_x1.....gguuAucacccaacagauccg.....1  
Gi5\_8832460\_x1.....gguCcucacccaacagauc.....1  
Gi5\_8972409\_x1.....cggcguaguauaacAgcuagaau.....1  
Gi2\_11074341\_x1.....Agguucucacccaacagaucc.....1  
Gi1\_4282852\_x1.....ggAucgauuccggcgccggag.....1  
Gi3\_28580361\_x1.....ucgauuccggcgccggagcA.....1  
Gi5\_9103980\_x1.....uccggcguaguauGacggcu.....1  
Gi1\_4319024\_x1.....gguucucacccaaAagauccg.....1  
Gi4\_596825\_x1.....uccggcguaguauaacggUuag.....1  
Gi4\_579821\_x1.....uccggcgCaguauaacggcuaga.....1  
G1a\_6020147\_x1.....gguucgauuccAggcgccggag.....1  
Gi3\_28324364\_x1.....gguucgauuccggcgCg.....1  
Gi5\_8988332\_x1.....ggcguaguNuaacggcua.....1  
Gi5\_8920249\_x1.....gguucgauuccggcCccggagc.....1  
G1a\_6189935\_x1.....uucucacccGacagauccg.....1  
Gi5\_8934544\_x1.....guucgauCccggcgccggag.....1  
Gi1\_4206479\_x1.....ccggcguUguauaacggcua.....1  
Gi2\_11072067\_x1.....ggguucgauuccggcgccg.....0

Gi3\_28332991\_x1.....aucUggguucgauucccggcgccggagc..... 1  
Gi5\_9121068\_x1.....ucucacccaacagauUcg..... 1  
Gi4\_594361\_x1.....Aucaccaacagauccggguucg..... 1  
Gi3\_28596156\_x1.....cgaNucccggcgccggagc..... 1  
Gi2\_11154727\_x1.....uccggcguaguauaCcgguagaau..... 1  
Gi3\_28351186\_x1.....guucucacccaacagaucc..... 0  
Gi2\_11082774\_x1.....guuGgauucccggcgccggag..... 1  
G1a\_6330986\_x1.....guucgauucccCgcgccc..... 1  
Gi1\_4339970\_x1.....guucgauucccggcgccAgagc..... 1  
Gi2\_11381308\_x1.....guucgauucccggcgccU..... 1  
Gi2\_11236569\_x1.....ugguucuaAcacaacagaucc..... 1  
Gi4\_592118\_x1.....gguucucacccGacagaucg..... 1  
Gi3\_28269161\_x1.....ccaacagauccggguucgCuucc..... 1  
Gi2\_11057050\_x1.....gcuaguanaacggcuagaa..... 1  
Gi2\_11133468\_x1.....Cgguucucacccaacagaucg..... 1  
Gi1\_4277007\_x1.....guucgauucccggcUccgg..... 1  
Gi1\_4308627\_x1.....guucgauucccgGgccc..... 1  
Gi5\_9030840\_x1.....gauucccggcgccggagA..... 1  
Gi3\_28586589\_x1.....uccggguucgauucccggcgccggagc..... 0  
Gi5\_9026658\_x1.....aGagauccggguucgauucccggcgc..... 1  
G1a\_6164369\_x1.....uccggcguaguauaacAgcuagaa..... 1  
Gi2\_11320157\_x1.....uccggcguaguauaaGggcuagaa..... 1  
Gi2\_11268373\_x1.....ucgauucccggcgccggaAc..... 1  
Gi1\_4198238\_x1.....uucucacccaacagaucggU..... 1  
Gi2\_11074895\_x1.....agGccggcguaguauaacgg..... 1  
Gi3\_28630680\_x1.....guucgauucccggcgccUagc..... 1  
Gi5\_9020509\_x1.....gguucucacccaacagauccC..... 1  
Gi2\_11099575\_x1.....guucgauuccAggcgccg..... 1  
Gi2\_11059441\_x1.....gguucgauuccAggcgccg..... 1  
Gi3\_28378571\_x1.....ggguucgGuucccggcgccggagc..... 1  
Gi3\_28471226\_x1.....cggAuucgauucccggcgccgga..... 1  
Gi1\_4291873\_x1.....uccggcguaguauaacggcuagaauA..... 1  
Gi1\_4257778\_x1.....gguucgauucccggcgcAg..... 1  
Gi5\_8950064\_x1.....gguuGgauucccggcgc..... 1  
Gi1\_4269386\_x1.....ugguucucacccaacagauccCg..... 1  
Gi1\_4290332\_x1.....guucgauucccggcgccggaC..... 1  
Gi3\_28552848\_x1.....guucgauucccggcUccg..... 1  
Gi2\_11172346\_x1.....uccggcguaguauaacggcuaUaau..... 1  
Gi5\_8889832\_x1.....guucgauucccCgcgcccggagc..... 1  
Gi2\_11140477\_x1.....uucucacccaacagaucggA..... 1  
Gi3\_28298784\_x1.....uucucacccaacagauGcgg..... 1  
Gi3\_28708828\_x1.....ucucacccaacagaucggC..... 1  
G1a\_6330265\_x1.....gguucgauucccggcgcUgga..... 1  
Gi3\_28962457\_x1.....Gccaacagauccggguucgauucc..... 1  
Gi5\_9058656\_x1.....uucucacccaacGgaucggguu..... 1  
Gi3\_28615613\_x1.....Ugaucggguucgauucccggcgccgg..... 1  
Gi5\_8997089\_x1.....ccggguucgGuucccggcgccgga..... 1

Gi2\_11322039\_x1.....guuAucacccaacagauccg..... 1  
 Gi5\_9082997\_x1.....guucgauucccggcgcggagcg..... 0  
 Gi3\_28492309\_x1.....uccggcCuaguauaacggcuagaau..... 1  
 Gi1\_4170363\_x1.....uccggcguGguauaacggcuagaau..... 1  
 Gi5\_8901041\_x1.....gguucgauucccggcgcggCag..... 1  
 Gi3\_28633513\_x1.....uccggcguCuauaacggcuag..... 1  
 Gl1a\_6169776\_x1.....gguucgaCucccggcgcggga..... 1  
 Gi4\_573574\_x1.....uucucacccaacagauccg..... 0  
 Gi3\_28888554\_x1.....ugguucucacAaacagauccg..... 1  
 Gi5\_9065295\_x1.....uccgCcguguaguauaacggcuagaau..... 1  
 Gi5\_9040621\_x1.....ggcuguaguauaacggcuagC..... 1  
 Gi4\_604630\_x1.....uUcggcguaguauaacggcuag..... 1  
 Gi5\_8864055\_x1.....cggcuguaguauaacgAcuag..... 1  
 Gl1a\_6301306\_x1.....gguucgauCcccgggcgcggagc..... 1  
 Gi3\_28326683\_x1.....uccggcguaguauaaAggcuag..... 1  
 Gi2\_11157678\_x1.....gguucgauucccgUcgccggag..... 1  
 Gi3\_28405878\_x1.....cagauccggguucgauucccggcgcg..... 0  
 Gi5\_8923647\_x1.....uccggcguaguauaacggcGa..... 1  
 Gl1a\_6242963\_x1.....ucAcacccaacagauccg..... 1  
 Gl1a\_6202501\_x1.....gguucgauNcccgggcgc..... 1  
 Gi2\_11331612\_x1.....uucAauucccggcgcgg..... 1  
 Gi5\_8979444\_x1.....Cucgauucccggcgcgg..... 1  
 Gi5\_8979070\_x1.....uugguucucCcccaacagauccg..... 1  
 Gi1\_4334700\_x1.....uucucUcccaacagauccggguucgau..... 1  
 Gi5\_8985932\_x1.....uccggcgCaguauaacggcu..... 1  
 Gi3\_28313959\_x1.....gguCcuacccaacagauccg..... 1  
 Gi1\_4332412\_x1.....uccggcguaguauaUcggcuaga..... 1  
 Gi3\_28366159\_x1.....gauccggguucgauucccggcgcggagcC..... 1  
 Gi2\_11036911\_x1.....uccggcguaguauaaAggcu..... 1  
 Gi5\_9014789\_x1.....guucucacccaacagauCagg..... 1  
 Gi5\_8896571\_x1.....uggCucucacccaacagauccgggu..... 1  
 Gi3\_28845642\_x1.....agauCaggguucgauucc..... 1  
 Gi3\_28729090\_x1.....uuGucacccaacagauccg..... 1  
 Gi1\_4255937\_x1.....ccggUguaguauaacggcuag..... 1  
 Gi3\_28440405\_x1.....cgNuuccgggcgcggagc..... 1  
 Gl1a\_6079268\_x1.....gguucgauuAccgggcgcggagc..... 1  
 Gi2\_11209821\_x1.....uccggcguUuauaacggcuagaa..... 1  
 Gi1\_4315732\_x1.....uUcggcguaguauaacggcu..... 1  
 Gi3\_28827616\_x1.....agauccggguAcgauucc..... 1  
 Gi1\_4328858\_x1.....uGcucacccaacagauccggguucgau..... 1  
 Gi5\_8993100\_x1.....guucucacccaacagauGcg..... 1  
 Gi5\_8834483\_x1.....gguucgauucccgGgcggag..... 1  
 Gi4\_589114\_x1.....gguucgauucccggcgcgggaAC..... 1  
 Gi5\_8980189\_x1.....uccggcguaguCuaacggcuagaa..... 1  
 Gi3\_28599906\_x1.....auccggguNcgauuccggcg..... 1  
 Gl1a\_6057563\_x1.....uccggcguaguauaaUggcuagaau..... 1  
 Gi2\_11271529\_x1.....cagauccggguucgCuuccgggcgcggag..... 1



Gi3\_28599939\_x1.....ccggcguaguCuaacggcuaga.....1  
Gi3\_28694185\_x1.....uccggcguaguauaNcgguaga.....1  
Gi3\_28296388\_x1.....guucuAacccaacagauccg.....1  
Gi3\_28373286\_x1.....auccgggGucgauuccggcgccgga.....1  
Gi4\_600813\_x1.....Cccggcguaguauaacggcua.....1  
G1a\_6100783\_x1.....gguucgauucccgAcgccg.....1  
Gi2\_11228118\_x1.....aguccggcguaguauaacggcua.....0  
Gi2\_11005910\_x1.....caUaucggguucgauuccggcgccgga.....1  
Gi3\_28323193\_x1.....Cauccggguucgauucc.....1  
G1a\_6108627\_x1.....Agguucucacccaacagauccg.....1  
Gi2\_11034387\_x1.....uccggguucgaCuccggcgccgga.....1  
Gi2\_11352187\_x1.....uccggcguaguauaacggcAaga.....1  
Gi2\_11236505\_x1.....ugguucucUcccaacagauccg.....1  
Gi5\_9067202\_x1.....uccggcguagCuaaacggcu.....1  
Gi5\_9013166\_x1.....Cgauccggguucgauucc.....1  
Gi1\_4319846\_x1.....ucucacccaacagaCccg.....1  
Gi5\_8977507\_x1.....gguucucacccGacagauccggguu.....1  
Gi1\_4320232\_x1.....uccggcguaguauGacggc.....1  
Gi3\_28659346\_x1.....guGcucacccaacagauccggg.....1  
Gi5\_9084857\_x1.....uGcggguucgauuccggc.....1  
G1a\_5996456\_x1.....ggguucgauuccggcgccggagcC.....1  
Gi1\_4202460\_x1.....uccAgguucgauuccggcgccgga.....1  
Gi1\_4296745\_x1.....gguucgauuccggcgccggaC.....1  
Gi3\_28771419\_x1.....ggcguaguauaacggcuagCau.....1  
Gi1\_4164300\_x1.....ggcguaguUuaacggcua.....1  
Gi2\_11241927\_x1.....uccggcguaguauAaacggc.....1  
Gi2\_11248524\_x1.....gguucucacGcaacagauccg.....1  
Gi3\_28398881\_x1.....ucacccaacagauccggguCc.....1  
Gi2\_11275583\_x1.....cagauccggguucgauuccggcgccggCg.....1  
Gi2\_11088551\_x1.....cgauuccggcgccggagcU.....1  
Gi1\_4191986\_x1.....aCccggguucgauuccggcgccgg.....1  
G1a\_6239905\_x1.....gguucgauuccUggcgccggagc.....1  
Gi5\_9078320\_x1.....uucucacccaacUgauccg.....1  
Gi1\_4191676\_x1.....ucgauuccggcgccgga.....0  
Gi5\_9007676\_x1.....uNcggcguaguauaacgg.....1  
Gi3\_28281122\_x1.....uucgauuccggcgUgg.....1  
Gi3\_28909169\_x1.....ggcguagCuaaacggcuaga.....1  
Gi1\_4219145\_x1.....ggcguaguauaacgAcuag.....1  
Gi5\_8921644\_x1.....guucgauuccggcgUggag.....1  
Gi3\_28337109\_x1.....guucgauGcccggcgccgg.....1  
Gi4\_606285\_x1.....uucucacccaacagauccggguuc.....0  
Gi5\_9124832\_x1.....gguucgauuccggGgccggagc.....1  
Gi3\_28876647\_x1.....aAuccggguucgauuccggcgccggag.....1  
Gi3\_28792058\_x1.....guucgaAuccggcgccg.....1  
Gi1\_4322936\_x1.....uugguucucacccaacagauccg.....0  
Gi5\_9097006\_x1.....gguucgUuuccggcgccgga.....1  
Gi4\_568121\_x1.....uugguucucaccUaacaga.....1

Gi1\_4234343\_x1.....gguucUauucccgcgccg..... 1  
 Gi5\_8896414\_x1.....ucucaccaacagauccAggu..... 1  
 Gi1\_4217338\_x1.....ucucacUcaacagauccgg..... 1  
 Gi1\_4367436\_x1.....Acucaccaacagauccgg..... 1  
 Gi2\_11116924\_x1.....uccggcguaguauaacggGuaga..... 1  
 Gi1\_4295070\_x1.....caacagauccggguucgauuccUggc..... 1  
 Gi3\_28809061\_x1.....Cguucucaccaacagauccgggu..... 1  
 Gi1\_4193194\_x1.....gguucucaccaacagaucc..... 0  
 Gi3\_28538696\_x1.....gauccggguucgauAccc..... 1  
 Gi5\_9069420\_x1.....ucacccUacagauccgggu..... 1  
 Gi1\_6353152\_x1.....gguucAauucccgcgccggagc..... 1  
 Gi2\_11038569\_x1.....gguucgauucccgcgccgUa..... 1  
 Gi3\_28522852\_x1.....uAcggcguaguauaacggcua..... 1  
 Gi3\_28331776\_x1.....ucgauucccgcgGcggag..... 1  
 Gi1\_4371846\_x1.....uccggcUuaguauaacggcua..... 1  
 Gi3\_28363045\_x1.....ccggcguaguauaCggcua..... 1  
 Gi2\_11330651\_x1.....uccggguucgauucccgcgUcgga..... 1  
 Gi1\_4364403\_x1.....ucUcccaacagauccgggu..... 1  
 Gi3\_28263261\_x1.....uccggcguaguauaacgCcuagaa..... 1  
 Gi4\_582105\_x1.....uccggcguaguauaacggcuCga..... 1  
 Gi3\_28422376\_x1.....uccggguucgauuccAgcgccgga..... 1  
 Gi3\_28418507\_x1.....uucgauGccggcgccggagc..... 1  
 Gi1\_4372687\_x1.....uccggcgGaguauaacggcua..... 1  
 Gi1\_4205118\_x1.....guucgauucccgUcgccggagc..... 1  
 Gi1\_4181266\_x1.....ucucaccaacagauccAg..... 1  
 Gi3\_28604818\_x1.....ucgauCcccgcgccggag..... 1  
 Gi3\_28844265\_x1.....ccUgcguaguauaacggcuaga..... 1  
 Gi1\_4173683\_x1.....Ucggcguaguauaacggcuaga..... 1  
 Gi3\_28911893\_x1.....guucucacUcaacagauccgggu..... 1  
 Gi2\_11390696\_x1.....agaucggguucAauucc..... 1  
 Gi5\_8977196\_x1.....ccggcguaguauaacUgcua..... 1  
 Gi3\_28862388\_x1.....uccggcguaguauaacggcuagaauuggu..... 0  
 Gi1\_4324906\_x1.....cagaucggguucgCuucccgcgcc..... 1  
 Gi1\_4222424\_x1.....guucgauuccAgcgccggagc..... 1  
 Gi2\_11336996\_x1.....guAcucaccaacagauccg..... 1  
 Gi1\_4290788\_x1.....uccggcgGaguauaacggcuagaauuggu..... 1  
 Gi2\_11018820\_x1.....uAcgauucccgcgccggagc..... 1  
 Gi3\_28529026\_x1.....guucgauGccggcgccgga..... 1  
 Gi1\_4264589\_x1.....ucgauucccgUgcggagc..... 1  
 Gi5\_8941812\_x1.....gguucgauucccgcgccggagcguuC..... 1  
 Gi4\_588102\_x1.....guucgauucccgcgccggag..... 0  
 Gi1\_6015802\_x1.....gguucgauucccgcgUcg..... 1  
 Gi5\_8989993\_x1.....Ggguucucaccaacagauccggguucga..... 1  
 Gi1\_4278973\_x1.....uccggcguaguauaacgCcua..... 1  
 Gi1\_4371490\_x1.....gguucuUaccaacagauccgg..... 1  
 Gi2\_11264212\_x1.....gguucgauucccgcgccggUg..... 1  
 Gi3\_28795788\_x1.....gaUucccgcgccggagc..... 1

Gi4\_595786\_x1 .....guucgCuucccgccgcccgg..... 1  
Gi2\_11033012\_x1.....cgaCuucccgccgcccggagcguuu..... 1  
Gi2\_11335105\_x1.....uccgCcguaquauaacggcua..... 1  
Gi1\_4257203\_x1.....Ugguucgauucccgccgcccggga..... 1  
Gi1\_4223970\_x1.....guucgauucccgccgcccggga..... 1  
Gi1\_4329162\_x1.....Guccggguucgauucccgccgcccggga..... 1  
Gi2\_11289243\_x1.....gguucgauucccgCcgcc..... 1  
Gi5\_9086408\_x1.....guucucaccaacaCauccgg..... 1  
Gi2\_11031628\_x1.....aguccggUguaguauaacggcuaga..... 1  
Gi3\_28339637\_x1.....ggcguaguGuaacggcua..... 1  
Gi5\_8883005\_x1.....gguucucaccaacagauccgggGu..... 1  
Gi1\_4380293\_x1.....cucaccaacGgauccggguucgauucc..... 1  
Gi3\_28865077\_x1.....agaucgggAucgauucc..... 1  
Gi5\_8833405\_x1.....ugguucucaccaacagaucUgggu..... 1  
Gi5\_9134220\_x1.....uccggcguaguauaaAggcuagaa..... 1  
Gi4\_588732\_x1.....Gccggcguaguauaacggcua..... 1  
Gi1\_4389669\_x1.....gguucUauucccgccgcccgg..... 1  
Gi2\_11164250\_x1.....gguucgauucccgccgcccgggaU..... 1  
Gi2\_11396827\_x1.....guucgauuccCcgccgcccggag..... 1  
Gi1a\_6215091\_x1.....uccggcguaguGuaacggc..... 1  
Gi1\_4242935\_x1.....aguccggcguagCauaacgg..... 1  
Gi5\_8855692\_x1.....ucucaccaacagaucGg..... 1  
Gi5\_8991135\_x1.....ccggUguaguauaacggcuaga..... 1  
Gi3\_28709885\_x1.....guucgauGccggccgcccggagc..... 1  
Gi2\_11271302\_x1.....Ugguucgauucccgccgccc..... 1  
Gi2\_11235190\_x1.....guucgauucccgccgcccUgag..... 1  
Gi2\_11319089\_x1.....gguucgauuccCcgccgcccggag..... 1  
Gi3\_28419933\_x1.....agaucggNuucgauucc..... 1  
Gi5\_8877369\_x1.....guucgauucccgccgcccggU..... 1  
Gi3\_28973498\_x1.....ucgauuccGggccgcccggagc..... 1  
Gi5\_8956689\_x1.....ucucGcccaacagauccgg..... 1  
Gi5\_8839602\_x1.....ucucacGcaacagauccg..... 1  
Gi5\_9033874\_x1.....ugguucucaccaacagauAcgg..... 1  
Gi3\_28369503\_x1.....auccggguucgauucccgccUccgga..... 1  
Gi2\_11317602\_x1.....guucucaccaacagaucGg..... 1  
Gi5\_8918949\_x1.....ucgGuucccgccgcccggagc..... 1  
Gi3\_28341037\_x1.....guucgauucccgCcgcccggagc..... 1  
Gi5\_9138174\_x1.....ggguucgauucccgccgAcg..... 1  
Gi5\_8944459\_x1.....uucucaccaacagauccgC..... 1  
Gi5\_8857528\_x1.....gguucgGuucccgccgcccggagcguu..... 1  
Gi2\_11308489\_x1.....cgUuucccgccgcccggagcguuuc..... 1  
Gi2\_11358279\_x1.....guucgauucccgccgcccggagcgc..... 1  
Gi3\_28562024\_x1.....uucgauuccAgggccgcccggagc..... 1  
Gi3\_28845590\_x1.....ggguuUgauucccgccgcccgg..... 1  
Gi2\_11287437\_x1.....gauccggguucgauucccgccgcccggga..... 0  
Gi1\_4195490\_x1.....guucgauucccgccgcccgggaAc..... 1  
Gi5\_8899476\_x1.....gguucgauucccgccgUcg..... 1

Gi5\_8884678\_x1.....ucucCcccaacagauccgg..... 1  
Gi3\_28400890\_x1.....uccggcguaguauaacUgcuag..... 1  
Gi2\_11237694\_x1.....Ugcguaguauaacggcuagaau..... 1  
G1a\_6035510\_x1.....guucgaCucccggcgcggag..... 1  
Gi1\_4366842\_x1.....cGcacccaacagauccggguucga..... 1  
Gi5\_8993338\_x1.....ugguucucGcccaacagauccgg..... 1  
Gi5\_9122889\_x1.....gguGcgauucccggcgcggagc..... 1  
Gi3\_28656184\_x1.....guucucacccaaAgaucgg..... 1  
Gi1\_4313092\_x1.....gguucgauucccAgcgccggag..... 1  
Gi3\_28283721\_x1.....uugguucucacccaCcagauc..... 1  
Gi2\_11046574\_x1.....gguucgauGcccggcgcc..... 1  
Gi5\_9100425\_x1.....cggcguaguauaacgAcuaga..... 1  
Gi3\_28764885\_x1.....ugguucucacccaacagauA..... 1  
Gi5\_9017239\_x1.....guucUauucccggcgcggagcguuucc..... 1  
Gi3\_28302604\_x1.....gAucucacccaacagauccg..... 1  
Gi3\_28712821\_x1.....guucgauucccCgcgccg..... 1  
Gi2\_11100270\_x1.....cagaGccggguucgauucccggcgcggag..... 1  
G1a\_6183397\_x1.....guucgauucccggcgcggagcU..... 1  
Gi1\_4230805\_x1.....ccggcguaguCuaacggc..... 1  
Gi2\_11393863\_x1.....uccggAguaguauaacggcuag..... 1  
Gi4\_604894\_x1.....uccAgcguaguauaacggcuaga..... 1  
Gi5\_8961556\_x1.....uccggcguaguauaacCgc..... 1  
Gi2\_11019638\_x1.....uccCgcguaguauaacggcua..... 1  
Gi1\_4266347\_x1.....guucucacccaacagaAccg..... 1  
Gi5\_8834769\_x1.....aGccaacagauccggguucgauucc..... 1  
Gi2\_11243515\_x1.....guaguauaacggcuagaau..... 0  
Gi2\_11387804\_x1.....gaCucccggcgcggagc..... 1  
G1a\_6183620\_x1.....ugguucucacccaacagCuccg..... 1  
Gi3\_28825253\_x1.....uccggGguaguauaacggc..... 1  
Gi2\_11346556\_x1.....ccggcguaguauaacggcua..... 1  
G1a\_6193663\_x1.....Cccggcguaguauaacggcuagaa..... 1  
Gi5\_9116513\_x1.....ucucacccaacGgauccgggu..... 1  
Gi3\_28617586\_x1.....uccggguucgauucccggcgcggc..... 1  
Gi1\_4289921\_x1.....uccggcguaguUuaacggcuagaau..... 1  
Gi5\_9132765\_x1.....ucucacGcaacagauccgg..... 1  
Gi5\_9021917\_x1.....uucucacccGacagauccggguu..... 1  
Gi5\_9036811\_x1.....uccggcguaguauUacggcuagaau..... 1  
Gi1\_4301285\_x1.....gguucgauUccggcgccggagc..... 1  
Gi2\_11107507\_x1.....uNcggcguaguauaacggcuaga..... 1  
Gi2\_11045741\_x1.....guucgauucccggcgcggAa..... 1  
Gi5\_8908215\_x1.....gguucgUuucccggcgcgg..... 1  
G1a\_6004502\_x1.....ggguucgauucccgUgc..... 1  
Gi1\_4305945\_x1.....uccggcguaguauGacggcuaga..... 1  
Gi5\_8960465\_x1.....guucucacccaacagaucGg..... 1  
Gi2\_11063992\_x1.....ccggcguaguauUcggcua..... 1  
Gi4\_604906\_x1.....guucgauucccAgcgccgg..... 1  
Gi2\_11231686\_x1.....gauucccggcgcggCgc..... 1

Gi2\_11279772\_x1.....ugguucucacccaacaUaucgg.....1  
 Gi1\_4368785\_x1.....uucucacccaacagGuccggguucgau.....1  
 Gi5\_8857061\_x1.....uccggcguaguGuaacggcuagaauggu.....guucgauucccgggcgccggCg.....1  
 Gi5\_8969474\_x1.....uccggcguaguGuaacggcuagaauggu.....Uggguucgauucccgggcgccggagc.....1  
 Gi3\_28446139\_x1.....Uggguucgauucccgggcgccggagc.....1  
 Gi1\_4274271\_x1.....uucgauucccgggcgccggagcgA.....1  
 Gi5\_8891167\_x1.....cucacccaUcagauccgg.....1  
 Gi1\_4248612\_x1.....uccggcguaguGuaacggcuagaa.....1  
 Gi2\_11071232\_x1.....uccggcguaguauaacCg.....1  
 Gl1a\_6044462\_x1.....ucgauucccgggcgccggagc.....0  
 Gi1\_4328051\_x1.....aguccggcguaguauaacggcuaga.....0  
 Gi1\_4307382\_x1.....aguccggUguaguauaacggcua.....1  
 Gl1a\_6047477\_x1.....gCuucgauucccgggcgccggag.....1  
 Gi1\_4214623\_x1.....cgauucccgggcgccggagcguuuc.....0  
 Gi3\_28335134\_x1.....caacagGuccggguucga.....1  
 Gl1a\_6328472\_x1.....uucgauucNcggcgccggagc.....1  
 Gi2\_11016792\_x1.....cagauccggguucgauucc.....0  
 Gi2\_11361035\_x1.....guucgauuGccggcgccg.....1  
 Gi1\_4377282\_x1.....ucacccaacagauccggAu.....1  
 Gi2\_11388017\_x1.....gNucgauucccgggcgccgg.....1  
 Gi1\_4242184\_x1.....Acggcguaguauaacggcuag.....1  
 Gi1\_4179955\_x1.....gguucgauucccgggcgUg.....1  
 Gi4\_568345\_x1.....uccggcguaguGuaacggc.....1  
 Gi2\_11264536\_x1.....gauucccgggcgccgAagc.....1  
 Gi5\_8884712\_x1.....uucgauuAccggcgccgg.....1  
 Gi3\_28433959\_x1.....ccggcgCaguauaacggcuaga.....1  
 Gi3\_28559884\_x1.....ccUaacagauccggguucgauucc.....1  
 Gi5\_9020591\_x1.....acagauccgAguucgauucccgggcg.....1  
 Gi3\_28939267\_x1.....ucucGcccaacagauccg.....1  
 Gi1\_4203173\_x1.....Nucacccaacagauccgg.....1  
 Gi3\_28983412\_x1.....ucucacccaacagauUcgg.....1  
 Gi2\_11303749\_x1.....guucgaAuccggcgccgg.....1  
 Gi2\_11272735\_x1.....cggguucgauCcccggcgccgga.....1  
 Gi1\_4361472\_x1.....uccggcguGguauaacggcuagaa.....1  
 Gi3\_28395434\_x1.....cggcgCaguauaacggcuagaa.....1  
 Gi5\_8876262\_x1.....ugguucucacccUacagauccgggu.....1  
 Gl1a\_6126156\_x1.....uccggcguaguCuaacggcu.....1  
 Gi1\_4275615\_x1.....uccggcguUguauaacggcu.....1  
 Gi3\_28374533\_x1.....ucucacccaacaCaucgg.....1  
 Gi3\_28759870\_x1.....agauccggguucgauuccU.....1  
 Gi5\_8943072\_x1.....uucucacccaacCgauccg.....1  
 Gi2\_11113912\_x1.....uccggcguaguauaacggcuaCa.....1  
 Gi3\_28771493\_x1.....caGcagauccggguucgauucc.....1  
 Gi5\_8871044\_x1.....gguucucaUccaacagauccgg.....1  
 Gi1\_4297345\_x1.....uucgauucccgggcgccggGgc.....1  
 Gi2\_11137772\_x1.....uccgCcgaguauaacggcuag.....1  
 Gi5\_8907661\_x1.....Aguucgauucccgggcgccggagcguu.....1

Gi3\_28293012\_x1.....ucgauuccAgggcgccggag.....1  
Gi1\_4280852\_x1.....uccggguucgaCuccggcgccgga.....1  
Gi3\_28290095\_x1.....gguucucacccaacagauccgggA.....1  
Gi5\_9035748\_x1.....gNuucgauucccgcgccggagc.....1  
Gi5\_8932366\_x1.....ccggcguGguauaacggcua.....1  
Gi1\_4376981\_x1.....uucgGuucccgcgccggagc.....1  
Gi1a\_6082016\_x1.....uccggcguaguauaacggcCagaa.....1  
Gi1a\_6166156\_x1.....uccggcguaguaGaacggcuag.....1  
Gi3\_28756476\_x1.....gguucgauucccgCcgcc.....1  
Gi1\_4259723\_x1.....gguucucCcccaacagauccgg.....1  
Gi5\_8998405\_x1.....uucucacccaacagauccgggCu.....1  
Gi4\_577047\_x1.....gguucgauNcccgcgcc.....1  
Gi4\_589372\_x1.....uccAgcguaguauaacggcuag.....1  
Gi2\_11016489\_x1.....ugguucucaccAaacagauccg.....1  
Gi2\_11391649\_x1.....ugguucucacccaGcagaucc.....1  
Gi5\_8903574\_x1.....Cgcguaguauaacggcuag.....1  
Gi5\_9075623\_x1.....guucgaCucccgcgccggagcgu.....1  
Gi5\_8840835\_x1.....uccggguucgauucUcggc.....1  
Gi5\_8923861\_x1.....guucAcacccaacagauccgg.....1  
Gi4\_575714\_x1.....ugguucucacccaacGga.....1  
Gi1\_4272790\_x1.....uccggcguaguauaaAggcu.....1  
Gi2\_11138958\_x1.....aguccggcguaguauCacggcuaga.....1  
Gi5\_9000220\_x1.....guucgaCucccgcgccggagcguuuc.....1  
Gi1\_4350415\_x1.....uucgauucccgcgccAgagc.....1  
Gi1\_4171949\_x1.....uucgauucccgAcgccc.....1  
Gi3\_28534528\_x1.....aUagauccggguucgauu.....1  
Gi1\_4366673\_x1.....uccggcguaguauaacgC.....1  
Gi1a\_6317276\_x1.....gguucgauucccgAgccg.....1  
Gi2\_11312496\_x1.....ucgauAcccgcgccggag.....1  
Gi3\_28977093\_x1.....gguucucacccaacagUuccg.....1  
Gi1\_4336743\_x1.....uucuaAcacccaacagauccgg.....1  
Gi3\_28284791\_x1.....gauccgAguucgauucc.....1  
Gi3\_28751554\_x1.....Acgauucccgcgccggagc.....1  
Gi3\_28509370\_x1.....ugguucucaccccUacagauc.....1  
Gi5\_9077327\_x1.....gGaguauaacggcuagaau.....1  
Gi3\_28955718\_x1.....caUccaacagauccggguuc.....1  
Gi3\_28571596\_x1.....uUcggcguaguauaacggcu.....1  
Gi2\_11007067\_x1.....gguucucacccaacagauccgg.....0  
Gi5\_8921422\_x1.....acccaacagGuccggguucgauucc.....1  
Gi5\_8931379\_x1.....uccggcguaguauaUcgg.....1  
Gi2\_11343980\_x1.....uccNgcguaguauaacggcua.....1  
Gi3\_28699645\_x1.....Agcguaguauaacggcuaga.....1  
Gi5\_8964200\_x1.....ggNucgauucccgcgccg.....1  
Gi5\_9007389\_x1.....guucgauucccgcgccgUagc.....1  
Gi3\_28459116\_x1.....uucNauucccgcgccgga.....1  
Gi3\_28682260\_x1.....gguucgauucGcggcgccg.....1  
Gi3\_28851294\_x1.....caccUaacagauccggguuc.....1

Gi2\_11116811\_x1.....cUgcguaguauaacggcuaga.....1  
Gi3\_28350522\_x1.....agauccggguucUauuccgggcccgg.....1  
Gi2\_11366968\_x1.....uccggcguUguauaacggcuag.....1  
Gi3\_28307645\_x1.....ggcguaguauaacggcuaUa.....1  
Gi3\_28628330\_x1.....uccggguucgauuccgggcccggG.....1  
Gi3\_28874542\_x1.....gguucgauucAcgggcccgg.....1  
Gi2\_11383158\_x1.....guucgauuccgggcccggUa.....1  
Gi5\_8944332\_x1.....Accggcguaguauaacggcuagaa.....1  
Gi5\_8835427\_x1.....ugguuAucacccaacagauccg.....1  
Gi4\_583265\_x1.....guucgauucUcgggcccggga.....1  
Gi3\_28371487\_x1.....uucucacccaacaUauccg.....1  
Gi3\_28365131\_x1.....cggcguaguauGacggcuaagaau.....1  
G1a\_6005304\_x1.....uucgauuccUgggcccggagc.....1  
Gi3\_28737152\_x1.....uucucacccaacagauccGgg.....1  
Gi5\_8911201\_x1.....uccAgcguaguauaacggcu.....1  
G1a\_6346247\_x1.....gguucgauuccccAcgcccgg.....1  
G1i\_4361419\_x1.....uucucacccaacagauccUg.....1  
Gi2\_11349991\_x1.....agGaugguugguucucacc.....1  
Gi2\_11039119\_x1.....auccggguucgauuccgggcccggagc.....0  
G1a\_6095435\_x1.....uGcggcguaguauaacggcu.....1  
Gi3\_28317899\_x1.....gCucucacccaacagauccgggu.....1  
Gi5\_9045459\_x1.....Agguucgauuccgggcccggagc.....1  
Gi5\_9132180\_x1.....uccggcguaguauaacggcuagaa.....1  
G1a\_6104029\_x1.....gguucgauucccCgcgcccggagc.....1  
G1i\_4367466\_x1.....accaacaAauccggguucgauuccc.....1  
Gi3\_28728864\_x1.....Agguucgauuccgggcccggga.....1  
G1i\_4249212\_x1.....gguucgaCuccgggcccggag.....1  
G1a\_6299274\_x1.....gguucgauucccUgcgcccggag.....1  
Gi4\_612650\_x1.....guucgauuccgggcccggUcggga.....1  
Gi5\_8890773\_x1.....guucucaAccaacagauccgg.....1  
G1i\_4175616\_x1.....gguCcgauuccgggcccggga.....1  
Gi3\_28305474\_x1.....ggcguaguauaacggcuaga.....1  
G1i\_4215423\_x1.....ucacccaacagauccgCgu.....1  
G1i\_4266422\_x1.....uucucacccaacagauccU.....1  
Gi3\_28787178\_x1.....ucgauuAccgggcccggag.....1  
Gi3\_28423118\_x1.....guucucacGcaacagauccggg.....1  
G1i\_4185751\_x1.....ggCucucacccaacagauccgg.....1  
Gi2\_11225171\_x1.....ugguucucacGcaacagauccg.....1  
Gi5\_8962046\_x1.....Cgguucucacccaacagauccgggu.....1  
Gi5\_9054686\_x1.....guucucacccaacagaucc.....0  
G1a\_6154963\_x1.....uuUgauuccgggcccggagc.....1  
G1a\_6300659\_x1.....uGcggcguaguauaacggc.....1  
Gi4\_579742\_x1.....guCcgauuccgggcccgg.....1  
Gi3\_28492538\_x1.....uucucacccaacaCauccgg.....1  
Gi3\_28689156\_x1.....ucgauucccAcgcccggag.....1  
G1i\_4281978\_x1.....Ucggcguaguauaacggc.....1  
Gi3\_28396191\_x1.....ugguucucUcccaacagaucc.....1

Gi1\_4268271\_x1.....gguucucacAcaacagauccgg..... 1  
Gi2\_11059842\_x1.....gguucgauucccggcgccgCa..... 1  
Gi2\_11351729\_x1.....uccggguucgauucccggcgcUgga..... 1  
Gi3\_28647909\_x1.....Cguucucacccaacagaucc..... 1  
Gi2\_11022110\_x1.....cgauuccUggcgccggagcguuuc..... 1  
Gi1\_4324299\_x1.....ggcguaguauaacggUua..... 1  
Gi3\_28383338\_x1.....cgUguucgauucccggcgccgga..... 1  
Gi4\_583134\_x1.....guucgauuccUggcgccgg..... 1  
Gi2\_11204646\_x1.....ccggcguCguauaacggcua..... 1  
Gi5\_9082625\_x1.....uucgCuucccggcgccg..... 1  
Gi4\_577890\_x1.....Gccggcguaguauaacggcua..... 1  
Gi1\_4241720\_x1.....gguucgauuccUggcgccggagc..... 1  
Gi3\_28429230\_x1.....uucucUcccaacagauccgg..... 1  
Gi1\_4335218\_x1.....guucucacccUacagaucgg..... 1  
Gi3\_28709223\_x1.....Acgauucccggcgccggag..... 1  
Gi1\_4234736\_x1.....gguucgauucccggcgccgCagc..... 1  
Gi1\_4262903\_x1.....guucgCuucccggcgccggagc..... 1  
Gi2\_11295088\_x1.....gguNcgauucccggcgccgga..... 1  
Gi2\_11299356\_x1.....agauccgAguucgauucc..... 1  
Gi5\_9020413\_x1.....acccaacagauccggguucgauucUc..... 1  
Gi1\_4308228\_x1.....Agguucgauucccggcgccg..... 1  
Gi1\_4242195\_x1.....ggguucgauucccggcgccgU..... 1  
Gi3\_28558286\_x1.....guucgauucccgAcgccg..... 1  
Gi1\_4316738\_x1.....uucccggcgccggagcCu..... 1  
Gi5\_9101401\_x1.....ucGcacccaacagauccgggu..... 1  
Gi1\_4197881\_x1.....uccUgcguaguauaacggcua..... 1  
Gi5\_9068058\_x1.....cgauucccCgcgccggagcguuuc..... 1  
Gi1\_6152621\_x1.....Cguucgauucccggcgccg..... 1  
Gi3\_28480317\_x1.....uucgauucccgAcgccg..... 1  
Gi1\_4214955\_x1.....ccggcguaguauaacggcua..... 1  
Gi2\_11219074\_x1.....cccaacagUuccggguuc..... 1  
Gi3\_28366738\_x1.....uccggcguaguauaacgCcu..... 1  
Gi2\_11365196\_x1.....uucuGacccaacagauccg..... 1  
Gi1\_4304370\_x1.....uccggcguaguauaacgU..... 1  
Gi5\_8925876\_x1.....gguucgauucccggcgcGggagc..... 1  
Gi5\_9133689\_x1.....uccggcguaguauaacggcuaUaau..... 1  
Gi1\_4301381\_x1.....guucgauucccggcgccggaCc..... 1  
Gi2\_11240885\_x1.....cGggcguaguauaacggcuaagaau..... 1  
Gi2\_11219967\_x1.....ucAggcguaguauaacgg..... 1  
Gi3\_28595032\_x1.....cggcguagNauaacggcuaagaau..... 1  
Gi5\_8838906\_x1.....cggcguaguauaacggcuagG..... 1  
Gi1\_4211252\_x1.....gUguucgauucccggcgccgga..... 1  
Gi3\_28481247\_x1.....uucucacccaacagCuccgg..... 1  
Gi2\_11300518\_x1.....Gagauccggguucgauucccggcgccggag..... 1  
Gi5\_9048280\_x1.....guucgGuucccggcgccggag..... 1  
Gi1\_4194051\_x1.....guGcgauucccggcgccg..... 1  
Gi2\_11134767\_x1.....cucacccaacagUuccgg..... 1



Gi3\_28702826\_x1.....cgGuucccgccgcccggag..... 1  
Gi2\_11148909\_x1.....uccggcguaguauaCcggc..... 1  
G1a\_6096632\_x1.....Uuucgauucccgccgcccggag..... 1  
Gi3\_28320600\_x1.....uucucaUccaacagauccgg..... 1  
Gi3\_28890204\_x1.....ucAgggguucgauucccgccgcccga..... 1  
Gi2\_11354062\_x1.....uccggcguaguauaacGU..... 1  
Gi1\_4169482\_x1.....guucgauuccUgcgccg..... 1  
Gi1\_4365183\_x1.....cucacccaacagauccggguucgauU..... 1  
Gi3\_28339002\_x1.....ccggUguaguauaacggcu..... 1  
Gi3\_28420742\_x1.....cucacccaacagauccggC..... 1  
Gi2\_11285736\_x1.....cgauucccgccgcccggCgcguuu..... 1  
Gi1\_4382342\_x1.....agauccggguucgauCccc..... 1  
Gi3\_28282996\_x1.....gguucgauucccgccUccgg..... 1  
Gi3\_28684600\_x1.....uucgauUccggccgcccgg..... 1  
G1a\_6197386\_x1.....uccgUcguaguauaacggcuagaa..... 1  
Gi1\_4362163\_x1.....guugguucucacccaacaAauccgggu..... 1  
Gi2\_11291313\_x1.....gguucgauucccgccCccgga..... 1  
Gi1\_4343697\_x1.....cucacccaacagauccggU..... 1  
G1a\_6151198\_x1.....gguucgauUccggccgcccggagc..... 1  
Gi3\_28718085\_x1.....ugguucucacccaacagauU..... 1  
Gi5\_9100593\_x1.....uucucacccaUagauccg..... 1  
Gi3\_28609217\_x1.....uucucacccaacagauccggguA..... 1  
G1a\_5986143\_x1.....gCuucgauucccgccgccc..... 1  
Gi2\_11095496\_x1.....uccUcguaguauaacggcuagaa..... 1  
G1a\_6263421\_x1.....uucucaUccaacagauccg..... 1  
Gi3\_28346100\_x1.....aucggguucgauucccgccC..... 1  
Gi5\_8904963\_x1.....cgauucccgccgcccggagcgg..... 0  
Gi2\_11013224\_x1.....uggGucucacccaacagauccg..... 1  
Gi2\_11355533\_x1.....uccggguucgauAcccgccgcccgga..... 1  
G1a\_6258115\_x1.....Auucgauucccgccgcccgg..... 1  
Gi2\_11168775\_x1.....cccaacagauccgggCuc..... 1  
Gi2\_11090457\_x1.....uucucacUcaacagauccggguucg..... 1  
Gi1\_4178239\_x1.....guucucacccaacagauUcgg..... 1  
Gi3\_28539468\_x1.....guucucacGcaacagauccgggu..... 1  
Gi3\_28519263\_x1.....cagauccggguucgauucccgccAccgg..... 1  
Gi1\_4260712\_x1.....ucucacccaacagGuccg..... 1  
Gi5\_9073159\_x1.....guucuUaccaacagauccgg..... 1  
Gi3\_28908699\_x1.....Ncucacccaacagauccgg..... 1  
Gi3\_28547559\_x1.....gguucucacccaacaCaucc..... 1  
Gi5\_9097109\_x1.....aUagauccggguucgauucccgccg..... 1  
Gi3\_28831761\_x1.....Auucggguucgauucccgccgcccgga..... 1  
Gi1\_4390133\_x1.....guucucUccaacagauccg..... 1  
Gi1\_4364259\_x1.....gguucgauUcggccgcccggag..... 1  
Gi2\_11318275\_x1.....uGcucacccaacagauccggguucg..... 1  
Gi3\_28473247\_x1.....uUcggguucgauucccgccgcccg..... 1  
Gi2\_11325663\_x1.....uGcggguucgauucccgccgcccgga..... 1  
Gi5\_9013177\_x1.....uccggcguaguauaacggcuagaaCgguu..... 1

Gi3\_28405141\_x1.....auccggguCcgauuccggcgccggagc..... 1  
Gi4\_585429\_x1.....Aguucgauuccggcgccgg..... 1  
Gi4\_571453\_x1.....uccggcguaguauaacggAuagaau..... 1  
G1a\_6303005\_x1.....uccggcguaguauaacggcuUga..... 1  
Gi5\_8927650\_x1.....gguucucaccaCcagauc..... 1  
Gi5\_8939812\_x1.....uucucaccaacagaucGg..... 1  
Gi3\_28675988\_x1.....ggcguaguauCacggcuagaau..... 1  
G1a\_6020043\_x1.....guucgauCcccgggcgccggagc..... 1  
Gi1\_4267136\_x1.....gguucucaccaacagauccA..... 1  
Gi2\_11271428\_x1.....gguucgaGuccggcgccg..... 1  
Gi5\_8941978\_x1.....aguccggcguaguauGacggcuagaauagg..... 1  
Gi3\_28435245\_x1.....gguCcuacccaacagauccgggu..... 1  
Gi1\_4239349\_x1.....uccggGguaguauaacggcua..... 1  
Gi1\_4259666\_x1.....gguucgauuccggcUccgg..... 1  
Gi3\_28350141\_x1.....ggcguaguauaacggcuaAa..... 1  
Gi3\_28590145\_x1.....guucgauGccggcgccggag..... 1  
Gi2\_11013948\_x1.....guucgauGccggcgccgga..... 1  
Gi5\_9129030\_x1.....uccggcguNguauaacggcuagaauagg..... 1  
Gi3\_28963182\_x1.....uccggcguaguauaacggcGagaau..... 1  
Gi5\_9082933\_x1.....gguucucaccaacagauccAg..... 1  
Gi5\_8988570\_x1.....uccCgcguaguauaacggcuag..... 1  
Gi3\_28399065\_x1.....uccggguUgauuccggcgccgga..... 1  
Gi5\_8923123\_x1.....gUuucucaccaacagauccgggu..... 1  
Gi4\_598994\_x1.....gguucgauuccggUgccgg..... 1  
Gi2\_11042293\_x1.....uccggcguaguauaaGggcua..... 1  
Gi1\_4328694\_x1.....cgauuccggcgccggagc..... 0  
Gi3\_28552813\_x1.....guuNgauuccggcgccggag..... 1  
Gi2\_11248282\_x1.....ugUuucucaccaacagauccggguucga..... 1  
Gi5\_8883410\_x1.....uucucaccaacagCuccgg..... 1  
Gi5\_9083362\_x1.....uucucaccaacagauUcgg..... 1  
Gi5\_9005679\_x1.....gguucgauuccggcgccggagcgAu..... 1  
Gi4\_597091\_x1.....uGcucaccaacagauccgg..... 1  
Gi3\_28941279\_x1.....gguucgauuccggcgccgUag..... 1  
Gi3\_28381292\_x1.....gguucucacccGacagaucc..... 1  
G1a\_6331626\_x1.....uccggcguaguaCaacggcuag..... 1  
Gi2\_11200439\_x1.....Gggcguaguauaacggcuagaau..... 1  
Gi2\_11294964\_x1.....gcAuaguauaacggcuagaau..... 1  
Gi3\_28526016\_x1.....cgauuccggcgUcggag..... 1  
Gi5\_9022843\_x1.....cccaacagauccAgguuc..... 1  
Gi1\_4360840\_x1.....uccggcguaguCuaacggcuaga..... 1  
Gi3\_28908752\_x1.....cucaccaCcagauccgg..... 1  
Gi3\_28488094\_x1.....Gagauccggguucgauuccggcgccgg..... 1  
Gi5\_9079622\_x1.....cccaacagauccggcCuc..... 1  
Gi5\_9044106\_x1.....Agcguaguauaacggcuagaa..... 1  
Gi4\_604099\_x1.....ugguucucaccaacagauccgggu..... 0  
Gi5\_8877020\_x1.....uucgauuccggcgccggagcgA..... 1  
Gi3\_28940114\_x1.....cggcguaguauaacggUuagaau..... 1

Gi3\_28789606\_x1.....gguucgauuccggcUcc..... 1  
Gi3\_28975968\_x1.....auccggguucAauuccggcgccgga..... 1  
Gi5\_8925195\_x1.....ucucaccaacagauccgC..... 1  
Gi2\_11115133\_x1.....gguuAgauuccggcgcc..... 1  
Gi1\_4225630\_x1.....uccggcguaguUuaacggcua..... 1  
Gi3\_28784225\_x1.....uucgUuuccggcgccg..... 1  
G1a\_6280602\_x1.....gguucgGuuccggcgccgag..... 1  
G1a\_6264563\_x1.....guucucaccaacUgauccg..... 1  
Gi5\_9122569\_x1.....ccggUguaguauaacggcuag..... 1  
Gi3\_28577470\_x1.....agauccggguuAgauucc..... 1  
Gi3\_28328436\_x1.....cGcccaacagauccggguuc..... 1  
Gi2\_11358228\_x1.....ucgauuccGggcgccggagc..... 1  
Gi3\_28428452\_x1.....ucgaGuuccggcgccggagc..... 1  
Gi3\_28344790\_x1.....uccggcguaguauaaGggcuagaa..... 1  
Gi5\_9050820\_x1.....uuNucaccaacagauccg..... 1  
Gi3\_28439206\_x1.....cagauccggguucgauGcc..... 1  
Gi5\_8910802\_x1.....uAcggcguaguauaacgg..... 1  
Gi3\_28323628\_x1.....uccggcguaguauaaGggcuag..... 1  
Gi4\_606205\_x1.....guucgauuccggcgCagg..... 1  
Gi5\_8886831\_x1.....gguucgauuccUggcgccggagcguu..... 1  
Gi2\_11109699\_x1.....guucAcaccaacagauccg..... 1  
Gi3\_28940951\_x1.....uccggguucgauuccAgggcgccgga..... 1  
Gi3\_28915508\_x1.....gauuccggcgccAgagc..... 1  
Gi2\_11096192\_x1.....uccggcguaguauaacggG..... 1  
Gi1\_4265161\_x1.....ucucacAcaacagauccgg..... 1  
Gi2\_11267232\_x1.....ugguucucacUcaacagauccg..... 1  
Gi2\_11098528\_x1.....uccggcguaguauaacgUcuaga..... 1  
Gi3\_28824909\_x1.....uccggcguaguUuaacggcuag..... 1  
Gi1\_4336238\_x1.....uugguucucaccaacagaucc..... 0  
Gi3\_28864523\_x1.....ucgauucccgAgccgga..... 1  
Gi3\_28489770\_x1.....uucgauuccAgggcgccgga..... 1  
Gi3\_28281105\_x1.....cucaccaacagauccAgguucgauu..... 1  
Gi2\_11360205\_x1.....cgauuccggcgCaggagcguu..... 1  
Gi3\_28902693\_x1.....uccggcguaguauaaGggcu..... 1  
Gi2\_11124518\_x1.....gguucgauAccggcgccgga..... 1  
Gi3\_28296806\_x1.....guAcucaccaacagauccggg..... 1  
Gi5\_9022000\_x1.....ccggcguaguauaGcggcuag..... 1  
G1a\_6108774\_x1.....gguucgauGccggcgccgga..... 1  
Gi3\_28467341\_x1.....ucucacUcaacagauccgg..... 1  
Gi3\_28578239\_x1.....caccaacagauccAgguuc..... 1  
Gi1\_4382100\_x1.....uccggcguCguauaacggcuagaa..... 1  
Gi1\_4272815\_x1.....gAuucucaccaacagauccgg..... 1  
Gi3\_28329919\_x1.....cUcccaacagauccggguuc..... 1  
Gi3\_28725258\_x1.....cucaccaNcagauccggguucgauucc..... 1  
G1a\_6278848\_x1.....gguucgauuccggcCccggagc..... 1  
G1a\_6286866\_x1.....Cguucgauuccggcgccg..... 1  
Gi1\_4376379\_x1.....uucucaccaacaCaucgg..... 1

Gi2\_11024313\_x1.....gguucgauucccgcgccggagcguuA..... 1  
Gi1\_4320439\_x1.....auccAgguucgauucccgcgccgg..... 1  
Gi2\_11258334\_x1.....cccaacagauGcgguuc..... 1  
Gi5\_9050629\_x1.....acccCacagauccggguucgauucc..... 1  
Gi3\_28568661\_x1.....gguucucacccaacagaCcc..... 1  
Gi3\_28559303\_x1.....guAcucacccaacagauccgg..... 1  
G1a\_5986255\_x1.....uccggAguaguauaacggcuaga..... 1  
Gi5\_8876399\_x1.....uccggcguaguCuaacggcu..... 1  
Gi5\_8902325\_x1.....Agguucgauucccgcgccggag..... 1  
Gi3\_28921023\_x1.....uucAauucccgcgccgga..... 1  
G1a\_6071562\_x1.....Aguucgauucccgcgccg..... 1  
Gi3\_28632935\_x1.....ucaccUaacagauccggguuc..... 1  
Gi1\_4358312\_x1.....ucaccCacagauccgggu..... 1  
Gi1\_4215116\_x1.....gguucgauucccgGgcccga..... 1  
Gi5\_8904088\_x1.....uccggcguagAuaaacggcuagaa..... 1  
Gi5\_9080958\_x1.....gCuucgauucccgcgccggagcgu..... 1  
Gi2\_11171329\_x1.....uccggcguaguauaacggcuaC..... 1  
Gi5\_8911403\_x1.....uccggcgGaguauaacggc..... 1  
Gi2\_11197417\_x1.....uccggcguaguUuaaacggcuaga..... 1  
G1a\_6257853\_x1.....gguucgauCcccggcgccggag..... 1  
G1a\_6346630\_x1.....uGcggcguaguauaacggcuagaa..... 1  
Gi2\_11009016\_x1.....uGcgauucccgcgccggag..... 1  
Gi2\_11036483\_x1.....gguucucacccaacaCauccg..... 1  
Gi2\_11266191\_x1.....cUcgguaguauaacggcuag..... 1  
Gi3\_28362998\_x1.....uccCgcguaguauaacggcuagaa..... 1  
Gi2\_11331587\_x1.....guNcgauucccgcgccgg..... 1  
Gi5\_9082802\_x1.....ucucacccaacGgauccgg..... 1  
Gi3\_28900399\_x1.....auccggguucgaGucccgcgccgga..... 1  
Gi5\_8974191\_x1.....ucAgggcguaguauaacggcuagaa..... 1  
G1a\_5999775\_x1.....Cucucacccaacagauccg..... 1  
Gi3\_28843634\_x1.....cggcguaguauaacggcuaAa..... 1  
Gi1\_4212311\_x1.....ucucacccaacagauccAg..... 1  
Gi5\_8916156\_x1.....guucgauNccggcgccggag..... 1  
Gi2\_11311014\_x1.....uucgauucccgcgccUgag..... 1  
Gi5\_9049110\_x1.....ucacccaacagauccAgguu..... 1  
Gi2\_11110564\_x1.....ugguucucacccaacagaCcc..... 1  
Gi3\_28589833\_x1.....ugguucucacccaacagaucc..... 0  
Gi3\_28576477\_x1.....ucAauucccgcgccggag..... 1  
Gi2\_11340941\_x1.....uucgCuucccgcgccgg..... 1  
G1a\_6177820\_x1.....uucgauucccgcgccgAagc..... 1  
Gi2\_11199524\_x1.....Gggguucgauucccgcgccgga..... 1  
Gi5\_9000909\_x1.....gguucgauucccgcgccggaUc..... 1  
Gi1\_4213027\_x1.....gguucgauucccgcgccggaCc..... 1  
Gi5\_8855431\_x1.....uccggcguaUuaaacggc..... 1  
Gi3\_28323490\_x1.....ugguucucacUaacagauccggguucga..... 1  
Gi1\_4183056\_x1.....cggcguagNuaaacggcu..... 1  
Gi2\_11010459\_x1.....ucgaCuucccgcgccgga..... 1

Gi5\_8848946\_x1.....ucgauucUcggcgccggag.....1  
 Gi2\_11294474\_x1.....uucgauucccggcAccgg.....1  
 Gi1\_4307504\_x1.....Aucgauucccggcgcccgg.....1  
 Gi5\_8857226\_x1.....guucgauucccggcgcccggagcgu.....0  
 Gi1\_4210347\_x1.....uggNucucacccaacagauccgg.....1  
 Gi1\_4166191\_x1.....cucacccaacagauccggguucgG.....1  
 Gi3\_28846649\_x1.....cgauucccggcgcccggagcgC.....1  
 Gi2\_11398309\_x1.....cucacccaacagaCccgg.....1  
 Gi1\_4311204\_x1.....gguAcucacccaacagauccg.....1  
 Gi5\_8959419\_x1.....ccggcguaNuauaacggcuagaau.....1  
 Gi2\_11226846\_x1.....ucNggcguaguauaacgg.....1  
 Gi5\_8902008\_x1.....ucacUcaacagauccggguu.....1  
 Gi2\_11361367\_x1.....uccUgcguaguauaacggc.....1  
 Gi1\_4368147\_x1.....uAucacccaacagauccg.....1  
 Gi3\_28707866\_x1.....gguucucacccaaUagauccgg.....1  
 Gi3\_28396531\_x1.....ugguucucaUccaacagaucc.....1  
 Gi1\_4347019\_x1.....guucgauuAccggcgcccg.....1  
 Gl1a\_6212261\_x1.....guucgauucccggcgAcg.....1  
 Gi5\_9013907\_x1.....ugguucucacccaacagauccAg.....1  
 Gi1\_4191041\_x1.....gguucucacccaUcagauccg.....1  
 Gi5\_8971807\_x1.....cagauccgNguucgauucccggcgcccg.....1  
 Gi5\_8943502\_x1.....guucucacccaacaUauccg.....1  
 Gi5\_8858148\_x1.....ccggcguaquauaacggcuGga.....1  
 Gi2\_11061990\_x1.....ucgauuccNggcgcccga.....1  
 Gi3\_28449308\_x1.....uucgaCucccggcgcccga.....1  
 Gi5\_9077290\_x1.....uucgaCucccggcgcccggagc.....1  
 Gi2\_11324069\_x1.....cAgguucgauucccggcgcccga.....1  
 Gi5\_9077938\_x1.....gauucccggcgcccggagcCu.....1  
 Gi5\_8961489\_x1.....uucucacccaacGgauccgg.....1  
 Gi3\_28508720\_x1.....gguuAucacccaacagauccg.....1  
 Gi2\_11070776\_x1.....ucgauucccggcgcccUgag.....1  
 Gi1\_4211759\_x1.....gguucucUcccaacagauccgg.....1  
 Gi3\_28466710\_x1.....Nguucgauucccggcgcccg.....1  
 Gi1\_4374766\_x1.....uccUgcguaguauaacgg.....1  
 Gi1\_4360605\_x1.....uccggcguaAuauaacggcuagaau.....1  
 Gi3\_28399320\_x1.....guucucacccaacUgauccg.....1  
 Gi5\_8837121\_x1.....gNuucucacccaacagauccg.....1  
 Gi5\_9081632\_x1.....ggcguaquauaacggcuagaGu.....1  
 Gi3\_28971467\_x1.....ucgauucccggcgcccCga.....1  
 Gi2\_11372612\_x1.....gauccggguucgauucc.....0  
 Gi4\_600706\_x1.....uccggcgguNguauaacggcuag.....1  
 Gi5\_8927523\_x1.....ugguucucacccaacagaCccgggu.....1  
 Gi3\_28311635\_x1.....ugguucucacccaacagGuc.....1  
 Gi5\_8970024\_x1.....acagauccggguucgauucccgAgc.....1  
 Gi3\_28686329\_x1.....agCuccggguucgauucc.....1  
 Gi3\_28440888\_x1.....cagauccggguucgauucccggcGcgg.....1  
 Gi5\_8961680\_x1.....gguucucaccccCacagaucc.....1

Gi1\_4323888\_x1.....gGucgauucccgcgccggag..... 1  
 Gi1\_4191855\_x1.....Gucaccaacagauccggguucgauucc..... 1  
 Gi5\_9053092\_x1.....ugguucucaccaacaUauccgggu..... 1  
 Gi5\_8847668\_x1.....ugguucucaccaacagauUcgggu..... 1  
 Gi3\_28389825\_x1.....Uggcguaguauaacggcuagaa..... 1  
 Gi5\_9124826\_x1.....gguucGcaccaacagauccg..... 1  
 Gi2\_11112269\_x1.....agaucGggguucgauucc..... 1  
 Gi3\_28381752\_x1.....ucgauucccgAgccggag..... 1  
 Gi2\_11168535\_x1.....uucgauucccgcgccUga..... 1  
 Gi5\_8991978\_x1.....gguucAcaccaacagauccg..... 1  
 Gi4\_575170\_x1.....ggCucgauucccgcgccggagc..... 1  
 Gi5\_8831624\_x1.....gguucuAaccaacagaucc..... 1  
 Gi3\_28407437\_x1.....guucucaccaacagauccggG..... 1  
 Gi5\_9044427\_x1.....ucucacGcaacagauccgggu..... 1  
 Gi5\_9053971\_x1.....acagauccggguucgauucGcggcgc..... 1  
 Gi1a\_6155221\_x1.....guucucacNcaacagauccg..... 1  
 Gi2\_11059949\_x1.....uccggcguaguauaacAgcuagaa..... 1  
 Gi2\_11198248\_x1.....uucucaccaaaAagauccg..... 1  
 Gi4\_570229\_x1.....uccgAcguaguauaacggcuaga..... 1  
 Gi2\_11346832\_x1.....agaucggguucgCuucc..... 1  
 Gi5\_9049413\_x1.....ugguuAucaccaacagauccgggu..... 1  
 Gi1\_4326763\_x1.....uccNgcguaguauaacgg..... 1  
 Gi1\_4374816\_x1.....Ccgauucccgcgccggagc..... 1  
 Gi1\_4264100\_x1.....aacagauccggguucgauuccAgcgcgg..... 1  
 Gi1\_4348091\_x1.....gguucgauucccgcgccCga..... 1  
 Gi1a\_6322399\_x1.....gguucgGuucccgcgccg..... 1  
 Gi5\_9126598\_x1.....cccaGcagauccggguucgau..... 1  
 Gi2\_11222589\_x1.....ucgauuccAgcgcggga..... 1  
 Gi1\_4230138\_x1.....uccggGguaguauaacgg..... 1  
 Gi3\_28912144\_x1.....aucggguuAgauucccgcgccgga..... 1  
 Gi5\_8985532\_x1.....uucucaccaacagauccU..... 1  
 Gi5\_8973379\_x1.....ucgauucccgcgAcggagc..... 1  
 Gi3\_28957958\_x1.....uccggcguagCauaacggcuagaa..... 1  
 Gi3\_28839168\_x1.....guucucUccaacagauccggg..... 1  
 Gi5\_8856754\_x1.....Nccggcguaguauaacggcua..... 1  
 Gi5\_8849942\_x1.....aguccggcguaguauaacggcuagaaAgg..... 1  
 Gi2\_11227077\_x1.....guucgauucccgcgccGg..... 1  
 Gi3\_28728177\_x1.....agaucgggCucgauucc..... 1  
 Gi3\_28427369\_x1.....ucaccaacagUuccggguuc..... 1  
 Gi5\_9087774\_x1.....ggcguaguauaacggcuGg..... 1  
 Gi2\_11234424\_x1.....ggcguaguauaacAgcuaga..... 1  
 Gi1a\_6320710\_x1.....guAcgauucccgcgccgg..... 1  
 Gi5\_8846494\_x1.....uccggcguAuaaacggcuagaa..... 1  
 Gi5\_9000256\_x1.....cgauucccgcgccggagcguu..... 0  
 Gi3\_28676654\_x1.....cGcaacagauccggguucgauucc..... 1  
 Gi3\_28828058\_x1.....uccggcguaguauaacgUcuagaa..... 1  
 Gi3\_28366366\_x1.....uccggcgGaguauaacggcuagaa..... 1

Gi1\_4311669\_x1.....gguucgauuccAggcgccc..... 1  
Gi1\_4209480\_x1.....uccggcgCaguauaacggcuagaau..... 1  
G1a\_6056374\_x1.....Cccggcguaguauaacggcuaga..... 1  
Gi2\_11256551\_x1.....uucucaccaacagaAccg..... 1  
Gi5\_9047984\_x1.....gcuaguauaGcggcuaga..... 1  
Gi2\_11275391\_x1.....ucgauuccggcgcccggagA..... 1  
Gi1\_4246456\_x1.....ucucaccaacaUauccg..... 1  
Gi1\_4247730\_x1.....uucgCuuccggcgcccgg..... 1  
Gi4\_572180\_x1.....gguucgauuccggcgGcggagc..... 1  
Gi5\_9066233\_x1.....uccggcguaguauaacggcuauA..... 1  
Gi1\_4204272\_x1.....ugguucucacUcaacagaucg..... 1  
Gi3\_28593613\_x1.....Ncgauuccggcgcccggagc..... 1  
Gi2\_11015154\_x1.....accaacagaucggguucgauucc..... 0  
Gi1\_4221503\_x1.....agauccggguucgauuccggcgcccggagc..... 0  
Gi1\_4225951\_x1.....ucacAcaacagaucgggu..... 1  
Gi2\_11238491\_x1.....guucgauuccggcgcccggA..... 1  
Gi3\_28316960\_x1.....ggcguaguauaUcggcuagaau..... 1  
Gi1\_4244347\_x1.....Uauuccggcgcccggagc..... 1  
Gi3\_28883816\_x1.....gguucgauuccggNgcccggagc..... 1  
Gi1\_4196051\_x1.....guucucaccaacagaucgC..... 1  
Gi2\_11040866\_x1.....uccggAguaguauaacggcuagaau..... 1  
Gi1\_4315660\_x1.....cUgguucgauuccggcgcccgg..... 1  
Gi3\_28395763\_x1.....caacagaCccggguucga..... 1  
Gi5\_8855244\_x1.....uccggcguaguauaacggG..... 1  
Gi5\_8870495\_x1.....guucucaccGaacagaucgg..... 1  
Gi2\_11141503\_x1.....uucucaccaacagauUcgg..... 1  
Gi2\_11373101\_x1.....guucuCaaccaacagaucg..... 1  
Gi3\_28481643\_x1.....CccggguucgauuccggcgcccggA..... 1  
Gi4\_592962\_x1.....gAuucgauuccggcgcccggagc..... 1  
Gi2\_11209690\_x1.....guucgauuccGggcgcccggA..... 1  
Gi1\_4388966\_x1.....ucgauuccggcgUcggagc..... 1  
Gi3\_28383019\_x1.....ggCucucaccaacagauc..... 1  
G1a\_6043894\_x1.....uUcggcguaguauaacggc..... 1  
Gi5\_8915546\_x1.....gguucgUuuccggcgcccggagc..... 1  
Gi3\_28627834\_x1.....uNcgauuccggcgcccggagc..... 1  
Gi2\_11314643\_x1.....uucgauuccggcgcccggUg..... 1  
Gi5\_8876946\_x1.....uccggcCuaguauaacggcuagaau..... 1  
Gi2\_11095490\_x1.....guucAcaccaacagaucgg..... 1  
Gi3\_28323073\_x1.....cccaacagaucgggCucgauucc..... 1  
Gi1\_4228899\_x1.....gguucgauuccGggcgcccggag..... 1  
Gi5\_8919154\_x1.....cUggcguaguauaacggcuaga..... 1  
Gi1\_4323646\_x1.....NuucgauuccggcgcccggA..... 1  
Gi1\_4213676\_x1.....uccggcguaguauaacGcuagaau..... 1  
Gi1\_4202183\_x1.....ucgauuccAgcggcccggagc..... 1  
Gi3\_28675635\_x1.....caacagaucAgguucga..... 1  
Gi3\_28501653\_x1.....cUacagaucggguucga..... 1  
Gi3\_28587312\_x1.....gauuccggcgcccggUgc..... 1

Gi2\_11021237\_x1.....ccggcguGguauaacggcua..... 1  
Gi3\_28795125\_x1.....ccggcguaguauaaUggc..... 1  
G1a\_6130507\_x1.....gguucgauucccggcAccg..... 1  
Gi3\_28897627\_x1.....cagaucUggguucgauucc..... 1  
Gi1\_4201497\_x1.....aacaUauccggguucgauucccggcgcgg..... 1  
Gi5\_8981188\_x1.....gguucgauuGccggcgccggagc..... 1  
Gi4\_591325\_x1.....gguucgauucUcggcgccgg..... 1  
Gi1\_4195597\_x1.....cUuaguauaacggcuagaau..... 1  
Gi3\_28795804\_x1.....cucGcccaacagauccgg..... 1  
Gi5\_9071109\_x1.....uccggcguaguauaacggcuagaauaggGu..... 1  
Gi2\_11356626\_x1.....cggUguaguauaacggcua..... 1  
Gi5\_9124695\_x1.....uucucaccUaacagauccgg..... 1  
Gi2\_11226612\_x1.....uccggcguaguauaacCgcuag..... 1  
Gi2\_11363201\_x1.....cUgcguaguauaacggcuagaau..... 1  
Gi5\_9073493\_x1.....cagaucggguucgauucccgAgccg..... 1  
Gi2\_11234487\_x1.....ucgauucccggcgcgUagc..... 1  
Gi1\_4340501\_x1.....gguNcgauucccggcgcg..... 1  
Gi1\_4373086\_x1.....guugguucucaccGacagauccgggu..... 1  
Gi2\_11114347\_x1.....cCauuccgggcgcggagcguuu..... 1  
Gi2\_11184244\_x1.....cggcguaguauaacggcuagG..... 1  
Gi3\_28420422\_x1.....agaucggguucgauucccggcgcggaA..... 1  
Gi3\_28635101\_x1.....uugguucucacccaacGgaucc..... 1  
Gi4\_609932\_x1.....Cccggcguaguauaacggcuaga..... 1  
Gi3\_28475828\_x1.....cagaucggguucgCuuccc..... 1  
Gi2\_11304603\_x1.....uccggcguaguGuaacggcuagaa..... 1  
Gi3\_28976315\_x1.....gguucucGcccaacagauccgg..... 1  
Gi5\_8848803\_x1.....guGcgauucccggcgcggag..... 1  
Gi5\_9027007\_x1.....uccggcguaguauaacCgcuaga..... 1  
Gi3\_28481122\_x1.....uccggcguaguauaacGcuag..... 1  
Gi5\_9059061\_x1.....uucucaccUacagauccg..... 1  
Gi3\_28507220\_x1.....uccggcguaguauaacggcuaUaaugguuggu..... 1  
Gi3\_28763703\_x1.....Nccggcguaguauaacggc..... 1  
Gi5\_8965890\_x1.....Agauucccggcgcggagcguuuc..... 1  
Gi3\_28276348\_x1.....ucgaCucccggcgcggag..... 1  
Gi3\_28270759\_x1.....gcguaguauaacggUuaga..... 1  
Gi1\_4286025\_x1.....gguucucUcccaacagauccg..... 1  
Gi5\_8838262\_x1.....gguucgauAcccggcgcggga..... 1  
Gi2\_11164530\_x1.....gguucgauuccUgcgcggga..... 1  
Gi5\_8958892\_x1.....ucgGuucccggcgcggag..... 1  
Gi5\_9072391\_x1.....ugguucucacccaaUagauccg..... 1  
Gi1\_4223722\_x1.....ggcAuaguauaacggcuag..... 1  
Gi2\_11267438\_x1.....ucNggcguaguauaacggcuagaau..... 1  
Gi2\_11267230\_x1.....cggcUuaguauaacggcuag..... 1  
Gi1\_4158953\_x1.....gguucgGuucccggcgcg..... 1  
Gi2\_11061560\_x1.....gguucgauucccggcgcggagcAu..... 1  
Gi2\_11231128\_x1.....agaucggguucgauucccggcgcggag..... 0  
Gi5\_8875925\_x1.....Cucgauucccggcgcggag..... 1



Gi3\_28647113\_x1.....ggguucgauucccgcgUcgga..... 1  
 Gl1a\_5995027\_x1.....ucucGcccaacagauccg..... 1  
 Gi2\_11134632\_x1.....uccggcguaguauaacggAuagaa..... 1  
 Gi3\_28962871\_x1.....uccggcguaguauaacggG..... 1  
 Gi2\_11360589\_x1.....ugguucucacccaacagaAccg..... 1  
 Gi5\_8876071\_x1.....guucgaGucccgcgccgga..... 1  
 Gi1\_4335481\_x1.....gguNcgauucccgcgccgg..... 1  
 Gi3\_28561027\_x1.....cggcguagCauaacggcuaga..... 1  
 Gi2\_11016230\_x1.....uucgauucccgcgccAg..... 1  
 Gi5\_8985862\_x1.....ccggcguaguauaacAgcua..... 1  
 Gi2\_11068692\_x1.....uccggcguCguauaacggcuagaau..... 1  
 Gi5\_9106722\_x1.....cgauucccgcgUggagcguuuc..... 1  
 Gi1\_4241493\_x1.....auccggguCcgauucccgcgccgg..... 1  
 Gi1\_4284495\_x1.....ucgauucccgcgccggagU..... 1  
 Gi5\_9023466\_x1.....gguucgauuccAgggcgccgg..... 1  
 Gi2\_11365551\_x1.....gauuccUggcgccggagc..... 1  
 Gi2\_11281917\_x1.....gUcguaguauaacggcuaga..... 1  
 Gi5\_9125988\_x1.....guCcgauucccgcgccggag..... 1  
 Gi3\_28910686\_x1.....Aauccggguucgauucccgcgccggag..... 1  
 Gi5\_8846253\_x1.....ccggcguaguUuaacggcua..... 1  
 Gi1\_4185539\_x1.....gauucccgcgccggagU..... 1  
 Gi2\_11235221\_x1.....Gccggcguaguauaacggcuagaauugguagg..... 1  
 Gi3\_28681081\_x1.....caacagauccggguucgGuucccgcgccgg..... 1  
 Gi2\_11204160\_x1.....gguucgauuccCgcgccgg..... 1  
 Gi4\_603804\_x1.....cucacccaacagauccg..... 0  
 Gi2\_11171955\_x1.....uccggcguaguauGacggc..... 1  
 Gi1\_4218610\_x1.....uucgauuccAgggcgccgg..... 1  
 Gi3\_28982503\_x1.....guucCcacccaacagauccgg..... 1  
 Gi3\_28621345\_x1.....gguucucacccaacagauccgg..... 1  
 Gi3\_28390158\_x1.....cguaguauaacAgcuaga..... 1  
 Gi3\_28489861\_x1.....agauccggguuAgauucccgcgccggag..... 1  
 Gi2\_11377995\_x1.....guucgauuccGggcgccg..... 1  
 Gi5\_8865141\_x1.....guuNgauucccgcgccggagc..... 1  
 Gi5\_8893376\_x1.....gguuGgauucccgcgccggag..... 1  
 Gi3\_28721884\_x1.....cacccaacagauccAgguuc..... 1  
 Gi5\_9107189\_x1.....cAcacccaacagauccgg..... 1  
 Gi5\_8969081\_x1.....gguucucacccaacagauccAgguu..... 1  
 Gi1\_4319907\_x1.....guuNgauucccgcgccgga..... 1  
 Gi3\_28478583\_x1.....ccGacagauccggguucgauucccgcgccgg..... 1  
 Gi5\_9092870\_x1.....uccggcguaguaGaacggcuagaa..... 1  
 Gi3\_28984545\_x1.....ucacccaacagauccAgguuc..... 1  
 Gi3\_28555333\_x1.....ucgauucccgcgccggagc..... 1  
 Gi2\_11239010\_x1.....guucgauuccCgcgccgga..... 1  
 Gi4\_585503\_x1.....uugguucucUcccaacaga..... 1  
 Gl1a\_6104292\_x1.....gguucgauuccUggcgcc..... 1  
 Gi1\_4205937\_x1.....ccggcguaguauaacAggcua..... 1  
 Gi5\_8992771\_x1.....uccggAguaguauaacggcuagaa..... 1

Gi1\_4378852\_x1..... agauccggguucgauucUc..... 1  
 Gi3\_28868060\_x1..... cagaGccggguucgauucc..... 1  
 Gi3\_28882545\_x1..... ggcgguaguauUacggcuag..... 1  
 Gi1\_4267799\_x1..... gguucucacccaacagCuccgg..... 1  
 Gi2\_11356522\_x1..... gcguaguauaacggcuagaaA..... 1  
 Gi1\_4283334\_x1..... Agguucucacccaacagauccg..... 1  
 Gi5\_9110155\_x1..... gguucgauucUcggcgccggag..... 1  
 Gi2\_11059354\_x1..... gguucgaAucccggcgcc..... 1  
 Gi5\_9048238\_x1..... gguucgaAucccggcgccgga..... 1  
 Gi3\_28370586\_x1..... uucucacccaacagauAcggguuc..... 1  
 Gi5\_8909169\_x1..... gauucccgcgccgAagc..... 1  
 Gl1a\_5981303\_x1..... Gccggcguaguauaacggcu..... 1  
 Gi3\_28677760\_x1..... ggcgguaguNuaacggcua..... 1  
 Gi1\_4237845\_x1..... cucacccaacagauccAgguucgauucc..... 1  
 Gi3\_28381888\_x1..... ucgauuccUgcgcccggagc..... 1  
 Gi5\_8897113\_x1..... gguCucacccaacagauccggguu..... 1  
 Gl1a\_6295680\_x1..... uucgauucccgcgccggagcCu..... 1  
 Gi5\_9045279\_x1..... gAuucgauucccgcgccggagcguuu..... 1  
 Gi5\_8979582\_x1..... uccggcguaguaGaacggcuag..... 1  
 Gi3\_28320605\_x1..... gguucucacccaacUgaucc..... 1  
 Gi1\_4165515\_x1..... guugguucCcacccaacagauccgggu..... 1  
 Gi3\_28773590\_x1..... ggcgCguauaacggcuagaa..... 1  
 Gi3\_28751347\_x1..... ccggcguaguauaacggcuGgaa..... 1  
 Gi1\_4338588\_x1..... cagaucggguucgauuccc..... 0  
 Gi3\_28266730\_x1..... guucucacccaGcagauccgggu..... 1  
 Gi3\_28441267\_x1..... uucgauuccAgcgccgg..... 1  
 Gi1\_4321927\_x1..... uccggcguaguaCaacggcuagaa..... 1  
 Gi4\_587775\_x1..... Cccggcguaguauaacggcuagaa..... 1  
 Gi3\_28518396\_x1..... ggcgguaguGuaacggcuaga..... 1  
 Gl1a\_6046161\_x1..... uccggcguaguauCacggc..... 1  
 Gi5\_8892905\_x1..... agauccggguucgaCuccc..... 1  
 Gi2\_11365591\_x1..... ucgauucccgcgccggGg..... 1  
 Gi1\_4180668\_x1..... Uguccggcguaguauaacggcuag..... 1  
 Gi5\_9084668\_x1..... uccggcguagGauaacgg..... 1  
 Gi3\_28439388\_x1..... gNuucgauucccgcgccggagc..... 1  
 Gi1\_4339288\_x1..... uccgAcguaguauaacggc..... 1  
 Gi3\_28716628\_x1..... uucgauucccgcgccUgagc..... 1  
 Gi1\_4380338\_x1..... guucgaGucccggcgccggagc..... 1  
 Gi3\_28815812\_x1..... gguucucacccaacagauccAgg..... 1  
 Gi5\_8959181\_x1..... gguGcucacccaacagauccg..... 1  
 Gi1\_4172506\_x1..... uccggcAuaguauaacggcuagaa..... 1  
 Gi4\_570145\_x1..... gGucgauucccgcgccgga..... 1  
 Gi2\_11344505\_x1..... uccggcguaguauaacggcuagaG..... 1  
 Gi3\_28688297\_x1..... gguAcgauucccgcgcc..... 1  
 Gi1\_4203859\_x1..... uuGucacccaacagauccgg..... 1  
 Gi2\_11134506\_x1..... cccaacagauccgggGuc..... 1  
 Gl1a\_6176978\_x1..... gguucgauCcccggcgccgga..... 1

Gi3\_28351550\_x1.....uccggcguaguaAaacggc.....1  
G1a\_6029100\_x1.....gguucgauucccAgcgccg.....1  
Gi3\_28881524\_x1.....Gcggcguaguaaacggcuag.....1  
Gi3\_28288256\_x1.....guucucaccccGacagauccgggu.....1  
Gi2\_11366958\_x1.....uccggcguauuaaacgg.....1  
Gi2\_11185963\_x1.....gguucgauucccgggcgggagcAuuuc.....1  
Gi5\_9001238\_x1.....gguNcgauucccgggcggc.....1  
Gi1\_4323829\_x1.....gguucgauGcccggcggcga.....1  
Gi3\_28923520\_x1.....cCauucccgggcgggag.....1  
Gi1\_4371947\_x1.....uccggcguaguaaacgCc.....1  
Gi3\_28740307\_x1.....guucucacccaaAagaucgg.....1  
Gi3\_28822384\_x1.....guucucacccaaAagaucgg.....1  
Gi3\_28923004\_x1.....uccggcguauuaaacgg.....1  
Gi2\_11352222\_x1.....ucNggcguaguaaacggcuaga.....1  
Gi2\_11312903\_x1.....uccgAcguaguaaacggcu.....1  
Gi1\_4238223\_x1.....ucucaAccaacagauccgg.....1  
Gi3\_28890051\_x1.....guucgauuccUgcggcggag.....1  
Gi2\_11085676\_x1.....uucucacccaacagauccU.....1  
Gi1\_4240444\_x1.....gguucgauucccgggcggcggag.....1  
Gi3\_28963298\_x1.....cgauucccgggcggcggagc.....1  
Gi4\_587799\_x1.....uccggcguaguaaacAgcuagaau.....1  
Gi4\_574948\_x1.....gguucgauCcccggcggcggagc.....1  
Gi4\_577240\_x1.....Uuucucacccaacagauccgg.....1  
Gi2\_11061751\_x1.....cGggcguaguaaacggcu.....1  
Gi3\_28937902\_x1.....ugguCcuacccaacagaucc.....1  
Gi5\_9129461\_x1.....gguucgauucccgCcgccgg.....1  
G1a\_6150146\_x1.....uucucacccaacGgauccg.....1  
Gi2\_11000074\_x1.....ucgaGucccggcggcggag.....1  
Gi3\_28828962\_x1.....uccggUguaguaaacggcu.....1  
Gi2\_11012929\_x1.....guAcgauucccgggcggc.....1  
Gi1\_4283531\_x1.....ggcguaguauCaaggcuag.....1  
Gi2\_11154898\_x1.....cggcguGguauaacggcuaga.....1  
Gi2\_11135237\_x1.....guucgauuccUggcgccg.....1  
Gi3\_28692203\_x1.....gguucuUacccaacagaucc.....1  
Gi1\_4376683\_x1.....gguucgauUccggcggcggc.....1  
Gi5\_8861140\_x1.....uccggguucgauucccCgc.....1  
Gi3\_28367049\_x1.....caacagauccgAguucga.....1  
Gi1\_4333951\_x1.....gAucgauucccgggcggc.....1  
Gi3\_28573061\_x1.....uccggguucgauuccggcAccgga.....1  
Gi3\_28494622\_x1.....guucucaccAaacagauccgg.....1  
Gi5\_9043316\_x1.....ccggcguaguauUcggcuag.....1  
Gi1\_4372239\_x1.....guucucacccaacUgauccg.....1  
Gi3\_28678017\_x1.....gguucgauucccgggcggcAgagc.....1  
Gi5\_9127215\_x1.....gguucUauucccgggcggc.....1  
Gi1\_4197516\_x1.....uccggcguaguaaacCg.....1  
Gi3\_28552136\_x1.....ucgauuccggcggcgggU.....1  
G1a\_6016120\_x1.....uucgauucccgggcgggGgc.....1

Gi1a\_6098600\_x1.....gguucgauucccgccAcc..... 1  
 Gi4\_567782\_x1.....Gucaccaacagauccggguucg..... 1  
 Gi5\_9045931\_x1.....gguucucaccaacagCuccgg..... 1  
 Gi3\_28555814\_x1.....uucgauucUcggcgccggagc..... 1  
 Gi2\_11228306\_x1.....ucAauucccgccggag..... 1  
 Gi3\_28528581\_x1.....cAauucccgccggagc..... 1  
 Gi1a\_6100600\_x1.....gguucgauuccAgcgccgg..... 1  
 Gi3\_28672440\_x1.....gguucucaccaacagauccggAu..... 1  
 Gi1\_4186097\_x1.....agaucggguucgaCuccc..... 1  
 Gi2\_11403411\_x1.....cucaccaacUgauccgg..... 1  
 Gi2\_11070767\_x1.....gguucuAaccaacagauccg..... 1  
 Gi5\_9129558\_x1.....gguucgaGucccgccggagc..... 1  
 Gi2\_11197936\_x1.....ugguucucaccaacagauUc..... 1  
 Gi1a\_6084214\_x1.....gguucgauucccgccgUcggag..... 1  
 Gi5\_9086464\_x1.....Aguucgauucccgccggagcgu..... 1  
 Gi5\_9045519\_x1.....aacagauccggGucgauucccgccggagc..... 1  
 Gi3\_28272130\_x1.....gGguaguauaacggcuaga..... 1  
 Gi2\_11089352\_x1.....Cauuccggcgccggagc..... 1  
 Gi3\_28857693\_x1.....Agguucucaccaacagauccg..... 1  
 Gi5\_9019155\_x1.....uucgauucccgccggcA..... 1  
 Gi1\_4192941\_x1.....Aaacagauccggguucgauuccggc..... 1  
 Gi1a\_6174368\_x1.....uccggcguaguauaacggGuag..... 1  
 Gi3\_28391790\_x1.....Uguucgauucccgccggagcguu..... 1  
 Gi5\_8843860\_x1.....ccggcguagCauaacggcuag..... 1  
 Gi1\_4353672\_x1.....agauAacggguucgauuccc..... 1  
 Gi2\_11258655\_x1.....uccgAcguaguauaacggcuagaau..... 1  
 Gi2\_11320069\_x1.....gcguaguauaacggcuGgaa..... 1  
 Gi3\_28732959\_x1.....uccggcUuaguauaacggcuagaa..... 1  
 Gi5\_9138450\_x1.....ucucaccaacagGuccgg..... 1  
 Gi5\_8886018\_x1.....Ucggcguaguauaacggcu..... 1  
 Gi3\_28702503\_x1.....guucucaccaacagauccgggA..... 1  
 Gi2\_11120609\_x1.....ucgauuccAggcgccggag..... 1  
 Gi2\_10994031\_x1.....gguucgauucccgccgcAgg..... 1  
 Gi3\_28837471\_x1.....gauCcccgccggagc..... 1  
 Gi2\_11014586\_x1.....uccggcguauauaacggcuag..... 1  
 Gi2\_11131159\_x1.....aguucUcguaguauaacggcuaga..... 1  
 Gi3\_28579118\_x1.....ucgauuccAgcgccggagc..... 1  
 Gi2\_11287223\_x1.....uccgUcguaguauaacggcuagaau..... 1  
 Gi3\_28727938\_x1.....uCgguucucaccaacagaucc..... 1  
 Gi1\_4195531\_x1.....uccggcguaguauaacggcuUa..... 1  
 Gi2\_11294532\_x1.....uucgauucccgAcgccgga..... 1  
 Gi3\_28922194\_x1.....guucucUccaacagauccg..... 1  
 Gi2\_11340649\_x1.....uucucaccaacGgauccgg..... 1  
 Gi2\_11327666\_x1.....gguucucaccaacagaucc..... 0  
 Gi2\_11390964\_x1.....aacagauccggguucgGuuccggcgccg..... 1  
 Gi2\_11092858\_x1.....guucgauucccgUccgga..... 1  
 Gi1\_4359562\_x1.....caCcagauccggguucgauuccggc..... 1

Gi3\_28799960\_x1.....uugguucucacccaaUagaucc.....1  
G1a\_6310241\_x1.....Cuucgauucccggcgcg.....1  
Gi2\_11357110\_x1.....uucgGuucccggcgcg.....1  
Gi5\_8983424\_x1.....ggcguaguauaacggcGag.....1  
Gi1\_4175261\_x1.....gguucgauucccggcgcgAag.....1  
Gi5\_8851360\_x1.....ugguucucacccaacagauAcgggu.....1  
Gi3\_28425771\_x1.....uccggcguaguauUcggcu.....1  
Gi3\_28813720\_x1.....uggAucucacccaacagauccg.....1  
Gi1\_4203577\_x1.....ucucaccUaacagauccgg.....1  
Gi3\_28570107\_x1.....ccggcguaguauaaAggcuaga.....1  
Gi5\_8910947\_x1.....uccggcGaguauaacggcua.....1  
Gi2\_11119670\_x1.....uCcgauucccggcgcgagc.....1  
Gi1\_4354408\_x1.....ucucacccaacagauccgA.....1  
G1a\_6274430\_x1.....gguucgCuucccggcgcgagc.....1  
Gi1\_4221935\_x1.....ggcguaguauCacggcua.....1  
Gi5\_9006296\_x1.....uccggcguaguauaacggcuagaauaggA.....1  
Gi1\_4230010\_x1.....ccggcguaguUuaaacggcuaga.....1  
Gi1\_4336294\_x1.....gguuAgauucccggcgcgag.....1  
Gi3\_28360332\_x1.....ugguucucacccaacagauccGg.....1  
Gi2\_11354537\_x1.....ucgauuccAggcgcgagc.....1  
Gi2\_11267696\_x1.....cggcguaguauCacggcua.....1  
Gi3\_28943427\_x1.....caacagauUggguucgauucc.....1  
Gi5\_8933169\_x1.....caccGacagauccggguucga.....1  
Gi5\_9070817\_x1.....ggcguauuuaacggcuaga.....1  
Gi5\_8922531\_x1.....guucucacccaacagauccGg.....1  
Gi2\_11123658\_x1.....uccggcguCguauaacgg.....1  
Gi3\_28878569\_x1.....gguucucacccaacagGuccgg.....1  
Gi1\_4364784\_x1.....ucucacUaacagauccg.....1  
Gi3\_28960986\_x1.....ucgauucAcggcgcgagc.....1  
Gi2\_11045545\_x1.....Ucguaguauaacggcuaga.....1  
Gi3\_28584662\_x1.....gauuccAggcgcgagc.....1  
Gi3\_28630962\_x1.....Nuucgauucccggcgcg.....1  
Gi3\_28774530\_x1.....uccgAguucgauucccggcgcgga.....1  
Gi4\_569927\_x1.....gguucgauucccggcgcgagcA.....1  
Gi5\_9137971\_x1.....uccggcguCuauaacggcuagaau.....1  
Gi1\_4250698\_x1.....cagauccggguucgauucccggcGAc.....1  
Gi1\_4255742\_x1.....ggcguaguauaacAgcuag.....1  
Gi3\_28872324\_x1.....ucUggguucgauucccggcgcgga.....1  
Gi1\_4380110\_x1.....ccggcguauuuaacggcu.....1  
Gi2\_11132369\_x1.....gauucUcggcgcgagc.....1  
Gi2\_11037583\_x1.....Ggaaugguugguucucacc.....1  
Gi5\_9025860\_x1.....ugguucAcacccaacagauccgggu.....1  
Gi3\_28409719\_x1.....uccggcCuaguauaacggcuag.....1  
G1a\_6289377\_x1.....gguucgauucccggcgcgGg.....1  
Gi3\_28332252\_x1.....aCaucggguucgauucccggcgcgag.....1  
Gi2\_10996113\_x1.....gguucucacccaacagauUcg.....1  
Gi2\_11248111\_x1.....gguuGucacccaacagauccg.....1

Gi3\_28474226\_x1.....gcguGguauaacggcuagaa..... 1  
Gi3\_28521686\_x1.....uggNucucacccaacagauccg..... 1  
Gi1\_4218397\_x1.....uccggguucgauGcccggcgccgga..... 1  
Gi2\_11393693\_x1.....guucucacccaacaUauccg..... 1  
Gi3\_28277343\_x1.....uucucUcccaacagauccggguu..... 1  
Gi3\_28628149\_x1.....gUuucgauucccgcgccggagcg..... 1  
Gi4\_608816\_x1.....uccggcguaguauaacggcuagU..... 1  
Gi5\_9003046\_x1.....guucgauucccgcgccUga..... 1  
Gi3\_28608683\_x1.....Cgguucgauucccgcgccg..... 1  
Gi3\_28614583\_x1.....uccggcguaguauaCcgguagaa..... 1  
Gi5\_9095721\_x1.....gguucucacccaacagGuc..... 1  
Gi3\_28811057\_x1.....uccggcguauauaacggcuagaa..... 1  
Gi5\_8834311\_x1.....guucgauucccgcgccggagU..... 1  
Gi5\_8872085\_x1.....gguucgauucccgUcgccggag..... 1  
Gi5\_8837028\_x1.....ccggcguaguauaacggUua..... 1  
Gi5\_8954286\_x1.....gauucccgcgccggaUc..... 1  
Gi2\_11376939\_x1.....ggNucgauucccgcgccgga..... 1  
Gi5\_9011958\_x1.....aacagauccggguucgauucccgcgccg..... 0  
Gi3\_28752902\_x1.....uugguucucacccGacagaucc..... 1  
Gi2\_11054287\_x1.....gguucgauucccgUcgccg..... 1  
Gi5\_9103621\_x1.....uucucacccaacagauccggguCc..... 1  
Gi1\_4360748\_x1.....uccggcguaguaAaacgg..... 1  
Gi5\_9075210\_x1.....ucacccaacagauccggguC..... 1  
Gi2\_11121269\_x1.....cguaguauaacggcuagaaugguugguuc..... 0  
Gi1\_4326623\_x1.....guucgauAcccgcgccg..... 1  
Gi3\_28309903\_x1.....gAucucacccaacagauccg..... 1  
Gi3\_28881903\_x1.....Cccggguucgauucccgcgccg..... 1  
Gi3\_28987564\_x1.....gguucgauGcccggcgcc..... 1  
Gi2\_11241331\_x1.....auuccggcgccggagcC..... 1  
Gi1\_4241313\_x1.....cCgauccggguucgauucccgcgcc..... 1  
Gi5\_9110281\_x1.....uucNcacccaacagauccg..... 1  
Gi2\_10995462\_x1.....uccggcgGaguauaacggcuag..... 1  
Gi3\_28855045\_x1.....uccggcguaguauaacUgc..... 1  
Gi5\_8957435\_x1.....guucgauuccGggcgccg..... 1  
Gi1\_4190703\_x1.....agaucggguucgauuAcc..... 1  
Gi3\_28766511\_x1.....ccggcguaguCuaacggc..... 1  
Gi5\_9107136\_x1.....ucAgggguucgauucccgcgccg..... 1  
Gi2\_11282668\_x1.....uccgggAucgauucccgcgccgga..... 1  
Gi1\_4380634\_x1.....uucNcacccaacagauccg..... 1  
Gi5\_8893944\_x1.....uccggGguaguauaacggc..... 1  
Gi3\_28770490\_x1.....guucgauucccgcgccGggag..... 1  
Gi3\_28963819\_x1.....gcguaguauaacAgcuagaa..... 1  
Gi5\_9010274\_x1.....uccggcguaguauaacggcuAaa..... 1  
Gi2\_11317020\_x1.....uccggcguaguauaacggcuagaauggu..... 0  
Gi1\_4186633\_x1.....uGacccaacagauccgggu..... 1  
Gi3\_28593556\_x1.....auccAgguucgauucccgcgccgga..... 1  
Gi1\_4260476\_x1.....Gcggcguaguauaacggc..... 1

Gi5\_8870938\_x1.....ggCucucacccaacagauc..... 1  
Gi4\_595660\_x1.....cucacccaacagauccggguucA..... 1  
Gi1\_4358284\_x1.....uccggcguaguauaacggcuagaGu.....gguuAgauuuccggcgccg..... 1  
G1a\_6195412\_x1.....uccggcguaguauaacggcuagaGu..... 1  
Gi1\_4227510\_x1.....guucucacccaagagauccgg..... 1  
Gi1\_4358148\_x1.....Auccggcguaguauaacggc..... 1  
Gi3\_28767597\_x1.....gauucccgUcgggagc..... 1  
Gi5\_8885001\_x1.....Uuucgauuccggcgccggagcguu..... 1  
Gi1\_4360278\_x1.....uccggcguUguauaacggc..... 1  
Gi2\_11267262\_x1.....Accggcguaguauaacgg..... 1  
Gi5\_8946289\_x1.....uGacccaacagauccggguu..... 1  
Gi3\_28435059\_x1.....ugguucucacccaGcagauc..... 1  
Gi3\_28765865\_x1.....gauucccgUcgccggagc..... 1  
Gi1\_4375213\_x1.....guucgauuccggcgccggagcg..... 0  
Gi1\_4274575\_x1.....ccggcguagAuaaacggcua..... 1  
Gi3\_28987095\_x1.....cccaacagauccggguucgaCuccc..... 1  
Gi3\_28939063\_x1.....guucucacccaUagauccg..... 1  
Gi5\_9102312\_x1.....Cucucacccaacagauccggguu..... 1  
Gi5\_9000985\_x1.....Cgcguaguauaacggcuaga..... 1  
Gi5\_8904536\_x1.....ugguucucacccaacagCuccg..... 1  
Gi3\_28391138\_x1.....uccggcguaguaAaacggcuag..... 1  
Gi4\_571028\_x1.....uccggcguaguauaacAgcuaga..... 1  
Gi1\_4321648\_x1.....cacccaacagauccggguucgCuuccc..... 1  
Gi3\_28659909\_x1.....uucgauucNcggcgccg..... 1  
Gi2\_11001856\_x1.....guucGcacccaacagauccg..... 1  
Gi2\_11172189\_x1.....aguccAgcguaguauaacggcuaga..... 1  
Gi3\_28742472\_x1.....gauuccGggcgccggagc..... 1  
Gi3\_28520573\_x1.....Cuccggcguaguauaacggcuaga..... 1  
Gi5\_9118019\_x1.....uccggguucgauucccgGA..... 1  
Gi1\_4167359\_x1.....gUguucgauuccggcgccg..... 1  
Gi5\_8946318\_x1.....Cccggcguaguauaacggcuagaaug..... 1  
Gi3\_28944552\_x1.....Aucgauuccggcgccgga..... 1  
Gi3\_28782911\_x1.....ggguucgGuuccggcgccggag..... 1  
Gi5\_9120741\_x1.....gguNcgauuccggcgcc..... 1  
Gi5\_8944125\_x1.....ggguucgauuccggcgGA..... 1  
Gi3\_28533199\_x1.....uccggcguaguauaacgUc..... 1  
Gi3\_28783069\_x1.....ucgauuccggcUccggagc..... 1  
Gi1\_4179217\_x1.....agauccggguCcgauuccc..... 1  
Gi1\_4162336\_x1.....uccggguucgauuccggcgccg..... 0  
Gi2\_11110040\_x1.....guucgauuccggGgccg..... 1  
Gi5\_9103469\_x1.....aCauccggguucgauuccc..... 1  
G1a\_6053965\_x1.....gguucgGuuccggcgccg..... 1  
Gi1\_4201748\_x1.....uucgauuccggcgccggagcA..... 1  
Gi2\_11107469\_x1.....agaauAguugguucucacc..... 1  
Gi2\_11261799\_x1.....gguucgauuAccggcgccggag..... 1  
Gi2\_11338905\_x1.....gguucgauuccggcgccGg..... 1  
Gi2\_11386236\_x1.....agaNccggguucgauucc..... 1

Gi4\_569785\_x1 ..... cCcaccaacagauccggguucg ..... 1  
 Gi2\_11299578\_x1 ..... cgcgcuagNauaacggcuagaau ..... 1  
 Gi1\_4339676\_x1 ..... ugguuAucaccaacagauccg ..... 1  
 Gi5\_8896035\_x1 ..... uucucaccaacagauAggguu ..... 1  
 Gi2\_11007588\_x1 ..... guucgaGucccggcgccggag ..... 1  
 Gi4\_596994\_x1 ..... uugguucucacAcaacaga ..... 1  
 Gi3\_28943001\_x1 ..... auccggguucgauuccggcAccgga ..... 1  
 Gi1\_4355106\_x1 ..... gCuucgauuccggcgccggag ..... 1  
 Gi3\_28917137\_x1 ..... ucgauucGcggcgccggagc ..... 1  
 Gi1\_4284310\_x1 ..... uucucaccaacagauCg ..... 1  
 Gi4\_608663\_x1 ..... gguucgauuccggcgccgA ..... 1  
 Gi1\_4181418\_x1 ..... uccggcguaguauaacggcCagaau ..... 1  
 Gi2\_11095148\_x1 ..... ggcguaguauaacggcuagaau ..... 0  
 Gi4\_594121\_x1 ..... gguucgaCucccggcgccggagc ..... 1  
 Gi2\_11001708\_x1 ..... gAucucaccaacagauccg ..... 1  
 Gi3\_28725190\_x1 ..... guucgauGccggcgccg ..... 1  
 Gi2\_11397611\_x1 ..... ccUgcguaguauaacggcua ..... 1  
 Gl1\_6340938\_x1 ..... gguCcgauuccggcgccggagc ..... 1  
 Gi3\_28724358\_x1 ..... cccccGacagauccggguuc ..... 1  
 Gi3\_28440000\_x1 ..... ugguucucaccaacagauUcg ..... 1  
 Gi2\_11321425\_x1 ..... agauccggguucUauucc ..... 1  
 Gl1\_6080800\_x1 ..... uccggcguaguGuaacggcua ..... 1  
 Gi5\_8940077\_x1 ..... uucgauuccggcgccgga ..... 0  
 Gi5\_8915072\_x1 ..... uucucaccaacagauUcg ..... 1  
 Gi5\_8970598\_x1 ..... uugguucGcaccaacagauccg ..... 1  
 Gi1\_4330992\_x1 ..... guucgaGucccggcgccg ..... 1  
 Gi5\_9052472\_x1 ..... ugguucucCcccaacagauccg ..... 1  
 Gi1\_4302283\_x1 ..... guucucaccaacagauCagg ..... 1  
 Gi5\_9128802\_x1 ..... gguucgauucccgCcgccgga ..... 1  
 Gi1\_4390598\_x1 ..... guucgauGcccggcgccgg ..... 1  
 Gi2\_11155780\_x1 ..... guucucaccaacagCuccgg ..... 1  
 Gi1\_4312727\_x1 ..... gguucucaccUaacagauccgg ..... 1  
 Gi2\_11144500\_x1 ..... guucgauucccgGgccggag ..... 1  
 Gi5\_8874790\_x1 ..... uccggcguaguauaacggcuagaU ..... 1  
 Gi3\_28878353\_x1 ..... uccNgcguaguauaacgg ..... 1  
 Gi1\_4258694\_x1 ..... ugguucucaccaacagUuccg ..... 1  
 Gi4\_593486\_x1 ..... Cguucgauuccggcgccgg ..... 1  
 Gi2\_11053014\_x1 ..... ugguucucaccaacagGucc ..... 1  
 Gi5\_8892016\_x1 ..... ugguuucGaccaacagauccg ..... 1  
 Gi3\_28494870\_x1 ..... gguucgauuccggcgccggGgc ..... 1  
 Gi5\_8988260\_x1 ..... ucacccaaNagauccggguu ..... 1  
 Gl1\_6239732\_x1 ..... gguucgauuccggcgccUgagc ..... 1  
 Gi1\_4267734\_x1 ..... auccgAguucgauuccggcgccgg ..... 1  
 Gi3\_28362273\_x1 ..... cucaGccaacagauccgg ..... 1  
 Gi1\_4165615\_x1 ..... ugguucucaccaacagauAccg ..... 1  
 Gi2\_11119338\_x1 ..... guucucaccaacaCauccgg ..... 1  
 Gi5\_8899033\_x1 ..... uccggguuNgauuccggc ..... 1



G1a\_6055536\_x1.....gguucgauucccgAcgcc..... 1  
 Gi1\_4249870\_x1.....guugguucucacccaacagauccggG..... 1  
 Gi1\_4205593\_x1.....guucucaAccaacagauccg..... 1  
 Gi5\_8931323\_x1.....aguccggcguaguauaacggcuagaaugA..... 1  
 Gi5\_8942041\_x1.....acagGuccggguucgauucccggcg..... 1  
 Gi2\_11029933\_x1.....ugguucucacccaacagauGcg..... 1  
 Gi5\_9124004\_x1.....Gguccggcguaguauaacggcu..... 1  
 G1a\_6213932\_x1.....uccggcguaguauCcgg..... 1  
 G1a\_6004225\_x1.....guucucacccaacagaCccg..... 1  
 Gi3\_28790025\_x1.....ucucacUcaacagauccg..... 1  
 Gi3\_28963190\_x1.....cucacccaacGgauccgg..... 1  
 Gi1\_4253110\_x1.....guucAauucccggcgcccggagc..... 1  
 Gi5\_9062050\_x1.....gguucgauucUcggcgcccggagcgu..... 1  
 Gi2\_11207120\_x1.....guucucCcccaacagauccg..... 1  
 Gi2\_11266359\_x1.....cgauuccggcgcccggagcCu..... 1  
 Gi1\_4231263\_x1.....uuNucacccaacagauccg..... 1  
 G1a\_6103745\_x1.....guGcucacccaacagauccg..... 1  
 Gi1\_4341708\_x1.....gguucgauucccggcgcccggagcG..... 1  
 G1a\_6007522\_x1.....uccggcguaguauaaUggcuaga..... 1  
 Gi5\_8975325\_x1.....uugguucucacUcaacagauccg..... 1  
 Gi5\_9066493\_x1.....guucgauucccggcgcccGua..... 1  
 Gi3\_28688159\_x1.....cAauuccggcgcccggag..... 1  
 Gi2\_11394664\_x1.....gguucgauuccGggcgccc..... 1  
 G1a\_6083325\_x1.....gguucgauucccgAgccgg..... 1  
 Gi5\_8908734\_x1.....guuGucacccaacagauccgg..... 1  
 Gi3\_28633437\_x1.....cggcguaguauaacggUuaga..... 1  
 Gi5\_9120986\_x1.....ugguucucaccAaacagauccgg..... 1  
 Gi5\_9068649\_x1.....gguucgauucGcggcgcccggagc..... 1  
 Gi5\_9104674\_x1.....guucgauucccgCcgcccga..... 1  
 Gi3\_28585848\_x1.....Uuccggguucgauucccggcgcccga..... 1  
 Gi1\_4346213\_x1.....guucgaAucccggcgccc..... 1  
 Gi3\_28714124\_x1.....caccacagauccgAguuc..... 1  
 Gi1\_4246433\_x1.....uccggcguaguauCcggcu..... 1  
 Gi2\_11077411\_x1.....cAcacccaacagauccgg..... 1  
 G1a\_6322424\_x1.....ucgauucccggcgcccggagcCu..... 1  
 Gi3\_28860126\_x1.....cccaacagauccggguucgauGcc..... 1  
 Gi2\_11056875\_x1.....gguucucacccaacaAauccg..... 1  
 Gi5\_8938031\_x1.....uucucGcccaacagauccggguu..... 1  
 Gi3\_28621467\_x1.....uccggcgAaguauaacggc..... 1  
 Gi2\_11395681\_x1.....uccggcguaUuauaacggc..... 1  
 Gi3\_28906139\_x1.....ucucacccaacagGuccgg..... 1  
 Gi1\_4218549\_x1.....ugguucucacccaacagauccggguucgauuc..... 0  
 Gi5\_9052659\_x1.....gguucucaNccaacagauccgg..... 1  
 Gi3\_28935120\_x1.....guUcggcguaguauaacggcuaga..... 1  
 G1a\_6117902\_x1.....uccggcguaguauCacggcuag..... 1  
 Gi5\_8965853\_x1.....ugguucucacccaacagCuccgggu..... 1  
 Gi3\_28954306\_x1.....ucgauucUcggcgcccggag..... 1

Gi5\_9048020\_x1.....gguucgauucccgUcgccggagc..... 1  
G1a\_6308753\_x1.....gguucgauuNccggcgccggagc..... 1  
Gi2\_11276217\_x1.....uccggcguaguauaacggcuagaauggGu..... 1  
Gi3\_28348367\_x1.....gguucgaAuuccggcgcc..... 1  
Gi2\_11026771\_x1.....gcguaguauaacggcuaga..... 0  
Gi1\_4217767\_x1.....ggcguaguauaacggcuagU..... 1  
G1a\_6219977\_x1.....ucAgggcguaguauaacggcuaga..... 1  
G1a\_6262994\_x1.....gguAcgauucccgcgccggag..... 1  
Gi5\_9115682\_x1.....gguucuGacccaacagauccgg..... 1  
Gi1\_4283760\_x1.....ugguucuAacccaacagauccg..... 1  
Gi3\_28465680\_x1.....ccggcguGguauaacggcuaga..... 1  
Gi5\_8915832\_x1.....cccaacagauccggguAc..... 1  
Gi3\_28582896\_x1.....Ucggcguaguauaacggcuagaa..... 1  
Gi2\_11358202\_x1.....uccggcguaguauaacCgc..... 1  
Gi5\_8956571\_x1.....gguucgauuccUggcgccggagc..... 1  
Gi5\_9064949\_x1.....uccUgcuaguauaacggc..... 1  
Gi3\_28922062\_x1.....Auucucacccaacagauccggg..... 1  
Gi1\_4217158\_x1.....cucacccaacagauccggguucAa..... 1  
Gi2\_11093458\_x1.....gguucGcacccaacagauccgg..... 1  
G1a\_6031264\_x1.....gguucgauucccgcgccAggagc..... 1  
Gi3\_28700299\_x1.....uccggcguaguauaacgUcuag..... 1  
Gi5\_9089275\_x1.....ggcguGguauaacggcuaga..... 1  
Gi2\_11368469\_x1.....gguucucaccAaacagauccg..... 1  
Gi5\_9101242\_x1.....uccggguucgauuccUggc..... 1  
Gi5\_9092859\_x1.....uccggcguaguauaacgCcu..... 1  
Gi2\_11043616\_x1.....gguucgUuucccgcgccgga..... 1  
Gi5\_9056090\_x1.....aacagauccgggCucgauucccgcgccggagc..... 1  
Gi1\_4261801\_x1.....gguucgauucccgAgccggagc..... 1  
Gi5\_8846646\_x1.....aguccggcNuaguauaacggcuagaaugg..... 1  
Gi3\_28613963\_x1.....gguucucacGcaacagauccgg..... 1  
Gi3\_28412858\_x1.....cgauucccgcgccggagcU..... 1  
Gi2\_11064202\_x1.....uccggcguaguauaacgCcuaga..... 1  
Gi3\_28577856\_x1.....ggNucucacccaacagauccg..... 1  
Gi3\_28643184\_x1.....uucgauucccgcgccAggagc..... 1  
Gi3\_28328912\_x1.....ccggcguaguauaaUggcuag..... 1  
Gi3\_28287707\_x1.....gguucucacAaacagaucc..... 1  
Gi5\_8887714\_x1.....uccggcguaguauaacUg..... 1  
Gi2\_11405600\_x1.....cgguucgauucccgcgccggU..... 1  
Gi1\_4205325\_x1.....ccgAcguaguauaacggcuaga..... 1  
Gi5\_9107706\_x1.....gguucgauuccGggcgccgga..... 1  
Gi4\_581032\_x1.....gCuucgauucccgcgccggagc..... 1  
Gi5\_8977529\_x1.....gguucgauuUccggcgcc..... 1  
Gi2\_11024176\_x1.....ggguucgauucccgUgcc..... 1  
Gi3\_28548837\_x1.....cgggCucgauucccgcgccgga..... 1  
Gi2\_11100601\_x1.....ucgauuccggcUccggag..... 1  
Gi5\_9122369\_x1.....ucacccaacagauccgGguu..... 1  
Gi5\_8949533\_x1.....uggGucucacccaacagauccg..... 1

Gi2\_11278841\_x1.....gguGcgauuccggcgccggag..... 1  
G1a\_6115971\_x1.....Auucgauuccggcgccgga..... 1  
Gi3\_28418844\_x1.....uucucacccaacagauccgAguuc..... 1  
Gi2\_11294997\_x1.....gguucucacccaacagauccgggu..... 0  
Gi2\_11116921\_x1.....uccggcguaguauaacUgcuag..... 1  
Gi3\_28846220\_x1.....ggguucgaNuccggcgccggagc..... 1  
Gi3\_28855230\_x1.....guucucacccaacUgauccgg..... 1  
Gi3\_28607525\_x1.....ggguucgauuccggcgAcggagc..... 1  
Gi3\_28446037\_x1.....cccaacagGuccggguucgauucc..... 1  
Gi5\_8965383\_x1.....gguucgauuccUgcgcc..... 1  
Gi2\_11001660\_x1.....ugguucucacccUacagauccg..... 1  
Gi5\_8979466\_x1.....guaguauaacgAcuagaau..... 1  
Gi5\_8866573\_x1.....ugguucAcacccaacagauccg..... 1  
Gi2\_11006973\_x1.....ugguAcucacccaacagauccg..... 1  
Gi5\_9111430\_x1.....cggcguaguauCacggcuaga..... 1  
Gi1\_4292922\_x1.....uucucacccUacagauccg..... 1  
Gi3\_28344517\_x1.....caccaacUgauccggguuc..... 1  
G1a\_6047473\_x1.....gguucgauuccggcgccgCagc..... 1  
Gi5\_9021916\_x1.....guucucCcccaacagauccg..... 1  
Gi3\_28461352\_x1.....ggcguaguauCacggcua..... 1  
Gi5\_8862734\_x1.....gguucgauuccggcgccAgag..... 1  
Gi2\_11159583\_x1.....uccggcguaguauaacgCc..... 1  
Gi3\_28979015\_x1.....Gucgauuccggcgccggag..... 1  
Gi2\_11051947\_x1.....cccaacaUauccggguuc..... 1  
Gi1\_4202196\_x1.....cgauuccggcgccggag..... 0  
G1a\_6287206\_x1.....uucucacccaacagauUg..... 1  
Gi3\_28965147\_x1.....Agguucucacccaacagauc..... 1  
Gi1\_4199363\_x1.....gguucucacccaacUgauccg..... 1  
Gi2\_11090701\_x1.....uucucacccaacagaGccggguucg..... 1  
Gi3\_28755984\_x1.....cucacccaacagauAgg..... 1  
Gi3\_28935762\_x1.....uccggcguaguauaacggcuagaugguugc..... 1  
Gi4\_571218\_x1.....gguucgauuccggcgccA..... 1  
Gi1\_4250444\_x1.....ccggcguaguauaacggcua..... 1  
Gi3\_28503864\_x1.....ugguucucacccaCagauc..... 1  
Gi5\_8946116\_x1.....uucucacccaacagaCccg..... 1  
Gi5\_9040313\_x1.....ucucacccaCagauccg..... 1  
Gi2\_11084435\_x1.....ucAggcguaguauaacggcua..... 1  
Gi1\_4228821\_x1.....cGcaccacagauccggguucgauucc..... 1  
Gi3\_28812310\_x1.....gguucucacccaacagauGg..... 1  
Gi1\_4292558\_x1.....guucucacccaacUgauccgg..... 1  
Gi5\_9026887\_x1.....ucucacccaacagauccU..... 1  
Gi2\_11319370\_x1.....ucgGuuccggcgccggag..... 1  
Gi3\_28419247\_x1.....ucacccaacagauccggguU..... 1  
Gi5\_9064515\_x1.....Aucucacccaacagauccggguu..... 1  
Gi1\_4362114\_x1.....ucucacccUacagauccg..... 1  
Gi3\_28527212\_x1.....gguucCauuccggcgcc..... 1  
Gi3\_28309427\_x1.....guuAucacccaacagauccg..... 1

Gi5\_8857640\_x1.....gguucgUuuccggcgccggag..... 1  
 Gi5\_8960439\_x1.....Ggucggcgaguauaacggcuagaaugg..... 1  
 Gi5\_8902752\_x1.....uccggcgaguauaaUggcuagaauggu..... 1  
 Gi3\_28554081\_x1.....gguucgGuuccggcgccg..... 1  
 Gi5\_8855737\_x1.....gguucucaccaacagUuccgg..... 1  
 Gi2\_11361890\_x1.....cggguucgauuccggcgUcggg..... 1  
 Gi1\_4310529\_x1.....uccggcgAaguauaacggcuagaa..... 1  
 Gi1\_4216481\_x1.....uNcggcgaguauaacgg..... 1  
 Gi2\_11022829\_x1.....cccaCcagauccggguuc..... 1  
 Gi2\_11394100\_x1.....cggcgaguauaacggcuaAaau..... 1  
 Gi3\_28811273\_x1.....gguucCauuccggcgccggag..... 1  
 Gi5\_8968586\_x1.....gguucgauGcccggcgccgg..... 1  
 Gi2\_11280951\_x1.....aguccggcgaguauaGcgg..... 1  
 Gi5\_8862355\_x1.....gguucucaccaacaAauccgg..... 1  
 Gi5\_9000461\_x1.....ggUguaguauaacggcuaga..... 1  
 Gi1\_4372665\_x1.....ggcgaguauaacggcCag..... 1  
 Gi2\_11373735\_x1.....Acgauuccggcgccggag..... 1  
 Gi2\_11407350\_x1.....ucgauuccCgcgccggagc..... 1  
 Gi1\_4334308\_x1.....ccggcguCguauaacggc..... 1  
 Gi2\_11303602\_x1.....gguucgauuccggcgccggagcguuu..... 0  
 Gi2\_11122381\_x1.....uucgauuccggUgccggag..... 1  
 Gl1\_5985246\_x1.....uccggcgaguGuaacggcuagaa..... 1  
 Gi1\_4236171\_x1.....aAauccggguucgauucc..... 1  
 Gi2\_11273164\_x1.....uucgauuccggcgccgC..... 1  
 Gi2\_11138565\_x1.....uccAgcgaguauaacggcuagaa..... 1  
 Gi1\_4231488\_x1.....gguucucaccaacagauUcg..... 1  
 Gi3\_28827725\_x1.....uccggguucgauAccggcgccgga..... 1  
 Gi5\_8840045\_x1.....ucgauuccggcgccgAa..... 1  
 Gi5\_8924373\_x1.....Gccggcgaguauaacggcuagaaug..... 1  
 Gi2\_11237360\_x1.....gguucgauGccggcgccggag..... 1  
 Gi3\_28524515\_x1.....uccggguucUauuccggcgccgga..... 1  
 Gi5\_8955198\_x1.....gguuAucaccaacagauccg..... 1  
 Gi5\_8994404\_x1.....Cuucgauuccggcgccggag..... 1  
 Gi1\_4308261\_x1.....gguucgauuccAgcggc..... 1  
 Gi3\_28652401\_x1.....ucgauuccggcgccggagA..... 1  
 Gi2\_11388762\_x1.....gguucucaccaacGguc..... 1  
 Gi5\_8957344\_x1.....uucucaAccaacagauccgg..... 1  
 Gi1\_4349058\_x1.....gguucgGuuccggcgccggag..... 1  
 Gi5\_8862066\_x1.....uGgauuccggcgccgga..... 1  
 Gi5\_9084990\_x1.....gguucgauuccggcgccgCagc..... 1  
 Gi5\_8947288\_x1.....gguucgaAuccggcgccggagc..... 1  
 Gi2\_11218230\_x1.....gguucgauuccggAgccgg..... 1  
 Gi2\_11395804\_x1.....uccggcgaguauaaAgggcuagaa..... 1  
 Gi1\_4159395\_x1.....guuNgauuccggcgccggagc..... 1  
 Gi1\_4364503\_x1.....uccNgcgaguauaacggcuag..... 1  
 Gi3\_28459091\_x1.....uucgGuuccggcgccgga..... 1  
 Gi1\_4217748\_x1.....cucaccaAagaucgg..... 1

Gi4\_572129\_x1 .....gguuAgauucccgcgccggagc..... 1  
Gi1\_4248954\_x1.....ucacccUacagauccgggu..... 1  
Gi2\_11326604\_x1.....Nguucgauucccgcgccg..... 1  
Gi2\_11108052\_x1.....uucucacccaacagauccgggCucg..... 1  
Gi5\_8871802\_x1.....cucacccaacagaucAgg..... 1  
Gi3\_28297674\_x1.....guNcgauucccgcgccgg..... 1  
Gi5\_8857495\_x1.....ucunacccaacagauccg..... 1  
Gi3\_28549937\_x1.....cggcguaguauaacggcuCga..... 1  
Gi5\_9003694\_x1.....uucucacccGacagauccgg..... 1  
Gi3\_28394896\_x1.....uucgauuccUgcgccgga..... 1  
Gi5\_9072967\_x1.....gguucucGcccaacagauccgg..... 1  
Gi5\_9009059\_x1.....ccggcguaguauaacggcuagC..... 1  
Gi5\_8992512\_x1.....gguucgauuccGggcgccgga..... 1  
Gi5\_9072601\_x1.....uccggcguaguauaacggcuagaauaggCu..... 1  
Gi3\_28607845\_x1.....cggNuucgauucccgcgccgga..... 1  
Gi2\_11055791\_x1.....gUucgauucccgcgccggagcguuu..... 1  
Gi5\_9114652\_x1.....uccggcguUguauaacgg..... 1  
Gi1\_4380831\_x1.....guucCauucccgcgccgga..... 1  
Gi2\_11362498\_x1.....gguucgauuccUgcgccg..... 1  
Gi5\_8917411\_x1.....guucucacccaaGagauccgg..... 1  
Gi5\_9051740\_x1.....uucgauucccgUgcg..... 1  
Gi3\_28759482\_x1.....uccggcguaguauaacggUu..... 1  
Gi3\_28968230\_x1.....ucacccaacCgauccggguuc..... 1  
Gi5\_8952807\_x1.....uucgauCcccgcgccg..... 1  
Gi3\_28346108\_x1.....ucCacccaacagauccg..... 1  
Gi2\_11366978\_x1.....ucgauAcccgcgccgagc..... 1  
Gi4\_606396\_x1.....guucgaGuucccgcgccg..... 1  
Gi5\_8956080\_x1.....gguucgauucccgCccgga..... 1  
Gi1\_4269937\_x1.....ggcguaguNuaacggcua..... 1  
Gi2\_11037431\_x1.....agauccggguucgCuuccc..... 1  
Gi3\_28269762\_x1.....cacccaacagauccgggGuc..... 1  
Gi5\_9053379\_x1.....guucucacccaacagaucNg..... 1  
Gi3\_28361222\_x1.....Ugauccggguucgauucccgcgccggag..... 1  
Gi2\_11004858\_x1.....uccggcAuaguauaacggcuagaa..... 1  
Gi4\_592725\_x1.....guucgauucGcggcgccggagc..... 1  
Gi3\_28759380\_x1.....Ggguucucacccaacagauccgg..... 1  
Gi2\_11025721\_x1.....guucucacccaCcagauccgg..... 1  
Gi2\_11133986\_x1.....cggguucgauuccAgcgccgga..... 1  
Gi5\_9131644\_x1.....aguccggcguaguauaacggcu..... 1  
Gi3\_28764665\_x1.....gguucucGcccaacagauccgggu..... 1  
Gi3\_28327543\_x1.....guucucacccaacagaucUgg..... 1  
Gi5\_9038982\_x1.....guaguauaacgCcuagaau..... 1  
Gi1\_6175626\_x1.....uccggcguaguauaacggcuagCa..... 1  
Gi2\_11085936\_x1.....ccggGguaguauaacggcua..... 1  
Gi3\_28782586\_x1.....guucgaAuuccggcgccggag..... 1  
Gi3\_28662191\_x1.....acagauccggguucgauucccgUcgccg..... 1  
Gi2\_11050879\_x1.....uucucacccaGcagauccggguucg..... 1

Gi5\_9003495\_x1.....guucucaccaacaCauccg..... 1  
Gi2\_10996523\_x1.....gguucgauucccCgcgccg..... 1  
Gi3\_28632715\_x1.....cucaccaacagauccggCu..... 1  
Gi4\_594417\_x1.....cucaccaacagauccggguUg..... 1  
Gi3\_28912503\_x1.....gauuccggcgccggaAc..... 1  
Gi2\_11263507\_x1.....gguucUauuccggcgccg..... 1  
Gi2\_11007780\_x1.....uccggcUuaguauaacggc..... 1  
Gi3\_28599412\_x1.....gguucucacAcaacagauccgg..... 1  
Gi3\_28424382\_x1.....uugguucucaccaacaga..... 0  
Gi2\_11054248\_x1.....ccggcguaNuauaacggcua..... 1  
G1a\_6017759\_x1.....Gccggcguaguauaacggcuagaau..... 1  
Gi1\_4207462\_x1.....uucgauuccggcgccggagcCu..... 1  
Gi1\_4199628\_x1.....gguucgauuccggcgccCgagc..... 1  
G1a\_6327152\_x1.....gguucgauuccUggcgccgga..... 1  
Gi5\_8879089\_x1.....gguucucaccaCcagauccgg..... 1  
Gi3\_28970858\_x1.....ucgauuccggcgUgga..... 1  
Gi3\_28507336\_x1.....ucgauuccggcgAcgga..... 1  
G1a\_6186067\_x1.....gguuAgauuccggcgccggagc..... 1  
Gi5\_8959505\_x1.....gguucgauuccggcgGgga..... 1  
Gi5\_8892777\_x1.....ucucaccaacagauAg..... 1  
Gi1\_4276289\_x1.....ugguucucaccaacagCuccg..... 1  
Gi5\_8905453\_x1.....uucucaccaacCgauccggguu..... 1  
Gi1\_4320148\_x1.....Cgcuaguauaacggcua..... 1  
Gi2\_11060389\_x1.....uucgauuccggcgGcgagc..... 1  
Gi1\_4213486\_x1.....ugguucucUcccaacagauccgg..... 1  
Gi4\_582858\_x1.....ggAucgauuccggcgccgg..... 1  
G1a\_6201526\_x1.....gAuucgauuccggcgccggag..... 1  
Gi5\_8851114\_x1.....ugguucucaccaacagauccggAu..... 1  
Gi3\_28325726\_x1.....uccggcguaguCuaacggcuagaa..... 1  
Gi5\_8863732\_x1.....gguucgauuccggcgccggagcguC..... 1  
Gi2\_11257600\_x1.....uucucaccaacagGuccgg..... 1  
Gi5\_8952929\_x1.....gguucucaccaacagauA..... 1  
Gi3\_28619795\_x1.....cgguucgauuGccggcgccgga..... 1  
Gi1\_4278256\_x1.....gguucgauuGccggcgccggagc..... 1  
Gi5\_9050163\_x1.....uucuAaccaacagauccg..... 1  
Gi3\_28746704\_x1.....aCauccggguucgauuccggcgccgg..... 1  
G1a\_6358700\_x1.....uucucaccaacaCauccg..... 1  
Gi5\_8983010\_x1.....aguccggcguaguauaacgAcuagaauagg..... 1  
Gi3\_28838892\_x1.....auccgAguucgauuccggcgccgga..... 1  
Gi5\_9056287\_x1.....Cugguucucaccaacagauccg..... 1  
Gi3\_28353381\_x1.....uccggguucgauuccggcUccgga..... 1  
Gi3\_28450955\_x1.....ggcgGaguauaacggcua..... 1  
Gi5\_8833470\_x1.....acUgauccggguucgauuccggcg..... 1  
Gi2\_11403150\_x1.....cgauuccggcgccggagcguuC..... 1  
Gi4\_592464\_x1.....gguucgauuccggcgccgA..... 1  
Gi3\_28343661\_x1.....uucgaCuccggcgccggag..... 1  
Gi3\_28815093\_x1.....ucgauGccggcgccggag..... 1

Gi4\_609748\_x1 .....gguucgauucccgcgccggagcCu..... 1  
 Gi4\_609235\_x1 .....Gcgauucccgcgccggagc..... 1  
 Gi1\_4222554\_x1 .....uccUgcguaguauaacggcuagaau..... 1  
 Gi1\_4203726\_x1 .....ccggcguaguauaacggcuagaU..... 1  
 Gi5\_8911690\_x1 .....caacagauccggguucgauucccgcgccgg..... 0  
 Gl1a\_6245004\_x1 .....uccggcguaguauaacggUuag..... 1  
 Gi3\_28582693\_x1 .....Uggguucgauucccgcgccggag..... 1  
 Gi5\_9019263\_x1 .....gguucgauucUcggcgccgga..... 1  
 Gi2\_11000793\_x1 .....uccggGguaguauaacggc..... 1  
 Gi5\_9063088\_x1 .....guucgauucccggcCccgga..... 1  
 Gi2\_11244713\_x1 .....ucgauucccgcgccAga..... 1  
 Gi3\_28787669\_x1 .....uccCgcguaguauaacggcua..... 1  
 Gi5\_9044436\_x1 .....ucucaccaacagauccggguu..... 0  
 Gi1\_4224178\_x1 .....gguucgauucccCgcgccgg..... 1  
 Gi5\_9020961\_x1 .....guucucaccaacagauGcgg..... 1  
 Gi1\_4332899\_x1 .....ugguucucaccaUcagauccg..... 1  
 Gi5\_8876818\_x1 .....cccaacagaucGggguuc..... 1  
 Gi2\_11244944\_x1 .....uccggcguaguauaacUgcua..... 1  
 Gi5\_9063159\_x1 .....gguucucaccaacagGuccggguu..... 1  
 Gi3\_28914915\_x1 .....cgguucgauucccggcAccgga..... 1  
 Gi4\_593467\_x1 .....uccggcguaguauaacggcuagaG..... 1  
 Gl1a\_6158177\_x1 .....gguucgauucccgcgcAgga..... 1  
 Gi5\_8918044\_x1 .....Gccggcguaguauaacggcuagaugguu..... 1  
 Gi3\_28311232\_x1 .....ccUgcguaguauaacggc..... 1  
 Gi3\_28712356\_x1 .....guucgauuccGggcgccggag..... 1  
 Gi2\_11321386\_x1 .....uccggcguaguaAaacggcua..... 1  
 Gi5\_8907434\_x1 .....ucucaccaCcagauccgg..... 1  
 Gi3\_28813952\_x1 .....ucgGuucccggcCccggag..... 1  
 Gi3\_28778243\_x1 .....cccaacagaucUggguucgauucc..... 1  
 Gi3\_28658183\_x1 .....cgguucgauucccgcgccggG..... 1  
 Gi5\_8981725\_x1 .....Gucgauucccgcgccggagc..... 1  
 Gl1a\_6279999\_x1 .....gguucgauucccAgcgccggagc..... 1  
 Gi5\_9052619\_x1 .....uucucaccAaacagauccgg..... 1  
 Gi3\_28946249\_x1 .....ugguucucaccccCacagauc..... 1  
 Gi5\_8878519\_x1 .....uucAcaccaacagauccggguu..... 1  
 Gl1a\_6208819\_x1 .....uccggcguCguauaacggcuag..... 1  
 Gl1a\_6114946\_x1 .....gguucgauucccgcgccgA..... 1  
 Gi5\_8884338\_x1 .....cggcguagCauaacggcuag..... 1  
 Gl1a\_6305575\_x1 .....guucgauucccgCcgccgg..... 1  
 Gi3\_28352573\_x1 .....Ggauucccgcgccggag..... 1  
 Gi5\_9130071\_x1 .....agauccggguCcgauucc..... 1  
 Gi3\_28268109\_x1 .....uccggcguaguaAaacggcua..... 1  
 Gi2\_11337343\_x1 .....gguucgauucGcggcgcc..... 1  
 Gl1a\_6271337\_x1 .....Gcccaacagauccggguucgauucc..... 1  
 Gi3\_28931829\_x1 .....caacagauccUggguucgauucc..... 1  
 Gi2\_11100384\_x1 .....uucucaGccaacagauccg..... 1  
 Gi5\_8905012\_x1 .....uccggcguaguauaacggcAaga..... 1

Gi3\_28263266\_x1.....ggcguaguauaCcggcua.....1  
 Gi4\_586628\_x1.....cucaccaacagGuccggguucg.....1  
 Gl1\_6058608\_x1.....ucucaccaacagauUg.....1  
 Gi1\_4195659\_x1.....Uuccggguucgauucccggcgccgga.....1  
 Gi2\_11176502\_x1.....uccUgcguaguauaacggcuaga.....1  
 Gi5\_9032219\_x1.....uccggcguaguaGaacggc.....1  
 Gi1\_4264243\_x1.....uccggguucgauuccAgcgccgga.....1  
 Gi1\_4214280\_x1.....guucucaccaacagauccgA.....1  
 Gi3\_28817192\_x1.....guAcucaccaacagauccg.....1  
 Gi2\_11261593\_x1.....cagaucggguucgauucccggcgccgagc.....0  
 Gi5\_8855745\_x1.....ugguucucaccaGcagauccgg.....1  
 Gi2\_11021814\_x1.....uccggcguaguauaacggcuacaa.....1  
 Gl1\_6325166\_x1.....ggAucgauucccggcgccgag.....1  
 Gl1\_6296102\_x1.....gguAcgauucccggcgccgagc.....1  
 Gi3\_28974909\_x1.....uucgauucccgAgccgagc.....1  
 Gi2\_11008204\_x1.....Aucucaccaacagauccg.....1  
 Gi2\_11098079\_x1.....ugguucucaccaacagauccgggu.....0  
 Gi2\_11288815\_x1.....gguAcgauucccggcgcc.....1  
 Gi5\_8840844\_x1.....uccggcguaguauUacggc.....1  
 Gi5\_9136247\_x1.....uccggcguaguauaacAgcuagaugguu.....1  
 Gi2\_11033285\_x1.....ugguucucaccaUagauccg.....1  
 Gi1\_4256718\_x1.....guucucaccaacagUuccgg.....1  
 Gi1\_4205070\_x1.....uccggcguaguauaGcggc.....1  
 Gi3\_28663955\_x1.....caUcagauccggguucgauucccggcgccg.....1  
 Gi2\_11311669\_x1.....gauucccggcgGggagc.....1  
 Gi3\_28557748\_x1.....uccgcgGaguauaacggcuag.....1  
 Gi5\_9047439\_x1.....ccggcguaguauaacggcuGgaa.....1  
 Gi3\_28377151\_x1.....ugguucucaccAaacagauccg.....1  
 Gi5\_9051916\_x1.....guNcgauucccggcgccgagc.....1  
 Gi4\_573755\_x1.....uucgauucccggcgccg.....0  
 Gi3\_28772532\_x1.....uccggcguaguauaUcggcuagaau.....1  
 Gi3\_28399980\_x1.....guucgauuccCgcgccgag.....1  
 Gi1\_4256719\_x1.....gguucucaccaGcagau.....1  
 Gl1\_6201313\_x1.....uucgauucccggcgccgCgc.....1  
 Gi3\_28504071\_x1.....guucucaccaacagUuccgg.....1  
 Gi1\_4372405\_x1.....uccggcguaguauGacggcua.....1  
 Gi1\_4342867\_x1.....cgauucccggcgccgagcU.....1  
 Gi3\_28644085\_x1.....uucuUaccaacagauccgggu.....1  
 Gi3\_28905466\_x1.....cucUcccaacagauccg.....1  
 Gi5\_8886401\_x1.....cggcguaguauaacggcuagCau.....1  
 Gi5\_8975422\_x1.....guucgaCucccggcgccgagcguu.....1  
 Gl1\_6123275\_x1.....uccggcguaguauaGcggc.....1  
 Gi5\_8960424\_x1.....gguucgauucAcggcgcc.....1  
 Gi3\_28500724\_x1.....guucucaccaacagauccgA.....1  
 Gi3\_28545311\_x1.....aacagauccggguucgauucccggcgUcgga.....1  
 Gi3\_28644478\_x1.....Uuucucaccaacagauccggguucgau.....1  
 Gi1\_4371333\_x1.....uucgauuccUggcgccgagc.....1



Gi1\_4249968\_x1.....gguucucacccaacagauccU..... 1  
Gi2\_11252299\_x1.....aguccggcguUguauaacgg..... 1  
Gi2\_11233810\_x1.....uNcggcguaguauaacggc..... 1  
Gi5\_8857946\_x1.....ugguucucaUccaacagauccgg..... 1  
Gi5\_8858258\_x1.....ggcgGaguauaacggcuag..... 1  
Gi2\_11041101\_x1.....gguucgauucAcggcgccgga..... 1  
Gi3\_28391917\_x1.....uccggcguaguauaaGggcua..... 1  
Gi3\_28552888\_x1.....cucacccaacagauccGgg..... 1  
Gi3\_28318453\_x1.....gguNcgauuccggcgccg..... 1  
Gi3\_28772100\_x1.....ugguucucacccaaUagauccg..... 1  
Gi5\_9097868\_x1.....uccggcguaguauaacgCcuaga..... 1  
Gi2\_11181027\_x1.....uccggcguaguUuaacggcua..... 1  
Gi1\_4374990\_x1.....guucucacccaacagauccgggu..... 0  
Gi5\_9051131\_x1.....uAcucacccaacagauccggguuc..... 1  
Gi5\_9016215\_x1.....uccggcgGaguauaacggcuagaau..... 1  
Gi2\_11350215\_x1.....gguucgauucccgGgUccggagcggu..... 1  
Gi5\_9011451\_x1.....uccggcgAaguauaacggcuagaau..... 1  
Gi3\_28271680\_x1.....gguucgauucccgGgcc..... 1  
Gi2\_11248818\_x1.....aacUgauccggguucgauuccggcgccg..... 1  
Gi3\_28482553\_x1.....Ccacccaacagauccggguuc..... 1  
Gi5\_8842286\_x1.....gguucgauuccAgggcgccggagcggu..... 1  
Gi5\_8935297\_x1.....guucgauuccCgcgcgga..... 1  
Gi3\_28690276\_x1.....uccNcguaguauaacggcuagaau..... 1  
Gi3\_28438328\_x1.....ucgauucAcggcgccggagc..... 1  
Gi2\_11265027\_x1.....agaauuguuAguucucacc..... 1  
Gi2\_11348783\_x1.....guucucacccaacagCuccg..... 1  
Gi5\_9043186\_x1.....uccggcguaguauaCcggu..... 1  
Gi1\_4344470\_x1.....ugguucucacccaacagaAccgg..... 1  
Gi5\_9116538\_x1.....ucucacccaacagauAccg..... 1  
Gi5\_8936068\_x1.....uucucacccCacagauccggguu..... 1  
Gi1\_4349308\_x1.....cggcguaguauaacggcC..... 1  
Gi1\_4212124\_x1.....aacagauccggguucgCuuccggcgccg..... 1  
Gi3\_28985193\_x1.....ggguucgauuccggcgccggaCc..... 1  
Gi5\_8850989\_x1.....gguucgauuccggcgUggag..... 1  
Gi2\_11043102\_x1.....uccggcguaguauaacgUcuag..... 1  
Gi5\_8974330\_x1.....guucucGcccaacagauccgg..... 1  
Gi5\_8843088\_x1.....Agguucgauuccggcgccg..... 1  
Gi3\_28806175\_x1.....ggguucgGuuccggcgccgga..... 1  
Gi5\_9095572\_x1.....uucucacccaacagauAccg..... 1  
G1a\_6138565\_x1.....gguucgauuccggcgccggagcU..... 1  
Gi2\_11312605\_x1.....uccggcguagGauaacggcuaga..... 1  
Gi5\_9087095\_x1.....gguucgCuuccggcgccggagcg..... 1  
Gi2\_11395991\_x1.....ucgauuccggUccggag..... 1  
Gi4\_596185\_x1.....ucgauuccggcgccggagcC..... 1  
Gi1\_4213675\_x1.....uccggcgAaguauaacgg..... 1  
Gi2\_11068295\_x1.....guucucacccaacagauUcg..... 1  
Gi3\_28369938\_x1.....gaurUggguucgauucc..... 1

Gi1\_4221446\_x1.....gguucucaccaacaCauccg..... 1  
Gi5\_9076870\_x1.....uucgauucccgcgccgC..... 1  
Gi1\_4343275\_x1.....ucucaccaacaAauccgg..... 1  
Gi5\_9007222\_x1.....uccggcguagAauaacggc..... 1  
Gi3\_28336947\_x1.....guucgauucccgcgccgAag..... 1  
Gi5\_9083523\_x1.....ggNucucaccaacagauccg..... 1  
Gi3\_28909124\_x1.....uccggcguaguGuaacggcu..... 1  
Gi5\_8934898\_x1.....uccgCcguguauaacgg..... 1  
Gi4\_568672\_x1.....gUucgauucccgcgccgga..... 1  
Gi3\_28789032\_x1.....ucucaccaUcagauccgg..... 1  
Gi1\_4202829\_x1.....gguUGgauucccgcgccggagc..... 1  
Gi5\_9116262\_x1.....uUucaccaacagauccgg..... 1  
Gi2\_11144807\_x1.....ucucaccGacagauccgg..... 1  
Gi2\_11345545\_x1.....cAgcguaguauaacggcua..... 1  
Gi3\_28304608\_x1.....Cgguucucaccaacagauccggguucga..... 1  
Gi5\_9051218\_x1.....ucaccaacaAauccggguu..... 1  
Gi2\_10997984\_x1.....uucucGcccaacagauccg..... 1  
G1a\_6035669\_x1.....gguucgauuccUgcgccgga..... 1  
Gi5\_8906375\_x1.....cucaccaacagauccgA..... 1  
G1a\_6119872\_x1.....uccggcguAauaacggcuag..... 1  
Gi2\_11272262\_x1.....uccggcUuaguauaacggcua..... 1  
Gi5\_8911041\_x1.....cguaguauaacAgcuagaauugguuc..... 1  
Gi5\_8935087\_x1.....gguAcgauucccgcgccgg..... 1  
Gi2\_11121073\_x1.....gguucgauucccgAgcc..... 1  
Gi2\_11021314\_x1.....ucgauuccAgcgccggagc..... 1  
Gi5\_9045643\_x1.....agauccggguucgUuucc..... 1  
Gi3\_28970556\_x1.....uccNgcguaguauaacggcuagaa..... 1  
Gi1\_4206857\_x1.....uucgauucccgGgccgg..... 1  
Gi3\_28351075\_x1.....ugguAcucaccaacagauccg..... 1  
Gi5\_8997230\_x1.....gguucuGaccaacagauccg..... 1  
Gi5\_9099443\_x1.....acagauccggguucAauucccgcg..... 1  
Gi5\_8977628\_x1.....ugguCcucaccaacagauccgg..... 1  
Gi2\_11094102\_x1.....uucucaccaacagauccggguuc..... 0  
Gi1\_4285101\_x1.....uccUgcuaguauaacggcuag..... 1  
Gi3\_28610467\_x1.....Uuucucaccaacagauccggguucga..... 1  
Gi3\_28980890\_x1.....agGuccggguucgauucc..... 1  
G1a\_6137072\_x1.....uUcggcguaguauaacggcu..... 1  
Gi1\_4165399\_x1.....Nuucgauucccgcgccggagc..... 1  
Gi3\_28283115\_x1.....aAauccggguucgauucc..... 1  
Gi4\_586758\_x1.....gguucgauucUcggcgccgg..... 1  
Gi5\_9053569\_x1.....guNcgauucccgcgccg..... 1  
Gi1\_4287339\_x1.....ccNgcguaguauaacggc..... 1  
Gi3\_28609946\_x1.....uccggcguaguauaacggAu..... 1  
G1a\_6074540\_x1.....Cuucucaccaacagauccg..... 1  
Gi1\_4360267\_x1.....uccggcguaguauaacggcuaUaau..... 1  
Gi3\_28582943\_x1.....gguucgauucccgAgccgga..... 1  
Gi3\_28282524\_x1.....uUaccaacagauccggguuc..... 1

G1a\_6049064\_x1.....uucucaccaacagaCccgg..... 1  
 Gi3\_28981538\_x1.....guGcucaccaacagauccgggu..... 1  
 Gi1\_4296833\_x1.....ccggcAuaguauaacggc..... 1  
 Gi3\_28428151\_x1.....guucgauucccgCcgccgga..... 1  
 G1a\_6170784\_x1.....guucgauucccgcgccAg..... 1  
 Gi4\_583360\_x1.....ucUggcguaguauaacggcuag..... 1  
 Gi1\_4278303\_x1.....ugguucucacGcaacagauccgg..... 1  
 Gi5\_9062821\_x1.....ggcguaguauaacggcCag..... 1  
 Gi5\_8940859\_x1.....gaGucccgcgccggagc..... 1  
 Gi4\_609562\_x1.....Gccggcguaguauaacggcuagaau..... 1  
 Gi1\_4174351\_x1.....uccggcguaAuauaacggcuaga..... 1  
 Gi1\_4364029\_x1.....cucaccaacagauccggguucgauUc..... 1  
 Gi3\_28547069\_x1.....gauuccUgcgccggagc..... 1  
 Gi2\_11374572\_x1.....uccggcCuaguauaacggc..... 1  
 Gi2\_11030898\_x1.....ugguucucaccaacagauUcg..... 1  
 Gi1\_4207197\_x1.....gguucgauCcccgcgccggag..... 1  
 Gi4\_569538\_x1.....guucUauucccgcgccgga..... 1  
 Gi5\_8880505\_x1.....ucgauucccgUgccgga..... 1  
 Gi4\_570127\_x1.....guCcgauucccgcgccg..... 1  
 G1a\_6159216\_x1.....gguucgauucccAgcgccgga..... 1  
 Gi1\_4193613\_x1.....gguucgauucccgcgccgAagc..... 1  
 Gi3\_28759523\_x1.....gAgucgauucccgcgccggagc..... 1  
 Gi3\_28303949\_x1.....guucucaccAaacagauccg..... 1  
 Gi5\_8879847\_x1.....ccggcguaguauaacggcuUga..... 1  
 Gi5\_9066794\_x1.....uAcggcguaguauaacggc..... 1  
 Gi5\_9088725\_x1.....uccggcguaguauaacAgcu..... 1  
 Gi3\_28972616\_x1.....Ngguucucaccaacagauccg..... 1  
 Gi3\_28684001\_x1.....uccggcguCuauaacggcuagaa..... 1  
 Gi2\_11000963\_x1.....guucgauGccggcgccggagc..... 1  
 Gi3\_28584641\_x1.....ggguucgauucccgcgcc..... 0  
 Gi3\_28378752\_x1.....gauccggguucgauuccA..... 1  
 G1a\_6344008\_x1.....gguucgauucccgcgccA..... 1  
 Gi3\_28718778\_x1.....guucucaccaUcagauccg..... 1  
 Gi2\_11031798\_x1.....gguucgauucccgcgccG..... 1  
 Gi4\_590903\_x1.....gguucgaCucccgcgccgg..... 1  
 Gi1\_4280151\_x1.....guucgUuucccgcgccgga..... 1  
 Gi1\_4390025\_x1.....ucucaccCacagauccgg..... 1  
 Gi2\_11101619\_x1.....ccggcguagCauaacggcua..... 1  
 Gi1\_4303009\_x1.....guucucaccaacagaAccgg..... 1  
 G1a\_6355749\_x1.....guucgauAcccgcgccggagc..... 1  
 Gi5\_9038510\_x1.....gguucgaAuucccgcgccgg..... 1  
 Gi5\_9103529\_x1.....guucgauucGcgcgccgg..... 1  
 Gi5\_9045801\_x1.....ccggcguaguauCacggcuag..... 1  
 Gi2\_11157373\_x1.....agaucgggCucgauucc..... 1  
 Gi1\_4352878\_x1.....gguucucaccaacagauccAg..... 1  
 Gi3\_28311070\_x1.....ucgauucccgcgccUggag..... 1  
 Gi3\_28616852\_x1.....guCucaccaacagauccgggu..... 1

Gi3\_28644290\_x1.....gggGucgauucccggcgccga..... 1  
 Gi1\_4199746\_x1.....ucucaccaacagauUcg..... 1  
 Gi4\_588625\_x1.....uccggUguaguauaacggcuag..... 1  
 Gi2\_11328054\_x1.....uccNgcguaguauaacggcuag..... 1  
 Gi2\_11403305\_x1.....uccggcguagAauaacggcuaga..... 1  
 Gi2\_11328496\_x1.....ugAuucucacccaacagaucc..... 1  
 Gi5\_9040047\_x1.....guAcucaccaacagauccgg..... 1  
 Gi5\_9120589\_x1.....uccggcguaguauaaGggc..... 1  
 Gi3\_28902627\_x1.....ccggcguaguauaacgAc..... 1  
 Gi3\_28728018\_x1.....ggguucgauucAcgggcgccgagc..... 1  
 Gi5\_8876136\_x1.....uccgUcguaguauaacggcu..... 1  
 Gi2\_11386665\_x1.....ucgauucccgGgccgga..... 1  
 Gi2\_11154551\_x1.....uguuAucaccaacagaucc..... 1  
 Gi3\_28580965\_x1.....uugguucucacccaUcagaucc..... 1  
 Gi2\_11328523\_x1.....cagauccgNguucgauucc..... 1  
 Gi1\_4295372\_x1.....ugguucucUcccaacagaucc..... 1  
 Gi4\_605653\_x1.....uccggcguaguauaGcggcuagaa..... 1  
 Gi2\_11021809\_x1.....uccggcguaguauaacggcuaUaa..... 1  
 G1a\_6071110\_x1.....uGcggcguaguauaacggcuagaa..... 1  
 G1a\_6275200\_x1.....guucucaccaCcagauccg..... 1  
 G1a\_6183164\_x1.....Aguucgauucccggcgcc..... 1  
 Gi3\_28851276\_x1.....caacagauccggguucAa..... 1  
 Gi3\_28607644\_x1.....cucaccaacUgauccgg..... 1  
 Gi4\_610798\_x1.....gguucgauucccggcgccgC..... 1  
 Gi5\_9112221\_x1.....gguucgauucccggcgccgGcggu..... 1  
 Gi2\_11031964\_x1.....gguucgauucccgCgcgccg..... 1  
 Gi4\_578888\_x1.....uccggcguNguauaacggcua..... 1  
 Gi5\_8890193\_x1.....guucgauucccggcgccgGg..... 1  
 Gi2\_11135721\_x1.....agaugguugguucuUc..... 1  
 Gi2\_11311702\_x1.....guucgauucccgUcgccgga..... 1  
 Gi5\_8859996\_x1.....uucucaccaacagauccgggAu..... 1  
 Gi5\_8893444\_x1.....ucgauucccggcgccgCagc..... 1  
 Gi2\_11154278\_x1.....gguucgauuAccgggcgccg..... 1  
 Gi5\_8956102\_x1.....cgauucccggcgccgagcA..... 1  
 Gi3\_28817291\_x1.....Nccggcguaguauaacggcuagaa..... 1  
 Gi3\_28898428\_x1.....guucucaccaacagaGccg..... 1  
 Gi5\_8866308\_x1.....uccggcguaguauCacggcuagaauggu..... 1  
 Gi2\_11275861\_x1.....aguccggUguaguauaacgg..... 1  
 Gi3\_28872144\_x1.....guucucaccaacaAauccg..... 1  
 Gi5\_9030671\_x1.....gguucgauucccgGgcc..... 1  
 Gi1\_4257465\_x1.....gguucgauAccgggcgccgag..... 1  
 Gi1\_4313075\_x1.....guucgauucccgAcg..... 1  
 Gi3\_28662358\_x1.....uccggcguagAauaacggcu..... 1  
 Gi5\_9133169\_x1.....ccggcguaguauaaUggcuaga..... 1  
 Gi5\_9087436\_x1.....auucccggcgccgagcGA..... 1  
 Gi4\_591759\_x1.....guucgauucccggcgccgC..... 1  
 Gi1\_4373866\_x1.....ggcguaguGuaacggcua..... 1

Gi5\_8994262\_x1.....ggguucgauucccgcgccggagcC..... 1  
Gi5\_8935263\_x1.....cccaacagauUcggguuc..... 1  
Gi5\_9119606\_x1.....ucaccUaacagauccggguu..... 1  
Gi1\_4167615\_x1.....agaaugguugguucucacc..... 0  
Gi1\_4278672\_x1.....caGcagauccggguucgauucccggc..... 1  
G1a\_6280899\_x1.....gguucgauucccgcgccggagcgA..... 1  
Gi3\_28845316\_x1.....acccaGcagauccggguucgauucc..... 1  
Gi5\_9128815\_x1.....guucgauucccgAgccggagc..... 1  
Gi3\_28316339\_x1.....guucuUacccaacagauccgg..... 1  
Gi3\_28514188\_x1.....ucGcacccaacagauccgg..... 1  
Gi4\_600480\_x1.....guucgUuucccgcgccg..... 1  
Gi5\_8957526\_x1.....aacagauccggAuucgauucccgcgccggagc..... 1  
Gi3\_28530015\_x1.....ccaacagauccggguucgauucccgcgccggagc..... 0  
Gi1\_4251497\_x1.....guucucacccaacagaGccg..... 1  
Gi3\_28606103\_x1.....Gcaacagauccggguucgauucccgcgccggagc..... 1  
Gi3\_28933221\_x1.....gguucucacccaacaUauccg..... 1  
Gi2\_11134309\_x1.....cgggGucgauucccgcgccgga..... 1  
Gi5\_8903697\_x1.....gguucgauucccggcUccggagc..... 1  
Gi2\_11333413\_x1.....guucgaAuucccgcgccgga..... 1  
Gi2\_11034520\_x1.....uucucacccaacaUauccg..... 1  
G1a\_6253918\_x1.....ucucacccaacCgauccg..... 1  
Gi5\_8913613\_x1.....cacccaGcagauccggguucga..... 1  
Gi5\_9073696\_x1.....uccgCcguguauaacggcuag..... 1  
Gi5\_8891075\_x1.....cucacccaAagaucgg..... 1  
Gi2\_11318228\_x1.....uccggcguaguauaaAgg..... 1  
Gi1\_4387861\_x1.....ugguucucacccaacaAuuccg..... 1  
Gi5\_8974533\_x1.....cccaacagCuccggguuc..... 1  
Gi1\_4170449\_x1.....ucgaCucccgcgccggagc..... 1  
G1a\_6236295\_x1.....uccggcguCuuaaacggcuagaa..... 1  
Gi5\_9135834\_x1.....guucgauUgccggcgccgga..... 1  
Gi5\_8971504\_x1.....ccggcguagAuaaacggcua..... 1  
Gi3\_28670617\_x1.....cccaacagauccggguuc..... 0  
Gi5\_9047390\_x1.....uccggcguaguauaaUgg..... 1  
Gi2\_11384950\_x1.....agaCccggguucgauucc..... 1  
Gi3\_28897993\_x1.....gaGccggguucgauucc..... 1  
Gi4\_571954\_x1.....guAcgauucccgcgccgg..... 1  
Gi2\_11284343\_x1.....ucgaAuucccgcgccggagc..... 1  
G1a\_6220951\_x1.....uAcgauucccgcgccggagc..... 1  
G1a\_6021407\_x1.....gguucgauucccgcgccggagU..... 1  
Gi5\_8916664\_x1.....cacccaacagauccAgguucga..... 1  
Gi2\_11014138\_x1.....guucgauucccgUcgccggag..... 1  
Gi5\_8887625\_x1.....caacagauccgggCucgauucccgcgccg..... 1  
Gi4\_575011\_x1.....auucccgcgccggagcC..... 1  
Gi3\_28370921\_x1.....ggguuAgauucccgcgccggagc..... 1  
Gi3\_28336392\_x1.....cccaacCgauccggguucgauucc..... 1  
Gi3\_28748657\_x1.....ccAgcguaguauaacggcuag..... 1  
Gi2\_11284605\_x1.....cagauccggCuucgauucccgcgccggag..... 1

Gi5\_8852998\_x1.....gguucAauucccgcgcc..... 1  
 Gi2\_11037821\_x1.....uucAauucccgcgccggag..... 1  
 Gi1\_4371977\_x1.....uccggcguNguauaacggcuagaa..... 1  
 Gi5\_9135537\_x1.....ucacccGacagauccgggu..... 1  
 Gi2\_11129664\_x1.....ggguucgauucccgcgAcgga..... 1  
 Gi3\_28622818\_x1.....cggcguaguauaacgAcuagaau..... 1  
 Gi3\_28923883\_x1.....Gguccggcguaguauaacggcuagaugguu..... 1  
 G1a\_6314845\_x1.....guucucaccaacagGuccg..... 1  
 Gi3\_28984927\_x1.....uugguucucaccaacagGucc..... 1  
 Gi1\_4247741\_x1.....ucAggcguaguauaacggcu..... 1  
 G1a\_6161345\_x1.....uccggcguaguauaacAgcu..... 1  
 Gi5\_8942143\_x1.....uucAcaccaacagauccgg..... 1  
 Gi2\_11302589\_x1.....cgguucgauucAcggcgccgga..... 1  
 Gi1\_4300720\_x1.....uAcggcguaguauaacggcuagaau..... 1  
 Gi5\_9041570\_x1.....uccNgcguaguauaacggcuaga..... 1  
 Gi5\_8992574\_x1.....uccgUcguguaguauaacggcuagaau..... 1  
 Gi2\_11394025\_x1.....uucgauucccgcgccgA..... 1  
 Gi2\_11273501\_x1.....gguucgauucccgCcgccggag..... 1  
 Gi5\_8961465\_x1.....gguuUgauucccgcgccggagcguuu..... 1  
 Gi2\_11023000\_x1.....uccggcguaguUuaacgg..... 1  
 G1a\_6164324\_x1.....uccggcguaguauaacggcC..... 1  
 Gi3\_28317100\_x1.....cggcguagGauaacggc..... 1  
 Gi5\_9112409\_x1.....gguucucaccaacGgauccgggu..... 1  
 Gi5\_8928381\_x1.....uccggcguagAauaacgg..... 1  
 Gi5\_9116559\_x1.....guucgauuccUgcgccggagc..... 1  
 Gi2\_11307595\_x1.....guucucaccaacagaucGgg..... 1  
 Gi4\_596980\_x1.....cggcguaguauaacggcuaga..... 0  
 Gi5\_9098234\_x1.....ugguucucaccaacGgauccgg..... 1  
 Gi2\_11103065\_x1.....cccaacagauccggguGc..... 1  
 Gi2\_11063689\_x1.....gguucucaccUaacagauccg..... 1  
 Gi3\_28352247\_x1.....guuAucaccaacagauccg..... 1  
 Gi3\_28594514\_x1.....ggguucgauucccgcgccggG..... 1  
 Gi2\_11062455\_x1.....guucgauucccgcgccggagcg..... 0  
 Gi3\_28608323\_x1.....gUuccggguucgauucccgcgccgga..... 1  
 Gi2\_11261549\_x1.....uucucaUccaacagauccg..... 1  
 G1a\_6140685\_x1.....uccggcguaguauaacggcuCga..... 1  
 Gi3\_28419469\_x1.....uccggguucgauucccgAgccgga..... 1  
 Gi1\_4274502\_x1.....caacUgauccggguucgauucccggc..... 1  
 Gi5\_8832448\_x1.....guucucaccaacagauccAg..... 1  
 Gi2\_11295613\_x1.....guuGgauucccgcgccggagc..... 1  
 Gi2\_11177370\_x1.....uccNgcguaguauaacggc..... 1  
 Gi2\_11107148\_x1.....aacagauccggguuAgauucccgcgccg..... 1  
 Gi5\_9023441\_x1.....uccggcguaguauaacgUcuaga..... 1  
 Gi3\_28418808\_x1.....guucgauuccGggcgccg..... 1  
 Gi1\_4351216\_x1.....gguAcgauucccgcgccggagc..... 1  
 Gi5\_8887622\_x1.....uccggcguaguauaacgA..... 1  
 Gi5\_9069029\_x1.....cggcguaguauCacggcua..... 1

Gi1a\_6088397\_x1.....uccggcguaguaCaacggc..... 1  
 Gi2\_11274935\_x1.....uccggcgAguauaacggcua..... 1  
 Gi5\_8853453\_x1.....uccggcgAguauaacggcua.....guucgauucccgUcgccggag..... 1  
 Gi2\_11396307\_x1.....uccggcgAguauaacggcua.....guucucacUcaacagauccgg..... 1  
 Gi1\_4337569\_x1.....uccggcguagGauaacgg..... 1  
 Gi2\_11020624\_x1.....uccggcgAguauaacggcua.....guucgauuccAgggcgccgga..... 1  
 Gi5\_9032630\_x1.....uccggcgAguauaacggcua.....gguucucacccaacagauccU..... 1  
 Gi1\_4218050\_x1.....uccggcgAguauaacggcua.....gguucgauuccggcgccgCag..... 1  
 Gi3\_28773250\_x1.....uccggcguaguauUacggcuagaa..... 1  
 Gi2\_11195649\_x1.....uccggcguaCuauaacgg..... 1  
 Gi5\_9111585\_x1.....uccggGguaguauaacgg..... 1  
 Gi3\_28699586\_x1.....gguucucacUcaacagauccgggu..... 1  
 Gi1\_4323896\_x1.....uccggcgAguauaacggcua.....auccggAuucgauuccggcgccgg..... 1  
 Gi3\_28984872\_x1.....uccggcguaCuauaacggcua.....ucucUcccaacagauccgg..... 1  
 Gi2\_11308415\_x1.....uccggcguaCuauaacggcua..... 1  
 Gi2\_11130540\_x1.....uccggcgAguauaacggcua.....ucgauucccgAcgcccga..... 1  
 Gi3\_28438278\_x1.....uccggcgAguauaacggcua.....gauuccggcgccggagcU..... 1  
 Gi5\_9107204\_x1.....ggcguaguGuaacggcuag..... 1  
 Gi5\_8883160\_x1.....aguccggcguGguauaacgg..... 1  
 Gi5\_8866757\_x1.....ucucacccaacagauccggg..... 0  
 Gi2\_11144917\_x1.....uccggcgAguauaacggcua.....cgauuccggcgccggaAcguuu..... 1  
 Gi3\_28580755\_x1.....ucucacccaacagaucca..... 1  
 Gi5\_8937867\_x1.....uccggcgAguauaacggcua.....guucCauuccggcgccggag..... 1  
 Gi5\_8870721\_x1.....uccggcgAguauaacggcua.....ugguucucaccUaacagauccgg..... 1  
 Gi1\_4264312\_x1.....uccggcgAguauaacggcua.....ucucaUccaacagauccg..... 1  
 Gi5\_9119994\_x1.....cUggcguaguauaacggcua..... 1  
 Gi3\_28672092\_x1.....uccggcgAguauaacggcua.....uucucacGcaacagauccg..... 1  
 Gi1\_4374162\_x1.....uccggcgAguauaacggcua.....accaacagauccggguucgauuccUcg..... 1  
 Gi1\_4226524\_x1.....uccgCcguaquauaacggc..... 1  
 Gi5\_9036859\_x1.....ucucacccaacagauccggg..... 1  
 Gi5\_8925769\_x1.....uccggcgAguauaacggcua.....guucgaAuuccggcgccggagcguuu..... 1  
 Gi3\_28968747\_x1.....uccggcgAguauaacggcua.....uucgauuccggcAccgga..... 1  
 Gi5\_9017324\_x1.....uccggcgAguauaacggcua.....cacccaaUagaucggguucga..... 1  
 Gi5\_9114512\_x1.....uccggcgAguauaacggcua.....gguucgauuccggcgccggagcgcCuu..... 1  
 Gi2\_11357651\_x1.....uccggcgAguauaacggcua.....uucucaccUaacagauccgg..... 1  
 Gi5\_8950806\_x1.....uccggcgAguauaacggcua.....guucgauuccggcgccggagc..... 1  
 Gi5\_9026656\_x1.....uccggcguaguauaacggAcuagaa..... 1  
 Gi2\_11314715\_x1.....uccggcgAguauaacggcua.....uuNucacccaacagauccgg..... 1  
 Gi2\_11370999\_x1.....uccggcgAguauaacggcua.....uucucCcccaacagauccgg..... 1  
 Gi5\_8934047\_x1.....uccggcgAguauaacggcua.....uugguCcucacccaacagauccg..... 1  
 Gi1\_4319217\_x1.....aguccggcguaguauaacgg..... 0  
 Gi5\_8892467\_x1.....uccggcgAguauaacggcua.....cUcaacagauccggguuc..... 1  
 Gi1\_4366445\_x1.....uccggcgAguauaacggcua.....ucucacccaUagaucgg..... 1  
 Gi5\_9134259\_x1.....uccggcgAguauaacggcua.....gguucacccaacagaGccgg..... 1  
 Gi5\_8923742\_x1.....uccggcgAguauaacggcua.....cgggcCaguauaacggcuag..... 1  
 Gi3\_28829414\_x1.....uccggcgAguauaacggcua.....cucacccaacagauccgA..... 1  
 Gi1\_4243940\_x1.....ccggcguaguauaacggUua..... 1

Gi1\_4224993\_x1.....cucaccaacagauccggguucg..... 0  
 Gl1a\_6110384\_x1.....uccggcguaguGuaacggcuagaau..... 1  
 Gi1\_4172732\_x1.....Ucagauccggguucgauuccc..... 1  
 Gi3\_28876102\_x1.....uccggguucgauucccggUgccgga..... 1  
 Gi3\_28563903\_x1.....ggguucgauucccggcgccggGg..... 1  
 Gi1\_4312696\_x1......uuccggcgccggagcgA..... 1  
 Gi3\_28983925\_x1......agauccggAuucgauucccggcgccggagc..... 1  
 Gi5\_9003785\_x1......uucucaccaacagauccAg..... 1  
 Gi2\_11000590\_x1......gauuAccggcgccggagc..... 1  
 Gi1\_4266129\_x1......gguucgauucccggcCccggagc..... 1  
 Gi5\_8993877\_x1......cggcguaguauaacggcAaga..... 1  
 Gi3\_28492981\_x1......uccggguucgGuucccggcgccg..... 1  
 Gi3\_28781900\_x1......acagauccggguucgauucccggcgccggG..... 1  
 Gi5\_9016590\_x1......guuNucaccaacagauccgg..... 1  
 Gi2\_11340065\_x1......uccggcguauuaaacggcua..... 1  
 Gi1\_4229325\_x1......uccggcguaguauaaAggcuagaau..... 1  
 Gl1a\_6216070\_x1......Cguucgauucccggcgcc..... 1  
 Gi2\_11111681\_x1......guucgauuccGggcgccggagc..... 1  
 Gi1\_4328204\_x1......gguucgauucccCgcgcc..... 1  
 Gl1a\_6340775\_x1......uccggcguaguauaacggcuagaG..... 1  
 Gl1a\_6302868\_x1......auccggguucgaCucccggc..... 1  
 Gi2\_11041640\_x1......guaguGuaacggcuagaau..... 1  
 Gi5\_9045446\_x1......gguucucaccaacaUauccg..... 1  
 Gi1\_4289002\_x1......cucaccaacagauccggg..... 1  
 Gi3\_28546804\_x1......guucucaccUaacagauccggg..... 1  
 Gi5\_9082398\_x1......uucgGuucccggcgccgg..... 1  
 Gi2\_11222279\_x1......gauuUccggcgccggagc..... 1  
 Gi1\_4197287\_x1......auucccggcgccggagcU..... 1  
 Gi4\_604495\_x1......gGuucccggcgccggagc..... 1  
 Gi1\_4306787\_x1......cucaccaGcagauccggguucga..... 1  
 Gi3\_28914095\_x1......guucucacccUacagauccgg..... 1  
 Gi2\_11386878\_x1......guucgauucGcggcgccg..... 1  
 Gi3\_28376183\_x1......gguucgUuucccggcgccgg..... 1  
 Gi1\_4327164\_x1......auccggguucgauucccggcgccggU..... 1  
 Gi3\_28868449\_x1......auccgggCucgauucccggcgccgga..... 1  
 Gi2\_11346721\_x1......guucucaccaacagauccUgg..... 1  
 Gi5\_9067346\_x1......guucgauucccggcgGcgga..... 1  
 Gi3\_28714050\_x1......cagauccggguucgaCucccggcgccgg..... 1  
 Gl1a\_6174982\_x1......gguucgauucccCgcgccggag..... 1  
 Gi1\_4354254\_x1......guucgCuucccggcgccg..... 1  
 Gi5\_9021911\_x1......uuUucaccaacagauccggguuc..... 1  
 Gi5\_9131642\_x1......gguucgauucccggcgccggaA..... 1  
 Gi3\_28744785\_x1......ucucaccaacagCuccgg..... 1  
 Gi3\_28893665\_x1......cgguucgaCucccggcgccgga..... 1  
 Gi3\_28554705\_x1......gguucuaNccaacagauccgg..... 1  
 Gi1\_4332510\_x1......gguucgaGuucccggcgccgga..... 1  
 Gi5\_8977588\_x1......uucucaccaacagauccC..... 1



Gi5\_9018245\_x1.....gguucgauucccgcgccAgagcguu..... 1  
G1a\_6330116\_x1.....gguucgauucccgcgGcggagc..... 1  
Gi4\_591882\_x1.....uccggUguaguauaacggcuagaau..... 1  
Gi1\_4218202\_x1.....uccggcguaguauaacgAcu..... 1  
Gi2\_11372011\_x1.....cgauucccgUgcccggagcguuu..... 1  
Gi2\_11297972\_x1.....ggNucgauucccgcgccggag..... 1  
Gi3\_28402350\_x1.....aucggguNcgauucccgcgccggagc..... 1  
Gi3\_28317217\_x1.....gguucucacccaacagauccC..... 1  
Gi1\_4180272\_x1.....ucucCcccaacagauccg..... 1  
Gi1\_4246585\_x1.....uccggcguagAauaacggcuag..... 1  
Gi1\_4175714\_x1.....gguucgauucccgcgGcggagc..... 1  
Gi5\_8985418\_x1.....uccggcguaguUuaacggcuagaau..... 1  
Gi1\_4188947\_x1.....uccggAguaguauaacggcuaga..... 1  
Gi3\_28493974\_x1.....cacccaacagUuccggguuc..... 1  
Gi5\_8846416\_x1.....ccggcgCaguauaacggcuag..... 1  
Gi3\_28349661\_x1.....ucacccaacagauccggAuuc..... 1  
Gi3\_28737614\_x1.....ucAauucccgcgccgga..... 1  
Gi2\_11252634\_x1.....gguucgauucccgcgccU..... 1  
Gi5\_8890323\_x1.....uccggAguaguauaacgg..... 1  
Gi5\_8867078\_x1.....cccGacagauccggguuc..... 1  
Gi5\_8884315\_x1.....Cguucucacccaacagauccggguu..... 1  
Gi5\_9096554\_x1.....uccggcguaguauaacCgcuagaau..... 1  
Gi5\_8848841\_x1.....gguucucacccaacagaCccgg..... 1  
Gi5\_8916660\_x1.....uucucacccCacagauccgg..... 1  
Gi2\_11309983\_x1.....Ugauucccgcgccggagc..... 1  
Gi3\_28872991\_x1.....guucgauucccgUccgga..... 1  
Gi3\_28685562\_x1.....guucucacccaacagauccgg..... 1  
Gi1\_4201107\_x1.....gguucgauucccgcgccggagc..... 1  
Gi3\_28325103\_x1.....ugguuUucacccaacagauccg..... 1  
Gi3\_28435967\_x1.....caacagauccggGucga..... 1  
Gi1\_4247162\_x1.....gguucgauucccgAgccggag..... 1  
Gi5\_8895251\_x1.....gguucucaccUaacagauccgg..... 1  
Gi3\_28577158\_x1.....Cuucucacccaacagauccgggu..... 1  
G1a\_6027245\_x1.....gguuAgauucccgcgccg..... 1  
Gi3\_28612011\_x1.....guucAcacccaacagauccgggu..... 1  
Gi2\_11214536\_x1.....ucGggcguaguauaacggc..... 1  
Gi3\_28888618\_x1.....ucgauucccgAccggagc..... 1  
Gi2\_11121472\_x1.....uccggcguagGauaacgg..... 1  
Gi3\_28695765\_x1.....uccggcguaguauaacgUcua..... 1  
G1a\_6211574\_x1.....uccggcguaguauGacggcuagaa..... 1  
Gi3\_28783571\_x1.....ccggcguGguauaacggcuagaau..... 1  
Gi3\_28310110\_x1.....ccgNcguaguauaacggc..... 1  
Gi3\_28743439\_x1.....acagauccggguucgauucccgcgccgAa..... 1  
Gi5\_9050165\_x1.....guuAgauucccgcgccg..... 1  
Gi2\_11150518\_x1.....gguucgauucccgcgGcggag..... 1  
Gi3\_28672800\_x1.....uccggcguaguGaacggcuag..... 1  
Gi3\_28358554\_x1.....uccggcguCuauaacggcuagaau..... 1

Gi1\_4354556\_x1.....gguucucaGccaacagauccgg..... 1  
 Gi5\_9069093\_x1.....ggcguaguauaacggcuagaC..... 1  
 Gi2\_11278047\_x1.....ccGgguucgauuccggcgccggagc..... 1  
 Gi4\_584701\_x1.....ccggcguaguauaacggcuag..... 0  
 Gi1\_4201504\_x1.....ggNucucaccaacagauccg..... 1  
 Gi5\_8949105\_x1.....gguucgauuccggcgccggCgcguuu..... 1  
 G1a\_6250668\_x1.....guucgauuccggUgccgg..... 1  
 Gi5\_9110145\_x1.....gguucgauuccAggcgcccga..... 1  
 Gi5\_9017302\_x1.....Ucggguucgauuccggcgccgga..... 1  
 Gi5\_9124154\_x1.....guuAgauuccggcgccgga..... 1  
 G1a\_6345276\_x1.....ugguucucaccaacagGuccg..... 1  
 Gi4\_597138\_x1.....gguucgauuccggUgccgg..... 1  
 Gi3\_28400846\_x1.....guucucacccGacagauccgg..... 1  
 Gi2\_11178729\_x1.....uucucaccaacagauccggguUg..... 1  
 Gi5\_8862420\_x1.....uCGuucucaccaacagauccgggu..... 1  
 Gi3\_28594797\_x1.....ggcAuaguauaacggcuag..... 1  
 Gi5\_8985112\_x1.....ucgauuccggAgccggag..... 1  
 Gi5\_8990492\_x1.....gguCcgauuccggcgccggagcguu..... 1  
 G1a\_6297142\_x1.....ucUggcguaguauaacggcuagau..... 1  
 Gi2\_11173314\_x1.....gNuucgauuccggcgccggagc..... 1  
 Gi1\_4280106\_x1.....ccggcguaguauaacggcuagaa..... 1  
 Gi5\_9112113\_x1.....ccgggCucgauuccggcgccgga..... 1  
 Gi3\_28543581\_x1.....caacGgauccggguucga..... 1  
 Gi1\_4259039\_x1.....guucuAaccaacagauccg..... 1  
 Gi2\_11210225\_x1.....ucAauuccggcgccggagc..... 1  
 Gi3\_28885944\_x1.....uccggcguaUuauaacggcu..... 1  
 Gi2\_11179071\_x1.....uccggcguaguauaacggcuUgaa..... 1  
 Gi2\_11400291\_x1.....uccgggCucgauuccggcgccgga..... 1  
 Gi1\_4324529\_x1.....gguucAauuccggcgccggagc..... 1  
 Gi3\_28636057\_x1.....gggCucgauuccggcgccg..... 1  
 Gi5\_8854179\_x1.....uccggcguCuauaacggcuag..... 1  
 Gi3\_28618792\_x1.....gguucgauucAcggcgcc..... 1  
 Gi1\_4207312\_x1.....ggcguaguauaacAgcua..... 1  
 Gi2\_11182677\_x1.....Uggguucgauuccggcgccggagc..... 1  
 Gi3\_28554672\_x1.....guucucaccaacagGuccgg..... 1  
 Gi1\_4159212\_x1.....Ggauccggguucgauucc..... 1  
 Gi2\_11180185\_x1.....Gccaacagauccggguuc..... 1  
 Gi3\_28835913\_x1.....uccggguucgauuccggcgccAga..... 1  
 Gi5\_8968028\_x1.....gguucgauuccGggcgccggagc..... 1  
 Gi5\_8902456\_x1.....uucucaUccaacagauccggguu..... 1  
 Gi5\_9096651\_x1.....accaacagauccggguucgaCuccc..... 1  
 Gi3\_28505496\_x1.....Uaacagauccggguucga..... 1  
 Gi2\_11282194\_x1.....uucgauucNcggcgccggag..... 1  
 Gi3\_28646600\_x1.....uucgauAccggcgccgga..... 1  
 Gi3\_28322090\_x1.....gguucgauuccGggcgccgga..... 1  
 Gi5\_9082787\_x1.....uucucacccUacagauccggguu..... 1  
 Gi5\_8906067\_x1.....ugguucucaccaacagauUcg..... 1

Gi3\_28894200\_x1.....cucaccaGcagauccgg.....1  
Gi1\_4170752\_x1.....ugguucucacccaacagauccC.....1  
Gi5\_9011318\_x1.....uccggcguaguauaacggcAag.....gguucgauucccgccgUagc.....1  
Gi1\_4339347\_x1.....uccggcguaguauaacggcAag.....1  
Gi3\_28692740\_x1.....cucaccaacaAauccgg.....1  
Gi3\_28335349\_x1.....acagauccNggucgauucccgccgga.....1  
Gi2\_11240438\_x1.....uAcggcguaguauaacggcua.....1  
G1a\_6162908\_x1.....uccggcguaguauCacggcuagaau.....1  
Gi3\_28701100\_x1.....ugguucucCcccaacagauc.....1  
Gi5\_9011185\_x1.....ucgauCcccgccgccgagc.....1  
Gi5\_8919948\_x1.....uugguucucacccaacaga.....0  
Gi1\_4270057\_x1.....uccggcguagAuaaacggcua.....1  
Gi3\_28339293\_x1.....ucaccUacagauccggguuc.....1  
Gi2\_11088895\_x1.....Nuucgauucccgccgagc.....1  
Gi3\_28544967\_x1.....Guccggguucgauucccgccgga.....1  
Gi4\_589084\_x1.....gguucgauucccgccAccgg.....1  
Gi3\_28467549\_x1.....gguucgUuucccgccg.....1  
Gi2\_11276863\_x1.....cucaccaaaUagauccgg.....1  
Gi5\_9041740\_x1.....uugguucucacccaacagauccA.....1  
Gi5\_8835091\_x1.....uccggAguaguauaacggcu.....1  
Gi3\_28319896\_x1.....Gucaccaacagauccggguucgauucc.....1  
Gi2\_10997619\_x1.....ucgauucccgccgagcU.....1  
Gi3\_28713029\_x1.....uccggcguaguauaacggcuagaUu.....1  
Gi3\_28903629\_x1.....uccggguucgaCucccgccgga.....1  
Gi1\_4275504\_x1.....gguucgauucccgAccc.....1  
Gi5\_8948057\_x1.....Cgguucgauucccgccgagc.....1  
Gi1\_4373711\_x1.....uccggcguCuauaacgg.....1  
Gi2\_11128906\_x1.....guucucacccaacagauccgA.....1  
Gi3\_28686517\_x1.....cucaccaacagauccUg.....1  
Gi2\_11201441\_x1.....guucgauucccgccgUag.....1  
Gi4\_595029\_x1.....guucgauucccgccgAccg.....1  
Gi5\_9079014\_x1.....ccggcguaguauaacggUuag.....1  
Gi5\_9109561\_x1.....uccggcCuaguauaacggcua.....1  
Gi3\_28945706\_x1.....cggcguaguauaacAgcuagaauugu.....1  
Gi3\_28715958\_x1.....ggguCcgauucccgccgag.....1  
Gi5\_9070424\_x1.....uccggcguaguauaacUgc.....1  
Gi1\_4275075\_x1.....cagauccggCucgauucccgcc.....1  
Gi3\_28544544\_x1.....ugguucucacccUacagauccg.....1  
G1a\_6154480\_x1.....uccggcguNguauaacggcua.....1  
Gi5\_8997540\_x1.....ucUcccaacagauccggguu.....1  
Gi5\_9102986\_x1.....ccggcguagCauaacggcuaga.....1  
Gi4\_578344\_x1.....uugguucucacccGacaga.....1  
Gi2\_11222338\_x1.....guNcgauucccgccgagc.....1  
Gi5\_9092387\_x1.....gguucgauucccgCcgccg.....1  
Gi3\_28682926\_x1.....uccUgcguaguauaacggcuagaau.....1  
Gi3\_28803494\_x1.....gauccggguucgauucAc.....1  
Gi3\_28444929\_x1.....uGcggguucgauucccgccg.....1



|                                            |                               |   |
|--------------------------------------------|-------------------------------|---|
| Gi5_3728878_x8684.....                     | gguucgauucccggcgccggagc.....  | 0 |
| Gi3_13864308_x6910.....                    | gguucgauucccggcgccg.....      | 0 |
| Gi2_3537957_x6599.....                     | guucgauucccggcgccggagcC.....  | 1 |
| Gi3_14018747_x6489.....                    | Uguucgauucccggcgccggagc.....  | 1 |
| Gi3_14430267_x5377.....                    | guucgauucccggcgccggag.....    | 0 |
| Gi5_3990121_x5185.....                     | gguucgauucccggcgccggagcC..... | 1 |
| Gi3_14604826_x4914.....                    | gguucgauucccggcgccgg.....     | 0 |
| Gi1_1946380_x4673.....                     | gguucgauucccggcgccgg.....     | 0 |
| Gi3_14790128_x4604.....                    | gUuucgauucccggcgccggagc.....  | 1 |
| Gi2_3825436_x4527.....                     | gguucgauucccggcgccggag.....   | 0 |
| Gi2_3883487_x4338.....                     | gguucgauucccggcgcc.....       | 0 |
| Gi5_4133188_x4096.....                     | gguucgauucccggcgccg.....      | 0 |
| Gi3_15580261_x3458.....                    | gguucgauucccggcgcc.....       | 0 |
| Gi2_4129219_x3450.....                     | gguucgauucccggcgccg.....      | 0 |
| Gi5_4342263_x3360.....                     | gguucgauucccggcgccgga.....    | 0 |
| Gi1_2059731_x3261uucucacccaacagauccg.....  | .....                         | 0 |
| Gi2_4175715_x3240.....                     | Uguucgauucccggcgccggagc.....  | 1 |
| Gi3_15854949_x3080uucucacccaacagauccg..... | .....                         | 0 |
| Gi2_4266688_x3008.....                     | guucgauucccggcgccg.....       | 0 |
| Gi1_2084611_x2882uucucacccaacagauccg.....  | .....                         | 0 |
| Gi2_4338576_x2763.....                     | gguucgauucccggcgccgga.....    | 0 |
| Gi3_16196749_x2745.....                    | guucgauucccggcgccg.....       | 0 |
| Gi5_4464014_x2733uucucacccaacagauccg.....  | .....                         | 0 |
| Gi5_4466747_x2732.....                     | guucgauucccggcgccgga.....     | 0 |
| Gi1_2098525_x2672.....                     | Uuucgauucccggcgccgg.....      | 1 |
| Gi1_2106457_x2553.....                     | guucgauucccggcgccggagcC.....  | 1 |
| Gi5_4584884_x2359.....                     | gguucgauucccggcgccgg.....     | 0 |
| Gi2_4550526_x2301.....                     | gUuucgauucccggcgccggagc.....  | 1 |
| Gi3_16719768_x2271.....                    | ucgauucccggcgccggagcC.....    | 1 |
| Gi1_2160670_x2236.....                     | guucgauucccggcgccgga.....     | 0 |
| Gi2_4659874_x2088.....                     | guucgauucccggcgccgga.....     | 0 |
| Gi5_4689295_x2063.....                     | guucgauucccggcgccggagcC.....  | 1 |
| Gi2_4678540_x2059.....                     | guucgauucccggcgccggag.....    | 0 |
| Gi5_4746918_x1924.....                     | gguucgauucccggcgccg.....      | 0 |
| Gi3_17258833_x1863uucucacccaacagauccg..... | .....                         | 0 |
| Gi5_4797320_x1809.....                     | guucgauucccggcgccggagc.....   | 0 |
| Gi5_4829364_x1752.....                     | gguucgauucccggcgccggag.....   | 0 |
| Gi5_4856838_x1692..cucacccaacagauccg.....  | .....                         | 0 |
| Gi3_17723670_x1584.....                    | Uguucgauucccggcgccgga.....    | 1 |
| Gi1_2263260_x1508.....                     | guucgauucccggcgccg.....       | 0 |
| Gi1_2279516_x1437.....                     | gGucgauucccggcgccgg.....      | 1 |
| Gi3_18002792_x1423.....                    | ucgauucccggcgccggagc.....     | 0 |
| Gi2_5190590_x1386uucucacccaacagauccg.....  | .....                         | 0 |
| Gi3_18114895_x1376.....                    | Uguucgauucccggcgccggag.....   | 1 |
| Gi2_5265076_x1323.....                     | ucgauucccggcgccggagc.....     | 0 |
| Gi3_18253831_x1317.....                    | Uuucgauucccggcgccgg.....      | 1 |
| Gi1_2332554_x1264.....                     | gguucgauucccggcgccggagc.....  | 0 |

|                                         |                              |   |
|-----------------------------------------|------------------------------|---|
| Gi1_2340050_x1226.....                  | guucgauucccggcgccggagc.....  | 0 |
| Gi3_18631876_x1148.....                 | Uuucgauucccggcgccgga.....    | 1 |
| Gi5_5178308_x1083.....                  | Uuucgauucccggcgccgg.....     | 1 |
| Gi5_5191186_x1059.....                  | Uuucgauucccggcgccg.....      | 1 |
| Gi3_18881639_x1044.....                 | gUuucgauucccggcgccgga.....   | 1 |
| Gi2_5612893_x1032.....                  | Uuucgauucccggcgccggagc.....  | 1 |
| Gi3_18985137_x1003.....                 | Uuucgauucccggcgccggagc.....  | 1 |
| Gi3_19108956_x964.....                  | gUuucgauucccggcgccggag.....  | 1 |
| Gi5_5277356_x931.....                   | Uguucgauucccggcgccggagc..... | 1 |
| Gi3_19223083_x923.....                  | uucgauucccggcgccggagc.....   | 0 |
| Gi3_19277081_x906.....                  | gauucccggcgccggagc.....      | 0 |
| Gi2_5857907_x868.....                   | Uuucgauucccggcgccg.....      | 1 |
| Gi5_5341340_x840.ucucaccaacagauccg..... |                              | 0 |
| Gi1_2480982_x805.....                   | gguucgauucccggcgccg.....     | 0 |
| Gi3_19615623_x803.....                  | Uguucgauucccggcgccg.....     | 1 |
| Gi1a_3739453_x774.....                  | gguucgauucccggcgccggagc..... | 0 |
| Gi2_6110175_x725.....                   | gguucgauucccggcgccg.....     | 0 |
| Gi5_5453834_x702uucaccaacagauccg.....   |                              | 0 |
| Gi3_20044512_x691.....                  | gGucgauucccggcgccg.....      | 1 |
| Gi3_20062420_x686.....                  | guucgauucccggcgccgC.....     | 1 |
| Gi5_5504875_x652.....                   | gUuucgauucccggcgccggagc..... | 1 |
| Gi1_2562309_x634.....                   | gguucgauucccggcgccgga.....   | 0 |
| Gi3_20331714_x633.....                  | Aguucgauucccggcgccggagc..... | 1 |
| Gi3_20356944_x628.....                  | cgauucccggcgccggagc.....     | 0 |
| Gi3_20450237_x607.....                  | uucgauucccggcgccgga.....     | 0 |
| Gi3_20477458_x603.....                  | uucgauucccggcgccggagcC.....  | 1 |
| Gi3_20490687_x600.....                  | gGucgauucccggcgccgga.....    | 1 |
| Gi3_20592804_x574.....                  | gauucccggcgccggagcC.....     | 1 |
| Gi3_20641249_x565.....                  | gguucgauucccggcgccgC.....    | 1 |
| Gi2_6524433_x562.....                   | gGucgauucccggcgccggagc.....  | 1 |
| Gi3_20654213_x562.....                  | guucgaCucccggcgccggagc.....  | 1 |
| Gi3_20711587_x552.....                  | gguucgauNcccggcgccggagc..... | 1 |
| Gi3_20742876_x547.....                  | gUuucgauucccggcgccg.....     | 1 |
| Gi5_5635437_x543.....                   | gGucgauucccggcgccg.....      | 1 |
| Gi3_20766281_x542.....                  | ucgauucccggcgccggag.....     | 0 |
| Gi3_20813076_x534.....                  | Uuucgauucccggcgccggag.....   | 1 |
| Gi1_2629414_x520.....                   | Uguucgauucccggcgccg.....     | 1 |
| Gi3_20890919_x518.....                  | ucgauucccggcgccgga.....      | 0 |
| Gi3_20912056_x514.....                  | Uguucgauucccggcgccg.....     | 1 |
| Gi3_20940158_x508.cucaccaacagauccg..... |                              | 0 |
| Gi2_6718036_x497.....                   | gauucccggcgccggagc.....      | 0 |
| Gi2_6721016_x496.....                   | gGucgauucccggcgccg.....      | 1 |
| Gi3_21017851_x495.....                  | auucccggcgccggagcC.....      | 1 |
| Gi2_6751449_x486.....                   | Uguucgauucccggcgcc.....      | 1 |
| Gi3_21069318_x486.....                  | gguucgauucccggcgccggCgc..... | 1 |
| Gi2_6769824_x481.....                   | Uguucgauucccggcgccggag.....  | 1 |
| Gi2_6779412_x478.....                   | ucgauucccggcgccggagcC.....   | 1 |

|                                                     |   |
|-----------------------------------------------------|---|
| Gi1_2664335_x471..cucacccaacagauccg.....            | 0 |
| Gi3_21175959_x470.ucucacccaacagauccg.....           | 0 |
| Gi5_5742002_x468.....gGucgauucccgcgccg.....         | 1 |
| Gi3_21241144_x461.....gGucgauucccgcgccggagc.....    | 1 |
| Gi1_2680859_x446.ucucacccaacagauccg.....            | 0 |
| Gi1_2686601_x437.....uucgauucccgcgccg.....          | 0 |
| Gi5_5802448_x432.....Uguucgauucccgcgccg.....        | 1 |
| Gi3_21433943_x429.....ggCucgauucccgcgccggagc.....   | 1 |
| Gi2_7002965_x415.....Uguucgauucccgcgccg.....        | 1 |
| Gl1a_4132002_x412.....gguucgauucccgcgccggag.....    | 0 |
| Gi1_2728696_x387.ucucacccaacagauccg.....            | 0 |
| Gi3_21767117_x381.....Uguucgauucccgcgcc.....        | 1 |
| Gi5_5902217_x373.....Uguucgauucccgcgccgga.....      | 1 |
| Gi3_21824415_x373.....gUuucgauucccgcgccg.....       | 1 |
| Gi3_21849616_x369.....cgauucccgcgccggagcC.....      | 1 |
| Gi3_21850354_x369.....gguucgauucccgcgccggagcCu..... | 1 |
| Gi1_2749901_x367.....gguucgauucccgcgccggag.....     | 0 |
| Gi5_5915080_x362.....gauucccgcgccggagc.....         | 0 |
| Gi2_7279530_x347.....gauucccgcgccggagcC.....        | 1 |
| Gi3_22045248_x341.....cagaucggguucgauucc.....       | 0 |
| Gi1_2780262_x336.....gUuucgauucccgcgccg.....        | 1 |
| Gi2_7348465_x332.....Aguucgauucccgcgccggagc.....    | 1 |
| Gi2_7360380_x330.....gUuucgauucccgcgccggag.....     | 1 |
| Gi5_6005812_x327.....gUuucgauucccgcgccg.....        | 1 |
| Gi2_7428877_x314.....Uuucgauucccgcgccg.....         | 1 |
| Gi3_22313956_x308.....gUuucgauucccgcgcc.....        | 1 |
| Gi2_7451906_x308.....guucgaCucccgcgccggagc.....     | 1 |
| Gi3_22310260_x308.....gguucgauucccgcgccggGgc.....   | 1 |
| Gi3_22350015_x303.....uccggguucgauucccgcgccgga..... | 0 |
| Gi3_22369960_x301.....gGucgauucccgcgccggag.....     | 1 |
| Gl1a_4343709_x299.....gguucgauucccgcgccggagcC.....  | 1 |
| Gi3_22406772_x297.....gguucgauuccUggcgccggagc.....  | 1 |
| Gi3_22426894_x295.....Uuucgauucccgcgccg.....        | 1 |
| Gi3_22440421_x293.....Cguucgauucccgcgccggagc.....   | 1 |
| Gi3_22470199_x290.....uucgauucccgcgccg.....         | 0 |
| Gi1_2833307_x289..Uucacccaacagauccg.....            | 1 |
| Gi1_2837629_x286.....gguucgauucccgcgccggagcC.....   | 1 |
| Gi2_7584647_x283.....gUuucgauucccgcgcc.....         | 1 |
| Gi2_7604625_x280.....uucgauucccgcgccg.....          | 0 |
| Gi2_7623265_x277.....Uguucgauucccgcgccgga.....      | 1 |
| Gi2_7633467_x275.....gguucgauNcccgcgccggagc.....    | 1 |
| Gi3_22667789_x270.....guucgauucccgcgccggagcCu.....  | 1 |
| Gi1_2865516_x267.....guucgauucccgcgccggagcCu.....   | 1 |
| Gi5_6179994_x266.....Uuucgauucccgcgccgga.....       | 1 |
| Gi1_2868710_x265.....ucgauucccgcgccggagc.....       | 0 |
| Gl1a_4422156_x265.....gguucgauucccgcgccgga.....     | 0 |
| Gi3_22715945_x265.....agaucggguucgauucc.....        | 0 |

|                        |                              |   |
|------------------------|------------------------------|---|
| Gi3_22720450_x265..... | gguucgaCucccggcgccggagc..... | 1 |
| Gi2_7692801_x265.....  | gUuucgauucccggcgcg.....      | 1 |
| Gi1_2876324_x260.....  | guucgaCucccggcgcg.....       | 1 |
| Gi5_6222628_x254.....  | agauccggguucgauucc.....      | 0 |
| Gi5_6228460_x253.....  | ccaacagauccggguuc.....       | 0 |
| Gi5_6235510_x251.....  | ucucaccaacagauccgg.....      | 0 |
| Gi3_22899164_x248..... | guucgaCucccggcgccgga.....    | 1 |
| Gi5_6245734_x248.....  | Uguucgauucccggcgcg.....      | 1 |
| Gi4_339684_x242.....   | gguucgauucccggcgcg.....      | 0 |
| Gi3_22994850_x240..... | gguucgGuucccggcgcggagc.....  | 1 |
| Gi1_2928825_x236.....  | uucgauucccggcgcggagcC.....   | 1 |
| Gi3_23052063_x235..... | caccaacagauccggguuc.....     | 0 |
| Gi5_6308565_x232.....  | Uguucgauucccggcgcg.....      | 1 |
| Gi2_7899826_x230.....  | uucgauucccggcgcggagcC.....   | 1 |
| Gi5_6317809_x230.....  | ucgauucccggcgcggag.....      | 0 |
| Gi1_2938596_x230.....  | Cguucgauucccggcgcg.....      | 1 |
| Gi5_6326282_x228.....  | ucgauucccggcgcggagc.....     | 0 |
| Gi5_6331966_x226.....  | guucgauucccggcgcggag.....    | 0 |
| Gi2_7938475_x225.....  | gguucgauucccggcgcggCgc.....  | 1 |
| Gi3_23193875_x224..... | gguucgauuccUggcgcggag.....   | 1 |
| Gi3_23200799_x223..... | guucgaCucccggcgcg.....       | 1 |
| Gl1_4538766_x220.....  | uucucaccaacagauccg.....      | 0 |
| Gi1_2963766_x219.....  | gCucgauucccggcgcg.....       | 1 |
| Gl1_4546649_x218.....  | gguucgauucccggcgcg.....      | 0 |
| Gi2_7994399_x217.....  | Uuucgauucccggcgcggag.....    | 1 |
| Gi3_23304530_x215..... | ucucaccaacagauccg.....       | 0 |
| Gi2_8017908_x214.....  | uucgauucccggcgcggagc.....    | 0 |
| Gl1_4557874_x214.....  | gguucgauucccggcgcg.....      | 0 |
| Gi5_6398702_x214.....  | gUuucgauucccggcgcggga.....   | 1 |
| Gi5_6417005_x211.....  | ucgauucccggcgcggagcC.....    | 1 |
| Gi3_23382327_x210..... | guucgauucccggcgcgA.....      | 1 |
| Gi1_2985636_x210.....  | Uuucgauucccggcgcggga.....    | 1 |
| Gi5_6461919_x203.....  | Uguucgauucccggcgcggag.....   | 1 |
| Gi1_3010075_x201.....  | uucgauucccggcgcggagc.....    | 0 |
| Gi3_23506713_x201..... | caacagauccggguucgauucc.....  | 0 |
| Gi2_8127732_x200.....  | ggCucgauucccggcgcggagc.....  | 1 |
| Gi3_23516931_x200..... | gguCcgauucccggcgcggagc.....  | 1 |
| Gi2_8144076_x198.....  | Uuucgauucccggcgcggga.....    | 1 |
| Gi3_23560200_x197..... | gauccggguucgauucc.....       | 0 |
| Gi3_23573973_x196..... | gCuucgauucccggcgcggagc.....  | 1 |
| Gi3_23641643_x191..... | guucgauucccgUgcccggag.....   | 1 |
| Gl1_4632800_x191.....  | guucgauucccggcgcggagcC.....  | 1 |
| Gi3_23694905_x188..... | Agguucgauucccggcgcggagc..... | 1 |
| Gi3_23697725_x188..... | ggGucgauucccggcgcggagc.....  | 1 |
| Gl1_4644493_x187.....  | guucgauucccggcgcggagc.....   | 0 |
| Gi5_6557180_x187.....  | ucaccaacagauccggguu.....     | 0 |
| Gi2_8259226_x185.....  | ccaacagauccggguuc.....       | 0 |



|                                                      |   |
|------------------------------------------------------|---|
| Gi3_23749033_x184.....gAuucgauucccggcgccggagc.....   | 1 |
| Gl1a_4658536_x183.....gguucgauucccggcgcc.....        | 0 |
| Gi1_3070143_x179.....agauccggguucgauuccc.....        | 0 |
| Gi4_367620_x179.....guucgauucccggcgccgg.....         | 0 |
| Gi5_6615364_x179.....Uuucgauucccggcgccggagc.....     | 1 |
| Gi5_6632435_x177.....gguucgauucccggcgccggagcCu.....  | 1 |
| Gi3_23865777_x176.....cgauucccggcgccggag.....        | 0 |
| Gi1_3086057_x175.....Uuucgauucccggcgccgg.....        | 1 |
| Gi3_23948305_x171.....guucgaCucccggcgccggag.....     | 1 |
| Gi2_8390578_x170.....gUuucgauucccggcgccgga.....      | 1 |
| Gi5_6685354_x169.....gUuucgauucccggcgccgg.....       | 1 |
| Gi1_3103256_x169.....ucacccaacagauccgggu.....        | 0 |
| Gi2_8419886_x166.....gGucgauucccggcgccgg.....        | 1 |
| Gi2_8436782_x165.....gguucgauucccggcgccggGgc.....    | 1 |
| Gi5_6719756_x164.....gauucccggcgccggagcC.....        | 1 |
| Gl1a_4721617_x163.....guucgauucccggcgccgg.....       | 0 |
| Gi3_24072831_x163.....gguucgauucccggcgccggagc.....   | 1 |
| Gi5_6738710_x162.....guucgaCucccggcgccgg.....        | 1 |
| Gi3_24090728_x162.....cgguucgauucccggcgccgga.....    | 0 |
| Gi2_8472510_x161.....ucgauucccggcgccggag.....        | 0 |
| Gi3_24111706_x161.....gGucgauucccggcgccgg.....       | 1 |
| Gi5_6747445_x161uucacccaacagauccgggu.....            | 0 |
| Gi3_24113960_x161.....gguucgauCcccggcgccggagc.....   | 1 |
| Gi5_6756601_x160.....uucgauucccggcgccgg.....         | 0 |
| Gi3_24150185_x159.....ucacccaacagauccggguuc.....     | 0 |
| Gi3_24142553_x159.....gguucgauucccAgcgccggagc.....   | 1 |
| Gi5_6778507_x158.....uccggguucgauucccggc.....        | 0 |
| Gl1a_4740628_x157.ucacccaacagauccg.....              | 0 |
| Gi2_8512592_x157.....gguucgaCucccggcgccggagc.....    | 1 |
| Gi2_8518708_x156.....cgauucccggcgccggagcC.....       | 1 |
| Gi1_3162430_x154.....gguucgauucccggcgccggagcCu.....  | 1 |
| Gi5_6811730_x153.....guucgauucccggcgccggaCc.....     | 1 |
| Gi1_3167020_x152.....Auucgauucccggcgccgg.....        | 1 |
| Gi3_24263996_x151.....gguucgauucccggcgccggagcA.....  | 1 |
| Gi3_24257654_x151.....Aguucgauucccggcgccggag.....    | 1 |
| Gi2_8579332_x150.....agauccggguucgauucc.....         | 0 |
| Gi3_24312302_x148.....gguucgauucccggcgcgAgggagc..... | 1 |
| Gi3_24331334_x147.....aucggguucgauucccggcgccgga..... | 0 |
| Gi1_3193841_x145.....guucgauuNccgggcgccgg.....       | 1 |
| Gi3_24417877_x142.....guucgauucccggcgccggaC.....     | 1 |
| Gi3_24415889_x142.....gguucAauucccggcgccggagc.....   | 1 |
| Gi2_8670143_x142.....Cguucgauucccggcgccggagc.....    | 1 |
| Gi5_6930592_x139.....auucccggcgccggagcC.....         | 1 |
| Gi5_6938237_x139.....guucgauucccggcgccggagcCu.....   | 1 |
| Gi2_8736673_x136.....gGucgauucccggcgccggag.....      | 1 |
| Gi3_24512108_x136.....ggAucgauucccggcgccggagc.....   | 1 |
| Gi2_8744776_x135.....guuUgauucccggcgccggag.....      | 1 |

|                                                   |   |
|---------------------------------------------------|---|
| Gi1_3244829_x134.....Uuucgauucccgccgagc.....      | 1 |
| Gi3_24551410_x134.....ggguucgauucccgccgagc.....   | 0 |
| Gi5_6979068_x134.....gguucgauUccggcgccgg.....     | 1 |
| Gi5_6975584_x134.....gUuucgauucccgccgag.....      | 1 |
| Gi3_24559584_x134uucacccaacagauccggguuc.....      | 0 |
| Gi1_3258716_x131..cucacccaacagauccCg.....         | 1 |
| Gi3_24613453_x131.....gguuUgauucccgccgagc.....    | 1 |
| Gi5_7003636_x131.....gGucgauucccgccgag.....       | 1 |
| Gi5_7008202_x130.....gUuucgauucccgccgccc.....     | 1 |
| Gi1_3271991_x127.....guCcgauucccgccgag.....       | 1 |
| Gi5_7036657_x127.....guucgaCuccggcgccg.....       | 1 |
| Gi3_24687352_x126.....Aguucgauucccgccgag.....     | 1 |
| Gi3_24694660_x126.....gguucgauucccgccgagA.....    | 1 |
| Gi3_24739411_x123.....gguucgauNccggcgccgag.....   | 1 |
| Gi3_24749611_x122.....gguucgauucccgccgUggagc..... | 1 |
| Gi2_8905500_x121.....gguCcgauucccgccgagc.....     | 1 |
| Gi3_24812582_x119.....caacagauccggguucga.....     | 0 |
| Gi1_3311683_x118.....Uguucgauucccgccgagc.....     | 1 |
| Gi5_7131131_x117.....Cguucgauucccgccgccc.....     | 1 |
| Gi2_8951030_x117.....Uguucgauucccgccgagc.....     | 1 |
| Gi3_24835557_x117.....gguucgauNccggcgccgag.....   | 1 |
| Gi1_3326847_x115Gucucacccaacagauccg.....          | 1 |
| Gi3_24942169_x111.....gguucgauucccgccgagCc.....   | 1 |
| Gi2_9037156_x110.....ucgauucccgccgagc.....        | 0 |
| Gi5_7223837_x108Gucucacccaacagauccg.....          | 1 |
| Gi3_25015334_x107.....ggguucgauucccgccgag.....    | 0 |
| Gi3_25009663_x107.....Uauuccggcgccgagc.....       | 1 |
| Gi3_25019293_x107.....guucgaCuccggcgccg.....      | 1 |
| Gi1_3358450_x107Gucucacccaacagauccg.....          | 1 |
| Gi1_3372775_x105.....gGucgauucccgccgag.....       | 1 |
| Gi4_415438_x105.....gguucgauucccgccgagc.....      | 0 |
| Gi5_7247474_x105.ucucacccaacagauccgggu.....       | 0 |
| Gi1a_4940392_x105.....uucgauucccgccgagc.....      | 0 |
| Gi2_9109341_x104.....gGucgauucccgccgag.....       | 1 |
| Gi2_9115834_x103.....gguucgGuuccggcgccgagc.....   | 1 |
| Gi3_25104011_x102.....gguAcgauucccgccgagc.....    | 1 |
| Gi5_7296674_x101.....gguucgauucccgccgagcgu.....   | 0 |
| Gi3_25119990_x101.....gguucgCuuccggcgccgagc.....  | 1 |
| Gi2_9144974_x100.....cgauucccgccgagcguuA.....     | 1 |
| Gi3_25155666_x99Gucucacccaacagauccg.....          | 1 |
| Gi1_3403571_x98.....gUuucgauucccgccgagc.....      | 1 |
| Gi3_25193808_x97uGucucacccaacagauccg.....         | 1 |
| Gi1_3410380_x97.....gguucgauucccgccgagcU.....     | 1 |
| Gi2_9186957_x97.....guucgaCuccggcgccg.....        | 1 |
| Gi1_3412405_x96.....gguucgauucccgccgccc.....      | 0 |
| Gi1_3412885_x96.....gguucgauucccgccgAg.....       | 1 |
| Gi5_7369994_x94.....gCucgauucccgccgagc.....       | 1 |

|                                             |                                   |   |
|---------------------------------------------|-----------------------------------|---|
| Gi3_25246829_x94.....                       | agauccggguucgauucc.....           | 0 |
| Gi3_25254537_x94.....                       | gguucgauucUcggcgccggagc.....      | 1 |
| Gi1_3431858_x93.....                        | Cuucgauucccggcgccgg.....          | 1 |
| Gi3_25304938_x91.....                       | gguucgauucccggcgcUcggagc.....     | 1 |
| Gi3_25293472_x91.....                       | Auucgauucccggcgcgccga.....        | 1 |
| Gi1_3443389_x90.....                        | Agguucgauucccggcgccgg.....        | 1 |
| Gi5_7424212_x89.....                        | acagauccggguucgauucccggcgc.....   | 0 |
| Gi2_9277568_x89.....                        | gAuucgauucccggcgccggagc.....      | 1 |
| Gi1_3455056_x88.....                        | guucgGuucccggcgccgg.....          | 1 |
| Gi5_7436018_x88.....                        | gGucgauucccggcgccggagc.....       | 1 |
| Gi2_9296624_x87.....                        | ggGucgauucccggcgccggagc.....      | 1 |
| Gi1_3464465_x86.....                        | Uguucgauucccggcgccg.....          | 1 |
| Gi3_25413852_x85.....                       | ccaacagauccggguucgauucc.....      | 0 |
| Gi3_25418899_x84.....                       | Auucgauucccggcgccggagc.....       | 1 |
| Gi3_25425115_x84.....                       | cagauccggguucgauucccggcgccgg..... | 0 |
| Gi3_25423855_x84.....                       | gguucgauucccggcAccggagc.....      | 1 |
| Gi3_25424863_x84.....                       | gguucgauucccggcgcAggagc.....      | 1 |
| Gi5_7492827_x83.....                        | Agguucgauucccggcgccggagc.....     | 1 |
| Gi2_9348290_x83.....                        | cucaccaacagauccgg.....            | 0 |
| Gi1a_5050925_x83.....                       | Uguucgauucccggcgccggagc.....      | 1 |
| Gi5_7506722_x82.....                        | gguucgauucccggcgccggagcguu.....   | 0 |
| Gi1_3484149_x82.....                        | guucAauucccggcgccgg.....          | 1 |
| Gi3_25469201_x81.....                       | gguucgauuccUgcgccggagc.....       | 1 |
| Gi1_3491081_x81.....                        | guucgauucccggcgccAg.....          | 1 |
| Gi3_25483376_x81.....                       | gguucgauucccggcgccAgagc.....      | 1 |
| Gi3_25483214_x81.....                       | gguucgauucccggcgccggG.....        | 1 |
| Gi2_9378699_x80.....                        | uucgauucccggcgccggag.....         | 0 |
| Gi3_25486936_x80.....                       | ggCucgauucccggcgccggga.....       | 1 |
| Gi3_25504765_x79.....                       | guucgauucccggcgccggGg.....        | 1 |
| Gi1_3506059_x78uGcucaccaacagauccg.....      | .....                             | 1 |
| Gi1_3501457_x78.....                        | guuUgauucccggcgccgg.....          | 1 |
| Gi2_9417028_x77.....                        | ggAucgauucccggcgccggagc.....      | 1 |
| Gi1_3510223_x77.....                        | gGucgauucccggcgccg.....           | 1 |
| Gi1_3506604_x77.....                        | guucUauucccggcgccgg.....          | 1 |
| Gi4_442433_x77.....                         | guucgauucccggcgccggga.....        | 0 |
| Gi2_9414179_x77.....                        | Auucgauucccggcgccgg.....          | 1 |
| Gi5_7559961_x77.....                        | cgauucccggcgccggagcguuuc.....     | 0 |
| Gi3_25568178_x76.....                       | gguucgauucccggcgccggagU.....      | 1 |
| Gi1_3511686_x76uGcucaccaacagauccg.....      | .....                             | 1 |
| Gi3_25594935_x75.....                       | guucgauuNccggcgccggga.....        | 1 |
| Gi2_9443182_x75.....                        | gguuUgauucccggcgccggagc.....      | 1 |
| Gi5_7589840_x74.....                        | guucgaCuccggcgccggagc.....        | 1 |
| Gi3_25621492_x73.....                       | Auucgauucccggcgccgg.....          | 1 |
| Gi3_25620397_x73.....                       | guucgauuNccggcgccgg.....          | 1 |
| Gi3_25652418_x72.....                       | gguucgauuUccggcgccggagc.....      | 1 |
| Gi5_7616829_x72uucucaccaacagauccggguuc..... | .....                             | 0 |
| Gi2_9477623_x72.....                        | cgauucccggcgccggagcguuuc.....     | 0 |

|                                                      |   |
|------------------------------------------------------|---|
| Gi1a_5110245_x71.....cgauucccggcgcggagcC.....        | 1 |
| Gi1_3538184_x71.....gGucgauucccggcgcggagc.....       | 1 |
| Gi1_3539746_x71.....guucgauucccgUgccgg.....          | 1 |
| Gi2_9490621_x71.....gCuucgauucccggcgcggagc.....      | 1 |
| Gi1_3536125_x71.....Uguucgauucccggcgcggga.....       | 1 |
| Gi3_25661387_x71.....Cguucgauucccggcgcggga.....      | 1 |
| Gi3_25659541_x71.....ggguucgauucccggcgcggga.....     | 0 |
| Gi3_25690730_x70.....guucgGuucccggcgcggga.....       | 1 |
| Gi1a_5117872_x70.....guucgauucccggcgcgg.....         | 0 |
| Gi4_448843_x70..cucaccaacagauccggguucg.....          | 0 |
| Gi2_9498941_x70.....gguucgauucccggcgAcggagc.....     | 1 |
| Gi2_9499641_x70uucucaccaacagauccgg.....              | 0 |
| Gi3_25706398_x69.....guucgauucccggcgcggG.....        | 1 |
| Gi2_9511814_x69.....gUuucgauucccggcgcgg.....         | 1 |
| Gi3_25693495_x69.....gCucgauucccggcgcgg.....         | 1 |
| Gi3_25697014_x69.....ggCucgauucccggcgcggag.....      | 1 |
| Gi2_9507881_x69.....gguucgauucccggcgcggagA.....      | 1 |
| Gi5_7659095_x68.....gguucgauNcccggcgcggagc.....      | 1 |
| Gi2_9519724_x68.....gguucgauucccAgcgcggagc.....      | 1 |
| Gi5_7667663_x68.....Auucgauucccggcgcgg.....          | 1 |
| Gi3_25725127_x68.....Aguucgauucccggcgcgg.....        | 1 |
| Gi2_9536503_x67.....gguucgauCcccggcgcggagc.....      | 1 |
| Gi5_7668269_x67.....gguucgauucccggcgcggAg.....       | 1 |
| Gi5_7687168_x66.....ucgauucccggcgcggga.....          | 0 |
| Gi1_3561746_x66.....guucgauCcccggcgcgg.....          | 1 |
| Gi5_7680238_x66.....ggguucgauucccggcgcggagc.....     | 0 |
| Gi1_3559898_x66.....guucgauucccAgcgcgg.....          | 1 |
| Gi5_7691722_x66.....cagauccggguucgauucccggcgcgg..... | 0 |
| Gi2_9546257_x66.....gguucAauucccggcgcggagc.....      | 1 |
| Gi5_7698366_x65.....ccggguucgauucccggcgcggga.....    | 0 |
| Gi3_25769037_x65.....gCucgauucccggcgcggagc.....      | 1 |
| Gi3_25791259_x64.....Cguucgauucccggcgcggag.....      | 1 |
| Gi2_9571513_x64uucucaccaacagauccggguucg.....         | 0 |
| Gi1_3572008_x64.....caacagauccggguucgauucccggc.....  | 0 |
| Gi1_3573800_x64.....guucgauucccggcgcUgg.....         | 1 |
| Gi2_9577273_x64.....Auucgauucccggcgcggagc.....       | 1 |
| Gi2_9578297_x64.....cgauucccggcgcggagcguuu.....      | 0 |
| Gi3_25813920_x63.....guucgauucccggcgcggCgc.....      | 1 |
| Gi5_7721679_x63.....gguucgauucccggcgcggagcguuu.....  | 0 |
| Gi5_7726656_x63.....Auucgauucccggcgcgg.....          | 1 |
| Gi3_25805856_x63.....gguucgauucccggcgcggagcG.....    | 1 |
| Gi2_9582921_x63.....guucgaCucccggcgcgg.....          | 1 |
| Gi1_3575068_x63.....gUuucgauucccggcgcgg.....         | 1 |
| Gi1a_5165112_x62uucucaccaacagauccgg.....             | 0 |
| Gi3_25833123_x62.....gguucgauucccgUgccc.....         | 1 |
| Gi3_25836223_x62.....gguucgauucccggcgcAg.....        | 1 |
| Gi3_25833619_x62.....gguucgauucccggcgcggAagc.....    | 1 |

|                                         |                                |   |
|-----------------------------------------|--------------------------------|---|
| Gi3_25826303_x62.....                   | guucGGuuccggcgccggagc.....     | 1 |
| Gi2_9593361_x62.....                    | gguucgauuccggcgccggGg.....     | 1 |
| Gi1_3588041_x61.....                    | guucgauuccUggcgccgg.....       | 1 |
| Gi1_3588651_x61.....                    | cagauccggguucgauuccggcgcc..... | 0 |
| Gi1_3585662_x61.....                    | caccaacagauccggguucgauucc..... | 0 |
| Gi3_25847533_x61.....                   | gguucgauuccggcgccggGg.....     | 1 |
| Gi2_9614597_x61.....                    | gguucgauuccUggcgccggagc.....   | 1 |
| Gi3_25870549_x60.....                   | gguucgauuccAggcgccggagc.....   | 1 |
| Gi5_7764076_x60uGcucaccaacagauccg.....  |                                | 1 |
| Gi3_25867609_x60.....                   | gguucgauNcccggcgccg.....       | 1 |
| Gi2_9636740_x59.....                    | guucgauuccggcgccggagcCu.....   | 1 |
| Gi5_7768413_x59.....                    | cgauuccggcgccggagcguuuA.....   | 1 |
| Gi2_9646919_x58.....                    | Aguucgauuccggcgccggag.....     | 1 |
| Gi3_25900812_x58Gucucaccaacagauccg..... |                                | 1 |
| Gi5_7785515_x58.....                    | gguucgauuccggcgccggCgc.....    | 1 |
| Gi3_25913050_x58.....                   | gCucgauuccggcgccggga.....      | 1 |
| Gi2_9663188_x57.....                    | guucgauuNcccggcgccggagc.....   | 1 |
| Gi3_25956726_x56.....                   | Aguucgauuccggcgccgg.....       | 1 |
| Gi2_9670686_x56.....                    | gCucgauuccggcgccggagc.....     | 1 |
| Gi2_9671918_x56.....                    | Uauuccggcgccggagc.....         | 1 |
| Gi2_9670070_x56.....                    | uucgauuccggcgccgga.....        | 0 |
| Gi3_25948550_x56.....                   | guCcgauuccggcgccgg.....        | 1 |
| Gi3_25940150_x56.....                   | guucgauuccggcgccggagcA.....    | 1 |
| Gi3_25942054_x56.....                   | gguucgauuccggcgccggAc.....     | 1 |
| Gi3_25954822_x56.....                   | gguucgaCuccggcgccgga.....      | 1 |
| Gi5_7824359_x55.....                    | gCucgauuccggcgccgg.....        | 1 |
| Gi3_25969945_x55.....                   | gguucgauuccggcgUggag.....      | 1 |
| Gi2_9702216_x54.....                    | gguucgauuccggcAccggagc.....    | 1 |
| Gi2_9697464_x54Gucucaccaacagauccg.....  |                                | 1 |
| Gi3_25983306_x54.....                   | cUauuccggcgccggagc.....        | 1 |
| Gi3_26016048_x53.....                   | gguucgauuccggAgccggagc.....    | 1 |
| Gi3_26031092_x52.....                   | Gcgauuccggcgccggagc.....       | 1 |
| Gi3_26033432_x52.....                   | Cuucgauuccggcgccggga.....      | 1 |
| Gi1_3633854_x52.....                    | guucgauuccggcAccgg.....        | 1 |
| Gi3_26032808_x52.....                   | cgauuccggcgccggagcguuuA.....   | 1 |
| Gi5_7874053_x51.....                    | gguucgauuccggcgccggagcA.....   | 1 |
| Gi3_26052100_x51.....                   | gguucgauuccgAcgccggagc.....    | 1 |
| Gi1_3640695_x51.....                    | guucgauuccggcgAgg.....         | 1 |
| Gi3_26049448_x51.....                   | Cuucgauuccggcgccgg.....        | 1 |
| Gi5_7864261_x51.....                    | ggCucgauuccggcgccggagc.....    | 1 |
| Gi3_26077436_x50.....                   | gguucgauuccggcgccggagcU.....   | 1 |
| Gi3_26064286_x50.....                   | gguucgauNcccggcgccg.....       | 1 |
| Gi3_26069236_x50.....                   | Cguucgauuccggcgccg.....        | 1 |
| Gi3_26077036_x50.....                   | guucgauuNcccggcgccggagc.....   | 1 |
| Gi3_26058286_x50.....                   | gCuucgauuccggcgccggag.....     | 1 |
| Gi2_9747145_x50.....                    | gguucgauuccggcgAggagc.....     | 1 |
| Gi3_26057686_x50.....                   | gguuGgauuccggcgccggagc.....    | 1 |

|                                         |                               |   |
|-----------------------------------------|-------------------------------|---|
| Gi1_3642664_x50.....                    | guucgauucUcggcgccgg.....      | 1 |
| Gi2_9757944_x49.....                    | guucgauucccgccAga.....        | 1 |
| Gi1_3647301_x49.....                    | gguucgauNcccggcgccgg.....     | 1 |
| Gi3_26079272_x49.....                   | guucgGuucccgccgg.....         | 1 |
| Gi1_3647644_x49.....                    | auccggguucgauucccgccgga.....  | 0 |
| Gi3_26081820_x49.....                   | gAuucgauucccgccggag.....      | 1 |
| Gi2_9755445_x49.....                    | gguucgauucccgccggagcCu.....   | 1 |
| Gi1_3652936_x49.....                    | gguucgauCcccgccgg.....        | 1 |
| Gi5_7897160_x49.....                    | Uauucccgccggagc.....          | 1 |
| Gi1_3657785_x48.....                    | Aguucgauucccgccgg.....        | 1 |
| Gi3_26113280_x48.....                   | gguucgauCcccgccgg.....        | 1 |
| Gi1_3653081_x48.....                    | guucgauucccgccggagcA.....     | 1 |
| Gi2_9772973_x48.....                    | gguucgCuucccgccggagc.....     | 1 |
| Gi2_9773741_x48.....                    | Aguucgauucccgccgg.....        | 1 |
| Gi2_9777389_x48.....                    | guCcgauucccgccgg.....         | 1 |
| Gi2_9784714_x47.....                    | gguucgauucccgccggagU.....     | 1 |
| Gi3_26130456_x47.....                   | gguucgGuucccgccggag.....      | 1 |
| Gi5_7923906_x47.....                    | gguucgauucccCgcccggag.....    | 1 |
| Gi1_3662555_x47.....                    | guucgauucccgccgUcgg.....      | 1 |
| Gi2_9784902_x47.....                    | guucgauucccgccggcCgc.....     | 1 |
| Gi2_9796478_x46.....                    | guucgauucccgccggGgc.....      | 1 |
| Gi3_26153973_x46.....                   | ggguucgauucccgccgg.....       | 0 |
| Gi5_7937975_x46.....                    | Cuucgauucccgccgg.....         | 1 |
| Gi3_26152501_x46.....                   | gguucgauCcccgccggag.....      | 1 |
| Gi5_7938021_x46.....                    | guucgauuNcccggccgg.....       | 1 |
| Gi1a_5280140_x46.....                   | gUuucgauucccgccggagc.....     | 1 |
| Gi3_26153651_x46.....                   | gguucgauuUccggccggag.....     | 1 |
| Gi5_7940367_x46.....                    | guucgGuucccgccgg.....         | 1 |
| Gi2_9805034_x46.....                    | gguucgauucccgUgcccggagc.....  | 1 |
| Gi2_9809439_x45.....                    | Gcgauucccgccggagc.....        | 1 |
| Gi2_9814704_x45.....                    | gguucgauucccgccUggagc.....    | 1 |
| Gi2_9809574_x45.....                    | gguucgauucccgAcgcccggagc..... | 1 |
| Gi5_7946502_x45.....                    | guCcgauucccgccgg.....         | 1 |
| Gi3_26186901_x44.....                   | gguucgauucccAgcggcga.....     | 1 |
| Gi2_9825942_x44.....                    | gguucgauucccgccggagcA.....    | 1 |
| Gi1_3679485_x44.....                    | guGcgauucccgccgg.....         | 1 |
| Gi5_7956443_x44Cucucacccaacagauccg..... |                               | 1 |
| Gi1a_5301606_x43.....                   | Uguucgauucccgccggag.....      | 1 |
| Gi5_7973936_x43.....                    | guucgauuNcccggccgg.....       | 1 |
| Gi2_9841797_x43.....                    | guCcgauucccgccggagc.....      | 1 |
| Gi3_26228521_x42.....                   | guCcgauucccgccggagc.....      | 1 |
| Gi5_7989610_x42.....                    | gguucgauucccgccggagcA.....    | 1 |
| Gi2_9852685_x42.....                    | gguucgauucUcggccggagc.....    | 1 |
| Gi5_7984822_x42.....                    | cacccaacagauccggguucga.....   | 0 |
| Gi2_9851257_x42.....                    | cggguucgauucccgccgg.....      | 0 |
| Gi2_9858523_x42.....                    | gguucgauucccgccAgagc.....     | 1 |
| Gi1_3695766_x41.....                    | guAcgauucccgccgg.....         | 1 |

|                       |                                       |   |
|-----------------------|---------------------------------------|---|
| Gi5_7993863_x41.....  | Aguucgauucccggcgcccg.....             | 1 |
| Gi3_26252492_x41..... | gguucgauucccggcgcccgUgc.....          | 1 |
| Gi5_7996569_x41.....  | gguucgauNcccggcgcccg.....             | 1 |
| Gi2_9863452_x41.....  | guucgaCucccggcgcccggag.....           | 1 |
| Gi3_26260364_x41..... | auccggguucgauucccggcgcccggagc.....    | 0 |
| Gi1_3697317_x40.....  | gUuucgauucccggcgcccgga.....           | 1 |
| Gi1_3698477_x40.....  | guucgauucccgAcgcccg.....              | 1 |
| Gi3_26263930_x40..... | gCuucgauucccggcgcccgga.....           | 1 |
| Gi3_26276090_x40..... | guucgauucccggcgcccAga.....            | 1 |
| Gi3_26276010_x40..... | gguucgauAcccggcgcccggagc.....         | 1 |
| Gi3_26299059_x39..... | Cuucgauucccggcgcccggagc.....          | 1 |
| Gi3_26305572_x39..... | gguucgauucAcggcgcccggagc.....         | 1 |
| Gi3_26305026_x39..... | agauccggguucgauucccggcgcccggagcC..... | 1 |
| Gi3_26283693_x39..... | gguucgaCucccggcgcccggag.....          | 1 |
| Gi5_8026280_x39.....  | guucgauucccggcAccgg.....              | 1 |
| Gi2_9893236_x39.....  | Cuucgauucccggcgcccgg.....             | 1 |
| Gi3_26320318_x38..... | gguucgauucccggcAccgg.....             | 1 |
| Gi2_9911093_x38.....  | guucgauuNcccggcgcccg.....             | 1 |
| Gi3_26326702_x38..... | guucgauucccgUgcccg.....               | 1 |
| Gi3_26311426_x38..... | gguucgauucccggcgcccgCg.....           | 1 |
| Gi2_9913069_x38.....  | gguucgauNcccggcgcccggag.....          | 1 |
| Gi3_26318608_x38..... | gguucgGuucccggcgcccgga.....           | 1 |
| Gi2_9912081_x38.....  | guucgaCucccggcgcccgga.....            | 1 |
| Gi2_9905051_x38.....  | uccggguucgauucccggcgcccgga.....       | 0 |
| Gi2_9909383_x38.....  | guucgGuucccggcgcccggagc.....          | 1 |
| Gi5_8031125_x38.....  | guucgauucccggcgccA.....               | 1 |
| Gi5_8033481_x38.....  | accacaacagauccggguucgauucc.....       | 0 |
| Gi1_3709984_x38.....  | gUuucgauucccggcgcccggag.....          | 1 |
| Gi2_9916965_x37.....  | Aguucgauucccggcgcccg.....             | 1 |
| Gi3_26335638_x37..... | gguucgauucccggcgccA.....              | 1 |
| Gi3_26349402_x37..... | gguucgauucccggcgcccAag.....           | 1 |
| Gi1_3715031_x37.....  | guucgauucccggcgcccggag.....           | 0 |
| Gi1_3717732_x37.....  | guucgauucccggcgAcg.....               | 1 |
| Gi2_9923107_x37.....  | gguucgauNcccggcgcc.....               | 1 |
| Gi3_26331161_x37..... | Auucgauucccggcgcccggag.....           | 1 |
| Gi3_26345147_x37..... | ggAucgauucccggcgcccgga.....           | 1 |
| Gi2_9924698_x37.....  | gguucgauucccggcgAc.....               | 1 |
| Gi5_8052664_x37.....  | Cguucgauucccggcgcccggagc.....         | 1 |
| Gi5_8046744_x37.....  | gguucgauNcccggcgcccgga.....           | 1 |
| Gi5_8055436_x36.....  | guuucccgccuuccuucgucu.....            | 0 |
| Gi3_26372855_x36..... | gguucgauucccggcgcccgC.....            | 1 |
| Gi5_8058424_x36.....  | cucacccCacagauccgg.....               | 1 |
| Gi2_9929187_x36.....  | gguucgauucccgAgcccggagc.....          | 1 |
| Gi1_3721587_x36.....  | cucacccaacagauccggguucgauucc.....     | 0 |
| Gi3_26352083_x36..... | guucgauucccggcgcccgGgc.....           | 1 |
| Gi3_26352767_x36..... | gguucgauucccgUgcccgga.....            | 1 |
| Gi2_9939771_x36.....  | gguucgauucccggcgcccggaAc.....         | 1 |

|                                           |                                 |   |
|-------------------------------------------|---------------------------------|---|
| Gi3_26359031_x36.....                     | gguucgauucccgccAccgga.....      | 1 |
| Gi2_9939159_x36.....                      | gguucgauucccgccgAgc.....        | 1 |
| Gi3_26353271_x36uGcucacccaacagauccgg..... |                                 | 1 |
| Gi3_26361443_x36.....                     | gguCcgauucccgccgAgc.....        | 1 |
| Gi1_3728247_x35.....                      | guucgauucccgAgcgg.....          | 1 |
| Gi3_26393525_x35.....                     | guucgauuccAgcgg.....            | 1 |
| Gi3_26377950_x35.....                     | guCcgauucccgccgga.....          | 1 |
| Gi5_8072429_x35.....                      | Cuucgauucccgccg.....            | 1 |
| Gi3_26394540_x35.....                     | guucAauucccgccg.....            | 1 |
| Gl1a_5365600_x35.....                     | guucgauucccgccgga.....          | 0 |
| Gi5_8077714_x35.....                      | guucUauucccgccg.....            | 1 |
| Gi2_9949979_x35.....                      | gguuGgauucccgccgAgc.....        | 1 |
| Gi3_26381415_x35.....                     | agauccggguucgauucccgccgAgc..... | 0 |
| Gi5_8068229_x35.....                      | guucgaCucccgccgga.....          | 1 |
| Gi3_26394120_x35.....                     | uccggguucgauucccgccg.....       | 0 |
| Gi3_26384355_x35.....                     | ggCucgauucccgccg.....           | 1 |
| Gi2_9956477_x34.....                      | gguucgauuccUgcgggAgc.....       | 1 |
| Gi3_26413068_x34.....                     | gguucgauuccAgcgggAgc.....       | 1 |
| Gi5_8085025_x34..                         | cGcaccacagauccgg.....           | 1 |
| Gi3_26398108_x34uCcucacccaacagauccg.....  |                                 | 1 |
| Gi5_8085535_x34.....                      | guCcgauucccgccg.....            | 1 |
| Gi2_9967459_x34.....                      | gguucgauuUccggccgAgc.....       | 1 |
| Gi2_9958755_x34.....                      | Aguucgauucccgccgga.....         | 1 |
| Gi3_26414972_x34.....                     | guucgauuccggUgcggga.....        | 1 |
| Gi2_9965147_x34.....                      | gguucgauNccggccg.....           | 1 |
| Gi3_26424136_x33.....                     | gguCcgauucccgccgga.....         | 1 |
| Gi3_26434465_x33.....                     | guucgauucccgccA.....            | 1 |
| Gi3_26442022_x33.....                     | guucgauucccgccAg.....           | 1 |
| Gi2_9980106_x33.....                      | gguucgauuccggUcggAgc.....       | 1 |
| Gi1_3738717_x33.....                      | uccggguucgauucccgccgga.....     | 0 |
| Gi2_9982581_x33.....                      | gguucgauAccggccgAgc.....        | 1 |
| Gi3_26428129_x33.....                     | gguucgauuccUgcggccgga.....      | 1 |
| Gi5_8105061_x33.....                      | gguucgGuuccggccgAgc.....        | 1 |
| Gi3_26426050_x33.....                     | guucUauucccgccg.....            | 1 |
| Gi5_8097372_x33.....                      | gguucgauuccggccgGgc.....        | 1 |
| Gi1_3743568_x33uucucaccNaacagauccg.....   |                                 | 1 |
| Gi3_26426809_x33.....                     | Aguucgauucccgcc.....            | 1 |
| Gi2_9978951_x33.....                      | gguucgauuccggccgAgc.....        | 1 |
| Gi5_8099451_x33.....                      | guucgauuccggcUg.....            | 1 |
| Gi1_3745344_x32.....                      | guucgauuccUcggcgg.....          | 1 |
| Gi3_26468638_x32uucucacccaCagauccg.....   |                                 | 1 |
| Gi3_26450590_x32.....                     | gguUgauuccggccgga.....          | 1 |
| Gi3_26446270_x32.....                     | acagauccggguucgauucccgccg.....  | 0 |
| Gi3_26466494_x32.....                     | ggGucgauuccggccgAgc.....        | 1 |
| Gi3_26457758_x32.....                     | gguucgauuAccggccgAgc.....       | 1 |
| Gi5_8108550_x32.....                      | gAuucgauuccggccgAgc.....        | 1 |
| Gi3_26460286_x32.....                     | gAuucgauuccggccgga.....         | 1 |



|                                                         |   |   |
|---------------------------------------------------------|---|---|
| Gi5_8111366_x32..cucacccaNcagauccgg.....                | 1 |   |
| Gi3_26469278_x32.....gguucgauucccgccgUgga.....          |   | 1 |
| Gi3_26457918_x32.....ggGucgauucccgccgcca.....           |   | 1 |
| Gi2_10011860_x31.....guucgauucccgccgC.....              |   | 1 |
| Gi3_26473655_x31.....guucgauCcccgccgccc.....            |   | 1 |
| Gi5_8126192_x31.....gguucgaCucccgccgcccgagc.....        | 1 |   |
| Gi3_26475019_x31.....guucgauCcccgccgcca.....            |   | 1 |
| Gi1_3754020_x31uuUucacccaacagauccg.....                 | 1 |   |
| Gi1_3754578_x31.....gguucgauucccgccgcca.....            | 0 |   |
| Gi3_26491728_x31.....guucgauuccUggcgccc.....            |   | 1 |
| Gi3_26480072_x31.....gguucgaCucccgccgccc.....           |   | 1 |
| Gi3_26477902_x31.....agauccggguucgauucccgccgcccgag..... |   | 0 |
| Gi3_26487574_x31.....gguuAgauucccgccgcccgagc.....       |   | 1 |
| Gi5_8130315_x31.....guucgauucccgccAaccg.....            | 1 |   |
| Gi2_9999863_x31.....Cuucgauucccgccgcccgagc.....         | 1 |   |
| Gi3_26472911_x31.....guuUgauucccgccgccc.....            |   | 1 |
| Gi3_26478336_x31.....guucUauucccgccgccc.....            |   | 1 |
| Gl1a_5399946_x30.....Uguucgauucccgccgccc.....           | 1 |   |
| Gi2_10018675_x30.....guucgauucccAgcggcccgagc.....       |   | 1 |
| Gi3_26516520_x30.....guucgauucccgccgUcgga.....          |   | 1 |
| Gi1_3758705_x30..cucacccaacagauccggguucga.....          | 0 |   |
| Gi3_26506200_x30.....gguucAauucccgccgcccgga.....        |   | 1 |
| Gi1_3758915_x30.....auccggguucgauucccgccgccc.....       | 0 |   |
| Gi3_26512770_x30.....guucgauucccAgcggcccgga.....        |   | 1 |
| Gi2_10028005_x30.....Cguucgauucccgccgccc.....           |   | 1 |
| Gi1_3756845_x30.....aacagauccggguucgauucccgccgccc.....  | 0 |   |
| Gi2_10024765_x30uucacccaacGgauccg.....                  |   | 1 |
| Gi5_8141425_x30.....gguucgauucccgccgcccgC.....          | 1 |   |
| Gi5_8137855_x30.....guucgauuccUggcgccc.....             | 1 |   |
| Gi2_10032948_x29.....cagaucggguucgauucccgccgcccgag..... |   | 0 |
| Gi3_26538688_x29.....gguucgauucccgccgCgcccgagc.....     |   | 1 |
| Gi3_26527030_x29.....guucgauucccgccgUgga.....           |   | 1 |
| Gi3_26542980_x29.....gguucgauucccgccgAcggag.....        |   | 1 |
| Gi5_8148740_x29....acccaacagauccggguucgauuccc.....      | 0 |   |
| Gi1_3767858_x29.....guucgauucccgccgcccCg.....           | 1 |   |
| Gi5_8152887_x29.....guucgauuccUggcgccc.....             | 1 |   |
| Gi3_26537209_x29.....guucgauuNccggccgcccgag.....        |   | 1 |
| Gi3_26539645_x29.....Gucgauucccgccgcccgagc.....         |   | 1 |
| Gi5_8150915_x29.Gcucacccaacagauccg.....                 | 1 |   |
| Gi1_3764610_x29.....guucgauucccgccgcccgagcgA.....       | 1 |   |
| Gi1_3767597_x29.....guucgauuUccggccgccc.....            | 1 |   |
| Gi5_8144825_x29.....guucgGuucccgccgccc.....             | 1 |   |
| Gi1_3764407_x29....acccaacagauccggguucgauuccc.....      | 0 |   |
| Gi3_26528828_x29.....guucAauucccgccgcccgga.....         |   | 1 |
| Gi2_10029874_x29.....gguCcgauucccgccgccc.....           |   | 1 |
| Gi3_26555953_x28.....guucgauuccUggcgcccgagc.....        |   | 1 |
| Gi5_8162657_x28.....gCuucgauucccgccgcccgagc.....        | 1 |   |

|                                         |                                      |   |
|-----------------------------------------|--------------------------------------|---|
| Gi5_8160949_x28.....                    | gguucgauNcccggcgccggag.....          | 1 |
| Gi1_3770940_x28.....                    | Uguucgauucccgcgccggag.....           | 1 |
| Gi5_8156945_x28.....                    | guucgauucccgcgUcgg.....              | 1 |
| Gi3_26554693_x28.....                   | gguucgauucccgcgAcgga.....            | 1 |
| Gi5_8158877_x28uucacacNaacagauccg.....  |                                      | 1 |
| Gi3_26556541_x28.....                   | guucgauucccgcgAcgga.....             | 1 |
| Gi2_10045729_x28.....                   | guucgauuccUggcgccggagc.....          | 1 |
| Gi3_26554441_x28.....                   | cucaccaacagauccggguucgauucc.....     | 0 |
| Gi2_10045757_x28.....                   | gguuAgauucccgcgccggagc.....          | 1 |
| Gi2_10046429_x28.....                   | gguucgauuccAcggcgccggagc.....        | 1 |
| Gi3_26547861_x28.....                   | guucGGuuccggcgccggag.....            | 1 |
| Gi5_8166913_x28.....                    | gguucgauucccgcgAc.....               | 1 |
| Gi2_10055053_x28.....                   | gguucgauucccgcgccggG.....            | 1 |
| Gi3_26590710_x27.....                   | aacagauccggguucgauucccgcgccgga.....  | 0 |
| Gi1_3780354_x27.....                    | gguucgauucccgcgccgU.....             | 1 |
| Gi3_26577156_x27.....                   | guucgaGuucccgcgccggagc.....          | 1 |
| Gi3_26587578_x27.....                   | gguucgauucccgcgccAga.....            | 1 |
| Gl1_5426177_x27.....                    | Uguucgauucccgcgccgg.....             | 1 |
| Gi2_10059158_x27.....                   | guucUauuccggcgccgg.....              | 1 |
| Gi3_26588604_x27.....                   | gguucgauucccgcgAcgga.....            | 1 |
| Gi5_8169947_x27.....                    | gauccggguucgauucccgcgccgga.....      | 0 |
| Gi2_10067744_x27.....                   | guucgauucccgcgAcgga.....             | 1 |
| Gi3_26578533_x27.....                   | cucaccaacagauccggguucgau.....        | 0 |
| Gi3_26585094_x27.....                   | ggAucgauucccgcgccggag.....           | 1 |
| Gi5_8170649_x27.....                    | guucgauCcccggcgccg.....              | 1 |
| Gi3_26582799_x27.Gcucaccaacagauccg..... |                                      | 1 |
| Gi1_3776601_x27.....                    | guucgaCuuccggcgccgga.....            | 1 |
| Gi3_26592168_x27.....                   | guucgauuccAcgcgccggagc.....          | 1 |
| Gi5_8186590_x26.....                    | guucgauuccAcgcgccg.....              | 1 |
| Gi5_8191868_x26..Gucaccaacagauccg.....  |                                      | 1 |
| Gi5_8194208_x26.....                    | gguucgauucccgUgcc.....               | 1 |
| Gi5_8183444_x26.....                    | guGcgauucccgcgccg.....               | 1 |
| Gi5_8186200_x26.....                    | guucgauucccgUgccg.....               | 1 |
| Gi3_26596267_x26.....                   | guucgauucccgcgAcgga.....             | 1 |
| Gi1_3785741_x26uucacaccaCcagauccg.....  |                                      | 1 |
| Gi3_26600531_x26.....                   | acagauccggguucgauucccgcgccggagc..... | 0 |
| Gi2_10076679_x26.....                   | guucGGuuccggcgccgg.....              | 1 |
| Gi2_10082815_x26uGcucaccaacagauccg..... |                                      | 1 |
| Gi3_26621123_x26.....                   | Gucgauucccgcgccgga.....              | 1 |
| Gi3_26601935_x26.....                   | gguucgauuccUcggcgccggag.....         | 1 |
| Gi1_3781945_x26.....                    | guucgauucccgcgccgA.....              | 1 |
| Gi5_8207059_x25.....                    | guucgauucccgcgccAg.....              | 1 |
| Gl1_5444687_x25.....                    | gUucgauucccgcgccggag.....            | 1 |
| Gi2_10104647_x25.....                   | guucgauucccgcgccAg.....              | 1 |
| Gi3_26633193_x25.....                   | gguucgauNcccggcgcc.....              | 1 |
| Gi3_26649193_x25.....                   | gguucgauucccgUgccggag.....           | 1 |
| Gi3_26621768_x25.....                   | gguucgCuucccgcgccgga.....            | 1 |

|                                                         |   |   |
|---------------------------------------------------------|---|---|
| Gi1a_5450987_x25.....Uguucgauucccgccgcca.....           | 1 |   |
| Gi5_8197809_x25.....Aguucgauucccgccgcca.....            | 1 |   |
| Gi2_10090447_x25.....guucgauuccUggcgccgg.....           |   | 1 |
| Gi1_3792481_x25uuUucaccaacagauccg.....                  | 1 |   |
| Gi3_26638018_x25.....gguucgauuccAgggccgg.....           |   | 1 |
| Gi2_10095222_x25.....guuUgauucccgccgagc.....            |   | 1 |
| Gi3_26624893_x25.....guucgauuccUggcgccg.....            |   | 1 |
| Gi2_10100072_x25.....gguucgauNcccgccgcca.....           |   | 1 |
| Gi5_8200709_x25uuUucaccaacagauccg.....                  | 1 |   |
| Gi1_3790881_x25.....gAucgauucccgccgcca.....             | 1 |   |
| Gi2_10100297_x25.....aacagauccggguucgauucccgccgcca..... |   | 0 |
| Gi3_26647618_x25.....gguuUgauucccgccgagc.....           |   | 1 |
| Gi2_10097647_x25.....gguucgauucccgUgcca.....            |   | 1 |
| Gi3_26645368_x25.....guucgauucccgccAccg.....            |   | 1 |
| Gi1_3790131_x25.....guucgaCucccgccgcca.....             | 1 |   |
| Gi3_26640343_x25.....guucgauuccGccgcccggagc.....        |   | 1 |
| Gi5_8203184_x25.....gguuUgauucccgccgagc.....            | 1 |   |
| Gi3_26675528_x24.....gguucgauucccgccgUg.....            |   | 1 |
| Gi3_26665520_x24.....gguucgaCucccgccgcca.....           |   | 1 |
| Gi5_8218584_x24.....guucgauucccgccgagcguuucc.....       |   | 0 |
| Gi1_3798686_x24.....gguucgaCucccgccgcca.....            | 1 |   |
| Gi3_26675624_x24.....guucgauCcccgccgagc.....            |   | 1 |
| Gi2_10115803_x24.....guucgauucccgUgcccggagc.....        |   | 1 |
| Gi3_26663672_x24.....gguucAauucccgccgagc.....           |   | 1 |
| Gi3_26674952_x24.....gguucgauucccgccgUcgg.....          |   | 1 |
| Gi3_26658896_x24.....guucgauucccgccgUcgg.....           |   | 1 |
| Gi3_26671712_x24.....gguuUgauucccgccgcca.....           |   | 1 |
| Gi3_26666672_x24.....aUaucggguucgauucc.....             |   | 1 |
| Gi2_10137065_x23.....gCucgauucccgccgcca.....            |   | 1 |
| Gi3_26687230_x23.....ggGucgauucccgccgcca.....           |   | 1 |
| Gi4_499827_x23.....Uguucgauucccgccgcca.....             | 1 |   |
| Gi5_8227343_x23.....gguucgauuccAgccgagc.....            | 1 |   |
| Gi5_8228263_x23.....gguucgauuccUggcgccgagc.....         | 1 |   |
| Gi5_8228700_x23.....guucAauucccgccgcca.....             | 1 |   |
| Gi3_26708827_x23uuUucaccaacagauccg.....                 |   | 1 |
| Gi5_8223571_x23.....guucgauucccgccgagcA.....            | 1 |   |
| Gi2_10128003_x23.....guucUauucccgccgagc.....            |   | 1 |
| Gi5_8231069_x23.....guucUauucccgccgcca.....             | 1 |   |
| Gi3_26687529_x23.....gguAcgauucccgccgagc.....           |   | 1 |
| Gi5_8223433_x23Gucucaccaacagauccg.....                  | 1 |   |
| Gi3_26697948_x23.....gguucgauuccUggcgccgcca.....        |   | 1 |
| Gi5_8220144_x23.....guuUgauucccgccgcca.....             | 1 |   |
| Gi5_8229942_x23.....Cguucgauucccgccgcca.....            | 1 |   |
| Gi4_499091_x23.....gUuucgauucccgccgcca.....             | 1 |   |
| Gi3_26697833_x23.....gguucgauCcccgccgcca.....           |   | 1 |
| Gi5_8222398_x23.....guucgauucccgccgagcA.....            | 1 |   |
| Gi1_3800485_x23.....guucgauucccgccgccaU.....            | 1 |   |

|                                                 |                                        |   |
|-------------------------------------------------|----------------------------------------|---|
| Gi3_26701122_x23.....                           | guucgauucccgAcgccggagc.....            | 1 |
| Gi1_3799979_x23.....                            | guucgCuucccgccgcccgg.....              | 1 |
| Gi3_26740848_x22.....                           | gguCcgauucccgccgcccgg.....             | 1 |
| Gi3_26717924_x22.....                           | uGcgauucccgccgcccga.....               | 1 |
| Gi3_26711566_x22.....                           | guucgauucccAgcgcccggag.....            | 1 |
| Gi3_26731828_x22.....                           | gguCcgauucccgccgcccgg.....             | 1 |
| Gi3_26730772_x22.....                           | gguucgauucccUgcgccgga.....             | 1 |
| Gi3_26726196_x22.....                           | Cguucgauucccgccgcccgg.....             | 1 |
| Gi3_26713986_x22uuUucaccaacagauccgg.....        | .....                                  | 1 |
| Gi2_10139948_x22.....                           | guucgauucccgccgcccggG.....             | 1 |
| Gi3_26728792_x22.....                           | gguNcgauucccgccgcccggagc.....          | 1 |
| Gi3_26718166_x22.....                           | guAcgauucccgccgcccga.....              | 1 |
| Gi1_3813437_x22.....                            | gAuucgauucccgccgcccgg.....             | 1 |
| Gi5_8240427_x22.....                            | gguucgauNcccggccgcccgg.....            | 1 |
| Gi2_10147758_x22.....                           | Cguucgauucccgccgcccggag.....           | 1 |
| Gi1_3808399_x22uucucaccUaacagauccgg.....        | .....                                  | 1 |
| Gi3_26716120_x22.....                           | gCucgauucccgccgcccggag.....            | 1 |
| Gi3_26725954_x22.....                           | gguucgauucccgccgcccAgga.....           | 1 |
| Gi1_3811083_x22uucucacccaCcagauccgg.....        | .....                                  | 1 |
| Gi3_26709784_x22.....                           | guAcgauucccgccgcccgg.....              | 1 |
| Gi2_10140696_x22.....                           | guGcgauucccgccgcccgg.....              | 1 |
| Gi3_26727450_x22.....                           | cGcaccacaacagauccgg.....               | 1 |
| Gi3_26727098_x22.....                           | guucAauucccgccgcccggagc.....           | 1 |
| Gi3_26717066_x22.....                           | gguucgGuucccgccgcccgg.....             | 1 |
| Gi1_3812227_x22.....                            | guucgauucccgccgcccG.....               | 1 |
| Gi2_10138452_x22.....                           | guuUgauucccgccgcccgg.....              | 1 |
| Gi3_26728088_x22.....                           | guucgauucccgccgcccAgga.....            | 1 |
| Gi5_8234575_x22.....                            | Aguucgauucccgccgccc.....               | 1 |
| Gi2_10151036_x22.....                           | uGgauucccgccgcccggagc.....             | 1 |
| Gi5_8255085_x21.....                            | guucgaCuucccgccgcccggag.....           | 1 |
| Gi2_10163098_x21.....                           | gguucgauucccgccgcccUg.....             | 1 |
| Gi3_26755716_x21.....                           | Uauccggguucgauuccc.....                | 1 |
| Gi1_3818985_x21..                               | Gucaccaacagauccgg.....                 | 1 |
| Gi2_10171771_x21.....                           | gguucgauucccAgcgcccggag.....           | 1 |
| Gi1_3820035_x21uucucacccaacagauccggguucgau..... | .....                                  | 0 |
| Gi5_8253741_x21.....                            | guucgauucccgccgcccG.....               | 1 |
| Gi5_8252838_x21.....                            | gguCcgauucccgccgcccggagc.....          | 1 |
| Gi5_8258970_x21.....                            | ggGucgauucccgccgcccggagc.....          | 1 |
| Gi5_8251956_x21.....                            | ggAucgauucccgccgcccggagc.....          | 1 |
| Gi1_3814533_x21.....                            | gguucgauucccgccgcccgaU.....            | 1 |
| Gi1_3818649_x21uucucacccaacGgauccgg.....        | .....                                  | 1 |
| Gi2_10157743_x21.....                           | gguucgauuccAgccgcccggagc.....          | 1 |
| Gi3_26754267_x21.....                           | guGcgauucccgccgcccga.....              | 1 |
| Gi5_8257437_x21.....                            | gguucgauCcccggccgcccggagc.....         | 1 |
| Gi3_26765145_x21.....                           | cagauccggguucgauucccgccgcccggagcC..... | 1 |
| Gi5_8255211_x21.....                            | gguucAauucccgccgcccggagc.....          | 1 |
| Gi2_10171897_x21.....                           | guucgauucccgccgcccUgcggagc.....        | 1 |

|                                               |                                  |   |
|-----------------------------------------------|----------------------------------|---|
| Gi5_8254014_x21.....                          | gguucgauucccggcgccggagA.....     | 1 |
| Gl1a_5485777_x21.....                         | gUuucgauucccggcgccg.....         | 1 |
| Gi1_3813861_x21uucucacccGacagauccgg.....      |                                  | 1 |
| Gi2_10183169_x20.....                         | guucgauCcccggcgccgg.....         | 1 |
| Gi5_8271389_x20.....                          | guuUgauucccggcgccg.....          | 1 |
| Gi3_26801825_x20.....                         | gAucgauucccggcgccg.....          | 1 |
| Gi5_8276429_x20.....                          | guucAauucccggcgccg.....          | 1 |
| Gi3_26786165_x20.....                         | gauccggguucgauucccggcgccgga..... | 0 |
| Gi1_3821550_x20.....                          | guucgauAcccggcgccgg.....         | 1 |
| Gi2_10173549_x20.....                         | guucgauucccggcgccggagcA.....     | 1 |
| Gi2_10185989_x20.....                         | gguucgauucccggcgccggagcU.....    | 1 |
| Gi5_8268609_x20.....                          | guucgauucccggcgccgAcgg.....      | 1 |
| Gi1_3823770_x20.....                          | gguucgauucccggcgccgAcgg.....     | 1 |
| Gi2_10175769_x20.....                         | Aguucgauucccggcgccgg.....        | 1 |
| Gi2_10186169_x20.....                         | gguucgauucccggcgccggcCc.....     | 1 |
| Gi1_3827510_x20.Gcucacccaacagauccg.....       |                                  | 1 |
| Gi3_26799545_x20.....                         | gguucgauucccgAcgccgga.....       | 1 |
| Gi1_3827030_x20uucucaccNaacagauccgg.....      |                                  | 1 |
| Gi3_26803925_x20.....                         | gguucgauucccggcgccAgag.....      | 1 |
| Gi2_10181629_x20.....                         | guucgauCcccggcgccggagc.....      | 1 |
| Gi1_3825530_x20.....                          | ggCucgauucccggcgccgg.....        | 1 |
| Gi3_26802185_x20.....                         | gguucgCuucccggcgccggag.....      | 1 |
| Gi2_10187089_x20.....                         | ggGucgauucccggcgccggag.....      | 1 |
| Gi3_26804425_x20.....                         | Ugguucgauucccggcgccggagc.....    | 1 |
| Gi3_26810854_x19Cucucacccaacagauccg.....      |                                  | 1 |
| Gi3_26820183_x19.....                         | guucgauucccgAcgccgg.....         | 1 |
| Gi3_26808840_x19.....                         | gguucgauucccggcgccAg.....        | 1 |
| Gi5_8287020_x19.....                          | guucgauCcccggcgccgg.....         | 1 |
| Gi2_10196756_x19.....                         | guucgauucccggcgccgCagc.....      | 1 |
| Gi2_10199340_x19.....                         | guucgauucccggcgccgAcgg.....      | 1 |
| Gi2_10206845_x19.....                         | gguucgGuucccggcgcc.....          | 1 |
| Gi3_26830880_x19.....                         | Cuucgauucccggcgccggag.....       | 1 |
| Gi1_3830427_x19..ucacccaacagauccggguucga..... |                                  | 0 |
| Gi3_26828410_x19.....                         | gguucgauucccggcgccgAcg.....      | 1 |
| Gi3_26822102_x19.....                         | guucgauucccggcgccgAcgga.....     | 1 |
| Gi1_3831985_x19.....                          | gguucgauucccggcgccUgg.....       | 1 |
| Gi1_3834930_x19.....                          | Auucgauucccggcgccggagc.....      | 1 |
| Gi2_10206731_x19.....                         | gguucgauuAccgggcgccggagc.....    | 1 |
| Gi3_26805230_x19.....                         | guCcgauucccggcgccggag.....       | 1 |
| Gi3_26821722_x19.....                         | guucgauuccUgggcgccgga.....       | 1 |
| Gi3_26832894_x19.....                         | guucgauuccUgggcgccgg.....        | 1 |
| Gi5_8291903_x19.....                          | gguucgauucccggcAccggagc.....     | 1 |
| Gi3_26819936_x19.....                         | cUauucccggcgccggag.....          | 1 |
| Gi3_26815452_x19.....                         | gAuucgauucccggcgccg.....         | 1 |
| Gi2_10199530_x19.....                         | guAcgauucccggcgccggagc.....      | 1 |
| Gi3_26866942_x18.....                         | guucgauucccggcgccgAcgg.....      | 1 |
| Gi2_10218010_x18.....                         | gguucgauucccggcgccUgga.....      | 1 |

Gi3\_26844622\_x18.....uGcgauuccggcgccggagc..... 1  
 Gi4\_506352\_x18.....gguucgauuccggcgccggagcC..... 1  
 Gi3\_26850778\_x18.....gguucgauuccggcgccgCagc..... 1  
 Gi1\_3840465\_x18.....guucgauuccggcgccggG..... 1  
 Gi1\_3837495\_x18Cucucacccaacagauccg..... 1  
 Gi1\_3843633\_x18uucCcacccaacagauccg..... 1  
 G1a\_5511635\_x18.....Uguucgauuccggcgcc..... 1  
 Gi5\_8297325\_x18uCcucacccaacagauccg..... 1  
 Gi3\_26870074\_x18.....guucgauuccUggcgccggag..... 1  
 Gi3\_26873890\_x18.....uGgauuccggcgccggagc..... 1  
 Gi2\_10224562\_x18.....guucgauuccggcgUgg..... 1  
 Gi3\_26846368\_x18.....gguuUgauuccggcgccg..... 1  
 Gi3\_26842750\_x18.....guucgauuccggUgcccggagc..... 1  
 Gi2\_10215526\_x18.....guucgauuccggcgUcgg..... 1  
 Gi3\_26843128\_x18.....guGcgauuccggcgccgg..... 1  
 Gi3\_26859778\_x18.....guucgauuccggcgUgg..... 1  
 Gi1\_3842463\_x18.....Gucgauuccggcgccgg..... 1  
 Gi5\_8296497\_x18uucucacccaCagauccg..... 1  
 Gi1\_3838593\_x18uucucacccaacGgauccg..... 1  
 Gi3\_26859400\_x18.....gguucgauuccggcgccUgagc..... 1  
 Gi5\_8302311\_x18.....guucgauuccggcgUcg..... 1  
 Gi2\_10218298\_x18.....agauccggguucgauuccggcgccggagcC..... 1  
 Gi2\_10224454\_x18.....gguuUgauuccggcgccgga..... 1  
 Gi2\_10223176\_x18.....guucAauuccggcgccggagc..... 1  
 Gi5\_8310769\_x17.....caacagauccggguucgauuccggcgccg..... 0  
 Gi1\_3851194\_x17uCcucacccaacagauccg..... 1  
 Gi3\_26896844\_x17.....guucgauuUccggcgccgg..... 1  
 Gi2\_10243414\_x17.....guucgauucUcggcgccgg..... 1  
 Gi5\_8315223\_x17.....gAucgauuccggcgccgg..... 1  
 Gi4\_508099\_x17.....Uuucgauuccggcgccgg..... 1  
 Gi3\_26878246\_x17.....gguucgUuuccggcgccggagc..... 1  
 Gi2\_10230664\_x17.....gguucgauuccggcgccggUgc..... 1  
 Gi1\_3848746\_x17.....guucgaCuuccggcgccggagc..... 1  
 Gi3\_26889806\_x17uucucacccaacagaCccg..... 1  
 Gi5\_8318266\_x17.....aUauccggguucgauucc..... 1  
 Gi1\_3850973\_x17.....aUauccggguucgauucc..... 1  
 Gi1\_3846808\_x17.....guucgauuAccggcgccgg..... 1  
 Gi3\_26903763\_x17.....guucgauuccggcgccggagcgA..... 1  
 Gi2\_10246083\_x17.....guucgauuccggcgccAgagc..... 1  
 Gi3\_26882904\_x17.....guucgauuccggcgccUga..... 1  
 Gi1\_3854747\_x17.....gguucgauuccggUgcccg..... 1  
 Gi2\_10239453\_x17.....Auucgauuccggcgccgga..... 1  
 Gi3\_26878059\_x17.....gGuuccggcgccggagc..... 1  
 Gi5\_8310820\_x17.....guucgauuUccggcgccgg..... 1  
 Gi2\_10229746\_x17.....gguucgauuccggcgAcg..... 1  
 Gi3\_26882054\_x17.....gguucgauuccggGgcccggagc..... 1  
 Gi1\_3850905\_x17.....Auucgauuccggcgccgga..... 1

|                  |                              |       |   |
|------------------|------------------------------|-------|---|
| Gi5_8319694_x17  | .....guucgauucccggcgUgg      | ..... | 1 |
| Gi2_10232534_x17 | .....gguucgauucccggcAcc      | ..... | 1 |
| Gi2_10238671_x17 | .....guucgauucUcggcgccggagc  | ..... | 1 |
| Gi3_26909917_x17 | .....guucgauucccggcgAgg      | ..... | 1 |
| Gi3_26901825_x17 | .....gguucgauucccggAgccgga   | ..... | 1 |
| Gi3_26877923_x17 | .....guucgauAcccggcgccgg     | ..... | 1 |
| Gi2_10238654_x17 | .....ggCucgauucccggcgcc      | ..... | 1 |
| Gi1_3848525_x17  | .....guucgauucccggcgGgg      | ..... | 1 |
| Gi3_26893376_x17 | .....guucgauucccggcgccgAa    | ..... | 1 |
| Gi3_26912263_x17 | .....Ugguucgauucccggcgccggag | ..... | 1 |
| Gi3_26882003_x17 | .....gguucgGuucccggcgccg     | ..... | 1 |
| Gi1_3862977_x16  | .....guucgauuccAgggcgccgg    | ..... | 1 |
| Gi3_26935261_x16 | .....gguucgauucccgAcgcccggag | ..... | 1 |
| Gi2_10252361_x16 | .....gguucgUuucccggcgccggagc | ..... | 1 |
| Gi3_26943453_x16 | .....gguucgauCcccggcgccgg    | ..... | 1 |
| Gi3_26941533_x16 | .....guucgauucUcggcgccgga    | ..... | 1 |
| Gi5_8331232_x16  | .....Auucgauucccggcgccgga    | ..... | 1 |
| Gi1_3858289_x16  | .....gguucgGuucccggcgccgg    | ..... | 1 |
| Gi3_26919517_x16 | .....cUgguucgauucccggcgccgga | ..... | 1 |
| Gi1_3861985_x16  | .....guucgauucAcggcgccgg     | ..... | 1 |
| Gi1a_5537341_x16 | .....gUuucgauucccggcgccgga   | ..... | 1 |
| Gi5_8323808_x16  | .....guucgauucUcggcgccg      | ..... | 1 |
| Gi5_8337504_x16  | .....Aguucgauucccggcgccggag  | ..... | 1 |
| Gi5_8333760_x16  | .....ggCucgauucccggcgccg     | ..... | 1 |
| Gi5_8327520_x16  | .....guAcgauucccggcgccg      | ..... | 1 |
| Gi1_3855969_x16  | uucacccaacagGuccgg           | ..... | 1 |
| Gi1_3860049_x16  | uCuacccaacagauccgg           | ..... | 1 |
| Gi3_26925405_x16 | .....gguucgauucccggAgccg     | ..... | 1 |
| Gi1_3858945_x16  | .....gguucgauucccgAcgccg     | ..... | 1 |
| Gi2_10269849_x16 | .....guucgauucccggcgGccggagc | ..... | 1 |
| Gi3_26916285_x16 | .....gguucgauuccGggcgccggagc | ..... | 1 |
| Gi3_26932605_x16 | .....gguucgauucccggcgccggaA  | ..... | 1 |
| Gi3_26926957_x16 | uucacccNaacagauccg           | ..... | 1 |
| Gi3_26920877_x16 | .....guucgauAcccggcgccgga    | ..... | 1 |
| Gi5_8335584_x16  | .....guucgauucccggUgccgg     | ..... | 1 |
| Gi2_10267577_x16 | .....Cguucgauucccggcgccg     | ..... | 1 |
| Gi3_26946093_x16 | .....guucgauucccggcgccggC    | ..... | 1 |
| Gi2_10256521_x16 | .....gguucgauucccggcgccAga   | ..... | 1 |
| Gi3_26921565_x16 | .....ggAucgauucccggcgccg     | ..... | 1 |
| Gi2_10261465_x16 | .....gguucgauuccAgcgcc       | ..... | 1 |
| Gi3_26935277_x16 | .....gAucgauucccggcgccgga    | ..... | 1 |
| Gi3_26948301_x16 | .....gAuucgauucccggcgccgg    | ..... | 1 |
| Gi3_26919165_x16 | .....ggCucgauucccggcgccgg    | ..... | 1 |
| Gi3_26942765_x16 | .....gAucgauucccggcgccggagc  | ..... | 1 |
| Gi2_10263561_x16 | .....gguucgauuccGggcgccggagc | ..... | 1 |
| Gi2_10268377_x16 | .....guucgauucccggcgAcggagc  | ..... | 1 |
| Gi1_3861281_x16  | uucGcccaacagauccg            | ..... | 1 |

|                                         |                                    |   |
|-----------------------------------------|------------------------------------|---|
| Gi1_3857777_x16.....                    | gguucgCuuccggcgccgg.....           | 1 |
| Gi1_3861793_x16.....                    | Uguucgauuccggcgcc.....             | 1 |
| Gi2_10258249_x16.....                   | gguucgaCuccggcgccg.....            | 1 |
| Gi1_3856657_x16.....                    | gCucgauuccggcgccgga.....           | 1 |
| Gi2_10263641_x16.....                   | guAcgauuccggcgccgg.....            | 1 |
| Gi2_10257705_x16.....                   | guucgauuccggcgUggagc.....          | 1 |
| Gi5_8336528_x16.....                    | Aguucgauuccggcgccgg.....           | 1 |
| Gi3_26930301_x16uucacccaacagGuccg.....  | .....                              | 1 |
| Gi5_8344007_x15.....                    | gguucgauuccggUgccggagc.....        | 1 |
| Gi5_8344892_x15.ucucacccGacagauccg..... | .....                              | 1 |
| Gi1_3870362_x15.....                    | ggGucgauuccggcgccgg.....           | 1 |
| Gi1_3870317_x15.....                    | gCuucgauuccggcgccgg.....           | 1 |
| Gi2_10284595_x15.....                   | guucgauuccggUgccgg.....            | 1 |
| Gi2_10281325_x15.....                   | gAuucgauuccggcgccggag.....         | 1 |
| Gi2_10291690_x15.....                   | ggCucgauuccggcgccggag.....         | 1 |
| Gi3_26983810_x15.....                   | gguucgauuccUcgcggag.....           | 1 |
| Gi5_8346857_x15.....                    | gguucgauNccggcgcc.....             | 1 |
| Gi5_8354912_x15.....                    | gguucgauuccggcgUggagc.....         | 1 |
| Gi5_8340467_x15.....                    | guucgauuccggcgccCg.....            | 1 |
| Gi3_26975290_x15.....                   | guucgauucUcggcgccggagc.....        | 1 |
| Gi3_26977105_x15.....                   | cagaucggguucgauuccggcgccggagc..... | 0 |
| Gi2_10275640_x15.....                   | gCucgauuccggcgccg.....             | 1 |
| Gi5_8338577_x15.....                    | guucgauuccAgcgccgg.....            | 1 |
| Gi2_10291720_x15.....                   | guucgauAccggcgccggagc.....         | 1 |
| Gi3_26954470_x15.....                   | gguucgauGccggcgccggagc.....        | 1 |
| Gi2_10287895_x15.....                   | guucAauuccggcgccgg.....            | 1 |
| Gi3_26960050_x15.....                   | guucgauuAccggcgccggagc.....        | 1 |
| Gi3_26981320_x15.....                   | ggCucgauuccggcgcc.....             | 1 |
| Gi1a_5544824_x15.....                   | Uuucgauuccggcgccggagc.....         | 1 |
| Gi2_10287565_x15.....                   | guCcgauuccggcgccggagc.....         | 1 |
| Gi5_8349707_x15.....                    | guucgauuccggAgccgg.....            | 1 |
| Gi3_26952685_x15.....                   | gguucgauuUccggcgccggga.....        | 1 |
| Gi2_10293895_x15.....                   | gguucgGuuccggcgccggag.....         | 1 |
| Gi3_26953450_x15.....                   | guucgauuccggcgccCg.....            | 1 |
| Gi2_10287145_x15.....                   | guucgauuccggcgccgA.....            | 1 |
| Gi1a_5552324_x15.....                   | gUuucgauuccggcgcc.....             | 1 |
| Gi3_26972620_x15.....                   | gguucgauuccAgggcgccggga.....       | 1 |
| Gi3_26957860_x15uucCacccaacagauccg..... | .....                              | 1 |
| Gi3_26985805_x15.....                   | guucgauuUccggcgccggag.....         | 1 |
| Gi3_26969215_x15.....                   | guAcgauuccggcgccggagc.....         | 1 |
| Gi2_10273030_x15.....                   | guucgGuuccggcgccggga.....          | 1 |
| Gi3_26953060_x15.....                   | guucUauuccggcgccggagc.....         | 1 |
| Gi5_8351162_x15.cCacccaacagauccg.....   | .....                              | 1 |
| Gi3_26978710_x15.....                   | acagaucggguucgauuccggcgccggga..... | 0 |
| Gi3_26957575_x15.....                   | Auucgauuccggcgccg.....             | 1 |
| Gi5_8339057_x15.....                    | gguucgauuccAgcgccggga.....         | 1 |
| Gi2_10274605_x15.....                   | guCcgauuccggcgccg.....             | 1 |



|                                              |   |
|----------------------------------------------|---|
| Gi3_26968030_x15uucucacccaacGgaucgg          | 1 |
| Gi2_10294195_x15uucucacccaCcgauccg           | 1 |
| Gi3_26986465_x15.....guucgauucccgccgAggagc   | 1 |
| Gi3_26966755_x15.....gCuucgauucccgccg        | 1 |
| Gi5_8338427_x15uucucacccaacGgaucgg           | 1 |
| Gi2_10292530_x15.....guucgauucccgccgAccggagc | 1 |
| Gi3_27019345_x14.....guucgauuccAgggcgccgg    | 1 |
| Gi2_10313039_x14.....guucgauucccgccgUg       | 1 |
| Gi3_27012821_x14.....gCucgauucccgccg         | 1 |
| Gi3_27000123_x14.....ggauucgauucccgccgAa     | 1 |
| Gi2_10313193_x14.....guucgauucccgccgA        | 1 |
| Gi5_8365253_x14.....Cguucgauucccgccg         | 1 |
| Gi5_8362635_x14.....ggauucgauucccgccgGg      | 1 |
| Gi2_10297023_x14.....ggauucgauCcccgccg       | 1 |
| Gi3_26998135_x14uucucaccNaacagauccg          | 1 |
| Gi3_27002125_x14.....ggauucgauucccgccgAccg   | 1 |
| Gi5_8359135_x14.....ggCucgauucccgccg         | 1 |
| Gi5_8363433_x14.....Cuucgauucccgccg          | 1 |
| Gi5_8356405_x14.....ggauucgauuccAgcgccg      | 1 |
| Gi3_27022649_x14.....guucgauucccgccgCcgagc   | 1 |
| Gi2_10298059_x14.....guucgauUccggcgccg       | 1 |
| Gi5_8360045_x14.....gAuucgauucccgccg         | 1 |
| Gi3_27005429_x14.....gCuucgauucccgccg        | 1 |
| Gi1_5558613_x14Gucucacccaacagauccg           | 1 |
| Gi1_3875372_x14.....ggauucgauucccgccgAccgg   | 1 |
| Gi3_27000333_x14.....ggauucgauucccgccgCgagc  | 1 |
| Gi3_26999605_x14.....ggauucgauuccUggcgccg    | 1 |
| Gi3_27016139_x14.....ggauGgauucccgccg        | 1 |
| Gi3_27005163_x14.....guucgauucccgccgAagc     | 1 |
| Gi1_3873146_x14uucucGcccaacagauccg           | 1 |
| Gi3_27006577_x14uCucacccaacagauccg           | 1 |
| Gi5_8363755_x14.....ggauucAauucccgccg        | 1 |
| Gi2_10316595_x14.....gAuucgauucccgccg        | 1 |
| Gi1_3874140_x14Cucucacccaacagauccg           | 1 |
| Gi1_3877780_x14.....ggCucgauucccgccgagc      | 1 |
| Gi2_10306039_x14.....guucgauucccgAgccgagc    | 1 |
| Gi5_8358995_x14.....gCucgauucccgccg          | 1 |
| Gi2_10316175_x14.....guucgauucccgccgAagc     | 1 |
| Gi3_27000277_x14.....uucgauucccgccgCgc       | 1 |
| Gi5_8372561_x14.....guGcgauucccgccg          | 1 |
| Gi3_27009573_x14.....guucgauucccgccgAccggagc | 1 |
| Gi5_8368865_x14.....ggCucgauucccgccg         | 1 |
| Gi3_27001719_x14.....gAuucgauucccgccg        | 1 |
| Gi3_27004211_x14.....ggauucgauucccgccgUcggag | 1 |
| Gi5_8363685_x14.....ggauucgauucccgccgU       | 1 |
| Gi3_27015145_x14.....ggauucgauAcccgccg       | 1 |
| Gi3_27011939_x14uucucacccaGcagauccg          | 1 |

|                                          |                              |   |   |
|------------------------------------------|------------------------------|---|---|
| Gi5_8363377_x14.....                     | gguucgCuuccggcgccg.....      | 1 |   |
| Gi3_27018169_x14.....                    | guuUgauucccgcccgagc.....     |   | 1 |
| Gi3_27023615_x14uucucGcccaacagauccg..... |                              |   | 1 |
| Gi3_27021501_x14.....                    | guGcgauucccgcccgag.....      |   | 1 |
| Gi1_3877304_x14uucacccaacagGuccg.....    |                              | 1 |   |
| Gi2_10296631_x14.....                    | guucgauuNccggcgccg.....      |   | 1 |
| Gi3_27029341_x14.....                    | uucgauucccgcccgC.....        |   | 1 |
| Gi3_26999759_x14.....                    | gguucgauucccgUgccc.....      |   | 1 |
| Gi3_27015621_x14.....                    | guGcgauuccggcgccgagc.....    |   | 1 |
| Gi3_27010399_x14.....                    | ggNucgauucccgcccgagc.....    |   | 1 |
| Gi5_8360829_x14.....                     | gguucgauuccUgcccggagc.....   | 1 |   |
| Gi3_27065327_x13.....                    | guucGGuuccggcgccg.....       |   | 1 |
| Gi3_27052756_x13.....                    | gguucgauuccggcgUcg.....      |   | 1 |
| Gi2_10322532_x13.....                    | gguucgauucccgcccgagcGA.....  |   | 1 |
| Gi5_8390368_x13.....                     | guucgauucccgUgcccgg.....     | 1 |   |
| Gi5_8383855_x13.....                     | guucgauucUcgcccgccg.....     | 1 |   |
| Gi3_27042083_x13.....                    | Cguucgauuccggcgcc.....       |   | 1 |
| Gi1_3884643_x13.....                     | guucgauuccAgcggccgga.....    | 1 |   |
| Gi5_8380410_x13.....                     | guucgauuccggcgCggg.....      | 1 |   |
| Gi3_27059906_x13.....                    | gguucUauucccgcccgagc.....    |   | 1 |
| Gi3_27057319_x13.....                    | guucgCuuccggcgcccgagc.....   |   | 1 |
| Gi5_8385636_x13.....                     | guAcgauucccgcccg.....        | 1 |   |
| Gi3_27064742_x13..                       | Gucaccaacagauccg.....        |   | 1 |
| Gi5_8373858_x13.....                     | Cguucgauuccggcgccg.....      | 1 |   |
| Gi2_10330592_x13.....                    | guucgauuccggcgcccgAc.....    |   | 1 |
| Gi1a_5572419_x13.....                    | gUuucgauucccgcccg.....       | 1 |   |
| Gi2_10338912_x13.....                    | guucgaGuccggcgcccgagc.....   |   | 1 |
| Gi3_27039015_x13.....                    | gguucgauuUccggcgccg.....     |   | 1 |
| Gi5_8380748_x13uucacccaacagGuccg.....    |                              | 1 |   |
| Gi5_8384674_x13.....                     | gguucgauuccggcgAcggagc.....  |   | 1 |
| Gi2_10322402_x13.....                    | guucgauuccggcgcccgagcU.....  |   | 1 |
| Gi3_27046542_x13.....                    | gguuGgauuccggcgcccgag.....   |   | 1 |
| Gi3_27062818_x13.....                    | gguucgauuccUggcgcc.....      |   | 1 |
| Gi1_3891845_x13.....                     | gguucgauNccggcgcccgagc.....  | 1 |   |
| Gi2_10322298_x13.....                    | gguucgauuccggcgAccgga.....   |   | 1 |
| Gi3_27077092_x13.....                    | gguucgauuccggcgcccggaUc..... |   | 1 |
| Gi3_27062961_x13.....                    | guucgauCccggcgcccgag.....    |   | 1 |
| Gi1_3892261_x13.....                     | guucgauuccggcgcccgU.....     | 1 |   |
| Gi1_3885592_x13.....                     | guucgauuccggcgCggg.....      | 1 |   |
| Gi2_10328811_x13.....                    | ggCucgauuccggcgccg.....      |   | 1 |
| Gi4_514174_x13.....                      | Uguucgauuccggcgcccgagc.....  | 1 |   |
| Gi5_8382022_x13.....                     | guucgauuccggcgcccgCgc.....   | 1 |   |
| Gi2_10332919_x13.....                    | aUauccggguucgauucc.....      |   | 1 |
| Gi1_3885540_x13.....                     | guuNgauuccggcgccgg.....      | 1 |   |
| Gi5_8373351_x13.....                     | gguucgauuccggcgcccgG.....    | 1 |   |
| Gi3_27045437_x13.....                    | guucgauuccggcgccAgagc.....   |   | 1 |
| Gi3_27048310_x13.....                    | gguucgauuccUggcgccg.....     |   | 1 |

|                                          |                               |   |
|------------------------------------------|-------------------------------|---|
| Gi3_27052301_x13.....                    | gguucgauucccgcgAggag.....     | 1 |
| Gi2_10336390_x13.....                    | gguucgauucccgcgccgCagc.....   | 1 |
| Gi3_27043669_x13.....                    | guucgauuccAggcgccgga.....     | 1 |
| Gi3_27072802_x13.....                    | gguucgauuccCcgccggagc.....    | 1 |
| Gi5_8376679_x13.....                     | guucgauuNccggcgccgga.....     | 1 |
| Gi4_513719_x13.....                      | guucgauucccgcgccg.....        | 0 |
| Gi3_27044670_x13.....                    | guucgauuUccggcgccggagc.....   | 1 |
| Gi5_8376926_x13.....                     | gguucgauuUccggcgccg.....      | 1 |
| Gi5_8373910_x13.....                     | ggGucgauucccgcgccg.....       | 1 |
| Gi2_10338106_x13.....                    | gCuucgauucccgcgccggag.....    | 1 |
| Gi2_10336663_x13Cucucacccaacagauccg..... |                               | 1 |
| Gi3_27043162_x13.....                    | gguucgauucccgcgGggagc.....    | 1 |
| Gi3_27063065_x13.....                    | gguucgauucccgcgccgA.....      | 1 |
| Gi2_10332256_x13.....                    | gguAcgauucccgcgccggagc.....   | 1 |
| Gi2_10321648_x13.....                    | guucgauucccgcgccggagU.....    | 1 |
| Gi5_8389601_x13.....                     | gguucgaCuuccggcgccg.....      | 1 |
| Gi3_27067030_x13.....                    | gguuAgauucccgcgccgga.....     | 1 |
| Gi2_10324222_x13.....                    | gguucgauucccgcgccAgag.....    | 1 |
| Gi5_8373884_x13.....                     | gguucgauucccgcgccAgagc.....   | 1 |
| Gi3_27063494_x13.....                    | uGgauucccgcgccggag.....       | 1 |
| Gi3_27050338_x13.....                    | guucgauucccgcgccggagA.....    | 1 |
| Gi2_10354906_x12.....                    | guucgauuccAgcgccg.....        | 1 |
| Gi2_10359070_x12.....                    | Cuucgauucccgcgccggag.....     | 1 |
| Gi3_27131349_x12.....                    | guucgauuUccggcgccgga.....     | 1 |
| Gi5_8395722_x12.....                     | gguucgauucccgcgUgga.....      | 1 |
| Gi1_3900650_x12.....                     | guucgauuccCcgccgg.....        | 1 |
| Gi5_8401914_x12.....                     | Uuucgauucccgcgccggag.....     | 1 |
| Gi1_3895874_x12uucucacccaacaAauccg.....  |                               | 1 |
| Gi5_8403234_x12.....                     | gguucgauucccgcgUcggagc.....   | 1 |
| Gi3_27096909_x12.....                    | guucgauucccgcgGcgg.....       | 1 |
| Gi5_8407074_x12.....                     | gguucgauucccgcgAggagc.....    | 1 |
| Gi3_27118293_x12.....                    | guucUauucccgcgccggag.....     | 1 |
| Gi2_10349386_x12.....                    | gAucgauucccgcgccggagc.....    | 1 |
| Gi3_27113469_x12.....                    | uUgauucccgcgccggagc.....      | 1 |
| Gi2_10348270_x12uCuucacccaacagauccg..... |                               | 1 |
| Gi3_27127785_x12.....                    | guucgauucccgcgccggagcU.....   | 1 |
| Gi5_8394810_x12.....                     | guucgauucccgAcgccc.....       | 1 |
| Gi3_27123429_x12.....                    | guucgauucccgcgccggagU.....    | 1 |
| Gi5_8404566_x12.....                     | gguucgaCuuccggcgccg.....      | 1 |
| Gi2_10344394_x12.....                    | guucgauucccgcgAccgga.....     | 1 |
| Gi2_10359730_x12uucucacccaacagGuccg..... |                               | 1 |
| Gi5_8400306_x12.....                     | guucgauucccgcgAcg.....        | 1 |
| Gi5_8407494_x12.....                     | guucgauucccgcgUcggagc.....    | 1 |
| Gi3_27126693_x12.....                    | guucgauuccCcgccggagc.....     | 1 |
| Gi3_27110877_x12.....                    | guucgauucccgcgccAgag.....     | 1 |
| Gi5_8401218_x12.....                     | gUuucgauucccgcgccggagcgu..... | 1 |
| Gi2_10363918_x12.....                    | gguucgCuucccgcgccggag.....    | 1 |

|                                                           |   |
|-----------------------------------------------------------|---|
| Gi5_8401710_x12.uGucacccaacagauccg.....                   | 1 |
| Gi3_27108045_x12uucucacccaGcagauccgg.....                 | 1 |
| Gi2_10364326_x12.....gguucgauucccggGgccggagc.....         | 1 |
| Gi5_8400042_x12.....gAuucgauucccggcgccgga.....            | 1 |
| Gi3_27117369_x12.....gguucgauucccggcgAg.....              | 1 |
| Gi5_8404698_x12uucCcacccaacagauccg.....                   | 1 |
| Gi2_10345018_x12.....guucgauuNccggcgccggag.....           | 1 |
| Gi2_10365874_x12.....gguNcgauucccggcgccggagc.....         | 1 |
| Gi3_27124785_x12.....gguucgauucccggUgccgg.....            | 1 |
| Gi2_10356154_x12.....ggGucgauucccggcgccgga.....           | 1 |
| Gi2_10353190_x12.....gguucgauuccUggcgcc.....              | 1 |
| Gi5_8394774_x12.....guucgauucccggcgAg.....                | 1 |
| Gi5_8402034_x12.....guucgauucccggcgAgg.....               | 1 |
| Gi3_27117285_x12.....gguucgauucAcggcgccggag.....          | 1 |
| Gi1_3897482_x12.....guucgaGucccggcgccgg.....              | 1 |
| Gi3_27112941_x12.....gguucgaAucccggcgccggagc.....         | 1 |
| Gi2_10350382_x12.....Auucgauucccggcgccg.....              | 1 |
| Gi3_27122361_x12.....gguucgauuUccggcgccg.....             | 1 |
| Gi2_10356202_x12.....gGuuccggcgccggagc.....               | 1 |
| Gi2_10344010_x12.....guuUgauucccggcgccg.....              | 1 |
| Gi3_27088305_x12.....gguucgauucccggcgUgg.....             | 1 |
| Gi5_8404902_x12.....gguucgauucccggcgccggCg.....           | 1 |
| Gi5_8393478_x12.....gguucgCuuccggcgccggagc.....           | 1 |
| Gi2_10367230_x12.....guucgauucccAgcgccgg.....             | 1 |
| Gi2_10354426_x12.....gguucgGuuccggcgccgga.....            | 1 |
| Gi3_27087333_x12.....caacagauccggguucgauucccggcgccgg..... | 0 |
| Gi1_3897170_x12uucCcacccaacagauccg.....                   | 1 |
| Gi1_3899774_x12.....uGcgauucccggcgccgg.....               | 1 |
| Gi1_3897854_x12.....guucgauucccUgcgccc.....               | 1 |
| Gi5_8404434_x12.....gCucgauucccggcgccggagc.....           | 1 |
| Gi1_3895370_x12.....gguucgauucccAgcgccc.....              | 1 |
| Gi3_27104649_x12uucCcacccaacagauccg.....                  | 1 |
| Gi3_27097029_x12.....gguucgauucccggcAcc.....              | 1 |
| Gi3_27093009_x12.....gguucgauucccggcgccggU.....           | 1 |
| Gi2_10373432_x11.....gguucgauuUccggcgcc.....              | 1 |
| Gi5_8414458_x11.....gguucgauuUccggcgccggagc.....          | 1 |
| Gi2_10369868_x11.....ucgauuccNggcgccggagc.....            | 1 |
| Gi2_10392935_x11.....gguucgaAucccggcgccggagc.....         | 1 |
| Gi1_3908324_x11.....guucgauucccggcgccggagcU.....          | 1 |
| Gi3_27166690_x11.....Gcgauucccggcgccgga.....              | 1 |
| Gi5_8428120_x11...Gcacccaacagauccgggu.....                | 1 |
| Gi5_8429264_x11.....guucgauuUccggcgccg.....               | 1 |
| Gi3_27169121_x11.....gguucgauucccAgcgccc.....             | 1 |
| Gi5_8419903_x11.....guuUgauucccggcgccgga.....             | 1 |
| Gi5_8418286_x11.....gguucgauuccUggcgccc.....              | 1 |
| Gi5_8424138_x11.Gcucacccaacagauccg.....                   | 1 |
| G1a_5613319_x11.....Uuucgauuccgcgccgg.....                | 1 |

|                                                            |   |
|------------------------------------------------------------|---|
| Gi2_10385290_x11.....gCucgauuuccggcgccggag.....            | 1 |
| Gi3_27183982_x11.....guucgauuuccggAgccggagc.....           | 1 |
| Gi2_10379944_x11.....ggGucgauuuccggcgcc.....               | 1 |
| Gi1_3905453_x11.....Aguucgauuuccggcgccgga.....             | 1 |
| Gi2_10373322_x11.....guGcgauuuccggcgccg.....               | 1 |
| Gi3_27164699_x11.....gguucgauAcccgggcgccgga.....           | 1 |
| Gi1_3914561_x11.Gcucaccaacagauccgg.....                    | 1 |
| Gi3_27144360_x11.....aUauccggguucgauucc.....               | 1 |
| Gi3_27180308_x11.....guuAgauuccggcgccgg.....               | 1 |
| Gi3_27172443_x11.....guucgauuuccggcgccgCagc.....           | 1 |
| Gi3_27138805_x11.....ggGucgauuuccggcgcc.....               | 1 |
| Gi5_8422455_x11.....gAucgauuuccggcgccg.....                | 1 |
| Gi3_27151873_x11.....guucgauuuccggcgUcggagc.....           | 1 |
| Gi3_27173730_x11.....guucgauuuccggcgccgU.....              | 1 |
| Gi3_27142325_x11.....ccaacagauccggguucgauuuccggcgccgg..... | 0 |
| Gi3_27167482_x11.....gguucgauuuccAgcgccg.....              | 1 |
| Gi2_10393540_x11.....gguucgauuuccggcgUc.....               | 1 |
| Gi2_10397588_x11.....gguucgauCcccgcgcc.....                | 1 |
| Gi2_10394222_x11.....gguucgaCuccggcgccgga.....             | 1 |
| Gi2_10391307_x11.....Cuucgauuuccggcgccg.....               | 1 |
| Gi1_3909710_x11.....Aguucgauuuccggcgccggagc.....           | 1 |
| Gi1_3910887_x11uAcucaccaacagauccg.....                     | 1 |
| Gi1_3909963_x11.....guucgauuuccggcgccAga.....              | 1 |
| Gi5_8431057_x11.....guucgauuuccAgggcgccg.....              | 1 |
| Gi5_8420024_x11.....gguucgauuuccggcgccA.....               | 1 |
| Gi2_10395916_x11.....guucgauuuccggcgccggagcgA.....         | 1 |
| Gi2_10371342_x11.....guucgauuuccggUgccgga.....             | 1 |
| Gi2_10376281_x11.....guucgauuuccggcgccggCg.....            | 1 |
| Gi3_27162972_x11.....Gccggguucgauuuccggcgccgga.....        | 1 |
| Gi3_27167427_x11.....guucgauuuccgUcggccgga.....            | 1 |
| Gi5_8419232_x11..cucaccaacagGuccgg.....                    | 1 |
| Gi3_27156955_x11..cucaccaacagauccggguucgauucc.....         | 0 |
| Gi1_3907752_x11.....guucAauuccggcgccgga.....               | 1 |
| Gi2_10388832_x11.....ggAucgauuuccggcgcc.....               | 1 |
| Gi2_10384201_x11.....guucgauuuccggcgAgg.....               | 1 |
| Gi3_27157648_x11.....uGcgauuuccggcgccgg.....               | 1 |
| Gi1_3905156_x11.....gguucgauuuccggcgAgg.....               | 1 |
| Gi3_27167878_x11.....guucgCuuccggcgccgg.....               | 1 |
| Gi3_27179593_x11.....guucgauuAccggcgccgga.....             | 1 |
| Gi3_27183586_x11.....guucgauuuccggcAccggag.....            | 1 |
| Gi5_8418066_x11.....gCuucgauuuccggcgccg.....               | 1 |
| Gi5_8426822_x11.....gguucgauuuccggcgUg.....                | 1 |
| Gi1_3908104_x11uucucaccaGcagauccg.....                     | 1 |
| Gi5_8420310_x11.....guucgauuuccggcgccgA.....               | 1 |
| Gi2_10376468_x11.....guucgauuuccUgcgccggag.....            | 1 |
| Gi3_27178009_x11.....Ugguucgauuuccggcgccgga.....           | 1 |
| Gi5_8423874_x11.....guucgauuuccgAcggcgga.....              | 1 |

|                                         |                                       |   |
|-----------------------------------------|---------------------------------------|---|
| Gi3_27178779_x11.....                   | gguucgauuAccggcgccggag.....           | 1 |
| Gi3_27168615_x11.....                   | ucgauuccNggcgccggagc.....             | 1 |
| Gi1_3909952_x11.....                    | gguucgauuccUggcgccgg.....             | 1 |
| Gi1_3907873_x11.....                    | guucgauucccgggcgUgga.....             | 1 |
| Gi3_27186776_x11.....                   | uuUgauuccggcgccggagc.....             | 1 |
| Gi3_27177382_x11.....                   | guucgauuNccggcgccg.....               | 1 |
| Gi2_10381913_x11.....                   | Auucgauuccggcgccggag.....             | 1 |
| Gi2_10395388_x11uuUucaccaacagauccg..... | .....                                 | 1 |
| Gi1_3923174_x10.....                    | guucgaAuuccggcgccgg.....              | 1 |
| Gi3_27209272_x10.....                   | guucgauuccggcgccggUgc.....            | 1 |
| Gi3_27220922_x10.....                   | gguucgauuccUgcggcg.....               | 1 |
| Gi2_10404252_x10.....                   | gguucgauuUccggcgccgga.....            | 1 |
| Gi2_10413142_x10.....                   | guucgauuccggcgccggGg.....             | 1 |
| Gi3_27210902_x10.....                   | guucgauAccggcgccggagc.....            | 1 |
| Gi2_10417302_x10.....                   | gguucgauuccggcgGggagc.....            | 1 |
| Gi2_10407042_x10.....                   | gguucgauuccUggcgccggag.....           | 1 |
| Gi5_8447646_x10.....                    | guucgauucAcggcgccgg.....              | 1 |
| Gi5_8434636_x10.....                    | ggAucgauuccggcgccg.....               | 1 |
| Gi3_27191172_x10.....                   | gguucgCuuccggcgccgg.....              | 1 |
| Gi5_8447786_x10.....                    | gguucgauucccgAcgccggagc.....          | 1 |
| Gi4_520909_x10.....                     | gGucgauuccggcgccgg.....               | 1 |
| Gi2_10427882_x10.....                   | gguucgauuccggcgccCgagc.....           | 1 |
| Gi5_8433596_x10uucucaccaGcagauccg.....  | .....                                 | 1 |
| Gi3_27220262_x10.....                   | guucgauuccggcgccC.....                | 1 |
| Gi3_27204172_x10.....                   | gguucAauuccggcgccg.....               | 1 |
| Gi3_27206282_x10.....                   | gguucgauucccgAcgccg.....              | 1 |
| Gi3_27217412_x10.....                   | gguucgauuccAgggcgccggag.....          | 1 |
| Gi1_3920724_x10.....                    | aacagauccggguucgauuccggcgccggagc..... | 0 |
| Gi1_3917484_x10uucucaccaacagauAcgg..... | .....                                 | 1 |
| Gi2_10412472_x10.....                   | gguucAauuccggcgcc.....                | 1 |
| Gi2_10412292_x10.....                   | gguucgUuuccggcgccggag.....            | 1 |
| Gi5_8435356_x10.....                    | gguCcgauuccggcgccg.....               | 1 |
| Gi3_27188212_x10.....                   | guucgCuuccggcgccgga.....              | 1 |
| Gi5_8447406_x10.....                    | guucgCuuccggcgccgg.....               | 1 |
| Gi3_27209772_x10.....                   | gguucgauuccggcgAccg.....              | 1 |
| Gi1_3928104_x10..cGcaccaacagauccg.....  | .....                                 | 1 |
| Gi1_3923774_x10.....                    | gguucgauuUccggcgccg.....              | 1 |
| Gi2_10419612_x10.....                   | cUauuccggcgccggagcguuu.....           | 1 |
| Gi2_10403692_x10.....                   | guucgauucccgAcgccg.....               | 1 |
| Gi3_27197082_x10.....                   | guAcgauuccggcgccggag.....             | 1 |
| Gi5_8449706_x10.uucacccNacagauccg.....  | .....                                 | 1 |
| Gi2_10403522_x10.....                   | gguucgCuuccggcgcc.....                | 1 |
| Gi2_10410772_x10.....                   | gguucgauuccggcgUcgga.....             | 1 |
| Gi3_27204082_x10.....                   | guucgauuccggcgUggagc.....             | 1 |
| Gi5_8449856_x10.....                    | gguucgGuuccggcgccg.....               | 1 |
| Gi2_10401452_x10.....                   | guucgauuccggcgAccg.....               | 1 |
| Gi3_27239182_x10.....                   | Gcgauuccggcgccggag.....               | 1 |

|                                          |                               |   |
|------------------------------------------|-------------------------------|---|
| Gi3_27205472_x10.....                    | guuUgauuucccgcccgag.....      | 1 |
| Gi2_10403512_x10.....                    | gguucgauuucccgccgUagc.....    | 1 |
| Gi5_8452576_x10.....                     | gguucgauuucccgAgccggagc.....  | 1 |
| Gi3_27240502_x10.....                    | Cuucgauuucccgcccg.....        | 1 |
| Gi3_27192892_x10.....                    | guucgauuuccgUcgccgg.....      | 1 |
| Gi5_8434526_x10uGcucacccaacagauccgg..... | gCuucgauuucccgcc.....         | 1 |
| Gi2_10419012_x10.....                    | gCuucgauuucccgcc.....         | 1 |
| Gi5_8452316_x10.....                     | guucgauuNccggcgccggagc.....   | 1 |
| Gi2_10397762_x10.....                    | guucgauuUccggcgccggagc.....   | 1 |
| Gi3_27190712_x10.....                    | gguucgauuAcggcgccgga.....     | 1 |
| Gi2_10409622_x10.....                    | gguucgauuuccggcgccggC.....    | 1 |
| Gi3_27204492_x10.....                    | guucgauuuccgAcgccgga.....     | 1 |
| Gi3_27233622_x10.....                    | gCguucgauuuccggcgccggagc..... | 1 |
| Gi1_3921274_x10.....                     | guCcgauuuccggcgccg.....       | 1 |
| Gi5_8448436_x10.....                     | guucgauuuccggcgccggGgc.....   | 1 |
| Gi1_3916754_x10.....                     | gguucAauuuccggcgccgg.....     | 1 |
| Gi2_10405312_x10.....                    | guucgauuuccggcgAggagc.....    | 1 |
| Gi2_10409192_x10.....                    | gguuUgauuuccggcgcc.....       | 1 |
| Gi2_10411892_x10.....                    | guucgGuuccggcgccg.....        | 1 |
| Gi2_10407172_x10.....                    | guucgauuuccgAcgccggagc.....   | 1 |
| Gi3_27226722_x10.....                    | guucgauuuccggcAccggagc.....   | 1 |
| Gi2_10448607_x9.....                     | guucgauuuccggcgAcg.....       | 1 |
| Gi1_3933244_x9uucucacccaacagauUgg.....   | guucgauuuccAgcgccgga.....     | 1 |
| Gi5_8476581_x9.....                      | guucgauuuccAgcgccgga.....     | 1 |
| Gi5_8469489_x9.....                      | guucgauAccggcgccg.....        | 1 |
| Gi5_8460930_x9.....                      | guucgauuuccggcgUgga.....      | 1 |
| Gi3_27297991_x9.....                     | ggAucgauuuccggcgccgg.....     | 1 |
| Gi2_10434270_x9.....                     | gguucgauuuccCgcgccggagc.....  | 1 |
| Gi3_27288757_x9.....                     | guucAauuuccggcgccggag.....    | 1 |
| Gi3_27268903_x9.....                     | gguGcgauuuccggcgccggagc.....  | 1 |
| Gi5_8453325_x9..cucaccUaacagauccgg.....  | gguucgauNccggcgccg.....       | 1 |
| Gi1_3936475_x9.....                      | gguucgauNccggcgccg.....       | 1 |
| Gi2_10447860_x9.....                     | guucgauuAcggcgccgg.....       | 1 |
| Gi3_27281638_x9.....                     | Ggauuuccggcgccggagc.....      | 1 |
| Gi5_8467230_x9.....                      | gguucgCuuccggcgccggag.....    | 1 |
| Gi5_8458752_x9.....                      | gguucgauuuccggcgccAga.....    | 1 |
| Gi5_8472180_x9.....                      | gguucgauuuccUggcgccgg.....    | 1 |
| Gi3_27273718_x9uucucacccGacagauccg.....  | ggGucgauuuccggcgccgg.....     | 1 |
| Gi5_8454351_x9.....                      | ggGucgauuuccggcgccgg.....     | 1 |
| Gi4_521253_x9.....                       | guucgauuuccggcgccggagc.....   | 0 |
| Gi1_3940336_x9uucucaccUaacagauccg.....   | gGuuccggcgccggagc.....        | 1 |
| Gi5_8463774_x9.....                      | gGuuccggcgccggagc.....        | 1 |
| Gi1_3941641_x9uucucacUaacagauccg.....    | guucgauuuccAgcgccg.....       | 1 |
| Gi3_27260965_x9.....                     | guucgauuuccggcgccggagA.....   | 1 |
| Gi2_10443045_x9.....                     | guucgauuuccggcgccggagA.....   | 1 |
| Gi3_27247375_x9.....                     | gguucgauuuccggcCccggagc.....  | 1 |
| Gi5_8459643_x9.....                      | gguucgGuuccggcgccgg.....      | 1 |

Gi2\_10434306\_x9.....gguucgauucccggcgccggaUc..... 1  
Gi3\_27296749\_x9.....ggguucgauucccggcgccgagcC..... 1  
Gi1\_3932884\_x9.....gCucgauucccggcgccgagc..... 1  
Gi3\_27302113\_x9.....gguuAgauucccggcgccgag..... 1  
Gi3\_27290737\_x9.....gguucgauuccGggcgccgga..... 1  
Gi5\_8464125\_x9.....Gucgauucccggcgccg..... 1  
Gi3\_27245107\_x9.....ggGucgauucccggcgccg..... 1  
Gi1\_3931111\_x9uucucacccaacagaucUg..... 1  
Gi5\_8469930\_x9.....gguucgauucccggcAccgga..... 1  
Gi5\_8458428\_x9.....gguucgauucccggcgccgC..... 1  
Gi2\_10443882\_x9.....gguucAauucccggcgccgag..... 1  
Gi5\_8461515\_x9.....guucUauucccggcgccgga..... 1  
Gi3\_27256195\_x9.....gguucgauucccggcgccgUagc..... 1  
Gi2\_10446852\_x9.....gguucgauucccgUgccg..... 1  
Gi3\_27249112\_x9.....guGcgauucccggcgccg..... 1  
Gi1\_3936016\_x9.....guuUgauucccggcgccgga..... 1  
Gi5\_8470668\_x9.....gguucgauucccggcgccggaCc..... 1  
Gi5\_8466123\_x9.....guucgauucccgAgccg..... 1  
Gi1\_3931120\_x9.....ucgauucccggcgccgagcC..... 1  
Gi5\_8467374\_x9.....guucgauuccCgcgccg..... 1  
Gi3\_27271405\_x9.....guucgauuccCgcgccg..... 1  
Gi1\_3932146\_x9.....gguucgauucccggcgccgagcgA..... 1  
Gi5\_8461047\_x9.....Uguucgauucccggcgccgagcgu..... 1  
Gi2\_10457346\_x9.....gguucgauCcccggcgccg..... 1  
Gi3\_27263017\_x9.....guucgauuccCgcgccgga..... 1  
Gi2\_10458642\_x9.....gguucgauucccgAgccg..... 1  
G1a\_5648809\_x9....acccaacagauccggguucgauucc..... 0  
G1a\_5644426\_x9.....guucgauucccggcgccgga..... 0  
Gi3\_27283429\_x9.....guucgauucccgAgccgga..... 1  
Gi3\_27245278\_x9uucucUcccaacagaucg..... 1  
Gi3\_27303679\_x9uucucacccaCcgauccg..... 1  
Gi2\_10450506\_x9.....Cguucgauucccggcgccgga..... 1  
Gi2\_10432020\_x9.....guucAauucccggcgccgga..... 1  
Gi5\_8454072\_x9.....Ggauccggguucgauucc..... 1  
Gi2\_10438842\_x9.....guucgauucccggcUcgga..... 1  
Gi2\_10447644\_x9.....gguucgCuucccggcgccg..... 1  
Gi2\_10437555\_x9.....guucgauucccggcgccCg..... 1  
Gi5\_8461218\_x9.....ggGucgauucccggcgcc..... 1  
Gi5\_8498865\_x8.....guucgUuucccggcgccg..... 1  
Gi2\_10464722\_x8.....gguucgGuucccggcgccg..... 1  
Gi2\_10481186\_x8.....gguucgauucUcggcgccgag..... 1  
Gi2\_10466082\_x8.....gguucgauucccggcUcg..... 1  
Gi2\_10471362\_x8.....aacagauccggguucgauucccggcgccg..... 0  
Gi2\_10475850\_x8.....gguucAauucccggcgccgga..... 1  
Gi2\_10480930\_x8.....gguucgCuucccggcgccgga..... 1  
Gi5\_8481609\_x8.....Uuuuccgccuuccuucgucu..... 1  
Gi3\_27310729\_x8.....gguucgauucccggcgccgCag..... 1



Gi2\_10493754\_x8.....guucgauAccggcgccggagc..... 1  
Gi2\_10472418\_x8.....gguCcgauuccggcgccggag..... 1  
Gi5\_8490161\_x8.....ggGucgauuccggcgccggag..... 1  
Gi3\_27361201\_x8uucucaccaacagauAcg..... 1  
Gi5\_8493065\_x8.....gguucgauucUcggcgccggagc..... 1  
Gi3\_27359665\_x8.....gguucgauuccGggcgccg..... 1  
Gi5\_8492497\_x8.ucCcacccaacagauccg..... 1  
Gi2\_10492594\_x8.....guucgauCcccggcgccgga..... 1  
Gi3\_27328017\_x8.....guucgaGuccggcgccgga..... 1  
Gi5\_8482345\_x8.....gAuucgauuccggcgcc..... 1  
Gi5\_8488537\_x8uucucaccAaacagauccg..... 1  
Gi1\_3947829\_x8.....gguuUgauuccggcgccgg..... 1  
Gi2\_10477890\_x8.....gguuUgauuccggcgccg..... 1  
Gi3\_27363793\_x8.....guucgauuccggcgGcggga..... 1  
Gi2\_10474298\_x8.....gguucgauuccggcgccggagG..... 1  
Gi3\_27359369\_x8.....guucgauuccggcgccggaAc..... 1  
Gi5\_8486489\_x8.....gGucgauuccggcgccggag..... 1  
Gi2\_10483890\_x8.....ggCucgauuccggcgccgga..... 1  
Gi3\_27320833\_x8.....cgauuccggcgccggCgc..... 1  
Gi5\_8493233\_x8.....gCuucgauuccggcgccgg..... 1  
Gi5\_8479161\_x8..cucGcccaacagauccg..... 1  
Gi1\_3943093\_x8.ucucGcccaacagauccg..... 1  
Gi2\_10488730\_x8.....gguucgauuccggcgAccgg..... 1  
Gi5\_8481825\_x8.....ggCucgauuccggcgccggag..... 1  
Gi1\_3943365\_x8.....gguucgauuccggcgccggagU..... 1  
Gi2\_10487810\_x8.....guCcgauuccggcgccggag..... 1  
Gi5\_8487297\_x8.....guucgauuccAgggcgccg..... 1  
Gi3\_27348209\_x8.....gguuUgauuccggcgcc..... 1  
Gi1\_3943421\_x8.....gguucgauuccggcgccggU..... 1  
Gi3\_27328089\_x8.....guucgauuccAgggcgccgg..... 1  
Gi5\_8501385\_x8.....gguucgauuccAgggcgccggagc..... 1  
Gi1\_3955053\_x8.....gguucgauuccggcgccggagcA..... 1  
Gi1\_3942421\_x8.....gguucgauucUcggcgccgg..... 1  
Gi5\_8493593\_x8.....gguucgauuccggcgUcggga..... 1  
Gi5\_8479537\_x8.....gguucgauuccggAgccgga..... 1  
Gi2\_10467834\_x8.....guucgauuccggcgCccggagc..... 1  
Gi2\_10486802\_x8.....ucgauucUcggcgccggagc..... 1  
Gi3\_27364521\_x8.....gguucgauuccggAgccggag..... 1  
Gi4\_526408\_x8.....gguucgauuccggcgccgga..... 0  
Gi2\_10482586\_x8.....guucgauuccggcgccUgagc..... 1  
Gi1\_3946141\_x8.....gguCcgauuccggcgccgg..... 1  
Gi3\_27332217\_x8uucucaccaacagUuccg..... 1  
Gi2\_10486738\_x8.....gguucgauuccggcgGcggagc..... 1  
Gi3\_27324385\_x8.....Gucgauuccggcgccgg..... 1  
Gi2\_10492602\_x8.ucucaccaacagauccg..... 0  
Gi2\_10472362\_x8.....gguucgauuccAgcgccgga..... 1  
Gi4\_525296\_x8.....gUuucgauuccggcgccggagc..... 1

Gi5\_8496129\_x8.....ggCucgauuucccgccgg..... 1  
Gi3\_27335497\_x8.....cgUuuccggcgccggagc..... 1  
Gi5\_8493825\_x8.....ggGucgauuucccgccggga..... 1  
Gi5\_8488025\_x8.....ggAucgauuucccgccggga..... 1  
Gi2\_10472842\_x8.....guucgauuNccggcgccgga..... 1  
Gi2\_10479466\_x8.....guucgauuuccCgcgcccggagc..... 1  
Gi5\_8486097\_x8.....guuUgauuucccgccgggagc..... 1  
Gi2\_10469098\_x8.....gguucgauuuccggcgccA..... 1  
Gi3\_27320697\_x8.....guucgauuuccggGgcccgg..... 1  
Gi3\_27342481\_x8.....gguucgauuuccAggcccgg..... 1  
Gi2\_10487410\_x8.....gguucgauuuccggcgcc..... 1  
Gi5\_8487249\_x8.....guucgauuuccggcgcccggG..... 1  
Gi5\_8496041\_x8.....gguucgauuuccggcgAcgga..... 1  
Gi2\_10479218\_x8.....gguucgauuuccggcgAcgga..... 1  
Gi3\_27374497\_x8.....gAucgauuuccggcgcccggag..... 1  
Gi1\_3947309\_x8.....guucgauuuccggcgcccggGgc..... 1  
Gi2\_10494842\_x8.....ucgauuuccggcgcccggGgc..... 1  
Gi2\_10487194\_x8.....Gucgauuuccggcgcccgg..... 1  
Gi5\_8476993\_x8.....agauccggNuucgauuucc..... 1  
Gi5\_8494609\_x8.....gguucgauuuccggcgUc..... 1  
Gi2\_10476746\_x8.....gguucgauNccggcgcccgg..... 1  
Gi5\_8477785\_x8.....guCcgauuuccggcgcccggga..... 1  
Gi2\_10497218\_x8.....guucgauuuccAgcgcggga..... 1  
Gi2\_10469946\_x8.....guucgUuuccggcgcccgg..... 1  
Gi1\_3945037\_x8.....gguucgauuuccggcgcccggG..... 1  
Gi1\_3943805\_x8.....guucgUuuccggcgcccgg..... 1  
Gi2\_10480546\_x8.....gguucgauuuccggUgcccgga..... 1  
Gi2\_10466818\_x8.....Cuucgauuuccggcgcccggga..... 1  
Gi2\_10494178\_x8.....gguucgauuuccggcAccggag..... 1  
Gi3\_27356329\_x8.....gauuuccAgcgcggagc..... 1  
Gi2\_10486098\_x8.....gguucgaCuuccggcgcccgg..... 1  
Gi2\_10487602\_x8.....guucgauuuccAggcccgg..... 1  
Gi3\_27360993\_x8.....guucgauuuccggcgcccggUg..... 1  
Gi3\_27346385\_x8.....guucgauuuccggcgcccCgagc..... 1  
Gi2\_10478338\_x8.....gguucgauuuccggAgcc..... 1  
Gi3\_27362081\_x8.....guucgauuuccggcgGgga..... 1  
Gi2\_10495786\_x8.....guucgauuuccAgggcgcccggagc..... 1  
Gi3\_27331577\_x8.....gguucgCuuccggcgcc..... 1  
Gi5\_8497897\_x8.....guucgGuuccggcgcccggagc..... 1  
Gi2\_10467634\_x8.....guucgauuuccgUcggcccggagc..... 1  
G1a\_5671057\_x8.....Aguucgauuuccggcgcccggagc..... 1  
Gi3\_27425942\_x7.....guucgauuuccggcgcccggagcgC..... 1  
Gi5\_8523892\_x7.....guucgauuuccggcgcccAgagc..... 1  
Gi3\_27394498\_x7.....gguucgauuuccggAgcccgg..... 1  
Gi5\_8521939\_x7.....guucgauuuccggcgGcg..... 1  
Gi5\_8507155\_x7.....Gcgauuuccggcgcccggagc..... 1  
Gi3\_27379581\_x7.....gguucgauuuccggcgUc..... 1

Gi1\_3960671\_x7.....guucCauucccgcgccgg..... 1  
Gi1\_3958641\_x7.....gguucgauucccggcAccggagc..... 1  
Gi2\_10509617\_x7.....guucgauuccUggcgccgga..... 1  
Gi2\_10509813\_x7.....guuUgauucccgcgccgga..... 1  
Gi2\_10514692\_x7.....guuAgauucccgcgccgg..... 1  
Gi2\_10522343\_x7.....uGcgauucccgcgccggagc..... 1  
Gi5\_8506252\_x7.....gguucgauucccgcgccgAagc..... 1  
Gi2\_10525304\_x7.....gguucgauucccgcgGcg..... 1  
Gi5\_8504460\_x7.....gguuUgauucccgcgccg..... 1  
Gi3\_27444233\_x7.....guucgauucAcggcgccgga..... 1  
Gi5\_8512132\_x7.....guuAgauucccgcgccgg..... 1  
Gi3\_27396451\_x7.....guucgCuucccgcgccg..... 1  
Gi5\_8514484\_x7.....gguucgauucccggcAccg..... 1  
Gi3\_27381107\_x7.....gguucgauucccgcgUcgg..... 1  
Gi5\_8515569\_x7.....guucgauucccgUgcccga..... 1  
Gi2\_10499586\_x7.....gguucgauucccgcgUcggag..... 1  
Gi5\_8529464\_x7.....Uguucgauucccgcgccggagcguuu..... 1  
Gi2\_10537645\_x7uucucaccNaacagaucg..... 1  
Gi2\_10503373\_x7.....ucgaCuuccggcgccggagc..... 1  
Gi1\_3973922\_x7.....uuUgauucccgcgccgg..... 1  
Gi1\_3973369\_x7.....gguucgauucccgcgccggCgc..... 1  
G1a\_5687742\_x7.Gcucaccaacagaucg..... 1  
G1a\_5688204\_x7.....gGucgauucccgcgccggagc..... 1  
Gi3\_27424451\_x7..cucaccaNcagaucg..... 1  
Gi3\_27423296\_x7.....guuUgauucccgcgccg..... 1  
Gi5\_8528449\_x7.....gguucgauucccAgcgc..... 1  
Gi5\_8521162\_x7.....gguucgauucccgcgccggUgc..... 1  
Gi3\_27446438\_x7.....guucgauuAccggcgccgg..... 1  
Gi3\_27381044\_x7.....guucgauucccgcgAggag..... 1  
Gi2\_10499642\_x7.....Gucgauucccgcgccggagc..... 1  
Gi2\_10517688\_x7.....gguucgauCcccgcgccggag..... 1  
Gi3\_27431668\_x7uucucaccAaacagaucg..... 1  
Gi3\_27447873\_x7.....gguucgauucccgcgccgCa..... 1  
Gi3\_27414959\_x7.....gguucgCuucccgcgccg..... 1  
Gi2\_10516162\_x7.....Cguucgauucccgcgccgg..... 1  
Gi3\_27411417\_x7.....guucgauucAcggcgccggagc..... 1  
Gi3\_27405824\_x7.....gguucgauucccgcgGcgga..... 1  
Gi3\_27427111\_x7.....guucgauucccgcgccGggagc..... 1  
Gi3\_27409758\_x7.....ucgGuucccgcgccggagc..... 1  
Gi2\_10535055\_x7.....ucgauUccggcgccggagc..... 1  
Gi5\_8505811\_x7.....guucgauucccgAcgccc..... 1  
Gi1\_3962561\_x7.....ggAucgauucccgcgccgg..... 1  
Gi1\_3962540\_x7.....gguAcgauucccgcgccgg..... 1  
Gi5\_8521813\_x7.....gguucgauCcccgcgccg..... 1  
Gi3\_27382605\_x7.....uucgauucccgcgccAgagc..... 1  
Gi1\_3963688\_x7.....guuAgauucccgcgccgg..... 1  
Gi2\_10501994\_x7.....guucgCuucccgcgccgg..... 1

Gi3\_27448888\_x7.....gguucgauucccggcgccggagG..... 1  
Gi3\_27418193\_x7.....Nguucgauucccggcgccggagc..... 1  
Gi3\_27386308\_x7.....gguucgauucccggcUccggagc..... 1  
Gi3\_27420545\_x7.....gguucgauGcccggcgccggagc..... 1  
Gi5\_8512580\_x7.....gguucgGuucccggcgccggag..... 1  
Gi3\_27446081\_x7.....gguucgauuccAggcgcc..... 1  
Gi1\_3957976\_x7.....Cuucgauucccggcgccgga..... 1  
Gi3\_27445787\_x7.....gguucgauucccggcgcUg..... 1  
Gi5\_8516486\_x7.....guucgauucccggcgccggC..... 1  
Gi5\_8507673\_x7.....guucAauucccggcgccggagc..... 1  
Gi1\_3972046\_x7uucucacccaGcagauccgg..... 1  
Gi1\_3967076\_x7.....gguucgauucccggcgccggGgc..... 1  
Gi1\_3961497\_x7.....gUuucgauucccggcgcc..... 1  
Gi3\_27382640\_x7.....guucgauucccggcgcUg..... 1  
Gi1\_3967475\_x7.....ggCucgauucccggcgccgga..... 1  
Gi3\_27407525\_x7.....guucgauucccggcgccggCg..... 1  
Gi3\_27423527\_x7.....cgauuccNgcgccggagc..... 1  
Gi5\_8530668\_x7.Ccucacccaacagauccg..... 1  
Gi2\_10508350\_x7.....gguucgauuccUgcgccggag..... 1  
Gi2\_10529371\_x7.....gguucgaCuucccggcgccggag..... 1  
Gi3\_27447810\_x7.....gguucgauucUcgggcgcc..... 1  
Gi3\_27425508\_x7.....guCcgauucccggcgccg..... 1  
Gi3\_27447943\_x7.....uucgauucNcgggcgccggagc..... 1  
Gi1a\_5701007\_x7.....gguucgauucccgUgcc..... 1  
Gi1\_3961980\_x7.....gguGgauucccggcgccgg..... 1  
Gi3\_27405733\_x7.....guucgaGuucccggcgccg..... 1  
Gi2\_10512207\_x7.....guucgauucccggcgccCgagc..... 1  
Gi2\_10515833\_x7.....gguucgauuccUgggcgcc..... 1  
Gi2\_10524779\_x7.....gguucgauucccgUgccggag..... 1  
Gi3\_27441874\_x7.....guucAauucccggcgccg..... 1  
Gi2\_10523505\_x7.....uGcgauucccggcgccg..... 1  
Gi3\_27402597\_x7uucucacccaacagauccgC..... 1  
Gi2\_10507881\_x7.....guCcgauucccggcgccgga..... 1  
Gi1\_3968056\_x7uucucacccaacCgauccgg..... 1  
Gi1\_3967965\_x7.....guucgauucccggcgccUg..... 1  
Gi1\_3958823\_x7uucucacccaacagaCccg..... 1  
Gi5\_8508282\_x7.....gguucgauucccgAcgccgga..... 1  
Gi3\_27449252\_x7.....guucgauucccggcgccggaCc..... 1  
Gi5\_8526216\_x7..cucacUcaacagauccg..... 1  
Gi3\_27448104\_x7.....ucgaCuucccggcgccggagc..... 1  
Gi1\_3973243\_x7uucucacccaacagauccAg..... 1  
Gi1a\_5682142\_x7.....gguucgauNcccggcgccggagc..... 1  
Gi3\_27407679\_x7.....gguucgauucccggcgcGggag..... 1  
Gi5\_8519272\_x7.....gguCcgauucccggcgccgg..... 1  
Gi3\_27416485\_x7.....gguucgauucccgAgcc..... 1  
Gi3\_27398712\_x7uucucacccaacGgauccgg..... 1  
Gi5\_8529632\_x7.....ggAucgauucccggcgccg..... 1

Gi2\_10534873\_x7.....guucCauucccggcgcgg..... 1  
Gi5\_8506868\_x7.....gguucgCuucccggcgcggga..... 1  
Gi2\_10520656\_x7uucucacccaacCgaucgg..... 1  
Gi3\_27451051\_x7.....gguCcgauucccggcgcggcc..... 1  
Gi5\_8523577\_x7.....guucgauucccggcgcggUg..... 1  
Gi3\_27451499\_x7.....guucgauucccgggUgccg..... 1  
Gi3\_27435749\_x7uucuUacccaacagauccg..... 1  
Gi3\_27442532\_x7.....gguucgauucAcggcgccg..... 1  
Gi3\_27445290\_x7.....guucgauucccggcgcggCga..... 1  
Gi5\_8512531\_x7uGcucacccaacagauccggguuc..... 1  
Gi1\_3965249\_x7uucucaccccUacagauccgg..... 1  
Gi3\_27434055\_x7.....gguucgauucccggcgcgggagcg..... 0  
Gi1\_3967139\_x7uucucacccaacagaAccg..... 1  
Gi5\_8503165\_x7.....guucgauuAccggcgccg..... 1  
Gi5\_8527161\_x7.....Ugguucgauucccggcgcgggagc..... 1  
Gi2\_10529735\_x7.....guucUauucccggcgcgggag..... 1  
Gi3\_27426285\_x7.....guucgauuccUggcgccg..... 1  
Gi2\_10522161\_x7.....gguCcgauucccggcgcggc..... 1  
Gi5\_8514904\_x7.....Auucgauucccggcgcgggagc..... 1  
Gi2\_10525598\_x7.....gguucgauucccggcgcggC..... 1  
Gi3\_27432172\_x7uucucacccaacagauUg..... 1  
Gi5\_8503200\_x7.....guucgCuucccggcgcgg..... 1  
Gi2\_10517387\_x7.....ggGucgauucccggcgcgg..... 1  
Gi1\_3958452\_x7uucucacccaacagauAgg..... 1  
Gi5\_8521729\_x7.....gCuucgauucccggcgcgggag..... 1  
Gi3\_27453277\_x7.....gguucgauucUcggcgcgg..... 1  
Gi2\_10525038\_x7.....guucUauucccggcgcgg..... 1  
Gi5\_8511859\_x7.....gguucgauucccggcgcggAgc..... 1  
Gi5\_8530185\_x7.....Uguucgauucccggcgcgggagcguu..... 1  
Gi2\_10501630\_x7.....guucgauucccgggUgccggag..... 1  
Gi2\_10536210\_x7.....gguucgauucccgggUgccgg..... 1  
Gi3\_27386875\_x7.....guucgauucccggcgcggggaA..... 1  
Gi1\_3971206\_x7uAcucacccaacagauccg..... 1  
Gi2\_10576583\_x6.....ggAucgauucccggcgcgggag..... 1  
Gi5\_8547289\_x6.....gguucgauucccgggAgccg..... 1  
Gi3\_27484798\_x6.....uCcgauucccggcgcggga..... 1  
Gi5\_8533417\_x6uucucacAcaacagauccg..... 1  
Gi1\_3988993\_x6.....gguucgauucccggcgcggCg..... 1  
Gi5\_8531353\_x6.....gguucgauucAcggcgccggagc..... 1  
Gi3\_27520444\_x6.....gaCucccggcgcgggagc..... 1  
Gi1\_3978925\_x6uGucacccaacagauccg..... 1  
Gi2\_10569701\_x6.....gguucgauucccggcAccg..... 1  
Gi1\_3985681\_x6.....guNcgauucccggcgcgg..... 1  
Gi2\_10548773\_x6uucucacccaacagaCccg..... 1  
Gi3\_27547384\_x6uucAcacccaacagauccg..... 1  
Gi3\_27525220\_x6.....uucgauucccggcgcggC..... 1  
Gla\_5702458\_x6.....Cguucgauucccggcgcgggag..... 1

Gi3\_27507706\_x6.....guAcgauucccggcgcgg..... 1  
Gi2\_10589573\_x6.....guucgauucccgUcgccgg..... 1  
Gi5\_8560951\_x6uucucacccaacagauAcg..... 1  
Gi3\_27470788\_x6.....gguucgaGucccggcgccggagc..... 1  
Gi5\_8562223\_x6.....guucgaGucccggcgccgg..... 1  
Gi5\_8533621\_x6.....guucgauCcccggcgccgga..... 1  
Gi1\_3985861\_x6.....guCcgauucccggcgcggagc..... 1  
Gi3\_27469624\_x6.....Gagauccggguucgauucc..... 1  
Gi2\_10562117\_x6.....gguucgauucccAgcgccg..... 1  
Gi1\_3980713\_x6...Gcacccaacagauccgggu..... 1  
Gi5\_8550685\_x6.....ucUggguucgauucccggc..... 1  
Gi5\_8556733\_x6.....gguucgauuccUggcgccgga..... 1  
Gi5\_8545291\_x6..Uucacccaacagauccgg..... 1  
Gi1\_3984469\_x6.....guuUgauucccggcgcggagc..... 1  
Gi2\_10551425\_x6.....cgauucccggcgcggagc..... 0  
Gi3\_27521374\_x6.....guucgauucccggcCccgga..... 1  
Gi3\_27521662\_x6.....gguucgGuucccggcgc..... 1  
Gi5\_8532547\_x6.....gguuUgauucccggcgcggagcguu..... 1  
Gi3\_27491716\_x6uucucacccaacagauccgA..... 1  
Gi5\_8542951\_x6..cucacccaacagaCccgg..... 1  
Gi1\_3975169\_x6.....Cuucgauucccggcgcgg..... 1  
Gi3\_27509530\_x6.....acagauccggguucgauucccggcgcggagcC..... 1  
Gi3\_27510196\_x6.....gguucgauucccAgcgcc..... 1  
Gi5\_8549155\_x6.ucucGcccaacagauccg..... 1  
Gi5\_8543557\_x6..cuUacccaacagauccgg..... 1  
Gi1\_3980503\_x6.....gguucgauCcccggcgccggagc..... 1  
Gi5\_8558725\_x6.....gguucgauucccUcgccgg..... 1  
Gi3\_27464092\_x6.....guucgauucccggcAg..... 1  
Gi5\_8548675\_x6.....guucgauucccgGgccc..... 1  
Gi5\_8533807\_x6.....gguucgauucccggcgcggAa..... 1  
Gi1\_3988279\_x6.....Gucgauucccggcgcggagc..... 1  
Gi1\_3991351\_x6.....gauucccggcgcggagc..... 0  
Gi5\_8547775\_x6.....guucgauAcccggcgcgg..... 1  
Gi5\_8562331\_x6.....guucgauucccCgcgccc..... 1  
Gi2\_10546109\_x6.....gguucgauucccggcgccUgagc..... 1  
Gi5\_8554297\_x6.....gguucgauucccggcgcggAc..... 1  
Gi3\_27518572\_x6.....gguucgauuAccggcgccgga..... 1  
Gi3\_27511798\_x6.....guucgauucccggcUcgag..... 1  
Gi5\_8555773\_x6.....gguucgauucccggcAccggag..... 1  
Gi2\_10568933\_x6.....gguucgauucccgGgcc..... 1  
Gi2\_10576511\_x6.....gCuucgauucccggcgcgg..... 1  
Gi2\_10578299\_x6.....cUauucccggcgcggagcguuuc..... 1  
G1a\_5719582\_x6.....Uuucgauucccggcgccc..... 1  
Gi3\_27478264\_x6.....guucUauucccggcgccc..... 1  
Gi3\_27532678\_x6uucucacccaacagauUgg..... 1  
Gi3\_27482182\_x6.....gguucgauucccggcgcggU..... 1  
Gi3\_27515602\_x6.Gcucacccaacagauccgg..... 1

Gi2\_10574429\_x6.....Ccgaaucccggcgcggagc..... 1  
Gi2\_10575779\_x6.....gAucgaaucccggcgccgga..... 1  
Gi1\_3975235\_x6.....guucgaaucccggcgccgGgc..... 1  
Gi3\_27527164\_x6.....gguucgaaucccgAcgccgg..... 1  
Gi5\_8560213\_x6.....gUuucgaaucccggcgccggagcguuu..... 1  
Gi1\_3992917\_x6.....ucgauuAccggcgccggagc..... 1  
Gi2\_10574765\_x6.....gguucgaaucccggcgcA..... 1  
Gi1\_3993187\_x6.....gCucgaaucccggcgccg..... 1  
Gi5\_8563561\_x6.....gguuUgauuaccggcgccggag..... 1  
Gi2\_10556015\_x6.....guucgaaucccggcAccggag..... 1  
Gi2\_10569353\_x6.....cUcaacagauccggguuc..... 1  
Gi3\_27477280\_x6.....Ugguucgaaucccggcgccg..... 1  
Gi1\_3991867\_x6.....guucgaaucccgUgccgga..... 1  
Gi3\_27542590\_x6.....ucgaaucccggcgccggGgc..... 1  
Gi5\_8535757\_x6.....Cguucgaaucccggcgccggag..... 1  
Gi4\_530649\_x6.....Uuucgaaucccggcgccgga..... 1  
Gi5\_8550985\_x6.....gguucgaaucccggcgcUgg..... 1  
Gi3\_27501868\_x6.....gguucgaaucccgGgccggag..... 1  
Gi5\_8561839\_x6.....gCuucgaaucccggcgccgga..... 1  
Gi2\_10585175\_x6.....gguucgaaucccggcgcU..... 1  
Gi1\_3980479\_x6.....guucgaaucccggcgccA..... 1  
Gi3\_27509992\_x6.....guucgaauccAggcgccggagc..... 1  
Gi2\_10580399\_x6.....guucgaaucccggcgcAg..... 1  
Gi5\_8544295\_x6.....ccUaacagauccggguuc..... 1  
Gi2\_10574453\_x6.....gguCcgauuaccgggcgccg..... 1  
Gi2\_10567661\_x6.....guucgauCcccggcgccg..... 1  
Gi5\_8538079\_x6Cucucacccaacagauccgg..... 1  
Gi3\_27501688\_x6.....uGgauuaccggcgccgga..... 1  
Gi2\_10549907\_x6.....guucgaaucccgAcgccgga..... 1  
Gi3\_27478312\_x6uAcucacccaacagauccg..... 1  
Gi2\_10585691\_x6.....gguucgaaucccggcgcAgga..... 1  
Gi2\_10590599\_x6.....gguucgaaucccUgcgccg..... 1  
Gi2\_10558439\_x6.....cgauuaccgggcgccggagcguuG..... 1  
Gi5\_8555503\_x6.....guucgauuccAgcgccggagc..... 1  
Gi5\_8531137\_x6.....gguucgGuuaccgggcgccgga..... 1  
Gi3\_27484174\_x6.....gguucgaaucccggcgccU..... 1  
Gi5\_8549311\_x6.....gguuAgauuaccgggcgccggagc..... 1  
Gi3\_27494680\_x6uucucacAcaacagauccgg..... 1  
Gi5\_8558587\_x6..cucacccaCcagauccgg..... 1  
Gi5\_8534767\_x6.....guucgUuuccgggcgccg..... 1  
Gi2\_10563647\_x6.....gguuUgauuaccgggcgccggag..... 1  
Gi1\_3984025\_x6.....guucgauuNccggcgccgga..... 1  
Gi5\_8550865\_x6.....guucgaGuuccgggcgccg..... 1  
Gi3\_27465052\_x6.....guucgaauccgggcgccgU..... 1  
Gi3\_27525706\_x6.....guucgauuccUgcgccg..... 1  
Gi3\_27498148\_x6Cucucacccaacagauccgg..... 1  
Gi3\_27535378\_x6.....gguuGgauuaccgggcgccg..... 1

Gi2\_10565009\_x6.....gguucgauuccUgcgccgga..... 1  
Gi2\_10542875\_x6.....guucgauuccggcgUgga..... 1  
Gi2\_10558097\_x6.....gguucgauuccggcgUggag..... 1  
Gi2\_10549547\_x6.....gguucgauuccggcgccggaA..... 1  
Gi5\_8541073\_x6.....guucgauuccgUcgccg..... 1  
Gi3\_27541582\_x6.....uucgauucNcggcgccgga..... 1  
Gi3\_27536362\_x6.....guucgauuccggcgccUg..... 1  
Gi5\_8545987\_x6.....gguAcgauuccggcgccggagc..... 1  
Gi3\_27472150\_x6.....guucgauuccgUcgccggagc..... 1  
Gi2\_10545881\_x6.....guucgauuccggcgUcg..... 1  
Gi5\_8536891\_x6.....gguucAauuccggcgccgg..... 1  
Gi2\_10544189\_x6.....gguuGgauuccggcgccg..... 1  
Gi3\_27511150\_x6.....gguuGgauuccggcgccg..... 1  
Gi3\_27509242\_x6.....aacagauccggguucgauuccggcgccggagc..... 0  
Gi1\_3986503\_x6.....Aguucgauuccggcgccg..... 1  
Gi2\_10580027\_x6.....Gcgauuccggcgccggag..... 1  
Gi5\_8548669\_x6.....gguuUgauuccggcgccgga..... 1  
Gi5\_8532871\_x6.....gguucgauuccggcgAg..... 1  
Gi1\_3992161\_x6.....guucgauuccggcgAccgga..... 1  
Gi1\_3986059\_x6.....guucgauuccggcgccgU..... 1  
Gi5\_8554057\_x6.....gguGcgauuccggcgccg..... 1  
Gi2\_10569563\_x6.....guucgauuccggcgccggC..... 1  
Gi3\_27515596\_x6.....gauuccggGgccggagc..... 1  
Gi5\_8548093\_x6.....guucgauuccggcgAccgga..... 1  
Gi2\_10578713\_x6.....Gagauccggguucgauucc..... 1  
Gi2\_10583597\_x6.....gguCcgauuccggcgccgga..... 1  
Gi5\_8551537\_x6.....gguucgauuccAgcgccgg..... 1  
Gi1\_3993481\_x6.....guucgauuccggcgUcg..... 1  
Gi3\_27548074\_x6.....cgauuccggcgccAgagc..... 1  
Gi5\_8543503\_x6.....gguucgauAccggcgccggagc..... 1  
Gi2\_10561487\_x6.....guucUauuccggcgccgga..... 1  
Gi1\_3981253\_x6.....guuGgauuccggcgccg..... 1  
Gi2\_10586393\_x6uucaccccGacagauccg..... 1  
Gi2\_10566755\_x6.....guucgauuccUgcgccggagc..... 1  
Gi3\_27459346\_x6.....gguucgauuccGggcgccggag..... 1  
Gi3\_27487786\_x6.....gguucUauuccggcgccgga..... 1  
Gi2\_10548545\_x6.....guucgauuccAgcgccggagc..... 1  
Gi1\_3982381\_x6.....guucgauuccUggcgccg..... 1  
Gi3\_27511738\_x6.....guucgauuccggcgAccg..... 1  
Gi3\_27495448\_x6..cCaccaacagauccgg..... 1  
Gi3\_27463690\_x6.....gguucgaAuuccggcgccgga..... 1  
Gi1\_3992587\_x6.....guAcgauuccggcgccgga..... 1  
Gi3\_27488302\_x6.....ucgauuccggcgccggCgc..... 1  
Gi2\_10587971\_x6.....gguucgauucAcggcgccggag..... 1  
Gi3\_27531694\_x6.....gguGgauuccggcgccggagc..... 1  
Gi1\_3990205\_x6.....Aguucgauuccggcgccggag..... 1  
Gi2\_10567193\_x6.....gguucgauuccggcgAccgag..... 1



Gi1\_3978103\_x6.....Cguucgauucccgcgccggagc..... 1  
Gi3\_27581747\_x5.....gguucgauucccgcgCagg..... 1  
Gi1\_4001215\_x5.....gguucgauucccgAgccgg..... 1  
Gi1\_4014305\_x5.....guucgauGccggcgccgg..... 1  
Gi5\_8596607\_x5.....ggAucgauucccgcgcc..... 1  
Gi3\_27588207\_x5.....agUuccggguucgauucc..... 1  
Gi1a\_5763772\_x5.....gGucgauucccgcgccg..... 1  
Gi2\_10615105\_x5.....agUuccggguucgauucc..... 1  
Gi2\_10617540\_x5.....uUgauucccgcgccggagc..... 1  
Gi1\_4005155\_x5.....gguucgauNcccgcgccgga..... 1  
Gi3\_27549482\_x5.....gCuucgauucccgcgcc..... 1  
Gi2\_10614235\_x5.....guucgauucccgUgccc..... 1  
Gi3\_27605667\_x5uGcucaccaacagauccggguuc..... 1  
Gi5\_8579392\_x5.....guucgauuAccggcgccgg..... 1  
Gi5\_8576487\_x5uuUucaccaacagauccgg..... 1  
Gi2\_10592560\_x5uucucaccaacagaucc..... 1  
Gi3\_27574032\_x5.....Gaccaacagauccggguuc..... 1  
Gi2\_10634505\_x5.....guucgauucccgcgCagg..... 1  
Gi1\_4017635\_x5.....guucgauucccgcgccggC..... 1  
Gi5\_8598692\_x5uucucacccGacagauccg..... 1  
Gi1\_3995460\_x5uuAucaccaacagauccg..... 1  
Gi5\_8600352\_x5.....guucgauCcccgcgccggagc..... 1  
Gi1\_4007875\_x5uucucaccaacagaCccgg..... 1  
Gi2\_10602770\_x5.....gguucgauucccgUcgccggagc..... 1  
Gi3\_27567232\_x5uucucaccaacagaucc..... 1  
Gi3\_27593912\_x5.....gguucgauuUccggcgcc..... 1  
Gi2\_10622310\_x5.....gCuucgauucccgcgccg..... 1  
Gi3\_27595842\_x5.....gguucgUuucccgcgccgga..... 1  
Gi3\_27585937\_x5uucucaccaacagauUcg..... 1  
Gi2\_10630340\_x5.....gguuGgauucccgcgccggag..... 1  
Gi5\_8570127\_x5uucucaccaCcagauccg..... 1  
Gi5\_8566427\_x5uucucGcccaacagauccg..... 1  
Gi5\_8566167\_x5.....gUguucgauucccgcgccggagc..... 1  
Gi2\_10627645\_x5.....guucgauAcccgcgccgg..... 1  
Gi1\_4010650\_x5.....guucgauucccgcgccggagcgC..... 1  
Gi1\_4006125\_x5.....guucgauucccgcgccgAa..... 1  
Gi3\_27635117\_x5.....gguucAauucccgcgcc..... 1  
Gi3\_27572302\_x5.....gguucgauuccUgccc..... 1  
Gi3\_27618362\_x5...Gaccaacagauccggguuc..... 1  
Gi3\_27555052\_x5.....agauccggguucgauucccgcgccgg..... 0  
Gi3\_27586067\_x5.....gUguucgauucccgcgccggag..... 1  
Gi2\_10598525\_x5.....guucgauucccgcgccggUgc..... 1  
Gi1\_4015470\_x5.....guucgauucGggcgccgg..... 1  
Gi3\_27630187\_x5uucucacccGacagauccg..... 1  
Gi1\_4009905\_x5uucucacccGacagauccg..... 1  
Gi2\_10613545\_x5.....ucgauucccgcgccggUgc..... 1  
Gi2\_10642580\_x5.....gAucgauucccgcgccgg..... 1

Gi3\_27650387\_x5.....gguNcgauuccggcgccgga..... 1  
Gi5\_8597617\_x5.....gguucgauucccAgcgccggag..... 1  
Gi5\_8576632\_x5..cucaccaGcagauccgg..... 1  
Gi5\_8598442\_x5.....guucgaGuccggcgccggagc..... 1  
Gi1\_4004885\_x5uucucaccaacagauUcg..... 1  
Gi1\_4017240\_x5.....guucgauNccggcgccggagc..... 1  
Gi2\_10643425\_x5.....guucgauuccggcgccggaCc..... 1  
Gi5\_8596177\_x5.ucucaccaacCgauccg..... 1  
Gi5\_8568342\_x5.....gUuucgauuccggcgccggagcguu..... 1  
Gi3\_27601762\_x5.....gguucgauucccgGgcccga..... 1  
Gi1\_4003445\_x5.....gguucgauNcccggcgccggag..... 1  
Gi3\_27561792\_x5.uGucaccaacagauccg..... 1  
Gi3\_27550742\_x5.....guucgaAucccggcgccggagc..... 1  
Gi5\_8594457\_x5.....guucgauuccUggcgccgga..... 1  
Gi3\_27655387\_x5.....Gaacagauccggguucgauucc..... 1  
G1a\_5735567\_x5.....guCcgauuccggcgccgg..... 1  
Gi5\_8590282\_x5.....gguCcgauuccggcgccgga..... 1  
Gi5\_8566407\_x5uucucacUcaacagauccg..... 1  
Gi1\_4008040\_x5.....guucgauuccggcgGccggagc..... 1  
Gi3\_27589007\_x5.....guucgauucccgUcgccggag..... 1  
Gi5\_8569292\_x5.....gguucgaCucccggcgccgga..... 1  
Gi5\_8577237\_x5.....cGcaacagauccggguuc..... 1  
Gi3\_27607117\_x5.....ucgauuccggcgccgAagc..... 1  
Gi3\_27596067\_x5uucucaccUaacagauccg..... 1  
Gi1\_4011340\_x5.....gguucgCuuccggcgccg..... 1  
Gi3\_27610652\_x5.....ucgauucUcgggcgccggagc..... 1  
Gi2\_10602855\_x5.....guuAgauuccggcgccggagc..... 1  
Gi5\_8594042\_x5.....gguucgauucccgUgcccga..... 1  
Gi3\_27651732\_x5.....guucgauucccgAgcccggag..... 1  
Gi5\_8571622\_x5.....gguucgauCcccggcgccggag..... 1  
Gi1\_4005055\_x5.....agUuccggguucgauucc..... 1  
Gi5\_8575312\_x5.....guucgauuccUggcgccggagc..... 1  
Gi2\_10606795\_x5.....gguucgauuccUggcgccgga..... 1  
Gi3\_27611272\_x5.....guucgUuuccggcgccgga..... 1  
Gi5\_8591757\_x5.....gguucgauuccggcAccgg..... 1  
Gi1\_4010410\_x5.....Auucgauuccggcgccg..... 1  
Gi3\_27604932\_x5.ucucaccaacagaCccg..... 1  
Gi2\_10605435\_x5.....ucgauuccNggcgccggag..... 1  
Gi3\_27613417\_x5...uGaccaacagauccggguuc..... 1  
Gi5\_8575227\_x5.....guucgaAucccggcgccgg..... 1  
Gi5\_8575022\_x5.....gguucgaCucccggcgccggag..... 1  
Gi1\_4006725\_x5uucAcaccaacagauccg..... 1  
Gi1\_3995685\_x5.....Gcgauuccggcgccggagc..... 1  
Gi5\_8588572\_x5.....acagauccggguucgauuccggcgccggagcC..... 1  
Gi3\_27642202\_x5.....gguAcgauuccggcgccgga..... 1  
Gi3\_27574422\_x5.....uucgauuccggUgcccggagc..... 1  
Gi5\_8592097\_x5.....gguuGgauuccggcgccggagc..... 1

Gi1\_4014320\_x5uucucaccaacCgauccg..... 1  
G1a\_5752867\_x5.....gguucgauucccggcgcggGgc..... 1  
Gi5\_8571147\_x5.....guucgauucccggcgcAgga..... 1  
Gi2\_10591920\_x5.....gguucgauucccggcgcUgg..... 1  
Gi1\_3996520\_x5.....guucUauucccggcgcggga..... 1  
Gi3\_27588697\_x5.....guucgauucccgAcgccggag..... 1  
Gi1\_4010130\_x5uucucaccaacagauAcg..... 1  
Gi2\_10642120\_x5.....guucgauucccggcgcGggagc..... 1  
Gi2\_10645020\_x5.....gguucgauUccgggcggag..... 1  
Gi2\_10638655\_x5.....guucgauucccggcgcUggag..... 1  
Gi3\_27640892\_x5uucucaccccUacagauccg..... 1  
Gi1\_3999215\_x5.....uucgauucNcgggcgcgg..... 1  
Gi1\_4000445\_x5.....gguucgauucccggcgcggA..... 1  
Gi3\_27600652\_x5.....ucgauuccNggcgccggag..... 1  
Gi1\_4017165\_x5uucucacAcaacagauccg..... 1  
Gi5\_8565527\_x5.....cccaacagNuccggguuc..... 1  
Gi2\_10624170\_x5.....gguucgauucccggcgcAg..... 1  
Gi2\_10633035\_x5.....guAcgauucccggcgcggag..... 1  
Gi3\_27619477\_x5Aucucaccaacagauccg..... 1  
Gi3\_27566502\_x5.....ggguucgauucccggcgcUcg..... 1  
Gi3\_27551832\_x5.....gguucgauCcccggcgc..... 1  
Gi3\_27622827\_x5.....gguucgauucccggcCccgga..... 1  
Gi3\_27574737\_x5.....guucgauucccggcgcCa..... 1  
Gi2\_10646650\_x5.....cUggguucgauucccggcgcggag..... 1  
Gi3\_27653367\_x5.....uucgaCuuccgggcgcggagc..... 1  
Gi3\_27577512\_x5.....guucgauucccggcgcUcg..... 1  
Gi3\_27612727\_x5.....gguucgauucGcgggcgcggagc..... 1  
Gi1\_4012760\_x5uucucaccaacagaucca..... 1  
Gi3\_27651257\_x5.....gguucAauucccggcgcgg..... 1  
Gi2\_10604880\_x5.....gguucgauuccAggcgcggga..... 1  
Gi2\_10622855\_x5.....gguucgauucccggcgcCag..... 1  
Gi1\_4001675\_x5.Ccucaccaacagauccg..... 1  
Gi3\_27591427\_x5.....ucgauuccNggcgccgga..... 1  
Gi1\_4002880\_x5.....guucgauucccggcgcUcgagc..... 1  
Gi2\_10594165\_x5.....gguucgauuccAggcgc..... 1  
Gi2\_10626120\_x5.....gguGcgauucccggcgcggagc..... 1  
Gi5\_8582857\_x5.....gguucgauAccgggcgcggagc..... 1  
Gi2\_10630375\_x5.....gguucgauCcccggcgcgg..... 1  
Gi1\_4015505\_x5.....guucgauucccgGgcgg..... 1  
Gi2\_10604695\_x5.....gguucgauucccgAgccggag..... 1  
Gi3\_27608742\_x5.....ggAucgauucccggcgc..... 1  
Gi1\_4003015\_x5.....guucgauucccggcgcUg..... 1  
Gi2\_10592830\_x5.....guucgUuuccgggcgcggagc..... 1  
Gi5\_8590502\_x5.....gguucgauucccggcgcUcg..... 1  
Gi2\_10596120\_x5.....guucgCuuccgggcgcggagc..... 1  
Gi2\_10615215\_x5.....gguucgauucccgCcgccggagc..... 1  
Gi3\_27654967\_x5.....gguucgauucccggcgcCga..... 1

Gi3\_27621692\_x5.....gguuUgauucccggcgccgg..... 1  
Gi1\_3995375\_x5.....gguucgauucccggcgccAga..... 1  
Gi1\_3994800\_x5..cucaccaacagGuccgg..... 1  
Gi3\_27599387\_x5.....ucgauucccggcgccggG..... 1  
G1a\_5753682\_x5.....gguuUgauucccggcgccggagc..... 1  
Gi3\_27567322\_x5.....gauucccggcgccggCgc..... 1  
Gi5\_8589032\_x5.....gguucgauucccggcgccggagcU..... 1  
Gi5\_8590737\_x5.....gAuucgauucccggcgccgg..... 1  
Gi3\_27619017\_x5.....gguucgauucccggcgccCg..... 1  
Gi2\_10642000\_x5.....ggNucgauucccggcgccggagc..... 1  
Gi5\_8584982\_x5.....gguucgauucccgGgccc..... 1  
Gi1\_4009640\_x5.....ucgauuccNggcgccggagc..... 1  
Gi3\_27584367\_x5.....gguucgauucccgCcgccggagc..... 1  
Gi2\_10631330\_x5.....gguucgauucccgGgccc..... 1  
Gi2\_10599780\_x5.....gguucgauucccggcCaggag..... 1  
Gi1\_4015315\_x5uucucaccaacagaucAg..... 1  
Gi2\_10627080\_x5.....guucgauucccgAgccc..... 1  
Gi3\_27640812\_x5.....cccaacagaGccggguucgauucc..... 1  
Gi3\_27559772\_x5.....cagauccggGucgauucc..... 1  
Gi5\_8591027\_x5.....guucgauucccggcgccggU..... 1  
Gi1\_4012755\_x5.....uGcgauucccggcgccggagc..... 1  
Gi5\_8592012\_x5.....Cuucgauucccggcgccggagc..... 1  
Gi3\_27641547\_x5.....ucUauucccggcgccggag..... 1  
Gi1\_4011745\_x5uucGaccaacagauccg..... 1  
Gi1\_3995530\_x5.....gguucgauucccggcAcggagc..... 1  
Gi1\_4015240\_x5uucucacAcaacagauccg..... 1  
Gi3\_27581737\_x5.....guucgauucccggcAcggag..... 1  
Gi2\_10630885\_x5.....ucgauucccggcgccggCgc..... 1  
Gi5\_8594797\_x5.....guAcgauucccggcgccgga..... 1  
Gi2\_10628225\_x5.....gguucgaGucccgggcgccggagc..... 1  
Gi3\_27595807\_x5.....ucgauucccgGgcccggagc..... 1  
Gi2\_10623165\_x5.....gCucgauucccggcgccgga..... 1  
Gi5\_8586612\_x5.....gguucgauucccgGgccc..... 1  
Gi3\_27623577\_x5.....gguucgauucccggcUccgga..... 1  
Gi1\_4003010\_x5uucucaccaacagauccgA..... 1  
Gi3\_27644187\_x5.....guucgUuucccggcgccggag..... 1  
Gi5\_8602037\_x5..ucaccaacGgauccggguu..... 1  
Gi4\_536278\_x5.....gguucgauucccggcgccg..... 0  
Gi5\_8592172\_x5.....gguucgauucccggcgccggU..... 1  
Gi5\_8597282\_x5..cucaccaacagCuccgg..... 1  
Gi1\_3998275\_x5.....guucgauucccggcAcgga..... 1  
Gi1\_3996660\_x5uucucaccaacagCuccg..... 1  
Gi1\_4011460\_x5.....aUagauccggguucgauucc..... 1  
Gi1\_3996170\_x5.....gguucgauucccggcgccC..... 1  
Gi5\_8601592\_x5.....guucgauucccggcgccC..... 1  
G1a\_5760217\_x5.....ggCucgauucccggcgccggagc..... 1  
Gi2\_10626655\_x5.....gguucgauucccgGgccc..... 1

Gi2\_10616180\_x5.....guucgauucccgUcgccg..... 1  
Gi5\_8577467\_x5.....guAcgauucccggcgcccggagc..... 1  
Gi2\_10645415\_x5.....guucAauucccggcgccc..... 1  
Gi5\_8581037\_x5.....gguucgauCcccggcgcc..... 1  
Gi5\_8605199\_x4..cucaccaacCgauccgg..... 1  
Gi3\_27667689\_x4.....caacagauNcggguucga..... 1  
Gi3\_27795865\_x4.....gguucgauucccggcgcccCgag..... 1  
Gi5\_8635967\_x4uucucaUccaacagauccg..... 1  
Gi1\_4037176\_x4.....gguCcgauucccggcgcccggagc..... 1  
Gi3\_27665241\_x4uucucaccaacagauccA..... 1  
Gi1\_4023416\_x4..cCaccaacagauccgg..... 1  
Gi2\_10689443\_x4.....gguucUauucccggcgcccggagc..... 1  
Gi2\_10695635\_x4.....ucgauucccgUgcccggagc..... 1  
Gi3\_27769641\_x4.....gguucUauucccggcgcccggag..... 1  
Gi1\_4044292\_x4uucAcaccaacagauccgg..... 1  
Gi5\_8614263\_x4.....gguucgauucccggcgAcgg..... 1  
Gi3\_27730749\_x4.....Aauucccggcgcccggagc..... 1  
Gi2\_10682415\_x4.....guucgauuUccggcgcccga..... 1  
Gi3\_27701357\_x4.....Ggauccggguucgauucc..... 1  
Gi3\_27737637\_x4.....gguucgauucccggcgcccgaC..... 1  
Gi5\_8627543\_x4.ucGaccaacagauccg..... 1  
Gi3\_27787413\_x4.....ucgauucccgAcgcccggagc..... 1  
Gi1\_4034080\_x4.....guucgauuNccggcgccc..... 1  
Gi3\_27784853\_x4.....gguucgauuAccggcgccc..... 1  
Gi3\_27792825\_x4.....guucCauucccggcgcccgg..... 1  
Gi5\_8636847\_x4uucucaccaacagauccgAguuc..... 1  
Gi5\_8603079\_x4.....gguucgauucccCgcccgg..... 1  
Gi2\_10677995\_x4.....gguucgauucccgAcgcccgg..... 1  
Gi1\_4022416\_x4.....gguucgauucccAgcggcccggagc..... 1  
Gi3\_27687081\_x4uucucacUaacagauccg..... 1  
Gi2\_10721295\_x4.....cagauccggguucgauucccggcgcccga..... 0  
Gi2\_10706115\_x4.....gguucgauucccgAcgccc..... 1  
Gi5\_8649707\_x4uucucaccUaacagauccg..... 1  
Gi5\_8624019\_x4.....guucgauucUcggcgcccggagc..... 1  
Gi2\_10712155\_x4.....ucgaGucccggcgcccggagc..... 1  
Gi2\_10704539\_x4.....Agguucgauucccggcgcccggagc..... 1  
Gi2\_10711235\_x4uucucaccaacaAauccgg..... 1  
Gi3\_27683097\_x4.....guNcgauucccggcgcccga..... 1  
Gi3\_27778965\_x4..cuUaccaacagauccgg..... 1  
G1a\_5789218\_x4.uGucaccaacagauccg..... 1  
Gi3\_27735613\_x4.....guucgauucccggcgUggag..... 1  
Gi5\_8623143\_x4.....gguCcgauucccggcgccc..... 1  
Gi5\_8647743\_x4..ucaccaacagauccggCu..... 1  
Gi3\_27734441\_x4.....cgauucccggcgcccggagcA..... 1  
Gi5\_8633523\_x4.....guucAauucccggcgcccga..... 1  
Gi2\_10660771\_x4.....guucgauucccgAgcccgg..... 1  
Gi1\_4025668\_x4.....guucgauucccggcgUcgga..... 1

Gi1\_4047284\_x4.....guucgGuucccgccgaggc..... 1  
Gi2\_10681731\_x4.....guucgauuccUgcgccg..... 1  
Gi2\_10669571\_x4.....ggguucgauucccgccgaggc..... 0  
Gi3\_27754773\_x4.....uUgauucccgccgaggc..... 1  
G1a\_5805290\_x4uGcucaccaacagauccg..... 1  
Gi3\_27795609\_x4.....uCcgauucccgccgaggc..... 1  
Gi2\_10681647\_x4.....gguucCauucccgccgaggc..... 1  
Gi1\_4029416\_x4.....uGgauucccgccgaggc..... 1  
Gi3\_27668109\_x4.....guucgauucccgccgAgc..... 1  
Gi3\_27683689\_x4.....ucgGuucccgccgaggc..... 1  
Gi2\_10678799\_x4.....uuUgauucccgccgaggc..... 1  
Gi3\_27784729\_x4uucucacccaUcagauccg..... 1  
Gi2\_10669251\_x4uucucaccaacagauUg..... 1  
Gi5\_8629787\_x4.....gguucgauuccUgcgccgaggc..... 1  
Gi1\_4039424\_x4uucucaccAaacagauccg..... 1  
G1a\_5772702\_x4uucucGcccaacagauccg..... 1  
Gi1\_4019692\_x4.uGucaccaacagauccg..... 1  
Gi1\_4030560\_x4.....Cguucgauucccgccgaggc..... 1  
Gi3\_27730345\_x4.....gguucgauuAccggccgaggc..... 1  
Gi1\_4026548\_x4.....guGcgauucccgccgaggc..... 1  
Gi2\_10660663\_x4.....uucgauucNcgccgaggc..... 1  
Gi5\_8639583\_x4.....gguuUgauucccgccgaggc..... 1  
Gi1\_4040124\_x4.....guCcgauucccgccgaggc..... 1  
Gi2\_10693463\_x4.....gguucgauuccAggcccgaggc..... 1  
Gi1\_4036324\_x4.....gCuucgauucccgccgaggc..... 1  
Gi3\_27731089\_x4.....Ccgauucccgccgaggc..... 1  
Gi1\_4031772\_x4.....guucgauucccgccgaggc..... 1  
Gi5\_8633619\_x4.....guucgauucccgccgaggcU..... 1  
Gi2\_10666835\_x4.....Acgauucccgccgaggc..... 1  
Gi2\_10711727\_x4.....guucAauucccgccgaggc..... 1  
Gi3\_27773113\_x4.....gUguucgauucccgccgaggc..... 1  
Gi2\_10687567\_x4.....guucCauucccgccgaggc..... 1  
Gi2\_10714383\_x4uucCcacccaacagauccg..... 1  
Gi2\_10657371\_x4.....guucgauucccgccgaggc..... 1  
Gi5\_8618571\_x4uucucaccaacagauUg..... 1  
Gi5\_8638887\_x4.....guucgauuUccggccgaggc..... 1  
Gi5\_8615995\_x4.....gAuucgauucccgccgaggc..... 1  
Gi1\_4029016\_x4.ucucacccNacagauccg..... 1  
Gi2\_10665975\_x4.....gguucgauucUcggccgaggc..... 1  
Gi3\_27778913\_x4.....guucgauucccgccgaggc..... 1  
Gi3\_27763597\_x4.....cagauccggguucgGuucc..... 1  
Gi5\_8632635\_x4.....gguucgauucccgccgaggcU..... 1  
Gi2\_10718583\_x4.....ggAucgauucccgccgaggc..... 1  
Gi3\_27753053\_x4.....caUcagauccggguucgauucc..... 1  
Gi3\_27721721\_x4.....gguucgauuGccggccgaggc..... 1  
Gi5\_8637387\_x4.ucucaccUaacagauccg..... 1  
Gi2\_10723707\_x4.....ucgauuccUggccgaggc..... 1

Gi5\_8607155\_x4.....Gccaacagauccggguuc..... 1  
Gi1\_4035960\_x4.....agaucggguucgCuucc..... 1  
Gi5\_8619295\_x4.....guucgauucAcggcgccggagc..... 1  
Gi3\_27780217\_x4.....Ccgauuccggcgccgga..... 1  
Gi5\_8611723\_x4.....gaucggguucgauucc..... 0  
Gi1\_4047016\_x4.....gguucgauuccggcgUggagc..... 1  
Gi5\_8608147\_x4..cucacccGacagauccgg..... 1  
Gi2\_10688451\_x4.....guucgauuccggcgGcgg..... 1  
Gi2\_10700483\_x4.....gguucgauucUcggcgccg..... 1  
Gi2\_10717623\_x4.....gguucgauuGcggcgccggagc..... 1  
Gi1\_4027556\_x4.uUucacccaacagauccg..... 1  
Gi3\_27713285\_x4.....Gggguucgauuccggcgccgga..... 1  
Gi5\_8616915\_x4.....gauuccgNcgccggagc..... 1  
Gi3\_27771121\_x4.....Cgguucgauuccggcgccggagc..... 1  
Gi1\_4039380\_x4.....guucgauuccggcgccggagU..... 1  
Gi1\_4033656\_x4.....agaucggNuucgauucc..... 1  
Gi2\_10684211\_x4.....gguucgauuccUggcgccgg..... 1  
Gi1\_4028852\_x4.....guucgGuuccggcgccgga..... 1  
Gi3\_27766557\_x4.....cgUuuccggcgccggag..... 1  
Gi1\_4031176\_x4.....guucgauuccAgcggccggagc..... 1  
Gi2\_10690695\_x4.....gguucgGuuccggcgccgg..... 1  
Gi3\_27771089\_x4.....gguucgauAccggcgccg..... 1  
Gi3\_27746029\_x4.....gguucgUuuccggcgccggag..... 1  
Gi2\_10677467\_x4.....gAucgauuccggcgccg..... 1  
Gi2\_10683207\_x4..cGcaccacaacagauccgg..... 1  
Gi3\_27735701\_x4.....guucgauuccGggcgccgg..... 1  
Gi2\_10685383\_x4.....gguucgauucccgAcgccggag..... 1  
Gi1\_5786382\_x4.....guucgaCuccggcgccgga..... 1  
Gi5\_8638219\_x4.....guucgaAuuccggcgccg..... 1  
Gi1\_4017968\_x4.....gguucgauuAccggcgccgg..... 1  
Gi1\_4032704\_x4.....gguucgauucccgAgccggagc..... 1  
Gi5\_8624351\_x4.....gguucgauuccggcgccggUg..... 1  
Gi5\_8644247\_x4.....gguuGgauuccggcgccg..... 1  
Gi5\_8622683\_x4.....guCcgauuccggcgccggagc..... 1  
Gi2\_10670995\_x4.....guucgGuuccggcgccggag..... 1  
Gi3\_27685073\_x4.....gguucgauuAccggcgccg..... 1  
Gi5\_8635099\_x4..cucacccaaUagauccgg..... 1  
Gi5\_8611627\_x4.....guucgauuccggcgccgAa..... 1  
Gi3\_27778521\_x4.....guucgauuccggcgccUgagc..... 1  
Gi5\_8623607\_x4.....guucgauuccggcgUggagc..... 1  
Gi5\_8609459\_x4.....gguucgCuuccggcgccgg..... 1  
Gi2\_10724311\_x4.....gguucgauuccAgcgccgg..... 1  
Gi1\_4039752\_x4..cucacccaNcagauccgg..... 1  
Gi2\_10685011\_x4.....gAuucgauuccggcgccg..... 1  
Gi3\_27695869\_x4.....gguucCauuccggcgccggagc..... 1  
Gi2\_10695131\_x4.....gguucgauucccgAcgccgga..... 1  
Gi5\_8602619\_x4.....guucgGuuccggcgccgga..... 1

Gi2\_10657263\_x4.....guucgauucccgAcgccg..... 1  
Gi2\_10693895\_x4.....guucgauucccggcUcggag..... 1  
Gi3\_27672645\_x4.....gauUccggcgccggagc..... 1  
Gi3\_27694377\_x4.....guucgauucUcggcgccggag..... 1  
Gi5\_8625803\_x4.....gguucgCuucccggcgc..... 1  
Gi3\_27750101\_x4uuUucacccaacagauccggguuc..... 1  
Gi3\_27664693\_x4.....cGgauccggguucgauucccggcgcgg..... 1  
Gi2\_10703143\_x4.....gguucgauucccggcCccggagc..... 1  
Gi5\_8631527\_x4.....uGcgauucccggcgcgg..... 1  
Gi1\_4046344\_x4uucucacccaacagauUcgg..... 1  
Gi1\_4033416\_x4.....gguucgauucccggcgcgg..... 0  
Gi5\_8623915\_x4.....gguucgauucccgAgccggag..... 1  
Gi3\_27761817\_x4.....guucgauucccgGgcccga..... 1  
Gi2\_10670415\_x4.....Gccggguucgauucccggcgcggga..... 1  
Gi1\_4046608\_x4.....gguucgauAcccggcgcgg..... 1  
Gi3\_27772357\_x4.....guucgCuucccggcgcggag..... 1  
Gi3\_27772193\_x4.Ccucacccaacagauccg..... 1  
Gi3\_27680801\_x4.....gguucgauucccggcCccggag..... 1  
Gi2\_10706091\_x4.....ggAucgauucccggcgcgg..... 1  
Gi5\_8623135\_x4uucucacccaacagCuccg..... 1  
Gi5\_8642475\_x4.....gguucgauucccggcgcggA..... 1  
Gi1\_4039608\_x4.....ucgauucccggcgcggagcCu..... 1  
Gi1\_4033028\_x4uucucacUcaacagauccgg..... 1  
G1a\_5784282\_x4.....gguucgauNcccggcgcggag..... 1  
G1a\_5812030\_x4.....guucgaCucccggcgcgg..... 1  
Gi3\_27749661\_x4uucuGacccaacagauccg..... 1  
Gi1\_4018196\_x4.....uucgauucccggcgcUgg..... 1  
Gi2\_10702083\_x4.....gguAcgauucccggcgcggag..... 1  
Gi5\_8632475\_x4.....gguUgauucccggcgcgg..... 1  
Gi3\_27752297\_x4.....guucgauucccggcgcGg..... 1  
Gi1\_4024384\_x4.....gauucccggcgcggagcC..... 1  
Gi3\_27764721\_x4.....gauucccggcgcUggagc..... 1  
Gi3\_27793009\_x4uucucacccaacaAauccg..... 1  
Gi1\_4037048\_x4.....guucgauCcccggcgcggagc..... 1  
Gi3\_27696305\_x4.....guucgauucccgAgccg..... 1  
Gi5\_8604751\_x4.....gguucgauucccggcUccg..... 1  
Gi5\_8640951\_x4..cucacccaacGgauccg..... 1  
Gi1\_4025512\_x4.....guucgauuccUgggcgcggagc..... 1  
Gi5\_8620595\_x4.....gguAcgauucccggcgcgg..... 1  
Gi3\_27790573\_x4.....guucgaGucccggcgcggag..... 1  
Gi3\_27762773\_x4uucucacccaacUgauccg..... 1  
G1a\_5801486\_x4.....cagauccggguucgauucccggcgcggag..... 0  
Gi3\_27685973\_x4.....agauccggNuucgauucc..... 1  
Gi2\_10700555\_x4.....gguucgauucccggcgcggAag..... 1  
Gi3\_27745305\_x4.....gguucgaGucccggcgcggga..... 1  
Gi1\_4022432\_x4.....gguucgauucccggcgcGgg..... 1  
Gi2\_10653131\_x4.....guGcgauucccggcgcggga..... 1



Gi2\_10697727\_x4.....guucgauucccCgcgccg..... 1  
Gi1\_4025808\_x4.....guucgauucccAgcgccg..... 1  
Gi1\_4046500\_x4..cucaccaacGgauccgg..... 1  
Gi1\_4026372\_x4..ucaccaacagauccggc..... 1  
Gi3\_27739557\_x4.....gguucgauucccggcgccC..... 1  
Gi5\_8636191\_x4uucucacccCacagauccg..... 1  
G1a\_5768570\_x4.....Aguucgauucccggcgccggag..... 1  
G1a\_5790914\_x4.....gguucgGuucccggcgccggagc..... 1  
Gi2\_10659599\_x4.....guucgauuAccggcgccgg..... 1  
Gi3\_27753009\_x4.....cGacagauccggguucgauucc..... 1  
G1a\_5773650\_x4.....Uuucgauucccggcgccgga..... 1  
Gi1\_4043464\_x4.....ggCucgauucccggcgccg..... 1  
Gi3\_27743185\_x4.....uucgauucccggcgccggagcCu..... 1  
Gi3\_27781409\_x4.....ucgauucccggcgccAga..... 1  
Gi1\_4043420\_x4.....gguucgCuucccggcgccggagc..... 1  
G1a\_5778542\_x4uucucaccNaacagauccg..... 1  
Gi5\_8619903\_x4.....guuGgauucccggcgccg..... 1  
Gi4\_538906\_x4.....guucgauucccggcgccggagcCu..... 1  
Gi1\_4028916\_x4.....gguucgauucccggcgccA..... 1  
Gi2\_10672991\_x4.....guAcgauucccggcgccgga..... 1  
Gi1\_4043404\_x4.....guucgauucccggCcgccgg..... 1  
Gi3\_27718133\_x4.....gguucgauuAcccggcgcc..... 1  
Gi5\_8648907\_x4.....guucgauucccggcgccGg..... 1  
Gi3\_27715681\_x4.....gguucgauucccggAcgcc..... 1  
Gi2\_10677239\_x4uucucaccUaacagauccg..... 1  
Gi3\_27678893\_x4.....guucgauucccggcgccCgag..... 1  
Gi2\_10655231\_x4.....gguucgauucccggcUccggagc..... 1  
G1a\_5807290\_x4.....guucgauucccggcgccggCgc..... 1  
Gi2\_10666019\_x4.....guucgauucccggcgccAgga..... 1  
Gi5\_8638903\_x4.ucAcaccaacagauccg..... 1  
Gi5\_8623479\_x4.....gguCcgauucccggcgccggag..... 1  
Gi3\_27739361\_x4.....Uguucgauucccggcgccggagcg..... 1  
Gi5\_8627359\_x4.....gguucgauucccggAgcc..... 1  
Gi5\_8650211\_x4.....gguucgauuccAggcgccc..... 1  
Gi3\_27681081\_x4.....ucgauuccUggcgccggagc..... 1  
G1a\_5787674\_x4.....ggGucgauucccggcgccc..... 1  
Gi1\_4028920\_x4.ucAcaccaacagauccg..... 1  
Gi1\_4028676\_x4.....gguucgauuccAggcgccc..... 1  
G1a\_5776354\_x4.....gguucgauucccggcgccggagcCu..... 1  
Gi5\_8612051\_x4..cucaccaacagauccAg..... 1  
Gi1\_4042944\_x4.....gguucgauucccggcgccAggagc..... 1  
G1a\_5767494\_x4.....gguucgauNcccggcgccc..... 1  
Gi3\_27791545\_x4.....guucgauuccGggcgccgga..... 1  
Gi3\_27720869\_x4uucucacccaacagaCccgg..... 1  
Gi5\_8612143\_x4uucucacccaacagauccAg..... 1  
Gi3\_27749101\_x4.....uucgauCcccggcgccgga..... 1  
Gi3\_27779217\_x4.....guucgauAcccggcgccggag..... 1

Gi4\_539122\_x4 .....guucgauucccgcgccggagcC..... 1  
Gi2\_10661863\_x4.....guucgauuAccggcgccg..... 1  
Gi1\_4046468\_x4uucucacccaaUagauccg..... 1  
Gi3\_27761645\_x4.uUucacccaacagauccg..... 1  
Gi1\_4044148\_x4.ucucacccaacagCuccg..... 1  
Gi5\_8621807\_x4uucucaccNaacagauccg..... 1  
Gi1\_4071663\_x3.....gguucgauucccgcgCUGga..... 1  
Gi1\_4071303\_x3..cucacccaacagauCUGg..... 1  
Gi2\_10774735\_x3uGcucacccaacagauccg..... 1  
Gi3\_27835121\_x3.....uucgauucccgAcgccggagc..... 1  
Gi3\_27838577\_x3.....uucccgcgccggagcCu..... 1  
Gi3\_27896120\_x3.....uucgauuccUGgccccgga..... 1  
Gi5\_8702387\_x3..cucacccaacagauCUGg..... 1  
Gi5\_8663876\_x3uucuUacccaacagauccg..... 1  
Gi1\_4060719\_x3.....gguucgauuAcggcgccg..... 1  
Gi5\_8694449\_x3.....gguucgauucccgcgccCgagc..... 1  
Gi2\_10779472\_x3.....gguucgauucccgcgCAG..... 1  
Gi2\_10804204\_x3.....guucgauucccgcgccgUagc..... 1  
Gi2\_10822213\_x3.....cgauuccNgcgccggagcguuu..... 1  
Gi5\_8706995\_x3.....gguucgauucccgcgCA..... 1  
Gi2\_10744057\_x3Gucucacccaacagauccggguucg..... 1  
Gi1a\_5875426\_x3.....gguCcgauucccgcgccg..... 1  
Gi5\_8712719\_x3uucucacAcaacagauccg..... 1  
Gi3\_27887174\_x3uucucacccaacagCuccg..... 1  
Gi1\_4049865\_x3uucucacccaacUgauccg..... 1  
Gi3\_27798860\_x3uucucacccaacagauCagg..... 1  
Gi5\_8680364\_x3.....gguucgauuUcggcgccg..... 1  
Gi3\_27849674\_x3.....gguucgauuGccggcgccg..... 1  
Gi2\_10736971\_x3.....gguucgauucccgcgccgC..... 1  
Gi3\_27955169\_x3.....gguucUauucccgcgccg..... 1  
Gi2\_10795651\_x3.....gguucgauuAccggcgccgga..... 1  
Gi5\_8657915\_x3.....gguucgauuccUgcgccg..... 1  
Gi3\_27892118\_x3.....guuNgauucccgcgccg..... 1  
Gi3\_27877115\_x3.....Nuucgauucccgcgccggag..... 1  
Gi1\_4085529\_x3.....guuUgauucccgcgccg..... 1  
Gi2\_10791523\_x3.....gguucgauuUccggcgccg..... 1  
Gi1\_4085742\_x3.....guucUauucccgcgccggagc..... 1  
Gi5\_8672801\_x3.....gguucgauucccgAcgccgg..... 1  
Gi3\_27950240\_x3.....aGccggguucgauucccgcgccgga..... 1  
Gi5\_8705318\_x3.Acucacccaacagauccg..... 1  
Gi2\_10760845\_x3uucucacccaUcagauccg..... 1  
Gi2\_10751776\_x3.....guucgauucccgcgccggU..... 1  
Gi3\_27843638\_x3.....gguAcgauucccgcgccg..... 1  
Gi3\_27874355\_x3.....uccggguuNgauucccgcgccgga..... 1  
Gi3\_27925016\_x3.....gguucgauuGccggcgccgga..... 1  
Gi3\_27958253\_x3.....uUgauucccgcgccggag..... 1  
Gi4\_552126\_x3 .....guucgaCucccgcgccggagc..... 1

Gi5\_8715362\_x3.....guucgauucccgcgUcgga..... 1  
Gi3\_27869762\_x3.....gauuccgNcgccggagc..... 1  
Gi2\_10792240\_x3.....gguucgauucccgcgccgA..... 1  
Gi5\_8655605\_x3.....guucgauucccgcgccAga..... 1  
Gi2\_10813018\_x3.....ccUaacagauccggguuc..... 1  
Gi3\_27890375\_x3.....cggguucgauucccgcgccgC..... 1  
Gi4\_548499\_x3.....gguucgauucccgcgcc..... 0  
Gi1a\_5850052\_x3.....guucgaCucccgcgccggagc..... 1  
Gi2\_10743808\_x3.....Gcgauucccgcgccgga..... 1  
Gi2\_10816255\_x3.....cccaacagaCccggguuc..... 1  
Gi1\_4079901\_x3.....ggAucgauucccgcgccggagc..... 1  
Gi2\_10786429\_x3.....uGgauucccgcgccggag..... 1  
Gi2\_10753012\_x3.....gguucgauucccgcgccggagcC..... 1  
Gi3\_27836138\_x3uucucacccaaUagauccgg..... 1  
Gi5\_8685113\_x3.....guucgauucccgcgccggaAc..... 1  
Gi5\_8669642\_x3uGcucacccaacagauccggguu..... 1  
Gi3\_27937088\_x3.....Nuucgauucccgcgccggagc..... 1  
Gi5\_8700377\_x3.....uuUgauucccgcgccgg..... 1  
Gi1\_4048995\_x3.....gguucgaCucccgcgccggagc..... 1  
Gi3\_27911900\_x3.....guucCauucccgcgccgga..... 1  
Gi5\_8657486\_x3uucucacccaacagaCccgg..... 1  
Gi1\_4063026\_x3.....gAucgauucccgcgccgga..... 1  
Gi2\_10765123\_x3.....guucCauucccgcgccgga..... 1  
Gi3\_27970070\_x3uucucacUaacagauccg..... 1  
Gi2\_10784119\_x3.....gguAucgauucccgcgccg..... 1  
Gi3\_27926360\_x3.....Aucgauucccgcgccggagc..... 1  
Gi3\_27949205\_x3.....guucgauAcccgcgccg..... 1  
Gi2\_10821682\_x3.....gguucgauuccUcgcc..... 1  
Gi4\_547647\_x3.....gguucgauucccgcgccggag..... 0  
Gi1\_4063590\_x3.....guucgauucccgcgccCga..... 1  
Gi1\_4085451\_x3uucucaAccaacagauccg..... 1  
Gi1\_4047990\_x3uucGcaccacagauccg..... 1  
Gi1\_4057449\_x3.....gguucgauucccgcgccAgagc..... 1  
Gi3\_27821048\_x3.....gguucgauucccgUcgccggagc..... 1  
Gi2\_10784854\_x3.....gguucgauAcccgcgccg..... 1  
Gi3\_27868535\_x3.....cagauccggguCcgauucc..... 1  
Gi5\_8675369\_x3.....Gcgauucccgcgccgga..... 1  
Gi3\_27944972\_x3.....ucUauucccgcgccggagc..... 1  
Gi3\_27816947\_x3.....ggNucgauucccgcgcc..... 1  
Gi3\_27970415\_x3.....uGcggguucgauucccgcgccgga..... 1  
Gi1\_4072857\_x3.....guucgauucccgcgccgCa..... 1  
Gi2\_10755211\_x3.....cGcaacagauccggguuc..... 1  
Gi5\_8709440\_x3.....gguucgauAcccgcgccg..... 1  
Gi2\_10783159\_x3.....guucgauuccGggcgccg..... 1  
Gi3\_27884855\_x3.....uucgauUccggcgccggagc..... 1  
Gi3\_27888362\_x3.....gguucgauucccgCcgccg..... 1  
Gi2\_10790146\_x3.....gguucgauucccgcgccgAa..... 1

Gi2\_10767859\_x3.....Nguucgauucccggcgcccggagc..... 1  
Gi1\_4076907\_x3.....gguucgauucccgUgcccga..... 1  
Gi5\_8661461\_x3.....Auucgauucccggcgcccggag..... 1  
Gi3\_27820343\_x3.....ucAauucccggcgcccggagc..... 1  
Gi5\_8652128\_x3.....guucgauucccgUgcccga..... 1  
Gi3\_27830687\_x3.....gguucgauucccCgcccga..... 1  
Gi2\_10783561\_x3uucucaccccCacagauccg..... 1  
Gi5\_8656658\_x3.....gguNcgauucccggcgcccggagc..... 1  
Gi1\_4067886\_x3.....auccggguucgauuccAggcccgg..... 1  
Gi1\_4075323\_x3.....ucgauucccggcgcccggag..... 0  
Gi5\_8676506\_x3..Acacccaacagauccgggu..... 1  
Gi2\_10794754\_x3.....gguucAauucccggcgccc..... 1  
Gi3\_27884132\_x3.....guucgaAuucccggcgcccga..... 1  
Gi1\_4063098\_x3.....gguucgauuccGggcccgg..... 1  
Gi3\_27836450\_x3.....guucgauucccggcgcccUag..... 1  
Gi1\_4087308\_x3.....guucgGuucccggcgccc..... 1  
Gi1\_4057752\_x3.....gguucgaCuuccggcgcccga..... 1  
Gi5\_8659796\_x3uucucacccaacagauUgg..... 1  
Gi3\_27941390\_x3.....uucgauCcccggcgcccggagc..... 1  
G1a\_5853448\_x3uGcucacccaacagauccgg..... 1  
Gi2\_10750684\_x3.....gguucgauucccgAgcccga..... 1  
Gi3\_27849311\_x3.....guucgauucccggcgcccggagG..... 1  
Gi1\_4075806\_x3.....Nuucgauucccggcgcccgg..... 1  
Gi5\_8713547\_x3.....guucgauGcccggcgcccgg..... 1  
Gi5\_8663615\_x3.ucucaccccGacagauccg..... 1  
Gi5\_8677196\_x3.ucucacccaacagGuccgggu..... 1  
Gi1\_4080300\_x3.....gguuAgauucccggcgcccgg..... 1  
Gi5\_8658149\_x3.....guGcgauucccggcgcccga..... 1  
Gi3\_27821375\_x3.....ucgauCcccggcgcccggagc..... 1  
Gi3\_27906098\_x3.....uucgauUcccggcgcccga..... 1  
Gi5\_8714339\_x3.....ucUauucccggcgcccggagc..... 1  
Gi5\_8669591\_x3.....gguucgauucccgAgcccgg..... 1  
Gi1\_4065120\_x3.ucucaccccNacagauccg..... 1  
Gi5\_8692454\_x3.....gguucgauucccgUgcccggag..... 1  
Gi1\_4077564\_x3.....gguucgGuucccggcgcccggagc..... 1  
Gi1\_4074720\_x3.....auccggguucgauucccggcgcccAg..... 1  
Gi3\_27813977\_x3.....ucgaCuuccggcgcccga..... 1  
Gi3\_27812366\_x3.....gguucgauucGggcgcccggag..... 1  
Gi1\_4088490\_x3.....gguucgauucccggcgcccggGg..... 1  
Gi3\_27937673\_x3.....Uauccggguucgauucccggcgcccga..... 1  
Gi5\_8663273\_x3.....Uuucgauucccggcgcccggagcguuucc..... 1  
Gi5\_8688164\_x3.....guucgauucUggcgcccga..... 1  
Gi3\_27954461\_x3.....gguuAgauucccggcgccc..... 1  
Gi5\_8688299\_x3.....guucgCuucccggcgcccggagc..... 1  
Gi5\_8663858\_x3.....gguucgauCcccggcgcccga..... 1  
Gi1\_4077450\_x3uucucacccaacagauccgU..... 1  
Gi1\_4088190\_x3.....gguucgauucUggcgcccga..... 1

Gi1\_4048947\_x3..cuUaccaacagauccgg..... 1  
Gi1\_4058412\_x3.ucucaccaacGgauccg..... 1  
Gi1\_4052205\_x3uucucaccaacagauccgC..... 1  
Gi5\_8711684\_x3.....gguucAauuccggcgccgga..... 1  
Gi2\_10745776\_x3.....gguuAgaauuccggcgccgga..... 1  
Gi5\_8715332\_x3.ucucaccaacagGuccg..... 1  
Gi1\_4073901\_x3.....uUgauuccggcgccggagc..... 1  
Gi3\_27935387\_x3.....Cauuccggcgccggagc..... 1  
Gi1\_4048029\_x3.....gguucgauuccggcgccggagA..... 1  
Gi3\_27823085\_x3uucucacAcaacagauccg..... 1  
Gi3\_27815537\_x3uucucaccaacagauccg..... 1  
Gi1\_4079502\_x3.....uucgaCuccggcgccgg..... 1  
Gi2\_10730764\_x3.....uCcgauuccggcgccgg..... 1  
Gi5\_8686355\_x3.....aacagauccggguucgauuccggcgccggagc..... 0  
Gi2\_10800736\_x3.....gguucCauuccggcgccggag..... 1  
Gi3\_27892247\_x3.....gguucgauuccggcgccggag..... 1  
Gi5\_8658599\_x3.....cgauuccggcgccggagcCu..... 1  
Gi1\_4077060\_x3uucucaccaacUgauccg..... 1  
Gi2\_10785745\_x3.....gguucgauuccggcgccggag..... 1  
Gi3\_27876740\_x3.....guuAgaauuccggcgccggag..... 1  
Gi1\_4059540\_x3.....gguucAauuccggcgccgg..... 1  
Gi5\_8693288\_x3.....gauuccggcgccggGgc..... 1  
Gi3\_27905309\_x3.....cagauccgNguucgauucc..... 1  
Gi2\_10804873\_x3.....gguucgauuccggcgccggag..... 1  
Gi5\_8664269\_x3.....gguucgauuccUggcgccggag..... 1  
Gi1\_4057824\_x3.....guucgauCcccgccgg..... 1  
Gi5\_8655893\_x3.....guucCauuccggcgccgg..... 1  
Gi3\_27893261\_x3.....guucgauAccggcgccggag..... 1  
Gi5\_8653427\_x3uucucaccaCcagauccgggu..... 1  
Gi2\_10811437\_x3.....guucgauuccAgggcgccg..... 1  
Gi5\_8701292\_x3.....guucgauuccUgcgccgg..... 1  
Gi1\_4082823\_x3.....gAuucgauuccggcgccggag..... 1  
Gi4\_551532\_x3 uucucaccaacagauccg..... 0  
Gi2\_10778767\_x3.....gguucgauuccAgggcgccggag..... 1  
Gi3\_27913643\_x3.....agaucggguucgUuucc..... 1  
Gi3\_27829070\_x3.....gguucgauuccggcgccggag..... 1  
Gi5\_8653847\_x3.....uCcgauuccggcgccgg..... 1  
Gi3\_27912119\_x3.....aacagauccggguucgauuccggcgccggagcC..... 1  
Gi3\_27834674\_x3.....aUaucggguucgauuccggcgccggagc..... 1  
Gi2\_10824061\_x3.....gguucgauuccAgggcgcc..... 1  
Gi1a\_5829127\_x3.ucucaccaacagGuccg..... 1  
Gi3\_27967724\_x3.....ucUauuccggcgccggag..... 1  
Gi2\_10746802\_x3.....gAuucgauuccggcgccggag..... 1  
Gi1\_4081971\_x3.....ggGucgauuccggcgccggagc..... 1  
Gi3\_27913328\_x3.....caacagauNcggguucgauucc..... 1  
Gi1\_4083423\_x3.....gguucgauuccggUgccggagc..... 1  
Gi5\_8678831\_x3.....gguucgaAuuccggcgccg..... 1

Gi4\_549507\_x3 .ucucacccaacagauccg..... 0  
Gi5\_8680913\_x3.....guucgauucccgUgcccggagc..... 1  
Gi1\_4080075\_x3uucucCcccaacagauccg..... 1  
Gi5\_8660549\_x3.....guucgauuccAgggcgccgg..... 1  
Gi3\_27883871\_x3.....uucgauucccgccggagcgA..... 1  
Gi2\_10803289\_x3.....gguucgauucAcggcgccg..... 1  
Gi5\_8671748\_x3uAcucacccaacagauccg..... 1  
Gi3\_27933464\_x3.....ucgauucccgccggagcCu..... 1  
Gi5\_8658845\_x3.....gguucgauuccUggcgcc..... 1  
Gi1\_4075257\_x3.ucucacccaacagauccA..... 1  
G1a\_5872276\_x3.....gguucgaCucccgccggagc..... 1  
Gi5\_8684414\_x3.....agaucgggGucgauucc..... 1  
Gi5\_8652935\_x3.....guucgauuccAgggcgccgga..... 1  
Gi1\_4073718\_x3.....guucgauuUccggcgccggagc..... 1  
Gi2\_10726432\_x3.....gguucgauucGcggcgccggagc..... 1  
Gi1\_4056513\_x3uucucacccaacagCuccgg..... 1  
Gi5\_8658503\_x3.....ggAucgauucccgccggagc..... 1  
Gi5\_8667827\_x3.ucucacccaacagauccggG..... 1  
Gi5\_8717162\_x3..Aucacccaacagauccgg..... 1  
Gi3\_27917921\_x3.....gguucgauucccgccggcgg..... 0  
Gi2\_10730596\_x3.....guucgauucccgccggcC..... 1  
Gi1\_4076667\_x3.....guucgauucccgAgccg..... 1  
Gi3\_27931829\_x3.....ucgauuUccggcgccggag..... 1  
G1a\_5853931\_x3.....guucgGuucccgccggagc..... 1  
Gi4\_544908\_x3.....gguucgauNcccggcgccgg..... 1  
Gi5\_8672588\_x3.....gguucgauuccCcgccggagc..... 1  
Gi3\_27925910\_x3.....cgauuccUggcgccggagc..... 1  
Gi3\_27961436\_x3uucucaccUaacagauccg..... 1  
Gi1\_4054593\_x3.cucacccGacagauccgg..... 1  
Gi5\_8711294\_x3.....gguucgauucccgccAgag..... 1  
Gi3\_27914537\_x3.....guucgauuccUgcccggga..... 1  
Gi3\_27818741\_x3.....guucgUuucccgccggagc..... 1  
Gi3\_27864263\_x3.....guucgauucccgccggcU..... 1  
Gi2\_10761202\_x3.....gguucgauucUcggcgccgg..... 1  
Gi2\_10781692\_x3.....guucgauucUcggcgccggag..... 1  
Gi2\_10785715\_x3.....ucgauucAcggcgccggagc..... 1  
Gi1\_4074498\_x3Aucucacccaacagauccg..... 1  
Gi2\_10769323\_x3.....auuccggcgccggagcCu..... 1  
G1a\_5840212\_x3.....gguucgGuucccgccg..... 1  
Gi2\_10822219\_x3.....gguucgauucccgccggagcg..... 0  
Gi3\_27842411\_x3.....gguucgauuccGggcgccgg..... 1  
Gi3\_27827708\_x3.....guucgUuucccgccgg..... 1  
Gi5\_8710403\_x3.ucuUacccaacagauccg..... 1  
Gi5\_8675351\_x3.....gguucgauucAcggcgccgga..... 1  
Gi5\_8712632\_x3.....guuNgaucccgccgg..... 1  
Gi2\_10762363\_x3.....uucgaCucccgccggagc..... 1  
Gi5\_8697125\_x3.....guucgauuccgUgcccggagc..... 1

Gi5\_8692604\_x3..cucUcccaacagauccgg..... 1  
Gi5\_8673644\_x3.....gguucgauucccggcgcAggag..... 1  
Gi1\_4051002\_x3.....guucgauuccGggcgccgg..... 1  
Gi1\_4060380\_x3uucucaUccaacagauccgg..... 1  
Gi2\_10783765\_x3.....guucgauucccggcgcU..... 1  
Gi2\_10765033\_x3uucucacccaacagauAcg..... 1  
Gi3\_27834023\_x3.....guuNgauucccggcgcgga..... 1  
Gi5\_8653148\_x3.....guucgauucccggcgcAggag..... 1  
Gi1\_4068717\_x3.....gguucgauucccggcgcUcgga..... 1  
Gi2\_10796617\_x3.....guucgauucccggcgcGgg..... 1  
Gi2\_10779409\_x3.....guucgCuucccggcgcggag..... 1  
Gi2\_10796326\_x3.....gUuucccggcgcggagc..... 1  
Gi3\_27906026\_x3Gucucacccaacagauccggguuc..... 1  
Gi3\_27886430\_x3.....guuGgauucccggcgcgga..... 1  
G1a\_5845960\_x3.....guucgauucccggcgcggagcCu..... 1  
Gi5\_8667416\_x3uucucacccaacUgauccg..... 1  
Gi5\_8682884\_x3.....cagauccgggCucgauucccggcgcg..... 1  
Gi3\_27975029\_x3.....gUuucccggcgcggagc..... 1  
Gi2\_10788475\_x3.....ucgauucccggcgcAgagc..... 1  
G1a\_5854144\_x3.....gguucgauucccggcgcggCgc..... 1  
Gi5\_8672123\_x3.....gguucgauucUcggcgccgg..... 1  
Gi1\_4087377\_x3.....gAaucgauucccggcgcggagc..... 1  
Gi2\_10776802\_x3.....guucgauucccggcgcgga..... 1  
Gi2\_10790677\_x3.....guucgauucccggcgcggagc..... 1  
Gi2\_10801846\_x3.....guucgaAucccggcgcggagc..... 1  
Gi5\_8661062\_x3Gucucacccaacagauccggguu..... 1  
Gi5\_8664656\_x3.ucucacccNacagauccgg..... 1  
Gi3\_27887441\_x3..cucacccGacagauccgg..... 1  
Gi5\_8679263\_x3.....gguucgauucUcggcgcc..... 1  
Gi5\_8653064\_x3.....Cauucccggcgcggagc..... 1  
Gi3\_27845336\_x3..cucacccaacagGuccgg..... 1  
Gi2\_10743196\_x3.....guucgauCcccggcgcggag..... 1  
Gi1\_4055634\_x3.ucucacccaacagauAcg..... 1  
Gi1\_4082253\_x3.....guucgauCcccggcgcggga..... 1  
Gi2\_10746955\_x3.....guucgaGucccggcgcggga..... 1  
Gi2\_10823227\_x3.....guucgauucccAgcgccggag..... 1  
Gi2\_10753882\_x3.....gguucgauucccggcgcgggaC..... 1  
Gi1\_4073049\_x3uucucacccaacaAauccg..... 1  
Gi3\_27870452\_x3.....gguucgauucccggcgcU..... 1  
Gi1\_4057833\_x3.....gguucgauucccUgcgcgg..... 1  
Gi3\_27932771\_x3.....gguucgauucccCgcgcgg..... 1  
Gi2\_10816390\_x3.....guuNgauucccggcgcggagc..... 1  
Gi5\_8703620\_x3.ucucacccaacagauUg..... 1  
Gi2\_10780225\_x3.....Aauucccggcgcggagc..... 1  
Gi3\_27927506\_x3uucucacccUacagauccg..... 1  
Gi1\_4056333\_x3.....gguucgauuccUggcgccg..... 1  
Gi1\_4055508\_x3.....gguucgauucccGAcgcgg..... 1

Gi3\_27827657\_x3.....gAucgauucccggcgccg..... 1  
Gi1\_4060953\_x3uuuUacccaacagauccg..... 1  
Gi2\_10749778\_x3.....gguAcgauucccggcgccgga..... 1  
Gi1\_4073733\_x3.....uuUgauucccggcgccggagc..... 1  
Gi3\_27875945\_x3.....agauccggguCcgauucc..... 1  
Gi1\_4089273\_x3.....gguucgaCucccggcgccg..... 1  
Gi3\_27955472\_x3uAcucaccaacagauccg..... 1  
Gi2\_10822114\_x3.....gguuGgauucccggcgccgga..... 1  
Gi2\_10776085\_x3.....gguucUauucccggcgcc..... 1  
Gi5\_8699609\_x3.....ucgauucccgAcgccgga..... 1  
Gi3\_27819824\_x3.....gguuAgauucccggcgccgg..... 1  
Gi2\_10794589\_x3.....ucgauucccggcgccgAagc..... 1  
Gi2\_10795318\_x3Gucucaccaacagauccg..... 1  
Gi2\_10795600\_x3.....gguucgauucccggcgccUgag..... 1  
Gi3\_27911921\_x3.....gguucgauGcccgggcgcc..... 1  
Gi3\_27864914\_x3.....uucgaCucccggcgccg..... 1  
Gi5\_8684030\_x3..ucaccaacagauccgggGu..... 1  
Gi5\_8656268\_x3.....guGcgauucccggcgccggagc..... 1  
Gi2\_10779790\_x3.....gguucgauucccggcCccggag..... 1  
Gi5\_8701718\_x3.....Gccggguucgauucccggc..... 1  
G1a\_5855329\_x3.....Aguucgauucccggcgccgg..... 1  
Gi2\_10811659\_x3.....gguucgauucccggcgccGc..... 1  
Gi5\_8705831\_x3.....gAucgauucccggcgccgga..... 1  
Gi5\_8702807\_x3uucucCcccaacagauccg..... 1  
Gi4\_550752\_x3.....ggGucgauucccggcgccgg..... 1  
Gi3\_27867647\_x3.....Nguucgauucccggcgccggag..... 1  
Gi3\_27818801\_x3.....guucgauuccAgggcgcg..... 1  
Gi1\_4074957\_x3.....guucgauuccCgcgcgccgga..... 1  
Gi5\_8705780\_x3Aucucaccaacagauccg..... 1  
Gi1\_4065948\_x3.....gguCcgauucccggcgccg..... 1  
Gi3\_27828017\_x3.....aUauccggguucgauucccggcgccggag..... 1  
Gi5\_8669648\_x3.....guucgauucccggcgccUgagc..... 1  
Gi1\_4078809\_x3.....gguucgauucccggcgccggagcCuu..... 1  
Gi1\_4089084\_x3.....guucgauUccgggcgccg..... 1  
Gi2\_10759840\_x3.....ucUauucccggcgccggagc..... 1  
Gi2\_10748152\_x3.....Gucgauucccggcgccggag..... 1  
Gi3\_27964262\_x3.....gguucgauucccggcgccgUa..... 1  
G1a\_5836006\_x3.....gguucgauucccggcAccggagc..... 1  
Gi2\_10791622\_x3.....gguuAgauucccggcgccggag..... 1  
Gi3\_27804551\_x3.....gguucgauucccgGgccg..... 1  
Gi3\_27936176\_x3.....gauucccggcAccggagc..... 1  
Gi3\_27954134\_x3.....guucgauuccUgcgccggagc..... 1  
Gi2\_10743235\_x3.....gguucgauucccggcGggag..... 1  
Gi1\_4065504\_x3.....guucAauucccggcgccg..... 1  
Gi1\_4059471\_x3.ucucaccGacagauccg..... 1  
Gi5\_8665940\_x3.Gcucaccaacagauccgggu..... 1  
G1a\_5858230\_x3.....gGucgauucccggcgccg..... 1



Gi2\_10798258\_x3.....gguucgauucccgcgGcgg..... 1  
Gi5\_8666495\_x3...ucaccaGcagauccggguu..... 1  
Gi5\_8657537\_x3.....Gcgauucccgcgccggag..... 1  
Gi1\_4054572\_x3.ucucacccGacagauccgg..... 1  
Gi5\_8666963\_x3.....gguucgauucccgcgccggaUc..... 1  
Gi3\_27909551\_x3.....uucgauuccUggcgccggagc..... 1  
Gi3\_27859577\_x3.....uccggguucgauucccgcgccgAa..... 1  
Gi5\_8698340\_x3.....gguucgauucccgcgccCg..... 1  
Gi5\_8671412\_x3.....ccggguucgauucccgcgccggC..... 1  
Gi3\_27947888\_x3.....gguucgauucccgCcgccg..... 1  
Gi5\_8683811\_x3.....gCuucgauucccgcgcc..... 1  
Gi3\_27804281\_x3.ucucacccaacagGuccg..... 1  
Gi1\_4075113\_x3...cacccaacagauccgggGucgauucc..... 1  
Gi3\_27939230\_x3.....ggguucgauucccgcgccggCgc..... 1  
Gi5\_8653355\_x3.....gguucgauuAccggcgccgga..... 1  
Gi2\_10803223\_x3.....guuGgauucccgcgccgga..... 1  
Gi2\_10756783\_x3.....gguucgauAcccgcgcc..... 1  
Gi3\_27851090\_x3.....Gggguucgauucccgcgccggag..... 1  
Gi5\_8673065\_x3.....ucgauucccgcgccggagcCu..... 1  
Gi2\_10779721\_x3uucuUacccaacagauccg..... 1  
Gi5\_8673704\_x3.....gguucgauucccgcgccggagcgcCu..... 1  
Gi5\_8669315\_x3.....cccaacagauccggguCc..... 1  
Gi3\_27834272\_x3.....guuAgauucccgcgccggagc..... 1  
Gi5\_8651117\_x3Gucucacccaacagauccggguuc..... 1  
Gi3\_27922640\_x3.....ucgauucccgUgcccga..... 1  
Gi2\_10790641\_x3.....gguucgauuUccggcgccg..... 1  
Gi3\_27822023\_x3.....auUcggguucgauucccgcgccgga..... 1  
Gi3\_27881726\_x3.....gguucgauucccgUcgccggag..... 1  
Gi3\_27814679\_x3.....ucgauucccgcgccAgggag..... 1  
Gi2\_10745017\_x3.....gguucgauucccgcgccCgag..... 1  
Gi1\_4058463\_x3.....guucgauucccgUcgccgga..... 1  
Gi3\_27869522\_x3.....guucgauucccgCcgccgg..... 1  
Gi3\_27846707\_x3.....Acgauucccgcgccgga..... 1  
Gi5\_8680985\_x3.....gGuucccgccuuccuucgucu..... 1  
Gi2\_10811863\_x3uucucacAcaacagauccg..... 1  
Gi5\_8694740\_x3uucucacccaacagauccA..... 1  
Gi5\_8708984\_x3.....Ccgauucccgcgccggagc..... 1  
Gi5\_8652497\_x3.....guucgauucccgcgccCga..... 1  
Gi3\_27948005\_x3.....guucgauucccgGgcccggagc..... 1  
Gi3\_27963530\_x3.....gguucgauucccgcgccA..... 1  
Gi3\_27813083\_x3.....cggguucgNuucccgcgccgga..... 1  
Gi5\_8698208\_x3...cucaGccaacagauccgg..... 1  
Gi5\_8676110\_x3.....ucgauuccNgcgccggag..... 1  
Gi2\_10828222\_x3.....gguucgauuccCcgccgga..... 1  
Gi3\_27911471\_x3.....gUguucgauucccgcgccggagc..... 1  
Gi5\_8716589\_x3.....guucgauucccgAgccgga..... 1  
Gi3\_27940733\_x3.....gguuAgauucccgcgcc..... 1

Gi2\_10761703\_x3.....guucgauucccggcgcGgga..... 1  
Gi2\_10779490\_x3.....guucgaGucccggcgccgg..... 1  
Gi1\_4074180\_x3.ucAcaccaacagauccg..... 1  
Gi3\_27813704\_x3.....uccgggCucgauucccggcgccgga..... 1  
Gi5\_8695913\_x3.....gguucgauucccggcgcCa..... 1  
Gi5\_8716610\_x3.....gguucgauucccggcgcU..... 1  
Gi1\_4131255\_x2.....uucgauucccggcgcggCgc..... 1  
Gi4\_555552\_x2.....Uuucgauucccggcgcgg..... 1  
Gi3\_28150738\_x2.....guuAgauucccggcgccggag..... 1  
Gi3\_28170812\_x2uucucacGcaacagauccgg..... 1  
Gi3\_28086048\_x2.....cgauucccgAgccggagc..... 1  
Gi5\_8824933\_x2.....gguucgauCcccgggcgccgg..... 1  
G1a\_5953700\_x2.....guucgauucccggcgcUcggagc..... 1  
Gi5\_8801793\_x2.....ggCucgauucccggcgccggagcguu..... 1  
Gi5\_8828365\_x2.uGucaccaacagauccgggu..... 1  
Gi2\_10926921\_x2.....guucgauucccggcgccCga..... 1  
Gi2\_10831105\_x2.....uGcgauucccggcgccgga..... 1  
Gi3\_28164796\_x2.....gguucgauuccGggcgcc..... 1  
Gi1\_4128985\_x2.....Cuccggguucgauucccggcgccgg..... 1  
Gi3\_28071682\_x2.....gguGcgauucccggcgccg..... 1  
Gi3\_28057976\_x2.....auccUgguucgauucccggcgccgga..... 1  
Gi1\_4147021\_x2.....guucgauucccggcgcAg..... 1  
Gi3\_28133550\_x2uucucaccaacCgauccg..... 1  
Gi1\_4118677\_x2.....guucgauucccgUcgcgg..... 1  
Gi3\_28230940\_x2.....ucgauucccgCcgccggagc..... 1  
Gi2\_10922353\_x2.....cgauucccggcgccggag..... 0  
Gi1\_4103481\_x2.....gguucgauucccggcgcU..... 1  
Gi1\_4135867\_x2.....Cguucgauucccggcgccgga..... 1  
G1a\_5943884\_x2uucucacAcaacagauccg..... 1  
Gi3\_28229644\_x2.....cgauucccggcgccggagcCu..... 1  
Gi3\_28024186\_x2.....gguucgauuccUgcgccgg..... 1  
Gi5\_8745705\_x2.....gguucgauuAccgggcgccggag..... 1  
Gi1\_4124623\_x2..cucaccaacagUuccgg..... 1  
Gi5\_8823089\_x2.....uUcggguucgauucccggc..... 1  
Gi5\_8801251\_x2.....uucccggcgccggagcCu..... 1  
Gi3\_28001584\_x2..Gucaccaacagauccggguucgauu..... 1  
Gi1\_4123331\_x2uucucacGcaacagauccgg..... 1  
G1a\_5938360\_x2.....gguNcgauucccggcgccg..... 1  
Gi3\_28149540\_x2uucucacccUacagauccggguuc..... 1  
Gi2\_10856589\_x2.....cgauucccggcgccggagcCuuc..... 1  
G1a\_5913426\_x2.....Gucgauucccggcgccggagc..... 1  
Gi1\_4152189\_x2.....gguucgauuccUgcgccg..... 1  
Gi2\_10951235\_x2.....ucgauucccggcgccggagU..... 1  
Gi1\_4156275\_x2..ucaccaacagaCccgggu..... 1  
Gi2\_10984877\_x2.....cccaacGgauccggguuc..... 1  
Gi2\_10974063\_x2.....uccggguuNgauucccggcgccgga..... 1  
Gi2\_10868905\_x2.....gguucgauucccggcgccggU..... 1

Gi5\_8748139\_x2.....Gagauccggguucgauucccgcgccg..... 1  
Gi5\_8765215\_x2.....guuNgauucccgcgccg..... 1  
Gi2\_10912907\_x2.....gguNcgauucccgcgcc..... 1  
Gi2\_10872295\_x2.....gCuucgauucccgcgccg..... 1  
Gi1\_4141471\_x2.....guucgauucccgcgccgagA..... 1  
Gi3\_28174612\_x2.....gauucccgcgccgagcCu..... 1  
Gi1\_4114789\_x2.....gguUgauucccgcgccgagc..... 1  
Gi3\_28240662\_x2.....gguNcgauucccgcgccg..... 1  
Gi5\_8791119\_x2.....Gcggguucgauucccgcgccgga..... 1  
Gi2\_10847523\_x2.....guucgauucccgCcgccgagc..... 1  
Gi1\_4101425\_x2.....gguucgauucccgcgGcgg..... 1  
Gi3\_28236116\_x2uucucacccaacagauAccg..... 1  
Gi3\_27993528\_x2uucAcacccaacagauccg..... 1  
Gi5\_8827803\_x2.....gauuccAgcgccgagc..... 1  
Gi5\_8772669\_x2.....uucgauucccgcgccgagcC..... 1  
Gi1\_4105643\_x2uucucacccCacagauccg..... 1  
Gi5\_8789299\_x2.....guucCauucccgcgccg..... 1  
Gi1\_4138577\_x2.....guucgauuccUggcgccgga..... 1  
Gi1\_4145965\_x2..cucacccaacagauAccg..... 1  
Gi2\_10886109\_x2uucucacccUacagauccg..... 1  
G1a\_5966336\_x2.....gguucgauucccgcgccAgagc..... 1  
Gi1\_4141445\_x2.....gguucGUucccgcgccgagc..... 1  
Gi5\_8786747\_x2uucucacccaacagauccgAuu..... 1  
Gi5\_8721603\_x2.....uGgauucccgcgccgag..... 1  
Gi5\_8797229\_x2.....gguucgauucccgcgAcc..... 1  
Gi3\_28133844\_x2.....gNucgauucccgcgccgagc..... 1  
Gi2\_10886403\_x2.....guucgauAcccgcgccgga..... 1  
Gi5\_8812953\_x2.....gaCucccgcgccgagc..... 1  
Gi1\_4118443\_x2.....uucgGuucccgcgccg..... 1  
Gi3\_28052776\_x2..cucaccaaUagauccg..... 1  
Gi3\_28204134\_x2.....ucgauucccgcgccgagU..... 1  
Gi1\_4104675\_x2.....gguucgauucccgcgccgCg..... 1  
Gi2\_10978487\_x2.....gaAuucccgcgccgagc..... 1  
Gi2\_10868073\_x2.....guucgauuccAgcgccgag..... 1  
Gi3\_28041284\_x2.....cgauucccgcgccggaAc..... 1  
Gi2\_10873443\_x2.....gguucGUucccgcgccg..... 1  
Gi5\_8803327\_x2.....agauUgguucgauucc..... 1  
Gi3\_28218068\_x2.....gguucgaAuucccgcgccg..... 1  
Gi2\_10947541\_x2.....Uccaacagauccgguuc..... 1  
Gi1\_4149379\_x2.....gguucgauucccgcgAccg..... 1  
Gi1\_4119445\_x2.....uucgauuccUggcgccg..... 1  
Gi5\_8812831\_x2.....guucgauucccgAcgccgagc..... 1  
Gi3\_28167666\_x2.....cagauccggguucgauuccU..... 1  
Gi1\_4101387\_x2.....gguucgauucccgcgccggaA..... 1  
Gi2\_10886137\_x2.....gAuucgauucccgcgccg..... 1  
Gi2\_10890015\_x2.....guGcgauucccgcgccgag..... 1  
Gi5\_8747139\_x2uucucacccaacGgauccggguuc..... 1

Gi3\_28199080\_x2.....gguucgauucccggcgccUgag..... 1  
Gi3\_28081378\_x2.ucucaccccGacagauccg..... 1  
Gi2\_10928843\_x2.....uucgauucccggcgcAgg..... 1  
Gi3\_28239860\_x2.....gauccggguucgaCuccc..... 1  
G1a\_5966242\_x2.....uucgaCucccggcgcgggagc..... 1  
Gi3\_28236100\_x2.....caacagauccggguucAauucc..... 1  
Gi1\_4127809\_x2.....guucgauucUcggcgccgga..... 1  
Gi2\_10846981\_x2.....ucgauucccggcAccggagc..... 1  
Gi1\_4152497\_x2..cucaccUaacagauccgg..... 1  
G1a\_5954188\_x2.....guucgGuucccggcgcgg..... 1  
Gi3\_27993194\_x2.....gguucgaGucccggcgcggag..... 1  
Gi3\_28063662\_x2..cGcaccacacagauccggguucgauu..... 1  
Gi3\_28254224\_x2.....guucgaGucccggcgcgg..... 1  
Gi3\_28091478\_x2..cucacccaacCgauccgg..... 1  
G1a\_5955404\_x2.....uucgGuucccggcgcgggagc..... 1  
Gi2\_10897531\_x2.....guucgauAcccggcgcggag..... 1  
Gi1\_4142341\_x2.....guucgauucccggcgcAgag..... 1  
G1a\_5955874\_x2.....gguucgauucccggcgcggCg..... 1  
Gi2\_10973301\_x2.....guucgauucccggcgcGcg..... 1  
Gi2\_10918135\_x2.....gguucgauucccggcgcUcgg..... 1  
Gi1\_4125009\_x2.ucGcaccacacagauccgg..... 1  
Gi5\_8743365\_x2.ucCacccaacagauccgg..... 1  
G1a\_5943254\_x2.ucucaccccNacagauccg..... 1  
G1a\_5930724\_x2.....ggGucgauucccggcgcgggagc..... 1  
Gi3\_28051960\_x2.....gguucgauucUcggcgcc..... 1  
Gi2\_10853099\_x2.....ucgauucccgCcgccggag..... 1  
G1a\_5925080\_x2.....gguucgauucccAgcgcgggagc..... 1  
Gi3\_28051586\_x2.....ucgauucccggcgcgggaA..... 1  
Gi3\_28247670\_x2.....cagauccAgguucgauucc..... 1  
Gi2\_10884795\_x2.....ucgauucccggcgcAcggagc..... 1  
Gi3\_28078074\_x2.....guucgauGccggcgccgg..... 1  
Gi1\_4142901\_x2.....gguuUgauucccggcgcggga..... 1  
Gi2\_10908019\_x2.....gguucgauuccAggcgcgg..... 1  
Gi3\_28083252\_x2.....guucgauucAcggcgccggag..... 1  
Gi5\_8754887\_x2.....uucgaCucccggcgcgg..... 1  
Gi5\_8724119\_x2.....Nguucgauucccggcgcgggagc..... 1  
Gi4\_554608\_x2.....guucgaCucccggcgcgg..... 1  
Gi2\_10981625\_x2uucucaccAaacagauccg..... 1  
Gi1\_4100873\_x2.....guucgauucccggcAccggagc..... 1  
G1a\_5889316\_x2.....guucgaCucccggcgcgg..... 1  
Gi3\_28133342\_x2.....ucgauucccggcgcggCagc..... 1  
Gi1\_4148309\_x2.....caGcagauccggguucgauu..... 1  
Gi1\_4145883\_x2uucucacGcaacagauccg..... 1  
Gi5\_8767991\_x2uucuGacccaacagauccg..... 1  
Gi2\_10925471\_x2.....gguucgauucccggcgccCga..... 1  
Gi1\_4140307\_x2.....guucgauucccgAcgcgg..... 1  
Gi1\_4145737\_x2.....cggguucgauucccggcgcgg..... 0

Gi2\_10980421\_x2.....guucgCuucccggcgccgga..... 1  
Gi2\_10905079\_x2uucucacccaacagauGcg..... 1  
Gi5\_8731585\_x2.....guucgaAuucccggcgccgagc..... 1  
Gi3\_28023594\_x2...Uacccaacagauccggguuc..... 1  
Gi3\_28169190\_x2.....uuUgauucccggcgccgga..... 1  
Gi5\_8770651\_x2.....guucgauucccggcgccgAagc..... 1  
Gi1\_4134717\_x2.....guucgauucccgUgccc..... 1  
Gi2\_10869407\_x2.....guucCauucccggcgccgagc..... 1  
Gi2\_10959413\_x2uucucacGcaacagauccg..... 1  
Gi5\_8818769\_x2.ucucacccaacagauUgg..... 1  
Gi5\_8764685\_x2.....guucgauAcccggcgccgga..... 1  
Gi5\_8718507\_x2.....guucgauucccggcgccgagA..... 1  
Gi3\_28038396\_x2.....ucgauucccggcGggagc..... 1  
Gi2\_10949289\_x2uucucacccaUagauccg..... 1  
Gi1\_4148939\_x2.....guGcgauucccggcgccgga..... 1  
Gi5\_8789839\_x2.....cgguucgauucccgUgcc..... 1  
G1a\_5909814\_x2.....gguucgauucccggcgccgC..... 1  
Gi1\_4155703\_x2.....guucgauUccgggcgccgga..... 1  
Gi1\_4125441\_x2.....guucgauucccggcGcgga..... 1  
Gi3\_28021150\_x2.....gNucgauucccggcgccgga..... 1  
Gi2\_10869777\_x2.....guucgauucGcggcgccgagc..... 1  
Gi4\_564836\_x2.....gguucgauucccggcgccgCgc..... 1  
Gi3\_28012736\_x2.....ggNucgauucccggcgccg..... 1  
Gi3\_28149006\_x2..Aucacccaacagauccg..... 1  
Gi3\_28026106\_x2.....Cgauccggguucgauucc..... 1  
Gi4\_564000\_x2.....gCucgauucccggcgccgga..... 1  
Gi3\_28251356\_x2.....cgauCcccggcgccgagc..... 1  
Gi1\_4106031\_x2..cucacccaNcagauccggguucga..... 1  
Gi3\_28089238\_x2.....uucgauucAcgggcgccgga..... 1  
Gi5\_8782065\_x2.....uucgauucccggcgccgagcCu..... 1  
Gi5\_8790799\_x2.....guucUauucccggcgccgag..... 1  
Gi5\_8820787\_x2.....gguucgauucccggcUcgag..... 1  
Gi1\_4135609\_x2uucGacccaacagauccg..... 1  
Gi5\_8742179\_x2.....gguucgauAcccggcgccgag..... 1  
Gi1\_4143197\_x2uucucaAcacaacagauccg..... 1  
Gi5\_8744671\_x2.....guucgauucccggcAcgga..... 1  
Gi3\_28132424\_x2.....gauccggguucgGuucc..... 1  
Gi3\_28062282\_x2.ucucGcccaacagauccg..... 1  
Gi1\_4132611\_x2.....ucgGuucccggcgccgagc..... 1  
Gi5\_8762963\_x2.....gguucgauucccggcAcgga..... 1  
Gi2\_10978229\_x2uucucacccaUgauccg..... 1  
Gi1\_4148397\_x2..cucacccaacagCuccgg..... 1  
Gi3\_28166900\_x2.....cgauucAcgggcgccgagc..... 1  
Gi1\_4145445\_x2.....uucgauucUcggcgccg..... 1  
Gi3\_28141704\_x2.....guucgauuccAgggcgcgag..... 1  
Gi1\_4107127\_x2.....Gccggguucgauucccggcgccgga..... 1  
Gi1\_4094027\_x2.....gguucgauucccggcgccU..... 1

Gi3\_28013354\_x2.....uucgauucccAgcgccgga..... 1  
Gi1\_4120567\_x2.....guucgauucccggcgAgga..... 1  
Gi3\_28164826\_x2.....guucgauucGcggcgccgga..... 1  
Gi2\_10883591\_x2.....ucgauucccggcgccUga..... 1  
Gi5\_8822577\_x2.....gguucgauucAcggcgccg..... 1  
Gi3\_28253028\_x2.....gggCucgauucccggcgcccggag..... 1  
Gi1\_4145897\_x2.....acccaacaNauccggguucgauuccg..... 1  
Gi5\_8754843\_x2.....agUuccggguucgauuccc..... 1  
Gi1\_4151871\_x2.....gguucgaNucccggcgccgga..... 1  
Gi3\_28210346\_x2.....gguucgauucccggcgcccgg..... 1  
Gi3\_28108166\_x2.....ucgauucccggcgcccggagcU..... 1  
Gi5\_8743865\_x2.....Aauucccggcgcccggagc..... 1  
Gi3\_28038154\_x2.....caacagauccggUuucga..... 1  
Gi3\_28079716\_x2.....gguucgauucccggcgcccgg..... 1  
Gi3\_28134252\_x2uucucacccCacagauccg..... 1  
Gi1\_4153353\_x2.....ggGucgauucccggcgcccgga..... 1  
Gi2\_10897681\_x2.....uuUgauucccggcgcccggag..... 1  
Gi3\_28096882\_x2.....guucgauucccggcgccUgag..... 1  
Gi3\_28030324\_x2.....ucgauucccggcgcccggagcGA..... 1  
G1a\_5929114\_x2.....gguucgauucccAgcgcccggag..... 1  
Gi5\_8719451\_x2.....gguucgauucccggcgGcgga..... 1  
Gi5\_8759113\_x2.....cUauucccggcgcccggagcguuuc..... 1  
Gi5\_8766929\_x2.....cagauccgggGucgauucccggcgcccg..... 1  
Gi1\_4153047\_x2.....guAcgauucccggcgcccggagc..... 1  
Gi3\_28119816\_x2.....Cucgauucccggcgcccggagc..... 1  
Gi3\_28146482\_x2.....guucgauucccUgcgcccg..... 1  
Gi3\_28028268\_x2.....uuGgauucccggcgcccgg..... 1  
Gi3\_28114184\_x2.....cagauccggguucgauUcc..... 1  
Gi3\_27984222\_x2.....guucgauucccggcgcccgggaU..... 1  
Gi1\_4091359\_x2.....Cuucgauucccggcgcccggagc..... 1  
Gi3\_28169138\_x2.....uAcgauucccggcgcccggagc..... 1  
Gi5\_8808045\_x2..cucacccaacagauAcgg..... 1  
Gi3\_28181902\_x2.....gguucgauucccggcgccUg..... 1  
Gi5\_8746429\_x2..cucacccaacagauUcgg..... 1  
Gi1\_4143387\_x2.....gguGgauucccggcgcccg..... 1  
Gi2\_10930853\_x2uuUucacccaacagauccggguucg..... 1  
Gi5\_8741773\_x2.....uucgauucccggcgcccggagc..... 0  
Gi2\_10938311\_x2uAcucacccaacagauccg..... 1  
Gi1\_4125299\_x2.....ucgauucccggcgcccgggaU..... 1  
Gi2\_10949321\_x2uucucacccaacagauccAg..... 1  
Gi1\_4123847\_x2.....Gaacagauccggguucgauucccggc..... 1  
Gi2\_10948229\_x2.....auucccggcgcccggagcGA..... 1  
Gi3\_28086514\_x2.....cagauccggguucgauCccc..... 1  
Gi3\_28056430\_x2.....uucgGuucccggcgcccgg..... 1  
G1a\_5877838\_x2uCcucacccaacagauccg..... 1  
Gi3\_28154320\_x2.....caacagauccggguucgCuucc..... 1  
Gi3\_28067814\_x2.....gguucgauucccggcgGcgag..... 1

Gi5\_8757095\_x2.....Ggauucccgcgccggagcguuuc..... 1  
Gi5\_8721245\_x2uucCcacccaacagauccgg..... 1  
Gi3\_28079074\_x2.....ucgauuccAgggcgccgga..... 1  
Gi1\_4131383\_x2.....guucgauucccgcgAcggagc..... 1  
Gi1\_4138259\_x2.....gguucgauuccUgcgcccga..... 1  
Gi3\_28207296\_x2.....gguNcgauuccggcgccggag..... 1  
Gi5\_8754285\_x2.....gguucgauuccggGgccg..... 1  
Gi3\_28171068\_x2.....gguucgauucccgcgGcg..... 1  
Gi2\_10950493\_x2.....gguucgauuccggGgccg..... 1  
Gi3\_28194368\_x2.....gguucgauucccgcgccggagcgC..... 1  
Gi3\_28162802\_x2.....gauucAcggcgccggagc..... 1  
Gi5\_8745723\_x2.....gguucgauAcccgcgcc..... 1  
Gi3\_28233518\_x2.ucucaccaacagCuccg..... 1  
Gi5\_8728773\_x2.....guucgauuccggcgGgg..... 1  
Gi3\_28136020\_x2uucGcacccaacagauccg..... 1  
Gi3\_28236300\_x2.....Guccggguucgauuccggcgccggagc..... 1  
Gi1\_4155181\_x2uucUcccaacagauccg..... 1  
Gi1\_4107525\_x2.....uCcgauuccggcgccgg..... 1  
Gi1\_4122019\_x2.....uucgauuccggcgccgga..... 0  
Gi2\_10976811\_x2.....gguucgauuccggcgccUga..... 1  
Gi5\_8808605\_x2..ucacAcaacagauccgggu..... 1  
Gi5\_8822741\_x2.....guucgauuccggcgccgCa..... 1  
Gi2\_10905121\_x2.....cgauucccgAcgccggagcguuu..... 1  
Gi3\_28115858\_x2.....uUcggguucgauuccggcgccgga..... 1  
Gi1\_4129275\_x2.....gguucgauuccCgcgcccggagc..... 1  
Gi4\_554144\_x2..cGcacccaacagauccggguucg..... 1  
Gi2\_10831947\_x2.....Gucgauuccggcgccgga..... 1  
G1a\_5897474\_x2.....guucgauuccggcgUggagc..... 1  
Gi5\_8798343\_x2.....gguucgauUccggcgccgga..... 1  
Gi4\_560328\_x2..cuUaccaacagauccggguucg..... 1  
Gi2\_10919851\_x2.....gauuccggcgccggagcCu..... 1  
Gi3\_27997574\_x2.....gauuccggcgccggagU..... 1  
Gi1\_4151121\_x2..ucacccaNagauccgggu..... 1  
Gi3\_28239600\_x2uucucaccaacagauccAg..... 1  
Gi3\_28112010\_x2.ucCcacccaacagauccgg..... 1  
Gi1\_4118337\_x2...caUccaacagauccggguucgauucc..... 1  
Gi3\_28168954\_x2.....agauccggguucgauCccc..... 1  
Gi2\_10991033\_x2.....gguuGgauuccggcgcc..... 1  
Gi5\_8785603\_x2.....ucgauucccgAcgccggag..... 1  
Gi3\_28135542\_x2.....guucgauucGcggcgccgg..... 1  
Gi3\_28150320\_x2.....ggguucgauuccggcgccggaA..... 1  
Gi2\_10888181\_x2.....gguucgUuuccggcgccgga..... 1  
Gi3\_28107384\_x2.....ucgauuccggcCccggagc..... 1  
G1a\_5911486\_x2.....gguucgauuccggcgccggUgc..... 1  
Gi3\_28185408\_x2.....uucgauucUcggcgccgg..... 1  
Gi3\_27980764\_x2..Uucaccaacagauccgg..... 1  
Gi5\_8774561\_x2.....gguucgauNccggcgccggagcgu..... 1

Gi5\_8750557\_x2uuUucacccaacagauccggguu..... 1  
Gi1\_4123089\_x2..cucaGccaacagauccgg..... 1  
Gi3\_28233852\_x2.....gUguucgauucccgccgcg..... 1  
G1a\_5898620\_x2.....gguucgauucccUgcgcgggagc..... 1  
Gi5\_8788193\_x2.....gguuAgauucccgccgcggga..... 1  
G1a\_5921074\_x2.....gguucgauucccgccgcggagA..... 1  
G1a\_5952986\_x2.....guucgauucccgccgcggagU..... 1  
Gi5\_8786395\_x2.ucucaccAaacagauccg..... 1  
Gi3\_28130614\_x2.....agauccggguucgCuuccc..... 1  
Gi3\_28005272\_x2.....guucgauucccgccUccgg..... 1  
Gi5\_8798379\_x2.ucucacccaacaUauccg..... 1  
Gi3\_28134604\_x2.....cGacagauccggguucga..... 1  
Gi5\_8722591\_x2.....ucgauucccgccgcggCgc..... 1  
Gi5\_8763795\_x2.....gguucgauucccgAcgcc..... 1  
Gi3\_28149672\_x2.....gggGucgauucccgccgcg..... 1  
G1a\_5976424\_x2.....gguucgCuucccgccgcg..... 1  
Gi3\_28217236\_x2.....uucgauucccgAgccgga..... 1  
Gi3\_28104480\_x2.....uucgauucccAgcccgagc..... 1  
Gi3\_28062226\_x2.....guucgauucccgccGcggag..... 1  
Gi1\_4154003\_x2.....guucgauAcccgccgcggagc..... 1  
Gi3\_28147466\_x2.....ucgauucccgccUggagc..... 1  
Gi1\_4123129\_x2...cacccaacNgaucggguucgauuccc..... 1  
Gi5\_8829199\_x2.....Ccgauucccgccgcggag..... 1  
Gi5\_8817329\_x2...cccaacGgauccggguuc..... 1  
Gi3\_28014692\_x2...cacccaacNgaucggguuc..... 1  
Gi2\_10922863\_x2.....guucgauAcccgccgcg..... 1  
G1a\_5905292\_x2.....gguucgauucccgccgcgC..... 1  
Gi3\_28204358\_x2.....cgaCuucccgccgcggagc..... 1  
Gi3\_28096670\_x2..cuUacccaacagauccggguucgau..... 1  
Gi1\_4097929\_x2.....guucgauucccgAgccgga..... 1  
Gi5\_8800855\_x2.....guucgauAcccgccgcggagc..... 1  
Gi5\_8804723\_x2uucucaccaGcagauccg..... 1  
Gi5\_8779869\_x2.....gguucgGuucccgccgc..... 1  
Gi4\_558418\_x2.....gguucgauucccgAgccgg..... 1  
Gi2\_10924427\_x2.....guucgCuucccgccgcg..... 1  
Gi2\_10853421\_x2.....cggguucgauucccgccgcggagc..... 0  
Gi1\_4106855\_x2.....gguucgauucccgccAgc..... 1  
G1a\_5894674\_x2.....gguucgauucccgccUc..... 1  
Gi2\_10904063\_x2.....gauucccgUgccggagc..... 1  
Gi3\_28040690\_x2uucucacccaUagauccg..... 1  
Gi3\_28180718\_x2.....aCaucggguucgauucc..... 1  
Gi3\_28139806\_x2.....Gacagauccggguucgauucccgccgga..... 1  
Gi3\_28061330\_x2.ucucacccaacagauccC..... 1  
Gi3\_28078132\_x2.....gauAcccgccgcggagc..... 1  
Gi5\_8813375\_x2.uUucacccaacagauccg..... 1  
Gi1\_4112609\_x2.....gguucgauucccgccUccgagc..... 1  
Gi1\_4138575\_x2.....guucgauucAcggccgcgga..... 1



Gi2\_10964051\_x2.....guucgauucccggcgccggUg..... 1  
Gi1\_4147217\_x2.....guucgauucccgUgcccggagc..... 1  
Gi5\_8789659\_x2.....guucgaAuucccggcgccgga..... 1  
Gi3\_28148246\_x2uucucacccaUcagaucgg..... 1  
Gi5\_8723867\_x2.....gguucgauucccgCcgccggagc..... 1  
Gi3\_28208094\_x2uucucacccaacagauccgggCuc..... 1  
Gi1\_4118461\_x2.....ggAucgauucccggcgccgga..... 1  
Gi3\_28027990\_x2.....cgauucccggcgccAgag..... 1  
Gi2\_10861221\_x2.....guucgauGcccggcgccggagc..... 1  
Gi2\_10932017\_x2..cucacccaacGgaucgg..... 1  
Gi5\_8772665\_x2.....agauccggguucgCuuccc..... 1  
Gi2\_10940653\_x2.....Cucgauucccggcgccggagc..... 1  
Gi1\_4110277\_x2.....gguucgauucccggcgccggC..... 1  
Gi3\_28174226\_x2.....gauucccggcgccgAagc..... 1  
Gi3\_27985358\_x2.ucucacccNacagaucgg..... 1  
Gi1\_4118543\_x2.....guucgauucccggcgccC..... 1  
Gi1\_4126973\_x2uucucacccaacagauGcgg..... 1  
G1a\_5954946\_x2.....gguucgGuucccggcgccgga..... 1  
Gi5\_8729459\_x2.....guucgauuccAggcgccggagc..... 1  
Gi3\_28198142\_x2.....uucgauucccgGgccgga..... 1  
Gi4\_557714\_x2.....guucgauCcccggcgccgg..... 1  
Gi3\_28166684\_x2.....guucgauucccgUgcgg..... 1  
Gi3\_28053326\_x2.....gguucgauucccgCcgccgga..... 1  
Gi3\_28084158\_x2.....Cgguucgauucccggcgccggag..... 1  
Gi2\_10973233\_x2.....guucgauucccgGgccgg..... 1  
Gi1\_4124833\_x2..ucucaAccaacagaucgg..... 1  
Gi5\_8766899\_x2.....gCucgauucccggcgccggag..... 1  
Gi1\_4127477\_x2.....uucgauuccAgcgcgg..... 1  
Gi2\_10871971\_x2.....guucgauucccggcgccgCag..... 1  
Gi1\_4099341\_x2.....gguucgauuccUggcgccgga..... 1  
Gi3\_28174146\_x2.ucAcacccaacagaucgg..... 1  
Gi2\_10830341\_x2.....ggGucgauucccggcgccgg..... 1  
Gi3\_28076800\_x2....cacccaacagaucggguCc..... 1  
G1a\_5900034\_x2.....Aguucgauucccggcgccgga..... 1  
Gi2\_10955977\_x2.....uucgaCuuccggcgccgga..... 1  
Gi3\_28160030\_x2.....Gcagaucggguucgauucc..... 1  
Gi5\_8718193\_x2.....auucccggcgccggagcA..... 1  
G1a\_5911236\_x2.....uGcgauucccggcgccggagc..... 1  
Gi5\_8747675\_x2.....gguucgauuccAggcgccgg..... 1  
Gi3\_28257730\_x2.....gguGcgauucccggcgccgga..... 1  
Gi3\_28141006\_x2.....ggguCcgauucccggcgccg..... 1  
Gi5\_8746507\_x2.....guucgauucccggcCccggagc..... 1  
Gi3\_27997186\_x2.....cagaucggguucgauucUc..... 1  
Gi3\_28234392\_x2.....gguucgauucccggcgccggaU..... 1  
Gi2\_10890847\_x2.....guucgauucccggcgccCgag..... 1  
G1a\_5977690\_x2.....gguucgauNcccggcgccgga..... 1  
Gi1\_4121371\_x2.....gguucgauucccggcgccAgag..... 1

Gi5\_8734655\_x2.....gguucgauucccgcgccgAag..... 1  
Gi3\_28249020\_x2uucucacccaacagauUcgg..... 1  
Gi5\_8719709\_x2uucAcacccaacagauccg..... 1  
Gi1\_4137099\_x2.ucucGcccaacagauccgg..... 1  
Gi3\_27995030\_x2.....gauucccgcgccgUagc..... 1  
Gi2\_10947365\_x2.....guucgauuAccggcgccggag..... 1  
Gi1a\_5936950\_x2.....Cguucgauucccgcgccgga..... 1  
Gi5\_8718575\_x2.....gguucgauucccgcgccggagG..... 1  
Gi5\_8810763\_x2.....gguuGgauucccgcgccgg..... 1  
Gi2\_10948143\_x2.....Cgguucgauucccgcgccggagc..... 1  
Gi3\_28197924\_x2.ucucaccUaacagauccgg..... 1  
Gi3\_28160534\_x2.....uucgGuucccgcgccggagc..... 1  
Gi3\_28175786\_x2.....Ggauccggguucgauucc..... 1  
Gi1\_4129347\_x2.ucCcacccaacagauccg..... 1  
Gi1\_4099169\_x2uucucaccAaacagauccgg..... 1  
Gi3\_28060026\_x2uucucacccaacCgauccgg..... 1  
Gi5\_8756105\_x2.....Uauccggguucgauucccgcgccgga..... 1  
Gi5\_8748009\_x2..ucacccaacagGuccggguu..... 1  
Gi1\_4093929\_x2.....guucUauucccgcgccg..... 1  
Gi5\_8826953\_x2.....uGgauucccgcgccggagc..... 1  
Gi2\_10977695\_x2.....guucgauucccgcgccggaA..... 1  
Gi3\_28194068\_x2.....ucgauucccgcgAcggagc..... 1  
Gi1\_4129393\_x2.....auUcggguucgauucccgcgccgga..... 1  
Gi2\_10861727\_x2uucucacccaCcagauccgg..... 1  
Gi3\_28257636\_x2.....guuNgauucccgcgccg..... 1  
Gi4\_553262\_x2.....gguucgauNcccggcgccggagc..... 1  
Gi3\_28046310\_x2.ucucacccaacCgauccg..... 1  
Gi3\_28239946\_x2.....ucgauucccgcgccggC..... 1  
Gi1\_4118757\_x2.....Cucgauucccgcgccggagc..... 1  
Gi2\_10929055\_x2.....guucgauucccgcgAcggag..... 1  
Gi5\_8795627\_x2.....caacagauccggguucgauucccgcgccggagc..... 0  
Gi2\_10835117\_x2.....ucgauCcccggcgccggagc..... 1  
Gi3\_28203820\_x2.....cgauucccgcgccggagc..... 1  
Gi1\_4124701\_x2.ucCcacccaacagauccgg..... 1  
Gi2\_10859405\_x2uucucacccaacagauccA..... 1  
Gi3\_28229254\_x2.ucGcacccaacagauccg..... 1  
Gi2\_10882565\_x2.....gauucccgcgccUggagc..... 1  
Gi5\_8741619\_x2.uGucacccaacagauccgg..... 1  
Gi2\_10952571\_x2.....guucgauucccgcgccggaUc..... 1  
Gi3\_28059142\_x2.....cgauuccAgcgccggag..... 1  
Gi3\_28098530\_x2.....cgauucccgcgccggGg..... 1  
Gi3\_28002086\_x2.....guucgauucccgGgccggag..... 1  
Gi5\_8812521\_x2.....guucgauuAcggcgccgga..... 1  
Gi2\_10973467\_x2.....caacagauccggguucgauucc..... 0  
Gi1\_4156999\_x2uucucacccaacagUuccgg..... 1  
Gi3\_28077110\_x2.....ucgauuAccggcgccgga..... 1  
Gi3\_28254678\_x2.....Ugauucccgcgccggagc..... 1

Gi1\_4143113\_x2.....uucgauucNcggcgccggagc..... 1  
Gi5\_8820439\_x2uucucacAcaacagauccggguu..... 1  
Gi2\_10984659\_x2.....guucgauucccggcgccggagG..... 1  
Gi2\_10924103\_x2.....uucgauucNcggcgccggagc..... 1  
Gi3\_28130308\_x2.....cCauucccggcgccggagc..... 1  
Gi3\_28145154\_x2.....cggguucgGuucccgccggcggga..... 1  
Gi1\_4153439\_x2.....gguucgauucccgAcgccggga..... 1  
Gi5\_8765217\_x2.....guucgauucccgCcgccg..... 1  
Gi5\_8775529\_x2..cucacccUacagauccgg..... 1  
Gi1\_4106033\_x2.....gguucgauuccAggcgccggga..... 1  
Gi5\_8731359\_x2.....gguucgauucccgccC..... 1  
Gi5\_8732703\_x2.....gguucgauucccgccAgg..... 1  
Gi3\_28177260\_x2uucuGacccaacagauccgg..... 1  
Gi3\_28144720\_x2..cucacccaacagaucUgg..... 1  
G1a\_5954434\_x2.....gGucgauucccgccggag..... 1  
Gi3\_28224872\_x2.....uucAauucccgccggagc..... 1  
Gi5\_8823847\_x2....acccaacauuccggguucgauucc..... 1  
Gi2\_10850305\_x2.....guucgaGuucccgccgg..... 1  
Gi4\_556122\_x2.....guucgauNccggcgccgg..... 1  
Gi3\_28006938\_x2.....cAgguucgauucccgccggcggga..... 1  
Gi5\_8770111\_x2.....guucUauucccgccggagc..... 1  
Gi5\_8730799\_x2.....guucgauucGggcgccg..... 1  
Gi2\_10960141\_x2.....uucgauucccgccAccggga..... 1  
Gi3\_28220846\_x2uucucacccaacagaucAgggguuc..... 1  
Gi3\_28236582\_x2.....guucgauCcccggcgccg..... 1  
Gi3\_28147408\_x2.....cagGuuccggguucgauucc..... 1  
Gi5\_8719757\_x2.....gguuUgauucccgccggagcgu..... 1  
Gi2\_10921797\_x2.....uuUgauucccgccggcggga..... 1  
Gi5\_8811325\_x2.....guucgauuccGggcgccgg..... 1  
Gi5\_8782019\_x2.....gguucAauucccgccggag..... 1  
Gi5\_8807219\_x2uucucacGcaacagauccg..... 1  
Gi3\_28150636\_x2.....gaGuucccgccggagc..... 1  
Gi3\_28152912\_x2.....gguucgauuccCgcgccggag..... 1  
G1a\_5946596\_x2.....gguucgauucccgccgcAg..... 1  
G1a\_5965278\_x2.....gguucgauucccgccgUcggagc..... 1  
G1a\_5951118\_x2.....gguucgauucccgAgccggagc..... 1  
Gi5\_8757575\_x2.....gguucgauuccUgcgccggag..... 1  
Gi1\_4120257\_x2.....ggguucgauCcccggcgccggga..... 1  
Gi3\_28164600\_x2uucucCcccaacagauccg..... 1  
Gi1\_4154685\_x2uucucacccaaUagauccgg..... 1  
G1a\_5974960\_x2.....ggCucgauucccgccggag..... 1  
Gi3\_27989860\_x2....cccaacagNuuccggguucgauucc..... 1  
Gi3\_28190458\_x2.....guucgauucccgccGgg..... 1  
Gi2\_10918517\_x2uucucacccaGcagauccg..... 1  
Gi3\_28016184\_x2.....Nguucgauucccgccggcggga..... 1  
Gi2\_10840491\_x2.....guucgauucccgAgccggag..... 1  
Gi2\_10913593\_x2.....agauccggguCcgauucc..... 1

Gi3\_28154844\_x2.....cgguucgauucccAgcgcgga..... 1  
Gi1\_4133053\_x2.....ggGucgauucccggcgccc..... 1  
Gi1\_4158449\_x2.....gguucgauCcccggcgcccga..... 1  
Gi2\_10848597\_x2uucucacUcaacagauccg..... 1  
Gi3\_28017590\_x2.....gauccgggNucgauucc..... 1  
Gi2\_10990005\_x2.....gguucgauuccGggcgcc..... 1  
Gi3\_28231734\_x2.....cgauucccggcGcggagc..... 1  
Gi3\_28173668\_x2.....uucgauucccggcUcgga..... 1  
Gi5\_8738131\_x2.ucucaccaacagCuccg..... 1  
Gi2\_10849895\_x2.....agauccggNuucgauucc..... 1  
Gi2\_10908611\_x2uucucaccaacagaucAg..... 1  
Gi5\_8752639\_x2.....ggGucgauucccggcgcccggagcguu..... 1  
Gi3\_28146992\_x2.....caacagauccggguucgauuccA..... 1  
Gi2\_10959617\_x2.....gauucccggcgcccggUgc..... 1  
Gi1\_4143385\_x2.ucGcaccaacagauccg..... 1  
Gi1\_4092719\_x2.....gguucgauucccggcgcccUg..... 1  
Gi1\_4142987\_x2.ucucaccaCcagauccgg..... 1  
Gi1\_4100751\_x2.....gguucgauucccggcgcccAa..... 1  
G1a\_5899828\_x2.....gguUgauucccggcgcccgg..... 1  
Gi2\_10838901\_x2.....guucgauucccgAcgcccggag..... 1  
Gi3\_27994084\_x2.....uucgCuuccggcgcccga..... 1  
Gi1\_4105631\_x2uucNcaccaacagauccg..... 1  
Gi3\_28236496\_x2uucucaccAaacagauccg..... 1  
Gi2\_10858231\_x2.....uccgAguucgauucccggcgcccga..... 1  
Gi3\_28038906\_x2.uGucaccaacagauccg..... 1  
Gi5\_8753995\_x2.....guucgauucccgCcgcccgg..... 1  
Gi3\_28018856\_x2.....guucgaAuuccggcgcccgg..... 1  
Gi1\_4143699\_x2.....agauccggguucgauucc..... 0  
Gi5\_8793103\_x2.....cgauucccggcgcccggagcC..... 1  
Gi1\_4142627\_x2.....gguucgauucccAgcgcgga..... 1  
Gi1\_4151535\_x2uucuUaccaacagauccg..... 1  
Gi2\_10830241\_x2.....gguucgauucccggcUccggag..... 1  
Gi5\_8731855\_x2.....Gcagauccggguucgauucccggcgccc..... 1  
Gi4\_564144\_x2.....guucgauucccggcgcccggagcA..... 1  
Gi3\_28053262\_x2.....Cucgauucccggcgcccga..... 1  
Gi3\_28108420\_x2.....cagauccgggCucgauucc..... 1  
Gi5\_8730009\_x2.....gguucgauAcccggcgcccgg..... 1  
Gi3\_28027372\_x2.ucucaccaacGgauccg..... 1  
Gi3\_28174380\_x2.....ucgauucccggcAccgga..... 1  
Gi2\_10858249\_x2.....uucgauucccggcgcccggCg..... 1  
Gi3\_28022676\_x2.....uucgauucccggcgcccggagcA..... 1  
Gi2\_10911591\_x2.....gauucccgUcgcccggagc..... 1  
Gi3\_28226426\_x2.....uucgauucccggcGcgga..... 1  
Gi4\_556180\_x2.....Auucgauucccggcgcccgg..... 1  
Gi4\_562044\_x2.....ggCucgauucccggcgcccgg..... 1  
Gi1\_4100149\_x2..cAcaccaacagauccg..... 1  
Gi5\_8785053\_x2.....gguUGauucccggcgcccga..... 1

Gi2\_10922609\_x2.....gauuccggcgccggagU..... 1  
Gi3\_28146306\_x2.....cgauuccggcgccggGgc..... 1  
Gi1\_4095373\_x2.....ucgauCcccggcgccgggagc..... 1  
Gi1\_4096007\_x2...Gcacccaacagauccggguucga..... 1  
Gi3\_28034016\_x2.....gguucgUuuccggcgcc..... 1  
Gi1\_4147109\_x2..cucaccaacagauccgA..... 1  
Gi1\_4134587\_x2.....guucgauuccggcgccUga..... 1  
Gi4\_560504\_x2.....gguCcgauuccggcgccggagc..... 1  
Gi1\_4140105\_x2.....cgauuccggcgccgggagcC..... 1  
Gi5\_8745417\_x2.....gguucgauucccgAcgccg..... 1  
Gi2\_10893279\_x2.....agauccgggAucgauucc..... 1  
G1a\_5904370\_x2.....gCucgauuccggcgccgg..... 1  
Gi2\_10980637\_x2.....uccggguucgauucccggc..... 0  
Gi3\_28229778\_x2.....gggGucgauuccggcgccggagc..... 1  
Gi1\_4114805\_x2.Ccucaccaacagauccg..... 1  
Gi5\_8738921\_x2.....guucgauuccggcgAcgagc..... 1  
Gi2\_10883617\_x2.....ggAucgauuccggcgccgg..... 1  
Gi4\_560646\_x2.....gguucgauuccUgcgccg..... 1  
Gi3\_28094734\_x2..ucaccaaNagauccggguuc..... 1  
Gi3\_28178876\_x2..cAcaccaacagauccg..... 1  
Gi3\_27984986\_x2.....agauccggguucAauucc..... 1  
Gi3\_28073120\_x2.....uccggguucgauucccgAcgccgga..... 1  
Gi3\_28117386\_x2.....gguucgauuccggcgUccg..... 1  
Gi3\_28028530\_x2..cucaccaacagauccggguCcgauu..... 1  
Gi3\_28247674\_x2.....uucgauuccggcgccgAa..... 1  
Gi2\_10893647\_x2.....gguucgaAuuccggcgccgga..... 1  
Gi4\_565016\_x2..cucaccaNcagauccggguuc..... 1  
Gi5\_8728743\_x2uucucaccaacaAauccg..... 1  
Gi5\_8777695\_x2.....gguucgauuccGggcgccg..... 1  
Gi2\_10831301\_x2.....guucgauuccAcggcgccgga..... 1  
Gi3\_28175422\_x2.....uucgauuccggcgUggagc..... 1  
Gi4\_553470\_x2.....guucgauuccggcgccAg..... 1  
Gi3\_28162628\_x2.....gguGgauuccggcgcc..... 1  
Gi2\_10852143\_x2.....cgauuccggcgccggGgcguuu..... 1  
Gi1\_4153631\_x2uucucaccaUcagauccg..... 1  
Gi1\_4108265\_x2.....gCuucgauuccggcgccggagc..... 1  
Gi5\_8737139\_x2.....gguucgauuccggcgccgCagc..... 1  
Gi1\_4116277\_x2.....uucgauuccggcgccggaU..... 1  
Gi1\_4112635\_x2uucucaccaacagauccCg..... 1  
Gi5\_8784921\_x2.....guucgauuccggcgccggagcgC..... 1  
Gi2\_10935317\_x2.....guucgauuccggcgccgAag..... 1  
Gi5\_8808483\_x2.....gguucgaGuuccggcgccg..... 1  
Gi1\_4118663\_x2.....gguucgauuccggcgAccgga..... 1  
Gi5\_8745639\_x2.....gguucgauuccggcgGcgagc..... 1  
Gi3\_28140736\_x2.....ucgaGuuccggcgccggag..... 1  
Gi5\_8738645\_x2uucucaccaacagUuccgg..... 1  
Gi2\_10975085\_x2.....ucgauuccggcgccggG..... 1

Gi3\_28040844\_x2.....ucgauuccggcgccggaAc..... 1  
Gi1\_4153405\_x2.....agauccgggCucgauucc..... 1  
G1a\_5882038\_x2.....Auucgauuccggcgccggagc..... 1  
Gi5\_8732521\_x2.....uccggguucgGuucccggc..... 1  
Gi3\_28243286\_x2.....ucgauuccggcgAgga..... 1  
Gi2\_10833539\_x2.....guucgauucUcggcgccgga..... 1  
Gi5\_8758435\_x2uucucaUccaacagauccgg..... 1  
Gi2\_10906983\_x2.....gguucgauuccggcUcc..... 1  
Gi1\_4156181\_x2.....guucgauuccggcgccUgagc..... 1  
Gi5\_8738045\_x2.....uUgauuccggcgccggagc..... 1  
G1a\_5959402\_x2.....ggCucgauuccggcgccg..... 1  
Gi3\_28016178\_x2.....ccaacagauccggguucgauuccggcgccgga..... 0  
Gi2\_10851903\_x2.....gguAcgauuccggcgccgg..... 1  
Gi1\_4129793\_x2.....gguucgCuuccggcgccggag..... 1  
Gi2\_10982175\_x2.....Cucgauuccggcgccgg..... 1  
Gi5\_8759301\_x2.....guucgauuccUgcgccg..... 1  
Gi5\_8811253\_x2.....cgUuuccggcgccggagcguuuc..... 1  
Gi2\_10940445\_x2.....guuNgauuccggcgccgg..... 1  
Gi1\_4153575\_x2.....ucgauuccggcgccggCgc..... 1  
Gi1\_4114517\_x2.....gAucgauuccggcgccggagc..... 1  
Gi2\_10988729\_x2.....cgauUccggcgccggagcguuuc..... 1  
Gi3\_27992666\_x2.....guucgauuccggcgccggagcAu..... 1  
Gi3\_28051810\_x2.....gguucgauuccggcgccUga..... 1  
Gi3\_28048188\_x2.....gguucCauuccggcgccgg..... 1  
G1a\_5908756\_x2uuUucaccaacagauccg..... 1  
Gi3\_28125892\_x2uucucaUccaacagauccg..... 1  
Gi5\_8735137\_x2.....guucgauuccggcAccggagc..... 1  
Gi1\_4106883\_x2..cucaccaCcagauccgg..... 1  
Gi3\_28007004\_x2.uUucaccaacagauccgg..... 1  
Gi3\_28231186\_x2.....ucgauAcccgcgccggagc..... 1  
Gi4\_559956\_x2.....guucgauuccggcgUcgg..... 1  
Gi1\_4117525\_x2.ucuUaccaacagauccgg..... 1  
Gi1\_4095171\_x2.....gguucgauuccUggcgccggagc..... 1  
Gi2\_10859403\_x2uuUucaccaacagauccg..... 1  
Gi3\_28128796\_x2..cucaccaacagaCccgg..... 1  
Gi2\_10854593\_x2.....Cgguucgauuccggcgccg..... 1  
Gi5\_8739787\_x2.....guuGgauuccggcgccgg..... 1  
Gi1\_4139407\_x2.....gguucgauuccggcgUcgg..... 1  
Gi3\_28211802\_x2.....auccggguucgauuccggcg..... 0  
Gi5\_8730235\_x2.....ucgauuccNgcgccggagc..... 1  
Gi2\_10964813\_x2...ucaccaacagauccgggu..... 0  
Gi5\_8721061\_x2.ucucaccaacGgauccg..... 1  
Gi3\_28096924\_x2.....guucgauucAcggcgccg..... 1  
Gi3\_28146416\_x2.....gguucgauuccggcgccggagcAu..... 1  
Gi3\_28212126\_x2.....gauuccgAcgcccggagc..... 1  
Gi5\_8802831\_x2.....gguuAgauuccggcgccg..... 1  
Gi5\_8789587\_x2uucucaGccaacagauccg..... 1

Gi3\_28000816\_x2.....guucgauucccggcgcgUa..... 1  
Gi2\_10914825\_x2.....uUgauucccggcgcgag..... 1  
Gi5\_8755189\_x2Aucucacccaacagauccg..... 1  
Gi3\_27983194\_x2uucucCcccaacagauccg..... 1  
Gi3\_28241752\_x2.....cagauccgAguucgauucc..... 1  
Gi1\_4106429\_x2..Aucaccaacagauccg..... 1  
Gi5\_8780981\_x2.....gguucgauucccggcgGcgg..... 1  
Gi1\_4109713\_x2uucucUcccaacagauccg..... 1  
Gi3\_28065536\_x2.....agaucUggguucgauucc..... 1  
Gi2\_10965185\_x2.....ucgGuucccggcgcgagc..... 1  
G1a\_5934562\_x2.....gguucUauucccggcgc..... 1  
Gi1\_4111627\_x2.....gguucgauucccgUgccc..... 1  
Gi1\_4155083\_x2.ucucaccaacCgauccg..... 1  
G1a\_5930474\_x2.....gguucgauucccggcgAc..... 1  
G1a\_5885002\_x2.....ggAucgauucccggcgcgagc..... 1  
Gi1\_4150583\_x2.....guucgauucccgAcgcccga..... 1  
Gi5\_8808217\_x2.....gguucgauucccggcgAcggag..... 1  
Gi5\_8826375\_x2.....Nuucgauucccggcgcg..... 1  
Gi5\_8723713\_x2.....gUuucccggcgcgagc..... 1  
Gi3\_28128564\_x2.....uucgauucccggcgcgag..... 0  
Gi2\_10969409\_x2.....guuGgauucccggcgcg..... 1  
Gi2\_10945881\_x2.....uucgaCucccggcgcg..... 1  
Gi5\_8729477\_x2uucucacccaacaAauccggguuc..... 1  
Gi5\_8806185\_x2.ucucaccUaacagauccg..... 1  
Gi1\_4135311\_x2.....gguucgauNcccggcgc..... 1  
Gi2\_10858823\_x2.....guucgauucUcgggcgc..... 1  
Gi2\_10991491\_x2.....gguuAgauucccggcgc..... 1  
Gi1\_4148503\_x2.....Uuucgauucccggcgcgag..... 1  
Gi2\_10952191\_x2.....gguucgauucccggcgcCg..... 1  
Gi2\_10832883\_x2.....guucgauuGccgggcgcg..... 1  
Gi3\_28140802\_x2.....gguucCauucccggcgcgga..... 1  
Gi2\_10869631\_x2.....gguucgauucccgGgcccgag..... 1  
Gi3\_28147456\_x2.....uuUgauucccggcgcg..... 1  
Gi2\_10836725\_x2.....gauuccgNcgcccgagc..... 1  
Gi5\_8763973\_x2.....gguucgauucccggcgcgagcAu..... 1  
Gi5\_8819591\_x2.....gguucgauucccgAcgcccgag..... 1  
Gi2\_10981085\_x2.....guucgauucccggcgcUg..... 1  
Gi1\_4107931\_x2uucucaUccaacagauccg..... 1  
Gi5\_8764301\_x2uucucaccNaacagauccggguu..... 1  
Gi3\_28241054\_x2.....uucgauucccggcgcAga..... 1  
G1a\_5900774\_x2.ucGcaccaacagauccg..... 1  
Gi1\_4091203\_x2.....guucgauucccggcCccga..... 1  
Gi3\_28606103\_x1.....Gcaacagauccggguucgauucccggcgcgagc..... 1  
Gi5\_9082398\_x1.....uucgGuucccggcgcg..... 1  
Gi2\_11291313\_x1.....gguucgauucccggcCccga..... 1  
Gi5\_8850989\_x1.....gguucgauucccggcgcUggag..... 1  
G1a\_6242963\_x1.ucAcaccaacagauccg..... 1

Gi1\_4203859\_x1uuGucacccaacagauccgg..... 1  
Gi3\_28446139\_x1.....Uggguucgauucccggcgccggagc..... 1  
Gi3\_28744785\_x1.ucucacccaacagCuccgg..... 1  
Gi4\_595506\_x1.....gguuUgauucccggcgccgg..... 1  
Gi4\_594361\_x1..Aucacccaacagauccggguucg..... 1  
Gi3\_28787178\_x1.....ucgauuAccggcgccggag..... 1  
G1a\_6176978\_x1.....gguucgauCcccggcgccgga..... 1  
Gi5\_9012621\_x1uucucacccaacagauccggguC..... 1  
Gi3\_28960986\_x1.....ucgauucAcggcgccggag..... 1  
Gi1\_4364029\_x1..cucacccaacagauccggguucgauUc..... 1  
Gi5\_9082997\_x1.....guucgauucccggcgccggagcg..... 0  
Gi5\_9125734\_x1uucucacccaacagGuccggguuc..... 1  
Gi5\_9071651\_x1uucucaccAaacagauccggguuc..... 1  
Gi3\_28912503\_x1.....gauucccggcgccggaAc..... 1  
Gi5\_9095907\_x1.....guNcgauucccggcgccgg..... 1  
G1a\_6020147\_x1.....gguucgauuccAggcgccggag..... 1  
Gi1\_4194051\_x1.....guGcgauucccggcgccg..... 1  
Gi2\_11324069\_x1.....cAgguucgauucccggcgccgga..... 1  
Gi3\_28428452\_x1.....ucgaGucccggcgccggagc..... 1  
Gi3\_28917137\_x1.....ucgauucGcggcgccggagc..... 1  
Gi2\_11284343\_x1.....ucgaAucccggcgccggagc..... 1  
Gi3\_28723782\_x1.....Agguucgauucccggcgccgga..... 1  
Gi5\_8946289\_x1..uGacccaacagauccgggu..... 1  
Gi2\_11264536\_x1.....gauucccggcgccgAagc..... 1  
Gi3\_28692740\_x1..cucacccaacaAauccgg..... 1  
Gi1\_4295209\_x1.....gguGcgauucccggcgccgg..... 1  
G1a\_6336195\_x1.....gGucgauucccggcgccgga..... 1  
Gi3\_28590145\_x1.....guucgauuGccggcgccggag..... 1  
Gi3\_28759870\_x1.....agauccggguucgauuccU..... 1  
Gi5\_8918949\_x1.....ucgGuucccggcgccggagc..... 1  
Gi5\_8849782\_x1.....gguucgauucccggcgccggGgcguu..... 1  
Gi2\_11031774\_x1.....cAauucccggcgccggagcguuuc..... 1  
G1a\_6160626\_x1.....gAuucgauucccggcgccggagc..... 1  
Gi5\_8920249\_x1.....gguucgauucccggcCccggagc..... 1  
Gi2\_11271302\_x1.....Uggguucgauucccggcgcc..... 1  
Gi3\_28683519\_x1.ucucaccccNacagauccg..... 1  
Gi3\_28471226\_x1.....cggAuucgauucccggcgccgga..... 1  
G1a\_6126895\_x1.....guucgauuNccggcgccgg..... 1  
Gi5\_9049110\_x1..ucacccaacagauccAggu..... 1  
G1a\_6344008\_x1.....gguucgauucccggcgccA..... 1  
Gi3\_28420742\_x1..cucacccaacagauccgC..... 1  
Gi5\_9077616\_x1.....uucgauucccggcgccggagcguuucc..... 0  
Gi1\_4278280\_x1..cucacccaacagauccggguucgauucA..... 1  
Gi3\_28915508\_x1.....gauucccggcgccAgagc..... 1  
Gi5\_9064515\_x1Aucucacccaacagauccgggu..... 1  
G1a\_6201313\_x1.....uucgauucccggcgccggCgc..... 1  
Gi5\_8873261\_x1..cucaUccaacagauccgg..... 1



Gi3\_28349661\_x1...ucacccaacagauccggAuuc.....1  
Gi2\_11110040\_x1.....guucgauucccgGgccg.....1  
Gi5\_9070968\_x1.....ucgaCucccgccgcccggagc.....1  
Gi1\_4175616\_x1.....gguCcgauucccgccgcccga.....1  
Gi1\_4194882\_x1.....uGcggguucgauucccgccgcccga.....1  
Gi3\_28494870\_x1.....ggguucgauucccgccgcccggGgc.....1  
Gi3\_28725258\_x1..cucacccaNcagauccggguucgauucc.....1  
Gi5\_8878632\_x1..cucacccaacaAauccg.....1  
Gi2\_11054287\_x1.....gguucgauucccgUcgccg.....1  
Gi3\_28604818\_x1.....ucgauCcccgccgcccggag.....1  
Gi2\_11120609\_x1.....ucgauuccAgggcggagg.....1  
Gi5\_9138174\_x1.....ggguucgauucccgccgAcg.....1  
Gi5\_8988260\_x1..ucacccaaNagauccggguu.....1  
Gi1\_4313092\_x1.....gguucgauuccAgcgcccggag.....1  
G1a\_6058608\_x1.ucucacccaacagauCg.....1  
Gi2\_11039119\_x1.....auccggguucgauucccgccgcccggagc.....0  
Gi5\_9127316\_x1.....cccaacagauccggguucgau.....0  
Gi5\_9116538\_x1.ucucacccaacagauAcg.....1  
Gi2\_11046574\_x1.....gguucgauGcccgccgcc.....1  
G1a\_6108774\_x1.....gguucgauCcccgccgcccggag.....1  
Gi5\_8843127\_x1.....Ucagauccggguucgauucccgccgccc.....1  
Gi3\_28881241\_x1.....gauucccgccgcccggagG.....1  
Gi3\_28795788\_x1.....gaAuuccggcggcccggagc.....1  
Gi1\_4376981\_x1.....uucgGuucccgccgcccggagc.....1  
Gi5\_9122889\_x1.....gguGcgauucccgccgcccggagc.....1  
Gi3\_28555333\_x1.....ucgauucccgccgcccgaC.....1  
Gi5\_9038163\_x1.....gguucCauucccgccgcccggagc.....1  
Gi3\_28552136\_x1.....ucgauucccgccgcccggU.....1  
Gi2\_11140477\_x1uucucacccaacagauccgA.....1  
Gi5\_8977529\_x1.....gguucgauUccggccgccc.....1  
Gi3\_28688297\_x1.....gguAcgauucccgccgccc.....1  
Gi5\_8857226\_x1.....guucgauucccgccgcccggagcgu.....0  
Gi5\_9086464\_x1.....Aguucgauucccgccgcccggagcgu.....1  
Gi3\_28766235\_x1.....caacagauccggguucgC.....1  
G1a\_5996456\_x1.....ggguucgauucccgccgcccggagcC.....1  
Gi2\_11058683\_x1.....cagauccggguucgauucccgccgcccggagcC.....1  
Gi2\_11189622\_x1.....uucgauucccgccgUcgg.....1  
Gi1\_4240262\_x1.....uucgauuccGggcggcccgg.....1  
Gi1\_4352148\_x1.....gguucgauCcccgccgcccgg.....1  
G1a\_6310241\_x1.....Cuucgauucccgccgcccgg.....1  
Gi5\_8899476\_x1.....gguucgauucccgccgUcgg.....1  
Gi4\_606285\_x1 uucucacccaacagauccggguuc.....0  
Gi1\_4257778\_x1.....gguucgauucccgccgAg.....1  
Gi5\_9003046\_x1.....guucgauucccgccgcccUga.....1  
Gi2\_11059842\_x1.....gguucgauucccgccgcccCa.....1  
Gi2\_11164530\_x1.....guucgauuccUcgccggag.....1  
Gi2\_11103065\_x1.....cccaacagauccggguGc.....1

Gi5\_8891167\_x1..cucaccaUcagauccgg..... 1  
Gi3\_28471742\_x1.ucucacAcaacagauccgg..... 1  
Gi5\_9000220\_x1.....guucgaCucccgccgagcgguuc..... 1  
Gi5\_8950064\_x1.....gguuGgauucccgcc..... 1  
Gi5\_9121068\_x1.ucucaccaacagauUcg..... 1  
Gi5\_9052619\_x1uucucaccAaacagauccgg..... 1  
Gi5\_8872085\_x1.....gguucgauuccgUcgccggag..... 1  
Gi1\_4366842\_x1..cGcaccaacagauccggguucga..... 1  
Gi4\_604906\_x1.....guucgauuccAgcgccgg..... 1  
Gi5\_8908215\_x1.....gguucGUuucccgccg..... 1  
Gi1\_4312696\_x1.....uucccgccgagcgA..... 1  
Gi3\_28557731\_x1.....cagauccggguucgaCucc..... 1  
Gi2\_11394664\_x1.....gguucgauuccGggcccg..... 1  
Gi2\_11278841\_x1.....gguGcgauucccgccggag..... 1  
Gi2\_11018820\_x1.....uAcgauucccgccggagc..... 1  
G1a\_6055536\_x1.....gguucgauuccAgcc..... 1  
Gi1\_4261491\_x1.....gguucgauuccUggccggag..... 1  
Gi4\_583265\_x1.....guucgauuccUcgcccgga..... 1  
Gi5\_9120741\_x1.....gguNcgauucccgcc..... 1  
Gi5\_8853453\_x1.....guucgauuccgUcgccggag..... 1  
Gi5\_8923941\_x1..cucacAcaacagauccgg..... 1  
G1a\_6024901\_x1.....gguucgauuAccggcccgag..... 1  
Gi1\_4327164\_x1.....aucggguucgauucccgccggU..... 1  
G1a\_6035669\_x1.....gguucgauuccUcgccggag..... 1  
Gi5\_8933169\_x1...caccGacagauccggguucga..... 1  
Gi3\_28281794\_x1.....gguucgauuccUggcccgga..... 1  
Gi3\_28983412\_x1.ucucaccaacagauUcgg..... 1  
Gi3\_28782586\_x1.....guucgaAuuccggccggag..... 1  
Gi3\_28328436\_x1...cGcccaacagauccggguuc..... 1  
Gi3\_28632715\_x1..cucaccaacagauccggCu..... 1  
Gi5\_9051916\_x1.....guNcgauucccgccggagc..... 1  
Gi4\_597138\_x1.....guucgauucccgUcgccga..... 1  
Gi2\_11275391\_x1.....ucgauucccgccggagA..... 1  
Gi3\_28721884\_x1...cacccaacagauccAgguuc..... 1  
Gi1\_4202829\_x1.....gguuGgauucccgccggagc..... 1  
G1a\_6220951\_x1.....uAcgauucccgccggagc..... 1  
Gi4\_575170\_x1.....ggCucgauucccgccggagc..... 1  
Gi2\_11263507\_x1.....gguucUauucccgccg..... 1  
G1a\_6174982\_x1.....gguucgauuccCgcccggag..... 1  
Gi5\_8941816\_x1.....gguucUauucccgccgg..... 1  
Gi3\_28792058\_x1.....guucgaAuuccggccg..... 1  
Gi5\_8848803\_x1.....guGcgauucccgccggag..... 1  
Gi4\_585899\_x1.....Aguucgauucccgccggagc..... 1  
Gi5\_8857640\_x1.....gguucGUuucccgccggag..... 1  
Gi3\_28971467\_x1.....ucgauuccggccCga..... 1  
Gi5\_8956689\_x1.ucucGcccaacagauccgg..... 1  
Gi1\_4373113\_x1.....cccaacUgauccggguuc..... 1

Gi3\_28555814\_x1.....uucgauucUcggcgccggagc..... 1  
Gi5\_8843474\_x1.Ccucaccaacagauccgg..... 1  
Gi3\_28492981\_x1.....uccgguucgGuuccggcgccg..... 1  
Gi3\_28968747\_x1.....uucgauuccggcAccgga..... 1  
Gi1\_4316738\_x1.....uuccggcgccggagcCu..... 1  
Gi3\_28562024\_x1.....uucgauuccAgggcgccggagc..... 1  
Gi5\_8935263\_x1.....cccaacagauUcggguuc..... 1  
Gi3\_28682260\_x1.....gguucgauucGcggcgccg..... 1  
Gi3\_28419933\_x1.....agauccggNuucgauucc..... 1  
Gi5\_9107136\_x1.....ucAgggguucgauuccggcgccg..... 1  
Gi3\_28806175\_x1.....ggguucgGuuccggcgccgga..... 1  
Gi2\_11100601\_x1.....ucgauuccggcUccggag..... 1  
Gi5\_9048238\_x1.....gguucgaAuuccggcgccgga..... 1  
G1a\_6258115\_x1.....Auucgauuccggcgccg..... 1  
Gi5\_9087095\_x1.....gguucgCuuccggcgccggagcg..... 1  
Gi5\_9030840\_x1.....gauuccggcgccggagA..... 1  
Gi4\_598390\_x1.....gguucgauuccggGgcccg..... 1  
G1a\_6302868\_x1.....aucggguucgaCuuccggc..... 1  
Gi3\_28280924\_x1.....guucgauuccggcCccggagc..... 1  
Gi3\_28544967\_x1.....Guccggguucgauuccggcgccgga..... 1  
Gi3\_28870627\_x1.....guucCauuccggcgccggagc..... 1  
G1a\_5986143\_x1.....gCuucgauuccggcgcc..... 1  
Gi2\_11094102\_x1uucucaccaacagauccggguuc..... 0  
Gi5\_8897594\_x1uucucaccaacagauccgAguu..... 1  
Gi3\_28644290\_x1.....gggGucgauuccggcgccgga..... 1  
G1a\_6005304\_x1.....uucgauuccUggcgccggagc..... 1  
Gi5\_8965890\_x1.....Agauuccggcgccggagcgguuc..... 1  
Gi1\_4374259\_x1..cucaccAaacagauccgg..... 1  
Gi2\_11386878\_x1.....guucgauucGcggcgccg..... 1  
Gi3\_28467549\_x1.....gguucgUuuccggcgccg..... 1  
Gi5\_8975422\_x1.....guucgaCuuccggcgccggagcggu..... 1  
Gi5\_9066493\_x1.....guucgauuccggcgccgUa..... 1  
Gi1\_4328694\_x1.....cgauuccggcgccggagc..... 0  
Gi3\_28481247\_x1uucucaccaacagCuuccg..... 1  
Gi4\_570145\_x1.....gGucgauuccggcgccgga..... 1  
Gi5\_8954286\_x1.....gauuccggcgccggaUc..... 1  
Gi2\_11034520\_x1uucucaccaacaUauccg..... 1  
Gi5\_8867078\_x1.....cccGacagauccggguuc..... 1  
Gi2\_11055804\_x1.....aacagauccggguucgauCcccgcgccg..... 1  
Gi5\_9075210\_x1..ucaccaacagauccggguC..... 1  
Gi2\_11226528\_x1.....agGuccggguucgauucc..... 1  
Gi1\_4185010\_x1.uUucaccaacagauccgg..... 1  
Gi1\_4278256\_x1.....guucgauuGcggcgccggagc..... 1  
Gi5\_8891075\_x1..cucaccaaAagauccg..... 1  
Gi2\_11199524\_x1.....Gggguucgauuccggcgccgga..... 1  
Gi5\_9011630\_x1uucucCcccaacagauccg..... 1  
Gi1\_4202183\_x1.....ucgauuccAgcgccggagc..... 1

Gi3\_28815093\_x1.....ucgauGcccggcgccggag..... 1  
G1a\_6177820\_x1.....uucgauucccgcgccgAagc..... 1  
Gi3\_28784225\_x1.....uucgUuucccgcgccgg..... 1  
Gi5\_9087436\_x1.....auucccgcgccggagcgA..... 1  
Gi5\_8994262\_x1.....ggguucgauucccgcgccggagcC..... 1  
Gi3\_28822165\_x1.....guuGgauucccgcgccgg..... 1  
Gi4\_586758\_x1.....gguucgauucUcggcgccgg..... 1  
G1a\_6322424\_x1.....ucgauucccgcgccggagcCu..... 1  
Gi2\_11303602\_x1.....gguucgauucccgcgccggagcguuu..... 0  
Gi5\_9116559\_x1.....guucgauuccUgcgccggagc..... 1  
G1a\_6250668\_x1.....guucgauucccgUgcccgg..... 1  
Gi5\_9044436\_x1.ucucacccaacagauccggguu..... 0  
Gi3\_28883800\_x1uucucacGcaacagauccggguuc..... 1  
Gi1\_4368785\_x1uucucacccaacagUccggguucgau..... 1  
Gi1\_4330992\_x1.....guucgaGucccgcgccgg..... 1  
Gi5\_9050629\_x1.....acccCacagauccggguucgauucc..... 1  
Gi5\_9015306\_x1.....guucgauGcccggcgccgg..... 1  
Gi3\_28320600\_x1uucucaUccaacagauccgg..... 1  
Gi5\_9018245\_x1.....gguucgauucccgcgccAgagcguu..... 1  
Gi3\_28519129\_x1.....cgauAcccgcgccggagc..... 1  
Gi5\_9026824\_x1.....agauAccggguucgauucc..... 1  
Gi3\_28737614\_x1.....ucAauucccgcgccgga..... 1  
Gi1\_4166191\_x1.cucacccaacagauccggguucgG..... 1  
Gi3\_28860126\_x1.....cccaacagauccggguucgauGcc..... 1  
Gi5\_9114512\_x1.....gguucgauucccgcgccggagcgCuu..... 1  
G1a\_6021407\_x1.....gguucgauucccgcgccggagU..... 1  
G1a\_6308753\_x1.....guucgauNccggcgccggagc..... 1  
Gi5\_8877369\_x1.....guucgauucccgcgccggU..... 1  
Gi5\_8973379\_x1.....ucgauucccgcgAccggagc..... 1  
Gi3\_28643184\_x1.....uucgauucccgcgccAggagc..... 1  
Gi3\_28944552\_x1.....Aucgauucccgcgccgga..... 1  
Gi3\_28462976\_x1.....gguuNgauucccgcgccggagc..... 1  
Gi5\_8941812\_x1.....gguucgauucccgcgccggagcguuC..... 1  
Gi1\_4217338\_x1.ucucacUcaacagauccgg..... 1  
Gi3\_28746704\_x1.....aCauccggguucgauucccgcgccgg..... 1  
Gi5\_9125988\_x1.....guCcgauucccgcgccggag..... 1  
Gi3\_28370586\_x1uucucacccaacagauAccggguuc..... 1  
Gi2\_11107148\_x1.....aacagauccggguuAgauucccgcgccg..... 1  
Gi3\_28403797\_x1.....agauccggguucgauGc..... 1  
Gi1\_4358312\_x1..ucacccCacagauccgggu..... 1  
Gi3\_28851276\_x1.....caacagauccggguucAa..... 1  
Gi3\_28371487\_x1uucucacccaacaUauccg..... 1  
Gi5\_8872509\_x1.....ggguucgCuucccgcgccggagc..... 1  
Gi2\_11010459\_x1.....ucgaCuucccgcgccgga..... 1  
Gi3\_28838892\_x1.....auccgAguucgauucccgcgccgga..... 1  
Gi3\_28625165\_x1.cucacccaacagauUcgg..... 1  
Gi5\_8943072\_x1uucucacccaacCgauccg..... 1

Gi1\_4307504\_x1.....Aucgauucccgcgccgg..... 1  
Gi4\_581032\_x1.....gCuucgauucccgcgccggagc..... 1  
Gi3\_28970858\_x1.....ucgauucccgcgccUgga..... 1  
Gi5\_8906375\_x1..cucacccaacagauccgA..... 1  
Gi2\_10999928\_x1.....gguucgauuccGggcgccgga..... 1  
Gi3\_28973006\_x1.....cagaucgggGucgauucccgcgccgg..... 1  
Gi1\_4222424\_x1.....guucgauuccAgggcgccggagc..... 1  
Gi4\_610798\_x1.....gguucgauucccgcgccgC..... 1  
Gi2\_11072067\_x1.....ggguucgauucccgcgccg..... 0  
Gi3\_28501653\_x1.....cUacagauccggguucga..... 1  
Gi5\_8903697\_x1.....gguucgauucccggcUccggagc..... 1  
Gi2\_11337343\_x1.....gguucgauuccGggcgcc..... 1  
Gi2\_11235190\_x1.....guucgauucccgcgccUgag..... 1  
Gi3\_28444929\_x1.....uGcggguucgauucccgcgccg..... 1  
Gi2\_11323640\_x1.....gUguucgauucccgcgccggag..... 1  
Gi5\_9075623\_x1.....guucgaCucccgcgccggagcgu..... 1  
Gi5\_9097109\_x1.....aUagauccggguucgauucccgcgcc..... 1  
Gi1\_4212311\_x1.ucucacccaacagauccAg..... 1  
Gi3\_28392848\_x1.....gguucgauucccgcgccggagcUu..... 1  
Gi2\_11237992\_x1.....uucgauuccUggcgccggagc..... 1  
Gi5\_8901041\_x1.....gguucgauucccgcgccgCag..... 1  
Gi5\_9135537\_x1..ucacccGacagauccggguu..... 1  
Gi3\_28588303\_x1Nucucacccaacagauccg..... 1  
Gi2\_11289243\_x1.....gguucgauucccgCcgcc..... 1  
Gi5\_9025560\_x1.....gguucgauucccgcgccggaC..... 1  
Gi5\_8964200\_x1.....ggNucgauucccgcgccg..... 1  
Gi5\_9088187\_x1.....ccggguucgauucccgcgccggU..... 1  
Gi3\_28765865\_x1.....gauucccgUcgccggagc..... 1  
Gi3\_28593613\_x1.....Ncgauucccgcgccggagc..... 1  
Gi5\_9126598\_x1.....cccaGcagauccggguucgau..... 1  
G1a\_6016120\_x1.....uucgauucccgcgccggGgc..... 1  
Gi3\_28426008\_x1.....ucgauuAccggcgccggagc..... 1  
Gi5\_9048280\_x1.....guucgGuucccgcgccggag..... 1  
Gi5\_8866384\_x1.....ucgauucccgcgccggC..... 1  
Gi5\_8875925\_x1.....Cucgauucccgcgccggag..... 1  
Gi4\_600480\_x1.....guucgUuucccgcgccg..... 1  
G1a\_6183397\_x1.....guucgauucccgcgccggagcU..... 1  
Gi5\_9050165\_x1.....guuAgauucccgcgccg..... 1  
Gi4\_592464\_x1.....guucgauucccgcgccgA..... 1  
Gi3\_28684600\_x1.....uucgauuUccggcgccgg..... 1  
Gi3\_28827725\_x1.....uccggguucgauAcccgcgccgga..... 1  
Gi3\_28609217\_x1uucucacccaacagauccggguuA..... 1  
Gi3\_28321592\_x1.....Accggguucgauucccgcgccgga..... 1  
Gi3\_28426142\_x1.....uccggguucgCuucccgcgccgga..... 1  
Gi5\_9056090\_x1.....aacagauccgggCucgauucccgcgccggagc..... 1  
Gi2\_11231686\_x1.....gauucccgcgccggCgc..... 1  
Gi3\_28403535\_x1.....aUauccggguucgauucccgcgccgg..... 1

Gi4\_574850\_x1 .....guucgGuucccgcgccgga..... 1  
Gi1\_4271575\_x1 .....gAuucgAuucccgcgccggag..... 1  
Gi1\_4195490\_x1 .....guucgAuucccgcgccggaAc..... 1  
Gi2\_11237360\_x1 .....gguucgAuucGccggcgccggag..... 1  
Gi2\_11361890\_x1 .....ccggguucgAuucccgcgUcgga..... 1  
Gi3\_28572390\_x1 .....gguucgAuAcccgcgccgg..... 1  
Gi5\_9045279\_x1 .....gAuucgAuucccgcgccggagcguuu..... 1  
Gi2\_11100384\_x1uucucaGccaacagauccg..... 1  
Gi3\_28689156\_x1 .....ucgauucccgAcgccggag..... 1  
Gi3\_28507336\_x1 .....ucgauucccgcgAcgga..... 1  
Gi3\_28901503\_x1 .....caacagauccggguCcg..... 1  
Gi5\_9082802\_x1.ucucacccaacGgauccg..... 1  
Gi5\_8985201\_x1 .....gUuccggguucgAuucccgcgccgga..... 1  
Gi3\_28545311\_x1 .....aacagauccggguucgAuucccgcgUcgga..... 1  
Gi3\_28682632\_x1..cucacccaacagauccGg..... 1  
Gi1\_4380831\_x1 .....guucCauucccgcgccgga..... 1  
Gi2\_11215724\_x1 .....guuNgauucccgcgccggag..... 1  
Gi2\_11403150\_x1 .....cgauucccgcgccggagcguuC..... 1  
Gi5\_9050820\_x1uuNucacccaacagauccg..... 1  
G1a\_6104292\_x1 .....gguucgAuuccUggcgcc..... 1  
Gi3\_28921023\_x1 .....uucAauucccgcgccgga..... 1  
Gi4\_584974\_x1 .....CuucgAuucccgcgccgg..... 1  
Gi5\_8979444\_x1 .....CucgAuucccgcgccgg..... 1  
Gi5\_8997089\_x1 .....ccggguucgGuucccgcgccgga..... 1  
Gi2\_11178729\_x1uucucacccaacagauccggguUg..... 1  
Gi1\_4202196\_x1 .....cgauucccgcgccggag..... 0  
Gi3\_28983925\_x1 .....agauccggAuucgAuucccgcgccggagc..... 1  
Gi5\_9099443\_x1 .....acagauccggguucAauucccgcg..... 1  
Gi1\_4355106\_x1 .....gCuucgAuucccgcgccggag..... 1  
Gi1\_4250698\_x1 .....cagauccggguucgAuucccgcgAc..... 1  
G1a\_6320710\_x1 .....guAcgAuucccgcgccgg..... 1  
Gi2\_10994031\_x1 .....gguucgAuucccgcgccAgg..... 1  
Gi3\_28940332\_x1 .....UgauccggguucgAuucc..... 1  
Gi3\_28368155\_x1 .....ggNucgAuucccgcgccgga..... 1  
Gi1\_4266129\_x1 .....gguucgAuucccgcgCccggagc..... 1  
Gi5\_9112221\_x1 .....gguucgAuucccgcgccggCgCGuu..... 1  
Gi4\_609748\_x1 .....gguucgAuucccgcgccggagcCu..... 1  
Gi5\_8974533\_x1 .....cccaacagCuccggguuc..... 1  
G1a\_6317276\_x1 .....gguucgAuucccgAgcgg..... 1  
Gi5\_9023466\_x1 .....gguucgAuuccAgcgccgg..... 1  
Gi2\_11331587\_x1 .....guNcgAuucccgcgccgg..... 1  
Gi5\_8935297\_x1 .....guucgAuuccCcgcgccgga..... 1  
G1a\_6279999\_x1 .....guucgAuuccAgcgccggagc..... 1  
Gi5\_8839602\_x1.ucucacGcaacagauccg..... 1  
Gi1\_4374162\_x1 .....acccaacagauccggguucgAuucUcg..... 1  
Gi3\_28608683\_x1 .....CgguucgAuucccgcgccg..... 1  
Gi3\_28816522\_x1 .....uAcgAuucccgcgccgg..... 1

Gi3\_28869815\_x1uucuUacccaacagauccgg..... 1  
Gi3\_28376183\_x1.....gguucgUuuccggcgccgg..... 1  
Gi2\_11009016\_x1.....uGcgauuccggcgccggag..... 1  
Gi1\_4213027\_x1.....gguucgauuccggcgccggaCc..... 1  
Gi1\_4320439\_x1.....auccAgguucgauuccggcgccgg..... 1  
Gi1\_4336294\_x1.....gguuAgauuccggcgccggag..... 1  
G1a\_6139298\_x1uucucaccAaacagauccg..... 1  
Gi2\_11397560\_x1.....guucgauuccggcgGcgga..... 1  
Gi1\_4159385\_x1.....aGccggguucgauuccggcgccgga..... 1  
Gi3\_28391790\_x1.....Uguucgauuccggcgccggagcguu..... 1  
Gi3\_28573501\_x1..ucaccaGcagauccggguuc..... 1  
Gi3\_28439206\_x1.....cagauccggguucgauuGcc..... 1  
Gi3\_28519252\_x1..cucaccaNcagauccggguucgauu..... 1  
Gi5\_8878519\_x1uucAcacccaacagauccggguu..... 1  
Gi2\_11248818\_x1.....aacUgauccggguucgauuccggcgccg..... 1  
Gi5\_8861140\_x1.....uccggguucgauuccCgc..... 1  
Gi5\_8965334\_x1.....gguucgauuUccggcgccggagcguu..... 1  
Gi1\_4248429\_x1.....guucgauuccGggcgccg..... 1  
Gi5\_9021911\_x1uuUucacccaacagauccggguuc..... 1  
Gi5\_9107189\_x1..cAcacccaacagauccgg..... 1  
Gi2\_11375064\_x1.....ccaacagaNccggguucgauuccggcgccggagc..... 1  
Gi5\_9017239\_x1.....guucUauuccggcgccggagcguuucc..... 1  
Gi5\_8990492\_x1.....gguCcgauuccggcgccggagcguu..... 1  
Gi3\_28495574\_x1.....agauGcggguucgauucc..... 1  
G1a\_6330265\_x1.....gguucgauuccggcgGcgga..... 1  
Gi2\_11033012\_x1.....cgaCuuccggcgccggagcguuu..... 1  
Gi1\_4282852\_x1.....ggAucgauuccggcgccggag..... 1  
Gi2\_11294532\_x1.....uucgauuccGAcgcccga..... 1  
Gi3\_28742968\_x1.....cccNacagauccggguucgauucc..... 1  
Gi3\_28672092\_x1uucucacGaacagauccg..... 1  
Gi3\_28423031\_x1.....cagauccggguucgauuccggcgccgC..... 1  
Gi1\_4326623\_x1.....guucgauAccggcgccg..... 1  
Gi5\_8863732\_x1.....gguucgauuccggcgccggagcguC..... 1  
Gi3\_28467341\_x1.ucucacUaacagauccg..... 1  
Gi2\_11056791\_x1.....agauccggAuucgauucc..... 1  
Gi5\_8865448\_x1.....uccggguucgauuAccggc..... 1  
Gi5\_9124154\_x1.....guuAgauuccggcgccgga..... 1  
G1a\_6169776\_x1.....gguucgaCuuccggcgccgga..... 1  
Gi3\_28481643\_x1.....Cccggguucgauuccggcgccgga..... 1  
Gi5\_8872269\_x1.....guucgauuccggcgUccggag..... 1  
Gi3\_28668874\_x1.....caacagauccggguucgauuccggcgccggagc..... 0  
Gi1\_4323896\_x1.....auccggAuucgauuccggcgccgg..... 1  
Gi1\_4323736\_x1.....cgauuccggcgccggagcguuA..... 1  
Gi4\_575202\_x1.....cgauuccggcgccggagcC..... 1  
Gi5\_8950806\_x1.....guucgauuUccggcgccggagc..... 1  
Gi3\_28864523\_x1.....ucgauuccggAgcccga..... 1  
Gi5\_8841715\_x1.....Accaacagauccggguucgauucc..... 1

Gi1\_4159212\_x1.....Ggauccggguucgauuccc..... 1  
Gi4\_579742\_x1.....guCcgauucccggcgcgag..... 1  
Gi5\_8960424\_x1.....gguucgauucAcggcgcc..... 1  
Gi4\_596185\_x1.....ucgauucccggcgcgagcC..... 1  
Gi2\_11020624\_x1.....guucgauuccAgggcgccga..... 1  
Gi1\_4325094\_x1.....guAcgauucccggcgcgag..... 1  
Gi5\_9103621\_x1ucucacccaacagauccggguCc..... 1  
Gi5\_8878709\_x1..cucacccaacagauccCg..... 1  
Gi2\_11304308\_x1.....guucgauGccggcgccggag..... 1  
Gi5\_9116513\_x1.ucucacccaacGgauccgggu..... 1  
Gi3\_28378571\_x1.....ggguucgGuucccggcgcgagc..... 1  
Gi3\_28964329\_x1.....ggguGcgauucccggcgcgag..... 1  
Gi1a\_6100783\_x1.....gguucgauucccgAcgccc..... 1  
Gi3\_28284791\_x1.....gauccgAguucgauuccc..... 1  
Gi2\_11383158\_x1.....guucgauucccggcgcgagUa..... 1  
Gi1\_4290332\_x1.....guucgauucccggcgcgagcA..... 1  
Gi3\_28493974\_x1...caccaacagUuccggguuc..... 1  
Gi3\_28714124\_x1...caccaacagauccgAguuc..... 1  
Gi4\_594417\_x1..cucacccaacagauccggguUg..... 1  
Gi3\_28478583\_x1.....ccGacagauccggguucgauucccggcgcgag..... 1  
Gi2\_11218958\_x1.....gauuccggcAccggagc..... 1  
Gi1\_4179955\_x1.....gguucgauucccggcgcgagUg..... 1  
Gi5\_9021917\_x1ucucaccccGacagauccgggu..... 1  
Gi5\_8848946\_x1.....ucgauucUcggcgccggag..... 1  
Gi3\_28973498\_x1.....ucgauuccGggcgccggagc..... 1  
Gi5\_8892467\_x1...cUaacagauccggguuc..... 1  
Gi1\_4295786\_x1.....guuAgauucccggcgcgagc..... 1  
Gi4\_569927\_x1.....gguucgauucccggcgcgagcA..... 1  
Gi5\_8948057\_x1.....Cgguucgauucccggcgcgagc..... 1  
Gi1\_4374816\_x1.....Ccgauucccggcgcgagc..... 1  
Gi3\_28439388\_x1.....gNuucgauucccggcgcgagc..... 1  
Gi3\_28502031\_x1.....ucgauucccggcgcgagGg..... 1  
Gi1\_4201748\_x1.....uucgauucccggcgcgagcA..... 1  
Gi2\_11118619\_x1.....cgUuucccggcgcgagcguuu..... 1  
Gi2\_11144807\_x1.ucucaccccGacagauccgg..... 1  
Gi2\_11134309\_x1.....cgggGucgauucccggcgcgag..... 1  
Gi2\_11252634\_x1.....gguucgauucccggcgcgagU..... 1  
Gi1\_4175714\_x1.....gguucgauucccggcgcgagc..... 1  
Gi1\_4389669\_x1.....gguucUauucccggcgcgag..... 1  
Gi5\_8961465\_x1.....gguuUgauucccggcgcgagcguuu..... 1  
Gi5\_8913058\_x1.....ucgauucccggcgcgagGg..... 1  
Gi2\_11057976\_x1uuNucacccaacagauccg..... 1  
Gi3\_28790025\_x1.ucucacUaacagauccg..... 1  
Gi2\_11222589\_x1.....ucgauuccAgcgcgag..... 1  
Gi3\_28852957\_x1ucucacccaacagauccggguucg..... 0  
Gi1\_4274271\_x1.....uucgauucccggcgcgagcA..... 1  
Gi2\_11158769\_x1.....uucgauucccggcgcgagA..... 1



Gi1\_4217748\_x1..cucacccaaAgaucggg..... 1  
Gi5\_8905453\_xluucucacccaacCgaucggguu..... 1  
Gi5\_8840045\_x1.....ucgauuccggcgccgAa..... 1  
Gi2\_11129664\_x1.....ggguucgauuccggcgAcgga..... 1  
G1a\_6189935\_xluucucaccccGacagaucgg..... 1  
Gi1\_4295070\_x1.....caacagaucggguucgauuccUggc..... 1  
Gi4\_589114\_x1.....gguucgauuccggcgccggaAc..... 1  
Gi1\_4301285\_x1.....gguucgauUccggcgccggagc..... 1  
Gi2\_11154278\_x1.....gguucgauAccggcgccg..... 1  
Gi3\_28418844\_xluucucacccaacagaucggAguuc..... 1  
Gi2\_11328523\_x1.....cagaucggNguucgauucc..... 1  
Gi3\_28974909\_x1.....uucgauuccggAgccggagc..... 1  
Gi5\_9020591\_x1.....acagaucggAguucgauuccggcg..... 1  
Gi5\_8915546\_x1.....gguucgUuuccggcgccggagc..... 1  
Gi5\_9018585\_x1.....gguucgaAuuccggcgccggag..... 1  
G1a\_6154963\_x1.....uuUgauuccggcgccggagc..... 1  
Gi5\_9062050\_x1.....gguucgauucUcggcgccggagcgu..... 1  
Gi4\_597091\_x1 uGcucacccaacagaucgg..... 1  
Gi4\_571954\_x1.....guAcgauuccggcgccgg..... 1  
Gi1\_4224661\_xluucucacccaacagaGccgg..... 1  
Gi2\_11090701\_xluucucacccaacagaGccggguucg..... 1  
Gi3\_28422376\_x1.....uccggguucgauuccAgcgccgga..... 1  
Gi2\_11358108\_x1.....agaucggguucgGuucc..... 1  
Gi3\_28375014\_x1.....guucgauuccggcgccggagcg..... 0  
Gi5\_8984487\_x1...Uacccaacagaucggguucga..... 1  
Gi3\_28584570\_x1.....Cucgauuccggcgccgg..... 1  
Gi1\_4218397\_x1.....uccggguucgauGcccggcgccgga..... 1  
Gi3\_28617586\_x1.....uccggguucgauuccggcgccggC..... 1  
Gi5\_8838262\_x1.....gguucgauAccggcgccgga..... 1  
Gi3\_28742472\_x1.....gauuccGggcgccggagc..... 1  
Gi2\_11372011\_x1.....cgauuccggUgcccggagcguuu..... 1  
Gi5\_9003785\_xluucucacccaacagaucAg..... 1  
Gi3\_28516877\_x1.....agaucggguCcgauuccggcgccggag..... 1  
Gi3\_28565667\_x1.....auuccggcgccggagcCu..... 1  
Gi5\_8990706\_x1.ucucacccaacUgaucgg..... 1  
Gi1\_4371333\_x1.....uucgauuccUggcgccggagc..... 1  
Gi1\_4269826\_x1...cGcccaacagaucggguucgauucc..... 1  
Gi4\_594121\_x1.....gguucgaCuuccggcgccggagc..... 1  
Gi3\_28605773\_x1.....gguGcgauuccggcgccggag..... 1  
Gi2\_11000590\_x1.....gauAccggcgccggagc..... 1  
G1a\_6004502\_x1.....ggguucgauuccggUgc..... 1  
Gi5\_8876818\_x1...cccaacagaucGggguuc..... 1  
Gi2\_11295613\_x1.....guuGgauuccggcgccggagc..... 1  
Gi1\_4283066\_x1.....gAuucgauuccggcgcc..... 1  
Gi2\_11021314\_x1.....ucgauuccAgcgccggagc..... 1  
Gi2\_11295088\_x1.....gguNcgauuccggcgccgga..... 1  
Gi3\_28609483\_x1.....ucgauuccggcgccggUgc..... 1

Gi5\_8868571\_x1.....guuNgauucccgcgccgga..... 1  
Gi3\_28429230\_x1uucucUcccaacagauccgg..... 1  
Gi2\_11244713\_x1.....ucgauucccgcgccAga..... 1  
Gi4\_604592\_x1.....gguucgauUccggcgccgg..... 1  
G1a\_6044083\_x1.....guucAauucccgcgccggag..... 1  
Gi1\_4376379\_x1uucucaccaacaCaucgg..... 1  
Gi4\_610398\_x1..cucaccaacagauccggguCcg..... 1  
Gi1\_4266422\_x1uucucaccaacagauccU..... 1  
Gi3\_28435967\_x1.....caacagauccggGucga..... 1  
Gi3\_28543581\_x1.....caacGgauccggguucga..... 1  
G1a\_6158177\_x1.....gguucgauucccgcgAgga..... 1  
Gi3\_28767525\_x1.....ucgCuucccgcgccggagc..... 1  
Gi2\_11151932\_x1.....uccggguucgauuccUggcgccgga..... 1  
Gi3\_28509361\_x1.....gCucgauucccgcgccggagcg..... 1  
Gi2\_11303749\_x1.....guucgaAuuccggcgccgg..... 1  
Gi3\_28419247\_x1..ucaccaacagauccggguU..... 1  
Gi3\_28774530\_x1.....uccGAguucgauucccgcgccgga..... 1  
Gi2\_11338905\_x1.....gguucgauucccgcgGg..... 1  
Gi5\_9130071\_x1.....agaucggguCcgauucc..... 1  
Gi5\_8896035\_x1uucucaccaacagauccAggguu..... 1  
Gi2\_11302589\_x1.....cggguucgauuccAcggcgccgga..... 1  
Gi3\_28686517\_x1..cucaccaacagauccUg..... 1  
Gi1\_4186097\_x1.....agaucggguucgaCuccc..... 1  
Gi5\_8981725\_x1.....Gucgauucccgcgccggagc..... 1  
Gi5\_8834769\_x1...aGccaacagauccggguucgauucc..... 1  
Gi2\_11150518\_x1.....gguucgauucccgcgGcggag..... 1  
Gi5\_9132765\_x1.ucucacGcaacagauccgg..... 1  
Gi2\_11264212\_x1.....gguucgauucccgcgccggUg..... 1  
Gi5\_9077938\_x1.....gauucccgcgccggagcCu..... 1  
Gi4\_570039\_x1.....guucgauucccggcAccggag..... 1  
Gi1\_4191676\_x1.....ucgauucccgcgccgga..... 0  
Gi2\_11000963\_x1.....guucgauGccggcgccggagc..... 1  
Gi3\_28923520\_x1.....cCauucccgcgccggag..... 1  
Gi3\_28467988\_x1.....cgauucccgcgccggagcguu..... 0  
Gi5\_8884678\_x1.ucucCcccaacagauccgg..... 1  
Gi1\_4340501\_x1.....gguNcgauucccgcgccg..... 1  
Gi3\_28552888\_x1..cucaccaacagauccGgg..... 1  
Gi3\_28729090\_x1uuGucaccaacagauccg..... 1  
Gi3\_28521586\_x1uucucGcccaacagauccgg..... 1  
Gi3\_28876879\_x1.....Aguucgauucccgcgccggagcg..... 1  
Gi5\_8866757\_x1.ucucaccaacagauccgg..... 0  
Gi2\_11340941\_x1.....uucgCuucccgcgccgg..... 1  
Gi1\_4203173\_x1..Nucaccaacagauccgg..... 1  
G1a\_6109479\_x1uucucaccUaacagauccg..... 1  
Gi3\_28740307\_x1.....gauucccgcgccggagcGA..... 1  
Gi2\_11031964\_x1.....gguucgauucccgCcgccgg..... 1  
Gi2\_11061990\_x1.....ucgauuccNggcgccgga..... 1

Gi2\_11114223\_x1.....Ggaucgguucgauucc..... 1  
Gi1\_4257465\_x1.....gguucgauAcccggcgcggag..... 1  
G1a\_5995027\_x1.ucucGcccaacagauccg..... 1  
Gi1\_4176742\_x1.....aacagauccggguucgauucccgUgcccg..... 1  
Gi3\_28315274\_x1.....cagaGccggguucgauucccggcgcgg..... 1  
Gi5\_8953659\_x1.....gguucgauuccUgcccggg..... 1  
Gi5\_8902831\_x1.....cagauccggguucgauCcccggcgcgg..... 1  
Gi3\_28908699\_x1.Ncucaccaacagauccg..... 1  
Gi5\_9082065\_x1.....gguucgauGccgggcgcgg..... 1  
Gi5\_8968009\_x1Nucucaccaacagauccg..... 1  
Gi3\_28399065\_x1.....uccggguUgauuccgggcgcggg..... 1  
Gi2\_11379186\_x1.....cgauuccgggcgcgggagcguuuA..... 1  
Gi1\_4171915\_x1.....gguucgauUcgggcgcgg..... 1  
Gi2\_11168775\_x1.....cccaacagauccgggCuc..... 1  
Gi2\_11311702\_x1.....gguucgauucccgUgcccggg..... 1  
Gi1\_4159395\_x1.....guuNgauuccgggcgcgggagc..... 1  
G1a\_6343388\_x1.....gguucUauuccgggcgcgg..... 1  
G1a\_6044462\_x1.....ucgauuccgggcgcgggagc..... 0  
Gi1\_4271800\_x1.cucaccaacUgauccg..... 1  
Gi5\_9133714\_x1.....ucgauucccgUgcccgggagc..... 1  
Gi2\_11275583\_x1.....cagauccggguucgauuccgggcgcggCg..... 1  
Gi2\_11372612\_x1.....gaucggguucgauucc..... 0  
Gi3\_28577470\_x1.....agauccggguUAgauucc..... 1  
Gi5\_9017324\_x1.....cacccaaUagauccggguucga..... 1  
Gi3\_28607644\_x1.cucaccaacUgauccg..... 1  
Gi4\_571218\_x1.....gguucgauucccggcgcA..... 1  
Gi5\_9084857\_x1.....uGcggguucgauuccgggc..... 1  
Gi5\_9053569\_x1.....guNcgauuccgggcgcgg..... 1  
Gi2\_11271529\_x1.....cagauccggguucgCuuccgggcgcgggag..... 1  
Gi2\_11022110\_x1.....cgauuccUgggcgcgggagcguuuc..... 1  
Gi3\_28872324\_x1.....ucUggguucgauuccgggcgcggg..... 1  
G1a\_6053965\_x1.....gguucgGuuccgggcgcgg..... 1  
Gi5\_9101242\_x1.....uccggguucgauuccUggc..... 1  
Gi5\_9118019\_x1.....uccggguucgauuccgggA..... 1  
Gi3\_28782911\_x1.....ggguucgGuuccgggcgcgggag..... 1  
Gi1\_4367436\_x1.Acucaccaacagauccg..... 1  
Gi2\_11005910\_x1.....caUauccggguucgauuccgggcgcggg..... 1  
Gi2\_11059354\_x1.....gguucgaAuuccgggcgc..... 1  
Gi3\_28402350\_x1.....auccggguNcgauuccgggcgcgggagc..... 1  
Gi5\_8902325\_x1.....Agguucgauuccgggcgcgggag..... 1  
Gi3\_28580361\_x1.....ucgauuccgggcgcgggagcA..... 1  
G1a\_6202501\_x1.....gguucgauNccgggcgc..... 1  
Gi4\_567782\_x1..Gucaccaacagauccggguucg..... 1  
Gi2\_11008204\_x1Aucucaccaacagauccg..... 1  
Gi1\_4284310\_x1uucucaccaacagauccg..... 1  
Gi1\_4275504\_x1.....gguucgauucccgAcgcc..... 1  
Gi2\_11222338\_x1.....guNcgauuccgggcgcgggagc..... 1

Gi1a\_6083325\_x1.....gguucgauucccgAgccgg..... 1  
Gi2\_11355533\_x1.....uccggguucgauAcccggcgccgga..... 1  
Gi4\_595029\_x1.....guucgauucccggcAgcg..... 1  
Gi3\_28395763\_x1.....caacagaCccggguucga..... 1  
Gi3\_28905466\_x1..cucUcccaacagauccgg..... 1  
Gi4\_603804\_x1..cucaccaacagauccgg..... 0  
Gi3\_28526016\_x1.....cgauucccggcUcggag..... 1  
Gi1\_4386623\_x1uucucCcccaacagauccgg..... 1  
Gi2\_11111681\_x1.....guucgauuccGggcgccggagc..... 1  
Gi1\_4376683\_x1.....gguucgauUccggcgccg..... 1  
Gi4\_606205\_x1.....guucgauucccggcAgg..... 1  
Gi2\_10997984\_x1uucucGcccaacagauccg..... 1  
Gi3\_28770490\_x1.....guucgauucccggcGcgGggag..... 1  
Gi1\_4234343\_x1.....gguucUauucccggcgccg..... 1  
Gi3\_28846220\_x1.....ggguucgaNuuccggcgccggagc..... 1  
Gi1\_4388966\_x1.....ucgauucccggcUcggagc..... 1  
Gi2\_11090457\_x1uucucacUcaacagauccggguucg..... 1  
Gi2\_11287437\_x1.....gauccggguucgauucccggcgccgga..... 0  
Gi1\_4313075\_x1.....guucgauucccggcAccg..... 1  
Gi2\_11294474\_x1.....uucgauucccggcAccgg..... 1  
Gi1a\_6328472\_x1.....uucgauucNcggcgccggagc..... 1  
Gi5\_8957344\_x1uucucaAccaagauccgg..... 1  
Gi4\_595660\_x1..cucaccaacagauccggguucA..... 1  
Gi3\_28975968\_x1.....auccggguucAauucccggcgccgga..... 1  
Gi5\_9077290\_x1.....uucgaCucccggcgccggagc..... 1  
Gi4\_587679\_x1.....gauucccggcgccggagcC..... 1  
Gi3\_28708828\_x1.ucucaccaacagauccgC..... 1  
Gi2\_11034387\_x1.....uccggguucgaCucccggcgccgga..... 1  
Gi5\_8840570\_x1.....guucgauucccggcGcggag..... 1  
Gi3\_28979015\_x1.....Gucgauucccggcgccggag..... 1  
Gi1\_4343275\_x1.ucucaccaacaAuuccgg..... 1  
Gi1\_4207462\_x1.....uucgauucccggcgccggagcCu..... 1  
Gi1a\_6151198\_x1.....gguucgauUccggcgccggagc..... 1  
Gi2\_11133986\_x1.....cggguucgauucccAgcgccgga..... 1  
Gi2\_11022829\_x1.....cccaCcagauccggguuc..... 1  
Gi1\_4280852\_x1.....uccggguucgaCucccggcgccgga..... 1  
Gi5\_9030671\_x1.....gguucgauucccgGgcc..... 1  
Gi2\_11045741\_x1.....guucgauucccggcgccgAa..... 1  
Gi5\_8855692\_x1.ucucaccaacagauccGg..... 1  
Gi1\_4367709\_x1.....cGgauccggguucgauucccggcgcc..... 1  
Gi3\_28894200\_x1..cucaccaGcagauccgg..... 1  
Gi5\_8885001\_x1.....Uuucgauucccggcgccggagcguu..... 1  
Gi1a\_6170784\_x1.....guucgauucccggcgccAg..... 1  
Gi2\_11370999\_x1uucucCcccaacagauccgg..... 1  
Gi3\_28923891\_x1.....Ugauccggguucgauucc..... 1  
Gi5\_9051218\_x1..ucaccaacaAuuccgggu..... 1  
Gi3\_28458350\_x1.....guucgauucccggcUccggag..... 1

Gi5\_9036859\_x1.ucucacccNacagauccgggu..... 1  
Gi1\_4367466\_x1....acccaacaAauccggguucgauucc..... 1  
Gi2\_11185963\_x1.....gguucgauucccggcgccggagcAuuuc..... 1  
Gi1\_4342867\_x1.....cgauucccggcgccggagcU..... 1  
Gi5\_8852998\_x1.....gguucAauucccggcgcc..... 1  
Gi3\_28332252\_x1.....aCauccggguucgauucccggcgccggag..... 1  
Gi3\_28624239\_x1..cCacccaacagauccggguucgauucc..... 1  
Gi5\_8895238\_x1.....gguucgauCcccggcgccggagcguu..... 1  
Gi5\_8971807\_x1.....cagaucggNguucgauucccggcgccg..... 1  
Gi1\_4377282\_x1..ucacccaacagauccggAu..... 1  
Gi5\_9035748\_x1.....gNuucgauucccggcgccggagc..... 1  
Gi3\_28716628\_x1.....uucgauucccggcgccUgagc..... 1  
Gi1\_4348091\_x1.....gguucgauucccggcgccCga..... 1  
Gi4\_612632\_x1.....gGucgauucccggcgccg..... 1  
Gi3\_28954306\_x1.....ucgauucUcgggcgccggag..... 1  
Gi1\_4195659\_x1.....Uuccggguucgauucccggcgccgga..... 1  
Gi1\_4364259\_x1.....gguucgauucAcgggcgccggag..... 1  
Gi1\_4185539\_x1.....gauucccggcgccggagU..... 1  
Gi3\_28343661\_x1.....uucgaCuucccggcgccggag..... 1  
Gi5\_9013166\_x1.....Cgauccggguucgauucc..... 1  
Gi5\_8842286\_x1.....gguucgauuccAggcgccggagcguu..... 1  
Gi5\_9092387\_x1.....gguucgauucccgCgcgcc..... 1  
Gi2\_11292939\_x1.....guucgauUccgggcgccggag..... 1  
Gi1\_6026247\_x1.....guucUauucccggcgccgg..... 1  
Gi3\_28558286\_x1.....guucgauucccgAcgccg..... 1  
Gi3\_28500151\_x1.....ggguucgauucccggcgA..... 1  
Gi3\_28333127\_x1.....Ucagauccggguucgauucc..... 1  
Gi5\_9084290\_x1uucNcacccaacagauccgg..... 1  
Gi4\_574948\_x1.....gguucgauCcccggcgccggagc..... 1  
Gi5\_8862734\_x1.....guucgauucccggcgccAgag..... 1  
Gi5\_8925876\_x1.....gguucgauucccggcgcGggagc..... 1  
Gi3\_28283115\_x1.....aAauccggguucgauucc..... 1  
Gi5\_8897780\_x1.....gguuAgauucccggcgcc..... 1  
Gi1\_4352544\_x1.....cccaacagauccggguuc..... 0  
Gi2\_11075509\_x1.....uucgaAuucccggcgccggag..... 1  
Gi5\_9098832\_x1uucucacccaaUagauccggguuc..... 1  
Gi5\_8887625\_x1.....caacagauccgggCucgauucccggcgccg..... 1  
Gi2\_11024313\_x1.....gguucgauucccggcgccggagcguuA..... 1  
Gi5\_9069420\_x1..ucacccUacagauccggguu..... 1  
Gi3\_28529026\_x1.....guucgauGcccggcgccgga..... 1  
Gi3\_28688159\_x1.....cAauucccggcgccggag..... 1  
Gi3\_28743439\_x1.....acagauccggguucgauucccggcgccgAa..... 1  
Gi5\_9129758\_x1.....gguucgauucccggcgcGg..... 1  
Gi5\_9122369\_x1..ucacccaacagauccgCguu..... 1  
Gi1\_4225951\_x1..ucacAcaacagauccgggu..... 1  
Gi3\_28447617\_x1.....uucgauucccgAcgccgga..... 1  
Gi2\_11061560\_x1.....gguucgauucccggcgccggagcAu..... 1

Gi5\_9127215\_x1.....gguucUauucccgcgccg..... 1  
Gi2\_11340649\_x1uucucacccaacGgauccgg..... 1  
Gi2\_11088895\_x1.....Nuucgauucccggcgcccggagc..... 1  
G1a\_6037754\_x1.....gguucgauucccggcgcccAag..... 1  
Gi3\_28369938\_x1.....gaucUggguucgauucc..... 1  
Gi3\_28939267\_x1.ucucGcccaacagauccg..... 1  
Gi2\_11180185\_x1.....Gccaacagauccggguuc..... 1  
G1a\_6325166\_x1.....ggAucgauucccggcgcccggag..... 1  
Gi1\_4316550\_x1.....gguucgauAcccggcgcccggagc..... 1  
Gi1\_4341708\_x1.....gguucgauucccggcgcccggagcgG..... 1  
Gi1\_4193613\_x1.....gguucgauucccggcgcccAagc..... 1  
Gi3\_28579118\_x1.....ucgauuccAgcgcccggagc..... 1  
Gi5\_9124832\_x1.....gguucgauucccggcgcccggagc..... 1  
Gi1\_4380634\_x1uucNcaccacaacagauccgg..... 1  
Gi3\_28578239\_x1.....caccacaacagauccAgggguuc..... 1  
Gi3\_28434038\_x1.....cucacccaacagauccAg..... 1  
Gi1\_4172732\_x1.....Ucagauccggguucgauucc..... 1  
Gi2\_11173314\_x1.....gNuucgauucccggcgcccggagc..... 1  
Gi4\_586628\_x1.....cucacccaacagGuccggguucg..... 1  
Gi4\_591325\_x1.....guucgauucccggcgcccgg..... 1  
Gi3\_28418808\_x1.....guucgauuccGggcgccc..... 1  
G1a\_6096632\_x1.....Uuucgauucccggcgcccggag..... 1  
Gi3\_28527212\_x1.....gguucCauucccggcgccc..... 1  
Gi2\_11273501\_x1.....gguucgauucccgCcgcccggag..... 1  
Gi1\_4278672\_x1.....caGcagauccggguucgauucccggc..... 1  
Gi2\_11358228\_x1.....ucgauuccGggcgcccggagc..... 1  
Gi1\_4272720\_x1.....gCuucgauucccggcgccc..... 1  
G1a\_5999775\_x1Cucucacccaacagauccg..... 1  
Gi1\_4275075\_x1.....cagauccgggCucgauucccggcgccc..... 1  
Gi5\_8883410\_x1uucucacccaacagCuccgg..... 1  
Gi3\_28405878\_x1.....cagauccggguucgauucccggcgccc..... 0  
Gi2\_11234487\_x1.....ucgauucccggcgcccUagc..... 1  
Gi1\_4215423\_x1.....ucacccaacagauccgCgu..... 1  
Gi3\_28618792\_x1.....gguucgauuccAgcgccc..... 1  
Gi5\_9135834\_x1.....guucgauuccGccggcgcccga..... 1  
Gi5\_9007389\_x1.....guucgauucccggcgcccUagc..... 1  
G1a\_6333977\_x1uCucacccaacagauccg..... 1  
Gi3\_28428151\_x1.....guucgauucccgCcgcccga..... 1  
Gi2\_11106519\_x1.....ucacccaacagauccggguuc..... 0  
Gi3\_28548837\_x1.....cgggCucgauucccggcgcccga..... 1  
Gi1\_4231263\_x1uuNucacccaacagauccg..... 1  
Gi5\_9026658\_x1.....aGagauccggguucgauucccggcgccc..... 1  
Gi5\_8968028\_x1.....gguucgauuccGggcgcccggagc..... 1  
Gi2\_11000175\_x1.....gguucUauucccggcgcccggag..... 1  
Gi1\_4317254\_x1.....gguuAgauucccggcgcccggagc..... 1  
Gi3\_28586589\_x1.....uccggguucgauucccggcgcccggagc..... 0  
G1a\_6071562\_x1.....Aguucgauucccggcgccc..... 1

Gi4\_608663\_x1 .....gguucgauucccgcgccgA..... 1  
Gi3\_28897993\_x1.....gaGccggguucgauucc..... 1  
Gi1\_4364403\_x1..ucUcccaacagauccgggu..... 1  
Gi3\_28335349\_x1.....acagauccNgguucgauucccgcgccgga..... 1  
Gi3\_28319896\_x1..Gucaccaacagauccggguucgauucc..... 1  
Gi2\_11346832\_x1.....agaucggguucgCuucc..... 1  
Gi1a\_6027245\_x1.....gguuAgauucccgcgccg..... 1  
Gi1\_4324906\_x1.....cagauccggguucgCuucccgcgcc..... 1  
Gi3\_28441267\_x1.....uucgauuccAgcgccg..... 1  
Gi3\_28376579\_x1.....guucgauuUccggcgccg..... 1  
Gi5\_9100593\_x1uucucacccaaUagauccg..... 1  
Gi1\_4242195\_x1.....gguucgauucccgcgccgU..... 1  
Gi3\_28912144\_x1.....auccggguuAgauucccgcgccgga..... 1  
Gi1\_4347019\_x1.....guucgauuAccggcgccg..... 1  
Gi2\_11271890\_x1.....ucgauucccgcgccgAa..... 1  
Gi5\_9012390\_x1.....gguucgauucccgcgccUggagcguu..... 1  
Gi5\_9100445\_x1.ucucaccccCacagauccg..... 1  
Gi3\_28367049\_x1.....caacagauccgAguucga..... 1  
Gi3\_28728177\_x1.....agaucgggCucgauucc..... 1  
Gi4\_590903\_x1.....gguucgaCucccgcgccg..... 1  
Gi3\_28528581\_x1.....cAauucccgcgccggagc..... 1  
Gi2\_11119670\_x1.....uCcgauucccgcgccggagc..... 1  
Gi1\_4160066\_x1.....gguucgUuucccgcgccggag..... 1  
Gi3\_28284425\_x1.....acagauccggguucgaCucccgcgccg..... 1  
Gi3\_28298784\_x1uucucacccaacagauGcgg..... 1  
Gi1\_4228899\_x1.....gguucgauuccGggcgccggag..... 1  
Gi2\_11043616\_x1.....guucgUuucccgcgccgga..... 1  
Gi3\_28412858\_x1.....cgauucccgcgccggagcU..... 1  
Gi2\_11311014\_x1.....uucgauucccgcgccUgag..... 1  
Gi3\_28550482\_x1..cucaUccaacagauccg..... 1  
Gi2\_11330095\_x1.....gguGcgauucccgcgccgga..... 1  
Gi3\_28984872\_x1.ucucUcccaacagauccg..... 1  
Gi2\_11288815\_x1.....gguAcgauucccgcgcc..... 1  
Gi1\_4338121\_x1.....auccggguucgGuucccgcgccg..... 1  
Gi1a\_6327152\_x1.....gguucgauuccUggcgccgga..... 1  
Gi2\_11239010\_x1.....guucgauuccCcgccgga..... 1  
Gi3\_28608323\_x1.....gGuccggguucgauucccgcgccgga..... 1  
Gi5\_8840835\_x1.....uccggguucgauucUcggc..... 1  
Gi3\_28584321\_x1.....agaucggguucgauucccgcgccgGg..... 1  
Gi2\_11071155\_x1..cucaccaacagauccCg..... 1  
Gi2\_11082774\_x1.....guuGgauucccgcgccggag..... 1  
Gi5\_8896414\_x1.ucucacccaacagauccAggu..... 1  
Gi1\_4224993\_x1..cucaccaacagauccggguucg..... 0  
Gi2\_11301120\_x1.....cgauuccNgcgccggagcguuuc..... 1  
Gi3\_28361274\_x1.....agaucggguucgauucUc..... 1  
Gi5\_8833470\_x1.....acUgauccggguucgauucccgcgcc..... 1  
Gi5\_8889832\_x1.....guucgauuccCcgcgccggagc..... 1

Gi1a\_6271337\_x1.....Gcccaacagauccggguucgauuccc..... 1  
Gi3\_28559884\_x1.....ccUaacagauccggguucgauuccc..... 1  
Gi5\_9011318\_x1.....gguucgauucccgccgUagc..... 1  
Gi2\_11204160\_x1.....gguucgauucccCgcgccg..... 1  
Gi2\_11261549\_x1uucucaUccaacagauccg..... 1  
Gi1\_4339970\_x1.....guucgauucccgccAgagc..... 1  
Gi3\_28627834\_x1.....uNcgauucccgccggagc..... 1  
Gi2\_11357110\_x1.....uucgGuucccgccg..... 1  
Gi3\_28712821\_x1.....guucgauucccCgcgccg..... 1  
Gi3\_28652401\_x1.....ucgauucccgccggagA..... 1  
Gi3\_28323073\_x1.....cccaacagauccggCucgauuccc..... 1  
Gi4\_572180\_x1.....gguucgauucccgccGcggagc..... 1  
Gi5\_8940077\_x1.....uucgauucccgccggga..... 0  
Gi1\_4319907\_x1.....guuNgauucccgccggga..... 1  
Gi3\_28281105\_x1..cucaccaacagauccAgguucgauu..... 1  
Gi3\_28405141\_x1.....aucggguCcgauuccggccggagc..... 1  
Gi5\_9104398\_x1...cUcccaacagauccggguucga..... 1  
Gi2\_11138380\_x1.....ucgauucccgccGggagc..... 1  
Gi5\_9112113\_x1.....ccgggCucgauucccgccggga..... 1  
Gi1\_4240444\_x1.....gguucgauucccgccGcggag..... 1  
Gi1a\_6278848\_x1.....gguucgauucccgccCccggagc..... 1  
Gi1\_4368827\_x1.....gguucgauucccgccCgagc..... 1  
Gi3\_28903629\_x1.....uccggguucgaCuccggccggga..... 1  
Gi2\_11390696\_x1.....agaucggguucAauucc..... 1  
Gi3\_28680340\_x1.....Nuucgauuccggccg..... 1  
Gi3\_28514188\_x1.ucGaccaacagauccg..... 1  
Gi2\_11256551\_x1uucucaccaacagaAccg..... 1  
Gi3\_28332991\_x1.....aucUggguucgauucccgccggagc..... 1  
Gi5\_9084990\_x1.....gguucgauucccgccCagc..... 1  
Gi5\_9078320\_x1uucucaccaacUgauccg..... 1  
Gi2\_11157678\_x1.....gguucgauucccgUcggag..... 1  
Gi2\_11092858\_x1.....guucgauucccgUccgga..... 1  
Gi2\_11271428\_x1.....gguucgaGuuccggccg..... 1  
Gi1a\_6280602\_x1.....gguucgGuuccggccggag..... 1  
Gi2\_11193724\_x1.....gauuccAggcccggagc..... 1  
Gi3\_28381752\_x1.....ucgauucccgAgccggag..... 1  
Gi5\_8998405\_x1uucucaccaacagauccggCu..... 1  
Gi2\_11121073\_x1.....gguucgauucccgAcgcc..... 1  
Gi1\_4368147\_x1.uAucaccaacagauccg..... 1  
Gi5\_8935087\_x1.....gguAcgauucccgccgg..... 1  
Gi2\_11144917\_x1.....cgauuccggccgggaAcguu..... 1  
Gi2\_11403411\_x1..cucaccaacUgauccg..... 1  
Gi3\_28940951\_x1.....uccggguucgauuccAggcccggga..... 1  
Gi2\_11088551\_x1.....cgauuccggccggagcU..... 1  
Gi3\_28563903\_x1.....ggguucgauuccggccggg..... 1  
Gi5\_8958892\_x1.....ucgGuuccggccggag..... 1  
Gi1\_4223970\_x1.....guucgauucccgccGgga..... 1



Gi2\_11135237\_x1.....guucgauuccUggcgccg..... 1  
Gi1\_4236171\_x1.....aAuccggguucgauucc..... 1  
Gi2\_11190614\_x1uucucacccaacaAuccg..... 1  
Gi3\_28931829\_x1.....caacagauccUggguucgauucc..... 1  
Gi2\_11146961\_x1.....gguucgauucccgccggagcgC..... 1  
Gi2\_11037431\_x1.....agauccggguucgCuucc..... 1  
Gi3\_28439530\_x1.....uccggguucgauCcccgccgccgga..... 1  
Gi3\_28835913\_x1.....uccggguucgauucccgccgccaAga..... 1  
Gi3\_28383338\_x1.....cgUguucgauucccgccgccaAga..... 1  
Gi5\_9119908\_x1.....uucgauucccgccgccaAga..... 1  
Gi5\_8909169\_x1.....gauucccgccgccaAga..... 1  
Gi2\_11300518\_x1.....GagauccggguucgauucccgccgccaAga..... 1  
Gi3\_28615613\_x1.....UgauccggguucgauucccgccgccaAga..... 1  
Gi3\_28482553\_x1...Ccaccacagauccggguuc..... 1  
Gi4\_588102\_x1.....guucgauucccgccgccaAga..... 0  
Gi2\_11141503\_x1uucucacccaacagauUcgg..... 1  
Gi3\_28659909\_x1.....uucgauucNcgccgccaAga..... 1  
Gi5\_9083362\_x1uucucacccaacagauUcgg..... 1  
Gi1\_4199628\_x1.....guucgauucccgccgccaAga..... 1  
Gi3\_28662191\_x1.....acagauccggguucgauucccgUcggccaAga..... 1  
Gi2\_11358279\_x1.....guucgauucccgccgccaAga..... 1  
Gi5\_9017302\_x1.....UcggguucgauucccgccgccaAga..... 1  
Gi5\_8857528\_x1.....gguucgGuucccgccgccaAga..... 1  
G1a\_6355749\_x1.....guucgauAcccgccgccaAga..... 1  
Gi5\_8839554\_x1.ucucacccUacagauccg..... 1  
Gi3\_28955718\_x1...caUccaacagauccggguuc..... 1  
Gi2\_11257600\_x1uucucacccaacagUuccg..... 1  
Gi3\_28337109\_x1.....guucgauGcccgccgccaAga..... 1  
Gi2\_11299356\_x1.....agauccgAguucgauucc..... 1  
Gi5\_9022843\_x1...ccaacagauccAgguuc..... 1  
Gi5\_9071985\_x1.ucucacccaacagauGcgggu..... 1  
Gi3\_28819375\_x1.....agauccgggCucgauucc..... 1  
Gi2\_11282194\_x1.....uucgauucNcgccgccaAga..... 1  
Gi1\_4202460\_x1.....uccAgguucgauucccgccgccaAga..... 1  
G1a\_6253918\_x1.ucucacccaacCgauccg..... 1  
G1a\_6353152\_x1.....gguucAauucccgccgccaAga..... 1  
Gi5\_8907632\_x1...ucacccaCagauccgggu..... 1  
Gi5\_8937867\_x1.....guucCauucccgccgccaAga..... 1  
Gi2\_11350215\_x1.....gguucgauucccgUcggccaAga..... 1  
Gi3\_28383516\_x1.....gguucgauuccCgccgccaAga..... 1  
Gi5\_9103469\_x1.....aCauccggguucgauucc..... 1  
Gi2\_11362987\_x1.....gguucgauuccCgccgccaAga..... 1  
Gi2\_11258334\_x1...ccaacagauGcggguuc..... 1  
Gi2\_11144500\_x1.....guucgauucccgccgccaAga..... 1  
Gi5\_8877325\_x1.....guucgUuucccgccgccaAga..... 1  
Gi1\_4197287\_x1.....auucccgccgccaAga..... 1  
Gi5\_9076870\_x1.....uucgauucccgccgccaAga..... 1

Gi2\_11289923\_x1.....ucgNuucccggcgcccggagc..... 1  
Gi2\_11407350\_x1.....ucgauucccCgcgcccggagc..... 1  
Gi1\_4325900\_x1.....caacagGuccggguucgauucccggc..... 1  
Gi5\_8921422\_x1.....accacaacagGuccggguucgauucc..... 1  
Gi1\_4169482\_x1.....guucgauucccUgcgcccg..... 1  
Gi5\_9138450\_x1.ucucacccaacagGuccgg..... 1  
Gi4\_593486\_x1.....Cguucgauucccgccgcccg..... 1  
Gi3\_28737152\_x1uucucacccaacagaucGgg..... 1  
Gi5\_9086160\_x1.....uucgauucccgccgcccggagcAu..... 1  
Gi1\_4186633\_x1..uGaccaacagauccgggu..... 1  
Gi3\_28573061\_x1.....uccggguucgauucccggcAccgga..... 1  
Gi3\_28344517\_x1...caccacaacUgauccggguuc..... 1  
Gi1\_4375213\_x1.....guucgauucccgccgcccggagcg..... 0  
Gi3\_28329919\_x1...cUcccaacagauccggguuc..... 1  
G1a\_6301306\_x1.....gguucgauCcccggcgcccggagc..... 1  
Gi2\_11261799\_x1.....gguucgauuAccggcgcccggag..... 1  
Gi3\_28781900\_x1.....acagauccggguucgauucccgccgcccggG..... 1  
Gi4\_606396\_x1.....guucgaGucccgccgcccgg..... 1  
Gi2\_11055791\_x1.....gUucgauucccgccgcccggagcguuu..... 1  
Gi5\_8939812\_x1uucucacccaacagaucGg..... 1  
Gi3\_28554081\_x1.....ggguucgGuucccgccgcccg..... 1  
Gi5\_8970024\_x1.....acagauccggguucgauucccgccgAgc..... 1  
Gi5\_9040313\_x1.ucucacccaCagauccg..... 1  
Gi2\_11182677\_x1.....Uggguucgauucccgccgcccggagc..... 1  
G1a\_6272640\_x1.....guCcgauucccgccgcccggagc..... 1  
Gi3\_28516924\_x1.....gauccggguucgauCccc..... 1  
Gi4\_595786\_x1.....guucgCuucccgccgcccg..... 1  
Gi5\_8957526\_x1.....aacagauccggAuucgauucccgccgcccggagc..... 1  
Gi3\_28833541\_x1.....cgauGcccggcgcccggagc..... 1  
Gi1\_4346213\_x1.....guucgaAuucccgccgcccg..... 1  
Gi5\_8934544\_x1.....guucgauCcccggcgcccggag..... 1  
Gi1\_4358284\_x1.....gguuAgauucccgccgcccg..... 1  
Gi5\_8876071\_x1.....guucgaGucccgccgcccgga..... 1  
Gi1\_4193508\_x1.....caacagauccggguucgauucUcggc..... 1  
Gi3\_28751554\_x1.....Acgauucccgccgcccggagc..... 1  
Gi3\_28980890\_x1.....agGuccggguucgauucc..... 1  
Gi4\_585429\_x1.....Aguucgauucccgccgcccg..... 1  
Gi4\_573755\_x1.....uucgauucccgccgcccg..... 0  
Gi5\_9131642\_x1.....gguucgauucccgccgcccggaA..... 1  
Gi3\_28646600\_x1.....uucgauAcccgccgcccgga..... 1  
Gi5\_9027678\_x1...accacaacagauccggAuucgauucc..... 1  
Gi2\_11066010\_x1.....uucgauucccgccgAcggagc..... 1  
G1a\_6084214\_x1.....gguucgauucccgccgUcggag..... 1  
Gi1\_4247730\_x1.....uucgCuucccgccgcccg..... 1  
Gi3\_28281122\_x1.....uucgauucccgccgUgg..... 1  
Gi3\_28394896\_x1.....uucgauucccUgcgcccgga..... 1  
Gi5\_8873427\_x1..cucacccaacagauccUg..... 1

Gi3\_28276348\_x1.....ucgaCucccggcgccggag..... 1  
Gi2\_11228306\_x1.....ucAauucccggcgccggag..... 1  
Gi5\_9129558\_x1.....gguucgaGucccggcgccgga..... 1  
G1a\_6322399\_x1.....gguucgGuucccggcgccg..... 1  
G1a\_6239732\_x1.....gguucgauucccggcgccUgagc..... 1  
Gi1\_4349061\_x1.....Gcagaucggguucgauucc..... 1  
Gi3\_28489770\_x1.....uucgauuccAggcgccgga..... 1  
Gi1\_4259666\_x1.....gguucgauucccggcUccgg..... 1  
Gi3\_28755984\_x1..cucaccaacagauCagg..... 1  
G1a\_6286866\_x1.....Cguucgauucccggcgccg..... 1  
G1a\_6015802\_x1.....gguucgauucccggcgUcg..... 1  
Gi2\_11223709\_x1.....ucgauUccggcgccggag..... 1  
G1a\_6115971\_x1.....Auucgauucccggcgccgga..... 1  
Gi4\_569785\_x1..cCcacccaacagauccggguucg..... 1  
Gi1\_4248954\_x1..ucacccUacagauccgggu..... 1  
Gi3\_28647113\_x1.....ggguucgauucccggcgUcgga..... 1  
Gi3\_28888618\_x1.....ucgauucccggcAccggagc..... 1  
Gi3\_28467228\_x1.....gguucgauucccgCcgccggag..... 1  
G1a\_6299274\_x1.....gguucgauucccUgcgcccggag..... 1  
Gi1\_4323888\_x1.....gGucgauucccggcgccggag..... 1  
Gi1\_4380293\_x1..cucaccaacGgaucggguucgauucc..... 1  
Gi3\_28346100\_x1.....aucggguucgauucccggcC..... 1  
Gi3\_28890051\_x1.....guucgauucccUgcgcccggag..... 1  
Gi3\_28714050\_x1.....cagaucggguucgaCucccggcgccgg..... 1  
Gi3\_28603845\_x1.....uccggguucgauucccggc..... 0  
Gi5\_8970092\_x1.....uucgauucccggcgUgg..... 1  
G1a\_6104029\_x1.....gguucgauucccCcgcccggagc..... 1  
Gi3\_28795804\_x1..cucGcccaacagauccgg..... 1  
Gi1\_4220382\_x1.....guuAgauucccggcgcccggagc..... 1  
Gi5\_9070166\_x1..ucuUacccaacagauccgg..... 1  
Gi5\_8888853\_x1.....guucgauucccggcgGcggagc..... 1  
Gi1\_4328858\_x1uGcucaccaacagauccggguucgau..... 1  
Gi2\_11368171\_x1.....gguucgauAcccggcgcccggag..... 1  
Gi1\_4349058\_x1.....guucgGuucccggcgccggag..... 1  
Gi5\_9073493\_x1.....cagaucggguucgauucccggAgccg..... 1  
Gi3\_28789032\_x1..ucucaccaUcagauccgg..... 1  
Gi3\_28534528\_x1.....aUagauccggguucgau..... 1  
Gi1\_4308228\_x1.....Agguucgauucccggcgccg..... 1  
Gi5\_8947288\_x1.....gguucgaAucccggcgcccggagc..... 1  
Gi5\_9101401\_x1..ucGcacccaacagauccgggu..... 1  
Gi3\_28728864\_x1.....Agguucgauucccggcgcccgga..... 1  
Gi5\_9082625\_x1.....uucgCuucccggcgccgg..... 1  
Gi2\_11405600\_x1.....cggguucgauucccggcgcccggU..... 1  
Gi3\_28821354\_x1.....cggguucgauucccggcgcccggagcA..... 1  
Gi5\_8871802\_x1..cucaccaacagauCagg..... 1  
Gi3\_28963298\_x1.....cgauucccggcgUcggagc..... 1  
Gi1\_4217533\_x1.....gguCcgauucccggcgcc..... 1

Gi1\_4224178\_x1.....gguucgauucccCgcgccgg..... 1  
Gi3\_28552813\_x1.....guuNgauucccgcccgagg..... 1  
Gi2\_11157373\_x1.....agauccgggCucgauucc..... 1  
Gi1\_4280231\_x1.....guucgauGcccggcgccg..... 1  
Gi1\_4378852\_x1.....agauccggguucgauucUc..... 1  
Gi5\_9119065\_x1.....acccaacagauccgggCucgauucc..... 1  
Gi2\_11398309\_x1..cucaccaacagaCccgg..... 1  
Gi1\_4356775\_x1.....guuAgauucccgcccg..... 1  
Gi1\_4179217\_x1.....agauccggguCcgauucc..... 1  
Gi3\_28313780\_x1.....cccaacagauccggguucgauucUc..... 1  
Gi2\_11007588\_x1.....guucgaGucccgcccgagg..... 1  
Gi5\_9080958\_x1.....gCuucgauucccgcccgaggcgu..... 1  
Gi1\_4205118\_x1.....guucgauucccgUcgcgggagc..... 1  
Gi2\_11013948\_x1.....guucgauGccggcgccgga..... 1  
Gi2\_11053413\_x1.....ggCucgauucccgccgg..... 1  
Gi5\_8956571\_x1.....ggguucgauuccUggcgccggagc..... 1  
Gi2\_11261593\_x1.....cagauccggguucgauucccgccggagc..... 0  
Gi3\_28987072\_x1.....aaUagauccggguucgauucc..... 1  
Gi3\_28489861\_x1.....agauccggguuAgauucccgcccgagg..... 1  
Gi5\_8997540\_x1..ucUccaacagauccgggu..... 1  
Gi5\_8952778\_x1.....gguucgauucccgcccgccUgag..... 1  
Gi1\_4351216\_x1.....gguAcgauucccgcccgaggc..... 1  
G1a\_6153473\_x1.....gguucgauucAcggcgccgga..... 1  
Gi2\_11130143\_x1.....cagauccggguucgauucccgccAgag..... 1  
Gi3\_28425353\_x1.....caacagauccgggCucgauucc..... 1  
Gi3\_28920241\_x1.....caacagauccggguucgGuucc..... 1  
Gi1\_4218050\_x1.....gguucgauucccgcccgCag..... 1  
Gi5\_9003694\_x1uucucacccGacagauccgg..... 1  
Gi3\_28900399\_x1.....aucggguucgaGuccggcgccgga..... 1  
Gi2\_11384950\_x1.....agaCccggguucgauucc..... 1  
Gi3\_28593556\_x1.....aucAgguucgauucccgcccgga..... 1  
Gi2\_11059441\_x1.....gguucgauucAcggcgccgg..... 1  
G1a\_6263421\_x1uucucaUccaacagauccg..... 1  
Gi3\_28897627\_x1.....cagauUggguucgauucc..... 1  
Gi5\_8925195\_x1.ucucacccaacagauccgC..... 1  
Gi3\_28811273\_x1.....gguucCauucccgcccgagg..... 1  
Gi2\_11089352\_x1.....Cauuccggcgccggagc..... 1  
Gi5\_8843088\_x1.....Agguucgauucccgcccg..... 1  
Gi4\_573574\_x1 uucucacccaacagauccg..... 0  
Gi2\_11112269\_x1.....agauGggguucgauucc..... 1  
Gi3\_28783069\_x1.....ucgauuccgggUccggagc..... 1  
Gi2\_11381308\_x1.....guucgauucccgccgU..... 1  
Gi5\_9116262\_x1.uUucacccaacagauccgg..... 1  
Gi3\_28709885\_x1.....guucgauGccggcgccggagc..... 1  
Gi5\_9128802\_x1.....gguucgauucccgCcgccgga..... 1  
Gi2\_11127044\_x1.....ucgauuccggcgccggagcA..... 1  
Gi2\_11218470\_x1.....ggguucgauucccgcccgaggcGA..... 1

Gi1\_4201107\_x1.....guucgauucUcggcgccggagc..... 1  
Gi3\_28671000\_x1.....gguucgauucccggcgccggagcgG..... 1  
G1a\_6305575\_x1.....guucgauucccgCcgccgg..... 1  
Gi2\_11108052\_x1uucucacccaacagauccgggCucg..... 1  
Gi3\_28868449\_x1.....auccgggCucgauucccggcgccgga..... 1  
Gi3\_28269161\_x1.....ccaacagauccggguucgCuucc..... 1  
Gi3\_28846649\_x1.....cgauucccggcgccggagcgC..... 1  
Gi1\_4215116\_x1.....gguucgauucccgGgccgga..... 1  
Gi2\_11160678\_x1.....uccggguucgauucccggcgccggagc..... 0  
G1a\_6150146\_x1uucucacccaacGgauccg..... 1  
Gi1\_4167359\_x1.....gUguucgauucccggcgccgg..... 1  
Gi5\_9026887\_x1.ucucacccaacagauccU..... 1  
Gi5\_8884316\_x1.....cggguucgauucccgUgc..... 1  
Gi3\_28469741\_x1.....Nguucgauucccggcgcc..... 1  
Gi5\_9063088\_x1.....guucgauucccggcCccgga..... 1  
Gi2\_11396827\_x1.....guucgauuccCgcgccggag..... 1  
Gi5\_9050029\_x1.....gauccggguucgauucccgUgccgga..... 1  
G1a\_6274430\_x1.....gguucgCuucccggcgccggagc..... 1  
Gi5\_9019155\_x1.....uucgauucccggcgccgA..... 1  
Gi2\_11386236\_x1.....agaNccggguucgauucc..... 1  
Gi3\_28941386\_x1.cucacccaacagauccgggCucgau..... 1  
Gi2\_11269785\_x1.....guucgauucccggcgccggag..... 1  
G1a\_6024655\_x1.....guucgauucccggcgccggC..... 1  
Gi1\_4244347\_x1.....Uauucccggcgccggagc..... 1  
Gi3\_28675635\_x1.....caacagauccAgguucga..... 1  
Gi2\_11373735\_x1.....Acgauucccggcgccggag..... 1  
Gi4\_572457\_x1.....gguucgCuucccggcgccgg..... 1  
Gi1\_4366445\_x1.ucucacccaaUagauccgg..... 1  
G1a\_6038980\_x1.....gguucgauucccgUgccggagc..... 1  
Gi4\_579019\_x1.....gGucgauucccggcgccggagc..... 1  
Gi3\_28418507\_x1.....uucgauuGccggcgccggagc..... 1  
Gi3\_28323193\_x1.....Cauccggguucgauucc..... 1  
Gi2\_11298164\_x1.....uGgauucccggcgccgga..... 1  
Gi1\_4165188\_x1.cucacccaacaAauccgg..... 1  
Gi1\_4336743\_x1uucuAacccaacagauccgg..... 1  
Gi2\_11354537\_x1.....ucgauuccAggcgccggagc..... 1  
Gi5\_9050163\_x1uucuAacccaacagauccg..... 1  
Gi2\_11292688\_x1uucucacccaacagauUcg..... 1  
Gi3\_28748580\_x1.....cgauucccggcgccggagU..... 1  
Gi3\_28565650\_x1.....caacagauccggguucgauCccc..... 1  
Gi2\_11039943\_x1.....guucgauuccUgcgccg..... 1  
Gi2\_11099575\_x1.....guucgauuccAggcgccg..... 1  
Gi3\_28547069\_x1.....gauuccUgcgccggagc..... 1  
Gi1\_4221503\_x1.....agauccggguucgauucccggcgccggagc..... 0  
Gi3\_28658183\_x1.....cggguucgauucccggcgccggG..... 1  
Gi1\_4284495\_x1.....ucgauucccggcgccggagU..... 1  
Gi3\_28344005\_x1.....cccaacagauccUgguucgauucc..... 1

Gi3\_28607845\_x1.....cggNuucgauucccggcgcccga..... 1  
Gi2\_11024176\_x1.....ggguucgauucccgUgcc..... 1  
G1a\_6047477\_x1.....gCuucgauucccggcgcccggag..... 1  
Gi3\_28873117\_x1.....cucGcccaacagauccggguucgauu..... 1  
G1a\_6186067\_x1.....gguuAgauucccggcgcccggagc..... 1  
G1a\_6130492\_x1.....guucUauucccggcgcccggagc..... 1  
Gi3\_28459091\_x1.....uucgGuucccggcgcccga..... 1  
Gi3\_28374533\_x1.ucucacccaacaCauccg..... 1  
G11\_4264100\_x1.....aacagauccggguucgauuccAgcgcccg..... 1  
Gi3\_28771493\_x1.....caGcagauccggguucgauucc..... 1  
Gi3\_28318453\_x1.....gguNcgauucccggcgcccg..... 1  
Gi3\_28366159\_x1.....gauccggguucgauucccggcgcccggagcC..... 1  
Gi3\_28644085\_x1uucuUacccaacagauccggguu..... 1  
G11\_4211252\_x1.....gUguucgauucccggcgcccga..... 1  
Gi5\_8902008\_x1..ucacUcaacagauccggguu..... 1  
G11\_4390598\_x1.....guucgauGcccgggcgcccg..... 1  
Gi2\_11000074\_x1.....ucgaGuuccgggcgcccggag..... 1  
Gi3\_28941279\_x1.....gguucgauucccggcgcccUag..... 1  
G11\_4338588\_x1.....cagauccggguucgauucc..... 0  
Gi5\_8944459\_x1uucucacccaacagauccgC..... 1  
G11\_4311669\_x1.....gguucgauuccAgcgcccg..... 1  
Gi3\_28968230\_x1..ucacccaacCgauccggguuc..... 1  
G11\_4186427\_x1.....guucAauucccggcgcccggag..... 1  
G11\_4347531\_x1.....uucgauucccggcgcccggagcU..... 1  
Gi5\_9106455\_x1.....aucggguucgauucccggcgcccggagc..... 0  
Gi5\_8915832\_x1.....cccaacagauccggguAc..... 1  
Gi3\_28632935\_x1..ucaccUaacagauccggguuc..... 1  
G1a\_6130507\_x1.....gguucgauucccggcAccg..... 1  
Gi2\_11209690\_x1.....guucgauuccGggcgcccga..... 1  
Gi5\_8857495\_x1.ucuNacccaacagauccg..... 1  
Gi5\_8942041\_x1.....acagGuccggguucgauucccggcg..... 1  
Gi5\_9079622\_x1.....cccaacagauccgggCuc..... 1  
G11\_4354408\_x1.ucucacccaacagauccgA..... 1  
Gi5\_8915072\_x1uucucacccaacagauUcg..... 1  
Gi2\_11122381\_x1.....uucgauucccgUgccggag..... 1  
G11\_4203577\_x1.ucucaccUaacagauccg..... 1  
Gi2\_10997619\_x1.....ucgauucccggcgcccggagcU..... 1  
G11\_4264589\_x1.....ucgauucccgUgccggagc..... 1  
Gi2\_11201441\_x1.....guucgauucccggcgcccUag..... 1  
Gi2\_11299054\_x1.....ucgauAccgggcgcccggagc..... 1  
Gi5\_9104674\_x1.....guucgauucccgCcgcccga..... 1  
Gi3\_28398881\_x1..ucacccaacagauccggguCc..... 1  
Gi2\_11218230\_x1.....gguucgauucccgAgcccg..... 1  
G11\_4308261\_x1.....gguucgauuccAgcgccc..... 1  
G11\_4241313\_x1.....cCgauccggguucgauucccggcgccc..... 1  
Gi2\_11390964\_x1.....aacagauccggguucgGuuccgggcgccc..... 1  
Gi2\_11366978\_x1.....ucgauAccgggcgcccggagc..... 1

Gi2\_11041101\_x1.....gguucgauucAcggcgccgga..... 1  
Gi4\_582552\_x1.....gguCcgauucccggcgcccgg..... 1  
Gi3\_28594514\_x1.....ggguucgauucccggcgcccggG..... 1  
Gi1\_4280151\_x1.....guucgUuucccggcgcccgga..... 1  
Gi2\_11271538\_x1.....ucgauucAcggcgcccgga..... 1  
Gi5\_8961489\_x1uucucacccaacGgauccgg..... 1  
G1a\_6047473\_x1.....guucgauucccggcgcccGagc..... 1  
Gi1\_4225088\_x1.....gguucgauucccgAgccg..... 1  
Gi3\_28381888\_x1.....ucgauuccUgcgcccggagc..... 1  
Gi1\_4362114\_x1.ucucaccccUacagauccgg..... 1  
Gi5\_9051131\_x1uAcucacccaacagauccggguuc..... 1  
Gi5\_9053971\_x1.....acagauccggguucgauucGcggcgc..... 1  
Gi3\_28851294\_x1.....caccUaacagauccggguuc..... 1  
Gi2\_11077411\_x1.cAcacccaacagauccgg..... 1  
Gi5\_9110145\_x1.....gguucgauuccAggcgcccgga..... 1  
Gi5\_9067315\_x1.....cccaacagauccgAguuc..... 1  
Gi2\_11279226\_x1.....cgauuccAgcgcccggagcguuu..... 1  
Gi3\_28350522\_x1.....agaucggguucUauucccggcgcccgg..... 1  
Gi4\_592725\_x1.....guucgauucGcggcgcccggagc..... 1  
G1a\_6330116\_x1.....guucgauucccggcgGcggagc..... 1  
Gi2\_11086499\_x1.....cggguucgaGucccggcgcccgga..... 1  
Gi1\_4214623\_x1.....cgauucccggcgcccggagcguuuc..... 0  
Gi5\_8859996\_x1uucucacccaacagauccgggAu..... 1  
Gi2\_11231128\_x1.....agaucggguucgauucccggcgcccggag..... 0  
Gi3\_28294130\_x1.....guucgauucccggcgcccGag..... 1  
Gi3\_28865077\_x1.....agaucgggAucgauucc..... 1  
Gi1\_4332510\_x1.....gguucgaGucccggcgcccgga..... 1  
Gi2\_11273164\_x1.....uucgauucccggcgcccG..... 1  
Gi3\_28767597\_x1.....gauuccggcgUcggagc..... 1  
Gi3\_28310326\_x1.....gauccggguCcgauucc..... 1  
Gi2\_11319089\_x1.....gguucgauuccCgcgcccggag..... 1  
Gi5\_9011185\_x1.....ucgauCcccggcgcccggagc..... 1  
Gi3\_28630962\_x1.....Nuucgauuccggcgcccgg..... 1  
Gi1\_4277007\_x1.....guucgauucccggcUccgg..... 1  
Gi3\_28339293\_x1..ucaccccUacagauccggguuc..... 1  
Gi5\_8916156\_x1.....guucgauuNccggcgcccggag..... 1  
Gi5\_9035518\_x1.....ggguucgauucccggcgccc..... 0  
Gi5\_9001791\_x1.....cUauucccggcgcccggagcguuucc..... 1  
Gi1\_4382342\_x1.....agaucggguucgauCccc..... 1  
Gi1\_4175261\_x1.....gguucgauucccggcgcccAag..... 1  
Gi5\_8913613\_x1.....caccCaGcagauccggguucga..... 1  
Gi5\_8965383\_x1.....gguucgauuccUgcgccc..... 1  
Gi5\_9051740\_x1.....uucgauucccgUgcgg..... 1  
G1a\_6035510\_x1.....guucgaCucccggcgcccggag..... 1  
Gi1\_4262903\_x1.....guucgCuuccggcgcccggagc..... 1  
Gi2\_11060389\_x1.....uucgauucccggcGcggagc..... 1  
Gi2\_11278047\_x1.....ccCgguucgauucccggcgcccggagc..... 1

Gi2\_11134506\_x1.....cccaacagauccgggGuc..... 1  
Gi1\_4274785\_x1.....caacagauccgAguucgauucccggc..... 1  
Gi3\_28829414\_x1..cucacccaacagauccgA..... 1  
Gi3\_28420422\_x1.....agauccggguucgauucccggcgccggaA..... 1  
G1a\_6289377\_x1.....gguucgauucccggcgccggGg..... 1  
Gi3\_28277343\_x1uucucUcccaacagauccgggu..... 1  
Gi5\_8935009\_x1uucucacccaacagaCccggguuc..... 1  
Gi1\_4257203\_x1.....Ugguucgauucccggcgccgga..... 1  
Gi2\_11038569\_x1.....gguucgauucccggcgccgUa..... 1  
Gi5\_8932518\_x1.....ggguucgauUccggcgccggagc..... 1  
Gi1\_4328204\_x1.....gguucgauucccCgcgcc..... 1  
Gi2\_11357651\_x1uucucaccUaacagauccg..... 1  
Gi2\_11031798\_x1.....gguucgauucccggcgcG..... 1  
Gi5\_8956080\_x1.....gguucgauucccggcCccgga..... 1  
G1a\_6296102\_x1.....gguAcgauucccggcgccggagc..... 1  
G1a\_6280899\_x1.....gguucgauucccggcgccggagcgaA..... 1  
Gi5\_8916686\_x1.....uucgauucccggcgccAg..... 1  
Gi1\_4192941\_x1.....Aaacagauccggguucgauucccggc..... 1  
Gi2\_11100270\_x1.....cagaGccggguucgauucccggcgccggag..... 1  
Gi3\_28361222\_x1.....Ugauccggguucgauucccggcgccggag..... 1  
Gi2\_11144303\_x1.....guucCauucccggcgccggag..... 1  
Gi5\_8981188\_x1.....guucgauUccggcgccggagc..... 1  
Gi5\_8834311\_x1.....guucgauucccggcgccggagU..... 1  
Gi1\_4354265\_x1.....guuucccgccuuccuucgucuu..... 0  
Gi1\_4162336\_x1.....uccggguucgauucccggcgccgg..... 0  
Gi2\_11319370\_x1.....ucgGuucccggcgccggag..... 1  
Gi3\_28706486\_x1.ucucacccaacagauUgg..... 1  
Gi3\_28906139\_x1.ucucacccaacagGuccgg..... 1  
Gi3\_28585848\_x1.....Uuccggguucgauucccggcgccgga..... 1  
Gi5\_8974423\_x1...caccacagauccgggAucga..... 1  
G1a\_6295680\_x1.....uucgauucccggcgccggagcCu..... 1  
Gi3\_28530015\_x1.....ccaacagauccggguucgauucccggcgccggagc..... 0  
Gi1\_4369953\_x1.....gguucgauuccAgggcgccggagc..... 1  
Gi3\_28378752\_x1.....gauccggguucgauuccA..... 1  
Gi5\_9106722\_x1.....cgauucccggcgcUggagcguuuc..... 1  
Gi5\_8851989\_x1uucucGcccaacagauccgg..... 1  
Gi1\_4201497\_x1.....aacaUauccggguucgauucccggcgccgg..... 1  
Gi2\_11062455\_x1.....guucgauucccggcgccggagcg..... 0  
Gi1\_4264312\_x1.ucucaUccaacagauccg..... 1  
Gi1\_4237244\_x1.....uucgauucccggcgccAg..... 1  
G1a\_6079268\_x1.....gguucgauUaccggcgccggagc..... 1  
Gi1\_4228821\_x1..cGcaccacagauccggguucgauucc..... 1  
Gi3\_28419469\_x1.....uccggguucgauucccgAgccgga..... 1  
Gi1\_4297345\_x1.....uucgauucccggcgccggGgc..... 1  
Gi4\_570127\_x1.....guCcgauucccggcgccg..... 1  
Gi5\_9119606\_x1..ucaccUaacagauccgggu..... 1  
Gi2\_11015154\_x1.....accacagauccggguucgauucc..... 0



Gi5\_8952807\_x1.....uucgauCcccggcgccgg..... 1  
G1a\_6239905\_x1.....gguucgauuccUggcgccggagc..... 1  
Gi5\_9038197\_x1.....gguucUauucccgccgccc..... 1  
Gi4\_583134\_x1.....guucgauuccUggcgccgg..... 1  
Gi3\_28845590\_x1.....ggguuUgauucccgccgccc..... 1  
Gi3\_28985193\_x1.....ggguucgauucccgccgcccgaCc..... 1  
Gi5\_8985532\_x1uucucacccaacagauccU..... 1  
Gi3\_28876647\_x1.....aAuccggguucgauucccgccgcccggag..... 1  
Gi3\_28282996\_x1.....gguucgauucccgccUccgg..... 1  
Gi2\_11009191\_x1.....cccaacagNuccggguuc..... 1  
Gi4\_572129\_x1.....gguuAgauucccgccgcccggagc..... 1  
Gi2\_11161442\_x1uucucacccaacagauccgC..... 1  
Gi2\_11097809\_x1.....uucgauucAcggcgccgg..... 1  
Gi5\_9107706\_x1.....guucgauuccGggcgccgga..... 1  
Gi3\_28552848\_x1.....guucgauucccgccUccg..... 1  
Gi1\_4334700\_x1uucucUcccaacagauccggguucgau..... 1  
Gi2\_11309983\_x1.....Ugauucccgccgcccggagc..... 1  
G1a\_6098600\_x1.....gguucgauucccgccAcc..... 1  
Gi3\_28876102\_x1.....uccggguucgauucccgccUgcccga..... 1  
Gi3\_28572412\_x1.....guucgauucGccggcgcccga..... 1  
Gi3\_28890204\_x1.....ucAgggguucgauucccgccgcccga..... 1  
Gi2\_11388017\_x1.....gNucgauucccgccgcccgg..... 1  
Gi3\_28955418\_x1.....gauuAccggcgcccggagc..... 1  
Gi2\_11198248\_x1uucucacccaAagauccg..... 1  
Gi5\_8895369\_x1.....gauucccgccgAggagc..... 1  
Gi1\_4353672\_x1.....agauAcggguucgauucc..... 1  
Gi3\_28676654\_x1.....cGcaacagauccggguucgauucc..... 1  
Gi2\_11168535\_x1.....uucgauucccgccgcccUga..... 1  
Gi5\_9124695\_x1uucucaccUaacagauccgg..... 1  
Gi1\_4170449\_x1.....ucgaCucccgccgcccggagc..... 1  
Gi3\_28630680\_x1.....guucgauucccgccgcccUagc..... 1  
Gi3\_28582943\_x1.....ggguucgauucccgccAgcccga..... 1  
Gi1\_4171366\_x1.....gguucgauucccgccgcccAgga..... 1  
Gi3\_28987095\_x1.....cccaacagauccggguucgaCucc..... 1  
Gi5\_9038510\_x1.....gguucgaAuucccgccgcccgg..... 1  
Gi5\_8849804\_x1.ucAcacccaacagauccgg..... 1  
Gi3\_28943001\_x1.....auccggguucgauucccgccAccgga..... 1  
Gi3\_28702826\_x1.....cgGuucccgccgcccggag..... 1  
Gi2\_11282668\_x1.....uccgggAucgauucccgccgcccga..... 1  
Gi1\_4241720\_x1.....gguucgauuccUcgccgcccggagc..... 1  
Gi5\_8880505\_x1.....ucgauucccgccUgcccga..... 1  
Gi5\_9129461\_x1.....gguucgauucccgCccgcccgg..... 1  
Gi2\_11268373\_x1.....ucgauucccgccgcccgaAc..... 1  
Gi2\_11077775\_x1uucucacccaGcagauccg..... 1  
Gi5\_9110281\_x1uucNcacccaacagauccg..... 1  
Gi3\_28893665\_x1.....cggguucgaCucccgccgcccga..... 1  
Gi3\_28293012\_x1.....ucgauuccAggcccggag..... 1

Gi3\_28963190\_x1..cucaccaacGgaucggg..... 1  
Gi3\_28872991\_x1.....guucgauuccgggcUccgga..... 1  
Gi2\_11394025\_x1.....uucgauuccgggcgccgA..... 1  
Gi3\_28584662\_x1.....gauuccAggcgccggagc..... 1  
Gi5\_9045459\_x1.....Agguucgauuccgggcgccggagc..... 1  
Gi5\_9125235\_x1.....guuuccgccCuccuucgucu..... 1  
Gi2\_11297972\_x1.....ggNucgauuccgggcgccggag..... 1  
G1a\_6340938\_x1.....gguCcgauuccgggcgccggagc..... 1  
Gi1\_4261801\_x1.....guucgauuccgggAgccggagc..... 1  
Gi2\_11124518\_x1.....gguucgauAcccgggcgccgga..... 1  
Gi5\_9001980\_x1.....guucgauGcccgggcgccg..... 1  
Gi1\_4207197\_x1.....gguucgauCcccgggcgccggag..... 1  
Gi5\_9037758\_x1.ucNcaccacagauccg..... 1  
G1a\_6257853\_x1.....gguucgauCcccgggcgccggag..... 1  
Gi3\_28686329\_x1.....agCuccggguucgauucc..... 1  
Gi5\_9000256\_x1.....cgauuccgggcgccggagcguu..... 0  
Gi5\_9082787\_x1uucucacccUacagauccggguu..... 1  
Gi2\_11376939\_x1.....ggNucgauuccgggcgccgga..... 1  
Gi5\_9020413\_x1....acccaacagauccggguucgauucUc..... 1  
Gi2\_11114347\_x1.....cCauuccgggcgccggagcguuu..... 1  
Gi4\_609235\_x1.....Gcgauuccgggcgccggagc..... 1  
G1a\_6183164\_x1.....Aguucgauuccgggcgcc..... 1  
Gi4\_575011\_x1.....auuccgggcgccggagcC..... 1  
Gi3\_28459116\_x1.....uucNauuccgggcgccgga..... 1  
Gi3\_28466710\_x1.....Nguucgauuccgggcgccg..... 1  
Gi2\_11219074\_x1....cccaacagGuccggguuc..... 1  
Gi3\_28845316\_x1....acccaGcagauccggguucgauucc..... 1  
Gi5\_8985112\_x1.....ucgauuccgggAgccggag..... 1  
G1a\_6358700\_x1uucucaccaacaCauccg..... 1  
Gi1\_4214366\_x1.....gguucgauuAccgggcgccggag..... 1  
Gi1\_4361419\_x1uucucaccaacagauccUg..... 1  
Gi3\_28475828\_x1.....cagauccggguucgCuucc..... 1  
Gi3\_28370921\_x1.....ggguuAgauuccgggcgccggagc..... 1  
Gi1\_4308627\_x1.....guucgauuccgggGgccg..... 1  
Gi2\_11331612\_x1.....uucAauuccgggcgccgg..... 1  
Gi1\_4218610\_x1.....uucgauuccAggcgccgg..... 1  
Gi4\_592962\_x1.....gAuucgauuccgggcgccggagc..... 1  
Gi1\_4356054\_x1..cucaccaacagauccggguucgauuccU..... 1  
G1a\_6031264\_x1.....guucgauuccgggcgcAggagc..... 1  
Gi1\_4165399\_x1.....Nuucgauuccgggcgccggagc..... 1  
Gi3\_28683435\_x1.....acagauccggguucgauCcccgggcgccggagc..... 1  
Gi3\_28492538\_x1uucucaccaacaCauccg..... 1  
G1a\_6262994\_x1.....gguAcgauuccgggcgccggag..... 1  
Gi5\_8907434\_x1.ucucaccaCagauccg..... 1  
Gi3\_28681081\_x1.....caacagauccggguucgGuuccgggcgccg..... 1  
Gi3\_28546806\_x1.....cgauucccgAcgccggagc..... 1  
Gi3\_28628149\_x1.....gUucgauuccgggcgccggagc..... 1

Gi3\_28438328\_x1.....ucgauucAcggcgccggagc..... 1  
Gi3\_28883816\_x1.....gguucgauucccgNgccggagc..... 1  
Gi2\_11050879\_x1uucucacccaGcagauccggguucg..... 1  
G1a\_6346247\_x1.....gguucgauucccgAcgccgg..... 1  
Gi2\_11311502\_x1.....uccggguucgCuucccgcccgga..... 1  
Gi2\_11130540\_x1.....ucgauucccgAcgccgga..... 1  
Gi1\_4171949\_x1.....uucgauucccgAcgccgg..... 1  
Gi3\_28529579\_x1.....uucgauuAccggcgccggagc..... 1  
Gi1\_4247162\_x1.....gguucgauucccgAgccggag..... 1  
Gi1\_4274502\_x1.....caacUgauccggguucgauuccggc..... 1  
Gi3\_28399980\_x1.....guucgauuccCgcccggag..... 1  
G1a\_6321473\_x1.....uucgauucccgAgccggagc..... 1  
Gi3\_28874542\_x1.....gguucgauucAcggcgccgg..... 1  
Gi5\_9027416\_x1uucGcaccacaacagauccg..... 1  
Gi2\_11014138\_x1.....guucgauucccgUcggccggag..... 1  
Gi1\_4191986\_x1.....aCccggguucgauucccgccggc..... 1  
Gi3\_28271680\_x1.....gguucgauucccgGgcc..... 1  
Gi5\_8992512\_x1.....gguucgauuccGggcgccgga..... 1  
Gi3\_28348367\_x1.....gguucgaAuuccggcgcc..... 1  
Gi2\_11241331\_x1.....auuccggcgccggagcC..... 1  
Gi5\_8877020\_x1.....uucgauuccggcgccggagcgA..... 1  
Gi5\_9037534\_x1uucucacccaacagaGccg..... 1  
Gi1\_4246456\_x1.ucucacccaacaUauccg..... 1  
Gi5\_8936068\_x1uucucaccccCacagauccgggu..... 1  
Gi2\_11077824\_x1.....aUcagauccggguucgauuccggcgccg..... 1  
Gi5\_9045643\_x1.....agaucggguucgUuucc..... 1  
Gi3\_28628330\_x1.....uccggguucgauuccggcgccggG..... 1  
Gi5\_9068649\_x1.....gguucgauucGcggcgccggagc..... 1  
Gi2\_10996523\_x1.....gguucgauuccCgcccgg..... 1  
Gi2\_11314643\_x1.....uucgauuccggcgccggUg..... 1  
Gi3\_28607525\_x1.....ggguucgauuccggcgAcggagc..... 1  
Gi1\_4234736\_x1.....gguucgauuccggcgccgCagc..... 1  
Gi5\_8857061\_x1.....guucgauuccggcgccggCg..... 1  
Gi5\_8834483\_x1.....gguucgauuccggGgccggag..... 1  
Gi3\_28488094\_x1.....Gagauccggguucgauuccggcgccgg..... 1  
Gi3\_28778243\_x1.....cccaacagauUggguucgauucc..... 1  
Gi2\_11365591\_x1.....ucgauuccggcgccggGg..... 1  
Gi2\_11136551\_x1.....guucgaAuuccggcgccggag..... 1  
Gi5\_8944125\_x1.....ggguucgauuccggcgA..... 1  
Gi1\_4329162\_x1.....Guccggguucgauuccggcgccgga..... 1  
Gi3\_28728018\_x1.....ggguucgauucAcggcgccggagc..... 1  
Gi4\_582858\_x1.....ggAucgauuccggcgccgg..... 1  
Gi2\_11161412\_x1..cucacccaacagauccAg..... 1  
Gi3\_28480317\_x1.....uucgauucccgAcgccgg..... 1  
Gi5\_8982493\_x1.....gguucgauuccggcgGcg..... 1  
Gi2\_11180345\_x1.....Uggguucgauuccggcgccggagc..... 1  
Gi5\_9067346\_x1.....guucgauuccggcgGcgga..... 1

Gi2\_11274941\_x1.....guucgauucccgccCccgga..... 1  
Gi2\_11325663\_x1.....uGcggguucgauucccgccgcca..... 1  
Gi2\_11321425\_x1.....agauccggguucUauucc..... 1  
Gi5\_8865141\_x1.....guuNgaucccgccgcccggagc..... 1  
Gi2\_11395991\_x1.....ucgauucccgUgcccggag..... 1  
Gi3\_28587312\_x1.....gauucccgccgcccggUgc..... 1  
Gi2\_11294708\_x1..cCaccaacagauccgg..... 1  
Gi3\_28813952\_x1.....ucgGuucccgccgcccggag..... 1  
Gi3\_28427369\_x1..ucaccaacagUuccggguuc..... 1  
Gi3\_28803494\_x1.....gauccggguucgauucAc..... 1  
G1a\_6138565\_x1.....gguucgauucccgccgcccggagcU..... 1  
Gi2\_11133795\_x1.....gauucAcggcgcccggagc..... 1  
Gi5\_8977588\_x1uucucaccaacagauccC..... 1  
Gi3\_28331776\_x1.....ucgauucccgccgGcggag..... 1  
G1a\_6256295\_x1.....guucgauucUcggcgcccga..... 1  
Gi1\_4158953\_x1.....gguucgGuucccgccgccc..... 1  
Gi1\_4292922\_x1uucucaccccUacagauccg..... 1  
Gi2\_11222279\_x1.....gauUccggcgcccggagc..... 1  
Gi3\_28827616\_x1.....agauccggguAcgauucc..... 1  
Gi3\_28619795\_x1.....cggguucgauGccggcgcccga..... 1  
Gi5\_8968586\_x1.....gguucgauGcccggcgcccgg..... 1  
Gi1\_4241493\_x1.....aucggguCcgauucccgccgcccgg..... 1  
Gi4\_591759\_x1.....guucgauucccgccgcccC..... 1  
Gi1\_4181266\_x1.ucucaccaacagauAg..... 1  
Gi1\_4323646\_x1.....Nuucgauucccgccgcccga..... 1  
Gi1\_4198238\_x1uucucaccaacagauccggU..... 1  
Gi3\_28596156\_x1.....cgaNuuccggcgcccggagc..... 1  
Gi3\_28724358\_x1...caccGacagauccggguuc..... 1  
Gi3\_28341037\_x1.....guucgauucccgCcgcccggagc..... 1  
G1a\_6100600\_x1.....gguucgauuccAcgcccgg..... 1  
Gi3\_28311070\_x1.....ucgauucccgccgUggag..... 1  
Gi1\_4249212\_x1.....gguucgaCucccgccgcccggag..... 1  
Gi5\_8946116\_x1uucucaccaacagaCccg..... 1  
G1a\_6216070\_x1.....Cguucgauucccgccgccc..... 1  
Gi1\_4190703\_x1.....agauccggguucgauAcc..... 1  
Gi3\_28352573\_x1.....Ggauucccgccgcccggag..... 1  
G1a\_6152621\_x1.....Cguucgauucccgccgcccgg..... 1  
Gi1\_4217158\_x1..cucaccaacagauccggguucAa..... 1  
Gi2\_11016230\_x1.....uucgauucccgccgcccAg..... 1  
Gi3\_28297674\_x1.....guNcgauucccgccgcccgg..... 1  
Gi3\_28505496\_x1.....Uaacagauccggguucga..... 1  
Gi3\_28908752\_x1..cucaccaCagauccgg..... 1  
Gi1\_4266472\_x1.....ucgaGucccgccgcccggagc..... 1  
Gi1\_4321648\_x1...caccacagauccggguucgCuuccc..... 1  
Gi5\_9110155\_x1.....gguucgauucUcggcgcccggag..... 1  
Gi3\_28920230\_x1..cGaccaacagauccggguucgauucc..... 1  
Gi3\_28715958\_x1.....ggguCcgauucccgccgcccggag..... 1

Gi3\_28951653\_x1.....agauccAgguucgauucc..... 1  
Gi2\_11276863\_x1..cucacccaaUagauccgg..... 1  
Gi3\_28449308\_x1.....uucgaCucccggcgccgga..... 1  
Gi4\_612542\_x1.....gauucccggcgccggagc..... 0  
Gi2\_11318275\_x1uGcucacccaacagauccggguucg..... 1  
Gi5\_8947925\_x1.....guucgauucccggcgccgAag..... 1  
Gi2\_11266359\_x1.....cgauucccggcgccggagcCu..... 1  
Gi5\_8949105\_x1.....gguucgauucccggcgccggCgcguuu..... 1  
Gi3\_28686905\_x1.....uucgauucccggcAccgg..... 1  
Gi3\_28789606\_x1.....gguucgauucccggcUcc..... 1  
Gi3\_28636057\_x1.....gggCucgauucccggcgccg..... 1  
Gi2\_11212311\_x1.....gguucgauuccGggcgccggag..... 1  
Gi5\_9007798\_x1.ucGcacccaacagauccgg..... 1  
G1a\_6330986\_x1.....guucgauuccCgcgccg..... 1  
Gi2\_11227077\_x1.....guucgauucccggcGg..... 1  
Gi1\_4331175\_x1.....gguucgauucccggcUga..... 1  
Gi5\_9011958\_x1.....aacagauccggguucgauucccggcgccg..... 0  
Gi2\_11115133\_x1.....gguuAgauucccggcgcc..... 1  
Gi1\_4237845\_x1..cucacccaacagauccAgguucgauucc..... 1  
G1a\_6235090\_x1.....gguucgauucccggcAccgg..... 1  
Gi1\_4316704\_x1.....gguucgauucccggcgccUag..... 1  
Gi1\_4350415\_x1.....uucgauucccggcgccAgagc..... 1  
Gi2\_11326604\_x1.....Nguucgauucccggcgccg..... 1  
Gi1\_4359562\_x1.....caCcagauccggguucgauucccggc..... 1  
Gi5\_8907661\_x1.....Aguucgauucccggcgccggagcguu..... 1  
Gi3\_28322090\_x1.....ggguucgauuccGggcgccgga..... 1  
Gi3\_28282524\_x1..uUacccaacagauccggguuc..... 1  
Gi3\_28868060\_x1.....cagaGccggguucgauucc..... 1  
Gi2\_11312496\_x1.....ucgauAcccggcgccggag..... 1  
Gi2\_11360205\_x1.....cgauucccggcUggagcguuu..... 1  
G1a\_6029100\_x1.....gguucgauuccAgcgccg..... 1  
Gi5\_8899033\_x1.....uccggguuNgauuccggc..... 1  
Gi4\_604495\_x1.....gGuucccggcgccggagc..... 1  
Gi5\_8904963\_x1.....cgauucccggcgccggagcg..... 0  
Gi2\_11351729\_x1.....uccggguucgauucccggcUgga..... 1  
Gi5\_8938031\_x1uucucGcccaacagauccggguu..... 1  
Gi3\_28665053\_x1.....agauccggguucgauuAcc..... 1  
Gi2\_11365196\_x1uucuGacccaacagauccg..... 1  
Gi5\_9116846\_x1.....guuucccgccuuccuucgCcu..... 1  
Gi2\_11272735\_x1.....cgguucgauCcccggcgccgga..... 1  
Gi3\_28519263\_x1.....cagauccggguucgauucccggcAccgg..... 1  
Gi3\_28984545\_x1..ucacccaacagauccgAguuc..... 1  
Gi5\_9005679\_x1.....gguucgauucccggcgccggagcgAu..... 1  
Gi2\_11193403\_x1.....cccaacagCuccggguuc..... 1  
Gi3\_28310905\_x1.....ucgauuucCggcgccgga..... 1  
Gi5\_9000909\_x1.....guucgauucccggcgccggaUc..... 1  
Gi1\_4365740\_x1.....ucgUuucccggcgccggagc..... 1

Gi2\_11037821\_x1.....uucAauucccggcgccggag..... 1  
G1a\_6287206\_x1uucucaccaacagauUg..... 1  
Gi1\_4174174\_x1.....caacagUuccggguucgauucccggc..... 1  
Gi5\_8893376\_x1.....gguuGgauucccggcgccggag..... 1  
Gi4\_576983\_x1.....guucAauucccggcgccgg..... 1  
G1a\_6248764\_x1uuUucaccaacagauccg..... 1  
Gi3\_28725190\_x1.....guucgauGccggcgccg..... 1  
Gi3\_28633401\_x1.....ggguucgauucccgGgccgga..... 1  
Gi5\_8837373\_x1.....Nuucgauucccggcgccg..... 1  
Gi3\_28712356\_x1.....guucgauuccGggcgccggag..... 1  
Gi5\_8884712\_x1.....uucgauAccggcgccgg..... 1  
Gi5\_8906643\_x1.....gaurccggguucgCuucccggcgccgga..... 1  
Gi2\_11016792\_x1.....cagauccggguucgauucc..... 0  
Gi3\_28831761\_x1.....Aauccggguucgauucccggcgccgga..... 1  
Gi4\_569538\_x1.....guucUauucccggcgccgga..... 1  
Gi5\_8902456\_x1uucucaUccaacagauccgggu..... 1  
Gi3\_28962457\_x1.....Gccaacagauccggguucgauucc..... 1  
Gi1\_4234834\_x1.....auccggguucgauucccggcUgga..... 1  
Gi5\_9050913\_x1.ucucacUcaacagauccg..... 1  
Gi2\_11400291\_x1.....uccgggCucgauucccggcgccgga..... 1  
Gi3\_28809496\_x1.....cgauuccAgcgccggagc..... 1  
Gi3\_28324364\_x1.....gguucgauucccggcGg..... 1  
Gi5\_8907107\_x1.....gguuAgauucccggcgccgg..... 1  
G1a\_6159216\_x1.....gguucgauuccAgcgccgga..... 1  
Gi3\_28845642\_x1.....agaucAgguucgauucc..... 1  
Gi2\_11308489\_x1.....cgUuucccggcgccgagcguuuc..... 1  
G1a\_6087353\_x1.....gguucgauuccCgcgccgga..... 1  
Gi3\_28369503\_x1.....auccggguucgauuccggcUccgga..... 1  
Gi5\_8959505\_x1.....guucgauucccggcGgga..... 1  
Gi1\_4240077\_x1.....cagauccgNguucgauucccggcgc..... 1  
Gi1\_4238223\_x1.ucucaAccaacagauccg..... 1  
Gi3\_28525479\_x1.....aGcagauccggguucgauucc..... 1  
Gi5\_9044427\_x1.ucucacGcaacagauccgggu..... 1  
Gi3\_28759523\_x1.....gAguucgauucccggcgccggagc..... 1  
Gi5\_8892905\_x1.....agaucggguucgaCuccc..... 1  
Gi2\_11285736\_x1.....cgauucccggcgccggCgcuuu..... 1  
Gi3\_28440888\_x1.....cagauccggguucgauucccggcGcg..... 1  
Gi3\_28336947\_x1.....guucgauucccggcgccgAag..... 1  
Gi3\_28910686\_x1.....Aauccggguucgauucccggcgccggag..... 1  
Gi3\_28972842\_x1.....gauuccCgcgccggagc..... 1  
Gi1\_4253110\_x1.....guucAauucccggcgccggagc..... 1  
Gi1\_4199746\_x1.ucucaccaacagauUcg..... 1  
Gi5\_8921644\_x1.....guucgauucccggcUggag..... 1  
Gi3\_28652680\_x1.....cgauuccgggcgccggCg..... 1  
Gi2\_11284605\_x1.....cagauccgCuucgauuccgggcgccggag..... 1  
Gi3\_28538480\_x1.....gguucgauucccggcGc..... 1  
Gi1\_4327807\_x1...ucaNccaacagauccgggu..... 1

Gi1\_4319846\_x1.ucucaccaacagaCccg..... 1  
Gi2\_11295437\_x1.....aacagauccggguAcgauuccggcgccg..... 1  
Gi2\_11134767\_x1..cucaccaacagGuccgg..... 1  
Gi2\_11132369\_x1.....gauucUcggcgccggagc..... 1  
Gi3\_28599906\_x1.....aucggguNcgauuccggcg..... 1  
Gi5\_8953895\_xluucucUcccaacagaucgg..... 1  
Gi5\_8911690\_x1.....caacagauccggguucgauuccggcgccg..... 0  
Gi2\_11154360\_x1.....Ggauuccggcgccggagcguuuc..... 1  
Gi3\_28709223\_x1.....Acgauuccggcgccggag..... 1  
Gi1\_4329538\_x1.....guucgauuccAgggcgccg..... 1  
Gi1\_4306787\_x1..cucaccaGcagauccggguucga..... 1  
Gi3\_28440405\_x1.....cgNuuccggcgccggagc..... 1  
Gi2\_11387804\_x1.....gaCuccggcgccggagc..... 1  
Gi5\_9058656\_xluucucaccaacGgauccggguu..... 1  
Gi5\_8957435\_x1.....guucgauuccGggcgccg..... 1  
Gi5\_9001238\_x1.....gguNcgauuccggcgccg..... 1  
Gi3\_28538696\_x1.....gauccggguucgauAcc..... 1  
Gi3\_28914915\_x1.....cggguucgauuccggcgAccgga..... 1  
Gi2\_11085676\_xluucucaccaacagaucU..... 1  
Gi5\_8956102\_x1.....cgauuccggcgccggagcA..... 1  
Gi2\_11361035\_x1.....guucgauuGccggcgccg..... 1  
Gi3\_28582693\_x1.....Uggguucgauuccggcgccggag..... 1  
Gi3\_28625718\_x1.....ggguucgaCuccggcgccggag..... 1  
Gi5\_8940859\_x1.....gaGuccggcgccggagc..... 1  
Gi1\_4388547\_x1.....Gacagauccggguucgauuccggcgccg..... 1  
Gi5\_8916664\_x1...caccaacagaucAgguucga..... 1  
Gi5\_9128815\_x1.....guucgauuccggAgccggagc..... 1  
Gi1\_4354254\_x1.....guucgCuuccggcgccg..... 1  
Gi1\_4267734\_x1.....aucgAguucgauuccggcgccg..... 1  
G1a\_6212261\_x1.....guucgauuccggcgAcg..... 1  
Gi2\_11053440\_x1.....ucgauuccggcgUggagc..... 1  
Gi5\_8916660\_xluucucacccCacagaucgg..... 1  
Gi5\_8942143\_xluucAcaccaacagaucgg..... 1  
Gi5\_8886831\_x1.....gguucgauuccUggcgccggagcguu..... 1  
Gi5\_8867507\_x1.....acagauGggguucgauuccggcg..... 1  
Gi3\_28534135\_xluucucaccaacagaucU..... 1  
Gi1\_4333951\_x1.....gAucgauuccggcgccg..... 1  
Gi3\_28596304\_x1.....uucgauuccggcgccggUgc..... 1  
Gi3\_28756476\_x1.....gguucgauucccgCcgcc..... 1  
Gi2\_11330651\_x1.....uccggguucgauuccggcgUcgga..... 1  
Gi3\_28353381\_x1.....uccggguucgauuccggcgUccgga..... 1  
Gi5\_9120349\_x1.....ucgauuAccggcgccggagc..... 1  
Gi2\_11238491\_x1.....guucgauuccggcgccggaC..... 1  
Gi3\_28881903\_x1.....Cccggguucgauuccggcgccg..... 1  
Gi1\_4191855\_x1..Gucaccaacagaucggguucgauucc..... 1  
Gi2\_11168067\_x1.....gNucgauuccggcgccggagc..... 1  
Gi4\_612650\_x1.....guucgauuccggcgUcgga..... 1

Gi5\_9019263\_x1.....gguucgauucUcggcgccgga..... 1  
G1a\_6201526\_x1.....gAuucgauucccggcgcccggag..... 1  
Gi5\_9056183\_x1....acccaacagauccggguucgauCcc..... 1  
Gi4\_589084\_x1.....gguucgauucccggcAccgg..... 1  
Gi3\_28837471\_x1.....gauCcccggcgccggagc..... 1  
G1a\_6002738\_x1.....gCuucgauucccggcgcccgg..... 1  
Gi3\_28987564\_x1.....gguucgauGcccggcgcc..... 1  
Gi3\_28373286\_x1.....aucgggGucgauucccggcgcccga..... 1  
Gi3\_28336392\_x1.....cccaacCgauccggguucgauucc..... 1  
Gi5\_9068058\_x1.....cgauucccCgcccggagcguuuc..... 1  
Gi3\_28576477\_x1.....ucAauucccggcgcccggag..... 1  
Gi1\_4175368\_x1.....gguucgauucccggcAccggag..... 1  
Gi3\_28580755\_x1.ucucaccaacagauccA..... 1  
Gi5\_9047258\_x1.....gguucgauucccgAcgcccggagcgu..... 1  
Gi2\_11386665\_x1.....ucgauucccgGgcccga..... 1  
G1a\_6167788\_x1.Ccucaccaacagauccg..... 1  
Gi5\_9097006\_x1.....gguucgUuuccggcgcccga..... 1  
Gi2\_11314715\_x1uuNucaccaacagauccg..... 1  
Gi1\_4324529\_x1.....gguucAauucccggcgcccggagc..... 1  
Gi3\_28311531\_x1.....Aagauccggguucgauucc..... 1  
Gi5\_9045519\_x1.....aacagauccggGucgauucccggcgcccggagc..... 1  
Gi5\_8893444\_x1.....ucgauucccggcgcccCagc..... 1  
Gi2\_11070776\_x1.....ucgauucccggcgcccUgag..... 1  
Gi1\_4380338\_x1.....guucgaGucccggcgcccggagc..... 1  
Gi5\_9103529\_x1.....guucgauucGcggcgcccgg..... 1  
Gi2\_11210225\_x1.....ucAauucccggcgcccggagc..... 1  
Gi3\_28962402\_x1.....ucgauucccggcgcccCg..... 1  
G1a\_6252954\_x1uucCcacccaacagauccg..... 1  
Gi1\_4365183\_x1..cucaccaacagauccggguucgauU..... 1  
Gi5\_9095572\_x1uucucaccaacagauccAgg..... 1  
Gi1\_4343697\_x1..cucaccaacagauccggU..... 1  
Gi3\_28424338\_x1.....gauccggguucgauucccgG..... 1  
Gi1\_4289002\_x1..cucaccaacagauccGgg..... 1  
Gi4\_598994\_x1.....gguucgauucccgGgcccgg..... 1  
Gi3\_28446037\_x1.....cccaacagGuccggguucgauucc..... 1  
Gi3\_28678017\_x1.....ggguucgauucccggcgcccAgagc..... 1  
Gi5\_8925769\_x1.....guucgaAucccggcgcccggagcguu..... 1  
Gi3\_28584641\_x1.....ggguucgauucccggcgccc..... 0  
Gi1\_4265161\_x1.ucucacAcaacagauccg..... 1  
Gi1\_4212124\_x1.....aacagauccggguucgCuucccggcgcccgg..... 1  
Gi1\_4315660\_x1.....cUggguucgauucccggcgcccgg..... 1  
Gi1\_4274906\_x1uucucaccccCacagauccg..... 1  
Gi4\_577047\_x1.....gguucgauNcccggcgcc..... 1  
Gi5\_9102312\_x1Cucucaccaacagauccgggu..... 1  
Gi5\_8890193\_x1.....guucgauucccggcgcccggGg..... 1  
Gi1\_4323829\_x1.....gguucgauGcccggcgcccga..... 1  
Gi5\_9048020\_x1.....gguucgauucccgUcggcccggagc..... 1



Gi1\_4335481\_x1.....gguNcgauucccgcgccgg..... 1  
Gi2\_11293023\_x1uucAcacccaacagauccggguucg..... 1  
Gi2\_11164250\_x1.....gguucgauucccgcgccggaU..... 1  
Gi3\_28335134\_x1.....caacagGuccggguucga..... 1  
G1a\_6020043\_x1.....guucgauCcccggcgccggagc..... 1  
Gi2\_11301148\_x1.....uucAauucccgcgccggagc..... 1  
Gi1\_4368857\_x1.....ggNucgauucccgcgccgg..... 1  
Gi3\_28670617\_x1.....cccaacagauccggguuc..... 0  
Gi4\_598497\_x1.....gguucgauucccgAcgccgg..... 1  
Gi1\_4220275\_x1.....guuGgauucccgcgccggagc..... 1  
Gi3\_28362273\_x1..cucAGccaacagauccgg..... 1  
Gi1\_4206857\_x1.....uucgauucccgGgcccgg..... 1  
Gi5\_9062397\_x1.....ucgauucccgUgcccggag..... 1  
Gi3\_28663955\_x1.....caUcagauccggguucgauucccgcgccgg..... 1  
Gi5\_8994404\_x1.....Cuucgauucccgcgccggag..... 1  
Gi1\_4296745\_x1.....gguucgauucccgcgccggaC..... 1  
Gi3\_28943427\_x1.....caacagauUggguucgauucc..... 1  
G1a\_6049064\_x1uucucacccaacagaCccgg..... 1  
Gi5\_8887075\_x1.....gguucgUuucccgcgccgg..... 1  
Gi2\_11377995\_x1.....guucgauuccGggcgccg..... 1  
Gi1\_4172795\_x1.....guucgUuucccgcgccg..... 1  
Gi2\_11246227\_x1.....gguNcgauucccgcgccg..... 1  
Gi3\_28438278\_x1.....gauucccgcgccggagcU..... 1  
Gi3\_28756382\_x1uucucacccaacUgauccg..... 1  
Gi2\_11051947\_x1.....cccaacaUauccggguuc..... 1  
Gi1\_4390025\_x1.ucucaccccCacagauccgg..... 1  
Gi5\_9096651\_x1....acccaacagauccggguucgaCuccc..... 1  
Gi4\_568672\_x1.....gUuucgauucccgcgccgga..... 1  
Gi2\_11311669\_x1.....gauucccgcgccGggagc..... 1  
Gi5\_9059061\_x1uucucaccccUacagauccg..... 1  
Gi5\_8884803\_x1.....guucgauucccgcgccggagcAuuucc..... 1  
Gi2\_11362498\_x1.....gguucgauucccUgcccgg..... 1  
Gi1\_4264243\_x1.....uccggguucgauucccAgcgccgga..... 1  
Gi1\_4364784\_x1.ucucacUcaacagauccg..... 1  
Gi1\_4388420\_x1.....gguucgaAuucccgcgccgg..... 1  
Gi3\_28411947\_x1.....cgguucgauucccgcgccgCa..... 1  
Gi2\_11012929\_x1.....guAcgauucccgcgccg..... 1  
Gi3\_28524515\_x1.....uccggguucUauucccgcgccgga..... 1  
Gi1\_4301381\_x1.....guucgauucccgcgccggaCc..... 1  
Gi5\_8862066\_x1.....uGgauucccgcgccgga..... 1  
Gi1\_4229021\_x1.....ucgauucccgcgccggGgc..... 1  
Gi1\_4180272\_x1.ucucCcccaacagauccg..... 1  
Gi5\_8892777\_x1.ucucacccaacagauAg..... 1  
Gi1\_4361395\_x1.....uucgauucccggcUccgg..... 1  
G1a\_6169655\_x1.ucucacccaacagauAg..... 1  
Gi2\_11365551\_x1.....gauuccUggcgccggagc..... 1  
Gi2\_11291518\_x1..cucacccaacagauccgC..... 1



|                     |                              |   |
|---------------------|------------------------------|---|
| Gi3_12273191_x14392 | gGgggaacacggggugccgaacu      | 1 |
| Gi3_12316259_x14259 | cgugggaacacggggugccgaacA     | 1 |
| Gi2_2816430_x13238  | aacacggggugccgaacu           | 0 |
| Gi1_1545627_x13127  | gugggaacacggggugccgaacu      | 0 |
| Gi1_1571667_x12719  | aacacggggugccgaacu           | 0 |
| Gi3_12559239_x12622 | cUugggaacacggggugccgaacu     | 1 |
| Gi2_2906896_x12602  | gugggaacacggggugcc           | 0 |
| Gi2_2931772_x12203  | gaacacggggugccgaacu          | 0 |
| Gi3_12707463_x11795 | gucgugggaacacggggugccgaacu   | 0 |
| G1a_2764528_x11766  | gugggaacacggggugccgaacu      | 0 |
| Gi5_3567497_x11394  | ggaacacggggugccgaacu         | 0 |
| Gi5_3578891_x11040  | ucgugggaacacggggugccgaacu    | 0 |
| Gi1_1629613_x10992  | gaacacggggugccgaacu          | 0 |
| Gi5_3622560_x10645  | gggaacacggggugccgaacu        | 0 |
| Gi2_3022030_x10586  | aggccccgccaguacugc           | 0 |
| Gi3_13008745_x10559 | gugggaacacggggugccgaa        | 0 |
| Gi2_3131603_x9318   | ggaacacggggugccgaac          | 0 |
| Gi2_3204185_x8821   | ucgugggaacacggggugccgaacu    | 0 |
| Gi5_3754824_x8567   | Uugggaacacggggugccgaacu      | 1 |
| Gi3_13368980_x8549  | gugggaacacggggugccg          | 0 |
| Gi3_13385977_x8446  | cgucgugggaacacggggugccgaacu  | 0 |
| Gi3_13419752_x8420  | Uugggaacacggggugccgaac       | 1 |
| Gi1_1717006_x8199   | cgugggaacacggggugccgaacu     | 0 |
| Gi3_13598074_x7829  | aucggagacgucgugggaacacggg    | 0 |
| Gi3_13690359_x7531  | aucggagacgucgugggaacacg      | 0 |
| Gi2_3397579_x7478   | cgugggaacacggggugccgaac      | 0 |
| Gi1_1772599_x7300   | ucgugggaacacggggugccgaacu    | 0 |
| Gi1_1779899_x7252   | ugggaacacggggugccgaacu       | 0 |
| Gi2_3462884_x7005   | gGgggaacacggggugccgaacu      | 1 |
| Gi3_13952821_x6649  | aucggagacgucgugggaacacgggu   | 0 |
| Gi3_13966109_x6626  | ugggaacacggggugccgaacA       | 1 |
| Gi3_14044647_x6441  | ggaacacggggugccgaacA         | 1 |
| Gi3_14120580_x6174  | acgucgugggaacacggggugccgaacu | 0 |
| Gi3_14163414_x6077  | ucgugggaacacggggugccgaac     | 0 |
| Gi2_3600679_x5869   | gugggaacacggggugccgaacA      | 1 |
| Gi3_14325748_x5585  | ugggaacacggggugccgaa         | 0 |
| Gi2_3662960_x5473   | gucgugggaacacggggugccgaacu   | 0 |
| Gi2_3711694_x5322   | cUugggaacacggggugccgaacu     | 1 |
| Gi2_3743210_x5193   | gugggaacacggggugccg          | 0 |
| Gi3_14503814_x5146  | ugggaacacggggugccga          | 0 |
| Gi3_14514096_x5110  | Uggaacacggggugccgaacu        | 1 |
| Gi5_4030023_x4816   | gugggaacacggggugccgaac       | 0 |
| Gi5_4039646_x4802   | cgucgugggaacacggggugccgaacu  | 0 |
| Gi1_1936852_x4772   | gggaacacggggugccgaacu        | 0 |
| Gi3_14710792_x4718  | aggccccgccaguacugc           | 0 |
| Gi1_1955690_x4631   | ggaacacggggugccgaacu         | 0 |
| Gi3_14826722_x4528  | uUggaacacggggugccgaacu       | 1 |

|                    |                                     |   |
|--------------------|-------------------------------------|---|
| Gi3_14898149_x4389 | .....Ugaacacggggugccgaacu           | 1 |
| Gi3_14919984_x4333 | .....gucgugggaaacacggggugccgaac     | 0 |
| Gi3_14950267_x4314 | .....cgugggaaacacggggugcc           | 0 |
| Gi3_14963195_x4302 | .....gaacacggggugccgaac             | 0 |
| Gi3_14997439_x4255 | .....gggaacacggggugccgaacA          | 1 |
| Gi2_3938664_x4179  | .....gggaacacggggugccgaac           | 0 |
| Gi3_15039619_x4164 | .....caggccccgccaguacugcg           | 0 |
| Gi2_3951163_x4151  | .....gugggaacacggggugccga           | 0 |
| Gi3_15097440_x4078 | .....gaacacggggugccgaacA            | 1 |
| Gi5_4169765_x3965  | .....cUugggaacacggggugccgaacu       | 1 |
| Gi3_15209990_x3947 | .....cgugggaaacacggggugccga         | 0 |
| Gi3_15276456_x3855 | .....cgucgugggaaacacggggugcc        | 0 |
| Gi3_15375097_x3741 | .....Ugaacacggggugccgaac            | 1 |
| Gi5_4272399_x3626  | .....gucgugggaaacacggggugccgaacu    | 0 |
| Gi3_15478073_x3592 | .....gGgggaacacggggugccgaac         | 1 |
| Gi3_15485251_x3582 | .....aggccccgccaguacugcg            | 0 |
| Gi2_4108274_x3511  | .....cgucgugggaaacacggggugccgaacu   | 0 |
| Gi5_4338890_x3373  | .....gGgggaacacggggugccgaacu        | 1 |
| Gi2_4182182_x3220  | .....cgugggaaacacggggugcc           | 0 |
| Gi3_15764003_x3192 | .....gUgaacacggggugccgaacu          | 1 |
| Gi2_4211031_x3168  | .....aucggagacgucgugggaaacacgggg    | 0 |
| Gi2_4214199_x3154  | .....cgugggaaacacggggugccgaacA      | 1 |
| Gl1a_3091306_x3090 | .....ggaacacggggugccgaacu           | 0 |
| Gi3_15861109_x3071 | .....aucggagacgucgugggaaacacgg      | 0 |
| Gi3_15921905_x3019 | .....Ggugggaaacacggggugccgaacu      | 1 |
| Gi2_4269696_x3008  | .....ugggaacacggggugccgaac          | 0 |
| Gi5_4412639_x2992  | .....acgucgugggaaacacggggugccgaacu  | 0 |
| Gi2_4296153_x2901  | .....aucggagacgucgugggaaacacggggugc | 0 |
| Gl1a_3120858_x2850 | .....cgugggaaacacggggugccgaacu      | 0 |
| Gi3_16073861_x2847 | .....caggccccgccaguacugc            | 0 |
| Gi3_16082396_x2840 | .....cgugggaaacacggggugc            | 0 |
| Gi3_16096567_x2821 | .....gUaacacggggugccgaacu           | 1 |
| Gi2_4327464_x2792  | .....Uugggaacacggggugccgaac         | 1 |
| Gi3_16248655_x2719 | .....Cugggaacacggggugccgaacu        | 1 |
| Gi3_16289142_x2676 | .....aucggagacgucgugggaaacacgggg    | 0 |
| Gi5_4504505_x2664  | .....Uaacacggggugccgaacu            | 1 |
| Gl1a_3154096_x2645 | .....ugggaacacggggugccgaacu         | 0 |
| Gi2_4387474_x2636  | .....aggccccgccaguacugc             | 0 |
| Gi3_16341999_x2618 | .....Uugggaacacggggugcc             | 1 |
| Gi2_4431581_x2539  | .....aucggagacgucgugggaaacac        | 0 |
| Gi3_16429319_x2514 | .....caggccccgccaguacugcg           | 0 |
| Gi3_16461911_x2499 | .....aacacggggugccgaacA             | 1 |
| Gi3_16466907_x2486 | .....cgugggaaacacggggugccgaa        | 0 |
| Gi2_4459306_x2481  | .....Ugaacacggggugccgaacu           | 1 |
| Gi2_4466727_x2466  | .....ucgugggaaacacggggugccgaac      | 0 |
| Gi3_16499062_x2460 | .....gggaacacggggugccgaa            | 0 |
| Gi3_16518676_x2441 | .....cgucgugggaaacacggggugccgaac    | 0 |

|                    |                                         |   |
|--------------------|-----------------------------------------|---|
| Gi3_16545467_x2428 | . . . . . gUaacacggggugccgaac           | 1 |
| Gi2_4491170_x2425  | . . . . . guggaacacggggugccgaa          | 0 |
| Gi3_16643558_x2347 | . . . . . Uggaacacggggugccgaac          | 1 |
| Gi3_16648252_x2346 | . . . . . ugggaacacggggugccg            | 0 |
| Gi5_4594294_x2341  | . . . . . guggaacacggggugccgaacA        | 1 |
| Gi3_16699239_x2288 | . . . . . aggccccgccaguacugcga          | 0 |
| Gi2_4566568_x2278  | . . . . . caggccccgccaguacugcgauc       | 0 |
| Gi3_16791254_x2203 | . . . . . Ggggaacacggggugccgaacu        | 1 |
| Gi2_4593584_x2197  | . . . . . Uggaacacggggugccgaacu         | 1 |
| Gi3_16871628_x2136 | . . . . . gGacacggggugccgaacu           | 1 |
| Gi3_16882279_x2126 | . . . . . guggaacNcggggugccgaacu        | 1 |
| Gi3_16903467_x2107 | . . . . . Augggaacacggggugccgaacu       | 1 |
| Gi5_4683050_x2103  | . . . . . ugggaacacggggugccgaacA        | 1 |
| Gi3_16928684_x2092 | . . . . . acgucguggaacacggggugccgaac    | 0 |
| Gi3_16934960_x2091 | . . . . . cguggaacacggggugccg           | 0 |
| Gi5_4687229_x2066  | . . . . . gggaacacggggugccgaac          | 0 |
| Gi1_2182073_x2038  | . . . . . cgucguggaacacggggugccgaacu    | 0 |
| Gi2_4694926_x2033  | . . . . . cggagacgucguggaacacggggugcc   | 0 |
| Gi5_4703592_x2029  | . . . . . ugggaacacggggugccgaac         | 0 |
| Gi2_4701009_x2017  | . . . . . cccccgccaguacugcgauc          | 0 |
| Gi3_17070356_x2005 | . . . . . aucggagacgucguggaacacggggugcc | 0 |
| Gi3_17110031_x1960 | . . . . . gacgucguggaacacggggugccgaacu  | 0 |
| Gi5_4754590_x1912  | . . . . . uUggaacacggggugccgaacu        | 1 |
| Gi3_17183517_x1905 | . . . . . cgugggaaNacggggugccgaacu      | 1 |
| Gi3_17196833_x1895 | . . . . . aucggagacgucguggaacac         | 0 |
| Gi2_4747972_x1892  | . . . . . acgucguggaacacggggugccgaacu   | 0 |
| Gi2_4751755_x1891  | . . . . . aucggagacgucguggaaca          | 0 |
| Gi2_4761194_x1879  | . . . . . aggccccgccaguacugcga          | 0 |
| Gi3_17249501_x1869 | . . . . . Uuggaacacggggugccga           | 1 |
| Gi2_4774302_x1861  | . . . . . aggccccgccaguacugcg           | 0 |
| Gi2_4789143_x1843  | . . . . . cguggaacacggggugc             | 0 |
| Gi3_17407574_x1767 | . . . . . cUuggaacacggggugccgaac        | 1 |
| Gl1a_3336841_x1748 | . . . . . gggaacacggggugccgaacu         | 0 |
| Gi3_17442691_x1747 | . . . . . ggaacacggggugccgaa            | 0 |
| Gi2_4857106_x1746  | . . . . . ggccccgccaguacugcgauc         | 0 |
| Gi3_17461856_x1734 | . . . . . gaucggagacgucguggaacacggg     | 0 |
| Gi2_4893280_x1699  | . . . . . Uaacacggggugccgaacu           | 1 |
| Gi5_4851747_x1698  | . . . . . cguggaacacggggugccgaacA       | 1 |
| Gi2_4903457_x1688  | . . . . . aucggagacgucguggaacacggggugcc | 0 |
| Gi3_17603980_x1650 | . . . . . uUggaacacggggugccgaac         | 1 |
| Gi3_17620445_x1641 | . . . . . ggccccgccaguacugcgauc         | 0 |
| Gi3_17670918_x1614 | . . . . . gaucggagacgucguggaacacggggu   | 0 |
| Gi1_2244512_x1612  | . . . . . acgucguggaacacggggugccgaacu   | 0 |
| Gi1_2246124_x1601  | . . . . . Uuggaacacggggugccgaacu        | 1 |
| Gi3_17687009_x1601 | . . . . . cgucguggaacacggggugccg        | 0 |
| Gi2_5013053_x1581  | . . . . . gUaacacggggugccgaacu          | 1 |
| Gi2_5014634_x1581  | . . . . . cgucguggaacacggggugccg        | 0 |

|                    |                                          |   |
|--------------------|------------------------------------------|---|
| Gi3_17792439_x1544 | .....gCgGggaacacggggugccgaacu.....       | 1 |
| Gi3_17804757_x1535 | .....cgCgGggaacacggggugccgaacu.....      | 1 |
| Gi3_17827658_x1521 | .....gugggaacacggggGgccgaacu.....        | 1 |
| Gi2_5088374_x1492  | .....gggaacacggggugccgaacA.....          | 1 |
| Gi3_17889244_x1487 | .....gugggGacacggggugccgaacu.....        | 1 |
| Gi3_17901117_x1481 | .....gugggaacacggggGgccgaacu.....        | 1 |
| Gi2_5101745_x1480  | .....ugggaacacggggugccgaacA.....         | 1 |
| Gi5_4964517_x1471  | .....gggaacacggggugccgaacA.....          | 1 |
| Gi2_5116506_x1469  | .....Uugggaacacggggugcc.....             | 1 |
| Gi3_17926170_x1466 | .....aggccccgccaguacugcgau.....          | 0 |
| Gi1a_3417093_x1462 | .....Uugggaacacggggugccgaacu.....        | 1 |
| Gi3_17949532_x1452 | .....ccccgccaguacugcgau.....             | 0 |
| Gi3_17950984_x1451 | .....gugggaacacggggugccgaGcu.....        | 1 |
| Gi5_4980585_x1450  | .....cgugggaacacggggugccgaac.....        | 0 |
| Gi3_17956783_x1448 | .....gUgaacacggggugccgaac.....           | 1 |
| Gi1_2278079_x1437  | .....Uaacacggggugccgaacu.....            | 1 |
| Gi2_5142644_x1430  | .....ggagacgucgugggaacacggggugcc.....    | 0 |
| Gi1_2286667_x1421  | .....ucgCgGggaacacggggugccgaacu.....     | 1 |
| Gi5_4999235_x1414  | .....Ugaacacggggugccgaacu.....           | 1 |
| Gi3_18041055_x1409 | .....Uucgugggaacacggggugccgaacu.....     | 1 |
| Gi3_18050907_x1405 | .....cgucaggccccgccaguacugc.....         | 0 |
| Gi2_5172447_x1403  | .....ugggaacacggggugccga.....            | 0 |
| Gi1_2297923_x1382  | .....gucgugggaacacggggugccgaacu.....     | 0 |
| Gi3_18106627_x1380 | .....guUggaacacggggugccgaacu.....        | 1 |
| Gi2_5197508_x1379  | .....aucggagacgucgugggaacacggg.....      | 0 |
| Gi2_5205765_x1375  | .....caggccccgccaguacugcg.....           | 0 |
| Gi5_5014528_x1369  | .....Uggaacacggggugccgaacu.....          | 1 |
| Gi5_5019990_x1359  | .....ggaacacggggugccgaac.....            | 0 |
| Gi3_18165432_x1357 | .....ucgugggaacacggggugccgaacA.....      | 1 |
| Gi2_5224850_x1355  | .....uUggaacacggggugccgaacu.....         | 1 |
| Gi2_5241045_x1346  | .....gaucggagacgucgugggaacacgggg.....    | 0 |
| Gi3_18220661_x1338 | .....caggccccgccaguacugcga.....          | 0 |
| Gi3_18241935_x1325 | .....agacgucgugggaacacggggugccgaacu..... | 0 |
| Gi2_5287405_x1300  | .....acgucgugggaacacggggugcc.....        | 0 |
| Gi2_5290004_x1297  | .....cgugggaacacggggugccga.....          | 0 |
| Gi3_18311187_x1293 | .....gugggaGcacggggugccgaacu.....        | 1 |
| Gi3_18316358_x1292 | .....gugggaacGcggggugccgaacu.....        | 1 |
| Gi3_18321520_x1289 | .....caggccccgccaguacugcgau.....         | 0 |
| Gi2_5310584_x1271  | .....gucgugggaacacggggugccgaac.....      | 0 |
| Gi5_5074131_x1271  | .....agacgucgugggaacacggggugccgaacu..... | 0 |
| Gi3_18362356_x1267 | .....cgucgugggaacacggggugccgaacA.....    | 1 |
| Gi3_18375009_x1263 | .....cgucaggccccgccaguacugcg.....        | 0 |
| Gi2_5323214_x1257  | .....caggccccgccaguacugc.....            | 0 |
| Gi2_5344499_x1246  | .....aucggagacgucgugggaacacggggug.....   | 0 |
| Gi2_5356932_x1241  | .....gUgaacacggggugccgaacu.....          | 1 |
| Gi3_18423837_x1240 | .....cgGggaacacggggugccgaacu.....        | 1 |
| Gi2_5368059_x1231  | .....agacgucgugggaacacggggugcc.....      | 0 |

|                         |                                    |   |
|-------------------------|------------------------------------|---|
| Gi2_5372973_x1220.....  | cgucgugggaacacggggugcc.....        | 0 |
| Gi3_18490145_x1214..... | Uugggaacacggggugccgaa.....         | 1 |
| Gi2_5386346_x1212.....  | gucaggccccgccaguacugc.....         | 0 |
| Gi2_5414040_x1195.....  | aucggagacgucgugggaacacg.....       | 0 |
| Gi2_5422389_x1190.....  | cgucaggccccgccaguacugc.....        | 0 |
| Gi2_5433050_x1179.....  | gccccgccaguacugcgau.....           | 0 |
| Gi3_18574980_x1178..... | Aaacacggggugccgaacu.....           | 1 |
| Gi2_5438941_x1177.....  | Ggugggaacacggggugccgaacu.....      | 1 |
| Gi3_18586732_x1173..... | cgucgugggaacacggggugccga.....      | 0 |
| Gi3_18585559_x1173..... | gaUcacggggugccgaacu.....           | 1 |
| Gi2_5451849_x1165.....  | Ugaacacggggugccgaac.....           | 1 |
| Gi3_18622676_x1152..... | gGgggaacacggggugcc.....            | 1 |
| Gi3_18660449_x1138..... | aUgccccgccaguacugcgau.....         | 1 |
| Gi2_5505511_x1125.....  | cgugggaacacggggugccgaa.....        | 0 |
| Gi2_5507759_x1120.....  | gGgggaacacggggugccgaac.....        | 1 |
| Gi3_18723411_x1108..... | gacgucgugggaacacggggugccgaac.....  | 0 |
| Gi3_18741079_x1101..... | gccccgccaguacugcgau.....           | 0 |
| Gi3_18748770_x1097..... | ucaggccccgccaguacugcgau.....       | 0 |
| Gi3_18752058_x1095..... | ucaggccccgccaguacugcg.....         | 0 |
| Gi5_5172874_x1092.....  | caggccccgccaguacugcg.....          | 0 |
| Gi5_5171782_x1092.....  | gugggaacacggggugccga.....          | 0 |
| Gi3_18769520_x1087..... | cggagacgucgugggaacacggggugcc.....  | 0 |
| Gi1_2378013_x1083.....  | Cgggaacacggggugccgaacu.....        | 1 |
| Gi3_18785802_x1083..... | gugggaacacggggugccgCacu.....       | 1 |
| Gi3_18803090_x1078..... | gaacacggNgugccgaacu.....           | 1 |
| Gi5_5189063_x1063.....  | ggaacacggggugccgaacA.....          | 1 |
| Gi3_18852239_x1056..... | cgugggaacacggggugccgCacu.....      | 1 |
| Gi2_5590002_x1051.....  | gugggaacacggggGgccgaacu.....       | 1 |
| Gi3_18873269_x1048..... | gaucggagacgucgugggaacacg.....      | 0 |
| Gi2_5593147_x1046.....  | gugggaacNcggggugccgaacu.....       | 1 |
| Gi3_18879550_x1045..... | gaacacggggGgccgaacu.....           | 1 |
| Gi2_5602530_x1038.....  | gacgucgugggaacacggggugccgaacu..... | 0 |
| Gi3_18895181_x1038..... | Uugggaacacggggugccg.....           | 1 |
| Gi1_2388645_x1037.....  | gugggaacacggggugccgaacA.....       | 1 |
| Gi3_18930286_x1026..... | cgugggaacacggggugccgaGcu.....      | 1 |
| Gi3_18936438_x1024..... | aGcacggggugccgaacu.....            | 1 |
| Gi2_5640495_x1012.....  | ggaacacggggugccgaacA.....          | 1 |
| Gi3_18965997_x1011..... | Ugugggaacacggggugccgaacu.....      | 1 |
| Gi2_5641507_x1011.....  | ugggaacacggggugccg.....            | 0 |
| Gi1_2404967_x998.....   | cgCgggaacacggggugccgaacu.....      | 1 |
| Gi2_5703062_x974.....   | ucaggccccgccaguacugcgau.....       | 0 |
| Gi2_5716655_x966.....   | gucgugggaacacggggugcc.....         | 0 |
| Gi3_19114736_x963.....  | ccccgccaguacugcgau.....            | 0 |
| Gi1_2421588_x960.....   | gCgggaacacggggugccgaacu.....       | 1 |
| Gi2_5724354_x959.....   | gaucggagacgucgugggaacacggg.....    | 0 |
| Gi5_5266060_x950.....   | gugggaacacggggugcc.....            | 0 |
| Gi1_2426354_x947.....   | ggaacacggggugccgaac.....           | 0 |

|                        |                                          |   |
|------------------------|------------------------------------------|---|
| Gi3_19175586_x938..... | cccgccaguacugcgauccgagacguc.....         | 0 |
| Gi3_19185895_x936..... | .....uggaacacggggugccgCacu.....          | 1 |
| Gi2_5758373_x932.....  | .....Augggaacacggggugccgaacu.....        | 1 |
| Gi3_19195239_x932..... | .....gugggaacCcggggugccgaacu.....        | 1 |
| Gi4_255519_x927.....   | .....gugggaacacggggugccgaacu.....        | 0 |
| Gi3_19228620_x922..... | .....gGgggaacacggggugccga.....           | 1 |
| Gi2_5772246_x920.....  | .....aacacggggugccgaacA.....             | 1 |
| Gi3_19238742_x919..... | .....cgucgugggaacacggggugc.....          | 0 |
| Gi1_2435607_x912.....  | .....ucgugggaacacggggugccgaac.....       | 0 |
| Gi1_2437431_x908.....  | .....ucgugggaacacggggugcc.....           | 0 |
| Gi1_2438339_x907.....  | .....cUugggaacacggggugccgaacu.....       | 1 |
| Gi3_19283423_x905..... | .....guggUaacacggggugccgaacu.....        | 1 |
| Gi3_19314932_x896..... | .....gaucggagacgucguggaacac.....         | 0 |
| Gi5_5305716_x892.....  | .....gUaacacggggugccgaacu.....           | 1 |
| Gi3_19336339_x887..... | .....aucggagacgucguggaacacggggugc.....   | 0 |
| Gi3_19337226_x887..... | .....cgugggaGcacggggugccgaacu.....       | 1 |
| Gi5_5313715_x884.....  | .....Ggggaacacggggugccgaacu.....         | 1 |
| Gi3_19346078_x883..... | .....Gacacggggugccgaacu.....             | 1 |
| Gi3_19353136_x882..... | .....gucgugggaacacggggugcc.....          | 0 |
| Gi5_5328573_x862.....  | .....Ggugggaacacggggugccgaacu.....       | 1 |
| Gi3_19436709_x861..... | .....acgucgugggaacacggggugcc.....        | 0 |
| Gi2_5879427_x852.....  | cccgccaguacugcgauccg.....                | 0 |
| Gi3_19477784_x849..... | .....gugggaacacAgggugccgaacu.....        | 1 |
| Gi1_2463627_x846.....  | .....aacacggggugccgaacA.....             | 1 |
| Gi2_5894717_x846.....  | .....gaucggagacgucguggaacac.....         | 0 |
| Gi3_19487110_x846..... | .....ggagacgucgugggaacacggggugcc.....    | 0 |
| Gi2_5893025_x846.....  | .....aUgccccgccaguacugcgauc.....         | 1 |
| Gi2_5898094_x843.....  | .....aucggGgacgucguggaacac.....          | 1 |
| Gi3_19501449_x840..... | .....cgAgggaacacggggugccgaacu.....       | 1 |
| Gi3_19505645_x838..... | .....cgugggGacacggggugccgaacu.....       | 1 |
| Gi5_5346371_x836.....  | .....gacgucgugggaacacggggugccgaacu.....  | 0 |
| Gi3_19551295_x824..... | .....cgugggaacacggggCgccgaacu.....       | 1 |
| Gl1a_3705092_x821..... | .....gugggaacacggggugcc.....             | 0 |
| Gi2_5959289_x811.....  | ucaggccccgccaguacugc.....                | 0 |
| Gi3_19597896_x808..... | .....cggagacgucgugggaacacggggg.....      | 0 |
| Gi2_5972240_x807.....  | .....cgucgugggaacacggggugccga.....       | 0 |
| Gi3_19635652_x799..... | .....gAgggaacacggggugccgaacu.....        | 1 |
| Gi3_19638048_x798..... | .....gugggaacacggggugccgaCcu.....        | 1 |
| Gi3_19666621_x789..... | .....gccaguacugcgauccgagacguc.....       | 0 |
| Gi2_6000086_x787.....  | .....aucggGgacgucguggaacacggggugc.....   | 1 |
| Gi2_6000873_x786.....  | .....cgugggaaNacggggugccgaacu.....       | 1 |
| Gi3_19702742_x782..... | .....agacgucgugggaacacggggugccgaac.....  | 0 |
| Gi2_6009494_x781.....  | .....gCgggaacacggggugccgaacu.....        | 1 |
| Gi5_5388210_x779.....  | .....gaacacggggugccgaac.....             | 0 |
| Gi3_19712107_x778..... | .....ugggaacacNggggugccgaacu.....        | 1 |
| Gi2_6025044_x773.....  | .....agacgucgugggaacacggggugccgaacu..... | 0 |
| Gi3_19752275_x768..... | .....cgugggaacacggggugccgaCcu.....       | 1 |



|                   |                              |   |
|-------------------|------------------------------|---|
| Gi3_19762243_x765 | cgccaguacugcgauccgagacguc    | 0 |
| Gi2_6041171_x764  | gacgucgugggaaacacggggugcc    | 0 |
| Gi5_5408852_x752  | gUgaacacggggugccgaacu        | 1 |
| Gi2_6059364_x751  | gUaacacggggugccgaac          | 1 |
| Gi3_19831848_x748 | cguggaacGcggggugccgaacu      | 1 |
| Gi3_19863131_x742 | Ggggaacacggggugccgaac        | 1 |
| Gi5_5423735_x735  | Augggaacacggggugccgaacu      | 1 |
| Gi2_6106547_x727  | aucggGgacgucgugggaaacac      | 1 |
| Gi3_19928311_x724 | aggccccgccaguacugcgauccgga   | 0 |
| Gi1_2524539_x721  | gggaacacggggugccgaacA        | 1 |
| Gi3_19944198_x720 | guAggaacacggggugccgaacu      | 1 |
| Gi5_5436081_x717  | aucggagacgucgugggaaacacg     | 0 |
| Gi2_6138250_x715  | acgucgugggaaacacggggugc      | 0 |
| Gi2_6136105_x715  | caggccccgccaguacugcgau       | 0 |
| Gi3_19977837_x712 | gaucggagacgucgugggaaacacgggg | 0 |
| Gi2_6149646_x710  | cguggaaacacggggugccg         | 0 |
| Gi2_6156741_x709  | gugggaacacggggGgccgaacu      | 1 |
| Gi2_6156032_x709  | Uugggaacacggggugccg          | 1 |
| Gi5_5452426_x705  | ugggaacacggggugccgaa         | 0 |
| Gi5_5458036_x697  | gugggaacacggggugccgaa        | 0 |
| Gi1_2530929_x697  | gugggaacacggggugccgaac       | 0 |
| Gi3_20027165_x696 | gggaacacggggugccga           | 0 |
| Gi5_5459430_x696  | ucgugggaacacggggugccgaac     | 0 |
| Gi1_2534401_x692  | gugggaacacggggugcc           | 0 |
| Gi3_20049348_x690 | gagaagcgccgucaggccccgc       | 0 |
| Gi2_6200666_x687  | ggagacgucgugggaaacacggggugc  | 0 |
| Gi2_6202725_x686  | Cugggaacacggggugccgaacu      | 1 |
| Gi3_20061734_x686 | ucgugggaacacggggugc          | 0 |
| Gi3_20075429_x683 | Caacacggggugccgaacu          | 1 |
| Gi2_6219121_x680  | gugggGacacggggugccgaacu      | 1 |
| Gi3_20087693_x680 | cgugUgaacacggggugccgaacu     | 1 |
| Gi1a_3822562_x678 | gaacacggggugccgaacu          | 0 |
| Gi3_20100593_x678 | gaacacggggugccgaCcu          | 1 |
| Gi3_20103302_x677 | cgugggaacaUggggugccgaacu     | 1 |
| Gi2_6230650_x676  | cgucgugggaaacacggggugc       | 0 |
| Gi2_6242770_x671  | aggccccgccaguacugcgauccgga   | 0 |
| Gi2_6249470_x669  | gucaggccccgccaguacugcg       | 0 |
| Gi3_20138255_x668 | ggagacgucgugggaaacacgggggu   | 0 |
| Gi2_6261466_x664  | guUggaacacggggugccgaacu      | 1 |
| Gi2_6259474_x664  | gaacacggggugccgaacA          | 1 |
| Gi1_2549977_x662  | gGgggaacacggggugccgaacu      | 1 |
| Gi2_6272692_x658  | gugggaacGcggggugccgaacu      | 1 |
| Gi2_6277948_x656  | gugggaacacggggugccgaGcu      | 1 |
| Gi5_5501608_x654  | Uugggaacacggggugccgaac       | 1 |
| Gi2_6287759_x653  | Uucgugggaacacggggugccgaacu   | 1 |
| Gi5_5502916_x653  | aggccccgccaguacugcgaucc      | 0 |
| Gi3_20229392_x653 | gccgucaggccccgccaguacugcg    | 0 |

|                   |                                     |   |
|-------------------|-------------------------------------|---|
| Gi3_20231351_x652 | .....gaacacggggugccgaGcu            | 1 |
| Gi3_20245021_x650 | .....gccccgccaguacugcgau            | 0 |
| Gi3_20269645_x645 | .....gucaggccccgccaguacugcg         | 0 |
| Gi2_6306563_x644  | .....cUugggaacacggggugccgaac        | 1 |
| Gi3_20285750_x643 | .....gaacGcggggugccgaacu            | 1 |
| Gi3_20303064_x640 | .....uacugcgaucggagacguc            | 0 |
| Gi2_6335368_x636  | .....gaucggagacgucgugggaacacggggugc | 0 |
| Gi3_20327280_x634 | .....gucaggccccgccaguacugc          | 0 |
| Gi2_6340450_x634  | .....acgucgugggaacacggggugccgaac    | 0 |
| Gi3_20335512_x633 | .....Gcgugggaacacggggugccgaacu      | 1 |
| Gi3_20333613_x633 | .....aUcacggggugccgaacu             | 1 |
| Gi5_5530522_x632  | .....cgugggaaNacggggugccgaacu       | 1 |
| Gi3_20338041_x632 | .....ucaggccccgccaguacugc           | 0 |
| Gi2_6352455_x629  | .....gGgggaacacggggugcc             | 1 |
| Gi2_6356223_x627  | .....cgggagacgucgugggaacacggggugc   | 0 |
| Gi3_20373844_x624 | .....gaagagaagcgccgucaggcccc        | 0 |
| Gl1a_3874721_x623 | .....cgucaggccccgccaguacugcg        | 0 |
| Gi2_6372478_x622  | .....Ggggaacacggggugccgaacu         | 1 |
| Gi1_2574227_x619  | .....gacgucgugggaacacggggugccgaacu  | 0 |
| Gi1_2575463_x616  | .....UGaacacggggugccgaacu           | 1 |
| Gi3_20425189_x613 | .....aucggagacgucguggga             | 0 |
| Gi3_20433767_x612 | .....acgucgugggaacacggggugccgaacA   | 1 |
| Gl1a_3889537_x611 | .....gGgggaacacggggugccgaacu        | 1 |
| Gi2_6414228_x607  | .....aggccccgccaguacugcgau          | 0 |
| Gi3_20455698_x606 | .....cCugggaacacggggugccgaacu       | 1 |
| Gi1_2583389_x604  | .....uUggaacacggggugccgaacu         | 1 |
| Gi2_6418466_x604  | .....gaucggagacgucguggga            | 0 |
| Gi2_6427498_x600  | .....ucgugggaacacggggugccgaacA      | 1 |
| Gi3_20496077_x598 | .....gugggaacacggggugccAaacu        | 1 |
| Gi3_20524036_x591 | .....cAugggaacacggggugccgaacu       | 1 |
| Gi2_6449532_x591  | .....gugggaGcacggggugccgaacu        | 1 |
| Gi3_20535824_x588 | .....uAggaacacggggugccgaacu         | 1 |
| Gi3_20534060_x588 | .....cUucgugggaacacggggugccgaacu    | 1 |
| Gi1_2589356_x587  | .....Uggaacacggggugccgaacu          | 1 |
| Gi3_20555743_x584 | .....gugggaacacggggugcUgaacu        | 1 |
| Gi3_20552239_x584 | .....gaagagaagcgccgucaggcccc        | 0 |
| Gi2_6477610_x580  | .....gaacacggggugccgaac             | 0 |
| Gi3_20572614_x580 | .....cgugggaacacAgggugccgaacu       | 1 |
| Gi2_6501196_x571  | .....cgCgggaacacggggugccgaacu       | 1 |
| Gi3_20621399_x570 | .....gGgggaacacggggugccgaa          | 1 |
| Gi2_6509178_x568  | .....cgGgggaacacggggugccgaacu       | 1 |
| Gi3_20641814_x565 | .....Cugggaacacggggugccgaac         | 1 |
| Gl1a_3939434_x563 | .....aacacggggugccgaacu             | 0 |
| Gi3_20653089_x562 | .....ucgugggaacacggggugccg          | 0 |
| Gi2_6525556_x561  | .....gugggaacacggggugccgCacu        | 1 |
| Gi3_20660950_x561 | .....gaGcacggggugccgaacu            | 1 |
| Gi1_2607734_x560  | .....ugggaacacggggugccgaac          | 0 |

|                   |                                          |   |
|-------------------|------------------------------------------|---|
| Gi2_6532839_x559  | .....Uggaacacggggugccgaac.....           | 1 |
| Gi3_20686091_x556 | .....Uaacacggggugccgaac.....             | 1 |
| Gi3_20690539_x556 | .....ucggagacgucgugggaaacacggggugcc..... | 0 |
| G1a_3950603_x553  | .....aucggagacgucgugggaaacacggg.....     | 0 |
| Gi5_5626687_x549  | .....gggaacacggggugccgaa.....            | 0 |
| Gi3_20726447_x549 | .....aacacgggNugccgaacu.....             | 1 |
| Gi3_20755962_x544 | .....gugggaaacNcggggugccgaac.....        | 1 |
| Gi5_5641931_x539  | .....cgugggaaacacggggugccga.....         | 0 |
| Gi3_20781433_x539 | .....cccgccaguacugcgauccgagacgu.....     | 0 |
| Gi2_6592497_x537  | .....gucgugggaaacacggggugc.....          | 0 |
| Gi2_6591423_x537  | .....Uugggaaacacggggugccga.....          | 1 |
| G1a_3965849_x535  | .....caguacugcgauccgagacguc.....         | 0 |
| Gi2_6597318_x535  | .....ccccgccaguacugcgauccg.....          | 0 |
| Gi2_6604800_x533  | .....ugggaaacacggggugccgaa.....          | 0 |
| Gi2_6605333_x533  | .....gaucggagacgucgugggaaacacg.....      | 0 |
| Gi3_20840175_x528 | .....gucaggccccgccaguacug.....           | 0 |
| Gi3_20854929_x526 | .....cgucaggccccgccaguacug.....          | 0 |
| Gi2_6634895_x523  | .....ccccgccaguacugcgaucc.....           | 0 |
| Gi3_20866986_x523 | .....gugAgaacacggggugccgaacu.....        | 1 |
| Gi1_2630453_x519  | .....gucgCgggaacacggggugccgaacu.....     | 1 |
| G1a_3984256_x519  | .....gugggaaacacggggugccga.....          | 0 |
| Gi2_6654166_x518  | .....ucgugggaaacacggggugccg.....         | 0 |
| Gi3_20897129_x516 | .....aggccccgccaguacugcgauccg.....       | 0 |
| Gi2_6663968_x514  | .....gggaacacggggugccgaa.....            | 0 |
| Gi3_20927425_x511 | .....gucgugggaaacacggggugccgaacA.....    | 1 |
| Gi2_6669610_x511  | .....cgugggaaacacggggugccgCacu.....      | 1 |
| Gi3_20933547_x509 | .....gUacacggggugccgaacu.....            | 1 |
| Gi4_298421_x509   | .....cgugggaaacacggggugccgaacu.....      | 0 |
| Gi2_6688434_x506  | .....cgucgugggaaacacggggugccgaac.....    | 0 |
| Gi2_6691467_x505  | .....ucggGgacgucgugggaaacacg.....        | 1 |
| Gi5_5684347_x503  | .....gugggaaacNcggggugccgaacu.....       | 1 |
| Gi3_20965425_x503 | .....ucggagacgucgugggaaacacg.....        | 0 |
| Gi5_5685353_x502  | .....aucggagacgucgugggaaacacgg.....      | 0 |
| G1a_4003648_x501  | .....aucggagacgucgugggaaacacggggu.....   | 0 |
| G1a_4008139_x498  | .....gugggaaacacggggugccgaac.....        | 0 |
| G1a_4011121_x496  | .....cgugggaaacacggggugcc.....           | 0 |
| G1a_4013105_x495  | .....aguacugcgauccgagacguc.....          | 0 |
| Gi3_21024275_x493 | .....gacgucgugggaaacacggg.....           | 0 |
| Gi2_6731385_x492  | .....caggccccgccaguacug.....             | 0 |
| Gi5_5704214_x491  | .....aucggagacgucgugggaaacacggggu.....   | 0 |
| Gi3_21053720_x489 | .....Cgaacacggggugccgaacu.....           | 1 |
| Gi3_21053231_x489 | .....cgugggaaacacggggugccAaacu.....      | 1 |
| Gi5_5708616_x486  | .....gugggaaacacggggugccgaacuu.....      | 0 |
| Gi2_6754847_x485  | .....gaucggagacgucgugggaaaca.....        | 0 |
| Gi3_21074174_x485 | .....aaUacggggugccgaacu.....             | 1 |
| Gi1_2653352_x484  | .....cgucgCgggaacacggggugccgaacu.....    | 1 |
| Gi3_21090151_x483 | .....Aggaacacggggugccgaacu.....          | 1 |

|                   |                                          |   |
|-------------------|------------------------------------------|---|
| Gi2_6764528_x482  | .....ggGgacgucgugggaacacggggugcc.....    | 1 |
| Gi2_6774146_x480  | .....gugggaacCcggggugccgaacu.....        | 1 |
| Gi2_6772226_x480  | .....cgucaggccccgccaguacugcg.....        | 0 |
| Gi2_6773666_x480  | .....aucggGgacgucgugggaacacggg.....      | 1 |
| Gi1a_4033121_x479 | .....cgucaggccccgccaguacugc.....         | 0 |
| Gi3_21119024_x479 | .....aacacggggugccgaacuu.....            | 0 |
| Gi3_21122373_x478 | .....agcgcgucaggccccgccagu.....          | 0 |
| Gi3_21138590_x475 | .....gGcgugggaacacggggugccgaacu.....     | 1 |
| Gi3_21144290_x475 | .....gGgggaacacggggugccg.....            | 1 |
| Gi3_21139065_x475 | .....cgccgucaggccccgccaguacugc.....      | 0 |
| Gi3_21150932_x474 | .....caguacugcgauccggagacguc.....        | 0 |
| Gi3_21147140_x474 | .....ggccccgccaguacugcgau.....           | 0 |
| Gi3_21151406_x474 | .....gccgucaggccccgccaguac.....          | 0 |
| Gi3_21178779_x470 | .....Augggaacacggggugccgaac.....         | 1 |
| Gi5_5737314_x470  | .....aacacggggugccgaacA.....             | 1 |
| Gi3_21177839_x470 | .....gagaagcgcgucaggccc.....             | 0 |
| Gi3_21189573_x469 | .....Uucgugggaacacggggugccgaac.....      | 1 |
| Gi5_5745274_x466  | .....gugggaacacggggugccg.....            | 0 |
| Gi2_6811953_x465  | .....ucggagacgucgugggaacacg.....         | 0 |
| Gi3_21225428_x463 | .....gucgugggaacacggggugccga.....        | 0 |
| Gi2_6818913_x463  | .....caguacugcgauccggagacguc.....        | 0 |
| Gi2_6829073_x461  | .....gccaguacugcgauccggagacguc.....      | 0 |
| Gi1_2673628_x459  | .....gugggaacacggggugccg.....            | 0 |
| Gi3_21253553_x458 | .....agaagcgcgucaggccccgcc.....          | 0 |
| Gi5_5767386_x456  | .....aaUacggggugccgaacu.....             | 1 |
| Gi3_21260413_x456 | .....caguacugcgauccggagacgucgug.....     | 0 |
| Gi2_6849190_x455  | .....aucggagacgucgugggaac.....           | 0 |
| Gi3_21277250_x454 | .....ggaacacgNggugccgaacu.....           | 1 |
| Gi3_21273618_x454 | .....cgugggaacacggggugcUgaacu.....       | 1 |
| Gi2_6855091_x453  | .....ggaacacggggugccgaa.....             | 0 |
| Gi1_2677719_x450  | .....agacgucgugggaacacggggugccgaacu..... | 0 |
| Gi3_21301662_x450 | .....uUggaacacggggugccgaa.....           | 1 |
| Gi2_6870001_x450  | .....agacgucgugggaacacggggugc.....       | 0 |
| Gi5_5775083_x449  | .....aGcacggggugccgaacu.....             | 1 |
| Gi3_21314237_x448 | .....gaacacggggugccgCacu.....            | 1 |
| Gi3_21316924_x447 | .....cgucgugggaacacgggg.....             | 0 |
| Gi5_5781786_x445  | .....ugcgauccggagacgucgug.....           | 0 |
| Gi3_21334759_x445 | .....gugggaacacggggUaccgaacu.....        | 1 |
| Gi3_21342750_x443 | .....Cgggaacacggggugccgaacu.....         | 1 |
| Gi3_21366587_x440 | .....Cggaacacggggugccgaacu.....          | 1 |
| Gi3_21362627_x440 | .....agaagcgcgucaggccccgcc.....          | 0 |
| Gi2_6909972_x439  | .....cccgccaguacugcgauccggagac.....      | 0 |
| Gi3_21374493_x438 | .....gaucggagacgucgugggaacacgg.....      | 0 |
| Gi3_21392841_x436 | .....agaagcgcgucaggcccc.....             | 0 |
| Gi3_21398498_x435 | .....agcgcgucaggccccgcc.....             | 0 |
| Gi2_6928292_x434  | .....guggUaacacggggugccgaacu.....        | 1 |
| Gi3_21419305_x432 | .....gaagagaagcgcgucagg.....             | 0 |

|                   |                                       |   |
|-------------------|---------------------------------------|---|
| Gi3_21420601_x432 | .....gugggaacaUggggugccgaacu.....     | 1 |
| Gi3_21425343_x431 | .....cgccaguacugcgauccggagacgu.....   | 0 |
| Gi1_2690059_x430  | .....ucgCgggaacacggggugcc.....        | 1 |
| Gi2_6946431_x430  | .....cggGgacgucgugggaacacggggugc..... | 1 |
| Gi3_21430506_x430 | .....agagaagcggcucaggccccgc.....      | 0 |
| Gi5_5805893_x429  | .....Gcgugggaacacggggugccgaacu.....   | 1 |
| Gi3_21442941_x428 | .....uUggaacacggggugccga.....         | 1 |
| Gi3_21442085_x428 | .....gugggaacacggggugccgaUc.....      | 1 |
| Gi5_5809746_x427  | .....Gacacggggugccgaacu.....          | 1 |
| Gi5_5810600_x427  | .....Uucgugggaacacggggugccgaacu.....  | 1 |
| Gi3_21454905_x426 | .....Ggugggaacacggggugccgaac.....     | 1 |
| Gi2_6960982_x425  | .....aucggGgacgucgugggaacacg.....     | 1 |
| Gi3_21464696_x425 | .....gggaacacggggugccgaCcu.....       | 1 |
| Gi3_21470210_x424 | .....gugggaacacggggugccgGacu.....     | 1 |
| Gl1a_4115331_x422 | .....Ugaacacggggugccgaacu.....        | 1 |
| Gi3_21495525_x420 | .....gugggaacacggggugUcgaacu.....     | 1 |
| Gi2_6981692_x419  | .....cggagacgucgugggaacacggggg.....   | 0 |
| Gi2_6981273_x419  | .....cgugggaacacggggugccgaCcu.....    | 1 |
| Gi3_21518968_x417 | .....cccggcaguacugcgauccggagacg.....  | 0 |
| Gi3_21519802_x417 | .....cgccaguacugcgauccggagacg.....    | 0 |
| Gi3_21532298_x416 | .....gugggaacacggUgugccgaacu.....     | 1 |
| Gi3_21552587_x413 | .....gCgggaacacggggugccgaac.....      | 1 |
| Gi3_21566190_x411 | .....gggaacacNggggugccgaacu.....      | 1 |
| Gi2_7023165_x410  | .....gugggaacacggggugccgaCcu.....     | 1 |
| Gi3_21574397_x409 | .....aUgccccgccaguacugc.....          | 1 |
| Gi3_21576442_x409 | .....cguAggaacacggggugccgaacu.....    | 1 |
| Gi3_21578892_x408 | .....gugggaacacgAggugccgaacu.....     | 1 |
| Gi3_21593951_x405 | .....cggagacgucgugggaacacg.....       | 0 |
| Gi1_2710911_x404  | .....aucggagacgucgugggaacacg.....     | 0 |
| Gi3_21620582_x402 | .....cgcgugggaacacggggugccgaa.....    | 0 |
| Gi3_21622588_x401 | .....agaagcggcucaggccc.....           | 0 |
| Gi3_21647373_x398 | .....ucggagacgucgugggaacacggggg.....  | 0 |
| Gi3_21658497_x397 | .....gugggaacacggAgugccgaacu.....     | 1 |
| Gi5_5858005_x396  | .....gugggaacacggggGgccgaacu.....     | 1 |
| Gi3_21665630_x396 | .....gugggaacacggggugccgaGc.....      | 1 |
| Gi3_21677878_x394 | .....acugcgauccggagacguc.....         | 0 |
| Gi2_7083828_x393  | .....ccggcaguacugcgauccgg.....        | 0 |
| Gi3_21683787_x393 | .....Cugggaacacggggugcc.....          | 1 |
| Gi5_5865493_x392  | .....cgGgggaacacggggugccgaacu.....    | 1 |
| Gi2_7092453_x391  | .....gaagcggcucaggcccc.....           | 0 |
| Gi3_21723258_x388 | .....cccggcaguacugcgauccggagac.....   | 0 |
| Gi5_5879505_x385  | .....cgCgggaacacggggugccgaacu.....    | 1 |
| Gi3_21743350_x385 | .....agagaagcggcucaggccccgc.....      | 0 |
| Gi3_21762536_x382 | .....aguacugcgauccggagacg.....        | 0 |
| Gi2_7137581_x379  | .....gaagcggcucaggccccgc.....         | 0 |
| Gl1a_4189285_x379 | .....ugggaacacggggugccgaacA.....      | 1 |
| Gi3_21792532_x377 | .....acugcgauccggagacgucgug.....      | 0 |

|                        |                                           |   |
|------------------------|-------------------------------------------|---|
| Gi3_21808710_x375..... | .gccaguacugcgauccgagacgu.....             | 0 |
| Gi3_21813955_x374..... | .....gaacacggggugccgGacu.....             | 1 |
| Gi3_21813581_x374..... | .....gugggaacacggggCgccgaac.....          | 1 |
| Gi2_7156442_x374.....  | .....cgugggGacacggggugccgaacu.....        | 1 |
| Gi5_5898479_x374.....  | .....cgugggaacacggggugcc.....             | 0 |
| Gi2_7160930_x373.....  | .....gggaacacggggugccga.....              | 0 |
| Gi5_5903708_x372.....  | .....gucaggccccgccaguacugcg.....          | 0 |
| Gi1_2746579_x371.....  | .....cgugggaacacggggugccgaac.....         | 0 |
| Gi1_2746950_x371.....  | .....aggccccgccaguacugcgau.....           | 0 |
| Gi3_21839642_x370..... | .....gugggaacacggggGgccgaac.....          | 1 |
| Gi3_21848878_x369..... | .....cgugggaacacgUggugccgaacu.....        | 1 |
| Gi3_21844450_x369..... | .....cggagacgucgugggaacacggg.....         | 0 |
| Gi3_21875321_x366..... | .....cgugAgaacacggggugccgaacu.....        | 1 |
| Gi3_21874955_x366..... | .....cccgccaguacugcgauccg.....            | 0 |
| Gi3_21878975_x365..... | .....guggAaacacggggugccgaacu.....         | 1 |
| Gi2_7201552_x365.....  | .....ccgucaggccccgccaguacugcg.....        | 0 |
| Gi3_21886627_x364..... | .....ggUacacggggugccgaacu.....            | 1 |
| Gi2_7209198_x363.....  | .....gAgggaacacggggugccgaacu.....         | 1 |
| Gi3_21888810_x363..... | .....agacgucgugggaacacggggugcc.....       | 0 |
| Gi5_5912906_x363.....  | .....gugggGacacggggugccgaacu.....         | 1 |
| Gi3_21890988_x363..... | .....aacacggggCgccgaacu.....              | 1 |
| Gi1_2755728_x362.....  | .....gugggaacacggggugccgaacu.....         | 0 |
| Gi1_2760408_x359.....  | .....gUgaacacggggugccgaacu.....           | 1 |
| Gi2_7227600_x359.....  | .....aucggagacgucguggga.....              | 0 |
| Gi3_21920229_x359..... | .....ggagacgucgugggaacacg.....            | 0 |
| Gi2_7231906_x358.....  | .....cgugggaacacggggugccgaGcu.....        | 1 |
| Gi3_21924892_x358..... | .....gugggaaUacggggugccgaacu.....         | 1 |
| Gi1_2762199_x357.....  | .....gUaacacggggugccgaacu.....            | 1 |
| Gi2_7235843_x357.....  | .....aagagaagcgccgucaggccc.....           | 0 |
| Gi3_21936329_x357..... | .....Agugggaacacggggugccgaacu.....        | 1 |
| Gi3_21940247_x356..... | .....cgccaguacugcgauccgagac.....          | 0 |
| Gi3_21945230_x355..... | .....gacgucgugggaacacgggg.....            | 0 |
| Gi3_21947005_x355..... | .....cUugggaacacggggugcc.....             | 1 |
| Gi2_7246532_x355.....  | .....ggGgacgucgugggaacacggggugc.....      | 1 |
| Gi1_2765402_x354.....  | .....cgucgugggaacacggggugcc.....          | 0 |
| Gi3_21950908_x354..... | .....gagacgucgugggaacacggggugccgaacu..... | 0 |
| Gi2_7255377_x353.....  | .....ucaggccccgccaguacugcg.....           | 0 |
| Gi3_21959043_x353..... | .....ugggaacacggggugccgCac.....           | 1 |
| Gi2_7257846_x352.....  | .....gugggaacacAgggugccgaacu.....         | 1 |
| Gi2_7262421_x351.....  | .....Gcgugggaacacggggugccgaacu.....       | 1 |
| Gi1_2768927_x350.....  | .....gucgugggaacacggggugcc.....           | 0 |
| Gi5_5957529_x345.....  | .....ugggaacacggggugccgCacu.....          | 1 |
| Gi3_22045930_x341..... | .....ucgugggaacacggggugccgaa.....         | 0 |
| Gi5_5971873_x338.....  | .....gGacacggggugccgaacu.....             | 1 |
| Gi3_22074093_x337..... | .....gugggGacacggggugccgaac.....          | 1 |
| Gi1_4268455_x337.....  | .....aggccccgccaguacugcg.....             | 0 |
| Gi5_5975582_x336.....  | .....gCgggaacacggggugccgaacu.....         | 1 |

|                   |                                          |   |
|-------------------|------------------------------------------|---|
| Gi3_22078811_x336 | .....gacgucgugggaacacggggugccgaacA.....  | 1 |
| Gi2_7332098_x336  | .....Uguggaacacggggugccgaacu.....        | 1 |
| Gi1_2782276_x335  | .....cgugggaacacggggugccga.....          | 0 |
| Gi5_5979277_x335  | .....ugggaacaNggggugccgaacu.....         | 1 |
| Gi2_7335117_x335  | .....cgugggaGcacggggugccgaacu.....       | 1 |
| Gi3_22101607_x334 | .....Agaacacggggugccgaacu.....           | 1 |
| Gi5_5988969_x333  | .....cgugggaacacggggugccgaGcu.....       | 1 |
| Gi3_22106611_x333 | .....aguacugcgauccgagacgucgug.....       | 0 |
| Gi5_5986971_x333  | .....gugggaacacggggCgccgaacu.....        | 1 |
| Gi3_22111938_x332 | .....cgauccgagacgucguggggaacacg.....     | 0 |
| Gi1_2785611_x332  | .....ggagacgucguggggaacacggggugcc.....   | 0 |
| Gi5_5992293_x332  | .....Cugggaacacggggugccgaacu.....        | 1 |
| Gi3_22123215_x331 | .....Agaacacggggugccgaac.....            | 1 |
| Gi2_7359060_x330  | .....gccgucaggccccgccaguacugc.....       | 0 |
| Gi3_22148239_x328 | .....ggaacacgNggugccgaac.....            | 1 |
| Gi1_2787918_x328  | .....gCgggaacacggggugccg.....            | 1 |
| Gi2_7368916_x327  | .....gUgaacacggggugccgaac.....           | 1 |
| Gi5_6006792_x326  | .....gucguggggaacacggggugccgaac.....     | 0 |
| Gi2_7373163_x326  | .....cgAggggaacacggggugccgaacu.....      | 1 |
| Gi3_22168136_x325 | .....gaacacAgggugccgaacu.....            | 1 |
| Gi2_7380644_x325  | .....ccgucaggccccgccaguacugc.....        | 0 |
| Gi2_7381942_x324  | .....guAggaacacggggugccgaacu.....        | 1 |
| Gi1_2791179_x324  | .....caggccccgccaguacugc.....            | 0 |
| Gi5_6014257_x323  | .....cUucguggggaacacggggugccgaacu.....   | 1 |
| Gi1_2795056_x322  | .....aucggagacgucGgggaacacgg.....        | 1 |
| Gi2_7397102_x321  | .....aguacugcgauccgagacguc.....          | 0 |
| Gi3_22199475_x321 | .....guacugcgauccgagacg.....             | 0 |
| Gl1_4304011_x321  | .....agaagcgccgucaggccccgc.....          | 0 |
| Gi1_2797301_x319  | .....acgucguggggaacacggggugcc.....       | 0 |
| Gi1_2797939_x318  | .....ugggaacacggggugccgaacA.....         | 1 |
| Gi3_22222813_x318 | .....aacGcggggugccgaacu.....             | 1 |
| Gi2_7410220_x318  | .....gaucggagacgucguggggaacacggggug..... | 0 |
| Gi5_6024830_x317  | .....guUggaacacggggugccgaacu.....        | 1 |
| Gi2_7417202_x317  | .....aucggagacgucguggggaacacgg.....      | 0 |
| Gi3_22238689_x317 | .....ccgucaggccccgccaguacugc.....        | 0 |
| Gi3_22243432_x316 | .....aacacggggugccgaGcu.....             | 1 |
| Gi3_22254787_x315 | .....cUugggaacacggggugccga.....          | 1 |
| Gi3_22263909_x314 | .....ccgccaguacugcgauccgagacguc.....     | 0 |
| Gi2_7432954_x313  | .....gGgacgucguggggaacacggggugcc.....    | 1 |
| Gi5_6037437_x313  | .....caggccccgccaguacugcgaucc.....       | 0 |
| Gl1_4318902_x313  | .....acugcgauccgagacgucgug.....          | 0 |
| Gi3_22285171_x311 | .....guUggaacacggggugccgaac.....         | 1 |
| Gi4_321304_x310   | .....ugggaacacggggugccgaacu.....         | 0 |
| Gi2_7449127_x309  | .....gacgucguggggaacacggggugccg.....     | 0 |
| Gi1_2805774_x309  | .....cgucaggccccgccaguacugc.....         | 0 |
| Gi3_22299763_x309 | .....cgauccgagacgucguggg.....            | 0 |
| Gi3_22309644_x308 | .....ugggGacacggggugccgaacu.....         | 1 |

|                   |                                            |   |
|-------------------|--------------------------------------------|---|
| Gi2_7456834_x308  | .....cggGgacgucguggggaacac.....            | 1 |
| Gi5_6054155_x307  | .....gugggaacacggggugccgaGcu.....          | 1 |
| Gi2_7460519_x307  | .....gGgggaacacggggugccg.....              | 1 |
| Gi3_22321325_x307 | .....aguacugcgauccgagacgucg.....           | 0 |
| Gi3_22317027_x307 | .....gacgucguggggaacacggggugccg.....       | 0 |
| Gi3_22318255_x307 | .....gggaacacggggugccgaaA.....             | 1 |
| Gi2_7465729_x306  | .....cgugggaacacggggCgccgaacu.....         | 1 |
| Gi3_22329900_x306 | .....cgugggaacacgAggugccgaacu.....         | 1 |
| Gi2_7474883_x304  | .....cccgccaguacugcgauccgagacguc.....      | 0 |
| Gi2_7477315_x304  | .....ucggagacgucgugggaaaca.....            | 0 |
| Gi3_22354863_x303 | .....Uggaacacggggugccgaa.....              | 1 |
| Gi3_22349712_x303 | .....ggaacacggggugccgCacu.....             | 1 |
| Gi3_22367853_x301 | .....cccgccaguacugcgauccgag.....           | 0 |
| Gi3_22366649_x301 | .....cccgccaguacugcgauccgagacgu.....       | 0 |
| Gi3_22378677_x300 | .....ugggaGcacggggugccgaacu.....           | 1 |
| Gi3_22384377_x300 | .....ggaacacggggugccgCac.....              | 1 |
| Gi5_6073549_x299  | .....cgucguggggaacacggggugccgaacA.....     | 1 |
| Gi2_7505051_x299  | .....aguacugcgauccgagacgu.....             | 0 |
| Gi3_22402604_x298 | .....guacugcgauccgagacgucgug.....          | 0 |
| Gi2_7521375_x295  | .....Uugggaacacggggugccgaa.....            | 1 |
| Gi5_6086590_x294  | .....caggccccgccaguacug.....               | 0 |
| Gi3_22433079_x294 | .....cccgccaguacugcgauccgagacguc.....      | 0 |
| Gi3_22434549_x294 | .....aUgccccgccaguacugcg.....              | 1 |
| Gi3_22449504_x293 | .....ucaggccccgccaguacugcgauccg.....       | 0 |
| Gi3_22447160_x293 | .....gaacacggggugccAaacu.....              | 1 |
| Gi3_22441300_x293 | .....gucguggggaacacggggugc.....            | 0 |
| Gi3_22443058_x293 | .....cccgccaguacugcgau.....                | 0 |
| Gi3_22455345_x292 | .....ucaggccccgccaguacug.....              | 0 |
| Gi3_22456221_x292 | .....gucaggccccgccaguacugcgaucc.....       | 0 |
| Gi2_7536057_x292  | .....gugggaacacggggugcUgaacu.....          | 1 |
| Gi2_7543054_x291  | .....cgauccgagacgucgugg.....               | 0 |
| Gi3_22461473_x291 | .....ggUacacggggugccgaac.....              | 1 |
| Gi3_22467875_x291 | .....ugggaacacggggCgccgaacu.....           | 1 |
| Gi3_22478029_x290 | .....ggaacacggggCgccgaacu.....             | 1 |
| Gi5_6101490_x290  | .....ucgggagacgucguggggaacacg.....         | 0 |
| Gi2_7548566_x289  | .....Agaacacggggugccgaac.....              | 1 |
| Gi1_2833885_x289  | .....acugcgauccgagacgucg.....              | 0 |
| Gi1a_4370751_x288 | .....caggccccgccaguacugcgau.....           | 0 |
| Gi2_7556077_x288  | .....ggGgacgucgugggaaaca.....              | 1 |
| Gi3_22500808_x287 | .....uCggaacacggggugccgaacu.....           | 1 |
| Gi1_2839059_x286  | .....caggccccgccaguacugcg.....             | 0 |
| Gi3_22522274_x285 | .....gugggaacGcggggugccgaac.....           | 1 |
| Gi2_7580393_x284  | .....gaucggagacgucguggggaacacggggugcc..... | 0 |
| Gi3_22526264_x284 | .....cgugggaaUacggggugccgaacu.....         | 1 |
| Gi3_22534784_x284 | .....gaucggagacgucguggggaacacggggugc.....  | 0 |
| Gi2_7585213_x283  | .....cgccaguacugcgauccgagac.....           | 0 |
| Gi3_22547230_x282 | .....cUucguggggaacacggggugcc.....          | 1 |



|                   |                                      |       |   |
|-------------------|--------------------------------------|-------|---|
| Gi3_22555125_x281 | .....Gggccccgccaguacugcgau           | ..... | 1 |
| Gi1_2845298_x281  | .....Gcguggaacacggggugccgaacu        | ..... | 1 |
| Gi3_22562991_x280 | .....gaucggagacgucgugggaacacggggugcc | ..... | 0 |
| Gi2_7605185_x280  | .....uggaacacggggugccgCacu           | ..... | 1 |
| Gi3_22579204_x279 | .....uggaacGcggggugccgaacu           | ..... | 1 |
| Gi5_6138683_x279  | .....gagacgucgugggaacacggggugccgaacu | ..... | 0 |
| Gi2_7606304_x279  | .....ggccccgccaguacugcgau            | ..... | 0 |
| Gi2_7608536_x279  | .....aucggGgacgucgugggaacacggggugcc  | ..... | 1 |
| Gi3_22583102_x278 | .....aacacggggugccgGacu              | ..... | 1 |
| Gi3_22611622_x276 | .....uggaacacNggggugccgaac           | ..... | 1 |
| Gi3_22607482_x276 | .....guggaacacggggAgccgaacu          | ..... | 1 |
| Gi3_22618779_x275 | .....ccgccaguacugcgau                | ..... | 0 |
| Gi2_7632642_x275  | .....cgugUgaacacggggugccgaacu        | ..... | 1 |
| Gi2_7635117_x275  | .....cUucguggaacacggggugccgaacu      | ..... | 1 |
| Gi3_22620429_x275 | .....guggaacacgggAugccgaacu          | ..... | 1 |
| Gi1_2853614_x274  | .....ucggagacgucgugggaacacg          | ..... | 0 |
| Gi1_2854984_x274  | .....Caacacggggugccgaacu             | ..... | 1 |
| Gi2_7641697_x274  | .....gucguggaacacggggugccga          | ..... | 0 |
| Gi3_22626184_x274 | .....cgugggaCcacggggugccgaacu        | ..... | 1 |
| Gi2_7642791_x273  | .....ucggagacgucgugggaacacggggugcc   | ..... | 0 |
| Gi3_22634390_x273 | .....gagacgucgugggaacacggggugccgaac  | ..... | 0 |
| Gi2_7655585_x271  | .....cguggaacGcggggugccgaacu         | ..... | 1 |
| Gi3_22672641_x269 | .....gugggaaAacggggugccgaacu         | ..... | 1 |
| Gi3_22673179_x269 | .....guggaacacggggugccgCac           | ..... | 1 |
| Gi5_6167436_x269  | .....Uggaacacggggugccgaac            | ..... | 1 |
| Gi3_22677752_x269 | .....cguggaacacggggUaccgaacu         | ..... | 1 |
| Gi2_7667997_x269  | .....aucggGgacgucgugggaacacgggg      | ..... | 1 |
| Gi5_6173063_x267  | .....guggaacGcggggugccgaacu          | ..... | 1 |
| Gi3_22694116_x267 | .....guggaacacggggugccgaacG          | ..... | 1 |
| Gl1_4420290_x267  | .....gUaacacggggugccgaacu            | ..... | 1 |
| Gi2_7676042_x267  | .....gacgucgugggaacacgggg            | ..... | 0 |
| Gl1_4421358_x266  | .....ccgccaguacugcgau                | ..... | 0 |
| Gi3_22712765_x265 | .....gccaguacugcgau                  | ..... | 0 |
| Gi2_7691476_x265  | .....gacgucguggaacacggggugc          | ..... | 0 |
| Gi5_6184234_x264  | .....cguggGacacggggugccgaacu         | ..... | 1 |
| Gi2_7699399_x263  | .....ucggagacgucgugggaacacggggugc    | ..... | 0 |
| Gi5_6193187_x262  | .....gugggaGcacggggugccgaacu         | ..... | 1 |
| Gi5_6196067_x261  | .....cguggaacacggggugccgCacu         | ..... | 1 |
| Gi5_6197633_x261  | .....acgucguggaacacggggugccgaac      | ..... | 0 |
| Gi5_6197111_x261  | .....Uguggaacacggggugccgaacu         | ..... | 1 |
| Gi3_22764540_x260 | .....ccccgccaguacugcgau              | ..... | 0 |
| Gi2_7719813_x260  | .....aucggGgacgucguggga              | ..... | 1 |
| Gi2_7724223_x259  | .....gGgacgucgugggaacacggggugc       | ..... | 1 |
| Gi2_7725259_x259  | .....ccaguacugcgau                   | ..... | 0 |
| Gi3_22783220_x259 | .....acacggggugccgaacu               | ..... | 0 |
| Gi2_7723964_x259  | .....aguacugcgau                     | ..... | 1 |
| Gi2_7727071_x258  | .....ggaacacgNggugccgaacu            | ..... | 1 |

|                   |                                          |   |
|-------------------|------------------------------------------|---|
| Gi3_22797153_x257 | .....caguacugcgauccggagacgu.....         | 0 |
| Gi2_7734292_x257  | .....cUugggaacacggggugcc.....            | 1 |
| Gi3_22809979_x256 | .....gGcgugggaacacggggugccgaac.....      | 1 |
| Gi3_22807163_x256 | .....cgugggaaNacggggugccgaac.....        | 1 |
| Gi2_7744291_x255  | .....gaucggagacgucgugggaacacgggg.....    | 0 |
| Gi1_2887914_x255  | .....cgugggaacacggggugccg.....           | 0 |
| Gi3_22833935_x254 | .....ugUgaacacggggugccgaacu.....         | 1 |
| Gi2_7753201_x254  | .....ugggaacaNggggugccgaacu.....         | 1 |
| Gi5_6223644_x254  | .....cgucgugggaacacggggugccgaac.....     | 0 |
| Gi5_6222882_x254  | .....ucaggccccgccaguacugcg.....          | 0 |
| Gi3_22843812_x253 | .....gugggUacacggggugccgaacu.....        | 1 |
| Gi3_22848113_x253 | .....aggccccgccaguacugcgauccggagacg..... | 0 |
| Gi3_22846342_x253 | .....Aucgugggaacacggggugccgaacu.....     | 1 |
| Gi1_2893239_x252  | .....gugggaacacggggugccga.....           | 0 |
| Gi1_2892483_x252  | .....cgCgggaacacggggugcc.....            | 1 |
| Gi3_22872752_x250 | .....ggaacacggggCgccaac.....             | 1 |
| Gi3_22871752_x250 | .....gaacacggggugcUgaacu.....            | 1 |
| Gi5_6240516_x249  | .....cgAggggaacacggggugccgaacu.....      | 1 |
| Gi5_6242757_x249  | .....gGgggaacacggggugccgaac.....         | 1 |
| Gi2_7783342_x249  | .....aucggGgacgucgugggaacacgg.....       | 1 |
| Gl1a_4464036_x249 | .....cUugggaacacggggugccgaacu.....       | 1 |
| Gi3_22906604_x248 | .....Uacgucgugggaacacggggugccgaacu.....  | 1 |
| Gi2_7787561_x248  | .....uUggaacacggggugccgaac.....          | 1 |
| Gi2_7790041_x248  | .....cCugggaacacggggugccgaacu.....       | 1 |
| Gl1a_4469990_x247 | .....ggaacacggggugccgaacA.....           | 1 |
| Gi3_22910312_x247 | .....agaagcgccgucaggccccgccagu.....      | 0 |
| Gi3_22922900_x246 | .....gugggaacacggggugccgUacu.....        | 1 |
| Gi2_7804100_x246  | .....aGcacggggugccgaacu.....             | 1 |
| Gi1_2904701_x246  | .....aGcacggggugccgaacu.....             | 1 |
| Gi1_2906915_x246  | .....gggagacgucgugggaacacggggugccg.....  | 0 |
| Gi3_22939106_x245 | .....Uaucggagacgucgugggaacacggg.....     | 1 |
| Gl1a_4475643_x245 | .....gugggaacacggggugccg.....            | 0 |
| Gl1a_4475398_x245 | .....cgccaguacugcgauccggagacguc.....     | 0 |
| Gi3_22937146_x245 | .....ugggaacacggggugccgU.....            | 1 |
| Gi3_22952543_x244 | .....acgucgugggaacacggg.....             | 0 |
| Gi5_6261217_x244  | .....aacacgggNugccgaacu.....             | 1 |
| Gi2_7809735_x244  | .....gagacgucgugggaacacggggugcc.....     | 0 |
| Gi1_2912295_x243  | .....ugggaacacggggugccgaacuu.....        | 0 |
| Gl1a_4478574_x243 | .....gucaggccccgccaguacugcg.....         | 0 |
| Gi2_7823837_x242  | .....aucggagacgucgugggaacacgggg.....     | 0 |
| Gi1_2915203_x242  | .....aucggagacgucgugggaacacggggugcc..... | 0 |
| Gi3_22973653_x242 | .....cugugggaacacggggugcgaacu.....       | 1 |
| Gi3_22984514_x241 | .....gggaacacggggugccgCacu.....          | 1 |
| Gi2_7833252_x241  | .....gugggaacacggggugccAaacu.....        | 1 |
| Gi3_22993410_x240 | .....cggagacgucgugggaacac.....           | 0 |
| Gi3_22989810_x240 | .....aggccccgccaguacugcgauA.....         | 1 |
| Gl1a_4487024_x239 | .....aucggagacgucguggga.....             | 0 |

|                        |                                   |   |
|------------------------|-----------------------------------|---|
| Gi3_23001553_x239..... | aaAacggggugccgaacu.....           | 1 |
| Gi2_7844045_x239.....  | gggaacacNgggugccgaacu.....        | 1 |
| Gi2_7842372_x239.....  | gugggaacaUggggugccgaacu.....      | 1 |
| Gi2_7851431_x238.....  | gugggaacacggggugccGacu.....       | 1 |
| Gi3_23014672_x238..... | cUugggaacacggggugc.....           | 1 |
| Gi3_23020146_x238..... | guggUaacacggggugccgaac.....       | 1 |
| Gi3_23016100_x238..... | gugggaacCcggggugccgaac.....       | 1 |
| Gi2_7863743_x236.....  | ggaGcacggggugccgaacu.....         | 1 |
| Gi3_23037682_x236..... | gugggaacacggggugcAgaacu.....      | 1 |
| Gi5_6293819_x236.....  | gucgugggaacacggggugccgaacA.....   | 1 |
| Gi3_23038390_x236..... | ggccccgccaguacugcga.....          | 0 |
| Gi3_23052298_x235..... | ugggaacacggggugccgaGcu.....       | 1 |
| Gi1_2930002_x235.....  | cgugggaacacggggugccgaacu.....     | 0 |
| Gi2_7867979_x235.....  | gucgugggaacacggggugccgaacA.....   | 1 |
| Gl1a_4500564_x235..... | guacugcgaucggagacguc.....         | 0 |
| Gi3_23053003_x235..... | cgugggaacacggggugccgaacG.....     | 1 |
| Gi5_6300402_x234.....  | gugggaacCcggggugccgaacu.....      | 1 |
| Gi3_23060757_x234..... | uGgugggaacacggggugccgaacu.....    | 1 |
| Gi3_23082717_x233..... | uUggaacacggggugccg.....           | 1 |
| Gi1_2931875_x233.....  | caggccccgccaguacugcgauc.....      | 0 |
| Gi5_6302507_x233.....  | cgugggaacacggggugc.....           | 0 |
| Gl1a_4505245_x233..... | ggaacacggggugccgaac.....          | 0 |
| Gi2_7882949_x233.....  | gaagagaagcgccgucaggccccgcc.....   | 0 |
| Gi1_2932108_x233.....  | Ggggaacacggggugccgaacu.....       | 1 |
| Gi3_23080620_x233..... | ggUaacacggggugccgaacu.....        | 1 |
| Gi1_2934666_x232.....  | acgucgCgggaacacggggugccgaacu..... | 1 |
| Gi1_2934434_x232.....  | gucgugggaacacggggugccgaacA.....   | 1 |
| Gi2_7893605_x231.....  | gGcgugggaacacggggugccgaacu.....   | 1 |
| Gi3_23118110_x230..... | gggaacacNgggugccgaac.....         | 1 |
| Gi3_23121330_x230..... | cgccgucaggccccgccaguacu.....      | 0 |
| Gi3_23113050_x230..... | cgugggaacacggggugccgaaAu.....     | 1 |
| Gi1_2940892_x229.....  | ucaggccccgccaguacugcg.....        | 0 |
| Gi3_23136914_x229..... | gaacacggggugccgaacuu.....         | 0 |
| Gi3_23138513_x228..... | ucaggccccgccaguacugcga.....       | 0 |
| Gi3_23139197_x228..... | ccgccaguacugcgauccg.....          | 0 |
| Gi2_7917898_x227.....  | cgauccgagacgucgugggaacacggg.....  | 0 |
| Gi2_7928104_x226.....  | gagaagcgccgucaggccccgcc.....      | 0 |
| Gi5_6336932_x225.....  | guggUaacacggggugccgaacu.....      | 1 |
| Gi1_2949311_x225.....  | gaaacacggggugccgaac.....          | 0 |
| Gi3_23178388_x225..... | aGcggagacgucgugggaacacg.....      | 1 |
| Gi3_23192755_x224..... | cggagacgucgugggaacacgggg.....     | 0 |
| Gi2_7955244_x223.....  | gugggaacacggUgugccgaacu.....      | 1 |
| Gl1a_4530999_x223..... | cgugggaacacggggugc.....           | 0 |
| Gi3_23201914_x223..... | gugggaacacggggGgcc.....           | 1 |
| Gi3_23215051_x222..... | gaagagaagcgccgucaggccccgcc.....   | 0 |
| Gi5_6353490_x222.....  | cgugggaacacggggCgccgaacu.....     | 1 |
| Gi3_23225485_x222..... | ucggagacgucgugggaacacggg.....     | 0 |

|                        |                                   |   |
|------------------------|-----------------------------------|---|
| Gi2_7967227_x221.....  | gGgggaacacggggugccga.....         | 1 |
| Gi3_23235655_x221..... | aGcggagacgucgugggaacacggg.....    | 1 |
| G1a_4536999_x221.....  | Uggaacacggggugccgaacu.....        | 1 |
| Gi2_7968332_x221.....  | cgugggaacacggggugcUga.....        | 1 |
| Gi3_23230130_x221..... | ggagacgucgugggaacacggggugccg..... | 0 |
| Gi3_23251068_x220..... | Gcgugggaacacggggugccgaac.....     | 1 |
| Gi3_23245788_x220..... | ggaGcacggggugccgaacu.....         | 1 |
| Gi3_23244688_x220..... | gugggaGcacggggugccgaac.....       | 1 |
| Gi2_7982408_x219.....  | aagagaagcgcgucaggccc.....         | 0 |
| Gi2_7983284_x219.....  | Agaacacggggugccgaacu.....         | 1 |
| G1a_4542937_x219.....  | gccaguacugcgauccggagacguc.....    | 0 |
| Gi2_7983941_x219.....  | aaacacggggugccgaGcu.....          | 1 |
| Gi3_23256763_x219..... | gugggaCcacggggugccgaacu.....      | 1 |
| Gi5_6370944_x219.....  | gaacacggNgugccgaacu.....          | 1 |
| Gi3_23273142_x218..... | cgccgucaggccccgccagu.....         | 0 |
| Gi2_7993097_x217.....  | ggGgacgucgugggaacacg.....         | 1 |
| Gi3_23275103_x217..... | cccgccaguacugcgauccgga.....       | 0 |
| Gi3_23276622_x217..... | gagacgucgugggaacacggggu.....      | 0 |
| Gi3_23286387_x217..... | ccccgccaguacugcgauccggagacg.....  | 0 |
| Gi3_23288986_x216..... | caggccccgccaguacugcgauccg.....    | 0 |
| G1a_4550990_x216.....  | gugggaacacggggugccgaacA.....      | 1 |
| Gi2_8005442_x216.....  | gGacacggggugccgaacu.....          | 1 |
| Gi5_6392467_x216.....  | cgucgugggaacacggggugc.....        | 0 |
| Gi3_23295682_x216..... | cgccgucaggccccgcccag.....         | 0 |
| Gi2_8012762_x215.....  | caggccccgccaguacugcgauccgga.....  | 0 |
| Gi3_23326407_x214..... | gugggaacacggggugccgaaUu.....      | 1 |
| Gi1_2979521_x213.....  | aucggagacgucgugggaacacggggu.....  | 0 |
| Gi4_350396_x213.....   | gugggaacacggggugccgaa.....        | 0 |
| Gi3_23348767_x212..... | cgugggaacacggAgugccgaacu.....     | 1 |
| Gi3_23345587_x212..... | cgugggUacacggggugccgaacu.....     | 1 |
| Gi2_8029631_x212.....  | agaagcgcgucaggcccc.....           | 0 |
| Gi1_2982695_x211.....  | gucaggccccgccaguacugc.....        | 0 |
| Gi1_2982062_x211.....  | gggaacacggggugccgaacu.....        | 0 |
| Gi5_6416161_x211.....  | cgugUgaacacggggugccgaacu.....     | 1 |
| Gi3_23363588_x211..... | gugggaacacggggugccgaCc.....       | 1 |
| Gi2_8043172_x211.....  | gugggaacacggggUaccgaacu.....      | 1 |
| Gi2_8052213_x210.....  | gagacgucgugggaacacggggugc.....    | 0 |
| Gi3_23382537_x210..... | gugggaacaUggggugcc.....           | 1 |
| Gi5_6424997_x209.....  | aucggagacgucgugggaacacggg.....    | 0 |
| Gi2_8058071_x209.....  | ucgugggaacacggggugccgaa.....      | 0 |
| Gi1_2988772_x208.....  | cgucGgggaacacggggugcc.....        | 1 |
| Gi3_23404915_x208..... | ucgugggaacacggggugccga.....       | 0 |
| Gi2_8067652_x208.....  | gugggaacacgAggugccgaacu.....      | 1 |
| Gi2_8068484_x208.....  | ggGgacgucgugggaacacggggu.....     | 1 |
| Gi3_23428141_x207..... | gaagagaagcgcgucaggccc.....        | 0 |
| Gi3_23420689_x207..... | gggaacacggggGgcccgaacu.....       | 1 |
| Gi2_8075951_x207.....  | cgucgugggaacacgggg.....           | 0 |

|                        |                                     |   |
|------------------------|-------------------------------------|---|
| Gi5_6442892_x206.....  | acugcgauccggagacgucgug.....         | 0 |
| Gi3_23429590_x206..... | agacgucgugggaacacggg.....           | 0 |
| Gi1_2997669_x205.....  | cggagacgucgugggaacacggggugcc.....   | 0 |
| Gi3_23444820_x205..... | gAgggaacacggggugccgaac.....         | 1 |
| Gi3_23442975_x205..... | Ugaacacggggugccgaa.....             | 1 |
| Gi3_23459966_x204..... | Ggggaacacggggugccgaa.....           | 1 |
| Gi2_8098395_x204.....  | gugAgaacacggggugccgaacu.....        | 1 |
| Gi5_6462325_x203.....  | aagagaagcgccgucaggccccgc.....       | 0 |
| Gi3_23475628_x203..... | aagagaagcgccgucaggccc.....          | 0 |
| Gi2_8107965_x203.....  | gucgugggaacacggggugccg.....         | 0 |
| Gi2_8110401_x203.....  | Ugccccgccaguacugcgau.....           | 1 |
| Gi3_23477049_x203..... | Uaucggagacgucgugggaacacggggu.....   | 1 |
| Gi5_6464152_x203.....  | uacugcgauccggagacgu.....            | 0 |
| Gi1_3004409_x203.....  | cgugggaacacggggugccgaacA.....       | 1 |
| Gi3_23466899_x203..... | gggaGcacggggugccgaacu.....          | 1 |
| Gi3_23467508_x203..... | Ggggaacacggggugccga.....            | 1 |
| Gi3_23493632_x202..... | cggagacgucgugggaacacggggugccga..... | 0 |
| Gi3_23487370_x202..... | agagaagcgccgucaggccccg.....         | 0 |
| Gi3_23494844_x202..... | aggccccgNcaguacugcgau.....          | 1 |
| Gi5_6470819_x202.....  | aacacggggCgcccgaacu.....            | 1 |
| Gi3_23488784_x202..... | gaacacggAgugccgaacu.....            | 1 |
| Gi3_23502492_x201..... | ucgugggaacacggggugcc.....           | 0 |
| Gi2_8120901_x201.....  | guggAaacacggggugccgaacu.....        | 1 |
| Gi2_8125524_x201.....  | ccgccaguacugcgauccggag.....         | 0 |
| Gi3_23518931_x200..... | cgGgggaacacggggugccgaac.....        | 1 |
| Gi2_8132932_x200.....  | cgugggaaUacggggugccgaacu.....       | 1 |
| Gi3_23523331_x200..... | cgugggaacacggggugccgaaUu.....       | 1 |
| Gi2_8139707_x199.....  | aUgccccgccaguacugc.....             | 1 |
| Gi1a_4602587_x199..... | uUggaacacggggugccgaacu.....         | 1 |
| Gi2_8142888_x198.....  | ggUacacggggugccgaacu.....           | 1 |
| Gi2_8150412_x198.....  | ucgugggaacacggggugc.....            | 0 |
| Gi3_23558821_x197..... | gAaacacggggugccgaacu.....           | 1 |
| Gi5_6495719_x197.....  | cgugggaacacggggugccgaCcu.....       | 1 |
| Gi3_23564928_x197..... | ggGacacggggugccgaacu.....           | 1 |
| Gi2_8154944_x197.....  | caguacugcgauccggGgacguc.....        | 1 |
| Gi3_23579069_x196..... | Aggaacacggggugccgaac.....           | 1 |
| Gi2_8171036_x195.....  | cgccgucaggccccgccaguacugc.....      | 0 |
| Gi3_23605197_x194..... | acgucgugggaacacggggugccg.....       | 0 |
| Gi2_8180968_x194.....  | aagagaagcgccgucaggcc.....           | 0 |
| Gi5_6521848_x193.....  | guAggaacacggggugccgaacu.....        | 1 |
| Gi2_8199875_x192.....  | cAugggaacacggggugccgaacu.....       | 1 |
| Gi2_8200451_x192.....  | gugggaaAacggggugccgaacu.....        | 1 |
| Gi3_23638576_x192..... | gUgaacacggggugccgaa.....            | 1 |
| Gi3_23646609_x191..... | cguggAaacacggggugccgaacu.....       | 1 |
| Gi2_8206185_x191.....  | gagaagcgccgucaggccccgc.....         | 0 |
| Gi1_3035987_x191.....  | cUucgugggaacacggggugccgaacu.....    | 1 |
| Gi2_8202747_x191.....  | gagacgucgugggaacacggggugccg.....    | 0 |

|                        |                                            |   |   |
|------------------------|--------------------------------------------|---|---|
| Gi2_8204466_x191.....  | acugcgauccggGgacguc.....                   | 1 |   |
| Gi3_23664695_x190..... | .gccgucaggccccgccagu.....                  |   | 0 |
| Gi2_8211718_x190.....  | .gaagagaagcgccgucaggcccc.....              |   | 0 |
| Gi1_3038462_x190.....  | .....gGacacggggugccgaacu.....              | 1 |   |
| Gi3_23659185_x190..... | .....guggaacaacggggugccAaac.....           |   | 1 |
| Gi3_23677007_x189..... | .....cgaucggagacgucgugg.....               |   | 0 |
| Gi3_23680787_x189..... | .....guAggaacaacggggugccgaac.....          |   | 1 |
| Gi2_8225558_x189.....  | .....gacgucgugggaacaacggggugccgaac.....    |   | 0 |
| Gi3_23698853_x188..... | .....aggccccgccaguacugcgauccggagacguc..... |   | 0 |
| Gi1_3042249_x188.....  | .....acgucgugggaacaacggggugccg.....        |   | 0 |
| Gi1_3045436_x187.....  | .....Uucgugggaacaacggggugccgaacu.....      |   | 1 |
| Gi3_23705032_x187..... | .....aUgccccgccaguacugcga.....             |   | 1 |
| Gi2_8238546_x187.....  | .....ggagacgucgugggaacaacggggug.....       |   | 0 |
| Gi3_23712512_x187..... | .....guggaacaacAgggugccgaac.....           |   | 1 |
| Gi3_23714569_x187..... | .....cccgccaguacugcgauccggaga.....         |   | 0 |
| Gi4_363236_x187.....   | .....ucgugggaacaacggggugccgaacu.....       |   | 0 |
| Gi2_8248078_x186.....  | .....gugggaacaacggAgugccgaacu.....         |   | 1 |
| Gi1a_4647473_x186..... | .....cgaucggagacgucgugg.....               |   | 0 |
| Gi5_6562038_x186.....  | .....Ugaacaacggggugccgaac.....             |   | 1 |
| Gi3_23717926_x186..... | .....cgCgggaacaacggggugccgaac.....         |   | 1 |
| Gi3_23738900_x185..... | .....gugggaacaacggggugccgaaA.....          |   | 1 |
| Gi2_8265331_x185.....  | .....gagacgucgugggaacaacggggug.....        |   | 0 |
| Gi2_8264961_x185.....  | .....aggccccgccaguacugcgauccggaga.....     |   | 0 |
| Gi1_3053794_x185.....  | .....aucggagacgucCgggaacaacg.....          |   | 1 |
| Gi3_23752161_x184..... | .....gaacaacggggguAccgaacu.....            |   | 1 |
| Gi3_23756393_x184..... | .....caguacugcgauccggagacgucgu.....        |   | 0 |
| Gi5_6582202_x184.....  | .....ugggaacaacggggugccgaacuu.....         |   | 0 |
| Gi3_23758969_x184..... | .....gaucggagacgucgugggaac.....            |   | 0 |
| Gi2_8270124_x184.....  | ccuaaacucguuccgaau.....                    |   | 0 |
| Gi2_8268652_x184.....  | .....cccgccaguacugcgauccggag.....          |   | 0 |
| Gi2_8270860_x184.....  | .....ccaguacugcgauccggag.....              |   | 0 |
| Gi3_23755289_x184..... | .....aagagaagcgccgucaggccccgc.....         |   | 0 |
| Gi2_8267916_x184.....  | .....gugggaacaacggggugccgaacuu.....        |   | 0 |
| Gi3_23745169_x184..... | .....gCgaacaacggggugccgaacu.....           |   | 1 |
| Gi5_6588611_x183.....  | .....gAgggaacaacggggugccgaacu.....         |   | 1 |
| Gi3_23763182_x183..... | .....gugggaacaacggggugccgaU.....           |   | 1 |
| Gi2_8278387_x183.....  | .....ugggaacaacggggugccgaacuu.....         |   | 0 |
| Gi3_23772149_x183..... | .....aagagaagcgccgucaggcccc.....           |   | 0 |
| Gi2_8288608_x182.....  | .....acugcgauccggagacgucgu.....            |   | 0 |
| Gi1a_4660908_x182..... | .....gucgugggaacaacggggugccgaacu.....      |   | 0 |
| Gi2_8292248_x182.....  | .....ccccgccaguacugcgau.....               |   | 0 |
| Gi3_23780342_x182..... | .....gaagagaagcgccgucaggccccgc.....        |   | 0 |
| Gi3_23800118_x181..... | .....cUugggaacaacggggugccgaa.....          |   | 1 |
| Gi5_6597354_x181.....  | .....agacgucgugggaacaacggggugccgaac.....   |   | 0 |
| Gi3_23795955_x181..... | .....cgugggaacaacggggGgccgaacu.....        |   | 1 |
| Gi3_23791973_x181..... | .....Cgaacaacggggugccgaac.....             |   | 1 |
| Gi3_23790706_x181..... | .....ugggaacaacAgggugccgaacu.....          |   | 1 |

|                        |                                      |   |
|------------------------|--------------------------------------|---|
| Gi1a_4664176_x181..... | .gaucggagacgucguggggaacacggg.....    | 0 |
| Gi3_23791611_x181..... | .cUucgugggaacacggggugccgaac.....     | 1 |
| Gi5_6604946_x180.....  | .ugggaacacggggugccgaacuA.....        | 1 |
| Gi3_23807333_x180..... | .gaacaUggggugccgaacu.....            | 1 |
| Gi3_23809853_x180..... | .gggaacacggggGgccgaacu.....          | 1 |
| Gi2_8311368_x179.....  | .gggaacacggggugccgaCcu.....          | 1 |
| Gi5_6616796_x179.....  | .cugcgaucggagacgucGA.....            | 1 |
| Gi3_23820447_x179..... | .aguacugcgaucggagacguc.....          | 0 |
| Gi3_23836346_x178..... | .cgugggaacacggggugccgGacu.....       | 1 |
| Gi2_8316379_x178.....  | .ggaaacacggggugccgCacu.....          | 1 |
| Gi5_6624636_x178.....  | .aucggagacgucguggggaacacggggugc..... | 0 |
| Gi5_6622500_x178.....  | .cgugggaGcacggggugccgaacu.....       | 1 |
| Gi3_23843110_x178..... | .aacacAgggugccgaacu.....             | 1 |
| Gi3_23843822_x178..... | .gggaacacggggugccgaGcu.....          | 1 |
| Gi2_8320829_x178.....  | .gucaggccccgccaguacug.....           | 0 |
| Gi1_3077791_x177.....  | .gaacaUggggugccgaacu.....            | 1 |
| Gi2_8327396_x177.....  | .cgucaggccccgccaguac.....            | 0 |
| Gi3_23862248_x177..... | .cUugggaacacggggugccg.....           | 1 |
| Gi3_23847911_x177..... | .aagagaagcgccgucaggc.....            | 0 |
| Gi3_23848973_x177..... | .cgugggaacacggggugcAgaacu.....       | 1 |
| Gi2_8337988_x176.....  | .Ugagacgucguggggaacacggggugcc.....   | 1 |
| Gi1_3079561_x176.....  | .ucgugggaacacggggugc.....            | 0 |
| Gi3_23874753_x176..... | .gaaUacggggugccgaacu.....            | 1 |
| Gi3_23866657_x176..... | .gggaacGcggggugccgaacu.....          | 1 |
| Gi3_23873169_x176..... | .gugggaacacggggugccgGac.....         | 1 |
| Gi3_23881427_x175..... | .gaacacggggGgccgaacu.....            | 1 |
| Gi3_23885102_x175..... | .cgugggaacacggggugccgCac.....        | 1 |
| Gi1_3086232_x175.....  | .Gacacggggugccgaacu.....             | 1 |
| Gi5_6641405_x175.....  | .Aaacacggggugccgaacu.....            | 1 |
| Gi2_8346057_x175.....  | .cgugggaacacAgggugccgaacu.....       | 1 |
| Gi2_8343432_x175.....  | .Aggaacacggggugccgaacu.....          | 1 |
| Gi5_6642805_x175.....  | .cgugggaacGcggggugccgaacu.....       | 1 |
| Gi5_6642280_x175.....  | .caguacugcgaucggagacgucgug.....      | 0 |
| Gi2_8348332_x175.....  | .gggagacgucguggggaacac.....          | 0 |
| Gi3_23905164_x174..... | .ugggaacacggggugcUgaacu.....         | 1 |
| Gi3_23895246_x174..... | .ccaguacugcgaucggagacgucgug.....     | 0 |
| Gi3_23900640_x174..... | .aGcggagacgucguggggaacacggggg.....   | 1 |
| Gi5_6653442_x174.....  | .aacacggggugccgaGcu.....             | 1 |
| Gi3_23901858_x174..... | .ccuuaacucguuccgaau.....             | 0 |
| Gi3_23917659_x173..... | .gugggaacacggggugAcgaacu.....        | 1 |
| Gi1_3091278_x173.....  | .ugggaacacggggugccga.....            | 0 |
| Gi2_8368473_x173.....  | .gugggaaUacggggugccgaacu.....        | 1 |
| Gi3_23913853_x173..... | .cgugggaacacggggugccgaUc.....        | 1 |
| Gi5_6661059_x173.....  | .uUggaacacggggugccgaac.....          | 1 |
| Gi2_8370025_x172.....  | .Gggccccgccaguacugcgau.....          | 1 |
| Gi1a_4693658_x172..... | .ucgugggaacacggggugccgaacu.....      | 0 |
| Gi3_23929411_x172..... | .ccccgccaguacugcgaucggaga.....       | 0 |

|                   |                                       |       |   |
|-------------------|---------------------------------------|-------|---|
| Gi3_23931131_x172 | .....gccgucaggccccgccagua             | ..... | 0 |
| Gi1_3095076_x172  | .....ucguggaacacggggugccga            | ..... | 0 |
| Gi5_6668462_x172  | .....cCugggaacacggggugccgaacu         | ..... | 1 |
| Gi3_23936463_x172 | .....ggagacgucgugggaacacggggugccgaacu | ..... | 0 |
| Gi5_6665194_x172  | .....gugggaacacAgggugccgaacu          | ..... | 1 |
| Gi2_8373981_x172  | .....cccgccaguacugcgauccggaga         | ..... | 0 |
| Gi5_6671547_x171  | .....acgucgugggaacacggggugccgaacA     | ..... | 1 |
| Gi2_8385120_x171  | .....aguacugcgauccggGgacgucgu         | ..... | 1 |
| Gi3_23948989_x171 | .....gucgugggaacacggggugccgaa         | ..... | 0 |
| Gi2_8387514_x171  | .....aggccccgccaguacugcgauccggagac    | ..... | 0 |
| Gi2_8386146_x171  | .....ggGgacgucgugggaacacggg           | ..... | 1 |
| G1a_4699299_x170  | .....gggaacacggggugccgaacA            | ..... | 1 |
| Gi3_23965713_x170 | .....gaacacggggugUcgaacu              | ..... | 1 |
| Gi5_6679067_x170  | .....gaUcacggggugccgaacu              | ..... | 1 |
| Gi2_8394658_x170  | .....gccccgccaguacugcgauccgg          | ..... | 0 |
| Gi3_23971493_x170 | .....ucggagacgucgugggaaca             | ..... | 0 |
| Gi2_8394488_x170  | .....cgccaguacugcgauccggagacguc       | ..... | 0 |
| Gi3_23985384_x169 | .....aagcgccgucaggccccgccagua         | ..... | 0 |
| G1a_4702688_x169  | .....gucaggccccgccaguacugc            | ..... | 0 |
| Gi3_23982173_x169 | .....ccgucaggccccgccaguacugcg         | ..... | 0 |
| Gi3_23993496_x169 | .....gugggaacNcggggugcc               | ..... | 1 |
| Gi3_23991806_x169 | .....gagacgucgugggaacacggggugccg      | ..... | 0 |
| Gi3_23995524_x169 | .....Gucggagacgucgugggaacacg          | ..... | 1 |
| Gi2_8406832_x168  | .....gagaagcgccgucaggccccgccag        | ..... | 0 |
| Gi2_8407000_x168  | .....Uaucggagacgucgugggaacacggggg     | ..... | 1 |
| Gi5_6693966_x168  | .....ggccccgccaguacugcgaucc           | ..... | 0 |
| Gi5_6698334_x168  | .....gUgaacacggggugccgaac             | ..... | 1 |
| Gi2_8410360_x168  | .....aguacugcgauccggGgacg             | ..... | 1 |
| Gi2_8417048_x167  | .....cggGgacgucgugggaacacggg          | ..... | 1 |
| Gi1_3112149_x167  | .....ccaguacugcgauccggaAa             | ..... | 1 |
| Gi3_24017819_x167 | .....ggaacGcggggugccgaacu             | ..... | 1 |
| Gi3_24023998_x167 | .....acugcgauccggagacgucgu            | ..... | 0 |
| Gi5_6701015_x167  | .....ugcgauccggagacgucguggg           | ..... | 0 |
| G1a_4708565_x167  | .....acugcgauccggagacguc              | ..... | 0 |
| Gi1_3109978_x167  | .....cgCgggaacacggggugccga            | ..... | 1 |
| Gi2_8414376_x167  | .....Gacacggggugccgaacu               | ..... | 1 |
| Gi3_24023497_x167 | .....gggaacacggggugccgaCc             | ..... | 1 |
| Gi2_8419720_x166  | .....acugcgauccggagacgucgugg          | ..... | 0 |
| Gi2_8436452_x165  | .....aggccccgNcaguacugcgaucc          | ..... | 1 |
| Gi3_24053806_x165 | .....gugggaacacggggugccgaaAu          | ..... | 1 |
| Gi2_8435462_x165  | .....aggccccgccaguacugcgaucc          | ..... | 0 |
| Gi3_24051496_x165 | .....gugggaacacggggugccgaacuA         | ..... | 1 |
| Gi5_6725660_x164  | .....gugggaacacggggugccgCacu          | ..... | 1 |
| Gi2_8444685_x164  | .....aUgccccgccaguacugcg              | ..... | 1 |
| Gi3_24066447_x164 | .....agagaagcgccgucaggccccgcca        | ..... | 0 |
| Gi3_24064479_x164 | .....aagagaagcgccgucaggccccgcca       | ..... | 0 |
| Gi2_8455644_x163  | .....agacgucgugggaacacggggugccg       | ..... | 0 |



|                   |                                            |   |
|-------------------|--------------------------------------------|---|
| Gi2_8468961_x162  | .....aUgccccgccaguacugcg.....              | 1 |
| Gi5_6741788_x162  | .....caggccccgccaguacugc.....              | 0 |
| Gi2_8468799_x162  | .....cUgagacgucguggggaacacggggugcc.....    | 1 |
| Gi5_6740006_x162  | .....cgucguggggaacacggggugccga.....        | 0 |
| Gi2_8476052_x161  | .....agagaagcgccgucaggcccc.....            | 0 |
| Gi1_3133457_x161  | .....gagacgucguggggaacacggggugccgaacu..... | 0 |
| Gi3_24115087_x161 | .....ccaguacugcgauccggagacguc.....         | 0 |
| Gi1_3136516_x161  | .....aucggagacgucguggggaacacgg.....        | 0 |
| Gi3_24103978_x161 | .....acgucguggggaacacggggugccga.....       | 0 |
| Gi3_24103817_x161 | .....gggaacacgggUugccgaacu.....            | 1 |
| Gi2_8470900_x161  | .....agaagcgccgucaggccccgcc.....           | 0 |
| Gi2_8475086_x161  | .....cgccaguacugcgauccggaga.....           | 0 |
| Gi1_3133296_x161  | .....cguggggaacacggggugccgU.....           | 1 |
| Gi3_24120212_x160 | .....cgugggaaacacggggugccgUacu.....        | 1 |
| Gi1_3138118_x160  | .....cgCgggaacacggggugc.....               | 1 |
| Gi3_24117172_x160 | .....agacgucguggggaacacggggugccga.....     | 0 |
| Gi1_3140198_x160  | .....ucguggggaacacggggugccgaacA.....       | 1 |
| Gi2_8479907_x160  | .....aagcgccgucaggccccgccaguacugc.....     | 0 |
| Gi3_24128212_x160 | .....gucguggggaacacggggUa.....             | 1 |
| Gi3_24123412_x160 | ccuuaacucguuccgaau.....                    | 0 |
| Gi2_8492525_x159  | .....cgucguggggaacacggggugccgaa.....       | 0 |
| Gi3_24140486_x159 | .....aacacggggAgccgaacu.....               | 1 |
| Gi1_3141791_x159  | .....cgucaggccccgccaguacugcg.....          | 0 |
| Gi2_8489822_x159  | .....gaagcgccgucaggccccgccaguacugc.....    | 0 |
| Gi2_8496818_x159  | .....cgugggaaacacgUggugccgaacu.....        | 1 |
| Gi3_24147800_x159 | .....gaacacggggAgccgaacu.....              | 1 |
| Gi3_24145415_x159 | .....gaagcgccgucaggccccgcc.....            | 0 |
| Gi2_8501089_x158  | .....Uacgucguggggaacacggggugccgaacu.....   | 1 |
| Gi3_24153188_x158 | .....gugggaacacggggugcUgaac.....           | 1 |
| Gi1_3147341_x158  | .....aucggagacgucguggggaacacggggugc.....   | 0 |
| Gi1_3146551_x158  | .....ucguggggaacacggggugccg.....           | 0 |
| Gi3_24155874_x158 | .....Augggaacacggggugcc.....               | 1 |
| Gi2_8508667_x157  | .....gaagagaagcgccgucaggcccc.....          | 0 |
| Gi3_24172716_x157 | .....Ugccccgccaguacugcgaucc.....           | 1 |
| Gi3_24173187_x157 | .....gagacgucguggggaacac.....              | 0 |
| Gi2_8512749_x157  | .....gugggaacNcggggugccgaac.....           | 1 |
| Gi5_6784945_x157  | .....gugggaacacggggugccgaCcu.....          | 1 |
| Gi5_6786980_x156  | .....aUcacggggugccgaacu.....               | 1 |
| Gi2_8525884_x156  | .....cggGgacgucguggggaacacggggugcc.....    | 1 |
| Gi5_6788696_x156  | .....cgucaggccccgccaguacugcg.....          | 0 |
| Gi5_6789320_x156  | .....aagagaagcgccgucaggcccc.....           | 0 |
| Gi3_24179914_x156 | .....gAgaacacggggugccgaacu.....            | 1 |
| Gi2_8518084_x156  | .....aacacgggNugccgaacu.....               | 1 |
| Gi3_24186778_x156 | .....aagcgccgucaggccccgccaguacugc.....     | 0 |
| Gi4_380000_x156   | .....acgucguggggaacacggggugccgaacu.....    | 0 |
| Gi3_24183814_x156 | .....Agggaacacggggugccgaacu.....           | 1 |
| Gi1_3155480_x155  | .....ucaggccccgccaguacugcgaucc.....        | 0 |

|                   |                                         |   |
|-------------------|-----------------------------------------|---|
| Gi3_24209927_x155 | .....ccgccaguacugcgauccggagacgu.....    | 0 |
| Gi3_24205432_x155 | .....ucgugggaNcaccgggugccgaacu.....     | 1 |
| Gi3_24221021_x154 | .....Ugugggaacacgggugccgaac.....        | 1 |
| Gi5_6803740_x154  | .....ccgucaggccccgccaguacugcg.....      | 0 |
| Gi3_24221175_x154 | .....ucggagacgucgugggaacac.....         | 0 |
| Gi1a_4751489_x154 | .....gaucggagacgucgugggaacacgggu.....   | 0 |
| Gi3_24212397_x154 | .....gagacgucgugggaacacg.....           | 0 |
| Gi5_6808822_x154  | .....aguacugcgauccggagacguc.....        | 0 |
| Gi3_24223023_x154 | .....aagagaagcgccgucaggccccgccagu.....  | 0 |
| Gi3_24215169_x154 | .....ucgugUgaacacgggugccgaacu.....      | 1 |
| Gi3_24218865_x154 | .....ugggaacacgggugccAaacu.....         | 1 |
| Gi3_24219943_x154 | .....Uacacgggugccgaacu.....             | 1 |
| Gi5_6806050_x154  | .....ugcgauccggagacgucguggga.....       | 0 |
| Gi3_24221637_x154 | .....cgccgucaggccccgccaguac.....        | 0 |
| Gi2_8556120_x153  | .....aguacugcgauccggagac.....           | 0 |
| Gi1a_4755018_x153 | .....caguacugcgauccggagacgu.....        | 0 |
| Gi3_24229013_x153 | .....gggaacacgggugccgaacuu.....         | 0 |
| Gi3_24229472_x153 | .....guacugcgauccggagacguc.....         | 0 |
| Gi5_6811577_x153  | .....gGcgugggaacacgggugccgaacu.....     | 1 |
| Gi2_8568000_x152  | .....cgccaguacugcgauccgg.....           | 0 |
| Gi2_8565872_x152  | .....aucggGgacgucguggga.....            | 1 |
| Gi3_24240636_x152 | .....gacgucgugggaacacgg.....            | 0 |
| Gi3_24251124_x152 | .....ggGacacgggugccgaacu.....           | 1 |
| Gi3_24241700_x152 | .....aacacgggugccgCacu.....             | 1 |
| Gi3_24252340_x152 | .....gauccggagacgucgugggaaca.....       | 0 |
| Gi3_24266412_x151 | .....cgccaguacugcgauccggagacgucgug..... | 0 |
| Gi3_24261429_x151 | .....agcgccgucaggccccgccaguac.....      | 0 |
| Gi3_24269432_x151 | .....gcgccgucaggccccgccagu.....         | 0 |
| Gi1_3172630_x151  | .....Ggugggaacacgggugccgaacu.....       | 1 |
| Gi3_24287758_x150 | .....Uacgucgugggaacacgggugccgaac.....   | 1 |
| Gi2_8581132_x150  | .....cgucaggccccgccaguacug.....         | 0 |
| Gi3_24279958_x150 | .....aggccccgccaguacugcgauccg.....      | 0 |
| Gi5_6836284_x150  | .....uGgugggaacacgggugccgaacu.....      | 1 |
| Gi2_8583082_x150  | .....gaucggagacgucgugggaac.....         | 0 |
| Gi5_6835084_x150  | .....caguacugcgauccggagacguc.....       | 0 |
| Gi5_6838384_x150  | .....aucggagacgucgugggaacacgggg.....    | 0 |
| Gi3_24287008_x150 | .....gaucggagacgucguggg.....            | 0 |
| Gi3_24285808_x150 | .....gugggCacacgggugccgaacu.....        | 1 |
| Gi3_24294029_x149 | .....cgugggaacCgggugccgaacu.....        | 1 |
| Gi5_6845857_x149  | .....gaacacgggCgccgaacu.....            | 1 |
| Gi2_8589668_x149  | .....cgugAgaacacgggugccgaacu.....       | 1 |
| Gi4_383349_x149   | .....gggaacacgggugccgaacu.....          | 0 |
| Gi3_24302224_x149 | .....gugggaacacgggguAccgaac.....        | 1 |
| Gi2_8606742_x148  | .....gugggaacacgggugUcgaacu.....        | 1 |
| Gi2_8606002_x148  | .....caguacugcgauccggGgacgu.....        | 1 |
| Gi3_24311710_x148 | .....ucgugggaacacgggugccgCacu.....      | 1 |
| Gi3_24308158_x148 | .....Ccaggccccgccaguacugc.....          | 1 |

|                   |                                           |   |
|-------------------|-------------------------------------------|---|
| Gi2_8599786_x148  | .....cgucgugggaacacggggug.....            | 0 |
| Gi5_6862596_x147  | .....cAugggaacacggggugccgaacu.....        | 1 |
| Gi5_6860391_x147  | .....cgucgugggaacacggggugcc.....          | 0 |
| Gi2_8617489_x147  | .....ccccgccaguacugcgauccggagac.....      | 0 |
| Gi3_24328247_x147 | .....cgauccggagacgucgugggaacacgggggu..... | 0 |
| Gi3_24333833_x147 | .....aguacugcgauccggagacgu.....           | 0 |
| Gi2_8617342_x147  | .....Ggugggaacacggggugccgaac.....         | 1 |
| Gi2_8625387_x146  | .....gugggaacacggggAgccgaacu.....         | 1 |
| Gi3_24340862_x146 | .....gccaguacugcgauccggagacg.....         | 0 |
| Gi3_24349184_x146 | .....ggaacacggggugccgaGcu.....            | 1 |
| Gi2_8622029_x146  | .....aucggagacgucgugggaa.....             | 0 |
| Gi5_6868915_x146  | .....gagaagcgccgucaggccccgc.....          | 0 |
| Gi5_6883903_x145  | .....gauccggagacgucgugggaacacgg.....      | 0 |
| Gi3_24367915_x145 | .....aguacugcgauccggagacgucgu.....        | 0 |
| Gi2_8634117_x145  | .....ccgucaggccccgccaguacugcgau.....      | 0 |
| Gi5_6877088_x145  | .....cacggggugccgaacu.....                | 0 |
| Gi1_3195581_x145  | .....acgucgugggaacacggggugccgaacA.....    | 1 |
| Gi1_3194131_x145  | .....aucggagacgucgCgggaaca.....           | 1 |
| Gi2_8648420_x144  | .....caguacugcgauccggagacgucg.....        | 0 |
| Gi3_24387219_x144 | .....ggaGcacggggugccgaac.....             | 1 |
| Gi3_24378003_x144 | .....ugggGacacggggugccgaac.....           | 1 |
| Gi2_8642804_x144  | .....aguacugcgauccggagacgucg.....         | 0 |
| Gi3_24377427_x144 | .....gccaguacugcgauccggagac.....          | 0 |
| Gi1_3206809_x143  | .....gacgucgugggaacacggggugcc.....        | 0 |
| Gi5_6896006_x143  | .....ugggGacacggggugccgaacu.....          | 1 |
| Gi4_387142_x143   | .....gccaguacugcgauccggagacguc.....       | 0 |
| Gi2_8662464_x143  | .....gaagcgccgucaggccccgccag.....         | 0 |
| Gi1_4791376_x143  | .....caguacugcgauccggagac.....            | 0 |
| Gi3_24437223_x141 | .....cgugggaacacggggAugccgaacu.....       | 1 |
| Gi2_8679762_x141  | .....ggaacacggggCgccgaacu.....            | 1 |
| Gi1_3211781_x141  | .....guacugcgauccggagacgucg.....          | 0 |
| Gi2_8680326_x141  | .....cUugggaacacggggugc.....              | 1 |
| Gi3_24440593_x140 | .....ggaacacggggugccgaGc.....             | 1 |
| Gi2_8683567_x140  | .....uacugcgauccggagacgucgug.....         | 0 |
| Gi1_3220917_x140  | .....gucgugggaacacggggugccgaac.....       | 0 |
| Gi3_24451933_x140 | .....gaacacgAggugccgaacu.....             | 1 |
| Gi2_8691407_x140  | .....caguacugcgauccggagacgucgu.....       | 0 |
| Gi3_24447873_x140 | .....cgugggaacacggggugccgaGc.....         | 1 |
| Gi3_24463223_x139 | .....agagaagcgccgucaggcc.....             | 0 |
| Gi5_6936430_x139  | .....gccccgccaguacugcgau.....             | 0 |
| Gi3_24470312_x139 | .....ccccgccaguacugcgauccggag.....        | 0 |
| Gi1_4804631_x139  | .....caguacugcgauccggagacgucg.....        | 0 |
| Gi3_24457246_x139 | .....gagaagcgccgucaggcccc.....            | 0 |
| Gi1_4808926_x138  | .....aucggagacgucgugggaacacggggugc.....   | 0 |
| Gi3_24487865_x138 | .....aggccccgccaguaUugcgau.....           | 1 |
| Gi3_24481241_x138 | .....cgugggaacacggggugccgaacuA.....       | 1 |
| Gi1_3228266_x138  | .....gugggaacacggggugccgaacAu.....        | 1 |

|                   |                                          |   |
|-------------------|------------------------------------------|---|
| Gi3_24474755_x138 | .....cgaucggagacgucgugggaaacacggg.....   | 0 |
| Gi5_6944862_x138  | .....gacgucgugggaaacacggggugccgaac.....  | 0 |
| Gi3_24474203_x138 | .....cgccaguacugcgauccgaga.....          | 0 |
| Gi2_8720316_x137  | .....Cgaacacggggugccgaacu.....           | 1 |
| Gi3_24493911_x137 | .....uggaacaacggggugccgGacu.....         | 1 |
| Gi3_24498432_x137 | .....ggagacgucgugggaaaca.....            | 0 |
| Gi2_8724426_x137  | .....cgugggaaacacggggugcUgaacu.....      | 1 |
| Gi2_8726609_x136  | .....Uucgugggaaacacggggugcc.....         | 1 |
| Gi3_24520676_x136 | .....agaagcgccgucaggccccgc.....          | 0 |
| Gi3_24511428_x136 | .....gCaacacggggugccgaacu.....           | 1 |
| Gi3_24511564_x136 | .....gggaacacggggugccgCac.....           | 1 |
| Gi2_8739376_x135  | .....ggccccgccaguacugcga.....            | 0 |
| Gi1_3238370_x135  | .....gucgugggaaacacggggug.....           | 0 |
| G1a_4820247_x135  | .....gaucggagacgucgugggga.....           | 0 |
| Gi3_24532584_x135 | .....cgAgggaacacggggugccgaac.....        | 1 |
| Gi3_24533529_x135 | .....uggaacaacggggUugccgaacu.....        | 1 |
| Gi3_24545112_x134 | .....Ggucgugggaaacacggggugccgaacu.....   | 1 |
| Gi5_6975048_x134  | .....Uugggaacaacggggugccga.....          | 1 |
| Gi5_6973574_x134  | .....agacgucgugggaaacacggggugcc.....     | 0 |
| Gi5_6974914_x134  | .....aucggagacgucgugggaaacac.....        | 0 |
| Gi2_8751502_x134  | .....ggGgacgucgugggaaacacggggug.....     | 1 |
| Gi3_24557440_x134 | .....cugcgauccgagacgucg.....             | 0 |
| Gi3_24546720_x134 | .....cgucaggccccgccagua.....             | 0 |
| Gi2_8748554_x134  | .....gugggaacaacggggGgccgaac.....        | 1 |
| G1a_4823877_x134  | .....gaucggagacgucgugggg.....            | 0 |
| Gi5_6976522_x134  | .....gaucggagacgucgugggaaacacggg.....    | 0 |
| Gi3_24546988_x134 | .....guUggaacaacggggugcc.....            | 1 |
| Gi3_24551946_x134 | .....Cggaacaacggggugccgaac.....          | 1 |
| Gi2_8759938_x133  | .....Uucaggccccgccaguacugc.....          | 1 |
| Gi4_394652_x133   | .....gagaagcgccgucaggcc.....             | 0 |
| Gi2_8767652_x133  | .....gccccgccaguacugcgau.....            | 0 |
| Gi2_8761135_x133  | .....cgccaguacugcgauccgagacg.....        | 0 |
| G1a_4830645_x132  | .....caggccccgccaguacugc.....            | 0 |
| Gi2_8776771_x132  | .....Augggaacaacggggugccgaac.....        | 1 |
| Gi3_24591938_x132 | .....gugggaacaacggggCgcc.....            | 1 |
| Gi2_8772811_x132  | .....ucggagacgucgugggaaacacggggu.....    | 0 |
| Gi5_6992079_x132  | .....gugggaacaacggggUaccgaacu.....       | 1 |
| Gi2_8774263_x132  | .....ucggGgacgucgugggaa.....             | 1 |
| Gi1_3251485_x132  | .....gaucggagacgucgugggaaacac.....       | 0 |
| G1a_4833271_x131  | .....aagagaagcgccgucaggccc.....          | 0 |
| Gi3_24612667_x131 | .....ucggagacgucgugggaaacacgg.....       | 0 |
| Gi2_8782821_x131  | .....cguAggaaacaacggggugccgaacu.....     | 1 |
| Gi2_8785834_x131  | .....cgccgucaggccccgccagua.....          | 0 |
| Gi2_8783607_x131  | .....gaucggagacgucgugggaaacacgg.....     | 0 |
| G1a_4837317_x130  | .....aucggagacgucgugggaaacacggggug.....  | 0 |
| Gi2_8798879_x130  | .....agacgucgugggaaacacggggugccgaac..... | 0 |
| Gi5_7007422_x130  | .....aacacggggugccgaacu.....             | 0 |

|                        |                                           |   |
|------------------------|-------------------------------------------|---|
| Gi2_8798489_x130.....  | .ccgccaguacugcgauccggagacg.....           | 0 |
| Gi3_24622685_x130..... | .....gugggaacacggggugccgaUcu.....         | 1 |
| Gi2_8797839_x130.....  | .....guacugcgauccggagacgucg.....          | 0 |
| Gi2_8811029_x129.....  | .....cUucgugggaacacggggugcc.....          | 1 |
| Gi3_24635002_x129..... | .....uCggaacacggggugccga.....             | 1 |
| Gi5_7021922_x129.....  | .....ggaacacgNggugccgaacu.....            | 1 |
| Gi3_24645064_x129..... | .....cgucaggccccgccaguacugcgauccg.....    | 0 |
| Gi2_8808449_x129.....  | .....gGgggaacacggggugccgaa.....           | 1 |
| Gi2_8810900_x129.....  | .....Uccccgccaguacugcgaucc.....           | 1 |
| Gi5_7015988_x129.....  | .....uCggaacacggggugccgaacu.....          | 1 |
| Gi3_24632551_x129..... | .....Uaucggagacgucgugggaacacg.....        | 1 |
| Gi5_7018439_x129.....  | .....cUugggaacacggggugccgaac.....         | 1 |
| Gi3_24630745_x129..... | .....cggagacgucgugggaacacggggugc.....     | 0 |
| Gi2_8815012_x128.....  | .....Aaacacggggugccgaacu.....             | 1 |
| Gi2_8816548_x128.....  | .....gGgacgucgugggaacac.....              | 1 |
| Gi5_7025917_x128.....  | .....Agaacacggggugccgaacu.....            | 1 |
| Gi1a_4847247_x128..... | .....aguacugcgauccggagacgucgu.....        | 0 |
| Gi1a_4847887_x128..... | .....ccaguacugcgauccggagacguc.....        | 0 |
| Gi2_8820644_x128.....  | .....cggagacgucgugggaacac.....            | 0 |
| Gi2_8819236_x128.....  | .....guacugcgauccggagacgu.....            | 0 |
| Gi2_8818852_x128.....  | .....cgugggaacaUggggugccgaacu.....        | 1 |
| Gi3_24663904_x128..... | .....agacgucgugggaacacggggugccgaacA.....  | 1 |
| Gi3_24674962_x127..... | .....ccgucaggccccgccaguac.....            | 0 |
| Gi2_8827015_x127.....  | .....ccccgccaguacugcgauccgga.....         | 0 |
| Gi5_7042880_x127.....  | .....gacgucgugggaacacggggugccgaacA.....   | 1 |
| Gi3_24666707_x127..... | .....ccccccaguacugcgauccggagacgucgug..... | 0 |
| Gi2_8826761_x127.....  | .....cgauccggagacgucguggga.....           | 0 |
| Gi3_24678010_x127..... | .....gcgauccggagacgucgug.....             | 0 |
| Gi3_24672803_x127..... | .....gggaacacggggguAccgaacu.....          | 1 |
| Gi3_24678899_x127..... | .....gUaacacggggugccgaa.....              | 1 |
| Gi1_3273515_x127.....  | .....gccgucaggccccgccaguacu.....          | 0 |
| Gi5_7045787_x126.....  | .....Uaacacggggugccgaac.....              | 1 |
| Gi5_7050449_x126.....  | .....ucgugggaacacggggugcc.....            | 0 |
| Gi2_8846754_x126.....  | .....agagaagcgccgucaggccccgc.....         | 0 |
| Gi3_24694912_x126..... | .....gugggaacGcggggugcc.....              | 1 |
| Gi3_24684202_x126..... | .....ucgugggaacacggggCgcccgaacu.....      | 1 |
| Gi1_3276686_x126.....  | .....gacgucgCgggaacacgggg.....            | 1 |
| Gi2_8843856_x126.....  | .....gugggaacacggggugcAgaacu.....         | 1 |
| Gi3_24684454_x126..... | .....Ccgugggaacacggggugccgaac.....        | 1 |
| Gi3_24698053_x125..... | .....gacgucgugggaacacgggg.....            | 0 |
| Gi3_24700053_x125..... | .....acgucgugggaacacggggugccgaa.....      | 0 |
| Gi2_8860137_x125.....  | .....gccaguacugcgauccgga.....             | 0 |
| Gi5_7054093_x125.....  | .....Cgggaacacggggugccgaacu.....          | 1 |
| Gi3_24704303_x125..... | .....aggccccccaguacugcgauccggagac.....    | 0 |
| Gi3_24698928_x125..... | .....cgugggCacacggggugccgaacu.....        | 1 |
| Gi2_8852512_x125.....  | .....uGgugggaacacggggugccgaacu.....       | 1 |
| Gi2_8860512_x125.....  | .....ucggGgacgucgugggaacacggggugc.....    | 1 |

|                        |                                      |   |
|------------------------|--------------------------------------|---|
| Gi3_24697803_x125..... | gUccccgccaguacugcgauC.....           | 1 |
| Gi1_3280844_x125.....  | cgucgugggaacacggggugccgaacA.....     | 1 |
| Gi1_3283969_x125.....  | Ugaacacggggugccgaac.....             | 1 |
| Gl1a_4859632_x125..... | ggccccgccaguacugcgauC.....           | 0 |
| Gi5_7067804_x124.....  | uAggaacacggggugccgaacu.....          | 1 |
| Gi2_8866467_x124.....  | Uaucgggagacgucgugggaacacggg.....     | 1 |
| Gi5_7063836_x124.....  | ugggaacGcggggugccgaacu.....          | 1 |
| Gi2_8865103_x124.....  | aggccccgccaguacugcgGuc.....          | 1 |
| Gi3_24728070_x124..... | ggGacacggggugccgaac.....             | 1 |
| Gi2_8860887_x124.....  | agagaagcgccgucaggccccgcc.....        | 0 |
| Gi3_24724102_x124..... | cgugggaacacggggAgccgaacu.....        | 1 |
| Gi2_8864235_x124.....  | aucggGgacgucgugggaacacggggug.....    | 1 |
| Gi1_3286835_x124.....  | cgccaguacugcgauCggaga.....           | 0 |
| Gi2_8861383_x124.....  | cgugggaacacgAggugccgaacu.....        | 1 |
| Gi3_24714926_x124..... | UccccgccaguacugcgauC.....            | 1 |
| Gi3_24729310_x124..... | ggaacacggggugccgaUc.....             | 1 |
| Gi3_24735598_x123..... | ugAgaacacggggugccgaacu.....          | 1 |
| Gi3_24740518_x123..... | gucgugggaacacggggugccgCacu.....      | 1 |
| Gi3_24742732_x123..... | gCggaacacggggugccgaa.....            | 1 |
| Gi3_24741871_x123..... | cgucgugggaacacggggg.....             | 0 |
| Gi5_7080021_x123.....  | Caacacggggugccgaacu.....             | 1 |
| Gi5_7092496_x122.....  | aggccccgccaguacugcga.....            | 0 |
| Gi1_3294845_x122.....  | gaacacggggugccgaacu.....             | 0 |
| Gi2_8890083_x122.....  | cgugggaacacggggugccAaacu.....        | 1 |
| Gi2_8893621_x122.....  | aagcgccgucaggccccgccaguac.....       | 0 |
| Gi2_8892035_x122.....  | ucgugggaacacggggugcc.....            | 0 |
| Gi5_7087128_x122.....  | gggaacacggggCgccgaacu.....           | 1 |
| Gl1a_4867154_x122..... | aucgggagacgucgugggaacacggggugcc..... | 0 |
| Gi3_24753393_x122..... | gugggaacNcggggugccga.....            | 1 |
| Gi5_7086884_x122.....  | gaucgggagacgucgugggaacac.....        | 0 |
| Gi2_8903927_x121.....  | gaacacggNgugccgaacu.....             | 1 |
| Gl1a_4873352_x121..... | gUgaacacggggugccgaacu.....           | 1 |
| Gi5_7097702_x121.....  | guggAaacacggggugccgaacu.....         | 1 |
| Gi3_24770900_x121..... | gagaagcgccgucaggccccgccag.....       | 0 |
| Gi3_24781886_x120..... | aUgccccgccaguacugcgau.....           | 1 |
| Gi1_3304766_x120.....  | acgucgCgggaacacggggugc.....          | 1 |
| Gi5_7105063_x120.....  | gugggaacaUggggugccgaacu.....         | 1 |
| Gi2_8915106_x120.....  | gaucggGgacgucguggga.....             | 1 |
| Gi3_24789086_x120..... | ggUaacacggggugccgaac.....            | 1 |
| Gi2_8907546_x120.....  | cgugggaacacggggugUcgaacu.....        | 1 |
| Gi3_24801039_x119..... | Gucgggagacgucgugggaacacggggg.....    | 1 |
| Gi3_24808060_x119..... | gugggaacUcggggugccgaacu.....         | 1 |
| Gi5_7119297_x119.....  | ugggaacacggggCgccgaacu.....          | 1 |
| Gi3_24796398_x119..... | gCaacacggggugccgaac.....             | 1 |
| Gi3_24802586_x119..... | guUgugggaacacggggugccgaacu.....      | 1 |
| Gi2_8940131_x118.....  | cgugggaCcacggggugccgaacu.....        | 1 |
| Gi2_8929511_x118.....  | gugggaacacggggugccgaaUu.....         | 1 |

|                        |                                   |   |
|------------------------|-----------------------------------|---|
| Gi1_3312863_x118.....  | ugggaacacggggugccg.....           | 0 |
| Gi5_7124289_x118.....  | gaucggagacgucguggaacaacg.....     | 0 |
| Gi2_8934113_x118.....  | gucaggccccgccaguacugcgau.....     | 0 |
| Gi3_24828520_x118..... | .....                             | 1 |
| Gi3_24826514_x118..... | gaagagaagcggcucaggccccgccag.....  | 0 |
| Gi2_8934349_x118.....  | .....                             | 1 |
| Gi2_8941901_x118.....  | ugcgaucggGgacgucgug.....          | 1 |
| Gi5_7127947_x118.....  | .....                             | 1 |
| Gi5_7124171_x118.....  | .....                             | 1 |
| Gi2_8939069_x118.....  | cgaucggagacgucgugggaacaacg.....   | 0 |
| Gi5_7126413_x118.....  | .....                             | 1 |
| Gi2_8935883_x118.....  | .....                             | 1 |
| Gi2_8952902_x117.....  | gUagacgucgugggaacacggggugcc.....  | 1 |
| Gi3_24840471_x117..... | .....                             | 1 |
| Gi2_8944010_x117.....  | cgagacgucgugggaacacggggug.....    | 0 |
| Gi3_24839769_x117..... | aucggagacgucgugggaacacggggug..... | 0 |
| Gi2_8950913_x117.....  | Uucgugggaacacggggugccgaac.....    | 1 |
| Gi5_7131014_x117.....  | gugggaacacggggugccAaacu.....      | 1 |
| Gi2_8954774_x117.....  | gugggaacacggggugccgaGc.....       | 1 |
| Gi2_8952317_x117.....  | guacugcgaucggagacguc.....         | 0 |
| Gi2_8948690_x117.....  | Agugggaacacggggugccgaacu.....     | 1 |
| Gi3_24858393_x116..... | .....                             | 1 |
| Gi2_8961159_x116.....  | gugggUacacggggugccgaacu.....      | 1 |
| Gi3_24854101_x116..... | gugggaacacggggugccgaacuu.....     | 0 |
| Gi2_8965799_x116.....  | cUucgugggaacacggggugccg.....      | 1 |
| Gi5_7144314_x116.....  | ugggaacacggggugccgaacuu.....      | 0 |
| Gl1a_4893984_x115..... | ugcgaucggagacgucgu.....           | 0 |
| Gi3_24868915_x115..... | ucaggccccgccaguacugcgaucgga.....  | 0 |
| Gi3_24881105_x115..... | gucaggccccgccaguacugcgaucgg.....  | 0 |
| Gi5_7153437_x115.....  | .....                             | 1 |
| Gi2_8972591_x115.....  | ugcgaucggagacgucgugggaaca.....    | 0 |
| Gi2_8968221_x115.....  | .....                             | 1 |
| Gi1_3328227_x115.....  | .....                             | 1 |
| Gi3_24878460_x115..... | cgugggaacUcggggugccgaacu.....     | 1 |
| Gi3_24875700_x115..... | guacugcgaucggagacgu.....          | 0 |
| Gi3_24877885_x115..... | .....                             | 1 |
| Gi2_8985868_x114.....  | .....                             | 1 |
| Gi3_24894705_x114..... | gCgggaacacggggugccga.....         | 1 |
| Gi3_24896415_x114..... | gucgugggaacacggggCgccaacu.....    | 1 |
| Gi5_7167498_x114.....  | gugggaacacggggugccGacu.....       | 1 |
| Gi1_3328686_x114.....  | cgagacgucCgggaacacggggugcc.....   | 1 |
| Gi3_24892653_x114..... | Gucggagacgucgugggaacaacggg.....   | 1 |
| Gi3_24900732_x113..... | .....                             | 1 |
| Gi5_7174512_x113.....  | gugggaacacggggugcUgaacu.....      | 1 |
| Gi2_9000585_x113.....  | gugggaacacggggugccGacu.....       | 0 |
| Gi2_8994935_x113.....  | ggagacgucgugggaacaacg.....        | 0 |
| Gl1a_4902897_x113..... | aucgggagacgucgugggaacaacg.....    | 0 |

|                   |                                       |   |
|-------------------|---------------------------------------|---|
| Gi3_24905704_x113 | .....cUucgugggaacacggggugccg          | 1 |
| Gi3_24912371_x113 | .....gagacgucgugggaacacggggugcc       | 0 |
| G1a_4903123_x113  | .....gaacacggggugccgaac               | 0 |
| Gi2_9002275_x112  | .....gugggaacacggggugAcgaacu          | 1 |
| Gi2_9001939_x112  | .....ucaggccccgccaguacug              | 0 |
| Gi3_24919826_x112 | .....cgugggaacacggggugccgaCc          | 1 |
| Gi2_9008435_x112  | .....Ggacgucgugggaacacggggugcc        | 1 |
| Gi3_24935058_x112 | .....gggaacacggggCgccgaac             | 1 |
| G1a_4907071_x112  | .....Augggaacacggggugccgaacu          | 1 |
| Gi5_7179115_x112  | .....caggccccgccaguacugcga            | 0 |
| Gi2_9002499_x112  | .....cgugggaaNacggggugccgaac          | 1 |
| Gi1_3345348_x111  | .....gaucggagacgucGgggaacacgg         | 1 |
| Gi1_3345459_x111  | .....ucggagacgucgugggaacacggggugcc    | 0 |
| Gi2_9024915_x111  | .....cgaucggagacgucgugggaaca          | 0 |
| G1a_4913099_x111  | .....gugggaacacggggugccgaa            | 0 |
| Gi3_24952936_x111 | .....ugggaacaUggggugccgaacu           | 1 |
| Gi1_3345237_x111  | .....aacacgggNugccgaacu               | 1 |
| Gi5_7192613_x111  | .....acgucgugggaacacggggugcc          | 0 |
| Gi2_9023805_x111  | .....aagagaagcgccgucaggccccgcc        | 0 |
| Gi2_9028023_x111  | .....cUugggaacacggggugccga            | 1 |
| Gi2_9016701_x111  | .....aggccccgccaguacugcgauccggagacguc | 0 |
| Gi5_7192724_x111  | .....cgugggaacacgUggugccgaacu         | 1 |
| Gi3_24952381_x111 | .....aacacggggugccAaacu               | 1 |
| Gi2_9023361_x111  | .....gggaacacggggugccgCacu            | 1 |
| Gi1_3346234_x110  | .....ugggaacacggggugccgCacu           | 1 |
| Gi2_9039576_x110  | .....cgucgugggaacacggggugccgaacA      | 1 |
| Gi2_9038696_x110  | .....gUccccgccaguacugcgauc            | 1 |
| Gi5_7202323_x110  | .....gaagcgccgucaggccccgccagua        | 0 |
| Gi1_3347334_x110  | .....gaucggagacgucguggg               | 0 |
| Gi3_24965812_x110 | .....ugUgaacacggggugccgaac            | 1 |
| Gi2_9039686_x109  | .....ggUacacggggugccgaac              | 1 |
| Gi3_24984387_x109 | .....gugggaacaAggggugccgaacu          | 1 |
| Gi5_7212368_x109  | .....aggccccgccaguacugc               | 0 |
| Gi3_24976103_x109 | .....Gggccccgccaguacugc               | 1 |
| Gi1_3354560_x109  | .....gugggaacNcggggugccgaacu          | 1 |
| Gi2_9045245_x109  | .....gccaguacugcgauccggaga            | 0 |
| Gi2_9042956_x109  | .....gugggaacacggggugccgaaAu          | 1 |
| Gi3_24977411_x109 | .....agagaagcgccgucaggcccc            | 0 |
| Gi3_24984278_x109 | .....caggccccgccaguacugcgauccga       | 0 |
| Gi3_24977738_x109 | .....gucgugggaacacggggug              | 0 |
| Gi2_9051458_x109  | .....cgaucggagacgucgugggaacacggggug   | 0 |
| Gi5_7214765_x108  | .....ugggaacacggggugccgaGcu           | 1 |
| Gi2_9060966_x108  | .....gugggaacacggggCgccgaac           | 1 |
| Gi3_24998367_x108 | .....ggagacgucgugggaacacggggugccgaac  | 0 |
| G1a_4927650_x108  | .....cgucgugggaacacggggugccgaacu      | 0 |
| Gi3_24996639_x108 | .....cgugggGacacggggugccgaac          | 1 |
| Gi1_3356292_x108  | .....Cgggaacacggggugccga              | 1 |



|                   |                                           |   |
|-------------------|-------------------------------------------|---|
| Gi3_24999015_x108 | .....ggagacgucgugggaaacacgg.....          | 0 |
| Gi3_24996855_x108 | .....aUacgucgugggaaacacggggugccgaacu..... | 1 |
| Gi5_7230912_x107  | .....cgugggaaacacggggugccg.....           | 0 |
| Gi5_7228130_x107  | .....gggaacacggggugccgaCcu.....           | 1 |
| Gi3_25016832_x107 | .....cgccagucgucggaucgg.....              | 0 |
| Gi2_9074254_x107  | .....gugggGacacggggugccgaac.....          | 1 |
| Gi1a_4931723_x107 | .....aucggagacgucgugggaaacacgg.....       | 0 |
| Gi1_3360376_x107  | .....Augggaaacacggggugccgaacu.....        | 1 |
| Gi3_25006346_x107 | .....ggaacacggggugccgGacu.....            | 1 |
| Gi2_9063875_x107  | .....acgucgugggaaacacggg.....             | 0 |
| Gi3_25038824_x106 | .....ggaacGcggggugccgaac.....             | 1 |
| Gi2_9084648_x106  | .....ggagacgucgugggaaacacggggugccg.....   | 0 |
| Gi3_25023348_x106 | .....agagaagcggcucaggg.....               | 0 |
| Gi2_9083588_x106  | .....gacgucgugggaaacacggg.....            | 0 |
| Gi3_25032570_x106 | .....gaucggagacgucguggg.....              | 0 |
| Gi3_25026316_x106 | .....ccgccagucgucggaucggagacg.....        | 0 |
| Gi1_3368784_x106  | .....ggaacacggggugccgaa.....              | 0 |
| Gi5_7243890_x106  | .....Uacgucgugggaaacacggggugccgaacu.....  | 1 |
| Gi3_25026846_x106 | .....cggagacgucgugggaaacacgg.....         | 0 |
| Gi1a_4935758_x106 | .....aucggagacgucgugggaa.....             | 0 |
| Gi3_25041781_x105 | .....agUccccgccagucgucggauc.....          | 1 |
| Gi3_25049656_x105 | .....Cgggaacacggggugccgaac.....           | 1 |
| Gi5_7254299_x105  | .....ccgccagucgucggaucggaga.....          | 0 |
| Gi1a_4939762_x105 | .....gucaggccccgccagucgucgga.....         | 0 |
| Gi5_7254194_x105  | .....cgucgugggaaacacggggugccgaa.....      | 0 |
| Gi2_9092127_x105  | .....caggccccgccagucgucggaucgg.....       | 0 |
| Gi2_9104349_x104  | .....ggaacacggggugccgGacu.....            | 1 |
| Gi3_25070429_x104 | .....gCgggaacacggggugcc.....              | 1 |
| Gi3_25063253_x104 | .....cgugggaaacacggggugAcgaacu.....       | 1 |
| Gi3_25075837_x104 | .....ugggaacacggggCgccgaac.....           | 1 |
| Gi5_7257745_x104  | .....Aggaacacggggugccgaacu.....           | 1 |
| Gi2_9100189_x104  | .....ccccgccagucgucggaucggaga.....        | 0 |
| Gi2_9101229_x104  | .....cgugggaaacacgggguaAccgaacu.....      | 1 |
| Gi5_7256497_x104  | .....gaacGcggggugccgaacu.....             | 1 |
| Gi5_7260761_x104  | .....Uugggaacacggggugcc.....              | 1 |
| Gi3_25073965_x104 | .....gggaacacggggugccgaGc.....            | 1 |
| Gi2_9107781_x104  | .....gCgggaacacggggugccgaac.....          | 1 |
| Gi1_3379019_x103  | .....gggaacacggggugccgaac.....            | 0 |
| Gi5_7271213_x103  | .....gggaacacNgggugccgaacu.....           | 1 |
| Gi5_7272140_x103  | .....caggccccgccagucgucggauc.....         | 0 |
| Gi1_3381182_x103  | .....cgucgugggaaacacggggugccgaac.....     | 0 |
| Gi3_25090890_x103 | .....cgaucggagacgucgugggaaacacgg.....     | 0 |
| Gi4_416893_x103   | .....aacacggggugccgaacu.....              | 0 |
| Gi5_7266372_x103  | .....aucggagacgucgugggaaaca.....          | 0 |
| Gi5_7268432_x103  | .....aacacggggugccgGacu.....              | 1 |
| Gi2_9116040_x103  | .....gugggaacacgggAugccgaacu.....         | 1 |
| Gi5_7270286_x103  | .....gaacacggggugccgaGcu.....             | 1 |

|                   |                                            |   |
|-------------------|--------------------------------------------|---|
| Gi5_7273479_x103  | .....gugggaacacggUgugccgaacu.....          | 1 |
| Gi2_9118409_x103  | .....ggaacacgNggugccgaac.....              | 1 |
| Gi5_7286260_x102  | .....cgugggaCcacggggugccgaacu.....         | 1 |
| Gi3_25101257_x102 | .....Uucgugggaacacggggugcc.....            | 1 |
| Gi3_25107173_x102 | .....cUucaggccccgccaguacugcg.....          | 1 |
| Gi2_9130047_x102  | .....cgugggaacacggggugccgaaAu.....         | 1 |
| Gi2_9124845_x102  | .....gugggaacacggggGgcc.....               | 1 |
| Gi2_9128415_x102  | .....Cugggaacacggggugccgaac.....           | 1 |
| Gi2_9124437_x102  | .....cgaucggGgacgucgugggaaca.....          | 1 |
| Gi2_9121173_x102  | .....acgucgugggaacacggggugccg.....         | 0 |
| Gi4_417304_x102   | .....cgucaggccccgccaguacugc.....           | 0 |
| Gi2_9127293_x102  | .....agagaagcgccgucaggccccgccag.....       | 0 |
| Gi3_25112579_x102 | .....gaagcgccgucaggccccgccaguac.....       | 0 |
| Gi2_9123621_x102  | .....cguggAaacacggggugccgaacu.....         | 1 |
| Gi5_7286464_x102  | .....cgugggaacacggggugccAaacu.....         | 1 |
| Gi2_9129129_x102  | .....ucgggagacgucgugggaacacgggg.....       | 0 |
| Gi5_7296876_x101  | .....aUacgucgugggaacacggggugccgaacu.....   | 1 |
| Gl1a_4957453_x101 | .....aagagaagcgccgucaggccccg.....          | 0 |
| Gi5_7291018_x101  | .....cgccaguacugcgacggagacgu.....          | 0 |
| Gi3_25120798_x101 | .....cgugggaGcacggggugccgaac.....          | 1 |
| Gi5_7290816_x101  | .....ugggaGcacggggugccgaacu.....           | 1 |
| Gi1_3390755_x101  | .....acgucgCgggaacacggggugccga.....        | 1 |
| Gi3_25137826_x100 | .....ugggaacGcggggugccgaac.....            | 1 |
| Gi1_3393764_x100  | .....gacgucgCgggaacacggggugcc.....         | 1 |
| Gi2_9146674_x100  | .....uAggaacacggggugccgaacu.....           | 1 |
| Gi1_3395764_x100  | .....ugggaacaNggggugccgaacu.....           | 1 |
| Gi2_9146974_x100  | .....gucaggccccgccaguacugcgauc.....        | 0 |
| Gi1_3394164_x100  | .....aaUacggggugccgaacu.....               | 1 |
| Gi2_9149174_x100  | .....gugggaacGcggggugccgaac.....           | 1 |
| Gi1_3395564_x100  | .....ucgggagacgucgugggaacacggg.....        | 0 |
| Gi3_25138426_x100 | .....gugggaacacgAggugccgaac.....           | 1 |
| Gi2_9143574_x100  | .....Uaucgggagacgucgugggaacac.....         | 1 |
| Gi3_25144526_x100 | .....ggccccgccaguacugcgaucggagac.....      | 0 |
| Gi3_25138926_x100 | .....gaaacgggAugccgaacu.....               | 1 |
| Gi2_9153574_x100  | .....gggagacgucgugggaacacgggg.....         | 0 |
| Gi2_9153174_x100  | .....cgaucgggagacgucgugggaacacggggugc..... | 0 |
| Gl1a_4969722_x99  | .....gggaacacggggugccgaa.....              | 0 |
| Gi2_9161106_x99   | .....cggGgacgucgugggaaca.....              | 1 |
| Gi1_3396864_x99   | .....aucgggagacgucgugggaacacgggg.....      | 0 |
| Gi2_9158928_x99   | .....ggaacGcggggugccgaacu.....             | 1 |
| Gi2_9165462_x99   | .....gGgacgucgugggaacacgggg.....           | 1 |
| Gi2_9164670_x99   | .....Uacgucgugggaacacggggugcc.....         | 1 |
| Gi5_7316708_x99   | .....cgugggaacacggggugcUgaacu.....         | 1 |
| Gi3_25160022_x99  | .....ugggaacacggggugccgaCcu.....           | 1 |
| Gi3_25150716_x99  | .....ggaacacggggugccgGac.....              | 1 |
| Gi5_7313342_x99   | .....gUaacacggggugccgaac.....              | 1 |
| Gi1_3398052_x99   | .....uGgugggaacacggggugccgaacu.....        | 1 |

|                       |                                     |   |
|-----------------------|-------------------------------------|---|
| Gi1a_4964772_x99..... | ggagacgucgugggaacacggggugcc.....    | 0 |
| Gi1_3399141_x99.....  | gaacacgNgugccgaacu.....             | 1 |
| Gi2_9157344_x99.....  | ccccgccaguacugcgauccggag.....       | 0 |
| Gi2_9168996_x98.....  | ugcgauccggagacgucgugggaacacg.....   | 0 |
| Gi5_7324670_x98.....  | aacacggggAgccgaacu.....             | 1 |
| Gi3_25183907_x98..... | Caucggagacgucgugggaacacggggu.....   | 1 |
| Gi3_25171559_x98..... | ccgccaguacugcgauccggagacgucgug..... | 0 |
| Gi2_9170368_x98.....  | gcgauccggagacgucguggga.....         | 0 |
| Gi5_7324474_x98.....  | ccgccaguacugcgauccggagacg.....      | 0 |
| Gi5_7321534_x98.....  | ugUgaacacggggugccgaacu.....         | 1 |
| Gi3_25181163_x98..... | aacacggggGgccgaacu.....             | 1 |
| Gi2_9171642_x98.....  | aucggGgacgucgugggaacacgggg.....     | 1 |
| Gi2_9178306_x98.....  | gcgauccggagacgucgugggaacac.....     | 0 |
| Gi2_9178992_x98.....  | ccgccaguacugcgauccggagacguc.....    | 0 |
| Gi3_25184884_x97..... | ccgccaguacugcgauccggag.....         | 0 |
| Gi5_7329464_x97.....  | acgucgugggaacacggggugccg.....       | 0 |
| Gi5_7329949_x97.....  | ccaguacugcgauccggagacgu.....        | 0 |
| Gi2_9182592_x97.....  | aUacgucgugggaacacggggugcc.....      | 1 |
| Gi2_9188024_x97.....  | aacacggggCgccgaacu.....             | 1 |
| Gi2_9181428_x97.....  | Gcgugggaacacggggugccgaac.....       | 1 |
| Gi3_25184787_x97..... | cgucgugggaacacggggGgccgaacu.....    | 1 |
| Gi5_7332277_x97.....  | aagagaagcgccgucagggccccgcca.....    | 0 |
| Gi1_3409604_x97.....  | cggagacgucgugggaacacggggugc.....    | 0 |
| Gi3_25197979_x97..... | uCggaacacggggugccgaac.....          | 1 |
| Gi3_25208656_x96..... | cgucagggccccgccaguacu.....          | 0 |
| Gi3_25202800_x96..... | ggaacacggggGgccgaacu.....           | 1 |
| Gi3_25206736_x96..... | gggaacacAgggugccgaacu.....          | 1 |
| Gi3_25216144_x96..... | Ggggaacacggggugccg.....             | 1 |
| Gi1a_4984567_x96..... | aggccccgccaguacugc.....             | 0 |
| Gi2_9194393_x96.....  | gggaGcacggggugccgaacu.....          | 1 |
| Gi2_9199769_x96.....  | gaacacggggCgccgaacu.....            | 1 |
| Gi3_25207312_x96..... | aggccccgccaAuacugcgaucc.....        | 1 |
| Gi3_25200688_x96..... | gucgugggaacacggggGgccgaacu.....     | 1 |
| Gi3_25200880_x96..... | ggccccgccaguacugcgauccgg.....       | 0 |
| Gi2_9196025_x96.....  | Ugagacgucgugggaacacggggugc.....     | 1 |
| Gi2_9214736_x95.....  | Cggaacacggggugccgaacu.....          | 1 |
| Gi1_3419378_x95.....  | agacgucgugggaacacggg.....           | 0 |
| Gi3_25229369_x95..... | gucgugggNacacggggugccgaacu.....     | 1 |
| Gi5_7352631_x95.....  | ccccgccaguacugcgauccggagacg.....    | 0 |
| Gi3_25234214_x95..... | cgucgugggaacacggggug.....           | 0 |
| Gi3_25221199_x95..... | ugggaacacggggugcAgaacu.....         | 1 |
| Gi5_7357951_x95.....  | cgugAgaacacggggugccgaacu.....       | 1 |
| Gi2_9206281_x95.....  | ugcgauccggagacgucguggga.....        | 0 |
| Gi3_25234974_x95..... | gucgCgggaacacggggugccgaac.....      | 1 |
| Gi2_9213786_x95.....  | gggaacacggggCgccgaacu.....          | 1 |
| Gi5_7355196_x95.....  | Uugggaacacggggugccgaa.....          | 1 |
| Gi5_7358901_x95.....  | aacacAggggugccgaacu.....            | 1 |

Gi3\_25219299\_x95.....cUgagacgucgugggaacacggggugcc..... 1  
 Gi1\_3416338\_x95.....gccaguacugcgauccggagacg..... 0  
 Gi2\_9206376\_x95.....ugggaGcacggggugccgaacu..... 1  
 Gi5\_7368396\_x94.....ucgugggaacacggggugccgaacA..... 1  
 Gi1\_3424573\_x94.....Uugggaacacggggugcc..... 1  
 Gi3\_25236959\_x94.....agacgucgugggaacacgggg..... 0  
 Gi2\_9222733\_x94.....cgggagacgucgugggaacacg..... 0  
 Gi3\_25247017\_x94.....Uaucggagacgucgugggaacac..... 1  
 Gi2\_9224331\_x94.....cgccgucagggcccgcaguc..... 0  
 Gi2\_9217375\_x94.....cUugggaacacggggugccgaa..... 1  
 Gi2\_9221041\_x94.....ucgugggaacacggggGgccgaacu..... 1  
 Gi2\_9220665\_x94.....agacgucgugggaacacggggug..... 0  
 Gi1\_3422035\_x94.....gagacgucgugggaacacggggugcc..... 0  
 Gi5\_7371216\_x94.....gugggaacacgAggugccgaacu..... 1  
 Gl1a\_4994118\_x94.....ucgugggaacacggggugccgaac..... 0  
 Gi3\_25243351\_x94.....gccaguacugcgauccggag..... 0  
 Gi1\_3425983\_x94.....ggagacgucGgggaacacggggugcc..... 1  
 Gi1\_3426829\_x94.....gagacgucGgggaacacggggugccgaacu..... 1  
 Gi3\_25247111\_x94.....Augggaacacggggugccg..... 1  
 Gi3\_25247675\_x94.....Gcgucgugggaacacggggugccgaacu..... 1  
 Gi3\_25246547\_x94.....ucgggagacgucgugggaacacggggugc..... 0  
 Gi2\_9232999\_x93.....ugcgauccggGgacgucguggga..... 1  
 Gi3\_25272301\_x93.....ugcgauccgggagacgucgugggaaca..... 0  
 Gi5\_7371404\_x93.....gugggaacacggAgugccgaacu..... 1  
 Gi3\_25271743\_x93.....ugggaacCcggggugccgaacu..... 1  
 Gi3\_25256770\_x93.....gugAgaacacggggugccgaac..... 1  
 Gi2\_9231976\_x93.....Uaucgggagacgucguggga..... 1  
 Gi1\_3427673\_x93.....cgugggaaNacggggugccgaacu..... 1  
 Gi3\_25256584\_x93.....cUucaggccccgcagucguc..... 1  
 Gi5\_7377542\_x93.....gugAgaacacggggugccgaacu..... 1  
 Gi2\_9232069\_x93.....acgucgugggaacacggggu..... 0  
 Gi3\_25269604\_x93.....guggAaacacggggugccgaac..... 1  
 Gi3\_25273603\_x93.....ggaacacAgggugccgaacu..... 1  
 Gl1a\_4994959\_x93.....gugggaacNcggggugccgaacu..... 1  
 Gi3\_25255003\_x93.....aggccccgcagucgucgucgagga..... 0  
 Gi3\_25257700\_x93.....ugggaacacggggugUcgaacu..... 1  
 Gi2\_9231046\_x93.....Ggacgucgugggaacacg..... 1  
 Gi1\_3430649\_x93.....gucgCgggaacacggggugccg..... 1  
 Gi3\_25281059\_x92.....uUgugggaacacggggugccgaacu..... 1  
 Gi5\_7387252\_x92.....acgucgugggaacacggggugccga..... 0  
 Gi2\_9245464\_x92.....cgccgucagggcccgcaguc..... 0  
 Gi3\_25274987\_x92.....gaacacggggugcAgaacu..... 1  
 Gi3\_25278943\_x92.....ugggaGcacggggugccgaac..... 1  
 Gi3\_25291271\_x92.....aggccccgcCguacugcgau..... 1  
 Gi2\_9243532\_x92.....gaUcacggggugccgaacu..... 1  
 Gi3\_25282163\_x92.....cgucgugggaacacggggGgcc..... 1  
 Gi3\_25284279\_x92.....Ugagacgucgugggaacacggggugcc..... 1

Gi2\_9244360\_x92.....ucgugggaNcacggggugccgaacu..... 1  
 Gi3\_25282807\_x92.....gaacacggggugccgaauUu..... 1  
 Gi4\_428363\_x92.....Uugggaacacggggugccgaacu..... 1  
 Gi2\_9250062\_x91.....ccccgccaguacugcgagcgagacguc..... 0  
 Gi3\_25293836\_x91.....Ggugggaacacggggugcc..... 1  
 Gl1a\_5006461\_x91.....caggccccgccaguacugcg..... 0  
 Gi2\_9251791\_x91.....aGcgggagacgucgugggaacacggggu..... 1  
 Gi3\_25296293\_x91.....cgugggaacacggggCgccgaac..... 1  
 Gi2\_9270067\_x90.....ccccgccaguacugcgagcgagacgu..... 0  
 Gl1a\_5013689\_x90.....Cggaacacggggugccgaacu..... 1  
 Gi2\_9265567\_x90.....ugggGacacggggugccgaacu..... 1  
 Gi3\_25313003\_x90.....aucggagacgucgugggaGcacg..... 1  
 Gi3\_25323173\_x90.....ucgugggGacacggggugccgaacu..... 1  
 Gi1\_3445729\_x90.....ugcgauccggagacgucguggga..... 0  
 Gi3\_25321823\_x90.....gugNgaacacggggugccgaacu..... 1  
 Gi2\_9267187\_x90.....ggUaacacggggugccgaacu..... 1  
 Gi3\_25320023\_x90.....gggagacgucgugggaacacggg..... 0  
 Gl1a\_5013509\_x90.....caggccccgccaguacug..... 0  
 Gi5\_7421987\_x89.....gugggaacacggggugccgaacuuu..... 0  
 Gi3\_25337101\_x89.....Uggaacacggggugccga..... 1  
 Gi3\_25336745\_x89.....gcgccgucaggccccgccaguacug..... 0  
 Gi3\_25338970\_x89.....cgugggaacacggggugA..... 1  
 Gi5\_7421364\_x89.....Cucgugggaacacggggugccgaacu..... 1  
 Gl1a\_5014678\_x89.....gucaggccccgccaguacu..... 0  
 Gi3\_25333452\_x89.....gugggaacacUgggugccgaacu..... 1  
 Gi2\_9273474\_x89.....ugggaacacggggCgccgaacu..... 1  
 Gi1\_3447520\_x89.....cgugggaacacggggugccgaa..... 0  
 Gi3\_25331583\_x89.....cUcgccaguacugcgagcgagacgu..... 1  
 Gi1\_3446719\_x89.....agacgucgugggaacacggggugcc..... 0  
 Gi1\_3450457\_x89.....aacacggggUAccgaacu..... 1  
 Gi1\_3451970\_x89.....gugggaacacggggGgccgaacu..... 1  
 Gl1a\_5022569\_x88.....uacugcgauccggagacgucgu..... 0  
 Gi2\_9286871\_x88.....gugggaacCcgggugccgaac..... 1  
 Gi5\_7430474\_x88.....agacgucgugggaacacggggugc..... 0  
 Gi3\_25346872\_x88.....ugggaacacggggugccgaGc..... 1  
 Gi3\_25351976\_x88.....gggagacgucgugggaacacggggugccgaa..... 0  
 Gi2\_9291623\_x88.....Augggaacacggggugcc..... 1  
 Gi2\_9286167\_x88.....cUucaggccccgccaguacug..... 1  
 Gl1a\_5022129\_x88.....gccgucaggccccgccagua..... 0  
 Gi3\_25352504\_x88.....acgucgugggaacacggggugc..... 0  
 Gi2\_9295143\_x88.....guUggaacacggggugccgaac..... 1  
 Gi3\_25359192\_x88.....cAugggaacacggggugccgaac..... 1  
 Gi3\_25356288\_x88.....ucgugggaGcacggggugccgaacu..... 1  
 Gi3\_25351360\_x88.....aacacggggUAccgaacu..... 1  
 Gi5\_7432146\_x88.....cgugggaacacggggGgccgaacu..... 1  
 Gi2\_9291447\_x88.....gugggaCcacggggugccgaacu..... 1  
 Gi3\_25372362\_x87.....gugggaacacggUgugccgaac..... 1

Gi3\_25372623\_x87.....ucgugggaacGcggggugccgaacu..... 1  
 Gi3\_25377060\_x87.....Ggugggaacacggggugccga..... 1  
 Gi5\_7444123\_x87.....gagacgucgugggaacacg..... 0  
 Gi3\_25371579\_x87.....gaacUcggggugccgaacu..... 1  
 Gi3\_25363836\_x87.....gggaacacggggugccgGac..... 1  
 Gi5\_7446211\_x87.....cgccaguacugcgauccggagacguc..... 0  
 Gi2\_9298103\_x87.....ggaacacggggGcgggaac..... 1  
 Gi2\_9295754\_x87.....agaagcgccgucagggcccgcaguc..... 0  
 Gi5\_7439164\_x87.....gaacacggggugccgaacuucU..... 1  
 Gi3\_25372536\_x87.....Uagaagcgccgucagggcccgc..... 1  
 Gi5\_7453470\_x86.....gugggaaUacggggugccgaacu..... 1  
 Gi3\_25382074\_x86.....uGgugggaacacggggugccgaac..... 1  
 Gi4\_433136\_x86.....ugggaacacgggUugccgaacu..... 1  
 Gi1\_3465497\_x86.....gaacacggggGcgggaacu..... 1  
 Gi5\_7457254\_x86.....cCucgugggaacacggggugccgaacu..... 1  
 Gi3\_25384912\_x86.....gucgugggaacacggggugccgaCcu..... 1  
 Gi5\_7453212\_x86.....Cgaacacggggugccgaacu..... 1  
 Gi3\_25384740\_x86.....gugggaacacggggGgcccga..... 1  
 Gi5\_7456308\_x86.....Uggaacacggggugccgaa..... 1  
 Gi3\_25394114\_x86.....gaacacggggugccgaUcu..... 1  
 Gi3\_25410877\_x85.....gaucggagacgucgugggaacacggggug..... 0  
 Gi3\_25402122\_x85.....aGgucgugggaacacggggugccgaacu..... 1  
 Gi5\_7472510\_x85.....gaGcacggggugccgaacu..... 1  
 Gi1\_3470793\_x85.....aacacggggGcgggaacu..... 1  
 Gi3\_25396342\_x85.....aucggagacgucgugggaa..... 0  
 Gi3\_25407137\_x85.....aucggagacgucgugggaGcacgggu..... 1  
 Gi3\_25404247\_x85.....gcgauccggagacgucguggga..... 0  
 Gi3\_25399912\_x85.....guggUaacacggggugcc..... 1  
 Gi2\_9321204\_x85.....Uucagggcccgcagucugcg..... 1  
 Gi3\_25406032\_x85.....caggccccgcagucgucgagacguc..... 0  
 Gi2\_9321799\_x85.....guUgugggaacacggggugccgaacu..... 1  
 Gi3\_25427887\_x84.....ccaguacugcgauccggagacgucgu..... 0  
 Gi5\_7483776\_x84.....gaagcgccgucagggcccgc..... 0  
 Gi2\_9331229\_x84.....cugcgauccggGgacgucgug..... 1  
 Gi3\_25417891\_x84.....cgucgugggaacacggggugccgCacu..... 1  
 Gi5\_7474284\_x84.....ucgugggaacacggggugccgCacu..... 1  
 Gl1\_5044607\_x84.....guacugcgauccggagacgucg..... 0  
 Gi3\_25428055\_x84.....gugggaaUacggggugccgaac..... 1  
 Gi1\_3475179\_x84.....Uugggaacacggggugccgaac..... 1  
 Gi2\_9337865\_x84.....gaagagaagcgccgucagggcccgc..... 0  
 Gl1\_5041751\_x84.....gaucggagacgucgugggaa..... 0  
 Gi5\_7477056\_x84.....ucgugggaacacggggGcgggaacu..... 1  
 Gi3\_25429651\_x84.....ucgCgggaacacggggugccgaacu..... 1  
 Gi5\_7491665\_x83.....ucgugggaNcacggggugccgaacu..... 1  
 Gi2\_9346796\_x83.....aguacugcgauccggGgacgucgugg..... 1  
 Gi3\_25432318\_x83.....Uccgucagggcccgcagucugcg..... 1  
 Gl1\_5048767\_x83.....gaagcgccgucagggcccgcga..... 0

Gi1\_3482014\_x83.....gugggGacacggggugccgaacu..... 1  
 Gi2\_9347958\_x83.....gaucggGgacgucgugggaacacggg..... 1  
 G1a\_5047024\_x83.....Ggggaacacggggugccgaacu..... 1  
 Gi2\_9351195\_x83.....gagacgucgugggaacacggggugccgaacu..... 0  
 Gi2\_9344555\_x83.....aGcggagacgucgugggaacacggggugc..... 1  
 Gi5\_7486104\_x83.....agagaagcgcgucagggccccgccaagu..... 0  
 Gi2\_9348871\_x83.....ccaguacugcgauccggagacg..... 0  
 Gi2\_9350282\_x83.....ugggaacacggggugccgaGcu..... 1  
 Gi4\_436403\_x82.....cgucgugggaacacggggugccga..... 0  
 Gi2\_9362214\_x82.....gugggaacacggggugccgaUc..... 1  
 Gi1\_3482427\_x82.....gagacgucgCgggaacacgg..... 1  
 Gi3\_25448495\_x82.....Uaagagaagcgcgucagggcccc..... 1  
 Gi3\_25451365\_x82.....agaagcgcgucagggccccgccaqua..... 0  
 Gi3\_25450627\_x82.....guUggaacacggggugccga..... 1  
 G1a\_5053716\_x82.....cgccgucagggccccgccaaguacugc..... 0  
 Gi2\_9361804\_x82.....gaacacggggugccgaCcu..... 1  
 Gi1\_3486937\_x82.....agacgucgCgggaacacggggugccgaacu..... 1  
 G1a\_5054044\_x82.....uacugcgauccggagacguc..... 0  
 Gi3\_25473980\_x81.....Uagaagcgcgucagggcccc..... 1  
 Gi2\_9364002\_x81.....guUggaacacggggugcc..... 1  
 Gi3\_25479002\_x81.....cgugUgaacacggggugccgaac..... 1  
 Gi3\_25483295\_x81.....aacacgAggugccgaacu..... 1  
 Gi3\_25470578\_x81.....gggaacacggggugcUgaacu..... 1  
 Gi3\_25484915\_x81.....Uccaguacugcgauccggagacguc..... 1  
 Gi2\_9364731\_x81.....gggaacGcggggugccgaacu..... 1  
 Gi5\_7512478\_x81.....gugggaaAacggggugccgaacu..... 1  
 Gi2\_9364812\_x81.....ggaaacacggggugccgCac..... 1  
 G1a\_5058206\_x81.....ccccgccaaguacugcgauccggagacguc..... 0  
 Gi3\_25476977\_x81.....aacacggAgugccgaacu..... 1  
 Gi3\_25485563\_x81.....ggccccgccaaguacugcgauccg..... 0  
 Gi3\_25467581\_x81.....aucggagaNgucgugggaacacg..... 1  
 Gi2\_9374694\_x81.....gaucggGgacgucgugggaacacggg..... 1  
 Gi2\_9371211\_x81.....gugggaGcacggggugccgaac..... 1  
 Gi3\_25466933\_x81.....gggaacacggggugccgaUc..... 1  
 Gi3\_25466285\_x81.....Uucagggccccgccaaguacugc..... 1  
 Gi4\_437222\_x81.....agacgucgugggaacacggggugcc..... 0  
 Gi3\_25490776\_x80.....aacaUggggugccgaacu..... 1  
 G1a\_5061681\_x80.....aggccccgccaaguacugcgaucc..... 0  
 Gi3\_25493176\_x80.....gaagcgcgucagggccccgccaqua..... 0  
 Gi2\_9384619\_x80.....uUggaacacggggugccg..... 1  
 Gi2\_9378139\_x80.....gggaacacggggGgccgaacu..... 1  
 Gi2\_9381739\_x80.....aggccccgccaaguacugcgaucc..... 1  
 Gi1\_3495901\_x80.....aggccccgccaaguacugcgauccg..... 0  
 Gi3\_25500536\_x80.....gGacacggggugccgaac..... 1  
 Gi3\_25489336\_x80.....gugggaacacggggugcgaac..... 1  
 Gi5\_7519667\_x80.....gccgucagggccccgccaaguacugc..... 0  
 Gi3\_25500296\_x80.....gAaacacggggugccgaac..... 1

Gi2\_9381419\_x80.....gugggCacacggggugccgaacu..... 1  
 Gi3\_25502936\_x80.....aagagaagcgccgucaggccccgccag..... 0  
 Gi1\_3497581\_x80.....aguacugcgauccggagacgucgug..... 0  
 Gi2\_9379179\_x80.....gggGacacggggugccgaacu..... 1  
 Gi3\_25489096\_x80.....cUucgugggaacacggggugccga..... 1  
 Gi3\_25513613\_x79.....gugggaacCcggggugcc..... 1  
 Gi1\_3498694\_x79.....Uacgucgugggaacacggggugccgaacu..... 1  
 Gi5\_7537412\_x79.....gccccgccaguacugcgauccga..... 0  
 Gi3\_25512349\_x79.....gAgaacacggggugccgaac..... 1  
 Gi3\_25507372\_x79.....gugggaacGcggggugccga..... 1  
 Gi3\_25506898\_x79.....cgucguggNaacacggggugccgaacu..... 1  
 Gi2\_9397844\_x79.....gaacGcggggugccgaacu..... 1  
 Gi5\_7539703\_x79.....cgugggaacacgAggugccgaacu..... 1  
 Gi2\_9389944\_x79.....ggGacacggggugccgaacu..... 1  
 Gi2\_9393894\_x79.....gugggaacNcggggugcc..... 1  
 Gi3\_25512507\_x79.....acgucgugNgaacacggggugccgaacu..... 1  
 Gi3\_25539716\_x78.....ugggaacacggggAgccgaacu..... 1  
 G1a\_5074078\_x78.....acgucgugggaacacggggg..... 0  
 G1a\_5074468\_x78.....gucagggccccccaguacug..... 0  
 Gi3\_25535192\_x78.....ucgugggaacacggggugccgaGcu..... 1  
 Gi3\_25525520\_x78.....Ccugggaacacggggugccgaacu..... 1  
 Gi3\_25525988\_x78.....gccaguacugcgauccggagacgucg..... 0  
 Gi1\_3504733\_x78.....acugcgauccggagacgucguggga..... 0  
 G1a\_5071192\_x78.....Uugggaacacggggugcc..... 1  
 G1a\_5074624\_x78.....gagaagcgccgucagggccccgcca..... 0  
 Gi3\_25527470\_x78.....gugggaacacggggugccUaacu..... 1  
 Gi5\_7549064\_x78.....acugcgauccggagacguc..... 0  
 Gi3\_25526690\_x78.....Uucagggccccccaguacugcg..... 1  
 Gi3\_25528718\_x78.....ugcgauccggagacgucguggga..... 0  
 Gi2\_9401361\_x78.....Uaucggagacgucgugggaacacggggugc..... 1  
 Gi5\_7540718\_x78.....ccgccaguacugcgauccggagacguc..... 0  
 Gi3\_25548201\_x77.....aUgucgugggaacacggggugccgaacu..... 1  
 Gi5\_7553801\_x77.....ggaacacggggCgccgaacu..... 1  
 G1a\_5079871\_x77.....Uaacacggggugccgaacu..... 1  
 Gi3\_25556055\_x77.....gCcuggggaacacggggugccgaacu..... 1  
 Gi3\_25541733\_x77.....gacgucgugggaacacggggugcA..... 1  
 Gi5\_7554802\_x77.....cguggAaacacggggugccgaacu..... 1  
 Gi3\_25544813\_x77.....aacacggggugUcgaacu..... 1  
 Gi3\_25549510\_x77.....cUgagacgucgugggaacacggggg..... 1  
 Gi1\_3507836\_x77.....cgCgggaacacggggugccgaa..... 1  
 Gi5\_7560654\_x77.....gacgucgugggaacacggggugccg..... 0  
 Gi2\_9416104\_x77.....gccaguacugcgauccggagacgu..... 0  
 Gi2\_9432317\_x76.....ggccccgccaguacugcgauccgg..... 0  
 Gi2\_9427833\_x76.....ucagggccccccaguacugcgauccga..... 0  
 Gi3\_25567722\_x76.....gccccgccaguacugcgauccgg..... 0  
 Gi3\_25570306\_x76.....gugggaacacggggAgccgaac..... 1  
 Gi2\_9429125\_x76.....ccccgccaguacugcgauccggagacg..... 0



Gi2\_9428745\_x76.....ucgugggaaacacggggugccgCacu..... 1  
 Gi3\_25562022\_x76.....Cugggaacacggggugccga..... 1  
 Gi1\_3511838\_x76.....gUaacacggggugccgaac..... 1  
 Gi3\_25559438\_x76.....gugggGacacggggugccga..... 1  
 Gl1a\_5082764\_x76.....gucgugggaaacacggggugccgaac..... 0  
 Gi3\_25569774\_x76.....Gggccccgccaguacugcg..... 1  
 Gi1\_3519858\_x75.....aacacggggugccgaGcu..... 1  
 Gi2\_9449107\_x75.....gugggaUcacggggugccgaacu..... 1  
 Gi3\_25584885\_x75.....ugAgaacacggggugccgaac..... 1  
 Gl1a\_5090461\_x75.....aguacugcgauccggagac..... 0  
 Gi5\_7579246\_x75.....cccgccaguacugcgauccggagacgu..... 0  
 Gi3\_25597260\_x75.....gugggaacacggggGgccgaa..... 1  
 Gi3\_25593285\_x75.....auUgggagcugcuggggaacacggg..... 1  
 Gi3\_25579485\_x75.....ucgugggaacacggggugccAaacu..... 1  
 Gi1\_3520533\_x75.....cgggagcugcuggggaacacggg..... 0  
 Gi2\_9442132\_x75.....cgggagcugcuggggaaca..... 0  
 Gi5\_7577296\_x75.....agagaagcgccgucagggccccg..... 0  
 Gi3\_25595160\_x75.....aucggagaNgucgugggaacacggggg..... 1  
 Gi1\_3520608\_x75.....gaUcacggggugccgaacu..... 1  
 Gi1\_3518658\_x75.....ucgugggaacacggggCgccgaacu..... 1  
 Gi3\_25589910\_x75.....aacacggggugccgaCcu..... 1  
 Gi2\_9443707\_x75.....gCaacacggggugccgaacu..... 1  
 Gi3\_25587960\_x75.....ugggaacacggggugccgaUc..... 1  
 Gi1\_3517983\_x75.....agacgucgugggaacacggggugccg..... 0  
 Gi5\_7574746\_x75.....gUacacggggugccgaacu..... 1  
 Gi3\_25593210\_x75.....acugcgauccggagacgucg..... 0  
 Gi1\_3522761\_x74.....gugggaacacggggCgccgaacu..... 1  
 Gi3\_25607927\_x74.....gaacCcggggugccgaacu..... 1  
 Gi3\_25615919\_x74.....ggaacacggggugcUgaacu..... 1  
 Gl1a\_5095805\_x74.....aaauaggaagagaagcgccguc..... 0  
 Gi5\_7593762\_x74.....Ggucgugggaacacggggugccgaacu..... 1  
 Gi2\_9451341\_x74.....gGgacgucgugggaacacg..... 1  
 Gi2\_9454523\_x74.....aagcgccgucagggccccgccaguacu..... 0  
 Gi2\_9451563\_x74.....Uaucggagacgucgugggaacacg..... 1  
 Gi2\_9460887\_x74.....cgugggaacacggggGgccgaacu..... 1  
 Gi3\_25604893\_x74.....gucgugggaacacggggugccg..... 0  
 Gi3\_25603265\_x74.....aacacggggugccgaaUu..... 1  
 Gi3\_25606669\_x74.....gucgugggaacacggggUcccgaac..... 1  
 Gi3\_25604301\_x74.....cgccgucagggccccgccagua..... 0  
 Gi3\_25613181\_x74.....ggccccgccaguacugcgauccgga..... 0  
 Gi3\_25608963\_x74.....aGcgggagcugcuggggaacacgg..... 1  
 Gi5\_7585918\_x74.....aacacggggugccgCacu..... 1  
 Gi3\_25599195\_x74.....gucgugggaacacggggg..... 0  
 Gi1\_3522169\_x74.....agcgccgucagggccccgccaguacugc..... 0  
 Gi5\_7591690\_x74.....gcgccgucagggccccgccaguacug..... 0  
 Gi3\_25606003\_x74.....agaagcgccgucagggccccgccaguacug..... 0  
 Gl1a\_5093585\_x74.....ggaacacggggugccAaacu..... 1

|                  |                                                    |   |
|------------------|----------------------------------------------------|---|
| Gi1a_5099778_x73 | . . . . . ccgccaguacugcgauccggagacguc . . . . .    | 0 |
| Gi2_9470180_x73  | . . . . . ucggagacgucguggaac . . . . .             | 0 |
| Gi5_7604253_x73  | . . . . . acacggggugccgaacuuu . . . . .            | 0 |
| Gi2_9470910_x73  | . . . . . gacgucguggaacacgg . . . . .              | 0 |
| Gi2_9464267_x73  | . . . . . cgccaguacugcgauccggagacgucg . . . . .    | 0 |
| Gi5_7598997_x73  | . . . . . Uacacggggugccgaacu . . . . .             | 1 |
| Gi3_25629157_x73 | . . . . . Ggucguggaacacggggugcc . . . . .          | 1 |
| Gi5_7600092_x73  | . . . . . gucguggaacacggggugccgaa . . . . .        | 0 |
| Gi1a_5100946_x73 | . . . . . ggccccgccaguacugcg . . . . .             | 0 |
| Gi3_25629084_x73 | . . . . . ggaaacacggggGgccgaac . . . . .           | 1 |
| Gi4_447562_x72   | . . . . . guggaacacggggugccgaac . . . . .          | 0 |
| Gi2_9477263_x72  | . . . . . guggaacacggggGgcc . . . . .              | 1 |
| Gi3_25642554_x72 | . . . . . gCgaacacggggugccgaac . . . . .           | 1 |
| Gi5_7611069_x72  | . . . . . guggaacacggggugUcgaacu . . . . .         | 1 |
| Gi5_7618701_x72  | . . . . . ucguggaacacggggugccgaGcu . . . . .       | 1 |
| Gi3_25644282_x72 | . . . . . ccgccaguacugcgauccggagacgucgu . . . . .  | 0 |
| Gi4_447418_x72   | . . . . . guacugcgauccggagacgucgug . . . . .       | 0 |
| Gi3_25644570_x72 | . . . . . cguggaacacggggugccgaUcu . . . . .        | 1 |
| Gi5_7614669_x72  | . . . . . Agggaacacggggugccgaacu . . . . .         | 1 |
| Gi3_25646514_x72 | . . . . . gucguggaacGcggggugccgaacu . . . . .      | 1 |
| Gi5_7615317_x72  | . . . . . cgagacgucguggaacacggggugcc . . . . .     | 0 |
| Gi3_25653786_x72 | . . . . . cccgccaguacugcgaucc . . . . .            | 0 |
| Gi5_7617261_x72  | . . . . . gccaguacugcgauccggagacguc . . . . .      | 0 |
| Gi3_25646226_x72 | . . . . . gUagacgucguggaacacggggugcc . . . . .     | 1 |
| Gi5_7609773_x72  | . . . . . guggaacacgggAugccgaacu . . . . .         | 1 |
| Gi2_9475535_x72  | . . . . . guggaacacggggugccAaac . . . . .          | 1 |
| Gi3_25635354_x72 | . . . . . guggaacNcggggugccgaa . . . . .           | 1 |
| Gi2_9474023_x72  | . . . . . caggccccgccaguacugcgauccggagac . . . . . | 0 |
| Gi3_25647594_x72 | . . . . . Uucguggaacacggggugccga . . . . .         | 1 |
| Gi3_25641042_x72 | . . . . . uggaacacggggugccGac . . . . .            | 1 |
| Gi2_9493461_x71  | . . . . . gcgaucggGgacgucguggaac . . . . .         | 1 |
| Gi1_3537261_x71  | . . . . . cggagacgucgCgggaacacgg . . . . .         | 1 |
| Gi5_7620483_x71  | . . . . . cguggaacUggggugccgaacu . . . . .         | 1 |
| Gi1_3539462_x71  | . . . . . aagcgccgucagccccgccaguacug . . . . .     | 0 |
| Gi3_25667138_x71 | . . . . . Uaagagaagcgccgucaggccc . . . . .         | 1 |
| Gi3_25658263_x71 | . . . . . cguggaacGcggggugccgaac . . . . .         | 1 |
| Gi3_25659115_x71 | . . . . . gggaacGcggggugccgaac . . . . .           | 1 |
| Gi2_9489840_x71  | . . . . . cguggaacacggAgugccgaacu . . . . .        | 1 |
| Gi5_7630494_x71  | . . . . . ggaacacggggugccgCacu . . . . .           | 1 |
| Gi3_25661742_x71 | . . . . . gggaGcacggggugccgaac . . . . .           | 1 |
| Gi5_7629997_x71  | . . . . . cguggaacacggggugccgaaAu . . . . .        | 1 |
| Gi3_25667990_x71 | . . . . . gaagagaagcgccgucaggccccgccagu . . . . .  | 0 |
| Gi3_25665576_x71 | . . . . . gaacacggggugccgUacu . . . . .            | 1 |
| Gi2_9485296_x71  | . . . . . agccccgccaguacugcgauccggagacgu . . . . . | 0 |
| Gi3_25669410_x71 | . . . . . guggaacCgggggugccga . . . . .            | 1 |
| Gi2_9504331_x70  | . . . . . Ggacgucguggaacacggggugc . . . . .        | 1 |
| Gi3_25686670_x70 | . . . . . uggaacacggggGgccgaacu . . . . .          | 1 |

Gi1\_3541156\_x70.....agacgucgugggaacacgggg..... 0  
Gi3\_25674630\_x70.....gugggaacacggggugcAgaac..... 1  
Gi5\_7635978\_x70.....Cggaacacggggugccgaacu..... 1  
Gi3\_25679880\_x70.....gugggaacacggCgugccgaacu..... 1  
G1a\_5117802\_x70.....aguacugcgauccgagacgucg..... 0  
G1a\_5116682\_x70.....ucggagacgucgugggaacacggg..... 0  
Gi2\_9504681\_x70.....guacugcgauccgagacgucgugg..... 0  
Gi3\_25676660\_x70.....cgucgugggaacacggggCgccgaacu..... 1  
Gi2\_9497541\_x70.....gucgugggaacacggggCgccgaacu..... 1  
Gi2\_9495931\_x70.....cgccaguacugcgauccgagacgu..... 0  
Gi3\_25680930\_x70.....gacgucgugggaacacggggugcc..... 0  
Gi2\_9510917\_x69.....gggaacacggggugccgaGcu..... 1  
Gi2\_9512021\_x69.....ugUgaacacggggugccgaacu..... 1  
G1a\_5120665\_x69.....gugggaacacggggGgccgaacu..... 1  
Gi3\_25693081\_x69.....Gggccccgccaguacugcga..... 1  
Gi3\_25706950\_x69.....ggaacacAgggugccgaac..... 1  
Gi4\_449333\_x69.....gucgugggaacacggggugccgaacu..... 0  
Gi3\_25696324\_x69.....gugggaacNcggggugccg..... 1  
Gi3\_25697704\_x69.....gaacacggggugccgaaAu..... 1  
Gi3\_25691356\_x69.....Gaggccccgccaguacugc..... 1  
Gi3\_25704811\_x69.....aggccccgNcaguacugc..... 1  
Gi3\_25691632\_x69.....caggccccgccaguacugcgagac..... 0  
Gi1\_3548742\_x69.....ggagacgucgugggaacacggggugccgaacu..... 0  
Gi2\_9515747\_x69.....agagaagcgccgucagggccccgcca..... 0  
Gi2\_9510572\_x69.....cgccaguacugcgauccgGgacguc..... 1  
Gi3\_25697428\_x69.....cCugggaacacggggugccgaac..... 1  
Gi3\_25691494\_x69.....guggCaacacggggugccgaacu..... 1  
Gi3\_25702051\_x69.....gggaacaUggggugccgaacu..... 1  
Gi3\_25696669\_x69.....Ugagacgucgugggaacacggggg..... 1  
G1a\_5122183\_x69.....cgucaggccccgccaguacu..... 0  
Gi3\_25698877\_x69.....uacugcgauccgagacgu..... 0  
Gi2\_9509744\_x69.....cgucaggccccgccaguacugcgaucc..... 0  
Gi3\_25697635\_x69.....aCgccccgccaguacugcgaucc..... 1  
Gi2\_9510503\_x69.....Ggucgugggaacacggggugccgaacu..... 1  
Gi2\_9516368\_x69.....gucgugggaacacggggGgccgaacu..... 1  
Gi3\_25715063\_x68.....ugggaacacgAggugccgaacu..... 1  
G1a\_5129660\_x68.....cgucaggccccgccagua..... 0  
Gi2\_9529720\_x68.....Gucggagacgucgugggaacacggggg..... 1  
Gi3\_25721455\_x68.....cUucgugggaacacggggugc..... 1  
Gi3\_25710507\_x68.....gggaaUacggggugccgaacu..... 1  
Gi3\_25715267\_x68.....ucgugggaacacggggug..... 0  
Gi3\_25725603\_x68.....gugggaacacggggCgccga..... 1  
Gi2\_9530400\_x68.....cgugggaacacggggugcAgaacu..... 1  
Gi2\_9519316\_x68.....ucgugggaacacggggugccgaaA..... 1  
Gi3\_25719415\_x68.....gugggUacacggggugccgaac..... 1  
Gi5\_7660727\_x68.....Agugggaacacggggugccgaacu..... 1  
Gi3\_25710779\_x68.....uUgggagacgucgugggaacacggggg..... 1

Gi2\_9523668\_x68.....Cgagaagcgccgucagggccccgc..... 1  
 Gi3\_25711935\_x68.....ugggaacaNggggugccga..... 1  
 Gi2\_9519044\_x68.....ugggaacGcggggugccgaacu..... 1  
 Gi2\_9543605\_x67.....Uaagcgccgucagggccccgc..... 1  
 Gi3\_25736079\_x67.....ugggaacaNggggugccgaa..... 1  
 Gi2\_9532818\_x67.....ugggaacacggggugccgaGc..... 1  
 Gi5\_7670748\_x67.....ggUaacacggggugccgaacu..... 1  
 Gi5\_7672892\_x67.....aacacggggugccAaacu..... 1  
 Gi3\_25734806\_x67.....guAggaacacggggugcc..... 1  
 Gi2\_9538580\_x67.....gugggaacacggggUaccgaac..... 1  
 Gi3\_25731724\_x67.....aucggagacgucgugggaacacggggC..... 1  
 Gi3\_25741104\_x67.....ugggUaacacggggugccgaacu..... 1  
 Gi2\_9532148\_x67.....Ugaacacggggugccgaa..... 1  
 Gi3\_25738223\_x67.....Auggaacacggggugccgaa..... 1  
 Gi2\_9539451\_x67.....ucggGgacgucgugggaacacggggugcc..... 1  
 Gi1\_3559565\_x67.....gggaacacNggggugccgaacu..... 1  
 Gi2\_9535163\_x67.....Cgggaacacggggugccgaacu..... 1  
 Gi3\_25728776\_x67.....cGggccccgccaguacugcgauc..... 1  
 Gi5\_7674902\_x67.....gaacacggggugccgCacu..... 1  
 Gi3\_25747711\_x66.....aucggagacgucgugggaCcacg..... 1  
 Gi3\_25746787\_x66.....ucgugggaNcacggggugccgaac..... 1  
 Gi3\_25752925\_x66.....Uaucggagacgucgugggaacacgggg..... 1  
 Gi3\_25758733\_x66.....ccccgccaguacugcgaucggagac..... 0  
 Gi3\_25747579\_x66.....Uacgucgugggaacacggg..... 1  
 Gi3\_25755235\_x66.....auUgggagacgucgugggaacacg..... 1  
 Gi3\_25759525\_x66.....gagaagcgccgucagggccccgc..... 0  
 Gi2\_9545267\_x66.....Uggaacacggggugccgaa..... 1  
 Gi3\_25752397\_x66.....gccgucagggccccgccaguacugc..... 0  
 Gi2\_9553847\_x66.....Caacacggggugccgaacu..... 1  
 Gi2\_9551207\_x66.....ccgccaguacugcgaucggagacgA..... 1  
 Gi5\_7682218\_x66.....Uugggaacacggggugccg..... 1  
 Gi2\_9550151\_x66.....cggGgacgucgugggaacacggggug..... 1  
 Gi2\_9556025\_x66.....guggUaacacggggugccgaac..... 1  
 Gi5\_7703566\_x65.....cgggagacgucgugggaacacgg..... 0  
 Gi3\_25774692\_x65.....gugggaacacggggUacc..... 1  
 Gi3\_25772287\_x65.....gggaacacggggGgccgaac..... 1  
 Gi3\_25766567\_x65.....gggaacacggggugccAaacu..... 1  
 Gi2\_9560261\_x65.....cgugggaacacggggugccgaaUu..... 1  
 Gi2\_9563511\_x65.....cgccaguacugcgaucggagacgucgug..... 0  
 Gl1\_5147067\_x65.....acgucgugggaacacggggugccgaacu..... 0  
 Gi3\_25773977\_x65.....gggGacacggggugccgaac..... 1  
 Gi5\_7701811\_x65.....cgugggaacacggggugUcgaacu..... 1  
 Gi2\_9575609\_x64.....cgGgggaacacggggugccgaac..... 1  
 Gl1\_3573992\_x64.....cgGgggaacacggggugccgaacu..... 1  
 Gl1\_5152372\_x64.....ccccccaguacugcgaucgga..... 0  
 Gi3\_25798683\_x64.....gaagcgccgucagggccccgccaguacu..... 0  
 Gl1\_5154868\_x64.....cgaucggagacgucgugggaacacg..... 0

Gi2\_9574073\_x64.....gagacgucgugggaacacggg..... 0  
Gi5\_7711909\_x64.....gugggaacacggggAgccgaacu..... 1  
Gi1\_3571752\_x64.....Cugggaacacggggugccgaacu..... 1  
Gi3\_25801051\_x64.....ugggaacacggAgugccgaacu..... 1  
Gi1\_3570984\_x64.....ccgucagggccccgccaguacug..... 0  
Gi3\_25797659\_x64.....ggaacacgAggugccgaacu..... 1  
Gi2\_9575545\_x64.....uGggaacacggggugccgaacu..... 1  
Gi3\_25796443\_x64.....aGcggagacgucgugggaacacgggg..... 1  
Gi2\_9570681\_x64.....aagagaagcgccgucagggccccgcca..... 0  
Gi3\_25783259\_x64.....aucggagaNgucgugggaacacggg..... 1  
Gi3\_25788187\_x64.....gugggaaAacggggugccgaac..... 1  
Gi5\_7708325\_x64.....uUggaacacggggugccgaa..... 1  
Gi3\_25783963\_x64.....Gucggagacgucgugggaacacgg..... 1  
Gi3\_25801563\_x64.....agcgccgucagggccccgccaguacugc..... 0  
Gi3\_25809888\_x63.....cgugCgaacacggggugccgaacu..... 1  
Gi3\_25820409\_x63.....cgccaguacugcgauccggagacgucgu..... 0  
Gi1\_3578155\_x63.....guUggaacacggggugccgaacu..... 1  
Gi3\_25809636\_x63.....gcgaucggagacgucgugggaacacggg..... 0  
Gi3\_25804344\_x63.....ucgugggaacacggggGgccgaacu..... 1  
Gi2\_9580464\_x63.....guacugcgauccggGgacgucgu..... 1  
Gi2\_9587331\_x63.....gAgaacacggggugccgaacu..... 1  
Gi3\_25809951\_x63.....ggaacacggggugccAaac..... 1  
Gi1\_3574690\_x63.....ucgugggaNcacggggugccgaacu..... 1  
Gi2\_9587205\_x63.....gaacacggggugccgaGcu..... 1  
Gi2\_9591174\_x63.....gccgucagggccccgccaguac..... 0  
Gi1a\_5161155\_x63.....gugggaacacggggCgccgaacu..... 1  
Gi2\_9581472\_x63.....gAgggaacacggggugccgaac..... 1  
Gi3\_25838207\_x62.....gugggaacacggggugCccaacu..... 1  
Gi3\_25825931\_x62.....ucgugggaacCcggggugccgaacu..... 1  
Gi2\_9601979\_x62.....agaagcgccgucagggccccgccaguac..... 0  
Gi2\_9592493\_x62.....aGcggagacgucgugggaaca..... 1  
Gi3\_25828721\_x62.....gugggaacacggggugccgaaU..... 1  
Gi3\_25830953\_x62.....gugggaUcacggggugccgaacu..... 1  
Gi5\_7732026\_x62.....ggGacacggggugccgaacu..... 1  
Gi1\_3582331\_x62.....gacgucgugggaacacggggugccg..... 0  
Gi2\_9603467\_x62.....gagaagcgccgucagggccccgccaguac..... 0  
Gi5\_7737048\_x62.....ggaGcacggggugccgaacu..... 1  
Gi3\_25840935\_x62.....gaacacggggugccgaacG..... 1  
Gi3\_25822893\_x62.....uggAaacacggggugccgaacu..... 1  
Gi1\_3580719\_x62.....aUcacggggugccgaacu..... 1  
Gi2\_9604521\_x62.....ggagacgucgugggaacacggggugccgaacu..... 0  
Gi5\_7732770\_x62.....gaacacggggugccgGacu..... 1  
Gi5\_7732398\_x62.....cgugggaacacggggugccgGacu..... 1  
Gi2\_9600553\_x62.....Cgaacacggggugccgaac..... 1  
Gi2\_9614231\_x61.....aucggagacgucgugggaacacggggugccg..... 0  
Gi3\_25854121\_x61.....gggaacacAgggugccgaac..... 1  
Gi3\_25846862\_x61.....gucgugggaacCcggggugccgaacu..... 1

Gi3\_25848143\_x61.....cgGcguggggaacacggggugccgaacu..... 1  
 Gi2\_9608924\_x61.....cgugggaacacggggAgccgaacu..... 1  
 Gi3\_25855341\_x61.....Cacacggggugccgaacu..... 1  
 Gi3\_25857781\_x61.....ugggaaacacgggAugccgaacu..... 1  
 Gi2\_9612035\_x61.....gugggGacacggggugcc..... 1  
 Gi3\_25842592\_x61.....aacacggggugcAgaacu..... 1  
 Gi3\_25849241\_x61.....gcgaucggagacgucgugggaaca..... 0  
 Gi3\_25842714\_x61.....ggagacgucgugggaacacggggugc..... 0  
 G1a\_5174179\_x61.....cgucaggccccgccaguacug..... 0  
 Gi5\_7745769\_x61.....aucggagacgucgugggaacacggggugcc..... 0  
 Gi5\_7746501\_x61.....gugggaacacggggugccgaaAu..... 1  
 Gi3\_25844910\_x61.....cgugggaacacggggugccAaac..... 1  
 Gi2\_9612767\_x61.....agcgccgucaggccccgccaguacugc..... 0  
 Gi2\_9614841\_x61.....Uaacacggggugccgaac..... 1  
 Gi2\_9613499\_x61.....gAaacacggggugccgaacu..... 1  
 Gi1\_3585967\_x61.....ccgccaguacugcgauccggaga..... 0  
 Gi2\_9605569\_x61.....cgugggaacacgggAugccgaacu..... 1  
 Gi2\_9610266\_x61.....gugggaacacggggugccgaacG..... 1  
 Gi5\_7743085\_x61.....cguAggaaacacggggugccgaacu..... 1  
 Gi3\_25851620\_x61.....gugggaacacggggugccA..... 1  
 Gi3\_25863349\_x60.....ugggaCcacggggugccgaacu..... 1  
 G1a\_5181925\_x60.....cggagacgucgugggaacacgggggu..... 0  
 Gi3\_25865929\_x60.....Uaagagaagcgccgucagg..... 1  
 Gi2\_9619505\_x60.....ccgccaguacugcgauccggGgacguc..... 1  
 Gi1\_3590960\_x60.....cgucgCgggaacacggggugccgaac..... 1  
 Gi3\_25869409\_x60.....aguacugcgauccggagacgucguggg..... 0  
 Gi5\_7756696\_x60.....cgugggaaUacggggugccgaacu..... 1  
 Gi2\_9627725\_x60.....gGcgugggaacacggggugccgaac..... 1  
 Gi2\_9628805\_x60.....Uucgugggaacacggggugc..... 1  
 Gi1\_3592580\_x60.....aucggagacgucgugggaacac..... 0  
 G1a\_5183065\_x60.....ucggagacgucgugggaacacgg..... 0  
 Gi2\_9626345\_x60.....gucgugggaacacggggugccgCacu..... 1  
 Gi5\_7754296\_x60.....gggGacacggggugccgaacu..... 1  
 Gi3\_25875049\_x60.....gaacacggggugccgaUc..... 1  
 Gi2\_9627005\_x60.....agcgccgucaggccccgccagua..... 0  
 Gi2\_9620465\_x60.....aagagaagcgccgucaggccccgccagu..... 0  
 Gi3\_25877869\_x60.....cgugggaacaUggggugccgaac..... 1  
 Gi5\_7759876\_x60.....Ccguccgugggaacacggggugccgaacu..... 1  
 Gi3\_25887980\_x59.....ugggaaUacggggugccgaacu..... 1  
 Gi3\_25897125\_x59.....gugggGacacggggugccgaa..... 1  
 Gi3\_25891815\_x59.....cgugggaacacAgggugccgaac..... 1  
 G1a\_5193625\_x59.....aguacugcgauccggagacgucgug..... 0  
 Gi3\_25883260\_x59.....gugggaacacggAgugccgaac..... 1  
 Gi1\_3598372\_x59.....cgugggaacacggggugccgCacu..... 1  
 Gi2\_9636268\_x59.....caggccccgccaguacugcgauccggag..... 0  
 Gi5\_7776024\_x59.....uUgugggaacacggggugccgaacu..... 1  
 G1a\_5188964\_x59.....gacgucgugggaacacgggggu..... 0

Gi5\_7777027\_x59.....guUgugggaacacggggugccgaacu..... 1  
 Gi5\_7771953\_x59.....gggaacacggggugccgCacu..... 1  
 Gi1\_3599080\_x59.....aacacggggugccgaacuu..... 0  
 Gi2\_9636858\_x59.....agUccccgccaguacugcgau..... 1  
 Gi3\_25884027\_x59.....gucgugggaacacggggugccgaGcu..... 1  
 Gi3\_25892346\_x59.....gugggaGcacggggugccga..... 1  
 Gi3\_25894883\_x59.....ugggaacacggggguAccgaacu..... 1  
 Gi5\_7774313\_x59.....cgugggaacacggggguAccgaacu..... 1  
 Gi1\_3599788\_x59.....ucgggagacgucgugggaacacggggugc..... 0  
 Gl1a\_5191619\_x59.....agaagcgccgucagggccc..... 0  
 Gi3\_25885148\_x59.....Ggugggaacacggggugccgaa..... 1  
 Gi1\_3597133\_x59.....gugggaacGcggggugccgaacu..... 1  
 Gi5\_7769180\_x59.....aacacgAggugccgaacu..... 1  
 Gi3\_25909976\_x58.....Uucaggccccgccaguacug..... 1  
 Gl1a\_5197106\_x58.....aagcgccgucagggccccgccaguacugc..... 0  
 Gi2\_9654633\_x58.....gugggaacaAggggugccgaacu..... 1  
 Gl1a\_5194264\_x58.....gugggaacacggggugccgaGcu..... 1  
 Gi1\_3601488\_x58.....aacGcggggugccgaacu..... 1  
 Gi3\_25907946\_x58.....aucgggagacgucgugggaCcacggg..... 1  
 Gi5\_7783775\_x58.....agacgucgugggaacacggggugccgaacA..... 1  
 Gi2\_9645353\_x58.....gUagacgucgugggaacacggggugc..... 1  
 Gi1\_3604736\_x58.....gaacacggggugccgaGcu..... 1  
 Gi3\_25903596\_x58.....acgAcgugggaacacggggugccgaa..... 1  
 Gi3\_25915776\_x58.....Uccccgccaguacugcgau..... 1  
 Gi1\_3601952\_x58.....ggccccgccaguacugcgau..... 0  
 Gi3\_25912354\_x58.....gUgaacacggggugccga..... 1  
 Gi1\_3601662\_x58.....gaacacggggugccgaCcu..... 1  
 Gi2\_9643903\_x58.....aUgccccgccaguacugcgau..... 1  
 Gi3\_25900232\_x58.....ugggaacaUggggugccgaac..... 1  
 Gi5\_7780411\_x58.....ugggaacacggggugccAacu..... 1  
 Gi3\_25904756\_x58.....gggaacacggggugUcgaacu..... 1  
 Gi3\_25917400\_x58.....aacaGggggugccgaacu..... 1  
 Gi3\_25900000\_x58.....cgugggaaNacggggugcc..... 1  
 Gi2\_9645527\_x58.....aUcacggggugccgaacu..... 1  
 Gi3\_25919743\_x57.....gcgccgucagggccccgccaguacugcg..... 0  
 Gi3\_25928407\_x57.....ggaacacggggugccAacu..... 1  
 Gi5\_7795744\_x57.....ggccccgccaguacugcgau..... 0  
 Gl1a\_5201038\_x57.....agagaagcgccgucagggccc..... 0  
 Gi2\_9661991\_x57.....ucgugggaGcacggggugccgaacu..... 1  
 Gi5\_7801615\_x57.....ugggaacacggggugccgGacu..... 1  
 Gi3\_25921339\_x57.....gugggaacacgggCugccgaacu..... 1  
 Gi2\_9661820\_x57.....ggaacacggggGgccgaacu..... 1  
 Gi1\_3611999\_x57.....ucgggagacgucgCgggaacacgggg..... 1  
 Gi1\_3607040\_x57.....cagggccccgccaguacugcgau..... 0  
 Gi3\_25929832\_x57.....gugggaacacAgggugcc..... 1  
 Gi5\_7801672\_x57.....agacgucgugggaacacgggg..... 0  
 Gi3\_25925671\_x57.....aggccccgccaguacugcgau..... 0

Gi2\_9656291\_x57.....gccaguacugcgauccggGgacg..... 1  
 Gi1\_3611771\_x57.....ucaggccccgccaguacugcgauccgga..... 0  
 Gi3\_25927495\_x57.....ucgugggaacacggggugccgCac..... 1  
 Gi3\_25932511\_x57.....ggaacacggggugUcgaacu..... 1  
 Gi2\_9657260\_x57.....agacgucgugggaacacggggugccgaacA..... 1  
 Gl1a\_5202577\_x57.....gaagagaagcgccgucag..... 0  
 Gi2\_9657374\_x57.....guacugcgauccggGgacgucgug..... 1  
 Gi2\_9658172\_x57.....cgugggUacacggggugccgaacu..... 1  
 Gi2\_9658058\_x57.....cUugggaacacggggugccg..... 1  
 Gi2\_9656804\_x57.....gucgugggaacacggggugccgaCcu..... 1  
 Gi3\_25927666\_x57.....aUacgucgugggaacacggggugccgaac..... 1  
 Gl1a\_5203261\_x57.....Cugggaacacggggugccgaacu..... 1  
 Gi2\_9657203\_x57.....cgugggaacacggggugccgUacu..... 1  
 Gi3\_25953702\_x56.....ucguUggaacacggggugccgaacu..... 1  
 Gi1\_3616538\_x56.....aagagaagcgccgucagccccgccagu..... 0  
 Gi2\_9676398\_x56.....gucgugggNacacggggugccgaacu..... 1  
 Gi3\_25955550\_x56.....cguggCaacacggggugccgaacu..... 1  
 Gi5\_7810528\_x56.....aacaUgggugccgaacu..... 1  
 Gi2\_9667214\_x56.....cggagacgucgugggaGca..... 1  
 Gi3\_25950230\_x56.....aUgccccgccaguacugcgauccgga..... 1  
 Gi2\_9674438\_x56.....gcgauccggagacgucgugggaacacggg..... 0  
 Gi3\_25951630\_x56.....gaagagaagcgccgucagggccccg..... 0  
 Gi2\_9675670\_x56.....aagagaagcgccgucagggccccgc..... 0  
 Gi2\_9671582\_x56.....Cugggaacacggggugcc..... 1  
 Gi3\_25947766\_x56.....gccgucagggccccgccaguacug..... 0  
 Gi3\_25945526\_x56.....Gaggccccgccaguacugcgaucc..... 1  
 Gi2\_9676286\_x56.....ccccgccaguacugcgauccggGgac..... 1  
 Gi2\_9672030\_x56.....gaagcgccgucagggccccgccagu..... 0  
 Gi1\_3613346\_x56.....ggaacacgNggugccgaacu..... 1  
 Gi3\_25940990\_x56.....agacgucgugggaacacggggu..... 0  
 Gi3\_25956054\_x56.....agagaagcgccgucagggccccgccagua..... 0  
 Gi5\_7804592\_x56.....cggagacgucgugggaacacg..... 0  
 Gi5\_7811984\_x56.....gagacgucgugggaacacggggugcc..... 0  
 Gi3\_25957454\_x56.....cggagacgucgugggaacacggggug..... 0  
 Gi2\_9674606\_x56.....ggccccgccaguacugcgauccggagacgu..... 0  
 Gi3\_25957230\_x56.....cgucgugggaacGcgggugccgaacu..... 1  
 Gi1\_3614802\_x56.....agacgucgugggaacacggggugccgaac..... 0  
 Gl1a\_5211959\_x56.....cgugggaacacggggugccg..... 0  
 Gi5\_7826614\_x55.....aacacgggguAccgaacu..... 1  
 Gi5\_7823149\_x55.....Ggggaacacggggugccgaac..... 1  
 Gi3\_25973190\_x55.....aacacgggAugccgaacu..... 1  
 Gi2\_9678296\_x55.....Aggaacacggggugccgaac..... 1  
 Gi2\_9682916\_x55.....gGcaggccccgccaguacugc..... 1  
 Gi3\_25965545\_x55.....Cgaagagaagcgccgucagggccc..... 1  
 Gl1a\_5217105\_x55.....agagaagcgccgucagggccccgc..... 0  
 Gi3\_25971210\_x55.....cgugggaacacUgggugccgaacu..... 1  
 Gi2\_9685886\_x55.....aGcggagacgucgugggaacac..... 1



Gi2\_9678736\_x55.....aacGcggggugccgaacu..... 1  
 Gi3\_25975775\_x55.....cgucguggNaacacggggugcc..... 1  
 Gi3\_25972585\_x55.....Cucgugggaacacggggugccgaacu..... 1  
 Gi3\_25962080\_x55.....Cugggaacacggggugccgaa..... 1  
 G1a\_5219250\_x55.....gugggGacacggggugccgaacu..... 1  
 Gi3\_25961915\_x55.....gagacgucgugggaacacggggugccgaa..... 0  
 Gi2\_9682861\_x55.....Ggacgucgugggaacacgggggu..... 1  
 Gi5\_7817869\_x55.....gucaggccccgccaguac..... 0  
 Gi3\_25972475\_x55.....cgugggaacacggggugcUgaac..... 1  
 Gi2\_9684291\_x55.....ucggGgacgucgugggaacac..... 1  
 Gi1\_3618268\_x55.....gcgaucggagacgucGcgggaacac..... 1  
 Gi2\_9679066\_x55.....gGcuguggaacacggggugcc..... 1  
 G1a\_5215180\_x55.....agagaagcgccgucagggccccgc..... 0  
 Gi3\_25962245\_x55.....gggaacacAggugccgaacu..... 1  
 Gi5\_7833851\_x54.....gCaacacggggugccgaacu..... 1  
 Gi2\_9698706\_x54.....gGgacgucgugggaacacggggug..... 1  
 Gi2\_9702108\_x54.....gCgaacacggggugccgaacu..... 1  
 Gi3\_25987842\_x54.....aucggagacgucgugggaCcacgggg..... 1  
 Gi5\_7828343\_x54.....ugAgaacacggggugccgaacu..... 1  
 Gi5\_7836335\_x54.....ugggaacacAgggugccgaacu..... 1  
 Gi1\_3623484\_x54.....ggUacacggggugccgaacu..... 1  
 Gi5\_7836011\_x54.....aacacggggugcUgaacu..... 1  
 Gi5\_7832177\_x54.....caguacugcgaucggagacgucguggga..... 0  
 Gi5\_7831259\_x54.....ugggaacacgggUugccgaacu..... 1  
 Gi2\_9691416\_x54.....gCgggaacacggggugcc..... 1  
 Gi3\_25988544\_x54.....Gucggagacgucgugggaacacgggg..... 1  
 G1a\_5224932\_x54.....cgggagacgucgugggaacacggg..... 0  
 Gi5\_7832555\_x54.....gaucggagacgucgugggaacacgggg..... 0  
 G1a\_5226066\_x54.....gccaguacugcgaucgga..... 0  
 Gi5\_7835039\_x54.....ucgugggGacacggggugccgaacu..... 1  
 Gi2\_9693684\_x54.....cgugggaacacggggugccGacu..... 1  
 Gi3\_25993242\_x54.....cgucgugggaGcacggggugccgaacu..... 1  
 Gi5\_7838171\_x54.....ucgugggaacGcggggugccgaacu..... 1  
 Gi5\_7834283\_x54.....cgucguggNaacacggggugccgaacu..... 1  
 Gi5\_7826723\_x54.....aucggagacgucgugggaGcacggg..... 1  
 Gi1\_3623592\_x54.....aucggagacgucgugggaacacggggU..... 1  
 G1a\_5223960\_x54.....gCgggaacacggggugccgaacu..... 1  
 Gi2\_9699624\_x54.....Gggccccgccaguacugc..... 1  
 Gi2\_9700920\_x54.....aguacugcgaucggagacgucgug..... 0  
 Gi5\_7827425\_x54.....Uugggaacacggggugccgaacuu..... 1  
 Gi2\_9694656\_x54.....ugggaacacggggugcUgaacu..... 1  
 Gi2\_9701190\_x54.....ccaguacugcgaucggGgacgucgu..... 1  
 Gi5\_7828019\_x54.....cgugggaacacggggugccgaaUu..... 1  
 Gi2\_9700164\_x54.....caggccccgccaguacugcgaucggagacg..... 0  
 Gi1\_3630128\_x53.....Uugggaacacggggugccg..... 1  
 Gi3\_26008681\_x53.....gugggaacacggggugcGgaacu..... 1  
 Gi3\_25997286\_x53.....Uccgucaggccccgccaguac..... 1

Gi2\_9705185\_x53.....gccaguacugcgauccggagacg..... 0  
 Gl1a\_5230397\_x53.....gggaacacggggugccgaac..... 0  
 Gi3\_25997021\_x53.....Ggugggaacacggggugc..... 1  
 Gi2\_9703224\_x53.....cgauccggagacgucgugggaacac..... 0  
 Gi5\_7850966\_x53.....gccgucaggccccccaguacu..... 0  
 Gi2\_9712340\_x53.....aGcgggagacgucgugggaacacggggugcc..... 1  
 Gi3\_26005819\_x53.....gugggaacacgggAugccgaac..... 1  
 Gi2\_9705556\_x53.....gucgugggaacacggggugccga..... 0  
 Gi3\_26013451\_x53.....ugggGacacggggugccga..... 1  
 Gi5\_7843599\_x53.....cgugggaacacggggugcAgaacu..... 1  
 Gi1\_3628803\_x53.....gugggaacacggggugccgaGcu..... 1  
 Gi3\_26002374\_x53.....cgugggaaAacggggugccgaacu..... 1  
 Gi3\_25999883\_x53.....aacacggggugccGUacu..... 1  
 Gi2\_9708047\_x53.....Ggugggaacacggggugcc..... 1  
 Gi2\_9713506\_x53.....aggccccgNcaguacugc..... 1  
 Gi1\_3630976\_x53.....cgAgggaacacggggugccgaacu..... 1  
 Gi2\_9706086\_x53.....aggccccgccaaguacugcgaCc..... 1  
 Gi3\_26000890\_x53.....gucgugggaGcacggggugccgaacu..... 1  
 Gi3\_26005077\_x53.....ugggaacacggggugccGUacu..... 1  
 Gi3\_26000201\_x53.....ggAaacacggggugccgaacu..... 1  
 Gi3\_26003169\_x53.....acgucgugggaacacggggGcgcgaacu..... 1  
 Gi1\_3627478\_x53.....cgggagacgucgugggaacacggggg..... 0  
 Gi3\_26013398\_x53.....gccccgccaaguacugcgaggaga..... 0  
 Gi2\_9704867\_x53.....Ggggaacacggggugccga..... 1  
 Gi2\_9715255\_x53.....gugggaacUcggggugccgaacu..... 1  
 Gi5\_7839836\_x53.....aUgccccgccaaguacugcgaucc..... 1  
 Gi3\_26023136\_x52.....gucgugggaacacggggugccGac..... 1  
 Gi5\_7852687\_x52.....cgugggaacacggAgugccgaacu..... 1  
 Gi3\_26019964\_x52.....aggccccgNcaguacugcg..... 1  
 Gi2\_9721662\_x52.....aguacugcgauccggagacg..... 0  
 Gi1\_3632450\_x52.....gGcugugggaacacggggugccgaacu..... 1  
 Gi2\_9726706\_x52.....cUucgugggaacacggggugccga..... 1  
 Gi5\_7854871\_x52.....cgucgugggaacacggggGgccgaacu..... 1  
 Gi3\_26029324\_x52.....gAgggaacacggggugccga..... 1  
 Gi2\_9725926\_x52.....uUgugggaacacggggugccgaacu..... 1  
 Gi5\_7855391\_x52.....ggaacacggggugccgaGcu..... 1  
 Gl1a\_5241298\_x52.....Uugggaacacggggugccgaac..... 1  
 Gi2\_9718230\_x52.....gggaacacggggugccGacu..... 1  
 Gi3\_26020224\_x52.....aGcgggagacgucgugggaacac..... 1  
 Gi3\_26029740\_x52.....Ugagacgucgugggaacacg..... 1  
 Gi2\_9732412\_x51.....gugggaacacAgggugccgaac..... 1  
 Gi2\_9734452\_x51.....Uaucgggagacgucgugggaaca..... 1  
 Gi3\_26041900\_x51.....gucguggGacacggggugccgaacu..... 1  
 Gi3\_26043532\_x51.....ggaacacggggUAccgaacu..... 1  
 Gl1a\_5243652\_x51.....aagagaagcgcgucaggcccc..... 0  
 Gi2\_9730015\_x51.....ggccccgccaaguacugcgaucc..... 0  
 Gi3\_26043226\_x51.....agaagcgcgucaggccccccaaguacu..... 0

Gi3\_26055568\_x51.....aggccccgccaguacCgcgauC.....1  
 Gi3\_26054548\_x51.....gugggaacacgggguAccga.....1  
 G1a\_5245488\_x51.....agaagcgccgucagggccccgcca.....0  
 G1a\_5246304\_x51.....gugggaacGcggggugccgaacu.....1  
 Gi3\_26038330\_x51.....ggaacacggggAgccgaacu.....1  
 G1a\_5246559\_x51.....Uugggaacacggggugccga.....1  
 Gi2\_9741541\_x51.....caguacugcgauCggagacgucgug.....0  
 Gi3\_26038738\_x51.....gaacaAggggugccgaacu.....1  
 Gi2\_9738328\_x51.....gggaacacNgggugccgaac.....1  
 Gi3\_26048989\_x51.....cgugggaUcacggggugccgaacu.....1  
 Gi3\_26044807\_x51.....Cacgucgugggaacacggggugccgaacu.....1  
 Gi2\_9739246\_x51.....aUacgucgugggaacacggggugccgaacu.....1  
 Gi2\_9729046\_x51.....gaGcacggggugccgaacu.....1  
 Gi4\_467501\_x51.....cccgccaguacugcgauCggagacguc.....0  
 Gi3\_26056384\_x51.....gugUgaacacggggugccgaacu.....1  
 G1a\_5247831\_x50.....gucgugggaacacggggugcc.....0  
 Gi2\_9753695\_x50.....ucgggagacgucgugggaacaUggggugcc.....1  
 Gi5\_7878986\_x50.....gaacacggggugcUgaacu.....1  
 Gi3\_26075986\_x50.....ugggaacacAggggugccgaac.....1  
 Gi3\_26069186\_x50.....aucgggagacgucgugggaacacCg.....1  
 Gi3\_26074336\_x50.....gugggaacacggggugccgaG.....1  
 Gi2\_9751095\_x50.....aUgccccgccaguacugcgau.....1  
 Gi3\_26073286\_x50.....ugggaacacggggugccAaac.....1  
 Gi2\_9755295\_x50.....cgCgggaacacggggugccgaac.....1  
 Gi3\_26071736\_x50.....aUgccccgccaguacugcgauCgg.....1  
 Gi5\_7880636\_x50.....gGgggaacacggggugccga.....1  
 G1a\_5254831\_x50.....ugcgauCggagacgucgug.....0  
 Gi2\_9751145\_x50.....Gggccccgccaguacugcg.....1  
 G1a\_5250181\_x50.....guUggaacacggggugccgaacu.....1  
 Gi1\_3644514\_x50.....gaucgggagacgucgugggaacacgg.....0  
 Gi2\_9750495\_x50.....gugggaacCcggggugcc.....1  
 Gi3\_26068386\_x50.....gaucgggagacgucguggCaacacggggu.....1  
 Gi3\_26058986\_x50.....gugggaacacggggCgcccga.....1  
 Gi3\_26060736\_x50.....Gaggccccgccaguacugcg.....1  
 Gi2\_9754595\_x50.....cgugggaaNacggggugcc.....1  
 Gi3\_26069086\_x50.....ggaacacggggugcUgaac.....1  
 Gi1\_3642014\_x50.....Aggaacacggggugccgaacu.....1  
 Gi3\_26062736\_x50.....ggaacaUggggugccgaac.....1  
 Gi2\_9748995\_x50.....gugNgaacacggggugccgaacu.....1  
 Gi2\_9748195\_x50.....acgucgugggaacacggggugccgaacA.....1  
 Gi3\_26060086\_x50.....cguNgggaacacggggugccgaacu.....1  
 Gi3\_26083045\_x49.....cgugggaacacgUggugccgaac.....1  
 Gi1\_3650143\_x49.....ugggaacacggggCgccgaacu.....1  
 Gi2\_9757062\_x49.....gugggaacacggggugccgaUcu.....1  
 Gi2\_9762109\_x49.....ugggaacacggggugccgaCcu.....1  
 Gi3\_26085985\_x49.....gugggaacacggggGgccg.....1  
 Gi3\_26080644\_x49.....aggccccAccaguacugcgauC.....1

Gi1\_3648771\_x49.....gaacGcggggugccgaacu..... 1  
 Gi3\_26082114\_x49.....gaagcgcgucaggccccgccaguacugc..... 0  
 Gl1a\_5261264\_x49.....ggagacgucgugggaaca..... 0  
 Gi3\_26080399\_x49.....gugggaacaGggggugccgaacu..... 1  
 Gi3\_26093874\_x49.....gugggaGcacggggugccgaa..... 1  
 Gi5\_7899512\_x49.....cgggagacgucgugggaacacggg..... 0  
 Gi1\_3647056\_x49.....gagacgucgugggaacacggggugccg..... 0  
 Gi5\_7889712\_x49.....cUugggaacacggggugccga..... 1  
 Gi2\_9759561\_x49.....cgAgggaacacggggugccgaac..... 1  
 Gi2\_9762991\_x49.....Augggaacacggggugccg..... 1  
 Gi5\_7894857\_x49.....gugggaacacggggugccgaaUu..... 1  
 Gi2\_9763726\_x49.....gUacacggggugccgaacu..... 1  
 Gi5\_7895445\_x49.....ggaacGcggggugccgaacu..... 1  
 Gi2\_9761080\_x49.....Ggugggaacacggggugc..... 1  
 Gi3\_26084221\_x49.....Ugccccgccaguacugcgau..... 1  
 Gi3\_26084074\_x49.....ucguAggaacacggggugccgaacu..... 1  
 Gi2\_9764608\_x49.....gccgucaggccccgccaguacugc..... 0  
 Gi3\_26085593\_x49.....Uacgucgugggaacacggggg..... 1  
 Gi3\_26089023\_x49.....guUggaacacggggugccg..... 1  
 Gl1a\_5256217\_x49.....ugggaacacggggugccgCacu..... 1  
 Gi5\_7913888\_x48.....ugggaacacggggugcUgaacu..... 1  
 Gi2\_9778013\_x48.....cgaucggagacgucgugggaacacgggg..... 0  
 Gi2\_9776525\_x48.....gugggaacNcggggugccg..... 1  
 Gi2\_9777533\_x48.....aggccccgccaguacugcgauccg..... 0  
 Gi3\_26109872\_x48.....gggaacacggAgugccgaacu..... 1  
 Gi5\_7902368\_x48.....cgugggaacacgggAugccgaacu..... 1  
 Gl1\_3657401\_x48.....cgugUgaacacggggugccgaacu..... 1  
 Gi3\_26104208\_x48.....aucggagacgucgugggaacacggggG..... 1  
 Gi3\_26100896\_x48.....cgugggaacacgCggugccgaacu..... 1  
 Gl1\_3654041\_x48.....uUggaacacggggugccgaac..... 1  
 Gi2\_9773885\_x48.....gaacacggggugccgCacu..... 1  
 Gl1\_3657017\_x48.....gugggaGcacggggugccgaacu..... 1  
 Gi3\_26109536\_x48.....ucaggccccgccaguacugcgauccggag..... 0  
 Gi3\_26113184\_x48.....ucgugggaacacAgggugccgaacu..... 1  
 Gi5\_7909808\_x48.....cgugggaacacggggugAcgaacu..... 1  
 Gi3\_26102336\_x48.....gucgugggaacacggggugccgaacu..... 0  
 Gi3\_26114336\_x48.....Ggucgugggaacacggggugccgaac..... 1  
 Gi5\_7901840\_x48.....gugggaacacggggugcAgaacu..... 1  
 Gi2\_9770333\_x48.....gugggaacacggggugccgCc..... 1  
 Gi3\_26104736\_x48.....cUccaguacugcgauccggagacguc..... 1  
 Gi5\_7907408\_x48.....gggaacGcggggugccgaacu..... 1  
 Gi3\_26116016\_x48.....ugggaacacggggugccgaaUu..... 1  
 Gl1a\_5262484\_x48.....Ggugggaacacggggugccgaacu..... 1  
 Gl1\_3656201\_x48.....ucgugggaacacggggugccgCacu..... 1  
 Gi2\_9771389\_x48.....gugggaGcacggggugcc..... 1  
 Gi5\_7925786\_x47.....cgugggCacacggggugccgaacu..... 1  
 Gi3\_26126884\_x47.....Uuacugcgauccggagacg..... 1

Gi1\_3662931\_x47.....ugggGacacggggugccgaacu..... 1  
 Gi3\_26132289\_x47.....gugggaCcacggggugccgaac..... 1  
 Gi5\_7916903\_x47.....ucgCgggaacacggggugccgaacu..... 1  
 Gi2\_9788474\_x47.....cgugggaacCcggggugccgaacu..... 1  
 Gi3\_26135720\_x47.....aucggagacgucgugggaGcacggg..... 1  
 Gi5\_7915822\_x47.....gggaGcacggggugccgaacu..... 1  
 Gi3\_26129187\_x47.....aggccccgccaguacugcgGuc..... 1  
 Gi5\_7924329\_x47.....gugggaacacggggugAcgaacu..... 1  
 Gi3\_26129751\_x47.....auUggagacgucgugggaacacgg..... 1  
 Gi1\_3663918\_x47.....aacacggggAgccgaacu..... 1  
 Gi3\_26130785\_x47.....aggccccgccaguacugcgaCc..... 1  
 Gi3\_26116779\_x47.....Uagacgucgugggaacacggggugccgaac..... 1  
 Gi4\_472216\_x47.....cUugggaacacggggugccgaacu..... 1  
 Gi1\_3664388\_x47.....gugggaacacggggugccgCacu..... 1  
 Gi3\_26124628\_x47.....ggaUcacggggugccgaacu..... 1  
 Gi3\_26134028\_x47.....cccgccaguacugcgauccggagacgucg..... 0  
 Gi2\_9787299\_x47.....Gucggagacgucgugggaacacggggugc..... 1  
 Gi3\_26127448\_x47.....Uagacgucgugggaacacggggugccgaacu..... 1  
 Gi1\_3661521\_x47.....ggagacgucgugggaacacggggg..... 0  
 Gi3\_26129093\_x47.....gugggaacGcggggugccgaa..... 1  
 Gi2\_9800296\_x46.....cgugggCacacggggugccgaacu..... 1  
 Gl1\_5280646\_x46.....gcgauccggagacgucgug..... 0  
 Gi3\_26151535\_x46.....aucggagCcgucgugggaacacggg..... 1  
 Gi1\_3668211\_x46.....gaacacggggugccgCacu..... 1  
 Gi2\_9803148\_x46.....cGccgccaguacugcgauc..... 1  
 Gi2\_9803424\_x46.....ucgugggGacacggggugccgaacu..... 1  
 Gi3\_26147855\_x46.....gugggaacacggggugccgG..... 1  
 Gi3\_26147901\_x46.....cgugAgaacacggggugccgaac..... 1  
 Gi5\_7940275\_x46.....gucgugggaacacggggugc..... 0  
 Gi3\_26145555\_x46.....gugggGacacggggugcc..... 1  
 Gl1\_5280784\_x46.....cgucgugggaacacggggugccgaacA..... 1  
 Gi3\_26146337\_x46.....guggUaacacggggugccga..... 1  
 Gi3\_26141967\_x46.....cGggccccgccaguacugcg..... 1  
 Gi5\_7939079\_x46.....cgggagacgucgugggaacacggggugccga..... 0  
 Gi3\_26144911\_x46.....aGcgggagacgucgugggaacacggggugcc..... 1  
 Gi3\_26140633\_x46.....ggagacgucgugggaacacggggug..... 0  
 Gi3\_26142841\_x46.....aacacggggugcGgaacu..... 1  
 Gi3\_26150937\_x46.....gugggaacacggggugccgUac..... 1  
 Gi3\_26156917\_x46.....gugggaacacgUggugccgaacu..... 1  
 Gi3\_26154479\_x46.....aggccccgNcaguacugcga..... 1  
 Gi3\_26148867\_x46.....aucggagacgucgugggaacGcggg..... 1  
 Gi1\_3667199\_x46.....cgggagacgucgugggaacacgggg..... 0  
 Gi3\_26137735\_x46.....cgggagacgucgugggaacacggggugccg..... 0  
 Gi1\_3667245\_x46.....uUgugggaacacggggugccgaacu..... 1  
 Gi5\_7939263\_x46.....cgugggaacacggggAgccgaacu..... 1  
 Gi3\_26151581\_x46.....gaacacggNgugccgaac..... 1  
 Gi5\_7941147\_x45.....cgugggaacacggggugccgaacuu..... 0

Gi5\_7941372\_x45.....gaacacAgggugccgaacu..... 1  
 Gi3\_26161558\_x45.....gaagagaagcgccgucaggc..... 0  
 Gi1\_3671610\_x45.....gcgaucggagacgucgugggaaca..... 0  
 Gi2\_9818934\_x45.....cgucaggccccgccaguacugcgaucgg..... 0  
 Gi3\_26167273\_x45.....cgugggaacacggggugccUaacu..... 1  
 Gi2\_9818664\_x45.....acugcgaucggagacgucgugggaaca..... 0  
 Gi3\_26173078\_x45.....cGggccccgccaguacugc..... 1  
 Gi3\_26176273\_x45.....cGggccccgccaguacugc..... 1  
 Gi3\_26168983\_x45.....gAgggaacacggggugcc..... 1  
 Gi3\_26175958\_x45.....ugggaacaNggggugccg..... 1  
 Gi2\_9811914\_x45.....Uucgugggaacacggggugccga..... 1  
 Gi3\_26162188\_x45.....cgugggaacacgggCugccgaacu..... 1  
 Gi1\_3672150\_x45.....aacacggggugccgCacu..... 1  
 Gi3\_26169703\_x45.....Ggugggaacacggggugccg..... 1  
 Gi2\_9816729\_x45.....Aucgugggaacacggggugccgaacu..... 1  
 Gi2\_9811239\_x45.....gugggaacacggggugccgCac..... 1  
 Gi3\_26174788\_x45.....Uccaguacugcgaucggagacgu..... 1  
 Gi2\_9814569\_x45.....Uccaguacugcgaucggagacguc..... 1  
 Gi2\_9807864\_x45.....cUucgugggaacacggggugc..... 1  
 Gi3\_26160613\_x45.....Uggccccgccaguacugcgauc..... 1  
 Gi3\_26175103\_x45.....cgccaguacugcgaucggagacgucg..... 0  
 Gi1\_3673455\_x45.....ucggagacgucgugggaacacgggg..... 0  
 Gi5\_7943982\_x45.....cgucgugggaacacggggCgccgaacu..... 1  
 Gi3\_26166418\_x45.....gugggaacCggggugccgaa..... 1  
 Gi3\_26176993\_x45.....gUagacgucgugggaacacggggu..... 1  
 Gi3\_26189409\_x44.....ucgugggaacacggggCgccgaac..... 1  
 Gi2\_9831882\_x44.....cgucgugggaacacggggGgccgaacu..... 1  
 Gi4\_474816\_x44.....gGgggaacacggggugccgaacu..... 1  
 Gi3\_26192709\_x44.....ggaacacggggugccgaCcu..... 1  
 Gi3\_26192665\_x44.....cgaucggagacgucgugggaacacggggugc..... 0  
 Gi2\_9829242\_x44.....caggccccgccaguacugcgaucggaga..... 0  
 Gi1\_3676493\_x44.....gacgucgugggaacacggggugccgaacA..... 1  
 Gi2\_9825062\_x44.....ggaacacggggugccgaGc..... 1  
 Gi2\_9822510\_x44.....agacgucgugggaacacggggu..... 0  
 Gi2\_9823258\_x44.....ugggaacacggggugccgCac..... 1  
 Gi2\_9824886\_x44.....ugggaacacAgggugccgaacu..... 1  
 Gi3\_26196845\_x44.....Uaucggagacgucgugggaacacgg..... 1  
 Gi3\_26187913\_x44.....gccgucaggccccgccaguacugcgau..... 0  
 Gi2\_9829418\_x44.....gaucggGgacgucgugggaacac..... 1  
 Gi3\_26188837\_x44.....cguUggaacacggggugccgaacu..... 1  
 Gi3\_26193633\_x44.....aggccccgccGguacugcgauc..... 1  
 Gi5\_7964143\_x44.....gugggUacacggggugccgaacu..... 1  
 Gi3\_26181533\_x44.....ggaacacggggugccgaaUu..... 1  
 Gi1\_3675965\_x44.....gugggaacCcgggugccgaacu..... 1  
 Gi3\_26192753\_x44.....gugggaacacggAgugcc..... 1  
 Gi3\_26180521\_x44.....Aaacacggggugccgaac..... 1  
 Gl1a\_5294604\_x44.....ugggaacaNggggugccgaacu..... 1

Gi2\_9830738\_x44.....ggaacacAgggugccgaacu..... 1  
 Gi3\_26179069\_x44.....gugggGacacggggugccg..... 1  
 Gi3\_26185053\_x44.....gugggaacacggggugccAa..... 1  
 Gi1\_3677153\_x44.....gggaacacggggugccgaCcu..... 1  
 Gi2\_9823390\_x44.....uUggaacacggggugccgaa..... 1  
 Gi2\_9832234\_x44.....gaucggGgacgucgugggaacacggggugc..... 1  
 Gi5\_7961195\_x44.....aGgucgugggaacacggggugccgaacu..... 1  
 Gi3\_26191345\_x44.....ggagacgucgugggaacacggggugccga..... 0  
 Gi3\_26178057\_x44.....Agugggaacacggggugccgaac..... 1  
 Gi3\_26185933\_x44.....gugggaaUacggggugcc..... 1  
 G1a\_5300617\_x43.....gGgggaacacggggugcc..... 1  
 Gi1\_3680974\_x43.....uAggaacacggggugccgaacu..... 1  
 Gi3\_26218945\_x43.....gagacgucgugggaacacggggugc..... 0  
 G1a\_5301477\_x43.....gugggaGcacggggugccgaacu..... 1  
 Gi2\_9835132\_x43.....agggccccccaguacugcgCuc..... 1  
 Gi2\_9839690\_x43.....Agggaacacggggugccgaacu..... 1  
 Gi3\_26201917\_x43.....ucAugggaacacggggugccgaacu..... 1  
 Gi3\_26209313\_x43.....ugggGacacggggugccga..... 1  
 Gi2\_9845022\_x43.....ggaacacggggugcUgaacu..... 1  
 Gi3\_26210689\_x43.....cgugggaaNacggggugccga..... 1  
 Gi3\_26206733\_x43.....gCgggaacacggggugccg..... 1  
 Gi3\_26214860\_x43.....ggaacaUggggugccgaacu..... 1  
 Gi3\_26219762\_x43.....cggagacgucgugggaacacggggugccgaacu..... 0  
 Gi3\_26220149\_x43.....gugggaacacAgggugccga..... 1  
 Gi3\_26198778\_x43.....auUggagacgucgugggaacacggggg..... 1  
 Gi3\_26211764\_x43.....cgucguggGacacggggugccgaacu..... 1  
 Gi2\_9840120\_x43.....ugggaacaNggggugccgaac..... 1  
 Gi3\_26217053\_x43.....cgCcgugggaacacggggugccgaacu..... 1  
 Gi1\_3682780\_x43.....aUacgucgugggaacacggggugccgaacu..... 1  
 Gi5\_7974796\_x43.....cgucgugggaacacggggugccgCacu..... 1  
 Gi5\_7971571\_x43.....acgucgugNgaacacggggugccgaacu..... 1  
 Gi3\_26218601\_x43.....aucggagacgucgugggaacacgggA..... 1  
 Gi3\_26204970\_x43.....ggaacacggAgugccgaacu..... 1  
 Gi3\_26207077\_x43.....uAggaacacggggugccga..... 1  
 Gi2\_9847129\_x43.....cgggagacgucgugggaacacgggg..... 0  
 G1a\_5302853\_x43.....ucagggccccccaguacugcgaucgg..... 0  
 Gi2\_9836766\_x43.....cUgagacgucgugggaacacggggugc..... 1  
 Gi2\_9844764\_x43.....Uggaacacggggugccga..... 1  
 Gi3\_26231755\_x42.....aAgccccccaguacugcgauc..... 1  
 Gi2\_9850837\_x42.....gucgugggaacCcgggugccgaacu..... 1  
 Gi3\_26226379\_x42.....gugggaacacggggugcUg..... 1  
 Gi1\_3689477\_x42.....gacgucgugggaacacggggugccgaac..... 0  
 Gi2\_9847897\_x42.....cgugggaacacggggugAcgaacu..... 1  
 Gi3\_26226883\_x42.....ggaacacggAgugccgaac..... 1  
 Gi1\_3688595\_x42.....aacacggggugccAaacu..... 1  
 Gi1\_3691157\_x42.....gaGcacggggugccgaacu..... 1  
 Gi5\_7987090\_x42.....gugggaCcacggggugccgaacu..... 1

Gi5\_7986922\_x42.....gugggaacNcggggugccgaac..... 1  
Gi5\_7983226\_x42.....gAaacacggggugccgaacu..... 1  
Gi2\_9849157\_x42.....gAgggaacacggggugccg..... 1  
Gi3\_26232301\_x42.....ggaacacggggugccgaCc..... 1  
Gi5\_7978984\_x42.....Uucgugggaacacggggugccgaac..... 1  
Gi2\_9848611\_x42.....cggGgacgucgugggaacacgggg..... 1  
Gi3\_26225287\_x42.....aCcgagacgucgugggaacacg..... 1  
Gi3\_26239777\_x42.....aucggagGcgucgugggaacacg..... 1  
Gi2\_9861001\_x42.....aGcggagacgucgugggaacacg..... 1  
Gi3\_26222893\_x42.....guUggaacacggggugccgaa..... 1  
Gi3\_26228185\_x42.....gUccccgccaguacugcgau..... 1  
Gi2\_9857515\_x42.....gucgugggaacacgggg..... 0  
Gi3\_26230873\_x42.....gcgccgucaggccccgccaguacug..... 0  
G1a\_5312145\_x42.....gaucggagacgucgugggaacacg..... 0  
Gi2\_9857473\_x42.....aUacgucgugggaacacggggugc..... 1  
Gi1\_3687041\_x42.....gAgggaacacggggugccgaacu..... 1  
Gi1\_3690989\_x42.....ugggaGcacggggugccgaacu..... 1  
Gi3\_26231125\_x42.....aUacgucgugggaacacggggugcc..... 1  
Gi3\_26223607\_x42.....gugggaacGcggggugccg..... 1  
Gi2\_9864395\_x41.....gUaacacggggugccgaa..... 1  
Gi5\_7996692\_x41.....gggagacgucgugggaacacggggugccgaacu..... 0  
Gi3\_26255895\_x41.....Uuacugcgaucgggagacgucgug..... 1  
Gi5\_8001776\_x41.....gggaacacggggGgccgaacu..... 1  
Gi1\_3695848\_x41.....Agaacacggggugccgaacu..... 1  
Gi3\_26240110\_x41.....gCacacggggugccgaacu..... 1  
Gi3\_26252410\_x41.....cgugggaacaAggggugccgaacu..... 1  
Gi1\_3692076\_x41.....ucgugggGcacggggugccgaacu..... 1  
Gi2\_9866322\_x41.....ggaacacggggugccAaacu..... 1  
Gi3\_26242529\_x41.....gugAgaacacggggugcc..... 1  
Gi2\_9868782\_x41.....ucggGgacgucgugggaacacgg..... 1  
Gi5\_7998209\_x41.....ucgugggaGcacggggugccgaacu..... 1  
Gi3\_26253804\_x41.....Cugggaacacggggugccg..... 1  
Gi3\_26253148\_x41.....ccgucaggccccgccaguacugcgau..... 0  
Gi3\_26248638\_x41.....gggagacgucgugggaacacgggg..... 0  
Gi2\_9871201\_x41.....gaaacAcAgggugccgaacu..... 1  
Gi5\_7990952\_x41.....ugggaacacggggAgccgaacu..... 1  
Gi5\_7993166\_x41.....gCgaacacggggugccgaacu..... 1  
Gi2\_9866691\_x41.....gaagcgccgucaggccccccagua..... 0  
Gi2\_9865338\_x41.....gggaacacggAgugccgaacu..... 1  
G1a\_5314654\_x41.....cUucaggccccgccaguacugcg..... 1  
Gi2\_9869684\_x41.....aacacggggAgccgaacu..... 1  
Gi5\_8006734\_x40.....gggaacacggggugccgaGcu..... 1  
Gi2\_9877850\_x40.....Uaagcgccgucaggcccc..... 1  
Gi3\_26280010\_x40.....gggaacCcggggugccgaacu..... 1  
Gi2\_9883890\_x40.....cgccgucaggccccgccaguacugcgau..... 0  
Gi1\_3701277\_x40.....cgugggaacacggggugccgaCcu..... 1  
Gi1\_3702037\_x40.....gUaacacggggugccgaacu..... 1



Gi2\_9880010\_x40.....gggaacacggggugccgaCc..... 1  
 Gi4\_479774\_x40.....cgccaguacugcgauccgagacgucgug..... 0  
 Gi2\_9884250\_x40.....ggUgacgucgugggaaacacggggugcc..... 1  
 Gi1\_3701557\_x40.....guggUaacacggggugccgaacu..... 1  
 Gi5\_8010294\_x40.....aacacggggugccgaCcu..... 1  
 Gi2\_9884570\_x40.....Gucggagacgucgugggaaacac..... 1  
 Gi1\_3700477\_x40.....gugggaacacggggugccgaCcu..... 1  
 Gi5\_8015894\_x40.....ugggaacacggggugccgaCcu..... 1  
 Gi2\_9876490\_x40.....ucguUggaacacggggugccgaacu..... 1  
 Gl1a\_5322148\_x40.....aUuacugcgauccgagacguc..... 1  
 Gi3\_26273810\_x40.....cguAggaacacggggugccgaac..... 1  
 Gi2\_9885530\_x40.....cgugggaacacggggugccgCac..... 1  
 Gi3\_26279330\_x40.....aacUcggggugccgaacu..... 1  
 Gi3\_26268970\_x40.....Agggaaacacggggugccgaac..... 1  
 Gl1a\_5322628\_x40.....cgugggaacacggggugccgaac..... 0  
 Gi2\_9878130\_x40.....cccgccaguacugcgauccgagacgucg..... 0  
 Gi5\_8009854\_x40.....ucguUggaacacggggugccgaacu..... 1  
 Gi3\_26273970\_x40.....cgCgggaacacggggugccga..... 1  
 Gi3\_26266370\_x40.....gaacacggUgugccgaacu..... 1  
 Gi1\_3700597\_x40.....acgucgugggaacacggggugccgaac..... 0  
 Gi3\_26267770\_x40.....aCcgagacgucgugggaaacacggg..... 1  
 Gi5\_8012734\_x40.....ucgugggaacCcgggugccgaacu..... 1  
 Gi3\_26270650\_x40.....cUucaggccccgccaguacug..... 1  
 Gl1a\_5330397\_x39.....ccccgccaguacugcgauccg..... 0  
 Gl1a\_5329695\_x39.....cgucaggccccgccaguac..... 0  
 Gi3\_26295666\_x39.....aucggagacgucgUggaacacggggugc..... 1  
 Gi3\_26292273\_x39.....cgucaggccccgccaguacugcgauccg..... 0  
 Gi3\_26285526\_x39.....aUagaagcgccgucaggccccgcc..... 1  
 Gi5\_8019767\_x39.....cgugggUaacacggggugccgaacu..... 1  
 Gi3\_26296797\_x39.....Aucgugggaacacggggugccgaac..... 1  
 Gi2\_9888907\_x39.....aggccccgccGguacugcgaucc..... 1  
 Gi3\_26295861\_x39.....cggagacgucgugggaaacacggggugccgaa..... 0  
 Gi2\_9899983\_x39.....ggaacacggggugUcgaacu..... 1  
 Gl1a\_5335233\_x39.....cUugggaacacggggugcc..... 1  
 Gi2\_9900451\_x39.....agaagcgccgucaggccccgccagua..... 0  
 Gi3\_26294808\_x39.....cgCgugggaacacggggugcc..... 1  
 Gi2\_9899320\_x39.....aguacugcgauccgagacgucg..... 0  
 Gi5\_8023199\_x39.....ucggagacgucgugggaaacacggggugc..... 0  
 Gi2\_9889063\_x39.....gccccgccaguacugcg..... 0  
 Gi3\_26294730\_x39.....gggaacacggggugcAgaacu..... 1  
 Gi2\_9898189\_x39.....Gucggagacgucgugggaaacacggggugcc..... 1  
 Gi3\_26286072\_x39.....gaUcacggggugccgaac..... 1  
 Gi2\_9891988\_x39.....guAggaacacggggugccgaac..... 1  
 Gi3\_26303193\_x39.....agUccccgccaguacugc..... 1  
 Gi2\_9892651\_x39.....acgucgugggaacacggggugccga..... 0  
 Gl1a\_5334726\_x39.....Ugaacacggggugccgaac..... 1  
 Gi2\_9896083\_x39.....Gucggagacgucgugggaaaca..... 1

Gi3\_26293170\_x39.....gugggaGcacggggugccg..... 1  
 Gi3\_26286423\_x39.....ggaacacggggUccgaacu..... 1  
 Gi3\_26301087\_x39.....ggaacacgAggugccgaac..... 1  
 Gi3\_26294886\_x39.....ugggaacacggggugcUgaac..... 1  
 Gi2\_9894367\_x39.....aacacggggugccgCacu..... 1  
 Gi3\_26302803\_x39.....acgucgugggaacacggggugccgCacu..... 1  
 Gi1\_3706817\_x39.....cgucgugggaacacggggugccg..... 0  
 Gi3\_26287398\_x39.....aucggagacgucgugggGacacggg..... 1  
 Gi2\_9895381\_x39.....agacgucgugggaacacggggugccga..... 0  
 Gi2\_9899554\_x39.....gugggaacGcggggugcc..... 1  
 Gi5\_8024603\_x39.....aacacggggGgccgaacu..... 1  
 Gi3\_26291688\_x39.....gGcgucgugggaacacggggugccgaacu..... 1  
 Gi2\_9888166\_x39.....Gucggagacgucgugggaacacggg..... 1  
 Gi2\_9898462\_x39.....guggUaacacggggugcc..... 1  
 Gi3\_26293209\_x39.....gacgucgugggaacacggggugc..... 0  
 Gi1\_3708338\_x39.....gGgggaacacggggugcc..... 1  
 Gi3\_26286579\_x39.....gGucggagacgucgugggaacacggg..... 1  
 Gi1\_3702917\_x39.....gacgucgCgggaacacggggugccgaac..... 1  
 Gi5\_8018675\_x39.....cUugggaacacggggugcc..... 1  
 Gl1\_5331567\_x39.....gugggaacacggggugccgCacu..... 1  
 Gi3\_26319216\_x38.....gugggCacacggggugccgaac..... 1  
 Gl1\_5340570\_x38.....aucggagacgucgugggaacac..... 0  
 Gi2\_9901555\_x38.....Ugugggaacacggggugccgaac..... 1  
 Gi2\_9909497\_x38.....cgugggaacacggggugccgaCc..... 1  
 Gi2\_9902543\_x38.....cgCcgugggaacacggggugccgaacu..... 1  
 Gi3\_26308994\_x38.....aUagaagcgccgucaggccccgc..... 1  
 Gi3\_26308576\_x38.....Gcaggccccgccaguacugcgauc..... 1  
 Gi3\_26322598\_x38.....aucggagacgucgugggCacacg..... 1  
 Gi1\_3713784\_x38.....gGgggaacacggggugccgaac..... 1  
 Gl1\_5337796\_x38.....aggccccccaguacCgc..... 1  
 Gi3\_26320166\_x38.....aucggagacgucgugggaGcacgg..... 1  
 Gi3\_26319140\_x38.....Uucgugggaacacggggugc..... 1  
 Gi1\_3710212\_x38.....ugggaacGcggggugccgaacu..... 1  
 Gl1\_5339734\_x38.....cccgccaguacugcgagacgu..... 0  
 Gi3\_26311046\_x38.....gugggaGcacggggugcc..... 1  
 Gi3\_26313022\_x38.....Uaagagaagcgccgucaggccccgcc..... 1  
 Gi3\_26316442\_x38.....Nugggaacacggggugccgaacu..... 1  
 Gi1\_3709718\_x38.....ucgugggaacacggggugccgaa..... 0  
 Gi3\_26321610\_x38.....gugggaacacggggugUc..... 1  
 Gi1\_3710782\_x38.....gugggaacacggggugccAaacu..... 1  
 Gi2\_9910371\_x38.....gugggaacacggggugccgGac..... 1  
 Gi1\_3713860\_x38.....ggaacacggggCgccgaacu..... 1  
 Gi5\_8032949\_x38.....ugggaacacgAggugccgaacu..... 1  
 Gi5\_8035229\_x38.....ugggaacaUggggugccgaacu..... 1  
 Gi3\_26327310\_x38.....cgugggaCcacggggugccgaac..... 1  
 Gi1\_3714278\_x38.....ggaacacggggugccgCacu..... 1  
 Gi2\_9904861\_x38.....cGggccccccaguacugcgauc..... 1

Gi3\_26306296\_x38.....gugCgaacacggggugccgaacu..... 1  
Gi2\_9901175\_x38.....Uacgucgugggaacacggggugccg..... 1  
Gi3\_26317772\_x38.....cgugggaacacggggugccgaaA..... 1  
Gi3\_26311312\_x38.....cUccaguacugcgauccggagacg..... 1  
Gi2\_9908167\_x38.....gagacgucgugggaacacggggugccgaac..... 0  
Gi1\_3710744\_x38.....acgucgCgggaacacggggugccg..... 1  
Gi1\_3708882\_x38.....ucgugggaacGcggggugccgaacu..... 1  
Gi3\_26316404\_x38.....uCggaacacggggugccgaa..... 1  
G1a\_5339012\_x38.....guggUaacacggggugccgaacu..... 1  
Gi2\_9912993\_x38.....cUucgugggaacacggggugccgaac..... 1  
Gi3\_26307170\_x38.....ugggaacacggggCgccgaa..... 1  
Gi2\_9903075\_x38.....cccgccaguacugcgauccggagacgu..... 0  
Gi3\_26327044\_x38.....guUgugggaacacggggugccgaac..... 1  
G1a\_5337948\_x38.....cgucaggccccgccaguacugcgauccg..... 0  
G1a\_5343686\_x38.....aucggagacgucgugggaacacgggg..... 0  
Gi5\_8031201\_x38.....gGgggaacacggggugccgaa..... 1  
G1a\_5341938\_x38.....gugggaacCcgggugccgaacu..... 1  
Gi3\_26321572\_x38.....gugggaacacggggCgccg..... 1  
Gi2\_9914486\_x37.....ggaacacggggugccgaCcu..... 1  
Gi3\_26343001\_x37.....gaucggagacguUgugggaacacggg..... 1  
Gi3\_26327609\_x37.....aUcgcggucaggccccgccagu..... 1  
Gi2\_9924661\_x37.....Gcaggccccgccaguacugc..... 1  
Gi3\_26350660\_x37.....cguUgugggaacacggggugccgaacu..... 1  
Gi2\_9924402\_x37.....aacacggggugccgGacu..... 1  
Gi2\_9918001\_x37.....ggaGcacggggugccgaac..... 1  
Gi3\_26346479\_x37.....gugggaacacggggugcUga..... 1  
Gi3\_26333640\_x37.....gaaacacggggCgccgaa..... 1  
Gi3\_26332974\_x37.....gaagagGagcgcggucaggccccgcc..... 1  
Gi1\_3716548\_x37.....ggaacacggggugccgaacuu..... 0  
Gi2\_9915633\_x37.....Gggccccgccaguacugcga..... 1  
Gi3\_26350290\_x37.....ugggCacacggggugccgaacu..... 1  
Gi2\_9917742\_x37.....cccgccaguacugcgauccggagacgucg..... 0  
Gi3\_26338006\_x37.....Uaacacggggugccgaacuu..... 1  
Gi2\_9921442\_x37.....aCgccccgccaguacugcgauc..... 1  
Gi2\_9925882\_x37.....cgugggaacUcggggugccgaacu..... 1  
G1a\_5350800\_x37.....gGgggaacacggggugccgaa..... 1  
G1a\_5345916\_x37.....gccaguacugcgauccggagacgucg..... 0  
Gi5\_8053663\_x37.....ucgugggaacacggggGgccgaacu..... 1  
Gi3\_26347071\_x37.....aucggagacgucgugggaCcacggg..... 1  
Gi3\_26346627\_x37.....cguggUaacacggggugccgaacu..... 1  
Gi2\_9919814\_x37.....gugggaacacggggugcUgaac..... 1  
Gi1\_3719397\_x37.....Gcuggggaacacggggugccgaac..... 1  
Gi1\_3715586\_x37.....Uucgugggaacacggggugcc..... 1  
G1a\_5345768\_x37.....cgauccggagacgucgugggaacacggg..... 0  
Gi2\_9918593\_x37.....cgccaguacugcgauccggagacgucgu..... 0  
Gi2\_9922774\_x37.....aacacAgggugccgaacu..... 1  
Gi3\_26336082\_x37.....ugggaacacgggUugccgaac..... 1

Gi2\_9917853\_x37.....Gagggccccccagucugcggauc..... 1  
 Gi3\_26328978\_x37.....aUuacugcgauccggagacg..... 1  
 Gi2\_9917113\_x37.....gcgaucggagacgucgugggaacacgg..... 0  
 Gi2\_9913487\_x37.....cgugggaacacggggugccgaGc..... 1  
 Gi3\_26333344\_x37.....acgucgugggaacacggggGgccgaacu..... 1  
 Gi3\_26371307\_x36.....ugggaacacggggugccgaG..... 1  
 Gi2\_9941103\_x36.....aguacugcgauccggGgacgucguggg..... 1  
 Gi2\_9940203\_x36.....gagaagcgccgucagggccccgccaaguacu..... 0  
 Gi3\_26362055\_x36.....aacacggggugccgaaAu..... 1  
 Gi1\_3723243\_x36.....aucggagacgucgCgggaacacggggugcc..... 1  
 Gi5\_8062888\_x36.....cgCcgugggaacacggggugccgaacu..... 1  
 Gi2\_9936747\_x36.....Uacacggggugccgaacu..... 1  
 Gi1a\_5359379\_x36.....ggaacacgNggugccgaacu..... 1  
 Gi3\_26359751\_x36.....gggaacacggggugccAaac..... 1  
 Gi5\_8065480\_x36.....gUGaacacggggugccgaa..... 1  
 Gi3\_26374619\_x36.....ucgugggaacaUggggugccgaacu..... 1  
 Gi3\_26362235\_x36.....ucgugggaacacggggugccgaGc..... 1  
 Gi5\_8060152\_x36.....aacacggAgugccgaacu..... 1  
 Gi3\_26357843\_x36.....cgucagggccccgccaaguacugcgaucc..... 0  
 Gi3\_26358563\_x36.....acgucgugggaacGcggggugccgaacu..... 1  
 Gi3\_26354315\_x36.....aUuacugcgauccggagacgucgug..... 1  
 Gi3\_26363207\_x36.....cUccgucagggccccgccaaguacugc..... 1  
 Gi1\_3724431\_x36.....Ugagacgucgugggaacacggggugcc..... 1  
 Gi2\_9932031\_x36.....ucgugggaacacggggGgccgaacu..... 1  
 Gi3\_26361011\_x36.....agacgucgugggaacacggggugccgaa..... 0  
 Gi3\_26356655\_x36.....aUaagcgccgucagggccccgcca..... 1  
 Gi3\_26357627\_x36.....gcgaucggagacgucgugggaacacggggugcc..... 0  
 Gi5\_8056192\_x36.....gAgaacacggggugccgaacu..... 1  
 Gi2\_9935739\_x36.....aacacggggugcUgaacu..... 1  
 Gi1\_3722523\_x36.....uCggaacacggggugccgaacu..... 1  
 Gi3\_26370947\_x36.....Gcgugggaacacggggugc..... 1  
 Gi3\_26371703\_x36.....aggcccUgccaguacugcgaucc..... 1  
 Gi3\_26363243\_x36.....cgugggaacacggggugccgGac..... 1  
 Gi2\_9938691\_x36.....Uaucggagacgucgugggaacacggggug..... 1  
 Gi2\_9941031\_x36.....gugggaacacAgggugcc..... 1  
 Gi3\_26364971\_x36.....cgugggaacacggggugcGgaacu..... 1  
 Gi1a\_5355887\_x36.....gagacgucgugggaacacg..... 0  
 Gi2\_9935955\_x36.....cUgagacgucgugggaacacggggg..... 1  
 Gi2\_9937935\_x36.....gGgacgucgugggaacacggggugccg..... 1  
 Gi5\_8056264\_x36.....gaacacggggugccAaacu..... 1  
 Gi1\_3720579\_x36.....ggagacgucgugggaacacggggugc..... 0  
 Gi2\_9932535\_x36.....gUGaacacggggugccgaa..... 1  
 Gi5\_8059684\_x36.....uUcgauccggagacgucgug..... 1  
 Gi3\_26373251\_x36.....gaacacggggugGcgaacu..... 1  
 Gi3\_26374403\_x36.....gcgaucggagacgucgugggaac..... 0  
 Gi5\_8054860\_x36.....ggagacgucgugggaacacggggugcc..... 0  
 Gi3\_26353991\_x36.....aucggagacgCcgugggaacacggggg..... 1

Gi3\_26361947\_x36.....guAggaacacggggugccga..... 1  
 Gi3\_26353163\_x36.....Gucggagacgucguggaacacggggugcc..... 1  
 Gi1\_3726159\_x36.....ucguggaacacggggugccgaGcu..... 1  
 Gi2\_9940923\_x36.....ucguggaacGcggggugccgaacu..... 1  
 Gi3\_26372099\_x36.....cgucguggaacacggggugccAaacu..... 1  
 Gi2\_9945919\_x35.....gccaguacugcgauccggGgacgucgug..... 1  
 Gi3\_26385755\_x35.....ggaacCcggggugccgaac..... 1  
 Gi5\_8076664\_x35.....uggaacUcggggugccgaacu..... 1  
 Gi3\_26381940\_x35.....cguggaaNacggggugccgaa..... 1  
 Gi3\_26394295\_x35.....cguggaaUacggggugccgaac..... 1  
 Gi5\_8068264\_x35.....gaacaUggggugccgaacu..... 1  
 Gi5\_8078589\_x35.....guggaacacggggugccgUacu..... 1  
 Gi3\_26374870\_x35.....ucUuggaacacggggugccgaacu..... 1  
 Gi3\_26396640\_x35.....cgauccggagacgucguggaacacggggugcc..... 0  
 Gi1\_3733112\_x35.....cgugggGacacggggugccgaacu..... 1  
 Gi3\_26386420\_x35.....aucggagacgucgugggGacacggggg..... 1  
 Gi3\_26394190\_x35.....gggaacacggggugccgaaAu..... 1  
 Gi3\_26379875\_x35.....aucggagacgCcguggaacacggg..... 1  
 Gi3\_26389220\_x35.....guggaacacggggugccCaacu..... 1  
 Gi2\_9947669\_x35.....cgccaguacugcgauccggGgacgucgug..... 1  
 Gi3\_26384670\_x35.....Aggaacacggggugccgaa..... 1  
 Gi3\_26385580\_x35.....uggaacacggggugccgC..... 1  
 Gi2\_9942104\_x35.....ccaguacugcgauccggGgacgucgug..... 1  
 Gi5\_8071484\_x35.....ggagacgucgugggaaca..... 0  
 Gi3\_26388940\_x35.....aUaagcgccgucaggcccc..... 1  
 Gi3\_26376655\_x35.....cgucgCgggaacacggggugccgaacu..... 1  
 Gi2\_9946269\_x35.....guAggaacacggggugcc..... 1  
 Gi3\_26385965\_x35.....cgucguggaacacggggugccgaGcu..... 1  
 Gi2\_9955544\_x35.....gCaacacggggugccgaac..... 1  
 Gi3\_26378300\_x35.....ucgugAgaacacggggugccgaacu..... 1  
 Gi2\_9941999\_x35.....Uccgucaggccccgccaguacugcg..... 1  
 Gi2\_9949069\_x35.....cUucaggccccgccaguacugcg..... 1  
 Gl1a\_5367175\_x35.....guggaacacAgggugccgaacu..... 1  
 Gl1a\_5365635\_x35.....aagagaagcgccgucaggccccgccc..... 0  
 Gi3\_26385300\_x35.....Agccccgccaguacugcgaucc..... 1  
 Gi2\_9952009\_x35.....ucggGgacgucguggaacacggggug..... 1  
 Gi3\_26375570\_x35.....cguggaacacggggugcAgaac..... 1  
 Gi2\_9944869\_x35.....gagaagcgccgucaggcccc..... 0  
 Gi1\_3728702\_x35.....gagaagcgccgucaggccccgccaguacuU..... 1  
 Gi3\_26377180\_x35.....cguggaacacgAggugccgaac..... 1  
 Gi1\_3731292\_x35.....cCuggaacacggggugccgaacu..... 1  
 Gi1\_3727092\_x35.....ucguUggaacacggggugccgaacu..... 1  
 Gi1\_3730627\_x35.....guAggaacacggggugccgaacu..... 1  
 Gi3\_26387330\_x35.....gggUacacggggugccgaacu..... 1  
 Gl1a\_5361225\_x35.....gacgucguggaacacggggugccgaacu..... 0  
 Gi3\_26394680\_x35.....aucggagacgucguggaacGcg..... 1  
 Gi2\_9955159\_x35.....gAgggaacacggggugcc..... 1

Gi3\_26375535\_x35.....gggaacacggggugcUgaac..... 1  
 Gi1\_3730417\_x35.....aucggagacgucgugggaacacggg..... 0  
 Gi1\_3730802\_x35.....cgugggaacacggggugccgaGcu..... 1  
 Gi4\_486007\_x35.....aucggagacgucgugggaacacggggugcc..... 0  
 Gi5\_8068054\_x35.....gggUacacggggugccgaacu..... 1  
 Gi2\_9943749\_x35.....aggccccgNcaguacugcga..... 1  
 Gi3\_26382535\_x35.....gGcgugggaacacggggugcc..... 1  
 Gi2\_9949279\_x35.....cgugggaacacggggGgccgaac..... 1  
 Gi1a\_5362170\_x35.....cgaucggagacgucgugggaa..... 0  
 Gi2\_9970179\_x34.....cgucaggccccgccaguacugcgaucg..... 0  
 Gi3\_26414836\_x34.....Ugucgugggaacacggggugccgaacu..... 1  
 Gi1\_3734407\_x34.....acugcgaucggagacgucgugggaaca..... 0  
 Gi5\_8091689\_x34.....ugggaaacCcggggugccgaacu..... 1  
 Gi2\_9959265\_x34.....ugggaaacacgggUugccgaacu..... 1  
 Gi5\_8083733\_x34.....Augggaacacggggugccgaac..... 1  
 Gi1a\_5368014\_x34.....gugggaacacggggugccgGacu..... 1  
 Gi3\_26409838\_x34.....ucgugggaacacggggugccgaUc..... 1  
 Gi2\_9956239\_x34.....gugggaacaUggggugccgaac..... 1  
 Gi5\_8081557\_x34.....Ccgugggaacacggggugccgaacu..... 1  
 Gi5\_8083699\_x34.....gucgugggaacacggggGgccgaacu..... 1  
 Gi3\_26416944\_x34.....gaacacggggugAcgaacu..... 1  
 Gi3\_26404296\_x34.....gagaagcgccgucaggccccgccaguacugc..... 0  
 Gi3\_26406132\_x34.....gAgggaacacggggugccgaa..... 1  
 Gi3\_26416706\_x34.....Gccccgccaguacugcgauc..... 1  
 Gi1a\_5370054\_x34.....cgugggaaNacggggugccgaacu..... 1  
 Gi2\_9956613\_x34.....aucggagaNgucgugggaacacggggugc..... 1  
 Gi1\_3733285\_x34.....cgugggaGcacggggugccgaacu..... 1  
 Gi3\_26410416\_x34.....ugggaGcacggggugccga..... 1  
 Gi5\_8084889\_x34.....gaagcgccgucaggccccgccaguacugc..... 0  
 Gi2\_9968139\_x34.....ugggaaacacggggugccgGacu..... 1  
 Gi3\_26417080\_x34.....gugggaacacggggugAcgaac..... 1  
 Gi2\_9959333\_x34.....aucggagacgucgugggaGcacggggu..... 1  
 Gi1\_3733761\_x34.....aacacggggugccgGacu..... 1  
 Gi2\_9958007\_x34.....Augggaacacggggugccga..... 1  
 Gi5\_8092097\_x34.....gucgugggNacacggggugccgaacu..... 1  
 Gi3\_26418508\_x34.....uAggaaacacggggugccgaa..... 1  
 Gi2\_9958585\_x34.....aGcggagacgucgugggaacacggggug..... 1  
 Gi3\_26412116\_x34.....ugcgaucggagacgucgugggaacacgggggu..... 0  
 Gi2\_9956919\_x34.....cgCgggaacacggggugcc..... 1  
 Gi2\_9965589\_x34.....cgaucggagacgucgugggaacacgggg..... 0  
 Gi3\_26399910\_x34.....ggaacacggggguAccgaac..... 1  
 Gi2\_9971029\_x34.....cgucgugggaacacacggggugccgCacu..... 1  
 Gi2\_9962665\_x34.....gugggaacacggggGgccg..... 1  
 Gi2\_9961339\_x34.....gAaacacggggugccgaac..... 1  
 Gi1a\_5368524\_x34.....gaagcgccgucaggccccgcc..... 0  
 Gi2\_9963821\_x34.....cugcgaucggagacgucgugggaacac..... 0  
 Gi2\_9963379\_x34.....Uaagagaagcgccgucaggccccgcc..... 1

Gi2\_9964161\_x34.....agccccgccaguacAgcgauC..... 1  
 Gi3\_26411470\_x34.....gaucggagacgucgugggaacacggggugccg..... 0  
 Gi2\_9959435\_x34.....cgucaggccccgccaguacugcgauCgga..... 0  
 Gi2\_9959061\_x34.....aagagaagcgccgucaggccccgCag..... 0  
 Gi5\_8084481\_x34.....gGgggaacacggggugcc..... 1  
 Gi2\_9967493\_x34.....ggaacGcggggugccgaac..... 1  
 Gi3\_26406472\_x34.....guggUaacacggggugccgaa..... 1  
 Gi3\_26405350\_x34.....gucgugggaacacggggGgccgaac..... 1  
 G1a\_5371924\_x34.....gaucggagacgucgugggaacacgg..... 0  
 Gi2\_9979776\_x33.....ggGacacggggugccgaac..... 1  
 Gi1\_3741753\_x33.....aucggagacgucGgggaacacgggg..... 1  
 G1a\_5382125\_x33.....Agaacacggggugccgaacu..... 1  
 Gi1\_3738783\_x33.....Uugggaacacggggugccgaacu..... 1  
 Gi3\_26441395\_x33.....agccccgccagCacugcgauC..... 1  
 Gi2\_9982152\_x33.....Ggacgucgugggaacacggggugccgaacu..... 1  
 Gi5\_8093742\_x33.....cgGcgugggaacacggggugccgaacu..... 1  
 Gi2\_9974793\_x33.....ugggaaUacggggugccgaacu..... 1  
 Gi3\_26428888\_x33.....gggaacacgggAugccgaacu..... 1  
 Gi2\_9976113\_x33.....gCgcccugcaggccccgccaguacug..... 0  
 Gi2\_9984297\_x33.....cgugggaacacggggugccgaUC..... 1  
 Gi3\_26433145\_x33.....aUaagcgccgucaggccc..... 1  
 G1a\_5376317\_x33.....UuacugcgauCggagacguc..... 1  
 Gi5\_8100573\_x33.....gaacacgAggugccgaacu..... 1  
 Gi5\_8096745\_x33.....gGgggaacacggggugccgaacu..... 1  
 Gi3\_26420275\_x33.....cgucgugggaacacggggGgcc..... 1  
 G1a\_5382356\_x33.....gAgggaacacggggugccgaacu..... 1  
 Gi3\_26430769\_x33.....Uacgucgugggaacacggggugccg..... 1  
 Gi2\_9977136\_x33.....ccgccaguacugcgauCggGgacgucgug..... 1  
 Gi3\_26426347\_x33.....UccaguacugcgauCgga..... 1  
 Gi2\_9975189\_x33.....gugggaGcacggggugccg..... 1  
 Gi2\_9975849\_x33.....cgugggGacacggggugccgaac..... 1  
 Gi1\_3740829\_x33.....Uugggaacacggggugccga..... 1  
 Gi3\_26427502\_x33.....ggaacacggggugUcgaac..... 1  
 Gi2\_9983307\_x33.....Ggggaacacggggugccg..... 1  
 Gi5\_8096712\_x33.....aGcgggagacgucgugggaacacg..... 1  
 Gi3\_26437006\_x33.....gugggaacacggggugccgC..... 1  
 Gi2\_9978423\_x33.....gggaacaUggggugccgaacu..... 1  
 Gi3\_26427106\_x33.....gucgugggaacacAgggugccgaacu..... 1  
 Gi3\_26429581\_x33.....gugggaacacgCggugccgaacu..... 1  
 Gi3\_26441329\_x33.....cguggAaacacggggugccgaac..... 1  
 Gi3\_26439811\_x33.....cgugggaacacggggUaccgaac..... 1  
 Gi3\_26425819\_x33.....gGcaggccccgccaguacug..... 1  
 Gi2\_9971988\_x33.....gCgauCggagacgucgugggaaca..... 0  
 Gi2\_9979611\_x33.....gugggaacacggUgugccgaac..... 1  
 Gi3\_26438590\_x33.....gucgugggNacacggggugccgaac..... 1  
 Gi3\_26441857\_x33.....gGucggagacgucgugggaacacgggg..... 1  
 Gi1\_3741456\_x33.....cgugggaacacggggGgccgaacu..... 1

Gi2\_9977862\_x33.....ugggaacacggggugccAaacu..... 1  
 Gi3\_26432749\_x33.....gugggaacacgAggugcc..... 1  
 Gi3\_26433607\_x33.....aCcgagacgucgugggaacacggggu..... 1  
 Gi2\_9982317\_x33.....ggaacacggggugccgaUc..... 1  
 Gi3\_26426677\_x33.....ugUgaacacggggugccga..... 1  
 Gi3\_26444365\_x33.....Uaggccccgccaguacugcgau..... 1  
 Gi1\_3739542\_x33.....Ccgugggaacacggggugccgaacu..... 1  
 Gi3\_26421166\_x33.....gagacgucgugggaacacggggugccga..... 0  
 Gi3\_26420704\_x33.....Gggccccgccaguacugcgau..... 1  
 Gi2\_9983802\_x33.....gucgugggGacacggggugccgaacu..... 1  
 Gi5\_8094633\_x33.....uggAaacacggggugccgaacu..... 1  
 Gi2\_9980337\_x33.....uacugcgauccggagacgucgugggaaca..... 0  
 Gi1\_3745568\_x32.....cgaucggagacgucgugggaacacgggguU..... 1  
 Gi3\_26459614\_x32.....aggccccgccaguGcugcgau..... 1  
 Gi3\_26459518\_x32.....gucgCgggaacacggggugccgaacu..... 1  
 Gi1\_3745504\_x32.....acgucgugggaacacggggugccga..... 0  
 Gi3\_26447678\_x32.....aggccccgccaguacuAcgau..... 1  
 Gi5\_8109254\_x32.....Ggugggaacacggggugccgaac..... 1  
 Gi1\_3747712\_x32.....gaacacggggugccgGacu..... 1  
 Gi5\_8107078\_x32.....ucgugggaacacggggugccgaacu..... 1  
 Gi3\_26453214\_x32.....gucgugggaacacggggugccgGacu..... 1  
 Gi3\_26445854\_x32.....cgugggaacacggUgugccgaacu..... 1  
 Gi3\_26451550\_x32.....cgugggaaNacggggugc..... 1  
 Gi3\_26462110\_x32.....aggccUcgccaguacugcgau..... 1  
 Gi5\_8109126\_x32.....gugggaacCcggggugccgaac..... 1  
 Gi2\_9996253\_x32.....gugAgaacacggggugccgaac..... 1  
 Gi3\_26452478\_x32.....ucgugggaacacggggugccgaCcu..... 1  
 Gi3\_26469214\_x32.....gugggaacacggggAgcc..... 1  
 Gi3\_26464606\_x32.....gaacacggggugccgaGc..... 1  
 Gi3\_26461790\_x32.....gagaagcgccgucaggccccgccaguacug..... 0  
 Gi3\_26449150\_x32.....cUucgugggaacacgggg..... 1  
 Gi5\_8108326\_x32.....Uagacgucgugggaacacggggugccgaacu..... 1  
 Gi3\_26457470\_x32.....Ggucaggccccgccaguacugc..... 1  
 Gi3\_26447390\_x32.....guNggaaacacggggugccgaacu..... 1  
 Gi3\_26468446\_x32.....cgugggaacacggCgugccgaacu..... 1  
 Gi1\_3744544\_x32.....caggccccgccaguacugcgauccggagacg..... 0  
 Gi3\_26453470\_x32.....cgggagacgucgugggaacacggggugccgaac..... 0  
 Gi3\_26458462\_x32.....ucgugggGacacggggugccgaac..... 1  
 Gi2\_9995805\_x32.....gggaacacAgggugccgaacu..... 1  
 Gi2\_9992189\_x32.....gugggaacacgAggugccgaac..... 1  
 Gi5\_8110886\_x32.....gCgggaacacggggugccgaac..... 1  
 Gi3\_26458078\_x32.....cgGcgugggaacacggggugcc..... 1  
 Gi1\_3747520\_x32.....gagacgucgCgggaacacggggugcc..... 1  
 Gi1\_3746368\_x32.....aucggagacgucgCgggaacacggggugc..... 1  
 Gi3\_26458686\_x32.....ggaacacgggAugccgaacu..... 1  
 Gi1a\_5387533\_x32.....Uugggaacacggggugccg..... 1  
 Gi2\_9995933\_x32.....ucgGgggaacacggggugccgaacu..... 1



Gi2\_9997693\_x32.....aGcggagacgucgugggaacacggg..... 1  
 Gl1a\_5384269\_x32.....ggUacacggggugccgaacu..... 1  
 Gi2\_9997853\_x32.....aucggagaNgucgugggaacac..... 1  
 Gi3\_26447710\_x32......gaaNacggggugccgaacu..... 1  
 Gi3\_26458910\_x32......ggaacacggggugcAgaacu..... 1  
 Gi3\_26445374\_x32......gugggaaAacggggugcc..... 1  
 Gi3\_26465278\_x32......Gcaggccccgccaguacugcg..... 1  
 Gi4\_488999\_x32......gaacacggggugccgaacu..... 0  
 Gi2\_9998013\_x32......gggaacacggggugccAaacu..... 1  
 Gi3\_26461022\_x32......cUgagacgucgugggaacacg..... 1  
 Gi5\_8105638\_x32......ugggaacacgggguAccgaacu..... 1  
 Gi2\_9992317\_x32......gCcgugggaacacggggugccgaacu..... 1  
 Gi3\_26484939\_x31......gucaggccccgccaguacugcgga..... 0  
 Gi2\_10010868\_x31......Agccccgccaguacugcgau..... 1  
 Gi5\_8122844\_x31......gggaacacggggugccGacu..... 1  
 Gi2\_10012294\_x31......ggGgacgucgugggaacacggggugccg..... 1  
 Gi3\_26484970\_x31......gugggaacacggggugAc..... 1  
 Gi3\_26480351\_x31......cgAcgugggaacacggggugccgaacu..... 1  
 Gi3\_26472539\_x31......gugggaacaAggggugccgaac..... 1  
 Gi2\_10004327\_x31......aucggagacgucgugggaCcacggggu..... 1  
 Gi5\_8122658\_x31......gagaagcgccgucagggccccgccaguacug..... 0  
 Gi1\_3751695\_x31......ugcgaucggagacgucgugggaacacg..... 0  
 Gi2\_10003707\_x31......guacugcgauccggagacgucgugggaaca..... 0  
 Gi4\_489954\_x31......cgucgugggaacacggggugcc..... 0  
 Gi2\_10003490\_x31......gccaguacugcgauccggagacgucgug..... 0  
 Gi3\_26489992\_x31......ggaacacggggugcAgaac..... 1  
 Gi3\_26480661\_x31......aucgUagacgucgugggaacacg..... 1  
 Gi1\_3750517\_x31......aUgccccgccaguacugcgau..... 1  
 Gi3\_26473779\_x31......ugggaacacgggCugccgaacu..... 1  
 Gi5\_8121976\_x31......cgugggaacacggggugccgUacu..... 1  
 Gi2\_10008729\_x31......aacacggggGgccgaacu..... 1  
 Gi1\_3753431\_x31......cgucgugggaacacggggugccgaa..... 0  
 Gl1a\_5394914\_x31......gaagcgccgucagggccccgccagu..... 0  
 Gi2\_10000049\_x31......gccgucagggccccgccaguacugcgau..... 0  
 Gi3\_26483854\_x31......gucgugggaacacggggugccgaaAu..... 1  
 Gi1\_3752098\_x31......Uaacacggggugccgaac..... 1  
 Gi2\_10005846\_x31......cgucgugggaacacggggCgccgaacu..... 1  
 Gi2\_10010713\_x31......gucgugggaacGcggggugccgaacu..... 1  
 Gi3\_26473624\_x31......ggaacacggggugccgaUcu..... 1  
 Gi3\_26481374\_x31......gugggaacacggggugccgGa..... 1  
 Gi3\_26484753\_x31......gucgugggaacacggggugccgaCc..... 1  
 Gi2\_10012418\_x31......aacacggggugccgaCcu..... 1  
 Gi3\_26488163\_x31......aagagaagcgccgucagggccccgccagua..... 0  
 Gi3\_26473965\_x31......gggaacaUggggugccgaac..... 1  
 Gi4\_490326\_x31......uUggaacacggggugccgaacu..... 1  
 Gi2\_10011798\_x31......ggccccgccaguacugcgCuc..... 1  
 Gi2\_10010930\_x31......ucgugggaacacggggugccgaGcu..... 1

Gi2\_10005660\_x31.....cgugUgaacacggggugccgaac..... 1  
Gi2\_9999429\_x31.....guggCaacacggggugccgaacu..... 1  
Gi5\_8118721\_x31.....ggaacacggggugccAaacu..... 1  
Gi3\_26471268\_x31.....cgGgggaacacggggugcc..... 1  
Gi2\_10012108\_x31.....gugggaaUacggggugccgaac..... 1  
Gi5\_8123185\_x31.....Ggacgucgugggaaacacggggugccgaacu..... 1  
Gi2\_10013410\_x31.....Gcaggccccgccaguacugcgauc..... 1  
Gi1\_3753338\_x31.....ucgugggaGcacggggugccgaacu..... 1  
Gi3\_26488380\_x31.....ggaacacgggAugccgaac..... 1  
Gi2\_10001599\_x31.....aucggagaNgucgugggaaacacgggggu..... 1  
Gi5\_8119062\_x31.....ucgugggaaacacAgggugccgaacu..... 1  
Gi3\_26482211\_x31.....gugggaaacacggggguUccgaacu..... 1  
Gi1\_3751943\_x31.....cgaucggagacgucgCgggaaacacgggg..... 1  
Gi3\_26483141\_x31.....cgugggaaacacggggugUcgaac..... 1  
Gi3\_26474957\_x31.....cgucgugggaaacacggggugccgCac..... 1  
Gi2\_10009752\_x31.....Uaucggagacgucgugggaaacacgggg..... 1  
Gi2\_9999925\_x31.....ggUaacacggggugccgaac..... 1  
Gi2\_10010992\_x31.....gugggaaacNcggggugccgaa..... 1  
G1a\_5396526\_x31.....ucgggagacgucgugggaaacacgggggu..... 0  
Gi5\_8127773\_x31.....gucgugggaaacacggggugccgCacu..... 1  
Gi3\_26487822\_x31.....gaacaGggggugccgaacu..... 1  
Gi3\_26487202\_x31.....ggaaGacggggugccgaacu..... 1  
Gi2\_10023295\_x30.....Ccugggaaacacggggugccgaacu..... 1  
Gi2\_10022665\_x30.....uGgugggaaacacggggugccgaac..... 1  
Gi2\_10017325\_x30.....aggccccgccagCacugcgauc..... 1  
Gi4\_491189\_x30.....Uugggaaacacggggugccgaa..... 1  
Gi3\_26517120\_x30.....gugggaaacacggggguAccg..... 1  
G1a\_5408346\_x30.....cgggagacgucgugggaaacacg..... 0  
Gi5\_8142385\_x30.....ggaacacggggugccgUacu..... 1  
Gi3\_26497290\_x30.....ucgugggaaacacggggugcUgaacu..... 1  
Gi3\_26504910\_x30.....agAccccgccaguacugcgauc..... 1  
Gi2\_10014415\_x30.....gGucgggagacgucgugggaaacacgggggu..... 1  
Gi2\_10027435\_x30.....auUgggagacgucgugggaaacacggggugc..... 1  
Gi1\_3756965\_x30.....cgugggaaacacAgggugccgaacu..... 1  
Gi2\_10020835\_x30.....gaagagaagcggccgucagg..... 0  
Gi3\_26500830\_x30.....aggccccgcUaguacugcgauc..... 1  
Gi3\_26493360\_x30.....Gacugcgaucgggagacguc..... 1  
Gi3\_26497410\_x30.....gugggaaacUcggggugccgaac..... 1  
Gi2\_10024435\_x30.....auUgggagacgucgugggaaacacgggggu..... 1  
Gi1\_3762245\_x30.....cgucgCgggaaacacggggugccg..... 1  
Gi5\_8130865\_x30.....gaaacacggggGgccgaacu..... 1  
Gi2\_10021645\_x30.....aucgggagacgucgugggaaacacggggugA..... 1  
Gi2\_10017985\_x30.....ucguAggaaacacggggugccgaacu..... 1  
Gi3\_26511750\_x30.....gggaaacacggggugccgUacu..... 1  
Gi3\_26493420\_x30.....ugUgaacacggggugccgaa..... 1  
Gi3\_26494380\_x30.....cAucgugggaaacacggggugccgaacu..... 1  
Gi2\_10021615\_x30.....gugggaaacacggggugUcgaac..... 1

Gi3\_26494950\_x30.....cgucguggNaacacggggugccgaac..... 1  
G1a\_5401056\_x30.....gggagacgucgugggaacacggggugc..... 0  
Gi3\_26511780\_x30.....caggccccgccaguacugcgagacguc..... 0  
Gi3\_26504700\_x30.....gggaacacggggguAccgaac..... 1  
Gi5\_8140885\_x30.....cgucgugggaacacggggugccgaGcu..... 1  
Gi5\_8140765\_x30.....gagacgucgugggaacacggggugccgaac..... 0  
Gi3\_26509080\_x30.....cUgagacgucgugggaacacggg..... 1  
Gi2\_10024825\_x30.....aAgccccgccaguacugcgau..... 1  
Gi3\_26497050\_x30.....gccaguacugcgagacgucgug..... 0  
Gi2\_10027135\_x30.....gaacacggggugccGacu..... 1  
Gi2\_10019065\_x30.....aucggagacgucgugggaacacggggC..... 1  
Gi2\_10013965\_x30.....ucAugggaacacggggugccgaacu..... 1  
Gi2\_10025755\_x30.....guggAaacacggggugccgaac..... 1  
Gi3\_26497440\_x30.....cgugggaacacggggugGcgaacu..... 1  
G1a\_5402796\_x30.....gggagacgucgugggaacacg..... 0  
Gi5\_8131495\_x30.....ugggaaUacggggugccgaacu..... 1  
Gi5\_8138905\_x30.....Gcgucgugggaacacggggugccgaacu..... 1  
Gi3\_26498640\_x30.....Ggucgugggaacacggggugccg..... 1  
Gi3\_26516880\_x30.....Cgggaacacggggugccga..... 1  
G1a\_5400306\_x30.....cUucaggccccgccaguacugc..... 1  
Gi2\_10020145\_x30.....Gggagacgucgugggaacacggggugcc..... 1  
Gi3\_26505600\_x30.....Uaagagaagcgccgucaggcc..... 1  
Gi1\_3760325\_x30.....ucggagacgucGgggaacacggggugcc..... 1  
Gi2\_10015435\_x30.....cgucguggNaacacggggugccgaacu..... 1  
Gi2\_10019155\_x30.....Aagacgucgugggaacacggggug..... 1  
Gi2\_10029025\_x30.....ucGgggaacacggggugccgaacu..... 1  
Gi3\_26509320\_x30.....gucgugggaacacggggCgccgaac..... 1  
Gi1\_3762185\_x30.....cUugggaacacggggugccga..... 1  
Gi3\_26513250\_x30.....gccccgccaguacugcgagacguc..... 0  
Gi3\_26508330\_x30.....aucggagacGcgugggaacacg..... 1  
Gi3\_26503680\_x30.....aacNcggggugccgaacu..... 1  
Gi5\_8141875\_x30.....cgugggaacCcgggugccgaacu..... 1  
Gi3\_26514900\_x30.....gcgauccggagacgucgugggaacacgg..... 0  
Gi2\_10025905\_x30.....aggccccAccaguacugcgau..... 1  
Gi1\_3756665\_x30.....gaacacAgggugccgaacu..... 1  
Gi5\_8133085\_x30.....gugggaacacggggugGcgaacu..... 1  
Gi3\_26508090\_x30.....aUaagcgccgucaggccccgcc..... 1  
Gi3\_26502780\_x30.....aucggGgacgucgugggaacacgggg..... 1  
Gi3\_26500560\_x30.....Uucaggccccgccaguacugcgau..... 1  
Gi2\_10019665\_x30.....gucgugggaacacggggugccGacu..... 1  
G1a\_5408552\_x29.....cgggagacgucgugggaacacgg..... 0  
Gi3\_26529611\_x29.....gugggaacacggggugcA..... 1  
Gi2\_10042431\_x29.....cgGcgugggaacacggggugccgaacu..... 1  
Gi1\_3765712\_x29.....ugUgaacacggggugccgaacu..... 1  
Gi1\_3766118\_x29.....caggccccgccaguacugcgau..... 0  
Gi1\_3763131\_x29.....ucggagacgucGgggaacacggggugc..... 1  
Gi2\_10038313\_x29.....ucggGgacgucgugggaacacgggg..... 1

Gi2\_10030947\_x29.....gugggaacacggCgugccgaacu..... 1  
 Gi5\_8148189\_x29.....ggaacacAgggugccgaacu..... 1  
 Gi1\_3766669\_x29.....aucggGgacgucgugggaacacggggugc..... 1  
 Gi3\_26530713\_x29.....uUgugggaacacggggugccgaac..... 1  
 Gi2\_10030077\_x29.....Uugggaacacggggugccgaacu..... 1  
 Gi2\_10040256\_x29.....ugggaacacggggugcAgaacu..... 1  
 Gi2\_10031643\_x29.....aggccccgccaguacugcgagacg..... 0  
 Gi2\_10037037\_x29.....gugggaaAacggggugcc..... 1  
 Gi3\_26533323\_x29.....Ugagacgucgugggaacacggggugccg..... 1  
 Gi5\_8145231\_x29.....Uucaggccccgccaguacugcg..... 1  
 Gi3\_26542081\_x29.....gugggaacacggAgugccga..... 1  
 Gi5\_8147986\_x29.....gaaUacggggugccgaacu..... 1  
 Gi2\_10043533\_x29.....ucgugggaacacggggugccgaCcu..... 1  
 Gi1\_3766988\_x29.....agacgucgugggaacacggggugccga..... 0  
 Gi2\_10039618\_x29.....gUgacgucgugggaacacggggugc..... 1  
 Gi3\_26538108\_x29.....guggAaacacggggugccga..... 1  
 Gi3\_26534222\_x29.....caggccccNccaguacugcgauc..... 1  
 Gi2\_10041996\_x29.....ucgugggaacCcgggugccgaacu..... 1  
 Gi2\_10042141\_x29.....Gccccccaguacugcgauc..... 1  
 Gi2\_10038922\_x29.....cgugCgaacacggggugccgaacu..... 1  
 Gi3\_26532540\_x29.....cgNgggaacacggggugccgaacu..... 1  
 Gi1a\_5414265\_x29.....cccgccaguacugcgauccgaga..... 0  
 Gi2\_10043330\_x29.....Uagacgucgugggaacacggggugccg..... 1  
 Gi2\_10038632\_x29.....ggaacaUggggugccgaacu..... 1  
 Gi3\_26530771\_x29.....cgucAugggaacacggggugccgaacu..... 1  
 Gi2\_10029439\_x29.....Ggucgugggaacacggggugccg..... 1  
 Gi3\_26517837\_x29.....guAgggaacacggggugccg..... 1  
 Gi3\_26540051\_x29.....ucgGgggaacacggggugccgaacu..... 1  
 Gi3\_26541849\_x29.....Uggaacacggggugccgaacu..... 1  
 Gi3\_26535556\_x29.....gGcgugggaacacggggugccga..... 1  
 Gi2\_10030860\_x29.....ugAgaacacggggugccgaacu..... 1  
 Gi3\_26528451\_x29.....acgucgugNgaacacggggugccgaac..... 1  
 Gi3\_26541936\_x29.....cgAgggaacacggggugcc..... 1  
 Gi2\_10037211\_x29.....cgugggaacacggggugccgaacG..... 1  
 Gi3\_26522912\_x29.....gcgaucgggagacgucgugggaacacggggu..... 0  
 Gi3\_26530017\_x29.....aagagaagcgccgucaggccccgccaguacu..... 0  
 Gi2\_10040169\_x29.....gaagagaagcgccgucaggccccgccag..... 0  
 Gi2\_10042576\_x29.....ggaacacAggugccgaacu..... 1  
 Gi3\_26519809\_x29.....aUuacugcgauccggagacgucg..... 1  
 Gi1\_3763160\_x29.....Aucgugggaacacggggugccgaacu..... 1  
 Gi1\_3765422\_x29.....aacacAgggugccgaacu..... 1  
 Gi3\_26535266\_x29.....gugggaacacggUgugcc..... 1  
 Gi5\_8149175\_x29.....gugggaacacggggugccgaUc..... 1  
 Gi3\_26535585\_x29.....gugggaacacCgggugccgaacu..... 1  
 Gi3\_26519403\_x29.....gggaaAacggggugccgaacu..... 1  
 Gi1\_3764378\_x29.....cgugggaacacggggugcc..... 0  
 Gi3\_26523898\_x29.....gacAucgugggaacacggggugc..... 1

Gi3\_26531757\_x29.....aucggagacgucgugggaacacggggugccgaacu..... 0  
Gi3\_26539587\_x29.....ugggaGcacggggugccgaa..... 1  
Gi2\_10036283\_x29.....Cacgucgugggaacacggggugccgaac..... 1  
Gi1\_3765944\_x29.....CUugggaacacggggugccgaac..... 1  
Gi3\_26539558\_x29.....gccccgccaguacugcgauccggagacgucg..... 0  
Gi3\_26528422\_x29.....ucgugggaacacggggAgccgaacu..... 1  
Gi3\_26527436\_x29.....Gcgucgugggaacacggggugccgaac..... 1  
Gi2\_10030889\_x29.....gugggaacNcggggugccga..... 1  
Gi5\_8149378\_x29.....gucgugggaacacggggugccgaCcu..... 1  
Gi5\_8152017\_x29.....Cacacggggugccgaacu..... 1  
Gi3\_26535179\_x29.....gucgugggaaAacggggugccgaacu..... 1  
G1a\_5419226\_x28.....gucgugggaacacggggugccga..... 0  
Gi3\_26556821\_x28.....cgugggaacacggggugccgaaU..... 1  
Gi2\_10048949\_x28.....cgugggGacacggggugccga..... 1  
Gi2\_10046737\_x28.....aUuacugcgauccggagacgu..... 1  
Gi3\_26544473\_x28.....ugggaacacggggugcAgaac..... 1  
Gi4\_494472\_x28.....Uagaagcggcucagggc..... 1  
Gi2\_10046961\_x28.....cgugggaUcacggggugccgaacu..... 1  
Gi2\_10055949\_x28.....ggaacacggggGgccgaac..... 1  
Gi2\_10057069\_x28.....aggccccgNcaguacugcg..... 1  
Gi3\_26563961\_x28.....gggaUcacggggugccgaacu..... 1  
Gi3\_26544417\_x28.....caggccccgccaguacugcgauccggagacguc..... 0  
Gi2\_10050321\_x28.....Ggugggaacacggggugccga..... 1  
Gi3\_26547357\_x28.....gGcaggccccgccaguacugcg..... 1  
G1a\_5423398\_x28.....ccccccaguacugcgauccggagacgucg..... 0  
Gi2\_10052141\_x28.....aucggGgacgucgugggaacacggggugccg..... 1  
Gi2\_10057237\_x28.....gugggaaacGggggugccgaacu..... 1  
G1a\_5417238\_x28.....aUgccccgccaguacugcg..... 1  
Gi3\_26558697\_x28.....caggccccgccaguacugcgauccggagacg..... 0  
Gi3\_26547637\_x28.....gUagacgucgugggaacacg..... 1  
Gi5\_8161621\_x28.....cgucgugggGacacggggugccgaacu..... 1  
Gi3\_26559033\_x28.....gucgugggaacacggggugcUgaacu..... 1  
Gi5\_8163217\_x28.....ugggaacacggAgugccgaacu..... 1  
Gi2\_10048389\_x28.....ggaacacggggUaccgaacu..... 1  
Gi3\_26550045\_x28.....cgCgggaacacggggugcc..... 1  
Gi2\_10058833\_x28.....cggGgacgucgugggaacacggggugccg..... 1  
G1a\_5419422\_x28.....ggagacgucgugggaacac..... 0  
Gi2\_10053905\_x28.....ggaacacggAgugccgaacu..... 1  
Gi2\_10053233\_x28.....aucggagacgucgugggaGcac..... 1  
Gi3\_26566229\_x28.....aucggagacgucgugggaCcacgg..... 1  
Gi2\_10054157\_x28.....cgugggaaAacggggugccgaacu..... 1  
Gi5\_8157757\_x28.....ugggaacacggggugcAgaacu..... 1  
Gi1\_3774384\_x28.....cAugggaacacggggugccgaacu..... 1  
Gi3\_26550409\_x28.....Uucgugggaacacggggugccgaa..... 1  
Gi2\_10047941\_x28.....ucgugggaacacggggCgccgaac..... 1  
Gi5\_8165261\_x28.....acgucgugggGacacggggugccgaacu..... 1  
Gi2\_10050069\_x28.....cggagacgucgugggaacCcgggugcc..... 1

Gi1\_3770268\_x28.....cgucgugggaacacggggGgccgaacu..... 1  
Gi2\_10047885\_x28.....gaucggGgacgucgugggaacacggggug..... 1  
Gi3\_26563821\_x28.....acgucgugggaGcacggggugccgaacu..... 1  
Gi2\_10058105\_x28.....Uaucggagacgucgugggaacacggggugcc..... 1  
Gi3\_26561133\_x28.....gugggaacacAgggugccgaa..... 1  
G1a\_5432603\_x27.....guAggaacacggggugccgaacu..... 1  
Gi5\_8172080\_x27.....gucgugggaacacggggGgccgaacu..... 1  
Gi3\_26572863\_x27.....guCggaacacggggugccgaacu..... 1  
Gi3\_26575374\_x27.....gucgugggaacacggggugccgaGc..... 1  
Gi2\_10066232\_x27.....Gucggagacgucgugggaacacg..... 1  
Gi5\_8177426\_x27.....aacacggggugUcgaacu..... 1  
Gi2\_10072037\_x27.....gacgucgugggaacacggggugccga..... 0  
Gi1\_3775980\_x27.....gggaacacggggugccgCacu..... 1  
Gi3\_26574861\_x27.....aucggagGcgucgugggaacacggggg..... 1  
Gi3\_26589198\_x27.....ugggaacacggggAgccgaac..... 1  
Gi2\_10067096\_x27.....aggccccgccaguacCgcgauc..... 1  
Gi2\_10070579\_x27.....guUggaacacggggugccg..... 1  
G1a\_5427878\_x27.....gugggaacacggggugcUgaacu..... 1  
Gi3\_26575617\_x27.....ucUugggaacacggggugccgaac..... 1  
Gi3\_26570595\_x27.....cgGgggaacacggggugccga..... 1  
Gi3\_26582853\_x27.....cgucgugggaacacggggGgccgaac..... 1  
Gi2\_10068446\_x27.....cgugggaacacggggugcCgaacu..... 1  
Gi5\_8171432\_x27.....gggaacacggggugcUgaacu..... 1  
Gi2\_10070660\_x27.....gaagGgaagcgcggucaggccc..... 1  
Gi2\_10066799\_x27.....gcgauccggGgacgucgugggaacacgg..... 1  
Gi1\_3778329\_x27.....Ugagacgucgugggaacacggggugccg..... 1  
Gi1\_3779652\_x27.....Ugugggaacacggggugccgaacu..... 1  
Gi3\_26570514\_x27.....ucgugggaacacUgggugccgaacu..... 1  
Gi5\_8169461\_x27.....gaacacggggugUcgaacu..... 1  
Gi3\_26569164\_x27.....acgucGcgggaacacggggugccgaacu..... 1  
Gi3\_26575239\_x27.....ggaacacggggugccgaaU..... 1  
Gi2\_10060049\_x27.....gccgucaggccccgccaguacugcgau..... 0  
Gi2\_10066745\_x27.....gCgggaacacggggugccg..... 1  
Gi2\_10064207\_x27.....gugggaacacggggugcUg..... 1  
Gi5\_8177183\_x27.....ugggaCcacggggugccgaacu..... 1  
Gi1\_3778194\_x27.....Cgaacacggggugccgaacu..... 1  
Gi2\_10069580\_x27.....aacacggggugccAaacu..... 1  
Gi3\_26574105\_x27.....acgucgugggaacCcggggugccgaacu..... 1  
G1a\_5426096\_x27.....gugggaacacggggugccgaCcu..... 1  
Gi1\_3777033\_x27.....gugAgaacacggggugccgaacu..... 1  
Gi3\_26571999\_x27.....aucgUagacgucgugggaacacggg..... 1  
Gi1\_3778464\_x27.....ggaacacggggugccgaacA..... 1  
Gi3\_26578452\_x27.....agaagcgcggucaggccccgccaguacugcg..... 0  
Gi3\_26575644\_x27.....Uaagagaagcgcggucaggccccgc..... 1  
Gi1\_3777573\_x27.....acgucgugNgaacacggggugccgaacu..... 1  
Gi4\_495473\_x27.....cgucgugggaacacggggugccgaacu..... 0  
Gi1\_3778086\_x27.....ggaGcacggggugccgaacu..... 1

Gi3\_26591385\_x27.....gggaacacggggAgccgaacu..... 1  
Gi5\_8170757\_x27.....aacaGggggugccgaacu..... 1  
Gi5\_8175671\_x27.....agcgccgucagggccccccagucugcga..... 0  
Gi3\_26581314\_x27.....cUaucgggagacgucgugggaaacacg..... 1  
Gi3\_26592816\_x27.....agagaagcgccgucagggccccccagucacu..... 0  
G1a\_5430767\_x27.....ucgggagacgucgugggaaacacg..... 0  
Gi1\_3778707\_x27.....Gcgugggaaacacggggugcc..... 1  
Gi2\_10069418\_x27.....gUgaacacggggugccga..... 1  
Gi3\_26583312\_x27.....acgucgugggGacacggggugccgaacu..... 1  
Gi3\_26572647\_x27.....ggaacacggggUccgaac..... 1  
Gi2\_10087989\_x26.....Uagaagcgccgucagggccccgccc..... 1  
Gi3\_26606459\_x26.....aggcUccgcccagucugcgauc..... 1  
Gi2\_10076237\_x26.....gugggaacacggggugccUaacu..... 1  
Gi5\_8185966\_x26.....ugggaacacggggugUcgaacu..... 1  
Gi3\_26609501\_x26.....guggAaacacggggugcc..... 1  
Gi1\_3782933\_x26.....gugggaacaUggggugccgaacu..... 1  
Gi3\_26618783\_x26.....cgGgggaacacggggugccg..... 1  
Gi3\_26614961\_x26.....aUcgcgucagggccccgccc..... 1  
Gi5\_8190802\_x26.....Uaagagaagcgccgucagggccc..... 1  
Gi2\_10086065\_x26.....gugggaacGcggggugccg..... 1  
Gi5\_8191140\_x26.....gugggaacacggggGgccgaac..... 1  
Gi2\_10085545\_x26.....gucgugggaGcacggggugccgaacu..... 1  
Gi2\_10084375\_x26.....ggccccgcccagucugcgaucggagac..... 0  
Gi3\_26621591\_x26.....gucguAggaacacggggugccgaacu..... 1  
Gi5\_8182014\_x26.....ugggaacacggggugccgCac..... 1  
Gi2\_10075431\_x26.....Gcgucgugggaacacggggugccgaacu..... 1  
Gi3\_26596085\_x26.....cgugggaacacggggAgccgaac..... 1  
Gi3\_26608539\_x26.....cgucgugggaCcacggggugccgaacu..... 1  
Gi3\_26612283\_x26.....aggccccgcccagucugUgauc..... 1  
Gi2\_10078577\_x26.....acgucgugNgaacacggggugcc..... 1  
Gi3\_26613011\_x26.....Gcaggccccgcccagucugc..... 1  
Gi3\_26597723\_x26.....cgCgggaacacggggugc..... 1  
Gi5\_8186694\_x26.....gaacacggggUaccgaacu..... 1  
Gi2\_10075691\_x26.....UacgucgugggaacacggggU..... 1  
Gi1\_3780515\_x26.....gggGacacggggugccgaacu..... 1  
Gi5\_8192856\_x26.....cgugggaacacggggugccgaacG..... 1  
Gi2\_10074677\_x26.....Uagacgucgugggaacacggggugcc..... 1  
Gi3\_26604665\_x26.....aucgggagacgucgugggCacacggg..... 1  
Gi3\_26614545\_x26.....aucgggagacgucgugggaacacggggugccg..... 0  
Gi2\_10075795\_x26.....uggAaacacggggugccgaacu..... 1  
Gi1\_3783193\_x26.....Gcgucgugggaacacggggugccgaacu..... 1  
Gi3\_26611477\_x26.....gugggaacacgggAugcc..... 1  
Gi3\_26608383\_x26.....gaucgggagacgucgugggaacacggggG..... 1  
Gi1\_3780541\_x26.....Uucaggccccgcccagucugc..... 1  
Gi3\_26601389\_x26.....cgucgugggGacacggggugccgaac..... 1  
Gi3\_26599543\_x26.....cgugggaacacggggGgccgaac..... 1

Gi2\_10085701\_x26.....Uacgucgugggaacacggggugc..... 1  
Gi3\_26605939\_x26.....cgucgugggaacacggggugccgaCcu..... 1  
Gi5\_8191842\_x26.....Aucgugggaacacggggugccgaacu..... 1  
Gi5\_8188306\_x26.....cgucgugggaGcacggggugccgaacu..... 1  
Gi3\_26603859\_x26.....cgucgugggaacCcggggugccgaacu..... 1  
Gi2\_10086793\_x26.....gcgaucggGgacgucgugggaacacg..... 1  
Gi5\_8192492\_x26.....gugggCacacggggugccgaacu..... 1  
Gi3\_26616027\_x26.....Gcggagacgucgugggaacacggggugcc..... 1  
Gi3\_26594993\_x26.....cUccaguacugcgauccggagacgu..... 1  
Gi1\_3785429\_x26.....Ggucgugggaacacggggugccgaacu..... 1  
Gi2\_10080709\_x26.....cggagacgucgugggaacacggggugccgaac..... 0  
Gi2\_10083231\_x26.....guacugcgauccggGgacgucgugggaaca..... 1  
Gi2\_10074989\_x26.....aagagaagcgccgucGggccc..... 1  
G1a\_5438857\_x26.....gaucggagacgucgugggaacac..... 0  
G1a\_5438207\_x26.....Uucgugggaacacggggugccgaacu..... 1  
Gi5\_8189502\_x26.....ggagacgucgugggaacacggggugccgaac..... 0  
Gi3\_26616339\_x26.....gaacacggCgugccgaacu..... 1  
Gi2\_10084063\_x26.....Uggccccgccaguacugcgau..... 1  
Gi5\_8194052\_x26.....gugggaacacggggugcGgaacu..... 1  
Gi2\_10083725\_x26.....acgucgugNgaacacggggugccgaacu..... 1  
Gi2\_10081957\_x26.....gucguAggaacacggggugc..... 1  
Gi2\_10086195\_x26.....Ggucaggccccgccaguacugc..... 1  
Gi2\_10078187\_x26.....cggagacgucgugggaacacggggugccg..... 0  
Gi1\_3782231\_x26.....Cggaacacggggugccgaacu..... 1  
G1a\_5434619\_x26.....cgGgggaacacggggugccgaacu..... 1  
Gi1\_3782829\_x26.....gggaGcacggggugccgaacu..... 1  
Gi4\_496309\_x26.....ucggagacgucgugggaacacggggugccg..... 0  
G1a\_5435555\_x26.....ucggagacgucgugggaacacggggugc..... 0  
Gi2\_10086767\_x26.....cguNggaaacacggggugccgaacu..... 1  
Gi3\_26619927\_x26.....gugggaacCcggggugccg..... 1  
Gi3\_26647918\_x25.....aucggagacgucgugggGacacg..... 1  
Gi1\_3789581\_x25.....Uggaacacggggugccgaac..... 1  
Gi2\_10096097\_x25.....acgucgugggaacacggggugccgaGc..... 1  
Gi1\_3790281\_x25.....gggaacGcggggugccgaacu..... 1  
Gi3\_26642093\_x25.....Caacacggggugccgaac..... 1  
Gi3\_26642543\_x25.....ugggaacacgAggugccgaac..... 1  
Gi3\_26630068\_x25.....cgGgggaacacggggugc..... 1  
Gi3\_26649768\_x25.....acgucgugggaacacggggugccgaGcu..... 1  
Gi3\_26644068\_x25.....gugggaacacggggugcU..... 1  
Gi3\_26635293\_x25.....Uaucggagacgucgugggaacacggggugcc..... 1  
Gi5\_8201409\_x25.....ggaacacggggugccgGacu..... 1  
Gi3\_26647218\_x25.....auUggagacgucgugggaacacgggg..... 1  
Gi3\_26631918\_x25.....aucAgagacgucgugggaacacg..... 1  
Gi3\_26639943\_x25.....gcccccagacuacggaucgagacgu..... 0  
Gi3\_26639443\_x25.....ugggaacCcggggugccgaac..... 1  
Gi3\_26624793\_x25.....gucgugggaacacggggugccgaUC..... 1  
Gi3\_26642393\_x25.....Ggucaggccccgccaguacugcg..... 1



Gi5\_8202134\_x25.....ucUugggaacacggggugccgaacu..... 1  
 Gi2\_10093122\_x25.....aucggagacgucgugggGacacggggugc..... 1  
 Gl1a\_5446512\_x25.....cgucgugggaacacggggugccgaac..... 0  
 Gi2\_10094772\_x25.....ggUcccggccaguacugcgauC..... 1  
 Gi1\_3787581\_x25.....Uggaacacggggugccgaacuu..... 1  
 Gi5\_8206759\_x25.....acgucgugggaacacggggugccgaacuuu..... 0  
 Gi2\_10090472\_x25.....ggagacgucgugggaacacggggugccgaa..... 0  
 Gi2\_10095997\_x25.....cUccaguacugcgauCggagac..... 1  
 Gi1\_3790406\_x25.....ggaacacAgggugccgaacu..... 1  
 Gi2\_10101872\_x25.....cgucgugggaacacggggGgcc..... 1  
 Gi3\_26626868\_x25.....aggcGccggccaguacugcgauC..... 1  
 Gi3\_26649318\_x25.....aGgucgugggaacacggggugccgaac..... 1  
 Gi3\_26636418\_x25.....gccccggccaguacugcgauCggagac..... 0  
 Gi5\_8205909\_x25.....aacUcggggugccgaacu..... 1  
 Gi3\_26635093\_x25.....aacacUgggugccgaacu..... 1  
 Gi3\_26629593\_x25.....Uaucggagacgucgugggaacacggggugc..... 1  
 Gl1a\_5444887\_x25.....UccaguacugcgauCggagacguc..... 1  
 Gi2\_10102922\_x25.....gGcaggccccggccaguacugcg..... 1  
 Gi2\_10095272\_x25.....gccaguacugcgauCggGgacgucgu..... 1  
 Gi3\_26643393\_x25.....gaagagaagcgccgucaggccccggccagua..... 0  
 Gi3\_26646643\_x25.....aggccccggccaguacCgc..... 1  
 Gi5\_8202859\_x25.....agacgucgugggaacacggggugccga..... 0  
 Gi3\_26639018\_x25.....ugUgaacacggggugccg..... 1  
 Gi1\_3792831\_x25.....Uacacggggugccgaacu..... 1  
 Gi2\_10092447\_x25.....ggaacacggggugccgUacu..... 1  
 Gi5\_8194809\_x25.....Gaggccccggccaguacugcg..... 1  
 Gi3\_26625618\_x25.....gaCgggagacgucgugggaacacggg..... 1  
 Gi5\_8203659\_x25.....ucguAggaacacggggugccgaacu..... 1  
 Gi1\_3790306\_x25.....ucgugggaacacAgggugccgaacu..... 1  
 Gi2\_10103047\_x25.....ggaacacAgggugccgaac..... 1  
 Gi3\_26643543\_x25.....ugggaGcacggggugccg..... 1  
 Gi2\_10095497\_x25.....gaagcgccgucaggccccggccaguacug..... 0  
 Gi2\_10098997\_x25.....Uaagcgccgucaggccccggccag..... 1  
 Gi3\_26639968\_x25.....cgugggaacacggAgugccgaac..... 1  
 Gi3\_26646543\_x25.....ucgCgggaacacggggugccgaac..... 1  
 Gi3\_26642593\_x25.....cgucgugggaacacggggGgccgaac..... 1  
 Gl1a\_5443412\_x25.....gucgugggaacacggggugccgaa..... 0  
 Gi3\_26628393\_x25.....ugggaacUcggggugccgaacu..... 1  
 Gi3\_26624768\_x25.....aucgUagacgucgugggaacacggggg..... 1  
 Gi1\_3792931\_x25.....gaacacggggugcUgaacu..... 1  
 Gi3\_26629668\_x25.....aucggGgacgucgugggaacacg..... 1  
 Gi3\_26646393\_x25.....aucggagacgucGgggaacacg..... 1  
 Gi3\_26641868\_x25.....gagacgucgugggaacacggggugccgaacA..... 1  
 Gi3\_26625668\_x25.....cgucgugggaacacggggGgc..... 1  
 Gl1a\_5444237\_x25.....Ugugggaacacggggugccgaacu..... 1  
 Gi3\_26638418\_x25.....aggccAcgccaguacugcgauC..... 1  
 Gi5\_8205834\_x25.....Gcgugggaacacggggugccgaac..... 1

Gi3\_26622593\_x25.....cUaucggagacgucguggg..... 1  
 Gi3\_26631568\_x25.....Gaggccccgccaguacugcga..... 1  
 Gi5\_8198084\_x25.....gGcgugggaacacggggugccgaac..... 1  
 Gi5\_8206509\_x25.....gGgggaacacggggugccg..... 1  
 Gi1\_3791831\_x25.....acgucgugggaacacggggugccgaa..... 0  
 Gi3\_26632493\_x25.....aucggagacgucgugAgaacacggg..... 1  
 Gi3\_26622218\_x25.....agUccccgccaguacugcg..... 1  
 Gi3\_26645068\_x25.....Cggccccgccaguacugcgauc..... 1  
 Gi3\_26626368\_x25.....gaacacggggugccUaacu..... 1  
 Gi3\_26664464\_x24.....cGccgccaguacugcgauc..... 1  
 Gi1\_3795710\_x24.....gugggaacacggggugcUgaacu..... 1  
 Gi5\_8214336\_x24.....gggaacacNggggugccgaac..... 1  
 Gi3\_26656184\_x24.....ggaacacgNggugccgaa..... 1  
 Gi3\_26656208\_x24.....cgCgugggaacacggggugccgaac..... 1  
 Gi2\_10106659\_x24.....Uagaagcgccgucaggccccg..... 1  
 Gi3\_26649968\_x24.....cgugUgaacacggggugcc..... 1  
 Gi3\_26656136\_x24.....Uagacgucgugggaacacggggugccg..... 1  
 Gi5\_8215992\_x24.....cUucgugggaacacggggugccgaac..... 1  
 Gi3\_26673104\_x24.....ggaacacggggugccgUacu..... 1  
 Gl1\_5455936\_x24.....gGgggaacacggggugccga..... 1  
 Gi3\_26662376\_x24.....ugggaacacggggugccgUac..... 1  
 Gi3\_26667872\_x24.....aucggagacgucgugggaGcacggg..... 1  
 Gi3\_26658080\_x24.....cgugggUacacggggugccgaac..... 1  
 Gi1\_3797438\_x24.....gggagacgucgCgggaacacggggugc..... 1  
 Gi3\_26662592\_x24.....cgCgggaacacggggugccgaa..... 1  
 Gi2\_10114219\_x24.....gucgugggaacacggggugccgaGcu..... 1  
 Gi3\_26657000\_x24.....aacacggggugccUaacu..... 1  
 Gi5\_8219232\_x24.....ugggaacacggggGgccgaacu..... 1  
 Gi1\_3796478\_x24.....aucggGgacgucgugggaacacggggg..... 1  
 Gi2\_10109851\_x24.....gggaacacgggggUaccgaacu..... 1  
 Gi3\_26669144\_x24.....aCgccccgccaguacugc..... 1  
 Gi3\_26654696\_x24.....ugggaacacggggugccgaCc..... 1  
 Gi3\_26666072\_x24.....aucggagacgucgugggaacCcgggg..... 1  
 Gi3\_26675264\_x24.....ucgugggaacGcggggugccgaac..... 1  
 Gi2\_10115971\_x24.....uacugcgaucggGgacgucgugggaaca..... 1  
 Gi5\_8207208\_x24.....ucgugggaacacggggugccgaCcu..... 1  
 Gi3\_26660672\_x24.....guAggaacacggggugccgaa..... 1  
 Gi3\_26654600\_x24.....gacgucgugggaacacggggugccgaa..... 0  
 Gi2\_10108963\_x24.....gacgucgugggaacacggggugccgaacA..... 1  
 Gi5\_8216664\_x24.....ucgugggaacacggggugccAaacu..... 1  
 Gi1\_3794678\_x24.....agacgucgugggaacacggggg..... 0  
 Gi3\_26676944\_x24.....aucggagacgucgugggCacacgg..... 1  
 Gi2\_10121371\_x24.....Uaagagaagcgccgucaggcccc..... 1  
 Gi5\_8217816\_x24.....gggaacaUggggugccgaacu..... 1  
 Gi3\_26655224\_x24.....aucggagacgucgugggaacacggggA..... 1  
 Gi1\_3794342\_x24.....gaacacggggugccAaacu..... 1  
 Gi3\_26676248\_x24.....aucggagaNucgugggaacacgggg..... 1

Gi3\_26653304\_x24.....gugggaacacgAggugccgaa..... 1  
 Gi2\_10109827\_x24.....cUaucggagacgucgugg..... 1  
 Gi3\_26660312\_x24.....aucggGgacgucgugggaacacggg..... 1  
 Gi1\_3794030\_x24.....gGgggaacacggggugccg..... 1  
 Gi3\_26672840\_x24.....aucggagaNgucgugggaacac..... 1  
 Gi1\_3795278\_x24.....aacacggggGgccgaacu..... 1  
 Gi5\_8208624\_x24.....gugggaacUcggggugccgaacu..... 1  
 G1a\_5455144\_x24uccuuaacucguuccgaauuaAga..... 1  
 Gi2\_10117747\_x24.....gugggaacacggggAgccgaac..... 1  
 Gi3\_26667392\_x24.....cgugggaacacggggugccgaaGu..... 1  
 Gi2\_10106059\_x24.....Acgugggaacacggggugccgaacu..... 1  
 Gi3\_26676608\_x24.....gugggaacaUggggugccga..... 1  
 Gi3\_26675648\_x24.....gaacacggggugccgaCc..... 1  
 Gi3\_26655272\_x24.....Gucggagacgucgugggaacac..... 1  
 Gi3\_26650496\_x24.....cgugggaacacgggAgccgaac..... 1  
 Gi1\_3793454\_x24.....aacaUggggugccgaacu..... 1  
 Gi5\_8211744\_x24.....ugggaacacggggugccgUacu..... 1  
 Gi5\_8218056\_x24.....ucggagacgucgugggaacacggggugccg..... 0  
 Gi2\_10117843\_x24.....ugggaacaUggggugccgaacu..... 1  
 Gi1\_3794894\_x24.....gugggaacacggggugccgGacu..... 1  
 G1a\_5457016\_x24.....gUaacacggggugccgaac..... 1  
 Gi3\_26650256\_x24.....Ugucgugggaacacggggugccg..... 1  
 Gi2\_10107811\_x24.....gucgugggaacacggggGgcc..... 1  
 Gi5\_8215848\_x24.....ccgccaguacugcgauccggagacgucgu..... 0  
 Gi2\_10119643\_x24.....gaacacggggugcUgaacu..... 1  
 Gi3\_26671904\_x24.....gugggaacacggggugGcgaac..... 1  
 G1a\_5460184\_x24.....aagagaagcgccgucagggccccgcca..... 0  
 Gi2\_10110499\_x24.....ggaacacggggAgccgaacu..... 1  
 Gi5\_8208744\_x24.....gucgugggaacCcgggugccgaacu..... 1  
 Gi3\_26670008\_x24.....aucggagacgucgugggaacGcggggg..... 1  
 Gi2\_10107259\_x24.....gugggaacacggggugGcgaacu..... 1  
 Gi3\_26666504\_x24.....cgucguAggaacacggggugccgaacu..... 1  
 Gi5\_8214600\_x24.....gcccgcgucagggccccgcagucguc..... 0  
 Gi3\_26661272\_x24.....acgucgugggaacacggAgugccgaacu..... 1  
 Gi1\_3796694\_x24.....Uagacgucgugggaacacggggugccgaacu..... 1  
 Gi2\_10119259\_x24.....ggaacacggggGgccgaac..... 1  
 Gi3\_26668376\_x24.....gaCcacggggugccgaacu..... 1  
 Gi3\_26703537\_x23.....acgCcgugggaacacggggugccgaacu..... 1  
 Gi2\_10124714\_x23.....gugggaacacggggugccgaaA..... 1  
 Gi3\_26707562\_x23.....ggCaacacggggugccgaacu..... 1  
 Gi5\_8231920\_x23.....gaucggagacgucgugggaaca..... 0  
 Gi2\_10125381\_x23.....agUccccgccaguacugc..... 1  
 Gi5\_8232817\_x23.....cgucgugggaacacggggugccgaacuu..... 0  
 Gi3\_26703468\_x23.....gaUgucgugggaacacggggugccgaacu..... 1  
 Gi1\_3802509\_x23.....ccgucagggccccgcagucgucgga..... 0  
 Gi2\_10122966\_x23.....gugggaacacUggggugccgaacu..... 1  
 Gi2\_10126876\_x23.....gugggGacacggggugccg..... 1

Gi3\_26703721\_x23.....ugggaCcacggggugccgaac.....1  
Gi2\_10124530\_x23.....aucggagacgucgugggGacacggggg.....1  
Gi5\_8225020\_x23.....cGggccccgccaguacugcgau.....gggaacacggggugccAaacu.....1  
Gi3\_26699949\_x23.....cGggccccgccaguacugcgau.....ugggaacacgggggAccgaacu.....1  
Gi2\_10134834\_x23.....ugggaacacgggggAgaacu.....1  
Gi2\_10137157\_x23.....gGcccgccaguacugcgau.....1  
Gi2\_10125818\_x23.....aUuacugcgauccggagacguc.....1  
Gi2\_10129912\_x23.....ggaacacggggugccgUac.....1  
Gi3\_26700432\_x23.....cCugggaacacggggugccgaac.....1  
Gi2\_10131430\_x23.....gugggaacaAggggugccgaacu.....1  
Gi5\_8221225\_x23.....Uucgugggaacacggggugccg.....1  
Gi2\_10132281\_x23.....aCcacggggugccgaacu.....1  
Gi3\_26702410\_x23.....cgucgugggaGcacggggugccg.....1  
Gi2\_10124829\_x23.....ggaGcacggggugccgaacu.....1  
G1a\_5465430\_x23.....gaacacggggugUcgaacu.....1  
Gi1\_3801083\_x23.....Gcgugggaacacggggugccg.....1  
Gi2\_10121724\_x23.....gugggaacacggggugccgaGc.....1  
Gi5\_8222766\_x23.....Gaggccccgccaguacugc.....1  
Gi2\_10129291\_x23.....ugcgauccggagacgucgugggaacacg.....0  
Gi5\_8228976\_x23.....aucggCgacgucgugggaacacggg.....1  
Gi3\_26701444\_x23.....ggAaacacggggugccgaacu.....1  
Gi2\_10131637\_x23.....ucgugggaacacAggggugccgaacu.....1  
Gi2\_10135869\_x23.....gugggaacacgAggugccga.....1  
Gi3\_26705630\_x23.....gugNgaacacggggugccgaac.....1  
Gi3\_26698155\_x23.....ugggaacacggAgugccgaacu.....1  
Gi2\_10122138\_x23.....ugggaUcacggggugccgaacu.....1  
Gi3\_26686908\_x23.....cgugggaGcacggggugccga.....1  
Gi3\_26697718\_x23.....cUugggaacacggggugc.....1  
Gi5\_8224399\_x23.....gaaUacggggugccgaacu.....1  
Gi2\_10136605\_x23.....gggaacacggggugcUgaacu.....1  
Gi2\_10134696\_x23.....gugggaacacggAgugccgaac.....1  
Gi2\_10123035\_x23.....gUgacgucgugggaacacggggugcc.....1  
Gi1\_3800416\_x23.....ucgugggaacCcggggugccgaacu.....1  
Gi3\_26705676\_x23.....cUgagacgucgugggaacacgggg.....1  
Gi3\_26705009\_x23.....cUucgugggaacacggggugccgaa.....1  
Gi1\_3802141\_x23.....ugcgauccggagacgucgugggaaca.....0  
Gi2\_10122667\_x23.....Ucgauccggagacgucgugggaacacggg.....1  
Gi2\_10123150\_x23.....Uagacgucgugggaacacggggugc.....1  
Gi3\_26698592\_x23.....ggaacacggggugccgaacG.....1  
Gi3\_26681802\_x23.....gucgugggaacCcggggugccgaac.....1  
Gi3\_26708114\_x23.....gGgaagcgcggucaggccccgc.....1  
Gi5\_8222835\_x23.....aacacggggugccgaaUu.....1  
Gi2\_10132212\_x23.....gggaacacggggugccgaGc.....1  
Gi2\_10126278\_x23.....Uaagcgcggucaggccccgccaguacugc.....1  
Gi3\_26702640\_x23.....gugggaacacggggugccAaa.....1  
Gi1\_3800094\_x23.....gugggaacacAggggugccgaacu.....1

Gi1\_3804740\_x23.....gggaacacggggCgccgaacu..... 1  
Gi3\_26685781\_x23.....aacaAggggugccgaacu..... 1  
Gi1\_3801497\_x23.....cUucgugggaacacggggugcc..... 1  
Gi5\_8230885\_x23.ccuuaacucguuccgaauaAga..... 1  
Gi2\_10122391\_x23.....gugAgaacacggggugcc..... 1  
Gi3\_26692244\_x23.....caUgccccgccaguacugcgauc..... 1  
Gi2\_10135639\_x23.....ugggaacacggggugUcgaacu..... 1  
Gi3\_26681411\_x23.....ugggaacacggggugccgaau..... 1  
Gi1\_3804763\_x23.....gugggaacacggggugccU..... 1  
Gi3\_26689737\_x23.....aucggagacgucgCgggaacacggg..... 1  
Gi5\_8229390\_x23.....ggaacacgNggugccgaac..... 1  
Gi5\_8226124\_x23.....cgugggaanNacggggugccgaac..... 1  
Gi2\_10132971\_x23.....auUggagacgucgugggaaca..... 1  
G1a\_5467500\_x23.....cgugggaacacggggugccgCacu..... 1  
Gi3\_26700616\_x23.....ucaggccccgccaguacugcgaucggagac..... 0  
Gi2\_10121770\_x23.....ucgugggaNcacggggugccgaac..... 1  
Gi5\_8233668\_x23.....Cugggaacacggggugccgaac..... 1  
Gi2\_10128923\_x23.....cgGgggaacacggggugcc..... 1  
Gi3\_26706619\_x23.....gucgugggaacacggggugccAaacu..... 1  
Gi5\_8224215\_x23.....gggaacacAgggugccgaacu..... 1  
Gi1\_3813129\_x22.....gucgugggaacacggggugccgaacuu..... 0  
Gi2\_10139068\_x22.....Ugccccgccaguacugcgauc..... 1  
Gi3\_26711346\_x22.....ggagacgucgugggaacacggggugccgaacA..... 1  
Gi3\_26725140\_x22.....gaacacgggUugccgaacu..... 1  
Gi3\_26734908\_x22.....aacCcggggugccgaacu..... 1  
Gi3\_26737658\_x22.....cGggccccgccaguacugcga..... 1  
Gi5\_8241043\_x22.....cGggccccgccaguacugcg..... 1  
Gi2\_10145470\_x22.....gGucggagacgucgugggaacacggg..... 1  
Gi2\_10154886\_x22.....gugggGacacggggugccga..... 1  
Gi1\_3810753\_x22.....ugggaacacggggugccgaGcu..... 1  
Gi3\_26712490\_x22.....ugcgauccggagacgucgugggaacacg..... 0  
Gi3\_26731806\_x22.....Uccgucaggccccgccagu..... 1  
Gi3\_26737438\_x22.....gucgugggaacacggggugccgGac..... 1  
Gi2\_10151938\_x22.....gGcgugggaacacggggugc..... 1  
G1a\_5478437\_x22.....ugcgauccggagacgucgugggaa..... 0  
Gi2\_10139486\_x22.....agacgucgugggaacacggggugccgaa..... 0  
Gi2\_10140652\_x22.....cgggagacgucgugggaacacggggugccgaacu..... 0  
Gi1\_3811061\_x22.....Ggggaacacggggugccgaac..... 1  
Gi3\_26716956\_x22.....gucgugggaacacggggUaccgaac..... 1  
Gi3\_26733874\_x22.....cUccgucaggccccgccagu..... 1  
Gi3\_26718738\_x22.....cgugggaacacgggAugccg..... 1  
Gi3\_26731388\_x22.....ggccccgccaguacugcgaucggagacg..... 0  
Gi2\_10141752\_x22.....ugggaacacggggugccgUacu..... 1  
Gi2\_10140542\_x22.....agcgccgucaggccccgccaguacugcg..... 0  
Gi3\_26720212\_x22.....ugggaacacgggAgugccgaac..... 1  
Gi3\_26740232\_x22.....gugggaacacggggugcUgaa..... 1  
Gi3\_26709630\_x22.....cUgccccgccaguacugcgauc..... 1

Gi5\_8241021\_x22.....ccccgccaguacugcgauccggagacguc..... 0  
 Gi2\_10139860\_x22.....cgugggaaNacggggugccga..... 1  
 Gi3\_26738274\_x22.....gugggaacacggUgugccg..... 1  
 Gi1\_3808201\_x22.....ucgugggaacacggggugccgaCcu..... 1  
 Gi3\_26727846\_x22.....uggNaacacggggugccgaacu..... 1  
 Gi2\_10144898\_x22.....gggGacacggggugccgaac..... 1  
 Gi1\_3808179\_x22.....gugggaacacggggugccgaaU..... 1  
 Gi3\_26738516\_x22.....gucgugggaacGcggggugccgaac..... 1  
 Gi2\_10144524\_x22.....Agagacgucgugggaacacggggugcc..... 1  
 Gi3\_26726746\_x22.....cgucgugggaacacggggugccgaacuA..... 1  
 Gi2\_10153412\_x22.....ucaggccccgccaguacugcgau..... 0  
 Gi5\_8239327\_x22.....aacacggggugccgaaAu..... 1  
 Gi2\_10139574\_x22.....gugggaacacggAgugcc..... 1  
 Gl1a\_5474763\_x22.....cgugggaacacgAggugccgaacu..... 1  
 Gi3\_26729782\_x22.....aacacggggugccgaacG..... 1  
 Gi5\_8235433\_x22.....aacacgggAugccgaacu..... 1  
 Gi2\_10151278\_x22.....gggaaUacggggugccgaacu..... 1  
 Gi1\_3810643\_x22.....gacgucgCgggaacacggggugccgaacu..... 1  
 Gl1a\_5475181\_x22.....Uucaggccccgccaguacugc..... 1  
 Gi3\_26721642\_x22.....cgugggaacacggggugccgUac..... 1  
 Gi1\_3807761\_x22.....ggccccgccaguacugcgagacg..... 0  
 Gi1\_3808883\_x22.....guggAaacacggggugccgaacu..... 1  
 Gi2\_10141950\_x22.....gugggaacGcggggugccga..... 1  
 Gi3\_26712556\_x22.....aggccccgccagGacugcgau..... 1  
 Gi3\_26721818\_x22.....Uagaagcgccgucaggccccgccag..... 1  
 Gi2\_10140300\_x22.....ucgugggaacacgggAugccgaacu..... 1  
 Gl1a\_5477051\_x22.....ggaacacggggugccgCacu..... 1  
 Gi1\_3808069\_x22.....cgucgugggaacacggggCgccgaacu..... 1  
 Gi3\_26713744\_x22.....ugggaaUacggggugccgaac..... 1  
 Gi2\_10145162\_x22.....agagaagcgccgucaggccccgccaguacu..... 0  
 Gi3\_26712754\_x22.....Naacacggggugccgaacu..... 1  
 Gi2\_10151828\_x22.....aucggagacgucgugggaCcacggggugc..... 1  
 Gi3\_26729298\_x22.....Uugggaacacggggugccgaacuu..... 1  
 Gi3\_26732862\_x22.....acgucgugggaacacAgggugccgaacu..... 1  
 Gi2\_10142016\_x22.....cgugggaacacggggugcGgaacu..... 1  
 Gl1a\_5475379\_x22.....Uaucggagacgucguggga..... 1  
 Gi3\_26722214\_x22.....ugggaacacggggugAcgaacu..... 1  
 Gi2\_10138980\_x22.....cggagacgNcgugggaacacggggugcc..... 1  
 Gi3\_26715174\_x22.....gacggagacgucgugggCacacggg..... 1  
 Gi2\_10151190\_x22.....acgucgugggaacacggggugccgaa..... 0  
 Gi1\_3812051\_x22.....ucgugggaacacggggGgccgaacu..... 1  
 Gi3\_26736954\_x22.....aucggagacgucgugggCacacggggu..... 1  
 Gi1\_3810401\_x22.....Agggaacacggggugccgaacu..... 1  
 Gi5\_8243441\_x22.....cgugggaaAacggggugccgaacu..... 1  
 Gl1a\_5472123\_x22.....Uucaggccccgccaguacugcg..... 1  
 Gi3\_26718518\_x22.....ucgugggaacacggggugccgaCc..... 1  
 Gi2\_10143270\_x22.....cgGgggaacacggggugc..... 1

Gi1\_3806991\_x22.....gagacgucgugggaacacggggugccgaac..... 0  
 Gi3\_26734578\_x22.....cgucgugggaacGcggggugccgaac..... 1  
 Gi5\_8236071\_x22.....cgaucggagacgucgugggaacacggg..... 0  
 Gi5\_8235917\_x22.....Aggaacacggggugccgaac..... 1  
 Gi3\_26731542\_x22.....Ugagacgucgugggaacacggggugccgaacu..... 1  
 Gi3\_26727912\_x22.....gggaacacggggugccgaG..... 1  
 Gi5\_8236445\_x22.....gaacacggAgugccgaacu..... 1  
 Gi3\_26710092\_x22.....gugggaacacggggugUcgaa..... 1  
 Gi3\_26716560\_x22.....gCcgugggaacacggggugccgaac..... 1  
 Gi3\_26717154\_x22.....Uucggagacgucgugggaacacggg..... 1  
 Gi3\_26722126\_x22.....aggccccgccaguacugAgauc..... 1  
 Gi2\_10147340\_x22.....cggagacgucgugggaacacggggugccga..... 0  
 Gi3\_26719948\_x22.....ugggaacacggggugccUaacu..... 1  
 Gi2\_10145514\_x22.....gugggaGcacggggugccga..... 1  
 Gi3\_26738714\_x22.....Uaucggagacgucgugggaaca..... 1  
 Gi5\_8236423\_x22.....ucAugggaacacggggugccgaacu..... 1  
 Gi5\_8242495\_x22.....gggaacacgAggugccgaacu..... 1  
 Gl1a\_5489137\_x21.....cgCgggaacacggggugccgaacu..... 1  
 Gi5\_8262225\_x21.....aggccccccaAuacugcgauc..... 1  
 Gi3\_26748429\_x21.....gGacugcgaucggagacg..... 1  
 Gi3\_26758908\_x21.....uAggaacacggggugccg..... 1  
 Gi2\_10163413\_x21.....gucgugggaaAacggggugccgaacu..... 1  
 Gi3\_26745657\_x21.....Cgggaacacggggugccgaa..... 1  
 Gi1\_3816066\_x21.....cgugggaacGcggggugccgaacu..... 1  
 Gi3\_26758362\_x21.....cgucUugggaacacggggugccgaacu..... 1  
 Gi2\_10157869\_x21.....cguUggaacacggggugccgaacu..... 1  
 Gi3\_26768043\_x21.....aGcggagacgucgugggaacacggggugc..... 1  
 Gi3\_26755023\_x21.....aucggagacgucgugggaacacggggugccga..... 0  
 Gi1\_3820896\_x21.....cUugggaacacggggugccgaacuu..... 1  
 Gi2\_10159318\_x21.....ugggaGcacggggugccgaac..... 1  
 Gi2\_10170448\_x21.....aggcccUgccaguacugcgauc..... 1  
 Gi3\_26750172\_x21.....Uagacgucgugggaacacg..... 1  
 Gi2\_10173031\_x21.....ugggaCcacggggugccgaacu..... 1  
 Gi3\_26767644\_x21.....aucggagacgucgCgggaacacggggu..... 1  
 Gi3\_26747064\_x21.....cgccaguacugcgaucggGgacgucgug..... 1  
 Gi5\_8261994\_x21.....ggaacacggggGgccgaacu..... 1  
 Gi2\_10156399\_x21.....gucAugggaacacggggugccgaacu..... 1  
 Gi3\_26769051\_x21.....ucgugggaacacggAgugccgaacu..... 1  
 Gi3\_26757270\_x21.....gugggaacacAgggugccg..... 1  
 Gi3\_26769387\_x21.....aAgccccgccaguacugcg..... 1  
 Gi3\_26762100\_x21.....gggaacacggggugccgaacG..... 1  
 Gi3\_26762289\_x21.....gugUgaacacggggugccgaac..... 1  
 Gi1\_3814281\_x21.....cgaucggagacgucgugggaacacggggu..... 0  
 Gl1a\_5487352\_x21.....Uaucggagacgucgugggaacacggg..... 1  
 Gi2\_10158751\_x21.....gugggaacacggggugcGgaacu..... 1  
 Gi5\_8254329\_x21.....gCcgugggaacacggggugccgaacu..... 1  
 Gi3\_26750529\_x21.....aggccUcgccaguacugcgauc..... 1

Gi3\_26743788\_x21.....gugggaacacggggugccgaacuu..... 0  
Gi5\_8261469\_x21.....guUggaacacggggugccgaac..... 1  
Gi2\_10165660\_x21.....gugggaacacgUggugccgaacu..... 1  
Gi2\_10156273\_x21.....cgugggaacacggggugccgaUcu..... 1  
Gi3\_26748639\_x21.....cgucgugggaacacggggUAccgaacu..... 1  
Gi5\_8255925\_x21.....aacacggggugccgUacu..... 1  
Gi1\_3813924\_x21.....cgucguggNaacacggggugccgaacu..... 1  
Gi3\_26758950\_x21.....cgugggaaNacggggugccg..... 1  
Gi3\_26753910\_x21.....gaacacgggCugccgaacu..... 1  
Gi3\_26763192\_x21.....Gcgugggaacacggggugccg..... 1  
Gi2\_10163350\_x21.....cgugggaacGcggggugccgaac..... 1  
Gi2\_10164967\_x21.....gcgaucggagacgucgugggaacacggggugc..... 0  
Gi2\_10169398\_x21.....Ggugggaacacggggugccgaa..... 1  
Gi3\_26753196\_x21.....ucgugggaGcacggggugccgaac..... 1  
Gi2\_10165933\_x21.....cgucgugggaGcacggggugccgaacu..... 1  
Gi3\_26751600\_x21.....cgucgugggaacacggggugccgGacu..... 1  
Gi3\_26768715\_x21.....gaucggagacgucgugggaGcacggggU..... 1  
Gi3\_26754204\_x21.....ugggaacacggggugccgG..... 1  
Gi3\_26743704\_x21.....ucgugggaacacggggugUcgaacu..... 1  
Gi3\_26746266\_x21.....aucggagacgucgugggaacacggggugccgaac..... 0  
Gi2\_10170238\_x21.....Gaggccccgccaguacugcg..... 1  
Gi2\_10168516\_x21.....Nugggaacacggggugccgaacu..... 1  
Gi1\_3815226\_x21.....Gccccccaguacugcgagacgu..... 1  
Gi2\_10170028\_x21.....cgAgggaacacggggugcc..... 1  
Gi1\_3820497\_x21.....ucgugggaacacggggugccgaacuu..... 0  
Gi2\_10169734\_x21.....gCgggaacacggggugccga..... 1  
Gi5\_8256954\_x21.....ucguggAaacacggggugccgaacu..... 1  
Gi5\_8258256\_x21.....ucgugggaacacggggugcUgaacu..... 1  
Gi2\_10169062\_x21.....cgugggaGcacggggugccgaac..... 1  
Gi2\_10158814\_x21.....gGcugcugugggaacacggggugccgaacu..... 1  
Gi2\_10169146\_x21.....gggaacCcgggugccgaacu..... 1  
Gi3\_26769282\_x21.....gaaAacggggugccgaacu..... 1  
Gi3\_26763276\_x21.....gggaacacgAggugccgaac..... 1  
Gi3\_26770605\_x21.....ugggaacacggggGgccgaac..... 1  
Gi3\_26745258\_x21.....gugggaacacggggUcCcggaacu..... 1  
Gi2\_10172569\_x21.....gggaacGcggggugccgaac..... 1  
G1a\_5488801\_x21.....gcgaucggagacgucgugggaacacggg..... 0  
Gi3\_26759643\_x21.....aucggagaNgucgugggaacacgg..... 1  
Gi2\_10166416\_x21.....Uucaggccccgccaguacug..... 1  
Gi2\_10172674\_x21.....Uagaagcgcggucaggccccgcag..... 1  
Gi3\_26744376\_x21.....gaacacggggugcUgaac..... 1  
Gi5\_8256555\_x21.....acgucgugggaacacggggCgccaacu..... 1  
Gi5\_8258109\_x21.....gucgugggaacGcggggugccgaacu..... 1  
Gi1\_3814239\_x21.....cUgagacgucgugggaacacggggugcc..... 1  
Gi3\_26757228\_x21.....cGcgccaguacugcgauc..... 1  
Gi3\_26742885\_x21.....ugggaacacggggUAccgaac..... 1  
Gi3\_26750361\_x21.....ggaaGacggggugccgaac..... 1



Gi2\_10171078\_x21.....agcgccgucaggccccgccaguacugcgau..... 0  
Gi1\_3817872\_x21.....Uucguggaacacggggugccgaac..... 1  
Gi3\_26751243\_x21.....gaucggagacgucgugggaacacggggC..... 1  
Gi2\_10185369\_x20.....gaaacacgAggugccgaacu..... 1  
Gi3\_26789965\_x20.....uggaacaAggggugccgaacu..... 1  
Gi2\_10178389\_x20.....cgucguggGacacggggugccgaacu..... 1  
Gi5\_8270509\_x20.....cguggaacacggggugccgaUc..... 1  
Gi5\_8275509\_x20.....aacacggggugcAgaacu..... 1  
Gi2\_10189929\_x20.....aucggagGcgucgugggaacacggggugc..... 1  
Gi3\_26782065\_x20.....cgucguggaacCcggggugcc..... 1  
Gi5\_8268569\_x20.....gucguggaacacggggugccgaGcu..... 1  
Gi3\_26799045\_x20.....aucggagacgucgugggaacGcgggg..... 1  
Gi3\_26804745\_x20.....ucguggaacCcggggugccgaac..... 1  
Gi3\_26799225\_x20.....aucggagacgucgugggaacacggggCgcc..... 1  
Gi3\_26788885\_x20.....cUggccccgccaguacugcg..... 1  
Gi1\_3824090\_x20.....cguAggaacacggggugccgaacu..... 1  
Gi3\_26780825\_x20.....uggaacacgggAugccgaac..... 1  
Gi1\_3823050\_x20.....uUggaacacggggugccgaacuu..... 1  
Gi2\_10174649\_x20.....agagaagcgccgucaggc..... 0  
Gi2\_10175069\_x20.....acgucguggaacacggggugccgCacu..... 1  
Gi3\_26801945\_x20.....cgGcguggaacacggggugccgaac..... 1  
Gi3\_26785145\_x20.....Uaagagaagcgccgucaggccccgccag..... 1  
Gi2\_10181569\_x20.....Ggggaacacggggugccgaa..... 1  
Gi3\_26796225\_x20.....aggcccAgccaguacugcgau..... 1  
Gi3\_26777645\_x20.....guggUaacacggggugccg..... 1  
Gi3\_26791865\_x20.....aggccccgccCguacugcga..... 1  
Gi2\_10185129\_x20.....Gccgccaguacugcgau..... 1  
G1a\_5491580\_x20.....gccccgccaguacugcgau..... 0  
Gi2\_10174109\_x20.....cgugUaacacggggugcc..... 1  
Gi2\_10182389\_x20.....ugcgauccgagacgucguggaacac..... 0  
Gi5\_8277049\_x20.....gaaCgcggggugccgaac..... 1  
Gi3\_26776345\_x20.....caggccccNccaguacugcg..... 1  
Gi3\_26786305\_x20.....aUuacugcgauccgagacguc..... 1  
Gi3\_26786225\_x20.....ugggUaacacggggugccgaac..... 1  
Gi2\_10181849\_x20.....gggaacacggggugccgCac..... 1  
Gi3\_26794245\_x20.....uggaacacggggugUcgaac..... 1  
Gi3\_26779045\_x20.....gcgauccgagacgucguggaacacgggg..... 0  
Gi5\_8269269\_x20.....gucGgggaacacggggugccgaacu..... 1  
Gi3\_26773145\_x20.....acgucguggaacacggggugcAgaacu..... 1  
Gi3\_26786065\_x20.....agaagcgccgucaggccccgccaguacugc..... 0  
Gi3\_26785065\_x20.....Uacgucguggaacacgggg..... 1  
Gi3\_26785505\_x20.....cgAgggaacacggggugccga..... 1  
Gi3\_26801745\_x20.....cguggaaGacggggugccgaacu..... 1  
Gi2\_10180409\_x20.....agUccccgccaguacugcg..... 1  
Gi5\_8273989\_x20.....agacgucguggaacacggggugccgaacuA..... 1  
Gi3\_26780965\_x20.....aggaagagaagcgccguc..... 0  
Gi2\_10182229\_x20.....ugUaacacggggugccgaac..... 1

Gi3\_26775365\_x20.....aucggagacgucguAggaacacggg..... 1  
Gi3\_26788645\_x20.....aucggagaNgucguggaacaacggggugcc..... 1  
G1a\_5495320\_x20.....Aggaacacggggugccgaacu..... 1  
Gi5\_8268589\_x20.....uUggaacacggggugccgaacuu..... 1  
Gi3\_26797925\_x20.....ggUacacggggugccgaa..... 1  
Gi3\_26791765\_x20.....uggaacaacggggAgccgaa..... 1  
Gi2\_10178929\_x20.....aggccccgccaguGcugcgau..... 1  
Gi3\_26781065\_x20.....ucguggaacaacggggugccGacu..... 1  
Gi3\_26788485\_x20.....cUccgucaggccccgccag..... 1  
Gi3\_26783465\_x20.....cgAgggaacaacggggugccg..... 1  
Gi2\_10186829\_x20.....ccccgccaguacugcgauccggagacgucg..... 0  
Gi1\_3828790\_x20.....cgugggaacaacgUggugccgaacu..... 1  
Gi5\_8263669\_x20.....Ggggaacaacggggugccgaa..... 1  
Gi3\_26784645\_x20.....ucggagacgucgugggaacaacggggugccg..... 0  
Gi3\_26792105\_x20.....aUaagcgccgucaggccccgccagu..... 1  
Gi3\_26801485\_x20.....cgGgggaacaacggggugccgaa..... 1  
Gi1\_3826590\_x20.....gugggaaUacggggugccgaacu..... 1  
G1a\_5498300\_x20.....aUaagcgccgucaggccccgc..... 1  
Gi3\_26795005\_x20.....gugggUacacggggugccga..... 1  
Gi2\_10183909\_x20.....ucgugggaGcaccggggugccgaac..... 1  
Gi2\_10181469\_x20.....acugcgauccggagacgucgugggaacac..... 0  
Gi3\_26780465\_x20.....aucggagacgucgugggaacCcggg..... 1  
Gi3\_26786405\_x20.....cgugggaacGcggggugc..... 1  
Gi2\_10179529\_x20.....gccccgccaguacugcgauccggagacguc..... 0  
Gi3\_26772865\_x20.....ugggaacGcggggugccgaa..... 1  
Gi3\_26779625\_x20.....Ugagacgucgugggaaca..... 1  
Gi2\_10178229\_x20.....cgugggaacaacAgggugccgaac..... 1  
Gi3\_26798645\_x20.....gugggaacaacggggugccgaaGu..... 1  
Gi2\_10186869\_x20.....cgugggaacaacggggugccAaac..... 1  
Gi3\_26782965\_x20.....gggaacaacggggugcAgaac..... 1  
Gi2\_10188889\_x20.....cGggccccgccaguacugcg..... 1  
Gi2\_10179049\_x20.....caggccccgccagAacugcgau..... 1  
Gi1\_3825710\_x20.....Uaacacggggugccgaacuu..... 1  
Gi3\_26778765\_x20.....ggccccgccaguacugcgCuc..... 1  
G1a\_5491160\_x20.....gGacugcgauccggagacguc..... 1  
Gi5\_8275669\_x20.....ucgugggaacaUggggugccgaacu..... 1  
Gi2\_10185289\_x20.....Uuacugcgauccggagacguc..... 1  
Gi5\_8266309\_x20.....Acgugggaacaacggggugccgaacu..... 1  
Gi3\_26774005\_x20.....ugggaacaacggggCgcca..... 1  
Gi5\_8277069\_x20.....gaacacgggAugccgaacu..... 1  
Gi5\_8265949\_x20.....gugNgaacaacggggugccgaacu..... 1  
Gi2\_10177009\_x20.....agacgucNgggaacaacggggugccgaacu..... 1  
Gi5\_8267029\_x20.....ggaacaacggggugcUgaacu..... 1  
Gi2\_10183689\_x20.....cgugggaaNacggggugc..... 1  
Gi2\_10174549\_x20.....cgAcgugggaacaacggggugccgaacu..... 0  
Gi2\_10176509\_x20.....cugcgauccggagacgucgugggaacacg..... 1  
Gi3\_26791265\_x20.....cgucguggNaacaacggggugccg..... 1

Gi2\_10175749\_x20.....gugggaacacggggCgccga..... 1  
 Gi2\_10181349\_x20.....auUgggagacgucgugggaacac..... 1  
 Gi3\_26813153\_x19.....acgucguAggaacacggggugcc..... 1  
 Gi1\_3833543\_x19.....cgggagacgucgugggaacacggggugccgaacu..... 0  
 G1a\_5504764\_x19.....ccaguacugcgauccggagacgucgug..... 0  
 Gi1\_3832498\_x19.....ggaacacggggugccgGacu..... 1  
 Gi3\_26821931\_x19.....cgucgugggaacacgAggugccgaacu..... 1  
 Gi3\_26820392\_x19.....acgucgugggCacacggggugccgaacu..... 1  
 Gi5\_8287229\_x19.....Uaucggagacgucgugggaacacgg..... 1  
 Gi3\_26823470\_x19.....cgucgugggaacacggggugcUgaacu..... 1  
 Gi2\_10204698\_x19.....caggccccNccaguacugc..... 1  
 Gi3\_26832951\_x19.....cgucguggNaacacggggugccg..... 1  
 Gi1\_3830142\_x19.....caggccccNccaguacugc..... 1  
 Gi1\_3830142\_x19.....cgccaguacugcgauccggagac..... 0  
 Gi3\_26808213\_x19.....ggaacacAggggugccgaacu..... 1  
 Gi1\_3836412\_x19.....gugggaacacggUgugccgaacu..... 1  
 Gi2\_10194704\_x19.....gaacacggggUaccgaacu..... 1  
 Gi1\_3833448\_x19.....aacacggggugccgaCcu..... 1  
 Gi3\_26822919\_x19.....gugggaacacggggugccUaac..... 1  
 Gi3\_26812469\_x19.....ucguUggaacacggggugccgaac..... 1  
 Gi2\_10197421\_x19.....aucggagaNgucgugggaacacggggugcc..... 1  
 Gi3\_26808593\_x19.....cgugggGacacggggugccgaa..... 1  
 Gi3\_26805192\_x19.....ggaacacggggugccgaaUu..... 1  
 Gi3\_26814331\_x19.....gaacacggggugccgCac..... 1  
 Gi5\_8282384\_x19.....Ggugggaacacggggugccga..... 1  
 Gi3\_26833521\_x19.....aggccccgAcaguacugcgau..... 1  
 G1a\_5506721\_x19.....Cgaacacggggugccgaacu..... 1  
 Gi1\_3830693\_x19.....ucAugggaacacggggugccgaacu..... 1  
 Gi3\_26808004\_x19.....cgugggGacacggggugcc..... 1  
 Gi3\_26808688\_x19.....ucguAggaacacggggugccgaac..... 1  
 Gi3\_26808650\_x19.....cgugggaacacggggCgcc..... 1  
 Gi2\_10194685\_x19.....aucgggagacgucgugggGacac..... 1  
 Gi2\_10206522\_x19.....aggccccgccCguacugcga..... 1  
 Gi3\_26832761\_x19.....aCgccccgccaguacugcg..... 1  
 Gi1\_3829496\_x19.....Uuacugcgauccggagacgucg..... 1  
 Gi3\_26827346\_x19.....aucgggagacgucgugggaacCcg..... 1  
 Gi3\_26829759\_x19.....uGaggccccgccaguacugcg..... 1  
 Gi1\_3833353\_x19.....acgucgugggaacacggggugccgaacuu..... 0  
 Gi1\_3834455\_x19.....cUucaggccccgccaguacugc..... 1  
 Gi3\_26819043\_x19.....Ggacgucgugggaacacggggugccgaacu..... 1  
 Gi2\_10198086\_x19.....ggaacacggggUccgaacu..... 1  
 Gi3\_26807947\_x19.....ggaaUacggggugccgaacu..... 1  
 Gi3\_26808384\_x19.....aggccccgccCguacugcg..... 1  
 Gi1\_3834778\_x19.....gagacgucgugggaacacggggugccga..... 0  
 Gi5\_8283315\_x19.....ucgugggaacacggggugUcgaacu..... 1  
 Gi1\_3832004\_x19.....aggccccgccaguacugcg..... 0  
 Gi3\_26809448\_x19.....gGucggagacgucgugggaacacg..... 1  
 Gi3\_26814217\_x19.....Ugccccgccaguacugcga..... 1

Gi5\_8284208\_x19.....aUacgucgugggaacacggggugccgaac..... 1  
Gi2\_10202019\_x19.....Gucggagacgucgugggaacacggggug..... 1  
Gi2\_10191227\_x19.....cuggggaacacgUggugccgaac..... 1  
Gi3\_26810550\_x19.....cUccaguacugcgauccggagac..... 1  
Gi3\_26830044\_x19.....Uagacgucgugggaacac..... 1  
Gi2\_10206788\_x19.....cgucgugggaacacggggugccgaGcu..... 1  
Gi5\_8287096\_x19.....agacgucgNgggaacacggggugccgaacu..... 1  
Gi3\_26833863\_x19.....ucguggAaacacggggugccgaacu..... 1  
Gi1\_3832764\_x19.....ggagacgucgugggaacacggggug..... 0  
Gi3\_26820772\_x19.....cCugggaacacggggugcc..... 1  
Gi3\_26833806\_x19.....gucAugggaacacggggugccgaacu..... 1  
Gi3\_26821133\_x19.....gaacGcggggugccgaac..... 1  
Gi3\_26825408\_x19.....cccgccagNacugcgau..... 1  
Gi2\_10196604\_x19.....ugggaacacggggugccgaUc..... 1  
Gi3\_26824192\_x19.....gccccgccaguacugcgauccggagacg..... 0  
Gi5\_8284455\_x19.....aacacggggugcGgaacu..... 1  
Gi2\_10207035\_x19.....gugggaacacggggugccCaacu..... 1  
Gi3\_26815205\_x19.....cggagacgucgugggaacCcgggugcc..... 1  
Gi3\_26809182\_x19.....aucggCgacgucgugggaacacg..... 1  
Gi2\_10194191\_x19.....guggUaacacggggugccg..... 1  
Gi3\_26838404\_x19.....ucgugggaacacggggUAccgaacu..... 1  
Gi2\_10197877\_x19.....gggaacacggggugccgaaAu..... 1  
Gi3\_26831925\_x19.....aggccccgccCguacugc..... 1  
Gi3\_26808783\_x19.....Ggccaguacugcgauccggagacguc..... 1  
Gi3\_26817789\_x19.....auUggagacgucgugggaacacggggugcc..... 1  
Gi3\_26831393\_x19.....Ugugggaacacggggugcc..... 1  
Gi3\_26810930\_x19.....aggcAccgccaguacugcgau..... 1  
Gi3\_26831944\_x19.....ucgugAgaacacggggugccgaac..... 1  
Gi2\_10201392\_x19.....cGggccccgccaguacugc..... 1  
Gi3\_26831868\_x19.....gugggUaacacggggugcc..... 1  
Gi2\_10192538\_x19.....aucggagacAucgugggaacacggggg..... 1  
Gi3\_26816554\_x19.....ggAaacacggggugccgaac..... 1  
Gi5\_8280180\_x19.....gugUgaacacggggugccgaacu..... 1  
Gi1\_3831700\_x19.....guUgugggaacacggggugccgaacu..... 1  
Gi3\_26806123\_x19.....ugggaacacggggugccgaaAu..... 1  
Gi2\_10196585\_x19.....Ggacgucgugggaacacggggugccgaac..... 1  
Gi3\_26826130\_x19.....gccagCacugcgauccggagacguc..... 1  
Gi3\_26815547\_x19.....aggccccgUcaguacugcgau..... 1  
Gi1\_3830047\_x19.....aggccccgccaguacugcga..... 0  
Gi2\_10204603\_x19.....uCggaacacggggugccgaac..... 1  
Gi5\_8283467\_x19.....ucgAgggaacacggggugccgaacu..... 1  
Gi5\_8280256\_x19.....ugggaacacgggAugccgaacu..... 1  
Gi2\_10208859\_x19.....ggaacacggggugcAgaacu..... 1  
Gi3\_26806617\_x19.....ucgugggaacacgggAugccgaacu..... 1  
Gi2\_10202684\_x19.....ugggaacAkgggugccga..... 1  
Gi3\_26821171\_x19.....aacacgggCugccgaacu..... 1  
Gi3\_26836960\_x19.....ugggaacacAgggugccga..... 1

Gi1\_3829914\_x19.....ugAgaacacggggugccgaacu..... 1  
Gi3\_26830557\_x19.....Gccgccaguacugcgau..... 1  
Gi2\_10207206\_x19.....ggUgacgucguggggaacacggggugc..... 1  
Gi2\_10201145\_x19.....ccUcgccaguacugcgau..... 1  
Gi2\_10193564\_x19.....aGgucguggggaacacggggugcc..... 1  
Gi3\_26812716\_x19.....Uuacugcgauccggagacguc..... 1  
Gi3\_26828068\_x19.....aucggagacgucguggggaacacA..... 1  
G1a\_5501952\_x19.....ucggagacgucguggggaGcacg..... 1  
Gi2\_10204717\_x19.....Cucguggggaacacggggugccgaacu..... 1  
Gi3\_26822387\_x19.....cUggccccgccaguacugc..... 1  
Gi2\_10192310\_x19.....ggccccgcNaguacugcgau..... 1  
Gi2\_10211692\_x18.....gaaacUggggugccgaacu..... 1  
Gi2\_10211566\_x18.....gugggaacacgggAugccgaac..... 1  
Gi1\_3838071\_x18.....cgucguggggaacacggggugccgCacu..... 1  
G1a\_5514605\_x18.....ggaacacggggCgccgaacu..... 1  
Gi3\_26844478\_x18.....cgucUugggaacacggggugcc..... 1  
Gi3\_26841922\_x18.....ggccccgcNaguacugcgau..... 1  
Gi3\_26856196\_x18.....cgucguggggaacacggggCgc..... 1  
Gi3\_26852344\_x18.....ggaNcacggggugccgaacu..... 1  
Gi2\_10224310\_x18.....agacgucgNgggaacacggggugcc..... 1  
Gi5\_8293599\_x18.....gugggaacacggggugccgaUcu..... 1  
Gi3\_26852848\_x18.....Uagaagcgccgucaggcccc..... 1  
Gi2\_10223824\_x18.....aucggagacgucguggggaacacggggCgc..... 1  
Gi3\_26845018\_x18.....gugggaaUacggggugccga..... 1  
Gi1\_3839529\_x18.....gugggaacacggggugccgaa..... 0  
Gi1\_3838251\_x18.....ucggagacgucguggggaacacggggu..... 0  
G1a\_5511743\_x18.....gugggaacacggggugccAaacu..... 1  
Gi3\_26848978\_x18.....ucguggggaacacggggugccAaac..... 1  
Gi3\_26856988\_x18.....aucggCgacgucguggggaacacggggu..... 1  
Gi5\_8302491\_x18.....cgugggaUcacggggugccgaacu..... 1  
Gi2\_10219252\_x18.....ugggaacacggggGgccgaacu..... 1  
Gi5\_8296281\_x18.....ugggaacacggggUaccgaac..... 1  
G1a\_5514965\_x18.....gugggaacaUggggugccgaacu..... 1  
Gi2\_10209820\_x18.....ugggaacCcggggugccgaacu..... 1  
Gi2\_10222258\_x18.....acgucguggggaacacggggGgcc..... 1  
Gi3\_26853874\_x18.....gacgucguggggaGcacggggugccgaacu..... 1  
Gi5\_8293113\_x18.....Ugucguggggaacacggggugccgaacu..... 1  
Gi1\_3839151\_x18.....cUugggaacacggggugccg..... 1  
Gi3\_26840914\_x18.....gUacacggggugccgaac..... 1  
Gi2\_10217578\_x18.....acgucguggggaacacggggGgccgaacu..... 1  
Gi2\_10210252\_x18.....Ggucguggggaacacggggugccga..... 1  
Gi3\_26872090\_x18.....Acgugggaacacggggugccgaacu..... 1  
Gi2\_10222168\_x18.....caggccccNccaguacugcg..... 1  
Gi3\_26857456\_x18.....gugggaacacggUgucgga..... 1  
Gi5\_8294823\_x18.....ugggUacacggggugccgaacu..... 1  
Gi3\_26861254\_x18.....cgugggaacCcggggugccga..... 1  
Gi5\_8296821\_x18.....cgucguggggaacCcggggugccgaacu..... 1

Gi2\_10212088\_x18.....ucUugggaacacggggugccgaacu..... 1  
Gi1\_3843003\_x18.....ucguAggaacacggggugccgaacu..... 1  
Gi2\_10221286\_x18.....gaacacggggugccAaacu..... 1  
Gi3\_26855872\_x18.....gAcgugggaacacggggugccgaacu..... 1  
Gi2\_10220656\_x18.....Ccggaacgucgugggaacacggggugcc..... 1  
Gi5\_8303337\_x18.....gaacacggggAgccgaacu..... 1  
Gi1\_3845271\_x18.....ggaacacggggugccgaGcu..... 1  
Gi2\_10211296\_x18.....ugggUacacggggugccgaacu..... 1  
Gi3\_26873602\_x18.....uggAaacacggggugccgaac..... 1  
Gi3\_26867104\_x18.....gggaacacggggugccgUac..... 1  
Gi2\_10219936\_x18.....Cggaacacggggugccgaac..... 1  
G1a\_5520599\_x18.....gugggaacacgUgugccgaacu..... 1  
Gi2\_10223518\_x18.....Uacgucgugggaacacggggugccgaac..... 1  
Gi3\_26850130\_x18.....Uacgucgugggaacacg..... 1  
G1a\_5514857\_x18.....gugggaacacgAggugccgaacu..... 1  
Gi2\_10210720\_x18.....aGgucgugggaacacggggugccgaacu..... 1  
Gi5\_8296047\_x18.....cgucgCgggaacacggggugccgaacu..... 1  
Gi1\_3840321\_x18.....cgugggaacacggggugccAaacu..... 1  
Gi2\_10216156\_x18.....aucggagacgucgugggaacGcggggugc..... 1  
Gi2\_10215778\_x18.....gugUgaacacggggugccgaacu..... 1  
Gi5\_8298099\_x18.....Gcggaucggagacgucgug..... 1  
Gi2\_10215490\_x18.....ugggaacacgAggugccgaacu..... 1  
Gi4\_505452\_x18.....Uccaguacugcgaucggagacguc..... 1  
Gi2\_10211368\_x18.....ggaacacggggugccgGac..... 1  
Gi3\_26868922\_x18.....ucgugggaacacggggugcAgaacu..... 1  
Gi3\_26846296\_x18.....aggUcccgccaguacugcgauc..... 1  
Gi3\_26854612\_x18.....gaGcacggggugccgaac..... 1  
Gi2\_10215796\_x18.....Cugggaacacggggugccg..... 1  
Gi2\_10221718\_x18.....aggcGccgccaguacugcgauc..... 1  
Gi3\_26859022\_x18.....gggaCcacggggugccgaacu..... 1  
Gi1\_3843795\_x18.....acacggggugccgaacuu..... 0  
Gi3\_26848564\_x18.....ucgugggaacacggggugccgaaAu..... 1  
Gi2\_10213312\_x18.....cgucgugggaacCcgggugccgaacu..... 1  
Gi3\_26839222\_x18.....gggaacacNgggugccgaa..... 1  
Gi1\_3839511\_x18.....gUagacgucgugggaacacggggugccg..... 1  
Gi2\_10218766\_x18.....aggccUcgccaguacugcgauc..... 1  
Gi3\_26873764\_x18.....Cggaacacggggugccgaa..... 1  
Gi2\_10218946\_x18.....acgucgugggGacacggggugccgaacu..... 1  
Gi5\_8298063\_x18.....ucgugggaacacggggugccgGacu..... 1  
Gi5\_8295327\_x18.....gagacgucgugggaacacggggugccgaacA..... 1  
Gi5\_8300043\_x18.....ugggaacacNggggugccgaac..... 1  
Gi1\_3842913\_x18.....ugggaacacggggugcUgaacu..... 1  
Gi3\_26870974\_x18.....aggccccgccaguCucggauc..... 1  
Gi3\_26851786\_x18.....aUagaagcgccgucaggcc..... 1  
G1a\_5518727\_x18.....cgugggaGcacggggugccgaacu..... 1  
Gi3\_26862442\_x18.....agUcccgccaguacugcga..... 1  
Gi2\_10216282\_x18.....ggaaGacggggugccgaacu..... 1

Gi3\_26839348\_x18.....gugggaacacggUgugccgaa.....1  
 Gi2\_10215958\_x18.....Gcugcuguggaacacggggugcc.....1  
 Gi3\_26859634\_x18.....cgucgugggaacacAgggugccgaacu.....1  
 Gi1\_3844587\_x18.....ggagacgucgCgggaacacggggugccga.....1  
 Gi2\_10227370\_x18.....Ucgaucggagacgucguggga.....1  
 Gi3\_26874952\_x18.....cAugggaacacggggugcc.....1  
 Gi3\_26875150\_x18.....ggaaUacggggugccgaac.....1  
 Gi3\_26859454\_x18.....cgugggaacacggggugAcgaac.....1  
 Gi1\_3840033\_x18.....gggaacacAgggugccgaacu.....1  
 Gi5\_8294247\_x18.....gugggaacacggggugccUaacu.....1  
 Gi3\_26874880\_x18.....Ngugggaacacggggugccgaacu.....1  
 Gi3\_26862172\_x18.....gaacacCgggugccgaacu.....1  
 Gi1\_3838377\_x18.....ggUaacacggggugccgaacu.....1  
 Gi3\_26854378\_x18.....gaacacgUggugccgaacu.....1  
 Gi2\_10211080\_x18.....ucgugggaacacggggugccgUacu.....1  
 Gi3\_26862388\_x18.....Uccgucaggccccgccaguacu.....1  
 Gi3\_26859562\_x18.....cgugggaacacggggUccgaacu.....1  
 Gi3\_26845666\_x18.....aCcgagacgucgugggaacacgg.....1  
 Gi3\_26869786\_x18.....cggagacgNcgugggaacacggggugcc.....1  
 Gi5\_8301609\_x18.....cccgccaguacugcgaucggagacgucgug.....0  
 Gi3\_26847448\_x18.....aacacggUgugccgaacu.....1  
 Gi2\_10215166\_x18.....gugggaaAacggggugccgaac.....1  
 G1a\_5516513\_x18.....ugcgaucggagacgucgugggaacac.....0  
 Gi2\_10217434\_x18.....Augggaacacggggugccgaa.....1  
 Gi2\_10223608\_x18.....aucggagaNgucgugggaaca.....1  
 Gi3\_26851624\_x18.....ggaacUcggggugccgaacu.....1  
 Gi3\_26864836\_x18.....cgucguAggaacacggggugcc.....1  
 Gi3\_26838790\_x18.....UagacgucgugggaacacggggU.....1  
 Gi3\_26841562\_x18.....gagaagcgccgucaggccccgccaguacu.....0  
 Gi3\_26904239\_x17.....aCcgagacgucgugggaacacgggg.....1  
 Gi2\_10230341\_x17.....aCcgagacgucgugggaacacg.....1  
 Gi1\_3852248\_x17.....Cacacggggugccgaacu.....1  
 G1a\_5528054\_x17.....aucggagacgucgugggaacacggAgugcc.....1  
 Gi2\_10235798\_x17.....cUucaggccccgccaguacug.....1  
 Gi3\_26900686\_x17.....Ugagacgucgugggaacacggggugccgaac.....1  
 Gi2\_10248225\_x17.....cgugggaacaUggggugccgaac.....1  
 Gi2\_10235764\_x17.....aucggagacgucgugggaacacggggCgcc.....1  
 Gi2\_10234812\_x17.....aggccccgccCguacugc.....1  
 Gi3\_26881884\_x17.....acgucgugggaacacggggugccgCac.....1  
 Gi5\_8321394\_x17.....cgugCgaacacggggugccgaacu.....1  
 G1a\_5531573\_x17.....gugAgaacacggggugccgaacu.....1  
 Gi1\_3849715\_x17.....gggaacacggggugccgaGcu.....1  
 Gi1\_3852367\_x17.....aggccccgccaguacugc.....0  
 Gi5\_8309528\_x17.....cgAcgugggaacacggggugccgaacu.....1  
 Gi2\_10234081\_x17.....Ggucgugggaacacggggugcc.....1  
 Gi3\_26877464\_x17.....cgaucggagacgucgugggaacacgggg.....0  
 Gi2\_10234540\_x17.....cUggccccgccaguacugcgauc.....1

Gi1\_3854764\_x17.....gugggaacacggggugccgaU..... 1  
 Gi3\_26888939\_x17.....agacgucgNgggaacacggggugccgaacu..... 1  
 Gi3\_26903066\_x17.....ucgugggaacacggggugccgUacu..... 1  
 Gi3\_26912603\_x17.....guggCaacacggggugccgaac..... 1  
 Gi2\_10245845\_x17.....cgugggGacacggggugcc..... 1  
 Gi3\_26909475\_x17.....Gaggccccgccaguacugcgau..... 1  
 Gi2\_10237668\_x17.....gggaGcacggggugccgaac..... 1  
 Gi3\_26909169\_x17.....aUuacugcgauccggagacgucgu..... 1  
 Gi3\_26880167\_x17.....cgugggCacacggggugccgaac..... 1  
 Gi5\_8309698\_x17.....gucgugggGacacggggugccgaacu..... 1  
 Gi1\_3849443\_x17.....gCaacacggggugccgaacu..... 1  
 Gi3\_26912484\_x17.....Uaucggagacgucgugggaac..... 1  
 Gi3\_26912467\_x17.....gcgaucggagacgucgugggaacacggggug..... 0  
 Gi1\_3851092\_x17.....ggccccgccaguacugcgau..... 0  
 Gi3\_26893138\_x17.....gucgugggGacacggggugccgaac..... 1  
 Gi2\_10238637\_x17.....gaacacggggGgccgaacu..... 1  
 Gi3\_26913130\_x17.....ggaacacggggugccgaaAu..... 1  
 Gi1\_3852962\_x17.....gugggaacacggAgugccgaacu..... 1  
 Gi3\_26901179\_x17.....acgucgugggaacGcggg..... 1  
 Gi3\_26905803\_x17.....ggaacUcggggugccgaac..... 1  
 Gi3\_26877345\_x17.....aucggagacgucgugggaacacAgg..... 1  
 Gi3\_26894022\_x17.....acgucgugggaacacggggugccgaUc..... 1  
 Gi3\_26876886\_x17.....aucggagCcgucgugggaacacgg..... 1  
 Gi3\_26896385\_x17.....cgugggaacUcggggugccgaac..... 1  
 G1a\_5530587\_x17.....agaagcgccgucagggccccgccaguacu..... 0  
 Gi3\_26879589\_x17.....gucguggAaacacggggugccgaacu..... 1  
 Gi3\_26901808\_x17.....gugggaacacUgggugccgaac..... 1  
 G1a\_5529618\_x17.....guggAaacacggggugccgaacu..... 1  
 Gi3\_26878280\_x17.....cUgagacgucgugggaacac..... 1  
 Gi2\_10246168\_x17.....ugggaacGcggggugccgaac..... 1  
 Gi2\_10232058\_x17.....cgucgugggaacacggggGcgg..... 1  
 Gi2\_10230392\_x17.....gcgaucggagacgucgugggaacacggggug..... 0  
 Gi2\_10240252\_x17.....Uccccgccaguacugcgau..... 1  
 Gi2\_10244723\_x17.....guNggaaacacggggugccgaacu..... 1  
 Gi2\_10247970\_x17.....uAggaacacggggugccgaac..... 1  
 Gi5\_8316532\_x17.....ggaacacggggGgccgaac..... 1  
 Gi2\_10231140\_x17.....ggaacaUggggugccgaac..... 1  
 Gi3\_26876750\_x17.....acgucgugggaacacggggGgccgaac..... 1  
 Gi2\_10238467\_x17.....aggcUccgccaguacugcgau..... 1  
 Gi3\_26889245\_x17.....cUccgucagggccccgccaguac..... 1  
 Gi2\_10235050\_x17.....Ugagacgucgugggaacacggggug..... 1  
 Gi2\_10235220\_x17.....aucggagacgucgugggaCcacggggugcc..... 1  
 Gi2\_10239555\_x17.....cgugggaacacgCggugccgaacu..... 1  
 Gi3\_26910223\_x17.....cgugggaacacggggGgccga..... 1  
 Gi2\_10243703\_x17.....ccccgccaguacugcgCuc..... 1  
 Gi3\_26907095\_x17.....ugggaacacggggugcUgaa..... 1  
 Gi3\_26882088\_x17.....ugcgaucggagacgucgugggaacacggg..... 0



Gi3\_26882938\_x17.....ucgugggaaUacggggugccgaacu..... 1  
Gi2\_10248208\_x17.....aucggagacgucgugggGaca..... 1  
Gi3\_26894855\_x17.....ugggaacacggggGcggc..... 1  
Gi3\_26877719\_x17.....gugggaacacggggugUcga..... 1  
Gi3\_26894685\_x17.....caggccccgccagCacugcgauC..... 1  
G1a\_5521849\_x17.....uAggaacacggggugccgaacu..... 1  
Gi2\_10248242\_x17.....Ugagacgucgugggaacacgggggu..... 1  
Gi3\_26907299\_x17.....Agggaacacggggugccgaa..... 1  
Gi2\_10233928\_x17.....aucggagacgucgugggaCcac..... 1  
Gi2\_10244128\_x17.....gucgCgggaacacggggugccgaacu..... 1  
Gi2\_10248616\_x17.....guggUaacacggggugccga..... 1  
Gi2\_10229270\_x17.....cgugggaacacggggugccgaaA..... 1  
Gi2\_10231004\_x17.....uUggaacacggggugccgaacuu..... 1  
Gi2\_10239504\_x17.....gaacacggggugUcgaacu..... 1  
Gi2\_10241221\_x17.....cAucgugggaacacggggugccgaacu..... 1  
Gi1\_3852265\_x17.....Uaucggagacgucguggg..... 1  
Gi3\_26896810\_x17.....gaacacUgggugccgaacu..... 1  
Gi2\_10247681\_x17.....cggGgacgucgugggaacacggggugccga..... 1  
Gi1\_3851381\_x17.....gggaacacggggGgccgaacu..... 1  
G1a\_5522461\_x17.....Ccugcuggggaacacggggugccgaacu..... 1  
Gi5\_8319150\_x17.....Uaucggagacgucgugggaacac..... 1  
Gi3\_26906143\_x17.....gucgugggaacacgggAugccgaacu..... 1  
Gi1\_3848882\_x17.....aacacgAggugccgaacu..... 1  
Gi2\_10247443\_x17.....ucgugggGacacggggugccgaac..... 1  
Gi2\_10234455\_x17.....aucggagacgucgugggaacGcggggg..... 1  
Gi5\_8310854\_x17.....gugggaacacggggugccgaacG..... 1  
Gi3\_26875458\_x17.....caggccccgccaguacCgc..... 1  
Gi5\_8315546\_x17.....aacacgUgugccgaacu..... 1  
Gi3\_26895093\_x17.....agagaagcgccgucaggccccgccaguacugc..... 0  
Gi2\_10240286\_x17.....gucgugggaacacggggugcUgaacu..... 1  
Gi1\_3854645\_x17.....ggaacGcggggugccgaacu..... 1  
Gi3\_26875339\_x17.....cgggagacgucgugggaacCcggggu..... 1  
Gi2\_10234557\_x17.....aucgUagacgucgugggaacacggggugc..... 1  
Gi2\_10232092\_x17.....ugggaacacgggAugccgaacu..... 1  
Gi3\_26893750\_x17.....Ggggagacgucgugggaacacggggugcc..... 1  
Gi2\_10249041\_x17.....ucgugggaacacggggugcUgaacu..... 1  
Gi3\_26895331\_x17.....UcgauCggagacgucgug..... 1  
Gi3\_26891846\_x17.....aucggagacgucgugggGacacgg..... 1  
Gi1\_3854475\_x17.....gAgaacacggggugccgaacu..... 1  
Gi2\_10234880\_x17.....cgugggaGcacggggugcc..... 1  
Gi2\_10236223\_x17.....gAgaacacggggugccgaac..... 1  
Gi3\_26909577\_x17.....gugggaacaAggggugcc..... 1  
Gi3\_26896946\_x17.....gucgugAgaacacggggugccgaacu..... 1  
Gi3\_26891506\_x17.....ugggaacacggggugUcгаа..... 1  
Gi3\_26899734\_x17.....cgugUgaacacggggugccga..... 1  
Gi2\_10244672\_x17.....Ugccccgccaguacugcga..... 1  
Gi1\_3847505\_x17.....ugggaacacggggugccAaacu..... 1

Gi5\_8316345\_x17.....ugggaacacgggCugccgaacu..... 1  
Gi3\_26894056\_x17.....cgugggGacacggggugccga..... 1  
Gi1\_3854135\_x17.....aucggGgacgucgugggaacacggggugcc..... 1  
Gi3\_26905548\_x17.....aUagaagcgccgucaggccccc..... 1  
Gi3\_26906500\_x17.....gucgugggaacaUggggugccgaacu..... 1  
Gi2\_10234472\_x17.....Ugagacgucgugggaacac..... 1  
Gi5\_8312605\_x17.....gugggaacacggggCgccgaac..... 1  
Gi5\_8320969\_x17.....ucgugAgaacacggggugccgaacu..... 1  
Gi5\_8310378\_x17.....ggAaacacggggugccgaacu..... 1  
Gi3\_26900737\_x17.....aucggagGcgucgugggaacacgggg..... 1  
Gi2\_10259737\_x16.....gugggaacacggggugccgaU..... 1  
Gi1\_3854897\_x16.....uUggaacacggggugccga..... 1  
Gi3\_26946269\_x16.....cCugggaacacggggugccga..... 1  
Gi3\_26914301\_x16.....ugggaacacggggugccAa..... 1  
Gi2\_10258633\_x16.....gugggaacacgggAugcc..... 1  
Gi3\_26945933\_x16.....ggaacCcgggugccgaacu..... 1  
Gi2\_10263897\_x16.....acgucgugggaacacggggCgcc..... 1  
Gi3\_26941853\_x16.....acgucgugggaacacggggugccGacu..... 1  
Gi3\_26933677\_x16.....gugggaacacgUggugccgaac..... 1  
Gi1a\_5538605\_x16.....gaagagaagcgccgucaggccc..... 0  
Gi3\_26948717\_x16.....Uaucggagacgucguggg..... 1  
Gi2\_10261545\_x16.....ccccgccaguacugcgGuc..... 1  
Gi3\_26919661\_x16.....cgugUgaacacggggugc..... 1  
Gi3\_26927149\_x16.....Caucggagacgucgugggaacacggg..... 1  
Gi1\_3860737\_x16.....ugggaacacggggAgccgaacu..... 1  
Gi3\_26932493\_x16.....Ucgccgucaggccccgccagu..... 1  
Gi3\_26941741\_x16.....cgucgugggaacacggggGgccg..... 1  
Gi1\_3855489\_x16.....gugggaacacgggAugccgaacu..... 1  
Gi1\_3857105\_x16.....gugggaacacggggUaccgaacu..... 1  
Gi3\_26924189\_x16.....ugggaacacggggugccAaa..... 1  
Gi1\_3856865\_x16.....gggaacacggggugccGacu..... 1  
Gi3\_26931517\_x16.....ucaggccccgccaguacugcgagacg..... 0  
Gi2\_10252857\_x16.....aggUcccgccaguacugcgau..... 1  
Gi1\_3861953\_x16.....acgucgugggaacacggggugccGacu..... 1  
Gi2\_10267145\_x16.....gugggaacacggggugccGUac..... 1  
Gi3\_26948909\_x16.....gucgugggaacacgAggugccgaacu..... 1  
Gi3\_26940045\_x16.....gggaacacggggugAcgaacu..... 1  
Gi2\_10255673\_x16.....Gcggagacgucgugggaacacg..... 1  
Gi3\_26922349\_x16.....gacgucgugggaacacggggGgccgaacu..... 1  
Gi4\_508724\_x16.....ggaacacggggugccgaacu..... 0  
Gi3\_26922685\_x16.....gggaacacNgggugccga..... 1  
Gi2\_10254057\_x16.....cgucgugggGacacggggugccg..... 1  
Gi3\_26913757\_x16.....cguUgugggaacacggggugcc..... 1  
Gi3\_26944317\_x16.....caggccccgccaguacugcgGuc..... 1  
Gi3\_26923997\_x16.....ggaacacggggugAcgaac..... 1  
Gi2\_10264681\_x16.....ggaaUacggggugccgaacu..... 1  
Gi3\_26927021\_x16.....ucgugggaacacgAggugccgaacu..... 1

Gi3\_26915021\_x16.....cUgagacgucgugggaacacggggugccga..... 1  
Gi3\_26945453\_x16.....Ggucgugggaacacggggugc..... 1  
Gi2\_10264137\_x16.....gUccccgccaguacugcgau..... 1  
Gi2\_10261801\_x16.....aacacgggguAccgaacu..... 1  
Gi2\_10267641\_x16.....gggaacacgAggugccgaacu..... 1  
Gi1\_3857713\_x16.....gaacacggggGccgaacu..... 1  
Gi1\_3862289\_x16.....Ugaacacggggugccgaa..... 1  
Gi5\_8323872\_x16.....cUucgugggaacacggggugc..... 1  
Gi1\_3857553\_x16.....aggccccgccaguacugcgauccggagacgu..... 0  
Gi2\_10266617\_x16.....Cugggaacacggggugccga..... 1  
Gi3\_26939629\_x16.....ucgugggaacacgggguAccgaac..... 1  
Gi3\_26951997\_x16.....cgucgugggaacacgggguAc..... 1  
Gi2\_10251417\_x16.....aUagaagcgccgucaggccccgcc..... 1  
G1a\_5536733\_x16.....gggGacacggggugccgaacu..... 1  
Gi2\_10269561\_x16.....aggccccgccUguacugcgau..... 1  
Gi3\_26914509\_x16.....gugggaacacggggugAcga..... 1  
Gi3\_26937837\_x16.....Uucgugggaacacggggu..... 1  
Gi3\_26914733\_x16.....ucgugggaacacggggGccgaac..... 1  
Gi3\_26920941\_x16.....aAcggagacgucgugggaacacggg..... 1  
Gi3\_26919405\_x16.....acgucgugggGacacggggugccgaac..... 1  
Gi1\_3858417\_x16.....cgugggaacacggggugc..... 0  
Gi5\_8334016\_x16.....gucgugggaGcacggggugccgaacu..... 1  
G1a\_5544445\_x16.....Uaagcgccgucaggccccgcca..... 1  
Gi3\_26932061\_x16.....gugAgaacacggggugccga..... 1  
G1a\_5535933\_x16.....cgggagacgucgugggaacacggggug..... 0  
Gi5\_8332400\_x16.....gAgggaacacggggugccgaac..... 1  
G1a\_5542717\_x16.....uCggaacacggggugccgaacu..... 1  
Gi1\_3862225\_x16.....cUucaggccccgccaguacugcg..... 1  
Gi3\_26948093\_x16.....ccccgccaguacugcgauccggagacgucgu..... 0  
G1a\_5539885\_x16.....agaagcgccgucaggccccgccaguacugc..... 0  
Gi2\_10252233\_x16.....aacacggggugccgaaUu..... 1  
Gi2\_10269785\_x16.....gugggaacacggggugAcgaac..... 1  
Gi2\_10252569\_x16.....ggaacacggggugccgaaUu..... 1  
Gi2\_10262121\_x16.....gggaacacggggugUcgaacu..... 1  
Gi3\_26947309\_x16.....agGgaagcgccgucaggcc..... 1  
Gi2\_10263721\_x16.....Uaucggagacgucgugggaac..... 1  
Gi2\_10260009\_x16.....cgucgugggaacGcgggugccgaacu..... 1  
Gi3\_26943277\_x16.....cUaucggagacgucgugggaacacggggu..... 1  
Gi3\_26945245\_x16.....Ggucgugggaacacggggugccga..... 1  
Gi1\_3862353\_x16.....gugggaacacgAggugccgaacu..... 1  
Gi3\_26943021\_x16.....agUcgcgugggaacacggggugccgaacu..... 1  
Gi3\_26938077\_x16.....gUccccgccaguacugcga..... 1  
Gi3\_26924893\_x16.....gggNacacggggugccgaacu..... 1  
Gi1\_3855665\_x16.....cgCcgugggaacacggggugccgaacu..... 1  
Gi3\_26934733\_x16.....guggAaacacggggugccg..... 1  
Gi3\_26947341\_x16.....aucggagacgucguAggaacacg..... 1  
Gi1\_3855281\_x16.....gCgaacacggggugccgaacu..... 1

Gi1a\_5541517\_x16.....gccccgccaguacugcgauccggagacguc..... 0  
 Gi3\_26948573\_x16.....gacgucguggaacaacggggCgccgaac..... 1  
 Gi2\_10253673\_x16.....aacaUggggugccgaacu..... 1  
 Gi4\_508468\_x16.....agacgucguggaacaacggggugccgaacu..... 0  
 Gi2\_10252985\_x16.....guggaacaacggggCgccg..... 1  
 Gi1a\_5542141\_x16.....guggaacaacggggugUcgaacu..... 1  
 Gi3\_26918093\_x16.....uggaacaacUgggugccgaacu..... 1  
 Gi3\_26935917\_x16.....gucguggaacaacgAgugccgaacu..... 1  
 Gi3\_26932205\_x16.....uggaacaacgUgugccgaacu..... 1  
 Gi1\_3857585\_x16.....gucguggaacaacggggugccgCacu..... 1  
 Gi3\_26946493\_x16.....aucAgagacgucguggaacaacggggu..... 1  
 Gi3\_26921437\_x16.....cgugggGacaacggggugc..... 1  
 Gi2\_10267481\_x16.....gggaacaacggggugccgaacG..... 1  
 Gi5\_8338224\_x16.....uggaacaacggggugccgaaAu..... 1  
 Gi1\_3860353\_x16.....gGcgcuguggaacaacggggugccgaacu..... 1  
 Gi1a\_5537165\_x16.....cUccaguacugcgauccggagacguc..... 1  
 Gi2\_10265865\_x16.....guggaacaacggggugccgaG..... 1  
 Gi3\_26925453\_x16.....guggaacaacgAgugccg..... 1  
 Gi3\_26917373\_x16.....acgucguggaacaacggggugcUgaacu..... 1  
 Gi3\_26926621\_x16.....ucguggaCcacggggugccgaacu..... 1  
 Gi3\_26929709\_x16.....cUucaggccccgccagua..... 1  
 Gi3\_26952061\_x16.....gAgggaacaacggggugccg..... 1  
 Gi3\_26946285\_x16.....gucguggaGcacggggugccgaac..... 1  
 Gi3\_26919069\_x16.....uggaacaacggggugccgaaA..... 1  
 Gi3\_26947821\_x16.....Uguggaacaacggggugccga..... 1  
 Gi3\_26949069\_x16.....Cucggagacgucguggaacaacggggu..... 1  
 Gi2\_10264569\_x16.....aacacggggugcGgaacu..... 1  
 Gi2\_10270937\_x16.....gaacaacgAgugccgaacu..... 1  
 Gi3\_26928941\_x16.....Uaagcgccgucaggccccgcc..... 1  
 Gi3\_26914269\_x16.....gucguggaacaacggggugcAgaacu..... 1  
 Gi3\_26915997\_x16.....gGcgcuguggaacaacggggugccgaac..... 1  
 Gi2\_10251209\_x16.....gugggUacaacggggugccgaac..... 1  
 Gi3\_26923933\_x16.....uggaacaacggggugcGgaacu..... 1  
 Gi2\_10264089\_x16.....gGcuguggaacaacggggugccga..... 1  
 Gi5\_8326400\_x16.....gaacaacggggugccgaaUu..... 1  
 Gi1a\_5543101\_x16.....gggaacaacNgggugccgaacu..... 1  
 Gi2\_10261529\_x16.....Uagacgucguggaacaacggggug..... 1  
 Gi3\_26921645\_x16.....aggccccgccGguacugcg..... 1  
 Gi2\_10256089\_x16.....ucggagacgucguggaacaacggggugccga..... 0  
 Gi3\_26947133\_x16.....ucgAgggaacaacggggugccgaacu..... 1  
 Gi3\_26920237\_x16.....aacacgGcugccgaacu..... 1  
 Gi2\_10268793\_x16.....cUccaguacugcgauccg..... 1  
 Gi2\_10266985\_x16.....cggaUacgucguggaacaacggggugcc..... 1  
 Gi3\_26927741\_x16.....uggaacaacgUgccgaa..... 1  
 Gi1\_3858817\_x16.....cguggaacUcgggugccgaacu..... 1  
 Gi3\_26955235\_x15.....cgauccgagacgucguggaacaacggggug..... 0  
 Gi2\_10289020\_x15.....gucguggaacaacggggugccgCac..... 1

Gi3\_26956630\_x15.....ccgccaguacugcgGucgg..... 1  
Gi2\_10279600\_x15.....cgccaguacugcgGgac..... 1  
G1a\_5551094\_x15.....gcgccgucagggcccgccaguacugc..... 0  
Gi3\_26977585\_x15.....Cucgugggaaacacggggugccgaac..... 1  
Gi2\_10283140\_x15.....aUgccccgccaguacugcgaucg..... 1  
Gi1\_3865667\_x15.....acgucgugggaacacggggGgccgaacu..... 1  
Gi3\_26985820\_x15.....gugggaacacggggugUcg..... 1  
Gi2\_10277275\_x15.....acgucgugggaacacggggGgccgaacu..... 1  
Gi3\_26991610\_x15.....aucggagaUgucgugggaacacggggg..... 1  
Gi2\_10276660\_x15.....aCgccccgccaguacugc..... 1  
Gi3\_26961790\_x15.....acgucAugggaacacggggugccgaacu..... 1  
Gi3\_26990530\_x15.....gacgucgugggaacacggggGgccgaacu..... 1  
Gi3\_26965195\_x15.....Gcaggccccgccaguacug..... 1  
G1a\_5544944\_x15.....cUugggaacacggggugc..... 1  
Gi3\_26986045\_x15.....Ggacgucgugggaacacggggugccgaac..... 1  
Gi3\_26975590\_x15.....cgucaggccccgccaguacugcgGgaga..... 0  
Gi1\_3866147\_x15.....gUgaacacggggugccgaacuu..... 1  
Gi3\_26987770\_x15.....Accaguacugcgaucggagacguc..... 1  
Gi3\_26974450\_x15.....gagacgucgugggaacacgggAugccg..... 1  
Gi3\_26976220\_x15.....ucAugggaacacggggugccgaac..... 1  
Gi2\_10294120\_x15.....gucguAggaaacacggggugccgaacu..... 1  
Gi1\_3864797\_x15.....Cacgucgugggaacacggggugccgaacu..... 1  
Gi2\_10288285\_x15.....cUgagacgucgugggaacacg..... 1  
Gi3\_26954335\_x15.....Gccgccaguacugcgaucggagacguc..... 1  
Gi5\_8342417\_x15.....ggaaUacggggugccgaacu..... 1  
Gi2\_10288480\_x15.....cgGgggaacacggggugccga..... 1  
Gi2\_10278850\_x15.....gugggaacacggggGgccgaa..... 1  
Gi3\_26970460\_x15.....gccaguacCgcgaucggagacgucgu..... 1  
Gi2\_10291165\_x15.....cgucguggNaacacggggugcc..... 1  
Gi2\_10286815\_x15.....gugggCacacggggugcc..... 1  
Gi2\_10274320\_x15.....ggccccgccaguacugcgGuc..... 1  
Gi1\_3866567\_x15.....gugggaaAacggggugccgaacu..... 1  
Gi3\_26953795\_x15.....gaucggagNcgucgugggaacacggg..... 1  
Gi3\_26957815\_x15.....Uggccccgccaguacugcg..... 1  
Gi3\_26978905\_x15.....ugggaacGcggggugccga..... 1  
Gi3\_26958190\_x15.....acgucguggAaacacggggugccgaacu..... 1  
Gi2\_10289785\_x15.....aucggagacgucgugggaacacggggGgc..... 1  
Gi2\_10289995\_x15.....ucgugggaacacggggugUcgaacu..... 1  
G1a\_5546579\_x15.....cUaucggagacgucgugg..... 1  
Gi3\_26961460\_x15.....cgucgugggaacGcggggugcc..... 1  
Gi3\_26986525\_x15.....gugggaCcacggggugcc..... 1  
Gi2\_10292560\_x15.....ucgugggaacacggggugccgaGc..... 1  
Gi3\_26957365\_x15.....caggccccNccaguacugcga..... 1  
Gi3\_26959030\_x15.....cgucgugggaacGcggggugccga..... 1  
Gi5\_8341652\_x15.....gggaacacggggUaccgaacu..... 1  
Gi3\_26983600\_x15.....aggccccgccGguacugc..... 1  
Gi2\_10290625\_x15.....aggccAcgccaguacugcgauc..... 1

Gi1\_3866357\_x15.....gucgugggaaacacggggugccgaaA..... 1  
Gi3\_26970535\_x15.....Aaucggagacgucgugggaaacacggg..... 1  
Gi3\_26965420\_x15.....Ggcgccgucaggccccgccagu..... 1  
Gi3\_26987935\_x15.....cgucgugggaGcacggggugccgaac..... 1  
Gi3\_26983330\_x15.....Gcggagacgucgugggaaacacggggu..... 1  
Gi5\_8341052\_x15.....cgucgugggaCcacggggugccgaacu..... 1  
Gi3\_26980240\_x15.....gggaacacggAgugccgaac..... 1  
G1a\_5549339\_x15.....gccaguacugcgauccgagacgucgug..... 0  
Gi2\_10293100\_x15.....cgCgggaacacggggugc..... 1  
Gi3\_26991895\_x15.....cGcgccaguacugcgauccgagacguc..... 1  
Gi1\_3871667\_x15.....cgugggaaUacggggugccgaacu..... 1  
Gi2\_10292455\_x15.....guUgugggaaacacggggugccgaac..... 1  
Gi3\_26971750\_x15.....Ugugggaaacacggggugc..... 1  
Gi2\_10285135\_x15.....aucAgagacgucgugggaaaca..... 1  
Gi3\_26976115\_x15.....aucAgagacgucgugggaaacacggg..... 1  
Gi2\_10292410\_x15.....gaucgAagacgucgugggaaacacggg..... 1  
Gi2\_10287070\_x15.....guggAaacacggggugcc..... 1  
Gi5\_8341307\_x15.....cAucgugggaaacacggggugccgaacu..... 1  
Gi5\_8348927\_x15.....gggGacacggggugccgaac..... 1  
Gi2\_10272550\_x15.....cUccgccaguacugcgaucc..... 1  
Gi3\_26985610\_x15.....gaucggagacgucgugggCcacacggggg..... 1  
Gi3\_26980600\_x15.....aucggagacgucguAggaacacgggggu..... 1  
Gi2\_10292710\_x15.....ucgugggaaacaUggggugccgaacu..... 1  
Gi3\_26953120\_x15.....ggaacacggggGcgccgaa..... 1  
Gi2\_10277470\_x15.....aggccccgAcaguacugcgaucc..... 1  
Gi3\_26975725\_x15.....gggaacacggggugccgaaU..... 1  
Gi3\_26979265\_x15.....uGaggccccgccaguacugcgaucc..... 1  
Gi3\_26956675\_x15.....gucaggccccgccaguacugcgauccgaga..... 0  
G1a\_5547164\_x15.....gagaagcgccgucaggccc..... 0  
Gi3\_26987845\_x15.....gugggaaGacggggugccgaacu..... 1  
Gi1\_3870557\_x15.....aacacgggAugccgaacu..... 1  
Gi2\_10288675\_x15.....aUgccccgccaguacugcgauccgagac..... 1  
Gi2\_10280350\_x15.....cgauccggagacgucgugggaaacacggggugcc..... 0  
Gi5\_8338832\_x15.....Uccccgccaguacugcgaucc..... 1  
Gi2\_10286545\_x15.....aucggagaNgucgugggaaacacggg..... 1  
Gi1\_3868577\_x15.....aGcggagacgucgugggaaacacg..... 1  
Gi3\_26969725\_x15.....gggaacGcggggugccgaa..... 1  
Gi5\_8349542\_x15.....ugggaaacacggggugccgaaUu..... 1  
Gi2\_10293310\_x15.....ggccccgccGguacugcgaucc..... 1  
Gi2\_10280530\_x15.....caggccccNccaguacugcgaucc..... 1  
Gi4\_510287\_x15.....Uggaacacggggugccgaacu..... 1  
Gi1\_3865442\_x15.....Cgggaacacggggugccgaac..... 1  
Gi2\_10281505\_x15.....cgucguggNaacacggggugc..... 1  
Gi2\_10280290\_x15.....gggaacacggggugccgaUc..... 1  
Gi3\_26954005\_x15.....ugggCacacggggugccgaac..... 1  
Gi5\_8342597\_x15.....ucgugggCacacggggugccgaacu..... 1  
Gi2\_10287400\_x15.....cgugggaaacacgggCugccgaacu..... 1

Gi2\_10282390\_x15.....ggaacacggggugcUgaac..... 1  
Gi5\_8351357\_x15.....cguggCaacacggggugccgaacu..... 1  
Gi2\_10293505\_x15.....aUagaagcgcgcgucaggcccc..... 1  
Gi4\_510062\_x15.....ugggaacacggggugccgaac..... 0  
Gi3\_26982400\_x15.....Aaucggagacgucgugggaacacgggggu..... 1  
Gi3\_26966320\_x15.....gaacacggggguCccgaacu..... 1  
Gi1\_3871637\_x15.....Uccaguacugcgauccggagacg..... 1  
Gi2\_10285165\_x15.....gugggaacacggggugccgaGu..... 1  
Gi3\_26957065\_x15.....gugggaacacgggAugccga..... 1  
Gi2\_10274620\_x15.....aucggagGcgucgugggaacacgggggu..... 1  
Gi2\_10282375\_x15.....gugggaacCcggggugccgaa..... 1  
Gi3\_26954680\_x15.....acgucguAggaacacggggugccgaacu..... 1  
Gi3\_26956360\_x15.....gucgugggaacacggggugAcgaacu..... 1  
Gi5\_8354492\_x15.....ucgugggaacacggggAgccgaacu..... 1  
Gi2\_10292935\_x15.....aUaagcgcgcgucaggcccc..... 1  
Gi3\_26961295\_x15.....ggaacacggggAgccgaac..... 1  
Gi3\_26966065\_x15.....cUccgucaggccccgccaguacu..... 1  
Gi2\_10286065\_x15.....ggaacCcggggugccgaacu..... 1  
Gi5\_8342702\_x15.....Uccgucaggccccgccaguacugc..... 1  
Gi3\_26986090\_x15.....ucgugggCacacggggugccgaacu..... 1  
Gi3\_26964505\_x15.....cUucaggccccgccaguacugcgauccg..... 1  
G1a\_5555699\_x15.....cGguacugcgauccggagacguc..... 1  
Gi2\_10277770\_x15.....cggagacgucgugggaGcacggggugcc..... 1  
G1a\_5557244\_x15.....cgccaguacugcgauccggagacgucgug..... 0  
Gi5\_8352467\_x15.....ucgugggaacacgAggugccgaacu..... 1  
Gi2\_10285975\_x15.....ucaggcccNgccaguacugcgaucc..... 1  
Gi3\_26990470\_x15.....gugggaacaUggggugccgaa..... 1  
Gi5\_8339162\_x15.....cgGgggaacacggggugccgaac..... 1  
Gi2\_10292485\_x15.....gucgugggaacacAgggugccgaacu..... 1  
Gi3\_26964910\_x15.....cgugUgaacacggggugccg..... 1  
Gi2\_10285195\_x15.....cUaucggagacgucgugggaacacggg..... 1  
Gi3\_26971795\_x15.....acugcgauccggagacgCcg..... 1  
Gi2\_10286245\_x15.....ucgugAgaacacggggugccgaacu..... 1  
Gi2\_10286365\_x15.....gaacacggggugccgUacu..... 1  
Gi1\_3864857\_x15.....gaagagaagcgcgcgucaggccccgccagu..... 0  
Gi2\_10277935\_x15.....aggccccgccaguacuAcgaucc..... 1  
Gi3\_26965330\_x15.....aucggagacgucguggAaacacg..... 1  
Gi3\_26977600\_x15.....aggccccgccaguacCgcg..... 1  
Gi1\_3871277\_x15.....aGgucgugggaacacggggugccgaacu..... 1  
Gi3\_26957845\_x15.....Cgaacacggggugccgaa..... 1  
Gi3\_26987995\_x15.....aggccccgNcaguacugcgau..... 1  
Gi1\_3870692\_x15.....gaacacggggugccgaacA..... 1  
Gi2\_10288990\_x15.....Agggaacacggggugccgaac..... 1  
Gi3\_26955925\_x15.....gugggCacacggggugcc..... 1  
G1a\_5554544\_x15.....Uaucggagacgucgugggaacacggggu..... 1  
Gi2\_10275025\_x15.....cccgccaguacugcgauccggagacAuc..... 1  
Gi3\_26987710\_x15.....cccgccaguacugcgauccggagacgucg..... 0

Gi5\_8344022\_x15.....gugggaacacgUggugccgaacu..... 1  
Gi5\_8340962\_x15.....gGcaggccccgccaguacugcg..... 1  
Gi3\_26981710\_x15.....cgugggaacCcggggugccgaac..... 1  
Gi3\_26966620\_x15.....Gcggagacgucgugggaacacg..... 1  
Gi3\_26966275\_x15.....cccgccagNacugcgauccggagacguc..... 1  
Gi3\_26970265\_x15.....caggccccgccaguacuAc..... 1  
Gi3\_26992150\_x15.....cgugggaacGcggggugcc..... 1  
G1a\_5554214\_x15.....Uuacugcgauccggagacgucg..... 1  
Gi3\_26961175\_x15.....caggccccgccaguacugcgCuc..... 1  
Gi3\_27015215\_x14.....ggUcccgccaguacugcgaucc..... 1  
Gi2\_10307565\_x14.....gugggaacacggggugccgG..... 1  
Gi3\_27012191\_x14.....Uuacugcgauccggagacgu..... 1  
Gi1\_3879432\_x14.....cgugggaacacggggugcUgaacu..... 1  
Gi2\_10310043\_x14.....cgugggaGcacggggugccga..... 1  
Gi3\_27003595\_x14.....cccgccaguacugcgauccggagGcguc..... 1  
Gi3\_27017329\_x14.....aggccccgccaguacCgcga..... 1  
Gi3\_27023657\_x14.....Gucggagacgucgugggaacacggggugc..... 1  
Gi5\_8369117\_x14.....ggUacacggggugccgaac..... 1  
G1a\_5560391\_x14.....aGcggagacgucgugggaacacggg..... 1  
Gi2\_10297919\_x14.....gucgugggNacacggggugccgaac..... 1  
Gi1\_3878494\_x14.....gggagacgucGgggaacacggggugccgaacu..... 1  
Gi1\_3877024\_x14.....ggGacacggggugccgaacu..... 1  
Gi2\_10297695\_x14.....cucguuccgaauaggaaga..... 0  
Gi3\_27032603\_x14.....gggaacacggggugUcgaac..... 1  
Gi2\_10315475\_x14.....ccccgccaNuacugcgaucc..... 1  
Gi2\_10306417\_x14.....gggagacguNgugggaacacggggugcc..... 1  
Gi2\_10297961\_x14.....cCugggaacacggggugcc..... 1  
Gi3\_27018365\_x14.....aUuacugcgauccggagacgu..... 1  
Gi3\_27007809\_x14.....gGcaguacugcgauccggagacguc..... 1  
Gi2\_10306221\_x14.....Ugucgugggaacacggggugccgaacu..... 1  
Gi3\_27025407\_x14.....aggccccgccaguacugcAauc..... 1  
Gi3\_27023825\_x14.....gaucggagacgucgugggGacacggggu..... 1  
Gi2\_10317505\_x14.....ugggaacacggggGcgggaac..... 1  
Gi3\_26993515\_x14.....gGgaagcgccgucaggccc..... 1  
Gi3\_27000529\_x14.....aggccccgccUguacugcgaucc..... 1  
Gi3\_27024875\_x14.....cgucguggAaacacggggugccgaacu..... 1  
Gi3\_27002013\_x14.....cgucgugggUacacggggugcc..... 1  
Gi2\_10303743\_x14.....cgggagacgCcgugggaacacggggugcc..... 1  
Gi5\_8356573\_x14.....gagaagcgccgucaggccccgccaguacu..... 0  
Gi5\_8364455\_x14.....gugggaacGcggggugccgaac..... 1  
Gi5\_8364035\_x14.....cUucgugggaacacggggugccga..... 1  
Gi4\_511002\_x14.....gGgggaacacggggugccgaa..... 1  
Gi1\_3875064\_x14.....ugggaacacggggugccgaac..... 1  
Gi3\_27016783\_x14.....gaucggagacgucgugggaGcacggg..... 1  
Gi5\_8358253\_x14.....cgugggaacacggggugccUaacu..... 1  
Gi2\_10298759\_x14.....gggaacacgggAugccgaa..... 1  
Gi5\_8367521\_x14.....cgugggaacUcggggugccgaacu..... 1



Gi1\_3873468\_x14.....gugggaacacggggugccgaaUu..... 1  
 Gi2\_10295749\_x14.....Gcaggccccgccaguacugcg..... 1  
 Gi5\_8358449\_x14.....Cggaacacggggugccgaac..... 1  
 Gi3\_27000697\_x14.....aacacggggugAcgaacu..... 1  
 Gi1\_3878522\_x14.....Uagacgucgugggaacacggggugcc..... 1  
 Gi5\_8362285\_x14.....ugggaacacggggugcGgaacu..... 1  
 Gi3\_27013605\_x14.....gGcaggccccgccaguacugcgau..... 1  
 Gi2\_10309987\_x14.....gugggaacacggggugcA..... 1  
 Gi2\_10310645\_x14.....Ugugggaacacggggugcc..... 1  
 Gi3\_27002083\_x14.....gGagagaagcgccgucagg..... 1  
 Gi3\_27023097\_x14.....ccgccaguacugcgauccggagacgucgugg..... 0  
 Gi2\_10296127\_x14.....cguggUaacacggggugccgaacu..... 1  
 Gi1a\_5557437\_x14.....gGcaggccccgccaguacugcg..... 1  
 Gi3\_27020339\_x14.....aucggGgacgucgugggaacacgg..... 1  
 Gi3\_26998233\_x14.....ccUgccaguacugcgauccggagacguc..... 1  
 Gi3\_27005877\_x14.....ccUgccaguacugcgau..... 1  
 Gi2\_10295525\_x14.....aUuacugcgauccggagac..... 1  
 Gi2\_10296925\_x14.....aggccccgccGguacugc..... 1  
 Gi3\_27003077\_x14.....gugAgaacacggggugccgaa..... 1  
 Gi1\_3881588\_x14.....ugggaacacggggugccgaa..... 0  
 Gi1\_3877444\_x14.....gucgugggaacacggggGgccgaacu..... 1  
 Gi3\_27010903\_x14.....caggccccgccaguacCgcg..... 1  
 Gi1\_3879348\_x14.....ucgugggaacacggggugccgGacu..... 1  
 Gi3\_27032477\_x14.....cgAcgugggaacacggggugccgaac..... 1  
 Gi2\_10298927\_x14.....cgucgugggaacacggggugcUgaacu..... 1  
 Gi3\_27003175\_x14.....gGcaggccccgccaguacug..... 1  
 Gi3\_27013227\_x14.....cUccaguacugcgauccgg..... 1  
 Gi5\_8356643\_x14.....gaacacggggugccgaacA..... 1  
 Gi2\_10312227\_x14.....ucgugggaacacggggugccAaacu..... 1  
 Gi3\_26995993\_x14.....caggccccgccaguacCgcgau..... 1  
 Gi2\_10304079\_x14.....gugggaacacggUgugccg..... 1  
 Gi2\_10314117\_x14.....guUaggccccgccaguacugc..... 1  
 Gi3\_27000347\_x14.....Agggaacacggggugccga..... 1  
 Gi3\_26999073\_x14.....acgucgugNgaacacggggugcc..... 1  
 Gi3\_27035697\_x14.....gGagagaagcgccgucaggcccc..... 1  
 Gi2\_10296155\_x14.....cUaucggagacgucgugggaacacg..... 1  
 Gi2\_10306333\_x14.....gugggaacacggggUacc..... 1  
 Gi1\_3875750\_x14.....Acgugggaacacggggugccgaacu..... 1  
 Gi2\_10310939\_x14.....aucgggagacgucgugggaCcacggg..... 1  
 Gi2\_10301741\_x14.....ugggGacacggggugccgaac..... 1  
 Gi3\_27000725\_x14.....caUgccccgccaguacugcg..... 1  
 Gi1a\_5566509\_x14.....Gguacugcgauccggagacguc..... 1  
 Gi2\_10300285\_x14.....gugggaGcacggggugccgaa..... 1  
 Gi2\_10306123\_x14.....gucgugggaacCcgggugccgaac..... 1  
 Gi2\_10307593\_x14.....gugggaacacgggCugccgaacu..... 1  
 Gi3\_27019443\_x14.....caggccccgccagCacugc..... 1  
 Gi2\_10310337\_x14.....Uccaguacugcgauccgg..... 1

Gi3\_27035431\_x14.....gggaacacggggugcGgaacu..... 1  
Gi2\_10301125\_x14.....ggaaacacgAggugccgaac..... 1  
Gi1\_3876590\_x14.....ucgugAgaacacggggugccgaacu..... 1  
Gi3\_27036845\_x14.....gaaGacggggugccgaacu..... 1  
Gi5\_8371203\_x14.....agacgucgugggaacacggggGgccgaacu..... 1  
Gi2\_10302175\_x14.....ggaaacacggggAgccgaac..... 1  
Gi3\_26994803\_x14.....Ugucgugggaacacggggugcc..... 1  
Gi2\_10316049\_x14.....caAgccccgccaguacugcgaucgg..... 1  
Gi2\_10303323\_x14.....aggccccgccaguacugcgauU..... 1  
Gi5\_8364273\_x14.....uCggaacacggggugccgaac..... 1  
Gi1\_3880790\_x14.....cgugggaCcacggggugccgaacu..... 1  
Gi2\_10300131\_x14.....aacacgAggugccgaacu..... 1  
Gi3\_26996539\_x14.....aucggagacgucgugggaCcac..... 1  
Gi2\_10315055\_x14.....aacacggAgugccgaacu..... 1  
Gi3\_27035683\_x14.....aucggagacgucgugggaaAacggggu..... 1  
Gi3\_26994859\_x14.....acgucgugAgaacacggggugccgaacu..... 1  
Gi3\_26995573\_x14.....ugggaacacggggugcUga..... 1  
Gi3\_27022593\_x14.....gGcgugggaacacggggugc..... 1  
Gi3\_27035109\_x14.....caggccccgccaguacugcgaCc..... 1  
Gi3\_27012835\_x14.....aggccccgccaguacAgcgauc..... 1  
Gi3\_27033891\_x14.....aucggagacgucgugggaacacgAg..... 1  
Gi5\_8362537\_x14.....acgucgugggaacacggggugccgaGcu..... 1  
Gi3\_26997953\_x14.....cgucgugggaacacggAgugccgaacu..... 1  
Gi2\_10316063\_x14.....Ugagacgucgugggaacacg..... 1  
Gi2\_10301293\_x14.....gGgacgucgugggaacacggggugccgaac..... 1  
Gi3\_27009727\_x14.....aucggagacgucgugggaacCcgggg..... 1  
Gi2\_10312451\_x14.....ccccgccaguacugcgaucggagacgucgug..... 0  
Gi2\_10305143\_x14.....cgugggaacacgAggugccgaac..... 1  
Gi5\_8356979\_x14.....ugggaacacggggugAcgaacu..... 1  
Gi5\_8372323\_x14.....aacacgggCugccgaacu..... 1  
Gi3\_27006311\_x14.....gacgucgugggaacacgggAugccgaac..... 1  
Gi3\_27000389\_x14.....aucggagacgucgugggaacGcgg..... 1  
Gi3\_27017525\_x14.....cAugggaacacggggugccga..... 1  
Gi3\_26994047\_x14.....Ucgccgucaggccccgccaguacugc..... 1  
Gi3\_27004225\_x14.....ucgugggaacacggggugccgaacG..... 1  
Gi3\_27010203\_x14.....Uucgugggaacacggggug..... 1  
Gi5\_8361347\_x14.....aGcgggagacgucgugggaacacgg..... 1  
Gi5\_8366541\_x14.....cgucgugggaacacacggggugccgGacu..... 1  
Gi1\_3875470\_x14.....ugggaaUacggggugccgaacu..... 1  
Gi3\_26997533\_x14.....ugggaacacggggugAcgaac..... 1  
Gi5\_8359023\_x14.....agacgucgugggGacacggggugccgaacu..... 1  
Gi3\_27016013\_x14.....gUgaacacggggugccgaacuu..... 1  
Gi2\_10314453\_x14.....ugggaacacggggAgccgaacu..... 1  
G1a\_5570275\_x14.....cgAgggaacacggggugccgaacu..... 1  
G1a\_5563275\_x14.....aucggagacgucgugggaGcacggggugc..... 1  
Gi2\_10296883\_x14.....Gggccccgccaguacugcgaucgga..... 1  
Gi3\_27033695\_x14.....Uucgggagacgucgugggaacacggggu..... 1

Gi3\_27013899\_x14.....cgucgugggaacacggggAgccgaac..... 1  
Gi3\_27018715\_x14.....agacgucgugggaacacggggCgccgaacu..... 1  
Gi3\_27030545\_x14.....cCucgugggaacacggggugccgaacu..... 1  
Gi1\_3877192\_x14.....gAaacacggggugccgaacu..... 1  
Gi3\_27026667\_x14.....gugggaacacggCgugccgaac..... 1  
Gi3\_26998835\_x14.....aggccccgccaguacugU..... 1  
Gi3\_27008089\_x14.....aggccccgccaguacugcgaU..... 1  
Gi2\_10314537\_x14.....Uaucggagacgucgugggaacacgg..... 1  
Gi2\_10299431\_x14.....gugggaacacggggGgccgaa..... 1  
Gi3\_27008355\_x14.....gggGacacggggugccgaa..... 1  
Gi3\_27011687\_x14.....gugggaacacggggugccCaac..... 1  
Gi3\_27015467\_x14.....cUucgugggaacacgggggu..... 1  
Gi5\_8370349\_x14.....ucgugggaacacUgggugccgaacu..... 1  
Gi1\_3881728\_x14.....ugggaacacggggugccgGacu..... 1  
Gi3\_27033947\_x14.....aUgccccgccaguacugcgaucggagacg..... 1  
G1a\_5567377\_x14.....aUuacugcgaucggagacgucgu..... 1  
Gi1\_3879236\_x14.....gaacacggAgugccgaacu..... 1  
Gi2\_10304975\_x14.....Uuacugcgaucggagacgucg..... 1  
Gi1\_3877626\_x14.....aacacggggugcGgaacu..... 1  
Gi3\_27001005\_x14.....cgccgucaggccccgccaguacuAc..... 1  
Gi5\_8365561\_x14.....aCcacggggugccgaacu..... 1  
Gi5\_8362383\_x14.....Gcaggccccgccaguacugcg..... 1  
Gi1\_3872894\_x14.....ugggaacCcggggugccgaacu..... 1  
Gi1\_3882344\_x14.....ucUugggaacacggggugccgaacu..... 1  
Gi2\_10315181\_x14.....cgugggaacaAggggugccgaacu..... 1  
Gi3\_27006283\_x14.....aucggagacgucgugggaacacggggAgcc..... 1  
Gi5\_8360171\_x14.....cgugggaacacggggugccgaUcu..... 1  
G1a\_5567461\_x14.....gugggaacacggAgugccgaacu..... 1  
Gi3\_27036117\_x14.....gGucggagacgucgugggaacac..... 1  
Gi3\_26993571\_x14.....guUgugggaacacggggugcc..... 1  
Gi1\_3882148\_x14.....uggAaacacggggugccgaacu..... 1  
G1a\_5566257\_x14.....gaagagaagcgccgucagggccc..... 0  
Gi5\_8364413\_x14.....Uagaagcgccgucagggcccgc..... 1  
Gi5\_8388457\_x13.....Uaucggagacgucgugggaacacg..... 1  
Gi2\_10324014\_x13.....Cugggaacacggggugccgaa..... 1  
Gi5\_8377017\_x13.....cgugggaacacggUgugccgaacu..... 1  
Gi3\_27083475\_x13.....gucgugggaacacggggugUcgaacu..... 1  
Gi2\_10330345\_x13.....gUccccgccaguacugcga..... 1  
Gi2\_10336793\_x13.....ggagacgucgugggaacacggggugccga..... 0  
Gi3\_27061765\_x13.....ugggaaAacggggugccgaacu..... 1  
Gi5\_8385727\_x13.....aacCcggggugccgaacu..... 1  
Gi3\_27076780\_x13.....cgucaggcNccgccaguacugcg..... 1  
G1a\_5576917\_x13.....cgugggaacacggggCgccgaacu..... 1  
Gi2\_10327797\_x13.....gugggaacacggUgugcc..... 1  
Gi3\_27064144\_x13.....ucgugggaacaUggggugccgaac..... 1  
Gi3\_27071983\_x13.....Uccaguacugcgaucggagac..... 1  
Gi3\_27059893\_x13.....ugggaacacggggugccgCa..... 1

Gi3\_27044189\_x13.....gucgugAgaacacggggugccgaac..... 1  
Gi2\_10319594\_x13.....aAgccccgccaguacugc..... 1  
Gi3\_27076078\_x13.....auUggagacgucguggggaacac..... 1  
Gi2\_10332815\_x13.....cugcgaucggGgacgucguggggaacac..... 1  
Gi2\_10336377\_x13.....cgGcguggggaacacggggugcc..... 1  
Gi2\_10324950\_x13.....ugggGacacggggugccga..... 1  
G1a\_5583456\_x13.....ugggaacacggggGgccgaacu..... 1  
Gi3\_27053991\_x13.....Cgccccgccaguacugcgauc..... 1  
Gi2\_10334258\_x13.....Uccgucaggccccgccaguac..... 1  
Gi3\_27048817\_x13.....acgucguggggaacacggggugccgaaAu..... 1  
Gi3\_27058593\_x13.....gugggaacacggggUAccgaa..... 1  
Gi3\_27053900\_x13.....aucggagacgucgugAgaacacg..... 1  
G11\_3889206\_x13.....gGgggaacacggggugccgaacu..... 1  
Gi2\_10338496\_x13.....gGucggagacgucguggggaacac..... 1  
Gi2\_10318853\_x13.....cgugAgaacacggggugccgaac..... 1  
Gi2\_10319269\_x13.....gugggaacacggggugccAa..... 1  
G11\_3884799\_x13.....cgucguggggaacacggggugcU..... 1  
Gi2\_10324105\_x13.....gugggaCcacggggugccgaac..... 1  
G11\_3884045\_x13.....gUagacgucguggggaacacggggugcc..... 1  
Gi3\_27062051\_x13.....gaucggagacgucGgggaacacggg..... 1  
G11\_3889765\_x13.....Agaacacggggugccgaac..... 1  
Gi2\_10323715\_x13.....gugggGacacggggugccgaa..... 1  
G11\_3890636\_x13.....aacaGggggugccgaacu..... 1  
Gi2\_10340979\_x13.....ggagacgucguggggaacacggggGgcc..... 1  
Gi2\_10326679\_x13.....gccccgccNguacugcgauc..... 1  
Gi3\_27082344\_x13.....Uccaguacugcgaucggagacg..... 1  
Gi5\_8381892\_x13.....cgccaguacugcgaucggagacgucgugg..... 0  
G1a\_5579543\_x13.....gUccccgccaguacugcgauc..... 1  
Gi2\_10332503\_x13.....aggccccgcUaguacugcgauc..... 1  
Gi3\_27065470\_x13.....caggccccgccaguGcugcgauc..... 1  
Gi2\_10339783\_x13.....cUccgucaggccccgccaguacugc..... 1  
Gi2\_10339484\_x13.....uUcgaucggagacgucguggggaaca..... 1  
Gi2\_10331502\_x13.....guggUaacacggggugccgaa..... 1  
Gi3\_27047608\_x13.....gugggaCcacggggugccga..... 1  
Gi5\_8383738\_x13.....gucgGgggaacacggggugccgaacu..... 1  
G11\_3883343\_x13.....gucguggggaacacggggugccgaCcu..... 1  
G11\_3883083\_x13.....gugggaacacggggugccgUacu..... 1  
Gi3\_27050845\_x13.....cgugggaacacgggUugccgaacu..... 1  
Gi3\_27054368\_x13.....aGcggagacgucgugggga..... 1  
Gi5\_8375678\_x13.....ggaacacgAggugccgaacu..... 1  
Gi2\_10337417\_x13.....cUccaguacugcgaucggaga..... 1  
Gi2\_10339796\_x13.....cGggccccgccaguacugcgauc..... 1  
Gi2\_10338054\_x13.....aUgccccgccaguacugcgaucggaga..... 1  
Gi5\_8383608\_x13.....acgucGcgggaacacggggugccgaacu..... 1  
Gi2\_10320075\_x13.....aggccccgccaguCucgcauc..... 1  
Gi2\_10334609\_x13.....aggccccgccGguacugcg..... 1  
Gi5\_8390108\_x13.....aUgccccgccaguacugcga..... 1

Gi2\_10331086\_x13.....gUagacgucgugggaacac..... 1  
Gi1\_3891728\_x13.....gccccgccaguacugcgauc..... 0  
Gi5\_8380592\_x13.....aacacggggugccgaUcu..... 1  
Gi2\_10319945\_x13.....aCcgagacgucgugggaacac..... 1  
Gi3\_27045502\_x13.....Agucgugggaacacggggugccgaacu..... 1  
Gi3\_27078808\_x13.....cgGcaggccccgccaguacugc..... 1  
Gi3\_27056357\_x13.....gggNacacggggugccgaac..... 1  
Gi1\_3887724\_x13.....cgugggaacacggggugccgaacAu..... 1  
Gi3\_27048557\_x13.....cgugggUacacggggugc..... 1  
Gi3\_27068837\_x13.....ugggaacacggggugcAgaa..... 1  
Gi2\_10320426\_x13.....ggaacacggggugccAaac..... 1  
Gi5\_8390875\_x13.....aUgucgugggaacacggggugccgaacu..... 1  
Gi3\_27076793\_x13.....aUgccccgccaguacugcgaucg..... 1  
Gi3\_27074661\_x13.....gugggaacacggAgugccgaa..... 1  
Gi3\_27044813\_x13.....gugggaacacggggugcAgaa..... 1  
Gi2\_10329461\_x13.....aucggagacgucgugggaacacggggugccgaacu..... 0  
Gi2\_10336026\_x13.....gugggaacacggggugUc..... 1  
Gi2\_10342331\_x13.....cgucgugggaacacggggGgc..... 1  
Gi3\_27058710\_x13.....Cgggaacacggggugccg..... 1  
Gi3\_27069773\_x13.....gucgugggaacacAgggugccgaac..... 1  
Gi3\_27054771\_x13.....caggccccgccaguacugcgauA..... 1  
G1a\_5579894\_x13.....Uggaacacggggugccgaa..... 1  
Gi3\_27069578\_x13.....aacacggggugccgaUcu..... 1  
Gi1\_3884266\_x13.....cgggagacgucgugggaacacggggugccgaac..... 0  
Gi1\_3889453\_x13.....cgucgugggGacacggggugccgaacu..... 1  
Gi3\_27065574\_x13.....gggaacacggggGgccgaa..... 1  
Gi3\_27067849\_x13.....aucggagacguUgugggaacacg..... 1  
Gi3\_27076247\_x13.....Gcucgugggaacacggggugcc..... 1  
Gi2\_10340576\_x13.....guAggaacacggggugccg..... 1  
G1a\_5572432\_x13.....gagacgucgugggaacacggggugccgaacu..... 0  
Gi2\_10328512\_x13.....aggccccgccaguacugcgaucggagacgucg..... 0  
Gi3\_27082513\_x13.....aucggagacgucgugggaacacC..... 1  
Gi2\_10321739\_x13.....aucgUagacgucgugggaacacggggg..... 1  
Gi3\_27065964\_x13.....cgucgugggaacacggggugccgaGc..... 1  
G1a\_5581116\_x13.....gacgucgugggaacacggggugccgaac..... 0  
Gi2\_10323975\_x13.....aucggagacgucgugggaCcacggggug..... 1  
Gi2\_10337521\_x13.....ugggaacacgUggugccgaacu..... 1  
Gi2\_10336520\_x13.....gugggaacacggggugcUga..... 1  
Gi1\_3892859\_x13.....cgAcgugggaacacggggugccgaacu..... 1  
Gi3\_27043461\_x13.....aacacggggugccgaaGu..... 1  
Gi2\_10334284\_x13.....gaacacggggAgccgaacu..... 1  
Gi3\_27043396\_x13.....aaNacggggugccgaacu..... 1  
G1a\_5578022\_x13.....Uucgugggaacacggggugcc..... 1  
G1a\_5574590\_x13.....Uaucggagacgucguggg..... 1  
Gi5\_8389614\_x13.....cUccaguacugcgaucggagacgu..... 1  
Gi3\_27050910\_x13.....Uaagcgccgucaggccccgccaguac..... 1

Gi5\_8375054\_x13.....acgucgugggaacGcggggugccgaacu..... 1  
 Gi1\_3886372\_x13.....Agugggaacacggggugccgaacu..... 1  
 Gi3\_27060270\_x13.....caggccccgccCguacugcgau..... 1  
 Gi2\_10322467\_x13.....aUgucgugggaacacggggugcc..... 1  
 Gi3\_27046659\_x13.....aAgccccgccaguacugc..... 1  
 Gl1a\_5583508\_x13.....acugcgauccggagGcgucgug..... 1  
 Gi5\_8374560\_x13.....gUccccgccaguacugcgau..... 1  
 Gi3\_27040796\_x13.....cgucgugggaacacggggugUcgaacu..... 1  
 Gi3\_27046724\_x13.....agGcgucgugggaacacggggugccgaacu..... 1  
 Gi3\_27076377\_x13.....gaucggagacgucgugggaacGcggggg..... 1  
 Gi1\_3888946\_x13.....Uaucggagacgucgugggaacac..... 1  
 Gi3\_27063962\_x13.....gugAgaacacggggugccg..... 1  
 Gi3\_27052041\_x13.....aucggagacgucAuggggaacacggg..... 1  
 Gi3\_27063975\_x13.....gaacacgCggugccgaacu..... 1  
 Gi2\_10341174\_x13.....cgugggaacacggggugcUgaac..... 1  
 Gi5\_8373663\_x13.....Agaacacggggugccgaac..... 1  
 Gi3\_27050676\_x13.....ggaacGcggggugccgaa..... 1  
 Gi1\_3892820\_x13.....gaacacggggUaccgaacu..... 1  
 Gi3\_27048648\_x13.....aacacgggUugccgaacu..... 1  
 Gl1a\_5574616\_x13.....uUcgauccggagacgucgu..... 1  
 Gi5\_8373533\_x13.....aggccccgNcaguacugcgau..... 1  
 Gi3\_27083124\_x13.....aucggGacgucgugggaacacggggugcc..... 1  
 Gi5\_8387781\_x13.....aUagaagcgccgucagggccccccagu..... 1  
 Gi3\_27037988\_x13.....cgucguggGacacggggugccg..... 1  
 Gi3\_27074219\_x13.....aUacgucgugggaacacggggugccga..... 1  
 Gi3\_27040822\_x13.....gUagacgucgugggaacacggggugccg..... 1  
 Gi2\_10326341\_x13.....guggCaacacggggugccgaac..... 1  
 Gi5\_8381749\_x13.....ucggagacgucgugggaacacggggugccgaacu..... 0  
 Gi5\_8373156\_x13.....cguUggaacacggggugccgaacu..... 1  
 Gi1\_3886892\_x13.....ucaggccccgccaguacugcgauccggagacgu..... 0  
 Gi2\_10336364\_x13.....gGgggaacacggggugccgaacuu..... 1  
 Gi5\_8386585\_x13.....cgugggaacacggggugccgaCc..... 1  
 Gi2\_10319009\_x13.....gGagagaagcgccgucagggccccgcc..... 1  
 Gi2\_10320712\_x13.....Uacgucgugggaacacgg..... 1  
 Gi5\_8387677\_x13.....ugcgauccggagacgucgugggaacacggg..... 0  
 Gi1\_3888842\_x13.....gggaacacggggUaccgaacu..... 1  
 Gi2\_10321050\_x13.....Uucggagacgucgugggaacacgggg..... 1  
 Gi5\_8389458\_x13.....gucgugggaaAacggggugccgaacu..... 1  
 Gi3\_27047751\_x13.....Ugucgugggaacacggggugccgaac..... 1  
 Gi3\_27038872\_x13.....gggaacacgggCugccgaac..... 1  
 Gi5\_8387339\_x13.....cgucgugggaacacggggugccgaCcu..... 1  
 Gi3\_27064716\_x13.....Uggccccgccaguacugc..... 1  
 Gl1a\_5572367\_x13.....gggaacacggggugccgaCcu..... 1  
 Gi3\_27083644\_x13.....gaUgagaagcgccgucagggcccc..... 1  
 Gi2\_10337222\_x13.....gaacacgggAugccgaacu..... 1  
 Gi3\_27077404\_x13.....aucggagacgucgugggaaUacg..... 1  
 Gi1\_3887698\_x13.....uGugggaacacggggugcc..... 1

Gi3\_27045762\_x13.....aggccccgccaguGcugc.....1  
Gi3\_27083969\_x13.....Uucggagacgucgugggaaacacg.....1  
Gi5\_8378512\_x13.....ggaacacggggugAcgaaacu.....1  
Gi1\_3892222\_x13.....gggaacacggggugccAaacu.....1  
Gi2\_10337352\_x13.....cggagacgucgugggaaacacggggGgcc.....1  
Gi1\_3889180\_x13.....gaacacggggugccgaacAu.....1  
Gi5\_8380787\_x13.....cgNgggaacacggggugccgaacu.....1  
Gi2\_10340134\_x13.....ggagacgucgugggaaacacggggCgcc.....1  
Gi2\_10323767\_x13.....gUgacgucgugggaaacacggggU.....1  
Gi2\_10332243\_x13.....Uagaagcgccgucaggccccgccaguac.....1  
Gi2\_10329318\_x13.....gugggaacacCgggugccgaacu.....1  
Gi3\_27074700\_x13.....gucgugggaaUacggggugccgaacu.....1  
Gi3\_27052431\_x13.....gGucggagacgucgugggaaacacgg.....1  
Gi3\_27051846\_x13.....aggccUcgccaguacugc.....1  
Gi3\_27081447\_x13.....Ggagaagcgccgucaggccccgc.....1  
Gi3\_27052184\_x13.....gggaacacgggCugccgaacu.....1  
Gi5\_8378239\_x13.....gugggaacacAgggugccgaac.....1  
Gi2\_10332724\_x13.....ggaacacggggugUcgaac.....1  
Gi3\_27061154\_x13.....cgucgugggaaacaUggggugccgaacu.....1  
Gi3\_27067251\_x13.....cgugggaaacacggggUcccgaacu.....1  
Gi3\_27057670\_x13.....Uaucggagacgucgugggaa.....1  
Gi3\_27080758\_x13.....cggagacgNcgugggaaacacggggU.....1  
Gi3\_27066016\_x13.....ucgugggaaacacggggAgccgaac.....1  
Gi1\_3888257\_x13.....ucgugggaaNcacggggugcc.....1  
Gi1\_3885969\_x13.....cUgagacgucgugggaaacacggggugc.....1  
Gi2\_10328096\_x13.....aucggagacgucgugggaaacacggggCg.....1  
Gi3\_27067706\_x13.....ggUaacacggggugccgaa.....1  
Gi2\_10330462\_x13.....gugggaacacggggugAc.....1  
Gi2\_10340264\_x13.....cgugggaaacGcggggugcc.....1  
Gi2\_10336429\_x13.....ggagacgucgugggGacacggggugcc.....1  
Gi5\_8386247\_x13.....guggUaacacggggugccgaac.....1  
Gi2\_10336780\_x13.....cgucgugggaaacGcggggugcc.....1  
Gi1\_3889622\_x13.....cgugggaaacacgggAugccgaacu.....1  
G1a\_5579179\_x13.....gCaacacggggugccgaacu.....1  
Gi5\_8384635\_x13.....ucgugggaaCcacggggugccgaacu.....1  
Gi3\_27055356\_x13.....ugggaaUacggggugccga.....1  
G1a\_5574135\_x13.....gugggaUcacggggugccgaacu.....1  
Gi2\_10348810\_x12.....ggccccgccCguacugcgau.....1  
Gi3\_27092385\_x12.....aUagaagcgccgucaggccccgccagua.....1  
Gi5\_8403450\_x12.....gggaacacggggugccgaCc.....1  
Gi3\_27108285\_x12.....gucgugggaaUacggggugcc.....1  
Gi5\_8401134\_x12.....acgucgugggaaacacggggugccgCacu.....1  
G1a\_5591923\_x12.....ggaacGcggggugccgaacu.....1  
Gi3\_27114477\_x12.....aucggagacgucgugggaaacaUggg.....1  
Gi3\_27099693\_x12.....aucggagacgucguAggaaacacgggg.....1  
Gi2\_10349518\_x12.....aggccccgccCguacugcgau.....1  
Gi2\_10352962\_x12.....gugggaacacggggUaccgaa.....1

Gi5\_8406426\_x12.....ugUgaacacggggugccgaac..... 1  
Gi3\_27115485\_x12.....cgugUgaacacggggugccga..... 1  
Gi2\_10366858\_x12.....Ucgccgucaggccccgccaguac.....gggaacacggggugccAaac..... 1  
Gi3\_27117105\_x12.....aUcgccgucaggccccgccaguac..... 1  
Gi2\_10343518\_x12.....cUccaguacugcgauccggagacgucgug..... 1  
Gi3\_27131097\_x12.....aUgucgugggaacacggggugccgaac..... 1  
Gi3\_27089613\_x12.....acAucgugggaacacggggugccgaacu..... 1  
G1a\_5595799\_x12.....Ggucaggccccgccaguacugc..... 1  
Gi2\_10359622\_x12.....gacgucgugggaacacggggCgcc..... 1  
Gi2\_10357450\_x12.....cgucguggNaacacggggugccga..... 1  
Gi5\_8407974\_x12.....uUggaacacggggugccgaacuuu..... 1  
Gi3\_27111897\_x12.....ggaacacggggugAcgaacu..... 1  
Gi2\_10352218\_x12.....gGgaagcgccgucaggccccgcc..... 1  
Gi3\_27112029\_x12.....gugggaaUacggggugccga..... 1  
Gi5\_8397978\_x12.....Agucgugggaacacggggugccgaacu..... 1  
G1a\_5600383\_x12.....gacgucgugggaacacggg..... 0  
Gi2\_10355878\_x12.....cgGcaggccccgccaguacugc..... 1  
Gi2\_10368346\_x12.....gCgaacacggggugccgaac..... 1  
Gi3\_27114297\_x12.....Aacgucgugggaacacggggugccgaac..... 1  
Gi5\_8406702\_x12.....gaacacggggugccgUacu..... 1  
G1a\_5594647\_x12.....Ugccccgccaguacugcg..... 1  
Gi3\_27128193\_x12.....aucggagacgucGgggaacacggggugcc..... 1  
Gi3\_27088365\_x12.....gugggaacacgggUugccgaacu..... 1  
Gi2\_10364770\_x12.....caggccccgccaguacugcga..... 0  
Gi2\_10343602\_x12.....gGcgucgugggaacacggggugcc..... 1  
Gi2\_10349122\_x12.....gAgggaacacggggugccga..... 1  
Gi3\_27090537\_x12.....Gccgccaguacugcgauccggagac..... 1  
Gi2\_10357582\_x12.....ggccccgccaguacugcgauccggagacg..... 0  
G1a\_5596159\_x12.....ggaacacggggugccgaGcu..... 1  
Gi3\_27129081\_x12.....cgugggaacacggggCgc..... 1  
Gi1\_3894578\_x12.....gaacacgAggugccgaacu..... 1  
Gi3\_27126765\_x12.....cGguacugcgauccggagacgucgug..... 1  
Gi2\_10360018\_x12.....gugCgaacacggggugccgaacu..... 1  
Gi2\_10361062\_x12.....ucguggAaacacggggugccgaacu..... 1  
Gi5\_8395194\_x12.....ucgugggaacacggggugccgaUu..... 1  
Gi5\_8404086\_x12.....Gcggagacgucgugggaacacg..... 1  
Gi3\_27115845\_x12.....gGcgucgugggaacacggg..... 1  
Gi3\_27111189\_x12.....Ggucaggccccgccaguacug..... 1  
Gi2\_10350262\_x12.....aucggagacgucgugggGacacg..... 1  
Gi5\_8404014\_x12.....caggccccgccaguacugUgauc..... 1  
Gi3\_27126465\_x12.....gugggaacacgCggugccgaac..... 1  
G1a\_5592811\_x12.....ugUgaacacggggugccgaacu..... 1  
Gi3\_27131781\_x12.....gggUacacggggugccgaac..... 1  
Gi2\_10353946\_x12.....gugggaacCcgggugccga..... 1  
Gi3\_27104253\_x12.....gugggaacacgAggugccg..... 1  
Gi5\_8402454\_x12.....gugggaUcacggggugccgaacu..... 1  
Gi5\_8392950\_x12.....ucgugggaacacgggAugccgaacu..... 1



Gi3\_27089421\_x12.....Uagacgucgugggaacacggggugcc..... 1  
Gi2\_10364806\_x12.....aucggagacgucgugggaGca..... 1  
Gi2\_10349266\_x12.....aGcggagacgucguggga..... 1  
Gi2\_10353058\_x12.....gugggUacacggggugccgaa..... 1  
Gi3\_27101277\_x12.....aUagaagcgcggucaggccccgcca..... 1  
Gi5\_8399922\_x12.....Uccgucaggccccgccaguacu..... 1  
Gi3\_27104001\_x12.....acgucgugggaacacggggGgccgaac..... 1  
Gi3\_27088161\_x12.....gucgugggaacacggggugccAaac..... 1  
Gi5\_8406534\_x12.....ugggaacacggggugccgaUcu..... 1  
Gi1\_3903482\_x12.....cgGcgugggaacacggggugccgaacu..... 1  
Gi2\_10365946\_x12.....ccccccagNacugcgaucgg..... 1  
G1a\_5598271\_x12.....aGcggagacgucgugggaacacggggg..... 1  
G1a\_5599711\_x12.....caguacugNgaucggagacguc..... 1  
Gi3\_27128397\_x12.....cgucgugggaacacggggugccgaaAu..... 1  
Gi3\_27095721\_x12.....cgucgugggaacacggggGccg..... 1  
Gi5\_8393562\_x12.....acgucgugggaacacggggGgccgaacu..... 1  
Gi3\_27118185\_x12.....gggaacacggggAgccgaac..... 1  
Gi2\_10365430\_x12.....ucguUggaacacggggugccgaac..... 1  
Gi1\_3896738\_x12.....gaacacggggAgccgaacu..... 1  
Gi5\_8406594\_x12.....ugcgaucggagGcugcuggg..... 1  
Gi1\_3901862\_x12.....gugggaacacggggugcAgaacu..... 1  
Gi5\_8396226\_x12.....ugggaacacAgggugccgaac..... 1  
Gi3\_27084489\_x12.....gucgugggaacacggggAgccgaacu..... 1  
Gi2\_10363066\_x12.....Gcugcugugggaacacggggugc..... 1  
Gi1\_3902078\_x12.....gugggaacacggggugUcgaacu..... 1  
Gi2\_10360870\_x12.....gUgacgucgugggaacac..... 1  
Gi2\_10356790\_x12.....gugggaacacggggAgcc..... 1  
Gi5\_8395050\_x12.....gagaagcgcggucagAccccgccaguacugc..... 1  
Gi3\_27111585\_x12.....cgugggaacacgUggugcc..... 1  
Gi2\_10363522\_x12.....cgucgugggaacacggggGgccg..... 1  
Gi2\_10363750\_x12.....aucggagacgucgugggaGcacggggugcc..... 1  
Gi2\_10349146\_x12.....Uccccgccaguacugcgaucgg..... 1  
Gi5\_8399046\_x12.....gugggGacacggggugccgaac..... 1  
Gi5\_8399490\_x12.....gggaacacggggugccgaGc..... 1  
Gi3\_27130557\_x12.....Ugucaggccccgccaguacugc..... 1  
Gi2\_10350538\_x12.....aacaGggggugccgaacu..... 1  
Gi3\_27090825\_x12.....aucgUagacgucgugggaacacggggugcc..... 1  
Gi5\_8393010\_x12.....Ugccccgccaguacugcgauc..... 1  
Gi2\_10365538\_x12.....gggagacgucgugggaacGcggggugcc..... 1  
G1a\_5593111\_x12.....agacgucgugggaacacggggugccgaac..... 0  
Gi2\_10356346\_x12.....gugggaacacggggugcAgaac..... 1  
Gi5\_8406462\_x12.....Uugggaacacggggugccgaacuuu..... 1  
Gi5\_8403738\_x12.....gggaacacggggugccgaaUu..... 1  
Gi2\_10368670\_x12.....cAgagacgucgugggaacacggggugcc..... 1  
Gi3\_27125169\_x12.....gugggaacacggggugcGgaac..... 1  
Gi3\_27122781\_x12.....gacgucgugggaacacggggugccgCacu..... 1  
Gi1\_3898730\_x12.....ugggaacacgggUugccgaacu..... 1

Gi1\_3895202\_x12.....acgucgugggGacacggggugccgaacu..... 1  
Gi2\_10362994\_x12.....auUgggagacgucgugggaacacggggug..... 1  
Gi2\_10351690\_x12.....gGucggagacgucguggga..... 1  
Gi2\_10359022\_x12.....gggaacacAgggugccgaac..... 1  
Gi3\_27105885\_x12.....gucgugggUacacggggugccgaacu..... 1  
Gi2\_10356094\_x12.....gaucggagacgucgugggCacacggg..... 1  
Gi5\_8405958\_x12.....ggaacacggggUaccgaacu..... 1  
Gi3\_27094389\_x12.....gaacacAgggugccgaac..... 1  
Gi5\_8395374\_x12.....Uaagcgccgucagggcccgccagua..... 1  
Gi5\_8400954\_x12.....gucguAggaacacggggugccgaacu..... 1  
Gi1\_3894866\_x12.....gGcuggggaacacggggugcc..... 1  
G1a\_5591767\_x12.....aucgggagacgucgugggaacGcggggugc..... 1  
Gi3\_27106053\_x12.....aCcggaacgucgugggaacacggggugcc..... 1  
Gi2\_10355590\_x12.....Gaggccccgccaguacugcgau..... 1  
Gi3\_27092469\_x12.....caUgccccgccaguacugc..... 1  
Gi2\_10351654\_x12.....uGaggccccgccaguacugcgau..... 1  
Gi1\_3903314\_x12.....ucgugggaNcacggggugccgaac..... 1  
Gi3\_27094101\_x12.....ccccgccaNuacugcgau..... 1  
Gi3\_27095265\_x12.....cgugggaacacggggugccgGa..... 1  
Gi2\_10367614\_x12.....Uucaggccccgccaguacugcgau..... 1  
Gi3\_27108957\_x12.....cAugggaacacggggugccgaa..... 1  
Gi2\_10360234\_x12.....ugggaacacggggugccAaac..... 1  
Gi3\_27125493\_x12.....gaucggagNcgucgugggaacacggggg..... 1  
Gi3\_27130677\_x12.....acgucgugggaacaUggggugccgaacu..... 1  
G1a\_5597455\_x12.....cgugggGacacggggugccgaacu..... 1  
Gi3\_27104313\_x12.....ugggaacacggggugccA..... 1  
Gi2\_10353982\_x12.....gucgugAgaacacggggugccgaacu..... 1  
Gi3\_27093693\_x12.....uGgugggaacacggggugc..... 1  
Gi3\_27117777\_x12.....gCcaggccccgccaguacugc..... 1  
Gi3\_27101145\_x12.....cgugggaacacgUggugccga..... 1  
Gi5\_8408106\_x12.....cgugggaacacgggCugccgaacu..... 1  
Gi1\_3897818\_x12.....acgucgCgggaacacggggugccgaac..... 1  
Gi1\_3901958\_x12.....gaacacgggAugccgaacu..... 1  
Gi2\_10348558\_x12.....ucgugggaacacggggugccgCac..... 1  
Gi5\_8394318\_x12.....gaacacggggugccgaUcu..... 1  
Gi3\_27103737\_x12.....gaacacggggugccgaaGu..... 1  
Gi5\_8403654\_x12.....ugggGacacggggugccgaac..... 1  
Gi2\_10351978\_x12.....gugggaacacAgggugccga..... 1  
Gi3\_27111093\_x12.....cgucgCgggaacacggggugcc..... 1  
Gi2\_10356034\_x12.....gugggaacacggAgugccg..... 1  
Gi2\_10366342\_x12.....Ggugggaacacggggugccg..... 1  
Gi5\_8394270\_x12.....gugggaacNcgggugccga..... 1  
Gi2\_10353310\_x12.....gucgugggaacacggggCgcc..... 1  
Gi2\_10345426\_x12.....cUccaguacugcgauccggagacguc..... 1  
Gi3\_27132045\_x12.....caggccccAccaguacugcgau..... 1  
Gi3\_27106005\_x12.....gccgucaggccccAccaguacugcg..... 1  
Gi2\_10346302\_x12.....cgucgugggaacacggggugccgG..... 1

Gi3\_27130953\_x12.....aAcggagacgucgugggaacacg..... 1  
 Gi3\_27086025\_x12.....cgucUugggaacacggggugccg..... 1  
 Gi3\_27088461\_x12.....gucgugggNacacggggugcc..... 1  
 Gi3\_27132249\_x12.....ucgugggaaAacggggugccgaacu..... 1  
 Gi3\_27125529\_x12.....acgucgugggaacacggggAgccgaacu..... 1  
 Gi2\_10357774\_x12.....aucggagacgucgugggaacacggggAgcc..... 1  
 Gi5\_8402286\_x12.....ucgugggaaUacggggugccgaacu..... 1  
 Gi2\_10344454\_x12.....caggccccgccaguacugcgaCc..... 1  
 G1a\_5596075\_x12.....Uaacacggggugccgaac..... 1  
 Gi3\_27113721\_x12.....aucggagacgCgugggaacacgg..... 1  
 G1i\_3901538\_x12.....gucgugggaacacggggCgccgaacu..... 1  
 G1i\_3900458\_x12.....ucgugggaacacggggugccAaacu..... 1  
 Gi3\_27090753\_x12.....gaacacggggugcGgaacu..... 1  
 Gi3\_27103689\_x12.....Agucgugggaacacggggugccgaac..... 1  
 G1a\_5594791\_x12.....cgugggaacacggggugccgUacu..... 1  
 G1a\_5596123\_x12.....ugggaaacGcggggugccgaacu..... 1  
 Gi3\_27090801\_x12.....aucggagacgucgugggaacacggAgu..... 1  
 Gi3\_27119025\_x12.....cgucgugggaacacggggCgccga..... 1  
 Gi2\_10362022\_x12.....agAccccgccaguacugcgauc..... 1  
 G1a\_5589691\_x12.....gUgaacacggggugccgaa..... 1  
 Gi2\_10350574\_x12.....Uccaguacugcgaucggagacgu..... 1  
 Gi3\_27111909\_x12.....gucgugggCacacggggugccgaacu..... 1  
 Gi2\_10349206\_x12.....cUucaggccccgccaguac..... 1  
 Gi3\_27099945\_x12.....caggccUcgccaguacugc..... 1  
 Gi3\_27096597\_x12.....Uucgugggaacacggggugccg..... 1  
 Gi3\_27125901\_x12.....cgugggaacacggggugccA..... 1  
 Gi2\_10356010\_x12.....gagacgucgugggaacacggggugccga..... 0  
 Gi2\_10362814\_x12.....cgugggaacacggggugUcgaac..... 1  
 Gi3\_27114021\_x12.....gGucggagacgucgugggaacacgggg..... 1  
 Gi2\_10364158\_x12.....aUuacugcgaucggagacgucg..... 1  
 Gi2\_10366078\_x12.....gugggaacacggggugUcga..... 1  
 Gi3\_27092625\_x12.....cgucgugggaacacAgggugcc..... 1  
 Gi2\_10368946\_x12.....gggaacacgggAugccgaacu..... 1  
 G1i\_3914990\_x11.....cgucgugggaacacggggugccga..... 0  
 Gi2\_10369549\_x11.....ggagacgucgugggaacacggUgugcc..... 1  
 Gi5\_8423225\_x11.....Uccaguacugcgaucggagacguc..... 1  
 Gi2\_10385114\_x11.....aAcggagacgucgugggaacacggggugcc..... 1  
 Gi2\_10385312\_x11.....Ugagacgucgugggaacacggggugccg..... 1  
 Gi3\_27142369\_x11.....Uaucggagacgucgugggaacacggggug..... 1  
 Gi5\_8427185\_x11.....cgAgggaacacggggugccgaac..... 1  
 Gi3\_27186567\_x11.....aucggagaUgucgugggaacacg..... 1  
 G1i\_3906883\_x11.....aggccccgNcaguacugcgauc..... 1  
 Gi3\_27148595\_x11.....acUucgugggaacacggggugccgaacu..... 1  
 G1i\_3911899\_x11.....Ggacgucgugggaacacggggugccgaacu..... 1  
 Gi2\_10385708\_x11.....aucggagacgucgugggaacacggggA..... 1  
 Gi3\_27176744\_x11.....Ggaagcggcugacggccccgcc..... 1  
 Gi3\_27184609\_x11.....Ugccccgccaguacugcgaucgga..... 1

Gi2\_10382980\_x11.....acgCcgugggaacacggggugccgaacu..... 1  
Gi3\_27144448\_x11.....guNggaaacacggggugccgaac..... 1  
Gi2\_10388601\_x11.....cgugggaacacggUgugccgaacu..... 1  
Gi5\_8429055\_x11.....agaagcgccgucagggccccgccaguacugc..... 0  
Gi3\_27136176\_x11.....Gucggagacgucguggga..... 1  
Gi1\_3909028\_x11.....aAcggagacgucgugggaacacggg..... 1  
Gi2\_10379075\_x11.....Cccccgccaguacugcgauc..... 1  
Gi3\_27165876\_x11.....Gcugcgauccggagacguc..... 1  
Gi2\_10386126\_x11.....gacgucgugggaacacggggGgccgaacu..... 1  
G1a\_5606609\_x11.....cgugggaacacggggugccgaGcu..... 1  
Gi3\_27145592\_x11.....ggaacacggggugccgaG..... 1  
Gi1\_3904727\_x11.....ugggaacaUggggugccgaacu..... 1  
Gi2\_10374092\_x11.....cgCcgugggaacacggggugc..... 1  
Gi3\_27181199\_x11.....uGaggccccgccaguacugc..... 1  
Gi5\_8419518\_x11.....ugggaacacggggugccgaacG..... 1  
Gi2\_10379306\_x11.....gugggaacacggggugcU..... 1  
Gi2\_10397544\_x11.....acgucgugNgaacacggggugc..... 1  
Gi3\_27134779\_x11.....aUgccccgccaguacugcgaucggagacguc..... 1  
G1a\_5616938\_x11.....ggUaacacggggugccgaacu..... 1  
Gi5\_8426107\_x11.....aacacUggggugccgaacu..... 1  
Gi2\_10376017\_x11.....ucgAgggaacacggggugccgaacu..... 1  
Gi3\_27179296\_x11.....ucgugggaCcacggggugccgaac..... 1  
Gi2\_10380835\_x11.....aCcgagacgucgugggaacacggggg..... 1  
Gi3\_27155459\_x11.....aucggagacgucgugggaacGcggggugcc..... 1  
Gi2\_10390790\_x11.....Ucgauccggagacgucgugggaacac..... 1  
Gi3\_27144393\_x11.....gucGggccccgccaguacug..... 1  
Gi3\_27165854\_x11.....gccccgccNguacugcgauc..... 1  
Gi3\_27156900\_x11.....aucggagacgucgugggaacCcg..... 1  
Gi3\_27157043\_x11.....Ugugggaacacggggugccgaa..... 1  
Gi3\_27165425\_x11.....gGacugcgauccggagacgucgug..... 1  
Gi5\_8417758\_x11.....gGcugcugugggaacacggggugccgaacu..... 1  
Gi3\_27152852\_x11.....Ggucgugggaacacgggg..... 1  
Gi5\_8426459\_x11.....Ucgccgucagggccccgccaguacug..... 1  
Gi5\_8410707\_x11.....gugggaacacggUgugccgaac..... 1  
Gi2\_10383409\_x11.....agagaagcgccgucagggccccgccaguacug..... 0  
Gi2\_10376226\_x11.....cgucguAggaacacggggugccgaacu..... 1  
Gi3\_27159452\_x11.....Ugagacgucgugggaacacggg..... 1  
Gi2\_10372035\_x11.....cggagGcugcugugggaacacggggugcc..... 1  
Gi3\_27177888\_x11.....gUagacgucgugggaacacggggugccgaacu..... 1  
Gi1\_3906630\_x11.....gGcagggccccgccaguacugc..... 1  
G1a\_5604398\_x11.....gugggaacacggggAgccgaacu..... 1  
Gi3\_27172696\_x11.....aggccccgccaguacugcgCuc..... 1  
Gi3\_27164138\_x11.....gcUccgccaguacugcgauc..... 1  
Gi2\_10379284\_x11.....Gggccccgccaguacugcgauc..... 1  
Gi2\_10372992\_x11.....cAugggaacacggggugccgaac..... 1  
Gi2\_10376127\_x11.....aggccccgNcaguacugcgaucgga..... 1  
Gi3\_27185687\_x11.....cggagacgucgugggaacGcggggugcc..... 1

Gi1a\_5607544\_x11.....cgugUgaacacggggugccgaacu..... 1  
Gi1\_3904551\_x11.....gCguggggaacacggggugccgaacu..... 1  
Gi3\_27133162\_x11.....cgucguggggaacGcggggugc..... 1  
Gi3\_27152181\_x11.....aucggGgacgucguggggaacac..... 1  
Gi3\_27181969\_x11.....cUaucgggagacgucguggggaacacgg..... 1  
Gi3\_27150410\_x11.....cguggggaGcacggggugcc..... 1  
Gi3\_27176392\_x11.....cgugCgaacacggggugccgaac..... 1  
Gi2\_10371144\_x11.....cUaucgggagacgucgugggga..... 1  
Gi3\_27186600\_x11.....aggccccgccagGacugc..... 1  
Gi2\_10386720\_x11.....acgCcguggggaacacggggugcc..... 1  
Gi2\_10392473\_x11.....cguggggaacacgggguCccgaacu..... 1  
Gi2\_10375918\_x11.....ugggaacacggggugccGac..... 1  
Gi1a\_5602748\_x11.....cgaucgggagacgucguggggaacacggggugc..... 0  
Gi5\_8421916\_x11.....uUcgaucgggagacgucgugggga..... 1  
Gi1\_3906168\_x11.....ucgugggGacacggggugccgaac..... 1  
Gi3\_27178625\_x11.....Gggccccgccaguacugcgaucgga..... 1  
Gi3\_27161839\_x11.....gGccccgccaguacugcgauc..... 1  
Gi3\_27174302\_x11.....ggUgacgucguggggaacacg..... 1  
Gi3\_27176601\_x11.....ucguggggaacacggggugcUgaac..... 1  
Gi1\_3908995\_x11.....Ggggaacacggggugccgaacuu..... 1  
Gi2\_10379581\_x11.....aggccccgUcaguacugcgauc..... 1  
Gi2\_10380010\_x11.....cgucguggggaacGcggggugccg..... 1  
Gi5\_8415261\_x11.....gggaacacggAgugccgaacu..... 1  
Gi3\_27134856\_x11.....aucgggagGcgucguggggaacacggggugcc..... 1  
Gi3\_27160189\_x11.....gGcgucaggccccgccaguac..... 1  
Gi3\_27134394\_x11.....cguCggaacacggggugccgaacu..... 1  
Gi1a\_5611350\_x11.....Gacacggggugccgaacu..... 1  
Gi2\_10394970\_x11.....cUucguggggaacacggggugccgaa..... 1  
Gi2\_10383101\_x11.....aucgggagGcgucguggggaacac..... 1  
Gi3\_27169022\_x11.....ugggaacacggCgugccgaacu..... 1  
Gi5\_8420959\_x11.....acUucguggggaacacggggugccgaacu..... 1  
Gi3\_27166184\_x11.....aucgggagaUgucguggggaacacgggg..... 1  
Gi3\_27182871\_x11.....ccccgccaguacugcgGuc..... 1  
Gi2\_10386830\_x11.....aggccccgccaguaUugcgauc..... 1  
Gi3\_27185126\_x11.....aucgggagCcgucguggggaacacggg..... 1  
Gi5\_8409860\_x11.....cguggggaacacggggugccgaGc..... 1  
Gi5\_8420970\_x11.....gaacUcggggugccgaacu..... 1  
Gi2\_10372816\_x11.....aggccccgccagGacugcgauc..... 1  
Gi3\_27170892\_x11.....Gcugcgaucgggagacgucgug..... 1  
Gi4\_516705\_x11.....gCgggaaacacggggugccgaacu..... 1  
Gi1a\_5607071\_x11.....Uaucgggagacgucgugggga..... 1  
Gi2\_10370407\_x11.....aucgUgacgucguggggaacacg..... 1  
Gi1a\_5608699\_x11.....gaucgggagacgucguggggaacacggggug..... 0  
Gi3\_27182244\_x11.....acgucguggggaacacggggCgcc..... 1  
Gi2\_10392209\_x11.....cgNgggaacacggggugccgaacu..... 1  
Gi2\_10369681\_x11.....gCcguggggaacacggggugccgaac..... 1  
Gi1\_3911360\_x11.....gucgugggNacacggggugccgaacu..... 1

Gi3\_27180110\_x11.....Agaacacggggugccgaa..... 1  
Gi3\_27152423\_x11.....Ugagacgucguggaacaacggggugccgaa..... 1  
Gi3\_27164303\_x11.....uggaacaacgUggugccgaacu..... 1  
Gi2\_10391197\_x11.....gggaacaacggggugccGUacu..... 1  
Gi3\_27173796\_x11.....Accccgccaguacugcgau..... 1  
Gi2\_10369846\_x11.....aggccccgNcaguacugcgau..... 1  
Gi2\_10369252\_x11.....ggagacgucguggaacaacAgggugc..... 1  
Gi2\_10386632\_x11.....agUcgucguggaacaacggggugcc..... 1  
Gi3\_27151433\_x11.....gggaacaacggggugccUaacu..... 1  
Gi3\_27138002\_x11.....gggaaAacggggugccgaac..... 1  
Gi3\_27164149\_x11.....Aggaacaacggggugccga..... 1  
Gi2\_10387501\_x11.....gggaacaacggggugccgaaUu..... 1  
Gi3\_27184092\_x11.....gucguggaacaacUgggugccgaacu..... 1  
Gi3\_27176194\_x11.....ggaacaacgUggugccgaacu..... 1  
Gi2\_10384542\_x11.....cggagacgucguggaacaacggggCgcc..... 1  
Gi1\_3905112\_x11.....aacacgAgugccgaacu..... 1  
Gi3\_27164622\_x11.....ucguggaacaacggggugccgaaUu..... 1  
Gi3\_27136165\_x11.....acgucguggaacaacgAggugccgaacu..... 1  
Gi2\_10381770\_x11.....gugggaacaacggggGgccga..... 1  
Gi5\_8413083\_x11.....gugggaacaacgAggugccgaac..... 1  
Gi3\_27165513\_x11.....cgugggaacaacgUggugc..... 1  
Gi3\_27182255\_x11.....gugggaacaacggggAgccgaa..... 1  
Gi3\_27173587\_x11.....cAucguggaacaacggggugcc..... 1  
G1a\_5616751\_x11.....cgugggaacaacggggugccgaCcu..... 1  
Gi3\_27184136\_x11.....uGggagacgucguggaacaacg..... 1  
Gi3\_27153215\_x11.....acgucguggaacaacggggugccgaacu..... 1  
G1a\_5614804\_x11.....Uaagagaagcgccgucag..... 1  
Gi2\_10377810\_x11.....ucguggaacaacgggguAccgaacu..... 1  
Gi3\_27176458\_x11.....aucggagacAucguggaacaacggggg..... 1  
Gi2\_10387039\_x11.....gUagacgucguggaacaacggggug..... 1  
Gi3\_27142083\_x11.....aucggagCcgucguggaacaacg..... 1  
Gi5\_8418187\_x11.....gaacaAggggugccgaacu..... 1  
Gi3\_27178218\_x11.....gugggUacacggggugccgaa..... 1  
Gi2\_10374290\_x11.....ucguggaacaacCggggugccgaac..... 1  
Gi3\_27178328\_x11.....gucguggaacaacgggguAccgaacu..... 1  
G1a\_5606928\_x11.....gggaGcacggggugccgaacu..... 1  
Gi3\_27150190\_x11.....Ggccgucaggccccgccaguacugc..... 1  
Gi2\_10390108\_x11.....gGucggagacgucguggaacaacg..... 1  
Gi3\_27144459\_x11.....gugggaUacacggggugccgaac..... 1  
Gi2\_10385389\_x11.....gugggaCcacggggugcc..... 1  
Gi3\_27180385\_x11.....caggccccgccagCacugcg..... 1  
Gi2\_10385224\_x11.....uggaacaacggggugccgaaAu..... 1  
Gi2\_10390262\_x11.....gagacgucguggaacaacggggCgc..... 1  
Gi2\_10381297\_x11.....cGcgccaguacugcgauccggagac..... 1  
Gi2\_10377832\_x11.....aacacggggugcAgaacu..... 1  
Gi2\_10386203\_x11.....aUagaagcgccgucaggccccgc..... 1  
Gi3\_27177250\_x11.....Gcguggaacaacggggugccgaa..... 1

Gi2\_10397731\_x11.....gugggaacacgCggugccgaacu..... 1  
 G1a\_5614023\_x11.....Gucggagacgucgugggaacacggg..... 1  
 Gi2\_10395190\_x11.....gAcgugggaacacggggugccgaacu..... 1  
 Gi2\_10374059\_x11.....Ugacgucgugggaacacggggugcc..... 1  
 Gi3\_27135307\_x11.....caggccccgccaguacugUgauc..... 1  
 Gi2\_10382166\_x11.....ucgugggaacacgAggugccgaacu..... 1  
 Gi3\_27141566\_x11.....guggAaacacggggugccgaa..... 1  
 Gi5\_8426800\_x11.....cgucgugggaacacggggugccAaacu..... 1  
 G1a\_5607126\_x11.....Ugagacgucgugggaacacggggugcc..... 1  
 Gi1\_3905959\_x11.....ucguggggCacacggggugccgaacu..... 1  
 Gi4\_517717\_x11.....gggaacacggggugccgaac..... 0  
 Gi5\_8421168\_x11.....gaaNacggggugccgaacu..... 1  
 Gi2\_10390086\_x11.....Aucgugggaacacggggugccgaac..... 1  
 Gi5\_8422378\_x11.....gugggaacacggggugccgGac..... 1  
 Gi5\_8424853\_x11.....Uagacgucgugggaacacg..... 1  
 Gi5\_8430606\_x11.....acgCcgugggaacacggggugccgaacu..... 1  
 Gi3\_27176161\_x11.....aucggagacgucgugggUacacggg..... 1  
 Gi2\_10380538\_x11.....agUcgucgugggaacacggggugccgaacu..... 1  
 Gi2\_10386478\_x11.....uUgugggaacacggggugccgaac..... 1  
 Gi2\_10384806\_x11.....ggaacacggggUaccgaac..... 1  
 Gi3\_27178493\_x11.....cgugggaacacggggCgccg..... 1  
 Gi3\_27165964\_x11.....cccgccaguacugcgauccggagacgucgug..... 0  
 Gi2\_10389877\_x11.....Cggccccgccaguacugcgaucc..... 1  
 Gi3\_27165990\_x11.....Ucgucgugggaacacggggugccgaacu..... 1  
 Gi3\_27169638\_x11.....aUacgucgugggaacacggg..... 1  
 Gi2\_10382364\_x11.....cgugggaacacggggAgccgaac..... 1  
 Gi2\_10393243\_x11.....gggaacacggggugccgGac..... 1  
 Gi3\_27175908\_x11.....cgugggaacacggggCgccgaa..... 1  
 Gi4\_517574\_x11.....Ggggaacacggggugccgaacu..... 1  
 Gi1\_3911404\_x11.....Gcaggccccgccaguacugcg..... 1  
 G1a\_5615453\_x11.....gugggaaUacggggugccgaacu..... 1  
 Gi5\_8429143\_x11.....gggaacacggggCgccgaa..... 1  
 Gi2\_10377271\_x11.....ccUgccaguacugcgauccgg..... 1  
 Gi5\_8420948\_x11.....Uaucggagacgucgugggaacacggg..... 1  
 Gi3\_27176304\_x11.....gacgucgugggaacacggggG..... 1  
 Gi2\_10392880\_x11.....aucggagGcgucgugggaaca..... 1  
 Gi5\_8415525\_x11.....ugggaacacggCgugccgaacu..... 1  
 Gi2\_10384058\_x11.....agUgaagcgccgucaggcccc..... 1  
 Gi3\_27181837\_x11.....aucggagaNgucgugggaacacggggugc..... 1  
 Gi2\_10379548\_x11.....Uuacugcgauccggagacgu..... 1  
 Gi1\_3908148\_x11.....Uacgucgugggaacacggggugcc..... 1  
 Gi2\_10393111\_x11.....aucggagacgucCgggaacacggggg..... 1  
 Gi1\_3912856\_x11.....ugggaacacgAggugccgaacu..... 1  
 Gi5\_8421674\_x11.....gucAugggaacacggggugccgaacu..... 1  
 Gi3\_27173422\_x11.....caggccccgccGguacugcga..... 1  
 Gi1\_3914055\_x11.....agacgucgCgggaacacggggugccgaac..... 1  
 Gi3\_27137452\_x11.....aucggagacgucgugggaaUacggg..... 1

Gi2\_10377425\_x11.....cgugggaaNacggggugccgaa..... 1  
Gi2\_10378360\_x11.....aucggagacgucgugggGacacggg..... 1  
Gi2\_10390438\_x11.....gucgGgggaacacggggugccgaacu..... 1  
Gi2\_10376325\_x11.....cgaucggagacgucgAgggaaac..... 1  
Gi3\_27141478\_x11.....aggccccgccaguacugcgG..... 1  
Gi3\_27170419\_x11.....gGagagaagcgccgucaggccc..... 1  
Gi2\_10379108\_x11.....aGcggagacgucgugggaaac..... 1  
Gi2\_10382529\_x11.....gucgugggaaacacggggGgccgaac..... 1  
Gi3\_27175314\_x11.....gugggaaAacggggugccga..... 1  
Gi2\_10397522\_x11.....caggccccgccagCacugcgau..... 1  
Gi2\_10385862\_x11.....gggaCcacggggugccgaacu..... 1  
Gi3\_27149024\_x11.....gGccccgccaguacugcgau..... 1  
Gi2\_10381220\_x11.....gugggaaUacggggugcc..... 1  
Gi3\_27168340\_x11.....Ugccccgccaguacugcgaucg..... 1  
Gi2\_10393419\_x11.....Cacacggggugccgaacu..... 1  
Gi2\_10376380\_x11.....cgCgugggaaacacggggugccga..... 1  
Gi3\_27148815\_x11.....aGgucgugggaaacacggggugcc..... 1  
Gi3\_27147561\_x11.....gucgGgggaacacggggugccgaacu..... 1  
Gi1\_3913857\_x11.....ucgugggaaacacggggugcUgaacu..... 1  
Gi5\_8411290\_x11.....gugggaaacacggggugccgCac..... 1  
Gi2\_10374851\_x11.....gugggaaacacggggugccg..... 1  
Gi3\_27170716\_x11.....aUgccccgccaguacugcgaucggaga..... 1  
Gi5\_8411301\_x11.....cgucgugggaaacacggAgugccgaacu..... 1  
Gi3\_27172542\_x11.....Uaagagaagcgccgucaggccccg..... 1  
Gi2\_10387094\_x11.....cUucgugggaaacacgggg..... 1  
Gi2\_10392440\_x11.....aucggagacgucgugggCacacggggugc..... 1  
Gi2\_10385422\_x11.....Gggagacgucgugggaaacacggggugc..... 1  
Gi5\_8410091\_x11.....Uacgucgugggaaacacggggugccg..... 1  
Gi3\_27158462\_x11.....gucgAgggaaacacggggugccgaacu..... 1  
Gi5\_8430991\_x11.....ucgugggaaacacggAgugccgaacu..... 1  
Gi3\_27162334\_x11.....cgucgugAgaacacggggugccgaacu..... 1  
G1a\_5601307\_x11.....aggccccgNcaguacugcg..... 1  
Gi2\_10391967\_x11.....cgugggaaacacUgggugccgaacu..... 1  
Gi3\_27135175\_x11.....ugAgaacacggggugccgaa..... 1  
Gi5\_8412269\_x11.....gugggaaacacggCgugccgaacu..... 1  
G1a\_5601219\_x11.....ugggaaacacggggugccgaGcu..... 1  
Gi3\_27167592\_x11.....aggccccgccaguaAugcgau..... 1  
Gi5\_8412181\_x11.....ggaacacggggAgccgaacu..... 1  
Gi5\_8414689\_x11.....ggaacacggggugccgaUcu..... 1  
Gi2\_10375984\_x11.....gugggCacacggggugccgaac..... 1  
Gi3\_27174082\_x11.....aCgccccgccaguacugcga..... 1  
Gi5\_8430309\_x11.....ggaacacggggugccgaaUu..... 1  
Gi2\_10396213\_x11.....gucaggccNcgccaguacugc..... 1  
Gi2\_10395905\_x11.....cgugggaaacacgUggugcc..... 1  
Gi5\_8413512\_x11.....gugggaaacacggggugccCaacu..... 1  
Gi2\_10370924\_x11.....gaucggagacgucgugggGacacggg..... 1  
Gi3\_27168593\_x11.....gUagacgucgugggaaacacggggugccgaac..... 1



Gi3\_27168285\_x11.....gggaacCcggggugccgaac..... 1  
Gi3\_27140367\_x11.....cCucguggaacacggggugcc..... 1  
Gi2\_10376908\_x11.....aucggagacgucgugggaacGc..... 1  
Gi3\_27138882\_x11.....cgucgugggaacCcggggugccga..... 1  
Gi2\_10373311\_x11.....gaucggagacgucgugggGacacggggu..... 1  
Gi3\_27136484\_x11.....acugcgaucggagGcgucgug..... 1  
Gi5\_8430694\_x11.....ggaacCcggggugccgaacu..... 1  
Gi3\_27236192\_x10.....gGcgucaggccccgccaguacugcg..... 1  
Gi4\_519349\_x10.....Gguggaacacggggugccgaacu..... 1  
Gi1a\_5630147\_x10.....aGcacggggugccgaacu..... 1  
Gi3\_27223552\_x10.....cCugggaacacggggugc..... 1  
Gi3\_27240942\_x10.....gggaacacggggugAcgaac..... 1  
Gi5\_8437056\_x10.....cgugggaGcacggggugccgaac..... 1  
Gi5\_8450856\_x10.....gCaacacggggugccgaac..... 1  
Gi2\_10416622\_x10.....gggagacgucgugggaacacggggugccgaac..... 0  
Gi3\_27200492\_x10.....uggUaacacggggugccgaacu..... 1  
Gi1\_3916694\_x10.....Uaucggagacgucgugggaacacgg..... 1  
Gi3\_27214252\_x10.....gugggaacUcggggugcc..... 1  
Gi5\_8436366\_x10.....guggAaacacggggugccgaac..... 1  
Gi5\_8438476\_x10.....cgucguAggaacacggggugccgaacu..... 1  
Gi3\_27209802\_x10.....gcUgucaggccccgccaguac..... 1  
Gi2\_10426432\_x10.....Uucaggccccgccaguacugcg..... 1  
Gi2\_10413712\_x10.....ugcgaucggagacgucgugggaacacggggu..... 0  
Gi3\_27235102\_x10.....aucggagacgucgugAgaacacggggu..... 1  
Gi2\_10403292\_x10.....uGaggccccgccaguacugc..... 1  
Gi5\_8441186\_x10.....Uucguggaacacggggugccgaa..... 1  
Gi2\_10416012\_x10.....agAccccgccaguacugc..... 1  
Gi3\_27217012\_x10.....Uaggccccgccaguacugc..... 1  
Gi3\_27211362\_x10.....ugAgaacacggggugccga..... 1  
Gi1\_3927084\_x10.....ucggagacgucguggaacacggggugccgaacu..... 0  
Gi2\_10407982\_x10.....cgucgugggaacacggggCgcc..... 1  
Gi3\_27243092\_x10.....aguaucgcgaucggagacgucguggaacacgg..... 0  
Gi2\_10405692\_x10.....Ugccccgccaguacugcg..... 1  
Gi3\_27225142\_x10.....aucggagacgucguggGacac..... 1  
Gi3\_27192382\_x10.....ucguggaacacAgggugccgaac..... 1  
Gi2\_10406942\_x10.....cggagacgucgugggaCcacggggugcc..... 1  
Gi2\_10398782\_x10.....Ggucguggaacacggggugc..... 1  
Gi3\_27220322\_x10.....gaucggagacgucgugggaGcacg..... 1  
Gi3\_27204982\_x10.....cgugggaUcacggggugccgaac..... 1  
Gi2\_10403922\_x10.....aucggagacgucgugggaacG..... 1  
Gi3\_27230512\_x10.....gggaGcacggggugccgaa..... 1  
Gi3\_27226482\_x10.....ggaacacggggGgccgaa..... 1  
Gi1\_3927044\_x10.....aUcgccgucaggccccgccaguacugc..... 1  
Gi5\_8449506\_x10.....ugggaacaAggggugccgaacu..... 1  
Gi3\_27205492\_x10.....cguuccgaaauaggaagagaagcgccguc..... 0  
Gi2\_10427992\_x10.....cgucUuggaacacggggugccg..... 1  
Gi3\_27210422\_x10.....Uccaguacugcgaucggagacgucgu..... 1

Gi5\_8437276\_x10.....gggaGcacggggugccgaac..... 1  
Gi5\_8450406\_x10.....gugggaacacggggugccAaac..... 1  
Gi2\_10405782\_x10.....aucggagacgucgugggaGcacg..... 1  
Gi2\_10413112\_x10.....cguAggaacacggggugccgaac..... 1  
Gi2\_10409832\_x10.....aucggagacgCcgugggaacacggggugcc..... 1  
Gi2\_10418422\_x10.....cGcgccaguacugcgaucgg..... 1  
Gi2\_10424272\_x10.....cgCgggaacacggggugccgaa..... 1  
Gi3\_27220492\_x10.....Ugagacgucgugggaacacggggugccga..... 1  
Gi2\_10402092\_x10.....ucgugggaacacAgggugccgaac..... 1  
Gi3\_27229262\_x10.....cgucaggcNccgccaguacugc..... 1  
Gi3\_27227032\_x10.....aucAgagacgucgugggaacacgg..... 1  
Gi3\_27192632\_x10.....gcUgucaggccccgccaguacugc..... 1  
G1a\_5628897\_x10.....cUccgucaggccccgccaguacugc..... 1  
Gi3\_27220392\_x10.....uGggagacgucgugggaacacggggugcc..... 1  
Gi3\_27208182\_x10.....gggaacacgUggugccgaacu..... 1  
Gi4\_520529\_x10.....ggaacacggggugccgaac..... 0  
Gi5\_8444216\_x10.....ggaacacggAgugccgaacu..... 1  
Gi3\_27187772\_x10.....aucggagaNgucguggga..... 1  
Gi3\_27216052\_x10.....gaNcacggggugccgaacu..... 1  
Gi2\_10414102\_x10.....ggaacacggAgugccgaac..... 1  
Gi3\_27189142\_x10.....uGgugggaacacggggugccg..... 1  
Gi3\_27233262\_x10.....aucggagacgucgugggaCcacggggugcc..... 1  
G1a\_5624977\_x10.....Uccaguacugcgaucgga..... 1  
G1a\_5628187\_x10.....ugggGacacggggugccgaacu..... 1  
Gi1\_3921984\_x10.....ggaacacggggugccAaacu..... 1  
Gi3\_27200042\_x10.....aucggagacgucguggAaacacggg..... 1  
Gi3\_27206612\_x10.....ggaacacgUggugccgaac..... 1  
Gi2\_10423372\_x10.....gugggaacUcggggugccgaac..... 1  
Gi2\_10400442\_x10.....Cucgugggaacacggggugcc..... 1  
Gi2\_10420632\_x10.....gucgugggaacacggAgugccgaacu..... 1  
Gi5\_8444776\_x10.....caggccccgccaguacugcgaucggagacgu..... 0  
Gi3\_27215002\_x10.....Cggccccgccaguacugc..... 1  
Gi3\_27197312\_x10.....gUcguacaggccccgccaguacugc..... 1  
Gi5\_8443816\_x10.....ggaacaAggggugccgaacu..... 1  
Gi3\_27233172\_x10.....gacgucgugggaacacggggugccgCac..... 1  
Gi2\_10405582\_x10.....gucgugggaacGcggggugccgaac..... 1  
Gi2\_10407872\_x10.....cUgagacgucgugggaacacggggug..... 1  
Gi3\_27199492\_x10.....cgucgugggaCcacggggugcc..... 1  
Gi5\_8435556\_x10.....Ggcgaucggagacgucguggga..... 1  
Gi3\_27235862\_x10.....ggaacacggUgugccgaac..... 1  
Gi3\_27225372\_x10.....aggccccgccagCacugcg..... 1  
Gi3\_27215952\_x10.....cgucgugggaacacggggGgccga..... 1  
Gi1\_3924384\_x10.....gaaacacggggugcAgaacu..... 1  
Gi2\_10426542\_x10.....ucgugggaacacggggugccgaUc..... 1  
Gi1\_3921164\_x10.....cgugggaacacggggugccgUacu..... 1  
Gi5\_8443746\_x10.....cgugggaaNacggggugccga..... 1  
Gi1\_3927864\_x10.....aacacggggugcUgaacu..... 1

Gi5\_8443976\_x10.....Gucggagacgucgugggaacacgg..... 1  
Gi2\_10425852\_x10.....cgugggaaNacggggugccg..... 1  
Gi2\_10406702\_x10.....aagagaagcgccgCcaggccc..... 1  
G1a\_5633367\_x10.....cgugggaacacAgggugccgaacu..... 1  
Gi2\_10419912\_x10.....aucggagGcgucgugggaacacggggugcc..... 1  
Gi5\_8449426\_x10.....ugggaacacggUgugccgaacu..... 1  
Gi2\_10399012\_x10.....cguUgugggaacacggggugccgaacu..... 1  
Gi2\_10426672\_x10.....cUccaguacugcgauccggagacg..... 1  
Gi5\_8437666\_x10.....gAgaacacggggugccgaac..... 1  
Gi1\_3924304\_x10.....acgucgugggaacacggggGgccgaacu..... 1  
Gi3\_27214102\_x10.....Gccgccaguacugcgauccg..... 1  
Gi3\_27222202\_x10.....gugggaacacggggugcc..... 1  
Gi3\_27208562\_x10.....gGcgugggaacacggggugccgaa..... 1  
Gi2\_10418412\_x10.....ggaaGacggggugccgaac..... 1  
Gi2\_10419492\_x10.....ggGgacgucgugggaacacggggugccgaacu..... 1  
Gi2\_10417822\_x10.....aucggagacgucgugggaacacAggugc..... 1  
G1a\_5622757\_x10.....gaucggagacgucgugggaacacgggg..... 0  
Gi3\_27193052\_x10.....gUgagacgucgugggaacacggg..... 1  
Gi2\_10398532\_x10.....agUccccgccaguacugcga..... 1  
Gi2\_10405372\_x10.....aucggagacgucgugggaacacggggAgc..... 1  
Gi1\_3919164\_x10.....cgucgugggaacCcggggugccgaacu..... 1  
Gi3\_27229062\_x10.....cgugggaacacggggugccAa..... 1  
Gi2\_10413772\_x10.....aAgccccgccaguacugcga..... 1  
Gi3\_27190562\_x10.....gugggaacacggggugGcga..... 1  
Gi3\_27241052\_x10.....Ggaagcgccgucaggccc..... 1  
Gi1\_3923864\_x10.....ggaacacggggugcUgaacu..... 1  
Gi3\_27211332\_x10.....ugggaacUcggggugccgaac..... 1  
Gi3\_27216132\_x10.....cgucgugggaacacggggAgcc..... 1  
Gi2\_10423722\_x10.....Ugagcugcugggaacacggggugccgaacu..... 1  
Gi3\_27204542\_x10.....cUaucggagacgucgugggaacacggg..... 1  
Gi5\_8448076\_x10.....agccccgccaguacugcgauccggagacguc..... 0  
Gi3\_27214452\_x10.....cgugggaacacggggugccgaC..... 1  
Gi1\_3917144\_x10.....cgugggaacacggggugcAgaacu..... 1  
Gi5\_8432796\_x10.....gaucggagacgucgugggaacacggggugcc..... 0  
Gi5\_8432136\_x10.....Cgaacacggggugccgaac..... 1  
Gi3\_27192662\_x10.....aucggagacguUgugggaacacgggg..... 1  
Gi3\_27195202\_x10.....Acgugggaacacggggugccgaac..... 1  
Gi2\_10398432\_x10.....ucgugggaacacggAgugccgaacu..... 1  
Gi3\_27216402\_x10.....gUucggagacgucgugggaacacgggg..... 1  
Gi2\_10401962\_x10.....cgAagacgucgugggaacacggggugc..... 1  
Gi3\_27188982\_x10.....cUggccccgccaguacugcga..... 1  
Gi3\_27218592\_x10.....ugggaacacgggUugccga..... 1  
G1a\_5620767\_x10.....ggaacacAgggugccgaacu..... 1  
Gi3\_27229732\_x10.....Ugagacgucgugggaacacgg..... 1  
Gi1\_3927204\_x10.....cgugggaacacggggAgccgaacu..... 1  
Gi3\_27214852\_x10.....cgCcaggccccgccaguacugc..... 1  
Gi2\_10421472\_x10.....ugggaacacggggugccgC..... 1

Gi1\_3923884\_x10.....Gggccccccagucugcgau..... 1  
Gi3\_27224622\_x10.....cgucgugggaaacacggggugccgaUc..... 1  
Gi3\_27237262\_x10.....Uccccgccagucugcgau..... 1  
Gi3\_27228592\_x10.....aggccccccagucugcgau..... 0  
Gi3\_27217742\_x10.....aucggagacgucgugggaaAacg..... 1  
Gi2\_10408812\_x10.....Uggagacgucgugggaaacacggggugcc..... 1  
Gi3\_27198422\_x10.....cUgagacgucgugggaaacacggggugc..... 1  
Gi2\_10408942\_x10.....Aacgucgugggaaacacggggugcc..... 1  
Gi3\_27222332\_x10.....aggccccccagCacugc..... 1  
Gi3\_27230122\_x10.....guacAgcgau..... 1  
Gi1\_3920144\_x10.....aggccccAccaguc..... 1  
Gi3\_27208172\_x10.....aggccccAccaguc..... 1  
Gi2\_10415442\_x10.....ucggagacgucgugggaaacacggggugccgaacu..... 0  
Gi3\_27221502\_x10.....Gggagacgucgugggaaacacggggg..... 1  
Gi2\_10402402\_x10.....gucgugggaaacacggggAgccgaacu..... 1  
Gi3\_27201952\_x10.....gugggaacaUggggugccg..... 1  
Gi3\_27199122\_x10.....cgucguggNaacacggggugccga..... 1  
Gi2\_10414902\_x10.....gGagcgccgucaggccccgc..... 1  
Gi3\_27233682\_x10.....ugggaacacggggugccgGa..... 1  
Gi3\_27217892\_x10.....cgAgggaacacggggugccgaa..... 1  
Gi2\_10425742\_x10.....aUacgucgugggaaacacggggugccg..... 1  
Gi2\_10421362\_x10.....aCcgagacgucgugggaaacacggggugc..... 1  
G1a\_5633237\_x10.....cUgagacgucgugggaaacacggggg..... 1  
Gi2\_10414272\_x10.....gggaacaAggggugccgaacu..... 1  
Gi5\_8432876\_x10.....ggaacacggggugccgaCcu..... 1  
Gi2\_10416472\_x10.....gggUacacggggugccgaacu..... 1  
Gi3\_27200462\_x10.....ucgugggUacacggggugccgaacu..... 1  
Gi3\_27225582\_x10.....aucggagacgucgugggaaacacAg..... 1  
Gi3\_27241342\_x10.....gacgucgugggaaacacggggugccgaGcu..... 1  
G1a\_5634077\_x10.....gaagcgccgucaggccccccagucugc..... 0  
Gi3\_27231222\_x10.....uggCaacacggggugccgaacu..... 1  
Gi3\_27238342\_x10.....gaCcgagacgucgugggaaacacggggg..... 1  
Gi2\_10403112\_x10.....gacgucgugggGcacggggugccgaacu..... 1  
Gi3\_27238252\_x10.....cgCcgugggaaacacggggugccg..... 1  
Gi2\_10403842\_x10.....gugggaacaUggggugcc..... 1  
Gi2\_10404192\_x10.....aucggagacgucguAggaacac..... 1  
Gi3\_27206892\_x10.....cgucgugggaaUacggggugccgaacu..... 1  
Gi2\_10408962\_x10.....ucguggaacGcggggugccgaac..... 1  
Gi2\_10412572\_x10.....ugggaacacggggugccgaacG..... 1  
Gi3\_27232382\_x10.....ccgaauuaNgaagagaagc..... 1  
Gi5\_8435916\_x10.....Gucggagacgucgugggaaacacg..... 1  
Gi2\_10420582\_x10.....gUucggagacgucgugggaaacacggggg..... 1  
Gi3\_27205172\_x10.....aucggaAacgucgugggaaacacggggg..... 1  
Gi2\_10422112\_x10.....gGacacggggugccgaac..... 1  
Gi2\_10406792\_x10.....aGgagaagcgccgucaggccc..... 1  
Gi3\_27242532\_x10.....gucgugggaaacacggggugcUgaac..... 1  
Gi3\_27209482\_x10.....ggagacguNgugggaacacggggugcc..... 1

Gi2\_10404452\_x10.....cgGgggaacacggggugccgaa..... 1  
Gi5\_8446366\_x10.....uAggaacacggggugccgaac..... 1  
Gi3\_27236482\_x10.....cgucguggNaacacggggugc..... 1  
Gi3\_27190862\_x10.....gugggaacacggggugccgU..... 1  
Gi2\_10422472\_x10.....aggccccgccaguacugcAauc..... 1  
Gi5\_8436056\_x10.....ugggaacacggggugcUgaac..... 1  
Gi1\_3921234\_x10.....cgugggaacacgggguAccgaacu..... 1  
Gi3\_27234332\_x10.....cgucgugggaGcacggggugccg..... 1  
Gi3\_27201972\_x10.....cggagacgucgugggaacacggggGgcc..... 1  
Gi5\_8444506\_x10.....ugggaGcacggggugccgaac..... 1  
Gi3\_27203892\_x10.....cGguacugcgauccggagacguc..... 1  
Gi2\_10427762\_x10.....cgGgggaacacggggugccg..... 1  
Gi2\_10410662\_x10.....cggagacgucgugggaacGcggggugcc..... 1  
Gi2\_10417052\_x10.....aggccccgccaguacugUgauc..... 1  
Gi2\_10421282\_x10.....gCgggaacacggggugccgaa..... 1  
Gi2\_10428592\_x10.....gugggaacacggggugccgaC..... 1  
Gi2\_10422302\_x10.....cgugggGacacggggugccgaa..... 1  
Gi1\_3918424\_x10.....ucgGgggaacacggggugccgaacu..... 1  
G1a\_5625677\_x10.....gGcaggccccgccaguacu..... 1  
Gi2\_10399922\_x10.....aucggagacgucgugggGacacggggugcc..... 1  
Gi2\_10417402\_x10.....gucgugggNacacggggugcc..... 1  
Gi2\_10427352\_x10.....ggaacacggggugccgaaA..... 1  
Gi1\_3919754\_x10.....ggaacaUggggugccgaacu..... 1  
Gi5\_8450186\_x10.....aUagaagcgccgucagggccccg..... 1  
Gi2\_10409722\_x10.....Accccgccaguacugcgauccg..... 1  
Gi2\_10408722\_x10.....aucggagacgucgugggaacGcg..... 1  
Gi3\_27199842\_x10.....gucgugggaacacggggGgc..... 1  
Gi2\_10418932\_x10.....auUggagacgucgugggaacacggg..... 1  
Gi2\_10398832\_x10.....gcUccgccaguacugcgaucc..... 1  
Gi3\_27207082\_x10.....gugggaacacggggAgccga..... 1  
Gi3\_27207532\_x10.....cgGcugggaacacggggugccg..... 1  
Gi5\_8446136\_x10.....uggNaacacggggugccgaacu..... 1  
Gi3\_27222472\_x10.....cGccgccaguacugcgauccgga..... 1  
Gi2\_10416082\_x10.....gaagagaagcgccgucagggccccccagua..... 0  
Gi2\_10427802\_x10.....gccccgccaguacugcgGuc..... 1  
Gi1\_3926704\_x10.....gaaUacggggugccgaacu..... 1  
Gi2\_10410932\_x10.....gugggaacacgAggugcc..... 1  
Gi3\_27238822\_x10.....uGcugcgauccggagacguc..... 1  
Gi3\_27189552\_x10.....cgccaguacugcgauccggCgacguc..... 1  
Gi3\_27237382\_x10.....gugggaacacggggugAcg..... 1  
Gi2\_10399542\_x10.....ucgugggaacacUgggugccgaacu..... 1  
Gi2\_10408862\_x10.....aggccccgccaguacCgcg..... 1  
Gi2\_10419312\_x10.....caggccccNccaguacugc..... 1  
Gi3\_27232262\_x10.....gccccgccaguacugcAauc..... 1  
Gi3\_27203522\_x10.....cgucgugggGacacggggugc..... 1  
Gi2\_10421422\_x10.....ggaacacgggAugccgaacu..... 1  
Gi5\_8435956\_x10.....ggaacaUggggugccgaacu..... 1

Gi5\_8451836\_x10.....gaacacggggugAcgaacu..... 1  
Gi3\_27200352\_x10.....gaucggagacgucgugggaaacCcggggu..... 1  
Gi3\_27202302\_x10.....cUgagacgucgugggaaacacgg..... 1  
Gi3\_27203862\_x10.....aucggagacgucguggAaacacgggggu..... 1  
Gi2\_10397872\_x10.....aacacggggugUcgaacu..... 1  
Gi2\_10404752\_x10.....gucgugggaaacacggggugccAaacu..... 1  
Gi3\_27234592\_x10.....aucgUagacgucgugggaaacacgg..... 1  
G1a\_5630467\_x10.....gUagacgucgugggaaacacggggugcc..... 1  
Gi2\_10407992\_x10.....aucggagacgCcgugggaaac..... 1  
G1a\_5628517\_x10.....gGcgugggaaacacggggugccgaacu..... 1  
Gi2\_10399102\_x10.....cgCcgugggaaacacggggugccg..... 1  
Gi3\_27222082\_x10.....aGcacggggugccgaacu..... 1  
Gi3\_27206182\_x10.....aucUgagacgucgugggaaacacg..... 1  
Gi3\_27207892\_x10.....gUagacgucgugggaaacacgg..... 1  
Gi1\_3928114\_x10.....cgugggaaacacggggugUcgaacu..... 1  
Gi3\_27217912\_x10.....cgucgugggaaacacggggugcAgaacu..... 1  
Gi2\_10423152\_x10.....auUggagacgucgugggaaacacggggugcc..... 1  
Gi2\_10407392\_x10.....ggagacgucgugggaaacacggggugcc..... 1  
Gi5\_8433976\_x10.....cgucgugggaaacacggggugccgaaAu..... 1  
Gi2\_10403822\_x10.....ggaacacggggugccgaaAu..... 1  
Gi3\_27205182\_x10.....cgCgggaaacacggggugccg..... 1  
Gi2\_10400452\_x10.....cgCgggaaacacggggugccg..... 1  
Gi3\_27197342\_x10.....aucggagacgucgugggaaacacAggggu..... 1  
Gi3\_27239332\_x10.....Uggccccgccaguacugcga..... 1  
Gi1\_3917364\_x10.....ucgugggaaacacggAgugccgaacu..... 1  
Gi3\_27209062\_x10.....cggagacgucgugggaaacacggggC..... 1  
Gi3\_27229972\_x10.....gacgucgugggGaacacggggugccgaacu..... 1  
Gi2\_10415602\_x10.....Gcgucgugggaaacacggggugccgaac..... 1  
Gi3\_27212712\_x10.....gaucggagGcgucgugggaaacacgggg..... 1  
Gi3\_27214082\_x10.....aucggagacgCcgugggaaacacggggugcc..... 1  
Gi5\_8436716\_x10.....Cgggaaacacggggugccgaac..... 1  
Gi3\_27216792\_x10.....gggaaacacggggCgccgaa..... 1  
Gi3\_27224642\_x10.....cgugggaaacacggUgugccgaac..... 1  
Gi2\_10408712\_x10.....cCucgugggaaacacggggugccg..... 1  
Gi4\_519379\_x10.....gaucggagacgucgugggaaacacggg..... 0  
Gi5\_8433016\_x10.....gugggaaacacgggCugccgaacu..... 1  
Gi2\_10426772\_x10.....cggagacgucgugggGaacacggggugcc..... 1  
Gi2\_10423612\_x10.....cgugggaaacacggggugccgaC..... 1  
Gi2\_10409392\_x10.....aggcccAgccaguacugcgauc..... 1  
Gi3\_27240912\_x10.....ucaggcccNgccaguacugcg..... 1  
Gi1\_3926034\_x10.....gaacacggggugccgUacu..... 1  
Gi3\_27237422\_x10.....aucAgagacgucgugggaaacacgggg..... 1  
Gi5\_8431476\_x10.....gggaaUacggggugccgaacu..... 1  
Gi2\_10406832\_x10.....gugggaaacUggggugccg..... 1  
G1a\_5630977\_x10.....Gcugcgaucggagacgucgug..... 1  
Gi3\_27244252\_x10.....caggccccgccaguGcugc..... 1  
Gi3\_27198852\_x10.....gugggaaacacggggugccgaC..... 1

Gi2\_10398542\_x10.....Gcccgccaguacugcgauccg..... 1  
 Gi3\_27194412\_x10.....ccccgccaguacugcgauccgagacgucgug..... 0  
 Gi1\_3919724\_x10.....cgugAgaacacggggugccgaacu..... 1  
 Gi5\_8432666\_x10.....cgugggaacaAggggugccgaacu..... 1  
 Gi3\_27212822\_x10.....aggccccgccCguacugcgau..... 1  
 Gi5\_8449806\_x10.....ggUaacacggggugccgaac..... 1  
 Gi3\_27192932\_x10.....cAugggaacacggggugc..... 1  
 Gi3\_27223012\_x10.....cUaucggagacgucgugg..... 1  
 Gi1\_3923914\_x10.....cguggAaacacggggugccgaacu..... 1  
 Gi3\_27225702\_x10.....ugggaacaCggAgugccgaa..... 1  
 Gi3\_27187952\_x10.....aggcccUgccaguacugcg.....ugggaacaGggggugccgaacu..... 1  
 Gi3\_27204062\_x10.....aggcccUgccaguacugcg..... 1  
 Gi2\_10414842\_x10.....caggccccgccaguacugcgCuc..... 1  
 Gi3\_27195112\_x10.....gggaacaCggggugccgaC..... 1  
 Gi3\_27197542\_x10.....aggcccUgccaguacugc..... 1  
 Gi2\_10420422\_x10.....gucgugggaacaCggggugccgaCc..... 1  
 Gi3\_27239432\_x10.....cgCcaggccccgccaguacugcg..... 1  
 Gi5\_8448056\_x10.....gucgugggaacacAgggugccgaacu..... 1  
 Gi2\_10457994\_x9.....acgucgugggaacacCggAgugccgaacu..... 1  
 Gi3\_27260326\_x9.....ucgugggaUcacggggugccgaacu..... 1  
 Gi2\_10453899\_x9.....cggagacgucgugggaacCcggggugc..... 1  
 Gi5\_8463639\_x9.....ggaacacgggAugccgaacu..... 1  
 Gi5\_8459526\_x9.....uUcgauccggagacgucguggg..... 1  
 Gi3\_27304624\_x9.....ugggaacacggggugGcgaacu..... 1  
 Gi2\_10454394\_x9.....gGcgugggaacacggggugccg..... 1  
 Gi1a\_5637838\_x9.....Ggucaggccccgccaguacugcg..... 1  
 Gi2\_10461189\_x9.....Ugugggaacacggggugc..... 1  
 Gi3\_27246115\_x9.....aucggagacgucgugggaacacggggCgc..... 1  
 Gi3\_27247816\_x9.....acgucgugggaacacggggugccgaaUu..... 1  
 Gi2\_10446519\_x9.....gacgucgugggaacacggggugccgaa..... 0  
 Gi3\_27252163\_x9.....cgucgugggaaUacggggugccgaac..... 1  
 Gi3\_27246250\_x9.....gggaacacggggugccgaUcu..... 1  
 Gi2\_10456950\_x9.....Ucccgccaguacugcgaucc..... 1  
 Gi2\_10449354\_x9.....aUgucgugggaacacggggugccgaacu..... 1  
 Gi3\_27291511\_x9.....ucggagacgucgugggaacacggggugccgaac..... 0  
 Gi2\_10432209\_x9.....cgucgCgggaacacggggugccgaacu..... 1  
 Gi5\_8475861\_x9.....gaacCcggggugccgaacu..... 1  
 Gi3\_27303067\_x9.....cgucUugggaacacggggugc..... 1  
 Gi3\_27272953\_x9.....cgugggaacaGggggugccgaacu..... 1  
 Gi3\_27249121\_x9.....ucgugggaacacCggAgugccgaa..... 1  
 Gi3\_27303958\_x9.....ugggaacaCAgggugccgaa..... 1  
 Gi2\_10441893\_x9.....Gucggagacgucgugggaac..... 1  
 Gi2\_10458579\_x9.....ggaUcacggggugccgaacu..... 1  
 Gi3\_27280567\_x9.....cgccGguacugcgauccggagacguc..... 1  
 Gi3\_27250408\_x9.....gGagagaagcgcgucaggcc..... 1  
 Gi2\_10438923\_x9.....ugggCacacggggugccgaacu..... 1  
 Gi5\_8473755\_x9.....caggccccgccGguacugcgaucc..... 1

Gi5\_8476464\_x9.....cgugggaacacgCggugccgaacu..... 1  
 Gi2\_10449084\_x9.....gaucggagacgucgugggaacacggggG..... 1  
 Gi2\_10437186\_x9.....gGgacgucgugggaacacggggugccgaacu..... 1  
 Gi2\_10457220\_x9.....gugggaaGacggggugccgaacu..... 1  
 G1a\_5638648\_x9.....gaacacgNgugccgaacu..... 1  
 Gi2\_10436727\_x9.....acgucgugggaacacggggGcgcgaac..... 1  
 Gi3\_27262342\_x9.....caggcccUgccaguacugcgauc..... 1  
 Gi1\_3929014\_x9.....aacacggggugccgaaUu..... 1  
 Gi2\_10454430\_x9.....gaacacggggugccgaacG..... 1  
 Gi2\_10439463\_x9.....cAugggaacacggggugcc..... 1  
 Gi2\_10455420\_x9.....gucgugggaacacggggugccgaaAu..... 1  
 Gi2\_10433361\_x9.....cgugggaacacggggGgcc..... 1  
 Gi2\_10437006\_x9.....agccccgccagCacugc..... 1  
 Gi1\_3933478\_x9.....agccccgccaguacugcgaucU..... 1  
 Gi3\_27246862\_x9.....acgucgugggaacGcggggugccgaac..... 1  
 Gi3\_27298702\_x9.....aucggaAacgucgugggaacacggg..... 1  
 Gi2\_10459425\_x9.....gugAgaacacggggugccg..... 1  
 Gi2\_10451847\_x9.....Gguacugcgaucggagacguc..... 1  
 Gi5\_8456376\_x9.....cguNggaacacggggugccgaacu..... 1  
 Gi5\_8461506\_x9.....ucgugggaacacggggugcAgaacu..... 1  
 Gi3\_27297208\_x9.....cgccaguaNugcgaucggagacguc..... 1  
 Gi3\_27245854\_x9.....ucaggccccgccGguacugcgauc..... 1  
 Gi2\_10452612\_x9.....gucaggccccgccCguacugc..... 1  
 Gi3\_27283294\_x9.....aGugcgaucggagacguc..... 1  
 Gi1\_3935872\_x9.....cgucgugggaacGcggggugccgaacu..... 1  
 Gi3\_27305074\_x9.....gaucggagacgucgugggaacaAggggu..... 1  
 Gi3\_27295102\_x9.....cgggagacgucgugggaacacggggugccgaacA..... 1  
 Gi2\_10432254\_x9.....cgugggaacacggggUccgaacu..... 1  
 Gi3\_27292978\_x9.....gugggaaUacggggugccg..... 1  
 Gi1\_3929392\_x9.....gugggaacacggggAgccgaacu..... 1  
 Gi2\_10433415\_x9.....ggaacaAggggugccgaacu..... 1  
 Gi5\_8461488\_x9.....ucggagacgucgugggaacacggggugccgaac..... 0  
 Gi3\_27299719\_x9.....Uaagagaagcggcugcagggccccgccagu..... 1  
 Gi3\_27255727\_x9.....gaucggagacgucgugggCacac..... 1  
 Gi3\_27248320\_x9.....gggagacgucgugggaacaUggggugccg..... 1  
 Gi3\_27280909\_x9.....gucgugggaacacggggGgcc..... 1  
 Gi2\_10454997\_x9.....gucguggAaacacggggugccgaacu..... 1  
 Gi2\_10436304\_x9.....caggccccgccaguacugcGuc..... 1  
 Gi3\_27304678\_x9.....Ugccccgccaguacugcgaucgg..... 1  
 Gi3\_27255268\_x9.....ggaacacggggugccgaaA..... 1  
 Gi3\_27258661\_x9.....cgucaggccccgccagCacugc..... 1  
 Gi1\_3940453\_x9.....ucgugggaaUacggggugccgaacu..... 1  
 Gi1\_3940669\_x9.....gacgucgugggGacacggggugccgaacu..... 1  
 Gi3\_27302428\_x9.....ugggaacacggggugccUaac..... 1  
 Gi5\_8473818\_x9.....Augggaacacggggugcc..... 1  
 Gi3\_27248617\_x9.....agccccgccaguacugcA..... 1  
 Gi5\_8464449\_x9.....gggaacacggggugccgaUc..... 1



Gi2\_10450785\_x9.....cagggccccccagacuugcgauA..... 1  
 Gi5\_8467140\_x9.....gucgugggaaacacggggugccgGacu..... 1  
 Gi1\_3932947\_x9.....ugggaacacggggugccgaU..... 1  
 Gi3\_27273547\_x9.....gaucggagGcgucugggaaacacggg..... 1  
 Gi3\_27301339\_x9.....aucggagacAucgugggaaacacg..... 1  
 Gi5\_8473260\_x9.....aUgccccgccagacuugc..... 1  
 Gi3\_27292798\_x9.....ucUggccccccagacuugcgauC..... 1  
 Gi3\_27244648\_x9.....gucgugggCacacggggugccgaac..... 1  
 Gi5\_8458833\_x9.....acgucAugggaacacggggugccgaacu..... 1  
 Gi2\_10429167\_x9.....gucgAugggaacacggggugccgaacu..... 1  
 Gi5\_8465961\_x9.....ggaacUcggggugccgaacu..... 1  
 Gl1\_5641483\_x9.....agagaagcgccgucaggccccccagu..... 0  
 Gi2\_10437573\_x9.....ugggaGcacggggugccga..... 1  
 Gi5\_8471091\_x9.....gggaacacNgggugccgaa..... 1  
 Gi3\_27270055\_x9.....gGgacgucugggaaacacggggugccgaacu..... 1  
 Gl1\_5651248\_x9.....Uagaagcgccgucaggccccgcca..... 1  
 Gi2\_10441767\_x9.....agacgucugggGacacggggugcc..... 1  
 Gi3\_27296704\_x9.....Uacgucugggaaacacggggugc..... 1  
 Gi3\_27302707\_x9.....gucgugggaaacacggggCgcc..... 1  
 Gi2\_10459659\_x9.....aggccccAccagacuugcgga..... 1  
 Gi3\_27294994\_x9.....acgucugggaaacacgggguAccgaacu..... 1  
 Gi3\_27291799\_x9.....gugggaaAacggggugccg..... 1  
 Gi3\_27281242\_x9.....cAucgugggaaacacggggugccgaac..... 1  
 Gi3\_27280603\_x9.....gaacacggggugccCaacu..... 1  
 Gi2\_10458480\_x9.....gugggaaacacggggugGc..... 1  
 Gi3\_27285778\_x9.....agaagcgcnGucagggccccgccc..... 1  
 Gi3\_27304849\_x9.....acgucgCgggaaacacggggugccgaac..... 1  
 Gi2\_10436196\_x9.....aucggagacgucguAggaaacacggggu..... 1  
 Gi3\_27256213\_x9.....aggccccccagucgucg..... 1  
 Gi3\_27271729\_x9.....cgugggaGcacggggugccgaa..... 1  
 Gi4\_523332\_x9.....gUgaacacggggugccgaacu..... 1  
 Gi3\_27273997\_x9.....cgucugggaaacacggggugccA..... 1  
 Gi5\_8460264\_x9.....gggaacacggggugccgGac..... 1  
 Gi2\_10452594\_x9.....cgucugggaaacacAgggugccgaacu..... 1  
 Gi2\_10438572\_x9.....gugggaaacacgggguUccgaacu..... 1  
 Gi5\_8453352\_x9.....cgugggaaacacgggguUccgaacu..... 1  
 Gi2\_10452198\_x9.....aucggagaNucgugggaaacacg..... 1  
 Gi3\_27280117\_x9.....agacgucugggaaacacggggugccgCacu..... 1  
 Gi3\_27294598\_x9.....cgccaguaNugcgauaggagacg..... 1  
 Gl1\_5635489\_x9.....gggaacacggggugccgaGcu..... 1  
 Gi3\_27299314\_x9.....gggaacacgggAugccgaac..... 1  
 Gi3\_27296092\_x9.....acgucugggaaacacggggugccgaGc..... 1  
 Gi2\_10449363\_x9.....gUagacgucugggaaacacggggugccg..... 1  
 Gi3\_27266014\_x9.....gacgCcgugggaaacacggggugccgaacu..... 1  
 Gl1\_5647270\_x9.....gggaacacggggugccgCacu..... 1  
 Gi3\_27286867\_x9.....aucggagacgucugggaaacacggA..... 1  
 Gi2\_10445178\_x9.....ggagGcgucugggaaacacggggugcc..... 1

Gi4\_521703\_x9 .....gugggaacacggggugccgaGcu..... 1  
 Gi5\_8466888\_x9.....aucggagaNgucgugggaacacgg..... 1  
 Gi3\_27292501\_x9.....aucgAgacgucgugggaacacg..... 1  
 Gi3\_27278812\_x9.....aucggagacgucAugggaacacg..... 1  
 Gi3\_27277183\_x9.....ugggGacacggggugccg..... 1  
 Gi2\_10438734\_x9.....ggaacCcggggugccgaac..... 1  
 Gi1\_3931075\_x9.....ucgAgggaacacggggugccgaacu..... 1  
 Gi1\_3933955\_x9.....ucgugggaacacUgggugccgaacu..... 1  
 Gi5\_8459472\_x9.....gugggaacacggggugcUgaac..... 1  
 Gi3\_27298648\_x9.....cgAcgugggaacacggggugccg..... 1  
 Gi2\_10459119\_x9.....guAgggaacacggggugccga..... 1  
 Gi3\_27300808\_x9.....Aggagacgucgugggaacacggggugccg..... 1  
 Gi3\_27271360\_x9.....gacgucgugggaacacggggAgccgaacu..... 1  
 Gi1\_3938995\_x9.....Uacgucgugggaacacggggugccgaac..... 1  
 Gi3\_27298135\_x9.....cgucagggccccgccUguacugcg..... 1  
 Gi3\_27282412\_x9.....cgucagggccccgccaguacCgc..... 1  
 Gi5\_8465709\_x9.....ggaacacggggugccgaacG..... 1  
 Gi2\_10461603\_x9.....uUcgaucggagacgucgugggaacacg..... 1  
 Gi3\_27250147\_x9.....Uccgucagggccccgccaguacugcgau..... 1  
 Gi2\_10442199\_x9.....ccccgccGguacugcgau..... 1  
 Gi3\_27301249\_x9.....Aacgucgugggaacacggggugccgaacu..... 1  
 Gi4\_522819\_x9.....gagacgucgugggaacacggggugccgaacu..... 0  
 Gi3\_27285706\_x9.....cagggccccgccaguacugcgCu..... 1  
 Gi3\_27285310\_x9.....ucgugggaaUacggggugccgaac..... 1  
 Gi5\_8465772\_x9.....aUuacugcgauccgagacguc..... 1  
 Gi5\_8465628\_x9.....ucgugggaacacggggugccgaaAu..... 1  
 Gi3\_27253045\_x9.....gacgucgugggaacacggggAgccgaac..... 1  
 Gl1\_5638531\_x9.....cgugggaacacggggugcUgaacu..... 1  
 Gl1\_5653984\_x9.....aCcgagacgucgugggaacacggg..... 1  
 Gi1\_3935224\_x9.....gaaacacggggugccgaaUu..... 1  
 Gi3\_27276913\_x9.....cGcgccaguacugcgauccgagacg..... 1  
 Gi3\_27298882\_x9.....aacacgUggugccgaacu..... 1  
 Gi5\_8470047\_x9.....Gacugcgauccgagacgu..... 1  
 Gi5\_8461992\_x9.....gucgugAgaacacggggugccgaacu..... 1  
 Gi2\_10432065\_x9.....ugggaacacgggUugccgaac..... 1  
 Gi2\_10444917\_x9.....aucggagacgCcgugggaacacggggugc..... 1  
 Gi2\_10449471\_x9.....gugggaacacggggUaccga..... 1  
 Gi3\_27259129\_x9.....aggccccccagCacugcga..... 1  
 Gi3\_27301024\_x9.....Gcgccaguacugcgauccgagacguc..... 1  
 Gi3\_27302221\_x9.....gugggaacacggggugcAga..... 1  
 Gi3\_27261676\_x9.....gaUgucgugggaacacggggugccgaacu..... 1  
 Gi1\_3934063\_x9.....gucgugggaacacggggugccgGacu..... 1  
 Gi2\_10456896\_x9.....aggccccgccCguacugcg..... 1  
 Gi3\_27263368\_x9.....ggaacacggCgugccgaacu..... 1  
 Gi3\_27290836\_x9.....Agugggaacacggggugccga..... 1  
 Gi3\_27291601\_x9.....cUccaguacugcgauccgaga..... 1  
 Gi5\_8468013\_x9.....cUucgugggaacacggggugccgaa..... 1

Gi5\_8468391\_x9.....acgucgugggaacacAgggugccgaacu..... 1  
G1a\_5647612\_x9.....Ugccccgccaguacugcgauc..... 1  
Gi2\_10459893\_x9.....Uccgucaggccccgccaguacu.....aucggagacgucgugggCaca..... 1  
Gi1\_3930931\_x9.....Uccgucaggccccgccaguacu..... 1  
Gi2\_10450533\_x9.....Uggccccgccaguacugc..... 1  
Gi2\_10446726\_x9.....cUucgugggaacacggggug..... 1  
Gi5\_8460858\_x9.....ggaUcacggggugccgaacu..... 1  
Gi2\_10459434\_x9.....gucgugggaacacggggugUcgaacu..... 1  
Gi2\_10448247\_x9.....guUggaacacggggugccgaa..... 1  
Gi5\_8474070\_x9.....gggaacGcggggugccgaac..... 1  
Gi5\_8473242\_x9.....cgugggaacacggggugGcgaacu..... 1  
Gi2\_10444836\_x9.....aAcggagacgucgugggaacacgggg..... 1  
G1a\_5635732\_x9.....aucggagacgucGgggaacacggg..... 1  
Gi4\_521595\_x9.....cgugggaNacggggugccgaacu..... 1  
Gi1\_3936925\_x9.....ugggaacacggggugccgaCcu..... 1  
Gi3\_27300439\_x9.....aucggagacgucgugggaacacgA..... 1  
Gi3\_27278353\_x9.....cguNggaacacggggugccgaac..... 1  
Gi5\_8459112\_x9.....gugggaacacGcggugccgaacu..... 1  
Gi2\_10440642\_x9.....acgucgugNgaacacggggugccgaac..... 1  
Gi5\_8467950\_x9.....gugggaGcacggggugccgaac..... 1  
Gi3\_27246007\_x9.....cgucgugggaacacAgggugccgaac..... 1  
Gi3\_27259525\_x9.....cgugggaacacCgggugccgaacu..... 1  
Gi2\_10444233\_x9.....aucggagacgucgugggaacCcgggg..... 1  
Gi2\_10430391\_x9.....caggccccgcUaguacugcgauc..... 1  
Gi2\_10444701\_x9.....guCggaacacggggugccgaacu..... 1  
Gi2\_10451118\_x9.....Acgaucggagacgucgugggaacacggggugc..... 1  
Gi2\_10443279\_x9.....aucggagacgucgugggaacaUggggg..... 1  
Gi1\_3935863\_x9.....cUccaguacugcgaucggaga..... 1  
Gi3\_27289621\_x9.....Aaucggagacgucgugggaacacgggg..... 1  
Gi2\_10444143\_x9.....gaacacggggugcAgaacu..... 1  
Gi2\_10436430\_x9.....cgGcuggggaacacggggugccg..... 1  
Gi5\_8465295\_x9.....cgucgugAgaacacggggugccgaacu..... 1  
Gi3\_27298396\_x9.....cUgggaacacggggugccg..... 1  
G1a\_5641393\_x9.....Cgggaacacggggugccgaacu..... 1  
Gi1\_3930382\_x9.....ucgugggaacaUggggugccgaacu..... 1  
Gi2\_10458120\_x9.....ucaggccccgccaguacugUgauc..... 1  
Gi3\_27263971\_x9.....Gguacugcgaucggagacgucgug..... 1  
Gi1\_3936007\_x9.....cgucgugggaGcacggggugccgaacu..... 1  
G1a\_5640034\_x9.....ggaacacggggugccgGacu..... 1  
Gi5\_8460237\_x9.....acgucgugggaacacggggugcAgaacu..... 1  
Gi5\_8469093\_x9.....auUggagacgucgugggaacacgg..... 1  
Gi2\_10453845\_x9.....agccccgccaAuacugcgauc..... 1  
Gi2\_10453872\_x9.....ucgugggaacacggggugcAgaacu..... 1  
Gi2\_10431660\_x9.....aUgccccgccaguacugcgaucggagacguc..... 1  
G1a\_5649844\_x9.....gGgggaacacggggugccg..... 1  
Gi5\_8464845\_x9.....acgucgugggaacCcgggugccgaacu..... 1  
Gi2\_10460109\_x9.....aUacgucgugggaacacggggugccgaac..... 1

Gi3\_27271639\_x9.....aucggagacgucUugggaacacggggu..... 1  
 Gi2\_10455987\_x9.....Ugucaggccccgccaguacugc..... 1  
 Gi3\_27304561\_x9.....cgAcgugggaacacggggugcc..... 1  
 Gi5\_8467725\_x9.....acgucguAggaacacggggugccgaacu..... 1  
 Gi2\_10458219\_x9.....Aucgugggaacacggggugc..... 1  
 Gi2\_10433532\_x9.....aucggagacgucgugggaacacAgggugc..... 1  
 Gi3\_27269461\_x9.....gUagacgucgugggaaca..... 1  
 Gi2\_10461765\_x9.....ugggGacacggggugccg..... 1  
 Gi3\_27255277\_x9.....aucgUagacgucgugggaacacgggg..... 1  
 Gi5\_8465844\_x9.....ggaacacggggugccgaaAu..... 1  
 Gi2\_10442217\_x9.....aacacgggAugccgaacu..... 1  
 Gi2\_10457445\_x9.....ucgugggaacacggggAgccgaacu..... 1  
 Gi5\_8456079\_x9.....cgugggaacacggggugcGgaacu..... 1  
 Gi2\_10449057\_x9.....gugggaacacggggugccA..... 1  
 Gi3\_27259345\_x9.....Uagaagcgccgucagggcccg..... 1  
 Gi3\_27265474\_x9.....aggccAcgccaguacugcga..... 1  
 Gi2\_10443162\_x9.....cgugggCacacggggugc..... 1  
 Gi3\_27299143\_x9.....caggccccgccGguacugcg..... 1  
 Gi3\_27265501\_x9.....cgugggGacacggggugccg..... 1  
 Gi1\_3939958\_x9.....aacacggggugcAgaacu..... 1  
 Gi2\_10442775\_x9.....cguggAaacacggggugccgaac..... 1  
 Gi2\_10432650\_x9.....cgucgugggaacacggggugUcgaacu..... 1  
 Gi3\_27262630\_x9.....gccccgccCguacugcgauc..... 1  
 Gi2\_10439265\_x9.....cUccgucaggccccgccaguac..... 1  
 Gi5\_8468445\_x9.....ugggCacacggggugccgaacu..... 1  
 Gi3\_27291565\_x9.....cCugggaacacggggugccgaa..... 1  
 Gi5\_8453541\_x9.....ugggaacacggggCgccgaac..... 1  
 Gi2\_10443153\_x9.....gugggaaUacggggugccga..... 1  
 Gi2\_10458903\_x9.....cgucgugggaacacggggugccgGacu..... 1  
 Gi3\_27256348\_x9.....gugggaacaAgggggugccga..... 1  
 Gi1\_3933001\_x9.....Ggugggaacacggggugccga..... 1  
 Gi3\_27292168\_x9.....cgucgugggaacacggggugccgaacG..... 1  
 Gi3\_27248716\_x9.....cgucAugggaacacggggugcc..... 1  
 Gi5\_8469120\_x9.....cgucgugggaacacggggAgccgaacu..... 1  
 Gi5\_8473062\_x9.....uGgugggaacacggggugccgaac..... 1  
 Gi2\_10452216\_x9.....cgCgggaacacggggugccga..... 1  
 Gl1\_5653948\_x9.....Uucaggccccgccaguacu..... 1  
 Gi2\_10435629\_x9.....aucgUagacgucgugggaacacggggugcc..... 1  
 Gi2\_10431822\_x9.....agacgucgugggaacGcggggugcc..... 1  
 Gi3\_27261505\_x9.....aucggagaUgucgugggaacacggg..... 1  
 Gi2\_10461261\_x9.....Uacgucgugggaacacggg..... 1  
 Gi2\_10432263\_x9.....aUaagcgccgucagggccccgcc..... 1  
 Gi3\_27247753\_x9.....ggaacacggUgugccgaacu..... 1  
 Gi1\_3941974\_x9.....ucaggccccgccaguacugc..... 0  
 Gi1\_3928969\_x9.....uUggaacacggggugccg..... 1  
 Gi3\_27247294\_x9.....aggccccgccaguacugcC..... 1  
 Gl1\_5643364\_x9.....agaagcgcNgucaggccccgc..... 1

Gi2\_10458192\_x9.....cCucgugggaacacggggugccgaacu..... 1  
 Gi3\_27302842\_x9.....cgugggaaUacggggugc..... 1  
 Gi5\_8455953\_x9.....Nugggaacacggggugccgaacu..... 1  
 Gi2\_10429428\_x9.....ugggaacGcggggugccga..... 1  
 Gi2\_10460487\_x9.....gaucggagacgucgugggaacGcggg..... 1  
 Gi1\_3936781\_x9.....Gaggccccgccaguacugc..... 1  
 Gi2\_10456716\_x9.....ugggaacacggggugccgaaUu..... 1  
 Gi2\_10437987\_x9.....cgucguggNaacacggggugccgaac..... 1  
 Gi2\_10439418\_x9.....gcgaucggagacgucgugggaacacggggugcc..... 0  
 Gi1\_3930589\_x9.....aUgucgugggaacacggggugccgaacu..... 1  
 Gi3\_27262486\_x9.....ggagacgucUugggaacacggggg..... 1  
 Gi5\_8458887\_x9.....aaAacggggugccgaacu..... 1  
 Gi3\_27248338\_x9.....Agccccgccaguacugcgau..... 1  
 Gi3\_27287182\_x9.....cggagacgucgugggaGcacggggg..... 1  
 Gi1\_3937537\_x9.....gCcgugggaacacggggugcc..... 1  
 Gi2\_10447455\_x9.....gucgugggaaAacggggugcc..... 1  
 Gi5\_8474592\_x9.....agUcucgugggaacacggggugccgaacu..... 1  
 Gi2\_10457616\_x9.....cgugggaacacggggugccgaaGu..... 1  
 Gi3\_27259111\_x9.....cgucgAggggaacacggggugccgaacu..... 1  
 Gi2\_10461090\_x9.....gCcgugggaacacggggugcc..... 1  
 Gi5\_8471883\_x9.....Uacgucgugggaacacggggugccgaac..... 1  
 Gi3\_27268633\_x9.....gucgugggaacaGggggugccgaacu..... 1  
 Gi3\_27305506\_x9.....aucggagacgucgugggGacacggggugcc..... 1  
 Gi1\_3930607\_x9.....ucgugggaacacgAggugccgaacu..... 1  
 G1a\_5648206\_x9.....aacacgggNugccgaacu..... 1  
 Gi2\_10436169\_x9.....Gcggagacgucgugggaacacggggugcc..... 1  
 Gi3\_27296083\_x9.....gugggaacacggggugGc..... 1  
 Gi3\_27255700\_x9.....gaacacgAggugccgaac..... 1  
 G1a\_5643670\_x9.....Uugggaacacggggugccgaa..... 1  
 Gi2\_10459371\_x9.....ugggaacacggggugccgaCc..... 1  
 Gi1\_3940219\_x9.....ucgugggaacacggggugUcgaacu..... 1  
 Gi3\_27258022\_x9.....cUcgccaguacugcgauccgagacguc..... 1  
 Gi3\_27295624\_x9.....gacgucgugggaacGcggggugccgaacu..... 1  
 Gi2\_10447419\_x9.....Aaucggagacgucgugggaacacggg..... 1  
 Gi1\_3938167\_x9.....acgucgugggaGcacggggugccg..... 1  
 Gi2\_10431849\_x9.....caggccccgccGguacugcgau..... 1  
 Gi1\_3931516\_x9.....aucggagacgucgugggaacacgU..... 1  
 G1a\_5635012\_x9.....gCgaacacggggugccgaacu..... 1  
 Gi3\_27258787\_x9.....gucgugggaacacggggugccgaaA..... 1  
 Gi3\_27245296\_x9.....cgugAgaacacggggugcc..... 1  
 Gi3\_27280738\_x9.....ugggaacacggggugccgaUcu..... 1  
 Gi5\_8462667\_x9.....guNggaacacggggugccgaacu..... 1  
 Gi2\_10432785\_x9.....aucggagacgCcgugggaacacgggg..... 1  
 Gi3\_27300574\_x9.....cgucgugggaacacggggAgccgaacu..... 1  
 Gi1\_3941902\_x9.....ucgugggaGcacggggugcc..... 1  
 Gi3\_27269407\_x9.....Uaagcggcugacggccccccagua..... 1  
 Gi2\_10442928\_x9.....gccccgccGguacugcgau..... 1

Gi1\_3942172\_x9.....ucgugggaacacggggCgcc..... 1  
 Gi2\_10443918\_x9.....aucggagacgucgugggaacGcggggug..... 1  
 Gi3\_27280450\_x9.....uCGgaacacggggugccg..... 1  
 Gi3\_27322537\_x8.....cgugggaaAacggggugccgaac..... 1  
 Gi3\_27337577\_x8.....gggaacacUgggugccgaacu..... 1  
 Gi2\_10468514\_x8.....gugggaaUacggggugccgaa..... 1  
 Gi5\_8477193\_x8.....aucggagacgCcgugggaacacg..... 1  
 Gi3\_27353481\_x8.....ucaggcccNgccaguacugcgauC..... 1  
 Gi2\_10487546\_x8.....gaucggagacgucgugggGacac..... 1  
 Gi2\_10481178\_x8.....aucggagacgucgugggaacacAggggu..... 1  
 Gi2\_10496202\_x8.....ucaggccccgccaguacugcgauCggagacg..... 0  
 Gi3\_27341753\_x8.....aucggagacgucgugggaacacggc..... 1  
 Gi2\_10497050\_x8.....ucggagacgucgugggaacacggggugccg..... 0  
 Gi3\_27339945\_x8.....guggCaacacggggugcc..... 1  
 Gi2\_10494930\_x8.....cugcgauCggagacgucgugggaacacgggggu..... 0  
 Gi3\_27375129\_x8.....ucgugggaacacggggugccgaaU..... 1  
 Gi5\_8480225\_x8.....acgucgugggaacacggggugccgGacu..... 1  
 Gi3\_27331849\_x8.....cgGcaggccccgccaguacugcg..... 1  
 Gi3\_27311545\_x8.....ggUgacgucgugggaacacgggggu..... 1  
 Gi3\_27347505\_x8.....cgugggaGcacggggugccg..... 1  
 Gi3\_27335017\_x8.....GccgccaguacugcgauCggagacg..... 1  
 Gi2\_10478682\_x8.....gaacacggggCgccgaac..... 1  
 Gi1a\_5672737\_x8.....cgauCggaNacgucgugg..... 1  
 Gi2\_10497354\_x8.....aucGUagacgucgugggaacac..... 1  
 Gi1\_3947661\_x8.....caggccccgccaguacugcgau..... 0  
 Gi1\_3942981\_x8.....aUuacugcgauCggagacgucgug..... 1  
 Gi5\_8500633\_x8.....gggaacacgggAugccgaacu..... 1  
 Gi4\_524288\_x8.....guUggaacacggggugccgaacu..... 1  
 Gi3\_27327585\_x8.....agacgucgugggaacacggggCgccgaac..... 1  
 Gi5\_8496801\_x8.....gugggaacacggAgugccg..... 1  
 Gi2\_10479370\_x8.....gaucggagacgucgugggaacacggggC..... 1  
 Gi2\_10479282\_x8.....gaacacggggugccUaacu..... 1  
 Gi5\_8481753\_x8.....gugggaacacggggugccgaaU..... 1  
 Gi5\_8502273\_x8.....gugggaacacggggAgccgaac..... 1  
 Gi1\_3949877\_x8.....Uagacgucgugggaacacggggugccg..... 1  
 Gi5\_8502265\_x8.....gacgucgugggaacacggggGgccgaacu..... 1  
 Gi2\_10483730\_x8.....Ugacgucgugggaacacg..... 1  
 Gi1\_3947581\_x8.....Gcgucgugggaacacggggugcc..... 1  
 Gi2\_10496410\_x8.....cgucgugggGacacggggugccga..... 1  
 Gi5\_8497001\_x8.....gggaacacggggugccgaC..... 1  
 Gi3\_27310329\_x8.....gugCgaacacggggugccgaac..... 1  
 Gi5\_8478465\_x8.....auUggagacgucgugggaacacg..... 1  
 Gi3\_27354313\_x8.....cgGcugggaacacggggugccga..... 1  
 Gi2\_10475002\_x8.....ugCgaacacggggugccgaacu..... 1  
 Gi3\_27375601\_x8.....cgugggaacacgAggugcc..... 1  
 Gi2\_10483682\_x8.....cccgccagNacugcgauC..... 1  
 Gi3\_27308041\_x8.....ugggaCcacggggugccgaa..... 1

Gi3\_27362449\_x8.....cgucgugggaacacggggugAcgaacu..... 1  
 Gi3\_27315377\_x8.....Gccgccaguacugcgaucggag..... 1  
 Gi3\_27376993\_x8.....Uucagggccccccaguacugcgaucgga..... 1  
 Gi3\_27321433\_x8.....cGguacugcgaucggagacgu..... 1  
 Gi5\_8495393\_x8.....gucgugggCacacggggugccgaacu..... 1  
 Gi3\_27309617\_x8.....aucggagacgucgugggCacac..... 1  
 Gi2\_10483754\_x8.....cgugggaacacggggUaccgaac..... 1  
 Gi1\_5658201\_x8.....gGacacggggugccgaacu..... 1  
 Gi2\_10462866\_x8.....ucagggcccNccaguacugc..... 1  
 Gi3\_27307905\_x8.....aucggagacgucgGgggaacacg..... 1  
 Gi2\_10467378\_x8.....Ggucgugggaacacggggugccgaac..... 1  
 Gi3\_27362761\_x8.....gUcaguacugcgaucggagacguc..... 1  
 Gi1\_3947125\_x8.....cgucgugAgaacacggggugccgaacu..... 1  
 Gi3\_27344201\_x8.....aacacggggUccgaacu..... 1  
 Gi3\_27324201\_x8.....aAcggagacgucgugggaacacggggU..... 1  
 Gi1\_3948205\_x8.....cgugggaacacggggugccGacu..... 1  
 Gi1\_3947253\_x8.....Gucggagacgucgugggaacacg..... 1  
 Gi3\_27308641\_x8.....aggccccgccaguaUugcg..... 1  
 Gi5\_8480049\_x8.....gggaacacggggugccgaaAu..... 1  
 Gi3\_27363057\_x8.....cgugggaCcacggggugccga..... 1  
 Gi2\_10464698\_x8.....gucgugggaacacggggGgc..... 1  
 Gi2\_10480818\_x8.....gaUgucgugggaacacggggugcc..... 1  
 Gi5\_8501033\_x8.....Gguacugcgaucggagacguc..... 1  
 Gi3\_27314793\_x8.....ggaaAacggggugccgaac..... 1  
 Gi1\_3953205\_x8.....gGacacggggugccgaac..... 1  
 Gi2\_10486658\_x8.....gaucggagacgucgugggGacacg..... 1  
 Gi2\_10482610\_x8.....aAcggagacgucgugggaacac..... 1  
 Gi3\_27373385\_x8.....acgucgugggaacacggggugcAgaac..... 1  
 Gi3\_27329825\_x8.....ggaGcacggggugccgaa..... 1  
 Gi3\_27347233\_x8.....aggNccccccaguacugcgauc..... 1  
 Gi3\_27329009\_x8.....cggagacgucgugggaacacggggG..... 1  
 Gi1\_5661625\_x8.....aUgccccccaguacugc..... 1  
 Gi3\_27322801\_x8.....cUccgccaguacugcgauc..... 1  
 Gi2\_10486338\_x8.....cgaucggGgacgucgugggaacacggggugc..... 1  
 Gi5\_8496785\_x8.....aucggagacgucgugggGacacg..... 1  
 Gi2\_10498290\_x8.....Gcgugggaacacggggugcc..... 1  
 Gi2\_10490114\_x8.....gGcgucgugggaacacggggU..... 1  
 Gi2\_10492786\_x8.....aAcggagacgucgugggaacacggggugc..... 1  
 Gi1\_3949269\_x8.....gaucggagacgucgugggaacacggggU..... 0  
 Gi5\_8497737\_x8.....caggccccccaguacCgcg..... 1  
 Gi2\_10468738\_x8.....ggaacacUgggugccgaacu..... 1  
 Gi3\_27365881\_x8.....ugggaacacggggugUcga..... 1  
 Gi2\_10483658\_x8.....acgucgugggaacacggggugUc..... 1  
 Gi3\_27370633\_x8.....Gggccccccaguacugcgaucgg..... 1  
 Gi3\_27316417\_x8.....cgucgugggUacacggggugccgaacu..... 1  
 Gi3\_27314817\_x8.....cGguacugcgaucggagacgucgu..... 1  
 Gi1\_3945117\_x8.....cgugggaacacggggGgcccgaacu..... 1

Gi2\_10488482\_x8.....caggccccgccGguacugcg..... 1  
 Gi3\_27327289\_x8.....gUucggagacgucgugggaacacggg..... 1  
 Gi2\_10472250\_x8.....gaucggagacgucgugggCaca..... 1  
 Gi3\_27358113\_x8.....gAaacacggggugccgaa..... 1  
 Gi1\_3948365\_x8.....ggaacCcggggugccgaacu..... 1  
 Gi3\_27336489\_x8.....gggaacacggUgugccgaacu..... 1  
 Gi2\_10484842\_x8.....agacgucgugggaacacggggCgcc..... 1  
 Gi5\_8502017\_x8.....ugAgaacacggggugccgaac..... 1  
 Gi2\_10490802\_x8.....gaucggagNcgucgugggaacacgggg..... 1  
 Gi5\_8479449\_x8.....gggaacacggggugcAgaacu..... 1  
 Gi5\_8478417\_x8.....aucggagacgucgugggaCcacgg..... 1  
 Gi3\_27313969\_x8.....cgucgugggaaAacggggugcc..... 1  
 Gi3\_27372433\_x8.....aucggaAacgucgugggaacacg..... 1  
 Gi3\_27311337\_x8.....Gacacggggugccgaacuu..... 1  
 Gi3\_27365889\_x8.....ucgugggaacacgggAugccgaac..... 1  
 Gi2\_10461922\_x8.....gGucggagacgucgugggaacacgggg..... 1  
 Gi5\_8501561\_x8.....gagaagcgccgucagggccccccaguacugc..... 0  
 Gi5\_8497697\_x8.....ggaacGacggggugccgaacu..... 1  
 Gi5\_8498297\_x8.....gaacacggggugGcgaacu..... 1  
 Gi2\_10492698\_x8.....cgucgugggaacacggggUaccgaacu..... 1  
 Gi2\_10494626\_x8.....gugggaacacggggugGcgaac..... 1  
 Gi2\_10461890\_x8.....acgucgugggaGcacggggugccgaacu..... 1  
 Gi2\_10496970\_x8.....gggaGcacggggugccgaa..... 1  
 Gi3\_27374761\_x8.....cgCcgugggaacacggggugc..... 1  
 Gi2\_10474786\_x8.....Ggaagcgccgucagggccccgcc..... 1  
 Gi3\_27370209\_x8.....gAcgugggaacacggggugccgaac..... 1  
 Gi3\_27314993\_x8.....gugggaacacggggugcAg..... 1  
 Gi3\_27332113\_x8.....gccccgccaguGcugcgauc..... 1  
 Gi2\_10466634\_x8.....ccccgccaguacugUgauc..... 1  
 Gi1\_3945525\_x8.....gugggaacaAggggugccgaacu..... 1  
 Gi3\_27317713\_x8.....ggaacacggggUcccgaacu..... 1  
 Gi2\_10464738\_x8.....aUaagcgccgucagggccccccaguac..... 1  
 Gi5\_8485673\_x8.....aacacggggugccUaacu..... 1  
 Gi3\_27308657\_x8.....aucggagacguUgugggaacacggg..... 1  
 Gi3\_27376297\_x8.....cgugggaacacggggugAcg..... 1  
 Gi3\_27332745\_x8.....ggagacgucgugggaacacggggC..... 1  
 Gi5\_8493785\_x8.....gugggaacacggggGgcc..... 1  
 Gi3\_27374545\_x8.....Uaggccccccaguacugcg..... 1  
 Gi2\_10486954\_x8.....ggaacacggggugcAgaac..... 1  
 Gi3\_27336529\_x8.....gacgucgCgggaacacggggugccgaac..... 1  
 Gi2\_10474170\_x8.....ugUgaacacggggugccga..... 1  
 Gi5\_8496929\_x8.....cguggUaacacggggugccgaacu..... 1  
 Gi2\_10468026\_x8.....gUagacgucgugggaacacg..... 1  
 Gi2\_10484218\_x8.....aucggagacgucguggAaacacggggugc..... 1  
 Gi2\_10467218\_x8.....guggAaacacggggugccg..... 1  
 Gi1a\_5659185\_x8.....ugggaacacggggAgccgaacu..... 1  
 Gi3\_27365145\_x8.....ugggaacCcggggugccgaa..... 1



Gi2\_10474434\_x8.....gaucggagacgucguggaacGcggggu..... 1  
Gi3\_27337489\_x8.....gUcccgccaguacugcgau..... 1  
Gi3\_27362585\_x8.....cgUcaguacugcgauccgagacg..... 1  
Gi2\_10498634\_x8.....Ccagggccccccagucugcg..... 1  
Gi3\_27353241\_x8.....agaagcgccgucagggccccGgu..... 1  
Gi2\_10492650\_x8.....Ucgauccgagacgucguggaacacgg..... 1  
Gi3\_27349345\_x8.....cgucgCgggaacacggggugccgaac..... 1  
Gi3\_27307721\_x8.....gggaacacggUgugccgaac..... 1  
Gi2\_10481250\_x8.....cguggaacacUgggugccg..... 1  
Gi1\_3952237\_x8.....Ggucguggaacacggggugcc..... 1  
Gi5\_8488665\_x8.....Gcugcgauccgagacgucgug..... 1  
Gi3\_27318729\_x8.....gaacacggggGgccgaac..... 1  
Gi2\_10476242\_x8.....cgucguggaacacggggugccgaCcu..... 1  
Gi3\_27329473\_x8.....Aacgucguggaacacggg..... 1  
Gi2\_10481698\_x8.....gaacacggggugccgaAu..... 1  
Gi3\_27350513\_x8.....gaagGgaagcgccgucaggg..... 1  
Gi2\_10486090\_x8.....acgucguggaacacggggugccgaGcu..... 1  
Gi2\_10493546\_x8.....Uagaagcgccgucagggcc..... 1  
Gi3\_27344217\_x8.....cguggaacacgCggugccgaac..... 1  
Gi3\_27375449\_x8.....cCucguggaacacggggugccgaac..... 1  
Gi5\_8484137\_x8.....cgucguggaacacAgggugccgaacu..... 1  
Gi2\_10462282\_x8.....cgAgggaacacggggugc..... 1  
Gi2\_10488074\_x8.....aucggagacgucguggaacacggggugccga..... 0  
Gi2\_10489586\_x8.....Ugccccgccaguacugcgauccgagacgu..... 1  
Gi2\_10478858\_x8.....aucggagacgucgCgggaacacggggugc..... 1  
Gi2\_10480170\_x8.....Gcggagacgucguggaacacggggugc..... 1  
Gi3\_27310457\_x8.....cgUcugcagggccccccagucugc..... 1  
Gi3\_27307737\_x8.....aacacCgggugccgaacu..... 1  
Gi2\_10483698\_x8.....aucgUagacgucguggaacacggggug..... 1  
Gi3\_27343761\_x8.....gacgucguggaacacggggugccgaGc..... 1  
Gi3\_27316961\_x8.....cguggaacacggggugcGgaac..... 1  
Gi1\_5661857\_x8.....gGcaggccccccagucugc..... 1  
Gi3\_27350977\_x8.....gUccccgccaguacugcgauccgagac..... 1  
Gi1\_3952973\_x8.....aGcggagacgucguggaacacggggu..... 1  
Gi2\_10469354\_x8.....cguggaacacggggCgc..... 1  
Gi3\_27370841\_x8.....ggaNcacggggugccgaac..... 1  
Gi5\_8488841\_x8.....gaacacggggugcAgaacu..... 1  
Gi2\_10470226\_x8.....agUccccgccaguacugcgau..... 1  
Gi5\_8501737\_x8.....gCgggaacacggggugccga..... 1  
Gi5\_8476889\_x8.....guAggaacacggggugccgaac..... 1  
Gi2\_10488954\_x8.....gGacugcgauccgagacguc..... 1  
Gi2\_10472194\_x8.....acgucguggaacCcgggugccgaacu..... 1  
Gi2\_10485242\_x8.....Cguggaacacggggugccgaac..... 1  
Gi2\_10480970\_x8.....Aaucggagacgucguggaacacggggu..... 1  
Gi3\_27366881\_x8.....ccgucagggccccccagucC..... 1  
Gi1\_3949909\_x8.....gaacacggggugAcgaacu..... 1  
Gi3\_27340673\_x8.....Gcagggccccccagucugcgauccg..... 1

Gi3\_27355785\_x8.....cgugggaacacggggugccgC..... 1  
 Gi3\_27312657\_x8.....aUcgcgcucagggccccccagucucg..... 1  
 Gi2\_10469034\_x8.....cgugggaacacggggugccgaaU..... 1  
 Gl1a\_5674769\_x8.....cCugggaacacggggugccgaacu..... 1  
 Gi2\_10477666\_x8.....uggUaacacggggugccgaacu..... 1  
 Gl1a\_5675177\_x8.....ggaacacggggGgccgaacu..... 1  
 Gi2\_10494914\_x8.....gacgucgugggaacGcggggugccgaacu..... 1  
 Gi2\_10487314\_x8.....gaucggagacgucgugggaacCcg..... 1  
 Gi3\_27334689\_x8.....cccgccagucgcaCcgagacguc..... 1  
 Gi2\_10470786\_x8.....ugggaacacAgggugccgaac..... 1  
 Gi3\_27351065\_x8.....aucgAagacgucgugggaacacggg..... 1  
 Gl1a\_5673425\_x8.....Uacgucgugggaacacggggg..... 1  
 Gi3\_27368201\_x8.....gUcgcgucgugggaacacggggugccgaacu..... 1  
 Gi5\_8491521\_x8.....ucgugggaacacggggugccgaacG..... 1  
 Gi2\_10493074\_x8.....gugggaacacAgggugccg..... 1  
 Gi3\_27309673\_x8.....ucCugggaacacggggugccgaacu..... 1  
 Gi3\_27376617\_x8.....caguacugcgaucggGgacgucgug..... 1  
 Gi2\_10490946\_x8.....Gguacugcgaucggagacgu..... 1  
 Gi2\_10468346\_x8.....gggaacacggggugccgaaA..... 1  
 Gi2\_10466090\_x8.....cUaucggagacgucgugggaacacggggg..... 1  
 Gi3\_27374905\_x8.....cgugggaacacggggUac..... 1  
 Gi3\_27333657\_x8.....ggaacacggggugcGgaac..... 1  
 Gl1a\_5670689\_x8.....agCacugcgaucggagacguc..... 1  
 Gi2\_10469050\_x8.....Cgagacgucgugggaacacggggugcc..... 1  
 Gi2\_10471002\_x8.....ccccgccUguacugcgauc..... 1  
 Gi3\_27342617\_x8.....aggccccccagucagcgaC..... 1  
 Gi3\_27353473\_x8.....gucgugggaaAacggggugccgaac..... 1  
 Gi5\_8486033\_x8.....agacgucgugggaacGcggggugccgaacu..... 1  
 Gi2\_10497322\_x8.....gggaacacggggAgccgaacu..... 1  
 Gi1\_3946325\_x8.....gaucggagacgucgugggaacacggg..... 0  
 Gi3\_27309137\_x8.....cggagacgCcgugggaacacggggg..... 1  
 Gi2\_10465450\_x8.....gggaacacgAggugccgaac..... 1  
 Gi2\_10479002\_x8.....gaacacggggugccgUac..... 1  
 Gi3\_27329913\_x8.....cgucgugggaCcacggggugccgaac..... 1  
 Gi3\_27326161\_x8.....Uagaagcgcgcucagggccccccagucucg..... 1  
 Gi2\_10497242\_x8.....uUaggccccccagucagcgauc..... 1  
 Gi5\_8478761\_x8.....cgucgugggaacGcggggugccgaacu..... 1  
 Gi3\_27322889\_x8.....Gaguacugcgaucggagacgucgug..... 1  
 Gi3\_27344929\_x8.....ugggaacGcggggugccg..... 1  
 Gi1\_3950357\_x8.....cgugggaacacgAgugccgaacu..... 1  
 Gi3\_27320257\_x8.....ugggaacacAgggugccg..... 1  
 Gi3\_27359169\_x8.....cgugggaacacUgggugccgaac..... 1  
 Gi1\_3952373\_x8.....Uacgucgugggaacacggggugccg..... 1  
 Gi3\_27349129\_x8.....uUcgaucggagacgucgugggaaca..... 1  
 Gi2\_10490746\_x8.....cgugAgaacacggggugcc..... 1  
 Gi2\_10497226\_x8.....gCcaggccccccagucucg..... 1  
 Gi3\_27365289\_x8.....cgugggaacacggggUaccga..... 1

Gi2\_10495442\_x8.....ggaacacggggugccgaCc..... 1  
 Gi1\_3953661\_x8.....ugggaacacggggugUcgaacu..... 1  
 Gi1\_3945925\_x8.....agacgucgugggaacacggggCgccgaacu..... 1  
 Gi5\_8497785\_x8.....acgucgugggaGcacggggugccgaacu..... 1  
 Gi2\_10485882\_x8.....ugggaacaNggggugccgaa..... 1  
 Gi1\_3942621\_x8.....gcgaucggagacgucgCgggaacacggggugcc..... 1  
 Gi3\_27335441\_x8.....aucggagacgucgugggaacacgggAu..... 1  
 Gi5\_8479993\_x8.....ugggaacacggggugccUaacu..... 1  
 Gi5\_8494497\_x8.....aacacgCgugccgaacu..... 1  
 Gi3\_27322577\_x8.....gccaguacugcgauccgCgacguc..... 1  
 Gi5\_8480593\_x8.....aucggagacgucgugggaacacggggugccgaacu..... 0  
 Gi1\_3944237\_x8.....acgucgugggaacacggggugcAgaacu..... 1  
 Gi2\_10494474\_x8.....aucAgagacgucgugggaacacgggg..... 1  
 Gl1a\_5655225\_x8.....ugggaacacAgggugccgaacu..... 1  
 Gi3\_27348625\_x8.....gucgugggaacacggggG..... 1  
 Gi1\_3956037\_x8.....ggUacacggggugccgaac..... 1  
 Gi3\_27318377\_x8.....ugNgaacacggggugccgaacu..... 1  
 Gi5\_8500353\_x8.....Uaagcgccgucagggcccgcc..... 1  
 Gi3\_27315289\_x8.....cgAgggaaacacggggugc..... 1  
 Gi3\_27337057\_x8.....gugggaaAacggggugccgaa..... 1  
 Gi4\_525112\_x8.....Uucgugggaacacggggugccgaacu..... 1  
 Gi3\_27376641\_x8.....aggccccgccaAuacugc..... 1  
 Gi5\_8492865\_x8.....gucgugggaaUacggggugccgaacu..... 1  
 Gi2\_10493682\_x8.....ccUguacugcgauccgagacguc..... 1  
 Gi5\_8493801\_x8.....cgugggaacacggCgugccgaacu..... 1  
 Gi2\_10478226\_x8.....gaacacggggugccgaUc..... 1  
 Gi2\_10487690\_x8.....ugcgauccgagacgucgug..... 0  
 Gi3\_27368313\_x8.....aggccccgcUaguacugc..... 1  
 Gi3\_27325793\_x8.....gucgugggaacacggggugccgaacG..... 1  
 Gi3\_27355545\_x8.....gucguAggaacacggggugccgaac..... 1  
 Gi2\_10483090\_x8.....cgugggaacacggggugccgaG..... 1  
 Gi2\_10493962\_x8.....gugggaaacGcggggugccgaa..... 1  
 Gi1\_3946725\_x8.....cgugggaacaUggggugccgaacu..... 1  
 Gi3\_27328273\_x8.....aggccccgccCguacugcgauccg..... 1  
 Gl1a\_5669241\_x8.....gugggaacacggggUaccgaacu..... 1  
 Gi2\_10467346\_x8.....gucgugggGacacggggugccgaac..... 1  
 Gi5\_8478009\_x8.....aacaAgggugccgaacu..... 1  
 Gi2\_10483338\_x8.....ucgugggaacacggggugccgGacu..... 1  
 Gi3\_27375937\_x8.....ugggaacacggggugccCaacu..... 1  
 Gi3\_27341457\_x8.....aUaagcgccgucagggccccgc..... 1  
 Gi3\_27356241\_x8.....agacgucguAggaacacggggugccgaacu..... 1  
 Gi3\_27350449\_x8.....caggccccgccaguacAgcgauc..... 1  
 Gi2\_10482354\_x8.....ugggaacacgggCugccgaacu..... 1  
 Gi5\_8498913\_x8.....gggaacacggggugUcgaacu..... 1  
 Gi3\_27327265\_x8.....Gguacugcgauccgagacg..... 1  
 Gi2\_10488026\_x8.....ucgugggaacacggggugccgaaUu..... 1  
 Gi2\_10476114\_x8.....gccccgccaguacugcgauccgagacgu..... 0

|                      |                                       |   |
|----------------------|---------------------------------------|---|
| Gi5_8500817_x8.....  | gGacacggggugccgaac.....               | 1 |
| Gi3_27341961_x8..... | caggccccgccCguacugc.....              | 1 |
| Gi2_10464474_x8..... | aggNccccccaguacugcgauc.....           | 1 |
| Gi1_3956821_x8.....  | aUacgucgugggaacacggg.....             | 1 |
| Gi3_27316393_x8..... | cGgccagucugcgaucggagacgu.....         | 1 |
| Gl1a_5656425_x8..... | gGgggaacacggggugccgaa.....            | 1 |
| Gi3_27375849_x8..... | cccgccagNacugcgaucggagac.....         | 1 |
| Gi2_10494330_x8..... | gaucggagNcgucgugggaacacggggugc.....   | 1 |
| Gi1_3953669_x8.....  | ggaacacggggGgccgaacu.....             | 1 |
| Gi2_10496274_x8..... | Ggucaggccccccaguacugcgc.....          | 1 |
| Gi5_8492633_x8.....  | Augggaacacggggugccga.....             | 1 |
| Gi3_27314185_x8..... | aggcUccgccaguacugcgc.....             | 1 |
| Gi1_3956557_x8.....  | aacacggggugUcgaacu.....               | 1 |
| Gi3_27359889_x8..... | aggccccccaguacugA.....                | 1 |
| Gi3_27352329_x8..... | aucgAagacgucgugggaacacggggg.....      | 1 |
| Gi2_10489930_x8..... | cgCcgugggaacacggggugcc.....           | 1 |
| Gi3_27330345_x8..... | caggccccNccaguacugcgau.....           | 1 |
| Gi2_10486130_x8..... | cgugggaacacggCgugccgaacu.....         | 1 |
| Gi2_10482482_x8..... | aucggagGcgucgugggaacacggg.....        | 1 |
| Gi1_3947389_x8.....  | gGgggaacacggggugccga.....             | 1 |
| Gi2_10478602_x8..... | aucggagacgucgugggaacacggggGgcc.....   | 1 |
| Gi3_27343145_x8..... | Gcgugggaacacggggugcc.....             | 1 |
| Gi2_10480474_x8..... | gaucggagNcgucguggga.....              | 1 |
| Gi2_10490850_x8..... | gaucggagacgucgugggCacac.....          | 1 |
| Gi2_10474690_x8..... | aggccccccagCacugcg.....               | 1 |
| Gi2_10487882_x8..... | gugggUacacggggugcc.....               | 1 |
| Gi5_8487129_x8.....  | Uagacgucgugggaacacggggugcc.....       | 1 |
| Gi3_27364817_x8..... | cgucgugggaacGcggggugccg.....          | 1 |
| Gi3_27340001_x8..... | acgucgugggaacacggggGgcc.....          | 1 |
| Gi3_27332977_x8..... | guacugcgaucggagacgucgugggaacacgg..... | 0 |
| Gi3_27341185_x8..... | gagaagcgNcgucaggccccgc.....           | 1 |
| Gi2_10496138_x8..... | Aaucggagacgucgugggaacac.....          | 1 |
| Gi5_8480249_x8.....  | cgugggaGacggggugccgaacu.....          | 1 |
| Gi4_525168_x8.....   | aggccccccaguacugcgauc.....            | 0 |
| Gi3_27376321_x8..... | aucggagacgucgugggaGcac.....           | 1 |
| Gi2_10494506_x8..... | gugggaacacggAgugccgaa.....            | 1 |
| Gi2_10491338_x8..... | cUccgucaggccccccagu.....              | 1 |
| Gi1_3943333_x8.....  | cgucgGgggaacacggggugccgaacu.....      | 1 |
| Gi3_27371225_x8..... | gagGcgucgugggaacacggggugccgaacu.....  | 1 |
| Gi3_27337305_x8..... | ugCgaacacggggugccgaacu.....           | 1 |
| Gi3_27361489_x8..... | gggaacUcggggugccgaacu.....            | 1 |
| Gi2_10498562_x8..... | Aucgugggaacacggggugcc.....            | 1 |
| Gi2_10470554_x8..... | ggaNcacggggugccgaacu.....             | 1 |
| Gi1_3950485_x8.....  | ugggaacacggggugcAgaacu.....           | 1 |
| Gi5_8480481_x8.....  | Aaacacggggugccgaac.....               | 1 |
| Gi3_27349305_x8..... | cgCcgugggaacacggggugccga.....         | 1 |
| Gl1a_5670041_x8..... | Uccgucaggccccccagua.....              | 1 |

Gi2\_10488002\_x8.....cCucugugggaacacggggugcc..... 1  
Gi2\_10482346\_x8.....gGcaggccccgccaguacug..... 1  
Gi3\_27322569\_x8.....Ggucugugggaacacggggugccgaa..... 1  
Gi2\_10493322\_x8.....Cgggaacacggggugccgaac..... 1  
Gi3\_27313425\_x8.....ucggagacgucugugggaacacggggCgcc..... 1  
Gi3\_27374049\_x8.....gaucggagacgucugugggaacCcggg..... 1  
Gi3\_27308233\_x8.....ucggagacgucugugggaacacggggugccga..... 0  
Gi1\_3951181\_x8.....gugggaacacggggugccgU..... 1  
Gi3\_27359385\_x8.....aucggagacgucUugggaacacggg..... 1  
Gi3\_27343889\_x8.....ggagacgucugugggGacacggggu..... 1  
Gi3\_27328737\_x8.....Cccccgccaguacugcgauc..... 1  
Gi2\_10475930\_x8.....gucugugggUacacggggugccgaacu..... 1  
Gi5\_8498777\_x8.....cgugggaacacggggugcUgaac..... 1  
Gi1\_3957181\_x8.....ggagacgucugugggaGcacggggugccg..... 1  
Gi3\_27366785\_x8.....gugggaacacgggAugccgaa..... 1  
Gi3\_27340729\_x8.....aucggagacAucgugggaacacgg..... 1  
Gi2\_10496834\_x8.....cgugggaacacggggugccgG..... 1  
Gi3\_27367033\_x8.....aggcGccgccaguacugcga..... 1  
Gi2\_10490330\_x8.....gaucggagacgucugugggC..... 1  
Gi5\_8491089\_x8.....acAucgugggaacacggggugccgaacu..... 1  
Gi1\_3954277\_x8.....ugggaacacggggugccgCac..... 1  
Gi2\_10488778\_x8.....ggaacacgggAugccgaac..... 1  
Gi2\_10463642\_x8.....cgucugugggaGcacggggugcc..... 1  
Gi2\_10485634\_x8.....aucggagacgucugAgaacacggggugc..... 1  
Gi3\_27321161\_x8.....cguAggaacacggggugc..... 1  
Gi5\_8496665\_x8.....gugggaaAacggggugccgaac..... 1  
Gi2\_10492570\_x8.....Uccgccaguacugcgaucgg..... 1  
Gi2\_10479786\_x8.....cgugggaacCcgggugccgaac..... 1  
Gi5\_8496529\_x8.....agacgucgCgggaacacggggugccgaacu..... 1  
Gi5\_8493257\_x8.....aucggagacgucugugggGacacgg..... 1  
Gi3\_27315297\_x8.....gucGggccccgccaguacugc..... 1  
Gi2\_10481154\_x8.....aucggagacgucugugggaGcacggggugc..... 1  
Gi5\_8488417\_x8.....gucgugggaacacgAgggugccgaacu..... 1  
Gi2\_10462858\_x8.....gccaguacugcgaucggagacgCc..... 1  
G1a\_5662161\_x8.....gugggUacacggggugccgaacu..... 1  
Gi5\_8490313\_x8.....Gggccccgccaguacugcgauc..... 1  
Gi3\_27369337\_x8.....caUgccccgccaguacugcga..... 1  
Gi3\_27309697\_x8.....acgucgAgggaacacggggugccgaacu..... 1  
Gi2\_10478034\_x8.....ccccgccaguacugcgaCc..... 1  
Gi3\_27365633\_x8.....aaGacggggugccgaacu..... 1  
Gi3\_27320001\_x8.....aucggagacgucugugggaacGc..... 1  
Gi5\_8485297\_x8.....gaagcgcucagcagccccgccaguacug..... 0  
Gi4\_525544\_x8.....Uuacugcgaucggagacgucgugg..... 1  
Gi5\_8485441\_x8.....gaUgucgugggaacacggggugccgaacu..... 1  
Gi3\_27351513\_x8.....aggccccgccaguacugUg..... 1  
Gi3\_27310753\_x8.....Ggcgcgucagggccccgcc..... 1  
Gi2\_10490322\_x8.....cGgucaggccccgccaguacugcg..... 1

Gi1\_3950517\_x8.....uUcgauccggagacgucguggga..... 1  
 Gi3\_27357017\_x8.....Ucgauccggagacgucguggga..... 1  
 Gi2\_10463090\_x8.....acgucgugggGacacggggugcc..... 1  
 Gi3\_27364001\_x8.....cUucaggccccgccaguacu..... 1  
 Gi3\_27359897\_x8.....cagggccccgccGguacugcgau..... 1  
 Gi2\_10495874\_x8.....Uucgugggaacacggggugccgaa..... 1  
 Gi2\_10465298\_x8.....cgugggaacacggggugUc..... 1  
 Gi3\_27325121\_x8.....gucgugggaacacggAgugccgaa..... 1  
 Gi5\_8477089\_x8.....gucgugggaacUcggggugccgaa..... 1  
 Gi2\_10475410\_x8.....cgugggaacacggAgugccgaa..... 1  
 G1a\_5657641\_x8.....Uucaggccccgccaguacugcga..... 1  
 Gi2\_10491178\_x8.....uAggaacacggggugccg..... 1  
 Gi5\_8500569\_x8.....Cugggaacacggggugccga..... 1  
 Gi3\_27372521\_x8.....agacgucgugggaacacggggugccAaac..... 1  
 Gi5\_8484913\_x8.....Uccccgccaguacugcgauccga..... 1  
 Gi2\_10492386\_x8.....cgCcaggccccgccaguacugc..... 1  
 Gi3\_27355913\_x8.....aucggagacgucgugggaacaUg..... 1  
 Gi1\_3951365\_x8.....agacgucgUgggaacacggggugccgaa..... 1  
 Gi3\_27312201\_x8.....cgucgugggaacacggggugUc..... 1  
 Gi3\_27363097\_x8.....aucggagacgucgugggaUacggg..... 1  
 Gi5\_8500537\_x8.....cUugggaacacggggugccg..... 1  
 Gi3\_27311593\_x8.....gugggaacacggggugccgaaG..... 1  
 Gi5\_8484617\_x8.....guUggaacacggggugccga..... 1  
 Gi3\_27358681\_x8.....gaucggagacgucgugggaacacgggA..... 1  
 G1a\_5664785\_x8.....aUuacugcgauccggagacgucg..... 1  
 Gi1\_3951821\_x8.....gUccccgccaguacugcgauccggaga..... 1  
 Gi3\_27330817\_x8.....cguggAaacacggggugccga..... 1  
 Gi3\_27318673\_x8.....cgugggaacacgggAugcc..... 1  
 Gi2\_10481850\_x8.....gggaacacggggugcGgaacu..... 1  
 Gi3\_27330209\_x8.....ucguCggaacacggggugccgaa..... 1  
 Gi1\_3950693\_x8.....cUugggaacacggggugccgaa..... 1  
 G1a\_5654697\_x8.....gggaacacAgggugccgaa..... 1  
 Gi2\_10495074\_x8.....acugcgauccggagacgucgugggaacacggg..... 0  
 Gi1\_3953149\_x8.....ucgugggaacacgggAugccgaa..... 1  
 Gi5\_8477385\_x8.....Uaucggagacgucgugggaacacggggu..... 1  
 Gi3\_27341249\_x8.....cgugggaacacgggCugccgaa..... 1  
 Gi2\_10477778\_x8.....ugggaacacggggugcAgaac..... 1  
 Gi3\_27377209\_x8.....ugggaacacgggAugccgaa..... 1  
 Gi2\_10520705\_x7.....Acgugggaacacggggugccgaa..... 1  
 Gi2\_10508119\_x7.....aguacugcgauccggagGcgu..... 1  
 Gi3\_27385349\_x7.....aggcGcccagauacugc..... 1  
 Gi3\_27390291\_x7.....gacgucgugggaacacAgggugccgaa..... 1  
 Gi3\_27386161\_x7.....cUccaguacugcgauccggagacgucgug..... 1  
 Gi3\_27431248\_x7.....ucaggccccgccaguacugcgauccggagacgu..... 0  
 Gi3\_27425354\_x7.....agacgucgCgggaacacggggugccgaa..... 1  
 Gi1\_3969442\_x7.....cgugggCacacggggugccgaa..... 1  
 Gi2\_10517065\_x7.....gCagacgucgugggaacacggggugcc..... 1

Gi2\_10502316\_x7.....gggaacacggggugcUgaac..... 1  
 Gi3\_27437436\_x7.....caggccccccaUuacugc..... 1  
 Gi2\_10505403\_x7.....aUgucgugggaacacggggugc..... 1  
 Gi3\_27448524\_x7.....aucAgagacgucgugggaacacggggugc..... 1  
 Gi3\_27396710\_x7.....Ggccaguacugcgauccgagacgu..... 1  
 Gi1\_3965207\_x7.....uGgugggaacacggggugccgaac..... 1  
 Gi1\_3971234\_x7.....cgugggaacacgggAugccga..... 1  
 Gi3\_27393728\_x7.....gGcgucgugggaacacggggg..... 1  
 Gi2\_10500293\_x7.....aucggagacgucgugggUa..... 1  
 Gi3\_27413391\_x7.....cgucgugggaacacgggAugccgaacu..... 1  
 Gi3\_27409380\_x7.....cCgagacgucgugggaacacggggugcc..... 1  
 Gi2\_10502981\_x7.....Uagaagcgccgucagggccccgcagua..... 1  
 Gi2\_10514594\_x7.....Uaggccccgcaguaucggauc..... 1  
 Gi3\_27408330\_x7.....cgugggaacGcggggugccg..... 1  
 G1a\_5682870\_x7.....aUgccccgccaguaucggauc..... 1  
 Gi3\_27391488\_x7.....acgucgugggaacacggggugccgaCcu..... 1  
 G1a\_5695729\_x7.....Agggaacacggggugccgaacu..... 1  
 Gi3\_27443484\_x7.....gugggaacaAggggugccgaa..... 1  
 Gi3\_27381086\_x7.....agacgucgugggaGcacggg..... 1  
 Gi2\_10499985\_x7.....cgugUgaacacggggugccgaa..... 1  
 Gi3\_27393070\_x7.....agacUucgugggaacacggggugccgaacu..... 1  
 Gi3\_27454572\_x7.....caggccccgcaguaUugcgau..... 1  
 Gi3\_27424339\_x7.....Gcgugggaacacggggugccga..... 1  
 Gi2\_10529224\_x7.....caUgccccgcaguaucgcg..... 1  
 Gi2\_10538821\_x7.....gaacUcggggugccgaacu..... 1  
 Gi5\_8521645\_x7.....gucgugggaacacggggugccAaacu..... 1  
 Gi1\_3968112\_x7.....aGugcgauccgagacgucg..... 1  
 Gi5\_8524466\_x7.....Ggggaacacggggugccgaacu..... 1  
 Gi3\_27392188\_x7.....ucgGgggaacacggggugccgaac..... 1  
 Gi1\_3964878\_x7.....ucgugggaacacggggGccgaac..... 1  
 Gi3\_27448783\_x7.....aucggagacgucgugggaacacggggGgcc..... 1  
 Gi2\_10508861\_x7.....cggagacgucgugggaacacAgggugcc..... 1  
 Gi3\_27397697\_x7.....aucAgagacgucgugggaacacggggugcc..... 1  
 Gi3\_27400021\_x7.....aucggagacgucUugggaacag..... 1  
 Gi3\_27432858\_x7.....cgugggaacacggggugUcga..... 1  
 Gi3\_27457183\_x7.....cccgccaguaucgGucggagacguc..... 1  
 Gi3\_27395030\_x7.....ucgugggaacacggggugcAgaac..... 1  
 Gi2\_10532948\_x7.....Gcugcgauccgagacgucgugg..... 1  
 Gi3\_27431073\_x7.....aucggagacgucgugAgaacacgg..... 1  
 Gi5\_8503095\_x7.....cgucUugggaacacggggugccgaacu..... 1  
 Gi3\_27417584\_x7.....cgucgCgggaacacggggugccg..... 1  
 Gi1\_3970835\_x7.....Uucgugggaacacggggug..... 1  
 Gi3\_27396591\_x7.....aggccccgcaguaacuAc..... 1  
 Gi2\_10541061\_x7.....cUgagacgucgugggaaca..... 1  
 Gi5\_8526244\_x7.....caggccccgcaguaucggaucggagacg..... 0  
 Gi3\_27446669\_x7.....gggaGcacggggugccga..... 1  
 Gi2\_10520320\_x7.....cUccgccaguaucggaucgg..... 1

Gi3\_27395611\_x7.....acgucgugggaaAacggggugccgaacu..... 1  
 Gi3\_27419117\_x7.....gugNgaacacggggugccgaa..... 1  
 Gi3\_27383914\_x7.....gGgacgucgugggaaacacggggugccgaac..... 1  
 Gi3\_27385979\_x7.....Uccgucagggccccgccaguacugc..... 1  
 Gi3\_27454719\_x7.....cguAggaacacggggugccga..... 1  
 Gi3\_27407357\_x7.....gggaCcacggggugccgaac..... 1  
 Gi3\_27404844\_x7.....gugggaaacacggggucCccgaac..... 1  
 Gi3\_27388828\_x7.....Aaggccccgccaguacugcg..... 1  
 Gi2\_10537743\_x7.....aucggagacgCcgugggaaacacg..... 1  
 Gi2\_10530890\_x7.....gggaacUcggggugccgaacu..... 1  
 Gi3\_27454089\_x7.....gggaacacgAgggugccgaa..... 1  
 Gi2\_10533333\_x7.....Ggacgucgugggaaacacggggug..... 1  
 Gi2\_10529280\_x7.....Ugucgugggaaacacggggugccg..... 1  
 Gi5\_8504530\_x7.....acgucgugggaaacacggggucAccgaacu..... 1  
 Gi2\_10526865\_x7.....uCGgaaacacggggugccg..... 1  
 Gi2\_10517114\_x7.....AcccgccaguacugcgauC..... 1  
 Gi3\_27426215\_x7.....cggagacgNcgugggaaacacggg..... 1  
 Gi3\_27432018\_x7.....cgugggaaacacggggucAcc..... 1  
 Gi3\_27442945\_x7.....gGcagggccccgccaguacugcgauCgg..... 1  
 Gi1\_3960083\_x7.....ucgugggaaacacggggAgccgaacu..... 1  
 Gi1\_3969421\_x7.....ugggaGcacggggugccgaac..... 1  
 Gi3\_27433628\_x7.....aUacgucgugggaaacacgggguc..... 1  
 Gi3\_27378027\_x7.....gaucggagacgucgugggaaAacg..... 1  
 Gl1\_5696324\_x7.....gugggCacacggggugccgaacu..... 1  
 Gi1\_3962764\_x7.....ugggaaacacgggAugccgaacu..... 1  
 Gi2\_10507020\_x7.....Agugggaaacacggggugcc..... 1  
 Gi3\_27448013\_x7.....ggccccgccaguacugcgCu..... 1  
 Gi5\_8526223\_x7.....aacNcggggugccgaacu..... 1  
 Gi1\_3968560\_x7.....gugggUacacggggugccgaacu..... 1  
 Gi2\_10533872\_x7.....agGcGucgugggaaacacggggugcc..... 1  
 Gi3\_27393399\_x7.....acgucgugAgaacacggggugccgaac..... 1  
 Gl1\_5683416\_x7.....Gucggagacgucgugggaaacacgggguc..... 1  
 Gi2\_10537918\_x7.....cgugggaaacacggggugccUaacu..... 1  
 Gi2\_10518164\_x7.....gggaaAacggggugccgaacu..... 1  
 Gi2\_10536518\_x7.....acgucgugggaaacacAgggugcc..... 1  
 Gi3\_27387631\_x7.....acgucguAggaacacggggugccgaac..... 1  
 Gi2\_10521510\_x7.....gUucggagacgucgugggaaacac..... 1  
 Gi2\_10516890\_x7.....gugggaaacacggggucCccgaacu..... 1  
 Gi2\_10513747\_x7.....aucggagacgucUugggaaacacggggugc..... 1  
 Gi3\_27396878\_x7.....caguacugNgaucggagacgucgug..... 1  
 Gi1\_3962036\_x7.....ccccgccaguacugcgauC..... 0  
 Gi3\_27429183\_x7.....caggccccgccaguacugUg..... 1  
 Gi2\_10502757\_x7.....ucgugggaaacacggggGgccgaac..... 1  
 Gl1\_5683899\_x7.....gaagagaagcgccugcagc..... 0  
 Gi2\_10520488\_x7.....ugggaaacacggggugcUga..... 1  
 Gi2\_10515063\_x7.....ccaguacugcgauCggagacgucgugggaaaca..... 0  
 Gi5\_8508016\_x7.....cUucaggccccgccaguacugcg..... 1



|                 |                                         |   |
|-----------------|-----------------------------------------|---|
| Gi2_10516491_x7 | .....Agugggaacacggggugccgaac            | 1 |
| Gi2_10518577_x7 | .....uUgugggaacacggggugccg              | 1 |
| Gi2_10539374_x7 | .....aucggagacgucgugggCacac             | 1 |
| Gi1_3958928_x7  | .....ugggaacacggggGgccgaacu             | 1 |
| Gi1_3972900_x7  | .....cgugggaacCcgggugccgaacu            | 1 |
| Gi3_27456777_x7 | .....cgucagggcUccgccaguacugcg           | 1 |
| Gi1_3973439_x7  | .....gUaacacggggugccgaa                 | 1 |
| Gi3_27400791_x7 | .....caggUcccgccaguacugc                | 1 |
| Gi3_27381765_x7 | .....cgugggaacacggggugcUgaa             | 1 |
| Gi2_10531296_x7 | .....gugAgaacacggggugccgaa              | 1 |
| Gi2_10499747_x7 | .....aucAgagacgucgugggaacacggggugcc     | 1 |
| Gi1_3971920_x7  | .....cgucgugggaacacggggugccgaacu        | 0 |
| Gi2_10514314_x7 | .....agacgCcgugggaacacggggugcc          | 1 |
| Gi1_3965662_x7  | .....gggaacaccgAgugccgaacu              | 1 |
| Gi2_10538695_x7 | .....ugggaacaNggggugccg                 | 1 |
| Gi2_10531170_x7 | .....aacacggggugccgUacu                 | 1 |
| Gi5_8527119_x7  | .....gugggaacacggggugUcgaac             | 1 |
| Gi3_27425382_x7 | .....agacgucgugggaacacggggUaccgaac      | 1 |
| Gi3_27396780_x7 | .....caggccccgccCguacugcg               | 1 |
| Gi3_27399965_x7 | .....agagaagcNccgucagggccccgcc          | 1 |
| Gi2_10504073_x7 | .....gucagggccccgccaguacugcggaucggagacg | 0 |
| Gi3_27454187_x7 | .....gggaacacggggugccAaa                | 1 |
| Gi3_27403864_x7 | .....ugggaacacgCggugccgaacu             | 1 |
| Gi2_10534502_x7 | .....gucagggccccgccaguacCgc             | 1 |
| Gi2_10536266_x7 | .....gGcgucgugggaacacggggugccgaac       | 1 |
| Gi3_27405110_x7 | .....ugggaacacgUggugccga                | 1 |
| Gi4_526830_x7   | .....Augggaaacacggggugccgaacu           | 1 |
| Gi3_27418669_x7 | .....Uccaguacugcggaucggag               | 1 |
| Gi2_10503926_x7 | .....aCgccccgccaguacugcga               | 1 |
| Gi2_10499761_x7 | .....gugggaaUacggggugccg                | 1 |
| Gi2_10504367_x7 | .....aucggagaNgcugugggaacacggggug       | 1 |
| Gi2_10524261_x7 | .....gucgugggaaAacggggugc               | 1 |
| Gi3_27408351_x7 | .....gacgucgugggaacacggggGgccgaac       | 1 |
| Gi2_10530918_x7 | .....guUgugggaacacggggugcc              | 1 |
| Gi3_27392293_x7 | .....gaacacggggUccgaacu                 | 1 |
| Gi3_27410962_x7 | .....gugggUacacggggugccg                | 1 |
| Gi1a_5698571_x7 | .....Gcggagacgucgugggaacacggg           | 1 |
| Gi2_10528888_x7 | .....ggaaacacggggUccgaac                | 1 |
| Gi4_527677_x7   | .....gugggaacacggggugccg                | 0 |
| Gi1_3966390_x7  | .....ucgugggaacacggggUaccgaac           | 1 |
| Gi3_27394925_x7 | .....Cucggagacgucgugggaacacggg          | 1 |
| Gi5_8505762_x7  | .....Ugugggaacacggggugccgaac            | 1 |
| Gi5_8513462_x7  | .....gggaacacggggGgccgaac               | 1 |
| Gi3_27404305_x7 | .....ggUgacgucgugggaacacggggugcc        | 1 |
| Gi3_27447005_x7 | .....cgucgugggGacacggggugccga           | 1 |
| Gi3_27454999_x7 | .....ggGacacggggugccgaa                 | 1 |
| Gi1_3965186_x7  | .....Gaggccccgccaguacugcg               | 1 |

Gi3\_27400007\_x7.....Ugucagggccccgccaguacugcg..... 1  
 Gi5\_8517704\_x7.....caggccccgccGguacugcg..... 1  
 Gi3\_27397298\_x7.....acgucgugggaGcacggggugccgaac..... 1  
 Gi2\_10539171\_x7.....cguggCaacacggggugccgaacu..... 1  
 Gi2\_10501546\_x7.....aucggagaUgucgugggaacacggggugc..... 1  
 Gi3\_27457015\_x7.....Ucgccgucagggccccgccaguacugcg..... 1  
 Gi3\_27455986\_x7.....acgGcugugggaacacggggugccgaacu..... 1  
 Gi2\_10533130\_x7.....Gaggccccgccaguacug..... 1  
 Gi2\_10540690\_x7.....ggcUccgccaguacugcgau..... 1  
 Gi2\_10525507\_x7.....aggccccgccaguaAugcgau..... 1  
 Gi5\_8503242\_x7.....gGucggagacgucgugggaacacgg..... 1  
 Gi2\_10518850\_x7.....agGcugcugugggaacacggggugc..... 1  
 Gi3\_27384950\_x7.....cgucguAggaacacggggugc..... 1  
 Gi3\_27451618\_x7.....cgugggaacacggggugccUaac..... 1  
 Gi1\_3965557\_x7.....gugggaacacggggugccgaUc..... 1  
 Gi3\_27380666\_x7.....gGcaguacugcgauccggagacg..... 1  
 Gi1\_3971794\_x7.....cgucguggNaacacggggugcc..... 1  
 Gi3\_27439466\_x7.....gucgugggaUcacggggugccgaacu..... 1  
 Gi4\_529119\_x7.....Uugggaacacggggugccgaac..... 1  
 Gi3\_27429540\_x7.....gacgucguggggGcacggggugccgaac..... 1  
 Gi2\_10506257\_x7.....Uaagagaagcgccgucagggccccg..... 1  
 Gi3\_27443911\_x7.....ugggaacacggggUaccga..... 1  
 Gi2\_10505676\_x7.....cgugUgaacacggggugccga..... 1  
 Gi1\_3971010\_x7.....aggccccgccaguacugcU..... 1  
 Gi2\_10530456\_x7.....aucggagacgucgugggaacacggggG..... 1  
 Gi2\_10500482\_x7.....cccgccaguacugcgauccggagacgucgug..... 0  
 G1a\_5678145\_x7.....gggaacGcggggugccgaacu..... 1  
 Gi5\_8519174\_x7.....aaNacggggugccgaacu..... 1  
 Gi3\_27421420\_x7.....ucggagacgucgugggaGcacggggU..... 1  
 Gi3\_27393378\_x7.....cgggagacgCcgugggaacacggggugcc..... 1  
 Gi5\_8510375\_x7uccuuaacucguuccgaaauaAgaagagaagc..... 1  
 Gi1\_3960118\_x7.....gucgugggaacCcgggugccgaacu..... 1  
 G1a\_5683619\_x7.....aGcggagacgucguggga..... 1  
 Gi3\_27449868\_x7.....cgucgugggaacacggggugccAaac..... 1  
 Gi2\_10510744\_x7.....uUcgauccggagacgucguggga..... 1  
 Gi3\_27430387\_x7.....Gaggccccgccaguacugcgau..... 1  
 Gi1\_3969722\_x7.....cgugggaacacggggugccU..... 1  
 Gi3\_27449630\_x7.....auUggagacgucgugggaacacggggugc..... 1  
 Gi5\_8514470\_x7.....cgucgugggaAacggggugccgaacu..... 1  
 Gi3\_27429743\_x7.....aucggagacgucgugggUacacg..... 1  
 Gi2\_10506719\_x7.....ugggaacacggggugcGgaacu..... 1  
 Gi2\_10525815\_x7.....cGgucagggccccgccaguacugc..... 1  
 Gi2\_10538352\_x7.....caggccccgccGguacugc..... 1  
 Gi2\_10506523\_x7.....cgucaggcNccgccaguacugc..... 1  
 Gi3\_27395177\_x7.....acgucguggUaacacggggugccgaacu..... 1  
 Gi2\_10506481\_x7.....aucAgagacgucgugggaacacggggugc..... 1  
 Gi2\_10507188\_x7.....Aucagggccccgccaguacugcg..... 1

Gi1\_3962309\_x7.....gacgucgugggaacacggggCgccgaacu..... 1  
 Gi2\_10511206\_x7.....aCgccccgccaguacugcg..... 1  
 Gi1\_3963961\_x7.....caggccccgccaguacugcAauc.....ugggaacacgggguAccgaacu..... 1  
 Gi3\_27385132\_x7.....caggccccgccaguacugcAauc..... 1  
 Gi2\_10527509\_x7.....cgugggCacacggggugcc..... 1  
 Gi3\_27379910\_x7.....ugggaacacggggugcUg..... 1  
 Gi2\_10516505\_x7.....cgucAugggaacacggggugc..... 1  
 Gi5\_8530598\_x7.....uggCaacacggggugccgaacu..... 1  
 Gi1\_3972032\_x7.....gGcgugggaacacggggugccgaac..... 1  
 Gi2\_10526879\_x7.....cgucgugggaacacggggugccgaUc..... 1  
 Gi3\_27439403\_x7.....aAcggagacgucgugggaacacgggg..... 1  
 Gi3\_27447761\_x7.....uUcgaucggagacgucguggga..... 1  
 Gi5\_8521099\_x7.....ugggaUcacggggugccgaacu..... 1  
 Gl1a\_5677165\_x7.....ugcgauccggagacgucgugggaac..... 0  
 Gi2\_10511920\_x7.....gaCcgagacgucgugggaacacgggg..... 1  
 Gi3\_27456301\_x7.....cgugggaacacgggguAccg..... 1  
 Gi3\_27437849\_x7.....gccgucaggccccgccaguUcugcg..... 1  
 Gi3\_27437604\_x7.....ggaacacggggugccUaacu..... 1  
 Gi3\_27383137\_x7.....cggagacgucgugggaacacggggCgcc..... 1  
 Gi3\_27406748\_x7.....Ggagaagcgccgucaggccccgcc..... 1  
 Gi3\_27380631\_x7.....gCccccgccaguacugcgauc..... 1  
 Gi3\_27402093\_x7.....Gagcgccgucaggccccgccaguacugc..... 1  
 Gi5\_8505230\_x7.....gaUcacggggugccgaac..... 1  
 Gi1\_3957458\_x7.....Ggucaggccccgccaguacugc..... 1  
 Gi3\_27440558\_x7.....aucggagacgucgugggaacacggAg..... 1  
 Gi2\_10540872\_x7.....cCugggaacacggggugc..... 1  
 Gi2\_10539549\_x7.....cgucgugAgaacacggggugccg..... 1  
 Gi3\_27452395\_x7.....ugggaacacggAgugccga..... 1  
 Gi5\_8521442\_x7.....agGcgucgugggaacacggggugccgaacu..... 1  
 Gi5\_8518502\_x7.....gugggaacacggggugccgaCc..... 1  
 Gi3\_27387092\_x7.....caggccccgccaAuacugcgauc..... 1  
 Gi3\_27395023\_x7.....gaucggagacgucgugggaacacggggugccgaacu..... 0  
 Gi3\_27446382\_x7.....gaucggGgacgucgugggaacac..... 1  
 Gi5\_8516402\_x7.....aucAgagacgucgugggaacacgg..... 1  
 Gi5\_8522737\_x7.....gggaacacAgggugccgaac..... 1  
 Gi3\_27408190\_x7.....Gcaggccccgccaguacugcga..... 1  
 Gi2\_10516995\_x7.....Gcggagacgucgugggaaca..... 1  
 Gi2\_10499796\_x7.....cgAcgugggaacacggggugccga..... 1  
 Gi2\_10507391\_x7.....aucggagacgucgugggaacacggggGg..... 1  
 Gi3\_27429085\_x7.....gaucggagNcgucgugggaacacgggg..... 1  
 Gi3\_27379175\_x7.....cgucgugggaacacggCgugcc..... 1  
 Gi2\_10527628\_x7.....aAgccccgccaguacugcg..... 1  
 Gi5\_8512349\_x7.....gGgggaacacggggugccgaacu..... 1  
 Gi3\_27436575\_x7.....aggccccgNcaguacugcgaucgg..... 1  
 Gi2\_10526949\_x7.....aucggagGcgucgugggaacacggggug..... 1  
 Gi3\_27393707\_x7.....gcUaguacugcgaucggagacguc..... 1  
 Gi3\_27395688\_x7.....gugNgaacacggggugcc..... 1

Gi3\_27442357\_x7.....ugggaacacgggguAccgaa..... 1  
 Gi1\_3966278\_x7.....aguacugcgaucggagacgucgCgggaac..... 1  
 G1a\_5680959\_x7.....gGucggagacgucguggga..... 1  
 Gi2\_10502925\_x7.....ggagacgCcgugggaacacggggugcc..... 1  
 Gi5\_8510991\_x7.....gucgugggUacacggggugccgaacu..... 1  
 Gi1\_3970450\_x7.....ucgugggaacacgggguAccgaacu..... 1  
 Gi3\_27449161\_x7.....gugggCacacggggugccga..... 1  
 Gi2\_10519774\_x7.....ggGgacgucgugggaacacggggugccgaac..... 1  
 Gi1\_3966873\_x7.....acgucgugggaacacggggugccgaGcu..... 1  
 Gi5\_8504845\_x7.....aGcggagacgucgugggaacacggggu..... 1  
 Gi2\_10516351\_x7.....ucgugggaacacggggugUcgaac..... 1  
 Gi3\_27384117\_x7.....ucguUggaacacggggugc..... 1  
 Gi4\_527852\_x7.....gugggaGcacggggugccgaacu..... 1  
 Gi3\_27410451\_x7.....gaucggagacgucgugggCacacg..... 1  
 Gi3\_27441594\_x7.....aggccAcgccaguacugc..... 1  
 Gi2\_10517562\_x7.....gUagacgucgugggaacacggggu..... 1  
 Gi2\_10533165\_x7.....cggagacgucgugggaacacggggugUc..... 1  
 Gi3\_27419565\_x7.....agcgcgucagggccccgccagC..... 1  
 Gi5\_8528575\_x7.....ucgugggaaAacggggugccgaacu..... 1  
 Gi2\_10524065\_x7.....Uaagagaagcggcugcagg..... 1  
 G1a\_5695911\_x7.....aguacugcNaucggagacguc..... 1  
 Gi2\_10504682\_x7.....cUccgucagggccccgccaguacu..... 1  
 Gi3\_27378468\_x7.....ucggagacgucgugggaacacggggugccgaacu..... 0  
 Gi3\_27435511\_x7.....ggaaAacggggugccgaacu..... 1  
 Gi3\_27394834\_x7.....cUggccccgccaguacugcga..... 1  
 Gi2\_10519718\_x7.....cgugggUacacggggugccgaac..... 1  
 Gi1\_3970863\_x7.....gugggaacacgUggugccgaacu..... 1  
 Gi3\_27398068\_x7.....gucaggccNcgccaguacug..... 1  
 Gi5\_8510921\_x7.....ucgugggUacacggggugccgaacu..... 1  
 Gi3\_27420258\_x7.....Gguacugcgaucggagacguc..... 1  
 Gi2\_10499817\_x7.....cgAcgugggaacacggggugccg..... 1  
 Gi3\_27425781\_x7.....aucggagacgucgugggaaUacggggu..... 1  
 Gi2\_10500881\_x7.....Ugagacgucgugggaacacggggugccgaacu..... 1  
 Gi3\_27416289\_x7.....gugggaaGacggggugccgaac..... 1  
 Gi3\_27412271\_x7.....cgucgugggaaAacggggugccgaacu..... 1  
 Gi3\_27379420\_x7.....aucggagacgucgugggUacacggggu..... 1  
 Gi3\_27435791\_x7.....aggccccgccaguCcuac..... 1  
 Gi3\_27428189\_x7.....cgugggaCcacggggugcc..... 1  
 Gi2\_10515707\_x7.....gGucggagacgucgugggaacacggggug..... 1  
 Gi1\_3971045\_x7.....gugggaacacggCgugccgaacu..... 1  
 Gi5\_8515611\_x7.....gacgucgugggaGcacggggugccgaacu..... 1  
 Gi2\_10523722\_x7.....uAggaacacggggugccga..... 1  
 Gi3\_27436953\_x7.....caggccccgccGguacugc..... 1  
 Gi1\_3959327\_x7.....gugggaacacggggugccgaacG..... 1  
 Gi3\_27403668\_x7.....agcgcgcuNaggccccgcc..... 1  
 Gi3\_27420391\_x7.....Ucgaucggagacgucgugggaaaca..... 1  
 Gi5\_8505076\_x7.....ugggaacacggggugccgGac..... 1

|                 |                                        |   |
|-----------------|----------------------------------------|---|
| Gi1_3958683_x7  | .....Ggugggaacacggggugccg              | 1 |
| Gi4_527103_x7   | .....cgugggaacacggggugccgaac           | 0 |
| Gi2_10534817_x7 | .....cggagacgNcgugggaacacggggugc       | 1 |
| Gi1a_5678460_x7 | .....gugggaaAacggggugccgaacu           | 1 |
| Gi3_27387057_x7 | .....agacgCcgugggaacacggggugccgaacu    | 1 |
| Gi3_27439389_x7 | .....cgugggaaUacggggugccga             | 1 |
| Gi1_3960804_x7  | .....cgccgucagccccccagucggaucgga       | 0 |
| Gi1_3964353_x7  | .....Ggucaggccccccagucggaucg           | 1 |
| Gi2_10511248_x7 | .....ugggaacacggggugAcgaacu            | 1 |
| Gi5_8515184_x7  | .....Ugagacgucgugggaacacggggugccgaacu  | 1 |
| Gi3_27384859_x7 | .....ccccgccGguacugcgauc               | 1 |
| Gi3_27415645_x7 | .....gacgucguNggaacacggggugccgaacu     | 1 |
| Gi2_10520698_x7 | .....aacacggggugccgaaAu                | 1 |
| Gi2_10520376_x7 | .....gucgugggaacGcggggugc              | 1 |
| Gi2_10532479_x7 | .....agggccccccagucgucg                | 1 |
| Gi3_27383942_x7 | .....cgucgugggaacacggggugccgG          | 1 |
| Gi1a_5695925_x7 | .....gugggaacNcggggugcc                | 1 |
| Gi2_10534600_x7 | .....gugggaacacggUgugccga              | 1 |
| Gi1a_5677319_x7 | .....gugggaacacggggugccgaaUu           | 1 |
| Gi2_10527257_x7 | .....gUccccgccagucggaucg               | 1 |
| Gi5_8522170_x7  | .....Uucaggccccccaguc                  | 1 |
| Gi3_27429064_x7 | .....aucggagacgucAugggaacacggggu       | 1 |
| Gi4_527439_x7   | .....cUucgugggaacacggggugccga          | 1 |
| Gi3_27444079_x7 | .....gucgugggaacacggggugccgaaUu        | 1 |
| Gi3_27428196_x7 | .....ggccccgccagucggaCc                | 1 |
| Gi5_8523241_x7  | .....aGcggagacgucgugggaacacggggugc     | 1 |
| Gi3_27431955_x7 | .....Nugggaacacggggugccgaac            | 1 |
| Gi2_10525885_x7 | .....guUggaacacggggugccga              | 1 |
| Gi3_27384446_x7 | .....cAucgugggaacacggggugccg           | 1 |
| Gi2_10531646_x7 | .....gugggaacacAggggugccgaa            | 1 |
| Gi5_8510760_x7  | .....acgucgugggaacacggggugccAaacu      | 1 |
| Gi3_27404816_x7 | .....gCaacacggggugccgaa                | 1 |
| Gi3_27438304_x7 | .....gagaagcgccgucagggccccccagucggaucg | 0 |
| Gi3_27388583_x7 | .....Agagacgucgugggaacacggggugcc       | 1 |
| Gi3_27383802_x7 | .....gaucggagacgCcgugggaacacggg        | 1 |
| Gi2_10512284_x7 | .....cgucgugggaacacggggGccgaaC         | 1 |
| Gi3_27441475_x7 | .....cgucgugggaacacgggAugcc            | 1 |
| Gi3_27425578_x7 | .....aucggagacgAucgugggaacacgg         | 1 |
| Gi3_27449301_x7 | .....cgucgugggaacacggggugccgC          | 1 |
| Gi2_10536182_x7 | .....Gagagaagcgccgucagggccc            | 1 |
| Gi2_10514041_x7 | .....cgugggaacacgUgggugc               | 1 |
| Gi2_10517597_x7 | .....gugggaacacggggugAcg               | 1 |
| Gi2_10523435_x7 | .....aacaAggggugccgaacu                | 1 |
| Gi2_10517464_x7 | .....Cgccccgccagucggauc                | 1 |
| Gi2_10518192_x7 | .....cgucgugggaacacggAgugccgaacu       | 1 |
| Gi3_27457295_x7 | .....gggaacacggAgugccgaa               | 1 |
| Gi5_8523521_x7  | .....aacacggggugAcgaacu                | 1 |

Gi3\_27390368\_x7.....ggagacgucgugggaaAacggggu..... 1  
Gi2\_10537316\_x7.....cgucGggccccgccaguacugc..... 1  
G1a\_5687245\_x7.....gugNgaacacggggugccgaacu..... 1  
Gi1\_3959026\_x7.....ugggaacacgggCugccgaacu..... 1  
Gi1\_3968847\_x7.....ggUgacgucgugggaacacggggugcc..... 1  
Gi5\_8504187\_x7.....caggccccNccaguacugc..... 1  
Gi3\_27394435\_x7.....cguAggaacacggggugcc..... 1  
Gi1\_3958389\_x7.....cCucgugggaacacggggugccgaacu..... 1  
Gi2\_10533564\_x7.....cgugUgaacacggggugc..... 1  
Gi3\_27419271\_x7.....Aaucggagacgucgugggaacac..... 1  
Gi2\_10528748\_x7.....cgugggGacacggggugc..... 1  
Gi1\_3963737\_x7.....Cucgugggaacacggggugccgaacu..... 1  
Gi2\_10519809\_x7.....cUaucggagacgucgugggaaca..... 1  
G1a\_5691137\_x7.....aUuacugcgauccggagacgucgug..... 1  
Gi2\_10534250\_x7.....ugcgauccggagacgucgugggaacacggggugc..... 0  
Gi3\_27394890\_x7.....gaucggagaUgucgugggaacacg..... 1  
Gi3\_27395744\_x7.....ggagacgucgugggaacacggggG..... 1  
Gi2\_10535776\_x7.....cUucaggccccgccaguacugcgau..... 1  
Gi1\_3965543\_x7.....cgucAugggaacacggggugccgaacu..... 1  
Gi5\_8523080\_x7.....aacacggggugccgaGu..... 1  
Gi3\_27431612\_x7.....gggaacacAgggugccgaa..... 1  
Gi2\_10523932\_x7.....ggaacacggggugccgaUcu..... 1  
Gi3\_27430149\_x7.....cguUggaacacggggugccgaac..... 1  
Gi3\_27390242\_x7.....gugggaacacCgggugccgaac..... 1  
Gi2\_10517954\_x7.....ucaggccccgccaguacugcgCuc..... 1  
G1a\_5681176\_x7.....gugggaacacggggugAcgaacu..... 1  
G1a\_5691830\_x7.....cggagacgucgugggaacacggggugcc..... 0  
Gi2\_10513964\_x7.....cGguacugcgauccggagacguc..... 1  
Gi2\_10519564\_x7.....cgugggaaGacggggugccgaacu..... 1  
Gi2\_10532906\_x7.....acgucgugggaacacggggugcAgaacu..... 1  
Gi5\_8528533\_x7.....ggaacacggggUccgaacu..... 1  
Gi3\_27390235\_x7.....gugggaacacggggugccUa..... 1  
Gi2\_10499880\_x7.....cgucgCgggaacacggggugcc..... 1  
Gi1\_3959369\_x7.....gCgggaacacggggugcc..... 1  
Gi1\_3958837\_x7.....gcgacgugagacgucgugggaacacggggugcc..... 0  
Gi2\_10511304\_x7.....gucgugggaaUacggggugccgaacu..... 1  
Gi3\_27452990\_x7.....gucgugggaCcacggggugccgaacu..... 1  
Gi1\_3960020\_x7.....gGgacgucgugggaacacggggugcc..... 1  
Gi5\_8524011\_x7.....aacacgggUugccgaacu..... 1  
Gi2\_10523064\_x7.....caggccccgccCguacugcgau..... 1  
Gi2\_10508931\_x7.....gucgugggaacacgggAugccgaacu..... 1  
Gi2\_10520929\_x7.....cgucaggccccgccagCacugc..... 1  
Gi5\_8506329\_x7.....ucgGgggaacacggggugccgaacu..... 1  
Gi2\_10517933\_x7.....Gcggagacgucgugggaacacgggg..... 1  
Gi3\_27377817\_x7.....acgucgugggaacacggggugccAaacu..... 1  
Gi1\_3972116\_x7.....aUacgucgugggaacacggggugcc..... 1  
Gi3\_27378545\_x7.....acgucgugggaacCggggugccgaac..... 1

Gi3\_27398551\_x7.....ucagAccccgccaguacugcgau..... 1  
 Gi2\_10527810\_x7.....Ngugggaacacggggugccgaacu..... 1  
 Gi5\_8512720\_x7.....cgucguggggaacacggggugcUgaacu..... 1  
 Gi2\_10499887\_x7.....gGagcgccgucagggccc..... 1  
 Gi5\_8514267\_x7.....Ucgucguggggaacacggggugccgaacu..... 1  
 G1a\_5683395\_x7.....aGcggagacgucguggggaacacggggugcc..... 1  
 Gi3\_27400826\_x7.....gGcaguacugcgauccggagacgu..... 1  
 Gi3\_27380029\_x7.....Gccgccaguacugcgauccgga..... 1  
 Gi3\_27443043\_x7.....Gcgccaguacugcgauccggagac..... 1  
 Gi2\_10514055\_x7.....cggGgacgucguggggaacacggggugccgaacu..... 1  
 Gi2\_10502162\_x7.....ggUaacacggggugccgaa..... 1  
 Gi2\_10530610\_x7.....gucgugggCacacggggugccgaacu..... 1  
 Gi3\_27430072\_x7.....aggccccgcUaguacugcg..... 1  
 Gi2\_10539871\_x7.....uggAaacacggggugccgaac..... 1  
 Gi2\_10519298\_x7.....aucggagacgucAuggggaacacggggugcc..... 1  
 Gi2\_10503191\_x7.....caggccccAccaguacugc..... 1  
 G1a\_5699117\_x7.....ggagacgucguggggaacacggggugccgaacu..... 0  
 Gi3\_27392209\_x7.....cGccgccaguacugcgau..... 1  
 Gi2\_10537190\_x7.....uGuggggaacacggggugccg..... 1  
 Gi5\_8515023\_x7.....cgucAuggggaacacggggugccgaacu..... 1  
 Gi3\_27396402\_x7.....Ggacgucguggggaacacggggugcc..... 1  
 Gi2\_10506264\_x7.....Gccgccaguacugcgauccggag..... 1  
 Gi2\_10540431\_x7.....acgucguggggaacGcggggugccgaac..... 1  
 Gi3\_27449665\_x7.....cgugggaacacggggGgcc..... 1  
 G1a\_5691361\_x7.....Ucgauccggagacgucgug..... 1  
 Gi3\_27390298\_x7.....aucggagacgAcguggggaacacggg..... 1  
 Gi2\_10512683\_x7.....aucggUgacgucguggggaacacgggg..... 1  
 Gi5\_8518236\_x7.....gucguggggaacacggggugccgaaAu..... 1  
 Gi2\_10513229\_x7.....Accccgccaguacugcgau..... 1  
 Gi3\_27443379\_x7.....gUgaagcgccgucagggccccgc..... 1  
 Gi2\_10530722\_x7.....aGgucguggggaacacggggugc..... 1  
 Gi3\_27409590\_x7.....cgugggaacacggAgugccgaa..... 1  
 G1a\_5700650\_x7.....cgugggaacGcggggugccgaacu..... 1  
 Gi5\_8509857\_x7.....Auggggaacacggggugccgaacu..... 1  
 Gi5\_8510431\_x7.....aggccccgccCguacugcgau..... 1  
 Gi2\_10500685\_x7.....ggaacacggggugAcgaa..... 1  
 Gi3\_27451576\_x7.....Gagagaagcgccgucagggccccgc..... 1  
 Gi3\_27436050\_x7.....gauccggagacgucgCgggaacacgggg..... 1  
 Gi3\_27449637\_x7.....aucggagacAucguggggaacacggggugcc..... 1  
 Gi2\_10505228\_x7.....aCgggagacgucguggggaaca..... 1  
 Gi1\_3963422\_x7.....ugggaCcacggggugccgaacu..... 1  
 Gi2\_10499824\_x7.....acgucguggggaacGcggggugccgaacu..... 1  
 Gi3\_27387834\_x7.....acguUguggggaacacggggugccgaacu..... 1  
 Gi3\_27386770\_x7.....ucggGgacgucguggggaacac..... 1  
 Gi3\_27395065\_x7.....cgucgugggGacacggggugcc..... 1  
 Gi5\_8524473\_x7.....Uagaagcgccgucagggccccgccaguacug..... 1  
 Gi2\_10538674\_x7.....gugggaacacggggugccAaa..... 1

Gi5\_8528022\_x7.....ggaacacggggugUcgaacu..... 1  
 Gi3\_27378503\_x7.....ugggaaAacggggugccgaac..... 1  
 Gi5\_8521302\_x7.....gaaacacggggugccgaUc..... 1  
 Gl1a\_5701105\_x7.....ucggagacgucgugggaaacacggggugcc..... 0  
 Gi3\_27440229\_x7.....agggcccgccGguacugcga..... 1  
 Gl1a\_5696730\_x7.....aucggagacgucgGgggaacacggg..... 1  
 Gi3\_27437142\_x7.....cgucgugggaacacggggGgccgaa..... 1  
 Gi2\_10534992\_x7.....cgugggaacaGggggugccgaacu..... 1  
 Gi3\_27399517\_x7.....aucggagGcgucgugggaacac..... 1  
 Gi5\_8505440\_x7.....aCacgucgugggaaacacggggugccgaacu..... 1  
 Gi5\_8505279\_x7.....agagaagcgccgucagggcccgccaguacugc..... 0  
 Gi1\_3966040\_x7.....gugggaacacggggGgccgaac..... 1  
 Gi3\_27445423\_x7.....aucgAagacgucgugggaacacgg..... 1  
 Gi3\_27396871\_x7.....cgucguggAaacacggggugccg..... 1  
 Gi3\_27411970\_x7.....gCgaacacggggugccgaa..... 1  
 Gi3\_27403556\_x7.....Gcggagacgucgugggaacacggg..... 1  
 Gi3\_27407112\_x7.....gaucggGgacgucgugggaacacggg..... 1  
 Gi2\_10523330\_x7.....ccccUccaguacugcgauc..... 1  
 Gi1\_3965795\_x7.....ggaacacgAgggugccgaacu..... 1  
 Gi3\_27393371\_x7.....aucggagacgucguggCaacacggg..... 1  
 Gi2\_10519914\_x7.....gucgugggaGcacggggugccgaac..... 1  
 Gi3\_27441741\_x7.....Ugugggaacacggggugccg..... 1  
 Gi5\_8524004\_x7.....ugggaacacggggugccgaGc..... 1  
 Gi2\_10522560\_x7.....cggagacgucgCgggaacacggggugcc..... 1  
 Gi1\_3973768\_x7.....Gcugggaacacggggugc..... 1  
 Gi2\_10502323\_x7.....cgugggaacacAgggugcc..... 1  
 Gi3\_27398187\_x7.....ccccgccagCacugcgauc..... 1  
 Gi5\_8504880\_x7.....GcgaucggGgacgucgugggaacacggggugc..... 1  
 Gi2\_10515490\_x7.....gcaucggGgacgucgugggaacacggggugc..... 1  
 Gi2\_10534166\_x7.....aggccUcggcaguacugcga..... 1  
 Gi3\_27395513\_x7.....cggagacgucgCgggaacacggggugcc..... 1  
 Gi3\_27416121\_x7.....gucgugggaacacggggugccgUacu..... 1  
 Gi2\_10509197\_x7.....gugggaacaAggggugcc..... 1  
 Gi5\_8541745\_x6.....cgugAgaacacggggugccgaac..... 1  
 Gl1a\_5711662\_x6.....ugggaacCcggggugccgaacu..... 1  
 Gi1\_3976885\_x6.....gaaCcggggugccgaacu..... 1  
 Gi3\_27547750\_x6.....caggccccccaUuacugcgauc..... 1  
 Gi3\_27496432\_x6.....gaucggagacgucAugggaacacggggu..... 1  
 Gi3\_27465184\_x6.....aAacgucgugggaacacggggugccgaacu..... 1  
 Gi2\_10575983\_x6.....ugggaacacggggugcUgaac..... 1  
 Gi1\_3985951\_x6.....ggaacacgNgggugccgaac..... 1  
 Gi1\_3989227\_x6.....gUagacgucgugggaacacggggugccgaacu..... 1  
 Gi3\_27477304\_x6.....aucggagacgucgugggUacacggggugcc..... 1  
 Gi2\_10550141\_x6.....cUaucggagacgucgugggaacacggggugc..... 1  
 Gi5\_8547301\_x6.....acgucgugggaacacgAgggugccgaacu..... 1  
 Gi1\_3981643\_x6.....cggagacgucgCgggaacacggggugccgaacu..... 1  
 Gi3\_27505126\_x6.....cGcgccaguacugcgaucgg..... 1



Gi3\_27522616\_x6.....agggccccgUguacugc..... 1  
Gi3\_27493588\_x6.....aucggagacgucgugggG..... 1  
Gi3\_27546808\_x6.....aucggagacgCcgugggaacacgggg..... 1  
Gi3\_27526510\_x6.....gGcgugggaacacggggugccg..... 1  
Gi5\_8534191\_x6.....aucggagacgucgugggaGcacgg..... 1  
Gi3\_27487138\_x6.....gaacacggggAgccgaac..... 1  
Gi1\_3974473\_x6.....gugNgaacacggggugccgaacu..... 1  
Gi2\_10554899\_x6.....ucgugggaaUacggggugccgaacu..... 1  
Gi3\_27511954\_x6.....ugggUacacggggugccgaa..... 1  
Gi2\_10575809\_x6.....gaucggagGcgucgugggaacacggg..... 1  
Gi5\_8542339\_x6.....agacgAcgugggaacacggggugcc..... 1  
Gi2\_10562195\_x6.....Ggucagggccccgccaguacug..... 1  
Gi3\_27528130\_x6.....caggccccgUguacugcgau..... 1  
Gi3\_27501550\_x6.....aGgagaagcgccgucaggcccc..... 1  
Gi2\_10554287\_x6.....cUccaguacugcgauccggagacgu..... 1  
Gi2\_10590719\_x6.....agggccccgccaguacugcAaucgga..... 1  
G1a\_5724268\_x6.....gGagcgccgucaggccccgcca..... 1  
Gi3\_27468862\_x6.....aggccccAccaguacugcg..... 1  
Gi2\_10564283\_x6.....gaacacggggugccgaGc..... 1  
Gi3\_27542548\_x6.....cagAccccgccaguacugcgau..... 1  
Gi3\_27497632\_x6.....gUucggagacgucgugggaacacg..... 1  
Gi3\_27512296\_x6.....cAugggaacacggggugccg..... 1  
Gi2\_10564637\_x6.....ugggaaUacggggugccgaac..... 1  
Gi5\_8551477\_x6.....gaacacggCgugccgaacu..... 1  
Gi5\_8531173\_x6.....gugggaacacggAgugccgaac..... 1  
Gi3\_27523498\_x6.....gacgucgugggaGcacgggu..... 1  
Gi1\_3981397\_x6.....Ugucgugggaacacggggugccgaacu..... 1  
G1a\_5708002\_x6.....aaUacggggugccgaacu..... 1  
Gi3\_27497932\_x6.....aucggagacgucgugggaaUacgg..... 1  
Gi3\_27543592\_x6.....ccaguacugcgauccggGgacguc..... 1  
Gi3\_27512932\_x6.....gccccgccaguacugcgGuc..... 1  
Gi3\_27536296\_x6.....aggAccccgccaguacugcgau..... 1  
G1a\_5722708\_x6.....ugggaacacgAggugccgaacu..... 1  
Gi2\_10562627\_x6.....uGggagacgucgugggaaca..... 1  
Gi2\_10551251\_x6.....gaucggagacgucgugggaacaA..... 1  
Gi5\_8555041\_x6.....gugggaacGcggggugccga..... 1  
Gi3\_27493432\_x6.....gacguUgugggaacacggggugccgaacu..... 1  
Gi3\_27460522\_x6.....aucggagacgucgugggaacacAggg..... 1  
Gi1\_3979159\_x6.....ucgugggaacCcgggugcc..... 1  
Gi3\_27540322\_x6.....ucgugggaacacggggGgc..... 1  
Gi1\_3990775\_x6.....ucgugggaGcacggggugccgaac..... 1  
Gi3\_27526900\_x6.....acgucuggAaacacggggugccgaac..... 1  
Gi2\_10578701\_x6.....Agucgugggaacacggggugccgaacu..... 1  
Gi2\_10554323\_x6.....cUgucagggccccgccaguacugcg..... 1  
Gi3\_27467758\_x6.....gucgugggaacCcgggugccga..... 1  
Gi2\_10562999\_x6.....cgucgugggaacacggAgugccg..... 1  
Gi2\_10585547\_x6.....agacgucgugggaacacggggugAc..... 1

Gi2\_10576853\_x6.....gccccgccaguacugcgaCc..... 1  
Gi3\_27517228\_x6.....cgagacgucgugggaaAacggggu..... 1  
Gi4\_532059\_x6.....gugggaacacggggugccgCacu..... 1  
Gi2\_10569599\_x6.....gGacugcgauccggagacgu..... 1  
Gi3\_27474820\_x6.....ugggaaGacggggugccgaacu..... 1  
Gi3\_27493138\_x6.....Cgggagacgucgugggaaacacggg..... 1  
Gi2\_10548629\_x6.....ccccccagNacugcgauccggagac..... 1  
Gi2\_10574543\_x6.....gugggaacaUggggugccgaa..... 1  
Gi3\_27547426\_x6.....caggccccgAcaguacugcgaucc..... 1  
Gi5\_8533993\_x6.....acgucgugggaaacacggggugccgaaUu..... 1  
Gi2\_10575245\_x6.....caggccccgccaguacuAcgaucc..... 1  
Gi2\_10562321\_x6.....ugggaaacacggggugccUaacu..... 1  
Gi5\_8540611\_x6.....cUgagacgucgugggaaacacgg..... 1  
Gi3\_27483658\_x6.....gUccccgccaguacugcgauccgga..... 1  
Gi5\_8557087\_x6.....ggaGcacggggugccgaa..... 1  
Gi3\_27469402\_x6.....cgccaguacugcgauccggagGcguc..... 1  
Gi2\_10578215\_x6.....Aggagacgucgugggaaacacggggugcc..... 1  
Gi3\_27502330\_x6.....agacgucgugggaaacacggggugccgaa..... 1  
Gi3\_27485302\_x6.....cUccaguacugcgauccggagacgucgu..... 1  
Gi5\_8550457\_x6.....aucggagacgucgugggaaacacggggC..... 1  
Gi2\_10566401\_x6.....cgucgugggaaacacggggCgc..... 1  
Gi1\_3984439\_x6.....ucguggAaacacggggugccgaa..... 1  
Gi3\_27511186\_x6.....gccaguacNcgauccggagacguc..... 1  
Gi3\_27480340\_x6.....cguggCaacacggggugccgaa..... 1  
Gi1\_3976117\_x6.....ugggaaacacggggugccgUacu..... 1  
Gi1\_3977677\_x6.....ugggaaacacAgggugccgaa..... 1  
Gi3\_27484702\_x6.....Ucgccgucagggccccgccaguacug..... 1  
Gi3\_27535054\_x6.....aCgccccgccaguacugcgau..... 1  
Gi1\_3982171\_x6.....gugggGaacacggggugccg..... 1  
Gi2\_10565585\_x6.....cgccaguaNugcgauccggagacguc..... 1  
Gi3\_27516532\_x6.....agAccccgccaguacugcg..... 1  
Gi2\_10569497\_x6.....Cccaguacugcgauccggagacguc..... 1  
Gi3\_27493522\_x6.....agUcgcgugggaaacacggggugcc..... 1  
Gi5\_8539555\_x6.....ggaacacggggGccgaa..... 1  
G1a\_5721892\_x6.....cguggaaacacggggugUcgaacu..... 1  
Gi1\_3988375\_x6.....ugggaaacacggggugcGgaacu..... 1  
Gi2\_10571207\_x6.....agacUucgugggaaacacggggugcc..... 1  
Gi2\_10559363\_x6.....gaucggagacgucgugggaaGcacggggu..... 1  
Gi3\_27464242\_x6.....cgagacgucgugggaaacacggggugUc..... 1  
Gi2\_10541927\_x6.....ucguAggaaacacggggugccgaa..... 1  
Gi3\_27523294\_x6.....gaucggagacgucgugggaaacGcg..... 1  
Gi5\_8551723\_x6.....gugggaaacacggggugccgaaGu..... 1  
Gi2\_10560269\_x6.....aggccccgccaguacugUga..... 1  
Gi3\_27466288\_x6.....gggaaGacggggugccgaa..... 1  
Gi3\_27490450\_x6.....cgccaguacCgcaucggagacguc..... 1  
Gi2\_10579025\_x6.....aucggagacgucgugggGac..... 1  
Gi3\_27503380\_x6.....ugggaaUacggggugccgaa..... 1

Gi3\_27479794\_x6.....cgugggCacacggggugc..... 1  
 Gi3\_27538000\_x6.....aucggagacgucgugggaacaUgg..... 1  
 Gi5\_8540359\_x6.....cgucaggccccgccUguacugcg..... 1  
 Gi5\_8546665\_x6.....Augggaaacacggggugccg..... 1  
 Gi2\_10588337\_x6.....caggccccgAcaguacugcgauc..... 1  
 Gi2\_10588511\_x6.....aGcggagacgucgugggaacacgg..... 1  
 Gi3\_27527968\_x6.....cGccgccaguacugcgaucggagacgu..... 1  
 Gi2\_10549661\_x6.....aacacggggugccgaacG..... 1  
 G1a\_5706724\_x6.....aUagaagcgccgucaggccccgc..... 1  
 Gi2\_10577843\_x6.....aUuacugcgaucggagacgucgug..... 1  
 Gi3\_27471202\_x6.....cgucgugggUacacggggugccgaac..... 1  
 Gi3\_27511516\_x6.....gaGcggagacgucgugggaacacggg..... 1  
 Gi2\_10570871\_x6.....Aaucggagacgucgugggaacacggggugc..... 1  
 Gi4\_532527\_x6.....caguacugcgaucggagacguc..... 0  
 Gi2\_10589231\_x6.....gacgucgugggaacacggggGgcc..... 1  
 Gi2\_10553333\_x6.....ggUgacgucgugggaacacggggug..... 1  
 Gi5\_8540473\_x6.....ugcgaucgNagacgucgug..... 1  
 Gi5\_8541691\_x6.....Agugggaacacggggugccgaac..... 1  
 Gi2\_10565039\_x6.....aacUcggggugccgaacu..... 1  
 Gi2\_10580633\_x6.....cGgccccgccaguacug..... 1  
 Gi2\_10580999\_x6.....acgucgugggaacacggggugccgGacu..... 1  
 Gi1\_3993463\_x6.....caggccccgccaAuacugcg..... 1  
 Gi2\_10558253\_x6.....gaucggagacgCcgugggaacac..... 1  
 G1a\_5710792\_x6.....guacugcgaucggagacgucgugggaaca..... 0  
 Gi2\_10557791\_x6.....uUaggccccgccaguacugc..... 1  
 G1a\_5710138\_x6.....cgugggaacacggggugccAaacu..... 1  
 Gi1\_3991477\_x6.....ucgugggUacacggggugccgaacu..... 1  
 Gi3\_27531526\_x6.....agUagcgccgucagggccc..... 1  
 Gi2\_10579931\_x6.....aucggagacgucgugggaacCc..... 1  
 G1a\_5726194\_x6.....cgccaguacugcgGucggagacguc..... 1  
 Gi5\_8535733\_x6.....Gucggagacgucgugggaacacggg..... 1  
 Gi3\_27491830\_x6.....acugcgauNggagacgucgug..... 1  
 Gi2\_10556561\_x6.....ugggaGcacggggugccg..... 1  
 Gi2\_10556903\_x6.....gggaacacNgggugccgaa..... 1  
 Gi1\_3983515\_x6.....ggaacGcggggugccgaac..... 1  
 Gi3\_27502708\_x6.....gucgugggaacaAggggugccgaacu..... 1  
 Gi2\_10571087\_x6.....gugggaacacggggugcAg..... 1  
 Gi5\_8534755\_x6.....gAaacacggggugccgaac..... 1  
 Gi2\_10547999\_x6.....gaucggagacgCcgugggaacacggggu..... 1  
 Gi3\_27507958\_x6.....ugggaacacgAggugccga..... 1  
 Gi3\_27515362\_x6.....ucagUccccgccaguacugcgauc..... 1  
 Gi2\_10579721\_x6.....cgucgugggaacacggggAgccgaacu..... 1  
 Gi5\_8552443\_x6.....gugggaacacggggGgccgaa..... 1  
 Gi2\_10566179\_x6.....gucaggccccgccaguacCgcg..... 1  
 Gi5\_8558617\_x6.....uggUaacacggggugccgaacu..... 1  
 Gi2\_10550303\_x6.....gGucggagacgucgugggaacacggggugc..... 1  
 Gi3\_27487522\_x6.....ucaggccccgccCguacugcg..... 1

Gi5\_8541655\_x6.....gugggaacacggggugccgaaA..... 1  
Gi2\_10571309\_x6.....gaucggagGcugcuggggaacacggggu..... 1  
Gi3\_27490378\_x6.....Cccaguacugcgaucggagacguc..... 1  
Gi2\_10571579\_x6.....caggcccUgccaguacugc..... 1  
Gi1\_3977089\_x6.....acgucgugggaacCcggggugccgaacu..... 1  
Gi3\_27469666\_x6.....gaagagaaNcgccgucaggccc..... 1  
Gi2\_10582457\_x6.....gaucggagacgucgugggCacacggggugc..... 1  
Gi3\_27544666\_x6.....gaucggGgacgucgugggaacacggggu..... 1  
Gi2\_10578095\_x6.....cUaucggagacgucgugggaacacggggug..... 1  
Gi3\_27487342\_x6.....aucggagacgucgugggaacacgC..... 1  
Gi2\_10546115\_x6.....aagagGagcgccgucaggccc..... 1  
Gi3\_27488950\_x6.....cGaguacugcgaucggagacgucgug..... 1  
Gi2\_10554005\_x6.....aggccccgccaguGcugc..... 1  
Gi5\_8550733\_x6.....cUugggaacacggggugccgaacu..... 1  
Gi2\_10575371\_x6.....gacgucgugggaacacggggugccgCacu..... 1  
Gi5\_8547823\_x6.....gugggaacacggggUAccgaac..... 1  
Gi2\_10582967\_x6.....ggagacgucgugggaacacAgggugcc..... 1  
Gi4\_530985\_x6.....gGaaagcgcgucaggcc..... 1  
Gi2\_10557551\_x6.....gucgugggaacacggggUAccgaacu..... 1  
Gi3\_27544822\_x6.....aucggagacgucgugggaacacgAggu..... 1  
Gi5\_8555653\_x6.....cGggccccgccaguacugc..... 1  
Gi2\_10549181\_x6.....caggccccNccaguacugcgau..... 1  
Gi3\_27480124\_x6.....gagacgucgugggaacacggggGgccgaacu..... 1  
Gi3\_27475786\_x6.....agUagcgccgucaggccccgcca..... 1  
Gi3\_27527686\_x6.....gccaguGcugcgaucggagacguc..... 1  
Gi2\_10571351\_x6.....ggaacacggggugccgaG..... 1  
Gi3\_27516724\_x6.....ucaggccccgccaguacugcgCuc..... 1  
Gi5\_8556715\_x6.....gaacacggggUcCgaacu..... 1  
Gi2\_10573589\_x6.....aGcggagacgucgugggaacacgggg..... 1  
Gi1a\_5721412\_x6.....cGcgccaguacugcgaucggagacguc..... 1  
Gi3\_27499600\_x6.....gucguggAaacacggggugccgaac..... 1  
Gi2\_10585091\_x6.....Ggacgucgugggaacacggggugccg..... 1  
Gi2\_10559723\_x6.....ggagacgucguAggaacacggggugcc..... 1  
Gi2\_10543289\_x6.....gggaUcacggggugccgaacu..... 1  
Gi3\_27531970\_x6.....Cccccgccaguacugcgau..... 1  
Gi2\_10570403\_x6.....agacgucgugggaacacggggGgccgaacu..... 1  
Gi2\_10580081\_x6.....gucgugggaacacggggugcAgaacu..... 1  
Gi2\_10551683\_x6.....cgucguggGacacggggugcc..... 1  
Gi3\_27542626\_x6.....Ucgaucggagacgucgugggaacacggggugcc..... 1  
Gi5\_8549365\_x6.....aGcggagacgucgugggaacacgggg..... 1  
Gi3\_27512758\_x6.....cgucgugggaacCcggggugc..... 1  
Gi2\_10563827\_x6.....caUgccccgccaguacugc..... 1  
Gi2\_10563983\_x6.....aucggagacgucGgggaacac..... 1  
Gi2\_10582583\_x6.....gaacCcggggugccgaacu..... 1  
Gi3\_27536602\_x6.....ggccccgccaguacugcgGuc..... 1  
Gi3\_27478432\_x6.....gaucggagacgucgugggaacCcg..... 1  
Gi5\_8546407\_x6.....cgugggaacacggggugccgaaGu..... 1

Gi2\_10584983\_x6.....Gcgugggaacacggggugccgaa..... 1  
 Gi5\_8562745\_x6.....uGggagacgucgugggaacacg..... 1  
 Gi2\_10572743\_x6.....gugggaacacggAgugccga..... 1  
 Gi5\_8549617\_x6.....gugCgaacacggggugccgaacu..... 1  
 Gi2\_10580105\_x6.....Caucggagacgucgugggaacac..... 1  
 Gi3\_27491578\_x6.....ucgugggaNcacggggugccgaa..... 1  
 Gi5\_8558239\_x6.....aucggagacgucgugggaCcacg..... 1  
 Gi3\_27507244\_x6.....Aaucggagacgucgugggaacacg..... 1  
 Gi3\_27494734\_x6.....gGcgugggaacacggggg..... 1  
 Gi3\_27548944\_x6.....ugggaacacgggUugccg..... 1  
 Gi2\_10546925\_x6.....gGcgucgugggaacacggggugccg..... 1  
 Gi3\_27471448\_x6.....gaucggagacgucgugggGacac..... 1  
 Gi3\_27494404\_x6.....ggaCcacggggugccgaac..... 1  
 Gi3\_27522190\_x6.....Gguacugcgauccggagacgucg..... 1  
 Gi3\_27499240\_x6.....Uucggagacgucgugggaacacg..... 1  
 Gl1\_5721466\_x6.....Gggccccgccaguacugc..... 1  
 Gi3\_27484510\_x6.....gugggaacacggggugccgCa..... 1  
 Gi3\_27511768\_x6.....aggccccgccaguacuCcgau..... 1  
 Gi3\_27534112\_x6.....caggccccgcUaguacugc..... 1  
 Gi3\_27472708\_x6.....caggccccgccaguacuAcgau..... 1  
 Gi1\_3974755\_x6.....cUgagacgucgugggaacacggg..... 1  
 Gi1\_3986305\_x6.....gugggaacacggggGgccgaacu..... 1  
 Gi1\_3976327\_x6.....ggaaGacggggugccgaacu..... 1  
 Gi2\_10561379\_x6.....cguCggaacacggggugccgaacu..... 1  
 Gi2\_10567859\_x6.....Aaucggagacgucguggga..... 1  
 Gi1\_3992575\_x6.....Cgaacacggggugccgaac..... 1  
 Gi3\_27458512\_x6.....gcUccgccaguacugcga..... 1  
 Gi2\_10544789\_x6.....guUaggccccgccaguacugc..... 1  
 Gi2\_10561955\_x6.....gCccccgccaguacugcgauc..... 1  
 Gi2\_10574801\_x6.....Gucggagacgucguggga..... 1  
 Gi2\_10580141\_x6.....ggaacacggggugccgUac..... 1  
 Gi3\_27492718\_x6.....aucggagacgucgugggaacacggggugcU..... 1  
 Gl1\_5721430\_x6.....gaagagaagcgccgucaggccccgccagu..... 0  
 Gi5\_8561431\_x6.....acguUgugggaacacggggugccgaacu..... 1  
 Gl1\_5715958\_x6.....cgucGggccccgccaguacugc..... 1  
 Gi3\_27547618\_x6.....caggccccAccaguacugc..... 1  
 Gi3\_27517822\_x6.....ucgugggaacacUgggugccgaac..... 1  
 Gi3\_27458284\_x6.....ucaggccccgccGguacugc..... 1  
 Gi1\_3979669\_x6.....gucgugggaacacAgggugccgaacu..... 1  
 Gi1\_3988213\_x6.....Ggugggaacacggggugccgaac..... 1  
 Gi1\_3984631\_x6.....ggAaacacggggugccgaacu..... 1  
 Gi5\_8543407\_x6.....gAgggaacacggggugccgaa..... 1  
 Gi3\_27521188\_x6.....agacgucgNgggaacacggggugcc..... 1  
 Gi2\_10569095\_x6.....gucgugggGacacggggugcc..... 1  
 Gi2\_10557629\_x6.....Uggccccgccaguacugc..... 1  
 Gi3\_27548320\_x6.....ggaacaAggggugccgaac..... 1  
 Gi2\_10561415\_x6.....gacgucgugggaGcacggggugcc..... 1

Gi3\_27485512\_x6.....ucgugggaacacggggGgc..... 1  
 Gi3\_27490684\_x6.....gccccgccaguacugcgGu..... 1  
 Gi2\_10576733\_x6.....cggagacgucgugggaacacggggAcc..... 1  
 Gi2\_10569065\_x6.....aucggagacgucguAggaacacggggugc..... 1  
 Gi2\_10571513\_x6.....ccgucaggNccccgccaguacugcg..... 1  
 Gi3\_27533218\_x6.....cgucgugAgaacacggggugc..... 1  
 Gi3\_27542440\_x6.....aucggagacgucgCgggaacacgg..... 1  
 Gi1\_3990199\_x6.....acgucgugggaCcacggggugccgaacu..... 1  
 Gi5\_8535337\_x6.....ggaacacggggugccgCac..... 1  
 Gl1\_5723602\_x6.....gugggaGcacggggugccgaac..... 1  
 Gi2\_10563743\_x6.....gaucUgagacgucgugggaacacgggg..... 1  
 Gi3\_27513154\_x6.....gccgucagNccccgccaguacugcg..... 1  
 Gl1\_5723032\_x6.....gugggaacacgUggugccgaacu..... 1  
 Gi3\_27487378\_x6.....acgucgugggaacacggggugUcgaacu..... 1  
 Gi3\_27462742\_x6.....gaucggagacgucgugggaGcacgggg..... 1  
 Gi5\_8533471\_x6.....gggaacacUgggugccgaacu..... 1  
 Gi5\_8548681\_x6.....cgugggaacacggggugccgaa..... 0  
 Gi1\_3991861\_x6.....aUgccccgccaguacugcgauccg..... 1  
 Gi2\_10561931\_x6.....aucggagacgucgugggaacCcggggugcc..... 1  
 Gi3\_27507490\_x6.....aucggagUcgucgugggaacacg..... 1  
 Gi2\_10576529\_x6.....aucggagacgucgugggaacGcggg..... 1  
 Gi2\_10579637\_x6.....gaUcacggggugccgaac..... 1  
 Gi2\_10573097\_x6.....ucUggccccgccaguacugc..... 1  
 Gi2\_10571057\_x6.....gugggaacacggggugUcg..... 1  
 Gl1\_5711182\_x6.....gaucggagacgucgugggaacacgggAugcc..... 1  
 Gi3\_27498388\_x6.....gUagacgucgugggaacacgggg..... 1  
 Gi2\_10569881\_x6.....cgugggaCcacggggugcc..... 1  
 Gi2\_10545527\_x6.....aucggagacgucgugggGacacggggug..... 1  
 Gi2\_10586219\_x6.....Ggagaagcgccgucagggccccgc..... 1  
 Gi5\_8550385\_x6.....gggaacacggggugccgUacu..... 1  
 Gi3\_27471274\_x6.....cgucaggcccUgccaguacugc..... 1  
 Gi3\_27462730\_x6.....ggagacgucgugggaacacggggugccA..... 1  
 Gi3\_27466138\_x6.....aUaagcgccgucagggccccgccaguacu..... 1  
 Gi5\_8560801\_x6.....Gcgucgugggaacacggggugccgaac..... 1  
 Gi3\_27487468\_x6.....aacacgCggugccgaacu..... 1  
 Gi3\_27485446\_x6.....cguAggaacacggggugccg..... 1  
 Gi1\_3989155\_x6.....ucguUggaacacggggugccgaac..... 1  
 Gi2\_10577405\_x6.....ggUacacggggugccgaa..... 1  
 Gi5\_8562079\_x6.....acgucgugAgaacacggggugccgaacu..... 1  
 Gi3\_27491686\_x6.....cucguuccgaauuaggaagagaagcgccgu..... 0  
 Gi2\_10560017\_x6.....ucgugggaacacggggugccAaac..... 1  
 Gi3\_27538042\_x6.....gGagagaagcgccgucagggccccgcc..... 1  
 Gi3\_27510220\_x6.....aucggagacgucgugggaaAacgg..... 1  
 Gi5\_8545657\_x6.....ucgugggaacacggggugccgUacu..... 1  
 Gi2\_10553609\_x6.....aggccccAccaguacugc..... 1  
 Gi2\_10566221\_x6.....acgucgCgggaacacggggugccgaacu..... 1  
 Gi2\_10577465\_x6.....aUaagcgccgucagggccccgccagu..... 1

Gi1\_3991903\_x6.....Gucggagacgucgugggaacacggggu..... 1  
 Gi3\_27527092\_x6.....aucggUgacgucgugggaacacg..... 1  
 G1a\_5707936\_x6.....Aagaagcgcgcgucaggccc.....agacgucgugggaacacggggugccgaacu..... 0  
 Gi3\_27508012\_x6.....Aagaagcgcgcgucaggccc..... 1  
 Gi3\_27458458\_x6.....aucAgagacgucgugggaacac..... 1  
 Gi3\_27470668\_x6.....cccgccaguacCgcgaucggagacguc..... 1  
 Gi2\_10570781\_x6.....ucUugggaacacggggugccgaac..... 1  
 Gi5\_8545945\_x6.....ugggaacaNggggugccgaa..... 1  
 Gi2\_10541315\_x6.....Auacugcgaucggagacguc..... 1  
 Gi2\_10579325\_x6.....gggaacacgggguAccgaac..... 1  
 Gi3\_27544960\_x6.....gucagggcccgcagucCugc.....cgucgugggaacacggggugccgaCc..... 1  
 Gi3\_27479290\_x6.....gucagggcccgcagucCugc..... 1  
 Gi3\_27523858\_x6.....Aaggccccgcagucggauc..... 1  
 Gi5\_8537095\_x6.....aUacgucgugggaacacggggugcc..... 1  
 Gi4\_530697\_x6.....gugggaacacggggugccga..... 0  
 Gi1\_3985537\_x6.....ucgugggaacacggggugccgaaAu..... 1  
 Gi2\_10552991\_x6.....cgucgugggaCcacggggugccgaacu..... 1  
 Gi2\_10569377\_x6.....cgucgugggaAacggggugccgaacu..... 1  
 Gi3\_27481510\_x6.....ggCacacggggugccgaacu..... 1  
 G1a\_5713036\_x6.....gugggaacacggggugCggaacu..... 1  
 Gi3\_27545260\_x6.....Gcgccaguacugcgaucgg..... 1  
 Gi2\_10560203\_x6.....ccccgcagucgucggaucgg..... 1  
 G1a\_5706094\_x6.....ugggaacacgggUugccgaacu..... 1  
 Gi2\_10588295\_x6.....gucgugggNacacggggugccga..... 1  
 Gi5\_8548825\_x6.....gggaacacCgggugccgaacu..... 1  
 Gi3\_27499204\_x6.....caggccccgUcaguacugc..... 1  
 G1a\_5715988\_x6.....Uaagcgcgcgucaggccccgcaguc..... 1  
 Gi3\_27514996\_x6.....aggGcccgcagucggaucg..... 1  
 Gi5\_8559457\_x6.....cgucgugggaacacgggAugccgaacu..... 1  
 Gi3\_27549022\_x6.....gggaacacggggugcUgaa..... 1  
 Gi3\_27506236\_x6.....aUgccccgcagucggaucggagac..... 1  
 Gi2\_10590419\_x6.....aCgccccgcagucggaucgga..... 1  
 Gi3\_27470818\_x6.....ucagggcccgcagucCgcgauc..... 1  
 Gi2\_10574621\_x6.....caggccccgcagucggaucggaU..... 1  
 Gi5\_8559145\_x6.....cUucgugggaacacggggugcc..... 1  
 Gi3\_27479890\_x6.....gccagucggaucggaucggaGcuc..... 1  
 Gi2\_10546451\_x6.....cAucgugggaacacggggugcc..... 1  
 Gi2\_10560929\_x6.....caggccccgcagucggaucggaucgga..... 0  
 Gi2\_10567565\_x6.....ugggaGcacggggugccgaa..... 1  
 Gi3\_27544720\_x6.....aggccUcgcagucggaucg..... 1  
 Gi3\_27471334\_x6.....gggaacacgUggugccgaac..... 1  
 Gi3\_27472924\_x6.....ugggaCcacggggugccga..... 1  
 Gi2\_10561175\_x6.....aacacggggugccgaaGu..... 1  
 Gi2\_10564715\_x6.....aucgUagacgucgugggaaca..... 1  
 Gi3\_27466534\_x6.....Ugucgugggaacacggggugccga..... 1  
 Gi5\_8534647\_x6.....gUccccgcagucggaucgga..... 1  
 Gi3\_27517702\_x6.....Gcgucagggcccgcagucggaucg..... 1

Gi3\_27471124\_x6.....aucggagacgucguAggaaacacggggugcc..... 1  
Gi1\_3992011\_x6.....cUgagacgucgugggaacacggggu..... 1  
Gi5\_8538787\_x6.....aUacgucgugggaacacggggugc..... 1  
Gi3\_27537988\_x6.....Ugccccgccaguacugcgauccgagac..... 1  
Gi1\_3992929\_x6.....gucgugggGacacggggugccgaacu..... 1  
Gi3\_27491392\_x6.....ugggaacaAggggugccgaac..... 1  
Gi2\_10557239\_x6.....ucgugggaaAacggggugccgaacu..... 1  
Gi3\_27464098\_x6.....uGaggccccgccaguacugcgauccg..... 1  
Gi3\_27546226\_x6.....gaucggagacgucgugggCacacgg..... 1  
Gi2\_10544261\_x6.....cUggccccgccaguacugc..... 1  
Gi3\_27473710\_x6.....Ggacgucgugggaacacggg..... 1  
Gi3\_27475672\_x6.....agacgucgNgggaacacggggugccgaac..... 1  
Gi2\_10576025\_x6.....aucggagacAucgugggaacac..... 1  
Gi3\_27479734\_x6.....cccgccUguacugcgauccgagacguc..... 1  
Gi2\_10564235\_x6.....aAcggagacgucgugggaacacggg..... 1  
Gi2\_10544357\_x6.....gaucggagacgucgugggaGcac..... 1  
Gi1\_3991435\_x6.....ucgugggaacacggUgugccgaacu..... 1  
Gi5\_8548369\_x6.....cgugggaacacUgggugccgaacu..... 1  
Gi2\_10584323\_x6.....gaucggagNcgucgugggaacacggg..... 1  
Gi2\_10586807\_x6.....gucgugggaacacggggCgccgaac..... 1  
Gi3\_27498754\_x6.....agGcgucgugggaacacggggugccgaac..... 1  
Gi3\_27547912\_x6.....gaacacggggugcAgaac..... 1  
Gi3\_27461548\_x6.....gcgccgucagggccccgccCgu..... 1  
Gi5\_8552209\_x6.....Gucggagacgucgugggaacacgggg..... 1  
Gi1\_3977047\_x6.....ggaacacggggugccgaacAu..... 1  
Gi3\_27499330\_x6.....cgucgugggaCcacggggugccg..... 1  
Gi3\_27479254\_x6.....aGggccgucagggccccgccaguacugc..... 1  
Gi3\_27524794\_x6.....cUgagacgucgugggaacacggggug..... 1  
Gi3\_27539656\_x6.....Gggccgucagggccccgccaguac..... 1  
G1a\_5711500\_x6.....aGugcgauccgagacgucgug..... 1  
Gi3\_27487762\_x6.....gaucggagacgucgugggaaAacggggu..... 1  
Gi1\_3983965\_x6.....caggccccgccaguacugcU..... 1  
Gi5\_8537767\_x6.....cgCgggaacacggggugccgaac..... 1  
Gi2\_10561181\_x6.....Cggccccgccaguacugc..... 1  
Gi3\_27481024\_x6.....ggaacacgggCugccgaacu..... 1  
Gi3\_27484966\_x6.....Uaagagaagcgccgucaggg..... 1  
Gi2\_10553639\_x6.....cggagacAucgugggaacacggggugcc..... 1  
Gi1\_3983221\_x6.....ucgugggaCcacggggugccgaacu..... 1  
Gi2\_10558859\_x6.....aggcccUgccaguacugc..... 1  
Gi3\_27495172\_x6.....uacugcgauccgagGcguc..... 1  
Gi3\_27538636\_x6.....cgugggaacacggggugcA..... 1  
Gi5\_8534803\_x6.....ugggaacacggggugccgaUc..... 1  
Gi5\_8555197\_x6.....Gggccccgccaguacugcga..... 1  
Gi3\_27477928\_x6.....cgugggaacacggggugGcgaac..... 1  
G1a\_5721676\_x6.....cgucagggccccgccagCacugcg..... 1  
Gi2\_10566743\_x6.....ggagGcgucgugggaacacggggugc..... 1  
Gi3\_27491014\_x6.....cggagacgucgugggGacacg..... 1



|                      |                                       |   |
|----------------------|---------------------------------------|---|
| Gi3_27540184_x6..... | cgugAgaacacggggugccga.....            | 1 |
| Gi3_27507004_x6..... | caUgccccgccaguacugcgau.....           | 1 |
| Gi2_10583351_x6..... | gucgugggaacacgAggugccgaacu.....       | 1 |
| Gi2_10582385_x6..... | .Ggggaacacggggugccgaacuu.....         | 1 |
| Gi2_10563761_x6..... | cgucgugggaacGcggggugccga.....         | 1 |
| Gi3_27500578_x6..... | .ugggaacCcggggugccga.....             | 1 |
| Gi2_10541627_x6..... | gggNacacggggugccgaacu.....            | 1 |
| Gi3_27542920_x6..... | gaucggagNcgucgugggaacacg.....         | 1 |
| Gi5_8532505_x6.....  | guCggaacacggggugccgaacu.....          | 1 |
| G1a_5707444_x6.....  | .Cggaacacggggugccga.....              | 1 |
| Gi3_27535420_x6..... | .cggGgacgucgugggaacacggggugcc.....    | 1 |
| Gi1_3985315_x6.....  | gaacUcggggugccgaacu.....              | 1 |
| Gi3_27500056_x6..... | ucUgccccgccaguacugcg.....             | 1 |
| Gi2_10570421_x6..... | .guggAaacacggggugccga.....            | 1 |
| Gi2_10578527_x6..... | Uucggagacgucgugggaacacggggugc.....    | 1 |
| Gi5_8553313_x6.....  | .gugggaacCcggggugccga.....            | 1 |
| Gi1_3981103_x6.....  | cgugggaacacggggugccgaAu.....          | 1 |
| Gi3_27544942_x6..... | gaagagaaNcgccgucagg.....              | 1 |
| G1a_5722474_x6.....  | .gugggaacacgggAugccgaacu.....         | 1 |
| Gi2_10568813_x6..... | aucggaAacgucgugggaaca.....            | 1 |
| Gi3_27543226_x6..... | .cgugggaacacgUggugccg.....            | 1 |
| Gi5_8554033_x6.....  | Ggucgugggaacacggggugccgaac.....       | 1 |
| Gi2_10574519_x6..... | gucgugggaacCcggggugcc.....            | 1 |
| Gi5_8558005_x6.....  | gucgugggaacacggAgugccgaacu.....       | 1 |
| Gi5_8532733_x6.....  | .ugggaacacggggCgccga.....             | 1 |
| Gi3_27477076_x6..... | .Agucgugggaacacggggugcc.....          | 1 |
| Gi2_10576919_x6..... | .gugUgaacacggggugccgaac.....          | 1 |
| Gi3_27495946_x6..... | .ugggUacacggggugccga.....             | 1 |
| Gi3_27481096_x6..... | .guCggaacacggggugccgaac.....          | 1 |
| G1a_5731456_x6.....  | .gugggaacacggggugccgaGc.....          | 1 |
| Gi3_27462850_x6..... | cccgccaguacugcgauccgCgacguc.....      | 1 |
| Gi2_10549859_x6..... | .gugggUacacggggugccga.....            | 1 |
| Gi4_529941_x6.....   | .gugggaacNcggggugccgaacu.....         | 1 |
| Gi1_3978679_x6.....  | .gucagcccccgccaguacugcg.....          | 0 |
| Gi2_10552091_x6..... | gaucggagNcgucgugggaaca.....           | 1 |
| Gi2_10561121_x6..... | .ugggaacacggggugcAga.....             | 1 |
| Gi2_10574009_x6..... | .caggGccccgccaguacugcgau.....         | 1 |
| G1a_5725462_x6.....  | .gggaacacgAggugccgaacu.....           | 1 |
| G1a_5704018_x6.....  | .ggGacacggggugccgaacu.....            | 1 |
| Gi3_27525928_x6..... | .cAucaggccccgccaguacugcg.....         | 1 |
| Gi2_10553717_x6..... | .aggccccgccaguacugAgauc.....          | 1 |
| Gi3_27542158_x6..... | .uGggagacgucgugggaacacgggu.....       | 1 |
| G1a_5725492_x6.....  | Gagagaagcggcugcagggcc.....            | 1 |
| Gi5_8547457_x6.....  | cugcgauccggagacgucgugggaacacgggg..... | 0 |
| G1a_5712406_x6.....  | .ugggaacacggggugccgGacu.....          | 1 |
| Gi3_27506260_x6..... | cgucgGgggaacacggggugccgaacu.....      | 1 |
| Gi3_27490438_x6..... | .ugggaacacggggAgccga.....             | 1 |

Gi5\_8532787\_x6.....acgucguggggaacaUggggugccgaacu..... 1  
 Gi5\_8553199\_x6.....cgucguggggaacacggggGgc..... 1  
 Gl1a\_5712124\_x6.....Uucaggccccgccaguacug..... 1  
 Gi3\_27523426\_x6.....cgggagacgNcguggggaacacg..... 1  
 Gi5\_8535871\_x6.....gugggaacacCgggugccgaacu..... 1  
 Gi2\_10579163\_x6.....Ugugggaacacggggugccga..... 1  
 Gi3\_27462334\_x6.....cgAcguggggaacacggggugc..... 1  
 Gi5\_8549215\_x6.....acgucguggggaacacggggugccgaaAu..... 1  
 Gi2\_10572647\_x6.....Ggcgaucgggagacgucguggggaaca..... 1  
 Gi3\_27472750\_x6.....guUaggccccgccaguacugcg..... 1  
 Gi3\_27527578\_x6.....ucguggggaacacggggugccA..... 1  
 Gi5\_8562625\_x6.....cgugUgaacacggggugccgaac..... 1  
 Gi5\_8555209\_x6.....aucgggagacgucguggggaacacggggG..... 1  
 Gi1\_3989461\_x6.....acgucguggggaacacAggggugccgaacu..... 1  
 Gi4\_531369\_x6.....cguggggaacacggggugccgaaAu..... 1  
 Gi4\_530301\_x6.....aucgggagacgucguggggaacacggg..... 0  
 Gi3\_27480568\_x6.....ggagacgucguggggaacacggggCgcc..... 1  
 Gi2\_10567985\_x6.....gaucgggagacgucAuggggaacacggg..... 1  
 Gl1a\_5729320\_x6.....Uggaacacggggugccgaac..... 1  
 Gi3\_27472900\_x6.....agacgucguggggaacacggggugccgaUc..... 1  
 Gi3\_27537508\_x6.....cguggggaacacgggAugccga..... 1  
 Gi2\_10553915\_x6.....cgucguggggaGcacggggugccga..... 1  
 Gi5\_8545693\_x6.....Cuggggaacacggggugccgaa..... 1  
 Gi3\_27495550\_x6.....caggccccUgccaguacugcga..... 1  
 Gi3\_27527860\_x6.....ggaacacgCggugccgaacu..... 1  
 Gi3\_27499444\_x6.....agacgucgCgggaacacggggugccgaacu..... 1  
 Gi2\_10541705\_x6.....agccccgcUaguacugc..... 1  
 Gi5\_8549029\_x6.....gucaggccccgccCguacugcg..... 1  
 Gi2\_10544807\_x6.....ggccccgccagCacugcgauc..... 1  
 Gi5\_8552347\_x6.....cguAggaacacggggugccgaac..... 1  
 Gi3\_27535750\_x6.....ugggaacacggggugUcg..... 1  
 Gi1\_3990535\_x6.....gucgugggaaAacggggugccgaacu..... 1  
 Gi3\_27494800\_x6.....ucaggccccgccaguacCgcg..... 1  
 Gl1a\_5727262\_x6.....uUcgaucgggagacgucgug..... 1  
 Gi5\_8550493\_x6.....Aacgucguggggaacacggggugccgaacu..... 1  
 Gi2\_10554305\_x6.....Uagacgucguggggaacacggggugccgaac..... 1  
 Gi3\_27500524\_x6.....ugggaacacgggguCccgaacu..... 1  
 Gi3\_27518074\_x6.....acgucgGgggaacacggggugccgaacu..... 1  
 Gi3\_27520438\_x6.....aucgggagacgucgugAgaacac..... 1  
 Gi2\_10559249\_x6.....agccccgccaguacugUg..... 1  
 Gi3\_27493072\_x6.....Agagacgucguggggaacacgggg..... 1  
 Gi3\_27499300\_x6.....aAcgggagacgucguggggaacacggggugcc..... 1  
 Gi3\_27461278\_x6.....gugNgaacacggggugccga..... 1  
 Gi2\_10567139\_x6.....gugAgaacacggggugccga..... 1  
 Gi3\_27468658\_x6.....cguggggaacacggggAgcc..... 1  
 Gi3\_27503182\_x6.....cgccgucaNccccgccaguacugc..... 1  
 Gi3\_27547012\_x6.....caggccccUgccaguacugc..... 1

Gi2\_10584155\_x6.....agGacugcgauccggagacgu..... 1  
 Gi2\_10550789\_x6.....cGgcccagucugcgaucc..... 1  
 Gi3\_27465472\_x6.....aucggagCcgucuggggaacacggggugcc..... 1  
 Gi3\_27522604\_x6.....ugggaacacUggggugccgaac..... 1  
 Gi3\_27514318\_x6.....guUgugggaacacggggugccga..... 1  
 Gi2\_10559639\_x6.....acgucuggggaacCcgggugcc..... 1  
 Gi3\_27544312\_x6.....Accaguacugcgauccggagacg..... 1  
 Gi2\_10563833\_x6.....agggcccggccaguaUugcgga..... 1  
 Gi2\_10545911\_x6.....ugggGacacggggugccgaa..... 1  
 Gi2\_10571615\_x6.....ucguCggaacacggggugccgaacu..... 1  
 Gi5\_8558023\_x6.....agacgucuggggaGcacggggugccgaacu..... 1  
 Gi5\_8547415\_x6.....acgucuggggaacacggAgugccgaacu..... 1  
 G1a\_5719312\_x6.....cgugggaaNacggggugcc..... 1  
 Gi3\_27527416\_x6.....ucguggAaacacggggugccgaac..... 1  
 Gi3\_27534934\_x6.....cgucuggggaacCcgggugccgaac..... 1  
 Gi3\_27524446\_x6.....ggcccUgcccagucugcgaucc..... 1  
 Gi2\_10565819\_x6.....ugggaacaUggggugccgaac..... 1  
 G1a\_5727964\_x6.....aacacggggugccgaGcu..... 1  
 Gi2\_10563659\_x6.....ggcccggccagucugcgauccggagacgucgu..... 0  
 Gi3\_27518986\_x6.....cgggagacgucuggggaacCcg..... 1  
 Gi3\_27530728\_x6.....uAgugggaacacggggugccgaacu..... 1  
 G1a\_5727166\_x6.....cgauccggagacgucuggggaacacggggugcc..... 0  
 Gi3\_27503422\_x6.....aacacggggugGcgaacu..... 1  
 Gi3\_27478654\_x6.....caguacugcgauccggGgacgucgu..... 1  
 Gi3\_27542164\_x6.....aggccUgcccagucugcgga..... 1  
 Gi2\_10554503\_x6.....ugggaacacggggugUcga..... 1  
 Gi3\_27504250\_x6.....ugggaacCcgggugccg..... 1  
 Gi2\_10559513\_x6.....aucgggagacgucuggggaacacggggUacc..... 1  
 Gi5\_8554939\_x6.....gAcgugggaacacggggugccgaacu..... 1  
 Gi3\_27493678\_x6.....Gcccagucugcgauccggagacgu..... 1  
 Gi5\_8540803\_x6.....caUgcccggccagucugcg..... 1  
 Gi3\_27459772\_x6.....aucgggagacAucgugggaacacggg..... 1  
 Gi2\_10573655\_x6.....cgugggaacacggAgugcc..... 1  
 Gi2\_10584671\_x6.....ggaacacggggugAcgaacu..... 1  
 Gi2\_10555181\_x6.....ggaacacggggugccgaacG..... 1  
 Gi3\_27510364\_x6.....cgucuggggaacacggggG..... 1  
 Gi4\_533289\_x6.....ugggaacacggggugccgaacA..... 1  
 Gi2\_10568093\_x6.....cgucgCgggaacacggggugc..... 1  
 Gi2\_10546391\_x6.....gugggaacaAggggugccgaac..... 1  
 Gi5\_8559787\_x6.....acgucuggggaacacggggugcUgaacu..... 1  
 Gi3\_27532846\_x6.....Aucgugggaacacggggugccga..... 1  
 Gi3\_27529570\_x6.....cgucugAgaacacggggugcc..... 1  
 Gi2\_10571339\_x6.....aucggGgacgucuggggaacacggggugccga..... 1  
 G11\_3980233\_x6.....ggGacacggggugccgaac..... 1  
 Gi3\_27465340\_x6.....cgucuggggaacacggggUaccg..... 1  
 G11\_3986707\_x6.....ucgugggaacacggggugccgCac..... 1  
 Gi2\_10568453\_x6.....cgucUugggaacacggggugccgaacu..... 1

|                      |                                      |   |
|----------------------|--------------------------------------|---|
| Gi2_10553837_x6..... | gucgugggaacaUggggugccgaacu.....      | 1 |
| Gi1_3990133_x6.....  | ccgccaguacugcgauccg.....             | 0 |
| Gi5_8556115_x6.....  | gaacacgUggugccgaacu.....             | 1 |
| Gi5_8560105_x6.....  | ggaacGcggggugccgaac.....             | 1 |
| Gi2_10577039_x6..... | Aucaggccccgccaguacugc.....           | 1 |
| Gi1_3990385_x6.....  | ucaggccccgccaguacAgcgauc.....        | 1 |
| Gi3_27470710_x6..... | agacgucguggaacGcggggugccgaac.....    | 1 |
| Gi2_10573391_x6..... | aucggagacgucgugggGacacgg.....        | 1 |
| Gi2_10564613_x6..... | Gcggagacgucguggaacacggggu.....       | 1 |
| Gi3_27496828_x6..... | ugggaacacgggAugccga.....             | 1 |
| Gi1_3975655_x6.....  | aucggGgacgucgugggaaca.....           | 1 |
| Gi2_10561979_x6..... | Ggggagacgucguggaacacggggu.....       | 1 |
| Gi3_27487738_x6..... | ugggaacacgggCugccgaac.....           | 1 |
| Gi3_27528220_x6..... | ggagacgucguggaacGcaccggggu.....      | 1 |
| Gi2_10576883_x6..... | Ucgcgugggaacacggggugccgaacu.....     | 1 |
| Gi2_10564181_x6..... | cgucgCgggaacacggggugccg.....         | 1 |
| Gi1_3974401_x6.....  | gacgCcgugggaacacggggugccgaac.....    | 1 |
| Gi5_8546353_x6.....  | Caacacggggugccgaac.....              | 1 |
| Gi2_10583591_x6..... | Aacgucguggaacacggggugccgaacu.....    | 1 |
| G1a_5724346_x6.....  | aucggagacgucguggaacGcggg.....        | 1 |
| Gi5_8538421_x6.....  | ugggaaUacggggugccgaac.....           | 1 |
| Gi3_27473122_x6..... | aucggagacgucgCgggaacacgggg.....      | 1 |
| Gi3_27520012_x6..... | gggaacacgggguAccgaa.....             | 1 |
| Gi2_10545449_x6..... | Uaggccccgccaguacugcgau.....          | 1 |
| Gi2_10578125_x6..... | Gaguacugcgauccggagacguc.....         | 1 |
| G1a_5717860_x6.....  | cguggAaacacggggugccgaacu.....        | 1 |
| G1a_5731636_x6.....  | gaagcgccgucaggccccgccaguacugcg.....  | 0 |
| Gi2_10580135_x6..... | cgggagacgucguggaacacggggAgcc.....    | 1 |
| Gi3_27542656_x6..... | ucgggagacgucguggaacCcg.....          | 1 |
| Gi4_530199_x6.....   | ugggaacacggggugccgCacu.....          | 1 |
| Gi2_10563215_x6..... | ugggaacacggggGgccga.....             | 1 |
| Gi1_3976129_x6.....  | Accaguacugcgauccggagacg.....         | 1 |
| Gi3_27480814_x6..... | gugggCacacggggugccgaa.....           | 1 |
| Gi5_8534389_x6.....  | Uagacgucguggaacacacggggugccgaac..... | 1 |
| Gi2_10577987_x6..... | ugggaacacggAgugccga.....             | 1 |
| Gi3_27458524_x6..... | ccUgccaguacugcgau.....               | 1 |
| Gi2_10579841_x6..... | aucAgagacgucguggaacac.....           | 1 |
| Gi2_10581263_x6..... | ucguggaacacacggggGcaccg.....         | 1 |
| Gi5_8553649_x6.....  | acgucgugNgaacacggggugccgaac.....     | 1 |
| Gi2_10570103_x6..... | gccauuacugcgauccggagacguc.....       | 1 |
| Gi1_3987793_x6.....  | aucggagacgucguggaacacgggU.....       | 1 |
| Gi2_10568429_x6..... | agGcgcgucgggaacacggggugccgaacu.....  | 1 |
| Gi2_10590413_x6..... | cgucguggaacacggggGgccga.....         | 1 |
| Gi2_10558073_x6..... | gugggaacacggggugcAga.....            | 1 |
| Gi2_10566023_x6..... | aGgagaagcgccgucaggcc.....            | 1 |
| Gi1_3977773_x6.....  | gggaacacggggugccgaaAu.....           | 1 |
| Gi2_10572023_x6..... | caguacugNgaucggagacguc.....          | 1 |

Gi3\_27486640\_x6.....ucgugggaacacggggugUcgaac..... 1  
Gi2\_10545173\_x6.....cAucgugggaacacggggugccg..... 1  
Gi3\_27531334\_x6.....ucgugggaacacgAggugccgaac..... 1  
Gi3\_27490324\_x6.....Aucgugggaacacggggugcc..... 1  
Gi3\_27517918\_x6.....gacgucgCgggaacacggggugccgaacu..... 1  
G1a\_5731882\_x6.....ggccccgccaguacugcgauccgagacguc..... 0  
Gi2\_10567667\_x6.....Ugccccgccaguacugcgauccgagacg..... 1  
Gi3\_27459520\_x6.....Ggaucggagacgucgugggaacacg..... 1  
Gi2\_10554539\_x6.....Cucgugggaacacggggugccgaac..... 1  
Gi2\_10582049\_x6.....ucgugggaacacggggugccgaacG..... 1  
Gi3\_27517396\_x6.....gaucggagacgucgugggaacGcggg..... 1  
Gi1\_3980623\_x6.....cgugggaacacgAggugccgaacu..... 1  
Gi3\_27496444\_x6.....gaucUgagacgucgugggaacacggg..... 1  
Gi3\_27542104\_x6.....cgugggaacacggggGgccga..... 1  
Gi2\_10561811\_x6.....aucggagacgucgCgggaacacggggugcc..... 1  
Gi3\_27481264\_x6.....caggccccgccaguacugcgaC..... 1  
Gi1\_3980587\_x6.....guacugcgauccgagacguc..... 0  
Gi2\_10572653\_x6.....cgugggaacCcgggugcc..... 1  
Gi1\_3975115\_x6.....cGggccccgccaguacugcg..... 1  
Gi5\_8569687\_x5.....acguGuggggaacacggggugccgaacu..... 1  
Gi3\_27636117\_x5.....gUagacgucgugggaacacggggugccga..... 1  
Gi2\_10599450\_x5.....ucaggcccNgccaguacugcg..... 1  
Gi2\_10611045\_x5.....acgucgugggaacacggAgugcc..... 1  
Gi2\_10644310\_x5.....aggAcccgccaguacugcgauc..... 1  
Gi2\_10645570\_x5.....gccccgccagCacugcgauc..... 1  
Gi3\_27619237\_x5.....ucggagacNucgugggaacacg..... 1  
Gi2\_10617790\_x5.....cGccgccaguacugcgaucgg..... 1  
Gi4\_537203\_x5.....ugggaacacggggugccgaGcu..... 1  
Gi2\_10625595\_x5.....Ugugggaacacggggugccgaa..... 1  
Gi5\_8576787\_x5.....ccccgccaguacugcgauc..... 0  
Gi2\_10635955\_x5.....gUcaguacugcgaucggagacguc..... 1  
Gi2\_10618775\_x5.....aggccccAccaguacugcg..... 1  
G1a\_5763747\_x5.....ggaacacgggguUccgaacu..... 1  
Gi2\_10638185\_x5.....aUcggcgucaggccccgccaguacugc..... 1  
Gi3\_27637977\_x5.....aggccccgccaguacAgcg..... 1  
Gi2\_10591300\_x5.....ucgugggaCcacggggugccgaacu..... 1  
Gi2\_10612745\_x5.....agacgucgugggaacacggggAgcc..... 1  
G1a\_5748842\_x5.....gAgaacacggggugccgaacu..... 1  
Gi5\_8579062\_x5.....cgugggaacacgUggugccgaac..... 1  
G1a\_5739392\_x5.....Agagacgucgugggaacacg..... 1  
Gi2\_10640795\_x5.....aggccccgccagGacugc..... 1  
Gi5\_8578257\_x5.....ugUgaucggagacgucgug..... 1  
Gi3\_27602687\_x5.....gaGgagaagcgccgucaggccc..... 1  
Gi3\_27586987\_x5.....cgucaggccccgccaguacCg..... 1  
G1a\_5746157\_x5.....ugggaacacggggugUcgaacu..... 1  
Gi5\_8593867\_x5.....Ugagacgucgugggaacacggggugcc..... 1  
Gi2\_10650305\_x5.....ucgugggaacacgggAugccgaac..... 1

Gi1\_4015060\_x5.....aGgucgugggaacacggggugcc..... 1  
 Gi3\_27655857\_x5.....aAgccccgccaguacugcga..... 1  
 Gi3\_27570392\_x5.....gaacaUggggugccgaac..... 1  
 Gi3\_27565172\_x5.....aggGccccgccaguacugcgauc..... 1  
 G1a\_5757942\_x5.....cgccaguacugcgaucggCgacguc..... 1  
 Gi3\_27650897\_x5.....aucggagacgucUugggaacacgggg..... 1  
 Gi2\_10616670\_x5.....aucggagacgucAugggaacacggggg..... 1  
 Gi2\_10601305\_x5.....acAucgugggaacacggggugcc..... 1  
 Gi2\_10591130\_x5.....aUacgucgugggaacacggggug..... 1  
 Gi1\_3998300\_x5.....gucAugggaacacggggugccgaacu..... 1  
 Gi3\_27565012\_x5.....gacgucguNggaacacggggugccgaac..... 1  
 Gi2\_10620970\_x5.....gugggaacacgggggUaccg..... 1  
 Gi3\_27624122\_x5.....cgugggaCcacggggugccgaa..... 1  
 Gi2\_10605310\_x5.....cgCgaggccccgccaguacugcg..... 1  
 Gi5\_8576997\_x5.....Naacacggggugccgaacu..... 1  
 Gi3\_27553002\_x5.....gaucggagacgucgugggaacacggAgu..... 1  
 Gi1\_4004275\_x5.....acgucgugggaGcacggggugccgaacu..... 1  
 Gi2\_10643380\_x5.....gaucggagNcgucgugggaacacggggugcc..... 1  
 Gi3\_27604817\_x5.....caggccUcgccaguacugcgauc..... 1  
 Gi2\_10599855\_x5.....cgucguggNaacacgggg..... 1  
 Gi3\_27610897\_x5.....aucggagacguGgugggaacacggggg..... 1  
 Gi2\_10610430\_x5.....acgucgugggaacacAgggugccgaacu..... 1  
 Gi2\_10626745\_x5.....cgugggaacacggAgugccgaa..... 1  
 Gi2\_10627205\_x5.....ggccccgccaguacugcgaCc..... 1  
 Gi5\_8600702\_x5.....gaacacgggCugccgaacu..... 1  
 G1a\_5765337\_x5.....cgugggaacaUggggugccgaacu..... 1  
 Gi2\_10630670\_x5.....aucggagacgucgugggaacacgAggugcc..... 1  
 Gi5\_8581477\_x5.....ggaacacggUgugccgaacu..... 1  
 Gi5\_8570757\_x5.....ucggagacgucgugggGacacg..... 1  
 Gi3\_27602312\_x5.....gGucggagacgucgugggaacacggggugc..... 1  
 Gi3\_27606737\_x5.....cgucgugggaacacggAgugc..... 1  
 Gi2\_10621805\_x5.....gaGcggagacgucgugggaacacggggg..... 1  
 Gi2\_10649530\_x5.....cgucgugggaacaUggggugccgaacu..... 1  
 Gi5\_8585717\_x5.....acgucgugggCaacacggggugccgaacu..... 1  
 Gi3\_27552607\_x5.....gGcaguacugcgaucgga..... 1  
 Gi3\_27572762\_x5.....Accgucaggccccgccaguac..... 1  
 Gi5\_8566107\_x5.....ugggaacacggggAgccgaac..... 1  
 Gi2\_10600840\_x5.....aucggagacguUgugggaacacggggugc..... 1  
 Gi2\_10634175\_x5.....aggccAcgccaguacugcga..... 1  
 Gi3\_27561047\_x5.....aUagaagcgccgucagggccc..... 1  
 Gi3\_27609892\_x5.....acugcgaucggagacgAcgug..... 1  
 Gi1\_4016075\_x5.....Ugagacgucgugggaacacggggg..... 1  
 Gi2\_10649455\_x5.....aucggCgacgucgugggaacacggggugcc..... 1  
 Gi3\_27655467\_x5.....gaaUacggggugccgaac..... 1  
 Gi5\_8571142\_x5.....cgugggaacGcggggugccga..... 1  
 Gi3\_27593387\_x5.....caggcUccgccaguacugc..... 1  
 Gi3\_27563487\_x5.....ggagacgucgugggaGcacggggugccg..... 1

Gi3\_27572862\_x5.....cgucgugggCacacggggugcc..... 1  
 Gi3\_27613682\_x5.....cUcugugggaacacggggug..... 1  
 Gi5\_8568832\_x5.....Ugagacgucgugggaaca..... 1  
 Gi2\_10608205\_x5.....cgccgucaNgccccgccaguacugc..... 1  
 Gi3\_27651132\_x5.....gaucggagacgucgugggaacacggggugccga..... 0  
 Gi3\_27622342\_x5.....agUccccgccaguacugcgau..... 1  
 Gi2\_10646590\_x5.....aGgagaagcgccgucaggcccc..... 1  
 Gi5\_8563927\_x5.....gugggaacaUggggugccgaac..... 1  
 Gi5\_8590872\_x5.....gugggaacacAgggugcc..... 1  
 Gi3\_27590137\_x5.....agacgucgugggaacacgAggugccgaacu..... 1  
 Gi3\_27559272\_x5.....Gggagacgucgugggaacacggg..... 1  
 Gi3\_27605407\_x5.....cguAggaacacggggugccgaa..... 1  
 Gi5\_8566967\_x5.....cgucgugggaacacggggugUcgaacu..... 1  
 Gl1\_5748337\_x5.....gugggaGcacggggugcc..... 1  
 Gl1\_5743502\_x5.....aUagaagcgccgucaggccccgc..... 1  
 Gi2\_10599810\_x5.....aucggagacgucgugggaacacgAg..... 1  
 Gi2\_10607130\_x5.....gugggaacacggCgugccgaac..... 1  
 Gi3\_27564522\_x5.....cgugggaacaAgggugccgaac..... 1  
 Gi5\_8576267\_x5.....guUgugggaacacggggugccgaac..... 1  
 Gi3\_27568247\_x5.....gaUgagaagcgccgucaggccccgc..... 1  
 Gl1\_5753562\_x5.....Ugagacgucgugggaacacggggugc..... 1  
 Gl1\_5738917\_x5.....Ggaagcgccgucaggccccgc..... 1  
 Gi2\_10628195\_x5.....Ucugcugugggaacacggggugc..... 1  
 Gi5\_8590027\_x5.....cgAgggaacacggggugccga..... 1  
 Gi1\_3996840\_x5.....gggaacacggggAgccgaacu..... 1  
 Gi3\_27638262\_x5.....ccccUccaguacugcgauc..... 1  
 Gl1\_5752897\_x5.....aUaagcgccgucaggccccgcca..... 1  
 Gi2\_10593460\_x5.....agacgucgugggaacacggggugccgaCcu..... 1  
 Gi3\_27616912\_x5.....aggccccgccaguacAgc..... 1  
 Gi3\_27567812\_x5.....aUagaagcgccgucaggccccgccaguacu..... 1  
 Gi2\_10615775\_x5.....aucggagacgucgugggaCcacg..... 1  
 Gi1\_3999990\_x5.....Gcggagacgucgugggaacacggggugcc..... 1  
 Gi2\_10641105\_x5.....ugggaacacggggugUcgaac..... 1  
 Gi5\_8601857\_x5.....gggaCcacggggugccgaacu..... 1  
 Gi5\_8563977\_x5.....acgucgugggaCcacggggugccgaacu..... 1  
 Gi3\_27574812\_x5.....aggccccgccagAacugcgauc..... 1  
 Gi2\_10612915\_x5.....ucgugggaacacggggugAcgaacu..... 1  
 Gi2\_10647105\_x5.....ucgugggaacacggggugccgaaAu..... 1  
 Gi3\_27642377\_x5.....Cacgucgugggaacacggggugccgaac..... 1  
 Gi2\_10630710\_x5.....aguacugcNaucggagacguc..... 1  
 Gi2\_10623780\_x5.....ucgugggCacacggggugccgaacu..... 1  
 Gi3\_27646937\_x5.....gccgucaggccccgccagCac..... 1  
 Gi3\_27624332\_x5.....ccccgcUaguacugcgauc..... 1  
 Gi3\_27621852\_x5.....ggaacaAgggugccgaacu..... 1  
 Gi3\_27632672\_x5.....Gcugcugugggaacacggggugccg..... 1  
 Gi2\_10627300\_x5.....cgugggaacacggggugAc..... 1  
 Gi2\_10631780\_x5.....Gagagaagcgccgucaggcccc..... 1

Gi5\_8595952\_x5.....ggaacacggggugccgaUc..... 1  
Gi2\_10595715\_x5.....cccgccagNacugcgauccgagacguc..... 1  
Gi1\_3996665\_x5.....ucguggAaacacggggugcc..... 1  
Gi5\_8578357\_x5.....gugggaaGacggggugccgaacu..... 1  
Gi2\_10629335\_x5.....gaucggagacgucgugggaaacGcggggug..... 1  
Gi3\_27617722\_x5.....ugggaaacacggggugAcga..... 1  
Gi2\_10609040\_x5.....cgucguggAaacacggggugccgaacu..... 1  
Gi3\_27590072\_x5.....caggccccgccaguacuAcg..... 1  
Gi3\_27595087\_x5.....gGcgucgugggaaacacggggugccg..... 1  
Gi3\_27581497\_x5.....ucgugggaaacacggCgugccgaacu..... 1  
Gi3\_27632347\_x5.....Gccccccaguacugcgau..... 1  
Gi2\_10592815\_x5.....aggccccgccaguacugcgauccgagGc..... 1  
Gi2\_10615510\_x5.....aagagUagcgccgucagggcc..... 1  
Gi2\_10622605\_x5.....cgccaguacugcgauccgCgac..... 1  
Gi2\_10624295\_x5.....ggaacUcggggugccgaacu..... 1  
Gi3\_27589047\_x5.....acgAcgugggaaacacggggugccgaacu..... 1  
Gi3\_27653902\_x5.....gcgaucggGgacgucgug..... 1  
Gi1a\_5760732\_x5.....gGacugcgauccgagacgucg..... 1  
Gi2\_10644910\_x5.....cgucagggccccgcUaguacugc..... 1  
Gi1\_3999295\_x5.....gaucggagacgucguggga..... 0  
Gi1\_4002000\_x5.....gugggaGcacggggugccga..... 1  
Gi3\_27606397\_x5.....gugggaaacGggggugccgaac..... 1  
Gi3\_27560932\_x5.....cgAcaggccccgccaguacug..... 1  
Gi2\_10600275\_x5.....aggccccgccaguacugU..... 1  
Gi2\_10643485\_x5.....ucggagacNucgugggaaacacggggugcc..... 1  
Gi1\_4011250\_x5.....aucggagacgucgugggaCcacg..... 1  
Gi3\_27584857\_x5.....ggGgacgucgugggaaacacggggugccgaacu..... 1  
Gi2\_10648145\_x5.....aUagaagcgccgucagggccccgccag..... 1  
Gi3\_27647537\_x5.....gggCacacggggugccgaacu..... 1  
Gi1\_3995105\_x5.....acCcgauccgagacgucg..... 1  
Gi3\_27577582\_x5.....aCcgagacgucgugggaaacacggggugc..... 1  
Gi3\_27573317\_x5.....gucagggccccgccaguGcug..... 1  
Gi3\_27641612\_x5.....aggccccgcAaguacugc..... 1  
Gi3\_27577322\_x5.....aguacugcgauccgagacgucgugggaaacac..... 0  
Gi1\_3994075\_x5.....ugggaaacacggggugAcgaacu..... 1  
Gi2\_10606810\_x5.....aAcggagacgucgugggaaacacggggug..... 1  
Gi3\_27598632\_x5.....aggccccgGcaguacugcgau..... 1  
Gi5\_8594202\_x5.....gugggaaacacggggGgccgaacuu..... 1  
Gi3\_27558787\_x5.....ggccccgcNaguacugcgau..... 1  
Gi3\_27598457\_x5.....aggccccCccaguacugcgau..... 1  
Gi5\_8589577\_x5.....aucggagacgucgugggCacacgg..... 1  
Gi2\_10615165\_x5.....gaucggagacgucgugggaaacacAg..... 1  
Gi3\_27603657\_x5.....cgucgugggaaacUggggugcc..... 1  
Gi2\_10594755\_x5.....uGgugggaaacacggggugc..... 1  
Gi3\_27626242\_x5.....aggccccgccaguacuAcg..... 1  
Gi3\_27608547\_x5.....gucgugggaaacUggggugccgaac..... 1  
Gi3\_27631387\_x5.....agacgucgugggaaacacAgggugccgaacu..... 1



Gi3\_27647462\_x5.....aggcUccgccaguacugcgau..... 1  
Gi1\_3994480\_x5.....cgucgugggaCcacggggugccgaacu..... 1  
Gi5\_8579367\_x5.....ggNacacggggugccgaacu..... 1  
Gi3\_27602452\_x5.....gacgucgugggaGcacggggugccgaac..... 1  
Gi3\_27597577\_x5.....gugggaacacggggugccgUa..... 1  
Gi3\_27650622\_x5.....caggccccgccaguacugcgauU..... 1  
Gi3\_27649667\_x5.....gauUggagacgucgugggaacacgggggu..... 1  
Gi2\_10649895\_x5.....gaucggagacgCgugggaacacggggug..... 1  
G1a\_5750237\_x5.....cgugggaaUacggggugccgaacu..... 1  
Gi3\_2755517\_x5.....ggccccgccGguacugcgauC..... 1  
Gi3\_27568352\_x5.....aucggagacgucgugAgaacacggggugcc..... 1  
Gi3\_27558222\_x5.....gagacgucgugggaacGcggggugccgaacu..... 1  
Gi3\_27567497\_x5.....gggaaUacggggugccgaac..... 1  
Gi2\_10632510\_x5.....aucggagacgucgCgggaacacggg..... 1  
G1a\_5753477\_x5.....cUucaggccccgccagua..... 1  
Gi3\_27597437\_x5.....Agugggaacacggggugcc..... 1  
Gi3\_27623542\_x5.....cUccguacaggccccgccagua..... 1  
Gi3\_27606362\_x5.....gaucggagacgucgCgggaacacg..... 1  
Gi3\_27552822\_x5.....gccGguacugcgauCggagacguc..... 1  
Gi1\_4003525\_x5.....cgugggaacacggggugccgaaUu..... 1  
Gi1\_3993885\_x5.....gucgugggaaAacggggugcc..... 1  
G1a\_5759912\_x5.....gugggaacacggggCgccgaac..... 1  
G1a\_5763782\_x5.....ugggaGcacggggugccgaacu..... 1  
Gi3\_27649792\_x5.....ccUgccaguacugcgauCggagac..... 1  
Gi3\_27630032\_x5.....agCacugcgauCggagacg..... 1  
Gi3\_27592277\_x5.....uacugcgauCggagacguU..... 1  
Gi2\_10629620\_x5.....agacgucgugggaacacggggCgc..... 1  
Gi2\_10593240\_x5.....ucgNgggaacacggggugccgaacu..... 1  
Gi3\_27595642\_x5.....cgucgugggaGcacgggggu..... 1  
Gi3\_27640462\_x5.....cgucgugggaacacggggugccgaaUu..... 1  
Gi5\_8599957\_x5.....gaacacggggugccgaaAu..... 1  
Gi3\_27552732\_x5.....aucggagacgucgugggaacUcggg..... 1  
Gi2\_10629535\_x5.....gucaggccccgccaguCcugcg..... 1  
Gi2\_10595395\_x5.....ugggaacacUgggugccgaacu..... 1  
Gi3\_27633682\_x5.....ggaacacggggugUcgaac..... 1  
Gi2\_10619630\_x5.....aguacugcNaucggagacgu..... 1  
Gi2\_10591060\_x5.....cgugggaacacggggGgccgaac..... 1  
Gi3\_27605507\_x5.....gGgggaacacggggugccgaacuu..... 1  
Gi2\_10634600\_x5.....Cucaggccccgccaguacugcg..... 1  
Gi5\_8592347\_x5.....ugggaaCcgggugccgaac..... 1  
Gi3\_27558112\_x5.....ggccccgccaguaUugcgauC..... 1  
Gi3\_27625402\_x5.....ccccgccaguGcugcgauC..... 1  
Gi5\_8589652\_x5.....ugggaaCcgggugccgaac..... 1  
Gi4\_535233\_x5.....cgAgggaaacacggggugccgaacu..... 1  
Gi3\_27621702\_x5.....gugggaacacggggugccCa..... 1  
Gi2\_10607155\_x5.....cGguacugcgauCggagacgucg..... 1  
Gi3\_27592862\_x5.....gaacacggggugccgUac..... 1

Gi3\_27606472\_x5.....gucguggUaacacggggugccgaacu..... 1  
 Gi3\_27600987\_x5.....ggaacacggggUAccgaa..... 1  
 Gi1\_4014325\_x5.....cgGgggaacacggggugccgaac..... 1  
 Gi1\_4008640\_x5.....cgccaguacugcgauccgagacgucguggg..... 0  
 Gi3\_27626812\_x5.....cgAcgugggaacacggggugccga..... 1  
 Gi3\_27552992\_x5.....aucggagacgucguggCaacacg..... 1  
 Gi3\_27615887\_x5.....cggagacgNcgugggaacac..... 1  
 G1a\_5746132\_x5.....aucggagaNgucgugggaacacggggg..... 1  
 Gi2\_10612940\_x5.....cgucagggccccgcccagCacugcg..... 1  
 Gi3\_27552022\_x5.....ucggGgacgucgugggaacacggggugcc..... 1  
 Gi3\_27570477\_x5.....aggccccgNcaguacugcgauccgaga..... 1  
 Gi2\_10636265\_x5.....ggagacgCcgugggaacacggggugc..... 1  
 Gi2\_10615960\_x5.....acUucgugggaacacggggugccgaacu..... 1  
 Gi3\_27561222\_x5.....ugggaUcacggggugccgaac..... 1  
 G1a\_5746057\_x5.....Gaguacugcgauccgagacgu..... 1  
 Gi3\_27559442\_x5.....ucgugggaNcacggggugccg..... 1  
 G1a\_5739957\_x5.....Uucgugggaacacggggugccgaac..... 1  
 Gi3\_27575152\_x5.....Agccccgcccaguacugcga..... 1  
 Gi2\_10608700\_x5.....cgugggaacacgUggugccga..... 1  
 Gi3\_27593882\_x5.....uggNaacacggggugccgaac..... 1  
 Gi3\_27550217\_x5.....cagggccccgcccaguacugcC..... 1  
 Gi1\_4016375\_x5.....Gaggccccgcccaguacugcgauc..... 1  
 G1a\_5751252\_x5.....aguaUugcgauccgagacgucg..... 1  
 Gi5\_8586247\_x5.....Uaucggagacgucgugggaaca..... 1  
 Gi3\_27616272\_x5.....cgucgugggaacacggggugcU..... 1  
 Gi3\_27567047\_x5.....aggccccgUaguacugcga..... 1  
 Gi1\_3997795\_x5.....ccaguacugcgauccgagacguc..... 0  
 Gi2\_10641895\_x5.....aggccAcgccaguacugc..... 1  
 Gi3\_27622197\_x5.....ugggaaUacggggugccg..... 1  
 Gi5\_8586912\_x5.....gCacacggggugccgaacu..... 1  
 Gi3\_27594142\_x5.....gUccccgcccaguacugcgaucg..... 1  
 Gi1\_3996550\_x5.....aacaAggggugccgaacu..... 1  
 Gi2\_10622090\_x5.....gaagcgccNucaggccccgc..... 1  
 G1a\_5750647\_x5.....gugggaacGcggggugcc..... 1  
 Gi2\_10645475\_x5.....cgAgggaacacggggugccga..... 1  
 Gi5\_8579752\_x5.....ugggaacGcggggugccgaa..... 1  
 Gi3\_27615947\_x5.....gacgucgugggaacacggggugccgGac..... 1  
 Gi2\_10593250\_x5.....cggagacgNcgugggaacacggggg..... 1  
 Gi5\_8582522\_x5.....gggaacCcggggugccgaacu..... 1  
 Gi2\_10592350\_x5.....ggUgacgucgugggaacacggggg..... 1  
 Gi2\_10608165\_x5.....agacgucgugggaacacggggugccgCacu..... 1  
 Gi2\_10596250\_x5.....cgugggaacacggggugccgUac..... 1  
 Gi2\_10628425\_x5.....aCcgagacgucgugggaacacggggugcc..... 1  
 Gi5\_8592562\_x5.....cgugggaacacAgggugccgaac..... 1  
 Gi2\_10650040\_x5.....gucgugggaacGcggggugcc..... 1  
 Gi2\_10596605\_x5.....ggccccgUaguacugcgauc..... 1  
 Gi3\_27549682\_x5.....gugggaCcacggggugccgaa..... 1

Gi1\_4013190\_x5.....acgucgugggaaacacggggugccgaaAu..... 1  
 Gi3\_27568507\_x5.....gaucggagacgucgugggCacacggg..... 1  
 Gi3\_27558127\_x5.....gucGggccccgccaguacugcg..... 1  
 Gi2\_10596950\_x5.....agCcgucgugggaaacacggggugccgaacu..... 1  
 Gi5\_8584422\_x5.....ugggaaAacggggugccgaacu..... 1  
 Gi2\_10613575\_x5.....ggagacguUgugggaaacacggggugc..... 1  
 Gi1\_3995625\_x5.....gUgaacacggggugccgaac..... 1  
 Gi3\_27558357\_x5.....aucggagacgucgugggaaacacgAgg..... 1  
 Gi2\_10633350\_x5.....ccUgccaguacugcgauc..... 1  
 Gi3\_27612627\_x5.....gaucggagGcgucgugggaaacacggggu..... 1  
 G1a\_5756177\_x5.....aucAgagacgucgugggaaacacggggu..... 1  
 Gi3\_27609197\_x5.....cCucaggccccgccaguacugc..... 1  
 Gi3\_27631797\_x5.....cggagGcgucgugggaaacacggggugcc..... 1  
 Gi3\_27573232\_x5.....aucggagacgucgugggaaacaU..... 1  
 Gi3\_27585392\_x5.....aucggagacgucgugggUacacgg..... 1  
 Gi3\_27590467\_x5.....gugggaaacacggggAgccg..... 1  
 Gi3\_27586902\_x5.....caggccUcgccaguacugcg..... 1  
 G1a\_5761277\_x5.....cgugggaaNacggggugc..... 1  
 Gi3\_27600732\_x5.....gucNugggaaacacggggugccgaacu..... 1  
 Gi2\_10601240\_x5.....cGaguacugcgauccggagacguc..... 1  
 Gi1\_4004080\_x5.....ggUgacgucgugggaaacacggggugccg..... 1  
 Gi1\_3997990\_x5.....aacacggggugccgaUcu..... 1  
 Gi2\_10608815\_x5.....ggUgacgucgugggaaacacg..... 1  
 Gi3\_27550282\_x5.....cgucgugggaaacaUggggugccgaac..... 1  
 Gi3\_27656292\_x5.....Gacucggaucggagacgu..... 1  
 Gi3\_27643857\_x5.....gucgugggaaacacggggugcGgaacu..... 1  
 Gi3\_27577487\_x5.....aggccccGAcaguacugcg..... 1  
 Gi3\_27595192\_x5.....Ucgauccggagacgucgugggaaacacg..... 1  
 Gi2\_10637655\_x5.....cgucaggcNccgccaguacugcg..... 1  
 Gi5\_8581517\_x5.....gCgggaaacacggggugccgaa..... 1  
 Gi1\_4004095\_x5.....Gcugcgauccggagacguc..... 1  
 Gi1\_3997580\_x5.....gggaaacaUggggugccgaacu..... 1  
 Gi3\_27642542\_x5.....gGagagaagcggccgucaggccccgc..... 1  
 Gi2\_10639475\_x5.....gacgucgCgggaaacacggggugccgaacu..... 1  
 Gi5\_8591707\_x5.....aggccccgccaguacugcg..... 0  
 Gi1\_4017620\_x5.....acgCcgugggaaacacggggugccgaacu..... 1  
 Gi2\_10608310\_x5.....cgucgugAgaacacggggugccgaacu..... 1  
 Gi3\_27570557\_x5.....cgugggaaacacggggUaccgaa..... 1  
 Gi2\_10645235\_x5.....gUucggagacgucgugggaaacacggg..... 1  
 Gi3\_27579932\_x5.....gucgugggaaacacggggugcAgaac..... 1  
 Gi3\_27635562\_x5.....ggCaacacggggugccgaac..... 1  
 Gi2\_10606500\_x5.....agacgucgugggGacacggggugccgaacu..... 1  
 Gi2\_10627210\_x5.....Ugacgucgugggaaacacggggugc..... 1  
 Gi3\_27551352\_x5.....aucggagacgucguggAaacacggggugcc..... 1  
 Gi2\_10614065\_x5.....cgCcgugggaaacacggggugccgaac..... 1  
 Gi2\_10645510\_x5.....cgugggaaacacggggugccUaac..... 1  
 Gi3\_27557732\_x5.....agAccccgccaguacugc..... 1

|                 |                                |   |
|-----------------|--------------------------------|---|
| Gi5_8577432_x5  | cgugggaacacggggugccgCac        | 1 |
| Gi2_10641160_x5 | cgugggaaAacggggugccgaac        | 1 |
| Gi5_8595072_x5  | ggccccgccaguacugcg             | 0 |
| Gl1a_5734542_x5 | ugggaacacggggugccAaacu         | 1 |
| Gi2_10641750_x5 | caggccccgccaguacGcgauc         | 1 |
| Gi3_27584847_x5 | ccccgccaguacugcgCuc            | 1 |
| Gi3_27645302_x5 | cgccaguacugcgauccggagacgC      | 1 |
| Gi3_27617292_x5 | aucggGgacgucgugggaacacgggg     | 1 |
| Gi1_4016450_x5  | ggagacgucgugggaacacggggugccga  | 0 |
| Gi2_10639620_x5 | aucggagacgucgugggaacacggaAgu   | 1 |
| Gi3_27603992_x5 | Uaagcgccgucagggccccgccaguacugc | 1 |
| Gi3_27632152_x5 | gucAugggaacacggggugccgaac      | 1 |
| Gi3_27638797_x5 | Accgucagggccccgccaguacugcg     | 1 |
| Gi3_27623942_x5 | gaacCcggggugccgaac             | 1 |
| Gi1_4001440_x5  | ucgugggaacacggggugccgUacu      | 1 |
| Gi1_4005585_x5  | Aucaggccccgccaguacugc          | 1 |
| Gi3_27564422_x5 | cgugggaaUacggggugcc            | 1 |
| Gi3_27551162_x5 | cgugggaacacAggggugccga         | 1 |
| Gi3_27651042_x5 | gugNgaacacggggugccg            | 1 |
| Gi3_27613337_x5 | acgucgugggaacacgguUgugccgaacu  | 1 |
| Gi2_10616845_x5 | aucggagGcgcgucgugggaacacg      | 1 |
| Gi3_27592447_x5 | caggccccUgccaguacugcg          | 1 |
| Gi3_27624847_x5 | Aaucggagacgucgugggaacacg       | 1 |
| Gi2_10638760_x5 | caggccccgccaguacugcgUuc        | 1 |
| Gi2_10601530_x5 | gugggaacacggggugAcga           | 1 |
| Gi3_27575027_x5 | acgucgugggaaUacggggugccgaacu   | 1 |
| Gi1_4002545_x5  | ggaacacggggugUcgaacu           | 1 |
| Gi2_10635730_x5 | gucgugggaacGcggggugccga        | 1 |
| Gl1a_5749012_x5 | gugggaacacggggugccgaaAu        | 1 |
| Gi3_27627277_x5 | gaAcggagacgucgugggaacacggggu   | 1 |
| Gl1a_5749992_x5 | gugggaacacggggGgccgaac         | 1 |
| Gi3_27613152_x5 | Aaggccccgccaguacugc            | 1 |
| Gi3_27627512_x5 | Ggccaguacugcgauccggagacg       | 1 |
| Gi5_8586002_x5  | cgucgugggaaUacggggugccgaacu    | 1 |
| Gi3_27577552_x5 | cgugggaacacggggugAc            | 1 |
| Gi3_27567257_x5 | aggccccgccaguGcugcga           | 1 |
| Gi2_10601575_x5 | ccccgccaNuacugcgauccgg         | 1 |
| Gi3_27624432_x5 | aggccccgccUguacugcg            | 1 |
| Gi3_27552647_x5 | gauUggagacgucgugggaacacggg     | 1 |
| Gi3_27601432_x5 | gggaacacggggugcGgaac           | 1 |
| Gl1a_5745152_x5 | aguacugcgauccggagGcgcuc        | 1 |
| Gi3_27647917_x5 | ccUgccaguacugcgauccgg          | 1 |
| Gi3_27552832_x5 | Agucgugggaacacggggugccg        | 1 |
| Gi1_4004185_x5  | ugggaacacggggugccgaaU          | 1 |
| Gi2_10619500_x5 | gugggUacacggggugccg            | 1 |
| Gi2_10639670_x5 | gggUacacggggugccgaac           | 1 |
| Gi3_27563302_x5 | ccccgccaguacugcgGucggagacgu    | 1 |

Gi2\_10623490\_x5.....cggagacgucgugggaaacCcggggu..... 1  
 Gi1\_4016370\_x5.....cgCgggaacacggggugccgaac..... 1  
 G1a\_5751912\_x5.....Auacugcgauccggagacguc..... 1  
 Gi3\_27647112\_x5.....cgucagggccccgccaguacAgc..... 1  
 Gi2\_10620865\_x5.....Ucugcugggaaacacggggugcc..... 1  
 Gi5\_8588782\_x5.....Gaggccccgccaguacugcga..... 1  
 Gi3\_27556037\_x5.....caggccccgccaguacugcgG..... 1  
 Gi3\_27629492\_x5.....ucggagacgucgugggGacacggggg..... 1  
 Gi2\_10636875\_x5.....Uuacugcgauccggagacgucgugggaaca..... 1  
 Gi3\_27641302\_x5.ccuuaacucguuccgaGu..... 1  
 Gi3\_27650202\_x5.....aggaagagaagcgccgucag..... 0  
 Gi2\_10603635\_x5.....cgugggaacacggggugccgGac..... 1  
 Gi3\_27560007\_x5.....caggccccgccaAuacugc..... 1  
 Gi3\_27619322\_x5.....cggagacgNcgugggaacacggggugccga..... 1  
 Gi2\_10619975\_x5.....gaucggagacgucgugggaGcacggggugcc..... 1  
 Gi3\_27560897\_x5.....ccccgccaguacugcgauccggagGcgu..... 1  
 Gi1\_4012200\_x5.....gaacacggUgugccgaacu..... 1  
 Gi2\_10615690\_x5.....caUgccccgccaguacugcgaucc..... 1  
 Gi2\_10599745\_x5.....acgucgugggaacacggggGgc..... 1  
 G1a\_5742372\_x5.....cgucgugggaacacggggugccgCacu..... 1  
 Gi3\_27583762\_x5.....gucgugggaacacgggAugccgaac..... 1  
 Gi3\_27611887\_x5.....gugggaacacggggugAcgaa..... 1  
 Gi3\_27615937\_x5.....aacacggggGgccgaacuu..... 1  
 Gi2\_10631300\_x5.....aggccccgccaguCcuyc..... 1  
 Gi3\_27631162\_x5.....cgucguAggaacacggggugccgaac..... 1  
 Gi2\_10643165\_x5.....acgucgugggaacacgggguAccgaacu..... 1  
 Gi3\_27630017\_x5.....guUaggccccgccaguacugc..... 1  
 Gi3\_27556102\_x5.....aucggagacgucgugggaacCcggggugc..... 1  
 Gi1\_4002060\_x5.....uGgugggaacacggggugccg..... 1  
 Gi2\_10641110\_x5.....aucggagCcgucgugggaaca..... 1  
 Gi2\_10634825\_x5.....gaucggagacgucgugggGacacggggugc..... 1  
 Gi2\_10634520\_x5.....cgugggaacGcggggugc..... 1  
 Gi1\_3994090\_x5.....cgucgugggaacacggggugccgaGcu..... 1  
 Gi1\_3995040\_x5.....ggaacacggggAgccgaacu..... 1  
 Gi2\_10630270\_x5.....Uucgugggaacacggggg..... 1  
 Gi3\_27640372\_x5.....cguggUaacacggggugccgaac..... 1  
 Gi5\_8594347\_x5.....ccUccaguacugcgauccggagacg..... 1  
 Gi3\_27636997\_x5.....ucgugggaacacggggugAcgaacu..... 1  
 Gi2\_10606790\_x5.....gugggaacacggggAgccgaa..... 1  
 Gi3\_27573472\_x5.....cggagacgucgugggaacacAgggugcc..... 1  
 Gi2\_10594930\_x5.....ggccUcgccaguacugcgaucc..... 1  
 Gi2\_10626485\_x5.....ggagacgucguggAaacacggggugcc..... 1  
 Gi3\_27635517\_x5.....cccgccagNacugcgauccggagacg..... 1  
 Gi3\_27638977\_x5.....acugcgauNggagacguc..... 1  
 Gi2\_10617200\_x5.....ucgugggaacUcggggugccgaacu..... 1  
 Gi1\_4000820\_x5.....ucgugggaacacggggugccgaGc..... 1  
 Gi1\_3995525\_x5.....cAucgugggaacacggggugccgaacu..... 1

Gi2\_10618165\_x5.....ggaacacgUgugccgaacu..... 1  
 Gi2\_10621845\_x5.....gaucggagacgucgugggCacacgggu..... 1  
 Gi2\_10612860\_x5.....aucggagacgCcgugggaaca..... 1  
 Gi2\_10636520\_x5.....Cgggaacacggggugccg..... 1  
 Gi1\_4008600\_x5.....ucgugggaacacggggugcAgaacu..... 1  
 Gi2\_10632070\_x5.....gaucggagacgucgugggaacCcggggu..... 1  
 Gi3\_27627697\_x5.....Cagaagcgccgucagggcccg..... 1  
 Gi3\_27586437\_x5.....aggccccgccaguacuAcga..... 1  
 Gi3\_27582067\_x5.....cgugggaacacgAggugc..... 1  
 Gi2\_10649355\_x5.....aacacgUggugccgaacu..... 1  
 Gi3\_27552087\_x5.....aAcggagacgucgugggaacacg..... 1  
 Gi1\_4009465\_x5.....gugggaacacggggugccgaaAu..... 1  
 Gi3\_27623267\_x5.....Cucggagacgucgugggaacacg..... 1  
 Gi2\_10640900\_x5.....gugggaUcacggggugccgaac..... 1  
 Gi2\_10614910\_x5.....cgucgugggaCcacggggugccga..... 1  
 Gi3\_27648432\_x5.....gaCcgagacgucgugggaacacg..... 1  
 Gi1\_4016090\_x5.....Gucggagacgucgugggaacacggggugc..... 1  
 Gi1\_4004390\_x5.....cgucgugggaacacggggGgcc..... 1  
 Gi1\_4007150\_x5.....aucggGgacgucgugggaacacg..... 1  
 Gi1\_3998955\_x5.....aAgccccgccaguacugcgauc..... 1  
 Gi2\_10621425\_x5.....cgugggaacacggggCgccgaa..... 1  
 Gi3\_27613932\_x5.....ucggagacgucgugggCacacg..... 1  
 Gi2\_10602085\_x5.....agaagcgcNgcagggccc..... 1  
 Gi2\_10614895\_x5.....Ugccccgccaguacugcgaucg..... 1  
 Gi3\_27658322\_x5.....ucagggccccgUaguacugcg..... 1  
 G1a\_5739467\_x5.....Ucgaucggagacgucgugggaacacggg..... 1  
 Gi2\_10610965\_x5.....agUagcgccgucagggccc..... 1  
 Gi3\_27633832\_x5.....ggGgacgucgugggaacacggggu..... 1  
 Gi2\_10639010\_x5.....gagaagcgccgucGggccccgacg..... 1  
 Gi3\_27652857\_x5.....ggccccgccaguacugcgaU..... 1  
 Gi3\_27597692\_x5.....gagaGgcgccgucagggccccg..... 1  
 Gi2\_10600580\_x5.....aucggagacAucgugggaacacggggugcc..... 1  
 Gi3\_27621307\_x5.....cgccaguacugcgaCcgagacgu..... 1  
 Gi2\_10602650\_x5.....Agugggaacacggggugc..... 1  
 G1a\_5742917\_x5.....ggaacacggggugcUgaacu..... 1  
 Gi1\_4013680\_x5.....Ccgugggaacacggggugcc..... 1  
 Gi3\_27654457\_x5.....gucgugggaacacgAggugccgaac..... 1  
 Gi2\_10643415\_x5.....gccccgccaguacugcgCuc..... 1  
 Gi1\_4011395\_x5.....Ggacgucgugggaacacgggg..... 1  
 Gi2\_10642335\_x5.....guacugcgNucggagacguc..... 1  
 Gi3\_27630877\_x5.....cGgccaguacugcgaucggagacguc..... 1  
 Gi5\_8598902\_x5.....Ggugggaacacggggugc..... 1  
 Gi3\_27656107\_x5.....ccccgUaguacugcgaucggagacguc..... 1  
 Gi2\_10622490\_x5.....ucggagacNucgugggaacacg..... 1  
 Gi1\_4003720\_x5.....Ggggaacacggggugccga..... 1  
 Gi2\_10634700\_x5.....gucgugggaacacggggugccgUacu..... 1  
 Gi5\_8578042\_x5.....aGcacggggugccgaacuuu..... 1

Gi3\_27568697\_x5.....caggccccgccaguacCgcgau..... 1  
 Gi1\_4004175\_x5.....acAucguggggaacacggggugccgaacu..... 1  
 Gi5\_8575192\_x5.....gucgAggggaacacggggugccgaacu..... 1  
 Gi2\_10613490\_x5.....agacgucgugggaacCcggggugcc..... 1  
 Gi3\_27580032\_x5.....acgucgugggUacacggggugccgaacu..... 1  
 Gi3\_27593747\_x5.....aUuacugcgauccggagacgucguggg..... 1  
 Gi3\_27595397\_x5.....agUgcccugcaggccccgcc..... 1  
 Gi3\_27622402\_x5.....aggccccgccaguacugcgUuc..... 1  
 Gi1a\_5758102\_x5.....aucggagacgucgugggCacacggg..... 1  
 Gi1\_3998700\_x5.....gCgggaacacggggugccgaac..... 1  
 Gi2\_10607560\_x5.....cgGcgugggaacacggggugccga..... 1  
 Gi3\_27577687\_x5.....aAcggagacgucgugggaacacggggugc..... 1  
 Gi2\_10640140\_x5.....cgugggaacCcggggugc..... 1  
 Gi5\_8574002\_x5.....gugggaGcacggggugcc..... 1  
 Gi3\_27610292\_x5.....guAgugggaacacggggugccgaacu..... 1  
 Gi2\_10592985\_x5.....ggaacacgUggugccgaac..... 1  
 Gi3\_27641417\_x5.....Uccgccaguacugcgauccg..... 1  
 Gi1\_4010305\_x5.....aggccccgccaguacugcgauU..... 1  
 Gi1\_4016875\_x5.....cguNggaacacggggugccgaacu..... 1  
 Gi3\_27587497\_x5.....cgugggaacacggggugUcg..... 1  
 Gi2\_10593430\_x5.....aggccccgccaguGcugcga..... 1  
 Gi2\_10618675\_x5.....cUcgccaguacugcgauccg..... 1  
 Gi3\_27614037\_x5.....caguacugcgauccggagacgCc..... 1  
 Gi5\_8564497\_x5.....gucgugggaacacgggAugccgaacu..... 1  
 Gi2\_10600680\_x5.....gugggaacacggggugUcgaa..... 1  
 Gi3\_27609202\_x5.....caAgccccgccaguacugcgau..... 1  
 Gi3\_27635782\_x5.....cgugggaaUacggggugccg..... 1  
 Gi3\_27584132\_x5.....cgggagacgucgugggaGcacgggg..... 1  
 Gi5\_8585482\_x5.....gugggCacacggggugccgaac..... 1  
 Gi4\_534893\_x5.....aUacgucgugggaacacggggugcc..... 1  
 Gi3\_27562412\_x5.....agUgaagcgccgucaggccccgc..... 1  
 Gi3\_27584302\_x5.....ugggaacUcggggugccgaa..... 1  
 Gi3\_27591057\_x5.....cccUgcccaguacugcgau..... 1  
 Gi5\_8570842\_x5.....cgucgugggaacaUggggugccgaacu..... 1  
 Gi3\_27639007\_x5.....gucgugggaacacggggAgccgaac..... 1  
 Gi3\_27565932\_x5.....gGgacgucgugggaacacgggg..... 1  
 Gi2\_10626295\_x5.....cgggagacgucgugAgaacacggggugcc..... 1  
 Gi5\_8569842\_x5.....cgucgugggaacacggggUaccgaacu..... 1  
 Gi3\_27583742\_x5.....ucgugggGcacggggugccgaa..... 1  
 Gi2\_10601805\_x5.....ucgugggaacacggggugccgGac..... 1  
 Gi3\_27554957\_x5.....ggaacacggggugccgGa..... 1  
 Gi3\_27623507\_x5.....gggagacgCcguggggaacacgggg..... 1  
 Gi3\_27600597\_x5.....gaacacgggAugccgaac..... 1  
 Gi3\_27642367\_x5.....aucggGgacgucguggga..... 1  
 Gi2\_10609505\_x5.....aucggagacgucgugggCac..... 1  
 Gi3\_27644042\_x5.....ccUgcccaguacugcgauccggagacg..... 1  
 Gi3\_27649887\_x5.....aucggCgacgucgugggaacacgggg..... 1

Gi3\_27575072\_x5.....Ccgcugugggaacacggggugccgaacu..... 1  
 Gi3\_27580537\_x5.....cgucugugggaacacggggUAcc..... 1  
 Gi3\_27632507\_x5.....gaUgagaagcgccgcucagggccc..... 1  
 Gi2\_10632125\_x5.....cgucugugggUacacggggugccgaacu..... 1  
 Gi2\_10604175\_x5.....aucggagacgucgugggaacGcggggugcc..... 1  
 Gi3\_27643827\_x5.....gaucggagacgucgugggaacGcgggg..... 1  
 Gi1a\_5764787\_x5.....Gucggagacgucgugggaacacgg..... 1  
 Gi2\_10602725\_x5.....acgucugugggaacacggggCgc..... 1  
 Gi2\_10622640\_x5.....Gucggagacgucgugggaacacgggg..... 1  
 Gi3\_27626237\_x5.....cgugggaacacggggugUcgaa..... 1  
 Gi2\_10618290\_x5.....agCacugcgauccggagacgu..... 1  
 Gi1a\_5755092\_x5.....cgAcaggccccccagucugc..... 1  
 Gi3\_27578362\_x5.....ucgAgggaacacggggugccgaac..... 1  
 Gi2\_10625770\_x5.....cUucaggccccccagucugcgauccg..... 1  
 Gi1\_4012650\_x5.....Ugccccccagucugcgauccgaga..... 1  
 Gi3\_27609352\_x5.....agacgucgugggaacacggggugccgCac..... 1  
 Gi1\_4009605\_x5.....gugggaacacggggugcU..... 1  
 Gi2\_10595450\_x5.....gugggaacacggggAugccgaa..... 1  
 Gi3\_27658747\_x5.....Ucgauccggagacgucgugggaac..... 1  
 Gi3\_27602442\_x5.....agacgucgugAgaacacggggugccgaacu..... 1  
 Gi2\_10617175\_x5.....aucggagacgucgugggCacacgggg..... 1  
 Gi3\_27648152\_x5.....uaUugcgauccggagacguc..... 1  
 Gi5\_8601102\_x5.....cguUgugggaacacggggugccgaacu..... 1  
 Gi3\_27585562\_x5.....ggccccccagucugUgauc..... 1  
 Gi2\_10635485\_x5.....aggccccccagucugcgUuc..... 1  
 Gi2\_10628935\_x5.....Caucggagacgucgugggaaca..... 1  
 Gi3\_27653787\_x5.....caggcAccgccagucugcg..... 1  
 Gi5\_8569047\_x5.....Gacacggggugccgaacu..... 1  
 Gi3\_27633542\_x5.....ucgugggaacaAggggugccgaacu..... 1  
 Gi3\_27591052\_x5.....gaagagaaNcgccgucagggccc..... 1  
 Gi3\_27578737\_x5.....Ggagaagcgccgcucagggccc..... 1  
 Gi3\_27550917\_x5.....Cucgugggaacacggggugccga..... 1  
 Gi2\_10591415\_x5.....gggaaUacggggugccgaac..... 1  
 Gi3\_27621377\_x5.....cgAcaggccccccagucugcg..... 1  
 Gi2\_10635645\_x5.....aaAacggggugccgaacu..... 1  
 Gi2\_10625370\_x5.....ggaacacggCgugccgaacu..... 1  
 Gi3\_27650557\_x5.....aucggUgacgucgugggaacacggg..... 1  
 Gi3\_27570952\_x5.....acUucgugggaacacggggugccgaac..... 1  
 Gi2\_10608230\_x5.....gaUgucgugggaacacggggugccgaacu..... 1  
 Gi2\_10630105\_x5.....gAccccgcccagucugcgaucc..... 1  
 Gi3\_27619167\_x5.....ucaggccccccagucugcC..... 1  
 Gi3\_27549627\_x5.....aGgucgugggaacacggg..... 1  
 Gi5\_8586072\_x5.....Ggggaacacggggugccgaacu..... 1  
 Gi2\_10633305\_x5.....aucgAagacgucgugggaacacggggugcc..... 1  
 Gi5\_8583082\_x5.....gugggaacacggggugccgaG..... 1  
 Gi3\_27583897\_x5.....Uucaggccccccagucugcgauccg..... 1  
 Gi3\_27570417\_x5.....ggaacacAggggugccgaa..... 1



Gi3\_27617377\_x5.....agUgaagcgccgucagggc..... 1  
Gi5\_8569037\_x5.....cgucguggNaacacggggugccgaac..... 1  
Gi3\_27588092\_x5.....acgucgugggaGacggggugccgaacu..... 1  
Gi3\_27579327\_x5.....ggcUccgccaguaucugcgau..... 1  
Gi5\_8588257\_x5.....ugcgauccggagacgucGgg..... 1  
Gi2\_10650345\_x5.....aCacgucgugggaacacggggugccgaacu..... 1  
Gi1\_3995050\_x5.....Ugagacgucgugggaacacggggugccgaacu..... 1  
Gi3\_27645622\_x5.....aggccccgccaguaucugGgau..... 1  
Gi3\_27620782\_x5.....Ugucgugggaacacggggugc..... 1  
Gi2\_10649795\_x5.....cgugggaacacggggugccgC..... 1  
Gi3\_27593597\_x5.....ucaggccccgccaguaucugcgauccggagacguc..... 0  
Gi3\_27628487\_x5.....aucggCgacgucgugggaacacggggugcc..... 1  
Gi3\_27555172\_x5.....ucggGgacgucgugggaacacggggug..... 1  
Gi3\_27572722\_x5.....cgugggaacacggggugUc..... 1  
Gi1\_4014080\_x5.....acgucgugggaacGcggggugcc..... 1  
Gi1\_4015705\_x5.....Gggagacgucgugggaacacggggugcc..... 1  
G1a\_5748287\_x5.....aggccccgccCguacugcg..... 1  
Gi3\_27574177\_x5.....caggccccgccaguaUugc..... 1  
Gi5\_8601012\_x5.....aucggagacgucgugggaacacggggugccgaac..... 0  
Gi2\_10630065\_x5.....cgggagacgucgugggaacacggggGgc..... 1  
G1a\_5748522\_x5.....aUaagcgccgucagggcc..... 1  
Gi1\_3997000\_x5.....cggGgacgucgugggaacacggggugc..... 1  
Gi5\_8581212\_x5.....gggaacacggggAgccgaacu..... 1  
Gi1\_4011345\_x5.....agacgCcgugggaacacggggugccgaac..... 1  
Gi2\_10636195\_x5.....aguacugcgauccggagCcguc..... 1  
Gi3\_27587322\_x5.....caggccccgccGguacugcgau..... 1  
Gi3\_27644252\_x5.....aggccccgccaguaUugc..... 1  
Gi3\_27631722\_x5.....Ugagacgucgugggaacacgggg..... 1  
Gi3\_27614827\_x5.....uGaggccccgccaguaucg..... 1  
Gi3\_27552547\_x5.....uacugcgGucggagacguc..... 1  
Gi2\_10621680\_x5.....Uccaguaucgcgauccggaga..... 1  
Gi3\_27614722\_x5.....gugggaacUcggggugccga..... 1  
Gi5\_8567242\_x5.....cgugggaacGcggggugccgaac..... 1  
Gi5\_8570187\_x5.....gucgugggaacacggggugUcgaacu..... 1  
Gi2\_10594750\_x5.....aucggagacgucgugggaacacAgggugcc..... 1  
Gi2\_10594030\_x5.....gugggaacacggCgugcc..... 1  
Gi3\_27594992\_x5.....aggccAcgccaguaucugcg..... 1  
Gi2\_10592920\_x5.....ggaacacgUggugccgaacu..... 1  
Gi5\_8599942\_x5.....cgugggaaNacggggugc..... 1  
Gi3\_27627192\_x5.....Uucggagacgucgugggaacacggggugcc..... 1  
Gi5\_8569287\_x5.....cgugggaaNacggggugcc..... 1  
Gi3\_27601372\_x5.....aAgccccgccaguaucugcgau..... 1  
Gi3\_27570772\_x5.....cCggccccgccaguaucugcgau..... 1  
Gi1\_3994265\_x5.....aacacggggugccgaaAu..... 1  
Gi2\_10607685\_x5.....gacAucgugggaacacggggugcc..... 1  
Gi5\_8588502\_x5.....aucggagacgucgugggaGcac..... 1  
Gi2\_10622955\_x5.....aggccccgccaguaucugcgauccggagacgucg..... 0

Gi3\_27575907\_x5.....Uccgccaguacugcgauccggagacguc..... 1  
Gi2\_10591100\_x5.....cgucgCgggaacacggggugccgaac..... 1  
Gi2\_10632805\_x5.....gggaacacggggugccgaC..... 1  
Gi3\_27642262\_x5.....ggagacgucgugggaCcacggggugcc..... 1  
Gi2\_10620905\_x5.....ugggaacacggggugGcgaacu..... 1  
Gi3\_27556757\_x5.....aucggagacgucgugggaacacggAgugcc..... 1  
Gi2\_10632920\_x5.....aucggagacgucgugggaacacggggAg..... 1  
Gi3\_27645062\_x5.....Agugggaacacggggugccgaa..... 1  
Gi1\_4003655\_x5.....cgucgugggaacacggggAgccgaacu..... 1  
Gi3\_27585872\_x5.....ugggaacacggggAgccg..... 1  
Gi5\_8578622\_x5.....gucgugggaacacggggugcUgaacu..... 1  
Gi2\_10620730\_x5.....ugggaacacggggugccgaUcu..... 1  
G1a\_5761722\_x5.....gggaacacggggugccAaacu..... 1  
Gi2\_10618705\_x5.....gaucggagacgucgugggaAacggg..... 1  
Gi1\_3997165\_x5.....gaacaAggggugccgaacu..... 1  
Gi2\_10631680\_x5.....acgucguAggaacacggggugccgaacu..... 1  
Gi2\_10648390\_x5.....gUcccgccaguacugcgau..... 1  
Gi1\_4006315\_x5.....gugggaacacggggugAcgaacu..... 1  
Gi2\_10614775\_x5.....cgucagggccccgccGguacugcg..... 1  
Gi3\_27576387\_x5.....gGucggagacgucgugggaacacggggugcc..... 1  
Gi1\_4002605\_x5.....aucggagacgucgugggaGcacggggg..... 1  
Gi2\_10625535\_x5.....aUgccccgccaguacugcgauccggagacgu..... 1  
Gi3\_27584267\_x5.....ggccccgccagCacugcgau..... 1  
Gi5\_8582597\_x5.....Gaggccccgccaguacugcgau..... 1  
Gi2\_10609805\_x5.....caggccccgccagCacugcgau..... 1  
G1a\_5765417\_x5.....Agugggaacacggggugccgaacu..... 1  
Gi2\_10600080\_x5.....ucgugggUacacggggugccgaacu..... 1  
Gi1\_4006235\_x5.....gggaacacggggugcUgaacu..... 1  
Gi1\_3996070\_x5.....gugggaacacggggugGcgaacu..... 1  
Gi2\_10597775\_x5.....gucgugggaacacCggggugccgaacu..... 1  
Gi5\_8589802\_x5.....agacgucgugggaCcacggggugccgaacu..... 1  
Gi3\_27653562\_x5.....gagaGgcccgcgucagggcc..... 1  
Gi2\_10595835\_x5.....Agaacacggggugccgaa..... 1  
Gi2\_10641855\_x5.....cgugggaacacggggCgccga..... 1  
Gi2\_10624945\_x5.....cgugggaacacAgggugc..... 1  
Gi3\_27649222\_x5.....aucggagacgucgugggaCcacggggugc..... 1  
Gi5\_8585592\_x5.....agacgucgugggaacacAgggugccgaacu..... 1  
Gi2\_10598230\_x5.....cgucgugggaacacggggugccgCac..... 1  
Gi2\_10647300\_x5.....aggccccgccaguacCgcca..... 1  
Gi3\_27612817\_x5.....gucgugggaaUacggggugccgaac..... 1  
Gi5\_8590827\_x5.....gggaacacggggugccAaac..... 1  
Gi2\_10617380\_x5.....aucggagaNgucgugggaac..... 1  
Gi3\_27650822\_x5.....cAucaggccccgccaguacugc..... 1  
Gi2\_10608370\_x5.....gacgucgugggaacacggggAgccgaacu..... 1  
Gi5\_8580852\_x5.....Ggacgucgugggaacacggggugcc..... 1  
Gi1\_4012665\_x5.....gggaacacAgggugccgaacu..... 1  
Gi2\_10640365\_x5.....ucgugggaacacggggugccgaaU..... 1

Gi3\_27593767\_x5.....cUaucggagacgucgugggaacacggggugc..... 1  
Gi3\_27622302\_x5.....caggccccgccaguacugcA..... 1  
Gi3\_27563007\_x5.....aucggagacgucgugggaUcacg..... 1  
Gi5\_8586292\_x5.....cGguacugcgauccggagacgucgug..... 1  
Gi2\_10639380\_x5.....gacgucgugggaGcacggggugccg..... 1  
Gi3\_27552552\_x5.....ugggaacacgAggugccgaa..... 1  
Gi2\_10622420\_x5.....guggAaacacggggugccga..... 1  
Gi2\_10593060\_x5.....ggagacgucgugggaacaUggggugcc..... 1  
Gi3\_27556437\_x5.....caggccccgccaguGcugcg..... 1  
Gi3\_27598937\_x5.....aucggagacgucguAggaacacgg..... 1  
Gi3\_27568112\_x5.....caguacugcgCucggagacguc..... 1  
Gi1\_3999855\_x5.....ugggGacacggggugccgaac..... 1  
Gi1\_4004350\_x5.....aacacgCggugccgaacu..... 1  
Gi3\_27581637\_x5.....gcccUgccaguacugcgau..... 1  
Gi5\_8586837\_x5.....ggaNcacggggugccgaacu..... 1  
Gi2\_10650100\_x5.....aucggaAacgucgugggaacac..... 1  
Gi3\_27621247\_x5.....aucggagacgucgugggaacacgAggugcc..... 1  
Gi3\_27564817\_x5.....gaucggGgacgucgugggaacacgg..... 1  
Gi3\_27561137\_x5.....Ucgccgucaggccccgccaguacug..... 1  
Gi2\_10605930\_x5.....aUaagcgccgucaggccccgccagua..... 1  
Gi3\_27647442\_x5.....acgucgugggaacaUggggugccgaac..... 1  
Gi3\_27560987\_x5.....gacgucgugggaacacggggugccgaGcu..... 1  
Gi2\_10612595\_x5.....cUcgccaguacugcgau..... 1  
Gi3\_27650417\_x5.....acugcgGucggagacgucgug..... 1  
G1a\_5765257\_x5.....cgugggGacacggggugccgaac..... 1  
Gi5\_8587942\_x5.....Gaggccccgccaguacugcgau..... 1  
G1a\_5737587\_x5.....cgucGggccccgccaguacugcg..... 1  
G1a\_5745157\_x5.....agacgucgugggaaUacggggugccgaacu..... 1  
Gi5\_8601362\_x5.....aCcgagacgucgugggaacacggggug..... 1  
Gi2\_10595445\_x5.....gccGguacugcgauccggagacguc..... 1  
Gi4\_535258\_x5.....cgAcgugggaacacggggugc..... 1  
Gi2\_10620930\_x5.....gggaacacggggugcUgaac..... 1  
Gi5\_8582687\_x5.....ggaaacacggggugccgUacu..... 1  
G1a\_5735152\_x5.....gggaacacggggugcUgaacu..... 1  
G1a\_5737687\_x5.....gugggCacacggggugccg..... 1  
Gi3\_27620122\_x5.....cgucgugggaacacggggGgccgaa..... 1  
Gi3\_27629802\_x5.....agacgucgugggaCcacggggugcc..... 1  
Gi2\_10604745\_x5.....Ggacgucgugggaacacggggugccgaac..... 1  
Gi5\_8592657\_x5.....gggaacacCgggugccgaacu..... 1  
Gi3\_27626712\_x5.....Ggaucggagacgucgugg..... 1  
Gi2\_10648625\_x5.....cgaucggaNacgucgugg..... 1  
Gi3\_27594457\_x5.....cgugggaacacggggugccAaa..... 1  
Gi3\_27658552\_x5.....cUgagacgucgugggaacac..... 1  
Gi2\_10647065\_x5.....agacUucgugggaacacggggugccgaacu..... 1  
Gi5\_8592217\_x5.....gaacacggggugccAaac..... 1  
Gi3\_27578607\_x5.....cgugggaacacggggugccgG..... 1  
Gi3\_27562212\_x5.....

Gi3\_27558552\_x5.....cgucguggNaacacgggg..... 1  
 Gi1\_4008925\_x5.....cggagacgucgCgggaacacggggugccga..... 1  
 Gl1a\_5733697\_x5.....Ugugggaacacggggugcc..... 1  
 Gi3\_27557632\_x5.....ccUccaguacugcgauccggagac..... 1  
 Gi3\_27565292\_x5.....Aagaagcgccgucagggccc..... 1  
 Gl1a\_5739052\_x5.....aucggagacgucgugggGacacggggg..... 1  
 Gi3\_27572387\_x5.....cGcgccaguacugcgauccggagac..... 1  
 Gi3\_27596297\_x5.....uUaggccccgccaguacugcgaucc..... 1  
 Gi5\_8579957\_x5.....gaacacggggugccgaacG..... 1  
 Gi1\_4016225\_x5.....gugggaacacggggugccgaGc..... 1  
 Gi3\_27555772\_x5.....cgugggaacacggggugccgaG..... 1  
 Gi5\_8595182\_x5.....gugggaacNcggggugccg..... 1  
 Gi2\_10646870\_x5.....Cucggagacgucgugggaacacggggugcc..... 1  
 Gi1\_4011665\_x5.....Uagacgucgugggaacacggggugccgaac..... 1  
 Gi5\_8570322\_x5.....aacacggggugccgaacG..... 1  
 Gi2\_10625075\_x5.....cgucgugggaacacggggugccgaaAu..... 1  
 Gi3\_27617847\_x5.....cgauccggagacgucgugggaCcacg..... 1  
 Gi2\_10606585\_x5.....ucAugggaacacggggugccgaac..... 1  
 Gi3\_27643547\_x5.....gGgaagcgccgucagggccccgag..... 1  
 Gi1\_4015640\_x5.....gggaacacgggAugccgaacu..... 1  
 Gi2\_10596795\_x5.....aggccccgccaAuacugc..... 1  
 Gi3\_27600617\_x5.....Gccccgaguacugcgauccggaga..... 1  
 Gi3\_27652377\_x5.....Cagaagcgccgucagggccc..... 1  
 Gi2\_10609180\_x5.....ucgCgggaacacggggugccgaac..... 1  
 Gi3\_27551577\_x5.....gaucggagacgucgugggaCcac..... 1  
 Gi1\_4000235\_x5.....ugggUacacggggugccgaacu..... 1  
 Gi2\_10612375\_x5.....cgugggaacacggggugccAa..... 1  
 Gi5\_8580582\_x5.....aucggagacgucgugggaacacggggCgc..... 1  
 Gi1\_4011735\_x5.....ugggaacaNggggugccga..... 1  
 Gi3\_27560157\_x5.....ugggaacaUggggugccgaa..... 1  
 Gl1a\_5741272\_x5.....gggaacacggggCgccgaacu..... 1  
 Gi3\_27619937\_x5.....gacgucgugggaGcacggg..... 1  
 Gi2\_10595960\_x5.....ugggaacCggggugccgaac..... 1  
 Gl1a\_5741382\_x5.....Gacugcgauccggagacguc..... 1  
 Gi3\_27646647\_x5.....cgugggaacCggggugccga..... 1  
 Gi3\_27610662\_x5.....Ggaagcgccgucagggccccgcca..... 1  
 Gi3\_27564852\_x5.....uUcugcgauccggagacguc..... 1  
 Gi3\_27558742\_x5.....agagaagcgUgucagggccccgccc..... 1  
 Gi2\_10645030\_x5.....ugAgaacacggggugccgaac..... 1  
 Gi3\_27631187\_x5.....cgucgugggaGcacggggugccga..... 1  
 Gi2\_10649850\_x5.....gggaacacggggugccAgaac..... 1  
 Gi2\_10591670\_x5.....acgucgugggaGcacggggugcc..... 1  
 Gi3\_27653967\_x5.....gacgucgugggaacacggggugccgaUc..... 1  
 Gi2\_10625435\_x5.....aucggagacgucgugggaUac..... 1  
 Gi4\_537243\_x5.....Gcuggggaacacggggugccgaacu..... 1  
 Gi3\_27638512\_x5.....aucNgagacgucgugggaacacg..... 1  
 Gi5\_8595167\_x5.....cggagacgucgugggaacacggggugccgaa..... 0

Gi5\_8589502\_x5.....uggaacacggggugccgCa..... 1  
 Gl1a\_5735972\_x5.....cgugAgaacacggggugccgaacu..... 1  
 Gi3\_27627217\_x5.Gcuuaacucguuccgaau..... 1  
 Gi2\_10649885\_x5.....gggaacacggggugAcgaacu..... 1  
 Gi2\_10644095\_x5.....Ucgaucggagacgucgugggaacacggggugc..... 1  
 Gi2\_10622155\_x5.....cgucgugggaacGcggggugc..... 1  
 Gi3\_27649982\_x5.....gaucAgagacgucgugggaacacggggug..... 1  
 Gi2\_10649510\_x5.....cgugggaaUacggggugccgaac..... 1  
 Gi5\_8568412\_x5.....ucgugggaacacggggugccUaacu..... 1  
 Gi3\_27596417\_x5.....ucgugggaNcacggggugc..... 1  
 Gi3\_27578847\_x5.....aguacugcNaucggagacgucgug..... 1  
 Gl1a\_5745757\_x5.....Gaguacugcgaucggagacguc..... 1  
 Gi3\_27632632\_x5.....Ugccaguacugcgaucggagacguc..... 1  
 Gi2\_10621045\_x5.....cgucgugggGacacggggugc..... 1  
 Gi2\_10633715\_x5.....gacgucgugggaacacggggGcgggaacu..... 1  
 Gi3\_27633727\_x5.....ugggaacaUggggugccga..... 1  
 Gi2\_10628660\_x5.....gaucggagacguUgugggaacacggggug..... 1  
 Gi3\_27639827\_x5.....aucUgagacgucgugggaacacgggg..... 1  
 Gi5\_8594957\_x5.....uggaacacAaggggugccgaa..... 1  
 Gi3\_27650072\_x5.....ccccgccaguacugcGuc..... 1  
 Gi2\_10609305\_x5.....gugggaaAacggggugccg..... 1  
 Gi3\_27560132\_x5.....gaagagaagcggccGcagg..... 1  
 Gi3\_27616277\_x5.....gucgugggaacUcggggugccgaacu..... 1  
 Gi2\_10619910\_x5.....Caucggagacgucgugggaacacggggugcc..... 1  
 Gi3\_27636637\_x5.....cgucAugggaacacggggugccg..... 1  
 Gi3\_27613947\_x5.....gaucggagacgCcgugggaacacg..... 1  
 Gi2\_10642475\_x5.....Gacugcgaucggagacgucgug..... 1  
 Gi2\_10606490\_x5.....gucgugggaacacggggugccgaGc..... 1  
 Gi3\_27559902\_x5.....cgaucggaNacgucgugggaacacg..... 1  
 Gi1\_4015885\_x5.....cgucgugggaacCcggggugcc..... 1  
 Gi2\_10602200\_x5.....gaucggagCcgucgugggaacacggggug..... 1  
 Gi3\_27572327\_x5.....gGgacgucgugggaacacg..... 1  
 Gi3\_27613372\_x5.....aAcgccgucagggccccgcc..... 1  
 Gi2\_10631380\_x5.....cgUagacgucgugggaacacggggugc..... 1  
 Gi2\_10622360\_x5.....Gcggaucggagacgucgugggaacacg..... 1  
 Gi3\_27568737\_x5.....gaagagaagcggccGcaggcccc..... 1  
 Gi3\_27658127\_x5.....aucggGgacgucgugggaacacggggugc..... 1  
 Gl1a\_5732142\_x5.....uggaacacacggggugAcgaacu..... 1  
 Gi3\_27642907\_x5.....ucgugggaacGcggggugc..... 1  
 Gi1\_4005680\_x5.....cgugggaacacacggggugccgaaU..... 1  
 Gi2\_10593860\_x5.....aucggagacgucgugggCacacggg..... 1  
 Gi2\_10626965\_x5.....gucgugggaaAacggggugccgaac..... 1  
 Gi1\_3994290\_x5.....ggaacacggggugccgaCcu..... 1  
 Gi2\_10648365\_x5.....aagGgaagcggccgucagggcc..... 1  
 Gi3\_27566312\_x5.....gCcgugggaacacggggugcc..... 1  
 Gi2\_10642885\_x5.....cgucgugggaacCcggggugccg..... 1  
 Gi3\_27589932\_x5.....cggaUacgucgugggaacacggggug..... 1

Gi3\_27651497\_x5.....cagggcccAccaguacugcgau.....1  
 Gi2\_10640475\_x5.....guUgugggaacacggggugc.....1  
 Gi2\_10608630\_x5.....cgccgucagggcccGgu.....1  
 Gi3\_27597267\_x5.....aucggagacgucgCggga.....1  
 Gi2\_10601500\_x5.....gGcccgccaguacugcgau.....1  
 Gi2\_10644450\_x5.....gcgaucggGgacgucgugggaacacggggugcc.....1  
 Gi2\_10633510\_x5.....aucggagacgucgugggaCca.....1  
 Gi2\_10608595\_x5.....cgggagacgucgugggaacacggggugAc.....1  
 G1a\_5747237\_x5.....gugggaacacggggugcAgaacu.....1  
 Gi1\_4013205\_x5.....aacacggggugccgaacG.....1  
 Gi2\_10624460\_x5.....gugggaacacgAggugccg.....1  
 Gi2\_10641485\_x5.....gucGggccccgccaguacugc.....1  
 Gi3\_27631947\_x5.....gugggaacacgCgugccga.....1  
 Gi3\_27565552\_x5.....Ucgaucggagacgucgugggaacacggg.....1  
 Gi2\_10644955\_x5.....gugNgaacacggggugccgaac.....1  
 Gi5\_8569227\_x5.....gacgucgugAgaacacggggugccgaacu.....1  
 Gi2\_10609830\_x5.....ggcccUgccaguacugcgau.....1  
 Gi3\_27561062\_x5.....ucgugggaacacggggCgccga.....1  
 Gi3\_27566632\_x5.....ugggaacacggggugcGgaac.....1  
 G1a\_5732667\_x5.....agagaagcgccgucaggc.....0  
 Gi2\_10642765\_x5.....Aaacacggggugccgaac.....1  
 Gi2\_10644635\_x5.....ggaNcacggggugccgaac.....1  
 Gi2\_10622470\_x5.....ggaCcacggggugccgaacu.....1  
 Gi3\_27606072\_x5.....agcgccguNaggccccgccagu.....1  
 Gi1\_3996775\_x5.....aucggagacgucgugggaacacggU.....1  
 Gi3\_27608952\_x5.....agUgaagcgccgucagggcccgc.....1  
 Gi3\_27640987\_x5.....cgucagggcccAccaguacugcg.....1  
 Gi2\_10597460\_x5.....ugggaacacggggCgccg.....1  
 Gi1\_4016735\_x5.....gucgugggaacacggggugccgaGcu.....1  
 Gi2\_10598245\_x5.....cgucAugggaacacggggugccgaacu.....1  
 Gi5\_8578217\_x5.....agacgucgugggaacacggggugccgCacu.....1  
 Gi3\_27606307\_x5.....agaagcgcNguhagggcccgcga.....1  
 Gi5\_8596497\_x5.....GucggagacgucgugggaacacggggU.....1  
 G1a\_5746677\_x5.....auUggagacgucgugggaacacggg.....1  
 Gi3\_27645367\_x5.....cNugggaacacggggugccgaacu.....1  
 Gi2\_10634400\_x5.....aggccccgccaguacugcgC.....1  
 G1a\_5763037\_x5.....aucggagacgucgugggaGcacggg.....1  
 Gi3\_27656372\_x5.....gacgucgugggaacacggggugUcgaacu.....1  
 Gi3\_27553877\_x5.....uGggagacgucgugggaacacggg.....1  
 Gi1\_3999865\_x5.....ggGgacgucgugggaaca.....1  
 G1a\_5758467\_x5.....Gcaguacugcgauaggagacguc.....1  
 Gi2\_10631180\_x5.....cagggcAcgccaguacugcgau.....1  
 Gi3\_27654152\_x5.....gccCcagggccccgccaguacugcg.....1  
 Gi2\_10603395\_x5.....ugggaacacggggUAccgaac.....1  
 Gi2\_10618185\_x5.....aUcgccgucagggccccccagua.....1  
 Gi5\_8576517\_x5.....ucagggccccgccaguacugcA.....1  
 Gi3\_27657422\_x5.....cgucgugggaacacggAgugcc.....1

Gi2\_10602425\_x5.....aUuacugcgauccggagacg..... 1  
 Gi2\_10639275\_x5.....aucggUgacgucgugggaacacggggugc..... 1  
 Gi5\_8564632\_x5.....aGcggagacgucgugggaacacggggugcc..... 1  
 Gi4\_535428\_x5.....ugggaacaNggggugccgaacu..... 1  
 Gi5\_8590832\_x5.....gugggaacacggggugccA..... 1  
 Gi2\_10592945\_x5.....uGggagacgucgugggaacacggggugcc..... 1  
 Gi3\_27599372\_x5.....gcgaucggagacgucgugggaacacggggugc..... 0  
 Gi2\_10613945\_x5.....ugggaCcacggggugccgaac..... 1  
 Gi2\_10592100\_x5.....aggcAccgccaguacugc..... 1  
 Gi3\_27692357\_x4.....cgAcaggccccccagacuacugc..... 1  
 Gi2\_10696751\_x4.....cgAcgugggaacacggggugcc..... 1  
 Gi3\_27709313\_x4.....gcUaguacugcgauccggagacgu..... 1  
 Gi2\_10715159\_x4.....gGagagaagcgccgucagggccc..... 1  
 Gi3\_27756253\_x4.....cgucaggccccAccagacuacugc..... 1  
 Gi1\_4040560\_x4.....gCaacacggggugccgaac..... 1  
 Gi3\_27666501\_x4.....ggagacgucgugggaacacggggGgcc..... 1  
 Gi5\_8623699\_x4.....gaacacggggugccgaCc..... 1  
 Gi2\_10689999\_x4.....cAugggaacacggggugccgaa..... 1  
 Gi3\_27672397\_x4.....ugggaacacggggUaccg..... 1  
 Gl1\_5804558\_x4.....gugggaacGcggggugccgaac..... 1  
 Gi5\_8643479\_x4.....ggaacacgCggugccgaacu..... 1  
 Gi3\_27789073\_x4.....agUagcgccgucagggccccgccc..... 1  
 Gi2\_10719643\_x4.....aggccccgccGguacugcga..... 1  
 Gi3\_27782029\_x4.....uUggagacgucgugggaacacggggugcc..... 1  
 Gi4\_542842\_x4.....acgucgugNgaacacggggugccgaacu..... 1  
 Gi3\_27786917\_x4.....cgccagacuacugcgauccggCgac..... 1  
 Gi3\_27734657\_x4.....cgugggaacacgAgugccga..... 1  
 Gi3\_27762549\_x4.....acgNcgugggaacacggggugccgaacu..... 1  
 Gi3\_27781733\_x4.....cGcgccagacuacugcgauccggaga..... 1  
 Gi2\_10657403\_x4.....gacgucgugggaacacggggugcAgaacu..... 1  
 Gi3\_27788337\_x4.....ggaacacggggugcGgaacu..... 1  
 Gi3\_27768609\_x4.....cguggAaacacggggugcc..... 1  
 Gi2\_10691119\_x4.....Gccgccagacuacugcgauccggagacguc..... 1  
 Gi3\_27681077\_x4.....caggccccccagacuCugc..... 1  
 Gi3\_27665969\_x4.....cgucgugggaaAacggggugc..... 1  
 Gi2\_10697295\_x4.....acgucgugggCacacggggugccgaacu..... 1  
 Gi3\_27752033\_x4.....caggGccccccagacuacugcg..... 1  
 Gi5\_8647267\_x4.....Agggaacacggggugccgaac..... 1  
 Gi1\_4028704\_x4.....gggaacacggggugccgUacu..... 1  
 Gi3\_27680529\_x4.....acgucgugggCacacggggugcc..... 1  
 Gi5\_8604675\_x4.....aggccccAccagacuacugcgauc..... 1  
 Gi2\_10713683\_x4.....ugggaGcacggggugccgaacuu..... 1  
 Gi3\_27721649\_x4.....Accagacuacugcgauccggagacgu..... 1  
 Gi5\_8644647\_x4.....ucgugggaNcacggggugccgaac..... 1  
 Gi5\_8618879\_x4.....gugggaacacggggugccgCacuu..... 1  
 Gi3\_27718313\_x4.....gagaagcgccgCcaggccccgc..... 1  
 Gi3\_27790693\_x4.....caggcUccgccagacuacugcg..... 1

Gi2\_10658167\_x4.....Uagacgucgugggaacacggg..... 1  
 Gi2\_10669555\_x4.....aucggagacgucgCgggaacacg..... 1  
 Gi5\_8614939\_x4.....aucggagaNgcugcugggaacacg..... 1  
 Gi5\_8620015\_x4.....gucgugggaacacggggugAcggaacu..... 1  
 Gi2\_10717167\_x4.....acgucugNgaacacggggugccg..... 1  
 Gi2\_10696691\_x4.....ccgccaguacugcgGucggag..... 1  
 Gi2\_10664867\_x4.....gagGagcgccgucagggcccgcc..... 1  
 Gi2\_10711947\_x4.....cguAggaacacggggugccgaa..... 1  
 Gi2\_10684231\_x4.....gugggaacaAggggugccgaa..... 1  
 Gi3\_27705109\_x4.....gucaggccNcgccaguacugc..... 1  
 Gi3\_27729773\_x4.....acgCcgugggaacacggggugccgaa..... 1  
 Gi5\_8611951\_x4.....ugggaacacUgggugccgaaacu..... 1  
 G1a\_5793330\_x4.....aucggagaNgcugcuggga..... 1  
 Gi2\_10672811\_x4.....cAucaggccccgccaguacugc..... 1  
 Gi2\_10704951\_x4.....ggccAcgccaguacugcgauc..... 1  
 Gi1\_4029492\_x4.....Ugagacgucgugggaacacggggug..... 1  
 Gi2\_10718943\_x4.....guggCaacacggggugccg..... 1  
 Gi3\_27761993\_x4.....caggccccgccaguacuAcgau..... 1  
 Gi2\_10693675\_x4.....uGggaacacggggugccgaa..... 1  
 Gi1\_4034972\_x4.....gaagcgccgucagggccc..... 0  
 Gi2\_10694623\_x4.....caggGccccgccaguacugcg..... 1  
 Gi5\_8608931\_x4.....Ugacgucgugggaacacggggugccgaaacu..... 1  
 Gi2\_10675939\_x4.....ggccccgccaguacugcgCu..... 1  
 Gi2\_10715031\_x4.....cgugggaacacgAggugc..... 1  
 Gi1\_4036300\_x4.....Uaucggagacgucgugggaacacggggg..... 1  
 G1a\_5776970\_x4.....gUagacgucgugggaaca..... 1  
 Gi2\_10687167\_x4.....gccgucagggccccgccCguacugcg..... 1  
 Gi3\_27794453\_x4.....ggaUcacggggugccgaa..... 1  
 Gi3\_27723293\_x4.....acgucAugggaacacggggugccgaa..... 1  
 Gi3\_27687029\_x4.....cgugggaacacggggGgc..... 1  
 Gi1\_4047116\_x4.....Ncgugggaacacggggugccgaaacu..... 1  
 Gi3\_27753817\_x4.....cgucguggAaacacggggugcc..... 1  
 Gi1\_4020904\_x4.....Gucggagacgucgugggaacacggggugcc..... 1  
 Gi2\_10697815\_x4.....cgucgugggaacacggggugccAaacu..... 1  
 Gi1\_4024780\_x4.....cgucaggcNccgccaguacugc..... 1  
 Gi5\_8647387\_x4.....aggccccgccaguacugcgaCc..... 1  
 Gi1\_4024348\_x4.....gacgucgugggaacacggggGgccgaaacu..... 1  
 Gi3\_27663973\_x4.ccuuaacCcgguccgaa..... 1  
 Gi4\_543830\_x4.....Uaacacggggugccgaaacu..... 1  
 Gi3\_27788965\_x4.....gacgucgugggaacGcggg..... 1  
 G1a\_5787506\_x4.....cUugggaacacggggugccg..... 1  
 Gi2\_10675807\_x4.....gaucggagacgucgugggaacacggggAgc..... 1  
 Gi2\_10700259\_x4.....Ugacgucgugggaacacggggugccgaa..... 1  
 Gi2\_10655259\_x4.....Cgagacgucgugggaacacggggugccg..... 1  
 Gi2\_10706099\_x4.....gaucggagacgucgugggCacacg..... 1  
 Gi2\_10681247\_x4.....cggagacgucgugggaacacggggugccgaa..... 0  
 Gi3\_27679521\_x4.....gaucggagacgucgugggGacacg..... 1



Gi2\_10709723\_x4.....gaucggagacgucguggGaca..... 1  
 Gi3\_27787533\_x4.....aggccccgccaguCucgcaucgg..... 1  
 Gi2\_10676187\_x4.....cggagacgucgugggaGcacggggugc..... 1  
 Gi4\_540638\_x4.....cAugggaacacggggugccgaacu..... 1  
 Gi3\_27732497\_x4.....ucgugggUacacggggugccgaac..... 1  
 Gi5\_8603663\_x4.....ucgugggaacacggggugccgaGc..... 1  
 Gi2\_10722959\_x4.....gaucggagGcgucgugggaacacggggugcc..... 1  
 Gi2\_10719719\_x4.....cguggAaacacggggugcc..... 1  
 Gi1\_4042960\_x4.....cccgccaguacugcgauccgagacguc..... 0  
 Gi3\_27726897\_x4.....cgccaguacugcgauccgagacgCc..... 1  
 Gi3\_27687089\_x4.....cgucgugggaacacgAggugccgaac..... 1  
 Gi2\_10653143\_x4.....ccUgccaguacugcgauccgagac..... 1  
 Gi5\_8615267\_x4.....agacgucgugggaacacggggugccGacu..... 1  
 Gi2\_10689119\_x4.....ucgugggaacacggggugcAgaac..... 1  
 Gi3\_27666533\_x4.....cucguuccgaauuaCgaaga..... 1  
 Gi2\_10681079\_x4.....cgucgugggaacacAggugcccg..... 1  
 Gi2\_10655183\_x4.....agagaagcgccgucagggccccgccaguacugc..... 0  
 Gi1\_4019672\_x4.....gGucggagacgucgugggaacac..... 1  
 Gi3\_27746973\_x4.....cggagacgucgugggaGcacggggugcc..... 1  
 Gi2\_10706939\_x4.....aacNcggggugccgaacu..... 1  
 Gi2\_10693239\_x4.....ugggUacacggggugccgaac..... 1  
 Gi3\_27772873\_x4.....Aagaagcgccgucagggccccgc..... 1  
 Gi3\_27784565\_x4.....gacgucgugggaacGcggggugccgaac..... 1  
 Gi2\_10702115\_x4.....agagaGgcgccgucagggcccc..... 1  
 Gi3\_27705521\_x4.....aucggagaUgucgugggaacac..... 1  
 Gi1\_4039652\_x4.....aucggGgacgucgugggaacac..... 1  
 G1a\_5773834\_x4.....cgugggaCcacggggugccgaacu..... 1  
 Gi1\_4025724\_x4.....aCcacggggugccgaacu..... 1  
 Gi2\_10665487\_x4.....cCugggaacacggggugccga..... 1  
 Gi2\_10664167\_x4.....aggccccgcUaguacugcga..... 1  
 Gi5\_8605335\_x4.....gGccccccaguacugcgaucc..... 1  
 Gi2\_10717987\_x4.....gaGcggagacgucgugggaacac..... 1  
 Gi5\_8614831\_x4.....Augggaacacggggugccgaa..... 1  
 Gi2\_10716187\_x4.....ggagacgucgugggaGcacggggugc..... 1  
 Gi3\_27674629\_x4.....caggccccccaUuacugcg..... 1  
 Gi3\_27728941\_x4.....aucggagacgucgugggaacacAggugc..... 1  
 G1a\_5789090\_x4.....cgugggaacacggggGgcccgaacu..... 1  
 Gi3\_27691761\_x4.....gaUaagcgccgucagggccccgc..... 1  
 Gi2\_10686251\_x4.....ucggagacgucgugggCacacg..... 1  
 Gi2\_10662999\_x4.....cccgccaguacugcgauccUg..... 1  
 Gi3\_27740505\_x4.....agGacugcgauccgagacgucgug..... 1  
 Gi3\_27776897\_x4.....cgucguAgggaacacggggugccg..... 1  
 Gi2\_10713623\_x4.....aucggCgacgucgugggaacac..... 1  
 Gi3\_27779857\_x4.....agUgccgucagggccccccagu..... 1  
 Gi5\_8627263\_x4.....gugggaacacggggugcUga..... 1  
 Gi3\_27670941\_x4.....gUcaguacugcgauccga..... 1  
 Gi5\_8619859\_x4.....ucgugggaacacgggUgugccgaacu..... 1

Gi3\_27719861\_x4.....ugggaacaAggggugccgaa..... 1  
Gi5\_8622431\_x4.....guggUaacacggggugccga..... 1  
Gi3\_27721625\_x4.....Gcggagacgucgugggaacac..... 1  
Gi1\_4020556\_x4.....aggccccgccaguacugcgau..... 0  
Gi3\_27781765\_x4.....aggccccgUcaguacugc..... 1  
Gi1\_4039552\_x4.....cgugggaacacggggCgccgaacu..... 1  
Gi2\_10712563\_x4.....ggagacgucgugggaacacggggAgcc..... 1  
Gi3\_27670713\_x4.....ugggaacacggggGgccgaa..... 1  
Gi2\_10664875\_x4.ccuuaacuNquuccgaau..... 1  
Gi3\_27789473\_x4.....ucgNgggaacacggggugccgaacu..... 1  
Gi5\_8609507\_x4.....ugggaacacAggugccgaac..... 1  
Gi3\_27661253\_x4.....gaUgucgugggaacacggg..... 1  
Gi3\_27791701\_x4.....gAgaacacggggugccgaa..... 1  
Gi3\_27693133\_x4.....gaacacggggugUcgaac..... 1  
Gi5\_8624055\_x4.....ugggaacacggggugccgaG..... 1  
Gi2\_10711519\_x4.....aucggagaNgcugugggaacacgg..... 1  
Gi2\_10691099\_x4.....gucguAggaacacggggugcc..... 1  
Gi2\_10694747\_x4.....cgugggGacacggggugccg..... 1  
Gi2\_10706903\_x4.....gccccgccaguacugcgauA..... 1  
Gi4\_539354\_x4.....aUacgucgugggaacacggggugccgaacu..... 1  
Gi1\_4027564\_x4.....agagaagcgcgucagggccccccaguacugcg..... 0  
Gi2\_10673219\_x4.....ccccgccaguacuAcgauc..... 1  
Gi3\_27749145\_x4.....cCccgucagggccccccag..... 1  
Gi3\_27782921\_x4.....cggagacgucguAggaacacggggugcc..... 1  
Gi3\_27756937\_x4.....aucggagacgucguggAaacacggggugccga..... 1  
Gi2\_10655803\_x4.....ucaggccccgccaguacCgc..... 1  
Gi5\_8604615\_x4.....aggccccgccaguacugcgGuc..... 1  
Gi2\_10715359\_x4.....aggccccgccaguacAgcgau..... 1  
Gi2\_10664671\_x4.....ucUggccccgccaguacugcgauC..... 1  
Gi3\_27717045\_x4.....gaAcggagacgucgugggaacacggg..... 1  
Gi3\_27669845\_x4.....cgucgugggaacacggggugccgaaU..... 1  
Gi3\_27770669\_x4.....cUucagggccccgccaguacugcgauC..... 1  
Gi3\_27659433\_x4.....aUcacggggugccgaacu..... 1  
Gi3\_27703777\_x4.....Uacgucgugggaacacggggugccgaa..... 1  
Gi2\_10669831\_x4.....gugggaacacgUggugcc..... 1  
Gi3\_27702589\_x4.....gccccgccCguacugcgau..... 1  
Gi2\_10683255\_x4.....ggaacacggggugccAaa..... 1  
Gi1\_4019432\_x4.....cGggccccgccaguacugc..... 1  
Gi1\_4035496\_x4.....gggaacacggggugAcgaacu..... 1  
Gi2\_10722015\_x4.....gugggaacacgggAugccg..... 1  
Gi3\_27792073\_x4.....acgucgugggaacacggggugcAga..... 1  
Gi3\_27793193\_x4.....Gggagacgucgugggaacac..... 1  
Gi1\_4040668\_x4.....cgucgugggaacacggggAccgaacu..... 1  
Gi3\_27729553\_x4.....cgucgugggaacacggggAgccg..... 1  
Gi1\_4043696\_x4.....cgucgugggaacacggggugccgGacu..... 1  
Gi3\_27689141\_x4.....aggcccGgccaguacugcgauC..... 1  
Gi3\_27754637\_x4.....aggccccgCaguacugcgauC..... 1

Gi5\_8641743\_x4.....guggaacCcggggugcc..... 1  
 Gi3\_27768413\_x4.....aAcggagacgucgugggaacac..... 1  
 Gi2\_10713743\_x4.....gacgucgugggaacacggggGgccg..... 1  
 Gl1\_5775066\_x4.....ugggaacacggggugccgaac..... 0  
 Gi1\_4039392\_x4.....auUggagacgucgugggaacacggggugcc..... 1  
 Gi3\_27759553\_x4.....cgugggCacacggggugccga..... 1  
 Gi1\_4036936\_x4.....gacgucgugggaacacggggGgccg..... 1  
 Gi1\_4031496\_x4.....ugggaacacggggugccgaacAu..... 1  
 Gi3\_27716637\_x4.....cucguuccgaauaggaagagaagcgccguc..... 0  
 Gi5\_8604455\_x4.....gucaggccNcgccaguacugcg..... 1  
 Gi2\_10665879\_x4.....Gccgccaguacugcgauccggagac..... 1  
 Gi3\_27787865\_x4.....guacugcgNucgggagacg..... 1  
 Gi1\_4032420\_x4.....gcgaucggagacgucgugggaacacggggugc..... 0  
 Gi1\_4028944\_x4.....ggagacgucgugggaUacggggug..... 1  
 Gi2\_10679827\_x4.....gaacacggggugGcgaacu..... 1  
 Gi3\_27763745\_x4.....cgucaAgccccgccaguacugcg..... 1  
 Gi4\_543106\_x4.....Cugggaacacggggugccgaacu..... 1  
 Gi3\_27696929\_x4.....cgucGggccccgccaguacugc..... 1  
 Gi3\_27752757\_x4.....ggccccgccaguacugcgaC..... 1  
 Gi3\_27695501\_x4.....ggAaacacggggugccga..... 1  
 Gi3\_27711601\_x4.....cCccaguacugcgauccggagac..... 1  
 Gi3\_27796145\_x4.....ucgugggaGcacggggugccgaa..... 1  
 Gi5\_8625051\_x4.....Ggacgucgugggaacacggggugc..... 1  
 Gi3\_27756501\_x4.....aucggagacgucgugggCacacggggugcc..... 1  
 Gi1\_4031264\_x4.....aacacggggugAcgaacu..... 1  
 Gi5\_8638359\_x4.....cgucguggAaacacggggugccgaacu..... 1  
 Gi3\_27683105\_x4.....aggccccgccagGacugcg..... 1  
 Gi3\_27735993\_x4.....ucgugggaGcacggggugccg..... 1  
 Gi3\_27706697\_x4.....Agagacgucgugggaacacg..... 1  
 Gi2\_10651315\_x4.....gggaacacggggugccgaG..... 1  
 Gi5\_8621015\_x4.....Gaguacugcgauccggagacgucgug..... 1  
 Gi5\_8627695\_x4.....cCugggaacacggggugccgaac..... 1  
 Gi3\_27752597\_x4.....ucggagacgucgugggaGcacg..... 1  
 Gi3\_27712817\_x4.....aucgCagacgucgugggaacacggg..... 1  
 Gi2\_10685459\_x4.....aucggagacgucgugggaacacgggAu..... 1  
 Gi5\_8607371\_x4.....cgugggaacacgggUugccgaacu..... 1  
 Gi3\_27722713\_x4.....cgugAgaacacggggugccg..... 1  
 Gl1\_5776298\_x4.....aacacggggugccAaacu..... 1  
 Gi2\_10720291\_x4.....Ucgauccggagacgucgugggaaca..... 1  
 Gi2\_10663359\_x4.....Uggccccgccaguacugcga..... 1  
 Gi3\_27685129\_x4.....Ugacgucgugggaacacggggugccgaacu..... 1  
 Gi3\_27702717\_x4.....ucgugggaacacggggugccgUac..... 1  
 Gi5\_8618463\_x4.....gugggaCcacggggugccgaac..... 1  
 Gi5\_8608747\_x4.....acgucgugggaacacggggugAcgaacu..... 1  
 Gi2\_10665791\_x4.....acgucgugggaaAacggggugcc..... 1  
 Gi3\_27725993\_x4.....cccgccagNacugcgauccggagacgu..... 1  
 Gi1\_4028512\_x4.....aGgucgugggaacacggggugccg..... 1

Gi2\_10687595\_x4.....aggccccgccUguacugcga..... 1  
 Gi2\_10710131\_x4.....Gguacugcgauccggagacgucg..... 1  
 Gi2\_10710311\_x4.....ucgugggGacacggggugcc..... 1  
 Gi1\_4040048\_x4.....acgucgugggaacacggggugccGacu..... 1  
 Gi2\_10687451\_x4.....gAgaacacggggugccgaa..... 1  
 Gi3\_27736177\_x4.....ccccgccaguacugcgauccggagacgC..... 1  
 Gi2\_10652635\_x4.....aggcAccgccaguacugcgaucc..... 1  
 Gi2\_10689771\_x4.....aggccccgccaguacugcgauccggagacgucgu..... 0  
 Gi1\_4038772\_x4.....gucgugggaacacgAggugccgaacu..... 1  
 Gi3\_27723725\_x4.....cccgccaguacugcgauccggCgac..... 1  
 Gi3\_27669941\_x4.....gccgucagggccccgccagCacugcg..... 1  
 Gi5\_8617675\_x4.....cgugggaacacggggCgccgaac..... 1  
 Gi3\_27753805\_x4.....cggagacgucgugggaacGcgggu..... 1  
 Gi2\_10688615\_x4.....ucgugggaacacggggugccgaCc..... 1  
 Gi3\_27695717\_x4.....agacgucgugggaacacggggugccgaGc..... 1  
 Gi5\_8643723\_x4.....acgucgAgggaacacggggugccgaacu..... 1  
 Gi2\_10691539\_x4.....ugggaUcacggggugccgaacu..... 1  
 Gi3\_27717561\_x4.....cgccaguacugcgGucggagacguc..... 1  
 Gi2\_10678207\_x4.....cgugggaacUcggggugcc..... 1  
 Gi4\_541546\_x4.....gugggaacacggggugccgaUc..... 1  
 Gi3\_27661861\_x4.....aucggagCcgucgugggaacacgg..... 1  
 Gi3\_27683429\_x4.....gggaacacggggAgccgaa..... 1  
 Gi3\_27723457\_x4.....ucagggcccAccaguacugcg..... 1  
 Gi3\_27663073\_x4.....aUgagaagcgccgucagggccccgccagua..... 1  
 Gi3\_27692733\_x4.....gacgucgAgggaacacggggugccgaacu..... 1  
 Gi3\_27753081\_x4.....Aaagagaagcgccgucagggccccgcc..... 1  
 Gi3\_27756549\_x4.....ggccccgccaguacugcgauccggagacguc..... 0  
 Gi1\_4024168\_x4.....gugggaacNcggggugccg..... 1  
 Gi3\_27790589\_x4.....cgucgGgggaacacggggugcc..... 1  
 Gi2\_10682839\_x4.....caggccccgUcaguacugcgaucc..... 1  
 Gi2\_10686743\_x4.ccuuaacucguuccgaaC..... 1  
 Gi2\_10660043\_x4.....ucggagacNucgugggaacacgggg..... 1  
 Gi1\_4042752\_x4.....ucguCggaacacggggugccgaacu..... 1  
 Gi2\_10700615\_x4.....agacgucgugggaacacggggugcUgaacu..... 1  
 Gi2\_10666627\_x4.....cgugggCacacggggugccgaac..... 1  
 Gi3\_27717401\_x4.....cgugggaacaUggggugccga..... 1  
 Gi3\_27707389\_x4.....gaucggagacgCcgugggaacacgggg..... 1  
 Gi3\_27788957\_x4.....ggccccgUcaguacugcgaucc..... 1  
 Gi3\_27745049\_x4.....cgugggaacaUggggugccg..... 1  
 Gi3\_27740641\_x4.....cgucgugggaGcacggggugcc..... 1  
 Gi3\_27788733\_x4.....gaucggagacgucgugggaaAacggg..... 1  
 Gi5\_8620307\_x4.....acugcgauNggagacgucgug..... 1  
 Gl1\_5802902\_x4.....uggAaacacggggugccgaacu..... 1  
 Gi3\_27681205\_x4.....gGucggagacgucguggg..... 1  
 Gi3\_27700957\_x4.....cgucgugggaacaUggggugc..... 1  
 Gi3\_27719301\_x4.....aggccccAccaguacugcga..... 1  
 Gl1\_5792706\_x4.....Aaacacggggugccgaac..... 1

Gi2\_10704723\_x4.....caggccccgccaguGcugcg..... 1  
 Gi2\_10702375\_x4.....uggAaacacggggugccga..... 1  
 Gi2\_10692675\_x4.....acgucgugggaacacggggugcUgaacu..... 1  
 Gi2\_10722983\_x4.....ugggaacacgggAugccgaac..... 1  
 Gi2\_10700343\_x4.....aacacgggCugccgaacu..... 1  
 Gi2\_10688351\_x4.....caggccccgcUaguacugcg..... 1  
 Gi1\_4030328\_x4.....Ggugggaacacggggugccgaacu..... 1  
 Gi2\_10654279\_x4.....ggaacacgCggugccgaacu..... 1  
 G1a\_5812278\_x4.....gugggaacGcggggugccga..... 1  
 Gi1\_4045568\_x4.....ggagacgucgugggGacacggggugcc..... 1  
 Gi3\_27783429\_x4.....cguUgugggaacacggggugc..... 1  
 Gi1\_4034184\_x4.....ucgugggaacacggggugccgaaA..... 1  
 Gi3\_27738965\_x4.....ucgNgggaacacggggugccgaac..... 1  
 Gi3\_27785533\_x4.....cucguuccgaauuaggaaga..... 0  
 Gi3\_27698253\_x4.....caggccccgccaguacCgcga..... 1  
 Gi5\_8631955\_x4.....caggccccgccaguGcugcg..... 1  
 Gi2\_10661295\_x4.....gugggaacacggggugccU..... 1  
 Gi1\_4040776\_x4.....gGcuggggaacacggggug..... 1  
 Gi2\_10682075\_x4.....gaAcggagacgucguggga..... 1  
 Gi2\_10664755\_x4.....Gucggagacgucgugggaa..... 1  
 Gi2\_10718483\_x4.....gugggaacacggggugcUgaa..... 1  
 Gi3\_27714501\_x4.....cgugggaacacgggCugccga..... 1  
 Gi2\_10709127\_x4.....aggccccgccaguacugAg..... 1  
 Gi2\_10666823\_x4.....ggagacgucgugggaacacggggCgc..... 1  
 Gi2\_10676687\_x4.....gugggaacacggggugcGgaac..... 1  
 Gi5\_8641303\_x4.....cUggccccgccaguacugcgauc..... 1  
 Gi3\_27794833\_x4.....aucggagacgucAugggaaacacgg..... 1  
 Gi5\_8606687\_x4.....cgugggaacaUggggugccgaac..... 1  
 Gi2\_10695463\_x4.....aggccccgccaguacugAga..... 1  
 Gi3\_27785317\_x4.....gaacacggggugccgGac..... 1  
 Gi3\_27660885\_x4.....ugggUacacggggugccg..... 1  
 Gi2\_10712363\_x4.....cgucgugggaacacggggugccgaaUu..... 1  
 Gi3\_27747221\_x4.....Ggacgucgugggaacacgggg..... 1  
 Gi5\_8617983\_x4.....gugAgaacacggggugccga..... 1  
 Gi1\_4036552\_x4.....cggagacgucgugggGacacggggugcc..... 1  
 Gi5\_8624931\_x4.....gugggaacacggggCgcc..... 1  
 Gi3\_27699357\_x4.....caggAcccgccaguacugcgauc..... 1  
 Gi5\_8621383\_x4.....gacgucgugggaacacggggCgcgaacu..... 1  
 Gi1\_4041360\_x4.....gaaNacggggugccgaacu..... 1  
 Gi1\_4039560\_x4.....aacacgCgugccgaacu..... 1  
 Gi3\_27689197\_x4.....Gggagacgucgugggaacacgggg..... 1  
 Gi3\_27726041\_x4.....cUgagacgucgugggaacacggggugccg..... 1  
 Gi2\_10658979\_x4.....aggccccgccaguacuAc..... 1  
 Gi3\_27705985\_x4.....gccccgagCacugcgauc..... 1  
 Gi3\_27794513\_x4.....Aaucggagacgucgugggaac..... 1  
 Gi3\_27710817\_x4.....aCacgucgugggaacacggggugccgaacu..... 1  
 Gi3\_27793241\_x4.....gugggaUcacggggugccga..... 1

|                 |                                 |   |
|-----------------|---------------------------------|---|
| Gi1_4025908_x4  | cguggaaNacggggugccgaac          | 1 |
| Gi1_4031100_x4  | aGcggagacgucguggaacacgg         | 1 |
| Gi3_27702173_x4 | gucguggaacacggggugccgUac        | 1 |
| Gi3_27763037_x4 | cgUcaguacugcgauccggagac         | 1 |
| Gi2_10714919_x4 | aucggagacgucguggaacCcgggug      | 1 |
| Gi1_4033604_x4  | guggaacNcggggugccgaac           | 1 |
| Gi1_4044024_x4  | cgauccggagacgucgugg             | 0 |
| Gi1_4034680_x4  | Gcguggaacacggggugccg            | 1 |
| Gi1a_5810490_x4 | Gguggaacacggggugc               | 1 |
| Gi2_10688631_x4 | gUucggagacgucguggaacacg         | 1 |
| Gi2_10703519_x4 | Agucguggaacacggggugcc           | 1 |
| Gi2_10664399_x4 | ucguggaacacggggUaccg            | 1 |
| Gi2_10660951_x4 | aucggagacgucguggaacCcgggugc     | 1 |
| Gi3_27704337_x4 | gGaaagcgcgcgucagggccc           | 1 |
| Gi1_4035276_x4  | uggaacacggAgugccgaacu           | 1 |
| Gi1_4043352_x4  | acgucguggaacacggggugccAaacu     | 1 |
| Gi5_8638243_x4  | cGggccccgccaguacugcgau          | 1 |
| Gi3_27700981_x4 | ggCacacggggugccgaac             | 1 |
| Gi1_4033888_x4  | uggaacacUggggugccgaacu          | 1 |
| Gi2_10667995_x4 | gaagcgcgcgucagggcccgc           | 0 |
| Gi3_27721025_x4 | gggaacacggggugccUaac            | 1 |
| Gi3_27677221_x4 | ucaggcUccgccaguacugc            | 1 |
| Gi2_10671311_x4 | gGcaguacugcgauccgga             | 1 |
| Gi3_27661701_x4 | cguggaacacAgggugccgaa           | 1 |
| Gi2_10655663_x4 | gggaacacggggugccgaaU            | 1 |
| Gi3_27717021_x4 | agacUucguggaacacggggugccgaac    | 1 |
| Gi3_27733805_x4 | cgucguggaacCcgggugccg           | 1 |
| Gi3_27692461_x4 | aucggagacgucguggaacacgggU       | 1 |
| Gi1_4020488_x4  | agggccccgccaguacugcgauccggagacg | 0 |
| Gi3_27701273_x4 | ucggagacNucguggaacacgg          | 1 |
| Gi5_8641103_x4  | cGcggggugccgaacu                | 1 |
| Gi2_10704323_x4 | acgucguggaacacggggugccgaUc      | 1 |
| Gi3_27674045_x4 | Aucaggccccgccaguacugcg          | 1 |
| Gi3_27743773_x4 | acguAguggaacacggggugccgaacu     | 1 |
| Gi2_10679871_x4 | uggaacacAgggugccgaacu           | 1 |
| Gi5_8611779_x4  | guggaacacggggGccga              | 1 |
| Gi2_10688163_x4 | gaucggagacgucgCgggaacacggggug   | 1 |
| Gi1a_5803606_x4 | ggaaUacggggugccgaacu            | 1 |
| Gi5_8641007_x4  | gucguggaacacggggUaccgaacu       | 1 |
| Gi4_539670_x4   | cUccaguacugcgauccggagacgucgug   | 1 |
| Gi3_27712373_x4 | cgucguggaacacggggugccgaG        | 1 |
| Gi2_10666675_x4 | guggaCcacggggugccgaa            | 1 |
| Gi2_10655843_x4 | guggaacacggggugccUaac           | 1 |
| Gi3_27696765_x4 | cgUucggagacgucguggg             | 1 |
| Gi2_10678979_x4 | gggaacacCggggugccgaacu          | 1 |
| Gi2_10658199_x4 | cggagacgucguggAaacacggggugcc    | 1 |
| Gi2_10667583_x4 | gGucggagacgucguggaac            | 1 |

Gi3\_27693937\_x4.....cccgccagCacugcgauC.....1  
 Gi3\_27687213\_x4.....gagGcgucgugggaaacacggggugccgaac.....1  
 Gi2\_10706683\_x4.....ucgAgggaaacacggggugccgaac.....1  
 Gi3\_27748285\_x4.....cgucgugggaaacacggggugccGac.....1  
 Gi2\_10668207\_x4.....ucgugggaaacacggAgugccgaac.....1  
 Gi3\_27796081\_x4.....gccccgccaguacugcgCuc.....1  
 Gi1\_4023168\_x4.....gucgugggaaacacggggugccAaacu.....1  
 Gi3\_27795245\_x4.....aagGgaagcgccgucagggc.....1  
 Gi3\_27787737\_x4.....gagacgucgugggaaacacggggC.....1  
 Gi3\_27776525\_x4.....gaagagGagcgccgucagggccc.....1  
 Gi2\_10661215\_x4.....cccgccaguacugcgauCggGgac.....1  
 Gi1\_4038824\_x4.....acgucgugggaaacGcggggugccgaacu.....1  
 Gi2\_10678671\_x4.....ucaggccccgccaguacugcgGuc.....1  
 Gi2\_10663879\_x4.....gaucggagacgCcgugggaaacacggggugc.....1  
 Gi5\_8603943\_x4.....Aucaggccccgccaguacugcg.....1  
 Gi2\_10697951\_x4.....ucgugCgaacacggggugccgaacu.....1  
 Gi3\_27682801\_x4.....acugcgauNggagacgucgu.....1  
 Gi5\_8605147\_x4.....uAggaacacggggugccgaa.....1  
 Gi3\_27769929\_x4.....cgucgugggaaacacgAgggugcc.....1  
 Gi3\_27778257\_x4.....gUagagaagcgccgucagggccc.....1  
 Gi3\_27683977\_x4.....ccUgccaguacugcgauCggag.....1  
 Gi2\_10711879\_x4.....ccaguacugcgauCggGgacguc.....1  
 G1a\_5796122\_x4.....ggaacaUggggugccgaacu.....1  
 Gi3\_27710389\_x4.....gaucggagacgucgugggaaacacggggGgc.....1  
 G1a\_5807098\_x4.....cgucaggcNccgccaguacugcg.....1  
 Gi2\_10723243\_x4.....gaacGcggggugccgaac.....1  
 Gi2\_10658387\_x4.....cgugggaaacacggggugcUgaa.....1  
 Gi3\_27668329\_x4.....Agggaaacacggggugccg.....1  
 Gi3\_27794509\_x4.....ucaggccUcgccaguacugc.....1  
 Gi1\_4038064\_x4.....uAggaacacggggugccgaac.....1  
 Gi3\_27742317\_x4.....gaCcgagacgucgugggaaaca.....1  
 Gi5\_8647759\_x4.....ucgCgggaacacggggugccgaac.....1  
 Gi3\_27790425\_x4.....cgugggaaacCcggggugccgaa.....1  
 Gi2\_10705439\_x4.....gUacacggggugccgaac.....1  
 G1a\_5782854\_x4.....aucggagacgucgugggGacacggg.....1  
 Gi2\_10682659\_x4.....Cgggaacacggggugccga.....1  
 Gi2\_10676559\_x4.....gacgucgugggaaacacggggugccgaacu.....1  
 G1a\_5797370\_x4.....gugggaaacacggggugccgaacu.....1  
 Gi1\_4018052\_x4.....cggagacgNcgugggaaacacggggugc.....1  
 Gi2\_10716535\_x4.....cggagacguUgugggaaacacggggugcc.....1  
 Gi3\_27764245\_x4.....ccccgccaNuacugcgauCgga.....1  
 Gi3\_27749517\_x4.....acguUgugggaaacacggggugccgaac.....1  
 G1a\_5796114\_x4.....acucguuccgaauuaggaaga.....0  
 Gi2\_10676867\_x4.....aucggagUcgucgugggaaacacggggg.....1  
 Gi3\_27697785\_x4.....gacgucguAggaacacggggugccgaacu.....1  
 Gi1\_4020944\_x4.....gggaacacggggugUcgaacu.....1  
 Gi2\_10710563\_x4.....ugggaacCcggggugccga.....1

Gi3\_27666805\_x4.....gugggaacacggggugccUaa..... 1  
Gi2\_10686083\_x4.....cCugggaacacggggugccgaa..... 1  
Gi3\_27669081\_x4.....cgugggaacaUggggugc..... 1  
Gi3\_27718989\_x4.....aucgUagacgucgugggaacac..... 1  
Gi1\_4031116\_x4.....gGacugcgauccggagacgucg..... 1  
Gi3\_27685481\_x4.....ucaggccccgccaguacugcA..... 1  
Gi2\_10688691\_x4.....Caucggagacgucgugggaacacggggu..... 1  
Gi2\_10708799\_x4.....aucggagaUgucgugggaacac..... 1  
Gi3\_27747393\_x4.....cgccaguaNugcgauccggagac..... 1  
Gi5\_8649291\_x4.....aaGacggggugccgaacu..... 1  
Gi2\_10715947\_x4.....aucggagacAucgugggaacacggggugc..... 1  
Gi5\_8617403\_x4.....gUagacgucgugggaaca..... 1  
Gi3\_27707665\_x4.....cgucUugggaacacggggugccga..... 1  
Gi3\_27708965\_x4.....gucaggccNcgccaguacugcg..... 1  
Gi5\_8625791\_x4.....cgugggaacacggggugccAaac..... 1  
Gi2\_10702467\_x4.....caggccccUgccaguacugcgaucc..... 1  
Gi1\_4037992\_x4.....ugggaacacggggugccgaUc..... 1  
G1a\_5792962\_x4.....aCaagcgccgucaggccccgc..... 1  
Gi3\_27663717\_x4.....gaucggagacgucgugggaacacA..... 1  
Gi3\_27760837\_x4.....aggccccgccaguCcuugcg..... 1  
Gi3\_27792861\_x4.....agUcugcugugggaacacggggugccgaac..... 1  
Gi3\_27678173\_x4.....acgucAugggaacacggg..... 1  
Gi2\_10717723\_x4.....cggagacgucguUggaacacggggugc..... 1  
Gi2\_10702903\_x4.....caggccccAccaguacugcg..... 1  
G1a\_5799366\_x4.....gggaacacggggGgccgaacu..... 1  
Gi2\_10674383\_x4.....ggccccgccagCacugcgau..... 1  
Gi2\_10717627\_x4.....ucaggccccgccaguacuAcgauc..... 1  
Gi1\_4022212\_x4.....caggccccgccaguacugcgaCc..... 1  
Gi2\_10702883\_x4.....gaucggagacgucgugggaacacgggAu..... 1  
Gi1\_4027332\_x4.....uGugggaacacggggugc..... 1  
Gi3\_27664593\_x4.....caggccccCccaguacugcg..... 1  
Gi3\_27722881\_x4.....gucaggccccgccagCacugc..... 1  
Gi1\_4023196\_x4.....gucgugggaacGcggggugccgaacu..... 1  
Gi3\_27698145\_x4.....agaagcgcNgcagccccgccagu..... 1  
Gi2\_10713151\_x4.....cGgccaguacugcgauccggag..... 1  
Gi3\_27757849\_x4.....cgucgugggaacacggggugcUg..... 1  
Gi1\_4034264\_x4.....aGgcgcccugcaggccccgccaguacug..... 1  
Gi3\_27664669\_x4.....cgugggaacacgggAugccgaa..... 1  
Gi2\_10650619\_x4.....aCacgucgugggaacacggggugcc..... 1  
G1a\_5800046\_x4.....aucggagGcgucgugggaacacggg..... 1  
Gi2\_10652755\_x4.....gGgaagcgcgucaggccccgc..... 1  
Gi2\_10684399\_x4.....ggaacacgNggugccgaa..... 1  
Gi5\_8607575\_x4.....gucgugggNacacggggugccgaac..... 1  
G1a\_5797090\_x4.....guUggaacacggggugccgaac..... 1  
Gi3\_27737241\_x4.....Cccaguacugcgauccggagacgu..... 1  
Gi5\_8609639\_x4.....Agggaacacggggugccgaa..... 1  
Gi3\_27733185\_x4.....cgucaggcUccgccaguacug..... 1



Gi2\_10676839\_x4.....ucaggccccgccUguacugcgauC.....1  
 Gi2\_10668115\_x4.....gaucAgagacgucgugggaaacacggg.....1  
 Gi5\_8641975\_x4.....ugUgaucggagacgucgugggga.....1  
 Gi2\_10714687\_x4.....cgCcaggccccgccaguacugcg.....1  
 Gi2\_10651807\_x4.....ugggaacaGggggugccgaacu.....1  
 Gi5\_8649595\_x4.....aucggagacgucguggggaGcacg.....1  
 Gi3\_27725537\_x4.....gagaagcgccgucagggcUcgc.....1  
 Gi5\_8631847\_x4.....ggcUccgccaguacugcgauC.....1  
 Gi3\_27795073\_x4.....aucggagacgucgugAgaacacggg.....1  
 Gi3\_27699033\_x4.....gaagagaagcgccgucCgg.....1  
 Gi3\_27763609\_x4.....gccaguacCgcaucggagacgu.....1  
 Gi5\_8617719\_x4.....agacgucgugggaaacacggggugccgaGcu.....1  
 Gi2\_10668551\_x4.....ugggaacacgggCugccgaac.....1  
 Gi3\_27739329\_x4.....cAccaguacugcgauCggagacguc.....1  
 Gi1\_4040956\_x4.....caguacugcgauCggagacgucU.....1  
 Gi3\_27700353\_x4.....gacgucguggggaCcacggggugccgaacu.....1  
 G1a\_5794974\_x4.....UaggccccgccaguacugC.....1  
 Gi2\_10675075\_x4.....aUgucgugggaaacacggggugccgaac.....1  
 Gi5\_8616231\_x4.....gugggaacNcggggugcc.....1  
 Gi1\_4025240\_x4.....Uugggaacacggggugccgaa.....1  
 Gi2\_10718559\_x4.....gggGacacggggugccgaa.....1  
 Gi2\_10677415\_x4.....aacacggggugccgaUcu.....1  
 G1a\_5792278\_x4.....Ggaucggagacgucgugg.....1  
 Gi3\_27756629\_x4.....aucggagacgAcgugggaaacacggggg.....1  
 Gi2\_10690667\_x4.....aucggagacgucgugggaaacacggggugU.....1  
 Gi1\_4027792\_x4.....gucguAggaacacggggugccgaacu.....1  
 Gi2\_10718983\_x4.....gaucggagacgucgugggaaUacggg.....1  
 Gi3\_27788673\_x4.....gUcugcugggaaacacggggugccgaac.....1  
 Gi3\_27730501\_x4.....caggccccCccaguacugcgauC.....1  
 Gi3\_27754909\_x4.....UccccgccaguacugcgauCggagac.....1  
 Gi5\_8608435\_x4.....aucggagacgucguggggaCcacggggg.....1  
 Gi2\_10704715\_x4.....ucagAccccgccaguacugcgauC.....1  
 G1a\_5774446\_x4.....gucgugggNacacggggugccgaacu.....1  
 Gi2\_10703771\_x4.....gGcugcugggaaacacggggugc.....1  
 Gi2\_10698011\_x4.....gugggaacUcggggugccg.....1  
 Gi3\_27670061\_x4.....gNgggaacacggggugccgaacu.....1  
 Gi3\_27768725\_x4.....cgccaguaNugcgauCggagacgucgug.....1  
 G1a\_5786810\_x4.....cgugggaacacggggugccgaCc.....1  
 Gi2\_10718815\_x4.....GccgccaguacugcgauCggaga.....1  
 G1a\_5807754\_x4.....gugggaacacggggGgcc.....1  
 G1a\_5775102\_x4.....aucggagaNgcugggaaacacggg.....1  
 Gi3\_27698697\_x4.....cccgccaguacugcgauCggagCcguc.....1  
 Gi3\_27715981\_x4.....caggccccgccUguacugcg.....1  
 Gi2\_10720983\_x4.....auUggagacgucgugggaaacacg.....1  
 Gi5\_8603019\_x4.....cgugggaacacCgggugccgaacu.....1  
 Gi3\_27770877\_x4.....agUgaagcgccgucagggccccgca.....1  
 Gi3\_27777973\_x4.....ucggagacNucgugggaaac.....1

Gi3\_27723117\_x4.....gagaagcgccgAcaggccccgc..... 1  
 Gi3\_27790765\_x4.....cccgccaguacugcgaucaAga..... 1  
 Gi2\_10668663\_x4.....caggccccgccGguacug..... 1  
 Gi3\_27706781\_x4.....gugggaacacgCggugccga..... 1  
 Gi5\_8627283\_x4.....gggaacacgUgugccgaacu..... 1  
 Gi2\_10720059\_x4.....aggccccgccGguacugcgauccgga..... 1  
 Gi3\_27741437\_x4.....cugcgauccggagacgucgugggaacacggggug..... 0  
 Gi2\_10659311\_x4.....Uaagcgccgucaggccccgccaguacug..... 1  
 Gi2\_10675799\_x4.....gucgugggaacacggggugccgaUc..... 1  
 Gi2\_10661719\_x4.....cgucgCgggaacacggggugccga..... 1  
 Gi2\_10689395\_x4.....cGguacugcgauccggagacgucgu..... 1  
 G1a\_5795834\_x4.....aucggagacgucgugggaCcacggg..... 1  
 Gi2\_10666131\_x4.....gggaaAacggggugccgaac..... 1  
 Gi3\_27681521\_x4.....ucgugggGacacggggugccg..... 1  
 G1a\_5771386\_x4.....cgUucggagacgucgugg..... 1  
 Gi1\_4018832\_x4.....acUucgugggaacacggggugccgaacu..... 1  
 Gi3\_27670673\_x4.....Ccugcugugggaacacggggugccgaac..... 1  
 Gi2\_10708987\_x4.....ggagacgucgugggaCcacggggugcc..... 1  
 Gi2\_10704887\_x4.....aggccccgGcaguacugcgauca..... 1  
 Gi3\_27736169\_x4.....ucgugCgaacacggggugccgaacu..... 1  
 Gi2\_10699187\_x4.....aggcUccgccaguacugcg..... 1  
 Gi3\_27780521\_x4.....aucggagacgucgugggaaAacggg..... 1  
 Gi3\_27682281\_x4.....aucggagacgucgGgggaacacggggu..... 1  
 Gi2\_10671831\_x4.....gaagcgccgucaggccccgccCgu..... 1  
 Gi2\_10657831\_x4.....aucggagacgucgugggCacacggggug..... 1  
 Gi2\_10673451\_x4.....gugggaacUcggggugcc..... 1  
 Gi2\_10686079\_x4.....gaUgcgccgucaggccccgc..... 1  
 Gi3\_27757393\_x4.....gucaggccccgccaguCcug..... 1  
 Gi2\_10712459\_x4.....gaucggagacgucgugggaacacggggGgcc..... 1  
 Gi2\_10693955\_x4.....gaAcggagacgucgugggaacacggggg..... 1  
 Gi3\_27703125\_x4.....gucgugggaacGcggggugc..... 1  
 Gi1\_4022344\_x4.....aucggagacgucgugggaU..... 1  
 Gi2\_10680863\_x4.....gagacgucgugggaacGcggggug..... 1  
 Gi3\_27695413\_x4.....Uucgugggaacacggggugccgaacu..... 1  
 Gi2\_10654759\_x4.....caggccccgccaguacugcgac..... 1  
 Gi2\_10651723\_x4.....ucgugUgaacacggggugccgaacu..... 1  
 Gi3\_27756909\_x4.....ggaacacggggugcUgaa..... 1  
 Gi3\_27782153\_x4.....acacggggugccAaacuu..... 1  
 Gi3\_27742841\_x4.....gccaguacugcgauccggGgacgu..... 1  
 Gi1\_4029584\_x4.....gccgucagggccccgccCguacu..... 1  
 Gi5\_8622043\_x4.....gggaacacgUggugccgaacu..... 1  
 Gi1\_4042580\_x4.....aacNcggggugccgaacu..... 1  
 Gi2\_10652087\_x4.....cUggccccgccaguacugcgau..... 1  
 Gi1\_4018700\_x4.....guggUaacacggggugcc..... 1  
 Gi2\_10715863\_x4.....gGacugcgauccggagacgucg..... 1  
 Gi2\_10657759\_x4.....acgucgugggaCcacggggugccgaacu..... 1  
 Gi2\_10653491\_x4.....cgugggaacacgAgugccga..... 1

Gi2\_10656843\_x4.....Cucagggccccgccaguacug..... 1  
 Gi3\_27775337\_x4.....ucUggccccgccaguacugc..... 1  
 Gi2\_10702943\_x4.....aucggagacgucgugAgaacac..... 1  
 Gl1\_5771014\_x4.....Aaucggagacgucguggg..... 1  
 Gi2\_10688423\_x4.....acgucgugggaacGcggggugcc..... 1  
 Gi2\_10708519\_x4.....aggccccgcAaguacugcgau..... 1  
 Gi2\_10655223\_x4.....aucAgagacgucgugggaacacggg..... 1  
 Gl1\_5773222\_x4.....aucggagacgucgugggaacacggggugccgaacu..... 0  
 Gi5\_8639555\_x4.....cgucgugggaacacggggGgcc..... 1  
 Gi3\_27690821\_x4.....ucggagacgucgugggaacacggggC..... 1  
 Gi2\_10673467\_x4.....agacAucgugggaacacggggugcc..... 1  
 Gi5\_8627811\_x4.....ugggaacacgggCugccgaac..... 1  
 Gi2\_10655827\_x4.....agUcgcgugggaacacggggugc..... 1  
 Gi4\_544682\_x4.....gugggaacacggggugcc..... 0  
 Gi3\_27788373\_x4.....ugggCacacggggugccga..... 1  
 Gi3\_27694661\_x4.....ggagacgucgugggGacacg..... 1  
 Gi3\_27723277\_x4.....ucagggccccgccaguGcugcg..... 1  
 Gi3\_27685641\_x4.....Ccgagacgucgugggaacacggggugcc..... 1  
 Gi2\_10706547\_x4.....gggaacacgUggugccgaacu..... 1  
 Gi3\_27733157\_x4.....cgucguUggaacacggggugccgaacu..... 1  
 Gi3\_27687049\_x4.....acguGgugggaacacggggugccgaacu..... 1  
 Gi2\_10725383\_x4.....aggccccgccaguCcugcg..... 1  
 Gl1\_4034648\_x4.....aggccccgccaguGcugcgau..... 1  
 Gl1\_5771934\_x4.....ugcgauccggagacgucgugggaacacggggg..... 0  
 Gi3\_27733717\_x4.....gucagggccccgccGguacugc..... 1  
 Gi3\_27763373\_x4.....gucgugggaacacggggugUcgaac..... 1  
 Gi3\_27714377\_x4.....aucggagacgucgugggaacacggggGacg..... 1  
 Gi2\_10715431\_x4.....gUcgcgugggaacacggggugccgaacu..... 1  
 Gi3\_27664317\_x4.....caggccAcgccaguacugcgau..... 1  
 Gi5\_8604019\_x4.....ugggaacacggggugccAaa..... 1  
 Gi5\_8639299\_x4.....gGgacgucgugggaacacggggugccgaacu..... 1  
 Gl1\_4033860\_x4.....guggCaacacggggugccgaacu..... 1  
 Gl1\_4028996\_x4.....gAgggaacacggggugccgaac..... 1  
 Gi3\_27679689\_x4.....ggagacgucgugggaacacgggggUaccg..... 1  
 Gi3\_27730721\_x4.....guUgugggaacacggggugc..... 1  
 Gi2\_10653975\_x4.....gacgucgugggaacacggggugccAaacu..... 1  
 Gi3\_27690457\_x4.....gaucggagacAucgugggaacacg..... 1  
 Gi4\_543190\_x4.....caggccccgccaguacugcg..... 0  
 Gi3\_27743201\_x4.....cgucgugggaacacgggAugc..... 1  
 Gi2\_10685323\_x4.....caggccccgUcaguacug..... 1  
 Gl1\_4035880\_x4.....Gcggagacgucgugggaacacg..... 1  
 Gi2\_10682851\_x4.....ccgucaggNcccgccaguacugc..... 1  
 Gi2\_10716435\_x4.....Agccccgccaguacugcgauccg..... 1  
 Gi3\_27727421\_x4.....Ggccgucaggccccgccaguacu..... 1  
 Gi3\_27781861\_x4.....aucggagacgucgugggaacacggggugAc..... 1  
 Gi3\_27676801\_x4.....gucgugggaacacAgggugcc..... 1  
 Gi3\_27736513\_x4.....cgucUggccccgccaguacugc..... 1

Gi2\_10698795\_x4.....cCucagggccccgcaguacugc..... 1  
 Gi3\_27752801\_x4.....gGgacgucgugggaacac..... 1  
 Gi2\_10691295\_x4.....Uaagcgccgucagggccccccagu..... 1  
 Gi1\_4035844\_x4.....acgucgugggaacacgAggugccgaacu..... 1  
 Gi2\_107117871\_x4.....agggcccCccaguacugcgau..... 1  
 Gi2\_10663267\_x4.....gugggaacacggggugccC..... 1  
 Gi3\_27671713\_x4.....ugggaacacggggGgccga..... 1  
 Gi2\_10700367\_x4.....gagGcgucgugggaacacggggugc..... 1  
 Gi3\_27665753\_x4.....gagacgucgCgggaacacgggg..... 1  
 Gi2\_10707427\_x4.....agggcccgcaguacugGgau..... 1  
 Gi2\_10714491\_x4.....guNggaacacggggugccgaac..... 1  
 Gi5\_8604567\_x4.....gucgugggaacacggggugccgaaUu..... 1  
 Gi1\_4037592\_x4.....aucggagaNgcgucgugggaacacgggg..... 1  
 Gi2\_10665855\_x4.....Caucggagacgucgugggaacacggg..... 1  
 Gi3\_27700041\_x4.....cgucgugggaaUacggggugcc..... 1  
 Gi5\_8625411\_x4.....aucggagacgucgugggaCcacggg..... 1  
 Gi4\_538718\_x4.....gacgucgugggaacacggggugccgaacuu..... 0  
 Gi3\_27779685\_x4.....agggcccgcaguacuAcgau..... 1  
 Gi3\_27686069\_x4.....gGgccgucagggccccccagu..... 1  
 Gi3\_27667849\_x4.....aGgagaagcgccgucagggccccccagu..... 1  
 Gi2\_10714459\_x4.....aucggCgacgucgugggaacacggggugc..... 1  
 Gi3\_27739449\_x4.....cgucgugggaacacggUgugccgaacu..... 1  
 Gi2\_10712171\_x4.....Gagcgccgucagggccccccaguacugc..... 1  
 Gi1\_4021380\_x4.....Ucgucgugggaacacggggugccgaacu..... 1  
 Gi2\_10667823\_x4.....cccgccagNacugcgauccggag..... 1  
 Gi1\_4032344\_x4.....ucgugggaacacAgggugccgaac..... 1  
 Gi3\_27795205\_x4.....cgugggaacacggggGgccgaa..... 1  
 Gl1\_5775334\_x4.....aguacugcgaCcgagacguc..... 1  
 Gi2\_10674407\_x4.....cgugggaacacgggAugcc..... 1  
 Gi3\_27725405\_x4.....gccgucagggccccccCguacugcg..... 1  
 Gi1\_4038304\_x4.....uAgugggaacacggggugccgaacu..... 1  
 Gi3\_27781701\_x4.....cGccgccaguacugcgauccggagacguc..... 1  
 Gi2\_10681047\_x4.....ucUugggaacacggggugccg..... 1  
 Gi1\_4036500\_x4.....cgccaguacugcgauccggagacg..... 0  
 Gi3\_27770577\_x4.....gagacgucgugggaacacggggugccgaCcu..... 1  
 Gl1\_5805126\_x4.....Uaagcgccgucagggcccccc..... 1  
 Gi3\_27766353\_x4.....gucAuggggaacacgggg..... 1  
 Gi3\_27717629\_x4.....agagGagcgccgucagggcccccc..... 1  
 Gi5\_8624767\_x4.....aucggagaNgcgucgugggaacacgggg..... 1  
 Gl1\_5807370\_x4.....gcUaguacugcgauccggagacguc..... 1  
 Gi2\_10716295\_x4.....agggcccgcaguacugcgauA..... 1  
 Gi2\_10691219\_x4.....gaucggagacgucgugggaacacAggg..... 1  
 Gi3\_27703261\_x4.....cgNggggaacacggggugccgaac..... 1  
 Gi2\_10656451\_x4.....ccccAccaguacugcgau..... 1  
 Gi3\_27741353\_x4.....cccgccaguGcugcgauccggag..... 1  
 Gi5\_8631799\_x4.....auUggagacgucgugggaacacgggg..... 1  
 Gi4\_543594\_x4.....gaacacggggugccgaac..... 0

Gi5\_8647967\_x4.....gugggaaUacggggugccgaac..... 1  
 Gi2\_10713587\_x4.....gucgugggaacaUggggugccgaac..... 1  
 Gi3\_27699773\_x4.....cgucaggccccccaAuacugc..... 1  
 Gi3\_27670309\_x4.....cgccaguNcugcgauccggagacg..... 1  
 Gi4\_539622\_x4.....cgGgggaacacggggugccgaacu..... 1  
 Gi5\_8635359\_x4.....gCgaacacggggugccgaac..... 1  
 Gi2\_10693271\_x4.....ugggaacacgggAugccgaa..... 1  
 Gi3\_27766429\_x4.....agacgucgugggGacacggggugccgaacu..... 1  
 Gi3\_27726705\_x4.....gucgugggaacacggggugccgaaU..... 1  
 Gi2\_10673959\_x4.....aAcgggagacgucgugggaacacg..... 1  
 Gi3\_27771821\_x4.....Ggaucggagacgucguggg..... 1  
 Gi2\_10701339\_x4.....Aggaacacggggugccgaa..... 1  
 Gi3\_27794437\_x4.....cgccaguacugcgauccggCgacg..... 1  
 Gi2\_10653319\_x4.....acgucgugggCacacggggugc..... 1  
 Gi3\_27666957\_x4.....ggaaUacggggugccgaa..... 1  
 Gi3\_27670549\_x4.....cgucaggccccAccaguacug..... 1  
 Gl1a\_5790038\_x4.....agagaagcggcugacggccccgccaguacugc..... 0  
 Gi3\_27667609\_x4.....uggAaacacggggugccga..... 1  
 Gi2\_10707471\_x4.....gaucggagacgucgugggaacGc..... 1  
 Gi2\_10665959\_x4.....ugggaacacggAgugccg..... 1  
 Gi3\_27714717\_x4.....Gguacugcgauccggagacgu..... 1  
 Gi2\_10694191\_x4.....aAacgucgugggaacacggggugccgaacu..... 1  
 Gi2\_10721699\_x4.....Ugagacgucgugggaacacggggugccgaa..... 1  
 Gi3\_27694593\_x4.....cgugAgaacacggggugc..... 1  
 Gi1\_4025284\_x4.....ucgugggaUacggggugccgaacu..... 1  
 Gi3\_27686881\_x4.....uGgugggaacacggggugccgaa..... 1  
 Gi3\_27708985\_x4.....gggagacgucgCgggaacacggggugcc..... 1  
 Gi2\_10678563\_x4.....cgggagacgucgugggaacacggggugcU..... 1  
 Gi2\_10653691\_x4.....Cgagacgucgugggaacacggggug..... 1  
 Gi3\_27659337\_x4.....gGagcggcugacggccccgccc..... 1  
 Gi1\_4025856\_x4.....Ugaacacggggugccgaacuu..... 1  
 Gi3\_27785525\_x4.....gucgugggGacacggggugcc..... 1  
 Gi3\_27777817\_x4.....cAgagacgucgugggaacacggggugcc..... 1  
 Gi2\_10666899\_x4.....gacgCcgugggaacacggggugcc..... 1  
 Gi5\_8610871\_x4.....gugggGacacggggugccga..... 1  
 Gi3\_27707877\_x4.....cgccgucaNgccccgccagu..... 1  
 Gi2\_10653591\_x4.....gggCacacggggugccgaacu..... 1  
 Gi1\_4021340\_x4.....cgugggaacacgggCugccgaacu..... 1  
 Gi2\_10711211\_x4.....aggccccgccaguCcugcga..... 1  
 Gi4\_538762\_x4.....ggaaacacggggugccgaaA..... 1  
 Gi3\_27790997\_x4.....gagacgucNugggaacacggggugccgaacu..... 1  
 Gi2\_10711451\_x4.....cgucaggccccgccGguacugc..... 1  
 Gi3\_27787969\_x4.....cgccgucaggccccAccaguacugc..... 1  
 Gi2\_10690275\_x4.....cgugggaacacggggugccgaacuu..... 0  
 Gi3\_27745005\_x4.....ucGggccccgccaguacugcg..... 1  
 Gi2\_10704039\_x4.....acugcgauccggagacgucgug..... 0  
 Gi2\_10691855\_x4.....aucggagacgucgugggaCcacgg..... 1

Gi3\_27662149\_x4.....cgugggaacacggggugccCaacu..... 1  
Gi1\_4044232\_x4.....acgucgugggaacacggggugUcgaacu..... 1  
Gi2\_10697039\_x4.....acAucgugggaacacggggugccgaacu..... 1  
Gi5\_8604307\_x4.....Cugggaacacggggugcc..... 1  
Gi2\_10708443\_x4.....cgucgugggaacacAgggugccga..... 1  
Gi1\_4042292\_x4.....cgugggaacacggggugccgC..... 1  
Gi3\_27733677\_x4.....cgugggUacacggggugcc..... 1  
Gi3\_27705125\_x4.....gggaacacggggugGcgaacu..... 1  
Gi1\_4026088\_x4.....ugggaacacggggugccgGac..... 1  
Gi3\_27691169\_x4.....cgucaggccccgccagCacugcg..... 1  
Gi2\_10694179\_x4.....cgucgugggaacacggggugccA..... 1  
Gi4\_539850\_x4.....gucgGgggaacacggggugccgaacu..... 1  
Gi2\_10659323\_x4.....aucggagCcgucgugggaacacggggugcc..... 1  
Gi3\_27723269\_x4.....cUgagacgucgugggaacacggggugccgaacu..... 1  
Gi1\_4041324\_x4.....Ggggaacacggggugccg..... 1  
G1a\_5775038\_x4.....Uacgucgugggaacacggggugccgaacu..... 1  
Gi2\_10702979\_x4.....cguuccgaauuaggaagagaagcgccgc..... 0  
Gi3\_27732241\_x4.....ucaggccccUgccaguacugcgauC..... 1  
Gi3\_27794153\_x4.....aucggagacgucgugggGacacgggg..... 1  
Gi2\_10725371\_x4.....gucgugggaacacggggCgc..... 1  
Gi2\_10657643\_x4.....gacguUgugggaacacgggg..... 1  
Gi3\_27697101\_x4.....gggaacacggggugccgaCcuu..... 1  
Gi1\_4023156\_x4.....agacgucgugggaacacggggugcUgaacu..... 1  
Gi3\_27725885\_x4.....UccgccaguacugcgauC..... 1  
Gi2\_10699671\_x4.....cGgccaguacugcgauCggagacg..... 1  
Gi2\_10684891\_x4.....ggagacgucgugggaaca..... 0  
Gi3\_27736561\_x4.....AuacugcgauCggagacgucgug..... 1  
Gi2\_10657707\_x4.....agacgucgugggaacacggggugccgGacu..... 1  
Gi2\_10700199\_x4.....gauCgagacgucguggga..... 1  
Gi1\_4038800\_x4.....ucgCgggaacacggggugccg..... 1  
Gi3\_27791489\_x4.....ccccgccaguacugcgCu..... 1  
Gi3\_27713085\_x4.....cCccaguacugcgauCggagacgu..... 1  
G1a\_5787258\_x4.....cAugggaacacggggugccgaacu..... 1  
Gi1\_4031712\_x4.....ucguUggaacacggggugcc..... 1  
Gi2\_10684815\_x4.....aucggagacguUgugggaacac..... 1  
Gi3\_27780785\_x4.....gauCgagacgucgugggaacacg..... 1  
Gi3\_27785953\_x4.....cgucgugAgaacacggggugccg..... 1  
Gi3\_27684109\_x4.....cggagGcgucgugggaacacgggg..... 1  
Gi2\_10720747\_x4.....gucgugggGacacggggugc..... 1  
Gi3\_27708737\_x4.....ugAgaacacggggugccg..... 1  
Gi3\_27788077\_x4.....ucgGgggaacacggggugccg..... 1  
Gi2\_10676327\_x4.....gccccgccGguacugcgauC..... 1  
Gi3\_27705485\_x4.....guggCaacacggggugccg..... 1  
G1a\_5805342\_x4.....GguacugcgauCggagac..... 1  
Gi1\_4031656\_x4.....aUacgucgugggaacacggggugccgaac..... 1  
Gi2\_10708887\_x4.....agacgucgugggaacacggggugccgaGcu..... 1  
Gi5\_8649447\_x4.....acgucgugggaAacggggugccgaacu..... 1

Gi3\_27783793\_x4.....gggaacaAggggugccgaac..... 1  
 Gi4\_538806\_x4.....gugggaacacggggGgccgaacu..... 1  
 Gi5\_8618343\_x4.....cgucgugggaacacggggugccgaacG..... 1  
 Gi2\_10661371\_x4.....gaacacggggugccAaac..... 1  
 Gi3\_27780277\_x4.....gUcgcugugggaacacggg..... 1  
 Gi1\_4039732\_x4.....ugggaacacggAgugccgaac..... 1  
 Gi3\_27684157\_x4.....gucguUggaacacggggugccgaacu..... 1  
 Gi3\_27718185\_x4.....gGacacggggugccgaacuu..... 1  
 Gi3\_27771361\_x4.....gucgugggaacacggggugAcgaac..... 1  
 Gi3\_27784989\_x4.....cgucgugggaacacggggugccgUacu..... 1  
 Gi3\_27669029\_x4.....gggaUcacggggugccgaac..... 1  
 Gi2\_10683087\_x4.....gggaacacgggUugccgaacu..... 1  
 Gi2\_10665843\_x4.....uGgugggaacacggggugcc..... 1  
 Gl1a\_5804430\_x4.....cgucaggcNccgccaguacugc..... 1  
 Gi3\_27784761\_x4.....aucggagacgucgGgggaacacggg..... 1  
 Gi3\_27736237\_x4.....caggGcccgccaguacugcgauC..... 1  
 Gi3\_27701277\_x4.....GggccccgccaguacugcgauCggagacg..... 1  
 Gi5\_8624251\_x4.....gacgucgCgggaacacggggugccgaacu..... 1  
 Gi1\_4020072\_x4.....cgucgugggaacacggggugcUgaacu..... 1  
 Gi5\_8649775\_x4.....aucgUagacgucgugggaacacg..... 1  
 Gl1a\_5811330\_x4.....cUucgugggaacacggggugccgaacu..... 1  
 Gi3\_27792749\_x4.....GggccccgccaguacugcgauCg..... 1  
 Gi2\_10718055\_x4.....cccgccaguacugcgGucggagac..... 1  
 Gi3\_27750213\_x4.....aUacgucgugggaacacggggugccgaa..... 1  
 Gi3\_27736213\_x4.....aguacugcNaucggagacguc..... 1  
 Gi5\_8645363\_x4.....aGgagaagcgccgucagcggccg..... 1  
 Gi2\_10655647\_x4.....aucggagacgucgugggaCc..... 1  
 Gi5\_8622655\_x4.....gugggaacacggggugAcgaac..... 1  
 Gl1a\_5769298\_x4.....aagagaagcgccgucaggc..... 0  
 Gi1\_4032256\_x4.....cUugggaacacggggugcc..... 1  
 Gi1\_4042664\_x4.....Ggcgaucggagacgucguggga..... 1  
 Gi3\_27773521\_x4.....agaagcgccgucagAcccc..... 1  
 Gi3\_27661909\_x4.....ucgugggaacCcggggugc..... 1  
 Gi3\_27686601\_x4.....cccgccaguacugcgCucgg..... 1  
 Gi2\_10680839\_x4.....acgucgugggGacacggggugc..... 1  
 Gi5\_8637743\_x4.....gaucggagacgucgugggaacacggggugc..... 0  
 Gi3\_27698393\_x4.....aUgucgugggaacacggggugcc..... 1  
 Gi3\_27729933\_x4.....cgucgugggaacacggAgugccgaac..... 1  
 Gi3\_27699597\_x4.....acgucgugUgaacacggggugccgaac..... 1  
 Gi2\_10723551\_x4.....agagaagcNccgucagggccc..... 1  
 Gi2\_10701051\_x4.....cgUagacgucgugggaacacggggugcc..... 1  
 Gl1a\_5782586\_x4.....aGugcgaucggagacguc..... 1  
 Gi3\_27744901\_x4.....GaguacugcgauCggagacguc..... 1  
 Gi1\_4037488\_x4.....ggagacgucgugggaacacggggugccgaac..... 0  
 Gi3\_27719197\_x4.....gccAUuacugcgauCggagacguc..... 1  
 Gi2\_10692987\_x4.....aggcUccgccaguacugc..... 1  
 Gi3\_27733253\_x4.....cggagacgucgugAgaacacggggugcc..... 1

Gi2\_10650715\_x4.....gucgugggaacCcggggugc..... 1  
 Gi1\_4031884\_x4.....auUggagacgucgugggaacacg..... 1  
 Gi1\_4028344\_x4.....cgCcgugggaacacggggugcc..... 1  
 Gi1\_4047268\_x4.....ggagacgCcgugggaacacggggugcc..... 1  
 Gi3\_27747437\_x4.....ugggaacacggCgugccgaac..... 1  
 Gl1a\_5797466\_x4.....guNggaaacacggggugccgaacu..... 1  
 Gi2\_10722551\_x4.....cguAggaaacacggggugcc..... 1  
 Gi5\_8605439\_x4.....gucguggAaacacggggugccgaacu..... 1  
 Gi2\_10658047\_x4.....cgugggaacacgggAugc..... 1  
 Gi3\_27713849\_x4.....Ggaucggagacgucgugggaacacggggugcc..... 1  
 Gi1\_4019344\_x4.....aucggagacgucgugggaaca..... 0  
 Gi1\_4040904\_x4.....aUacgucgugggaacacgggg..... 1  
 Gi3\_27705081\_x4.....cGgucagggccccccagucg..... 1  
 Gi1\_4047696\_x4.....ggaacacggguUccgaacu..... 1  
 Gi1\_4028444\_x4.....Ugugggaacacggggugccgaac..... 1  
 Gi3\_27707805\_x4.....aucggagacgucgGgggaacacgggg..... 1  
 Gi2\_10686883\_x4.....gugggaacacggggugccgGa..... 1  
 Gi3\_27727281\_x4.....Caagagaagcgccgucagggccc..... 1  
 Gi1\_4046432\_x4.....ucgugggaacacggggGgccgaac..... 1  
 Gi3\_27678489\_x4.....gccgucagAccccgccagucg..... 1  
 Gl1a\_5808614\_x4.....cUucagggccccccaguc..... 1  
 Gl1a\_5794482\_x4.....cGaguacugcgaucggagacguc..... 1  
 Gi2\_10654827\_x4.....cgucgugggaacacggggAgcc..... 1  
 Gi3\_27735437\_x4.....Ccaggccccgccagucg..... 1  
 Gi3\_27694533\_x4.....agacgucgugggaGcacgggugccgaac..... 1  
 Gi3\_27718065\_x4.....acGgcgaucggagacgucg..... 1  
 Gi2\_10660479\_x4.....aucggagacgucgugggCacacgg..... 1  
 Gi3\_27716605\_x4.....ugggaacacgggguCccgaac..... 1  
 Gi3\_27720757\_x4.....cgUucggagacgucgugggaacacg..... 1  
 Gi2\_10708615\_x4.....cgccaguaUugcgaucggagac..... 1  
 Gi2\_10718503\_x4.....aacacggUgugccgaacu..... 1  
 Gi3\_27775585\_x4.....gGacugcgaucggagacgu..... 1  
 Gi3\_27763209\_x4.....cagggAccgccagucg..... 1  
 Gi2\_10720603\_x4.....cgugggaGcacgggugccgaa..... 1  
 Gl1a\_5770242\_x4.....cGguacugcgaucggagacgu..... 1  
 Gi1\_4025196\_x4.....ggaacacggggCgccgaac..... 1  
 Gi5\_8648679\_x4.....gaaAacgggugccgaacu..... 1  
 Gi5\_8604559\_x4.....agacgucguAggaaacacggggugccgaacu..... 1  
 Gi2\_10697299\_x4.....aucggagCcgucgugggaacacggg..... 1  
 Gi2\_10712395\_x4.....gacgCcgugggaacacggggugccgaacu..... 1  
 Gi3\_27757225\_x4.....ucggagacgucgugggaacacggggAgcc..... 1  
 Gi3\_27792301\_x4.....cgugggaacacAgggugcc..... 1  
 Gi3\_27741125\_x4.....cgucguggNaacacgggugccgaa..... 1  
 Gi2\_10653783\_x4.....gAgggaacacggggugccgaa..... 1  
 Gl1a\_5809158\_x4.....cagggccccccagucgGg..... 1  
 Gi2\_10665167\_x4.....cgucgugAgaacacgggugccga..... 1  
 Gi2\_10678487\_x4.....ucggagacgucgugggaacacggggC..... 1



Gi3\_27768137\_x4.....aucggUgacgucgugggaacacggggu..... 1  
 Gi2\_10687223\_x4.....ugggaacacggggAgccgaac..... 1  
 Gi2\_10652547\_x4.....cgucAugggaacacggggugccga..... 1  
 Gi3\_27750069\_x4.....agacgucgugggaacGcggggugccga..... 1  
 Gi3\_27754081\_x4.....guUgugggaacacggggu..... 1  
 Gi2\_10683771\_x4.....aucggagacgucgugAgaacacggg..... 1  
 Gi3\_27775837\_x4.....gugggaacacggCgugcc..... 1  
 Gi1\_4017984\_x4.....gggaacacggggugccgaa..... 0  
 Gi3\_27685233\_x4.....cgccGguacugcgauccgagacgu..... 1  
 Gi5\_8630143\_x4.....ucgNgggaacacggggugccgaacu..... 1  
 G1a\_5788794\_x4.....aucggagacgucgAgggaacacggggu..... 1  
 Gi3\_27781837\_x4.....acAucgugggaacacggggugccgaac..... 1  
 Gi2\_10660671\_x4.....gaucUgagacgucgugggaacacggggug..... 1  
 Gi3\_27783237\_x4.....aucggagacgucgugggaacaUggggu..... 1  
 Gi3\_27763577\_x4.....Uccgucagggccccgccaguacug..... 1  
 Gi3\_27714145\_x4.....cUgucagggccccgccaguacugc..... 1  
 Gi2\_10667991\_x4.....uGggaacacggggugccga..... 1  
 Gi2\_10664275\_x4.....gGagagaagcgccgucagggccccg..... 1  
 Gi2\_10670675\_x4.....gaucggagNcgucgugggaacac..... 1  
 Gi1\_4027268\_x4.....gugggaacGcggggugccgaac..... 1  
 Gi2\_10702675\_x4.....ccccgccagAacugccgauc..... 1  
 Gi2\_10696771\_x4.....gCacacggggugccgaacu..... 1  
 Gi2\_10708903\_x4.....gugggaacacgggguUccgaac..... 1  
 Gi3\_27692653\_x4.....cgucgugggCacacggggugccgaacu..... 1  
 Gi3\_27670469\_x4.....ggccccgcNaguacugcga..... 1  
 Gi3\_27669709\_x4.....aucggagacgucgugggaacacgCg..... 1  
 Gi2\_10682535\_x4.....ucgugggaNcacggggugccgaa..... 1  
 Gi3\_27675697\_x4.....auUgggagacgucguggga..... 1  
 Gi1\_4039688\_x4.....cgugggaaNacggggugccga..... 1  
 Gi1\_4040100\_x4.....Uaagagaagcgccgucagggccccccagu..... 1  
 Gi3\_27681253\_x4.....Nacacggggugccgaacu..... 1  
 Gi3\_27739721\_x4.....cccgccagNacugcgauccggag..... 1  
 Gi3\_27717033\_x4.....gccgucagggccccgccCguac..... 1  
 Gi3\_27783021\_x4.....Cggaacacggggugccga..... 1  
 Gi5\_8633391\_x4.....agacgucgugggaacacggggGgccgaacu..... 1  
 Gi2\_10660843\_x4.....ggaacacgggguCccgaacu..... 1  
 Gi3\_27778497\_x4.....aucggagacgucgugUgaacacg..... 1  
 Gi3\_27714361\_x4.....gaucggagacgucAugggaacacggg..... 1  
 Gi3\_27699993\_x4.....Ggagaagcgccgucagggc..... 1  
 Gi1\_4019952\_x4.....cgccgucagggccccgccaguacugc..... 0  
 Gi3\_27742953\_x4.....aUgagaagcgccgucagggcccc..... 1  
 Gi2\_10691983\_x4.....ugAgaacacggggugccga..... 1  
 Gi3\_27671825\_x4.....Gcgucagggccccgccaguacugcg..... 1  
 Gi5\_8622475\_x4.....cgugggaacacgAggugccgaac..... 1  
 Gi2\_10679019\_x4.....ucgugggaacacUgggugccgaac..... 1  
 Gi5\_8623515\_x4.....gggaacacggggGgccgaa..... 1  
 Gi3\_27674801\_x4.....ugggaacacgUggugccgaac..... 1

Gi3\_27770733\_x4.....ccccgccaguaUugcgauC.....1  
Gi4\_539982\_x4.....cUucaggccccgccaguacugC.....1  
Gi3\_27780773\_x4.....aucggagaGgucgugggaaacacggg.....1  
Gi3\_27761589\_x4.....aucggagacgucguAggaacac.....1  
Gi5\_8629723\_x4.....cguggaaacacgggguCccgaacu.....1  
Gi3\_27691109\_x4.....gAagacgucgugggaaacacggggugcc.....1  
Gi3\_27698093\_x4.....cgucaggccccgccaguacCgcg.....1  
Gi3\_27755005\_x4.....aggccccgccaguacugAga.....1  
Gi2\_10654287\_x4.....caggccUcgccaguacugcgauC.....1  
Gi1\_4037868\_x4.....aCggagacgucgugggaaacacg.....1  
Gi3\_27692645\_x4.....gaucggagCcgucgugggaaacacggggu.....1  
Gi3\_27760833\_x4.....uggaaacacgAggugccg.....1  
Gi3\_27697221\_x4.....cguUguggaaacacgggugccgaac.....1  
Gi3\_27768489\_x4.....cgUcaguacugcgauCggaga.....1  
Gi1a\_5787546\_x4.....uggaaacacgggguAccgaacu.....1  
Gi2\_10680463\_x4.....Ggagaagcgccgucagggccccgcc.....1  
Gi3\_27749609\_x4.....UguacugcgauCggagacg.....1  
Gi3\_27791829\_x4.....agacgucgugggaaacacggggugcAgaacu.....1  
Gi2\_10669615\_x4.....guggaaacacggUgugccgaa.....1  
Gi5\_8614675\_x4.....gaacacCgggugccgaacu.....1  
Gi3\_27659185\_x4.....gCacacggggugccgaac.....1  
Gi3\_27734585\_x4.....aGacggggugccgaacuu.....1  
Gi1\_4040760\_x4.....gggaacUcggggugccgaacu.....1  
Gi1\_4019580\_x4.....guggaaacacggggCgcc.....1  
Gi2\_10683511\_x4.....aagagaagNgccgucagggccccgcc.....1  
Gi3\_27724069\_x4.....ggagGcgucgugggaaacacggggu.....1  
Gi2\_10666047\_x4.....aucggagacgucgugAgaacacggggugcc.....1  
Gi3\_27730009\_x4.....gGgacgucgugggaaacacggggugccg.....1  
Gi2\_10699115\_x4.....ucUggccccgccaguacugcg.....1  
Gi5\_8608743\_x4.....aucggagacgucgugggaaacCcggggu.....1  
Gi2\_10715967\_x4.....aucggagacgucgugggaaacacgAggu.....1  
Gi2\_10666875\_x4.....GcaguacugcgauCggag.....1  
Gi3\_27726709\_x4.....gacgucgugggaaacacggggugccgGacu.....1  
Gi2\_10689127\_x4.....gauUggagacgucgugggaaacacggggugc.....1  
Gi3\_27770241\_x4.....gggaacacgggAugccgaa.....1  
Gi3\_27671177\_x4.....aUagaagcgccgucaggg.....1  
Gi3\_27734901\_x4.....gggaacacggggugccgGa.....1  
Gi3\_27744237\_x4.....acgucgugggaaacacggggugccgGac.....1  
Gi3\_27720253\_x4.....agUagcgccgucagggcc.....1  
Gi2\_10690583\_x4.....guggaaacacgggAugccga.....1  
Gi2\_10653139\_x4.....aCgggagacgucgugggaaacacggg.....1  
Gi1\_4019368\_x4.....aguacugcgauCggagacgu.....0  
Gi2\_10693883\_x4.....gucgugggaaacacggAgugccgaac.....1  
Gi3\_27733249\_x4.....uggaaacacgggguUccgaacu.....1  
Gi3\_27760709\_x4.....aucggagacgucgugggaaacCcgggugcc.....1  
Gi3\_27777289\_x4.....uacugcgauCggagacgCc.....1  
Gi5\_8606787\_x4.....gugAgaacacggggugccgaac.....1

Gi1\_4044872\_x4.....gugUgaacacggggugccgaacu..... 1  
 Gi3\_27771653\_x4.....gggGacacggggugccga..... 1  
 Gi3\_27741129\_x4.....aacacgggguCccgaacu..... 1  
 Gi2\_10667115\_x4.....Gcaguacugcgauccggagacguc..... 1  
 G1a\_5804378\_x4.....Uaucggagacgucgugggaaacacgg..... 1  
 Gi2\_10678711\_x4.....gUgacgucgugggaaacacg..... 1  
 Gi3\_27688785\_x4.....cccAccaguacugcgauccggagacgu..... 1  
 Gi5\_8634123\_x4.....cgucguggNaacacggggugc..... 1  
 Gi2\_10659387\_x4.....ucaggccccgccaguacugcgaCc..... 1  
 G1a\_5805802\_x4.....caguacugcgGucggagacguc..... 1  
 G1a\_5783022\_x4.....gugggaacacggggCgcc..... 1  
 G1a\_5786962\_x4.....aucggagacgucgugggaaacGcggggu..... 1  
 Gi2\_10715419\_x4.....aucgUagacgucgugggaaacacggg..... 1  
 Gi5\_8644947\_x4.....agUccccgccaguacugcgauc..... 1  
 Gi5\_8634323\_x4.....Cacgucgugggaacacggggugccgaacu..... 1  
 Gi2\_10668175\_x4.....ucggagacgucgugggGaca..... 1  
 Gi5\_8604743\_x4.....ccgaauuaNgaagagaagc..... 1  
 Gi5\_8605867\_x4.....ggaaAacggggugccgaacu..... 1  
 G1a\_5769026\_x4.....cUucaggccccgccaguacu..... 1  
 Gi2\_10714363\_x4.....gggaacaAggggugccgaac..... 1  
 Gi2\_10668371\_x4.....gGcaguacugcgauccggagacguc..... 1  
 Gi2\_10663883\_x4.....acgucgugggaacacggggGccgaac..... 1  
 Gi2\_10697007\_x4.....ugggaacacggggugccAa..... 1  
 Gi2\_10675959\_x4.....cgucUugggaacacggggugcc..... 1  
 Gi3\_27782337\_x4.....cgucGcgggaacacggggugccga..... 1  
 Gi2\_10686635\_x4.....gggaacacUgggugccgaacu..... 1  
 Gi1\_4033264\_x4.....cgucgugggaacacggggugc..... 0  
 Gi1\_4036740\_x4.....gGcugcugugggaacacggggugccg..... 1  
 Gi4\_541970\_x4.....Ugaacacggggugccgaacu..... 1  
 Gi3\_27724549\_x4.....aucggagacgucgugggaaacacggggugUc..... 1  
 Gi5\_8631911\_x4.....agacgucgugggaacacggggugccAaacu..... 1  
 Gi3\_27673049\_x4.....uacugcgauccggGgacguc..... 1  
 Gi2\_10719751\_x4.....caggccccgccaUuacugcgauc..... 1  
 G1a\_5792154\_x4.....Ugagacgucgugggaaacacg..... 1  
 Gi3\_27758077\_x4.....gucgugggGacacggggugccga..... 1  
 Gi2\_10663627\_x4.....cgggagacgucgugggaaUacgggugcc..... 1  
 Gi4\_544010\_x4.....acAucgugggaacacggggugccgaacu..... 1  
 Gi5\_8614175\_x4.....aacacgUgggugccgaacu..... 1  
 Gi1\_4038836\_x4.....Aggaacacggggugccgaac..... 1  
 Gi3\_27666057\_x4.....aucggCgacgucgugggaaacacgg..... 1  
 Gi5\_8608115\_x4.....uGcugcgaucggagacgu..... 1  
 Gi2\_10686939\_x4.....acgucgugggaGcacggggugccgaac..... 1  
 Gi2\_10715627\_x4.....aucggagacgucgugggaaacacAgg..... 1  
 Gi2\_10678603\_x4.....aucggagacgucgugggaaGcacggggug..... 1  
 Gi1\_4045188\_x4.....cgccaguacugcgauccggagacguc..... 0  
 Gi3\_27737865\_x4.....ucggagacNucgugggaaacacggg..... 1  
 Gi3\_27659837\_x4.....Gcggagacgucgugggaaaca..... 1

Gi4\_541694\_x4 .....cgucgugggaaacacggggGgccga..... 1  
Gi2\_10689619\_x4.....ucgugggUacacggggugccgaac..... 1  
Gi3\_27715809\_x4.....aucNgagacgucgugggaaacacggggu..... 1  
Gi3\_27662081\_x4.....ggagGcgucgugggaaacacg..... 1  
Gi3\_27700709\_x4.....gggaacacggggugccgaGu..... 1  
Gi5\_8606735\_x4.....Gcgucaggccccgccaguacugcg..... 1  
Gi5\_8603055\_x4.....caggccccAccaguacugcg..... 1  
Gi3\_27760317\_x4.....cgucgugggaaacacggggugcA..... 1  
Gi2\_10683851\_x4.....cgucgugggaaacacggggGg..... 1  
Gi3\_27768601\_x4.....ggccccgccaguGcugcgauC..... 1  
Gi2\_10722283\_x4.....ucggagacgucAugggaaacacggggugc..... 1  
Gi5\_8650423\_x4.....guUggaacacggggugcc..... 1  
Gi3\_27792325\_x4.....GccccccaguacugcgauCggagacguc..... 1  
Gi3\_27712101\_x4.....ucggGgacgucgugggaaaca..... 1  
Gi2\_10652931\_x4.....Uccgucaggccccgccaguacugcgau..... 1  
Gi2\_10680359\_x4.....acgucAugggaaacacggggugccgaacu..... 1  
Gi3\_27726945\_x4.....gGcgucgugggaaacacg..... 1  
Gi1\_4027448\_x4.....ggaacaUggggugccgaac..... 1  
Gi2\_10677191\_x4.....gaucggagacgucgugggaaacacAgg..... 1  
Gi2\_10701731\_x4.....cgugggaaacacggggugccAaa..... 1  
Gi2\_10656443\_x4.....ucgGgggaacacggggugccgaac..... 1  
Gi2\_10677851\_x4.....ucgugggaaacacggggGgccga..... 1  
Gi5\_8647307\_x4.ccuuaacucguuccgaauuaAgaagagaagcg..... 1  
Gi3\_27751613\_x4.....aUgagaagcgccgucagggccccgcca..... 1  
Gi3\_27778029\_x4.....ggagacguNgugggaaacacggggu..... 1  
Gi5\_8606935\_x4.....gGgacgucgugggaaacacg..... 1  
Gi3\_27711857\_x4.....ccccgccaguacugcgCucgga..... 1  
Gi2\_10713967\_x4.....agacgucgNgggaaacacggggugccg..... 1  
Gi1\_4025728\_x4.....ucgCgggaacacggggugccgaac..... 1  
Gi2\_10722395\_x4.....ugNgaacacggggugccgaacu..... 1  
Gi2\_10701931\_x4.....agCacugcgauCggagacgucg..... 1  
Gi2\_10679043\_x4.....aucggagacgucgCgggaacacggggug..... 1  
Gi3\_27782161\_x4.....caggccccAccaguacugcg..... 1  
Gi3\_27786137\_x4.....Gggagacgucgugggaaacacg..... 1  
Gi3\_27677557\_x4.....gaucggagacgucgugggaaacacAgg..... 1  
Gi2\_10672323\_x4.....gGcgucaggccccgccaguacugcg..... 1  
Gi3\_27776133\_x4.....ucguUggaacacggggugccg..... 1  
Gi2\_10678051\_x4.....ccccccaguacugcgauCggGgacguc..... 1  
Gi3\_27767317\_x4.....gaucggagacgucgugggaaacacAggg..... 1  
G1a\_5806098\_x4.....aAaagcgccgucagggccccgc..... 1  
Gi3\_27704581\_x4.....agaagcgcNgcagggccc..... 1  
Gi2\_10664347\_x4.....ccccgccGguacugcgauCgg..... 1  
Gi5\_8640219\_x4.....ucguCggaacacggggugccgaacu..... 1  
Gi2\_10669435\_x4.....gaagagGagcgccgucagggccc..... 1  
Gi2\_10664675\_x4.....Gucggagacgucgugggaaacacg..... 1  
Gi3\_27752789\_x4.....cgUcggagacgucgugggaaacacggggu..... 1  
Gi2\_10717831\_x4.....gUccccgccaguacugcgauCggagacg..... 1

Gi2\_10680127\_x4.....gcUgucagggccccgccaguacugcg..... 1  
 Gi3\_27681801\_x4.....agaagcgcNgucagggcccc..... 1  
 Gi2\_10700139\_x4.....acgucuggggaacacggggugccgaaAu..... 1  
 Gi3\_27752181\_x4.....gugggaacacgggCugccgaac..... 1  
 Gi3\_27781173\_x4.....ucgugggaacacggggGgccg..... 1  
 Gi3\_27733209\_x4.....cgccaguacugcgauccggCgacgu..... 1  
 Gi2\_10662707\_x4.....Uuacugcgauccggagacgucguggg..... 1  
 Gi2\_10679671\_x4.....gaGcgggagacgucgugggaacacg..... 1  
 Gi3\_27662145\_x4.....cgucAugggaacacggggugccgaac..... 1  
 Gi1\_4020016\_x4.....gggaacaAggggugccgaacu..... 1  
 Gi1\_4041996\_x4.....ucaggcccNgccaguacugcg..... 1  
 Gi3\_27763197\_x4.....aacGcggggugccgaacuu..... 1  
 Gi3\_27724617\_x4.....gaucgggagacgucguAgggaacacg..... 1  
 Gi3\_27681621\_x4.....aucgggagacgCcgugggaacac..... 1  
 Gi3\_27716829\_x4.....cgucgugAgaacacggggugccgaac..... 1  
 Gi2\_10651487\_x4.....cgucgugggaacacgAggugccgaacu..... 1  
 Gi2\_10685331\_x4.....caggcUccgccaguacugc..... 1  
 Gi4\_544670\_x4.....gggaacacggggugccgaacA..... 1  
 Gi2\_10656135\_x4.....gaucgggagacgucgCgggaacacg..... 1  
 Gi1\_4045516\_x4.....aaAacggggugccgaacu..... 1  
 Gi2\_10663799\_x4.....cgAgggaacacggggugccgaa..... 1  
 Gi1\_4036040\_x4.....gaucgggagacgucgugggaacacggggugccgaacu..... 0  
 Gi2\_10652883\_x4.....aucgggagacgucgugggaacGcgggg..... 1  
 Gi2\_10669819\_x4.....gaucggGgacgucgugggaacacggggg..... 1  
 Gi2\_10701151\_x4.....gaucgggagacgucgugggaacacggggGgc..... 1  
 Gi2\_10708919\_x4.....ggCacacggggugccgaacu..... 1  
 Gi2\_10696715\_x4.....uggNaacacggggugccgaacu..... 1  
 Gi5\_8640451\_x4.....agacgCcgugggaacacggggugccgaacu..... 1  
 Gi2\_10679351\_x4.....Uaggccccgccaguacugcg..... 1  
 Gi3\_27778977\_x4.....cgugggaacacggAgugcc..... 1  
 Gi2\_10690871\_x4.....gucagggccccgccaguacugcgauccgggagacgu..... 0  
 Gi4\_542922\_x4.....cgugggaacacggggugccgaGcu..... 1  
 Gi3\_27691521\_x4.....cgucgugggaaGacggggugccgaacu..... 1  
 Gi2\_10654507\_x4.....gagacgucgugggaacacggggg..... 0  
 Gi2\_10719919\_x4.....cucguuccgaauuaggaagagaagcgccguc..... 0  
 Gi3\_27696297\_x4.....gaucgggagacgucgCgggaacacgggg..... 1  
 Gi3\_27671577\_x4.....aUaagcgccgucagggccccgccaguacug..... 1  
 Gi5\_8609343\_x4.....gGcugcugugggaacacggggugccg..... 1  
 Gl1\_5772950\_x4.....cgugUgaacacggggugcc..... 1  
 Gi3\_27670889\_x4.....gcccgcucagggccccgccagC..... 1  
 Gi4\_542342\_x4.....gugggaacGcggggugccgaacu..... 1  
 Gi1\_4023716\_x4.....Gcuggggaacacggggugccga..... 1  
 Gi2\_10671239\_x4.....gaucgggagacgucgugggaacG..... 1  
 Gi3\_27791789\_x4.....gucagggccccgccCguacugcg..... 1  
 Gi1\_4034220\_x4.....guUgugggaacacggggugcc..... 1  
 Gi2\_10686547\_x4.....ucgugggaGcacggggugccg..... 1  
 Gi3\_27770185\_x4.....ugggaacacggggugGcga..... 1

Gi2\_10663963\_x4.....gaucggagacgucgugggUacac..... 1  
Gi2\_10688771\_x4.....cCucgugggaacacggggugccgaac..... 1  
Gi4\_539458\_x4.....cgugggaacacggggugccgaCcu..... 1  
Gi3\_27737753\_x4.....gccccgccaguacCgcgauc..... 1  
Gi5\_8624831\_x4.....uggAaacacggggugccgaa..... 1  
G1a\_5790514\_x4.....aggccccgccaguacuAcg..... 1  
Gi5\_8646047\_x4.....gugggaacacUggggugccgaacu..... 1  
Gi2\_10670235\_x4.....Ccaggccccgccaguacugcgauc..... 1  
Gi2\_10684011\_x4.....caggccccgccaguacugcgCu..... 1  
Gi5\_8621247\_x4.....uAuggggaacacggggugccgaacu..... 1  
Gi3\_27704857\_x4.....gacgucgugggaacacggggUaccgaacu..... 1  
Gi2\_10702351\_x4.....gucgCgggaacacggggugcc..... 1  
Gi1\_4032672\_x4.....gaacacggggugGcgaacu..... 1  
Gi2\_10695887\_x4.....aggccccgAcaguacugcga..... 1  
Gi3\_27791561\_x4.....cgucgugggaacacgAggugccg..... 1  
Gi3\_27664013\_x4.....aUgccccgccaguacugcgaucggagacgu..... 1  
Gi3\_27680781\_x4.....Cucggagacgucgugggaacacgg..... 1  
Gi2\_10684263\_x4.....cGggccccgccaguacugcgaucgga..... 1  
Gi5\_8629475\_x4.....gugggaacacggggugcAgaac..... 1  
Gi3\_27716841\_x4.....cgugggaacacggggAugc..... 1  
Gi5\_8617687\_x4.....ggaacacggggugccgaGc..... 1  
Gi1\_4036808\_x4.....aggccccgccaguacugcgaucggagac..... 0  
Gi2\_10677459\_x4.....ggagacgucguAgggaacacggggugc..... 1  
G1a\_5801690\_x4.....cgugggaacacgggAugccgaacu..... 1  
Gi3\_27777337\_x4.....aggccccgccGguacugcgau..... 1  
G1a\_5767646\_x4.....cgugggaacacggggUaccgaacu..... 1  
Gi2\_10681195\_x4.....cgucgugggaaUaccgggugccgaa..... 1  
Gi5\_8608663\_x4.....ugggaGcacggggugccgaa..... 1  
Gi3\_27672461\_x4.....gccaguacNgcgaucgga..... 1  
Gi3\_27698385\_x4.....Gcggagacgucgugggaacacggggugc..... 1  
Gi2\_10722871\_x4.....gugggaacaUggggugccga..... 1  
Gi5\_8624335\_x4.....agacAucgugggaacacggggugccgaacu..... 1  
G1a\_5801170\_x4.....gGucggagacgucgugggaacacggg..... 1  
Gi2\_10682939\_x4.....ucggagacgucgugggaacGcggggugc..... 1  
Gi2\_10678655\_x4.....cgucgugggaacacggggugccgC..... 1  
Gi2\_10665147\_x4.....aggccccgccaguacugcgaAc..... 1  
Gi3\_27756609\_x4.....gggaacaUggggugccgaa..... 1  
G1a\_5772646\_x4.....cUgagacgucgugggaacaccg..... 1  
Gi1\_4030608\_x4.....ucgugggaacacggggugccUaacu..... 1  
Gi2\_10710547\_x4.....ucgugggaNcacggggugccg..... 1  
Gi2\_10678215\_x4.....gCcaggccccgccaguacugcg..... 1  
Gi1\_4030548\_x4.....Ccaggccccgccaguacugcgaucgga..... 1  
Gi3\_27717725\_x4.....cgucgugggaaAacggggu..... 1  
G1a\_5769530\_x4.....cgCgggaacacggggugcc..... 1  
Gi2\_10677619\_x4.....aggccccgccagAacugcgauc..... 1  
Gi3\_27770549\_x4.....caggccccgccaguacugcgC..... 1  
Gi2\_10712855\_x4.....cAgagacgucgugggaacacggggugc..... 1

Gi2\_10653815\_x4.....cgucgugggaacacggggGgccga..... 1  
Gi3\_27720185\_x4.....cgugggaacacggggugccgU..... 1  
Gi3\_27726681\_x4.....ucgugggaacCcggggugccg..... 1  
G1a\_5810754\_x4.....ugggaacacggggugccgaCcu..... 1  
Gi3\_27683321\_x4.....aNcacggggugccgaacu..... 1  
Gi3\_27665341\_x4.....gGucggagacgucguggga..... 1  
Gi2\_10655283\_x4.....cAugggaacacggggugc..... 1  
Gi2\_10663239\_x4.....Agagacgucgugggaacacggggugc..... 1  
Gi3\_27698709\_x4.....acgucgugggaacacggggugcUgaac..... 1  
Gi2\_10687799\_x4.....caggccccgccaguacCgc..... 1  
Gi3\_27715405\_x4.....acgucgugggaacacAgggugccgaac..... 1  
Gi5\_8638159\_x4.....ucguUgaacacggggugccgaacu..... 1  
G1l\_4036720\_x4.....ugggaacacggggugccAaac..... 1  
Gi3\_27715657\_x4.....gugggaacacggggugcGga..... 1  
Gi3\_27776741\_x4.....cGccgccaguacugcgauccgagacg..... 1  
Gi3\_27737625\_x4.....caggccccgccaguacugcgGu..... 1  
G1a\_5788706\_x4.....Augggaacacggggugcc..... 1  
Gi3\_27666293\_x4.....cgugggaacacgUggugccgaa..... 1  
Gi3\_27670845\_x4.....cggagacgucgugggaGcacggg..... 1  
G1a\_5786478\_x4.....caguacugcgauccgGgacguc..... 1  
Gi5\_8635335\_x4.....Ngugggaacacggggugccgaacu..... 1  
Gi2\_10674003\_x4.....aggccccgNcaguacugcgauccgagac..... 1  
Gi5\_8647279\_x4.....Aggaacacggggugccgaa..... 1  
Gi2\_10723587\_x4.....cccgccaguCgucggaucggagacguc..... 1  
Gi5\_8623475\_x4.....gaacaGggggugccgaacu..... 1  
Gi3\_27761625\_x4.....cgGcaggccccgccaguacug..... 1  
Gi3\_27724525\_x4.....cggagacgNcgugggaacacggggugc..... 1  
Gi2\_10674867\_x4.....aucggagacgucgugggaacacggAgugcc..... 1  
Gi3\_27710345\_x4.....guacugcgauccgagacgucgCg..... 1  
Gi2\_10655055\_x4.....cggaUacgucgugggaacacggggugc..... 1  
G1l\_4020984\_x4.....acgucgugggaacacggggugcAg..... 1  
Gi3\_27705049\_x4.....gaCcgagacgucgugggaacac..... 1  
Gi3\_27768165\_x4.....Uucaggccccgccaguacugcgauccgaga..... 1  
Gi5\_8636703\_x4.....gacgucgugggaacacggggAgccgaacu..... 1  
Gi3\_27660413\_x4.....gccccgcGguacugcgaucc..... 1  
Gi2\_10702711\_x4.....Ggccaguacugcgauccg..... 1  
Gi3\_27774305\_x4.....Gcgucgugggaacacggg..... 1  
G1l\_4041168\_x4.....agacgucgugggaacacggggugccgCacu..... 1  
Gi3\_27716633\_x4.....ggccccAccaguacugcgau..... 1  
Gi3\_27714693\_x4.....cgugggaaAacggggugcc..... 1  
Gi2\_10706567\_x4.....cgucgugggaacacAgggugc..... 1  
Gi5\_8622631\_x4.....cgucgugggaacacgAgggugccgaacu..... 1  
Gi3\_27724201\_x4.....aagagaagcgccgucagccccgccaguacugc..... 0  
Gi2\_10669911\_x4.....agacgucAugggaacacggggugcc..... 1  
Gi5\_8646351\_x4.....ucaggcccNgccaguacugcg..... 1  
G1a\_5811798\_x4.....gaucggagacgucgugggaacacggggugc..... 0  
Gi2\_10723079\_x4.....Uccaguacugcgauccgagacg..... 1

Gi3\_27777709\_x4.....ugggaacacggggugcAga..... 1  
 Gi5\_8638459\_x4.....gggaaAacggggugccgaacu..... 1  
 Gi3\_27731393\_x4.....cgugggaacacAgggugccg..... 1  
 Gi2\_10691887\_x4.....aggcGccgccaguacugcg..... 1  
 Gi2\_10691555\_x4.....cggagacgucgugggaacaUggggugcc..... 1  
 Gi3\_27674365\_x4.....gaacacggggugccgaaA..... 1  
 Gi2\_10686719\_x4.....aucggagacgucgugggaacaUggg..... 1  
 Gi3\_27675701\_x4.....aucggagacgucgugggaGcacggggugcc..... 1  
 Gi3\_27771669\_x4.....ggaacacggggugGcgaac..... 1  
 Gi2\_10658539\_x4.....ugggaacacggggGgccgaac..... 1  
 Gi1\_4037020\_x4.....ggaacacggggugccgCac..... 1  
 Gi2\_10705595\_x4.....gucaggccccgccaguacugcgaucggagac..... 0  
 Gi5\_8639815\_x4.....gggaacacggggugccgCac..... 1  
 Gi2\_10716419\_x4.....cgucgugggaacacggggAgccg..... 1  
 Gi2\_10710191\_x4.....gggaacacggggugGcgaacu..... 1  
 Gi2\_10683543\_x4.....agacgucgCgggaacacggggugccgaacu..... 1  
 Gi2\_10654643\_x4.....ugggaacacggggugccA..... 1  
 Gi3\_27729245\_x4.....gaucggagacgucgugggaaAacgg..... 1  
 Gi1\_4041564\_x4.....cgucgugggaacacAgggugccgaacu..... 1  
 Gi3\_27727617\_x4.....cgucgugggaacacggggugAc..... 1  
 Gi2\_10654579\_x4.....aggaagagaagcggcguc..... 0  
 Gi3\_27688325\_x4.....Gugcgaucggagacgucg..... 1  
 Gi3\_27669909\_x4.....aucggagacgucAugggaacacgggg..... 1  
 Gi3\_27704213\_x4.....aggccccgccaguacugcgaucggagGcg..... 1  
 Gi3\_27751249\_x4.....agacgucgugggaacacggggugccgGacu..... 1  
 Gi3\_27700721\_x4.....caAgccccgccaguacugc..... 1  
 Gi3\_27721385\_x4.....gucgugggaacacggUgugccgaacu..... 1  
 Gi3\_27752997\_x4.....Ggccaguacugcgaucggagac..... 1  
 Gi2\_10678687\_x4.....gugggaUcacggggugcc..... 1  
 Gl1\_5807726\_x4.....ccgccaguacugcgaucggagaUguc..... 1  
 Gi1\_4029108\_x4.....Aaacacggggugccgaac..... 1  
 Gi2\_10656971\_x4.ccuuaacucguuccgaCu..... 1  
 Gi5\_8625903\_x4.....Gcgugggaacacggggugcc..... 1  
 Gi5\_8604779\_x4.....uUgugggaacacggggugccgaac..... 1  
 Gi3\_27729209\_x4.....caggGccccgccaguacugc..... 1  
 Gi2\_10682655\_x4.....aucggagacgucUugggaaca..... 1  
 Gi3\_27722745\_x4.....cGgccaguacugcgaucggagacg..... 1  
 Gi3\_27769557\_x4.....cgucgugggaacacggggugccgUac..... 1  
 Gi2\_10691303\_x4.....cgugggaGcacggggugc..... 1  
 Gi1\_4034068\_x4.....gggaacacggggugccgaacAu..... 1  
 Gi1\_4024244\_x4.....gucgGgggaacacggggugccgaacu..... 1  
 Gi2\_10657287\_x4.....Aaggccccgccaguacugcg..... 1  
 Gi3\_27753881\_x4.....caggccccgAcaguacugcg..... 1  
 Gi5\_8648859\_x4.....cgugggaacacggggugccgaaU..... 1  
 Gi1\_4043712\_x4.....cgucgugggaacacggggugccgaaUu..... 1  
 Gi3\_27674341\_x4.....cgUcaguacugcgaucggagacguc..... 1  
 Gi3\_27767441\_x4.....uUgugggaacacggggugc..... 1



Gi3\_27716193\_x4.....aucggagacgucgugggaacCc..... 1  
 Gi1\_4025900\_x4.....cggagacgucgugggaacacggggugccgaacA..... 1  
 Gi5\_8646727\_x4.....uacugcgaucggGgacgu..... 1  
 Gi3\_27719953\_x4.....agagaagcNccgucagggccccgc..... 1  
 Gi2\_10664023\_x4.....aUacgucgugggaacacggggugccga..... 1  
 Gi3\_27737053\_x4.....Uacgucgugggaacacggggugcc..... 1  
 Gi3\_27701465\_x4.....gucgugggNacacggggugccga..... 1  
 Gi2\_10696631\_x4.....gaacacggggugcGgaacu..... 1  
 Gi3\_27706641\_x4.....ugggaacacggggugccgaaGu..... 1  
 Gi3\_27765097\_x4.....ggUcccgccaguacugcga..... 1  
 Gi3\_27772421\_x4.....ggNaacacggggugccgaacu..... 1  
 Gi3\_27672041\_x4.....uggAaacacggggugccgaa..... 1  
 Gi3\_27749925\_x4.....aucggagacgucgugggaacacggggugcA..... 1  
 Gi3\_27779025\_x4.....cggagacgNcguggggaacacgggg..... 1  
 Gi3\_27671633\_x4.....gggaacacggggugAcgaa..... 1  
 Gl1\_5771198\_x4.....aGcggagacgucgugggaacacggggugc..... 1  
 Gi3\_27696041\_x4.....cgugggaacacggggAgccga..... 1  
 Gi1\_4043060\_x4.....aucggagacgucgugggaacacggggug..... 0  
 Gi2\_10652051\_x4.....cgugggaCcacggggugccgaac..... 1  
 Gi1\_4039724\_x4.....Nacacggggugccgaacu..... 1  
 Gi3\_27708269\_x4.....gaucggagGcugcugggaacacg..... 1  
 Gi2\_10666631\_x4.....cgucgugggaacCcggggugcc..... 1  
 Gi3\_27753153\_x4.....ccccgccaguacugcgauccgagagaUgu..... 1  
 Gi3\_27701429\_x4.....cAcgccaguacugcgauccgagacguc..... 1  
 Gi4\_543682\_x4.....gugggaacacggggugccgaacA..... 1  
 Gi3\_27775985\_x4.....gacgucgugggaacacggggGgccg..... 1  
 Gi2\_10657419\_x4.....gacgucgugggaacGcggggugccg..... 1  
 Gi1\_4047472\_x4.....gucgugggaacacggggugccga..... 0  
 Gi2\_10695351\_x4.....uggAaacacggggugccg..... 1  
 Gl1\_5771882\_x4.....guUaggccccgccaguacugc..... 1  
 Gi2\_10687287\_x4.....gaucggagacgucgugggG..... 1  
 Gi1\_4025912\_x4.....cgucgugggaacacggggugUcgaacu..... 1  
 Gi2\_10712927\_x4.....cgucgugggaacacggggUaccg..... 1  
 Gi3\_27791761\_x4.....gccccgccNguacugcgau..... 1  
 Gi5\_8691200\_x3.....Cgacgucgugggaacacggggugccgaacu..... 1  
 Gi2\_10782271\_x3.....cggagacgucgCgggaacacgggg..... 1  
 Gi4\_545151\_x3.....gUaacacggggugccgaac..... 1  
 Gi2\_10797103\_x3.....gaCcggagacgucgugggaaca..... 1  
 Gi3\_27875804\_x3.....Ggaucggagacgucgugggaacacgg..... 1  
 Gi3\_27875294\_x3.....ugggaacaGggggugccgaac..... 1  
 Gi1\_4088517\_x3.....acUucgugggaacacggggugccg..... 1  
 Gi2\_10749811\_x3.....cgucgugggaCcacggggugc..... 1  
 Gi3\_27859361\_x3.....ccgccaguacugcgauccgagacgAg..... 1  
 Gi1\_4074492\_x3.....ugggaaAacggggugccgaacu..... 1  
 Gi2\_10796344\_x3.....aucggagacgucgugggaaAacggggugc..... 1  
 Gi2\_10791268\_x3.....aNggagacgucgugggaacacggggug..... 1  
 Gi5\_8703542\_x3.....gugggaacacggggUccgaacu..... 1

Gi3\_27847664\_x3.....aggccccgccaguGcugcgau..... 1  
Gi2\_10787248\_x3.....aGgagaagcgccgucagggccccgccagu..... 1  
Gi1\_4070685\_x3.....uGggagacgucgugggaaacacggggugc..... 1  
Gi5\_8679866\_x3.....cgugggUacacggggugccgaac..... 1  
Gi2\_10774129\_x3.....Caagcgccgucagggccccgc..... 1  
Gi1\_4083792\_x3.....cgGcagggccccgccaguacugcg..... 1  
Gi5\_8698481\_x3.....ucgugggaacacgggUugccgaacu..... 1  
Gi3\_27957194\_x3.....gUagacgucgugggaacacggggugc..... 1  
Gi3\_27854006\_x3.....agUgaagcgccgucagggccc..... 1  
Gi2\_10775545\_x3.....gaucggagGcgucgugggaacacg..... 1  
Gi1\_5824732\_x3.....Gccgccaguacugcgauccgaga..... 1  
Gi5\_8679107\_x3.....Ugccccgccaguacugcgauccgga..... 1  
Gi2\_10729927\_x3.....gggaacacggggugccgGa..... 1  
Gi2\_10812571\_x3.....aucggagacguUgugggaacacggggg..... 1  
Gi5\_8668616\_x3.....gugggaaAacggggugccgaa..... 1  
Gi3\_27949331\_x3.....Agucagggccccgccaguacugc..... 1  
Gi3\_27802364\_x3.....agggccccgccaguaGugcg..... 1  
Gi2\_10810147\_x3.....aucggagacAucgugggaaca..... 1  
Gi3\_27906728\_x3.....cgucguggAaacacggggugc..... 1  
Gi5\_8702303\_x3.....gggaacacggggugccgaaU..... 1  
Gi5\_8702669\_x3.....gugggaacacggggugccgCcuu..... 1  
Gi3\_27945785\_x3.....Ugagaagcgccgucagggccccgcc..... 1  
Gi3\_27950411\_x3.....gagaagcgccgucCggccc..... 1  
Gi5\_8656670\_x3.....gugggaaUacggggugccg..... 1  
Gi3\_27922535\_x3.....cgucgugggaacaAggggugccgaacu..... 1  
Gi2\_10784848\_x3.....ggaacacggggugccgCa..... 1  
Gi2\_10767685\_x3.....cccgccaguacugcgGucgg..... 1  
Gi3\_27856808\_x3.....gucagggccccgccaguacugcgCc..... 1  
Gi2\_10743982\_x3.....ggaacacggggugccUaacu..... 1  
Gi5\_8686013\_x3.....aGcggagacgucgugggaacac..... 1  
Gi2\_10812211\_x3.....gucagggccccgcUaguacugc..... 1  
Gi5\_8667176\_x3.....cccgccagNacugcgauccgagacgu..... 1  
Gi3\_27815786\_x3.....ccgucagggccccgccaguCcugc..... 1  
Gi3\_27862109\_x3.....Ucgauccgagacgucgugggaacacggggg..... 1  
Gi2\_10813540\_x3.....caggAcccgccaguacugcgau..... 1  
Gi1\_4060836\_x3.....aacacggUgugccgaacu..... 1  
Gi2\_10737010\_x3.....cAaucggagacgucgugggaacacggggugc..... 1  
Gi5\_8689976\_x3.....Gagagaagcgccgucagggccc..... 1  
Gi2\_10812367\_x3.....agggccccgcUaguacugcg..... 1  
Gi3\_27924209\_x3.....ucgCgggaacacggggugc..... 1  
Gi2\_10779121\_x3.....Gcaguacugcgauccgagacg..... 1  
Gi3\_27859775\_x3.....cguNugggaacacggggugccgaacu..... 1  
Gi3\_27920204\_x3.....agggccccgccagCacugcgau..... 1  
Gi5\_8673287\_x3.....cagggccccgccaguacugcgauA..... 1  
Gi1\_4062000\_x3.....agUgccgucagggccccgccaguacugc..... 1  
Gi3\_27879770\_x3.....Ggccaguacugcgauccg..... 1  
Gi3\_27803915\_x3.....acgucgugggaacacggggAgccgaac..... 1

Gi3\_27817805\_x3.....cagggcUcgccaguacugcgau..... 1  
 Gl1a\_5826538\_x3.....cgugggaacacggAgugcc..... 1  
 Gi2\_10736158\_x3.....cgugggaCcacggggugc..... 1  
 Gi5\_8684675\_x3.....ucgugggaacacggggugAcgaacu..... 1  
 Gi3\_27831314\_x3.....gccaguacugcgauAggagacguc..... 1  
 Gi3\_27923399\_x3.....gaucggagaUgucgugggaacacgggg..... 1  
 Gi2\_10769605\_x3.....gucagggcUcgccaguacugcg..... 1  
 Gl1a\_5840086\_x3.....Ggucgugggaacacggggugccgaacu..... 1  
 Gi3\_27841475\_x3.....gugggaacacggggguCcc..... 1  
 Gi2\_10789837\_x3.....ggUgacgucgugggaacacggggugccgaa..... 1  
 Gi3\_27942782\_x3.....cagggcccgcaguacAgcgau..... 1  
 Gi5\_8687504\_x3.....cgugggaacacgUggugcc..... 1  
 Gi2\_10738600\_x3.....cgucgugggaCcacggggugcc..... 1  
 Gi2\_10791352\_x3.....ccccgAcaguacugcgau..... 1  
 Gi2\_10826026\_x3.....gaagagaaNcgccgucagggccc..... 1  
 Gi2\_10751578\_x3.....agggcccgcaguacCgcgucgggagac..... 1  
 Gi2\_10768549\_x3.....acucguuccgaauuaggaag..... 0  
 Gi5\_8662922\_x3.....Uucgugggaacacggggugc..... 1  
 Gi2\_10750255\_x3.....gggaacacggAgugccgaac..... 1  
 Gi2\_10735615\_x3.....cagggcccgcaguacugUgau..... 1  
 Gi1\_4075935\_x3.....gggaacacggggGgcccgaacu..... 1  
 Gi2\_10822783\_x3.....uUggagacgucgugggaaca..... 1  
 Gi3\_27850370\_x3.....ccccgccaguacugcgauaggagCcguc..... 1  
 Gi5\_8716886\_x3.....agacguUgugggaacacggggugccgaacu..... 1  
 Gi1\_4084500\_x3.....cgucgugggaacacggggugccU..... 1  
 Gi2\_10804405\_x3.....aucggagacgucgugggaacacggggAug..... 1  
 Gi3\_27953096\_x3.....cgugggUacacggggugccga..... 1  
 Gi5\_8697584\_x3.....ugggaacacggggugccgaaU..... 1  
 Gi5\_8709788\_x3.....cgugggaacaGggggugccgaacu..... 1  
 Gl1a\_5825074\_x3.....cgugggaacCggggugccgaacu..... 1  
 Gi3\_27894605\_x3.....gggaacacggggugcAga..... 1  
 Gi3\_27973862\_x3.....aggAcccgccaguacugcg..... 1  
 Gi2\_10795309\_x3.....cgucgugggaaUacggggugccgaacu..... 1  
 Gi3\_27815954\_x3.....gaucggagGcugcugggaacac..... 1  
 Gi2\_10826707\_x3.....ucguggCaacacggggugccgaacu..... 1  
 Gl1a\_5832079\_x3.....gaucggagacgCcgugggaacacggg..... 1  
 Gi3\_27946097\_x3.....cagggAcccgccaguacugcgau..... 1  
 Gi1\_4088238\_x3.....acgucgugggaacacggggugAcgaacu..... 1  
 Gi4\_552684\_x3.....gGacugcgauccggagacgucgugg..... 1  
 Gi2\_10738186\_x3.....Ggccaguacugcgauccggagac..... 1  
 Gi3\_27828461\_x3.....Gggagacgucgugggaacacggggugccga..... 1  
 Gi3\_27974228\_x3.....cgccaguacugcgauccggagGcg..... 1  
 Gi3\_27935048\_x3.....aucggagacgucgugggaacaAggggu..... 1  
 Gi2\_10784044\_x3.....ucguggCaacacggggugccgaac..... 1  
 Gl1a\_5861191\_x3.....aGgagaagcgccgucagggccc..... 1  
 Gi3\_27948104\_x3.....acucguuccgaauuagga..... 0  
 Gi2\_10743364\_x3.....acgucgugggaacacggggugcU..... 1

Gi2\_10740193\_x3.....agggcccgccagucugcAa..... 1  
 Gi5\_8696801\_x3.....cgugggaacCcggggugccgaac..... 1  
 Gi3\_27882431\_x3.....cgccagucugcgauccggagUcgu..... 1  
 Gi3\_27800447\_x3.....cgccUguacugcgauccgg..... 1  
 Gi3\_27941927\_x3.....gacgucgugggaacacggggugcAgaacu..... 1  
 Gi2\_10745245\_x3.....aucggagCcgucgugggaacacggggg..... 1  
 Gi3\_27968591\_x3.....Ggaagcgccgucagggccc..... 1  
 Gi3\_27861347\_x3.....acgucgugCgaacacggggugccgaacu..... 1  
 Gi3\_27920540\_x3.....auNggagacgucgugggaacacggggg..... 1  
 Gi3\_27966665\_x3.....cgccgucaNgccccgccagucacu..... 1  
 Gi1\_4060938\_x3.....gggNacacggggugccgaacu..... 1  
 Gi2\_10783036\_x3.....Ggucgugggaacacggggugccgaa..... 1  
 Gi1\_4068378\_x3.....uGggagacgucgugggaacacggg..... 1  
 Gi5\_8663726\_x3.....cgugggaacacggggugAcgaac..... 1  
 Gi3\_27942146\_x3.....cgugggaaGacggggugccgaac..... 1  
 Gi5\_8651468\_x3.....guAggaacacggggugccga..... 1  
 Gl1a\_5840566\_x3.....Uccccgccagucugcgauccggagacg..... 1  
 Gi2\_10726195\_x3.....ucgugAgaacacggggugccgaac..... 1  
 Gi1\_4079394\_x3.....ggagacgucgugUgaacacggggugccg..... 1  
 Gi5\_8659412\_x3.....cguuccgaauuaggaagagaagc..... 0  
 Gi3\_27811670\_x3.....ccAcgccagucugcgaucc..... 1  
 Gi2\_10730071\_x3.....cgUcgucagggccccgccagucugc..... 1  
 Gi2\_10766044\_x3.....uggCaacacggggugccgaacu..... 1  
 Gi3\_27881657\_x3.....cgugggaacaGggggugccgaac..... 1  
 Gi3\_27871544\_x3.....ucggagacgucgugggaGcacggg..... 1  
 Gi2\_10727827\_x3.....gggaacacggUgugccgaacu..... 1  
 Gi2\_10800586\_x3.....gaUgcgccgucagggccccgccagucugc..... 1  
 Gi3\_27894065\_x3.....aCgccccgccagucugcgauccggg..... 1  
 Gi3\_27842525\_x3.....gaucggagacgucgUAggaacac..... 1  
 Gi2\_10825870\_x3.....cguNgugggaacacggggugccgaacu..... 1  
 Gi3\_27929879\_x3.....cggagacgucgugggaacacgAggu..... 1  
 Gi4\_545679\_x3.....cgugggaacacggggugcc..... 0  
 Gi1\_4071018\_x3.....ggagacgucgugggaacacggggugcAg..... 1  
 Gi3\_27905519\_x3.....agaGgcgccgucagggccc..... 1  
 Gi5\_8715755\_x3.....gugggaacaGggggugccgaacu..... 1  
 Gi2\_10758421\_x3.....cgugggaacacggggugUcga..... 1  
 Gi1\_4062069\_x3.....gGgacgucgugggaacacggggugc..... 1  
 Gi3\_27802835\_x3.....gugggaacacUggggugccgaa..... 1  
 Gl1a\_5855146\_x3.....cgugggUacacggggugccgaacu..... 1  
 Gi3\_27949664\_x3.....ucggagacgCcgugggaacacg..... 1  
 Gi2\_10799812\_x3.....gacgucguNggaacacggggg..... 1  
 Gi2\_10758673\_x3.....aAgccccgccagucugcgauccgggaga..... 1  
 Gi3\_27921569\_x3.....gacgucgugggaacCcggggugccgaac..... 1  
 Gi5\_8659703\_x3.....gGagcgccgucagggccccgccc..... 1  
 Gi1\_4049751\_x3.....gucgugggaacacggggGgccc..... 1  
 Gi3\_27915215\_x3.....gccUcgccagucugcgaucc..... 1  
 Gi2\_10727533\_x3.....agggcccgccagucAgc..... 1

Gi3\_27816974\_x3.....gagaagcgUcgucagggccc..... 1  
 Gi2\_10740481\_x3.....ggAaacacggggugccgaac..... 1  
 Gi3\_27834800\_x3.....gucagggccccgccaguacCgc..... 1  
 Gi2\_10824589\_x3.....aUgagaagcgcccgucagggccc..... 1  
 Gi3\_27887453\_x3.....acgucgugggaacacggggugcGgaacu..... 1  
 Gi3\_27901463\_x3.....agacgucgugggaacGcggggugccgaacu..... 1  
 Gl1a\_5849782\_x3.....gaucggagacgucgugggaGcacggg..... 1  
 Gi3\_27964163\_x3.....ggaacacgAggugccgaa..... 1  
 Gi3\_27910703\_x3.....cAgagacgucgugggaacacg..... 1  
 Gl1a\_5868439\_x3.....ggaacacggggCgccgaac..... 1  
 Gi2\_10729516\_x3.....agacgucgugggaacacgggAugcc..... 1  
 Gi3\_27870731\_x3.....cggagacgucgugggaacUcggggugcc..... 1  
 Gi1\_4074924\_x3.....ucgugggaacacggggugccgaUcu..... 1  
 Gi2\_10772365\_x3.....gUgacgucgugggaacacggggugccgaac..... 1  
 Gi2\_10772920\_x3.....agagGagcgcccgucagggccc..... 1  
 Gi3\_27958757\_x3.....Uggccccgccaguacugcgauccg..... 1  
 Gi3\_27846500\_x3.....ccAccaguacugcgauccggagac..... 1  
 Gi3\_27823505\_x3.....ccUccaguacugcgauccggagacgucgug..... 1  
 Gi1\_4069206\_x3.....uGaggccccgccaguacugcg..... 1  
 Gi2\_10745842\_x3.....aucggCgacgucgugggaacacggggg..... 1  
 Gi1\_4059369\_x3.....cgauccggGgacgucgugggaaca..... 1  
 Gi5\_8688971\_x3.....aagagaagNgccgucagggccccg..... 1  
 Gi3\_27954884\_x3.....Ggccaguacugcgauccggagacgucgug..... 1  
 Gi1\_4052940\_x3.....cUugggaacacggggugc..... 1  
 Gi1\_4084722\_x3.....gaucggagacgucgugggaacacg..... 0  
 Gi2\_10803742\_x3.....gacgucgugggGacacggggugcc..... 1  
 Gi3\_27870818\_x3.....gacgucgugggaacacggUgugccgaac..... 1  
 Gi3\_27833312\_x3.....aucggagacgucgugggaUcacggggg..... 1  
 Gi1\_4078098\_x3.....gugggaacacggggugcUgaacuu..... 1  
 Gi3\_27919172\_x3.....agGagcgcccgucagggccccgcau..... 1  
 Gi2\_10805560\_x3.....gccaguacugcgauccggagacguU..... 1  
 Gi1\_4052958\_x3.....ucgugggaacacggggugAcgaacu..... 1  
 Gi2\_10742341\_x3.....cgugggaacacggggugcAgaac..... 1  
 Gi2\_10734061\_x3.....aucggagacguUgugggaacacg..... 1  
 Gi3\_27822065\_x3.....agacAucgugggaacacggggugccgaacu..... 1  
 Gi1\_4065732\_x3.....ggaCcacggggugccgaacu..... 1  
 Gi2\_10729651\_x3.....Gccccgccaguacugcgauccgga..... 1  
 Gi3\_27936044\_x3.....caAgccccgccaguacugcg..... 1  
 Gl1a\_5831287\_x3.....ccgccGguacugcgauccggagacguc..... 1  
 Gi2\_10740886\_x3.....aucggagacgucgugggaacaUgg..... 1  
 Gi5\_8717567\_x3.....ugggaacacggggugccgCacuuu..... 1  
 Gi4\_552456\_x3.....ugggaacacggggugccgaaAu..... 1  
 Gi2\_10735675\_x3.....Ggaagcgcccgucagggccccgcauac..... 1  
 Gi5\_8681321\_x3.....cUaucggagacgucgugggaacacggg..... 1  
 Gi2\_10804882\_x3.....cgucgugggaacacggggugccgUacu..... 1  
 Gi3\_27973244\_x3.....cggagacgucgugggGacacggggg..... 1  
 Gi2\_10826827\_x3.....ucgCgggaacacggggugc..... 1

Gi3\_27860228\_x3.....gacgucgugggaacacAgggugccgaac..... 1  
Gi3\_27866261\_x3.....ucgugggaaAacggggugccgaac..... 1  
Gi2\_10759915\_x3.....gaucggagacgucgugggaaAac..... 1  
Gi5\_8683100\_x3.....Gcgccaguacugcgauccgagacguc..... 1  
G1a\_5844055\_x3.....gaacacggggugccAaacu..... 1  
Gi2\_10727941\_x3.....agacgucgugggaaacacAgggugcc..... 1  
G1a\_5831893\_x3.....gugggaaacacGcgugccgaacu..... 1  
Gi3\_27798965\_x3.....agAacugcgauccgagacgucg..... 1  
Gi2\_10744231\_x3.....ggccccgccaguaUugcgau..... 1  
Gi2\_10750945\_x3.....caggccccgccCguacugc..... 1  
G1l\_4055457\_x3.....aacUcggggugccgaacu..... 1  
Gi2\_10739578\_x3.....caAgccccgccaguacugc..... 1  
Gi5\_8674967\_x3.....Cugggaaacacggggugccgaacuu..... 1  
Gi2\_10816447\_x3.....Ngaacacggggugccgaacu..... 1  
G1l\_4084443\_x3.....agacgucgugggaGcacggggugccgaacu..... 1  
Gi2\_10826632\_x3.....cgAcgugggaaacacgggg..... 1  
Gi3\_27973067\_x3.....gaucggagacgucgugggaaGcacgg..... 1  
Gi3\_27911456\_x3.....aguacugcgauccgagacgucgCg..... 1  
G1l\_4066107\_x3.....caguacugcgauccgGgacguc..... 1  
Gi5\_8670902\_x3.....aucggagGcgucgugggaaacacggggu..... 1  
Gi4\_551727\_x3.....cgugggaaacacggggugccgCacu..... 1  
Gi3\_27921188\_x3.....gacgCcgugggaaacacggggugccgaac..... 1  
Gi3\_27948608\_x3.....uAgugggaaacacggggugccgaac..... 1  
Gi5\_8677871\_x3.....uacugcAaucggagacgu..... 1  
Gi3\_27854276\_x3.....cgucaggccccgccUguacugc..... 1  
Gi5\_8690648\_x3.....acgNcgugggaaacacggggugccgaacu..... 1  
Gi3\_27880706\_x3.....Ucugcugugggaaacacggggugcc..... 1  
Gi2\_10767721\_x3.....acucguuccgaauuaggaaga..... 0  
Gi5\_8707976\_x3.....ugggaaacacggggugccCaacu..... 1  
Gi5\_8697707\_x3.....Cucgugggaaacacggggugccgaac..... 1  
Gi2\_10765498\_x3.....caguacCgcgauccgagacguc..... 1  
Gi2\_10771915\_x3.....gccccgccaguacugcgauA..... 1  
Gi3\_27796562\_x3.....gaucggUgacgucgugggaaacacggggu..... 1  
Gi3\_27830504\_x3.....ccccAccaguacugcgau..... 1  
Gi4\_550002\_x3.....Ggacgucgugggaaacacggggugcc..... 1  
Gi2\_10818886\_x3.....ggaaUacggggugccgaac..... 1  
Gi2\_10766305\_x3.....aggccccgccaguacugcgG..... 1  
Gi3\_27854240\_x3.....caggccccgccaUuacugcgau..... 1  
Gi2\_10811731\_x3.....cgugggaCcacggggugccga..... 1  
Gi3\_27821141\_x3.....gugggaaacacggCgugccg..... 1  
Gi2\_10770793\_x3.....ucgugggaaacacggAgugc..... 1  
Gi3\_27919037\_x3.....gaucggagacgucguAggaaacacgggg..... 1  
Gi2\_10731217\_x3.....cgucgugggaaacacggggugcUga..... 1  
Gi3\_27820901\_x3.....acacggggugccgCacuu..... 1  
Gi5\_8679824\_x3.....ucagUccccgccaguacugc..... 1  
Gi3\_27883913\_x3.....ugggCacacggggugccg..... 1  
Gi2\_10815640\_x3.....cgAcaggccccgccaguacugc..... 1

Gi5\_8688389\_x3.....gCgggaacacggggugccg..... 1  
 Gi5\_8712203\_x3.....caggccccccaguaUugcg..... 1  
 Gi1\_4071504\_x3.....auUggagacgucgugggaacacggggugc..... 1  
 Gi3\_27882140\_x3.....gccgCcaggccccccagua..... 1  
 Gi2\_10734811\_x3.....gaucggagacgCcgugggaacacggg..... 1  
 Gi3\_27888302\_x3.....Ucgauccggagacgucgugggaacacgggg..... 1  
 Gi1\_4064406\_x3.....ugggaacacggggugccUaacu..... 1  
 Gi3\_27935435\_x3.....gUagacgucgugggaacacggggugccgaa..... 1  
 Gi3\_27939923\_x3.....gaagcgccgCcaggccccccaguac..... 1  
 Gi3\_27918530\_x3.....aucggagacgucgugggaaAac..... 1  
 Gi5\_8680430\_x3.....gggaacaAggggugccgaacu..... 1  
 Gi2\_10759966\_x3.....aucggagacgucgugggCacacg..... 1  
 Gi5\_8664650\_x3.....gaacacgCggugccgaacu..... 1  
 Gi3\_27954656\_x3.....agacgucAugggaacacggggugccgaac..... 1  
 Gi5\_8715548\_x3.....gugAgaacacggggugccgaacuu..... 1  
 Gi3\_27931577\_x3.....ggaacacgggUugccgaacu..... 1  
 G1a\_5871889\_x3.....gccaUuacugcgauccggagacguc..... 1  
 Gi5\_8692847\_x3.....Gagagaagcgccgucaggcccc..... 1  
 Gi2\_10801255\_x3.....ugggCacacggggugccg..... 1  
 Gi3\_27862628\_x3.....cgCcgugggaacacggggugccgaa..... 1  
 Gi3\_27807887\_x3.....gUcccgccaguacugcgau..... 1  
 G1a\_5874634\_x3.....Uaagagaagcgccgucaggcccc..... 1  
 Gi5\_8691932\_x3.....Ggugggaacacggggugcc..... 1  
 Gi3\_27817271\_x3.....ucaggccccccagGacugcgau..... 1  
 Gi1\_4050819\_x3.....ucggCgacgucgugggaacacg..... 1  
 Gi3\_27930425\_x3.....gaucggagacgucgugggaacaUggggugc..... 1  
 Gi4\_545274\_x3.....gugggaacacggggugccgGacu..... 1  
 Gi2\_10809070\_x3.....aguacugcgauccggagGcg..... 1  
 Gi2\_10791397\_x3.....ucgugggaacacggUgugccgaacu..... 1  
 Gi3\_27860576\_x3.....gugggaacacgggCugccga..... 1  
 Gi2\_10726483\_x3.....cCucaggccccccaguac..... 1  
 Gi2\_10783267\_x3.....caggAcccgccaguacug..... 1  
 Gi3\_27953486\_x3.....gggaacacgggguUccgaac..... 1  
 Gi4\_550170\_x3.....cgucgugggaacacggggugccgaac..... 0  
 Gi1\_4048449\_x3.....cUgagacgucgugggaacacggggugccgaacu..... 1  
 Gi5\_8706362\_x3.....gggaacaUggggugccgaac..... 1  
 G1a\_5822872\_x3.....gAaacacggggugccgaac..... 1  
 Gi1\_4074723\_x3.....guNggaacacggggugccgaacu..... 1  
 Gi3\_27800747\_x3.....acgucgugUgaacacggggugccgaacu..... 1  
 Gi3\_27918344\_x3.....aucggCgacgucgugggaacac..... 1  
 Gi5\_8673848\_x3.....Cugggaacacggggugccg..... 1  
 Gi1\_4076070\_x3.....gGcgucgugggaacacggggugcc..... 1  
 Gi3\_27871088\_x3.....gucagggcUgccaguacugc..... 1  
 Gi5\_8709728\_x3.....cgucUugggaacacggggugccga..... 1  
 Gi3\_27833135\_x3.....ggccccgCaguacugcgau..... 1  
 Gi3\_27976151\_x3.....gcUaguacugcgauccggagac..... 1  
 Gi1\_4071768\_x3.....acgucAugggaacacggggugccgaacu..... 1

Gi3\_27950759\_x3.....Cgaagcgccgucagggccc.....agacgucgugggaacacggggugUcgaacu..... 1  
 Gi2\_10801654\_x3.....agacgucgugggaacacggggugUcgaacu..... 1  
 Gi2\_10826332\_x3.....Gccgccaguacugcgau..... 1  
 Gi3\_27948506\_x3.....ccccgccaNuacugcgau..... 1  
 Gi3\_27958685\_x3.....cUaucggagacgucgugggaacacggggugcc..... 1  
 Gi3\_27859262\_x3.....gagaagcgccgucaAgccc..... 1  
 Gi2\_10784011\_x3.....Ugacgucgugggaacacgggggu..... 1  
 Gi3\_27852497\_x3.....gAccccgccaguacugcgau..... 1  
 Gi1\_4050477\_x3.....Ggugggaacacggggugccgaa..... 1  
 Gi3\_27856013\_x3.....acgucgugAgaacacggggugccgaa..... 1  
 Gi2\_10749838\_x3.....cgUcaguacugcgauccgagac..... 1  
 Gi3\_27871139\_x3.....caggcAccgccaguacugcga..... 1  
 Gi2\_10756315\_x3.....cgucgugggaacacgAggugccg..... 1  
 Gi2\_10744417\_x3.....gaucggagacAucgugggaacacgggggu..... 1  
 Gl1a\_5872135\_x3.....cgucagggccccgccGguacugcg..... 1  
 Gi3\_27929255\_x3.....aggccccgccaguacugcAa..... 1  
 Gi5\_8711654\_x3.....cggagacgucgugggaacacggggugccgaa..... 0  
 Gi3\_27907553\_x3.....agacgucgugggaacacggggugUcgaacu..... 1  
 Gi3\_27798299\_x3.....ucgugggaacacggggugccgGac..... 1  
 Gi1\_4088766\_x3.....ggaGcacggggugccgaa..... 1  
 Gi5\_8652494\_x3.....Uaggccccgccaguacugcg..... 1  
 Gi2\_10797907\_x3.....aucggagacgCcgugggaacacggggug..... 1  
 Gi1\_4052616\_x3.....Augggaacacggggugccg..... 1  
 Gi2\_10728640\_x3.....aucAgagacgucgugggaacacgggg..... 1  
 Gl1a\_5851702\_x3.....gugggaacaAggggugccgaa..... 1  
 Gi2\_10759648\_x3.....cgucagggccccgccaguGcugcg..... 1  
 Gi2\_10783798\_x3.....aucggagGcugcugggaacacgg..... 1  
 Gi3\_27963542\_x3.....gaagagaagcgccgucGggcccc..... 1  
 Gl1a\_5831371\_x3.....gugggaacNcggggugccg..... 1  
 Gi1\_4053558\_x3.....guggggGacacggggugcc..... 1  
 Gl1a\_5854384\_x3.....cgugggaacaAggggugccgaa..... 1  
 Gi2\_10771786\_x3.....gugggaacacggggCugccg..... 1  
 Gi3\_27846467\_x3.....gugggaacacggggugGcgaa..... 1  
 Gi3\_27897926\_x3.....ccccgccaguacuUcgauccgagacguc..... 1  
 Gi4\_550197\_x3.....cgugggaacacAggggugccgaa..... 1  
 Gi3\_27924971\_x3.....ggagacgucgugggaacGcgggggu..... 1  
 Gi3\_27958514\_x3.....gucgCgggaacacggggugccga..... 1  
 Gi3\_27839732\_x3.....gaucggagaUgucgugggaacacgggggu..... 1  
 Gi2\_10806004\_x3.....gugggaacaAggggugccga..... 1  
 Gi1\_4074774\_x3.....aAacgucgugggaacacggggugccgaa..... 1  
 Gi2\_10816849\_x3.....Ggccgucagggccccgccagu..... 1  
 Gi3\_27805589\_x3.....gaagagaCgcccgucagggccc..... 1  
 Gl1a\_5817355\_x3.....gggaaAacggggugccgaa..... 1  
 Gi3\_27815198\_x3.....cGgccaguacugcgauccg..... 1  
 Gl1a\_5874613\_x3.....Gcgugggaacacggggugccgaa..... 1  
 Gi3\_27872915\_x3.....cagggccccgccGguacugcgau..... 1  
 Gi2\_10751740\_x3.....aggUcccgccaguacugcg..... 1



Gi3\_27925163\_x3.....gcgccgucagccccgccCguacug..... 1  
 Gi3\_27882287\_x3.....aGgagaagcgccgucagggccc..... 1  
 Gi1\_4059837\_x3.....cgugggaacacgCggugccgaacu..... 1  
 Gi1\_4088841\_x3.....gugggaacGcggggugcc..... 1  
 Gi2\_10823692\_x3.....Uggagacgucgugggaacacggggu..... 1  
 Gi3\_27899126\_x3.....Nggaacacggggugccgaac..... 1  
 Gi3\_27852401\_x3.....gacgucgugggaacacggAgugccgaacu..... 1  
 Gi2\_10729165\_x3.....acugcgGucggagacgucgugg..... 1  
 Gi5\_8702969\_x3.....Ugugggaacacggggugccga..... 1  
 Gl1a\_5871514\_x3.....gugggaacacggggCgccga..... 1  
 Gi3\_27814181\_x3.....aucggagacgucgCgggaacacggggugc..... 1  
 Gi3\_27932222\_x3.....Gagagaagcgccgucagggccccgccagu..... 1  
 Gi1\_4059210\_x3.....acgucgugNgaacacggggugccgaac..... 1  
 Gi3\_27924860\_x3.....guacugcgaucggGgacgucgug..... 1  
 Gi2\_10816507\_x3.....aggccccgccagAacugc..... 1  
 Gi3\_27816101\_x3.....ccgucaggNccccgccaguac..... 1  
 Gi2\_10740382\_x3.....agacUucgugggaacacggggugccgaacu..... 1  
 Gl1a\_5835670\_x3.....caguacugcgaucggagGcguc..... 1  
 Gi2\_10822813\_x3.....gaucggagacgucguAgga..... 1  
 Gi2\_10759594\_x3.....cgugggaacacUgggugcc..... 1  
 Gi2\_10729405\_x3.....gaUaagcgccgucagggccccgcc..... 1  
 Gi2\_10764997\_x3.....auUggagacgucgugggaacacgg..... 1  
 Gi3\_27884267\_x3.....cAucgugggaacacggggugc..... 1  
 Gi3\_27844754\_x3.....agUcgucgugggaacacggggugccga..... 1  
 Gi3\_27906920\_x3.....cgucaggcNccgccaguacugcgauccg..... 1  
 Gi1\_4079583\_x3.....cCucagggccccgccaguacugc..... 1  
 Gl1a\_5833633\_x3.....gugggaGcacggggugccga..... 1  
 Gi5\_8717189\_x3.....caggccccUgccaguacugcg..... 1  
 Gi2\_10754992\_x3.....gaucggagacgucgCgggaacacggggu..... 1  
 Gi3\_27875990\_x3.....ggccccgccGguacugcgau..... 1  
 Gi3\_27920378\_x3.....gaagagGagcgccgucagggc..... 1  
 Gi3\_27846416\_x3.....cgauUggagacgucgugggaacacggg..... 1  
 Gi3\_27913892\_x3.....cgucagggccccgUcaguacugcg..... 1  
 Gi2\_10772344\_x3.....gucgugggaacacggggugAcgaacu..... 1  
 Gi2\_10814653\_x3.....gaucggagGcgucguggga..... 1  
 Gi2\_10738150\_x3.....ugcgaucggCgacgucgugggaaca..... 1  
 Gi2\_10798681\_x3.....ggaacacggggugccgaacuu..... 0  
 Gi3\_27903707\_x3.....gaagagGagcgccgucagg..... 1  
 Gl1a\_5845792\_x3.....ugggaUcacggggugccgaacu..... 1  
 Gi3\_27870863\_x3.....gucgugggaacGcggggugccga..... 1  
 Gi3\_27972911\_x3.....aucggagaUgucgugggaacacgg..... 1  
 Gi5\_8702666\_x3.....gacgucgugggaacacggggugccgGacu..... 1  
 Gi2\_10734343\_x3.....gGagcgccgucagggccccgccag..... 1  
 Gi3\_27966812\_x3.....ucguggUaacacggggugccgaacu..... 1  
 Gi3\_27923294\_x3.....ggAaacacggggugccgaa..... 1  
 Gi3\_27909398\_x3.....aggccccgccagGacugcgauccg..... 1  
 Gi2\_10759048\_x3.....ggagacgucgAgggaacacggggugcc..... 1

Gi2\_10749448\_x3.....gucagggccccgccaguUcug..... 1  
 Gi2\_10736995\_x3.....gaucggagacgucgugggaacCc..... 1  
 Gi3\_27917717\_x3.....ccgUcaguacugcgauccggagac..... 1  
 Gi2\_10800697\_x3.....cgugggaacacgggUugccgaacu..... 1  
 Gi3\_27832670\_x3.....ggccccgccaguacCgcgaucgg..... 1  
 Gi5\_8674031\_x3.....ucCugggaacacggggugccgaacu..... 1  
 Gi1\_4076373\_x3.....gacgucgugggaacacAgggugccgaacu..... 1  
 G1a\_5848129\_x3.....guUaggccccgccaguacugcg..... 1  
 Gi5\_8683043\_x3.....agUcgcugugggaacacggggugccgaac..... 1  
 Gi5\_8653586\_x3.....gggGacacggggugccga..... 1  
 Gi3\_27969059\_x3.....aggccccgNcaguacugcgauccgga..... 1  
 Gi2\_10803199\_x3.....ggccccgccCguacugcgau..... 1  
 Gi3\_27840677\_x3.....gcccUgccaguacugcgau..... 1  
 Gi2\_10800826\_x3.....gcUaguacugcgauccggagacguc..... 1  
 Gi1\_4053615\_x3.....cgccaguacugcgauccggagacgucgu..... 0  
 Gi5\_8670410\_x3.....auUggagacgucgugggaaca..... 1  
 Gi2\_10783987\_x3.....gacgucgugggaacacggUgugcc..... 1  
 Gi1\_4050567\_x3.....cgGgggaacacggggugccga..... 1  
 Gi2\_10807603\_x3.....gGgaagcgccgucagggccccccag..... 1  
 Gi3\_27820862\_x3.....aucggagacAucgugggaacac..... 1  
 Gi2\_10770001\_x3.....ucgugggaacacggggugcUgaac..... 1  
 Gi1\_4082853\_x3.....cgugggaacacggggCgccg..... 1  
 Gi3\_27890897\_x3.....cgauccggagacgucgugggaacacggggG..... 1  
 Gi3\_27924605\_x3.....Aucagggccccgccaguacugc..... 1  
 Gi3\_27903215\_x3.....Aucgugggaacacggggugc..... 1  
 G1a\_5856088\_x3.....cUaucggagacgucguggga..... 1  
 Gi2\_10759663\_x3.....aagcgccgucagggccccgccaguGcugc..... 1  
 Gi5\_8663657\_x3.....gggaacacggggugcGgaacu..... 1  
 Gi3\_27932672\_x3.....gauUggagacgucgugggaacac..... 1  
 G1a\_5850379\_x3.....ugggaacacggggugcUgaacu..... 1  
 Gi3\_27944294\_x3.....gggCacacggggugccgaac..... 1  
 Gi1\_4062036\_x3.....ggagacguNuggggaacacggggugcc..... 1  
 Gi2\_10818823\_x3.....ucguuccgaauaggaagagaagcggcugc..... 0  
 Gi3\_27925919\_x3.....aggccccgNcaguacugcgauccggagacg..... 1  
 Gi3\_27953948\_x3.....ugggaacacggAgugccg..... 1  
 Gi2\_10780222\_x3.....gaCcgagacgucgugggaacacg..... 1  
 Gi1\_4084035\_x3.....uUcgaucggagacgucgugggaacacg..... 1  
 Gi2\_10733119\_x3.....ucUggccccgccaguacug..... 1  
 Gi2\_10794130\_x3.....cgugggaacacggggCgccg..... 1  
 Gi5\_8702921\_x3.....gggaacacggCgugccgaacu..... 1  
 Gi3\_27960848\_x3.....Gcgauccggagacgucgugggaaca..... 1  
 Gi3\_27846413\_x3.....cgucgugggaacaAgggugcc..... 1  
 Gi3\_27921779\_x3.....cgucagggccccccagGacugcg..... 1  
 Gi2\_10796488\_x3.....ggagacguNuggggaacac..... 1  
 Gi5\_8651198\_x3.....ucgugggaacacgCggugccgaacu..... 1  
 Gi2\_10729555\_x3.....caggcAccgccaguacugcgau..... 1  
 Gi5\_8653559\_x3.....aggccccgccGguacugcgau..... 1

Gi2\_10771657\_x3.....cguggAaacacggggugc..... 1  
Gi2\_10787191\_x3.....ccUcgccaguacugcgauccgagac..... 1  
Gi5\_8677232\_x3.....ccaguacuNcgauccgagacgu..... 1  
Gi3\_27884045\_x3.....guUaggccccgccaguacugcgau..... 1  
Gi3\_27806531\_x3.....guNggaacacggggugcc..... 1  
G1a\_5864764\_x3.....cUccgccaguacugcgauccgagacguc..... 1  
Gi3\_27944438\_x3.....Ccgagacgucgugggaacacggggg..... 1  
Gi3\_27878522\_x3.....cgugggaacacggggCugccgaa..... 1  
Gi3\_27912089\_x3.....gugggaacacCgggugccga..... 1  
Gi3\_27968057\_x3.....gaucggCgacgucgugggaacacggg..... 1  
G1a\_5834365\_x3.....Caacacggggugccgaacu..... 1  
Gi4\_548118\_x3.....guacugcgNucggagacgucgugg..... 1  
Gi3\_27904043\_x3.....aucggagGcgucguggga..... 1  
Gi3\_27851339\_x3.....aucNgagacgucgugggaacacggg..... 1  
Gi3\_27969368\_x3.....gccccgccaguacugcgacC..... 1  
G1a\_5842435\_x3.....Uagacgucgugggaacacg..... 1  
Gi2\_10792555\_x3.....gucgugggaacacgggguAccgaac..... 1  
Gi2\_10764967\_x3.....cGcgccaguacugcgauccgagacguc..... 1  
Gi2\_10768798\_x3.....gucagggccccgccagCacugc..... 1  
Gi2\_10771819\_x3.....aUcgccgucagggccccgccaguacugcgau..... 1  
Gi5\_8678357\_x3.....ucUugggaacacggggugccgaac..... 1  
Gi3\_27979649\_x3.....aggUcccgccaguacugcgau..... 1  
Gi3\_27908333\_x3.....cgauccgagacgucgugggaCcacggg..... 1  
G1a\_5857144\_x3.....cgucagggccccgccaguGcugcg..... 1  
Gi1\_4084479\_x3.....ucagggccccgccaguacugcgauCaga..... 1  
Gi2\_10736659\_x3.....acgucgugggaacCcggggugccgaac..... 1  
Gi2\_10793788\_x3.....aUuacugcgauccgagacgucgu..... 1  
Gi1\_4054935\_x3.....ugggaacacggggugccgaacG..... 1  
Gi2\_10786129\_x3.....Ggccgucagggccccgccaguacugc..... 1  
Gi5\_8688542\_x3.....uUcgauccgagacgucgugggaacacg..... 1  
Gi2\_10808542\_x3.....gacgucguNggaacacggggugcc..... 1  
Gi3\_27979802\_x3.....cguuccgaauaCgaagagaagcgccguc..... 1  
G1a\_5821882\_x3.....gUgaacacggggugccgaac..... 1  
Gi2\_10821991\_x3.....gugNgaacacggggugccg..... 1  
Gi3\_27835445\_x3.....gucgAggggaacacggggugccgaac..... 1  
G1a\_5849527\_x3.....ucggagacgucgugggGacacggg..... 1  
Gi2\_10828168\_x3.....aucggagGcgucgugggaacacgggg..... 1  
G1a\_5820790\_x3.....aucggagacgucguAggaacacggg..... 1  
Gi3\_27903698\_x3.....agacgucgugggaacacggggugccgaCcu..... 1  
Gi5\_8683115\_x3.....ggaacacggggAgccgaac..... 1  
Gi3\_27929564\_x3.....ggNacacggggugccgaacu..... 1  
Gi3\_27920174\_x3.....agagUagcgccgucagggccccg..... 1  
Gi3\_27816251\_x3.....acugcgauccgCgacgucgu..... 1  
Gi3\_27965708\_x3.....Agagacgucgugggaacacggggugccgaa..... 1  
Gi3\_27884099\_x3.....ccccgccaguacugUgau..... 1  
Gi3\_27963212\_x3.....aacacgggguAccgaacu..... 1  
Gi3\_27805952\_x3.....gugggaacacgggguUccg..... 1

Gi5\_8671646\_x3.....aucggagacgucgCgggaacacgg..... 1  
 Gi3\_27877985\_x3.....caggccccgccagCacugcga..... 1  
 Gi2\_10826314\_x3.....aucggaAacgucgugggaacacggggug..... 1  
 Gi3\_27851591\_x3.....aucggagacgucgugggGacacggggugc..... 1  
 Gi3\_27836228\_x3.....uccgaauuaggaagagaagc..... 0  
 Gi3\_27962873\_x3.....Agagacgucgugggaacacggggugccg..... 1  
 Gi3\_27832094\_x3.....cgucgugggaacacggggugccAa..... 1  
 G1a\_5859607\_x3.....gaucggagacgucgugggCacacggg..... 1  
 Gi2\_10817107\_x3.....aCgggagacgucguggga..... 1  
 Gi5\_8660984\_x3.....aacacggggUccgaacu..... 1  
 Gi3\_27864794\_x3.....cccgccaguGcugcgauccgagacguc..... 1  
 Gi3\_27811586\_x3.Gcuuaacucguuccgaau..... 1  
 G1l\_4086336\_x3.....cgucaggccccgccaguacCgcg..... 1  
 Gi3\_27871664\_x3.....cccgccaguacugcgauccAgagacg..... 1  
 G1l\_4077654\_x3.....gugggaacacggggugUc..... 1  
 Gi2\_10763680\_x3.....gaucUgagacgucgugggaaca..... 1  
 Gi3\_27812168\_x3.....gggaacaGggggugccgaac..... 1  
 G1l\_4052571\_x3.....ggccccgccaguacugcgauccg..... 0  
 Gi3\_27875126\_x3.....aggcAccgccaguacugc..... 1  
 Gi3\_27970433\_x3.....gucguggCaacacggggugccgaacu..... 1  
 Gi2\_10802128\_x3.....cgccaguacugcgauccgCgacg..... 1  
 Gi2\_10816027\_x3.....cUcgccaguacugcgauccgagac..... 1  
 Gi2\_10807438\_x3.....ggaCcacggggugccgaac..... 1  
 Gi2\_10809481\_x3.....gaGgcgccgucagggccccgc..... 1  
 Gi3\_27890750\_x3.....agaUgucgugggaacacggggugccgaacu..... 1  
 Gi2\_10777291\_x3.....cccUgccaguacugcgaucc..... 1  
 Gi5\_8660855\_x3.....agacgucgugggaacacggggugcUgaacu..... 1  
 Gi5\_8665718\_x3.....gacgucgugggGacacggggugccgaacu..... 1  
 Gi5\_8654792\_x3.....cgucgugggaacacggggugcAgaacu..... 1  
 Gi2\_10763785\_x3.....acgucgugggaacacggggugcA..... 1  
 Gi3\_27856406\_x3.....ucgugggaacacggAgugccg..... 1  
 Gi2\_10726510\_x3.....gaucggagacgucgugggaacaAggggu..... 1  
 Gi2\_10739275\_x3.....Uccgccaguacugcgaucc..... 1  
 G1a\_5859235\_x3.....caguacugcgCucggagacguc..... 1  
 Gi3\_27918440\_x3.....aggaagagaagcgccgucagggccc..... 0  
 Gi3\_27944237\_x3.....gCcaggccccgccaguacug..... 1  
 Gi3\_27938246\_x3.....ucggagacgucguAggaacacggggugcc..... 1  
 G1l\_4071903\_x3.....ucgugggaacacAgggugcc..... 1  
 Gi3\_27959078\_x3.....gccccgccaguacugcgauA..... 1  
 G1l\_4084524\_x3.....cUggccccgccaguacugc..... 1  
 Gi3\_27863696\_x3.....gaagagaagcgccgucAaAg..... 1  
 Gi2\_10743385\_x3.....gaucggagacgucgugggaacacggggugccgaacu..... 0  
 Gi3\_27821687\_x3.....ggaacacggggugGcgaacu..... 1  
 Gi2\_10825678\_x3.....gacgucguNggaacacggggugccgaacu..... 1  
 Gi3\_27878891\_x3.....cugcgauccNgagacgucg..... 1  
 Gi3\_27883004\_x3.....cgugggaacCcgggugccg..... 1  
 G1a\_5856013\_x3.....cUucaggccccgccaguacug..... 1

Gi3\_27942383\_x3.....gauUggagacgucgugggaacacg..... 1  
 Gi5\_8666564\_x3.....Aacgucgugggaacacggggugccgaac..... 1  
 Gi3\_27959663\_x3.....Gcaggccccgccaguacugcgauccgga..... 1  
 Gi3\_27872324\_x3.....gucaggccccgccaguacugcgga..... 0  
 Gi2\_10776319\_x3.....cggGgacgucgugggaacacggggugccgaa..... 1  
 Gi1\_4074405\_x3.....ggaacacAgggugccgaac..... 1  
 Gi2\_10814467\_x3.....ggNgacgucgugggaacacggggugcc..... 1  
 Gi3\_27804476\_x3.....cgccgucaNgccccgccaguac..... 1  
 Gi3\_27866378\_x3.....cgugggaacGcggggugccgaa..... 1  
 Gi2\_10777894\_x3.....gagaagcgccgCcaggccccgccag..... 1  
 Gi3\_27850634\_x3.....cggagacgucgugggaacGcgg..... 1  
 Gi2\_10759630\_x3.....ccccgccaguacugcgauccgagGc..... 1  
 Gi2\_10774135\_x3.....acgucAugggaacacggggugccgaac..... 1  
 Gi2\_10803274\_x3.....aucggUgacgucgugggaacacg..... 1  
 Gi5\_8694500\_x3.....aacacggggugGcgaacu..... 1  
 Gi4\_545877\_x3.....gugggaacacggggugcUgaacu..... 1  
 Gi3\_27800921\_x3.....ucgugggaNcacgggug..... 1  
 Gi1a\_5857492\_x3.....aguacugcgauccgagacgCcg..... 1  
 Gi2\_10734031\_x3.....gUucggagacgucguggga..... 1  
 Gi1\_4061400\_x3.....ucgugggaacacggggGcg..... 1  
 Gi2\_10787143\_x3.....gaucggagacgucAugggaacacggggugc..... 1  
 Gi1a\_5837830\_x3.....aUuacugcgauccgagac..... 1  
 Gi1a\_5817382\_x3.....agaaUcggccgucaggccccgc..... 1  
 Gi3\_27808211\_x3.....cgucaggccccgccaguacuA..... 1  
 Gi3\_27948998\_x3.....Aucgugggaacacggggug..... 1  
 Gi1\_4054662\_x3.....aucggagaNgucgugggaacacggggugcc..... 1  
 Gi1\_4055004\_x3.....ucgugggGacacggggugccg..... 1  
 Gi5\_8699030\_x3.....cgugggaacGcgggugcc..... 1  
 Gi3\_27816263\_x3.....cgucgugggUacacggggugccga..... 1  
 Gi2\_10812994\_x3.....agacgucgugggaacacAggggugccgaacu..... 1  
 Gi3\_27906536\_x3.....cgugggaacacCgggugccgaac..... 1  
 Gi3\_27959921\_x3.....Cggccccgccaguacugcgauccg..... 1  
 Gi5\_8679500\_x3.....uacugcgauccgagacgC..... 1  
 Gi3\_27797090\_x3.....cugcgauccgagGcugc..... 1  
 Gi5\_8663168\_x3.....gGcaggccccgccaguac..... 1  
 Gi1\_4053834\_x3.....aucggagacgCcgugggaacacg..... 1  
 Gi5\_8699957\_x3.....gugggaacacAggggugccga..... 1  
 Gi3\_27815993\_x3.....agccccgccaguacAgcga..... 1  
 Gi3\_27936638\_x3.....gGacgucgugggaacacggggugcc..... 1  
 Gi3\_27869987\_x3.....ggagacgucgugggaacGcg..... 1  
 Gi1\_4077108\_x3.....ucgugggaacacggggugccAaac..... 1  
 Gi5\_8714897\_x3.....gacgucgugggGacacggggugccg..... 1  
 Gi1\_4078362\_x3.....Cacgucgugggaacacggggugccg..... 1  
 Gi5\_8686553\_x3.....gugggaGcacggggugccga..... 1  
 Gi3\_27889250\_x3.....aggUcccgccaguacugcg..... 1  
 Gi3\_27948131\_x3.....uGuguggaacacggggugcc..... 1  
 Gi1a\_5840341\_x3.....cgccaguacugcgauUggagacguc..... 1

Gi3\_27824561\_x3.....ucgugggaacacggggugccUaacu..... 1  
 Gi3\_27807257\_x3.....Cagacgucgugggaacacggggugccg..... 1  
 Gi5\_8684549\_x3.....ugggaacacgggAugccgaac..... 1  
 Gi3\_27891413\_x3.....caggUcccgccaguacugcgau..... 1  
 Gi1a\_5864272\_x3.....gugggaacacggggugccgaacG..... 1  
 Gi5\_8685278\_x3.....ugggaacacggggUccgaacu..... 1  
 Gi1\_4054014\_x3.....aucggagaNgucgugggaacacg..... 1  
 Gi2\_10813732\_x3.....cgugggaacacggggGgc..... 1  
 Gi2\_10766509\_x3.....ccgccaguacugcgau..... 0  
 Gi2\_10760674\_x3.....gaaNacggggugccgaacu..... 1  
 Gi2\_10750396\_x3.....Cagaagcgccgucagccccgcc..... 1  
 Gi3\_27887930\_x3.....aucggagacgucgugggaacacAgggugcc..... 1  
 Gi3\_27929816\_x3.....acugcgauccggagacgucG..... 1  
 Gi1\_4051761\_x3.....gaUgucgugggaacacacggggugccgaacu..... 1  
 Gi2\_10728835\_x3.....gaucggagacgucgugggaacacggggGgcc..... 1  
 Gi2\_10806874\_x3.....gggaacaUggggugccgaac..... 1  
 Gi5\_8683868\_x3.....agacgucGAgggaacacggggugccgaacu..... 1  
 Gi5\_8692445\_x3.....auUggagacgucgugggaacacacgggg..... 1  
 Gi2\_10803469\_x3.....gaucAgagacgucgugggaacacggggug..... 1  
 Gi3\_27888605\_x3.....gacgucgugggaacacgggAugccgaacu..... 1  
 Gi3\_27871103\_x3.....gggUacacggggugccgaa..... 1  
 Gi3\_27848687\_x3.....gucaggccccgccaguGcugc..... 1  
 Gi2\_10770121\_x3.....cgggagacgucgugggaacacggg..... 0  
 Gi5\_8715584\_x3.....aucggagGcugcuggggaacacgggg..... 1  
 Gi3\_27896831\_x3.....cgucgugggaaUacggggugc..... 1  
 Gi3\_27901826\_x3.....gucgugggaacCcggggugcc..... 1  
 Gi1a\_5871601\_x3.....gggaacacggggugccgGacu..... 1  
 Gi2\_10786597\_x3.....aggccccgccGguacugcgau..... 1  
 Gi5\_8675660\_x3.....gugggaacacgUggugccgaac..... 1  
 Gi5\_8662676\_x3.....gGcugcuggggaacacggggugccgaac..... 1  
 Gi5\_8695256\_x3.....ggaaGacggggugccgaac..... 1  
 Gi2\_10788667\_x3.....caggccccNccaguacug..... 1  
 Gi3\_27850022\_x3.....ccccgccGguacugcgauccggagacguc..... 1  
 Gi3\_27818246\_x3.....caggccccgccUguacugcga..... 1  
 Gi3\_27812246\_x3.....aucggagacUucgugggaacac..... 1  
 Gi5\_8705870\_x3.....ugggaacacggggugcAgaac..... 1  
 Gi3\_27977819\_x3.....aagGgaagcgccgucagccccgcca..... 1  
 Gi3\_27845630\_x3.....uNggaaacacggggugccgaac..... 1  
 Gi2\_10771975\_x3.....aggcccUgccaguacugcg..... 1  
 Gi2\_10825615\_x3.....gaCgggagacgucgugggaacac..... 1  
 Gi2\_10726930\_x3.....caggccccgccaguacugcA..... 1  
 Gi5\_8657477\_x3.....aucggagacgucgugggaacGcggg..... 1  
 Gi5\_8671109\_x3.....aucggagaNgucgugggaacacggg..... 1  
 Gi1\_4047867\_x3.....cgucgugggaacacggggugccAaacu..... 1  
 Gi2\_10792666\_x3.....Aacgucgugggaacacggggugccg..... 1  
 Gi1a\_5857135\_x3.....ggaaacacggggugcAgaacu..... 1  
 Gi2\_10814404\_x3.....aucggagacgucAugggaaca..... 1

Gi3\_27886835\_x3.....Uagacgucgugggaacacggggugccgaa..... 1  
 Gi3\_27979301\_x3.....ucggagacgucgugggCacacgggu..... 1  
 Gi3\_27809537\_x3.....cAgagacgucgugggaacac..... 1  
 Gi1\_4054857\_x3.....Ugugggaacacggggugccg..... 1  
 Gi3\_27870071\_x3.....gaucggGgacgucgugggaacacg..... 1  
 Gi2\_10762645\_x3.....aucggagacgucgugggaacaAg..... 1  
 Gi3\_27851066\_x3.....Ggccgucagggccccccaguac..... 1  
 Gi2\_10784653\_x3.....ucgugggaacacggggugUcg..... 1  
 Gi3\_27957371\_x3.....ucaggccccAccaguacugc..... 1  
 Gi3\_27812252\_x3.....aggccccccaguUcugcgauc..... 1  
 Gi5\_8657315\_x3.....aacacCgggugccgaacu..... 1  
 Gi2\_10739425\_x3.....gccaguacugcgGucggagacguc..... 1  
 Gi2\_10804090\_x3.....agacgCcgugggaacacggggugccgaacu..... 1  
 Gi2\_10800646\_x3.....gucguUggaacacggggugccgaacu..... 1  
 Gi2\_10796053\_x3.....gucgugggaacaGggggugccgaacu..... 1  
 Gi3\_27831113\_x3.....gCgaacacggggugccga..... 1  
 Gi5\_8655326\_x3.....gCgggaacacggggugccgaacu..... 1  
 Gi3\_27927239\_x3.....gaucgAagacgucgugggaacacgggu..... 1  
 Gi1\_4075146\_x3.....cgucagAcccccagacuacugc..... 1  
 Gi5\_8682356\_x3.....ugggaCcacggggugccgaac..... 1  
 Gi3\_27800288\_x3.....ccUcgccaguacugcgauccgagacgu..... 1  
 Gl1\_5867491\_x3.....gggaaUacggggugccgaacu..... 1  
 Gi2\_10817953\_x3.....ccccgccaguacugcgGucgg..... 1  
 Gi3\_27913940\_x3.....aCgggagacgucgugggaacac..... 1  
 Gi1\_4066944\_x3.....gaucggagacgucgCgggaacacggggugccg..... 1  
 Gi1\_4059243\_x3.....cgucaggcNccgccaguacugcg..... 1  
 Gi5\_8680556\_x3.....acucguuccgaauuaggaagagaagcg..... 0  
 Gl1\_5835673\_x3.....aucggagacgucAugggaacacg..... 1  
 Gl1\_5849461\_x3.....aucggagacgucgugggaCcacgggu..... 1  
 Gi3\_27917228\_x3.....gUgaagcgccgucagggcc..... 1  
 Gi2\_10817077\_x3.....cggUgacgucgugggaacacggggugcc..... 1  
 Gi2\_10812775\_x3.....gaucggagacgGcgugggaacacggggugcc..... 1  
 Gi2\_10741366\_x3.....gccUcgccaguacugcgaucc..... 1  
 Gi2\_10761133\_x3.....aUacgucgugggaacacgggu..... 1  
 Gi3\_27933566\_x3.....gacguGgugggaacacggggugccgaacu..... 1  
 Gi3\_27962246\_x3.....agUccccgccaguacugcgauccgagacguc..... 1  
 Gi3\_27950312\_x3.....gGcaguacugcgauccgag..... 1  
 Gi3\_27894683\_x3.....cgccaguGcugcgauccgagac..... 1  
 Gi3\_27918635\_x3.....cgucaggccUcgccaguacugcgauccg..... 1  
 Gl1\_5821597\_x3.....ggaaCcgggugccgaacu..... 1  
 Gi3\_27817700\_x3.....ccccccaNuacugcgauccgagacgu..... 1  
 Gi2\_10826347\_x3.....cgauccggaNacgucgugg..... 1  
 Gi2\_10787461\_x3.....aucggagacgucgugggaacGcgg..... 1  
 Gi2\_10811233\_x3.....cgucgugggaacacggggUaccgaa..... 1  
 Gi1\_4065462\_x3.....aggccccccaguacugcgauccg..... 0  
 Gl1\_5873851\_x3.....gugggaacacAgggugcc..... 1  
 Gi3\_27856451\_x3.....agcgccgCcaggccccgcc..... 1

Gi1a\_5852317\_x3.....acugcgauNggagacguc..... 1  
Gi1a\_5837572\_x3.....caguGcugcgauCggagacguc..... 1  
Gi3\_27924356\_x3.....gccaguacugcgGucggagacguc..... 1  
Gi3\_27826565\_x3.....cgccaguaNugcgauCggaga..... 1  
Gi5\_8664836\_x3.....gaacacUgggugccgaacu..... 1  
Gi5\_8655449\_x3.....gacgucguNggaacacggggugccgaacu..... 1  
Gi2\_10816861\_x3.....gucguggAaacacggggugccgaac..... 1  
Gi1\_4076172\_x3.....ucggagacgucgugggGacacg..... 1  
Gi3\_27846662\_x3.....gggaacacggggugccgUa..... 1  
Gi2\_10754569\_x3.....CccaguacugcgauCggagacgu..... 1  
Gi1\_4054542\_x3.....gugggaacacggggugccA..... 1  
Gi4\_549663\_x3.....guggUaacacggggugccgaacu..... 1  
Gi3\_27847958\_x3.....gggaacacggggugUcga..... 1  
Gi3\_27863798\_x3.....cgugggaacacggggugcUga..... 1  
Gi1\_4065939\_x3.....aggccccAccaguacugcgauC..... 1  
Gi3\_27872453\_x3.....GcaguacugcgauCggagacguc..... 1  
Gi3\_27877439\_x3.....aucggagacguUgugggaacacggggugcc..... 1  
Gi2\_10776688\_x3.....gaucAgagacgucguggggaacacgggg..... 1  
Gi2\_10812463\_x3.....aggccccgccaguacuUcgauc..... 1  
Gi3\_27823526\_x3.....acugcgauCggagacAucgug..... 1  
Gi2\_10787239\_x3.....Ggaucggagacgucgugggaaca..... 1  
Gi3\_27907859\_x3.....aguacugcgauCggagCcg..... 1  
Gi3\_27861284\_x3.....aucggaAacgucgugggaacacgg..... 1  
Gi1\_4081326\_x3.....gaucggagNcgucgugg..... 1  
Gi3\_27940103\_x3.....gaucggagacgucgugggaacacggAg..... 1  
Gi1a\_5822161\_x3.....agGacugcgauCggagacguc..... 1  
Gi5\_8714585\_x3.....uCggaacacggggugccgaa..... 1  
Gi3\_27858914\_x3.....GcugcgauCggagacgucgu..... 1  
Gi3\_27911447\_x3.....UccccgccaguacugcgauCggagacgu..... 1  
Gi3\_27930824\_x3.....UaggccccgccaguacuCgga..... 1  
Gi1\_4053885\_x3.....aaUagaagcgccgucaggccccgcc..... 1  
Gi5\_8704574\_x3.....Aagaagcgccgucaggccccgc..... 1  
Gi2\_10742344\_x3.....Gcgucaggccccgccaguacugc..... 1  
Gi1a\_5853538\_x3.....gggaacacggggUaccgaacu..... 1  
Gi2\_10823950\_x3.....ggUccccgccaguacuCgga..... 1  
Gi3\_27803858\_x3.....gucgugggaGcacgggg..... 1  
Gi1\_4048494\_x3.....agaUgucgugggaacacggggugccgaacu..... 1  
Gi3\_27799826\_x3.....aucggagacgucgugggaacaAg..... 1  
Gi2\_10726075\_x3.....gucaggccccgccaguacuAc..... 1  
Gi2\_10827322\_x3.....gugNgaacacggggugcc..... 1  
Gi3\_27833963\_x3.....aGgucgugggaacacggggugccga..... 1  
Gi3\_27916112\_x3.....gagacgucgugggaacGcggggugccgaac..... 1  
Gi2\_10780558\_x3.....aucggagacgucgugggaacacggggUac..... 1  
Gi2\_10820890\_x3.....Naacacggggugccgaacu..... 1  
Gi3\_27915731\_x3.....cUccgccaguacugcgauCggagacguc..... 1  
Gi5\_8676794\_x3.....guUggaacacggggugccgaa..... 1



Gi2\_10732465\_x3.....aCcacggggugccgaacu..... 1  
 Gi3\_27859553\_x3.....cgagacgucguUggaacacggggu..... 1  
 Gi3\_27912203\_x3.....cccgccaguacugcgauccggagGcgu..... 1  
 Gi3\_27827144\_x3.....ggagacguUgugggaacacggggu..... 1  
 G1a\_5829289\_x3.....Uucgugggaacacggggugccga..... 1  
 Gi3\_27959876\_x3.....uaggaagagaagcggcgc..... 0  
 Gi2\_10767778\_x3.....cccgccaguacGcgauccggagacguc..... 1  
 G1a\_5871067\_x3.....Gggccccgccaguacugc..... 1  
 Gi3\_27918179\_x3.....guNggaacacggggugccga..... 1  
 Gi3\_27809774\_x3.....agAccccgccaguacugcga..... 1  
 Gi3\_27942323\_x3.....gaucggagNcgucgugggaacac..... 1  
 Gi2\_10802359\_x3.....agaagcgcNgcagggccccgcc..... 1  
 Gi2\_10759894\_x3.....gagacgucgugggaGcacggggugc..... 1  
 Gi1\_4064145\_x3.....gucgugggaacacggggugGc..... 1  
 Gi1\_4067565\_x3.....gGcaguacugcgauccggagacg..... 1  
 G1a\_5835253\_x3.....gGucggagacgucgugggaacacggggu..... 1  
 Gi1\_4049322\_x3.....gucgugggNacacggggugcc..... 1  
 Gi5\_8694095\_x3.....cUgagacgucgugggaacacg..... 1  
 Gi2\_10763503\_x3.....ugggaacCcggggugccg..... 1  
 Gi2\_10726579\_x3.....gAcaggccccgccaguacugc..... 1  
 Gi3\_27833189\_x3.....Cggccccgccaguacugcga..... 1  
 Gi3\_27951293\_x3.....aucGgagacgucgugggaacacggggugc..... 1  
 Gi2\_10822297\_x3.....aggccccgccaguaGucggauc..... 1  
 Gi2\_10820941\_x3.....ugggaacacggggugAcgaac..... 1  
 Gi3\_27919262\_x3.....cGgccaguacugcgauccggagac..... 1  
 Gi1\_4076022\_x3.....Ugccccgccaguacugcgauc..... 1  
 Gi3\_27889274\_x3.....Gcgccaguacugcgauccggagacgu..... 1  
 Gi3\_27905588\_x3.....guUaggccccgccaguacug..... 1  
 Gi2\_10733626\_x3.....cgucguAggaacacggggugcc..... 1  
 Gi3\_27867434\_x3.....ucgugggaacacggggugGcgaacu..... 1  
 Gi2\_10815778\_x3.....cUgccaguacugcgauccgg..... 1  
 Gi2\_10758457\_x3.....aucggagaUgucgugggaacacggggugcc..... 1  
 Gi3\_27973421\_x3.....gaGgagaagcggccgucagggc..... 1  
 Gi2\_10776682\_x3.....agacgucguAggaacacggggugcc..... 1  
 Gi5\_8655662\_x3.....ggccccgcNaguacugcgauc..... 1  
 Gi5\_8681231\_x3.....gucaggcccUgccaguacugc..... 1  
 Gi1\_4063695\_x3.....ggUgacgucgugggaacacggggugc..... 1  
 Gi2\_10817665\_x3.....gGucggagacgucgugggaaca..... 1  
 Gi3\_27906290\_x3.....cccgccaguacugcgGucggaga..... 1  
 Gi3\_27925478\_x3.....aucggagacgucgugggaUcacggg..... 1  
 Gi1\_4077408\_x3.....aagagaagcggccgucagggc..... 0  
 Gi3\_27804263\_x3.....ucgugggaUacggggugc..... 1  
 Gi3\_27953765\_x3.....agaUgucgugggaacacggggugccgaac..... 1  
 Gi3\_27907094\_x3.....aUgagaagcggccgucagggccccgcc..... 1  
 Gi2\_10823332\_x3.....cgugggaacGcggggugccg..... 1  
 Gi4\_548895\_x3.....cgCgggaacacggggugccgaacu..... 1  
 Gi2\_10821178\_x3.....cgugggaacGcggggugccga..... 1

Gi3\_27877019\_x3.....cgucgugggaacacgggguAccgaac..... 1  
 Gi3\_27973520\_x3.....Gagagaagcgccgucaggcccc..... 1  
 Gi2\_10823371\_x3.....cgucgugggaacacgggAugccgaacu..... 1  
 Gl1\_5876032\_x3.....Uaucggagacgucgugggaacac..... 1  
 Gi3\_27885170\_x3.....acgucgugggaacacggggugccgaaA..... 1  
 Gi1\_4075632\_x3.....cgugggaGcacggggugccgaa..... 1  
 Gi2\_10801072\_x3.....aAcggagacgucgugggaaca..... 1  
 Gi3\_27857210\_x3.....cgugggaacacgAggugccga..... 1  
 Gi3\_27942389\_x3.....ucgugggaacCcggggug..... 1  
 Gi3\_27849020\_x3.....Ngggaacacggggugccgaacu..... 1  
 Gi3\_27949607\_x3.....cccgccagNacugcgauccgaga..... 1  
 Gi3\_27927203\_x3.....ggaacacCgggugccgaacu..... 1  
 Gl1\_5851645\_x3.....uggNaacacggggugccgaacu..... 1  
 Gi3\_27824828\_x3.....Gggccccgccaguacugcgauccgagacguc..... 1  
 Gi2\_10821493\_x3.....agagaagcgccgucaggcUcc..... 1  
 Gi3\_27846491\_x3.....ugggaacacgggCugccgaa..... 1  
 Gl1\_5866681\_x3.....gUccccgccaguacugcg..... 1  
 Gi3\_27880391\_x3.....aagagaagNgccgucaggcccc..... 1  
 Gi2\_10760725\_x3.....agacgCcgugggaacacggggugccg..... 1  
 Gi1\_4062876\_x3.....cccgccaguacugcgaucc..... 0  
 Gl1\_5826214\_x3.....aagagaagNgccgucaggccc..... 1  
 Gi5\_8714903\_x3.....aGucggaucggagacgucgug..... 1  
 Gi3\_27865241\_x3.....acgucgugggGacacggggugc..... 1  
 Gi3\_27815108\_x3.....caggcUccgccaguacugcgaucc..... 1  
 Gi1\_4080687\_x3.....gacgucgugggaacacggggugccgGacu..... 1  
 Gi2\_10736566\_x3.....gugggaaAacggggugccga..... 1  
 Gi2\_10777267\_x3.....aggcGccgccaguacugcga..... 1  
 Gi3\_27854582\_x3.....Aaagagaagcgccgucaggcccc..... 1  
 Gi2\_10802239\_x3.....cUccgucaggccccgccaguacugcgaucc..... 1  
 Gi3\_27848435\_x3.....gagacgucgCgggaacacggggugccgaac..... 1  
 Gi2\_10756420\_x3.....acgucgugggaacGcggggugc..... 1  
 Gi3\_27859004\_x3.....gggaacacCgggugccgaac..... 1  
 Gi3\_27819695\_x3.....cUggccccgccaguacugcgauccg..... 1  
 Gi2\_10805077\_x3.....gaucggagacgucgugggaacGcggggugcc..... 1  
 Gi3\_27970055\_x3.....ugggaacacggUgugccgaac..... 1  
 Gi2\_10808941\_x3.....Agggaacacggggugccgaa..... 1  
 Gi3\_27913664\_x3.....gacgucgugggaacacggggugcUgaac..... 1  
 Gl1\_5816455\_x3.....aucggagacgucgugggaacacA..... 1  
 Gi3\_27894512\_x3.....cugcgaCcgagacgucg..... 1  
 Gi1\_4076895\_x3.....cUgagacgucgugggaacacgggg..... 1  
 Gi2\_10777213\_x3.....cgugggaacacgggguAccgaa..... 1  
 Gi3\_27890720\_x3.....gucaggccccgccGuaucugc..... 1  
 Gi2\_10792939\_x3.....agacgucgNgggaacacggggugc..... 1  
 Gl1\_5826532\_x3.....gugggaacUcggggugccgaacu..... 1  
 Gi3\_27878144\_x3.....cUccgccaguacugcgau..... 1  
 Gi2\_10820020\_x3.....aucggagacgucgugggUacacggggugc..... 1  
 Gi3\_27975320\_x3.....gaagagCagcgccgucaggccc..... 1

|                 |                                            |   |
|-----------------|--------------------------------------------|---|
| Gi5_8655929_x3  | .....gacgucgugggaaacaUggggugccgaacu.....   | 1 |
| Gi1_4078674_x3  | .....aucggagaNgucgugggaaacacgg.....        | 1 |
| G1a_5841070_x3  | .....aguacugcAaucggagacguc.....            | 1 |
| Gi3_27960152_x3 | .....acgucgugNgaacacggg.....               | 1 |
| Gi3_27900527_x3 | .....gUucggagacgucgugggaaacacgggg.....     | 1 |
| Gi2_10730152_x3 | .....aagagaagcgccgucagggccccccagucguc..... | 0 |
| Gi3_27799364_x3 | .....Agugggaacacggggugccg.....             | 1 |
| Gi2_10763620_x3 | .....gGcgucagggccccccagucgucguc.....       | 1 |
| Gi3_27881918_x3 | .....gccccccagucgucgga.....                | 0 |
| Gi3_27809156_x3 | .....Aagacgucgugggaaacacggggg.....         | 1 |
| Gi3_27977213_x3 | .....Ngugggaacacggggugccgaac.....          | 1 |
| G1a_5832058_x3  | .....cagucgucNgaucggagac.....              | 1 |
| Gi2_10728463_x3 | .....ggagacgucgugAgaacacggggugcc.....      | 1 |
| Gi2_10808905_x3 | .....gucguAggaacacggggugccgaac.....        | 1 |
| Gi3_27930878_x3 | .....caggAcccgccagucguc.....               | 1 |
| Gi2_10768621_x3 | .....cgucgugggaaacCcggggugccga.....        | 1 |
| G1a_5814250_x3  | .....acugcgaucggagacgucgCg.....            | 1 |
| Gi2_10742845_x3 | .....gucagggccccCccagucgucg.....           | 1 |
| Gi3_27914966_x3 | .....Acccgccagucgucgga.....                | 1 |
| Gi3_27821651_x3 | .....ucagggccccccagucgucggaCc.....         | 1 |
| Gi3_27928439_x3 | .....cgugggaaacaUggggugcc.....             | 1 |
| Gi5_8663171_x3  | .....ugggaacacgggUugccgaac.....            | 1 |
| Gi1_4049802_x3  | .....agUccccccagucgucgucg.....             | 1 |
| Gi3_27813257_x3 | .....gucgugggaaacacggggugccUaacu.....      | 1 |
| Gi1_4068357_x3  | .....aCacgucgugggaaacacggggugccgaacu.....  | 1 |
| Gi1_4074750_x3  | .....gugggaacUcggggugccgaacu.....          | 1 |
| Gi3_27826904_x3 | .....gucgugggaaacacggggGgccga.....         | 1 |
| Gi3_27907781_x3 | .....ggagaUgucgugggaaacacggggugcc.....     | 1 |
| Gi2_10802134_x3 | .....gagacgucgugggaaacacAgggugcc.....      | 1 |
| Gi3_27904814_x3 | .....cgaucggaNacgucgugggaaacacggg.....     | 1 |
| Gi2_10730275_x3 | .....cgUucggagacgucgugggaaacacggggug.....  | 1 |
| Gi2_10780765_x3 | .....caggccccccagucgucgga.....             | 1 |
| Gi2_10789327_x3 | .....Cccccccagucgucgga.....                | 1 |
| Gi5_8692316_x3  | .....cAugggaacacggggugccga.....            | 1 |
| G1a_5853256_x3  | .....ugggaaUacggggugccgaacu.....           | 1 |
| Gi5_8704820_x3  | .....gCgggaaacacggggugcc.....              | 1 |
| Gi3_27882782_x3 | .....caggccccccagucgucgga.....             | 1 |
| Gi2_10766263_x3 | .....agUgaagcgccgucagggcccccc.....         | 1 |
| Gi2_10796734_x3 | .....gggaaacacgggCugccgaacu.....           | 1 |
| Gi2_10822768_x3 | .....gugggaacNcggggugccgaacu.....          | 1 |
| Gi3_27828755_x3 | .....aucggagacgucgugAaacac.....            | 1 |
| Gi5_8666699_x3  | .....Gaguacugcgaucggagacguc.....           | 1 |
| Gi2_10749937_x3 | .....aucggagacgAcgugggaaaca.....           | 1 |
| Gi3_27825662_x3 | .....gggaaacacggggCgccga.....              | 1 |
| Gi3_27873527_x3 | .....ucagggccccccagucgucgGucgg.....        | 1 |
| Gi1_4049010_x3  | .....gugggaCcacggggugccgaacu.....          | 1 |
| Gi2_10736200_x3 | .....caggccccccUguacugc.....               | 1 |

Gi3\_27905708\_x3.....cgucgugggaacacggggugccC..... 1  
 Gi1\_4075395\_x3.....gGgacgucgucgugggaacacggggugccgaacu..... 1  
 Gi2\_10783732\_x3.....guggCaacacggggugcc..... 1  
 Gi4\_548136\_x3.....acucgcaucggagacgucgug..... 0  
 Gi2\_10748338\_x3.....gggaacacggggUccgaacu..... 1  
 Gi3\_27967211\_x3.....cGgcccagucgucggaucggag..... 1  
 Gi1\_4060731\_x3.....aUgccccccagucgca..... 1  
 Gi4\_550260\_x3.....aucggagacgucgucguggaacc..... 0  
 Gi3\_27834089\_x3.....ggagacgucgugggaacGcggggugcc..... 1  
 Gi2\_10792429\_x3.....ucaggccccccagucgucgcauc..... 1  
 Gi2\_10749271\_x3.....gaucggagacgucgGgggaacacggggug..... 1  
 G1a\_5867374\_x3.....agaGgcccagucagggccccgc..... 1  
 Gi2\_10815790\_x3.....agacgucgugggaacacggggGgcc..... 1  
 Gi2\_10811815\_x3.....CacgucgugggaacacggggU..... 1  
 Gi2\_10814509\_x3.....ucgugggaaAacggggugccgaac..... 1  
 Gi3\_27973373\_x3.....gccagucgucggaucggGgacguc..... 1  
 Gi2\_10786039\_x3.....aguacgucgcaucUgagacgu..... 1  
 Gi2\_10810735\_x3.....agGagcccagucagggcccc..... 1  
 Gi2\_10757557\_x3.....aucggagacgucgugggaacacggAgugc..... 1  
 G1a\_5860282\_x3.....aagagGagcccagucagggcccc..... 1  
 Gi3\_27947357\_x3.....aucggagacgucgugggaacaUggggugc..... 1  
 Gi2\_10743457\_x3.....cggagacgucgugggaacacggggGgc..... 1  
 Gi2\_10821571\_x3.....aucggaAacgucgugggaacacggggugc..... 1  
 Gi2\_10726444\_x3.....cgUucggagacgucgugg..... 1  
 Gi2\_10788151\_x3.....ggaacacgggUugccgaacu..... 1  
 Gi3\_27803885\_x3.....gucgGgggaacacggggugccga..... 1  
 Gi1\_4048674\_x3.....Gcucagggccccccagucg..... 1  
 Gi2\_10804186\_x3.....ucaggccccAccagucguc..... 1  
 Gi3\_27824768\_x3.....Ngaacacggggugccgaac..... 1  
 Gi3\_27903650\_x3.....gaucggagacgucgugggaacGc..... 1  
 Gi2\_10781359\_x3.....ccUgccagucgucggaucggagacguc..... 1  
 Gi5\_8662430\_x3.....gAgggaacacggggugccga..... 1  
 G1a\_5826922\_x3.....aucggagacgucgugggaacacggggC..... 1  
 Gi2\_10734325\_x3.....ugggaaUacggggugccga..... 1  
 Gi5\_8706596\_x3.....gaacacggggugccgaacu..... 0  
 G1a\_5872132\_x3.....Augggaacacggggugccga..... 1  
 Gi2\_10764763\_x3.....ggUaacacggggugccga..... 1  
 Gi2\_10728643\_x3.....cgugggaacacggggGgccga..... 1  
 G1a\_5824282\_x3.....cUucagggccccccagucgcaucgg..... 1  
 Gi3\_27801008\_x3.....cgUagacgucgugggaacacggggU..... 1  
 Gi5\_8686193\_x3.....Ugagacgucgugggaacacggggugccgaac..... 1  
 Gi2\_10789072\_x3.....aagGgaagcccagucagggccccgc..... 1  
 Gi2\_10756531\_x3.....cUaucggagacgucgugggaacacgggg..... 1  
 Gi1\_4074168\_x3.....Gcagggccccccagucgcauc..... 1  
 Gi5\_8715218\_x3.....ggaacacggggugccUaacu..... 1  
 Gi1\_4075992\_x3.....gugggaacCggggugcc..... 1  
 Gi2\_10820815\_x3.....gacgucgugggaacacAgggugccgaacu..... 1

Gi5\_8703941\_x3.....aacacgCggugccgaacu..... 1  
 Gi2\_10751338\_x3.....acgucguggaaAacggggugc..... 1  
 Gi2\_10758889\_x3.....agagaagcgccgucagggcccg..... 0  
 Gi2\_10825546\_x3.....gaucggagacgucgugggGacacgggg..... 1  
 G1a\_5850442\_x3.....aCgggagacgucgugggaaacacggggg..... 1  
 Gi3\_27920489\_x3.....aggccccgccaguaUugcgau..... 1  
 Gi2\_10814374\_x3.....caggUcccgccaguacugcgau..... 1  
 Gi5\_8712389\_x3.....gacgucgugggaacacggggugccgCacu..... 1  
 G11\_4073253\_x3.....acgucgugggaacacggggugcUgaacu..... 1  
 Gi5\_8691650\_x3.....gggaacacggggugGcgaacu..... 1  
 Gi2\_10733881\_x3.....aggccccgccaguGcugcgau..... 1  
 Gi3\_27827633\_x3.....aguaucgNaucggagacgu..... 1  
 Gi2\_10738363\_x3.....cgugggaacacggggugccgGa..... 1  
 Gi2\_10810327\_x3.....aucggagacguGugggaaacacggg..... 1  
 Gi3\_27952910\_x3.....cggaUacgucgugggaaacag..... 1  
 G11\_4081650\_x3.....cccgccaguacugcgau..... 0  
 G11\_4085907\_x3.....acgucgugggaacaAggggugccgaacu..... 1  
 Gi3\_27843401\_x3.....gacgucgugggaacacggggugccgUacu..... 1  
 Gi3\_27839870\_x3.....ccgccGguacugcgau..... 1  
 Gi2\_10769218\_x3.....gaucAgagacgucgugggaaacacggggugc..... 1  
 G11\_4069440\_x3.....aucgUagacgucgugggaaacacg..... 1  
 Gi2\_10755268\_x3.....ggagacgucgugggaaacacggggGgc..... 1  
 Gi5\_8690675\_x3.....cAugggaacacggggugccgaac..... 1  
 Gi5\_8657180\_x3.....agacgucgugggaaacacggggugAcgaacu..... 1  
 Gi2\_10760020\_x3.....ggagacAucgugggaaacacggggug..... 1  
 Gi3\_27937094\_x3.....Ggaucggagacgucgugggaaacacggg..... 1  
 Gi3\_27836657\_x3.....cgucgugggaaacacggggugAcgaac..... 1  
 Gi2\_10794466\_x3.....aucggagacgucgugggaaacacgggAugc..... 1  
 G11\_4074330\_x3.....cgAgggaacacggggugccgaac..... 1  
 Gi2\_10728373\_x3.....ggccccgccaguacuAcgauc..... 1  
 Gi3\_27881672\_x3.....uacugcgau..... 1  
 G1a\_5826586\_x3.....Aaacacggggugccgaacu..... 1  
 Gi5\_8661320\_x3.....gugggaacNcggggugccgaa..... 1  
 Gi2\_10764541\_x3.....cgucaggAcccgccaguacugc..... 1  
 Gi3\_27826037\_x3.....agGacugcgau..... 1  
 Gi2\_10732975\_x3.....aucggagUcugcugugggaaacac..... 1  
 Gi3\_27844466\_x3.....gaagagaagcgccgucGggcc..... 1  
 Gi3\_27898190\_x3.....gagacgucgugggGacacggggg..... 1  
 G1a\_5870446\_x3.....cUgagacgucgugggaaacacggg..... 1  
 G1a\_5813758\_x3.....cgccaguaNugcgau..... 1  
 Gi2\_10806601\_x3.....agacgucgugggGacacggggugccg..... 1  
 Gi3\_27932003\_x3.....cGccgccaguacugcgau..... 1  
 Gi2\_10772161\_x3.....cgugggaacacgggCugcc..... 1  
 G11\_4086681\_x3.....gugggaacacggggugccgCac..... 1  
 Gi3\_27874511\_x3.....Cggccccgccaguacugcgau..... 1  
 Gi3\_27962891\_x3.....gggaacacggggugccgG..... 1  
 G11\_4056990\_x3.....ggaacacgggguAccgaacu..... 1

Gi3\_27944330\_x3.....ggaacacggggugccgCa..... 1  
 Gi3\_27835814\_x3.....cgucgugggaaAacggggugccg..... 1  
 Gi2\_10793518\_x3.....aucggagacgucgugggaGcacgg..... 1  
 Gi2\_10728763\_x3.....aGcggagacgucgugggaa..... 1  
 Gi3\_27957062\_x3.....gucgugggaGcacggggugccga..... 1  
 Gi3\_27849941\_x3.....acgucgugggaaacacggggugccA..... 1  
 Gi3\_27885944\_x3.....caggcUccgccaguacugcgau..... 1  
 Gi5\_8666966\_x3.....caggccccNccaguacug..... 1  
 Gi3\_27947465\_x3.....gAcaggccccgccaguacugc..... 1  
 Gi3\_27823622\_x3.....Cggccccgccaguacugcg..... 1  
 Gi5\_8696834\_x3.....aAgccccgccaguacugcgau..... 1  
 Gi2\_10737436\_x3.....ggaacacgggCugccgaacu..... 1  
 Gi3\_27802805\_x3.....gaucggagacgCgugggaaacacgggg..... 1  
 Gi2\_10772386\_x3.....ucaggccccgccCguacugcgau..... 1  
 Gi2\_10798951\_x3.....aucggagacgucgugggUaca..... 1  
 Gi3\_27926144\_x3.....uUggagacgucgugggaaacacg..... 1  
 Gi3\_27924137\_x3.....gugggaaacacgUggugccga..... 1  
 Gi5\_8692028\_x3.....aggccccgccaguacugAgauc..... 1  
 Gi2\_10818196\_x3.....gugggaaacacggggUccgaac..... 1  
 Gi5\_8659529\_x3.....Uggccccgccaguacugcgau..... 1  
 Gi2\_10784359\_x3.....acgucgCgggaaacacggggugcc..... 1  
 Gi3\_27811847\_x3.....agaagcgcNgcaggccccgccagua..... 1  
 Gi2\_10799023\_x3.....ccccgUcaguacugcgauccg..... 1  
 Gi2\_10825567\_x3.....gucgugggaaacacggggugccgaaA..... 1  
 Gi3\_27968831\_x3.....cGaguacugcgauccgagacguc..... 1  
 Gl1\_5862913\_x3.....gugggaaacaGggggugccgaacu..... 1  
 Gi3\_27851615\_x3.....cgucCugggaaacacggggugccgaacu..... 1  
 Gl1\_5873899\_x3.....aucggagacgucgugggaaacacggggUacc..... 1  
 Gi3\_27947969\_x3.....Accaguacugcgauccgagac..... 1  
 Gi3\_27946334\_x3.....gaucggagacgucgugggaaacacggggugccgaac..... 0  
 Gi3\_27824636\_x3.....Aucaggccccgccaguacugcgau..... 1  
 Gi2\_10819327\_x3.....gacgucgugggaaacacggggugccgGacu..... 1  
 Gi3\_27894638\_x3.....cgucgugggaaacacAggg..... 1  
 Gi3\_27812906\_x3.....aggcUccgccaguacugcga..... 1  
 Gi1\_4074717\_x3.....gggaGcacggggugccgaac..... 1  
 Gi1\_4069098\_x3.....aGcggagacgucgugggaaacacggggugc..... 1  
 Gi3\_27963245\_x3.....aucggagacgucgAgggaaacacggggU..... 1  
 Gi3\_27855644\_x3.....aggccccUccaguacugcgau..... 1  
 Gi3\_27901238\_x3.....aacacggggugccCaacu..... 1  
 Gi3\_27832283\_x3.....cCucgugggaaacacggggugccga..... 1  
 Gi3\_27797693\_x3.....cgugggaaacacggggugccC..... 1  
 Gi2\_10783210\_x3.....agacgucgugggGacacggggugc..... 1  
 Gi1\_4078929\_x3.....gaucggagacgucgugggaaacacgggg..... 0  
 Gi3\_27824330\_x3.....Acaggccccgccaguacugc..... 1  
 Gi3\_27894110\_x3.....cgugggaaacacggggAgccg..... 1  
 Gl1\_5840314\_x3.....Gaggccccgccaguacug..... 1  
 Gi3\_27799004\_x3.....aggccccgccaguacugAg..... 1

Gi3\_27865178\_x3.....gacNucgugggaaacacggggugccgaacu..... 1  
 Gi2\_10745437\_x3.....aggccccgccaguacCgcgaucggagacguc..... 1  
 Gi2\_10729045\_x3.....ggaacacgCggugccgaac..... 1  
 Gi2\_10825702\_x3.....gggaacacggggCgccga..... 1  
 Gi3\_27965918\_x3.....cgucguggAaacacggggugccga..... 1  
 Gi5\_8662079\_x3.....Uagaagcgcgcgucaggccccgccaguacu..... 1  
 Gi2\_10752517\_x3.....Gcaggccccgccaguacug..... 1  
 G1a\_5835307\_x3.....Gcugcgaucggagacguc..... 1  
 G1a\_5838319\_x3.....aguacCgcgaucggagacguc..... 1  
 G1a\_5866288\_x3.....caguacugcUaucggagacguc..... 1  
 Gi3\_27955556\_x3.....gagacgucgugggaGcacggggu..... 1  
 Gi2\_10814068\_x3.....gagaGgcgcgcgucaggccccgcc..... 1  
 Gi2\_10824400\_x3.....gaucAgagacgucgugggaacacggggugcc..... 1  
 Gi5\_8706155\_x3.....gacgucgCgggaacacggggugccgaac..... 1  
 Gi3\_27929303\_x3.....cAaucggagacgucgugggaacacggggu..... 1  
 Gi3\_27840512\_x3.....ucggagacgucgCgggaacacggggu..... 1  
 Gi2\_10809565\_x3.....Ccgucgugggaacacggggugcc..... 1  
 Gi3\_27950780\_x3.....gaucggagacAucgugggaacacggggu..... 1  
 Gi2\_10793074\_x3.....cgucgugggaacaUggggugcc..... 1  
 Gi2\_10809664\_x3.....gaucggagacgucgugggaGca..... 1  
 Gi2\_10812289\_x3.....ccUcgccaguacugcgau..... 1  
 Gi2\_10726777\_x3.....gagGagcgcgcgucaggccccgccaguac..... 1  
 Gi2\_10741690\_x3.....Aggaaacacggggugccga..... 1  
 G1a\_5832430\_x3.....cgGgggaacacggggugcc..... 1  
 Gi2\_10768585\_x3.....ccccccaguGcugcgau..... 1  
 Gi2\_10734352\_x3.....Ccgucgugggaacacggggugccgaacu..... 1  
 G1a\_5870404\_x3.....gaaacacggggCgccgaacu..... 1  
 Gi5\_8655509\_x3.....Aaggccccgccaguacugcg..... 1  
 Gi3\_27835349\_x3.....gaagagaaNcgccgucaggccccgcc..... 1  
 Gi4\_548769\_x3.....aucggagacgucgugggaacacggggu..... 0  
 Gi2\_10795690\_x3.....agacgucgugggaCcacgggugc..... 1  
 G1\_4069764\_x3.....ugggaGcacgggugccgaacu..... 1  
 Gi3\_27886172\_x3.....ugggaacaGggggugccga..... 1  
 Gi3\_27815594\_x3.....aggccccccaAuacugcgauccgga..... 1  
 Gi3\_27862508\_x3.....gucaggccccgccaguCucgcg..... 1  
 Gi5\_8692325\_x3.....aucggagacgucguggaaUacg..... 1  
 Gi3\_27958547\_x3.....cggaUacgucgugggaacacggggugcc..... 1  
 Gi5\_8680856\_x3.....aucggagacgucgugggaGcacggggu..... 1  
 Gi5\_8680793\_x3.....Uaagcgcgcgucaggccccgccaguacugc..... 1  
 Gi2\_10814386\_x3.....gggaacacgggguCccgaacu..... 1  
 Gi3\_27960317\_x3.....acUcggggugccgaacu..... 1  
 Gi3\_27978812\_x3.....cgucaggAcccgccaguacugcg..... 1  
 Gi3\_27842783\_x3.....gaucggagacgucgugggaacacggggGgcc..... 1  
 G1a\_5869438\_x3.....gugggaacacgAgugccga..... 1  
 Gi3\_27806324\_x3.....cgugggaacacggggAgc..... 1  
 Gi3\_27977711\_x3.....uaUgaagagaagcgcgcguc..... 1  
 Gi2\_10806037\_x3.....cugcgauccgagacgucgA..... 1

Gi3\_27934391\_x3.....gugggaacacgggguUccgaac..... 1  
 Gi3\_27802310\_x3.....cgucCggccccgccaguacugc..... 1  
 Gi3\_27960254\_x3.....aagcgccgucagggccccgccaguGcugc..... 1  
 Gi3\_27870524\_x3.....Accaguacugcgauccgga..... 1  
 Gi3\_27872360\_x3.....aucggagacgucgugggaacacCgg..... 1  
 Gl1\_5814793\_x3.....aucggagGcgucgugggaacacggggu..... 1  
 Gi5\_8694332\_x3.....aCgggagacgucgugggaacacgg..... 1  
 Gi3\_27940097\_x3.....Gggagacgucgugggaacacggggugccgaacu..... 1  
 Gi3\_27929750\_x3.....ucggGgacgucgugggaacacg..... 1  
 Gi3\_27891245\_x3.....cgucaggccUgccaguacugc..... 1  
 Gi5\_8651492\_x3.....gucgugggaacacggggugcAgaacu..... 1  
 Gi3\_27896396\_x3.....ucgugggaacacAgggugc..... 1  
 Gi3\_27910007\_x3.....ggUcccgccaguacugcgau..... 1  
 Gi1\_4065030\_x3.....ucUggccccgccaguacugcgau..... 1  
 Gi3\_27864185\_x3.....cgucGgggaacacggggugccga..... 1  
 Gi2\_10750126\_x3.....Uccccgccaguacugcga..... 1  
 Gi5\_8663072\_x3.....ucguggCaacacggggugccgaacu..... 1  
 Gi3\_27927563\_x3.....cccgccaguacugcgauccggUgacguc..... 1  
 Gl1\_5863651\_x3.....guUcugcgauccggagacguc..... 1  
 Gi5\_8708816\_x3.....gNgggaacacggggugccgaacu..... 1  
 Gi2\_10744510\_x3.....agacgucgugggaaUacgggugccgaacu..... 1  
 Gi2\_10739515\_x3.....ggaaAacgggugccgaac..... 1  
 Gi3\_27872114\_x3.....gagaagcgccgucGggccccgc..... 1  
 Gi1\_4085061\_x3.....ugggaacacgggguCccgaacu..... 1  
 Gi1\_4081533\_x3.....cgugggaGcacgggugccg..... 1  
 Gi1\_4054194\_x3.....ucguggGacacgggugcc..... 1  
 Gi1\_4088802\_x3.....Ugagacgucgugggaacacggggugc..... 1  
 Gi2\_10786954\_x3.....Gggagacgucgugggaacac..... 1  
 Gi3\_27968501\_x3.....ucagggAccgccaguacugcgau..... 1  
 Gi3\_27852035\_x3.....aucggagacgucgugggaaGacggg..... 1  
 Gi3\_27837236\_x3.....guggCaacacggggugccga..... 1  
 Gi3\_27809864\_x3.....ucgugggaacUcgggugccgaacu..... 1  
 Gi5\_8699363\_x3.....ucagggccUgccaguacugcg..... 1  
 Gi5\_8694233\_x3.....gucguUggaacacggggugccgaacu..... 1  
 Gi5\_8715926\_x3.....aacacgggugccCaacu..... 1  
 Gi2\_10736221\_x3.....gaacacgggUugccgaacu..... 1  
 Gi1\_4052985\_x3.....gCagacgucgugggaacacggggugcc..... 1  
 Gi3\_27827954\_x3.....cccgccaguacugcgauccggagGcg..... 1  
 Gi3\_27975788\_x3.....cggGgacgucgugggaacacggg..... 1  
 Gi1\_4085475\_x3.....cgugggGacacgggugccgaac..... 1  
 Gi3\_27892982\_x3.....aggccccgccaguacugUgaucggagacg..... 1  
 Gi3\_27854255\_x3.....gcUaguacugcgauccggag..... 1  
 Gi3\_27854351\_x3.....ucguCggaacacggggugccgaac..... 1  
 Gi2\_10760446\_x3.....ggUgacgucgugggaaca..... 1  
 Gi3\_27901850\_x3.....aCagaagcgccgucagggccccgc..... 1  
 Gl1\_5834704\_x3.....gaacacgggugccgGacu..... 1  
 Gl1\_5864809\_x3.....gAaacacgggugccgaacu..... 1



Gi3\_27867692\_x3.....Gcgucugugggaacacggggugccgaa..... 1  
 Gi2\_10787716\_x3.....aggccccgccaguacugA..... 1  
 Gi3\_27918725\_x3.....cggagacAucugugggaacacggggg..... 1  
 Gi3\_27916124\_x3.....aCaagcgccgucagggccc..... 1  
 Gi3\_27878072\_x3.....gggaacacNgggugccgaacuu..... 1  
 Gi1\_4063134\_x3.....aGcggagacgucguggggaacacggg..... 1  
 Gi2\_10767676\_x3.....Cgacgucugugggaacacggggugccgaacu..... 1  
 Gi2\_10784431\_x3.....aucgAagacgucguggggaaca..... 1  
 Gi1\_4080966\_x3.....Augggaacacggggugccga..... 1  
 Gi2\_10763878\_x3.....Ugccccgccaguacugcgauccggagac..... 1  
 Gi2\_10778269\_x3.....cgucugugggaacacggggCg..... 1  
 Gi5\_8689850\_x3.....agacgucgNgggaacacggggugccgaac..... 1  
 Gi3\_27938108\_x3.....aagagaagcgcGgucaggc..... 1  
 Gi2\_10737316\_x3.....ugcgaucgNagacgucguggggaaca..... 1  
 Gl1\_5848498\_x3.....cgugggaacacggggCgcc..... 1  
 Gi2\_10791637\_x3.....aggUcccgccaguacugc..... 1  
 Gi3\_27963689\_x3.....Uaagagaagcgcgucagggccccgccagua..... 1  
 Gi1\_4080474\_x3.....aggccccgccaguacugcgU..... 1  
 Gi3\_27853268\_x3.....ggaCcacggggugccgaacu..... 1  
 Gi2\_10749670\_x3.....acgucAugggaacacggggugcc..... 1  
 Gi2\_10799869\_x3.....aggccccgccaguacuAcg..... 1  
 Gi3\_27944183\_x3.....aguacugcNaucggagacgucg..... 1  
 Gi1\_4087809\_x3.....Aacgucgugggaacacggggugccgaacu..... 1  
 Gl1\_5840815\_x3.....Cugggaacacggggugcc..... 1  
 Gi3\_27918506\_x3.....aguacugcgauccggagGcgucg..... 1  
 Gi3\_27799481\_x3.....aagGgaagcgcgucagggccccgccagu..... 1  
 Gi2\_10727383\_x3.....caggccccgccaguacCg..... 1  
 Gi2\_10760116\_x3.....cgucAugggaacacggggugcc..... 1  
 Gi2\_10759369\_x3.....agUagcgcgucagggccccgcc..... 1  
 Gi3\_27825254\_x3.....ucgugggaacacggggugcGgaacu..... 1  
 Gi2\_10789240\_x3.....gugUgaacacggggugcc..... 1  
 Gi1\_4088373\_x3.....cgUcaguacugcgauccggaga..... 1  
 Gi1\_4054245\_x3.....gGcgucgugggaacacggggugccgaac..... 1  
 Gi3\_27914399\_x3.....cggagacgucguggggaacCcggg..... 1  
 Gi3\_27824948\_x3.....Uucggagacgucguggggaacacgggg..... 1  
 Gl1\_5832232\_x3.....Gcgcgucgagacgucg..... 1  
 Gi2\_10766437\_x3.....gcUccgccaguacugcgau..... 1  
 Gi2\_10743616\_x3.....ggagacguUgugggaacacggggugcc..... 1  
 Gi1\_4065951\_x3.....cgucguAggaacacggggugccgaacu..... 1  
 Gi2\_10796512\_x3.....aucggagacgucguggggaacCcggg..... 1  
 Gi3\_27847217\_x3.....gccccgccaguacugcgaC..... 1  
 Gi3\_27931370\_x3.....acgucuggggaGacggggugccgaac..... 1  
 Gi3\_27930542\_x3.....aucgUagacgucguggggaacacggggugc..... 1  
 Gi3\_27855653\_x3.....acgucuggggaGcacggg..... 1  
 Gi3\_27970904\_x3.....gaucggagacgucguggggaacacggggAgcc..... 1  
 Gi2\_10824112\_x3.....Ugucagggccccgccaguacugcg..... 1  
 Gi1\_4078347\_x3.....gucgugAgaacacggggugccgaacu..... 1

Gi2\_10764298\_x3.....cgugggaacacCgggugccgaacu..... 1  
 Gi5\_8667788\_x3.....ggaacacggggugccAaac..... 1  
 Gi3\_27929030\_x3.....cccgccaguacCgcgaucggagacgucgug..... 1  
 Gl1a\_5826928\_x3.....aucgAagacgucgugggaacacggggug..... 1  
 Gi3\_27863897\_x3.....aucggagCcgucgugggaacacgggggu..... 1  
 Gi2\_10736134\_x3.....gacgucgugggaacacggggCgccgaac..... 1  
 Gi3\_27801683\_x3.....uGgugggaacacggggugccga..... 1  
 Gi3\_27812822\_x3.....uUaggccccgccaguacugcg..... 1  
 Gi3\_27939089\_x3.....gaGcggagacgucgugggaacacgggggu..... 1  
 Gi2\_10827310\_x3.....Uccgucaggccccgccaguacugc..... 1  
 Gi5\_8657186\_x3.....cGaguacugcgauccggagacgu..... 1  
 Gi3\_27976649\_x3.....ggaagagaagcgccgucaggcccc..... 0  
 Gi1\_4064226\_x3.....aucggagacgucgugggaCcacggggugcc..... 1  
 Gi3\_27943604\_x3.....agacgucgugggaacUcggggugccgaacu..... 1  
 Gi2\_10825258\_x3.....acgucgugggaacacggggAgccgaacu..... 1  
 Gi3\_27817832\_x3.....agUgaagcgccgucaggccccgcc..... 1  
 Gi5\_8678867\_x3.....gggaacCcgggugccgaa..... 1  
 Gi2\_10809958\_x3.....gAagacgucgugggaacacggggugcc..... 1  
 Gi5\_8705672\_x3.....cgGgggaacacggggugccga..... 1  
 Gi4\_549546\_x3.....ucguUggaacacggggugccgaacu..... 1  
 Gi2\_10824214\_x3.....Cggccccgccaguacugcga..... 1  
 Gi2\_10747471\_x3.....gaacacggggugccgaUcu..... 1  
 Gi3\_27909149\_x3.....cgccaguaNugcgauccggagacgu..... 1  
 Gi3\_27891179\_x3.....cccgccaguacugcgauUggagacgu..... 1  
 Gi4\_550362\_x3.....Cugggaacacggggugccgaa..... 1  
 Gi2\_10748743\_x3.....ugggaacacggggugccgCacuu..... 1  
 Gi3\_27933242\_x3.....cgugggCacacggggugcc..... 1  
 Gi2\_10787872\_x3.....gucaUgccccgccaguacugc..... 1  
 Gi2\_10733638\_x3.....aucggagacgucgugggaacUggggug..... 1  
 Gi5\_8688935\_x3.....gggaacacggggugccgaUcu..... 1  
 Gi3\_27932450\_x3.....aguacugcgauccggagGcgucgug..... 1  
 Gi1\_4078182\_x3.....gaacGcggggugccgaac..... 1  
 Gi2\_10794790\_x3.....gugggaacacggggugccgaacuA..... 1  
 Gl1a\_5871073\_x3.....ggaNcacggggugccgaacu..... 1  
 Gi1\_4081698\_x3.....ggagGcgucgugggaacacggggugcc..... 1  
 Gi1\_4075593\_x3.....gacgucgugggaacCcgggugccgaacu..... 1  
 Gi4\_549642\_x3.....Ugugggaacacggggugccgaacu..... 1  
 Gi5\_8677709\_x3.....gucgugggaacacggggugccgaacG..... 1  
 Gi3\_27797471\_x3.....aggccccgccaguaAugcg..... 1  
 Gi3\_27939236\_x3.....cgugggaUcacggggugcc..... 1  
 Gi2\_10812325\_x3.....gacgucguNggaacacggggugc..... 1  
 Gi5\_8697425\_x3.....gucgugggaacacggggugccgaCc..... 1  
 Gi3\_27853103\_x3.....cCccaguacugcgauccggagacguc..... 1  
 Gl1a\_5815954\_x3.....gUucggagacgucguggga..... 1  
 Gi3\_27977231\_x3.....gugggaaGacggggugcc..... 1  
 Gi3\_27926960\_x3.....acgucgugggaacacgAggugcc..... 1  
 Gi1\_4085787\_x3.....ugggaacacggUgugccgaacu..... 1

Gi3\_27836384\_x3.....aucgAagacgucgugggaacacgggg..... 1  
Gi3\_27818456\_x3.....gaucAgagacgucgugggaacacggg..... 1  
Gi5\_8676833\_x3.....Caagagaagcgcgucagg.....cgucgAgggaacacggggugccgaacu..... 1  
Gi3\_27937691\_x3.....Caagagaagcgcgucagg..... 1  
Gi2\_10806136\_x3.....caUgccccgccaguacug..... 1  
Gi5\_8689712\_x3.....cAucaggccccgccaguacugcg..... 1  
G1a\_5827330\_x3.....cCccaguacugcgauccgagacguc..... 1  
Gi1\_4059420\_x3.....cgucgugggaaAacggggugccgaacu..... 1  
Gi2\_10797841\_x3.....ucagUccccgccaguacugc..... 1  
Gi3\_27863285\_x3.....aucggagacgAcgugggaacacg..... 1  
Gi5\_8675285\_x3.....gggaacacgAggugccgaac..... 1  
Gi5\_8655539\_x3.....ugcgaCcgagacgucgug..... 1  
Gi3\_27902045\_x3.....gaagagaagUgccgucagggccc..... 1  
Gi3\_27913463\_x3.....Aaggccccgccaguacugcgau..... 1  
Gi3\_27814484\_x3.....gGgaucggagacgucgug..... 1  
Gi2\_10823797\_x3.....ugggaacUcggggugccgaacu..... 1  
Gi2\_10778941\_x3.....Uucggagacgucgugggaacacggg..... 1  
Gi2\_10749646\_x3.....gugggaaAacggggugccgaa..... 1  
Gi1\_4074573\_x3.....gucaggccccgccaguacug..... 0  
Gi2\_10822456\_x3.....cgucguAggaacacggggugc..... 1  
Gi3\_27972077\_x3.....caggccccgccaguUcugcgauc..... 1  
Gi3\_27810149\_x3.....gaucggagacgucgugggUacacggggu..... 1  
G1a\_5857381\_x3.....gaucggagacgucgugggaacCcggggu..... 1  
G1a\_5838661\_x3.....Uguacugcgauccgagacgucgu..... 1  
Gi1\_4088730\_x3.....aacacggggugGcgaacu..... 1  
Gi2\_10784905\_x3.....ucguUggaacacggggugccg..... 1  
Gi2\_10813960\_x3.....ucguUggaacacggggugc..... 1  
Gi5\_8663048\_x3.....gugggGacacggggugcc..... 1  
G1a\_5835313\_x3.....ggccccgccaguacugcgCuc..... 1  
Gi3\_27868268\_x3.....cgucgugggaacacggggAgc..... 1  
Gi3\_27883106\_x3.....aggccccgccaguacugUgau..... 1  
Gi1\_4063875\_x3.....ggGgacgucgugggaacacggggugccgaacu..... 1  
Gi3\_27903422\_x3.....gagaagcAccgucagggccccgc..... 1  
Gi3\_27953885\_x3.....caggccccgccaguCcugcgauc..... 1  
Gi3\_27954242\_x3.....aggcAccgccaguacugcgau..... 1  
Gi3\_27804023\_x3.....gggagacgucAugggaacacggggugcc..... 1  
Gi2\_10758874\_x3.....aucggagacgucgugggaacacggggugAc..... 1  
Gi3\_27801899\_x3.....cgGucggagacgucguggg..... 1  
Gi5\_8714552\_x3.....Ggucgugggaacacggggugcc..... 1  
Gi3\_27946997\_x3.....gugggaacacgUggugccgaa..... 1  
Gi2\_10733548\_x3.....aucggagacgucgugggaaUacggggu..... 1  
Gi2\_10729612\_x3.....caggccccgccaguCcugc..... 1  
Gi3\_27891338\_x3.....gggaacacggggugUcgaa..... 1  
Gi3\_27922823\_x3.....gugggaacacggCgugccgaa..... 1  
Gi2\_10732633\_x3.....ucgggagacNucgugggaacacggggugc..... 1  
Gi3\_27866645\_x3.....cgaucggagGcugcugggaacacgggggu..... 1  
Gi3\_27908183\_x3.....acgucguUggaacacggggugccgaacu..... 1

Gi3\_27875330\_x3.....agaagcgccgucagggccccgcUa.....1  
 Gi5\_8669738\_x3.....ucgugggaacacggggugcGgaacu.....1  
 Gi2\_10763002\_x3.....Cucggagacgucgugggaacacggggugc.....1  
 Gi5\_8688242\_x3.....ggNaacacggggugccgaacu.....1  
 Gl1\_5834938\_x3.....ugggaacacggggugcAgaacu.....1  
 Gi3\_27922091\_x3.....gugggaacacgggAugccg.....1  
 Gi2\_10800883\_x3.....Gaggccccgccaguacugcgauccgga.....1  
 Gi2\_10769035\_x3.....ccccgccaguaucgcgauccgCgacguc.....1  
 Gi3\_27891047\_x3.....agacgucgugggaacacggAgugccgaacu.....1  
 Gl1\_5857465\_x3.....gGcuggggaacacggggugccgaac.....1  
 Gi2\_10800268\_x3.....cgugggaacacggggugcU.....1  
 Gi3\_27820325\_x3.....aguacugcNaucggagacgucgu.....1  
 Gi3\_27800000\_x3.....ggaacacgggguCccgaac.....1  
 Gi3\_27894797\_x3.....aagcgccgNcaggccccccaguacugc.....1  
 Gl1\_4088328\_x3.....gugggaacacCgggugccgaacu.....1  
 Gi2\_10765678\_x3.....ccccgccaguaUugcgauc.....1  
 Gi2\_10747369\_x3.....gaacaAggggugccgaacu.....1  
 Gl1\_4081590\_x3.....gUgacgucgugggaacacggggugcc.....1  
 Gi2\_10766785\_x3.....Ggccaguacugcgauccgagacgucg.....1  
 Gi3\_27917549\_x3.....gaUgagaagcgccgucagggccccgcc.....1  
 Gi3\_27803624\_x3.....Cgagacgucgugggaacacggggugccga.....1  
 Gi2\_10750723\_x3.....gauUgggagacgucgugggaacacggggu.....1  
 Gi2\_10735225\_x3.....cgggagacgucgugggaCcacggggugc.....1  
 Gi5\_8696045\_x3.....gggaGcacggggugccgaa.....1  
 Gi3\_27802016\_x3.....gccaguacugcgauccAgagacguc.....1  
 Gi3\_27861920\_x3.....cAccaguacugcgauccggagacg.....1  
 Gi3\_27838094\_x3.ccuuaacuNguuccgaau.....1  
 Gl1\_4087143\_x3.....cGggccccgccaguacugcgauc.....1  
 Gi2\_10807750\_x3.....aucgggagacguAgugggaacacggggugc.....1  
 Gi5\_8711174\_x3.....aucggGgacgucgugggaacacggggu.....1  
 Gi3\_27967730\_x3.....Uugggaacacggggugccgaacuuu.....1  
 Gl1\_4088286\_x3.....ugggaacacAgggugccgaac.....1  
 Gi3\_27815600\_x3.....gacgCcgugggaacacggggu.....1  
 Gl1\_5869690\_x3.....cgucaggcUccgccaguacugcg.....1  
 Gl1\_5829190\_x3.....acugcgauNggagacgucgug.....1  
 Gi2\_10740571\_x3.....gggaacacggggCgccgaa.....1  
 Gi2\_10814248\_x3.....cUgagacgucgugggaacacggggugccga.....1  
 Gi3\_27928310\_x3.....ucgggagacgCcgugggaacacggggugcc.....1  
 Gl1\_4056027\_x3.....Ugacgucgugggaacacggggugccgaacu.....1  
 Gi2\_10767331\_x3.....uGaggccccgccaguacugcg.....1  
 Gi2\_10749709\_x3.....ucgugggaacacggggugcGgaacu.....1  
 Gl1\_5836057\_x3.....ugAgaacacggggugccgaacu.....1  
 Gl1\_5851876\_x3.....aUugcgauccgagacgucgug.....1  
 Gi5\_8657756\_x3.....ggcccUgccaguacugcgauc.....1  
 Gi3\_27873797\_x3.....caggccccccaAuacugcg.....1  
 Gi3\_27851837\_x3.....gucguAggaacacggggugcc.....1  
 Gi2\_10759816\_x3.....gaacacggUgugccgaacu.....1

Gi1a\_5862604\_x3.....caggccccNccaguacugcg..... 1  
 Gi2\_10753723\_x3.....gaacacgggguUccgaacu..... 1  
 Gi5\_8664815\_x3.....gucgugggaaacaGggggugccgaacu..... 1  
 Gi3\_27937151\_x3.....Cccaguacugcgauccggagacgucgu..... 1  
 Gi2\_10810810\_x3.....gucgugggaaacacggggG..... 1  
 Gi2\_10753561\_x3.....Agggaaacacggggugccga..... 1  
 Gi3\_27848702\_x3.....cAucgugggaaacacggggugccga..... 1  
 Gi2\_10751461\_x3.....aucAgagacgucgugggaaacacg..... 1  
 Gi3\_27948209\_x3.....acgucgugNgaacacggggugccga..... 1  
 Gi2\_10732903\_x3.....aCacgucgugggaaacacggggugc..... 1  
 Gi3\_27866117\_x3.....ggagacgucgugggaaacacggggA..... 1  
 Gi3\_27862712\_x3.....aucggagacgucgugggaaacacggggUcc..... 1  
 Gi2\_10790446\_x3.....acgucgugggaaUacggggugcc..... 1  
 Gi2\_10799656\_x3.....Uccgucagggccccccaguacugcgau..... 1  
 Gi1\_4086882\_x3.....gacAucgugggaaacacggggugccgaacu..... 1  
 Gi2\_10827406\_x3.....aguacugcgauUgagacgucg..... 1  
 Gi3\_27934034\_x3.....cgucgugggaaacacggggugAcg..... 1  
 Gi5\_8674844\_x3.....gaacacggUgugccgaacu..... 1  
 Gi2\_10766893\_x3.....gaucggagNcugcugggaaacacg..... 1  
 Gi1\_4079571\_x3.....gaacacggggugccgaaAu..... 1  
 Gi3\_27913406\_x3.....cgucgugggaaUcacggggugccgaacu..... 1  
 Gi2\_10730434\_x3.....gugggaaacacggggAgccga..... 1  
 Gi2\_10758391\_x3.....aacacCgggugccgaacu..... 1  
 Gi3\_27938030\_x3.....cccgccaguacugcgauccggagacgCc..... 1  
 Gi2\_10742497\_x3.....agaagcgccgucagggcc..... 0  
 Gi2\_10784365\_x3.....gucgugggaaUcacggggugccgaacu..... 1  
 Gi2\_10752463\_x3.....ucgugggaaacacggggAgccgaac..... 1  
 Gi1\_4070679\_x3.....uAggaaacacggggugccga..... 1  
 Gi3\_27840407\_x3.....agaagcgccgucagggUccgcca..... 1  
 Gi5\_8681660\_x3.....gggaaacCcgggugccgaac..... 1  
 Gi1a\_5875174\_x3.....aggccccgccaguGcugcg..... 1  
 Gi2\_10822747\_x3.....ucUgagacgucgugggaaacacg..... 1  
 Gi1a\_5872882\_x3.....ccUguacugcgauccggagacguc..... 1  
 Gi1a\_5834956\_x3.....cccgccagNacugcgauccggagacguc..... 1  
 Gi2\_10798315\_x3.....cccgccCguacugcgau..... 1  
 Gi3\_27796910\_x3.....caggccccUgccaguacugcgau..... 1  
 Gi3\_27796928\_x3.....gagaagcgNcgucagggcc..... 1  
 Gi3\_27974006\_x3.....ucggagacgucgugggaaacacgggg..... 0  
 Gi2\_10745857\_x3.....cgucagggccccccaguaUugc..... 1  
 Gi2\_10827289\_x3.....aguacugcgCucggagacgu..... 1  
 Gi3\_27866666\_x3.....gaagGgaagcgccgucagggcc..... 1  
 Gi3\_27979796\_x3.....cgucgugggaaacacggggugccgaUcu..... 1  
 Gi4\_546303\_x3.....aucggagacgucgugggaaacacggggugc..... 0  
 Gi3\_27910874\_x3.....aGgagaagcgccgucagggccccccag..... 1  
 Gi3\_27895973\_x3.....Cccgucagggccccccaguacugcg..... 1  
 Gi5\_8686826\_x3.....gugggaaacCcgggugccg..... 1  
 Gi2\_10740448\_x3.....cgauccggagacgucgugggGacacggg..... 1

Gi2\_10741327\_x3.....Cacgucgugggaacacggggugccgaacu..... 1  
 Gl1a\_5822329\_x3.....cgucaggccccgcUaguacugcg..... 1  
 Gi2\_10798870\_x3.....gaucggagaUgucgugggaacacggg..... 1  
 Gi3\_27842891\_x3.....caggccccgcUcaguacugcg..... 1  
 Gi3\_27805871\_x3.....Nggccccgccaguacugcgau..... 1  
 Gi2\_10756930\_x3.....gccaguacugcgauccggagac..... 0  
 Gi2\_10781164\_x3.....cccgccaguacugcAaucgg..... 1  
 Gi3\_27844175\_x3.....gucgGgggaacacggggugc..... 1  
 Gi2\_10740979\_x3.....ggagacgucgugggaacacggggCgccg..... 1  
 Gi5\_8651819\_x3.....ggaacacgAggugccgaac..... 1  
 Gi3\_27917822\_x3.....agaagcgccgcCcaggccccgcca..... 1  
 Gi5\_8717435\_x3.....gugggGacacggggugccg..... 1  
 Gi5\_8663684\_x3.....cgugggaacacgUggugccga..... 1  
 Gi2\_10747279\_x3.....aCgccccgccaguacugcgau..... 1  
 Gi1\_4070493\_x3.....gAgggaacacggggugccga..... 1  
 Gi3\_27973466\_x3.....Cucgugggaacacggggugcc..... 1  
 Gi3\_27958778\_x3.....gaagagaagcgUgucaggcccc..... 1  
 Gi2\_10774237\_x3.....aggccUcgccaguacugcg..... 1  
 Gi1\_4051386\_x3.....aguacugcgauccggagacguc..... 0  
 Gi3\_27813023\_x3.....cgggagacgucgugggaacacggggugcA..... 1  
 Gi3\_27972641\_x3.....gaucggagacgucgugggaacacggggugUc..... 1  
 Gi3\_27874499\_x3.....agUagcgccgcucaggccccgccagu..... 1  
 Gi3\_27924791\_x3.....gaGcggagacgucgugggaacac..... 1  
 Gi3\_27962189\_x3.....Aucaggccccgccaguacug..... 1  
 Gi3\_27936593\_x3.....gaagagaagcgccAucaggcc..... 1  
 Gi2\_10737670\_x3.....cgCcaggccccgccaguac..... 1  
 Gi3\_27958742\_x3.....gaucggagacgucgugggaGcac..... 1  
 Gi3\_27958847\_x3.....ucgggagacgCcgugggaacacggggu..... 1  
 Gi3\_27844277\_x3.....ggaacacggggugccCaac..... 1  
 Gi3\_27890213\_x3.....agaGgcccgcucaggcccc..... 1  
 Gi5\_8674556\_x3.....ugggCcacggggugccgaac..... 1  
 Gi3\_27801464\_x3.....aggccccgccaguacugcgauUgg..... 1  
 Gi2\_10790197\_x3.....gggaacacggggugccCaacu..... 1  
 Gi3\_27904514\_x3.....Cucaggccccgccaguacugc..... 1  
 Gi2\_10792390\_x3.....caggccccgccaUuacugcg..... 1  
 Gi3\_27869729\_x3.....ucaggccccgccaguGcugc..... 1  
 Gi1\_4088820\_x3.....gUagacgucgugggaacacggggu..... 1  
 Gi2\_10759132\_x3.....ugggaacacggggugccgaC..... 1  
 Gi2\_10784206\_x3.....acgucgugAgaacacggggugc..... 1  
 Gi2\_10827943\_x3.....gaacacggggugccgaCc..... 1  
 Gi3\_27852209\_x3.....caggccccgccaguUcugcg..... 1  
 Gi3\_27953717\_x3.....Caucggagacgucgugggaacacgggg..... 1  
 Gi3\_27869537\_x3.....aggccccgccaguUcugcg..... 1  
 Gi3\_27894281\_x3.....ccccUccaguacugcgauccggagacgu..... 1  
 Gi1\_4080198\_x3.....ucgugggaCcacggggugcc..... 1  
 Gl1a\_5870518\_x3.....Augggaacacggggugccgaac..... 1  
 Gi3\_27809399\_x3.....agUccccgccaguacugcgauccg..... 1

Gi3\_27962993\_x3.....cCgagacgucgugggaacacggggu..... 1  
 Gi3\_27887492\_x3.....ggaacaGggggugccgaacu..... 1  
 Gi3\_27940016\_x3.....ccUccaguacugcgauccgagacg..... 1  
 Gi5\_8707304\_x3.....cGggccccgccaguacugcga..... 1  
 Gi3\_27892076\_x3.....gucagggccccccaguacugcgauccgagacguc..... 0  
 Gi2\_10817485\_x3.....acgucgugggaacacggggugccgGac..... 1  
 Gi2\_10790509\_x3.....ggccccgccaguacCgcgaucgg..... 1  
 Gi2\_10737547\_x3.....ugggUacacggggugccga..... 1  
 Gi2\_10781374\_x3.....ugggaacGcggggugccg..... 1  
 Gi2\_10762552\_x3.....Gagagaagcgccgucagggc..... 1  
 Gi2\_10826701\_x3.....gucgugggaacacggggugcGgaacu..... 1  
 Gi5\_8694947\_x3.....ugggUacacggggugccgaa..... 1  
 Gi3\_27881111\_x3.....gacAucgugggaacacggggugccgaacu..... 1  
 Gi2\_10798792\_x3.....gaucggagacgucgugggaaAacggggugc..... 1  
 Gi3\_27821660\_x3.....gugggaacacUgggugccga..... 1  
 Gi3\_27844043\_x3.....agcgccgucGggccccgccagu..... 1  
 Gi5\_8686478\_x3.....gugggaacGcggggugccgaa..... 1  
 Gi1\_4072599\_x3.....Ggacgucgugggaacacggg..... 1  
 Gi1\_4081626\_x3.....agacgucgugggGacacggggugccgaacu..... 1  
 Gi1\_4060818\_x3.....Acgugggaacacggggugcc..... 1  
 Gi2\_10779910\_x3.....gggagacgucgugggaacacggggugUc..... 1  
 Gi3\_27938255\_x3.....ccccgccaguacugcgGucggagacg..... 1  
 Gi2\_10811800\_x3.....caggccUcgccaguacugcg..... 1  
 Gi5\_8677325\_x3.....gucgugggaacacggggugccgUacu..... 1  
 Gi3\_27898661\_x3.....ccccgccaguacugcgauccgagacgC..... 1  
 G1a\_5833837\_x3.....Gacugcgauccgagacgucg..... 1  
 G1a\_5858080\_x3.....Ugagacgucgugggaaca..... 1  
 Gi2\_10762348\_x3.....aucggagacguUgugggaacacggggug..... 1  
 Gi5\_8714222\_x3.....ucgugggaacaAggggugccgaacu..... 1  
 Gi3\_27969704\_x3.....caggccccgUcaguacugcgauc..... 1  
 Gi5\_8694914\_x3.....ucgugggaacCggggugccgaac..... 1  
 G1a\_5835508\_x3.....Ggugggaacacggggugcc..... 1  
 Gi3\_27905123\_x3.....ccUgccaguacugcgauccgagacgu..... 1  
 Gi5\_8686139\_x3.....gugggaacacgAggugccg..... 1  
 G1a\_5840905\_x3.....cUgagacgucgugggaacacg..... 1  
 Gi2\_10746376\_x3.....cgggagacgucguAggaacacggggugcc..... 1  
 Gi1\_4047879\_x3.....cgggagacgucgugggaacacggggug..... 0  
 Gi2\_10783585\_x3.....gaucggagacguUguggga..... 1  
 Gi1\_4061307\_x3.....ggaacacggggugccgUacu..... 1  
 Gi5\_8706773\_x3.....ggGacacggggugccgaac..... 1  
 Gi3\_27865130\_x3.....gugggaacUcggggugccgaa..... 1  
 Gi2\_10780246\_x3.....ccccgccCguacugcgauc..... 1  
 Gi2\_10753072\_x3.....gGcugugggaacacggggu..... 1  
 Gi5\_8694893\_x3.....gugggaacacggggugccUaac..... 1  
 Gi2\_10738555\_x3.....ucguAggaacacggggugccg..... 1  
 Gi3\_27806318\_x3.....gugggaacacUgggugcc..... 1  
 Gi3\_27933722\_x3.....caggccGcgccaguacugcgau..... 1

|                 |                                      |   |
|-----------------|--------------------------------------|---|
| Gi3_27811070_x3 | .....gugggaCcacggggugccg             | 1 |
| Gi1_4051644_x3  | .....cccgccaguacugcgaucgg            | 0 |
| Gi2_10784227_x3 | .....gacgucguggAaacacggggugccg       | 1 |
| Gi5_8680040_x3  | .....ugggGacacggggugccgaa            | 1 |
| Gi3_27896564_x3 | .....cUgagacgucgugggaacacggggugccgaa | 1 |
| Gi3_27803093_x3 | .....gaucggagacgucgugggaacaAggg      | 1 |
| Gi3_27918134_x3 | .....agacgucgugggaacacggggugcUgaac   | 1 |
| Gi3_27959276_x3 | .....aucggagacgucgugggaaca           | 0 |
| Gi2_10734526_x3 | .....gucgugggaacacggggugGcgaacu      | 1 |
| Gi3_27901757_x3 | .....cgucaggAcccgccaguacugc          | 1 |
| Gi5_8702360_x3  | .....aucggagacAucgugggaacacgg        | 1 |
| Gi2_10779586_x3 | .....cgaucggaNacgucgugggaacacggggg   | 1 |
| Gi3_27976973_x3 | .....gaucggagacgucgugggaacCcg        | 1 |
| Gi3_27924533_x3 | .....agacgucgugggaacCcggggugccgaacu  | 1 |
| Gi2_10761445_x3 | .....Ugucgugggaacacggggugccga        | 1 |
| Gi3_27854378_x3 | .....Agugggaacacggggugc              | 1 |
| Gi2_10825768_x3 | .....caggccccgccCguacugcg            | 1 |
| Gi3_27804872_x3 | .....agGagcgccgucagggccc             | 1 |
| Gi2_10802992_x3 | .....aggccccgccaguacuAcgaucgga       | 1 |
| Gi2_10791334_x3 | .....gaUgagaagcgccgucagggccc         | 1 |
| Gi2_10742053_x3 | .....Uggccccgccaguacugcgaucgga       | 1 |
| Gi3_27807986_x3 | .....aggAcccgccaguacugcga            | 1 |
| Gi2_10811071_x3 | .....guAggaaacacggggugccgaa          | 1 |
| Gi3_27893177_x3 | .....cgugggaacacggggugAcgaa          | 1 |
| Gi2_10791646_x3 | .....gacgucgugggaGcacggggugc         | 1 |
| Gi2_10802647_x3 | .....cUgucaggccccgccaguacugc         | 1 |
| Gi2_10824700_x3 | .....ugggaacacAgggugccga             | 1 |
| Gl1_5821114_x3  | .....caguacugNgaucggagacgu           | 1 |
| Gi4_550485_x3   | .....guAggaaacacggggugccgaacu        | 1 |
| Gi3_27855020_x3 | .....aggccccgccagCacugcgaucgg        | 1 |
| Gi3_27872150_x3 | .....gaagagaGgcgccgucagggccc         | 1 |
| Gi2_10820017_x3 | .....cgugggaacacgCggugccgaa          | 1 |
| Gi3_27954500_x3 | .....Gcgccaguacugcgaucggagacg        | 1 |
| Gi1_4074270_x3  | .....aguacugcgaucggGgacguc           | 1 |
| Gi2_10765549_x3 | .....gaagcgccNucaggccccgccaguacugc   | 1 |
| Gi3_27851729_x3 | .....cgucaggccccgccCguacugc          | 1 |
| Gi1_4071576_x3  | .....cgucaAgccccgccaguacugcg         | 1 |
| Gi3_27874604_x3 | .....Uaggccccgccaguacugcgau          | 1 |
| Gi3_27914804_x3 | .....cgucaggcNccgccaguacug           | 1 |
| Gi1_4052178_x3  | .....aacacgUggugccgaacu              | 1 |
| Gi3_27933230_x3 | .....Gcggagacgucgugggaacacgg         | 1 |
| Gi3_27908699_x3 | .....gaagcgUgucagggccccg             | 1 |
| Gi1_4058457_x3  | .....aagagaagcgccgucagggccc          | 0 |
| Gi3_27895214_x3 | .....aggccccgccaguacCcggaucgga       | 1 |
| Gi3_27879404_x3 | .....gUgacgucgugggaacacggggugccgaacu | 1 |
| Gi1_4074321_x3  | .....Aaggccccgccaguacugcg            | 1 |
| Gl1_5847826_x3  | .....ugggaacacggAgugccgaacu          | 1 |



Gi4\_547317\_x3 .....cgugggGacacggggugccgaacu..... 1  
 Gi3\_27811253\_x3.....gaucggagacgucgugggaCcacg..... 1  
 Gi3\_27878333\_x3.....gugggaacUcggggugccg..... 1  
 Gi4\_549291\_x3 .....gugggaacacggggugccgaaAu..... 1  
 Gi1\_4052067\_x3.....ggaacacgAgugccgaacu..... 1  
 Gi3\_27897830\_x3.....gaucggagacgucgugggGacacggg..... 1  
 Gi2\_10729423\_x3.....aucggagacgucGgggaacacggggugc..... 1  
 Gi2\_10762717\_x3.....gaucggGgacgucgugggaacacg..... 1  
 Gi3\_27979238\_x3.....Caucggagacgucgugggaacac..... 1  
 Gi2\_10730041\_x3.....Cucaggccccgccaguacugcgau..... 1  
 G1a\_5834758\_x3.....gUagacgucgugggaacacg..... 1  
 Gi1\_4052421\_x3.....aucggagacgucgugggaacacA..... 1  
 Gi3\_27946538\_x3.....gucgugggNacacggggug..... 1  
 Gi2\_10797322\_x3.....gcccUgccaguacugcgau..... 1  
 Gi5\_8711792\_x3.....cguUgugggaacacggggugc..... 1  
 Gi2\_10761067\_x3.....aucggagacgucgugggaaUacggggugc..... 1  
 Gi3\_27896687\_x3.....cgucUugggaacacggggugccgaac..... 1  
 Gi5\_8663633\_x3.....gugggaacacgggggUcCcgaaacu..... 1  
 Gi2\_10735144\_x3.....gaUgagaagcgccgucagggccc..... 1  
 Gi3\_27810677\_x3.....gccgucagNccccgccaguac..... 1  
 Gi3\_27816350\_x3.....gugUgaacacggggugccga..... 1  
 Gi3\_27896921\_x3.....cgucgugggCacacggggugc..... 1  
 Gi2\_10775620\_x3.....ugggaacacgAgugccgaac..... 1  
 Gi5\_8669942\_x3.....cgCcgugggaacacggggugc..... 1  
 Gi3\_27903941\_x3.....aucggagacgucgugggaaUacggggugcc..... 1  
 Gi3\_27901427\_x3.....cgucAugggaacacggggugc..... 1  
 Gi1\_4079169\_x3.....gacgucgugggaacacggggugAcgaacu..... 1  
 Gi2\_10786291\_x3.....Ggucgugggaacacgggg..... 1  
 Gi3\_27973571\_x3.....Cacgucgugggaacacggg..... 1  
 Gi3\_27878099\_x3.....cGcgauccggagacgucg..... 1  
 Gi2\_10749289\_x3.....gugggaacacgggCugccgaac..... 1  
 Gi3\_27884156\_x3.....agacgucgugggaacacggggugc..... 0  
 Gi3\_27896612\_x3.....gucgGgggaacacggggugcc..... 1  
 Gi5\_8667566\_x3.....cgucGgggaacacggggugccgaacu..... 1  
 Gi5\_8652890\_x3.....gugggaacacgAgugccga..... 1  
 Gi3\_27962291\_x3.....cccgccaguacugcgaCc..... 1  
 Gi3\_27947603\_x3.....uggUaacacggggugccgaac..... 1  
 Gi3\_27956597\_x3.....aagagaagcgccgucagggcccgcagC..... 1  
 Gi3\_27979223\_x3.....ggUgacgucgugggaacacgg..... 1  
 Gi2\_10772626\_x3.....Cuacugcgauccggagacgu..... 1  
 Gi3\_27934649\_x3.....caggAcccgccaguacugcgau..... 1  
 Gi2\_10815088\_x3.....Ugucgugggaacacggggugcc..... 1  
 Gi5\_8689139\_x3.....cUguacugcgauccggagacgucgug..... 1  
 Gi5\_8716097\_x3.....cGggccccgccaguacug..... 1  
 Gi3\_27836159\_x3.....uccgaauuaggaagGgaagc..... 1  
 Gi3\_27875162\_x3.....aCuacugcgauccggagacgucg..... 1  
 Gi5\_8710031\_x3.....ucNugggaacacggggugccgaacu..... 1

Gi2\_10798351\_x3.....cGaguacugcgauccggagacg..... 1  
 Gi3\_27894050\_x3.....ucggagacNucgugggaacacggggu..... 1  
 Gi3\_27911222\_x3.....cAgagacgucgugggaacacggggu..... 1  
 Gi3\_27911228\_x3.....ggaUcacggggugccgaa..... 1  
 Gi1\_4086768\_x3.....Agagacgucgugggaacacggggugcc..... 1  
 Gi3\_27977588\_x3.....cGggccccgccaguacugcgauccgga..... 1  
 Gi3\_27878966\_x3.....cggagacguUgugggaacacggggu..... 1  
 Gi2\_10798300\_x3.....gacgucgugggaacacggggugcU..... 1  
 Gi3\_27925109\_x3.....gcgaucggNgacgucgug..... 1  
 Gi2\_10795351\_x3.....Ggaagcgccgucagggccc..... 1  
 G1a\_5829799\_x3.....agaagcgccgucaggcUccgc..... 1  
 Gi2\_10740502\_x3.....Uucggagacgucgugggaacac..... 1  
 G1a\_5872516\_x3.....cgAgggaacacggggugcc..... 1  
 Gi3\_27971141\_x3.....aucggagacgucgugggaUcacggggugcc..... 1  
 Gi2\_10752130\_x3.....agaagcgccgucGggcccc..... 1  
 Gi3\_27969863\_x3.....ucagggccccgccagCacugcgaucc..... 1  
 Gi2\_10738690\_x3.....ucgugggaUcacggggugccgaacu..... 1  
 Gi3\_27843680\_x3.....cgUagacgucgugggaacacggggugcc..... 1  
 Gi3\_27920756\_x3.ccuaaacucguuccgaCu..... 1  
 G1a\_5825428\_x3.....gggaacacggggugccgUacu..... 1  
 Gi3\_27916661\_x3.....ggaaGacggggugccgaa..... 1  
 Gi3\_27861602\_x3.....aggccccgccaguacugcgaCcgga..... 1  
 Gi3\_27964334\_x3.....aggccccgccaguacugcgauccgA..... 1  
 Gi3\_27945722\_x3.....cgucagggccccgccaguGcugcg..... 1  
 Gi2\_10799326\_x3.....ugcgGucggagacgucguggga..... 1  
 Gi3\_27850148\_x3.....ggagacgucguAggaaacacggggu..... 1  
 G1a\_5836210\_x3.....guggAaacacggggugccga..... 1  
 Gi2\_10782685\_x3.....cAccaguacugcgauccggagac..... 1  
 G1a\_5813425\_x3.....caggccccgccUuacugcgau..... 1  
 Gi2\_10750228\_x3.....Gcgccaguacugcgauccg..... 1  
 G1a\_5850307\_x3.....ggaacUcggggugccgaacu..... 1  
 Gi3\_27824306\_x3.....aucggagacgucgugggaacUcggggu..... 1  
 Gi2\_10737913\_x3.....Agugggaacacggggugccga..... 1  
 Gi2\_10791940\_x3.....Acgugggaacacggggugccgaa..... 1  
 Gi3\_27807521\_x3.....cgucgugggaacacggCgugccgaacu..... 1  
 Gi2\_10768942\_x3.....gugggaacacgAggugccgaa..... 1  
 Gi3\_27807353\_x3.....cgugggaacacgCggugcc..... 1  
 Gi3\_27972755\_x3.....gucgugCgaacacggggugccgaacu..... 1  
 Gi1\_4059270\_x3.....guUggaacacggggugcc..... 1  
 Gi3\_27849659\_x3.....ccaguacuNcgauccggagacgucgug..... 1  
 Gi1\_4088157\_x3.....aucggagacgCcgugggaacac..... 1  
 Gi2\_10759972\_x3.....Aagacgucgugggaacacggggugcc..... 1  
 Gi2\_10732795\_x3.....Uccgccaguacugcgauccggagac..... 1  
 G1a\_4073040\_x3.....Cugggaacacggggugccg..... 1  
 Gi3\_27860468\_x3.....aggccccgccaguacugcgauccggagacA..... 1  
 G1a\_4065624\_x3.....gucgugggaacacggggugcUgaacu..... 1  
 Gi5\_8681933\_x3.....cgUcaguacugcgauccggagacgu..... 1

Gi2\_10788838\_x3.....cgucaggccGcgcagacuacugc..... 1  
 Gi3\_27979745\_x3.....ugggaaAacggggugccga..... 1  
 Gi1\_4078923\_x3.....ucgugggaacacggggugcGgaacu..... 1  
 Gi2\_10814581\_x3.....ucggagacgucgCgggaacacggggg..... 1  
 Gi2\_10777318\_x3.....gucgugggaacacggggugccgaacG..... 1  
 Gi1\_4052184\_x3.....acucggaugNggagacgucg..... 1  
 Gi3\_27839636\_x3.....Ccgugggaacacggggugccgaa..... 1  
 Gi2\_10749727\_x3.....aucggagacgCcgugggaac..... 1  
 Gi3\_27970955\_x3.....cgccGguacugcgauccggagac..... 1  
 Gi3\_27851957\_x3.....ccUcgcagacuacggaucggagacg..... 1  
 Gi3\_27804146\_x3.....cCucgugggaacacggggugc..... 1  
 Gi2\_10759159\_x3.....gaucggagacgucgugggaacacggggCgc..... 1  
 Gi5\_8666183\_x3.....Gggccccgccagacuacugc..... 1  
 Gi2\_10744408\_x3.....ugggaacacggggugUcg..... 1  
 G1a\_5859400\_x3.....aucggagacguUgugggaacacggggg..... 1  
 Gi2\_10780180\_x3.....cggagCcgucgugggaacacggggugcc..... 1  
 Gi5\_8664128\_x3.....acgucgugggaacGcggggugcc..... 1  
 Gi5\_8700644\_x3.....ugcgaucaAgagacgucgug..... 1  
 Gi2\_10769650\_x3.....ccgucagggcccgUaguacugc..... 1  
 Gi2\_10822045\_x3.....cgucagggcAccgccagacuacugc..... 1  
 Gi2\_10813285\_x3.....aucggagUcgcgucgugggaaca..... 1  
 Gi3\_27852392\_x3.....aucggagacgucgugggaacacggggGgc..... 1  
 Gi2\_10811266\_x3.....Gccccccagacuacggaucggagacguc..... 1  
 G1a\_5869159\_x3.....aAcggagacgucgugggaacacggg..... 1  
 Gi2\_10803631\_x3.....Gccccccagacuacggaucggag..... 1  
 Gi1\_4050033\_x3.....agUcgcgucgugggaacacggggugccg..... 1  
 Gi2\_10810957\_x3.....gaucggagacgucgugggaacCcggggugc..... 1  
 Gi3\_27899009\_x3.....gccgucagggcUccgccagacuacugc..... 1  
 Gi2\_10740184\_x3.....cgccgucagggccccgccaguaGugc..... 1  
 Gi3\_27960374\_x3.....cggagGcgcgucgugggaacac..... 1  
 Gi1\_4059642\_x3.....ucgugAgaacacggggugcc..... 1  
 Gi4\_552207\_x3.....cUcugugggaacacggggugcc..... 1  
 Gi3\_27971276\_x3.....uacuUcgaucggagacguc..... 1  
 Gi2\_10772440\_x3.....caAgccccgccagacuacggauc..... 1  
 Gi2\_10823215\_x3.....gaucggagacgucgugggaacCcgggg..... 1  
 Gi2\_10824904\_x3.....ucgugggaacacggggugccA..... 1  
 Gi1\_4059972\_x3.....Gcggagacgucgugggaacacggg..... 1  
 Gi3\_27833495\_x3.....ccccccagacuacggaucAga..... 1  
 Gi1\_4061859\_x3.....cgugUgaacacggggugccg..... 1  
 Gi1\_4075587\_x3.....gaucggagacgucgugggaacacggggugc..... 0  
 Gi3\_27923705\_x3.....Cgccccgccagacuacgga..... 1  
 Gi2\_10762894\_x3.....gucagggccccgccaguCcuac..... 1  
 Gi3\_27936596\_x3.....gugUgaacacggggugcc..... 1  
 Gi1\_4051854\_x3.....gucgugggaacaGggggugccgaacu..... 1  
 Gi1\_4060131\_x3.....guacugcgauccggagacgucgugU..... 1  
 Gi2\_10777033\_x3.....ggNacacggggugccgaacu..... 1  
 Gi3\_27927674\_x3.....caguGcugcgauccggagacgucgug..... 1

|                 |                                          |   |
|-----------------|------------------------------------------|---|
| Gi2_10758130_x3 | .....ggaacaAggggugccgaac                 | 1 |
| Gi2_10790503_x3 | .....gaucggagacgucgugggaaacacAgggugc     | 1 |
| Gi3_27813986_x3 | .....gaucggagacgucgugAgaacacggg          | 1 |
| Gi1_4087335_x3  | .....acguUgugggaacacggggugccgaacu        | 1 |
| Gi3_27862274_x3 | .....aguacugcgauccggagGcg                | 1 |
| Gi3_27891737_x3 | .....Ugagacgucgugggaaacacggggugc         | 1 |
| Gi2_10752319_x3 | .....ucggUgacgucgugggaa                  | 1 |
| Gi3_27932597_x3 | .....gaucggagacAucgugggaaacacgggg        | 1 |
| Gi1_4059753_x3  | .....cUucgugggaaacacggggugccg            | 1 |
| Gi2_10749154_x3 | .....gggaacacggggugUcgaac                | 1 |
| Gi1_4080627_x3  | .....cgucAugggaaacacggggugcc             | 1 |
| Gi3_27885230_x3 | .....gugggaacaAggggugccg                 | 1 |
| Gi1_4083555_x3  | .....cgucaggccccgccaguacug               | 0 |
| Gi2_10794340_x3 | .....uacugcgauccAgagacgucgug             | 1 |
| Gi3_27965840_x3 | .....aggUcccgccaguacugc                  | 1 |
| Gi5_8686154_x3  | .....ccccccaNuacugcgauccggagacg          | 1 |
| Gi2_10794943_x3 | .....cgucaggccccgccagCac                 | 1 |
| Gi1_4087119_x3  | .....aucggGgacgucgugggaaacacggg          | 1 |
| Gi1a_5848189_x3 | .....agUagcgccgucaggccccgc               | 1 |
| Gi5_8695994_x3  | .....cUggccccgccaguacugcg                | 1 |
| Gi5_8708135_x3  | .....gagaagcgNcgucaggccccgc              | 1 |
| Gi3_27849752_x3 | .....gagaagcAccgucaggccc                 | 1 |
| Gi3_27846809_x3 | .....gugggaacacgggUugccgaac              | 1 |
| Gi2_10817053_x3 | .....gucgCgggaacacggggugccgaac           | 1 |
| Gi3_27970514_x3 | .....aAgucgugggaaacacggggugccgaacu       | 1 |
| Gi4_547920_x3   | .....cgccaguacugcgauccggagacguc          | 0 |
| Gi2_10811200_x3 | .....Cucaggccccgccaguacugc               | 1 |
| Gi2_10731823_x3 | .....cgucguggNaacacggggug                | 1 |
| Gi2_10748488_x3 | .....aucggCgacgucgugggaaacacggg          | 1 |
| Gi2_10828039_x3 | .....gaucggagacgucgCgggaacacggg          | 1 |
| Gi5_8698763_x3  | .....ugggaUcaccggggugccgaac              | 1 |
| Gi2_10768330_x3 | .....Caucggagacgucgugggaaacacg           | 1 |
| Gi2_10734931_x3 | .....gaucggagacgucgugggaaacacgAggugc     | 1 |
| Gi2_10771588_x3 | .....gGcugggaaacacggggugccgaa            | 1 |
| Gi1_4080390_x3  | .....aacacgggNugccgaacu                  | 1 |
| Gi3_27915845_x3 | .....ccccccaguacugcgauccggGgac           | 1 |
| Gi1_4086879_x3  | .....cguggaaacacggggugcGgaacu            | 1 |
| Gi3_27871451_x3 | .....aucggagacguUgugggaacac              | 1 |
| Gi2_10808959_x3 | .....gucgugggaaacacgUggugccgaacu         | 1 |
| Gi1a_5856055_x3 | .....cgAcaggccccgccaguacugcg             | 1 |
| Gi3_27834959_x3 | .....gacgucgugggaaacacggggugccgaaU       | 1 |
| Gi3_27803402_x3 | .....gugggaacacgUggugcc                  | 1 |
| Gi5_8673011_x3  | .....acgucguggAaacacggggugccgaacu        | 1 |
| Gi2_10807684_x3 | .....aucggGgacgucgugggaaacacggggugccgaac | 1 |
| Gi1_4082541_x3  | .....gaagagaagcgccgucaggccccgccagua      | 0 |
| Gi1_4059762_x3  | .....aacacggggugccgUacu                  | 1 |
| Gi5_8707934_x3  | .....gcUaguacugcgauccggagacguc           | 1 |

Gi3\_27918212\_x3.....aucGUagacgucguggga..... 1  
 Gi3\_27825473\_x3.....cgccUucaggccccgccaguacugc..... 1  
 Gi5\_8701061\_x3.....agacgucgugggaacacggggAgccgaacu..... 1  
 Gi2\_10803373\_x3.....agacgucgugggaacGcggggugccgaacu..... 1  
 Gi3\_27970472\_x3.....cgucaggccccgccagCacug..... 1  
 Gi3\_27948041\_x3.....ugggCacacggggugccgaa..... 1  
 Gi3\_27903476\_x3.....uacugcgaNcggagacguc..... 1  
 Gi2\_10736347\_x3.....cccgccaguacugcAaucggagac..... 1  
 Gi2\_10772284\_x3.....ucgugggaacaAggggugccgaacu..... 1  
 Gl1a\_5848867\_x3.....gugggaacacggggugccgaUcu..... 1  
 Gi4\_547791\_x3.....gGgggaacacggggugccgaac..... 1  
 Gi2\_10801150\_x3.....gaGgcgcgucagggccccgccagua..... 1  
 Gi3\_27840224\_x3.....acgucgugggaCcacggggugccgaac..... 1  
 Gi3\_27860627\_x3.....ggagacgucgugggaacG..... 1  
 Gi5\_8687252\_x3.....aucGUagacgucgugggaacacggggu..... 1  
 Gi2\_10787647\_x3.....ucaggccccgccCguacugc..... 1  
 Gi3\_27934151\_x3.....auAggagacgucgugggaacacggg..... 1  
 Gi2\_10780711\_x3.....ggagacgucgugggaacacggggugcU..... 1  
 Gi2\_10777615\_x3.....Uccgccaguacugcgauccggagacguc..... 1  
 Gi3\_27975020\_x3.....gacgucguNggaacacggggu..... 1  
 Gi3\_27921392\_x3.....Acccgccaguacugcgaucc..... 1  
 Gi3\_27861509\_x3.....ugggaacacggggugccUaa..... 1  
 Gi3\_27856031\_x3.....aggNccccccaguacugcg..... 1  
 Gi5\_8671334\_x3.....Gaggccccgccaguacugcgau..... 1  
 Gi3\_27821945\_x3.....aUgagaagcgccgucaggg..... 1  
 Gi1\_4075824\_x3.....cgugggaacacggggugccgaCc..... 1  
 Gi3\_27811694\_x3.....aUgaagagaagcgccguc..... 1  
 Gi1\_4064628\_x3.....cCucaggccccgccaguacugcg..... 1  
 Gi1\_4061133\_x3.....gugggaacacggggugccgaCc..... 1  
 Gi3\_27866408\_x3.....cccgccaguacugcgauccggCgacgu..... 1  
 Gi3\_27808355\_x3.....cgccaguacugcgauccggGgacgu..... 1  
 Gi2\_10733551\_x3.....agAcccgccaguacugcg..... 1  
 Gi2\_10821940\_x3.....gcgauccggagacgucgug..... 0  
 Gi3\_27869588\_x3.....cgucaggccccgccGguacugc..... 1  
 Gi2\_10788961\_x3.....ucggagacNucgugggaaca..... 1  
 Gi3\_27960779\_x3.....ggUgacgucgugggaacacggggugccg..... 1  
 Gi3\_27917177\_x3.....cgucgugggaacUcggggugccga..... 1  
 Gl1a\_5866222\_x3.....aucggagacgucgugggaG..... 1  
 Gi1\_4049220\_x3.....cgucUugggaacacggggugccgaacu..... 1  
 Gi3\_27826100\_x3.....ucggagacguUgugggaacacggggugcc..... 1  
 Gi3\_27829442\_x3.....acgucgugggaacUcggggugccgaacu..... 1  
 Gi1\_4071327\_x3.....agacgucgugggaacacAggggugccgaacu..... 1  
 Gi3\_27872246\_x3.....aAaagcgccgucagggccccgccagu..... 1  
 Gi3\_27971429\_x3.....cgucaggccccgccaguacuAc..... 1  
 Gi3\_27815444\_x3.....uggAaacacggggugccg..... 1  
 Gi3\_27836417\_x3.....cggagacgucGgggaacacggggu..... 1  
 Gi2\_10779235\_x3.....cccgccaguacCgcgauccg..... 1

Gi1a\_5854771\_x3.....aGcggagacgucgugggaacacggggug..... 1  
Gi1a\_5863201\_x3.....cCucaggccccgccaguacugc..... 1  
Gi2\_10807972\_x3.....ucgugggaacacggggUaccgaac..... 1  
Gi2\_10805773\_x3.....gugggaacacUgggugccg..... 1  
Gi3\_27947759\_x3.....gggaacacggggugGcgaac..... 1  
Gi2\_10757740\_x3.....aguacugcgauccggagacgCc..... 1  
Gi3\_27803168\_x3.....aagagGagcgccgucagggccccgcc..... 1  
Gi5\_8682353\_x3.....gacgucgugggaacGcggggugccgaacu..... 1  
Gi2\_10817035\_x3.....gaucggagacgucgugggaGcacggg..... 1  
Gi1a\_5828833\_x3.....gggaacaAggggugccgaacu..... 1  
Gi2\_10770448\_x3.....ccUucaggccccgccaguacugc..... 1  
Gi2\_10793179\_x3.....ucgugggaacacggggugccgaUcu..... 1  
Gi2\_10825000\_x3.....cgucUugggaacacggggugc..... 1  
Gi1a\_5842108\_x3.....caguacCgcgaucggagacguc..... 1  
Gi1\_4060617\_x3.....cgucgugggUacacggggugccgaacu..... 1  
Gi3\_27958811\_x3.....gaucggagacgucgugggaaUacg..... 1  
Gi2\_10820173\_x3.....ggaagagaagcgccgucagggccc..... 0  
Gi2\_10793458\_x3.....gucgugggaacacggggugAc..... 1  
Gi3\_27935345\_x3.....gaGcacggggugccgaacuu..... 1  
Gi2\_10821151\_x3.....aGgcgcccgucagggccccgccaguacugc..... 1  
Gi3\_27870185\_x3.....ucaggcUccgccaguacugc..... 1  
Gi5\_8689673\_x3.....gUacacggggugccgaac..... 1  
Gi3\_27967715\_x3.....Ugagacgucgugggaacacggggug..... 1  
Gi3\_27922160\_x3.....caggccccgAcaguacugc..... 1  
Gi2\_10798459\_x3.....Uucggagacgucgugggaacacggggugcc..... 1  
Gi2\_10745254\_x3.....gaucgAagacgucgugggaaca..... 1  
Gi5\_8706923\_x3.....gaacacggggugccgGac..... 1  
Gi2\_10772494\_x3.....aggccccgccaguacuCc..... 1  
Gi3\_27874235\_x3.....cgucgugggaaAacggggugccga..... 1  
Gi3\_27945371\_x3.....cgucAugggaaacacggggugccga..... 1  
Gi2\_10822879\_x3.....gucgugggaacacggggCgccg..... 1  
Gi3\_27962765\_x3.....ugggaacacgggCugccg..... 1  
Gi3\_27876755\_x3.....cCucaggccccgccaguacugc..... 1  
Gi1\_4059636\_x3.....ucguggUaacacggggugccgaacu..... 1  
Gi2\_10774417\_x3.....gggaacCcggggugccgaac..... 1  
Gi1a\_5853475\_x3.....gaacacggggugccgaCcu..... 1  
Gi3\_27920768\_x3.....gucgCgggaacacggggugc..... 1  
Gi1a\_5874043\_x3.....gugggaacacggggugccgaaU..... 1  
Gi2\_10747003\_x3.....aggcccUgccaguacugcga..... 1  
Gi1a\_5853190\_x3.....cgugggaacacggggugccgaacA..... 1  
Gi3\_27928865\_x3.....cgugggaacacggggugAcga..... 1  
Gi5\_8697986\_x3.....gggaacUcggggugccgaacu..... 1  
Gi3\_27956225\_x3.....Aacgucgugggaacacggggugccg..... 1  
Gi1\_4077195\_x3.....gacgucgugggaacacggggugccgCacu..... 1  
Gi3\_27802856\_x3.....aguacugcgauccggagacAucg..... 1  
Gi1\_4052358\_x3.....Ucgaucggagacgucgugggaaca..... 1  
Gi3\_27933758\_x3.....acgucgugggaacacggggugAc..... 1

Gi2\_10729075\_x3.....Acgucaggccccgccaguacugcg..... 1  
 Gi1\_4077852\_x3.....ugggCacacggggugccgaacu..... 1  
 Gi2\_10752502\_x3.....ggccccgccaguacCgcgauc..... 1  
 Gi1\_4085361\_x3.....ccccgccaguacugcgauccggagacguc..... 0  
 Gi2\_10772563\_x3.....caggUcccgccaguacugc..... 1  
 Gi2\_10826893\_x3.....caguacugcgCucggagacguc..... 1  
 Gi3\_27907856\_x3.....gGgaucggagacgucgugggaaca..... 1  
 Gi3\_27902123\_x3.....Ugggagacgucgugggaacacggggugccga..... 1  
 Gi1a\_5876332\_x3.....gugggaacacggggugccgUacu..... 1  
 Gi1a\_5815156\_x3.....cgugggaacacggggugccgGacu..... 1  
 Gi3\_27968975\_x3.....agaaUcgccgucagggccc..... 1  
 Gi2\_10797019\_x3.....gaucggagacgucgugggaacaAggg..... 1  
 Gi2\_10817542\_x3.....cgucgugggaacacggggugcUg..... 1  
 Gi1\_4055142\_x3.....cAggagacgucgugggaacacggggugcc..... 1  
 Gi3\_27947978\_x3.....ccccgccaguacugcgGucgg..... 1  
 Gi3\_27938075\_x3.....Uccgccaguacugcgauccggaga..... 1  
 Gi3\_27903353\_x3.....gacAucgugggaacacggggugccgaac..... 1  
 Gi1\_4048068\_x3.....gugAgaacacggggugccgaac..... 1  
 Gi3\_27978533\_x3.....gucgugggaacacgggAu..... 1  
 Gi1\_4059054\_x3.....gacgucgugggaGcacggggugccgaacu..... 1  
 Gi2\_10773808\_x3.....cgucgugggCacacggggugc..... 1  
 Gi3\_27931832\_x3.....caggccccgcUaguacugcgaucc..... 1  
 Gi2\_10742797\_x3.....gggaCcacggggugccgaac..... 1  
 Gi5\_8667236\_x3.....cgCgggaacacggggugccga..... 1  
 Gi2\_10737043\_x3.....gucgugggaacaAggggugccgaacu..... 1  
 Gi1\_4088247\_x3.....guacugcgNucggagacgucg..... 1  
 Gi3\_27833747\_x3.....Gagagaagcgccgucagggccc..... 1  
 Gi3\_27809198\_x3.....cgucguggAaacacggggugccgaac..... 1  
 Gi1\_4057707\_x3.....cgucgugggaacacgAgggugccgaacu..... 1  
 Gi2\_10746226\_x3.....ucgugggaacacggggugccga..... 0  
 Gi2\_10793869\_x3.....aucggagacgucgugggUacacggggu..... 1  
 Gi1\_4069623\_x3.....Gggagacgucgugggaacacggggugc..... 1  
 Gi1\_4072788\_x3.....cGgccaguacugcgauccggaga..... 1  
 Gi3\_27884573\_x3.....agaaUcgccgucagggccc..... 1  
 Gi5\_8671298\_x3.....ucggagacNucgugggaacacg..... 1  
 Gi3\_27806909\_x3.....ccUcgccaguacugcgauccggag..... 1  
 Gi3\_27827237\_x3.....Agccgucagggccccgccagu..... 1  
 Gi2\_10812430\_x3.....cgugggaacacgggAugccgaac..... 1  
 Gi2\_10769089\_x3.....gccaguacugcgauccggagacgC..... 1  
 Gi5\_8661548\_x3.....ugCgaacacggggugccgaacu..... 1  
 Gi2\_10760065\_x3.....guUggaacacggggugccgaacuu..... 1  
 Gi1a\_5824249\_x3.....gaacaUggggugccgaacu..... 1  
 Gi2\_10817935\_x3.....ucggagacgucgGgggaacacggggugcc..... 1  
 Gi2\_10787071\_x3.....gucgugggaacacgAgggugccgaac..... 1  
 Gi2\_10755100\_x3.....gccccgcUaguacugcgaucc..... 1  
 Gi1a\_5861968\_x3.....gugggaacacggCgugccgaacu..... 1  
 Gi1\_4084089\_x3.....gagacgucgugggGacacggggugccgaacu..... 1

Gi3\_27881789\_x3.....agUccccgccaguacugcgauccgga..... 1  
Gi2\_10814413\_x3.....caggcUccgccaguacug..... 1  
Gi3\_27975836\_x3.....ggccccgccaguacuAcgauc..... 1  
Gi3\_27977102\_x3.....guacugcgauccggCgacgucgug..... 1  
Gi1\_4076163\_x3.....gucgugggaaacacggAgugccgaacu..... 1  
Gi2\_10730686\_x3.....gUucggagacgucgugggaaacacggggugc..... 1  
Gi1\_4070628\_x3.....ugggaacaUggggugccgaac..... 1  
Gi2\_10759261\_x3.....acgucgugggaaacacggggugccgCac..... 1  
Gi2\_10744261\_x3.....gaucggagacgucgugggGacacg..... 1  
Gi3\_27815522\_x3.....ggaacacggggUccgaa..... 1  
Gi3\_27901088\_x3.....ucguggCaacacggggugccgaacu..... 1  
Gi2\_10782622\_x3.....ggagacgucgugggCacacggggugcc..... 1  
Gi1\_4086267\_x3.....agaagcgccgucagggccccgc..... 0  
Gi2\_10777042\_x3.....gacgucgugggaaacacggggugccgaaAu..... 1  
Gi2\_10754623\_x3.....cGcgccaguacugcgauccggaga..... 1  
G1a\_5852905\_x3.....gaagGgaagcgccgucag..... 1  
Gi3\_27869366\_x3.....cggagacgucgugggCaacacggggU..... 1  
Gi3\_27838670\_x3.....gggaacacggggGgccga..... 1  
Gi5\_8651753\_x3.....ucagggccccgccaguacCgcg..... 1  
Gi5\_8705045\_x3.....gaucggagacgucgugggGacacggg..... 1  
Gi3\_27856655\_x3.....cagggccccgccagCacugcgau..... 1  
Gi2\_10764361\_x3.....ucggagacgucgugggGacacg..... 1  
Gi2\_10798510\_x3.....gucgCgggaacacggggugc..... 1  
Gi3\_27821192\_x3.....cagggccUcgccaguacugcga..... 1  
Gi1\_4078071\_x3.....ugggaacacggggugccU..... 1  
Gi3\_27979094\_x3.....caggcUccgccaguacugcga..... 1  
Gi3\_27886427\_x3.....cguUgugggaacacggggugccg..... 1  
Gi5\_8652710\_x3.....cgugggaacacggggUaccgaac..... 1  
Gi3\_27844613\_x3.....cagggccccgccaguacugcgGucggagac..... 1  
Gi1\_4061787\_x3.....cgugggaaAacggggugccgaacu..... 1  
G1a\_5829595\_x3.....Gcggagacgucgugggaaacacgg..... 1  
Gi2\_10827661\_x3.....Ccagggccccgccaguacugc..... 1  
Gi1\_4066821\_x3.....ugggaacacggggugccgU..... 1  
Gi2\_10797766\_x3.....aggccccgccaguacugcgauccggagGcguc..... 1  
Gi3\_27938021\_x3.....cagggccccgccaguacugA..... 1  
Gi2\_10753744\_x3.....aagcgccgNcagggccccgccaguacu..... 1  
Gi3\_27923108\_x3.....agagaagcgccgucagggccccgccaguacugcg..... 0  
Gi5\_8679695\_x3.....guggAaacacggggugccga..... 1  
Gi1\_4056000\_x3.....ugggaacacggggugccgaaAu..... 1  
Gi3\_27835430\_x3.....aggccccgccaguacugcgaGc..... 1  
Gi3\_27866273\_x3.....gaucggagGcgucgugggaaacacgg..... 1  
Gi1\_4071414\_x3.....acgucgugggUacacggggugccgaacu..... 1  
Gi2\_10748392\_x3.....Gagcgccgucagggccccgccaguac..... 1  
Gi2\_10755529\_x3.....gagaagcgccgucagggccccgccagCac..... 1  
Gi3\_27866933\_x3.....gggaacacggggugccgaaG..... 1  
Gi3\_27841604\_x3.....Gcggaucggagacgucguggg..... 1  
Gi2\_10746589\_x3.....aucggagGcgucgugggaaac..... 1



Gi2\_10814737\_x3.....gaucggagacgucgugggaacacggggAgcc..... 1  
Gi2\_10769197\_x3.....acgucgugggCacacggggugcc..... 1  
Gi2\_10808470\_x3.....ugggaacaNggggugccgaacuu..... 1  
Gi3\_27859586\_x3.....aggcUccgccaguacugc..... 1  
Gi3\_27971567\_x3.....agagaagcNccgucaggcc..... 1  
Gi2\_10814824\_x3.....gccaguacugcgauccggGgacguc..... 1  
Gi3\_27974195\_x3.....Gcccgccaguacugcgauccggagacg..... 1  
Gi3\_27814334\_x3.....gggaacCcggggugccgaa..... 1  
Gi2\_10813876\_x3.....gUagacgucgugggaacacggggugccgaacu..... 1  
Gi3\_27853859\_x3.....cccgccaguacugcgauccggGg..... 1  
Gi4\_550683\_x3.....Gcgcugugggaacacggggugccgaacu..... 1  
Gi3\_27842909\_x3.....agGgaagcgcccgucaggccccgccc..... 1  
Gi2\_10802776\_x3.....ggaacUcggggugccgaa..... 1  
Gi5\_8668277\_x3.....cgugggaacacggggugccgaaA..... 1  
Gi2\_10732843\_x3.....cgugggaacacgAggugcc..... 1  
Gi1\_4072497\_x3.....acgucgugNgaacacggggugcc..... 1  
Gi1\_4081848\_x3.....ucgugggaacacggggCgccc..... 1  
Gi5\_8675246\_x3.....aucggagacgucgugggCacacg..... 1  
Gi3\_27902906\_x3.....gccgucaggccccgccaAuacugcg..... 1  
Gi2\_10752007\_x3.....cccgccaguacugcgauccggCgac..... 1  
Gi3\_27831995\_x3.....Gagagaagcgccgucaggccccgcca..... 1  
Gi2\_10813606\_x3.....Gcgugggaacacggggugc..... 1  
Gi3\_27965642\_x3.....gaucggagacgucgugggGacacggggugc..... 1  
G1a\_5818777\_x3.....cUaucggagacgucgugggaacacg..... 1  
Gi3\_27883538\_x3.....gacgucgugggaacacgggAugccg..... 1  
Gi1\_4068687\_x3.....gccgucaggccccgcccagCacu..... 1  
Gi3\_27921194\_x3.....agacgucgugggaacacggggugccg..... 0  
Gi2\_10744240\_x3.....acgucgugNgaacacggggg..... 1  
Gi2\_10788781\_x3.....cgugggaacGcggggugccgaa..... 1  
G1a\_5841190\_x3.....acGgcgaucggagacgucgug..... 1  
Gi3\_27796256\_x3.....cgauccggagacgucgugggaacCcgc..... 1  
Gi5\_8673617\_x3.....cgugggCacacggggugccgaa..... 1  
Gi1\_4064256\_x3.....cgccaguacugcgaCcggaga..... 1  
G1a\_5857033\_x3.....Gaggccccgcccaguacugcg..... 1  
Gi2\_10772716\_x3.....gccccgcccaguacuAcgauc..... 1  
Gi3\_27833243\_x3.....Gcacggggugccgaacuu..... 1  
G1a\_5835199\_x3.....ugggaacacgggAugccgaacu..... 1  
Gi2\_10773517\_x3.....Gggccccgcccaguacugcgauccg..... 1  
Gi1\_4078482\_x3.....gagacgCcgguggaacacggggugccgaacu..... 1  
Gi3\_27835448\_x3.....gucgugggNacacggggugc..... 1  
Gi5\_8716988\_x3.....gggaacacgggAugccgaac..... 1  
Gi3\_27908006\_x3.....cAccaguacugcgauccggagacgu..... 1  
Gi1\_4080531\_x3.....auUggagacgucgugggaacacg..... 1  
Gi2\_10757023\_x3.....ugggaacacggggugccgaaU..... 1  
Gi3\_27958469\_x3.....aucggagacUucgugggaacacggggugcc..... 1  
Gi2\_10815637\_x3.....gacgucgugggaacacgAggugcc..... 1  
Gi1\_4073469\_x3.....cgauccggagacgucgugggGacacggggg..... 1

Gi3\_27952970\_x3.....gUccccgccaguacugcgauccggagacg..... 1  
 Gi1\_4084743\_x3.....acgucguggggaacaUggggugccgaacu..... 1  
 Gi3\_27809510\_x3.....gaucggagacgucgugggaaacCcggggugc..... 1  
 Gi2\_10763998\_x3.....ggagacguNgugggaaacacggggugc..... 1  
 Gi3\_27947858\_x3.....agGacugcgauccggagacguc..... 1  
 Gi5\_8709332\_x3.....ucgugggaaacacggggugccgCac..... 1  
 Gi5\_8693252\_x3.....guUgugggaaacacggggugc..... 1  
 Gi5\_8668460\_x3.....cgucgugggaaacacggggugccgUacu..... 1  
 Gi5\_8705129\_x3.....acgucgugggaaUacggggugccgaacu..... 1  
 Gi2\_10780513\_x3.....gccccgccaguacugcgauccggGgacguc..... 1  
 Gi2\_10740928\_x3.....aucggaAacgucgugggaaacacggggg..... 1  
 Gi2\_10813573\_x3.....cgugggaaacaAggggugccgaac..... 1  
 Gi3\_27848738\_x3.....gacgucAugggaaacacggggugccgaac..... 1  
 Gi3\_27819212\_x3.....gagaagcgcgucagggcc..... 0  
 Gi5\_8709968\_x3.....agacgucgugggaaacacgggggUaccgaacu..... 1  
 Gi3\_27921842\_x3.....ucagUccccgccaguacugc..... 1  
 Gi3\_27961268\_x3.....aagagaagNgccgucagggccccgccc..... 1  
 Gi3\_27905240\_x3.....Uagaagcgcgucagggccccgccaguacug..... 1  
 Gi3\_27866264\_x3.....agacgucgugggaaacacggggugccgaGcu..... 1  
 Gi5\_8708045\_x3.....cCugggaaacacggggugccga..... 1  
 Gl1a\_5875237\_x3.....Uaguacugcgauccggagacguc..... 1  
 Gi2\_10796569\_x3.....ccccgccaguGcugcgaucc..... 1  
 Gi2\_10795438\_x3.....cggagGcgucgugggaaacacggggg..... 1  
 Gl1a\_5857822\_x3.....Ggagaagcgcgucagggcccc..... 1  
 Gi2\_10811308\_x3.....cagggccccgccaguacugUgauc..... 1  
 Gi2\_10780096\_x3.....gUagcgcgucagggccccgccaguacugc..... 1  
 Gi1\_4072122\_x3.....aUugcgauccggagacgucg..... 1  
 Gl1a\_5859112\_x3.....ugcgauccggGgacgucgu..... 1  
 Gi2\_10743559\_x3.....cagggccccgccaguacugcAauc..... 1  
 Gi3\_27975059\_x3.....gucagggccccgccaguacugAg..... 1  
 Gi2\_10758526\_x3.....acgucgugggaaacacgggggUgGcgaacu..... 1  
 Gi5\_8705969\_x3.....aagagaagcgcgucagggccccgccaguacug..... 0  
 Gi1\_4088715\_x3.....gaacacggggugccUaacu..... 1  
 Gi2\_10765219\_x3.....cgucgugggaaacacggggugccC..... 1  
 Gi2\_10790221\_x3.....aucggagacgucUugggaaac..... 1  
 Gi5\_8659343\_x3.....gugggaaacacgggUugccgaacu..... 1  
 Gi3\_27910634\_x3.....gggaacacggggugccCaac..... 1  
 Gl1a\_5859121\_x3.....gucgugggaaGcacggggugccgaacu..... 1  
 Gi2\_10806292\_x3.....cgucgugggaaCcacggggugccg..... 1  
 Gi3\_27834506\_x3.....ccccgccaguacCcgauccggagacgu..... 1  
 Gi2\_10811866\_x3.....gacgucgugggaaacacAgggugcc..... 1  
 Gi2\_10735897\_x3.....gaucggaAacgucgugggaaacacggg..... 1  
 Gi2\_10812781\_x3.....cguAggaacacggggugc..... 1  
 Gi2\_10776541\_x3.....uAggaacacggggugccgaa..... 1  
 Gi3\_27845351\_x3.....gucgugggGacacggggugc..... 1  
 Gi3\_27839084\_x3.....gaucggagacgucgugggGac..... 1  
 Gi3\_27801377\_x3.....gacgucgugggaaacacggggugccgaacG..... 1

Gi2\_10783819\_x3.....gacgucgugggaacacggggAgcc..... 1  
 Gi2\_10818001\_x3.....gGacugcgaucggagacgucgugggaaca..... 1  
 Gl1a\_5818843\_x3.....cgccaguacugcgauccgagacgucgugg..... 0  
 Gi2\_10766299\_x3.....acgucgugggaacacgggAugccgaacu..... 1  
 Gi3\_27945755\_x3.....gGucggagacgucgugggaac..... 1  
 Gl1a\_5865688\_x3.....gucgugggaacacggggugccgCac..... 1  
 Gi2\_10739329\_x3.....ccUucaggccccgccaguacugc.....acgucgugAgaacacggggugccgaacu..... 1  
 Gi2\_10767076\_x3.....ccUucaggccccgccaguacugc.....gucgugUgaacacggggugccgaacu..... 1  
 Gi3\_27871880\_x3.....gaagagaagcgccgucUggccccgc.....gucgugUgaacacggggugccgaacu..... 1  
 Gi3\_27896018\_x3.....aggcccAgccaguacugc..... 1  
 Gi3\_27831047\_x3.....ucaggccccgccagAacugc..... 1  
 Gi3\_27811781\_x3.....cgugggaacacggggCgccga..... 1  
 Gi5\_8707220\_x3.....ccccgccaguCcuycgauc..... 1  
 Gi2\_10802644\_x3.....cgucgugggaacacggggugUcgaac..... 1  
 Gi3\_27824276\_x3.....aucggagacgucgugggaaAacggggu..... 1  
 Gi2\_10740643\_x3.....acCgcgaucggagacgucgu..... 1  
 Gi2\_10782319\_x3.....ucaggccccNgccaguacugc..... 1  
 Gi3\_27838736\_x3.....cgugggaacacggggugA..... 1  
 Gi2\_10801885\_x3.....ggccccgccaguacugAgauc..... 1  
 Gi2\_10818118\_x3.....ucaggccccgccaguGcuycgauc..... 1  
 Gi3\_27827036\_x3.....gucguggCaacacggggugccgaacu..... 1  
 Gi2\_10773031\_x3.....cgucgugggaacacggggCgcc..... 1  
 Gi1\_4062510\_x3.....agacgucgugggaacacggggugccgaacG..... 1  
 Gi3\_27824693\_x3.....ucgugggaacacggggGgccgaac..... 1  
 Gi5\_8682854\_x3.....gaagagaaNcgccgucaggccc.....cgGcugugggaacacggggugccgaac..... 1  
 Gi2\_10779181\_x3.....gggaacacggggugccgUac..... 1  
 Gi2\_10828048\_x3.....cgauccggagGcugcugggaacacg..... 1  
 Gi5\_8668676\_x3.....cgugggaaUacggggugccga..... 1  
 Gi3\_27878600\_x3.....agcgccgucaggccccgccGgu..... 1  
 Gi2\_10786963\_x3.....gugggaacacggggugccgaC..... 1  
 Gi3\_27816626\_x3.....ccgcUaguacugcgauccgagac..... 1  
 Gi5\_8693672\_x3.....acgucguggUaacacggggugccgaac..... 1  
 Gi3\_27897275\_x3.....ggaacacgNggugccgaac..... 1  
 Gl1a\_5863120\_x3.....ucggGgacgucgugggaacacggggugccga..... 1  
 Gi2\_10805320\_x3.....acgAcgugggaacacggggugccgaacu..... 1  
 Gi5\_8675609\_x3.....aggccccgAcaguacugcga..... 1  
 Gi3\_27840503\_x3.....gGucggagacgucgugggaacac..... 1  
 Gi5\_8686865\_x3.....aaagGagcgccgucaggc..... 1  
 Gi3\_27901907\_x3.....gaacacgggguAccgaac..... 1  
 Gi3\_27879392\_x3.....uacugcgauccgagacguc..... 0  
 Gi2\_10793011\_x3.....Gcccgccaguacugcgau..... 1  
 Gi2\_10772842\_x3.....guAgugggaacacggggugccgaac..... 1  
 Gi3\_27912560\_x3.....cGuuaacucguuccgaau..... 1  
 Gi2\_10794748\_x3.....gucaggccccgccGguacug..... 1  
 Gi3\_27911024\_x3..... 1  
 Gi3\_27976805\_x3.cGuuaacucguuccgaau..... 1

Gi2\_10734847\_x3.....cgugggaacacggggugccA..... 1  
 Gi1\_4079916\_x3.....ugggaacacggggugccgaGc..... 1  
 Gi2\_10798342\_x3.....gaucggCgacgucguggga..... 1  
 Gi2\_10770409\_x3.....gaaAacggggugccgaacu..... 1  
 Gi3\_27905858\_x3.....cgucgugggaacacAgggugccg..... 1  
 Gi3\_27942215\_x3.....ggaacacUggggugccgaac..... 1  
 Gi3\_27922844\_x3.....agggcccgcaguaUugcga..... 1  
 G1a\_5841409\_x3.....aacacggggugccgGacu..... 1  
 Gi1\_4055745\_x3.....ucgugggaaAacggggugccgaacu..... 1  
 Gi2\_10822171\_x3.....cgugggaacacggggugGcgaac..... 1  
 Gi3\_27928607\_x3.....cgNgggaacacggggugcc..... 1  
 Gi1\_4055781\_x3.....cggagacgucgugggaacacggggugccga..... 0  
 Gi3\_27943727\_x3.....gGacugcgaucggagacguc..... 1  
 Gi2\_10770733\_x3.....cggagacgucgugggaacacAgggugc..... 1  
 Gi3\_27892274\_x3.....gaCcgagacgucgugggaacacgg..... 1  
 Gi2\_10824391\_x3.....ucagggcccNgccaguaucg..... 1  
 Gi3\_27949763\_x3.....aucggagacgucgugggaacGcggggugc..... 1  
 Gi3\_27807944\_x3.....cgucgugggaacacggggAugccga..... 1  
 Gi2\_10779133\_x3.....ggagacAucgugggaacacggggugcc..... 1  
 Gi2\_10729795\_x3.....cgugAgaacacggggugc..... 1  
 Gi2\_10750867\_x3.....ggaGcacggggugccgaa..... 1  
 Gi5\_8715878\_x3.....gucgugggaacaAgggugccgaacu..... 1  
 Gi5\_8685881\_x3.....caAgccccgccaguaucgcg..... 1  
 Gi2\_10778554\_x3.....ggagacgucgugggaacacggggugAc..... 1  
 Gi1\_4088400\_x3.....Ggacgucgugggaacacggggugcc..... 1  
 Gi1\_4080093\_x3.....cgugggUacacggggugccgaacu..... 1  
 Gi3\_27857159\_x3.....Ngggaacacggggugccgaa..... 1  
 Gi3\_27819560\_x3.....agagaagcgccgucagggcccgcU..... 1  
 Gi2\_10765099\_x3.....aagagaagNgccgucagggccc..... 1  
 Gi3\_28022860\_x2.....Gccgccaguaucggaucggagacgucgug..... 1  
 Gi5\_8827533\_x2.....cccgccaguaucggauc..... 0  
 Gi5\_8808971\_x2.....ucggagacgucgugggaaAacg..... 1  
 Gi3\_28183104\_x2.....cgucagggcccgcaguaucgAg..... 1  
 Gi3\_28076344\_x2.....Ccgagacgucgugggaaca..... 1  
 G1a\_5878350\_x2.....auUggagacgucgugggaacacg..... 1  
 G1a\_5925060\_x2.....gggaacacggggugccga..... 0  
 Gi1\_4115209\_x2.....ugggaacacggggCgccaac..... 1  
 Gi5\_8736497\_x2.....acgucgugggaacacggggugccgUacu..... 1  
 Gi2\_10854459\_x2.....gacgucguAggaacacggggugccg..... 1  
 Gi3\_28258888\_x2.....cgucGggccccgccaguaucgcg..... 1  
 Gi2\_10982197\_x2.....cggagacgucgugggaCcacggggu..... 1  
 Gi2\_10985337\_x2.....ugggaCcacggggugccga..... 1  
 Gi1\_4156279\_x2.....Ccgugggaacacggggugccgaac..... 1  
 Gi3\_27999944\_x2.....cgugggaacacggAgugc..... 1  
 Gi2\_10862497\_x2.....agacgucgugggaacGcggggugc..... 1  
 Gi2\_10873517\_x2.....gUagcgccgucagggccc..... 1  
 Gi3\_28189658\_x2.....gaagagaCgcgccgucagg..... 1

Gi3\_28014822\_x2.....agggccccccagacuugcgGucggagacguc..... 1  
 Gi4\_561576\_x2.....gugggGacacggggugccgaacu..... 1  
 Gi2\_10982777\_x2.....ugggaacacgggUugccg..... 1  
 Gi2\_10842157\_x2.....aucggagacgucgugggaacacCgggugc..... 1  
 Gi5\_8817981\_x2.....gugggaacaUggggugccg..... 1  
 Gi2\_10831743\_x2.....gUcgucagggccccccagacuugcg..... 1  
 Gi3\_28071144\_x2.....aggaagagaagcgccgucagg..... 0  
 Gi3\_28123122\_x2.....Uguacugcgauccggagacgucgug..... 1  
 Gi3\_28004550\_x2.....gucgugggaacacAgggugc..... 1  
 Gi3\_28178882\_x2.....cgggagacgucgCgggaacacggggugccgaacu..... 1  
 Gi3\_28053948\_x2.....Gggagacgucgugggaacacggggugccgaa..... 1  
 Gi5\_8774735\_x2.....gaucggagacgucgugggaacCcg..... 1  
 Gi2\_10983489\_x2.....ggCaacacggggugccgaacu..... 1  
 Gi3\_28259664\_x2.....gaucggagacgucgugggaacacggggCgc..... 1  
 Gi5\_8734129\_x2.....aucggCgacgucgugggaacacggg..... 1  
 Gi2\_10984425\_x2.....ccagacuugcgGucggagacg..... 1  
 Gi2\_10972641\_x2.....gaucggagGcgucgugggaacacggggug..... 1  
 Gi1\_4146839\_x2.....gaucggagacgucgugggaacacggggugcc..... 0  
 Gi1\_4136725\_x2.....aucggagacAucgugggaacacg..... 1  
 Gi2\_10848447\_x2.....aucggagacgucgugggaaAacggggugcc..... 1  
 Gi1\_4091635\_x2.....caggccccccCguacugc..... 1  
 Gi5\_8824001\_x2.....caggcccUgccagacuug..... 1  
 Gi2\_10947099\_x2.....ucgugggaacaAggggugccgaac..... 1  
 Gi3\_28161648\_x2.....Ggaucggagacgucgugg..... 1  
 Gi3\_28010846\_x2.....cUccgccagacuugcgauccggag..... 1  
 Gi2\_10850269\_x2.ccuuaacucguucAgaau..... 1  
 Gi2\_10887823\_x2.....ccccccaNuacugcgauccggagacguc..... 1  
 Gi1\_4113187\_x2.....cgucgugggGacacggggugccgaac..... 1  
 Gi2\_10877343\_x2.....cguUgugggaacacggggugcc..... 1  
 Gi3\_28197740\_x2.....caguacugcgGucggagacgucgug..... 1  
 Gi3\_28132520\_x2.....agacgucgugggaacaGggggugccgaacu..... 1  
 Gi1\_4146213\_x2.....aucggagacgucgugggaac..... 0  
 Gi2\_10955441\_x2.....gGcaggccccccagacuugcgau..... 1  
 Gi5\_8771285\_x2.....agaUgucgugggaacacggggugccgaacu..... 1  
 Gi2\_10977443\_x2.....ucgggagacgucgCgggaaca..... 1  
 Gi3\_28246504\_x2.....aagcgccguUaggccccccagua..... 1  
 Gi3\_27980346\_x2.....aggccccccGguacugcgauccgga..... 1  
 Gi2\_10969407\_x2.....acUucgugggaacacggggugc..... 1  
 Gi2\_10919265\_x2.....caggcUccgccagacuugcgau..... 1  
 Gi2\_10870367\_x2.....ucgugggaacCggggugccgaa..... 1  
 Gi5\_8724157\_x2.....cgucgugggaacacggggugccgaaUu..... 1  
 Gi4\_561212\_x2.....acgucgugggaacacggggCgccgaacu..... 1  
 Gi3\_28225976\_x2.....gccgucagAccccccagacu..... 1  
 Gi3\_28069370\_x2.....gccccccagucgucgau..... 1  
 Gi3\_28042172\_x2.....gggaacGcggggugccga..... 1  
 Gi2\_10890049\_x2.....cgucgugggaacacggggugA..... 1  
 Gl1a\_5946438\_x2.....ugggaacaUggggugccgaacu..... 1

Gi3\_28085154\_x2.....ugggaacacggggugccCa..... 1  
 Gi3\_28256428\_x2.....aggccccgccaguaAugc..... 1  
 Gi2\_10895775\_x2.....cccgUaguacugcgauccg..... 1  
 Gi2\_10828759\_x2.....aucggagacgucgGgggaacac..... 1  
 G1a\_5896378\_x2.....cgaucggagacgCcgugg..... 1  
 Gi5\_8745247\_x2.....cUccaguacugcgauccggagacguc..... 1  
 Gi2\_10969453\_x2.....ggaacacgggCugccgaac..... 1  
 Gi5\_8732055\_x2.....caguacugcgaCcgagacgucgug..... 1  
 Gi3\_28136140\_x2.....aagagGagcgccgucagggccccgcca..... 1  
 Gi2\_10912911\_x2.....ugggaacacggggCgccga..... 1  
 Gi3\_28048970\_x2.....aucggagUcgucgugggaacacggg..... 1  
 Gi2\_10864805\_x2.....gucgugggaacacggggugUc..... 1  
 Gi5\_8749845\_x2.....gagGcgucgugggaacacggggugcc..... 1  
 Gi5\_8755197\_x2.....gaucggagacgucgugggaGcacg..... 1  
 Gi3\_28199844\_x2.....agacgucgAggggaacacggggugccgaac..... 1  
 Gi2\_10847225\_x2.....guUaggccccgccaguacugcgau..... 1  
 Gi2\_10891101\_x2.....gaagagaagcgccgucUggccccgcc..... 1  
 G1a\_5925150\_x2.....Aucaggccccgccaguacugcg..... 1  
 Gi3\_28201286\_x2.....ccccgccaAuacugcgau..... 1  
 Gi3\_28041280\_x2.....gagaUgucgugggaacacggggugccgaacu..... 1  
 Gi3\_28006960\_x2.....cgugggaacaAggggugccga..... 1  
 Gi3\_28078720\_x2.....cgccgucagggUccgccaguacugc..... 1  
 Gi2\_10873155\_x2.....uacugcgauccggagacgucgugggaacacgggg..... 0  
 Gi3\_28096382\_x2.....gCagacgucgugggaacacggggugcc..... 1  
 Gi5\_8775393\_x2.....gugggaGcacggggugccgaacu..... 1  
 Gi2\_10874309\_x2.....ugggaacacggggugccgUac..... 1  
 Gi2\_10847465\_x2.....gacgucgugggaacacggggugccgaGc..... 1  
 Gi2\_10914149\_x2.....ucgugggaacacggggugccgUac..... 1  
 Gi3\_28127304\_x2.....cccgCAaguacugcgauccggagacguc..... 1  
 Gi1\_4098987\_x2.....ccccgccaguacugcgau..... 1  
 Gi2\_10931091\_x2.....ccgucagggccccgccCguacugc..... 1  
 Gi2\_10851365\_x2.....aggUccgccaguacugcgau..... 1  
 Gi3\_28121338\_x2.....ccgccaguacugcgGucggagacguc..... 1  
 G1a\_5883442\_x2.....gccaguacugcgauccggagGcguc..... 1  
 Gi2\_10961947\_x2.....gUcgucgugggaacacggggugcc..... 1  
 Gi3\_28039174\_x2.....ucggagacgucgugggaacCcgggugcc..... 1  
 Gi2\_10835319\_x2.....aAacgucgugggaacacggggugcc..... 1  
 Gi5\_8736743\_x2.....uGugggaacacggggugcc..... 1  
 Gi3\_28191284\_x2.....ugcgauccggagacgucgugggaacGcg..... 1  
 Gi2\_10843689\_x2.....cgucgugggaacacAgggugcc..... 1  
 Gi3\_27989896\_x2.....agAccccgccaguacugcgau..... 1  
 Gi3\_27990978\_x2.....cgaucggaNacgucgugggaacacg..... 1  
 Gi3\_28260530\_x2.....aucggagacgucguggAa..... 1  
 Gi1\_4133177\_x2.....Ggcgccgucagggccccgccaguacugc..... 1  
 Gi2\_10886591\_x2.....gggaacacggggugccgaacAu..... 1  
 Gi3\_28017160\_x2.....ggagacgucgugggaacacggggAgcc..... 1  
 Gi1\_4093767\_x2.....caggccccgccaguacCgcgauc..... 1

Gi3\_28166790\_x2.....agggcccgGaguacugcgauC..... 1  
G1a\_5933460\_x2.....cgugggaacacggggugcAgaacu..... 1  
G1a\_5979912\_x2.....gccaguacugcgGucggagacguc..... 1  
Gi2\_10920459\_x2.....ucgugggaacacggCgugccgaacu..... 1  
G11\_4102039\_x2.....gugggaacacggggGgcc..... 1  
Gi3\_28064246\_x2.....caguacugNgaucggagacguc..... 1  
Gi5\_8735085\_x2.....cgucgugggaacaGggggugccgaacu..... 1  
Gi3\_28098096\_x2.....agggcccgccaguacugcgCcgagacguc..... 1  
Gi2\_10965771\_x2.....ugcgauCggagacgucgugggGaca..... 1  
Gi2\_10941579\_x2.....gaagagaagcgccgucCggcccgcc..... 1  
Gi5\_8773587\_x2.....cgGcgugggaacacggggugc..... 1  
G1a\_5954878\_x2.....guUggaacacggggugccg..... 1  
Gi5\_8812499\_x2.....guAggaacacggggugccgaa..... 1  
G11\_4140677\_x2.....cgucgugggCacacggggugccgaacu..... 1  
Gi3\_28113002\_x2.....cgauCggagacgucgugggaacacggggC..... 1  
Gi2\_10873873\_x2.....cgauCggCgacgucgugggaacacggg..... 1  
Gi3\_28145044\_x2.....cgauCggagacgucgugggaacacggggGgc..... 1  
Gi2\_10911613\_x2.....ccccCccaguacugcgauC..... 1  
Gi3\_28233944\_x2.....gGcaguacugcgauCggagac..... 1  
G11\_4112383\_x2.....gugggaacGcggggugccgaacu..... 1  
Gi5\_8793035\_x2.....gauCggagacgucgugggaacacggggG..... 1  
Gi3\_28002992\_x2.....Ncgugggaacacggggugccgaac..... 1  
Gi5\_8800917\_x2.....gugggaacacggggUaccga..... 1  
Gi2\_10916003\_x2.....AccaguacugcgauCggagacgucgug..... 1  
Gi2\_10940923\_x2.....gauCggagacgucgugggCac..... 1  
Gi3\_28064928\_x2.....agaagcAccgucagggcccgcc..... 1  
Gi2\_10830543\_x2.....CcgauCggagacgucgugggaacacg..... 1  
Gi5\_8731341\_x2.....gauCggagacgucgugggCacacggg..... 1  
Gi3\_28011902\_x2.....gaUacgucgugggaacacggggugccgaacu..... 1  
G11\_4099757\_x2.....ggccccgccaguacugcgau..... 0  
G11\_4117687\_x2.....ugggaacGcggggugccgaac..... 1  
Gi5\_8741455\_x2.....gucgugggaacacggggugccgaUcu..... 1  
Gi3\_28212490\_x2.....gaagagaagAgccgucagggccc..... 1  
G1a\_5879178\_x2.....ugcgauCggagacgCcgU..... 1  
Gi3\_28184338\_x2.....agcgccgucagggcccgUagu..... 1  
Gi2\_10860131\_x2.....gucguggAaacacggggugcc..... 1  
Gi2\_10893201\_x2.....ugggaacacggggugcUg..... 1  
G1a\_5876456\_x2.....caguacugcgGucggagacgu..... 1  
Gi2\_10841581\_x2.....gacgucgugggaacacggggugcUgaacu..... 1  
Gi3\_28118444\_x2.....cgccgucagggUcccgccaguacugc..... 1  
Gi5\_8808277\_x2.....gacgucguggAaacacggggugccgaacu..... 1  
Gi5\_8793475\_x2.....caguacugNgaucggagacgucgug..... 1  
Gi3\_28122468\_x2.....gagacgucgCgggaacacggggugccgaacu..... 1  
Gi2\_10856515\_x2.....gucagggccccgccaguacugcgauCgg..... 0  
Gi5\_8736069\_x2.....gugggaacacgAggugccga..... 1  
G11\_4137813\_x2.....cgucgAgggaacacggggugccgaac..... 1  
Gi3\_28003308\_x2.....cUgccaguacugcgauCggagacg..... 1

Gi3\_28109550\_x2.....gaacaAggggugccgaac..... 1  
 Gi2\_10883349\_x2.....gaucggagacgucguggAaacacggggu..... 1  
 Gi2\_10842913\_x2.....aucggagacgucguggaaUa..... 1  
 Gi3\_28160628\_x2.....caggccccgccaguacGcgca..... 1  
 Gi3\_28079076\_x2.....aucggagacgucgAgggaacacg..... 1  
 Gi5\_8786199\_x2.....gaucggagNcgucgugggaacac..... 1  
 Gi3\_28058118\_x2.....aucCgagacgucgugggaacacggg..... 1  
 Gi5\_8788397\_x2.....ccgccaguacugcgau..... 0  
 Gi2\_10957855\_x2.....cgugggaacacggggugUcgaa..... 1  
 Gi3\_28194944\_x2.....acgucguggCaacacggggugccgaacu..... 1  
 Gi2\_10945441\_x2.....gacgucguAgggaacacggggugccgaacu..... 1  
 Gi2\_10833201\_x2.....aggccccgccaguacCgc..... 1  
 Gi3\_28058006\_x2.....ccAccaguacugcgau..... 1  
 Gi4\_557642\_x2.....aucggagacgucgugggaacacggggugcA..... 1  
 Gi3\_28074714\_x2.....cggagacgucgugggaacacggggAgcc..... 1  
 Gi3\_28094822\_x2.ccuuaacCcgucgaaau..... 1  
 Gi2\_10986465\_x2.....gucgugggaacacggggugccgUac..... 1  
 Gi3\_28221870\_x2.....ccUcgccaguacugcgau..... 1  
 Gi3\_28218664\_x2.....Ggucagggccccccagua..... 1  
 Gi4\_567214\_x2.....cgugAgaacacggggugccgaacu..... 1  
 Gi1\_4139775\_x2.....ucggagacgucgugggCacacg..... 1  
 Gi3\_28043190\_x2.....gcccAgccaguacugcgau..... 1  
 Gi3\_28141550\_x2.....ucgugggaacacggggugcGgaac..... 1  
 Gi3\_28035250\_x2.....acacUgggugccgaacuu..... 1  
 Gi2\_10829843\_x2.....aAcgcccugacggccccgccaguacugc..... 1  
 Gi2\_10872461\_x2.....aggccccgccaguacugcA..... 1  
 Gi1\_4153287\_x2.....gaacacggggugccgaacuC..... 1  
 G1a\_5889334\_x2.....aagagaagcgccgucagggcUcg..... 1  
 Gi3\_28143604\_x2.....aagagaGggccgucagggccccgcc..... 1  
 Gi1\_4106965\_x2.....cggagGcgucgugggaacacggggugcc..... 1  
 Gi3\_28173636\_x2.....ucgAagacgucgugggaacacggggugcc..... 1  
 Gi5\_8804625\_x2.....caggccccgccCguacugc..... 1  
 Gi3\_28006432\_x2.....Uagcgccgucagggccccgccaguacugc..... 1  
 Gi5\_8796891\_x2.....aucggagacguUgugggaacacg..... 1  
 Gi2\_10990889\_x2.....gacgucgCgggaacacggggu..... 1  
 Gi3\_28216682\_x2.....Ccgugggaacacggggugccg..... 1  
 Gi5\_8826279\_x2.....gugggaacacgggAugccgaac..... 1  
 Gi3\_28105810\_x2.....gcUaguacugcgau..... 1  
 Gi2\_10839745\_x2.....gacgucgugggaacacgAggugccgaac..... 1  
 Gi2\_10878065\_x2.....cgugggaacacgUggugccg..... 1  
 G1a\_5906790\_x2.....aucggGgacgucgugggaacacggg..... 1  
 Gi2\_10852085\_x2.....gagaagcgccgucGggccccgc..... 1  
 Gi3\_28161622\_x2.....cgucaggUcccgccaguacugc..... 1  
 Gi3\_28211234\_x2.....cagCccccgccaguacugcgau..... 1  
 Gi5\_8817963\_x2.....cgccaguaNugcgauccgagacguc..... 1  
 Gi1\_4089943\_x2.....ugggaUcacggggugccgaacu..... 1  
 Gi5\_8754949\_x2.....gGgacgucgugggaacacggggugcc..... 1



Gi3\_28086938\_x2.....gaagagaagcAccgucag..... 1  
Gi3\_28053398\_x2.....ggagacgucgugggaacacggggugccAaa..... 1  
Gi3\_28013432\_x2.....gccaguacNcggaucggagacg.....ggaacacgggugccAaa..... 1  
Gi3\_28121946\_x2.....cgugggaacacggCgugccgaac..... 1  
Gi1\_4118323\_x2.....cggagacgucgugggaacacgggAugcc..... 1  
Gi2\_10956831\_x2.....cgucgugggaacacggggAgccga..... 1  
Gi3\_28249762\_x2.....cgccaguGcugcgaucggagacgucgug..... 1  
Gi3\_28009436\_x2.....auAggagacgucgugggaacacggggg..... 1  
Gi4\_554284\_x2.....gucgugggaGcacggggugccgaacu..... 1  
Gi3\_28067138\_x2.....aggccccgccaguaUugcgaucgga..... 1  
Gi2\_10955117\_x2.....gccgucagggUccgccaguacugcg..... 1  
Gi1\_4153625\_x2.....gugggaacacggggugccgaGu..... 1  
Gi2\_10960639\_x2.....gggaacacgggCugccgaac..... 1  
Gi2\_10991397\_x2.....cggaCacgucgugggaacacggggugc..... 1  
Gi2\_10948839\_x2.....cggagacgNcgugggaacac..... 1  
Gi5\_8827979\_x2.....Ggggaacacggggugccga..... 1  
Gi3\_28244302\_x2.....agacgucgugggaacacggggAgccgaacu..... 1  
Gi5\_8815343\_x2.....Gacggggugccgaacu..... 1  
Gi1\_4105933\_x2.....gugggaacacggUgugcc..... 1  
Gi1a\_5920836\_x2.....ugggaacacggggugccgUacu..... 1  
Gi1\_4155857\_x2.....cgugggaGcacggggugccgaac..... 1  
Gi2\_10833919\_x2.....cGgccaguacugcgaucggag..... 1  
Gi3\_28233618\_x2.....aguacugcgaucggagacgucgAg..... 1  
Gi4\_554166\_x2.....uGugggaacacggggugccgaacu..... 1  
Gi2\_10833047\_x2.....cgucgugggaacacggAgugc..... 1  
Gi3\_28150550\_x2.....agacgucgCgggaacacggggugcc..... 1  
Gi1\_4135245\_x2.....cccgccaguacugcgaucggagac..... 0  
Gi5\_8724223\_x2.....gGgaagcgccgucagggccccgccaguacug..... 1  
Gi2\_10880177\_x2.....gccgucagggccccgccaguacCgcg..... 1  
Gi3\_28184548\_x2.....ucaggccccgccaguacugcgauU..... 1  
Gi3\_28014618\_x2.....agcgccgucagggccccAccagu..... 1  
Gi3\_28162096\_x2.....agacgucguAggaacacggggugcc..... 1  
Gi3\_28136910\_x2.....ccccgccaguacugcgaCc..... 1  
Gi3\_28203016\_x2.....gacguUgugggaacacggggugccgaac..... 1  
Gi3\_28184136\_x2.....gGagagaagcgccgucagggccccgccagu..... 1  
Gi3\_28248718\_x2.....ucaggccccgccaguacuAcgauc..... 1  
Gi2\_10989293\_x2.....gacgucgugggaacacgggAugccgaacu..... 1  
Gi4\_560684\_x2.....gCacugcgaucggagacgucgugg..... 1  
Gi1\_4100463\_x2.....aUgccccgccaguacugc..... 1  
Gi5\_8755267\_x2.....gugggaacacggggugccAaacuu..... 1  
Gi3\_28228276\_x2.....cgucgCgggaacacgggg..... 1  
Gi5\_8781633\_x2.....cacgUggugccgaacu..... 1  
Gi5\_8766277\_x2.....ccccgccaguacugcgGucggagacg..... 1  
Gi1\_4143029\_x2.....gucagggccccgccGguacugc..... 1  
Gi3\_27992184\_x2.....gagaagcgccgCcaggccc..... 1  
Gi2\_10854083\_x2.....caguacugcgaucggagCcguc..... 1  
Gi3\_28180040\_x2.....aucGgagacgucgugggaacacg..... 1

Gi2\_10926355\_x2.....gaucggagacgucgugggaacCcggg..... 1  
 G1a\_5972996\_x2.....caguacugcgauUggagacguc..... 1  
 Gi3\_28205088\_x2.....gagacgucgugggaacacggggCgccg..... 1  
 Gi3\_28127338\_x2.....ccaguacugcgauCggagCcgucgug..... 1  
 Gi1\_4113363\_x2.....gaacacgCgugccgaacu..... 1  
 Gi2\_10922939\_x2.....gacgucgugggaacaUggggugccgaacu..... 1  
 Gi5\_8817015\_x2.....cgaucggagacgCcgugggaacacggg..... 1  
 Gi2\_10958593\_x2.....ucgugggaacCcggggugccg..... 1  
 Gi2\_10959045\_x2.....cAucgugggaacacggggugccgaa..... 1  
 Gi3\_28017454\_x2.....Gcgucaggccccgccaguac..... 1  
 G1a\_5953480\_x2.....Ggccgucaggccccgccaguacugc..... 1  
 Gi3\_28176316\_x2.....gagacgucguggAaacacggggugccgaacu..... 1  
 G1a\_5944752\_x2.....cccgccaguacugcgGucggagacguc..... 1  
 G1a\_5879238\_x2.....gggaacacgAgugccgaacu..... 1  
 Gi1\_4130411\_x2.....gucgugggaacacggggugcAgaacu..... 1  
 Gi2\_10951987\_x2.....cgucgugggaacacgAgugccga..... 1  
 Gi2\_10842367\_x2.....ggccccccaguacugcAauc..... 1  
 Gi3\_28104258\_x2.....ccaguacugcgauCggCgacgucgug..... 1  
 G1a\_5954170\_x2.....ugUgaucggagacgucgu..... 1  
 Gi3\_27998906\_x2.....acgucgugAgaacacggggugccg..... 1  
 Gi1\_4132923\_x2.....ggaacacggggGgccgaac..... 1  
 Gi3\_28196346\_x2.....gucgugggaacaUggggugcc..... 1  
 Gi2\_10923743\_x2.....cccgUaguacugcgauC..... 1  
 Gi2\_10856445\_x2.....gucaggccccgccCguacugcg..... 1  
 Gi3\_28191956\_x2.....ccccgccaNuacugcgauCggaga..... 1  
 Gi3\_28144652\_x2.....gggaacacUggggugccgaac..... 1  
 Gi2\_10833363\_x2.....gugggaCcacggggugccga..... 1  
 Gi2\_10929051\_x2.....Gcgucgugggaacacggggugccg..... 1  
 G1a\_5949354\_x2.....uaUugcgauCggagacgucgu..... 1  
 Gi3\_28207558\_x2.....gaagagaagcgccgucagggcccAgcc..... 1  
 Gi5\_8798069\_x2.....acacggggugccgaacuU..... 1  
 Gi4\_557542\_x2.....Aggaacacggggugccgaacu..... 1  
 G1a\_5953670\_x2.....cgucaggAcccgccaguacugc..... 1  
 Gi3\_28224928\_x2.....ucgugggaacacggggugccUaac..... 1  
 Gi2\_10885809\_x2.....cUccgccaguacugcgauCggagacgu..... 1  
 Gi3\_27997362\_x2.....cggagacgucgugggaacCcggggugc..... 1  
 Gi4\_563258\_x2.....ugggaacCcggggugccgaacu..... 1  
 Gi2\_10977551\_x2.....agacgucgugggaacacggggugcA..... 1  
 Gi2\_10880397\_x2.....cgauCggagacgucgugggGacacg..... 1  
 Gi1\_4092969\_x2.....acgucgugggaacacggggCgcc..... 1  
 Gi2\_10902313\_x2.....gcgauCggNgacgucgugggaacac..... 1  
 G1a\_5978624\_x2.....cgucaAgccccccaguacugcg..... 1  
 Gi3\_28001992\_x2.....gacgucgugAgaacacggggugccgaacu..... 1  
 Gi3\_28006104\_x2.....agacgucgugggaGcacggggugcc..... 1  
 Gi2\_10925553\_x2.....gagacgucgugggaacac..... 0  
 G1a\_5895352\_x2.....ggUccccccaguacugcgauC..... 1  
 Gi2\_10900583\_x2.....gaucggagacgucgCggga..... 1

Gi2\_10945959\_x2.....cggagacgucgugggaacGcggggug..... 1  
 Gi2\_10878435\_x2.....acgucgugggGacacggggugccgaac..... 1  
 Gi5\_8799175\_x2.....gaacacgNgugccgaac..... 1  
 Gi2\_10946765\_x2.....aucggagacgucgugggaacaUggggugcc..... 1  
 G1a\_5889564\_x2.....ggaacacgCggugccgaacu..... 1  
 Gi1\_4151351\_x2.....Ggugggaacacggggugcc..... 1  
 Gi2\_10958021\_x2.....gggNacacggggugccgaac..... 1  
 Gi2\_10870553\_x2.....gugggCacacggggugccg..... 1  
 Gi3\_28190178\_x2.....ucaggccccgUcaguacugc..... 1  
 Gi2\_10888463\_x2.....acgAcgugggaacacggggugc..... 1  
 Gi2\_10987301\_x2.....cggagacgucguAggaacac..... 1  
 Gi5\_8774417\_x2.....Uaggccccgcccaguacug..... 1  
 G1a\_5977458\_x2.....gaacacggggugccAaac..... 1  
 Gi1\_4130611\_x2.....cgucgugggaGcacggggugcc..... 1  
 Gi4\_553760\_x2.....cgugggaacacggggugccgaacA..... 1  
 Gi3\_27997400\_x2.....cgucgugggaacacggggugcAgaac..... 1  
 Gi3\_28086572\_x2.....gaucggagacgucGgggaacacggg..... 1  
 Gi2\_10925559\_x2.....cgucgugggaacacgggguAc..... 1  
 Gi1\_4094233\_x2.....gucgugggaacacggggGg..... 1  
 Gi3\_28253102\_x2.....cgccgucagggcccAccaguac..... 1  
 Gi3\_28170888\_x2.....cgugggaacUcggggugcc..... 1  
 Gi2\_10892149\_x2.....agacgucgugggaacacggggugcU..... 1  
 Gi5\_8749499\_x2.....gggaacacggggugccUaacu..... 1  
 Gi1\_4149201\_x2.....Gggccccgcccaguacugc..... 1  
 Gi2\_10835505\_x2.....ggagacgucgugggGacacg..... 1  
 Gi2\_10957883\_x2.....acgucgugggaacUcggggugcc..... 1  
 Gi1\_4111257\_x2.....caggccccgcccaguacugcgaucggag..... 0  
 Gi2\_10901911\_x2.....gaagcgccNucaggcccc..... 1  
 Gi3\_27998142\_x2.....gaucggUgacgucgugggaacacggg..... 1  
 Gi3\_28125632\_x2.....gaucggagacgucgugUgaacacgggg..... 1  
 Gi3\_28105546\_x2.....ucgugggaacacggggugccgG..... 1  
 Gi2\_10832287\_x2.....agaagcgccgucagggccccgcca..... 0  
 Gi1\_4102091\_x2.....acugcgGucggagacgucg..... 1  
 Gi3\_28017260\_x2.....Gcgugggaacacggggug..... 1  
 Gi2\_10953413\_x2.....gauUggagacgucgugggaacacggg..... 1  
 Gi3\_28156598\_x2.....cgccaguacuAcgaucgggagac..... 1  
 G1a\_5918406\_x2.....Ggccaguacugcgaucgggagacguc..... 1  
 Gi2\_10855667\_x2.....ucaggccccgcccaguacugcgauUgga..... 1  
 Gi3\_28017334\_x2.....aggccccgcccaguGcugcgauccggagac..... 1  
 Gi3\_28045830\_x2.....aucggagacgucguCggaacacggggugc..... 1  
 Gi2\_10928323\_x2.....aggccAcgccaguacugcgauccgga..... 1  
 Gi3\_28185294\_x2.....gUcugcugugggaacacgg..... 1  
 Gi2\_10834945\_x2.....ugUgaacacggggugccg..... 1  
 Gi1\_4119527\_x2.....gaucggagacgucguAgg..... 1  
 Gi3\_28058028\_x2.....gaacacggggugccgaaU..... 1  
 Gi3\_28083378\_x2.....acgucgugggaacCcggg..... 1  
 Gi2\_10899175\_x2.....gucgugggaacacggggGgccga..... 1

Gi3\_28192372\_x2.....gaucggagCcgucuggggaacacg..... 1  
 Gi3\_28227928\_x2.....gAcaggccccgccaguacugcgau..... 1  
 Gi3\_28037126\_x2.....cCucaggccccgccaguacug..... 1  
 Gi3\_28148422\_x2.....acgucugNgaacacggggugccg..... 1  
 Gi5\_8778053\_x2.....cgucuggggaacaAggggugccgaacu..... 1  
 Gi3\_28175938\_x2.....gGgaagcgccgucagggccccg..... 1  
 Gi4\_554044\_x2.....gucgugggNacacggggugccgaacu..... 1  
 Gi3\_28058248\_x2.....cggagacgucgugggaaUacggggugcc..... 1  
 Gi1\_4145523\_x2.....gugggaacacgggAugccgaac..... 1  
 Gi4\_562242\_x2.....gGcaguacugcgauccgagacguc..... 1  
 Gi3\_28192122\_x2.....acgucugggCacacggggugccga..... 1  
 Gi3\_28036890\_x2.....ggagacgucgCgggaacacg..... 1  
 Gi3\_28023464\_x2.....Accgccaguacugcgauccgagacguc..... 1  
 Gi3\_28137584\_x2.....gaucggagUcgucuggggaacacgg..... 1  
 Gi3\_28236800\_x2.....agccccgccaguaGugcgau..... 1  
 Gi2\_10865799\_x2.....cagAccccgccaguacugcgau..... 1  
 Gi5\_8807419\_x2.....Cgccccgccaguacugcgau..... 1  
 Gi3\_27986086\_x2.....guacugcgauccgagacguUgug..... 1  
 Gi3\_28163576\_x2.....gacgucuggggaacacggggCgccg..... 1  
 Gl1\_5973040\_x2.....ggagacgucguAggaacacggggugcc..... 1  
 Gi3\_28112308\_x2.....caggccccgccaguacugG..... 1  
 Gi5\_8779469\_x2.....cgucuggggaacacggggugccUaacu..... 1  
 Gi2\_10935355\_x2.....ccgccaguacugcgauAg..... 1  
 Gi3\_28000514\_x2.....ucguggAaacacggggugccg..... 1  
 Gi2\_10862737\_x2.....gagacguUgugggaacacggggug..... 1  
 Gi3\_28185246\_x2.....cgccgucagggccccgccGguac..... 1  
 Gi4\_561664\_x2.....gagaagcgccgucCggcc..... 1  
 Gl1\_5925322\_x2.....ggaacacggAgugccgaacu..... 1  
 Gi2\_10957593\_x2.....gagacgucguggggaacacAgggugc..... 1  
 Gi5\_8828425\_x2.....Uucggagacgucguggggaacacgggu..... 1  
 Gi2\_10871627\_x2.....agaagcgccAucaggcccc..... 1  
 Gi2\_10928277\_x2.....aucggGgacgucgugggaac..... 1  
 Gi5\_8749843\_x2.....auUggagacgucguggggaacacggg..... 1  
 Gl1\_5955186\_x2.....gucaggccNcgccaguacugc..... 1  
 Gi3\_28014472\_x2.....cccgccaguacugcgaAcggagacgu..... 1  
 Gi1\_4110205\_x2.....ccgaauuaNgaagagaagc..... 1  
 Gi2\_10829885\_x2.....ucaggUccccgccaguacugcgau..... 1  
 Gi5\_8756681\_x2.....Uucggagacgucguggggaacacgg..... 1  
 Gi1\_4143271\_x2.....gaucggagacgucgugggGcac..... 1  
 Gi3\_28063668\_x2.....ggaNcacggggugccgaa..... 1  
 Gi5\_8803683\_x2.....ccgucaggNccccgccaguacugcg..... 1  
 Gi3\_28166178\_x2.....agacguAgugggaacacggggugccgaacu..... 1  
 Gi3\_28194714\_x2.....gacgucugggUacacggggugccgaacu..... 1  
 Gi2\_10906705\_x2.....aucggagacgucguggggaacacggggugccgaac..... 0  
 Gi1\_4143435\_x2.....acgucuggggaacacggggCgccg..... 1  
 Gi2\_10886105\_x2.....agacguUgugggaacacggggugcc..... 1  
 Gi5\_8773599\_x2.....cgucuggggaacacggggGgccgaa..... 1

Gi2\_10830491\_x2.....aUagaagcgccgucagggccccgcca..... 1  
 Gi5\_8738491\_x2.....acgucgugggaacacggggCgccgaac..... 1  
 Gi3\_28198862\_x2.....gacgucgugggaacacggggGgc..... 1  
 Gi3\_28199108\_x2.....guacugcgauccggagGcguc..... 1  
 Gi3\_28227286\_x2.....gaucggagNcgucgugggaacacgg..... 1  
 Gi1\_4135015\_x2.....guAggaacacggggugcc..... 1  
 Gi2\_10894127\_x2.....ucaggccccgccaAuacugcgauc..... 1  
 Gi2\_10917741\_x2.....caggccccgcccagucCgcg..... 1  
 Gi1a\_5880660\_x2.....cgugggaGcacggggugcc..... 1  
 Gi3\_28163290\_x2.....Cacgucgugggaacacggggg..... 1  
 Gi1\_4151537\_x2.....gugggaacCcggggugccgaacuu..... 1  
 Gi2\_10906703\_x2.....caggccccgcccagCacug..... 1  
 Gi3\_28196202\_x2.....Uucggagacgucgugggaacac..... 1  
 Gi3\_28164390\_x2.....Nugggaacacggggugcc..... 1  
 Gi2\_10866315\_x2.....ccccgccaguacugcgCucggagac..... 1  
 Gi5\_8766979\_x2.....cacggggugccAaacuuu..... 1  
 Gi2\_10944383\_x2.....cgucguAggaacacggggugccga..... 1  
 Gi3\_28250844\_x2.....aucggagacgucgugUgaacacgggg..... 1  
 Gi1a\_5914574\_x2.....aGcggagacgucgugggaacacg..... 1  
 Gi1\_4130177\_x2.....Uagacgucgugggaacacggggugccga..... 1  
 Gi3\_28128774\_x2.....ucaggccccgcccGuaucugcgauc..... 1  
 Gi2\_10854781\_x2.....cAccgucagggccccgcccaguc..... 1  
 Gi2\_10947361\_x2.....ggagacgucgAggggaacac..... 1  
 Gi2\_10908759\_x2.....ggaacacggggugccgaaU..... 1  
 Gi5\_8760087\_x2.....aucggagacgucgCgggaacacgggg..... 1  
 Gi1\_4139977\_x2.....cgugggaacacggggugAcgaacu..... 1  
 Gi5\_8821309\_x2.....gacgaggagacgucgugggaacCc..... 1  
 Gi5\_8723953\_x2.....caggccccgcccagucugcgCuc..... 1  
 Gi3\_28031916\_x2.....cgugggaaAacggggugc..... 1  
 Gi5\_8746837\_x2.....Ggucgugggaacacggggugccga..... 1  
 Gi1\_4103031\_x2.....aguacugcgauccggagacgucg..... 0  
 Gi2\_10885567\_x2.....cggagacgucgugggaGcacgggg..... 1  
 Gi3\_27994862\_x2.....agcgccgucagggccccCccaguc..... 1  
 Gi3\_27989910\_x2.....ggccccgccCguacugcgauc..... 1  
 Gi2\_10917347\_x2.....cgccagucugcAaucgg..... 1  
 Gi3\_28232096\_x2.....gccgucagggccccgcccagucCc..... 1  
 Gi5\_8736693\_x2.....cgucgugggaacacggggGgccgaacuu..... 1  
 Gi5\_8766741\_x2.....ucAuggggaacacggggugccgaac..... 1  
 Gi3\_28245058\_x2.....cguuccgaaauaggaagagaagcgcc..... 0  
 Gi2\_10909247\_x2.....caggccccgcccaguaUugc..... 1  
 Gi3\_28116068\_x2.....ucguuccgaaauaggaaga..... 0  
 Gi3\_28011674\_x2.....cAcgccagucugcgauccgg..... 1  
 Gi2\_10907257\_x2.....cgccGguacugcgauccggagacguc..... 1  
 Gi3\_28173930\_x2.....Ugccagucugcgauccggaga..... 1  
 Gi1\_4110939\_x2.....gugggaacacggggugccgaGcuu..... 1  
 Gi1a\_5927302\_x2.....ugcgauccggagGcgucgu..... 1  
 Gi2\_10855739\_x2.....aguGcugcgauccggagacgucg..... 1

Gi2\_10872953\_x2.....gucgugggaaacGcggggugccgaa..... 1  
 Gi2\_10947599\_x2.....caguGcugcgauccgagacguc..... 1  
 Gi3\_27997404\_x2.....Aacgucgugggaaacacggggu..... 1  
 Gi3\_28212446\_x2.....ccUguacugcgauccgagacgucgu..... 1  
 Gi2\_10836367\_x2.....ucggagacgucgugggaaGcacggggugc..... 1  
 Gi5\_8721341\_x2.....gucgugggaaacacgggguAccgaa..... 1  
 Gi3\_28166032\_x2.....gacgucgugggaaacacggggugcGgaacu..... 1  
 Gi3\_28237126\_x2.....uggNaacacggggugccgaa..... 1  
 Gi1\_4132485\_x2.....cgucgugggaaAacggggugcc..... 1  
 Gi2\_10851597\_x2.....Gcccgccaguacugcgauccgagacg..... 1  
 Gi2\_10990731\_x2.....ggagacgucgugggaaacacgggAugcc..... 1  
 Gi3\_28116012\_x2.....auGggagacgucgugggaaacacggg..... 1  
 Gi2\_28118494\_x2.....ccccgccaguacugcgaCcgagacgu..... 1  
 Gi2\_10844345\_x2.....cAgagacgucgugggaaacacggggu..... 1  
 Gi5\_8756465\_x2.....cgAgggaacacggggugcc..... 1  
 Gi2\_10852223\_x2.....gugggaaacacgCggugccgaa..... 1  
 Gi3\_28038288\_x2.....gccaguaUugcgauccgga..... 1  
 Gi2\_10867815\_x2.....acugcgauNggagacgucgu..... 1  
 Gi1\_4137465\_x2.....aUacgucgugggaaacacggggugccg..... 1  
 Gi3\_28020980\_x2.....Gcgccaguacugcgauccgagacgucgug..... 1  
 Gi1a\_5980830\_x2.....gacgucgugggaaacaUggggu..... 1  
 Gi3\_28084908\_x2.....acAgcgauccgagacgucgu..... 1  
 Gi3\_27989472\_x2.....cccNccaguacugcgauccgagac..... 1  
 Gi1\_4150153\_x2.....gaGcacggggugccgaa..... 1  
 Gi3\_28032566\_x2.ccuuaacucgCuccgaa..... 1  
 Gi2\_10978381\_x2.....ccAccaguacugcgauccg..... 1  
 Gi1\_4151723\_x2.....cguggUaacacggggugccgaa..... 1  
 Gi2\_10944499\_x2.....acgAcgugggaaacacggggugccgaa..... 1  
 Gi2\_10949571\_x2.....ccgucaggNcccgccaguacugcgau..... 1  
 Gi2\_10917219\_x2.....aguGcugcgauccgagacgu..... 1  
 Gi2\_10909273\_x2.....gacgucgCgggaaacacggggugcc..... 1  
 Gi1\_4135599\_x2.....acugcgauccgagacgucgCgggaaacacggggu..... 1  
 Gi3\_28002054\_x2.....Uagaagcgccgucagggccccgccaguac..... 1  
 Gi2\_10885637\_x2.....acucguuccgaaauagga..... 0  
 Gi3\_28055386\_x2.....ccccgccaguCugcgau..... 1  
 Gi3\_28070634\_x2.....gggaaacacggggugccgaaU..... 1  
 Gi3\_28078234\_x2.....acugcgauccgagacguA..... 1  
 Gi1a\_5930478\_x2.....uacugcgaNcgagacguc..... 1  
 Gi3\_28081418\_x2.....ccccgccaguacugcgauccgagacA..... 1  
 Gi3\_28141660\_x2.....Agaucggagacgucgugggaaacacggg..... 1  
 Gi3\_28176660\_x2.....aguacugcgauccgagGcugcuggg..... 1  
 Gi3\_28217294\_x2.....aucggagacguUguggga..... 1  
 Gi3\_28033076\_x2.....ucUggccccgccaguacug..... 1  
 Gi1\_4122181\_x2.....gcgacggagacgucgug..... 0  
 Gi3\_28112914\_x2.....gacgucgugggaaacacAgggu..... 1  
 Gi3\_28076198\_x2.....cggagacgucgugggaaacacggggCgccga..... 1  
 Gi2\_10957045\_x2.....gagacgucAuggaaacacggggugccg..... 1

Gi2\_10907677\_x2.....cggagacgucgugggaGcac..... 1  
 Gi4\_565838\_x2.....gccAUuacugcgauccggagacguc..... 1  
 Gi3\_28063116\_x2.....aagagaagcgUcugcaggccc..... 1  
 Gi3\_28136648\_x2.....ggaacacggggAgccgaa..... 1  
 Gi5\_8738237\_x2.....aGugcgauccggagacguc..... 1  
 Gl1a\_5980446\_x2.....auUggagacgucgugggaacacggggu..... 1  
 Gi3\_27984628\_x2.....acgucgugggaacacggggGgccgaa..... 1  
 Gi3\_28164260\_x2.....cgccgucaggccccgcGgua..... 1  
 Gi2\_10909235\_x2.....aagcgccgucaggccccgcAguacugc..... 1  
 Gi3\_28116446\_x2.....aGgagaagcgccgucaggccccgcca..... 1  
 Gi3\_28174704\_x2.....gUagagaagcgccgucaggccccgc..... 1  
 Gi1\_4126187\_x2.....aucggagacgucGgggaacacggggu..... 1  
 Gi3\_28177868\_x2.....cgauccggagacgucgugAgaacacg..... 1  
 Gi2\_10837357\_x2.....ugggaaAacggggugccgaacu..... 1  
 Gi5\_8729809\_x2.....agaagcgccgucaggccccgcc..... 0  
 Gl1a\_5956778\_x2.....aucggUgacgucgugggaacacggggugc..... 1  
 Gi2\_10863467\_x2.....aucGAgacgucgugggaacacggggugc..... 1  
 Gi3\_27994086\_x2.....aucggagacgucgugggaacacgggCu..... 1  
 Gl1a\_5905150\_x2.....gaagagaagcgccgucGggccc..... 1  
 Gi2\_10955833\_x2.....ucggGgacgucgugggaacacgggg..... 1  
 Gi2\_10927245\_x2.....cgCcgugggaacacggggugccgaa..... 1  
 Gl1a\_5881074\_x2.....Accaguacugcgauccggagacguc..... 1  
 Gi3\_28088352\_x2.....gGcgugggaacacggggugccgaacu..... 1  
 Gl1a\_5963416\_x2.....aguacugcgauccggagacgCc..... 1  
 Gi2\_10847611\_x2.....ucaggccccgccaguacugUg..... 1  
 Gi3\_28250554\_x2.....ugcgauccggagacgucgugggaacacA..... 1  
 Gi2\_10961895\_x2.....ucaggccccgccaguGcugc..... 1  
 Gi2\_10845541\_x2.....cgccaguacugcgUucgg..... 1  
 Gi3\_28168046\_x2.....gaagagaagcAccgucaggcccc..... 1  
 Gl1a\_5931230\_x2.....cgGcaggccccgccaguacugc..... 1  
 Gi3\_28226482\_x2.....gccaguacugcgGucggagacgu..... 1  
 Gi1\_4095981\_x2.....Aucgugggaacacggggugcc..... 1  
 Gi3\_28170272\_x2.....ggagacgucgugggaacacggggAcc..... 1  
 Gi3\_28023732\_x2.....gccaguacuAcgauccggagacguc..... 1  
 Gi3\_28227174\_x2.....ggagacgucAugggaacacg..... 1  
 Gi2\_10887693\_x2.....gacgucAugggaacacggggugccgaacu..... 1  
 Gl1a\_5962048\_x2.....gucaggccccgccGguacu..... 1  
 Gi2\_10833489\_x2.....cgUucggagacgucgugggaacacggggugc..... 1  
 Gi3\_28232438\_x2.....ucggagacgucgugggaGcacgg..... 1  
 Gi2\_10973183\_x2.....Gcccgccaguacugcgauccggaga..... 1  
 Gi1\_4113099\_x2.....agacgucgugggaCcacggggugccgaacu..... 1  
 Gi2\_10841517\_x2.....Aaucggagacgucgugggaacacg..... 1  
 Gi5\_8755265\_x2.....acgucgugggaacacggggugccgaCcu..... 1  
 Gl1a\_5901334\_x2.....aagagaGcgccgucaggccc..... 1  
 Gi2\_10896905\_x2.....gaaacacggggUcccgaacu..... 1  
 Gi3\_28154800\_x2.....gaucggagacgucGgggaacacggggu..... 1  
 Gi1\_4139789\_x2.....ugggaCcacggggugccgaac..... 1

Gi1\_4121829\_x2.....ugcgaucgNagacgucgugggga..... 1  
 Gi3\_28181102\_x2.....Cgagacgucgugggaaacacg..... 1  
 Gi3\_28088318\_x2.....cccgccaguacugcgaucggagUcg..... 1  
 Gi1\_4100937\_x2.....ucgCgggaacacggggugccga..... 1  
 Gi3\_28253276\_x2.....gucaggccccgcUaguacugc..... 1  
 Gi3\_28200802\_x2.....aucggagacgucgugggaaacaAggg..... 1  
 Gi3\_28196116\_x2.....gaagagaagcgccgucaAgccccgc..... 1  
 G1a\_5888646\_x2.....ggccccgccaguGcugcgau..... 1  
 Gi5\_8733875\_x2.....gugggaaUacggggugcc..... 1  
 Gi3\_28206988\_x2.....Gcgucgugggaaacacggggugccga..... 1  
 Gi3\_28187226\_x2.....caggccccgccaguacugAgauc..... 1  
 Gi3\_28192218\_x2.....ucUgagacgucgugggaaacacg..... 1  
 Gi2\_10866571\_x2.....agcgcUgucagggccccgccaguacugc..... 1  
 Gi1\_4094797\_x2.....caggccccgccaguacugcAauc..... 1  
 Gi2\_10957685\_x2.....cgccaguacugcgauccgCga..... 1  
 Gi2\_10939763\_x2.....cccgccagCacugcgauccg..... 1  
 Gi3\_28260336\_x2.....gaucggagacguUgugggaaacacggg..... 1  
 Gi3\_28089086\_x2.....cgccaguacuAcgaucggagacg..... 1  
 Gi3\_28129382\_x2.....cgugggaaacacggggugcAga..... 1  
 Gi3\_28048240\_x2.....gucaggccNcgccaguacugcgauccg..... 1  
 Gi3\_27992198\_x2.....gaagcgccgucCggccccgc..... 1  
 Gi2\_10939365\_x2.....ucggagacgucgugggaaacacggg..... 0  
 Gi3\_28179426\_x2.....acGcgcaucggagacgucgug..... 1  
 G1a\_5972376\_x2.....aucAgagacgucgugggaaacacggg..... 1  
 Gi5\_8787401\_x2.....aucggagacgucgugggaaacGcg..... 1  
 Gi2\_10911607\_x2.....aucggagacgucgugggaaUcacggggugcc..... 1  
 Gi2\_10892997\_x2.....gagaagcgccgucagggcccUgccag..... 1  
 Gi2\_10874835\_x2.....gucaCgccccgccaguacug..... 1  
 Gi3\_28098124\_x2.....ggaacacCgggugccgaac..... 1  
 Gi2\_10949501\_x2.....gagaagcAccgucagggccccgcag..... 1  
 Gi1\_4118011\_x2.....agacgucgNgggaacacggg..... 1  
 Gi1\_4128643\_x2.....acgucgugggaaacacggggugccgaUu..... 1  
 Gi2\_10885225\_x2.....caguacugcgauccgagGcguc..... 1  
 Gi2\_10876763\_x2.....acgucgugggaaacUcggggugccgaacu..... 1  
 Gi2\_10941151\_x2.....cUcgccaguacugcgauccgag..... 1  
 Gi1\_4131815\_x2.....acugcgauNggagacgucgugggga..... 1  
 Gi3\_28060980\_x2.....gCccccgccaguacugcgau..... 1  
 Gi2\_10955355\_x2.....ugggaaacacggUgugccgaacu..... 1  
 G1a\_5896474\_x2.....gaagagaGcgccgucag..... 1  
 G1a\_5941512\_x2.....auUggagacgucgugggaaacacggggugcc..... 1  
 Gi5\_8806967\_x2.....aagagaagNgccgucagggccc..... 1  
 Gi1\_4153155\_x2.....agacgucgugggaaacGcggggugccgaacu..... 1  
 Gi3\_28157692\_x2.....Gggagacgucgugggaaacacggggugc..... 1  
 Gi3\_28112610\_x2.....gccaguacugcgauccgagacgC..... 1  
 G1a\_5940640\_x2.....Uaagagaagcgccgucagggccccgcagu..... 1  
 Gi2\_10968351\_x2.....ucgugAgaacacggggugccg..... 1  
 Gi3\_28090342\_x2.....gacgucgugggaaacacgggAu..... 1



Gi3\_28066582\_x2.....Agagacgucgugggaaca..... 1  
 Gi2\_10874763\_x2.....agacgucgugggaCcacggggugccgaacu..... 1  
 Gi2\_10893899\_x2.....acguUgugggaacacggggugc..... 1  
 Gi3\_28249076\_x2.....cgucgugggaacacggggugcUga..... 1  
 Gi1\_4093765\_x2.....aucgUagacgucgugggaacacgg..... 1  
 Gi4\_566418\_x2.....aacacggggugccgaacA..... 1  
 Gi2\_10970517\_x2.....acucguuccgaauuaggaa..... 0  
 Gi5\_8824539\_x2.....Uaggccccgccaguacugcgauc..... 1  
 Gi3\_28169172\_x2.....gCagacgucgugggaacacg..... 1  
 Gi2\_10877683\_x2.....Accccgccaguacugcgau..... 1  
 Gi3\_28007696\_x2.....cgccgucGggccccgccaguacugc..... 1  
 Gi1\_4142555\_x2.....acgucgugggaacacgUggugcc..... 1  
 Gi3\_28255052\_x2.....agacgucAugggaacacggggugcc..... 1  
 Gi5\_8801603\_x2.....aucggagacgucgugggaacCcg..... 1  
 Gi2\_10962533\_x2.....gagacgucgugggGacacggggugcc..... 1  
 Gi1\_4137399\_x2.....gugggaacacggggugccgaacuC..... 1  
 Gi1\_4156415\_x2.....aucggagacgucgugggaacacAg..... 1  
 Gi5\_8768611\_x2.....gugggaacNcggggugccgaacuu..... 1  
 Gi3\_28252454\_x2.....gaagagaagcgccgucUggccc..... 1  
 Gi2\_10892095\_x2.....acgucgugggaacacggAgugccgaac..... 1  
 Gi2\_10938713\_x2.....cgucgugggaacacggggGgccgaac..... 1  
 Gi2\_10905561\_x2.....gaagagaagcgccgucagAccccgcc..... 1  
 Gi3\_28098158\_x2.....cggagacgucgucUggaacacggggug..... 1  
 Gi1\_4156041\_x2.....Ucugcgauccggagacgucg..... 1  
 Gi3\_28104324\_x2.....gaagagaaNcgccgucagggc..... 1  
 Gi3\_28040336\_x2.....Ucccgccaguacugcgauc..... 1  
 Gi3\_28087522\_x2.....aucggagacgucguggAaacacgggg..... 1  
 Gi2\_10906691\_x2.....Cgacgucgugggaacacggggugcc..... 1  
 Gi5\_8825989\_x2.....cgCgggaacacggggugc..... 1  
 Gi2\_10891047\_x2.....agaagcgccgucagggcUc..... 1  
 Gl1\_5958422\_x2.....gcgccgucagggccccgccCguacugc..... 1  
 Gi3\_28113504\_x2.....aGgagaagcgccgucagggc..... 1  
 Gi3\_28191634\_x2.....cgccaguacugcgauccggagGcgu..... 1  
 Gi1\_4099335\_x2.....uGugggaacacggggugccga..... 1  
 Gi3\_28091158\_x2.....gaucggagacgucgugggaacacggC..... 1  
 Gi3\_28109778\_x2.....ggagacgucgugggaacacggggugAc..... 1  
 Gi3\_28061770\_x2.....gccaguacugcAaucggagacguc..... 1  
 Gi2\_10858545\_x2.....gCgaacacggggugccga..... 1  
 Gi3\_28033148\_x2.....cgccaguacugcgGucggagacgu..... 1  
 Gi3\_28186738\_x2.....gucgugggaacacgCggugccgaac..... 1  
 Gi2\_10842069\_x2.....ugggaacacggggugccgaacuC..... 1  
 Gi2\_10955225\_x2.....cgCcgugggaacacggggug..... 1  
 Gi3\_28039224\_x2.....cgccgCcaggccccgccaguac..... 1  
 Gi3\_28188822\_x2.....cGccgccaguacugcgauccggag..... 1  
 Gi1\_4138305\_x2.....aucggagacgucgugggaacacggggCgcc..... 1  
 Gi3\_28116192\_x2.....cgccgucagggccccgccguaUugc..... 1  
 Gi3\_28170996\_x2.....cccgccaguacugcgauccggagGc..... 1

Gi2\_10834397\_x2.....ccaguacuNcgauccgagacguc..... 1  
 Gi5\_8782699\_x2.....cgucgugggaaacacggggAgccgaac..... 1  
 G1a\_5913130\_x2.....gacgucgCgggaacacggggugccgaacu..... 1  
 Gi2\_10917105\_x2.....cgugggaacacgggUugc..... 1  
 Gi3\_27994660\_x2.....gucgugggaaacCcggggugccg..... 1  
 Gi2\_10854111\_x2.....gacgucgugggaaacacgggguAc..... 1  
 Gi3\_28061692\_x2.....gacgucgugggaaacacggggugccgaCcu..... 1  
 Gi1\_4123177\_x2.....cgAcgugggaaacacggggugcc..... 1  
 Gi2\_10967435\_x2.....aucggaUacgucgugggaaacacggggugc..... 1  
 Gi3\_28107200\_x2.....caggccccgccagAacugc..... 1  
 Gi4\_566686\_x2.....gaucggagacgucgugggaaacacggggu..... 0  
 Gi5\_8723193\_x2.....gugggaacacggggCgccgaa..... 1  
 Gi5\_8806877\_x2.....caguacugNgaucggagacguc..... 1  
 G1a\_5903870\_x2.....gugggaacacggggugccgC..... 1  
 Gi5\_8769055\_x2.....agacgucgugggaaacacggggCgccgaac..... 1  
 Gi3\_27998452\_x2.....caguacugcgaucaAgagacgu..... 1  
 G1a\_5911902\_x2.....gaacacgggAugccgaacu..... 1  
 Gi2\_10947617\_x2.....agUccccgccaguacugcgauccg..... 1  
 Gi3\_28217356\_x2.....gUgacgucgugggaaacacggggugccgaac..... 1  
 Gi3\_28201490\_x2.....caguacugNgaucggagacgucgu..... 1  
 Gi3\_28009914\_x2.....caggccccccaAuacugcga..... 1  
 Gi3\_28176196\_x2.....ggccccgccaguacugcAauc..... 1  
 Gi2\_10958287\_x2.....Uggagacgucgugggaaacacggggugc..... 1  
 Gi1\_4154463\_x2.....ugggaacacgggUugccgaac..... 1  
 Gi3\_28101734\_x2.....acgucgugggaaacacggggugAcgaacu..... 1  
 Gi2\_10944429\_x2.....gccaguacugcgGucggagacgucgug..... 1  
 Gi1\_4136947\_x2.....gucgugggaaacacggggugccgaac..... 1  
 Gi3\_28057744\_x2.....ccaguacugcgGucggagacguc..... 1  
 Gi1\_4147951\_x2.....gugggaacacggggCgccgaacu..... 1  
 Gi5\_8820373\_x2.....cgAgggaaacacggggugc..... 1  
 Gi2\_10952117\_x2.....cgccaguacugAgaucggagacguc..... 1  
 Gi3\_28208734\_x2.....ucUugggaacacggggugccga..... 1  
 Gi1\_4153833\_x2.....gacgucguggCaacacggggugccgaac..... 1  
 Gi1\_4133395\_x2.....aucggagacgucgugggGacacgggu..... 1  
 Gi2\_10870841\_x2.....gggagacgucgugggaaacacggggCg..... 1  
 Gi1\_4112891\_x2.....caggccccgAcaguacugc..... 1  
 Gi3\_28254762\_x2.....aggccccgccaguacugUgaucgga..... 1  
 Gi3\_28184422\_x2.....aucggagacgAcgugggaaacac..... 1  
 G1a\_5885004\_x2.....agUccccgccaguacugcg..... 1  
 Gi3\_28068030\_x2.....ucaggccccgccaguacugAgauc..... 1  
 Gi3\_28205208\_x2.....cgauccggagacgucguggAaacacg..... 1  
 Gi5\_8737109\_x2.....cgucgugggaaacacggggGgccgaac..... 1  
 Gi3\_28083856\_x2.....cgCaggccccgccaguacugcgauccgga..... 1  
 Gi2\_10931727\_x2.....cggagacgucgugggGacacgggugc..... 1  
 Gi2\_10945793\_x2.....uGaggccccgccaguacug..... 1  
 Gi2\_10971517\_x2.....cggagacgCcgugggaaacacggggugc..... 1  
 Gi1\_4150511\_x2.....aucggagacgucgugggaaacacgggg..... 1

Gi3\_28154236\_x2.....aggcccAgccaguacugcg..... 1  
 Gi2\_10841959\_x2.....gucguCggaacacggggugccgaacu..... 1  
 Gl1a\_5928784\_x2.....guggCaacacggggugccgaacu..... 1  
 Gi5\_8776849\_x2.....gacgucgugggaaacacgggggUaccgaacu..... 1  
 Gi3\_28036598\_x2.....gugggaacacggggugGcg..... 1  
 Gl1a\_5910074\_x2.....guAggaacacggggugccgaa..... 1  
 Gi2\_10929403\_x2.....gccguAaggccccgccaguacugcg..... 1  
 Gi2\_10963519\_x2.....cgggagacgucgugggaacacggggG..... 1  
 Gi5\_8766015\_x2.....aucggagacgucgugggUacacg..... 1  
 Gi3\_28090846\_x2.....ccgccaguNcugcgaucgggagacguc..... 1  
 Gi3\_28088212\_x2.....ccaAuacugcgaucgggagacguc..... 1  
 Gi2\_10922073\_x2.....acugcgaucgggagacguc..... 0  
 Gi1\_4132403\_x2.....ucgugggaacacggggGgc..... 1  
 Gi1\_4138045\_x2.....agaagcgccgucaggccc..... 0  
 Gi5\_8744945\_x2.....aggccccgccaguacugcgau..... 0  
 Gi3\_28225626\_x2.....gaagagaagcgccgCcaggccc..... 1  
 Gi3\_28162188\_x2.....gcgaucgggagacgCcguggga..... 1  
 Gi3\_28048906\_x2.....gaagcgccNucaggccccgccaguac..... 1  
 Gi5\_8798933\_x2.....acgucgugggGacacggggugcc..... 1  
 Gi2\_10937811\_x2.....ucgggagacgucgugggaacacAggggugc..... 1  
 Gi3\_28187808\_x2.....cgucgCgggaacacggggugc..... 1  
 Gi3\_28222854\_x2.....uggUaacacggggugccgaa..... 1  
 Gi3\_28002326\_x2.....acgAcgugggaacacggggugccgaac..... 1  
 Gi3\_28141584\_x2.....gcgccgucagggccccgccCguacugcg..... 1  
 Gi3\_28142548\_x2.....cgugAgaacacggggugccgaa..... 1  
 Gi5\_8781389\_x2.....agacgucgugggaacacggggG..... 1  
 Gi2\_10980797\_x2.....ucgggagacgucgugggaacGcggggugcc..... 1  
 Gi2\_10872431\_x2.....gucgugggaCcacggggugcc..... 1  
 Gi3\_28178398\_x2.....cccgccaguacugcgaucggCgacg..... 1  
 Gi3\_28039218\_x2.....agacgucgugggaGcacggggugccgaacu..... 1  
 Gi1\_4090011\_x2.....aGcgggagacgucgugggaac..... 1  
 Gl1a\_5892180\_x2.....gucaggcUccgccaguacugcg..... 1  
 Gi3\_28140592\_x2.....Ucaguacugcgaucgggagacguc..... 1  
 Gi2\_10899051\_x2.....cccgccaguacugcgGucggaga..... 1  
 Gi2\_10851075\_x2.....acgucguggUaacacggggugcc..... 1  
 Gi1\_4153617\_x2.....Uucgugggaacacggggugccgaacu..... 1  
 Gi2\_10837923\_x2.....aucggagaAgucgugggaaca..... 1  
 Gi2\_10983475\_x2.....cgaucgggagacgucguAggaacacggg..... 1  
 Gi1\_4137241\_x2.....cgugUgaacacggggugccga..... 1  
 Gl1a\_5925776\_x2.....gGgacgucgugggaacacg..... 1  
 Gi2\_10883139\_x2.....gggagacgucgCgggaacacggggugcc..... 1  
 Gi3\_28100228\_x2.....gucgugggaacacggggugGcgaacu..... 1  
 Gi1\_4138747\_x2.....gccaguacugcgaucggagCcg..... 1  
 Gl1a\_5944926\_x2.....gcgaucggGgacgucgug..... 1  
 Gi2\_10852581\_x2.....Uaagagaagcgccgucagggccccgccag..... 1  
 Gi1\_4098391\_x2.....gugggaacacggggUaccgaac..... 1  
 Gi5\_8807159\_x2.....gugggaaAacggggugccga..... 1

|                                                             |   |
|-------------------------------------------------------------|---|
| Gi5_8817199_x2.....ucguuccgaauuaggaagagaagc.....            | 0 |
| Gi1_4156527_x2.....acgucgugggaaacacggggugccUaacu.....       | 1 |
| Gi3_28185116_x2.....ucgGgggaacacggggugccga.....             | 1 |
| Gi4_554592_x2.....gccagucugcgGucggagacguc.....              | 1 |
| Gi2_10845017_x2.....cgucaggccccAccaguacugc.....             | 1 |
| Gi2_10869163_x2.....aucggagacgucgugggaaUcacg.....           | 1 |
| Gi3_28128300_x2.....cgucgugggaaUcacggggugccg.....           | 1 |
| Gi5_8799679_x2.....cgugAgaacacggggugcc.....                 | 1 |
| Gi3_28237846_x2.....acgucgugggaaacacggggugccgaCc.....       | 1 |
| Gi3_28092876_x2.....gUagagaagcgccgucagggccc.....            | 1 |
| Gi2_10933779_x2.....agagaagcgccgucagggccccgccaguacugcg..... | 0 |
| Gi3_28105004_x2.....caggccccgccaguaGugcg.....               | 1 |
| Gi3_27992316_x2.....cUgccaguacugcgauccggagacgucgug.....     | 1 |
| Gi3_28155596_x2.....cgccaguacugcgauccAgaga.....             | 1 |
| Gi2_10842845_x2.....aguacugcgUucggagacgucg.....             | 1 |
| Gi2_10951857_x2.....gaucggagacgucgugggaaacacggggCg.....     | 1 |
| Gi5_8784759_x2.....gggaacacggggugccgCa.....                 | 1 |
| Gi2_10878419_x2.....aggccccgccaguaacuAcga.....              | 1 |
| Gi3_28230738_x2.....cgucgugggaaacacggggGg.....              | 1 |
| Gi2_10944583_x2.....cgugggaaUacggggugcc.....                | 1 |
| Gi1a_5877092_x2.....gugggaacNcggggugccga.....               | 1 |
| Gi3_28160886_x2.....cgggagacgucgugggGacacggggugcc.....      | 1 |
| Gi3_28122678_x2.....ucaggccccNgccaguacugcgauccgga.....      | 1 |
| Gi3_28136534_x2.....cgcUaguacugcgauccggagacgucgug.....      | 1 |
| Gi3_28178500_x2.....acgucgugggaaacacgggAugccgaacu.....      | 1 |
| Gi2_10897277_x2.....Ugacgucgugggaaacacggggug.....           | 1 |
| Gi1a_5939628_x2.....gggaacCcggggugccgaacu.....              | 1 |
| Gi3_28097152_x2.....agaagcgccgucagggUcc.....                | 1 |
| Gi5_8754799_x2.....aUacgucgugggaaacacggggugccga.....        | 1 |
| Gi3_28062886_x2.....gucaggccccgccagCacug.....               | 1 |
| Gi5_8757061_x2.....cgucgugggaaacacggggugccgCa.....          | 1 |
| Gi2_10920211_x2.....Uagacgucgugggaaacacggggugccga.....      | 1 |
| Gi2_10888537_x2.....aguacCgcgaucggagacgucg.....             | 1 |
| Gi1_4110889_x2.....acugcgaucggGgacguc.....                  | 1 |
| Gi5_8719549_x2.....acgucgugggaaacacggggCgccga.....          | 1 |
| Gi1a_5975334_x2.....cUaucggagacgucgugggaaacacggggugc.....   | 1 |
| Gi1a_5882408_x2.....Ggccaguacugcgauccggagacguc.....         | 1 |
| Gi3_28062970_x2.....uGcucggaucggagacgu.....                 | 1 |
| Gi2_10992217_x2.....aucggagacgucgAgggaaacacggggugc.....     | 1 |
| Gi3_28100298_x2.....acGcggggugccgaacu.....                  | 1 |
| Gi3_28130048_x2.....gucgugggaaacacgAggugcc.....             | 1 |
| Gi1_4093343_x2.....caguacugcgauccggagacgucgug.....          | 0 |
| Gi3_28186732_x2.....cgccaAuaucggaucggagacg.....             | 1 |
| Gi3_28047534_x2.....Nugggaacacggggugccgaa.....              | 1 |
| Gi3_28251820_x2.....aGgucgugggaaacacggggugc.....            | 1 |
| Gi3_28185024_x2.....cgucgugggaaacacggggugccgCa.....         | 1 |
| Gi5_8826759_x2.....uacugcgaNcgggagacgu.....                 | 1 |

Gi2\_10931209\_x2.....gaucggagacgucgugggUacacggggu..... 1  
 Gi5\_8800503\_x2.....agacgucgugggaacacAgggugc..... 1  
 Gi3\_28168720\_x2.....agagaagcgccgcucaggUcccgc..... 1  
 Gi2\_10940639\_x2.....cgucCggccccgccaguacugc..... 1  
 Gi2\_10967735\_x2.....Gaguacugcgauccgagacgucgu..... 1  
 Gi5\_8737313\_x2.....cgGgggaacacggggugcc..... 1  
 Gi1\_4153651\_x2.....gggaacGcggggugccgaacu..... 1  
 Gi5\_8812751\_x2.....ucgugggaacacggggugccgaUcu..... 1  
 Gi2\_10839165\_x2.....Gagcgccgucagggccccgccaguacu..... 1  
 Gi3\_28069644\_x2.....ucgugggaacacggggguAc..... 1  
 Gi3\_28122554\_x2.....acgucgugggaacaAggggugccgaacu..... 1  
 Gi3\_28209830\_x2.....auGggagacgucgugggaacacggggu..... 1  
 Gi3\_28045496\_x2.....ggagacgucgugggaacacgggAugccg..... 1  
 Gi2\_10845317\_x2.....caguacugNgauccggagacgucgu..... 1  
 Gi2\_10932225\_x2.....gUgaagcgccgucagggccccgcc..... 1  
 Gi2\_10886115\_x2.....gaucggagacgucguAggaacacggggu..... 1  
 Gi4\_565280\_x2.....aguacugcgauccggagacgucgu..... 0  
 Gi3\_28230044\_x2.....acgucgugggaacacggggguAccgaac..... 1  
 Gi3\_28130890\_x2.....gaagagCagcgccgucagggccc..... 1  
 Gl1\_5964494\_x2.....Cacacggggugccgaacu..... 1  
 Gi1\_4147283\_x2.....Agucgugggaacacggggugccgaacu..... 1  
 Gi5\_8808635\_x2.....cgugggaanacggggugccg..... 1  
 Gi2\_10967795\_x2.....aucggagacgucguggCaacacggggu..... 1  
 Gl1\_5906952\_x2.....gCcaggccccgccaguacugc..... 1  
 Gi2\_10902565\_x2.....agGcgucgugggaacacggggugccg..... 1  
 Gl1\_5972652\_x2.....cgauccggagacgucgugggaacacggggGgc..... 1  
 Gi3\_28082188\_x2.....gacgGcgugggaacacggggugccgaacu..... 1  
 Gi3\_28069320\_x2.....cgccgucaNgccccgccag..... 1  
 Gi3\_28048580\_x2.....gGgaucggagacgucgugggaacac..... 1  
 Gi2\_10896975\_x2.....gucgugggaCcaccggggugccgaacu..... 1  
 Gi5\_8820775\_x2.....aacacggggugccgGacuuu..... 1  
 Gi2\_10941265\_x2.....cgucgugggaacCcgggg..... 1  
 Gi5\_8805737\_x2.....acgucgugggaacacggggGgcc..... 1  
 Gi2\_10947027\_x2.....cgugggaacacggggugcAg..... 1  
 Gi1\_4135163\_x2.....ugUgaacacggggugccg..... 1  
 Gi3\_28221514\_x2.....gagaaAcgcccgucagggccc..... 1  
 Gi2\_10885335\_x2.....cgccaguGcugcgauccggagacg..... 1  
 Gi5\_8778131\_x2.....cGguacugcgauccggagacguc..... 1  
 Gi3\_28008888\_x2.....acugcgauccggaUacgucgug..... 1  
 Gi3\_28066518\_x2.....aguacugcgauccggagacgucAug..... 1  
 Gi3\_27986462\_x2.....ggccccgccaguUcugcgau..... 1  
 Gi2\_10835083\_x2.....cgugggaacUcggggugccgaac..... 1  
 Gi2\_10986393\_x2.....agacgucgCgggaacacggggugc..... 1  
 Gi3\_28080450\_x2.....cugcgauccggagacgucgugggaacacggggugc..... 0  
 Gi2\_10955077\_x2.....Cggaacacggggugccga..... 1  
 Gi3\_28025000\_x2.....ucggagGcgucgugggaacacg..... 1  
 Gi3\_28030806\_x2.....ucgugggaacacgggAugc..... 1

Gi1\_4135067\_x2.....gucgugggaaacacggggugccgaCc..... 1  
 Gi2\_10988447\_x2.....acAucgugggaaacacggggugccgaac..... 1  
 Gi2\_10845795\_x2.....ucggagacgucgugggaaacacggggugccgaac..... 0  
 Gi2\_10869059\_x2.....cgUagacgucgugggaaacacggggg..... 1  
 Gi5\_8783807\_x2.....Ucgccgucagggcccgcagucg..... 1  
 Gi5\_8761063\_x2.....cgugggaaacacggggugccgG..... 1  
 Gi2\_10953385\_x2.....gccaguacNgcgaucggaga..... 1  
 Gi3\_28010300\_x2.....Ucgccaguacugcgauccg..... 1  
 Gi2\_10870583\_x2.....gacgucgugggaaacUggggugccg..... 1  
 Gi3\_28222754\_x2.....aucggagacgAcgugggaaacacgggg..... 1  
 Gi5\_8738427\_x2.....caggccccgccaguacugcgaAc..... 1  
 Gi3\_28175384\_x2.....aguacugcgGucggagacg..... 1  
 Gi2\_10876357\_x2.....ccgucagggcccgcagCacugcg..... 1  
 Gi2\_10830753\_x2.....gggaacacggggugccgaU..... 1  
 Gi5\_8797835\_x2.....gUucggagacgucgugggaaacacg..... 1  
 Gi5\_8720003\_x2.....gcUccgccaguacugcgauccg..... 1  
 Gi2\_10916803\_x2.....aucggagacgucguAggaacacggggugcc..... 1  
 Gi3\_28185148\_x2.....caggccccgcagAacugcg..... 1  
 Gi3\_28114444\_x2.....aagcgccgucagggcccAccaguacugc..... 1  
 Gi2\_10856693\_x2.....ugggaacacggggugcGgaac..... 1  
 Gi1\_4108217\_x2.....gugggaacacggggCgccgaac..... 1  
 Gi3\_28187154\_x2.....gccaguacugcgauccgagacguA..... 1  
 Gi2\_10863839\_x2.....aguacugcgaCcgagacguc..... 1  
 Gi2\_10875665\_x2.....gaucggagacgucgugggaaUac..... 1  
 Gi2\_10891681\_x2.....ucNugggaacacggggugccgaacu..... 1  
 Gi2\_10932761\_x2.....aUgaagagaagcgccguc..... 1  
 Gi5\_8812551\_x2.....gugggaacGcggggugcc..... 1  
 Gi2\_10883079\_x2.....aucgCagacgucgugggaaacacggggugc..... 1  
 Gi1\_4099943\_x2.....aacGcggggugccgaacu..... 1  
 Gi2\_10838167\_x2.....Gucggagacgucgugggaaacacggggugccg..... 1  
 Gi2\_10956119\_x2.....cgucgugggaaacacggggugcAgaacu..... 1  
 Gi2\_10977923\_x2.....gagaagcAccgucagggcccgc..... 1  
 Gi4\_563200\_x2.....gUgaagcgccgucagggc..... 1  
 Gi2\_10932363\_x2.....gGagcgccgucagggcccgcagucg..... 1  
 Gi3\_28146932\_x2.....caggccccccaAuacugcgau..... 1  
 Gi5\_8733227\_x2.....Aagacgucgugggaaacacggggugccgaacu..... 1  
 Gi1\_4098975\_x2.....ggaacacgggAugccgaacu..... 1  
 Gi3\_28211198\_x2.....cAaucggagacgucgugggaaacacg..... 1  
 Gl1a\_5952398\_x2.....ugggaacacggggugccga..... 0  
 Gi5\_8751665\_x2.....ugggaacacggggugccgaC..... 1  
 Gi3\_28103084\_x2.....ucagCccccgccaguacugcgau..... 1  
 Gi3\_28050880\_x2.....agaagcgccgucGggccccgc..... 1  
 Gi3\_28088406\_x2.....aucggagGcgucgugggaaacacggggugc..... 1  
 Gl1a\_5887632\_x2.....guacugcgauCagagacguc..... 1  
 Gl1a\_5913040\_x2.....aacucguuccgaauaCgaaga..... 1  
 Gi3\_28127888\_x2.....cccgccaguacugcgauccgC..... 1  
 Gi3\_28096076\_x2.....acgucgugggaaacGcggggugcc..... 1

Gi2\_10931665\_x2.....aucggagacgucgugggUacac..... 1  
 Gi2\_10940087\_x2.....ccgccaguacugcgauccggaA..... 1  
 G1a\_5973564\_x2.....gucgugggaaacacggggGcgcgaac..... 1  
 Gi5\_8737365\_x2.....gucgugggGacacggggugc..... 1  
 Gi3\_28084214\_x2.....agggcccgUcaguacugcg..... 1  
 Gi2\_10835597\_x2.....cAugggaacacggggugccga..... 1  
 Gi3\_28198580\_x2.....ccgccGguacugcgauccg..... 1  
 Gi1\_4146693\_x2.....Aucgugggaaacacggggug..... 1  
 Gi3\_28240100\_x2.....gaagagaagcgccgucaAgccc..... 1  
 Gi2\_10836351\_x2.....cgucaggcccUgccaguacugc..... 1  
 Gi1\_4133543\_x2.....gggaUcacggggugccgaacu..... 1  
 Gi2\_10959801\_x2.....ugcgauccggagacgucgugggaaAa..... 1  
 Gi5\_8805019\_x2.....gaacacgAggugccgaac..... 1  
 Gi3\_28055686\_x2.....caggccccgcAaguacugcga..... 1  
 Gi3\_28211722\_x2.....aCaagcgccgucagggccccgcc..... 1  
 Gi3\_28147556\_x2.....acgucgCgggaacacggggugcc..... 1  
 Gi2\_10907137\_x2.....aucggagacgucgugggaaacacgggCu..... 1  
 Gi3\_28218064\_x2.....uUgugggaaacacggggugccg..... 1  
 Gi1\_4091283\_x2.....cAucgugggaaacacggggugcc..... 1  
 Gi3\_28154324\_x2.....agcAccgucagggccccgcc..... 1  
 Gi2\_10958821\_x2.....gGagcgccgucagggccccgccagua..... 1  
 Gi3\_28210898\_x2.....aaUagaagcgccgucagggccc..... 1  
 Gi3\_28130842\_x2.....Ccgauccggagacgucgugggaaacacggggugcc..... 1  
 Gi3\_28166570\_x2.....gucaggGcccgccaguacugc..... 1  
 Gi2\_10877347\_x2.....cgucgugggaGcacggggug..... 1  
 Gi5\_8777025\_x2.....cgucgugggaaacacgUggugccgaacu..... 1  
 Gi2\_10969225\_x2.....aUgaagagaagcgccgucagggccc..... 1  
 Gi2\_10884875\_x2.....gGaaagcgccgucagggccccgccaguac..... 1  
 Gi3\_28024354\_x2.....gggaacaAggggugccgaa..... 1  
 Gi3\_28129812\_x2.....Aaagagaagcgccgucagggccc..... 1  
 Gi3\_28220512\_x2.....agggccccccaguacugcgauccgG..... 1  
 Gi5\_8725591\_x2.....cgucgugggUacacggggugccgaacu..... 1  
 Gi2\_10885749\_x2.....ccgucagggccccgccUguacugc..... 1  
 Gi2\_10865903\_x2.....agaagcgccgCcagggccc..... 1  
 Gi4\_566598\_x2.....Aagaagcgccgucagggcc..... 1  
 Gi3\_28211584\_x2.....gucAugggaacacggggug..... 1  
 Gi3\_27986824\_x2.....gucaAgccccgccaguacug..... 1  
 Gi1\_4111531\_x2.....ccccccaguacugcgau..... 0  
 Gi2\_10959167\_x2.....cgccaguacugcgauccgGcagcuc..... 1  
 Gi5\_8772133\_x2.....acgucgugggUacacggggugccgaacu..... 1  
 G1a\_5878222\_x2.....Cgagacgucgugggaaaca..... 1  
 Gi5\_8719597\_x2.....acgucgugggaaacacggggGcgg..... 1  
 Gi3\_28158750\_x2.....ggccccgcNaguacugcgauccgga..... 1  
 Gi2\_10836033\_x2.....ugcgauccggagacgucgugggG..... 1  
 Gi1\_4117121\_x2.....gaucggagacgucgugggaaacaAggg..... 1  
 Gi2\_10874385\_x2.....caggccUgccaguacugc..... 1  
 Gi3\_28197746\_x2.....cgauGggagacgucgugggaaacacg..... 1

Gi2\_10869051\_x2.....Uccgccaguacugcgauccggag..... 1  
 Gi2\_10910245\_x2.....uUaggccccgccaguacug..... 1  
 Gl1a\_5908766\_x2.....aucggagacgucguggggaGcacggggg..... 1  
 Gi2\_10949177\_x2.....acgucguggggaacaUggggugccgaacu..... 1  
 Gi3\_28026182\_x2.....aguacugcgauccggagacA..... 1  
 Gi3\_28127256\_x2.....ucaggccccgccGguacugcg..... 1  
 Gi1\_4139537\_x2.....cUucguggggaacacggggugccgaac..... 1  
 Gi2\_10968809\_x2.....gugggaUcacggggugccg..... 1  
 Gi2\_10904361\_x2.....gagacgucguggggaGcacgggggug..... 1  
 Gi2\_10939031\_x2.....gaucggagacgCcgugggga..... 1  
 Gi5\_8802721\_x2.....Gcacggggugccgaacuuu..... 1  
 Gi3\_28067118\_x2.....gaagagaagcgccgucagggccccgccGg..... 1  
 Gi5\_8740827\_x2.....cgugggaaacacUgggugccgaac..... 1  
 Gi3\_28107132\_x2.....aucggagacgucguggggaacacgggggUacc..... 1  
 Gi3\_28057818\_x2.....ccgucGggccccgccaguacugc..... 1  
 Gi1\_4103949\_x2.....ucgugggaaacacggggugccgaUc..... 1  
 Gi3\_28169278\_x2.....cgucgugggUacacgggg..... 1  
 Gi2\_10892301\_x2.....ucguggggaCcacggggugccg..... 1  
 Gi3\_28225604\_x2.....ggNacacggggugccgaac..... 1  
 Gi2\_10917939\_x2.....gaucggagaAgucguggggaacacggggg..... 1  
 Gi1\_4127209\_x2.....cggagacgucgugggaaacacggggCgc..... 1  
 Gi5\_8728661\_x2.....gugggaacacggggugccgaaUuu..... 1  
 Gi3\_28249328\_x2.....Aaagcgccgucagggccccgccaguac..... 1  
 Gi1\_4106421\_x2.....ucgugggCcacggggugccgaac..... 1  
 Gi5\_8774291\_x2.....agagaagcNccgucagggccccg..... 1  
 Gi3\_28039642\_x2.....cggagacgucgugggaaUacgggg..... 1  
 Gi1\_4100663\_x2.....Ucgauccggagacgucgugggaaacacggggugcc..... 1  
 Gi2\_10963901\_x2.....aggccUcgccaguacugcgau..... 1  
 Gi2\_10852995\_x2.....aUagaagcgccgucagggccccgccaguacugc..... 1  
 Gi3\_28162662\_x2.....ccUguacugcgauccggagacguc..... 1  
 Gl1a\_5964304\_x2.....gAgggaaacacggggugccga..... 1  
 Gi3\_28140090\_x2.....aucggagacguGgugggaaacacggg..... 1  
 Gi5\_8736339\_x2.....aacacggggugccgaGcuuu..... 1  
 Gl1a\_5919416\_x2.....aagUgaagcgccgucagggccccgcc..... 1  
 Gi2\_10839559\_x2.....Aaggccccgccaguacugcgau..... 1  
 Gi5\_8781473\_x2.....gaacacggggCgccgaac..... 1  
 Gi2\_10875381\_x2.....gccaguacugcgCucggagacguc..... 1  
 Gi2\_10953277\_x2.....aucggagacgucgugggG..... 1  
 Gi2\_10837267\_x2.....ccccgccaguacuAcgauccggagac..... 1  
 Gi2\_10867747\_x2.....caggcccUgccaguacug..... 1  
 Gi3\_28118436\_x2.....ucgugggaaacacggggCgcc..... 1  
 Gi3\_28106058\_x2.....gaucggagacgucgugggaaacacggggCgcc..... 1  
 Gl1a\_5905042\_x2.....aucggagacgucgugggGacacggggugc..... 1  
 Gi2\_10861189\_x2.....aggccccgccaguacugcgUucg..... 1  
 Gi1\_4104123\_x2.....ucaggccccgccaguacugcgauU..... 1  
 Gi4\_562596\_x2.....gaUacggggugccgaacu..... 1  
 Gi3\_28146132\_x2.....aguGcugcgauccggagacgucgug..... 1



Gi5\_8761925\_x2.....cgUagacgucgugggaaacacgg..... 1  
 Gi2\_10947627\_x2.....gaucggagacgucAugggaacacggggu..... 1  
 Gi1\_4133739\_x2.....ugggaacaGggggugccgaacu..... 1  
 Gi2\_10943467\_x2.....gaucggagacgucguAggaaca..... 1  
 Gi3\_28109674\_x2.....caguacugcCaucggagacgucgug..... 1  
 Gi2\_10908651\_x2.....gaucggagNcgucgugggaaacacggggug..... 1  
 Gi2\_10861893\_x2.....aagGgaagcgccgucagggccc..... 1  
 Gi1\_4133093\_x2.....caggccccgccaAuacugc..... 1  
 Gi2\_10859283\_x2.....ucaggccccgccaaguaUugc..... 1  
 Gi2\_10866709\_x2.....ucaggccccgccaCacugcgau..... 1  
 Gi3\_28213278\_x2.....cgugggaacacggUgugcc..... 1  
 Gi1\_4157847\_x2.....gucgugggaaacacggggCg..... 1  
 Gi2\_10990197\_x2.....auAggagacgucgugggaaacacggggugc..... 1  
 Gi1\_4119935\_x2.....Naacacggggugccgaacu..... 1  
 Gi1\_4094605\_x2.....gucgugggGacacggggug..... 1  
 Gi2\_10961669\_x2.....Aucgugggaaacacggggugccg..... 1  
 Gi3\_28181532\_x2.....uacugcgauccggagCcguc..... 1  
 Gi2\_10949549\_x2.....cccgccagCacugcgauccggagacguc..... 1  
 Gi5\_8743073\_x2.....cgucgugggaaacacggggugAcgaacu..... 1  
 Gi3\_28246686\_x2.....acCgcgauccggagacgucgug..... 1  
 Gi1\_4128049\_x2.....ggaacacggggugccgGac..... 1  
 Gi2\_10880379\_x2.....gacgucgAgggaacacggggugccgaacu..... 1  
 Gi2\_10885799\_x2.....gugggaacacgCggugcc..... 1  
 Gi2\_10885487\_x2.....ucgugggaaacacCgggugccgaacu..... 1  
 Gi3\_27994554\_x2.....Aggagacgucgugggaaacacggggugcc..... 1  
 Gi3\_28050812\_x2.....uggCaacacggggugccgaac..... 1  
 Gi3\_28056342\_x2.....gGagcgccgucagggccccgccaauac..... 1  
 Gi3\_28240156\_x2.....guggCaacacggggugccgaa..... 1  
 Gi2\_10923051\_x2.....gaucggagacgucgugggaaacacgggAugc..... 1  
 Gi3\_28015660\_x2.....cgccaguaucgagauAggagac..... 1  
 Gi5\_8824281\_x2.....caggccccgccaCucgug..... 1  
 Gi2\_10845127\_x2.....Uaggccccgccaaguaucg..... 1  
 Gi3\_28007706\_x2.....ggaagagaagcgccgucagggccccgcc..... 0  
 Gi2\_10941961\_x2.....ggagaUgucgugggaaacacggggugcc..... 1  
 Gi2\_10904979\_x2.....cgucUugggaacacggggugccgaac..... 1  
 Gi2\_10847647\_x2.....gucgugggaaacacggggugccgaaUu..... 1  
 Gi1\_4132777\_x2.....ucgugggaaacacAgggugccgaac..... 1  
 Gi3\_28180702\_x2.....gaucggagacgCcguggggaacac..... 1  
 Gi1\_4150127\_x2.....ugggaacacggggugcUgaacu..... 1  
 Gi3\_28159642\_x2.....cGcguuccgaauuaggaagagaagcgccguc..... 1  
 Gi3\_28210420\_x2.....gGcccgcaguaucgagcgg..... 1  
 Gi5\_8776827\_x2.....gucgugggaaacacggggugccgaGc..... 1  
 Gi2\_10833381\_x2.....aGgagaagcgccgucagggccccgcc..... 1  
 Gi2\_10860497\_x2.....cgucgugggaaacaAggggugc..... 1  
 Gi3\_28032858\_x2.....aUgcgcccgucagggccccgccaagua..... 1  
 Gl1\_5951276\_x2.....Ugucagggccccgccaaguaucg..... 1  
 Gi3\_28054924\_x2.....cAccgccaaguaucgagc..... 1

Gi3\_28119048\_x2.....agGcgucgugggaaacacggggugcc..... 1  
Gi3\_28118984\_x2.....ucUgagacgucgugggaaacacggggugccg..... 1  
Gi5\_8793059\_x2.....ugggaacacggAgugccgaac..... 1  
Gi5\_8760997\_x2.....gagacgucgugggaaacCcggggugccgaacu..... 1  
Gi3\_28014322\_x2.....Ggagaagcgccgucagggcccgccagua..... 1  
Gi5\_8795999\_x2.....cgucgugggaaacGcggggugccga..... 1  
Gi3\_28028216\_x2.....gGgcccgucagggcccgccaguacugcg..... 1  
Gi3\_27991232\_x2.....cggagCcgucgugggaaacacggggg..... 1  
Gi2\_10894635\_x2.....gaucggagaUgucgugggaaacacggggg..... 1  
Gi5\_8829071\_x2.....gGcuggggaacacgggggugccgaa..... 1  
Gi2\_10900003\_x2.....ggaacGcgggggugccgaa..... 1  
Gi2\_10930051\_x2.....acGgcgaucggagacgucgugg..... 1  
Gi1\_4153685\_x2.....gugggaGcacgggggugccgaac..... 1  
Gi3\_28159726\_x2.....gacgucgugggaaacacgggggugccAaacu..... 1  
Gi3\_28098838\_x2.....cccgccagNacugcgauccg..... 1  
Gi2\_10900525\_x2.....gugggaacacUggggugccgaa..... 1  
Gi3\_28022922\_x2.....cgugggaacaAggggugcc..... 1  
Gi1\_4101189\_x2.....guUggggaaacacgggggugccgaacu..... 1  
Gi5\_8828577\_x2.....Agugggaacacgggggugcc..... 1  
Gi1\_4092611\_x2.....gucgugggaaUacgggggugcc..... 1  
Gi3\_28161762\_x2.....cccgccaguacugcgauUggagacguc..... 1  
Gi3\_28099992\_x2.....cUcgccaguacugcgauccggagac..... 1  
Gi3\_28208586\_x2.....gccccgccaAuacugcgau..... 1  
Gi3\_27993080\_x2.....ccUcgccaguacugcgauccggaga..... 1  
Gi3\_28157682\_x2.....Ugcccgucagggcccgccagua..... 1  
Gi3\_28213180\_x2.....gaagGcccgucagggcccgccaguacu..... 1  
Gi3\_28166830\_x2.....Cgaagcgccgucagggcccgcca..... 1  
Gi2\_10924207\_x2.....aucggagacgucgugAggaacacgg..... 1  
Gi2\_10976821\_x2.....ccAcgccaguacugcgaucc..... 1  
Gi2\_10960419\_x2.....gucCugggaacacgggggugccgaacu..... 1  
Gi5\_8798575\_x2.....gaucggagacgucgugggaaacGc..... 1  
Gi2\_10943333\_x2.....agUcgucgugggaaacacgggggug..... 1  
Gi2\_10980431\_x2.....gacgucgugggaaacacgggggugccgaac..... 1  
Gi2\_10936567\_x2.....cgggagacgucgugggGacacggggg..... 1  
Gi3\_28196540\_x2.....ggccccgccaguacCgcgauccg..... 1  
Gi1\_4139205\_x2.....aucggagacgucgugggaaacacggggCgc..... 1  
Gi3\_28067948\_x2.....aucCgagacgucgugggaaacacggggg..... 1  
Gi3\_28228506\_x2.....caggccccgccaguGcugcgau..... 1  
Gi2\_10839587\_x2.....cccNgccaguacugcgaucc..... 1  
Gi2\_10908915\_x2.....ugggaacacgggUugccga..... 1  
Gi2\_10855313\_x2.....gggaacacgggggugccgaUcu..... 1  
Gi3\_28047746\_x2.....acgucgugggaaacacgggggugcA..... 1  
Gi5\_8823631\_x2.....ggUaacacgggggugccgaa..... 1  
Gi3\_28122416\_x2.....acgucguggCaacacgggggugccgaac..... 1  
Gi3\_28072336\_x2.....cgucagAccccgccaguacugcg..... 1  
Gi2\_10897939\_x2.....agaagcgccgucagggcAcc..... 1  
Gi3\_28112124\_x2.....ggagacgucgCgggaacacggggg..... 1

Gi1\_4131065\_x2.....gucgugggaaacCcggggug..... 1  
 Gl1\_5889360\_x2.....guggUaacacggggugccgaac..... 1  
 Gi3\_28158326\_x2.....aagGgaagcgcgcgucagggccccgc.....gggaacacggggGgccgaacuu..... 1  
 Gi3\_28102546\_x2.....aagGgaagcgcgcgucagggccccgc.....Uagacgucgugggaaacacggggugccgaa..... 1  
 Gi2\_10937039\_x2.....Uagacgucgugggaaacacggggugccgaa..... 1  
 Gi2\_10910833\_x2.....agacgucguAggaacacggggugccgaacu..... 1  
 Gi3\_28195948\_x2.....cgccgucagggcGcgccaguacugc..... 1  
 Gi5\_8789241\_x2.....aucCgagacgucgugggaaacacgg..... 1  
 Gi2\_10983201\_x2.....Aacgucgugggaaacacgggg..... 1  
 Gi2\_10955087\_x2.....gaGcggagacgucgugggaaacacggggugcc..... 1  
 Gl1\_5926380\_x2.....gcgauccggagacGcug..... 1  
 Gi2\_10960685\_x2.....gucagggccccgcGguacugc.....ucgugggaaacacggggugGcgaacu..... 1  
 Gi5\_8765133\_x2.....ucgugggaaacacggggugGcgaacu..... 1  
 Gi3\_28089476\_x2.....cgUcgucagggccccgcag..... 1  
 Gi3\_28134316\_x2.....ggccUcgccaguacugcgau..... 1  
 Gi3\_28009500\_x2.....gccaguacugcgauccggagacgucgC..... 1  
 Gi3\_28213488\_x2.....cgccUguacugcgauccggagacg..... 1  
 Gl1\_5951326\_x2.....gacgucAugggaaacacgggg..... 1  
 Gi2\_10960375\_x2.....caggUcccgccaguacugcg..... 1  
 Gi3\_28247964\_x2.....cgCcagggccccgcaguacug..... 1  
 Gi3\_28040658\_x2.....ccUccaguacugcgauccggagacgucg..... 1  
 Gi3\_28111116\_x2.....gaucggagacgucgugggCaca..... 1  
 Gi3\_28155426\_x2.....cgucgugggaaacacggAgugccg..... 1  
 Gi3\_28099986\_x2.....gaagcgcgcgucagggccccgc..... 0  
 Gi3\_28180138\_x2.....agagaagcgcgcgucagAccccg..... 1  
 Gi2\_10829777\_x2.....Aacgucgugggaaacacggggugc..... 1  
 Gi2\_10860821\_x2.....guacugcgauccggagacgucgugggaaacacggg..... 0  
 Gi3\_28068492\_x2.....ucagggccccgUcaguacugcg..... 1  
 Gi5\_8781563\_x2.....gggaaUacggggugccgaac..... 1  
 Gi3\_28257812\_x2.....acgucgugggaaacCcggggugccgaa..... 1  
 Gi1\_4147779\_x2.....acgucguAggaacacggggugcc..... 1  
 Gi3\_28073474\_x2.....gaUgucgugggaaacacgggg..... 1  
 Gi1\_4142625\_x2.....gaagagaagcgcgcgucag..... 0  
 Gi2\_10931937\_x2.....cgGcugggaaacacggggugc..... 1  
 Gi2\_10921209\_x2.....gaacacggggugccgaacuu..... 0  
 Gi5\_8782881\_x2.....acugcgauNggagacguc.....gCcgugggaaacacggggugccg..... 1  
 Gi2\_10896623\_x2.....gCcgugggaaacacggggugccg..... 1  
 Gi1\_4141439\_x2.....caggcAccgccaguacugcgau..... 1  
 Gi3\_28206866\_x2.....cagggccccgcUguacugc..... 1  
 Gi3\_28226120\_x2.....gaUacgucgugggaaacacgggg..... 1  
 Gi2\_10893515\_x2.....gaucggagacAucgugggaaacacggg..... 1  
 Gi3\_28214650\_x2.....cgucgugggaaacacggggAugccgaac..... 1  
 Gl1\_5966480\_x2.....gugCgaacacggggugccgaacu..... 1  
 Gi1\_4151335\_x2.....cUucgugggaaacacggggugccga..... 1  
 Gi3\_28128114\_x2.....gucagggccccgcagCacugcg..... 1  
 Gi3\_28010504\_x2.....cgucGggaaacacggggugccgaac..... 1  
 Gi3\_28126836\_x2.....ucgugggaaacCcggggugcc..... 1

Gi1\_4147287\_x2.....cgugggaacacggggGgccgaac..... 1  
 Gi2\_10990045\_x2.....ucagggccccgcccGguacugcg..... 1  
 Gi3\_27991548\_x2.....aggAcccgccaguacugc..... 1  
 Gi2\_10938639\_x2.....gacgucguNggaacacggggugccg..... 1  
 Gi2\_10945205\_x2.....caAgccccgcccaguacugcg..... 1  
 Gi2\_10858733\_x2.....gucagggccccgcccaguaUugcg..... 1  
 Gi3\_28126796\_x2.....aagagaagNgccgucagggccc..... 1  
 Gi2\_10875229\_x2.....cGggccccgcccaguacugcgauccggag..... 1  
 Gi2\_10888377\_x2.....aGgucgugggaacacggggugccgaac..... 1  
 Gi5\_8786053\_x2.....gUcgucgugggaacacggggugccgaacu..... 1  
 Gi2\_10947335\_x2.....agagaagcgccgucagAcccc..... 1  
 Gi2\_10845767\_x2.....cgucagAccccgcccaguacugc..... 1  
 Gi2\_10861681\_x2.....aucggagacgucAugggaaacac..... 1  
 Gi1\_4144845\_x2.....aucggagacgucgugggCacacgg..... 1  
 Gi3\_28225326\_x2.....gacgucgugggaGccacgg..... 1  
 Gi2\_10857515\_x2.....acgucgugggaaUacggggugc..... 1  
 Gi2\_10969445\_x2.....gagacgucgugggaacacggAgugccg..... 1  
 Gi2\_10875041\_x2.....ugUgaacacggggugccgaac..... 1  
 Gi2\_10919331\_x2.....cgucagCccccgcccaguacugc..... 1  
 Gi3\_28253934\_x2.....aucggagaAgucgugggaacacggg..... 1  
 Gi3\_28095562\_x2.....gucagggccccgcccaguacuAccgauc..... 1  
 Gi2\_10848809\_x2.....cgUucggagacgucguggga..... 1  
 Gi3\_28254310\_x2.....ccccgcUaguacugcgauccggagacgu..... 1  
 Gi3\_28111198\_x2.....uacugcgGucggagacgu..... 1  
 Gi5\_8728777\_x2.....Ucaguacugcgauccggagacgu..... 1  
 G1a\_5895824\_x2.....acCcgauccggagacguc..... 1  
 G1a\_5938368\_x2.....gugggaacacggggugccCaacu..... 1  
 G1a\_5948774\_x2.....Gccccgcccaguacugcgauccggagacguc..... 1  
 Gi3\_28164240\_x2.....ggaacacggggugccgaC..... 1  
 Gi1\_4141425\_x2.....gucgCgggaacacggggugccgaac..... 1  
 Gi2\_10960191\_x2.....aagagaagcgccgucagggAcc..... 1  
 Gi2\_10984277\_x2.....cgugggaacacggggugAcgaac..... 1  
 Gi2\_10991589\_x2.....ccccgcccaguacugcgac..... 1  
 G1a\_5897378\_x2.....gggaacacggUgugccgaacu..... 1  
 Gi5\_8786761\_x2.....agaagcgccNgucagggccccgcccaguacugc..... 1  
 Gi2\_10833741\_x2.....ggagacguUgugggaacacggggug..... 1  
 Gi5\_8742747\_x2.....aucggagacgucgugggaacacAgggg..... 1  
 Gi1\_4106303\_x2.....cgugggaacacUggggugccgaacu..... 1  
 Gi3\_28229878\_x2.....ucguuccgaauaggaagagaagcgccguc..... 0  
 Gi2\_10875925\_x2.....gccgucagggccccgcccGguacugcg..... 1  
 Gi3\_28203366\_x2.....gacgucgugggaacacggggUAccgaac..... 1  
 Gi1\_4099253\_x2.....gaagcgccgucagggccccgcccaguacugc..... 0  
 Gi3\_28172888\_x2.....gucgugggCacacggggugcc..... 1  
 Gi3\_28230570\_x2.....cgucguggUaacacggggugc..... 1  
 Gi2\_10967965\_x2.....gucagggccNcgcccaguacugcg..... 1  
 Gi3\_28217206\_x2.....ggagacgucgugggaaAacggggugccg..... 1  
 Gi1\_4090135\_x2.....gagacgucgugggaacGcggggugccgaacu..... 1

Gi1\_4111235\_x2.....ucggagGcgucgugggaacacg..... 1  
Gi2\_10889387\_x2.....cgucaggccccgccaguacCgcg..... 1  
Gi2\_10947589\_x2.....ucggagacgucgugggaacacAgggugcc..... 1  
Gi1\_4126593\_x2.....uUgugggaacacggggugccg..... 1  
Gi3\_28137824\_x2.....gucgugggCacacggggugccg..... 1  
Gi3\_28189220\_x2.....gCccccgccaguacugcgaucg..... 1  
G1a\_5928186\_x2.....aacacggggGgccgaacu..... 1  
Gi3\_28180210\_x2.....cgugggaacacgCggugccg..... 1  
G1a\_5957082\_x2.....gaucggagGcgucgugggaa..... 1  
Gi2\_10954955\_x2.....gacgucgugggaacacggggugccA..... 1  
Gi3\_28052084\_x2.....gagacAucgugggaacacggggugccgaacu..... 1  
Gi2\_10898755\_x2.....cccgccaguacugcgUuc..... 1  
Gi3\_28203226\_x2.....aggccccccaUuacugcgauc..... 1  
Gi2\_10923095\_x2.....aucggagacgucguggAaacacggg..... 1  
Gi5\_8819765\_x2.....gucgugggCacacggggugccgaac..... 1  
Gi3\_28215880\_x2.....cggGgacgucgugggaacacggggg..... 1  
Gi5\_8731999\_x2.....gucaggccccgccaguacCgcg..... 1  
Gi1\_4143255\_x2.....gaacacgggggCccgaacu..... 1  
Gi3\_28046872\_x2.....ccccgccaguacuAcgauc..... 1  
Gi1\_4151833\_x2.....gagacgucgugggaacGcggggugccga..... 1  
Gi3\_28250502\_x2.....Gguacugcgauccgagacgucg..... 1  
Gi3\_28131006\_x2.....gucgugggaacacggggGgccgaa..... 1  
Gi5\_8815895\_x2.....agacgucgugggaacGcggggugcc..... 1  
Gi1\_4122509\_x2.....aGcggagacgucgugggaacacggggugcc..... 1  
Gi3\_28174772\_x2.....gacgucgugggaacacggggugcAgaac..... 1  
Gi1\_4129545\_x2.....gCacacggggugccgaacu..... 1  
Gi2\_10891195\_x2.....acgucgugggaacacggggugA..... 1  
Gi2\_10992093\_x2.....gacgucgugggaacacggggugAc..... 1  
Gi2\_10967511\_x2.....cgucgugggaaAacggggugcc..... 1  
Gi3\_28062038\_x2.....Ggccgucagccccgccag..... 1  
Gi2\_10946749\_x2.....agGacugcgauccgagacguc..... 1  
Gi3\_27997904\_x2.....cCggccccgccaguacugcgau..... 1  
Gi3\_28077452\_x2.....gggaacacgggggCccgaac..... 1  
Gi5\_8765111\_x2.....Ggucaggccccgccaguacugcg..... 1  
Gi3\_28232074\_x2.....Ggucaggccccgccaguacugcgauccg..... 1  
Gi1\_4125031\_x2.....ggaaacacgNggugccgaa..... 1  
Gi2\_10916195\_x2.....acgucgugggaacaUggggugccg..... 1  
Gi3\_28015598\_x2.....aggccccgccaguacugcgaCcg..... 1  
Gi2\_10910865\_x2.....gacgucguUggaacacggggugcc..... 1  
Gi3\_28067682\_x2.....cgggagacgCcgugggaacacggggugc..... 1  
Gi3\_28058782\_x2.....cccgccaguacugcgGucggagac..... 1  
Gi5\_8821753\_x2.....cgucgugggCacacggggugccgaacu..... 1  
Gi3\_28052964\_x2.....cgucgAgggaacacggggugccgaac..... 1  
G1a\_5883254\_x2.....aucggagaNgucgugggaacacg..... 1  
Gi2\_10857817\_x2.....gaucggagacgucguAggaacacggggug..... 1  
G1a\_5954060\_x2.....gucgugggNacacggggugccgaac..... 1  
Gi2\_10881207\_x2.....gugggaacacgggggUcc..... 1

Gi3\_28146406\_x2.....gucgugggaacacggggCgccga..... 1  
 Gi4\_566520\_x2.....cgucaggAccgccagucugc..... 1  
 Gi3\_28138966\_x2.....aucggagacguUgugggaacacgg..... 1  
 Gi2\_10854813\_x2.....aucggagacgucgugggaacaAggggugcc..... 1  
 Gi5\_8737153\_x2.....ggaacacggggugcAgaacu..... 1  
 Gi2\_10978789\_x2.....aacacUgggugccgaacu..... 1  
 Gi3\_28028790\_x2.....acugcgauccggagacgucgC..... 1  
 Gi3\_28110256\_x2.....ggagacgCcgugggaacacg..... 1  
 Gi3\_28003692\_x2.....ggagGcgucgugggaacacggggugccgaac..... 1  
 Gi5\_8719899\_x2.....Gucggagacgucgugggaaca..... 1  
 Gi3\_28228756\_x2.....cgucCggccccgccagucg..... 1  
 Gi1\_4149651\_x2.....aCacgucgugggaacacggggugcc..... 1  
 Gi3\_28186522\_x2.....gggaacacgCgugccgaacu..... 1  
 Gi5\_8790747\_x2.....acgucgugggaacacggggugccgaaA..... 1  
 Gi3\_28169248\_x2.....gggaacacgggAugccga..... 1  
 Gi2\_10903373\_x2.....aggccccgccaguCucggaucggaga..... 1  
 Gi2\_10963679\_x2.....gUagagaagcgccgucagggccccg..... 1  
 Gi2\_10939047\_x2.....cgucaggccccgccagucguc..... 1  
 G1a\_5970886\_x2.....cgugggaacacggggugccgCac..... 1  
 Gi5\_8792057\_x2.....ugggaacacggggugccAaac..... 1  
 G1a\_5952800\_x2.....aggccccgccaguUcugcg..... 1  
 Gi3\_28121918\_x2.....caggccAcgccagucgucgga..... 1  
 Gi3\_28201312\_x2.....aucggagacgucguggUaacac..... 1  
 Gi2\_10835865\_x2.....ggagacgucgugggaacCcggggugcc..... 1  
 Gi3\_28207200\_x2.....ccccgccagucggaucggagGcg..... 1  
 Gi3\_28260088\_x2.....cggagacAucgugggaacacggggugcc..... 1  
 Gi3\_28214950\_x2.....cggagGcgucgugggaacacggggugccga..... 1  
 Gi4\_554220\_x2.....gacgucgugggaacacggggugccgaacu..... 0  
 Gi3\_28257312\_x2.....aguacugcgGucggagacgucgug..... 1  
 Gi3\_28005192\_x2.....caguacugcgGucggagacguc..... 1  
 Gi2\_10851067\_x2.....aucggagacgucgugggaCcaccggg..... 1  
 Gi1\_4130179\_x2.....gccagucggaucgagga..... 0  
 Gi3\_28062014\_x2.....aagagaagcgccgucagggccccgCG..... 1  
 Gi3\_28197204\_x2.....cgucaggccccgUcagucguc..... 1  
 Gi5\_8817069\_x2.....agacgucguggGacacggggugccgaac..... 1  
 Gi3\_28073558\_x2.....gagGagcgccgucagggccccg..... 1  
 G1a\_5975304\_x2.....cguUaggccccgccagucgucg..... 1  
 Gi3\_28159308\_x2.....caguacugcgauccggagacgC..... 1  
 Gi1\_4121709\_x2.....gugggaGcacggggugccgaacu..... 1  
 Gi3\_27989034\_x2.....gucgugggaaAacggggugc..... 1  
 Gi3\_28148588\_x2.....ggagacgucgugggaGcacggggugccgaac..... 1  
 Gi3\_28160616\_x2.....ucaggccccgccagucCcgauccg..... 1  
 Gi2\_10930565\_x2.....gaUacgucgugggaacacggggugc..... 1  
 Gi3\_28041818\_x2.....cgucaggccccgcAaguacugc..... 1  
 Gi3\_28027206\_x2.....aguacCggaucggagacgucgug..... 1  
 Gi2\_10934383\_x2.....gagacgucgugggaacacg..... 0  
 Gi3\_27981900\_x2.....caggccccgcAaguacugc..... 1

Gi5\_8764471\_x2.....aagaUaagcgccgucagggccc..... 1  
 Gi3\_28108796\_x2.....caguacugcgauccggaAacguc..... 1  
 Gi3\_28102344\_x2.....cgucagggccccgccGguacug..... 1  
 Gi2\_10931277\_x2.....aucggagCcgucgugggaacac..... 1  
 Gi3\_27996056\_x2.....Aagacgucgugggaacacggggugccg..... 1  
 Gi1\_4107905\_x2.....ggagGcgucgugggaacacggggugccgaacu..... 1  
 Gi5\_8821747\_x2.....aucggCgacgucgugggaacacgggg..... 1  
 Gi2\_10956079\_x2.....gccGguacugcgauccgagacguc..... 1  
 Gi5\_8823805\_x2.....gggaacacggggAgccgaac..... 1  
 Gi5\_8801525\_x2.....aGgucgugggaacacggggugccgaac..... 1  
 Gi2\_10884221\_x2.....Cagacgucgugggaacacggggugccg..... 1  
 Gi1\_4118541\_x2.....cgugggaacacgggguCccgaacu..... 1  
 Gi3\_28038238\_x2.....cagggccccccaguacugU..... 1  
 Gi2\_10944099\_x2.....ccgucagggccccccaguacugAgauc..... 1  
 Gi1\_4125809\_x2.....cUccaguacugcgauccgagac..... 1  
 Gi1\_4136507\_x2.....gUucggagacgucgugggaacac..... 1  
 Gi5\_8730099\_x2.....aCcgagacgucgugggaacacg..... 1  
 Gi5\_8807595\_x2.....cgugggaacacggggugccgGac..... 1  
 Gi2\_10868637\_x2.....agacgucgugggaacCcgggugc..... 1  
 Gi4\_561274\_x2.....gggaGcacggggugccgaacu..... 1  
 Gi1\_4153443\_x2.....ggGgacgucgugggaacacggggugcc..... 1  
 Gi3\_27987112\_x2.....cggagacgucAuggggaacacggggugcc..... 1  
 Gi1\_4121533\_x2.....gacgucgugggaacacggg..... 0  
 Gi3\_28121478\_x2.....uacuAcgauccgagacguc..... 1  
 Gi2\_10888089\_x2.....aaNacggggugccgaacu..... 1  
 Gi2\_10962635\_x2.....cagggccccccagCacugc..... 1  
 Gi2\_10969951\_x2.....ucgugggaacacggggugccgaC..... 1  
 Gl1\_5888046\_x2.....Gguacugcgauccgagacgucgu..... 1  
 Gi1\_4120539\_x2.....gGucggagacgucguggg..... 1  
 Gi1\_4157221\_x2.....gGgacgucgugggaacacggggugccga..... 1  
 Gi2\_10831775\_x2.....cgccaguaNugcgauccg..... 1  
 Gi2\_10861925\_x2.....aggccccccaguacugcgGu..... 1  
 Gl1\_5888844\_x2.....ggaacacgggAugccgaacu..... 1  
 Gi1\_4090801\_x2.....ucgugggaacacggggAgccgaac..... 1  
 Gi3\_28198522\_x2.....cggagacgucgCgggaacacgggg..... 1  
 Gi1\_4142589\_x2.....ggaacacggggugAcgaacu..... 1  
 Gi3\_28091688\_x2.....ucggagacAucgugggaacacggggugccg..... 1  
 Gi3\_28124784\_x2.....gagacgucgugggaGcacggggugccgaacu..... 1  
 Gl1\_5923610\_x2.....aucggagacgucguAggaacacggggugcc..... 1  
 Gi2\_10887913\_x2.....ucgugggaacaUggggugccgaac..... 1  
 Gi2\_10977281\_x2.....gacgucgugggaacacAgggugccgaac..... 1  
 Gi5\_8823937\_x2.....cGgccaguacugcgauccgagacgu..... 1  
 Gi2\_10953485\_x2.....uaUgaagagaagcgccguc..... 1  
 Gi3\_28140822\_x2.....cgucgugggaacaGggggugccgaacu..... 1  
 Gi3\_28211948\_x2.....gaagagaagcgccgucaggAc..... 1  
 Gi3\_28244870\_x2.....Agccccccaguacugcgauccg..... 1  
 Gi5\_8750819\_x2.....gggaacacggggugccgaacG..... 1

Gi1a\_5977764\_x2.....cgugggGacacggggugcc..... 1  
 Gi2\_10880767\_x2.....gCagacgucgugggaacacggggugccg..... 1  
 Gi3\_28229834\_x2.....caUuacugcgauccggagacguc..... 1  
 Gi5\_8781847\_x2.....aggcUccgccagucgucguc..... 1  
 Gi2\_10952265\_x2.....cgAcaggccccgcaguacugcg..... 1  
 Gi5\_8764583\_x2.....aagagGagcgccgucaggccccgcc..... 1  
 Gi5\_8806367\_x2.....gugggaacacggggCgccgaacu..... 1  
 Gi1\_4106851\_x2.....gacgucgugggaacacggAgugccgaacu..... 1  
 Gi5\_8770185\_x2.....ugcgaAcggagacgucgug..... 1  
 Gi3\_28250656\_x2.....aggcccUgccagucgucgucgucg..... 1  
 Gi3\_28113064\_x2.....cgugggCacacggggugccgaa..... 1  
 Gi3\_27988066\_x2.....cgccGguacugcgauccggagacg..... 1  
 Gi2\_10979789\_x2.....ccccgccagucgucgucgucg..... 1  
 Gi5\_8826595\_x2.....ucgugggaacacgggCugccgaacu..... 1  
 Gi3\_28095902\_x2.....agcgccgucaggcccUgccagu..... 1  
 Gi3\_28145282\_x2.....aucggagacgucguggAaacacggggugc..... 1  
 Gi3\_28130332\_x2.....agacgucgNgggaacacgggg..... 1  
 Gi3\_28001504\_x2.....agagaagcgccgucaggccccgcAa..... 1  
 Gi2\_10935719\_x2.....ggagacgucgugggaacacgUggugc..... 1  
 Gi1\_4099585\_x2.....cgugggaacaUggggugccgaacu..... 1  
 Gi3\_28182160\_x2.....ugggaacacCgggugccgaacu..... 1  
 Gi3\_27981796\_x2.....caggccccgccagucgucgucguc..... 1  
 Gi1a\_5968046\_x2.....aucggagacgucgCgggaacacggggugcc..... 1  
 Gi5\_8771475\_x2.....gugggaacacggggugccgaacuC..... 1  
 Gi1a\_5968188\_x2.....Agcgaucggagacgucguc..... 1  
 Gi3\_28159390\_x2.....cGggccccgccagucgucgucgucg..... 1  
 Gi2\_10938139\_x2.....gaagcgccgucaggccccgccCg..... 1  
 Gi2\_10946067\_x2.....aucggagacUucgugggaacacggggugcc..... 1  
 Gi2\_10902343\_x2.....gugggaacacgggUugccg..... 1  
 Gi1\_4097115\_x2.....uUgugggaacacggggugccgaac..... 1  
 Gi3\_28075318\_x2.....gucgugggaacacAgggugccga..... 1  
 Gi2\_10903515\_x2.....gGcccgccagucgucgucgucgucg..... 1  
 Gi2\_10885247\_x2.....aucggagacgucgugggaacacCgggu..... 1  
 Gi2\_10950669\_x2.....gagaagcgccgCcaggccccgcc..... 1  
 Gi4\_563672\_x2.....Augggaacacggggugccgaa..... 1  
 Gi3\_28213852\_x2.....ccccgccagucgucgucgucgucg..... 1  
 Gi1\_4096131\_x2.....cguUgugggaacacggggugccgaacu..... 1  
 Gi2\_10872215\_x2.....gUccccgccagucgucgucgucgucg..... 1  
 Gi1a\_5938504\_x2.....cgugggaacCcggggugc..... 1  
 Gi3\_28244344\_x2.....aCgccccgccagucgucgucgucgucg..... 1  
 Gi3\_28246358\_x2.....aggccccgccagucgucgucgucgucg..... 1  
 Gi2\_10902087\_x2.....gaagagGagcgccgucaggccccgcc..... 1  
 Gi3\_28051608\_x2.....Ugaucggagacgucguggg..... 1  
 Gi5\_8736219\_x2.....cgugggaacacggggugCccaac..... 1  
 Gi5\_8788643\_x2.....gaacacgggUugccgaacu..... 1  
 Gi1\_4104395\_x2.....ccgucaggccccgAcaguacug..... 1  
 Gi3\_28009082\_x2.....aagagaagcgccgCcaggc..... 1



Gi1\_4135611\_x2.....cguggaacacggggugccgaU..... 1  
 Gi2\_10839811\_x2.....ccgccGguacugcgauccg..... 1  
 Gi3\_28020518\_x2.....aucggUgacgucguggga..... 1  
 Gi2\_10912689\_x2.....caggccccgccCguacug..... 1  
 Gi3\_28120730\_x2.....gacgucguggaacacggggC..... 1  
 Gi3\_28200704\_x2.....gaucggagacgucguggaacGcggggugcc..... 1  
 Gi3\_28249530\_x2.....cgccaguacugcgauccgagagUguc..... 1  
 Gi3\_28112664\_x2.....aguacugcgauccgagacgCcguggg..... 1  
 Gi5\_8783875\_x2.....ucggagacgucguggaacacggggugccA..... 1  
 Gi3\_28074972\_x2.....ggagacgucguggaacacggggCgccg..... 1  
 Gi2\_10895485\_x2.....cagAccccgccaguacug..... 1  
 Gi2\_10953771\_x2.....aucggagacgucgugggaaUacggg..... 1  
 Gi5\_8767315\_x2.....cguggaacacggggugcUgaacuu..... 1  
 Gi1\_4089383\_x2.....gacgucguggaacacggggugccGac..... 1  
 Gi4\_556458\_x2.....cgCcguggaacacggggugcc..... 1  
 G1a\_5930928\_x2.....Uaggccccgccaguacug..... 1  
 Gi2\_10974021\_x2.....ccgccaguacugcgauccgagGcguc..... 1  
 Gi3\_28164938\_x2.....gacgucAugggaacacggggu..... 1  
 Gi3\_28249038\_x2.....ucggagacgucguAggaaacggggu..... 1  
 Gi4\_559086\_x2.....uUguggaacacggggugccgaacu..... 1  
 Gi5\_8821983\_x2.....ucguggaacacAgggugccgaac..... 1  
 Gi2\_10942743\_x2.....guUguggaacacggggugccg..... 1  
 Gi2\_10917753\_x2.....auUggagacgucguggaacacggggugccg..... 1  
 Gi2\_10940973\_x2.....aucggagacgucgugggaaUgugggugc..... 1  
 Gi3\_28145270\_x2.....caggccccccaCuacugc..... 1  
 Gi2\_10879653\_x2.....caggccccAccaguacugcgaucc..... 1  
 Gi2\_10916439\_x2.....ugggaaacacAgggugccg..... 1  
 Gi1\_4107867\_x2.....ucUguggaacacggggugcc..... 1  
 Gi4\_565340\_x2.....agUcgucguggaacacggggugcc..... 1  
 G1a\_5916066\_x2.....cgucaggUcccgccaguacugc..... 1  
 Gi1\_4098497\_x2.....gacgucguggaacacggggAgccgaacu..... 1  
 G1a\_5889764\_x2.....acucguuccgaauaCgaaga..... 1  
 Gi2\_10932797\_x2.....aggccccUccaguacugcga..... 1  
 Gi4\_564438\_x2.....cgucguggNaacacggggugccga..... 1  
 G1a\_5889030\_x2.....aucggagacgucguggAa..... 1  
 Gi3\_28146750\_x2.....ggUgacgucguggaacacgggg..... 1  
 Gi2\_10921581\_x2.....ccgccaguacugcgauccgagacg..... 0  
 Gi3\_28122830\_x2.....gaagcgccgucagggccccAcagua..... 1  
 Gi5\_8744789\_x2.....gugggaaacacAgggugccgaacuu..... 1  
 Gi2\_10963171\_x2.....cgccgucagggccccgccaguacCcgaucc..... 1  
 Gi2\_10923947\_x2.....caggccccCccaguacugc..... 1  
 Gi2\_10911931\_x2.....cAucguggaacacggggugc..... 1  
 G1a\_5883074\_x2.....ggaacUcggggugccgaac..... 1  
 Gi1\_4133003\_x2.....cgccaguacugcgauccgagacgucU..... 1  
 Gi3\_28244198\_x2.....gccgucagNccccgccagu..... 1  
 Gi5\_8783675\_x2.....aucggagacAucguggaacacggggugc..... 1  
 Gi3\_28139982\_x2.....cUccaguacugcgauccgagacgucg..... 1

Gi3\_28240870\_x2.....gaucggagacgucgugggGacacggg..... 1  
Gi3\_28006032\_x2.....gucguggaacacgUggugccgaacu..... 1  
Gi2\_10900101\_x2.....gaucggagacgucguAggaacac..... 1  
Gi2\_10957469\_x2.....gaGcggagacgucguggaacacggggugc..... 1  
Gi1a\_5979918\_x2.....aacacggggugccgaaAu..... 1  
Gi3\_28043342\_x2.....aucggagacgucgugggCacacggg..... 1  
Gi2\_10929449\_x2.....cggagaGgucguggaacacggggugcc..... 1  
Gi2\_10885475\_x2.....Accaguacugcgauccgga..... 1  
Gi3\_28213308\_x2.....aucggagacgGcuguggaacacggggg..... 1  
Gi2\_10901831\_x2.....uggaacGcggggugccgaa..... 1  
Gi2\_10865487\_x2.....gucguggaacacggggugAcg..... 1  
Gi1\_4157585\_x2.....gagacgucGcggaacacggggugccgaacu..... 1  
Gi1a\_5879480\_x2.....ggaacacggguAccgaacu..... 1  
Gi3\_28085854\_x2.....cggagacgucgugAgaacacggg..... 1  
Gi3\_28136846\_x2.....gucaggccccgcUaguacug..... 1  
Gi2\_10831719\_x2.....agacgucgugAgaacacggggugcc..... 1  
Gi2\_10966275\_x2.....gUagcgccgucagggccccgag..... 1  
Gi1\_4103357\_x2.....ggUgacgucguggaacacggggg..... 1  
Gi3\_28131016\_x2.....ggUcccgccaguacugcgaucc..... 1  
Gi3\_28024400\_x2.....Uagacgucguggaacacggggugccga..... 1  
Gi1\_4121825\_x2.....guggaacacggggugccgaaAu..... 1  
Gi2\_10986835\_x2.....uggaacacggCgugccgaacu..... 1  
Gi2\_10855677\_x2.....agGagcgccgucagggccccgcc..... 1  
Gi3\_28051406\_x2.....gaucggagacgucGcggaac..... 1  
Gi2\_10854349\_x2.....gucaggccccgccaguacAgc..... 1  
Gi3\_28128144\_x2.....ucggagacgucguggaacUggggugcc..... 1  
Gi2\_10847123\_x2.....ccgccaguacugcgauUgg..... 1  
Gi4\_563882\_x2.....cguggaacGcggggugccgaacu..... 1  
Gi3\_28252034\_x2.....ggccccAccaguacugcgaucc..... 1  
Gi2\_10930943\_x2.....ccgccGguacugcgauccg..... 1  
Gi5\_8771611\_x2.....ggagacgucguggaacacggggugccgaacA..... 1  
Gi2\_10864547\_x2.....ccgucagggccccgccaguacCgcg..... 1  
Gi2\_10883295\_x2.....agacAucguggaacacggggugccgaacu..... 1  
Gi2\_10971065\_x2.....aUgccccgccaguacugcgauccgagacg..... 1  
Gi2\_10933689\_x2.....ggagacAucguggaacacggggugc..... 1  
Gi2\_10970081\_x2.....gacgucgugAgaacacggggugcc..... 1  
Gi2\_10927969\_x2.....ggccccgccaguacugcgauU..... 1  
Gi2\_10957873\_x2.....gaacacggggugccgaaUu..... 1  
Gi2\_10850991\_x2.....cgccgucaNggccccccagu..... 1  
Gi2\_10968947\_x2.....Gcgucagggccccgccaguacugcg..... 1  
Gi2\_10901271\_x2.....aggccccccaCuacugc..... 1  
Gi2\_10937521\_x2.....Cgccccgccaguacugcgauccg..... 1  
Gi2\_10989061\_x2.....gagacgucguggaacGcggggugccg..... 1  
Gi3\_28206696\_x2.....cUgccaguacugcgauccgagac..... 1  
Gi3\_28119294\_x2.....aguacugcgauccgagagUg..... 1  
Gi3\_28195576\_x2.....Caagcgccgucagggccccgccc..... 1  
Gi2\_10841049\_x2.....cgccaguaNugcgauccgagag..... 1

G1a\_5927618\_x2.....cgucagggccccgccaguGcu..... 1  
 Gi2\_10949629\_x2.....cgCcgugggaacacgggg..... 1  
 Gi3\_28046572\_x2.....gagGagcgccgucagggc.....acgucgugggaacacAgggugcc..... 1  
 Gi4\_559274\_x2.....gagGagcgccgucagggc..... 1  
 G1a\_5919002\_x2.....gaagcgccgucGggccccgcca.....gAcgugggaacacggggugccga..... 1  
 Gi3\_27989112\_x2.....gUgacgucgugggaacacg..... 1  
 Gi3\_27994870\_x2.....cUccgccaguacugcgauccggagacgu.....ucgugggaacGcggggugccgaacu..... 1  
 Gi3\_28186204\_x2.....cUccgccaguacugcgauccggagacgu..... 1  
 G1a\_5883252\_x2.....ucgugggaacGcggggugccgaacu..... 1  
 Gi2\_10907569\_x2.....aguacugcgauccggagGcguc..... 1  
 G1a\_5951448\_x2.....ugggaacacggggugccgaUcu..... 1  
 Gi2\_10864739\_x2.....Gggagacgucgugggaacacggggug..... 1  
 Gi3\_28078516\_x2.....cgucagggccccgccagGacugc..... 1  
 Gi1\_4136455\_x2.....aguacugcgauccggagacg..... 0  
 Gi2\_10861573\_x2.....gacgAcgugggaacacgggg..... 1  
 Gi2\_10878093\_x2.....cgucgugggaacacggggugccgaacG..... 1  
 Gi2\_10941885\_x2.....agacgucgugggaacacgAggguc..... 1  
 Gi2\_10908427\_x2.....aucggagUcgucgugggaacacgggg..... 1  
 Gi2\_10911625\_x2.....gaucggUgacgucgugggaacacgggg..... 1  
 Gi2\_10976919\_x2.....Uaggccccgccaguacugc.....aucgAagacgucgugggaacacggg..... 1  
 Gi2\_10901283\_x2.....aucgAagacgucgugggaacacggg..... 1  
 Gi3\_28130114\_x2.....gCcaggccccgccaguacugcg..... 1  
 Gi1\_4113335\_x2.....ugggaacacggggugcAgaac..... 1  
 Gi2\_10941677\_x2.....gaucggUgacgucgugggaacacg..... 1  
 Gi2\_10986723\_x2.....aucggagUcgucgugggaacacg..... 1  
 Gi5\_8778097\_x2.....ugUgaacacggggugccgaa..... 1  
 Gi2\_10921893\_x2.....Ugccaguacugcgauccgg..... 1  
 Gi3\_28066846\_x2.....ugggaacacggggGgccg..... 1  
 Gi3\_28207748\_x2.....ccgaauuaNgaagagaagcgccguc..... 1  
 Gi5\_8785979\_x2.....aggccccgNcaguacugcgauccggagacguc..... 1  
 Gi2\_10845059\_x2.....Acaggccccgccaguacugcgaucc..... 1  
 Gi3\_28117576\_x2.....gacgucgugggGacacggg..... 1  
 Gi3\_27989736\_x2.....gagacgCcgugggaacac..... 1  
 Gi2\_10971805\_x2.....ccccgcUaguacugcgauccggagac..... 1  
 Gi3\_27993854\_x2.....Cgccccgccaguacugcgauccgga..... 1  
 G1a\_5887566\_x2.....guUaggccccgccaguacugcga..... 1  
 Gi3\_28178192\_x2.....cgggagacgCcgugggaacacggg..... 1  
 Gi3\_28209404\_x2.....ucAgagacgucgugggaacacgggg..... 1  
 Gi3\_28223334\_x2.....ccgccaguacugcgauccggagCc..... 1  
 Gi3\_27993626\_x2.....ccgccaguGcugcgaucc.....ucgugggaacacUgggugccg..... 1  
 Gi2\_10946283\_x2.....ucgugggaacacUgggugccg..... 1  
 Gi5\_8806797\_x2.....gaucggagacgucgugggaacacggggugccgaac..... 0  
 Gi2\_10863149\_x2.....cUaucggagacgucgugggaacac..... 1  
 Gi2\_10969017\_x2.....aggccccgUcaguacugcg..... 1  
 Gi2\_10885889\_x2.....Agucagggccccgccaguacugcg..... 1  
 Gi3\_28129122\_x2.....gucaUgccccgccaguacugcg..... 1  
 Gi1\_4139185\_x2.....gugggaaGacgggugccgaacu..... 1

Gi2\_10897143\_x2.....cAucagggccccgccaguacugcg..... 1  
 Gi2\_10933585\_x2.....aggccccgcUaguacugcgau..... 1  
 Gi2\_10930075\_x2.....aggccccgccaguacugcgauccggaUa..... 1  
 Gi2\_10961911\_x2.....agGacugcgauccggagac..... 1  
 G1a\_5922926\_x2.....gugggaacacggggugccAa..... 1  
 Gi2\_10829841\_x2.....gccAUuacugcgauccggaga..... 1  
 Gi2\_10854579\_x2.....cguNggaaacacggggugccg..... 1  
 Gi5\_8811629\_x2.....aggccccgccaguacCgcgauc..... 1  
 Gi3\_28085984\_x2.....gaucggagacgucgugggaaUacggggu..... 1  
 G1a\_5959566\_x2.....aguacugcgauccggagCcguc..... 1  
 Gi2\_10898677\_x2.....aucGUagacgucgugggaaacacgg..... 1  
 Gi3\_28052408\_x2.....ucGggccccgccaguacugcgau..... 1  
 Gi3\_28175532\_x2.....acgucgugggaaCcggggugcc..... 1  
 Gi1\_4118675\_x2.....cUccaguacugcgauccggagacguc..... 1  
 Gi1\_4143591\_x2.....ucgugggaaUacggggugccga..... 1  
 Gi2\_10972689\_x2.....gucgugggaaAaggggugcc..... 1  
 Gi3\_28236348\_x2.....gaagagaagcgccgAcaggccccgc..... 1  
 Gi2\_10959471\_x2.....cgucgugggaaCcggggugc..... 1  
 Gi3\_28059268\_x2.....acgucgugggaaacacggggCgc..... 1  
 Gi1\_4143951\_x2.....gaagcgccgucagggccccgag..... 0  
 Gi3\_28186506\_x2.....Cagacgucgugggaaacacggggu..... 1  
 Gi3\_28213896\_x2.....gaacacggggugGcgaac..... 1  
 Gi4\_553932\_x2.....gaacacggggugccgaacuucU..... 1  
 Gi3\_28068170\_x2.....gacgucgugggaaUacggggugccgaacu..... 1  
 G1a\_5943140\_x2.....acgCcgugggaaacacggggu..... 1  
 Gi3\_28031528\_x2.....acugcgauccggagCcguc..... 1  
 Gi3\_28202992\_x2.....aacacggggugccgaGcuu..... 1  
 Gi2\_10859017\_x2.....caggccccgccaguacugGgauccggag..... 1  
 Gi3\_28213796\_x2.....Ccgugggaaacacggggugc..... 1  
 Gi2\_10954999\_x2.....gCucggagacgucgugggaaac..... 1  
 Gi2\_10843207\_x2.....gauUggagacgucgugggaaac..... 1  
 Gi2\_10898621\_x2.....gugggaaacacgggUugccgaac..... 1  
 Gi3\_28216548\_x2.....acgucgugggGacacggg..... 1  
 Gi2\_10950449\_x2.....gcUaguacugcgauccgga..... 1  
 Gi5\_8736309\_x2.....gGucggagacgucgugggaaacacggg..... 1  
 Gi3\_28014848\_x2.....aggcUccgccaguacugcgauccggagac..... 1  
 G1a\_5918754\_x2.....gucagggccccgccCguacugc..... 1  
 Gi2\_10914297\_x2.....gucgugggaaacacggUgugccgaacu..... 1  
 Gi2\_10947657\_x2.....Gcgucgugggaaacacggggu..... 1  
 Gi3\_28148536\_x2.....gccaguacugcgauccggagacgCc..... 1  
 Gi3\_28222626\_x2.....cggagacgucgugggaaacGc..... 1  
 Gi2\_10939799\_x2.....gacgucgugggaaGcacggggu..... 1  
 Gi2\_10887663\_x2.....cguggCaacacggggugcc..... 1  
 Gi1\_4123809\_x2.....cUucgugggaaacacggggugccgaa..... 1  
 Gi2\_10837071\_x2.....gCgacgucgugggaaacacggggugcc..... 1  
 Gi2\_10854143\_x2.....ggcccAgccaguacugcgau..... 1  
 Gi3\_28008882\_x2.....agaagcgCgucagggccccgccc..... 1

Gi3\_27988690\_x2.....acacggggCgccgaacuu..... 1  
 Gi5\_8725151\_x2.....uUggaacacggggugccga..... 1  
 Gi3\_28176904\_x2.....agGagcgccgcucagggcc.....Gugcgauccggagacgucgu..... 1  
 Gi3\_28195330\_x2.....aGugcgauccggagacgucgu..... 1  
 Gi2\_10989379\_x2.....ccgucagggcccCccaguacugcg..... 1  
 Gi5\_8824367\_x2.....gugggaaacacggggugAcga..... 1  
 Gi2\_10990049\_x2.....ucgugggCacacggggugccgaac..... 1  
 Gi3\_27989464\_x2.....gucagggcccgcagucGcugcg.....ggagacgucguggaaacGcggggugc..... 1  
 Gi2\_10882981\_x2.....ggagacgucguggaaacGcggggugc..... 1  
 Gi3\_28230934\_x2.....ucagggcccgcagucGcggaucc..... 1  
 Gi5\_8747813\_x2.....cagggcccNccaguacugcgaucc..... 1  
 Gi3\_28258322\_x2.....gucguggaaacacggggugccgaaGu..... 1  
 Gi2\_10956395\_x2.....acgucgugAgaacacggggugcc..... 1  
 Gl1\_5970068\_x2.....cccgccagucGcugcgauccggagacguc..... 1  
 Gi2\_10945111\_x2.....cgccagucNugcgauccggagac..... 1  
 Gi3\_28196328\_x2.....cggagaUgucguggaaacacggggg..... 1  
 Gi2\_10869025\_x2.....cagggcccgcGguacugcgaucc..... 1  
 Gi2\_10912177\_x2.....cgucguggaaacGcggggugccgaac..... 1  
 Gi2\_10908451\_x2.....ggaacacggggugccCaac..... 1  
 Gi3\_28025412\_x2.....cgucguggaaacacgAgg..... 1  
 Gi1\_4117609\_x2.....gugggaaacNcggggugccgaacuu..... 1  
 Gi5\_8800295\_x2.....gugggaGcacggggugccgaa..... 1  
 Gi1\_4111947\_x2.....aucggagacgucgugggGcacggggugcc..... 1  
 Gi1\_4090129\_x2.....gacgucguggaaacacgggAugcc..... 1  
 Gi2\_10992239\_x2.....gaucggGgacgucguggaaac..... 1  
 Gi3\_28110000\_x2.....aagagaagcgccgcucagggccUcgccaguc..... 1  
 Gi3\_28172424\_x2.....gucGggcccgcagucacugcgaucc..... 1  
 Gi3\_28187040\_x2.....uggaaacacgUggugccg..... 1  
 Gi2\_10917387\_x2.....gucgugggCacacggggugccgaac..... 1  
 Gi2\_10926777\_x2.....Cggcccgcagucacugcg..... 1  
 Gi2\_10845181\_x2.....cguggaaacaUggggugc..... 1  
 Gi2\_10922877\_x2.....aagagaGgcccgcucagggcc.....gacgucguggaaacacggggugUc..... 1  
 Gi2\_10911117\_x2.....gacgucguggaaacacggggugUc..... 1  
 Gi2\_10901907\_x2.....cgucagggNccgccagucacugc..... 1  
 Gi1\_4133243\_x2.....ucUgagacgucguggaaacacggggugcc..... 1  
 Gi3\_28199894\_x2.....ccccgccagucGcugcgauccggagacguc.....aCacgucguggaaacacggg..... 1  
 Gi3\_28208108\_x2.....aCacgucguggaaacacggg..... 1  
 Gi1\_4126195\_x2.....cagggcccgcGguacugcg..... 1  
 Gi3\_28009376\_x2.....agUgaagcgccgcucagggc.....gugCgaacacggggugcc..... 1  
 Gi3\_28103238\_x2.....gugCgaacacggggugcc..... 1  
 Gi3\_28098258\_x2.....ggUaacacggggugccga..... 1  
 Gi2\_10847689\_x2.....guggaaacacggggugcGg..... 1  
 Gi5\_8776731\_x2.....aGcggagacgucguggaaaca..... 1  
 Gi5\_8810919\_x2.....ggaacacAgggugccgaac..... 1  
 Gi5\_8793531\_x2.....gugggCacacggggugccgaacuu..... 1  
 Gl1\_5887628\_x2.....aacacggggugcAgaacu..... 1  
 Gi2\_10848123\_x2.....ccgccGguacugcgauccggag..... 1

Gi2\_10849697\_x2.....cggagacgucgugggCacacggggugcc..... 1  
 Gi3\_28135996\_x2.....cgaucggCgacgucugggaacacg..... 1  
 Gi1\_4154219\_x2.....cAugggaacacggggugccgaa..... 1  
 Gi2\_10838643\_x2.....ggagacgucgugggaaUacggggugc..... 1  
 Gi3\_28092046\_x2.....cgucgugggaacacggAgugccga..... 1  
 Gi2\_10867051\_x2.....Ggccaguacugcgauccgaga..... 1  
 Gi1\_4152849\_x2.....guggUaacacggggugccga..... 1  
 Gi3\_28258364\_x2.....ugUgaucggagacgucgugggaaca..... 1  
 Gi2\_10965725\_x2.....Ugucaggccccgccaguac..... 1  
 Gi2\_10879465\_x2.....gaucggagacgucgugggaGcacgg..... 1  
 Gi3\_28171116\_x2.....cccgccaguacugcgauccgagacguA..... 1  
 Gi2\_10883697\_x2.....cgugCgaacacggggugccgaa..... 1  
 Gi3\_28184774\_x2.....aucggagacgucUugggaaacacggggugcc..... 1  
 Gi3\_28206544\_x2.....aGcggagacgucgugggaac..... 1  
 Gi1\_4119679\_x2.....Cccaguacugcgauccgagacg..... 1  
 Gi3\_28117158\_x2.....cgAagacgucgugggaacacggggugcc..... 1  
 Gi3\_28026510\_x2.....gaucggagacgucgugggaGcacggggugcc..... 1  
 Gl1\_5891532\_x2.....ugggUaacacggggugccgaa..... 1  
 Gi2\_10871159\_x2.....gacgucgugggaacacggggugccgCac..... 1  
 Gi2\_10852237\_x2.....caUuacugcgauccgagacguc..... 1  
 Gi2\_10937065\_x2.....Gagagaagcgccgucagggccccgcc..... 1  
 Gl1\_5972818\_x2.....cGgccaguacugcgauccgga..... 1  
 Gi3\_28043266\_x2.....gucaUgccccgccaguacugc..... 1  
 Gi3\_28147140\_x2.....agaagcgccgucagggUcccgccagu..... 1  
 Gi3\_28220794\_x2.....agacgucgugggaacacgAggugcc..... 1  
 Gl1\_5913522\_x2.....aUgagaagcgccgucagggcc..... 1  
 Gi2\_10842359\_x2.....aguacugcgauccgGgacgu..... 1  
 Gi3\_28001086\_x2.....acgucgugggaacacggggCgccg..... 1  
 Gl1\_5948222\_x2.....gugggGaacacggggugccgaa..... 1  
 Gi3\_28017870\_x2.....guUgugggaacacggggugccgaa..... 1  
 Gi2\_10970951\_x2.....cgugggaacacgAggugccga..... 1  
 Gi5\_8822455\_x2.....ggaacacggggugccgaa..... 0  
 Gi2\_10829559\_x2.....aagagaagcgccgucGggcc..... 1  
 Gi3\_28242198\_x2.....cgugggaCcacggggugc..... 1  
 Gl1\_5962312\_x2.....cgccaguacuAcgauccgagacguc..... 1  
 Gi3\_28086592\_x2.....acCgcgauccgagacguc..... 1  
 Gi1\_4125797\_x2.....ggagacgucgugUgaaacacggggugcc..... 1  
 Gi2\_10834125\_x2.....gggaacacggggAgccgaa..... 1  
 Gi2\_10981627\_x2.....cggagGcugcugugggaacacggggugc..... 1  
 Gi2\_10977289\_x2.....gacgucgugggaacacggggugccgaa..... 1  
 Gi3\_28118500\_x2.....ucggagacgucgugggaacacAgggu..... 1  
 Gi3\_28246310\_x2.....aucggagacgucgugggaacacgUg..... 1  
 Gi2\_10896331\_x2.....gucAugggaacacggggugccgaa..... 1  
 Gi2\_10939061\_x2.....Nccccaguacugcgaucc..... 1  
 Gi2\_10875417\_x2.....cUucaggccccgccaguacugcgaucc..... 1  
 Gl1\_4134449\_x2.....gucgugggaacacggggUacc..... 1  
 Gl1\_5921948\_x2.....acugcgauccgagacguUgug..... 1

Gi3\_28017842\_x2.....aggccAcgccaguacugcgauccgga.....1  
Gi4\_562910\_x2.....cgugggaacacggggugc.....0  
Gi3\_28060992\_x2.....acucguuccgaauaggaagagaagcgc.....0  
Gi1\_4112751\_x2.....Gcgucgugggaacacggggugccg.....1  
Gi3\_28237556\_x2.....cggagacgucgugggaacCcgggg.....1  
Gi2\_10888751\_x2.....cgugggaacUcggggugccga.....1  
Gi2\_10876289\_x2.....ucgugggaacacgUggugccgaacu.....1  
Gi2\_10955719\_x2.....gUgacgucgugggaacacggggugccg.....1  
Gi3\_28057992\_x2.....agacgucgugggaacaUggggugcc.....1  
Gi3\_28077596\_x2.....cgcgucagCccccgccaguacugc.....1  
Gi3\_28193114\_x2.....gaagagaagcgccgucaggcUcc.....1  
Gi5\_8799323\_x2.....aagagaGcgccgucagggccccgccc.....1  
Gi2\_10877663\_x2.....aggccccgccaguacuCcgau.....1  
Gi3\_27998202\_x2.....gucgugggaacGacggggugccgaacu.....1  
Gi2\_10901739\_x2.....Aaucggagacgucgugggaac.....1  
Gi3\_28213476\_x2.....agUccccgccaguacugcgauccggagac.....1  
Gi2\_10911019\_x2.....cgucUugggaacacgggg.....1  
Gi1\_4131969\_x2.....agcgccgCcaggccccgccaguacugc.....1  
G1a\_5918070\_x2.....cgucagggcccAgccaguacugc.....1  
Gi1\_4120099\_x2.....gaacacggggugccgaaGu.....1  
Gi3\_28118672\_x2.....Ugaacacggggugccgaacu.....1  
Gi1\_4101825\_x2.....cgugggaacacAgggugccga.....1  
Gi2\_10990945\_x2.....acgucgCgggaacacggggugc.....1  
Gi2\_10951671\_x2.....agacgAcgugggaacacggggugcc.....1  
Gi3\_28038066\_x2.....cggagacgucgugAgaacacg.....1  
Gi2\_10983889\_x2.....gucgugggaacacggggAugccgaac.....1  
Gi2\_10942135\_x2.....Gcugcgauccggagacgucgugggaacac.....1  
Gi3\_28013396\_x2.....cggagacgucgugggGacacggggugccga.....1  
Gi1\_4125215\_x2.....gUucggagacgucguggg.....1  
Gi3\_28027678\_x2.....Uggccccgccaguacugcgau.....1  
Gi5\_8815801\_x2.....aucggagacgucgugggCacacggg.....1  
Gi3\_28182042\_x2.....cgucgugggaacacggggugcGaaacu.....1  
G1a\_5883262\_x2.....Cuacugcgauccggagacgucg.....1  
Gi1\_4121999\_x2.....gggaacacggggugccgU.....1  
Gi2\_10828769\_x2.....gccGguacugcgauccgga.....1  
Gi3\_28070958\_x2.....ucaggccccgccaguacugcgauUgg.....1  
Gi1\_4146415\_x2.....gUaacacggggugccgaacu.....1  
Gi2\_10843835\_x2.....gaCgggagacgucgugggaacacggggugcc.....1  
Gi3\_28112414\_x2.....gccaguacugcgauccAgagacgu.....1  
Gi5\_8819689\_x2.....ucggagacgucgugUgaacacg.....1  
Gi2\_10901389\_x2.....caggccccgccaguacuA.....1  
Gi3\_28156114\_x2.....cgGcugugggaacacggggugccgaa.....1  
Gi3\_28112740\_x2.....aguacugcgauccggagacgCcgug.....1  
Gi3\_28113150\_x2.....aagcgccgucagggccccgccCguacugc.....1  
Gi1\_4093549\_x2.....Augggaaacacggggugccgaacu.....1  
Gi3\_28014834\_x2.....cggagacgucgugggCacacgggg.....1  
Gi1\_4097523\_x2.....ucggGgacgucgugggaacacggg.....1

G1a\_5965470\_x2.....Aaucggagacgucgugggaacac..... 1  
 Gi2\_10970975\_x2.....Cagaagcgccgucagggccccgc..... 1  
 Gi2\_10876739\_x2.....aguacugcgGucggagacgucg..... 1  
 Gi2\_10954979\_x2.....acugcgaucggagacgucgugggaacacggggu..... 0  
 Gi2\_10837301\_x2.....ucAgagacgucgugggaacacg..... 1  
 Gi5\_8811299\_x2.....ucgGgggaacacggggugccgaac..... 1  
 Gi1\_4129965\_x2.....cgucagggccccccagucCgc..... 1  
 G1a\_5907020\_x2.....gugggaacacUgggugccgaacu..... 1  
 Gi3\_28175568\_x2.....gaucggagacgucgugggUacacggg..... 1  
 Gi1\_4151693\_x2.....cgugggaacacggggugccgaUcu..... 1  
 Gi3\_28104288\_x2.....ggagacgucAugggaacacggggugccgaacu..... 1  
 Gi3\_27999840\_x2.....gaagagaGgcccgcgucagggccccgc..... 1  
 Gi2\_10902581\_x2.....ucgugggaacacggggGgccg..... 1  
 Gi5\_8784927\_x2.....aucggagaUgucgugggaacacgg..... 1  
 G1a\_5958034\_x2.....caguacugcgaucggGgacgu..... 1  
 Gi3\_28092844\_x2.....aucggagacgucgugggaaAacggggugcc..... 1  
 Gi1\_4145653\_x2.....caggccccccagucgucgGucggaga..... 1  
 G1a\_5883070\_x2.....caguaUugcgaucggagacguc..... 1  
 Gi3\_28041326\_x2.....ucaggccccgcUaguacugc..... 1  
 Gi3\_28044408\_x2.....ggccccCccagucggauc..... 1  
 Gi3\_28106792\_x2.....cgucgugggaacacCgggugccga..... 1  
 Gi4\_564548\_x2.....aacaUggggugccgaacu..... 1  
 Gi3\_28220614\_x2.....Uaggccccccagucgucggaucgaga..... 1  
 Gi1\_4144837\_x2.....cgugggaacacggggugGcgaacu..... 1  
 Gi2\_10918017\_x2.....aCcgagacgucgugggaacacgggg..... 1  
 Gi5\_8725171\_x2.....aggccUcgccagucguc..... 1  
 Gi5\_8821035\_x2.....cgucgugggaacacggggugccgCac..... 1  
 Gi2\_10973377\_x2.....aggccccgcUguacugcg..... 1  
 Gi5\_8782071\_x2.....gccagucgucggaucggagacguU..... 1  
 Gi3\_28044982\_x2.....gucgugggGacacggggu..... 1  
 Gi3\_28218528\_x2.....aagagaagNgcccucagggccccccaguc..... 1  
 Gi3\_28193986\_x2.....auAggagacgucgugggaacac..... 1  
 Gi3\_28083038\_x2.....ugggaacacggggugcAg..... 1  
 G1a\_5918408\_x2.....gugggaacacCgggugccgaacu..... 1  
 G1a\_5949266\_x2.....gaucUgagacgucgugggaacacggggu..... 1  
 Gi3\_28222400\_x2.....gucagggccccccagucCgcg..... 1  
 Gi2\_10898025\_x2.....ggaacacggggugccUaac..... 1  
 Gi3\_28088408\_x2.....aggccccccagucCucgga..... 1  
 G1a\_5896394\_x2.....cgaucggGgacgucgugggaacacg..... 1  
 Gi3\_28155246\_x2.....gaagagaagcgucUgucagggccc..... 1  
 Gi2\_10889085\_x2.....gacgucgugggaacacggggugccgaCcu..... 1  
 Gi1\_4131007\_x2.....gugggaacacggggugcA..... 1  
 Gi3\_28157458\_x2.....cggagacgucgugggaaAacgggg..... 1  
 Gi2\_10869179\_x2.....cgucguAggaacacggggugccg..... 1  
 Gi3\_28187312\_x2.....gagaagcgccAucagggccccgc..... 1  
 G1a\_5903494\_x2.....gCagacgucgugggaacacg..... 1  
 Gi1\_4143465\_x2.....caggccccccCguacugcgauc..... 1



Gi2\_10868255\_x2.....gacgucgugggaacacacggggugccgaacG..... 1  
 Gi5\_8802397\_x2.....acucgcaCcgagacgucgug..... 1  
 Gi3\_28032418\_x2.....aagagaagcgccUucagggccc..... 1  
 Gi5\_8789041\_x2.....gagacguAgugggaacacggggugccgaacu..... 1  
 Gi3\_28099584\_x2.....ccaguacugcgauccgagacgucAu..... 1  
 Gi5\_8821831\_x2.....gugggaacaUggggugcc..... 1  
 Gi5\_8770265\_x2.....ugggaacacggggugGcgaacu..... 1  
 Gi3\_28204130\_x2.....gucgugggaacCcggggugc..... 1  
 Gi1a\_5927182\_x2.....gugggGacacggggugcc..... 1  
 Gi3\_27996186\_x2.....ccgNcaggccccgccaguacugc..... 1  
 Gi2\_10829467\_x2.....caggccccgccaguGcugcgau..... 1  
 Gi2\_10956327\_x2.....cgucgugggaacaUggggugccgaac..... 1  
 Gi3\_27994720\_x2.....gaucggagacguGgugggaacacg..... 1  
 Gi1a\_5889256\_x2.....cgucaggccccgccCguacugcg..... 1  
 Gi3\_28158960\_x2.....aagagaagcgccCcaggcccc..... 1  
 Gi3\_28227338\_x2.....cgucgugggaacacggggguAccga..... 1  
 Gi2\_10830483\_x2.....ccgucGggccccgccaguacugc..... 1  
 Gi3\_28022320\_x2.....gccaguaUugcgauccgagacguc..... 1  
 Gi1\_4099399\_x2.....caguacugcgauccgagacgucg..... 0  
 Gi5\_8808355\_x2.....cacggggugccgaacuCu..... 1  
 Gi2\_10839087\_x2.....cccgccagCacugcgauccgagac..... 1  
 Gi2\_10915061\_x2.....aacucguuccgaauaCgaagagaagcgcc..... 1  
 Gi3\_28132614\_x2.....acgucgugggaacacggggAgcc..... 1  
 Gi5\_8801159\_x2.....ggaacacggggugccgaaGu..... 1  
 Gi3\_28197214\_x2.....Accgucaggccccgccaguacu..... 1  
 Gi2\_10992219\_x2.....gaucggagacguAgugggaacac..... 1  
 Gi3\_28035978\_x2.....aguacugcgauccgagacgCc..... 1  
 Gi1a\_5910466\_x2.....cgugggaacGcggggugc..... 1  
 Gi2\_10873411\_x2.....caggccccgcUaguacugcgau..... 1  
 Gi3\_28250212\_x2.....Gggccccgccaguacugcgauccgagac..... 1  
 Gi3\_28154168\_x2.....caggccccgccaguacAgcga..... 1  
 Gi2\_10990875\_x2.....gucNugggaacacggggugccgaacu..... 1  
 Gi2\_10842719\_x2.....gacgucAugggaacacggggugccga..... 1  
 Gi5\_8736171\_x2.....cgugggaacacggggGgccgaac..... 1  
 Gi2\_10950975\_x2.....cgAcgugggaacacggggug..... 1  
 Gi5\_8778685\_x2.....aucggagacgucguggaaAacgg..... 1  
 Gi1a\_5970036\_x2.....ggaacacggggugAcgaacu..... 1  
 Gi3\_28135038\_x2.....aUgucgugggaacacggggugccgaa..... 1  
 Gi3\_28096100\_x2.....cgucgugggaaUacggggugccg..... 1  
 Gi2\_10840051\_x2.....aggccccgccaguUcugcgau..... 1  
 Gi2\_10957263\_x2.....gaagcgccNucaggccccgccagu..... 1  
 Gi3\_28159676\_x2.....cgucaggccccgccaguacugcgCucgg..... 1  
 Gi3\_28079012\_x2.....agacgucgugggaacacgAggugccgaac..... 1  
 Gi3\_28139760\_x2.....Ggcgccgucaggccccgccaguacugc..... 1  
 Gi1\_4116859\_x2.....gccccgccaguacugcgauccg..... 0  
 Gi3\_28159372\_x2.....gGucggagacgucgugggaacacggggug..... 1  
 Gi2\_10903273\_x2.....gccccgccaguacAgcgauc..... 1

Gi2\_10850183\_x2.....gucaggccccgcUaguacugcg..... 1  
 Gl1a\_5902188\_x2.....gaucggagacgucguAggaacacggggu..... 1  
 Gi5\_8780103\_x2.....cgugggGacacggggugccga..... 1  
 Gi2\_10944711\_x2.....cccgccaguacugcgauAgg..... 1  
 Gi1\_4143001\_x2.....ccgucaggccccgccaguacugcgau..... 0  
 Gi4\_564526\_x2.....cGcgccaguacugcgauccggagacguc..... 1  
 Gi3\_28045286\_x2.....ucgugggaacacggCgugccgaac..... 1  
 Gi2\_10864747\_x2.....cucguuccgaauaCgaagagaagcgccguc..... 1  
 Gi3\_28102184\_x2.....aggccccgccaguacCgcgau..... 1  
 Gi2\_10857583\_x2.....gucgugggaacacggggGgccg..... 1  
 Gi5\_8753529\_x2.....aggccccgccaguacugUgauc..... 1  
 Gi1\_4153173\_x2.....ggagacgucguggggaacacgggguU..... 1  
 Gi3\_28195344\_x2.....cgucgGgggaacacggggugccgaa..... 1  
 Gi2\_10833275\_x2.....cguAggaacacggggugccga..... 1  
 Gi3\_28090316\_x2.....aCuacugcgauccggagacgucgu..... 1  
 Gi3\_28113420\_x2.....guacugcgNucggagacgucgug..... 1  
 Gi4\_562892\_x2.....aguacugcgauccggagacguc..... 0  
 Gi2\_10875553\_x2.....ucaggccccgccaguGcugcg..... 1  
 Gl1a\_5950514\_x2.....aucggagaUgucgugggaacacggggu..... 1  
 Gi1\_4091075\_x2.....gagacgucguAggaacacggggugcc..... 1  
 Gi2\_10859905\_x2.....ugggaacacgggCugccg..... 1  
 Gi2\_10885823\_x2.....gucaggccccgccGguacugcgau..... 1  
 Gi3\_28168004\_x2.....Caucggagacgucgugggaacacg..... 1  
 Gi3\_28021538\_x2.....Ncgugggaacacggggugccgaacu..... 1  
 Gi4\_555188\_x2.....caggccccgccaguacug..... 0  
 Gi2\_10896027\_x2.....aucggagaUgucgugggaacacggggu..... 1  
 Gi2\_10864285\_x2.....gucgugggaacCcggggugccg..... 1  
 Gi2\_10894951\_x2.....ccUccaguacugcgauccggag..... 1  
 Gl1a\_5963674\_x2.....guAggaacacggggugcc..... 1  
 Gi3\_28042864\_x2.....cgucgugUgaacacggggugccgaacu..... 1  
 Gi1\_4122201\_x2.....ugggaacaAggggugccgaacu..... 1  
 Gi2\_10882901\_x2.....gugggCacacggggugccga..... 1  
 Gi3\_28016080\_x2.....aaAagaagcgccgucagggccccgca..... 1  
 Gi1\_4105541\_x2.....aggccccgccaguacugcgauU..... 1  
 Gi2\_10991643\_x2.....Cacgucgugggaacacggggugcc..... 1  
 Gi3\_28044364\_x2.....caggUcccgccaguacugcgau..... 1  
 Gi3\_28081868\_x2.....cguggAaacacggggugccg..... 1  
 Gi3\_28113368\_x2.....ccgccaguacugcAaucggagacgu..... 1  
 Gi3\_28126062\_x2.....cgucgugggaacacggUgugccgaac..... 1  
 Gi3\_27996584\_x2.....Acgugggaacacggggugc..... 1  
 Gi2\_10951523\_x2.....acgucgugggaacCcggggu..... 1  
 Gi1\_4143943\_x2.....ugggaacacggggugccgaaGu..... 1  
 Gi3\_28205242\_x2.....aucggagacguGuggggaacacg..... 1  
 Gi5\_8727377\_x2.....aucggagaNgucgugggaacacgggg..... 1  
 Gi3\_28209402\_x2.....aucggagacgucgugAgaacacggggugc..... 1  
 Gi2\_10829211\_x2.....gucgugggaacacUgggugccgaacu..... 1  
 Gi3\_28200934\_x2.....gaucgAagacgucgugggaacac..... 1

Gi3\_28241732\_x2.....ucgugggaacacCgggugccgaacu..... 1  
 Gi3\_28077624\_x2.....gugCgaacacggggugccga..... 1  
 Gi2\_10976107\_x2.....aagagaagNgccgucagggccccgccagua.....aucggagacgucguggAaacacgggu..... 1  
 Gi3\_28025008\_x2.....aagagaagNgccgucagggccccgccagua..... 1  
 Gi3\_28168812\_x2.....aucggagacgucguggUaacacggg..... 1  
 Gi3\_28160022\_x2.....gucguggAaacacggggugccga..... 1  
 Gi3\_28162798\_x2.....gaucggagacgucguggaacGcggggugc..... 1  
 Gi3\_28138800\_x2.....gUccccgccaguaucgcaucgg..... 1  
 Gi3\_28082510\_x2.....gagacgucguggaacCcggggu..... 1  
 Gi3\_27990414\_x2.....ggagacgucguggAaacacggg..... 1  
 Gi2\_10910645\_x2.....acgNcuguggaacacggggugc..... 1  
 Gi2\_10922909\_x2.....gaucggagacgucgugAgaac..... 1  
 Gi3\_28074110\_x2.....ucguggaacacggggugccgGa..... 1  
 Gi2\_10833139\_x2.....guggaacacggggAgccg..... 1  
 Gi1\_4143681\_x2.....Gcugcgaucggagacgucgugga..... 1  
 Gi2\_10944323\_x2.....uggaacacggggGgccg..... 1  
 Gi3\_27991632\_x2.....gaucggCgacgucguggaacacgggu..... 1  
 Gi3\_27986416\_x2.....cccUgccaguaucgcaucggagacgu..... 1  
 Gi3\_28125192\_x2.....caguacugcgauCAgagacgucgug..... 1  
 Gi3\_28151474\_x2.....gaucggagNcugcuguggaacacggggugc..... 1  
 Gi3\_28136026\_x2.....agacgucguggaacacggggCgcc..... 1  
 Gi2\_10867973\_x2.....ccccgccaguaucgcaAc..... 1  
 Gi3\_27995724\_x2.....acgucguggaacacggggGgc..... 1  
 Gi2\_10963873\_x2.....ccccUccaguaucgcaucgg..... 1  
 Gi3\_28107430\_x2.....Cucaggccccgccaguaucgcg..... 1  
 Gi5\_8803383\_x2.....uggaacacggggugccgaacuC..... 1  
 Gi3\_27986240\_x2.....cagggccccgccaguGcugcga..... 1  
 Gi2\_10973075\_x2.....cgUcaguaucgcaucgggaga..... 1  
 Gi1\_4119585\_x2.....cgAagacgucguggaacacggggugcc..... 1  
 Gi5\_8749177\_x2.....ggaacacgggCugccgaacu..... 1  
 Gi1\_4152381\_x2.....cgGggaacacggggugccg..... 1  
 Gi4\_565140\_x2.....cguggaacacggggugccgGacu..... 1  
 Gi2\_10911045\_x2.....aguacugcgGucggagacgu..... 1  
 Gi3\_28077824\_x2.....guacugcgGucggagacgucgug..... 1  
 Gi3\_28212364\_x2.....aAgccccgccaguaucgcaucgggagac..... 1  
 Gi2\_10886183\_x2.....acgucgugggaaAacggggugccgaac..... 1  
 Gi3\_28056580\_x2.....cgaucggGgacgucguggaacacg..... 1  
 Gi5\_8789333\_x2.....gaucggagacgucguAggaaacacgg..... 1  
 Gi3\_28147950\_x2.....ucguggaacGcggggugccga..... 1  
 Gi3\_28008342\_x2.....guggaacacggggNgccgaacu..... 1  
 Gi2\_10980771\_x2.....cgucguggaGcacggggugccga..... 1  
 Gi3\_28126384\_x2.....aucggagacgucguggaUcacgg..... 1  
 Gi3\_28039276\_x2.....gucguggaacacggggugccgaC..... 1  
 Gi3\_28227428\_x2.....cgccaguaucgUaucggagacguc..... 1  
 Gi5\_8811621\_x2.....acgucguggaGcacggggugccgaac..... 1  
 Gi3\_28073848\_x2.....gaagagaagcggcagAc.... 1  
 Gi3\_28040158\_x2.....Cgagacgucguggaacacgggu..... 1

Gi1\_4114083\_x2.....aucggagaNgucgugggaaacacgggg..... 1  
 Gi3\_28054886\_x2.....agaagcgcgcucagggccccgccG..... 1  
 Gi5\_8747205\_x2.....gacgucgugggaaacCcggggugccgaacu..... 1  
 Gi5\_8802355\_x2.....acCucgugggaaacacggggugccgaacu..... 1  
 Gi3\_28113004\_x2.....aucggagacgucCugggaaacacggggu..... 1  
 Gi2\_10928321\_x2.....ugggaCcacggggugccgaa..... 1  
 Gi3\_28185572\_x2.....cccgccaguacugcgauacAgagacgu..... 1  
 G1a\_5928102\_x2.....Gucggagacgucgugggga..... 1  
 Gi1\_4117117\_x2.....ccgCcaggccccccagucg..... 1  
 Gi3\_28007564\_x2.....gaauuaggaagagaagcgc..... 0  
 G1a\_5950270\_x2.....gccaguacugcgauccggGgacguc..... 1  
 Gi3\_28029074\_x2.....Cacugcgauccggagacguc..... 1  
 Gi3\_28161866\_x2.....gucgugggaaacacggggugGcgaac..... 1  
 Gi3\_28067618\_x2.....ucggagacgucgugggaaacacggggG..... 1  
 G1a\_5889382\_x2.....Uucgugggaaacacggggugccgaa..... 1  
 Gi2\_10965371\_x2.....cUgagacgucgugggaaacacgggg..... 1  
 Gi3\_28078486\_x2.....ucagUccccgccaguacugcgauccgga..... 1  
 Gi5\_8785417\_x2.....cgauccggagacgucgugggaaacacAgg..... 1  
 Gi2\_10886539\_x2.....ggaacacggggugccgaaGu..... 1  
 G1a\_5885100\_x2.....cgucagggccccccaguaUugc..... 1  
 Gi3\_28055278\_x2.....Cagacgucgugggaaacacggggugccgaacu..... 1  
 G1a\_5876972\_x2.....Gaguacugcgauccggagacgucg..... 1  
 Gi3\_27997460\_x2.....aGcggagacgucgugggaaacacggggug..... 1  
 G1a\_5940878\_x2.....aucggagGcgcgucgugggaaacacgggg..... 1  
 Gi5\_8764523\_x2.....ucggagacAucgugggaaacacg..... 1  
 Gi3\_28057370\_x2.....cggagacgucgugggaaacacgAgu..... 1  
 Gi5\_8803293\_x2.....aCcgagacgucgugggaaaca..... 1  
 Gi2\_10932883\_x2.....ugggaacacggggugAcg..... 1  
 Gi2\_10927537\_x2.....cguggUaacacggggugcc..... 1  
 G1a\_5931792\_x2.....cgCcaggccccccagucg..... 1  
 Gi3\_28103200\_x2.....cgccaguCucggaucggagacgu..... 1  
 Gi4\_561938\_x2.....uUggaacacggggugccgaac..... 1  
 Gi3\_28105008\_x2.....Ugaagcgcgcucagggccccgcc..... 1  
 Gi2\_10956569\_x2.....cgAcgugggaaacacggggugccgaac..... 1  
 Gi3\_28011254\_x2.....cccgccaguacugcgauccgA..... 1  
 Gi3\_28136490\_x2.....Uccccgccaguacugcgauccggaga..... 1  
 Gi3\_28062110\_x2.....aucggagacgucgugUgaacacggg..... 1  
 Gi4\_559618\_x2.....agaagcgcgcucagggccc..... 0  
 Gi1\_4099819\_x2.....caggccccccagCacugcg..... 1  
 Gi2\_10992205\_x2.....cgauccggGgacgucgugggga..... 1  
 Gi3\_27992908\_x2.....gacgucgugggaaacacgAggugccgaacu..... 1  
 Gi2\_10940941\_x2.....ugAgaacacggggugccgaa..... 1  
 Gi3\_28024428\_x2.....cgugggaaacaUggggugccgaa..... 1  
 Gi3\_28052334\_x2.....gCacugcgauccggagacguc..... 1  
 Gi3\_28202132\_x2.....aucggagCcgucgugggaaacac..... 1  
 Gi1\_4132281\_x2.....gccaguacugcgauccgga..... 0  
 G1a\_5918378\_x2.....cgugCgaacacggggugccgaacu..... 1

Gi5\_8751863\_x2.....aucggagaUgucgugggaaacacggggg..... 1  
 Gi4\_558354\_x2.....ggagacgucgugggaaacacggggugcc..... 0  
 Gi5\_8797781\_x2.....aucggagCcgucgugggaaacacg..... 1  
 Gi3\_27985100\_x2.....cggaUacgucgugggaaacacgggg..... 1  
 Gi2\_10848897\_x2.....guUcugcgauccggagacguc..... 1  
 Gi2\_10886759\_x2.....gagaagcgccgucagAccccgc..... 1  
 Gi3\_28120448\_x2.....ccgccaguacCgcgaucggagacguc..... 1  
 Gi5\_8762525\_x2.....gugggaacacAgggugccgaa..... 1  
 Gi2\_10955855\_x2.....gccccgccUguacugcgau..... 1  
 Gi5\_8786021\_x2.....guggUaacacggggugcc..... 1  
 Gi5\_8792365\_x2.....aCgccccccaguacugc..... 1  
 Gi1\_4090285\_x2.....gaacacggggugccgaacG..... 1  
 Gi1\_4139897\_x2.....gagGcgucgugggaaacacggggugccg..... 1  
 Gi3\_28214636\_x2.....cgucgugggaaGcacggggugccgaa..... 1  
 Gi1\_4132711\_x2.....gaacacggggugccgaCc..... 1  
 Gi2\_10984317\_x2.....cgucguggCaacacggggugccgaacu..... 1  
 Gi5\_8769759\_x2.....cguAgugggaacacggggugccgaacu..... 1  
 Gi2\_10866735\_x2.....ucggGgacgucgugggaaaca..... 1  
 G1a\_5979872\_x2.....Gccgccaguacugcgauccggagacguc..... 1  
 Gi3\_28086756\_x2.....aggccccccaguacugcgauccggCgacg..... 1  
 Gi2\_10911365\_x2.....ggagacgucgugggaaCcacggggugc..... 1  
 Gi3\_28213426\_x2.....ucgCgggaacacggggugccg..... 1  
 Gi3\_28008462\_x2.....Cagacgucgugggaaacacg..... 1  
 Gi2\_10920981\_x2.....cgugggaacacggggugccCaac..... 1  
 Gi3\_28152780\_x2.....acgucgugggaaacacgggAugccgaac..... 1  
 Gi1\_4090067\_x2.....gacgucgugggaaacacggggugUcgaacu..... 1  
 G1a\_5887052\_x2.....cggagacgNcguggaaacacg..... 1  
 Gi3\_28114438\_x2.....aucggagacgucCugggaacacgggg..... 1  
 Gi1\_4156167\_x2.....acgucgugggaaacacggAgugcc..... 1  
 Gi5\_8801087\_x2.....Aucgugggaaacacggggugccgaac..... 1  
 Gi3\_28173372\_x2.....ccccAccaguacugcgauccggagacgu..... 1  
 Gi5\_8764179\_x2.....cgucaggcNcccaccaguacugc..... 1  
 Gi1\_4090983\_x2.....gugggaacacggAgugcc..... 1  
 Gi2\_10950213\_x2.....ucguuccgaauuaggaagagaagcgcc..... 0  
 Gi3\_27991042\_x2.....cgUcaguacugcgauccggagacgucgug..... 1  
 Gi2\_10909949\_x2.....gugUgaacacggggugccg..... 1  
 Gi2\_10907027\_x2.....gacgucgugggaaCcacggggugccg..... 1  
 Gi2\_10899677\_x2.....caggccccccaguacugUg..... 1  
 Gi2\_10975253\_x2.....gGcgucgugggaaacacgg..... 1  
 Gi2\_10933493\_x2.....gugggaacacUgggugccgaac..... 1  
 Gi2\_10836449\_x2.....cgauccggaNacgucgugggaaacacggg..... 1  
 Gi3\_28258590\_x2.....agacgucgNgggaacacggggugccga..... 1  
 Gi2\_10958501\_x2.....cgugggaacaUggggugccgaa..... 1  
 Gi5\_8797871\_x2.....Gggagacgucgugggaaacacggg..... 1  
 Gi3\_28091864\_x2.....gucaggcUccgccaguacugc..... 1  
 Gi5\_8829593\_x2.....acgucgugggaaacacggggCgcc..... 1  
 Gi1\_4133201\_x2.....caggccccccaguacugUg..... 1

Gi3\_28023966\_x2.....cggagacgucgugggaacacggC..... 1  
 Gi2\_10957553\_x2.....gaucggagGcgcgucgugggaacacggggugc..... 1  
 Gi3\_28229234\_x2.....cccgccaguUcugcgauccggagacguc..... 1  
 Gi3\_28139582\_x2.....ggagacgucgugggaacacggggugcUga..... 1  
 Gi2\_10965689\_x2.....gucgugggaacacggggugccgGac..... 1  
 Gi2\_10844929\_x2.....aucggagacgucgugggaacacgAggug..... 1  
 G1a\_5964980\_x2.....aauuaggCagagaagcgcgcguc..... 1  
 Gi3\_28070622\_x2.....ccaguacuNcgauccggagacgucgu..... 1  
 Gi2\_10842315\_x2.....cgugggaacacggggugAcg..... 1  
 Gi1\_4156689\_x2.....acgucgugggCacacggggugcc..... 1  
 G1a\_5927080\_x2.....gugggaacacgggCugccgaacu..... 1  
 Gi2\_10841879\_x2.....cAucaggccccgccaguac..... 1  
 Gi3\_28148690\_x2.....gagacgucgugggaacCcg..... 1  
 Gi2\_10969365\_x2.....ccgucaggccccgccaguaAugc..... 1  
 Gi2\_10884813\_x2.....ucggagacgucgCgggaacacggggugc..... 1  
 G1a\_5877556\_x2.....gugggaacCcggggugccgaac..... 1  
 Gi3\_28114162\_x2.....acgucgugggCacacggggugccgaac..... 1  
 Gi3\_28081320\_x2.....cgucgugggaacacggggugcUgaac..... 1  
 Gi2\_10874755\_x2.....cgucguUggaacacggggugccgaac..... 1  
 Gi3\_28245304\_x2.....gagacgucgugggaacacggggguAccgaacu..... 1  
 G1a\_5926390\_x2.....ucgugggaacacggggugccgCac..... 1  
 Gi3\_28002284\_x2.....gucgugggaacacggggugccCaac..... 1  
 G1a\_5929818\_x2.....aguacugcgGucggagacgucgug..... 1  
 Gi2\_10974825\_x2.....aacacggggugAcgaacu..... 1  
 Gi3\_28229906\_x2.....ucguggUaacacggggugccgaac..... 1  
 Gi4\_562448\_x2.....gAgaacacggggugccgaacu..... 1  
 Gi2\_10850973\_x2.....ugcgauccggagacgucgugggaacacggggugcc..... 0  
 G1a\_5904258\_x2.....cgugggaacacgggCugccgaacu..... 1  
 Gi3\_28151588\_x2.....ucaggccccgccagCacugcg..... 1  
 Gi2\_10981553\_x2.....cccgccaguacCgcgauc..... 1  
 Gi3\_27988192\_x2.....ggccccgcNaguacugcgauccggagac..... 1  
 Gi2\_10889919\_x2.....ucggagacgucguAggaaca..... 1  
 Gi2\_10958255\_x2.....aagcgccgNcaggccccgccaguac..... 1  
 Gi2\_10983387\_x2.....Cacugcgauccggagacgucgugggaaca..... 1  
 Gi1\_4111317\_x2.....ugggaacacgggCugccg..... 1  
 Gi3\_28109940\_x2.....ucggagacgAcgugggaacacgggggu..... 1  
 Gi3\_28055236\_x2.....cucguuccgaauuaggaagagaagcgccg..... 0  
 Gi4\_557100\_x2.....gagaagcgNcgucagggc..... 1  
 G1a\_5933084\_x2.....Uacgucgugggaacacggg..... 1  
 Gi1\_4104505\_x2.....ugggaacacggggugAcg..... 1  
 Gi2\_10837539\_x2.....gggaacacggggugccUaac..... 1  
 G1a\_5952064\_x2.....gaUcacggggugccgaacu..... 1  
 Gi1\_4118171\_x2.....gacgucgugggaacacggggGgcc..... 1  
 Gi2\_10863939\_x2.....gaucggagacgucgugAga..... 1  
 Gi3\_27991952\_x2.....ccccgccGuaucgcauc..... 1  
 Gi3\_27993186\_x2.....gucaggcccUgccaguacugcgauc..... 1  
 Gi3\_28183690\_x2.....gucAugggaacacggggugc..... 1

Gi3\_28014496\_x2.....aucggagacgucgugggaacacUggg..... 1  
 Gi3\_28135242\_x2.....aucggagacgucUugggaacacggggugc..... 1  
 Gi3\_28260520\_x2.....cgauccggGgacgucguggg..... 1  
 Gi2\_10985579\_x2.....agacgucgNgggaacacggggugc..... 1  
 Gi5\_8815239\_x2.....gugggaacacggggugccAa..... 1  
 Gi5\_8819157\_x2.....ucggGgacgucgugggaacacg..... 1  
 Gi2\_10897301\_x2.....cgAgacgucgugggaacacggggugcc..... 1  
 Gi3\_28193946\_x2.....Caucggagacgucgugggaacacgg..... 1  
 Gi5\_8816251\_x2.....gacgucgugggaacacggggugccgaUcu..... 1  
 Gi3\_28039124\_x2.....ugggaacacggUgugccgaa..... 1  
 Gi3\_28099836\_x2.....cguNgugggaacacggggugcc..... 1  
 Gi2\_10851589\_x2.....ggagacgucgugggGacacggggugc..... 1  
 G1a\_5968806\_x2.....ugggaacacggggugccgaacG..... 1  
 Gi2\_10924421\_x2.....gagaagcgcgucagggccAcgccaguac..... 1  
 Gi1\_4116953\_x2.....acgucguAggaacacggggugccgaacu..... 1  
 Gi1\_4150617\_x2.....ucggGgacgucgugggaacacggggg..... 1  
 Gi2\_10900667\_x2.....ccccgccaguacugcgauccggagacgCc..... 1  
 Gi3\_28063360\_x2.....ucgugggaacacggggGgccgaa..... 1  
 Gi1\_4150793\_x2.....aaNacggggugccgaacu..... 1  
 Gi3\_28117880\_x2.....cggagacgucgugggaacacgggA..... 1  
 Gi1\_4119901\_x2.....agccAcgccaguacugcgauc..... 1  
 Gi3\_27996412\_x2.....aucggagacgucUugggaacacgg..... 1  
 G1a\_5978024\_x2.....guacugcgauccggCgacguc..... 1  
 G1a\_5916242\_x2.....cgugggaacacggAgugccgaacu..... 1  
 Gi3\_28049154\_x2.....cgucagggAccgccaguacugc..... 1  
 G1a\_5881400\_x2.....caggccccgccGguacugcgau..... 1  
 Gi3\_28182226\_x2.....ggaacacggggugccgaaGu..... 1  
 Gi5\_8772941\_x2.....gucgugCgaacacggggugccgaacu..... 1  
 Gi3\_28076656\_x2.....cccgccUguacugcgauccggagacgu..... 1  
 Gi3\_28137316\_x2.....gaGgagaagcgcgucaggg..... 1  
 Gi1\_4096115\_x2.....agacgucgugggaGcacgggg..... 1  
 Gi2\_10952505\_x2.....ccaguacugcgauccggagacgucgug..... 0  
 Gi3\_28231968\_x2.....ccgucagggcccUgccaguac..... 1  
 Gi3\_28117766\_x2.....gaucggCgacgucgugggaacac..... 1  
 Gi2\_10965385\_x2.....cgucgugggaacacggggugcAga..... 1  
 Gi3\_28242634\_x2.....aucggagacgucgugggaacaUggggugcc..... 1  
 Gi1\_4150557\_x2.....ccgccaguacugcgauccggagacgA..... 1  
 Gi2\_10937979\_x2.....aucggagacgucAuggggaacacggg..... 1  
 Gi3\_28170112\_x2.....ucagggAccgccaguacugcg..... 1  
 Gi2\_10962007\_x2.....ucgugggaGcacggggugccgaa..... 1  
 Gi2\_10986085\_x2.....Ngaacacggggugccgaa..... 1  
 Gi1\_4125181\_x2.....gaucggagacgucgugggaacacggggU..... 1  
 Gi3\_28095250\_x2.....cgucagggccccGcaguacugc..... 1  
 Gi2\_10920821\_x2.....gagacguAuggggaacacggggugc..... 1  
 Gi5\_8792053\_x2.....gugggaacacggggugcGgaac..... 1  
 Gi2\_10832709\_x2.....cAccgucagggccccgccaguacugc..... 1  
 Gi5\_8802959\_x2.....gugggaacacgggAugcc..... 1

Gi2\_10915091\_x2.....aucggagacgCcgugggaa..... 1  
 Gi3\_28142422\_x2.....ucUggccccgccaguacugcga..... 1  
 Gi2\_10984739\_x2.....aucggagacgucgugggaaGacggggugcc..... 1  
 Gi2\_10874173\_x2.....ucagUccccgccaguacug..... 1  
 Gi2\_10902023\_x2.....Agccccgccaguacugcga..... 1  
 Gi2\_10885701\_x2.....cgucgugggaaacacggggugccgaG..... 1  
 Gi3\_28040506\_x2.....gccgucaggccccccaUuacugcg..... 1  
 Gi3\_28024012\_x2.....auAgggagacgucguggga..... 1  
 Gi3\_28202836\_x2.....cggagacgucguUggaacacggggugcc..... 1  
 Gi1\_4140723\_x2.....aucAgagacgucgugggaaacacg..... 1  
 Gi1\_4146809\_x2.....Gggagacgucgugggaaacacggg..... 1  
 Gi2\_10879233\_x2.....caguacugcgauccggUgacgucg..... 1  
 Gi2\_10863101\_x2.....ucgugggaGcacggggugcc..... 1  
 Gi5\_8732153\_x2.....gccccgccaguacugcgGucgga..... 1  
 Gi2\_10905399\_x2.....gacgucgugggCacacggggugccgaacu..... 1  
 Gi2\_10919359\_x2.....gucaggccccgccaguaUugc..... 1  
 Gi3\_28221306\_x2.....ucgugggaaacacgggguUccgaacu..... 1  
 Gi5\_8779835\_x2.....cUccgccaguacugcgauccggagacg..... 1  
 Gi5\_8768759\_x2.....ggaacacggggugccgaa..... 0  
 Gi3\_27983876\_x2.....Caucggagacgucgugggaaacacggggugc..... 1  
 Gi2\_10938691\_x2.....cgucaggcUccgccaguacugc..... 1  
 Gi2\_10829419\_x2.....auAgggagacgucgugggaaacacggg..... 1  
 Gi3\_28038806\_x2.....acugcgauccggaUacgucgu..... 1  
 Gi3\_28111774\_x2.....cccGAcaguacugcgaucc..... 1  
 Gi2\_10922995\_x2.....acgucguAggaacacggggugccgaac..... 1  
 Gi2\_10964205\_x2.....ucggagacgucgugggaaGcacggggu..... 1  
 Gi2\_10854383\_x2.....cgucaggccccUgccaguacugcg..... 1  
 Gi5\_8773727\_x2.....ggaacacggggugccgGac..... 1  
 Gi3\_28259858\_x2.....caggccccgccaguaUugcgau..... 1  
 Gi1\_4092105\_x2.....cgucgugggaaacGcggggugcc..... 1  
 Gi2\_10916307\_x2.....Accaguacugcgauccggagacguc..... 1  
 Gi2\_10953969\_x2.....ucaggccccgccGguacugcgaucc..... 1  
 Gi3\_28097060\_x2.....agUccccgccaguacugcgauccggagacg..... 1  
 Gi1\_4139261\_x2.....gaagagaagcggcucaggccccgcc..... 0  
 Gi3\_28037720\_x2.....ccaguacCgcgauccggagacgucgug..... 1  
 Gi5\_8827237\_x2.....ucaggccccgccaguacugcgaucc..... 0  
 Gi1\_4132445\_x2.....acgucgugggaaacacggAgugccgaacu..... 1  
 Gi2\_10938677\_x2.....gaucggagUcgucgugggaaacacggggu..... 1  
 Gi2\_10927029\_x2.....cgccaguacugcUaucggagac..... 1  
 Gi5\_8817341\_x2.....ucgugggGacacggggugccgaac..... 1  
 Gi3\_28015966\_x2.....aCaagcgccgucaggccccgcca..... 1  
 Gi3\_28170830\_x2.....ggccAcgccaguacugcgaucc..... 1  
 Gi2\_10965715\_x2.....aGugcgauccggagacgucgugg..... 1  
 Gi5\_8797611\_x2.....cgugggaaacacggggugccgUac..... 1  
 Gi3\_28185946\_x2.....cgauccggagGcgucguggg..... 1  
 Gi2\_10950255\_x2.....agacgucgugggaaAacggggugc..... 1  
 Gi3\_27980382\_x2.....Gccccgccaguacugcgaucc..... 1



Gi2\_10948207\_x2.....gccccgccaguCcuugcgau..... 1  
Gi1\_4134773\_x2.....cggagacgucgugggaaAacggggugc..... 1  
Gi2\_10889875\_x2.....aucggCgacgucgugggaa..... 1  
Gi2\_10876251\_x2.....gucaggccccgccaguacugcA..... 1  
Gi2\_10899685\_x2.....ucGggccccgccaguacugc..... 1  
Gi2\_10929885\_x2.....ccUccaguacugcgagcg..... 1  
Gi5\_8774219\_x2.....aucggagGcgucgugggaaacacgg..... 1  
Gi5\_8829257\_x2.....cguggaaacacgAggugcc..... 1  
Gi5\_8733095\_x2.....caggccUcgccaguacugcg..... 1  
Gi1\_4114699\_x2.....caggccccgccaguacCgc..... 1  
Gi2\_10843535\_x2.....Agugggaacacggggugccg..... 1  
Gi3\_28049686\_x2.....gggaacacggggugccgaGcuu..... 1  
Gi2\_10926955\_x2.....cgucgugggaaacacgggAugccga..... 1  
Gi2\_10888247\_x2.....uacNcgauccggagacgucgug..... 1  
Gi2\_10949707\_x2.....gaagcgccgucagggUcc..... 1  
Gi2\_10954097\_x2.....caggccccccaCuacugcg..... 1  
Gi3\_28069094\_x2.....guNugggaacacggggugccgaacu..... 1  
Gi5\_8774751\_x2.....cgucUugggaacacggggugccgaac..... 1  
Gi3\_28156828\_x2.....aggccUcgccaguacugcgauccga..... 1  
Gi5\_8752233\_x2.....cgucUugggaacacggggugc..... 1  
Gi3\_28082946\_x2.....cgucagggccccgAcaguacugcg..... 1  
Gi3\_28037512\_x2.....gacgucgugggaaacaUggggugccgaacu..... 1  
Gi5\_8776153\_x2.....ugcgauccggagacgucgugggC..... 1  
Gi2\_10873739\_x2.....gaucAgagacgucgugggga..... 1  
Gi1\_4152801\_x2.....caggccccNccaguacugc..... 1  
G1a\_5907902\_x2.....gucgugggaaacacggggugccgGacu..... 1  
Gi2\_10857741\_x2.....ccgucagggccccgccagCacugc..... 1  
Gi5\_8782821\_x2.....cGgucagggccccgccaguacugcg..... 1  
Gi2\_10877661\_x2.....cgucagggUccgccaguacug..... 1  
Gi1\_4153781\_x2.....gucgugggaaacacggggCgcccgaac..... 1  
G1a\_5975062\_x2.....gaCcgagacgucguggg..... 1  
Gi5\_8825617\_x2.....gacgucgCgggaacacggggugccg..... 1  
Gi3\_28135256\_x2.....cggCgacgucgugggaaacacggggu..... 1  
Gi2\_10854811\_x2.....cGgucagggccccgccaguacugcgaucc..... 1  
Gi5\_8812003\_x2.....aucggagacgucguAggaacacggg..... 1  
Gi5\_8787953\_x2.....cgccgucagggccccgccag..... 0  
Gi2\_10897685\_x2.....gacgucgugggaaacacggggugccgUacu..... 1  
Gi2\_10871399\_x2.....aagcUccgucagggccccgccaguacugc..... 1  
Gi3\_28113160\_x2.....gggaCcacggggugccgaa..... 1  
G1a\_5964546\_x2.....cguAggaacacggggugccgaacu..... 1  
Gi1\_4092417\_x2.....acgAcgugggaaacacggggugccgaacu..... 1  
Gi3\_28027242\_x2.....cggagacgucgugggaaacacAggggu..... 1  
Gi1\_4126551\_x2.....ucgugggaaacGcggggugccgaac..... 1  
Gi2\_10925227\_x2.....guCggaacacggggugccgaac..... 1  
Gi1\_4153039\_x2.....cgucguggAaacacggggugccgaacu..... 1  
Gi3\_28219172\_x2.....cccgccaguacugcgauccAg..... 1  
Gi2\_10882277\_x2.....gUgaagcgccgucagggccccgccag..... 1

Gi2\_10829705\_x2.....aucggagCcgucgugggaacacggggugc..... 1  
 Gi3\_28031826\_x2.....ggagacgucgugUgaacacggggugccg..... 1  
 Gl1a\_5892250\_x2.....ggaacacggggugccgaaAu..... 1  
 Gl1a\_5915188\_x2.....cagCacugcgauccggagacguc..... 1  
 Gi3\_28012386\_x2.....cgugggaacacUggggugc..... 1  
 Gi3\_28182410\_x2.....ucgugggaacacAgggugccg..... 1  
 Gi3\_28114254\_x2.....Cggccccgccaguacugcgauccgga..... 1  
 Gl1a\_5927938\_x2.....gggUacacggggugccgaacu..... 1  
 Gi3\_28169862\_x2.....acugcgauccggagacguUgug..... 1  
 Gi1\_4100523\_x2.....Ccaggccccgccaguacugcg..... 1  
 Gi1\_4124125\_x2.....gaaAagaagcgccgucaggg..... 1  
 Gi3\_28104282\_x2.....gaaAagaagcgccgucaggg..... 1  
 Gl1a\_5907232\_x2.....acugcguggGacacggggg..... 1  
 Gi1\_4149933\_x2.....Ggggaacacggggugccgaa..... 1  
 Gi3\_28177240\_x2.....agggccccccaguacugAgau..... 1  
 Gi2\_10936481\_x2.....agggccccccagCacugcg..... 1  
 Gi1\_4117965\_x2.....gaaacacgAgugccgaac..... 1  
 Gi5\_8729121\_x2.....gaucggagacgucgugggaacaAgg..... 1  
 Gi3\_28035482\_x2.....acugcgugggaacacggggGgccga..... 1  
 Gi1\_4097963\_x2.....ucgugggaacacgUgugcc..... 1  
 Gi3\_28096118\_x2.....gagacgCcgugggaacacg..... 1  
 Gi5\_8814301\_x2.....Gcgccaguacugcgauccggaga..... 1  
 Gi2\_10926605\_x2.....gugggaacacggggugGcg..... 1  
 Gi3\_28007234\_x2.....gucagggcUcgccaguacugcg..... 1  
 Gl1a\_5884554\_x2.....cgccGguacugcgauccggagacguc..... 1  
 Gi3\_28151726\_x2.....uGggagacgucgugggaacac..... 1  
 Gi3\_28054708\_x2.....cgucgugggaacaUggggg..... 1  
 Gi2\_10970933\_x2.....ccgccaguacCgcgauccggag..... 1  
 Gi3\_28020372\_x2.....gucagggccccccaguCcgcgaucc..... 1  
 Gi2\_10947901\_x2.....cagNccccgccaguacugcgaucc..... 1  
 Gi1\_4153639\_x2.....agacgucgugggaacacggggAgccgaacu..... 1  
 Gi3\_28127186\_x2.....ggagacgCcgugggaacacggggugcc..... 1  
 Gl1a\_5916678\_x2.....guacugcgGucggagacguc..... 1  
 Gi3\_28011654\_x2.....cgugggaacacggggugccgCa..... 1  
 Gi2\_10876279\_x2.....gacgucgugggaacacggggugcUg..... 1  
 Gl1a\_5962976\_x2.....gugggaacacAgggugccga..... 1  
 Gi4\_562384\_x2.....ggaacacgNggugccgaac..... 1  
 Gi2\_10839501\_x2.....agacgucguggGacacggggugc..... 1  
 Gi3\_28017780\_x2.....acugcgugggaacaUggggugcc..... 1  
 Gl1a\_5949652\_x2.....cagggccccccaguacCcgcau..... 1  
 Gi3\_28049906\_x2.....ggagacgucgugggaacacggAgu..... 1  
 Gl1a\_5907070\_x2.....guacugcgauccggGgacguc..... 1  
 Gi2\_10894573\_x2.....gUgacgucgugggaacacggggugccgaacu..... 1  
 Gi3\_28051790\_x2.....cUcgccaguacugcgauccggag..... 1  
 Gi2\_10986087\_x2.....cggagacgucgugAgaacacggggugc..... 1  
 Gi2\_10832885\_x2.....cggagacAucgugggaacacggggugccgaacu..... 1  
 Gi2\_10881825\_x2.....aagagaagUgcccugagggc..... 1

Gi2\_10851835\_x2.....ucaggccUcgccaguacugcgauc..... 1  
 Gi3\_28165790\_x2.....gacgAcgugggaacacggggugccgaacu..... 1  
 Gi5\_8821819\_x2.....aCcgagacgucgugggaacacgggg..... 1  
 G1a\_5939680\_x2.....gagaagcgccgucaggccccgccaguacug..... 0  
 Gi3\_27992782\_x2.....ggGgacgucgugggaacacggggugcc..... 1  
 Gi1\_4157797\_x2.....gugCgaacacggggugccgaacu..... 1  
 Gi1\_4112477\_x2.....ucgugggaacacggggugccgaaUu..... 1  
 Gi1\_4112913\_x2.....ggagacgucgugggaacacggggAgccg..... 1  
 G1a\_5883136\_x2.....guggUaacacggggugccga..... 1  
 G1a\_5939222\_x2.....gaucggagacgucgugggCa..... 1  
 Gi2\_10849799\_x2.....Ucgucaggccccgccaguacugc..... 1  
 Gi2\_10845235\_x2.....aggccccgccaguaUugcgauccgga..... 1  
 Gi3\_28219220\_x2.....Aaucggagacgucgugggaacacggggugcc..... 1  
 Gi3\_28128494\_x2.....guGugggaacacggggugccgaacu..... 1  
 Gi2\_10913127\_x2.....agacgucgugggaacacggggCgccga..... 1  
 Gi5\_8783161\_x2.....Aucgugggaacacggggugccgaa..... 1  
 Gi2\_10893231\_x2.....aucggagacgCguggga..... 1  
 Gi3\_28151552\_x2.....cggagaUgucgugggaacacggggugcc..... 1  
 Gi3\_28183748\_x2.....ucgCgggaacacggggugccgaa..... 1  
 Gi3\_28075726\_x2.....aucggagacgucgugggaacacggggAgc..... 1  
 Gi1\_4156795\_x2.....ucgugggaacacUgggugccgaac..... 1  
 Gi5\_8825471\_x2.....Gcaguacugcgaucggagacgu..... 1  
 Gi2\_10980135\_x2.....cguUgugggaacacggggugccgaac..... 1  
 Gi1\_4123699\_x2.....cgugggaacacggggUaccg..... 1  
 Gi3\_28242760\_x2.....Ugcgccgucaggccccgcc..... 1  
 Gi3\_28164150\_x2.....cgucgugggaacaUggggugccga..... 1  
 Gi2\_10963525\_x2.....cggagacgucgugggaacGcggggugc..... 1  
 Gi2\_10846593\_x2.....cgugggaaUacggggugccgaa..... 1  
 Gi2\_10981571\_x2.....cgucgugggaacacggggugcUgaac..... 1  
 Gi2\_10943447\_x2.....ucguuccgaauuaggaagagaagc..... 0  
 G1a\_5944912\_x2.....cgugggaacacggUgugccgaacu..... 1  
 Gi3\_28034588\_x2.....gucaggcUccgccaguacugcgauc..... 1  
 Gi5\_8804191\_x2.....cgugggaacacggggugccgaC..... 1  
 Gi1\_4117193\_x2.....ucgugggaacacggggugcA..... 1  
 Gi2\_10933189\_x2.....gaucgAagacgucgugggaacacggggugc..... 1  
 Gi1\_4131425\_x2.....cCucgugggaacacggggugcc..... 1  
 Gi3\_28201822\_x2.....ccccgccaguacugcgaucggCgagc..... 1  
 Gi3\_28044284\_x2.....aggccccgccaguCcugcgau..... 1  
 Gi4\_566822\_x2.....aGcacggggugccgaacu..... 1  
 Gi3\_28101492\_x2.....cgugggaacacggggugU..... 1  
 G1a\_5957058\_x2.....Gagagaagcgccgucaggccccgcc..... 1  
 Gi3\_28172580\_x2.....gucgugggUacacggggugcc..... 1  
 Gi2\_10955383\_x2.....ggaacaGggggugccgaacu..... 1  
 Gi1\_4115813\_x2.....gggaaAacggggugccgaacu..... 1  
 Gi5\_8795031\_x2.....cagAccccgccaguacugc..... 1  
 Gi3\_28245060\_x2.....gUgccgucaggccccgccaguacugc..... 1  
 Gi3\_28022040\_x2.....caggGccccgccaguacugcga..... 1

Gi3\_28259082\_x2.....agagaagcgccguUagggccccgcca..... 1  
 Gi2\_10989689\_x2.....aggccccgccUguacugc..... 1  
 G1a\_5938698\_x2.....gugggaacacggggugccgCac..... 1  
 Gi2\_10925703\_x2.....caguacugcgauccggagacgCc..... 1  
 Gi1\_4143731\_x2.....Cggaacacggggugccgaacuu..... 1  
 Gi2\_10839399\_x2.....ucggUgacgucguggggaacacg..... 1  
 Gi3\_28062322\_x2.....Gaggccccgccaguacugcgauccggagac..... 1  
 Gi2\_10946593\_x2.....caggccccAccaguacugcgau..... 1  
 Gi1\_4132253\_x2.....gggaacacggggugccgaaUu..... 1  
 Gi3\_28171436\_x2.....cCgagacgucguggggaacacggg..... 1  
 Gi3\_28093608\_x2.....agacgucguggggaacaUggggugccgaacu..... 1  
 G1a\_5940784\_x2.....Gcgucguggggaacacggggg..... 1  
 Gi2\_10983665\_x2.....gaucggagacgucguggggaacacggggA..... 1  
 Gi2\_10935153\_x2.....aucggagacgucgugggAaacacggggugcc..... 1  
 Gi3\_28227088\_x2.....cccgccUguacugcgau..... 1  
 Gi1\_4119587\_x2.....acugcgauAggagacgucg..... 1  
 Gi3\_28233290\_x2.....Accgccaguacugcgauccggag..... 1  
 Gi2\_10871509\_x2.....cggagacgucguggggaacC..... 1  
 Gi5\_8724763\_x2.....gagacgucguggggaacacggggCgccaacu..... 1  
 Gi3\_28211524\_x2.....gucaggUcccgccaguacugcg..... 1  
 Gi3\_28239358\_x2.....cgucUugggaacacggggugccgaa..... 1  
 Gi2\_10904759\_x2.....Agucguggggaacacggggugccgaac..... 1  
 Gi5\_8718225\_x2.....gagacgucguggggaacacggggugcUgaacu..... 1  
 Gi2\_10982853\_x2.....Cgggagacgucguggggaacacggggugc..... 1  
 Gi3\_28026600\_x2.....gCacugcgauccggagacg..... 1  
 Gi3\_28016690\_x2.....cccgccagCacugcgauccggagacguc..... 1  
 G1a\_5928576\_x2.....guggUaacacggggugcc..... 1  
 Gi3\_28108522\_x2.....cCaucggagacgucguggg..... 1  
 Gi4\_564222\_x2.....cgugggaacacggggCgccaacu..... 1  
 Gi3\_28167592\_x2.....agacgucguggggaacacggggAugccaacu..... 1  
 Gi5\_8736563\_x2.....Ggggagacgucguggggaacacg..... 1  
 Gi3\_27994090\_x2.....gacgucgugggGacacgg..... 1  
 Gi1\_4128487\_x2.....gugggaacacggggUccaacu..... 1  
 Gi2\_10979939\_x2.....gggagacgucguggggaacacggggC..... 1  
 G1a\_5902340\_x2.....cgucguggggaacacggggGgccaacu..... 1  
 Gi2\_10937129\_x2.....ucgugggaacUcggggugccgaa..... 1  
 Gi2\_10872181\_x2.....ccgucaggcccUgccaguacugcg..... 1  
 Gi2\_10830465\_x2.....ccccUccaguacugcgauccgga..... 1  
 Gi3\_27981546\_x2.....gugggaaGacggggugccgaa..... 1  
 Gi2\_10933579\_x2.....gaucggagacgucguggggaacaUg..... 1  
 Gi3\_27991268\_x2.....cgucguggggaacacCgggugc..... 1  
 Gi1\_4155297\_x2.....Cugggaacacggggugccgaacuu..... 1  
 Gi2\_10856603\_x2.....aucggagacgucgUAggaaca..... 1  
 Gi1\_4103487\_x2.....Augggaacacggggugccgaa..... 1  
 Gi2\_10951155\_x2.....caggGccccgccaguacugcgau..... 1  
 Gi3\_28061526\_x2.....aCagaagcgccgucagggccccgc..... 1  
 G1a\_5962694\_x2.....ggagacgucgugggAca..... 1

|                      |                                      |   |
|----------------------|--------------------------------------|---|
| Gi1_4143619_x2.....  | gagacgucgugggaaacacg.....            | 0 |
| Gi3_28184880_x2..... | caAuacugcgauccggagacgucgug.....      | 1 |
| Gi3_28156956_x2..... | cguggCaacacggggugcc.....             | 1 |
| Gi5_8725531_x2.....  | aggccccgAcaguacugcgau.....           | 1 |
| Gi2_10840733_x2..... | aagcgccgNcaggccccccaguacugc.....     | 1 |
| Gi3_28049886_x2..... | cgagacguAgugggaacacggggu.....        | 1 |
| Gi5_8780763_x2.....  | cgugggaGcacggggugccga.....           | 1 |
| Gi1_4138555_x2.....  | gugggaacacggggCgccg.....             | 1 |
| Gi5_8718759_x2.....  | guggAaacacggggugccgaacuu.....        | 1 |
| Gi2_10916585_x2..... | aucggagacgucgAgggaacacggg.....       | 1 |
| Gi2_10860071_x2..... | cUccaguacugcgauccggagacgucgu.....    | 1 |
| Gi2_10898559_x2..... | cgagacgucgugggaUcacggggugcc.....     | 1 |
| Gi2_10850035_x2..... | ucggagacgucgugggaacacggggAgcc.....   | 1 |
| Gi3_27980890_x2..... | gaUgagaagcgccgucagg.....             | 1 |
| Gi3_28032234_x2..... | cgaCcgagacgucguggg.....              | 1 |
| Gi3_28239506_x2..... | cgucgugggaacacggUgugccg.....         | 1 |
| Gi5_8747075_x2.....  | Aaucggagacgucgugggaacacgg.....       | 1 |
| Gi3_28031476_x2..... | aucggagacgucgCgggaacac.....          | 1 |
| Gi5_8743765_x2.....  | cgugggaacacggggugcU.....             | 1 |
| Gi1_4120139_x2.....  | Uggccccgccaguacugcgau.....           | 1 |
| Gi1_4133275_x2.....  | Agagacgucgugggaacacggggugccgaac..... | 1 |
| Gi2_10908667_x2..... | Cggaacacggggugccgaa.....             | 1 |
| Gi2_10922357_x2..... | agAacugcgauccggagacgu.....           | 1 |
| Gi3_27990322_x2..... | cgAcgugggaacacgggg.....              | 1 |
| Gi3_28132138_x2..... | acgucgugggaacacggCgugccgaac.....     | 1 |
| Gi3_28178040_x2..... | aacacggggugccgaaUuu.....             | 1 |
| Gi2_10944571_x2..... | agCacugcgauccggagacguc.....          | 1 |
| Gi3_28169928_x2..... | gaucggagaUgucguggg.....              | 1 |
| Gi2_10928835_x2..... | Cucaggccccccaguacugcgau.....         | 1 |
| Gi3_28134998_x2..... | gaagcgccgucaggccccccUguacugc.....    | 1 |
| Gi1_4134493_x2.....  | cgagacgNcgugggaacacggggu.....        | 1 |
| Gi3_28101444_x2..... | aagcgccgucaggccccccagCacugc.....     | 1 |
| Gi5_8734731_x2.....  | acgucgugggaacacggggugccgaGc.....     | 1 |
| Gi1_4097495_x2.....  | ugggaacUcggggugccgaac.....           | 1 |
| Gi2_10898275_x2..... | Ugacgucgugggaacacggggugccgaac.....   | 1 |
| Gi1_4126135_x2.....  | Cgagaagcgccgucaggccccgc.....         | 1 |
| Gi2_10976997_x2..... | ugggaacacgggguCccgaac.....           | 1 |
| Gi3_28214748_x2..... | gagacgucgugggaacacggggCgccgaac.....  | 1 |
| Gi1_4148643_x2.....  | cguNcugggaacacggggugccgaac.....      | 1 |
| Gi3_28173416_x2..... | agacgucgugggaacacggggugUc.....       | 1 |
| Gi1_4118895_x2.....  | acgucgugggaacacggg.....              | 0 |
| Gi2_10969503_x2..... | cccgUaguacugcgauccggagacguc.....     | 1 |
| Gi3_28023456_x2..... | caguacugcgauUggagacguc.....          | 1 |
| G1a_5912624_x2.....  | Caucggagacgucguggga.....             | 1 |
| Gi2_10991897_x2..... | aggccccgccGguacugcgauccg.....        | 1 |
| Gi3_28260314_x2..... | agcgccgucaggccccccCgu.....           | 1 |
| Gi3_28149706_x2..... | agacgucgugAgaacacggggugccgaac.....   | 1 |

Gi2\_10850481\_x2.....agggccccccagacuagcGucgga..... 1  
Gi2\_10901013\_x2.....gAagacgucgugggaacacggggugc..... 1  
Gi5\_8823893\_x2.....cguAggaacacggggugccga..... 1  
Gi3\_28221492\_x2.....gaucggagacgucgugggaacacgggA..... 1  
Gi3\_28059270\_x2.....ucaggccccccagacuAgcg..... 1  
Gi1\_4133549\_x2.....ucgugggaacacggggugccgaacAu..... 1  
Gi5\_8804041\_x2.....gugggaacacggggGgccgaacuuu..... 1  
Gi2\_10986747\_x2.....acgucgugggaacacgggCgugcc..... 1  
Gi5\_8802797\_x2.....acgucgugggaacacggggugccgaacG..... 1  
Gi1\_4097397\_x2.....ugggaacacggggugccgC..... 1  
Gi2\_10843569\_x2.....gggaaGacggggugccgaacu..... 1  
Gi2\_10952389\_x2.....gaGcggagacgucgugggaaca..... 1  
Gi1\_4135921\_x2.....guUaggccccccagacuagc..... 1  
Gi2\_10907903\_x2.....ggagGcgcgucgugggaacacg..... 1  
Gi1\_4106881\_x2.....aucgUagacgucgugggaacacggggg..... 1  
Gi5\_8751919\_x2.....gucgugggaacacggggGgccgaac..... 1  
G1a\_5962704\_x2.....Uaucggagacgucgugggaacacg..... 1  
G1a\_5925530\_x2.....gggaacacggggugUcgaacu..... 1  
Gi5\_8730307\_x2.....cAccaguacugcgaucggagacgu..... 1  
Gi3\_27984096\_x2.....aagcgccgucagggccccccaguc..... 1  
Gi2\_10859427\_x2.....Uucggagacgucgugggaacacggggug..... 1  
G1a\_5961466\_x2.....gccagacuacCgcgaucggagacguc..... 1  
Gi3\_28004736\_x2.....gucAugggaacacggggugcc..... 1  
Gi3\_28004910\_x2.....ucaggccccNggcagacuagcgaucgg..... 1  
Gi2\_10849243\_x2.....caggccccccagacuGcug..... 1  
Gi2\_10900717\_x2.....gagacgucgugggGacacggggug..... 1  
Gi2\_10849411\_x2.....gaagagaagcgccgucGggcccc..... 1  
G1a\_5915572\_x2.....gugggaacacgUggugccga..... 1  
Gi3\_28115308\_x2.....gccccgccagacuagcAau..... 1  
Gi3\_28030584\_x2.....ccccgccGguacugcgaucgga..... 1  
Gi1\_4106151\_x2.....cgugggaacacggggugccgCac..... 1  
Gi3\_28187768\_x2.....aucggagacgucgugggaacacgggAugcc..... 1  
Gi2\_10950739\_x2.....gaucggagacgucgugggaacGcggggugc..... 1  
Gi1\_4126445\_x2.....gucgugggCacacggggugcc..... 1  
Gi3\_28107654\_x2.....Ccggagacgucgugggaacacg..... 1  
Gi1\_4149347\_x2.....gugggaacacgggCugccgaacu..... 1  
Gi1\_4126579\_x2.....cgugggaacacAgggugccgaacu..... 1  
Gi2\_10968607\_x2.....cUaucggagacgucgugggaacacggggugcc..... 1  
Gi3\_28060804\_x2.....cCucgugggaacacggggugccgaa..... 1  
Gi3\_28165908\_x2.....aaNacggggugccgaacu..... 1  
Gi3\_28224952\_x2.....agacgCcgugggaacacggggugccgaac..... 1  
G1a\_5976884\_x2.....cgugggaacGcggggugcc..... 1  
Gi2\_10862219\_x2.....cgugggaacacgggguAc..... 1  
G1a\_5885072\_x2.....guacugcgaucggagGcuc..... 1  
Gi5\_8772565\_x2.....cugcgaucggagacgucgC..... 1  
Gi3\_28231924\_x2.....gaucggagacgucgugggaacacggggugccgaa..... 0  
Gi3\_28257918\_x2.....Ccgcgugggaacacggggugcc..... 1

Gi2\_10926381\_x2.....ugggaacacggggugccgaaGu..... 1  
G1a\_5925190\_x2.....Cccaguacugcgauccggagacguc..... 1  
Gi4\_566500\_x2.....ugggaacacggggugccgaacuA..... 1  
Gi1\_4131707\_x2.....gacgCcgugggaaacacggggugccgaacu..... 1  
Gi5\_8789829\_x2.....aucggagacgucgugggGacacgggg..... 1  
Gi1\_4138931\_x2.....acugcgauccggCgacgucg..... 1  
Gi5\_8808935\_x2.....aucgUagacgucgugggaaacacgg..... 1  
Gi4\_558578\_x2.....ugggaacacggggugccgGacu..... 1  
Gi1\_4111519\_x2.....gCgggaacacggggugccgaacuu..... 1  
G1a\_5952220\_x2.....caggccccgccaCuacugcgau..... 1  
Gi2\_10837585\_x2.....gucaAgccccgccaaguacugc..... 1  
Gi3\_28152106\_x2.....cccgccaguGcugcgauccg..... 1  
G1a\_5900890\_x2.....Ugucgugggaaacacggggugccgaacu..... 1  
Gi5\_8775467\_x2.....gggaacaGggggugccgaacu..... 1  
Gi5\_8786763\_x2.....Cucggagacgucgugggaaacacg..... 1  
G1a\_5900360\_x2.....gCgggaacacggggugccga..... 1  
G1a\_5894830\_x2.....Ggcgaucggagacgucgug..... 1  
Gi3\_28167668\_x2.....aggccccgccaCuacugc..... 1  
Gi2\_10842695\_x2.....uGggagacgucgugggaaacacggggugc..... 1  
Gi5\_8728983\_x2.....gUagacgucgugggaaacacggggugccgaacu..... 1  
Gi2\_10914495\_x2.....cgugUgaacacggggugccg..... 1  
Gi3\_28257988\_x2.....gggaacacgAggugccga..... 1  
Gi2\_10871215\_x2.....aucggagacgCcgugggaaacacgggg..... 1  
Gi5\_8749113\_x2.....ucguuccgaauuaggaagagaagcgc..... 0  
Gi5\_8723941\_x2.....gagacgucNugggaacacggggugccgaacu..... 1  
G1a\_5912914\_x2.....Ggaagcgccgucagggcc..... 1  
Gi5\_8828775\_x2.....ugggaacacggggugUcgaac..... 1  
Gi2\_10849375\_x2.....gacgCcgugggaaacacggggg..... 1  
Gi1\_4126433\_x2.....ucggGgacgucgugggaaacacg..... 1  
G1a\_5902016\_x2.....gGcugggaaacacggggugccga..... 1  
G1a\_5905272\_x2.....Uagaagcgccgucagggcc..... 1  
Gi2\_10954717\_x2.....cccgccaguacugcgauccggagacgC..... 1  
Gi3\_28166652\_x2.....ggagacgucgugggGacacggggugccg..... 1  
Gi3\_28215254\_x2.....ugggaacacgggggUccg..... 1  
Gi3\_28159950\_x2.....guacugcgauccggagacgCcgug..... 1  
Gi3\_28190546\_x2.....ccccgccaguGcugcgau..... 1  
Gi5\_8808343\_x2.....gacgucgugggaaacacAgggugccgaacu..... 1  
Gi2\_10899171\_x2.....ggagacgucgugggaaacaUggggugc..... 1  
Gi2\_10939987\_x2.....uacugcgaNcggagacgucgug..... 1  
Gi1\_4119241\_x2.....gugggGacacggggugcc..... 1  
Gi2\_10952529\_x2.....cguCggaacacggggugccgaac..... 1  
Gi5\_8827441\_x2.....gggaacacggggugccUaac..... 1  
Gi2\_10966235\_x2.....caggccccgAcaguacugcgau..... 1  
Gi2\_10876257\_x2.....gaucggagacgucgugggaaUacggggug..... 1  
Gi3\_28259280\_x2.....gagaagcgccgucagggccccgCg..... 1  
Gi3\_28108864\_x2.....cgGucggagacgucgugggaaacacgggg..... 1  
Gi3\_28203946\_x2.....ucGggccccgccaaguacugcgauccggag..... 1

Gi2\_10841181\_x2.....cGgccaguacugcgauccg..... 1  
Gi2\_10899655\_x2.....cgagacgucgugggaaacacgAggugcc..... 1  
Gi3\_28152088\_x2.....cgGcugggaaacacgggg..... 1  
G1a\_5940748\_x2.....ggaUcacggggugccgaacu..... 1  
Gi5\_8789719\_x2.....cUgagacgucgugggaaacacggggugcc..... 1  
Gi3\_28006282\_x2.....ucaggccccgcAaguacugcgaucc..... 1  
Gi3\_28098028\_x2.....gucaggccccgccGguacugcg..... 1  
Gi3\_28096430\_x2.....ucagUccccgccaguacug..... 1  
Gi5\_8799865\_x2.....gucgGggaaacacggggugccgaac..... 1  
Gi2\_10938781\_x2.....gaAcggagacgucgugggaaacacggg..... 1  
Gi2\_10976441\_x2.....gagacgucgugggaaacacgggAugcc..... 1  
Gi2\_10865109\_x2.....ggagacgucgugggaaacacggggUacc..... 1  
Gi3\_28245116\_x2.....agcgcccgucagccUcgccaauac..... 1  
Gi2\_10976689\_x2.....cgucaggccccgccAauacugc..... 1  
Gi1\_4114499\_x2.....gUgagcugcugggaaacacggggugccgaa..... 1  
Gi3\_28140428\_x2.....aucggagCcgucgugggaaacacgggg..... 1  
Gi3\_28125734\_x2.....cgGcugggaaacacggggugc..... 1  
Gi3\_28115508\_x2.....ucgggagcugcuggggCacac..... 1  
Gi2\_10909773\_x2.....caggccccgccaguacugcgauAgga..... 1  
Gi3\_28165772\_x2.....gacgucgugggaaacacggggugAcgaa..... 1  
Gi3\_28048812\_x2.....acgucgugggaaacacgAggugccgaac..... 1  
G1a\_5892716\_x2.....aAcggagacgucgugggaaacacggggugcc..... 1  
Gi2\_10851139\_x2.....ucGggccccgccaguacug..... 1  
Gi4\_553922\_x2.....cgCcaggccccgccaguacugc..... 1  
Gi1\_4103325\_x2.....guggAaacacggggugccgaac..... 1  
Gi1\_4132743\_x2.....gaucggagacgucgugggaaaca..... 0  
Gi2\_10945165\_x2.....cgucgugggaaacacggggugccgaCc..... 1  
Gi2\_10975245\_x2.....agUcgucgugggaaacacggggugccgaac..... 1  
Gi2\_10945599\_x2.....cAugggaaacacggggugccg..... 1  
Gi3\_28179822\_x2.....ucaggccccgccaguacugcgauccC..... 1  
Gi3\_28119844\_x2.....auAggagacgucgugggaaacacggggugcc..... 1  
Gi3\_28128170\_x2.....gaucggagGcgucgugggaaacacggggugc..... 1  
Gi5\_8759569\_x2.....cguggaaacacggggugcAgaac..... 1  
Gi5\_8746157\_x2.....caguacugcgauccgGgacguc..... 1  
Gi3\_28167826\_x2.....ggagacgucgugggGacacgg..... 1  
Gi3\_28100664\_x2.....cCcaguacugcgauccggagacg..... 1  
Gi2\_10972775\_x2.....ucgugggaaUacggggugccgaac..... 1  
Gi3\_27993880\_x2.....Aaagagaagcggcugcagc..... 1  
Gi2\_10915639\_x2.....caggccccgAcaguacug..... 1  
Gi5\_8798731\_x2.....cAgagacgucgugggaaacacggggugccga..... 1  
Gi2\_10888657\_x2.....agacgucgugggaaacacggggugccga..... 1  
Gi2\_10974941\_x2.....Uacgucgugggaaacacggggugccga..... 1  
Gi5\_8757785\_x2.....cguggaaacacAgggugcc..... 1  
Gi3\_28002410\_x2.....gGcugcugggaaacacggggugcc..... 1  
Gi5\_8777473\_x2.....gggaacacggggugccgGa..... 1  
Gi2\_10890945\_x2.....Gaguacugcgauccggagacguc..... 1  
Gi3\_28024446\_x2.....auUggagacgucgugggaaacacggggug..... 1



Gi2\_10960003\_x2.....Uguacugcgauccggagacgu..... 1  
Gi3\_28100736\_x2.....gagacgucgAgggaacac..... 1  
Gi2\_10909523\_x2.....gucgugggaacacAgggugc..... 1  
Gi1\_4130005\_x2.....guUggaacacggggugccg..... 1  
Gi2\_10853633\_x2.....Uucggagacgucgugggaaca..... 1  
Gi2\_10940525\_x2.....ggcGccgccaguacugcgau..... 1  
Gi3\_28135296\_x2.....ugggaacacggggugAcg..... 1  
Gi2\_10864319\_x2.....gacgucgugggGacacggggugccgaacu..... 1  
Gi2\_10981845\_x2.....cCgagacgucgugggaacacggggugc..... 1  
Gi1\_4136963\_x2.....agacgucgugggaacacggggugccgaCcu..... 1  
Gi2\_10943517\_x2.....aucggagacgucgugggaacacAgggug..... 1  
Gi1\_4094421\_x2.....aUgcgccgucaggccccccagacu..... 1  
Gi1\_4133145\_x2.....gagacgucNugggaacacggggugccgaacu..... 1  
Gi2\_10978025\_x2.....gagaagcgcUgucaggccccccag..... 1  
Gi2\_10930725\_x2.....auAggagacgucgugggaaca..... 1  
Gi3\_28209472\_x2.....Uguacugcgauccggagacguc..... 1  
Gi1\_4103173\_x2.....agAccccgccaguacugcgau..... 1  
Gi2\_10907909\_x2.....cUgcgccaguacugcgau..... 1  
G1a\_5943708\_x2.....gaacacggggugccgaacA..... 1  
Gi2\_10952575\_x2.....ugggaacCcggggugccgaa..... 1  
Gi5\_8768107\_x2.....cgugggaacCcggggugccga..... 1  
Gi2\_10863565\_x2.....Gcgucaggccccccagacu..... 1  
Gi2\_10877331\_x2.....gucgGgggaacacggggugcc..... 1  
Gi5\_8793473\_x2.....aagaUaagcgcgucaggcccccc..... 1  
G1a\_5877616\_x2.....cgucaggccccccUguacugc..... 1  
Gi1\_4138001\_x2.....aucggagacgucguggaaUacggggugcc..... 1  
Gi1\_4149013\_x2.....aggccccgcUaguacugcgau..... 1  
G1a\_5954882\_x2.....gucgugggaacacggggGgccgaacu..... 1  
Gi2\_10976531\_x2.....cgugggaacGacggggugccgaac..... 1  
Gi3\_28107528\_x2.....cgccaguacugcgauUggagac..... 1  
Gi2\_10900213\_x2.....gugggaacaUggggugccgaacuu..... 1  
Gi1\_4091979\_x2.....gugggaacacagAgggugccga..... 1  
Gi2\_10864975\_x2.....Agccccgccaguacugcgauccggagacgu..... 1  
Gi3\_28256596\_x2.....cggagacgucgugggaCcacggg..... 1  
Gi3\_28075406\_x2.....ggagGcgucgugggaaca..... 1  
Gi3\_28109482\_x2.....gucguUggaacacggggugccgaac..... 1  
Gi3\_28134878\_x2.....Gguacugcgauccggagacgucgugg..... 1  
Gi2\_10903453\_x2.....cgccgucaNccccccagacu..... 1  
Gi2\_10978143\_x2.....ucaggcUccgccaguacugc..... 1  
Gi5\_8796265\_x2.....gaCcacggggugccgaacu..... 1  
Gi3\_28250256\_x2.....ggaacacggGgugccgaac..... 1  
Gi1\_4101717\_x2.....ggGacacggggugccgaa..... 1  
Gi3\_28133770\_x2.....ggUgacgucgugggaaca..... 1  
Gi2\_10981547\_x2.....Gggccccccagacuacugcgauccggagacguc..... 1  
Gi1\_4121961\_x2.....aucggagacgucguggga..... 0  
Gi3\_28027472\_x2.....Cucggagacgucgugggaacacggggugcc..... 1  
Gi2\_10921343\_x2.....ccccccagacuacugcgUu..... 1

Gi2\_10978599\_x2.....Ugagacgucgugggaacacggggugccga..... 1  
 Gi2\_10854613\_x2.....gugggaUcacggggugccgaa..... 1  
 Gi1\_4115027\_x2.....caggccccgccaguacugcgauC..... 1  
 Gi3\_28138542\_x2.....aacNcggggugccgaacuu..... 1  
 Gi2\_10992275\_x2.....aucggagacgucgugggCacacggggugcc..... 1  
 Gi2\_10957903\_x2.....cguuccgaauaggaagagaagcgcc..... 0  
 Gi2\_10935305\_x2.....gccaguacugcgauccgCgacguc..... 1  
 Gi2\_10922253\_x2.....cgucaggccccgcUaguacugcg..... 1  
 Gi2\_10874129\_x2.....acgucgugggaacacggggugGc..... 1  
 Gi3\_28221268\_x2.....aucggagaGgucgugggaacacg..... 1  
 Gi1\_4126067\_x2.....Agaacacggggugccgaa..... 1  
 Gi3\_28043918\_x2.....gagCagcgccgucaggccc..... 1  
 Gi3\_28248996\_x2.....gggaacacggggugccgC..... 1  
 Gi3\_28130550\_x2.....gaaNacggggugccgaac..... 1  
 Gi2\_10867037\_x2.....ucggagGcgucgugggaaca..... 1  
 Gi3\_28208218\_x2.....ggagacguNgugggaacacg..... 1  
 Gi5\_8818629\_x2.....gacgucgugggaacacggggugAcgaacu..... 1  
 Gi3\_28003690\_x2.....gacgucAugggaacacggggugccgaacu..... 1  
 Gi3\_28031700\_x2.....cCgcgaucggagacgucg..... 1  
 Gi3\_28057850\_x2.....ccccgccaguacugcgauCagagacg..... 1  
 Gi3\_27998130\_x2.....gaAcggagacgucgugggaacacg..... 1  
 Gi2\_10952167\_x2.....aguacugcNaucggagac..... 1  
 G1a\_5951788\_x2.....guAggaacacggggugccg..... 1  
 Gi5\_8810925\_x2.....cgucGggccccgccaguacugcg..... 1  
 G1a\_5939666\_x2.....aucggagaNgucgugggaacacggggugcc..... 1  
 Gi3\_28004450\_x2.....Ugucaggccccgccaguacug..... 1  
 Gi2\_10854097\_x2.....cCccaguacugcgauccg..... 1  
 Gi2\_10837931\_x2.....caggccccgccaguacugcAaucgga..... 1  
 Gi5\_8799731\_x2.....gaucggagNcgucgugggaacacg..... 1  
 Gi3\_28212936\_x2.....ggagacgucgugggGacacggggugccgaac..... 1  
 Gi2\_10948559\_x2.....gugNgaacacggggugccga..... 1  
 Gi2\_10956509\_x2.....gucgugAgaacacggggugc..... 1  
 Gi2\_10979629\_x2.....caggccccgccaguCucgcauc..... 1  
 Gi3\_27991622\_x2.....ggagGcgucgugggaacacggggugcc..... 1  
 Gi2\_10908593\_x2.....ucgugggaNcacggggugcc..... 1  
 Gi3\_28188740\_x2.....aacacggggugccgCacuu..... 1  
 Gi2\_10962123\_x2.....gaCcacggggugccgaacu..... 1  
 Gi3\_28224090\_x2.....guacugcgauccgagGcgucgug..... 1  
 Gi1\_4140475\_x2.....cgugggaacacgAggugccgaa..... 1  
 G1a\_5972560\_x2.....Gucggagacgucgugggaacacgggg..... 1  
 Gi5\_8741033\_x2.....Aaucggagacgucgugggaacacgggg..... 1  
 Gi3\_28204498\_x2.....ccgccaguacugcgaGcggagac..... 1  
 Gi2\_10969897\_x2.....agacgucgugggaacacggggugGc..... 1  
 Gi3\_28025162\_x2.....gggaacacggggugccCaa..... 1  
 Gi1\_4109685\_x2.....cgugggGacacggggugccgaacuu..... 1  
 Gi1\_4155791\_x2.....aucggagacgucAugggaacacggggugcc..... 1  
 Gi2\_10897281\_x2.....ggagacgucgugUgaacacggggugc..... 1

Gi3\_27987920\_x2.....gUcaguacugcgauccggagacgucgug..... 1  
G1a\_5938540\_x2.....ucgugggaNcacggggugccgaac..... 1  
G11\_4144619\_x2.....aggcUccgccaguacugcgau..... 1  
Gi3\_28157830\_x2.....gacgucgugggaGcacggggugccg..... 1  
Gi2\_10868825\_x2.....cgucagccccgccUguacugcg..... 1  
Gi3\_28075382\_x2.....gcUccgucaggccccgccagu..... 1  
Gi3\_27986942\_x2.....ucaggccccgccCguacugc..... 1  
Gi2\_10872739\_x2.....ggagacgucgugggaacacggAgugc..... 1  
G1a\_5932596\_x2.....agaagcgcNgucaggccc..... 1  
G1a\_5896918\_x2.....cagCacugcgauccggagacgucg..... 1  
G1a\_5880852\_x2.....ggagacgucgugggGcacggggugcc..... 1  
Gi3\_28149728\_x2.....gccaguacCgcgaucggagacguc..... 1  
G11\_4112021\_x2.....agacgucgugggaacacggggugccgU..... 1  
Gi5\_8737609\_x2.....cgugggaacacgUggugc..... 1  
G1a\_5932222\_x2.....Agccccgccaguacugcgau..... 1  
G1a\_5942076\_x2.....aucggagacgucgugggaacacggggCgcc..... 1  
G11\_4097639\_x2.....cgAcaggccccgccaguacugc..... 1  
Gi3\_28144680\_x2.....gccaguacNcgcaucggagac..... 1  
G11\_4113657\_x2.....acgucgugggaacacggggGgccg..... 1  
Gi2\_10872115\_x2.....agUgaagcgcgcgucaggccccgc..... 1  
Gi2\_10951341\_x2.....Uucggagacgucgugggaacacg..... 1  
Gi2\_10932427\_x2.....cagAccccgccaguacugc..... 1  
G11\_4105997\_x2.....aucggagGcgucgugggaacacg..... 1  
G11\_4126289\_x2.....aggcGccgccaguacugcgau..... 1  
G11\_4106577\_x2.....caggccccgccaguacugcgauU..... 1  
Gi3\_28191026\_x2.....ccgccaguacugcgauccggGgacgu..... 1  
Gi3\_28032610\_x2.....ggccccgccaguacCgcgau..... 1  
Gi2\_10844541\_x2.....gccccgccaguacCgcgau..... 1  
G1a\_5950646\_x2.....acugcgauccggagGcguc..... 1  
Gi2\_10950651\_x2.....ucggagacgucgugggaacGcgggg..... 1  
Gi5\_8806773\_x2.....gaNcacggggugccgaacu..... 1  
G11\_4157775\_x2.....ucggagacgucgugggaGcacg..... 1  
G11\_4090741\_x2.....ucggagacgucgugggCacacggggugc..... 1  
G1a\_5896312\_x2.....aucggagacgucgugggCacacgg..... 1  
Gi2\_10927299\_x2.....caggccccgccaAuacugcgau..... 1  
Gi2\_10943909\_x2.....ucagUccccgccaguacugcgau..... 1  
Gi2\_10921939\_x2.....Gguacugcgauccggagacgucgu..... 1  
G11\_4119569\_x2.....ccgucaggccccgccaguCcug..... 1  
G1a\_5911814\_x2.....gggNcacggggugccgaacu..... 1  
Gi2\_10934913\_x2.....cgugggaacacggggAgccgaa..... 1  
Gi2\_10868369\_x2.....gugggaacacggggugccgC..... 1  
Gi2\_10911817\_x2.....cccAccaguacugcgauccgg..... 1  
Gi2\_10971567\_x2.....acugcgauNggagacgucgugg..... 1  
Gi3\_28238466\_x2.....ccccgccaNuacugcgauccggagacguc..... 1  
Gi5\_8816119\_x2.....acacggggCgccgaacuuu..... 1  
Gi2\_10895705\_x2.....gaCcgagacgucgugggaacacggggugc..... 1  
Gi3\_28157016\_x2.....gagacgucguAggaacacggggg..... 1

Gi2\_10903109\_x2.....ggagacgucgugggaacaUggggugccgaacu..... 1  
 Gi2\_10919611\_x2.....gaacacggggugccgGac..... 1  
 Gi2\_10985331\_x2.....aUagaagcgccgcucagggcccgccaguacu..... 1  
 Gi2\_10925861\_x2.....Uaagcgccgcucagggcccgccagua..... 1  
 Gi1\_4142221\_x2.....cGggccccgccaguacugcgauCG..... 1  
 Gi3\_28086502\_x2.....cgaucggagacgucgugggaGcacggggug..... 1  
 Gi2\_10920719\_x2.....gaucggagacguGgugggaacacgggggu..... 1  
 Gi4\_557216\_x2.....gugggGacacggggugccgaa..... 1  
 Gi5\_8754761\_x2.....cgugUgaacacggggugccga..... 1  
 Gi3\_28077974\_x2.....aguacugcgauCGgaAacgu..... 1  
 Gi3\_27984046\_x2.....caggccccUccaguacugCG..... 1  
 Gi3\_28098140\_x2.....caguacugNgaucggagacgu..... 1  
 Gi2\_10990657\_x2.....gucagggccccgccaguaUugcgau..... 1  
 Gi3\_28112916\_x2.....UgccaguacugcgauCGgagacg..... 1  
 Gi3\_28032586\_x2.....gggaacaGggggugccgaacu..... 1  
 Gi3\_28163080\_x2.....gaCcacggggugccgaac..... 1  
 Gi2\_10835485\_x2.....aucggagacgucCGggaaca..... 1  
 Gi2\_10844701\_x2.....caguacugNgaucggagacgucg..... 1  
 Gi3\_28179634\_x2.....aCaagcgccgcucagggcccgccaguacug..... 1  
 Gi2\_10959435\_x2.....aucgAagacgucgugggaacacgggggu..... 1  
 Gi3\_28071538\_x2.....agacgCcgugggaacacggggugcc..... 1  
 Gi5\_8801329\_x2.....cUgagacgucgugggaacacggggugccga..... 1  
 Gi4\_553128\_x2.....cgucgugggaacacggggugc..... 0  
 Gi3\_28089000\_x2.....gccccgccGguacugcgau..... 1  
 Gi3\_28128256\_x2.....gCGauUggagacgucgugggaacacggg..... 1  
 Gi3\_28255066\_x2.....cUguacugcgauCGgagacgucg..... 1  
 Gi2\_10865327\_x2.....acgucgugggaGacggggugccgaacu..... 1  
 Gi3\_28176814\_x2.....acAucgugggaacacggg..... 1  
 G1a\_5937678\_x2.....ugggaacacgggCugccgaacu..... 1  
 G1a\_5980070\_x2.....gaucggagacgucgugggaacGcggggu..... 1  
 Gi3\_28126828\_x2.....acgucgugggGacacggggugccg..... 1  
 G1a\_5899480\_x2.....cgugggaacacggggCgc..... 1  
 Gi5\_8763425\_x2.....acugcgGucggagacgucgug..... 1  
 Gi5\_8765851\_x2.....gggaacacggggugccgaG..... 1  
 Gi4\_565132\_x2.....gugggaacacggUgugccgaacu..... 1  
 G1a\_5915508\_x2.....ccgccaguacugcgauAggagacguc..... 1  
 Gi3\_28233948\_x2.....gaucggagacguUgugggaacacggggu..... 1  
 Gi2\_10934069\_x2.....gUcgucgugggaacacggggugccg..... 1  
 Gi3\_28034168\_x2.....gaucggagacgucguggAaacac..... 1  
 Gi2\_10857187\_x2.....acgucguAggaacacggggugcc..... 1  
 Gi5\_8754763\_x2.....caggccccAcaguacugCG..... 1  
 Gi5\_8796889\_x2.....cgucgugggaacacUgggugccgaacu..... 1  
 Gi5\_8752669\_x2.....aagagaagNgccgucagggcccgcca..... 1  
 Gi3\_28168746\_x2.....GcaggccccgccaguacugcgauCGgag..... 1  
 Gi2\_10950761\_x2.....acugcgauCGgCgacgucg..... 1  
 Gi2\_10856831\_x2.....caggccccgccaguaAugc..... 1  
 Gi3\_28131460\_x2.....agaagcgccgCaggccc..... 1

Gi3\_28098884\_x2.....gaucggagacgucAugggaacacgg..... 1  
Gi5\_8820925\_x2.....ucggagacgucgugggCacacg..... 1  
Gi3\_28082234\_x2.....caggccccgccGguacugcga..... 1  
Gi5\_8818889\_x2.....aucggagacgucgugggCcacggggugcc..... 1  
Gi3\_28186608\_x2.....cccgccGguacugcgaucggagac..... 1  
Gi2\_10970349\_x2.....ucaggccccgccagCacugcg..... 1  
Gi2\_10955159\_x2.....agacgucgugggaaacacAgggugccg..... 1  
Gi3\_28221606\_x2.....Aucgugggaacacggggugccgaa..... 1  
Gi3\_28118522\_x2.....aggccccgccaguCugcgauacg..... 1  
Gi2\_10986517\_x2.....ggaacaGggggugccgaa..... 1  
Gi2\_10858839\_x2.....ccccgccaguacugcgauUgga..... 1  
Gi2\_10931971\_x2.....ccgucaggccccgccaguacugUg..... 1  
Gi5\_8809569\_x2.....aAcggagacgucgugggaaacacgg..... 1  
Gi5\_8778607\_x2.....gUagacgucgugggaaacacggggugccgaa..... 1  
Gi5\_8734691\_x2.....cgugggaGcacggggugcc..... 1  
Gi2\_10940113\_x2.....ccccgccaguUcugcgauac..... 1  
Gi2\_10981261\_x2.....aucggagacgucgugggaaacUcggggu..... 1  
Gi2\_10834151\_x2.....ggagacgucgugggaaacacgggg..... 0  
Gi5\_8734431\_x2.....gaagcgcUgucaggccccgcc..... 1  
Gi3\_28244926\_x2.....Acaggccccgccaguacugcgauac..... 1  
Gi3\_28211748\_x2.....cgccagCacugcgauacggagacguc..... 1  
Gi1\_4154609\_x2.....gggaacacggggugccgaaacG..... 1  
G1a\_5950074\_x2.....gacgucguggggaGcacggggg..... 1  
Gi2\_10978183\_x2.....aagagaagUgccgucaggccc..... 1  
Gi5\_8722829\_x2.....ggUcccgccaguacugcgauacgga..... 1  
Gi2\_10864347\_x2.....cgugggaacaAggggugcc..... 1  
Gi5\_8767393\_x2.....acgucgugggaaacCcggggugccgaa..... 1  
Gi5\_8733201\_x2.....uGaggccccgccaguacugcg..... 1  
Gi1\_4131403\_x2.....gugggaacacggggugccgaaUcu..... 1  
Gi1\_4134525\_x2.....aacacgggCugccgaaacu..... 1  
G1a\_5931376\_x2.....Uccaguacugcgauacggagacgucg..... 1  
Gi3\_28165964\_x2.....agcgccgCcaggccccgccaguac..... 1  
Gi3\_28222292\_x2.....ccgucaggAcccgccaguacugc..... 1  
Gi5\_8765189\_x2.....ggUgacgucgugggaaacacggggugccgaa..... 1  
Gi5\_8817253\_x2.....cAugggaacacggggugc..... 1  
Gi3\_28078524\_x2.....ucgugggaacacggUgugccgaaacu..... 1  
Gi2\_10945277\_x2.....acgucgugggaaacacgggggUacc..... 1  
Gi4\_556422\_x2.....uacCgcgaucggagacgucg..... 1  
Gi3\_28260672\_x2.....gccccgCcaguacugcgauac..... 1  
G1a\_5973830\_x2.....aAcggagacgucgugggaa..... 1  
G1a\_5955720\_x2.....Uacgucgugggaaacacggggugccgaa..... 1  
Gi2\_10900141\_x2.....ggccccgUcaguacugcgauac..... 1  
Gi1\_4137301\_x2.....cgucguAggaacacggggugcc..... 1  
Gi1\_4129751\_x2.....Ucggcaguacugcgauacggaga..... 1  
Gi3\_28077336\_x2.....Agccccgccaguacugcgauacgga..... 1  
Gi3\_27984638\_x2.....gucgugggUacacggggugccgaa..... 1  
Gi2\_10896197\_x2.....gucgugggNacacggggugccg..... 1

Gi3\_28170884\_x2.....gccgucagggcUcgccaguacugcg..... 1  
 Gi5\_8724907\_x2.....aucggagacgucguAggaacacggggugc..... 1  
 Gi2\_10894963\_x2.....agacgucAugggaacacggggugccgaacu..... 1  
 Gi2\_10937229\_x2.....gagacgCcgugggaacacggggug..... 1  
 Gi3\_28069964\_x2.....gaucggagNcgucuggg..... 1  
 Gi3\_27981340\_x2.....ucguuccgaauaCgaagagaagcgcguc..... 1  
 Gi1\_4107537\_x2.....cgugggaacacggggugccgaacuC..... 1  
 Gi3\_28023034\_x2.....acgucgugggaacacggggugUcgaac..... 1  
 Gi2\_10862877\_x2.....aggccccgccagAacugcgaucgga..... 1  
 Gi3\_28179206\_x2.....aucAgagacgucguggga..... 1  
 Gi1\_4128757\_x2.....Aagacgucgugggaacacggggugccgaacu..... 1  
 Gi2\_10962003\_x2.....ccccgccaguacugcgCucggaga..... 1  
 Gi2\_10952963\_x2.....acgucgugggaacacggUgugcc..... 1  
 Gi3\_28064918\_x2.....cgAagacgucgugggaacacg..... 1  
 Gi2\_10944369\_x2.....auAggagacgucgugggaacacggggug..... 1  
 Gi3\_28229724\_x2.....ggagacgucgugggaGcacggg..... 1  
 Gi2\_10915967\_x2.....aggccccgccaguUcugcg..... 1  
 Gi2\_10912651\_x2.....acgucgugUgaacacggggugccgaacu..... 1  
 Gi3\_28000452\_x2.....cgCcaggccccgccaguacugcgauc..... 1  
 G1a\_5964918\_x2.....Gagagaagcgccgucagggccccgcca..... 1  
 Gi4\_559224\_x2.....guUggaacacggggugccgaac..... 1  
 G1a\_5877728\_x2.....gucgugggaacacggggGgccgaac..... 1  
 G1a\_5952760\_x2.....caggccccAccaguacugc..... 1  
 G1a\_5949060\_x2.....Gaguacugcgaucggagac..... 1  
 Gi3\_28187958\_x2.....ugggaacacggggugccCaac..... 1  
 Gi1\_4156243\_x2.....cUggccccgccaguacugcg..... 1  
 G1a\_5905062\_x2.....aucggagacgucgugggCa..... 1  
 Gi2\_10847181\_x2.....ggagacguNgugggaacacggggugccg..... 1  
 Gi3\_28124324\_x2.....ucaggccccAccaguacugcgauc..... 1  
 Gi3\_28247732\_x2.....gaagagaagcgccgucGggccccgc..... 1  
 Gi4\_564142\_x2.....Ggucgugggaacacggggugccgaacu..... 1  
 Gi1\_4131193\_x2.....cgGcaggccccgccaguacugc..... 1  
 Gi1\_4094563\_x2.....gugggaaAacggggugcc..... 1  
 Gi2\_10948013\_x2.....Ggacgucgugggaacacggggugccgaa..... 1  
 Gi2\_10940573\_x2.....cgugggaacacgUggugccgaa..... 1  
 Gi2\_10915455\_x2.....gaacacgNgugccgaac..... 1  
 Gi4\_559694\_x2.....cgugggaacacgAggugccgaacu..... 1  
 Gi5\_8735023\_x2.....ggaacacggggugccgaCc..... 1  
 Gi2\_10945461\_x2.....acucguuccgaauaCgaaga..... 1  
 G1a\_5883766\_x2.....aucggagacgucgugggaacCcggg..... 1  
 Gi3\_28097308\_x2.....aucggagacgucguUggaacacggg..... 1  
 Gi2\_10987353\_x2.....ucggagacgucgugggGacacggggugcc..... 1  
 Gi3\_28100548\_x2.....cgucagggccccgccaguaUugcg..... 1  
 Gi1\_4142423\_x2.....cgCcaggccccgccaguacugc..... 1  
 Gi3\_28139608\_x2.....cguUgugggaacacggggugccga..... 1  
 Gi1\_4126641\_x2.....gUagacgucgugggaacacggggugc..... 1  
 Gi2\_10847663\_x2.....caggccccgccaUuacugc..... 1

Gi3\_28074076\_x2.....ucgugggaacacgaggAgc..... 1  
 Gl1\_5893196\_x2.....Ugaagcgccgucaggccccgc..... 1  
 Gi3\_28160854\_x2.....cggGgacgucgugggaacacgagg..... 1  
 Gi2\_10834093\_x2.....Gggccccgccaguacugcgauccgaga..... 1  
 Gi1\_4113593\_x2.....aucggagacgucgugggaacGcggggugcc..... 1  
 Gi2\_10899143\_x2.....gggaacacNgggugccga..... 1  
 Gi3\_28171054\_x2.....aggccccgccaguacugcgauG..... 1  
 Gi1\_4106299\_x2.....cgucaggccccgccaguacugcgU..... 1  
 Gi3\_28026996\_x2.....cgaucggagacgucgugggaacCcg..... 1  
 Gi2\_10840855\_x2.....aucggagacgucgugggaacacgaggugcU..... 1  
 Gi2\_10922011\_x2.....cgaucggagacgCcgugggaacacg..... 1  
 Gi1\_4100401\_x2.....ugggaacacgaggugccgCacuu..... 1  
 Gi1\_4132021\_x2.....ggaacacgaggugccgaaAu..... 1  
 Gi5\_8787265\_x2.....ggaacacgUggugccgaacu..... 1  
 Gi3\_28014108\_x2.....cgugggaacacgaggugcU..... 1  
 Gi5\_8817153\_x2.....gaagcgccgCcaggccccgc..... 1  
 Gi3\_28060006\_x2.....gaucggagNcgucgugggaac..... 1  
 Gi3\_28235716\_x2.....aagcgUgucaggccccgccaguacugc..... 1  
 Gi2\_10897123\_x2.....gaagcgccgucGggccccgccaguacugc..... 1  
 Gi5\_8797357\_x2.....ggaacacUgggugccgaacu..... 1  
 Gi2\_10913657\_x2.....acgucgUggaacacgaggugc..... 1  
 Gi3\_28076668\_x2.....Cccaguacugcgauccgga..... 1  
 Gi5\_8745701\_x2.....ugggaacacgaggugcAga..... 1  
 Gi3\_28049248\_x2.....gaucggagacgucAugggaacacg..... 1  
 Gi3\_28166880\_x2.....acucguuccgaauaCgaaga..... 1  
 Gi3\_28094334\_x2.....cggagacgNcgugggaacacgaggug..... 1  
 Gi2\_10941027\_x2.....aggaagagaagcgccgucaggcccc..... 0  
 Gi3\_28119780\_x2.....cgccaguacugcgauccgGgacg..... 1  
 Gi1\_4130549\_x2.....ucgugggaacCgaggugccg..... 1  
 Gi3\_28055120\_x2.....Caucggagacgucgugggaaca..... 1  
 Gi3\_27994840\_x2.....Augcgauccgagacgucg..... 1  
 Gi5\_8754979\_x2.....cacggguNccgaacuu..... 1  
 Gi3\_28027504\_x2.....aucggagacAucgugggaacacgagg..... 1  
 Gi5\_8760357\_x2.....aucggagacgucguggAaacacg..... 1  
 Gi3\_28076178\_x2.....aagagaagUgcccgucaggc..... 1  
 Gi3\_28224068\_x2.....agagaagcgUgucaggccccgc..... 1  
 Gi2\_10956299\_x2.....cggUgacgucgugggaacacgaggugc..... 1  
 Gi2\_10879209\_x2.....gccccgccaguGcugcgau..... 1  
 Gi2\_10896477\_x2.....acgucgugggaacGacggggugcc..... 1  
 Gi2\_10921533\_x2.....ugggaacacAgggugccgaa..... 1  
 Gi3\_28037686\_x2.....gagaagcgccguUaggccc..... 1  
 Gi3\_28096346\_x2.....cgaucggagacgucguggGacacg..... 1  
 Gi3\_27981474\_x2.....aggccccgccaguacugcgaAc..... 1  
 Gi2\_10899293\_x2.....ggccccgccUguacugcgau..... 1  
 Gi2\_10950777\_x2.....aggccccgccaguGcugcgauccgagac..... 1  
 Gi3\_28136942\_x2.....cgccaguacugcgauccgAaga..... 1  
 Gi5\_8731383\_x2.....aagagaagcgccgucaggccccUgccc..... 1

Gi2\_10932781\_x2.....ucguggggaacacggggugcAg..... 1  
 Gi5\_8825465\_x2.....cgucgugggGacacggggugc..... 1  
 Gi3\_28248044\_x2.....ucaggAcccgccaguacugc..... 1  
 Gi3\_28106586\_x2.....caggccccgccaguacugcCauc..... 1  
 Gi2\_10990583\_x2.....ccgcUaguacugcgauccggagacg..... 1  
 Gl1a\_5887940\_x2.....aagagaagcgccgCcaggccc..... 1  
 Gi1\_4131515\_x2.....aggccccccCguacugcgauc..... 1  
 Gi3\_28213130\_x2.....gaagagaagcgCAgucaggcccc..... 1  
 Gi1\_4101819\_x2.....gugggaacacUgggugccgaacu..... 1  
 Gi1\_4121715\_x2.....gGacacggggugccgaacuu..... 1  
 Gi3\_28065114\_x2.....Ugaucggagacgucguggggaacacg..... 1  
 Gi2\_10926621\_x2.....aggccccgccaguacGgcgauc..... 1  
 Gi3\_28248788\_x2.....gaucAgagacgucguggggaacacggggugcc..... 1  
 Gi1\_4156311\_x2.....Aggggaacacggggugccgaacuu..... 1  
 Gi2\_10896615\_x2.....gucAuggggaacacggggugc..... 1  
 Gi2\_10864159\_x2.....caggccccccaAuacugc..... 1  
 Gl1a\_5884034\_x2.....ugggaacacggggugccgaaAu..... 1  
 Gi5\_8805745\_x2.....gaagcgccgAcaggccccgcc..... 1  
 Gi3\_28250992\_x2.....agaUgucguggggaacacgggg..... 1  
 Gi2\_10946539\_x2.....cgggagacgucAuggggaacacggggugcc..... 1  
 Gi3\_28022772\_x2.....ccccgccaguacugcgauccggagCcg..... 1  
 Gi3\_28164878\_x2.....agagaagAgccgucaggccccgc..... 1  
 Gi5\_8772153\_x2.....gucaggccccccGguacugcg..... 1  
 Gi3\_28143516\_x2.....gGcguggggaacacggggug..... 1  
 Gi3\_28226784\_x2.....caUgccccgccaguacugcgauccgga..... 1  
 Gi1\_4114881\_x2.....cguggggaacacgggguAccgaac..... 1  
 Gi3\_28060764\_x2.....aacacggAgugccgaacuu..... 1  
 Gi5\_8790609\_x2.....aGcggagacgucguggggaacacggg..... 1  
 Gi1\_4123689\_x2.....Ucgucguggggaacacggggugcc..... 1  
 Gi2\_10915099\_x2.....caggcAccgccaguacugcgau..... 1  
 Gi2\_10989117\_x2.....ggaacacggggugGcgaacu..... 1  
 Gi2\_10847189\_x2.....aggcccUgccaguacugcgauccgga..... 1  
 Gi3\_28221138\_x2.....ucguggggaacacgggguAccg..... 1  
 Gi3\_28057130\_x2.....agagaagcgUcgucaggcccc..... 1  
 Gi2\_10873901\_x2.....aucggaAacgucguggggaacacg..... 1  
 Gi2\_10867485\_x2.....aucggagacgucguggggaUca..... 1  
 Gi3\_28134156\_x2.....gUagacgucguggggaacacggggug..... 1  
 Gi2\_10959345\_x2.....gccaguacugcgauccAga..... 1  
 Gi2\_10951263\_x2.....gccccgccaguCcuugcgauc..... 1  
 Gi1\_4125693\_x2.....gggaacacNgggugccgaacuu..... 1  
 Gi3\_28123386\_x2.....ccgcUaguacugcgauccggagacguc..... 1  
 Gi2\_10906193\_x2.....gacgucgCgggaacacggggugccgaac..... 1  
 Gi2\_10953765\_x2.....acugcgauNggagacgucguggggaacac..... 1  
 Gi1\_4141075\_x2.....gaucggagacgucguggggaacacggggug..... 0  
 Gi2\_10984193\_x2.....Accgucaggccccgccaguacugcg..... 1  
 Gi1\_4139845\_x2.....ccgccaguacugcgauccggagacguc..... 0  
 Gi3\_28142652\_x2.....aucggagacguAuggggaacacggggu..... 1



Gi3\_28083722\_x2.....gagacgCcgugggaacacggggugc..... 1  
 Gi3\_28123866\_x2.....gacgucgugggaCcacggggugccgaac..... 1  
 Gi1\_4118955\_x2.....gggaacaGggggugccgaacu..... 1  
 Gi3\_28082998\_x2.....gucgugggaacGcggggugcc..... 1  
 Gi2\_10989931\_x2.....Cugggaacacggggugccgaacuu..... 1  
 Gi4\_563820\_x2.....cCccaguacugcgaucggagacgucgug..... 1  
 Gi2\_10958259\_x2.....guacugcgaucggagacgucgug..... 0  
 Gi3\_28210908\_x2.....cgugggaacacggggUccga..... 1  
 Gi4\_555468\_x2.....Cggaacacggggugccgaacu..... 1  
 Gi3\_28209610\_x2.....cAccaguacugcgaucggagac..... 1  
 Gi3\_27994904\_x2.....ucaggccccgccaguacugcgauA..... 1  
 Gi3\_28086824\_x2.....cgGucgggagacgucgugggaacacg..... 1  
 Gi3\_28023560\_x2.....ggagacgucgugAgaacacg..... 1  
 Gi2\_10852551\_x2.....Aagaagcgccgucagggccccgag..... 1  
 Gi3\_27995456\_x2.....cgaucgggagacgucgugggCacacgg..... 1  
 Gi2\_10960207\_x2.....Agccaguacugcgaucggagacgucgug..... 1  
 Gi3\_28221760\_x2.....aucgggagacgucgugggaacacgAggugc..... 1  
 Gi2\_10846061\_x2.....aggccccCccaguacugcg..... 1  
 Gi2\_10850215\_x2.....cccgccGguacugcgaucggagac..... 1  
 Gi3\_28011132\_x2.....gaucgggagacAucgugggaac..... 1  
 Gi3\_28210116\_x2.....aagagaagcgcUgucagggccc..... 1  
 Gi5\_8722989\_x2.....ugggGacacggggugccgaacuu..... 1  
 Gi5\_8730531\_x2.....cgugggaacacggggugccgC..... 1  
 Gi3\_28196006\_x2.....gucagggccccgccaguacCg..... 1  
 Gi3\_28006638\_x2.....cgccaguacugcgaCcgagacg..... 1  
 G1a\_5931578\_x2.....gugggaacacggggugAc..... 1  
 G1a\_5889180\_x2.....gacgucgugggaacacAgggu..... 1  
 Gi3\_28061106\_x2.....gacgucgugggaacacggggugccgaaUu..... 1  
 Gi2\_10857267\_x2.....ugggCacacggggugccgaac..... 1  
 Gi2\_10832027\_x2.....gugggaacacggggugcG..... 1  
 Gi2\_10949825\_x2.....gaucgggagacgucguggAaacacggggugc..... 1  
 Gi3\_28127948\_x2.....agcgccguUaggccccgccc..... 1  
 Gi1\_4130417\_x2.....cgggagacgucgugggCacacggggugc..... 1  
 Gi2\_10858999\_x2.....acgucCugggaacacggggugccgaacu..... 1  
 Gi3\_28195896\_x2.....cgucagggccccgcUaguacugcg..... 1  
 Gi5\_8724131\_x2.....ugggaacacggggugccgaacuCu..... 1  
 Gi2\_10923859\_x2.....aggccccgccGguacugcgau..... 1  
 Gi2\_10985231\_x2.....cgucaggUcccgccaguacugc..... 1  
 Gi5\_8814825\_x2.....guAgugggaacacggggugccgaacu..... 1  
 Gi5\_8781643\_x2.....acgucgugggaacacggggGgccgaac..... 1  
 Gi5\_8775277\_x2.....cgugggaaUacggggugccgaac..... 1  
 Gi2\_10920007\_x2.....aggccccgccaguacuAcgaucgg..... 1  
 Gi3\_28153200\_x2.....gaagagaagcgcguUaggcccc..... 1  
 Gi2\_10833283\_x2.....cgucgugggaacacggggugUcgaac..... 1  
 Gi2\_10924483\_x2.....Cggccccgccaguacugcgau..... 1  
 Gi1\_4119073\_x2.....agacgucgugggaacacggggugccgGcu..... 1  
 Gi5\_8774193\_x2.....aucgggagacgucAugggaacacg..... 1

Gi5\_8814267\_x2.....caggccccgAcaguacugc..... 1  
 Gi2\_10900793\_x2.....Gcgucgugggaacacggg..... 1  
 Gl1a\_5976004\_x2.....cgugggaacacggggugccgaaAu..... 1  
 Gi5\_8815809\_x2.....gaagcgccgucaggcccUgcc..... 1  
 Gi2\_10927367\_x2.....caggccccgccaguacugcgGu..... 1  
 Gi3\_28133970\_x2.....gcgccgucNggccccgccagu..... 1  
 Gi2\_10899543\_x2.....gucgugggaGcacggggugccga..... 1  
 Gi3\_28158442\_x2.....agacgucgugggaacacggggAgcc..... 1  
 Gi1\_4126403\_x2.....acacggggugccgaaAu..... 1  
 Gi5\_8828939\_x2.....cgugggaacacggAgugccgaaC..... 1  
 Gi3\_27995778\_x2.....cggagacgucguAggaacacgggg..... 1  
 Gi1\_4098811\_x2.....aCacgucgugggaacacggggugccg..... 1  
 Gi2\_10829423\_x2.....aucggagacgAcgugggaacacgggg..... 1  
 Gi2\_10942205\_x2.....aucggagacgucguAggaacacg..... 1  
 Gi2\_10830897\_x2.....aucggCgacgucgugggaacacggggug..... 1  
 Gi3\_28127928\_x2.....cggagacgucgugggaacacggggAu..... 1  
 Gi2\_10963773\_x2.....gaucAgagacgucgugggaacac..... 1  
 Gi5\_8761581\_x2.....gccgucaggccccgccaguacC..... 1  
 Gi5\_8753689\_x2.....cgucgugggaacacggggugccgaaA..... 1  
 Gi3\_28219182\_x2.....ccgcUaguacugcgauccggag..... 1  
 Gi3\_28018452\_x2.....aacacgggNugccgaacuu..... 1  
 Gi3\_28151324\_x2.....gaacacggggCgccgaacuu..... 1  
 Gi3\_28051548\_x2.....ucggagacgucgugggaacGcg..... 1  
 Gi2\_10926301\_x2.....ccccgccaguacugcgauccggagacgC..... 1  
 Gl1a\_5877924\_x2.....ugggaacacggggGgccgaacu..... 1  
 Gi5\_8733951\_x2.....uacCgcgaucggagacgu..... 1  
 Gi3\_28013300\_x2.....Uggccccgccaguacugcgauccggagacguc..... 1  
 Gi3\_28195852\_x2.....gagaagcgccgucagggcAccg..... 1  
 Gi1\_4113107\_x2.....aucggagCcgucgugggaacacg..... 1  
 Gi5\_8746147\_x2.....gugggaacacggggugUcga..... 1  
 Gi3\_28054688\_x2.....agaagcgccgucaAgccc..... 1  
 Gi1\_4146097\_x2.....ggaacacggggugccgUac..... 1  
 Gi2\_10965165\_x2.....aucggUgacgucgugggaacacggggug..... 1  
 Gi2\_10829733\_x2.....Ggccgucagccccgccaguacu..... 1  
 Gi1\_4103511\_x2.....cggagacgucgugggaacacgCg..... 1  
 Gi2\_10908181\_x2.....cgucgCgggaacacggggugccgaa..... 1  
 Gi1\_4092061\_x2.....acgucgugggaacacggggGgcc..... 1  
 Gi3\_28116852\_x2.....Acgccgucagccccgccaguacugc..... 1  
 Gi2\_10898395\_x2.....gUccccgccaguacugcgauccg..... 1  
 Gl1a\_5887378\_x2.....cUguacugcgauccggagacguc..... 1  
 Gi3\_28060340\_x2.....aGgcgccgucagccccgccagua..... 1  
 Gi3\_28249422\_x2.....gggaacacgggCugccgaa..... 1  
 Gi1\_4135219\_x2.....aCggagacgucgugggaacacggggugcc..... 1  
 Gi1\_4119349\_x2.....cgucgugggaacacggggugccgUacu..... 1  
 Gi3\_28115388\_x2.....cgucagggcUcgccaguacugcg..... 1  
 Gi3\_28132154\_x2.....ggcccAgccaguacugcgau..... 1  
 Gi3\_28073328\_x2.....gugggaUcacggggugcc..... 1

Gi2\_10934113\_x2.....Ugccaguacugcgauccggagac..... 1  
 Gi2\_10885843\_x2.....gCgacgucgugggaacacggggugc..... 1  
 Gi5\_8809417\_x2.....Gggagacgucgugggaacacggggugccga..... 1  
 Gi1\_4106535\_x2.....gagacgucAugggaaacacggggugcc..... 1  
 Gi1\_4095145\_x2.....cggGgacgucgugggaacacggggugcc..... 1  
 Gi2\_10837173\_x2.....cgauccggagacgucgugggaacacggggCg..... 1  
 Gi3\_28156274\_x2.....aggccccCccaguacugcg..... 1  
 Gi1\_4108661\_x2.....ugUgaucggagacgucguggga..... 1  
 Gi5\_8742173\_x2.....Ggugggaacacggggugccg..... 1  
 Gi5\_8721055\_x2.....cgucguggNaacacggggugccga..... 1  
 Gi5\_8796759\_x2.....aucggagacgucguggGacacggggu..... 1  
 Gi3\_28252774\_x2.....acguUgugggaacacggggugcc..... 1  
 G1a\_5936326\_x2.....gcgaucggagacguUgug..... 1  
 Gi3\_28138942\_x2.....gaagagUagcgccgucagg..... 1  
 Gi1\_4118231\_x2.....Gucggagacgucgugggaacacggg..... 1  
 Gi3\_27980894\_x2.....cguUaggccccgccaguacugcg..... 1  
 Gi3\_28164380\_x2.....cgccaguacugcgauccAgacguc..... 1  
 Gi5\_8757713\_x2.....aCgccccgccaguacugcgaucc..... 1  
 Gi5\_8718899\_x2.....aagagaagcgccgucaggccccAgcc..... 1  
 Gi2\_10845649\_x2.....gUucggagacgucgugggaacac..... 1  
 Gi3\_28187048\_x2.....ugggaacacggggugccUaac..... 1  
 Gi5\_8824405\_x2.....ugNgaacacggggugccgaacu..... 1  
 Gi5\_8736009\_x2.....cAgagacgucgugggaacacggggugccga..... 1  
 Gi3\_28247040\_x2.....Ccgagacgucgugggaacacg..... 1  
 Gi2\_10913273\_x2.....cgugggaacacggggUaccga..... 1  
 Gi2\_10931577\_x2.....aagagaagcgccgucaggccccAgcc..... 1  
 Gi5\_8776497\_x2.....guggCaacacggggugccga..... 1  
 Gi1\_4112933\_x2.....aUaagcgccgucaggccccgccaguacugc..... 1  
 Gi3\_28145848\_x2.....aggcUccgccaguacugcgauccggagacg..... 1  
 Gi3\_28125244\_x2.....uUggagacgucgugggaacacggggugccgaacu..... 1  
 Gi1\_4100793\_x2.....gugggaacacggggugccCaacu..... 1  
 Gi2\_4096423\_x2.....ggagUcgcgucgugggaacacggggugc..... 1  
 Gi3\_28196850\_x2.....caguacugcgCucggagacgucgug..... 1  
 Gi3\_28122548\_x2.....cgccaguacugcgauccggGgacguc..... 1  
 Gi2\_10935371\_x2.....cggagacgucgugggaacacggUgugcc..... 1  
 Gi3\_28086146\_x2.....cggagacgucAugggaaacacggggugccga..... 1  
 Gi3\_28153548\_x2.....cgugggaCcacggggugccg..... 1  
 Gi2\_10887611\_x2.....aucggagacgucgugggaUacg..... 1  
 Gi3\_28125810\_x2.....aggccccgccaguacugcgaucc..... 1  
 Gi3\_28137380\_x2.....Uaauuaggaagagaagcgc..... 1  
 Gi1\_4126397\_x2.....cUaucggagacgucgugggaacacggggu..... 1  
 Gi5\_8828787\_x2.....ucggagacgCcgugggaacacg..... 1  
 G1a\_5969678\_x2.....Cgaacacggggugccgaac..... 1  
 Gi3\_28014214\_x2.....gggaacaAggggugccga..... 1  
 Gi2\_10839691\_x2.....Caagcgccgucaggcccc..... 1  
 Gi2\_10875819\_x2.....Accgccaguacugcgauccg..... 1

Gi2\_10839505\_x2.....cgGcagggccccgccaguac..... 1  
 Gi2\_10889835\_x2.....gagaagcgccgcucagggccccgccG..... 1  
 Gi3\_27985726\_x2.....aAgccccgccaguacugcgauccg..... 1  
 Gi2\_10849463\_x2.....aucggagacgucgugggaacacggggugUc..... 1  
 Gi1a\_5905578\_x2.....cUugggaacacggggugccgaac..... 1  
 Gi2\_10950481\_x2.....cccgccaguacugcgauccggagacgucgugg..... 0  
 Gi3\_28161996\_x2.....cggagacgucgugggaacCc..... 1  
 Gi3\_28152540\_x2.....aucggagacCucgugggaacacg..... 1  
 Gi5\_8768111\_x2.....gucgugggaacacggggugccgaUc..... 1  
 Gi1\_4134665\_x2.....ggagacgucgugAgaacacggggugcc..... 1  
 Gi2\_10956505\_x2.....cgccgucagggccccgccGguacugc..... 1  
 Gi3\_28076162\_x2.....gccccgccaAuacugcgaucc..... 1  
 Gi5\_8761781\_x2.....gucagggccccgcUaguacugcg..... 1  
 Gi1a\_5947348\_x2.....ccaguacuNcgauccggagacguc..... 1  
 Gi3\_27990168\_x2.....aggccccgccagGacugcgauccgga..... 1  
 Gi1a\_5932040\_x2.....gucgugggaacacggggCgccgaacu..... 1  
 Gi2\_10951535\_x2.....agcgccguNaggccccgccaguacugcg..... 1  
 Gi3\_27994742\_x2.....Nggccccgccaguacugc..... 1  
 Gi5\_8802515\_x2.....ucgugggaacacggggugccgaa..... 0  
 Gi1\_4140421\_x2.....ggaacacggggugccCaacu..... 1  
 Gi3\_28232272\_x2.....cgccgCcaggccccgccaguacugc..... 1  
 Gi1\_4089611\_x2.....gacgucgugggaacacggggugccgaGcu..... 1  
 Gi2\_10961605\_x2.....gUagagaagcgccgucagggcccc..... 1  
 Gi2\_10844189\_x2.....gGagcgccgucagggccccgccaguacug..... 1  
 Gi2\_10845111\_x2.....gaucUgagacgucgugggaacacgg..... 1  
 Gi1a\_5970686\_x2.....Agucagggccccgccaguacugcg..... 1  
 Gi2\_10947787\_x2.....ccUgccaguacugcgauccggaga..... 1  
 Gi2\_10961961\_x2.....gacgucgugggaacacggggUAccgaacu..... 1  
 Gi2\_10976871\_x2.....ccccgccGguacugcgauccg..... 1  
 Gi3\_28123148\_x2.....gUagcgccgucagggccccgcc..... 1  
 Gi2\_10925115\_x2.....gggaacacggCgugccgaac..... 1  
 Gi2\_10918031\_x2.....ccccgccaguacCgcgauc..... 1  
 Gi2\_10842217\_x2.....agacgucgugggaGcacggggugccgaacu..... 1  
 Gi2\_10961705\_x2.....gaagcgccgCcaggccccgc..... 1  
 Gi2\_10963917\_x2.....aucggagacgucgugggaUcacggggugc..... 1  
 Gi3\_28073838\_x2.....cggGgacgucgugggaacacggggugccga..... 1  
 Gi1a\_5904904\_x2.....cgugggaacacggggugU..... 1  
 Gi2\_10991605\_x2.....aucggagacgucgugggGacacgggg..... 1  
 Gi3\_28196352\_x2.....Nugggaacacggggugccga..... 1  
 Gi3\_28099974\_x2.....gaucggagacgucguggUaacacggg..... 1  
 Gi2\_10895413\_x2.....gggaaAacggggugccga..... 1  
 Gi2\_10972623\_x2.....Aagaagcgccgucagggccccgcc..... 1  
 Gi1\_4101551\_x2.....cggagacgNcgugggaacacggggugcc..... 1  
 Gi5\_8757671\_x2.....ugggaacacggggCgccgaacuuu..... 1  
 Gi3\_28071086\_x2.....aggccccgccaguacugcgauccggagG..... 1  
 Gi2\_10842529\_x2.....ccUgccaguacugcgauccggagacguc..... 1  
 Gi5\_8817775\_x2.....cgugggaaUacggggugcc..... 1

|                 |                                           |   |
|-----------------|-------------------------------------------|---|
| Gi3_28010874_x2 | .....guacugcgauccggagacgucgugg.....       | 0 |
| Gi3_28101274_x2 | .....gccUcgccagucugcgau.....              | 1 |
| Gi3_28249996_x2 | .....gagaagcgccAucaggccc.....             | 1 |
| Gi2_10860263_x2 | .....gaUgucgugggaacacggggugccgaac.....    | 1 |
| Gi3_28022108_x2 | .....cgugggaacacggggugccU.....            | 1 |
| Gi3_28200762_x2 | .....ucaggccccgccaguacCgcca.....          | 1 |
| Gi2_10970827_x2 | .....Ggaucggagacgucgugggaacacg.....       | 1 |
| Gi5_8764985_x2  | .....aUacgucgugggaacacggggg.....          | 1 |
| Gi3_28025028_x2 | .....gagacgucgugggaacGcggggugc.....       | 1 |
| Gi3_28155134_x2 | .....cgUcgucagggccccgccaguac.....         | 1 |
| Gi2_10849989_x2 | .....cgccgucagggccccgccUguac.....         | 1 |
| Gi3_28213538_x2 | .....caggccccgccaguacugcgauccggGga.....   | 1 |
| Gi3_28231532_x2 | .....gucCugggaacacggggugccgaacu.....      | 1 |
| Gi5_8777343_x2  | .....gaucggagacgucguggGcacacg.....        | 1 |
| Gi3_28233724_x2 | .....acgucguggGgacacggggugccga.....       | 1 |
| Gi1_4101931_x2  | .....cgugggaacacgggggUaccgaacu.....       | 1 |
| Gi3_27991258_x2 | .....ucaggccccAccaguacugcgauccgg.....     | 1 |
| Gi3_28152214_x2 | .....aucggagacgucguCggaacacggggg.....     | 1 |
| Gi3_28045146_x2 | .....gccaguacugcgGucggagacg.....          | 1 |
| Gi3_28041246_x2 | .....caguacugcgauccggCgacgucgug.....      | 1 |
| Gi2_10841547_x2 | .....aggcUccgccaguacugcgauccgg.....       | 1 |
| Gi3_28044572_x2 | .....ccgccaguacugcgaAcgg.....             | 1 |
| Gi2_10886723_x2 | .....aggccccgccaguacugcgauUgga.....       | 1 |
| Gi2_10959083_x2 | .....gaUacgucgugggaacacggggugccg.....     | 1 |
| Gi3_28045062_x2 | .....ucAgagacgucgugggaacacggg.....        | 1 |
| Gi2_10873057_x2 | .....ccgccaguNcugcgauccgg.....            | 1 |
| Gi5_8786291_x2  | .....gugggaacacggggugccgG.....            | 1 |
| Gi4_566140_x2   | .....gucaggccccgccaguacugc.....           | 0 |
| Gi2_10850753_x2 | .....cgucgugggaacGcggggugccgaa.....       | 1 |
| Gi1_4105781_x2  | .....uUgugggaacacggggugcc.....            | 1 |
| Gi1_4108507_x2  | .....gggaacacggggugccgaUc.....            | 1 |
| Gi1a_5934368_x2 | .....gaucUgagacgucguggga.....             | 1 |
| Gi2_10932445_x2 | .....caguacugcgauccggCgacguc.....         | 1 |
| Gi2_10960373_x2 | .....aucggagacgucguggAaacac.....          | 1 |
| Gi3_28025478_x2 | .....ucNugggaacacggggugccgaacu.....       | 1 |
| Gi3_28149576_x2 | .....cguNggaacacggggugc.....              | 1 |
| Gi2_10828523_x2 | .....ggccccgccaguCucggauc.....            | 1 |
| Gi3_27994538_x2 | .....Cagacgucgugggaacacggggugccgaac.....  | 1 |
| Gi2_10974151_x2 | .....caggccccNccaguacugcgauccggagacg..... | 1 |
| Gi1a_5963254_x2 | .....agaagcgcNgucagggcccccca.....         | 1 |
| Gi3_28133388_x2 | .....gucgugggaacacggggCgc.....            | 1 |
| Gi2_10992139_x2 | .....cccgccGuaucugcgauccgg.....           | 1 |
| Gi2_10905925_x2 | .....aggccccgccaguacCgcgauccgg.....       | 1 |
| Gi3_28251202_x2 | .....gaucggGgacgucgugggaaca.....          | 1 |
| Gi2_10855929_x2 | .....gucgGgggaacacggggugccgaac.....       | 1 |
| Gi1_4100241_x2  | .....gaUacggggugccgaacu.....              | 1 |
| Gi5_8765195_x2  | .....ucgugggaacacggggUaccgaac.....        | 1 |

Gi1\_4137739\_x2.....ggagacgucgugggaaacacggg..... 0  
Gi2\_10857089\_x2.....aucggagacgucgugggUacacg..... 1  
Gi2\_10979121\_x2.....cgccaguacugcgauccggGga..... 1  
Gi2\_10991715\_x2.....ucagggAccgccaguacugcgau..... 1  
Gi2\_10908475\_x2.....gaucggagacgucgugggaaAacggggu..... 1  
Gi2\_10923299\_x2.....gcccGgccaguacugcgau..... 1  
Gi2\_10870349\_x2.....gaagcgccgucaUgccccgc..... 1  
Gi3\_28077936\_x2.....cAgagacgucgugggaaacacggg..... 1  
Gi2\_10890755\_x2.....ucggagacgucgugggCacacggggu..... 1  
Gi2\_10847029\_x2.....ucagggcccUgccaguacugcgau..... 1  
Gi3\_28242404\_x2.....gcgauccggNgacgucgugggaaacacggggu..... 1  
Gi5\_8738047\_x2.....gagacgucgugggaaacacggggugccgaCcu..... 1  
Gi3\_28156666\_x2.....cgucgugggaaacUcggggugcc..... 1  
Gi5\_8828711\_x2.....Aaucggagacgucgugggaaacacg..... 1  
Gi3\_27981706\_x2.....caggccccCccaguacugcgau..... 1  
Gi2\_10890505\_x2.....aggccccUccaguacugcg..... 1  
G1a\_5958734\_x2.....gUagacgucgugggaaacac..... 1  
Gi2\_10886851\_x2.....gcUccgccaguacugcgauccgg..... 1  
Gi5\_8751237\_x2.....cgccaguGcugcgauccggagacgu..... 1  
Gi2\_10966131\_x2.....cgccagCacugcgauccggagac..... 1  
Gi3\_28179166\_x2.....cgccaguaNugcgauccgg..... 1  
Gi3\_28029820\_x2.....cggagGcugcugggaaacacg..... 1  
Gi3\_28150074\_x2.....caggccAcgccaguacugcgauccgg..... 1  
Gi3\_28247954\_x2.....cagAccccgccaguacugcgau..... 1  
Gi5\_8769845\_x2.....cggagacgucgugggaaAacggg..... 1  
Gi3\_28231170\_x2.....gUagagaagcgccgucagggccccgc..... 1  
Gi2\_10920499\_x2.....ccUguacugcgauccggag..... 1  
Gi3\_28093906\_x2.....gGagagaagcgccgucagggccccgcag..... 1  
Gi4\_564840\_x2.....acgucgugggaaacacggggugccgaac..... 0  
Gi3\_28156162\_x2.....cccgccGguacugcgau..... 1  
Gi2\_10851569\_x2.....ugggaaacacgggAugccga..... 1  
Gi2\_10944673\_x2.....cgccaguacugcgauccggagCcg..... 1  
Gi1\_4137761\_x2.....gaagagaagcgccgucagggccc..... 0  
Gi2\_10936783\_x2.....aucggagacgucgugggaaacacUgggu..... 1  
Gi2\_10924139\_x2.....ccgCcagggccccgccaguacugcg..... 1  
Gi3\_28028284\_x2.....aucggagacgucgucGgaaacacg..... 1  
Gi5\_8763595\_x2.....gucCugggaaacacggggugccgaacu..... 1  
Gi3\_28124982\_x2.....Uccccgccaguacugcgauccggagacg..... 1  
Gi2\_10953933\_x2.....caggccccgccaguacCcgauccggag..... 1  
Gi2\_10908305\_x2.....Gcgccaguacugcgauccggagacg..... 1  
Gi2\_10958401\_x2.....aagagaagcgccgucCggccc..... 1  
Gi2\_10850143\_x2.....caggccccgccaguacugcgauccggC..... 1  
G1a\_5954082\_x2.....gaacacggggugccgCacu..... 1  
Gi3\_28019874\_x2.....Gcggagacgucgugggaaacacggggugccg..... 1  
Gi1\_4089355\_x2.....ucagggccccgUaguacugcgauccgg..... 1  
Gi2\_10968523\_x2.....aggAcccgccaguacugcgau..... 1  
Gi3\_28070100\_x2.....ugggaaacacUgggugccga..... 1

|                      |                                      |   |
|----------------------|--------------------------------------|---|
| Gi3_28015224_x2..... | cgugggaacacggggugccgaacuu.....       | 0 |
| Gi5_8743301_x2.....  | Ggccaguacugcgauccgagacguc.....       | 1 |
| Gi2_10896595_x2..... | aggccccgccaguacugcgUucggaga.....     | 1 |
| Gi2_10951503_x2..... | Acggagacgucgugggaac.....             | 1 |
| Gi1a_5952858_x2..... | aGuuaggaagagaagcgccguc.....          | 1 |
| Gi5_8817743_x2.....  | agagGagcgccgucaggccccgccagu.....     | 1 |
| Gi1_4100263_x2.....  | gugggaacCcggggugccgaac.....          | 1 |
| Gi2_10846387_x2..... | cggagacgucgugggaacacggggCg.....      | 1 |
| Gi4_559150_x2.....   | cgugggaacaUggggugccgaacu.....        | 1 |
| Gi2_10948447_x2..... | caggUcccgccaguacugcgauccg.....       | 1 |
| Gi2_10919175_x2..... | gagacgucgugAgaacacggggugc.....       | 1 |
| Gi3_28188768_x2..... | ucUggccccgccaguacugcgauccg.....      | 1 |
| Gi4_560444_x2.....   | gugggaacacggAgugccgaacu.....         | 1 |
| Gi2_10854669_x2..... | aucggagacgucgugggaUacggggugcc.....   | 1 |
| Gi1a_5932466_x2..... | Accccgccaguacugcgauccgagacguc.....   | 1 |
| Gi2_10900053_x2..... | gccccgccaguacugcgauccggagacgCc.....  | 1 |
| Gi1_4095367_x2.....  | gugggaacacggggugUcgaac.....          | 1 |
| Gi2_10916001_x2..... | gaucggagacgucAugggaacac.....         | 1 |
| Gi1_4104639_x2.....  | ucgugggaacacggggugcGgaac.....        | 1 |
| Gi3_27984736_x2..... | gacgucguggAaacacggggg.....           | 1 |
| Gi3_28129056_x2..... | agacgucNgggaaacacggg.....            | 1 |
| Gi2_10972959_x2..... | agacgucgugggaacacggggugccgaGc.....   | 1 |
| Gi2_10853711_x2..... | aucAgagacgucguggga.....              | 1 |
| Gi3_28131384_x2..... | aucggagacgucgugggaacacggggugGc.....  | 1 |
| Gi1_4095909_x2.....  | cgugggaacacggggugccgaUc.....         | 1 |
| Gi2_10880075_x2..... | gccccUccaguacugcgaucc.....           | 1 |
| Gi5_8764251_x2.....  | gucUugggaacacggggugccgaacu.....      | 1 |
| Gi1_4123717_x2.....  | cgucgugggaacacgggAugccgaacu.....     | 1 |
| Gi2_10980899_x2..... | agUccccgccaguacugcgauccggagacgu..... | 1 |
| Gi3_28115514_x2..... | ucggagacgucgCgggaacacgggg.....       | 1 |
| Gi3_28060156_x2..... | gucgGgggaacacggggugccgaac.....       | 1 |
| Gi2_10955137_x2..... | gccgucagNccccgccaguacugcg.....       | 1 |
| Gi5_8822233_x2.....  | ccaguacugcgauccAagacgu.....          | 1 |
| Gi1a_5956478_x2..... | aacacggggugccgCacu.....              | 1 |
| Gi3_28036428_x2..... | gugggaacNcggggugccgaacuu.....        | 1 |
| Gi3_28114124_x2..... | ggccccgccGguacugcgauccgga.....       | 1 |
| Gi2_10986267_x2..... | ugggaacacgAgggugccgaac.....          | 1 |
| Gi3_28095574_x2..... | aaagagaGgcccgcgucaggc.....           | 1 |
| Gi5_8718839_x2.....  | ucgugGgaacacggggugccgaacu.....       | 1 |
| Gi2_10951997_x2..... | gucaggccccUgccaguacugc.....          | 1 |
| Gi1_4138689_x2.....  | gaacacgggUugccgaacu.....             | 1 |
| Gi3_28144010_x2..... | gaagagaagcgUcgucaggccc.....          | 1 |
| Gi3_28012794_x2..... | gGucggagacgucgugggaaca.....          | 1 |
| Gi3_28154008_x2..... | aggccccCccaguacugc.....              | 1 |
| Gi2_10922361_x2..... | gggaacacggggGgccga.....              | 1 |
| Gi3_28027914_x2..... | ucggagacgucgugggaGcacggggugcc.....   | 1 |
| Gi3_28238646_x2..... | ccgccaguacugcgauccggagGc.....        | 1 |

Gi3\_28094410\_x2.....agacgucuguggaacaacacggggGgccgaacu..... 1  
Gi3\_28148312\_x2.....ggccUcgccagucugcgauC..... 1  
Gi1\_4132683\_x2.....aCgggagacgucgugggaaacacgg..... 1  
Gi3\_28214876\_x2.....gaagagaagcgccgCcaggcccccgccag..... 1  
Gi3\_28258698\_x2.....gucuguggaacaacacggggAgcc..... 1  
Gi3\_28109972\_x2.....ggagacgucgCgggaacacggg..... 1  
Gi2\_10908455\_x2.....gauUggagacgucgugggaaacacgggg..... 1  
Gi3\_28246314\_x2.....aggccccgccagucugcCa..... 1  
Gi3\_28257296\_x2.....caggccccgccagucacAacgaucgga..... 1  
Gi3\_28088992\_x2.....gaucggagacgucgugggaaacaUgggg..... 1  
Gi3\_28214290\_x2.....cguCggaacacggggugccgaac..... 1  
Gi5\_8780513\_x2.....cgugggaacacgAggugccgaacu..... 1  
Gi2\_10873721\_x2.....cggagacgucgugggaaacacggggugGc..... 1  
G1a\_5900050\_x2.....Gucggagacgucgugggaaacacg..... 1  
Gi3\_28183142\_x2.....aaUagaagcgccgucagggccc..... 1  
Gi2\_10923643\_x2.....ccgucCggccccgccagucugcgauC..... 1  
Gi2\_10957703\_x2.....GcugcgauCggagacgucgugggaaaca..... 1  
Gi1\_4134563\_x2.....agacUucgugggaaacacggg..... 1  
Gi2\_10952965\_x2.....cGggccccgccagucugcgauCgg..... 1  
Gi1\_4137763\_x2.....cgugggaGcacggggugccga..... 1  
Gi1\_4118465\_x2.....agUcgucgugggaaacacggggugccgaacu..... 1  
Gi2\_10954715\_x2.....gGacugcgauCggagacgucguggg..... 1  
Gi3\_28155664\_x2.....acgucgugggaaacacggggGgccg..... 1  
Gi3\_28246936\_x2.....uacCgcgauCggagacguc..... 1  
Gi2\_10984453\_x2.....gaucggagaUgucgugggaaacacgggg..... 1  
Gi1\_4098425\_x2.....gggaGacggggugccgaacu..... 1  
Gi2\_10837567\_x2.....aucggagacgucguAggaaacacggggug..... 1  
Gi3\_28136290\_x2.....cguUggaacacggggugcc..... 1  
Gi2\_10919413\_x2.....aggccccgcGaguacugcgauC..... 1  
Gi2\_10907987\_x2.....aggccccgccagucugcgCu..... 1  
Gi2\_10877525\_x2.....gggaacacggggGgccgaa..... 1  
Gi2\_10832141\_x2.....cgucgugggaaacacggggugAcg..... 1  
Gi1\_4128303\_x2.....gggaacacggUgugccgaacu..... 1  
Gi3\_28115648\_x2.....gagacgucgugggaaacacggggugcUgaaC..... 1  
Gi2\_10882991\_x2.....aucggagacgucgugggaaacC..... 1  
Gi2\_10898377\_x2.....ccccgccGguacugcgauCggagac..... 1  
Gi3\_28181346\_x2.....gugggaacaGggggugcc..... 1  
Gi2\_10867407\_x2.....aguacugcgauCggCgacgu..... 1  
Gi2\_10932549\_x2.....cgugggaaUacggggugc..... 1  
Gi3\_28163782\_x2.....cgucguCggaacacggggugccg..... 1  
Gi2\_10832955\_x2.....ggaaAacggggugccgaacu..... 1  
Gi2\_10855495\_x2.....gcUaguacugcgauCggagacg..... 1  
Gi3\_28258586\_x2.....aggccccgccagucugAgauCgga..... 1  
Gi2\_10896285\_x2.....UguacugcgauCggagac..... 1  
Gi1\_4143281\_x2.....gCgaacacggggugccgaacu..... 1  
Gi1\_4098543\_x2.....Uucagggccccgccagucugcg..... 1  
Gi2\_10870585\_x2.....aggccccccaCuacugcgauC..... 1



Gi2\_10948213\_x2.....cGggccccgccaguacugcgauccgaga..... 1  
Gi3\_28243538\_x2.....cgucaggccccgcUaguacugc..... 1  
Gi2\_10902935\_x2.....ugggaacacggggCgccgaa..... 1  
Gi1\_4157229\_x2.....gucgugggaacacggggugcU..... 1  
Gi3\_28000296\_x2.....acugcgauccgCgacgucgug..... 1  
Gi5\_8778727\_x2.....gugggaacGcggggugccgaacu..... 1  
Gi3\_28064346\_x2.....gGagagaagcgccgucagccccgccagua..... 1  
Gi5\_8800465\_x2.....ucgugggaacacggggugccgaUc..... 1  
G1a\_5966328\_x2.....Uaagagaagcgccgucagcccc..... 1  
Gi1\_4137903\_x2.....cgCcgugggaacacggggugcc..... 1  
Gi2\_10975177\_x2.....cccGUcaguacugcgauccg..... 1  
Gi5\_8758991\_x2.....gucgugggaacacggggAgccgaacu..... 1  
Gi1\_4120607\_x2.....ucguAggaacacggggugcc..... 1  
Gi3\_28147862\_x2.....cgucgugggaacacggggUcccgaac..... 1  
Gi5\_8747457\_x2.....cgCcgugggaacacggggugccga..... 1  
Gi3\_28231686\_x2.....gaucggagUcugcugugggaacacggg..... 1  
Gi1\_4121037\_x2.....gaaGacggggugccgaacu..... 1  
Gi3\_28117680\_x2.....agNccccgccaguacugcgaucc..... 1  
Gi2\_10830549\_x2.....gaacacCgggugccgaacu..... 1  
Gi1\_4095389\_x2.....gccaguacugcgauccgagacgucgug..... 0  
Gi2\_10849345\_x2.....cguAgugggaacacggggugccgaacu..... 1  
Gi3\_28067594\_x2.....aUugcgauccgagacguc..... 1  
Gi5\_8731191\_x2.....aacacggggUcccgaacu..... 1  
Gi2\_10914985\_x2.....cgucCggccccgccaguacug..... 1  
Gi5\_8720715\_x2.....gaucggagacgucgugggaGcac..... 1  
Gi3\_28226396\_x2.....uUaggccccgccaguacugc..... 1  
Gi2\_10877497\_x2.....gggaacacggggugUcgaa..... 1  
Gi3\_28038254\_x2.....ggccccgccaguacugcgaucc..... 1  
Gi4\_567268\_x2.....aaUacggggugccgaacu..... 1  
Gi3\_28047234\_x2.....ucggagacgucgCgggaacacggggugc..... 1  
Gi2\_10864083\_x2.....gCcgugggaacacggggugc..... 1  
Gi2\_10962673\_x2.....cCgagacgucgugggaacacggggU..... 1  
Gi2\_10898817\_x2.....Uccaguacugcgauccgagacgucgug..... 1  
Gi1\_4096015\_x2.....ucaggccccgccaguacugcgaCcgga..... 1  
Gi3\_28070434\_x2.....aggccccgccaguacugcgC..... 1  
Gi3\_28248462\_x2.....ggagacguNgugggaaca..... 1  
Gi3\_28104270\_x2.....ccgucaggNccccgccaguacugc..... 1  
Gi3\_28130646\_x2.....gaucggagacAucgugggaacac..... 1  
Gi3\_27995714\_x2.....cugcUaucggagacgucg..... 1  
Gi3\_28145966\_x2.....aacacggggugccAaacuu..... 1  
Gi2\_10876245\_x2.....Gcgauccgagacgucgugggaacacggggugc..... 1  
Gi3\_28206414\_x2.....gccaAuacugcgauccgagacguc..... 1  
Gi2\_10919353\_x2.....CgacgucgugggaacacggggU..... 1  
Gi3\_28022252\_x2.....aucggagacgucgAgggaaacacgggg..... 1  
Gi3\_28069068\_x2.....cagAccccgccaguacugc..... 1  
Gi1\_4117087\_x2.....gaGcacggggugccgaacu..... 1  
Gi3\_28160214\_x2.....aucggGacgucgugggaacacggggugccgaac..... 1

Gi5\_8825779\_x2.....aggUcccgccaguacugcgau..... 1  
Gi2\_10897033\_x2.....caggccccgccaguacugcgaGc..... 1  
Gi3\_28125416\_x2.....agagaagcNccgucaggccccg..... 1  
Gi3\_28099810\_x2.....agacgucgCgggaacacgggg..... 1  
Gi3\_28259516\_x2.....aucggUgacgucgugggaacacggggugcc..... 1  
Gi3\_28059278\_x2.....ggccccgccUguacugcgau..... 1  
Gi2\_10903377\_x2.....acgucgugggaacacggggAgccgaac..... 1  
Gi3\_28002998\_x2.....agacgucgugggaacaUggggugccgaa..... 1  
Gi3\_28161850\_x2.....agaGgcgccgucagggccccgcau..... 1  
Gi3\_28074656\_x2.....gagaagcgccgucGggcccc..... 1  
Gi1\_4140219\_x2.....ggagacgucgugggaGcacggggugcc..... 1  
Gi3\_28054952\_x2.....agacgucgugggaacacggggugAcgaacu..... 1  
Gi2\_10945727\_x2.....caggGccccgccaguacugc..... 1  
Gi2\_10838303\_x2.....aagcgcUgucagggccccgccaguac..... 1  
Gi1\_4152171\_x2.....cgugCgaacacggggugccgaacu..... 1  
Gi5\_8787299\_x2.....gugggaacacggggugccgUac..... 1  
Gi3\_28021400\_x2.....cgccaguacugcgauccggagCcguc..... 1  
Gi3\_28105682\_x2.....cgucgugggaacacUgggugccgaacu..... 1  
Gi2\_10952249\_x2.....cGcgccaguacugcgauccggagacgucg..... 1  
Gi3\_28001934\_x2.....gaucAgagacgucgugggaacacgg..... 1  
Gi2\_10879007\_x2.....caggccccgccaguGcugc..... 1  
Gi1\_4107995\_x2.....ucgugUgaacacggggugccgaacu..... 1  
Gi2\_10981223\_x2.....gugggaacacCgggugccgaac..... 1  
Gi2\_10863195\_x2.....aUgcgccgucagggccccgccaguacugc..... 1  
Gi2\_10980859\_x2.....acgucgugggaacacgggAugccgaac..... 1  
Gi3\_28184242\_x2.....cCucagggccccgccagua..... 1  
Gi3\_28056092\_x2.....Ggucagggccccgccaguacu..... 1  
Gi3\_28174574\_x2.....cgccgucagggccccgccaguacC..... 1  
Gi2\_10835877\_x2.....ccaguacuNcgauccggagacg..... 1  
G1a\_5914708\_x2.....gugggaacacggggugccAaac..... 1  
Gi3\_28189456\_x2.....cggagacgucgCgggaacacgg..... 1  
G1a\_5941972\_x2.....aUacgucgugggaacacggggugccgaac..... 1  
Gi3\_28226406\_x2.....cgucgugggaaAacggggugccgaac..... 1  
Gi3\_28118140\_x2.....ccgccaguaUugcgauccggagacgu..... 1  
Gi5\_8800859\_x2.....gacgucgugggaacacggggugccgaGcu..... 1  
Gi5\_8784403\_x2.....cgugggaacacggggugccAa..... 1  
Gi3\_28199968\_x2.....aggccccgcAaguacugcgauccgga..... 1  
G1a\_5921892\_x2.....agAacugcgauccggagacguc..... 1  
Gi4\_555574\_x2.....ugggGacacggggugccgaacu..... 1  
Gi5\_8812025\_x2.....uacugcgauccAgagacgu..... 1  
Gi1\_4129401\_x2.....uAggaacacggggugccg..... 1  
Gi3\_28222656\_x2.....ucggagacNucgugggaacacggggugcc..... 1  
Gi2\_10830487\_x2.....gagacgucNugggaacacggggug..... 1  
Gi5\_8721415\_x2.....gUgacgucgugggaacacg..... 1  
Gi2\_10848775\_x2.....caggccccgccaguacAgcg..... 1  
Gi3\_28111260\_x2.....caggcAccgccaguacugcgauccgga..... 1  
Gi5\_8778199\_x2.....ggaaUacggggugccgaac..... 1

Gi2\_10972255\_x2.....gucaggccUcgccaguacugcgau..... 1  
 Gl1a\_5887176\_x2.....cccgccaguacugcgauccggagGcguc..... 1  
 Gi3\_28169958\_x2.....agaagcgccgucagggccccgcAa..... 1  
 Gl1a\_5911812\_x2.....cccgccagNacugcgauccgga..... 1  
 Gi1\_4127521\_x2.....Gggccccgccaguacugcgauccg..... 1  
 Gi3\_28258036\_x2.....gucgugggaaAacggggugccga..... 1  
 Gi3\_28244206\_x2.....gucgugggaaAacgggggu..... 1  
 Gl1a\_5914404\_x2.....aacacggggCgccgaacu..... 1  
 Gi5\_8773353\_x2.....Ugugggaacacggggugcc..... 1  
 Gi3\_28134372\_x2.....guacugcgauccgCgacg..... 1  
 Gi3\_27993594\_x2.....ugggaacacggCgugccgaa..... 1  
 Gi3\_28187906\_x2.....gacgucgugggaaCccggg..... 1  
 Gi2\_10858699\_x2.....ggagacgucgugggaaacacggggugcA..... 1  
 Gi2\_10890403\_x2.....aggcccAgccaguacugc..... 1  
 Gl1a\_5941316\_x2.....gugggaacacggggugUcg..... 1  
 Gi1\_4091761\_x2.....gucgugggaaacaUggggugcc..... 1  
 Gi3\_28026224\_x2.....ccccgccaguacugcgauccggagC..... 1  
 Gi1\_4151997\_x2.....ugggaacacggggGgccgaac..... 1  
 Gi5\_8768179\_x2.....aggccccgccagGacugcgau..... 1  
 Gl1a\_5921982\_x2.....gaucUgagacgucgugggaa..... 1  
 Gi2\_10878403\_x2.....aggcAccgccaguacugcga..... 1  
 Gi3\_28151460\_x2.....gaGgucgugggaaacacggg..... 1  
 Gi2\_10858087\_x2.....cgccaguacCgcaugcgagacguc..... 1  
 Gi3\_28205706\_x2.....gucaggccccgccCguacug..... 1  
 Gi5\_8774635\_x2.....agacgucgugAgaacacggggugccgaacu..... 1  
 Gi5\_8783105\_x2.....acgucgugggaaacacggggAgccgaacu..... 1  
 Gi5\_8768275\_x2.....aacacggggugccgaacu..... 0  
 Gi3\_28068258\_x2.....cGccgccaguacugcgauccg..... 1  
 Gi2\_10917275\_x2.....ccgucagggccccgccGguacugcg..... 1  
 Gi5\_8780973\_x2.....gAgggaacacggggugccgaacu..... 1  
 Gi3\_28179160\_x2.....ccccgccaguacugcgCucggagacg..... 1  
 Gi1\_4149687\_x2.....guCggaacacggggugccgaacu..... 1  
 Gi3\_28260340\_x2.....gaucggCgacgucgugggaaacacgg..... 1  
 Gl1a\_5921608\_x2.....aCuacugcgauccggagacguc..... 1  
 Gl1a\_5954730\_x2.....ggcccUgccaguacugcgau..... 1  
 Gi3\_28215228\_x2.....aguacugcgauccAgagacgucgug..... 1  
 Gi3\_28191528\_x2.....aggAcccgccaguacugcgau..... 1  
 Gi3\_28018068\_x2.....ggccccgccUguacugcgau..... 1  
 Gi2\_10982365\_x2.....cgugggaaacacggggAgcc..... 1  
 Gi3\_27987906\_x2.....Uaagcgccgucagggccccgccaguacu..... 1  
 Gi2\_10869833\_x2.....gacgucgGgggaaacacggggugccgaacu..... 1  
 Gi1\_4101317\_x2.....aggccccgAcaguacugcgau..... 1  
 Gi2\_10862627\_x2.....gacgucguggAaacacggggugccgaac..... 1  
 Gi3\_28054164\_x2.....gugggaaacaGggggugccgaa..... 1  
 Gi3\_28125148\_x2.....agAacugcgauccggagacgucguggg..... 1  
 Gl1a\_5902842\_x2.....uaUgaagagaagcgccgucag..... 1  
 Gi5\_8824851\_x2.....Ggucgugggaaacacggggugccgaa..... 1

Gi3\_28204770\_x2.....aAacgucgugggaacacggggugccgaac..... 1  
 Gi2\_10870177\_x2.....aucggGgacgucgugggaacacggggugccgaacu..... 1  
 Gi3\_28049840\_x2.....cgucgugggaacacggggugccUaacu..... 1  
 Gi3\_28072226\_x2.....ucaggccccgccaguacugA..... 1  
 Gi1\_4113867\_x2.....ggagacgucguAggaacacggggugcc..... 1  
 Gi1\_4121785\_x2.....Gagcgcgcgucaggccccccaguacug..... 1  
 Gi2\_10991683\_x2.ccuuaacucguuccgGau..... 1  
 Gi2\_10987005\_x2.....gaucggagacgucgugggaacacggAgu..... 1  
 Gi1\_4113635\_x2.....ucgugggaacacggggugcUgaac..... 1  
 G1a\_5957666\_x2.....gUagacgucgugggaacacggggugc..... 1  
 G1a\_5876886\_x2.....agGagcgcgcgucaggccccgc..... 1  
 Gi1\_4109851\_x2.....gacgucgugggaCcacggggugccgaacu..... 1  
 Gi3\_28019064\_x2.....ccgaauuaNgaagagaagcg..... 1  
 Gi5\_8785051\_x2.....aucggagacgCcgugggaacac..... 1  
 Gi2\_10873013\_x2.....aggccccccaguacuAcgaucg..... 1  
 Gi1\_4158531\_x2.....gggaacacgUggugccgaacu..... 1  
 G1a\_5882998\_x2.....aucggagacgucgugggaCcac..... 1  
 Gi2\_10917993\_x2.....ucggagacgucUugggaacacggggugccgaacu..... 1  
 G1a\_5890864\_x2.....aguacugcgauUgagacguc..... 1  
 Gi1\_4144103\_x2.....cgugggaacacggggCgccga..... 1  
 Gi4\_564580\_x2.....Ccgugggaacacggggugccgaacu..... 1  
 Gi5\_8758805\_x2.....cgucgugggaacCcgggugc..... 1  
 Gi2\_10984723\_x2.....gagacgucguggUaacacggggugcc..... 1  
 Gi3\_28044390\_x2.....gucgugggaacacggggugccgG..... 1  
 Gi3\_28098804\_x2.....gucgugggaacacggggugccgU..... 1  
 Gi2\_10956593\_x2.....caggccUcgccaguacugcgau..... 1  
 G1a\_5930410\_x2.....gugggaacacggggGgccga..... 1  
 Gi1\_4113937\_x2.....gucgugggaUacggggugccgaacu..... 1  
 Gi2\_10841217\_x2.....gaucggUgacgucgugggaacacggg..... 1  
 Gi3\_28238804\_x2.....cgugggaacacggggugcUg..... 1  
 Gi5\_8755091\_x2.....gacgucgugggaacacggggugccAaacu..... 1  
 G1a\_5971680\_x2.....gaucggagGcgcgucgugggaacacggggu..... 1  
 Gi2\_10926491\_x2.....aagagaagNgccgucaggccccccagau..... 1  
 Gi1\_4157721\_x2.....ugggaacacggggugccgaUu..... 1  
 Gi3\_28059750\_x2.....gaucggagacgucgCgggaacacgg..... 1  
 G1a\_5937132\_x2.....aucggagacgucgugggaacacggggA..... 1  
 Gi2\_10935903\_x2.....aucggagacgucgugggaacacgCggugc..... 1  
 Gi1\_4144693\_x2.....ucgugggaNcacggggugc..... 1  
 Gi5\_8726961\_x2.....aucggGgacgucgugggaacac..... 1  
 Gi2\_10916171\_x2.....acUucgugggaacacggggugccgaac..... 1  
 Gi4\_557008\_x2.....cggagacgucgugggaacacggggugccgaacu..... 0  
 Gi3\_27986222\_x2.....acgucgugggaacGcggggugccga..... 1  
 G1a\_5888630\_x2.....Caucggagacgucgugggaacacggggu..... 1  
 Gi2\_10840719\_x2.....aggcGccgccaguacugc..... 1  
 Gi3\_28086144\_x2.....ggUcccgccaguacugcgauccga..... 1  
 G1a\_5929048\_x2.....cAugggaacacggggugcc..... 1  
 Gi2\_10982137\_x2.....cgaucggagacgucgugggaCcacggg..... 1

Gi5\_8783353\_x2.....gggaacacgggguAccgaac..... 1  
 Gi3\_28153206\_x2.....acugcgauccggGgacgucgug..... 1  
 Gi5\_8780207\_x2.....cgucgGgggaacacggggugccgaac..... 1  
 Gi5\_8721073\_x2.....gugggaacaAggggugccgaac..... 1  
 Gi2\_10963435\_x2.....ucggagacgucguggaaUa..... 1  
 Gi2\_10867793\_x2.....gaucggagacAucgugggaacac..... 1  
 Gi4\_566300\_x2.....Gguacugcgauccggagacguc..... 1  
 Gi5\_8718479\_x2.....caggccccgcUaguacugcg..... 1  
 Gi3\_27991356\_x2.....cggGgacgucgugggaacac..... 1  
 G1a\_5936878\_x2.....gggaacaUggggugccgaacu..... 1  
 Gi2\_10911905\_x2.....cgUucggagacgucgugggaacacggg..... 1  
 G1a\_5953002\_x2.....ggNaacacggggugccgaacu..... 1  
 Gi3\_28112202\_x2.....cccgccGguacugcgauccggagacguc..... 1  
 Gi3\_28054754\_x2.....ucggagacgucguggGacacggggugcc..... 1  
 Gi3\_28222432\_x2.....acgucgugggaacacggggugcU..... 1  
 Gi2\_10932979\_x2.....Ggagaagcgccgucagggccccgag..... 1  
 Gi3\_28173682\_x2.....ggccccgcCguacugcgau..... 1  
 Gi3\_28144760\_x2.....cgucagggccUcgccagua..... 1  
 G1a\_5973822\_x2.....cgGcaggccccccaguacugcg..... 1  
 Gi1\_4125135\_x2.....gagacgucguAggaacacggggugccgaacu..... 1  
 Gi1\_4094585\_x2.....ggaacacggggugccgaaU..... 1  
 Gi1\_4141167\_x2.....agacgucguggGacacggggugccgaac..... 1  
 Gi2\_10884789\_x2.....cguAgugggaacacggggugccgaa..... 1  
 Gi4\_562610\_x2.....gugggaacacggggugccCaacu..... 1  
 Gi2\_10872095\_x2.....cgccagCacugcgauccggagacguc..... 1  
 Gi5\_8729441\_x2.....caggccccgcCguacugcgau..... 1  
 Gi2\_10829627\_x2.....cgugggaacacggggugAcgaa..... 1  
 Gi2\_10860083\_x2.....cgggagacgucgugggaaUacg..... 1  
 Gi3\_28125700\_x2.....Accgccaguacugcgauccgg..... 1  
 Gi3\_28017500\_x2.....ugggaUcacggggugccgaa..... 1  
 Gi3\_28246436\_x2.....guacugcgNucggagacguc..... 1  
 Gi2\_10958321\_x2.....gCgaacacggggugccgaa..... 1  
 Gi4\_554326\_x2.....cgucgugggaacacggggCgccga..... 1  
 Gi1\_4092337\_x2.....ggaacacggggugccgaaUu..... 1  
 Gi5\_8810231\_x2.....gugggGacacggggugccgaacuu..... 1  
 Gi2\_10844861\_x2.....ggAaacacggggugccgaa..... 1  
 Gi2\_10963347\_x2.....gccccgcCaguacugUgauc..... 1  
 Gi3\_28147552\_x2.....aAacgucgugggaacacggggugccga..... 1  
 Gi4\_557516\_x2.....cccgccaguacugcgauccggagacgCc..... 1  
 G1a\_5938550\_x2.....cgccaguacugcAaucggagacguc..... 1  
 Gi3\_28145340\_x2.....ugggaacacggggugccgaacuu..... 0  
 Gi3\_28170314\_x2.....gacgucguggGacacggggugccg..... 1  
 Gi3\_28068146\_x2.....GggccccgcCaguacugcgauccggaga..... 1  
 Gi1\_4113781\_x2.....gugggaaUacggggugccgaac..... 1  
 Gi5\_8787669\_x2.....gugggaacacggAgugccgaacuu..... 1  
 Gi5\_8789051\_x2.....gacgucgugggaCcacggggugccgaacu..... 1  
 Gi5\_8822113\_x2.....aucggagacAucgugggaacacg..... 1

Gi3\_28155092\_x2.....gaagagaagcgccgucagGAccc.....1  
 Gi2\_10855121\_x2.....ggagacgucgugggaaUacggggugcc.....1  
 Gi1\_4147797\_x2.....gacgucGgggaacacggggu.....1  
 Gi5\_8775817\_x2.....ugggaacacgggCugccgaa.....1  
 Gi3\_27994568\_x2.....gaucggagacgucgugggaaacacAgggu.....1  
 Gi3\_27983674\_x2.....gccagucgucggaCcgagacgucg.....1  
 Gi3\_27981310\_x2.....gccgGcaggccccccaguc.....1  
 Gi1\_4137089\_x2.....gCacugcgauccggagacgucg.....1  
 Gi2\_10876675\_x2.....gagaagcgccgucagggcccAc.....1  
 Gi3\_28041212\_x2.....uUggaacacggggugccgaacuu.....1  
 Gi5\_8782913\_x2.....aucggagacgucguggAaacacgg.....1  
 Gi2\_10887753\_x2.....cUccagucgucggaucggagacgucg.....1  
 Gi2\_10906063\_x2.....caggccccccagAacugcg.....1  
 Gl1\_5914868\_x2.....acugcgauccAgagacguc.....1  
 Gi3\_28154044\_x2.....uccgaauuaUgaagagaagcgc.....1  
 Gi2\_10889157\_x2.....ugUgaucggagacgucguggga.....1  
 Gl1\_5937186\_x2.....gGucggagacgucgugggaaacag.....1  
 Gi2\_10959753\_x2.....gucgugggaaacaUggggugc.....1  
 Gi2\_10850337\_x2.....gccccgccNguacugcgau.....1  
 Gi3\_27995580\_x2.....aggcGccgccagucgucgau.....1  
 Gi3\_27980052\_x2.....aggccccccCguacugcgau.....1  
 Gi3\_28113938\_x2.....gacgucgugggaaacacgggga.....1  
 Gi2\_10923605\_x2.....aucggagacgucgAggaaacacggg.....1  
 Gi3\_28056498\_x2.....cgucgugggGacacgggg.....1  
 Gi3\_28168786\_x2.....agacgucgugggaaCcacggggugcc.....1  
 Gi2\_10916997\_x2.....aucggagacgucgugAgaacacggggug.....1  
 Gi5\_8745471\_x2.....gugggaaacacggggugcUg.....1  
 Gi2\_10991095\_x2.....ucggagacgucgugggaaGcacg.....1  
 Gi3\_27998160\_x2.....gacgucgugggGacacggg.....1  
 Gi2\_10900309\_x2.....guacugcgNucggagacgu.....1  
 Gi3\_28146398\_x2.....aucggagacguAgugggaaacacggggugcc.....1  
 Gl1\_5926824\_x2.....cgugggaaacacgUggugccgaacu.....1  
 Gi4\_566570\_x2.....ccUgccagucgucggaucggagacguc.....1  
 Gi5\_8776649\_x2.....gggaaacacggggugccCaacu.....1  
 Gi3\_28156098\_x2.....ccccgccagucCggauc.....1  
 Gi5\_8808409\_x2.....gugggGacacggggugccgaa.....1  
 Gi2\_10933377\_x2.....acugcgauccggagacgucgC.....1  
 Gi1\_4151277\_x2.....cagucgucggaucggagacgucgU.....1  
 Gi3\_28212462\_x2.....gacAucgugggaaacacggggu.....1  
 Gi2\_10955701\_x2.....Uaguacugcgauccggagacgucg.....1  
 Gi2\_10904539\_x2.....ccccgUcagucgucggauc.....1  
 Gi1\_4115249\_x2.....ccgucagccccccagucg.....0  
 Gi3\_28133356\_x2.....gGcccgccagucgucggaucggagacgucg.....1  
 Gl1\_5907008\_x2.....cccgccagucgucggaucggagaGguc.....1  
 Gi3\_28131848\_x2.....Caacacggggugccgaacuu.....1  
 Gi3\_28233816\_x2.....ggGgacgucgugggaaaca.....1  
 Gi2\_10923721\_x2.....acgucgugggaaacaUggggugc.....1

Gi3\_28196438\_x2.....ggagacgucgugggaaAacggggugcc..... 1  
 Gl1a\_5922106\_x2.....guUggaacacggggugcc..... 1  
 Gl1a\_5972136\_x2.....gaGcacggggugccgaacu..... 1  
 Gl1a\_5891976\_x2.....aguacugcgCucggagacguc..... 1  
 Gi2\_10949863\_x2.....gaucggCgacgucgugggaacacggggugcc..... 1  
 Gi2\_10898649\_x2.....cgugggaacacggggugccCaacu..... 1  
 Gi2\_10891069\_x2.....ggagacgucgugggaacacgAggug..... 1  
 Gi3\_28179310\_x2.....ccgucaggccccgccaguacCgcgaucgga..... 1  
 Gi3\_28088278\_x2.....aguaUugcgauccggagacgucgug..... 1  
 Gi1\_4145203\_x2.....gaacacggAgugccgaacuu..... 1  
 Gi3\_28001440\_x2.....ucaggccccgccaguacCg..... 1  
 Gi5\_8756157\_x2.....caggccccgccaguacugcA..... 1  
 Gi2\_10959841\_x2.....gucgugggaacaUggggugcc..... 1  
 Gi2\_10869953\_x2.....gCcaguacugcgauccggaga..... 1  
 Gi3\_28211394\_x2.....ucggCgacgucgugggaacacg..... 1  
 Gi3\_28035186\_x2.....Accgccaguacugcgau..... 1  
 Gi1\_4102319\_x2.....cCugggaacacggggugccgaac..... 1  
 Gi3\_27985586\_x2.....ucguuccgaauaUgaagagaagcgcguc..... 1  
 Gi3\_28134320\_x2.....cccAccaguacugcgau..... 1  
 Gi2\_10833561\_x2.....ggccccgccaguacugcgUuc..... 1  
 Gi2\_10945567\_x2.....gaucggagCcgucgugggaacac..... 1  
 Gi3\_28083944\_x2.....aggccccgccaguacugcgCu..... 1  
 Gi1\_4134573\_x2.....Aaucggagacgucguggg..... 1  
 Gl1a\_5895550\_x2.....cgucaggccccgccaguGcugc..... 1  
 Gi5\_8767603\_x2.....gUgacgucgugggaacacggggugccgaacu..... 1  
 Gi5\_8813193\_x2.....ucguAggaacacggggugccgaac..... 1  
 Gi2\_10979185\_x2.....gccaguacugcgauUggagacguc..... 1  
 Gi3\_28074342\_x2.....uGaggccccgccaguacugcgauccggagacg..... 1  
 Gi3\_28215310\_x2.....gacgucgugggaacacgggC..... 1  
 Gi3\_28060548\_x2.....caggGccccgccaguacugcgau..... 1  
 Gi1\_4122481\_x2.....cgucGggccccgccaguacugcg..... 1  
 Gi2\_10854699\_x2.....Gccccgccaguacugcgauccggagacgu..... 1  
 Gi3\_28147940\_x2.....acgucgugggaacacAgggugccgaac..... 1  
 Gi3\_28183368\_x2.....aggccccgccaguacCgcgaucggagac..... 1  
 Gi3\_28131340\_x2.....gacgucgugggaacGcggggugc..... 1  
 Gl1a\_5912330\_x2.....cUcgccaguacugcgauccggagacgu..... 1  
 Gi2\_10926347\_x2.....ggaAacgucgugggaacacggggugc..... 1  
 Gi3\_28047122\_x2.....gacgucgugggCacacggggugccg..... 1  
 Gi3\_28199978\_x2.....ucaggccccAccaguacug..... 1  
 Gi2\_10937761\_x2.....cgucaggccccAccaguacugcg..... 1  
 Gi3\_28068040\_x2.....gaucggagCcgucgugggaacacggg..... 1  
 Gi2\_10955723\_x2.....cgucgugggaacaAggggugccgaacu..... 1  
 Gi5\_8729857\_x2.....ccgccaguacugcgauccggGgacguc..... 1  
 Gl1a\_5908106\_x2.....Nugggaacacggggugccgaacu..... 1  
 Gi5\_8809047\_x2.....ucgugggUacacggggugccgaac..... 1  
 Gi3\_28150152\_x2.....agcgccgucaggcUccgcc..... 1  
 Gi2\_10918505\_x2.....gagacgucgugggaacacggggugccgaac..... 0

Gi2\_10990765\_x2.....cgugggaacacAgggugccga..... 1  
 Gi3\_28179832\_x2.....cUcgccaguacugcgauccg..... 1  
 Gi3\_28111436\_x2.....aggccccgccUguacugcga..... 1  
 Gi1\_4138671\_x2.....cUgagacgucgugggaaacacggggugccgaac..... 1  
 Gi3\_28209910\_x2.....cccgccaguacugcgaCcgagacgu..... 1  
 Gi3\_28217992\_x2.....ucGggccccgccaguacugcga..... 1  
 Gi1\_4117099\_x2.....acgucgugggaaacacAgggugccg..... 1  
 Gi2\_10957177\_x2.....aucggagacgucgGgggaacacggggu..... 1  
 Gi3\_28051892\_x2.....aagagaagcgccgucagggccccgcc..... 1  
 Gi2\_10837971\_x2.....acgucgugggaaacaUggggugcc..... 1  
 Gi3\_27995012\_x2.....agaagcgccgucagggcAc..... 1  
 Gi1\_4107455\_x2.....ggaacUcggggugccgaacu..... 1  
 Gi1\_4093351\_x2.....gggaacacggggugcAgaacu..... 1  
 Gi3\_28023428\_x2.....cggagacgucgugggaaacacgAgggugccga..... 1  
 Gi1\_4151531\_x2.....gacgucgugggaaacacggggugcAgaacu..... 1  
 Gi3\_27999016\_x2.....ccccgcUaguacugcgau..... 1  
 Gi3\_28008748\_x2.....ucgugggaacacggggugccgaacuu..... 0  
 Gi5\_8794027\_x2.....gucguggggUcacggggugccgaacu..... 1  
 Gi3\_28066140\_x2.....Aggaacacggggugccgaacuu..... 1  
 Gi2\_10913977\_x2.....ccgccaguacugcgauAgag..... 1  
 Gi5\_8773127\_x2.....uAcgaucggagacgucgug..... 1  
 Gi2\_10835799\_x2.....gaucggCgacgucgugggaaacacggg..... 1  
 Gi2\_10945929\_x2.....caggcccAgccaguacugcgau..... 1  
 Gi2\_10845725\_x2.....gugggaacacggggugccCa..... 1  
 Gi3\_28190016\_x2.....aucggagacgucgugggaaacUcgggg..... 1  
 Gi2\_10934365\_x2.....cguNgugggaacacggggugccg..... 1  
 Gi3\_28150686\_x2.....ggccccgccaguacugcgG..... 1  
 Gi3\_28208054\_x2.....gUucggagacgucgugggaaacacggggugc..... 1  
 Gi3\_28120314\_x2.....agacgucguggggGcacggggugccga..... 1  
 Gi2\_10936193\_x2.....agacgucgugAgaacacggggugccgaacu..... 1  
 Gi2\_10876263\_x2.....gacgucgugggaaacacggggugUcgaacu..... 1  
 Gi5\_8745563\_x2.....ugcgaucggagacgucgugggG..... 1  
 Gi2\_10967797\_x2.....guacugcgauccggCgacgu..... 1  
 Gl1a\_5931366\_x2.....aacGcggggugccgaacu..... 1  
 Gi2\_10931093\_x2.....agacgucgugggaaacaGggggugcc..... 1  
 Gi2\_10890059\_x2.....acgucgugggaaAacggggugccgaacu..... 1  
 Gi3\_28127210\_x2.....agagGagcgccgucagggccccgc..... 1  
 Gi5\_8770135\_x2.....cUgagacgucgugggaaacacggg..... 1  
 Gi5\_8770309\_x2.....Gucggagacgucgugggaaacac..... 1  
 Gi2\_10863211\_x2.....gagacgucguAggaacacggggug..... 1  
 Gi5\_8808905\_x2.....Ggagaagcgccgucagggccccgccagu..... 1  
 Gi2\_10863967\_x2.....ggaacacggggCgccgaa..... 1  
 Gi2\_10982243\_x2.....aucggagacgucgugAgaacacggggu..... 1  
 Gi2\_10881011\_x2.....acgucgugggaaacacggggugccgaCcu..... 1  
 Gi3\_28141442\_x2.....aucggagacgucgugggaaacacCgggu..... 1  
 Gi3\_28211088\_x2.....agacgucgugggaaacacggggugccgUac..... 1  
 Gi2\_10986113\_x2.....cgccgucagggcccUgccagu..... 1



Gi1\_4142287\_x2.....gacgucgugggaaacGcggggugccgaacu..... 1  
 Gi2\_10834413\_x2.....cgagacgucguUggaacacggggugcc..... 1  
 Gi2\_10936333\_x2.....gggaacaGggggugccgaac..... 1  
 Gi2\_10972225\_x2.....Uaagagaagcgcgcgucagggccccgccagua..... 1  
 Gi2\_10900595\_x2.....aagcgccgucagggccccgcccGguac..... 1  
 Gi3\_28139918\_x2.....acgucgugggaaacacggggugccgaacG..... 1  
 G1a\_5932922\_x2.....cagggccccccagCacugcgau..... 1  
 Gi3\_28060668\_x2.....aucggagacgucgAgggaacacgg..... 1  
 Gi3\_28126696\_x2.....agagaagcgccgGcagggccccgc..... 1  
 Gi3\_28185060\_x2.....ggccGcgccaguaucugcgau..... 1  
 G1a\_5905498\_x2.....gggaacacggggugccgaC..... 1  
 Gi2\_10959107\_x2.....cgucguggAaacacggggugc..... 1  
 Gi1\_4131159\_x2.....agacgucgNgggaacacgggg..... 1  
 Gi3\_28146456\_x2.....gaucggCgacgucgugggaaacacgggg..... 1  
 Gi3\_28222032\_x2.....agacgucgugggaaacacAgggugccgaac..... 1  
 Gi5\_8794129\_x2.....gCcgugggaaacacggggugccgaa..... 1  
 Gi3\_27991438\_x2.....cccgccaguaucgGgaucggagacgucgug..... 1  
 Gi3\_28093960\_x2.....cagggccccgccaguaAugc..... 1  
 Gi3\_28199500\_x2.....cgauccggaNacgucgugg..... 1  
 Gi3\_28219626\_x2.....gggaacacggggugccCaacu..... 1  
 Gi3\_28241694\_x2.....ucagggccccgccagCacugc..... 1  
 Gi3\_28223568\_x2.....cgccaguaucAgcgauccgagac..... 1  
 Gi1\_4139175\_x2.....acgucgugggaaacacggggCgcccgaac..... 1  
 Gi1\_4158485\_x2.....gucgugggaaacacggggugc..... 0  
 Gi3\_28095110\_x2.....cgccaguaucgcgauccAgagacg..... 1  
 Gi1\_4104319\_x2.....agacgucgugggaaacGcggggugccg..... 1  
 Gi5\_8720321\_x2.....gcUgucagggccccgccaguauc..... 1  
 Gi5\_8807673\_x2.....cgugUgaacacggggugccgaacu..... 1  
 Gi4\_560560\_x2.....aguacugcgauccgagac..... 0  
 Gi5\_8785047\_x2.....acgucgugggaaacacggggugccgCac..... 1  
 Gi1\_4143291\_x2.....aucAgagacgucgugggaaacacgggg..... 1  
 Gi2\_10988925\_x2.....gagacgucgCgggaacacggggugccgaacu..... 1  
 Gi1\_4132763\_x2.....gaucggagacgucgugggaaacacgU..... 1  
 Gi1\_4120365\_x2.....agacgucguAggaaacacggggugccgaacu..... 1  
 Gi2\_10936447\_x2.....acgucCugggaacacggggugcc..... 1  
 Gi5\_8746537\_x2.....gugggaacaUggggugccga..... 1  
 Gi3\_28243380\_x2.....agacgucgAgggaacacggggugccgaacu..... 1  
 Gi3\_28158876\_x2.....cGcgccaguaucgcgauccgagacgucgug..... 1  
 G1a\_5975640\_x2.....Agaacacggggugccgaac..... 1  
 Gi1\_4107425\_x2.....gaucggagacgucgugggaaacacgggU..... 1  
 Gi3\_27992106\_x2.....agacgucgugggaaacGcggg..... 1  
 Gi4\_560196\_x2.....gugggaacacggAgugccgaa..... 1  
 Gi3\_28132214\_x2.....ucagggccccgAcaguaucg..... 1  
 Gi2\_10900327\_x2.....cgugggaacaUggggugccga..... 1  
 Gi2\_10871667\_x2.....cUgagacgucgugggaaacacggggugccgaac..... 1  
 Gi2\_10925505\_x2.....cUgagacgucgugggaaacacggggugccg..... 1  
 G1a\_5955948\_x2.....aagcgccgNcaggccccgccaguaucg..... 1

Gi2\_10924127\_x2.....cgucgugggaacacggAgugcc..... 1  
 Gi1\_4119441\_x2.....ggagacgCcgugggaacacggggugccg..... 1  
 Gi3\_27990376\_x2.....acgucgugggaacacgUggugccgaacu..... 1  
 Gi2\_10847327\_x2.....ggccccgccGguacugcga..... 1  
 Gi2\_10864607\_x2.....agagaagcgccgucagggccccgcUag..... 1  
 Gi3\_28167100\_x2.....gugggaacacgggUugccga..... 1  
 G1a\_5882770\_x2.....agccccgNcaguacugcgauc..... 1  
 Gi3\_28104536\_x2.....cgucgugggaacacggggugGcg..... 1  
 Gi3\_28225864\_x2.....ggagacgucgugggaacacggggugcA..... 1  
 Gi2\_10848887\_x2.....aucggagacgucgugAgaacacg..... 1  
 Gi3\_28223854\_x2.....Gggagacgucgugggaacacgg..... 1  
 Gi2\_10882243\_x2.....ggagacgucgugggaacCcggggugc..... 1  
 Gi2\_10894949\_x2.....cUccgccaguacugcgauc..... 1  
 Gi3\_28020498\_x2.....ccccgccaguGcugcgaucgga..... 1  
 Gi5\_8718753\_x2.....Aagacgucgugggaacacg..... 1  
 Gi2\_10960987\_x2.....ccccgccaguacCgcgaucgg..... 1  
 Gi2\_10855591\_x2.....ccgucagggccccgccGguacugc..... 1  
 Gi1\_4120675\_x2.....aucggagacgucgugggaGcacggggugcc..... 1  
 Gi2\_10841599\_x2.....agccccgccCguacugcgauc..... 1  
 Gi2\_10914777\_x2.....aucggagacgucgugggaaAacggg..... 1  
 Gi3\_28218010\_x2.....cggaUacgucgugggaacacggggugccga..... 1  
 Gi3\_28248662\_x2.....ccgccaguacugcgaucggCgacguc..... 1  
 Gi3\_28163008\_x2.....cguUagggccccgccaguacugc..... 1  
 Gi3\_28228746\_x2.....ggaacacggggugcAga..... 1  
 G1a\_5969606\_x2.....cgucCggccccgccaguacugc..... 1  
 Gi3\_28173088\_x2.....ugggaCcacggggugccg..... 1  
 Gi3\_28196320\_x2.....Uguacugcgaucggagacguc..... 1  
 Gi3\_28200094\_x2.....aucggagacgucgugggaacacUgg..... 1  
 Gi2\_10868897\_x2.....ccccgccaguacugUgaucgg..... 1  
 G1a\_5978494\_x2.....gugggaaAacggggugcc..... 1  
 Gi3\_28158862\_x2.....gacgucgugggaacacggggugAcgaacu..... 1  
 Gi3\_28140362\_x2.....agCccccgccaguacugcgauc..... 1  
 Gi3\_28154786\_x2.....cUaguacugcgaucggagacguc..... 1  
 Gi1\_4132825\_x2.....cgucagggccccgccaguacu..... 0  
 Gi1\_4120017\_x2.....aacacUgggugccgaacu..... 1  
 Gi4\_565018\_x2.....cgucgugggaGcacggggugccga..... 1  
 Gi3\_28256614\_x2.....cggagacgCcgugggaacacggggugccga..... 1  
 Gi2\_10832467\_x2.....gaucggagacgucgugAgaacacggggugc..... 1  
 Gi2\_10960335\_x2.....gcccgcucagggccccgccGguacug..... 1  
 Gi3\_27999604\_x2.....ucagggcccNgccaguacug..... 1  
 Gi1\_4102743\_x2.....ucAugggaacacggggugccgaac..... 1  
 Gi3\_28127672\_x2.....Caagcgccgucagggccccgccaguac..... 1  
 Gi5\_8724677\_x2.....gacgucgugggaUcacggggugccgaacu..... 1  
 Gi2\_10979865\_x2.....aucNgagacgucgugggaaca..... 1  
 Gi1\_4150179\_x2.....ucUugggaacacggggugccgaac..... 1  
 Gi2\_10837335\_x2.....ggaacacggCgugccgaac..... 1  
 Gi3\_28225414\_x2.....ccccgccaguacGcgaucggagacgu..... 1

Gi1a\_5948876\_x2.....aUagaagcgcgcgucagggccc..... 1  
 Gi1\_4106059\_x2.....aucggagaNgucguggggaacac..... 1  
 Gi3\_28198436\_x2.....ucggagacgucguggggaacGcggggugcc..... 1  
 Gi3\_28084166\_x2.....Gcccgccaguacugcgaucggagacgu..... 1  
 Gi3\_28010148\_x2.....aggccccgccaCuacugcgau..... 1  
 Gi1\_4094475\_x2.....gucguggggaacacgAggug..... 1  
 Gi5\_8729033\_x2.....acgucgugggaaGacggggugccgaacu..... 1  
 Gi1\_4150883\_x2.....auuaggaagagaagcgcgcguc..... 0  
 Gi5\_8770177\_x2.....caggcccAgccaguacugcgau..... 1  
 Gi3\_28049760\_x2.....agaagcAccgucagggccc..... 1  
 Gi3\_28220490\_x2.....aggccccgAcaguacugcgau..... 1  
 Gi5\_8812281\_x2.....cgugUgaacacggggugcc..... 1  
 Gi3\_28150668\_x2.....gccaguacugcgauccggGgac..... 1  
 Gi3\_27986010\_x2.....aucggagacgucguCggaacacggg..... 1  
 Gi2\_10862605\_x2.....Gggccgcucagggcccgcaguacugcg..... 1  
 Gi3\_28235222\_x2.....ucguggggaacacggggguCccgaacu..... 1  
 Gi2\_10853177\_x2.....gccccgccaguacugcgauU..... 1  
 Gi3\_28062268\_x2.....ggccccgccaguacugcgUuc..... 1  
 Gi3\_28047014\_x2.....gaucggagacgucguAgggaacacgg..... 1  
 Gi2\_10943989\_x2.....agacgucguggggaacacggggugccgaacG..... 1  
 Gi3\_28147638\_x2.....caggccccgccaguacugcAau..... 1  
 Gi3\_28203954\_x2.....aUaagcgcgcgucagggcccgcaguacugcg..... 1  
 Gi3\_28190028\_x2.....ugggaacacggggugccUa..... 1  
 Gi1a\_5958980\_x2.....guggggaacCcggggugcc..... 1  
 Gi1\_4104005\_x2.....ucguggggaacGcggggugcc..... 1  
 Gi3\_28095932\_x2.....caggccAcgccaguacugcgau..... 1  
 Gi1\_4156945\_x2.....ucguggggaacacggggGgcc..... 1  
 Gi2\_10926851\_x2.....gccaguacugcgGucgga..... 1  
 Gi1\_4144995\_x2.....ugggaacacggggugAcgaac..... 1  
 Gi5\_8718423\_x2.....uggAaacacggggugccgaac..... 1  
 Gi4\_566234\_x2.....gaucggagacgucgugggaa..... 0  
 Gi3\_28198708\_x2.....gaGgagaagcgcgcgucagggccc..... 1  
 Gi2\_10913015\_x2.....cgggagacgucguggggaacacggggC..... 1  
 Gi2\_10840785\_x2.....aucgCagacgucguggggaaca..... 1  
 Gi3\_28158008\_x2.....gaagagaagcgcgcgucagC..... 1  
 Gi4\_561452\_x2.....acgucguggggaacacggggugccgaaAu..... 1  
 Gi1\_4092387\_x2.....guggggaacNcggggugcc..... 1  
 Gi3\_28230914\_x2.....acgucguggggaacacggggugcGgaac..... 1  
 Gi3\_28243518\_x2.....aUacgucguggggaacacgggg..... 1  
 Gi2\_10958557\_x2.....gGagcgcgcgucagggcccgcagu..... 1  
 Gi2\_10843303\_x2.....aucggagacgucgugggaaAa..... 1  
 Gi2\_10894447\_x2.....aggAcccgccaguacugc..... 1  
 Gi3\_28212196\_x2.....ucUgagacgucguggggaacacggggugcc..... 1  
 Gi2\_10876505\_x2.....uGggagacgucguggggaacacgggggu..... 1  
 Gi5\_8766521\_x2.....aucggaAacgucguggggaacacg..... 1  
 Gi1\_4154213\_x2.....gcUaucggagacgucgugggaaaca..... 1  
 Gi3\_28017728\_x2.....agcgccAucagggcccgc..... 1

Gi5\_8770079\_x2.....cUgucaggccccccagguacugcg.....1  
 Gi5\_8738373\_x2.....gugggaacacggggugcA.....1  
 Gi2\_10899383\_x2.....caggccccccagguacAgcgauc.....1  
 Gi5\_8749593\_x2.....cgugggaCcaccggggugccgaac.....1  
 Gi2\_10895655\_x2.....gaucggagacgucgugggaacacggAgugc.....1  
 Gl1a\_5893868\_x2.....caguacugcgUucgggagacguc.....1  
 Gl1a\_5968718\_x2.....ggaacacggggugccUaacu.....1  
 Gi2\_10919953\_x2.....aggccccccagguacugcgCucgga.....1  
 Gi2\_10882223\_x2.....gaucggagacgucgugggaacacggU.....1  
 Gi3\_28029694\_x2.....gccaguacNgcgauccgggagacgu.....1  
 Gi2\_10868985\_x2.....acgucgugggaGcacggggu.....1  
 Gi3\_27980066\_x2.....cugcgauccggCgacgucg.....1  
 Gi2\_10955023\_x2.....gccccccagguacugAgauc.....1  
 Gi3\_27986984\_x2.....ugggaacacggggUccga.....1  
 Gi5\_8723707\_x2.....gugggaacaUggggugccgaa.....1  
 Gi3\_28074980\_x2.....cguAgugggaacacggggugcc.....1  
 Gi2\_10902593\_x2.....cggagacgucgugggUacacggggu.....1  
 Gi5\_8820789\_x2.....acgucgugggaacacggggugUcgaacu.....1  
 Gi3\_28019934\_x2.....aucggaAacgucgugggaacacgggg.....1  
 Gi3\_28199612\_x2.....ucgugggaacacggUgugccgaac.....1  
 Gi2\_10972607\_x2.....ucaggccccccGguacugc.....1  
 Gi3\_28114000\_x2.....cgucgugggaacacggggugcG.....1  
 Gi3\_27980880\_x2.....agcgUcguacaggccccccagguacugc.....1  
 Gl1a\_5932168\_x2.....aauuaggaagagGagcgccguc.....1  
 Gi3\_28034422\_x2.....aguacugcgauccggagCcgucg.....1  
 Gi2\_10872199\_x2.....cgugggaacacggggugcUg.....1  
 Gi3\_28139014\_x2.....ucgugggaacacggggugccgaUcu.....1  
 Gi5\_8778217\_x2.....ugggaacaNggggugccgaacu.....1  
 Gi3\_28160142\_x2.....gucaggcccUgccagguacugcg.....1  
 Gi5\_8745129\_x2.....agacgucgugggaacacggggugccgaacG.....1  
 Gi2\_10855043\_x2.....agacgucgugggaGcacggggugcc.....1  
 Gl4\_563534\_x2.....ucgCgggaacacggggugccgaacu.....1  
 Gi5\_8817007\_x2.....Ggucgugggaacacggggugc.....1  
 Gi3\_28068090\_x2.....acAucgugggaacacggggugcc.....1  
 Gi5\_8742811\_x2.....Gaggccccccagguacugc.....1  
 Gi3\_28192290\_x2.....ggUgacgucgugggaacacggggugccgaac.....1  
 Gi2\_10950335\_x2.....acgucgCgggaacacggggugccgaac.....1  
 Gi1\_4125553\_x2.....agacgucAugggaacacggggugccgaacu.....1  
 Gi3\_28134304\_x2.....gcgaucgggagacgucgugggaacacAg.....1  
 Gl1a\_5911524\_x2.....Cugggaacacggggugccgaac.....1  
 Gi5\_8774857\_x2.....gGucggagacgucgugggaacacg.....1  
 Gi2\_10953255\_x2.....Gggagacgucgugggaacacg.....1  
 Gi2\_10969295\_x2.....aucggagacgucgugggaacCcg.....1  
 Gi3\_28253040\_x2.....aucggagacgucguggAaacacgg.....1  
 Gi3\_28221752\_x2.....cgucgugggaacUcggggugccgaacu.....1  
 Gi3\_28163394\_x2.....caggccccccagguacugAg.....1  
 Gi3\_28159972\_x2.....ucagUccccccagguacugcg.....1

|                 |                                           |   |
|-----------------|-------------------------------------------|---|
| Gi1a_5905206_x2 | .....aucggagaNgucguggggaacacg.....        | 1 |
| Gi1_4095657_x2  | .....cgucguggggaacacggggugccgaCcu.....    | 1 |
| Gi3_28067858_x2 | .....agacgAcguggggaacacggggugccgaacu..... | 1 |
| Gi1_4132859_x2  | .....ugcgauccggagacgucgu.....             | 0 |
| Gi3_28010524_x2 | .....gaucUgagacgucguggggaacacgggggu.....  | 1 |
| Gi1_4120043_x2  | .....aucggagaNgucguggggaacacggggugc.....  | 1 |
| Gi5_8775317_x2  | .....aggccccccagucgucggauc.....           | 1 |
| Gi5_8766289_x2  | .....gGgaagcgccgucaggccccgc.....          | 1 |
| Gi1_4152341_x2  | .....cgugUgaacacggggugccgaac.....         | 1 |
| Gi2_10953463_x2 | .....aucggagaAgucguggggaacacgggggu.....   | 1 |
| Gi3_28189526_x2 | .....aUgucguggggaacacggggugccg.....       | 1 |
| Gi1_4146363_x2  | .....gucgugggCacacggggugccgaacu.....      | 1 |
| Gi3_28198812_x2 | .....ggaacacggAgugccgaa.....              | 1 |
| Gi3_28189640_x2 | .....agaagcgUcgucaggccccgc.....           | 1 |
| Gi5_8768837_x2  | .....gugggaacacggggugUc.....              | 1 |
| Gi3_28030300_x2 | .....gaucggagacgucgugAgaacacgggggu.....   | 1 |
| Gi2_10922039_x2 | .....gagaagcgccgucaggccccUgcc.....        | 1 |
| Gi2_10835245_x2 | .....aucggagaacgucguggggaUcacgggggu.....  | 1 |
| Gi2_10876349_x2 | .....cguggggaacacggggugcGgaac.....        | 1 |
| Gi2_10941819_x2 | .....aGugcgauccggagacgucgu.....           | 1 |
| Gi4_555934_x2   | .....gaucggagacgucguggggaacac.....        | 0 |
| Gi1a_5978824_x2 | .....gaacacgAggugccgaacu.....             | 1 |
| Gi3_28254674_x2 | .....aggccccccaAuacugcga.....             | 1 |
| Gi2_10876803_x2 | .....ggagacgucguggggaacacgAggugc.....     | 1 |
| Gi3_28091550_x2 | .....gaagcgUcgucaggccccccagua.....        | 1 |
| Gi5_8783919_x2  | .....gaacacggggugcGgaacu.....             | 1 |
| Gi3_28004490_x2 | .....gggaacacggCgugccgaac.....            | 1 |
| Gi5_8824179_x2  | .....gacgucguggggaacaGggggugccgaacu.....  | 1 |
| Gi2_10837593_x2 | .....acgucguggggaacacggggAgcc.....        | 1 |
| Gi3_28197248_x2 | .....gacgucgugggaaUacggggugccgaac.....    | 1 |
| Gi3_28226498_x2 | .....Gccccccagucgucggaucgga.....          | 1 |
| Gi2_10991787_x2 | .....ggagacgucgCgggaacacggggugc.....      | 1 |
| Gi3_28089426_x2 | .....ggagacgucgugggCacacg.....            | 1 |
| Gi5_8828047_x2  | .....acUcggggugccgaacuuu.....             | 1 |
| Gi5_8795707_x2  | .....gaucggagacAucguggggaacacggg.....     | 1 |
| Gi2_10976041_x2 | .....gaucggagacgucgugggAaacac.....        | 1 |
| Gi2_10899575_x2 | .....gaucggagacgucguggggaacacggggGg.....  | 1 |
| Gi1_4100571_x2  | .....ucguggAaacacggggugccgaac.....        | 1 |
| Gi1_4098033_x2  | .....ucgugggaacacggggug.....              | 0 |
| Gi3_28173830_x2 | .....aggccccccagucgucgCucgga.....         | 1 |
| Gi2_10919729_x2 | .....cGaguacugcgauccggag.....             | 1 |
| Gi3_28245800_x2 | .....cagAccccccagucgucg.....              | 1 |
| Gi3_28255100_x2 | .....agaagcgUcgucaggcccc.....             | 1 |
| Gi2_10851085_x2 | .....cgccagucAcggaucggaga.....            | 1 |
| Gi3_28204440_x2 | .....agacgucguggggaacacggggUaccgaacu..... | 1 |
| Gi3_28008610_x2 | .....gagacgucgugCgaacacggggugccg.....     | 1 |
| Gi1_4133883_x2  | .....ucgugggaacacgCggugccgaacu.....       | 1 |

Gi2\_10917071\_x2.....aucggagacguUgugggaacacggggugcc..... 1  
 Gi3\_28020818\_x2.....aggccccgccaguacugcgauccggU..... 1  
 Gi3\_28099774\_x2.....aacacggggugcUgaacuu..... 1  
 Gi5\_8774041\_x2.....gucguggCaacacggggugccgaacu..... 1  
 Gi2\_10884511\_x2.....gugggaacacggggugccgU..... 1  
 Gi3\_28056794\_x2.....ccUccaguacugcgauccggag..... 1  
 Gi3\_28186882\_x2.....ggaagagaagcgcgcgucaggccc..... 0  
 Gi3\_28178126\_x2.....agagaagAgccgucaggccccgcc..... 1  
 Gi3\_28172494\_x2.....aguacugcNaucggagacg..... 1  
 Gi2\_10848267\_x2.....cGccgccaguacugcgau..... 1  
 Gi3\_28222614\_x2.....gUucggagacgucgugggaacacggggugccg..... 1  
 Gi2\_10984547\_x2.....gaUgagaagcgcgcgucaggccccgcc..... 1  
 Gi1\_4116707\_x2.....guUggaacacggggugccgaacuu..... 1  
 Gi2\_10890807\_x2.....ucggagacgCcgugggaacacggggugccga..... 1  
 Gi3\_28209886\_x2.....ccgccaguacugcgauccggGgacguc..... 1  
 Gi2\_10832177\_x2.....ggccccgcAaguacugcgau..... 1  
 Gi5\_8740729\_x2.....Gucggagacgucgugggaacacggggugcc..... 1  
 Gi2\_10987069\_x2.....Ggucaggccccgccaguac..... 1  
 Gi5\_8810899\_x2.....acugUgacugggagacgucgug..... 1  
 Gi2\_10908895\_x2.....Ucccgccaguacugcgau..... 1  
 Gi2\_10934861\_x2.....cgugggaacacggggUacc..... 1  
 Gi5\_8812727\_x2.....ggccccgccaguacugcgCuc..... 1  
 Gi2\_10934883\_x2.....cggagacgucgugggaacacgg..... 0  
 Gi2\_10878159\_x2.....ggUgacgucgugggaacacggg..... 1  
 Gi2\_10894997\_x2.....gUagacgucgugggaacacggggugccgaa..... 1  
 Gi2\_10942267\_x2.....Gguacugcgauccggagac..... 1  
 Gi1\_4151703\_x2.....uggNaacacggggugccgaacu..... 1  
 Gi3\_28128000\_x2.....aucggagCcgucgugggaacacggggugc..... 1  
 Gi2\_10846431\_x2.....gGgaucggagacgucgugggaacac..... 1  
 Gi1\_4119201\_x2.....aucggagacgucgugggaacGcggggugc..... 1  
 Gi2\_10837949\_x2.....gggaacacAgggugccgaa..... 1  
 Gl1\_5950380\_x2.....aacacggggugccUaacu..... 1  
 Gi3\_28146106\_x2.....cgccgucaggccUcgccaguacu..... 1  
 Gi5\_8734725\_x2.....ugggaacacggggugcUgaacuu..... 1  
 Gi3\_28165188\_x2.....ccUccaguacugcgauccggagacgu..... 1  
 Gl1\_5912080\_x2.....aacacggAgugccgaacu..... 1  
 Gl1\_5920188\_x2.....gaaGacggggugccgaacu..... 1  
 Gi2\_10861587\_x2.....gugggaacaGggggugccgaa..... 1  
 Gi2\_10878071\_x2.....acgucguggAaacacggggugcc..... 1  
 Gi2\_10847605\_x2.....Aaagcgcgcgucaggccccgc..... 1  
 Gi3\_28089504\_x2.....gaucggaAacgucgugggaacacggggU..... 1  
 Gl1\_5931796\_x2.....agCacugcgauccggagacgucgug..... 1  
 Gi3\_28110694\_x2.....cgucUugggaacacgggg..... 1  
 Gi3\_28253166\_x2.....gggaacacggggugccUaa..... 1  
 Gi2\_10974105\_x2.....cggagacgucgugggaacacggggUAc..... 1  
 Gi3\_27995884\_x2.....gaacUcggggugccgaa..... 1  
 Gi2\_10851393\_x2.....cggagacgucgugggaacGc..... 1

Gi1\_4113073\_x2.....cgugAgaacacggggugccga..... 1  
 Gi2\_10906457\_x2.....Agucaggccccccagucacugc..... 1  
 Gi2\_10886093\_x2.....ggagacgucgugggaaacacggggAgc..... 1  
 G1a\_5952608\_x2.....aucggagacgucgugggaaacCcggggugcc..... 1  
 G1a\_5931836\_x2.....ggaaGacggggugccgaacu..... 1  
 Gi2\_10829199\_x2.....gaagagaagcgccgucagggccccAcc..... 1  
 Gi2\_10875839\_x2.....guacugcgauccggagacAucg..... 1  
 G1a\_5886174\_x2.....cAucaggccccccagucacugc..... 1  
 Gi3\_27981834\_x2.....aagagaagcgccgucagggAcccgcc..... 1  
 Gi2\_10960601\_x2.....aucggagacgucgugggaaacacggggA..... 1  
 Gi3\_28137172\_x2.....gAgaacacggggugccga..... 1  
 Gi1\_4102135\_x2.....agagaagcgccgucagggccccgcca..... 0  
 Gi5\_8808773\_x2.....gucgugggGacacggggugccgaac..... 1  
 Gi2\_10953959\_x2.....gacgucgugggaaacacgAggugccgaacu..... 1  
 Gi2\_10898295\_x2.....gaucggagacAucgugggA..... 1  
 Gi5\_8825251\_x2.....agacgucgugggaaacacgAggugccgaac..... 1  
 Gi5\_8820885\_x2.....Gaggccccccagucacug..... 1  
 Gi5\_8736353\_x2.....ugggaaacacggggugccgGa..... 1  
 G1a\_5888480\_x2.....aucggagaNgucgugggaaacacggggugc..... 1  
 Gi3\_28139070\_x2.....gccccgccagCacugcgau..... 1  
 Gi5\_8784605\_x2.....Agccccccagucacugcgau..... 1  
 Gi5\_8795007\_x2.....guAggaaacacggggugccgaacu..... 1  
 Gi3\_28131542\_x2.....gucgugggaaacGggggugccgaac..... 1  
 Gi2\_10978695\_x2.....caggGcccgccagucacug..... 1  
 Gi2\_10868521\_x2.....ccgucagggccccgccGguacugc..... 1  
 Gi2\_10940331\_x2.....cggagacgNcgugggaaacacggggugccgaac..... 1  
 Gi2\_10918395\_x2.....cccgccagucacugcgauUggagac..... 1  
 Gi4\_565408\_x2.....cgucagggccccccagucacugc..... 0  
 Gi1\_4092871\_x2.....cgucgugggaaacacgggAugcc..... 1  
 Gi2\_10947955\_x2.....aucggagUcgucgugggaaacacggg..... 1  
 Gi5\_8820403\_x2.....agacgucgugggaaacaUggggugccgaacu..... 1  
 Gi5\_8763829\_x2.....ucaggccccccagucCugcg..... 1  
 Gi3\_28093610\_x2.....gacgucgGgggaaacacggg..... 1  
 Gi3\_28083618\_x2.....caggccccccaCuacugcgau..... 1  
 Gi4\_556412\_x2.....cccgccagNacugcgauccggagacguc..... 1  
 Gi1\_4118431\_x2.....ccccccagucacugcgauccga..... 0  
 Gi2\_10967043\_x2.....gagacgucgugggaaacacggggCg..... 1  
 Gi3\_28022792\_x2.....agagaagcgccgucagggccccgAcagua..... 1  
 Gi1\_4090317\_x2.....ggaacacggggugcAgaacu..... 1  
 Gi5\_8787895\_x2.....cggagacgucgugggaaacacggggugc..... 0  
 Gi2\_10860539\_x2.....cccgccagucacugcgGucggag..... 1  
 Gi2\_10916461\_x2.....gaUaagcgccgucagggccccgcccag..... 1  
 Gi3\_28092208\_x2.....aguacugcgGucggagacguc..... 1  
 Gi3\_28201068\_x2.....caAgccccccagucacugcga..... 1  
 Gi2\_10971685\_x2.....cgucgugggaaacacggggugAc..... 1  
 Gi2\_10856103\_x2.....agacgucgugggaaacacgAggugcc..... 1  
 Gi2\_10829903\_x2.....gagacgucgugggaaacGcggggugccgaacu..... 1

Gi3\_28080276\_x2.....ucaggccccgccaguCcugcgauC.....1  
 Gi2\_10852205\_x2.....cgucaggccUcgccaguacugc.....1  
 Gi1\_4096163\_x2.....gacgucguggggaacacggggugccgaacu.....0  
 Gi1\_4134495\_x2.....gaCcgagacgucguggg.....1  
 Gi3\_28147186\_x2.....uUugggaacacggggugc.....1  
 Gi5\_8994737\_x1.....cgccaguacugcgauCgAagacgu.....1  
 Gi2\_11026220\_x1.....gucgugAgaacacggggugccgaac.....1  
 Gi2\_11259827\_x1.....aagagGagcgccgucagggccccgccagu.....1  
 Gi3\_28334282\_x1.....gacgucguggggaacacAgggugc.....1  
 Gi2\_11069640\_x1.....cgAagacgucguggggaacacggggu.....1  
 Gi3\_28863368\_x1.....ccaguacugcgauCggagacgucguggg.....0  
 Gi1\_4261978\_x1.....uGggagacgucguggggaacacgggg.....1  
 Gi2\_11075360\_x1.....gccgucagggccccgccGuaucugcgau.....1  
 Gi3\_28526411\_x1.....gacgucgugggUacacggggugccg.....1  
 Gl1a\_6216183\_x1.....gugggaacacggggugccA.....1  
 Gi4\_578222\_x1.....aAacgucguggggaacacggggugccgaacu.....1  
 Gi2\_11163967\_x1.....ucaggccccgccaguacCgcgaucgga.....1  
 Gi2\_11354638\_x1.....cgaucggagGcgucguggggaacacgggg.....1  
 Gi3\_28519736\_x1.....cgaAcggagacgucguggggaacacggggugcc.....1  
 Gi1\_4188149\_x1.....cgccaAuacugcgauCggaga.....1  
 Gi3\_28340533\_x1.....gccgucagggccccgccaAuac.....1  
 Gi3\_28390275\_x1.....cccgccaguacugcgauCggagacAuc.....1  
 Gi1\_4303606\_x1.....ucggagUcgucguggggaacacg.....1  
 Gi5\_8997585\_x1.....gagacgucguggggaacGcggggugcc.....1  
 Gi3\_28471074\_x1.....aguacugcgauUggagacgucgu.....1  
 Gl1a\_6332167\_x1.....gugggCacacggggugccgaac.....1  
 Gi3\_28739902\_x1.....ccaguacugcgGucggagacgucgug.....1  
 Gl1a\_6179448\_x1.....gUcaguacugcgauCggagacguc.....1  
 Gl1a\_6243696\_x1.....Uaagagaagcgccgucaggc.....1  
 Gi2\_11351281\_x1.....ggaacacggggugUcgaa.....1  
 Gi2\_11049929\_x1.....ucgugggaacacggCgugccgaac.....1  
 Gi2\_11245380\_x1.....gugggaacacggggCgccgaacu.....1  
 Gi4\_597262\_x1.....ugUgaacacggggugccgaacu.....1  
 Gi2\_11210708\_x1.....cggaUacgucguggggaacacggggugccga.....1  
 Gi2\_11070225\_x1.....aagcgccgucagggccccgccaguaUugc.....1  
 Gi3\_28789899\_x1.....AcaguacugcgauCggagacgucgug.....1  
 Gi2\_11092237\_x1.....AgccaguacugcgauCggagac.....1  
 Gi3\_28689043\_x1.....gucguggggaacUcggggugccgaac.....1  
 Gi2\_11400935\_x1.....gaucggagacgucgugggCacacggggugcc.....1  
 Gl1a\_6319305\_x1.....GgccaguacugcgauCggagacgucgug.....1  
 Gi5\_8866100\_x1.....cgucguggggaUcaccggggugccgaacu.....1  
 Gi3\_28505993\_x1.....caguacugcgauCggCgacgucgu.....1  
 Gl1a\_6061200\_x1.....ugcgauCgNagacgucguggggaacac.....1  
 Gi3\_28439760\_x1.....gUcgucguggggaacacggggu.....1  
 Gi2\_11070433\_x1.....ccaguacugUgauCggagacg.....1  
 Gi5\_8884275\_x1.....gaacacgUggugccgaac.....1  
 Gi4\_582315\_x1.....cgugggCacacggggugccgaacu.....1



Gi2\_11012039\_x1.....aucgAagacgucgugggaacac..... 1  
 Gi2\_11178993\_x1.....ucggagacguUgugggaacacgggg..... 1  
 Gi2\_11175569\_x1.....gaagagGagcgccgucagggccc..... 1  
 Gi2\_11270187\_x1.....aucggagCcgucgugggaacacggggug..... 1  
 Gi2\_11324218\_x1.....cgucgGgggaacacggggugccgaacu..... 1  
 Gi3\_28984449\_x1.....cgucguCggaacacggggugccgaacu..... 1  
 Gi2\_11249513\_x1.....aguaAugcgaucggagacguc..... 1  
 Gi3\_28277841\_x1.....aggccccgcUaguacugcgauccggagacgu..... 1  
 Gi2\_11005091\_x1.....caguacugNgaucggagacgucgug..... 1  
 G1a\_6075940\_x1.....gauUggagacgucgugggaa..... 1  
 Gi2\_11152741\_x1.....gagaagcgNcgucagggccccgc..... 1  
 Gi3\_28982958\_x1.....ggagacgucgGgggaacacggggugccg..... 1  
 Gi3\_28625664\_x1.....gaagagaagcgccgucGggccc..... 1  
 Gi2\_11088461\_x1.....ggccccGgccaguacugcgauC..... 1  
 Gi2\_11016155\_x1.....ucggagacgucgugggaacCcg..... 1  
 G1a\_6086531\_x1.....gaacacggggugAcgaacu..... 1  
 Gi2\_10993495\_x1.....cgugggaacacggggugG..... 1  
 Gi2\_11127496\_x1.....cugcgauccggagacgucgugggaacaA..... 1  
 Gi2\_11244262\_x1.....gggaacacUgggugccgaac..... 1  
 Gi5\_9042450\_x1.....agacgAcgugggaacacggggugccgaacu..... 1  
 Gi2\_11141261\_x1.....Caagagaagcgccgucagggccccg..... 1  
 Gi1\_4200153\_x1.....ucgugggaUcacggggugccgaac..... 1  
 Gi3\_28645827\_x1.....uacugcgCucggagacgu..... 1  
 Gi1\_4159483\_x1.....Ngaacacggggugccgaacu..... 1  
 Gi5\_8948673\_x1.....cgugggUacacggggugccg..... 1  
 Gi3\_28418977\_x1.....aggcAccgccaguacugcga..... 1  
 Gi3\_28499460\_x1.....aggccAcgccaguacugcgauccggagac..... 1  
 Gi1\_4269182\_x1.....aUacggggugccgaacuu..... 1  
 Gi5\_8951174\_x1.....aucggagacgucgugggCacacggggg..... 1  
 Gi3\_28431944\_x1.....ggagacgucgugggaacCcggggugccgaac..... 1  
 Gi3\_28362067\_x1.....aggccccgcaguacugUgaucgg..... 1  
 Gi3\_28314168\_x1.....aggccccUgccaguacugcgau..... 1  
 Gi3\_28595566\_x1.....cCgagacgucgugggaacacggggugc..... 1  
 Gi3\_28895903\_x1.....ggagacgucguggAaacacggggugccgaacu..... 1  
 Gi2\_11235032\_x1.....gccgucagCccccgccaguacugcg..... 1  
 G1a\_6310935\_x1.....acgucgugNgaacacggggugccgaacu..... 1  
 Gi3\_28628744\_x1.....agagaagcgccguUaggccccgcagua..... 1  
 Gi2\_11364461\_x1.....aagagaagNgccgucagggccc..... 1  
 Gi3\_28566894\_x1.....gugggaacacgggggUcc..... 1  
 Gi2\_11067767\_x1.....cugcgauccggagacgucgugggaacacggggugc..... 0  
 Gi2\_11305634\_x1.....gAccccgccaguacugcga..... 1  
 Gi3\_28604440\_x1.....gucgugggaaUacggggug..... 1  
 Gi2\_11139885\_x1.....aacacgggNugccgaacuu..... 1  
 Gi1\_4254092\_x1.....cguAggaacacggggugccgaac..... 1  
 Gi2\_11195248\_x1.....ccgucagggccccgcagucGcugc..... 1  
 Gi2\_11136972\_x1.....cccgccaguaUugcgauccggagacguc..... 1  
 Gi5\_8869600\_x1.....cggagacgucgugggaacCcg..... 1

Gi1\_4212515\_x1.....gGgacgucgugggaaacac..... 1  
 Gi5\_8920118\_x1.....ugcgauccggagacAucgug..... 1  
 Gi3\_28878758\_x1.....cgcGgucagggccccccagacu..... 1  
 Gi4\_591999\_x1.....acgucgugggaaacacggggugccGacu..... 1  
 Gi2\_11274874\_x1.....cgccagucgucggaucggagGcg..... 1  
 Gi2\_11041502\_x1.....ccgucagggUccgcccagucguc..... 1  
 Gi2\_11352353\_x1.....agacgucgugggaaacacggggUcc..... 1  
 Gi5\_8875139\_x1.....cagCacugcgauccggagacgucgug..... 1  
 Gi3\_28550308\_x1.....gacgucgugggUcacggggugccgaacu..... 1  
 Gi5\_8989045\_x1.....gaacacggggugccGac..... 1  
 Gi3\_28674695\_x1.....gaucggagacgucgugggaaacCcgggugcc..... 1  
 Gi2\_11318769\_x1.....gcccagggccccccagucgug..... 1  
 Gi4\_590316\_x1.....gaUaagcggccgucagggc..... 1  
 Gi1\_4343836\_x1.....cguggaaacacggggugccgaGcuu..... 1  
 Gi2\_10995722\_x1.....aucggagacgucgugggC..... 1  
 Gi3\_28972920\_x1.....acguAgugggaacacggggugcc..... 1  
 Gi2\_11394636\_x1.....gcgauccggagacgucgugggaaacacggggugccg..... 0  
 Gi3\_28382082\_x1.....ucagggUccgcccagucgucguc..... 1  
 Gi5\_8931795\_x1.....gagacgucgugggaaacaUggggugccgaac..... 1  
 Gi3\_28644664\_x1.....guacugcgGucggagacg..... 1  
 Gi3\_28929004\_x1.....aCgccccccagucgucggaucggagacg..... 1  
 Gi1\_4291028\_x1.....cguNugggaaacacggggugcc..... 1  
 Gi3\_28614281\_x1.....ccccccagucgucAauc..... 1  
 Gi5\_8964649\_x1.....cgugggaGcacggggugccg..... 1  
 Gi5\_9056848\_x1.....gcAaguacugcgauccggagacguc..... 1  
 Gi2\_10992737\_x1.....cAaucggagacgucguggg..... 1  
 Gi5\_8842363\_x1.....ugggaaacaGggggugccgaac..... 1  
 Gi3\_28839538\_x1.....cgccgucagggcccUgcccagucguc..... 1  
 Gi1\_4377533\_x1.....Uucggagacgucgugggaaacacggggugcc..... 1  
 Gi2\_11189360\_x1.....aggccccgNcagucgucggaucggagacguc..... 1  
 Gi5\_8909883\_x1.....cgucgugggaaacacggggugccGac..... 1  
 Gi5\_9073803\_x1.....ccgucagggccccccagucgucg..... 1  
 Gi3\_28945594\_x1.....gccagucCgcgauccgga..... 1  
 Gl1a\_6266596\_x1.....caUgccccccagucguc..... 1  
 Gl1a\_6124993\_x1.....ggagacgucgugggaaacacggggU..... 0  
 Gl1a\_6262157\_x1.....aGcggagacgucgugggaa..... 1  
 Gi3\_28939196\_x1.....aagcggccgucagggccccccagucgucA..... 1  
 Gi3\_28272728\_x1.....agaagcggccgucagCccc..... 1  
 Gi3\_28568500\_x1.....ggccccccagucgucgC..... 1  
 Gi2\_11181316\_x1.....ggccccccagucgucgCucgg..... 1  
 Gi2\_11164613\_x1.....aCuacugcgauccggagacguc..... 1  
 Gi1\_4257192\_x1.....ggccccccagucgucgga..... 0  
 Gi2\_11296757\_x1.....ggagacguAgugggaacacg..... 1  
 Gi2\_11407091\_x1.....ugcgauccggagacgucgAgggaaaca..... 1  
 Gi2\_11267514\_x1.....gagacgucgugggaaacacggggGgcc..... 1  
 Gi5\_8910228\_x1.....ugcgauccggagacgAcguggg..... 1  
 Gi2\_11228939\_x1.....agaUaagcggccgucagggccccccaguc..... 1

Gi5\_9122159\_x1.....acgucgucGgaacacggggugccg..... 1  
 Gi3\_28311423\_x1.....Cagacgucgugggaacac..... 1  
 Gi1\_4239538\_x1.....gggaacacggggugccCaacu..... 1  
 Gi3\_28701609\_x1.....cgugggaacacggggucC..... 1  
 G1a\_6174908\_x1.....gGcugcugugggaacacggggugccgaacu..... 1  
 G1a\_6168551\_x1.....gagaagcgNcgucaggccc..... 1  
 Gi3\_28580520\_x1.....cgccaguacugcgCucggagacg..... 1  
 Gi4\_584811\_x1.....acgucgugggaacacggggugccAaacu..... 1  
 Gi4\_610249\_x1.....gugggaacacggggugccAaacu..... 1  
 Gi3\_28795074\_x1.....Gcucguuccgaauaggaaga..... 1  
 Gi5\_9081526\_x1.....aucNgagacgucgugggaacacg..... 1  
 Gi3\_28750083\_x1.....ggccccgccaAuacugcgau..... 1  
 Gi5\_8947759\_x1.....aagagaagcgccgucaggUcccccca..... 1  
 Gi3\_28620771\_x1.....auNggagacgucgugggaacacg..... 1  
 Gi1\_4261592\_x1.....gagacgucgugggaacacgggUugccgaacu..... 1  
 Gi3\_28493034\_x1.....caguacugcgCucggagacgucg..... 1  
 Gi5\_8942100\_x1.....aucggagaUgucgugggaacacggggugc..... 1  
 Gi2\_10997572\_x1.....gacguAgugggaacacggggugccgaacu..... 1  
 Gi5\_8982859\_x1.....aAcggagacgucgugggaacacg..... 1  
 Gi3\_28330596\_x1.....gNgaacacggggugccgaacu..... 1  
 Gi5\_9117675\_x1.....Ugucgugggaacacggggugccgaac..... 1  
 Gi2\_11236626\_x1.....gccccAccaguacugcgau..... 1  
 Gi3\_28575795\_x1.....acgucgugggaacacgCggugccgaac..... 1  
 Gi1\_4241795\_x1.....cgugUgaacacggggugccgaacuu..... 1  
 Gi3\_28318010\_x1.....agcgccgucagggccccgAc..... 1  
 Gi3\_28576524\_x1.....agaagUgcccgucagggccccgcauacugcg..... 1  
 Gi5\_8874169\_x1.....cggagacgucAuggggaacacggggugccga..... 1  
 Gi3\_28789545\_x1.....Acccgccaguacugcgauccggagacg..... 1  
 Gi5\_8850510\_x1.....aguacugcgauccggagCcguc..... 1  
 Gi1\_4175660\_x1.....Gcgucgugggaacacggggugccga..... 1  
 Gi5\_9082746\_x1.....aucggagaNgcugugggaacacggggugc..... 1  
 Gi2\_11299761\_x1.....aucggagacUucgugggaacacg..... 1  
 Gi1\_4322404\_x1.....ugcgauccggagGcgucguggga..... 1  
 Gi3\_28406659\_x1.....gacgucgugggaacCcggggu..... 1  
 Gi2\_11395899\_x1.....ucggagacgucgugggGacacgggggu..... 1  
 Gi3\_28514672\_x1.....cggagacgucguUggaacacgggg..... 1  
 Gi4\_592287\_x1.....ggUacacggggugccgaac..... 1  
 Gi2\_11169763\_x1.ccuuaacCcgucuccgaau..... 1  
 Gi2\_11193802\_x1.....aggccccgccaAuacugcgauccgga..... 1  
 Gi5\_9045518\_x1.....aagagaagcgcccgucagggcccAcgccc..... 1  
 Gi2\_11033117\_x1.....ccaguacugcgauccggagacguUgugggaaca..... 1  
 Gi3\_28903616\_x1.....ccccgcccaguacugcgauU..... 1  
 Gi2\_11162713\_x1.....cgucGggccccgcccaguacugcgauccgga..... 1  
 Gi2\_11032415\_x1.....gauccggagacgucgCgggaaca..... 1  
 Gi4\_606182\_x1.....auUggagacgucgugggaacacggggugcc..... 1  
 Gi2\_11048143\_x1.....ccccgccagCacugcgauccg..... 1  
 Gi3\_28536240\_x1.....ggccAcgcccaguacugcgauccgga..... 1

Gi3\_28563241\_x1.....aucggaCacgucuguggaacaacacggg..... 1  
 Gi2\_11273020\_x1.....ggccccgccaguaUugcgauccg..... 1  
 Gi5\_8903290\_x1.....caggccccNccaguacugc..... 1  
 Gi3\_28668196\_x1.....gccgucaggccccgccaguCucgcg..... 1  
 Gi5\_8875773\_x1.....gugggaacCcggggugccg..... 1  
 Gi2\_11324177\_x1.....aggcccAgccaguaucugcgauccgagacguc..... 1  
 Gi2\_11275424\_x1.....aguacugcgauccgagUcgu..... 1  
 Gi2\_11151569\_x1.....ccccgccaguaucugcgauccg..... 1  
 Gi1a\_5983467\_x1.....gCcaggccccgccaguaucugcg..... 1  
 Gi1\_4213508\_x1.....aggccccNcaguacugcgauccg..... 1  
 Gi3\_28574879\_x1.....ggccccgccagCacugcgau..... 1  
 Gi3\_28788600\_x1.....cgAcaguaucugcgauccgagacguc..... 1  
 Gi2\_11232969\_x1.....gagaagcgccgucaggccccgccUg..... 1  
 Gi3\_28804015\_x1.....ccgucaggcAccgccaguaucugc..... 1  
 Gi2\_11209537\_x1.....agaNcugcuguggaacaacacggggugccg..... 1  
 Gi3\_28424450\_x1.....aucggagacgucgGgggaacac..... 1  
 Gi1a\_6105129\_x1.....caggccccgccaguaucugcgauccgagacguc..... 0  
 Gi1a\_6186756\_x1.....gcUccgccaguaucugcgauccgagacg..... 1  
 Gi5\_9073523\_x1.....aggccccgccaguUcugcgaucc..... 1  
 Gi1\_4174452\_x1.....Agugggaacacggggugccgaacuu..... 1  
 Gi3\_28728732\_x1.....aucggagacgucAuggggaacac..... 1  
 Gi2\_11205788\_x1.....gaucggagacgucgugggaacacggggug..... 1  
 Gi1\_4383027\_x1.....gaucggagacgucgugggaac..... 0  
 Gi5\_9113732\_x1.....aucggagacgCcgugggaacacggggugc..... 1  
 Gi3\_28628842\_x1.....aacacUgggugccgaacuu..... 1  
 Gi5\_9110660\_x1.....caggAccgccaguaucug..... 1  
 Gi3\_28294666\_x1.....agaagcgccgucaggccccA..... 1  
 Gi3\_28453491\_x1.....ggagacgucgugggaacacgggguCcc..... 1  
 Gi3\_28422833\_x1.....cgauccgagacgucgugggaacacgggA..... 1  
 Gi2\_11102508\_x1.....acugcgauccgagacgucgugggaUca..... 1  
 Gi1a\_6276197\_x1.....Ugucaggccccgccaguaucug..... 1  
 Gi3\_28570620\_x1.....gccccgccaguaucugUgauccgagaa..... 1  
 Gi3\_28511047\_x1.....gccgucaggccccGccaguaucugcg..... 1  
 Gi3\_28279687\_x1.....gcUgucaggccccgccaguaucugc..... 1  
 Gi3\_28402778\_x1.....agaagcgccguUaggccc..... 1  
 Gi3\_28938703\_x1.....ccgccaguaucugcgauccgagacgucgG..... 1  
 Gi4\_608543\_x1.....cgugggaGcacggggugccgaacu..... 1  
 Gi2\_11102824\_x1.....agagaaUcggcgucaggcccc..... 1  
 Gi1a\_6334932\_x1.....aggccccgccaguaucCgcg..... 1  
 Gi2\_11107354\_x1.....cgugggaacacCgggugccgaac..... 1  
 Gi2\_11278526\_x1.....gagacgucgugggaacacUgggugccg..... 1  
 Gi3\_28592323\_x1.....gcgauccgagacgucgGgggaac..... 1  
 Gi5\_8834137\_x1.....gaucggagacgucguAgggaacacggg..... 1  
 Gi2\_11155321\_x1.....cggagacgucguAgggaacacgggg..... 1  
 Gi1a\_6127069\_x1.....cggagacgucgugggaacCggg..... 1  
 Gi3\_28759704\_x1.....cgcUaguacugcgauccgagacguc..... 1  
 Gi3\_28859105\_x1.....gagacgucgugggaGcacggggugccgaac..... 1

Gi3\_28678967\_x1.....gucgugggaaacacggggugccA..... 1  
 Gi2\_11316137\_x1.....cCaucggagacgucgugggaaacacggggugc..... 1  
 Gl1\_6207866\_x1.....aucggagacgucgugggaaGacggggugcc..... 1  
 Gi3\_28885176\_x1.....cgaucggCgacgucgugggaaacacgg..... 1  
 Gi2\_11065301\_x1.....gggaacaUggggugccgaa..... 1  
 Gi3\_28756906\_x1.....ucggagacgucgugAgaacacggggugccg..... 1  
 Gi1\_4179046\_x1.....gucgugggaaacacggggugccgaacG..... 1  
 Gi1\_4334876\_x1.....acgucgugggaaacCcgggugcc..... 1  
 Gi4\_575506\_x1.....cgucgugggaaacacggAgugccga..... 1  
 Gi5\_8844755\_x1.....gccaguacugcgCucggagacguc..... 1  
 Gi2\_11086847\_x1.....cgucgugggaaacacggggugcGgaac..... 1  
 Gi2\_11358363\_x1.....aagagaagcgccgucagggccccCcca..... 1  
 Gl1\_6159318\_x1.....cCaucggagacgucgugggaa..... 1  
 Gi1\_4164323\_x1.....gAcgugggaaacacggggugcc..... 1  
 Gi3\_28332876\_x1.....gCccccgccaguacugcga..... 1  
 Gl1\_6087919\_x1.....ucUgagacgucgugggaaacacggg..... 1  
 Gi3\_28620522\_x1.....ucggagacgucgugggaaacaAggggu..... 1  
 Gi5\_9039662\_x1.....cgucgugggaaacacggAgugc..... 1  
 Gi1\_4367096\_x1.....gagacgucgugggaaacacggggGgcc..... 1  
 Gi2\_11180107\_x1.....gaagagaagcgccgucagggccccGAc..... 1  
 Gi3\_28941137\_x1.....gagaagcgccgucagggccGc..... 1  
 Gi3\_28916537\_x1.....aggccccgccaguacugcgauccggagacgC..... 1  
 Gi3\_28818848\_x1.....Aacgucgugggaaacacgg..... 1  
 Gi5\_8845673\_x1.....ucggagacgucgugggaaacacgggggu..... 0  
 Gl1\_6043230\_x1.....cgGgggaacacggggugc..... 1  
 Gi1\_4387387\_x1.....gccaguacugcgauUggagacg..... 1  
 Gi5\_9100188\_x1.....cUgggaacacggggugc..... 1  
 Gi1\_4366032\_x1.....gugggaaacacggggugccgaC..... 1  
 Gi2\_11127008\_x1.....cgugggaaacacggggugccC..... 1  
 Gi5\_9012931\_x1.....cacggggugccgaCcuuu..... 1  
 Gi1\_4308274\_x1.....acgucguggUaacacggggugccgaacu..... 1  
 Gi3\_28901822\_x1.....agacgucgugggaaacacggggugcUgaacu..... 1  
 Gi3\_28319028\_x1.....ccccgccaguaUugcgauccggagacguc..... 1  
 Gi1\_4185083\_x1.....cgugggaaacacCgggugccgaacu..... 1  
 Gl1\_6178871\_x1.....gucgGgggaacacggggugcc..... 1  
 Gi3\_28890054\_x1.....ugcgauccggagacgucgC..... 1  
 Gi3\_28963163\_x1.....gccccgccaguacugcAaucgg..... 1  
 Gi2\_11059774\_x1.....caguacugcgauccggagacguUgu..... 1  
 Gi1\_4230576\_x1.....aaUcgccgucagggccccgccaguacug..... 1  
 Gi2\_11166663\_x1.....gucaggUcccgccaguacugcg..... 1  
 Gi2\_11256240\_x1.....aucggagacgucAugggaa..... 1  
 Gi5\_8978870\_x1.....aucggagacgucgugggaaacacggggAgc..... 1  
 Gl1\_6027981\_x1.....ggccccgccUguacugcgau..... 1  
 Gi3\_28931149\_x1.....agaagcgccgucagggccccGAcaguacug..... 1  
 Gi3\_28347973\_x1.....cggUgacgucgugggaaacacgggggu..... 1  
 Gi5\_8933110\_x1.....cUgggaacacggggugccgaacu..... 1  
 Gi1\_4158961\_x1.....cgucgAgggaaacacggggugccgaacu..... 1

Gi1a\_6100032\_x1.....aucggagacgucgugggGacacg..... 1  
Gi3\_28675517\_x1.....gagacgucgugggUacac..... 1  
Gi3\_28852836\_x1.....gccccgccaguacugcgauccggGgac..... 1  
Gi1a\_6347224\_x1.....gccaguacAgcgauccggagacguc..... 1  
Gi3\_28662147\_x1.....ccccGAcaguacugcgauccggaga..... 1  
Gi3\_28981521\_x1.....guacugcgauccggGgacgucgugggaaacacg..... 1  
Gi3\_28842116\_x1.....Ncaggccccgccaguacugcg..... 1  
Gi3\_28325696\_x1.....Agagacgucgugggaaacacg..... 1  
Gi3\_28698127\_x1.....gccaguacNcgauccggag..... 1  
Gi1\_4387548\_x1.....ggagacgucgugggaaUacggggugccgaacu..... 1  
Gi3\_28551046\_x1.....gccccgccCguacugcgauccggagacg..... 1  
Gi1\_4257267\_x1.....gcgccgucaggccccgccaguU..... 1  
Gi2\_11109531\_x1.....ggGgacgucgugggaaacacggggugccgaa..... 1  
Gi2\_11013576\_x1.....Aggagacgucgugggaaacacggggugccgaacu..... 1  
Gi1\_4316718\_x1.....gacggGgacgucgugggaa..... 1  
Gi3\_28597109\_x1.....aggccccgccaguUcugcgauccgg..... 1  
Gi1\_4361376\_x1.....aucggaAacgucgugggaaacacggggugc..... 1  
Gi3\_28960192\_x1.....Gcgauccggagacgucgugggaaacacg..... 1  
Gi1\_4291219\_x1.....acgucgugggaaacacggggCgcccga..... 1  
Gi3\_28970846\_x1.....gugggaaacacggggugccgaCcuuu..... 1  
Gi1a\_6249602\_x1.....cgucaggccccgccaguacugcgauUgg..... 1  
Gi1a\_6013126\_x1.....gaAcggagacgucgugggaaacacg..... 1  
Gi2\_11220061\_x1.....ccccgcUaguacugcgauccgga..... 1  
Gi3\_28719656\_x1.....ucgugAgaacacggggugccg..... 1  
Gi2\_11351886\_x1.....gacgucgugggaaacacggggugccgaUcu..... 1  
Gi2\_11222336\_x1.....caUgccccgccaguacugcgau..... 1  
Gi1a\_6264093\_x1.....gacggagacgucgugggGacacg..... 1  
Gi3\_28855402\_x1.....cgccgucCggccccgccagu..... 1  
Gi5\_8887481\_x1.....cgucgugggaaacacggggugUcga..... 1  
Gi3\_28704902\_x1.....agacgucgugggaaacacggggugGc..... 1  
Gi3\_28868339\_x1.....cgucgugggaaacacgAggugccgaa..... 1  
Gi5\_9017364\_x1.....gucgugggaaacacggggugcAaa..... 1  
Gi3\_28831032\_x1.....ucaggccccgccaguacugcgauccgA..... 1  
Gi2\_11125158\_x1.....cgucaggccccgccaguacCg..... 1  
Gi2\_11322095\_x1.....ucaggAcccgccaguacug..... 1  
Gi2\_11100254\_x1.....aggccccgccaguacugcgauccgA..... 1  
Gi5\_8876791\_x1.....ucgugggaaacGcggggugccgaa..... 1  
Gi3\_28962588\_x1.....gUacacggggugccgaacu..... 1  
Gi5\_8965801\_x1.....aucggagacgucgugAgaacacg..... 1  
Gi5\_9056628\_x1.....ucgAagacgucgugggaaacacggggugccg..... 1  
Gi3\_28755102\_x1.....aUgucgugggaaacacg..... 1  
Gi3\_28751178\_x1.....gccccgccNguacugcgauccggagacgucg..... 1  
Gi2\_11111480\_x1.....gagacgucgugggaaacacggggugcAgaac..... 1  
Gi2\_11019399\_x1.....cggUgacgucgugggaaacacggggug..... 1  
Gi3\_28558724\_x1.....aucggagacgucgugggaaacacggggugUcga..... 1  
Gi2\_11046344\_x1.....gUcgcgugggaaacacggggugc..... 1  
Gi3\_28735750\_x1.....guacugcgauccggagacgucguc..... 1

Gi3\_28580606\_x1.....gccAuaucugcgauccggagac..... 1  
Gi2\_11173901\_x1.....aAgccccgccaguacugcgauccggagacg..... 1  
Gi2\_11197076\_x1.....ucggagGcgucgugggaaacacggggugc..... 1  
Gi3\_28791687\_x1.....cgGucggagacgucgugggaaacacggggug..... 1  
Gi2\_11228325\_x1.....gacgucgugggaaacacggggugccC..... 1  
Gi3\_28488184\_x1.....gucgugggaaacacgggAugc..... 1  
G1a\_5990736\_x1.....Uaucggagacgucgugggaaacacgggg..... 1  
Gi2\_11219335\_x1.....ggccccgccaguacugcAa..... 1  
Gi2\_11210577\_x1.....ccgccaguacugcAaucgg..... 1  
Gi1\_4239042\_x1.....ccccgccaguacugcgCucgg..... 1  
Gi3\_28415962\_x1.....gaagAgccgucagggccccgccaguacu..... 1  
Gi1\_4380561\_x1.....acugcgauccggagacgAcg..... 1  
Gi3\_28301838\_x1.....cggagacgucguAggaacacgg..... 1  
Gi3\_28552484\_x1.cGuaaacucguuccgaaau..... 1  
Gi2\_11404960\_x1.....gaucAgagacgucgugggaaacacgggg..... 1  
Gi3\_28704039\_x1.....aCcgccgucagggccccgcc..... 1  
Gi2\_11067707\_x1.....gaucggagaUgucgugggaaac..... 1  
Gi3\_28669441\_x1.....acugcgauccggagacgucgugggaaacacggggu..... 0  
Gi3\_28419620\_x1.....agacgucgugggUaacacggggugccgaacu..... 1  
Gi5\_8924870\_x1.....gugggaaacacgggCugccga..... 1  
Gi3\_28329679\_x1.....gcgGucggagacgucgugggaaac..... 1  
Gi3\_28943492\_x1.....cgucguggNaacacggggug..... 1  
G1a\_6185777\_x1.....ccaguacugUgauccggagacguc..... 1  
Gi4\_579560\_x1.....gAcgugggaaacacggggugccgaacu..... 1  
Gi2\_11337516\_x1.....cgauccggagacgucgCgggaaacacggg..... 1  
Gi3\_28827779\_x1.....gCgaagcgccgucagggccc..... 1  
Gi1\_4347899\_x1.....ggaacacggggugccgaacG..... 1  
Gi2\_11089532\_x1.....gaagcgccgucagggccUcgccag..... 1  
Gi5\_8962559\_x1.....ccgucagggccccCccaguacugcg..... 1  
Gi3\_28343237\_x1.....gccgucagggAcccgccagu..... 1  
Gi2\_11215171\_x1.....auGggagacgucgugggaaacacggggugcc..... 1  
Gi3\_28629260\_x1.....gaucggagacgCcgugggaaacacggggugc..... 1  
Gi2\_11137708\_x1.....gagacgucgugggUaacacggg..... 1  
Gi2\_11087013\_x1.....gccaguacugcgauccggagacgCcgug..... 1  
Gi3\_28518183\_x1.....gcgauccggagacgucgugggaaacGcggggu..... 1  
Gi3\_28458879\_x1.....Gggccccgccaguacugcgauccggagacgucg..... 1  
G1a\_6173894\_x1.....ggaAacgucgugggaaacacggggugcc..... 1  
Gi3\_28798542\_x1.....acugcgauccAgagacgucgug..... 1  
Gi2\_11249588\_x1.....gucaggAcccgccaguacugcgau..... 1  
Gi1\_4267719\_x1.....acgucgugggaaacacggggugccgG..... 1  
Gi2\_11119576\_x1.....ucgugggaaAacggggugccg..... 1  
Gi2\_11002105\_x1.....aGgagaagcgccgucagggccccgc..... 1  
Gi1\_4371378\_x1.....ucaggccccgccaguGcugcgauccgga..... 1  
Gi2\_11207526\_x1.....aacacggggUccgaacu..... 1  
Gi2\_11360876\_x1.....aucggagacgucguCggaacacggggu..... 1  
Gi2\_11138272\_x1.....Gaggccccgccaguacugcgauccggagac..... 1  
Gi2\_11241063\_x1.....gccaguacugcgauccAgagacgucgug..... 1

Gi3\_28854237\_x1.....ggccccgcCguacugcgauccgga..... 1  
 Gi3\_28299403\_x1.....gacgucguggAaacacgggugccgaac..... 1  
 Gi3\_28700568\_x1.....gUGaagcgccgucagggccccccagacu..... 1  
 Gi3\_28375246\_x1.....cgauccggagacgucgugggaacacgC..... 1  
 Gi2\_11195983\_x1.....ucgugggaacacgggAugccgaa..... 1  
 Gi3\_28329439\_x1.....acugcgauccggagacgCc..... 1  
 Gi5\_8953989\_x1.....cggagacgucgugggaacCcggg..... 1  
 Gi2\_11328178\_x1.....gccgucagggccccgcccagCac..... 1  
 Gi5\_8892423\_x1.....gugggaacaAggggugccg..... 1  
 Gi2\_11316202\_x1.....aGgagaagcgccgucagggccccgcca..... 1  
 Gi1\_4383334\_x1.....gGagcgccgucagggccccgcccag..... 1  
 Gi4\_598275\_x1.....aacucguuccgaaauaCgaagagaagcg..... 1  
 Gi3\_28346681\_x1.....cccgccagucgucggaucUgaga..... 1  
 Gi3\_28492314\_x1.....aUgccccgcccagucgucgagacgucgu..... 1  
 Gi1\_4348980\_x1.....ucggagacgAcgugggaacacg..... 1  
 Gi2\_11057831\_x1.....ucggagacgucgugggaacacg..... 0  
 Gi2\_11277484\_x1.....agagaagcgccgucagggccccgccaAuacug..... 1  
 Gi3\_28492636\_x1.....ugggaacacgCggugccga..... 1  
 Gi3\_28280943\_x1.....ugcgGucggagacgucgugggaacacggg..... 1  
 Gi3\_28284005\_x1.....ggagacgucgugggaacacAgggugccgaac..... 1  
 Gi2\_11395305\_x1.....gacgucgugggaCcacgg..... 1  
 Gi3\_28478521\_x1.....agaagcgccgucagggccccAc..... 1  
 Gi3\_28756893\_x1.....agacgucgugggaacacgggugccgaCc..... 1  
 Gi3\_28800214\_x1.....ucggagacgucgugggaUcacg..... 1  
 Gi3\_28505990\_x1.....cgucgugggaacacgggAugccg..... 1  
 Gi3\_28385282\_x1.....gcgGucggagacgucgugggaac..... 1  
 Gi2\_11331989\_x1.....ucagggccccgUaguacugc..... 1  
 Gi2\_11068410\_x1.....ccccgcccagucgucggaAcgg..... 1  
 Gi2\_11017564\_x1.....Ugucagggccccgcccagucggauc..... 1  
 Gi3\_28558999\_x1.....agagaagcgccgucagggcccUcgcc..... 1  
 Gi2\_11133092\_x1.....ggccccgUaguacugcga..... 1  
 Gi2\_11152910\_x1.....Nugggaacacgggugccg..... 1  
 Gi4\_575989\_x1.....Uccgcccagucgucgagacguc..... 1  
 Gi3\_28884048\_x1.....aAagaagcgccgucagggccccgccc..... 1  
 Gi3\_28952435\_x1.....Uaguacugcgaucggagacgu..... 1  
 Gi3\_28838030\_x1.....ccgaaauaggaagagaagcg..... 0  
 Gi2\_11067491\_x1.....gagaagcgUcgucagggccccgccc..... 1  
 Gi3\_28733287\_x1.....ccccgcccagucgucggaCcgagacg..... 1  
 Gi2\_11273640\_x1.....cgccgucagggccccgcccagucCgc..... 1  
 Gi3\_28319201\_x1.....cgccagucgucggaCcgagaga..... 1  
 Gi3\_28582722\_x1.....cagggccccgcccagucAgcg..... 1  
 Gi3\_28629045\_x1.....ucgugggUacacgggugccg..... 1  
 Gi3\_28312571\_x1.....ggagacgucgugggaacacgC..... 1  
 Gi2\_11249848\_x1.....cagggccccgcccaguaUugcg..... 1  
 Gi3\_28750431\_x1.....cggGgacgucgugggaacacg..... 1  
 Gi3\_28490721\_x1.....gagacgucGgggaacacgggugccg..... 1  
 Gi3\_28679334\_x1.....gaagagaagUgcccaggg..... 1



Gi3\_28512509\_x1.....ucaggccccgccaguaUugc..... 1  
 Gi1\_4363492\_x1.....cgucaggccccgccaguacugU..... 1  
 Gi3\_28553219\_x1.....ccgccaguaucugcgauccggagacgCc..... 1  
 Gi3\_28888275\_x1.....agaaCcgccgucaggccccgcc..... 1  
 Gi3\_28873153\_x1.....caggccccgccaguaAugcga..... 1  
 Gi2\_11162363\_x1.....ccccgccaNuacugcgau..... 1  
 Gi3\_28506728\_x1.....caggccccgccaguaucugcgGucgga..... 1  
 Gi1\_4243622\_x1.....ucgAagacgucgugggaaacacggg..... 1  
 Gi3\_28628344\_x1.....aucggagUcgucgugggaaacacggggu..... 1  
 Gi5\_9052335\_x1.....aucggagacgucgugggaaacGcggggu..... 1  
 Gi5\_8939669\_x1.....Uaucggagacgucgugggaaacacggggugc..... 1  
 Gi1\_4315634\_x1.....cgaucggagacgucgugggaaacacggggugcc..... 0  
 Gi2\_11167320\_x1.....aucggagacgucgugggaaacacgCg..... 1  
 Gl1a\_5996251\_x1.....aUcacggggugccgaacu..... 1  
 Gi5\_9014548\_x1.....aucggagacgucgugggaaUacggggugc..... 1  
 Gi3\_28620943\_x1.....cCccgucaggccccgccaguau..... 1  
 Gi1\_4278034\_x1.....aucggagacguUgugggaaacacggggu..... 1  
 Gl1a\_6067030\_x1.....ccgccaguaucugcgauccggCgacguc..... 1  
 Gi3\_28793491\_x1.....Uaggccccgccaguaucugcgauccgg..... 1  
 Gi5\_9081824\_x1.....ggaacacggggugcUgaac..... 1  
 Gi2\_11252952\_x1.....gaucggagacAucgugggaaac..... 1  
 Gi3\_28857206\_x1.....gucgugggaaGcacggggugccgaa..... 1  
 Gi3\_28412637\_x1.....cgucgugggaaacacggUgugcc..... 1  
 Gi2\_11070603\_x1.....gacgucgugggUacacggggugccgaacu..... 1  
 Gi1\_4195716\_x1.....agUcgucgugggaaacacggggugccgaac..... 1  
 Gi3\_28891140\_x1.....cgccaguaUugcgauccggagacgu..... 1  
 Gi3\_28423673\_x1.....gaUgucgugggaaacacggggugccg..... 1  
 Gl1a\_6008833\_x1.....gucgGgggaaacacggggugccga..... 1  
 Gi2\_11169569\_x1.....Agugggaaacacggggugccgaa..... 1  
 Gi2\_11047456\_x1.....aucggCgacgucgugggaaaca..... 1  
 Gl1a\_6089251\_x1.....aggccccgNcaguacugc..... 1  
 Gi2\_11089343\_x1.....gccaguaucugcgauccggagCcg..... 1  
 Gi5\_9034563\_x1.....agUccccgccaguaucugcga..... 1  
 Gl1a\_6207996\_x1.....cgauccggagGcgucgugg..... 1  
 Gi2\_11259100\_x1.....aucggagacgucAugggaaacacggggugc..... 1  
 Gi3\_28389654\_x1.....cgccgucaggccccgccagCacu..... 1  
 Gi3\_28938687\_x1.....cgucaggccccgccCgua..... 1  
 Gi2\_11091806\_x1.....Cgagacgucgugggaaacacggggugc..... 1  
 Gi1\_4348697\_x1.....gcgauccggagacgucgugggaaacacggg..... 0  
 Gi2\_11287167\_x1.....gacgGcugggaaacacggggugccg..... 1  
 Gi3\_28317263\_x1.....aaAagaagcggcugcaggc..... 1  
 Gi3\_28737931\_x1.....cgaaauaUgaagagaagcgcc..... 1  
 Gi3\_28682455\_x1.....aggccccgccaguaGugcgauccgga..... 1  
 Gi1\_4217110\_x1.....guAggaaacacggggugccg..... 1  
 Gi1\_4319439\_x1.....gaUgucgugggaaacacggggugccg..... 1  
 Gi4\_609763\_x1.....gucgCgggaaacacggggugccgaac..... 1  
 Gi2\_11404229\_x1.....aggccccgccaguaucugcgauccggU..... 1

Gi1a\_6341167\_x1.....Ugccaguacugcgauccggagacguc..... 1  
 Gi3\_28443156\_x1.....gaucggagacgAcgugggaacacggggu..... 1  
 Gi3\_28921372\_x1.....gcUccgccaguacugcgauccggagacguc..... 1  
 Gi5\_8984390\_x1.....acacggggugccAaacuu..... 1  
 Gi3\_28352131\_x1.....aucgAagacgucgugggaacacggggugcc..... 1  
 Gi2\_11001833\_x1.....acgucgugggaacacggggugcG..... 1  
 Gi5\_9088307\_x1.....aucggagacgucGcgggaacacggggugc..... 1  
 Gi3\_28983725\_x1.....uGgugggaacacggggug..... 1  
 Gi3\_28528292\_x1.....ucaggcccUgccaguacug..... 1  
 Gi1\_4218111\_x1.....ugggaacGcggggugccgaacu..... 1  
 Gi2\_11220420\_x1.....gccccgccaguaAugcgauc..... 1  
 Gi2\_11282918\_x1.....ucggagacgucgugggaCcacggggugcc..... 1  
 Gi2\_11351213\_x1.....Gcggagacgucgugggaacacggggugccgaacu..... 1  
 Gi2\_11044932\_x1.....cgccgucagggccccgccagCac..... 1  
 Gi3\_28654602\_x1.....ccccgccaguacugAgaucggagacgu..... 1  
 Gi2\_11025038\_x1.....gccgucagNccccgccaguac..... 1  
 Gi3\_28826368\_x1.....ucaggccccgccaguacCgcgaucgga..... 1  
 Gi2\_11162537\_x1.....caggccccgccaguGcugcgauccggagacg..... 1  
 Gi1\_4349748\_x1.....ugcgauccggagacgucguggGacacg..... 1  
 Gi2\_11044610\_x1.....gagaagcgNcgucagggccccg..... 1  
 Gi1a\_6131506\_x1.....cgugggaacacggggugccgaUc..... 1  
 Gi3\_28612146\_x1.....ccccgccaguCcuugcgauccggagacguc..... 1  
 Gi2\_11063086\_x1.....agGacugcgauccggagacgucg..... 1  
 Gi2\_11144363\_x1.....caggccccgccGguacugcgauccggagac..... 1  
 Gi3\_28265443\_x1.....ucggagacgucAugggaaca..... 1  
 Gi3\_28778583\_x1.....aggccccgccaguacugcgauccggGacgucg..... 1  
 Gi1\_4266687\_x1.....cgucgugUgaacacggggugcc..... 1  
 Gi3\_28714807\_x1.....gagaagcgccgucagggAcc..... 1  
 Gi1\_4226207\_x1.....cgccgucaNggccccgccaguacugcgauccgga..... 1  
 Gi2\_11303918\_x1.....gaGcacggggugccgaac..... 1  
 Gi3\_28345765\_x1.....ccccgccaguacugcgauAggagacgucgug..... 1  
 Gi2\_11170960\_x1.....agcgccgucagggccccgccaguCcuugcg..... 1  
 Gi3\_28903488\_x1.....aggccccgccaAuacugcg..... 1  
 Gi2\_11407557\_x1.....ccgccaguNcuugcgauccggagacg..... 1  
 Gi2\_11029800\_x1.....cgucgugggaacacggggugcGgaacu..... 1  
 Gi3\_28454411\_x1.....cgauUggagacgucgugg..... 1  
 Gi1\_4382265\_x1.....gucgugggaacacggggGgccgaac..... 1  
 Gi5\_9102765\_x1.....acgucgugggaacCcggggugccgaacu..... 1  
 Gi1a\_6174635\_x1.....ucgugggaacacggggGgccgaacu..... 1  
 Gi1\_4375750\_x1.....acugcgauccggagacgucgugU..... 1  
 Gi3\_28926951\_x1.....ggcAccgccaguacugcga..... 1  
 Gi1\_4159800\_x1.....aucggGgacgucgugggaacacggggugccga..... 1  
 Gi3\_28987557\_x1.....gagacgucAugggaacacggggugccgaac..... 1  
 Gi1a\_6352813\_x1.....cgucgugggaacacgggUgugccgaacu..... 1  
 Gi1\_4292866\_x1.....agaagcgccgucagggcccAgcca..... 1  
 Gi5\_8832230\_x1.....Ugccaguacugcgauccg..... 1  
 Gi3\_28948052\_x1.....gcgccgucagggccccgAcagu..... 1

Gi3\_28381524\_x1.ccuuaacucguuccgaCuu..... 1  
 Gi5\_8898858\_x1.....cggagacgucgCgggaacacgg..... 1  
 Gi3\_28952372\_x1.....agagaagcgccgucagggccccgU..... 1  
 Gi2\_11381896\_x1.....aUgccccgccaguacugcggaucgg..... 1  
 Gi3\_28272360\_x1.....ucggagacgucguggggaCcacggggugcc..... 1  
 Gi1\_4199154\_x1.....acgucguggggaacacggggAgccg..... 1  
 Gi5\_9021659\_x1.....cgugggaacacAgggugc..... 1  
 Gi3\_28689405\_x1.....ucggagacguAgugggaacacggggugcc..... 1  
 Gi2\_11085652\_x1.....cggagCcgucguggggaacacg..... 1  
 Gi3\_28300007\_x1.....Aacugcgauccggagacguc..... 1  
 Gi3\_28548592\_x1.....aggccccgGcaguacugc..... 1  
 Gi5\_9073721\_x1.....aucggagacgucgCgggaacacg..... 1  
 Gi3\_28922844\_x1.....cgucgugggCcacggggugccg..... 1  
 Gi5\_8978030\_x1.....caggccccAccaguacugcgauc..... 1  
 Gi1\_4226444\_x1.....gugNgaacacggggugccgaacu..... 1  
 Gi5\_8934222\_x1.....guUggaacacggggugccg..... 1  
 Gi3\_28404112\_x1.....gaucggagacgucguggAaacacg..... 1  
 Gi1\_4165018\_x1.....ccccgccaguacugcggaucgaga..... 0  
 Gi2\_11088272\_x1.....guAgugggaacacggggugccgaacu..... 1  
 Gi3\_28920922\_x1.....aggccccgccaguaGugc..... 1  
 Gi1\_4359471\_x1.....gaagagaagcgccgucag..... 0  
 Gl1\_6260308\_x1.....cccAccaguacugcgauccggagacguc..... 1  
 Gi3\_28376957\_x1.....cgucaUgccccgccaguacugc..... 1  
 Gi3\_28570008\_x1.....gaucggagacgucCugggaacac..... 1  
 Gi2\_10999830\_x1.....ccaguacugcgaCcgga..... 1  
 Gi3\_28759290\_x1.....ucaggccUcgccaguacug..... 1  
 Gi2\_11286270\_x1.....caguacugcgGucggagacgucg..... 1  
 Gi1\_4334935\_x1.....ugcgauccggagacgCcguggga..... 1  
 Gi5\_9009327\_x1.....aggccUcgccaguacugcgauc..... 1  
 Gi1\_4384652\_x1.....gacgucgugggaaUacggggugcc..... 1  
 Gi2\_11124813\_x1.....agGgaagcgccgucagggccccgcca..... 1  
 Gi2\_11363186\_x1.....agacgucgugggaacaAggggugcc..... 1  
 Gi2\_11304579\_x1.....agaagcgccgucagggccAc..... 1  
 Gi2\_11169961\_x1.....agcgcccAcaggccccgccaguacugc..... 1  
 Gi2\_11390123\_x1.....gucgugggaacacAgggugccgaac..... 1  
 Gi1\_4348430\_x1.....Ngugggaacacggggugccgaa..... 1  
 Gi2\_11244211\_x1.....Gcggaucggagacgucguggga..... 1  
 Gi2\_11372141\_x1.....ucggagCcgucgugggaaca..... 1  
 Gl1\_6135311\_x1.....Caagagaagcgccgucag..... 1  
 Gi3\_28497722\_x1.....gaucggagacgucgugggaacUcggggugc..... 1  
 Gi3\_28556073\_x1.....ucaggccccgcAaguacugcga..... 1  
 Gi3\_28760892\_x1.....Auacugcgauccggagacg..... 1  
 Gi5\_8912591\_x1.....gCagacgucgugggaacacggggugccgaacu..... 1  
 Gi3\_28852671\_x1.....cggagacgucgugggCcacggggugcc..... 1  
 Gi5\_8930083\_x1.....acgucgugggaacacggggAgcc..... 1  
 Gl1\_6300605\_x1.....caggccccNccaguacugcgau..... 1  
 Gi3\_28480538\_x1.....cgccgucagggccccUccaguacu..... 1

|                 |                                        |   |
|-----------------|----------------------------------------|---|
| Gi5_9023998_x1  | .....cggagacgucgugggaaacacggggugccg    | 0 |
| Gi1_4290685_x1  | .....ugUgaacacggggugccgaac             | 1 |
| Gi3_28684587_x1 | .....ucguCggaacacggggugccgaa           | 1 |
| Gi2_11233323_x1 | .....ggccccgccaguacugcgagGc            | 1 |
| Gi2_11222651_x1 | .....cgugggaUcacggggugccgaa            | 1 |
| Gi5_8840875_x1  | .....gucaggccccAccaguacugcg            | 1 |
| Gi3_28968474_x1 | .....caguacugcgauCagagacguc            | 1 |
| Gi5_9124787_x1  | .....aagagaagcgccgucagAcccccaccaguacug | 1 |
| Gi5_8874552_x1  | .....gugggaacacggggUaccgaa             | 1 |
| Gi1_4313108_x1  | .....ggagaUgucgugggaaacacggggugccgaa   | 1 |
| Gi3_28982243_x1 | .....cggGgacgucgugggaaacacggggug       | 1 |
| Gi2_11109144_x1 | .....gaGcggagacgucgugggaa              | 1 |
| Gi3_28673076_x1 | .....caguacugcgauCcgagGcgucguc         | 1 |
| Gi2_11125258_x1 | .....ugggaacaUggggugccga               | 1 |
| Gi2_11029553_x1 | .....aagagaagcgccgucUggccccgca         | 1 |
| Gi1_4276589_x1  | .....gggaacacggggugccga                | 0 |
| Gi3_28922372_x1 | .....gucgugggaaacacggggugUc            | 1 |
| Gi2_11282359_x1 | .....gaucggagacgucgugggaaacacgAg       | 1 |
| Gi5_8943638_x1  | .....uacugcgGucggagacgu                | 1 |
| Gi2_11305613_x1 | .....ggagacgucguAggaaacacg             | 1 |
| Gi2_11242661_x1 | .....ccUccaguacugcgauCgg               | 1 |
| Gi5_9020390_x1  | .....cggagGcgucgugggaaacacggggugccga   | 1 |
| Gi3_28803933_x1 | .....agcgccgucagggccccgccCguac         | 1 |
| Gi1_4389166_x1  | .....cgucaggGccccaccaguacugcg          | 1 |
| Gi1_4267626_x1  | .....gaacaNggggugccgaacu               | 1 |
| Gi3_28398465_x1 | .....agaagcgccgCcaggccccgcc            | 1 |
| Gi3_28935793_x1 | .....gugggaacacggggGgccgaacuuu         | 1 |
| Gi1_4377176_x1  | .....aagagaGcgccgucagggccccgccagu      | 1 |
| Gi2_11343139_x1 | .....cgcUgucagggccccgccagu             | 1 |
| Gl1_6125455_x1  | .....cgugggaacaUggggugcc               | 1 |
| Gi2_11012936_x1 | .....aucggagacgucgugCgaaca             | 1 |
| Gi3_28711561_x1 | .....gccaAuacugcgauCggagacgucgug       | 1 |
| Gi3_28912351_x1 | .....gNgaacacggggugccgaac              | 1 |
| Gi1_4227219_x1  | .....gucgugggaaacacggggugccU           | 1 |
| Gi2_11339024_x1 | .....cgccaguacugcgauCggGgacgu          | 1 |
| Gi2_11174074_x1 | .....caggccccgUcaguacugcgauCgga        | 1 |
| Gi5_9041783_x1  | .....cgucgugggGacacggggugccga          | 1 |
| Gi3_28623253_x1 | .....gaUgucgugggaaacacggggugc          | 1 |
| Gi3_28569565_x1 | .....cgccaguacugcgauCgggagaU           | 1 |
| Gi1_4262458_x1  | .....ccgccaguacugcgauCggagacU          | 1 |
| Gi3_28340592_x1 | .....gaagagaagcgccgucagggccAccccagu    | 1 |
| Gi2_11158970_x1 | .....acugcgauCgggagacguGguugg          | 1 |
| Gi3_28814517_x1 | .....ccccgccaguacugcgauCggCgac         | 1 |
| Gi5_8915265_x1  | .....cgugggaUcacggggugccga             | 1 |
| Gi2_11232825_x1 | .....cggagacgNcgugggaacacggggug        | 1 |
| Gl1_5995429_x1  | .....uacugcgaCcgagacguc                | 1 |
| Gi2_11313391_x1 | .....agacgucgugggaaacacggggugccgaUcu   | 1 |

G1a\_6134212\_x1.....gaucgAagacgucguggga..... 1  
 Gi3\_28984256\_x1.....gcgGucggagacgucguggga..... 1  
 Gi2\_11298091\_x1.....gacgucguUggaacacggggugccga..... 1  
 Gi3\_28638254\_x1.....ucgugggaacacUgggugc..... 1  
 Gi3\_28439339\_x1.....caggccccAgccaguacugcga..... 1  
 Gi2\_11336808\_x1.....Uaggccccgccaguacugcgauccggag..... 1  
 Gi3\_28938694\_x1.....Ccaggccccgccaguacugcgauc..... 1  
 Gi1\_4378019\_x1.....gagacgucgugggaaacacgCggugccg..... 1  
 G1a\_6322583\_x1.....cAccgucaggccccgccaguacugc..... 1  
 Gi3\_28942686\_x1.....cgccagCacugcgauccggagac..... 1  
 Gi2\_11182463\_x1.....gccaguacNcggaucggagac..... 1  
 Gi3\_28481778\_x1.....aguacugcgauccggagaUguc..... 1  
 G1a\_6282482\_x1.....gucgugggaaacacgggAugccgaacu..... 1  
 Gi3\_28349367\_x1.....ccAucaggccccgccaguacugc..... 1  
 Gi3\_28351233\_x1.....gucaggUcccgccaguacug..... 1  
 Gi5\_9024466\_x1.....aggccccgNcaguacugcga..... 1  
 Gi2\_10996223\_x1.....aucggagacgucgugggaacacgggguC..... 1  
 Gi3\_28308046\_x1.....cgggagacgucguAggaacacggg..... 1  
 G1a\_6307684\_x1.....uacGgcgacugcgagacgucgu..... 1  
 Gi3\_28378470\_x1.....Ngggagacgucgugggaacacggg..... 1  
 Gi5\_8952191\_x1.....ggccccAccaguacugcgauc..... 1  
 Gi3\_28495759\_x1.....acgucgugggaaUacggg..... 1  
 Gi2\_11355746\_x1.....cCucgugggaacacggggugc..... 1  
 Gi4\_582464\_x1.....aUuacugcgauccggagacguc..... 1  
 G1a\_6070299\_x1.....aucgggagacgucgugggCacacg..... 1  
 Gi5\_8924331\_x1.....cgugggaacacgAggugc..... 1  
 Gi5\_8970969\_x1.....caggccccgccaguacGgcga..... 1  
 Gi2\_11300231\_x1.....gcccAgccaguacugcgauc..... 1  
 Gi3\_28262502\_x1.....gaagagaaAcgccgucagg..... 1  
 Gi3\_28685119\_x1.....ucgggagacgucguAggaacacggg..... 1  
 Gi3\_28295855\_x1.....caggccccgccaguacugcgauccggagG..... 1  
 Gi2\_11219382\_x1.....cgauccUgagacgucguggga..... 1  
 Gi2\_11029143\_x1.....cgucaggccccgccaguacAgc..... 1  
 Gi3\_28677986\_x1.....aucgggagacUucgugggaacacgg..... 1  
 Gi2\_11383414\_x1.....cccgccUuacugcgaucc..... 1  
 Gi5\_9093292\_x1.....gugggaaacacggggugccUaa..... 1  
 Gi3\_28472640\_x1.....Uguacugcgauccggagacgucguggg..... 1  
 Gi2\_11403194\_x1.....gggaacacggggugccgU..... 1  
 Gi3\_28670765\_x1.....caguacugcgauccggagacgAcgug..... 1  
 Gi2\_11029869\_x1.....ucaggccccgccCguacugcg..... 1  
 Gi3\_28582136\_x1.....ccgucaggccccgccGguacugc..... 1  
 Gi3\_28892658\_x1.....gccccgccaguacugcgauccggUgacg..... 1  
 Gi3\_28927709\_x1.....agCacugcgauccggagacgucg..... 1  
 Gi3\_28450217\_x1.....Ccggccgucaggccccgccaguacugcg..... 1  
 G1a\_6144736\_x1.....cgugggaaAacggggugccgaacu..... 1  
 Gi3\_28724673\_x1.....ggUagagaagcgccgucaggc..... 1  
 Gi1\_4176686\_x1.....ucgggagacgucgugggGacacggg..... 1

Gi3\_28373076\_x1.....agacgucgugGCaacacggggugccgaacu..... 1  
 Gi2\_11243265\_x1.....caguacugcgauccggagacgu..... 0  
 Gi2\_11056555\_x1.....cgugggaacacggggucCccgaac..... 1  
 Gi2\_11189756\_x1.....ucggagaGgucgugggaaacacggggugc..... 1  
 Gi5\_9127627\_x1.....agacgucgugggaaacacggggugccgaaAu..... 1  
 Gi3\_28506293\_x1.....uuccgaauaCgaagagaagc..... 1  
 Gi2\_11305469\_x1.....gaagcgccguUaggccccgc..... 1  
 Gi5\_8975565\_x1.....aucggagCcgucgugggaaacacgg..... 1  
 Gi2\_11279985\_x1.....ugcgauccggagCcgucguggga..... 1  
 Gi2\_11022717\_x1.....acgucgugCgaacacggggugcc..... 1  
 Gi3\_28806797\_x1.....ccccccaguacugcgauccggagUcgu..... 1  
 Gi3\_28446593\_x1.....ucgugggaacacggggugUc..... 1  
 Gi2\_11017653\_x1.....cggagacgucgugggaaacGcg..... 1  
 Gi2\_11162054\_x1.....aucggagacgucgugGCaacac..... 1  
 Gi3\_28505523\_x1.....ugggaacacggggugGcg..... 1  
 Gi3\_28499152\_x1.....gaagagaagcgccgucagA..... 1  
 Gi2\_11329099\_x1.....gccccgccagAacugcgauc..... 1  
 Gi3\_28526121\_x1.....gucgugggUacacggggugc..... 1  
 Gi2\_11029013\_x1.....gagacgucguAggaaacacggggugc..... 1  
 Gl1\_6195201\_x1.....gugggaacacgggAugccgaa..... 1  
 Gi3\_28865856\_x1.....cgucgugggaacCcggggu..... 1  
 Gi3\_28946482\_x1.....acgucgGgggaacacggggugccga..... 1  
 Gi2\_11197378\_x1.....caggccccgccCguacugcgau..... 1  
 Gi3\_28974874\_x1.....auNggagacgucgugggaaacacgggg..... 1  
 Gi3\_28691099\_x1.....acucguuccgaauaggaagagaagcgccgu..... 0  
 Gi2\_11183516\_x1.....aucggagacgucgugggaaacUcgg..... 1  
 Gi3\_28324091\_x1.....gaacacAgggugccgaacuu..... 1  
 Gi3\_28786142\_x1.....Acgaucggagacgucgugggaaac..... 1  
 Gl1\_6073333\_x1.....cgaucggagacgucgAgg..... 1  
 Gi3\_28543651\_x1.....ccaguacugcgauAggagacgucgug..... 1  
 Gl1\_6226892\_x1.....aucggGgacgucgugggaaacacgggg..... 1  
 Gi3\_28496450\_x1.....ucggagacgucgugAggaaacacg..... 1  
 Gi3\_28898451\_x1.....cggagacgucgugggaaacacggCgu..... 1  
 Gi3\_28536161\_x1.....aucggagacgucgugCgaacacggggugcc..... 1  
 Gi1\_4220597\_x1.....gacgucgAgggaacacggggugc..... 1  
 Gi1\_4286095\_x1.....ggagacgucgugggaaacacggggugcc..... 1  
 Gi2\_11389475\_x1.....caggccccgccaguacugAgau..... 1  
 Gi2\_10999484\_x1.....gaucggagacgucgugGgaacacgggggu..... 1  
 Gi4\_573309\_x1.....gagaagcgccguGaggcc..... 1  
 Gi3\_28354976\_x1.....caguacugcgauccggagaUgucgu..... 1  
 Gi2\_11225956\_x1.....cguggUaacacggggugccg..... 1  
 Gi3\_28754351\_x1.....ggccccgccaguacCgcga..... 1  
 Gi5\_9106071\_x1.....ugggaacacggggGgcccgaacuu..... 1  
 Gl1\_4224402\_x1.....gcgaCcgagacgucgugggaaacacggggugcc..... 1  
 Gi2\_11045692\_x1.....cggagacgucgugAggaaacacggggug..... 1  
 Gi3\_28885556\_x1.....caggccccgcaguacugc..... 1  
 Gi3\_28744405\_x1.....gacgucgugggaCcacggg..... 1

Gi2\_11057667\_x1.....gaucggagacguAgugggaacacggg..... 1  
 Gi3\_28939945\_x1.....cgugggaaAacggggugccg..... 1  
 G1a\_6297960\_x1.....aguacugcgCucggagacgucgu..... 1  
 Gi3\_28507296\_x1.....ugcgauccggagacgucgugggGacacg..... 1  
 Gi2\_11323939\_x1.....aagagaUgcgccgucagggccc..... 1  
 G1a\_6022813\_x1.....cgCcgugggaacacggggugccgaacu..... 1  
 Gi2\_11076419\_x1.....caUuacugcgauccggagacgucgug..... 1  
 Gi5\_8975075\_x1.....gucguAggaacacggggugccgaa..... 1  
 Gi2\_10998623\_x1.....guAgugggaacacggggugcc..... 1  
 Gi1\_4313177\_x1.....gaacaGggggugccgaacu..... 1  
 Gi3\_28934494\_x1.....cgaauuaggaagagaagcgccguc..... 0  
 Gi5\_8929589\_x1.....Uucggagacgucgugggaacacg..... 1  
 Gi2\_11140351\_x1.....cgcNgcagggccccgccaguacu..... 1  
 Gi3\_28530137\_x1.....guUggaacacggggugccgaacuu..... 1  
 Gi2\_11225060\_x1.....gGucggagacgucgugggaacacggggugcc..... 1  
 Gi5\_8919784\_x1.....uUagggccccgccaguacugcg..... 1  
 Gi5\_9136647\_x1.....aucgCagacgucgugggaaca..... 1  
 Gi2\_11278920\_x1.....ucguuccgaaauGggaagagaagcgccguc..... 1  
 Gi3\_28438928\_x1.....cgucgugggaCcacgggg..... 1  
 Gi2\_11223470\_x1.....agacgucgugggaacacgUggugcc..... 1  
 Gi2\_11326614\_x1.....cgccgucagggccccgccaguCcu..... 1  
 Gi5\_8919052\_x1.....ucgugggaacacggggugUcgaac..... 1  
 Gi3\_28891329\_x1.....ccaguacugcgauccggagacAuc..... 1  
 Gi3\_28400112\_x1.....uaAugcgauccggagacguc..... 1  
 Gi1\_4334606\_x1.....auUggagacgucgugggaacac..... 1  
 Gi2\_11044915\_x1.....Uguacugcgauccggagacgucg..... 1  
 Gi2\_11244516\_x1.....aggccccgccaguacugcgaAcg..... 1  
 Gi3\_28513182\_x1.....ccaguacugcAaucggagacgucgug..... 1  
 Gi3\_28861589\_x1.....aguacCgcgauccggagacg..... 1  
 Gi2\_11012519\_x1.....cgccaguGcugcgauccggagacgucgu..... 1  
 Gi5\_8967036\_x1.....Ccgccgucagggccccgccaguacug..... 1  
 Gi1\_4296549\_x1.....ugggaacacggggugccgG..... 1  
 Gi2\_11209035\_x1.....gugggaacacggggugccgaU..... 1  
 Gi2\_11156692\_x1.....aucggagacgucgugggaacacgUgg..... 1  
 G1a\_6082055\_x1.....Ugucagggccccgccaguacu..... 1  
 Gi2\_11047544\_x1.....gucguAggaacacggggugccga..... 1  
 Gi3\_28953408\_x1.....gccgucagggccccUccaguacugcg..... 1  
 Gi2\_11287247\_x1.....gcgauccggagacgucgugggaUacggg..... 1  
 Gi3\_28809612\_x1.....ucgugggaNcacggggugcc..... 1  
 Gi3\_28916714\_x1.....cCccgucagggccccgccagu..... 1  
 Gi1\_4250914\_x1.....gagacgucgugggaacacggggAgccgaacu..... 1  
 Gi1\_4314359\_x1.....cAucgugggaacacggggugccg..... 1  
 Gi1\_4226680\_x1.....cagggccccccaCuacugcg..... 1  
 G1a\_6224467\_x1.....acugcgauccggagacgucgAg..... 1  
 Gi2\_11053351\_x1.....aggccccgccaguacugcgaucCgaga..... 1  
 Gi2\_11243697\_x1.....gacAucgugggaacacgggg..... 1  
 Gi2\_11079536\_x1.....aucggagacgucguAggaac..... 1

Gi2\_11011394\_x1.....aCuacugcgauccggagac..... 1  
 Gi2\_11291069\_x1.....agagaagcgccgucaggU..... 1  
 Gi2\_11104246\_x1.....gUagcgccgucaggccccgc..... 1  
 Gi3\_28265921\_x1.....cgccagucugcgauUggagacg..... 1  
 Gi3\_28485661\_x1.....ucaggccccgccaguCcuagcgaucgg..... 1  
 Gi3\_28737505\_x1.....agcgccgucaggccccgccGguac..... 1  
 Gi3\_28808093\_x1.....cggagacgCcgugggaacacgggg..... 1  
 Gi5\_9042409\_x1.....cgucgugggaacacggggGgccga..... 1  
 Gi2\_11231975\_x1.....cgucaggccAcgccaguacugc..... 1  
 Gi3\_28607986\_x1.....ggaacacgggCugccgaac..... 1  
 Gi4\_594598\_x1.....cAucgugggaacacggggugccgaacu..... 1  
 Gi5\_9087968\_x1.....ccccgccaguacugcgauccggCgacg..... 1  
 Gi5\_9115300\_x1.....gucgugggaacCcggggugccgaa..... 1  
 Gi3\_28851274\_x1.....aggccccCccagucugcgauccggagacg..... 1  
 Gi3\_28865642\_x1.....aggcccAgccagucugcgauccggagacgucg..... 1  
 Gi2\_11244624\_x1.....ccgccagucugcgcaCcgagacg..... 1  
 Gi3\_28500439\_x1.....aUgaagagaagcgccgucag..... 1  
 Gl1\_6040503\_x1.....gaucggagacgucgugggaacGcggg..... 1  
 Gi3\_28941724\_x1.....ccgccagucugcgauccggaAacgucgu..... 1  
 Gi3\_28752628\_x1.....ucgugggaacacggggugUcg..... 1  
 Gi3\_28732975\_x1.....aucUgagacgucgugggaacacggggg..... 1  
 Gi3\_28692337\_x1.....aggccccgccagucugcgauU..... 1  
 Gi5\_9056872\_x1.....cgGgggaacacggggugccg..... 1  
 Gi3\_28590704\_x1.....ccccgccagucugcgcaC..... 1  
 Gi3\_28274421\_x1.....cAccgccagucugcgauccggagac..... 1  
 Gi1\_4354270\_x1.....acgucgugNgaacacggggugccgaacu..... 1  
 Gl1\_6325247\_x1.....gccgucaggccUcgccagua..... 1  
 Gi3\_28801094\_x1.....ucggagacNucgugggaaca..... 1  
 Gi2\_11355610\_x1.....Acggagacgucgugggaacacgggg..... 1  
 Gi2\_11371512\_x1.....caggccccUgccagucugcgauccggaga..... 1  
 Gi2\_11348292\_x1.....acucguuccgaauaggaagagaagcg..... 0  
 Gi2\_11335973\_x1.....Ugagaagcgccgucaggccccgc..... 1  
 Gl1\_6131425\_x1.....cgccgucaggccccgccaguGcugc..... 1  
 Gi3\_28462851\_x1.....cguUaggccccgccaguacu..... 1  
 Gi3\_28648231\_x1.....ccccgccagucugcgauccggagacUucg..... 1  
 Gi5\_8852407\_x1.....guggAaacacggggugccg..... 1  
 Gl1\_6112209\_x1.....gcgaucggNgacgucgug..... 1  
 Gi2\_11093511\_x1.....caggccccUgccagucugcg..... 1  
 Gl1\_6059814\_x1.....gucaggccccgccaguaUugcga..... 1  
 Gi2\_11406367\_x1.....cgccgucaggccccgccaguUcu..... 1  
 Gi3\_28872389\_x1.....ccccgccaguaUugcgauccggagacguc..... 1  
 Gi4\_599708\_x1.....cgCcgugggaacacggggugccga..... 1  
 Gi3\_28412131\_x1.....gaagagaagcgccgucaggccccgUcagu..... 1  
 Gi2\_11013046\_x1.....ggagaGgucgugggaacacggggugc..... 1  
 Gi3\_28554246\_x1.....agaagcgccgucAagccccgc..... 1  
 Gi2\_11103392\_x1.....ccagucugcgCucggag..... 1  
 Gi1\_4336176\_x1.....ucgugggaNcacggggugccg..... 1



Gi1\_4177927\_x1.....ggccccccaguacuCcgauccggaga..... 1  
 Gi2\_11341473\_x1.....ucgGgggaacacggggugc..... 1  
 Gi3\_28752904\_x1.....gaagagGagcgccgucagggccccccagu..... 1  
 Gi1\_4351102\_x1.....cggAUacgucgugggaaacacggggugccgaac..... 1  
 G1a\_6103334\_x1.....gaucggagacgucguAgg..... 1  
 G1a\_6320415\_x1.....ugggaacaAggggugccgaacu..... 1  
 Gi1\_4386074\_x1.....ggagacgucgugggGacacggggg..... 1  
 Gi1\_4304294\_x1.....agacgucgugggaaacacggAgugccgaacu..... 1  
 Gi2\_11353185\_x1.....gacgucgugAgaacacggggg..... 1  
 Gi2\_11330053\_x1.....ccgcccaguacugcgauccgagac..... 1  
 Gi3\_28655065\_x1.....ccgGcagggccccccaguacugc..... 1  
 Gi3\_28789129\_x1.....aggccccccaguacugcgauccggGgacgu..... 1  
 Gi1\_4215914\_x1.....gAaacacggggugccgaac..... 1  
 G1a\_6105180\_x1.....aucggagGcgucgugggaaacacgg..... 1  
 Gi5\_9029138\_x1.....gucgugggaaacGcggggugc..... 1  
 Gi3\_28446026\_x1.....gaagcgccgucagggccccccCgua..... 1  
 Gi4\_614062\_x1.....gccaguacuUcgauccggagacguc..... 1  
 Gi1\_4253521\_x1.....gugggaacacAgggugccga..... 1  
 Gi2\_11366123\_x1.....ucgugggaacGcggggugccg..... 1  
 Gi3\_28358297\_x1.....ggagacAucgugggaaacacggggugcc..... 1  
 Gi5\_8987132\_x1.....cgUagacgucgugggaaacacg..... 1  
 Gi3\_28628883\_x1.....ugcgauccggagacgucgugggaaacacg..... 1  
 Gi3\_28636995\_x1.....ccccccaguacugcgacCcgagacguc..... 1  
 Gi3\_28386537\_x1.....acucguuccgaauaggGagagaagcg..... 1  
 Gi2\_11374281\_x1.....auUggagacgucgugggg..... 1  
 Gi2\_11026873\_x1.....gAccccccaguacugcgauccggagacgu..... 1  
 Gi1\_4325307\_x1.....agacgucgugggaaacacggggugccgaaA..... 1  
 Gi1\_4387212\_x1.....gcgauUggagacgucgugggaaacacggggugcc..... 1  
 Gi1\_4386977\_x1.....gagacgucgugggaaacacAgggugccgaacu..... 1  
 Gi5\_9090409\_x1.....gagacgucgugggaaacacggggugccgaaUu..... 1  
 G1a\_5983233\_x1.....ucgugggaacacggggGcgggaacu..... 1  
 Gi3\_28560938\_x1.....ccgcccaguacugcgauccgagacguc..... 1  
 Gi3\_28949996\_x1.....ucagggccccccaguauUugcg..... 1  
 Gi2\_11321451\_x1.....aggccccUccaguacugcgaucc..... 1  
 Gi2\_11136373\_x1.....ggaaUacggggugccgaa..... 1  
 Gi2\_11080440\_x1.....gcgccgucagggccccccaguacugc..... 0  
 Gi2\_11166385\_x1.....Ucgauccggagacgucgug..... 1  
 G1a\_6167171\_x1.....cgucagggccccAccaguacugcg..... 1  
 Gi1\_4244569\_x1.....ucgugggaacacCgggugccgaacu..... 1  
 Gi2\_11175560\_x1.....gccgucagggccccccCguacugc..... 1  
 Gi1\_4320265\_x1.....agacgucgugggaaacUcggg..... 1  
 Gi1\_4270787\_x1.....cgucagggccccccaAuacugc..... 1  
 Gi5\_9001287\_x1.....acgucgugggCacacggggugccgaac..... 1  
 Gi3\_28289263\_x1.....aagcgccgCcagggccccccagua..... 1  
 G1a\_6172531\_x1.....ugcgauccggagacgucgugggGc..... 1  
 Gi3\_28785048\_x1.....Ccgauccggagacgucgug..... 1  
 Gi3\_28867015\_x1.....ucggagacgAcgugggaacacggg..... 1

Gi2\_10995459\_x1.....ucggagacgucgugggGacacggg..... 1  
Gi3\_28807187\_x1.....cccgGcaguacugcgaucgg..... 1  
Gi3\_28720593\_x1.....aGugcgaucggagacgucg..... 1  
G1a\_6191308\_x1.....aCgggagacgucguggga..... 1  
Gi3\_28376061\_x1.....gNgggaacacggggugccg..... 1  
Gi2\_11346060\_x1.....aagagaagcgccgucaggUcc..... 1  
Gi3\_28550463\_x1.....aucggagacgucgCgggaac..... 1  
G1a\_6332446\_x1.....gggaacacggAgugccgaac..... 1  
Gi2\_11168901\_x1.....caggccccgccaguacCgcaucggagacg..... 1  
Gi3\_28810747\_x1.....aggcccAgccaguacugcgaucggga..... 1  
Gi2\_11357347\_x1.....cgcNguacagccccgccagu..... 1  
Gi3\_28922041\_x1.....gagacgucgugggaacacgggAu..... 1  
Gi3\_28826665\_x1.....gccgucaggccUcgccagu..... 1  
Gi3\_28324786\_x1.....acgucgugggaacacggggugcAga..... 1  
Gi2\_11265305\_x1.....gucgugggaacacUgggugc..... 1  
Gi3\_28330528\_x1.....Gaggccccgccaguacugcgaucggga..... 1  
Gi2\_11096801\_x1.....aucggagUcgucgugggaacacggggug..... 1  
Gi3\_28687403\_x1.....cgcUaguacugcgaucggagacg..... 1  
Gi1\_4215962\_x1.....cgucaggccccgccaguacugcgaucgg..... 0  
Gi2\_11047574\_x1.....gUcaguacugcgaucggga..... 1  
Gi3\_28575349\_x1.....gaagagaagcgccgucaggccAcg..... 1  
Gi1\_4352790\_x1.....aagcgccgucaggcccUgccaguacug..... 1  
Gi1\_4168633\_x1.....cgugggaacacggggugcUgaac..... 1  
Gi2\_11044452\_x1.....cgCagacgucgugggaacacggggugcc..... 1  
Gi1\_4358053\_x1.....Aggaacacggggugccgaacuu..... 1  
Gi3\_28764479\_x1.....gccgucaggccccgccCgu..... 1  
Gi3\_28680724\_x1.....agagaagcgccgCcaggcccc..... 1  
Gi3\_28943874\_x1.....ccccgccaguacugGgauc..... 1  
Gi3\_28668660\_x1.....agagaagcgccgAcaggccccgc..... 1  
Gi2\_11172828\_x1.....agacgucgugggaGcacggggugccga..... 1  
Gi3\_28692743\_x1.....cgucGggccccgccagua..... 1  
Gi2\_11047387\_x1.....ccgccaguacuAcgaucggag..... 1  
Gi3\_28580305\_x1.....gNacacggggugccgaacu..... 1  
Gi2\_11340363\_x1.....aguacugcgaucggagacgGcg..... 1  
Gi2\_11147086\_x1.....aggccccgccaguacugcgGucggaga..... 1  
Gi3\_28881179\_x1.....aggcGccgccaguacugcg..... 1  
Gi3\_28812122\_x1.....gaagcgccgucaggccccccaAuacugc..... 1  
Gi5\_9046455\_x1.....gagaagUgcccugacggccccgc..... 1  
Gi2\_11293279\_x1.....ugggaaAacggggugccga..... 1  
Gi2\_11381741\_x1.....gagacgucgugggaacacggggGgccgaac..... 1  
Gi2\_11143971\_x1.....aagcgccgucaggccccgccaguCcu..... 1  
Gi3\_28973548\_x1.....caggccccAccaguacugcgaucgg..... 1  
Gi2\_11380236\_x1.....ucAugggaacacggggugccg..... 1  
Gi2\_11047613\_x1.....ccccgccaguacugcgUuc..... 1  
Gi1\_4232075\_x1.....ucaggccccgcAaguacugcg..... 1  
Gi3\_28672404\_x1.....ggccccgccaguacugGgau..... 1  
Gi3\_28399185\_x1.....ucCgagacgucgugggaacacggggugcc..... 1

Gi2\_11015664\_x1.....cgaucggagacguUgugggaacacg..... 1  
Gi2\_11399448\_x1.....cggagaGgucgugggaacacggggugc..... 1  
Gi2\_11020976\_x1.....gUcgcagggccccccagucg..... 1  
Gi3\_28601072\_x1.....cgucgugggaCcacgggg..... 1  
Gi3\_28375676\_x1.....gUcccgccaguacugcgaucggagacgu..... 1  
Gi3\_28397870\_x1.....Aaagagaagcgccgucaggg..... 1  
Gi3\_28592873\_x1.....ucguUggaacacggggugccgaa..... 1  
Gi3\_28341990\_x1.....cgccagucgucggaucgAagacg..... 1  
Gi2\_11229844\_x1.....cgccgucagggccccccCguacugc..... 1  
G1a\_6178726\_x1.....Caucggagacgucgugggaacacggg..... 1  
Gi3\_28789552\_x1.....ggagacgucgugggaGcacggggugcc..... 1  
Gi2\_11186565\_x1.....agUgaagcgccgucagggcccccca..... 1  
Gi2\_11311964\_x1.....cggagacgucgugggaacacgggAugc..... 1  
Gi2\_10995106\_x1.....aucggagacgucgugggaacacggC..... 1  
Gi3\_28664024\_x1.....gaucggagacgucgugggaaA..... 1  
Gi3\_28344203\_x1.....caggUcccgccaguacugcg..... 1  
Gi2\_11196726\_x1.....agacUucgugggaacacgggg..... 1  
G1a\_6094056\_x1.....Ucugcgaucggagacgucgug..... 1  
Gi2\_11088514\_x1.....gccaguGcugcgaucggaga..... 1  
Gi3\_28450849\_x1.....ccccUccaguacugcgaucggagacgucgug..... 1  
Gi3\_28761621\_x1.....aguacugcgaucggagaUgucgug..... 1  
Gi2\_11388002\_x1.....cggagacgucgugggGacacggggugccga..... 1  
Gi3\_28270108\_x1.....ggaacacggggugcGgaa..... 1  
Gi2\_11196797\_x1.....caguacugcgaucggagGcugcug..... 1  
Gi2\_11025666\_x1.....gacgucGgggaacacggggugc..... 1  
G1a\_6240538\_x1.....cgccagucgucggaucgagacAuc..... 1  
Gi2\_11203270\_x1.....ggagacgucgugggaacacgUggugcc..... 1  
Gi3\_28920158\_x1.....aAacgucgugggaacacggggugcc..... 1  
Gi2\_11205711\_x1.....ccccccaAuacugcgau..... 1  
Gi3\_28924007\_x1.....ggagacgucgugggaacacggggugccCac..... 1  
G1a\_6122554\_x1.....auNggagacgucguggga..... 1  
G1a\_6295329\_x1.....gucgugggaacGcggggugccgaa..... 1  
G1a\_5997961\_x1.....cguNaggccccccagucggaucg..... 1  
Gi2\_11057443\_x1.....gucgugggaacacgCggugccgaacu..... 1  
Gi1\_4361914\_x1.....Cgagacgucgugggaacacggggugcc..... 1  
Gi3\_28407367\_x1.....ucggagacgucguAggaacacgg..... 1  
Gi3\_28737355\_x1.....cggagacgucgugggaaAacggggugcc..... 1  
Gi3\_28512206\_x1.....ggagacgucgugggaGca..... 1  
Gi1\_4334886\_x1.....gNcagggccccccagucg..... 1  
Gi1\_4346646\_x1.....gNcagggccccccagucg..... 1  
Gi3\_28701466\_x1.....Uucggagacgucguggga..... 1  
Gi2\_11212318\_x1.....gucgGgggaacacggggugccg..... 1  
Gi5\_9096350\_x1.....uaUugcgaucggagacgu..... 1  
Gi3\_28877763\_x1.....cgGcugcagggccccccag..... 1  
Gi2\_11048757\_x1.....cAucgugggaacacggggugccga..... 1  
Gi2\_11250518\_x1.....aGgcgccgucagggccccccagu..... 1  
Gi2\_10994799\_x1.....ucggagacNucgugggaacacggggugccg..... 1

Gi2\_11112082\_x1.....agggccAgccagucgucgau..... 1  
 Gi3\_28452071\_x1.....ccgccagucgucgucgCgacgucgug..... 1  
 Gi3\_28952730\_x1.....ccccgccagucgucAau..... 1  
 Gl1a\_6029596\_x1.....cagAacugcgaucggagac..... 1  
 Gi3\_28741759\_x1.....gcgaucggagacgucgugGaa..... 1  
 Gi2\_11200185\_x1.....agcgccgucagggccccgccagu..... 0  
 Gi3\_28986006\_x1.....cccNccagucgucguc..... 1  
 Gi3\_28919192\_x1.....acgucgugggaacacggggugccUaac..... 1  
 Gi2\_11086451\_x1.....ucgugggaCcacggggugccgaac..... 1  
 Gl1a\_6157341\_x1.....gagaagcgccgucagggccccgcccG..... 1  
 Gi1\_4303159\_x1.....agggccccccagucgucgucAgagacg..... 1  
 Gi2\_11280886\_x1.....guuccgaauaggaagagaagcgcc..... 0  
 Gi3\_28669761\_x1.....Ugucagggccccccagucgucgucguc..... 1  
 Gi2\_11189789\_x1.....ucggagacgucgugggaacacggggCgcc..... 1  
 Gl1a\_6105247\_x1.....ugcgaucggagUcugcgu..... 1  
 Gi3\_28412574\_x1.....cgauccggagacguAguggg..... 1  
 Gi2\_11021923\_x1.....gggGacacggggugccga..... 1  
 Gi1\_4176724\_x1.....gaucggagacgucgGgggaacacggggg..... 1  
 Gi2\_11037140\_x1.....ccccgccaguUcugcgaucggagac..... 1  
 Gi2\_11000037\_x1.....aucgCagacgucgugggaacacggg..... 1  
 Gi3\_28747708\_x1.....gucgugggaacaAggggugcc..... 1  
 Gi2\_11393009\_x1.....gccccgccGguacugcgaucggagacguc..... 1  
 Gl1a\_6240287\_x1.....Cucggagacgucgugggaacacg..... 1  
 Gi2\_11094749\_x1.....agCacugcgaucggagac..... 1  
 Gl1a\_6061372\_x1.....ucggagacgucgugggaacacggggCgc..... 1  
 Gi3\_28594451\_x1.....Acgugggaacacggggugccg..... 1  
 Gi5\_9037537\_x1.....acgucgugggaacacggggugccgGac..... 1  
 Gi2\_11359900\_x1.....cgggagacgucgugggaGcacggggug..... 1  
 Gi3\_28297605\_x1.....agcgAcgucagggccccgccc..... 1  
 Gi2\_11157143\_x1.....ccgccagucgucgucgagac..... 0  
 Gi5\_9116677\_x1.....ggGgacgucgugggaacacggggugccgaac..... 1  
 Gi3\_28429392\_x1.....caguacugcgaucggagacAucgug..... 1  
 Gl1a\_6075043\_x1.....cGggccccgccagucgucguc..... 1  
 Gl1a\_6341433\_x1.....caguacugcCucggagacgucg..... 1  
 Gi3\_28925814\_x1.....ccgucagggccccccagucCucgucg..... 1  
 Gi2\_10998672\_x1.....cgGcuggggaacacggggugccgaa..... 1  
 Gi3\_28641777\_x1.....Ucugcagggccccccagucguc..... 1  
 Gi1\_4387618\_x1.....aucggagacgucgugAgaacacggggugcc..... 1  
 Gi2\_11286101\_x1.....gaagagaagcgcccCcagg..... 1  
 Gi3\_28624244\_x1.....ucggagacgucgugggaAacggg..... 1  
 Gi2\_11343422\_x1.....gagacgucgugggaacacggggugccU..... 1  
 Gi2\_11284298\_x1.....ucggagacgucgugggUacacgggg..... 1  
 Gi3\_28276558\_x1.....aguacugcgaucgAagacg..... 1  
 Gi1\_4281919\_x1.....uacugcgaucggCgacgucgug..... 1  
 Gi3\_28697728\_x1.....cgucCugggaacacggggugccgaac..... 1  
 Gi5\_9053944\_x1.....caggUcccgccagucgucguc..... 1  
 Gi2\_11098569\_x1.....agagaagcgccgucagggccccgaguc..... 1

Gi3\_28615713\_x1.....gccgAcaggccccgccaguacugcg..... 1  
 Gi2\_11181534\_x1.....ggCaacacggggugccgaac..... 1  
 Gi2\_11141102\_x1.....agggccccagcGcugcgauccggagacgucgug..... 1  
 Gi5\_8952561\_x1.....gugggaaacGcggggugccgaacu..... 1  
 Gi3\_28678037\_x1.....gccgucagAccccgccaguac..... 1  
 Gi3\_28379268\_x1.....ccgccaguacugcgGcggagacguc..... 1  
 Gi5\_8926581\_x1.....ugcgUucggagacgucgug..... 1  
 Gi5\_8849447\_x1.....aggccccgccCguacugc..... 1  
 Gi2\_11167698\_x1.....cgauccggagacgucgugggaacaA..... 1  
 Gi3\_28346105\_x1.....Uggagacgucgugggaaacacgggg..... 1  
 G1a\_6048821\_x1.....gaucggagacguGgugggaaacacggg..... 1  
 Gi5\_9061967\_x1.....cgugggaaacGcggggugccg..... 1  
 Gi2\_11060526\_x1.....Nccccgccaguacugcgau..... 1  
 G1a\_6267152\_x1.....acgucgugggaaacacggggC..... 1  
 Gi4\_572315\_x1.....gggaaacacggggugccAaacu..... 1  
 Gi3\_28409995\_x1.....cguUgugggaaacacggggugccgaa..... 1  
 Gi5\_9132635\_x1.....aucggagacgucgugggCacac..... 1  
 Gi3\_28331576\_x1.....caggccGcgccaguacugcgau..... 1  
 Gi1\_4238529\_x1.....cgugggaaacacggggugccgCacuu..... 1  
 Gi2\_11403232\_x1.....ggagacgucgugggaaacUggggugccgaac..... 1  
 Gi5\_9000433\_x1.....cggagacgucgugggaaacCcg..... 1  
 Gi3\_28865362\_x1.....gcgccgucagggccccgccaguacugA..... 1  
 Gi3\_28282281\_x1.....cucguuccgaauuaUgaagagaagcgccguc..... 1  
 Gi3\_28803816\_x1.....cccAccaguacugcgauccggag..... 1  
 Gi1\_4341678\_x1.....cgucaggccccgccaguacugA..... 1  
 Gi3\_28707245\_x1.....caguacugcgauccggagacgCcgug..... 1  
 Gi2\_11014495\_x1.....agggccccgUaguacugcgauccgga..... 1  
 Gi2\_11249031\_x1.....agagaagcgUgucagggccccg..... 1  
 Gi1\_4264811\_x1.....aacacggggugccCaacu..... 1  
 Gi2\_11167665\_x1.....gacgucgugggaaGacggggugcc..... 1  
 Gi5\_8877830\_x1.....Cgcgacugcgagacgucguggg..... 1  
 Gi3\_28638459\_x1.....ggagacguUgugggaaacacggggugcc..... 1  
 Gi5\_8883554\_x1.....gugUgaacacggggugccga..... 1  
 Gi2\_11205569\_x1.....Uguacugcgauccggagacg..... 1  
 G1a\_6281801\_x1.....gaUgucgugggaaacacggggg..... 1  
 Gi3\_28422207\_x1.....ccccgccaguacugcgauccggG..... 1  
 Gi3\_28735436\_x1.....ccccgccaguGcugcgauccggaga..... 1  
 Gi3\_28266529\_x1.....gagaagUgccgucagggccccg..... 1  
 G1a\_6296879\_x1.....gCacugcgauccggagacgucg..... 1  
 Gi1\_4340674\_x1.....cgucaggccccgccagCacugc..... 1  
 G1a\_6207222\_x1.....gUagcgccgucagggccccgca..... 1  
 Gi3\_28899904\_x1.....cgauccggagacgGcugugggaaacacggggugc..... 1  
 Gi2\_11270146\_x1.....aucggagacgucguCggaacacg..... 1  
 G1a\_6239717\_x1.....ggagacgucgugggaaacacggggGgcc..... 1  
 Gi5\_9072668\_x1.....aagagaagcgccgucagggAccgcc..... 1  
 Gi1\_4229492\_x1.....aucggagGcgucgugggaaacacggggugc..... 1  
 Gi2\_11141966\_x1.....agggccccccaguaUugcgauccggagacgu..... 1

Gi1a\_5999763\_x1.....cgugggaacacggggugAcgaacu..... 1  
 Gi2\_11372063\_x1.....ggagacgucgugUgaacacggggugccgaacu..... 1  
 Gi3\_28754326\_x1.....gaagagaaAcgccgucagggccc..... 1  
 Gi3\_28638523\_x1.....acgucgugggaacGcggggugccgaa..... 1  
 Gi1a\_6262369\_x1.....aucggagacguAgugggaacacg..... 1  
 Gi3\_28688249\_x1.....agacgucgugggGacacggggugcc..... 1  
 Gi3\_28430477\_x1.....aagcgccgucagUccccgccagua..... 1  
 Gi3\_28592236\_x1.....ccgucagggcccgcUaguac..... 1  
 Gi2\_11377511\_x1.....ucaggcccAgccaguacugcg..... 1  
 Gi5\_8944500\_x1.....ucaggccccAccaguacugcg..... 1  
 Gi2\_11153050\_x1.....cgaucggagacgucgugggaacaUg..... 1  
 Gi1\_4307621\_x1.....aacacgggguCccgaacu..... 1  
 Gi2\_11072463\_x1.....caggccccgUcaguacugcgau..... 1  
 Gi3\_28882188\_x1.....cUaguacugcgaucggagacgucgu..... 1  
 Gi1a\_6083496\_x1.....gGucggagacgucgugggaacac..... 1  
 Gi5\_9025372\_x1.....ccUgccaguacugcgaucggagacgu..... 1  
 Gi3\_28770205\_x1.....Ugccaguacugcgaucggagacgu..... 1  
 Gi3\_28942045\_x1.....ucgugggaacacggggugccgU..... 1  
 Gi5\_8845526\_x1.....caggccccgccagGacugcg..... 1  
 Gi3\_28277327\_x1.....ggagacgucgAgggaacacggggu..... 1  
 Gi3\_28673127\_x1.....agaagcgccgucagggccccgccagC..... 1  
 Gi1\_4200379\_x1.....aucggagacgucgugAgaacacg..... 1  
 Gi1\_4290112\_x1.....cguGaggccccgccaguacugc..... 1  
 Gi3\_28623957\_x1.....agagaCgcgccgucagggccc..... 1  
 Gi1\_4308358\_x1.....aucggagacgucgugggaGacg..... 1  
 Gi3\_28450881\_x1.....agcgccgucagggccccccaAu..... 1  
 Gi4\_611330\_x1.....gucgugggaacacggggugccgaa..... 0  
 Gi1\_4180935\_x1.....agacgucgugggaacacAgg..... 1  
 Gi2\_11080893\_x1.....ccccgccaguaUugcgaucgg..... 1  
 Gi1\_4319359\_x1.....ugggaacaGggggugccga..... 1  
 Gi2\_11249251\_x1.....gGagagaagcgccgucagggccc..... 1  
 Gi3\_28464268\_x1.....ucaggccccUgccaguacugcg..... 1  
 Gi3\_28864669\_x1.....acAgcgaucggagacguc..... 1  
 Gi3\_28371975\_x1.....cggaUacgucgugggaacacggg..... 1  
 Gi2\_11187407\_x1.....gagaagcgccgucagggcccUcgccag..... 1  
 Gi3\_28700630\_x1.....gaagagGagcgccgucagggccc..... 1  
 Gi3\_28726093\_x1.....ccgccaguacugUgaucgg..... 1  
 Gi2\_11170793\_x1.....Agucgugggaacacggggugccga..... 1  
 Gi2\_11142536\_x1.....ucggagacgucgugggaacaUggggugc..... 1  
 Gi3\_28445666\_x1.....gacgucgAgggaacacggg..... 1  
 Gi2\_11187820\_x1.....aagagaagcgccAucaggcc..... 1  
 Gi1a\_6102441\_x1.....gucgGgggaacacggggugccgaacu..... 1  
 Gi5\_8992273\_x1.....gaCgggagacgucgugggaacacggggu..... 1  
 Gi1\_4254025\_x1.....aucggagacgucgugggaAa..... 1  
 Gi3\_28444400\_x1.....gaucggagacgucgugggaUacggg..... 1  
 Gi4\_608645\_x1.....acgucgugggaacacggggugcAgaacu..... 1  
 Gi2\_11276055\_x1.....cgucgugggaacaUggggugccgaa..... 1

Gi3\_28376963\_x1.....agacgucgugggCacacggggugccgaac..... 1  
 Gi2\_11365174\_x1.....caggccccgccaguUcugcgauC..... 1  
 Gi2\_11352400\_x1.....ggagacgucgugggaacacgg..... 0  
 Gi1\_4237817\_x1.....ucgugggaacacggggugccUaac..... 1  
 Gi5\_8990452\_x1.....caguacugcUaucggagacguc..... 1  
 Gi2\_11229970\_x1.....ccaguacugcgauCggagGcguc..... 1  
 Gi3\_28747058\_x1.....gaagagaagcgccgucCggccc..... 1  
 Gi1\_4173581\_x1.....aucggagacgucgugAgaacacgggg..... 1  
 Gi2\_11161359\_x1.....cggaCacgucgugggaacacggggugcc..... 1  
 Gi2\_11237611\_x1.....ccccgccaguacugcAaucggagacg..... 1  
 Gi5\_9016213\_x1.....ugcgauCggagacGcgug..... 1  
 Gi1\_4389112\_x1.....gacgucgugggCacacggggugccgaac..... 1  
 Gi1\_4261564\_x1.....ccccgccaguacugcAauc..... 1  
 Gi2\_11354778\_x1.....aggccccgccagGacugcga..... 1  
 Gi3\_28482745\_x1.....cgCNaguacugcgauCggagacg..... 1  
 Gi3\_28443876\_x1.....agaagcgccgucagggUccgccaguacugcg..... 1  
 Gi3\_28658975\_x1.....gUgaucggagacgucguggga..... 1  
 Gi2\_11386192\_x1.....gcgaucggagacgucguAggaacac..... 1  
 Gi2\_11373208\_x1.....gacgucgugggaacacgC..... 1  
 Gi2\_11305471\_x1.....guacugcgauCggagaUguc..... 1  
 Gi3\_28908985\_x1.....gccaguacugcgauCgagac..... 1  
 Gl1\_6314574\_x1.....ccccgccaguacugcgauC..... 0  
 Gi1\_4227669\_x1.....caggccccgccaguacugcgauA..... 1  
 Gi1\_4316748\_x1.....acucguuccgaauuaUgaagagaagcgccgu..... 1  
 Gi2\_11066318\_x1.....auNggagacgucgugggaac..... 1  
 Gi2\_11217659\_x1.....ggccccgccaguacugcCa..... 1  
 Gi3\_28538990\_x1.....aucggagacgucgugUgaacac..... 1  
 Gi2\_10993366\_x1.....cccgccaguacugAgaucggagacguc..... 1  
 Gi2\_11325962\_x1.....cucguuccgaauuagga..... 0  
 Gi3\_28629955\_x1.....agaGgcgccgucagggccccgccagua..... 1  
 Gi2\_11050522\_x1.....gCcgugggaacacggggugccga..... 1  
 Gi2\_11209890\_x1.....cUaguacugcgauCggag..... 1  
 Gi2\_11323849\_x1.....Caagagaagcgccgucagggccc..... 1  
 Gi3\_28432804\_x1.....cNcgccaguacugcgauCgga..... 1  
 Gi3\_28737263\_x1.....aUgucgugggaacacggggugccga..... 1  
 Gi5\_9015342\_x1.....gugggUacacggggugccga..... 1  
 Gi2\_11382773\_x1.....ucggagacgucgugggaacacggggugccgC..... 1  
 Gi2\_11193797\_x1.....ccgccaguacugcgGucgg..... 1  
 Gl1\_6084836\_x1.....gggaacacggggugccUaacu..... 1  
 Gi2\_11148917\_x1.....aagagaagcgccgucagggcccUgcc..... 1  
 Gi2\_11264968\_x1.....cggagaUgucgugggaacacggggugcc..... 1  
 Gi3\_28641239\_x1.....gaucgAagacgucgugggaacacg..... 1  
 Gi2\_11333168\_x1.....ucggagacgucgugggaaAacggggugccgaac..... 1  
 Gi3\_28319707\_x1.....agaNaagcgccgucagggccccgc..... 1  
 Gi3\_28643099\_x1.....agcgccgucagggccccccaNu..... 1  
 Gi1\_4237135\_x1.....ucaggccccgccaguacugcU..... 1  
 Gi2\_11093274\_x1.....gucgugggUacacggggugc..... 1

|                 |                                   |   |
|-----------------|-----------------------------------|---|
| Gi5_9017737_x1  | .....cAucgugggaacacggggugc        | 1 |
| Gi2_11363769_x1 | .....ggagacgucgugggaacacggg       | 0 |
| Gi5_9077626_x1  | .....aagagaagcgcgucaggcUccgcc     | 1 |
| Gi3_28746506_x1 | .....Cccgucagggccccgcca           | 1 |
| Gi2_11197987_x1 | .....Ugcccucagggccccgcca          | 1 |
| Gi3_28552725_x1 | .....ggagacgucgugggaacac          | 0 |
| Gi5_8956369_x1  | .....cguuccgaauuaggaagagaagcgc    | 0 |
| G1a_6302716_x1  | .....ugggaacacggCgugccgaacu       | 1 |
| Gi4_612920_x1   | .....cgucgCgggaacacggggugccgaacu  | 1 |
| G1a_6352747_x1  | .....agGagcgcgucaggcccccca        | 1 |
| G1a_6154411_x1  | .....ucggagacgucgugggCacacggggu   | 1 |
| Gi5_8900655_x1  | .....gAcaggccccgcca               | 1 |
| Gi2_11274943_x1 | .....ucagggccccgcca               | 1 |
| Gi4_614230_x1   | .....guggUaacacggggugcc           | 1 |
| Gi2_11197273_x1 | .....Aaggccccgcca                 | 1 |
| Gi1_4270557_x1  | .....gaucAgagacgucgugggaacac      | 1 |
| Gi3_28813027_x1 | .....ucgugggaacacgggCugccgaacu    | 1 |
| Gi5_8934022_x1  | .....cNucgugggaacacggggugccgaacu  | 1 |
| Gi3_28595436_x1 | .....gGgaagcgcgucagggccccgcca     | 1 |
| Gi4_602958_x1   | .....gccccgcca                    | 0 |
| Gi2_11378385_x1 | .....ucgGgggaacacggggugcc         | 1 |
| Gi1_4245667_x1  | .....ggagacgucgugggaacacg         | 0 |
| Gi1_4184081_x1  | .....ggagacgucgGgggaacacggggugcc  | 1 |
| Gi4_585175_x1   | .....gagaagcgcgCcaggccc           | 1 |
| G1a_6315686_x1  | .....acgucgugggaacacggggugccgCacu | 1 |
| Gi1_4352285_x1  | .....ggaacacggggAgccgaa           | 1 |
| Gi3_28364049_x1 | .....cgucaggAccccgcca             | 1 |
| Gi2_11115456_x1 | .....gacgucgugggGacacggggugccgaac | 1 |
| Gi1_4287381_x1  | .....acgucgugggCacacggggugccgaacu | 1 |
| G1a_6072823_x1  | .....gucgugggaacacggggUaccgaacu   | 1 |
| Gi2_11344072_x1 | .....cgGcuggggaacacgggg           | 1 |
| Gi3_28976245_x1 | .....Cgcgcccucagggccccgccc        | 1 |
| Gi3_28349541_x1 | .....gugggaacacUgggugccg          | 1 |
| Gi3_28632611_x1 | .....cgauUggagacgucgugggaacacg    | 1 |
| Gi2_11214247_x1 | .....ccgccGguacugcgauccggag       | 1 |
| G1a_6180925_x1  | .....aagagaagNgcccucaggcccc       | 1 |
| Gi5_9045058_x1  | .....aucggagacgucgugggaCca        | 1 |
| Gi1_4370999_x1  | .....ugggGacacggggugccgaacu       | 1 |
| Gi2_11055884_x1 | .....agUgcccucagggccccgcca        | 1 |
| Gi3_28447702_x1 | .....gCcccgcca                    | 1 |
| G1a_6108577_x1  | .....aguacugcgauccggGgacguc       | 1 |
| Gi2_11239172_x1 | .....ccccgcca                     | 1 |
| Gi3_28437323_x1 | .....aguacugcgauccggagacguAguggg  | 1 |
| Gi3_28476860_x1 | .....cgccguUaggccccgcca           | 1 |
| Gi5_8883935_x1  | .....acUucgugggaacacggggugccgaac  | 1 |
| Gi3_28517457_x1 | .....aucggagCgucgugggaacacggggug  | 1 |
| Gi2_11186566_x1 | .....cgccaguCucggaucggagacguc     | 1 |



Gi3\_28486721\_x1.....gacgucgugggaacacgAggu..... 1  
 Gi3\_28517870\_x1.....ccgccaguGcugcgauccgagac..... 1  
 G1a\_6301302\_x1.....ugcgauccgagacGcug..... 1  
 Gi3\_28905538\_x1.....gAccccgccaguacugcga..... 1  
 Gi2\_11113457\_x1.....cgccguUagggcccgcaguacugcgauc..... 1  
 Gi3\_28873776\_x1.....cugcgauccgagacgucgugggaacacggggugcc..... 0  
 Gi3\_28564061\_x1.....aagcgccgucagggcccgcaguacGgc..... 1  
 Gi2\_11307345\_x1.....gucagggcAcgccaguacugcg..... 1  
 Gi2\_11218858\_x1.....aucggagaNgucgugggaacacgggg..... 1  
 Gi2\_11391185\_x1.....ucAgagacgucgugggaacacggggg..... 1  
 Gi3\_28503045\_x1.....cagggcccgcaguaUugcga..... 1  
 Gi5\_8976850\_x1.....gaaGacggggugccgaacu..... 1  
 Gi3\_28412195\_x1.....gaucggagGcugcuggggaacacggggugcc..... 1  
 Gi5\_8977006\_x1.....gagGcgucgugggaacacg..... 1  
 Gi3\_28834855\_x1.....Aaucggagacgucgugggaacacggggug..... 1  
 Gi2\_11178163\_x1.....cgucgugggaacacgggAugccgaac..... 1  
 Gi1\_4243950\_x1.....cgccaguacugcgauccggaAa..... 1  
 Gi5\_8909139\_x1.....aagagaGcgccgucagggcccgcga..... 1  
 Gi2\_11100770\_x1.....gugggaacacggggugGcgaa..... 1  
 Gi5\_8854022\_x1.....gccgucagNccccgccaguacu..... 1  
 Gi3\_28403665\_x1.....ggaaAacggggugccga..... 1  
 G1a\_6205295\_x1.....gccaguacugcgauccAgagacguc..... 1  
 Gi2\_11080532\_x1.....gucNugggaacacggggugcc..... 1  
 Gi3\_28282095\_x1.....cgauccAgagacgucgugg..... 1  
 G1a\_6287006\_x1.....agggcUcgccaguacugcgauc..... 1  
 Gi3\_28689096\_x1.....agagaagcgccgCcagggcccgc..... 1  
 Gi2\_11043130\_x1.....gacgucgugggaUcacggggugccgaacu..... 1  
 Gi2\_11209090\_x1.....gaagcgccgucagggcccgcGgu..... 1  
 Gi1\_4284095\_x1.....Acggagacgucgugggaacacg..... 1  
 Gi3\_28899398\_x1.....cCucagggcccgcaguacugcgauccg..... 1  
 Gi5\_9136005\_x1.....gaagagaGggccgucagggcc..... 1  
 Gi3\_28642759\_x1.....aaAagaagcgccgucagggcc..... 1  
 Gi3\_28348284\_x1.....gccNucagggcccgcaguac..... 1  
 Gi3\_28613045\_x1.....cgUcaguacugcgauccgagacgu..... 1  
 Gi2\_11107572\_x1.....cgauccgagacgucguAg..... 1  
 Gi2\_11364575\_x1.....ccccgAcaguacugcgauccgagac..... 1  
 Gi2\_11376716\_x1.....cgucguAggaacacggggugccgaac..... 1  
 G1a\_6241347\_x1.....guggAaacacggggugccg..... 1  
 Gi2\_11030075\_x1.....cgauccAgagacgucgugggaacacggggug..... 1  
 Gi2\_11131535\_x1.....gaucggagacgucgugAgaacacggg..... 1  
 Gi3\_28635394\_x1.....cggagacgucgugggCacacg..... 1  
 Gi2\_11390616\_x1.....aucggagacgucgugggaGcacggg..... 1  
 Gi2\_11293981\_x1.....ccccgccaguacugcgaGc..... 1  
 Gi3\_28950647\_x1.....gacgucGgggaacacggggugccg..... 1  
 Gi5\_8911239\_x1.....Agagacgucgugggaacacggggugccgaacu..... 1  
 Gi2\_11163334\_x1.....uUagggcccgcaguacugcg..... 1

Gi2\_11284294\_x1.....gucgugggaGcacgggugccg..... 1  
 Gi2\_11149484\_x1.....aagcgccgucGggccccgccaguacugc..... 1  
 Gi2\_11157262\_x1.....agacgAcgugggaacacggggugccga..... 1  
 Gl1a\_6182121\_x1.....Gucggagacgucgugggaacacggggugcc..... 1  
 Gi3\_28668853\_x1.....gcgaucggagacgCcgugggaacacggggug..... 1  
 Gi3\_28668233\_x1.....gccaguacugcgauUggagac..... 1  
 Gi3\_28852984\_x1.....gucaggccccgccaguaUug..... 1  
 Gi2\_11005834\_x1.....gccgucagAccccgccaguac..... 1  
 Gi5\_8981460\_x1.....caggcccAgccaguacugcg..... 1  
 Gi3\_28582111\_x1.....gaucggagacguUgugggaacacggggug..... 1  
 Gi5\_9119474\_x1.....gaacaAggggugccgaac..... 1  
 Gi3\_28754812\_x1.....ggGcccgccaguacugcgau..... 1  
 Gi1\_4288677\_x1.....ucaggccccgccaguacugcgU..... 1  
 Gi3\_28747477\_x1.....ggagacguUgugggaacacggggugccgaa..... 1  
 Gi1\_4199848\_x1.....cgucgugggaacacggggGgccgaac..... 1  
 Gi5\_9021477\_x1.....Gcggaucggagacgucgugggaacacg..... 1  
 Gi3\_28536946\_x1.....gaagagaagcgccgucCggccccg..... 1  
 Gi1\_4239773\_x1.....gacgucgugggaacacggggugccgaCcu..... 1  
 Gi5\_8940772\_x1.....ggcccAgccaguacugcgau..... 1  
 Gi2\_11331752\_x1.....gacgucgugggaacacggggugAcgaac..... 1  
 Gi2\_11398004\_x1.....caggccAcgccaguacugcgau..... 1  
 Gi5\_9003467\_x1.....gaucggagacgucgugggUacacg..... 1  
 Gi2\_10994034\_x1.....gagaagcgccgucaggAcccgccag..... 1  
 Gi2\_11303362\_x1.....agUccccgccaguacugcgauccggagacguc..... 1  
 Gi3\_28510708\_x1.....ugggaacacCgggugccgaac..... 1  
 Gi3\_28695975\_x1.....gacgucgGgggaacacggggugccgaacu..... 1  
 Gl1a\_6064903\_x1.....acGcggaucggagacguc..... 1  
 Gi2\_11177789\_x1.....caggccccAccaguacugcgauccggagacg..... 1  
 Gl1a\_6184539\_x1.....aagcgccgucGggccccgccaguacugc..... 1  
 Gi2\_11391409\_x1.....cccgAcaguacugcgauccggaga..... 1  
 Gi3\_28911223\_x1.....aggcccAgccaguacugcga..... 1  
 Gi3\_28744696\_x1.....Gcgucgugggaacacggggugc..... 1  
 Gi1\_4377175\_x1.....ggagaUgucgugggaacacggggugcc..... 1  
 Gi3\_28820838\_x1.....agacgucgugggaacacggggugcG..... 1  
 Gi4\_609005\_x1.....aagagaagcgccgucaggccc..... 0  
 Gi2\_11184932\_x1.....cgucgugggaacacggggugcA..... 1  
 Gl1a\_6030055\_x1.....gaucAgagacgucgugggaacacggggg..... 1  
 Gi3\_28698346\_x1.....ggccAcgccaguacugcga..... 1  
 Gl1a\_6246452\_x1.....ucaggccccgccaguacugcga..... 0  
 Gi2\_11361873\_x1.....aCagaagcgccgucaggcccc..... 1  
 Gl1a\_6013003\_x1.....gaucggagacgucgugggaCcacgggg..... 1  
 Gi3\_28312282\_x1.....caggUccccgccaguacugcga..... 1  
 Gl1a\_6106144\_x1.....aguacugcgauccggagCcgucgu..... 1  
 Gl1a\_6229599\_x1.....aucggagacgucgCgggaacacgggg..... 1  
 Gi3\_28863548\_x1.....ggagaAgucgugggaacacggggugcc..... 1  
 Gi2\_11165155\_x1.....gaagaAaagcgccgucaggccc..... 1  
 Gi3\_28408443\_x1.....aucggaCacgucgugggaacacg..... 1

Gi2\_11321644\_x1.....cgucgugggaacUcggggugccga..... 1  
 Gi5\_8929015\_x1.....ccgccaguacugcAaucggagacguc..... 1  
 Gi2\_11094962\_x1.....cgucaggccccgccaAuacugcgau..... 1  
 Gi3\_28908634\_x1.....cgccgucaNgccccgccagua..... 1  
 Gi4\_598695\_x1.....gucaggccccgccaguacugcg..... 0  
 Gi2\_11316399\_x1.....aggccccgccGguacugcgauccggagacg..... 1  
 Gi3\_28942875\_x1.....agacgucguggAaacacggggugccgaac..... 1  
 Gi5\_8879695\_x1.....aAcggagacgucgugggaacacggggugc..... 1  
 G1a\_6316795\_x1.....aucggagacgucgugggC..... 1  
 Gi4\_593381\_x1.....cgugggaacacggggugccgaa..... 0  
 Gi5\_9007074\_x1.....gugggaacacggggugccgaacuA..... 1  
 G1a\_6086850\_x1.....aguacugcgauccggagaUgucgu..... 1  
 Gi2\_11106300\_x1.....cgccaguacuAcgauccggagac..... 1  
 G1a\_6236074\_x1.....gugggaacacggggugcUg..... 1  
 G1a\_6026357\_x1.....aguacugcgaGcggagacgucgu..... 1  
 Gi3\_28940316\_x1.....gNaacacggggugccgaacu..... 1  
 Gi3\_28822896\_x1.....gaucggagacgucAggggaacacg..... 1  
 Gi4\_606850\_x1.....cgugggaacUcggggugccgaacu..... 1  
 Gi2\_11371879\_x1.....Ucccgccaguacugcgauccgg..... 1  
 Gi3\_28380901\_x1.....agagaagcgccgucagggccccgccCgua..... 1  
 Gi2\_11240747\_x1.....ggaacacggggugcGgaacu..... 1  
 Gi2\_11049031\_x1.....ggccccgccUguacugcgauccggagacgu..... 1  
 Gi3\_28781093\_x1.....ccccgccUguacugcgauccg..... 1  
 Gi3\_28926256\_x1.....ggccccgccaguUcugcgauccg..... 1  
 G1a\_6317876\_x1.....ggagacguAgugggaacacg..... 1  
 Gi1\_4182557\_x1.....ucaggccccgccaAuacugcg..... 1  
 Gi1\_4236847\_x1.....gcgauccggagacgucgugggaacacgg..... 0  
 Gi2\_11188200\_x1.....caggAcccgccaguacugcg..... 1  
 Gi2\_11031391\_x1.....aagagaagNgccgucagggccccgcca..... 1  
 G1a\_6359343\_x1.....caguacugcgauccggagaUgu..... 1  
 Gi5\_8851294\_x1.....agacAucgugggaacacggggugc..... 1  
 G1a\_6298290\_x1.....caguacugcgauccggagacgC..... 1  
 Gi3\_28812834\_x1.....gccgucagNccccgccaguacugcgau..... 1  
 Gi3\_28905800\_x1.....gagacgucgugggaacacggggugccgaGcu..... 1  
 Gi2\_11362446\_x1.....cgauccggagacgucUugggaacacggggu..... 1  
 Gi1\_4259715\_x1.....ucgugggaCcacggggugccgaa..... 1  
 Gi3\_28484728\_x1.....gccgGcaggccccgccaguac..... 1  
 Gi2\_11378585\_x1.....ugcgauccggagacgucgugggaacG..... 1  
 Gi2\_11361104\_x1.....gCccccgccaguacugcgauccggagacgu..... 1  
 Gi3\_28459303\_x1.....gaucggagacUucgugggaacacggggu..... 1  
 Gi3\_28550501\_x1.....gaagcgccgucaAgccccgccagua..... 1  
 Gi2\_11012581\_x1.....ugcgauccggGgacgucgugggaaca..... 1  
 Gi2\_11356150\_x1.....gucagggCccgccaguacugcgaucc..... 1  
 Gi5\_8970834\_x1.....aucggagacgCcgugggaacacgggg..... 1  
 Gi3\_28654984\_x1.....Cagacgucgugggaacacggggugcc..... 1  
 Gi2\_11116936\_x1.....agcgccgucagggcUcggcaguacugc..... 1  
 Gi3\_28551081\_x1.....gaucUgagacgucgugggaacacggggugcc..... 1

Gi3\_28877464\_x1.....cggagacgucgugggaacacgggguAcc..... 1  
 Gi3\_28384936\_x1.....cggagacgucgugggaGcacgggugccga..... 1  
 Gi3\_28843332\_x1.....cGcgccaguacugcgauCG..... 1  
 Gi3\_28381401\_x1.....gucgugggaacacggggugUcga..... 1  
 Gi3\_28621897\_x1.....cgugggaacacggggugGcga..... 1  
 Gi2\_11261113\_x1.....aucGagacgucgugggaacacggggu..... 1  
 Gi3\_28456118\_x1.....aucAgagacgucgugggaacacggggug..... 1  
 Gi3\_28723983\_x1.....acgCcgugggaacacggggugccga..... 1  
 G1a\_6242959\_x1.....cgucaggccccCccaguacugcg..... 1  
 Gi1\_4312210\_x1.....ucUgagacgucgugggaacacg..... 1  
 Gi1\_4164506\_x1.....aucggagacgucUugggaacacggggugccgaacu..... 1  
 Gi1\_4259662\_x1.....acacggggNgccgaacu..... 1  
 Gi3\_28719835\_x1.....aguacugcgauUgagacgucgugggaacacg..... 1  
 Gi3\_28642193\_x1.....cgaucggagacgucgugggaUcacg..... 1  
 Gi3\_28309083\_x1.....ucggagacgucguAgggaacacggggugc..... 1  
 G1a\_6058640\_x1.....aaNagaagcgccgucaggccc..... 1  
 Gi1\_4348192\_x1.....Gggccccgccaguacugcga..... 1  
 Gi4\_605617\_x1.....agacgucgugggaacacggggugccgaacA..... 1  
 G1a\_6359687\_x1.....ucggagacgCcgugggaacacggg..... 1  
 Gi3\_28396474\_x1.....gaUacgucgugggaacacggggugccgaac..... 1  
 Gi3\_28937053\_x1.....aggccccgccaguCucgcaucgga..... 1  
 Gi2\_11356355\_x1.....aggcccAgccaguacugcg..... 1  
 Gi2\_11068673\_x1.....caggccccgccaguacuAcgaucggagacg..... 1  
 G1a\_6304011\_x1.....aGcggagacgucgugggaacacggggugccga..... 1  
 Gi2\_11230329\_x1.....UuacugcgauCGgagacgucgug..... 1  
 Gi1\_4286345\_x1.....gucgugggaacacgggAugccgaacu..... 1  
 Gi2\_11082726\_x1.....cccGcaguacugcgauC..... 1  
 Gi5\_8911700\_x1.....aggccccgccagGacugcga..... 1  
 G1a\_5984082\_x1.....ucggagacgucgugggaacGcggggugcc..... 1  
 Gi5\_8889916\_x1.....acucguuccgaauuaggaag..... 0  
 Gi2\_11086703\_x1.....cgucgugggaacNcggggugccgaacu..... 1  
 G1a\_6032304\_x1.....gUgaucggagacgucgug..... 1  
 Gi1\_4220778\_x1.....agacgucgugggaGcacggg..... 1  
 Gi2\_11019709\_x1.....agagaagcgUcgucaggccccgccag..... 1  
 Gi2\_11034900\_x1.....gccaguacugcgUucggagacguc..... 1  
 Gi5\_8910365\_x1.....Gagagaagcgccgucaggcccccca..... 1  
 Gi1\_4346989\_x1.....gaucggaAacgucguggg..... 1  
 Gi3\_28676754\_x1.....gaagagaagcgccgucaggccccA..... 1  
 Gi3\_28984405\_x1.....gggaacacCgggugccga..... 1  
 Gi1\_4373783\_x1.....ucaggccccgccaguacugcgGuc..... 1  
 Gi3\_28695107\_x1.....ugcgauCGgagacgucgugggCacacggggu..... 1  
 Gi3\_28555636\_x1.....agaUaagcgccgucaggccccgc..... 1  
 Gi3\_28921487\_x1.....aucggagacguAgugggaacacggg..... 1  
 Gi3\_28726450\_x1.....ccccgUcaguacugcgauCGgag..... 1  
 Gi1\_4218954\_x1.....cgCgggaacacggggugccgaacu..... 1  
 Gi5\_9084366\_x1.....ccUccaguacugcgauCGgaga..... 1  
 Gi3\_28826872\_x1.....cggagacgucguggAaacacggggu..... 1

Gi5\_9117681\_x1.....cgucgugggaaacacggggGgccgaac..... 1  
Gi3\_28671797\_x1.....gacgucgugggaaacacggAgugccgaa..... 1  
Gi1\_4166431\_x1.....acgucgugggaaacacggggugccgaaA..... 1  
Gi4\_581165\_x1.....aacacggggugccgGacu..... 1  
Gi1\_4356185\_x1.....gggaacacggggugccgaaA..... 1  
Gi2\_11246362\_x1.....gucguggAaacacggggugc..... 1  
Gi3\_28664626\_x1.....Ngugggaacacggggugcc..... 1  
Gi5\_8853183\_x1.....ccgccaguGcugcgauccggagacguc..... 1  
Gi2\_11268528\_x1.....gacgucgugggaaacaGggggugccgaac..... 1  
G1a\_6123008\_x1.....aggUcccgccaguacugcg..... 1  
Gi1\_4193181\_x1.....acgucCugggaacacggggugccgaacu..... 1  
Gi3\_28707223\_x1.....gaagcgccgucagggccccccaAuac..... 1  
Gi5\_8846252\_x1.....gucgugggaaacaUggggugccgaac..... 1  
Gi3\_28481969\_x1.....Cgccccgccaguacugcgau..... 1  
G1a\_6189808\_x1.....cAucaggccccgccagua..... 1  
Gi5\_8915373\_x1.....acguUgugggaacacggggugccga..... 1  
G1a\_6108943\_x1.....cggagacUucgugggaacacgg..... 1  
G1a\_6204160\_x1.....gaucggagacgucgugggaaacCcggg..... 1  
Gi3\_28788656\_x1.....gaucggagacgucAugggaaacacgggg..... 1  
Gi5\_9053409\_x1.....gaucggagacgucgugAgaacacgg..... 1  
Gi3\_28661103\_x1.....aCuacugcgauccggagacgucgug..... 1  
Gi3\_28642603\_x1.....cgccgucagggccccgccaguacug..... 0  
Gi3\_28609466\_x1.....cgAcgugggaacacggggugccgaa..... 1  
Gi1\_4225968\_x1.....gucAugggaaacacggggug..... 1  
Gi3\_28487612\_x1.....gagacgucgugggaaacaUggggugccg..... 1  
Gi2\_11391398\_x1.....Ggagaagcgccgucagggccc..... 1  
Gi3\_28636436\_x1.....gggaacUcggggugccgaa..... 1  
Gi2\_11384316\_x1.....cgucgugggaaacacggggugAcgaa..... 1  
Gi3\_28891922\_x1.....aUgcgccgucagggccccgccaguacugc..... 1  
G1a\_6084391\_x1.....ccgccaguacugcgauccggagaAguc..... 1  
Gi5\_8973150\_x1.....cgucagggccccgccaguacugcU..... 1  
Gi1\_4363714\_x1.....cgucgugAgaacacggggugccg..... 1  
Gi2\_11312481\_x1.....cgucgugggaaacaUggggugc..... 1  
Gi2\_11236290\_x1.....gaacacgUggugccgaacu..... 1  
Gi2\_11126150\_x1.....acucguuccgaauuaUgaaga..... 1  
Gi3\_28934149\_x1.....caguacugcgauccggagacgucAu..... 1  
Gi2\_11160656\_x1.....cCgagacgucgugggaaacacggggugcc..... 1  
Gi2\_11305820\_x1.....ugcgauccggagacgucAugggaaac..... 1  
Gi4\_581821\_x1.....cgauccggagacgucgugggaaacacg..... 0  
Gi3\_28798110\_x1.....gucgugggaaacCcgggugccgaacu..... 1  
Gi1\_4344071\_x1.....aGcggagacgucgugggaaacacgggg..... 1  
Gi5\_9056333\_x1.....cgucgugggaaacacggggugccgaGc..... 1  
G1a\_6090800\_x1.....aucggCgacgucgugggaaacacggggugcc..... 1  
Gi5\_9072832\_x1.....uUcugcgauccggagacgu..... 1  
Gi5\_8967342\_x1.....cguggaaacacggggugAcg..... 1  
Gi1\_4215247\_x1.....aucggagacgucguAggaacacggggugcc..... 1  
Gi3\_28695485\_x1.....gccgucagggAcccgccaguacugcgau..... 1

Gi5\_8871531\_x1.....agggcccgccaguaGugcgauC.....ugggaaGacggggugccgaacu..... 1  
 Gi5\_8841476\_x1.....ugggaaGacggggugccgaacu..... 1  
 Gi3\_28849404\_x1.....ggccccgccaguacCgcgaucgga..... 1  
 Gi3\_28405648\_x1.....caggccccgccagAACugcgauC..... 1  
 Gi1\_4208002\_x1.....ucggagacgucgugggaaacaAggggugccgaacu..... 1  
 Gi2\_11202063\_x1.....cgccgucaggccccAccaguacugC..... 1  
 Gi4\_591372\_x1.....cgAcaguacugcgauCggagacgucgug..... 1  
 Gi1\_4365646\_x1.....gaacacgUggugccgaacu..... 1  
 Gi3\_28615852\_x1.....cggagacgucgugggaaacacggCgugcc..... 1  
 Gl1a\_6325379\_x1.....acucguuccgaaauaCgaa..... 1  
 Gl1a\_6120579\_x1.....ugggaaacaGggggugccgaacu..... 1  
 Gi4\_588217\_x1.....agagaagcgccgucaggccccg..... 0  
 Gi5\_9073425\_x1.....ugggaaacacggggugccgCacuu..... 1  
 Gi4\_576295\_x1.....cgucgugCgaacacggggugccga..... 1  
 Gi1\_4254413\_x1.....ugggaaacacgCggugccgaacu..... 1  
 Gi1\_4168797\_x1.....gugggaaacacAggggugccg..... 1  
 Gl1a\_6274652\_x1.....ggagacgucgugggaaUcacg..... 1  
 Gi3\_28697004\_x1.....aguacugcgUucggagacg..... 1  
 Gi5\_8989723\_x1.....gaucggagacgucgCgggaaacacgg..... 1  
 Gi2\_11180734\_x1.....GgccaguacugcgauCgggagacg..... 1  
 Gi3\_28804291\_x1.....cccgccaguacugcgauCgggagacAu..... 1  
 Gi3\_28852548\_x1.....cGgucaggccccgccaguacugcgauCggg..... 1  
 Gl1a\_6349735\_x1.....aguacugcgauCgggagacCuc..... 1  
 Gi2\_11302816\_x1.....guacugcgauCgggagacguUg..... 1  
 Gi2\_11201189\_x1.....caggccccgccaguacugAgauc..... 1  
 Gl1a\_6315379\_x1.....Aucgugggaaacacggggugccgaa..... 1  
 Gi2\_11074982\_x1.....cUguacugcgauCgggagacguc..... 1  
 Gi2\_11367057\_x1.....agacgucgugggaaacacgggAugccgaacu..... 1  
 Gi3\_28911891\_x1.....cgaAcgggagacgucguggg..... 1  
 Gi2\_11072376\_x1.....ccccgccaguacugcAaucgg..... 1  
 Gl1a\_6289776\_x1.....Gagagaagcgccgucaggcccc..... 1  
 Gi2\_11032388\_x1.....gUgaagcgccgucaggccccgccaguac..... 1  
 Gi3\_28437477\_x1.....gaucggagacgucgugggaaacacgggAu..... 1  
 Gi2\_11057997\_x1.....ucaggccccgccaguacAgc..... 1  
 Gi1\_4202603\_x1.....cgccaguacugcgauCggCga..... 1  
 Gi2\_11338497\_x1.....cgccaguacCgcgauCgggagac..... 1  
 Gi3\_28432604\_x1.....agagCagcgccgucaggccccgC..... 1  
 Gi2\_11197787\_x1.....Nagagaagcgccgucaggcccc..... 1  
 Gi2\_11020073\_x1.....ggaAacgucgugggaaacac..... 1  
 Gl1a\_6303779\_x1.....ccccgccaguacCgcgauCgggagacguc..... 1  
 Gi1\_4220624\_x1.....ucgugggaaacacggggUccgaacu..... 1  
 Gi5\_8936902\_x1.....aucggagGcgucgugggaaacacggg..... 1  
 Gi2\_11009951\_x1.....ccAccaguacugcgauCgggag..... 1  
 Gi2\_11402514\_x1.....gacgucgugggaaGcacggg..... 1  
 Gi3\_28709802\_x1.....ucggGgacgucgugggaaacacgg..... 1  
 Gi1\_4375775\_x1.....cgugggaaacacggggGgccg..... 1  
 Gl1a\_6154120\_x1.....caguacugcUaucgggagacgucg..... 1

Gi3\_28383018\_x1.....aaagagaagcgcUgucagggccccgcca..... 1  
Gi2\_11312096\_x1.....gccccgccaguacugcgUuc..... 1  
G1a\_6276310\_x1.....cccgccCguacugcgauccggaga..... 1  
Gi2\_11368649\_x1.....ugcgauccggagacgucgugggUaca..... 1  
Gi2\_11366609\_x1.....ucagggccccgUcaguacugcg..... 1  
G1a\_6171201\_x1.....Aucaggccccgccaguacugcga..... 1  
Gi3\_28844504\_x1.....cggagacgucgugggaacacggggugcUga..... 1  
Gi3\_28786650\_x1.....Aaagagaagcgcggucagggccccg..... 1  
Gi2\_11074425\_x1.....gucgugggaacacggAgugccgaa..... 1  
G1a\_6248275\_x1.....Aucaggccccgccaguacu..... 1  
Gi3\_28268401\_x1.....Cacgucgugggaacacgggg..... 1  
Gi1\_4310413\_x1.....ucgugggaacacgAggugccgaa..... 1  
Gi3\_28495361\_x1.....ggGgacgucgugggaacacg..... 1  
G1a\_6040481\_x1.....aguacugcgauccggGgac..... 1  
Gi3\_28280406\_x1.....cccgccaguacugcgauAggagacguc..... 1  
Gi2\_11377683\_x1.....gaUaagcgcggucagggccccgccaguac..... 1  
Gi2\_11182787\_x1.....cgauCagagacgucgugggaacacggggugc..... 1  
Gi2\_11309602\_x1.....cguNggaacacggggugccga..... 1  
Gi2\_11230062\_x1.....cccgCaguacugcgauccggagacguc..... 1  
Gi2\_11062890\_x1.....gacgucgugggaacacggggUaccg..... 1  
Gi5\_9136691\_x1.....gggaacacggggugcAga..... 1  
G1a\_6023208\_x1.....cguugggaacacggggugccgaaGu..... 1  
Gi3\_28732886\_x1.....gaucggagacgucgugggGacacgg..... 1  
Gi1\_4354864\_x1.....ucAugggaaacacggggugccg..... 1  
Gi3\_28416918\_x1.....aggccccgccagGacugcgau..... 1  
Gi3\_28625720\_x1.....gagacgucgugggaacacggAgugccg..... 1  
Gi3\_28858010\_x1.....agagaagcgcAucaggccccgc..... 1  
Gi1\_4252993\_x1.....acgucgugggaacacggggugcAga..... 1  
Gi2\_11077691\_x1.....agAacugcgauccggagacguc..... 1  
Gi2\_11208912\_x1.....aggccccgccagCacugcgauccgga..... 1  
Gi2\_11370615\_x1.....aucggagacUucgugggaacac..... 1  
Gi5\_8853722\_x1.....agacgucgugggaacacggggugUc..... 1  
G1a\_6312630\_x1.....cgucagggccccgGcaguacugcg..... 1  
Gi3\_28917108\_x1.....gAcaggccccgccaguacug..... 1  
Gi3\_28545432\_x1.....ggagacgucgugggaacaUggggugcc..... 1  
Gi3\_28415994\_x1.....gucagggccccgccUguacugcgau..... 1  
Gi2\_11285185\_x1.....ucgugggaacacggUgugccgaa..... 1  
G1a\_6221549\_x1.....gaUaagcgcggucagggcccccca..... 1  
Gi5\_9060248\_x1.....aucggagacgucguggga..... 0  
Gi2\_11205126\_x1.....aucggagacguAgugggaacacg..... 1  
Gi1\_4281077\_x1.....ucagggccccgccaguacugUg..... 1  
Gi1\_4298257\_x1.....gccaguacugcgauccggagU..... 1  
Gi1\_4230356\_x1.....ugggaacacggggugccgCcuu..... 1  
Gi2\_11284415\_x1.....gccaguacugcgauccggUgacguc..... 1  
Gi5\_9060158\_x1.....acgucUugggaacacggggugccgaa..... 1  
Gi2\_11390370\_x1.....agagaagcgcggucagggccAcgcc..... 1  
Gi3\_28676817\_x1.....aguacugcgauccggagacguUg..... 1

Gi3\_28797156\_x1.....aggcGccgccaguacugcgauccgga..... 1  
Gi2\_11380780\_x1.....gucgugggaacacggggAgcc..... 1  
G1a\_6264381\_x1.....uacugcgauccggagacAucgu..... 1  
Gi2\_11185136\_x1.....gggaacGcggggugccgaa..... 1  
G1a\_6084238\_x1.....agaGgcgccgucagggcc..... 1  
Gi5\_8977478\_x1.....agacUucgugggaacacggggugc..... 1  
G1a\_6313170\_x1.....gugAgaacacggggugccgaac..... 1  
Gi2\_11232517\_x1.....agacgucgugggaacacggggugccgaUc..... 1  
Gi4\_603920\_x1.....gugAgaacacggggugccgaacu..... 1  
Gi1\_4299990\_x1.....ggccccgccaguacugcgCucggagacg..... 1  
Gi1\_4301727\_x1.....gGgggaacacggggugccgaa..... 1  
Gi3\_28897323\_x1.....gagacgucgugCgaacacg..... 1  
Gi5\_9064087\_x1.....aagagaagcgcgucagggccccgcUa..... 1  
Gi2\_11280509\_x1.....agacgucguAggaacacggggugc..... 1  
Gi3\_28899074\_x1.....gagacgucgugggaacacggggugcAgaacu..... 1  
G1a\_6342976\_x1.....gaNcacggggugccgaacu..... 1  
Gi1\_4159719\_x1.....Ccgugggaacacggggugccgaacu..... 1  
G1a\_6027256\_x1.....ugggaacacggggugcGgaacu..... 1  
G1a\_6069888\_x1.....aguacugcgauccggagacAuc..... 1  
Gi5\_8946761\_x1.....ccgccaguacugcgauccggagacgucgC..... 1  
Gi3\_28375230\_x1.....gagGagcgcgucagggccccgcccag..... 1  
Gi2\_11319453\_x1.....aguacugcgGucggagac..... 1  
Gi5\_9132786\_x1.....gcccUgccaguacugcgaucc..... 1  
Gi3\_28810062\_x1.....ucggaAacgucgugggaacacg..... 1  
Gi2\_11380151\_x1.....aucggagacAucgugggaacacggggug..... 1  
Gi5\_8999733\_x1.....cgugggaacacggggguAccga..... 1  
Gi2\_11095984\_x1.....gaNcacggggugccgaacu..... 1  
Gi1\_4333893\_x1.....guacugUgauccggagacgucg..... 1  
Gi5\_9039605\_x1.....agagaagcgcUgucagggccccgcccagu..... 1  
Gi1\_4171303\_x1.....gugggaaAacggggugccga..... 1  
Gi3\_28984842\_x1.....gauccggagacgucgugggaUcacggg..... 1  
Gi1\_4262225\_x1.....gugCgaacacggggugccg..... 1  
Gi2\_11142885\_x1.....ugcgauccNagacgucgugggaacacg..... 1  
G1a\_6007571\_x1.....cgucagggccccgccGguacugc..... 1  
Gi2\_11094170\_x1.....aucggagacgucgugggaacacgAgg..... 1  
Gi5\_9047299\_x1.....cgGgggaacacggggugccgaacu..... 1  
Gi5\_8885329\_x1.....aucggagacgucgugggaacacCgg..... 1  
Gi3\_28391706\_x1.....gaUaagcgcgucagggccc..... 1  
Gi5\_8908959\_x1.....ggagacgucgugggaacacggggCgcccgaacu..... 1  
Gi5\_8901750\_x1.....aucggagacgucgugggaacacgggAu..... 1  
Gi1\_4274446\_x1.....ugggCacacggggugccgaacu..... 1  
Gi5\_8901854\_x1.....Cccccgccaguacugcgauccggagacg..... 1  
Gi3\_28412732\_x1.....gacgucgugggaacacggggGgcc..... 1  
G1a\_6004677\_x1.....ggagacgucgugggaUcac..... 1  
G1a\_6283284\_x1.....cgGucggagacgucgugggaacacggg..... 1  
Gi3\_28282448\_x1.....cggagacgucgGgggaacacggggugccga..... 1  
Gi3\_28300774\_x1.....ucggagacgucgugggGacacg..... 1



Gi2\_11129670\_x1.....aucggagacgGcgugggaacacggg..... 1  
Gi3\_28546351\_x1.....ggccccgccaguacugcggaucggCgac..... 1  
Gi3\_28611430\_x1.....gcgaucggNgacgucgugggaaca..... 1  
G1a\_6240322\_x1.....gaAcggagacgucgugggaacacggggug..... 1  
Gi1\_4215169\_x1.....aucggagaAgucgugggaacacggggu..... 1  
Gi3\_28378442\_x1.....gaucggagacAucgugggaacacggg..... 1  
Gi2\_11250589\_x1.....aucggagacgCcgugggaacacgg..... 1  
Gi3\_28297570\_x1.....agcgccgucCggccccgcc..... 1  
Gi2\_11098458\_x1.....agagaagcgccgucaggAcccgc..... 1  
Gi3\_28468984\_x1.....aggccccgccaguacugcggaucAgagacguc..... 1  
Gi2\_11339320\_x1.....aggccccgccaguacugGg..... 1  
Gi2\_11309536\_x1.....agagaagcgccgucaggccccUgc..... 1  
Gi3\_28282485\_x1.....ucggagacgAcgugggaacac..... 1  
Gi2\_11011472\_x1.....aacacggggugGcgaacu..... 1  
G1a\_6182882\_x1.....gggaGcacggggugccgaa..... 1  
Gi2\_11381558\_x1.....ggagacgucgugggaCcac..... 1  
Gi3\_28366023\_x1.....aucggagaNgucgugggaacacggggugccgaac..... 1  
Gi2\_11383505\_x1.....gGucggagacgucgugggaacacgg..... 1  
Gi3\_28913928\_x1.....gGcgucagggccccgccaguacugcgau..... 1  
Gi3\_28507173\_x1.....ucaggccccgccaguCcu..... 1  
Gi4\_582727\_x1.....aucggagacgucgugggaacacggggugccgaacu..... 0  
Gi3\_28265929\_x1.....uuccgaauuaggaagagaagcAccguc..... 1  
Gi3\_28820395\_x1.....gagaagcgccgucaggccccgca..... 0  
Gi1\_4243653\_x1.....cagCccccgccaguacugcgau..... 1  
Gi2\_11395776\_x1.....cccgccaguacuUcgauccggag..... 1  
Gi3\_28431727\_x1.....Uagacgucgugggaacacggggugc..... 1  
Gi3\_28263780\_x1.....cgCcagggccccgccaguacugcgauccgg..... 1  
Gi3\_28283187\_x1.....cgucagggcccUgccaguacug..... 1  
Gi2\_11377216\_x1.....gucaAgccccgccaguacugcg..... 1  
Gi3\_28498459\_x1.....ugcgauccggagacgucgugggaGcacggg..... 1  
Gi2\_11030387\_x1.....gccccgcAaguacugcgau..... 1  
Gi5\_9002952\_x1.....Cagacgucgugggaacacg..... 1  
G1a\_6253053\_x1.....Ggcgaucggagacgucguggga..... 1  
Gi5\_8831284\_x1.....aucggUgacgucgugggaacacg..... 1  
Gi2\_11263514\_x1.....gagaagcgNcgucagggccccgcc..... 1  
Gi3\_28383594\_x1.....gucUggggaacacggggugccgaacu..... 1  
Gi5\_9110107\_x1.....aucggagacgCcgugggaacacgg..... 1  
Gi3\_28355975\_x1.....ccgccaguacugcAaucggagacgucg..... 1  
Gi5\_9066459\_x1.....gucgugggaacaUggggugccgaacu..... 1  
Gi5\_9137664\_x1.....acguUgugggaacacggggugccg..... 1  
Gi3\_28953636\_x1.....ugggaacacggggugccgUa..... 1  
Gi3\_28844830\_x1.....gccccgucCggccccgccaguacug..... 1  
Gi3\_28871156\_x1.....uacugcgCucggagacguc..... 1  
Gi3\_28696400\_x1.....ucggagacgucgugggCacacggg..... 1  
Gi3\_28388021\_x1.....agacgucgugggaacacggggGgccgaac..... 1  
G1a\_6314034\_x1.....cccNgccaguacugcgauccggagacguc..... 1  
Gi2\_11093131\_x1.....gccaguacugcgauccggagGcgu..... 1

Gi2\_11261665\_x1.....gacgucgugggaacacggggugcA..... 1  
 Gl1a\_6267303\_x1.....cccgccaguacugcgauccggagCcg..... 1  
 Gi1\_4281657\_x1.....aucgUagacgucgugggaacac..... 1  
 Gi2\_11379922\_x1.....aguacugcgauccggagacguA..... 1  
 Gi5\_8964368\_x1.....ugggaacacggggugccgGacuuu..... 1  
 Gi2\_11162766\_x1.....aNcacggggugccgaacu..... 1  
 Gi1\_4364444\_x1.....ugggaacacgUggugccgaacu..... 1  
 Gi2\_11400506\_x1.....aucggagacgucgugggaacacggggCgccg..... 1  
 Gi2\_11317290\_x1.....gagGagcgccgucagggcccgcag..... 1  
 Gi2\_11062941\_x1.....aggccccgccaguacAgcga..... 1  
 Gi2\_11215421\_x1.....ccccgccagCacugcgauc..... 1  
 Gi3\_28907053\_x1.....gucagggccccgccaguacugAgauccgga..... 1  
 Gi5\_9001632\_x1.....aCagaagcgccgucagggccccg..... 1  
 Gi1\_4252520\_x1.....gacgucgugggCacacggggugccgaacu..... 1  
 Gi3\_28640099\_x1.....gcccgcgucagggccccgcAaguacug..... 1  
 Gi2\_11206989\_x1.....ccgUcaguacugcgauccg..... 1  
 Gi2\_11391509\_x1.....cgugggaacacggggAgc..... 1  
 Gi3\_28736049\_x1.....gUaagagaagcgccgucagggc..... 1  
 Gi5\_9138141\_x1.....cgCcgugggaacacggggugccgaa..... 1  
 Gi4\_593420\_x1.....cgucgugggaCcacggggugccgaacu..... 1  
 Gi1\_4172058\_x1.....caggGccccccaguacugcgauccggaga..... 1  
 Gi1\_4262596\_x1.....gugggaacaUggggugccga..... 1  
 Gl1a\_6149434\_x1.....Uaucggagacgucgugggaacacggggugcc..... 1  
 Gi3\_28507394\_x1.....Gcagggccccccaguacugcgauccggagacgu..... 1  
 Gi2\_11281314\_x1.....Gggccccccaguacugcgauccggagacgu..... 1  
 Gi3\_28768076\_x1.....agagaagcNccgucagggc..... 1  
 Gi3\_28535260\_x1.....cgucagggcUccgccaguacugc..... 1  
 Gi2\_11108648\_x1.....ugggaaAacggggugccg..... 1  
 Gl1a\_6085840\_x1.....cgugggaacacggggugccA..... 1  
 Gi3\_28266357\_x1.....cGgucagggccccccaguacugcgauc..... 1  
 Gi2\_11217758\_x1.....gaucggagacgucgugggaacacgAggugcc..... 1  
 Gi2\_11255361\_x1.....ccccgccaguacugcgCucgga..... 1  
 Gi5\_8845049\_x1.....aguacugcgaucAgagacguc..... 1  
 Gl1a\_6043931\_x1.....aucggagacgucCugggaacacggg..... 1  
 Gi2\_11172414\_x1.....gagacgucgugggaacacggggugUc..... 1  
 Gi3\_28540816\_x1.....gcgaucAgagacgucgug..... 1  
 Gi3\_28917877\_x1.....aguacugcgCucggagacgu..... 1  
 Gi2\_11073122\_x1.....gacguUgugggaacacggggugccgaacu..... 1  
 Gl1a\_6251954\_x1.....ugcgauccggagaGgucgug..... 1  
 Gi1\_4388959\_x1.....gUcugcagggccccccaguacu..... 1  
 Gi2\_11161779\_x1.....gaAacgucgugggaacacggggug..... 1  
 Gi2\_11118187\_x1.....guacugcgGucggagacguc..... 1  
 Gl1a\_6154504\_x1.....aUgagaagcgccgucagggccc..... 1  
 Gl1a\_6249860\_x1.....gaacacggggGgccgaacu..... 1  
 Gl1a\_6184746\_x1.....acugcgauccggaCacgucgug..... 1  
 Gi2\_11000254\_x1.....cgccaAuacugcgauccggagacg..... 1  
 Gi3\_28650859\_x1.....gagaagcgccgGcagggccc..... 1

Gi3\_28485617\_x1.....aggaagagaagcAccguc..... 1  
G1a\_6171207\_x1.....Agagacgucgugggaacac..... 1  
Gi3\_28910134\_x1.....gggaacacggggugccAaacuu..... 1  
G1a\_6082929\_x1.....agaagcgccgucaggccccgA..... 1  
Gi2\_11198485\_x1.....aucggagGcgucguggga..... 1  
Gi3\_28819343\_x1.....Ugucgugggaacacggggugccgaa..... 1  
Gi2\_11342773\_x1.....aguacugcgauccggagCcgucg..... 1  
Gi2\_11205066\_x1.....cagAacugcgauccggagacgucgu..... 1  
Gi3\_28985797\_x1.....agacgucgugggaCcaccggg..... 1  
G1a\_6241761\_x1.....ugcgauccggagGcgucgug..... 1  
Gi3\_28525366\_x1.....ucggagacgucgugggaacacU..... 1  
Gi3\_28663748\_x1.....agUagcgccgucaggccccgccaguacu..... 1  
G1a\_6284893\_x1.....gagaagcgccAucaggccccgcca..... 1  
Gi5\_8918234\_x1.....agagaagcgccgucaCgccccg..... 1  
Gi3\_28287621\_x1.....ccccgcUaguacugcgauccggag..... 1  
Gi4\_614044\_x1.....gugggaaAaccggggugccgaa..... 1  
Gi1\_4365450\_x1.....gCgaacacggggugccgaac..... 1  
Gi2\_11086782\_x1.....acugcgauccggGgacgucgugggaaca..... 1  
Gi3\_28410105\_x1.....gccauuacugcgauccgga..... 1  
Gi2\_11212576\_x1.....agagaagcgcgUgucaggccccgcca..... 1  
Gi5\_9034524\_x1.....gaacacggggugccgaaG..... 1  
Gi3\_28283830\_x1.....ucguAgggaacacggggugcc..... 1  
Gi3\_28725120\_x1.....ccgccaguNcugcgauccgg..... 1  
Gi4\_594707\_x1.....gucgugggaacacggggugccgaCcu..... 1  
Gi1\_4219032\_x1.....agaagcgccgucaggccccgccc..... 0  
Gi3\_28519686\_x1.....acgucgugggaacacggggAgccga..... 1  
Gi2\_11045643\_x1.....gacAucgugggaacacggggugccgaacu..... 1  
G1a\_6349815\_x1.....gucgugggaGcacggggugccga..... 1  
Gi3\_28812396\_x1.....ccccgcUaguacugcgauccggagac..... 1  
Gi5\_9055764\_x1.....ucgugggaacacgUggugccgaacu..... 1  
Gi1\_4369014\_x1.....gUagacgucgugggaacacggggugccgaac..... 1  
Gi3\_28971499\_x1.....gAcgugggaacacggggugccgaa..... 1  
Gi3\_28649852\_x1.....gacgucgugggaacacgggCugccgaac..... 1  
Gi2\_11279997\_x1.....gcgauccggGgacgucguggga..... 1  
Gi2\_11113374\_x1.....cggagacgAcgugggaacacggggug..... 1  
Gi3\_28377095\_x1.....gucaggccccgccaguacuC..... 1  
Gi5\_9012929\_x1.....gacgGcgugggaacacggggugccgaacu..... 1  
Gi5\_8942499\_x1.....cggagacgucguAgggaacacggggugcc..... 1  
Gi3\_28623172\_x1.....cggagacgucgugggaacacggggugcUg..... 1  
Gi5\_9015251\_x1.....cgauccggagacgucgugggaacGcggg..... 1  
Gi2\_11303731\_x1.....ccccgcauacugcgauccggagC..... 1  
Gi2\_11103436\_x1.....ucggagacgCcgugggaacacggggugc..... 1  
Gi3\_28888350\_x1.....ggagacgucgugggaacacAgggugccg..... 1  
Gi1\_4302803\_x1.....gacgucgugggaacacgggCugccgaacu..... 1  
Gi2\_11298892\_x1.....Aucgugggaacacggggg..... 1  
Gi3\_28299653\_x1.....ggagacgucgugggaGcacgg..... 1  
Gi3\_28267826\_x1.....ccgccagCacugcgauccggagacgucgug..... 1

Gi5\_8937934\_x1.....Aaucggagacgucgugggaaacac..... 1  
 Gi2\_11107633\_x1.....ggaacacUgggugccgaac..... 1  
 Gl1a\_6341416\_x1.....aguacugcgaCcgagacgucgug..... 1  
 Gi4\_607449\_x1.....guUcugcgauccggagacgucgug..... 1  
 Gi3\_28501179\_x1.....cgucgugggaaacacggggugGc..... 1  
 Gi5\_8836752\_x1.....Ccucgcaucggagacgucgug..... 1  
 Gi2\_11105844\_x1.....gagacgucgugggaaacacggggGg..... 1  
 Gi3\_28471083\_x1.....ccgucaggccccgccaguacugU..... 1  
 Gi3\_28722319\_x1.....Acaggccccgccaguacugcgaucgga..... 1  
 Gi2\_11330644\_x1.....aucggagaGgucgugggaaac..... 1  
 Gi2\_11031614\_x1.....gaucggagacgCcgugggaaac..... 1  
 Gi2\_11371485\_x1.....ccgNcaggccccgccaguacugcgau..... 1  
 Gi2\_11385092\_x1.....aguaUugcgauccggagacgucg..... 1  
 Gi3\_28519124\_x1.....aggccccgccaguacugG..... 1  
 Gi3\_28909974\_x1.....ggaacacggggugccUaa..... 1  
 Gi5\_9131771\_x1.....agacgucgugAgaacacggggugccgaac..... 1  
 Gi2\_11217981\_x1.....cgucgugggaaacacAgggug..... 1  
 Gi2\_11124946\_x1.....gacgucgugggGacacggggugc..... 1  
 Gi2\_11336782\_x1.....gucaggccccgccaguacugcgCuc..... 1  
 Gl1a\_6069674\_x1.....aucggagacgucgugggaaacacAgg..... 1  
 Gi5\_9104027\_x1.....aucAgagacgucgugggaaacacgggg..... 1  
 Gi2\_11304503\_x1.....gaucggagacgucgugggaaacacgggCu..... 1  
 Gi3\_28547856\_x1.....aucggagacgucgugggaaacUcggggugcc..... 1  
 Gi2\_11033249\_x1.....gccUguacugcgauccggagacguc..... 1  
 Gi2\_11277374\_x1.....acugcgauccggagacgucgCgg..... 1  
 Gi1\_4331833\_x1.....gagacgucgugggaaacacAgggugccga..... 1  
 Gi2\_11159305\_x1.....ucggagacgucgugggaaacac..... 0  
 Gi1\_4184380\_x1.....cGguacugcgauccggagacguc..... 1  
 Gi1\_4377717\_x1.....gaaacacggggugcccgCac..... 1  
 Gl1a\_6024874\_x1.....cgugggaCcacggggugcc..... 1  
 Gi3\_28649692\_x1.....gucgCgggaacacggggug..... 1  
 Gi5\_8891910\_x1.....acgucgugggaaacacggggUaccgaac..... 1  
 Gi3\_28510280\_x1.....aucgUagacgucgugggaaacacggggugccg..... 1  
 Gi5\_8882314\_x1.....gugggaacaGggggugccgaac..... 1  
 Gi2\_11295301\_x1.....aCcgagacgucgugggaa..... 1  
 Gi2\_11364691\_x1.....ggGgacgucgugggaaacacggggugccga..... 1  
 Gi3\_28923804\_x1.....ucggagacgucgugggaaacacggggugccA..... 1  
 Gi3\_28688620\_x1.....acugcgauccggagacguAgu..... 1  
 Gi1\_4180698\_x1.....cgccaguacugcgCucggaga..... 1  
 Gl1a\_6050161\_x1.....guacCgcgaucggagacguc..... 1  
 Gi3\_28265457\_x1.....ggNgacgucgugggaaacacggggugcc..... 1  
 Gi3\_28342611\_x1.....aagagaagcgccgucaggU..... 1  
 Gi3\_28660192\_x1.....cccgccaguacugcgauccggagGcugcug..... 1  
 Gi2\_11236738\_x1.....aggccccgccaguacugcgauUgg..... 1  
 Gi1\_4242771\_x1.....cgucaggccccgccaguacugcgau..... 0  
 Gi2\_11261738\_x1.....agacgucgugggaaacacggggugcccgCac..... 1  
 Gi5\_9032334\_x1.....agNccccgccaguacugcgau..... 1

Gi5\_9028627\_x1.....gaCcgagacgucgugggaacac..... 1  
Gi2\_11030583\_x1.....gaucggagacgucgugggaacaUggggugc..... 1  
Gi2\_11062559\_x1.....gcgaucggagCcgucgugggaacacggg..... 1  
Gi2\_11310401\_x1.....gaucggagaUgucgugggaacacggggug..... 1  
Gi2\_11153641\_x1.....acgucgugggGacacggggugccga..... 1  
Gi5\_8891578\_x1.....ggccccgccaguacugcgCucgga..... 1  
Gi3\_28401813\_x1.....aucggagacgucguggCaacacggggg..... 1  
Gi5\_8936447\_x1.....gCagcgccgucaggccccgccagua..... 1  
Gi2\_11005962\_x1.....cgaucggaNacgucgugggaaca..... 1  
G1a\_6108404\_x1.....caggccUcgccaguacugcgau..... 1  
Gi2\_11344898\_x1.....aucggagacgucguggCaacacggggugc..... 1  
Gi3\_28385218\_x1.....gaagagaaAcgccgucaggccc..... 1  
Gi2\_11346551\_x1.....gacgucgugggCacacggg..... 1  
Gi2\_11038649\_x1.....aGgcgcccugacggccccgccagua..... 1  
Gi3\_28719143\_x1.....agcgccgucGggccccgcc..... 1  
Gi5\_9092885\_x1.....Nugggaacacggggugcc..... 1  
Gi3\_28304209\_x1.....gaCcgagacgucguggg..... 1  
Gi2\_11267513\_x1.....gucgugggaacacggggGgccga..... 1  
Gi2\_11073691\_x1.....Cggccccgccaguacugcgauccgaga..... 1  
Gi5\_9133208\_x1.....ugggaacGcggggugccgaacuuu..... 1  
G1l\_4334384\_x1.....ggccccCccaguacugcgauccgaga..... 1  
Gi5\_8940293\_x1.....aucggagacgucgugggaacGcggggugcc..... 1  
Gi3\_28321524\_x1.....aggccccgccagGacugcgauccgagac..... 1  
Gi2\_11140635\_x1.....uacugcgauccUgagacgucgugggaaca..... 1  
G1a\_6065426\_x1.....guacugcgauccgagCcgucg..... 1  
Gi3\_28684411\_x1.....agacgucgugggaUacggggugccga..... 1  
Gi3\_28534354\_x1.....gggagacgucgugggGacacggggugcc..... 1  
Gi2\_11029665\_x1.....ccccgccaguacugcgauA..... 1  
Gi5\_9039236\_x1.....gugggaacacgggguAcc..... 1  
G1l\_4308986\_x1.....ccaguacugcgauccgag..... 0  
G1l\_4298968\_x1.....ucCggccccgccaguacugcg..... 1  
Gi2\_11109312\_x1.....auAggagacgucgugggaacac..... 1  
Gi3\_28962790\_x1.....gagaUgucgugggaacacggggg..... 1  
Gi2\_11215133\_x1.....ggccccgccaguacugcgauccgA..... 1  
Gi3\_28901346\_x1.....ccUgccaguacugcgauccgagacgucg..... 1  
Gi3\_28425079\_x1.....ccccgccaguaUugcgauccgag..... 1  
Gi4\_613221\_x1.....gggaacacggggugccgaUc..... 1  
Gi2\_11368735\_x1.....gaucggagacgucgugggaacacgAgg..... 1  
Gi3\_28872590\_x1.....Aagaagcgccgucaggccccg..... 1  
Gi2\_11147578\_x1.....cgcNucggagacgucgugggaacacggg..... 1  
Gi3\_28758653\_x1.....acugcgauccgagacgAc..... 1  
Gi3\_28678009\_x1.....Acaguacugcgauccgagacguc..... 1  
Gi3\_28541271\_x1.....cccgccaguacugcgauccgagacgucgA..... 1  
G1a\_6166073\_x1.....aagagaagcgccgucGggcccc..... 1  
G1l\_4258082\_x1.....ucgugggaacacggggCgccga..... 1  
Gi3\_28606851\_x1.....aguacugcgauccUgagacgucg..... 1  
Gi2\_11112575\_x1.....guUcugcgauccgagacgu..... 1

Gi3\_28365965\_x1.....acgucgAgggaacacggggugccgaa..... 1  
 Gi2\_11145603\_x1.....acguGgugggaacacggggugccgaac..... 1  
 Gi3\_28653962\_x1.....cgccUucagggccccgccag..... 1  
 Gi2\_11144819\_x1.....ccccgccaguacugcgauCAgagac..... 1  
 Gi3\_28928767\_x1.....aggccccgccaguacugcAaucgg..... 1  
 Gi5\_9124912\_x1.....cacggggugccgGacuuu..... 1  
 Gi1\_4380575\_x1.....cgucguggggaacacggggugccgaUc..... 1  
 Gi3\_28373541\_x1.....guacugcgauccggagaUgu..... 1  
 Gi2\_11406968\_x1.....gaucggagacgucgugggGacacggggug..... 1  
 Gi5\_9110036\_x1.....aAgucgugggaacacggggugccgaac..... 1  
 Gi5\_8859094\_x1.....aAcggagacgucgugggaacacggggug..... 1  
 Gl1a\_6055834\_x1.....cgucaggccccgUcaguacugcg..... 1  
 Gi3\_28778685\_x1.....gagacgucgugggaacCc..... 1  
 Gi3\_28841029\_x1.....gaucggGgacgucgugggaacacgggg..... 1  
 Gi2\_11013809\_x1.....gaucggagacgucgugggaacacggCgugc..... 1  
 Gi3\_28391473\_x1.....aucggagacgGcgugggaacacgggg..... 1  
 Gi4\_613763\_x1.....cggagacgucgugggaacacggggug..... 0  
 Gi5\_8921524\_x1.....cggaCacgucgugggaacacg..... 1  
 Gi3\_28976179\_x1.....ucGggccccgccaguacugc..... 1  
 Gi2\_11192762\_x1.....aUgccccgccaguacugcgauccggagacgucg..... 1  
 Gi2\_11182149\_x1.....cccgccaguacugcgauccgAagac..... 1  
 Gi2\_11314211\_x1.....ccccgccaguacugcgauUgg..... 1  
 Gi2\_10992668\_x1.....aggccGcgccaguacugcg..... 1  
 Gi3\_28903469\_x1.....aggccccgccaguUcugcgauccgga..... 1  
 Gl1a\_6262000\_x1.....ucaggccccgccaguacCgcgauccg..... 1  
 Gi1\_4273633\_x1.....cggagacgucgugggaacacggggugUc..... 1  
 Gi3\_28362945\_x1.....gGagcgccgucagggccccgccagua..... 1  
 Gi2\_11237707\_x1.....Uucagggccccgccaguacugcgauccggagacg..... 1  
 Gi3\_28389376\_x1.....guacugcgauccggagacAuc..... 1  
 Gi3\_28503817\_x1.....agagaagcgUgucagggccccgccaguacu..... 1  
 Gi3\_28423845\_x1.....gAcgugggaacacggggugccg..... 1  
 Gi2\_11316579\_x1.....cguggUaacacggggugccgaa..... 1  
 Gi3\_28930894\_x1.....gacgucgugggaacaAggggugccgaacu..... 1  
 Gi1\_4310762\_x1.....aucggGgacgucguggga..... 1  
 Gi2\_11344245\_x1.....Cgcgauccggagacgucguggga..... 1  
 Gi2\_11239641\_x1.....ucgugggaacacgCggugccgaac..... 1  
 Gi2\_11021657\_x1.....ggagGcgucgugggaacacggggugccgaacu..... 1  
 Gi3\_28894718\_x1.....agUcgucgugggaacacggggug..... 1  
 Gl1a\_5995102\_x1.....gucguAggaacacggggugccgaacu..... 1  
 Gi3\_28512612\_x1.....gaAcggagacgucgugggaacac..... 1  
 Gl1a\_6150036\_x1.....aggcUccgccaguacugcg..... 1  
 Gi3\_28649176\_x1.....cgugggaacacggggugccCa..... 1  
 Gi3\_28301174\_x1.....cgccgucagggcGcgccagu..... 1  
 Gi1\_4364148\_x1.....cggagacgucgugggaacacggggugAccgaacu..... 1  
 Gi3\_28979969\_x1.....cgccaguacugUgucggagacg..... 1  
 Gi2\_11389529\_x1.....gGgacgucgugggaacacggg..... 1  
 Gi1\_4189985\_x1.....agcgccguNaggccccgccaguacugc..... 1

Gi1\_4239662\_x1.....acgucgugggaaacacggggugccgUacu..... 1  
 Gi2\_11179540\_x1.....Nucggagacgucgugggaaacacggggug..... 1  
 G1a\_5998643\_x1.....cgugggaaacacggggAgc..... 1  
 Gi3\_28629047\_x1.....aggcUccgccaguacugcgauccgga..... 1  
 Gi3\_28468562\_x1.....cagNccccgccaguacugc..... 1  
 Gi2\_11305005\_x1.....gaucggagacguAgugggaaacacg..... 1  
 G1a\_6334834\_x1.....cggagacgucgugggaaAacggggug..... 1  
 Gi1\_4337767\_x1.....aagagaagcggcucagccUcgccagu..... 1  
 Gi2\_11319230\_x1.....gccaguacugcgauccgUa..... 1  
 G1a\_6270080\_x1.....Cguacugcgauccggagacgucgu..... 1  
 Gi1\_4319177\_x1.....ugNgaacacggggugccgaacu..... 1  
 Gi2\_11253774\_x1.....ucgugggaaacacgggCugccgaacu..... 1  
 Gi4\_568166\_x1.....gaCcgagacgucguggg..... 1  
 Gi4\_594338\_x1.....gugggaaacacggggAgccgaa..... 1  
 Gi1\_4351741\_x1.....ggagacgucgugggaaacacAgggugccg..... 1  
 Gi3\_28962865\_x1.....gccaguacugcgaAcgggagacg..... 1  
 Gi2\_11178717\_x1.....gucgugggaaacCcgggugccga..... 1  
 Gi2\_11198642\_x1.....gaagagaagcAccgucagggccccg..... 1  
 Gi3\_28629292\_x1.....gaucggagacgucgugAgaaca..... 1  
 Gi5\_8966727\_x1.....cgucgugggaaacUcgggugccgaacu..... 1  
 Gi1\_4360340\_x1.....cCgagacgucgugggaaacacggggugc..... 1  
 G1a\_6298166\_x1.....gggaaacacggggugccgaUcu..... 1  
 G1a\_6185050\_x1.....aagagaagcggcucagggccccAg..... 1  
 Gi2\_11273812\_x1.....cgucgugggaaacacgggA..... 1  
 Gi2\_10995180\_x1.....aucggagacgucgugggaaacacgggCug..... 1  
 Gi2\_11225583\_x1.....cggagacgucgugCgaacacgggg..... 1  
 Gi1\_4190564\_x1.....cguUaggccccgccaguacugcg..... 1  
 Gi5\_8942401\_x1.....gUcgucgugggaaacacggggugccgaac..... 1  
 Gi2\_11091496\_x1.....agUccccgccaguacugcgauccg..... 1  
 G1a\_6050329\_x1.....gugggaaacacAgggugccg..... 1  
 Gi2\_11016297\_x1.....aucggagacgucguCggaacacggggugcc..... 1  
 Gi2\_11313891\_x1.....ggNacacggggugccgaac..... 1  
 Gi3\_28407284\_x1.....gaagcgccUucagggccccg..... 1  
 Gi3\_28725389\_x1.....ucagggccccgccaguacCgcgauccgag..... 1  
 Gi3\_28820152\_x1.....gucgugggaaacacCgggugc..... 1  
 Gi5\_8945337\_x1.....gaucggagacgCcgugggaaacacg..... 1  
 Gi2\_11052726\_x1.....gcgaucggagacgucgugggaaacGcggggug..... 1  
 Gi3\_28761127\_x1.....ccgccaguacugcgauccggagacgC..... 1  
 Gi3\_28532871\_x1.....aagagaagcAccgucagggcccc..... 1  
 Gi2\_11349943\_x1.....cgccgucagggccccgcUagu..... 1  
 Gi2\_11269530\_x1.....gacgucgugggUaacggggugccg..... 1  
 Gi2\_11372242\_x1.....gacgCcgugggaaacacg..... 1  
 Gi2\_11020497\_x1.....ccgccUguacugcgauccg..... 1  
 Gi5\_9110337\_x1.....ucgCgggaaacacggggugcc..... 1  
 Gi2\_11141553\_x1.....Gagagaagcggcucagggccccg..... 1  
 Gi3\_28789674\_x1.....gucgugggaaacacggggug..... 1  
 Gi2\_11230717\_x1.....uggCaacacggggugccga..... 1

Gi3\_28952086\_x1.....gaaAcgccgucagggccccccagacuagc..... 1  
 Gl1a\_6280926\_x1.....cgugAgaacacggggugcc..... 1  
 Gi2\_11403068\_x1.....cggagacAucgugggaacacggggugc..... 1  
 Gi2\_11350500\_x1.....ccccgccaguacCgcgau..... 1  
 Gi2\_11153738\_x1.....gagacgucgugggUacacggggugcc..... 1  
 Gi3\_28913063\_x1.....gugggaacacggggugccNaac..... 1  
 Gi1\_4171750\_x1.....gaacacgggAugccgaacuu..... 1  
 Gi2\_11174989\_x1.....cgucAugggaacacggggugccgaac..... 1  
 Gl1a\_6035525\_x1.....gucgCgggaacacggggugccgaa..... 1  
 Gi3\_28591664\_x1.....Cccaguacugcgauccgagacgucgug..... 1  
 Gi2\_11056573\_x1.....cgucGuAggaaacacggggug..... 1  
 Gi3\_28826782\_x1.....aucggUgacgucgugggaacacgggg..... 1  
 Gi3\_28362740\_x1.....gacgucgugggaaGacggggugcc..... 1  
 Gi2\_11154060\_x1.....gaagagaagcggcAcagggccc..... 1  
 Gi2\_11105535\_x1.....gucagggccccccagacuagcgu..... 1  
 Gi5\_8884907\_x1.....cggGgacgucgugggaacacggggugccga..... 1  
 Gi3\_28471310\_x1.....cgccaguCucgcaucggagacg..... 1  
 Gi3\_28348113\_x1.....ucggagacgCcgugggaacacggggugc..... 1  
 Gi2\_11266608\_x1.....ugcgauccgagacgucAuggga..... 1  
 Gi2\_11036243\_x1.....ggagacgucgugggaacacgggAgugcc..... 1  
 Gi5\_8940673\_x1.....cgucgugggGacacggggugccgaa..... 1  
 Gi5\_8989873\_x1.....gccccgccNguacugcgauc..... 1  
 Gi3\_28607416\_x1.....aucggagacgucgugggaacacgggCugcc..... 1  
 Gi3\_28444955\_x1.....cccgccagCacugcgauccgagacgucgugg..... 1  
 Gi2\_11184009\_x1.....agacgucgugggaacacggggugccA..... 1  
 Gl1a\_5984762\_x1.....gugggaacacggggugccgaU..... 1  
 Gi1\_4380528\_x1.....gccgucagggccccgccCgua..... 1  
 Gl1a\_6303357\_x1.....ggaacacggggugccgaaUu..... 1  
 Gi5\_9136098\_x1.....gucgugggaacacggggCgccgaac..... 1  
 Gi5\_8888339\_x1.....agGacugcgauccgagacguc..... 1  
 Gi2\_11066673\_x1.....cgccaguacugcgaCcgagac..... 1  
 Gi1\_4371963\_x1.....ggaacacggggugccAaac..... 1  
 Gi1\_4326427\_x1.....caggccccccagacuagcC..... 1  
 Gi3\_28349668\_x1.....agagaagcgcUgucagggccccccagua..... 1  
 Gi2\_10995213\_x1.....aucggUgacgucgugggaacacggg..... 1  
 Gi1\_4253136\_x1.....gaagagaagcggcucaggU..... 1  
 Gi2\_11025445\_x1.....cgCcaggccccccagacuagcgaucgga..... 1  
 Gi3\_28454039\_x1.....cgauccggagaGgucgugg..... 1  
 Gi3\_28305626\_x1.....aggccccccagacuagcgaucggagacgucgug..... 0  
 Gi2\_11154770\_x1.....cgccUucagggccccccagacu..... 1  
 Gi4\_594957\_x1.....ggUaacacggggugccgaacu..... 1  
 Gi3\_28975251\_x1.....caguacugcgauccgagacguA..... 1  
 Gi3\_28853130\_x1.....gucgGgggaacacggggugccgaa..... 1  
 Gi3\_28396148\_x1.....gacgucguAggaaacacgggggu..... 1  
 Gi1\_4184200\_x1.....cgucgugggUacacggggugccgaa..... 1  
 Gi3\_28980992\_x1.....cgucgugggaacacggggua..... 1  
 Gl1a\_5989973\_x1.....agaagcgccguGaggccc..... 1



Gi2\_11051097\_x1.....cgaucggagacgucgugggaacacggggGgc..... 1  
Gi2\_11280481\_x1.....cggagacgucgugggCacacggggugc..... 1  
Gi1\_4288014\_x1.....aAacgucgugggaacacggggugcc..... 1  
Gi2\_11398013\_x1.....agCacugcgauccggagacgucgug..... 1  
Gi2\_11395204\_x1.....Ugccaguacugcgauccggagacgu..... 1  
Gi1\_4286452\_x1.....cgugggUacacggggugccga..... 1  
Gi1\_4365078\_x1.....ucggGgacgucgugggaacac..... 1  
Gi3\_28919368\_x1.....ggagacgucgugggaGcacggggugccga..... 1  
Gi3\_28634572\_x1.....aguacugcgauccggagUcg..... 1  
Gi5\_8998906\_x1.....gAcgugggaacacggggugccgaac..... 1  
Gi2\_11382062\_x1.....gucagggAccgccaguacugcg..... 1  
Gi3\_28694334\_x1.....cGgucagggccccgccaguacugcg..... 1  
Gi5\_8838964\_x1.....aucggagacAucgugggaacacggg..... 1  
Gi1\_4331276\_x1.....cgucgugggaCcacggggugccgaa..... 1  
Gi3\_28497021\_x1.....cUcgccaguacugcgauccggagacgucgug..... 1  
Gi3\_28870651\_x1.....gccgCcaggccccgccaguacug..... 1  
Gi3\_28524676\_x1.....ggccccgccaguUcugcgau..... 1  
Gi3\_28584316\_x1.....aggccccgccaguacugcgauccggagaAg..... 1  
Gi2\_11283134\_x1.....cguGgugggaacacggggugccgaacu..... 1  
Gi3\_28662572\_x1.....gucgugggaacacggUgugccgaacuu..... 1  
Gi2\_11311248\_x1.....gccgucCggccccgccaguac..... 1  
Gi4\_596749\_x1.....guacugcgauccggagacgucgAgg..... 1  
Gi1\_4247466\_x1.....ucggagacgucgugggaacaU..... 1  
Gi3\_28569304\_x1.....gucgugggaacacggggguCc..... 1  
Gi3\_28677492\_x1.....ccaguacugcgauccggagacgucAug..... 1  
Gi3\_28823733\_x1.....cAgagacgucgugggaacacgg..... 1  
Gi2\_11222914\_x1.....ucgugggaUcacggggugcc..... 1  
Gi2\_11251650\_x1.....Aaggccccgccaguacugcgauccggag..... 1  
Gi3\_28284361\_x1.....cggagacgucgugggaacacgggC..... 1  
Gi5\_9077813\_x1.....gAgggaacacggggugcc..... 1  
Gi1\_4276375\_x1.....ucagUccccgccaguacugcgaucc..... 1  
Gi1\_4287461\_x1.....agacgucgugggaacacggggugccgaaUu..... 1  
Gi3\_28777184\_x1.....ucaggccccgcAaguacug..... 1  
Gi1\_4338330\_x1.....gaucggagacgucgugggUacacgg..... 1  
Gi1\_4181614\_x1.....gaGcggagacgucgugggaacacggggugc..... 1  
Gi5\_8868082\_x1.....cgucgugAgaacacggggugccga..... 1  
Gi3\_28840307\_x1.....ccccgccaguacugcgauccggUgacgu..... 1  
Gi2\_11173560\_x1.....ggNacacggggugccgaa..... 1  
Gi3\_28861563\_x1.....aucggagacguAgugggaacacgggg..... 1  
Gi1\_4168613\_x1.....gacgucgugggaacGcggggugcc..... 1  
Gi3\_28500864\_x1.....cggagacgAcgugggaacacggggugc..... 1  
Gi2\_11305132\_x1.....ggccccgcNaguacugcgaucc..... 1  
Gi3\_28465492\_x1.....ugUgaucggagacgucgugggaacacggggugcc..... 1  
Gi2\_11013578\_x1.....aggccccgccaguacugcgauccggCga..... 1  
Gi5\_8892343\_x1.....aCuacugcgauccggagacguc..... 1  
Gi2\_11083912\_x1.....ucggagacgucgugAgaacacg..... 1  
Gi3\_28695922\_x1.....ugcgauccNagacgucgugggaaca..... 1

Gi3\_28742055\_x1.....gagacgucgugggGacac..... 1  
Gi2\_11261753\_x1.....aucggagacgucguggUaacacg..... 1  
Gi3\_28837952\_x1.....Caagagaagcgccgucagggccccgc..... 1  
Gi2\_11049792\_x1.....ggaUcacggggugccgaac..... 1  
Gi4\_576864\_x1.....gucgugggaaacCcggggugccga..... 1  
Gi1\_4284463\_x1.....cgucaggccccgccGguacugcg..... 1  
Gi2\_11234661\_x1.....cCucaggccccgccaguacugcg..... 1  
G1a\_6290206\_x1.....aggccccgccGguacugcg..... 1  
Gi3\_28293164\_x1.....Ngccgucagggccccgccaguacugc..... 1  
Gi2\_11095887\_x1.....gaucggagacAucgugggaacacg..... 1  
Gi3\_28850568\_x1.....cgaucggagacgucgugggaacacggggugccgaacu..... 0  
Gi3\_28507154\_x1.....gucgugggaaacGcggggug..... 1  
G1a\_6148788\_x1.....cgugAgaacacggggugc..... 1  
Gi2\_11103817\_x1.....aggccccgccaguacugcgauccggagGcgu..... 1  
Gi1\_4184149\_x1.....ggagacgCcgugggaacacggggug..... 1  
Gi1\_4380659\_x1.....ugUgaucggagacgucgugggaaca..... 1  
Gi2\_11020743\_x1.....agagaagcgccgucGggcccc..... 1  
Gi2\_11025106\_x1.....gaagcgGcgucagggccccgc..... 1  
Gi2\_11403852\_x1.....gaucggagacgucgugggaUcacggggg..... 1  
Gi2\_11294052\_x1.....caguacuAcgaucggagacgucg..... 1  
Gi3\_28485673\_x1.....gagacgucgugggaacacAgggugccgaacu..... 1  
G1a\_6333829\_x1.....cccCccaguacugcgauccggagacguc..... 1  
Gi2\_11276792\_x1.....gugggaaacacUgggugcc..... 1  
Gi3\_28282298\_x1.....gccgucaUgccccgccaguacugcg..... 1  
Gi2\_11299569\_x1.....ggagacgucgugggaaAacggggugc..... 1  
Gi2\_11112883\_x1.....ugggaaacacgAggugccgaa..... 1  
G1a\_6103669\_x1.....gggaaacacggggugcAgaacu..... 1  
Gi2\_10993107\_x1.....gaucggagacgucgUAggaacacg..... 1  
Gi3\_28284157\_x1.....gacgucgugggaaacacAgg..... 1  
Gi5\_9057409\_x1.....cgucgugggaaacacggggGccgaa..... 1  
Gi3\_28301402\_x1.....gagGcgucgugggaaacacggggg..... 1  
Gi2\_11343122\_x1.....gaagcgccgucCggccccgccagua..... 1  
Gi1\_4365898\_x1.....ucgugggaaacacgggggUacc..... 1  
Gi1\_4374079\_x1.....agacgucgugggaaacacgggggUAcgaac..... 1  
Gi3\_28412625\_x1.....cagNccccgccaguacugcg..... 1  
Gi3\_28516671\_x1.....agagaagcAccgucagggccccg..... 1  
Gi2\_11063448\_x1.....gagacgucgugggaaacAaggggugccg..... 1  
Gi3\_28327229\_x1.....gaucggagacgCcgugggaaacacggggug..... 1  
Gi3\_28909690\_x1.....ggagacgucgugggaaacacgggggUcg..... 1  
Gi3\_28286487\_x1.....aggccccgccaguacugcgGu..... 1  
Gi3\_28317419\_x1.....agagUagcgccgucagggc..... 1  
Gi2\_11336074\_x1.....ggUgacgucgugggaaacacgggggugccgaac..... 1  
Gi3\_28550520\_x1.....gagaagcUccgucagggccc..... 1  
Gi3\_28323134\_x1.....aggccGcgccaguacugc..... 1  
Gi3\_28364139\_x1.....auAggagacgucgugggaaacacg..... 1  
Gi1\_4361272\_x1.....ugggaaacUcgggggugccgaac..... 1  
Gi2\_11122002\_x1.....gaucggagacgucgugggaaacGcg..... 1

Gi2\_11104104\_x1.....gucaggcUccgccaguacugcg..... 1  
 Gi2\_11350056\_x1.....aucggagacgucgugggaaacacAg..... 1  
 Gi2\_11328085\_x1.....gugggaacacgUggugccgaa..... 1  
 Gi3\_28316262\_x1.....agaagcgcUgucagggccc..... 1  
 Gi2\_11051689\_x1.....aucggagacAucgugggaaacacggg..... 1  
 Gl1a\_6338424\_x1.....gcgaucggagacgucgugggGacacggg..... 1  
 Gi1\_4315132\_x1.....aUacgucgugggaaacacggggug..... 1  
 Gi3\_28809281\_x1.....ccccgccaguacugcgaucgAa..... 1  
 Gi3\_28315859\_x1.....cgccaguacugcgaucggagaUg..... 1  
 Gi3\_28902029\_x1.....aagcgcgucagAccccgccagua..... 1  
 Gi3\_28646314\_x1.....gaucggagacgucguCggaacacgggg..... 1  
 Gl1a\_6317778\_x1.....Aagacgucgugggaaacacggggugcc..... 1  
 Gi3\_28338890\_x1.....cgucUggccccgccaguacug..... 1  
 Gi2\_11348395\_x1.....cgccaguacugcgaucAgagacg..... 1  
 Gi2\_11209155\_x1.....Nugggaacacggggugccgaa..... 1  
 Gi2\_11217651\_x1.....cggagacgucgugggaaAacggggu..... 1  
 Gi2\_11267137\_x1.....ggccccgccaguacugcgCucggagacgu..... 1  
 Gi2\_11363026\_x1.....ugcgGucggagacgucgugggaaacacg..... 1  
 Gi3\_28967674\_x1.....ggccccgccaguacugAgauc..... 1  
 Gi2\_11232921\_x1.....aggccccgccaguacugcgaGc..... 1  
 Gi2\_11142003\_x1.....ggagacgucgugggGacacggggug..... 1  
 Gi3\_28474027\_x1.....ccccAccaguacugcgaucggagacg..... 1  
 Gl1a\_6184986\_x1.....cgucagggccccgccUguacugcg..... 1  
 Gi1\_4222455\_x1.....ucAgagacgucgugggaaacacg..... 1  
 Gi2\_11296746\_x1.....ggagacgucAugggaaacacggggugccgaacu..... 1  
 Gi4\_568772\_x1.....gugggaacacgggAugccgaacu..... 1  
 Gl1a\_6216092\_x1.....cgccaguaUugcgaucggagacguc..... 1  
 Gi2\_11099041\_x1.....gacgucgugggaaacacggggC..... 1  
 Gi1\_4298924\_x1.....ccgucagggcccUgccaguacug..... 1  
 Gi5\_9076853\_x1.....gacgucgugggaaacacggggAgccgaac..... 1  
 Gl1a\_6070522\_x1.....Uccgccaguacugcgaucggagacgu..... 1  
 Gi2\_11216240\_x1.....ccccAccaguacugcgaucggagacguc..... 1  
 Gi1\_4306361\_x1.....gucgugggaaacacCgggugccgaac..... 1  
 Gi2\_11404089\_x1.....gucgugggaaacacggggugcAgaac..... 1  
 Gi1\_4254808\_x1.....ggGgacgucgugggaaacacggggugc..... 1  
 Gi3\_28511398\_x1.....aagagaagcgcgucagggccccgUcagu..... 1  
 Gi2\_11379852\_x1.....ggagacAucgugggaaacacggggugccgaacu..... 1  
 Gi3\_28771765\_x1.....caguacugcgaucggagacgCcu..... 1  
 Gi2\_11114207\_x1.....gUucggagacgucgugggaaacacggggugcc..... 1  
 Gi3\_28430681\_x1.....ugcgaucggagacgCcgugggaaacacggg..... 1  
 Gi3\_28347941\_x1.....ggaacacggggUcccga..... 1  
 Gi2\_11246975\_x1.....gaacacggggugccUaac..... 1  
 Gi3\_28913624\_x1.....guuccgaauaggaagagaagcgcguc..... 0  
 Gi2\_10994678\_x1.....Gguacugcgaucggagacgucgug..... 1  
 Gi1\_4385702\_x1.....cgugggGacacggggugccga..... 1  
 Gi2\_11394826\_x1.....aucggagacgAcgugggaaacacgg..... 1  
 Gi2\_11150588\_x1.....ccgucagggccccgccaguacugcgCuc..... 1

Gi2\_11042107\_x1.....gaucggagacAucgugggaaca..... 1  
Gi5\_9110612\_x1.....ucggagUcgcugugggaacacg..... 1  
Gi2\_11071518\_x1.....cUggccccgccaguacugcgauccgga..... 1  
Gi3\_28701913\_x1.....aucgCagacgucgugggaacacggggu..... 1  
Gi1\_4201699\_x1.....ucggagacgucgugAgaacacggggugc..... 1  
Gi2\_11093974\_x1.....gCucggagacgucgugggaacacg..... 1  
Gi2\_11321848\_x1.....cgccgucagggUccgccagu..... 1  
Gi2\_11007941\_x1.....agagUagcgccgucagggccccgcc..... 1  
Gi2\_11052966\_x1.....cgugggaacUcggggugc..... 1  
Gi2\_11108718\_x1.....uGaggccccgccaguacugcgauccgga..... 1  
Gi2\_11299728\_x1.....Accaguacugcgauccggaga..... 1  
G1a\_6224689\_x1.....gccgucagggccccgccagCa..... 1  
Gi3\_28443476\_x1.....ucuggGCaacacggggugccgaac..... 1  
Gi3\_28541125\_x1.....aggccccgcUaguacugcgau..... 1  
Gi4\_567819\_x1.....aacacggggugcGgaacu..... 1  
Gi3\_28975229\_x1.....acCucgugggaacacggggugccgaac..... 1  
Gi3\_28513195\_x1.....cggagacgucgugggaGcacg..... 1  
Gi2\_11173634\_x1.....cgucgugggaacaAggggugccgaac..... 1  
Gi3\_28511794\_x1.....gaucgCagacgucguggg..... 1  
Gi3\_28949531\_x1.....acugcgGucggagacgucg..... 1  
G1a\_6290049\_x1.....aucgUagacgucgugggaacacggggugc..... 1  
G1a\_6001969\_x1.....Accccgccaguacugcgauccggagacg..... 1  
Gi3\_28534163\_x1.....ccgucagggUcccgccaguacugcgauccgga..... 1  
G1a\_6046966\_x1.....gAgggaacacggggugccg..... 1  
Gi3\_28320614\_x1.....agAacugcgauccggagacgucg..... 1  
Gi3\_28872674\_x1.....aguacugcgauccggagGcgucg..... 1  
Gi3\_28603187\_x1.....ugggaacacUggggugccg..... 1  
Gi2\_11069535\_x1.....gccaguacugUgauccggagacguc..... 1  
Gi1\_4373741\_x1.....ucggagGcgcugugggaacacggggugcc..... 1  
Gi3\_28830852\_x1.....agacgucguggAaacacggggugccgaacu..... 1  
Gi3\_28953443\_x1.....ccgAcaguacugcgauccggagac..... 1  
Gi3\_28755922\_x1.....ggaacacggggugccgUa..... 1  
Gi3\_28913769\_x1.....ggGgacgucgugggaacacggggugccgaa..... 1  
Gi3\_28594698\_x1.....cgugggaacaGggggugccgaa..... 1  
Gi2\_11272933\_x1.....ucugggaacacggUgugccgaa..... 1  
Gi3\_28753941\_x1.....ccgccaguaAugcgauccg..... 1  
Gi4\_609212\_x1.....Caacacggggugccgaacu..... 1  
Gi1\_4308242\_x1.....gugggaacacgggCugcc..... 1  
Gi2\_11133419\_x1.....cgugggaacaUggggugccg..... 1  
Gi2\_11171642\_x1.....cccgccaguacugcgauccggagacguA..... 1  
Gi3\_28882102\_x1.....ucagggccccgccaguacuAcg..... 1  
Gi5\_9078714\_x1.....cCucgugggaacacggggugccgaac..... 1  
Gi1\_4365348\_x1.....Uaggccccgccaguacugcg..... 1  
Gi5\_8941579\_x1.....ccgccUguacugcgauccggagacg..... 1  
Gi2\_11296607\_x1.....aucggagacgGcugugggaacacggggu..... 1  
Gi1\_4377672\_x1.....ucggagacgucgGgggaacacg..... 1  
Gi4\_593030\_x1.....gccagCacugcgauccggagacguc..... 1

Gi1\_4160902\_x1.....agcgccgucagggccccgccc.....ugggaaacacg..... 0  
Gi2\_11306475\_x1.....ucggagacAucgugggaaacacg..... 1  
G1a\_6230182\_x1.....cCccgucagggccccgcccagucg..... 1  
Gi3\_28413100\_x1.....gccccgcUaguacugcggauc..... 1  
Gi1\_4341334\_x1.....ugggaaacacggggugccAa..... 1  
Gi2\_11111328\_x1.....gaucgAagacgucgugggaaacacggggugcc..... 1  
Gi2\_11180733\_x1.....guacugcgNucggagacgucguggg..... 1  
Gi2\_11374430\_x1.....Uccccgccaguacugcggaucggagacguc..... 1  
Gi5\_8949312\_x1.....gacgucgugggaaacacggggAaccgaac..... 1  
Gi3\_28297312\_x1.....cgucagggccccgcccaguc..... 0  
Gi5\_9128095\_x1.....agacgucgugggaaGacggggugccgaacu..... 1  
G1a\_5996796\_x1.....cgUcaguacugcggaucggagacgucgug..... 1  
Gi1\_4344238\_x1.....gucgugggGacacggggugcc..... 1  
Gi3\_28266331\_x1.....caguacugcgCucggagacgu..... 1  
Gi3\_28913816\_x1.....gaucggagacgucgugggaaacCcggggugccg..... 1  
G1a\_6092695\_x1.....gaucggagCcgucgugggaa..... 1  
Gi3\_28649048\_x1.....ccccgcccagucggaucgAagac..... 1  
Gi1\_4374811\_x1.....gAgaacacggggugccgaacuu..... 1  
Gi3\_28671654\_x1.....gUagagaagcgccgucagggccccgcccag..... 1  
Gi1\_4367652\_x1.....acgucgugggaaacacggggAaccg..... 1  
Gi1\_4387949\_x1.....cgcccagucCgcggaucggaga..... 1  
Gi3\_28355585\_x1.....cgugggaaacacgggUugccga..... 1  
Gi3\_28482599\_x1.....cgugggaaacacgAggugccgaacuu..... 1  
Gi2\_11272892\_x1.....gucguAggaaacacggggg..... 1  
Gi5\_9065795\_x1.....ugcgauccggagacCucgug..... 1  
Gi2\_11340629\_x1.....cgucguggCaacacggggugccg..... 1  
Gi3\_28971532\_x1.....aagaUaagcgccgucagggccccgcccag..... 1  
Gi5\_9013477\_x1.....cgcccagucgucgaCcgagacg..... 1  
Gi3\_28786031\_x1.....gaNaagcgccgucagggccccgc..... 1  
Gi3\_28853264\_x1.....Ccgccgucagggccccgcccagucg..... 1  
Gi2\_11142786\_x1.....ucaggccAcgcccagucguc..... 1  
Gi1\_4313097\_x1.....aucggagGcgucgugggaaacac..... 1  
Gi3\_28491527\_x1.....aacacggggugccgNacu..... 1  
Gi3\_28919206\_x1.....gaUaagcgccgucagggccccgcccag..... 1  
Gi5\_8888340\_x1.....cgucgugggaaacGcggggugccgaa..... 1  
Gi3\_28920438\_x1.....Ggucgugggaaacacggggug..... 1  
Gi3\_28584806\_x1.....gcgauccggagacgucgugggCaca..... 1  
Gi3\_28410630\_x1.....ccccUccaguacugcggaucggag..... 1  
Gi2\_11179032\_x1.....ggccccgcccagucgucgCucggagac..... 1  
Gi3\_28641595\_x1.....gccgucagggccccgcccagucguc..... 1  
Gi2\_11008382\_x1.....gauNggagacgucgugggaaacacggggugc..... 1  
Gi2\_11215735\_x1.....ucggagacgucgCgggaaacacggggugcc..... 1  
Gi3\_28606179\_x1.....aggccccgcccagucggaucggagacgCc..... 1  
Gi2\_11377300\_x1.....guggCaacacggggugccgaa..... 1  
Gi3\_28795395\_x1.....gucgugAgaacacggggugcc..... 1  
Gi1\_4173859\_x1.....Uagaagcgccgucagggccccgc..... 1  
Gi5\_8830864\_x1.....aucggUgacgucgugggaaacacgg..... 1

Gi5\_8947971\_x1.....Uaguacugcgauccggagacguc..... 1  
 Gi3\_28598291\_x1.....acugcgauccggaAacgucgu..... 1  
 Gi3\_28440407\_x1.....gaagcgccNucaggccccgcc..... 1  
 Gl1a\_6084329\_x1.....cgccgucaggccccgcUaguacugc..... 1  
 Gl1a\_6303120\_x1.....gccccgccaguacCgcgauccggagacg..... 1  
 Gi3\_28690215\_x1.....gacgucgugggaacaUggg..... 1  
 Gl1a\_6255532\_x1.....guacugcgNucggagacguc..... 1  
 Gi3\_28906050\_x1.....gccaguacugAgauccggagacguc..... 1  
 Gi3\_28765612\_x1.....ugcgauccgNagacgucgugggaacacg..... 1  
 Gi3\_28601753\_x1.....gugggaacacgUggugccg..... 1  
 Gi2\_11076350\_x1.....gaagcgUgucaggccccgccaguacug..... 1  
 Gi3\_28896482\_x1.....aagagCagcgccgucaggccccgccagu..... 1  
 Gi3\_28512226\_x1.....cgUagacgucgugggaacac..... 1  
 Gi3\_28884496\_x1.....agaagcAccgucaggccccgccagu..... 1  
 Gi3\_28469430\_x1.....gauccggagacgucgugggaacacCgggugc..... 1  
 Gi2\_11086558\_x1.....Cggccccgccaguacugcgauccggagac..... 1  
 Gi3\_28889438\_x1.....aucggagaUgucgugggaacacggggugcc..... 1  
 Gi2\_11104472\_x1.....gccccgUcaguacugcgaucc..... 1  
 Gi2\_11113536\_x1.....aggccccgccUguacugcgauccggagac..... 1  
 Gi5\_8970389\_x1.....aucggagacgucgugggaacacggAg..... 1  
 Gi1\_4314201\_x1.....aggUcccgccaguacugcgaucc..... 1  
 Gi2\_11139117\_x1.....Acgugggaacacggggugccg..... 1  
 Gi2\_11292833\_x1.....cccgccaguaUgucgauccggagac..... 1  
 Gi2\_11270967\_x1.....agUcccgccaguacugcgauccggagacg..... 1  
 Gi1\_4299588\_x1.....ccccgccaguacugcgauccgg..... 0  
 Gi3\_28970669\_x1.....ucaggccccgccAuaucugcg..... 1  
 Gi3\_28453639\_x1.....aucggagacgucgugggaacUc..... 1  
 Gi2\_11377878\_x1.....ugggaacacgggAugccg..... 1  
 Gi3\_28878863\_x1.....cgAcaggccccgccaguacugcgauccgga..... 1  
 Gi3\_28881230\_x1.....acucguuccgaauuaUgaaga..... 1  
 Gi2\_11096489\_x1.....cgggagacgucgugggaacacgggCugc..... 1  
 Gi1\_4284054\_x1.....cucguuccgaauuaCgaaga..... 1  
 Gi2\_11256263\_x1.....cgucgugggaacacggggg..... 0  
 Gi1\_4249470\_x1.....aucggagaUgucgugggaacacggggugc..... 1  
 Gi3\_28436940\_x1.....gacgucgugggaacCggggugccg..... 1  
 Gi2\_11011329\_x1.....cgggagacgucgGgggaacacggggugcc..... 1  
 Gi3\_28274578\_x1.....gauccggagacCucgugggaacacggggg..... 1  
 Gl1a\_6327999\_x1.....gaUcgccgucaggccccgcc..... 1  
 Gi2\_11179264\_x1.....cgCaggccccgccaguacugcgaucc..... 1  
 Gl1a\_6216216\_x1.....cgucaggccccgccaguGc..... 1  
 Gi3\_28600104\_x1.....gauccggaAacgucgugggaacacggggugc..... 1  
 Gi2\_11020513\_x1.....gauccggagacgucgugggaacCggggugcc..... 1  
 Gi2\_11318741\_x1.....aggUcccgccaguacugcgga..... 1  
 Gl1a\_6167978\_x1.....aggccccgccagCacugcg..... 1  
 Gl1a\_6139757\_x1.....Ggagaagcgccgucaggccccgcc..... 1  
 Gi2\_11243474\_x1.....agacgucgugggaacacgggggAcc..... 1  
 Gi3\_28574603\_x1.....gaagagaGcgccgucagg..... 1

Gi3\_28577131\_x1.....ccgucagggccccgccaguacugcgau..... 0  
 Gi3\_28524088\_x1.....aagagaagcAccgucagggcc..... 1  
 Gi3\_28359674\_x1.....gaCcgagacgucgugggaaacacggggug..... 1  
 Gi2\_11238253\_x1.....gUccccgccaguacugcgauccggagac..... 1  
 Gi2\_11354453\_x1.....gacgucgugggaaacacggggAgccgaac..... 1  
 Gi1\_4334945\_x1.....cgucgugggaaacacggggugccgaacG..... 1  
 Gl1a\_6049012\_x1.....ggaaacCcggggugccgaac..... 1  
 Gi3\_28308957\_x1.....aggccccgccaguaAugcgau..... 1  
 Gi1\_4227243\_x1.....gugggaaacGggggugccgaacu..... 1  
 Gi3\_28726464\_x1.....aucggagacgucgugggaaGcacggggug..... 1  
 Gl1a\_6359968\_x1.....gggaacacNgggugccgaac..... 1  
 Gi2\_11405081\_x1.....ccccgccaguacugcgCu..... 1  
 Gi1\_4210860\_x1.....aucCgagacgucgugggaaacacggggug..... 1  
 Gi5\_8862117\_x1.....gaucggagacgucgugAgaacacg..... 1  
 Gi2\_11004801\_x1.....gacgucgugggaaAacggggugccgaacu..... 1  
 Gi4\_574762\_x1.....ucUugggaaacacggggugccgaacu..... 1  
 Gi3\_28929737\_x1.....agcNccgucagggccccgcc..... 1  
 Gi1\_4308073\_x1.....ucGggccccgccaguacugcgau..... 1  
 Gi2\_11273503\_x1.....ccccgccaguacugcgauAggagac..... 1  
 Gi3\_28711466\_x1.....ucgugggaaacacgAggugccgaa..... 1  
 Gl1a\_6296990\_x1.....cgugggGacacggggugc..... 1  
 Gi2\_11080391\_x1.....cgugggaaacacgCggugccga..... 1  
 Gi3\_28904514\_x1.....ggagacgucguAggaaacacg..... 1  
 Gi2\_11003610\_x1.....gccccgcUaguacugcgau..... 1  
 Gi2\_11289621\_x1.....aggcUccgccaguacugcgauccggagac..... 1  
 Gi2\_11079985\_x1.....aagagaagcggcgucagggcUcc..... 1  
 Gi4\_607438\_x1.....cgucaAgccccgccaguacugc..... 1  
 Gi2\_11333439\_x1.....caguacugcgaCcgagacguc..... 1  
 Gi2\_11187043\_x1.....agacgucgugggaaacacggggGgccgaacu..... 1  
 Gi5\_9125700\_x1.....caggccccgccaguacugGg..... 1  
 Gi2\_11352061\_x1.....acgucgugggaaacacggggugccga..... 1  
 Gi3\_28728741\_x1.....cgccaguacugcgGucggagacgucgug..... 1  
 Gi3\_28379325\_x1.....ucggagacgucgugggaaacacgAggu..... 1  
 Gl1a\_6268366\_x1.....ugcgauUggagacgucgug..... 1  
 Gi3\_28904424\_x1.....gaAacgucgugggaaacacggggugccgaac..... 1  
 Gi2\_11371633\_x1.....auNggagacgucgugggaaacac..... 1  
 Gi3\_28571767\_x1.....gacgucgugggaaacacggggugccA..... 1  
 Gi2\_11311229\_x1.....ccgccaguacugcgauccggagacgucgug..... 0  
 Gi3\_28760994\_x1.....ccccgccaguacugcgauCagagacgu..... 1  
 Gl1a\_6275316\_x1.....gucUggccccgccaguacugc..... 1  
 Gi3\_28285457\_x1.....gaucggagacgucgugggaaacacgAggugcc..... 1  
 Gi5\_9080605\_x1.....ggaaacacgggCugccgaac..... 1  
 Gi3\_28325822\_x1.....guacugUgaucggagacgucgugggaaacacgg..... 1  
 Gi2\_11388080\_x1.....gaUgucgugggaaacacggg..... 1  
 Gi3\_28590261\_x1.....cgccgucagggccccgccCguacugc..... 1  
 Gl1a\_6188052\_x1.....ucggagaUgucgugggaaacacggg..... 1  
 Gi3\_28957394\_x1.....cguNugggaaacacggggugccgaa..... 1

Gi2\_11072220\_x1.....Gagagaagcgccgucagggccccccagacuagc..... 1  
Gi2\_11404387\_x1.....cguggAaacacggggugccgaa..... 1  
Gi2\_11358166\_x1.....guGcugcgauccggagacgucgugggaaca..... 1  
Gi3\_28662362\_x1.....ggagacgucgugggCacacggggugcc..... 1  
Gi3\_28845969\_x1.....ucaggcccUgccaguacugcgauccggag..... 1  
Gi3\_28854988\_x1.....gucguAggaacacggggugccgaa..... 1  
Gi5\_9021028\_x1.....acgucgugggaCcacggggugccgaa..... 1  
Gi1\_4252292\_x1.....acgucgugggaacacAgggugcc..... 1  
Gi3\_28385034\_x1.....gccgucagggcccgUaguacugcgau..... 1  
Gi3\_28634624\_x1.....ccccgccaguacugcgauccggagacUu..... 1  
Gi2\_11346009\_x1.....aucggagacgucgugggaacGcggggugccg..... 1  
Gi3\_28300518\_x1.....gaagcgccgucagCccccgcc..... 1  
Gi5\_8886489\_x1.....gaucggagacgAcgugggaacac..... 1  
Gi1\_4255520\_x1.....caggccccccagacuagcgCucggagacg..... 1  
Gi5\_9001165\_x1.....gagNcgucgugggaacacg..... 1  
Gi2\_11112829\_x1.....gGgccgucagggccccccagacuagc..... 1  
Gi5\_8935989\_x1.....ucggagGcugcugugggaacacg..... 1  
Gi3\_28418242\_x1.....ggagacgucgugggaAa..... 1  
Gi3\_28867521\_x1.....gaucggagacgucgugggaacaG..... 1  
Gi5\_9063163\_x1.....gagacgucgugggaacacggggugccga..... 0  
Gi1\_4277707\_x1.....gacgucgugggaacacggggugccgaaGu..... 1  
Gi3\_28958325\_x1.....gucgugggaacCcggggu..... 1  
Gi2\_10994254\_x1.....agggccccccagacuagcgauccggGgacguc..... 1  
Gi2\_11351416\_x1.....gccgucagguUcccgccagacuagc..... 1  
Gi3\_28799488\_x1.....aacacAgggugccgaaacu..... 1  
G1a\_6123919\_x1.....ggagacgucAugggaaacacggggugcc..... 1  
Gi2\_11049177\_x1.....agacgucGgggaacacggggug..... 1  
Gi3\_28943214\_x1.....ggagacgucgugggaacacggggugccgaUc..... 1  
Gi3\_28762805\_x1.....aagagaagcgccUucaggc..... 1  
Gi3\_28804171\_x1.....gccccgccagCacugcgauccgg..... 1  
Gi3\_28473639\_x1.....ucaggccccccagacuagcgGucgga..... 1  
Gi5\_8891076\_x1.....gacguAgugggaacacggggugccgaa..... 1  
Gi3\_28947509\_x1.....aNcggagacgucgugggaacacggggugcc..... 1  
Gi2\_11003932\_x1.....cgugggaacaGggggugccgaa..... 1  
Gi3\_28736140\_x1.....gccgAcaggccccccagacu..... 1  
Gi1\_4366140\_x1.....cgagacgucguAggaacacggggugc..... 1  
Gi3\_28394273\_x1.ccuuaacucAuuccgaaau..... 1  
Gi3\_28296339\_x1.....cgucgugggaacUcggggugccgaa..... 1  
Gi3\_28805117\_x1.....guUcugcgauccggagacgucgug..... 1  
Gi1\_4193166\_x1.....guUggaacacggggugccga..... 1  
Gi1\_4173542\_x1.....ggaacacggggugccgaCc..... 1  
Gi1\_4338428\_x1.....gccagacuagcgauccggagacgGc..... 1  
Gi3\_28753758\_x1.....aucCgagacgucgugggaacacggggugcc..... 1  
Gi3\_28929084\_x1.....gcAccgucagggccccccagacuagc..... 1  
Gi5\_8923396\_x1.....ucgugggaacacgggAugccgaa..... 1  
Gi2\_11015945\_x1.....ugcgauccggagacgucgugggaGcac..... 1  
G1a\_6186487\_x1.....cgccgucaNggccccccagacuagc..... 1



Gi3\_28929552\_x1.....aggcccGgccaguacugcg..... 1  
 Gi3\_28696161\_x1.....ucgugggaacacggggugGcgaac..... 1  
 Gi3\_28939553\_x1.....cccgccaguacugcgauccggUgac..... 1  
 Gi5\_8893036\_x1.....Agugggaacacggggugccga..... 1  
 Gi3\_28736651\_x1.....cUggccccgccaguacugcgauccggagac..... 1  
 Gl1a\_6194275\_x1.....gccaguacugcgauccggagUcguc..... 1  
 Gi5\_8989919\_x1.....aggccccgcUaguacugc..... 1  
 Gi2\_11331443\_x1.....agacgucgugggaacacggggugcAgaacu..... 1  
 Gi3\_28390360\_x1.....gacNucgugggaacacggggugccgaac..... 1  
 Gi2\_11022005\_x1.....gucgCgggaacacggggugccg..... 1  
 Gi1\_4345456\_x1.....aggccccgccaguacugGgauc..... 1  
 Gl1a\_6142464\_x1.....acugcgauccggaAacguc..... 1  
 Gi2\_11092400\_x1.....aucggagacgucguggCaacacggggugcc..... 1  
 Gi2\_11407009\_x1.....ggccccgccaguacugGga..... 1  
 Gl1a\_6340966\_x1.....aucggagacgucgugggaacacggggCgc..... 1  
 Gi2\_11039731\_x1.....Ggcgcccguacggccccgccagua..... 1  
 Gi1\_4286711\_x1.....gggaacacggggugccUaacu..... 1  
 Gi3\_28594917\_x1.....ucaggccccgccaguacugcgauccgCa..... 1  
 Gi3\_28413021\_x1.....gaucggagacgucgugggaacC..... 1  
 Gi3\_28469600\_x1.....Ccacggggugccgaacuu..... 1  
 Gi3\_28490816\_x1.....ucgugggaacacggggugccgaU..... 1  
 Gi2\_11117672\_x1.....gcgauccggagacgucgugggaacGc..... 1  
 Gi2\_11400175\_x1.....aucggagacguGgugggaaca..... 1  
 Gi4\_596900\_x1.....Uaucggagacgucgugggaacacggg..... 1  
 Gi2\_11305922\_x1.....aagagaagcggccgucaAgccccgccagu..... 1  
 Gi2\_11098177\_x1.....aggccccgccaguUcugcgau..... 1  
 Gl1a\_6021593\_x1.....agaagAgccgucagggccccgc..... 1  
 Gi5\_8831336\_x1.....cucguuccgaauaggaaga..... 0  
 Gi3\_28458758\_x1.....ucaggcccNgccaguacugcga..... 1  
 Gi2\_11073660\_x1.....uggAaacacggggugccgaacuu..... 1  
 Gi3\_28495366\_x1.....gacgucgugggaacaAggggu..... 1  
 Gi3\_28979165\_x1.....gGgaagcggccguacggccccgccaguacug..... 1  
 Gi3\_28790043\_x1.....Cgagacgucgugggaacacggggugcc..... 1  
 Gi3\_28953795\_x1.....acgCcgugggaacacggggugc..... 1  
 Gi2\_11048027\_x1.....ucgugUgaacacggggugccgaac..... 1  
 Gi2\_11302739\_x1.....cgucagggccccgccaAuacugcg..... 1  
 Gi3\_28277831\_x1.....agAacugcgauccggagacguc..... 1  
 Gi3\_28695813\_x1.....gaucggagNcgucgugggaacacggggugccgaacu..... 1  
 Gi1\_4191858\_x1.....ucgugggaacUcggggugccgaac..... 1  
 Gi3\_28475000\_x1.....cguggAaacacggggugccgaa..... 1  
 Gi3\_28748632\_x1.....aggccccgccUguacugcgauccg..... 1  
 Gi2\_11010028\_x1.....gugggaacacCgggugcc..... 1  
 Gi1\_4376885\_x1.....gagacgucgugggaacacggggCgccgaacu..... 1  
 Gi2\_11280847\_x1.....uNggagacgucgugggaacacg..... 1  
 Gl1a\_6118693\_x1.....ggaacGcggggugccgaac..... 1  
 Gi3\_28664622\_x1.....gagaUgcgcccguacggccccgc..... 1  
 Gl1a\_6052927\_x1.....gucaggccccgccaguaGug..... 1

Gi3\_28564493\_x1.....aucggagacgucgGgggaacacggggugcc..... 1  
Gi3\_28847478\_x1.....aucggagaAgucgugggaacacggggg..... 1  
Gi3\_28598152\_x1.....gucgugggaUcacggggugccgaac..... 1  
Gi3\_28787252\_x1.....cgaucggagacgucgugggaaUacggggg..... 1  
Gi3\_28860731\_x1.....ucggagacgCcgugggaacac..... 1  
Gi2\_11119991\_x1.....gaagcgccguacagcccccgccGgua..... 1  
Gi1\_4346547\_x1.....aNcacggggugccgaacu..... 1  
Gi2\_11020009\_x1.....cggagacgCcgugggaacac..... 1  
Gi3\_28703389\_x1.....aucggagacgucgugggaacaGg..... 1  
Gi5\_8839052\_x1.....agagaagcgccgucaUgccccg..... 1  
Gi2\_11301114\_x1.....gucagggcNcgccaguacug..... 1  
G1a\_6249945\_x1.....Cacgucgugggaacacggggg..... 1  
Gi3\_28466394\_x1.....aucggagacgucgugggaacaGggggugcc..... 1  
Gi5\_9030074\_x1.....caggccccCccaguacugcgauc..... 1  
Gi1\_4225865\_x1.....Agggaacacggggugccgaac..... 1  
Gi1\_4379998\_x1.....cgucagggcccccgccaguGcugcg..... 1  
Gi2\_11326745\_x1.....ucggagacgCcgugggaaca..... 1  
Gi1\_4357935\_x1.....gGgacgucgugggaacacggggg..... 1  
Gi1\_4188117\_x1.....ucggagacguUgugggaacacggggugcc..... 1  
Gi5\_8891709\_x1.....ugcgaucgggagaGgucgug..... 1  
G1a\_6075533\_x1.....gaucggagacgucgugAgaacacggg..... 1  
Gi3\_28321552\_x1.....gagacgucgCgggaacacggggugccg..... 1  
Gi2\_11020225\_x1.....ccccgccCguacugcgau..... 1  
Gi3\_28935112\_x1.....gacgucAugggaaacacggg..... 1  
Gi3\_28921642\_x1.....ucggagacgucgGgggaacacg..... 1  
Gi1\_4249970\_x1.....caggccccAccaguacugcg..... 1  
G1a\_6339415\_x1.....agaagcgcAgucaggccccgc..... 1  
Gi3\_28563246\_x1.....cccgccaguacugcAaucggagac..... 1  
Gi2\_11103390\_x1.....cccUgccaguacugcgauccggag..... 1  
Gi5\_9075403\_x1.....gagacgucgugggaacacggAgugcc..... 1  
Gi5\_9017207\_x1.....ucgugggaacacggggugcAgaac..... 1  
Gi3\_28694952\_x1.....gaagagaagcgccguacaggUcccgcc..... 1  
Gi2\_11075217\_x1.....cgucguggCaacacggggugccgaac..... 1  
Gi3\_28435930\_x1.....gaUgcccguacagcccccgccaguac..... 1  
Gi2\_11069464\_x1.....cgccaguacugcgauUggagacguc..... 1  
Gi2\_11102839\_x1.....gcgauccggagacgucgugggaacaAggggugc..... 1  
Gi3\_28729509\_x1.....gaagcgccgucaCgcccccgccaguac..... 1  
Gi2\_11187451\_x1.....gacgucgugggaacacggAgugccgaacu..... 1  
Gi2\_11380768\_x1.....gagacgAcgugggaacacggggugcc..... 1  
Gi2\_11036638\_x1.....ccgcGaguacugcgauccggag..... 1  
Gi1\_4338332\_x1.....gucgugggaaAacggggug..... 1  
Gi2\_11347897\_x1.....gccaguacugcgaCcgagacguc..... 1  
Gi3\_28707123\_x1.....cgAcaggcccccgccaguacugcgauccg..... 1  
Gi3\_28329042\_x1.....cccgccaAuacugcgauccggagacguc..... 1  
Gi5\_8906366\_x1.....gacgucgugggaacacggggCgccgaac..... 1  
Gi3\_28405978\_x1.....Gcgaucggagacgucgugggaacacggggg..... 1  
Gi3\_28415277\_x1.....caggccAcgccaguacugc..... 1

Gi2\_11027353\_x1.....uUgugggaacacggggugccgaa..... 1  
 Gi3\_28950247\_x1.....cgugggaacacggggGgccg..... 1  
 Gi2\_11264759\_x1.....ucggagacgAcgugggaacacggggugccg..... 1  
 Gi2\_11319250\_x1.....gaucggagacgucguCgga..... 1  
 Gi2\_11008909\_x1.....ccccgccaguacugcgauCgagacgu..... 1  
 Gi2\_11026490\_x1.....cgaucggagacgucguggggaacaAggg..... 1  
 Gi5\_9126180\_x1.....gugggaacacggggugGcgaacuu..... 1  
 Gi3\_28326706\_x1.....gaAacgucguggggaacacggggugcc..... 1  
 Gi2\_11052770\_x1.....ggagacgucAugggaacacggggugc..... 1  
 Gi2\_11053387\_x1.....agacgucguggggaUcacggggugcc..... 1  
 Gi1\_4367451\_x1.....aucggagacgucguggggaacacggggA..... 1  
 Gi3\_28662811\_x1.....cgugggaacacggggUccgaac..... 1  
 Gi3\_28741809\_x1.....caggUcccgccaguacugcgauCggagac..... 1  
 Gi3\_28689551\_x1.....gccaguacugcgauUggagacgu..... 1  
 Gl1a\_6142430\_x1.....acugcAaucggagacgucgug..... 1  
 Gi5\_9031315\_x1.....cggGgacgucguggggaacacg..... 1  
 Gi3\_28788641\_x1.....cggagacgucgugAgaacacggggugccg..... 1  
 Gl1a\_6254318\_x1.....gugggaacacggggugUcgaac..... 1  
 Gi1\_4252164\_x1.....ggaacacggggugGcgaac..... 1  
 Gi3\_28292615\_x1.....caggccccgccaguacugcgauCgA..... 1  
 Gi3\_28358968\_x1.....cgucguggUaacacggggugccgaacu..... 1  
 Gi1\_4210203\_x1.....cgugggaacacggggugcU..... 1  
 Gl1a\_6224006\_x1.....gucguggggaacacggggugccgaGcu..... 1  
 Gi3\_28421556\_x1.....ucggagacguUgugggaacacggg..... 1  
 Gi3\_28292608\_x1.....cgucagggccccgccUguacug..... 1  
 Gi5\_9013684\_x1.....ggagacguNuggggaaca..... 1  
 Gi1\_4298564\_x1.....aggccccgccaguacugcgauCggaga..... 0  
 Gi5\_9036365\_x1.....gucguggggaacacggggugA..... 1  
 Gi2\_11075460\_x1.....cgugggUacacggggugccga..... 1  
 Gl1a\_6111989\_x1.....caUuacugcgauCggagacguc..... 1  
 Gi3\_28699517\_x1.....gggaacUcggggugccgaac..... 1  
 Gi2\_11236211\_x1.....Ccugggaacacggggugccgaa..... 1  
 Gi2\_11077021\_x1.....cccgccaguacugcgGuc..... 1  
 Gi3\_28978603\_x1.....ucggagacgucguggggaacacggggugccgG..... 1  
 Gi3\_28657721\_x1.....cGcgccaguacugcgauCgga..... 1  
 Gi2\_11345048\_x1.....cgucgugCgaacacggggug..... 1  
 Gi5\_8964006\_x1.....agagaagcgcAgucaggccccg..... 1  
 Gi2\_11179539\_x1.....ucggagacgucguggggaGcacggg..... 1  
 Gi5\_8975476\_x1.....gagaagcgcgucagggccccgcc..... 0  
 Gi3\_28353639\_x1.....agaagcgcgucagggccUcgccagua..... 1  
 Gi3\_28745167\_x1.....Gagcgcgucagggccccgccagua..... 1  
 Gl1a\_6194097\_x1.....aacacgAggugccgaacu..... 1  
 Gl1a\_6269382\_x1.....gacgucguggggaacacggggGgcgaacu..... 1  
 Gi1\_4192915\_x1.....acgucguggggaacacggggugccgaacAu..... 1  
 Gi3\_28404998\_x1.....cUguacugcgauCggagacguc..... 1  
 Gi2\_11331618\_x1.....ucgugggaacacggggGgc..... 1  
 Gi1\_4311077\_x1.....ucgugggaacacggggugccgaacu..... 1

Gi2\_11095363\_x1.....cggagacguGuggggaacacggggugc..... 1  
Gi3\_28639240\_x1.....aCgggagacgucguggga..... 1  
Gi5\_8880874\_x1.....ugggaacacgggUugccgaa..... 1  
Gi3\_28632885\_x1.....gaagagaagcgcgucAagcccc..... 1  
Gi5\_8947473\_x1.....gugggaacacCgggugccgaacuuu..... 1  
G1a\_6186308\_x1.....Ugugggaacacggggugccgaac..... 1  
Gi2\_11338220\_x1.....gaagcgcgcgAcaggcccc..... 1  
Gi3\_28742554\_x1.....agacgucgugggaaAacggggugccgaacu..... 1  
Gi2\_11029106\_x1.....gagacgucguggUaacacggggugccgaacu..... 1  
Gi5\_8899486\_x1.....ccGcgccaguacugcgauccggagacg..... 1  
Gi3\_28577609\_x1.....ucUggccccgccaguacugcgauccgga..... 1  
Gi3\_28550286\_x1.....ugggaaAacggggugccg..... 1  
Gi3\_28409597\_x1.....cggagacgucgugggaacacggggugccAa..... 1  
Gi3\_28618036\_x1.....cccgccaguaUugcgau..... 1  
Gi3\_28927046\_x1.....cccgccaguacugcgCucggagacgu..... 1  
Gi3\_28450782\_x1.....agaagcgcgcgucagccccgUca..... 1  
G1a\_6314570\_x1.....cgugggaacacggggugccUaacu..... 1  
Gi5\_9027741\_x1.....cgugggaacacgggAugcc..... 1  
Gi3\_28629968\_x1.....cgccgAcaggccccgccagu..... 1  
Gi3\_28687368\_x1.....agAccccgccaguacugcgauccggagacg..... 1  
Gi5\_8884408\_x1.....gggaacacgggUugccgaacu..... 1  
Gi2\_11220190\_x1.....gGcgucagggccccgccaguac..... 1  
Gi2\_11146724\_x1.....cccAgccaguacugcgau..... 1  
Gi3\_28685726\_x1.....ggagacgucgugggaaCcggggu..... 1  
Gi2\_11226380\_x1.....ggUcccgccaguacugcgauccggagacgu..... 1  
Gi3\_28863564\_x1.....Ugaucggagacgucgugg..... 1  
Gi5\_9115246\_x1.....gugggaacacggUgugccga..... 1  
Gi3\_28927732\_x1.....cgucagggccccgccCguacugcgau..... 1  
Gi3\_28271475\_x1.....cAaucggagacgucgugggaaacacggg..... 1  
Gi5\_8916650\_x1.....gggaCcacggggugccgaac..... 1  
G1l\_4254934\_x1.....cgucCggccccgccaguacugc..... 1  
G1l\_4186063\_x1.....agacgucgugggaaacacgggUugccgaacu..... 1  
Gi3\_28598711\_x1.....gccccgccaAuacugcgauccggagacgu..... 1  
Gi2\_11152408\_x1.....ggagacgucgugggaaacacgggA..... 1  
Gi5\_9064969\_x1.....gCcaggccccgccaguac..... 1  
Gi5\_9128884\_x1.....gccccgccaguacCgcgauccgga..... 1  
Gi2\_11043719\_x1.....ccccgccaguacugGgauccggaga..... 1  
G1a\_6225477\_x1.....Agaucggagacgucgugggaa..... 1  
Gi3\_28498728\_x1.....gccccgccagAacugcgau..... 1  
G1a\_6126796\_x1.....aagagaagcgcgucagggccccgccC..... 1  
G1l\_4324705\_x1.....Cugggaacacggggugccga..... 1  
Gi3\_28382799\_x1.....aggccccgccaCuacugcga..... 1  
Gi2\_11226291\_x1.....aggccccgccaguacugcgauccgAa..... 1  
G1a\_5981328\_x1.....aggAccccgccaguacugcg..... 1  
Gi2\_11008762\_x1.....ccccgccaguacugcgauccgA..... 1  
Gi3\_28766741\_x1.....cgCugucagggccccgccaguacugc..... 1  
Gi3\_28623698\_x1.....gcgauUggagacgucguggga..... 1

Gi3\_28663692\_x1.....gcgaucggCgacgucuggggaaca..... 1  
 Gi1\_4276891\_x1.....caggccUcgccagucugcgau..... 1  
 Gi5\_9012429\_x1.....ugggaacacggUgugccgaac..... 1  
 Gi2\_11305096\_x1.....acugcgauNggagacgucuggggaacacggg..... 1  
 Gi2\_11167446\_x1.....gaucggagacgucuggggaGcacggggugc..... 1  
 Gi3\_28656476\_x1.....agcgccgucagggcccgA..... 1  
 Gi3\_28915662\_x1.....cccUccagucugcgauccgagacgu..... 1  
 Gi1\_4237513\_x1.....gucguUgaacacggggugccgaac..... 1  
 Gi4\_579186\_x1.....gggaacacggggugccgaaGu..... 1  
 Gi3\_28477362\_x1.....uacugUgaucggagacguc..... 1  
 Gi3\_28786713\_x1.....ggagacgucuggggaacacggggugGcg..... 1  
 Gi5\_9062151\_x1.....ugggaacacggggugccgUacuu..... 1  
 Gi4\_605228\_x1.....gugggaacGcggggugccgaa..... 1  
 Gl1a\_6282046\_x1.....cgNcaggccccgccagucg..... 1  
 Gi3\_28690210\_x1.....cgucuggggaacacgCggugccgaacu..... 1  
 Gi2\_11125166\_x1.....cgUucggagacgucuggggaacacg..... 1  
 Gi3\_28371256\_x1.....ugcgauAgagacgucugggga..... 1  
 Gi2\_11403646\_x1.....gugCgaacacggggugccga..... 1  
 Gi1\_4160998\_x1.....cgugggaacacggCgugccgaacu..... 1  
 Gi3\_28432752\_x1.....acugcgauccgagacgCcgug..... 1  
 Gi3\_28539949\_x1.....agagaagcgccgucaggAcccgc..... 1  
 Gi5\_8831947\_x1.....aucggagacgucuggggaacacgC..... 1  
 Gi3\_28351622\_x1.....ccgucUggccccgccagucg..... 1  
 Gi3\_28433819\_x1.....acugcgauGggagacgucgu..... 1  
 Gi1\_4332788\_x1.....gacgucuggggaacacUgggugccgaacu..... 1  
 Gl1a\_6131602\_x1.....Ugugggaacacggggugc..... 1  
 Gi5\_8896171\_x1.....aucggagacguUgugggaacacg..... 1  
 Gi3\_28398388\_x1.....guGgugggaacacggggugccga..... 1  
 Gi1\_4366079\_x1.....Ugacgucuggggaacacggg..... 1  
 Gi2\_11042777\_x1.....ugggaacacgggUugccgaacuu..... 1  
 Gl1a\_6269202\_x1.....cagucugcgauccgCgacguc..... 1  
 Gi2\_11392425\_x1.....aucggagacgucuggggaacacU..... 1  
 Gi2\_11316558\_x1.....cgauccggagaAgucuggggaacacgggg..... 1  
 Gi5\_8833249\_x1.....agacgucuggggaacacggggugcAgaacu..... 1  
 Gi1\_4313346\_x1.....ugggaacacAgggugccgaa..... 1  
 Gi2\_11310061\_x1.....aucggagacgucguCggaac..... 1  
 Gi1\_4220794\_x1.....guacugcgauccgagacgCcgugg..... 1  
 Gi4\_607288\_x1.....gacgucuggggaacacggggugccgaac..... 0  
 Gi5\_9027177\_x1.....cgugggaacCcgggugccg..... 1  
 Gi5\_9013130\_x1.....gaacCcgggugccgaac..... 1  
 Gi3\_28631735\_x1.....Gcgccagucugcgauccgagacgucgu..... 1  
 Gi3\_28689086\_x1.....cgucuggggCacacggggugccgaac..... 1  
 Gi3\_28757062\_x1.....ucaggcccUgccagucugcgga..... 1  
 Gi3\_28860957\_x1.....cgccaAuacugcgauccgagacguc..... 1  
 Gi5\_9054541\_x1.....aucggagacgucgCgggaacacggg..... 1  
 Gi2\_11361148\_x1.....aguacugcgaCcgagacgu..... 1  
 Gi2\_11063874\_x1.....aucggaAacgucuggggaacacggggugcc..... 1

Gi1\_4229685\_x1.....gaucggagacgAcguggga..... 1  
 Gi2\_11032363\_x1.....aggccccgccaguCcu gcgau cg..... 1  
 Gi1\_4390068\_x1.....guacGgcgaucggagacgucg..... 1  
 Gi2\_11016746\_x1.....Caucggagacgucgugggaacacggggugc..... 1  
 Gi3\_28598025\_x1.....gaagagaagcgcUgucagg..... 1  
 Gi2\_11145920\_x1.....aagagaagcgcgucagggcA..... 1  
 Gi2\_11205606\_x1.....gccaguacugcgau cggAacguc..... 1  
 Gi5\_8830987\_x1.....cgucgugggaacCcggggugccgaa..... 1  
 Gi3\_28548587\_x1.....cgugggaacacggggugccgUa..... 1  
 Gi1\_4338499\_x1.....ucguuccgaa uuaggaagagaagcgcgcguc..... 0  
 Gi4\_609651\_x1.....gGgggaacacggggugccga..... 1  
 Gi3\_28675423\_x1.....caguacugcgaCcgagacgucgug..... 1  
 Gi1a\_6080009\_x1.....gacgucguNggaacacggggg..... 1  
 Gi2\_11075388\_x1.....caggccccgcUaguacugcgau cggA..... 1  
 Gi5\_9100702\_x1.....ugggaacacgggggUccgaa..... 1  
 Gi2\_11291679\_x1.....ggaacacgggggugGcgaac..... 1  
 Gi2\_11069502\_x1.....ggagacgucgugggaacGcggggug..... 1  
 Gi1a\_6162315\_x1.....ucgugggaNcacgggggugccgaa..... 1  
 Gi1\_4193415\_x1.....cggagacgucgugggaacacAggggugc..... 1  
 Gi5\_9130670\_x1.....cgucguAggaacacgggggugc..... 1  
 Gi1a\_6098618\_x1.....cgucaggccccgccagAacugc..... 1  
 Gi2\_11170324\_x1.....gucaggccccgccaguGcu gcgau..... 1  
 Gi1\_4290435\_x1.....Acaggccccgccaguacugcgau c..... 1  
 Gi3\_28919145\_x1.....cccGcaguacugcgau c..... 1  
 Gi3\_28971012\_x1.....gaacacgggggUccgaa..... 1  
 Gi3\_28870413\_x1.....cggagacgucgugggaacacgggggugccgG..... 1  
 Gi3\_28972590\_x1.....cgucaggcccAgccaguacugcg..... 1  
 Gi1a\_6102016\_x1.....gggaacacUgggugccgaa..... 1  
 Gi2\_11208609\_x1.....agaagcgcUgucaggccccgccagu..... 1  
 Gi1a\_6137885\_x1.....ugUgaucggagacgucgugggaacac..... 1  
 Gi2\_11353305\_x1.....ucggagacgucgugggaacacggAgugc..... 1  
 Gi2\_11251366\_x1.....gGacugcgau cggagacgucgug..... 1  
 Gi1\_4357434\_x1.....cgucgugggaUcacgggggugccgaa..... 1  
 Gi3\_28588491\_x1.....cccgccaguacugUgaucggaga..... 1  
 Gi3\_28519874\_x1.....Aagacgucgugggaacacgggggugccgaa..... 1  
 Gi5\_9035983\_x1.....agaagcgcgucagCccccgccaguacugc..... 1  
 Gi2\_11174346\_x1.....cgau cggagaUgucgugggaaca..... 1  
 Gi2\_11251118\_x1.....auUggagacgucgugggaa..... 1  
 Gi1\_4222540\_x1.....cgugggaCcacgggggugccgaa..... 1  
 Gi3\_28671939\_x1.....gUucggagacgucgugggaacacgggggug..... 1  
 Gi1\_4276778\_x1.....cgucgugggGacacgggggugcc..... 1  
 Gi2\_11385907\_x1.....cgucUggccccgccaguacugc..... 1  
 Gi1a\_6041379\_x1.....ccaguacugcgau cggagacgucguA..... 1  
 Gi2\_11293815\_x1.....cgucgugggaaAacgggggugccg..... 1  
 Gi3\_28422835\_x1.....aucggagacgucgugggaacacgggggCgccg..... 1  
 Gi3\_28550572\_x1.....agaagcgcgucUggccccgcc..... 1  
 Gi2\_11139442\_x1.....cgugggaacacgggggugGcga..... 1

Gi3\_28752216\_x1.....gaucggagacgucgugggaacacgggAug..... 1  
 Gi3\_28369650\_x1.....acgucguggAaacacggggugccgaa..... 1  
 Gi2\_11229371\_x1.....ccUucagggccccgccaguacugcgau..... 1  
 Gi2\_11405543\_x1.....aggccccgccGguacugcgau..... 1  
 Gi2\_11165980\_x1.....cAucgugggaacacggggugccgaa..... 1  
 Gi2\_11324045\_x1.....ugcgauccggaAacgucguggga..... 1  
 Gi3\_28721373\_x1.....ccgucagggccccgccagAacugc..... 1  
 Gi3\_28388768\_x1.....gaucggagacgucgugggCac..... 1  
 Gi5\_9103810\_x1.....agacAucgugggaacacggggugcc..... 1  
 Gi2\_11006403\_x1.....cgugggaaUacggggugccg..... 1  
 Gi3\_28901595\_x1.....ccccgccaguCugcgau..... 1  
 Gi3\_28898556\_x1.....aucgUagacgucgugggaac..... 1  
 Gi5\_9119523\_x1.....acgucgugggaacGcggggugccg..... 1  
 Gi2\_11342528\_x1.....ggccUcgccaguacugcgau..... 1  
 Gi5\_8838093\_x1.....Cgggaacacggggugccgaa..... 1  
 Gi5\_8946509\_x1.....ggaacacggggUccgaa..... 1  
 Gi1\_4196698\_x1.....aucggagacgucgugggaacGcgggg..... 1  
 Gi3\_28295354\_x1.....cgugggaacacgggUugccg..... 1  
 Gi2\_11049566\_x1.....ggagGcgucgugggaacacggggugccga..... 1  
 Gi5\_8961656\_x1.....cgAcgugggaacacggggugccgaa..... 1  
 Gi3\_28921419\_x1.....ccccgccaguacCcgauccggagacgu..... 1  
 Gi1\_4360571\_x1.....ccgccaguacugcgauccgCga..... 1  
 Gi2\_11245393\_x1.....ucguuccgaaauaggaagagaagcgccg..... 0  
 Gi1\_4285166\_x1.....agagaagcgccgucagggccccgcaU..... 1  
 G1a\_6017559\_x1.....gaucgAagacgucgugggaacacgggg..... 1  
 Gi5\_8939637\_x1.....ugcgauccggagacguUgug..... 1  
 Gi1\_4377172\_x1.....ggagacgucgugggaacacgAggugcc..... 1  
 Gi3\_28475834\_x1.....agacgucgugggCacacgggg..... 1  
 Gi4\_580276\_x1.....gugggaacaUggggugccgaa..... 1  
 Gi3\_28435810\_x1.....agaagcgccgucagggccccgCgua..... 1  
 Gi2\_11244928\_x1.....agagaagcgccgucagggccccUgcc..... 1  
 Gi5\_8912821\_x1.....gacgucgugggaacacggggugccgCcu..... 1  
 Gi3\_28529042\_x1.....cggagacgucgugggaacacggggugGc..... 1  
 Gi3\_28320490\_x1.....aggccccgccGguacugcgauccggagac..... 1  
 Gi3\_28461139\_x1.....agaAaagcgccgucagggccccg..... 1  
 G1a\_6110499\_x1.....ggagacguUgugggaacacg..... 1  
 Gi3\_28796614\_x1.....gagaagcgccgucagggccccgUg..... 1  
 Gi2\_11181008\_x1.....gaucUgagacgucgugggaacacggg..... 1  
 Gi2\_11143291\_x1.....cgucagggccccgccaguCc..... 1  
 G1a\_6121275\_x1.....aguacugcgauccggagacgucgA..... 1  
 Gi3\_28819728\_x1.....gagacgucgugggaacGc..... 1  
 Gi3\_28713031\_x1.....ccCccaguacugcgauccggagac..... 1  
 Gi2\_11365037\_x1.....ccccgccaguacuAcgauccg..... 1  
 Gi5\_8908142\_x1.....ggaacacggggugUcgaac..... 1  
 Gi3\_28413710\_x1.....gaagagaagUgccgucagggccccgcc..... 1  
 Gi3\_28414930\_x1.....Ugccccgccaguacugcgauccggagacg..... 1  
 Gi2\_11137711\_x1.....aucggagacgucgugggaaGac..... 1

Gi2\_11199990\_x1.....agagaagcgccgucGggccccgcc..... 1  
 Gi3\_28392316\_x1.....cguuccgaauaCgaagagaagcgcc..... 1  
 Gi4\_605729\_x1.....agccccgccaguacugcgau..... 0  
 Gi1\_4383907\_x1.....Gcggaucggagacgucgugggaaacacg..... 1  
 Gi3\_28704814\_x1.....cgccaguacugcgGucggaga..... 1  
 Gi2\_11330793\_x1.....gagacgucgugggaaGacggggugccg..... 1  
 Gi5\_8915270\_x1.....cgaucggagacguUgugggaaacacggg..... 1  
 Gi5\_9046288\_x1.....ccccccagNacugcgaucgga..... 1  
 Gi3\_28750269\_x1.....agagaagcgccgucagggccAgcc..... 1  
 Gi5\_8923124\_x1.....aggccccgAcaguacugc..... 1  
 Gi3\_28285221\_x1.....aucggagacgucgugggaaacacggggugcG..... 1  
 Gl1a\_6091093\_x1.....ccccccaguacugUgaucggagacguc..... 1  
 Gl1a\_6037056\_x1.....ugcgaucggagacguUgug..... 1  
 Gi3\_28393193\_x1.....cuUguuccgaauuaggaaga..... 1  
 Gi1\_4239348\_x1.....ugggaUcacggggugccg..... 1  
 Gi2\_11282392\_x1.....Cacgucgugggaaacacggggugccg..... 1  
 Gi2\_11399145\_x1.....Cgggaacacggggugccgaa..... 1  
 Gi3\_28818665\_x1.....gaucggUgacgucgugggaaacacg..... 1  
 Gi3\_28921663\_x1.....ucguuccgaauaCgaagagaagcgcc..... 1  
 Gi3\_28370420\_x1.....ccgUcaguacugcgaucgg..... 1  
 Gi2\_11048847\_x1.....gagGcgucgugggaaacacggggugccg..... 1  
 Gl1a\_6283508\_x1.....Accaguacugcgaucggagacgucgug..... 1  
 Gl1a\_6094550\_x1.....ggagacgucgugggaaGcacg..... 1  
 Gi1\_4364968\_x1.....aagagaagcgccgucaCgccccgccagu..... 1  
 Gi3\_28517196\_x1.....aucNgagacgucgugggaaacacgg..... 1  
 Gi5\_9017717\_x1.....cgucgugggaaCcacggggugccga..... 1  
 Gi2\_11037002\_x1.....agagaGggcccgucaggg..... 1  
 Gi2\_11371641\_x1.....cgucgugggGacacggggugccgaa..... 1  
 Gl1a\_6160552\_x1.....ccccccaguacugcgaucgga..... 0  
 Gi2\_11271427\_x1.....gucaggccccgccaguacuAcg..... 1  
 Gi5\_8969411\_x1.....gggaUcacggggugccgaacu..... 1  
 Gi3\_28948788\_x1.....agUccccgccaguacugcgaucg..... 1  
 Gl1a\_6321199\_x1.....cGggccccgccaguacugc..... 1  
 Gi3\_28985650\_x1.....agacgucgNggaaacacggggg..... 1  
 Gi5\_8959012\_x1.....gucgugggaaacacggggugAcgaac..... 1  
 Gl1a\_5999316\_x1.....ggagacgucCgggaacacggggugcc..... 1  
 Gi1\_4372300\_x1.....ugggaUcacggggugccga..... 1  
 Gi4\_610217\_x1.....cUugggaaacacggggugccgaac..... 1  
 Gl1a\_6315857\_x1.....guAaggccccgccaguacu..... 1  
 Gi3\_28376955\_x1.....cgucaggccccgccaguaAugcg..... 1  
 Gi5\_8964019\_x1.....ggccccgccaguacugUgaucgga..... 1  
 Gi1\_4223267\_x1.....cggaucggagacgCcgugggaaaca..... 1  
 Gi3\_28575895\_x1.....gaucggagacUucgugggaaac..... 1  
 Gi5\_9006742\_x1.....cNggccccgccaguacugcg..... 1  
 Gi5\_9124927\_x1.....cgaauuaggaagagaagcgccgucagg..... 0  
 Gi2\_11226407\_x1.....guNggaaacacggggugccga..... 1  
 Gi2\_11297207\_x1.....gaucggagacgucgugGaaacacggggug..... 1



Gi3\_28508006\_x1.....gaucUgagacgucgugggaacac..... 1  
 Gi2\_11151208\_x1.....cggagacgNcgugggaacacg..... 1  
 Gi2\_11020679\_x1.....ccccgccaguacugcgauUgag..... 1  
 Gi3\_28978457\_x1.....gacgucgugggaacGcggggu..... 1  
 Gi1\_4243808\_x1.....gaucggCgacgucgugggaacacg..... 1  
 Gi3\_28273803\_x1.....gUcaguacugcgauUcgaggagacgu..... 1  
 Gl1\_6131419\_x1.....gaCgcgccgucagccccccagucg..... 1  
 Gi3\_28459399\_x1.....ccccgccaguacugUgauUcgagg..... 1  
 Gi5\_8930543\_x1.....ucggagacgucAuggggaacacg..... 1  
 Gi2\_11389890\_x1.....aggccccGcaguacugcgau..... 1  
 Gl1\_5981512\_x1.....acgucgugggCacacggggugccgaacu..... 1  
 Gi2\_11277224\_x1.....aggccccUcaguacugc..... 1  
 Gi3\_28694818\_x1.....aagagaagcgccgucagggcccAccagu..... 1  
 Gi2\_11121382\_x1.....Nucggagacgucgugggaacac..... 1  
 Gi2\_11044150\_x1.....ccccgccagGacugcgau..... 1  
 Gi1\_4257003\_x1.....Ugagacgucgugggaacacggggugccga..... 1  
 Gi2\_11008729\_x1.....ccgucagggccccccagucCgc..... 1  
 Gl1\_6104556\_x1.....acgucAuggggaacacggggu..... 1  
 Gi5\_9031246\_x1.....gaucggagacgucgugggaAacgg..... 1  
 Gi5\_8841979\_x1.....Cgagaagcgccgucagggccccgc..... 1  
 Gi2\_11119190\_x1.....Ugucgugggaacacggggug..... 1  
 Gi1\_4344108\_x1.....aucggagacgucgugggaUacg..... 1  
 Gi3\_28549399\_x1.....aggccUcgccaguacugcgauUcgaggagacg..... 1  
 Gi3\_28508231\_x1.....gcgauUcgaggagacgucgugggaacacggggG..... 1  
 Gi3\_28607831\_x1.....cagggccccccagucugcgauUcgaggCgacgu..... 1  
 Gi3\_28631064\_x1.....ucagggccccGcaguacugcgauUcgagg..... 1  
 Gi2\_11286877\_x1.....cgauUcgaggagacgucgugggaacacggA..... 1  
 Gi3\_28651731\_x1.....aUuacugcgauUcgaggagac..... 1  
 Gi1\_4235221\_x1.....ggaacacggggugGcgaacu..... 1  
 Gi3\_28594036\_x1.....ccccgccGguacugcgauUcgagg..... 1  
 Gi2\_10992610\_x1.....acugcgauUaggagacgucgu..... 1  
 Gl1\_6341711\_x1.....aguacugcgauUggagacguc..... 1  
 Gi3\_28274095\_x1.....gaacacggggugccgaaAuu..... 1  
 Gl1\_6043602\_x1.....agagaagcgccgucagggccccccGgu..... 1  
 Gi3\_28375273\_x1.....cggagacgucgugggaacaUggggugccgaacu..... 1  
 Gi1\_4224752\_x1.....acgucgugAgaacacggggugccgaacu..... 1  
 Gi1\_4300858\_x1.....gugggGacacggggugccgaac..... 1  
 Gi3\_28816403\_x1.....acgucAuggggaacacggggugccga..... 1  
 Gi1\_4223234\_x1.....cgucUugggaacacggggugcc..... 1  
 Gi2\_11049593\_x1.....gaucggagacgucgugggaacUcgg..... 1  
 Gl1\_6029049\_x1.....caguacGgcgauUcgaggagac..... 1  
 Gi3\_28610890\_x1.....gacgucAuggggaacacggggugccgaa..... 1  
 Gl1\_6203043\_x1.....cggagacgucgugggaAacggg..... 1  
 Gi3\_28339001\_x1.....gaucggagacgGcuggggaacac..... 1  
 Gi2\_11273926\_x1.....ccccccagucugcgauUggagacguc..... 1  
 Gi1\_4354330\_x1.....aagagaagcgccgucagggccccgcc..... 0  
 Gi3\_28371252\_x1.....agaagcgccgucAagcccc..... 1

Gi3\_28876738\_x1.....gccaguaAugcgauccggagacgu..... 1  
 Gl1\_6104028\_x1.....gaucggagacAucguggg..... 1  
 Gi2\_11024395\_x1.....Acgaucggagacgucgugggaacac..... 1  
 Gl1\_6281835\_x1.....aucggagacgucgugCga..... 1  
 Gi3\_28423790\_x1.....aagagaagcgcccgucagAcccc..... 1  
 Gi2\_11185362\_x1.....Uucaggccccgccaguacugcgauccggagac..... 1  
 Gl1\_6268801\_x1.....gaagcgccgucagccccccagCacugc..... 1  
 Gl1\_6243397\_x1.....Cccccgccaguacugcgauccggagacg..... 1  
 Gi3\_28436974\_x1.....gaagagaagcgcccgucagggccccgCA..... 1  
 Gi2\_11097887\_x1.....agacUucgugggaacacggggugc..... 1  
 Gi3\_28279921\_x1.....gaacacCgggugccgaac..... 1  
 Gl1\_4298864\_x1.....cggagacgucgugggaacCcggggugc..... 1  
 Gl1\_6104700\_x1.....gucgugggaacCcggggugccgaac..... 1  
 Gi3\_28342228\_x1.....aucggagacgucgugggaacacUgggu..... 1  
 Gl1\_4375876\_x1.....Cucggagacgucgugggaacacg..... 1  
 Gi3\_28632653\_x1.....gUagagaagcgcccgucaggg..... 1  
 Gi5\_9009015\_x1.....gucagggccccgccaguacugc..... 0  
 Gi5\_8914257\_x1.....uCcgauccggagacgucguggg..... 1  
 Gi5\_9092751\_x1.....cgucguAggaacacggggugccgaac..... 1  
 Gi5\_8956715\_x1.....Nugggaacacggggugccgaac..... 1  
 Gi3\_28673294\_x1.....agaagAgccgucagggccccgc..... 1  
 Gi2\_11167879\_x1.....gaucggagacgucgugUgaacacggggugcc..... 1  
 Gi2\_11140011\_x1.....cgccaguacugcUaucggagacgu..... 1  
 Gi3\_28589586\_x1.....gccccgccaguacugcgGucggagacgucg..... 1  
 Gi5\_8867493\_x1.....uacugcgauccggagGcgu..... 1  
 Gi3\_28527664\_x1.....agagaagcgcccgucCggccccgcca..... 1  
 Gi2\_11117033\_x1.....aucggagacgucguggAaaca..... 1  
 Gl1\_6230798\_x1.....guacugGgauccggagacguc..... 1  
 Gi2\_11091995\_x1.....Acccgccaguacugcgauccgg..... 1  
 Gi1\_4202512\_x1.....Ggacgucgugggaacacggggugccgaac..... 1  
 Gl1\_4294471\_x1.....ugggaacaUggggugccga..... 1  
 Gi3\_28412507\_x1.....agggCccgccaguacugcgauccggagacguc..... 1  
 Gi3\_28701827\_x1.....ccccgccaguacugcCaucggagacgucg..... 1  
 Gi3\_28674117\_x1.....gagacgCcgugggaacacggggugccgaac..... 1  
 Gi3\_28710539\_x1.....cggagacgucAuggggaacacgggg..... 1  
 Gl1\_4273652\_x1.....acgucgugggaacacggggAgcc..... 1  
 Gi3\_28450378\_x1.....cgauccggagacgucgugggaacacAgg..... 1  
 Gi2\_11256030\_x1.....agggccccccaguacugcgauccggGgacgu..... 1  
 Gl1\_4215512\_x1.....agacgucgugggGacacggggug..... 1  
 Gl1\_6314687\_x1.....gugggaacacggggugcUgaa..... 1  
 Gl1\_6280823\_x1.....Nucggagacgucguggga..... 1  
 Gi5\_9019521\_x1.....ugggaacacggggugcUgaa..... 1  
 Gi5\_8899024\_x1.....ccccgccaguacugcgauccgg..... 0  
 Gi2\_11190848\_x1.....guUaggccccccaguacug..... 1  
 Gi2\_11313282\_x1.....cgucgugggaacacgggCugccgaacu..... 1  
 Gi3\_28283261\_x1.....ucagggccccgccUguacugc..... 1  
 Gi2\_11223598\_x1.....gaUgagaagcgcccgucagggccccg..... 1

|                                                           |   |
|-----------------------------------------------------------|---|
| Gi3_28528696_x1.....ucguuccgaauuaggaag.....               | 0 |
| Gi3_28314915_x1.....ucgugggCacacggggugc.....              | 1 |
| Gi5_8995737_x1.....Cccaguacugcgauccggagacguc.....         | 1 |
| Gi4_613922_x1.....gccaguacugcgauccggGgacguc.....          | 1 |
| Gi4_611497_x1.....ucaggccccgccGguacugcg.....              | 1 |
| Gi3_28654062_x1.....ggNcccgccaguacugcgau.....             | 1 |
| Gl1a_6350803_x1.....aucggagacgucAugggaa.....              | 1 |
| Gi3_28766818_x1.....aucggagacgucgugggU.....               | 1 |
| Gi1_4294798_x1.....Gggccccgccaguacugcgauccggagacgu.....   | 1 |
| Gi5_9094801_x1.....gagacgucgCgggaacacggggugccgaacu.....   | 1 |
| Gi3_28311568_x1.....ucggagacgucgugggaacacggggGgcc.....    | 1 |
| Gi2_11354600_x1.....ggcccAgccaguacugcgau.....             | 1 |
| Gi3_28977401_x1.....gacgucgugggaacCcggggugccgaacu.....    | 1 |
| Gi3_28867806_x1.....agagaagcgcUgucaggccccgcca.....        | 1 |
| Gi2_11133825_x1.....cguggCaacacggggugccgaac.....          | 1 |
| Gi2_11184580_x1.....aucGcagacgucgugggaacacggggug.....     | 1 |
| Gi5_9080062_x1.....cgAgggaacacggggugccg.....              | 1 |
| Gi2_11393983_x1.....acugcgauccggagGcgucgugggaaca.....     | 1 |
| Gi3_28504909_x1.....ccGguacugcgauccggagacgucgug.....      | 1 |
| Gi2_11102524_x1.....gaucggagacgucgugggaacacgggUu.....     | 1 |
| Gl1a_6079822_x1.....gucaggccccgccaguGcugcga.....          | 1 |
| Gi3_28659719_x1.....cGggccccgccaguacugcgauccggagacgu..... | 1 |
| Gi3_28867046_x1.....Ugccccgccaguacugcgauccggagacguc.....  | 1 |
| Gi3_28519424_x1.....gacgucgugggGacacggggU.....            | 1 |
| Gi3_28429624_x1.....gacgucgugggaacacggggugAcgaac.....     | 1 |
| Gi1_4251505_x1.....gaacacggggugcGgaacuu.....              | 1 |
| Gi3_28799706_x1.....caguacugcgauccggagGcgu.....           | 1 |
| Gi3_28853315_x1.....gaucggagaUgucgugggaacacggg.....       | 1 |
| Gi3_28650155_x1.....gggNacacggggugccga.....               | 1 |
| Gi1_4183875_x1.....gugggaacacggggugccgUac.....            | 1 |
| Gi1_4245823_x1.....agacgucgugggaacacggggugccgaa.....      | 0 |
| Gi1_4314101_x1.....cgucgugggaacacggggugccCaac.....        | 1 |
| Gi2_11242122_x1.....cccgccaguacugcgauccgAag.....          | 1 |
| Gi3_28413707_x1.....gacguUgugggaacacggggU.....            | 1 |
| Gi3_28292654_x1.....cgugggaacacggggugccgaU.....           | 1 |
| Gi1_4164647_x1.....agaagcgccgucaggccccgccaguac.....       | 0 |
| Gl1a_6313976_x1.....aucggagacgucgugggaacacggggugccga..... | 0 |
| Gi2_11008785_x1.....aucNgagacgucgugggaacac.....           | 1 |
| Gl1a_6000882_x1.....gaacacggNgugccgaac.....               | 1 |
| Gi3_28968383_x1.....uacugcgaAcggagacguc.....              | 1 |
| Gi1_4357332_x1.....ucggagGcgucgugggaacacggg.....          | 1 |
| Gi2_10994639_x1.....cccgccCguacugcgauccggagacguc.....     | 1 |
| Gi4_578422_x1.....ucgugggaacacggggugccUaacu.....          | 1 |
| Gl1a_6118201_x1.....gaucggagacgucgugggCacacg.....         | 1 |
| Gi4_595780_x1.....gugggaacNcggggugccgaa.....              | 1 |
| Gl1a_6251213_x1.....aggccccgccaguacAgcg.....              | 1 |
| Gi3_28768230_x1.....aucggagacgucgugggaUac.....            | 1 |

Gi2\_11370912\_x1.....gCcgucgugggaacacggggugc..... 1  
Gi5\_9100497\_x1.....gugggUacacggggugccgaa..... 1  
Gi2\_11378852\_x1.....Ggagaagcgccgucagggcccccagcaguc..... 1  
Gi1\_4198265\_x1.....ggaacacggggugUcgaac..... 1  
Gi4\_598044\_x1.....acgucgugggGacacggggugccgaac..... 1  
Gi2\_11348922\_x1.....aguacugcAaucggagacgu..... 1  
Gi2\_11371330\_x1.....cgcUaguacugcgaucggagacgucgug..... 1  
Gi3\_28298559\_x1.....gggaaAacggggugccga..... 1  
Gi1\_4275166\_x1.....cgccaguacugcAaucggaga..... 1  
Gi2\_11394312\_x1.....Cucgugggaacacggggg..... 1  
Gi1\_4351635\_x1.....guUgugggaacacggggugccgaac..... 1  
Gi5\_8833892\_x1.....cgugggaacacgAggugccga..... 1  
Gi5\_8967416\_x1.....gugggaacacgggAugccgaacuu..... 1  
Gi1\_4186002\_x1.....cggagacgucgugggaacacggggAgcc..... 1  
Gi3\_28463868\_x1.....gaagagaaAcgccgucaggc..... 1  
Gi3\_28959840\_x1.....ccgccaguacugUgaucggagacgu..... 1  
Gi3\_28790512\_x1.....aucggagacgGcugugggaacacg..... 1  
Gi2\_11400637\_x1.....cgucagggccccCccaguacugc..... 1  
Gi3\_28911306\_x1.....ucguAgggaacacggggugccga..... 1  
Gi3\_28864586\_x1.....gaagcgccgucCggccccccaguc..... 1  
Gi1\_4235144\_x1.....gaucggagacgucguAggaacac..... 1  
Gi3\_28308658\_x1.....cgccaguacugcgaucggaAacgucg..... 1  
G1a\_6093678\_x1.....Cagaagcgccgucagggccccgcca..... 1  
Gi2\_11304067\_x1.....gucgugggaacUcggggugccgaacu..... 1  
Gi3\_28712542\_x1.....Uggagacgucgugggaacacggggg..... 1  
Gi2\_11250300\_x1.....cUccgccaguacugcgaucggag..... 1  
Gi2\_11158027\_x1.....Nggaacacggggugccgaacu..... 1  
Gi5\_8834775\_x1.....cccgccUguacugcgaucggagacgu..... 1  
Gi2\_11292405\_x1.....gccccGcaguacugcgauc..... 1  
Gi3\_28793693\_x1.....gaucggagacgucgugggaacacggAgugcc..... 1  
Gi2\_11133397\_x1.....gAgacgucgugggaacacggggg..... 1  
Gi4\_583246\_x1.....uGggagacgucgugggaacacggggugccg..... 1  
Gi5\_9049121\_x1.....gaGcggagacgucgugggaacac..... 1  
Gi5\_9029227\_x1.....gUagcgccgucagggccccccaguc..... 1  
G1a\_6164039\_x1.....ucggagacgucAugggaacacgg..... 1  
Gi5\_8831297\_x1.....gccaguacugcgaucggagacgCc..... 1  
Gi3\_28859606\_x1.....uacugcgaucggaAacguc..... 1  
Gi3\_28391161\_x1.....gaucggagacgucgugggaacacgAggugc..... 1  
Gi2\_11071102\_x1.....ggagacgucgugggaacacggggugccgaaU..... 1  
Gi2\_11320433\_x1.....ggagacgucgugUgaacacggggugcc..... 1  
Gi1\_4311510\_x1.....cggagacgucgugggaacacggggUacc..... 1  
Gi2\_11277633\_x1.....gacgGcugugggaacacggggugc..... 1  
Gi2\_11381760\_x1.....cccgccaguacuAcgauc..... 1  
Gi2\_11191537\_x1.....Agagacgucgugggaacac..... 1  
Gi1\_4203608\_x1.....cgucagggccAcgccaguacugcg..... 1  
Gi3\_28899099\_x1.....agacguAgugggaacacggggugcc..... 1  
Gi2\_11342982\_x1.....aguacugcgaucggGgacgucgug..... 1

Gi3\_28748776\_x1.....gucgugggaaAacggggugcc..... 1  
G1a\_5985157\_x1.....Naucggagacgucgugggaacacggg..... 1  
Gi1\_4182306\_x1.....Aaucggagacgucgugggaacac..... 1  
Gi2\_11005485\_x1.....ggagacgucguggAaacac..... 1  
G1a\_6147578\_x1.....Aaucggagacgucguggga..... 1  
G1a\_6041909\_x1.....Uaguacugcgauccggagacgucg..... 1  
Gi5\_8951561\_x1.....ucgUagacgucgugggaacacg..... 1  
G1a\_6313105\_x1.....aggccccgccaguacugcgGc..... 1  
Gi3\_28353060\_x1.....ucaAgccccgccaguacugcg..... 1  
G1a\_6077978\_x1.....gucaggccccgccaguCcugcga..... 1  
Gi3\_28365144\_x1.....agaagcgcNgcagggccccgc..... 1  
Gi2\_11332208\_x1.....aucggagacgucgugggaacacgggCugc..... 1  
G1a\_6226971\_x1.....aucggagacAucgugggaacacg..... 1  
Gi5\_8943999\_x1.....gucaggccccgccCguac..... 1  
Gi5\_9067664\_x1.....gugggaacacgAggugccgaa..... 1  
Gi5\_8996387\_x1.....ccccgccaguacugcgauccggagUcg..... 1  
Gi2\_11044495\_x1.....gGcaguacugcgauccggagacgu..... 1  
Gi3\_28820825\_x1.....cggagacgucgugggaGcacggggug..... 1  
Gi3\_28382234\_x1.....aagcgccgucCggccccgccagua..... 1  
Gi3\_28695850\_x1.....agGacugcgauccggagacg..... 1  
Gi3\_28648741\_x1.....ucgugggaacacgUggugccgaacu..... 1  
Gi3\_28817209\_x1.....cgucgugggaacacgAggugccga..... 1  
Gi2\_11365090\_x1.....aucggagaUgucgugggaaca..... 1  
Gi5\_8837114\_x1.....ucgugggaaUacggggugcc..... 1  
Gi3\_28714802\_x1.....ucgugUgaacacggggugc..... 1  
G1a\_6025430\_x1.....gucaggccccgccaguacugcAa..... 1  
Gi3\_28428087\_x1.....ccccgccaguacugUgaucggagacguc..... 1  
Gi2\_11017531\_x1.....cucguuccgaauaUgaaga..... 1  
Gi3\_28608928\_x1.....gccccgUcaguacugcgaucc..... 1  
Gi2\_11173143\_x1.....aggccccgccaguacugcgauccggagC..... 1  
Gi5\_9090919\_x1.....aagGgaagcgccgucaggcccc..... 1  
Gi2\_11245856\_x1.....aAagaagcgccgucaggcccc..... 1  
Gi5\_8900742\_x1.....Ncugcugugggaacacggggugccgaacu..... 1  
Gi5\_8976438\_x1.....aucggagacgucCugggaaca..... 1  
G1a\_6278792\_x1.....gaucggagacgCcgugggaa..... 1  
Gi3\_28754206\_x1.....cggagacgNcugugggaacacggggugccgaa..... 1  
Gi3\_28354559\_x1.....gUgccgucaggccccgccaguacugcg..... 1  
Gi2\_11311733\_x1.....ugcgauccggagacgucgugggC..... 1  
Gi2\_11406260\_x1.....aCgggagacgucgugggaaac..... 1  
Gi2\_11133999\_x1.....Ucgccaguacugcgauccggag..... 1  
Gi1\_4234315\_x1.....auAggagacgucgugggaacacggggugcc..... 1  
Gi2\_11192099\_x1.....gaucggagaAgucgugggaacac..... 1  
Gi5\_9072141\_x1.....guggAaacacggggugccgaa..... 1  
Gi5\_9037618\_x1.....aGgagaagcgccgucaggcccc..... 1  
Gi1\_4253692\_x1.....Agagacgucgugggaacacggggugccg..... 1  
Gi3\_28581205\_x1.....gucaggcccUgccaguacugc..... 1  
Gi3\_28619953\_x1.....ugggaacacUgggugccgaa..... 1

Gi3\_28837297\_x1.....caguacugcgauccggagacgGcgug..... 1  
Gi1\_4386832\_x1.....cgugggaacacgUgugccgaacu..... 1  
Gi3\_28452377\_x1.....gNgggaacacgggugccgaac..... 1  
Gi1\_4246617\_x1.....cgugggaacacgggugAcga..... 1  
Gi1\_4385604\_x1.....cgucgugggaacacgggugccgU..... 1  
Gi2\_11240038\_x1.....Uguacugcgauccggagacguc..... 1  
Gi1\_4262660\_x1.....agacgucgugggaacacggggCgccgaac..... 1  
Gi1\_4188867\_x1.....agcgcgucagggccccgccaguacugcg..... 0  
Gi1\_4228819\_x1.....ggagacgucgugggCacacggggu..... 1  
Gi1\_4212416\_x1.....cgugggaaUacggggugccga..... 1  
Gi2\_11313963\_x1.....gacgucgugggaacacgggAugccg..... 1  
Gi5\_8866937\_x1.....gggaacacgAggugccgaa..... 1  
Gi1\_4286327\_x1.....ccgucaAgccccgccaguacugcgauccga..... 1  
Gi5\_8918321\_x1.....gGagcgcgucagggccccgccaguacugc..... 1  
Gi3\_28293933\_x1.....aagagaagcgccgucagggccccgccUgua..... 1  
G1a\_6130100\_x1.....aagagaagcgUgucagggcccc..... 1  
Gi2\_11258788\_x1.....cgucgugggaacUcggggugccgaacu..... 1  
Gi3\_28422479\_x1.....agagaagcgccgucaAgc..... 1  
Gi3\_28780966\_x1.....ccgccaguacugcgCucgg..... 1  
Gi2\_11102190\_x1.....ccGguacugcgauccggagacguc..... 1  
Gi5\_9091257\_x1.....cccgccaguacugcgauccggUgacgu..... 1  
Gi3\_28332919\_x1.....aucggagacgucgugCgaacacggg..... 1  
Gi2\_11132982\_x1.....aAagaagcgccgucagggccccgcc..... 1  
Gi3\_28527389\_x1.....Uguacugcgauccggagacgu..... 1  
Gi3\_28617194\_x1.....ggccUcgccaguacugcga..... 1  
Gi2\_11383106\_x1.....uGggagacgucgugggaacacgggg..... 1  
Gi1\_4303385\_x1.....cggagacguUgugggaacacggggugc..... 1  
Gi3\_28932995\_x1.....caguacugAgaucggagacgucgug..... 1  
Gi3\_28372447\_x1.....gaucUgagacgucguggga..... 1  
G1a\_6193544\_x1.....guacugcgauccggagacguA..... 1  
Gi2\_11313772\_x1.....ugggaacacggggAgccga..... 1  
Gi2\_11284172\_x1.....cgugggaacacgAggugccgaa..... 1  
Gi5\_9014635\_x1.....cgucgugggaCcaccgggugcc..... 1  
Gi3\_28841173\_x1.....ucaggAcccgccaguacugcgauccggagacg..... 1  
G1a\_6087841\_x1.....guUggaacacggggugccga..... 1  
Gi3\_28562907\_x1.....Ucugcugugggaacacggggugccg..... 1  
Gi3\_28332733\_x1.....cggagacgucgugggaacGcggggugccgaac..... 1  
Gi1\_4257220\_x1.....Gcugugggaacacggggugccgaa..... 1  
G1a\_6126213\_x1.....gaagcgcgucagggccccgccG..... 1  
Gi2\_11247658\_x1.....cgauccggGgacgucgugggaacacggggug..... 1  
Gi3\_28703816\_x1.....ccccgccaguacugcgCucggag..... 1  
Gi5\_8868955\_x1.....gGccccccaguacugcgauccga..... 1  
Gi5\_8977776\_x1.....caggccccgccaguacuAcg..... 1  
Gi5\_9019608\_x1.....cgucgugggaGcacggggugccga..... 1  
Gi3\_28450276\_x1.....ggaacacUgggugccgaacu..... 1  
Gi1\_4182649\_x1.....ucaggccUcgccaguacugcgauccga..... 1  
Gi2\_11061458\_x1.....gagacgucgugggaacacgggAugccg..... 1

Gi1\_4210685\_x1.....cgCcgugggaaacacggggugccgaa..... 1  
 Gi2\_11203010\_x1.....cgAcgugggaaacacggggugccgaa..... 1  
 Gi5\_9035156\_x1.....cacggggugccgaGcuuu..... 1  
 Gi3\_28282645\_x1.....gugggaacacggggugcG..... 1  
 Gi5\_9065787\_x1.....gugggaacacgCGugccgaac..... 1  
 Gi2\_11134152\_x1.....uacugcgauUggagacgucgug..... 1  
 Gi2\_11392978\_x1.....cgucaggGcccgccaguacugcg..... 1  
 Gi3\_28958287\_x1.....cccUgccaguacugcgauccgga..... 1  
 Gi3\_28341878\_x1.....cguggUaacacggggugc..... 1  
 Gi3\_28626639\_x1.....acgucgugggaacacggggugccgUac..... 1  
 Gi3\_28450240\_x1.....uUgugggaacacggggug..... 1  
 Gi2\_11398396\_x1.....cgucgugggaacacgggAugccg..... 1  
 Gi3\_28944682\_x1.....gucgugggaacacgggAgccga..... 1  
 Gi3\_28481728\_x1.....gucgugggaaAacggggugccg..... 1  
 Gi3\_28417433\_x1.....gaagagaagcgccgucaggAcc..... 1  
 Gl1\_6090508\_x1.....caggccccgccaguacugcgA..... 1  
 Gi2\_11315279\_x1.....acugcgauccggaUacgucgu..... 1  
 Gi2\_11102367\_x1.cUuaacucguuccgaau..... 1  
 Gi5\_8873805\_x1.....gggaacacggggugUcgaac..... 1  
 Gi1\_4356730\_x1.....ucgugggaacacggggugccgGac..... 1  
 Gi3\_28445335\_x1.....aggccccgccaguacugcgauAgg..... 1  
 Gi3\_28840240\_x1.....ugggaaNacggggugccgaacu..... 1  
 Gi3\_28328234\_x1.....gccaguacugcgauccgagacAucgu..... 1  
 Gi2\_10995911\_x1.....gggaacaGggggugccgaa..... 1  
 Gi2\_11177254\_x1.....gaagGgaagcgccgucaggcccc..... 1  
 Gi5\_8879984\_x1.....ugggaacacggggugccCaa..... 1  
 Gi2\_11109319\_x1.....Aaggccccgccaguacugcgau..... 1  
 Gi5\_8912359\_x1.....gagacgucguggUacacg..... 1  
 Gi3\_28722129\_x1.....cgucgugggaacaUggggugccg..... 1  
 Gi3\_28839284\_x1.....ucaggccccccaAuacugcgauccg..... 1  
 Gi5\_8938603\_x1.....acgucgCgggaacacggggugccga..... 1  
 Gi2\_11366789\_x1.....ggccccgcUaguacugcgauccgagacgu..... 1  
 Gi3\_28620541\_x1.....gauNggagacgucgugggaacacggggu..... 1  
 Gi5\_8901796\_x1.....aUgcgaucggagacgucgug..... 1  
 Gi3\_28739792\_x1.....ccguUaggccccgccaguacugc..... 1  
 Gi5\_9058748\_x1.....cacgggGccgaacu..... 1  
 Gi3\_28701033\_x1.....ucgugggaacacggggUacc..... 1  
 Gi5\_9050265\_x1.....ugcgaucggagacgucgugggaacaUggg..... 1  
 Gi3\_28904027\_x1.....gccUcgccaguacugcgauccgagacgucg..... 1  
 Gi5\_8849458\_x1.....gugggaacacgggUugccgaac..... 1  
 Gi3\_28313606\_x1.....gaagagaagcgccgucGggccccccag..... 1  
 Gi3\_28373583\_x1.....ucagAccccgccaguacugcgauccg..... 1  
 Gl1\_6086071\_x1.....ggUgacgucgugggaacac..... 1  
 Gi5\_9057956\_x1.....Ucgucgugggaacacggggugcc..... 1  
 Gi3\_28473154\_x1.....cgauAggagacgucgugggaacacggggu..... 1  
 Gi2\_11190543\_x1.....gaacacggggUccgaac..... 1  
 Gi3\_28279368\_x1.....uaacucguuccgaauaUgaagagaagcgc..... 1

Gi3\_28277154\_x1.....acucguuccgaauuaggaCg..... 1  
 Gi2\_11145697\_x1.....aacucguuccgaauuagga..... 0  
 Gi3\_28401226\_x1.....cccgccaguacugcgauccggagCcg..... 1  
 Gi3\_28982643\_x1.....aucggagacUucgugggaacacggggu..... 1  
 Gi3\_28267101\_x1.....agGacugcgauccggagacgucgu..... 1  
 Gi3\_28727672\_x1.....gaagagaagcgccgCcagggcccgcc..... 1  
 Gi3\_28283685\_x1.....aagagaagcgccgucagggUccgcccag..... 1  
 G1a\_6163356\_x1.....cgccCguacugcgauccggagacguc..... 1  
 Gi1\_4223681\_x1.....gaacacggggAgccgaac..... 1  
 Gi2\_10996195\_x1.....cgucguUggaacacggggugccgaacu..... 1  
 Gi3\_28890027\_x1.....ggagacgucguggCaacacggggugcc..... 1  
 G1a\_6302958\_x1.....ggccccgccaguacugcgGuc..... 1  
 Gi2\_11197148\_x1.....aguGcugcgauccggagacgucg..... 1  
 Gi4\_581098\_x1.....ccaguacugcgauccggagacguc..... 0  
 Gi2\_11159141\_x1.....gucgugggaacacggggugccUaacu..... 1  
 Gi2\_11405881\_x1.....cAaucggagacgucgugggaaca..... 1  
 Gi2\_11115435\_x1.....gcUgucagggccccgccaguacugc..... 1  
 G1a\_6189167\_x1.....Aggaacacggggugccgaac..... 1  
 Gi5\_8979669\_x1.....cAugggaacacggggugcc..... 1  
 Gi5\_8993333\_x1.....ugcgGucggagacgucgug..... 1  
 Gi5\_8885665\_x1.....Cagaagcgccgucagggccccgccaguacu..... 1  
 Gi3\_28325586\_x1.....agcgccgucagggccccCccagu..... 1  
 Gi3\_28882532\_x1.....cccNccaguacugcgauccggagacguc..... 1  
 Gi3\_28275674\_x1.....caggccccUccaguacugcgaucc..... 1  
 Gi3\_28682112\_x1.....ccaguacugcgauccggagacgu..... 0  
 Gi1\_4220805\_x1.....caggccccgccaguacugcgauAggagacg..... 1  
 Gi3\_28602142\_x1.....cggagacgucgugggaacacCgggu..... 1  
 Gi5\_8847081\_x1.....aucggagacgucgugggaacacAgggugcc..... 1  
 Gi1\_4165348\_x1.....ucagUccccgccaguacugcg..... 1  
 Gi3\_28362450\_x1.....ccgccaguacugcgauccggagacgCcg..... 1  
 Gi3\_28768269\_x1.....gcgauccggagCcgucgugggaacacggg..... 1  
 Gi2\_11205810\_x1.....gagacgucgugggaacaUggggug..... 1  
 G1a\_6265330\_x1.....cgucagggccccgccaguacuAc..... 1  
 Gi5\_9084613\_x1.....cgugggaacacCgggugc..... 1  
 Gi1\_4231240\_x1.....gucgugggaacacggggAgcc..... 1  
 Gi3\_28850112\_x1.....agacguUgugggaacacggggugcc..... 1  
 Gi2\_11106786\_x1.....ugcgauccggagacgucgugggaAac..... 1  
 Gi2\_11179131\_x1.....cucguuccNaauuaggaagagaagcgccguc..... 1  
 Gi3\_28334246\_x1.....cgugggaacacCgggugc..... 1  
 Gi5\_8840126\_x1.....ugcgauccggagacgucgCggga..... 1  
 Gi3\_28907974\_x1.....acugcgauccggagacAuc..... 1  
 Gi2\_11326731\_x1.....aucggagacAucgugggaac..... 1  
 Gi1\_4308042\_x1.....gugggaUcacggggugccgaacu..... 1  
 Gi3\_28392768\_x1.....aucggaUacgucgugggaacacgggg..... 1  
 Gi3\_28529088\_x1.....cgucagggccccgccaguaUug..... 1  
 G1a\_6264754\_x1.....gaacacggAgugccgaacu..... 1  
 Gi3\_28819355\_x1.....gagaagcgccgucagggccccgccGg..... 1



Gi4\_580942\_x1 .....gugggaacacggggugccgCa..... 1  
 Gi2\_11089528\_x1.....gggaacCcggggugccgaa..... 1  
 Gi2\_11170481\_x1.....cgucgugggaacacggAg..... 1  
 Gi5\_9031301\_x1.....aggccccgccaguacugcgauccgagacg..... 0  
 Gi1\_4361823\_x1.....guaNugcgauccggagacgucg..... 1  
 Gi2\_11350871\_x1.....agacgucguggAaacacggggugc..... 1  
 Gi5\_9042728\_x1.....Ugugggaacacggggugccg..... 1  
 Gi1\_4189844\_x1.....ucgugggUacacggggugccgaa..... 1  
 Gi3\_28787234\_x1.....ggccccgccaguacuAcga..... 1  
 Gi1\_4321844\_x1.....gacgucgAgggaacacggggugccgaa..... 1  
 Gi3\_28803717\_x1.....ggagacgucgugggaacacggggGgccgaa..... 1  
 Gi2\_11008343\_x1.....ucaggccccgccaguacugcgauUggagacg..... 1  
 Gi3\_28400976\_x1.....aggccccgccUguacugcgauccggagacguc..... 1  
 Gi3\_28673335\_x1.....aagagaagNgccgucaggccccgccaguacu..... 1  
 Gi3\_28546094\_x1.....caggccccgccaguaAugcg..... 1  
 Gi1\_4222727\_x1.....gagacgucgugggaacaUggggugccgaa..... 1  
 Gi1\_4252500\_x1.....gucgugggaGcacggggugccgaa..... 1  
 Gi3\_28919112\_x1.....acguGuggggaacacggg..... 1  
 Gi2\_11206822\_x1.....gccagCacugcgauccgga..... 1  
 Gi1\_4212620\_x1.....acgucgugggaacacggggugccAaacuu..... 1  
 Gi3\_28282729\_x1.....aagcgccgucaggccccgccaguUcugc..... 1  
 Gi2\_11117814\_x1.....agacgucgugggaacacggggGgc..... 1  
 Gi1\_4178136\_x1.....ugcAaucggagacgucguggga..... 1  
 Gi4\_608163\_x1.....gugggaacacggggGgccgaa..... 1  
 Gi3\_28435594\_x1.....aggccccgccaguacGgc..... 1  
 Gi3\_28400944\_x1.....caggccccAgccaguacugcgau..... 1  
 Gi2\_11397095\_x1.....cccgccaguacugcgauccggagGcgucg..... 1  
 Gi5\_8935415\_x1.....acgucgugggaacacUggggugccgaa..... 1  
 Gi3\_28470745\_x1.....ucggagacgucgugggCacacggggugccgaa..... 1  
 Gi2\_11225356\_x1.....Aaagagaagcgccgucaggccc..... 1  
 Gi2\_11229155\_x1.....Auacugcgauccggagacgu..... 1  
 Gi2\_11023485\_x1.....Ccguuccgaauuaggaagagaagcgcc..... 1  
 G1a\_6017874\_x1.....gugggaacacgggAugccgaa..... 1  
 Gi3\_28778639\_x1.....aggaagagaagcgccgucaggc..... 0  
 G1a\_6245419\_x1.....Agagacgucgugggaacacggggugcc..... 1  
 Gi4\_594370\_x1.....gugggaacaUggggugccgaa..... 1  
 Gi2\_11335723\_x1.....gaagcgccgucaggccAcgccaguacugc..... 1  
 Gi2\_11154261\_x1.....gggaacacggggugccAaa..... 1  
 Gi5\_9126299\_x1.....ugggaacacggggugAcgaa..... 1  
 Gi5\_9048547\_x1.....gGagcgccgucaggccccgccagua..... 1  
 Gi5\_9012677\_x1.....agacUucgugggaacacggggugccga..... 1  
 Gi3\_28310413\_x1.....gaucggagacgucgugggCacacggggug..... 1  
 Gi3\_28976878\_x1.....cgugggaaAacggggugccga..... 1  
 Gi1\_4259676\_x1.....gUccccgccaguacugcgauccggagacg..... 1  
 Gi3\_28876954\_x1.....gaucggagacgCcguggga..... 1  
 G1a\_6268336\_x1.....acuUcgaucggagacguc..... 1  
 Gi1\_4283749\_x1.....agacguUgugggaacacggggugccgaa..... 1

Gi2\_11191993\_x1.....caggcccUgccaguacugcgau..... 1  
 Gl1a\_6144684\_x1.....aagagaagcgccgucaggcca..... 1  
 Gi3\_28859364\_x1.....agagaagcNccgucagggcccgcagua..... 1  
 Gi2\_11117161\_x1.....ggccccAccaguacugcgagcgagac..... 1  
 Gi1\_4322125\_x1.....cggagacgucgugggCacacggggu..... 1  
 Gi3\_28380579\_x1.....cgucgugggaacacCgggugccgaac..... 1  
 Gi1\_4272430\_x1.....Ugacgucgugggaacacggggugccga..... 1  
 Gi5\_9047066\_x1.....aacacgggNugccgaacuu..... 1  
 Gi1\_4165978\_x1.....cgugggaacacgUggugccgaacuu..... 1  
 Gi1\_4176823\_x1.....acugcgaucggagacgucgu..... 0  
 Gi5\_8888406\_x1.....Ucgucgugggaacacggggugccgaacuu..... 1  
 Gi3\_28949719\_x1.....ucgugggaacacgggCugc..... 1  
 Gi2\_11000213\_x1.....cgccagGacugcgaucggagacgucgu..... 1  
 Gi1\_4168117\_x1.....gagacgucgugggaacaU..... 1  
 Gi2\_11258819\_x1.....gaagcgccgucagggcccgcCaC..... 1  
 Gi5\_8927889\_x1.....gggaacacggggugccgaaGu..... 1  
 Gi3\_28833838\_x1.....cccgccaguacugcAaucggagacg..... 1  
 Gi3\_28802363\_x1.....Acgugggaacacggggugccgaa..... 1  
 Gi4\_590231\_x1.....gGcgugggaacacggggugccgaacu..... 1  
 Gi5\_8908408\_x1.....aagagaagcgccgucaggccccUcc..... 1  
 Gi1\_4237068\_x1.....caggUcccgccaguacugcg..... 1  
 Gi2\_11394715\_x1.....ucaggccccgccaguCcu..... 1  
 Gi1\_4228609\_x1.....gagaagcgccgucagggcccgcCa..... 0  
 Gi3\_28374216\_x1.....agagaGcgccgucagggcc..... 1  
 Gl1a\_6291452\_x1.....ccUgccaguacugcgaucggagacguc..... 1  
 Gi2\_11017793\_x1.....ggagacgucgugggaaAacgggug..... 1  
 Gi2\_11286771\_x1.....gaucggagacgucguggUaacac..... 1  
 Gi2\_11196360\_x1.....caggccccgUcaguacugcgaucggag..... 1  
 Gi5\_8920634\_x1.....ggagacgucguggAaacacggggugccgaacu..... 1  
 Gi2\_11316581\_x1.....cccgccaguacugcgaucggagaA..... 1  
 Gi3\_28721663\_x1.....cgccgucagggcccgcagCacugc..... 1  
 Gl1a\_6008614\_x1.....acugGgaucggagacguc..... 1  
 Gi3\_28467524\_x1.....ggCaacacggggugccgaa..... 1  
 Gi2\_11138736\_x1.....ggagacguNgugggaacacggggu..... 1  
 Gi3\_28404471\_x1.....aggccccgccaguacugcgCucgg..... 1  
 Gi2\_11188389\_x1.....acgucgugggaacGcggggu..... 1  
 Gi1\_4269850\_x1.....aggccccgccUguacugcgau..... 1  
 Gi1\_4280455\_x1.....gucgugggaacacggggugccgU..... 1  
 Gi2\_11089791\_x1.....cgucgugggaacacggggugUc..... 1  
 Gl1a\_6085353\_x1.....aucggagacgucAuggggaacacggggu..... 1  
 Gi2\_11216850\_x1.....ccaguacugcgaucggGgacgucgugg..... 1  
 Gi2\_11397058\_x1.....cgaucggagacgucgugAgaacacggggu..... 1  
 Gi5\_9033726\_x1.....agacgucgugggaacacggAgugccgaacu..... 1  
 Gi2\_11004471\_x1.....aCgccccgccaguacugcgau..... 1  
 Gi3\_28387725\_x1.....Ggacgucgugggaacacggggugccgaa..... 1  
 Gi1\_4249657\_x1.....agacgucgugggaGcacggggugccg..... 1  
 Gi3\_28501254\_x1.....agcgccgucagggcccgcaguaA..... 1

Gi2\_11017544\_x1.....agacgucgNgggaacacggggugccgaac..... 1  
 Gi2\_11154678\_x1.....gaagagaagcgccgucagggcccUgcc..... 1  
 G1a\_6293632\_x1.....aucggagacGcgugggaaacacggggu..... 1  
 Gi5\_8919455\_x1.....gaagcgccgucagggccccgccGgua..... 1  
 Gi3\_28928618\_x1.....cgccaguacGcgauccgagacgu..... 1  
 Gi3\_28331782\_x1.....cggagacAucgugggaaacGcg..... 1  
 Gi2\_11279739\_x1.....cccgccaguacGcgauccg..... 1  
 G1a\_6249423\_x1.....cgugggaaacacggggGgcc..... 1  
 Gi3\_28641579\_x1.....cgucgugggaaacacgUggugcc..... 1  
 Gi2\_11069401\_x1.....Gcggaucggagacgucgug..... 1  
 Gi3\_28912897\_x1.....gucagggccccccaguacugcgCuc..... 1  
 Gi2\_11378683\_x1.....ucgugggaaacacggggugAcgaac..... 1  
 Gi3\_28406392\_x1.....ggagacgucgugggaaacUg..... 1  
 Gi2\_11207060\_x1.....aucggagacAucgugggaa..... 1  
 Gi5\_8906248\_x1.....acAgcgauccgagacguc..... 1  
 G1a\_6275790\_x1.....gcUaguacugcgauccgga..... 1  
 Gi3\_28618407\_x1.....Ngcgccgucagggccccccaguac..... 1  
 Gi1\_4288307\_x1.....cggagacgucgugggaaacacggggGgcc..... 1  
 Gi3\_28884177\_x1.....gaagagGagcgccgucagggccccccag..... 1  
 Gi3\_28491737\_x1.....cgccaguacugcgauccgagGcgucgug..... 1  
 Gi4\_596883\_x1.....cccgccaguacugcgauccAgagacguc..... 1  
 Gi3\_28853792\_x1.....ccgccaguacugUgauccgag..... 1  
 Gi3\_28916186\_x1.....Ucugcgauccgagacguc..... 1  
 Gi3\_28321033\_x1.....aagGgaagcgccgucagggcccc..... 1  
 Gi2\_11139144\_x1.....gaUacgucgugggaaacacggggugcc..... 1  
 Gi1\_4257961\_x1.....gucgCgggaacacggggug..... 1  
 Gi3\_28671047\_x1.....cgauccgagacgucgCgg..... 1  
 Gi3\_28340748\_x1.....aucggagacgucgugggaaacacggggugA..... 1  
 Gi2\_11037769\_x1.....gagacgucgugggaaacacggggugcAgaacu..... 1  
 Gi3\_28297820\_x1.....acgucgugggaaacacggu..... 1  
 Gi4\_606299\_x1.....gggaacGcggggugccgaacu..... 1  
 G1a\_5999667\_x1.....cgcUgucagggccccccaguacugc..... 1  
 Gi1\_4167894\_x1.....cgugggaaacacCgggugccgaacu..... 1  
 G1a\_6144995\_x1.....gccgucagggccccccCgua..... 1  
 Gi1\_4373856\_x1.....ggaaacacUgggugccgaac..... 1  
 Gi5\_8835117\_x1.....cgugggaaacacggggugUcga..... 1  
 Gi3\_28286814\_x1.....cggagacgucgugggUacacgggu..... 1  
 Gi1\_4378064\_x1.....ucggagacgCcgugggaaacacggg..... 1  
 Gi5\_9087430\_x1.....agacAucgugggaaacacggggugccgaac..... 1  
 Gi1\_4302256\_x1.....Ucugcgauccgagacgucgugggaa..... 1  
 Gi5\_8849730\_x1.....agaNgcugugggaaacacggggugccgaacu..... 1  
 Gi1\_4324673\_x1.....Cggaaacacggggugccgaac..... 1  
 Gi2\_11169955\_x1.....cagggccccccaguaGugcgaucc..... 1  
 Gi3\_28801430\_x1.....gucguggAaacacggggugccgaacu..... 1  
 Gi4\_570138\_x1.....gccgucagggccccccaguacu..... 0  
 Gi5\_8919435\_x1.....ucggagacgucgGgggaacacg..... 1  
 Gi2\_11300559\_x1.....aAgccccccaguacugcgauccgga..... 1

Gi2\_11022169\_x1.....cccAgccaguacugcgauccg..... 1  
 Gi2\_11018236\_x1.....acuCcgauccgagacgucgugg..... 1  
 G1a\_6141481\_x1.....acugcgauccgagCcgucgug..... 1  
 Gi3\_28531659\_x1.....aaUagaagcgccgucagggccccgccag..... 1  
 Gi2\_11108709\_x1.....aucggUgacgucgugggaa..... 1  
 Gi3\_28856775\_x1.....caguacugcgauccgagGcgucgu..... 1  
 Gi3\_28267911\_x1.....gagaUgcgcccugcagggcc..... 1  
 Gi2\_11345659\_x1.....gucgGgggaacacggggugc..... 1  
 Gi2\_11255009\_x1.....gugggaacacgCggugccg..... 1  
 Gi5\_8889245\_x1.....aagagaagcgUgucagggccc..... 1  
 Gi2\_11238286\_x1.....ccUcgccaguacugcgauccgagacgu..... 1  
 G1a\_6333315\_x1.....cgccaguaNugcgauccgagacgucgug..... 1  
 Gi3\_28377266\_x1.....acgucgugggaaacaUggggugccg..... 1  
 Gi1\_4209231\_x1.....gcccaUuacugcgauccgagacg..... 1  
 Gi2\_11299687\_x1.....cgauccgagacgucgugggaGcacggggug..... 1  
 Gi3\_28805821\_x1.....Ugaagcgccgucagggccc..... 1  
 Gi5\_9095296\_x1.....gugggaacacggggugAcg..... 1  
 Gi3\_28614369\_x1.....ggagacgucgugggaaacacgAggugccg..... 1  
 Gi3\_28437607\_x1.....ggagGcgucgugggaaacacgggg..... 1  
 Gi3\_28544087\_x1.....gauccgagacgucguAggaaacacggggg..... 1  
 Gi1\_4193510\_x1.....agacgGcgugggaaacacggggugccgaacu..... 1  
 Gi2\_11158115\_x1.....gucagggccccgccaAuacugcg..... 1  
 Gi2\_11193429\_x1.....ugggaaacacggggugccgGa..... 1  
 Gi3\_28757660\_x1.....cgugggaaacacggggugcGga..... 1  
 Gi3\_28699180\_x1.....Uagagaagcgccgucagggccccgccag..... 1  
 Gi3\_28797897\_x1.....cgucagggccccgcccGguacugcg..... 1  
 Gi5\_9134488\_x1.....gauccggagGcgucgugggaaacacg..... 1  
 G1a\_6023231\_x1.....gagacgucgugggaaacacggggugccgaGcu..... 1  
 Gi3\_28741862\_x1.....ccccgccguacugcgauccgagac..... 1  
 Gi3\_28339683\_x1.....ucggagaAgucgugggaaacacg..... 1  
 Gi2\_11106474\_x1.....agacgCcgugggaaacacggggugc..... 1  
 Gi3\_28895364\_x1.....gccccgccaguacugcgCucggaga..... 1  
 Gi1\_4283213\_x1.....cUcgccaguacugcgauccg..... 1  
 Gi3\_28793495\_x1.....aucgAagacgucgugggaaacacggggugc..... 1  
 Gi3\_28726047\_x1.....agaagcgccguUagggccccgagucg..... 1  
 Gi2\_11322991\_x1.....gcUccgccaguacugcgauccgagacguc..... 1  
 Gi5\_9092151\_x1.....ccgccaguacugcgauccagaga..... 1  
 Gi5\_8882425\_x1.....gacAucgugggaaacacggggugccgaacu..... 1  
 Gi3\_28827535\_x1.....gucgugggaaacacgggAugccgaa..... 1  
 Gi3\_28570949\_x1.....cgauccgGgacgucgugggaaacacggg..... 1  
 Gi3\_28737321\_x1.....aCgccccgccaguacugcgauccg..... 1  
 Gi2\_11106205\_x1.....gacgucgugggaaacacggggugcc..... 1  
 Gi3\_28589281\_x1.....cgCagacgucgugggaaacacgg..... 1  
 Gi3\_28624606\_x1.....agacgucgugggaaacGcggggugcc..... 1  
 Gi2\_11088868\_x1.....caguacugcgauccgagacgucgugggaa..... 0  
 Gi1\_4319371\_x1.....aucggagacgucgugggaaacacggggugccgaacu..... 0  
 Gi3\_28289991\_x1.....ucgAgggaacacggggugccg..... 1

Gi2\_11398834\_x1.....gacgAcguggggaacacggggugcc..... 1  
G1a\_6296126\_x1.....Gucggagacgucguggggaacacggggug..... 1  
Gi1\_4351291\_x1.....agacgucguggggaacacggggugccU..... 1  
Gi2\_11263870\_x1.ccuuaacucguuccgaauaAgaaga..... 1  
Gi3\_28829679\_x1.....caggccccccagucgucgG..... 1  
Gi2\_11098890\_x1.....gaucggagacgucguggCa..... 1  
Gi5\_9021586\_x1.....gggNacacggggugccgaacu..... 1  
Gi2\_11235617\_x1.....ccccgccagucgucgucgagacgCcgug..... 1  
Gi5\_9012895\_x1.....cgAcguggggaacacggggugccgaac..... 1  
Gi2\_11295099\_x1.....cgaucggagGcgucgugg..... 1  
Gi2\_11176360\_x1.....gCgacgucguggggaacacggggug..... 1  
Gi3\_28974230\_x1.....cggagacgucAugggaacacggggug..... 1  
G1a\_6309915\_x1.....gAagacgucguggggaacac..... 1  
Gi3\_28392710\_x1.....aguacugcagucggagacgCcguggggaacac..... 1  
Gi5\_8993166\_x1.....Uggagacgucguggggaacacggg..... 1  
G1a\_6113358\_x1.....gaucggagacgucguggggaacCcg..... 1  
Gi5\_8989562\_x1.....gugggaacacggAgugcc..... 1  
Gi2\_11230386\_x1.....gccagAacugcgaucggagacguc..... 1  
G1a\_6119043\_x1.....Cucguggggaacacggggugccgaacu..... 1  
Gi1\_4202929\_x1.....ugggaGcacggggugccga..... 1  
Gi5\_9050829\_x1.....guAggaacacggggugcc..... 1  
Gi1\_4228476\_x1.....gucguggggaacacggggua..... 1  
Gi5\_9137478\_x1.....gccccccagucgucgG..... 0  
Gi2\_11055266\_x1.....cgUcaguacugcgaucgg..... 1  
Gi3\_28805041\_x1.....cguggggaacCcggggugcc..... 1  
Gi1\_4238658\_x1.....agaagcgcgucCggccccgcca..... 1  
G1a\_6228161\_x1.....ucguggggaacaUggggugccgaacu..... 1  
Gi3\_28287766\_x1.....ccgucaggccccccagucgucA..... 1  
G1a\_6158104\_x1.....ccccccGguacugcgaucggagacguc..... 1  
Gi1\_4360716\_x1.....ugNgaacacggggugccgaac..... 1  
Gi2\_11214065\_x1.....gucaggcAccgccagucguc..... 1  
Gi2\_11024679\_x1.....gCgggaacacggggugccgaacuu..... 1  
Gi3\_28342185\_x1.....cgaucggagacgucgugUg..... 1  
Gi1\_4283358\_x1.....ccgucaggccccccagucgucgG..... 1  
Gi3\_28464537\_x1.....gccccccUguacugcgaucggagac..... 1  
Gi3\_28459602\_x1.....caguacAgcgaucggagacgucgu..... 1  
Gi5\_8975463\_x1.....aggccccccagucAc..... 1  
Gi3\_28904284\_x1.....gaagcgcgucaggccccccagucgucgG..... 0  
Gi3\_28616815\_x1.....Agccgucaggccccccagucguc..... 1  
Gi3\_28490842\_x1.....ccAccagucgucgagacguc..... 1  
Gi3\_28709365\_x1.....cgccgucUggccccccaguc..... 1  
Gi5\_8935464\_x1.....gagacgucgAgggaacacg..... 1  
G1a\_6316284\_x1.....ggagacgucgugGaaacac..... 1  
Gi3\_28475142\_x1.....gaucggCgacgucguggggaacacggggugc..... 1  
Gi5\_8915720\_x1.....agagaagcgcgucagCccccccaguc..... 1  
Gi2\_11029136\_x1.....ucaggccccccagucCgccauc..... 1  
Gi3\_28534875\_x1.....ccccccagucgucgGaa..... 1

Gi2\_11142050\_x1.....gugggaacacggggugcGga..... 1  
 Gi2\_11011940\_x1.....agagaGgcgccgucaggccccgcc..... 1  
 Gi3\_28310555\_x1.....cgUucggagacgucgugggaacacggggugcc..... 1  
 Gl1a\_6328193\_x1.....ggaacacgggCugccgaacu..... 1  
 Gi3\_28446825\_x1.....caguacugGgaucggagacguc..... 1  
 Gi1\_4321912\_x1.....ggagacgucgugggaCcacggggugccg..... 1  
 Gi3\_28769087\_x1.....aUgagaagcgccgucaggccccgccagu..... 1  
 Gi1\_4289355\_x1.....cgucaggccccgAcaguacugcg..... 1  
 Gi5\_9135157\_x1.....cggagacgucgugggaacacggggugAc..... 1  
 Gl1a\_6334573\_x1.....gugggaacacggggugccgaacN..... 1  
 Gi4\_611104\_x1.....agaagcgccgucaggccccgc..... 0  
 Gi1\_4321046\_x1.....ucguAggaacacggggugccga..... 1  
 Gi3\_28610871\_x1.....cgaucggagacgGcguggg..... 1  
 Gi2\_11141227\_x1.....ugggaacacCgggugccgaac..... 1  
 Gi3\_28755289\_x1.....gacgucgugggaacacggggugccUaacu..... 1  
 Gi3\_28660903\_x1.....ucggagacNucgugggaacacggggugccg..... 1  
 Gi5\_8989736\_x1.....ggccccgccaguacugAgaucgga..... 1  
 Gi3\_28420941\_x1.....acgucguCggaacacggggugccgaac..... 1  
 Gi1\_4285595\_x1.....ggccccgccaguacugcgauUggaga..... 1  
 Gi1\_4277685\_x1.....agacgucgugggaacacggggugccgCac..... 1  
 Gi3\_28389004\_x1.....aguacugcgauccgUgacgucgug..... 1  
 Gi2\_11375397\_x1.....Aagacgucgugggaacacggggugc..... 1  
 Gi3\_28535669\_x1.....ccccgccaguacugcgauccgagGcguc..... 1  
 Gi3\_28497246\_x1.....ucggagacgucgugggCacacggggugccgaacu..... 1  
 Gl1a\_6133402\_x1.....uacugcgGucggagacgucgu..... 1  
 Gi1\_4185341\_x1.....ucggagacgucgugggaacacggggAgc..... 1  
 Gi5\_9130397\_x1.....cucguuccgaauaCgaagagaagcgc..... 1  
 Gi4\_580719\_x1.....gugAgaacacggggugccgaa..... 1  
 Gi3\_28311670\_x1.....gggaacacggggugcAga..... 1  
 Gi3\_28428264\_x1.....Cccaguacugcgauccgagac..... 1  
 Gi2\_11269659\_x1.....cgcAgucaggccccgccaguac..... 1  
 Gi2\_11302414\_x1.....gggaacacgggAugccga..... 1  
 Gi5\_8961250\_x1.....ugggaCcacggggugccgaa..... 1  
 Gi2\_11060102\_x1.....aucggagacgucgugggaacacgggA..... 1  
 Gi2\_11119640\_x1.....gaucggagaAgucgugggaacacggggugc..... 1  
 Gi1\_4198504\_x1.....cgUucggagacgucgugggaacacggggg..... 1  
 Gl1a\_5981358\_x1.....gaGgcgccgucaggccccgcc..... 1  
 Gi3\_28481044\_x1.....agaaAcgccgucaggcccc..... 1  
 Gi3\_28639192\_x1.....gaucggagacgucgugggaacacgAgg..... 1  
 Gi3\_28313007\_x1.....aucggagacgucgugggaacacggggugccgaacA..... 1  
 Gi3\_28777758\_x1.....ggagacAucgugggaacacg..... 1  
 Gi5\_8849632\_x1.....agacgCcgugggaacacggggg..... 1  
 Gl1a\_6234391\_x1.....agagaagcNccgucaggccccgc..... 1  
 Gi3\_28847302\_x1.....cggagacgucgugggaacacAgggugccga..... 1  
 Gl1a\_6283333\_x1.....aCuacugcgauccgagacgucgu..... 1  
 Gi5\_9083417\_x1.....gaucggagacgucgugggaGcacggg..... 1  
 Gi3\_28671249\_x1.....gaucggagacgucgugggaacacCgg..... 1

Gi4\_599228\_x1 .....uggaacaacgaggugccgaCcu..... 1  
 Gi2\_11025720\_x1.....cgucgugggaacaGgggugccga..... 1  
 Gi3\_28810750\_x1.....ccagCacugcgauccgagacgucgu..... 1  
 Gi3\_28689546\_x1.....gucgugggaacacgggAugcc..... 1  
 Gi2\_11157716\_x1.....ggagacgucgugggaacacgggAgccg..... 1  
 Gi1\_4321434\_x1.....ucggagacgucgugggCacacggggugcc..... 1  
 Gi3\_28869089\_x1.....guUggaacacggggugccgaacuuu..... 1  
 Gi3\_28473274\_x1.....Ugcgucagggccccgccaguacu..... 1  
 Gi2\_11071134\_x1.....ucggagacgucgugggaacaAggggu..... 1  
 Gi2\_11296193\_x1.....aggcccUgccaguacugcgaucg..... 1  
 Gi3\_28967852\_x1.....acgucgugggaacacgUggugccgaac..... 1  
 Gi2\_11368492\_x1.....ucaggccccgcUaguacugcgauc..... 1  
 Gi3\_28315878\_x1.....acacggggNgccgaacuu..... 1  
 Gl1\_6209976\_x1.....agaagcgAcgucaggccccgc..... 1  
 Gi3\_28900061\_x1.....gcgaucggagacgCcgug..... 1  
 Gl1\_6119200\_x1.....cgCcaggccccgccaguacug..... 1  
 Gi3\_28563138\_x1.....gcgccgucagggccccgccCguacugc..... 1  
 Gi3\_28527300\_x1.....guacugcgauccgagGcgucgugggaacacgg..... 1  
 Gi3\_28613802\_x1.....gaucggagacgucgCgggaacac..... 1  
 Gi2\_11083917\_x1.....cgaCcgagacgucgugg..... 1  
 Gi3\_28676114\_x1.....ucggagacgucgGgggaacacgggu..... 1  
 Gi1\_4226824\_x1.....cGggccccgccaguacugcgauccgaga..... 1  
 Gi5\_9054660\_x1.....caUgccccgccaguacugcgauc..... 1  
 Gi2\_11165304\_x1.....gugggaaUacggggugccgaacuu..... 1  
 Gi3\_28358830\_x1.....acgucgugggaacacggggugccCaac..... 1  
 Gl1\_6307046\_x1.....cgugggaacacgggAugcc..... 1  
 Gi3\_28716035\_x1.....cgccaguacAgcgauccgagacgu..... 1  
 Gi3\_28527967\_x1.....aucggagacgucguggUaacacggg..... 1  
 Gi2\_11297105\_x1.....ccccccaguacugcgaAcgggagac..... 1  
 Gi3\_28336215\_x1.....Aacgucgugggaacacggggugcc..... 1  
 Gi1\_4339295\_x1.....aucggagacgucgugggaacacU..... 1  
 Gi3\_28790070\_x1.....cgucagggccccgccagCacugcgauccgaga..... 1  
 Gi3\_28326781\_x1.....gaucUgagacgucgugggaacacggggugccga..... 1  
 Gl1\_5989035\_x1.....cgauccgagacgucgugggaacGcg..... 1  
 Gi2\_11059026\_x1.....ugcgauccggaCacgucgugggaacacg..... 1  
 Gi2\_11034665\_x1.....Naucggagacgucgugggaacacg..... 1  
 Gi3\_28666499\_x1.....ggagacgucgugggaacacggggugccgaGc..... 1  
 Gi3\_28345754\_x1.....caggccccgccaguacugcgauccgagGcguc..... 1  
 Gl1\_6098213\_x1.....aacucguuccgaauuaggaaga..... 0  
 Gi2\_11113674\_x1.....ucgNgggaacacggggugccgaac..... 1  
 Gi2\_11144897\_x1.....gagaaAcgccgucagggccccgc..... 1  
 Gi4\_580002\_x1.....ggaacacggggugccAaacu..... 1  
 Gi2\_11025637\_x1.....cgucgugggaacacCgggugc..... 1  
 Gl1\_6140352\_x1.....gggaacacggggugAcgaacu..... 1  
 Gi5\_8969547\_x1.....ccgccaguacugcgauccgagacguUgu..... 1  
 Gi3\_28943635\_x1.....gaucggagacgucguggUaacac..... 1  
 Gi3\_28457428\_x1.....gccaguacugcgauccgagacgG..... 1

Gi1a\_6315835\_x1.....cgAcagggccccgccaguac..... 1  
Gi2\_11105067\_x1.....cccgccagguacugcgcaCcgagagcugc..... 1  
Gi1a\_6050399\_x1.....Ggcgaucggagacgucguggggaacac..... 1  
Gi1a\_6266661\_x1.....gaucggGgacgucguggggaacac..... 1  
Gi1\_4212787\_x1.....cgAcguggggaacacggggugccgaa..... 1  
Gi3\_28833732\_x1.....aagagaagcgccUucagggccccgcc..... 1  
Gi2\_11178594\_x1.....agacgucguggggaacGcggggugccg..... 1  
Gi3\_28357916\_x1.....gaucggagacgucgAgggaacacggggg..... 1  
Gi5\_9065802\_x1.....ugggaacacggggGcgggaacu..... 1  
Gi1\_4264911\_x1.....caggccccgccaAuacugcgaucggaga..... 1  
Gi1\_4218014\_x1.....aagcgAcgucagggccccgccaguacugc..... 1  
Gi3\_28619277\_x1.....gcaucggagGcugcug..... 1  
Gi3\_28850216\_x1.....cccUgccagguacugcgaucgg..... 1  
Gi2\_11169248\_x1.....aguacugcgaucggagCcg..... 1  
Gi3\_28720034\_x1.....aGgagaagcgccgucagggccccgcc..... 1  
Gi1a\_6163263\_x1.....uggUaacacggggugccgaacu..... 1  
Gi1\_4194113\_x1.....ggUgacgucguggggaacacggggugccgaacu..... 1  
Gi3\_28401243\_x1.....ugcgaucggGgacgucgug..... 1  
Gi5\_8876109\_x1.....ccgucagggccccgccagCacugcg..... 1  
Gi3\_28377369\_x1.....cccAccagguacugcgaucggaga..... 1  
Gi2\_11023796\_x1.....cgucagggccccgccaguCcugc..... 1  
Gi1a\_6354602\_x1.....caggccccgcUaguacugcg..... 1  
Gi3\_28803584\_x1.....ggagacgucgugggUaacggggugcc..... 1  
Gi3\_28646681\_x1.....cggagacgucguggAaacacggg..... 1  
Gi3\_28452897\_x1.....acgucguggggaacaAgggggugccgaacu..... 1  
Gi5\_9057226\_x1.....ugggaacacggggugAcgaa..... 1  
Gi2\_11361321\_x1.....Ggaagcgccgucagggccccgccaguacugcg..... 1  
Gi3\_28643662\_x1.....ugggaGcaccggggugccgaacu..... 1  
Gi4\_614278\_x1.....gagaagcgccgucagggccccg..... 0  
Gi2\_11004026\_x1.....Uccagguacugcgaucggag..... 1  
Gi2\_11107055\_x1.....gacgucgugUgaacacggggugccgaacu..... 1  
Gi3\_28846990\_x1.....gaAgucguggggaacacggggugccgaacu..... 1  
Gi5\_8921686\_x1.....acgucguggggaacacgggg..... 0  
Gi3\_28863936\_x1.....cgugggaacacggggugGcg..... 1  
Gi2\_11243256\_x1.....gggaacacggggugccUaa..... 1  
Gi5\_9002342\_x1.....ccgucagggAccgccaguacugc..... 1  
Gi2\_11026457\_x1.....aguacugcgaucggagacAu..... 1  
Gi3\_28738968\_x1.....cccgccagguacugcgcaGcgg..... 1  
Gi3\_28276507\_x1.....agaagcgcgUgucagggccccgccaguacug..... 1  
Gi3\_28812068\_x1.....aggccccgcUaguacugcgaucgga..... 1  
Gi3\_28301839\_x1.....agacAucguggggaacacggggug..... 1  
Gi2\_11323507\_x1.....agcgccgucUggccccgccagu..... 1  
Gi3\_28710834\_x1.....cgucaAgccccgccaguacugc..... 1  
Gi3\_28715392\_x1.....cgccagguacugcgaucggC..... 1  
Gi3\_28335447\_x1.....caggccccgcUaguacugcg..... 1  
Gi1a\_6343160\_x1.....aggccccgccagguacugcgaucUg..... 1  
Gi2\_11165621\_x1.....



Gi3\_28847762\_x1.....aagcgccguAaggccccccagua..... 1  
 Gi3\_28693973\_x1.....agacgucgugggaacacgggAugcc..... 1  
 Gi2\_11051332\_x1.....gUucggagacgucgugggaacacggggug..... 1  
 Gi3\_28630477\_x1.....aggcccGgccaguacugc..... 1  
 Gi5\_8848723\_x1.....gugggaacacggggugAcgaacuu..... 1  
 Gi3\_28745380\_x1.....Aucaggccccgccaguacugcgaucgg..... 1  
 Gi3\_28955359\_x1.....cgucagUccccgccaguacugcg..... 1  
 Gi3\_28755340\_x1.....aguacugcgaucggCgacg..... 1  
 Gi3\_28645013\_x1.....gaUcacggggugccgaacuu..... 1  
 Gi5\_8961587\_x1.....gaucggagacgucgAgggaacacgg..... 1  
 Gi3\_28667067\_x1.....ccaguacugcgaGcggagacguc..... 1  
 Gi5\_8958790\_x1.....cUguacugcgaucggagacgucgugga..... 1  
 Gl1a\_6321701\_x1.....cgucaggccccgccaguacCgcgaucgg..... 1  
 Gi3\_28423268\_x1.....ucguggCaacacggggugccgaa..... 1  
 Gi1\_4371593\_x1.....ucggagacgucgugggaacacggggugA..... 1  
 Gi3\_28301990\_x1.....acguGgugggaacacggggugc..... 1  
 Gi1\_4204356\_x1.....uacugcgaucggagacgucgu..... 0  
 Gl1a\_6142119\_x1.....Agugggaacacggggugcc..... 1  
 Gi2\_11377914\_x1.....uggggaacacgCggugccgaacu..... 1  
 Gi3\_28448267\_x1.ccuuaacuUguuccgaau..... 1  
 Gi2\_11067835\_x1.....gucgugggUacacggggugcc..... 1  
 Gi3\_28716753\_x1.....gagaagcgccgucagggccccgccaguaUugc..... 1  
 Gi2\_11178541\_x1.....Cgccccgccaguacugcgau..... 1  
 Gi1\_4344405\_x1.....agaagcgccgucagggccccU..... 1  
 Gi3\_28397309\_x1.....gagacgucgugggaacacggggCgcc..... 1  
 Gi2\_11283667\_x1.....acguGgugggaacacggggugc..... 1  
 Gi2\_11192877\_x1.....Aggggaacacggggugccg..... 1  
 Gi3\_28726765\_x1.....cccgccaguacugcgauA..... 1  
 Gi4\_588100\_x1.....cgucAugggaacacggggugccga..... 1  
 Gi5\_8892493\_x1.....cgucgugggaacaUggggugc..... 1  
 Gi2\_11085866\_x1.....gacgucgugggaGcacggggugccgaac..... 1  
 Gi1\_4289542\_x1.....agacgucgugAgaacacggggugccgaacu..... 1  
 Gi3\_28323711\_x1.....ccgccGuacugcgaucgg..... 1  
 Gi3\_28435498\_x1.....agcgccgucagggccccgccaguGc..... 1  
 Gi2\_11327460\_x1.....gucagAccccgccaguacugcgau..... 1  
 Gi2\_11049208\_x1.....ucggagacgucgugggaacacggCg..... 1  
 Gi1\_4255511\_x1.....gugggCacacggggugccgaacu..... 1  
 Gi1\_4312147\_x1.....gugggaGcacggggugccg..... 1  
 Gi1\_4347431\_x1.....gugggaacacggggUaccgaacuu..... 1  
 Gi2\_11192697\_x1.....cgaucggagacgucgugggaGcacggggugc..... 1  
 Gi5\_8914936\_x1.....ugcgaucggagacgCcguggg..... 1  
 Gi1\_4249370\_x1.....Ggccaguacugcgaucggaga..... 1  
 Gi3\_28934792\_x1.....uUggagacgucgugggaacac..... 1  
 Gl1a\_6298858\_x1.....gccaguacugcgUucggagacguc..... 1  
 Gi2\_11305402\_x1.....ccgaauaNGaagagaagcgccguc..... 1  
 Gi3\_28367844\_x1.....acucguuccgaauaggaaga..... 0  
 Gi3\_28302050\_x1.....cccgccaguacugcgaucgAagacg..... 1

Gi5\_9022595\_x1.....Uaguacugcgaucggagacgucguggga..... 1  
Gi1\_4181962\_x1.....aucggagacgucgugggaacacgAggu..... 1  
Gi2\_11239406\_x1.....uGggagacgucgugggaacacg..... 1  
Gi2\_11327307\_x1.....gucaggccccgccUguacugc..... 1  
Gi1\_4277667\_x1.....gugggaacacggUgugccgaacuu..... 1  
Gi3\_28889664\_x1.....ccgucaggccccgccaAuacugc..... 1  
Gi1\_4261940\_x1.....cgccaguacugcAaucggagac..... 1  
Gi3\_28420671\_x1.....cgccgucaggccccgccCgu..... 1  
Gi3\_28660863\_x1.....caggAcccgccaguacugcg..... 1  
Gi5\_8883901\_x1.....gucgugggaacacggggugccgCa..... 1  
Gi3\_28910115\_x1.....gaucAgagacgucgugggaac..... 1  
Gi3\_28265323\_x1.....cgGcgugggaacacggggu..... 1  
Gi3\_28638353\_x1.....agacgucgugAgaacacggggugcc..... 1  
Gi1\_4245930\_x1.....ggaacacCgggugccgaacuu..... 1  
Gi2\_11036010\_x1.....aucggagacgucguggUaaca..... 1  
Gi5\_9095659\_x1.....gagacgucAugggaacacg..... 1  
Gi2\_11141800\_x1.....ugcgauccggGgacgucgugggaacac..... 1  
Gi2\_11198432\_x1.....aggUcccgccaguacugcgauccggagacguc..... 1  
Gi5\_8985350\_x1.....gaucggagacgucguggGacacg..... 1  
Gi2\_11118558\_x1.....agacgucgNgggaacacggggugccgaa..... 1  
Gi3\_28415433\_x1.....gccccgccaguaUugcgau..... 1  
Gi3\_28611028\_x1.....cccgccaguacugcgCucggaga..... 1  
Gi3\_28650630\_x1.....gucgugggaacacggggugccgaaAuu..... 1  
Gi1\_4185996\_x1.....ucggagacgucguggGacacggggugcc..... 1  
Gi3\_28428603\_x1.....ccccccaAuacugcgauccgga..... 1  
Gi1\_4173612\_x1.....aucggagacgucgugggaGcacgg..... 1  
Gi3\_28384515\_x1.....aggccccAccaguacugcgauccgga..... 1  
Gi2\_11169350\_x1.....ccUcgccaguacugcgauccg..... 1  
Gi1\_4376732\_x1.....gggaacacggggugcAgaacuu..... 1  
Gi2\_11024728\_x1.....agaagcgccgucagggcccU..... 1  
Gi2\_11350222\_x1.....gggaaAacggggugccgaa..... 1  
Gi3\_28726204\_x1.....agaagcgccgucagggccccgccaguGcugcg..... 1  
Gi5\_8942855\_x1.....cgugggGacacggggugccg..... 1  
Gi2\_11024595\_x1.....gugggaacacggggugcAga..... 1  
Gi2\_11308011\_x1.....cAucgugggaacacgggg..... 1  
Gi1\_4226117\_x1.....gacgucgugggaacacggggugcA..... 1  
Gi3\_28403531\_x1.....Ngugggaacacggggugc..... 1  
Gi2\_11156479\_x1.....gaucggagacgucgugggaGc..... 1  
Gi5\_8830899\_x1.....ucgugggaacCggggugcc..... 1  
Gi1\_4277024\_x1.....aggccccccagCacugcgauccg..... 1  
Gi3\_28599898\_x1.....gaucggagacgAcgugggaacacg..... 1  
Gi2\_11353473\_x1.....gagacgucgugggaacacggggugcUg..... 1  
Gi2\_11166368\_x1.....gcgauccggaAacgucgugggaacacggg..... 1  
Gi1\_4279207\_x1.....Auacugcgauccggagacgucg..... 1  
Gl1\_6242117\_x1.....gugggaacacggggugccgGa..... 1  
Gi2\_11085992\_x1.....ugggaacacggggugccgaacua..... 1  
Gi3\_28899662\_x1.....agGagcgccgucagggccccgccagua..... 1

Gi1\_4297365\_x1.....aucggagacgucgugggaa..... 0  
 Gi2\_11166568\_x1.....Ggaucggagacgucgugggaaacacggggug..... 1  
 G1a\_6151156\_x1.....Uagagaagcgccgucagggcc..... 1  
 Gi3\_28440211\_x1.....cgucgugggaaacGcggggug..... 1  
 Gi3\_28716064\_x1.....Cccgucagggcccgccaguac..... 1  
 Gi2\_11283051\_x1.....agAccccgccaguacugcgauccgga..... 1  
 Gi2\_11152599\_x1.....acgucgugggaaacacggggguAccg..... 1  
 Gi3\_28658974\_x1.....agagaagcUccgucagggcccgcc..... 1  
 Gi2\_11247738\_x1.....ccUcgccaguacugcgauccgaga..... 1  
 Gi4\_568415\_x1.....Uagacgucgugggaaacacggggugccgaacu..... 1  
 Gi3\_28368346\_x1.....cgauccgagaAgucguggg..... 1  
 Gi4\_607815\_x1.....cGguacugcgauccggagacgu..... 1  
 Gi3\_28418216\_x1.....cggagacgucgugggaaacCcggggugccg..... 1  
 Gi1\_4186351\_x1.....aucggGgacgucgugggaaacacgggg..... 1  
 Gi3\_28484608\_x1.....cccgccaguacugcCauc..... 1  
 Gi3\_28701757\_x1.....cgucagggcccgccagCacugcgauccgga..... 1  
 Gi3\_28614041\_x1.Ucuuaacucguuccgaau..... 1  
 Gi2\_11269251\_x1.....aggccccAccaguacugcgau..... 1  
 Gi3\_28847184\_x1.....ugggaaacacgggCugccga..... 1  
 Gi3\_28474740\_x1.....acgucgugggaaUacggggugc..... 1  
 Gi4\_593052\_x1.....cgucgugggaaacGcggggugccga..... 1  
 Gi5\_8970387\_x1.....caggccccgccaguacugcgauU..... 1  
 Gi2\_11313935\_x1.....guCggaacacggggugccga..... 1  
 Gi2\_11341722\_x1.....agUgaagcgccgucagggc..... 1  
 Gi3\_28677495\_x1.....cgugggaaacacgggUugccgaac..... 1  
 Gi1\_4289800\_x1.....aguacugcNaucggagacgucgug..... 1  
 Gi1\_4218624\_x1.....gagaUgucgugggaaacacggggugccgaacu..... 1  
 Gi5\_8991885\_x1.....cgugggaaacacggggAgcc..... 1  
 Gi1\_4196304\_x1.....aacacggggugccgaGcuu..... 1  
 Gi2\_11384165\_x1.....Uggagacgucgugggaaacacggggugccga..... 1  
 Gi1\_4260662\_x1.....gucgugggaaacacggggCgcc..... 1  
 Gi5\_8982868\_x1.....Ngggaaacacggggugccgaacu..... 1  
 Gi5\_8912141\_x1.....aucAgagacgucgugggaaacacggg..... 1  
 Gi2\_11360434\_x1.....cgUagacgucgugggaaaca..... 1  
 Gi3\_28735066\_x1.....gUgacggagacgucgugggaaacacggg..... 1  
 Gi3\_28948823\_x1.....agagaagcgccgCcaggc..... 1  
 Gi5\_9075650\_x1.....gaucggagNcgucgugggaaaca..... 1  
 Gi2\_11144616\_x1.....acgucgugggaaCcacggg..... 1  
 Gi3\_28774697\_x1.....aaagagaagcgccgucagggUcccggcag..... 1  
 Gi3\_28600190\_x1.....cgauccgagGcgucgugggaaacacggggug..... 1  
 G1a\_5989481\_x1.....Cacugcgauccggagacguc..... 1  
 Gi3\_28552775\_x1.....caguacugcgauccggagacgucg..... 0  
 Gi5\_9058085\_x1.....aGgucgugggaaacacggggugcc..... 1  
 Gi2\_11263588\_x1.....gucgugggaaacacggggugAcga..... 1  
 G1a\_6071603\_x1.....gucagggccccAccaguacugc..... 1  
 Gi3\_28804014\_x1.....gagacgucgugggaaacacggggugccgGac..... 1  
 Gi2\_11169135\_x1.....caggccccgccaguacugcUauc..... 1

Gi1\_4264832\_x1.....agcgccgucaggccccgccaUuacugc..... 1  
 Gi3\_28779419\_x1.....acgucgugggaacacggggugGcgaacu..... 1  
 Gi3\_28784955\_x1.....ucggagacgucgugggaacGcggg..... 1  
 Gi4\_575825\_x1.....cCucgugggaacacggggugcc..... 1  
 Gi3\_28968000\_x1.....aucggagaAgucgugggaacacggggugc..... 1  
 Gi2\_11153285\_x1.....caggccccgccaguacuAcg..... 1  
 Gi3\_28937614\_x1.....Uggagacgucgugggaacacggg..... 1  
 G1a\_6045301\_x1.....aucggagacgucgugggaacGcggggugcc..... 1  
 Gi2\_11219658\_x1.....agacgucgugggaacacAgggugccgaac..... 1  
 Gi1\_4300663\_x1.....ggagacgucgugggaacacggggugAc..... 1  
 Gi3\_28881363\_x1.....cgccgucagggccccgcccGguacu..... 1  
 G1a\_6147677\_x1.....gggaacacggggugccgaaUu..... 1  
 Gi4\_599000\_x1.....gAgggaacacggggugccga..... 1  
 Gi2\_11011755\_x1.....ccccgccGguacuagcgaucggag..... 1  
 Gi1\_4176926\_x1.....guGgugggaacacggggugccgaacu..... 1  
 G1a\_6079778\_x1.....Uaagcgccgucaggccccgcccaguacugc..... 1  
 Gi2\_11318163\_x1.....caggccccgcccaguacuAcgauccg..... 1  
 Gi3\_28478293\_x1.....acgucgAgggaacacggggugccgaac..... 1  
 Gi4\_590728\_x1.....uAgugggaacacggggugccgaacu..... 1  
 Gi3\_28669991\_x1.....agGgaagcgccgucagggccccg..... 1  
 Gi3\_28419966\_x1.....Ggaagcgccgucagggccccgcca..... 1  
 Gi2\_11145485\_x1.....ugggaacacggggugUcgaa..... 1  
 Gi3\_28776804\_x1.....acgucgugggaCcacggggugccg..... 1  
 Gi1\_4342565\_x1.....gucguAggaacacggggugc..... 1  
 Gi3\_28288241\_x1.....gucagggccccgGcaguacugc..... 1  
 Gi3\_28788606\_x1.....cccgccaguacugcgaucggagaAguc..... 1  
 G1a\_6186868\_x1.....gagagaagNgccgucagggccccgcca..... 1  
 Gi3\_28409733\_x1.....ucagggccccAccaguacugcgauc..... 1  
 Gi2\_11274883\_x1.....agGcugcugugggaacacggggg..... 1  
 Gi3\_28858236\_x1.....acgucgugggaacacgggCugccgaacu..... 1  
 Gi5\_8936835\_x1.....ggGacacggggugccgaa..... 1  
 Gi2\_11262347\_x1.....gaaGacggggugccgaacu..... 1  
 Gi4\_596344\_x1.....cgauccgagacgucgugggaacacggg..... 0  
 Gi1\_4226494\_x1.....aguacCgcgacgagacgucgug..... 1  
 G1a\_6269880\_x1.....ugcgaucggagacgucgugggaacacggggG..... 1  
 Gi1\_4313307\_x1.....gaucggagacgucgugggaacacggggugccU..... 1  
 Gi3\_28456851\_x1.....uAggagacgucgugggaacacggggg..... 1  
 Gi3\_28274763\_x1.....Nggaacacggggugccgaacu..... 1  
 Gi2\_11092655\_x1.....cgugggaacacAgggugccgaa..... 1  
 Gi3\_28813180\_x1.....ggccccgcccaguacuAcgau..... 1  
 Gi5\_8896638\_x1.....cggagacgucgugggaacacAgggugccga..... 1  
 G1a\_6309047\_x1.....gugggaacaUggggugccga..... 1  
 Gi3\_28599196\_x1.....caggccccgcccaguUcugcgauccgga..... 1  
 Gi5\_9119779\_x1.....Uccgccaguacugcgaucggagacgu..... 1  
 G1a\_6228389\_x1.....aucggagacgucgugggUacacggggug..... 1  
 Gi2\_11029557\_x1.....gccccgccGguacuagcgauc..... 1

|                 |                                         |   |
|-----------------|-----------------------------------------|---|
| Gi3_28419972_x1 | .....aucggagacguAguggga                 | 1 |
| Gi3_28855261_x1 | .....ucaggccccgccaguUcugcg              | 1 |
| Gi3_28421415_x1 | .....agacgucAugggaacacggggugccgaacu     | 1 |
| Gi2_11342446_x1 | .....cccgGcaguacugcgauccggagacguc       | 1 |
| Gi3_28646241_x1 | .....aucggagacgucgugggaacaAgggg         | 1 |
| Gi3_28909698_x1 | .....gCgaagcgccgucagggccccgc            | 1 |
| Gi3_28891905_x1 | .....cccgccaguacugcgaCcgagac            | 1 |
| G1a_6038772_x1  | .....gaagcgccNucaggccccgccaguacugcg     | 1 |
| Gi3_28296703_x1 | .....ggccccgccaAuacugcgau               | 1 |
| Gi2_11236178_x1 | .....Cguacugcgauccggagacgucg            | 1 |
| Gi3_28858179_x1 | .....agacgucgugggaacacgUggugccgaacu     | 1 |
| Gi2_11081759_x1 | .....ucguggAaacacggggugcc               | 1 |
| Gi1_4231459_x1  | .....gacgucgugggaacacggggugccgaacAu     | 1 |
| Gi5_8903733_x1  | .....ggaacacggggugGcgaac                | 1 |
| Gi2_11272081_x1 | .....agacgucgugggaacacgggg              | 0 |
| Gi2_11116877_x1 | .....cgucguCggaacacggggugc              | 1 |
| G1a_6343640_x1  | .....gacgucgugggaacacgAggugccgaacu      | 1 |
| Gi2_11232959_x1 | .....gcgauccggagacgucgugggCaca          | 1 |
| Gi1_4244440_x1  | .....cgucgugggCacacggggugcc             | 1 |
| Gi2_11282802_x1 | .....cgucgugggGacacgggg                 | 1 |
| G1a_6283873_x1  | .....guacugcgNucggagacgucg              | 1 |
| Gi2_11203993_x1 | .....cgauccggagacgucgugggGacacgggg      | 1 |
| Gi3_28380441_x1 | .....acacAgggugccgaacuu                 | 1 |
| G1a_6003496_x1  | .....gauccggagacgucguggAa               | 1 |
| Gi1_4288269_x1  | .....gagacgucgugggaacacggggugccgaacuu   | 0 |
| Gi2_11376915_x1 | .....ugggaacacggggugAcga                | 1 |
| Gi2_11069432_x1 | .....gucagggccccgccagCacugcgauccggagacg | 1 |
| Gi2_11036049_x1 | .....gaacacggggugcUgaac                 | 1 |
| Gi1_4169860_x1  | .....ggagacgucgugggaacacggggGgccg       | 1 |
| Gi3_28325503_x1 | .....aggccccgccaguacugcgauccUga         | 1 |
| G1a_6042831_x1  | .....cgGucggagacgucgugg                 | 1 |
| Gi5_9069336_x1  | .....ucgugggGacacggggugcc               | 1 |
| Gi3_28861827_x1 | .....gccaguacugcgGucgga                 | 1 |
| Gi1_4314917_x1  | .....gucguUggaacacggggugccgaacu         | 1 |
| Gi3_28327253_x1 | .....cgauccggagacgucgugggaacacggggCgc   | 1 |
| Gi2_11020948_x1 | .....cgucgAgggaacacggggugcc             | 1 |
| Gi3_28435228_x1 | .....ccUccaguacugcgauccggagacgucgugg    | 1 |
| Gi3_28549792_x1 | .....acgucgugggaacCcggggugccg           | 1 |
| G1a_6343039_x1  | .....aagcgccgucagggcUcgccaguacugc       | 1 |
| Gi3_28265804_x1 | .....cgucagggNccgccaguacugcgauccggaga   | 1 |
| Gi3_28757196_x1 | .....gggaacacggggAgccga                 | 1 |
| Gi5_9058186_x1  | .....caggGccccccaguacugcg               | 1 |
| Gi2_11047724_x1 | .....agcNccgucagggccccgccagua           | 1 |
| Gi2_11366401_x1 | .....aucNgagacgucgugggaacacggg          | 1 |
| Gi2_11147251_x1 | .....gucagggccccAccaguacugc             | 1 |
| Gi3_28749037_x1 | .....gcgUgucagggccccgccaguacugc         | 1 |
| Gi3_28728055_x1 | .....aCaagcgccgucagggccc                | 1 |

Gi2\_11024026\_x1.....cgugggaacacggggugccgaU..... 1  
 Gi2\_11298878\_x1.....ucguggUaacacggggugccg..... 1  
 Gi3\_28334452\_x1.....agacgucCugggaacacggggugccgaac..... 1  
 Gi1\_4307918\_x1.....gagaagcgcgcgucaggccccgcc..... 0  
 Gi1\_4182141\_x1.....gugggaacacAgggugccgaac..... 1  
 Gi2\_11266207\_x1.....cCugggaacacggggugccg..... 1  
 Gi3\_28718860\_x1.....gacgucgugggaacacggggugcUgaacu..... 1  
 Gl1a\_6056689\_x1.....Aucaggccccgccaguacugc..... 1  
 Gi3\_28787061\_x1.....ccccgccaguacugcgCucggaga..... 1  
 Gi2\_11291126\_x1.....cgccgucaggccccgccagua..... 0  
 Gi3\_28346322\_x1.....gccaguacugcgauccggagaGguc..... 1  
 Gi3\_28752446\_x1.....caggccccgccUguacugcgau..... 1  
 Gl1a\_6141373\_x1.....cgagacgucgugggaGcacggg..... 1  
 Gi3\_28578056\_x1.....gGcaguacugcgauccggagacgucgug..... 1  
 Gl1a\_6281662\_x1.....ccaNuacugcgauccggagacgucgug..... 1  
 Gi2\_11244373\_x1.....cgugggaacacgggCugc..... 1  
 Gi3\_28628716\_x1.....gccgucaggccccgccGguacugcg..... 1  
 Gi2\_11258231\_x1.....ccaguacugcgauccggagCcg..... 1  
 Gi2\_11203917\_x1.....ugggaacaAggggugccga..... 1  
 Gi3\_28809066\_x1.....gcgCUGucaggccccgccagu..... 1  
 Gi1\_4364678\_x1.....cgccaguaNugcgauccggaga..... 1  
 Gl1a\_6247227\_x1.....caguacugcgauccggagacguUg..... 1  
 Gi3\_28395996\_x1.....ccgccaguacugcgauccggagacguUgu..... 1  
 Gi3\_28278765\_x1.....gagacguAgugggaacacggggugcc..... 1  
 Gi3\_28737012\_x1.....ggccccgccaguacugUga..... 1  
 Gi2\_11327967\_x1.....agagaagcgcgcgucaggccccgcUa..... 1  
 Gi1\_4341312\_x1.....cgucaggccccgccGguacugc..... 1  
 Gi2\_11112113\_x1.....gcgauccggagacgucgugggaGcacggg..... 1  
 Gi3\_28893315\_x1.....Uccaguacugcgauccggagacgucgug..... 1  
 Gi3\_28708350\_x1.....cgucaggccccgccaguacAg..... 1  
 Gi5\_9056573\_x1.....ucaggccccgUcaguacugcg..... 1  
 Gi5\_8973741\_x1.....aucggagCcgucgugggaacacggggugcc..... 1  
 Gi2\_11133275\_x1.....aggcUccgccaguacugcga..... 1  
 Gl1a\_6343873\_x1.....cccgccaguacugcgauccggagacgCc..... 1  
 Gi3\_28554332\_x1.....aAgccccgccaguacugcgauccggagacguc..... 1  
 Gi2\_11168934\_x1.....gaagcgcgcgucaggccccAc..... 1  
 Gi5\_8883071\_x1.....cgccaguacuAcgauccggagacgu..... 1  
 Gi3\_28707203\_x1.....gcUccgccaguacugcgauccggagacgu..... 1  
 Gi1\_4237793\_x1.....ugggaacaAggggugccgaac..... 1  
 Gi2\_11012565\_x1.....ccgccaguacugcAaucggag..... 1  
 Gi3\_28407636\_x1.....ucAgagacgucgugggaacacg..... 1  
 Gi5\_9099298\_x1.....agacgucgugggaaAacggggugccgaac..... 1  
 Gl1a\_6228342\_x1.....gcgaGcggagacgucgug..... 1  
 Gi5\_8876238\_x1.....aucggagacgucgugggaaUgg..... 1  
 Gi5\_8882818\_x1.....cacAggggugccgaacuuu..... 1  
 Gl1a\_6002342\_x1.....aucgAagacgucguggga..... 1  
 Gl1a\_6034365\_x1.....aacacggggAgccgaacu..... 1

Gi2\_11229418\_x1.....ccccgAcaguacugcgauccg..... 1  
Gi2\_11331791\_x1.....Acgaucggagacgucgugggaaca..... 1  
Gi4\_583140\_x1.....cgucaggccccUgccaguacugc..... 1  
Gi2\_11114585\_x1.....cgucgugggaacGcgggg..... 1  
Gi3\_28982565\_x1.....cugNgaucggagacgucg..... 1  
Gi3\_28670904\_x1.....gagacgucgugggaacacggAgu..... 1  
Gi2\_11308679\_x1.....gaagagaagcgccgucagggcccg..... 0  
Gi3\_28729773\_x1.....cggagacgucAugggaacac..... 1  
Gi3\_28450197\_x1.....ccccgccaguacugcgauccggagacAuc..... 1  
G1a\_6224222\_x1.....gugggaacacggUgugcc..... 1  
Gi5\_8876633\_x1.....gaucggagacgucgugCgaacac..... 1  
Gi2\_11047309\_x1.....gccgucagggccccUccaguacugc..... 1  
G1a\_6086833\_x1.....gCgggaacacggggugccg..... 1  
Gi2\_11057975\_x1.....agacgucgCgggaacacggggugccgaa..... 1  
Gi2\_11018509\_x1.....ucagggccccccaguaAug..... 1  
Gi2\_11268857\_x1.....cgucUugggaacacggggug..... 1  
Gi2\_11306870\_x1.....ccccAccaguacugcgau..... 1  
Gi2\_11195520\_x1.....aggccccgccagGacugcg..... 1  
Gi2\_11118935\_x1.....aagagaagcgAcgucagggcccccca..... 1  
Gi3\_28955937\_x1.....cgucagggccccCccaguacugc..... 1  
Gi3\_28320169\_x1.....auNggagacgucgugggaacacggg..... 1  
Gi2\_11350851\_x1.....cggagacgAcgugggaacacgggg..... 1  
Gi5\_8895509\_x1.....Ccgagacgucgugggaacacggggugccgaacu..... 1  
Gi3\_28587241\_x1.....acugcgauccggaUacguc..... 1  
Gi5\_8943162\_x1.....aucggagacgucgGgggaacacg..... 1  
Gi3\_28818029\_x1.....ccgucaAgccccgccaguacugc..... 1  
G1a\_6157299\_x1.....gugggaacCcggggugccg..... 1  
Gi3\_28307823\_x1.....ucgNagacgucgugggaacacggggugccg..... 1  
Gi3\_28365408\_x1.....ccgccaAuacugcgauccggagac..... 1  
Gi3\_28539664\_x1.....cugcgauccggagacAucg..... 1  
Gi3\_28933201\_x1.....gagaagcgAcgucagggcc..... 1  
Gi3\_28592300\_x1.....gccguUaggccccccaguacugc..... 1  
Gi2\_11136577\_x1.....agacgucguUggaacacggggugc..... 1  
Gi5\_8841197\_x1.....caggccccccaguacuAcgauc..... 1  
Gi2\_11262688\_x1.....cgugggaacacggUgugccgaac..... 1  
Gi3\_28872279\_x1.....aagcgccgNcaggccccccagua..... 1  
Gi3\_28403958\_x1.....ggagacgucgugggGaca..... 1  
Gi3\_28724918\_x1.....Uagagaagcgccgucagggcc..... 1  
Gi3\_28414968\_x1.....acgucgugggCacacggg..... 1  
Gi3\_28698841\_x1.....gaucggagacgucguggUaacacgggg..... 1  
Gi3\_28967156\_x1.....ugggaacacggggUuccg..... 1  
G1l\_4370035\_x1.....ucagggccccccaguacCgcg..... 1  
G1a\_6177688\_x1.....Cgagacgucgugggaacacggggugcc..... 1  
Gi3\_28623019\_x1.....caggccccAccaguacugcga..... 1  
G1a\_6152878\_x1.....aggccUcgccaguacugcg..... 1  
Gi3\_28907795\_x1.....ccccgccaguCugcgauccggag..... 1  
Gi2\_11374510\_x1.....gccgucagggccccccaguacugcgauccg..... 0

Gi2\_11132193\_x1.....ggagacgucgugggaacacgggAug..... 1  
 Gi1\_4283632\_x1.....gugggUacacggggugccgaa..... 1  
 Gi3\_28816190\_x1.....ucagggccccccagucAgcgauc..... 1  
 Gi5\_9072830\_x1.....caguacugcgauccgagUcgucgug..... 1  
 Gi2\_11122784\_x1.....Caucggagacgucgugggaacacgggg..... 1  
 Gi2\_11268248\_x1.....caggccccccagucugcgauccgGgagc..... 1  
 Gi3\_28288773\_x1.....caggccccccagucugcUauc..... 1  
 Gi3\_28539792\_x1.....ucggagAcgucgugggaacacggg..... 1  
 Gi2\_11207838\_x1.....gaagagaagcgccgucagcAcccgcc..... 1  
 Gi3\_28325011\_x1.....gagaagcgcAgucaggccc..... 1  
 Gi1\_4202041\_x1.....cgugggCacacggggugccgaa..... 1  
 Gi3\_28481541\_x1.....ccgucGggccccccagucugcg..... 1  
 Gi5\_9094334\_x1.....gaucggagacgucgugggaaUacggggu..... 1  
 Gi2\_11133272\_x1.....aguacugcgaCcgagac..... 1  
 Gi3\_28623275\_x1.....cgccCguacugcgauccgagacgucgug..... 1  
 Gi1\_4316594\_x1.....cggagaAgucgugggaacacggggugcc..... 1  
 Gi3\_28826273\_x1.....agcgccgucagcUccgccaauac..... 1  
 Gl1\_6224291\_x1.....caguacugcgaAcggagacguc..... 1  
 Gi3\_28262726\_x1.....caggccccccagucucCcg..... 1  
 Gi3\_28289781\_x1.....cccgccagucugcgauccgGgagc..... 1  
 Gi3\_28481793\_x1.....ucguggAaacacggggugcc..... 1  
 Gi2\_11356550\_x1.....acgucgugggGacacggggugccg..... 1  
 Gi1\_4165380\_x1.....gauUggagacgucgugggaacac..... 1  
 Gi1\_4377921\_x1.....ucggagacgucgugggaacacggggUcc..... 1  
 Gi3\_28868573\_x1.....agacgucgugggGacacggg..... 1  
 Gi1\_4308818\_x1.....aacacggggugccgaaCcuu..... 1  
 Gi5\_9084103\_x1.....cGgccagucugcgauccgaga..... 1  
 Gi1\_4172357\_x1.....agUcgucgugggaacacggg..... 1  
 Gi2\_11146208\_x1.....gcgauccgGagcugcugggga..... 1  
 Gi2\_11114297\_x1.....Ugccagucugcgauccgaga..... 1  
 Gi2\_10993327\_x1.....agacUucgugggaacacggggugccg..... 1  
 Gl1\_6311197\_x1.....cccgccagucgAaucggagacguc..... 1  
 Gi2\_11326759\_x1.....acgucgugggaacGcggggugccga..... 1  
 Gi2\_11046142\_x1.....cccgccagucucCcgauccg..... 1  
 Gl1\_6337557\_x1.....aUacgucgugggaacacg..... 1  
 Gi3\_28727375\_x1.....gUcggagacgucgugggaacacgg..... 1  
 Gi2\_11118874\_x1.....cgucgugCgaacacggggugccgaa..... 1  
 Gi2\_11084781\_x1.....ccccgccagucugcgCucggagacguc..... 1  
 Gi1\_4349828\_x1.....cgucgugggaacGcggggugccgaa..... 1  
 Gi2\_11166154\_x1.....gacgucgugggaacacggggug..... 0  
 Gi3\_28761907\_x1.....cgugggaacacggGgugccgaa..... 1  
 Gi3\_28814753\_x1.....aucggUgacgucgugggaacacggggugc..... 1  
 Gi2\_11071412\_x1.....gaucggagacgucguCggaacac..... 1  
 Gi3\_28823082\_x1.....aagagaagcgccgucagccUc..... 1  
 Gi2\_11353046\_x1.....cgugggaacacggggugccgaa..... 1  
 Gi5\_8871745\_x1.....aggccccccGguacugc..... 1  
 Gi1\_4358394\_x1.....ucgugggaacacgggAugccgaa..... 1



G1a\_6257984\_x1.....cgccaguacugcgauccggagCcguc..... 1  
 Gi1\_4187644\_x1.....caggccAcgccaguacugcg..... 1  
 Gi3\_28459450\_x1.....agaagcgccgucagggcccgU..... 1  
 G1a\_6031476\_x1.....cgCcaggccccgccaguacugcg..... 1  
 Gi2\_11040622\_x1.....cgucagggccccgccaguCcuagc..... 1  
 Gi5\_9061940\_x1.....ccccgccaguacGcggaucggagacg..... 1  
 Gi3\_28898506\_x1.....gaucggagacgCcgugggaaca..... 1  
 Gi3\_28636613\_x1.....gucagggccccgcGaguacugcgauC..... 1  
 Gi3\_28432482\_x1.....cgccgucagggccccgUcagu..... 1  
 Gi2\_11107477\_x1.....ccgccaguacugcgacCcgag..... 1  
 Gi1\_4370461\_x1.....gugggaacacggggGgccga..... 1  
 Gi3\_28840738\_x1.....agaagcgccgucagggcccUgcca..... 1  
 Gi3\_28786285\_x1.....aggccccgccagGacugcga..... 1  
 Gi2\_11285874\_x1.ccAuaacucguuccgaau..... 1  
 Gi3\_28547849\_x1.....acgAcgugggaacacggggugcc..... 1  
 Gi1\_4213091\_x1.....gUagacgucgugggaacacggggug..... 1  
 Gi5\_9002715\_x1.....acgucAugggaacacggggugccgaac..... 1  
 Gi2\_11245257\_x1.....ugcgauccggagacgucgugggaacacggg..... 0  
 Gi2\_11303391\_x1.....gagaagUgccgucagggccccg..... 1  
 G1a\_6039076\_x1.....cgauccggagacgucgugggaCcacggggugc..... 1  
 Gi3\_28734935\_x1.....agaagcgUgucagggcccc..... 1  
 Gi5\_9083940\_x1.....aCgccccgccaguacugcga..... 1  
 Gi1\_4354671\_x1.....agUcugcugugggaacacggg..... 1  
 Gi1\_4387461\_x1.....ucgugggaacacggggugcU..... 1  
 G1a\_6091680\_x1.....gaagGgaagcgccgucagggcccc..... 1  
 Gi1\_4160997\_x1.....ggagacgucgugggaacacggggugcU..... 1  
 Gi3\_28638622\_x1.....cgccgucagggccccgccaguacugA..... 1  
 Gi3\_28768575\_x1.....agGacugcgauccggagacgu..... 1  
 Gi1\_4366900\_x1.....cgauccggagacgucgugggaacacgg..... 0  
 Gi5\_8973610\_x1.....ucAugggaacacggggugcc..... 1  
 Gi3\_28484806\_x1.....uggUaacacggggugccga..... 1  
 Gi3\_28786820\_x1.....gccagCacugcgauccggag..... 1  
 Gi2\_11315056\_x1.....aucggaAacgucgugggaacacgg..... 1  
 Gi3\_28817667\_x1.....ucggagacgucgugggaacacggggUac..... 1  
 Gi1\_4286657\_x1.....aucggagacgucgugggaacacggggGgc..... 1  
 Gi2\_11109650\_x1.....aagagaagNgccgucagggccccgccaguacugc..... 1  
 Gi3\_28928419\_x1.....ggagacgucAugggaacacggggU..... 1  
 G1a\_6190150\_x1.....gaagUgaagcgccgucagggcccc..... 1  
 Gi5\_9045110\_x1.....ugggaacacggggugccgUa..... 1  
 G1a\_6120721\_x1.....ucggagacgucgugggaacGcgggugc..... 1  
 Gi3\_28579379\_x1.....cgaaauaCgaagagaagcgccguc..... 1  
 Gi2\_11333671\_x1.....gaucggagacgucgugggaUacggggugcc..... 1  
 Gi3\_28271235\_x1.....gccgucagggccccgccagua..... 0  
 Gi3\_28490806\_x1.....caggccccgccaguaAugcgauc..... 1  
 G1a\_6297103\_x1.....gaacacggggugccgUacu..... 1  
 Gi2\_11029823\_x1.....ccgucagggccccgccaguaUugcgauc..... 1  
 Gi3\_28518136\_x1.....gagaagcgccgucCggccccg..... 1

Gi2\_11055407\_x1.....caggccccccagacuacugcgGucgga..... 1  
 Gi2\_11150159\_x1.....ucgugggaacaUggggugccg..... 1  
 Gi5\_8915090\_x1.....cgugggaUcacggggugccg..... 1  
 Gi3\_28391360\_x1.....gccgGcaggccccccagau..... 1  
 Gi2\_10997554\_x1.....gucaggAcccgccagacuacugcg..... 1  
 Gi3\_28320005\_x1.....agcgcUgucaggccccgcc..... 1  
 Gi4\_579690\_x1.....Gaggccccccagacuacugcg..... 1  
 Gi2\_11177724\_x1.....cgGcaggccccccagacuacugcgau..... 1  
 Gi3\_28333671\_x1.....ggagacgucgugggaacacggggAgccgaacu..... 1  
 Gi5\_9132631\_x1.....cgucgugggaacacggggugccgaC..... 1  
 Gi4\_571454\_x1.....Ugagaagcgcgcucaggccccgcc..... 1  
 Gi2\_11215995\_x1.....gugggaacacggggugccCaac..... 1  
 Gi1a\_6223544\_x1.....cgugAgaacacggggugccg..... 1  
 Gi1\_4251418\_x1.....ugggaacacggggCgccgaa..... 1  
 Gi3\_28353338\_x1.....ugcgaucggagacgucgugggaacacggggG..... 1  
 Gi3\_28432417\_x1.....gucgugggaacacggggugccUaac..... 1  
 Gi1\_4370002\_x1.....ggaaGacggggugccgaac..... 1  
 Gi3\_28620276\_x1.....ggccccccagacuacugcgau..... 1  
 Gi5\_9123580\_x1.....caggAcccgccagacuacugcgau..... 1  
 Gi2\_11046364\_x1.....cccgccaguGcugcgauccggag..... 1  
 Gi1\_4349705\_x1.....cUgagacgucgugggaacacggggugccga..... 1  
 Gi1a\_6145931\_x1.....cgucaggccccccagacuacugAg..... 1  
 Gi1\_4357092\_x1.....cgucgugggaacacggggugcGgaacu..... 1  
 Gi3\_28706225\_x1.....gcgauccggagacgucgAgggaacacggggug..... 1  
 Gi3\_28969246\_x1.....gccgucaggccccccagAacugcg..... 1  
 Gi1a\_6105516\_x1.....ugggaacacggUgugccgaacu..... 1  
 Gi3\_28941686\_x1.....aguacugcgauccAgagacgucguggg..... 1  
 Gi1a\_6073899\_x1.....cgucaggccccccCguacugc..... 1  
 Gi3\_28758458\_x1.....gaacacggggugccAaacuu..... 1  
 Gi2\_11322558\_x1.....agaagcgcgcucaggccccgcA..... 1  
 Gi1\_4214702\_x1.....gggaacacggggugccgCacuu..... 1  
 Gi2\_11134312\_x1.....gucgugggaacacggggugccgG..... 1  
 Gi1\_4173509\_x1.....cgucgugggaacacggggugcAgaacu..... 1  
 Gi2\_11237568\_x1.....ggagacgucgugggaacacggggugccU..... 1  
 Gi2\_11332576\_x1.....cgugggaacacggggGgcc..... 1  
 Gi5\_8965818\_x1.....agacgucgugggaacacggggugUcgaacu..... 1  
 Gi2\_11023640\_x1.....cccgccaguCucggaucggagacguc..... 1  
 Gi1\_4277803\_x1.....guUggaacacggggugccgaac..... 1  
 Gi1\_4264931\_x1.....cgugggaacacggggugccgG..... 1  
 Gi3\_28297220\_x1.....gcgauccggagacgucgugggaacacgAggugccga..... 1  
 Gi5\_9057716\_x1.....ucggagacgucgGgggaacacggggugccg..... 1  
 Gi5\_8877968\_x1.....aucggGgacgucgugggaacacggggugc..... 1  
 Gi2\_11378736\_x1.....ggccccUcagacuacugcgau..... 1  
 Gi5\_9117697\_x1.....gaagcgcNucaggccccgcc..... 1  
 Gi4\_582119\_x1.....cgucgugggaacacggggugccgC..... 1  
 Gi3\_28693499\_x1.....cgccagCacugcgauccggagacguc..... 1  
 Gi3\_28880478\_x1.....gaucggagacguAgugggaacacg..... 1

Gi3\_28624438\_x1.....cguGgugggaacacggggugccgaac..... 1  
Gi2\_10999194\_x1.....gaucgAagacgucgugggaacacggggu..... 1  
Gi5\_8925555\_x1.....aucggagacgucgugggaacGc..... 1  
Gi2\_11225268\_x1.....cggagacgucgCgggaacacggggugc..... 1  
Gi2\_11077724\_x1.....ugggaaUacggggugccg..... 1  
G1a\_6030401\_x1.....aguGcugcgauccgagacguc..... 1  
Gi3\_28771825\_x1.....ggagaUgucgugggaaca..... 1  
Gi2\_11242637\_x1.....cgucgugggaacacggggAgccgaac..... 1  
Gi5\_9041307\_x1.....cccgccaguacugcgauccAgagacgu..... 1  
Gi3\_28913409\_x1.....agacgucgNgggaacacggggugccgaa..... 1  
Gi2\_11131966\_x1.....cgccaguacugcgauccgagGcgucgu..... 1  
Gi5\_8863318\_x1.....caggccccgccaguacuAc..... 1  
Gi5\_8989656\_x1.....cggagacgNcgugggaacacggg..... 1  
Gi5\_9052130\_x1.....gaucggagCcgucgugggaacacggg..... 1  
Gi3\_28282508\_x1.....cgauccgagacgucgGgggaacacggggugc..... 1  
Gi3\_28844831\_x1.....ucgugggCacacggggugccg..... 1  
Gi3\_28420573\_x1.....agUccccgccaguacugcgauccgagacgucgug..... 1  
Gi1\_4238076\_x1.....ucggagacgAcgugggaacacggg..... 1  
Gi2\_11162244\_x1.....gcNccgucagggccccgccaguacug..... 1  
Gi3\_28541296\_x1.....gucgugggaacacggggCugccgaac..... 1  
Gi3\_28505302\_x1.....cgauccgagacgucgugggaGcacg..... 1  
Gi2\_11267893\_x1.....gagaagcgccgucagggUcccgcc..... 1  
Gi5\_8922740\_x1.....gacgucgAggggaacacggggugccgaacu..... 1  
Gi3\_28947315\_x1.....caggccccgccaguacugcgauccgGgac..... 1  
Gi3\_28911859\_x1.....cccgccaguaUugcgauccgagacgucgug..... 1  
Gi3\_28665022\_x1.....ccgccaguacugcgauccgUgacgu..... 1  
Gi3\_28400422\_x1.....ucaggccccgccGguacug..... 1  
Gi1\_4225090\_x1.....ucUggccccgccaguacugcgauccgga..... 1  
Gi2\_11246072\_x1.....aggcAccgccaguacugcg..... 1  
Gi2\_11266244\_x1.....aguacugcgauccAgagacguc..... 1  
Gi3\_28608585\_x1.....cgucgugggaacacggggugccgaaA..... 1  
Gi3\_28837145\_x1.....aagagaagcgcgUgucagggccc..... 1  
Gi3\_28863240\_x1.....gacgucgugggaacacggggugcGgaac..... 1  
Gi2\_11331983\_x1.....Cucgugggaacacggggugccg..... 1  
G1a\_6208341\_x1.....cgucagCccccgccaguacugcg..... 1  
Gi3\_28667606\_x1.....acugcgauccgGgacguc..... 1  
Gi3\_28577365\_x1.....cccgUcaguacugcgauccgagacgu..... 1  
Gi2\_11007063\_x1.....gugggaGcacgggugccgaaacu..... 1  
Gi2\_11105072\_x1.....ucgugggaNcacggggugc..... 1  
Gi2\_11345505\_x1.....aacCcggggugccgaaacu..... 1  
Gi5\_8884077\_x1.....ucaggccccgccagCacugcg..... 1  
Gi2\_11132485\_x1.....caggccccccaguaGugc..... 1  
G1a\_6306071\_x1.....aggccccccaguaGugcgaucc..... 1  
Gi3\_28512927\_x1.....gcgUcgucagggccccccagu..... 1  
Gi2\_11312986\_x1.....gacgucgCgggaacacggg..... 1  
Gi2\_11191084\_x1.....cgccaguaNugcgauccgagacg..... 1  
Gi2\_10996622\_x1.....acAucgugggaacacggg..... 1

G1a\_6306128\_x1.....Acggagacgucgugggaaacacgg..... 1  
 Gi3\_28924654\_x1.....ggGgacgucgugggaaacacggggugccgaac..... 1  
 Gi5\_8950464\_x1.....cguggAaacacggggugcc..... 1  
 Gi3\_28451417\_x1.....cggagacgucgCgggaacacg..... 1  
 Gi2\_11006797\_x1.....acgucUugggaacacggggugcc..... 1  
 Gi3\_28740229\_x1.....Gucggagacgucgugggaaacacggggugccgaacu..... 1  
 Gi5\_8957623\_x1.....gacgucgugggaaacacgggAugccgaacu..... 1  
 Gi1\_4233384\_x1.....cguUggaacacggggugccgaac..... 1  
 Gi2\_11216762\_x1.....gucagggccccccagacuagcgaucggagacA..... 1  
 Gi3\_28632708\_x1.....gaucggagacguGgugggaaacacggg..... 1  
 Gi2\_11051578\_x1.....aucggagacgucgAgggaaacacgggu..... 1  
 Gi3\_28733679\_x1.....cgauccggagacgucgugggaaacacgAggugc..... 1  
 G1a\_6290246\_x1.....gcgaucggGgacgucgugggaaacacggg..... 1  
 Gi3\_28672564\_x1.....ccagacuagcgaUggagacgucgu..... 1  
 Gi2\_11150888\_x1.....ccgccagacuagcgaUgg..... 1  
 Gi2\_11024032\_x1.....ccgucagggccccgUcagacuagc..... 1  
 G1a\_6055995\_x1.....aguacugcNaucggagacgucg..... 1  
 Gi1\_4337372\_x1.....cUgucagggccccccagacuagcgaucgga..... 1  
 Gi2\_11102917\_x1.....agggccccccagacuagcgaucggGgac..... 1  
 Gi1\_4211525\_x1.....gugggaaacUcggggugccga..... 1  
 Gi2\_11365008\_x1.....cgucgugUgaaacacggggugccg..... 1  
 Gi3\_28294608\_x1.....gaucggagacgucgugggaaacGcggggug..... 1  
 Gi3\_28944585\_x1.....gagacgucgugggaaacacggggugccgCac..... 1  
 Gi3\_28379668\_x1.....agaagcgcccgucagggccccUgccagu..... 1  
 G1a\_6102128\_x1.....gaucggagacgucguggAaacacg..... 1  
 G1a\_6001175\_x1.....aucggagacgucgCgggaacacgg..... 1  
 Gi3\_28939792\_x1.....gaucggagacgucgugggaaacacgggCu..... 1  
 G1a\_6154179\_x1.....gugggaaacUcggggugccgaac..... 1  
 G1a\_6084169\_x1.....cgggagacgucgugggGacacgg..... 1  
 Gi2\_11118674\_x1.....cUccgccagacuagcgaucggagacg..... 1  
 Gi5\_8978876\_x1.....uCcgaucggagacgucguggg..... 1  
 Gi2\_11028499\_x1.....ccccgccagacuagcgcCucgg..... 1  
 Gi3\_28708400\_x1.....cgccgucagggccccgcccUguacu..... 1  
 Gi2\_11191421\_x1.....guacugcgauacAgagacgucguggg..... 1  
 Gi3\_28544128\_x1.....cgggagacgNcugggaaacacggggugccgaa..... 1  
 Gi5\_9060290\_x1.....ugcgauccggagacgucguAggaaacacggg..... 1  
 Gi3\_28969903\_x1.....ccccgUcagacuagcgaucggagacgu..... 1  
 Gi3\_28323714\_x1.....ggccccgcUaguacugcgau..... 1  
 Gi3\_28630285\_x1.....ucagggccccccagacuagcgaucgUag..... 1  
 Gi2\_11194729\_x1.....gucaCgccccgccagacuagc..... 1  
 Gi5\_8837051\_x1.....ccccccagacuagcgaucggagacg..... 0  
 Gi2\_11228575\_x1.....cagCacugcgauccggagacguc..... 1  
 Gi2\_11157968\_x1.....ggAcccgccagacuagcgauc..... 1  
 Gi3\_28697996\_x1.....ccgccagacuagcgaucggGgac..... 1  
 Gi3\_28650199\_x1.....aggccccgccaCuacugcgaucgg..... 1  
 Gi3\_28466788\_x1.....cgucagggccccccaguaAugc..... 1  
 G1a\_6203086\_x1.....cgccagacuagcgaucggagacguc..... 1

Gi1\_4257202\_x1.....aggcUccgccaguacugcgau..... 1  
 Gi3\_28915140\_x1.....ucagAccccgccaguacugcg..... 1  
 Gi3\_28377940\_x1.....ggagacgucguggUaacacggggugcc..... 1  
 Gl1a\_6142777\_x1.....aucggagacgucgugggaacacggA..... 1  
 Gi2\_11022390\_x1.....cgucgugggaGcacgggg..... 1  
 Gi4\_583593\_x1.....aagagaagcgccgucaggccccg..... 0  
 Gi5\_9021961\_x1.....cgugggaacacgAggugccg..... 1  
 Gi2\_11004531\_x1.....cgucguggAaacacggggugccgaac..... 1  
 Gl1a\_6339257\_x1.....gaacacgAgugccgaac..... 1  
 Gi2\_11361519\_x1.....gacgucgugggaacacAgggg..... 1  
 Gi4\_577034\_x1.....uCGgaacacggggugccgaacu..... 1  
 Gi2\_11120544\_x1.....Uucggagacgucgugggaacacggggugccg..... 1  
 Gi1\_4276979\_x1.....cgccaguacugcgauccgGgacguc..... 1  
 Gi2\_11248684\_x1.....cgugggaacacgGgugccgaac..... 1  
 Gi5\_8855934\_x1.....ucguggUaacacggggugccgaacu..... 1  
 Gl1a\_5994533\_x1.....cgugggaUacggggugcc..... 1  
 Gi3\_28369862\_x1.....ggaacaGggggugccgaac..... 1  
 Gi3\_28922007\_x1.....agagaagcgccgCcaggccccg..... 1  
 Gl1a\_6020466\_x1.....Augggaacacggggugccgaa..... 1  
 Gi4\_576649\_x1.....gggaacacggggugUcgaacu..... 1  
 Gi3\_28643295\_x1.....ucgugggaacacggggUcCcgaa..... 1  
 Gi3\_28793840\_x1.....cgauccggaAacgucgugggaacacg..... 1  
 Gi1\_4257859\_x1.....gaUacgucgugggaacacggggugccg..... 1  
 Gi3\_28353340\_x1.....ucggagacgucgAgggaacacg..... 1  
 Gi2\_10997561\_x1.....aggcGccgccaguacugcgauccgagac..... 1  
 Gi3\_28284084\_x1.....gUcgucgugggaacacgggg..... 1  
 Gi5\_9065120\_x1.ccuuaacuNguuccgaau..... 1  
 Gl1a\_6018681\_x1.....caggccccgccCguacugc..... 1  
 Gi5\_8871182\_x1.....cgucgugggaacacAgggugccga..... 1  
 Gi4\_588749\_x1.....gggaacacggggugccgaGc..... 1  
 Gl1a\_6044266\_x1.....gauccgagacgucAugggaa..... 1  
 Gi4\_611346\_x1.....aAcggagacgucgugggaacacggggugcc..... 1  
 Gi3\_28722370\_x1.....gGgauccgagacgucgugggaacacggggug..... 1  
 Gi5\_9136080\_x1.....aucggagacgucgugggaacacAgg..... 1  
 Gi2\_11376466\_x1.....gacgucgugggaacacggggugA..... 1  
 Gl1a\_6223974\_x1.....gUagacgucgugggaacacggggugccgaacu..... 1  
 Gi5\_9022783\_x1.....Nucggagacgucgugggaacacggg..... 1  
 Gl1a\_6340869\_x1.....gaAcggagacgucgugggaacacggggg..... 1  
 Gl1a\_6288085\_x1.....ggaacacgAggugccgaacu..... 1  
 Gi5\_8874845\_x1.....Accgucagggccccccaguacugc..... 1  
 Gi2\_11195538\_x1.....gaUgcgcgucagggccc..... 1  
 Gi1\_4159588\_x1.....aaGacggggugccgaacu..... 1  
 Gi5\_9071434\_x1.....Uggaacacggggugccgaacu..... 1  
 Gi3\_28613139\_x1.....aucggagacgucgGgggaacacg..... 1  
 Gi1\_4237278\_x1.....ucaggccccgUcaguacugcgau..... 1  
 Gi3\_28911910\_x1.....ucggagacgucgugggaacacgUggugcc..... 1  
 Gi2\_11216776\_x1.....acgucguAggaacacggggugccg..... 1

Gi5\_8882536\_x1.....aucggagaNgucguggggaaca.....1  
 Gi3\_28688961\_x1.....ggccccgcNaguacugcgau.....1  
 Gi5\_9094656\_x1.....gagaagcgccgucagggccccG.....1  
 Gi2\_11353749\_x1.....aggccccgccaguacugGgau.....1  
 Gi1\_4227037\_x1.....gagacgucguggggaacacggggugc.....0  
 Gi2\_11301867\_x1.....aucUgagacgucguggggaacacggggg.....1  
 Gi3\_28888607\_x1.....aucggagacguUguggggaacacgggg.....1  
 Gi3\_28500430\_x1.....aggccccgccCguacugcgauccggagacg.....1  
 Gi2\_11276973\_x1.....gaagcgccgucagggGccc.....1  
 Gi3\_28510652\_x1.....ucguggggaacacggggugcAg.....1  
 Gi3\_28690632\_x1.....ggccccgccaguacugAga.....1  
 Gi2\_11234850\_x1.....ggagacgucguggggaacaA.....1  
 Gi1\_4302643\_x1.....Gcagggccccccaguacugcgauccgga.....1  
 Gi1\_4255536\_x1.....gaucggagNcgucguggggaacac.....1  
 Gi1\_4277193\_x1.....cagggccccgccaguacuAcgauc.....1  
 Gi3\_28335812\_x1.....cguNguggggaacacggggugccga.....1  
 Gi2\_11258136\_x1.....cucguuccgaaauaggaagagaagc.....0  
 Gi3\_28575332\_x1.....cccgccaguacugcgaCcgag.....1  
 Gi5\_9066133\_x1.....acgucgugggGacacggggugccg.....1  
 Gi5\_8954971\_x1.....cagggccccccaAuacugcgau.....1  
 Gi2\_11392980\_x1.....gagacguUguggggaacacggggugcc.....1  
 Gi5\_9128489\_x1.....ugggaacUcggggugccgaa.....1  
 Gi2\_11379039\_x1.....gggaacacggCgugccgaacu.....1  
 Gi5\_9103489\_x1.....guggggaacacgUggugccgaacu.....1  
 Gi3\_28505910\_x1.....aucggagacgucgugggUacac.....1  
 Gi3\_28784030\_x1.....gcgaucggGgacgucguggggaacacggg.....1  
 G1a\_6084089\_x1.....cGccgccaguacugcgauccgagacguc.....1  
 Gi4\_603115\_x1.....auAggagacgucguggggaacacggggugcc.....1  
 Gi2\_11075590\_x1.....aucUgagacgucguggggaaca.....1  
 Gi2\_11022979\_x1.....acgucguggggaacacggUgugccgaacu.....1  
 G1a\_6321111\_x1.....Ggucagggccccgccaguacu.....1  
 Gi3\_28274010\_x1.....aagagaagcgccgucagggccccAccagua.....1  
 Gi2\_11257254\_x1.....agacgucguggggaacacggAgugcc.....1  
 Gi3\_28385404\_x1.....gucagAccccgccaguacugcgauccg.....1  
 Gi5\_9054026\_x1.....ucggagacgucguggggaacaUg.....1  
 G1a\_6141768\_x1.....cagggccccgccaguCcug.....1  
 Gi1\_4321439\_x1.....Cgagacgucguggggaacacggggugccg.....1  
 Gi5\_9001101\_x1.....cgucguggggaacGacggggugc.....1  
 Gi5\_9024730\_x1.....gaucggagacguUguggggaacac.....1  
 Gi3\_28734288\_x1.....acucUuuccgaaauaggaagagaagcgccguc.....1  
 Gi3\_28921032\_x1.....caguCcugcgauccggagacgucgug.....1  
 Gi3\_28921822\_x1.....aggccccgccaguacugcgU.....1  
 Gi2\_11171750\_x1.....uacugcgauccggagaUgucgug.....1  
 G1a\_6180792\_x1.....aucggagCcgucguggggaacacg.....1  
 Gi3\_28434463\_x1.....acugcgauccggGgacgucg.....1  
 Gi2\_11314038\_x1.....agaagcgccgucagggUccgccaagu.....1  
 Gi3\_28334617\_x1.....gccGguacugcgauccggagacgu.....1

Gi3\_28955945\_x1.....cgugggCacacgggugccg..... 1  
Gi1\_4159918\_x1.....aguacugUgaucggagacguc..... 1  
Gi2\_11012108\_x1.....caguacugcgaucggGgacgucgugggaacacgg..... 1  
Gi3\_28761425\_x1.....cgaucggagaAgucgugggaacacgg..... 1  
Gi1\_4364020\_x1.....ucaggcUccgccaguacugcgaucgga..... 1  
Gi3\_28656846\_x1.....ucaggcUccgccaguacugcgaucggag..... 1  
Gi2\_11177349\_x1.....gaucggagacguUgugggaacacg..... 1  
Gi5\_9002070\_x1.....gacgucgugggaacacggggugccgaaGu..... 1  
Gi2\_11168236\_x1.....aucggagacguUgugggaacacgg..... 1  
Gi4\_567457\_x1.....agacgucgNgggaacacggggugccgaacu..... 1  
Gi3\_28715193\_x1.....ugcgauAggagacgucgugggaaca..... 1  
G1a\_6298951\_x1.....Gcaggccccgccaguacugcgaucgg..... 1  
Gi2\_11303664\_x1.....Nggccccgccaguacugc..... 1  
Gi3\_28765925\_x1.....aucggagacgucgugggaacacgggguAc..... 1  
Gi1\_4338663\_x1.....cgucguggNaacacggggugccg..... 1  
Gi3\_28694205\_x1.....gccaguacugcgCucgga..... 1  
Gi2\_11285368\_x1.....gaCcgagacgucgugggaacacgggg..... 1  
Gi2\_11055043\_x1.....ggccccgccCguacugcgaucggagacgucg..... 1  
Gi3\_28828259\_x1.....ccagGacugcgaucggagacguc..... 1  
Gi2\_11006890\_x1.....guUcugcgaucggagacgucguggg..... 1  
Gi3\_28831421\_x1.....aagagaagcgccgucagggcUc..... 1  
Gi2\_11195136\_x1.....gaucggagacgucgugggaacacUg..... 1  
Gi2\_11034339\_x1.....aagNggccgucagggccccgccaguacu..... 1  
Gi2\_11295828\_x1.....gucgugggaacacgggCugccgaacu..... 1  
Gi3\_28466926\_x1.....gucgugggaacacUgggugcc..... 1  
Gi3\_28474943\_x1.....aguacugcgaCcgagacguc..... 1  
Gi1\_4346728\_x1.....ugcgaucggGgacgucgug..... 1  
Gi2\_11049427\_x1.....cgucgugggaacacggggugccAaac..... 1  
Gi3\_28383689\_x1.....cgucgGgggaacacggggugc..... 1  
Gi2\_11059017\_x1.....gaagGgaagcgccgucagggccccgcc..... 1  
Gi3\_28856103\_x1.....gucgugggaacacggCgugcc..... 1  
Gi5\_9016641\_x1.....gugggaacacgAggugccgaacu..... 1  
Gi1\_4384993\_x1.....cggagacgucgugggaacacggggugcUgaacu..... 1  
Gi3\_28372346\_x1.....gaagcgccgucagggccccgcUagua..... 1  
Gi2\_11090206\_x1.....caggccAcgccaguacugc..... 1  
Gi3\_28299078\_x1.....gaucggagaUgucgugggaacacggggugcc..... 1  
Gi2\_11273180\_x1.....ucggagacgCcgugggaacacggggugcc..... 1  
Gi3\_28954476\_x1.....ucggagaUgucgugggaacacg..... 1  
Gi3\_28436907\_x1.....cggagacgucguggUaacacggggugcc..... 1  
Gi1\_4245263\_x1.....Agccccccaguacugcgaucggagacg..... 1  
Gi5\_8861866\_x1.....gucgugggaacacggggugccgaaA..... 1  
Gi2\_11033193\_x1.....aucggagacgucCugggaacacggggugc..... 1  
Gi5\_8945266\_x1.....cguggaaAacggggugccgaac..... 1  
Gi2\_11057141\_x1.....gaucggagacgucgugggaacacgAggug..... 1  
G1a\_6316526\_x1.....caguCcugcgaucggagacguc..... 1  
Gi2\_11163548\_x1.....Ucggcaguacugcgaucggagacg..... 1  
Gi2\_11180081\_x1.....gaagagaGgcccgucagggcc..... 1

Gi3\_28462056\_x1.....acugcgauccggagCcgucgug..... 1  
Gi1\_4271972\_x1.....gaacacggggCgccaacu..... 1  
Gi3\_28338868\_x1.....cagggcccgcagucgucgagacg..... 1  
Gi4\_595893\_x1.....gAgggaacacggggugccgaacu..... 1  
Gi3\_28760425\_x1.....ccgccaguCcuugcgauccggagacgucgug..... 1  
G1a\_6136106\_x1.....Cgagacgucguggggaacac..... 1  
Gi1\_4269008\_x1.....aacacggggugccgaacAu..... 1  
G1a\_6292413\_x1.....cUaucggagacgucguggggaacacggg..... 1  
Gi1\_4279410\_x1.....ggaUcacggggugccgaac..... 1  
Gi3\_28793304\_x1.....agGagcgccgucagggcccgcagucgug..... 1  
Gi1\_4196233\_x1.....cguAgggaacacggggugccgaa..... 1  
Gi2\_11238122\_x1.....gagacgucAugggaacacggggugc..... 1  
Gi2\_11384385\_x1.....gaucggagacgucguggggaacacggggugccgaacA..... 1  
Gi5\_9032307\_x1.....gugggaacacggAgugccgaa..... 1  
Gi2\_11150113\_x1.....acgucgugNgaacacggg..... 1  
Gi5\_8830122\_x1.....cgugggaacacggggugccgaacuucU..... 1  
Gi2\_11075572\_x1.....agagaagcgcUgucagggccc..... 1  
Gi2\_11317950\_x1.....gacgucgugggUacacggggu..... 1  
G1a\_6065279\_x1.....Uaagcgccgucagggcccgcagucgug..... 1  
G1a\_6343090\_x1.....aagagaagcgccgCagggccc..... 1  
G1a\_6180255\_x1.....aucggagacgucguggggaacacggggCg..... 1  
Gi1\_4364732\_x1.....aucggagacgucgugggGacacggg..... 1  
G1a\_6266010\_x1.....gacgucguggggaacGcggggu..... 1  
Gi2\_11231230\_x1.....ucguccgaauaCgaagagaagcgccguc..... 1  
Gi5\_8838385\_x1.....aggcccgcUcaguacugcgau..... 1  
G1a\_6056668\_x1.....cGcgccagucgucgagacgucg..... 1  
Gi3\_28889025\_x1.....gaagGgccgucagggcccgcagua..... 1  
Gi3\_28519085\_x1.....ucggagacgucguggggaacacggAgugcc..... 1  
Gi5\_8904328\_x1.....aUcggcgcagggcccgcagucgug..... 1  
Gi5\_9092572\_x1.....ccgaauaCgaagagaagc..... 1  
Gi3\_28311152\_x1.....cGcgccagucgucgagacgucgug..... 1  
Gi1\_4172082\_x1.....gucagggcccgcagucguc..... 1  
Gi2\_11174739\_x1.....ggagacgucguggggaacacgAggugccg..... 1  
Gi1\_4272641\_x1.....cgugggaacNacggggugc..... 1  
Gi3\_28305928\_x1.....gccccAccagucgucgagc..... 1  
G1a\_6274293\_x1.....gugggaacNcggggugccgaac..... 1  
Gi5\_8935569\_x1.....cguggAaacacggggugc..... 1  
Gi2\_11227737\_x1.....gccgucagggcccgcAaguacugc..... 1  
Gi1\_4258967\_x1.....acugcgauNggagacgucgug..... 1  
Gi2\_11235763\_x1.....ugggaacacggggugccgaU..... 1  
Gi3\_28457155\_x1.....agacgucguggggaacacggAgugccgaac..... 1  
Gi1\_4356266\_x1.....cgccgucagggcccgcagucgug..... 1  
Gi5\_8966029\_x1.....cagggcUcgccagucgug..... 1  
Gi2\_11187240\_x1.....ggagacgucguggggaacacggggu..... 1  
Gi2\_11299713\_x1.....cgccagucgucgagc..... 1  
Gi1\_4304967\_x1.....acgucguggggaacacggggu..... 0  
Gi2\_11131123\_x1.....cagggcccgcagCacugcgagacg..... 1



Gi1a\_6049949\_x1.....agGCCCCGccaguacAgcgaucggagacguc..... 1  
 Gi1\_4188215\_x1.....acGgcgaucggagacgucg..... 1  
 Gi3\_28718048\_x1.....gGgccgucagggccccccaguacugc..... 1  
 Gi3\_28705546\_x1.....gacgucgugggaacacAgggugccg..... 1  
 Gi1\_4349693\_x1.....uUggagacgucgugggaacacggggu..... 1  
 Gi2\_11186005\_x1.....gagacgucgugggaacCcggggugccgaac..... 1  
 Gi1a\_6197900\_x1.....uacuUcgauccggagacguc..... 1  
 Gi2\_11018487\_x1.....caggcccAgccaguacugc..... 1  
 Gi5\_9048533\_x1.....cgugggaacacggggugcG..... 1  
 Gi2\_11161862\_x1.....agacgucgugggaGcacgggugccg..... 1  
 Gi1\_4188320\_x1.....cccGCCaguacugcgaucggagacgucg..... 0  
 Gi3\_28732712\_x1.....agacgucgugggaacacggggugccA..... 1  
 Gi5\_9097871\_x1.....cUgccaguacugcgaucggagacguc..... 1  
 Gi2\_11381842\_x1.....cgccaguacCgcgaucggaga..... 1  
 Gi5\_9117308\_x1.....agcgcCGuNagggccccccaguacugcga..... 1  
 Gi5\_8889628\_x1.....gaacacggggugccgaGu..... 1  
 Gi5\_8922476\_x1.....caguacugcgaucgAagacguc..... 1  
 Gi3\_28351726\_x1.....gaucggagCcgucgugggaaca..... 1  
 Gi5\_9119067\_x1.....gaucggagacgucgugggCacacggggu..... 1  
 Gi2\_11086516\_x1.....gaucggagacguUgugggaacac..... 1  
 Gi2\_11041376\_x1.....aucggagacgucgugggaacaGggggugc..... 1  
 Gi3\_28315561\_x1.....cgccgucagAccccgccag..... 1  
 Gi1a\_6168612\_x1.....Cagagaagcgccgucagggcccg..... 1  
 Gi4\_590981\_x1.....gugggaacacggggugccgaCcu..... 1  
 Gi2\_11080070\_x1.....agaagcgccgucagggUccgcc..... 1  
 Gi4\_611726\_x1.....agagaagcgccgucagggcccgc..... 0  
 Gi3\_28878021\_x1.....acgucgugggaacacggggCgccga..... 1  
 Gi3\_28302869\_x1.....ucaggccUcgccaguacugcga..... 1  
 Gi2\_11148471\_x1.....cggagGcgucgugggaacacggggugccga..... 1  
 Gi1\_4192229\_x1.....ugggaacCcggggugccgaac..... 1  
 Gi5\_8913558\_x1.....cgucgugggaacacggggugcAga..... 1  
 Gi2\_11153364\_x1.....caggccccgccaguacugAg..... 1  
 Gi3\_28543025\_x1.....Caagagaagcgccgucaggg..... 1  
 Gi5\_8918902\_x1.....Gucggagacgucgugggaacacggggugc..... 1  
 Gi3\_28775381\_x1.....ccgccaguacugcgaucggagacUu..... 1  
 Gi4\_577894\_x1.....cgGcaggccccgccaguacugc..... 1  
 Gi2\_11124960\_x1.....gaagagaagAgccgucagggccc..... 1  
 Gi2\_11122132\_x1.....ugggaacacUgggugccga..... 1  
 Gi1\_4327579\_x1.....cgugggaacGcggggugccgaacu..... 1  
 Gi3\_28818447\_x1.....gaagcgccgucagggAcccgcc..... 1  
 Gi2\_11030349\_x1.....ucgugggaUcacgggugccgaac..... 1  
 Gi3\_28889876\_x1.....ucaggcUccgccaguacug..... 1  
 Gi1a\_6245439\_x1.....aucAgagacgucguggga..... 1  
 Gi2\_11149341\_x1.....aacacggCgugccgaacu..... 1  
 Gi3\_28460484\_x1.....cgugggaacUcggggugccga..... 1  
 Gi2\_11185202\_x1.....agagGagcgccgucagggccccgcca..... 1  
 Gi2\_11165318\_x1.....cguggCaacacggggugc..... 1

Gi3\_28285505\_x1.....ugcgauUggagacgucgugggaaacacg..... 1  
 Gi5\_9133249\_x1.....uUcgaucggagacgucgugggaaacacggg..... 1  
 Gi3\_28731744\_x1.....Cccgucagggccccccaguuacu..... 1  
 Gi2\_11332598\_x1.....gucagAccccgcccaguuacugcg..... 1  
 G1a\_6333617\_x1.....Ugucagggccccccaguuacugcg..... 1  
 Gi3\_28423660\_x1.....ccccgcccaguuAugcgauccggagacgu..... 1  
 Gi3\_28631449\_x1.....gaagagCagcgccgucagggccccgccc..... 1  
 Gi4\_583576\_x1.....Gcgugggaaacacggggugccgaac..... 1  
 Gi1\_4307275\_x1.....cgAgggaaacacggggugccg..... 1  
 Gi3\_28866976\_x1.....gcgauccggagacgucgugggaaA..... 1  
 Gi2\_11049906\_x1.....caggccccUgccaguuacugcgauccg..... 1  
 Gi2\_11293822\_x1.....aucggagUcgucgugggaaacacggggugcc..... 1  
 Gi5\_8980991\_x1.....cggAacgucgugggaaacacggggugccga..... 1  
 Gi1\_4187734\_x1.....ucggagacgucgugggAaacacggg..... 1  
 Gi2\_11243662\_x1.....gugggaaacacggggGgccgaacuu..... 1  
 Gi3\_28575365\_x1.....cgucgAgggaaacacggggugccg..... 1  
 Gi1\_4244665\_x1.....gaagagaagcgccgucGggccccccaguu..... 1  
 Gi3\_28273487\_x1.....ccccgcccaguuacugcgGu..... 1  
 Gi2\_11162548\_x1.....agagaagcgccgucagggAccccgccc..... 1  
 Gi3\_28453041\_x1.....aguacugcgauccggagacgucgCggg..... 1  
 Gi1\_4237187\_x1.....ucgugggaaacaUggggugccgaac..... 1  
 Gi1\_4226016\_x1.....ucgugggaaacUcgggugccgaacu..... 1  
 Gi2\_11092218\_x1.....cCgagacgucgugggaaacacg..... 1  
 Gi5\_9034431\_x1.....gacgucgugggaaacacggggugcGgaacu..... 1  
 Gi1\_4338118\_x1.....agacgucgugggaaacacggggugc..... 0  
 Gi2\_11018488\_x1.....cgucguggAaacacggggugcc..... 1  
 Gi3\_28592886\_x1.....gacgucgUAggaaacacggggugccgaac..... 1  
 Gi2\_11332971\_x1.....gccccgcccaguuacugcgauccggagac..... 0  
 Gi3\_28429776\_x1.....aacucguuccgaaauaCgaagagaagcg..... 1  
 Gi4\_591913\_x1.....gcUaguacugcgauccggagacguc..... 1  
 G1a\_6006867\_x1.....agagGagcgccgucagggccccgccc..... 1  
 G1a\_6200224\_x1.....ggccccccaguuacugcgUuc..... 1  
 Gi2\_10993657\_x1.....cgauccggagacguUgugggaaacacggg..... 1  
 Gi1\_4382999\_x1.....cggagacgucgugggaaacacgggUugcc..... 1  
 Gi5\_9118646\_x1.....gugggaaacacUggggugccgaac..... 1  
 Gi3\_28383401\_x1.....cgugggaaacacgAgggugccg..... 1  
 Gi5\_8974852\_x1.....aggcAccgcccaguuacugcgaucc..... 1  
 Gi2\_11010536\_x1.....cgauccggagacgucgugAgaacacggg..... 1  
 Gi1\_4268365\_x1.....ccccgccaNuacugcgaucc..... 1  
 Gi1\_4190278\_x1.....gccaguuacugcgauccgCgacg..... 1  
 Gi2\_11196308\_x1.....ccaguuacugcgauccggagau..... 1  
 Gi1\_4221530\_x1.....cgugggaaacacggggugccgaUuu..... 1  
 Gi3\_28317941\_x1.....agacgucgugggAaacacggg..... 1  
 Gi4\_586201\_x1.....ggaacacgNggugccgaacu..... 1  
 Gi1\_4332658\_x1.....guacugcgauccggagGcgucg..... 1  
 Gi2\_11263325\_x1.....agaagcgccgCcagggccccccaguu..... 1  
 Gi2\_11132177\_x1.....Agccccgcccaguuacugcgau..... 1

Gi3\_28879965\_x1.....ggagacgucgugggaacacggggugccgaG..... 1  
 Gi5\_9000953\_x1.....gugggaacacggggCgccga..... 1  
 Gi2\_11376636\_x1.....cUcgccaguacugcgauccgagacgucg..... 1  
 Gi3\_28302155\_x1.....cgccgucaggccccgccGgu..... 1  
 Gi3\_28432823\_x1.....gccgucaggccccgccaguGc..... 1  
 Gi3\_28720484\_x1.....guacugcgauccgUagacg..... 1  
 Gi3\_28935847\_x1.....ggagacgucgugggaGcacggggugccgaa..... 1  
 Gl1a\_6192155\_x1.....aucggagacgucguAggaacacgg..... 1  
 Gi1\_4160338\_x1.....ucggGgacgucgugggaacacggggugc..... 1  
 Gi2\_11040993\_x1.....agagaagcgccgucaggccc..... 0  
 Gi2\_11021818\_x1.....ggccGcgccaguacugcgaucc..... 1  
 Gi2\_11319798\_x1.....aucggagacgucgugggaacacggAgugccgaa..... 1  
 Gi3\_28454791\_x1.....cgauccgagacgucguUggaacacg..... 1  
 Gl1a\_6195701\_x1.....uaUugcgauccgagacguc..... 1  
 Gi4\_575089\_x1.....Cccaguacugcgauccgagacguc..... 1  
 Gi3\_28400955\_x1.....agacgCcgugggaacacggggugccgaa..... 1  
 Gi2\_11228099\_x1.....cgNgggaacacggggugc..... 1  
 Gi5\_9120656\_x1.....gaCcacggggugccgaa..... 1  
 Gl1a\_6137265\_x1.....gucaggccccAgccaguacugcg..... 1  
 Gl1a\_6184538\_x1.....aaucaggaagagaagcgccguc..... 1  
 Gi2\_11399549\_x1.....gagacgucgugggaGcacggggugccgaa..... 1  
 Gi1\_4182887\_x1.....Aucgugggaacacggggugccgaa..... 1  
 Gi3\_28281011\_x1.....cgucgugggaacCcgggg..... 1  
 Gi2\_11021097\_x1.....ggccccAccaguacugcgaucc..... 1  
 Gi1\_4252026\_x1.....caggGccccccaguacugc..... 1  
 Gl1\_4359484\_x1.....Agucgugggaacacggggugcc..... 1  
 Gi3\_28887758\_x1.....caggccccccaguacugAgau..... 1  
 Gi5\_8993553\_x1.....acgucgugggaacacgAggugccga..... 1  
 Gl1\_4193230\_x1.....ucgugggaAacggggugccgaa..... 1  
 Gl1a\_6335638\_x1.....aCgggagacgucgugggaacacgggg..... 1  
 Gl1a\_6248365\_x1.....auUgggagacgucgugggaacacgggg..... 1  
 Gl1\_4274435\_x1.....cccGgcaguacugcgauccg..... 1  
 Gi4\_586926\_x1.....gugggaCcacggggugccga..... 1  
 Gi2\_11021073\_x1.....aaCagaagcgccgucaggccccgcca..... 1  
 Gi3\_28546796\_x1.....cgucaggccccgcUaguacugcgauccg..... 1  
 Gi3\_28403399\_x1.....gucaggccccgccaguacGg..... 1  
 Gi2\_11015708\_x1.....cgucaggccUcgccaguacugcg..... 1  
 Gl1a\_6280031\_x1.....gaagcgccgucaggccccgAca..... 1  
 Gi2\_11027609\_x1.....aucggagacgucgugggaacacgUg..... 1  
 Gi5\_8997692\_x1.....cgccaguacugcUaucggagacguc..... 1  
 Gi2\_11295797\_x1.....aggccccccaguacugcCa..... 1  
 Gi3\_28703310\_x1.....aguacugcgauccgagac..... 0  
 Gi3\_28261137\_x1.....aggccccccaguacugUga..... 1  
 Gl1a\_6327953\_x1.....gucaggccccccaguGcugcg..... 1  
 Gi3\_28535604\_x1.....gcgaucAgagacgucguggga..... 1  
 Gi3\_28313946\_x1.....gccgucaggccccccaguacugcA..... 1  
 Gl1a\_6275276\_x1.....caguacugcgauccggaAacguc..... 1

G1a\_5983383\_x1.....ucggagacNucgugggaacacgg..... 1  
 Gi1\_4204810\_x1.....gugggaacacgggAugccga..... 1  
 G1a\_6031269\_x1.....cgucgugggaaacGcggggugccgaacu..... 1  
 Gi3\_28621995\_x1.....Gucguuccgaaauaggaagagaagcgcgcugacg..... 1  
 Gi3\_28494686\_x1.....acgucgugggaCcacggggugccga..... 1  
 Gi3\_28291438\_x1.....ucggagacgucgugggaaAacggggg..... 1  
 Gi3\_28511219\_x1.....ugggaacacggUgugccga..... 1  
 Gi2\_11113661\_x1.....aUgagaagcgcgcugacggcccc..... 1  
 Gi2\_11075975\_x1.....gccaguacugcgGucggagacgu..... 1  
 Gi3\_28339607\_x1.....cgccaguacugcUaucggagac..... 1  
 Gi3\_28873479\_x1.....uUggagacgucgugggaaacacggg..... 1  
 G1a\_6198196\_x1.....gggaacacggggugcAgaac..... 1  
 Gi5\_9077063\_x1.....ccgcaguacugcgaucggagCcguc..... 1  
 Gi1\_4344620\_x1.....ucaggccccgccaguacugcAauc..... 1  
 Gi2\_11070034\_x1.....caggccccgccaguacugUgaucgga..... 1  
 Gi3\_28557955\_x1.....Ggcgaucggagacgucgugggaaacacggg..... 1  
 Gi5\_9067617\_x1.....caggccccgUcaguacugcg..... 1  
 Gi1\_4311416\_x1.....Cgggagacgucgugggaaacacggggugc..... 1  
 Gi3\_28853400\_x1.....gaucggagaAgucgugggg..... 1  
 G1a\_6292837\_x1.....Cggccccgccaguacugc..... 1  
 Gi3\_28898609\_x1.....acgucgugggaaUacggggugcc..... 1  
 Gi1\_4383926\_x1.....gAgaacacggggugccgaac..... 1  
 Gi4\_581968\_x1.....ugggUaacacggggugccgaacu..... 1  
 Gi2\_11173721\_x1.....cgaucggagacgucgugggaaacacggAgugc..... 1  
 Gi2\_11038804\_x1.....guacugUgaucggagacgucguggg..... 1  
 Gi3\_28505215\_x1.....gccccgAcaguacugcgauc..... 1  
 Gi2\_11037573\_x1.....caggcGccgccaguacugcgau..... 1  
 Gi5\_9004407\_x1.....Ngucgugggaaacacggggugccgaacu..... 1  
 Gi5\_8936980\_x1.....agacgucguggAaacacggggugccgaacu..... 1  
 Gi2\_11401586\_x1.....gagacgucgugggaaacacggggCgccgaacu..... 1  
 Gi3\_28956006\_x1.....ggccccgccagAacugcgaucgga..... 1  
 Gi1\_4352741\_x1.....ggaacacggggUccgaac..... 1  
 Gi2\_11344286\_x1.....cgucgugggaaacacgUggugc..... 1  
 Gi3\_28923915\_x1.....gaagcgcgcugacggccccgccGguacugc..... 1  
 Gi5\_9127786\_x1.....acgucgugggaaacacgggAugccgaacu..... 1  
 Gi3\_28831418\_x1.....agaagcgcgcugcCggccccgccaguacug..... 1  
 Gi3\_28475397\_x1.....ccccgccaguaAugcgaucggagacgucgug..... 1  
 Gi3\_28307798\_x1.....aagagaagcgUcgucaggcccc..... 1  
 Gi2\_11385893\_x1.....cgucaggcNccgccaguac..... 1  
 Gi3\_28752444\_x1.....ucggagacAucgugggaaacacg..... 1  
 Gi2\_11219368\_x1.....aucggagacgucgugggaaacacggggugG..... 1  
 Gi3\_28400109\_x1.....gaucggagacgucgugggaaacacggA..... 1  
 Gi3\_28781955\_x1.....cggagGcgucgugggaaacacggggug..... 1  
 Gi2\_11192440\_x1.....gaccAcgugggaaacacggggugccgaac..... 1  
 Gi2\_11302551\_x1.....Ggaucggagacgucgugggaaacacggggugcc..... 1  
 Gi3\_28774544\_x1.....uacugcgaucggagacAu..... 1  
 G1a\_6278688\_x1.....gggaacaUggggugccgaac..... 1

Gi5\_8927404\_x1.....uaUgaagagaagcgccgucagggc..... 1  
 Gi3\_28296184\_x1.....acugcgaCcgagacguc..... 1  
 Gi3\_28297294\_x1.....agggcccgccaguacugcgUucgga..... 1  
 Gi3\_28786633\_x1.....cUcgccaguacugcgauccggaga..... 1  
 Gi5\_8863661\_x1.....gaagcgccgucagggccUgccaguacug..... 1  
 Gi2\_10995451\_x1.....cggagacgucgugggaaUac..... 1  
 Gi3\_28952971\_x1.....gucgugggaacaGggggugc..... 1  
 Gi3\_28343116\_x1.....gaucggagacgucgugggaaUcggg..... 1  
 Gi2\_11290228\_x1.....aagUgcccgucagggcccgccaguacugc..... 1  
 Gi3\_28316642\_x1.....gauGggagacgucgugggaaacacggggu..... 1  
 Gi5\_8893475\_x1.....guUagggcccgccaguacugcg..... 1  
 Gi2\_11106817\_x1.....ucggagGcgucgugggaaacacgggg..... 1  
 Gi3\_28529002\_x1.....cgucgugggaCcacggggugccgaa..... 1  
 Gi2\_11081520\_x1.....cgugggaaacUggggugccga..... 1  
 Gl1a\_6315853\_x1.....aucggagacgucgugAgaacacgg..... 1  
 Gi3\_28375575\_x1.....cagggcccgccaguacugcgauccggaAacguc..... 1  
 Gi2\_11341986\_x1.....aGgucgugggaaacacggggu..... 1  
 Gi5\_9055896\_x1.....cggagacgucguggAaacacg..... 1  
 Gi5\_9035580\_x1.....cCguacugcgauccggagacgucgug..... 1  
 Gi4\_598314\_x1.....guacugcgauccggagacguc..... 0  
 Gi5\_8976831\_x1.....gugggaaacacggggAgccgaa..... 1  
 Gi5\_8966364\_x1.....ucgugggaaacUcggggugccgaacu..... 1  
 Gi2\_11175061\_x1.....aagcCccgucagggcccgccaguacugc..... 1  
 Gl1a\_6251801\_x1.....cgugggaaacacggggguAc..... 1  
 Gi1\_4238386\_x1.....ucgugggaaacacggggugccgaCc..... 1  
 Gi2\_11407411\_x1.....gucgugggaaacacggggugccAa..... 1  
 Gi1\_4372978\_x1.....ugggaaacacCggggugccgaacu..... 1  
 Gi1\_4292905\_x1.....aucggagacgucguAgaacacggggugc..... 1  
 Gi2\_11143290\_x1.....gaucggagUcugcugugggaaacacggg..... 1  
 Gi3\_28550315\_x1.....cgucCugggaaacacggggugccg..... 1  
 Gi3\_28362479\_x1.....Cgaagagaagcgccgucagggcccgcc..... 1  
 Gi1\_4312408\_x1.....acgucgugggaaacacggggguAccgaacu..... 1  
 Gi3\_28950229\_x1.....cgccaguacugcgauccgaga..... 1  
 Gi3\_28310754\_x1.....gaagagaagcgccgucGggcccgccagua..... 1  
 Gl1a\_6179147\_x1.....cgugggaaacacggggugccgaGc..... 1  
 Gi5\_9092231\_x1.....cgucgugggaaacacggAgugccgaac..... 1  
 Gi2\_11155884\_x1.....gcccgucagggcccgccUguacugcg..... 1  
 Gl1a\_6337510\_x1.....gggaaacacAggggugccgaac..... 1  
 Gi2\_11348646\_x1.....gcgaucAgagacgucgugggaaaca..... 1  
 Gi5\_8981120\_x1.....ccgucaAgcccccgccaguacugcg..... 1  
 Gi5\_9030909\_x1.....agggcccgccaguacuUcgauc..... 1  
 Gi5\_9071436\_x1.....aucggGgacgucgugggaaacacgg..... 1  
 Gi3\_28681754\_x1.....gucgugggaaGacggggugccgaac..... 1  
 Gi3\_28800790\_x1.....aagagaagcgccgucagggcccgAca..... 1  
 Gi3\_28829287\_x1.....gccaguacugUgaucggagacgu..... 1  
 Gl1a\_6337559\_x1.....acgucgugggaaacCcggggugccgaacu..... 1  
 Gi2\_11357594\_x1.....aucggagacgucUugggaaacacggggugcc..... 1

Gi5\_8978993\_x1.....agacgucgugggaacacggggugcAgaac..... 1  
 Gi2\_11318610\_x1.....ucaggccccgccaguacugcgaucgg..... 0  
 Gi1\_4302488\_x1.....gcgaucggagacgucgugggaacacggggugccga..... 0  
 Gl1a\_6359702\_x1.....cgugggaacacgAgggugcc..... 1  
 Gi2\_11132721\_x1.....aggccccgccaguacugAgaucg..... 1  
 Gi2\_11086522\_x1.....acgucgugggaacacgAgggugc..... 1  
 Gl1a\_6092107\_x1.....acugcgaucggGgacguc..... 1  
 Gi3\_28318008\_x1.....gagaagcgccguUaggccccgccaguacugc..... 1  
 Gi1\_4267097\_x1.....gacgucguNggaacacggggugccgaac..... 1  
 Gi2\_11138447\_x1.....aguaucugcgaucUgagacguc..... 1  
 Gi2\_11285136\_x1.....cUcgccaguacugcgaucggaga..... 1  
 Gi1\_4260111\_x1.....aucggaUacgucgugggaacacgg..... 1  
 Gi3\_28524432\_x1.....caggccccgccaguacuAcgaucggagacgu..... 1  
 Gi2\_11248173\_x1.....ccgucGggccccgccaguacugcg..... 1  
 Gi1\_4378937\_x1.....ucaggccccgccaguGcugcgauc..... 1  
 Gi1\_4361548\_x1.....gaacacggNgugccgaac..... 1  
 Gi1\_4241130\_x1.....gacgucgugggaacacggggugccgaaA..... 1  
 Gl1a\_6039213\_x1.....aguaAugcgaucggagacgucg..... 1  
 Gi3\_28911524\_x1.....gucgugggaacacggggugA..... 1  
 Gi3\_28658001\_x1.....ucggagacgucgugggaaAacgg..... 1  
 Gi2\_11192724\_x1.....gccaguacCgcaucggagacguc..... 1  
 Gi2\_11263006\_x1.....ucggagGcgucgugggaacacggggu..... 1  
 Gi5\_9111466\_x1.....ucgugggaGcacggggugccgaac..... 1  
 Gl1a\_6044964\_x1.....Uacacggggugccgaacu..... 1  
 Gi2\_11363988\_x1.....gucgugggaacacggAgugccga..... 1  
 Gi5\_9069111\_x1.....ggccccgccaguacugcgaucggG..... 1  
 Gi3\_28359813\_x1.....agagaagcgccgucagggcccU..... 1  
 Gi5\_9012986\_x1.....aucggagGcgucgugggaacacg..... 1  
 Gi3\_28423166\_x1.....agacAucgugggaacacggggugccgaac..... 1  
 Gi3\_28757017\_x1.....ucguAggaacacggggugc..... 1  
 Gl1a\_6155480\_x1.....gGgaagcgccgucagggcccccca..... 1  
 Gl1a\_6220338\_x1.....cggGgacgucgugggaacacggggug..... 1  
 Gl1a\_6349188\_x1.....caguacugcAaucggagacgucg..... 1  
 Gi3\_28283674\_x1.....agagaagcgccgucagggAccgc..... 1  
 Gi1\_4356036\_x1.....cggGgacgucgugggaaca..... 1  
 Gi3\_28390097\_x1.....ucAugggaacacggggugccgaa..... 1  
 Gi1\_4368574\_x1.....gagacgucgugggaaAacggggugcc..... 1  
 Gi3\_28282921\_x1.....ggagacgucGgggaacacggggugccgaa..... 1  
 Gi2\_11019642\_x1.....ugggaacacggCgugccga..... 1  
 Gi3\_28684693\_x1.....gagacgucNugggaacacggggugc..... 1  
 Gi1\_4268619\_x1.....ucgugggaacacggCgugccgaac..... 1  
 Gl1a\_6191149\_x1.....agGacugcgaucggagacgucgug..... 1  
 Gi1\_4346591\_x1.....gccgucaggAcccgccaguacu..... 1  
 Gi2\_11273172\_x1.....aguaucugcgaucggCgacguc..... 1  
 Gi3\_28679052\_x1.....ccgucagggccccgccaguaUugcgaucgga..... 1  
 Gi3\_28381453\_x1.....gaagagaagcgUgucagggc..... 1  
 Gl1a\_6204354\_x1.....Cgaagcgccgucagggccccgc..... 1

Gi1\_4165913\_x1.....ggagacgucgugggaacacggggugcAgaacu..... 1  
 Gi3\_28933056\_x1.....cgugggUacacggggugccg..... 1  
 G1a\_6295918\_x1.....uAggagacgucgugggaacacggg..... 1  
 G1a\_6340850\_x1.....uccgaauuaggaagagaagcgc..... 0  
 Gi5\_9117987\_x1.....cggagacgucguggAaacacggggugcc..... 1  
 Gi5\_8978669\_x1.....gUaacacggggugccgaa..... 1  
 Gi3\_28372241\_x1.....cgaucggagacAucgugggaacacg..... 1  
 Gi3\_28748350\_x1.....cgccaguacugcgaucggagGcgucgu..... 1  
 Gi1\_4282144\_x1.....aacacggggugccgCacuu..... 1  
 G1a\_6137112\_x1.....ugcgaucgNagacgucgug..... 1  
 Gi5\_8939837\_x1.....cggagacgucguggaaUacggggugccga..... 1  
 Gi3\_28262342\_x1.....acgucgugggaacacgUgugccgaac..... 1  
 Gi2\_11088045\_x1.....Ugaagcgccgucagggccccgc..... 1  
 Gi1\_4262809\_x1.....ggagacguNuggggaacacggggu..... 1  
 Gi2\_11271014\_x1.....gaCcgagacgucguggga..... 1  
 Gi3\_28498054\_x1.....cgccaguacugcgaucggUgacgucgu..... 1  
 Gi2\_11088997\_x1.....aagagaagcgccguUaggcccc..... 1  
 Gi5\_8979839\_x1.....ggagGcgucgugggaacacggggugccgaac..... 1  
 Gi2\_11380980\_x1.....ucggagacgucgugggGacacggggugc..... 1  
 Gi3\_28351030\_x1.....cgccagCacugcgaucggagacgu..... 1  
 Gi3\_28552825\_x1.....Ggagaagcgccgucaggg..... 1  
 Gi2\_11320294\_x1.....aggccccgcAaguacugcg..... 1  
 Gi2\_11277907\_x1.....ucggagacgucgugggGac..... 1  
 G1a\_6261013\_x1.....aGcgagacgucgugggaacacgg..... 1  
 Gi3\_28982145\_x1.....aggccUcgccaguacugcgaucgg..... 1  
 Gi2\_11367570\_x1.....gaagagaagcgUgucagggccccgc..... 1  
 G1a\_6245317\_x1.....aucggagacgucgugAgaacacggg..... 1  
 Gi2\_11320048\_x1.....gaagagaagcgCGgucagggccccg..... 1  
 Gi2\_11088382\_x1.....caggccccgcagacuUcgauc..... 1  
 Gi3\_28272552\_x1.....gacgucgugggaacacggggugccgaaAu..... 1  
 Gi3\_28375523\_x1.....gagaagcgccgucagggccAcgc..... 1  
 Gi3\_28454117\_x1.....gacgucgugggaacNcggggugccgaacu..... 1  
 Gi1\_4199416\_x1.....gaucggagGcgucguggga..... 1  
 Gi2\_11401793\_x1.....gaagcgccgucagggccccgA..... 1  
 Gi3\_28537142\_x1.....ucggagCcgucgugggaaca..... 1  
 Gi3\_28575009\_x1.....aucggagacgucguggCaacacgg..... 1  
 Gi2\_11334365\_x1.....acugcgUucggagacgucgugg..... 1  
 Gi1\_4171425\_x1.....agagaagcgccgucagggccccgc..... 0  
 Gi1\_4245029\_x1.....ucguUgggaacacggggugccga..... 1  
 Gi3\_28316634\_x1.....gaagagaagcgccgucagggUccgc..... 1  
 Gi1\_4338528\_x1.....uUgugggaacacggggugccga..... 1  
 Gi3\_28471843\_x1.....cgccaguacugcgaCcgagac..... 1  
 Gi2\_11044897\_x1.....gccccccaCuacugcgauc..... 1  
 Gi2\_11049962\_x1.....uaUugcgaucggagacgucgugggaaca..... 1  
 Gi5\_8986387\_x1.....Ugccaguacugcgaucggagacgu..... 1  
 Gi2\_11102776\_x1.....cCaucggagacgucgugggaacacggg..... 1  
 Gi3\_28585302\_x1.....gcgaucggagacgucgugggGacacggg..... 1

Gi2\_11047471\_x1.....gucaggccccgccaguacugcgGuc..... 1  
 Gi3\_28265435\_x1.....ccccgccaAuacugcgauccggagacg..... 1  
 Gi1\_4193491\_x1.....cgugggaacacggggugcUg..... 1  
 Gi3\_28900221\_x1.....cggagacgucgugggaacGacgg..... 1  
 Gi3\_28426436\_x1.....ccccgccaguacugcgauccggagacguU..... 1  
 Gi5\_9090674\_x1.....cggagacgGcuggggaacacggggugcc..... 1  
 Gi1\_4340102\_x1.....ccccgccaguacugcgauccggagacg..... 0  
 Gi3\_28391848\_x1.....cguNggaacacggggugccga..... 1  
 Gi3\_28708363\_x1.....agaaUcgccgucagggccccgccaguacugc..... 1  
 Gi3\_28373284\_x1.....cgccaguacugcgGucggagacgucgu..... 1  
 Gi3\_28809945\_x1.....gccgucagggccccgccaguacugcgaC..... 1  
 Gi1\_4194074\_x1.....Cucgugggaacacggggugcc..... 1  
 Gi2\_11239936\_x1.....gagacgucgugAgaacacggg..... 1  
 Gi3\_28343123\_x1.....ggagacgucguAggaacacggggugccg..... 1  
 Gi3\_28892382\_x1.....gaucggagacguAguggg..... 1  
 Gi2\_11055218\_x1.....cggagacgucgugggaacaAggggugcc..... 1  
 Gi1\_4272121\_x1.....cguUggaacacggggugccgaacu..... 1  
 Gi3\_28413861\_x1.....gucaggccNcgccaguacugcgauC..... 1  
 Gi3\_28388970\_x1.....cgucgugggaacGacggggugccga..... 1  
 G1a\_6244351\_x1.....gccaguacugcgauUggagacguc..... 1  
 Gi3\_28826290\_x1.....agagaagcgUcgucagggccccgcc..... 1  
 Gi3\_28757174\_x1.....ggagacgucgAgggaacacggggugccg..... 1  
 Gi2\_11195074\_x1.....ggagacgucgugCgaacacggggugcc..... 1  
 Gi5\_9125770\_x1.....uacugcgauccggCgacgu..... 1  
 Gi3\_28273359\_x1.....aguacugAgaucggagacgucg..... 1  
 Gi2\_11366038\_x1.....gacgucgugggaacacAggggugccg..... 1  
 Gi2\_11298004\_x1.....uGcugcgauccggagacgucgug..... 1  
 Gi3\_28431241\_x1.....cggagacgucguUggaacacggggugcc..... 1  
 Gi1\_4362612\_x1.....ugggaacacggggugccgaC..... 1  
 Gi3\_28369839\_x1.....cgaAcggagacgucgugggaacacgggggu..... 1  
 G1a\_6148333\_x1.....gaucggagacgucgugggaG..... 1  
 G1a\_6165857\_x1.....acucguuccgaauuaCgaagagaagcg..... 1  
 G1a\_6342632\_x1.....aagagaagcgccgucCggcccc..... 1  
 Gi3\_28635531\_x1.....cgucgugggaacacggggugccgGa..... 1  
 Gi3\_28787045\_x1.....agaagcgccguUagggccccgcca..... 1  
 Gi2\_11100277\_x1.....cccgccaguacugcgauccggaAac..... 1  
 Gi5\_9100875\_x1.....gcgcccgucCggccccgccaguacug..... 1  
 Gi3\_28578716\_x1.....agagaagcgccgucagCccccg..... 1  
 Gi2\_11323820\_x1.....ccgucaggUcccgccaguacugc..... 1  
 Gi5\_9095891\_x1.....cgucagggccccccCguacugcg..... 1  
 Gi2\_11354574\_x1.....caguacugcgauccggaAacguc..... 1  
 G1a\_6273228\_x1.....aagagaagcgccgucaggAcccg..... 1  
 G1a\_5984957\_x1.....Gggagacgucgugggaacacggg..... 1  
 Gi3\_28525837\_x1.....agaagcgccgucaggcUcccgccaguacu..... 1  
 Gi1\_4201007\_x1.....gugggaacaAggggugccgaacu..... 1  
 Gi2\_11096538\_x1.....cggagacgucgugggaacacggggugcG..... 1  
 Gi5\_8977847\_x1.....aucggagacgucguggAaacacgggggu..... 1



Gi2\_11364518\_x1.....acgucgAgggaacacggggugc..... 1  
Gi2\_11186340\_x1.....caggccccgccaguGcugcgaucggaga..... 1  
Gi3\_28586180\_x1.....caggccccgccaguacugcgaA..... 1  
Gi3\_28454112\_x1.....cggagGcugcuggggaacacgg..... 1  
G1a\_6117396\_x1.....gccaguGcugcgauccga..... 1  
Gi2\_11274284\_x1.....cccgccaguaUugcgauccggagacgucgu..... 1  
Gi3\_28359171\_x1.....caguGcugcgauccggagacguc..... 1  
Gi3\_28601959\_x1.....cgauccggagacgucuggggaGcacggggg..... 1  
Gi3\_28460163\_x1.....cugcgauUgagacgucg..... 1  
Gi2\_11219971\_x1.....Cucggagacgucuggggaacacg..... 1  
Gi3\_28386764\_x1.....gCucggagacgucuggggaacacggggg..... 1  
Gi2\_11264700\_x1.....agacgucuggggaacacUgggugcc..... 1  
Gi5\_8974721\_x1.....ugcgauUagacgucugggga..... 1  
Gi1\_4369514\_x1.....caUgccccgccaguacugc..... 1  
Gi2\_11306787\_x1.....guNgugggaacacggggugccgaacu..... 1  
Gi2\_11145505\_x1.....cgauccggagacgucuggggaCcacggggg..... 1  
Gi3\_28561473\_x1.....Uccccccaguacugcgauccggagacg..... 1  
Gi3\_28475669\_x1.....cgucagAccccgccaguacug..... 1  
Gi2\_11356424\_x1.....aagcgccgucagggccccgccaguCugc..... 1  
Gi3\_28274840\_x1.....ucgugggaaAacggggugc..... 1  
Gi2\_11104825\_x1.....gccccccaAuacugcgaucc..... 1  
Gi2\_11011623\_x1.....acgucAuggggaacacggggg..... 1  
Gi1\_4223059\_x1.....cgauccggagacgucuggggaacacggggC..... 1  
Gi3\_28560422\_x1.....gacgucgugAgaacacggg..... 1  
Gi2\_11273039\_x1.....aucggagacgucuggggaacaG..... 1  
Gi1\_4369188\_x1.....aggccccgccagGacugcgauccg..... 1  
Gi5\_9039045\_x1.....gagaGcgccgucagggccccgccaguacug..... 1  
Gi2\_11199026\_x1.....cgcUaguacugcgauccggagacguc..... 1  
Gi5\_9094242\_x1.....gugNgaacacggggugccga..... 1  
Gi3\_28388220\_x1.....agagaagcgccgucagggcUccggc..... 1  
G1a\_6055863\_x1.....cgucaggAccccgccaguacugcg..... 1  
Gi3\_28412396\_x1.....ggagacgucgugUgaaca..... 1  
Gi2\_11046009\_x1.....gucgugggaacacggggAgccga..... 1  
Gi1\_4288263\_x1.....gaacacggggugcGgaacu..... 1  
Gi2\_11036376\_x1.....guacugcgauccggagacgCc..... 1  
Gi3\_28831095\_x1.....cgugggaacacggggugGc..... 1  
Gi1\_4202635\_x1.....gggaacacUggggugccgaacu..... 1  
Gi5\_9123371\_x1.....gGgaagcgccgucagggccccgccaguacugc..... 1  
Gi3\_28540069\_x1.....ggccccgccaguGcugcga..... 1  
Gi2\_11229308\_x1.....acugcgauccggagGcugcuggggaacac..... 1  
Gi2\_11015097\_x1.....gGcugcuggggaacacggggugccga..... 1  
Gi2\_11218353\_x1.....gggaacacgUggugccgaac..... 1  
Gi2\_11142574\_x1.....ggaacacggggugccgaacuA..... 1  
G1a\_6180132\_x1.....cgucagggccccgccagCacugcgauccg..... 1  
Gi2\_11145232\_x1.....caggccccgccagCacugcgauccggagac..... 1  
Gi2\_11323367\_x1.....gaagcgccgucaAgcccc..... 1  
G1a\_6231576\_x1.....aucggagaNgucgugggaacacggggg..... 1

Gi2\_11392069\_x1.....gucgugggaacaUggggugccg..... 1  
Gi3\_28798795\_x1.....acgucguAggaaacacggg..... 1  
Gi1\_4287996\_x1.....gNgggaacacggggugccgaacu..... 1  
Gi3\_28781070\_x1.....gaagagaagcgcUgucagggccccgcc..... 1  
Gi3\_28698349\_x1.....Ggccaguacugcgauccgagacgucgu..... 1  
Gi2\_11357749\_x1.....cgucgugggaacacggggAgc..... 1  
G1a\_6032606\_x1.....gugggaacacggAgugcc..... 1  
Gi3\_28979707\_x1.....ggagUcgucgugggaacacggggugcc..... 1  
Gi5\_8898134\_x1.....aggUcccgccaguacugcga..... 1  
Gi2\_11220507\_x1.....uUggagacgucgugggaacacggggugccgaacu..... 1  
Gi3\_28454678\_x1.....aagagaagcgcgucagggccccgccUg..... 1  
Gi5\_8958855\_x1.....Gcucgugggaacacggggugccgaacuuu..... 1  
Gi2\_11187456\_x1.....ugcgauccgagacgucguAggaaacacg..... 1  
Gi3\_28593053\_x1.....caggccccgccaguacugcgauccgagGcg..... 1  
Gi2\_11033935\_x1.....gacgucgugggaacacgAggugccg..... 1  
Gi1\_4343959\_x1.....gugggaacacggAgugccgaacuu..... 1  
Gi3\_28443102\_x1.....agacUcgugggaacacggggugcc..... 1  
Gi5\_8899894\_x1.....cccgccaguacugcgauccgagagcG..... 1  
Gi5\_9132924\_x1.....gugggaacacCgggugccg..... 1  
Gi3\_28851917\_x1.....Aagacgucgugggaacac..... 1  
Gi3\_28603483\_x1.....ccaguacugcgCucggagacguc..... 1  
Gi5\_9126874\_x1.....caggcAccgccaguacugc..... 1  
Gi3\_28850893\_x1.....aucggagacgucCugggaacacgg..... 1  
Gi2\_11111345\_x1.....ugggaacacggggugccU..... 1  
Gi3\_28450023\_x1.....ucgugggaUcacggggugccgaac..... 1  
Gi1\_4293249\_x1.....ccgucagggccccgccaguUcugc..... 1  
Gi2\_11019232\_x1.....ggagacgucgugggaacacggggCgccgaac..... 1  
G1a\_6086118\_x1.....cgccUguacugcgauccgagacguc..... 1  
Gi3\_28810893\_x1.....cgccaguacugcgGucgg..... 1  
Gi3\_28833934\_x1.....cgccaguacCgcaucggagacg..... 1  
Gi3\_28871743\_x1.....ucgugggaacacggUgugccg..... 1  
Gi2\_11405794\_x1.....caggccccgccGguacugcgauccgga..... 1  
Gi2\_10996938\_x1.....aguacugcgauccgagGc..... 1  
Gi3\_28654780\_x1.....cggagacgucgGgggaacacgggg..... 1  
Gi5\_9118913\_x1.....cgucgugggaAacggggugcc..... 1  
Gi2\_11131858\_x1.....gugggaacacggggugccgaacuuu..... 0  
Gi3\_28555327\_x1.....cgccaguacugGgauccgagacg..... 1  
Gi3\_28308244\_x1.....agcggcugcagggccccgAcagu..... 1  
Gi3\_28964820\_x1.....cAcgccaguacugcgauccgagacg..... 1  
Gi3\_28371234\_x1.....cgccaguGcugcgauccgagacguc..... 1  
Gi3\_28788814\_x1.....ucguuccgaauaCgaagagaagcgc..... 1  
Gi5\_8857118\_x1.....caguacugcgaCcgagacguc..... 1  
G1a\_6295485\_x1.....cggagacgucguggGacacggggg..... 1  
Gi3\_28607782\_x1.....gauccgagacgucgAgggaacacggggugcc..... 1  
Gi2\_11298417\_x1.....gauccgagUcgucgugggaacacgggg..... 1  
Gi3\_28961014\_x1.....ggagacgucgugggaacacggggUccgaacu..... 1  
Gi2\_11275553\_x1.....aaAgaagcgcgucagggccccgccagu..... 1

Gi5\_9126542\_x1.....ugggaacacggggugccgaaGu..... 1  
 Gi2\_11045111\_x1.....caUuacugcgauccgagacgucgu..... 1  
 Gi4\_575798\_x1.....Uaucggagacgucguggg..... 1  
 Gi2\_11309510\_x1.....aucggagacgucgGggga..... 1  
 Gi2\_11287943\_x1.....ucggagacgucgugggaacGcg..... 1  
 Gi1\_4173651\_x1.....gaacacggggAgccgaacuu..... 1  
 Gi3\_28320894\_x1.....cgucguggCaacacgggg..... 1  
 Gi2\_11251484\_x1.....uUggagacgucgugggaacacggggugc..... 1  
 Gi4\_584632\_x1.....ucagggccccgcagucgucggaucg..... 0  
 Gl1a\_6358243\_x1.....aagagaagcgccgucaggccccA..... 1  
 Gi2\_11383108\_x1.....gacgAcgugggaacacggggugccgaauc..... 1  
 Gi3\_28511946\_x1.....gagaagcgccgucagggccccgcGguacugc..... 1  
 Gi2\_11156738\_x1.....cUucagggccccgcagucgucggauc..... 1  
 Gi4\_596086\_x1.....Gucggagacgucgugggaacacggg..... 1  
 Gi3\_28378560\_x1.....ggccccgUcaguacugcgauccg..... 1  
 Gi5\_8889801\_x1.....agacgucgugggaacacggggugccgCac..... 1  
 Gi3\_28553921\_x1.....cgucagggccccgcagucgca..... 1  
 Gi1\_4221552\_x1.....gCagacgucgugggaacacggggu..... 1  
 Gi1\_4203916\_x1.....cCgagacgucgugggaacacgggg..... 1  
 Gi3\_28690428\_x1.....gcgccgGcagggccccgcagucgucg..... 1  
 Gi2\_11156384\_x1.....aUagaagcgccgucagggccccgcagucg..... 1  
 Gi3\_28922629\_x1.....aagagaagcgccgucagggccccgcGgu..... 1  
 Gi1\_4162420\_x1.....gaNcacggggugccgaaucuu..... 1  
 Gi5\_9050371\_x1.....aggccccccaCuacugcgaucc..... 1  
 Gi3\_28582264\_x1.....ggagacgucgugggGacacggggugccgaauc..... 1  
 Gi2\_11196312\_x1.....ucagggccccgcagGacugcg..... 1  
 Gi2\_11106981\_x1.....cAccaguacugcgauccg..... 1  
 Gi2\_11240394\_x1.....ucagggcccUgccagucgucg..... 1  
 Gi5\_9059690\_x1.....ggaacacggggugccgaaU..... 1  
 Gi3\_28591313\_x1.....gucgugggGacacggggugccg..... 1  
 Gi2\_11349211\_x1.....gucgugggaacacggggugcUgaac..... 1  
 Gi1\_4176136\_x1.....cgucagggccccgcagucgucU..... 1  
 Gi3\_28262709\_x1.....acacggggugcGgaacuu..... 1  
 Gi3\_28498899\_x1.....gccagAacugcgauccgga..... 1  
 Gi1\_4270476\_x1.....acgucgugggaacCcggggugccgaauc..... 1  
 Gi3\_28873444\_x1.....aggccccgcUguacugcgauccgagac..... 1  
 Gi5\_9082286\_x1.....cggGgacgucgugggaacacggggugccgaauc..... 1  
 Gi4\_579585\_x1.....uacugcgauccgagacgu..... 0  
 Gi3\_28523253\_x1.....gccagucgucgagacgagacAuc..... 1  
 Gi2\_11113076\_x1.....uacugcgauccgagacgucguA..... 1  
 Gi3\_28731009\_x1.....aggccccgcagucgucggaucg..... 1  
 Gl1a\_6319371\_x1.....gaucggagNcgucgugggaacacg..... 1  
 Gi2\_11146566\_x1.....gccccgcagucgucgagacgC..... 1  
 Gi1\_4378242\_x1.....gugggaacacgAgugccg..... 1  
 Gi2\_11062368\_x1.....gagacgucgugggaacacgAggugccg..... 1  
 Gi3\_28944921\_x1.....cgucgugggaacCcggggugccgaa..... 1  
 Gi2\_11017946\_x1.....cgaauuaggaagagaagc..... 0

Gi3\_28544475\_x1.....gaucggagacgucgugggaacacAgggug..... 1  
 Gi3\_28691537\_x1.....cccgCuaquacugcgauccggagacgu..... 1  
 Gi2\_11395864\_x1.....cAucagggccccccaguacug..... 1  
 Gi5\_9075514\_x1.....cgucgugggaacacggggCgcc..... 1  
 Gi2\_11136356\_x1.....acgucgugggaacacggggugccAa..... 1  
 Gi3\_28603341\_x1.....agGcgucgugggaacacggg..... 1  
 G1a\_6085658\_x1.....aucggagacgucgugggaacacggCg..... 1  
 G1a\_6115078\_x1.....ccaguacugcgGucggagacguc..... 1  
 G11\_4356119\_x1.....ucggagacgucgugggaGcacggggugc..... 1  
 Gi2\_11193383\_x1.....aucggagacgucgugggaacacgggCugcc..... 1  
 Gi2\_11190179\_x1.....cagNccccgccaguacugcg..... 1  
 Gi5\_8954635\_x1.....ucggUgacgucgugggaacacg..... 1  
 Gi3\_28740015\_x1.....cgucguCggaacacggggg..... 1  
 Gi3\_28958200\_x1.....Cccaguacugcgauccggagacg..... 1  
 Gi3\_28786173\_x1.....ccccgccGguacugcgauccggagacg..... 1  
 Gi3\_28536972\_x1.....cgucagggccccccaguacAgcg..... 1  
 Gi3\_28358715\_x1.....aucggagacgucgugCgaacac..... 1  
 G11\_4228255\_x1.....agacgucgugggaacacggggCg..... 1  
 Gi3\_28736171\_x1.....ucagggccccgcAaguacugcg..... 1  
 G1a\_6250241\_x1.....ggNacacggggugccgaacu..... 1  
 Gi2\_11220043\_x1.....cgagacgucgugggaacacggggugccAa..... 1  
 G1a\_6109115\_x1.....Gccccccaguacugcgauccg..... 1  
 Gi3\_28874333\_x1.....ucagggccccccaguacugcgCucgg..... 1  
 G11\_4246474\_x1.....acgucgugggaacacggggAgccgaacu..... 1  
 Gi3\_28389593\_x1.....aggNccccccaguacugcgauccgga..... 1  
 Gi3\_28515902\_x1.....aguacugcgauccggagacguA..... 1  
 Gi2\_11305632\_x1.....aguacugcgCucggagac..... 1  
 Gi3\_28277377\_x1.....aggccccccaguaAugcga..... 1  
 Gi2\_11099548\_x1.....gggaacacggggUccgaac..... 1  
 Gi3\_28774662\_x1.....gagGagcgccgucagggcc..... 1  
 Gi5\_8872390\_x1.....cgucgugggaacacgCggugccgaacu..... 1  
 Gi2\_11260415\_x1.....gUcgucgugggaacacggggugccgaac..... 1  
 Gi2\_11392362\_x1.....cgucgugggaacacCgggugcc..... 1  
 G11\_4165796\_x1.....aucggagacgucgugggaacacggAgugcc..... 1  
 Gi3\_28751483\_x1.....Ugccaguacugcgauccggagacgucgug..... 1  
 Gi3\_28538469\_x1.....cgccaguacugcgauccggaAac..... 1  
 Gi3\_28539070\_x1.....ccAgccaguacugcgauccggagac..... 1  
 G11\_4242350\_x1.....agacUucgugggaacacggggugccg..... 1  
 Gi2\_11252424\_x1.....cguAgugggaacacggggugccg..... 1  
 Gi5\_9023895\_x1.....ggagacgucgugggaacacggggA..... 1  
 G1a\_6104083\_x1.....cgccaguacugcgauccggagacCc..... 1  
 Gi3\_28651809\_x1.....Ugagaagcgccgucagggcc..... 1  
 G11\_4356332\_x1.....gugggaacaUggggugcc..... 1  
 Gi2\_11123841\_x1.....Acgauccggagacgucgugggaacacgg..... 1  
 G11\_4374416\_x1.....aggaagagaagcgccgucagggc..... 0  
 Gi2\_11234141\_x1.....agccAcgccaguacugcg..... 1  
 Gi3\_28325576\_x1.....gaUaagcgccgucagggccc..... 1

Gi1\_4360945\_x1.....gugggaacacggggAgcc..... 1  
 Gi1\_4367318\_x1.....agGcgucgugggaacacggggugccgaacu..... 1  
 Gi3\_28917393\_x1.....gaucAgagacgucgugggaacacg..... 1  
 Gi5\_9002969\_x1.....gucgugggaGcacggggugccgaac..... 1  
 Gi2\_11066836\_x1.....ucCugggaacacggggugccgaac..... 1  
 Gi5\_8970883\_x1.....gugggaacaGggggugccga..... 1  
 Gi4\_578893\_x1.....ucgugggaacacgggAugccgaacu..... 1  
 Gi3\_28740403\_x1.....cguAgugggaacacggggugccgaacu..... 1  
 Gi2\_11365939\_x1.....aucggagacgucgugggaGcacggg..... 1  
 Gi2\_11139858\_x1.....agacgucgugggaacacgAggugccga..... 1  
 G1a\_6297292\_x1.....gGcaguacugcgaucgga..... 1  
 Gi3\_28931471\_x1.....gccgCcaggccccgccaguacu..... 1  
 Gi3\_28923272\_x1.....cUccgccaguacugcgaucggagac..... 1  
 Gi1\_4259743\_x1.....Gcgccaguacugcgaucggaga..... 1  
 Gi3\_28511947\_x1.....acgucgugggaaAacggggugccgaac..... 1  
 Gi2\_11047951\_x1.....gaucggagCcgucgugggaacacgg..... 1  
 Gi2\_11379850\_x1.....gaaNacggggugccgaac..... 1  
 Gi5\_9080998\_x1.....acgucgugggaacacggggGgccga..... 1  
 Gi2\_11164912\_x1.....cgucguggNaacacggggugccgaa..... 1  
 Gi5\_9047038\_x1.....ugggaacacggggGgccgaac..... 1  
 G1a\_6190387\_x1.....gucaggccNcgccaguacugcga..... 1  
 G1a\_6220853\_x1.....cucguuccgCauuagga..... 1  
 Gi2\_11192409\_x1.....cgaucAgagacgucgugggaacacgggg..... 1  
 Gi3\_28440561\_x1.....guUgugggaacacggggug..... 1  
 G1a\_6129432\_x1.....uUcgaucggagacgucgugggaacac..... 1  
 Gi3\_28266196\_x1.....cgccagGacugcgauccggagacgucgu..... 1  
 Gi2\_11147114\_x1.....guacugcgaCcgagacguc..... 1  
 Gi3\_28761426\_x1.....guacugcgaucggagacgucguA..... 1  
 G1a\_6338929\_x1.....cgGucggagacgucgugggaa..... 1  
 Gi3\_28561811\_x1.....ggaacacggggugccgaacuu..... 0  
 Gi2\_11072289\_x1.....cccgccaguacugUgauc..... 1  
 Gi3\_28281579\_x1.....ggagacgucguggCaaca..... 1  
 Gi2\_11136483\_x1.....gcgaucggagacgCgugggaaca..... 1  
 Gi2\_11203200\_x1.....aagagaGcgccgucagggccccgcc..... 1  
 Gi3\_28978542\_x1.....cCccgucagggccccgccaguac..... 1  
 Gi2\_11271286\_x1.....agcgccgucagggccccCccaguacugcg..... 1  
 Gi3\_28433277\_x1.....gucaggccccgccUguacugcg..... 1  
 Gi4\_608104\_x1.....Uacacggggugccgaacu..... 1  
 G1a\_6180055\_x1.....caggccccAccaguacug..... 1  
 Gi3\_28583571\_x1.....gccgucGggccccgccaguacugcgau..... 1  
 Gi3\_28936711\_x1.....gccaguacugcgaCcgagacguc..... 1  
 G1a\_6118794\_x1.....Ggaucggagacgucgugggaa..... 1  
 Gi2\_11156756\_x1.....ccgccaguacugUgaucgg..... 1  
 Gi5\_9126251\_x1.....acucguuccgaauuaggaaga..... 0  
 Gi2\_11379491\_x1.....caggccccgccaguacugUgaucgg..... 1  
 Gi2\_11172917\_x1.....ucggagacgucgugggaacC..... 1  
 Gi3\_28332446\_x1.....cgucguggCaacacggggugccgaacu..... 1

Gi1\_4160340\_x1.....gucguggggaacaUggggugccgaacu..... 1  
 Gi2\_11357669\_x1.....cgucgugggaaGacggggugccgaacu..... 1  
 G1a\_6237595\_x1.....aucggagacgucguggggaacaG..... 1  
 Gi3\_28318434\_x1.....Cgccccgccaguacugcgauccg..... 1  
 G1a\_6046166\_x1.....cgauccggagacguUgugg..... 1  
 Gi2\_11398198\_x1.....auAggagacgucguggggaacacggggu..... 1  
 Gi3\_28678342\_x1.....gaucggagacgCcguggggaac..... 1  
 Gi3\_28881309\_x1.....agacguUguggggaacacggggugccgaac..... 1  
 G11\_4229791\_x1.....ccgucaggNccccccaguacug..... 1  
 Gi3\_28857296\_x1.....aucggagacgucgugggaaUacggggugc..... 1  
 G14\_572863\_x1.....gGgggaacacggggugcc..... 1  
 Gi2\_11342860\_x1.....aucggagaUgucguggggaacacg..... 1  
 G11\_4266851\_x1.....cgUucggagacgucgugg..... 1  
 Gi5\_9108995\_x1.....gugAgaacacggggugccgaa..... 1  
 Gi3\_28918801\_x1.....cgauccggagacgucgugggaaAacggggu..... 1  
 Gi2\_11056128\_x1.....ugcgauccggagGcugcuggggaaca..... 1  
 Gi2\_11280393\_x1.....gucguggggaacacggggugG..... 1  
 Gi2\_11026011\_x1.....aggccccgccUguacugcgauccggagacguc..... 1  
 Gi5\_8939568\_x1.....aacucguuccgaauuaggaaga..... 0  
 G1a\_6081477\_x1.....Uucggagacgucguggggaacacgg..... 1  
 Gi3\_28278938\_x1.....aucggagacgucguggggaacacggggGg..... 1  
 G1a\_6256012\_x1.....cgauccggagacgucguggggaacCcg..... 1  
 Gi3\_28440927\_x1.....gaucggagacgucguggggaacacgggU..... 1  
 Gi2\_11353603\_x1.....gaucggagacgucgGggga..... 1  
 Gi2\_11256518\_x1.....ccgccaguacugcgaCcg..... 1  
 Gi3\_28312668\_x1.....ccgccaguacugcAaucggagac..... 1  
 G11\_4238241\_x1.....ucguggggaacacUggggugc..... 1  
 Gi3\_28820679\_x1.....cgcUgucaggccccgccag..... 1  
 Gi3\_28541579\_x1.....Acaggccccgccaguacug..... 1  
 Gi5\_8873448\_x1.....guNggaaacacggggugccgaac..... 1  
 G1a\_6285556\_x1.....gaagagaaNcgccgucaggccc..... 1  
 Gi3\_28781346\_x1.....cggagacgucgugUgaacacggg..... 1  
 G11\_4206682\_x1.....gacgucguggggaacacgggU..... 1  
 Gi2\_11073889\_x1.....gaucggagacgucguggggaacaUgg..... 1  
 Gi5\_8852939\_x1.....gacgucguggggaacacgggAugccgaac..... 1  
 Gi2\_11170741\_x1.....aggccccgccagGacugcgau..... 1  
 Gi5\_8964789\_x1.....ucguggggaacacCgggugccgaacu..... 1  
 Gi2\_11069416\_x1.....gucguggggaacacggggugccgaUcu..... 1  
 Gi3\_28745182\_x1.....cGgccaguacugcgaucggagacgucgug..... 1  
 Gi2\_11197600\_x1.....Nacacggggugccgaacu..... 1  
 Gi2\_11264232\_x1.....aucggagacgucCugggaacac..... 1  
 Gi2\_11326833\_x1.....guacugcgGucggagacgucgugg..... 1  
 Gi2\_11317435\_x1.....ccgccaguacugcgaucggUg..... 1  
 Gi2\_11266595\_x1.....ugggaacUcggggugccgaa..... 1  
 Gi2\_11147062\_x1.....gaucggagacgucgugAgaacac..... 1  
 Gi2\_11211891\_x1.....gucaggccccccaCuacugc..... 1  
 Gi3\_28728847\_x1.....Ccggaucggagacgucguggggaaca..... 1

Gi3\_28922099\_x1.....caggAcccgccaguacugcgauccggagacg..... 1  
 Gi1\_4250548\_x1.....gaacacggggugGcgaacuu..... 1  
 Gi3\_28895585\_x1.....ucguuccgaaCuaggaagagaagcgccgu..... 1  
 Gi3\_28850844\_x1.....aucggagCcgucguggga..... 1  
 Gi3\_28530103\_x1.....ugggaacacgCggugccgaac..... 1  
 Gi2\_11101268\_x1.....ugggaacacCgggugccgaacu..... 1  
 Gi1\_4205476\_x1.....gccaguCcgugcgauccggagacg..... 1  
 Gi3\_28739641\_x1.....cgccaguacugcgauccggCgacgucgu..... 1  
 Gi1\_4365891\_x1.....caggccccgcUaguacugcg..... 1  
 Gi3\_28293751\_x1.....gacgucgugggaaAacggggu..... 1  
 Gi2\_11100580\_x1.....ucaggcUccgccaguacug..... 1  
 Gi2\_11219064\_x1.....gucguUggaacacggggugcc..... 1  
 Gi2\_11284889\_x1.....ucagggccccgcUaguacugcg..... 1  
 Gi3\_28706022\_x1.....aucggagacgucgugggaacaGgg..... 1  
 Gi2\_11071294\_x1.....ggccccgccaguacCgcgucg..... 1  
 Gi1\_4311024\_x1.....cccgccaguacugcgauccgga..... 0  
 Gi3\_28884437\_x1.....gaucggagacgucgugAgaacacg..... 1  
 Gi2\_11030353\_x1.....aggNcccgccaguacugc..... 1  
 Gi5\_8871380\_x1.....Ggugggaacacggggugccgaacuu..... 1  
 Gi1\_4227620\_x1.....ucguUggaacacggggugc..... 1  
 Gl1a\_6118168\_x1.....ggccccgccaguacugcgGucggagacguc..... 1  
 Gi4\_595022\_x1.....Uugggaacacggggugccg..... 1  
 Gl1a\_6134769\_x1.....aggaagagaagcgccgucaggccc..... 0  
 Gi1\_4368519\_x1.....gaucUgagacgucgugggaacacgg..... 1  
 Gi1\_4308148\_x1.....Aagacgucgugggaacacggggugcc..... 1  
 Gi5\_9019742\_x1.....ggaacacggggugccgaU..... 1  
 Gi2\_11260898\_x1.....agUgccgucagggccccgccagua..... 1  
 Gi3\_28831454\_x1.....gucgugggaacacggUgugccgaac..... 1  
 Gi2\_11266953\_x1.....cguNggaacacggggugcc..... 1  
 Gi3\_28375661\_x1.....cgccgucagggccccgccaguCugc..... 1  
 Gi3\_28423808\_x1.....aguacCgcgauccggagacgucg..... 1  
 Gi3\_28798460\_x1.....caggccccgccagCacugcgauccgga..... 1  
 Gi2\_11321236\_x1.....cggagCcgucgugggaacac..... 1  
 Gi3\_28430448\_x1.....Agccaguacugcgauccggagacguc..... 1  
 Gi2\_11057906\_x1.....ucgugggaacacgUggugccgaac..... 1  
 Gi3\_28557869\_x1.....caggccccgccaguaGugcgau..... 1  
 Gl1a\_6227759\_x1.....cgauccggagaGgucgugg..... 1  
 Gl1a\_6329446\_x1.....Uucggagacgucgugggaacacggggu..... 1  
 Gi2\_11099348\_x1.....gaucggagacgucgugggaacacgUggu..... 1  
 Gi1\_4179569\_x1.....cgucguggNaacacggggugccgaa..... 1  
 Gi3\_28458519\_x1.....agaagcgccgucagggccccAccagu..... 1  
 Gi5\_8905130\_x1.....ugcgauccgNagacgucguggga..... 1  
 Gl1a\_6286137\_x1.....Agagacgucgugggaacacggggu..... 1  
 Gi2\_11061142\_x1.....ucaggcUccgccaguacugcg..... 1  
 Gi2\_11084960\_x1.....aggccccgNcaguacugcgauccggaga..... 1  
 Gi2\_11319531\_x1.....ucUugggaacacggggugcc..... 1  
 Gi3\_28530191\_x1.....ccccccaNuacugcgauccg..... 1

Gi1\_4187370\_x1.....gucgugggGacacggggugccgaac..... 1  
Gi3\_28421870\_x1.....ugcgaCcgagacgucgugggaaacacggggu..... 1  
Gi2\_11234827\_x1.....gaagcgccAucagggccc..... 1  
Gi3\_28964234\_x1.....gucgAgggaacacggggugccga..... 1  
Gi2\_11407413\_x1.....aucggagacgucguAggaaacacgggg..... 1  
Gi3\_28481455\_x1.....ccccgccaguacugGgaucgggagacguc..... 1  
Gi2\_10994511\_x1.....uNgugggaacacggggugccgaacu..... 1  
Gi2\_11184770\_x1.....cUgagacgucgugggaaacacggggugccgaacu..... 1  
Gi3\_28348600\_x1.....ucggagGcgucgugggaaacacggggugcc..... 1  
Gi2\_11128287\_x1.....agacgucgugggaaacacCgggugcc..... 1  
Gi3\_28709324\_x1.....ucggagacgucguAggaaacacggggugccga..... 1  
Gi5\_9132143\_x1.....gugggaacacggggugUcg..... 1  
Gi3\_28944038\_x1.....gccccgccaguacugcgauU..... 1  
Gi1\_4361278\_x1.....ucgugggaacCcgggugccgaac..... 1  
Gi1\_4259251\_x1.....gagacgucgugGCaacacggggugccgaacu..... 1  
Gi5\_9094470\_x1.....gauUggagacgucgugggaaacacgg..... 1  
G1a\_6237566\_x1.....gacguUgugggaacacggggug..... 1  
Gi4\_585450\_x1.....gugggaacacggggugccCaa..... 1  
G1a\_5991208\_x1.....gaagagaagcgccgucGggccc..... 1  
Gi1\_4238132\_x1.....cguNggaacacggggugccgaacuu..... 1  
Gi1\_4262907\_x1.....ugcgauccgUgacgucguggg..... 1  
Gi3\_28286748\_x1.....gucagggcccgcaguaAugcgau..... 1  
Gi2\_11027439\_x1.....aagagaUgcgcccugacggccc..... 1  
Gi2\_11078563\_x1.....cgUcaguacugcgGaucgggagacg..... 1  
Gi4\_587678\_x1.....guacugcgauccgagacguAgugg..... 1  
Gi2\_11112592\_x1.....ccccgccCguacugcgauccgagacgu..... 1  
Gi5\_9018678\_x1.....aucggGgacgucgugggaaacacg..... 1  
Gi3\_28668560\_x1.....ggaAacgucgugggaaacacggggu..... 1  
G1a\_6000709\_x1.....cgugggaacacggggAgcc..... 1  
Gi1\_4317332\_x1.....gccaguacugcgGucggagacguc..... 1  
Gi2\_11341262\_x1.....gaucggagacguGgugggaacac..... 1  
Gi3\_28435301\_x1.....gcgauccgagacgucgCg..... 1  
Gi1\_4368670\_x1.....aucAgagacgucgugggaaacacgggg..... 1  
Gi2\_11064782\_x1.....agagaagcgccgucaAgccccgccaguacugc..... 1  
Gi3\_28521578\_x1.....agcgccguAaggccccgcaguu..... 1  
Gi1\_4373444\_x1.....agcgccgucagggccccgcaguuAugc..... 1  
Gi3\_28576466\_x1.....gccaguacugUgauccgga..... 1  
Gi2\_11361502\_x1.....cUccgccaguacugcgauccgga..... 1  
Gi3\_28967992\_x1.....cccgccagNacugcgauccgagacgucgug..... 1  
Gi5\_8947597\_x1.....gggaacacggggugAcgaacu..... 1  
Gi2\_11382175\_x1.....guacugcgauccgagacgG..... 1  
Gi1\_4331717\_x1.....gggaacacAgggugccgaacuu..... 1  
Gi1\_4235410\_x1.....Aacgucgugggaaacacggggugcc..... 1  
Gi2\_11193491\_x1.....gugggaacacggCgugccg..... 1  
Gi2\_11165549\_x1.....agcgccgucagggccccgcaguuUugc..... 1  
Gi3\_28310692\_x1.....ccccccaguacugcgauccg..... 0  
Gi2\_11171600\_x1.....gaUgcgcccugacggccccgcag..... 1



Gi1a\_6231581\_x1.....gaucggagacgCcgugggaacacgg..... 1  
 Gi5\_8901384\_x1.....caggccccccagacuucgCu..... 1  
 Gi5\_8901016\_x1.....aUagaagcgccgucagggccccccagacuucg..... 1  
 Gi3\_28543188\_x1.....Accccgccagacuucggaucgg..... 1  
 Gi3\_28492013\_x1.....aucggagacgucgugggUacacggggugc..... 1  
 Gi3\_28599518\_x1.....gcgauccggagacgucguAggaacacggg..... 1  
 Gi3\_28955190\_x1.....guacugcgaCcgagacgu..... 1  
 Gi3\_28705525\_x1.....gccgucaAgccccgccagacu..... 1  
 Gi3\_28927071\_x1.....Cacgucgugggaacacgg..... 1  
 Gi4\_613919\_x1.....agacgucgCgggaacacggggugcc..... 1  
 Gi1a\_6043588\_x1.....gcgauAggagacgucgugggaacacggg..... 1  
 Gi1a\_6295101\_x1.....aucggagacguAguggga..... 1  
 Gi5\_9102220\_x1.....ugcgauccgCagacgucgug..... 1  
 Gi3\_28387512\_x1.....aggcGccgccagacuucggaucggagac..... 1  
 Gi3\_28607562\_x1.....gaUgagaagcgccgucagggc..... 1  
 Gi2\_11134685\_x1.....caggUcccgccagacuucggaucgggaga..... 1  
 Gi2\_11261757\_x1.....aUaagcgccgucagggccccccagacu..... 1  
 Gi2\_11013623\_x1.....gucaggccccgCagacuucg..... 1  
 Gi1\_4340192\_x1.....gagacgucgugggaacacggggugccgaUcu..... 1  
 Gi2\_11395772\_x1.....ugggaacacggggugccAaa..... 1  
 Gi3\_28898760\_x1.....gaucggagCcgucgugggaac..... 1  
 Gi1\_4342132\_x1.....aguacugcgauccggagacguUgug..... 1  
 Gi3\_28607680\_x1.....aggccccgcuUguacugcgauccg..... 1  
 Gi2\_11392938\_x1.....aguaGugcgauccggagac..... 1  
 Gi1a\_6315566\_x1.....aucggagacgucgugggaacaUggggg..... 1  
 Gi3\_28575449\_x1.....cgauccggagacgucgugggGacacggggg..... 1  
 Gi5\_9031799\_x1.....caggccUcgccagacuucg..... 1  
 Gi3\_28636792\_x1.....ugcgauccgNagacgucgugggaacacggg..... 1  
 Gi3\_28522703\_x1.....gucaUgccccgccagacuucggauc..... 1  
 Gi3\_28977415\_x1.....gUgacgucgugggaacacggggugccg..... 1  
 Gi3\_28897080\_x1.....cgGcaggccccgccagacuucggaucgg..... 1  
 Gi3\_28932774\_x1.....cgccagacuUcgauccggaga..... 1  
 Gi3\_28325655\_x1.....gaGcggagacgucguggg..... 1  
 Gi3\_28396065\_x1.....ccccCccagacuucggaucgga..... 1  
 Gi3\_28622491\_x1.....aggccAcgccagacuucggauc..... 1  
 Gi5\_8898006\_x1.....gucaggccccUgccagacu..... 1  
 Gi1\_4280350\_x1.....cccgccagNacugcgauccggagacgucg..... 1  
 Gi5\_9025924\_x1.....gagacgucgugggaUacggggugccgaacu..... 1  
 Gi5\_9063069\_x1.....gugggaUcacggggugccgaa..... 1  
 Gi2\_11017983\_x1.....ucggagacgucguAggaacacggggg..... 1  
 Gi3\_28573036\_x1.....aggccccgccagacuucggaCcgagacg..... 1  
 Gi5\_8908267\_x1.....cguggAaacacggggugccga..... 1  
 Gi3\_28393094\_x1.....aggccccgccagacuucggaucggag..... 0  
 Gi1\_4245237\_x1.....gucgugggaacacgggAugccgaac..... 1  
 Gi3\_28938919\_x1.....aucggagacgGcgugggaacacggg..... 1  
 Gi1\_4187356\_x1.....gCcgugggaacacggggug..... 1  
 Gi5\_9115802\_x1.....gugggaacacggggugccgU..... 1

Gi3\_28818550\_x1.....gggaacacgggguUccgaacu..... 1  
 Gi3\_28693880\_x1.....ugcgaucgNagacgucguggga..... 1  
 Gi4\_598451\_x1.....ucggGgacgucgugggaacacggggugccg..... 1  
 Gi1\_4243435\_x1.....uacugcgaucggagacguc..... 0  
 G1a\_6186677\_x1.....Uccccgccaguacugcgaucggagacguc..... 1  
 Gi2\_11227396\_x1.....ugggaacacggggugccgaaAuu..... 1  
 Gi4\_591165\_x1.....Accaguacugcgaucggagacguc..... 1  
 Gi3\_28912765\_x1.....agagaagcgccgucGggc..... 1  
 Gi1\_4229878\_x1.....ucgugggaacacggggugAcg..... 1  
 Gi2\_11202635\_x1.....gaagcAccgucagggccccgccaguacugc..... 1  
 Gi1\_4337000\_x1.....ucaAgccccgccaguacugcgauc..... 1  
 Gi3\_28301455\_x1.....ugggaacacCgggugccga..... 1  
 Gi2\_11328307\_x1.....ucggGgacgucgugggaacacggggugccg..... 1  
 G1a\_6077432\_x1.....guacugcgaAcggagacguc..... 1  
 Gi1\_4239688\_x1.....aucAgagacgucgugggaacacggggugc..... 1  
 Gi3\_28987416\_x1.....aucggagacgucgugggCacacggggugc..... 1  
 Gi3\_28485410\_x1.....cgccgucCggccccgccagua..... 1  
 Gi2\_11156181\_x1.....Aagaagcgccgucagggccccgccaguac..... 1  
 Gi2\_11068560\_x1.....cgaucggagacgucgugggaacacggggugccgaac..... 0  
 Gi3\_28871711\_x1.....gagacgucguAggaacac..... 1  
 Gi3\_28386931\_x1.....gaNacgucgugggaacacggggugccgaacu..... 1  
 Gi1\_4306784\_x1.....Ugagacgucgugggaacacggggugccgaac..... 1  
 Gi2\_11263800\_x1.....gagaagcgccAucagggccccgcc..... 1  
 Gi1\_4188349\_x1.....gagacgucgugggaacacAgggugcc..... 1  
 G1a\_6088835\_x1.....caguacugcgaucAgagacgucg..... 1  
 Gi1\_4356747\_x1.....Ccgaucggagacgucgugggaaca..... 1  
 Gi3\_28275135\_x1.....gaucggaCacgucgugggaacacggg..... 1  
 Gi2\_11172678\_x1.....aggccccgNcaguacugcgaucg..... 1  
 Gi3\_28635996\_x1.....acgucgugggaacacggggugccCaacu..... 1  
 Gi1\_4335405\_x1.....ccgucagggccccgccUguacugc..... 1  
 Gi2\_11278045\_x1.....cgccUguacugcgaucggaga..... 1  
 Gi3\_28712193\_x1.....gaucggagacgucgugUgaacacggggu..... 1  
 Gi5\_9074497\_x1.....cagNacugcgaucggagacgucgug..... 1  
 Gi2\_11186467\_x1.....ccccgccUguacugcgau..... 1  
 G1a\_5985588\_x1.....cgaucggagacgucgugggaacaAg..... 1  
 Gi3\_28903130\_x1.....ucagCccccgccaguacugc..... 1  
 Gi4\_613798\_x1.....gaacacggNgugccgaacu..... 1  
 Gi3\_28670153\_x1.....ggagacgAcgugggaacacggggugccgaacu..... 1  
 Gi3\_28737489\_x1.....agaagcgccAucagggcc..... 1  
 Gi3\_28345653\_x1.....agcgccgucagggccccgccagGac..... 1  
 Gi2\_11273671\_x1.....caggccccgccaguacuUc..... 1  
 Gi2\_11306338\_x1.....ccagCacugcgaucggagacg..... 1  
 Gi3\_28812206\_x1.....gaagagUagcgccgucagggcc..... 1  
 Gi2\_11318735\_x1.....gaucggagacAucgugggaacacgggg..... 1  
 Gi2\_11116376\_x1.....gucagggccccgccaguCuugcgauc..... 1  
 Gi2\_10993964\_x1.....cggagacgucgugggaacG..... 1  
 Gi2\_11264242\_x1.....gucagggccccgccaguaUug..... 1

Gi2\_11244142\_x1.....uaggaagagaagcgccgucaggaA..... 1  
 Gi2\_11034163\_x1.....ggaacacggggugccgGa..... 1  
 Gi2\_11274666\_x1.....aagagaCgcgccgucagggc..... 1  
 Gi3\_28859388\_x1.....ggaacacggggugccgaaG..... 1  
 Gi5\_9102469\_x1.....caguGcugcgauccgagacguc..... 1  
 Gi2\_11269360\_x1.....ugggUacacggggugccgaa..... 1  
 Gi2\_11274013\_x1.....gagGcgucgugggaaacacggggugcc..... 1  
 Gi3\_28902659\_x1.....cgucguggCaacacggggugcc..... 1  
 Gi2\_11122247\_x1.....ggccccgAcaguacugcga..... 1  
 Gi5\_9105841\_x1.....ggagacgucgugggaaacacggggAgcc..... 1  
 Gi4\_572365\_x1.....agaagcgccgucagggccccccCguacu..... 1  
 Gi2\_11169365\_x1.....caggccccgcccagucCugcgau..... 1  
 Gi3\_28377750\_x1.....ccgccaguacugcgauCagagac..... 1  
 Gi3\_28635501\_x1.....ggccccgcccaguacugcgCucgga..... 1  
 Gi5\_8843094\_x1.....Naggccccgcccaguacugcga..... 1  
 Gi3\_28485697\_x1.....ucgugAgaacacggggugc..... 1  
 Gi1\_4171532\_x1.....cgugggaaNacggggugccgaa..... 1  
 Gi2\_11397356\_x1.....Cuacugcgauccgagacgucguggg..... 1  
 G1a\_6256606\_x1.....gaucggagaUgucgugggaaacacggg..... 1  
 Gi2\_11286382\_x1.....ucggagacgucgugggaaacacggggAcc..... 1  
 Gi3\_28874850\_x1.....gcUaguacugcgauccgagacgucgug..... 1  
 Gi2\_11009164\_x1.....gccccgAcaguacugcga..... 1  
 Gi2\_11008252\_x1.....ucaCgccccgcccaguacugcg..... 1  
 G1a\_5981694\_x1.....gaucggagCgucgugggaaacacggg..... 1  
 Gi3\_28760452\_x1.....gaagagaagcgccgucagAc..... 1  
 Gi3\_28391815\_x1.....Uggccccgcccaguacugcgauccg..... 1  
 Gi1\_4233669\_x1.....Cgggaacacggggugccg..... 1  
 Gi3\_28800607\_x1.....ggagacgucgugggaaacacggg..... 1  
 G1a\_6009808\_x1.....uacugcgauccgagacCuc..... 1  
 Gi2\_11092768\_x1.....cCaucggagacgucgugggaaacacggg..... 1  
 Gi1\_4257776\_x1.....ucggagacgucgugggaaacacA..... 1  
 Gi3\_28458142\_x1.....caggccccgcccaguaUugcg..... 1  
 Gi3\_28437536\_x1.....cgCcaggccccgcccaguacugcgauccgagaga..... 1  
 Gi3\_28760977\_x1.....agaagcgccgucagggUcccgc..... 1  
 Gi3\_28814679\_x1.....Cucgcgauccgagacgucgu..... 1  
 Gi1\_4183186\_x1.....cgugggaaacacggggGgccgaa..... 1  
 Gi3\_28548027\_x1.....agaaUcgccgucagggccccgcccagua..... 1  
 Gi1\_4306131\_x1.....aggccccgcccGguacugcg..... 1  
 Gi5\_9073909\_x1.....cguUggaacacggggugccgaa..... 1  
 G1a\_6291836\_x1.....aCcacggggugccgaaacu..... 1  
 Gi2\_11324727\_x1.....aggccccgcccaguacugcgauccgagagaAgucgug..... 1  
 G1a\_6276099\_x1.....cgccaguacugcgauccgCgacgucgug..... 1  
 Gi3\_28519658\_x1.....cggagacgucgugggaaacacggggugccgCcu..... 1  
 Gi2\_11215260\_x1.....gaucggagacgAcgugggaaacac..... 1  
 Gi3\_28783211\_x1.....ucguuccgaaauaggaagagaagcg..... 0  
 Gi2\_11302291\_x1.....gaAaagcgccgucagggccccgc..... 1  
 Gi2\_11023222\_x1.....ucggCgacgucgugggaaaca..... 1

Gi2\_11288080\_x1.....aggccccgccaguacugcgU..... 1  
Gi2\_11152975\_x1.....ggccccgccaguacAgcgauC..... 1  
Gi5\_8924908\_x1.....agagaagcgccgucGggccccg..... 1  
Gi3\_28435995\_x1.....aggccccgNcaguacugcgauCg..... 1  
Gi3\_28421410\_x1.....cgccaguacugcgauCggagacgucguggaacCcggg..... 1  
Gi2\_11146864\_x1.....ucaggccccgccaguacugcgauG..... 1  
Gi1\_4353970\_x1.....ggaacacgggAugccgaa..... 1  
Gi3\_28884445\_x1.....gaucgAagacgucguggga..... 1  
Gi5\_9099013\_x1.....aacacggggCgccgaacuuu..... 1  
Gi5\_8984995\_x1.....aGcggagacgucguggaacacggggugccgaaC..... 1  
Gi2\_11233902\_x1.....cggagacgNcgugggaaca..... 1  
Gi5\_8926548\_x1.....gcgccgucaggccccgccCguacug..... 1  
Gi4\_576311\_x1.....aucggagacgucgugggaGcacggggu..... 1  
Gi2\_11077976\_x1.....acAgcgauCggagacgucgu..... 1  
Gi3\_28593955\_x1.....gaucggagacgucgugggG..... 1  
Gi3\_28961268\_x1.....Caucggagacgucgugggaac..... 1  
Gi3\_28735793\_x1.....agaagcgccgucaggccAcgccagu..... 1  
Gi2\_11268571\_x1.....auAggagacgucgugggaacacg..... 1  
Gi5\_8917688\_x1.....gugggaacacggggugcUgaacuu..... 1  
Gi3\_28574923\_x1.....cgccaguacugcgauCggagaUgucgu..... 1  
Gi2\_11151976\_x1.....gaagcgUcgucaggccccgc..... 1  
Gi5\_9087641\_x1.....agagaagcgccgucaggccccAccagu..... 1  
Gi2\_10995824\_x1.....gagacgucgugggaacacggggugccgaGcu..... 1  
Gi2\_11098429\_x1.....cggagacgucgugggaacaGggggu..... 1  
Gi3\_28325783\_x1.....cgccAucaggccccgccaguacugc..... 1  
Gi2\_11060232\_x1.....cgugggaacUcggggugccgaa..... 1  
Gi3\_28719816\_x1.....acgucgugggaacacggggugAcg..... 1  
Gi2\_11267953\_x1.....cgucgugggaacacggggugccgaUcu..... 1  
Gi3\_28671222\_x1.....cgccaguacugcgauAggagacguc..... 1  
Gi2\_11313179\_x1.....Gucggagacgucgugggaacacggggugccgaacu..... 1  
G1a\_6198331\_x1.....cgugggaaNacggggugccg..... 1  
Gi2\_11183970\_x1.....ccNcgccaguacugcgauC..... 1  
Gi2\_11063626\_x1.....gagacgucgugggaacacggggugccgaacA..... 1  
G1a\_6337858\_x1.....caguacugcgaCcgagac..... 1  
Gi5\_8985482\_x1.....Caagcgccgucaggccccgccaguacugc..... 1  
Gi3\_28491215\_x1.....gaucggagacgucgugggaacacAgggugcc..... 1  
Gi1\_4218446\_x1.....ucgugggaacacggCgugcc..... 1  
Gi2\_11254054\_x1.....cgccaguGcugcgauCggagacguc..... 1  
Gi2\_11363801\_x1.....cccgccaguacugcgauCggaAacguc..... 1  
Gi2\_11144471\_x1.....gauGggagacgucgugggaaca..... 1  
Gi2\_11305333\_x1.....guacugcgGucggagacgucgugggaaca..... 1  
Gi3\_28689289\_x1.....uUaggccccgccaguacugcgauCggag..... 1  
Gi2\_11049827\_x1.....gagacAucgugggaacacggggugccg..... 1  
Gi5\_9100563\_x1.....acgAcgugggaacacggggugccgaaC..... 1  
G1a\_6303637\_x1.....ugUgaucggagacgucgugggaa..... 1  
Gi3\_28544314\_x1.....gagacgucgugggaacaUggggugc..... 1  
Gi3\_28703347\_x1.....cgucgugggaacacAgggugccga..... 1

Gi3\_28631531\_x1.....agagGagcgccgucagcg..... 1  
 Gi3\_28880029\_x1.....cgucUugggaacacggggu..... 1  
 Gi2\_11054340\_x1.....cccgUaguacugcgauccggagac..... 1  
 Gi2\_11273986\_x1.....gaagcgccgCcaggcccc..... 1  
 Gi5\_9109384\_x1.....aucggagacgucguggaacGcggggugc..... 1  
 Gi3\_28294614\_x1.....cgucguggCaacacggggugc..... 1  
 Gi2\_11035696\_x1.....aucggagacguUgugggaacacgggg..... 1  
 Gi3\_28429765\_x1.....ucaggccccgccaguacugcgGucgggagacg..... 1  
 Gi1a\_6277618\_x1.....aucggagGcgucgugggaa..... 1  
 Gi5\_9090640\_x1.....guUaggccccgccaguac..... 1  
 Gi1\_4244145\_x1.....ugggaaacGcggggugccg..... 1  
 Gi1\_4374172\_x1.....Ugugggaacacggggugccgaa..... 1  
 Gi5\_9013992\_x1.....acgNcgugggaacacggggugccgaa..... 1  
 Gi5\_9109727\_x1.....cgugggaaacCcggggugcc..... 1  
 Gi1\_4275708\_x1.....gugggaaacaUggggugccgaa..... 1  
 Gi5\_9083321\_x1.....ggaacacggggUccggaacu..... 1  
 Gi5\_8904191\_x1.....ugggaaacGcggggugccgaaacu..... 1  
 Gi3\_28330403\_x1.....gaucggagacgucgugAgaacac..... 1  
 Gi3\_28716633\_x1.....ccaguacugcgauccggagCcguc..... 1  
 Gi2\_11270047\_x1.....ucagCccccgccaguacugcg..... 1  
 Gi2\_11180881\_x1.....aguaAugcgauccggagac..... 1  
 Gi3\_28598660\_x1.....aggccccgccaguacugcgGucgga..... 1  
 Gi3\_28938160\_x1.....aguacugcgCucgggagacgucguggg..... 1  
 Gi2\_11049988\_x1.....agacgucgugggaaacacgAggu..... 1  
 Gi3\_28980012\_x1.....ccgccaguacugcgauccggagGcgu..... 1  
 Gi3\_28862658\_x1.....Naggccccgccaguacugc..... 1  
 Gi1\_4213084\_x1.....agUccccgccaguacugc..... 1  
 Gi3\_28609142\_x1.....ucgCgggaaacacggggugcc..... 1  
 Gi2\_11393676\_x1.....gggagacgucgCgggaaacacggggu..... 1  
 Gi3\_28951107\_x1.....gaGcgggagacgucgugggaaacacg..... 1  
 Gi2\_11302939\_x1.....aggccccgccaguacugcAaucgggagacguc..... 1  
 Gi2\_11253690\_x1.....gaUgucgugggaaacacggggugccg..... 1  
 Gi3\_28907593\_x1.....uccgaaauaggaagagaagcgc..... 0  
 Gi2\_11202595\_x1.....cgggagacguGgugggaaacacg..... 1  
 Gi3\_28339573\_x1.....cgccgCcaggccccccag..... 1  
 Gi5\_9130251\_x1.....gGcuggggaaacacggggugc..... 1  
 Gi2\_11248720\_x1.....guGaggccccgccaguacugc..... 1  
 Gi2\_11075690\_x1.....caggccccgUcaguacugcgauccggagac..... 1  
 Gi3\_28667785\_x1.....gaucgggagacgucguggAaacacggggu..... 1  
 Gi2\_11156589\_x1.....cgauccgggagacgGcugugggaaacac..... 1  
 Gi1a\_6305847\_x1.....Aacgucgugggaaacacggg..... 1  
 Gi3\_28856501\_x1.....ggccccgAcaguacugcgaucc..... 1  
 Gi3\_28441830\_x1.....Ggccaguacugcgauccgggagacgucg..... 1  
 Gi1\_4387436\_x1.....ggccccgccaguacCgcgauccggaga..... 1  
 Gi1a\_6302622\_x1.....gucgugggaaacacggggugUcga..... 1  
 Gi3\_28276170\_x1.....gccgaGcgggagacgucgugggaaacacggggu..... 1  
 Gi3\_28364915\_x1.....ucggagUcgucgugggaaacacg..... 1

Gi3\_28622615\_x1.....cccgccaguGcugcgauccgga..... 1  
 Gi3\_28316031\_x1.....cgucaggccccgccaguacugcAaucgg..... 1  
 G1a\_6167777\_x1.....ggaacacggggugccgaa..... 0  
 Gi3\_28303994\_x1.....cccgccaguacugcgauccggaCacguc..... 1  
 Gi2\_11233125\_x1.....guUgugggaacacggggugccga..... 1  
 Gi3\_28555824\_x1.....ucggagacgucgugggaUcac..... 1  
 G1a\_6059670\_x1.....gugUgaacacggggugccgaacu..... 1  
 Gi3\_28838756\_x1.....ucggagacgucgugggaacaAgg..... 1  
 Gi2\_11109614\_x1.....cugcgauccggagacgucgugggaacacggggug..... 0  
 Gi1\_4292600\_x1.....ucgugggaGcacggggugccg..... 1  
 Gi1\_4333800\_x1.....ucgugggaNcacggggugccgaa..... 1  
 Gi3\_28898027\_x1.....gaagcgccgucaggccccgccagC..... 1  
 Gi5\_8873257\_x1.....gUcgucgugggaacacggggugccg..... 1  
 G1a\_6126336\_x1.....gugggaacacggggUccgaacu..... 1  
 Gi3\_28741048\_x1.....gccaguacuAcgauccggagacgu..... 1  
 Gi3\_28648335\_x1.....agcgccgucaggccccgccagCacugc..... 1  
 Gi3\_28934294\_x1.....acugcgaCcgagacgucgug..... 1  
 Gi5\_9067359\_x1.....ugUgaacacggggugccgaacu..... 1  
 Gi2\_11305659\_x1.....aucggagacgucgugggaacacggCgugc..... 1  
 Gi2\_11116248\_x1.....aggccccgccaguacugcAau..... 1  
 Gi2\_11085909\_x1.....cgucaggcAccgccaguac..... 1  
 Gi2\_11359256\_x1.....Uagagaagcgccgucaggcccc..... 1  
 Gi3\_28659183\_x1.....acgCcgugggaacacggg..... 1  
 Gi3\_28323001\_x1.....ucgugggaacacggggCg..... 1  
 Gi1\_4271059\_x1.....aCcgccgucaggccccgccaguacugc..... 1  
 Gi2\_11105025\_x1.....cguNggaaacacggggugccgaac..... 1  
 Gi3\_28912650\_x1.....Ucgauccggagacgucgugggaacacggggug..... 1  
 Gi3\_28414537\_x1.....ucggagacgucguggAaacacgg..... 1  
 Gi2\_11379003\_x1.....ggagacgucgugggCacacggggugc..... 1  
 Gi2\_11350208\_x1.....cgucaggccccgUcaguacugcg..... 1  
 Gi2\_11051109\_x1.....acgucgugggaacacAgggugccgaac..... 1  
 Gi3\_28649533\_x1.....aucggagacgucgugggaGcacggggugc..... 1  
 Gi1\_4225270\_x1.....cgugggaacacggAgugccga..... 1  
 Gi3\_28580414\_x1.....gccaguacugcgauccggagacgCcgU..... 1  
 Gi2\_11358629\_x1.....agagaagcgccgucaggccccgccaguacugU..... 1  
 Gi2\_11177260\_x1.....ucggagacgucgCgggaacacg..... 1  
 Gi2\_11078691\_x1.....uNggaaacacggggugccgaacu..... 1  
 Gi2\_11383022\_x1.....ggagacgucgugggGacacggggugccga..... 1  
 Gi5\_9085140\_x1.....gaNcgagacgucgugggaacacggggugc..... 1  
 Gi3\_28982356\_x1.....caguacCcgauccggagacgucgu..... 1  
 Gi2\_11059334\_x1.....caUgccccgccaguacugcgauccggag..... 1  
 Gi2\_11241827\_x1.....cgucaggccccgccaguacugUg..... 1  
 Gi5\_8936831\_x1.....Ccgugggaacacggggugccgaac..... 1  
 Gi3\_28987843\_x1.....gccgucaggccccAccagu..... 1  
 Gi3\_28736416\_x1.....ucaggccccgccaguGcugcga..... 1  
 Gi3\_28524148\_x1.....Acgccgucaggccccgccaguacugcg..... 1  
 Gi5\_9001611\_x1.....Caucggagacgucgugggaacacgg..... 1

Gi3\_28821823\_x1.....ucaggccccgccaguGcug..... 1  
 Gi2\_11245404\_x1.....aagcgccgucagggccccgccGguacugc..... 1  
 Gi3\_28289528\_x1.....agaagcgccgucGggccccgccaguacu..... 1  
 Gi3\_28859820\_x1.....Aagacgucgugggaacacggggugcc..... 1  
 Gi2\_11137460\_x1.....cCguacugcgauccggagacguc..... 1  
 Gi5\_9082272\_x1.....aagagaaAcgcccgucagggccccgcca..... 1  
 Gi5\_8951463\_x1.....agagaGcgccgucagggccccg..... 1  
 Gi2\_11314052\_x1.....ccgcgcaguacugcgauA..... 1  
 Gi2\_11206891\_x1.....gaUaagcgccgucagggccc..... 1  
 Gi2\_11406887\_x1.....agaagcgccgucGggccccgcc..... 1  
 Gi3\_28700959\_x1.....gucgugggaCcacggggugcc..... 1  
 Gl1a\_6359722\_x1.....ucggagacgucgugggCacacggggugcc..... 1  
 Gi3\_28940806\_x1.....cAgcgauccggagacgucg..... 1  
 Gi1\_4248599\_x1.....cAugggaacacggggugccg..... 1  
 Gi3\_28637510\_x1.....ucaggccccgccUguacugcgauC..... 1  
 Gi2\_11017063\_x1.....aucggagacgucgugggaUcac..... 1  
 Gi2\_11242019\_x1.....ggagacgucgCgggaacacggggugccgaac..... 1  
 Gi2\_11052282\_x1.....aucggagacgucgugCgaacacggg..... 1  
 Gi5\_9005172\_x1.....gugggaacacggggugccCaa..... 1  
 Gi2\_11078568\_x1.....aggccUcgccaguacugcgauccgga..... 1  
 Gi2\_11125954\_x1.....agagaagcNccgucagggccccgc..... 1  
 Gi3\_28365802\_x1.....cgNagacgucgugggaacacggg..... 1  
 Gi2\_11061957\_x1.....aucggagUcgucgugggaacacggggugc..... 1  
 Gi5\_8967961\_x1.....cccgccagNacugcgauC..... 1  
 Gi1\_4163744\_x1.....cCugggaacacggggugccga..... 1  
 Gi2\_11136319\_x1.....cgauccggagacgucgugggCacacggggu..... 1  
 Gl1a\_6022868\_x1.....uGcugcgauccggagacguc..... 1  
 Gi1\_4238753\_x1.....gGcaggccccgccaguacugcg..... 1  
 Gi5\_8881043\_x1.....cgucgugggaacacggggAgccgaa..... 1  
 Gi2\_11097759\_x1.....cgGucggagacgucgugggaacacg..... 1  
 Gi5\_8845597\_x1.....cgGcgugggaacacggggugccgaa..... 1  
 Gi1\_4305764\_x1.....Ggucgugggaacacggggugccg..... 1  
 Gi1\_4182277\_x1.....Nggaacacggggugccgaacu..... 1  
 Gi3\_28308229\_x1.....cgugggaacacgggCugc..... 1  
 Gi3\_28952886\_x1.....caggccccgcUaguacugcgau..... 1  
 Gi5\_8956334\_x1.....cgucguggNaacacggggugccgaacu..... 1  
 Gi2\_11320052\_x1.....ugggaUcacggggugccga..... 1  
 Gi3\_28729878\_x1.....agagaagcgccgucagggccccgAca..... 1  
 Gl1a\_6038795\_x1.....aguacugcgauccggaCacgucgug..... 1  
 Gi3\_28626393\_x1.....ggagacgucgugggaacacgggCu..... 1  
 Gi2\_11150795\_x1.....ggagacgucgugggaacacggggugccgaacA..... 1  
 Gi2\_11074514\_x1.....gacgucguAggaacacggggugcc..... 1  
 Gi5\_8899975\_x1.....gaucggUgacgucgugggaacacg..... 1  
 Gi2\_11153668\_x1.....cgucgugggaacCcggggug..... 1  
 Gi2\_11141248\_x1.....gaucggagacgucgugggaacCcgg..... 1  
 Gi5\_8896311\_x1.....acacggggugcUgaacuuu..... 1  
 Gi2\_11105485\_x1.....cgGcaggccccgccaguacug..... 1

Gi3\_28641250\_x1.....cNucgugggaacacggggugccgaacu..... 1  
Gi3\_28564823\_x1.....cUaucggagacgucgugggaacacggggugccgaacu..... 1  
Gi3\_28981349\_x1.....gagNagcgccgucagggcc..... 1  
G1a\_6168154\_x1.....guacugcgauagcCagacgucg..... 1  
Gi5\_8885190\_x1.....ucgugggaacacggggugccgaaA..... 1  
G1a\_6280309\_x1.....aucggagacgucgugggaacaGg..... 1  
Gi4\_577406\_x1.....aagcgccAucagggccccgagucgucg..... 1  
Gi2\_11406577\_x1.....cgucguAggaacacggggugccgaa..... 1  
Gi3\_28313598\_x1.....gcgccAucagggccccgagucgucg..... 1  
Gi3\_28918732\_x1.....gucagggccccgcccGuaucgucgucg..... 1  
Gi5\_8987804\_x1.....ucggagacgCcgugggaacacggggugccg..... 1  
Gi3\_28291865\_x1.....cagggccccgagucacuUcg..... 1  
Gi3\_28669747\_x1.....gagacgucgugggCacac..... 1  
Gi2\_11183169\_x1.....guAgugggaacacggggugccgaac..... 1  
Gi3\_28684815\_x1.....cgucaAgccccgagucgucg..... 1  
G1a\_6323419\_x1.....ggccccgccaAuacugcgauc..... 1  
Gi1\_4175306\_x1.....gaacacggggCgcccgaac..... 1  
Gi2\_11368360\_x1.....acgucgAggggaacacggggugccgaac..... 1  
Gi3\_28366884\_x1.....gucgugggaacaAggggu..... 1  
Gi3\_28578295\_x1.....cgccagucgucgagUag..... 1  
Gi5\_9072637\_x1.....acucguuccgaauaCgaaga..... 1  
Gi3\_28492294\_x1.....aaUagaagcgccgucagggccccgagucg..... 1  
Gi2\_11268285\_x1.....cguggUaacacggggugccgaac..... 1  
Gi2\_11264992\_x1.....aucCgagacgucgugggaaca..... 1  
Gi3\_28959083\_x1.....cgaucggagacgucgugAgaacacgggg..... 1  
Gi3\_28699853\_x1.....ucaggUcccgagucgucg..... 1  
Gi5\_9072733\_x1.....ugAgaacacggggugccgaa..... 1  
G1a\_6013206\_x1.....Uggccccgagucgucg..... 1  
Gi3\_28502871\_x1.....agagaagcgccgucCggcccc..... 1  
Gi1\_4211233\_x1.....acguGugggaacacggggugccgaacu..... 1  
Gi3\_28619534\_x1.....Gccgaauuaggaagagaagcgcc..... 1  
Gi3\_28425988\_x1.....aggccccUccagucgucg..... 1  
Gi3\_28876134\_x1.....acgucgugggaacacggggugcUg..... 1  
Gi3\_28739126\_x1.....cccgagucgucgagacAgagac..... 1  
Gi1\_4186113\_x1.....agacgucgugggGacacggg..... 1  
Gi3\_28650669\_x1.....gagaagcAccgucagggccccgagucg..... 1  
Gi3\_28579735\_x1.....gAccccgagucgucgag..... 1  
Gi5\_9085734\_x1.....ugcgaucggGagcucguggg..... 1  
Gi3\_28828521\_x1.....gaucggagacguAgugggaacacggg..... 1  
Gi3\_28558327\_x1.....gAacucgagcggagacgucgug..... 1  
Gi3\_28729530\_x1.....cgccagucgucgagcggUgacguc..... 1  
Gi2\_11125314\_x1.....cgucgugggaacacggggugAcgaacu..... 1  
Gi2\_11168190\_x1.....gccgucGggccccgagucgucg..... 1  
Gi2\_11264225\_x1.....gucGggccccgagucgucg..... 1  
Gi3\_28668284\_x1.....gccccgagucgucgCu..... 1  
Gi2\_11231619\_x1.....cagNccccgagucgucgag..... 1  
Gi5\_8835987\_x1.....cagggccccgagucgucgGuc..... 1



Gi3\_28969662\_x1.....cgccgucaggcUccgccag..... 1  
 Gi3\_28659982\_x1.....gagaagcgUcgucaggccccgccaguacug..... 1  
 Gi2\_11046128\_x1.....uccgaauuaggaagagaagcgcc.....ugggUacacggggugccg..... 1  
 Gi3\_28647605\_x1.....uccgaauuaggaagagaagcgcc..... 0  
 Gi3\_28525832\_x1.....caggccccgccaguacugcgauAg..... 1  
 Gi3\_28610008\_x1.....cccgccaguacugcggaAcggagac..... 1  
 Gi1\_4240760\_x1.....gCcgugggaaacacggggugc..... 1  
 Gi5\_8975097\_x1.....acgucguUggaacacggggugccgaacu..... 1  
 Gi2\_11389614\_x1.....cgugggaCcacggggugccg..... 1  
 Gi3\_28656084\_x1.....Caagagaagcgccgucagggccccgc..... 1  
 Gl1a\_6308708\_x1.....gugggaaacUcggggugccg..... 1  
 Gi3\_28385279\_x1.....agagaGgcgcccgucagggccccgccagua..... 1  
 Gi2\_11016939\_x1.....cccAgccaguacugcgauccgaga..... 1  
 Gi2\_11157255\_x1.....acucguuccgaauuaggaagagaagcgccguc..... 0  
 Gi3\_28981327\_x1.....agaagAgccgucagggccccgcca..... 1  
 Gi2\_10995683\_x1.....cgccgucaNgccccgccaguac..... 1  
 Gi1\_4337533\_x1.....ucggagacgucguAggaacacg..... 1  
 Gl1a\_6045183\_x1.....agagaagcgUcgucagggccccgc..... 1  
 Gi3\_28757309\_x1.....Gcaguacugcgauccgagacgucgug..... 1  
 Gi2\_11037397\_x1.....ggccccgccaguacCgcgauccgagac..... 1  
 Gi2\_11236958\_x1.....aucggagacgucgugggaaacA..... 1  
 Gi3\_28560436\_x1.....Ngucgugggaaacacggggugccgaa..... 1  
 Gi2\_11308425\_x1.....ccgccaguacugcgauUg..... 1  
 Gi4\_585560\_x1.....guUgugggaaacacggggugccgaacu..... 1  
 Gi3\_28266645\_x1.....gaagaAaagcgccgucagggc..... 1  
 Gl1a\_6188148\_x1.....gccaguacugcgauccgGgacgucg..... 1  
 Gi2\_11246696\_x1.....gacgucgugggaaacacggggG..... 1  
 Gi2\_11158562\_x1.....gaagagaagcgccgucagAccccg..... 1  
 Gl1a\_6095337\_x1.....caguacugcggaCcgagacguc..... 1  
 Gi3\_28488260\_x1.....ucgugggaaacacggggugccgaG..... 1  
 Gi3\_28977484\_x1.....cgUucggagacgucgugggaaacacggg..... 1  
 Gi1\_4194308\_x1.....acguGgugggaaacacggggugcc..... 1  
 Gi3\_28545038\_x1.....cagCacugcgauccgagacgucgug..... 1  
 Gi1\_4267076\_x1.....aagcgUcgucagggccccgccaguacug..... 1  
 Gi3\_28309672\_x1.....aguacugcAaucggagacgucg..... 1  
 Gi3\_28418996\_x1.....aguacugcgauccgGgacgucgugggaaacac..... 1  
 Gi3\_28774704\_x1.....acugcgauccgagacAucgu..... 1  
 Gi2\_11319461\_x1.....ucgugggaaacacggggugGcgaac..... 1  
 Gi5\_8880969\_x1.....gaucggagacgucgugggaaacacgggg..... 1  
 Gi5\_9023819\_x1.....ugcgauccgagacCcguggga..... 1  
 Gi1\_4232884\_x1.....gucguAggaacacggggugcc..... 1  
 Gi2\_11246202\_x1.....cgGucggagacgucgugggaaac..... 1  
 Gl1a\_6058159\_x1.....gugNgaacacggggugcc..... 1  
 Gi2\_11361796\_x1.....ccAcgccaguacugcgau..... 1  
 Gi3\_28897022\_x1.....aggcccAgccaguacugcgau..... 1  
 Gi2\_11037228\_x1.....agacgucgAgggaacacggggugccgaacu..... 1  
 Gi5\_9030461\_x1.....cgucagggccccgUcaguacugcg..... 1

Gi3\_28382440\_x1.....Acccgccaguacugcgauccgga..... 1  
 Gi5\_8902367\_x1.....ccgccaguacugcgGucggaga..... 1  
 Gi2\_11209536\_x1.....Uagagaagcgccgucaggcccc.....uGugugggaacacggggugccgaa..... 1  
 Gi5\_8961375\_x1.....Uagagaagcgccgucaggcccc..... 1  
 Gi3\_28263311\_x1.....ucaggccccgccaguacugcgG..... 1  
 Gi3\_28465364\_x1.....cCggccccgccaguacugcgga..... 1  
 Gl1\_6246419\_x1.....cgCAguacugcgauccggagacguc..... 1  
 Gi3\_28710470\_x1.....ggagacgucgugggaaUacggggugccgaacu..... 1  
 Gi2\_11104637\_x1.....ccccgccaguacugGgauc..... 1  
 Gi2\_11154056\_x1.....gucgugggaUcacggggugccga..... 1  
 Gi3\_28574663\_x1.....aagcgccgucaggccccgccUguacugc..... 1  
 Gi3\_28460458\_x1.....Uggagacgucgugggaaacacggggugcc..... 1  
 Gi2\_11295679\_x1.....Cacgucgugggaacacggg..... 1  
 Gi2\_11002789\_x1.....acUucgugggaaacacggggugcc..... 1  
 Gl1\_6330843\_x1.....gacgucgugggaaacacggggCgccgaacu..... 1  
 Gi3\_28728269\_x1.....agagaagcgccgucAagcccccca..... 1  
 Gi4\_574258\_x1.....gaAcggagacgucgugggaaacacggg..... 1  
 Gi2\_11022786\_x1.....cgucgugggaaacacggggugccgaacuu..... 0  
 Gi5\_8830194\_x1.....agcgccgucaggccccUgccaguacugcgga..... 1  
 Gi3\_28465324\_x1.....ucgugggaaacacggggUaccga..... 1  
 Gi3\_28647551\_x1.....cucgCuccgaauuaggaaga..... 1  
 Gi3\_28430543\_x1.ccuuGacucguuccgaauu..... 1  
 Gi2\_11275259\_x1.....cgugCgaacacggggugccgaa..... 1  
 Gi1\_4191460\_x1.....ggagacgucgugggaGcacggggug..... 1  
 Gi2\_11038868\_x1.....cgauccggagGcgucgugggaaacacggggg..... 1  
 Gi3\_28457283\_x1.....gggNacacggggugccgaa..... 1  
 Gi5\_8858915\_x1.....gggaaacacggggugccgaacuu..... 0  
 Gi3\_28570057\_x1.....gaagagaagcgccgucGggccccg..... 1  
 Gi2\_11236329\_x1.....gagacgucgugggaaacacggggugA..... 1  
 Gi1\_4230006\_x1.....Cgccccgccaguacugcgauccggaga..... 1  
 Gi2\_11187634\_x1.....acCgcgaucggagacgucgugggaaacac..... 1  
 Gl1\_6219313\_x1.....gaucggagacGccguggg..... 1  
 Gi5\_8859447\_x1.....ccgccUguacugcgauccggagacguc..... 1  
 Gi3\_28728403\_x1.....agAccccgccaguacugcgauccgga..... 1  
 Gi5\_8831567\_x1.....ggUcccgccaguacugcgaucc..... 1  
 Gl1\_6135084\_x1.....Auacugcgauccggagacgucg..... 1  
 Gl1\_6331687\_x1.....gcgAcgucaggccccgccaguacugc..... 1  
 Gi1\_4351126\_x1.....gggaaacacggAgugccgaacuu..... 1  
 Gi2\_11311963\_x1.....ucUgagacgucgugggaaacacgggg..... 1  
 Gi5\_8968304\_x1.....gugUgaacacggggugccgaacuuu..... 1  
 Gi1\_4235862\_x1.....cgauccggagacgucgugAgaacacggggugc..... 1  
 Gi1\_4362616\_x1.....cgccaguacugcgauccggagacgu..... 0  
 Gl1\_6088612\_x1.....gucaggccccUgccaguacugcg..... 1  
 Gi2\_11359199\_x1.....cgauccgagacgucgugggaaaca..... 1  
 Gi2\_11261560\_x1.....caguacugcgauccggagacgucAu..... 1  
 Gl1\_6273796\_x1.....cAucaggccccgccaguacug..... 1  
 Gi3\_28751224\_x1.....cgccaguGcugcgauccggagacg..... 1

Gi1\_4274198\_x1.....cgCcaggccccccagacuacugcg..... 1  
Gi2\_11113831\_x1.....Ngggaacacggggugccgaacu..... 1  
G1a\_6129382\_x1.....agagaagcNccgucaggcccc..... 1  
Gi2\_11069801\_x1.....Uaggccccccagacuacugcgagac..... 1  
Gi3\_28461376\_x1.....ggagacgucguggaaAacg..... 1  
Gi3\_28428655\_x1.....gacgucgugCgaacacggggg..... 1  
Gi5\_9072787\_x1.....Ncggggaacacggggugccgaacu..... 1  
Gi1\_4259484\_x1.....Naucggagacgucgugg..... 1  
Gi2\_11221653\_x1.....aucggagacguAgugggaacacggggugcc..... 1  
Gi3\_28847512\_x1.....cccgccagacuacugcgaAcgg..... 1  
Gi5\_8861451\_x1.....gaucggagacgucguggaac..... 0  
Gi3\_28418452\_x1.....ccgcccagacuacugcgaUaggagac..... 1  
Gi3\_28913868\_x1.....caggccccccagacuacAgc..... 1  
Gi2\_11354586\_x1.....cccgccagacuacugcgUucggagacguc..... 1  
Gi2\_11057128\_x1.....agaAaagcgccgucagggccccgc..... 1  
Gi5\_8877721\_x1.....gagacgucgugggaacacggggugUcgaacu..... 1  
Gi3\_28665668\_x1.....ccccgccaguGcugcgauccggagacgucgug..... 1  
Gi1\_4363309\_x1.....gaacacggggugUccgaacu..... 1  
Gi2\_11055016\_x1.....agacgucgugggCacacggggugcc..... 1  
Gi5\_9029107\_x1.....acgCcgugggaacacggggugccg..... 1  
Gi3\_28575937\_x1.....aagcgccgucagggUccgccagacuacgc..... 1  
Gi2\_11069347\_x1.....cccAccagacuacugcgau..... 1  
Gi3\_28817096\_x1.....gNucggagacgucgugggaacacggggg..... 1  
Gi3\_28897319\_x1.....caggccccccagacuacugcgauccgaCac..... 1  
Gi2\_11256879\_x1.....gugCgaacacggggugccgaac..... 1  
Gi3\_28645682\_x1.....cCgagacgucgugggaacac..... 1  
Gi3\_28393006\_x1.....ccccgccagacuacAgauccggagacg..... 1  
Gi2\_11198671\_x1.....gccccgccagacuacugcgauccAgagacguc..... 1  
Gi2\_11213569\_x1.....aggccccccagacuacugcgauccCgagacg..... 1  
Gi2\_11061657\_x1.....cccgccagacuacugcgauccA..... 1  
Gi2\_11334049\_x1.....aggccccccagacuacugcgauccgaga..... 1  
Gi3\_28904865\_x1.....aacacggggugUcgaacuu..... 1  
Gi2\_11033926\_x1.....cggagGcgucgugggaacac..... 1  
Gi3\_28717663\_x1.....ucggagacgucgugggaacacggggugcA..... 1  
Gi2\_11161723\_x1.....Gacugcgauccggagacgucgugggaaca..... 1  
Gi3\_28503117\_x1.....Ugcccagucagggccccccagacu..... 1  
Gi2\_11013683\_x1.....cgauccggagacgucgugggaacacggggAgc..... 1  
G1a\_6182054\_x1.....Nucagggccccccagacuacugcg..... 1  
Gi2\_11006413\_x1.....gaucggCgacgucgugggaacacgggggug..... 1  
Gi3\_28577693\_x1.....ccAccagacuacugcgauccggagacgucgug..... 1  
Gi2\_11324468\_x1.....gaucggagacgucgAggggaacacggg..... 1  
Gi2\_11081100\_x1.....gcccgauUggagacgucgugggaacacggggugcc..... 1  
Gi5\_8867879\_x1.....gagacguUgugggaacacg..... 1  
G1a\_6203553\_x1.....aucggagacgucgCgggaacacggggug..... 1  
Gi5\_9021777\_x1.....acgucgugggaacacggggGgccc..... 1  
Gi2\_11260498\_x1.....acAucgugggaacacggggugc..... 1  
Gi2\_11381544\_x1.....gaucggagacgucgugggCacacgg..... 1

Gi1a\_6210213\_x1.....aagagaagcgccgucagggccU..... 1  
Gi3\_28439569\_x1.....ccUccaguacugcgauccgagacguc..... 1  
Gi3\_28463846\_x1.....cgugggaaGacggggugcc..... 1  
Gi3\_28605618\_x1.....ccgccaguacugcgauccggaAacgu..... 1  
Gi2\_11007882\_x1.....cgucgGgggaacacggggugc..... 1  
Gi2\_11206776\_x1.....aUagaagcgccgucagggc..... 1  
Gi3\_28619017\_x1.....agacgucgugggGacacggggugccgaac..... 1  
Gi5\_8986479\_x1.....cgccaguacugcgauccgagacguUgugg..... 1  
Gi1\_4298220\_x1.....aucggagacgucguAggaacacg..... 1  
Gi3\_28603933\_x1.....gcgauccgagacgucgugggaaAa..... 1  
Gi3\_28545241\_x1.....aagagGagcgccgucagggcccgccagu..... 1  
Gi3\_28326972\_x1.....ucggaAacgucgugggaaacacggggugcc..... 1  
Gi1a\_6016308\_x1.....gugggGacacggggugccga..... 1  
Gi2\_11115539\_x1.....cUguacugcgauccgagacgucgu..... 1  
Gi2\_11352659\_x1.....agacgucgugUgaacacggggugcc..... 1  
Gi3\_28571796\_x1.....cggagacgucgugggaaacacggggugcG..... 1  
Gi2\_11262270\_x1.....gucagggcccgccaguacGgc..... 1  
Gi5\_9088070\_x1.....ccccgccaguacugcgauccgagacg..... 1  
Gi3\_28730895\_x1.....cUguacugcgauccgagacgucgug..... 1  
Gi2\_11281154\_x1.....ugggaaacacggggugccgaaA..... 1  
Gi3\_28822979\_x1.....cccgccaguacuAcgauccgagacgucgug..... 1  
Gi1a\_6229925\_x1.....aucgUagacgucgugggaaacacgggg..... 1  
Gi2\_11123344\_x1.....cggagacgucgugggaaacacgUggugcc..... 1  
Gi2\_11344725\_x1.....cgucgugCgaacacggggugccg..... 1  
Gi3\_28453023\_x1.....ccUccaguacugcgauccg..... 1  
Gi5\_8845076\_x1.....cgucagggcccgccaguacuAcg..... 1  
Gi2\_11147120\_x1.....Ugaagagaagcgccgucagggcccg..... 1  
Gi2\_11072583\_x1.....ggagacgucAugggaaacacggggugcc..... 1  
Gi3\_28954349\_x1.....ggagacgucgCgggaaacacggggugccga..... 1  
Gi5\_8918097\_x1.....ggccccgccaguCcugcgaucc..... 1  
Gi2\_11091719\_x1.....gaacacggggUaccgaac..... 1  
Gi3\_28624533\_x1.....cggagacgucgCgggaaacacggggugc..... 1  
Gi1\_4329851\_x1.....cugcgauccgagacgucg..... 0  
Gi3\_28731575\_x1.....cgccaguGcugcgauccggaga..... 1  
Gi2\_11001701\_x1.....aucggagacgucgugggaaGacggggugc..... 1  
Gi5\_9085377\_x1.....cgucAugggaaacacggggugcc..... 1  
Gi2\_11047573\_x1.....gucagggcccgccaguacugUgauc..... 1  
Gi3\_28456713\_x1.....ccaguacugcgauccgagGcguc..... 1  
Gi1a\_6142514\_x1.....aagUgaagcgccgucagggccc..... 1  
Gi2\_10992993\_x1.....agccUcgccaguacugc..... 1  
Gi1a\_6091533\_x1.....guacugcgauccgagacguc..... 1  
Gi4\_580071\_x1.....agacgucgugggGacacggggugcc..... 1  
Gi1\_4170939\_x1.....ggagacgucgugggaaacaUggggugccg..... 1  
Gi3\_28926728\_x1.....agacgucgugggGacacggggg..... 1  
Gi1a\_6160371\_x1.....cggagacgucgugggaaacacggggGg..... 1  
Gi2\_11197035\_x1.....gagacgucgCgggaaacacggggug..... 1  
Gi2\_11234949\_x1.....ccccgccUguacugcgauccg..... 1

Gi3\_28474207\_x1.....Agagacgucgugggaacacgg..... 1  
Gi3\_28586968\_x1.....gauUggagacgucgugggaacacgg..... 1  
Gi5\_8911624\_x1.....gccguAagggccccccagucugc..... 1  
Gi3\_28280455\_x1.....gccaguacugcgauccggagCcg..... 1  
G1a\_6038099\_x1.....ggaacacgUggugccgaacu..... 1  
Gi3\_28718006\_x1.....gaagagaagcgccgCcaggccccgc..... 1  
Gi5\_8942016\_x1.....agaAgucguggggaacacggggugccgaacu..... 1  
G1a\_6105634\_x1.....cgccgucaggccccccGguacugc..... 1  
Gi1\_4227190\_x1.....cgucGggccccccagucugc..... 1  
Gi4\_603979\_x1.....ucAgagacgucguggggaacacggggugccg..... 1  
Gi3\_28669973\_x1.....ucUgggaacacggggugccgaa..... 1  
Gi2\_11298832\_x1.....aucggagacgucgugggaacacggggugccGacu..... 1  
Gi2\_11104245\_x1.....ucggagacgucgugggaacacAgggg..... 1  
G1a\_6163339\_x1.....cUccaguacugcgauccggagacgucg..... 1  
G1a\_5995158\_x1.....aAuacugcgauccggagacgucg..... 1  
Gi2\_11370936\_x1.....caggccccccaUuacugcga..... 1  
Gi5\_8850452\_x1.....acgucguAggaacacggggugccg..... 1  
G1a\_6068262\_x1.....ggaacacggggAgccgaacu..... 1  
Gi2\_11082867\_x1.....ucaggccAcgccagucugc..... 1  
Gi1\_4298577\_x1.....Aacgucguggggaacacggggugccg..... 1  
Gi2\_11340070\_x1.....aagaUaagcgccgucagggccccgc..... 1  
Gi3\_28424833\_x1.....agagaGcgcccgucagggcccccca..... 1  
Gi2\_11335833\_x1.....aucggagacgucgugggaacacggggUccgaacu..... 1  
Gi5\_9008576\_x1.....Nacacggggugccgaacu..... 1  
Gi2\_11111218\_x1.....cgucagggccccccagucugcgauccggagacguc..... 0  
Gi2\_11382028\_x1.....cCccaguacugcgauccggagacguc..... 1  
Gi1\_4163381\_x1.....auUggagacgucgugggaacacggggg..... 1  
G1a\_6104088\_x1.....aucggaAacgucguggggaacacggggugcc..... 1  
Gi3\_28421707\_x1.....ccccgccagucAaucggagacg..... 1  
Gi3\_28834180\_x1.....acgucgugggaacacAgg..... 1  
Gi5\_8879035\_x1.....ucgugggaUcacggggugccgaacu..... 1  
Gi3\_28363697\_x1.....agagaUgcccgcgucagggccccgc..... 1  
Gi3\_28565877\_x1.....gcUgucagggccccccaguc..... 1  
Gi2\_11159848\_x1.....aucggagacgucAugggaacacg..... 1  
Gi3\_28637861\_x1.....agggccccccagucUcugcga..... 1  
Gi3\_28719942\_x1.....gucgugggNacacggggugccgaa..... 1  
Gi3\_28422102\_x1.....guacugcgCucggagacg..... 1  
Gi2\_11038285\_x1.....gggaacacggggugccUaacu..... 1  
Gi2\_11252341\_x1.....gaagagaGgcccgcgucaggg..... 1  
Gi3\_28624301\_x1.....cUccgccagucugcgauccggagacg..... 1  
Gi2\_11140793\_x1.....guNggaacacggggugcc..... 1  
Gi3\_28363717\_x1.....gucgugAgaacacggggugccga..... 1  
Gi3\_28581829\_x1.....cgccagucAcgauccggagacg..... 1  
Gi2\_11360713\_x1.....cgauccggagacgucgugggaacacggggugG..... 1  
G1a\_6096377\_x1.....gucagggccccgUcagucugc..... 1  
Gi3\_28424149\_x1.....gucgugggaaAacggggugccgaa..... 1  
Gi2\_11136317\_x1.....gucgugggaacacggggugAcgaac..... 1

Gi2\_11257083\_x1.....ucggagacgucgugggaaacCcgggg..... 1  
 Gi3\_28597761\_x1.....gaucggGgacgucgugggaaacacggggugccgaacu..... 1  
 Gi3\_28818020\_x1.....uacugcgaucaGagacguc.....acggggugccgaac..... 1  
 Gi5\_9134122\_x1.....gggaaAacggggugccgaac..... 1  
 Gi2\_11207113\_x1.....cccgccaguacugAgaucgg..... 1  
 Gi3\_28742930\_x1.....aNcggagacgucgugggaaacacg..... 1  
 Gi3\_28513312\_x1.....acgucgugggaaacacggggugGc..... 1  
 Gi3\_28627026\_x1.....gcgaGcggagacgucgugggaaacacggg..... 1  
 Gi1\_4248776\_x1.....acugcgauccggagaAgucg..... 1  
 Gi3\_28721043\_x1.....ucggagacgucgugggCacacgg..... 1  
 Gi3\_28788999\_x1.....ucagUccccgccaguacugcgauccg..... 1  
 Gl1a\_6353042\_x1.....cgucaggccccgccaguacugUg..... 1  
 Gl1a\_6119399\_x1.....cgccaguacugcgUucggagacguc..... 1  
 Gi2\_11026821\_x1.....agaagcgccgucagUccccgccagu..... 1  
 Gi1\_4334723\_x1.....Gggagacgucgugggaaacacggggugccgaac..... 1  
 Gi4\_614186\_x1.....aUacgucgugggaaacacggggg..... 1  
 Gl1a\_6277786\_x1.....aagagaagcgcUgucaggccc..... 1  
 Gi2\_11370141\_x1.....aucggagacgGcgugggaaacac..... 1  
 Gi2\_11219855\_x1.....ccccgccaguacuCcgauc..... 1  
 Gi3\_28480387\_x1.....cguNaggccccgccaguacugcgauccg..... 1  
 Gi2\_11222770\_x1.....guacugcgauccgGgacgu..... 1  
 Gi3\_28683639\_x1.....aagagaagcgcCaggccc..... 1  
 Gi3\_28282324\_x1.....agacgucgugggaaacacggggAgccgaac..... 1  
 Gl1a\_6337277\_x1.....Gcggagacgucgugggaaacacggggugc..... 1  
 Gi2\_11373598\_x1.....gaucggGgacgucgugggaaaca..... 1  
 Gi2\_11403042\_x1.....ucgugggaaacacggggugcGgaac..... 1  
 Gi3\_28268982\_x1.....cUaucggagacgucgugggaaacacggggug..... 1  
 Gi2\_11120309\_x1.....agacgucguAggaacacggggugccg..... 1  
 Gi2\_11313192\_x1.....ugcAaucggagacgucgugggaaaca..... 1  
 Gi2\_11342962\_x1.....agaagcgccgucagccccgAc..... 1  
 Gi4\_580927\_x1.....gucaggccccgccaguacCgcg..... 1  
 Gi1\_4361582\_x1.....guacugcgauccgGgacgucgu..... 1  
 Gi2\_11060547\_x1.....cgucgugAgaacacggggugccgaac..... 1  
 Gi3\_28498903\_x1.....aucggagacgucgugggaaGacggg..... 1  
 Gi1\_4342969\_x1.....ucgugggaaacCcgggugc..... 1  
 Gi3\_28698219\_x1.....ucggagacgucgCgggaacacg..... 1  
 Gi5\_8888806\_x1.....ugcAaucggagacgucgugggaa..... 1  
 Gi5\_9009949\_x1.....gugggaaacacggggugccgaCcuuu..... 1  
 Gi3\_28677720\_x1.....gagacgucNugggaacacg..... 1  
 Gi1\_4247871\_x1.....aucgAagacgucgugggaaacacg..... 1  
 Gl1a\_6280664\_x1.....aucggagacgucgugggaaacacgggAug..... 1  
 Gi2\_11117908\_x1.....agAacugcgauccggagacgucg..... 1  
 Gi3\_28960715\_x1.....gucgugggaaacacggggugccgaac..... 1  
 Gi3\_28963887\_x1.....gggaaacacgUggugccga..... 1  
 Gi3\_28420565\_x1.....aagagaUgcgcccgucaggc..... 1  
 Gi1\_4191378\_x1.....gaucggagacgucgugggCaacacgg..... 1  
 Gi3\_28799148\_x1.....gccaguaAugcgauccggagacguc..... 1

Gi3\_28973030\_x1.....auGggagacgucgugggaacacggggugcc..... 1  
 Gi3\_28911732\_x1.....gccgucaggccccgccGguacu..... 1  
 Gi1\_4225154\_x1.....ggccUgccagucgucgagacgaga..... 1  
 Gi5\_9100266\_x1.....aguacugcgauUagacguc..... 1  
 Gi3\_28395315\_x1.....gucgugggaacacgggCugccga..... 1  
 Gi3\_28751606\_x1.....caggccccgAcaguacugcgau..... 1  
 Gi1\_4267381\_x1.....gaCcgagacgucgugggaacacgg..... 1  
 Gi2\_11239451\_x1.....gucgugggaacacggggugccgaaU..... 1  
 Gi1a\_6061831\_x1.....gaUgcgccgucaggccccgcca..... 1  
 Gi4\_598252\_x1.....uUggaacacggggugccga..... 1  
 Gi1a\_6194866\_x1.....cccgUcaguacugcgauUagacguc..... 1  
 Gi3\_28752326\_x1.....cgGcgucaggccccgccagua..... 1  
 Gi2\_11039844\_x1.....Ggucgugggaacacggggug..... 1  
 Gi5\_8878051\_x1.....cgugggaacaAggggugcc..... 1  
 Gi2\_11239154\_x1.....cgucguCggaacacggggugccgaa..... 1  
 Gi3\_28826202\_x1.....ccccgAcaguacugcgau..... 1  
 Gi3\_28688445\_x1.....gacguUgugggaacacggg..... 1  
 Gi1a\_6261597\_x1.....gaucggagacgucAuggggaacacggggu..... 1  
 Gi3\_28275142\_x1.....cgaucggaAacgucguggg..... 1  
 Gi1\_4381788\_x1.....gccccgccaguacCgcgucgagaga..... 1  
 Gi3\_28525078\_x1.....agaaUgcgccgucaggccccgccaguaucg..... 1  
 Gi3\_28590111\_x1.....gagGcgucgugggaacac..... 1  
 Gi3\_28530240\_x1.....ccccAccaguacugcgau..... 1  
 Gi2\_11246430\_x1.....ggccccgccUguacugcgau..... 1  
 Gi2\_11283954\_x1.....Ugagacgucgugggaaca..... 1  
 Gi1\_4294699\_x1.....gugggaacacggggugAcg..... 1  
 Gi3\_28312956\_x1.....gagaagcgccgucaggccccUgc..... 1  
 Gi3\_28615074\_x1.....gucaggccccgccaguaCucggaucgg..... 1  
 Gi3\_28841641\_x1.....ucguCggaacacggggugccg..... 1  
 Gi2\_11002249\_x1.....gacgucguNggaacacggggugccgaa..... 1  
 Gi5\_9000862\_x1.....cgugggaacacggggAgccga..... 1  
 Gi2\_11274415\_x1.....acguUgugggaacacggggugccgaa..... 1  
 Gi2\_11017046\_x1.....acgucgugggaacacggggugccgG..... 1  
 Gi5\_8905663\_x1.....aucggagacgucgugggaacaUg..... 1  
 Gi5\_9039918\_x1.....cCccaguacugcgauUagacguc..... 1  
 Gi2\_11226287\_x1.....ccccgcAaguacugcgauUagacguc..... 1  
 Gi5\_9105812\_x1.....acgucgugggaacGcggggugccgaa..... 1  
 Gi2\_11182052\_x1.....gagaagcgccgucaggccccgccaA..... 1  
 Gi2\_11228618\_x1.....ucggagacgucguggAaacacggggu..... 1  
 Gi2\_11160587\_x1.....GcgccaguacugcgauUagacguc..... 1  
 Gi1\_4218468\_x1.....ucggagacgucAuggggaacacg..... 1  
 Gi1a\_6047474\_x1.....gucgAggggaacacggggugccgaa..... 1  
 Gi3\_28482114\_x1.....acugcgauUagggagacguc..... 1  
 Gi2\_11237710\_x1.....aagagaagcgccgucaggcccc..... 1  
 Gi1a\_6084449\_x1.....cgucCggccccgccaguaucg..... 1  
 Gi2\_11220327\_x1.....aucggagacgucgugggaacacgggAugcc..... 1  
 Gi1\_4250768\_x1.....cgucaggccccgUcaguacugcg..... 1

Gi2\_11376987\_x1.....gugCgaacacggggugccg..... 1  
 Gi2\_11368188\_x1.....cAgagacgucgugggaacacggggug..... 1  
 Gi2\_11316561\_x1.....gcgaucgCagacgucguggga..... 1  
 Gi3\_28324680\_x1.....caggccccgcAaguacugcg..... 1  
 Gi2\_11245133\_x1.....uAggaacacggggugccgaacuu..... 1  
 Gi2\_11061967\_x1.....caAgccccgccaguacug..... 1  
 Gl1a\_6204197\_x1.....aucggagacgucgugggaGcacggggug..... 1  
 Gi2\_11141837\_x1.....gaacacggggugccgaaU..... 1  
 Gi2\_11207748\_x1.....acgucgugggaacacggggugccAaac..... 1  
 Gi3\_28762275\_x1.....ugUgaucggagacgucgugggaacacggggg..... 1  
 Gl1a\_6033122\_x1.....gaucggGgacgucgugggaacacggg..... 1  
 Gi2\_11016963\_x1.....aagaAaagcgccgucagggccccgccag..... 1  
 Gi3\_28458349\_x1.....ugggaacacggggUccgaa..... 1  
 Gi3\_28895260\_x1.....agaagcgccgucagggcGcc..... 1  
 Gi3\_28768992\_x1.....aagagaagcgccgucagggccccgUcagua..... 1  
 Gi2\_11346639\_x1.....cgNagacgucgugggaacacggggug..... 1  
 Gl1\_4293908\_x1.....acugcgaucggagacgucgugAga..... 1  
 Gi2\_11138233\_x1.....cgaucggagacgucgugggaGcacg..... 1  
 Gi2\_11092460\_x1.....acugcgaucggagaGgucgugggaacac..... 1  
 Gi2\_11380370\_x1.....aucggUgacgucguggga..... 1  
 Gl1\_4208248\_x1.....acgucgugggaacaUggggugcc..... 1  
 Gi2\_11279612\_x1.....cgaucggagacAucgugg..... 1  
 Gl1\_4386051\_x1.....aucggagacAucgugggaacacgg..... 1  
 Gl1a\_6154776\_x1.....gccaguacNcgcaucggagacgucgug..... 1  
 Gi5\_8844491\_x1.....gucagggccccgccaguacugcU..... 1  
 Gl1\_4298845\_x1.....gaacacgggCugccgaacu..... 1  
 Gi2\_11264793\_x1.....Acaggccccgccaguacugc..... 1  
 Gi5\_9001498\_x1.....ugggaaUacggggugccgaacuu..... 1  
 Gi5\_9027922\_x1.....gacgucgugAgaacacggggugccgaac..... 1  
 Gi3\_28864141\_x1.....Uagacgucgugggaacacggg..... 1  
 Gi3\_28582602\_x1.....gccguUagggccccgccaguacugc..... 1  
 Gl1a\_6147158\_x1.....aucgUagacgucgugggaacacggggugccgaacu..... 1  
 Gl1\_581452\_x1.....cgAcgugggaacacggggugccgaacu..... 1  
 Gl1\_4284261\_x1.....ucggagacgucgGgggaacacggggugcc..... 1  
 Gi3\_28954213\_x1.....cgucgugggaacacgUggugccgaacu..... 1  
 Gl1\_4375631\_x1.....ggaacacggggugccgaUcu..... 1  
 Gi2\_11177082\_x1.....cgggagacgucgugggaaGacggggugcc..... 1  
 Gi5\_9129840\_x1.....caggccccccCguacug..... 1  
 Gi5\_9132995\_x1.....ccccgccaguacugcgaCgggagacg..... 1  
 Gi2\_11180874\_x1.....gCagacgucgugggaacac..... 1  
 Gi2\_11371518\_x1.....cccgccaguacugcUauc..... 1  
 Gi2\_11213496\_x1.....ucaggccccgAcaguacugcg..... 1  
 Gl1a\_6014240\_x1.....aggccccgccagCacugc..... 1  
 Gi2\_11152317\_x1.....auNggagacgucgugggaa..... 1  
 Gi2\_11230865\_x1.....ccgucaggAcccgccaguacugc..... 1  
 Gl1\_4352787\_x1.....Gagagaagcgccgucagggccccgccagu..... 1  
 Gi2\_10998158\_x1.....ucguCggaacacggggugccgaac..... 1



Gi2\_11076189\_x1.....cgucgugggaacacggggugccUaacu..... 1  
 Gi2\_11239063\_x1.....acugcgaucggGgacgucgugg..... 1  
 Gi5\_8898971\_x1.....ucgugggaaGacggggugccgaacu..... 1  
 Gi2\_11131711\_x1.....cggagacgAcgugggaacacggggugc..... 1  
 Gi2\_11216759\_x1.....gccaguacugcgGucggaga..... 1  
 G1a\_6205048\_x1.....ggAaacacggggugccgaacu..... 1  
 Gi3\_28328145\_x1.....ccgaauuaggaagagaagA..... 1  
 Gi2\_11369648\_x1.....cCccgucagggcccgcaguc..... 1  
 Gi5\_8972330\_x1.....cgucagggcccgcGguacugcg..... 1  
 Gi2\_11344132\_x1.....cgaucggagacgucguggg..... 0  
 Gi2\_11203685\_x1.....Aaagagaagcgccgucagggccc..... 1  
 Gi2\_11255422\_x1.....acgucgugggUacacggg..... 1  
 Gi5\_8973750\_x1.....agacgucgNgggaacacggggugccga..... 1  
 Gi2\_11139295\_x1.....ggagUcgucgugggaaacag..... 1  
 Gi2\_11013882\_x1.....agagaagcgccgucagggccc..... 1  
 Gi1\_4218612\_x1.....ucgugggaacacggggugAcgaac..... 1  
 Gi3\_28612262\_x1.....gagCcgucgugggaacacggggugccgaacu..... 1  
 Gi5\_8959579\_x1.....gacgucgugggUacacggggugccgaacu..... 1  
 Gi1\_4187341\_x1.....cgucagggcccUcgccaguacugc..... 1  
 Gi2\_11161697\_x1.....ugggaacacggggugccgaGcuu..... 1  
 Gi3\_28765951\_x1.....gagacgucguggCaacac..... 1  
 Gi2\_10993195\_x1.....aggccccgccaguacugcgauCg..... 1  
 G1a\_6118270\_x1.....aucgUagacgucgugggaacacggggu..... 1  
 Gi5\_8871754\_x1.....gucgugggaacacggggugGcgaacu..... 1  
 Gi1\_4287992\_x1.....aguacugcgauCgGgacgucgugg..... 1  
 Gi2\_11333836\_x1.....caguacugcgauCggaAacgucgug..... 1  
 Gi3\_28686319\_x1.....cggagUcgucgugggaacacggggu..... 1  
 Gi3\_28370819\_x1.....ccgCcaggccccgccaguacugc..... 1  
 Gi3\_28729080\_x1.....caggccccgccaguacugcgcaCcgga..... 1  
 Gi3\_28971991\_x1.....acgucgugggaacacUgggugccgaacu..... 1  
 Gi5\_8866969\_x1.....gagacgucgGgggaacacggggugccgaacu..... 1  
 Gi3\_28442769\_x1.....cggagacgucgugggaacacgA..... 1  
 Gi1\_4332098\_x1.....aGcggagacgucgugggaacac..... 1  
 Gi1\_4180163\_x1.....ggUaacacggggugccgaa..... 1  
 Gi2\_11077671\_x1.....gucagggccccgcUaguacugcgau..... 1  
 Gi1\_4203296\_x1.....ugggaacacggggugccCaacu..... 1  
 Gi2\_11065564\_x1.....aAgccccgccaguacugcgauCgagacguc..... 1  
 Gi3\_28806727\_x1.....gaucggUgacgucguggga..... 1  
 Gi4\_581858\_x1.....ugggaacaUggggugccgaacu..... 1  
 Gi3\_28781421\_x1.....gucguCggaacacggggugccgaac..... 1  
 Gi2\_11394044\_x1.....ccgccaAuacugcgauCgagacg..... 1  
 Gi3\_28905150\_x1.....ucaggccccgccaguacugUgauc..... 1  
 Gi3\_28580025\_x1.....gggaacacggggugccAa..... 1  
 Gi2\_11319369\_x1.....gAacugcgauCgagacguc..... 1  
 Gi5\_9039252\_x1.....CacugcgauCgagacguc..... 1  
 Gi4\_601083\_x1.....gacgucgugggaacacggggugccgaacA..... 1  
 Gi3\_28845537\_x1.....aggccccgccaguaUugcgauCg..... 1

Gi2\_11019094\_x1.....gaagagaagcgcccgucCggccccg..... 1  
 Gi2\_11327060\_x1.....agagaaAcgccgucaggcccc..... 1  
 Gi2\_11163189\_x1.....ggagacgucAugggaaacac..... 1  
 Gi3\_28287834\_x1.....Ggacgucgugggaacacggggugccga..... 1  
 G1a\_6272810\_x1.....gugAgaacacggggugcc..... 1  
 Gi2\_11245222\_x1.....uacugcgaucggagacgucGg..... 1  
 G1a\_6211939\_x1.....ucUggccccgccaguacugcgucg..... 1  
 G1a\_6177240\_x1.....gugggaacacggUgugccgaac..... 1  
 Gi2\_11335073\_x1.....ugggaacaAggggugccgaac..... 1  
 Gi5\_8994390\_x1.....ugggaacacggggugAcgaac..... 1  
 Gi5\_9005993\_x1.....aagcgccgucaggccccgccag..... 1  
 Gi2\_11256948\_x1.....aagcgccgucaggccccgccag..... 0  
 Gi1\_4363772\_x1.....ucUggccccgccaguacugcg..... 1  
 Gi2\_11241494\_x1.....cccgccaguacugcgaCcg..... 1  
 Gi3\_28576509\_x1.....caguacugcgaucggagaAguc..... 1  
 G1a\_6330169\_x1.....gugggUacacggggugccga..... 1  
 Gi5\_8988568\_x1.....uCcgaucggagacgucgug..... 1  
 Gi2\_11143052\_x1.....gacgucgugggaacaUggggu..... 1  
 Gi2\_11202202\_x1.....gggaacacggggugccgaaG..... 1  
 Gi3\_28494721\_x1.....aggccccgccGguacugcgaucggagacguc..... 1  
 Gi3\_28841672\_x1.....gacgucgugggaacacggggAgccg..... 1  
 Gi3\_28766777\_x1.....Cgagacgucgugggaaca..... 1  
 Gi3\_28730796\_x1.....gagaagcgccgucaggccccgU..... 1  
 G1a\_6200068\_x1.....gaucggagacguUguggg..... 1  
 Gi2\_11325681\_x1.....ggccccgcNaguacugcgau..... 1  
 G1a\_6210977\_x1.....aucggCgacgucgugggaa..... 1  
 Gi3\_28736345\_x1.....ggagacgucCgggaacacggggugccg..... 1  
 Gi2\_11397475\_x1.....gccaguaUugcgaucgga..... 1  
 Gi2\_11298835\_x1.....aucggagaAgucgugggaacacggggugcc..... 1  
 Gi2\_11312390\_x1.....ugggaacacggggugcUgaacuu..... 1  
 Gi2\_11097603\_x1.....cgucUugggaacacggggugccgaa..... 1  
 Gi3\_28327540\_x1.....caggccccgccaguacugcAaucgg..... 1  
 Gi3\_28824308\_x1.....ggagacguNgugggaacacggggugccgaacu..... 1  
 Gi2\_11060477\_x1.....acgucguggAaacacggggugccgaacu..... 1  
 Gi2\_11313016\_x1.....ucggCgacgucgugggaacacg..... 1  
 Gi3\_28269626\_x1.....cgucCggccccgccagua..... 1  
 Gi3\_28265614\_x1.....gacgucguNggaacacgggg..... 1  
 Gi4\_602639\_x1.....Uugggaacacggggugccga..... 1  
 Gi3\_28898992\_x1.....gacgucgugggUacacgg..... 1  
 Gi5\_8879834\_x1.....ucggagacgucgugggaacacggggAgc..... 1  
 Gi2\_11213899\_x1.....ccccgccaguacugcgaucggagaU..... 1  
 Gi3\_28639876\_x1.....gaagcgccgucaAgccccgccagua..... 1  
 Gi5\_8831697\_x1.....ucaggccccgccaguaUugcg..... 1  
 Gi2\_11239555\_x1.....gaacacggggugAcgaacu..... 1  
 Gi1\_4297033\_x1.....ugAgaacacggggugccgaac..... 1  
 Gi2\_11049209\_x1.....ucggagacgucgugggaGca..... 1  
 Gi2\_11089603\_x1.....ugggCacacggggugccgaa..... 1

Gi3\_28519045\_x1.....gacgucgugggaacacggggugccAaac..... 1  
 Gi1\_4390456\_x1.....aagagGagcgccgucaggccccgccagu..... 1  
 Gi1\_4325097\_x1.....acgucgugNgaacacggggugccg..... 1  
 Gi3\_28602114\_x1.....aguacugcgauccggagacgucguggC..... 1  
 Gi3\_28326807\_x1.....caguacugcgaCcgagacgucg..... 1  
 Gi5\_8842873\_x1.....uGggagacgucguggggaacacggggugc..... 1  
 Gi2\_11273479\_x1.....Uucggagacgucguggga..... 1  
 G1a\_6173837\_x1.....ccgccaguacugcgGucggagacguc..... 1  
 Gi3\_28532087\_x1.....aagagaagUgccgucaggccccgccagu..... 1  
 Gi2\_11223692\_x1.....gagaagcgccgucaggcccc..... 0  
 Gi2\_11339566\_x1.....cgauccgGcagcugcugg..... 1  
 Gi3\_28781275\_x1.....aggccccgccaguacugcgauccggagGc..... 1  
 G1a\_6184194\_x1.....caguacugcgauccggagacGc..... 1  
 Gi3\_28531289\_x1.....cggagacgucgugggaacacggggugUcgaacu..... 1  
 Gi3\_28899933\_x1.....ccgucaggccccgcUaguacugc..... 1  
 Gi2\_11221025\_x1.....ucggagacgucgugggCac..... 1  
 G1a\_6148154\_x1.....ggagacgucgugggaGcacgggugc..... 1  
 Gi3\_28451547\_x1.....ggagacgucgugggaacaAggggugcc..... 1  
 Gi2\_11240536\_x1.....ucggagacgucgugAggaacacggggugc..... 1  
 Gi5\_8989152\_x1.....cggagacgucgugggaacGcgggugccga..... 1  
 Gi3\_28985203\_x1.....gggaacacggggugcUgaacuu..... 1  
 Gi1\_4287197\_x1.....Uggagacgucgugggaacacggg..... 1  
 Gi1\_4319731\_x1.....Uucgugggaacacggggugccga..... 1  
 Gi3\_28471382\_x1.....cgccgucaggccAcgccaguac..... 1  
 Gi3\_28682418\_x1.....gccaguGcugcgauccgga..... 1  
 Gi2\_11027942\_x1.....gucaggccccgAcaguacugc..... 1  
 Gi3\_28882687\_x1.....aggccccgccaguacugAgauccg..... 1  
 Gi3\_28955447\_x1.....gcccggucaggccccgccaguacGc..... 1  
 Gi3\_28348332\_x1.....gagaagcgccgGcaggcccc..... 1  
 G1a\_6146313\_x1.....cgauccgUagacgucgugg..... 1  
 Gi1\_4187792\_x1.....ccgccaguacugcgauccggag..... 0  
 Gi3\_28878412\_x1.....cgucUggccccgccaguacugcg..... 1  
 Gi2\_11350395\_x1.....gucaggccccgccaguaGugcgau..... 1  
 Gi2\_11104989\_x1.....aguacugcNaucggagacgucgu..... 1  
 G1a\_6121645\_x1.....gGcugcuggggaacacggggu..... 1  
 Gi3\_28768348\_x1.....aucggCgacgucguggga..... 1  
 Gi2\_11163716\_x1.....cgucgugggaacacggUgugccga..... 1  
 Gi2\_11344569\_x1.....cgccaguacugcgauccgA..... 1  
 Gi1\_4203920\_x1.....cgucgugggaacacCgggugccgaacu..... 1  
 Gi5\_8898412\_x1.....uNuggggaacacggggugccgaacu..... 1  
 Gi4\_585580\_x1.....Ucucgugggaacacggggugccgaacu..... 1  
 Gi3\_28685992\_x1.....agacgucgugggaacaAggggugcc..... 1  
 Gi2\_11377830\_x1.....ccccgccUguacugcgauccggagacgu..... 1  
 Gi1\_4283490\_x1.....gagacgucgugggGacacgggugccgaac..... 1  
 Gi1\_4214120\_x1.....acgucAuggggaacacggggugcc..... 1  
 Gi2\_11068700\_x1.....acgucguAggaacacggggu..... 1  
 Gi1\_4258367\_x1.....gaucggagacgucguggAaacac..... 1

G1a\_6066103\_x1.....gucgugggaaAacggggugcc..... 1  
 Gi5\_9042661\_x1.....ggaacacggggugcAgaac..... 1  
 Gi1\_4165828\_x1.....gacgucgugGgaacacggggugccgaacu..... 1  
 Gi2\_11037517\_x1.....gacgGcgugggaaacacggg..... 1  
 Gi2\_11055295\_x1.....agacgucguggAaacacggggugccgaac..... 1  
 Gi3\_28846831\_x1.....cggaUacgucgugggaacacggggugc..... 1  
 G1a\_6082560\_x1.....cUcggcagucgucgagacguc..... 1  
 Gi2\_11349767\_x1.....gucgugggaaUacggggugc..... 1  
 Gi2\_11103829\_x1.....cggagacgucguUggaacacggggg..... 1  
 Gi5\_9039556\_x1.....gAagacgucguggaaca..... 1  
 Gi3\_28653873\_x1.....gaagagaagcgccgucagGcc..... 1  
 Gi5\_9073329\_x1.....aucggGgacgucgugggaacacgg..... 1  
 Gi3\_28943300\_x1.....gacgucgugggaacacggggugUcgaac..... 1  
 Gi2\_11247733\_x1.....gaagcgccgucGggcccc..... 1  
 Gi2\_11309524\_x1.....agacgucguggCaacacggggugccg..... 1  
 Gi5\_9041758\_x1.....gggaacacggAgugccgaa..... 1  
 Gi3\_28550327\_x1.....ccccgccagucgucgagacguG..... 1  
 Gi5\_9011612\_x1.....cgucguggUacacggggugcc..... 1  
 Gi3\_28397331\_x1.....caggccccccagucgUuc..... 1  
 Gi3\_28811358\_x1.....caggccccNccagucgucgag..... 1  
 Gi3\_28872904\_x1.....cgUaguacgucgagac..... 1  
 Gi3\_28854929\_x1.....ugcgaucggagacgucg..... 0  
 Gi5\_8942613\_x1.....cgCgggaacacggggugcc..... 1  
 Gi1\_4289402\_x1.....caggccccNccagucgucg..... 1  
 Gi3\_28639173\_x1.....aggccccccagucgGucg..... 1  
 G1a\_6285320\_x1.....aucggagacgucgugggaacacgAggu..... 1  
 Gi2\_11402647\_x1.....Uaggccccccagucgucgag..... 1  
 Gi5\_8880976\_x1.....aggccccccagucgU..... 1  
 Gi5\_9134079\_x1.....aucggagacgucgugggaacaUgggg..... 1  
 G1a\_6268154\_x1.....Nugggaacacggggugccgaac..... 1  
 Gi2\_11235931\_x1.....Gcugcgaucggagacgucgugggaacacgggg..... 1  
 G1a\_6287698\_x1.....ggcUcccagucgucg..... 1  
 G1a\_6013865\_x1.....ggagacgucgugggaacGcggggugcc..... 1  
 Gi2\_11359732\_x1.....gaucggagacgucgugggaacacggggugU..... 1  
 Gi4\_567386\_x1.....gucgugggaacacggggugccgaac..... 0  
 Gi1\_4208410\_x1.....gucguggAaacacggggugccgaacu..... 1  
 Gi1\_4248030\_x1.....Cugggaacacggggugccgaac..... 1  
 Gi1\_4218245\_x1.....gacgucgugggaacacggggU..... 1  
 G1a\_6135161\_x1.....uacugcgaucggagacGc..... 1  
 Gi3\_28446594\_x1.....cgccCucagggccccagua..... 1  
 Gi3\_28595332\_x1.....ccgccUguacgucgagacguc..... 1  
 Gi5\_8865706\_x1.....ugggaacacgggAugccgaa..... 1  
 Gi2\_11299089\_x1.....aagaCaagcgccgucagggcc..... 1  
 Gi2\_11006347\_x1.....cggagacgucgugggaacacggggugccgaGc..... 1  
 Gi5\_8868039\_x1.....acgucGgggaacacggggugccg..... 1  
 Gi5\_8846235\_x1.....aucggagacgucgugggaacacggggugccgCacu..... 1  
 Gi2\_11373772\_x1.....aucggagacgucguggUaacacggggugcc..... 1

G1a\_6031185\_x1.....ucggGgacgucgugggaaacacggggugc..... 1  
 Gi3\_28281086\_x1.....uacugcgaucgUagacguc..... 1  
 Gi1\_4239272\_x1.....Uggaacacggggugccga..... 1  
 Gi3\_28938721\_x1.....gccAuaucugcgaucggagacgu..... 1  
 Gi2\_11228339\_x1.....agCacugcgaucggagacgucgu..... 1  
 Gi5\_8911937\_x1.....ugggaacacggggugcGgaa..... 1  
 Gi5\_9006437\_x1.....Ugucgugggaaacacggggugccga..... 1  
 G1a\_6225123\_x1.....Ccugcgaucggagacguc..... 1  
 G1a\_6351124\_x1.....gUagagaagcgccgucag..... 1  
 Gi3\_28305212\_x1.....gccgucaggccccgccaguGcug..... 1  
 Gi1\_4264564\_x1.....gucgugggaaacGcggggugccgaac..... 1  
 Gi2\_11310635\_x1.....gacgucgugggGacacggggugccga..... 1  
 Gi3\_28685900\_x1.....cggagacgucgugggaaacacggggugA..... 1  
 G1a\_6066440\_x1.....gaucggagacAucgugggaaacacgggggu..... 1  
 Gi1\_4294247\_x1.....gugggaacacggggugccgG..... 1  
 Gi3\_28472117\_x1.....cgccaCuacugcgaucggagacguc..... 1  
 Gi2\_11379577\_x1.....gaucggagacgucgugggaaacacggAg..... 1  
 Gi5\_9116943\_x1.....aagagaagcgccgucaggccccCcc..... 1  
 Gi2\_11279849\_x1.....cgaucggagacgucgugggGacacggg..... 1  
 Gi2\_11268480\_x1.....ggCgacgucgugggaaacacggggugccg..... 1  
 Gi5\_8915895\_x1.....cguggaaacacggggAgccgaac..... 1  
 Gi3\_28904151\_x1.....cgccaguacugcgaucggagacgucguC..... 1  
 Gi2\_11326686\_x1.....gagacAucgugggaaacacggggugccgaac..... 1  
 Gi1\_4238517\_x1.....ggagacgucgugggaaacacAgggugcc..... 1  
 Gi3\_28676313\_x1.....cgaucggagacgucgugggaaacacgAg..... 1  
 Gi2\_11212967\_x1.....aagagaagcgccgucagcccc..... 1  
 Gi3\_28457457\_x1.....Accgucaggccccgccaguacug..... 1  
 Gi3\_28837504\_x1.....acgucgugggaaacacggggugccgaaU..... 1  
 Gi3\_28852602\_x1.....ucgCgggaacacggggugccga..... 1  
 Gi2\_11297268\_x1.....gaucggagacgucgugggaaacacgCggu..... 1  
 Gi2\_11281114\_x1.....ccccgccaguGcugcgaucggag..... 1  
 Gi3\_28273799\_x1.....gagacgucgugggaaacacggggG..... 1  
 Gi3\_28702255\_x1.....ccgccaguNcugcgaucggagacgucgug..... 1  
 Gi2\_11056980\_x1.....ucggagacgucgugggaaUacggggugcc..... 1  
 Gi2\_11407229\_x1.....cgaucggagaUgucgugggaaacacggggug..... 1  
 G1a\_6235680\_x1.....caggGccccccaguacugc..... 1  
 Gi3\_28424052\_x1.....cgucgugggaaacUgggg..... 1  
 Gi5\_9028438\_x1.....cguggaaacacggggugccgCacuu..... 1  
 Gi5\_9073395\_x1.....gaucggagGcugcugggaaacac..... 1  
 Gi3\_28773657\_x1.....gugggaacacggggugccCaa..... 1  
 Gi3\_28389100\_x1.....gacgucguggCaacacggg..... 1  
 G1a\_6312734\_x1.....cgucaggccccccaguacGcgg..... 1  
 Gi2\_11382090\_x1.....ucguAggaaacacggggugccgaa..... 1  
 Gi2\_11137027\_x1.....ccgccaguacugcgaucggagacgCc..... 1  
 Gi2\_11121624\_x1.....ccccccaAuaucggauc..... 1  
 Gi3\_28620283\_x1.....uGggagacgucgugggaaacacggggugccgaa..... 1  
 Gi4\_607032\_x1.....cgucaggccccccagua..... 0

G1a\_6271189\_x1.....ucgugggaaacacggggugccgCacu..... 1  
 Gi1\_4258260\_x1.....agacgucguggAaacacgggg..... 1  
 Gi2\_11407747\_x1.....ggaacacgUggugccgaa..... 1  
 Gi3\_28768028\_x1.....gagacgucguUggaacacggggugccgaacu..... 1  
 Gi3\_28778325\_x1.....acugcgaucggGgacguc..... 1  
 Gi3\_28911453\_x1.....gccaguacugcgGucggagacgucgug..... 1  
 G1a\_6165964\_x1.....aGgagaagcgcgcucagcggcccg..... 1  
 Gi3\_28930946\_x1.....ccccgccaguacugcgauccggG..... 1  
 G1a\_6204988\_x1.....gucagggccccccaguacugUga..... 1  
 Gi3\_28395366\_x1.....gcUaguacugcgauccggagacgucgu..... 1  
 Gi2\_11140736\_x1.....acgucguggaaacacggggugcAga..... 1  
 Gi3\_28806899\_x1.....cgauccggagacgCcgugg..... 1  
 Gi1\_4212863\_x1.....acugcgaucggagacgucgug..... 0  
 Gi5\_8994048\_x1.....acgucguggaaacacggggugGcgaacu..... 1  
 Gi1\_4355122\_x1.....gcUaguacugcgauccggagacg..... 1  
 G1a\_6020469\_x1.....gGagagaagcgcgcucag..... 1  
 Gi3\_28667616\_x1.....cgccgucagggccccccaAuacugc..... 1  
 Gi2\_11261287\_x1.....gcgauccggagacgucgugggaGcac..... 1  
 Gi3\_28849959\_x1.....aucggagacgucgugggaacacggggugccgaCc..... 1  
 Gi3\_28927200\_x1.....cgccGguacugcgauccggagacgucgu..... 1  
 Gi2\_11227566\_x1.....cgucgugggaacCcggggugccgaac..... 1  
 Gi2\_11345812\_x1.....agcgcAgucagggccccccagua..... 1  
 Gi3\_28369545\_x1.....gccaguacugcgauccggagaAguc..... 1  
 Gi3\_28793683\_x1.....aacacgggAugccgaacuu..... 1  
 G1a\_6010522\_x1.....acugcgaucggaUacgucgug..... 1  
 G1a\_6275680\_x1.....aguacugcgUucggagacguc..... 1  
 Gi3\_28327060\_x1.....ggccccAccaguacugcgauccg..... 1  
 Gi2\_11049787\_x1.....gagacgucgugggGacacggggugccgaac..... 1  
 Gi3\_28263794\_x1.....cugcgaucggagGcgucgugggaacacggggug..... 1  
 Gi2\_11061044\_x1.....uacugcgaNcggagacgu..... 1  
 Gi5\_8838329\_x1.....ucgugggaaacacUgggugccgaac..... 1  
 Gi2\_11114290\_x1.....cgugggaacacCgggugcc..... 1  
 Gi2\_11396022\_x1.....agacgucguggAaacacggggugccgaacu..... 1  
 Gi2\_11259636\_x1.....agggccccccaguacugcgauccggagaU..... 1  
 Gi5\_9050285\_x1.....cgugggaGacggggugccgaac..... 1  
 Gi3\_28362844\_x1.....gucagggccccAccaguacug..... 1  
 Gi3\_28853055\_x1.....cgccgucagggcccUgccaguac..... 1  
 Gi5\_8946845\_x1.....gagaagcAccgucagggccccccaguacu..... 1  
 Gi5\_8966854\_x1.....aacNcggggugccgaacuuu..... 1  
 Gi3\_28474406\_x1.....ggagacgucgugggaacacggAgugccgaa..... 1  
 Gi3\_28452059\_x1.....aucggagacgucgugggaacacgUgg..... 1  
 Gi1\_4385906\_x1.....agaaUcgccgucagggccccgc..... 1  
 Gi2\_11098121\_x1.....acgucgugggaacCcggggugc..... 1  
 Gi2\_11139134\_x1.....ccaguUcugcgauccggagacguc..... 1  
 Gi2\_11269828\_x1.....cgucgugggUacacggggugccga..... 1  
 Gi3\_28441839\_x1.....caguacugUgauccggagacgucgug..... 1  
 Gi3\_28364789\_x1.....cccAccaguacugcgauccggaga..... 1

Gi5\_8883791\_x1.....gucguggAaacacggggugccgaac..... 1  
 Gl1a\_6318872\_x1.....cccgccaguacugcgauccggagacAuc..... 1  
 Gi2\_11316296\_x1.....gcgaucggagacgucAuggga..... 1  
 Gi3\_28474380\_x1.....Cguacugcgauccggagacg..... 1  
 Gi3\_28987731\_x1.....Agccaguacugcgauccggagacg..... 1  
 Gi2\_11107628\_x1.....gagacgucgugggGacacggg..... 1  
 Gl1a\_6141618\_x1.....gugggaGcaccggggugccg..... 1  
 Gi5\_9076818\_x1.....ucggagacgucgugggaacaUggggugc..... 1  
 Gi1\_4334866\_x1.....gugggaacGcggggugccg..... 1  
 Gi2\_11194674\_x1.....gccaguacugcgCucggagacg..... 1  
 Gi5\_9073317\_x1.....ucgugggaacaGggggugccgaacu..... 1  
 Gi5\_9006272\_x1.....cGccaguacugcgauccggagacg..... 1  
 Gi2\_11156294\_x1.....ccgucaggccccccaguUcugcg..... 1  
 Gi2\_11181265\_x1.....aguaAugcgauccggagacg..... 1  
 Gi2\_10997752\_x1.....ccgccUguacugcgauccggagacguc..... 1  
 Gi1\_4274004\_x1.....cgugggGacacggggugccg..... 1  
 Gi2\_11144389\_x1.....aggAcccgccaguacugcgauccgg..... 1  
 Gi1\_4377773\_x1.....cggGgacgucgugggaacacggg..... 1  
 Gi2\_11031273\_x1.....gugggaaGacggggugccg..... 1  
 Gi3\_28913650\_x1.....gucgugggaacacggggugcGgaac..... 1  
 Gi2\_11251656\_x1.....cgccGguacugcgauccggagac..... 1  
 Gi1\_4305564\_x1.....ggagacgucguggAaacacggggug..... 1  
 Gi3\_28870232\_x1.....gucgugUgaacacggggugcc..... 1  
 Gi3\_28632849\_x1.....aggccccgccaguacugcgGucgg..... 1  
 Gi2\_11278635\_x1.....Ncugcgauccggagacgucgugg..... 1  
 Gi2\_11133577\_x1.....ccccgccaguacugcgauU..... 1  
 Gi2\_11162603\_x1.....gacgucgugggGacacggg..... 1  
 Gi2\_11285778\_x1.....cAccaguacugcgauccggagacguc..... 1  
 Gi1\_4309018\_x1.....cgggagacgucgugggGacacggg..... 1  
 Gl1a\_6008330\_x1.....cgGgggaacacggggugccg..... 1  
 Gi3\_28478654\_x1.....agaagcAccgucaggcccc..... 1  
 Gi2\_11340143\_x1.....gaGgagaagcgccgucaggccccgcc..... 1  
 Gi2\_11359226\_x1.....acgucgugggaacacUgggugccgaacu..... 1  
 Gi5\_8978347\_x1.....gugNgaacacggggugccgaac..... 1  
 Gi1\_4248390\_x1.....aggcccAgccaguacugcgauccgg..... 1  
 Gi1\_4253439\_x1.....gucgugggaacacGcgugccgaacu..... 1  
 Gi2\_11363200\_x1.....gucgCgggaacacggggugccga..... 1  
 Gi5\_8938382\_x1.....ccccccaNuacugcgauccggagacguc..... 1  
 Gi5\_9103253\_x1.....aacaGggggugccgaacuuu..... 1  
 Gi2\_11132054\_x1.....cgauccggagaUgucgugg..... 1  
 Gi3\_28876598\_x1.....agagaagcgccgucaggccccccagCacu..... 1  
 Gl1a\_6157255\_x1.....agagaagcgccgucaggccccccaguacugcg..... 0  
 Gi3\_28717458\_x1.....agaagcgCNguacggccccccaguacugcg..... 1  
 Gi3\_28717228\_x1.....ucggGgacgucgugggaacacggg..... 1  
 Gi3\_28932665\_x1.....gugUgaacacggggugccg..... 1  
 Gi1\_4337449\_x1.....caUgccccccaguacugcgauccggagacg..... 1  
 Gi3\_28941250\_x1.....cgggagacgucgugggaacacggggCgccgaacu..... 1

Gi3\_28922843\_x1.....gGgacgucgugggaacacggggugccgaa..... 1  
 Gi3\_28835771\_x1.....gucguAggaacacggggugccga..... 1  
 Gi3\_28364391\_x1.....Gcugcgauccggagacgucg..... 1  
 Gi3\_28667676\_x1.....cgucgugggaacacggggugccgaaG..... 1  
 Gi5\_8907779\_x1.....caggUcccgccaguacugcga..... 1  
 Gi1\_4165743\_x1.....aggccccgccaguacuAcgauc..... 1  
 Gi3\_28561913\_x1.....ucUggccccgccaguacugcgauccggagac..... 1  
 G1a\_6073149\_x1.....agaagcgccgucaggUcccgc..... 1  
 Gi1\_4185255\_x1.....Agugggaacacggggugccg..... 1  
 Gi3\_28726619\_x1.....gagacgucgugggaacGcggggg..... 1  
 Gi5\_8889851\_x1.....cgucgugUgaacacggggugc..... 1  
 Gi3\_28304405\_x1.....cgugggaacacgggCugcc..... 1  
 Gi2\_11356584\_x1.....agagaagcgUcgucaggc..... 1  
 Gi2\_11071703\_x1.....agacgAcgugggaacacggggugccgaacu..... 1  
 Gi2\_11378665\_x1.....cccgccGguacugcgauccggagacguc..... 1  
 Gi3\_28674055\_x1.....cgucaggccccgccaguacuAcgaucgga..... 1  
 Gi1\_4373495\_x1.....gaNcacggggugccgaacu..... 1  
 Gi3\_28490468\_x1.....ccccgccGguacugcgauccg..... 1  
 Gi2\_11184253\_x1.....aCagaagcgccgucagggccccgccc..... 1  
 Gi3\_28723281\_x1.....agaagUgcccgucagggcccc..... 1  
 G1a\_6028206\_x1.....Gggccccgccaguacugcgauc..... 1  
 Gi2\_11298844\_x1.....uAggagacgucgugggaacacg..... 1  
 Gi3\_28280263\_x1.....Gccgccaguacugcgauccggagacgucg..... 1  
 Gi2\_11076305\_x1.....ggagacguNgugggaacacggggug..... 1  
 Gi1\_4372224\_x1.....Ggacgucgugggaacacggggugccg..... 1  
 Gi5\_9030997\_x1.....gugggaacCcggggugccga..... 1  
 Gi3\_28823538\_x1.....agagaagcgccgucGggccccgccc..... 1  
 Gi3\_28855707\_x1.....gaGcggagacgucgugggaacacgggg..... 1  
 Gi2\_11153262\_x1.....cgucgugggaGcacggggugccgaac..... 1  
 Gi1\_4248734\_x1.....ugUgaacacggggugccgaacu..... 1  
 Gi2\_11162846\_x1.....cggagacgucgugggaacaUggggg..... 1  
 Gi3\_28944625\_x1.....ccgccaguacugcgGucggagac..... 1  
 Gi2\_11304713\_x1.....aucggagacgucgugggaGc..... 1  
 Gi2\_11005273\_x1.....Ucgucgugggaacacggggg..... 1  
 Gi5\_9031043\_x1.....agacgucgugggCacacggggugccgaacu..... 1  
 Gi4\_600927\_x1.....guggUaacacggggugccgaac..... 1  
 Gi2\_11176115\_x1.....ugggaacaAggggugccg..... 1  
 Gi1\_4164095\_x1.....gagacAucgugggaacacggggugcc..... 1  
 Gi3\_28947707\_x1.....cgccUguacugcgauccggagacgucgug..... 1  
 Gi3\_28524549\_x1.....gugggaacacCgggugccg..... 1  
 Gi2\_11173193\_x1.....caggccccgccaguacugcgCucgga..... 1  
 Gi2\_11359708\_x1.....aucggagacgucgugAgaaca..... 1  
 Gi2\_11295790\_x1.....guggCaacacggggugccga..... 1  
 Gi5\_9126618\_x1.....aguacCgcgacgagacguc..... 1  
 Gi3\_28553739\_x1.....Acggagacgucgugggaacacggg..... 1  
 Gi2\_11066940\_x1.....cUgccaguacugcgauccggag..... 1  
 Gi5\_9101621\_x1.....acugcgauccggaUacguc..... 1



Gi3\_28794766\_x1.....gugggaacacgCggugccgaa..... 1  
Gi5\_8969834\_x1.....ucggagacgucgugggaaacacggggugccgacC..... 1  
Gi1\_4304902\_x1.....aucggagacgucgUAggaacacgg..... 1  
G1a\_6010676\_x1.....cgucaggccccgAcaguacugcg..... 1  
G1a\_6350341\_x1.....ggUacacggggugccgaa..... 1  
Gi5\_8947306\_x1.....gucgugggaaacacgAgggugccgaa..... 1  
Gi2\_11343345\_x1.....guNggaacacggggugccgaa..... 1  
Gi5\_9062997\_x1.....cggagacgucgugggGacacggggugccga..... 1  
Gi2\_11197183\_x1.....gagaAgucgugggaaacacggggug..... 1  
Gi3\_28436183\_x1.....ucgugggaaacacggggAgccga..... 1  
Gi2\_11046776\_x1.....ggagacgucgugggaaacacggggU..... 1  
Gi5\_9006416\_x1.....acgucgugggaaacacgggAugccgaa..... 1  
Gi2\_11208926\_x1.....cgccagCacugcgauccggaga..... 1  
G1a\_6180880\_x1.....cgucGggccccgacagua..... 1  
Gi3\_28855452\_x1.....cgccaguacugcgauccggagacCuc..... 1  
Gi3\_28663461\_x1.....guacugAgauccggagacg..... 1  
Gi2\_11220552\_x1.....cgccaguacugcgauccggagGcgucug..... 1  
Gi3\_28562460\_x1.....cgaauuaCgaagagaagcgc..... 1  
Gi3\_28650346\_x1.....ucaggccccgUaguacugcgaucc..... 1  
Gi2\_11234386\_x1.....cgugggaCcacggggugccgaa..... 1  
Gi2\_11362225\_x1.....gGgaucggagacgucgugggaaac..... 1  
Gi5\_9080550\_x1.....ugggaacacggggugcGgaa..... 1  
Gi1\_4242639\_x1.....agacgCcgugggaaacacggggugccgaacu..... 1  
Gi3\_28910295\_x1.....cccgccaguacCcggauc..... 1  
Gi5\_8972427\_x1.....ucaggccccgGcaguacugcg..... 1  
Gi3\_28419020\_x1.....cgccaguacugcgauccggUgacgucg..... 1  
Gi5\_9134788\_x1.....aggccccgccaguacugcgaAc..... 1  
Gi3\_28753057\_x1.....ccaguacugcgauccggagacguAgug..... 1  
Gi2\_11317758\_x1.....aagcgccgucagCccccgccaucugc..... 1  
Gi2\_11330853\_x1.....ggagacgucgugggaaacUc..... 1  
Gi1\_4219266\_x1.....guUgugggaacacggggug..... 1  
G1a\_6114862\_x1.....aguacugcgauccggGgacgucg..... 1  
Gi3\_28676887\_x1.....aAgucgugggaaacacggg..... 1  
Gi3\_28984566\_x1.....gaagCgaagcgccgucagggccc..... 1  
Gi3\_28369533\_x1.....cgugggaaUacggggugccgaa..... 1  
Gi1\_4356615\_x1.....caggccccgccaucugcgaucc..... 1  
Gi3\_28797323\_x1.....gaucggagNcgucgugggaaac..... 1  
Gi3\_28875237\_x1.....gAcaguacugcgauccggagacguc..... 1  
Gi5\_9101699\_x1.....agagaagcgccgucagggccccgGcagu..... 1  
Gi2\_11201061\_x1.....agagaagUgccgucagggccccgcca..... 1  
Gi3\_28803067\_x1.....agcgccgucagggCccccgcau..... 1  
Gi2\_11208892\_x1.....gAcgugggaacacggggugccgaa..... 1  
Gi3\_28849907\_x1.....ucggagGcgucgugggaaacacgg..... 1  
Gi3\_28424303\_x1.....cggagacgucgugggaaacacggggUccgaacu..... 1  
Gi3\_28601525\_x1.....ggagacgucgugggaaacacgggCugcc..... 1  
Gi3\_28346408\_x1.....gagacgucgugggaaacacggggugUcgaacu..... 1  
Gi3\_28772224\_x1.....cgccagGacugcgauccggagac..... 1

Gi3\_28488947\_x1.....acAucugugggaacacggggugccga..... 1  
Gi3\_28550778\_x1.....agaagcgccgucagggcAccgcca..... 1  
Gi1\_4312033\_x1.....acugcgauccggGgacgucguggga..... 1  
G1a\_6153709\_x1.....ggagacgucgugggaacacggggugccgUacu..... 1  
Gi5\_9078797\_x1.....gaucggagacgucgAgggaacacggggugc..... 1  
Gi2\_11049741\_x1.....aucggagacguAgugggaaca..... 1  
Gi2\_11002706\_x1.....cUcgccaguacugcgauccggagacgucgu..... 1  
Gi5\_8860336\_x1.....gugggaacCcggggugccgaacuu..... 1  
Gi3\_28444369\_x1.....cgucaggUcccgccaguacugcg..... 1  
G1a\_6228957\_x1.....ggaagagaagcgccgucagggc..... 0  
Gi5\_9112394\_x1.....gaucggagacgucgugggaGcacgg..... 1  
Gi1\_4353009\_x1.....gggaacacggggugccAaacuu..... 1  
G1a\_6031834\_x1.....cgugggaacacggggguAcc..... 1  
Gi2\_11318314\_x1.....aagagaGgcccgcgucagggccc..... 1  
G1a\_6354557\_x1.....aucggagacgucgugggUacacggggugcc..... 1  
Gi2\_11367292\_x1.....gCccccgccaguacugcgauccgg..... 1  
Gi5\_9062086\_x1.....ggagacgCcgugggaacacggggugccgaacu..... 1  
Gi2\_11304930\_x1.....ugggCacacggggugccga..... 1  
Gi2\_11305409\_x1.....caguacugcgauccggagGcgucg..... 1  
Gi5\_8880801\_x1.....guAgugggaacacggggugccgaa..... 1  
Gi2\_10992763\_x1.....cgauccggaAacgucguggga..... 1  
Gi2\_11244544\_x1.....cccgccaguacugcgauccAgagac..... 1  
Gi3\_28813095\_x1.....aggNccccgccaguacugcg..... 1  
Gi1\_4159604\_x1.....ugggaacaNggggugccgaacuu..... 1  
Gi2\_11090635\_x1.....gccgucGggccccgccaguacugcg..... 1  
Gi2\_11019672\_x1.....gccccgccaguCcgcgauccgg..... 1  
Gi5\_9025802\_x1.....Acaggccccgccaguacugcg..... 1  
Gi5\_9092452\_x1.....acgucgugUgaacacggggugccgaacu..... 1  
Gi2\_11088315\_x1.....aggccccgccaguacugcgGucg..... 1  
Gi2\_11069429\_x1.....ccccgccaguacugcgcaCcgag..... 1  
Gi1\_4272561\_x1.....ugcgaCcgagacgucguggga..... 1  
Gi2\_11201916\_x1.....gacgucgugggaacacggUgugccgaacu..... 1  
Gi2\_11241448\_x1.....gagacgucNugggaacacggggugcc..... 1  
Gi3\_28553144\_x1.....gucaAgccccgccaguacugcg..... 1  
Gi2\_11124541\_x1.....uUcugcgauccggagacgucgug..... 1  
Gi2\_11132058\_x1.....gugggaacacggggguCcc..... 1  
Gi5\_9045048\_x1.....aucggagacguAgugggaacacg..... 1  
Gi2\_11207090\_x1.....cgcUaguacugcgauccggagac..... 1  
Gi2\_11196410\_x1.....Aacgucgugggaacacggggugccgaac..... 1  
Gi2\_11128417\_x1.....gaucggagacgucgugggaacaAgg..... 1  
Gi3\_28862184\_x1.....cccgccaAuacugcgauccgg..... 1  
Gi2\_11028662\_x1.....gucaggccccgccGguacugcg..... 1  
Gi3\_28496837\_x1.....cgccaguacugcgauccggagacgucguA..... 1  
Gi5\_9121769\_x1.....gugggaacacggggugcAga..... 1  
Gi3\_28584250\_x1.....cccgccaguGcugcgauccggagacg..... 1  
Gi5\_9028513\_x1.....gccccgccUguacugcgauccgga..... 1  
Gi2\_11210839\_x1.....Acgucaggccccgccaguacugcgaucc..... 1

Gi3\_28431813\_x1.....ccgccCguacugcgauccggag..... 1  
Gi2\_11240880\_x1.....uggNaacacggggugccgaac..... 1  
Gi3\_28961737\_x1.....cgucgugggaCcacggggugccga..... 1  
Gi2\_11341444\_x1.....ccgccaguacugcgauccggagaUg..... 1  
Gi3\_28511370\_x1.....caguacugcgauccAgagacgucgu..... 1  
G1a\_6068107\_x1.....Ggucaggccccgccaguacug..... 1  
Gi2\_11114961\_x1.....gccaguacugcgauccggagacguAgug..... 1  
Gi2\_11377321\_x1.....gucgugAgaacacggggugcc..... 1  
Gi3\_28418074\_x1.....ccgccaguacugcgUucgg..... 1  
G1a\_6048808\_x1.....ggaacacggggugccgaaU..... 1  
Gi3\_28720113\_x1.....agUgaagcgccgucagggccccgccaguacu..... 1  
Gi2\_11269920\_x1.....ucggagacgucgugggaacacUgggugc..... 1  
Gi2\_11391111\_x1.....gagacgucguggAaacacggggugc..... 1  
Gi5\_9049990\_x1.....gccgucaggccccgccaguacuCc..... 1  
Gi3\_28570187\_x1.....gagaagcgccgucagggccccgccaA..... 1  
Gi1\_4203391\_x1.....gccgucaggccccgccagGacu..... 1  
Gi1\_4200544\_x1.....acugcgauccggagacGcCguggga..... 1  
Gi2\_11017429\_x1.....gccccgccaguacugcCauc..... 1  
Gi5\_8958246\_x1.....aagagaagcgccgucGggccccgcca..... 1  
Gi2\_11379042\_x1.....agagaagcgccgucaAgcccc..... 1  
Gi2\_11266754\_x1.....gggagacgucgugggGaca..... 1  
Gi3\_28298219\_x1.....aacucguuccgaauaCgaagagaagc..... 1  
Gi3\_28689514\_x1.....ccccgccaguacugcAaucggagacgu..... 1  
Gi2\_11346812\_x1.....acgucgCgggaacacgggggu..... 1  
Gi4\_572025\_x1.....cgugUgaacacggggugccgaacu..... 1  
Gi2\_11167562\_x1.....gggaacacggggugAcga..... 1  
Gi3\_28503586\_x1.....ccccgccaguacugAgaucggaga..... 1  
Gi3\_28303325\_x1.....gccgucagggccccgcUaguac..... 1  
Gi1\_4223786\_x1.....aucAgagacgucgugggaacacgg..... 1  
Gi3\_28876094\_x1.....cccgUcaguacugcgauccggagacguc..... 1  
Gi3\_28556832\_x1.....agacgucgugggaacacggggugccgCa..... 1  
Gi3\_28969706\_x1.....cgucgugggaacacgUggugc..... 1  
G1a\_6168374\_x1.....aucggagacgucgCgggaacacg..... 1  
Gi2\_11156498\_x1.....cgauccggagacgucgugggaGcacggg..... 1  
Gi2\_11002326\_x1.....aucggagacgucgugggaacacA..... 1  
G1a\_6238480\_x1.....gggagacgucgugggaacGcggggugccgaacu..... 1  
Gi2\_11248460\_x1.....gagacgucgugggaacacggggugccgCacu..... 1  
Gi2\_11390093\_x1.....cgauccggGgacgucgugggaacac..... 1  
Gi2\_11095498\_x1.....cggagacgucgugggaacacggUgug..... 1  
Gi2\_11198605\_x1.....cgAgggaacacggggugccg..... 1  
Gi3\_28582647\_x1.....aucggagacgucgugggaacacggggGccgaacu..... 1  
Gi2\_11270787\_x1.....gucgugggaacacggAgugcc..... 1  
Gi5\_8930869\_x1.....aucggaUacgucgugggaacac..... 1  
G1a\_6353752\_x1.....gaucggagacgucgugggaacaUg..... 1  
Gi3\_28724562\_x1.....gauAggagacgucgugggaacacgggg..... 1  
G1a\_6165842\_x1.....ccccgccaguacugcgauccggagacGc..... 1  
Gi3\_28419275\_x1.....ggccccgccaguacugcgauA..... 1

Gi3\_28783433\_x1.....gggaacacggggugccgCacuu..... 1  
 Gi1\_4261278\_x1.....ucggagacgucgugggaaacacAgggugc..... 1  
 Gi3\_28348224\_x1.....gucgNgggaacacggggugccgaacu..... 1  
 Gi3\_28597562\_x1.....ucaggccccgUcaguacugcgau..... 1  
 Gi5\_8863159\_x1.....agacguAgugggaacacggggugccgaac..... 1  
 Gi1\_4320291\_x1.....acgucgAgggaacacggggugccg..... 1  
 Gi3\_28704348\_x1.....cgucaggccccgccaguaGugc..... 1  
 G1a\_6244603\_x1.....ggcccAgccaguacugcgau..... 1  
 Gi3\_28657980\_x1.....gaagagaagUgccgucagggccccgc..... 1  
 Gi1\_4224197\_x1.....acugcgauccggagacAucguggaaca..... 1  
 Gi3\_28721702\_x1.....Aaucggagacgucgugggaaacacggggugc..... 1  
 Gi3\_28893236\_x1.....Ccuggggaacacggggug..... 1  
 Gi3\_28333244\_x1.....gaagagaGgcgccgucagggccccccagu..... 1  
 Gi3\_28353211\_x1.....cgccUguacugcgauccggagacguc..... 1  
 Gi3\_28284506\_x1.....gcGccgccaguacugcgau..... 1  
 Gi5\_8886182\_x1.....cgucgugggaCcaccggggugc..... 1  
 Gi2\_11077230\_x1.....guacugcgauccggagacgucAggg..... 1  
 Gi2\_11109190\_x1.....gacgucAugggaacacggggugccg..... 1  
 G1a\_6130414\_x1.....gugggaacacggggugccgaC..... 1  
 Gi2\_11103863\_x1.....gcccgcgucagAccccgccaguacug..... 1  
 Gi2\_11043660\_x1.....agNccccgccaguacugcg..... 1  
 Gi5\_9089708\_x1.....gaucggagGcgucgugggaacacgg..... 1  
 Gi1\_4304043\_x1.....Cgaacacggggugccgaa..... 1  
 Gi1\_4350968\_x1.....cgucgugggaacacggggugccgCac..... 1  
 Gi4\_594765\_x1.....gccaguacugcgauccggagCcguc..... 1  
 Gi1\_4373308\_x1.....ccgucaggAcccgccaguacug..... 1  
 Gi3\_28508747\_x1.....gaUacgucgugggaacacggggugcc..... 1  
 Gi2\_11394916\_x1.....gaAaagcggcugcagggccccgcc..... 1  
 Gi1\_4239750\_x1.....cguuccgaauaCgaagagaagc..... 1  
 Gi3\_28691686\_x1.....gUcgucagggccccgccaguac..... 1  
 Gi3\_28518841\_x1.....cgccaguacugcgauccAgagacguc..... 1  
 Gi5\_8844974\_x1.....gugggaacaAggggugccgaa..... 1  
 Gi3\_28946130\_x1.....ccccgccaguacugcgUucggagacg..... 1  
 Gi1\_4253668\_x1.....cggaUacgucgugggaacacggg..... 1  
 Gi3\_28829698\_x1.....gagacgucgCgggaacac..... 1  
 Gi3\_28806818\_x1.....gggaCcaccggggugccga..... 1  
 Gi3\_28636243\_x1.....Agucaggccccgccaguacugcg..... 1  
 Gi2\_11407500\_x1.....gaucggagacUucgugggaacacggg..... 1  
 Gi1\_4347727\_x1.....agacgucgugggaacaAggggugcc..... 1  
 Gi1\_4179380\_x1.....ggagacgucgugggaacacggggugAcg..... 1  
 Gi3\_28424747\_x1.....aguacugcgauccAgagacgucgu..... 1  
 Gi2\_11155296\_x1.....ucgugggaacCcggggugc..... 1  
 Gi3\_28386882\_x1.....aagagaagcggcGcaggccccgcc..... 1  
 Gi1\_4338964\_x1.....ucggagacNucgugggaacacggg..... 1  
 Gi3\_28286751\_x1.....gccaguacugcgauccggGgacg..... 1  
 Gi3\_28270965\_x1.....ccgccaguGcugcgauccggagacguc..... 1  
 Gi2\_11396997\_x1.....ccccgccaguacugcgCuc..... 1

Gi2\_10997053\_x1.....ugggaacacgggguCccg..... 1  
 Gi3\_28633542\_x1.....gaucggagaUgucguggga..... 1  
 Gi2\_11038458\_x1.....Accgucagggccccccagucggauc..... 1  
 Gi3\_28647744\_x1.....auNggagacgucgugggaacacggggugcc..... 1  
 Gi3\_28270008\_x1.....ucUgagacgucgugggaacac..... 1  
 Gi2\_11207418\_x1.....gacUucgugggaacacggggugccgaac..... 1  
 Gi1\_4310620\_x1.....gacgucgugggaacacgg..... 0  
 Gi2\_11371270\_x1.....aggGcccgccagucggauc..... 1  
 Gi2\_10993227\_x1.....gcgaucggagacgucguggUa..... 1  
 Gl1a\_6103203\_x1.....agacgucgugggaacacggggCgccgaac..... 1  
 Gi3\_28938742\_x1.....ucggagacgucgugggCacacggggugc..... 1  
 Gi3\_28430160\_x1.....gccccgccaguCucggauc..... 1  
 Gi2\_11211479\_x1.....cgucagggccUgccagucggaucgg..... 1  
 Gl1a\_6036646\_x1.....gccagucgucggaucggagagcUa..... 1  
 Gi2\_11027849\_x1.....gaucggagacgucguggUaacacggggug..... 1  
 Gi3\_28834404\_x1.....ccaguCucggaucggagacguc..... 1  
 Gl1a\_6143131\_x1.....gugggaacacggggugccgGac..... 1  
 Gi5\_9118162\_x1.....gaucgAagacgucgugggaacacg..... 1  
 Gi3\_28637153\_x1.....gaucggaAacgucgugggaaca..... 1  
 Gi2\_11259929\_x1.....cgaCcgagacgucguggga..... 1  
 Gi3\_28925425\_x1.....aggUcccgccagucggaucggagacguc..... 1  
 Gi3\_28437187\_x1.....ggagGcugcugugggaacacggggugccg..... 1  
 Gi3\_28577033\_x1.....ccccccagucggauc..... 1  
 Gl1a\_6039493\_x1.....gugAgaacacggggugccga..... 1  
 Gi3\_28682326\_x1.....gaagagaagcggcAcagggcc..... 1  
 Gi2\_11054948\_x1.....gaGgagaagcggcagggccccg..... 1  
 Gi3\_28955075\_x1.....aggaagagaagcgcAguc..... 1  
 Gi5\_9072563\_x1.....gagacgucAugggaacacggggugccgaac..... 1  
 Gi2\_11388550\_x1.....aucggagacgucgugggaGcacggggugccg..... 1  
 Gi2\_11183648\_x1.....gugggaacacggggugGcga..... 1  
 Gi3\_28266570\_x1.....Gaggccccccagucggaucggagacguc..... 1  
 Gi3\_28846082\_x1.....cggagacCucgugggaacacggggg..... 1  
 Gi3\_28889951\_x1.....guCggaacacggggugccga..... 1  
 Gi2\_11040597\_x1.....gugggaUcacggggugccga..... 1  
 Gi2\_11215250\_x1.....gagacgucgugggaacacggggUccgaacu..... 1  
 Gi3\_28603992\_x1.....gaagagaagAgccgucagggccccg..... 1  
 Gi5\_8974473\_x1.....ugggaacacggggugccg..... 0  
 Gi2\_11048718\_x1.....cgAcagggccccccagucg..... 1  
 Gi2\_11050836\_x1.....cgucgugggaacacggggUacc..... 1  
 Gi3\_28493635\_x1.....aagcggcagcagggccccgcAguacuc..... 1  
 Gi5\_9122974\_x1.....aucgCagacgucgugggaacacg..... 1  
 Gi1\_4225312\_x1.....Uccagucggaucggagacguc..... 1  
 Gi2\_11342256\_x1.....aucggagacgucUugggaacacggggug..... 1  
 Gi3\_28500262\_x1.....gagacgucguAggaacacggggugccgaac..... 1  
 Gi1\_4367521\_x1.....acgucgugggaacacggggugUc..... 1  
 Gi2\_11393531\_x1.....agacgucgugggaacacggggUaccg..... 1  
 Gi5\_8930820\_x1.....cagucggaucAgagacguc..... 1

Gi3\_28669124\_x1.....agaGgcgcccugacagccccccagacu..... 1  
 Gi3\_28611038\_x1.....agcAccgucagggccccgcca..... 1  
 Gi5\_9053840\_x1.....guggUaacacggggugccgaa..... 1  
 Gi2\_11229864\_x1.....gaaAcgcccugacagggccccgc..... 1  
 Gi1\_4384444\_x1.....caggccccgcUaguacugc..... 1  
 Gi4\_604161\_x1.....cgucgCgggaacacggggugccga..... 1  
 Gi3\_28396967\_x1.....ucguggaacaUggggugc..... 1  
 Gi1\_4344800\_x1.....gggaCcacggggugccgaacu..... 1  
 Gi3\_28408678\_x1.....cgucgugggaacacgggCugcc..... 1  
 Gi2\_11334589\_x1.....Gcggagacgucgugggaacacggggugccgaac..... 1  
 Gi3\_28983947\_x1.....cgNgggaacacggggugccg..... 1  
 Gi2\_11152286\_x1.....aucggagacgucgugggaacacUg..... 1  
 Gi3\_28574441\_x1.....gucagAccccgccaguacugcg..... 1  
 Gi2\_11057072\_x1.....gagaagUgcccugacagggccccgcca..... 1  
 Gi2\_11182736\_x1.....Naucggagacgucgugggaacacgg..... 1  
 Gi2\_11251319\_x1.....gaucggagacgucgugggaacacgAggu..... 1  
 Gi2\_11224570\_x1.....ccccgccaguacugcgCucgg..... 1  
 Gi3\_28826841\_x1.ccuNaacucguuccgaaau..... 1  
 Gi1\_4183810\_x1.....cguUgugggaacacggggugcc..... 1  
 Gi3\_28876899\_x1.....ccgccagCacugcgauccggagac..... 1  
 Gi5\_8960690\_x1.....aagagaagcgcccugacagccAcgcca..... 1  
 Gi3\_28769205\_x1.....ugcgauccggagacgucgugggaacGcggg..... 1  
 Gi5\_9020430\_x1.....ugUgaucggagacgucguggg..... 1  
 Gi5\_8919718\_x1.....gUcccgccaguacugcgaucc..... 1  
 Gi2\_11147986\_x1.....Auacugcgauccggagacgucgugggaaca..... 1  
 G1a\_5985725\_x1.....aCcgagacgucgugggaacacg..... 1  
 G1a\_6299819\_x1.....gaagagaagcgcccugcGggc..... 1  
 Gi3\_28915901\_x1.....ugggaacacgggAugccg..... 1  
 Gi3\_28326963\_x1.....gaCcgagacgucgugggaac..... 1  
 G1a\_6246463\_x1.....gaucggagacgucgugggaacacAgggu..... 1  
 Gi3\_28866673\_x1.....cgucgugggaacacCggg..... 1  
 Gi3\_28405688\_x1.....aggUcccgccaguacugcgauccgga..... 1  
 Gi3\_28803049\_x1.....gggaacacgUggugccgaa..... 1  
 Gi2\_11340177\_x1.....Ggccgucagggccccgccaaguac..... 1  
 Gi5\_8870483\_x1.....caggccccgccCguacugcgaucc..... 1  
 Gi1\_4261223\_x1.....ugggaacacggCgugccgaacu..... 1  
 Gi3\_28535019\_x1.....gaucggagNcgucgugggaacacggggug..... 1  
 Gi3\_28554012\_x1.....gagaagcgcccugacagggcccU..... 1  
 Gi3\_28354196\_x1.....cgucagggccccgccaaguCucg..... 1  
 Gi2\_11389550\_x1.....gucgugggaacacggggugA..... 1  
 Gi2\_11334202\_x1.....gggaacaGggggugccgaacu..... 1  
 Gi3\_28640697\_x1.....ccccgccaguacugcgauccggagaAgu..... 1  
 Gi2\_11342639\_x1.....gcgauccggagacgucgAgggaacac..... 1  
 Gi3\_28803950\_x1.....ggccccccagGacugcgaucc..... 1  
 Gi2\_10993919\_x1.....aucgAagacgucgugggaacacg..... 1  
 Gi2\_11299712\_x1.....gaagaCaagcgcccugacagggccccgccc..... 1  
 Gi3\_28277164\_x1.....gauUggagacgucgugggaacacggggug..... 1

Gi1a\_6304226\_x1.....agUccccgccaguacugcgau..... 1  
Gi3\_28563076\_x1.....gaucggagacgucgugggUacacggggugc..... 1  
Gi3\_28273809\_x1.....ccgccaguacugcgauccggagGcgucgu..... 1  
Gi3\_28451035\_x1.....aucggagaGgucgugggaacacgggg..... 1  
Gi2\_11239146\_x1.....agCagcgccgucagggccccccagu..... 1  
Gi2\_11375522\_x1.....aGgucgugggaacacggggugccg..... 1  
Gi1\_4376020\_x1.....cgugggaacacggggugccgaG..... 1  
Gi3\_28586507\_x1.....ucggagacgucguAggaacac..... 1  
Gi2\_11018557\_x1.....ggagacguUgugggaacacggggugccg..... 1  
Gi3\_28489445\_x1.....cgugCgaacacggggugccg..... 1  
Gi2\_11062238\_x1.....cggagacgucgugggaacCcg..... 1  
Gi3\_28286675\_x1.....gaagagaagcgccgucGggccccccagu..... 1  
Gi3\_28686881\_x1.....acgucgugggaacacgggUugccgaacu..... 1  
Gi2\_11126750\_x1.....gcgauccggGgacgucgugggaacac..... 1  
Gi3\_28488331\_x1.....cGgccaguacugcgauccggag..... 1  
Gi3\_28262856\_x1.....aggccccgccaguacCgcgauccggagacg..... 1  
Gi1a\_6196999\_x1.....aggccccgcUaguacugcg..... 1  
Gi1a\_6324161\_x1.....aucggagacgucguAggaacacg..... 1  
Gi2\_11043744\_x1.....aNcggagacgucgugggaacacggggugc..... 1  
Gi5\_8959416\_x1.....cgugggaacacggggCgcc..... 1  
Gi2\_11008392\_x1.....caggccccccaguaAugcgau..... 1  
Gi3\_28849625\_x1.....gccgucaggccccccagA..... 1  
Gi1\_4377790\_x1.....acugcgauccggagacAug..... 1  
Gi2\_11186429\_x1.....aggccccgccaguCucgcgau..... 1  
Gi3\_28840396\_x1.....cUcgccaguacugcgauccgga..... 1  
Gi5\_8861641\_x1.....ucggagacgucgugggaacacggggGgccgaacu..... 1  
Gi1a\_6210540\_x1.....gucaggccAcgccaguacu..... 1  
Gi3\_28756701\_x1.....aagagCagcgccgucagggccccgcc..... 1  
Gi3\_28667980\_x1.....gaagagUagcgccgucagggccccgc..... 1  
Gi5\_8923156\_x1.....ggaacacggggugAcgaac..... 1  
Gi3\_28801369\_x1.....ccccgccaguGcugcgauccggagacgu..... 1  
Gi5\_8956262\_x1.....gccaguacugcgauccggagacgC..... 1  
Gi2\_11043642\_x1.....gagaGgcgcccgucagggccccccaguac..... 1  
Gi3\_28684913\_x1.....ggccccgcUaguacugcga..... 1  
Gi3\_28276896\_x1.....gugggaacacggggUuccgaa..... 1  
Gi1a\_6089653\_x1.....uacugcgGucggagacguc..... 1  
Gi2\_11008922\_x1.....acgucgugggaacacggggugccgaacuuu..... 0  
Gi3\_28785174\_x1.....agaagcgccgucagggAccgccagu..... 1  
Gi3\_28633666\_x1.....ggccccgccaguacugcAaucgg..... 1  
Gi5\_9062472\_x1.....gccUcgccaguacugcgau..... 1  
Gi2\_11366052\_x1.....ccaguacugcgGucggag..... 1  
Gi2\_11399542\_x1.....aggccccAccaguacugcgauccggagac..... 1  
Gi1\_4268351\_x1.....cggagacgucgugggaGcacggg..... 1  
Gi2\_11178041\_x1.....agacgucgugggaacacgggAugc..... 1  
Gi1a\_6147163\_x1.....gucgugggaacaAggggugccgaacu..... 1  
Gi3\_28728799\_x1.....cggagacgucguggAaacacggggug..... 1  
Gi3\_28885929\_x1.....gaagagaagcgccgucUggccccgc..... 1

Gi2\_11025496\_x1.....ggagacgucUugggaacacggggugcc..... 1  
 Gi3\_28976737\_x1.....gaucggagacgucguCggaacacgg..... 1  
 Gi2\_11211200\_x1.....cccgccaguacugcgauccggagacgCcg..... 1  
 Gl1a\_6276785\_x1.....Cuacugcgauccggagacguc..... 1  
 Gi3\_28763748\_x1.....ggagacgucgugggaacacggggCgcccga..... 1  
 Gi2\_11167559\_x1.....cgucgugggaacacgAggugcc..... 1  
 Gi5\_8881241\_x1.....agacgucgCgggaacacggggugccgaac..... 1  
 Gi2\_11148973\_x1.....cgccgucaggccccgccaAuac..... 1  
 Gi2\_11085749\_x1.....caggccccgccaaguacuAcgau..... 1  
 Gi1\_4251096\_x1.....ugggaacacggggugccgaCc..... 1  
 Gi2\_11359781\_x1.....cCucaggccccgccaaguacug..... 1  
 Gi1\_4176704\_x1.....cgucgugggaacaUggggugccgaacu..... 1  
 Gi1\_4371076\_x1.....uUggagacgucgugggaacacg..... 1  
 Gl1a\_6181667\_x1.....acugcgauccggagacgucguC..... 1  
 Gi1\_4363573\_x1.....ggaacacggggugccgaC..... 1  
 Gi5\_8998997\_x1.....aucggagacgucgugggaacacAg..... 1  
 Gi3\_28770403\_x1.....aacaGggggugccgaacuu..... 1  
 Gi2\_11000713\_x1.....agacgucgugggaacacggggAgcccga..... 1  
 Gi1\_4306980\_x1.....gacgucguAggaacacggggugccgaacu..... 1  
 Gi3\_28699448\_x1.....caguacuAcgauccggagacgu..... 1  
 Gi3\_28344309\_x1.....cgUcaguacugcgauccgg..... 1  
 Gi3\_28877549\_x1.....cguAgugggaacacggggugcccga..... 1  
 Gi3\_28533587\_x1.....gagaagcgcAgucagccccgc..... 1  
 Gi3\_28305872\_x1.....aucggaAacgucguggga..... 1  
 Gi1\_4257816\_x1.....gaucggCgacgucgugggaacac..... 1  
 Gl1a\_6051906\_x1.....aucggagacgucgugggaCcacggggug..... 1  
 Gi1\_4262054\_x1.....aucggagacgucgugggaacacggggugccg..... 0  
 Gi2\_11234040\_x1.....aauuaggaNgagaagcggcug..... 1  
 Gi3\_28496944\_x1.....ucgugggaacacggggU..... 1  
 Gi1\_4305731\_x1.....ucNugggaacacggggugccgaacu..... 1  
 Gi2\_11346533\_x1.....uGcugcgauccggagacguc..... 1  
 Gi2\_11339040\_x1.....aucggagacgucgugggaacacggggUaccga..... 1  
 Gi3\_28570625\_x1.....cgugggaacacggggugcAga..... 1  
 Gi3\_28642153\_x1.....gcgauccggagacgucgugggaacG..... 1  
 Gi2\_11042809\_x1.....gaucggagacgCcgugggaaca..... 1  
 Gi3\_28554378\_x1.....caggccccgccaaguacugUgauccg..... 1  
 Gi3\_28562618\_x1.....cggagacgucgugggaacacggggugccgU..... 1  
 Gi3\_28987088\_x1.....aucggagaGgucgugggaacacggggU..... 1  
 Gi3\_28834742\_x1.....agcccUcggcaguacugcgauccggagac..... 1  
 Gl1a\_6205771\_x1.....gaagagaaAacggcugcag..... 1  
 Gi3\_28825958\_x1.....ucggagacgucguggAaacacggggugcc..... 1  
 Gi1\_4171662\_x1.....gugggaaAacggggugccgaacuu..... 1  
 Gi2\_11388356\_x1.....aucggagaGgucgugggaacac..... 1  
 Gi3\_28700986\_x1.....gaucggagacgucgugggaUcacggggU..... 1  
 Gi5\_9096254\_x1.....gggaacacggggUcccgaacu..... 1  
 Gi5\_9048542\_x1.....aucggagacgucguggCaacacggggugcc..... 1  
 Gl1a\_6287046\_x1.....aucggagaUgucgugggaacacgg..... 1



Gi3\_28616736\_x1.....ggagacgucgugggaacacAggg..... 1  
 Gi3\_28710505\_x1.....uGggagacgucgugggaacacgg..... 1  
 Gi1\_4329871\_x1.....ggagacgucgugggaacac..... 0  
 Gi2\_11306606\_x1.ccuuaacucguuccgaaauaAga..... 1  
 Gi5\_9067242\_x1.....gggaaGacggggugccgaacu..... 1  
 Gi3\_28362151\_x1.....aguacugcgUucggagacgucg..... 1  
 Gi2\_11243115\_x1.....ccaguacugcgauccggagacgucgu..... 0  
 Gi3\_28776448\_x1.....gugggaacacggggugccGacuu..... 1  
 Gi3\_28650794\_x1.....gggaaGacggggugccgaac..... 1  
 Gi1\_4303371\_x1.....gugggaacacggCgugccgaac..... 1  
 Gi3\_28886431\_x1.....agacgucgugggaacacggggugccAa..... 1  
 Gi3\_28389722\_x1.....cgauccggagacgAcgugggaacacggggg..... 1  
 Gi3\_28309078\_x1.....guUcugcgauccggagacguc..... 1  
 Gi1\_4198759\_x1.....gccgucagUccccgccaguacu..... 1  
 Gi4\_600211\_x1.....ucgugggaacacggggugccGacu..... 1  
 Gi2\_11003597\_x1.....aucggagacgucgGgggaaca..... 1  
 Gi2\_11150213\_x1.....cgucgugggaacaAggggugccga..... 1  
 Gi3\_28689487\_x1.....Cacacggggugccgaacuu..... 1  
 Gi2\_11073667\_x1.....gagacgucgugggCacacggggug..... 1  
 Gi5\_9057239\_x1.....gucgugAgaacacggggugccgaa..... 1  
 Gi3\_28302147\_x1.....ccccgccagCacugcgauccggagacguc..... 1  
 Gi3\_28841037\_x1.....gucaggccccgccaguacuAcgauccgga..... 1  
 Gi5\_8980379\_x1.....gggaUcacggggugccgaac..... 1  
 Gi3\_28543623\_x1.....Uggagacgucgugggaacacg..... 1  
 G1a\_6140720\_x1.....aauuaggaagagaaUcgccguc..... 1  
 Gi5\_8890523\_x1.....cgccUguacugcgauccggagacguc..... 1  
 Gi3\_28729254\_x1.....cgauccggagacgucgugggaacCcgggg..... 1  
 Gi3\_28389749\_x1.....acugcgGucggagacgucgu..... 1  
 Gi3\_28893300\_x1.....ucgugggaacacCgggugccgaac..... 1  
 Gi2\_11050307\_x1.....cgAagacgucgugggaacacg..... 1  
 G1a\_6259359\_x1.....gUgccgucaggccccgccaguacugc..... 1  
 Gi2\_11079729\_x1.....aucggagCcgucguggga..... 1  
 Gi3\_28609191\_x1.....cgauccggagacgucgugggGacacggggug..... 1  
 Gi2\_11325508\_x1.....gccaguacNgcgauccggagacgucgug..... 1  
 Gi1\_4287470\_x1.....gaucggagacgucgugggaacGacgg..... 1  
 G1a\_6024032\_x1.....caguacuAcgauccggagacguc..... 1  
 Gi2\_11097560\_x1.....gugggaaGacggggugccgaa..... 1  
 Gi3\_28932277\_x1.....Gugcgauccggagacgucgugggaacacggggugcc..... 1  
 Gi2\_11303235\_x1.....agaagcgccgucagggccccgccagG..... 1  
 Gi2\_11387530\_x1.....gagaagcgccgucagggAcccgc..... 1  
 Gi1\_4194787\_x1.....ccccgccaguaUugcgaucc..... 1  
 Gi1\_4161912\_x1.....agacUucgugggaacacggggugccgaacu..... 1  
 Gi2\_11379845\_x1.....Cagagaagcgccgucagggccc..... 1  
 Gi5\_8973581\_x1.....aagagaagcgUgucagggccccgc..... 1  
 Gi2\_11294737\_x1.....aucggagacgucgugggaacacggAgug..... 1  
 Gi1\_4316270\_x1.....gugggaacacggCgugcc..... 1  
 Gi2\_11385480\_x1.....aucggUgacgucgugggaaca..... 1

Gi5\_9038076\_x1.....gacgucgugggaaacaAggggugccgaacu..... 1  
Gi2\_11184741\_x1.....gucgugggaaacacggggugccgC..... 1  
Gi2\_11374972\_x1.....caguacugcgauCGAgacgucgug..... 1  
Gi3\_28389627\_x1.....gagaagcgccgucaggccccAc..... 1  
Gi5\_9033191\_x1.....ucggagacgucgugggaaacacggggugccga..... 0  
Gi3\_28576144\_x1.....gccgucaggccAcgccaguac..... 1  
Gi2\_11209429\_x1.....gucgugggaaacacUgggugccgaac..... 1  
Gi4\_608255\_x1.....cgccaguacugcgCucggagacgucgug..... 1  
Gi2\_11345614\_x1.....gccAcgccaguacugcga..... 1  
Gi2\_11381013\_x1.....acugcgauCGgagacgucAugggaaca..... 1  
Gi1\_4361455\_x1.....UccccgccaguacugcgauCGgagacg..... 1  
Gi3\_28269658\_x1.....Cgaagcgccgucaggccccgcc..... 1  
Gi5\_9041173\_x1.....agacgucgugggaaacacCgggugccgaacu..... 1  
Gi3\_28838063\_x1.....uUcgauCGgagacgucgugggaaacacgggg..... 1  
Gi3\_28667815\_x1.....cgccaguacugcgCucggagacgu..... 1  
Gi3\_28374121\_x1.....gauCGgagacgucgugggUacacgg..... 1  
Gi1\_4237412\_x1.....cagAccccgccaguacugcg..... 1  
Gi5\_8970944\_x1.....aucggagacgucgugggaaacacggA..... 1  
Gi2\_11235006\_x1.....ccccCccaguacugcgauCGgagac..... 1  
Gi3\_28395586\_x1.....agaagcgccgucaggAcccgccaguacug..... 1  
Gi1\_4260454\_x1.....Ugucgugggaaacacggggugccg..... 1  
Gi3\_28343950\_x1.....UcgucaggccccgccaguacugcgauCGga..... 1  
Gi3\_28275871\_x1.....cggNgacgucgugggaaacacgggg..... 1  
Gi2\_11366313\_x1.....acgucgugggaaacacggggUccgaacu..... 1  
Gi5\_9015749\_x1.....aggccccgccaguacugcCa..... 1  
Gi1\_4365653\_x1.....ggGgacgucgugggaaacacg..... 1  
Gi2\_11085941\_x1.....cgccaguacugcAaucggagacgu..... 1  
Gi3\_28976023\_x1.....agagaagcgccguUaggccccgc..... 1  
Gi1\_4193175\_x1.....aguacugcgauCGgagCcgucgug..... 1  
Gi2\_11246022\_x1.....cgccaguGcugcgauCGgagac..... 1  
Gi3\_28357068\_x1.....ucgugggaaacacggggAgccg..... 1  
Gi1\_4164106\_x1.....acgucgugGaaacacggggugcc..... 1  
Gi3\_28967133\_x1.....aguacugcgauCGgCgacgucgug..... 1  
Gi1\_4268525\_x1.....gcgauCGgagGcgucgugggaaaca..... 1  
Gi2\_11135749\_x1.....gggagacgucgugggaaAacggggugcc..... 1  
Gi5\_9133234\_x1.....gugggaaacacggggugccgC..... 1  
G1a\_6074248\_x1.....gUucggagacgucgugggaa..... 1  
Gi3\_28305194\_x1.....cGgucaggccccgccaguac..... 1  
Gi3\_28378003\_x1.....gagacgucgugggaaGcac..... 1  
Gi3\_28288612\_x1.....gucgugGaaacacggggugcc..... 1  
Gi1\_4382776\_x1.....agagaagcgccgucaggccccgccagua..... 0  
Gi1\_4260539\_x1.....cgucaggccccgccaguaAugc..... 1  
G1a\_6178742\_x1.....aaauGggaagagaagcgccguc..... 1  
Gi2\_11359568\_x1.....Aaucggagacgucgugggaaacacggggug..... 1  
Gi1\_4192132\_x1.....gagacGAcgugggaaacacggggugcc..... 1  
Gi1\_4352685\_x1.....gcUgucaggccccgccaguac..... 1  
G1a\_6223827\_x1.....aagagaagcgccgucagAcccc..... 1

Gi2\_11362783\_x1.....gaagagaagAgccgucagggccccg..... 1  
 Gi1\_4182935\_x1.....gaucggagacgucgugggaaacCc..... 1  
 Gi5\_9001834\_x1.....acgucgugggaGcacggggugcc..... 1  
 Gi3\_28696848\_x1.....aGgagaagcgccgucagggccccgcccaguu..... 1  
 G1a\_6045368\_x1.....gucgugggaacacggggugccgCacu..... 1  
 Gi5\_8972701\_x1.....gcgcccgucagggccccgcccaguuAug..... 1  
 G1a\_6312372\_x1.....aauuaggaagGgaagcgccguc..... 1  
 Gi2\_11045193\_x1.....acgucgugggaaUacggggugccgaacu..... 1  
 Gi3\_28976836\_x1.....gugggaacacggggugccgaGcuu..... 1  
 Gi2\_11212702\_x1.....cggagacgucgugggaacacggAgugcc..... 1  
 Gi3\_28609414\_x1.....cccgccaguacugcAaucggaga..... 1  
 Gi3\_28427310\_x1.....uuaggaagagaagcgccguc..... 0  
 Gi2\_11353211\_x1.....gauUggagacgucgugggaacac..... 1  
 Gi1\_4387968\_x1.....gagacgucgGgggaacacggggugccgaacu..... 1  
 Gi3\_28604531\_x1.....agacgucguUggaacacggggugccgaa..... 1  
 Gi3\_28478675\_x1.....gugggaacacggAgugccgaacuu..... 1  
 Gi3\_28767428\_x1.....aGugcgauccggagacgucgug..... 1  
 Gi1\_4373095\_x1.....ugUgaacacggggugccga..... 1  
 Gi3\_28805357\_x1.....ucagggccccgcccaguuacugUga..... 1  
 Gi5\_9062796\_x1.....gccccgccaguuacAcgaucgga..... 1  
 Gi2\_11397907\_x1.....ggccccgcccaguuacugcgG..... 1  
 Gi3\_28352054\_x1.....gaucggagacgucgugggUacacgggg..... 1  
 Gi2\_11270476\_x1.....aacacgCggugccgaacu..... 1  
 Gi2\_11106234\_x1.....Ugcgcccgucagggccccgcccaguu..... 1  
 Gi3\_28588520\_x1.....aaUagaagcgccgucaggg..... 1  
 G1a\_6052384\_x1.....cgugggaacacggggugUc..... 1  
 Gi2\_10997963\_x1.....ucggagacgucgugggaacacggggCgc..... 1  
 Gi2\_11273514\_x1.....gagacgucgugggaGcacggggugccg..... 1  
 Gi2\_11024177\_x1.....Ggacgucgugggaacacggggugccga..... 1  
 Gi2\_11159686\_x1.....cccgccaguGcugcgaucgg..... 1  
 Gi2\_11281009\_x1.....gCacugcgauccggagacgu..... 1  
 Gi3\_28279419\_x1.....gaucggagGcgucguggg..... 1  
 Gi1\_4213328\_x1.....ucggagacgucgugggaaAacg..... 1  
 Gi1\_4296669\_x1.....cgugggaacacggggUccgaacu..... 1  
 Gi2\_11298760\_x1.....gaagagaGcgcccgucagggccc..... 1  
 Gi5\_9131469\_x1.....gGgaagcgcccgucagggccccgcccaguu..... 1  
 Gi3\_28986285\_x1.....cggagacgucgGgggaacacggggugcc..... 1  
 Gi5\_9060853\_x1.....aucggagacgCcgugggaaca..... 1  
 Gi3\_28659079\_x1.....cUgccaguuacugcgaucgg..... 1  
 Gi5\_8939704\_x1.....gucgugggaacacggggugccgGac..... 1  
 Gi2\_11113973\_x1.....cgccaguuacugcgaucGagac..... 1  
 Gi2\_11136679\_x1.....aagcggcggcGggccccgcccaguu..... 1  
 Gi2\_11358612\_x1.....gaagagaGcgcccgucagggccccgccc..... 1  
 Gi3\_28525933\_x1.....agagaagcgcccgucagggccccUc..... 1  
 Gi1\_4355633\_x1.....ggUcccggcccaguuacugcgauc..... 1  
 Gi2\_11148076\_x1.....ccccgccaguuacugAgau..... 1  
 Gi4\_584307\_x1.....cgucgugggaacaAgggggugccgaacu..... 1

G1a\_6080006\_x1.....aguUcugcgauccgagacgucgug..... 1  
 G1a\_6030332\_x1.....cUguacugcgauccgagacgu..... 1  
 Gi1\_4200821\_x1.....gaagcgccgucagggcccgccagua..... 0  
 Gi3\_28660411\_x1.....gccagucugcgauccggaAacgu..... 1  
 Gi2\_11223932\_x1.....gaagcgGgucagggccc..... 1  
 G1a\_6312724\_x1.....cgucagggcccgccagucC..... 1  
 Gi5\_9066741\_x1.....cgucagggcccgAcagucugcg..... 1  
 Gi3\_28474433\_x1.....agagaagcgccgucagggcUcg..... 1  
 G1a\_6162733\_x1.....Cggaacacggggugccgaac..... 1  
 Gi2\_11159723\_x1.....ggagacgucgugggGacacggggugc..... 1  
 Gi3\_28476339\_x1.....gaucggagacgucgugggaaAacggggugc..... 1  
 Gi3\_28511681\_x1.....gucgugggaaacacgAggugccga..... 1  
 Gi1\_4291281\_x1.....Gcccgcagucugcgauccgaga..... 1  
 Gi3\_28950129\_x1.....cAccgucagggcccgccagucg..... 1  
 Gi2\_11177965\_x1.....ccagucugcgauccgagacgucgAgggaaac..... 1  
 Gi3\_28460031\_x1.....cgucgugggaaacCggggug..... 1  
 Gi2\_11227967\_x1.....gucgugUgaacacggggugc..... 1  
 Gi3\_28520503\_x1.....agaagcgccgucagggcA..... 1  
 Gi1\_4198358\_x1.....agacgucguggAaacacggggugccg..... 1  
 Gi2\_11031199\_x1.....aggccccgUcagucugcg..... 1  
 Gi5\_8840468\_x1.....gucgugggaaacacUgggugccgaacu..... 1  
 Gi3\_28663158\_x1.....gauAggagacgucgugggaaacag..... 1  
 Gi3\_28340185\_x1.....aggccccgAaguacugcg..... 1  
 Gi1\_4290416\_x1.....acgucgugggGacacggggugccg..... 1  
 Gi3\_28510042\_x1.....aagcgccgucagggcccgUaguacugc..... 1  
 G1a\_6096775\_x1.....cagucugcgauGggagacguc..... 1  
 Gi1\_4266689\_x1.....gucgugggNacacggggugccgaac..... 1  
 Gi3\_28539747\_x1.....cagCccccgccagucugcg..... 1  
 Gi5\_9010226\_x1.....cAucgugggaaacacggggugccgaac..... 1  
 Gi3\_28421519\_x1.....ugggaaGacggggugccga..... 1  
 Gi4\_571953\_x1.....cccgccagucugcgauccgagacgGc..... 1  
 G1a\_6007303\_x1.....gagaagcAccgucagggcccgcca..... 1  
 Gi2\_11245932\_x1.....gagacgucgCgggaacacggg..... 1  
 Gi2\_11044939\_x1.....cgucgugggCacacggggugccg..... 1  
 Gi2\_11236719\_x1.....cccgccagucugUgauccgag..... 1  
 Gi5\_8916227\_x1.....aggcccGgccagucugcgauccgagacguc..... 1  
 Gi2\_11279987\_x1.....agGcgucgugggaaacacggggugccgaa..... 1  
 G1a\_6198109\_x1.....aucGgagacgucgugggaaacacggg..... 1  
 Gi5\_8855654\_x1.....cgucgugggaaacUcggggugccga..... 1  
 Gi3\_28596529\_x1.....Gucguuccgaauuaggaaga..... 1  
 G1a\_6359298\_x1.....agaagcgccgucagAccccgc..... 1  
 Gi3\_28439722\_x1.....gaucggagacguUgugggaaacacggggugcc..... 1  
 Gi2\_11101598\_x1.....gucgugggNacacggggugccgaa..... 1  
 Gi2\_11089620\_x1.....ugggaaacacggggUAccg..... 1  
 Gi1\_4292348\_x1.....ccUccagucugcgauccgaga..... 1  
 Gi3\_28484148\_x1.....ccagucugcgauccgagagUgucgu..... 1  
 Gi2\_11401389\_x1.....gacgucgugggaaAacggg..... 1

Gi1\_4258126\_x1.....uGagggccccgccaguacugcgauC..... 1  
 Gi2\_11099695\_x1.....aagagGagcgccgucaggccccgccag..... 1  
 Gi3\_28769931\_x1.....ucaggccUcgccaguacugcgauC..... 1  
 Gi2\_11270234\_x1.....CucggagacgucgugggaacacgggggU..... 1  
 Gi2\_11301926\_x1.....aagaUaagcgccgucaggcc..... 1  
 Gi1\_4275175\_x1.....gaagagaagcgccgucaggcccU..... 1  
 Gi3\_28743182\_x1.....UaggccccgccaguacugcgauCggagac..... 1  
 Gi2\_11244514\_x1.....ccccAccaguacugcgauCgg..... 1  
 Gi5\_9073428\_x1.....gccaguacugcgauCggGgacguc..... 1  
 Gi1\_4335724\_x1.....gUcgucgugggaacacggggugccgaacu..... 1  
 Gi3\_28579777\_x1.....NaggccccgccaguacugcgauCgg..... 1  
 Gi5\_9107454\_x1.....aucggagacgucguCggaaca..... 1  
 Gi2\_11016809\_x1.....cgccgucaggccccgccAuacu..... 1  
 Gi3\_28305703\_x1.....gaagcgccgucaggccccgccaguacugU..... 1  
 Gi2\_11094316\_x1.....gaagcgccgucaggccccgccaguacugcg..... 0  
 Gi4\_609275\_x1.....ccccccaguacugcgauCggagaAguc..... 1  
 Gi3\_28717582\_x1.....ccgccaguacugcgauCggGg..... 1  
 Gl1\_6319343\_x1.....gcgaAcggagacgucgug..... 1  
 Gi2\_11258111\_x1.....gauCggCgacgucgugggaaca..... 1  
 Gi3\_28284230\_x1.....agacgucgugggaacacggggugAcgaac..... 1  
 Gi5\_8949160\_x1.....gucgCgggaacacggggugc..... 1  
 Gi2\_11112844\_x1.....cgucaggccccgccCguacugcg..... 1  
 Gi3\_28637833\_x1.....ccgccaguacAgcgauCggagac..... 1  
 Gi2\_11303929\_x1.....cggaUacgucgugggaacacg..... 1  
 Gi3\_28500268\_x1.....cgugggaacacgAggugccgaa..... 1  
 Gi3\_28659649\_x1.....gugggaacacggggugccgaacuG..... 1  
 Gi2\_11032685\_x1.....ccgCcaaggccccgccaguacugc..... 1  
 Gi2\_11383406\_x1.....caguacugcgauUggagacgucgu..... 1  
 Gi2\_11219399\_x1.....ccccccaguacugcgauCggUgacguc..... 1  
 Gi3\_28537401\_x1.....aUuacugcgauCggagacgucgugggaacacg..... 1  
 Gi4\_603790\_x1.....ucgugggaCcacggggugccgaacu..... 1  
 Gi4\_608436\_x1.....aggccccgccAuacugcgauC..... 1  
 Gi3\_28334222\_x1.....UcgccaguacugcgauCggagacguc..... 1  
 Gi1\_4304226\_x1.....caggcccUgccaguacugc..... 1  
 Gi3\_28391746\_x1.....caggcccUgccaguacugcgauCgg..... 1  
 Gi2\_11183980\_x1.....ugggaacacggggugccAaacuu..... 1  
 Gi3\_28270362\_x1.....Ngggaacacggggugccga..... 1  
 Gi2\_11110898\_x1.....gccAcgccaguacugcgauC..... 1  
 Gl1\_6134904\_x1.....aagagaagcAccgucaggccc..... 1  
 Gl1\_6128669\_x1.....aucggagacgucgugggaacaUggg..... 1  
 Gi2\_11222495\_x1.....cUgagacgucgugggaacacggggugccgaa..... 1  
 Gi2\_11158578\_x1.....gauNggagacgucguggga..... 1  
 Gi2\_11169419\_x1.....cCaucggagacgucguggga..... 1  
 Gl1\_6306591\_x1.....agaagcgccgucaAgccccgc..... 1  
 Gi3\_28597321\_x1.....Ugacgucgugggaacacggg..... 1  
 Gi5\_8833510\_x1.....aguacugcgauAggagacguc..... 1  
 Gi3\_28785958\_x1.....ucggagacgucgugggaacacA..... 1

|                 |                                              |   |
|-----------------|----------------------------------------------|---|
| Gi2_11284158_x1 | .....gaagagaagcgccgcucagggc.....             | 0 |
| Gi2_11067240_x1 | .....guggUaacacggggugccgaacu.....            | 1 |
| Gi5_8834860_x1  | .....ugcgaucgNagacgucguggg.....              | 1 |
| Gi3_28673876_x1 | .....Cucgugggaacacggggg.....                 | 1 |
| Gi3_28685508_x1 | .....gugggaUcacggggugccg.....                | 1 |
| Gi3_28763837_x1 | .....cccgccGguacugcgauccggaga.....           | 1 |
| Gl1a_6354246_x1 | .....Ccgagacgucgugggaacacggggg.....          | 1 |
| Gi2_11400923_x1 | .....caggccccgccagCacugcg.....               | 1 |
| Gi2_11186867_x1 | .....gaucggagacgucgugggaacacggggugccgaa..... | 0 |
| Gi3_28923494_x1 | .....acugcgGucggagacguc.....                 | 1 |
| Gi1_4298364_x1  | .....cgaucggagacgucgugggaacacggg.....        | 0 |
| Gi1_4195261_x1  | .....ggaNcacggggugccgaacu.....               | 1 |
| Gi4_603024_x1   | .....Augggaacacggggugccgaa.....              | 1 |
| Gi3_28863208_x1 | .....gaNcugcugggaacacggggugccgaacu.....      | 1 |
| Gi3_28762103_x1 | .....gaucggagacgucgugggaacacgAggu.....       | 1 |
| Gl1a_6286988_x1 | .....aggNccccccagucugcg.....                 | 1 |
| Gl1a_6326137_x1 | .....gaucggagacgucguggGacacggg.....          | 1 |
| Gl1a_6054648_x1 | .....gaacacggggugUcgaacu.....                | 1 |
| Gi2_11179363_x1 | .....aggccccccaguaUugcg.....                 | 1 |
| Gi3_28665898_x1 | .....aucggagacgucguggCaacac.....             | 1 |
| Gi5_8989410_x1  | .....ccgccaguacCgcgauccggagacgucg.....       | 1 |
| Gl1a_6287478_x1 | .....acgucgugggaacacggggugccgaacA.....       | 1 |
| Gi3_28530083_x1 | .....gcgaucggNgacgucgugggaacacgggggug.....   | 1 |
| Gi2_11214646_x1 | .....aggccccccagucugcgaCcgga.....            | 1 |
| Gi3_28742442_x1 | .....cgaucggagacgucgugA.....                 | 1 |
| Gl1a_6163377_x1 | .....gugggaaAacggggugccgaac.....             | 1 |
| Gi3_28822262_x1 | .....acgucgugggaaAacggggugcc.....            | 1 |
| Gi2_11283553_x1 | .....ggagacgucAugggaacacggggg.....           | 1 |
| Gi1_4293418_x1  | .....gaagcgccgucaggccccccagucugcU.....       | 1 |
| Gi2_11322121_x1 | .....gacgucgugggaacacgggggU.....             | 1 |
| Gi2_11140562_x1 | .....agaagcgccgAcaggccccccagua.....          | 1 |
| Gi3_28425042_x1 | .....agaagcgccgucaAgccccccaguc.....          | 1 |
| Gi2_11102161_x1 | .....ucaggcGccgccagucugcgauc.....            | 1 |
| Gi4_610214_x1   | .....ucguggGacacggggugccgaacu.....           | 1 |
| Gi4_571901_x1   | .....ugcgaucggagacgucgugggaacac.....         | 0 |
| Gi3_28957693_x1 | .....guacugcgauccggagacgC.....               | 1 |
| Gi3_28560488_x1 | .....ggagCcgucgugggaacacggg.....             | 1 |
| Gi5_8838874_x1  | .....cgugggaacacgggUugccga.....              | 1 |
| Gl1a_6123994_x1 | .....gccaguacugcgauccggagGcgucgug.....       | 1 |
| Gi1_4340069_x1  | .....caAgccccccagucugcgauc.....              | 1 |
| Gi5_8867061_x1  | .....cgucgucGgaacacggggugccgaacu.....        | 1 |
| Gi5_8845074_x1  | .....gaacacggggugcUgaac.....                 | 1 |
| Gi2_11233787_x1 | .....gaagcAccgucagggccc.....                 | 1 |
| Gi3_28902587_x1 | .....aGcggagacgucgugggaacacggggugccgaa.....  | 1 |
| Gi2_11108264_x1 | .....gaucggGgacgucgugggaacacgggggugcc.....   | 1 |
| Gi2_11329852_x1 | .....acgucgugggaacacggggGgccg.....           | 1 |
| Gl1a_6159069_x1 | .....gugggaacacgggUugccgaacu.....            | 1 |

G1a\_6194359\_x1.....cgucgugggaaacacgggGgccgaac..... 1  
 Gi5\_8944145\_x1.....cggagacgucgugggaaacacgggGgcc..... 1  
 Gi3\_28753461\_x1.....gucgugggaaUacggggugc..... 1  
 Gi2\_11042122\_x1.....aggccccgccaguacugcggaucggagG..... 1  
 Gi2\_11280939\_x1.....gacgGcugggaaacacggggugcc..... 1  
 Gi1\_4159410\_x1.....CggccccgccaguacugcgauC..... 1  
 Gi2\_11101942\_x1.....ggaAacgucgugggaaacacggggu..... 1  
 Gi1\_4177961\_x1.....guggaaUacggggugccga..... 1  
 Gi3\_28689676\_x1.....gagaagcgccgucaAgccccgccaguacug..... 1  
 G1a\_6112212\_x1.....Ugucaggccccgccaguac..... 1  
 Gi3\_28884649\_x1.....aacacggggAgccgaacuu..... 1  
 Gi3\_28446645\_x1.....cgucgugCgaacacggggugcc..... 1  
 Gi2\_10993217\_x1.....auNggagacgucgugggaaaca..... 1  
 Gi2\_11211176\_x1.....aucggagacguAgugggaaac..... 1  
 Gi2\_11219497\_x1.....guacugcgauCggagacgucgugggCaca..... 1  
 Gi1\_4208748\_x1.....guggUaacacggggugccg..... 1  
 Gi1\_4294151\_x1.....acgucgugggaaacacggggugccgaUcu..... 1  
 Gi3\_28362455\_x1.....cgucaggccccgccaguacugUg..... 1  
 Gi3\_28398226\_x1.....gacgucgAgggaaacacggggugccgaac..... 1  
 Gi5\_8968609\_x1.....gaacacggggugccgCac..... 1  
 Gi5\_8853643\_x1.....gucgugggaaAacggggugccgaac..... 1  
 Gi2\_11106027\_x1.....agacgucgugggaaacacg..... 0  
 Gi5\_8857466\_x1.....aucggagacgucgugggGcacggggug..... 1  
 Gi3\_28373675\_x1.....gucaggccccgccaguCugcgauC..... 1  
 G1a\_6345358\_x1.....cccgccaguacugcgCcgagacgucg..... 1  
 Gi3\_28507297\_x1.....ggagacgucgugggaaacacggggugcAg..... 1  
 Gi3\_28873857\_x1.....aagagaagcgccgucagggcccUgccag..... 1  
 Gi1\_4195568\_x1.....caggccccgccaguacugcgauCgg..... 0  
 Gi2\_11340793\_x1.....ugcgauCggagUcugcugggaaacacg..... 1  
 Gi1\_4203667\_x1.....aucggagacgucgugggGcacgggg..... 1  
 Gi3\_28673630\_x1.....caggccccgccaguCugcgga..... 1  
 Gi2\_11189015\_x1.....ccccgccaguacugcgauCggagC..... 1  
 Gi2\_11305615\_x1.....acgucgugggGacacggggu..... 1  
 Gi3\_28326114\_x1.....ccgccaguacugcgauCgggagaAgucgug..... 1  
 Gi3\_28800306\_x1.....agaagcgCNgucagggccccgccaguacug..... 1  
 Gi1\_4302220\_x1.....cggaAacgucgugggaaacacggggugcc..... 1  
 Gi2\_11231794\_x1.....cgucaggcccUgccaguacug..... 1  
 Gi5\_8918286\_x1.....caggccccgccaguacuA..... 1  
 Gi3\_28669556\_x1.....gccaguacugcgauCggagacgGc..... 1  
 Gi2\_11161611\_x1.....ccAcgccaguacugcgauCgggaga..... 1  
 Gi2\_11205497\_x1.....cgccaguacugcgGucggagacgu..... 1  
 Gi1\_4222238\_x1.....gGagagaagcgccgucagggccccccagu..... 1  
 Gi3\_28939733\_x1.....agGgaagcgccgucagggccccgc..... 1  
 G1a\_6203867\_x1.....aucggagacgucgugggaaacacCg..... 1  
 Gi3\_28644215\_x1.....ccccgccaguacugcgauUggagacg..... 1  
 Gi3\_28861937\_x1.....cUucagggccccgccaguacugcgauCggagacg..... 1  
 Gi2\_11201649\_x1.....caggccccgccaguacugcgauCaga..... 1

Gi1a\_6113405\_x1.....aucggagUcugcugugga..... 1  
 Gi3\_28549568\_x1.....uacugcgauAggagacguc..... 1  
 Gi5\_8895373\_x1.....caguaAugcgaucggagacguc..... 1  
 Gi1\_4200769\_x1.....ggaacacgCggugccgaacu..... 1  
 Gi3\_28400757\_x1.....ucgNgggaacacggggugccgaa..... 1  
 Gi3\_28826768\_x1.....aguacugcgauCggagCcgucgu..... 1  
 Gi2\_11077513\_x1.....UcccgccaguacugcgauCgga..... 1  
 Gi2\_11170395\_x1.....cgccaguacugcgCucggagac..... 1  
 Gi5\_9136662\_x1.....guggaacacggggugccCaac..... 1  
 Gi1\_4385542\_x1.....uggaacacggggugGcgaacu..... 1  
 Gi2\_11112698\_x1.....guacugcgNucggagacgucg..... 1  
 Gi3\_28913129\_x1.....gugggaUcacggggugccgaa..... 1  
 Gi2\_11208938\_x1.....aggccccgccagGacugcgauCggagac..... 1  
 Gi1a\_6326921\_x1.....acugcgauCggagacgucAug..... 1  
 Gi2\_11232537\_x1.....Ggaucggagacgucgugggaacacggg..... 1  
 Gi1\_4370350\_x1.....cggagacgucgugggaacacg..... 0  
 Gi3\_28937716\_x1.....aacucguuccgaauuaggaagagaagcgccg..... 0  
 Gi2\_11336103\_x1.....cguCggaacacggggugc..... 1  
 Gi2\_11233367\_x1.....cggagacgucgugggaaAacggggugcc..... 1  
 Gi1\_4227534\_x1.....acgucgugggaacacggggugccAa..... 1  
 Gi2\_11183550\_x1.....gccaguGcugcgauCggagacg..... 1  
 Gi3\_28684709\_x1.....agCacugcgauCggagacgucgug..... 1  
 Gi3\_28525312\_x1.....agagaagcgccgucagggccccgA..... 1  
 Gi2\_11045861\_x1.....gagacgucgugggaacacgAggugc..... 1  
 Gi1a\_6129617\_x1.....gccaguacugcgauCggagacgucA..... 1  
 Gi2\_11251930\_x1.....cgauCggagacgucgugggaacacgg..... 0  
 Gi1a\_6263988\_x1.....Agugggaacacggggugc..... 1  
 Gi1a\_6262521\_x1.....cgucagggccccgccaguacuAcg..... 1  
 Gi1\_4327534\_x1.....cgauCggagacgucgugU..... 1  
 Gi2\_11168924\_x1.....aucggagacgucgugUgaaca..... 1  
 Gi2\_11132452\_x1.....gagacgucgugggaacaUggggugccgaacu..... 1  
 Gi3\_28934296\_x1.....agacgucguggCaacacggggugcc..... 1  
 Gi1\_4260727\_x1.....acgucgugggaacacggggugccA..... 1  
 Gi3\_28893585\_x1.....ccgucagggccccgccaguacugcgauUgga..... 1  
 Gi3\_28651755\_x1.....agaGgcgccgucagggccccgcc..... 1  
 Gi3\_28889158\_x1.....gccccgccaguacGgcgau..... 1  
 Gi1a\_6330585\_x1.....gacgucgugggaacacggggugccgaGcu..... 1  
 Gi1a\_6231668\_x1.....cagggcccAgccaguacugc..... 1  
 Gi3\_28695221\_x1.....gcGccgccaguacugcgauC..... 1  
 Gi2\_11227458\_x1.....gggaacacggggguAccgaa..... 1  
 Gi3\_28499134\_x1.....uggaacacggggguUccgaa..... 1  
 Gi5\_9103817\_x1.....gagacgucguCggaacacggggugccgaacu..... 1  
 Gi2\_11072371\_x1.....agacgucgAgggaacacggggugc..... 1  
 Gi2\_11124407\_x1.....cgauCggagacgucgCgggaacac..... 1  
 Gi3\_28877140\_x1.....gaagagaagcgCgGucagg..... 1  
 Gi3\_28779843\_x1.....aagagaagcgccguUaggccccgccag..... 1  
 Gi3\_28322885\_x1.....aagcgccgucagggccccgccaguacuAc..... 1



Gi1a\_6301518\_x1.....aucggagacgucgugggGacacgg.....1  
 Gi1\_4210007\_x1.....gacgucgugggaaacacgCggugccgaacu.....1  
 Gi1\_4225664\_x1.....gcggaucggNgacgucgugggaaaca.....1  
 Gi5\_8954413\_x1.....aAacgucgugggaaacacggggugccgaacu.....1  
 Gi3\_28623340\_x1.....gaucggGgacgucgugggaaacacggggugc.....1  
 Gi5\_8851030\_x1.....acgucgugNgaacacggggugccg.....1  
 Gi2\_11094568\_x1.....ggGacacggggugccgaa.....1  
 Gi1\_4205019\_x1.....agacgucgNgggaacacggggugcc.....1  
 Gi3\_28769351\_x1.....cccgccaguaUugcgauccggagac.....1  
 Gi1\_4229005\_x1.....aUgccccgccaguacugcgau.....1  
 Gi3\_28536163\_x1.....gaagcgccgucagggccccgccGgua.....1  
 Gi3\_28726768\_x1.....aggccccUccaguacugcg.....1  
 Gi2\_11363373\_x1.....ugggaacacggggugccgaacuuu.....0  
 Gi2\_11222943\_x1.....cccgccaguaucgucgucgCgacgucgug.....1  
 Gi1a\_6128192\_x1.....gccaguaucgucgucgUgacguc.....1  
 Gi5\_8920619\_x1.....gagacgucgugggaaacacggggugccgUacu.....1  
 Gi2\_11270370\_x1.....cccgccaguaucgucgUucggagacg.....1  
 Gi2\_11375234\_x1.....aagaUaagcgccgucagggccccccagu.....1  
 Gi1a\_6199135\_x1.....ucguggAaacacggggugccgaacu.....1  
 Gi3\_28391633\_x1.....cgucaggUcccgccaguaucg.....1  
 Gi3\_28590680\_x1.....cggagacgucgugggaaacacAg.....1  
 Gi3\_28750184\_x1.....caguacugcgauccggagacg.....0  
 Gi2\_11082236\_x1.ccuuaacucgCuccgaau.....1  
 Gi1\_4168268\_x1.....cgGgggaacacggggugccgaacuu.....1  
 Gi5\_9135756\_x1.....agagaagcNccgucagggccccccagu.....1  
 Gi2\_11083417\_x1.....ccGguacugcgauccggag.....1  
 Gi3\_28550786\_x1.....gacgGcgugggaaacacggg.....1  
 Gi1\_4308706\_x1.....gaacacggggugcUgaacuu.....1  
 Gi2\_11152785\_x1.....cgugggaaacaUggggugcc.....1  
 Gi2\_11301538\_x1.....ggaacacgggCugccgaa.....1  
 Gi2\_11013078\_x1.....aagcgccgucagggcccAgccaguaucg.....1  
 Gi5\_8895035\_x1.....ggaacacggCgugccgaacu.....1  
 Gi2\_11095628\_x1.....gaucggagacgucguggAaaca.....1  
 Gi3\_28880774\_x1.....aguacugcgauAggagacgucg.....1  
 Gi1\_4330232\_x1.....uggNaacacggggugccga.....1  
 Gi2\_11099714\_x1.....gccaguaAcggaucggagacgu.....1  
 Gi1a\_6045006\_x1.....ggaacacggggugccgaCcu.....1  
 Gi3\_28810053\_x1.....gcUccgccaguaucgucgucgagac.....1  
 Gi3\_28393291\_x1.....ucagggccccgccaguaucgucgauAgg.....1  
 Gi3\_28928474\_x1.....ccgcGaguacugcgauccggagac.....1  
 Gi2\_11263757\_x1.....acgucgugggCacacggggugccg.....1  
 Gi3\_28261656\_x1.....gaUgcccgucagggcccccc.....1  
 Gi3\_28575873\_x1.....caguacugcgauAggagacgucgug.....1  
 Gi2\_10996528\_x1.....aucggagacgucguggAaacacg.....1  
 Gi3\_28642662\_x1.....ucggagacgucgugggUacacg.....1  
 Gi1a\_6001292\_x1.....uacugcgauccggagacguU.....1  
 Gi2\_11090349\_x1.....ccgucagggccccgccCguacugcgau.....1

Gi3\_28553845\_x1.....cUuccgaaauaggaagagaagcgc..... 1  
 Gi3\_28477988\_x1.....caguacCgcgaucggagacgu..... 1  
 Gi2\_11266200\_x1.....cggagacgucgugggaacacggggAgc..... 1  
 Gi3\_28456611\_x1.....gaagagaagcgcgcUggcccc..... 1  
 Gi2\_11174552\_x1.....ucgugggaacacggggugGcgaacu..... 1  
 Gl1a\_6142400\_x1.....gucgugggaacCcggggugccgaacu..... 1  
 Gi2\_11121948\_x1.....acgucguCggaacacggggugcc..... 1  
 Gi3\_28919389\_x1.....aucggagaAgucgugggaacacg..... 1  
 Gi2\_11035292\_x1.....gaucggagacgucgugggaUca..... 1  
 Gi3\_28925743\_x1.....Aaagcgcgcucagggccccccagua..... 1  
 Gi1\_4255677\_x1.....gGcgugggaacacggggugccga..... 1  
 Gi3\_28278091\_x1.....ggagacgucgugggaGcacggggugccgaacu..... 1  
 Gi5\_8957692\_x1.....acgucgugggaacacggggCgccgaacuuu..... 1  
 Gi2\_11271881\_x1.....ggaaAacggggugccgaa..... 1  
 Gi2\_11355674\_x1.....agaaUcgccgucagggccc..... 1  
 Gi3\_28968108\_x1.....uGaggccccgccaguacugcga..... 1  
 Gi2\_11128826\_x1.....cguggUaacacggggugccga..... 1  
 Gi3\_28596092\_x1.....cgucagggccccgcUaguacug..... 1  
 Gi5\_8932462\_x1.....cgugggGacacggggugcc..... 1  
 Gi2\_11049473\_x1.....ugcgauGggagacgucgugggaacacggggg..... 1  
 Gi2\_11169527\_x1.....gaucggagaAgucguggga..... 1  
 Gi3\_28672898\_x1.....ccgccaguacugUgaucggagac..... 1  
 Gi2\_11307466\_x1.....cggagacgucguggAaacac..... 1  
 Gi1\_4168889\_x1.....ugcgauCggagCgucgugggaacacg..... 1  
 Gi2\_11388558\_x1.....agacgucgugggaUacggggugcc..... 1  
 Gi2\_11109380\_x1.....gccaguacugAgaucggagacguc..... 1  
 Gi2\_11149852\_x1.....cgauCggagGcgucgugggaaca..... 1  
 Gl1a\_6120753\_x1.....gaucggagUcgucgugggaa..... 1  
 Gl1a\_6004252\_x1.....uCcgaucggagacgucgugggaa..... 1  
 Gi4\_575150\_x1.....gagaagcgcgcucagggccc..... 0  
 Gi2\_11172861\_x1.....ggUcccgccaguacugcgau..... 1  
 Gl1a\_6069002\_x1.....gccaguacCgcgaucgga..... 1  
 Gi3\_28446330\_x1.....ucgugggaCcacggggugccga..... 1  
 Gi3\_28797702\_x1.....aagaUaagcgcgcucagggc..... 1  
 Gi5\_8978021\_x1.....agacgucgugggaacacggggGgcc..... 1  
 Gi2\_11355053\_x1.....aucggagacgucUugggaacacggg..... 1  
 Gi3\_28739461\_x1.....cgauCggagacgucgGggg..... 1  
 Gl1a\_6250134\_x1.....gccaguacugcgaCcgagacguc..... 1  
 Gi1\_4296039\_x1.....ucggagCcgucgugggaacacg..... 1  
 Gi2\_11328269\_x1.....cgauCggagacgucgugggaacGcg..... 1  
 Gi3\_28350306\_x1.....cgccaAuacugcgauCggagac..... 1  
 Gi3\_28642048\_x1.....gagGagcgcgcucagggccccccaguacu..... 1  
 Gi3\_28672916\_x1.....cgccaguacAgcgauCggagacgucgug..... 1  
 Gi3\_28571428\_x1.....cggagacgCcgugggaacacggggug..... 1  
 Gl1a\_6261673\_x1.....Caagcgcgcucagggccccgcca..... 1  
 Gi2\_11004618\_x1.....ccaguacugcgauCagag..... 1  
 Gl1a\_6232509\_x1.....cgauCggGacgucgugggaa..... 1

Gi1\_4177614\_x1.....ucggagacgucgCgggaacacggggugccgaacu..... 1  
 Gi3\_28368631\_x1.....gaagcgcUgucagggccccgccaguacugc..... 1  
 Gi3\_28278407\_x1.....cgucuggggaacacAgggugc..... 1  
 Gi5\_9099870\_x1.....caggccccgccCuacugcg..... 1  
 Gi3\_28422325\_x1.....aGgagaagcgccgucagggccccgccagua..... 1  
 Gl1a\_6023428\_x1.....ucggagacguAgugggaacacggg..... 1  
 Gl1a\_6274699\_x1.....cgugggaacacggggAgccgaacu..... 1  
 Gi3\_28332941\_x1.....gucgugCgaacacggggugccgaac..... 1  
 Gi4\_574133\_x1.....cgucagggccccgccaguGcugc..... 1  
 Gl1a\_6283938\_x1.....gaagcgcgucagggccccAcca..... 1  
 Gi2\_11143480\_x1.....aAcgcccugcagggccccgccaguacugcgauc..... 1  
 Gi1\_4194709\_x1.....aucggagacgucUugggaacacggggugcc..... 1  
 Gi2\_11323456\_x1.....gagacgucgugggaacacgAgggug..... 1  
 Gi1\_4261565\_x1.....uggAaacacggggugccgaac..... 1  
 Gi2\_11015326\_x1.....gggaacacggggugNcgaacu..... 1  
 Gi3\_28683283\_x1.....ggaagagaagcgccgucaggg..... 0  
 Gi3\_28886155\_x1.....cccgccaguacugcgaucggagaAg..... 1  
 Gi3\_28510958\_x1.....aAagaagcgccgucagggccccgc..... 1  
 Gi5\_8899412\_x1.....agacgucgugggaacacgUggugccgaac..... 1  
 Gi2\_11127371\_x1.....agacgucgugggaacaUggggugccga..... 1  
 Gi3\_28566124\_x1.....ggagacgucgugggaacacggggugcAgaacu..... 1  
 Gi3\_28452956\_x1.....ggccccgccaguacugcgaucggCgacg..... 1  
 Gi5\_8860388\_x1.....caguacugGgaucggagacguc..... 1  
 Gl1a\_6349840\_x1.....caguacugcgaucAgagacguc..... 1  
 Gi5\_9008784\_x1.....ugcgaucggagGcugcugggga..... 1  
 Gi3\_28442018\_x1.....agacgucgugUgaacacggggugccgaacu..... 1  
 Gl1a\_6199775\_x1.....agagaagGgccgucagggccccgcc..... 1  
 Gi5\_8909664\_x1.....aguacugcgaucggagGcugc..... 1  
 Gi2\_11332313\_x1.....cgcUaguacugcgaucggaga..... 1  
 Gi3\_28357202\_x1.....ugcgGucggagacgucgugggaacacggggugc..... 1  
 Gi2\_11134096\_x1.....cgucuggggaacacggggugccgaaA..... 1  
 Gi2\_11380323\_x1.....agagaGgccgucagggccccgc..... 1  
 Gi2\_11117373\_x1.....ccUgccaguacugcgaucggag..... 1  
 Gi5\_9115980\_x1.....gugggaacacggggUaccg..... 1  
 Gi5\_8925292\_x1.....agacgucgGgggaacacggggugcc..... 1  
 Gi5\_9126363\_x1.....guggUaacacggggugccg..... 1  
 Gi3\_28444446\_x1.....agaagcgccgucagggcccUgccaguacug..... 1  
 Gi3\_28582524\_x1.....cagggcccGccaguacugc..... 1  
 Gi3\_28611007\_x1.....ucgugggaacaUggggugccgaa..... 1  
 Gi2\_11383190\_x1.....agacgucgugggaacacgAgggugccgaacu..... 1  
 Gi3\_28715171\_x1.....ugcgaucggagGcugcugggga..... 1  
 Gi3\_28754020\_x1.....aucggagUcugcuggggaacacg..... 1  
 Gi3\_28967781\_x1.....ggagacgucguAggaacacggggugccgaac..... 1  
 Gi3\_28553181\_x1.....cgucguUggaacacggggugcc..... 1  
 Gi2\_11097283\_x1.....gacgucgugggaAAacggggugccg..... 1  
 Gi2\_11029496\_x1.....cguNgugggaacacggggugccga..... 1  
 Gi2\_11366947\_x1.....ugggaacacggggugccUaa..... 1

Gi2\_11006268\_x1.....gaacacggggugUcgaac..... 1  
 Gi3\_28401241\_x1.....cgucgugggaacacAgggug..... 1  
 Gi3\_28960692\_x1.....cCucagggccccccaguacu..... 1  
 Gl1a\_6181578\_x1.....ccgccaguNcugcgaucggagacguc..... 1  
 Gi3\_28539980\_x1.....cggagacgucgugggaGcacgg..... 1  
 Gi2\_11050927\_x1.....gCucggagacgucguggga..... 1  
 Gi2\_11059688\_x1.....Ngugggaacacggggugccgaac..... 1  
 Gl1a\_6136621\_x1.....agaagcgccgucaggccUcgc..... 1  
 Gi1\_4251046\_x1.....cggagGcgucgugggaacacggg..... 1  
 Gi3\_28393546\_x1.....gccGcgccaguacugcgaucggaga..... 1  
 Gi1\_4359343\_x1.....cggagacgucgugggaacacggggU..... 1  
 Gl1a\_6162471\_x1.....cguNggaacacggggugccgaacu..... 1  
 Gi5\_9129050\_x1.....acgucgugggaacGcggggugccga..... 1  
 Gi3\_28836463\_x1.....Agagacgucgugggaacacggggugccgaac..... 1  
 Gi2\_11338212\_x1.....aacacggggugccCaacu..... 1  
 Gi3\_28586277\_x1.....guacugcgaucggGgacgu..... 1  
 Gi3\_28782461\_x1.....acucguuccgaauuaggCagagaagcgc..... 1  
 Gi2\_11125843\_x1.....cgucagggccccgcUaguacugcgaucgga..... 1  
 Gi5\_9128761\_x1.....gaCcgagacgucgugggaacacggg..... 1  
 Gi1\_4341789\_x1.....ggGgacgucgugggaacacggggug..... 1  
 Gi3\_28519114\_x1.....cgaucggagacgucAugggaaacacggggugc..... 1  
 Gl1a\_6247495\_x1.....aggccccgccCguacugc..... 1  
 Gi2\_11304191\_x1.....cgucgugAgaacacggggugcc..... 1  
 Gi2\_11294547\_x1.....aucggagacCucgugggaacacggggugc..... 1  
 Gi3\_28475129\_x1.....caguacAgcgaucggagacguc..... 1  
 Gi3\_28840116\_x1.....gaucggagacgucguggAaacacggggug..... 1  
 Gl1a\_6137449\_x1.....agaGgucgugggaacacggggugccgaac..... 1  
 Gi5\_9028734\_x1.....agacgucgugggaacacggggC..... 1  
 Gi3\_28508543\_x1.....agaNgcggccgucaggccc..... 1  
 Gi3\_28609319\_x1.....gucgugggaacacgUggugcc..... 1  
 Gi3\_28630688\_x1.....gagacgucgugggaacacgggg..... 0  
 Gi1\_4182240\_x1.....cgugggaacacAgggugcc..... 1  
 Gi5\_9037172\_x1.....gccccgccaguacuAcgauc..... 1  
 Gi1\_4182374\_x1.....Ugugggaacacggggugcc..... 1  
 Gi3\_28896765\_x1.....cgccguAaggccccccaguacu..... 1  
 Gi5\_9058148\_x1.....ggaacacggggUaccgaac..... 1  
 Gi5\_9009504\_x1.....gugggaacacggggugccAaacuuu..... 1  
 Gi2\_11294509\_x1.....gucgugggaacacggggUac..... 1  
 Gi3\_28320364\_x1.....gaagagaagcgccguacuAgccccg..... 1  
 Gl1a\_6146714\_x1.....gagacgucgugggaacacggggugcc..... 0  
 Gi3\_28849383\_x1.....Accgucagggccccccaguacugc..... 1  
 Gi2\_11274199\_x1.....Ugaucggagacgucgugggaacacggg..... 1  
 Gi1\_4209898\_x1.....cgugggaacacAgggugccgaac..... 1  
 Gi2\_11194313\_x1.....aggccUcgccaguacugcgaucggaga..... 1  
 Gi5\_9044316\_x1.....acgucgugggaGcacggggugccga..... 1  
 Gi3\_28502095\_x1.....cguggCaacacggggugc..... 1  
 Gi2\_11279223\_x1.....gucGggccccccaguacugcgau..... 1

Gi3\_28561960\_x1.....ggagacgucguAggaacacggggugcc..... 1  
 Gl1a\_6147959\_x1.....gaucggagacgucgugggaaacGcggg..... 1  
 Gl1a\_6086624\_x1.....cgaucggagacgucgugggaaacGcag..... 1  
 Gi5\_9028743\_x1.....ccgccaguacugcgauccggagacgucgugggaaacacg..... 0  
 Gl1a\_6015544\_x1.....agagaagcgccgucagggcccgUc..... 1  
 Gi2\_11279657\_x1.....agacgucgugggaaacacggggug..... 1  
 Gi1\_4366622\_x1.....acgucgugggaaacacggggugccgGac..... 1  
 Gi1\_4381741\_x1.....uggaaacacggggAgccgaac..... 1  
 Gi5\_8916635\_x1.....gCccccccagucgucguc..... 1  
 Gi2\_11268995\_x1.....ccccgUcaguacugcgau..... 1  
 Gi2\_11324702\_x1.....gccccgcUaguacugcga..... 1  
 Gi1\_4316066\_x1.....gaucggagGcugcugggaaacacggg..... 1  
 Gi2\_11157763\_x1.....gcgaucggagacguUgugggaaac..... 1  
 Gi1\_4327042\_x1.....acgucgugggaaacCcggggugccg..... 1  
 Gi2\_11387169\_x1.....gaagagaagcgccguUagggcccgccag..... 1  
 Gi1\_4301563\_x1.....Ugugggaaacacggggugccgaacuu..... 1  
 Gi2\_11396301\_x1.....aUacgucgugggaaacacggggugccgaa..... 1  
 Gi1\_4353662\_x1.....ucgugggaaacacggggugccga..... 1  
 Gi1\_4198293\_x1.....gccgucGggccccccaguc..... 1  
 Gi2\_11148884\_x1.....aacucguuccgaauaggaagaga..... 0  
 Gi5\_9077826\_x1.....acugcgauccggagacgucGg..... 1  
 Gi1\_4228465\_x1.....ugcgGucggagacgucgugggaa..... 1  
 Gi2\_11122216\_x1.....ucgugggaaacacgggUugccgaacu..... 1  
 Gi3\_28323436\_x1.....ccgNcaguacugcgauccggagacgucgug..... 1  
 Gi2\_11007236\_x1.....gggaacacgggAugccgaac..... 1  
 Gi2\_11276209\_x1.....guacugcgauccgUagacgucg..... 1  
 Gi3\_28911772\_x1.....ggagGcugcugggaaacacggg..... 1  
 Gi3\_28502890\_x1.....gccaguacNcgauccggagacgucgug..... 1  
 Gl1a\_6086051\_x1.....cgAcaggccccccaguc..... 1  
 Gi3\_28925606\_x1.....agUgccgucagggccccccaguc..... 1  
 Gi2\_11043685\_x1.....cgugggaaacacggAgugc..... 1  
 Gi3\_28338406\_x1.....gucAugggaaacacggggugccga..... 1  
 Gi3\_28520225\_x1.....cggagacgucgugggaaacacgCg..... 1  
 Gi1\_4213114\_x1.....aucggagacgucgugggGacacg..... 1  
 Gi5\_8967224\_x1.....ccaguacugcAaucggagacgu..... 1  
 Gi3\_28459918\_x1.....gcgaucggagacgucGggaaacacggg..... 1  
 Gi3\_28617598\_x1.....ggaacacggUgugccga..... 1  
 Gi1\_4167554\_x1.....ggagCcgucgugggaaacacggggugcc..... 1  
 Gi1\_4256705\_x1.....gugggaaacNcggggugccga..... 1  
 Gi3\_28449605\_x1.....caggccccccaCuacugcga..... 1  
 Gi2\_11191714\_x1.....gagacgucgugggaaacacgggCug..... 1  
 Gi2\_11354807\_x1.....agccccgcUaguacugcgaucc..... 1  
 Gi1\_4228714\_x1.....aguacugcgauccggagac..... 0  
 Gi3\_28721392\_x1.....cggagaAgucgugggaaacacggggugcc..... 1  
 Gi5\_9074058\_x1.....gaacaUggggugccgaac..... 1  
 Gi3\_28447814\_x1.....aucggagacgucgugUgaacacgg..... 1  
 Gi5\_9132406\_x1.....caguacugAgauccggagacguc..... 1

Gi5\_9093918\_x1.....acgucgugggaaacacgCgugccgaacu..... 1  
 Gi2\_11257228\_x1.....aucggagacgucguUggaacac..... 1  
 Gi2\_11197578\_x1.....cucguuccgaauaCgaaga..... 1  
 Gi3\_28976007\_x1.....gacgucgugggaaacacggggugccgaCc..... 1  
 Gi3\_28915963\_x1.....agAccccgccaguacugcgaucgg..... 1  
 Gi1\_4210379\_x1.....gacgucgugggaaacaUggggugccgaacu..... 1  
 Gi3\_28532857\_x1.....Gguuccgaauuaggaagagaagcgccgcguc..... 1  
 Gi1\_4194444\_x1.....gaUacgucgugggaaacacggggugccgaac..... 1  
 Gi3\_28302472\_x1.....acgucgugggaaacCcggggugc..... 1  
 Gi3\_28509443\_x1.....agaagcgccgucaAgccccgcca..... 1  
 Gi5\_9088964\_x1.....Gcggagacgucgugggaaacacggggugccg..... 1  
 Gi2\_11205101\_x1.....gaagagaaNcgccgucagggccccg..... 1  
 Gi5\_9031850\_x1.....gucgugggaaacCcggggugc..... 1  
 Gi5\_8916538\_x1.....ggagacgucgugggaaGca..... 1  
 Gi2\_11373037\_x1.....cguggAaacacggggugccga..... 1  
 Gi3\_28552596\_x1.....gaucggagacgucgugggaaacUcg..... 1  
 Gi5\_8950920\_x1.....caguaUugcgauccgagacgucgug..... 1  
 Gi1\_4267078\_x1.....cccgccaguacugcgGucggagacg..... 1  
 Gi3\_28551677\_x1.....gcgaucggagacgucAugggaaacacggg..... 1  
 Gi1\_4233892\_x1.....gCcguggaaacacggggugccgaac..... 1  
 Gi3\_28302697\_x1.....gcgaCcggagacgucgugggaa..... 1  
 Gl1\_6358968\_x1.....cUgagacgucgugggaaacacggggug..... 1  
 Gi2\_11108017\_x1.....ucaggUcccgccaguacugc..... 1  
 Gi5\_9118483\_x1.....Ccgagacgucgugggaaacacg..... 1  
 Gi1\_4298681\_x1.....aucggagGcugcugggaaacacggg..... 1  
 Gi3\_28655918\_x1.....gccgucaggAccccccaguac..... 1  
 Gi3\_28683362\_x1.....ccaguacuAcgauccgagacgucgug..... 1  
 Gl1\_6307095\_x1.....aguacugcgauccgGcagcuc..... 1  
 Gi2\_11330146\_x1.....gaAcggagacgucgugggaaacacggggugc..... 1  
 Gi2\_11023884\_x1.....ggagacgucgugggaaacacgggUugcc..... 1  
 Gi2\_11143217\_x1.....gcgaucggNgacgucgugggaa..... 1  
 Gl1\_6332582\_x1.....cggagacgNcgugggaaacacg..... 1  
 Gi3\_28950467\_x1.....Ggucgugggaaacacgggguu..... 1  
 Gi4\_568901\_x1.....cgccaguacugcgauccgGgacgucgug..... 1  
 Gl1\_6017995\_x1.....gccaguacugcgauccgagacgCc..... 1  
 Gi2\_11103727\_x1.....cggagacgucgugggaaUacggggugc..... 1  
 Gi2\_11018977\_x1.....aggccccgccaguacAgcgauccg..... 1  
 Gi3\_28885975\_x1.....cgccUguacugcgauccgagac..... 1  
 Gi3\_28884269\_x1.....agaagcgccgucCggccc..... 1  
 Gi1\_4202225\_x1.....ggagacgucgugggaaacacggggA..... 1  
 Gi1\_4321601\_x1.....aggccccgccaguacCgcauc..... 1  
 Gi3\_28342767\_x1.....Uagaagcgccgucagggccccccaguacugcg..... 1  
 Gi5\_9026259\_x1.....gaucggagacgucgugAgaacacggg..... 1  
 Gi1\_4228958\_x1.....aguaUugcgauccgagacgucgug..... 1  
 Gl1\_6164968\_x1.....ugcgaucggagacgucUug..... 1  
 Gi3\_28440090\_x1.....aucggagacgucguUggaacacgggguu..... 1  
 Gi1\_4371409\_x1.....ggaUcacggggugccgaa..... 1

Gi1a\_6263650\_x1.....cguggaacUcggggugccgaacu..... 1  
Gi3\_28508398\_x1.....ccaguacugcgauccgagacgCc..... 1  
Gi5\_9060676\_x1.....ccccgccaguacugcgauccgUgacg..... 1  
Gi1\_4305702\_x1.....ugcgauccgagacgucgCggga..... 1  
Gi2\_11400490\_x1.....uacugcgaCcgagacgucgugggaaca..... 1  
Gi3\_28642411\_x1.....cgauccgagacgucgugggaacGcggggu..... 1  
Gi2\_11100541\_x1.....gauccgagacgucgugggaacaUggggug..... 1  
Gi3\_28885665\_x1.....gacguUgugggaacacggggugccg..... 1  
Gi1\_4357204\_x1.....cgugggaUcacggggugccgaacu..... 1  
Gi2\_11024970\_x1.....ccccccaguacugcgauccgCgacgucgu..... 1  
Gi2\_11245673\_x1.....gaagagUagcgccgucagg..... 1  
Gi1a\_6082838\_x1.....gucaggccccgcUaguacugcg..... 1  
Gi3\_28957304\_x1.....caguacugcgauccgagCcgucgu..... 1  
Gi3\_28737227\_x1.....gucaggccccgccaguacCcggauc..... 1  
Gi5\_8943983\_x1.....gggaUcacggggugccgaa..... 1  
Gi2\_11312944\_x1.....Nggagacgucgugggaacacggggugcc..... 1  
Gi3\_28422267\_x1.....gacgucgugggaacacggggugcAg..... 1  
Gi5\_9061516\_x1.....ucggagacgucgugggaacGcggggugc..... 1  
Gi5\_8956100\_x1.....cgUcaguacugcgauccgagacguc..... 1  
Gi4\_598708\_x1.....caguacugcgauccgagacgucg..... 0  
Gi2\_11133753\_x1.....Accgccaguacugcgauccgagacguc..... 1  
Gi2\_11049179\_x1.....ggaacacggggugcUgaa..... 1  
Gi2\_11040840\_x1.....gagaagcgccgucaAgccccgc..... 1  
Gi1\_4348859\_x1.....gggaacCcggggugccgaac..... 1  
Gi1\_4236708\_x1.....cgucgugggaacacAgggugc..... 1  
Gi5\_9006177\_x1.....gucgugggaacacgggAugccgaac..... 1  
Gi2\_11127809\_x1.....caggccccgcUaguacugcgauccgagac..... 1  
Gi2\_11091014\_x1.....gacgucgugggaacGcggggugcc..... 1  
Gi1\_4201785\_x1.....gucaggccNcgccaguacugc..... 1  
Gi1\_4284769\_x1.....gagacgucgugggaacacggggGgccgaacu..... 1  
Gi3\_28425207\_x1.....ucaggccccgccaguacugGg..... 1  
Gi3\_28530822\_x1.....aucggagacgucgugggaacacgCggu..... 1  
Gi1\_4297261\_x1.....gagacgucgugggaacacggggugcAgaacu..... 1  
Gi2\_11059337\_x1.....ugcgauccgCgacgucgugggaacacg..... 1  
Gi3\_28691388\_x1.....aagagaagcgccgucGggc..... 1  
Gi3\_28634470\_x1.....gucaggccccgccGguacugcgaucc..... 1  
Gi2\_11016549\_x1.....acgucgugggaacacggAgugc..... 1  
Gi5\_9008918\_x1.....Uccccccaguacugcgauccgagacguc..... 1  
Gi5\_8958928\_x1.....caggccccgccaguacCcggauc..... 1  
Gi5\_8927338\_x1.....gucgugggaacacggUgugccgaacu..... 1  
Gi2\_11244555\_x1.....ccguAaggccccgccaguacugcg..... 1  
Gi3\_28382718\_x1.....cgauccgagaAgucgugggaacacggg..... 1  
Gi3\_28349606\_x1.....cgccaguacugcgauccgagGc..... 1  
Gi1\_4270474\_x1.....acugcgauccgagGcgucg..... 1  
Gi3\_28722719\_x1.....gcUccgccaguacugcgauccg..... 1  
Gi3\_28272550\_x1.....gccaguacugcgGucggagac..... 1  
Gi2\_11044011\_x1.....cCccaguacugcgauccgagacgu..... 1

Gi1\_4259762\_x1.....cguUgugggaacacggggugccgaacu..... 1  
Gi5\_8935193\_x1.....ucgugggaacacgAggugccgaac..... 1  
Gi1\_4261436\_x1.....gacguUgugggaacacggggugcc..... 1  
Gi5\_9000397\_x1.....gccgAcaggccccgccaguacu..... 1  
Gi3\_28354612\_x1.....ccgucaggccccgccaguCcuugcgaucgga..... 1  
Gi2\_11027473\_x1.....cgucgugggaacacgggguCccgaa..... 1  
Gi2\_11062285\_x1.....ccccgccaguacugcgaucggUgac..... 1  
Gi2\_11315886\_x1.....cgugggaacacggggugGc..... 1  
Gi5\_8841682\_x1.....ggCacacggggugccgaacu..... 1  
Gi3\_28375176\_x1.....ggccccgccUguacugcga..... 1  
Gi2\_11035008\_x1.....ucgugggaacacggggugccgGa..... 1  
Gi3\_28867548\_x1.....gggGacacggggugccgaacu..... 1  
Gi2\_11070636\_x1.....cAccaguacugcgaucggagacgucgug..... 1  
Gi5\_9105896\_x1.....aacacgggguAccgaacu..... 1  
Gi3\_28444567\_x1.....cccgccUguacugcgaucggagacgucgug..... 1  
Gi3\_28466141\_x1.....agcgcAgucagggccccgccagu..... 1  
Gi3\_28549748\_x1.....acgucgugggaacacgAgugcc..... 1  
Gi3\_28392501\_x1.....ccccgccaguacCgcgaucg..... 1  
Gi3\_28476425\_x1.....gcUgucagggccccgccaguacu..... 1  
Gi3\_28475120\_x1.....Aaagagaagcggccgucagggccccg..... 1  
Gi4\_573087\_x1.....ugAgaacacggggugccgaacu..... 1  
Gi3\_28762894\_x1.....aggccccccaUuacugcga..... 1  
G1a\_6000238\_x1.....ccgccaguacCgcgaucggagacguc..... 1  
Gi3\_28962972\_x1.....cgucagCccccgccaguacugc..... 1  
G1a\_6199626\_x1.....aguacCgcgaucggagacgucg..... 1  
Gi3\_28567546\_x1.....gaagGaaagcggccgucagggcc..... 1  
Gi2\_11205191\_x1.....cugcgaucNgagacgucgugggaacac..... 1  
Gi2\_11228771\_x1.....acgucgugggaacacggggugccCaacu..... 1  
Gi3\_28398290\_x1.....ucaggccccgccaguaAugcgauc..... 1  
Gi5\_9077807\_x1.....aAcggagacgucgugggaaca..... 1  
G1a\_6010167\_x1.....cgucagggcccAgccaguacugcg..... 1  
Gi3\_28440918\_x1.....aagcggccgucagggcccUgccagua..... 1  
Gi3\_28787713\_x1.....gaagagGagcggccgucagggccccg..... 1  
Gi3\_28903472\_x1.....cgggagacgucguAggaacacg..... 1  
Gi2\_11404199\_x1.....gucagggccccgccaguGcugcg..... 1  
Gi5\_8924984\_x1.....gccccgccaguacuUcgaucgga..... 1  
Gi1\_4169383\_x1.....gggagacgucgugggaacacgggguAcc..... 1  
Gi2\_11079995\_x1.....gCgucgugggaacacggggugccgaacu..... 1  
Gi3\_28787347\_x1.....caguacugcgGucggagacgu..... 1  
Gi3\_28853698\_x1.....cccgCaguacugcgauc..... 1  
Gi3\_28963746\_x1.....ggccccgccagCacugcga..... 1  
Gi1\_4354071\_x1.....ggccccgccaguacugcgauU..... 1  
Gi1\_4352745\_x1.....agacgucgugggCacacggg..... 1  
Gi3\_28585683\_x1.....ucgugCgaacacggggugccgaac..... 1  
Gi2\_11368768\_x1.....ccccgccaguacugcgaCcggaga..... 1  
Gi1\_4368203\_x1.....ucaggccccgccaguacuAcgauc..... 1  
Gi3\_28269689\_x1.....gggagacgucgugggaacacggggCgccgaac..... 1



Gi3\_28574391\_x1.....gggaacUcggggugccga..... 1  
Gi3\_28481804\_x1.....ccgucaggccccgccUguacugcg..... 1  
Gi2\_11103752\_x1.....agcgccguNaggccccgccaguacugc.....ucguggAaacacggggugccgaa..... 1  
Gi2\_11263789\_x1.....agcgccguNaggccccgccaguacugc..... 1  
Gi3\_28492605\_x1.....ggagacgucgugggaacacAgggugcc..... 1  
Gi2\_11304417\_x1.....cUgccaguacugcgauccggagacg..... 1  
Gi1\_4325361\_x1.....cgccGguacugcgauccggaga..... 1  
Gi3\_28318452\_x1.....gccccgccGguacugcgauccggagacg..... 1  
Gi3\_28759881\_x1.....ucgugggaGacggggugccgaacu..... 1  
Gi2\_11403344\_x1.....aagaUaagcgccgucaggccc..... 1  
Gi5\_8842613\_x1.....aucggagaNgucgugggaacacggggugcc..... 1  
Gi1\_4304667\_x1.....Uaggccccgccaguacugc..... 1  
Gi1\_4175909\_x1.....gugggUacacggggugccga..... 1  
Gi5\_8992268\_x1.....ccccgccaguaUugcgauccggagacg..... 1  
Gi5\_8899164\_x1.....cgauccggagacgucgugggaGcacggg..... 1  
G1a\_6203520\_x1.....guUgugggaacacggggugccgaacu..... 1  
Gi1\_4195917\_x1.....ccgucaggUcccgccaguacug..... 1  
Gi2\_11357807\_x1.....ucggagacgucguUggaacacggggugc..... 1  
Gi3\_28791637\_x1.....ccgucaggccccAccaguacugcg..... 1  
Gi4\_593597\_x1.....gggaacacgggUugccgaacu..... 1  
Gi4\_611381\_x1.....cgugggaacacgggAugccgaacu..... 1  
Gi5\_9126426\_x1.....ucAgagacgucgugggaacacggggugccg..... 1  
Gi1\_4225351\_x1.....Aaacacggggugccgaacu..... 1  
Gi1\_4238347\_x1.....agacgucgugggaCcacggggugccg..... 1  
Gi2\_11270797\_x1.....cccgccaguacugcgaCcgag..... 1  
Gi2\_11043420\_x1.....auGggagacgucgugggaacac..... 1  
Gi3\_28633965\_x1.....cgccgucGggccccccag..... 1  
Gi5\_9062961\_x1.....gccgucaggcccGccaguacugc..... 1  
Gi5\_9126357\_x1.....gagacgucgugggaacacggggugccgCacu..... 1  
Gi1\_4292568\_x1.....ucggagacgucgugggaacGcggggugc..... 1  
Gi3\_28570019\_x1.....ucaggUcccgccaguacugcg..... 1  
Gi3\_28839531\_x1.....aguacugcgauUggagacgucg..... 1  
Gi3\_28763838\_x1.....gacgucgGgggaacacggggugccgaac..... 1  
Gi2\_11137727\_x1.....agAccccgccaguacugcga..... 1  
Gi1\_4296109\_x1.....ggagacgucgCgggaacacggggugccg..... 1  
G1a\_6028416\_x1.....caguacugcCaucggagacgucg..... 1  
Gi2\_11059386\_x1.....caUgccccgccaguacugcgauccggaga..... 1  
Gi2\_11294285\_x1.....gauccggagacgucgugggaUc..... 1  
Gi4\_569912\_x1.....gugggaacacggggugccgaG..... 1  
Gi3\_28507639\_x1.....Ugaagcgccgucaggccccgcca..... 1  
Gi3\_28929111\_x1.....agacgucgugAgaacacggg..... 1  
Gi5\_8935990\_x1.....uacugcgauccggagaAgu..... 1  
Gi5\_8997424\_x1.....caggccccgccaguacGgcgauc..... 1  
Gi5\_9032046\_x1.....aagGgaagcgccgucaggccccgcca..... 1  
G1a\_6259431\_x1.....Accaguacugcgauccgga..... 1  
G1a\_6302445\_x1.....ggagacgucgugggaacacggggAgc..... 1  
Gi3\_28342074\_x1.....gccgucaggccccccagGacugcg..... 1

Gi3\_28883029\_x1.....agggccccgccaguGcugcgauccg..... 1  
 Gi3\_28584685\_x1.....cgccaguuacuAcgauccgagacguc..... 1  
 Gi3\_28709093\_x1.....cgccgucagggccccgccCguac..... 1  
 Gi1\_4378877\_x1.....aucggagacgucgugggaaacacggggGgcc..... 1  
 Gi2\_11362341\_x1.....cUggccccgccaguacugcg..... 1  
 Gi5\_8912030\_x1.....acgucgugggaaAacggggugccgaac..... 1  
 Gi1\_4325387\_x1.....ucgAgggaaacacggggugccgaac..... 1  
 Gi1\_4324128\_x1.....cgccCguacugcgauccgagaga..... 1  
 Gi5\_9111783\_x1.....gucgugggaaacacgUggugccgaacu..... 1  
 Gi3\_28447287\_x1.....gcUccgccaguacugcgauccgagaga..... 1  
 Gi3\_28484062\_x1.....ucggagacgucgugggaaacacAgggugcc..... 1  
 Gi5\_8937443\_x1.....caguaUugcgauccgagacguc..... 1  
 Gi3\_28925765\_x1.....ccaguacugcgauccgagacguAgu..... 1  
 Gi3\_28809142\_x1.....ucguuccgaauuaCgaagagaagcg..... 1  
 Gi3\_28426457\_x1.....agUcugcugggaaacacgggg..... 1  
 Gi3\_28557953\_x1.....Gcaggccccgccaguacugcgauccgagac..... 1  
 Gi2\_11348266\_x1.....acucguuccgaauuaggaagagaagc..... 0  
 Gi1\_4211721\_x1.....ucaggcccNgccaguacugcgaucc..... 1  
 Gi3\_28685083\_x1.....agggccccUcaguacugcgauccgagacg..... 1  
 Gi3\_28486565\_x1.....ggUgacgucgugggaaacacggggugccgaa..... 1  
 Gi3\_28648200\_x1.....cgauccgagacgucgugggCacacg..... 1  
 Gi3\_28582409\_x1.....gccaGcggagacgucgugggaaaca..... 1  
 Gi1\_4213012\_x1.....Cugggaacacggggugcc..... 1  
 Gi3\_28482887\_x1.....aagcgccgucagggcccUgccaguacugc..... 1  
 Gi3\_28865742\_x1.....gacAucgugggaaacacgg..... 1  
 Gi3\_28628387\_x1.....gCaggccccgccaguacugcgauccgga..... 1  
 Gi3\_28862626\_x1.....gacgucgugggaaacGcggggugccg..... 1  
 Gi3\_28677341\_x1.....ggagacgucgugggaaacC..... 1  
 Gi2\_11160311\_x1.....aagagGagcgccgucagggccc..... 1  
 Gi3\_28576173\_x1.....cgccaguacugcgauUggagacgucgug..... 1  
 Gi5\_8882956\_x1.....cgugggCacacggggugc..... 1  
 Gl1\_6286273\_x1.....auGggagacgucgugggaaacacgggg..... 1  
 Gi2\_11232949\_x1.....agacgucgugggaaacacggUgugcc..... 1  
 Gl1\_6150272\_x1.....agaagcgccgucagggcccUgccca..... 1  
 Gl1\_6102169\_x1.....ggagacgucgugAgaacacggggugcc..... 1  
 Gi2\_11041666\_x1.....aggccUcggccaguacugcgauccgagacguc..... 1  
 Gi2\_11316526\_x1.....aguacugcgauccgagacguc..... 1  
 Gi2\_11029988\_x1.....Uagagaagcgccgucagggccc..... 1  
 Gi3\_28812085\_x1.....agacguAgugggaacacggggugccgaac..... 1  
 Gi3\_28710754\_x1.....guCggaacacggggugcc..... 1  
 Gi5\_8916653\_x1.....aucggagacAucgugggaaacacgggg..... 1  
 Gi3\_28659587\_x1.....aagagaagcgccgucagggAcc..... 1  
 Gi1\_4383838\_x1.....acugcgauccgagacgucgCgggaaca..... 1  
 Gi3\_28595224\_x1.....uacugcUaucggagacguc..... 1  
 Gi3\_28669637\_x1.....cggagacgucgugggaaacacggggGg..... 1  
 Gi3\_28921192\_x1.....agacgucgugggaaacacggggugccAaac..... 1  
 Gi3\_28879426\_x1.....cgugggaacacggggugccCaac..... 1

Gi2\_11193779\_x1.....gucgugggGacacggggugccga..... 1  
 Gi2\_11102165\_x1.....caggccccgccaguaGugcgauccg..... 1  
 Gl1a\_6233730\_x1.....aUagaagcgccgucagggccccccagucg..... 1  
 Gi2\_11124658\_x1.....agagaagcgAgucagggccc..... 1  
 Gi3\_28685837\_x1.....ugggaacacggggugccgaC..... 1  
 Gi2\_11234688\_x1.....agacgucgugggaacacggggugAcgaacu..... 1  
 Gi5\_8960443\_x1.....aAgucgugggaacacggggugccgaacu..... 1  
 Gi2\_11288524\_x1.....acugcgauccAgagacgucg..... 1  
 Gi4\_613556\_x1.....gugggaacacggggCgcccgaacu..... 1  
 Gi2\_11023851\_x1.....ccccgccaguaUugcgauccgagacg..... 1  
 Gi2\_11254115\_x1.....agagaagcgccgCcaggcccccca..... 1  
 Gi3\_28927952\_x1.....gucagggccccUcaguacugc..... 1  
 Gi1\_4290912\_x1.....aucggagacgucgugUgaacacggg..... 1  
 Gi3\_28986556\_x1.....ggccccgccGguacugcga..... 1  
 Gi3\_28463090\_x1.....Uuuccgaauuaggaagagaagcgccgu..... 1  
 Gi2\_11245259\_x1.....acgucgugggaacacggggugccAaacu..... 1  
 Gi2\_11109872\_x1.....aagcgccgucCggccccccagucg..... 1  
 Gl1a\_6275479\_x1.....Gcucguuccgaauuaggaaga..... 1  
 Gi3\_28626190\_x1.....gugggaaGacggggugccg..... 1  
 Gi2\_11002458\_x1.....caggccGcgccagucggauc..... 1  
 Gl1a\_6125545\_x1.....gauNggagacgucgugggaacacggg..... 1  
 Gi2\_11215633\_x1.....agacgucgugggaacacggggugA..... 1  
 Gi5\_8837433\_x1.....aucgAagacgucgugggaacacg..... 1  
 Gi3\_28565421\_x1.....caUgccccgccagucggaucgagacg..... 1  
 Gi3\_28599689\_x1.....cNgagacgucgugggaacacgggg..... 1  
 Gi5\_8846462\_x1.....ccgccaguaacuAcgaucggaga..... 1  
 Gi5\_9127830\_x1.....aCacgucgugggaacacggggugccgaac..... 1  
 Gi1\_4366392\_x1.....Uucaggccccccagucg..... 1  
 Gi3\_28528891\_x1.....Nucggagacgucgugggaacacg..... 1  
 Gi3\_28291287\_x1.....ucgugggaacacggggugccUa..... 1  
 Gi3\_28408123\_x1.....uaggaagagaagcgccgucagggccccgc..... 0  
 Gi2\_11117813\_x1.....gaucggagacgucgugggaacacgggguCcc..... 1  
 Gi5\_8837963\_x1.....caggcUccgccagucg..... 1  
 Gi5\_9089859\_x1.....cggGgacgucgugggaacacgg..... 1  
 Gi2\_11070143\_x1.....cgccagucggaucgagGcguc..... 1  
 Gi2\_11252218\_x1.....aucggagacgucgugggaacacgUggugc..... 1  
 Gi2\_11170729\_x1.....ucggagacgucAugggaacacg..... 1  
 Gi2\_11113469\_x1.....gucguggUaacacggggugccgaac..... 1  
 Gi3\_28532189\_x1.....Ugagaagcgccgucagggcccccca..... 1  
 Gi3\_28300205\_x1.....aguacugcgauccgGgacgucg..... 1  
 Gi3\_28611961\_x1.ccGuaacucguuccgaau..... 1  
 Gi1\_4235681\_x1.....gagacgucgugggGacacggggugccg..... 1  
 Gi2\_11111970\_x1.....gagacgucgGgggaacacggggugcc..... 1  
 Gi2\_11052441\_x1.....acgucguggUaacacggggugc..... 1  
 Gi5\_8941019\_x1.....gagacAucgugggaacacggggugccgaacu..... 1  
 Gi3\_28516093\_x1.....aggcGccgccagucggaucggaga..... 1  
 Gi2\_11302166\_x1.....agacgucgugggaacacgggguC..... 1

Gi1\_4196822\_x1.....cggGgacgucgugggaaacacggggugccgaacu..... 1  
Gi5\_8988561\_x1.....gcgccgucaggccccgccCguacugc..... 1  
Gi3\_28459401\_x1.....ccccgccaguacugcgauccg..... 0  
G1a\_6048353\_x1.....cgugggUacacggggugcc..... 1  
Gi2\_11173199\_x1.....cgNcgugggaacacggggugccg..... 1  
Gi2\_11344205\_x1.....gacgucAugggaaacacggggg..... 1  
G1a\_5998609\_x1.....aucggagacgucgugggCacacggggugc..... 1  
Gi2\_11388318\_x1.....ucggagacgucguggaCcacggggg..... 1  
Gi3\_28751089\_x1.....Ccugcgauccgagacgucg..... 1  
G1a\_6354688\_x1.....aggaagagaagcgccgucaggcccc..... 0  
Gi3\_28518557\_x1.....aguacugcgauccgGgacgucg..... 1  
Gi5\_9104013\_x1.....ccccgccaguacCgcgauccgagacg..... 1  
G1a\_6072638\_x1.....gccccgccaguacugcgauccgagacgCc..... 1  
Gi2\_11140748\_x1.....cUccgccaguacugcgauccgaga..... 1  
Gi5\_9004274\_x1.....gaucggCgacgucgugggaaacacg..... 1  
Gi5\_8977585\_x1.....aucggagacgucgugggaaacCc..... 1  
Gi5\_9042045\_x1.....aucggagacgucgugggaaacaAggggu..... 1  
Gi3\_28899965\_x1.....gaucggagacgucgugggaaUacggggugcc..... 1  
Gi2\_11396992\_x1.....Uagacgucgugggaaacacg..... 1  
Gi2\_11353363\_x1.....ugcgauccgagacgucgugggaaGcacg..... 1  
Gi2\_11126594\_x1.....ggccccgccaguacugGgauccg..... 1  
G11\_4388192\_x1.....cgccguUaggccccgccaguacugc..... 1  
Gi2\_11072028\_x1.....gccgCcaggccccgccaguac..... 1  
Gi3\_28423249\_x1.....gagaCgcgcccugcaggccccg..... 1  
G1a\_6076094\_x1.....Ggucaggccccgccaguacugcgauccg..... 1  
Gi3\_28270062\_x1.....ucaggccccgccGguacugcgauccg..... 1  
G1a\_6108666\_x1.....cgccgucaggccccgccaguacCgc..... 1  
Gi3\_28895378\_x1.....gagaagcgccgucaggccccgcUaguacug..... 1  
G11\_4203017\_x1.....ggccccgccaguacugcgauccgCgacg..... 1  
G1a\_6092977\_x1.....gucgugggaaAacggggugccgaacu..... 1  
Gi2\_11079842\_x1.....aucgUagacgucgugggaaac..... 1  
Gi5\_9073143\_x1.....gaucggagacgucgugggaaCcaccg..... 1  
Gi3\_28481038\_x1.....uacugcgauUggagacguc..... 1  
Gi3\_28665559\_x1.....ccccgccaguacugcgUuc..... 1  
Gi2\_11042862\_x1.....gagaGgucgugggaaacacggggugcc..... 1  
Gi3\_28667732\_x1.....cUguacugcgauccgagacg..... 1  
Gi2\_11274686\_x1.....ccccGcaguacugcgauccgagac..... 1  
Gi2\_11312474\_x1.....gccaguacugcAaucgga..... 1  
G11\_4161904\_x1.....cgugggaacacggggugAcgaacu..... 1  
Gi2\_11303879\_x1.....ucggUgacgucgugggaaacacggggugc..... 1  
Gi2\_11299864\_x1.....gacgucgugggaaacacggAgugc..... 1  
G11\_4354567\_x1.....gagacgucgugggaaacGcggggugcc..... 1  
Gi2\_11050032\_x1.....aGgcgcccugcaggccccgccaguac..... 1  
Gi3\_28544039\_x1.....gagaagcgccguUaggcccc..... 1  
Gi5\_8944234\_x1.....gagGcgucgugggaaacacggggugccgaacu..... 1  
Gi2\_11319104\_x1.....gugggaacacUgggugccga..... 1  
Gi3\_28519294\_x1.....ccgccagCacugcgauccgagacgucg..... 1

Gi3\_28879330\_x1.....Gaguacugcgauccggagacgucgu..... 1  
 Gi3\_28371378\_x1.....gucguAggaacacggggug..... 1  
 Gi3\_28273134\_x1.....agacgucgugggaacacgggguUccgaacu..... 1  
 Gi3\_28274983\_x1.....caggcccAgccagauacugcgau..... 1  
 Gi1\_4204908\_x1.....ugcgauccggagacgucgug..... 0  
 Gi2\_11080240\_x1.....Caagagaagcgccgucagggcccgcc..... 1  
 Gi2\_11241650\_x1.....gacgucgugggaaAacggggu..... 1  
 Gi5\_8886784\_x1.....aucggagacgucgugggaacacggggCgcc..... 1  
 Gi3\_28697545\_x1.....gAacugcgauccggagacg..... 1  
 Gi3\_28271374\_x1.....auGggagacgucgugggaacac..... 1  
 Gi2\_11182697\_x1.....uAgugggaacacggggugccgaa..... 1  
 Gi5\_9011327\_x1.....ccccgccagCacugcgauccggagacg..... 1  
 Gi2\_11183463\_x1.....cgucgugggaaAacggggugc..... 1  
 Gi2\_11135629\_x1.....gacgucgugggaacacgggguAccgaac..... 1  
 Gi3\_28856260\_x1.....aguaUugcgauccggagacgucg..... 1  
 Gi3\_28340896\_x1.....ccgucaggAcccgccagauacugcg..... 1  
 Gi5\_9113386\_x1.....ggaacacgggUugccgaacu..... 1  
 Gi1\_4213141\_x1.....gAagacgucgugggaacacggggugcc..... 1  
 G1a\_6279007\_x1.....caggUcccgccagauacugcgau..... 1  
 Gi2\_11374152\_x1.....ggagGcgucgugggaacacggggug..... 1  
 Gi3\_28295743\_x1.....ccagauacugcgauccggagacCucgug..... 1  
 Gi3\_28359490\_x1.....ggagacgucgugggaacacggA..... 1  
 Gi3\_28449173\_x1.....agaagcgccgucagggcccgccaCu..... 1  
 Gi3\_28642778\_x1.....acugcgauccggaCacgucgu..... 1  
 Gi1\_4389435\_x1.....gucgugggaacaAggggug..... 1  
 Gi2\_11024091\_x1.....uacugcgGucggagacgucgug..... 1  
 Gi5\_8869238\_x1.....cNugggaacacggggugccgaacu..... 1  
 Gi2\_11369247\_x1.....gaacaGggggugccgaacu..... 1  
 Gi2\_11113189\_x1.....gaCcgagacgucgugggaacacggg..... 1  
 Gi2\_11143258\_x1.....aucggagacgucgugggaaUacgggg..... 1  
 Gi2\_11197429\_x1.....gaagcgccgucagggcccgccagauacu..... 0  
 Gi2\_11224770\_x1.....aguacugcNaucggagacgucgug..... 1  
 Gi4\_607109\_x1.....aacacggggCgccgaacu..... 1  
 Gi2\_11031676\_x1.....agagaagcgccgAcaggc..... 1  
 Gi2\_11237102\_x1.....gucgugggaacacggggugccCa..... 1  
 G1a\_6287259\_x1.....acugcgauUggagacguc..... 1  
 Gi3\_28855034\_x1.....gaCcgagacgucgugggaacacgggg..... 1  
 Gi5\_9045984\_x1.....aucggagacgucgCgggaacac..... 1  
 Gi3\_28838043\_x1.....gUucggagacgucguggg..... 1  
 Gi3\_28442818\_x1.....ccUucagggcccgccagauacugc..... 1  
 Gi5\_8929204\_x1.....gucagggcccgccagugcugcg..... 1  
 Gi5\_9047761\_x1.....gacgucgugggaacacgAgggugccgaacu..... 1  
 Gi1\_4173293\_x1.....ucgugggaacacAgggugccg..... 1  
 Gi1\_4253666\_x1.....ucagggcccgccagauAugcg..... 1  
 Gi5\_8912285\_x1.....ccgucagggcccgccagugcugcg..... 1  
 Gi1\_4366502\_x1.....gugggaacacgUggugccgaac..... 1  
 Gi2\_11335531\_x1.....gaucggagCcgucgugggaacacggggugc..... 1

Gi2\_11133745\_x1.....gccgucagUccccgccaguacugcg..... 1  
Gi2\_11120754\_x1.....gagacgucgugggaaacacggAgugc..... 1  
Gi3\_28265582\_x1.....cggagacgucgugggaaacacggg..... 1  
Gi3\_28806822\_x1.....ccaguacugcgcaCcgagacguc..... 1  
Gi5\_8921410\_x1.....cggagacgucgugggaaacacgAggugcc..... 1  
Gi5\_9002879\_x1.....aggccccccaAuacugcga..... 1  
Gi3\_28559790\_x1.....cgccgucagggccccgccGguac..... 1  
Gi2\_11200183\_x1.....cgccgucagggccccgccGguac..... 1  
Gi5\_9015448\_x1.....caggccccccaguacCgc..... 1  
Gi3\_28837218\_x1.....cccgccaguacCgcgaucggagacg..... 1  
Gi2\_11317084\_x1.....ucgugggaaacacggCgugccg..... 1  
Gi4\_582014\_x1.....aGgucgugggaaacacggggugccgaacu..... 1  
Gi5\_8987905\_x1.....aucgUagacgucgugggaaacac..... 1  
Gi5\_9081320\_x1.....gucagCccccgccaguacugcg..... 1  
Gi2\_11219880\_x1.....ccccgccaguaAugcgauc..... 1  
Gi2\_11266148\_x1.....cgaucggagacgucgugggaaUacggggug..... 1  
Gi3\_28365029\_x1.....gaucggagacgucgugAgaacacgggg..... 1  
Gi5\_8910752\_x1.....caggcccUgccaguacugcgauc..... 1  
Gi2\_11089248\_x1.....uggUaacacggggugccgaac..... 1  
G1a\_5987536\_x1.....gagacgucgugggCacacg..... 1  
Gi3\_28913448\_x1.....cgucgugggaaacacgCggugccgaac..... 1  
Gi3\_28406877\_x1.....gucgugggaaacGcggggu..... 1  
Gi3\_28764538\_x1.....agaagcgccgucagguUcccgcc..... 1  
Gi3\_28565920\_x1.....ggagacgucgugggaaacacggCg..... 1  
Gi5\_9029124\_x1.....acGgcgaucggagacgucgug..... 1  
Gi2\_11068934\_x1.....Ucgaucggagacgucgugggaaacacggggug..... 1  
Gi2\_11033793\_x1.....ucggagaUgucgugggaaacacggggugccga..... 1  
Gi2\_11083536\_x1.....cUaguacugcgaucggagacg..... 1  
Gi3\_28823849\_x1.....gCcgucgugggaaacacggggugccgaacu..... 1  
Gi2\_11296848\_x1.....ucggGgacgucgugggaaacacggggugccgaac..... 1  
G1a\_6129189\_x1.....aagagaagcgccgucaAgccccg..... 1  
Gi5\_9019461\_x1.....cgccaguaNugcgaucggagacgu..... 1  
Gi2\_11141422\_x1.....cgaucggagacgGcgugg..... 1  
Gi3\_28886550\_x1.....caguacugcgaucggGgacgu..... 1  
Gi1\_4242742\_x1.....ucgugUgaacacggggugccgaacu..... 1  
Gi3\_28882733\_x1.....gacgucgugggaaacacgAggugccgaac..... 1  
Gi3\_28761144\_x1.....ucggGgacgucgugggaaacacggggugccgaac..... 1  
Gi3\_28882987\_x1.....gccaguGcugcgaucggag..... 1  
Gi3\_28700948\_x1.....gaagagaaNcgccgucagggccccgccag..... 1  
Gi3\_28827987\_x1.....cgaucggagacgucgugggaaacacgggAug..... 1  
Gi3\_28777646\_x1.....aggUcccgccaguacugcgaucggagacg..... 1  
Gi2\_11048682\_x1.....cgugggaaacacggggugcAga..... 1  
Gi3\_28641249\_x1.....aucggagacgucgugggaaacacU..... 1  
Gi3\_28304591\_x1.....ucggagacgucgugAgaacacggg..... 1  
Gi5\_8977517\_x1.....acNucgugggaaacacggggugccgaac..... 1  
Gi3\_28950838\_x1.....cgucaggcNccgccaguacugcgauc..... 1  
Gi2\_11399827\_x1.....cgucguCggaacacggggugccgaacu..... 1

Gi3\_28832664\_x1.....agaNaagcgccgucagggccccgcca.....ucguggggaacacggggugccgaaGu..... 1  
Gi1\_4248484\_x1.....agUgaagcgccgucagggccccgcca.....uggggaacacggggugcUgaacu..... 1  
Gi5\_8972643\_x1.....gCccccgccaguacugcgau.....cggagacgucgugggaacacggggugccgaUc..... 1  
Gi4\_610900\_x1.....ugcgCgggaacacggggugcc.....gacAucgugggaacacggggugccgaacu..... 1  
Gi2\_11024691\_x1.....ugcgauaggagacgucgugggC.....gucgCgggaacacggggugcc..... 1  
Gi1\_4247169\_x1.....gacAucgugggaacacggggugccgaacu.....aggcUccgccaguacugcgau..... 1  
G1a\_6277796\_x1.....gacAucgugggaacacggggugccgaacu.....cggagacgucgugggaacacggggugccgaUc..... 1  
Gi3\_28701691\_x1.....aggcUccgccaguacugcgau.....cggagacgucgugggaacacggggugccgaUc..... 1  
Gi2\_11007020\_x1.....cggagacgucgugggaacacggggugccgaUc.....cgucgCgggaacacggggugcc..... 1  
Gi5\_9133410\_x1.....cgucgCgggaacacggggugcc.....gucgCgggaacacggggugcc..... 1  
Gi2\_11052586\_x1.....gucgCgggaacacggggugcc.....gucgCgggaacacggggugcc..... 1  
Gi3\_28919402\_x1.....cgucgCgggaacacggggugcc.....gucgCgggaacacggggugcc..... 1  
Gi3\_28712079\_x1.....gucgCgggaacacggggugcc.....gucgCgggaacacggggugcc..... 1  
Gi3\_28510892\_x1.....gucgCgggaacacggggugcc.....gucgCgggaacacggggugcc..... 1  
Gi3\_28521901\_x1.....gucgCgggaacacggggugcc.....gucgCgggaacacggggugcc..... 1  
Gi2\_11172867\_x1.....gucgCgggaacacggggugcc.....gucgCgggaacacggggugcc..... 1  
G1a\_6047379\_x1.....gucgCgggaacacggggugcc.....gucgCgggaacacggggugcc..... 1  
Gi2\_11054537\_x1.....Cccgucagggccccgccaguacugcg.....gucgCgggaacacggggugcc..... 1  
Gi1\_4167450\_x1.....acacggggugccgaacuG.....gucgCgggaacacggggugcc..... 1  
Gi5\_9059131\_x1.....guAggaacacggggugccgaacu.....gucgCgggaacacggggugcc..... 1  
Gi2\_11093380\_x1.....ugggaacUcggggugccg.....gucgCgggaacacggggugcc..... 1  
Gi3\_28739695\_x1.....gggaacacggggUugccgaac.....gucgCgggaacacggggugcc..... 1  
Gi2\_11292455\_x1.....aggccccgccaguacugcgauaggacacguc.....gucgCgggaacacggggugcc..... 1  
Gi5\_8905360\_x1.....ugcgauaggagacgucgUAgga.....gucgCgggaacacggggugcc..... 1  
Gi1\_4335477\_x1.....aucggaAacgucgugggaacacggggu.....gucgCgggaacacggggugcc..... 1  
Gi3\_28676994\_x1.....gccauuacugcgauaggagacgu.....gucgCgggaacacggggugcc..... 1  
G1a\_5999446\_x1.....gucagggccccgccagCacugc.....gucgCgggaacacggggugcc..... 1  
Gi1\_4358823\_x1.....ugcgauaggagacgucgugggG.....gucgCgggaacacggggugcc..... 1  
Gi3\_28772210\_x1.....ccccgccaguacugcgauAg.....gucgCgggaacacggggugcc..... 1  
Gi3\_28726336\_x1.....Gcggagacgucgugggaacacggggugccgaacu.....gucgCgggaacacggggugcc..... 1  
Gi2\_11160912\_x1.....guacugcgGucggagacgu.....gucgCgggaacacggggugcc..... 1  
Gi3\_28935019\_x1.....aagagaagcgccgucagggUcccgccagu.....gucgCgggaacacggggugcc..... 1  
Gi5\_9054377\_x1.....gacgucguAggaacacggggugccgaacu.....gucgCgggaacacggggugcc..... 1  
Gi2\_11350065\_x1.....cgugggaaacacggggCugccgaac.....gucgCgggaacacggggugcc..... 1  
Gi2\_11038197\_x1.....gaagagaagcgccgucagggccccgUc.....gucgCgggaacacggggugcc..... 1  
Gi3\_28731951\_x1.....cgugggaaacacggggugcAg.....gucgCgggaacacggggugcc..... 1  
G1a\_6161651\_x1.....uCcgauaggagacgucgug.....gucgCgggaacacggggugcc..... 1  
Gi3\_28961845\_x1.....ggagacgucgugggaacacggggUaccgaacu.....gucgCgggaacacggggugcc..... 1  
Gi2\_11059151\_x1.....cguUggaacacggggugccgaac.....gucgCgggaacacggggugcc..... 1  
Gi3\_28830573\_x1.....gucgCgggaacacggggugccgaac.....gucgCgggaacacggggugcc..... 1  
Gi2\_11318153\_x1.....cgccaguacuAcgauaggagacgucg.....gucgCgggaacacggggugcc..... 1  
Gi3\_28797515\_x1.....cccgccaguUcugcgauaggagacg.....gucgCgggaacacggggugcc..... 1  
Gi2\_11052448\_x1.....cgucgugggaacacggggCgccga.....gucgCgggaacacggggugcc..... 1  
Gi2\_11047237\_x1.....cgauaggagacgucgugggaacUcggg.....gucgCgggaacacggggugcc..... 1  
Gi2\_11324979\_x1.....aaUcggcgucagggccccgccaguacugc.....gucgCgggaacacggggugcc..... 1  
Gi5\_8866484\_x1.....Nucggagacgucgugggaaca.....gucgCgggaacacggggugcc..... 1  
G1a\_6098889\_x1.....caguacugcCaucggagacguc.....gucgCgggaacacggggugcc..... 1

Gi3\_28652703\_x1.....cgccaguacugcgauccggagCcg..... 1  
 Gi3\_28278401\_x1.....aggccccgccagAacugcgauccggaga..... 1  
 Gi1\_4236988\_x1.....ggagacgucgugggGacacggggugccg..... 1  
 Gi2\_11354351\_x1.....cgauccggagacgucgugggG..... 1  
 Gi5\_8834795\_x1.....caUggggugccgaacuu..... 1  
 Gl1a\_6274090\_x1.....caAgccccgccaguacug..... 1  
 Gi2\_11121817\_x1.....ucaggccccgccaguUcugcg..... 1  
 Gi3\_28371913\_x1.....cgucaggccccAccaguacu..... 1  
 Gi1\_4187439\_x1.....acgucgugggaaacacggggugUcgaac..... 1  
 Gl1a\_6300835\_x1.....aucggagacgucgGgggaa..... 1  
 Gi1\_4229726\_x1.....cgugggaaUacggggugccgaac..... 1  
 Gi1\_4339908\_x1.....ugggaaacacggggugccgaaUuu..... 1  
 Gi3\_28482926\_x1.....ccgaauuaCgaagagaagcgc..... 1  
 Gi3\_28335977\_x1.....cggagacgucgugggaaacacA..... 1  
 Gi3\_28708320\_x1.....gccgucaggccccCccaguacugcg..... 1  
 Gi4\_574424\_x1.....cgAgggaacacggggugccgaac..... 1  
 Gi1\_4295637\_x1.....aucggagacgucgugggCacacggg..... 1  
 Gi4\_569467\_x1.....cUcgccaguacugcgauccggagacguc..... 1  
 Gl1a\_6255644\_x1.....Cucggagacgucgugggaaacacggggugcc..... 1  
 Gi2\_11033647\_x1.....cgccaguacugcgauccAgaga..... 1  
 Gi1\_4342532\_x1.....gucgugggGacacggggugccgaacu..... 1  
 Gi3\_28557915\_x1.....cgAcaggccccgccaguacugcgauccggaga..... 1  
 Gl1a\_5994204\_x1.....aAagaagcgcgucaggccccgcc..... 1  
 Gi2\_11280141\_x1.....guacugcgauccggagacgAgc..... 1  
 Gi5\_9076706\_x1.....gugggaacaAggggugccga..... 1  
 Gi1\_4390107\_x1.....gugggaacacggggugccgCacuu..... 1  
 Gi3\_28863752\_x1.....aggccccgccaguacugcgauccggC..... 1  
 Gi3\_28321553\_x1.....cggagacgucgugggaaacacggggugAc..... 1  
 Gi2\_11176374\_x1.....gccccgccagAacugcgauccgg..... 1  
 Gi3\_28493093\_x1.....aggccccgNcaguacugcgauccggagac..... 1  
 Gi2\_11369382\_x1.....acgucgugggaaacacgggAugcc..... 1  
 Gi2\_11137979\_x1.....aucggagacgucgAgggaacacg..... 1  
 Gi3\_28548164\_x1.....aggccccgUcaguacugcgau..... 1  
 Gi3\_28770430\_x1.....gugggaaUacggggugccgaacuu..... 1  
 Gi1\_4299018\_x1.....caggccccgAcaguacugcg..... 1  
 Gi2\_11294108\_x1.....acgucgugggaaacacggggugAcgaacu..... 1  
 Gi2\_11037527\_x1.....gaAcggagacgucgugggaaac..... 1  
 Gi3\_28577626\_x1.....cggagacgucgugggaaacacggAgugccga..... 1  
 Gi1\_4296363\_x1.....uUaggccccgccaguacugcg..... 1  
 Gi2\_11280957\_x1.....aagagaagcgcgUgagccccgc..... 1  
 Gl1a\_6294058\_x1.....ucggagacgucgugggaaacacgggUugc..... 1  
 Gi2\_11022846\_x1.....gucaggcUccgccaguacugc..... 1  
 Gi2\_11293961\_x1.....gcgauccggagacgucCuggga..... 1  
 Gi3\_28798543\_x1.....cccAgccaguacugcgauccggaga..... 1  
 Gi2\_11299263\_x1.....agaUgucgugggaaacacggggugcc..... 1  
 Gi3\_28625070\_x1.....caggccccgccaguacugUga..... 1  
 Gi1\_4293686\_x1.....caggccccgccaguacugcU..... 1



Gi3\_28765092\_x1.....caggccccccagacuagUgaucgga..... 1  
 Gi3\_28792042\_x1.....gcUaucggagacgucgug..... 1  
 Gi3\_28460544\_x1.....gagaagcgccgucagggcA..... 1  
 Gi4\_574356\_x1.....acgucgGgggaacacggggugccgaa..... 1  
 Gi3\_28567431\_x1.....aucggagacgucgugUaacacg..... 1  
 Gi3\_28553585\_x1.....gcccgcucagggccccCccagacuagc..... 1  
 Gi3\_28423613\_x1.....gCcgugggaacacggggugccgaa..... 1  
 Gi5\_8982994\_x1.....cgucgugggaacCcggggugccga..... 1  
 Gi2\_11190268\_x1.....cgugggaacacgggAugccg..... 1  
 Gi1\_4307217\_x1.....aggccccgAcagacuagc..... 1  
 Gi2\_11029921\_x1.....cucguuccgaauaggaagagaagcgc..... 0  
 Gi3\_28569036\_x1.....cgucaggccccgccGguacuagcgaucgg..... 1  
 Gi1\_4263292\_x1.....cggagacgucgugggaacacAgggugcc..... 1  
 Gi3\_28739623\_x1.....cgucaggccccccagacuagcgaucggagacg..... 0  
 Gi2\_11299500\_x1.....gaucggagGcgucgugggaacacgggg..... 1  
 Gi5\_9126757\_x1.....agacUucgugggaacacggggugccgaa..... 1  
 Gl1a\_6232007\_x1.....gucaggccccgGcagacuagc..... 1  
 Gi1\_4370639\_x1.....ggaacacggggugccgaUc..... 1  
 Gi1\_4318304\_x1.....aucAgagacgucgugggaacacggg..... 1  
 Gi3\_28453375\_x1.....cccgccagacuagcgaucggagCcg..... 1  
 Gl1a\_6318592\_x1.....gugggaacacggggugcAg..... 1  
 Gi2\_11224039\_x1.....aucggagacgucgugggaacacggggugUcg..... 1  
 Gi3\_28918158\_x1.....gaagagaagcgUcguagggccccgc..... 1  
 Gi3\_28299218\_x1.....gagacgucgugggaacGcggggugccg..... 1  
 Gi1\_4343252\_x1.....cccgccagacuagcgaucggag..... 0  
 Gi4\_598628\_x1.....ucgugggaacacggggugccgaaAu..... 1  
 Gi1\_4210662\_x1.....gacgucgugggaacacggggugUc..... 1  
 Gi2\_11267517\_x1.....agacUucgugggaacacggggug..... 1  
 Gi3\_28671803\_x1.....gCagagaagcgccgucagggccccgc..... 1  
 Gi5\_9058015\_x1.....cggagacgNcgugggaacacgg..... 1  
 Gi1\_4312952\_x1.....gaagcgccgucagggccccgcca..... 0  
 Gl1a\_6239939\_x1.....ggagacgucgCgggaacac..... 1  
 Gi2\_11127466\_x1.....cgccguUaggccccgcag..... 1  
 Gi3\_28484871\_x1.....gGcucgugggaacacggggugc..... 1  
 Gi5\_9049872\_x1.....aucAgagacgucgugggaacacg..... 1  
 Gi1\_4382701\_x1.....gacgucgugggaGcacggggugccg..... 1  
 Gl1a\_6306008\_x1.....ggGgacgucgugggaacacg..... 1  
 Gi2\_11359159\_x1.....cagCccccccagacuagcga..... 1  
 Gi1\_4284375\_x1.....gagacgucgugggaacacggggCgcc..... 1  
 Gi3\_28344248\_x1.....gagaagcgUcguagggccccgc..... 1  
 Gi2\_11052501\_x1.....ggagacgucgugggaacacggggugU..... 1  
 Gi3\_28980370\_x1.....agagaagcgccAucagggccccccagacuagc..... 1  
 Gi2\_11077043\_x1.....Ggagaagcgccgucagggccccccagacu..... 1  
 Gl1a\_6228580\_x1.....gugggaacacggggAgccga..... 1  
 Gi4\_569966\_x1.....agacgucgugggaacacggggugccgaaAu..... 1  
 Gi2\_11324661\_x1.....agaagcgccgucagggccccGgcc..... 1  
 Gi2\_11180191\_x1.....cgucaggccccCccagacuagc..... 1

Gi3\_28618923\_x1.....gccgucagggcccUgccaguac..... 1  
 Gi5\_8956895\_x1.....gacgucguggggaacacggggugccgaaUu..... 1  
 Gi2\_11158619\_x1.....gcgaucggagGcgucgugggaaacacggggug..... 1  
 Gi3\_28712773\_x1.....ccccgccaAuacugcggaucgggagacguc..... 1  
 Gi2\_11234092\_x1.....guacuAcgaucgggagacgu..... 1  
 G1a\_6179287\_x1.....ccgccaguacuAcgaucgggagacguc..... 1  
 Gi3\_28635145\_x1.....gucgugggaaacacggggugccgUacuu..... 1  
 Gi2\_11367302\_x1.....cccgccaguacugcggaucgggagaAguc..... 1  
 Gi3\_28321809\_x1.....ugcgauccggagacgucgugggaaacacggA..... 1  
 Gi3\_28346597\_x1.....gaagagaagcgccgucCggc..... 1  
 Gi3\_28870649\_x1.....gucgGgggaacacggggg..... 1  
 Gi2\_11389991\_x1.....ccccgagAacugcggaucgggagacgucg..... 1  
 Gi2\_11295142\_x1.....gaucgggagacgucgugggaaacacggggugcU..... 1  
 Gi3\_28352150\_x1.....agcgccgucagggccccgUc..... 1  
 Gi2\_11126713\_x1.....ggUccccgccaucugcggaucgggagac..... 1  
 Gi1\_4383069\_x1.....uAcgaucgggagacgucguggg..... 1  
 Gi1\_4368912\_x1.....cguAggaacacggggugccga..... 1  
 Gi1\_4177384\_x1.....gaucgggagGcgucguggg..... 1  
 Gi2\_11237697\_x1.....ccccgccaucugcggaCcgagacgucguc..... 1  
 Gi2\_11375174\_x1.....ucguggCaacacggggugccg..... 1  
 Gi3\_28361285\_x1.....gagaagcgccAucagggccccgag..... 1  
 Gi3\_28605923\_x1.....agacgucgugggUcacggggugccgaaacu..... 1  
 Gi4\_573194\_x1.....gggaacacggggGgcccgaac..... 1  
 G1a\_6166942\_x1.....cGguacugcggaucgggagac..... 1  
 Gi2\_11384933\_x1.....cGcgccaguacugcggaucgggagacgucguc..... 1  
 Gi5\_9048108\_x1.....cgAcguggggaacacggggugc..... 1  
 Gi2\_11110621\_x1.....gacgucgugAgaacacggggugccga..... 1  
 Gi3\_28522506\_x1.....cgucgugggaaacacggggugG..... 1  
 Gi1\_4249323\_x1.....uUagggccccgccaucugcggauc..... 1  
 Gi3\_28651206\_x1.....cgauUgggagacgucgugggaaacacggggugcc..... 1  
 Gi3\_28698580\_x1.....ucNugggaacacggggugccgaaac..... 1  
 Gi5\_8968075\_x1.....aggccccgccaUugcggauc..... 1  
 Gi2\_11184970\_x1.....ggagacgucgugAgaacacggggugc..... 1  
 Gi1\_4241970\_x1.....caggccccgccaucugcggaucgggagCcg..... 1  
 G1a\_6340127\_x1.....ccccgccaucugcggaucggGgacguc..... 1  
 Gi5\_9027828\_x1.....acugcggaucgggagCcgucguc..... 1  
 Gi3\_28799723\_x1.....aucgggagacguAgugggaaacacg..... 1  
 Gi3\_28555284\_x1.....gaucgggagacgucgugggGacacggggugccg..... 1  
 Gi3\_28455535\_x1.....agaagcgccgucagggccccgccaucCguc..... 1  
 Gi5\_9088516\_x1.....acugcggaucAgagacgucguc..... 1  
 Gi2\_11226345\_x1.....cagAacugcggaucgggagacguc..... 1  
 Gi2\_11265646\_x1.....guNggaaacacggggugccg..... 1  
 Gi2\_11101820\_x1.....gagacUucgugggaaacacggggugccgaaac..... 1  
 Gi2\_11285815\_x1.....gagacgucgugggaaacacggggGgccc..... 1  
 Gi2\_11073511\_x1.....caggccccgccaucugcggaucgg..... 1  
 Gi5\_9112485\_x1.....Cggaacacggggugccgaa..... 1  
 Gi3\_28376670\_x1.....gucgugggaaacacggggugcUga..... 1

Gi2\_11378714\_x1.....aNacgucgugggaacacggggugccgaacu..... 1  
 Gi4\_578090\_x1.....ucgugggaacacggggugccgCacu..... 1  
 Gi3\_28712297\_x1.....aggccAcgccaguacugcgauccg..... 1  
 Gi1\_4380333\_x1.....aucggagacgucgugggaacacggggugGc..... 1  
 Gi2\_11406795\_x1.....ggccccCccaguacugcgaucc..... 1  
 Gi5\_8962289\_x1.....guuccgaauuaggaagag..... 0  
 Gi3\_28462625\_x1.....agcggcgucaggccccgcU..... 1  
 Gi2\_11199167\_x1.....acugcgauccggagaUgucgu..... 1  
 Gi2\_11216005\_x1.....agggccAgccaguacugcga..... 1  
 Gl1a\_6047126\_x1.....gCcgugggaacacggggugccgaacu..... 1  
 Gi5\_8900987\_x1.....Ugucgugggaacacggggugc..... 1  
 Gi1\_4308091\_x1.....ugcgauccggagacgucAugggaaacacg..... 1  
 Gi3\_28951852\_x1.....cgccaguacGcgauccggagacguc..... 1  
 Gi3\_28311376\_x1.....ggagacgucgugggaacacggggugUc..... 1  
 Gl1a\_6354027\_x1.....aauuagAaagagaagcgccguc..... 1  
 Gi2\_11067697\_x1.....Ugagacgucgugggaacacggggugccgaac..... 1  
 Gi2\_11267745\_x1.....acgAcgugggaacacggggugccgaac..... 1  
 Gi3\_28791417\_x1.....ucaggccccgccaguacuAc..... 1  
 Gi5\_9063292\_x1.....cugcgauccggagacgucgG..... 1  
 Gi3\_28778799\_x1.....Gaggccccgccaguacugcgauccggaga..... 1  
 Gi2\_11012093\_x1.....aGgucgugggaacacggggugccga..... 1  
 Gi3\_28462990\_x1.....ccccgccaguacugcCauc..... 1  
 Gi1\_4321968\_x1.....ucgugggaaUacggggugccgaac..... 1  
 Gi3\_28935123\_x1.....aucggagacgucguUggaacacgggg..... 1  
 Gi3\_28647270\_x1.....cgucgugAgaacacggggugccga..... 1  
 Gi5\_8870040\_x1.....ucgugggaacacggggguUccgaacu..... 1  
 Gi2\_11315049\_x1.....aUugcgauccggagacgucgugg..... 1  
 Gi3\_28735867\_x1.....gacgucgugggaaAacggg..... 1  
 Gi2\_11311861\_x1.....agggccccgcUaguacugcgauccggagac..... 1  
 Gi4\_573085\_x1.....gucaggccccgccaguacug..... 0  
 Gi3\_28319666\_x1.....ugcgauccggGgacgucguggga..... 1  
 Gi1\_4312465\_x1.....acgucgugggaacacggggugc..... 0  
 Gl1a\_6003776\_x1.....guacugcgauccggagacguAg..... 1  
 Gi3\_28636499\_x1.....auAggagacgucgugggaacacgg..... 1  
 Gl1a\_6043620\_x1.....gaCcgagacgucgugggaacacggggug..... 1  
 Gi4\_569627\_x1.....agacgucgNgggaaacacggggugcc..... 1  
 Gi3\_28372469\_x1.....Nggccccgccaguacugcg..... 1  
 Gi3\_28784516\_x1.....cgauccggagacguUgugggaacacgg..... 1  
 Gi1\_4187515\_x1.....agacgucgugggaaUacggggugccgaacu..... 1  
 Gi5\_9110503\_x1.....gacguUgugggaacacggggugccgaacu..... 1  
 Gi1\_4294489\_x1.....caggcUccgccaguacugcgauccggaga..... 1  
 Gi3\_28878303\_x1.....agagaagcgccgucCggcc..... 1  
 Gi1\_4213625\_x1.....Uaucggagacgucgugggaacacg..... 1  
 Gi2\_11229903\_x1.....gaagcgccgucaggccccgccGguacugc..... 1  
 Gi1\_4355230\_x1.....gUagacgucgugggaacacg..... 1  
 Gi3\_28845923\_x1.....ucgugggaacCcggggugccgaa..... 1  
 Gl1a\_6133257\_x1.....gugggaacCcggggugccga..... 1

G1a\_6325276\_x1.....ugcgaucggagCcgucgug..... 1  
 Gi3\_28971096\_x1.....gaucggaAacgucgugggaacacggg..... 1  
 Gi3\_28470055\_x1.....aucggagacguAgugggaacacggggugc..... 1  
 Gi3\_28798346\_x1.....ggagacgucgugggaacGcggggugccg..... 1  
 Gi2\_11245854\_x1.....cgucaggccccgccGguac..... 1  
 Gi5\_9024949\_x1.....cgaucggCgacgucgugggaacacggg..... 1  
 Gi3\_28700411\_x1.....gccgucaggUcccgccaguac..... 1  
 Gi3\_28484055\_x1.....cgccgucaggcUccgccagua..... 1  
 Gi3\_28952661\_x1.....Ucccgccaguacugcgaucggaga..... 1  
 Gi3\_28544206\_x1.....ccgucaggccccgccaguGcugcg..... 1  
 Gi2\_11370168\_x1.....cgccaguacugcgaucggagacgC..... 1  
 Gi3\_28961832\_x1.....gacgucgugggCacacggg..... 1  
 G1a\_6124519\_x1.....gaGcggagacgucgugggaacacggg..... 1  
 Gi3\_28524184\_x1.....ugggaacacggggugGcgaac..... 1  
 Gi1\_4162081\_x1.....ggNacacggggugccgaacu..... 1  
 Gi2\_11225386\_x1.....aggccccgccaguacugcgauUggaga..... 1  
 Gi2\_11391945\_x1.....gaNaagcgccgucaggccccgc..... 1  
 Gi3\_28698943\_x1.....ugggaacacggggugcGg..... 1  
 Gi5\_8914105\_x1.....gaucggagacgucgugggGacacggggu..... 1  
 Gi3\_28309262\_x1.....gaacacggNgugccgaacuu..... 1  
 Gi3\_28605984\_x1.....ccgucaggccccgUcaguacugcg..... 1  
 Gi3\_28547924\_x1.....gacgucgugggaacacgCggugccgaacu..... 1  
 Gi2\_11227608\_x1.....gagacgucgugggaacacCgggugccg..... 1  
 Gi2\_11035733\_x1.....gucaggccccgccCuacugcg..... 1  
 Gi3\_28475874\_x1.....gaucggagacgucgugggaacUcggggu..... 1  
 Gi1\_4359851\_x1.....ucgugggaacacggggugcUgaa..... 1  
 Gi2\_10994775\_x1.....gUgacgucgugggaacacggg..... 1  
 Gi3\_28438211\_x1.....ggagacgucgugggaacacggggugGc..... 1  
 Gi5\_9101199\_x1.....cgaaauaggaagagaagcgc..... 0  
 Gi3\_28626369\_x1.....aggccccgccAuacugcgau..... 1  
 Gi3\_28568648\_x1.....cgccaguaUugcgaucggagacguc..... 1  
 Gi3\_28341781\_x1.....cgccagCacugcgaucggagacgu..... 1  
 Gi2\_11340626\_x1.....acgucgugggUacacggggugccgaacu..... 1  
 Gi1\_4341605\_x1.....aagagaagNgccgucaggccccgccagu..... 1  
 Gi3\_28521406\_x1.....aggccccgccaguGcugcgaucgga..... 1  
 Gi2\_11071325\_x1.....gagacgucgugggaCcacggg..... 1  
 Gi2\_11253600\_x1.....gugggaacacggggUccgaa..... 1  
 Gi3\_28933719\_x1.....cggaUacgucgugggaacacgg..... 1  
 G1a\_6104207\_x1.....ccgaaauaNgaagagaagcgc..... 1  
 G1a\_6346537\_x1.....acucguuccgaaauagga..... 0  
 Gi3\_28390928\_x1.....gucaggccccgccGguacugcgaucggaga..... 1  
 Gi2\_11225465\_x1.....gucaggccccgccaguacugc..... 1  
 Gi3\_28736285\_x1.....gagaagcgccgucaggccccgccagu..... 0  
 Gi2\_11069631\_x1.....agacgucguggCaacacggggugccgaacu..... 1  
 Gi2\_11026872\_x1.....cccgccaguacugUgaucgg..... 1  
 G1a\_6293102\_x1.....acugcgaucggagaUgucgug..... 1  
 Gi2\_11387060\_x1.....cgccaguacugcgCucggaga..... 1

Gi3\_28498069\_x1.....Ucccgccaguacugcgauccggagacguc..... 1  
 Gi5\_8974187\_x1.....caguacCgcgaucggagacguc..... 1  
 Gi3\_28788106\_x1.....ucggagacgucgugggGacacggggugccga..... 1  
 Gi3\_28914166\_x1.....gagaagcgccgucGggccc..... 1  
 Gi3\_28834777\_x1.....gacgucgugggaacacggAgu..... 1  
 Gi2\_11062247\_x1.....gugggaacacggggugAcgaa..... 1  
 Gi1\_4176367\_x1.....ucgugggaacacgAggugcc..... 1  
 Gi3\_28810669\_x1.....Cgagacgucgugggaacacggggugccgaacu..... 1  
 Gi1\_4176189\_x1.....gagaUgucgugggaacacggggugccga..... 1  
 G1a\_6084434\_x1.....uGggagacgucgugggaacacggggugc..... 1  
 Gi2\_11094654\_x1.....aucggagacgucguggAaacacgg..... 1  
 Gi2\_11200223\_x1.....agacgucgugCgaacacggggugc..... 1  
 G1a\_6234506\_x1.....gaagagaagcgccgucCg..... 1  
 Gi2\_11194247\_x1.....auNggagacgucgugggaacacggggugcc..... 1  
 G1a\_6151794\_x1.....gCgaacacggggugccgaa..... 1  
 G1a\_6319072\_x1.....gaucggagacgucgugggGa..... 1  
 Gi3\_28692331\_x1.....Ggaagcgccgucagggcccgcagua..... 1  
 Gi3\_28754684\_x1.....ucggagacgucgugggCacacggggugcc..... 1  
 Gi2\_11170763\_x1.....ucggagacgGcuggggaac..... 1  
 Gi2\_11096584\_x1.....agacgucgugggaacacggCgugccgaacu..... 1  
 Gi3\_28395862\_x1.....ggccccgccaguacugcgaCcgagacg..... 1  
 Gi2\_11366538\_x1.....ugggaacacAgggugccgaacuu..... 1  
 Gi2\_11397859\_x1.....cgucgugggGacacggggugccgaac..... 1  
 Gi1\_4376033\_x1.....gugggaacacggggugccAaac..... 1  
 Gi2\_11337680\_x1.....cgaCcgagacgucgugggaaca..... 1  
 Gi3\_28842010\_x1.....ggccccgccaguacugcgaGc..... 1  
 Gi3\_28682920\_x1.....cgucgugggaacacggggugccUaac..... 1  
 Gi3\_28929755\_x1.....gccAUuacugcgauccggagac..... 1  
 Gi3\_28266032\_x1.....gucagggUccgccaguacugcg..... 1  
 G1a\_6255572\_x1.....gagNagcgccgucagggcccgcga..... 1  
 Gi3\_28628051\_x1.....gucgugggCacacggggugccga..... 1  
 Gi3\_28601145\_x1.....gucaAgccccgccaguacugc..... 1  
 Gi5\_8977223\_x1.....gaagcgccgucagggcccgcagugc..... 1  
 Gi1\_4273302\_x1.....cgaucggagacgucguggga..... 0  
 Gi3\_28657787\_x1.....gaucggagacgucgugggaCcacgggg..... 1  
 Gi4\_609071\_x1.....gCgggaacacggggugccgaa..... 1  
 Gi2\_11136493\_x1.....Accgucagggcccgcagucguc..... 1  
 Gi3\_28628184\_x1.....acguUgugggaacacggggugccg..... 1  
 Gi2\_11104041\_x1.....aucggagacgucUugggaacacgggg..... 1  
 Gi2\_11266311\_x1.....gccccgccGguacugcgau..... 1  
 Gi2\_11371996\_x1.....cUggccccgccaguacug..... 1  
 G1a\_6108908\_x1.....gaagcgccgAcagggcccgcga..... 1  
 Gi2\_11096245\_x1.ccuuaacucguCccgaau..... 1  
 Gi5\_8839046\_x1.....Gaguacugcgauccggagacgucguggga..... 1  
 Gi3\_28860705\_x1.....gcccgcgucagggccAcgcccagu..... 1  
 Gi5\_9040463\_x1.....agaGcgccgucagggcccgcagucguc..... 1  
 Gi3\_28554830\_x1.....ccccgccaguaAugcgau..... 1

Gi3\_28735004\_x1.....acgucguAggaaacacggggugccga..... 1  
 Gi4\_576982\_x1.....gugggaacCcgggugccgaa..... 1  
 Gi3\_28354027\_x1.....cgccaguacugGgaucggagacguc..... 1  
 Gi1\_4256876\_x1.....ugcgauccgagacgucgugggaaacCcg..... 1  
 Gi3\_28284632\_x1.....caguacugcgauccgagacgucgC..... 1  
 Gi2\_11083932\_x1.....cgagacgucgugggaaacGcgggg..... 1  
 Gi3\_28924996\_x1.....agcgccguUaggccccgcca..... 1  
 Gi5\_8930817\_x1.....gaUgcgccgucaggccccgccc..... 1  
 Gi2\_11041587\_x1.....aucggagacgucgugUgaacacggggugc..... 1  
 Gi2\_11074565\_x1.....caggcccAgccaguacugcg..... 1  
 Gi3\_28569891\_x1.....Cucaggccccgccaaguacug..... 1  
 Gi3\_28915272\_x1.....gucgugggaacacggAgugccgaa..... 1  
 Gi3\_28926760\_x1.....aucggagGcgcgucguggaaacacggggugccg..... 1  
 Gi3\_28861903\_x1.....gugggaacacggggugccU..... 1  
 Gi3\_28575121\_x1.....ggccccgccUguacugcgauccg..... 1  
 Gi2\_11018629\_x1.....cgccaguacugcgauUgg..... 1  
 Gi2\_11089030\_x1.....gucgugggGacacggggU..... 1  
 Gi2\_11327594\_x1.....ccccgcGaguacugcgauC..... 1  
 Gi3\_28922491\_x1.....gaucggagacgAcgugggaacacggg..... 1  
 Gl1\_6122067\_x1.....cgucgugggaacacggggUaccgaa..... 1  
 Gi2\_11374027\_x1.....acgucgugggaacacggggugG..... 1  
 Gi5\_8872388\_x1.....cgccaguacAgcgauccgagacgucgugg..... 1  
 Gl1\_6318747\_x1.....gugggaacacggggugccgaacuC..... 1  
 Gi2\_11205819\_x1.....gucGggccccgccaaguacug..... 1  
 Gi3\_28956232\_x1.....gaUgagaagcgccgucagggccccg..... 1  
 Gl1\_6059854\_x1.....caggccccgccaaguacCg..... 1  
 Gi3\_28351576\_x1.....aggccccgccaaguUcugc..... 1  
 Gl1\_6272183\_x1.....ugcgauccgNagacgucgu..... 1  
 Gi2\_11157416\_x1.....gagacgucguggUaacacggggugccg..... 1  
 Gi1\_4163682\_x1.....cccgccaguacugcgauccggaU..... 1  
 Gi2\_11389790\_x1.....Cagaagcgccgucagggccccgccc..... 1  
 Gi1\_4350577\_x1.....gucgugggaacacggggugccgCac..... 1  
 Gi3\_28699081\_x1.....cAccaguacugcgauccgagacgucgu..... 1  
 Gi2\_11371625\_x1.....gaucggagacgucgugggaaAa..... 1  
 Gi1\_4210395\_x1.....gaucggagacgucgugggaacGcggggugcc..... 1  
 Gi3\_28704568\_x1.....gugggaacacgCggugccg..... 1  
 Gi2\_11285791\_x1.....ggGgacgucgugggaacac..... 1  
 Gi2\_11113412\_x1.....cgucgugggaacacggggAgccgaa..... 1  
 Gi3\_28890556\_x1.....aguacugcgauccgagUcgu..... 1  
 Gl1\_6245943\_x1.....gCacugcgauccgagacguc..... 1  
 Gi2\_11330488\_x1.....gccgucagggccccgccaaguGcugcg..... 1  
 Gi2\_11310409\_x1.....gaucggagacgucgugggaaUaccgggu..... 1  
 Gi5\_9052491\_x1.....gggaacacgggAugccgaa..... 1  
 Gi3\_28804143\_x1.....ucaggccccgcUaguacugcgauccgag..... 1  
 Gi5\_9102288\_x1.....Aaggccccgccaaguacugc..... 1  
 Gi3\_28376842\_x1.....acucguuccgaauuaggaag..... 0  
 Gi3\_28367784\_x1.....gucgugggNacacggggugccg..... 1

Gi1\_4383315\_x1.....cgucagggccccgAcaguacugc..... 1  
 Gi3\_28519564\_x1.....Aaucggagacgucguggga..... 1  
 Gi5\_8869803\_x1.....acugcgauccggagaUguc..... 1  
 Gi3\_28408832\_x1.....ccUucagggccccgccaaguac..... 1  
 Gi5\_8908821\_x1.....gucgugggaacacggggAgccgaa..... 1  
 Gi3\_28387195\_x1.....gacgucgugggaacaGggggugccg..... 1  
 Gi3\_28696072\_x1.....cgucgugggaacaGggggugcc..... 1  
 Gi5\_8892932\_x1.....gacgucgugggaaUacggggugccgaacu..... 1  
 Gi3\_28347027\_x1.....aguacugcgGucggagacgucgu..... 1  
 Gi2\_11233088\_x1.....Cccgucagggccccgccaaguacugcgau..... 1  
 Gi2\_11132557\_x1.....gcUgucagggccccgccaaguac..... 1  
 Gi2\_11140733\_x1.....ucagggcAccgccaaguacugc..... 1  
 Gi2\_11164169\_x1.....aucggagaGgucgugggaacacgggg..... 1  
 Gi3\_28764172\_x1.....acacggggugcAgaacuu..... 1  
 Gi3\_28635814\_x1.....ggagacgucgugggaacCcg..... 1  
 Gi3\_28867739\_x1.....gcgauccggagacgCcgugggaacacggggugcc..... 1  
 Gi1\_4202986\_x1.....aagcgccgucagggccccgccaaguCcug..... 1  
 Gl1a\_6139649\_x1.....uacugcgauccggagUcgucgu..... 1  
 Gi5\_9075230\_x1.....gugggaacacggggGgccc..... 1  
 Gi1\_4328121\_x1.....ucgugggaacacgAggugc..... 1  
 Gi3\_28652015\_x1.....cgucgugggaacaUggggugccgaa..... 1  
 Gi3\_28910607\_x1.....agaagcgccgucagggccccCcc..... 1  
 Gi3\_28748831\_x1.....gauNggagacgucgugggaacacgg..... 1  
 Gi3\_28776890\_x1.....cggagacgucgGgggaacacggggugc..... 1  
 Gi2\_11125503\_x1.....aguacuAcggaucggagacg..... 1  
 Gi3\_28365084\_x1.....gaucggagacgucgCggga..... 1  
 Gi3\_28404558\_x1.....ccAucagggccccgccaaguacugcg..... 1  
 Gi5\_9125070\_x1.....aucggagacgucgugggCacacggggugc..... 1  
 Gi1\_4177856\_x1.....acugcgauccAgagacgucg..... 1  
 Gi3\_28764513\_x1.....cgugCgaacacggggugcc..... 1  
 Gi2\_11342311\_x1.....gucgugggaUcacggggugc..... 1  
 Gi1\_4338853\_x1.....gggaacacNgggugccgaac..... 1  
 Gi2\_11097311\_x1.....gccgucagggccccgAcaguacugcg..... 1  
 Gi2\_11284311\_x1.....gucUggccccgccaaguacugcg..... 1  
 Gl1a\_6041689\_x1.....cUgagacgucgugggaacacggggugcc..... 1  
 Gi3\_28654801\_x1.....ggagacgucgugggaGacgg..... 1  
 Gi3\_28843528\_x1.....ccccgccaNuacugcgauccggag..... 1  
 Gi3\_28389538\_x1.....gucgugggaacacgCggugccgaacu..... 1  
 Gi4\_604087\_x1.....gugggaCcacggggugccgaacu..... 1  
 Gi1\_4162128\_x1.....agagaagcgccgucagggccccgcc..... 0  
 Gi3\_28910374\_x1.....agaagcgccgucagggccccUcca..... 1  
 Gi3\_28825396\_x1.....gugggaacacgggUugccg..... 1  
 Gi3\_28738027\_x1.....acgucgugggaacacggggUacc..... 1  
 Gl1a\_6338310\_x1.....cCaucggagacgucgugg..... 1  
 Gi1\_4350702\_x1.....Caacacggggugccgaac..... 1  
 Gi5\_9001631\_x1.....Aagacgucgugggaacacggggugccgaac..... 1  
 Gi3\_28885202\_x1.....gaucggagacgGcuggggaacacggggugcc..... 1

Gi5\_9116942\_x1.....gaGcacggggugccgaac..... 1  
Gi3\_28843483\_x1.....gagaagcgccgAcaggccc..... 1  
Gi3\_28310162\_x1.....gucaggcAccgccaguacugcg..... 1  
Gi2\_11230829\_x1.....cgGucgggagacgucgugggaacacggggug..... 1  
G1a\_6128789\_x1.....ccaguacugAgaucggagacguc..... 1  
Gi2\_11076854\_x1.....cguUaggccccgccaguacug..... 1  
Gi3\_28836764\_x1.....cccgccaguacugcgauccggaAacguc..... 1  
Gi1\_4284691\_x1.....gccaguacugcgauccgGgacgucgug..... 1  
Gi3\_28770212\_x1.....aggccccGAcaguacugc..... 1  
Gi3\_28983999\_x1.....ggNgacgucgugggaacacggggugccgaac..... 1  
G1a\_6058029\_x1.....caggccccgccagCacugc..... 1  
Gi2\_11072199\_x1.....cgucaggGccccgccaguac..... 1  
Gi5\_8955068\_x1.....caguacugcgauccgagaGgucgug..... 1  
Gi5\_8976050\_x1.....caguacugcgauccgGgacgucgug..... 1  
Gi3\_28713429\_x1.....gaagGgaagcgccgucagggccccgcc..... 1  
Gi3\_28316302\_x1.....aguacugUgaucgggagacg..... 1  
Gi2\_11184888\_x1.....gAcccgccaguacugcgaucc..... 1  
Gi3\_28560901\_x1.....gccaguacugcggaCcgga..... 1  
Gi3\_28550354\_x1.....gccccgccCguacugcgauccgagacgucg..... 1  
Gi2\_11134102\_x1.....cgugggaacacggggGgccga..... 1  
Gi2\_11257224\_x1.....caggccccgccaguacGccgucg..... 1  
Gi5\_9019210\_x1.....Agccccgccaguacugcgauccgga..... 1  
Gi3\_28348108\_x1.....gaagagaagcgccgucUggccccg..... 1  
Gi3\_28855456\_x1.....cgauccgagGcugcuggggaacacggg..... 1  
Gi2\_11160046\_x1.....gaGcgggagacgucgugggaac..... 1  
Gi2\_11164835\_x1.....cgucgAgggaacacggggugccg..... 1  
Gi2\_11209098\_x1.....ggaagGgaagcgccgucagggccccg..... 1  
Gi2\_11361831\_x1.....ggCgacgucgugggaacacggggug..... 1  
Gi1\_4196769\_x1.....gggGacacggggugccgaacu..... 1  
Gi3\_28416704\_x1.....ucgugggaacacggggugccgaaA..... 1  
Gi3\_28345845\_x1.....gaucgggagacgucgugggaacacgAg..... 1  
Gi3\_28580297\_x1.....ucgggagacgucgugggaacaUggggg..... 1  
Gi3\_28908826\_x1.....uUcgaucgggagacgucgugggaacacggg..... 1  
Gi1\_4253826\_x1.....acgucgugggaaUacggggugccgaacu..... 1  
G1a\_6150928\_x1.....gGgaagcgccgucagggccc..... 1  
Gi2\_11115504\_x1.....aggccccgccaguacugcgauG..... 1  
Gi3\_28283734\_x1.....gggagacgucgugUgaacacggggg..... 1  
Gi3\_28811831\_x1.....acgGcuggggaacacggggugccgaa..... 1  
Gi1\_4273573\_x1.....gggagacgucgugggaacacgggU..... 1  
Gi3\_28546490\_x1.....gGcugcuggggaacacgggg..... 1  
Gi1\_4368496\_x1.....cgugggCacacggggugcc..... 1  
Gi2\_11335064\_x1.....gucaUgccccgccaguacug..... 1  
Gi3\_28470043\_x1.....cagAcccgccaguacugcgga..... 1  
Gi3\_28671274\_x1.....aguacugcgauccgagCcgucgug..... 1  
Gi3\_28595817\_x1.....ccaguacugcgauccgagCcgucg..... 1  
G1a\_6232655\_x1.....aucgggagacgucgugggaacacAgggugcc..... 1  
Gi3\_28923617\_x1.....ggaacacgCggugccgaac..... 1



Gi3\_28404328\_x1...uuaacucguuccgaauuaAgaagagaagcgccguc..... 1  
 Gi3\_28545922\_x1.....cgaucggagacgucguggA..... 1  
 Gi3\_28761120\_x1.....cccgccagNacugcgauccgga..... 1  
 Gl1a\_6069437\_x1.....cgucaggcAccgccaguacugc..... 1  
 Gl1a\_6333416\_x1.....gaucggagGcgucgugggaacacggggugc..... 1  
 Gi5\_9131723\_x1.....cguCggaacacggggugccgaacu..... 1  
 Gi3\_28851900\_x1.....cagNccccgccaguacugcgauc..... 1  
 Gi3\_28608278\_x1.....uAggagacgucgugggaacacgggg..... 1  
 Gi3\_28529192\_x1.....acgucAugggaacacggggugc..... 1  
 Gi2\_11107956\_x1.....cggagacgCcgugggaacacg..... 1  
 Gi2\_11150570\_x1.....cgaucggagacgucgugCgaacacggg..... 1  
 Gi5\_8930406\_x1.....ccUcgccaguacugcgauccggagacg..... 1  
 Gi2\_11366693\_x1.....ggccccgccaguacugcCauc..... 1  
 Gi2\_11254872\_x1.....gucgugggaaAacggggugccga..... 1  
 Gi3\_28505150\_x1.....aUugcgauccggagacgucgug..... 1  
 Gl1a\_6014112\_x1.....gGcaggccccgccaguacug..... 1  
 Gi2\_11029576\_x1.....gucaggGccccgccaguacugc..... 1  
 Gi2\_11094707\_x1.....gucguggUaacacggggugccgaacu..... 1  
 Gi2\_11114660\_x1.....gucgugggCacacggggugccg..... 1  
 Gl1a\_6326986\_x1.....gucaggccccgccaguCcugc..... 1  
 Gi1\_4217692\_x1.....cgaucggagacgucgugggaacacg..... 0  
 Gi2\_11176483\_x1.....caggcAccgccaguacugcg..... 1  
 Gi2\_11074241\_x1.....cgccgucaggccccgccaguacC..... 1  
 Gi3\_28322465\_x1.....aucggaAacgucgugggaacacggggugc..... 1  
 Gi2\_11225969\_x1.....Gccccgccaguacugcgauccggagac..... 1  
 Gi5\_9062031\_x1.....gacgucgugggaacacggggugUcgaac..... 1  
 Gi1\_4295959\_x1.....ggagacgCcgugggaacacggggg..... 1  
 Gl1a\_6330985\_x1.....gucgugggaacacggggugccgaCcu..... 1  
 Gi2\_10994439\_x1.....aCuacugcgauccggagacgucgug..... 1  
 Gi1\_4217674\_x1.....gagacgucgugggaacacggggugcU..... 1  
 Gi3\_28364328\_x1.....aguacugcgauccggGgacg..... 1  
 Gi3\_28619928\_x1.....aucggagacgucgugggaacGcggggugccgaacu..... 1  
 Gi5\_9112329\_x1.....cCccaguacugcgauccggagacguc..... 1  
 Gi3\_28951396\_x1.....gaucggagacgucgugggGacacggggug..... 1  
 Gi3\_28444630\_x1.....ccccgccGguacugcgauccggagacgu..... 1  
 Gi1\_4181193\_x1.....guggUaacacggggugccgaac..... 1  
 Gi1\_4236133\_x1.....agaagcgccgucaggcccc..... 0  
 Gi1\_4245013\_x1.....guacugcgauccAgagacgucg..... 1  
 Gi3\_28299099\_x1.....gccGcgccaguacugcgauccggagacgu..... 1  
 Gi3\_28274293\_x1.....ucgugggUaacacggggugc..... 1  
 Gi3\_28970210\_x1.....aguacugUgaucggagacgu..... 1  
 Gi2\_11293689\_x1.....acucguuccgaauuaggaCgagaagc..... 1  
 Gi2\_11370219\_x1.....gaacacggCgugccgaacu..... 1  
 Gi3\_28548861\_x1.....cCguacugcgauccggagacgucgug..... 1  
 Gi3\_28809779\_x1.....gucgugggaacacggggugccUa..... 1  
 Gi3\_28479046\_x1.....uacugcgauccggagacAuc..... 1  
 Gi2\_11315842\_x1.....aggccccgccaguacugcCauc..... 1

|                 |                                                |   |
|-----------------|------------------------------------------------|---|
| Gi1_4190714_x1  | .....aucggagacgucUugggaacacg.....              | 1 |
| Gi1_4264513_x1  | .....gagacgucguggUaacacggggugccgaacu.....      | 1 |
| Gi3_28876506_x1 | .....gCcgugggaacacggggu.....                   | 1 |
| Gi5_9115147_x1  | .....aagagaagAgccgucaggcccc.....               | 1 |
| Gi3_28899403_x1 | .....cgccagAacucggaucggagac.....               | 1 |
| Gi3_28620393_x1 | .....ucaggccccCccaguaucgcgau.....              | 1 |
| Gi3_28876507_x1 | .....caggccccgccaguaGugcgau.....               | 1 |
| Gi1a_6061559_x1 | .....gugggaaUacggggugcc.....                   | 1 |
| Gi3_28532576_x1 | .....cgucgugggaaGacggggugc.....                | 1 |
| Gi2_11364411_x1 | .....caggccccgccUuacug.....                    | 1 |
| Gi3_28593124_x1 | .....aggccccgccaguacuUc.....                   | 1 |
| Gi3_28863190_x1 | .....cccgccaguaucgUgau.....                    | 1 |
| Gi3_28849830_x1 | .....cgccaguaucggaucggagacgCg.....             | 1 |
| Gi5_9054952_x1  | .....cgCcgugggaacacggggugccga.....             | 1 |
| Gi5_8891951_x1  | .....ggagacgucgugggaGcacggggugcc.....          | 1 |
| Gi4_613587_x1   | .....aucggagacgucgugggaacacg.....              | 0 |
| Gi1a_6196312_x1 | .....gaucggagacguAguggg.....                   | 1 |
| Gi3_28358273_x1 | .....cgucaggccccAgccaguaucg.....               | 1 |
| Gi2_11259521_x1 | .....Ugaacacggggugccgaacuu.....                | 1 |
| Gi1_4215504_x1  | .....cgNagacgucgugggaacacggg.....              | 1 |
| Gi5_8923862_x1  | .....acCgcgaucggagacguc.....                   | 1 |
| Gi5_8935414_x1  | .....aucggagacgucgugggaacacU.....              | 1 |
| Gi3_28526652_x1 | .....aagaAaagcgccgucaggccccgcc.....            | 1 |
| Gi5_9039031_x1  | .....aggcGccgccaguacugc.....                   | 1 |
| Gi1_4375157_x1  | .....aggccccgccaguacugcgaAc.....               | 1 |
| Gi5_9028471_x1  | .....caggccccgccaguacugcAau.....               | 1 |
| Gi3_28922613_x1 | .....ggagacgucgugggaacacggggugccCa.....        | 1 |
| Gi3_28930192_x1 | .....gagacgucgugggaacacAgggg.....              | 1 |
| Gi2_11372873_x1 | .....aguacugcgauccggagacgC.....                | 1 |
| Gi2_11404346_x1 | .....ccccgcUaguacugcgauccggagacguc.....        | 1 |
| Gi3_28417081_x1 | .....ccccgcGguacugcgauccggagacgu.....          | 1 |
| Gi5_9082662_x1  | .....gacgCcgugggaacacggggugccgaacu.....        | 1 |
| Gi5_8981697_x1  | .....aCagaagcgccgucaggccccgccagu.....          | 1 |
| Gi2_11039886_x1 | .....caggccccgccaguacugcgauccggGg.....         | 1 |
| Gi2_11081268_x1 | .....auGggagacgucgugggaacacggggugc.....        | 1 |
| Gi3_28981012_x1 | .....cgucgugggaacacgCggugccga.....             | 1 |
| Gi5_9028812_x1  | .....agacgucgugggaacacggggugccgaa.....         | 0 |
| Gi5_9075249_x1  | .....gaucggagacgucgugggaacacA.....             | 1 |
| Gi3_28285544_x1 | .....cgucgugggaacacAgggugccgaa.....            | 1 |
| Gi2_11184713_x1 | .....cgugggaaAacggggugccga.....                | 1 |
| Gi3_28611356_x1 | .....ggagacgucgugAgaacacggg.....               | 1 |
| Gi2_11063790_x1 | .....gaucggagacgucgugggaGcacggggug.....        | 1 |
| Gi2_11388428_x1 | .....caguaucggaucggagaUgucgu.....              | 1 |
| Gi2_11344786_x1 | .....ugcgauccggagacgucgugggaacacggggugccg..... | 0 |
| Gi1a_6080479_x1 | .....aucggagacgCcgugggaacacggg.....            | 1 |
| Gi5_8913350_x1  | .....aucggagacgucgugggaCcacggggugc.....        | 1 |
| Gi1a_6212267_x1 | .....cgugggaacacggggCgccgaac.....              | 1 |

Gi5\_8919156\_x1.....cagggcGcgccaguacug..... 1  
 Gl1a\_6260081\_x1.....ggccccAccaguacugcg..... 1  
 Gi2\_11039983\_x1.....cccgccaguacugcgCucggagacguc..... 1  
 Gi1\_4258049\_x1.....gccaguacugcgauccggagacguc..... 0  
 Gi2\_11059342\_x1.....ugggaacacggggAgccgaa..... 1  
 Gi1\_4236554\_x1.....ggaacacggCgugccgaacu..... 1  
 Gi5\_9013082\_x1.....cgugggaacacggAgugcc..... 1  
 Gi3\_28358584\_x1.....gucaggccccgccaguacugUgauc..... 1  
 Gi4\_573284\_x1.....gugggaacacggggugccgCac..... 1  
 Gi3\_28890897\_x1.....ggccccUgccaguacugcgau..... 1  
 Gi5\_9033246\_x1.....gugggaacacggggugAc..... 1  
 Gi1\_4335636\_x1.....gugggaaAacggggugccg..... 1  
 Gi5\_9120124\_x1.....cgucgugggaacacggggAgcc..... 1  
 Gl1a\_6025662\_x1.....gaCcgagacgucguggga..... 1  
 Gi3\_28311594\_x1.....cGggccccgccaguacugcgauccggagacg..... 1  
 Gi5\_8921649\_x1.....cgucgugggaacacggggugccgC..... 1  
 Gi2\_11149812\_x1.....cgauAggagacgucguggga..... 1  
 Gi3\_28787014\_x1.....cccgccaguacugcAaucggagacgu..... 1  
 Gi1\_4329319\_x1.....cgucaggccccgccaguacugcgauccgga..... 0  
 Gi1\_4337151\_x1.....ggaacacgNggugccgaacu..... 1  
 Gi3\_28272354\_x1.....cgAcaggccccgccagua..... 1  
 Gi3\_28360753\_x1.....acugcgauccggUgacgucgug..... 1  
 Gi2\_11279178\_x1.....guUgugggaacacggggugccgaa..... 1  
 Gl1a\_6342379\_x1.....agagaagcAccgucagggcccc..... 1  
 Gi5\_8897427\_x1.....gggaacacggggugcGgaac..... 1  
 Gi3\_28919793\_x1.....gaagCgaagcgccgucagggccccgccagua..... 1  
 Gl1a\_6140283\_x1.....gaacacggggugccgaGc..... 1  
 Gi3\_28353935\_x1.....aggccccgccaguacugcAau..... 1  
 Gi1\_4300654\_x1.....cggagacgucgugggaaAacggggg..... 1  
 Gi2\_11265792\_x1.....gucgugggaacacggggugAcgaa..... 1  
 Gi2\_11091529\_x1.....ccgccaAuacugcgauccgg..... 1  
 Gi2\_11252358\_x1.....gggUacacggggugccgaa..... 1  
 Gi3\_28983574\_x1.....agCacugcgauccggagacgucguggg..... 1  
 Gi1\_4304939\_x1.....cggagacgucguUggaacacgggg..... 1  
 Gi2\_11012508\_x1.....cccgccUguacugcgauccggaga..... 1  
 Gi3\_28466024\_x1.....acucguuccgaauuaUgaagagaagcgccgu..... 1  
 Gi3\_28747323\_x1.....gggUacacggggugccga..... 1  
 Gi2\_11176806\_x1.....ggCacacggggugccgaac..... 1  
 Gi2\_11074853\_x1.....gagaagcgccgucagggcccAgccaguac..... 1  
 Gi2\_11360093\_x1.....aggccccgccGguacugcgauccggagacgu..... 1  
 Gi2\_11235612\_x1.....cgucgugggaacacggggugcAgaac..... 1  
 Gi2\_11333214\_x1.....aagcgccgucagAccccgccaguacugc..... 1  
 Gi5\_9113568\_x1.....cgugggaacacgggAugccga..... 1  
 Gi3\_28477132\_x1.....gaucggagacgucgugggaacacgggguAc..... 1  
 Gi3\_28612445\_x1.....uNggaaacacggggugccgaa..... 1  
 Gi5\_9119231\_x1.....aucggCgacgucgugggaacacggggg..... 1  
 Gi3\_28638042\_x1.....gucgugggaacacAgggg..... 1

Gi5\_9125365\_x1.....ccgccUuacugcgauccgaga..... 1  
 Gi5\_8954181\_x1.....ucCggccccgccaguacugcg..... 1  
 Gi2\_11106151\_x1.....ccAgccaguacugcgaucc..... 1  
 Gi1\_4213839\_x1.....cgccgucGggccccgccaguac..... 1  
 Gi1\_4181743\_x1.....gaacacAgggugccgaacuu..... 1  
 Gi2\_11181111\_x1.....Aaagcgccgucagggccccgccaguacugc..... 1  
 Gi1\_4360806\_x1.....ugggaacacggggugccgaUcu..... 1  
 Gi1\_4190411\_x1.....cgccaguacugcgauccgagacguU..... 1  
 G1a\_6319134\_x1.....cgccgucagggccUcgccaguacugc..... 1  
 Gi2\_11407771\_x1.....gucAugggaacacggggugcc..... 1  
 Gi3\_28733389\_x1.....Gcgccaguacugcgauccgag..... 1  
 Gi2\_11242382\_x1.....aagcAccgucagggccccgccaguacu..... 1  
 Gi1\_4270238\_x1.....cgugggaacacggggAgccga..... 1  
 Gi5\_8908074\_x1.....gccgucGggccccgccaguacugc..... 1  
 Gi2\_11210488\_x1.....Cccaguacugcgauccgagacgucgug..... 1  
 G1a\_6085825\_x1.....aUgagaagcgccgucagggccccg..... 1  
 Gi3\_28511785\_x1.....gucgugggaacacUgggugccgaac..... 1  
 Gi3\_28778816\_x1.....ugNgaacacggggugccgaac..... 1  
 Gi1\_4286372\_x1.....cgugggaGcacggggugccgaacuu..... 1  
 Gi2\_11010182\_x1.....cagggccccgccaguacCgcgauccg..... 1  
 Gi3\_28524435\_x1.....gccaguacuAcgauccgagacg..... 1  
 Gi3\_28527332\_x1.....Aagacgucgugggaacacg..... 1  
 Gi3\_28964779\_x1.....gaagcgccgucagggccccgcca..... 0  
 Gi3\_28979467\_x1.....aguacugcgaCcgagacgucgu..... 1  
 Gi2\_11186647\_x1.....agacgucgugggaacacggggugUc..... 1  
 Gi2\_11135499\_x1.....gucgugggaacacAgggugccg..... 1  
 Gi1\_4384370\_x1.....Ucgauccgagacgucgugggaacacggggugc..... 1  
 Gi2\_11294388\_x1.....cccgcAaguacugcgaucc..... 1  
 Gi5\_8885446\_x1.....aucggagacgucgugAgaacacgg..... 1  
 Gi5\_9123941\_x1.....gagacgucgugggaacacggggugccgGacu..... 1  
 Gi3\_28632582\_x1.....aGgucgugggaacacggggugccg..... 1  
 Gi2\_11115918\_x1.....aagagaagcgccgucagggccccgcccG..... 1  
 Gi1\_4327231\_x1.....aucggagacguAgugggaacacg..... 1  
 Gi3\_28721942\_x1.....cgucCugggaacacggggugc..... 1  
 Gi1\_4317129\_x1.....aggccccgccaguacugcgauccggaAacg..... 1  
 Gi3\_28330497\_x1.....acAgcgauccgagacgucgug..... 1  
 Gi3\_28305390\_x1.....gaucUgagacgucgugggaacacgggg..... 1  
 Gi2\_11347618\_x1.....cgucgugggaacacCgggug..... 1  
 Gi5\_8974345\_x1.....ucggagacgucgugggaacacggggCgc..... 1  
 Gi1\_4180726\_x1.....cagggccccgccaguacugcgGucg..... 1  
 Gi5\_9022115\_x1.....cUggccccgccaguacugc..... 1  
 Gi3\_28302717\_x1.....cgugggUacacggggugccgaa..... 1  
 Gi2\_11036839\_x1.....gccccgcUaguacugcgauccg..... 1  
 Gi5\_8959021\_x1.....gagacgucgugggaacCcgggugcc..... 1  
 Gi3\_28518537\_x1.....Gggcgucagggccccgccagu..... 1  
 Gi3\_28282434\_x1.....gcccgucagggccccgccaguacuAc..... 1  
 Gi2\_11142379\_x1.....ucggaUacgucgugggaac..... 1

Gi2\_11209591\_x1.....ugggaacacgggguUccgaac..... 1  
Gi5\_8983057\_x1.....cgucgugggaacacggggAgccga..... 1  
Gi4\_611535\_x1.....cccgccaguacugcgGucggagacguc..... 1  
Gi2\_11059341\_x1.....gacgucguAggaacacggggu..... 1  
Gi3\_28349619\_x1.....ggUagagaagcgccgucagggccc..... 1  
Gi2\_11241806\_x1.....aggccccgccaguacugcC..... 1  
Gi3\_28618146\_x1.....ccccgccaguacugcgaCcgag..... 1  
Gi5\_9000891\_x1.....acgucCugggaacacggggugccgaacu..... 1  
Gi2\_11115008\_x1.....gucgugggUacacggggugccga..... 1  
Gi2\_11380506\_x1.....ucggGgacgucgugggaacacggg..... 1  
Gi3\_28601197\_x1.....gaagagaagcgccgucagggcAc..... 1  
Gi2\_10999098\_x1.....agagaagcgccgCcaggg..... 1  
Gi3\_28654542\_x1.ccuuaacucguAccgaau..... 1  
Gi3\_28831091\_x1.....ucGggccccgccaguacugcgaucgg..... 1  
Gi3\_28892561\_x1.....gccaguacugcgGucggag..... 1  
Gi3\_28931638\_x1.....agagaagcAccgucagggccccgc..... 1  
Gi3\_28407366\_x1.....aCaagcgccgucagggccccccaguacu..... 1  
Gi3\_28664889\_x1.....aagcgccgucUggccccgccaguacugc..... 1  
Gi2\_11194019\_x1.....aucggagacgucguggAaacacggggugccg..... 1  
Gi2\_11248778\_x1.....cgucgugggaacacggggugccgGa..... 1  
Gi5\_9057325\_x1.....acgucgugggaacacUgggugccgaacu..... 1  
Gi2\_11368706\_x1.....cgaucggagacgucgugggaacacggggugcG..... 1  
Gi2\_11360452\_x1.....aggccccgccaguacugcgaucggGgacgucg..... 1  
G1a\_6043156\_x1.....acugcgaucggagacGcug..... 1  
G1a\_6311154\_x1.....Gucggagacgucgugggaacacggggugc..... 1  
Gi2\_11070453\_x1.....cCccaguacugcgaucggagacguc..... 1  
Gi5\_8877787\_x1.....ugggGacacggggugccgaacuuu..... 1  
Gi2\_11308671\_x1.....ccccgccaguacGcgaucgga..... 1  
Gi2\_11284162\_x1.....aucggagacgucgugUgaacac..... 1  
Gi2\_11000540\_x1.....gccccgccNguacugcgaucgg..... 1  
Gi3\_28582718\_x1.....agaagcgccgucagggcUcgccaguacugcg..... 1  
Gi3\_28949240\_x1.....gGagcgccgucagggccccccaguacu..... 1  
Gi2\_11037408\_x1.....cagCacugcgaucggagacgucgu..... 1  
Gi1\_4231944\_x1.....Gcagccccgccaguacugc..... 1  
Gi2\_11324768\_x1.....Nccgccaguacugcgaucgg..... 1  
Gi2\_11362011\_x1.....uacugcgaucggCgacgucgug..... 1  
Gi1\_4325068\_x1.....gaacacggggugccgCacuu..... 1  
Gi3\_28284399\_x1.....gucgugggaacacggggA..... 1  
Gi4\_592146\_x1.....gUucggagacgucgugggaacacggg..... 1  
Gi2\_11347654\_x1.....agacgucgugggaacacggggugccgaacuA..... 1  
Gi3\_28446800\_x1.....cgucagggccccccagCacu..... 1  
Gi3\_28534514\_x1.....acugcgaucggaAacguc..... 1  
Gi2\_11330403\_x1.....Uccccgccaguacugcgaucggagacgu..... 1  
Gi2\_11303226\_x1.....ugggaacacggggugccgCa..... 1  
Gi3\_28841717\_x1.....ccccgccaguacugcgGucggag..... 1  
Gi3\_28822818\_x1.....cgaucGgagacgucgugggaacacggggugc..... 1  
Gi3\_28734763\_x1.....aucggagacgucgucGgaacacggggugcc..... 1

Gi3\_28566720\_x1.....ccgccaguacugcgauccggagaAguc..... 1  
 Gi2\_11168202\_x1.....gugNgaacacggggugccgaa..... 1  
 G1a\_6242302\_x1.....gaucggagacgucgugCgaacacggggg..... 1  
 Gi5\_9015061\_x1.....gGgccgucaggccccgccaguacug..... 1  
 Gi2\_11120793\_x1.....gacgucgugGaaacacggggugccgaacu..... 1  
 G1a\_6124709\_x1.....Accaguacugcgauccggagacguc..... 1  
 Gi3\_28267789\_x1.....cgauUggagacgucguggg..... 1  
 Gi5\_9113849\_x1.....agacgucgugggaacacgggAugccgaacu..... 1  
 Gi5\_9137800\_x1.....acgCcgugggaacacggggugcc..... 1  
 Gi3\_28569282\_x1.....aacacggggugccgaaAuu..... 1  
 Gi1\_4313231\_x1.....ugcgauCagagacgucguggga..... 1  
 G1a\_6299588\_x1.....aggccccgccaguCcugcgauC..... 1  
 Gi2\_11403106\_x1.....gaucggagacgucgugggaacUc..... 1  
 Gi2\_11110035\_x1.....Uccgccaguacugcgauccggagacguc..... 1  
 Gi2\_11190670\_x1.....ucggagacUucgugggaacacggggugc..... 1  
 Gi2\_11216467\_x1.....cguggAaacacggggugccg..... 1  
 Gi3\_28338973\_x1.....gucagggcAcgccaguacugcgauC..... 1  
 Gi3\_28947152\_x1.....cgucaggccccgccaguG..... 1  
 G1a\_6115624\_x1.....Gcgugggaacacggggugccgaacu..... 1  
 Gi2\_11387961\_x1.....gaagcgccgucagggccccgccCua..... 1  
 Gi3\_28555076\_x1.....cgagagacgucgugggGacacggggugccgaa..... 1  
 Gi5\_8916399\_x1.....caggccccgccaguacugcAauc..... 1  
 Gi1\_4210269\_x1.....cgugggaacacggggugccgaacG..... 1  
 G1a\_6071132\_x1.....Cucggagacgucgugggaacacggggg..... 1  
 Gi3\_28286681\_x1.....gccAcgccaguacugcgau..... 1  
 Gi2\_11164332\_x1.....cgucGggccccgccaguacugcgauC..... 1  
 Gi5\_9061604\_x1.....cgucgugggaacacggggugccgaCc..... 1  
 Gi5\_8937963\_x1.....caguacugcgauccgCagacgucgug..... 1  
 Gi3\_28925185\_x1.....cagCacugcgauccggagacgu..... 1  
 Gi3\_28841126\_x1.....gccgucagggAccgccaguac..... 1  
 Gi1\_4278910\_x1.....aucggagacguUgugggaacacggg..... 1  
 Gi3\_28441725\_x1.....gcgGucggagacgucgug..... 1  
 Gi3\_28924644\_x1.....gaagUgaagcgccgucagggccccgccagu..... 1  
 Gi1\_4288682\_x1.....agaagcgccgucagggccccgccaguacugcgU..... 1  
 Gi3\_28886827\_x1.....ccaguGcugcgauccggagacgucgug..... 1  
 Gi5\_9103142\_x1.....ccgucagggAccgccaguacugcg..... 1  
 Gi2\_11001341\_x1.....cgucgugggaUcacggggugccg..... 1  
 Gi5\_8888997\_x1.....aacacAgggugccgaaauuu..... 1  
 Gi3\_28643274\_x1.....caguacugcgauccggagacgucgA..... 1  
 G1a\_6022644\_x1.....aUagaagcgccgucagggccccgccagu..... 1  
 Gi2\_11039480\_x1.....gcgauccggagacgucguAggaaca..... 1  
 Gi5\_8972396\_x1.....ugggaacacgggAugccgaacu..... 1  
 Gi2\_11361845\_x1.....cgucgugggaacacUggggugccg..... 1  
 Gi5\_8843946\_x1.....aucggagacgucgCgggaaca..... 1  
 Gi5\_9035495\_x1.....gugggaacacggUgugcc..... 1  
 Gi1\_4359000\_x1.....aucggagUcgucgugggaacacggggg..... 1  
 G1a\_6088418\_x1.....aucggCgacgucguggga..... 1

Gi1\_4361219\_x1.....ucgugggaaacacggAgugc..... 1  
 Gi2\_11360641\_x1.....gugggaacacgAggugccga..... 1  
 Gi3\_28961274\_x1.....gucaUgccccgccaguacug..... 1  
 Gi1\_4185100\_x1.....gacgCcgugggaaacacggggugccgaacu..... 1  
 Gi3\_28527279\_x1.....gccgucagggcUcgccaguacugc..... 1  
 Gl1a\_6089179\_x1.....cgugggUacacggggugc..... 1  
 Gi5\_8891410\_x1.....acgucgugggaGcacggggugccg..... 1  
 Gi3\_28791712\_x1.....agagaagcgccgucagggUcccg..... 1  
 Gi3\_28920226\_x1.....gaagagaagcAccgucagggccccgc..... 1  
 Gi2\_11237307\_x1.....gaucggagCcgucgugggaaca..... 1  
 Gi1\_4162509\_x1.....cgAcgugggaaacacggggugccgaac..... 1  
 Gi2\_11370550\_x1.....ugggaacaGggggugccga..... 1  
 Gi3\_28403170\_x1.....gucagggccccgccaguacugcA..... 1  
 Gi3\_28660958\_x1.....cgugggaacacggAgugccg..... 1  
 Gi3\_28932592\_x1.....ggccccgccaguacGgcga..... 1  
 Gl1a\_6157031\_x1.....acugcgGucgggagacguc..... 1  
 Gi2\_11149538\_x1.....acgucgugggaacacggggugUcgaacu..... 1  
 Gi2\_11395947\_x1.....gcUaguacugcgauccggagacgu..... 1  
 Gi3\_28756311\_x1.....gaagagaagcgccgucagggcccAgc..... 1  
 Gi3\_28284025\_x1.....Aaagagaagcgccgucagggcc..... 1  
 Gi3\_28984451\_x1.....gagaagcgccgucUggccccgc..... 1  
 Gi1\_4185292\_x1.....gugggaUcacggggugcc..... 1  
 Gi3\_28835643\_x1.....gagaagcgccgucagggUcccg..... 1  
 Gi2\_11155939\_x1.....aucggagacguGgugggaacacggggugc..... 1  
 Gi3\_28508441\_x1.....gggaacacggggugccgU..... 1  
 Gi3\_28510906\_x1.....gccaCcgagacgucgugggaacacggggugcc..... 1  
 Gi3\_28300793\_x1.....cccgccaguacugcgCucgggagacguc..... 1  
 Gi3\_28656294\_x1.....acNgcgauccggagacgucgug..... 1  
 Gi2\_11394890\_x1.....gucagAccccgccaguacugcgau..... 1  
 Gl1a\_6004077\_x1.....Ccgauccgggagacgucgu..... 1  
 Gl1a\_6117844\_x1.....agagaaAcgcccgucagggccc..... 1  
 Gi5\_8929604\_x1.....aCgggagacgucgugggaacacggggugc..... 1  
 Gi2\_11143376\_x1.....gcgGucgggagacgucguggga..... 1  
 Gi3\_28840271\_x1.....acacggggugccgaGcuu..... 1  
 Gi3\_28392407\_x1.....cUuuccgaauuaggaagagaagcgccguc..... 1  
 Gi3\_28365121\_x1.....gauUgggagacgucguggga..... 1  
 Gi3\_28708100\_x1.....caggccccgccaguacGgcgauc..... 1  
 Gi3\_28358039\_x1.....acgucgugNgaacacggggugccgaa..... 1  
 Gi5\_8899371\_x1.....gccaguacugcgaCgggagacguc..... 1  
 Gi3\_28785305\_x1.....gccaguacugcgauccgAagacgu..... 1  
 Gi3\_28745203\_x1.....acugcgaCcggagacgucgu..... 1  
 Gi1\_4287734\_x1.....aacacggggGgcccgaacu..... 1  
 Gl1a\_5984356\_x1.....ccaguacuCcgauccgggagacguc..... 1  
 Gi3\_28306602\_x1.....cgucgugUgaacacggggugcc..... 1  
 Gi3\_28686044\_x1.....cccgccaguacCcgauccgggagac..... 1  
 Gi3\_28708724\_x1.....gaagagaagcgccgucagggcUcgc..... 1  
 Gi4\_610818\_x1.....agacgucAugggaaacacggggugccgaacu..... 1

Gi2\_11000973\_x1.....cgugggaacacggCgugccga..... 1  
Gi3\_28651294\_x1.....gaacacggggugccgaacuC..... 1  
Gi3\_28565111\_x1.....cccGcaguacugcgauccgagacgu..... 1  
Gi2\_11298505\_x1.....gacAucgugggaacacggggugccg..... 1  
Gi2\_11164527\_x1.....cgauccgagacgucGgg..... 1  
G1a\_6115828\_x1.....cgucgugggaacacggggugccgaacG..... 1  
Gi2\_11291650\_x1.....aguacugcgauccgagacguUg..... 1  
Gi3\_28495473\_x1.....cCccgucagggcccgcagacuacugc..... 1  
Gi2\_11220918\_x1.....aagcgccgucagggcccgcAuaucugc..... 1  
Gi1\_4309413\_x1.....ucgugggaacacggAgugcc..... 1  
Gi5\_9046077\_x1.....Accccgccaguacugcgauc..... 1  
Gi2\_11122628\_x1.....Ugauccgagacgucgugg..... 1  
Gi3\_28719795\_x1.....gaagUgcccucagggcccgc..... 1  
Gi3\_28335103\_x1.....gaagagaagcgccgucagggAcccgc..... 1  
Gi5\_8861773\_x1.....cguAgugggaacacggggugc..... 1  
Gi2\_11005262\_x1.....ucgNagacgucgugggaacacggggugcc..... 1  
Gi1\_4222764\_x1.....agacgucgugggaacacggggCgccc..... 1  
Gi3\_28385691\_x1.....acuAcgauccgagacguc..... 1  
Gi4\_581357\_x1.....gggGacacggggugccgaacu..... 1  
Gi3\_28492933\_x1.....aUugcgauccgagacgucgu..... 1  
G1a\_6060216\_x1.....aauuaggaGgagaagcgccguc..... 1  
Gi2\_11308113\_x1.....ucagUccccgccaguacugcg..... 1  
Gi2\_11306672\_x1.....cgucagggcccgcUaguac..... 1  
G1a\_6040532\_x1.....gacguAgugggaacacggggugccgaac..... 1  
Gi3\_28756253\_x1.....aggccccgccaguacugcgaucA..... 1  
Gi2\_11390185\_x1.....ggagacgucgugggaacacgAggu..... 1  
Gi1\_4308898\_x1.....ggagacgucAugggaacacggggugcc..... 1  
Gi2\_11273739\_x1.....uNggaaacacggggugccgaac..... 1  
Gi2\_11332273\_x1.....aggccccgAcaguacugcg..... 1  
Gi3\_28545280\_x1.....cgGcaguacugcgauccgagacgu..... 1  
Gi2\_11106863\_x1.....cgauccgGgacgucgugg..... 1  
Gi5\_8837866\_x1.....ugggaacacggggugccgaCcuuu..... 1  
Gi1\_4246421\_x1.....agacgucgugggaGcaccggggugccgaac..... 1  
Gi2\_11242630\_x1.....ucggagaUgucgugggaaca..... 1  
Gi5\_8851453\_x1.....cgucgugggaacacgAggugcc..... 1  
Gi5\_8901159\_x1.....gucgugggaacacggggugccgCac..... 1  
Gi2\_11267082\_x1.....cgucgugggaacacggCgugccg..... 1  
Gi2\_11342415\_x1.....agagaagUcccgucagggccc..... 1  
Gi1\_4368174\_x1.....agacgucgugggaacacggggugccgaacu..... 0  
Gi4\_613890\_x1.....gugggaacacggggugccgaaUu..... 1  
Gi5\_9128444\_x1.....aucUgagacgucgugggaacacggggugc..... 1  
Gi3\_28264933\_x1.....aggccccgccaguacugcgauAgga..... 1  
Gi3\_28821181\_x1.....cgucagUccccgccaguacug..... 1  
Gi3\_28368727\_x1.....gagacguUgugggaacacggggugcc..... 1  
Gi2\_11304069\_x1.....caguacugcgauccgagacgucA..... 1  
Gi3\_28886264\_x1.....Cgagacgucgugggaacacggggugccgaa..... 1  
Gi3\_28894534\_x1.....ucagggcccgcAguacugc..... 1



Gi2\_11277606\_x1.....aggccccgccagAACugcgau..... 1  
Gi3\_28832504\_x1.....Ccgccgucagggccccgccagu..... 1  
Gi3\_28349692\_x1.....aucNgagacgucguggga..... 1  
G1a\_6012406\_x1.....Ugccccgccaguacugcgauccggagacguc..... 1  
Gi1\_4287073\_x1.....cggagacgucgugggaaAACggggugcc..... 1  
Gi2\_11275693\_x1.....gugggaaacaAggggugccg..... 1  
Gi1\_4305659\_x1.....aggccccgccaguacugcgauccggagacguc..... 0  
Gi2\_11154462\_x1.....gcgauccggagGcgucgugggaaacacggggugc..... 1  
Gi5\_8902340\_x1.....cUgagacgucgugggaaacacggggugccgaacu..... 1  
Gi2\_11157811\_x1.....cugcgauccgAagacgucgugggaaacacg..... 1  
Gi1\_4170861\_x1.....ggagacguGgugggaaacacggggugcc..... 1  
Gi2\_10995743\_x1.....acgucgugggaaacacggggugcAgaac..... 1  
Gi5\_9114184\_x1.....ucgugggaaacacggggugccgaaGu..... 1  
Gi3\_28863567\_x1.....gauccgagacgucgugggaaacacggg..... 1  
Gi5\_8902033\_x1.....caggccccgccaguacugAg..... 1  
Gi2\_11366340\_x1.....ccaguacugcAaucggagacguc..... 1  
Gi1\_4214499\_x1.....ucgugggCacacggggugccg..... 1  
Gi2\_11179369\_x1.....auUggagacgucgugggaaac..... 1  
Gi1\_4263671\_x1.....gccgucagggccccgccaguacugcg..... 0  
Gi3\_28641962\_x1.....cccgcUaguacugcgaucc..... 1  
Gi3\_28370863\_x1.....cgauccAgagacgucgugggaaacacgg..... 1  
Gi2\_11177803\_x1.....agacgucgugggaaacacggggugccAaac..... 1  
Gi1\_4238778\_x1.....aucggagacgucGagggaaacacgggg..... 1  
Gi3\_28550189\_x1.....gucgugggaaacacggggugccgaUcu..... 1  
Gi3\_28664326\_x1.....caggccccgccaguacugcgUucggaga..... 1  
Gi3\_28833409\_x1.....gcgauccggagacgucgugggaaGc..... 1  
Gi2\_11359160\_x1.....ggccccgccaguacugUgauc..... 1  
Gi1\_4239204\_x1.....gaUgucgugggaaacacggggugccgaac..... 1  
Gi3\_28323104\_x1.....cgucgugggGacacggggg..... 1  
Gi3\_28762678\_x1.....gauccggagacgucAugggaacacggggugc..... 1  
Gi1\_4212251\_x1.....cgucagggccccgccaguCucgcg..... 1  
Gi2\_11096317\_x1.....gugggaaacacggggUugccgaacu..... 1  
Gi4\_593273\_x1.....cgucgugggaaacacggggugccgaaGu..... 1  
Gi3\_28430072\_x1.....aagcgcAgucagggccccgccaguacugc..... 1  
Gi3\_28856270\_x1.ccuAaacucguuccgaaau..... 1  
Gi2\_11272147\_x1.....gccauUacugcgauccgga..... 1  
Gi5\_8969832\_x1.....uaUgaagagaagcgccgucagggcc..... 1  
Gi3\_28832779\_x1.....cggagaUgucgugggaaacac..... 1  
Gi3\_28417452\_x1.....ucgugggaaacaUggggugcc..... 1  
Gi3\_28479003\_x1.....gucagggccccgccaguacugcgauccggag..... 0  
Gi3\_28262362\_x1.....aguaGugcgauccggagacgu..... 1  
G1a\_6139070\_x1.....Gaggccccgccaguacugcgaucc..... 1  
G1a\_6107658\_x1.....cggagacgucgugggaaUcacggg..... 1  
Gi3\_28746855\_x1.....gaagagaagcgccgucagggcccUgccag..... 1  
G1a\_6350034\_x1.....ucggagacNucgugggaaacacg..... 1  
Gi1\_4280715\_x1.....cgucgugggaaacacggAgugcc..... 1  
Gi3\_28291596\_x1.....uacuCcgauccggagacguc..... 1

Gi5\_9051358\_x1.....gaacacggggGgccgaac..... 1  
 Gi2\_11118343\_x1.....ccccgccaguaAugcgauccg..... 1  
 Gi3\_28277897\_x1.....ccgccaguaucugcgCucggagac..... 1  
 Gl1a\_6147459\_x1.....aucggagGcgucguggga..... 1  
 Gi2\_11263856\_x1.....acCcgguuccgaauuaggaa..... 1  
 Gi3\_28830978\_x1.....cggagaUgucgugggaacacggg..... 1  
 Gi3\_28597326\_x1.....cgaucggagacgucgugggaUacg..... 1  
 Gi3\_28979851\_x1.....aagagaagcAccgucagggccccgccagu..... 1  
 Gi3\_28762700\_x1.....gccguUaggccccgccagu..... 1  
 Gi2\_11148033\_x1.....cccCccaguaucugcgauccggagac..... 1  
 Gi3\_28611189\_x1.....aguacugcgauUgagacguc..... 1  
 Gi1\_4260934\_x1.....gaacacggggugcUgaac..... 1  
 Gi3\_28932077\_x1.....gccccgccCguacugcgauccggagacguc..... 1  
 Gi3\_28790007\_x1.....ucgugggaacacgggCugccgaac..... 1  
 Gi3\_28987897\_x1.....cgCuccgaauuaggaagagaagcgccguc..... 1  
 Gi3\_28650648\_x1.....aguacugcgauccggagacAucgug..... 1  
 Gi3\_28774148\_x1.....cAcgccaguaucugcgauccggagacgucgug..... 1  
 Gi2\_11375706\_x1.....gUgacgucgugggaacacggggugccgaa..... 1  
 Gi3\_28678842\_x1.....gucgugggaacacggggUAc..... 1  
 Gi2\_11172251\_x1.....gaucCgagacgucgugggaacacggggg..... 1  
 Gi2\_11200557\_x1.....aggcGccgccaguaucugcgauccgga..... 1  
 Gi5\_8889438\_x1.....gccgucagNccccgccaguaucg..... 1  
 Gi3\_28969334\_x1.....gaucggagacguUgugggaacac..... 1  
 Gi2\_11053744\_x1.....ccagGacugcgauccggag..... 1  
 Gl1a\_6071780\_x1.....gugggaacUcggggugcc..... 1  
 Gi2\_11237777\_x1.....agacgucgugggaacacggggCgccg..... 1  
 Gl1a\_6199634\_x1.....ggccccgccCguacugcg..... 1  
 Gi3\_28473882\_x1.....ggccccgGcaguaucugcgauccggagac..... 1  
 Gi2\_11064052\_x1.....gacgucgugggaacGcgg..... 1  
 Gi1\_4226661\_x1.....cgugggaacGcggggugccga..... 1  
 Gi1\_4161799\_x1.....gugAgaacacggggugcc..... 1  
 Gi3\_28643150\_x1.....cgauGggagacgucgugg..... 1  
 Gi5\_9078119\_x1.....ugggaacaGggggugccgaacu..... 1  
 Gi3\_28797821\_x1.....cgaucggagacgucgugAg..... 1  
 Gi3\_28438187\_x1.....cgucguAggaacacgggg..... 1  
 Gi3\_28946692\_x1.....gaucggagacgucguggCaacacggg..... 1  
 Gi5\_9040929\_x1.....aagagaagcgccgucagggcccUgcca..... 1  
 Gi2\_11175233\_x1.....gucgugggaacacggggugccUa..... 1  
 Gl1a\_6041051\_x1.....ggagGcgucgugggaacacggggugcc..... 1  
 Gi3\_28958165\_x1.....aagagaaAcgccgucagggccccgcca..... 1  
 Gi3\_28966487\_x1.....aucggagacgucgugggC..... 1  
 Gi5\_9052346\_x1.....aucggagacgucgugggaacCcg..... 1  
 Gi1\_4360144\_x1.....ucaggccccgccGguacugcgauccgga..... 1  
 Gi1\_4343112\_x1.....ggUaacacggggugccgaacu..... 1  
 Gi2\_11139457\_x1.....cggagacgucgugggaacaUggggugc..... 1  
 Gi3\_28744634\_x1.....gccgucagggcccUgccaguaucg..... 1  
 Gi2\_11386542\_x1.....aagcgccgucagUccccgccaguaucg..... 1

Gi2\_11092207\_x1.....cgucgugAgaacacggggug..... 1  
Gi2\_11180538\_x1.....agUgccgucagggccccgccaguacugc..... 1  
Gi2\_11030689\_x1.....gucgugggaacacggggugccCaac..... 1  
Gi5\_8857890\_x1.....Ggcgccgucagggccccgccaguacugcga..... 1  
Gi5\_9083808\_x1.....agacgucAugggaacacggggugccgaac..... 1  
G1a\_6141530\_x1.....cccgccaguacugcgaucggagaUguc..... 1  
Gi1\_4247374\_x1.....gagacgucgugggaacacggggugccgUacu..... 1  
Gi1\_4214663\_x1.....agcgcgcgucagggccccgccGguacugc..... 1  
Gi2\_11130811\_x1.....cagggUccgccaguacugcgau..... 1  
Gi3\_28447587\_x1.....cggagCcgucgugggaacacggggugccga..... 1  
Gi1\_4298753\_x1.....gagGcgucgugggaacacggggugcc..... 1  
Gi3\_28956126\_x1.....gaucggaAacgucgugggaacacgggg..... 1  
Gi2\_11024670\_x1.....cgucgugggaacacggggugccgaGc..... 1  
G1a\_6040698\_x1.....aucggagacgucgugggaacCcggggug..... 1  
Gi5\_9016347\_x1.....cgccaguacugcgaucggCgacgu..... 1  
G1a\_6051007\_x1.....gaacacggggugccgaacG..... 1  
Gi2\_11363778\_x1.....aagcgccgCcagggccccgccaguacugc..... 1  
Gi1\_4182043\_x1.....gacguUgugggaacacggggugccgaacu..... 1  
Gi3\_28651090\_x1.....agacgucguggAaacacggg..... 1  
Gi2\_11058282\_x1.....cgggagacgucgugggaacacgggCg..... 1  
G1a\_6309359\_x1.....ggUgacgucgugggaacacggggugc..... 1  
Gi2\_11003931\_x1.....aagagaagcgccgucagggccccgccaAu..... 1  
Gi3\_28580687\_x1.....cguggAaacacggggugc..... 1  
Gi3\_28808487\_x1.....gaucgAagacgucgugggaacacggggugcc..... 1  
Gi5\_9108470\_x1.....ugggaacacggggugccgaCc..... 1  
Gi1\_4199774\_x1.....Ugacgucgugggaacacgggg..... 1  
Gi1\_4351084\_x1.....ucagggccccgccaguacugcgCucgga..... 1  
Gi3\_28873933\_x1.....cgggagacgucguggUaacacggg..... 1  
Gi4\_577620\_x1.....aucggagacgucgCgggaacacgggg..... 1  
Gi2\_11168519\_x1.....gaucggagacgucgGgggaacacgggg..... 1  
Gi3\_28862545\_x1.....aguacugcgauacgAagacgucgug..... 1  
Gi2\_11028325\_x1.....gacgucgugggaaUacggggugccgaacu..... 1  
Gi2\_11178569\_x1.....gGcgucgugggaacacggg..... 1  
Gi3\_28731748\_x1.....cccgccGguacugcgaucggagacguc..... 1  
Gi2\_11350957\_x1.....Ggucagggccccgccaguacugcgauccg..... 1  
Gi3\_28277102\_x1.....ucgugggaacacggggugccCaacu..... 1  
Gi2\_11123606\_x1.....aagcgccgucagggccccgccCguacu..... 1  
Gi2\_11068911\_x1.....cagggUcccgccaguacugcgau..... 1  
Gi3\_28646626\_x1.....acAgcgauacggagacgucg..... 1  
Gi1\_4220712\_x1.....aucggagacgucAugggaacacgg..... 1  
Gi2\_11237570\_x1.....aggccccgccaguacugcgUucggagac..... 1  
Gi1\_4293761\_x1.....aucggagacgucgugggaacacggggC..... 1  
Gi2\_11067577\_x1.....aguacuCcgauacggagacgu..... 1  
Gi3\_28524068\_x1.....aagcgccgucaCgccccgccagua..... 1  
Gi1\_4212993\_x1.....ggccccCccaguacugcgaucggagacg..... 1  
Gi2\_11134665\_x1.....agaagcgccgucagggcccUgccaguac..... 1  
Gi2\_11312041\_x1.....gaucggagacguGugggaacacggggugc..... 1

Gi2\_11062542\_x1.....aguacugcgauccggagacguAg..... 1  
 Gi2\_11293778\_x1.....ucaggccccgccaguacugcgaucaAga..... 1  
 Gi2\_11115538\_x1.....aucggUgacgucgucguggaacacggggugcc..... 1  
 Gi5\_9076571\_x1.....gaagcgcUgucaggccccgccagua..... 1  
 Gi3\_28762733\_x1.....agagaagcgccgcGcaggccccg..... 1  
 Gi1\_4252124\_x1.....caAgccccgccaguacugc..... 1  
 Gl1\_6314884\_x1.....gugggaacacgggguCccgaacu..... 1  
 Gi1\_4301382\_x1.....gGgaucggagacgucgucguggaaca..... 1  
 Gi3\_28459604\_x1.....ccccgccaguacugcgUucggagac..... 1  
 Gi3\_28336443\_x1.....caguacugcAaucgggagacgucgu..... 1  
 Gi3\_28978927\_x1.....gccaguacugcgauccggC..... 1  
 Gi1\_4389094\_x1.....gaUcacggggugccgaac..... 1  
 Gi2\_10996233\_x1.....Ggagaagcgccgucagggccccgca..... 1  
 Gi5\_8844882\_x1.....aGgucgugggaaacacggggugccga..... 1  
 Gi1\_4289869\_x1.....cgugggaacacggggugccAa..... 1  
 Gl1\_6006199\_x1.....Uaucggagacgucgucguggaacacggggugc..... 1  
 Gi3\_28420836\_x1.....aguacugAgaucggagacgucgug..... 1  
 Gi1\_4378067\_x1.....gucgugggaaacacgggguCccgaacu..... 1  
 Gi2\_11041956\_x1.....cgccGguacugcgauccggagacg..... 1  
 Gi5\_8947795\_x1.....gaacacggggugccgaGc..... 1  
 Gi1\_4335346\_x1.....aucggagacgucgucguggaacaAg..... 1  
 Gi1\_4282194\_x1.....aGcacggggugccgaacu..... 1  
 Gi2\_11403739\_x1.....cccUgccaguacugcgau..... 1  
 Gl1\_6336557\_x1.....ucgugggaacacggggugccgaGc..... 1  
 Gl1\_6052898\_x1.....agUgaagcgccgucagggccc..... 1  
 Gi3\_28738715\_x1.....ucgugggaacaAggggugccgaac..... 1  
 Gi5\_8900473\_x1.....aagagaagcgccgucagggccUcgcca..... 1  
 Gi1\_4302833\_x1.....ggagacgucgucguggaCcaccggggugcc..... 1  
 Gi3\_28577996\_x1.....ucgAgggaaacacggggugc..... 1  
 Gi5\_8895196\_x1.....acgucguUggaacacggggugccga..... 1  
 Gi3\_28683181\_x1.....aguacugcgauccggagacgucC..... 1  
 Gi4\_582972\_x1.....Agccaguacugcgauccggagacgucgug..... 1  
 Gi1\_4318897\_x1.....gaacacUgggugccgaacu..... 1  
 Gi3\_28356747\_x1.....gacgucgugggaacacgA..... 1  
 Gi3\_28659872\_x1.....cggagacgucgucguggaacGcgggg..... 1  
 Gi2\_11036966\_x1.....gaagcgcgucagggccccgccCguacugc..... 1  
 Gl1\_6025976\_x1.....aucggagacgucgucguggGaac..... 1  
 Gi3\_28682308\_x1.....cgccUucaggccccgccagu..... 1  
 Gi3\_28644046\_x1.....cUgccaguacugcgauccggagacgu..... 1  
 Gi3\_28540993\_x1.....ggagacgucgucguggaacaUggggu..... 1  
 Gi5\_9038618\_x1.....ugcgauccggagacguGguggg..... 1  
 Gi5\_9097358\_x1.....ugggUacacggggugccgaac..... 1  
 Gi4\_609391\_x1.....ugggaacacAgggugccgaacu..... 1  
 Gl1\_6272080\_x1.....ggaacacAgggugccgaac..... 1  
 Gl1\_6167277\_x1.....acugcgauccggagacgCc..... 1  
 Gi2\_11163239\_x1.....ucgugggaacaGggggugccgaac..... 1  
 Gi1\_4260701\_x1.....caggccAcgccaguacugcgau..... 1

Gi2\_11396629\_x1.....aucggCgacgucguggaac..... 1  
 Gl1a\_6142167\_x1.....aagagaagcgccgucGggc..... 1  
 Gi2\_11040358\_x1.....aagcgccgucagggcccAgccaguac..... 1  
 Gi2\_11126230\_x1.....gaucggagacgucgAgggaacacgg..... 1  
 Gi2\_11010522\_x1.....ugggaacacggggCgccgaacuu..... 1  
 Gi2\_11197139\_x1.....aucggagacgucguggaacUcggggugc..... 1  
 Gi1\_4322613\_x1.....agacgucguggaacacggAgugcc..... 1  
 Gi2\_11384329\_x1.....ggccccgccaguacugcgauccgagagaAg..... 1  
 Gl1a\_6080951\_x1.....acgucgCgggaacacggggugccgaacu..... 1  
 Gi1\_4367624\_x1.....cgucgugggaacacggUgugcc..... 1  
 Gi3\_28788346\_x1.....cgugggaacacAgggugc..... 1  
 Gi5\_8902953\_x1.....gugggaaGacggggugccgaac..... 1  
 Gi2\_11226956\_x1.....cccgUcaguacugcgaucc..... 1  
 Gi2\_11146999\_x1.....gUucggagacgucguggaacacgg..... 1  
 Gi5\_8994114\_x1.....aucggagacgucgugggaaAacggggugccgaacu..... 1  
 Gi2\_11045764\_x1.....acgucgugggaacacggggugccgaaUu..... 1  
 Gi2\_11069077\_x1.....ugggaacacgAggugccgaacuu..... 1  
 Gi5\_8872636\_x1.....gcgcccugcagggccUcgccaguacug..... 1  
 Gi3\_28830050\_x1.....gcgaucggagacAucgugggaacacggg..... 1  
 Gi2\_11320009\_x1.....gaCcgagacgucgugggaacacgg..... 1  
 Gi3\_28326550\_x1.....gccgucaggUcccgccaguacu..... 1  
 Gi3\_28459843\_x1.....gucaggccccgccagAacugc..... 1  
 Gi3\_28924618\_x1.....agUagcgccgucagggccccccagua..... 1  
 Gi5\_9116794\_x1.....caggccccgccaguGcug..... 1  
 Gi3\_28796761\_x1.....aucggagacgucgugggaaGc..... 1  
 Gi2\_11252934\_x1.....ucgugggaacacggggCgcc..... 1  
 Gi2\_11150037\_x1.....aucggagacgucgAgggaaca..... 1  
 Gi5\_8914320\_x1.....ucggaucggagacgucgCg..... 1  
 Gi3\_28948947\_x1.....aguacugcgCucggagacg..... 1  
 Gi3\_28385969\_x1.....agaagcgccguAaggccc..... 1  
 Gi1\_4208446\_x1.....Ugucaggccccgccaguacugc..... 1  
 Gi5\_9021301\_x1.....ggccccgcUaguacugcgaucc..... 1  
 Gi3\_28891924\_x1.....ucaggccAcgccaguacugcgaucc..... 1  
 Gi1\_4337490\_x1.....gaUgagaagcgccgucagggccccccagu..... 1  
 Gi2\_11171325\_x1.....agGgaagcgccgucagggccccccaguacug..... 1  
 Gi2\_11284205\_x1.....aucggagacgucgCggaacacggg..... 1  
 Gi3\_28667627\_x1.....aucggagacgucgugCgaacacg..... 1  
 Gi3\_28466446\_x1.....cgCugucaggccccgccagu..... 1  
 Gi3\_28985380\_x1.....Aagacgucgugggaacacggggugccgaacu..... 1  
 Gi2\_11304645\_x1.....acugcgauccgagagaUgucgugg..... 1  
 Gi3\_28322913\_x1.....agaaUcgccgucagggccccccagu..... 1  
 Gi4\_581781\_x1.....cgucaggccccgccaguacugA..... 1  
 Gi1\_4199689\_x1.....acgucgugAgaacacggggugccgaac..... 1  
 Gi1\_4198892\_x1.....aagcgccgucagggccccAccaguacug..... 1  
 Gi3\_28728328\_x1.....cgGcgucagggccccccaguacugc..... 1  
 Gl1a\_6013434\_x1.....caguacugcgauccgagac..... 1  
 Gi3\_28984791\_x1.....cAcgccaguacugcgaucc..... 1

Gi2\_11230470\_x1.....acugcgauccgagacgucgugggaaAa..... 1  
 Gi2\_11170750\_x1.....gacgucgugggaacaGggggugccgaacu..... 1  
 Gl1a\_6220950\_x1.....ugcgauccgAagacgucgu..... 1  
 Gi1\_4311153\_x1.....aGgucgugggaacacggggugccga..... 1  
 Gi2\_11009250\_x1.....aGcggagacgucgugggaacacggggugccg..... 1  
 Gi2\_11240439\_x1.....gccccgAcaguacugcgaucc..... 1  
 Gi5\_8961626\_x1.....cgucgugggaacacggggGcg..... 1  
 Gi5\_9123992\_x1.....gggUacacggggugccgaac..... 1  
 Gi3\_28289234\_x1.....Cucagggccccccaguacugcgaucc..... 1  
 Gi1\_4248102\_x1.....acgCcgugggaacacggggugccg..... 1  
 Gi1\_4317479\_x1.....cgugggaCcacggggugccga..... 1  
 Gi3\_28316184\_x1.....caguacugcUaucggagacguc..... 1  
 Gl1a\_6065618\_x1.....gggaacacggggugccgCac..... 1  
 Gi3\_28955330\_x1.....gacgucguggggCacacggggugccgaac..... 1  
 Gi5\_9129210\_x1.....cucguuccgaaauaggaagagaagcgc..... 0  
 Gi5\_9111872\_x1.....gugggaacacggggugccAaa..... 1  
 Gi3\_28639233\_x1.....cgucguggCaacacggggugccgaac..... 1  
 Gi3\_28819830\_x1.....ucggagacgucguggggGacac..... 1  
 Gi3\_28626711\_x1.....gaGcggagacgucgugggaacacggggugc..... 1  
 Gl1a\_6121270\_x1.....agagaagcgccgCcaggcccc..... 1  
 Gi2\_11065960\_x1.....cccAccaguacugcgauccgagacguc..... 1  
 Gi3\_28850667\_x1.....agaCcgcccgucagggccccgcca..... 1  
 Gi2\_11236126\_x1.....cgaCcgagacgucgugggaacacggg..... 1  
 Gi3\_28932784\_x1.....gucagAcccgccaguacugc..... 1  
 Gi5\_8964934\_x1.....gagaagcgccgucagggccccgccaguGcugc..... 1  
 Gi1\_4317130\_x1.....caggcUccgcccaguacugc..... 1  
 Gi2\_11311505\_x1.....cccgccaguacuUcgauccg..... 1  
 Gi1\_4348974\_x1.....caggccccAccaguacugc..... 1  
 Gi3\_28952744\_x1.....gucagggcUcgccaguacugcgauccg..... 1  
 Gi2\_11298093\_x1.....agaagcgccgucCggccccgccc..... 1  
 Gi3\_28276988\_x1.....ggccccgcUaguacugcgauccgga..... 1  
 Gl1a\_6113765\_x1.....gugggaaUacggggugccgaac..... 1  
 Gi2\_11117463\_x1.....cguUgugggaacacggggugc..... 1  
 Gi3\_28802779\_x1.....ggccccgcccaguacugAgauccg..... 1  
 Gi5\_9131054\_x1.....agacgucgNgggaacacggggugc..... 1  
 Gi5\_8838736\_x1.....caggAcccgccaguacugc..... 1  
 Gl1a\_6153746\_x1.....caUgccccgcccaguacugcgau..... 1  
 Gi3\_28908845\_x1.....cguAgugggaacacggggugccgaac..... 1  
 Gi1\_4250089\_x1.....aguacugcgauccgagacgucgu..... 0  
 Gi2\_11349131\_x1.....cgUcgucagggccccgccagu..... 1  
 Gi2\_11262405\_x1.....cgucgugggaacaUggggugccg..... 1  
 Gi2\_11336807\_x1.....cgNcugugggaacacggggugccga..... 1  
 Gi1\_4363205\_x1.....gaacacCgggugccgaacu..... 1  
 Gi3\_28381081\_x1.....ucaggcAcccgccaguacug..... 1  
 Gi2\_11400757\_x1.....ccccgcccaguacugcgauccgagGcg..... 1  
 Gi2\_11072620\_x1.....cgccaguacugcgauccgagacgucU..... 1  
 Gi5\_9085664\_x1.....gaucggagacgucgugggaacaAggg..... 1

Gi3\_28690045\_x1.....Auacugcgauccggagacguc..... 1  
 Gi3\_28614813\_x1.....gucgugggaacaUggggugccg..... 1  
 Gi3\_28328078\_x1.....acacggggugccgaacuA..... 1  
 Gi1\_4235849\_x1.....Accgucaggccccgccaguacu..... 1  
 Gi3\_28613049\_x1.....ggaacacggggugccCaacu..... 1  
 Gi3\_28974497\_x1.....gacgucgugggaacacggAgugccgaac..... 1  
 Gl1a\_6260743\_x1.....cgugggCacacggggugccgaacu..... 1  
 Gi1\_4213093\_x1.....Augggaacacggggugcc..... 1  
 Gi5\_8911070\_x1.....Aaucggagacgucgugggaacacgggu..... 1  
 Gi2\_11321304\_x1.....caguacugcgGucggagacguc..... 1  
 Gi2\_11036928\_x1.....ucggagacgucgugggaacaUggggu..... 1  
 Gi3\_28344063\_x1.....cgggagacgCcgugggaacacggggugccgaacu..... 1  
 Gi2\_11114112\_x1.....caggccccgccaguacugG..... 1  
 Gi3\_28479734\_x1.....gagacgucgugggaUcacgggu..... 1  
 Gi3\_28399668\_x1.....gCucggagacgucgugggaacacggggugc..... 1  
 Gi2\_11226058\_x1.....aAacgucgugggaacacggggugc..... 1  
 Gi5\_8903105\_x1.....agacgucgugggaacacggggugccgaCcu..... 1  
 Gi3\_28421554\_x1.....gagacgucCugggaacacgggggu..... 1  
 Gi2\_11044045\_x1.....ccgucaggccccUccaguacugcg..... 1  
 Gi2\_11008238\_x1.....agacgucgNgggaacacgggggu..... 1  
 Gi3\_28803938\_x1.....uAcgaucggagacgucguggga..... 1  
 Gi3\_28481962\_x1.....ucgugggCacacggggugccgaac..... 1  
 Gl1a\_6129081\_x1.....aucggagCcgucgugggaacacggggug..... 1  
 Gl1a\_6046318\_x1.....ccccgccaguUcugcgauccggaga..... 1  
 Gi3\_28790349\_x1.....gccccgccaguacugcgCucggagacg..... 1  
 Gi2\_11178926\_x1.....caggccccgccaguacugAgaucggag..... 1  
 Gi2\_11011676\_x1.....ccccgccCguacugcgauccgga..... 1  
 Gi3\_28364572\_x1.....gagacgucgugggaacacggggugccgaaU..... 1  
 Gi4\_591374\_x1.....gaaacacggggugccgUacu..... 1  
 Gi3\_28667129\_x1.....gauNggagacgucgugggaacacggg..... 1  
 Gi2\_11009426\_x1.....uggNaacacggggugccga..... 1  
 Gi1\_4268677\_x1.....cgggagacgucgugAgaacacggggugcc..... 1  
 Gi2\_11274785\_x1.....aCaagcgccgucaggccccgccagua..... 1  
 Gi1\_4250180\_x1.....cgCgggaacacggggugccg..... 1  
 Gi5\_8840114\_x1.....aggccccgccaguacugcgCuc..... 1  
 Gi3\_28632471\_x1.....ggaacUcggggugccgaa..... 1  
 Gi5\_9062789\_x1.....cgucCugggaacacggggugccgaacu..... 1  
 Gi3\_28690639\_x1.....ccccgccaguacuUcgauccggagacgu..... 1  
 Gi2\_11199485\_x1.....guacugcgauccggCgacgucg..... 1  
 Gi5\_9070842\_x1.....ugggaacacggAgugccgaacuuu..... 1  
 Gi1\_4336150\_x1.....gugggaacaUggggugccgaa..... 1  
 Gi2\_11242858\_x1.....cugcgauccggagacgucgug..... 0  
 Gl1a\_6105967\_x1.....Ugagacgucgugggaacac..... 1  
 Gi3\_28512536\_x1.....ucaggccccCccaguacugcg..... 1  
 Gi3\_28346618\_x1.....aucggagacguAgugggaacacgg..... 1  
 Gi3\_28351713\_x1.....Gaguacugcgauccggagacgu..... 1  
 Gi4\_591294\_x1.....aucggagacgucgugggaacacggg..... 0

G1a\_5992043\_x1.....aucggagacgucgugggG.....1  
 Gi4\_582188\_x1.....cgucguggAaacacggggugccgaacu.....1  
 Gi2\_11084103\_x1.....aguacugcNaucggagacgucg.....1  
 Gi2\_11103153\_x1.....ucggagacgucgugggaacU.....1  
 Gi2\_11123461\_x1.....aagcgcAgucagggccccccagucg.....1  
 G1a\_6348926\_x1.....agGacugcgauccggagacgucg.....1  
 Gi5\_8901062\_x1.....gugggaacacggggugccgaGcuuu.....1  
 Gi3\_28893792\_x1.....Ggccgucagggccccccagucggauc.....1  
 G1a\_6118598\_x1.....caggcccUgccagucgucg.....1  
 Gi5\_8852039\_x1.....caguacugUgaucggagacgucgug.....1  
 Gi2\_11403226\_x1.....gaucUgagacgucgugggaacacggggugcc.....1  
 Gi3\_28332652\_x1.....agcgcgucagggccccGcagu.....1  
 Gi3\_28703590\_x1.....gccagucggaucggagCguc.....1  
 G1a\_5993826\_x1.....Cucggagacgucguggga.....1  
 Gi2\_11099488\_x1.....cUguacugcgauccggagacgucg.....1  
 Gi4\_576836\_x1.....ggagacgucgugggaacacg.....0  
 Gi2\_11389687\_x1.....ccccgccaNuacugcgauccggaga.....1  
 Gi2\_11005903\_x1.....aagagaagcgcgucagggccccUcag.....1  
 Gi2\_11024273\_x1.....gucagggccccccagucgU.....1  
 Gi2\_11240605\_x1.....ggagacgucgugggaGcac.....1  
 Gi2\_11165297\_x1.....aucggagacgucgugggaacacAggg.....1  
 G11\_4174464\_x1.....cgugggaacGcggggugccgaac.....1  
 Gi3\_28621973\_x1.....caggcUccgccagucggaucgga.....1  
 Gi3\_28818264\_x1.....cgccgucagggccccGg.....1  
 Gi4\_612220\_x1.....gucgugggaacacggggugcc.....0  
 Gi5\_9132194\_x1.....cgucgugggaAaacgggugc.....1  
 Gi2\_11189117\_x1.....cAccagucggaucggaga.....1  
 Gi2\_11097222\_x1.....cccgccagucgGgaucggag.....1  
 Gi3\_28807989\_x1.....agagaagcgcgucagggccccAccagua.....1  
 Gi5\_9131724\_x1.....cgucgugUgaacacggggugccgaacu.....1  
 Gi2\_11071903\_x1.....gaucggagacgucgUgga.....1  
 Gi2\_11159466\_x1.....ucggagacgucgugggCacacggggugc.....1  
 Gi2\_11035470\_x1.....Cgccccgccagucgga.....1  
 G11\_4179541\_x1.....gaacCcgggugccgaacu.....1  
 Gi3\_28922988\_x1.....gccagucggaucggaucg.....1  
 Gi2\_11355927\_x1.....cggagGcugcuggggaacacg.....1  
 Gi3\_28869066\_x1.....cgUucggagacgucgugggaacacgg.....1  
 Gi3\_28902618\_x1.....aguaUugcgauccggagacgu.....1  
 G1a\_6043573\_x1.....Agucagggccccccagucg.....1  
 Gi3\_28639363\_x1.....agagaGgcgucgagggccccg.....1  
 Gi3\_28273123\_x1.....gaucggagacgucgGgggaacacggggugcc.....1  
 G11\_4172999\_x1.....gucgAggggaacacggggug.....1  
 Gi4\_581493\_x1.....aUgucgugggaacacggggugccgaacu.....1  
 G11\_4293773\_x1.....ggccccccagucggaucgU.....1  
 Gi4\_596748\_x1.....cgugggGacacggggugcc.....1  
 Gi3\_28369315\_x1.....aguacCggaucggagacguc.....1  
 G1a\_6328464\_x1.....gucgugggNacacggggugcc.....1



Gi1\_4277313\_x1.....caggccccgccGguacugcgau..... 1  
 Gi3\_28383812\_x1.....ugCgaacacggggugccgaa..... 1  
 Gi1\_4263371\_x1.....ucaggccccgccCguacugcgau..... 1  
 Gl1\_6204894\_x1.....gccgucaggcUccgccagua..... 1  
 Gi5\_8976376\_x1.....cgugggaacacggggugccgaGcuu..... 1  
 Gi3\_28951237\_x1.....agcgccgucGggccccgccagua..... 1  
 Gi4\_602801\_x1.....gugggGacacggggugccgaa..... 1  
 Gi3\_28577689\_x1.....agagaagcgccgucaggcUccgc..... 1  
 Gi5\_9102550\_x1.....gucaggccccgccUguacugcg..... 1  
 Gi3\_28479164\_x1.....cccCccaguaucgcgau..... 1  
 Gi3\_28578962\_x1.....caguacugcgau..... 1  
 Gi2\_11226350\_x1.....ccgucaggccccgccaguCcugc..... 1  
 Gi5\_8927479\_x1.....gucguAggaacacggggugc..... 1  
 Gl1\_6337215\_x1.....caguacugcgau..... 1  
 Gi5\_8977242\_x1.....aucggagaNgcugugggaacac..... 1  
 Gi2\_11010782\_x1.....gaagcgccgucaggccccgccaguaAc..... 1  
 Gi3\_28638349\_x1.....gaUgucgugggaacacgg..... 1  
 Gi3\_28467269\_x1.....aUagaagcgccgucaggccccgccaguaucg..... 1  
 Gi3\_28521861\_x1.....caggccccgccaguaCgcgucggaga..... 1  
 Gi3\_28389049\_x1.....Ccgucgugggaacacggggugccgaa..... 1  
 Gi5\_9002786\_x1.....Aagacgucgugggaacacggggugcc..... 1  
 Gl1\_6042069\_x1.....gaucggagacgucgugggaacacggCgu..... 1  
 Gi1\_4319330\_x1.....agacgucgugggaacacggggugccgUac..... 1  
 Gi1\_4355797\_x1.....Uguacugcgau..... 1  
 Gi2\_11090049\_x1.....ggccccgccaguaGugcgau..... 1  
 Gi1\_4358604\_x1.....cgGgggaacacggggugccgaa..... 1  
 Gl1\_6236719\_x1.....ugcgau..... 1  
 Gi3\_28287658\_x1.....cgucaggccccgccaguaucg..... 0  
 Gl1\_6101489\_x1.....Ugccgucaggccccgccaguaucg..... 1  
 Gi2\_11394605\_x1.....aggUcccgccaguaucg..... 1  
 Gi2\_11085128\_x1.....gagacAucgugggaacacggggugcc..... 1  
 Gi3\_28325508\_x1.....agagaagcgccguUaggcccc..... 1  
 Gl1\_6219202\_x1.....ggaacacgUggugccgaa..... 1  
 Gi3\_28307368\_x1.....agacAucgugggaacacggggugccga..... 1  
 Gi3\_28341461\_x1.....cggagacgucgugggaaUacg..... 1  
 Gi1\_4281399\_x1.....gagacgucgugAgaacacggggugcc..... 1  
 Gi2\_11267805\_x1.....agcgccguNaggccccgccagua..... 1  
 Gi2\_10994167\_x1.....agacgucgugggaacGcggggugccgaa..... 1  
 Gl1\_6120281\_x1.....ucggagacgucgAgggaacacgg..... 1  
 Gi2\_11182077\_x1.....aaAcgccgucaggccccgccaguaucg..... 1  
 Gl1\_6108115\_x1.....aucggagacAucgugggaacacggggug..... 1  
 Gi3\_28675508\_x1.....agaagcgccgucaggccccgcUagu..... 1  
 Gi1\_4203629\_x1.....gaacacggggUaccgaacu..... 1  
 Gi1\_4323432\_x1.....aucggagacgucgCgggaacacggggugccgaa..... 1  
 Gl1\_6033863\_x1.....guacugcgauAggagacguc..... 1  
 Gi2\_11324072\_x1.....acugcgGucggagacgucg..... 1  
 Gi5\_8948508\_x1.....caggccccgccagCacugcg..... 1

Gi1\_4306174\_x1.....aguacugcgauccggagacgucgugU..... 1  
 Gi5\_9067003\_x1.....gucaggcUccgccaguacugcg..... 1  
 Gi2\_11161770\_x1.....aucggagacgucgugggaacacgggUugcc..... 1  
 Gi2\_11322706\_x1.....cgucgugggaacaUgggg..... 1  
 Gi5\_8896676\_x1.....gccccgccaguacugcgUucgga..... 1  
 Gi3\_28884493\_x1.....gagacgucgugggaCcacggggugccgaac..... 1  
 Gl1a\_6041067\_x1.....aCgggagacgucgugggaa..... 1  
 Gi2\_11245091\_x1.....caggccccgccaguacuAcgaucggag..... 1  
 Gi2\_11038644\_x1.....gaAacgucgugggaacacggggugc..... 1  
 Gi3\_28294068\_x1.....Cacgucgugggaacacggggugccg..... 1  
 Gi3\_28614328\_x1.....cggagacgucgugggaacaAggggu..... 1  
 Gi2\_11388932\_x1.....aggccccgccaguacCgcgaucggaga..... 1  
 Gi1\_4213635\_x1.....guAggaacacggggugccgaa..... 1  
 Gi1\_4337441\_x1.....ggccccgccagCacugcgaucggagacg..... 1  
 Gi3\_28359434\_x1.....gaUgcgccgucagggccccgccagua..... 1  
 Gi3\_28407508\_x1.....gucgugggaacCcggggugccgaa..... 1  
 Gi1\_4165622\_x1.....gugggaacacggggugccgGac..... 1  
 Gi2\_11066244\_x1.....aAcggagacgucgugggaa..... 1  
 Gi3\_28484912\_x1.....Cuacugcgauccggagacgucgug..... 1  
 Gi5\_9008876\_x1.....gggaacacggggugccgaacuucU..... 1  
 Gi2\_11177364\_x1.....aucggagacgucgugggaacacggggugcA..... 1  
 Gi3\_28542314\_x1.....gaucggagacgucgugggaacaUg..... 1  
 Gi1\_4186046\_x1.....cgugggaacacggggugUcga..... 1  
 Gi1\_4380325\_x1.....acgucgugggaaUacggggugcc..... 1  
 Gl1a\_6199384\_x1.....ccgccaguacugcgauUggagacguc..... 1  
 Gi2\_11284222\_x1.....gccgucaggcccAcgccaguac..... 1  
 Gi3\_28613246\_x1.....aucggagaGgucgugggaac..... 1  
 Gi2\_11108475\_x1.....aucUgagacgucgugggaacacggggugcc..... 1  
 Gi3\_28703791\_x1.....ccccgUcaguacugcgau..... 1  
 Gi3\_28277234\_x1.....gccgucaggccccgccGguacugc..... 1  
 Gi3\_28363846\_x1.....cgaCcggagacgucgugg..... 1  
 Gi2\_11383068\_x1.....cggagacgucgugggaacacggggCgccgaacu..... 1  
 Gi2\_11302484\_x1.....aucggagacgucUugggaacacg..... 1  
 Gl1a\_6346181\_x1.....aucggagUcgcgucgugggaacacggg..... 1  
 Gi3\_28438373\_x1.....agAacugcgauccggagacgu..... 1  
 Gi3\_28969752\_x1.....ggagacguNgugggaacacggggugccgaa..... 1  
 Gi1\_4279659\_x1.....ucggGgacgucgugggaacacggggug..... 1  
 Gi2\_11319585\_x1.....gaagUgccgucagggccccgc..... 1  
 Gi2\_11220097\_x1.....acgucgugggaacacggggugccgUacu..... 1  
 Gi1\_4176131\_x1.....acugcgauccggGgacgucgugggaaca..... 1  
 Gi2\_11208750\_x1.....gggaacacggggugccCaa..... 1  
 Gi1\_4291037\_x1.....agaagcgccgucagggccccccaU..... 1  
 Gi5\_8992811\_x1.....cgugggaacacggggugUcgaac..... 1  
 Gi5\_9091765\_x1.....acucguuccgaauuaggaagagaagcgc..... 0  
 Gi2\_11186675\_x1.....guAgugggaacacggggugc..... 1  
 Gi3\_28794267\_x1.....ggccccgccGguacugcgauccggagacg..... 1  
 Gi1\_4385562\_x1.....gaacCggggugccgaacu..... 1

Gi2\_11017674\_x1.....aagagaagcgcgcucagggcAc..... 1  
 Gi2\_11267058\_x1.....aucgCagacgucgugggaac..... 1  
 Gi2\_11095427\_x1.....cggagacgucgugggaacacggggGgccgaacu..... 1  
 Gi2\_11253260\_x1.....ucCugggaacacggggugccgaacu..... 1  
 Gi3\_28805458\_x1.....agaagUgccgucagggcccgcca..... 1  
 Gi3\_28599860\_x1.....gagacguUgugggaacacg..... 1  
 Gi2\_11295727\_x1.....acgucgugggaacacggggugccgUa..... 1  
 G1a\_6084347\_x1.....ggccccgcUaguacugcg..... 1  
 Gi3\_28433621\_x1.....agagaagcgcgcucagggcccgCA..... 1  
 Gi1\_4216898\_x1.....ucgugggaacacggggugAc..... 1  
 G1a\_6292104\_x1.....aagcgccguUagggccccccagucugc..... 1  
 Gi2\_11051435\_x1.....gauAggagacgucgugggaacacggg..... 1  
 G1a\_6145285\_x1.....gCgggaacacggggugccgaa..... 1  
 Gi2\_11135835\_x1.....cgucgugggaacacggggugUcga..... 1  
 Gi3\_28871967\_x1.....cgccagAacugcgauccgagacguc..... 1  
 Gi3\_28479783\_x1.....gagacgucgugggaacacggggGgccgaa..... 1  
 Gi2\_11379353\_x1.....Ugucgugggaacacggggugccgaac..... 1  
 Gi3\_28768448\_x1.....agacgAcgugggaacacggggugccgaac..... 1  
 G1a\_6083080\_x1.....ucggGgacgucgugggaacacgg..... 1  
 Gi5\_8947631\_x1.....gucgugggaaGacggggugccgaacu..... 1  
 Gi4\_586702\_x1.....aguacugcgauccgagacgAc..... 1  
 G1a\_5997066\_x1.....gucagggccccgccGguacugcg..... 1  
 Gi3\_28294282\_x1.....ccgccaguaUugcgauccgagacguc..... 1  
 Gi4\_600526\_x1.....acugcgauccgagacguc..... 0  
 Gi5\_8835778\_x1.....gagacgucguggUaacacggggugccgaacu..... 1  
 Gi3\_28960822\_x1.....aucggagacgucgugggaacacggUg..... 1  
 Gi3\_28408067\_x1.....Nggaacacggggugccgaa..... 1  
 Gi3\_28281181\_x1.....gagacgucgugggaacacgAggugccga..... 1  
 Gi1\_4308191\_x1.....cgucgugggaacacggggUcc..... 1  
 Gi3\_28874397\_x1.....gccccgccUguacugcgau..... 1  
 Gi1\_4374403\_x1.....acgucgugggGacacggggugccgaac..... 1  
 Gi3\_28743757\_x1.....agaagcgcgcucagggUccgcc..... 1  
 Gi2\_11378281\_x1.....Cuacugcgauccgagacgucg..... 1  
 G1a\_6178937\_x1.....acAgcgauccgagacgucgug..... 1  
 Gi3\_28854697\_x1.....gacgucguNggaacacgg..... 1  
 Gi5\_8975200\_x1.....cgugggaacacggggugA..... 1  
 Gi1\_4302348\_x1.....gGgacgucgugggaacacggggugccg..... 1  
 Gi2\_11051573\_x1.....aggcGccgccaguacugcgau..... 1  
 Gi2\_11325570\_x1.....gagacgucNugggaacacggggugc..... 1  
 Gi3\_28583824\_x1.....Uaguacugcgauccgagacgucgu..... 1  
 Gi3\_28567164\_x1.....gGgauccgagacgucgugggaacacgg..... 1  
 Gi3\_28753811\_x1.....ccgcGaguacugcgauccgagacguc..... 1  
 Gi2\_11001639\_x1.....aagagaagcgcgcucUggcccc..... 1  
 Gi2\_11063493\_x1.....gccaguacugcgauccAgagacgu..... 1  
 Gi2\_11382992\_x1.....aucggagacguAgugggaacacggggug..... 1  
 Gi3\_28980873\_x1.....aCaagcgcgcucagggcccgccagu..... 1  
 G1a\_6152391\_x1.....aggccccgccaguaUugc..... 1

Gi3\_28317371\_x1.....gGcaggccccgccaguacugcgauccggaga..... 1  
 Gl1a\_6180815\_x1.....Aucgugggaacacggggugcc..... 1  
 Gi2\_11208194\_x1.....gggaacacggggugAcgaac..... 1  
 Gi3\_28945513\_x1.....caggccccgccaguGcugcgauccggagac..... 1  
 Gi1\_4258278\_x1.....agacgucgugggaacacAgggugccgaac..... 1  
 Gi1\_4277537\_x1.....ugggaacacggggugcAga..... 1  
 Gi3\_28837199\_x1.....cCucgugggaacacggggugccg..... 1  
 Gi2\_11195905\_x1.....aagagaagcgccguUaggcc..... 1  
 Gi3\_28805356\_x1.....gagacgucgugggaacacggggugcUg..... 1  
 Gi5\_9137471\_x1.....Aggagacgucgugggaacacgg..... 1  
 Gl1a\_6079466\_x1.....cguggAaacacggggugcc..... 1  
 Gi1\_4176967\_x1.....cgugggaacaAggggugccgaacu..... 1  
 Gi3\_28880674\_x1.....Cagagaagcgccgucagggccccgcc..... 1  
 Gi5\_9114621\_x1.....gaacacggggugccAaac..... 1  
 Gi3\_28427336\_x1.....ggGgacgucgugggaacacgg..... 1  
 Gi3\_28575381\_x1.....cgucaggccccgccaguCcugc..... 1  
 Gl1a\_6041901\_x1.....gccgucagNccccgccagua..... 1  
 Gi5\_8833544\_x1.....acgucgugggaacacggggugcU..... 1  
 Gi5\_8951220\_x1.....guggUaacacggggugccgaacuu..... 1  
 Gi3\_28419095\_x1.....ucgugAgaacacggggug..... 1  
 Gi3\_28963263\_x1.....cgccgucagggccccgccaguacugcg..... 0  
 Gl1a\_6148201\_x1.....cgccaguacugcgaCcggagacguc..... 1  
 Gi3\_28375860\_x1.....gucgugggaacacggCgu..... 1  
 Gi3\_28266406\_x1.....gUcguacagggccccgccaguacu..... 1  
 Gi1\_4185594\_x1.....gugggaacacggggAgccgaac..... 1  
 Gi2\_11391441\_x1.....ccgucagggccccgccaguac..... 0  
 Gi3\_28642937\_x1.....ggUgacgucgugggaacacggg..... 1  
 Gi3\_28785885\_x1.....cgugggaacacggUgugccg..... 1  
 Gi5\_8966418\_x1.....ccgccaguacCgcgauccggagacg..... 1  
 Gi4\_597808\_x1.....gaucggagacgucgugggaacacggggugcc..... 0  
 Gi2\_11212649\_x1.....gaucggagacgucgugggaA..... 1  
 Gl1a\_6206492\_x1.....gaagagaagAgccgucag..... 1  
 Gi1\_4251171\_x1.....gccgucagggccccgccaguacugcgauU..... 1  
 Gi2\_11222580\_x1.....cgucgugggaacaUggggugccga..... 1  
 Gi3\_28374729\_x1.....cgaNcggagacgucgugggaacacg..... 1  
 Gi3\_28524640\_x1.....ugcgauccggGacgucgugggaacacggggu..... 1  
 Gl1a\_6272141\_x1.....gGucggagacgucguggg..... 1  
 Gi5\_9115087\_x1.....aguacugcgauccggGgacguc..... 1  
 Gi4\_602888\_x1.....caggccccgccaguacugc..... 0  
 Gi1\_4207887\_x1.....agAcccccgcaguacugcgauccg..... 1  
 Gi1\_4199754\_x1.....cggagacgucgugggaGca..... 1  
 Gi2\_11393699\_x1.....caggccccgccUguacug..... 1  
 Gi2\_11387868\_x1.....gCagcgccgucagggccc..... 1  
 Gi3\_28366359\_x1.....agcgccgCcaggccccgccagu..... 1  
 Gi1\_4217574\_x1.....acCgcgauccggagacgucgugggaaca..... 1  
 Gi3\_28626442\_x1.....gucgugggaacacgggguUccgaacu..... 1  
 Gl1a\_6081483\_x1.....gAcaggccccgccaguacugcga..... 1

Gi1\_4188484\_x1.....ucgNgggaacacggggugccgaac..... 1  
 Gi1\_4229862\_x1.....ggagacgucCugggaacacggggugccg..... 1  
 Gi1\_4384101\_x1.....aguacugcgaucggagGc..... 1  
 Gi3\_28277829\_x1.....ucggagCcgucgugggaacacggggu..... 1  
 Gi1\_4255567\_x1.....ccccgcaguacugcgaucggagacgu..... 0  
 Gi3\_28615756\_x1.....cagCccccgccaguacugcgauc..... 1  
 Gi5\_9037461\_x1.....cggagacgNcgugggaacacggggugcc..... 1  
 Gi2\_11344822\_x1.....agagaagcgccgGcaggccccgc..... 1  
 Gi3\_28522262\_x1.....gccaguacugcgaucggagGcgu..... 1  
 Gi2\_11343879\_x1.....cgucgugggaacacggggGgccga..... 1  
 Gi3\_28531302\_x1.....aucggaCacgucgugggaacac..... 1  
 Gi5\_9052480\_x1.....gucguggUaacacggggugccgaacu..... 1  
 Gi3\_28298018\_x1.....cgucagggccccgccaguacugcC..... 1  
 Gi3\_28444159\_x1.....gaucggagacgucgugggCacacggggugcc..... 1  
 Gi2\_11161982\_x1.....aucggagacgucGgggaacacgg..... 1  
 Gi5\_8937271\_x1.....aucggagacgucUugggaacacggggugc..... 1  
 Gi5\_8936796\_x1.....ccgucaggccUcgccaguacugcg..... 1  
 Gi3\_28406617\_x1.....aucggagacgucgugggaUcacgggg..... 1  
 G1a\_6268257\_x1.....Ggaagcgccgucagggccccgcca..... 1  
 Gi1\_4189311\_x1.....aagcgccgucagggccccgccaguacugc..... 0  
 Gi3\_28346118\_x1.....cgccgucCggccccgcccag..... 1  
 G1a\_6024170\_x1.....aucggagacgucguggAaacacggg..... 1  
 Gi4\_569393\_x1.....cgccaguacugcgaucAgagacgucgug..... 1  
 Gi2\_11239300\_x1.....gUcgucagggccccgccaguacugcgau..... 1  
 Gi2\_11047973\_x1.....cacggggugccgaacuu..... 0  
 Gi3\_28601788\_x1.....aagagaCgcgccgucagggccc..... 1  
 Gi3\_28652732\_x1.....gacgucguAgggaacacggg..... 1  
 Gi3\_28522302\_x1.....ccgccaguacugcgaCcgagac..... 1  
 Gi1\_4170323\_x1.....gugggaaUacggggugccgaacuu..... 1  
 Gi3\_28444891\_x1.....gaGgucgugggaacacggggugccgaacu..... 1  
 Gi3\_28739024\_x1.....agagUagcgccgucagggccccgc..... 1  
 Gi5\_9015464\_x1.....gggaacacggggugcAgaac..... 1  
 Gi2\_11089647\_x1.....aucCgagacgucgugggaacacggggugcc..... 1  
 Gi3\_28959176\_x1.....gaCcgagacgucgugggaacacggggugc..... 1  
 G1a\_5989269\_x1.....ucgugggaacCcggggugccgaacu..... 1  
 Gi2\_11152747\_x1.....Nggccccgccaguacugcg..... 1  
 G1a\_6195089\_x1.....cgucgugggaacacggggGgccg..... 1  
 Gi3\_28422898\_x1.....aCcgccgucagggccccgcca..... 1  
 Gi5\_8862570\_x1.....cgucgugggaacacggUgugccgaa..... 1  
 Gi5\_9051637\_x1.....ugcgGucggagacgucguggga..... 1  
 Gi2\_11283246\_x1.....cgccaguacugcgaucggagacgucguggga..... 0  
 Gi3\_28435471\_x1.....Ggagaagcgccgucagggccccgcca..... 1  
 Gi3\_28655507\_x1.....ccgccaguNcugcgaucggagac..... 1  
 G1a\_6083637\_x1.....Cucagggccccgccaguacu..... 1  
 Gi1\_4198464\_x1.....ucgugUgaacacggggugcc..... 1  
 Gi5\_8932681\_x1.....cgGgggaacacggggugc..... 1  
 Gi2\_11111966\_x1.....aCuacugcgaucggagacgucgu..... 1

Gi2\_11293092\_x1.....cgucaggAcccgccaguacugcg..... 1  
Gi2\_11049256\_x1.....aguacugcgauCgagacgucgu..... 1  
G1a\_6225375\_x1.....aacacggggugccgaacA..... 1  
Gi4\_593204\_x1.....acgucgugggaGacggggugccgaacu..... 1  
Gi5\_9055481\_x1.....gacUucgugggaacacggggugccgaacu..... 1  
Gi5\_9106089\_x1.....gagacgucgugggaGcacggggugccgaac..... 1  
Gi1\_4179114\_x1.....agacgucgugggCacacggggugccgaacu..... 1  
Gi4\_590178\_x1.....acgucgugggaGcacggggugccgaacu..... 1  
Gi4\_578509\_x1.....cccAccaguacugcgauCgagacguc..... 1  
Gi2\_11401936\_x1.....cgaucgggagacgGcuggggaacacgggg..... 1  
Gi3\_28641016\_x1.....gaucgggagacgucguggAaacacggggugc..... 1  
G1a\_6164818\_x1.....gccaguacugcgauCgagacguc..... 1  
G1a\_6258181\_x1.....aAuacugcgauCgagacguc..... 1  
Gi3\_28895158\_x1.....gaucgggagacgGuggggaacac..... 1  
Gi3\_28293053\_x1.....gucgugggaacacggggugCggaacuu..... 1  
Gi2\_11400225\_x1.....ccgucaggcAcccgccaguacugcg..... 1  
Gi5\_8844886\_x1.....gccccgccaguacugcgCuc..... 1  
Gi5\_9032690\_x1.....agacgucguggAaacacggggugccgaac..... 1  
Gi3\_28432572\_x1.....aguacugcgauCgagacgucguC..... 1  
G1a\_6068185\_x1.....cgggagacgucgugggaCcacggggg..... 1  
Gi3\_28633282\_x1.....CggccccgccaguacugcgauCgagacguc..... 1  
Gi2\_11211275\_x1.....acugcgauCgagacgucgu..... 1  
Gi3\_28477027\_x1.....gaucgggagacgucgugggUacacg..... 1  
Gi5\_9099488\_x1.....aucgggagacgucGgggaacacggggugcc..... 1  
Gi1\_4201994\_x1.....gccgucaggccccgccaguGcu..... 1  
Gi1\_4210310\_x1.....gagaagcgccgucaggcccU..... 1  
Gi3\_28663020\_x1.....aggccccgcGaguacugc..... 1  
Gi2\_11145386\_x1.....agacgucgugggaacaAggggugccgaac..... 1  
Gi3\_28480910\_x1.....aguacugcgauCggagaAg..... 1  
G1a\_6284147\_x1.....uGggagacgucgugggaacacgg..... 1  
Gi3\_28355036\_x1.....ucgggagacgucgugggaacacggUgugcc..... 1  
Gi2\_11245553\_x1.....gagacgucgugggGacacggggugccgaacu..... 1  
G1a\_6051815\_x1.....cccgccaguUcugcgauCgagacguc..... 1  
Gi2\_11312521\_x1.....cgaucggCgacgucgugggaacacg..... 1  
Gi4\_572858\_x1.....gggaacacggggCgccgaac..... 1  
Gi2\_11058297\_x1.....caguacugcgauCagagacguc..... 1  
Gi3\_28741946\_x1.....gaagcgccNucaggccccgccagua..... 1  
Gi5\_9009872\_x1.....gugggaacacggUgugccgaa..... 1  
G1a\_6089406\_x1.....acgucgugggCacacggggg..... 1  
Gi2\_11121543\_x1.....Ugccccgccaguacugcg..... 1  
Gi2\_11288922\_x1.....aucgggagacguUgugggaacacggg..... 1  
Gi5\_8935202\_x1.....ugggaacacgUggugccgaacu..... 1  
Gi5\_9069917\_x1.....cgucgugggGacacggggugcc..... 1  
Gi2\_11345128\_x1.....acgucgugggaCcacggggugcc..... 1  
Gi3\_28616625\_x1.....gaagagaagcgccgucaggcAccg..... 1  
Gi2\_11125928\_x1.....gaucgggagacgucgugggaacUcggggugcc..... 1  
Gi2\_11388070\_x1.....GccccccaguacugcgauCgagacgucgug..... 1

Gi2\_11153955\_x1.....gacgucgugggaacacggCgugccgaac..... 1  
 Gi1\_4165014\_x1.....cccgccaguacugcgauccgagacU..... 1  
 Gi2\_11406368\_x1.....ggccccAccaguacugcgauccg..... 1  
 Gi1\_4280795\_x1.....gucgugggaaacacggggAgccgaacu..... 1  
 Gi3\_28491434\_x1.....ggUcccgccaguacugcgauccg..... 1  
 Gl1a\_6179055\_x1.....ucgugggaaacacggggugccAaac..... 1  
 Gi1\_4333453\_x1.....gAgccgucagggccccgccaguacugcg..... 1  
 Gi5\_8922235\_x1.....gGucggagacgucgugggaaacacgggg..... 1  
 Gl1a\_6061753\_x1.....aucggagacgucgugggaaCcacg..... 1  
 Gi2\_11121082\_x1.....cAccaguacugcgauccgagacgu..... 1  
 Gi3\_28339535\_x1.....agcgccgucagggUcccgccagu..... 1  
 Gi2\_11161649\_x1.....ggccccgccAuaucugcgauccgagacgu..... 1  
 Gi2\_11303853\_x1.....gaucggagacgucgugggaaacacgggU..... 1  
 Gi3\_28716438\_x1.....ucaggUcccgccaguacugcgaucc..... 1  
 Gi5\_9046482\_x1.....cgucCugggaaacacggggugccgaacu..... 1  
 Gi3\_28590287\_x1.....ccccgccagCacugcgauccggag..... 1  
 Gl1a\_6134181\_x1.....gccaUuacugcgauccgga..... 1  
 Gi3\_28363745\_x1.....cccgccagAaucugcgauccggagacgucgug..... 1  
 Gl1a\_6260375\_x1.....aguacugcgCcgagac..... 1  
 Gi3\_28895586\_x1.....gucagggccccCccaguacugcg..... 1  
 Gi2\_11407721\_x1.....gacgucgugggaacacggggCgccg..... 1  
 Gi3\_28306597\_x1.....gugggaacacgCggugcc..... 1  
 Gi1\_4162733\_x1.....cggagacgucgugggaaacacggCgugcc..... 1  
 Gi3\_28383354\_x1.....guUcugcgauccggagacgu..... 1  
 Gi2\_11303807\_x1.....cgucgugggaaAacggggug..... 1  
 Gi2\_11235745\_x1.....caggccccNccaguacugcgauccgga..... 1  
 Gi5\_8847915\_x1.....cggagacgucgugggaaGcacg..... 1  
 Gi3\_28406709\_x1.....ucgugggaaNcacggggugccga..... 1  
 Gi3\_28961419\_x1.....gccgucGggccccgccaguacugcg..... 1  
 Gi3\_28785066\_x1.....gaagagaagcgccgucaAgccccgcc..... 1  
 Gi2\_11242936\_x1.....cgucgugggaacacAgggugccgaa..... 1  
 Gi3\_28593711\_x1.....aggccccgccUguacugcgauccgga..... 1  
 Gi3\_28846878\_x1.....ggagacgucgugggaaacacgAgggugcc..... 1  
 Gi3\_28640773\_x1.....gcgauccggCgacgucgugggaaac..... 1  
 Gi3\_28578975\_x1.....acgucgugggaaUcacggggugccgaacu..... 1  
 Gi3\_28261718\_x1.....gucgugggaaacacggggugccAaa..... 1  
 Gi2\_11210530\_x1.....gacgucgGgggaaacacggggugccg..... 1  
 Gi2\_11365498\_x1.....cguuccgaauuaCgaagagaagcgccguc..... 1  
 Gi3\_28618970\_x1.....aggccccgccaguacugcgGucggagacg..... 1  
 Gi5\_9008524\_x1.....acgucgugggGacacggggugccgaac..... 1  
 Gi5\_9025564\_x1.....gggaacacggggCgccgaa..... 1  
 Gi1\_4355657\_x1.....agcgccgucagggccccgcUaguacugc..... 1  
 Gi4\_611087\_x1.....ugggaaacacggggugccgaa..... 0  
 Gi3\_28749743\_x1.....ccgccagCacugcgauccggagacgucgug..... 1  
 Gi3\_28339036\_x1.....gaacacggggugccCaac..... 1  
 Gi2\_11026953\_x1.....Ugucgugggaaacacggggugc..... 1  
 Gi2\_11067626\_x1.....gggaaacacggggugccCaac..... 1

Gi1\_4378010\_x1.....agacgucgugggaaacacggggCgcc..... 1  
Gi1\_4351829\_x1.....aggccccgccaguCucgcauc..... 1  
Gi3\_28793472\_x1.....ggagacgucgugUgaacacg..... 1  
Gi2\_11399793\_x1.....gaucggagacgucgugggUaca..... 1  
Gi3\_28560837\_x1.....acgucgugggaacacggggugccAaac..... 1  
Gi3\_28393591\_x1.....agacgucgugggaacacgUggugccgaac..... 1  
G1a\_6152990\_x1.....agaagcgcgcucagccccccGguacugc..... 1  
Gi1\_4229365\_x1.....ugcgauccggagacgucgugggaacaU..... 1  
Gi1\_4297950\_x1.....ucgugggaacCcggggugccga..... 1  
Gi3\_28545275\_x1.....acgucgugggaacacggggugcGg..... 1  
Gi5\_8951152\_x1.....aggccccgccaguacAgcgauc..... 1  
Gi3\_28912825\_x1.....cgucgugggaacacggggugccCaacu..... 1  
Gi1\_4369640\_x1.....aggcAccgccaguacugcgauc..... 1  
Gi3\_28867530\_x1.....gaauuaCgaagagaagcgcgcuc..... 1  
Gi2\_11347123\_x1.....gAcaggccccgccaguacugcgauc..... 1  
Gi2\_11211815\_x1.....gucgugggaacaAggggugccga..... 1  
Gi1\_4172822\_x1.....gaagagaagcgcgcucagc..... 0  
Gi3\_28770047\_x1.....gUagacgucgugggaacac..... 1  
Gi2\_11237139\_x1.....aggccccgccCguacugcgaucggagacguc..... 1  
Gi2\_11157055\_x1.....uacugcgaNcggagacgucgugggaaca..... 1  
Gi3\_28928596\_x1.....cgucagggccccgccCguacug..... 1  
Gi2\_11337164\_x1.....ucUgagacgucgugggaac..... 1  
Gi3\_28733286\_x1.....Uccccccaguacugcgau..... 1  
Gi1\_4220550\_x1.....uCggaacacggggugccg..... 1  
Gi2\_11205831\_x1.....gaacacggggugccgCac..... 1  
Gi3\_28398140\_x1.....aggccccgcAaguacugcgau..... 1  
Gi3\_28942214\_x1.....ggaacacggggugAcgaa..... 1  
Gi3\_28649462\_x1.....cgugCgaacacggggugccgaa..... 1  
Gi2\_11192913\_x1.....gaucggagacgucgugggCacacgggg..... 1  
Gi1\_4354805\_x1.....ccgucagggccccgccaguacugcg..... 0  
G1a\_6312050\_x1.....gucaAgccccgccaguacugcg..... 1  
Gi3\_28476801\_x1.....cgccgucagggccccgccUg..... 1  
Gi2\_11390604\_x1.....ggccccgcAaguacugcga..... 1  
Gi3\_28469301\_x1.....gaucggagacgucgugggaaUacggggug..... 1  
Gi3\_28520721\_x1.....gccaguacugcgauccggUg..... 1  
G1a\_6010336\_x1.....Cugggaacacggggugccgaa..... 1  
Gi1\_4363032\_x1.....gaacacggggGgccgaacu..... 1  
Gi3\_28542862\_x1.....gucaggUccccccaguacugc..... 1  
Gi2\_10994212\_x1.....ccccccagNacugcgauccggagacgucgu..... 1  
Gi1\_4329337\_x1.....acgucgugggaacacgAggugccgaa..... 1  
Gi2\_11343646\_x1.....gcgaucggagCcgucgugggaacacgg..... 1  
Gi2\_11300625\_x1.....ggccccAccaguacugcgau..... 1  
Gi3\_28701231\_x1.....ucaggccccgccaguacugcgauAgagacgu..... 1  
Gi3\_28984296\_x1.....aagagaGgcgcgcucagggcccccca..... 1  
Gi5\_8846803\_x1.....agUcgucgugggaacacggggugccga..... 1  
Gi3\_28688954\_x1.....aucggagacgucgugggaacUcg..... 1  
Gi2\_11305290\_x1.....agaagcgcgcucagggccUcgcc..... 1



Gi3\_28732550\_x1.....gccccGcaguacugcgaucgg..... 1  
Gi1\_4274394\_x1.....aucggagaAgucgugggaaacac..... 1  
G1a\_6217775\_x1.....ucaggccccccagucgucggaucgg..... 1  
Gi4\_572678\_x1.....aucggagacgucgugggaa..... 0  
Gi1\_4304041\_x1.....gugggaacacggggugccgaCcuu..... 1  
Gi3\_28784244\_x1.....cggagacgucguAggaacacgggg..... 1  
Gi3\_28284140\_x1.....ucaggccccAccaguacugcgaucggag..... 1  
Gi3\_28806893\_x1.....gccccccagucgucggaucggag..... 1  
Gi1\_4283816\_x1.....ccaguacugcgaucggCgacgucgug..... 1  
Gi2\_11130711\_x1.....gUagacgucgugggaaacacggggugccgaac..... 1  
Gi5\_8895725\_x1.....gucgugggaaacacgCggugccgaacu..... 1  
Gi2\_11033540\_x1.....cccgccagNacugcgaucggagacgucgug..... 1  
Gi1\_4216602\_x1.....ggaacacgggUugccgaacu..... 1  
Gi3\_28392751\_x1.....gccgucaggccUcgccaguacu..... 1  
Gi5\_9095019\_x1.....ccgccaguacugcgaucggUgacg..... 1  
Gi3\_28878822\_x1.....Acgccgucaggccccgccagu..... 1  
Gi3\_28383219\_x1.....gccaguacugcgaucggagaUguc..... 1  
G1a\_6351091\_x1.....cguNaggccccgccaguacugcg..... 1  
Gi3\_28604795\_x1.....gcgaucggagacgucgugggaaacacggggC..... 1  
Gi3\_28880845\_x1.....gcccgcgucaggccccgccCuacugc..... 1  
Gi3\_28587978\_x1.....ugggaacaUggggugccg..... 1  
Gi2\_11190821\_x1.....cggagacgucguCggaacacggggg..... 1  
Gi3\_28931493\_x1.....gcgaucggCgacgucgugggaa..... 1  
Gi2\_11217973\_x1.....gcgaucggagaUgucgugggaaacacggggug..... 1  
Gi2\_11290378\_x1.....Ugucgugggaaacacggggugccgaac..... 1  
Gi1\_4378636\_x1.....aucggCgacgucgugggaaacacg..... 1  
Gi2\_11197420\_x1.....agccccccagCacugcgaucggagacguc..... 1  
Gi1\_4298453\_x1.....gucguAggaacacggggugccgaac..... 1  
G1a\_6101519\_x1.....cggagacgucgugggaaAacggggg..... 1  
G1a\_5990322\_x1.....ucggUgacgucgugggaaacacggg..... 1  
Gi3\_28939362\_x1.....ucguggAaacacggggugc..... 1  
Gi3\_28728436\_x1.....cgGcaguacugcgaucggagacg..... 1  
Gi3\_28926998\_x1.....ccgccaguaUugcgaucggagac..... 1  
Gi3\_28983266\_x1.....ccUcgccaguacugcgaucggagac..... 1  
G1a\_6156976\_x1.....gcgaucggagGcugcugug..... 1  
G1a\_6171422\_x1.....gucaggcUccgccaguacug..... 1  
Gi3\_28325499\_x1.....agagaagcgccgucaggcGccc..... 1  
Gi3\_28707833\_x1.....aguGcugcgaucggagacgucgu..... 1  
Gi3\_28625531\_x1.....gccaguacugcgaucggagUcgucgug..... 1  
Gi2\_11284346\_x1.....cccgccaguacugcgaucggUgac..... 1  
G1a\_6182732\_x1.....agagaagcgccgucaggcccUgcc..... 1  
Gi1\_4373690\_x1.....gugggaacaUggggugccgaacu..... 1  
Gi1\_4303677\_x1.....aucggagacgucgugggaaacacgAggugcc..... 1  
G1a\_6031618\_x1.....ggaacacggggugUcgaacu..... 1  
Gi3\_28371204\_x1.....agacgucgugAgaacacgggg..... 1  
Gi3\_28832056\_x1.ccCuaacucguuccgaau..... 1  
Gi2\_11341597\_x1.....caggccccccagAacug..... 1

Gi4\_574741\_x1 .....gagaagcgccgucaggcA..... 1  
Gi3\_28451964\_x1.....Ucgucgugggaacacggggugccgaac..... 1  
Gi3\_28585314\_x1.....aggccccccaAuacugcgauccgagacg..... 1  
Gi3\_28948528\_x1.....gucgugggCacacggggugc..... 1  
Gi3\_28674912\_x1.....cgGcugugggaacacggggug..... 1  
Gi4\_598230\_x1 .....gugggaacacAgggugccgaacu..... 1  
G1a\_6131155\_x1 .....gaucggagacgucguUggaa..... 1  
Gi2\_11106193\_x1 .....aucggagaAgucgugggaacacggggugc..... 1  
Gi3\_28457274\_x1 .....gaacacgAgggugccgaacu..... 1  
Gi1\_4262687\_x1 .....acugcgaCcgagacgucg..... 1  
Gi2\_11273899\_x1 .....aggccccccaguGcugcgau..... 1  
Gi3\_28446788\_x1 .....gccUguacugcgauccgga..... 1  
Gi3\_28950295\_x1 .....aagagCagcgccgucaggc..... 1  
Gi3\_28524732\_x1 .....acgucgugggaaUacggggugccgaac..... 1  
Gi2\_11025882\_x1 .....ccccgccGguacugcgauccgag..... 1  
Gi3\_28319509\_x1 .....guacugcgauccAgagacgucgug..... 1  
Gi3\_28742242\_x1 .....Acaggccccccaguacugcgauccg..... 1  
Gi2\_11334019\_x1 .....acgucgugggaaAcAggggugccgaac..... 1  
Gi3\_28637126\_x1 .....ccgccaguacugcgauccgagacgucgCg..... 1  
Gi1\_4191461\_x1 .....cgugggaacacggggCgcccga..... 1  
Gi1\_4304126\_x1 .....aucggagGcugcugugggaacacggggugcc..... 1  
G1a\_6279915\_x1 .....Agccaguacugcgauccgagacgucgug..... 1  
Gi3\_28584434\_x1 .....guacugcgauccggaAacguc..... 1  
Gi1\_4192980\_x1 .....ggccccgccaguacugcgauccgCga..... 1  
Gi2\_11092695\_x1 .....ugggaaCcggggugccgaacu..... 1  
Gi3\_28859736\_x1 .....gggaacacUgggugccga..... 1  
Gi2\_11115858\_x1 .....gucgugggaaacacgggAugcc..... 1  
Gi5\_8951078\_x1 .....uacugcgauccAagacgu..... 1  
Gi3\_28607222\_x1 .....aucgAagacgucgugggaaac..... 1  
Gi5\_8950790\_x1 .....acgucgugggaaacacggggugccgaUc..... 1  
Gi2\_11100641\_x1 .....caggccccccaguacGgc..... 1  
Gi3\_28373989\_x1 .....cgccaguacugcAaucggagacgucg..... 1  
G1a\_6156858\_x1 .....aagagGagcgccgucagggccccg..... 1  
Gi1\_4210394\_x1 .....aagagaagcgccgucagggccccg..... 0  
Gi2\_11065201\_x1 .....cggagacgucgugggCacac..... 1  
G1a\_6157154\_x1 .....gggaacacNgggugccga..... 1  
Gi3\_28654866\_x1 .....cagNacugcgauccgagacgucgug..... 1  
Gi3\_28706961\_x1 .....cgucgugggaaacacggggugcUgaa..... 1  
Gi3\_28698798\_x1 .....aggccccccagAacugc..... 1  
Gi5\_9018484\_x1 .....ccccccaguacugcgauccgagCcg..... 1  
Gi5\_9094637\_x1 .....gucNugggaaacacggggugccgaacu..... 1  
Gi2\_11286884\_x1 .....ucggagacgucgugggaaacacgggguAc..... 1  
Gi2\_11226743\_x1 .....cugugggaaacacggggugccgaG..... 1  
Gi1\_4301474\_x1 .....cCccaguacugcgauccgagac..... 1  
Gi3\_28866079\_x1 .....gccaguacugcgauccgagaA..... 1  
Gi2\_11228211\_x1 .....cggagacgAcgugggaaacacggggugcc..... 1  
Gi2\_11025453\_x1 .....ugggaaacacggggugccgaG..... 1

Gi2\_11240090\_x1.....gucagggccccgcUaguacugcgauccggagac..... 1  
Gi2\_11165680\_x1.....gacgucgugggaacacgCg..... 1  
Gi2\_11059111\_x1.....ccgucagAccccgccaguacugc..... 1  
Gi5\_8980965\_x1.....gcgccgCcaggccccgccaguacug..... 1  
Gi1\_4163111\_x1.....gugggaacacggggugccC..... 1  
Gi2\_11070916\_x1.....gaucggagaGgucgugggaacacggg..... 1  
Gi3\_28663753\_x1.....ucggagacgucguggAaacacggg..... 1  
Gi2\_11103088\_x1.....aggcGccgccaguacugcgauccggaga..... 1  
Gi2\_11311106\_x1.....cUcgccaguacugcgauccggagacguc..... 1  
Gi1\_4377469\_x1.....aucggagacgucgugggaGcacggggugc..... 1  
Gi2\_11084863\_x1.....agaagcgccgucagggccccgccGuac..... 1  
Gi2\_11351485\_x1.....gaucggagCcgucgugggaacacggggugcc..... 1  
Gi2\_11299126\_x1.....gaagcgccAucagggccccgc..... 1  
Gi2\_11045325\_x1.....gccaguacNgcgauccggagacguc..... 1  
G1a\_6297151\_x1.....cgucgugggaacacggggAgccgaacu..... 1  
Gi3\_28475236\_x1.....agaagcgccgucagggccUcgcc..... 1  
Gi1\_4281669\_x1.....gaucggagacgucguggga..... 0  
Gi2\_11278877\_x1.....aucggagacAucgugggaacacg..... 1  
Gi1\_4357153\_x1.....acgucguggAaacacggggugccgaac..... 1  
Gi3\_28385243\_x1.....aucggagacgAucguggga..... 1  
G1a\_6335649\_x1.....aagagaagGgccgucagggccccgc..... 1  
Gi3\_28679122\_x1.....gucgugggaacacggggugcAga..... 1  
Gi3\_28630256\_x1.....ugggaacacggggugccgaU..... 1  
Gi5\_8840899\_x1.....ggagacgucgugAgaacacggggugccgaacu..... 1  
G1a\_6090110\_x1.....gugggaacaUggggugcc..... 1  
Gi1\_4178616\_x1.....ggagacgucgugggaacCcggggu..... 1  
Gi2\_11359345\_x1.....cggagacguAgugggaacacggggugcc..... 1  
Gi3\_28614777\_x1.....aguacugcgauccggGgacgucgug..... 1  
Gi1\_4365103\_x1.....Uggagacgucgugggaacacggggugcc..... 1  
Gi5\_8957592\_x1.....gcgccgucagggccccgccaguacugcC..... 1  
Gi1\_4273606\_x1.....ggccccgUcaguacugcgau..... 1  
Gi2\_11348624\_x1.....gccccgccaguacCgcga..... 1  
Gi5\_8940636\_x1.....cgucgugggaacacggggugccgaUcu..... 1  
Gi1\_4311543\_x1.....Aaucggagacgucgugggaacacg..... 1  
G1a\_6248337\_x1.....cgauccggagacgucguggCaacacggg..... 1  
Gi2\_11301877\_x1.....agagaagcgcgAgucagggccccgc..... 1  
Gi2\_11391762\_x1.....cgucgugggaacacggggugU..... 1  
G1a\_6206525\_x1.....ugggaacUcgggugccgaacu..... 1  
Gi4\_605456\_x1.....gugggUaacacggggugccgaacu..... 1  
Gi5\_8978110\_x1.....Ccgagacgucgugggaacacggggugc..... 1  
Gi3\_28895964\_x1.....ucaggccUcgccaguacugcg..... 1  
Gi2\_11037841\_x1.....cucguuccgaauuaUgaagagaagcgccguc..... 1  
Gi2\_11336368\_x1.....aGugcgauccggagacgucgugggaaca..... 1  
Gi3\_28439009\_x1.....auAggagacgucgugggaac..... 1  
Gi2\_11327067\_x1.....acgucgugggaacacggggUc..... 1  
Gi3\_28481112\_x1.....gaaAacggggugccgaac..... 1  
G1a\_6106449\_x1.....ggagacgucgugggaacacggggGgc..... 1

Gi3\_28879791\_x1.....caguaUugcgauccggagacgucgug..... 1  
 Gl1a\_6297537\_x1.....cCucaggccccgccaguacu..... 1  
 Gi2\_11200953\_x1.....cccgccaguaUugcgauccggag..... 1  
 Gi2\_11226205\_x1.....aggcUccgccaguacugcgauccgg..... 1  
 Gi3\_28306449\_x1.....gaagCgaagcgccgcucagggccc..... 1  
 Gi4\_583337\_x1.....caggccccgccaguacugcgau..... 0  
 Gi3\_28822009\_x1.....aguacuAcgauccggagacgucguggg..... 1  
 Gi3\_28705573\_x1.....ugcgGucggagacgucgugggaacacg..... 1  
 Gi3\_28704398\_x1.....aaUcgccgcucagggccccgccaguacugc..... 1  
 Gi2\_11246485\_x1.....gucaggAcccgccaguacug..... 1  
 Gi1\_4253092\_x1.....aucggagaNgucgugggaacacggg..... 1  
 Gi2\_11028080\_x1.....gugggCacacggggugccgaa..... 1  
 Gi2\_11228189\_x1.....acugcgauUggagacgucgu..... 1  
 Gi2\_11273353\_x1.....gagaagcgccgcucagggccccgcUaguacu..... 1  
 Gi3\_28806670\_x1.....gcgauccggagacgucgugggaGcacgg..... 1  
 Gl1a\_6068387\_x1.....cggagacgucgugggaGcacgg..... 1  
 Gi5\_8877566\_x1.....gugggaacacggggugUcgaa..... 1  
 Gi3\_28657726\_x1.....ccccgccaguacugcgauccggGga..... 1  
 Gi3\_28949126\_x1.....caguaAugcgauccggagacgucgug..... 1  
 Gl1a\_6021679\_x1.....gucgCgggaacacggggugcc..... 1  
 Gi3\_28421987\_x1.....ggaacaUggggugccgaa..... 1  
 Gi2\_11158862\_x1.....Ccgugggaacacggggugc..... 1  
 Gi3\_28442290\_x1.....gagacgucgugggaCcacggggu..... 1  
 Gi2\_11249705\_x1.....gagGcgucgugggaacacggggug..... 1  
 Gi2\_11066809\_x1.....guacugcgaCcgagacgucguggg..... 1  
 Gi1\_4291230\_x1.....ucggagGcgucgugggaacacggggugc..... 1  
 Gi5\_9006448\_x1.....ccccgccaguacugcgauccggCgacguc..... 1  
 Gi1\_4377348\_x1.....acgucgugggaacGcggggugccg..... 1  
 Gi3\_28630329\_x1.....ccgccaguacGcgauccggagacgucgu..... 1  
 Gi2\_11292824\_x1.....cggagacgucguUggaaca..... 1  
 Gi2\_11382800\_x1.....ggagacgucgugAgaacacggggug..... 1  
 Gi3\_28719285\_x1.....agcgccgcucagggccccgcNagu..... 1  
 Gi3\_28432762\_x1.....ccccgccUguacugcgauccggagacgu..... 1  
 Gi2\_11318445\_x1.....gCagacgucgugggaacacg..... 1  
 Gi2\_11334140\_x1.....ugcgauccggagacAucguggga..... 1  
 Gi1\_4293264\_x1.....ugUgauccggagacgucgugggaacacg..... 1  
 Gi5\_8883571\_x1.....cgNcgugggaacacggggugccgaacu..... 1  
 Gi1\_4287044\_x1.....cgAcgugggaacacggggugccg..... 1  
 Gi3\_28873125\_x1.....ugggaacacggggugcGgaa..... 1  
 Gi2\_11104714\_x1.....cgucgugggaUacggggugcc..... 1  
 Gi3\_28483313\_x1.....caguacGcgauccggagacgucgug..... 1  
 Gi5\_8903263\_x1.....agaUgucgugggaacacggggugc..... 1  
 Gi5\_9127997\_x1.....agacgucgugggaacacgAggugccgaacu..... 1  
 Gi3\_28752838\_x1.....ccaguacugcgCucggagacgucgug..... 1  
 Gi5\_9014322\_x1.....ucguggCaacacggggugccgaa..... 1  
 Gi3\_28816981\_x1.....aAgccccccaguacugcgauccggaga..... 1  
 Gi2\_11378103\_x1.....aagagaCgcgcgcucagggccc..... 1

Gi2\_11045058\_x1.....aucgCagacgucgugggaacac..... 1  
 Gi3\_28749761\_x1.....gacgucgugggaacacggC..... 1  
 Gi1\_4199651\_x1.....ucguAggaacacggggugc..... 1  
 Gi5\_9008879\_x1.....caggccccgccaguacugcgG..... 1  
 Gi2\_11252566\_x1.....ucaNgccccgccaguacugc..... 1  
 Gi3\_28959289\_x1.....gacgucguNggaacacggggugccg..... 1  
 Gi1\_4179340\_x1.....acugcgaucggagacgucgug..... 0  
 Gi5\_8963786\_x1.....agacgucgugggaacGcggggugccga..... 1  
 Gi2\_11294016\_x1.....gugggaacacggggugccgaaUuu..... 1  
 Gi3\_28372282\_x1.....gacgucgugggaacacggA..... 1  
 Gi2\_11365406\_x1.....ccccgcUaguacugcgauccgagacgu..... 1  
 Gi2\_11056571\_x1.....Cucggagacgucgugggaacac..... 1  
 Gi2\_11346824\_x1.....gccaguacNgcgauccgagacg..... 1  
 Gi3\_28782756\_x1.....agacgucguggAaacacggggugcc..... 1  
 Gi3\_28656718\_x1.....cggagacgucgugggUacacgggg..... 1  
 Gi2\_11098985\_x1.....cgucGggccccgccaguacugcgauccg..... 1  
 Gi2\_11314741\_x1.....ucggagacgucgugggaacacggggugcU..... 1  
 Gi2\_11165755\_x1.....ccccgccaguacugcgauccgGgacguc..... 1  
 Gi4\_600413\_x1.....acgucguAggaacacggggugccgaacu..... 1  
 Gi3\_28837394\_x1.....ccgcGaguacugcgauccg..... 1  
 Gi3\_28597425\_x1.....acgucgugggaacacggggugcccgC..... 1  
 Gi1\_4354010\_x1.....gcgaucggNgacgucgugggaacacggggugc..... 1  
 Gi2\_11397491\_x1.....ggccccgccaguaAugcgauc..... 1  
 Gi3\_28442213\_x1.....ucggagacgucgugggaacacggggugccgaacA..... 1  
 Gi3\_28774643\_x1.....gacgucgugAgaacacggggugc..... 1  
 Gi3\_28483621\_x1.....cggagacguUgugggaacacggggugccgaacu..... 1  
 Gi2\_11268499\_x1.....cggGgacgucgugggaacacg..... 1  
 Gi2\_11316565\_x1.....gagacgucNugggaacacggggugccg..... 1  
 Gi3\_28603711\_x1.....ccccgccaguacugcgauccgUgacg..... 1  
 Gi2\_11123470\_x1.....cgccaguacugcgauccggaUac..... 1  
 Gi2\_11139306\_x1.....ggaacacggggAgccgaa..... 1  
 Gi3\_28548398\_x1.....gaagcgccgucagggccc..... 0  
 Gi3\_28332679\_x1.....gcgcGgucagggccccgccagu..... 1  
 Gi2\_11065678\_x1.....gugggaacacggggugcUgaacuu..... 1  
 Gi1\_4216983\_x1.....cgugggaacacggggugccAaac..... 1  
 Gi2\_11138303\_x1.....Caucggagacgucgugggaacacggggug..... 1  
 Gi5\_9055537\_x1.....agagaagcgccAucaggccccgccagu..... 1  
 Gi3\_28647648\_x1.....ccccccaguaUugcgauccg..... 1  
 Gi2\_11254875\_x1.....gcgaucggagGcgucgugggaacacggg..... 1  
 Gi5\_8835995\_x1.....ugcgauccgGgacgucguggg..... 1  
 Gi3\_28895805\_x1.....guacugcgauccgGgacg..... 1  
 Gi2\_11330531\_x1.....Ugugggaacacggggugccg..... 1  
 Gi3\_28638991\_x1.....cgucgugggaacacggggugccgaa..... 1  
 Gi3\_28743409\_x1.....guacugcgauccgagUcgucgug..... 1  
 Gi3\_28331041\_x1.....Cguacugcgauccgagacgucg..... 1  
 Gi5\_8892346\_x1.....agccUcgccaguacugcga..... 1  
 Gi3\_28452148\_x1.ccAuaacucguccgaaau..... 1

Gi1a\_6022297\_x1.....aucggagacgucgugggaaacacgUggu..... 1  
Gi1\_4335276\_x1.....caggccAcgccaguacugcgauccgaga..... 1  
Gi5\_8926046\_x1.....gacgucgGgggaacacggggugccgaacu..... 1  
Gi3\_28493002\_x1.....uggUaacacggggugccg..... 1  
Gi2\_11329459\_x1.....gucgugggaaacaGggggugcc..... 1  
Gi2\_11227011\_x1.....gCacugcgauccggagacguc..... 1  
Gi1a\_6123715\_x1.....aucggagaAgucgugggaaacacggg..... 1  
Gi2\_11094206\_x1.....aagGgaagcgccgucagggccccgcccag..... 1  
Gi3\_28351861\_x1.....ucgugggGacacggggugc..... 1  
Gi3\_28700805\_x1.....cUaguacugcgauccggagacgucgug..... 1  
Gi3\_28696960\_x1.....ggaacCcggggugccgaa..... 1  
Gi2\_11179885\_x1.....gucgugggaaacacggggugcU..... 1  
Gi5\_9119219\_x1.....agacgCcgugggaaacacggggugc..... 1  
Gi2\_11367323\_x1.....ucgggagacgucgugggaaacacgUggugc..... 1  
Gi3\_28329440\_x1.....gccgucagguUcccgccaguacugcg..... 1  
Gi5\_8945433\_x1.....acugUgauccggagacguc..... 1  
Gi2\_11104376\_x1.....aagcgccgucagggccccgccaguacC..... 1  
Gi3\_28356116\_x1.....ucaggccccgccaguacugUg..... 1  
Gi3\_28411159\_x1.....Nggccccgccaguacugcga..... 1  
Gi3\_28947489\_x1.....ucgggagacgucgugggGacacgg..... 1  
Gi2\_11168655\_x1.....gacgucgugggaaacacggggUaccga..... 1  
Gi3\_28973512\_x1.....cccgccaguacugcgauccgagacg..... 1  
Gi1a\_6157895\_x1.....Uucggagacgucgugggaaacacggg..... 1  
Gi1\_4184171\_x1.....ucaggcAccgccaguacugcgaucc..... 1  
Gi2\_11345632\_x1.....gaucgggagacguUgugggaaacacggggugc..... 1  
Gi5\_9100429\_x1.....gugggCacacggggugccgaa..... 1  
Gi3\_28531091\_x1.....cccgccaguacuUccgauc..... 1  
Gi3\_28672744\_x1.....aggccccgccaguacugcUauc..... 1  
Gi2\_11032815\_x1.....ugcgauccgggagacgucgugggaaacacA..... 1  
Gi2\_11149660\_x1.....cgucgugggaaUcacggggugccgaacu..... 1  
Gi5\_8938383\_x1.....ccgccaguCucgcgauccggagacg..... 1  
Gi5\_8993293\_x1.....ccccgccaguacugcgauccggagGcguc..... 1  
Gi2\_11165545\_x1.....cccgccaguacugcgauccggagGcgucgu..... 1  
Gi1\_4387046\_x1.....gGcgucagggccccgccaguacu..... 1  
Gi2\_11071456\_x1.....Gaggccccgccaguacugcgauccggag..... 1  
Gi1\_4191641\_x1.....Agugggaaacacggggugccgaac..... 1  
Gi3\_28531868\_x1.....acgucuggCaacacggggugcc..... 1  
Gi5\_8942592\_x1.....gagacgCcgugggaaacacggggugccgaacu..... 1  
Gi1\_4318947\_x1.....uGgugggaaacacggggugccgaacu..... 1  
Gi1a\_6135016\_x1.....gacgucgugggaaacacggggG..... 1  
Gi3\_28682352\_x1.....gauNgggagacgucgugggaaacacgggg..... 1  
Gi2\_11313225\_x1.....cGggccccgccaguacugcgauccggagac..... 1  
Gi3\_28966476\_x1.....gAcccgccaguacugcgaucc..... 1  
Gi2\_11092766\_x1.....cgucCugggaaacacggggugcc..... 1  
Gi3\_28859908\_x1.....ucgggagacgucgugggaaacacggggugUc..... 1  
Gi3\_28477095\_x1.....gagacgucgugggaaUacggggugccgaacu..... 1  
Gi2\_11201919\_x1.....cgucagggccccgUcaguacugcgaucc..... 1

Gi3\_28553099\_x1.....aagagaagNgccgucagcg.....gucguggggaacacggggugccga..... 1  
 Gi5\_9007837\_x1.....ucggCgacgucguggggaacacggggg..... 0  
 Gi2\_11192095\_x1.....gUcgucguggggaacacggggugccg..... 1  
 Gi3\_28937650\_x1.....Agccaguacugcgauccg..... 1  
 Gi2\_11173367\_x1.....cggCgacgucguggggaacacg..... 1  
 Gi5\_9123820\_x1.....gaucggagacgucAuggggaacacg..... 1  
 Gi2\_11308969\_x1.....gaucggagacgucguUggaacac..... 1  
 Gi2\_11225544\_x1.....aucggagacgucguggggaacaGggggg..... 1  
 Gi2\_11119321\_x1.....cgucaggccccgccaguacCg..... 1  
 Gl1\_6300330\_x1.....aggcccUgccaguacugcgauccgagacguc..... 1  
 Gi3\_28651506\_x1.....gacgucguggggaacacggggg..... 0  
 Gi1\_4168152\_x1.....caggccccgcagCacugcgauccg..... 1  
 Gi2\_11379161\_x1.....ccccgccaguacugAgauc..... 1  
 Gl1\_6241029\_x1.....aUacgucguggggaacacggggugccgaacu..... 1  
 Gi3\_28398885\_x1.....cgauccgagacgucguggggaacCggggg..... 1  
 Gi3\_28282558\_x1.....ggagacgucguggggaAacgg..... 1  
 Gl1\_6184934\_x1.....gaucggagacgucgugggCacacggggg..... 1  
 Gi1\_4278275\_x1.....agacgucgCgggaacacggggugcc..... 1  
 Gi3\_28889033\_x1.....gccgucaggccccgccagAacug..... 1  
 Gi3\_28601157\_x1.....gCacugcgauccgagacgucgug..... 1  
 Gi1\_4344351\_x1.....caguacugcgauccgagacgucgu..... 0  
 Gi3\_28825764\_x1.....gucguggggaacacggggugAc..... 1  
 Gl1\_6305844\_x1.....ggaacacggggugccgaUc..... 1  
 Gi2\_11026749\_x1.....aggccccgccaguacugGga..... 1  
 Gi1\_4278766\_x1.....ggaacaGggggugccgaacu..... 1  
 Gi5\_9126971\_x1.....caguacugcgauccgagacgucgCg..... 1  
 Gl1\_6188193\_x1.....auUggagacgucgugggga..... 1  
 Gi3\_28856797\_x1.....cgucaggccccgccaguacugcgauU..... 1  
 Gi2\_11169305\_x1.....ucAuggggaacacggggugc..... 1  
 Gi3\_28860406\_x1.....gaucggagUcgucguggggaacacg..... 1  
 Gi2\_11369594\_x1.....agagaagcgccgucagggccccgccGg..... 1  
 Gl1\_4210946\_x1.....ugggaaAacggggugccgaac..... 1  
 Gl1\_6152078\_x1.....guacugcgCucggagacguc..... 1  
 Gi1\_4274982\_x1.....gugggGacacggggugccgaacu..... 1  
 Gi5\_9045666\_x1.....acgucgCgggaacacggggugccgaac..... 1  
 Gi3\_28321811\_x1.....ccaguacugcgauccgCgacguc..... 1  
 Gi3\_28710095\_x1.....cggagacgucguggggaacaUg..... 1  
 Gl1\_6298679\_x1.....Agugggaacacggggugccg..... 1  
 Gi3\_28849181\_x1.....cgccguAaggccccgcag..... 1  
 Gi3\_28290923\_x1.....ucaggccccgccAuaucg..... 1  
 Gi5\_9091390\_x1.....acgucgugAaacacggggugccgaac..... 1  
 Gi2\_11197036\_x1.....aucggagacguAuggggaacacggggg..... 1  
 Gi2\_11222954\_x1.....agagaagcgccgucCggccccgc..... 1  
 Gi5\_9116410\_x1.....gcgccgucaggGccccccaguacug..... 1  
 Gi2\_11299684\_x1.....acugcgauccgGgacgucgu..... 1  
 Gi3\_28797316\_x1.....Accgccaguacugcgauccgagacgu..... 1

Gi3\_28322829\_x1.....cggagacgucgugCgaacacggggugcc..... 1  
 Gi2\_11261747\_x1.....gccaguacAgcgaucgga..... 1  
 Gi3\_28816355\_x1.....ccgucaggccccgccaguacugUg..... 1  
 Gi5\_8908615\_x1.....gggaacacggggugccgUa..... 1  
 Gi3\_28317032\_x1.....aagagaGgcgccgucagggccccgag..... 1  
 Gi2\_11327143\_x1.....gucaggccccgagCacugcgaucggagacguc..... 1  
 Gi3\_28369732\_x1.....gaagagaagcgccgucagggccccgag..... 1  
 Gi5\_9061142\_x1.....cgugggaacacggggugccgaacuC..... 1  
 G1a\_6171226\_x1.....gUacacggggugccgaacu..... 1  
 Gi3\_28917417\_x1.....gaucggagacgucgugggaacaAggggugc..... 1  
 Gi5\_9107966\_x1.....uggNaacacggggugccgaac..... 1  
 Gi2\_11140286\_x1.....caggccccccaAuacugcg..... 1  
 Gi2\_11337136\_x1.....gaucggagacgucgugggUacacggg..... 1  
 G1a\_6328895\_x1.....cccgccaguacugcgCucggagacguc..... 1  
 Gi2\_11280712\_x1.....gcgaucggNgacgucgugggaacacggg..... 1  
 Gi3\_28352860\_x1.....gcgaucggagacgucgCgggaacacggggug..... 1  
 Gi3\_28787955\_x1.....agagaagcgccgucagggccccUcc..... 1  
 Gi2\_11000198\_x1.....gagacgucgugggaacacggggugccgCac..... 1  
 Gi1\_4243250\_x1.....guggAaacacggggugcc..... 1  
 Gi1\_4315077\_x1.....agacgucgugggaCcacggg..... 1  
 Gi3\_28285496\_x1.....cccgccaguacugcgauU..... 1  
 Gi5\_8949968\_x1.....gugggaacacggggugccgaGcuu..... 1  
 G1a\_6339229\_x1.....gugggaacacgUggugccgaac..... 1  
 Gi5\_9075890\_x1.....ccgucaggccccgccaguacugAg..... 1  
 Gi5\_8901746\_x1.....ggccccgccGguacugcgauC..... 1  
 Gi2\_11365463\_x1.....ucggagacgucgugggaacacggggA..... 1  
 Gi3\_28530312\_x1.....gaagagaagcgccgAcaggcccc..... 1  
 Gi2\_11109608\_x1.....ggccccgccaguacugcgCcg..... 1  
 Gi3\_28302621\_x1.....cggagacgucgugggaCcacggggugcc..... 1  
 Gi3\_28564584\_x1.....agaagcgccgCcaggccccgccaguacug..... 1  
 Gi5\_8981582\_x1.....cCucaggccccgccaguacugcg..... 1  
 G1a\_6267886\_x1.....aucAgagacgucgugggaacacgggg..... 1  
 Gi1\_4217854\_x1.....gaucggGgacgucgugggaacacgggg..... 1  
 Gi3\_28829765\_x1.....uaggaagagaagcgccgucagggcccc..... 0  
 Gi2\_11368314\_x1.....gagacgucguggAaacacggggugcc..... 1  
 Gi2\_11123213\_x1.....gacgucgugggaacaGggggu..... 1  
 Gi3\_28837029\_x1.....aguacugcgaucggagCcguc..... 1  
 Gi2\_11043031\_x1.....cUggccccgccaguacugcgaucggaga..... 1  
 G1a\_6128625\_x1.....Ccgaucggagacgucgug..... 1  
 Gi1\_4389301\_x1.....caguacugcgaucggagac..... 0  
 Gi2\_10992557\_x1.....ggccccgccaguGcugcga..... 1  
 Gi5\_8904666\_x1.....ccgccGguacugcgaucggaga..... 1  
 Gi3\_28444731\_x1.....gccgucaggccccgccaguacuAcg..... 1  
 Gi5\_9050914\_x1.....gugggaacacAgggugccg..... 1  
 Gi1\_4360015\_x1.....gucgugggaacacggUgugccgaac..... 1  
 Gi2\_11085793\_x1.....aguacugcgaucggagaAguc..... 1  
 G1a\_6271266\_x1.....Ggucaggccccgccaguac..... 1



Gi1\_4292754\_x1.....ucaggccccgccCguacugcg..... 1  
Gi2\_11184356\_x1.....Naucggagacgucgugggaacacgggg..... 1  
Gi2\_11095758\_x1.....cgucaggccccgccUguacugc..... 1  
G1a\_6007725\_x1.....gucaggccccgccagCacugcg..... 1  
Gi1\_4226235\_x1.....uUggaacacggggugccgaa..... 1  
Gi3\_28913224\_x1.....gaucggagacgucgugggaacaUggg..... 1  
Gi2\_11020348\_x1.....agacgucgCgggaacacggggugcc..... 1  
Gi2\_11381595\_x1.....caggccccgccaguacCgcgau..... 1  
Gi3\_28864370\_x1.....Agagacgucgugggaacacggggugccga..... 1  
Gi3\_28742296\_x1.....ucgugggaacacgUggugccgaa..... 1  
Gi2\_11002799\_x1.....gaagcgccgCcaggccccgccaguacug..... 1  
Gi1\_4352531\_x1.....aucggagacgCcgugggaacacggggugc..... 1  
Gi2\_11079803\_x1.....Gcggagacgucgugggaac..... 1  
Gi3\_28673091\_x1.....cgugggaacaAggggugccg..... 1  
Gi2\_11177768\_x1.....gcUgucaggccccgccaguacugcgau..... 1  
G1a\_6111411\_x1.....ggccccgccaguacCgcgau..... 1  
Gi2\_11341625\_x1.....aggccccgccaguacugcgauCgagacguc..... 1  
Gi2\_11162462\_x1.....ugcgauccggagacgucgugAgaaca..... 1  
Gi2\_11365119\_x1.....cgucaggccccgccagCacugcgauccgga..... 1  
Gi3\_28666864\_x1.....gaNacgucgugggaacacggggg..... 1  
Gi3\_28697064\_x1.....cgucaggccccgccaguacugUgucgga..... 1  
Gi3\_28662030\_x1.....cgccgucaggccccgcAag..... 1  
Gi3\_28876694\_x1.....uacAgcgauccggagacguc..... 1  
Gi3\_28387432\_x1.....Ngaacacggggugccgaa..... 1  
Gi3\_28535206\_x1.....Ugucggagacgucgugggaacacgggg..... 1  
Gi2\_11193260\_x1.....cgucgugggaacacgCggugccgaa..... 1  
Gi1\_4294549\_x1.....gAgggaacacggggugcc..... 1  
Gi2\_11178120\_x1.....aucggagacgucgugggaacacggUgugcc..... 1  
Gi3\_28376014\_x1.....cgugggaacacUgggugccga..... 1  
Gi2\_11162460\_x1.....aggccccgccaguacCgcgau..... 1  
Gi5\_8992399\_x1.....cggagacgucgAgggaacacggggugcc..... 1  
Gi2\_11091492\_x1.....cggCgacgucgugggaacacggggugc..... 1  
Gi1\_4228142\_x1.....aucggagacgucguggAaacacggggugc..... 1  
Gi2\_11314345\_x1.....aagagaagcgccgucagccccgccG..... 1  
Gi1\_4283914\_x1.....Uaagagaagcgccgucagcccc..... 1  
Gi3\_28505872\_x1.....acgucgugggaaAacggg..... 1  
Gi3\_28530844\_x1.....cgucaggccccgccaguaUugc..... 1  
Gi1\_4201126\_x1.....acgucgugggaacacggAgugccga..... 1  
Gi4\_573249\_x1.....guacugcgauccggagacgucgugggaaca..... 0  
Gi2\_11389470\_x1.....cggAaacgucgugggaacacggggugc..... 1  
Gi5\_9079325\_x1.....cgucgugggaacGcggggugcc..... 1  
Gi5\_9059624\_x1.....cagccAcgccaguacug..... 1  
Gi3\_28617757\_x1.....caggcUccgccaguacugcgauccggagacgucgug..... 1  
Gi2\_11147144\_x1.....ccgucaggccccUccaguacugcgau..... 1  
Gi1\_4282937\_x1.....gaacacggggugccgaGcuu..... 1  
Gi2\_11057700\_x1.....cgccaguacugcgauccggagGcgu..... 1  
Gi2\_11329027\_x1.....gccccgccaguacugcAaucgg..... 1

Gi3\_28421892\_x1.....cgugggaacacggguUcc..... 1  
 Gi2\_11264762\_x1.....gccccgAcaguacugcgau..... 1  
 Gl1a\_6023786\_x1.....cgugggaacacgggCugcc..... 1  
 Gl1a\_6351561\_x1.....gacgucgugAgaacacgggu..... 1  
 Gi1\_4355707\_x1.....aucggagacgucGgggaacacgg..... 1  
 Gi5\_9022941\_x1.....cgCgggaacacggggugccg..... 1  
 Gi3\_28903420\_x1.....uaUugcgauccggagacgu..... 1  
 Gi3\_28919183\_x1.....ccaguacugcgauccAgagacguc..... 1  
 Gi3\_28537806\_x1.....cggagacgucgugggaGcac..... 1  
 Gi1\_4235064\_x1.....gugggaacacggggugcUgaac..... 1  
 Gi2\_11040538\_x1.....cgucgugggUacacggggugccg..... 1  
 Gi2\_11050727\_x1.....gccccgccaguacugcgC..... 1  
 Gi5\_9024171\_x1.....caguacugcgauccggagGcgucgug..... 1  
 Gi2\_11189433\_x1.....uacugcgauccggGgacgucgug..... 1  
 Gi2\_11261919\_x1.....gaagagaagcgcUgucagccccg..... 1  
 Gl1a\_6093579\_x1.....aucggGgacgucguggaa..... 1  
 Gi4\_570924\_x1.....caggccccgccaguacugcga..... 0  
 Gi3\_28480689\_x1.....agagGagcgccgucaggcc..... 1  
 Gi3\_28396346\_x1.....ccccccagCacugcgauccggagacgucgu..... 1  
 Gl1a\_6048779\_x1.....cgucagggccccgccaguacugcgauccggaga..... 0  
 Gi5\_8928931\_x1.....aucggagacCucgugggaacac..... 1  
 Gi5\_9026386\_x1.....gacgucgugggaacacggggugccgaaA..... 1  
 Gi2\_11115769\_x1.....gAgaacacggggugccga..... 1  
 Gi3\_28390595\_x1.....ucgugggUacacggggugcc..... 1  
 Gi2\_11169326\_x1.....guacugcgaCcgagacgucg..... 1  
 Gi5\_8920954\_x1.....ugcgauccAgagacgucguggg..... 1  
 Gi2\_11382041\_x1.....gucagggccccCccaguacugc..... 1  
 Gi3\_28708404\_x1.....cgucgugggaacacgggA..... 1  
 Gi2\_11098686\_x1.....acgCcgugggaacacggggugc..... 1  
 Gi3\_28428926\_x1.....gccagAacugcgauccggagacguc..... 1  
 Gi3\_28676665\_x1.....cggagacgucgugUggaacacgg..... 1  
 Gl1a\_6188465\_x1.....gccaguGcugcgauccggagacguc..... 1  
 Gi3\_28826877\_x1.....cggagacgucgugggaaAacggg..... 1  
 Gi3\_28830963\_x1.....cagggCccgccaguacugcg..... 1  
 Gi3\_28640612\_x1.....cggagacgucgugggGacacgggg..... 1  
 Gi2\_11142481\_x1.....gaucggagacgucgUAggaacacggg..... 1  
 Gi3\_28639545\_x1.....gucagggccccgccaguacugcgaCcgga..... 1  
 Gi4\_611216\_x1.....cgAcagggccccgccaguacugc..... 1  
 Gi5\_9071660\_x1.....cCucgugggaacacggggugcc..... 1  
 Gi5\_9028194\_x1.....acGcggggugccgaaacuuu..... 1  
 Gl1a\_6109655\_x1.....gucgugggCacacggggugccga..... 1  
 Gi1\_4389092\_x1.....Ccgauccggagacgucguggg..... 1  
 Gi1\_4246711\_x1.....gacgucgugggaacacggggugcUgaacu..... 1  
 Gi4\_593319\_x1.....ugggaacacggggugccgaUcu..... 1  
 Gi5\_9111829\_x1.....ggaacaUggggugccgaa..... 1  
 Gi3\_28528827\_x1.....gaUgagaagcggcugcagggccccccag..... 1  
 Gi1\_4389916\_x1.....gugggaCcacggggugccgaa..... 1

Gi3\_28264210\_x1.....acugcgauccggagacguAgug..... 1  
 Gi2\_11295483\_x1.....gccccgccaguGcugcgau..... 1  
 Gi3\_28469184\_x1.....gccgucagggcccUgccaguacug..... 1  
 Gi2\_11198754\_x1.....gugggaacacgCggugccgaa..... 1  
 Gi1\_4169079\_x1.....Ugaucggagacgucgugggaacacggggugc..... 1  
 Gi3\_28889491\_x1.....ggccccgccaguacugAgaucggagac..... 1  
 Gi4\_5791113\_x1.....cAucgugggaacacggggugcc..... 1  
 Gi1\_4200199\_x1.....cgucgugggaacaUggggugcc..... 1  
 G1a\_6005315\_x1.....gugggaacacgggAugccga..... 1  
 Gi2\_11260703\_x1.....gacgucgugggaacGcggggg..... 1  
 Gi2\_11383967\_x1.....gggaacUcggggugccgaa..... 1  
 Gi3\_28981373\_x1.....aucggagacgucgugggUacacgggg..... 1  
 Gi3\_28969845\_x1.....gAgggaacacggggugccgaaacu..... 1  
 Gi5\_8853628\_x1.....gacgucgugggaacacgUggugccg..... 1  
 Gi2\_11284491\_x1.....agaagcgcNcucagggccccgccagua..... 1  
 G1a\_6005448\_x1.....gaagcgcgcgucagcccUcggcagu..... 1  
 Gi2\_11266782\_x1.....uaggaagagaagcgcgcguc..... 0  
 Gi3\_28918950\_x1.....gccccgcUaguacugcgauccggaga..... 1  
 Gi2\_11175619\_x1.....gagacguUgugggaacacggggugc..... 1  
 Gi3\_28574005\_x1.....gGgaucggagacgucgugggaacacggggugcc..... 1  
 Gi2\_11030725\_x1.....gucaUgccccgccaguacugcg..... 1  
 Gi3\_28765382\_x1.....aucggagacgucgugggaacacgAggugccg..... 1  
 Gi4\_587038\_x1.....aggccccgccaguacugc..... 0  
 Gi2\_11015436\_x1.....cugcgauccggagacgucgugAgaacacggggu..... 1  
 Gi3\_28858376\_x1.....aggccccgccaguacugcgauccg..... 1  
 Gi3\_28908963\_x1.....ucaggccccAccaguacugcga..... 1  
 G1a\_6156067\_x1.....aucggagacgucgugggaacacgCggu..... 1  
 G1a\_6055454\_x1.....Aggagacgucgugggaacacg..... 1  
 Gi1\_4209235\_x1.....gggaacacggggugccgaU..... 1  
 Gi1\_4340617\_x1.....ucaAgccccgccaguacugcg..... 1  
 Gi2\_11361272\_x1.....gagacgucguggCaacacggggugccg..... 1  
 Gi5\_8868413\_x1.....cCggccccgccaguacugcg..... 1  
 Gi3\_28717562\_x1.....ucaggccccgAcaguacugcgauc..... 1  
 G1a\_6333566\_x1.....caggcccAgccaguacug..... 1  
 Gi3\_28821691\_x1.....cgucagggccAcgccaguacugcg..... 1  
 Gi2\_11302223\_x1.....aucggagacgucgugggaacacgUggugcc..... 1  
 Gi3\_28313448\_x1.....acgucgugggaacacggggugUcga..... 1  
 Gi5\_8915987\_x1.....aggccccgNcaguacugc..... 1  
 Gi2\_11253480\_x1.....ccUccaguacugcgaucggagacguc..... 1  
 Gi3\_28931522\_x1.....ggagacgucgGgggaacacggggugcc..... 1  
 G1a\_6351812\_x1.....aucggagacgucgugggaacacgggguAc..... 1  
 Gi3\_28710516\_x1.....gagaagcgUcgucagggccccgc..... 1  
 Gi2\_11323986\_x1.....ggaCacgucgugggaacacggggugc..... 1  
 Gi3\_28951989\_x1.....aucggagacgCcgugggaacacggggugccgaa..... 1  
 Gi3\_28883030\_x1.....ggccccgcAaguacugcgauc..... 1  
 Gi1\_4216268\_x1.....ucggagacgucgugggaCcacg..... 1  
 Gi2\_11075933\_x1.....gaucggCgacgucgugggaacac..... 1

Gi5\_8937912\_x1.....caggccccgccaguacuUcg..... 1  
 Gi5\_8981909\_x1.....gagacgucguggggaGcacggggugccgaacu..... 1  
 Gi5\_8990070\_x1.....agacgCcguggggaacacggggugccga..... 1  
 Gi3\_28984154\_x1.....gaagagaagcgccgucCggccccgc..... 1  
 Gi3\_28502334\_x1.....acgucgugggaaacacggggugGcgaac..... 1  
 Gi3\_28789237\_x1.....caggccccgccaguGcugcgauccggaga..... 1  
 Gi3\_28627435\_x1.....ucaggccAcgccaguacugcg..... 1  
 Gi2\_11396700\_x1.....aggccccgccaguacugcgaucaAga..... 1  
 Gi3\_28583822\_x1.....cgUcgucaggccccgccaguacu..... 1  
 Gi3\_28298501\_x1.....acugcgauccggagGcguc..... 1  
 Gi2\_11252626\_x1.....ucGggccccgccaguacugcgauccgga..... 1  
 Gl1\_6132668\_x1.....aAuacugcgauccggagacgucgu..... 1  
 Gi2\_11003098\_x1.....agaagcgccgucaggccccgcAa..... 1  
 Gi1\_4383125\_x1.....ggagacgucguAggaacacggggugccg..... 1  
 Gi2\_11234180\_x1.....aggccccgUcaguacugcgauccggagacg..... 1  
 Gi3\_28949827\_x1.....agacgucCugggaacacggggugcc..... 1  
 Gi3\_28812176\_x1.....caggccccgccaguacugcgGucggagacguc..... 1  
 Gi3\_28457323\_x1.....gucgugggaaacacggggAgc..... 1  
 Gi1\_4216317\_x1.....gagacgucguggggaacacggggugccgGacu..... 1  
 Gi2\_11251211\_x1.....cgauccggagacgucgugAgaacacggggugc..... 1  
 Gi2\_11128233\_x1.....aucggagCcgucguggggaacacg..... 1  
 Gl1\_6278743\_x1.....gauccggagacgucguggggaacacggggG..... 1  
 Gi4\_568442\_x1.....cgugggaaacacggggugccgCac..... 1  
 Gi2\_11166583\_x1.....agaagUgcccgucaggccccgcc..... 1  
 Gi3\_28361279\_x1.....cgccgucaggccccgccaguGc..... 1  
 Gi2\_11003254\_x1.....gccgucaggccccAccaguacugcg..... 1  
 Gi3\_28943835\_x1.....caggccccUgcccaguacugcgauccgga..... 1  
 Gi3\_28928490\_x1.....ucCugggaacacggggugcc..... 1  
 Gi2\_11130052\_x1.....cgccaguacugcUaucgg..... 1  
 Gi3\_28555262\_x1.ccuuaacAcguuccgaau..... 1  
 Gi3\_28476374\_x1.....cgccaguacugcgGucggagacg..... 1  
 Gi5\_8955386\_x1.....caAuacugcgauccggagacgucgug..... 1  
 Gi3\_28573965\_x1.....gugggaacacgggCugcc..... 1  
 Gi2\_11200928\_x1.....aAacgucgugggaaacacggggugccgaac..... 1  
 Gi5\_8964582\_x1.....ucagAccccgccaguacugcgaucc..... 1  
 Gi5\_8906821\_x1.....aggccccgccUguacugcgaucc..... 1  
 Gi3\_28769935\_x1.....gcccgucaggccccgccaguCuugc..... 1  
 Gi3\_28971847\_x1.....cAgagacgucgugggaaacacgggg..... 1  
 Gi3\_28692720\_x1.....cgucguggggaGcacgggg..... 1  
 Gi3\_28324173\_x1.....gucaggccccgccaguacugUg..... 1  
 Gi2\_11305826\_x1.....caggccccCccaguacugcgauccggagacg..... 1  
 Gi1\_4200279\_x1.....caguacugcgauccggGgacgu..... 1  
 Gl1\_6278591\_x1.....gucaggccccgccUguacugc..... 1  
 Gi3\_28988139\_x1.....Agucgugggaaacacggggugc..... 1  
 Gi3\_28351635\_x1.....Ngggaaacacggggugccgaac..... 1  
 Gi2\_11216679\_x1.....ggagacgucgugggaaacacggggugGc..... 1  
 Gi3\_28872754\_x1.....gugggaacaGggggugccg..... 1

Gi1a\_6222695\_x1.....agAcccccgcagucugcg..... 1  
 Gi3\_28558994\_x1.....gccgucGggccccgcaguc..... 1  
 Gi1\_4160358\_x1.....ucgugggaacacggggugccCaacu..... 1  
 Gi3\_28473782\_x1.....ugcgaucgagagaUgucgugggaacacggg..... 1  
 Gi2\_11154932\_x1.....ggcccAgccagucugcgaucggagacgu..... 1  
 Gi1a\_6284882\_x1.....aucggagacgucgugggaaAacgg..... 1  
 Gi3\_28840946\_x1.....cgUagacgucgugggaacacg..... 1  
 Gi3\_28721805\_x1.....gagacgucgugggaacacggggGgccgaacu..... 1  
 Gi5\_8901890\_x1.....ugggaacacggggugccga..... 0  
 Gi2\_11057598\_x1.....aggccccgcaguaGugcgaucgga..... 1  
 Gi2\_11102079\_x1.....cccgccaguGcugcgaucggagacgu..... 1  
 Gi5\_9114579\_x1.....cgugggCacacggggugcc..... 1  
 Gi3\_28648564\_x1.....ggagacgucgugggaacacggggGcggga..... 1  
 Gi2\_11088274\_x1.....aggccccAccagucugcgaucg..... 1  
 Gi2\_11261420\_x1.....Gccgccagucugcgaucggagacgu..... 1  
 Gi1a\_6055296\_x1.....gaucggagacgucgugggaGcac..... 1  
 Gi3\_28301576\_x1.....gucgCgggaacacggggugcc..... 1  
 Gi2\_11119935\_x1.....ucggagaUgucgugggaacacggggugccgaac..... 1  
 Gi2\_11021932\_x1.....Nucggagacgucguggga..... 1  
 Gi1a\_6120606\_x1.....cgccagucugcgCucggagacguc..... 1  
 Gi5\_8992121\_x1.....aacacggggugUcgaacuuu..... 1  
 Gi3\_28599540\_x1.....gaucggCgacgucgugggaacacggggugcc..... 1  
 Gi5\_9126307\_x1.....aCcgagacgucgugggaacac..... 1  
 Gi2\_11125162\_x1.....aguacugcgaucggUgac..... 1  
 Gi3\_28642768\_x1.....ucgugggaaUacggggugcc..... 1  
 Gi1\_4172265\_x1.....cgugggaacacggggugccgaaAuu..... 1  
 Gi3\_28626963\_x1.....cagGacugcgaucggagacguc..... 1  
 Gi1\_4163057\_x1.....aucggagacgucgugggaacGcgg..... 1  
 Gi2\_11232856\_x1.....gcgaucAgagacgucgugggaacacggggugc..... 1  
 Gi2\_11277303\_x1.....cgUcagucugcgaucggagacgucgug..... 1  
 Gi3\_28329797\_x1.....cccgccagucugUgaucgga..... 1  
 Gi5\_9108145\_x1.....ugcAaucggagacgucguggg..... 1  
 Gi4\_588889\_x1.....gugggaacacggggugccgUacu..... 1  
 Gi5\_8946142\_x1.....gucgugUgaacacggggugccgaacu..... 1  
 Gi1a\_6104325\_x1.....Gggagacgucgugggaacacggggug..... 1  
 Gi3\_28303681\_x1.....cgugCgaacacggggugccga..... 1  
 Gi1\_4234656\_x1.....gacgucgugggaGcacggggugcc..... 1  
 Gi3\_28943887\_x1.....cccgccagucAgcgaucggagacg..... 1  
 Gi3\_28800576\_x1.....ugggaacacggCgugccg..... 1  
 Gi1a\_6051036\_x1.....gugggaacacggggugAcg..... 1  
 Gi2\_11335445\_x1.....agUagcgccgucagggccccgcaguc..... 1  
 Gi1a\_6255725\_x1.....gaucggagacgucgCgggaa..... 1  
 Gi3\_28276001\_x1.....gagGcgucgugggaacacg..... 1  
 Gi3\_28433496\_x1.....gAcagucugcgaucggagacgucgug..... 1  
 Gi3\_28633324\_x1.....cggagacgucgugggaCcacggggugccga..... 1  
 Gi1a\_6359019\_x1.....aacacggggugcUgaacu..... 1  
 Gi5\_8908866\_x1.....ucUggccccgcagucugcg..... 1

Gi5\_8859712\_x1.....ggaacacggggugcGgaac..... 1  
 Gi5\_8959862\_x1....aacucguuccgaaauaUgaaga..... 1  
 Gi3\_28878725\_x1.....ccccgccaguacugcUaucgga..... 1  
 Gi1\_4360245\_x1.....cgAgggaacacggggugccgaa..... 1  
 G1a\_6110223\_x1.....gAccccgccaguacugcg..... 1  
 Gi3\_28566948\_x1.....gaagcgccNucaggccccgccaguacu..... 1  
 Gi2\_11118174\_x1.....uGggagacgucgugggaaacacggggugccg..... 1  
 Gi5\_9123985\_x1.....acgucgugCgaacacggggugccgaacu..... 1  
 Gi2\_11165645\_x1.....cgaucggagaUgucgugggaaacac..... 1  
 Gi1\_4195548\_x1.....cggaCacgucgugggaaacacggggugc..... 1  
 Gi1\_4381477\_x1.....cgucguggUaacacggggugccgaacu..... 1  
 Gi2\_11204538\_x1.....ggagacgucgugggaaacacggggugccgGa..... 1  
 Gi3\_28789204\_x1.....gcUaucggagacgucgugggaaacacggg..... 1  
 Gi3\_28627496\_x1.....cAccaguacugcgaucg..... 1  
 Gi4\_612266\_x1.....cgucgugggaaacacggggugUcga..... 1  
 Gi3\_28814031\_x1.....cgucaggccccgccaguacugcgGucgga..... 1  
 Gi2\_11324319\_x1.....gagaagcgccgucaAgccccgcc..... 1  
 Gi2\_11387324\_x1.....aCgcccguacaggccccgccagua..... 1  
 Gi3\_28745280\_x1.....caguacugcgauccggagacgucgCg..... 1  
 Gi3\_28533938\_x1.....caguacugcgauccgAagacgucgug..... 1  
 Gi2\_11117084\_x1.....ccccgccaguacugcgauccg..... 0  
 G1a\_6118028\_x1.....aggccccgccagGacugcg..... 1  
 G1a\_6184830\_x1.....cgUagacgucgugggaaacacggggugcc..... 1  
 Gi3\_28837703\_x1.....aaUacggggugccgaacuu..... 1  
 Gi3\_28409472\_x1.....cgucaggccccgccGgua..... 1  
 Gi1\_4275104\_x1.....cggagacguUgugggaaacacggggugcc..... 1  
 Gi3\_28777639\_x1.....cuUcgaucggagacgucg..... 1  
 Gi3\_28748198\_x1.....cggagacgucgCgggaacacggg..... 1  
 G1a\_6214735\_x1.....acgucgugggaaacacggggugccgaacu..... 1  
 Gi3\_28780562\_x1.....acgucgugggaaacacCggggugccgaacu..... 1  
 Gi1\_4250194\_x1.....aucggGgacgucgugggaaacacgg..... 1  
 Gi3\_28361834\_x1.....aucggagacgucgUcGgaacac..... 1  
 Gi3\_28546928\_x1.....uggNaacacggggugccg..... 1  
 G1a\_6063260\_x1.....ugggaacacggggugccgCac..... 1  
 Gi3\_28687361\_x1.....aguGcugcgauccggagacg..... 1  
 Gi5\_9137612\_x1.....gggaacacAgggugccgaa..... 1  
 Gi3\_28965141\_x1.....aagcgccgucaggcccAgccaguacugc..... 1  
 Gi2\_11116980\_x1.....cgccUucaggccccgccagu..... 1  
 Gi1\_4272206\_x1.....cggagaUgucgugggaaacacggg..... 1  
 G1a\_6072218\_x1.....acugcgauccggUgacguc..... 1  
 Gi2\_11178714\_x1.....gcgauccggagaUgucgugggaaacac..... 1  
 G1a\_6338639\_x1.....caguacugcgauUggagac..... 1  
 Gi1\_4182911\_x1.....ugggaacacCggggugccg..... 1  
 Gi5\_9053179\_x1.....cGgagacgucgugggaaacacggg..... 1  
 Gi1\_4215464\_x1.....gagaagcgccgucaggccccgc..... 0  
 Gi5\_9091832\_x1.....gccgucaggccccgcUaguacugc..... 1  
 Gi3\_28907827\_x1.....ccaguacugcgauccggagacgucgCg..... 1

Gi3\_28448276\_x1.....aggccccgccaguacugUgaucggagac..... 1  
 Gi2\_11109036\_x1.....ccccAccaguacugcgauccggagacgucg..... 1  
 Gi2\_11070930\_x1.....gucagggccccAccaguacugcg..... 1  
 Gi3\_28515481\_x1.....gagacgucgugggaaacCcggggugccgaac..... 1  
 Gi5\_8918407\_x1.....ccgucagggccccgccGguacugcg..... 1  
 Gi2\_11249860\_x1.....Cagacgucgugggaaacacggggugcc..... 1  
 Gi1\_4371872\_x1.....aucggagacgucguAggaacacgggg..... 1  
 G1a\_5990979\_x1.....aacacAgggugccgaacu..... 1  
 G1a\_6193869\_x1.....cgucagggccccGcaguacu..... 1  
 G1a\_6354956\_x1.....cggagacgucgugggaaacacggAgu..... 1  
 Gi2\_11234005\_x1.....aucggagacgucgugAga..... 1  
 Gi4\_586383\_x1.....ucgugggaaNcacggggugccgaacu..... 1  
 Gi5\_8851093\_x1.....cGggccccgccaguacugcgau..... 1  
 Gi3\_28901878\_x1.....aggccccgccaguacugcCauc..... 1  
 Gi3\_28859468\_x1.....gccccgccaguacugcgGucgg..... 1  
 Gi3\_28480853\_x1.....gccgucagggccAcgccaguacugcg..... 1  
 Gi5\_8941521\_x1.....cgccaguacugcgauacgAagacguc..... 1  
 Gi3\_28806121\_x1.....ugUgaucggagacgucgugggaa..... 1  
 Gi3\_28904404\_x1.....gccccgccaguacuAcgauc..... 1  
 Gi2\_11040731\_x1.....gaucggagacAucgugggaaacacggggugc..... 1  
 Gi3\_28296299\_x1.....ccgccaguacugcgauacAgagacgu..... 1  
 Gi3\_28920180\_x1.....aucggagacgucgugggaaacaAgg..... 1  
 Gi3\_28935219\_x1.....cagggccccgUaguacugcgauccgga..... 1  
 Gi3\_28446946\_x1.....ucCgagacgucgugggaaacacgggggu..... 1  
 Gi3\_28912773\_x1.....aguacugcgaCcgagacg..... 1  
 Gi1\_4328951\_x1.....acgucgugggaaacacgAggugcc..... 1  
 Gi3\_28520791\_x1.....gacgCcgugggaaacacgggg..... 1  
 Gi2\_11152878\_x1.....cgNgggaaacacggggugccga..... 1  
 Gi5\_8841939\_x1.....cggagacgucguUggaacacgg..... 1  
 Gi2\_11059439\_x1.....aagagaagcgccgucagggccccgccaguacugcg..... 0  
 Gi3\_28324735\_x1.....gucguggUaacacggggugccgaac..... 1  
 Gi3\_28295047\_x1.....gaagagCagcgccgucaggg..... 1  
 Gi3\_28489372\_x1.....Uccgccaguacugcgauccggagacgu..... 1  
 Gi2\_11229693\_x1.....ggagacgucgugggaaacacggggugAcg..... 1  
 Gi2\_11205226\_x1.....aucggaAacgucgugggaaac..... 1  
 Gi2\_11038656\_x1.....gaagcgUgucagggccccgccag..... 1  
 Gi5\_8830799\_x1.....aaUacggggugccgaacuuu..... 1  
 Gi3\_28562281\_x1.....cgauccggagacgucgGgggaaacacg..... 1  
 Gi1\_4265704\_x1.....cagggccccgccaguacugcgauccggagau..... 1  
 Gi5\_9001652\_x1.....gucagggccccgccaguacAgcg..... 1  
 Gi2\_11215470\_x1.....gUagagaagcgccgucagggccccgccag..... 1  
 Gi1\_4350807\_x1.....ucagggccccgccaguaUugcg..... 1  
 Gi2\_11302486\_x1.....gagaagcgGcgucagggccccgccaguac..... 1  
 Gi3\_28581080\_x1.....gacgucgCgggaaacacggg..... 1  
 Gi5\_9128641\_x1.....cggagacgucguAggaacacg..... 1  
 Gi3\_28698046\_x1.....gccgucggaUacgucgugggaaacacggggugcc..... 1  
 Gi3\_28425386\_x1.....cgauccggagacgucgugggaaacac..... 0

Gi1a\_6133798\_x1.....gagaagUgccgucaggccc..... 1  
Gi1\_4321284\_x1.....ucggagacgucguggggaacaUg..... 1  
Gi3\_28421296\_x1.....cccgccagucugcgauCgAgacgu..... 1  
Gi2\_11019653\_x1.....Cagacgucgugggaaacacggggugccgaacu..... 1  
Gi1\_4179185\_x1.....cggagacgucguAggaacacgggg..... 1  
Gi3\_28753298\_x1.....Cagacgucgugggaaacacggggugccga..... 1  
Gi2\_11004909\_x1.....cggagacgucgugggaaacacggCgugcc..... 1  
Gi3\_28637507\_x1.....caggcccAgccagucugcg..... 1  
Gi3\_28834290\_x1.....gccccgccagucAgcgauc..... 1  
Gi3\_28896225\_x1.....gccagucugcgauCagag..... 1  
Gi3\_28503006\_x1.....gagacgucgugguUaacacggggugcc..... 1  
Gi3\_28380094\_x1.....agaagAgccgucaggccc..... 1  
Gi2\_11154333\_x1.....ccgucaggccccgccaguCugcg..... 1  
Gi2\_11073626\_x1.....caggccccgccagucAgcgau..... 1  
Gi3\_28946124\_x1.....cgugggaacacggggugccgaaAuu..... 1  
Gi1\_4377845\_x1.....ggaacCcggggugccgaac..... 1  
Gi1\_4390414\_x1.....gucgugggGcacggggugcc..... 1  
Gi3\_28708663\_x1.....cugcgauCggagacgucgA..... 1  
Gi2\_11155839\_x1.ccCuaacucguuccgaa..... 1  
Gi3\_28487504\_x1.....gagGcgucgugggaaacacggggugccg..... 1  
Gi3\_28607970\_x1.....ucCggccccgccagucugcgauC..... 1  
Gi5\_9025853\_x1.....gaucggagacgucgugggaaacacC..... 1  
Gi2\_11147443\_x1.....ccagucugcgauCggagacgC..... 1  
Gi2\_11236659\_x1.....Acggagacgucgugggaaacacggggu..... 1  
Gi1a\_6262581\_x1.....aCuacugcgauCggagac..... 1  
Gi5\_8986576\_x1.....agacgucgugggGcacggggu..... 1  
Gi2\_11091314\_x1.....gucaggcccAgccagucugcg..... 1  
Gi5\_8926016\_x1.....aucggagacgucgugggCaacacgg..... 1  
Gi2\_11024932\_x1.....ugggaacacUgggugccgaa..... 1  
Gi3\_28335712\_x1.....aggccccgccagucugcgA..... 1  
Gi3\_28838295\_x1.....gucaggccccgccagucugcgauA..... 1  
Gi3\_28737659\_x1.....aggccccCccagucugcgauCggaga..... 1  
Gi1a\_6131388\_x1.....cgugggaacacggggugcU..... 1  
Gi3\_28859421\_x1.....agaagcgccguAaggccccgcca..... 1  
Gi3\_28822599\_x1.....ccccUccagucugcgauCggagacguc..... 1  
Gi3\_28688756\_x1.....gaagaUaagcgccgucaggccccgccaguc..... 1  
Gi3\_28644177\_x1.....ccgucaggccccgccagucAgcg..... 1  
Gi2\_11233051\_x1.....aagagaagcgccgucagAccc..... 1  
Gi5\_9087098\_x1.....aucgUagacgucgugggaaacacggg..... 1  
Gi2\_11329447\_x1.....ggaAacgucgugggaaacacggggugcc..... 1  
Gi1\_4324342\_x1.....gccgucagNccccgccaguc..... 1  
Gi2\_11318160\_x1.....gucgugguUaacacggggugccga..... 1  
Gi2\_11101105\_x1.....cggagacgucgugggaaacUc..... 1  
Gi1a\_6322999\_x1.....aucgUagacgucgugggaaacacggg..... 1  
Gi5\_8930734\_x1.....ggaacacgggAugccgaaC..... 1  
Gi3\_28426234\_x1.....gaGgagaagcgccgucaggccccgccag..... 1  
Gi3\_28702159\_x1.....gaUgagaagcgccgucaggccccgccag..... 1



Gi2\_11300848\_x1.....aaagagUagcgccgucagggccc..... 1  
 Gi3\_28754060\_x1.....caguacugUgaucggagacguc..... 1  
 Gi3\_28889505\_x1.....aucggagacgucgugggaacacggCgugc..... 1  
 Gi2\_11230980\_x1.....gucgugggaacaAggggugc..... 1  
 G1a\_6328957\_x1.....ggccccgccGguacugcgau..... 1  
 Gi2\_10995116\_x1.....gCaacacggggugccgaa..... 1  
 Gi2\_11098030\_x1.....gaacacAgggugccgaa..... 1  
 Gi5\_8875225\_x1.....agAccccgccaguacugcgau..... 1  
 Gi5\_9005713\_x1.....gagacgucgugggaacacAgggugccgaa..... 1  
 Gi1\_4335522\_x1.....caggccccgccaguacugcgau..... 0  
 Gi5\_8995561\_x1.....gccgucagggccccgccCguacu..... 1  
 Gi2\_11100423\_x1.....Aaguacugcgau..... 1  
 Gi2\_11185723\_x1.....cggagacgucGgggaacacgggugccgaa..... 1  
 Gi3\_28759480\_x1.....agcgccgucagAccccgcc..... 1  
 Gi3\_28854769\_x1.....cggagacgucgugggaacaUgggugccg..... 1  
 Gi2\_11015461\_x1.....cggagacguUgugggaaca..... 1  
 Gi3\_28526175\_x1.....gucgugggaacacggAgugcc..... 1  
 Gi2\_11089069\_x1.....cggagacgucgugggaacGcggggu..... 1  
 Gi2\_11301282\_x1.....agacgucgugggaacacggUgugccg..... 1  
 Gi2\_11307867\_x1.....aucggagacgucgugggCacacggg..... 1  
 Gi3\_28265456\_x1.....aucggagaNgcgugggaacacgggug..... 1  
 Gi2\_11051990\_x1.....ucguCgggaacacgggugccg..... 1  
 Gi3\_28784743\_x1.....cgccaguGcugcgau..... 1  
 Gi1\_4220535\_x1.....aucggagacgucgugggaacaUg..... 1  
 Gi3\_28610678\_x1.....cgaucCgagacgucgugggaacacg..... 1  
 G1a\_6176024\_x1.....cccgccagNacugcgau..... 1  
 Gi1\_4326793\_x1.....gaNgcgugggaacacgggugccgaa..... 1  
 Gi2\_11173161\_x1.....ggccccgccaguUcugcgau..... 1  
 Gi1\_4386517\_x1.....acgucgugggGacacgggugcc..... 1  
 Gi2\_11403408\_x1.....acGgcgaucggagacgucgu..... 1  
 G1a\_6207788\_x1.....caggccccAccaguacugcg..... 1  
 G1a\_6206716\_x1.....gGagcgccgucagggccccccagu..... 1  
 Gi2\_11271456\_x1.....agacgucgugggaacCcggggugccgaa..... 1  
 Gi2\_11221812\_x1.....cgugggaacacgggugccCa..... 1  
 Gi5\_9129798\_x1.....gugggaacacgggugGcgaac..... 1  
 Gi3\_28282999\_x1.....cgucguggCaacacgggugccgaa..... 1  
 G1a\_6269816\_x1.....ugcgau..... 1  
 Gi3\_28539230\_x1.....cgucguggUaacacgggugcc..... 1  
 Gi2\_11224533\_x1.....agaagcgccgucagggccccccaguacug..... 0  
 Gi3\_28446081\_x1.....cgucgugggUaacacgggugccg..... 1  
 Gi1\_4171445\_x1.....gaucggagacguUgugggaacacgg..... 1  
 G1a\_6047395\_x1.....aguacuCcgau..... 1  
 Gi3\_28585568\_x1.....aagagaagcgccgucagggcccA..... 1  
 Gi1\_4213776\_x1.....ggccccgccaguacCgcgaucggagacg..... 1  
 Gi2\_11105179\_x1.....ccgucagggcUcgccaguacugc..... 1  
 Gi3\_28529794\_x1.....gaaAcgcccgucagggccccccagua..... 1  
 Gi2\_11292121\_x1.....agacgucgugggaacacgggUaccgaa..... 1

Gi3\_28572009\_x1.....caggccccgccaCuacugcg..... 1  
 Gi5\_8864757\_x1.....gccgucaggccccgccaguacugU..... 1  
 Gi3\_28755393\_x1.....agaaAcgcccugcaggcccc..... 1  
 Gi4\_606662\_x1.....gaagcgccgucaggccccgcc..... 0  
 Gi3\_28474812\_x1.....cgucaggccccgccaguacugcgauccggagacguc..... 0  
 Gi3\_28296902\_x1.....ggaacacgggAugccgaa..... 1  
 Gi3\_28301295\_x1.....acgucCugggaacacggggugccgaacu..... 1  
 Gi2\_11325036\_x1.....gaucggagacgucgAggga..... 1  
 Gi3\_28337173\_x1.....caggccccgccaUuacugcga..... 1  
 Gi3\_28293718\_x1.....cgNgggaacacggggugc..... 1  
 Gi3\_28905806\_x1.....ucaggccccgccaguacAgc..... 1  
 Gi2\_11107755\_x1.....ccccgccaguaAugcgauccggagacg..... 1  
 Gi1\_4354513\_x1.....gagaagcgccgucaggcccc..... 0  
 Gi2\_11066590\_x1.....acgucgugggaCcacggggugccgaa..... 1  
 Gi3\_28781327\_x1.....cgucaggccccgccaguUcug..... 1  
 Gi2\_11179967\_x1.....acAgcgauccggagacgucgugg..... 1  
 Gi5\_8926299\_x1.....aNgagaagcgccgucaggcccc..... 1  
 Gi3\_28327131\_x1.....gagacgucgugggUacacggggugccg..... 1  
 Gi2\_11124872\_x1.....aagGgaagcgccgucaggccccgcca..... 1  
 Gi5\_8957289\_x1.....gCgaacacggggugccgaa..... 1  
 Gi3\_28693857\_x1.....gaucggagacgucgugggaaAac..... 1  
 Gl1\_6238654\_x1.....gAagacgucgugggaacacg..... 1  
 Gi2\_11188971\_x1.....aggccccgUcaguacugcgau..... 1  
 Gi1\_4354566\_x1.....gGucggagacgucgugggaacacgg..... 1  
 Gi5\_9004006\_x1.....cgugggaacacggggugGcga..... 1  
 Gi2\_11381419\_x1.....gugggaacacggggugccg..... 1  
 Gi5\_8851026\_x1.....aAcggagacgucgugggaacac..... 1  
 Gi2\_11000214\_x1.....aucgUagacgucgugggaa..... 1  
 Gi2\_11158685\_x1.....ggagUcugcugugggaacacggggu..... 1  
 Gi2\_11131652\_x1.....ucgggagacgucgugggGacacggggugccga..... 1  
 Gi3\_28880863\_x1.....ccccgccaguacugcgauccggagCcgucgug..... 1  
 Gl1\_6268555\_x1.....cggagacgucAugggaaacacggggu..... 1  
 Gi1\_4387893\_x1.....ugggaacacggggugcUgaac..... 1  
 Gi2\_11212906\_x1.....ucguggUaacacggggugccgaacu..... 1  
 Gi5\_9117015\_x1.....gugggaacacggggugccgUacuuu..... 1  
 Gi3\_28625773\_x1.....cgugggaacacggggucCccgaa..... 1  
 Gi5\_8918457\_x1.....acgucgugggaacacAgggugcc..... 1  
 Gi3\_28828925\_x1.....cCggccccgccaguacugc..... 1  
 Gi3\_28586308\_x1.....ccccgccaguacugcgaGcggagacgu..... 1  
 Gi5\_9000212\_x1.....ucaggccccgccGguacugcg..... 1  
 Gi1\_4168137\_x1.....ucgugggaacacggggugccC..... 1  
 Gi3\_28767486\_x1.....cccgccaguacugcgauccggagUcugc..... 1  
 Gi2\_11300504\_x1.....ggccccgcNaguacugcga..... 1  
 Gi2\_11361612\_x1.....Aaggccccgccaguacugc..... 1  
 Gi1\_4236751\_x1.....gugggaacaGggggugccgaacu..... 1  
 Gi2\_11277824\_x1.....aucggUgacgucgugggaacacgg..... 1  
 Gi3\_28747170\_x1.....gacgucgugggaacacgC..... 1

|                 |                                       |   |
|-----------------|---------------------------------------|---|
| Gi3_28270302_x1 | .....cgugggaacacggggugcGg             | 1 |
| Gi3_28388223_x1 | .....cggCgacgucgugggaacacggg          | 1 |
| Gi3_28477941_x1 | .....gucguggCaacacggggugccgaac        | 1 |
| Gi2_11311439_x1 | .....aucggCgacgucgugggaacacg          | 1 |
| Gi3_28887424_x1 | .....gccNucaggccccccagacuacugcg       | 1 |
| Gi3_28371285_x1 | .....cgCcgugggaacacgggggu             | 1 |
| Gi2_11127342_x1 | .....cguAggaacacggggugccg             | 1 |
| Gi3_28295471_x1 | .....ucgugggaacacggggugcGgaa          | 1 |
| Gi3_28667521_x1 | .....gucaggAcccgccagacuacugc          | 1 |
| Gi1_4291388_x1  | .....guacugcgauccggagacgu             | 0 |
| Gi3_28275088_x1 | .....cccgccGguacugcgauccgga           | 1 |
| Gi1_4272748_x1  | .....gccgucaggccccgccGguacu           | 1 |
| Gi3_28331419_x1 | .....ugNgaacacggggugccgaa             | 1 |
| Gi3_28733181_x1 | .....cgccagacuacugcgauccggagaUgu      | 1 |
| Gi3_28635305_x1 | .....caggcGccgccagacuacugcgau         | 1 |
| Gi2_11038203_x1 | .....caggccccccagacuacugA             | 1 |
| Gi2_11278921_x1 | .....gugggaacaAggggugccgaacuu         | 1 |
| Gi3_28327555_x1 | .....cggagacgucgugggaacacgggAug       | 1 |
| Gi3_28474693_x1 | .....gucaggccccccagacuacugcgau        | 1 |
| Gi2_11013144_x1 | .....ggccccgccagucugcgau              | 1 |
| Gi1_6070775_x1  | .....gugggaacacggggGgccg              | 1 |
| Gi3_28647021_x1 | .....acugcgauccggagGcgucgu            | 1 |
| Gi2_11131057_x1 | .....Gcaggccccccagacuacugcgauccgga    | 1 |
| Gi3_28763278_x1 | .....ggagacgucgugggaacacggggGgccgaa   | 1 |
| Gi1_4248594_x1  | .....aucggagacGcCgugggaacacgggg       | 1 |
| Gi2_11204750_x1 | .....Aucaggccccccagacuacugcgau        | 1 |
| Gi2_11003544_x1 | .....ggagacgucgugggaacacgAggugcc      | 1 |
| Gi1_6004977_x1  | .....caggcccUgccagacuacugcgau         | 1 |
| Gi5_9035516_x1  | .....caggGccccccagacuacug             | 1 |
| Gi3_28565825_x1 | .....gacNucgugggaacacgggggu           | 1 |
| Gi3_28972279_x1 | .....ccgccagucugcgauccggagacg         | 1 |
| Gi1_4184243_x1  | .....ucgugggaacacggggAgccga           | 1 |
| Gi2_11106516_x1 | .....ucaggccccUcagacuacugc            | 1 |
| Gi5_9094003_x1  | .....cggagacgucgugggaacCcgggugccga    | 1 |
| Gi2_11066935_x1 | .....ugggaacacggggugGccgaac           | 1 |
| Gi3_28480952_x1 | .....aguGcugcgauccggagacgucg          | 1 |
| Gi1_4217413_x1  | .....uGggagacgucgugggaacacg           | 1 |
| Gi3_28299199_x1 | .....ucguuccgNauuaggaagagaagcgccguc   | 1 |
| Gi2_11278650_x1 | .....cgucgugggaacacggggugccUa         | 1 |
| Gi2_11251688_x1 | .....cgauccAgagacgucgugg              | 1 |
| Gi1_4332968_x1  | .....cgccagacuacugcAaucggagacguc      | 1 |
| Gi2_11355642_x1 | .....cugcgauccggagacgucAugggaacac     | 1 |
| Gi5_9044911_x1  | .....gUagcgccgucaggccccgcc            | 1 |
| Gi2_11067094_x1 | .....aggccccccagacuacugcgauUggagacguc | 1 |
| Gi3_28819732_x1 | .....gaagagaagcgccguAaggccccgccag     | 1 |
| Gi3_28525123_x1 | .....ugGgauccggagacgucgugggaaca       | 1 |
| Gi5_8934689_x1  | .....caggccccccagCacugcga             | 1 |

Gi1a\_6046062\_x1.....cgugggGacacggggugccg..... 1  
 Gi2\_11172134\_x1.....cgagacgucgugggaacacggggugccCa..... 1  
 Gi5\_8837140\_x1.....ccgccAuaucugcgauG..... 1  
 Gi3\_28296188\_x1.....acGgcgaucggagacguc..... 1  
 Gi2\_11290011\_x1.....ggagacguGugggaacacggggugcc..... 1  
 Gi2\_11378329\_x1.....acucguuccgaauaCgaagagaagcgccguc..... 1  
 Gi4\_596201\_x1.....GgccaguacugcgauGggagacgucgug..... 1  
 Gi1a\_6019319\_x1.....agagaagUgccgucaggccccgc..... 1  
 Gi3\_28576112\_x1.....aggccccgccaguacuCcg..... 1  
 Gi3\_28302920\_x1.....Ngucgugggaacacggggugccgaacu..... 1  
 Gi1\_4301087\_x1.....agacgucGgggaacacggggugccgaacu..... 1  
 Gi1\_4302484\_x1.....cCaucggagacgucgugggaacacggggg..... 1  
 Gi2\_11011475\_x1.....aucggagacgAcgugggaacacggg..... 1  
 Gi3\_28833433\_x1.....uacugcgauGggagacguc..... 1  
 Gi2\_11068531\_x1.....gaucggagacgucgugggaacaU..... 1  
 Gi2\_11140796\_x1.....Caucggagacgucgugggaac..... 1  
 Gi4\_583534\_x1.....gugggaacacggggugcUgaa..... 1  
 Gi4\_588879\_x1.....aucggagacgucgugggaacacgg..... 0  
 Gi3\_28758590\_x1.....aucggagacgucgugggCacacggggug..... 1  
 Gi3\_28740480\_x1.....cgccaguUcugcgauGggagacg..... 1  
 Gi1a\_6210595\_x1.....cucguuccgaauaggaagagaagcgc..... 0  
 Gi5\_9133202\_x1.....aucggagaAgucgugggaacacg..... 1  
 Gi2\_11353992\_x1.....cccgccaguacugcgauGagacgucg..... 1  
 Gi3\_28360762\_x1.....ucggGgacgucgugggaacacggggugccgaacu..... 1  
 Gi5\_8864353\_x1.....aguacugcgauGggagacAuc..... 1  
 Gi3\_28524202\_x1.....gGccccgaguacugcgauGggagacg..... 1  
 Gi3\_28677206\_x1.....cccgccGguacugcgauGgg..... 1  
 Gi3\_28972808\_x1.....cccgccaguacugcgauGggCgacgucgug..... 1  
 Gi5\_9130218\_x1.....CgccccgccaguacugcgauGgg..... 1  
 Gi2\_11298185\_x1.....ucaggccccgcccagCacugc..... 1  
 Gi1\_4212425\_x1.....ugggaacacggcGugccgaac..... 1  
 Gi1\_4275317\_x1.....Ggacgucgugggaacacggggg..... 1  
 Gi1a\_6126411\_x1.....cagAccccgccaguacugcgau..... 1  
 Gi3\_28457192\_x1.....gAagacgucgugggaacacggggg..... 1  
 Gi2\_11240731\_x1.....aucggagUcugcuggggaac..... 1  
 Gi5\_8851618\_x1.....ugcgauGggCgacgucguggga..... 1  
 Gi1\_4296285\_x1.....gucaggccccgcccagCacugc..... 1  
 Gi1a\_6282132\_x1.....ugggCacacggggugccgaacu..... 1  
 Gi1a\_6353456\_x1.....gagacgucgugggaacCcggggugccgaacu..... 1  
 Gi2\_11026035\_x1.....ccaguacuAcgauGggag..... 1  
 Gi5\_9101820\_x1.....gccccgccaguCucgcauc..... 1  
 Gi1\_4300009\_x1.....gggaacacggggugccCaac..... 1  
 Gi2\_11169731\_x1.....acucguuccgaauaUgaagagaagcgcc..... 1  
 Gi3\_28360407\_x1.....cgugCgaacacggggugc..... 1  
 Gi5\_8895326\_x1.....gacgucgugggaacacgggggUcgaacu..... 1  
 Gi3\_28384763\_x1.....cgccaguacugcgaAcggagacguc..... 1  
 Gi2\_11030093\_x1.....aagagaagcgUgucaggccccgcca..... 1

Gi3\_28589059\_x1.....cagggccccgccaCuacugcgau..... 1  
 Gi3\_28327821\_x1.....cgccaguacugcAaucggagacgu..... 1  
 Gi3\_28738886\_x1.....gaAcggagacgucguggg..... 1  
 Gi5\_8884589\_x1.....ugcgauccggagGcgucgug..... 1  
 Gi2\_11372274\_x1.....gaagagaagcgccgucagggGcccg..... 1  
 G1a\_6272103\_x1.....cgUcaguacugcgauccggagacguc..... 1  
 Gi2\_11099273\_x1.....gagUcgucgugggaacacggggugcc..... 1  
 G1a\_6356212\_x1.....gccaguacuCcgauccggagacguc..... 1  
 G1a\_6021731\_x1.....aucggagacgucgugAga..... 1  
 Gi3\_28894135\_x1.....cccgUcaguacugcgauccgga..... 1  
 Gi2\_11220618\_x1.....ggcUccgcccaguacugcgauccg..... 1  
 Gi1\_4380814\_x1.....guacugcgaCcgagacgucg..... 1  
 Gi1\_4231468\_x1.....ccgccaguacugcgauccggGgacgucgug..... 1  
 G1a\_5986826\_x1.....gucaggccccgcccaguaUugcg..... 1  
 Gi2\_11316834\_x1.....aucggagacgGcgugggaacacggggugcc..... 1  
 Gi5\_9091988\_x1.....aucggagacgucgugggaUcacggg..... 1  
 G1a\_6170019\_x1.....Uucggagacgucgugggaa..... 1  
 Gi3\_28899503\_x1.....Cacgucgugggaacacggggugccgaa..... 1  
 Gi3\_28950353\_x1.....ccccccaguacAgcgauc..... 1  
 Gi3\_28869705\_x1.....cggagacgucgugggUacacggggugccga..... 1  
 G1a\_6317171\_x1.....gucagAccccgcccaguacugcga..... 1  
 Gi1\_4283802\_x1.....Cgacgucgugggaacacggggugccgaacu..... 1  
 Gi3\_28675818\_x1.....agacgucgugggaacacggggugccgG..... 1  
 Gi5\_9128118\_x1.....guGgugggaacacggggugc..... 1  
 Gi3\_28592308\_x1.....gaacacggggugcAgaacuu..... 1  
 Gi1\_4270849\_x1.....aagcgccgucagggccUcgccaguacug..... 1  
 Gi2\_11170853\_x1.....acgucgugggaacCcggggugccg..... 1  
 Gi3\_28967010\_x1.....agcgGcgucagggccccgccc..... 1  
 Gi2\_11372390\_x1.....aagUgcccgucagggccccgcccaguac..... 1  
 G1a\_6067513\_x1.....cgucgugggaacacggggugcc..... 0  
 Gi1\_4213608\_x1.....cgugggaaUacggggugccgaacuu..... 1  
 Gi2\_11317960\_x1.....aucggagacguAgugggaacacggg..... 1  
 Gi3\_28708777\_x1.....gggaCcacggggugccgaacuu..... 1  
 Gi2\_11310481\_x1.....agggccUcgccaguacugcgauccg..... 1  
 Gi3\_28688492\_x1.....agacgCcgugggaacacggg..... 1  
 Gi3\_28905620\_x1.....ccccgcccagGacugcgauccggagacguc..... 1  
 Gi4\_593541\_x1.....cguggCaacacggggugccgaacu..... 1  
 Gi2\_11079285\_x1.....cggagacgucgugggaacacggAgug..... 1  
 Gi3\_28609589\_x1.....cggagacgucgugggaacacggggugcU..... 1  
 Gi2\_11366733\_x1.....gucaggccUcgccaguacugc..... 1  
 Gi2\_11389766\_x1.....cgauccggagGcgucgugggaacacggg..... 1  
 Gi3\_28472735\_x1.....gagacgucguggAaacacggggg..... 1  
 G1a\_6321477\_x1.....aucggagacguUgugggaacacggg..... 1  
 Gi2\_11152456\_x1.....cggaUacgucgugggaacacggggug..... 1  
 Gi3\_28669165\_x1.....gUagcgccgucagggccccgcccaguacugc..... 1  
 Gi3\_28298735\_x1.....cgauccggagacgucgugggaacGcggg..... 1  
 Gi3\_28804023\_x1.....ucaggccccgcccaguacugcgauUggagacg..... 1

Gi3\_28415767\_x1.....agagaagcgcccgucagggcccAcc..... 1  
Gi3\_28701783\_x1.....cgucaggccAcgccaguacugc..... 1  
Gi3\_28328867\_x1.....ugggaacaAggggugccg..... 1  
Gi3\_28538581\_x1.....gaucggagacgucgAgggaacacggg..... 1  
Gi1\_4277911\_x1.....gacgucgugggaacacggggugc..... 0  
Gi2\_11060945\_x1.....caggccccgccaguacugcgauAggagac..... 1  
Gi2\_11182627\_x1.....cgugggUacacggggugcc..... 1  
Gi3\_28660047\_x1.....gagaaAcgccgucagggcccgc..... 1  
Gi3\_28312498\_x1.....ucaggccccgccaguacugcgCucgga..... 1  
Gi2\_11069415\_x1.....ugggaacacggggAgccgaacuu..... 1  
Gi1\_4269759\_x1.....cgAgggaacacggggugccga..... 1  
Gi2\_11003426\_x1.....cgggagacgucgugggaCcacggggugccg..... 1  
Gi3\_28334029\_x1.....cguuccgaaauaggaagagaagcgc..... 0  
Gi2\_11095059\_x1.....guacugcgaCcgagacgucgugggaaca..... 1  
Gi3\_28288889\_x1.....ucaggccccgAcaguacugcg..... 1  
G1a\_6203907\_x1.....agGacugcgauccggagacgucgu..... 1  
Gi3\_28507902\_x1.....gucaggccccAccaguacugc..... 1  
Gi2\_11254064\_x1.....aguacugcgauccggagacAu..... 1  
Gi3\_28529922\_x1.....gaagcgcUgucagggccccgccaguacu..... 1  
Gi3\_28932399\_x1.....gaucgAagacgucgugggaacacgg..... 1  
Gi3\_28575435\_x1.....caggccccgccaguacCgcgaucgg..... 1  
Gi5\_8843316\_x1.....acacAgggugccgaacuu..... 1  
Gi3\_28744307\_x1.....cgucgugggaacacgggUugccgaacu..... 1  
Gi3\_28313565\_x1.....gaucgCagacgucgugggaacacggg..... 1  
Gi1\_4226949\_x1.....agacgucgugggaacacggggugccAa..... 1  
Gi2\_11137722\_x1.....ugcgauUgagacgucgugggaaca..... 1  
Gi5\_9075065\_x1.....ccgaaauaNgaagagaagcgc..... 1  
Gi2\_11145097\_x1.....caggccccgccaguacugcgauUgg..... 1  
Gi5\_9091496\_x1.....agacgucgugggaGcacggggu..... 1  
Gi5\_8921215\_x1.....acugcgauccggagacgCcgug..... 1  
Gi3\_28503506\_x1.....aggccccgccaguacCgcgaucgg..... 1  
Gi3\_28307855\_x1.....ucgggagacgucgugggaCcacggggu..... 1  
Gi2\_11067174\_x1.....agcgcUgucagggccccgccaguacugcg..... 1  
Gi1\_4380965\_x1.....aguacugcgauccggGgacgucgu..... 1  
G1a\_6065650\_x1.....gaucAgagacgucgugggaacacg..... 1  
G1a\_6315805\_x1.....Uccaguacugcgauccggagacgucgug..... 1  
Gi3\_28969413\_x1.....gagaagcAccgucagggccccg..... 1  
Gi2\_11256056\_x1.....ccccgccaguacugcgGucggagac..... 1  
Gi2\_11221863\_x1.....guUcugcgauccggagacguc..... 1  
Gi3\_28928823\_x1.....aacacggggugccgaCcuu..... 1  
Gi5\_8941712\_x1.....ugcgauAggagacgucgugg..... 1  
Gi1\_4177610\_x1.....gagacgucNugggaacacggggugcc..... 1  
G1a\_6286487\_x1.....aucggGgacgucgugggaacacg..... 1  
Gi5\_8862638\_x1.....aggcGccgccaguacugcgau..... 1  
Gi2\_11015884\_x1.....gaucggagacgucgCgggaacacggg..... 1  
Gi1\_4326970\_x1.....gagacgucgugggaacacggggug..... 0  
Gi2\_11127184\_x1.....gccaguacugcgauccggagacguGgug..... 1

Gi5\_8908494\_x1.....gugggaaUacggggugccgaa..... 1  
 Gi3\_28279532\_x1.ccuuaCcucguuccgaau..... 1  
 Gi5\_8934044\_x1.....gagaagcgccgCcaggccccgc..... 1  
 Gi2\_11112200\_x1.....aagcgccgucaggccccUgccaguac..... 1  
 Gi3\_28319817\_x1.....gagacgucgugggaacacggAgugccgaacu..... 1  
 G1a\_6112636\_x1.....aguacugcNaucggagacgucgu..... 1  
 Gi2\_11285018\_x1.....cggagacgucgugggaacacUgggugcc..... 1  
 Gi5\_9079600\_x1.....acgucguggCaacacggggugccgaacu..... 1  
 Gi3\_28633291\_x1.....aUgccccgccaguacugcgauccggagacgucg..... 1  
 Gi5\_8990613\_x1.....aucggagacgucgugggaacaUggggugc..... 1  
 G1a\_6331381\_x1.....Uccgccaguacugcgauccggagacguc..... 1  
 G1a\_6216976\_x1.....aucggagacgucgGgggaacacggggu..... 1  
 Gi1\_4266221\_x1.....agcgccgucaggccccgccaguacugcgau..... 0  
 Gi2\_11222355\_x1.....aggccccCccaguacugcga..... 1  
 Gi3\_28910960\_x1.....cgucaggcAccgccaguacugcgau..... 1  
 Gi3\_28976384\_x1.....caggccccgccagGacugcg..... 1  
 Gi3\_28425265\_x1.....gagacgucgugggaCcacggggugccg..... 1  
 Gi2\_11365552\_x1.....ccccgccaguacugcgauAgg..... 1  
 Gi3\_28522606\_x1.....gucaggccccAccaguacugcgauccggaga..... 1  
 Gi5\_8832899\_x1.....gggaacacgggguAccgaa..... 1  
 Gi2\_11200528\_x1.....aagagaagcgccgucaggAcccgcca..... 1  
 Gi2\_11182568\_x1.....aguacugcgauAggagac..... 1  
 G1a\_6167373\_x1.....Aaucggagacgucgugggaacacg..... 1  
 Gi3\_28497345\_x1.....aucggagaGgucgugggaacacggggugcc..... 1  
 Gi4\_606336\_x1.....Uugggaacacggggugcc..... 1  
 Gi5\_9022172\_x1.....cgugggaacacgggCugccgaac..... 1  
 G1a\_6034782\_x1.....agCagcgccgucaggccc..... 1  
 Gi5\_9018409\_x1.....cgccaguacugcgauccgGacguc..... 1  
 Gi3\_28960556\_x1.....Ugaagcgccgucaggccc..... 1  
 Gi2\_11287096\_x1.....aucggagacUucgugggaacacggggu..... 1  
 G1a\_6051877\_x1.....aAgccccgccaguacugc..... 1  
 Gi2\_11261123\_x1.....aucUgagacgucgugggaacacg..... 1  
 Gi3\_28468915\_x1.....ccgccaguacCgcgauccg..... 1  
 Gi3\_28754549\_x1.....gucgugggaGcacggggugcc..... 1  
 Gi3\_28656497\_x1.....caUuacugcgauccggagacgucgug..... 1  
 Gi3\_28266750\_x1.....cgauccggagacgucgugggaCcacggggugc..... 1  
 Gi3\_28741032\_x1.....cgcUgucaggccccgccaguacu..... 1  
 Gi2\_11375697\_x1.....caggccccgccagCacugcgauccgga..... 1  
 Gi3\_28625320\_x1.....agagaagAgccgucaggccccg..... 1  
 Gi3\_28483502\_x1.....cgccgucaggGccccccagua..... 1  
 Gi3\_28970905\_x1.....cggagacgucgCgggaacacggggugccg..... 1  
 Gi3\_28285922\_x1.....ccccccaguacugcUaucggagacgucgu..... 1  
 Gi2\_11144443\_x1.....cgugggaacacggggAgccga..... 1  
 Gi3\_28371009\_x1.....ggagacgucgugggaacacggggugccgaGcu..... 1  
 Gi2\_11222006\_x1.....gccaguacugcgauccAgaga..... 1  
 Gi2\_11197354\_x1.....aggccccccaguacAgcgauccggaga..... 1  
 Gi1\_4301057\_x1.....gAcgugggaacacggggugccgaacu..... 1

Gi3\_28467637\_x1.....gccgucaggccccgccaguacugAg..... 1  
Gi3\_28586429\_x1.....ccccccaguacugcgauccggagacCuc..... 1  
Gi4\_597154\_x1.....Nugggaacacggggugccgaacu..... 1  
Gi2\_11016535\_x1.....gggaacacggggugcUga..... 1  
Gi2\_11312811\_x1.....gaagcgccgucaggGcccg..... 1  
Gi2\_11148400\_x1.....cgauccggagacgucgugggUaca..... 1  
Gi1\_4219953\_x1.....aUacgucgugggaacacggggugccga..... 1  
Gi3\_28841590\_x1.....Accaguacugcgauccggagacgucg..... 1  
Gi3\_28631322\_x1.....cgauccggagaUgucgugggaacacggggugc..... 1  
Gi3\_28788866\_x1.....cgucgugggaacacUgggu..... 1  
G1a\_6335055\_x1.....gucgugggaacCcggggugcc..... 1  
Gi1\_4309682\_x1.....Ugagacgucgugggaacacg..... 1  
Gi2\_11317150\_x1.....cgucgugggaacacggUgugccgaacu..... 1  
G1a\_6107839\_x1.....ccUgccaguacugcgauccggagacgucg..... 1  
Gi5\_9050031\_x1.....ccccgccaguGcugcgauccggagacg..... 1  
Gi2\_11319680\_x1.....ccgucaggccccgccaguacugcgGuc..... 1  
Gi2\_11019730\_x1.....aucggUgacgucgugggaac..... 1  
Gi3\_28457594\_x1.....ccaguacugcgauccggagacgucgAg..... 1  
Gi2\_11377828\_x1.....uUggagacgucgugggaacacggggu..... 1  
Gi2\_11246881\_x1.....ccccgccaguacugcgauUggagacgucg..... 1  
Gi1\_4350110\_x1.....cAugggaacacggggugccgaacu..... 1  
Gi5\_9090061\_x1.....gugggaacacggggugcU..... 1  
G1a\_6018141\_x1.....acugGgauccggagacgucgug..... 1  
Gi3\_28591573\_x1.....uUggagacgucgugggaacacggggugc..... 1  
Gi3\_28309053\_x1.....aucggagacgucgugggaacacgggAugc..... 1  
Gi3\_28960393\_x1.....gugggaacacggggugcGgaa..... 1  
Gi5\_9085833\_x1.....ucgugggCacacggggugccgaac..... 1  
Gi5\_8988460\_x1.....gggaacacggggugccga..... 0  
Gi3\_28561838\_x1.....Ugagaagcgccgucaggccccgc..... 1  
Gi3\_28477602\_x1.....gucaggccccgccaguaUugc..... 1  
Gi3\_28571548\_x1.....ccccccGuacugcgauccggagacgu..... 1  
Gi2\_11068476\_x1.....auGggagacgucgugggaaca..... 1  
G1a\_6287074\_x1.....acgucgugggaacUcggggu..... 1  
Gi3\_28873993\_x1.....cgugggaacacgCggugccgaa..... 1  
Gi3\_28770002\_x1.....cggagacgucgugUgaacacggggugccga..... 1  
Gi5\_8867749\_x1.....aggccccgcUaguacugcgau..... 1  
Gi5\_8888855\_x1.....gucaggcGccgccaguacugcg..... 1  
Gi3\_28846454\_x1.....Uggagacgucgugggaacac..... 1  
Gi3\_28831303\_x1.....cgugggaacacggggAgccgaa..... 1  
Gi3\_28335092\_x1.....gaacacggggugccgaaG..... 1  
Gi1\_4310333\_x1.....ucggagacgucgugggaacacggggugccgaCcu..... 1  
Gi2\_11295209\_x1.....agccccccaAuacugcga..... 1  
Gi4\_613083\_x1.....cgugggaacacgUggugccgaacu..... 1  
G1a\_6142904\_x1.....caguacugcgauccggagacgucC..... 1  
Gi4\_569964\_x1.....gccaguacugcgauccggagGcug..... 1  
Gi5\_9118463\_x1.....gugggaacacggggugccgaacuucU..... 1  
Gi1\_4275502\_x1.....gugggaacacggUgugccgaac..... 1



Gi3\_28835988\_x1.....gugggaacacCgggugcc..... 1  
 Gi5\_9079097\_x1.....cgGcgugggaacacggggugccgaac..... 1  
 Gi2\_11290825\_x1.....ccCucagggccccccaguacugcgau..... 1  
 Gi3\_28524268\_x1.....ggagacgucgugggaacacggggugcUg..... 1  
 Gi3\_28673157\_x1.....ggagacgucgugggaacacggggugUcgaacu..... 1  
 Gi5\_8907719\_x1.....aNcacggggugccgaacu..... 1  
 Gi2\_11107992\_x1.....gaucggagacgucgugggGacacggggugcc..... 1  
 Gi1\_4286737\_x1.....aguacugcgauccggagGcgucgug..... 1  
 Gi3\_28351204\_x1.....ugcgauccggagacgucgugggaac..... 0  
 Gl1a\_6203225\_x1.....caggccccccaguacAg..... 1  
 Gi3\_28831775\_x1.....caggccccccaguacugcgauAgg..... 1  
 Gi2\_11231689\_x1.....aagcgccgucagggcccUgccaguacugc..... 1  
 Gi1\_4320221\_x1.ccuuaacucguuccgaau..... 0  
 Gi5\_9065118\_x1.....ggGgacgucgugggaacacggggugccgaacu..... 1  
 Gi3\_28351905\_x1.....aggUcccgccaguacugcga..... 1  
 Gi4\_594282\_x1.....ucgugggaacacggggugccgaUc..... 1  
 Gi1\_4276179\_x1.....acgucguAggaacacggggugccga..... 1  
 Gi3\_28395349\_x1.....aucggagacgucguUggaacacggggugcc..... 1  
 Gi2\_11165847\_x1.....gaucggagacgucguAggaacacggggugc..... 1  
 Gi1\_4271260\_x1.....gccaguacugcgauccggagGcg..... 1  
 Gi2\_11245625\_x1.....Uggaacacggggugccgaacu..... 1  
 Gl1a\_6195750\_x1.....gucgugggaacaUggggugccgaacu..... 1  
 Gi1\_4361988\_x1.....aucggagacgucgugggGacacggggugc..... 1  
 Gi2\_11154024\_x1.....aAcggagacgucguggga..... 1  
 Gi2\_11315334\_x1.....ccgccaguNcugcgauccggag..... 1  
 Gi3\_28732880\_x1.....agagaagcgccgucGggccccg..... 1  
 Gi2\_11289205\_x1.....ccUguacugcgauccggagacg..... 1  
 Gi3\_28731925\_x1.....Ccaggccccccaguacugcgauccgga..... 1  
 Gi3\_28579747\_x1.....aagcAccgucagggccccccagaa..... 1  
 Gi2\_11309000\_x1.....gaagcgccgucGggccccccag..... 1  
 Gi3\_28505871\_x1.....ggagacgucgugggUacacggggugccgaa..... 1  
 Gi2\_11282619\_x1.....gacgucgugggaacacggCgugcc..... 1  
 Gi1\_4334526\_x1uccuuaacucguuccgaauuaAga..... 1  
 Gl1a\_6302390\_x1.....gucagggccccccCguacug..... 1  
 Gi2\_11360222\_x1.....acucguuccgaauuaUgaagagaagcgccguc..... 1  
 Gi3\_28952967\_x1.....agacguAgugggaacacggg..... 1  
 Gl1a\_6079701\_x1.....ucggagacgucgugCgaacacgg..... 1  
 Gi2\_11086671\_x1.....aguaGugcgauccggagacgu..... 1  
 Gi3\_28672611\_x1.....Aaacacggggugccgaacu..... 1  
 Gi1\_4388622\_x1.....cgugggaacacAgggugccgaa..... 1  
 Gi2\_11175808\_x1.....cgucgugggaacacggggugcU..... 1  
 Gi2\_11302322\_x1.....gaucggCgacgucgugggaacacg..... 1  
 Gi3\_28579041\_x1.....agagaagcgccgucGggccccg..... 1  
 Gi3\_28488998\_x1.....Ggggaacacggggugccgaacu..... 1  
 Gi2\_11198023\_x1.....cGccgccaguacugcgauccggagacguc..... 1  
 Gi3\_28341929\_x1.....gacguGugggaacacggggugccg..... 1  
 Gi4\_613630\_x1.....gagaagcgCugcaggcc..... 1

Gi1\_4207211\_x1.....cguggCaacacggggugccgaac..... 1  
 Gi2\_11165106\_x1.....gGgaucggagacgucgug..... 1  
 Gi3\_28963821\_x1.....gagGgcccgcagggccgcca.....gCcgugggaacacggggugccga..... 1  
 Gl1a\_6330237\_x1.....gaagGgcccgcagggccgcca..... 1  
 Gi2\_11056414\_x1.....ucguuccgaauuaUgaagagaagc.....Aaguacugcgauccggagacgucgug..... 1  
 Gi5\_8875720\_x1.....Aaguacugcgauccggagacgucgug..... 1  
 Gi1\_4234322\_x1.....cCugggaacacggggugccg..... 1  
 Gi2\_11297760\_x1.....ucaggccccAccaguacugcg..... 1  
 Gi1\_4289254\_x1.....Cagacgucgugggaacacggggugcc..... 1  
 Gi2\_11403354\_x1.....Cgacgucgugggaacacggggugccgaac..... 1  
 Gl1a\_6263906\_x1.....gaUgcgccgucagggcccgccaguacugc..... 1  
 Gi3\_28578273\_x1.....ggccccgccaguGcugcgau..... 1  
 Gi3\_28402393\_x1.....ggagacgCcgugggaacacggggugccg..... 1  
 Gi3\_28587462\_x1.....gacgucgugggaCcacggggugccg..... 1  
 Gi2\_11104214\_x1.....gacgucgugggaacGcggggugccgaac..... 1  
 Gi2\_11135581\_x1.....gucgugggaGcacggggugcc..... 1  
 Gi3\_28968027\_x1.....ccgucagggccccgccGguacugcg..... 1  
 Gi3\_28693438\_x1.....aucggagacgucgugggaacaGggggu..... 1  
 Gi1\_4264020\_x1.....acugcgauccgCgacgucguggga..... 1  
 Gi1\_4379517\_x1.....cgugggaacacgCggugccgaa..... 1  
 Gi3\_28329246\_x1.....gagacgucgugggUacacg..... 1  
 Gi2\_11262885\_x1.....acguUgugggaacacggg..... 1  
 Gl1a\_6096619\_x1.....cgucagggccccgUaguacugc..... 1  
 Gi2\_11015120\_x1.....gggaacacgCggugccga..... 1  
 Gi3\_28724451\_x1.....cgNcgugggaacacggggugccgaacu..... 1  
 Gl1a\_6278417\_x1.....Cgagacgucgugggaacacg..... 1  
 Gi2\_11139991\_x1.....acgucgugggaacacgAggugccgaacu..... 1  
 Gl1a\_6302010\_x1.....aucggagacgucgugggUa..... 1  
 Gi1\_4380178\_x1.....agGcugcugugggaacacgggg..... 1  
 Gi1\_4290876\_x1.....aacacggggugccgaaGu..... 1  
 Gi2\_11371211\_x1.....aucggagacguUgugggaaca..... 1  
 Gi5\_9105805\_x1.....ugcgauccggagacgucgug..... 0  
 Gi2\_11126070\_x1.....caggccccgccaguacugcCauc..... 1  
 Gi4\_584424\_x1.....cUucgugggaacacggggugc..... 1  
 Gi3\_28865662\_x1.....cgauccggagacgucgugggUacacg..... 1  
 Gi2\_11100280\_x1.....Caagcggcgcagggccccgccaguacugc..... 1  
 Gi3\_28483657\_x1.....agacgucgugggaacacUggggugccga..... 1  
 Gi2\_11374805\_x1.....Cucgugggaacacggggugc..... 1  
 Gi3\_28668090\_x1.....cgccgucagggccccgUcaguacugc..... 1  
 Gi3\_28550451\_x1.....cgaauuaCgaagagaagcgcc..... 1  
 Gi2\_11101343\_x1.....caggccccgccaguGcugcgau..... 1  
 Gi3\_28895345\_x1.....gagacgucgugggaacUcggggugcc..... 1  
 Gi1\_4211794\_x1.....agaUgucgugggaacacggggugccga..... 1  
 Gi1\_4253804\_x1.....gaacacggggugccgaGc..... 1  
 Gi3\_28347417\_x1.....gagaagcgccUucagggccccg..... 1  
 Gi3\_28462279\_x1.....Gcguuccgaauuaggaagagaagcgccguc..... 1  
 Gi1\_4223473\_x1.....ggagacgucgugggaacacgggguA..... 1

Gi2\_11054077\_x1.....aCacgucgugggaacacggggugccgaac..... 1  
Gi2\_11377774\_x1.....aucggaCacgucgugggaacacggggug..... 1  
Gi3\_28849935\_x1.....cgccgucaggAcccgccaguac..... 1  
Gi3\_28544116\_x1.....agagaagcgccgucaggAcccg..... 1  
Gi3\_28840310\_x1.....gccaguacugcgauUggagacguc..... 1  
G1a\_6341464\_x1.....gccGguacugcgauccggagacguc..... 1  
Gi2\_11030238\_x1.....gaagcgccgCcaggccccccaguacugc..... 1  
Gi1\_4270663\_x1.....cgugggaacacggggugccUaacu..... 1  
Gi1\_4307503\_x1.....ggaacacgggguAccgaac..... 1  
Gi1\_4169405\_x1.....gcAaucggagacgucgugggaaca..... 1  
Gi3\_28781011\_x1.....cggagacgNcgugggaacacgg..... 1  
Gi5\_8922883\_x1.....agacgucgugggaacacggggCgcc..... 1  
G1a\_6138011\_x1.....acgucgugggaacacAggggu..... 1  
Gi2\_11399380\_x1.....cgccaAuacugcgauccg..... 1  
Gi2\_11395502\_x1.....gaucgCagacgucgugggaacacggg..... 1  
Gi2\_11269507\_x1.....ucggagaUgucgugggaacacggggugc..... 1  
Gi3\_28573925\_x1.....gcccgcucaggcUccgccaaguacugc..... 1  
Gi2\_11044372\_x1.....ucggagacgucgugggaacaAggggugc..... 1  
Gi2\_11017154\_x1.....aagagaagcgUcgucaggccccgcc..... 1  
Gi5\_8911356\_x1.....gaagcgccgucaggcGccgcc..... 1  
Gi3\_28650280\_x1.....cccgccaguacugcgauccggagCcgucg..... 1  
Gi1\_4207945\_x1.....cguUgugggaacacggggugccgaa..... 1  
Gi5\_9129379\_x1.....agUcgucgugggaacacggggugc..... 1  
Gi2\_11356809\_x1.....ccgccaguacuAcgauccggagacguc..... 1  
Gi2\_11135611\_x1.....agagaagcNccgucaggccccgcc..... 1  
Gi2\_11133904\_x1.....ccgccaguacugcgaCcgagacguc..... 1  
Gi2\_11067790\_x1.....gUcccgccaguacugcgauccg..... 1  
Gi3\_28530831\_x1.....agagaagcgccgucaggccccA..... 1  
Gi5\_8901780\_x1.....gccccAccaguacugcgauc..... 1  
Gi3\_28415518\_x1.....agNacugcgauccggagacg..... 1  
Gi2\_11324113\_x1.....gacgucguggUaacacggggugccgaacu..... 1  
Gi2\_11211767\_x1.....aggccccgccaguacuUc..... 1  
Gi3\_28667201\_x1.....aCacgucgugggaacacggggugccgaac..... 1  
Gi2\_11287647\_x1.....cgucUugggaacacggggugccga..... 1  
Gi5\_8864211\_x1.....gaucAgagacgucgugggaacacg..... 1  
Gi5\_9081282\_x1.....ugggaacacggAgugccgaa..... 1  
Gi1\_4193349\_x1.....ucgugggaacacgggUcccgaacu..... 1  
Gi2\_11232290\_x1.....gugggaacacgggCugccgaa..... 1  
Gi3\_28834857\_x1.....Uccccgccaguacugcgauccggagacguc..... 1  
Gi2\_11159961\_x1.....aucAgagacgucgugggaacacggggug..... 1  
Gi1\_4253366\_x1.....gacgCcgugggaacacggggugcc..... 1  
Gi2\_11346821\_x1.....cgccguVaggccccccaguacugc..... 1  
Gi3\_28666495\_x1.....cgucgugggaacacgCggugcc..... 1  
Gi5\_8953486\_x1.....acugcgauccggaAacgucgug..... 1  
G1a\_6245842\_x1.....ggcccUgccaguacugc..... 1  
G1a\_6322370\_x1.....gccaguacNcgauccggagacguc..... 1  
Gi3\_28808414\_x1.....gagacgucgugggaacGcggggugcc..... 1

G1a\_6152912\_x1.....cccgccaguacugcgauCgagacguc..... 1  
 Gi3\_28820847\_x1.....cggagacgucgugggaacacggUgugcc..... 1  
 Gi1\_4271903\_x1.....gaacacggNgugccgaacuu..... 1  
 Gi3\_28409634\_x1.....ccccgccGguacugcgauCgagacgu..... 1  
 Gi1\_4254420\_x1.....acgucgGgggaacacggggugccg..... 1  
 Gi2\_11322340\_x1.....gacAucgugggaacacggggugc..... 1  
 Gi3\_28852182\_x1.....aggccccgccGguacugcgauCg..... 1  
 Gi2\_11372689\_x1.....cAccgucaggccccgccagu..... 1  
 Gi2\_11070510\_x1.....ccccgccaguacugcgauCgagc..... 1  
 Gi1\_4269033\_x1.....gagacgucgugggaGacggggugccgaacu..... 1  
 Gi2\_11302755\_x1.....gaagagaagcgccgucagggUcc..... 1  
 Gi3\_28722452\_x1.....gccgucaggccccgccaguGcu..... 1  
 Gi2\_10998464\_x1.....ucggagacgucgugggaacacggggG..... 1  
 Gi2\_11238194\_x1.....aagagaagcgccgucagggUccgcc..... 1  
 Gi2\_11245314\_x1.....ugggaaAacggggugccgaac..... 1  
 Gi3\_28910063\_x1.....gaucAgagacgucgugggaacacggggugc..... 1  
 Gi2\_11161038\_x1.....aucggagacgucUugggaaC..... 1  
 Gi2\_11220667\_x1.....ucgugggaacCcggggugcc..... 1  
 Gi2\_11383141\_x1.....uaUgaagagaagcgccgucagggc..... 1  
 Gi5\_9086086\_x1.....ugcgauCgagCcgucgug..... 1  
 Gi3\_28550553\_x1.....agagaagcgCAgucagggccccgc..... 1  
 Gi2\_11172915\_x1.....aucggagacgucgCgggaacacgggg..... 1  
 Gi2\_11094340\_x1.....caggccccNccaguacugcgauCg..... 1  
 Gi2\_11041294\_x1.....gcUaguacugcgauCgagac..... 1  
 Gi2\_11096661\_x1.....gugggaacacggggugccgaaG..... 1  
 Gi3\_28265331\_x1.....ccgccaguacugUgauCgagacgucg..... 1  
 G1a\_6267144\_x1.....gggCacacggggugccgaa..... 1  
 Gi2\_11369974\_x1.....caggcUccgccaguacugcg..... 1  
 Gi3\_28271891\_x1.....aucggagacgucgugggaacacggggUc..... 1  
 Gi2\_11051408\_x1.....aucggagacgucCugggaacacggg..... 1  
 Gi3\_28827864\_x1.....gagacguUgugggaacacggggugccgaac..... 1  
 G1a\_6151782\_x1.....cagCacugcgauCgagacgu..... 1  
 G1a\_6347188\_x1.....acgucgugggaacacggggugccgACcu..... 1  
 Gi2\_11089832\_x1.....aucggagacgucAugggaacacgggg..... 1  
 Gi2\_11269222\_x1.....gggaacacCgggugccgaac..... 1  
 G1a\_6238393\_x1.....cgauCgagacgucgCgg..... 1  
 Gi4\_572207\_x1.....Ugucaggccccgccaguacugc..... 1  
 Gi3\_28722178\_x1.....agcgccgucagggccccgccag..... 0  
 Gi3\_28410617\_x1.....ugggaacacggggugccgaaG..... 1  
 Gi3\_28477275\_x1.....ggNaacacggggugccgaac..... 1  
 Gi3\_28538130\_x1.....acacggggugccUaacuu..... 1  
 Gi3\_28858800\_x1.....cggagacguAgugggaacacg..... 1  
 Gi3\_28862303\_x1.....agcgUcgucagggccccgccaguac..... 1  
 Gi3\_28278181\_x1.....caggccccgccaguacugcgU..... 1  
 Gi4\_568513\_x1.....cgugggaacacggggugcUgaacu..... 1  
 Gi1\_4237917\_x1.....ugggaacacgggAugccgaacuu..... 1  
 Gi1\_4369465\_x1.....cgucgugAgaacacggggugcc..... 1

Gi1\_4347839\_x1.....aucggagacgucgugggaacaUgggg..... 1  
 Gi3\_28396682\_x1.....cccgAcaguacugcgauccggagacgucgug..... 1  
 Gi3\_28816666\_x1.....Ucugcgauccggagacgucgug..... 1  
 Gi4\_572310\_x1.....ggUacacggggugccgaacu..... 1  
 Gi3\_28936340\_x1.....ugggaacacggggugcGga..... 1  
 Gl1a\_6227138\_x1.....ggaacaGggggugccgaacu..... 1  
 Gi3\_28506213\_x1.....gaucggagacgucgugggaacacgUggu..... 1  
 Gi3\_28649922\_x1.....uUaggccccgccaguacugcga..... 1  
 Gi3\_28690852\_x1.....cgccaguacugcgauccggagacgAcg..... 1  
 Gl1a\_6263339\_x1.....cUggccccgccaguacugcgau..... 1  
 Gi3\_28302835\_x1.....cgucaggccccgccaguacuAcgaucgg..... 1  
 Gi2\_11061984\_x1.....Acggagacgucgugggaacacggggugcc..... 1  
 Gl1a\_5990889\_x1.....aucAgagacgucgugggaacacggggugcc..... 1  
 Gi5\_8917666\_x1.....cgAgggaacacggggugccgaacuu..... 1  
 Gi2\_11198224\_x1.....gucaggccccgccCguacugcgau..... 1  
 Gi3\_28857392\_x1.....ucagUccccgccaguacugcga..... 1  
 Gi3\_28421606\_x1.....ccccgccaguaUugcgauccggagac..... 1  
 Gi2\_11291051\_x1.....cgccgucaggUccccccagu..... 1  
 Gl1a\_5991065\_x1.....cccgccaguacugcgauccggCgacguc..... 1  
 Gi3\_28949794\_x1.....cguNaggccccgccaguacugc..... 1  
 Gi2\_11176431\_x1.....aagcgccgucaggccccgccaguacCgc..... 1  
 Gl1a\_6293762\_x1.....Uucggagacgucgugggaacacggggugc..... 1  
 Gi2\_11244921\_x1.....cggagacgucgugggaacacggggAg..... 1  
 Gi3\_28514084\_x1.....cggagacgucgugggaacacggAg..... 1  
 Gi2\_11005546\_x1.....acgucgugggUacacggggugc..... 1  
 Gi3\_28580641\_x1.....aagaUaagcgccgucaggcccc..... 1  
 Gi1\_4164747\_x1.....ggagacgucgugggUacacggggugcc..... 1  
 Gi2\_11064369\_x1.....Ugaucggagacgucgugggaacacggggugc..... 1  
 Gi3\_28297429\_x1.....aucggagacAucgugggaacacggggugc..... 1  
 Gi3\_28723611\_x1.....gagacgucgugAgaacacggggugccgaacu..... 1  
 Gi2\_11102523\_x1.....ugggaaGacggggugccgaac..... 1  
 Gi2\_11332818\_x1.....gaucggagacgucgugggUacacg..... 1  
 Gi2\_11340229\_x1.....aucggagaAgucgugggaacac..... 1  
 Gi2\_11279631\_x1.....ucaggcccNgccaguacugcgauccgga..... 1  
 Gi2\_11264190\_x1.....aagagaagcgccgucaggcGc..... 1  
 Gi1\_4322489\_x1.....gggaacacggggugccgCac..... 1  
 Gi1\_4160432\_x1.....ccgccaguNcugcgauccggaga..... 1  
 Gi3\_28612825\_x1.....gauAggagacgucgugggaacacggg..... 1  
 Gi3\_28565849\_x1.....Nugggaacacggggugccg..... 1  
 Gi3\_28671649\_x1.....ccUcgccaguacugcgau..... 1  
 Gl1a\_6214333\_x1.....cgugggGacacggggugccgaac..... 1  
 Gi3\_28557589\_x1.....gaucggagacgucgugggaa..... 0  
 Gi2\_11023500\_x1.....ggagacgucgAgggaacacggggug..... 1  
 Gi3\_28277162\_x1.....gaNcacggggugccgaac..... 1  
 Gi3\_28728299\_x1.....guacugcgauccggagacgucgugggaaGacgg..... 1  
 Gi3\_28880580\_x1.....agaagcgccgucaggccccgUc..... 1  
 Gi3\_28821829\_x1.....cggagacgucgugggaacCggggugccgaac..... 1

Gi3\_28408942\_x1.....cggagacgucgugggaacacggggGgc..... 1  
 Gl1a\_6311891\_x1.....gugggaacacggggugccgaG..... 1  
 Gi2\_11091012\_x1.....agccccgccaguacugcgaC..... 1  
 Gi1\_4371050\_x1.....cggGgacgucgugggaacacgggg..... 1  
 Gi3\_28742015\_x1.....cGgccaguacugcgaucggagacgucgu..... 1  
 Gi3\_28459930\_x1.....uUcugcgauccggagacgu..... 1  
 Gi2\_11313946\_x1.....ugggaacacggggUccgaacu..... 1  
 Gi2\_11094266\_x1.....cgNagacgucgugggaacacggggugcc..... 1  
 Gi2\_11213159\_x1.....acgucgAgggaacacggggugcc..... 1  
 Gi2\_11026308\_x1.....gucgugggaacacggggAgc..... 1  
 Gi3\_28727882\_x1.....ccgccaguUcugcgauccggagac..... 1  
 Gi2\_11038292\_x1.....cgugggaGcacggggugccg..... 1  
 Gi2\_11116710\_x1.....ggccccgccaguacugcgcCucg..... 1  
 Gi2\_11402528\_x1.....agaagcgcNgcagggccccgccaguac..... 1  
 Gi5\_9121618\_x1.....acgucgugggaacacgUggugccgaacu..... 1  
 Gi5\_9068629\_x1.....Cggccccgccaguacugc..... 1  
 Gi3\_28261837\_x1.....aucggaAacgucgugggaacac..... 1  
 Gi2\_11200595\_x1.....Ncgucgugggaacacggggugccgaacu..... 1  
 Gi2\_11395508\_x1.....ccgccaguacugUgauccggag..... 1  
 Gl1a\_6078785\_x1.....uGcugcgauccggagacgucgu..... 1  
 Gi1\_4376531\_x1.....aAcggagacgucgugggaacacg..... 1  
 Gi2\_11146186\_x1.....Cagacgucgugggaacacggggug..... 1  
 Gi4\_590441\_x1.....ucggagacNucgugggaacacggggugccg..... 1  
 Gi2\_11291305\_x1.....gUgacgucgugggaacacggggug..... 1  
 Gl1a\_6286601\_x1.....aacaGggggugccgaacu..... 1  
 Gi5\_8970245\_x1.....ugggaacacUgggugccgaac..... 1  
 Gi2\_11334412\_x1.....gccccgccaguacugcgaucgA..... 1  
 Gi3\_28785700\_x1.....ccccgccaguacugcgaucggagCc..... 1  
 Gi4\_595930\_x1.....aucggagacgucgugggGacacggg..... 1  
 Gi1\_4328034\_x1.....gagGcgucgugggaacacggggugccgaacu..... 1  
 Gi3\_28427025\_x1.....aucggagacgucgugggaacacCggg..... 1  
 Gi1\_4252213\_x1.....aucggagacgucgugggaCcacggggu..... 1  
 Gl1a\_6158258\_x1.....aguaAugcgauccggagacgucgug..... 1  
 Gi3\_28470486\_x1.....gaucggagacgucgugggaacacggUgugcc..... 1  
 Gi3\_28775358\_x1.....guacGgcgauccggagacguc..... 1  
 Gi2\_11072428\_x1.....ugggaacaUggggugccg..... 1  
 Gi5\_8939210\_x1.....uUgugggaacacggggugcc..... 1  
 Gi3\_28886576\_x1.....aguacugcgauccAgagacgucg..... 1  
 Gl1a\_6211101\_x1.....cguAgggaacacggggugcc..... 1  
 Gi1\_4164855\_x1.....ggaacacggggUccgaacu..... 1  
 Gi2\_11031034\_x1.....ucgugggaacacggggugUcgaa..... 1  
 Gi1\_4226840\_x1.....ggagGcgucgugggaacacggggugccg..... 1  
 Gi3\_28425316\_x1.....cguuccgaauaCgaagagaagcgccgu..... 1  
 Gi2\_11036564\_x1.....gucgCgggaacacggggugccgaa..... 1  
 Gi3\_28926027\_x1.....aggccccAccaguacugcgau..... 1  
 Gi2\_11288652\_x1.....caggccccgcAaguaucgcauc..... 1  
 Gi2\_11403600\_x1.....agUgaagcgcgucagggccccgccaguacugc..... 1

Gi1\_4353308\_x1.....aucggGgacgucgugggaa.....1  
 Gi3\_28635184\_x1.....gugggaacacggggugcUgaacuu.....1  
 Gi3\_28695490\_x1.....Gagagaagcgccgucagcc.....1  
 Gi2\_11131973\_x1.....gaucggagacgucgugggaaUacggggugc.....1  
 Gi3\_28761092\_x1.....agcgccguNagccccgccaguacugc.....1  
 Gi2\_11386734\_x1.....gagaUgucgugggaaacacggggugcc.....1  
 Gi1\_4347714\_x1.....agacgucUugggaacacgggg.....1  
 Gi1\_4262360\_x1.....gugggaacacggggugccgC.....1  
 Gi3\_28518761\_x1.....cAccgucagggcccgccaguacu.....1  
 Gi3\_28477810\_x1.....agaagcgccgucagAccccgccaguacu.....1  
 Gi3\_28461471\_x1.....aCacgucgugggaaacacgggg.....1  
 Gi3\_28823696\_x1.....gagaagcgNcgucagggcccg.....1  
 Gi2\_11286252\_x1.....caCgccccgccaguacugc.....1  
 Gi1\_4327139\_x1.....ucaggccUcgccaguacugcg.....1  
 G1a\_6023048\_x1.....aucggagacgucgugggaaGacgg.....1  
 Gi3\_28954769\_x1.....ccccgccGguacugcgauccgga.....1  
 Gi2\_11352255\_x1.....cNugggaacacggggugccgaacu.....1  
 Gi4\_581586\_x1.....ugggaacacggggCugccgaacu.....1  
 Gi3\_28335166\_x1.....cccgccagAacugcgauccgga.....1  
 Gi3\_28538267\_x1.....cgccaguacugcgauccgCagacguc.....1  
 Gi2\_11125143\_x1.....aguacugcgauccggaGgu.....1  
 Gi5\_9012387\_x1.....uggUaacacggggugccgaac.....1  
 Gi5\_8974192\_x1.....ccgccaguNcugcgauccgga.....1  
 Gi1\_4353728\_x1.....cgCcgugggaacacggggugccgaac.....1  
 G1a\_6315337\_x1.....ggCacacggggugccgaacu.....1  
 Gi1\_4386803\_x1.....caggccccgccaguaAugcg.....1  
 Gi3\_28781570\_x1.....gucgugggaaacaAggggug.....1  
 Gi2\_11230623\_x1.....agacguGgugggaacacggggugccga.....1  
 Gi1\_4273645\_x1.....Gucggagacgucgugggaaac.....1  
 Gi3\_28766273\_x1.....gaucggagaGgucgugggaaacacggggugc.....1  
 Gi2\_11298993\_x1.....cguuccgaauuaCgaagagaagcgccguca.....1  
 Gi2\_11389867\_x1.....gNgaucggagacgucgugggaa.....1  
 Gi2\_11343927\_x1.....caggccccgccaguacugcC.....1  
 Gi3\_28381291\_x1.....gggaacacAggggugccga.....1  
 Gi3\_28376956\_x1.....ggagacgAcgugggaacacgggg.....1  
 Gi3\_28505328\_x1.....cgauccggagacguUgugggaacacg.....1  
 G1a\_6205724\_x1.....gauAggagacgucguggg.....1  
 Gi3\_28737044\_x1.....gGagagaagcgccgucagcc.....1  
 G1a\_6044177\_x1.....aucggagacgucguAgga.....1  
 G1a\_6261034\_x1.....caguacugcgauccgUgacguc.....1  
 Gi2\_11205538\_x1.....cUucgugggaacacggggugccgaacu.....1  
 Gi3\_28924662\_x1.....ucggagacgucgugggaaacacggA.....1  
 Gi2\_11111732\_x1.....aucggagacgucguUggaacacggg.....1  
 Gi3\_28979578\_x1.....gacgucgugggaaacGcgg.....1  
 Gi4\_567410\_x1.....ucgugggaAacggggugccgaacu.....1  
 Gi3\_28287143\_x1.....guacugcgCucggagacgu.....1  
 Gi1\_4203797\_x1.....ccgccaguacugcgauccgagacguU.....1

Gi3\_28718337\_x1.....cagggccccccagucugcgauCGUa..... 1  
Gi1\_4245000\_x1.....ucaNgcggccccccagucugcgauC..... 1  
Gi3\_28836027\_x1.....aguacugcgauCGGgGacguc..... 1  
Gi2\_11339754\_x1.....caAgccccccagucugcgau..... 1  
Gi3\_28650059\_x1.....cgauCGGgagacgucgugCG..... 1  
Gi1\_4177938\_x1.....acguAgugggaaacacggggugcc..... 1  
Gi2\_11058230\_x1.....agagaagUgcccugcagggccccgc..... 1  
Gi1\_4262353\_x1.....gagacgucgugggaaacacggggugccgaGcu..... 1  
Gi3\_28719538\_x1.....agacgucgugggaaacacggggugUcgaac..... 1  
Gi3\_28548211\_x1.....ugggaaacGggggugccgaa..... 1  
Gi2\_11171666\_x1.....gucgugggNacacggggugc..... 1  
Gi3\_28657938\_x1.....agacgucgugggaaacacggggugccgaa..... 1  
G1a\_6129931\_x1.....aagcgccgucagggccccccCguacugc..... 1  
Gi3\_28839003\_x1.....cggagacgucgGgggaaacacg..... 1  
Gi5\_8951262\_x1.....gccccccagucugUgauCGga..... 1  
Gi3\_28443477\_x1.....gauCGgagNcgucgugggaa..... 1  
Gi3\_28663337\_x1.....ccgccaagucugcgGucggagacgucgug..... 1  
Gi2\_11375270\_x1.....acgucgugggaaacacCgggugccgaa..... 1  
Gi2\_11069953\_x1.....ccaguGcugcgauCGgag..... 1  
Gi5\_9125680\_x1.....gucgugggaaacacggggugccgaa..... 1  
Gi3\_28354762\_x1.....gcgccgucNggccccccagucugc..... 1  
Gi2\_11083625\_x1.....ucagggccccUgccaagucugc..... 1  
Gi3\_28364240\_x1.....gcccugcagggAccgcca..... 1  
Gi2\_11162057\_x1.....cggagacgucgugggaaacUcggggugcc..... 1  
Gi2\_11206647\_x1.....gagacgucgugggaaacGcggg..... 1  
Gi2\_11249896\_x1.....gucagggccccccUguacugc..... 1  
Gi2\_11332785\_x1.....ucggagacgucgugggaaacacgAggu..... 1  
G1a\_6151598\_x1.....aguacugcgauCGgagaAguc..... 1  
Gi5\_9135289\_x1.....auUggagacgucgugggaaacac..... 1  
Gi3\_28532652\_x1.....cgauCGgaNacgucgugggaaacacggggugc..... 1  
Gi3\_28801254\_x1.....gcccCguacugcgauCGgagac..... 1  
Gi1\_4245204\_x1.....Ugucgugggaaacacggggugccgaa..... 1  
Gi1\_4215633\_x1.....agggccccNcagucugcgga..... 1  
Gi1\_4253299\_x1.....agacgucgugggaaacacggggugccgaa..... 1  
Gi3\_28589990\_x1.....agaagcgccgucUgccccccca..... 1  
Gi3\_28509712\_x1.....cgugggaaacacgCggugccga..... 1  
Gi2\_11041503\_x1.....aucggagacguGugggaaacacggggg..... 1  
Gi4\_595456\_x1.....gggaaacacggggugccgGacu..... 1  
Gi3\_28376664\_x1.....ggagacgucgugggaaacacAgggugccga..... 1  
Gi5\_8967059\_x1.....cgucgugggaaacacggggugcc..... 1  
Gi5\_8870814\_x1.....gccccAccagucugcgauCGga..... 1  
Gi1\_4328206\_x1.....acgAcgugggaaacacggggugcc..... 1  
Gi1\_4355038\_x1.....gauCGgagacAucgugggaaacacg..... 1  
Gi5\_8885573\_x1.....agacgucgugggaaacacggggugccgaUcu..... 1  
Gi2\_11138332\_x1.....ucgugggaaacacggggugccg..... 1  
G1a\_6051418\_x1.....gauUggagacgucgugggaaacacggggg..... 1  
Gi5\_9039648\_x1.....agacgucgNgggaaacacggggugcc..... 1



Gi2\_11220442\_x1.....cgccgucagggcccCccaguacu.....gucgugggaacCcgggugccgaac..... 1  
 Gi5\_8876728\_x1.....gucgugggaacCcgggugccgaac..... 1  
 Gi3\_28554867\_x1.....aucggagacgucgAgggaacacggggugc..... 1  
 Gi2\_11312328\_x1.....gagGagcgcgcgucagggcccgcagacu..... 1  
 Gi2\_11094644\_x1.....cagNacugcgauccgagacguc..... 1  
 Gi3\_28303382\_x1.....cggagacgucgugggaCcac..... 1  
 Gi5\_8866143\_x1.....gugggaacUcggggugcc..... 1  
 Gi3\_28369050\_x1.....cgccguUaggccccgcagacu..... 1  
 Gi3\_28882310\_x1.....gucgugggaacacggggugccAa..... 1  
 Gi2\_11077758\_x1.....acgucgugggaacacgUggugccgaacu..... 1  
 Gi2\_11370542\_x1.....caggccccgcagacuugcgGucgg..... 1  
 Gi5\_8964123\_x1.....gggaacacggggugccgaaA..... 1  
 Gi3\_28317758\_x1.....ucaggccccgcagacuugcgau..... 0  
 Gi2\_11391827\_x1.....gaagagaGgcccgcgucagggcccg..... 1  
 Gi4\_587397\_x1.....gAaacacggggugccgaac..... 1  
 Gi2\_11258921\_x1.....ucgugggaacacgAgugccg..... 1  
 Gi3\_28506660\_x1.....aucggagaGgucgugggaacac..... 1  
 Gi2\_11192018\_x1.....acugUgaucggagacgucgugggaaca..... 1  
 Gi1\_4381532\_x1.....Acggagacgucgugggaacacggg..... 1  
 Gi3\_28822714\_x1.....acacggggugcUgaacuu..... 1  
 Gi3\_28877057\_x1.....gUcguacagggccccgcagacuugcgau..... 1  
 Gi5\_8877379\_x1.....cgucgugAgaacacggggugccgaac..... 1  
 Gi2\_11068086\_x1.....acgucgugggaacacgggCugccgaac..... 1  
 Gi2\_11049014\_x1.....acgCcgugggaacacggggugccgaac..... 1  
 Gi1\_6053314\_x1.....aucggGgacgucgugggaacacggggu..... 1  
 Gi3\_28333502\_x1.....Aaucggagacgucguggg..... 1  
 Gi2\_11346058\_x1.....aagAgccgucagggccccgcagacuugc..... 1  
 Gi3\_28395764\_x1.....gccagacuugcUaucgga..... 1  
 Gi3\_28675195\_x1.....caggccGcgcagacuugcga..... 1  
 Gi2\_11234361\_x1.....gccccgcagacuucgga..... 1  
 Gi5\_8864114\_x1.....ugcgauccgagaUgucgug..... 1  
 Gi3\_28532613\_x1.....cgucagggccccgcCguacuugc..... 1  
 Gi1\_4250287\_x1.....ggccccgcagacuugcgauugcUaga..... 1  
 Gi2\_11080560\_x1.....ugggaacacgUggugccgaac..... 1  
 Gi1\_4321274\_x1.....cggaUacgucgugggaacacggggugccgaacu..... 1  
 Gi4\_581998\_x1.....acugcgauccgagGcgucgug..... 1  
 Gi3\_28437065\_x1.....Ucgccagacuugcgauccgag..... 1  
 Gi1\_4285933\_x1.....cgucUggccccgcagacuugc..... 1  
 Gi3\_28859550\_x1.....aagcgccgucagggccccgcagacuugU..... 1  
 Gi2\_11382264\_x1.....ugggaacacggggugGcga..... 1  
 Gi5\_8838128\_x1.....gagacgucgCgggaacacg..... 1  
 Gi5\_8904636\_x1.....aagagaagcgcgucagggccccgAca..... 1  
 Gi3\_28423570\_x1.....gaagagaagcgcAucagggccccgc..... 1  
 Gi5\_9051496\_x1.....aggccccgcagCacugcgau..... 1  
 Gi2\_11389567\_x1.....caggccccgcagacuugcgau..... 1  
 Gi2\_11048233\_x1.....gaAgucgugggaacacggggugccgaac..... 1  
 Gi2\_11259171\_x1.....cccgAcagacuugcgauccg..... 1

Gi1\_4377485\_x1.....ggccccgccUguacugcgauccgaga..... 1  
 Gi5\_9137869\_x1.....cgucgCgggaacacggggugccga..... 1  
 Gi3\_28511157\_x1.....cgccgucagggccccccagucgU..... 1  
 Gl1a\_6178501\_x1.....aucgCagacgucgugggaaacacggg..... 1  
 Gi4\_607299\_x1.....gugggaacacggggugUcgaacu..... 1  
 Gi2\_11371436\_x1.....aggNccccccagucugcg..... 1  
 Gi2\_11250067\_x1.....cgugggaUcacggggugccgaac..... 1  
 Gi3\_28979102\_x1.....agacgucgugggCacacggggugccgaacu..... 1  
 Gi3\_28557240\_x1.....aggccccccagucugcgauccgU..... 1  
 Gi3\_28340331\_x1.....agagaagcgAcgucagggccccg..... 1  
 Gi3\_28917695\_x1.....cggagacgucgugggaCcacggggugccgaac..... 1  
 Gi3\_28791274\_x1.....caggccccccagucugcgauccgUgacguc..... 1  
 Gi3\_28738503\_x1.....ucgugggaacacggggugccgaaGu..... 1  
 Gi3\_28445297\_x1.....agCccccccagucugcgga..... 1  
 Gi2\_11089975\_x1.....ccGguacugcgauccgagacg..... 1  
 Gi5\_9082592\_x1.....Uaggccccccagucugcgga..... 1  
 Gl1a\_6245793\_x1.....aggccUcgccagucg..... 1  
 Gi5\_9043191\_x1.....cagucugcgCucggagacguc..... 1  
 Gi5\_8919849\_x1.....agacgucgugggaacacggggugccgaaUu..... 1  
 Gi3\_28643645\_x1.....caggccccccagGacugcgau..... 1  
 Gi1\_4363673\_x1.....aucggagacgucgugggCacacg..... 1  
 Gi2\_11360102\_x1.....aucggagacgucgAgggaaacac..... 1  
 Gi1\_4287872\_x1.....Ccgagacgucgugggaacacggggugcc..... 1  
 Gl1a\_6196858\_x1.....aucggagacgucUugggaacacggggg..... 1  
 Gi2\_11213851\_x1.....ugcgauccgagGcgucgugggaacacg..... 1  
 Gi5\_8994116\_x1.....aucAgagacgucgugggaacacggggugc..... 1  
 Gi3\_28398628\_x1.....ucggagacgCcgugggaaca..... 1  
 Gi1\_4268758\_x1.....gacgucgugggaacGcggggugccgaaacu..... 1  
 Gi5\_8866812\_x1.....agaagcgccgucagggccccccagucCgc..... 1  
 Gi5\_8854180\_x1.....aucggagacgucgugggaacacggggA..... 1  
 Gi1\_4375399\_x1.....cgauccgagacgucgugggaacacgAggu..... 1  
 Gi2\_11258352\_x1.....Uuacugcgauccgagacg..... 1  
 Gi5\_9034983\_x1.....cagucugcgauccgagagUgucgug..... 1  
 Gi5\_9093981\_x1.....cgugggaCcacggggugcc..... 1  
 Gi3\_28411699\_x1.....aggccccgUcagucugcgauccg..... 1  
 Gi3\_28666005\_x1.....auNggagacgucgugggaacac..... 1  
 Gi1\_4234473\_x1.....cgucgucCggaacacggggugccgaacu..... 1  
 Gl1a\_5982544\_x1.....cagucugcgauccgGgac..... 1  
 Gi3\_28686692\_x1.....cAucgugggaacacggggug..... 1  
 Gi2\_11075306\_x1.....gccgucagggccccccCguacugcgaucc..... 1  
 Gi3\_28564195\_x1.....gacgucgugggCacacggggugccgaacu..... 1  
 Gi3\_28587914\_x1.....ggGgacgucgugggaacacggggugccg..... 1  
 Gi3\_28665445\_x1.....gucgugggaacacCggggugccgaac..... 1  
 Gi2\_11315309\_x1.....cgucgugggaacacggggugGcgaacu..... 1  
 Gi2\_11142490\_x1.....cgugggaacCggggugccga..... 1  
 Gi2\_11236935\_x1.....caggccccccagucCgcaucgga..... 1  
 Gi3\_28608358\_x1.....ucgugggaacacggAgugccgaa..... 1

Gi2\_11338661\_x1.....gCcaggccccgccaguacug..... 1  
 Gi3\_28316513\_x1.....cgccgucCggccccgccaguacu..... 1  
 G1a\_6187858\_x1.....aucggagacgucguggggaCcacggggugc..... 1  
 Gi5\_8862829\_x1.....gugUgaacacggggugccgaac..... 1  
 Gi2\_11277441\_x1.....gCccccgccaguacugcga..... 1  
 Gi4\_601028\_x1.....agagaagcgccgucaggcccc..... 0  
 Gi3\_28949602\_x1.....ucggagacgucgugggaaacacgggAugcc..... 1  
 Gi3\_28683014\_x1.....Cccaguacugcgauccggag..... 1  
 Gi2\_11192321\_x1.....caggccccgccaguacugcgauccggGgacg..... 1  
 Gi1\_4281922\_x1.....gugggaaacacggggGgccga..... 1  
 Gi3\_28310791\_x1.....Uggagacgucgugggaaacacggggugccgaa..... 1  
 Gi2\_11227067\_x1.....ucggagacgucgCgggaac..... 1  
 Gi2\_11392116\_x1.....gccaguacugcgauccggagC..... 1  
 Gi5\_9074197\_x1.....gcgcccgucGggccccgccaguacugc..... 1  
 Gi1\_4304487\_x1.....cggaAacgucgugggaaacacggggugccgaacu..... 1  
 Gi1\_4173540\_x1.....acgucgCgggaacacgggg..... 1  
 Gi2\_11222988\_x1.....gAcaggccccgccaguacugcg..... 1  
 Gi3\_28285986\_x1.....ucgugggGacacggggugccga..... 1  
 Gi2\_11027356\_x1.....agacgucguggAaacacggggugcc..... 1  
 Gi3\_28750114\_x1.....Agccccgccaguacugcgauccggagac..... 1  
 Gi1\_4259982\_x1.....agacgucgugggUaacacggggugccga..... 1  
 Gi2\_11233788\_x1.....cggagacgucguggAaacacggggg..... 1  
 Gi2\_11370411\_x1.....gggaacaUggggugccga..... 1  
 G1a\_6256329\_x1.....uacugcgauccggagacGAcgu..... 1  
 Gi3\_28316678\_x1.....aucggagacgucgugggaaacaUgggg..... 1  
 Gi2\_11238775\_x1.....cgUucggagacgucgugggaaacacggggg..... 1  
 Gi3\_28692046\_x1.....gaaAagaagcgccgucaggccc..... 1  
 Gi3\_28445726\_x1.....cgucaggccccgcGaguacugcg..... 1  
 Gi3\_28594175\_x1.....gaucggagacgucgugggCacacggggugc..... 1  
 Gi3\_28889290\_x1.....ggccccgccaguacugcg..... 0  
 Gi5\_8865464\_x1.....Ggucgugggaaacacggggugccgaacu..... 1  
 Gi5\_8993805\_x1.....cAucguggaaacacggggugccgaacu..... 1  
 Gi3\_28461412\_x1.....ggagacgucgugggaaacacggAg..... 1  
 Gi3\_28272022\_x1.....uNguggaaacacggggugccgaacu..... 1  
 Gi2\_10995274\_x1.....aucCgagacgucgugggaaacacggggg..... 1  
 Gi1\_4369423\_x1.....aucggagacgucgugggCacacggggugc..... 1  
 Gi3\_28782433\_x1.....gaucggagacgucgugggaaUacgggg..... 1  
 Gi1\_4264808\_x1.....aucggCgacgucgugggaaacacggg..... 1  
 Gi3\_28806357\_x1.....cAccgucaggccccgccagu..... 1  
 Gi2\_11125983\_x1.....caguacugAgauccggagacguc..... 1  
 Gi3\_28381896\_x1.....aggccccgccaguacugcgauccggagacU..... 1  
 Gi2\_11084563\_x1.....cgauccAgagacgucgugggaaacacggggugcc..... 1  
 Gi3\_28498611\_x1.....gcgaucggNgacgucgugggaaacacggg..... 1  
 Gi2\_11035066\_x1.....ucggagacgucgCgggaacacggggugccga..... 1  
 Gi2\_11340820\_x1.....Cgagacgucgugggaaacacggggg..... 1  
 Gi1\_4159144\_x1.....agagaagcgccgucaggcUccgc..... 1  
 Gi1\_4303579\_x1.....cUggccccgccaguacugcgauc..... 1

Gi2\_11207181\_x1.....gccccgccagGacugcgauC..... 1  
Gi2\_11359988\_x1.....aucggagacgucguggCaacacggggug..... 1  
Gi3\_28394609\_x1.....agacgucguggaacacggUgugcc..... 1  
Gi5\_8921840\_x1.....ccccgccaguacugcgauCggagaAg..... 1  
Gi5\_9127092\_x1.....ucggagacgucguggGacacggggugc..... 1  
Gi2\_11182255\_x1.....gcgaucggagacgucguggaacacgA..... 1  
Gi5\_9070689\_x1.....gaucggagacgucguggGacac..... 1  
G1a\_6289547\_x1.....aucggagaUgucguggaacacggggug..... 1  
Gi5\_9075728\_x1.....gagacgucguggaacac..... 0  
Gi5\_8949251\_x1.....gacgAcguggaacacggggugccg..... 1  
G1a\_6332303\_x1.....cgGucggagacgucguggaacacggggugc..... 1  
Gi3\_28834695\_x1.....guUguggaacacggggugccgaacu..... 1  
Gi2\_11036193\_x1.....gaucggagacgucgugUgaacac..... 1  
Gi2\_11340687\_x1.....cugcgaucggagacgucguggaacacggggugcc..... 0  
Gi3\_28358481\_x1.....cgucgugUgaacacggggugccgaac..... 1  
G1a\_6207957\_x1.....cccgCAaguacugcgauCggagacguc..... 1  
Gi2\_11253814\_x1.....gNgggaacacggggugccgaacu..... 1  
Gi2\_11337994\_x1.....gaucggagacgucguggaacacggggaaAacg..... 1  
Gi2\_11028801\_x1.....acgAcguggaacacggggugccgaa..... 1  
G1a\_5991861\_x1.....gGcugggaacacacggggugcc..... 1  
Gi3\_28691323\_x1.....gaagcgccgCcaggccccgcc..... 1  
Gi2\_11149992\_x1.....cgucguggaacCcggggugccgaa..... 1  
Gi2\_11382921\_x1.....gGgaagcgccgucagggcc..... 1  
Gi2\_11112296\_x1.....cgugggaacaAggggugc..... 1  
Gi5\_8862983\_x1.....caggccccgccaguacugcgAc..... 1  
Gi2\_11299674\_x1.....acgucguAggaacacggggugccga..... 1  
Gi2\_11354419\_x1.....aggccccgccaguaUugcgau..... 1  
Gi2\_11084750\_x1.....aucggagacgucguggaacacggggGgccg..... 1  
Gi2\_11110685\_x1.....gaucggagacgucguggAaac..... 1  
G1a\_6129482\_x1.....guacuAcgaucggagacguc..... 1  
G1a\_6288706\_x1.....ggaaGacggggugccgaac..... 1  
Gi1\_4367622\_x1.....ucguggaacacacggggAgcc..... 1  
Gi2\_11400310\_x1.....cgccaguacugUgaucggagacgu..... 1  
Gi2\_11144036\_x1.....Uggccccgccaguacugcgau..... 1  
Gi3\_28687848\_x1.....caggccccgUcaguacugcgauCgg..... 1  
Gi2\_11053412\_x1.....gucguggaacacacggggug..... 0  
Gi1\_4370659\_x1.....cAccaguacugcgauCggaga..... 1  
Gi3\_28784238\_x1.....agCacugcgauCggagacgucgu..... 1  
Gi3\_28425432\_x1.....Aaagagaagcgccgucagggccccgccagu..... 1  
Gi3\_28757754\_x1.....agacgucguggaacacggA..... 1  
Gi2\_11332601\_x1.....cguggaacacgggAugccga..... 1  
Gi2\_11224623\_x1.....ccgGcaguacugcgauCgg..... 1  
Gi3\_28633418\_x1.....aucggagacgucguggaacacgggC..... 1  
Gi2\_11388664\_x1.....uggaacacggggugccC..... 1  
Gi3\_28329499\_x1.....cccgccagCacugcgauCggagac..... 1  
G1a\_6126572\_x1.....ccUcgccaguacugcgauCg..... 1  
Gi5\_8842241\_x1.....gugggaacaUggggugccgaacu..... 1

Gi3\_28690423\_x1.....gaucggagacgucguAggaaca..... 1  
 Gl1\_6118384\_x1.....agUagcgccgucaggccc..... 1  
 Gi3\_28902753\_x1.....Agagacgucgugggaacacggggugccgaacu..... 1  
 Gi1\_4312056\_x1.....ggccccgccaguacugcgau..... 0  
 Gi3\_28300504\_x1.....Agagacgucgugggaacacggggug..... 1  
 Gi3\_28561280\_x1.....gaagcgccgucagggAccgccaguacugc..... 1  
 Gi3\_28617291\_x1.....ggaacacggggugccAaa..... 1  
 Gl1\_6265280\_x1.....cccgccaguacugcgauUggagacguc..... 1  
 Gi3\_28309117\_x1.....aagagaagcgAcgucaggcccc..... 1  
 Gl1\_6141746\_x1.....aaUagaagcgccgucaggccccg..... 1  
 Gi3\_28585106\_x1.....cgauccgagacgucgugggaa..... 0  
 Gl1\_6244380\_x1.....Gucggagacgucgugggaacac..... 1  
 Gi2\_11188468\_x1.....Caucggagacgucguggga..... 1  
 Gl1\_5990120\_x1.....cgccaguGcugcgauccgagacguc..... 1  
 Gi1\_4210768\_x1.....agacgucgugggaacacAgggugccgaacu..... 1  
 Gi3\_28415105\_x1.....aagagaGgcgcccgucagggccccgccagua..... 1  
 Gi3\_28415984\_x1.....ccgucagggccccgccaguacuAc..... 1  
 Gi3\_28782751\_x1.....gccaguacugcgGucggagacgucg..... 1  
 Gi3\_28269882\_x1.....aggccccgccaguacugcgUu..... 1  
 Gi3\_28641246\_x1.....gugggaacaUggggugccgaacuu..... 1  
 Gi2\_11397773\_x1.....gucagggccccgccUguacugcgau..... 1  
 Gi5\_8893126\_x1.....gagacgucgugggaGcacg..... 1  
 Gl1\_6061706\_x1.....aAuaggaagagaagcgccguc..... 1  
 Gi3\_28599305\_x1.....gagaagcgccgucagggUcc..... 1  
 Gi3\_28823251\_x1.....cggagacgucgugggaacacAggg..... 1  
 Gi3\_28547721\_x1.....gaucggagacgucgugggaacaUggggg..... 1  
 Gi1\_4187600\_x1.....caggccccgcUaguacugcgauccgaga..... 1  
 Gi2\_11252084\_x1.....ccccgccAuaucugcgauccgagacguc..... 1  
 Gi2\_11379623\_x1.....gaagGgccgucagggccccgc..... 1  
 Gi2\_11220000\_x1.....Uucggagacgucgugggaac..... 1  
 Gi3\_28588148\_x1.....gucgugggaacacggCgugccgaacu..... 1  
 Gi5\_9069445\_x1.....acAgcgauccgagacgucgug..... 1  
 Gi1\_4286045\_x1.....gacgucgugggaacacggggUaccgaacu..... 1  
 Gi3\_28292153\_x1.....agacgucgugggaacacgUg..... 1  
 Gi3\_28278337\_x1.....gUagagaagcgccgucagggccccgccagua..... 1  
 Gi1\_4374556\_x1.....ucggagGcugcugugggaacacggggg..... 1  
 Gi1\_4273663\_x1.....caggccccgccaguacuAcg..... 1  
 Gi3\_28370221\_x1.....gaagCgaagcgccgucagggccccgccag..... 1  
 Gi3\_28887630\_x1.....cgUagacgucgugggaacacggg..... 1  
 Gi3\_28637369\_x1.....cucguuccgaauaCgaagagaagcgccg..... 1  
 Gl1\_6188484\_x1.....cgauccgGgacgucgugg..... 1  
 Gi2\_11067447\_x1.....Ucugcugugggaacacggggugccgaac..... 1  
 Gi3\_28985887\_x1.....ggagacgucgugggaacacggUgugcc..... 1  
 Gi5\_9092483\_x1.....gaucggagacgucgugggGacacgg..... 1  
 Gi3\_28654476\_x1.....aucggagacgucgugggaacacggggugccCacu..... 1  
 Gi3\_28357262\_x1.....aagagaagcgccgucagggUcgcc..... 1  
 Gi2\_11272031\_x1.....gaucggagacgucgCgggaacacggggugcc..... 1

Gi1a\_6235373\_x1.....aucggagacgucgugggaaacacgAgggugcc..... 1  
 Gi2\_11089553\_x1.....gccgucaggccccgccaCuacugc..... 1  
 Gi3\_28465573\_x1.....agacgucgugggaaAacggg..... 1  
 Gi2\_11181002\_x1.....gaucggaAacgucgugggaaacacggggu..... 1  
 Gi2\_11142159\_x1.....ucggagacgucgugggaaacUcg..... 1  
 Gi2\_11050627\_x1.....gagacAucgugggaaacacggg..... 1  
 Gi3\_28578397\_x1.....gccgucaggccccgcAaguacugcg..... 1  
 Gi4\_602119\_x1.....ggccccgccaguacugcgau..... 0  
 Gi2\_11149848\_x1.....guacugcgauccggagacgucgCggg..... 1  
 Gi3\_28341206\_x1.....cgauccggagacgucguAg..... 1  
 Gi2\_11250710\_x1.....gaucggagacgGcgugggaaaca..... 1  
 Gi3\_28341450\_x1.....ucggagacguAgugggaaaca..... 1  
 Gi5\_8971729\_x1.....gNaacacggggugccgaacu..... 1  
 Gi5\_8854846\_x1.....guUggaacacggggugccgaacu..... 1  
 Gi2\_11298927\_x1.....gaucggagacgucgCgggaacacggggugc..... 1  
 Gi3\_28684375\_x1.....gccccgccaguacugAgauc..... 1  
 Gi3\_28935952\_x1.....gccccgccaguacugcgaAc..... 1  
 Gi2\_11334057\_x1.....acgucgugggaaacacgggguAc..... 1  
 Gi3\_28949246\_x1.....cgccgucaggccccgccagC..... 1  
 Gi2\_11029857\_x1.....agagaagcgccgucagUc..... 1  
 Gi2\_11203537\_x1.....aucggagacgucgugggaaGacggg..... 1  
 Gi3\_28790571\_x1.....aguacugcgauccggGgacgu..... 1  
 Gi3\_28752703\_x1.....guNggaacacggggugccg..... 1  
 Gi3\_28296976\_x1.....cggagacgucgugggUacacg..... 1  
 Gi3\_28874953\_x1.....ucaggccccgccaguacuA..... 1  
 Gi3\_28488476\_x1.....gggaacacUgggugccga..... 1  
 Gi2\_11217098\_x1.....acgucgugggaaacacggggugccgaaGu..... 1  
 Gi2\_11326366\_x1.....uCggaacacggggugccgaacu..... 1  
 Gi3\_28608554\_x1.....cgauccggagacgucAugggaaacacggggu..... 1  
 Gi2\_11110293\_x1.....cgucgugggaaacacgUggugccgaacu..... 1  
 Gi2\_11296947\_x1.....gagacgucgugggaaacacggggugccAa..... 1  
 Gi3\_28542167\_x1.....gagaagcgccgucagggccccgUcag..... 1  
 Gi5\_8997735\_x1.....Accaguacugcgauccggagacguc..... 1  
 Gi3\_28604280\_x1.....gaGgagaagcgccgucagggccccgc..... 1  
 Gi3\_28738292\_x1.....gccccgccaguacugcgauccggagGcguc..... 1  
 Gi2\_11356449\_x1.....Cggccccgccaguacugcgauccgga..... 1  
 Gi5\_9081657\_x1.....aucggagacgucgugggaaacGcgg..... 1  
 Gi3\_28897329\_x1.....gAcaggccccgccaguacugcg..... 1  
 Gi2\_11095796\_x1.....ccccgccaguacCcgauccggaga..... 1  
 Gi3\_28385073\_x1.....aggcccUgccaguacugcga..... 1  
 Gi1\_4324206\_x1.....aggAccgcccaguacugcgau..... 1  
 Gi2\_11097328\_x1.....cgUcaguacugcgauccggagacguc..... 1  
 Gi2\_11137124\_x1.....ucaggcUccgccaguacugcgau..... 1  
 Gi1a\_6269263\_x1.....gagaagcgNcgucagggccccgccaguacug..... 1  
 Gi3\_28698688\_x1.....uUgugggaaacacggggugccga..... 1  
 Gi3\_28521774\_x1.....caguacugcgauccggagGcguc..... 1  
 Gi3\_28557209\_x1.....aucggagacgucgugggaaacacggUgu..... 1

Gi3\_28454640\_x1..... agaaAcgccgucagggccccgcca..... 1  
 Gi1\_4316092\_x1..... gacgucgugggaaacacAgggugccg..... 1  
 Gi3\_28380506\_x1..... caguacugcgUucggagacguc..... 1  
 Gi3\_28285969\_x1..... gccccgccaguacCgcgau..... 1  
 Gi5\_9100732\_x1..... agacgucgugggaCcaccggggugccgaac..... 1  
 Gl1a\_6301986\_x1..... gggaacaGggggugccgaacu..... 1  
 Gi3\_28748348\_x1..... ggagacgucgugggaCcacg..... 1  
 Gi2\_11344688\_x1..... agaagcgUcgucagggccc..... 1  
 Gi2\_11398153\_x1..... aucggagacCucgugggaacacggggugcc..... 1  
 Gi3\_28601367\_x1..... gucagggccccgccaguacugU..... 1  
 Gi5\_8991968\_x1..... ugcgUucggagacgucguggga..... 1  
 Gi2\_11050761\_x1..... agaNgccgucagggccccgccaguac..... 1  
 Gi1\_4333061\_x1..... aacacgggUugccgaacu..... 1  
 Gi3\_28847616\_x1..... ccaguacugGgaucggagacgucgug..... 1  
 Gi3\_28703434\_x1..... cgccaguacugcgaucG..... 1  
 Gi3\_28844651\_x1..... Uagagaagcgccgucagggccccgccagu..... 1  
 Gl1a\_6189629\_x1..... gccGguacugcgaucggagacgucgug..... 1  
 Gi1\_4341799\_x1..... gaucggGgacgucgugggaaacacggggg..... 1  
 Gi5\_8869645\_x1..... agacguUgugggaaacacggggugccgaac..... 1  
 Gi3\_28654086\_x1..... cgCcgugggaaacacgggggug..... 1  
 Gi2\_11354722\_x1..... gNgaacacggggugccgaacu..... 1  
 Gl1a\_6102388\_x1..... gugggUacacggggugccg..... 1  
 Gi3\_28961305\_x1..... acgucgugggaaacacggggugUcgaa..... 1  
 Gi1\_4345552\_x1..... gacgucgugGaaacacggggugccgaacu..... 1  
 Gi3\_28402892\_x1..... ccgccaguacugcgaucggCgac..... 1  
 Gi3\_28851059\_x1..... ggagacgucgugggaaacacgAggugccgaacu..... 1  
 Gi5\_8833801\_x1..... cguggAaacacggggugccg..... 1  
 Gi2\_11216035\_x1..... cgGggaaacacggggugccgaacuu..... 1  
 Gi2\_11118922\_x1..... Accaguacugcgaucggagacgu..... 1  
 Gi1\_4291944\_x1..... aucggagacgucgugggaaGacggg..... 1  
 Gi5\_9124812\_x1..... aucggagaNgucgugggaaacacggggugccgaacu..... 1  
 Gi1\_4261397\_x1..... ugcgaucggagacgucguAggaaca..... 1  
 Gi3\_28421221\_x1..... gaucggagacgucgugggaaGacggggugc..... 1  
 Gl1a\_6139174\_x1..... cguggaaacUcggggugcc..... 1  
 Gi2\_11069611\_x1..... gucgugggaaacacggggguAccgaa..... 1  
 Gi3\_28360987\_x1..... gaacacggggugccgaGcuu..... 1  
 Gi2\_11392832\_x1..... gacgucgugggaaacacggggugAcg..... 1  
 Gi3\_28353697\_x1..... aggccAcgccaguacugcgaucggagacg..... 1  
 Gi3\_28385669\_x1..... ucggagacgucgugCgaacacgg..... 1  
 Gi1\_4257018\_x1..... caggcUccgccaguacugcgau..... 1  
 Gi3\_28314969\_x1..... gaucggagaGgucgugggaaacacgg..... 1  
 Gi1\_4219924\_x1..... agccccgccaguacugcgGucggagacg..... 1  
 Gi3\_28700243\_x1..... aAuacugcgaucggagacgucg..... 1  
 Gi5\_9133458\_x1..... gccaguacNgcgaucggagacguc..... 1  
 Gi2\_11009185\_x1..... gucgGggaaacacggggugccga..... 1  
 Gi3\_28617761\_x1..... agaagcAccgucagggccccgccaguacugc..... 1  
 Gi2\_11024563\_x1..... agccccgccaguGcugcgaucgg..... 1

Gi4\_597071\_x1 ..... agacgucgugggaaacacggggCgcc..... 1  
Gi3\_28795111\_x1..... cUucaggccccgccaguacugcgauccgga..... 1  
Gi2\_11371299\_x1..... gucaggccccgccaguUcugcg..... 1  
Gi2\_11330130\_x1..... Uaguacugcgauccggagacguc..... 1  
Gi2\_11290287\_x1..... ccccgUaguacugcgaucc..... 1  
Gi2\_11198690\_x1..... cgucUugggaacacggggugccgaacuu..... 1  
Gi2\_11138822\_x1..... gaagcgccgucaAgccccgc..... 1  
Gi1\_4296635\_x1..... ggagacgucgugggGacacggggugccgaacu..... 1  
G1a\_6098345\_x1..... aucgAagacgucgugggaaacacggggg..... 1  
Gi2\_11082683\_x1..... cggagacgucgugggUacacggggugcc..... 1  
G1a\_6095384\_x1..... gaucggagaGgucgugggaaacacggg..... 1  
Gi1\_4358353\_x1..... agacgucgugggaaacacggggCgccga..... 1  
Gi1\_4324654\_x1..... gucgugCgaacacggggugccgaac..... 1  
Gi3\_28634120\_x1..... gaucggagacgucgugggaaacGcgg..... 1  
Gi5\_8951371\_x1..... gucaggUcccgccaguacugcg..... 1  
Gi2\_11126056\_x1..... ggUgacgucgugggaaacacggggugccg..... 1  
Gi3\_28280598\_x1..... cccgccaguacugcgGucgggagacg..... 1  
Gi5\_9010727\_x1..... cccgAcaguacugcgauccggagacgu..... 1  
Gi3\_28294053\_x1..... cguggUaacacggggugcc..... 1  
Gi3\_28717169\_x1..... gccaguacugcgaAcgggagacguc..... 1  
Gi2\_11252444\_x1..... ccccgccaguacAgcgauc..... 1  
Gi1\_4195591\_x1..... aUgccccgccaguacugcgauccggagacgu..... 1  
Gi5\_8843374\_x1..... agacgucguCggaacacggggugccgaacu..... 1  
G1a\_6223193\_x1..... agccccgccAuaucugcg..... 1  
Gi2\_11269520\_x1..... gagaagcgccgucaggccccUgccaguac..... 1  
Gi5\_9063362\_x1..... cguggaaacacgUggugccg..... 1  
Gi1\_4221133\_x1..... acgucgAgggaaacacggggugccgaacu..... 1  
G1a\_6051917\_x1..... gccgucGggccccgccagua..... 1  
Gi2\_11346287\_x1..... cGccgccaguacugcgauccggagac..... 1  
Gi2\_11316836\_x1..... acucguuccgaauaUgaag..... 1  
Gi2\_11192869\_x1..... cgucgugggCacacggggugccgaacu..... 1  
Gi5\_9061018\_x1..... gagacgucgugggaaUacggggugcc..... 1  
Gi4\_604326\_x1..... cccgccagCacugcgauccggagacguc..... 1  
Gi5\_9044750\_x1..... ccgccaguNcugcgauccggagacguc..... 1  
Gi1\_4201816\_x1..... ucgGggaaacacggggugccgaac..... 1  
Gi3\_28898779\_x1..... aggcUccgccaguacugcgauccgg..... 1  
Gi3\_28333960\_x1..... cccgccaNuacugcgauccggagacg..... 1  
Gi2\_11154026\_x1..... aaAcgccgucaggccccgccaguac..... 1  
Gi1\_4290890\_x1..... acgucgGggaaacacggggugccgaacu..... 1  
Gi3\_28767341\_x1..... ucggagacgucgugAgaacac..... 1  
Gi2\_11365158\_x1..... gucgugggaaacacggggugccgaacuu..... 0  
Gi5\_9092169\_x1..... gcUccgccaguacugcgaucc..... 1  
Gi2\_11165110\_x1..... cguggaaacacggggugcA..... 1  
Gi5\_8871658\_x1..... gucgugggaaacacggggGgccgaa..... 1  
Gi3\_28626749\_x1..... agaagcgccgucagAccccgccaguacug..... 1  
Gi2\_11266072\_x1..... ucguggaaacacAgggugccg..... 1  
Gi2\_11012139\_x1..... acgucgugggGacacggg..... 1



Gi1\_4357205\_x1.....agacUucgugggaaacacggggugccgaac..... 1  
 Gi3\_28305892\_x1.....gucgugggaaacacggggugccgaacAu..... 1  
 Gi1\_4169128\_x1.....Gcgucgugggaaacacggggugccgaa..... 1  
 G1a\_6309085\_x1.....gaucggagacgucgGgggaacacggg..... 1  
 Gi2\_11041161\_x1.....cgaucggagacgucgugA..... 1  
 Gi3\_28274725\_x1.....aggccccccagCacugcgaucgga..... 1  
 Gi3\_28517073\_x1.....caguacugcAaucggagacgu..... 1  
 Gi3\_28835081\_x1.....ucgugggaaacacggggCgccgaa..... 1  
 G1a\_6216077\_x1.....gagaagcgcUgucaggccccgcca..... 1  
 Gi3\_28384105\_x1.....ggagacgucgugggaaacacggggU..... 1  
 G1a\_6269004\_x1.....gaaCcggggugccgaacu..... 1  
 Gi2\_11146168\_x1.....agacguUgugggaaacacggggugc..... 1  
 Gi3\_28365960\_x1.....gAcgucaggccccccaguac..... 1  
 Gi3\_28773855\_x1.....gucgugggCacacggggugccgaacuu..... 1  
 Gi2\_11363551\_x1.....gucUugggaacacggggugcc..... 1  
 Gi2\_11254428\_x1.....gucgugggaaacCcggggugccg..... 1  
 Gi5\_9021273\_x1.....gugggaUcacggggugccgaac..... 1  
 Gi5\_9049361\_x1.....gucgugggaaacaAggggugccgaac..... 1  
 Gi1\_4252816\_x1.....ccgucaggNccccccaguacugcgaucgga..... 1  
 Gi3\_28516597\_x1.....cgccaguacugcAaucggagac..... 1  
 Gi3\_28709745\_x1.....ggagacgucguggAaacacg..... 1  
 Gi3\_28619085\_x1.....aggcGccgccaguacugcgaucggagacg..... 1  
 Gi3\_28976063\_x1.....aCacgucgugggaaacacgggg..... 1  
 Gi5\_9122136\_x1.....ggagacgucgugggUacacggggugccgaac..... 1  
 Gi2\_11318283\_x1.....cAgagacgucgugggaaaca..... 1  
 Gi3\_28430848\_x1.....gccgucaAgccccccaguacu..... 1  
 Gi2\_11155730\_x1.....cccgccaguGcugcgaucggagac..... 1  
 G1a\_6357245\_x1.....guacugcgaucggagaAguc..... 1  
 Gi1\_4238072\_x1.....ucguCggaacacggggugcc..... 1  
 Gi3\_28634512\_x1.....caggccccgccaUuacugcgaucggagacgu..... 1  
 Gi2\_11121042\_x1.....acgucgugggaaacCcggg..... 1  
 G1a\_6048134\_x1.....caggGccccccaguacugcgau..... 1  
 Gi5\_9112644\_x1.....cccgccaguacugcgaucggagCcgu..... 1  
 Gi3\_28468745\_x1.....ucggagacNucgugggaaacacggggugc..... 1  
 G1a\_6193564\_x1.....gUagcgccgucaggccccgcca..... 1  
 Gi5\_8939458\_x1.....aggccccgcUaguacugcga..... 1  
 Gi1\_4212845\_x1.....gacgGcgugggaaacacggggu..... 1  
 Gi5\_8940460\_x1.....aucggagacgucgugggGca..... 1  
 Gi5\_8830153\_x1.....gugggaacacgggAugccg..... 1  
 Gi1\_4370945\_x1.....gaucggagacgucgugggaaacaAgg..... 1  
 Gi5\_9011724\_x1.....caggccccccaguacugcgGu..... 1  
 Gi3\_28321587\_x1.....acugcgaucggagacgAcg..... 1  
 Gi2\_11097607\_x1.....uacugcgaucggagacgCcgug..... 1  
 Gi2\_11143581\_x1.....aguacugUgaucggagacguc..... 1  
 Gi3\_28913079\_x1.....agagaagcgcAgucaggcc..... 1  
 Gi1\_4236731\_x1.....ugggaacacggggUaccga..... 1  
 Gi2\_11089963\_x1.....aagagaagNgccgucaggcc..... 1

Gi1\_4248276\_x1.....ugggaacacggggugAcga..... 1  
 Gi2\_11260865\_x1.....aguacCgcgaucgagacgu..... 1  
 Gi1\_4371425\_x1.....agacgucgNgggaacacggggugccga..... 1  
 Gi2\_11143558\_x1.....gagaagcgcgcucagggcccgcA..... 1  
 Gi1\_4265337\_x1.....cgucgugggaacacggggugcA..... 1  
 G1a\_6183787\_x1.....aagcgcgcgucCggccccccagucguc..... 1  
 Gi3\_28760111\_x1.....ucggagacgucguggAaacac..... 1  
 G1a\_6273551\_x1.....gaucggagacgucgugggaacacAgg..... 1  
 Gi3\_28749840\_x1.....agGcgcgucgugggaacacgggg..... 1  
 Gi3\_28451338\_x1.....ucgugggaacaUggggugccg..... 1  
 G1a\_6122923\_x1.....cgucgugggaacacAgggugccgaacu..... 1  
 Gi3\_28834636\_x1.....gUgacgucgugggaacacggggugc..... 1  
 G1a\_6029292\_x1.....aCcgagacgucgugggaacacggggugc..... 1  
 Gi3\_28678067\_x1.....Ngaucggagacgucgugggaacacggggugc..... 1  
 G1a\_6250125\_x1.....acCgcgaucggagacgucgug..... 1  
 Gi5\_9089982\_x1.....ucgugggaacaccgAgugccgaac..... 1  
 Gi3\_28494275\_x1.....gacgucgugggCacacggggugcc..... 1  
 Gi5\_8898557\_x1.....agacgucAuggggaacacggggugccgaacu..... 1  
 Gi5\_8895834\_x1.....caggccccccagucacuUc..... 1  
 Gi1\_4293370\_x1.....aucggagacgucgugggaUac..... 1  
 Gi5\_9089283\_x1.....cgugggaacacggggugccgUacuu..... 1  
 Gi3\_28925187\_x1.....gagacgucNugggaacacggggugccga..... 1  
 Gi5\_9071272\_x1.....Gggagacgucgugggaacacggggugcc..... 1  
 Gi5\_8989660\_x1.....gagacgAcgugggaacacggggugccgaacu..... 1  
 G1a\_5988712\_x1.....cccgUaguacugcgauccgagacgu..... 1  
 Gi2\_11194075\_x1.....gccccgcagCacugcgaucgg..... 1  
 Gi1\_4275440\_x1.....acgucgugggaacacggggugccgU..... 1  
 Gi3\_28314004\_x1.....aggccccgNcaguacugcgauccgagacgu..... 1  
 Gi3\_28865295\_x1.....cgugggaacaGggggugc..... 1  
 Gi3\_28714576\_x1.....cgucagggccccccagucagU..... 1  
 Gi3\_28755674\_x1.....gacgucgugggaacacgAggugccg..... 1  
 Gi5\_9065640\_x1.....uggCaacacggggugccgaac..... 1  
 G1a\_6104492\_x1.....cgugggaGcaccggggugc..... 1  
 Gi2\_11174654\_x1.....cccgCaguacugcgaucgg..... 1  
 Gi1\_4204723\_x1.....ggaacacgggAugccgaac..... 1  
 Gi5\_9130544\_x1.....acgucgugggaacacggggugcAg..... 1  
 Gi5\_9116786\_x1.....Ucgccaguacugcgauccgagacguc..... 1  
 Gi3\_28300868\_x1.....cccgccaguaUugcgauccgagacg..... 1  
 Gi3\_28319358\_x1.....Uccgccaguacugcgauccgagacg..... 1  
 Gi3\_28813327\_x1.....aagagaagcgcgcucagggcccgcGg..... 1  
 Gi1\_4249935\_x1.....gacgucgugggaacaUggggugcc..... 1  
 Gi2\_11227110\_x1.....gaucggagGcgcgucgugggaaca..... 1  
 G1a\_6172033\_x1.....acugcgaucggCgacgucgug..... 1  
 Gi2\_11322892\_x1.....ggccccccagucagcgC..... 1  
 Gi3\_28973539\_x1.....gagacgucgugggaUacg..... 1  
 Gi3\_28940733\_x1.....gaucAgagacgucgugggaacacgggg..... 1  
 Gi5\_9029165\_x1.....ugcgauAggagacgucgug..... 1

Gi3\_28452542\_x1.....caggccccgccaAuacugcgauccg..... 1  
 Gi1\_4319560\_x1.....ugcgauccggagacguAguggga..... 1  
 Gi3\_28522995\_x1.....agcgccgucagCccccgcaagu..... 1  
 Gi5\_8865896\_x1.....cgccagucugcgauccggagacgCcgugg..... 1  
 Gi1\_4287372\_x1.....gucgCgggaacacggggugcc..... 1  
 Gi3\_28657123\_x1.....aucggagaAgucgugggaacac..... 1  
 Gi3\_28422773\_x1.....cccgUcaguacugcgauccggagacg..... 1  
 Gi3\_28563814\_x1.....cgAcaguacugcgauccggagacg..... 1  
 Gi3\_28720350\_x1.....aagagaagcgccgucagggccccgcauacugcg..... 0  
 Gi2\_11099029\_x1.....aagagaagcgccgucagUgcccc..... 1  
 Gi3\_28704856\_x1.....cccgccagucugcAaucggag..... 1  
 Gi2\_11371713\_x1.....agacgucgugggaacacggg..... 0  
 Gi3\_28736380\_x1.....agAacugcgauccggagacg..... 1  
 Gi1\_4370836\_x1.....Aaggccccgcauacugc..... 1  
 Gi3\_28742563\_x1.....cgauccggagacgCcgugggaacacg..... 1  
 Gi1\_4306928\_x1.....uacugcgauccggagacguU..... 1  
 Gi3\_28918504\_x1.....gccgucaggAcccgccagucugcg..... 1  
 Gi3\_28742213\_x1.....gggaacacggUgugccga..... 1  
 Gi2\_11102401\_x1.....caggccccgcauacugU..... 1  
 Gi2\_11390177\_x1.....cgccgucagggccccgcccCguacugcgaucc..... 1  
 Gi2\_11072392\_x1.....gagaagAgccgucagggccccg..... 1  
 Gi5\_8982437\_x1.....caggccccgcauacugcgauG..... 1  
 Gi2\_11313238\_x1.....gacgucgugggaacacggAgu..... 1  
 Gi3\_28358768\_x1.....cccCccagucugcgauccggagacgu..... 1  
 Gi3\_28424686\_x1.....uUaggccccgcauacug..... 1  
 Gl1a\_6303468\_x1.....agagaagcgccgucaggcUcc..... 1  
 Gi2\_11226778\_x1.....ucggagacNucgugggaacacggggugccgaacu..... 1  
 Gi3\_28897551\_x1.....agagaagcgccgucagggccccAc..... 1  
 Gi5\_8872013\_x1.ccuuaacucguuccgaauaCga..... 1  
 Gi2\_11120911\_x1.....aucggagacgucgCgggaacacggggugccgaacu..... 1  
 Gl1a\_6016942\_x1.....caggccccgcauacugG..... 1  
 Gi5\_8918103\_x1.....cgucgugAgaacacggggugcc..... 1  
 Gi3\_28308295\_x1.....cgauccggagacgucgugggaAacg..... 1  
 Gi3\_28416993\_x1.....ccccgcauUcugcgaucc..... 1  
 Gi2\_11234105\_x1.....agacgucguggUaacacggggugccgaacu..... 1  
 Gi3\_28831660\_x1.....cccgccagucugAgauccggag..... 1  
 Gi5\_9063717\_x1.....ggAaacacggggugccgaa..... 1  
 Gi2\_11051088\_x1.....gaagagaagcgccgucGggccccgccc..... 1  
 Gi1\_4273006\_x1.....ggaacacggggugccAaa..... 1  
 Gl1a\_5995796\_x1.....Cccagucugcgauccgga..... 1  
 Gi2\_11374229\_x1.....gauNggagacgucgugggaacacggggu..... 1  
 Gi3\_28896554\_x1.....Ggagaagcgccgucagggcccc..... 1  
 Gi2\_11390059\_x1.....ggccccgcnaguacugcgauccggagacg..... 1  
 Gl1a\_6219817\_x1.....gugggaacacggggugccG..... 1  
 Gi5\_9042366\_x1.....cgugggaacacggggugccUaac..... 1  
 Gi2\_11176188\_x1.....ggccccgAcaguacugcgaucc..... 1  
 Gi2\_11344375\_x1.....ccgucagggccccgcauacuAcgaucc..... 1

Gi2\_11233999\_x1.....cgucaggccccgccCguacugc..... 1  
 Gi3\_28519238\_x1.....aCcgagacgucgugggaaacacggggugccgaacu..... 1  
 Gi2\_11143733\_x1.....Ccgaucggagacgucgugggaaacacgg..... 1  
 Gl1a\_6078088\_x1.....uacuUcgauccgagacgucg..... 1  
 Gi3\_28555592\_x1.....cccgccaguacuUcgauccgagac..... 1  
 Gi2\_11225464\_x1.....gauUggagacgucgugggaaacacggggug..... 1  
 Gi3\_28418484\_x1.....agacguUgugggaaacacggggugccgaa..... 1  
 Gi2\_11188691\_x1.....cgccaguacCgcaucggagacgucg..... 1  
 Gi1\_4344880\_x1.....acgucgugggaaAacggggugcc..... 1  
 Gi3\_28629756\_x1.....ggagGcgucgugggaaacacggggugccgaacu..... 1  
 Gi2\_11354918\_x1.....gucUugggaaacacggggugc..... 1  
 Gi5\_8953223\_x1.....acugcgauccgagUcguc..... 1  
 Gl1a\_6113520\_x1.....gaagcgccgucaggccccAgcca..... 1  
 Gi1\_4243984\_x1.....ucgugggaaacacggCgucg..... 1  
 Gi5\_9070564\_x1.....cCugggaaacacggggugcc..... 1  
 Gi3\_28655724\_x1.....gaagcgccgucaggccccgcU..... 1  
 Gi1\_4390519\_x1.....ucgugggGacacggggugc..... 1  
 Gl1a\_6123974\_x1.....cUcgccaguacugcgauccgga..... 1  
 Gi5\_9093337\_x1.....Ucgccaguacugcgauccgaga..... 1  
 Gi5\_8930557\_x1.....Ugacgucgugggaaacacggggugccga..... 1  
 Gi3\_28583869\_x1.....aagagaagcgccgucaggcAccgccaguacu..... 1  
 Gi3\_28689443\_x1.....ucguUggaacacggggugccga..... 1  
 Gi1\_4219345\_x1.....ggUgacgucgugggaaacacggggugccgaacu..... 1  
 Gi3\_28472402\_x1.....acgucgCgggaacacggg..... 1  
 Gi2\_11043145\_x1.....gugggaCcacggggugccg..... 1  
 Gi2\_11170760\_x1.....cgucaggccccgccaguacugU..... 1  
 Gl1a\_6026972\_x1.....gugggaacacggggugccgaaGu..... 1  
 Gi1\_4317412\_x1.....cgucaggccccgccaguacugcgauccg..... 0  
 Gi2\_11154585\_x1.....gaGgcgccgucaggccccgccaguacugc..... 1  
 Gi3\_28386502\_x1.....cgccgucaggccccgcUaguacugc..... 1  
 Gi3\_28749277\_x1.....acgucgugggaaacacggAgugccgaac..... 1  
 Gi2\_11145614\_x1.....aucNgagacgucgugggaaacacggggg..... 1  
 Gi3\_28478443\_x1.....gcccgucaAgccccgccaguacugcg..... 1  
 Gi2\_11161591\_x1.....Gggagacgucgugggaaacacggggugccgaacu..... 1  
 Gi3\_28614971\_x1.....gaucggagacguGgugggaacacgg..... 1  
 Gi3\_28727110\_x1.....ccgccaguNcugcgauccgagacgu..... 1  
 Gi3\_28660929\_x1.....cccgccaguacugcgauAggagacgu..... 1  
 Gi2\_11154281\_x1.....aguacugcgauccgagGcgucug..... 1  
 Gi2\_11082676\_x1.....cccgccaguacugcgauG..... 1  
 Gi1\_4280383\_x1.....gccgucaggccccgccagua..... 0  
 Gi2\_11276104\_x1.....acuAcgauccgagacgucg..... 1  
 Gl1a\_6339461\_x1.....cgauccggaNacgucgugggaaacacg..... 1  
 Gi1\_4316056\_x1.....acgucgugggaaacacggggCgccgaa..... 1  
 Gi5\_8852869\_x1.....gaGgcgccgucaggccccgcc..... 1  
 Gi2\_11115589\_x1.....aggccccccaUuacugcgauccgga..... 1  
 Gi3\_28303095\_x1.....aCacgucgugggaaacacggggugcc..... 1  
 Gl1a\_6113190\_x1.....Gguacugcgauccgagacgucgug..... 1

Gi2\_11080214\_x1.....caggccccgccaguacuAcgauccgga..... 1  
Gi3\_28940418\_x1.....cggagacgucguAggaacac..... 1  
Gi5\_8887915\_x1.....aguaUugcgauccggagacguc..... 1  
Gi2\_11316054\_x1.....ucggagacgucgugggaacacgCggugc..... 1  
Gi3\_28335613\_x1.....agaagcgccgucagggcAcgcca..... 1  
Gi1\_4336910\_x1.....gagacgucgugggaacacggggugccgaCcu..... 1  
Gi3\_28651688\_x1.....cccAccaguacugcgauccggagacguc..... 1  
Gi4\_590009\_x1.....cgucagggccccgccCguacugc..... 1  
Gi5\_9092791\_x1.....caggccccgccaguacugcUauc..... 1  
Gi4\_594092\_x1.....cgucgugggaacacggggugccgaCcu..... 1  
G1a\_6111553\_x1.....aucggagacgucgAgggaacac..... 1  
G1a\_6230459\_x1.....ucgAagacgucgugggaacacggggugc..... 1  
G1a\_6147355\_x1.....caggccccgccaguacugcgCu..... 1  
Gi2\_11360799\_x1.....cgucagggccccgcAaguacugcg..... 1  
Gi3\_28873739\_x1.....agaagcgccAucagggccccccagu..... 1  
Gi5\_9056288\_x1.....aucggUgacgucgugggaacacggggugc..... 1  
Gi1\_4226635\_x1.....gugggaacacggggGgccc..... 1  
Gi4\_584151\_x1.....ucgugggaacacggggugcAgaacu..... 1  
Gi2\_11250310\_x1.....ugggaacacggggguAccga..... 1  
Gi1\_4241418\_x1.....aucggagacgucgugggaacacggAgu..... 1  
G1a\_6167409\_x1.....cgucgugggaacacggggugccgaaA..... 1  
Gi2\_11206746\_x1.....aguacugcgauccggagacA..... 1  
G1a\_6157138\_x1.....aguacugcgauccggagacgucgC..... 1  
Gi2\_11310100\_x1.....cggagacgucgugggaacacCggggucc..... 1  
Gi1\_4298224\_x1.....gaacacggggugcccGac..... 1  
Gi1\_4175926\_x1.....gggaacacggggugccgaCc..... 1  
Gi5\_8919882\_x1.....cgucguggNaacacggggugccgaa..... 1  
Gi5\_9132000\_x1.....ucgugggaacaGggggugccgaa..... 1  
Gi3\_28508314\_x1.....agaagAgccgucagggccc..... 1  
Gi2\_11380523\_x1.....gucagggcccUgcccaguacugcgau..... 1  
Gi5\_9016606\_x1.....Gcugcgauccggagacguc..... 1  
Gi3\_28401086\_x1.....cgucGggccccgccaguacug..... 1  
Gi1\_4245540\_x1.....cgucgugggaacacggggugccgaaAu..... 1  
Gi3\_28863222\_x1.....cgugggaacacggggugccgaaG..... 1  
Gi5\_8993936\_x1.....gUcgucagggccccgccaguacu..... 1  
Gi3\_28867293\_x1.....ggagCcgucgugggaacacggggugccc..... 1  
Gi3\_28853746\_x1.....caUgccccgccaguacugcgauccggaga..... 1  
G1a\_6268538\_x1.....ucgugggaGcacggggugccgaa..... 1  
Gi1\_4210373\_x1.....gaaAacggggugccgaaacu..... 1  
Gi2\_11249185\_x1.....aggccGgcccaguacugcgau..... 1  
Gi3\_28863975\_x1.....agagaGgcgcccgucagggccccgc..... 1  
Gi5\_9007944\_x1.....gaucggagacgucgCgggaacacggg..... 1  
Gi5\_9030484\_x1.....acgucgugggaUcacggggugccgaaacu..... 1  
Gi3\_28834232\_x1.....cgauccggagacgucAuggggaacacg..... 1  
G1a\_6221211\_x1.....ucggagacgucguggGacacgg..... 1  
Gi3\_28599038\_x1.....cccgccaguGcugcgauccggagacgu..... 1  
Gi3\_28638564\_x1.....ucaNggccccgccaguacugcg..... 1

Gi3\_28525340\_x1.....ggagGcgucuggggaacacgg..... 1  
 Gi2\_11336354\_x1.....gccgucaggccAcgccaguacugc..... 1  
 Gi3\_28779182\_x1.....gccaCuacugcgauccggagacgu..... 1  
 G1a\_6198867\_x1.....ugcgauccggagaGgucgugggaaacac..... 1  
 G1a\_6029711\_x1.....ccaguacugcgauccggagacgCc..... 1  
 Gi2\_11049465\_x1.....aggccccgccaguacuUcg..... 1  
 Gi1\_4163567\_x1.....cguAgugggaaacacggggugcc..... 1  
 Gi2\_11248222\_x1.....gucgugggaCcacggggugccgaac..... 1  
 Gi3\_28272125\_x1.....aAuacugcgauccggagacg..... 1  
 Gi3\_28315238\_x1.....cccgccaguacuAcgauccggagac..... 1  
 Gi2\_11019129\_x1.....cgauccggUgacgucugggga..... 1  
 Gi3\_28354379\_x1.....ucaggccUcgccaguacugcgauccgg..... 1  
 Gi5\_8884807\_x1.....cgGcgugggaaacacggggugcc..... 1  
 G1a\_6273069\_x1.....gucaggccccgccGguacugcga..... 1  
 Gi2\_11406627\_x1.....acgucgugggaaacacgAggugccgaac..... 1  
 Gi2\_11159484\_x1.....cgAcaguacugcgauccggagacguc..... 1  
 G1a\_6330344\_x1.....aucggagacgucgugAgaacacggggg..... 1  
 Gi3\_28317102\_x1.....agCacugcgauccggagacguc..... 1  
 Gi2\_11373876\_x1.....aucggagacgAcgugggaaacacg..... 1  
 Gi3\_28635578\_x1.....cccgccagCacugcgauccggag..... 1  
 Gi2\_11319496\_x1.....aacacgggUugccgaacu..... 1  
 Gi5\_8972610\_x1.....caggccccgccCguacugc..... 1  
 Gi2\_11219679\_x1.....uGggagacgucgugggaaac..... 1  
 Gi2\_11159606\_x1.....acgucgugggaUcacggggugc..... 1  
 G1a\_5991808\_x1.....acgucgugggaGcacggggg..... 1  
 Gi2\_11060699\_x1.....cgucgugAgaacacggggugc..... 1  
 Gi3\_28696299\_x1.....cAucgugggaaacacgggg..... 1  
 Gi1\_4258938\_x1.....ugggaaacacUgggugccgaacu..... 1  
 Gi3\_28565750\_x1.....ugcgauccggagacgucgugggaaacacggggA..... 1  
 G1a\_6338016\_x1.....ggaacacggggugccgaGc..... 1  
 Gi5\_8870866\_x1.....uacugcgauccggagacAu..... 1  
 Gi2\_11101813\_x1.....cgggagacgucgugggaaacCcggggug..... 1  
 G1a\_6131714\_x1.....gGacacggggugccgaac..... 1  
 Gi3\_28410113\_x1.....gugAgaacacggggugccgaacu..... 1  
 Gi1\_4178258\_x1.....ugggaaUacggggugccgaacu..... 1  
 Gi3\_28857202\_x1.....cgauccggagacgucgugggGacacg..... 1  
 Gi5\_9071099\_x1.....gauccggagacgucgugggaaacaUgg..... 1  
 Gi3\_28869995\_x1.....gccccgccaguacugcgauccggaAa..... 1  
 Gi1\_4185335\_x1.....ccgucagAccccgccaguacug..... 1  
 Gi3\_28314827\_x1.....cgucgugggaaacGcggggg..... 1  
 Gi3\_28318459\_x1.....gauccggagacgucgugggUacac..... 1  
 Gi2\_11246066\_x1.....Cccgucaggccccgccaguac..... 1  
 Gi3\_28333779\_x1.....ucggagacgCcuggggaaacacgg..... 1  
 Gi5\_9014436\_x1.....ucgugggaaacacggggugccgaCc..... 1  
 Gi4\_577101\_x1.....uacugcgauccggagacguc..... 0  
 Gi5\_8864756\_x1.....cgugggaaacacggggugccgaacu..... 0  
 Gi2\_11316126\_x1.....gaaacacggggugccgaaGu..... 1

Gi3\_28644883\_x1.....agacgucgugggaacacggggCgccga..... 1  
 Gi1\_4263470\_x1.....gggaGcacggggugccgaacu..... 1  
 Gi3\_28382763\_x1.....gucgugggaacacggggUccgaa..... 1  
 Gi1\_4192652\_x1.....ugggaacacggggugccgUac..... 1  
 Gi2\_11147788\_x1.....ggccccgccaguacugcgUu..... 1  
 Gi2\_11031709\_x1.....cgccaguacugcgauAggagacguc..... 1  
 Gi3\_28953307\_x1.....cgucgugggaacacgAggugc..... 1  
 Gi3\_28645186\_x1.....cgucgugggaacacgUggugccgaa..... 1  
 Gi3\_28965284\_x1.....cgccaguCcuugcgaucggagacguc..... 1  
 Gi3\_28417224\_x1.....cgucgugggaacacggggugGcgaacu..... 1  
 Gi3\_28772075\_x1.....aagagaagcgcccgucagggccccgUc..... 1  
 Gi2\_10995035\_x1.....acacggggugccgaacu..... 0  
 Gi3\_28656152\_x1.....gaacacggggGgccgaacu..... 1  
 Gi1\_4217688\_x1.....Uaggccccgccaguacugcgau..... 1  
 Gi2\_11169652\_x1.....cgccgucaCgccccgccaguacu..... 1  
 Gl1a\_6121274\_x1.....uGaggccccgccaguacugcgau..... 1  
 Gi1\_4166878\_x1.....gacgggagacgucgugggaCcacgg..... 1  
 Gl1a\_6167444\_x1.....caUgccccgccaguacug..... 1  
 Gi3\_28460633\_x1.....cgucgugggaacacgAgugccgaa..... 1  
 Gi3\_28818279\_x1.....acugcgauccggagacgucgAg..... 1  
 Gi1\_4258706\_x1.....gucaggccccgccaguacugU..... 1  
 Gi3\_28264287\_x1.....Cgagacgucgugggaacacggggugccg..... 1  
 Gi2\_11183891\_x1.....ggccccgccaguacugcgauccggGgac..... 1  
 Gi2\_11384701\_x1.....gcccguagggccccgccaguacugcgauccggagac..... 0  
 Gi3\_28384945\_x1.....aucgggagacgucgugggaacacAgggugccg..... 1  
 Gi1\_4365871\_x1.....agUagcgccgucagggccccgcca..... 1  
 Gi3\_28782108\_x1.....ugCgaacacggggugccgaa..... 1  
 Gi1\_4387209\_x1.....ugggaacacggggugUcga..... 1  
 Gi3\_28550362\_x1.....gucaggccccgAcaguacug..... 1  
 Gi3\_28808150\_x1.....Caucgggagacgucgugggaacacggggugccg..... 1  
 Gi2\_11311626\_x1.....cgAcaguacugcgauccgg..... 1  
 Gi3\_28455380\_x1.....ucaAgccccgccaguacugcgau..... 1  
 Gi2\_11068440\_x1.....gaagcgccgucagggccccgccaguGcugc..... 1  
 Gi2\_11114124\_x1.....aggccccCccaguacugc..... 1  
 Gi5\_9063834\_x1.....aucgggagacgucUugggaacacgg..... 1  
 Gi3\_28820957\_x1.....cggagaUgucgugggaacacggggug..... 1  
 Gi3\_28581455\_x1.....cUgccaguacugcgauccggagacguc..... 1  
 Gi2\_11258456\_x1.....gGgaucgggagacgucgugggaacacggggug..... 1  
 Gi3\_28636684\_x1.....ccgccaguacugcgauccggagUc..... 1  
 Gi3\_28341371\_x1.....ucggUgacgucgugggaacacg..... 1  
 Gi3\_28381297\_x1.....cgucgAgggaacacggggugcc..... 1  
 Gi3\_28656948\_x1.....cgccgucagggcccAgccag..... 1  
 Gi3\_28966068\_x1.....cgauccggagacgucgugAgaacacggggugc..... 1  
 Gi3\_28291481\_x1.....ugcgauccggagGcgucgugggaaca..... 1  
 Gi2\_11396983\_x1.....aucgggagacgugugggaacac..... 1  
 Gi2\_11201509\_x1.....ucaggccccgccaguacAgcgau..... 1  
 Gi3\_28645519\_x1.....acgucgugggaacacgCggugccgaacu..... 1

Gi1\_4367021\_x1.....aucggCgacgucgugggaaacacgg..... 1  
 Gl1a\_6228420\_x1.....ggccccgccaguacuUcg..... 1  
 Gi2\_11143844\_x1.....gaucCgagacgucgugggaaacacgggg..... 1  
 Gi5\_8918645\_x1.....ucaggccccgccaguacugcgauccg..... 0  
 Gi2\_11122015\_x1.....ggccccgGcaguacugcgaucc..... 1  
 Gi3\_28946301\_x1.....gucguAggaacacggggugc..... 1  
 Gi3\_28424949\_x1.....acgucgugggaaacaUggggugccgaa..... 1  
 Gi3\_28332143\_x1.....agcgccgucaAgccccgcc..... 1  
 Gi2\_11242448\_x1.....cccUgccaguacugcgauccgagacg..... 1  
 Gl1a\_6330146\_x1.....aguacCgagcugcgagac..... 1  
 Gi1\_4389983\_x1.....uCGgaacacggggugccgaa..... 1  
 Gi3\_28724960\_x1.....gacgucgugAgaacacggggugccg..... 1  
 Gi2\_11305029\_x1.....ucggagacgucgugggaaUcacggggg..... 1  
 Gi2\_11154062\_x1.....aucggagacgucgugggAaacacgggggug..... 1  
 Gi2\_11267997\_x1.....ccgccaguacugcgauccgagacgucg..... 0  
 Gi2\_11341797\_x1.....ccccgccaNuacugcgauccgga..... 1  
 Gi3\_28776780\_x1.....gaacacggAgugccgaa..... 1  
 Gi2\_11377217\_x1.....gacgucgugggaaacacggggugccAa..... 1  
 Gi2\_11119671\_x1.....ucggagacNucgugggaaacac..... 1  
 Gi3\_28633665\_x1.....cgucagggccccgccaguGcugcgaucc..... 1  
 Gl1a\_6342655\_x1.....acguUgugggaaacacggggg..... 1  
 Gi3\_28744683\_x1.....cccgccaguaAugcgaucc..... 1  
 Gi2\_11168234\_x1.....Aucgugggaaacacggggugccga..... 1  
 Gi1\_4333661\_x1.....ggagacgucgugggaaacacAggggugccgaa..... 1  
 Gi3\_28679339\_x1.....cguuccgaaauaggaagagaagcgccgu..... 0  
 Gi2\_11111627\_x1.....gucguggAaacacggggugccga..... 1  
 Gi3\_28942390\_x1.....guUgugggaaacacggggugccg..... 1  
 Gi4\_568982\_x1.....caguacugcgauccgagacg..... 0  
 Gi4\_611245\_x1.....cgugggUaacacggggugccgaa..... 1  
 Gi2\_11255911\_x1.....cccAccaguacugcgauccgag..... 1  
 Gi3\_28521723\_x1.....ucaggccccgccaguCucg..... 1  
 Gi3\_28407618\_x1.....ccccgccaguacCgagcugcgag..... 1  
 Gi3\_28546295\_x1.....caggccccgccaguacugGgaucc..... 1  
 Gi5\_8970238\_x1.....ccgccaguacugcgauccgagGcguc..... 1  
 Gi2\_11164118\_x1.....auGggagacgucgugggaa..... 1  
 Gi1\_4226321\_x1.....caUgccccgccaguacugcg..... 1  
 Gi2\_11082386\_x1.....caguCucggaucggagacguc..... 1  
 Gi3\_28504009\_x1.....gccgucagggccccgccagAacu..... 1  
 Gi2\_11222539\_x1.....gccaguacugcgauccgagGcguc..... 1  
 Gi2\_11141085\_x1.....ucgugggaaacacgggAugccg..... 1  
 Gi3\_28438461\_x1.....ugcUaacggagacgucgugggaa..... 1  
 Gi3\_28455574\_x1.....acguGugggaaacacggggugccgaa..... 1  
 Gi2\_11335249\_x1.....Nucggagacgucgugggaaacacggggugc..... 1  
 Gi2\_11266089\_x1.....cCccaguacugcgauccgagac..... 1  
 Gl1a\_6262195\_x1.....ggaacacggggugccgCac..... 1  
 Gi1\_4181116\_x1.....gcgaucggGgacgucgugggaaaca..... 1  
 Gi3\_28393995\_x1.....ucggagacgucgugggAaacacggggugccgaa..... 1



Gi3\_28667074\_x1.cUuaacucguuccgaau..... 1  
Gi4\_584966\_x1.....gugggaacacggggugccgaGc..... 1  
Gi2\_11155366\_x1.....ccgucagggcccAccaguacugcg..... 1  
Gi5\_9029594\_x1.....cgucAugggaaacacggggugccga..... 1  
Gi2\_11377701\_x1.....Cagacgucgugggaacacggg..... 1  
G1a\_6185367\_x1.....aucggagacgucgugggaacacU..... 1  
Gi3\_28938654\_x1.....gacAucgugggaacacggg..... 1  
G1a\_6184026\_x1.....acAgcgaucggagacguc..... 1  
Gi3\_28306897\_x1.....gaucggagGcgucgugggaac..... 1  
Gi3\_28809753\_x1.....agaagcgccgucagggcccGgcc..... 1  
G1i\_4316016\_x1.....aggccccccagucugcgGuc..... 1  
Gi3\_28380483\_x1.....aggccccccagucugcUaucgga..... 1  
Gi5\_8992761\_x1.....cgucgugggaacacggggugcGgaacu..... 1  
Gi3\_28569934\_x1.....ccgccagucugcgaucggagacA..... 1  
Gi2\_11116620\_x1.....cucguuccgaCuuaggaagagaagcg..... 1  
Gi3\_28542922\_x1.....cgccagucugcgGucggagac..... 1  
Gi3\_28960542\_x1.....ucggagacgucgugggaacGcggggu..... 1  
Gi5\_8844848\_x1.....ugggaacacggggAgccgaa..... 1  
G1i\_4220646\_x1.....cgucguUggaacacggggugccgaacu..... 1  
Gi2\_11017755\_x1.....aucggagacgucgugggaaAac..... 1  
Gi2\_11192229\_x1.....cgccagucugUgaucgg..... 1  
G1a\_6126304\_x1.....Gauuaggaagagaagcgccguc..... 1  
G1i\_4321838\_x1.....cggagacgucguggAaacacggggugcc..... 1  
Gi2\_11170283\_x1.....aucggagaUgucgugggaacacgggg..... 1  
Gi2\_11370022\_x1.....agagaagcgccgucagggcccUc..... 1  
Gi3\_28629008\_x1.....cccgccCguacugcgaucgg..... 1  
G1a\_6148186\_x1.....cggagacgucgugggaacacggggG..... 1  
G1i\_4240272\_x1.....cgucgugggaacacgggCugccgaacu..... 1  
Gi3\_28472869\_x1.....ucggaAacgucgugggaaca..... 1  
Gi3\_28266684\_x1.....gacgucguggAaacacggggugccgaacu..... 1  
Gi2\_11293426\_x1.....cgccagucugcgaucgg..... 1  
Gi5\_8858131\_x1.....Cagaagcgccgucagggcccggcagucg..... 1  
Gi3\_28787067\_x1.....aagagaagcgccgucagggcccUgcc..... 1  
Gi2\_11152820\_x1.....ggccccccagucCugcgau..... 1  
Gi3\_28295726\_x1.....uggCaacacggggugccga..... 1  
Gi5\_8840151\_x1.....ccgccagucugcgauUggagacgu..... 1  
Gi5\_8888109\_x1.....ccagucugcgauUggagacgu..... 1  
Gi3\_28444518\_x1.....ggagacgucgugggaacacggggugccgaaGu..... 1  
G1i\_4190560\_x1.....gagaagcgccgucagggcccggcagucgU..... 1  
Gi2\_11131164\_x1.....ggagacgucgugggaaAac..... 1  
Gi3\_28502309\_x1.....ucggCgacgucgugggaacacggggugcc..... 1  
Gi3\_28594618\_x1.....cgucgugggaacacgggCugccgaacu..... 1  
Gi2\_10999166\_x1.....ccgucagggcccggcagucCugcgau..... 1  
G1i\_4237373\_x1.....ucgugggaacaAggggugccgaacu..... 1  
Gi2\_11286042\_x1.....gugggaacacCgggugccga..... 1  
G1i\_4235669\_x1.....cAgagacgucgugggaacacggggugc..... 1  
G1a\_5987187\_x1.....aucggagacgucgugggaacacAggggug..... 1

Gi1\_4257841\_x1.....ucgugAgaacacggggugccgaac..... 1  
G1a\_6329013\_x1.....gacgucgCgggaacacggggu..... 1  
Gi5\_8893596\_x1.....gugggaaUacggggugccga..... 1  
Gi2\_11141086\_x1.....gCagacgucgugggaacacggggugc..... 1  
Gi2\_11327313\_x1.....aucggagacgucguggUaacacggggugc..... 1  
Gi4\_603506\_x1.....agacgucgugggaacacggggGgcc..... 1  
Gi3\_28461784\_x1.....aagagaagcgccgucagggccccgccaguG..... 1  
Gi3\_28648270\_x1.....gggaacacgCggugccgaacu..... 1  
Gi3\_28649949\_x1.....cgucgugggaaUacggggugccga..... 1  
Gi2\_11197282\_x1.....cgucGggccccgccaguac..... 1  
Gi2\_11394419\_x1.....gggCacacggggugccgaac..... 1  
Gi2\_11039361\_x1.....cgccaguacAgcgauccgagacguc..... 1  
Gi2\_11290484\_x1.....gucgugggaaacacggAgugc..... 1  
Gi1\_4245622\_x1.....gUgaacacggggugccga..... 1  
Gi1\_4261111\_x1.....acgucgugggaGcacggggugccga..... 1  
Gi5\_9043674\_x1.....ccAgccaguacugcgauccgagacgucgug..... 1  
Gi3\_28719019\_x1.....gcgaCcgagacgucgugggaacacgg..... 1  
Gi3\_28972167\_x1.....ccaguacugcgauccgagacgucgC..... 1  
Gi3\_28345978\_x1.....gccgucagggccccgccUguac..... 1  
Gi3\_28363607\_x1.....gucagggccccgccUguacugcgauccg..... 1  
Gi2\_11050219\_x1.....acgucguCggaacacggggu..... 1  
Gi3\_28315264\_x1.....ccccgccaguacuAcgauccgagacgu..... 1  
Gi2\_11394382\_x1.....guacugcgauccgagacgGcgugggaaaca..... 1  
Gi2\_11127173\_x1.....cgugggaaacaAggggugccg..... 1  
Gi3\_28820329\_x1.....gacgucgugggaaacCcg..... 1  
Gi2\_11022982\_x1.....gagaGcgccgucagggccccgc..... 1  
Gi3\_28733340\_x1.....acugcgauccggagaUguc..... 1  
Gi2\_11397562\_x1.....aaUagaagcgccgucagggcc..... 1  
Gi2\_11102292\_x1.....gcgauccgagacgucguAggaacacgg..... 1  
Gi3\_28605245\_x1.....gaucggagacgucgugggaaacaGg..... 1  
G1a\_6256116\_x1.....cAccaguacugcgauccgagacguc..... 1  
Gi3\_28604711\_x1.....cagCacugcgauccgagacguc..... 1  
Gi2\_11355660\_x1.....gccgucagggccccgccaguacAgcg..... 1  
Gi3\_28964734\_x1.....Uggccccgccaguacugcgauccgagacg..... 1  
Gi1\_4256393\_x1.....ggGgacgucgugggaaacacggggu..... 1  
Gi3\_28848243\_x1.....cgggagacgucgugggaaCcacg..... 1  
Gi2\_11068630\_x1.....gaagagaagcgGcgucagggcccc..... 1  
Gi2\_11249887\_x1.....cgucagggccccgccaguacugcgaCc..... 1  
Gi2\_11316809\_x1.....gaagagaagcgccgCcagggcccc..... 1  
Gi3\_28467932\_x1.....gaagagaaNcgccgucagggccccg..... 1  
Gi3\_28979580\_x1.....cgucagggccccgccaguacGgc..... 1  
Gi2\_11182990\_x1.....cccgccaguacAgcgaucc..... 1  
Gi3\_28937594\_x1.....ugcgauccgagacgucAuggga..... 1  
Gi2\_11359905\_x1.....ggcUccgccaguacugcgau..... 1  
Gi5\_9111071\_x1.....gaUacgucgugggaaacacggggugccgaacu..... 1  
Gi3\_28683621\_x1.....gaucggagUcgucgugggaaacac..... 1  
Gi2\_11214558\_x1.....cgucgugggaaCcacggggugccgaac..... 1

|                 |                                          |   |
|-----------------|------------------------------------------|---|
| Gi5_8867208_x1  | .....cgAagacgucgugggaaacacg              | 1 |
| G1a_5988080_x1  | .....aucggagacgucguCggaacacggggug        | 1 |
| Gi1_4300241_x1  | .....acgucgugggaaacacgggAugccgaa         | 1 |
| Gi3_28369498_x1 | .....agacgucgugggaaacacgAg               | 1 |
| Gi3_28982202_x1 | .....cccgAcaguacugcgauccggagac           | 1 |
| Gi2_11200488_x1 | .....ucggagacguUgugggaaacacggggugc       | 1 |
| Gi2_11401782_x1 | .....gagaagcgUcgucagggccccgag            | 1 |
| Gi2_11349603_x1 | .....agaNgcgccgucagggcccc                | 1 |
| Gi2_11284500_x1 | .....ggccGcgccaguacugcgauccggagacgu      | 1 |
| Gi1_4301257_x1  | .....ugggaacacggggUAccgaa                | 1 |
| Gi5_8838603_x1  | .....ggccccGAcaguacugcgau                | 1 |
| Gi2_11238672_x1 | .....cgucaCgccccgccaguacugc              | 1 |
| Gi3_28320715_x1 | .....cgGucggagacgucgugggaaacacg          | 1 |
| Gi3_28713599_x1 | .....cgccgucagggccccgagCac               | 1 |
| Gi3_28499175_x1 | .....gccUucagggccccgagacu                | 1 |
| Gi3_28668670_x1 | .....ccccUccaguacugcgauccggagac          | 1 |
| Gi3_28733790_x1 | .....ccgccaguacugcgauAggagacguc          | 1 |
| Gi3_28547828_x1 | .....cgucgugggaaacacggggC                | 1 |
| Gi1_4338546_x1  | .....cgucgugUgaacacggggugccgaacu         | 1 |
| Gi4_578916_x1   | .....gugggaaacCcggggugccgaac             | 1 |
| Gi1_4209292_x1  | .....acguAgugggaaacacggggugccgaacu       | 1 |
| Gi1_4216940_x1  | .....ucguAggaacacggggugccgaac            | 1 |
| Gi3_28329099_x1 | .....ggAcccgccaguacugcg                  | 1 |
| Gi5_9136118_x1  | .....Cagacgucgugggaaacacggggugccgaac     | 1 |
| Gi3_28914084_x1 | .....gccccgccaguacugcgauccggagacAu       | 1 |
| Gi2_11046805_x1 | .....cggagacgCcgugggaaacacggggug         | 1 |
| Gi2_11226552_x1 | .....aUgagaagcgccgucagggc                | 1 |
| Gi2_11331674_x1 | .....cccgGcaguacugcgauccggaga            | 1 |
| Gi3_28264823_x1 | .....gagaagcgccgucagggccccG              | 1 |
| Gi5_8903780_x1  | .....cgucguggNaacacggggugcc              | 1 |
| Gi5_9119926_x1  | .....acUucgugggaaacacggggugcc            | 1 |
| Gi3_28589088_x1 | .....ucgugggaaacacggggugUcga             | 1 |
| G1a_6014969_x1  | .....ccccgccaguacugcgauccggagCcguc       | 1 |
| Gi5_8854932_x1  | .....ucgugggaaacacggggugc                | 0 |
| Gi2_11132623_x1 | .....cgccUguacugcgauccggagacg            | 1 |
| G1a_6114215_x1  | .....aucggagacguAgugggaaacacggggug       | 1 |
| Gi3_28276702_x1 | .....cggagacgucgugggaaacacgAg            | 1 |
| Gi1_4346792_x1  | .....Gagggccccgagucgucgagagacg           | 1 |
| G1a_6228394_x1  | .....caguacuAcgaucggagacgucg             | 1 |
| Gi5_8879537_x1  | .....cgccaguGcugcgauccggagacguc          | 1 |
| Gi1_4351838_x1  | .....gUgacgucgugggaaacacggggugccgaacu    | 1 |
| Gi3_28650338_x1 | .....ugcgaucgNagacgucgugggaaacacggggugcc | 1 |
| Gi2_11389840_x1 | .....ugggaacacggggugcAg                  | 1 |
| Gi4_611240_x1   | .....cgucguggNaacacggggugccgaacu         | 1 |
| Gi3_28268539_x1 | .....Acgugggaaacacggggugccga             | 1 |
| Gi3_28264246_x1 | .....caguacugcgauccggGgacguc             | 1 |
| Gi5_8901598_x1  | .....gagacgucgugggaaacacAgggugcc         | 1 |

Gi5\_8976973\_x1.....cgaauuaCgaagagaagcgccgucagg..... 1  
 Gi3\_28405733\_x1.....guGcugcgauccgagacgucgug..... 1  
 Gi4\_609266\_x1.....ugggaacacgggguAccgaacu..... 1  
 Gi3\_28853823\_x1.....ucaggccccccagucacugcgauccAg..... 1  
 Gi3\_28345044\_x1.....cgauccggagacgucguggUaacacggggu..... 1  
 Gi2\_11242292\_x1.....cUccgccagucacugcgauccggagac..... 1  
 Gi3\_28797829\_x1.....aggccUcgccagucacugcgaucc..... 1  
 Gi2\_11351511\_x1.....aagcgUcgucaggccccccagucac..... 1  
 Gi2\_11095334\_x1.....Cgggaacacggggugccgaacuu..... 1  
 Gi4\_582176\_x1.....gugggaacacggggGgccgaa..... 1  
 Gi3\_28557520\_x1.....ucaggccccCccagucacugc..... 1  
 Gi3\_28469629\_x1.....aagagaagcgccAucaggccccccagucac..... 1  
 Gi3\_28938890\_x1.....ccgccGguacugcgauccggagacgucgu..... 1  
 Gi1\_4245848\_x1.....ccgucaggccccccagucacCg..... 1  
 Gi1\_4198510\_x1.....aucggagacgucgGgggaacacg..... 1  
 Gi2\_11161007\_x1.....cccgccagucacugcgauUgg..... 1  
 Gi2\_11085832\_x1.....ucgugggaacacggggCgc..... 1  
 Gi3\_28922110\_x1.....cagucacugcgauccggCgacguc..... 1  
 Gi3\_28620264\_x1.....aguacugcgGucggagacgucg..... 1  
 Gi3\_28590888\_x1.....ccccgccGguacugcgauccggagac..... 1  
 Gi3\_28411199\_x1.....acugcgauccAgagacguc..... 1  
 Gi3\_28292583\_x1.....aggccccccagucacCcgauccggaga..... 1  
 Gi2\_11299570\_x1.....ggUgacgucgugggaacac..... 1  
 Gi5\_9026751\_x1.....cggagacgNcgugggaacacg..... 1  
 Gi2\_11369715\_x1.....aucggagacgucgugCga..... 1  
 Gi1\_4306063\_x1.....acgucgugggaGcacgggugccgaacuu..... 1  
 Gi3\_28573738\_x1.....agacgucgugggaCcacgggugccgaac..... 1  
 Gl1\_6027502\_x1.....cgCcaggccccccagucac..... 1  
 Gi2\_11303052\_x1.....cgauccggagacgucgugggGaca..... 1  
 Gl1\_6276652\_x1.....Cugggaacacggggugccga..... 1  
 Gi5\_9016870\_x1.....caggccccgccaAuacugcg..... 1  
 Gi3\_28286901\_x1.....gggaacacggggugcGgaa..... 1  
 Gi4\_600100\_x1.....acgucgugggaacacggggugccgCacu..... 1  
 Gi2\_11136468\_x1.....gccgucaggccccCccagucacugcg..... 1  
 Gi5\_9107007\_x1.....ucguUggaacacggggugccgaac..... 1  
 Gi3\_28414397\_x1.....agaagcgcgUgucaggccccccagucac..... 1  
 Gi3\_28344892\_x1.....aggcccAgccagucacugcgaucc..... 1  
 Gi1\_4198491\_x1.....ugggGacacggggugccgaa..... 1  
 Gi3\_28807723\_x1.....gugggaacacgggUgcccga..... 1  
 Gi4\_609918\_x1.....aguacugcgauccggagacgucgug..... 0  
 Gi2\_11254543\_x1.....ccgAcaggccccccagucacugcg..... 1  
 Gl1\_6146804\_x1.....guacugcgUucggagacgucg..... 1  
 Gi3\_28630809\_x1.....ccccccagucacuUcgauccggagacg..... 1  
 Gl1\_6187046\_x1.....gccagucacAgcgaucgga..... 1  
 Gl1\_6127592\_x1.....Ccgauccggagacgucgug..... 1  
 Gi5\_8900393\_x1.....aacacggggugccgaacuuC..... 1  
 Gi1\_4324786\_x1.....gugggaacacgUgugccg..... 1

Gi5\_9048218\_x1.....Ngaacacggggugccgaacu..... 1  
Gi5\_9025447\_x1.....gCgcugcuggggaacacggggugccgaacu..... 1  
Gi3\_28322993\_x1.....cgauccggagacgucgugggaaacacAg..... 1  
Gi3\_28491232\_x1.....cgucaggccccgccaguacC..... 1  
Gi5\_9047431\_x1.....Agucgugggaaacacggggugccgaac..... 1  
Gi3\_28269844\_x1.....ucaggccccgccaguacugcgaCcgga..... 1  
Gi5\_8995266\_x1.....caguacCgcgaucggagacgucgug..... 1  
Gi1\_4223275\_x1.....gacgucAugggaaacacggggugccgaacu..... 1  
Gi2\_11240191\_x1.....aucggagacgucguCggaacacggggugc..... 1  
Gi2\_11367779\_x1.....aucggagacgucguggCaacacg..... 1  
Gi3\_28797203\_x1.....cggagacgucguggCaacacggggugcc..... 1  
G1a\_6117215\_x1.....ccaguacugcgaucggCgacguc..... 1  
Gi2\_11351434\_x1.....Nugggaaacacggggugcc..... 1  
Gi3\_28704965\_x1.....acgNcgugggaacacggggugccga..... 1  
Gi3\_28292164\_x1.....caggccccgccGguacugcgaucgga..... 1  
Gi2\_11114016\_x1.....aucggagacgucguUggaacacgggggu..... 1  
Gi2\_11049112\_x1.....gaucggagacgucguggaaacacggggugccA..... 1  
Gi2\_11065411\_x1.....agaUgucgugggaacacggggugccgaacu..... 1  
Gi4\_600129\_x1.....guacugcgaucAgagacgucgugg..... 1  
Gi5\_8913835\_x1.....agacgucgugggaacaUggggugccgaac..... 1  
G1a\_6202176\_x1.....cccccaAuacugcgaucggaga..... 1  
Gi3\_28691979\_x1.....gagCgucgugggaacacggggugccga..... 1  
Gi2\_11277342\_x1.....ggccccgccagCacugcga..... 1  
Gi5\_8931396\_x1.....cGguacugcgaucggagacgucguggga..... 1  
Gi3\_28806918\_x1.....cagUccccgccaguacugcg..... 1  
Gi3\_28486760\_x1.ccuuaacuNguuccgaau..... 1  
Gi3\_28890083\_x1.....ucaggccccgccUguacugcga..... 1  
Gi3\_28647994\_x1.....agacgucgugggaCcacggggugccgaacu..... 1  
Gi3\_28496355\_x1.....cgucgugAgaacacgggg..... 1  
Gi1\_4255711\_x1.....gucgugggaacacgUggugccgaacu..... 1  
Gi2\_11011422\_x1.....ggagacgAcgugggaacacggggugcc..... 1  
Gi3\_28571108\_x1.....ccaguacugcgaucggagacAucgug..... 1  
Gi5\_8846968\_x1.....gugggaaAacggggugccg..... 1  
Gi3\_28632956\_x1.....gccaguacAgcgaucggagacg..... 1  
Gi2\_11025103\_x1.....aggccccccaAuacugcg..... 1  
Gi2\_11302310\_x1.....cggagacguGugggaaacacggggugcc..... 1  
Gi3\_28363264\_x1.....aggccccgccaguacuCc..... 1  
Gi3\_28963555\_x1.....agacgucgugggaCcacggg..... 1  
Gi2\_11258033\_x1.....Ucugcgaucggagacgucgu..... 1  
Gi2\_11227824\_x1.....Uucggagacgucgugggaacacgg..... 1  
Gi3\_28349413\_x1.....cggagacgCcgugggaacacg..... 1  
Gi5\_8890091\_x1.....Cagacgucgugggaacacggggugccgaacu..... 1  
Gi1\_4273490\_x1.....gucgugggaaacGcggggugcc..... 1  
Gi3\_28557332\_x1.....ggagacgucgugggaaUacggg..... 1  
Gi2\_11221858\_x1.....Gggagacgucgugggaaacacggggugccgaac..... 1  
Gi2\_11121342\_x1.....gaucggagacgucgAgggaaacacg..... 1  
Gi2\_11140883\_x1.....agagaagcgccgucagAccccgcc..... 1

Gi1\_4365164\_x1.....ucggagacgucgugggaaGacggg..... 1  
Gi2\_11088235\_x1.....cgugggaacacggAgugccg..... 1  
Gi2\_11144232\_x1.....gagacgucgCgggaacacggggugc..... 1  
Gi2\_11112701\_x1.....cCccgucagggccccgccauguacugc..... 1  
Gi3\_28674437\_x1.....caggccccUccaguacugc..... 1  
Gi2\_11053181\_x1.....gucCggccccgccauguacug..... 1  
Gi3\_28474324\_x1.....cgucagggcccUgccaguacugcg..... 1  
G1a\_6260717\_x1.....cgugggaaAacggggugcc..... 1  
Gi2\_11076721\_x1.....gacgucAugggaaacacggggugcc..... 1  
Gi3\_28929746\_x1.....gggaGcacggggugccgaacu..... 1  
Gi3\_28861500\_x1.....agagaagcgccgucagggcccAccaguacu..... 1  
Gi2\_11194918\_x1.....ggNaacacggggugccgaacu..... 1  
Gi2\_11153825\_x1.....gaagagaagcgccgCcaggccccgcc..... 1  
Gi2\_11020399\_x1.....cgaucggUgacgucgugggaaacac..... 1  
Gi5\_9116610\_x1.....gugggaacacgggCugccgaac..... 1  
Gi1\_4201065\_x1.....ucgugggaacaUggggugccg..... 1  
Gi5\_8900244\_x1.....aCcgagacgucgugggaaacacggggg..... 1  
Gi2\_11386545\_x1.....gUgaucggagacgucgugggaaaca..... 1  
Gi3\_28879032\_x1.....ggagacguNgugggaaacacggggugccga..... 1  
Gi2\_11072299\_x1.....gaucggagacgucgugggaaacaUggggg..... 1  
Gi3\_28906657\_x1.....gucagggccccgccauguUcugc..... 1  
Gi3\_28305973\_x1.....gUcaguacugcgaucggagacg..... 1  
G1a\_6230300\_x1.....cgucUggccccgccauguacugcg..... 1  
G1a\_6273897\_x1.....cguAggaacacggggugc..... 1  
Gi1\_4296446\_x1.....aggccccgccauguacuAcgaucgg..... 1  
Gi2\_11034061\_x1.....aucggagacgucgugggaaGacg..... 1  
Gi3\_28326445\_x1.....gcgaucggagacgucgugggGac..... 1  
Gi2\_11321855\_x1.....acgCcgugggaaacacggggg..... 1  
Gi2\_11064679\_x1.....agaagcgccgucagggccccgUc..... 1  
Gi2\_11248175\_x1.....Ggccgucagggccccgccauguacugcg..... 1  
Gi3\_28279255\_x1.....gcgaucggagacgucgugggaaacacggggCg..... 1  
Gi3\_28514095\_x1.....ccgucagggccccUccaguacugc..... 1  
Gi5\_9013356\_x1.....gugggaaacacggggugcUgaa..... 1  
G1a\_6092528\_x1.....gacgucgugggaaacacgggAugccgaacu..... 1  
Gi3\_28366014\_x1.....agacgucgugggaaacacUgggugccgaa..... 1  
Gi3\_28739903\_x1.....ucagggccccCccaguacugcgaucgg..... 1  
Gi2\_11092741\_x1.....caguacugcgaucggagacAuc..... 1  
Gi2\_11160241\_x1.....aggcAccgccauguacugcgaucg..... 1  
Gi3\_28880290\_x1.....ggccccgccauguacugcgCucg..... 1  
Gi2\_11215749\_x1.....caggccccgccauguacGcgau..... 1  
Gi2\_11038033\_x1.....cgccauguacugcgaucggagUc..... 1  
Gi3\_28914168\_x1.....gagacgucNugggaaacacggggugccgaac..... 1  
Gi2\_11113615\_x1.....gccgucagggcAccgccauguacugcg..... 1  
Gi2\_11103474\_x1.....agacgucgugCgaacacggggugccgaacu..... 1  
Gi3\_28984984\_x1.....aucggagacgucgugggGacacggggugccga..... 1  
Gi2\_11174564\_x1.....cgugggCacacggggugccg..... 1  
Gi2\_11209156\_x1.....ucggagacgucgucCggaacacggggugcc..... 1

Gi3\_28774930\_x1.....gCcaggccccccagacuugcgauc..... 1  
 Gi1\_4264787\_x1.....uggCaacacggggugccgaacu..... 1  
 G1a\_6354139\_x1.....gaucggagacgucgCgggaacacg..... 1  
 Gi2\_11185418\_x1.....aucggagacgucUugggaacacggggu..... 1  
 Gi4\_605181\_x1.....Gaggccccccagacuugcgauc..... 1  
 Gi3\_28790213\_x1.....Cgaagcgccgucagggccccccagacu..... 1  
 Gi3\_28960629\_x1.....gaagagaagcgcUgucagggccccccag..... 1  
 Gi1\_4332119\_x1.....gccAucaggccccccagacu..... 1  
 G1a\_6305977\_x1.....caguacugcgaucggagUcgc..... 1  
 Gi2\_11131368\_x1.....agacgucguggaacGcggggu..... 1  
 Gi2\_11140579\_x1.....gccccccagacuCgcgaucgg..... 1  
 Gi3\_28714803\_x1.....ugggaUcacggggugccga..... 1  
 Gi2\_11296973\_x1.....cgucguggAaacacggggugccg..... 1  
 G1a\_6290335\_x1.....gUccccccagacuugcgaucggagacguc..... 1  
 Gi2\_11078926\_x1.....ccgucagggccccccagacuGgcg..... 1  
 G1a\_6091108\_x1.....aauuaggaagagaaAcgcccuc..... 1  
 Gi5\_8935405\_x1.....gugggaacacgggguAccgaacuu..... 1  
 Gi3\_28295515\_x1.....aggccccccagucgucggaucg..... 1  
 Gi3\_28626029\_x1.....agagaagcgcgucagggAccg..... 1  
 Gi3\_28486472\_x1.....aagagaagcgcgucCggcccc..... 1  
 Gi2\_11369767\_x1.....gaucggagacgucgugggaCcacgg..... 1  
 Gi2\_11404821\_x1.....cgccgucagggccccccagucC..... 1  
 Gi5\_9080797\_x1.....cgucgugggaacacAgggugccgaac..... 1  
 Gi2\_11077807\_x1.....Nucggagacgucgugggaacacggggugcc..... 1  
 Gi2\_11104901\_x1.....gggaacacggggugccgUac..... 1  
 Gi3\_28880296\_x1.....ucggagacgucgugggGaca..... 1  
 Gi5\_9002749\_x1.....agacgCcgugggaacacggggugcc..... 1  
 Gi2\_11154505\_x1.....ucggagacgucgugggaacacggggGgc..... 1  
 Gi2\_11160974\_x1.....gagaagcgcgucagggUcccggcag..... 1  
 Gi1\_4216619\_x1.....aucggaAacgucgugggaacacg..... 1  
 Gi5\_9128617\_x1.....aggcccUgccagacuugcga..... 1  
 Gi2\_11270877\_x1.....acucguuccgaauuaggaagagagcgcguc..... 0  
 Gi3\_28335936\_x1.....cgucgAgggaacacggggugccga..... 1  
 G1a\_6168312\_x1.....aucggUgacgucgugggaacacggg..... 1  
 Gi2\_11105247\_x1.....aagagaagcgcgucagggccccUcag..... 1  
 Gi3\_28986956\_x1.....gccgucagggccccccCguacug..... 1  
 G1a\_6050312\_x1.....gggaacacggggGgccgaac..... 1  
 Gi3\_28677629\_x1.....ccccccagacuugcgaucAgaga..... 1  
 Gi2\_11067397\_x1.....gagaagcgcgucagggccccUcag..... 1  
 Gi2\_11107025\_x1.....acucggaucggagacgucgugggaUcac..... 1  
 Gi5\_9134038\_x1.....aucggagacgucgugggaUacggggu..... 1  
 Gi3\_28419657\_x1.....gagacgucgCgggaacacggggugcc..... 1  
 Gi2\_11161771\_x1.....gaagagaGgcgcccagucagggcccc..... 1  
 Gi2\_11070050\_x1.....agUccccccagacuugcgaucggagac..... 1  
 Gi3\_28638901\_x1.....cggagacgucgugggaacCggggugccgaacu..... 1  
 Gi2\_11297692\_x1.....gucgugggaAaacggggugccg..... 1  
 Gi2\_11365374\_x1.....agacguAgugggaacacggggugcc..... 1





Gi3\_9849648\_x39171.....ggaacacggggugccgaacu.....  
0  
Gi3\_10365099\_x35048.....Uuggaacacggggugccgaacu.....  
1  
Gi3\_10400147\_x35013.....ggaacacggggugccgaacu.....  
0  
Gi3\_10560548\_x30012.....ggaacacggggugccgaac.....  
0  
Gi5\_2903321\_x29271.....aacacggggugccgaacu.....  
0  
Gi3\_10969964\_x24063.....guggaacacggggugccgaacA.....  
1  
Gi5\_3059569\_x22896.....uggaacacggggugccgaacu.....  
0  
Gi3\_11248361\_x22013.....cguggaacacggggugccgaac.....  
0  
Gi3\_11270374\_x21828.....guggaacacggggugcc.....  
0  
Gi2\_2498029\_x20890.....guggaacacggggugccgaac.....  
0  
Gi3\_11398260\_x20135.....uggaacacggggugccgaac.....  
0  
Gi2\_2518919\_x20131.....ggaacacggggugccgaacu.....  
0  
Gi5\_3172288\_x20011.....gaacacggggugccgaacu.....  
0  
Gi3\_11700602\_x17928.....gggaacacggggugccgaac.....  
0  
Gi2\_2576448\_x17286.....Uuggaacacggggugccgaacu.....  
1  
Gi3\_11804884\_x16850.....ucguggaacacggggugccgaacu.....  
0  
Gi2\_2593734\_x16668.....uggaacacggggugccgaacu.....  
0  
Gi2\_2643387\_x16224.....gggaacacggggugccgaacu.....  
0  
Gi3\_11984592\_x15862.....guggaacacggggugccga.....  
0  
Gi3\_12000454\_x15855.....Uaacacggggugccgaacu.....  
1  
Gi3\_12273191\_x14392.....gGggaacacggggugccgaacu.....  
1  
Gi3\_12316259\_x14259.....cguggaacacggggugccgaacA.....  
1  
Gi2\_2816430\_x13238.....aacacggggugccgaacu.....  
0

Gi1\_1545627\_x13127.....gugggaacacggggugccgaacu.....  
0  
Gi1\_1571667\_x12719.....aacacggggugccgaacu.....  
0  
Gi3\_12559239\_x12622.....cUugggaacacggggugccgaacu.....  
1  
Gi2\_2906896\_x12602.....gugggaacacggggugcc.....  
0  
Gi2\_2931772\_x12203.....gaacacggggugccgaacu.....  
0  
Gi3\_12707463\_x11795.....gucgugggaacacggggugccgaacu.....  
0  
G1a\_2764528\_x11766.....gugggaacacggggugccgaacu.....  
0  
Gi5\_3567497\_x11394.....ggaacacggggugccgaacu.....  
0  
Gi5\_3578891\_x11040.....ucgugggaacacggggugccgaacu.....  
0  
Gi1\_1629613\_x10992.....gaacacggggugccgaacu.....  
0  
Gi5\_3622560\_x10645.....gggaacacggggugccgaacu.....  
0  
Gi3\_13008745\_x10559.....gugggaacacggggugccgaa.....  
0  
Gi2\_3131603\_x9318.....ggaacacggggugccgaac.....  
0  
Gi2\_3204185\_x8821.....ucgugggaacacggggugccgaacu.....  
0  
Gi5\_3754824\_x8567.....Uugggaacacggggugccgaacu.....  
1  
Gi3\_13368980\_x8549.....gugggaacacggggugccg.....  
0  
Gi3\_13385977\_x8446.....cgucgugggaacacggggugccgaacu.....  
0  
Gi3\_13419752\_x8420.....Uugggaacacggggugccgaac.....  
1  
Gi1\_1717006\_x8199.....cgugggaacacggggugccgaacu.....  
0  
Gi3\_13598074\_x7829.....aucgggagacgucgugggaacacggg.....  
0  
Gi3\_13690359\_x7531.....aucgggagacgucgugggaacacg.....  
0  
Gi2\_3397579\_x7478.....cgugggaacacggggugccgaac.....  
0  
Gi1\_1772599\_x7300.....ucgugggaacacggggugccgaacu.....  
0

Gi1\_1779899\_x7252.....ugggaacacggggugccgaacu.....  
0  
Gi2\_3462884\_x7005.....gGgggaacacggggugccgaacu.....  
1  
Gi3\_13952821\_x6649.....aucggagacgucgugggaaacacggggg.....  
0  
Gi3\_13966109\_x6626.....ugggaacacggggugccgaacA.....  
1  
Gi3\_14044647\_x6441.....ggaacacggggugccgaacA.....  
1  
Gi3\_14120580\_x6174.....acgucgugggaaacacggggugccgaacu.....  
0  
Gi3\_14163414\_x6077.....ucgugggaaacacggggugccgaac.....  
0  
Gi2\_3600679\_x5869.....gugggaacacggggugccgaacA.....  
1  
Gi3\_14325748\_x5585.....ugggaacacggggugccgaa.....  
0  
Gi2\_3662960\_x5473.....gucgugggaaacacggggugccgaacu.....  
0  
Gi2\_3711694\_x5322.....cUugggaacacggggugccgaacu.....  
1  
Gi2\_3743210\_x5193.....gugggaacacggggugccg.....  
0  
Gi3\_14503814\_x5146.....ugggaacacggggugccga.....  
0  
Gi3\_14514096\_x5110.....Uggaacacggggugccgaacu.....  
1  
Gi5\_4030023\_x4816.....gugggaacacggggugccgaac.....  
0  
Gi5\_4039646\_x4802.....cgucgugggaaacacggggugccgaacu.....  
0  
Gi1\_1936852\_x4772.....gggaacacggggugccgaacu.....  
0  
Gi1\_1955690\_x4631.....ggaacacggggugccgaacu.....  
0  
Gi3\_14826722\_x4528.....uUggaacacggggugccgaacu.....  
1  
Gi3\_14898149\_x4389.....Ugaacacggggugccgaacu.....  
1  
Gi3\_14919984\_x4333.....gucgugggaaacacggggugccgaac.....  
0  
Gi3\_14950267\_x4314.....cgugggaaacacggggugcc.....  
0  
Gi3\_14963195\_x4302.....gaacacggggugccgaac.....  
0

Gi3\_14997439\_x4255.....gggaacacggggugccgaacA.....  
1  
Gi2\_3938664\_x4179.....gggaacacggggugccgaac.....  
0  
Gi2\_3951163\_x4151.....gugggaacacggggugccga.....  
0  
Gi3\_15097440\_x4078.....gaacacggggugccgaacA.....  
1  
Gi5\_4169765\_x3965.....cUugggaacacggggugccgaacu.....  
1  
Gi3\_15209990\_x3947.....cgugggaacacggggugccga.....  
0  
Gi3\_15276456\_x3855.....cgucgugggaacacggggugcc.....  
0  
Gi3\_15375097\_x3741.....Ugaacacggggugccgaac.....  
1  
Gi5\_4272399\_x3626.....gucgugggaacacggggugccgaacu.....  
0  
Gi3\_15478073\_x3592.....gGgggaacacggggugccgaac.....  
1  
Gi2\_4108274\_x3511.....cgucgugggaacacggggugccgaacu.....  
0  
Gi5\_4338890\_x3373.....gGgggaacacggggugccgaacu.....  
1  
Gi2\_4182182\_x3220.....cgugggaacacggggugcc.....  
0  
Gi3\_15764003\_x3192.....gUgaacacggggugccgaacu.....  
1  
Gi2\_4211031\_x3168.....aucgggagacgucgugggaacacggggu.....  
0  
Gi2\_4214199\_x3154.....cgugggaacacggggugccgaacA.....  
1  
G1a\_3091306\_x3090.....ggaacacggggugccgaacu.....  
0  
Gi3\_15861109\_x3071.....aucgggagacgucgugggaacacgg.....  
0  
Gi3\_15921905\_x3019.....Ggugggaacacggggugccgaacu.....  
1  
Gi2\_4269696\_x3008.....ugggaacacggggugccgaac.....  
0  
Gi5\_4412639\_x2992.....acgucgugggaacacggggugccgaacu.....  
0  
Gi2\_4296153\_x2901.....aucgggagacgucgugggaacacggggugc.....  
0  
G1a\_3120858\_x2850.....cgugggaacacggggugccgaacu.....  
0

Gi3\_16082396\_x2840.....cguggaacacggggugc.....  
0  
Gi3\_16096567\_x2821.....gUaacacggggugccgaacu.....  
1  
Gi2\_4327464\_x2792.....Uuggaacacggggugccgaac.....  
1  
Gi3\_16248655\_x2719.....Cuggaacacggggugccgaacu.....  
1  
Gi3\_16289142\_x2676.....aucggagacgucguggaacacgggg.....  
0  
Gi5\_4504505\_x2664.....Uaacacggggugccgaacu.....  
1  
G1a\_3154096\_x2645.....uggaacacggggugccgaacu.....  
0  
Gi3\_16341999\_x2618.....Uuggaacacggggugcc.....  
1  
Gi2\_4431581\_x2539.....aucggagacgucguggaacac.....  
0  
Gi3\_16461911\_x2499.....aacacggggugccgaacA.....  
1  
Gi3\_16466907\_x2486.....cguggaacacggggugccgaa.....  
0  
Gi2\_4459306\_x2481.....Ugaacacggggugccgaacu.....  
1  
Gi2\_4466727\_x2466.....ucguggaacacggggugccgaac.....  
0  
Gi3\_16499062\_x2460.....gggaacacggggugccgaa.....  
0  
Gi3\_16518676\_x2441.....cgucguggaacacggggugccgaac.....  
0  
Gi3\_16545467\_x2428.....gUaacacggggugccgaac.....  
1  
Gi2\_4491170\_x2425.....guggaacacggggugccgaa.....  
0  
Gi3\_16643558\_x2347.....Uggaacacggggugccgaac.....  
1  
Gi3\_16648252\_x2346.....uggaacacggggugccg.....  
0  
Gi5\_4594294\_x2341.....guggaacacggggugccgaacA.....  
1  
Gi3\_16791254\_x2203.....Ggggaacacggggugccgaacu.....  
1  
Gi2\_4593584\_x2197.....Uggaacacggggugccgaacu.....  
1  
Gi3\_16871628\_x2136.....gGacacggggugccgaacu.....  
1

Gi3\_16882279\_x2126.....guggaacNcggggugccgaacu.....  
1  
Gi3\_16903467\_x2107.....Augggaacacggggugccgaacu.....  
1  
Gi5\_4683050\_x2103.....ugggaacacggggugccgaacA.....  
1  
Gi3\_16928684\_x2092.....acgucgugggaacacggggugccgaac.....  
0  
Gi3\_16934960\_x2091.....cgugggaacacggggugccg.....  
0  
Gi5\_4687229\_x2066.....gggaacacggggugccgaac.....  
0  
Gi1\_2182073\_x2038.....cgucgugggaacacggggugccgaacu.....  
0  
Gi2\_4694926\_x2033.....cgggagacgucgugggaacacggggugcc.....  
0  
Gi5\_4703592\_x2029.....ugggaacacggggugccgaac.....  
0  
Gi3\_17070356\_x2005.....aucgggagacgucgugggaacacggggugcc.....  
0  
Gi3\_17110031\_x1960.....gacgucgugggaacacggggugccgaacu.....  
0  
Gi5\_4754590\_x1912.....uUggaacacggggugccgaacu.....  
1  
Gi3\_17183517\_x1905.....cgugggaaNacggggugccgaacu.....  
1  
Gi3\_17196833\_x1895.....aucgggagacgucgugggaacac.....  
0  
Gi2\_4747972\_x1892.....acgucgugggaacacggggugccgaacu.....  
0  
Gi2\_4751755\_x1891.....aucgggagacgucgugggaaca.....  
0  
Gi3\_17249501\_x1869.....Uugggaacacggggugccga.....  
1  
Gi2\_4789143\_x1843.....cgugggaacacggggugc.....  
0  
Gi3\_17407574\_x1767.....cUugggaacacggggugccgaac.....  
1  
G1a\_3336841\_x1748.....gggaacacggggugccgaacu.....  
0  
Gi3\_17442691\_x1747.....ggaacacggggugccgaa.....  
0  
Gi3\_17461856\_x1734.....gaucgggagacgucgugggaacacggg.....  
0  
Gi2\_4893280\_x1699.....Uaacacggggugccgaacu.....  
1

Gi5\_4851747\_x1698.....cgugggaacacggggugccgaacA.....  
1  
Gi2\_4903457\_x1688.....aucggagacgucgugggaacacggggugcc.....  
0  
Gi3\_17603980\_x1650.....uUggaacacggggugccgaac.....  
1  
Gi3\_17670918\_x1614....gaucggagacgucgugggaacacgggggu.....  
0  
Gi1\_2244512\_x1612.....acgucgugggaacacggggugccgaacu.....  
0  
Gi1\_2246124\_x1601.....Uugggaacacggggugccgaacu.....  
1  
Gi3\_17687009\_x1601.....cgucgugggaacacggggugccg.....  
0  
Gi2\_5014634\_x1581.....cgucgugggaacacggggugccg.....  
0  
Gi2\_5013053\_x1581.....gUaacacggggugccgaacu.....  
1  
Gi3\_17792439\_x1544.....gCgggaacacggggugccgaacu.....  
1  
Gi3\_17804757\_x1535.....cgCgggaacacggggugccgaacu.....  
1  
Gi3\_17827658\_x1521.....gugggaacacggggCgccaacu.....  
1  
Gi2\_5088374\_x1492.....gggaacacggggugccgaacA.....  
1  
Gi3\_17889244\_x1487.....gugggGacacggggugccgaacu.....  
1  
Gi3\_17901117\_x1481.....gugggaacacggggGgccaacu.....  
1  
Gi2\_5101745\_x1480.....ugggaacacggggugccgaacA.....  
1  
Gi5\_4964517\_x1471.....gggaacacggggugccgaacA.....  
1  
Gi2\_5116506\_x1469.....Uugggaacacggggugcc.....  
1  
G1a\_3417093\_x1462.....Uugggaacacggggugccgaacu.....  
1  
Gi3\_17950984\_x1451.....gugggaacacggggugccgaGcu.....  
1  
Gi5\_4980585\_x1450.....cgugggaacacggggugccgaac.....  
0  
Gi3\_17956783\_x1448.....gUgaacacggggugccgaac.....  
1  
Gi1\_2278079\_x1437.....Uaacacggggugccgaacu.....  
1

Gi2\_5142644\_x1430.....ggagacgucgugggaacacggggugcc.....  
0  
Gi1\_2286667\_x1421.....ucgCgggaacacggggugccgaacu.....  
1  
Gi5\_4999235\_x1414.....Ugaacacggggugccgaacu.....  
1  
Gi3\_18041055\_x1409.....Uucgugggaacacggggugccgaacu.....  
1  
Gi2\_5172447\_x1403.....ugggaacacggggugccga.....  
0  
Gi1\_2297923\_x1382.....gucgugggaacacggggugccgaacu.....  
0  
Gi3\_18106627\_x1380.....guUggaacacggggugccgaacu.....  
1  
Gi2\_5197508\_x1379.....aucggagacgucgugggaacacggg.....  
0  
Gi5\_5014528\_x1369.....Uggaacacggggugccgaacu.....  
1  
Gi5\_5019990\_x1359.....ggaacacggggugccgaac.....  
0  
Gi3\_18165432\_x1357.....ucgugggaacacggggugccgaacA.....  
1  
Gi2\_5224850\_x1355.....uUggaacacggggugccgaacu.....  
1  
Gi2\_5241045\_x1346.....gaucggagacgucgugggaacacgggg.....  
0  
Gi3\_18241935\_x1325.....agacgucgugggaacacggggugccgaacu.....  
0  
Gi2\_5287405\_x1300.....acgucgugggaacacggggugcc.....  
0  
Gi2\_5290004\_x1297.....cgugggaacacggggugccga.....  
0  
Gi3\_18311187\_x1293.....gugggaGcacggggugccgaacu.....  
1  
Gi3\_18316358\_x1292.....gugggaacGcggggugccgaacu.....  
1  
Gi5\_5074131\_x1271.....agacgucgugggaacacggggugccgaacu.....  
0  
Gi2\_5310584\_x1271.....gucgugggaacacggggugccgaac.....  
0  
Gi3\_18362356\_x1267.....cgucgugggaacacggggugccgaacA.....  
1  
Gi2\_5344499\_x1246.....aucggagacgucgugggaacacggggug.....  
0  
Gi2\_5356932\_x1241.....gUgaacacggggugccgaacu.....  
1



Gi3\_18423837\_x1240.....cgGgggaacacggggugccgaacu.....  
1  
Gi2\_5368059\_x1231.....agacgucgugggaacacggggugcc.....  
0  
Gi2\_5372973\_x1220.....cgucgugggaacacggggugcc.....  
0  
Gi3\_18490145\_x1214.....Uugggaacacggggugccgaa.....  
1  
Gi2\_5414040\_x1195.....aucggagacgucgugggaacacg.....  
0  
Gi3\_18574980\_x1178.....Aaacacggggugccgaacu.....  
1  
Gi2\_5438941\_x1177.....Ggugggaacacggggugccgaacu.....  
1  
Gi3\_18586732\_x1173.....cgucgugggaacacggggugccga.....  
0  
Gi3\_18585559\_x1173.....gaUcacggggugccgaacu.....  
1  
Gi2\_5451849\_x1165.....Ugaacacggggugccgaac.....  
1  
Gi3\_18622676\_x1152.....gGgggaacacggggugcc.....  
1  
Gi2\_5505511\_x1125.....cgugggaacacggggugccgaa.....  
0  
Gi2\_5507759\_x1120.....gGgggaacacggggugccgaac.....  
1  
Gi3\_18723411\_x1108.....gacgucgugggaacacggggugccgaac.....  
0  
Gi5\_5171782\_x1092.....gugggaacacggggugccga.....  
0  
Gi3\_18769520\_x1087.....cgggagacgucgugggaacacggggugcc.....  
0  
Gi1\_2378013\_x1083.....Cgggaacacggggugccgaacu.....  
1  
Gi3\_18785802\_x1083.....gugggaacacggggugccgCacu.....  
1  
Gi3\_18803090\_x1078.....gaacacggNgugccgaacu.....  
1  
Gi5\_5189063\_x1063.....ggaacacggggugccgaacA.....  
1  
Gi3\_18852239\_x1056.....cgugggaacacggggugccgCacu.....  
1  
Gi2\_5590002\_x1051.....gugggaacacggggGgccgaacu.....  
1  
Gi3\_18873269\_x1048.....gaucgggagacgucgugggaacacg.....  
0

Gi2\_5593147\_x1046.....gugggaacNcggggugccgaacu.....  
 1  
 Gi3\_18879550\_x1045.....gaaacacggggCgccgaacu.....  
 1  
 Gi2\_5602530\_x1038.....gacgucgugggaacacggggugccgaacu.....  
 0  
 Gi3\_18895181\_x1038.....Uugggaacacggggugccg.....  
 1  
 Gi1\_2388645\_x1037.....gugggaacacggggugccgaacA.....  
 1  
 Gi3\_18930286\_x1026.....cgugggaacacggggugccgaGcu.....  
 1  
 Gi3\_18936438\_x1024.....aGcacggggugccgaacu.....  
 1  
 Gi2\_5640495\_x1012.....ggaacacggggugccgaacA.....  
 1  
 Gi3\_18965997\_x1011.....Ugugggaacacggggugccgaacu.....  
 1  
 Gi2\_5641507\_x1011.....ugggaacacggggugccg.....  
 0  
 Gi1\_2404967\_x998.....cgCgggaacacggggugccgaacu..... 1  
 Gi2\_5716655\_x966.....gucgugggaacacggggugcc..... 0  
 Gi1\_2421588\_x960.....gCgggaacacggggugccgaacu..... 1  
 Gi2\_5724354\_x959.....gaucggagacgucgugggaacacggg..... 0  
 Gi5\_5266060\_x950.....gugggaacacggggugcc..... 0  
 Gi1\_2426354\_x947.....ggaacacggggugccgaac..... 0  
 Gi3\_19185895\_x936.....ugggaacacggggugccgCacu.....  
 1  
 Gi3\_19195239\_x932.....gugggaacCcgggugccgaacu.....  
 1  
 Gi2\_5758373\_x932.....Augggaacacggggugccgaacu..... 1  
 Gi4\_255519\_x927.....gugggaacacggggugccgaacu..... 0  
 Gi3\_19228620\_x922.....gGgggaacacggggugccga.....  
 1  
 Gi2\_5772246\_x920.....aacacggggugccgaacA..... 1  
 Gi3\_19238742\_x919.....cgucgugggaacacggggugc.....  
 0  
 Gi1\_2435607\_x912.....ucgugggaacacggggugccgaac..... 0  
 Gi1\_2437431\_x908.....ucgugggaacacggggugcc..... 0  
 Gi1\_2438339\_x907.....cUugggaacacggggugccgaacu..... 1  
 Gi3\_19283423\_x905.....guggUaacacggggugccgaacu.....  
 1  
 Gi3\_19314932\_x896.....gaucggagacgucgugggaacac.....  
 0  
 Gi5\_5305716\_x892.....gUaacacggggugccgaacu..... 1  
 Gi3\_19336339\_x887.....aucggagacgucgugggaacacggggugc.....  
 0

Gi3\_19337226\_x887.....cgugggaGcacggggugccgaacu.....  
     1  
 Gi5\_5313715\_x884.....Ggggaacacggggugccgaacu..... 1  
 Gi3\_19346078\_x883.....Gacacggggugccgaacu.....  
     1  
 Gi3\_19353136\_x882.....gucgugggaacacggggugcc.....  
     0  
 Gi5\_5328573\_x862.....Ggugggaacacggggugccgaacu..... 1  
 Gi3\_19436709\_x861.....acgucgugggaacacggggugcc.....  
     0  
 Gi3\_19477784\_x849.....gugggaacacAgggugccgaacu.....  
     1  
 Gi3\_19487110\_x846.....ggagacgucgugggaacacggggugcc.....  
     0  
 Gi1\_2463627\_x846.....aacacggggugccgaacA..... 1  
 Gi2\_5894717\_x846....gaucggagacgucgugggaacac..... 0  
 Gi2\_5898094\_x843....aucggGgacgucgugggaaca..... 1  
 Gi3\_19501449\_x840.....cgAgggaacacggggugccgaacu.....  
     1  
 Gi3\_19505645\_x838.....cgugggGcacggggugccgaacu.....  
     1  
 Gi5\_5346371\_x836.....gacgucgugggaacacggggugccgaacu..... 0  
 Gi3\_19551295\_x824.....cgugggaacacggggGgccgaacu.....  
     1  
 G1a\_3705092\_x821.....gugggaacacggggugcc..... 0  
 Gi3\_19597896\_x808.....cgggagacgucgugggaacacgggggu.....  
     0  
 Gi2\_5972240\_x807.....cgucgugggaacacggggugccga..... 0  
 Gi3\_19635652\_x799.....gAgggaacacggggugccgaacu.....  
     1  
 Gi3\_19638048\_x798.....gugggaacacggggugccgaCcu.....  
     1  
 Gi2\_6000086\_x787....aucggGgacgucgugggaacacggggugc..... 1  
 Gi2\_6000873\_x786.....cgugggaaNacggggugccgaacu..... 1  
 Gi3\_19702742\_x782.....agacgucgugggaacacggggugccgaac.....  
     0  
 Gi2\_6009494\_x781.....gCgggaacacggggugccgaacu..... 1  
 Gi5\_5388210\_x779.....gaacacggggugccgaac..... 0  
 Gi3\_19712107\_x778.....ugggaacacNggggugccgaacu.....  
     1  
 Gi2\_6025044\_x773.....agacgucgugggaacacggggugccgaacu..... 0  
 Gi3\_19752275\_x768.....cgugggaacacggggugccgaCcu.....  
     1  
 Gi2\_6041171\_x764.....gacgucgugggaacacggggugcc..... 0  
 Gi5\_5408852\_x752.....gUgaacacggggugccgaacu..... 1  
 Gi2\_6059364\_x751.....gUaacacggggugccgaac..... 1

Gi3\_19831848\_x748.....cguggaacGcggggugccgaacu.....  
     1  
 Gi3\_19863131\_x742.....Ggggaacacggggugccgaac.....  
     1  
 Gi5\_5423735\_x735.....Augggaacacggggugccgaacu..... 1  
 Gi2\_6106547\_x727.....aucggGgacgucgugggaacac..... 1  
 Gi1\_2524539\_x721.....gggaacacggggugccgaacA..... 1  
 Gi3\_19944198\_x720.....guAggaacacggggugccgaacu.....  
     1  
 Gi5\_5436081\_x717.....aucggagacgucgugggaacacg..... 0  
 Gi2\_6138250\_x715.....acgucgugggaacacggggugc..... 0  
 Gi3\_19977837\_x712.....gaucggagacgucgugggaacacgggg.....  
     0  
 Gi2\_6149646\_x710.....cgugggaacacggggugccg..... 0  
 Gi2\_6156741\_x709.....gugggaacacggggCgcccgaacu..... 1  
 Gi2\_6156032\_x709.....Uugggaacacggggugccg..... 1  
 Gi5\_5452426\_x705.....ugggaacacggggugccgaa..... 0  
 Gi1\_2530929\_x697.....gugggaacacggggugccgaac..... 0  
 Gi5\_5458036\_x697.....gugggaacacggggugccgaa..... 0  
 Gi3\_20027165\_x696.....gggaacacggggugccga.....  
     0  
 Gi5\_5459430\_x696.....ucgugggaacacggggugccgaac..... 0  
 Gi1\_2534401\_x692.....gugggaacacggggugcc..... 0  
 Gi2\_6200666\_x687.....ggagacgucgugggaacacggggugc..... 0  
 Gi2\_6202725\_x686.....Cugggaacacggggugccgaacu..... 1  
 Gi3\_20061734\_x686.....ucgugggaacacggggugc.....  
     0  
 Gi3\_20075429\_x683.....Caacacggggugccgaacu.....  
     1  
 Gi3\_20087693\_x680.....cgugUgaacacggggugccgaacu.....  
     1  
 Gi2\_6219121\_x680.....gugggGacacggggugccgaacu..... 1  
 Gi3\_20100593\_x678.....gaacacggggugccgaCcu.....  
     1  
 G1a\_3822562\_x678.....gaacacggggugccgaacu..... 0  
 Gi3\_20103302\_x677.....cgugggaacaUggggugccgaacu.....  
     1  
 Gi2\_6230650\_x676.....cgucgugggaacacggggugc..... 0  
 Gi3\_20138255\_x668.....ggagacgucgugggaacacgggggu.....  
     0  
 Gi2\_6261466\_x664.....guUggaacacggggugccgaacu..... 1  
 Gi2\_6259474\_x664.....gaacacggggugccgaacA..... 1  
 Gi1\_2549977\_x662.....gGgggaacacggggugccgaacu..... 1  
 Gi2\_6272692\_x658.....gugggaacGcggggugccgaacu..... 1  
 Gi2\_6277948\_x656.....gugggaacacggggugccgaGcu..... 1  
 Gi5\_5501608\_x654.....Uugggaacacggggugccgaac..... 1  
 Gi2\_6287759\_x653.....Uucgugggaacacggggugccgaacu..... 1

Gi3\_20231351\_x652.....gaacacggggugccgaGcu.....  
     1  
 Gi2\_6306563\_x644.....cUugggaacacggggugccgaac..... 1  
 Gi3\_20285750\_x643.....gaacGcggggugccgaacu.....  
     1  
 Gi2\_6335368\_x636....gaucggagacgucgugggaacacggggugc..... 0  
 Gi2\_6340450\_x634.....acgucgugggaacacggggugccgaac..... 0  
 Gi3\_20335512\_x633.....Gcgugggaacacggggugccgaacu.....  
     1  
 Gi3\_20333613\_x633.....aUcacggggugccgaacu.....  
     1  
 Gi5\_5530522\_x632.....cgugggaaNacggggugccgaacu..... 1  
 Gi2\_6352455\_x629.....gGgggaacacggggugcc..... 1  
 Gi2\_6356223\_x627.....cggagacgucgugggaacacggggugc..... 0  
 Gi2\_6372478\_x622.....Ggggaacacggggugccgaacu..... 1  
 Gi1\_2574227\_x619.....gacgucgugggaacacggggugccgaacu..... 0  
 Gi1\_2575463\_x616.....Ugaacacggggugccgaacu..... 1  
 Gi3\_20425189\_x613....aucggagacgucguggga.....  
     0  
 Gi3\_20433767\_x612.....acgucgugggaacacggggugccgaacA.....  
     1  
 G1a\_3889537\_x611.....gGgggaacacggggugccgaacu..... 1  
 Gi3\_20455698\_x606.....cUugggaacacggggugccgaacu.....  
     1  
 Gi2\_6418466\_x604....gaucggagacgucguggga..... 0  
 Gi1\_2583389\_x604.....uUggaacacggggugccgaacu..... 1  
 Gi2\_6427498\_x600.....ucgugggaacacggggugccgaacA..... 1  
 Gi3\_20496077\_x598.....gugggaacacggggugccAaacu.....  
     1  
 Gi2\_6449532\_x591.....gugggaGcacggggugccgaacu..... 1  
 Gi3\_20524036\_x591.....cAugggaacacggggugccgaacu.....  
     1  
 Gi3\_20535824\_x588.....uAggaacacggggugccgaacu.....  
     1  
 Gi3\_20534060\_x588.....cUucgugggaacacggggugccgaacu.....  
     1  
 Gi1\_2589356\_x587.....Uggaacacggggugccgaacu..... 1  
 Gi3\_20555743\_x584.....gugggaacacggggugcUgaacu.....  
     1  
 Gi2\_6477610\_x580.....gaacacggggugccgaac..... 0  
 Gi3\_20572614\_x580.....cgugggaacacAgggugccgaacu.....  
     1  
 Gi2\_6501196\_x571.....cgCgggaacacggggugccgaacu..... 1  
 Gi3\_20621399\_x570.....gGgggaacacggggugccgaa.....  
     1  
 Gi2\_6509178\_x568.....cgGgggaacacggggugccgaacu..... 1

Gi3\_20641814\_x565.....Cugggaacacggggugccgaac.....  
     1  
 G1a\_3939434\_x563.....aacacggggugccgaacu..... 0  
 Gi3\_20653089\_x562.....ucgugggaacacggggugccg.....  
     0  
 Gi3\_20660950\_x561.....gaGcacggggugccgaacu.....  
     1  
 Gi2\_6525556\_x561.....gugggaacacggggugccgCacu..... 1  
 Gi1\_2607734\_x560.....ugggaacacggggugccgaac..... 0  
 Gi2\_6532839\_x559.....Uggaacacggggugccgaac..... 1  
 Gi3\_20690539\_x556.....ucggagacgucgugggaacacggggugcc.....  
     0  
 Gi3\_20686091\_x556.....Uaacacggggugccgaac.....  
     1  
 G1a\_3950603\_x553.....aucggagacgucgugggaacacggg..... 0  
 Gi3\_20726447\_x549.....aacacgggNugccgaacu.....  
     1  
 Gi5\_5626687\_x549.....gggaacacggggugccgaa..... 0  
 Gi3\_20755962\_x544.....gugggaacNcggggugccgaac.....  
     1  
 Gi5\_5641931\_x539.....cgugggaacacggggugccga..... 0  
 Gi2\_6592497\_x537.....gucgugggaacacggggugc..... 0  
 Gi2\_6591423\_x537.....Uugggaacacggggugccga..... 1  
 Gi2\_6605333\_x533.....gaucggagacgucgugggaacacg..... 0  
 Gi2\_6604800\_x533.....ugggaacacggggugccgaa..... 0  
 Gi3\_20866986\_x523.....gugAgaacacggggugccgaacu.....  
     1  
 Gi1\_2630453\_x519.....gucgCgggaacacggggugccgaacu..... 1  
 G1a\_3984256\_x519.....gugggaacacggggugccga..... 0  
 Gi2\_6654166\_x518.....ucgugggaacacggggugccg..... 0  
 Gi2\_6663968\_x514.....gggaacacggggugccgaa..... 0  
 Gi3\_20927425\_x511.....gucgugggaacacggggugccgaacA.....  
     1  
 Gi2\_6669610\_x511.....cgugggaacacggggugccgCacu..... 1  
 Gi4\_298421\_x509.....cgugggaacacggggugccgaacu..... 0  
 Gi3\_20933547\_x509.....gUaacacggggugccgaacu.....  
     1  
 Gi2\_6688434\_x506.....cgucgugggaacacggggugccgaac..... 0  
 Gi2\_6691467\_x505.....ucggGgacgucgugggaacacg..... 1  
 Gi3\_20965425\_x503.....ucggagacgucgugggaacacg.....  
     0  
 Gi5\_5684347\_x503.....gugggaacNcggggugccgaacu..... 1  
 Gi5\_5685353\_x502.....aucggagacgucgugggaacacg..... 0  
 G1a\_4003648\_x501.....aucggagacgucgugggaacacggggu..... 0  
 G1a\_4008139\_x498.....gugggaacacggggugccgaac..... 0  
 G1a\_4011121\_x496.....cgugggaacacggggugcc..... 0

Gi3\_21024275\_x493.....gacgucgugggaacacggg.....  
 0  
 Gi5\_5704214\_x491....aucggagacgucgugggaacacgggu..... 0  
 Gi3\_21053231\_x489.....cgugggaacacggggugccAaacu.....  
 1  
 Gi3\_21053720\_x489.....Cgaacacggggugccgaacu.....  
 1  
 Gi5\_5708616\_x486.....gugggaacacggggugccgaacuu..... 0  
 Gi3\_21074174\_x485.....aaUacggggugccgaacu.....  
 1  
 Gi2\_6754847\_x485....gaucggagacgucgugggaaca..... 0  
 Gi1\_2653352\_x484.....cgucgCgggaacacggggugccgaacu..... 1  
 Gi3\_21090151\_x483.....Aggaacacggggugccgaacu.....  
 1  
 Gi2\_6764528\_x482.....ggGgacgucgugggaacacggggugcc..... 1  
 Gi2\_6773666\_x480....aucggGgacgucgugggaacacggg..... 1  
 Gi2\_6774146\_x480.....gugggaacCcgggugccgaacu..... 1  
 Gi3\_21119024\_x479.....aacacggggugccgaacuu.....  
 0  
 Gi3\_21144290\_x475.....gGgggaacacggggugccg.....  
 1  
 Gi3\_21138590\_x475.....gGcgugggaacacggggugccgaacu.....  
 1  
 Gi5\_5737314\_x470.....aacacggggugccgaacA..... 1  
 Gi3\_21178779\_x470.....Augggaacacggggugccgaac.....  
 1  
 Gi3\_21189573\_x469.....Uucgugggaacacggggugccgaac.....  
 1  
 Gi5\_5745274\_x466.....gugggaacacggggugccg..... 0  
 Gi2\_6811953\_x465....ucggagacgucgugggaacacg..... 0  
 Gi3\_21225428\_x463.....gucgugggaacacggggugccga.....  
 0  
 Gi1\_2673628\_x459.....gugggaacacggggugccg..... 0  
 Gi5\_5767386\_x456.....aaUacggggugccgaacu..... 1  
 Gi2\_6849190\_x455....aucggagacgucgugggaac..... 0  
 Gi3\_21273618\_x454.....cgugggaacacggggugcUgaacu.....  
 1  
 Gi3\_21277250\_x454.....ggaacacgNggugccgaacu.....  
 1  
 Gi2\_6855091\_x453.....ggaacacggggugccgaa..... 0  
 Gi1\_2677719\_x450.....agacgucgugggaacacggggugccgaacu..... 0  
 Gi2\_6870001\_x450.....agacgucgugggaacacggggugc..... 0  
 Gi3\_21301662\_x450.....uUggaacacggggugccgaa.....  
 1  
 Gi5\_5775083\_x449.....aGcacggggugccgaacu..... 1  
 Gi3\_21314237\_x448.....gaacacggggugccgCacu.....  
 1

Gi3\_21316924\_x447.....cgucgugggaacacgggg.....  
0  
Gi5\_5781786\_x445.ugcgaucggagacgucgug..... 0  
Gi3\_21334759\_x445.....gugggaacacgggguAccgaacu.....  
1  
Gi3\_21342750\_x443.....Cggaacacggggugccgaacu.....  
1  
Gi3\_21366587\_x440.....Cggaacacggggugccgaacu.....  
1  
Gi3\_21374493\_x438.....gaucggagacgucgugggaacacgg.....  
0  
Gi2\_6928292\_x434.....guggUaacacggggugccgaacu..... 1  
Gi3\_21420601\_x432.....gugggaacaUggggugccgaacu.....  
1  
Gi2\_6946431\_x430.....cggGgacgucgugggaacacggggugc..... 1  
Gi1\_2690059\_x430.....ucgCgggaacacggggugcc..... 1  
Gi5\_5805893\_x429.....Gcgugggaacacggggugccgaacu..... 1  
Gi3\_21442085\_x428.....gugggaacacggggugccgaUc.....  
1  
Gi3\_21442941\_x428.....uUggaacacggggugccga.....  
1  
Gi5\_5810600\_x427.....Uucgugggaacacggggugccgaacu..... 1  
Gi5\_5809746\_x427.....Gacacggggugccgaacu..... 1  
Gi3\_21454905\_x426.....Ggugggaacacggggugccgaac.....  
1  
Gi3\_21464696\_x425.....gggaacacggggugccgaCcu.....  
1  
Gi2\_6960982\_x425.....aucggGgacgucgugggaacacg..... 1  
Gi3\_21470210\_x424.....gugggaacacggggugccgGacu.....  
1  
G1a\_4115331\_x422.....Ugaacacggggugccgaacu..... 1  
Gi3\_21495525\_x420.....gugggaacacggggugUcgaacu.....  
1  
Gi2\_6981273\_x419.....cgugggaacacggggugccgaCcu..... 1  
Gi2\_6981692\_x419.....cggagacgucgugggaacacggggu..... 0  
Gi3\_21532298\_x416.....gugggaacacggUgugccgaacu.....  
1  
Gi3\_21552587\_x413.....gCgggaacacggggugccgaac.....  
1  
Gi3\_21566190\_x411.....gggaacacNgggugccgaacu.....  
1  
Gi2\_7023165\_x410.....gugggaacacggggugccgaCcu..... 1  
Gi3\_21576442\_x409.....cguAggaacacggggugccgaacu.....  
1  
Gi3\_21578892\_x408.....gugggaacacgAgggugccgaacu.....  
1



Gi3\_21593951\_x405.....cggagacgucgugggaacacg.....  
0  
Gi1\_2710911\_x404.....aucggagacgucgugggaacacg..... 0  
Gi3\_21620582\_x402.....cgucgugggaacacggggugccgaa.....  
0  
Gi3\_21647373\_x398.....ucggagacgucgugggaacacggggu.....  
0  
Gi3\_21658497\_x397.....gugggaacacggAgugccgaacu.....  
1  
Gi5\_5858005\_x396.....gugggaacacggggGgccgaacu..... 1  
Gi3\_21665630\_x396.....gugggaacacggggugccgaGc.....  
1  
Gi3\_21683787\_x393.....Cugggaacacggggugcc.....  
1  
Gi5\_5865493\_x392.....cgGgggaacacggggugccgaacu..... 1  
Gi5\_5879505\_x385.....cgCgggaacacggggugccgaacu..... 1  
G1a\_4189285\_x379.....ugggaacacggggugccgaacA..... 1  
Gi2\_7156442\_x374.....cgugggGacacggggugccgaacu..... 1  
Gi5\_5898479\_x374.....cgugggaacacggggugcc..... 0  
Gi3\_21813581\_x374.....gugggaacacggggCgccgaac.....  
1  
Gi3\_21813955\_x374.....gaacacggggugccGacu.....  
1  
Gi2\_7160930\_x373.....gggaacacggggugccga..... 0  
Gi1\_2746579\_x371.....cgugggaacacggggugccgaac..... 0  
Gi3\_21839642\_x370.....gugggaacacggggGgccgaac.....  
1  
Gi3\_21848878\_x369.....cgugggaacacgUggugccgaacu.....  
1  
Gi3\_21844450\_x369.....cggagacgucgugggaacacggg.....  
0  
Gi3\_21875321\_x366.....cgugAgaacacggggugccgaacu.....  
1  
Gi3\_21878975\_x365.....guggAaacacggggugccgaacu.....  
1  
Gi3\_21886627\_x364.....ggUacacggggugccgaacu.....  
1  
Gi3\_21888810\_x363.....agacgucgugggaacacggggugcc.....  
0  
Gi2\_7209198\_x363.....gAgggaacacggggugccgaacu..... 1  
Gi5\_5912906\_x363.....gugggGacacggggugccgaacu..... 1  
Gi3\_21890988\_x363.....aacacggggCgccgaacu.....  
1  
Gi1\_2755728\_x362.....gugggaacacggggugccgaacuu..... 0  
Gi1\_2760408\_x359.....gUgaacacggggugccgaacu..... 1  
Gi3\_21920229\_x359.....ggagacgucgugggaacacg.....  
0

Gi2\_7227600\_x359.....aucggagacgucguggga..... 0  
 Gi2\_7231906\_x358.....cgugggaacacggggugccgaGcu..... 1  
 Gi3\_21924892\_x358.....gugggaaUacggggugccgaacu.....  
 1  
 Gi1\_2762199\_x357.....gUaacacggggugccgaacu..... 1  
 Gi3\_21936329\_x357.....Agugggaacacggggugccgaacu.....  
 1  
 Gi3\_21947005\_x355.....cUugggaacacggggugcc.....  
 1  
 Gi3\_21945230\_x355.....gacgucgugggaacacgggggu.....  
 0  
 Gi2\_7246532\_x355.....ggGgacgucgugggaacacggggugc..... 1  
 Gi1\_2765402\_x354.....cgucgugggaacacggggugcc..... 0  
 Gi3\_21950908\_x354.....gagacgucgugggaacacggggugccgaacu.....  
 0  
 Gi3\_21959043\_x353.....ugggaacacggggugccgCac.....  
 1  
 Gi2\_7257846\_x352.....gugggaacacAgggugccgaacu..... 1  
 Gi2\_7262421\_x351.....Gcgugggaacacggggugccgaacu..... 1  
 Gi1\_2768927\_x350.....gucgugggaacacggggugcc..... 0  
 Gi5\_5957529\_x345.....ugggaacacggggugccgCacu..... 1  
 Gi3\_22045930\_x341.....ucgugggaacacggggugccgaa.....  
 0  
 Gi5\_5971873\_x338.....gGacacggggugccgaacu..... 1  
 Gi3\_22074093\_x337.....guggggGacacggggugccgaac.....  
 1  
 Gi3\_22078811\_x336.....gacgucgugggaacacggggugccgaacA.....  
 1  
 Gi2\_7332098\_x336.....Ugugggaacacggggugccgaacu..... 1  
 Gi5\_5975582\_x336.....gCgggaacacggggugccgaacu..... 1  
 Gi1\_2782276\_x335.....cgugggaacacggggugccga..... 0  
 Gi2\_7335117\_x335.....cgugggaGcacggggugccgaacu..... 1  
 Gi5\_5979277\_x335.....ugggaacaNggggugccgaacu..... 1  
 Gi3\_22101607\_x334.....Agaacacggggugccgaacu.....  
 1  
 Gi5\_5988969\_x333.....cgugggaacacggggugccgaGcu..... 1  
 Gi5\_5986971\_x333.....gugggaacacggggCgccgaacu..... 1  
 Gi3\_22111938\_x332...cgaucggagacgucgugggaacacg.....  
 0  
 Gi5\_5992293\_x332.....Cugggaacacggggugccgaacu..... 1  
 Gi1\_2785611\_x332.....ggagacgucgugggaacacggggugcc..... 0  
 Gi3\_22123215\_x331.....Agaacacggggugccgaac.....  
 1  
 Gi1\_2787918\_x328.....gCgggaacacggggugccg..... 1  
 Gi3\_22148239\_x328.....ggaacacgNggugccgaac.....  
 1  
 Gi2\_7368916\_x327.....gUgaacacggggugccgaac..... 1

Gi5\_6006792\_x326.....gucgugggaaacacggggugccgaac..... 0  
 Gi2\_7373163\_x326.....cgAgggaaacacggggugccgaacu..... 1  
 Gi3\_22168136\_x325.....gaacacAgggugccgaacu.....  
 1  
 Gi2\_7381942\_x324.....guAggaacacggggugccgaacu..... 1  
 Gi5\_6014257\_x323.....cUucgugggaaacacggggugccgaacu..... 1  
 Gi1\_2795056\_x322.....aucggagacgucgCgggaacacgg..... 1  
 Gi1\_2797301\_x319.....acgucgugggaaacacggggugcc..... 0  
 Gi3\_22222813\_x318.....aacGcggggugccgaacu.....  
 1  
 Gi1\_2797939\_x318.....ugggaacacggggugccgaacA..... 1  
 Gi2\_7410220\_x318....gaucggagacgucgugggaaacacggggug..... 0  
 Gi2\_7417202\_x317....aucggagacgucgugggaaacacgg..... 0  
 Gi5\_6024830\_x317.....guUggaacacggggugccgaacu..... 1  
 Gi3\_22243432\_x316.....aacacggggugccgaGcu.....  
 1  
 Gi3\_22254787\_x315.....cUugggaacacggggugccga.....  
 1  
 Gi2\_7432954\_x313.....gGgacgucgugggaaacacggggugcc..... 1  
 Gi3\_22285171\_x311.....guUggaacacggggugccgaac.....  
 1  
 Gi4\_321304\_x310.....ugggaacacggggugccgaacu..... 0  
 Gi3\_22299763\_x309....cgaucggagacgucguggg.....  
 0  
 Gi2\_7449127\_x309.....gacgucgugggaaacacggggugccg..... 0  
 Gi2\_7456834\_x308.....cggGgacgucgugggaaacac..... 1  
 Gi3\_22309644\_x308.....ugggGacacggggugccgaacu.....  
 1  
 Gi3\_22318255\_x307.....gggaacacggggugccgaaA.....  
 1  
 Gi3\_22317027\_x307.....gacgucgugggaaacacggggugccg.....  
 0  
 Gi5\_6054155\_x307.....gugggaacacggggugccgaGcu..... 1  
 Gi2\_7460519\_x307.....gGggaaacacacggggugccg..... 1  
 Gi2\_7465729\_x306.....cgugggaacacggggCgccaacu..... 1  
 Gi3\_22329900\_x306.....cgugggaacacgAggugccgaacu.....  
 1  
 Gi2\_7477315\_x304....ucggagacgucgugggaaaca..... 0  
 Gi3\_22354863\_x303.....Uggaacacggggugccgaa.....  
 1  
 Gi3\_22349712\_x303.....ggaacacggggugccgCacu.....  
 1  
 Gi3\_22378677\_x300.....ugggaGcacggggugccgaacu.....  
 1  
 Gi3\_22384377\_x300.....ggaacacggggugccgCac.....  
 1  
 Gi5\_6073549\_x299.....cgucgugggaaacacggggugccgaacA..... 1

Gi2\_7521375\_x295.....Uugggaacacggggugccgaa..... 1  
 Gi3\_22441300\_x293.....gucgugggaacacggggugc.....  
 0  
 Gi3\_22447160\_x293.....gaacacggggugccAaacu.....  
 1  
 Gi2\_7536057\_x292.....gugggaacacggggugcUgaacu..... 1  
 Gi3\_22467875\_x291.....ugggaacacggggCgccgaacu.....  
 1  
 Gi3\_22461473\_x291.....ggUacacggggugccgaac.....  
 1  
 Gi2\_7543054\_x291...cgaucggagacgucgugg..... 0  
 Gi5\_6101490\_x290.....ucggagacgucgugggaacacg..... 0  
 Gi3\_22478029\_x290.....ggaacacggggCgccgaacu.....  
 1  
 Gi2\_7548566\_x289.....Agaacacggggugccgaac..... 1  
 Gi2\_7556077\_x288.....ggGgacgucgugggaaca..... 1  
 Gi3\_22500808\_x287.....uCggaacacggggugccgaacu.....  
 1  
 Gi3\_22522274\_x285.....gugggaacGcggggugccgaac.....  
 1  
 Gi2\_7580393\_x284...gaucggagacgucgugggaacacggggugcc..... 0  
 Gi3\_22534784\_x284...gaucggagacgucgugggaacacggggugc.....  
 0  
 Gi3\_22526264\_x284.....cgugggaaUacggggugccgaacu.....  
 1  
 Gi3\_22547230\_x282.....cUucgugggaacacggggugcc.....  
 1  
 Gi1\_2845298\_x281.....Gcgugggaacacggggugccgaacu..... 1  
 Gi3\_22562991\_x280...gaucggagacgucgugggaacacggggugcc.....  
 0  
 Gi2\_7605185\_x280.....ugggaacacggggugccgCacu..... 1  
 Gi2\_7608536\_x279...aucggGgacgucgugggaacacggggugcc..... 1  
 Gi3\_22579204\_x279.....ugggaacGcggggugccgaacu.....  
 1  
 Gi5\_6138683\_x279.....gagacgucgugggaacacggggugccgaacu..... 0  
 Gi3\_22583102\_x278.....aacacggggugccgGacu.....  
 1  
 Gi3\_22607482\_x276.....gugggaacacggggAgccgaacu.....  
 1  
 Gi3\_22611622\_x276.....ugggaacaNggggugccgaac.....  
 1  
 Gi3\_22620429\_x275.....gugggaacacgggAugccgaacu.....  
 1  
 Gi2\_7632642\_x275.....cgugUgaacacggggugccgaacu..... 1  
 Gi2\_7635117\_x275.....cUucgugggaacacggggugccgaacu..... 1  
 Gi1\_2853614\_x274...ucggagacgucgugggaacacg..... 0  
 Gi1\_2854984\_x274.....Caacacggggugccgaacu..... 1

Gi3\_22626184\_x274.....cgugggaCcacggggugccgaacu.....  
 1  
 Gi2\_7641697\_x274.....gucgugggaacacggggugccga..... 0  
 Gi3\_22634390\_x273.....gagacgucgugggaacacggggugccgaacu.....  
 0  
 Gi2\_7642791\_x273.....ucggagacgucgugggaacacggggugcc..... 0  
 Gi2\_7655585\_x271.....cgugggaacGcggggugccgaacu..... 1  
 Gi3\_22673179\_x269.....gugggaacacggggugccgCac.....  
 1  
 Gi2\_7667997\_x269.....aucggGgacgucgugggaacacgggggu..... 1  
 Gi3\_22672641\_x269.....gugggaaAacggggugccgaacu.....  
 1  
 Gi5\_6167436\_x269.....Uggaacacggggugccgaac..... 1  
 Gi3\_22677752\_x269.....cgugggaacacggggguAccgaacu.....  
 1  
 Gi1a\_4420290\_x267.....gUaacacggggugccgaacu..... 1  
 Gi5\_6173063\_x267.....gugggaacGcggggugccgaacu..... 1  
 Gi3\_22694116\_x267.....gugggaacacggggugccgaacG.....  
 1  
 Gi2\_7676042\_x267.....gacgucgugggaacacgggggu..... 0  
 Gi2\_7691476\_x265.....gacgucgugggaacacggggugc..... 0  
 Gi5\_6184234\_x264.....cgugggGacacggggugccgaacu..... 1  
 Gi2\_7699399\_x263.....ucggagacgucgugggaacacggggugc..... 0  
 Gi5\_6193187\_x262.....gugggaGcacggggugccgaacu..... 1  
 Gi5\_6197111\_x261.....Ugugggaacacggggugccgaacu..... 1  
 Gi5\_6196067\_x261.....cgugggaacacggggugccgCacu..... 1  
 Gi5\_6197633\_x261.....acgucgugggaacacggggugccgaac..... 0  
 Gi2\_7719813\_x260.....aucggGgacgucgugggaa..... 1  
 Gi2\_7724223\_x259.....gGgacgucgugggaacacggggugc..... 1  
 Gi3\_22783220\_x259.....acacggggugccgaacuu.....  
 0  
 Gi2\_7727071\_x258.....ggaacacgNggugccgaacu..... 1  
 Gi2\_7734292\_x257.....cUugggaacacggggugcc..... 1  
 Gi3\_22809979\_x256.....gGcugugggaacacggggugccgaac.....  
 1  
 Gi3\_22807163\_x256.....cgugggaaNacggggugccgaac.....  
 1  
 Gi2\_7744291\_x255.....gaucggagacgucgugggaacacgggg..... 0  
 Gi1\_2887914\_x255.....cgugggaacacggggugccg..... 0  
 Gi3\_22833935\_x254.....ugUgaacacggggugccgaacu.....  
 1  
 Gi5\_6223644\_x254.....cgucgugggaacacggggugccgaac..... 0  
 Gi2\_7753201\_x254.....ugggaacaNggggugccgaacu..... 1  
 Gi3\_22846342\_x253.....Aucgugggaacacggggugccgaacu.....  
 1  
 Gi3\_22843812\_x253.....gugggUacacggggugccgaacu.....  
 1

Gi1\_2893239\_x252.....gugggaacacggggugccga..... 0  
 Gi1\_2892483\_x252.....cgCgggaacacggggugcc..... 1  
 Gi3\_22871752\_x250.....gaacacggggugcUgaacu.....  
     1  
 Gi3\_22872752\_x250.....ggaacacggggCgccgaac.....  
     1  
 Gi5\_6240516\_x249.....cgAgggaacacggggugccgaacu..... 1  
 Gi2\_7783342\_x249.....aucggGgacgucgugggaacacgg..... 1  
 Gi5\_6242757\_x249.....gGgggaacacggggugccgaac..... 1  
 Gl1a\_4464036\_x249.....cUugggaacacggggugccgaacu..... 1  
 Gi2\_7787561\_x248.....uUggaacacggggugccgaac..... 1  
 Gi3\_22906604\_x248.....Uacgucgugggaacacggggugccgaacu.....  
     1  
 Gi2\_7790041\_x248.....cCugggaacacggggugccgaacu..... 1  
 Gl1a\_4469990\_x247.....ggaacacggggugccgaacA..... 1  
 Gi2\_7804100\_x246.....aGcacggggugccgaacu..... 1  
 Gi1\_2906915\_x246.....ggagacgucgugggaacacggggugccg..... 0  
 Gi1\_2904701\_x246.....aGcacggggugccgaacu..... 1  
 Gi3\_22922900\_x246.....gugggaacacggggugccgUacu.....  
     1  
 Gl1a\_4475643\_x245.....gugggaacacggggugccg..... 0  
 Gi3\_22937146\_x245.....ugggaacacggggugccgU.....  
     1  
 Gi3\_22939106\_x245....Uaucggagacgucgugggaacacggg.....  
     1  
 Gi5\_6261217\_x244.....aacacgggNugccgaacu..... 1  
 Gi2\_7809735\_x244.....gagacgucgugggaacacggggugcc..... 0  
 Gi3\_22952543\_x244.....acgucgugggaacacggg.....  
     0  
 Gi1\_2912295\_x243.....ugggaacacggggugccgaacuu..... 0  
 Gi2\_7823837\_x242.....aucggagacgucgugggaacacgggg..... 0  
 Gi3\_22973653\_x242.....cgugggaacacggggugUcgaacu.....  
     1  
 Gi1\_2915203\_x242.....aucggagacgucgugggaacacggggugcc..... 0  
 Gi2\_7833252\_x241.....gugggaacacggggugccAaacu..... 1  
 Gi3\_22984514\_x241.....gggaacacggggugccgCacu.....  
     1  
 Gi3\_22993410\_x240.....cggagacgucgugggaacac.....  
     0  
 Gi3\_23001553\_x239.....aaAacggggugccgaacu.....  
     1  
 Gi2\_7842372\_x239.....gugggaacaUggggugccgaacu..... 1  
 Gl1a\_4487024\_x239.....aucggagacgucguggga..... 0  
 Gi2\_7844045\_x239.....gggaacacNgggugccgaacu..... 1  
 Gi3\_23014672\_x238.....cUugggaacacggggugc.....  
     1  
 Gi2\_7851431\_x238.....gugggaacacggggugccgGacu..... 1

Gi3\_23020146\_x238.....guggUaacacggggugccgaac.....  
     1  
 Gi3\_23016100\_x238.....gugggaacCcggggugccgaac.....  
     1  
 Gi3\_23037682\_x236.....gugggaacacggggugcAgaacu.....  
     1  
 Gi2\_7863743\_x236.....ggaGcacggggugccgaacu..... 1  
 Gi5\_6293819\_x236.....gucgugggaacacggggugccgaacA..... 1  
 Gi2\_7867979\_x235.....gucgugggaacacggggugccgaacA..... 1  
 Gi3\_23053003\_x235.....cgugggaacacggggugccgaacG.....  
     1  
 Gi1\_2930002\_x235.....cgugggaacacggggugccgaacuu..... 0  
 Gi3\_23052298\_x235.....ugggaacacggggugccgaGcu.....  
     1  
 Gi3\_23060757\_x234.....uGgugggaacacggggugccgaacu.....  
     1  
 Gi5\_6300402\_x234.....gugggaacCcggggugccgaacu..... 1  
 Gl1a\_4505245\_x233.....ggaacacggggugccgaac..... 0  
 Gi1\_2932108\_x233.....Ggggaacacggggugccgaacu..... 1  
 Gi3\_23082717\_x233.....uUggaacacggggugccg.....  
     1  
 Gi3\_23080620\_x233.....ggUaacacggggugccgaacu.....  
     1  
 Gi5\_6302507\_x233.....cgugggaacacggggugc..... 0  
 Gi1\_2934434\_x232.....gucgugggaacacggggugccgaacA..... 1  
 Gi1\_2934666\_x232.....acgucgCgggaacacggggugccgaacu..... 1  
 Gi2\_7893605\_x231.....gGcgugggaacacggggugccgaacu..... 1  
 Gi3\_23113050\_x230.....cgugggaacacggggugccgaaAu.....  
     1  
 Gi3\_23118110\_x230.....gggaacacNgggugccgaac.....  
     1  
 Gi3\_23136914\_x229.....gaacacggggugccgaacuu.....  
     0  
 Gi2\_7917898\_x227...cgaucggagacgucgugggaacacggg..... 0  
 Gi5\_6336932\_x225.....guggUaacacggggugccgaacu..... 1  
 Gi3\_23178388\_x225.....aGcggagacgucgugggaacacg.....  
     1  
 Gi1\_2949311\_x225.....gaacacggggugccgaac..... 0  
 Gi3\_23192755\_x224.....cgggagacgucgugggaacacggg.....  
     0  
 Gl1a\_4530999\_x223.....cgugggaacacggggugc..... 0  
 Gi2\_7955244\_x223.....gugggaacacggUgugccgaacu..... 1  
 Gi3\_23201914\_x223.....gugggaacacggggGgcc.....  
     1  
 Gi3\_23225485\_x222.....ucgggagacgucgugggaacacggg.....  
     0  
 Gi5\_6353490\_x222.....cgugggaacacggggCgccgaacu..... 1

Gi3\_23235655\_x221.....aGcggagacgucgugggaacacggg.....  
 1  
 Gi3\_23230130\_x221.....ggagacgucgugggaacacggggugccg.....  
 0  
 Gi1a\_4536999\_x221.....Uggaacacggggugccgaacu..... 1  
 Gi2\_7968332\_x221.....cgugggaacacggggugcUga..... 1  
 Gi2\_7967227\_x221.....gGgggaacacggggugccga..... 1  
 Gi3\_23245788\_x220.....ggaGcacggggugccgaacu.....  
 1  
 Gi3\_23244688\_x220.....gugggaGcacggggugccgaac.....  
 1  
 Gi3\_23251068\_x220.....Gcgugggaacacggggugccgaac.....  
 1  
 Gi2\_7983284\_x219.....Agaacacggggugccgaacu..... 1  
 Gi3\_23256763\_x219.....gugggaCcacggggugccgaacu.....  
 1  
 Gi5\_6370944\_x219.....gaacacggNgugccgaacu..... 1  
 Gi2\_7983941\_x219.....aacacggggugccgaGcu..... 1  
 Gi3\_23276622\_x217.....gagacgucgugggaacacgggg.....  
 0  
 Gi2\_7993097\_x217.....ggGgacgucgugggaacacg..... 1  
 Gi1a\_4550990\_x216.....gugggaacacggggugccgaacA..... 1  
 Gi5\_6392467\_x216.....cgucgugggaacacggggugc..... 0  
 Gi2\_8005442\_x216.....gGacacggggugccgaacu..... 1  
 Gi3\_23326407\_x214.....gugggaacacggggugccgaUu.....  
 1  
 Gi1\_2979521\_x213.....aucggagacgucgugggaacacgggg..... 0  
 Gi4\_350396\_x213.....gugggaacacggggugccgaa..... 0  
 Gi3\_23345587\_x212.....cgugggUacacggggugccgaacu.....  
 1  
 Gi3\_23348767\_x212.....cgugggaacacggAgugccgaacu.....  
 1  
 Gi2\_8043172\_x211.....gugggaacacggggUaccgaacu..... 1  
 Gi3\_23363588\_x211.....gugggaacacggggugccgaCc.....  
 1  
 Gi5\_6416161\_x211.....cgugUgaacacggggugccgaacu..... 1  
 Gi1\_2982062\_x211.....gggaacacggggugccgaacu..... 0  
 Gi2\_8052213\_x210.....gagacgucgugggaacacggggugc..... 0  
 Gi3\_23382537\_x210.....gugggaacUggggugcc.....  
 1  
 Gi2\_8058071\_x209.....ucgugggaacacggggugccgaa..... 0  
 Gi5\_6424997\_x209.....aucggagacgucgugggaacacggg..... 0  
 Gi2\_8067652\_x208.....gugggaacacgAggugccgaacu..... 1  
 Gi2\_8068484\_x208.....ggGgacgucgugggaacacgggg..... 1  
 Gi1\_2988772\_x208.....cgucgCgggaacacggggugcc..... 1  
 Gi3\_23404915\_x208.....ucgugggaacacggggugccga.....  
 0



Gi3\_23420689\_x207.....gggaacacggggCgccgaacu.....  
     1  
 Gi2\_8075951\_x207.....cgucgugggaacacgggg..... 0  
 Gi3\_23429590\_x206.....agacgucgugggaacacggg.....  
     0  
 Gi1\_2997669\_x205.....cggagacgucgugggaacacggggugcc..... 0  
 Gi3\_23442975\_x205.....Ugaacacggggugccgaa.....  
     1  
 Gi3\_23444820\_x205.....gAgggaacacggggugccgaa.....  
     1  
 Gi3\_23459966\_x204.....Ggggaacacggggugccgaa.....  
     1  
 Gi2\_8098395\_x204.....gugAgaacacggggugccgaacu..... 1  
 Gi1\_3004409\_x203.....cgugggaacacggggugccgaacA..... 1  
 Gi3\_23477049\_x203....Uaucggagacgucgugggaacacggggu.....  
     1  
 Gi3\_23466899\_x203.....gggaGcacggggugccgaacu.....  
     1  
 Gi2\_8107965\_x203.....gucgugggaacacggggugccg..... 0  
 Gi3\_23467508\_x203.....Ggggaacacggggugccga.....  
     1  
 Gi3\_23493632\_x202.....cggagacgucgugggaacacggggugccga.....  
     0  
 Gi5\_6470819\_x202.....aacacggggCgccgaacu..... 1  
 Gi3\_23488784\_x202.....gaacacggAgugccgaacu.....  
     1  
 Gi3\_23502492\_x201.....ucgugggaacacggggugcc.....  
     0  
 Gi2\_8120901\_x201.....guggAaacacggggugccgaacu..... 1  
 Gi3\_23518931\_x200.....cgGgggaacacggggugccgaac.....  
     1  
 Gi3\_23523331\_x200.....cgugggaacacggggugccgaaUu.....  
     1  
 Gi2\_8132932\_x200.....cgugggaaUacggggugccgaacu..... 1  
 G1a\_4602587\_x199.....uUggaacacggggugccgaacu..... 1  
 Gi2\_8150412\_x198.....ucgugggaacacggggugc..... 0  
 Gi2\_8142888\_x198.....ggUaacacggggugccgaacu..... 1  
 Gi3\_23564928\_x197.....gggGaacacggggugccgaacu.....  
     1  
 Gi5\_6495719\_x197.....cgugggaacacggggugccgaCcu..... 1  
 Gi3\_23558821\_x197.....gAaacacggggugccgaacu.....  
     1  
 Gi3\_23579069\_x196.....Aggaacacggggugccgaa.....  
     1  
 Gi3\_23605197\_x194.....acgucgugggaacacggggugccg.....  
     0  
 Gi5\_6521848\_x193.....guAggaacacggggugccgaacu..... 1

Gi2\_8200451\_x192.....gugggaaAacggggugccgaacu..... 1  
 Gi3\_23638576\_x192.....gUgaacacggggugccgaa.....  
 1  
 Gi2\_8199875\_x192.....cAugggaacacggggugccgaacu..... 1  
 Gi3\_23646609\_x191.....cguggAaacacggggugccgaacu.....  
 1  
 Gi1\_3035987\_x191.....cUucgugggaacacggggugccgaacu..... 1  
 Gi2\_8202747\_x191.....gagacgucgugggaacacggggugccg..... 0  
 Gi1\_3038462\_x190.....gGacacggggugccgaacu..... 1  
 Gi3\_23659185\_x190.....gugggaacacggggugccAaac.....  
 1  
 Gi3\_23680787\_x189.....guAggaacacggggugccgaac.....  
 1  
 Gi3\_23677007\_x189...cgaucggagacgucgugg.....  
 0  
 Gi2\_8225558\_x189.....gacgucgugggaacacggggugccgaac..... 0  
 Gi1\_3042249\_x188.....acgucgugggaacacggggugccg..... 0  
 Gi1\_3045436\_x187.....Uucgugggaacacggggugccgaacu..... 1  
 Gi2\_8238546\_x187.....ggagacgucgugggaacacggggug..... 0  
 Gi4\_363236\_x187.....ucgugggaacacggggugccgaacu..... 0  
 Gi3\_23712512\_x187.....gugggaacacAgggugccgaac.....  
 1  
 Gi5\_6562038\_x186.....Ugaacacggggugccgaac..... 1  
 Gi2\_8248078\_x186.....gugggaacacggAgugccgaacu..... 1  
 G1a\_4647473\_x186...cgaucggagacgucgugg..... 0  
 Gi3\_23717926\_x186.....cgCgggaacacggggugccgaac.....  
 1  
 Gi3\_23738900\_x185.....gugggaacacggggugccgaaA.....  
 1  
 Gi1\_3053794\_x185...aucggagacgucgCgggaacacg..... 1  
 Gi2\_8265331\_x185.....gagacgucgugggaacacggggug..... 0  
 Gi5\_6582202\_x184.....ugggaacacggggugccgaacuu..... 0  
 Gi2\_8267916\_x184.....gugggaacacggggugccgaacuu..... 0  
 Gi3\_23745169\_x184.....gCgaacacggggugccgaacu.....  
 1  
 Gi3\_23758969\_x184...gaucggagacgucgugggaac.....  
 0  
 Gi3\_23752161\_x184.....gaacacgggguAccgaacu.....  
 1  
 Gi5\_6588611\_x183.....gAgggaacacggggugccgaacu..... 1  
 Gi3\_23763182\_x183.....gugggaacacggggugccgaU.....  
 1  
 Gi2\_8278387\_x183.....ugggaacacggggugccgaacuu..... 0  
 G1a\_4660908\_x182.....gucgugggaacacggggugccgaacu..... 0  
 Gi3\_23791973\_x181.....Cgaacacggggugccgaac.....  
 1

Gi3\_23791611\_x181.....cUucuguggaacacggggugccgaac.....  
     1  
 Gi3\_23795955\_x181.....cguggaacacggggGgccgaacu.....  
     1  
 G1a\_4664176\_x181....gaucggagacgucguggaacacggg..... 0  
 Gi3\_23800118\_x181.....cUuggaacacggggugccgaa.....  
     1  
 Gi5\_6597354\_x181.....agacgucguggaacacggggugccgaac..... 0  
 Gi3\_23790706\_x181.....uggaacacAgggugccgaacu.....  
     1  
 Gi3\_23809853\_x180.....gggaacacggggGgccgaacu.....  
     1  
 Gi3\_23807333\_x180.....gaacaUggggugccgaacu.....  
     1  
 Gi5\_6604946\_x180.....uggaacacggggugccgaacuA..... 1  
 Gi2\_8311368\_x179.....gggaacacggggugccgaCcu..... 1  
 Gi5\_6616796\_x179cugcgauacggagacgucgA..... 1  
 Gi2\_8316379\_x178.....ggaacacggggugccgCacu..... 1  
 Gi3\_23843110\_x178.....aacacAgggugccgaacu.....  
     1  
 Gi5\_6622500\_x178.....cgugggaGcacggggugccgaacu..... 1  
 Gi3\_23843822\_x178.....gggaacacggggugccgaGcu.....  
     1  
 Gi5\_6624636\_x178....aucggagacgucguggaacacggggugc..... 0  
 Gi3\_23836346\_x178.....cguggaacacggggugccgGacu.....  
     1  
 Gi3\_23848973\_x177.....cguggaacacggggugcAgaacu.....  
     1  
 Gi1\_3077791\_x177.....gaacaUggggugccgaacu..... 1  
 Gi3\_23862248\_x177.....cUuggaacacggggugccg.....  
     1  
 Gi2\_8337988\_x176.....Ugagacgucguggaacacggggugcc..... 1  
 Gi1\_3079561\_x176.....ucguggaacacggggugc..... 0  
 Gi3\_23866657\_x176.....gggaacGcggggugccgaacu.....  
     1  
 Gi3\_23873169\_x176.....guggaacacggggugccgGac.....  
     1  
 Gi3\_23874753\_x176.....gaaUacggggugccgaacu.....  
     1  
 Gi5\_6642805\_x175.....cguggaacGcggggugccgaacu..... 1  
 Gi2\_8346057\_x175.....cguggaacacAgggugccgaacu..... 1  
 Gi5\_6641405\_x175.....Aaacacggggugccgaacu..... 1  
 Gi3\_23885102\_x175.....cguggaacacggggugccgCac.....  
     1  
 Gi1\_3086232\_x175.....Gacacggggugccgaacu..... 1  
 Gi2\_8343432\_x175.....Aggaacacggggugccgaacu..... 1  
 Gi2\_8348332\_x175.....ggagacgucguggaacac..... 0

Gi3\_23881427\_x175.....gaacacggggGgccgaacu.....  
 1  
 Gi3\_23900640\_x174.....aGcggagacgucgugggaacacggggu.....  
 1  
 Gi3\_23905164\_x174.....ugggaacacggggugcUgaacu.....  
 1  
 Gi5\_6653442\_x174.....aacacggggugccgaGcu..... 1  
 Gi1\_3091278\_x173.....ugggaacacggggugccga..... 0  
 Gi5\_6661059\_x173.....uUggaacacggggugccgaac..... 1  
 Gi3\_23913853\_x173.....cgugggaacacggggugccgaUc.....  
 1  
 Gi2\_8368473\_x173.....gugggaaUacggggugccgaacu..... 1  
 Gi3\_23917659\_x173.....gugggaacacggggugAcgaacu.....  
 1  
 1  
 G1a\_4693658\_x172.....ucgugggaacacggggugccgaacu..... 0  
 Gi1\_3095076\_x172.....ucgugggaacacggggugccga..... 0  
 Gi5\_6668462\_x172.....cCugggaacacggggugccgaacu..... 1  
 Gi5\_6665194\_x172.....gugggaacacAgggugccgaacu..... 1  
 Gi3\_23936463\_x172.....ggagacgucgugggaacacggggugccgaacu.....  
 0  
 Gi5\_6671547\_x171.....acgucgugggaacacggggugccgaacA..... 1  
 Gi3\_23948989\_x171.....gucgugggaacacggggugccgaa.....  
 0  
 Gi2\_8386146\_x171.....ggGgacgucgugggaacacggg..... 1  
 Gi3\_23971493\_x170.....ucggagacgucgugggaaca.....  
 0  
 Gi5\_6679067\_x170.....gaUcacggggugccgaacu..... 1  
 G1a\_4699299\_x170.....gggaacacggggugccgaacA..... 1  
 Gi3\_23965713\_x170.....gaacacggggugUcgaacu.....  
 1  
 Gi3\_23991806\_x169.....gagacgucgugggaacacggggugccg.....  
 0  
 Gi3\_23995524\_x169.....Gucggagacgucgugggaacacg.....  
 1  
 Gi3\_23993496\_x169.....gugggaacNcggggugcc.....  
 1  
 Gi5\_6698334\_x168.....gUgaacacggggugccgaac..... 1  
 Gi2\_8407000\_x168.....Uaucggagacgucgugggaacacggggu..... 1  
 Gi3\_24017819\_x167.....ggaacGcggggugccgaacu.....  
 1  
 Gi2\_8414376\_x167.....Gacacggggugccgaacu..... 1  
 Gi5\_6701015\_x167.ugcgaucggagacgucguggg..... 0  
 Gi2\_8417048\_x167.....cggGgacgucgugggaacacggg..... 1  
 Gi1\_3109978\_x167.....cgCgggaacacggggugccga..... 1  
 Gi3\_24023497\_x167.....gggaacacggggugccgaCc.....  
 1

Gi3\_24051496\_x165.....gugggaacacggggugccgaacuA.....  
     1  
 Gi3\_24053806\_x165.....gugggaacacggggugccgaaAu.....  
     1  
 Gi5\_6725660\_x164.....gugggaacacggggugccgCacu..... 1  
 Gi2\_8455644\_x163.....agacgucgugggaacacggggugccg..... 0  
 Gi5\_6740006\_x162.....cgucgugggaacacggggugccga..... 0  
 Gi2\_8468799\_x162.....cUgagacgucgugggaacacggggugcc..... 1  
 Gi1\_3136516\_x161.....aucggagacgucgugggaacacgg..... 0  
 Gi1\_3133457\_x161.....gagacgucgugggaacacggggugccgaacu..... 0  
 Gi3\_24103978\_x161.....acgucgugggaacacggggugccga.....  
     0  
 Gi3\_24103817\_x161.....gggaacacgggUugccgaacu.....  
     1  
 Gi1\_3133296\_x161.....cgugggaacacggggugccgU..... 1  
 Gi3\_24120212\_x160.....cgugggaacacggggugccgUacu.....  
     1  
 Gi3\_24117172\_x160.....agacgucgugggaacacggggugccga.....  
     0  
 Gi1\_3140198\_x160.....ucgugggaacacggggugccgaacA..... 1  
 Gi3\_24128212\_x160.....gucgugggaacacggggua.....  
     1  
 Gi1\_3138118\_x160.....cgCgggaacacggggugc..... 1  
 Gi3\_24147800\_x159.....gaacacggggAgccgaacu.....  
     1  
 Gi2\_8492525\_x159.....cgucgugggaacacggggugccgaa..... 0  
 Gi3\_24140486\_x159.....aacacggggAgccgaacu.....  
     1  
 Gi2\_8496818\_x159.....cgugggaacacgUggugccgaacu..... 1  
 Gi1\_3146551\_x158.....ucgugggaacacggggugccg..... 0  
 Gi1\_3147341\_x158.....aucggagacgucgugggaacacggggugc..... 0  
 Gi2\_8501089\_x158.....Uacgucgugggaacacggggugccgaacu..... 1  
 Gi3\_24155874\_x158.....Augggaacacggggugcc.....  
     1  
 Gi3\_24153188\_x158.....gugggaacacggggugcUgaac.....  
     1  
 Gi5\_6784945\_x157.....gugggaacacggggugccgaCcu..... 1  
 Gi2\_8512749\_x157.....gugggaacNcggggugccgaac..... 1  
 Gi3\_24173187\_x157.....gagacgucgugggaacac.....  
     0  
 Gi3\_24183814\_x156.....Agggaacacggggugccgaacu.....  
     1  
 Gi5\_6786980\_x156.....aUcacggggugccgaacu..... 1  
 Gi3\_24179914\_x156.....gAgaacacggggugccgaacu.....  
     1  
 Gi2\_8518084\_x156.....aacacgggNugccgaacu..... 1  
 Gi4\_380000\_x156.....acgucgugggaacacggggugccgaacu..... 0

Gi2\_8525884\_x156.....cggGgacgucgugggaaacacggggugcc..... 1  
 Gi3\_24205432\_x155.....ucgugggaNcacggggugccgaacu.....  
 1  
 Gi3\_24212397\_x154.....gagacgucgugggaaacacg.....  
 0  
 Gi3\_24221021\_x154.....Ugugggaaacacggggugccgaac.....  
 1  
 Gi3\_24221175\_x154.....ucggagacgucgugggaaacac.....  
 0  
 Gi3\_24215169\_x154.....ucgugUgaacacggggugccgaacu.....  
 1  
 Gi5\_6806050\_x154.ugcgaucggagacgucgugggaa..... 0  
 Gi3\_24218865\_x154.....ugggaaacacggggugccAaacu.....  
 1  
 G1a\_4751489\_x154....gaucggagacgucgugggaaacacgggg..... 0  
 Gi3\_24219943\_x154.....Uacacggggugccgaacu.....  
 1  
 Gi5\_6811577\_x153.....gGcgugggaaacacggggugccgaacu..... 1  
 Gi3\_24229013\_x153.....gggaaacacggggugccgaacuu.....  
 0  
 Gi3\_24241700\_x152.....aacacggggugccgCacu.....  
 1  
 Gi3\_24251124\_x152.....ggGacacggggugccgaacu.....  
 1  
 Gi2\_8565872\_x152....aucggGgacgucgugggaa..... 1  
 Gi3\_24240636\_x152.....gacgucgugggaaacacgg.....  
 0  
 Gi3\_24252340\_x152....gaucggagacgucgugggaaaca.....  
 0  
 Gi1\_3172630\_x151.....Ggugggaaacacggggugccgaacu..... 1  
 Gi3\_24287008\_x150....gaucggagacgucguggg.....  
 0  
 Gi3\_24285808\_x150.....gugggCacacggggugccgaacu.....  
 1  
 Gi5\_6836284\_x150.....uGgugggaaacacggggugccgaacu..... 1  
 Gi2\_8583082\_x150....gaucggagacgucgugggaa..... 0  
 Gi3\_24287758\_x150.....Uacgucgugggaaacacggggugccgaac.....  
 1  
 Gi5\_6838384\_x150....aucggagacgucgugggaaacacgggg..... 0  
 Gi4\_383349\_x149.....gggaaacacggggugccgaacu..... 0  
 Gi3\_24302224\_x149.....gugggaaacacgggguAccgaac.....  
 1  
 Gi5\_6845857\_x149.....gaacacggggCgccgaacu..... 1  
 Gi3\_24294029\_x149.....cgugggaaacCcgggugccgaacu.....  
 1  
 Gi2\_8589668\_x149.....cgugAgaacacggggugccgaacu..... 1  
 Gi2\_8599786\_x148.....cgucgugggaaacacggggug..... 0

Gi2\_8606742\_x148.....gugggaacacggggugUcgaacu..... 1  
 Gi3\_24311710\_x148.....ucgugggaacacggggugccgCacu.....  
 1  
 Gi5\_6860391\_x147.....cgucgugggaacacggggugcc..... 0  
 Gi2\_8617342\_x147.....Ggugggaacacggggugccgaac..... 1  
 Gi5\_6862596\_x147.....cAugggaacacggggugccgaacu..... 1  
 Gi3\_24328247\_x147...cgaucggagacgucgugggaacacggggu.....  
 0  
 Gi2\_8622029\_x146....aucggagacgucgugggaa..... 0  
 Gi3\_24349184\_x146.....ggaacacggggugccgaGcu.....  
 1  
 Gi2\_8625387\_x146.....gugggaacacggggAgccgaacu..... 1  
 Gi1\_3194131\_x145....aucggagacgucgCgggaaca..... 1  
 Gi1\_3195581\_x145....acgucgugggaacacggggugccgaacA..... 1  
 Gi5\_6877088\_x145.....cacggggugccgaacuuu..... 0  
 Gi5\_6883903\_x145....gaucggagacgucgugggaacacgg..... 0  
 Gi3\_24378003\_x144.....ugggGacacggggugccgaac.....  
 1  
 Gi3\_24387219\_x144.....ggaGcacggggugccgaac.....  
 1  
 Gi5\_6896006\_x143.....ugggGacacggggugccgaacu..... 1  
 Gi1\_3206809\_x143.....gacgucgugggaacacggggugcc..... 0  
 Gi2\_8680326\_x141.....cUugggaacacggggugc..... 1  
 Gi2\_8679762\_x141.....ggaacacggggCgccgaacu..... 1  
 Gi3\_24437223\_x141.....cgugggaacacgggAugccgaacu.....  
 1  
 Gi3\_24440593\_x140.....ggaacacggggugccgaGc.....  
 1  
 Gi3\_24447873\_x140.....cgugggaacacggggugccgaGc.....  
 1  
 Gi3\_24451933\_x140.....gaacacgAggugccgaacu.....  
 1  
 Gi1\_3220917\_x140.....gucgugggaacacggggugccgaac..... 0  
 Gl1a\_4808926\_x138....aucggagacgucgugggaacacggggugc..... 0  
 Gi3\_24474755\_x138...cgaucggagacgucgugggaacacggg.....  
 0  
 Gi3\_24481241\_x138.....cgugggaacacggggugccgaacuA.....  
 1  
 Gi1\_3228266\_x138.....gugggaacacggggugccgaacAu..... 1  
 Gi5\_6944862\_x138.....gacgucgugggaacacggggugccgaac..... 0  
 Gi3\_24498432\_x137.....ggagacgucgugggaaca.....  
 0  
 Gi2\_8720316\_x137.....Cgaacacggggugccgaacu..... 1  
 Gi3\_24493911\_x137.....ugggaacacggggugccgGacu.....  
 1  
 Gi2\_8724426\_x137.....cgugggaacacggggugcUgaacu..... 1

Gi3\_24511564\_x136.....gggaacacggggugccgCac.....  
     1  
 Gi2\_8726609\_x136.....Uucgugggaacacggggugcc..... 1  
 Gi3\_24511428\_x136.....gCaacacggggugccgaacu.....  
     1  
 Gi3\_24533529\_x135.....ugggaacacgggUugccgaacu.....  
     1  
 Gi3\_24532584\_x135.....cgAgggaacacggggugccgaac.....  
     1  
 Gi1\_3238370\_x135.....gucgugggaacacggggug..... 0  
 G1a\_4820247\_x135....gaucggagacgucguggga..... 0  
 Gi3\_24546988\_x134.....guUggaacacggggugcc.....  
     1  
 G1a\_4823877\_x134....gaucggagacgucguggg..... 0  
 Gi5\_6973574\_x134.....agacgucgugggaacacggggugcc..... 0  
 Gi5\_6974914\_x134....aucggagacgucgugggaacac..... 0  
 Gi3\_24557440\_x134cugcgauccgagacgucg.....  
     0  
 Gi3\_24551946\_x134.....Cggaacacggggugccgaac.....  
     1  
 Gi5\_6976522\_x134....gaucggagacgucgugggaacacggg..... 0  
 Gi2\_8748554\_x134.....gugggaacacggggGgccgaac..... 1  
 Gi3\_24545112\_x134.....Ggucgugggaacacggggugccgaacu.....  
     1  
 Gi5\_6975048\_x134.....Uugggaacacggggugccga..... 1  
 Gi2\_8751502\_x134.....ggGgacgucgugggaacacggggug..... 1  
 Gi2\_8776771\_x132.....Augggaacacggggugccgaac..... 1  
 Gi2\_8774263\_x132....ucggGgacgucgugggaa..... 1  
 Gi5\_6992079\_x132.....gugggaacacggggUAccgaacu..... 1  
 Gi2\_8772811\_x132....ucggagacgucgugggaacacggggu..... 0  
 Gi1\_3251485\_x132....gaucggagacgucgugggaacac..... 0  
 Gi3\_24591938\_x132.....gugggaacacggggCgcc.....  
     1  
 Gi2\_8783607\_x131....gaucggagacgucgugggaacacgg..... 0  
 Gi3\_24612667\_x131....ucggagacgucgugggaacacgg.....  
     0  
 Gi2\_8782821\_x131.....cguAgggaacacggggugccgaacu..... 1  
 Gi5\_7007422\_x130.....aacacggggugccgaacuuu..... 0  
 G1a\_4837317\_x130....aucggagacgucgugggaacacggggug..... 0  
 Gi2\_8798879\_x130.....agacgucgugggaacacggggugccgaac..... 0  
 Gi3\_24622685\_x130.....gugggaacacggggugccgaUcu.....  
     1  
 Gi3\_24630745\_x129.....cggagacgucgugggaacacggggugc.....  
     0  
 Gi5\_7021922\_x129.....ggaacacgNggugccgaacu..... 1  
 Gi3\_24632551\_x129....Uaucggagacgucgugggaacacg.....  
     1



Gi3\_24635002\_x129.....uCggaacacggggugccga.....  
 1  
 Gi5\_7018439\_x129.....cUugggaacacggggugccgaac..... 1  
 Gi2\_8808449\_x129.....gGgggaacacggggugccgaa..... 1  
 Gi2\_8811029\_x129.....cUucgugggaacacggggugcc..... 1  
 Gi5\_7015988\_x129.....uCggaacacggggugccgaacu..... 1  
 Gi2\_8820644\_x128.....cggagacgucgugggaacac..... 0  
 Gi2\_8815012\_x128.....Aaacacggggugccgaacu..... 1  
 Gi5\_7025917\_x128.....Agaacacggggugccgaacu..... 1  
 Gi2\_8816548\_x128.....gGgacgucgugggaacac..... 1  
 Gi3\_24663904\_x128.....agacgucgugggaacacggggugccgaacA.....  
 1  
 Gi2\_8818852\_x128.....cgugggaacaUggggugccgaacu..... 1  
 Gi3\_24672803\_x127.....gggaacacgggguAccgaacu.....  
 1  
 Gi3\_24678010\_x127..gcgaucggagacgucgug.....  
 0  
 Gi3\_24678899\_x127.....gUaacacggggugccgaa.....  
 1  
 Gi2\_8826761\_x127..cgaucggagacgucgugga..... 0  
 Gi5\_7042880\_x127.....gacgucgugggaacacggggugccgaacA..... 1  
 Gi3\_24694912\_x126.....gugggaacGcggggugcc.....  
 1  
 Gi3\_24684202\_x126.....ucgugggaacacggggCgccgaacu.....  
 1  
 Gi3\_24684454\_x126.....Ccugggaacacggggugccgaac.....  
 1  
 Gi2\_8843856\_x126.....gugggaacacggggugcAgaacu..... 1  
 Gi5\_7050449\_x126.....ucgugggaacacggggugcc..... 0  
 Gi5\_7045787\_x126.....Uaacacggggugccgaac..... 1  
 Gi1\_3276686\_x126.....gacgucgCgggaacacggggg..... 1  
 Gi5\_7054093\_x125.....Cgggaacacggggugccgaacu..... 1  
 Gi2\_8860512\_x125.....ucggGgacgucgugggaacacggggugc..... 1  
 Gi1\_3283969\_x125.....Ugaacacggggugccgaac..... 1  
 Gi2\_8852512\_x125.....uGgugggaacacggggugccgaacu..... 1  
 Gi1\_3280844\_x125.....cgucgugggaacacggggugccgaacA..... 1  
 Gi3\_24698053\_x125.....gacgucgugggaacacgggg.....  
 0  
 Gi3\_24700053\_x125.....acgucgugggaacacggggugccgaa.....  
 0  
 Gi3\_24698928\_x125.....cgugggCacacggggugccgaacu.....  
 1  
 Gi5\_7067804\_x124.....uAggaacacggggugccgaacu..... 1  
 Gi2\_8866467\_x124...Uaucggagacgucgugggaacacggg..... 1  
 Gi5\_7063836\_x124.....ugggaacGcggggugccgaacu..... 1  
 Gi2\_8861383\_x124.....cgugggaacacAgggugccgaacu..... 1

Gi3\_24729310\_x124.....ggaacacggggugccgaUc.....  
     1  
 Gi2\_8864235\_x124....aucggGgacgucgugggaaacacggggug..... 1  
 Gi3\_24724102\_x124.....cgugggaacacggggAgccgaacu.....  
     1  
 Gi3\_24728070\_x124.....ggGacacggggugccgaac.....  
     1  
 Gi3\_24740518\_x123.....gucgugggaacacggggugccgCacu.....  
     1  
 Gi3\_24735598\_x123.....ugAgaacacggggugccgaacu.....  
     1  
 Gi3\_24741871\_x123.....cgucgugggaacacgggggu.....  
     0  
 Gi5\_7080021\_x123.....Caacacggggugccgaacu..... 1  
 Gi3\_24742732\_x123.....gCgggaacacggggugccgaa.....  
     1  
 Gi2\_8892035\_x122.....ucgugggaacacggggugcc..... 0  
 Gi2\_8890083\_x122.....cgugggaacacggggugccAaacu..... 1  
 Gi3\_24753393\_x122.....gugggaacNcggggugccga.....  
     1  
 G1a\_4867154\_x122....aucggagacgucgugggaaacacggggugcc..... 0  
 Gi1\_3294845\_x122.....gaacacggggugccgaacuu..... 0  
 Gi5\_7086884\_x122....gaucggagacgucgugggaaacac..... 0  
 Gi5\_7087128\_x122.....gggaacacggggCgccgaacu..... 1  
 G1a\_4873352\_x121.....gUgaacacggggugccgaacu..... 1  
 Gi2\_8903927\_x121.....gaacacggNgugccgaacu..... 1  
 Gi5\_7097702\_x121.....guggAaacacggggugccgaacu..... 1  
 Gi3\_24789086\_x120.....ggUaacacggggugccgaac.....  
     1  
 Gi1\_3304766\_x120.....acgucgCgggaacacggggugc..... 1  
 Gi5\_7105063\_x120.....gugggaacaUggggugccgaacu..... 1  
 Gi2\_8915106\_x120....gaucggGgacgucgugggaa..... 1  
 Gi2\_8907546\_x120.....cgugggaacacggggugUccgaacu..... 1  
 Gi3\_24802586\_x119.....guUgugggaacacggggugccgaacu.....  
     1  
 Gi5\_7119297\_x119.....ugggaacacggggCgccgaacu..... 1  
 Gi3\_24796398\_x119.....gCaacacggggugccgaac.....  
     1  
 Gi3\_24801039\_x119....Gucggagacgucgugggaaacacgggggu.....  
     1  
 Gi3\_24808060\_x119.....gugggaacUcggggugccgaacu.....  
     1  
 Gi2\_8940131\_x118.....cgugggaCcacggggugccgaacu..... 1  
 Gi5\_7127947\_x118.....aacGcggggugccgaacu..... 1  
 Gi2\_8934349\_x118.....Ggggaacacggggugccgaac..... 1  
 Gi2\_8935883\_x118.....uUggaacacggggugccga..... 1  
 Gi2\_8939069\_x118....cgaucggagacgucgugggaaacacg..... 0

Gi5\_7124171\_x118.....cgugggaacacAgggugccgaacu..... 1  
 Gi2\_8941901\_x118.ugcgaucggGgacgucgug..... 1  
 Gi5\_7124289\_x118....gaucggagacgucgugggaacacg..... 0  
 Gi5\_7126413\_x118.....ggUacacggggugccgaacu..... 1  
 Gi2\_8929511\_x118.....gugggaacacggggugccgaaUu..... 1  
 Gi1\_3312863\_x118.....ugggaacacggggugccg..... 0  
 Gi3\_24828520\_x118.....gggaacacggggugccgGacu.....  
 1  
 Gi3\_24840471\_x117.....gugggaacaUggggugccgaac.....  
 1  
 Gi5\_7131014\_x117.....gugggaacacggggugccAaacu..... 1  
 Gi2\_8950913\_x117.....Uucgugggaacacggggugccgaac..... 1  
 Gi2\_8954774\_x117.....gugggaacacggggugccgaGc..... 1  
 Gi3\_24839769\_x117....aucggagacgucgugggaacacggggug.....  
 0  
 Gi2\_8948690\_x117.....Agugggaacacggggugccgaacu..... 1  
 Gi2\_8944010\_x117.....cggagacgucgugggaacacggggug..... 0  
 Gi2\_8952902\_x117.....gUagacgucgugggaacacggggugcc..... 1  
 Gi2\_8965799\_x116.....cUucgugggaacacggggugccg..... 1  
 Gi3\_24858393\_x116.....aacacggggugcUgaacu.....  
 1  
 Gi3\_24854101\_x116.....gugggaacacggggugccgaacuu.....  
 0  
 Gi2\_8961159\_x116.....gugggUacacggggugccgaacu..... 1  
 Gi5\_7144314\_x116.....ugggaacacggggugccgaacuuu..... 0  
 Gi2\_8968221\_x115.....aaUacggggugccgaacu..... 1  
 Gi3\_24878460\_x115.....cgugggaacUcggggugccgaacu.....  
 1  
 Gi5\_7153437\_x115.....gaacacggggugccgaCcu..... 1  
 Gi2\_8972591\_x115.ugcgaucggagacgucgugggaaca..... 0  
 Gi3\_24877885\_x115.....Augggaacacggggugccga.....  
 1  
 G1a\_4893984\_x115.ugcgaucggagacgucgu..... 0  
 Gi1\_3328227\_x115.....Aaacacggggugccgaacu..... 1  
 Gi3\_24896415\_x114.....gucgugggaacacggggCgccgaacu.....  
 1  
 Gi3\_24892653\_x114....Gucggagacgucgugggaacacggg.....  
 1  
 Gi5\_7167498\_x114.....gugggaacacggggugccgGacu..... 1  
 Gi2\_8985868\_x114.....ggaacacggggugccgaGcu..... 1  
 Gi3\_24894705\_x114.....gCgggaacacggggugccga.....  
 1  
 Gi1\_3328686\_x114.....cggagacgucgCgggaacacggggugcc..... 1  
 Gi3\_24905704\_x113.....cUucgugggaacacggggugccg.....  
 1  
 Gi2\_8994935\_x113.....ggagacgucgugggaacacg..... 0  
 Gi5\_7174512\_x113.....gugggaacacggggugcUgaacu..... 1

Gi2\_9000585\_x113.....gugggaacacggggugccgUacu..... 1  
 G1a\_4903123\_x113.....gaacacggggugccgaac..... 0  
 Gi3\_24900732\_x113.....uAggaacacggggugccgaac.....  
 1  
 G1a\_4902897\_x113.....aucggagacgucgugggaacacg..... 0  
 Gi3\_24912371\_x113.....gagacgucgugggaacacggggugcc.....  
 0  
 Gi2\_9002499\_x112.....cgugggaaNacggggugccgaac..... 1  
 Gi2\_9008435\_x112.....Ggacgucgugggaacacggggugcc..... 1  
 G1a\_4907071\_x112.....Augggaacacggggugccgaacu..... 1  
 Gi3\_24919826\_x112.....cgugggaacacggggugccgaCc.....  
 1  
 Gi3\_24935058\_x112.....gggaacacggggCgccgaac.....  
 1  
 Gi2\_9002275\_x112.....gugggaacacggggugAcgaacu..... 1  
 G1a\_4913099\_x111.....gugggaacacggggugccgaa..... 0  
 Gi2\_9024915\_x111.....cgaucggagacgucgugggaaca..... 0  
 Gi3\_24952936\_x111.....ugggaacaUggggugccgaacu.....  
 1  
 Gi1\_3345459\_x111.....ucggagacgucgugggaacacggggugcc..... 0  
 Gi5\_7192613\_x111.....acgucgugggaacacggggugcc..... 0  
 Gi1\_3345237\_x111.....aacacgggNugccgaacu..... 1  
 Gi3\_24952381\_x111.....aacacggggugccAaacu.....  
 1  
 Gi5\_7192724\_x111.....cgugggaacacgUggugccgaacu..... 1  
 Gi2\_9028023\_x111.....cUugggaacacggggugccga..... 1  
 Gi1\_3345348\_x111.....gaucggagacgucgCgggaacacgg..... 1  
 Gi2\_9023361\_x111.....gggaacacggggugccgCacu..... 1  
 Gi1\_3346234\_x110.....ugggaacacggggugccgCacu..... 1  
 Gi1\_3347334\_x110.....gaucggagacgucguggg..... 0  
 Gi2\_9039576\_x110.....cgucgugggaacacggggugccgaacA..... 1  
 Gi3\_24965812\_x110.....ugUgaacacggggugccgaac.....  
 1  
 Gi2\_9042956\_x109.....gugggaacacggggugccgaaAu..... 1  
 Gi2\_9039686\_x109.....ggUacacggggugccgaac..... 1  
 Gi2\_9051458\_x109.....cgaucggagacgucgugggaacacggggug..... 0  
 Gi1\_3354560\_x109.....gugggaacNcggggugccgaacu..... 1  
 Gi3\_24977738\_x109.....gucgugggaacacggggug.....  
 0  
 Gi3\_24984387\_x109.....gugggaacaAggggugccgaacu.....  
 1  
 Gi1\_3356292\_x108.....Cgggaacacggggugccga..... 1  
 Gi3\_24998367\_x108.....ggagacgucgugggaacacggggugccgaac.....  
 0  
 Gi3\_24996855\_x108.....aUacgucgugggaacacggggugccgaacu.....  
 1  
 Gi5\_7214765\_x108.....ugggaacacggggugccgaGcu..... 1

Gi2\_9060966\_x108.....gugggaacacggggCgccgaac..... 1  
 Gi3\_24996639\_x108.....cgugggGacacggggugccgaac.....  
 1  
 Gi3\_24999015\_x108.....ggagacgucgugggaacacgg.....  
 0  
 G1a\_4927650\_x108.....cgucgugggaacacggggugccgaacu..... 0  
 Gi1\_3360376\_x107.....Augggaacacggggugccgaacu..... 1  
 Gi2\_9063875\_x107.....acgucgugggaacacggg..... 0  
 Gi3\_25006346\_x107.....ggaacacggggugccgGacu.....  
 1  
 Gi5\_7228130\_x107.....gggaacacggggugccgaCcu..... 1  
 G1a\_4931723\_x107.....aucggagacgucgugggaacacgg..... 0  
 Gi2\_9074254\_x107.....gugggGacacggggugccgaac..... 1  
 Gi5\_7230912\_x107.....cgugggaacacggggugccg..... 0  
 Gi5\_7243890\_x106.....Uacgucgugggaacacggggugccgaacu..... 1  
 Gi3\_25026846\_x106.....cggagacgucgugggaacacgg.....  
 0  
 G1a\_4935758\_x106.....aucggagacgucgugggaa..... 0  
 Gi2\_9084648\_x106.....ggagacgucgugggaacacggggugccg..... 0  
 Gi1\_3368784\_x106.....ggaacacggggugccgaa..... 0  
 Gi3\_25038824\_x106.....ggaacGcggggugccgaac.....  
 1  
 Gi2\_9083588\_x106.....gacgucgugggaacacggg..... 0  
 Gi3\_25032570\_x106.....gaucggagacgucguggga.....  
 0  
 Gi3\_25049656\_x105.....Cgggaacacggggugccgaac.....  
 1  
 Gi5\_7254194\_x105.....cgucgugggaacacggggugccgaa..... 0  
 Gi2\_9104349\_x104.....ggaacacggggugccgGacu..... 1  
 Gi3\_25070429\_x104.....gCgggaacacggggugcc.....  
 1  
 Gi3\_25073965\_x104.....gggaacacggggugccgaGc.....  
 1  
 Gi2\_9107781\_x104.....gCgggaacacggggugccgaac..... 1  
 Gi5\_7256497\_x104.....gaacGcggggugccgaacu..... 1  
 Gi3\_25075837\_x104.....ugggaacacggggCgccgaac.....  
 1  
 Gi5\_7257745\_x104.....Aggaacacggggugccgaacu..... 1  
 Gi5\_7260761\_x104.....Uugggaacacggggugcc..... 1  
 Gi2\_9101229\_x104.....cgugggaacacgggguAccgaacu..... 1  
 Gi3\_25063253\_x104.....cgugggaacacggggugAcgaacu.....  
 1  
 Gi5\_7273479\_x103.....gugggaacacggUgugccgaacu..... 1  
 Gi3\_25090890\_x103.....cgauccgagacgucgugggaacacgg.....  
 0  
 Gi5\_7268432\_x103.....aacacggggugccgGacu..... 1  
 Gi5\_7271213\_x103.....gggaacacNgggugccgaacu..... 1

Gi1\_3379019\_x103.....gggaacacggggugccgaac..... 0  
 Gi1\_3381182\_x103.....cgucgugggaacacggggugccgaac..... 0  
 Gi2\_9118409\_x103.....ggaacacgNggugccgaac..... 1  
 Gi2\_9116040\_x103.....gugggaacacgggAugccgaacu..... 1  
 Gi5\_7270286\_x103.....gaacacggggugccgaGcu..... 1  
 Gi4\_416893\_x103.....aacacggggugccgaacu..... 0  
 Gi5\_7266372\_x103.....aucggagacgucgugggaaca..... 0  
 Gi2\_9124845\_x102.....gugggaacacggggGgcc..... 1  
 Gi2\_9128415\_x102.....Cugggaacacggggugccgaac..... 1  
 Gi3\_25101257\_x102.....Uucgugggaacacggggugcc..... 1  
 1  
 Gi2\_9130047\_x102.....cgugggaacacggggugccgaaAu..... 1  
 Gi2\_9129129\_x102.....ucggagacgucgugggaacacggg..... 0  
 Gi2\_9124437\_x102...cgaucggGgacgucgugggaaca..... 1  
 Gi2\_9123621\_x102.....cguggAaacacggggugccgaacu..... 1  
 Gi2\_9121173\_x102.....acgucgugggaacacggggugccg..... 0  
 Gi5\_7286260\_x102.....cgugggaCcacggggugccgaacu..... 1  
 Gi5\_7286464\_x102.....cgugggaacacggggugccAaacu..... 1  
 Gi3\_25120798\_x101.....cgugggaGcacggggugccgaac..... 1  
 1  
 Gi1\_3390755\_x101.....acgucgCgggaacacggggugccga..... 1  
 Gi5\_7290816\_x101.....ugggaGcacggggugccgaacu..... 1  
 Gi5\_7296876\_x101.....aUacgucgugggaacacggggugccgaacu..... 1  
 Gi1\_3393764\_x100.....gacgucgCgggaacacggggugcc..... 1  
 Gi2\_9146674\_x100.....uAggaacacggggugccgaacu..... 1  
 Gi2\_9149174\_x100.....gugggaacGcggggugccgaac..... 1  
 Gi2\_9143574\_x100...Uaucggagacgucgugggaacac..... 1  
 Gi1\_3394164\_x100.....aaUacggggugccgaacu..... 1  
 Gi1\_3395764\_x100.....ugggaacaNggggugccgaacu..... 1  
 Gi2\_9153574\_x100.....ggagacgucgugggaacacggggu..... 0  
 Gi3\_25138926\_x100.....gaacacgggAugccgaacu..... 1  
 1  
 Gi2\_9153174\_x100...cgaucggagacgucgugggaacacggggugc..... 0  
 Gi1\_3395564\_x100.....ucggagacgucgugggaacacggg..... 0  
 Gi3\_25137826\_x100.....ugggaacGcggggugccgaac..... 1  
 1  
 Gi3\_25138426\_x100.....gugggaacacgAggugccgaac..... 1  
 1  
 Gi2\_9165462\_x99.....gGgacgucgugggaacacggggu..... 1  
 Gi5\_7313342\_x99.....gUaacacggggugccgaac..... 1  
 Gi3\_25150716\_x99.....ggaacacggggugccgGac..... 1  
 Gi2\_9164670\_x99.....Uacgucgugggaacacggggugcc..... 1  
 Gi2\_9158928\_x99.....ggaacGcggggugccgaacu..... 1  
 Gi5\_7316708\_x99.....cgugggaacacggggugcUgaacu..... 1  
 Gi1\_3398052\_x99.....uGgugggaacacggggugccgaacu..... 1  
 Gi3\_25160022\_x99.....ugggaacacggggugccgaCcu..... 1  
 GlA\_4964772\_x99.....ggagacgucgugggaacacggggugcc..... 0

|                                                          |   |
|----------------------------------------------------------|---|
| Gi1_3396864_x99.....aucggagacgucgugggaaacacgggg.....     | 0 |
| Gi2_9161106_x99.....cggGgacgucgugggaaaca.....            | 1 |
| Gi1_3399141_x99.....gaacacggNgugccgaacu.....             | 1 |
| Gl1a_4969722_x99.....gggaacacggggugccgaa.....            | 0 |
| Gi3_25183907_x98....Caucggagacgucgugggaaacacgggg.....    | 1 |
| Gi2_9171642_x98....aucggGgacgucgugggaaacacgggg.....      | 1 |
| Gi2_9178306_x98..gcgauccgagacgucgugggaaacac.....         | 0 |
| Gi2_9170368_x98..gcgauccgagacgucgugggaa.....             | 0 |
| Gi3_25181163_x98.....aacacggggGgccgaacu.....             | 1 |
| Gi5_7321534_x98.....ugUgaacacggggugccgaacu.....          | 1 |
| Gi2_9168996_x98.ugcgauccgagacgucgugggaaacacg.....        | 0 |
| Gi5_7324670_x98.....aacacggggAgccgaacu.....              | 1 |
| Gi2_9188024_x97.....aacacggggCgccgaacu.....              | 1 |
| Gi1_3409604_x97.....cggagacgucgugggaaacacggggugc.....    | 0 |
| Gi5_7329464_x97.....acgucgugggaaacacggggugccg.....       | 0 |
| Gi3_25197979_x97.....uCggaacacggggugccgaac.....          | 1 |
| Gi3_25184787_x97.....cgucgugggaaacacggggGgccgaacu.....   | 1 |
| Gi2_9182592_x97.....aUacgucgugggaaacacggggugcc.....      | 1 |
| Gi2_9181428_x97.....Gcgugggaaacacggggugccgaac.....       | 1 |
| Gi3_25202800_x96.....ggaacacggggGgccgaacu.....           | 1 |
| Gi2_9194393_x96.....gggaGcacggggugccgaacu.....           | 1 |
| Gi2_9196025_x96.....Ugagacgucgugggaaacacggggugc.....     | 1 |
| Gi3_25200688_x96.....gucgugggaaacacggggGgccgaacu.....    | 1 |
| Gi2_9199769_x96.....gaacacggggCgccgaacu.....             | 1 |
| Gi3_25216144_x96.....Ggggaacacggggugccg.....             | 1 |
| Gi3_25206736_x96.....gggaacacAgggugccgaacu.....          | 1 |
| Gi3_25234974_x95.....gucgCgggaacacggggugccgaac.....      | 1 |
| Gi3_25229369_x95.....gucgugggNacacggggugccgaacu.....     | 1 |
| Gi3_25234214_x95.....cgucgugggaaacacggggug.....          | 0 |
| Gi3_25219299_x95.....cUgagacgucgugggaaacacggggugcc.....  | 1 |
| Gi2_9206376_x95.....ugggaGcacggggugccgaacu.....          | 1 |
| Gi2_9214736_x95.....Cggaacacggggugccgaacu.....           | 1 |
| Gi2_9213786_x95.....gggaacacggggCgccgaacu.....           | 1 |
| Gi2_9206281_x95.ugcgauccgagacgucgugggaa.....             | 0 |
| Gi5_7358901_x95.....aacacAgggugccgaacu.....              | 1 |
| Gi5_7355196_x95.....Uugggaacacggggugccgaa.....           | 1 |
| Gi5_7357951_x95.....cgugAgaacacggggugccgaacu.....        | 1 |
| Gi1_3419378_x95.....agacgucgugggaaacacggg.....           | 0 |
| Gi3_25221199_x95.....ugggaacacggggugcAgaacu.....         | 1 |
| Gi2_9221041_x94.....ucgugggaaacacggggCgccgaacu.....      | 1 |
| Gi2_9217375_x94.....cUugggaacacggggugccgaa.....          | 1 |
| Gi1_3422035_x94.....gagacgucgugggaaacacggggugcc.....     | 0 |
| Gi2_9220665_x94.....agacgucgugggaaacacggggug.....        | 0 |
| Gi1_3426829_x94.....gagacgucgCgggaacacggggugccgaacu..... | 1 |
| Gi3_25247675_x94.....Gcgucgugggaaacacggggugccgaacu.....  | 1 |
| Gi3_25236959_x94.....agacgucgugggaaacacgggg.....         | 0 |
| Gi5_7371216_x94.....gugggaacacgAgggugccgaacu.....        | 1 |

|                                                        |   |
|--------------------------------------------------------|---|
| Gi2_9222733_x94.....cgagacgucgugggaacacg.....          | 0 |
| Gi3_25247017_x94...Uaucggagacgucgugggaacac.....        | 1 |
| Gi3_25246547_x94.....ucggagacgucgugggaacacggggugc..... | 0 |
| Gi1_3425983_x94.....ggagacgucgCgggaacacggggugcc.....   | 1 |
| Gi3_25247111_x94.....Augggaacacggggugccg.....          | 1 |
| Gi5_7368396_x94.....ucgugggaacacggggugccgaacA.....     | 1 |
| Gi1a_4994118_x94.....ucgugggaacacggggugccgaac.....     | 0 |
| Gi1_3424573_x94.....Uugggaacacggggugcc.....            | 1 |
| Gi5_7363978_x94.....acuuucccagcgccugcugcccacc.....     | 0 |
| Gi2_9232069_x93.....acgucgugggaacacggggu.....          | 0 |
| Gi3_25272301_x93.ugcgaucggagacgucgugggaaca.....        | 0 |
| Gi2_9231046_x93.....Ggacgucgugggaacacg.....            | 1 |
| Gi3_25257700_x93.....ugggaacacggggugUcgaacu.....       | 1 |
| Gi3_25256770_x93.....gugAgaacacggggugccgaac.....       | 1 |
| Gi3_25271743_x93.....ugggaacCcgggugccgaacu.....        | 1 |
| Gi3_25269604_x93.....guggAaacacggggugccgaac.....       | 1 |
| Gi2_9231976_x93...Uaucggagacgucguggga.....             | 1 |
| Gi1a_4994959_x93.....gugggaacNcggggugccgaacu.....      | 1 |
| Gi5_7371404_x93.....gugggaacacggAgugccgaacu.....       | 1 |
| Gi1_3430649_x93.....gucgCgggaacacggggugccg.....        | 1 |
| Gi3_25273603_x93.....ggaacacAgggugccgaacu.....         | 1 |
| Gi5_7377542_x93.....gugAgaacacggggugccgaacu.....       | 1 |
| Gi2_9232999_x93.ugcgaucggGgacgucguggga.....            | 1 |
| Gi1_3427673_x93.....cgugggaaNacggggugccgaacu.....      | 1 |
| Gi2_9243532_x92.....gaUcacggggugccgaacu.....           | 1 |
| Gi2_9244360_x92.....ucgugggaNcacggggugccgaacu.....     | 1 |
| Gi4_428363_x92.....Uugggaacacggggugccgaacu.....        | 1 |
| Gi3_25282163_x92.....cgucgugggaacacggggGgcc.....       | 1 |
| Gi3_25281059_x92.....uUgugggaacacggggugccgaacu.....    | 1 |
| Gi3_25284279_x92.....Ugagacgucgugggaacacggggugcc.....  | 1 |
| Gi3_25282807_x92.....gaacacggggugccgaaUu.....          | 1 |
| Gi5_7387252_x92.....acgucgugggaacacggggugccga.....     | 0 |
| Gi3_25278943_x92.....ugggaGcacggggugccgaac.....        | 1 |
| Gi3_25274987_x92.....gaacacggggugcAgaacu.....          | 1 |
| Gi3_25296293_x91.....cgugggaacacggggCgccgaac.....      | 1 |
| Gi3_25293836_x91.....Ggugggaacacggggugcc.....          | 1 |
| Gi2_9251791_x91...aGcggagacgucgugggaacacggggu.....     | 1 |
| Gi3_25321823_x90.....gugNgaacacggggugccgaacu.....      | 1 |
| Gi3_25320023_x90.....ggagacgucgugggaacacggg.....       | 0 |
| Gi3_25313003_x90...aucggagacgucgugggaGcacg.....        | 1 |
| Gi1_3445729_x90.ugcgaucggagacgucguggga.....            | 0 |
| Gi2_9265567_x90.....ugggGacacggggugccgaacu.....        | 1 |
| Gi2_9267187_x90.....ggUaacacggggugccgaacu.....         | 1 |
| Gi3_25323173_x90.....ucgugggGacacggggugccgaacu.....    | 1 |
| Gi1a_5013689_x90.....Cggaacacggggugccgaacu.....        | 1 |
| Gi1_3447520_x89.....cgugggaacacggggugccgaa.....        | 0 |
| Gi3_25333452_x89.....gugggaacacUgggugccgaacu.....      | 1 |



|                                                          |   |
|----------------------------------------------------------|---|
| Gi5_7421987_x89.....gugggaacacggggugccgaacuuu.....       | 0 |
| Gi3_25338970_x89.....cgugggaacacggggugA.....             | 1 |
| Gi5_7421364_x89.....Cucgugggaacacggggugccgaacu.....      | 1 |
| Gi3_25337101_x89.....Uggaacacggggugccga.....             | 1 |
| Gi1_3451970_x89.....gugggaacacggggGgccgaacu.....         | 1 |
| Gi2_9273474_x89.....ugggaacacggggCgccgaacu.....          | 1 |
| Gi1_3450457_x89.....aacacgggguAccgaacu.....              | 1 |
| Gi1_3446719_x89.....agacgucgugggaacacggggugcc.....       | 0 |
| Gi3_25359192_x88.....cAugggaacacggggugccgaac.....        | 1 |
| Gi3_25352504_x88.....acgucgugggaacacggggugc.....         | 0 |
| Gi2_9286871_x88.....gugggaacCggggugccgaac.....           | 1 |
| Gi5_7432146_x88.....cgugggaacacggggGgccgaacu.....        | 1 |
| Gi3_25351360_x88.....aacacgggguAccgaacu.....             | 1 |
| Gi3_25346872_x88.....ugggaacacggggugccgaGc.....          | 1 |
| Gi2_9291447_x88.....gugggaCcacggggugccgaacu.....         | 1 |
| Gi2_9295143_x88.....guUggaacacggggugccgaac.....          | 1 |
| Gi3_25351976_x88.....ggagacgucgugggaacacggggugccgaa..... | 0 |
| Gi3_25356288_x88.....ucgugggaGcacggggugccgaacu.....      | 1 |
| Gi5_7430474_x88.....agacgucgugggaacacggggugc.....        | 0 |
| Gi2_9291623_x88.....Augggaacacggggugcc.....              | 1 |
| Gi3_25371579_x87.....gaacUcggggugccgaacu.....            | 1 |
| Gi5_7439164_x87.....gaacacggggugccgaacuuucU.....         | 1 |
| Gi3_25377060_x87.....Ggugggaacacggggugccga.....          | 1 |
| Gi2_9298103_x87.....ggaacacggggCgccgaac.....             | 1 |
| Gi3_25372362_x87.....gugggaacacggUgugccgaac.....         | 1 |
| Gi3_25363836_x87.....ggaacacggggugccgGac.....            | 1 |
| Gi3_25372623_x87.....ucgugggaacGcggggugccgaacu.....      | 1 |
| Gi5_7444123_x87.....gagacgucgugggaacacg.....             | 0 |
| Gi3_25384912_x86.....gucgugggaacacggggugccgaCcu.....     | 1 |
| Gi5_7456308_x86.....Uggaacacggggugccgaa.....             | 1 |
| Gi3_25384740_x86.....gugggaacacggggGgccga.....           | 1 |
| Gi3_25394114_x86.....gaacacggggugccgaUcu.....            | 1 |
| Gi5_7453470_x86.....gugggaaUacggggugccgaacu.....         | 1 |
| Gi3_25382074_x86.....uGgugggaacacacggggugccgaac.....     | 1 |
| Gi1_3465497_x86.....gaacacggggCgccgaacu.....             | 1 |
| Gi5_7453212_x86.....Cgaacacggggugccgaacu.....            | 1 |
| Gi5_7457254_x86.....cCucgugggaacacggggugccgaacu.....     | 1 |
| Gi4_433136_x86.....ugggaacacgggUugccgaacu.....           | 1 |
| Gi1_3470793_x85.....aacacggggCgccgaacu.....              | 1 |
| Gi3_25410877_x85.....gaucggagacgucgugggaacacggggug.....  | 0 |
| Gi5_7472510_x85.....gaGcacggggugccgaacu.....             | 1 |
| Gi3_25402122_x85.....aGgucgugggaacacggggugccgaacu.....   | 1 |
| Gi3_25396342_x85.....aucggagacgucgugggaac.....           | 0 |
| Gi3_25404247_x85.....gcgaucggagacgucguggga.....          | 0 |
| Gi2_9321799_x85.....guUgugggaacacggggugccgaacu.....      | 1 |
| Gi3_25399912_x85.....guggUaacacggggugcc.....             | 1 |
| Gi3_25407137_x85.....aucggagacgucgugggaGcacggggu.....    | 1 |

Gi3\_25417891\_x84.....cgucgugggaacacggggugccgCacu..... 1  
Gi5\_7477056\_x84.....ucgugggaacacggggCgccgaacu..... 1  
Gi2\_9331229\_x84cugcgauccggGgacgucgug..... 1  
Gi1\_3475179\_x84.....Uugggaacacggggugccgaac..... 1  
Gi5\_7474284\_x84.....ucgugggaacacggggugccgCacu..... 1  
G1a\_5041751\_x84....gaucggagacgucgugggaa..... 0  
Gi3\_25428055\_x84.....gugggaaUacggggugccgaac..... 1  
Gi3\_25429651\_x84.....ucgCgggaacacggggugccgaacu..... 1  
Gi2\_9344555\_x83....aGcggagacgucgugggaacacggggugc..... 1  
G1a\_5047024\_x83.....Ggggaacacggggugccgaacu..... 1  
Gi5\_7491665\_x83.....ucgugggaNcacggggugccgaacu..... 1  
Gi1\_3482014\_x83.....gugggGacacggggugccgaacu..... 1  
Gi2\_9350282\_x83.....ugggaacacggggugccgaGcu..... 1  
Gi2\_9351195\_x83.....gagacgucgugggaacacggggugccgaacu..... 0  
Gi2\_9347958\_x83....gaucggGgacgucgugggaacacgggg..... 1  
Gi3\_25450627\_x82.....guUggaacacggggugccga..... 1  
Gi4\_436403\_x82.....cgucgugggaacacggggugccga..... 0  
Gi2\_9361804\_x82.....gaacacggggugccgaCcu..... 1  
Gi1\_3482427\_x82.....gagacgucgCgggaacacgg..... 1  
Gi2\_9362214\_x82.....gugggaacacggggugccgaUc..... 1  
Gi1\_3486937\_x82....agacgucgCgggaacacggggugccgaacu..... 1  
Gi3\_25467581\_x81....aucggagaNgucgugggaacacg..... 1  
Gi5\_7512478\_x81.....gugggaaAacggggugccgaacu..... 1  
Gi3\_25476977\_x81.....aacacgAgugccgaacu..... 1  
Gi2\_9371211\_x81.....gugggaGcacggggugccgaac..... 1  
Gi3\_25466933\_x81.....gggaacacggggugccgaUc..... 1  
Gi2\_9374694\_x81....gaucggGgacgucgugggaacacggg..... 1  
Gi3\_25483295\_x81.....aacacgAggugccgaacu..... 1  
Gi3\_25470578\_x81.....gggaacacggggugcUgaacu..... 1  
Gi4\_437222\_x81....agacgucgugggaacacggggugcc..... 0  
Gi2\_9364731\_x81.....gggaacGcggggugccgaacu..... 1  
Gi2\_9364812\_x81.....ggaacacggggugccgCac..... 1  
Gi3\_25479002\_x81.....cgugUgaacacggggugccgaac..... 1  
Gi2\_9364002\_x81.....guUggaacacggggugcc..... 1  
Gi2\_9381419\_x80.....gugggCacacggggugccgaacu..... 1  
Gi3\_25490776\_x80.....aacaUggggugccgaacu..... 1  
Gi2\_9379179\_x80.....gggGacacggggugccgaacu..... 1  
Gi3\_25500536\_x80.....gGacacggggugccgaac..... 1  
Gi2\_9378139\_x80.....gggaacacggggGgccgaacu..... 1  
Gi2\_9384619\_x80.....uUggaacacggggugccg..... 1  
Gi3\_25500296\_x80.....gAaacacggggugccgaac..... 1  
Gi3\_25489096\_x80.....cUucgugggaacacggggugccga..... 1  
Gi3\_25489336\_x80.....gugggaacacggggugUcgaac..... 1  
Gi3\_25512507\_x79.....acgucgugNgaacacggggugccgaacu..... 1  
Gi3\_25506898\_x79.....cgucguggNaacacggggugccgaacu..... 1  
Gi2\_9397844\_x79....gaacGcggggugccgaacu..... 1  
Gi3\_25513613\_x79.....gugggaacCggggugcc..... 1

Gi2\_9389944\_x79.....ggGacacggggugccgaacu..... 1  
Gi3\_25512349\_x79.....gAgaacacggggugccgaac..... 1  
Gi2\_9393894\_x79.....gugggaacNcggggugcc..... 1  
Gi5\_7539703\_x79.....cgugggaacacgAggugccgaacu..... 1  
Gi3\_25507372\_x79.....gugggaacGcggggugccga..... 1  
Gi1\_3498694\_x79.....Uacgucgugggaacacggggugccgaacu..... 1  
Gi3\_25525520\_x78.....Ccgugggaacacggggugccgaacu..... 1  
Gi3\_25535192\_x78.....ucgugggaacacggggugccgaGcu..... 1  
G1a\_5071192\_x78.....Uugggaacacggggugcc..... 1  
G1a\_5074078\_x78.....acgucgugggaacacgggggu..... 0  
Gi3\_25528718\_x78.ugcgaucggagacgucguggga..... 0  
Gi2\_9401361\_x78.....Uaucggagacgucgugggaacacggggugc..... 1  
Gi3\_25539716\_x78.....ugggaacacggggAgccgaacu..... 1  
Gi3\_25527470\_x78.....gugggaacacggggugccUaacu..... 1  
G1a\_5079871\_x77.....Uaacacggggugccgaacu..... 1  
Gi3\_25556055\_x77.....gCcgugggaacacggggugccgaacu..... 1  
Gi5\_7560654\_x77.....gacgucgugggaacacggggugccg..... 0  
Gi3\_25548201\_x77.....aUgucgugggaacacggggugccgaacu..... 1  
Gi3\_25541733\_x77.....gacgucgugggaacacggggugcA..... 1  
Gi3\_25544813\_x77.....aacacggggugUcgaacu..... 1  
Gi5\_7553801\_x77.....ggaacacggggCgccgaacu..... 1  
Gi5\_7554802\_x77.....cguggAaacacggggugccgaacu..... 1  
Gi3\_25549510\_x77.....cUgagacgucgugggaacacgggggu..... 1  
Gi1\_3507836\_x77.....cgCgggaacacggggugccgaa..... 1  
Gi2\_9428745\_x76.....ucgugggaacacggggugccgCacu..... 1  
G1a\_5082764\_x76.....gucgugggaacacggggugccgaac..... 0  
Gi1\_3511838\_x76.....gUaacacggggugccgaac..... 1  
Gi3\_25562022\_x76.....Cugggaacacggggugccga..... 1  
Gi3\_25559438\_x76.....gugggGacacggggugccga..... 1  
Gi3\_25570306\_x76.....gugggaacacggggAgccgaac..... 1  
Gi3\_25595160\_x75.....aucggagaNgucgugggaacacgggggu..... 1  
Gi2\_9449107\_x75.....gugggaUcacggggugccgaacu..... 1  
Gi1\_3520608\_x75.....gaUcacggggugccgaacu..... 1  
Gi3\_25589910\_x75.....aacacggggugccgaCcu..... 1  
Gi3\_25579485\_x75.....ucgugggaacacggggugccAaacu..... 1  
Gi5\_7574746\_x75.....gUaacacggggugccgaacu..... 1  
Gi2\_9443707\_x75.....gCaacacggggugccgaacu..... 1  
Gi3\_25584885\_x75.....ugAgaacacggggugccgaac..... 1  
Gi3\_25597260\_x75.....gugggaacacggggGgccgaa..... 1  
Gi1\_3517983\_x75.....agacgucgugggaacacggggugccg..... 0  
Gi1\_3519858\_x75.....aacacggggugccgaGcu..... 1  
Gi1\_3518658\_x75.....ucgugggaacacggggCgccgaacu..... 1  
Gi3\_25587960\_x75.....ugggaacacggggugccgaUc..... 1  
Gi1\_3520533\_x75.....cggagacgucgugggaacacggg..... 0  
Gi2\_9442132\_x75.....cggagacgucgugggaaca..... 0  
Gi3\_25593285\_x75.....auUggagacgucgugggaacacggg..... 1  
Gi3\_25607927\_x74.....gaacCcgggugccgaacu..... 1

Gi3\_25608963\_x74.....aGcggagacgucgugggaacacgg..... 1  
Gi2\_9451341\_x74.....gGgacgucgugggaacacg..... 1  
Gi3\_25606669\_x74.....gucgugggaacacgggguCccgaac..... 1  
Gi2\_9460887\_x74.....cgugggaacacggggGgccgaacu..... 1  
Gi3\_25603265\_x74.....aacacggggugccgaaUu..... 1  
Gi5\_7593762\_x74.....Ggucgugggaacacggggugccgaacu..... 1  
Gi2\_9451563\_x74.....Uaucggagacgucgugggaacacg..... 1  
Gi3\_25615919\_x74.....ggaacacggggugcUgaacu..... 1  
Gi3\_25599195\_x74.....gucgugggaacacggggu..... 0  
Gi5\_7585918\_x74.....aacacggggugccgCacu..... 1  
Gi3\_25604893\_x74.....gucgugggaacacggggugccg..... 0  
Gi1\_3522761\_x74.....gugggaacacggggCgccgaacu..... 1  
Gi1a\_5093585\_x74.....ggaacacggggugccAaacu..... 1  
Gi3\_25629084\_x73.....ggaacacggggGgccgaac..... 1  
Gi2\_9470180\_x73.....ucggagacgucgugggaac..... 0  
Gi5\_7600092\_x73.....gucgugggaacacggggugccgaa..... 0  
Gi3\_25629157\_x73.....Ggucgugggaacacggggugcc..... 1  
Gi5\_7598997\_x73.....Uacacggggugccgaacu..... 1  
Gi5\_7604253\_x73.....acacggggugccgaacuuu..... 0  
Gi2\_9470910\_x73.....gacgucgugggaacacgg..... 0  
Gi4\_447562\_x72.....gugggaacacggggugccgaac..... 0  
Gi3\_25646226\_x72.....gUagacgucgugggaacacggggugcc..... 1  
Gi3\_25644570\_x72.....cgugggaacacggggugccgaUcu..... 1  
Gi5\_7609773\_x72.....gugggaacacgggAugccgaacu..... 1  
Gi3\_25641042\_x72.....ugggaacacggggugccgGac..... 1  
Gi2\_9475535\_x72.....gugggaacacggggugccAaac..... 1  
Gi3\_25635354\_x72.....gugggaacNcggggugccgaa..... 1  
Gi5\_7618701\_x72.....ucgugggaacacggggugccgaGcu..... 1  
Gi3\_25646514\_x72.....gucgugggaacGcggggugccgaacu..... 1  
Gi5\_7611069\_x72.....gugggaacacggggugUcgaacu..... 1  
Gi3\_25642554\_x72.....gCgaacacggggugccgaac..... 1  
Gi5\_7614669\_x72.....Agggaacacggggugccgaacu..... 1  
Gi5\_7615317\_x72.....cggagacgucgugggaacacggggugcc..... 0  
Gi3\_25647594\_x72.....Uucgugggaacacggggugccga..... 1  
Gi2\_9477263\_x72.....gugggaacacggggCgcc..... 1  
Gi3\_25665576\_x71.....gaacacggggugccgUacu..... 1  
Gi3\_25658263\_x71.....cgugggaacGcggggugccgaac..... 1  
Gi2\_9493461\_x71..gcgaucggGgacgucgugggaaca..... 1  
Gi5\_7629997\_x71.....cgugggaacacggggugccgaaAu..... 1  
Gi5\_7630494\_x71.....ggaacacggggugccgCacu..... 1  
Gi3\_25669410\_x71.....gugggaacCcgggugccga..... 1  
Gi1\_3537261\_x71.....cggagacgucgCgggaacacgg..... 1  
Gi2\_9489840\_x71.....cgugggaacacggAgugccgaacu..... 1  
Gi3\_25659115\_x71.....gggaacGcggggugccgaac..... 1  
Gi5\_7620483\_x71.....cgugggaacaUggggugccgaacu..... 1  
Gi3\_25661742\_x71.....gggaGcacggggugccgaac..... 1  
Gi2\_9497541\_x70.....gucgugggaacacggggCgccgaacu..... 1

Gi3\_25679880\_x70.....gugggaacacggCgugccgaacu..... 1  
Gi3\_25674630\_x70.....gugggaacacggggugcAgaac..... 1  
Gi2\_9504331\_x70.....Ggacgucgugggaacacggggugc..... 1  
Gi1\_3541156\_x70.....agacgucgugggaacacgggg..... 0  
Gi3\_25680930\_x70.....gacgucgugggaacacggggugcc..... 0  
Gi3\_25676660\_x70.....cgucgugggaacacggggCgccgaacu..... 1  
G1a\_5116682\_x70.....ucggagacgucgugggaacacggg..... 0  
Gi3\_25686670\_x70.....ugggaacacggggGgccgaacu..... 1  
Gi5\_7635978\_x70.....Cggaacacggggugccgaacu..... 1  
Gi2\_9512021\_x69.....ugUgaacacggggugccgaacu..... 1  
Gi2\_9510917\_x69.....gggaacacggggugccgaGcu..... 1  
Gi2\_9516368\_x69.....gucgugggaacacggggGgccgaacu..... 1  
Gi3\_25696669\_x69.....Ugagacgucgugggaacacggggu..... 1  
Gi3\_25706950\_x69.....ggaacacAgggugccgaac..... 1  
Gi3\_25702051\_x69.....gggaacaUggggugccgaacu..... 1  
Gi3\_25697428\_x69.....cCugggaacacggggugccgaac..... 1  
Gi4\_449333\_x69.....gucgugggaacacggggugccgaacu..... 0  
Gi3\_25691494\_x69.....guggCaacacggggugccgaacu..... 1  
Gi2\_9510503\_x69.....Ggucgugggaacacggggugccgaacu..... 1  
Gi3\_25696324\_x69.....gugggaacNcggggugccg..... 1  
Gi1\_3548742\_x69.....ggagacgucgugggaacacggggugccgaacu..... 0  
G1a\_5120665\_x69.....gugggaacacggggGgccgaacu..... 1  
Gi3\_25697704\_x69.....gaacacggggugccgaaAu..... 1  
Gi3\_25711935\_x68.....ugggaacaNggggugccga..... 1  
Gi3\_25710507\_x68.....gggaaUacggggugccgaacu..... 1  
Gi2\_9529720\_x68.....Gucggagacgucgugggaacacggggu..... 1  
Gi3\_25719415\_x68.....gugggUaacacggggugccgaac..... 1  
Gi3\_25721455\_x68.....cUucgugggaacacggggugc..... 1  
Gi2\_9530400\_x68.....cgugggaacacggggugcAgaacu..... 1  
Gi5\_7660727\_x68.....Agugggaacacggggugccgaacu..... 1  
Gi2\_9519044\_x68.....ugggaacGcggggugccgaacu..... 1  
Gi3\_25725603\_x68.....gugggaacacggggCgccga..... 1  
Gi3\_25715267\_x68.....ucgugggaacacggggug..... 0  
Gi3\_25710779\_x68.....uUggagacgucgugggaacacggggu..... 1  
Gi3\_25715063\_x68.....ugggaacacgAgggugccgaacu..... 1  
Gi2\_9519316\_x68.....ucgugggaacacggggugccgaaA..... 1  
Gi2\_9532818\_x67.....ugggaacacggggugccgaGc..... 1  
Gi2\_9539451\_x67.....ucggGgacgucgugggaacacggggugcc..... 1  
Gi5\_7670748\_x67.....ggUaacacggggugccgaacu..... 1  
Gi2\_9538580\_x67.....gugggaacacggggUaccgaac..... 1  
Gi2\_9535163\_x67.....Cgggaacacggggugccgaacu..... 1  
Gi3\_25731724\_x67.....aucggagacgucgugggaacacggggC..... 1  
Gi5\_7674902\_x67.....gaacacggggugccgCacu..... 1  
Gi2\_9532148\_x67.....Ugaacacggggugccgaa..... 1  
Gi1\_3559565\_x67.....gggaacacNgggugccgaacu..... 1  
Gi3\_25736079\_x67.....ugggaacaNggggugccgaa..... 1  
Gi5\_7672892\_x67.....aacacggggugccAaacu..... 1

Gi3\_25738223\_x67.....Augggaacacggggugccgaa..... 1  
 Gi3\_25741104\_x67.....ugggUacacggggugccgaacu..... 1  
 Gi3\_25734806\_x67.....guAgggaacacggggugcc..... 1  
 Gi3\_25747579\_x66.....Uacgucgugggaacacggg..... 1  
 Gi2\_9556025\_x66.....guggUaacacggggugccgaac..... 1  
 Gi3\_25746787\_x66.....ucgugggaNcacggggugccgaac..... 1  
 Gi2\_9553847\_x66.....Caacacggggugccgaacu..... 1  
 Gi2\_9545267\_x66.....Uggaacacggggugccgaa..... 1  
 Gi3\_25752925\_x66.....Uaucggagacgucgugggaacacggg..... 1  
 Gi3\_25747711\_x66.....aucggagacgucgugggaCcacg..... 1  
 Gi5\_7682218\_x66.....Uugggaacacggggugccg..... 1  
 Gi3\_25755235\_x66.....auUgggagacgucgugggaacacg..... 1  
 Gi2\_9550151\_x66.....cggGgacgucgugggaacacggggug..... 1  
 Gi5\_7703566\_x65.....cggagacgucgugggaacacgg..... 0  
 Gi3\_25772287\_x65.....gggaacacggggGgccgaac..... 1  
 Gl1a\_5147067\_x65.....acgucgugggaacacggggugccgaacu..... 0  
 Gi3\_25766567\_x65.....gggaacacggggugccAaacu..... 1  
 Gi5\_7701811\_x65.....cgugggaacacggggugUcgaacu..... 1  
 Gi3\_25774692\_x65.....gugggaacacggggUacc..... 1  
 Gi3\_25773977\_x65.....gggGacacggggugccgaac..... 1  
 Gi2\_9560261\_x65.....cgugggaacacggggugccgaaUu..... 1  
 Gi3\_25788187\_x64.....gugggaaAacggggugccgaac..... 1  
 Gi1\_3571752\_x64.....Cugggaacacggggugccgaacu..... 1  
 Gi3\_25797659\_x64.....ggaacacgAggugccgaacu..... 1  
 Gi3\_25796443\_x64.....aGcggagacgucgugggaacacggg..... 1  
 Gi3\_25783963\_x64.....Gucggagacgucgugggaacacgg..... 1  
 Gi3\_25783259\_x64.....aucggagaNgucgugggaacacggg..... 1  
 Gi2\_9574073\_x64.....gagacgucgugggaacacggg..... 0  
 Gl1a\_5154868\_x64.....cgaucggagacgucgugggaacacg..... 0  
 Gi2\_9575609\_x64.....cgGgggaacacggggugccgaac..... 1  
 Gi5\_7708325\_x64.....uUggaacacggggugccgaa..... 1  
 Gi2\_9575545\_x64.....uCggaacacggggugccgaacu..... 1  
 Gi3\_25801051\_x64.....ugggaacacggAgugccgaacu..... 1  
 Gi1\_3573992\_x64.....cgGgggaacacggggugccgaacu..... 1  
 Gi5\_7711909\_x64.....gugggaacacggggAgccgaacu..... 1  
 Gi2\_9587331\_x63.....gAgaacacggggugccgaacu..... 1  
 Gi2\_9581472\_x63.....gAgggaacacggggugccgaac..... 1  
 Gi3\_25809888\_x63.....cgugCgaacacggggugccgaacu..... 1  
 Gl1a\_5161155\_x63.....gugggaacacggggCgccgaacu..... 1  
 Gi1\_3574690\_x63.....ucgugggaNcacggggugccgaacu..... 1  
 Gi1\_3578155\_x63.....guUggaacacggggugccgaacu..... 1  
 Gi3\_25809636\_x63.....gcgaucggagacgucgugggaacacggg..... 0  
 Gi3\_25804344\_x63.....ucgugggaacacggggGgccgaacu..... 1  
 Gi3\_25809951\_x63.....ggaacacggggugccAaac..... 1  
 Gi2\_9587205\_x63.....gaacacggggugccgGcu..... 1  
 Gi5\_7737048\_x62.....ggaGcacggggugccgaacu..... 1  
 Gi3\_25822893\_x62.....uggAaacacggggugccgaacu..... 1

Gi3\_25830953\_x62.....gugggaUcacggggugccgaacu..... 1  
 Gi2\_9604521\_x62.....ggagacgucgugggaacacggggugccgaacu..... 0  
 Gi1\_3580719\_x62.....aUcacggggugccgaacu..... 1  
 Gi3\_25825931\_x62.....ucgugggaacCcgggugccgaacu..... 1  
 Gi3\_25838207\_x62.....gugggaacacggggugGcgaacu..... 1  
 Gi3\_25840935\_x62.....gaacacggggugccgaacG..... 1  
 Gi5\_7732770\_x62.....gaacacggggugccGacu..... 1  
 Gi2\_9600553\_x62.....Cgaacacggggugccgaac..... 1  
 Gi1\_3582331\_x62.....gacgucgugggaacacggggugccg..... 0  
 Gi5\_7732398\_x62.....cgugggaacacggggugccGacu..... 1  
 Gi5\_7732026\_x62.....ggGacacggggugccgaacu..... 1  
 Gi2\_9592493\_x62.....aGcggagacgucgugggaaca..... 1  
 Gi3\_25828721\_x62.....gugggaacacggggugccgaaU..... 1  
 Gi2\_9614231\_x61.....aucggagacgucgugggaacacggggugccg..... 0  
 Gi2\_9613499\_x61.....gAaacacggggugccgaacu..... 1  
 Gi3\_25842592\_x61.....aacacggggugccAgaacu..... 1  
 Gi3\_25857781\_x61.....ugggaacacgggAugccgaacu..... 1  
 Gi3\_25848143\_x61.....cgGcugggaacacggggugccgaacu..... 1  
 Gi3\_25844910\_x61.....cgugggaacacggggugccAaac..... 1  
 Gi2\_9610266\_x61.....gugggaacacggggugccgaacG..... 1  
 Gi3\_25842714\_x61.....ggagacgucgugggaacacggggugc..... 0  
 Gi3\_25846862\_x61.....gucgugggaacCcgggugccgaacu..... 1  
 Gi2\_9614841\_x61.....Uaacacggggugccgaac..... 1  
 Gi5\_7746501\_x61.....gugggaacacggggugccgaaAu..... 1  
 Gi3\_25851620\_x61.....gugggaacacggggugccA..... 1  
 Gi5\_7745769\_x61.....aucggagacgucgugggaacacggggugcc..... 0  
 Gi5\_7743085\_x61.....cguAggaacacggggugccgaacu..... 1  
 Gi3\_25854121\_x61.....gggaacacAgggugccgaac..... 1  
 Gi2\_9605569\_x61.....cgugggaacacgggAugccgaacu..... 1  
 Gi3\_25855341\_x61.....Cacacggggugccgaacu..... 1  
 Gi2\_9608924\_x61.....cgugggaacacggggAgccgaacu..... 1  
 Gi2\_9612035\_x61.....gugggGacacggggugcc..... 1  
 Gi3\_25849241\_x61.....gcgaucggagacgucgugggaaca..... 0  
 Gi1\_3592580\_x60.....aucggagacgucgugggaacac..... 0  
 Gi2\_9628805\_x60.....Uucgugggaacacggggugc..... 1  
 Gl1\_5183065\_x60.....ucggagacgucgugggaacacgg..... 0  
 Gi5\_7754296\_x60.....gggGacacggggugccgaacu..... 1  
 Gl1\_5181925\_x60.....cggagacgucgugggaacacggggg..... 0  
 Gi3\_25863349\_x60.....ugggaCcacggggugccgaacu..... 1  
 Gi2\_9626345\_x60.....gucgugggaacacggggugccGacu..... 1  
 Gi5\_7756696\_x60.....cgugggaaUacggggugccgaacu..... 1  
 Gi5\_7759876\_x60.....Ccguccgugggaacacggggugccgaacu..... 1  
 Gi2\_9627725\_x60.....gGcugggaacacggggugccgaac..... 1  
 Gi3\_25875049\_x60.....gaacacggggugccgaUc..... 1  
 Gi3\_25877869\_x60.....cgugggaacaUggggugccgaac..... 1  
 Gi1\_3590960\_x60.....cgucgCgggaacacggggugccgaac..... 1  
 Gi3\_25884027\_x59.....gucgugggaacacggggugccgaGcu..... 1

Gi1\_3597133\_x59.....guggaacGcggggugccgaacu..... 1  
 Gi3\_25894883\_x59.....uggaacacgggguAccgaacu..... 1  
 Gi3\_25883260\_x59.....guggaacacggAgugccgaac..... 1  
 Gl1a\_5188964\_x59.....gacgucgugggaacacggggu..... 0  
 Gi1\_3598372\_x59.....cguggaacacggggugccgCacu..... 1  
 Gi3\_25891815\_x59.....cguggaacacAgggugccgaac..... 1  
 Gi3\_25897125\_x59.....gugggGacacggggugccgaa..... 1  
 Gi5\_7776024\_x59.....uUguggaacacggggugccgaacu..... 1  
 Gi1\_3599080\_x59.....aacacggggugccgaacu..... 0  
 Gi3\_25885148\_x59.....Gugggaacacggggugccgaa..... 1  
 Gi1\_3599788\_x59.....ucggagacgucguggaacacggggugc..... 0  
 Gi5\_7771953\_x59.....gggaacacggggugccgCacu..... 1  
 Gi5\_7769180\_x59.....aacacgAgggugccgaacu..... 1  
 Gi5\_7774313\_x59.....cguggaacacgggguAccgaacu..... 1  
 Gi3\_25892346\_x59.....gugggaGcacggggugccga..... 1  
 Gi3\_25887980\_x59.....ugggaaUacggggugccgaacu..... 1  
 Gi5\_7777027\_x59.....guUguggaacacggggugccgaacu..... 1  
 Gi3\_25907946\_x58.....aucggagacgucgugggaCcacggg..... 1  
 Gi1\_3604736\_x58.....gaacacggggugccgaGcu..... 1  
 Gi5\_7780411\_x58.....uggaacacggggugccAaacu..... 1  
 Gi3\_25900232\_x58.....ugggaacaUggggugccgaac..... 1  
 Gl1a\_5194264\_x58.....gugggaacacggggugccgaGcu..... 1  
 Gi3\_25903596\_x58.....acgAcguggaacacggggugccgaa..... 1  
 Gi1\_3601488\_x58.....aacGcggggugccgaacu..... 1  
 Gi3\_25904756\_x58.....gggaacacggggugUcgaacu..... 1  
 Gi3\_25912354\_x58.....gUaacacggggugccga..... 1  
 Gi1\_3601662\_x58.....gaacacggggugccgaCcu..... 1  
 Gi2\_9645527\_x58.....aUcacggggugccgaacu..... 1  
 Gi3\_25900000\_x58.....cgugggaaNacggggugcc..... 1  
 Gi5\_7783775\_x58.....agacgucguggaacacggggugccgaacA..... 1  
 Gi3\_25917400\_x58.....aacaGggggugccgaacu..... 1  
 Gi2\_9654633\_x58.....gugggaacaAggggugccgaacu..... 1  
 Gi2\_9645353\_x58.....gUagacgucguggaacacggggugc..... 1  
 Gi3\_25921339\_x57.....guggaacacgggCugccgaacu..... 1  
 Gi5\_7801672\_x57.....agacgucguggaacacggggu..... 0  
 Gi5\_7801615\_x57.....uggaacacggggugccgGacu..... 1  
 Gi2\_9657203\_x57.....cguggaacacggggugccgUacu..... 1  
 Gl1a\_5203261\_x57.....Cuggaacacggggugccgaacu..... 1  
 Gi2\_9657260\_x57.....agacgucguggaacacggggugccgaacA..... 1  
 Gi2\_9658172\_x57.....cgugggUacacggggugccgaacu..... 1  
 Gi1\_3611999\_x57.....ucggagacgucgGggaacacggggu..... 1  
 Gi3\_25932511\_x57.....ggaacacggggugUcgaacu..... 1  
 Gi2\_9656804\_x57.....gucguggaacacggggugccgaCcu..... 1  
 Gi3\_25928407\_x57.....ggaacacggggugccAaacu..... 1  
 Gi3\_25927495\_x57.....ucguggaacacggggugccgCac..... 1  
 Gi3\_25929832\_x57.....guggaacacAgggugcc..... 1  
 Gi2\_9661991\_x57.....ucgugggaGcacggggugccgaacu..... 1



Gi3\_25927666\_x57.....aUacgucgugggaacacggggugccgaac..... 1  
 Gi2\_9658058\_x57.....cUugggaacacggggugccg..... 1  
 Gi2\_9661820\_x57.....ggaacacggggGgccgaacu..... 1  
 Gi3\_25957230\_x56.....cgucgugggaacGcggggugccgaacu..... 1  
 Gi3\_25940990\_x56.....agacgucgugggaacacggggg..... 0  
 Gi3\_25953702\_x56.....ucguUggaacacggggugccgaacu..... 1  
 Gi2\_9676398\_x56.....gucgugggNacacggggugccgaacu..... 1  
 Gi5\_7810528\_x56.....aacaUggggugccgaacu..... 1  
 Gi1\_3613346\_x56.....ggaacacgNggugccgaacu..... 1  
 Gi5\_7811984\_x56.....gagacgucgugggaacacggggugcc..... 0  
 Gi3\_25955550\_x56.....cguggCaacacggggugccgaacu..... 1  
 Gi2\_9667214\_x56.....cggagacgucgugggaGca..... 1  
 Gi2\_9671582\_x56.....Cugggaacacggggugcc..... 1  
 Gi1\_3614802\_x56.....agacgucgugggaacacggggugccgaac..... 0  
 Gi3\_25957454\_x56.....cggagacgucgugggaacacggggug..... 0  
 Gl1\_5211959\_x56.....cgugggaacacggggugccg..... 0  
 Gi2\_9674438\_x56..gcgaucggagacgucgugggaacacggg..... 0  
 Gi5\_7804592\_x56.....cggagacgucgugggaacacg..... 0  
 Gi3\_25971210\_x55.....cgugggaacacUgggugccgaacu..... 1  
 Gi3\_25973190\_x55.....aacacgggAugccgaacu..... 1  
 Gi3\_25975775\_x55.....cgucguggNaacacggggugcc..... 1  
 Gi2\_9682861\_x55.....Ggacgucgugggaacacggggg..... 1  
 Gi2\_9678296\_x55.....Aggaacacggggugccgaac..... 1  
 Gi5\_7826614\_x55.....aacacggggUaccgaacu..... 1  
 Gi3\_25962080\_x55.....Cugggaacacggggugccgaa..... 1  
 Gi3\_25961915\_x55.....gagacgucgugggaacacggggugccgaa..... 0  
 Gi3\_25972475\_x55.....cgugggaacacggggugcUgaac..... 1  
 Gi2\_9685886\_x55.....aGcggagacgucgugggaacac..... 1  
 Gi3\_25972585\_x55.....Cucgugggaacacggggugccgaacu..... 1  
 Gl1\_5219250\_x55.....gugggGacacggggugccgaacu..... 1  
 Gi5\_7823149\_x55.....Ggggaacacggggugccgaac..... 1  
 Gi2\_9684291\_x55.....ucggGgacgucgugggaacac..... 1  
 Gi2\_9678736\_x55.....aacGcggggugccgaacu..... 1  
 Gi3\_25962245\_x55.....gggaacacgAggugccgaacu..... 1  
 Gi2\_9679066\_x55.....gGcgugggaacacggggugcc..... 1  
 Gi1\_3618268\_x55..gcgaucggagacgucGggaacac..... 1  
 Gi5\_7832555\_x54...gaucggagacgucgugggaacacggggg..... 0  
 Gi5\_7831259\_x54.....ugggaacacgggUugccgaacu..... 1  
 Gi2\_9702108\_x54.....gCgaacacggggugccgaacu..... 1  
 Gl1\_5223960\_x54.....gCgggaacacggggugccgaacu..... 1  
 Gi2\_9693684\_x54.....cgugggaacacggggugccGacu..... 1  
 Gi5\_7828343\_x54.....ugAgaacacggggugccgaacu..... 1  
 Gi2\_9694656\_x54.....ugggaacacggggugcUgaacu..... 1  
 Gi2\_9691416\_x54.....gCgggaacacggggugcc..... 1  
 Gi2\_9698706\_x54.....gGgacgucgugggaacacggggug..... 1  
 Gi5\_7834283\_x54.....cgucguggNaacacggggugccgaacu..... 1  
 Gi3\_25988544\_x54.....Gucggagacgucgugggaacacgggg..... 1

Gi3\_25993242\_x54.....cgucgugggaGcacggggugccgaacu..... 1  
Gi5\_7836335\_x54.....ugggaacacAgggugccgaacu..... 1  
Gi5\_7828019\_x54.....cguggaacacggggugccgaaUu..... 1  
Gi5\_7833851\_x54.....gCaacacggggugccgaacu..... 1  
Gi3\_25987842\_x54.....aucggagacgucgugggaCcacgggu..... 1  
Gi1\_3623484\_x54.....ggUacacggggugccgaacu..... 1  
Gi5\_7836011\_x54.....aacacggggugcUgaacu..... 1  
Gi1\_3623592\_x54.....aucggagacgucguggaacacggguU..... 1  
G1a\_5224932\_x54.....cggagacgucguggaacacggg..... 0  
Gi5\_7826723\_x54.....aucggagacgucgugggaGcacggg..... 1  
Gi5\_7838171\_x54.....ucguggaacGcggggugccgaacu..... 1  
Gi5\_7827425\_x54.....Uugggaacacggggugccgaacu..... 1  
Gi5\_7835039\_x54.....ucguggGacacggggugccgaacu..... 1  
Gi3\_26000890\_x53.....gucgugggaGcacggggugccgaacu..... 1  
Gi3\_26005077\_x53.....uggaacacggggugccgUacu..... 1  
G1a\_5230397\_x53.....gggaacacggggugccgaac..... 0  
Gi1\_3627478\_x53.....cggagacgucguggaacacgggu..... 0  
Gi2\_9703224\_x53.....cgaucggagacgucguggaacac..... 0  
Gi1\_3628803\_x53.....guggaacacggggugccgaGcu..... 1  
Gi1\_3630128\_x53.....Uugggaacacggggugccg..... 1  
Gi2\_9708047\_x53.....Gguggaacacggggugcc..... 1  
Gi3\_26002374\_x53.....cgugggaaAacggggugccgaacu..... 1  
Gi3\_26000201\_x53.....ggAaacacggggugccgaacu..... 1  
Gi1\_3630976\_x53.....cgAgggaacacggggugccgaacu..... 1  
Gi2\_9715255\_x53.....guggaacUcggggugccgaacu..... 1  
Gi3\_26003169\_x53.....acgucguggaacacggggCgccgaacu..... 1  
Gi3\_26013451\_x53.....ugggGacacggggugccgaa..... 1  
Gi3\_26005819\_x53.....guggaacacgggAugccgaac..... 1  
Gi3\_25997021\_x53.....Gguggaacacggggugc..... 1  
Gi2\_9705556\_x53.....gucguggaacacggggugccgaa..... 0  
Gi3\_25999883\_x53.....aacacggggugccgUacu..... 1  
Gi2\_9712340\_x53.....aGcggagacgucguggaacacggggugcc..... 1  
Gi2\_9704867\_x53.....Ggggaacacggggugccga..... 1  
Gi5\_7843599\_x53.....cguggaacacggggugcAgaacu..... 1  
Gi3\_26008681\_x53.....guggaacacggggugcGgaacu..... 1  
Gi2\_9725926\_x52.....uUguggaacacggggugccgaacu..... 1  
Gi2\_9726706\_x52.....cUucguggaacacggggugccga..... 1  
Gi5\_7855391\_x52.....ggaacacggggugccgaGcu..... 1  
Gi1\_3632450\_x52.....gGcguggaacacggggugccgaacu..... 1  
Gi5\_7852687\_x52.....cguggaacacggAgugccgaacu..... 1  
Gi3\_26023136\_x52.....gucguggaacacggggugccgCac..... 1  
Gi3\_26029324\_x52.....gAgggaacacggggugccga..... 1  
Gi3\_26020224\_x52.....aGcggagacgucguggaacac..... 1  
Gi5\_7854871\_x52.....cgucguggaacacggggGgccgaacu..... 1  
Gi2\_9718230\_x52.....gggaacacggggugccgGacu..... 1  
G1a\_5241298\_x52.....Uuggaacacggggugccgaac..... 1  
Gi3\_26029740\_x52.....Ugagacgucguggaacacg..... 1

Gi3\_26041900\_x51.....gucgugggGacacggggugccgaacu..... 1  
 Gi3\_26048989\_x51.....cgugggaUcacggggugccgaacu..... 1  
 Gi3\_26038738\_x51.....gaacaAggggugccgaacu..... 1  
 Gi3\_26056384\_x51.....gugUgaacacggggugccgaacu..... 1  
 G1a\_5246304\_x51.....gugggaacGcggggugccgaacu..... 1  
 Gi3\_26044807\_x51.....Cacgucgugggaacacggggugccgaacu..... 1  
 G1a\_5246559\_x51.....Uugggaacacggggugccga..... 1  
 Gi2\_9739246\_x51.....aUacgucgugggaacacggggugccgaacu..... 1  
 Gi3\_26043532\_x51.....ggaacacggggUAccgaacu..... 1  
 Gi2\_9738328\_x51.....gggaacacNgggugccgaac..... 1  
 Gi2\_9734452\_x51...Uaucggagacgucgugggaaca..... 1  
 Gi2\_9732412\_x51.....gugggaacacAgggugccgaac..... 1  
 Gi2\_9729046\_x51.....gaGcacggggugccgaacu..... 1  
 Gi3\_26038330\_x51.....ggaacacggggAgccgaacu..... 1  
 Gi3\_26054548\_x51.....gugggaacacggggUAccga..... 1  
 Gi5\_7878986\_x50.....gaacacggggugcUgaacu..... 1  
 Gi2\_9753695\_x50.....ucggagacgucgugggaacaUggggugcc..... 1  
 Gi3\_26062736\_x50.....ggaacaUggggugccgaac..... 1  
 Gi3\_26075986\_x50.....ugggaacacAgggugccgaac..... 1  
 Gi3\_26069086\_x50.....ggaacacggggugcUgaac..... 1  
 Gi3\_26073286\_x50.....ugggaacacggggugccAaac..... 1  
 Gi3\_26068386\_x50...gaucggagacgucguggCaacacggggU..... 1  
 Gi5\_7880636\_x50.....gGgggaacacggggugccga..... 1  
 Gi3\_26058986\_x50.....gugggaacacggggCgccga..... 1  
 Gi2\_9748195\_x50.....acgucgugggaacacggggugccgaacA..... 1  
 Gi2\_9754595\_x50.....cgugggaaNacggggugcc..... 1  
 Gi3\_26069186\_x50...aucggagacgucgugggaacacCg..... 1  
 G1a\_5247831\_x50.....gucgugggaacacggggugcc..... 0  
 Gi3\_26074336\_x50.....gugggaacacggggugccgaG..... 1  
 Gi2\_9748995\_x50.....gugNgaacacggggugccgaacu..... 1  
 Gi2\_9755295\_x50.....cgCgggaacacggggugccgaac..... 1  
 Gi2\_9750495\_x50.....gugggaacCcgggugcc..... 1  
 Gi3\_26060086\_x50...cguNggaacacggggugccgaacu..... 1  
 Gi1\_3644514\_x50...gaucggagacgucgugggaacacgg..... 0  
 Gi1\_3642014\_x50.....Aggaacacggggugccgaacu..... 1  
 G1a\_5254831\_x50.ugcgaucggagacgucgug..... 0  
 G1a\_5250181\_x50.....guUggaacacggggugccgaacu..... 1  
 Gi2\_9759561\_x49.....cgAgggaacacggggugccgaac..... 1  
 Gi1\_3650143\_x49.....ugggaacacggggCgccgaacu..... 1  
 Gi5\_7899512\_x49.....cggagacgucgugggaacacggg..... 0  
 Gi5\_7894857\_x49.....gugggaacacggggugccgaaUu..... 1  
 Gi3\_26080399\_x49.....gugggaacaGggggugccgaacu..... 1  
 Gi5\_7889712\_x49.....cUugggaacacggggugccga..... 1  
 Gi3\_26083045\_x49.....cgugggaacacgUggugccgaac..... 1  
 Gi1\_3648771\_x49.....gaacCggggugccgaacu..... 1  
 G1a\_5261264\_x49.....ggagacgucgugggaaca..... 0  
 Gi2\_9761080\_x49.....Ggugggaacacggggugc..... 1

Gi5\_7895445\_x49.....ggaacGcggggugccgaacu..... 1  
 Gi2\_9762109\_x49.....ugggaacacggggugccgaCcu..... 1  
 Gi2\_9763726\_x49.....gUacacggggugccgaacu..... 1  
 Gi3\_26084074\_x49.....ucguAggaacacggggugccgaacu..... 1  
 Gi3\_26093874\_x49.....gugggaGcacggggugccgaa..... 1  
 Gi2\_9757062\_x49.....gugggaacacggggugccgaUcu..... 1  
 Gi3\_26085593\_x49.....Uacgucgugggaacacggggu..... 1  
 Gi1\_3647056\_x49.....gagacgucgugggaacacggggugccg..... 0  
 Gi3\_26085985\_x49.....gugggaacacggggGgccg..... 1  
 Gl1a\_5256217\_x49.....ugggaacacggggugccgCacu..... 1  
 Gi3\_26089023\_x49.....guUggaacacggggugccg..... 1  
 Gi2\_9762991\_x49.....Augggaacacggggugccg..... 1  
 Gi3\_26104208\_x48.....aucggagacgucgugggaacacggggG..... 1  
 Gi2\_9771389\_x48.....gugggaGcacggggugcc..... 1  
 Gi3\_26100896\_x48.....cgugggaacacgCggugccgaacu..... 1  
 Gi5\_7913888\_x48.....ugggaacacggggugcUgaacu..... 1  
 Gi5\_7907408\_x48.....gggaacGcggggugccgaacu..... 1  
 Gi3\_26114336\_x48.....Ggucgugggaacacggggugccgaac..... 1  
 Gi3\_26116016\_x48.....ugggaacacggggugccgaaUu..... 1  
 Gi5\_7909808\_x48.....cgugggaacacggggugAcgaacu..... 1  
 Gi1\_3656201\_x48.....ucgugggaacacggggugccgCacu..... 1  
 Gi5\_7902368\_x48.....cgugggaacacgggAugccgaacu..... 1  
 Gi2\_9778013\_x48.....cgaucggagacgucgugggaacacggggu..... 0  
 Gi1\_3657017\_x48.....gugggaGcacggggugccgaacu..... 1  
 Gi2\_9776525\_x48.....gugggaacNcggggugccg..... 1  
 Gi3\_26109872\_x48.....gggaacacggAgugccgaacu..... 1  
 Gi5\_7901840\_x48.....gugggaacacggggugcAgaacu..... 1  
 Gi3\_26102336\_x48.....gucgugggaacacggggugccgaacu..... 0  
 Gi2\_9773885\_x48.....gaacacggggugccgCacu..... 1  
 Gi1\_3654041\_x48.....uUggaacacggggugccgaac..... 1  
 Gl1a\_5262484\_x48.....Ggugggaacacggggugccgaacu..... 1  
 Gi2\_9770333\_x48.....gugggaacacggggugccgaCc..... 1  
 Gi1\_3657401\_x48.....cgugUgaacacggggugccgaacu..... 1  
 Gi3\_26113184\_x48.....ucgugggaacacAgggugccgaacu..... 1  
 Gi1\_3662931\_x47.....ugggGacacggggugccgaacu..... 1  
 Gi3\_26127448\_x47.....Uagacgucgugggaacacggggugccgaacu..... 1  
 Gi5\_7915822\_x47.....gggaGcacggggugccgaacu..... 1  
 Gi5\_7916903\_x47.....ucgCgggaacacggggugccgaacu..... 1  
 Gi3\_26129751\_x47.....auUggagacgucgugggaacacgg..... 1  
 Gi3\_26124628\_x47.....ggaUcacggggugccgaacu..... 1  
 Gi3\_26129093\_x47.....gugggaacGcggggugccgaa..... 1  
 Gi3\_26116779\_x47.....Uagacgucgugggaacacggggugccgaac..... 1  
 Gi5\_7925786\_x47.....cgugggCacacggggugccgaacu..... 1  
 Gi3\_26132289\_x47.....gugggaCcacggggugccgaac..... 1  
 Gi2\_9787299\_x47.....Gucggagacgucgugggaacacggggugc..... 1  
 Gi1\_3663918\_x47.....aacacggggAgccgaacu..... 1  
 Gi5\_7924329\_x47.....gugggaacacggggugAcgaacu..... 1

Gi4\_472216\_x47.....cUugggaacacggggugccgaacu..... 1  
 Gi1\_3661521\_x47.....ggagacgucgugggaacacggggu..... 0  
 Gi1\_3664388\_x47.....gugggaacacggggugccgCacu..... 1  
 Gi2\_9788474\_x47.....cgugggaacCcggggugccgaacu..... 1  
 Gi3\_26135720\_x47.....aucggagacgucgugggaGcacggg..... 1  
 Gi3\_26151535\_x46.....aucggagGcgucgugggaacacggg..... 1  
 Gi1\_3667245\_x46.....uUgugggaacacggggugccgaacu..... 1  
 Gi3\_26140633\_x46.....ggagacgucgugggaacacggggug..... 0  
 Gi3\_26151581\_x46.....gaacacggNgugccgaac..... 1  
 Gi3\_26156917\_x46.....gugggaacacgUggugccgaacu..... 1  
 G1a\_5280784\_x46.....cgucgugggaacacggggugccgaacA..... 1  
 Gi3\_26150937\_x46.....gugggaacacggggugccgUac..... 1  
 Gi3\_26147901\_x46.....cgugAgaacacggggugccgaac..... 1  
 Gi3\_26144911\_x46.....aGcggagacgucgugggaacacggggugcc..... 1  
 G1a\_5280646\_x46..gcaucggagacgucgug..... 0  
 Gi5\_7939079\_x46.....cggagacgucgugggaacacggggugccga..... 0  
 Gi2\_9803424\_x46.....ucgugggGacacggggugccgaacu..... 1  
 Gi2\_9800296\_x46.....cgugggCacacggggugccgaacu..... 1  
 Gi3\_26146337\_x46.....guggUaacacggggugccga..... 1  
 Gi1\_3667199\_x46.....cggagacgucgugggaacacgggg..... 0  
 Gi3\_26145555\_x46.....gugggGacacggggugcc..... 1  
 Gi3\_26142841\_x46.....aacacggggugcGgaacu..... 1  
 Gi5\_7939263\_x46.....cgugggaacacggggAgccgaacu..... 1  
 Gi3\_26147855\_x46.....gugggaacacggggugccgG..... 1  
 Gi3\_26137735\_x46.....cggagacgucgugggaacacggggugccg..... 0  
 Gi5\_7940275\_x46.....gucgugggaacacggggugc..... 0  
 Gi3\_26148867\_x46.....aucggagacgucgugggaacGcggg..... 1  
 Gi1\_3668211\_x46.....gaacacggggugccgCacu..... 1  
 Gi1\_3673455\_x45.....ucggagacgucgugggaacacgggg..... 0  
 Gi3\_26168983\_x45.....gAgggaacacggggugcc..... 1  
 Gi3\_26175958\_x45.....ugggaacaNggggugccg..... 1  
 Gi2\_9816729\_x45.....Aucgugggaacacggggugccgaacu..... 1  
 Gi1\_3671610\_x45..gcaucggagacgucgugggaaca..... 0  
 Gi3\_26166418\_x45.....gugggaacCcgggugccgaa..... 1  
 Gi3\_26167273\_x45.....cgugggaacacggggugccUaacu..... 1  
 Gi3\_26173078\_x45.....ugggaacacggggugccgaacG..... 1  
 Gi1\_3672150\_x45.....aacacggggugccgCacu..... 1  
 Gi2\_9811914\_x45.....Uucgugggaacacggggugccga..... 1  
 Gi3\_26162188\_x45.....cgugggaacacgggCugccgaacu..... 1  
 Gi5\_7943982\_x45.....cgucgugggaacacggggCgccgaacu..... 1  
 Gi2\_9807864\_x45.....cUucgugggaacacggggugc..... 1  
 Gi5\_7941372\_x45.....gaacacAgggugccgaacu..... 1  
 Gi2\_9811239\_x45.....gugggaacacggggugccgCac..... 1  
 Gi3\_26176993\_x45.....gUagacgucgugggaacacggggu..... 1  
 Gi3\_26169703\_x45.....Ggugggaacacggggugccg..... 1  
 Gi5\_7941147\_x45.....cgugggaacacggggugccgaacu..... 0  
 Gi3\_26181533\_x44.....gggaacacggggugccgaaUu..... 1

|                  |                                    |   |
|------------------|------------------------------------|---|
| Gi3_26192665_x44 | cgaucggagacgucgugggaaacacggggugc   | 0 |
| Gi3_26191345_x44 | ggagacgucgugggaaacacggggugccga     | 0 |
| Gi3_26189409_x44 | ucgugggaaacacggggCgccgaac          | 1 |
| Gi2_9830738_x44  | ggaacacAgggugccgaacu               | 1 |
| Gi2_9822510_x44  | agacgucgugggaaacacggggg            | 0 |
| Gi3_26185053_x44 | gugggaaacacggggugccAa              | 1 |
| Gi5_7961195_x44  | aGgucgugggaaacacggggugccgaacu      | 1 |
| Gi3_26179069_x44 | gugggGacacggggugccg                | 1 |
| Gi2_9829418_x44  | gaucggGgacgucgugggaaacac           | 1 |
| Gi3_26192753_x44 | gugggaaacacggAgugcc                | 1 |
| Gi4_474816_x44   | gGgggaacacggggugccgaacu            | 1 |
| Gi2_9823390_x44  | uUggaacacggggugccgaa               | 1 |
| Gi3_26180521_x44 | Aaacacggggugccgaac                 | 1 |
| Gi1_3677153_x44  | gggaacacggggugccgaCcu              | 1 |
| Gi3_26188837_x44 | cgUggaacacggggugccgaacu            | 1 |
| Gi1_3676493_x44  | gacgucgugggaaacacggggugccgaacA     | 1 |
| Gi1_3675965_x44  | gugggaaacCggggugccgaacu            | 1 |
| Gl1a_5294604_x44 | ugggaacaNggggugccgaacu             | 1 |
| Gi3_26196845_x44 | Uaucggagacgucgugggaaacacgg         | 1 |
| Gi5_7964143_x44  | gugggUacacggggugccgaacu            | 1 |
| Gi2_9824886_x44  | ugggaacacAgggugccgaacu             | 1 |
| Gi2_9825062_x44  | ggaacacggggugccgaGc                | 1 |
| Gi2_9823258_x44  | ugggaacacggggugccgCac              | 1 |
| Gi2_9832234_x44  | gaucggGgacgucgugggaaacacggggugc    | 1 |
| Gi3_26192709_x44 | ggaacacggggugccgaCcu               | 1 |
| Gi3_26185933_x44 | gugggaaUacggggugcc                 | 1 |
| Gi2_9831882_x44  | cgucgugggaaacacggggGgccgaacu       | 1 |
| Gi3_26178057_x44 | Agugggaacacggggugccgaac            | 1 |
| Gi3_26218945_x43 | gagacgucgugggaaacacggggugc         | 0 |
| Gi3_26219762_x43 | cggagacgucgugggaaacacggggugccgaacu | 0 |
| Gi2_9847129_x43  | cggagacgucgugggaaacacgggg          | 0 |
| Gi3_26198778_x43 | auUggagacgucgugggaaacacggggg       | 1 |
| Gi2_9840120_x43  | ugggaacaNggggugccgaac              | 1 |
| Gi3_26217053_x43 | cgCcgugggaacacggggugccgaacu        | 1 |
| Gi3_26201917_x43 | ucAugggaaacacggggugccgaacu         | 1 |
| Gi1_3680974_x43  | uAggaacacggggugccgaacu             | 1 |
| Gi2_9839690_x43  | Agggaacacggggugccgaacu             | 1 |
| Gi2_9844764_x43  | Uggaacacggggugccga                 | 1 |
| Gi5_7974796_x43  | cgucgugggaaacacggggugccgCacu       | 1 |
| Gi3_26210689_x43 | cgugggaaNacggggugccga              | 1 |
| Gi2_9845022_x43  | ggaacacggggugcUgaacu               | 1 |
| Gi1_3682780_x43  | aUacgucgugggaaacacggggugccgaacu    | 1 |
| Gi3_26220149_x43 | gugggaaacacAgggugccga              | 1 |
| Gi3_26211764_x43 | cgucgugggGacacggggugccgaacu        | 1 |
| Gi3_26214860_x43 | ggaacaUggggugccgaacu               | 1 |
| Gi3_26207077_x43 | uAggaacacggggugccga                | 1 |
| Gi3_26209313_x43 | ugggGacacggggugccga                | 1 |

Gi3\_26206733\_x43.....gCgग्gaacacggggugccg..... 1  
G1a\_5301477\_x43.....gugggaGcacggggugccgaacu..... 1  
Gi2\_9836766\_x43.....cUgagacgucgugग्gaacacggggugc..... 1  
G1a\_5300617\_x43.....gGग्gaacacggggugcc..... 1  
Gi5\_7971571\_x43.....acgucgugNgaacacggggugccgaacu..... 1  
Gi3\_26204970\_x43.....ग्gaacacggAgugccgaacu..... 1  
Gi3\_26218601\_x43.....aucggagacgucgugग्gaacacgggA..... 1  
Gi3\_26239777\_x42.....aucggagGcgucgugग्gaacacg..... 1  
Gi1\_3691157\_x42.....gaGcacggggugccgaacu..... 1  
Gi2\_9857515\_x42.....gucgugग्gaacacggggg..... 0  
Gi3\_26222893\_x42.....guUग्gaacacggggugccgaa..... 1  
Gi3\_26226883\_x42.....ग्gaacacggAgugccgaac..... 1  
Gi2\_9861001\_x42.....aGcggagacgucgugग्gaacacg..... 1  
Gi3\_26231125\_x42.....aUacgucgugग्gaacacggggugcc..... 1  
Gi2\_9847897\_x42.....cgugग्gaacacggggugAcgaacu..... 1  
G1a\_5312145\_x42.....gaucggagacgucgugग्gaacacg..... 0  
Gi2\_9857473\_x42.....aUacgucgugग्gaacacggggugc..... 1  
Gi1\_3688595\_x42.....aacacggggugccAaacu..... 1  
Gi5\_7986922\_x42.....gugggaacNcggggugccgaac..... 1  
Gi5\_7978984\_x42.....Uucgugग्gaacacggggugccgaac..... 1  
Gi2\_9848611\_x42.....cggGgacgucgugग्gaacacggggg..... 1  
Gi1\_3690989\_x42.....ugggaGcacggggugccgaacu..... 1  
Gi2\_9849157\_x42.....gAgग्gaacacggggugccg..... 1  
Gi1\_3687041\_x42.....gAgग्gaacacggggugccgaacu..... 1  
Gi3\_26223607\_x42.....gugggaacGcggggugccg..... 1  
Gi5\_7987090\_x42.....gugggaCcacggggugccgaacu..... 1  
Gi1\_3689477\_x42.....gacgucgugग्gaacacggggugccgaac..... 0  
Gi3\_26225287\_x42.....aCcggagacgucgugग्gaacacg..... 1  
Gi5\_7983226\_x42.....gAaacacggggugccgaacu..... 1  
Gi2\_9850837\_x42.....gucgugग्gaacCcggggugccgaacu..... 1  
Gi3\_26232301\_x42.....ग्gaacacggggugccgaCc..... 1  
Gi3\_26226379\_x42.....gugggaacacggggugcUg..... 1  
Gi5\_8001776\_x41.....gggaacacggggGgccgaacu..... 1  
Gi1\_3695848\_x41.....Agaacacggggugccgaacu..... 1  
Gi3\_26242529\_x41.....gugAgaacacggggugcc..... 1  
Gi2\_9864395\_x41.....gUaacacggggugccgaa..... 1  
Gi5\_7990952\_x41.....ugggaacacggggAgccgaacu..... 1  
Gi2\_9868782\_x41.....ucggGgacgucgugग्gaacacgg..... 1  
Gi3\_26253804\_x41.....Cugggaacacggggugccg..... 1  
Gi2\_9869684\_x41.....aacacggggAgccgaacu..... 1  
Gi3\_26240110\_x41.....gCcacacggggugccgaacu..... 1  
Gi1\_3692076\_x41.....ucgugggGacacggggugccgaacu..... 1  
Gi3\_26252410\_x41.....cgugggaacaAggggugccgaacu..... 1  
Gi2\_9865338\_x41.....gggaacacggAgugccgaacu..... 1  
Gi5\_7998209\_x41.....ucgugggaGcacggggugccgaacu..... 1  
Gi5\_7996692\_x41.....ggagacgucgugग्gaacacggggugccgaacu..... 0  
Gi3\_26248638\_x41.....ggagacgucgugग्gaacacgggg..... 0

Gi2\_9871201\_x41.....gaacacAgggugccgaacu..... 1  
 Gi5\_7993166\_x41.....gCgaacacggggugccgaacu..... 1  
 Gi2\_9866322\_x41.....ggaacacggggugccAaacu..... 1  
 Gi5\_8010294\_x40.....aacacggggugccgaCcu..... 1  
 Gi1\_3702037\_x40.....gUacacggggugccgaacu..... 1  
 Gi1\_3701277\_x40.....cgugggaacacggggugccgaCcu..... 1  
 Gi5\_8006734\_x40.....gggaacacggggugccgaGcu..... 1  
 Gi5\_8009854\_x40.....ucguUggaacacggggugccgaacu..... 1  
 Gi3\_26267770\_x40.....aCcgagacgucguggaacacggg..... 1  
 Gi2\_9884570\_x40.....Gucggagacgucguggaacac..... 1  
 Gi5\_8015894\_x40.....uggaacacggggugccgaCcu..... 1  
 Gi2\_9880010\_x40.....gggaacacggggugccgaCc..... 1  
 Gi3\_26268970\_x40.....Agggaacacggggugccgaac..... 1  
 Gi2\_9876490\_x40.....ucguUggaacacggggugccgaacu..... 1  
 Gi1\_3700597\_x40.....acgucguggaacacggggugccgaac..... 0  
 Gi3\_26273810\_x40.....cguAggaacacggggugccgaac..... 1  
 Gi2\_9884250\_x40.....ggUgacgucguggaacacggggugcc..... 1  
 Gi3\_26273970\_x40.....cgCgggaacacggggugccga..... 1  
 Gi3\_26280010\_x40.....gggaacCcgggugccgaacu..... 1  
 Gi3\_26266370\_x40.....gaacacggUgugccgaacu..... 1  
 Gi5\_8012734\_x40.....ucguggaacCcgggugccgaacu..... 1  
 Gl1a\_5322628\_x40.....cguggaacacggggugccgaac..... 0  
 Gi1\_3701557\_x40.....guggUaacacggggugccgaacu..... 1  
 Gi1\_3700477\_x40.....guggaacacggggugccgaCcu..... 1  
 Gi2\_9885530\_x40.....cguggaacacggggugccgCac..... 1  
 Gi3\_26279330\_x40.....aacUcggggugccgaacu..... 1  
 Gi3\_26291688\_x39.....gGcgucguggaacacggggugccgaacu..... 1  
 Gi1\_3708338\_x39.....gGgggaacacggggugcc..... 1  
 Gi2\_9895381\_x39.....agacgucguggaacacggggugccga..... 0  
 Gi2\_9894367\_x39.....aacacggggugccgCacu..... 1  
 Gi3\_26302803\_x39.....acgucguggaacacggggugccgCacu..... 1  
 Gi3\_26293209\_x39.....gacgucguggaacacggggugc..... 0  
 Gi2\_9891988\_x39.....guAggaacacggggugccgaac..... 1  
 Gi5\_8024603\_x39.....aacacggggGgccgaacu..... 1  
 Gi2\_9899983\_x39.....ggaacacggggugUcgaacu..... 1  
 Gi2\_9896083\_x39.....Gucggagacgucguggaaca..... 1  
 Gi5\_8018675\_x39.....cUuggaacacggggugcc..... 1  
 Gi3\_26286579\_x39.....gGucggagacgucguggaacacggg..... 1  
 Gi2\_9888166\_x39.....Gucggagacgucguggaacacggg..... 1  
 Gi3\_26295666\_x39.....aucggagacgucguAggaacacggggugc..... 1  
 Gl1a\_5334726\_x39.....Ugaacacggggugccgaac..... 1  
 Gl1a\_5331567\_x39.....guggaacacggggugccgCacu..... 1  
 Gi3\_26286072\_x39.....gaUcacggggugccgaac..... 1  
 Gi3\_26294808\_x39.....cgCcguggaacacggggugcc..... 1  
 Gi2\_9898189\_x39.....Gucggagacgucguggaacacggggugcc..... 1  
 Gi5\_8023199\_x39.....ucggagacgucguggaacacggggugc..... 0  
 Gi3\_26287398\_x39.....aucggagacgucguggGacacggg..... 1



Gi1a\_5335233\_x39.....cUugggaacacggggugcc..... 1  
 Gi3\_26295861\_x39.....cggagacgucgugggaacacggggugccgaa..... 0  
 Gi3\_26294730\_x39.....gggaacacggggugcAgaacu..... 1  
 Gi3\_26294886\_x39.....ugggaacacggggugcUgaac..... 1  
 Gi1\_3706817\_x39.....cgucgugggaacacggggugccg..... 0  
 Gi3\_26293170\_x39.....gugggaGcacggggugccg..... 1  
 Gi3\_26286423\_x39.....ggaacacgggguUccgaacu..... 1  
 Gi2\_9898462\_x39.....guggUaacacggggugcc..... 1  
 Gi3\_26296797\_x39.....Aucgugggaacacggggugccgaac..... 1  
 Gi2\_9899554\_x39.....gugggaacGcggggugcc..... 1  
 Gi5\_8019767\_x39.....cgugggUacacggggugccgaacu..... 1  
 Gi2\_9892651\_x39.....acgucgugggaacacggggugccga..... 0  
 Gi3\_26301087\_x39.....ggaacacgAggugccgaac..... 1  
 Gi1\_3702917\_x39.....gacgucgCgggaacacggggugccgaac..... 1  
 Gi5\_8031201\_x38.....gGgggaacacggggugccgaa..... 1  
 Gi1\_3713784\_x38.....gGgggaacacggggugccgaac..... 1  
 Gi1\_3710212\_x38.....ugggaacGcggggugccgaacu..... 1  
 Gi3\_26321572\_x38.....gugggaacacggggCgccg..... 1  
 Gi1a\_5343686\_x38.....aucggagacgucgugggaacacgggg..... 0  
 Gi2\_9908167\_x38.....gagacgucgugggaacacggggugccgaac..... 0  
 Gi3\_26317772\_x38.....cgugggaacacggggugccgaaA..... 1  
 Gi1\_3710782\_x38.....gugggaacacggggugccAaacu..... 1  
 Gi3\_26322598\_x38.....aucggagacgucgugggCacacg..... 1  
 Gi3\_26311046\_x38.....gugggaGcacggggugcc..... 1  
 Gi3\_26319140\_x38.....Uucgugggaacacggggugc..... 1  
 Gi2\_9902543\_x38.....cgCcgugggaacacggggugccgaacu..... 1  
 Gi2\_9909497\_x38.....cgugggaacacggggugccgaCc..... 1  
 Gi3\_26307170\_x38.....ugggaacacggggCgccgaa..... 1  
 Gi1\_3710744\_x38.....acgucgCgggaacacggggugccg..... 1  
 Gi3\_26327044\_x38.....guUgugggaacacggggugccgaac..... 1  
 Gi3\_26316404\_x38.....uCggaacacggggugccgaa..... 1  
 Gi2\_9912993\_x38.....cUucgugggaacacggggugccgaac..... 1  
 Gi3\_26327310\_x38.....cgugggaCcacggggugccgaac..... 1  
 Gi1a\_5339012\_x38.....guggUaacacggggugccgaacu..... 1  
 Gi1a\_5340570\_x38.....aucggagacgucgugggaacac..... 0  
 Gi2\_9901555\_x38.....Ugugggaacacggggugccgaac..... 1  
 Gi3\_26316442\_x38.....Nugggaacacggggugccgaacu..... 1  
 Gi3\_26321610\_x38.....gugggaacacggggugUc..... 1  
 Gi5\_8032949\_x38.....ugggaacacgAggugccgaacu..... 1  
 Gi1\_3709718\_x38.....ucgugggaacacggggugccgaa..... 0  
 Gi3\_26320166\_x38.....aucggagacgucgugggaGcacg..... 1  
 Gi1\_3713860\_x38.....ggaacacggggCgccgaacu..... 1  
 Gi3\_26319216\_x38.....gugggCacacggggugccgaac..... 1  
 Gi3\_26306296\_x38.....gugCgaacacggggugccgaacu..... 1  
 Gi1\_3714278\_x38.....ggaacacggggugccgCacu..... 1  
 Gi2\_9910371\_x38.....gugggaacacggggugccgGac..... 1  
 Gi5\_8035229\_x38.....ugggaacaUggggugccgaacu..... 1

G1a\_5341938\_x38.....guggaacCgggggugccgaacu..... 1  
 Gi2\_9901175\_x38.....Uacgucguggaacacggggugccg..... 1  
 Gi1\_3708882\_x38.....ucguggaacGcggggugccgaacu..... 1  
 Gi2\_9925882\_x37.....cguggaacUcggggugccgaacu..... 1  
 Gi3\_26336082\_x37.....uggaacacgggUugccgaac..... 1  
 Gi2\_9917113\_x37..gcgaucggagacgucguggaacacgg..... 0  
 Gi2\_9924402\_x37.....aacacggggugccgGacu..... 1  
 G1a\_5350800\_x37.....gGgggaacacggggugccgaac..... 1  
 Gi3\_26346627\_x37.....cguggUaacacggggugccgaacu..... 1  
 G1a\_5345768\_x37..cgaucggagacgucguggaacacgg..... 0  
 Gi1\_3719397\_x37.....Gcguggaacacggggugccgaac..... 1  
 Gi3\_26338006\_x37.....Uaacacggggugccgaacu..... 1  
 Gi2\_9918001\_x37.....ggaGcacggggugccgaac..... 1  
 Gi2\_9914486\_x37.....ggaacacggggugccgaCcu..... 1  
 Gi2\_9922774\_x37.....aacacAgggugccgaacu..... 1  
 Gi1\_3715586\_x37.....Uucguggaacacggggugcc..... 1  
 Gi5\_8053663\_x37.....ucguggaacacggggGgccgaacu..... 1  
 Gi1\_3716548\_x37.....ggaacacggggugccgaacu..... 0  
 Gi3\_26333640\_x37.....gaacacggggCgccgaac..... 1  
 Gi3\_26343001\_x37..gaucggagacguUguggaacacggg..... 1  
 Gi2\_9919814\_x37.....guggaacacggggugcUgaac..... 1  
 Gi3\_26333344\_x37.....acgucguggaacacggggGgccgaacu..... 1  
 Gi3\_26347071\_x37..aucggagacgucguggaCcacggg..... 1  
 Gi3\_26350290\_x37.....ugggCacacggggugccgaacu..... 1  
 Gi3\_26346479\_x37.....guggaacacggggugcUga..... 1  
 Gi3\_26350660\_x37.....cguUguggaacacggggugccgaacu..... 1  
 Gi2\_9913487\_x37.....cguggaacacggggugccgaGc..... 1  
 G1a\_5359379\_x36.....ggaacacgNggugccgaacu..... 1  
 Gi2\_9940923\_x36.....ucguggaacGcggggugccgaacu..... 1  
 Gi5\_8065480\_x36.....gUgaacacggggugccgaa..... 1  
 Gi2\_9932031\_x36.....ucguggaacacggggGgccgaacu..... 1  
 Gi3\_26370947\_x36.....Gcguggaacacggggugc..... 1  
 Gi5\_8054860\_x36.....ggagacgucguggaacacggggugcc..... 0  
 Gi3\_26353991\_x36.....aucggagacgCcguggaacacggggu..... 1  
 Gi3\_26357627\_x36..gcgaucggagacgucguggaacacggggugcc..... 0  
 Gi2\_9932535\_x36.....gUgaacacggggugccgaa..... 1  
 Gi2\_9936747\_x36.....Uacacggggugccgaacu..... 1  
 Gi3\_26374619\_x36.....ucguggaacUgggggugccgaacu..... 1  
 Gi3\_26362055\_x36.....aacacggggugccgaaAu..... 1  
 Gi1\_3726159\_x36.....ucguggaacacggggugccgaGcu..... 1  
 Gi1\_3724431\_x36.....Ugagacgucguggaacacggggugcc..... 1  
 Gi5\_8056264\_x36.....gaacacggggugccAaacu..... 1  
 Gi2\_9935739\_x36.....aacacggggugcUgaacu..... 1  
 Gi1\_3723243\_x36..aucggagacgucGgggaacacggggugcc..... 1  
 Gi2\_9935955\_x36..cUgagacgucguggaacacggggu..... 1  
 Gi1\_3722523\_x36.....uGggaacacggggugccgaacu..... 1  
 G1a\_5355887\_x36.....gagacgucguggaacacg..... 0

Gi3\_26362235\_x36.....ucguggaacacggggugccgaGc..... 1  
 Gi3\_26374403\_x36..gcgaucggagacgucguggaac..... 0  
 Gi3\_26371307\_x36.....uggaacacggggugccgaG..... 1  
 Gi5\_8059684\_x36.uUcgauccgagacgucgug..... 1  
 Gi3\_26359751\_x36.....gggaacacggggugccAaac..... 1  
 Gi2\_9937935\_x36.....gGgacgucgugggaacacggggugccg..... 1  
 Gi2\_9938691\_x36...Uaucggagacgucguggaacacggggug..... 1  
 Gi3\_26353163\_x36....Gucggagacgucguggaacacggggugcc..... 1  
 Gi5\_8062888\_x36.....cgCcguggaacacggggugccgaacu..... 1  
 Gi3\_26358563\_x36.....acgucguggaacGcggggugccgaacu..... 1  
 Gi1\_3720579\_x36.....ggagacgucguggaacacggggugc..... 0  
 Gi3\_26361011\_x36.....agacgucguggaacacggggugccgaa..... 0  
 Gi5\_8056192\_x36.....gAgaacacggggugccgaacu..... 1  
 Gi3\_26373251\_x36.....gaacacggggugGcgaacu..... 1  
 Gi3\_26364971\_x36.....cguggaacacggggugcGgaacu..... 1  
 Gi3\_26363243\_x36.....cguggaacacggggugccgGac..... 1  
 Gi2\_9941031\_x36.....guggaacacAgggugcc..... 1  
 Gi5\_8060152\_x36.....aacacgAgugccgaacu..... 1  
 Gi3\_26372099\_x36.....cgucguggaacacggggugccAaac..... 1  
 Gi3\_26361947\_x36.....guAggaacacggggugccga..... 1  
 Gl1\_5362170\_x35...cgauccgagacgucguggaa..... 0  
 Gi5\_8076664\_x35.....uggaacUcggggugccgaacu..... 1  
 Gi2\_9955159\_x35.....gAgggaacacggggugcc..... 1  
 Gi3\_26377180\_x35.....cguggaacacgAggugccgaac..... 1  
 Gi3\_26376655\_x35.....cgucgCgggaacacggggugccgaacu..... 1  
 Gi4\_486007\_x35...aucggagacgucguggaacacggggugcc..... 0  
 Gl1\_5361225\_x35.....gacgucguggaacacggggugccgaacu..... 0  
 Gi1\_3730417\_x35...aucggagacgucguggaacacggg..... 0  
 Gi2\_9949279\_x35.....cguggaacacggggGcggcaac..... 1  
 Gi3\_26394295\_x35.....cguggaaUacggggugccgaac..... 1  
 Gi3\_26394680\_x35...aucggagacgucguggaacGcg..... 1  
 Gi1\_3733112\_x35.....cgugggGacacggggugccgaacu..... 1  
 Gi3\_26382535\_x35.....gGcguuggaacacggggugcc..... 1  
 Gi3\_26379875\_x35...aucggagacgCcguggaacacggg..... 1  
 Gi3\_26375570\_x35.....cguggaacacggggugcAgaac..... 1  
 Gi2\_9952009\_x35...ucggGgacgucguggaacacggggug..... 1  
 Gi1\_3730627\_x35.....guAggaacacggggugccgaacu..... 1  
 Gi3\_26381940\_x35.....cguggaaNacggggugccgaa..... 1  
 Gi2\_9955544\_x35.....gCaacacggggugccgaac..... 1  
 Gl1\_5367175\_x35.....guggaacacAgggugccgaacu..... 1  
 Gi3\_26385965\_x35.....cgucguggaacacggggugccgaGcu..... 1  
 Gi5\_8068264\_x35.....gaacaUggggugccgaacu..... 1  
 Gi5\_8071484\_x35.....ggagacgucguggaaca..... 0  
 Gi3\_26385755\_x35.....ggaacCcgggugccgaac..... 1  
 Gi3\_26378300\_x35.....ucgugAgaacacggggugccgaacu..... 1  
 Gi3\_26386420\_x35...aucggagacgucguggGacacgggu..... 1  
 Gi3\_26394190\_x35.....gggaacacggggugccgaaAu..... 1

Gi1\_3730802\_x35.....cguggaacacggggugccgaGcu..... 1  
 Gi3\_26374870\_x35.....ucUugggaacacggggugccgaacu..... 1  
 Gi3\_26385580\_x35.....ugggaacacggggugccgC..... 1  
 Gi3\_26384670\_x35.....Aggaacacggggugccgaa..... 1  
 Gi5\_8068054\_x35.....gggUacacggggugccgaacu..... 1  
 Gi1\_3727092\_x35.....ucguUggaacacggggugccgaacu..... 1  
 Gi3\_26396640\_x35...cgaucggagacgucguggaacacggggugcc..... 0  
 Gi3\_26375535\_x35.....gggaacacggggugcUgaac..... 1  
 Gi5\_8078589\_x35.....guggaacacggggugccgUacu..... 1  
 Gi3\_26389220\_x35.....guggaacacggggugccCaacu..... 1  
 Gi2\_9946269\_x35.....guAggaacacggggugcc..... 1  
 Gi3\_26387330\_x35.....gggUacacggggugccgaacu..... 1  
 Gi1\_3731292\_x35.....cCuggaacacggggugccgaacu..... 1  
 Gi3\_26399910\_x34.....ggaacacggggUaccgaac..... 1  
 Gi5\_8084481\_x34.....gGgggaacacggggugcc..... 1  
 G1a\_5371924\_x34...gaucggagacgucguggaacacgg..... 0  
 Gi2\_9959265\_x34.....uggaacacgggUugccgaacu..... 1  
 Gi2\_9971029\_x34...cgucguggaacacggggugccgCacu..... 1  
 Gi2\_9961339\_x34.....gAaacacggggugccgaac..... 1  
 Gi2\_9967493\_x34.....ggaacGcggggugccgaac..... 1  
 Gi3\_26412116\_x34.ugcgaucggagacgucguggaacacggggU..... 0  
 Gi5\_8083699\_x34...gucguggaacacggggGgccgaacu..... 1  
 Gi3\_26410416\_x34.....ugggaGcacggggugccga..... 1  
 Gi3\_26405350\_x34.....gucguggaacacggggGgccgaac..... 1  
 Gi5\_8091689\_x34.....uggaacCcgggugccgaacu..... 1  
 G1a\_5368014\_x34.....guggaacacggggugccgGacu..... 1  
 Gi3\_26414836\_x34.....Ugucguggaacacggggugccgaacu..... 1  
 Gi5\_8092097\_x34.....gucguggNacacggggugccgaacu..... 1  
 Gi2\_9956239\_x34.....gugggaacaUggggugccgaac..... 1  
 Gi5\_8081557\_x34.....Ccguggaacacggggugccgaacu..... 1  
 Gi2\_9958007\_x34.....Augggaacacggggugccga..... 1  
 Gi3\_26417080\_x34.....guggaacacggggugAcgaac..... 1  
 Gi2\_9956613\_x34...aucggagaNgucguggaacacggggugc..... 1  
 G1a\_5370054\_x34...cguggaaNacggggugccgaacu..... 1  
 Gi3\_26406132\_x34.....gAgggaacacggggugccgaa..... 1  
 Gi2\_9958585\_x34...aGcggagacgucguggaacacggggug..... 1  
 Gi3\_26418508\_x34.....uAggaacacggggugccgaa..... 1  
 Gi3\_26406472\_x34.....guggUaacacggggugccgaa..... 1  
 Gi2\_9959333\_x34...aucggagacgucguggaGcacggggU..... 1  
 Gi1\_3733761\_x34.....aacacggggugccgGacu..... 1  
 Gi5\_8083733\_x34.....Augggaacacggggugccgaac..... 1  
 Gi2\_9965589\_x34...cgaucggagacgucguggaacacgggg..... 0  
 Gi2\_9968139\_x34.....uggaacacggggugccgGacu..... 1  
 Gi2\_9963821\_x34cugcgaucggagacgucguggaacac..... 0  
 Gi2\_9962665\_x34.....guggaacacggggGgccg..... 1  
 Gi2\_9956919\_x34...cgCgggaacacggggugcc..... 1  
 Gi1\_3733285\_x34.....cguggaGcacggggugccgaacu..... 1

Gi3\_26416944\_x34.....gaacacggggugAcgaacu..... 1  
 Gi3\_26409838\_x34.....ucguggaacacggggugccgaUc..... 1  
 Gi3\_26411470\_x34...gaucggagacgucguggaacacggggugccg..... 0  
 Gi2\_9978423\_x33.....gggaacaUggggugccgaacu..... 1  
 Gi5\_8100573\_x33.....gaacacgAggugccgaacu..... 1  
 Gi2\_9974793\_x33.....ugggaaUacggggugccgaacu..... 1  
 Gi3\_26426677\_x33.....ugUgaacacggggugccga..... 1  
 Gi2\_9983307\_x33.....Ggggaacacggggugccg..... 1  
 Gi5\_8093742\_x33.....cgGcguggaacacggggugccgaacu..... 1  
 Gi2\_9983802\_x33.....gucgugggGacacggggugccgaacu..... 1  
 Gi3\_26420275\_x33.....cgucguggaacacggggCgcc..... 1  
 Gi1\_3739542\_x33.....Ccguggaacacggggugccgaacu..... 1  
 Gi1\_3741456\_x33.....cguggaacacggggCgccgaacu..... 1  
 Gi3\_26433607\_x33....aCcggagacgucguggaacacgggg..... 1  
 Gl1a\_5382356\_x33.....gAgggaacacggggugccgaacu..... 1  
 Gi2\_9975849\_x33.....cgugggGacacggggugccgaac..... 1  
 Gi5\_8096712\_x33....aGcggagacgucguggaacacg..... 1  
 Gi1\_3741753\_x33....aucggagacgucgCgggaacacgggg..... 1  
 Gi3\_26432749\_x33.....guggaacacgAggugcc..... 1  
 Gi2\_9979611\_x33.....guggaacacgUgugccgaac..... 1  
 Gi2\_9975189\_x33.....gugggaGcacggggugccg..... 1  
 Gi3\_26437006\_x33.....guggaacacggggugccgC..... 1  
 Gi3\_26439811\_x33.....cguggaacacggggAccgaac..... 1  
 Gi3\_26441857\_x33....gGucggagacgucguggaacacgggg..... 1  
 Gi3\_26438590\_x33.....gucgugggNacacggggugccgaac..... 1  
 Gl1a\_5382125\_x33.....Agaacacggggugccgaacu..... 1  
 Gi3\_26427502\_x33.....ggaacacggggugUcgaac..... 1  
 Gi2\_9979776\_x33.....ggGacacggggugccgaac..... 1  
 Gi3\_26441329\_x33.....cguggAaacacggggugccgaac..... 1  
 Gi2\_9982152\_x33.....Ggacgucguggaacacggggugccgaacu..... 1  
 Gi1\_3740829\_x33.....Uugggaacacggggugccga..... 1  
 Gi3\_26429581\_x33.....guggaacacgCggugccgaacu..... 1  
 Gi1\_3738783\_x33.....Uugggaacacggggugccgaacu..... 1  
 Gi3\_26430769\_x33.....Uacgucguggaacacggggugccg..... 1  
 Gi3\_26427106\_x33.....gucguggaacacAgggugccgaacu..... 1  
 Gi3\_26428888\_x33.....gggaacacgggAugccgaacu..... 1  
 Gi5\_8094633\_x33.....uggAaacacggggugccgaacu..... 1  
 Gi2\_9977862\_x33.....uggaacacggggugccAaacu..... 1  
 Gi3\_26421166\_x33.....gagacgucguggaacacggggugccga..... 0  
 Gi2\_9982317\_x33.....ggaacacggggugccgaUc..... 1  
 Gi5\_8096745\_x33.....gGgggaacacggggugccgaacu..... 1  
 Gi2\_9984297\_x33.....cguggaacacggggugccgaUc..... 1  
 Gi2\_9971988\_x33..gcgaucggagacgucguggaaca..... 0  
 Gi5\_8110886\_x32.....gCgggaacacggggugccgaac..... 1  
 Gi2\_9998013\_x32.....gggaacacggggugccAaacu..... 1  
 Gi3\_26453470\_x32.....cggagacgucguggaacacggggugccgaac..... 0  
 Gi1\_3745504\_x32.....acgucguggaacacggggugccga..... 0

Gi3\_26445854\_x32.....cgugggaacacggUgugccgaacu..... 1  
 Gi3\_26469214\_x32.....gugggaacacggggAgcc..... 1  
 Gi3\_26464606\_x32.....gaacacggggugccgaGc..... 1  
 Gi4\_488999\_x32.....gaacacggggugccgaacu..... 0  
 Gi2\_9992189\_x32.....gugggaacacgAggugccgaac..... 1  
 Gi3\_26447390\_x32.....guNggaacacggggugccgaacu..... 1  
 Gi3\_26459518\_x32.....gucgCgggaacacggggugccgaacu..... 1  
 Gi3\_26468446\_x32.....cgugggaacacggCgugccgaacu..... 1  
 Gi2\_9995805\_x32.....gggaacacAgggugccgaacu..... 1  
 Gi2\_9995933\_x32.....ucgGgggaacacggggugccgaacu..... 1  
 Gi5\_8109126\_x32.....gugggaacCggggugccgaac..... 1  
 Gi3\_26451550\_x32.....cgugggaaNacggggugc..... 1  
 Gi3\_26458686\_x32.....ggaacacgggAugccgaacu..... 1  
 Gi2\_9996253\_x32.....gugAgaacacggggugccgaac..... 1  
 Gi3\_26458910\_x32.....ggaacacggggugcAgaacu..... 1  
 Gi1\_3745568\_x32...cgaucggagacgucgugggaaacacggguU..... 1  
 Gi3\_26447710\_x32.....gaaNacggggugccgaacu..... 1  
 Gi5\_8105638\_x32.....ugggaacacggggUAccgaacu..... 1  
 Gi3\_26449150\_x32.....cUucgugggaacacgggg..... 1  
 Gi2\_9997693\_x32....aGcggagacgucgugggaacacggg..... 1  
 Gi3\_26445374\_x32.....gugggaaAacggggugcc..... 1  
 Gl1\_5387533\_x32.....Uugggaacacggggugccg..... 1  
 Gi2\_9992317\_x32.....gCcgugggaacacggggugccgaacu..... 1  
 Gl1\_5384269\_x32.....ggUaacacggggugccgaacu..... 1  
 Gi3\_26453214\_x32.....gucgugggaacacggggugccgGacu..... 1  
 Gi2\_9997853\_x32....aucggagaNgucgugggaacac..... 1  
 Gi1\_3746368\_x32....aucggagacgucgCgggaacacggggugc..... 1  
 Gi5\_8108326\_x32.....Uagacgucgugggaacacggggugccgaacu..... 1  
 Gi5\_8109254\_x32.....Ggugggaacacggggugccgaac..... 1  
 Gi1\_3747520\_x32.....gagacgucgCgggaacacggggugcc..... 1  
 Gi3\_26458078\_x32.....cgGcgugggaacacggggugcc..... 1  
 Gi3\_26452478\_x32.....ucgugggaacacggggugccgaCcu..... 1  
 Gi3\_26461022\_x32.....cUgagacgucgugggaacacg..... 1  
 Gi5\_8107078\_x32.....ucgugggaacacggggUAccgaacu..... 1  
 Gi3\_26458462\_x32.....ucgugggGaacacggggugccgaac..... 1  
 Gi1\_3747712\_x32.....gaacacggggugccgGacu..... 1  
 Gi2\_10009752\_x31...Uaucggagacgucgugggaacacgggg..... 1  
 Gi1\_3751943\_x31...cgaucggagacgucgCgggaacacgggg..... 1  
 Gi5\_8122844\_x31.....gggaacacggggugccgGacu..... 1  
 Gi2\_10012108\_x31.....gugggaaUacggggugccgaac..... 1  
 Gi2\_9999925\_x31.....ggUaacacggggugccgaac..... 1  
 Gi3\_26473624\_x31.....ggaacacggggugccgaUcu..... 1  
 Gl1\_5396526\_x31....ucggagacgucgugggaacacgggg..... 0  
 Gi2\_10010930\_x31.....ucgugggaacacggggugccgaGcu..... 1  
 Gi3\_26487822\_x31.....gaacaGggggugccgaacu..... 1  
 Gi4\_490326\_x31.....uUggaacacggggugccgaacu..... 1  
 Gi2\_9999429\_x31.....guggCaacacggggugccgaacu..... 1

Gi2\_10012418\_x31.....aacacggggugccgaCcu..... 1  
 Gi2\_10008729\_x31.....aacacggggGgccgaacu..... 1  
 Gi2\_10001599\_x31....aucggagaNgucgugggaaacacggggg..... 1  
 Gi5\_8127773\_x31.....gucgugggaaacacggggugccgCacu..... 1  
 Gi5\_8121976\_x31.....cgugggaaacacggggugccgUacu..... 1  
 Gi3\_26484970\_x31.....gugggaaacacggggugAc..... 1  
 Gi3\_26487202\_x31.....ggaaGacggggugccgaacu..... 1  
 Gi1\_3752098\_x31.....Uaacacggggugccgaac..... 1  
 Gi3\_26480351\_x31.....cgAcgugggaaacacggggugccgaacu..... 1  
 Gi3\_26481374\_x31.....gugggaaacacggggugccgGa..... 1  
 Gi1\_3753338\_x31.....ucgugggGacacggggugccgaacu..... 1  
 Gi3\_26489992\_x31.....ggaacacggggugcAgaac..... 1  
 Gi2\_10010713\_x31.....gucgugggaaacGcggggugccgaacu..... 1  
 Gi5\_8123185\_x31.....Ggacgucgugggaaacacggggugccgaacu..... 1  
 Gi3\_26474957\_x31.....cgucgugggaaacacggggugccgCac..... 1  
 Gi3\_26483141\_x31.....cgugggaaacacggggugUcgaac..... 1  
 Gi5\_8119062\_x31.....ucgugggaaacacAgggugccgaacu..... 1  
 Gi3\_26488380\_x31.....ggaacacgggAugccgaac..... 1  
 Gi2\_10005846\_x31.....cgucgugggaaacacggggCgccgaacu..... 1  
 Gi2\_10005660\_x31.....cgugUgaacacggggugccgaac..... 1  
 Gi3\_26473965\_x31.....gggaacaUggggugccgaac..... 1  
 Gi5\_8118721\_x31.....ggaacacggggugccAaacu..... 1  
 Gi3\_26472539\_x31.....gugggaaacaAggggugccgaac..... 1  
 Gi2\_10012294\_x31.....ggGgacgucgugggaaacacggggugccg..... 1  
 Gi3\_26483854\_x31.....gucgugggaaacacggggugccgaaAu..... 1  
 Gi3\_26482211\_x31.....gugggaaacacggggUccgaacu..... 1  
 Gi2\_10004327\_x31....aucggagacgucgugggGaacacgggg..... 1  
 Gi4\_489954\_x31.....cgucgugggaaacacggggugcc..... 0  
 Gi3\_26471268\_x31.....cgGggaaacacggggugcc..... 1  
 Gi3\_26473779\_x31.....ugggaaacacgggCugccgaacu..... 1  
 Gi1\_3751695\_x31.ugcgauccggagacgucgugggaaacacg..... 0  
 Gi2\_10010992\_x31.....gugggaaacNcggggugccgaa..... 1  
 Gi3\_26480661\_x31....aucgUagacgucgugggaaacacg..... 1  
 Gi1\_3753431\_x31.....cgucgugggaaacacggggugccgaa..... 0  
 Gi3\_26484753\_x31.....gucgugggaaacacggggugccgCc..... 1  
 Gi2\_10019665\_x30.....gucgugggaaacacggggugccgGacu..... 1  
 Gi1\_3762245\_x30.....cgucgCgggaacacggggugccg..... 1  
 Gi1\_3756665\_x30.....gaacacAgggugccgaacu..... 1  
 Gi3\_26502780\_x30....aucggGgacgucgugggaaacacgggg..... 1  
 Gi5\_8142385\_x30.....ggaacacggggugccgUacu..... 1  
 Gl1a\_5408346\_x30....cggagacgucgugggaaacacg..... 0  
 Gi5\_8130865\_x30.....gaacacggggGgccgaacu..... 1  
 Gi5\_8138905\_x30.....Gcucgugggaaacacggggugccgaacu..... 1  
 Gi1\_3756965\_x30.....cgugggaaacacAgggugccgaacu..... 1  
 Gi3\_26509080\_x30....cUgagacgucgugggaaacacggg..... 1  
 Gi5\_8140885\_x30.....cgucgugggaaacacggggugccgGacu..... 1  
 Gi3\_26509320\_x30.....gucgugggaaacacggggCgccgaac..... 1

Gi2\_10023295\_x30.....Ccgugggaacacggggugccgaacu..... 1  
 Gi5\_8141875\_x30.....cgugggaacCcggggugccgaacu..... 1  
 Gi1\_3760325\_x30.....ucggagacgucgCgggaacacggggugcc..... 1  
 Gi3\_26514900\_x30..gcgaucggagacgucguggggaacacggg..... 0  
 Gi2\_10019065\_x30.....aucggagacgucgugggaacacggggC..... 1  
 Gi3\_26497410\_x30.....gugggaacUcggggugccgaac..... 1  
 Gi3\_26511750\_x30.....gggaacacggggugccgUacu..... 1  
 Gi3\_26508330\_x30.....aucggagacgCcgugggaacacg..... 1  
 Gi2\_10022665\_x30.....uGgugggaacacggggugccgaac..... 1  
 Gi3\_26503680\_x30.....aacNcggggugccgaacu..... 1  
 Gi2\_10027435\_x30.....auUggagacgucgugggaacacggggugc..... 1  
 Gi3\_26516880\_x30.....Cgggaacacggggugccga..... 1  
 Gi2\_10021615\_x30.....gugggaacacggggugUcgaac..... 1  
 Gi3\_26493420\_x30.....ugUgaacacggggugccgaa..... 1  
 Gi2\_10025755\_x30.....guggAaacacggggugccgaac..... 1  
 Gi2\_10019155\_x30.....Aagacgucgugggaacacggggug..... 1  
 Gi4\_491189\_x30.....Uugggaacacggggugccgaa..... 1  
 Gi3\_26497440\_x30.....cgugggaacacggggugCcgaaacu..... 1  
 Gi5\_8131495\_x30.....ugggaaUacggggugccgaacu..... 1  
 Gi3\_26497290\_x30.....ucgugggaacacggggugcUgaacu..... 1  
 Gi1\_3762185\_x30.....cUugggaacacggggugccga..... 1  
 Gi2\_10017985\_x30.....ucguAggaacacggggugccgaacu..... 1  
 Gi2\_10021645\_x30.....aucggagacgucgugggaacacggggugA..... 1  
 Gi3\_26498640\_x30.....Ggucgugggaacacggggugccg..... 1  
 Gi2\_10014415\_x30.....gGucggagacgucgugggaacacggggg..... 1  
 Gl1a\_5402796\_x30.....ggagacgucgugggaacacg..... 0  
 Gi2\_10015435\_x30.....cgucguggNaacacggggugccgaacu..... 1  
 Gi3\_26504700\_x30.....gggaacacggggUaccgaac..... 1  
 Gi2\_10020145\_x30.....Gggagacgucgugggaacacggggugcc..... 1  
 Gi3\_26517120\_x30.....gugggaacacggggUaccg..... 1  
 Gi3\_26494950\_x30.....cgucguggNaacacggggugccgaac..... 1  
 Gi2\_10013965\_x30.....ucAugggaacacggggugccgaacu..... 1  
 Gi2\_10024435\_x30.....auUggagacgucgugggaacacggggg..... 1  
 Gl1a\_5401056\_x30.....ggagacgucgugggaacacggggugc..... 0  
 Gi5\_8133085\_x30.....gugggaacacggggugCcgaaacu..... 1  
 Gi5\_8140765\_x30.....gagacgucgugggaacacggggugccgaac..... 0  
 Gi2\_10027135\_x30.....gaacacggggugccgGacu..... 1  
 Gi2\_10029025\_x30.....ucgCgggaacacggggugccgaacu..... 1  
 Gi3\_26494380\_x30.....cAucgugggaacacggggugccgaacu..... 1  
 Gi3\_26532540\_x29.....cgNgggaacacggggugccgaacu..... 1  
 Gi3\_26519403\_x29.....gggaaAacggggugccgaacu..... 1  
 Gi2\_10030889\_x29.....gugggaacNcggggugccga..... 1  
 Gi2\_10038632\_x29.....ggaacaUggggugccgaacu..... 1  
 Gi1\_3765422\_x29.....aacacAgggugccgaacu..... 1  
 Gi1\_3765944\_x29.....cUugggaacacggggugccgaac..... 1  
 Gi3\_26538108\_x29.....guggAaacacggggugccga..... 1  
 Gi2\_10038922\_x29.....cgugCgaacacggggugccgaacu..... 1



|                                                               |   |
|---------------------------------------------------------------|---|
| Gi5_8147986_x29.....gaaUacggggugccgaacu.....                  | 1 |
| Gi1_3764378_x29.....cgugggaacacggggugcc.....                  | 0 |
| Gi3_26522912_x29..gcgaucggagacgucgugggaacacggggg.....         | 0 |
| Gi3_26541936_x29.....cgAgggaacacggggugcc.....                 | 1 |
| Gi5_8148189_x29.....ggaacacAgggugccgaacu.....                 | 1 |
| Gi5_8149175_x29.....gugggaacacggggugccgaUc.....               | 1 |
| Gi2_10040256_x29.....ugggaacacggggugcAgaacu.....              | 1 |
| Gi2_10038313_x29.....ucggGgacgucgugggaacacggggg.....          | 1 |
| Gi3_26533323_x29.....Ugagacgucgugggaacacggggugccg.....        | 1 |
| Gi3_26523898_x29.....gacAucgugggaacacggggugc.....             | 1 |
| Gi2_10036283_x29.....Cacgucgugggaacacggggugccgaac.....        | 1 |
| Gi3_26527436_x29.....Gcgucgugggaacacggggugccgaac.....         | 1 |
| Gi1_3765712_x29.....ugUgaacacggggugccgaacu.....               | 1 |
| Gi3_26535179_x29.....gucgugggaAacggggugccgaacu.....           | 1 |
| Gi1a_5408552_x29.....cggagacgucgugggaacacgg.....              | 0 |
| Gi3_26541849_x29.....Uggaacacggggugccgaacuu.....              | 1 |
| Gi3_26528451_x29.....acgucgugNgaacacggggugccgaac.....         | 1 |
| Gi2_10030860_x29.....ugAgaacacggggugccgaacu.....              | 1 |
| Gi1_3763160_x29.....Aucgugggaacacggggugccgaacu.....           | 1 |
| Gi2_10043533_x29.....ucgugggaacacggggugccgaCcu.....           | 1 |
| Gi2_10042431_x29.....cgGcgugggaacacggggugccgaacu.....         | 1 |
| Gi3_26530713_x29.....uUgugggaacacggggugccgaac.....            | 1 |
| Gi2_10042576_x29.....ggaacacgAggugccgaacu.....                | 1 |
| Gi2_10041996_x29.....ucgugggaacCcgggugccgaacu.....            | 1 |
| Gi3_26535266_x29.....gugggaacacggUgugcc.....                  | 1 |
| Gi3_26517837_x29.....guAggaacacggggugccg.....                 | 1 |
| Gi2_10039618_x29.....gUgacgucgugggaacacggggugc.....           | 1 |
| Gi3_26535556_x29.....gGcgugggaacacggggugccga.....             | 1 |
| Gi2_10043330_x29.....Uagacgucgugggaacacggggugccg.....         | 1 |
| Gi3_26531757_x29.....aucggagacgucgugggaacacggggugccgaacu..... | 0 |
| Gi2_10037037_x29.....gugggaaAacggggugcc.....                  | 1 |
| Gi3_26535585_x29.....gugggaacacCgggugccgaacu.....             | 1 |
| Gi2_10030077_x29.....Uugggaacacggggugccgaacuu.....            | 1 |
| Gi3_26528422_x29.....ucgugggaacacggggAgccgaacu.....           | 1 |
| Gi2_10037211_x29.....cgugggaacacggggugccgaacG.....            | 1 |
| Gi5_8152017_x29.....Cacacggggugccgaacu.....                   | 1 |
| Gi3_26529611_x29.....gugggaacacggggugcA.....                  | 1 |
| Gi2_10030947_x29.....gugggaacacggCgugccgaacu.....             | 1 |
| Gi1_3763131_x29.....ucggagacgucgugggaacacggggugc.....         | 1 |
| Gi5_8149378_x29.....gucgugggaacacggggugccgaCcu.....           | 1 |
| Gi1_3766669_x29.....aucggGgacgucgugggaacacggggugc.....        | 1 |
| Gi3_26540051_x29.....ucgGgggaacacggggugccgaacu.....           | 1 |
| Gi3_26539587_x29.....ugggaGcacggggugccgaa.....                | 1 |
| Gi3_26542081_x29.....gugggaacacggAgugccga.....                | 1 |
| Gi1_3766988_x29.....agacgucgugggaacacggggugccga.....          | 0 |
| Gi2_10029439_x29.....Ggucgugggaacacggggugccg.....             | 1 |
| Gi3_26530771_x29.....cgucAugggaacacggggugccgaacu.....         | 1 |

Gi2\_10053905\_x28.....ggaacacggAgugccgaacu..... 1  
 Gi3\_26563821\_x28.....acgucgugggaGcacggggugccgaacu..... 1  
 Gi3\_26550409\_x28.....Uucgugggaacacggggugccgaa..... 1  
 Gi3\_26550045\_x28.....cgCgggaacacggggugcc..... 1  
 Gi1\_3770268\_x28.....cgucgugggaacacggggGgccgaacu..... 1  
 Gi2\_10057237\_x28.....gugggaacaGggggugccgaacu..... 1  
 Gi2\_10046961\_x28.....cgugggaUcacggggugccgaacu..... 1  
 Gi2\_10052141\_x28.....aucggGgacgucgugggaacacggggugccg..... 1  
 Gi3\_26559033\_x28.....gucgugggaacacggggugcUgaacu..... 1  
 Gi2\_10047885\_x28.....gaucggGgacgucgugggaacacggggug..... 1  
 Gl1a\_5419422\_x28.....ggagacgucgugggaacac..... 0  
 Gi5\_8161621\_x28.....cgucgugggGacacggggugccgaacu..... 1  
 Gi2\_10048949\_x28.....cgugggGacacggggugccga..... 1  
 Gi5\_8163217\_x28.....ugggaacacggAgugccgaacu..... 1  
 Gi2\_10050321\_x28.....Ggugggaacacggggugccga..... 1  
 Gi2\_10050069\_x28.....cggagacgucgugggaacCcgggugcc..... 1  
 Gi2\_10053233\_x28.....aucggagacgucgugggaGcac..... 1  
 Gi5\_8165261\_x28.....acgucgugggGacacggggugccgaacu..... 1  
 Gi2\_10054157\_x28.....cgugggaaAacggggugccgaacu..... 1  
 Gi3\_26561133\_x28.....gugggaacacAgggugccgaa..... 1  
 Gi3\_26544473\_x28.....ugggaacacggggugcAgaac..... 1  
 Gi2\_10047941\_x28.....ucgugggaacacggggCgccgaac..... 1  
 Gi2\_10058105\_x28.....Uaucggagacgucgugggaacacggggugcc..... 1  
 Gi3\_26556921\_x28.....cgugggaacacggggugccgaaU..... 1  
 Gi2\_10055949\_x28.....ggaacacggggGgccgaac..... 1  
 Gi3\_26563961\_x28.....gggaUcacggggugccgaacu..... 1  
 Gi3\_26547637\_x28.....gUagacgucgugggaacacg..... 1  
 Gi2\_10048389\_x28.....ggaacacggguAccgaacu..... 1  
 Gi5\_8157757\_x28.....ugggaacacggggugcAgaacu..... 1  
 Gi3\_26566229\_x28.....aucggagacgucgugggaCcacg..... 1  
 Gl1a\_5419226\_x28.....gucgugggaacacggggugccga..... 0  
 Gi2\_10058833\_x28.....cggGgacgucgugggaacacggggugccg..... 1  
 Gi1\_3774384\_x28.....cAugggaacacggggugccgaacu..... 1  
 Gi2\_10070579\_x27.....guUggaacacggggugccg..... 1  
 Gi1\_3777573\_x27.....acgucgugNgaacacggggugccgaacu..... 1  
 Gi1\_3775980\_x27.....gggaacacggggugccgCacu..... 1  
 Gl1a\_5426096\_x27.....gugggaacacggggugccgaCcu..... 1  
 Gl1a\_5430767\_x27.....ucggagacgucgugggaacacg..... 0  
 Gi2\_10069418\_x27.....gUgaacacggggugccga..... 1  
 Gi5\_8169461\_x27.....gaacacggggugUcgaacu..... 1  
 Gi2\_10068446\_x27.....cgugggaacacggggugcGcgaacu..... 1  
 Gi3\_26582853\_x27.....cgucgugggaacacggggCgccgaac..... 1  
 Gi1\_3778329\_x27.....Ugagacgucgugggaacacggggugccg..... 1  
 Gi5\_8177183\_x27.....ugggaCcacggggugccgaacu..... 1  
 Gi2\_10069580\_x27.....aacacggggugccAaacu..... 1  
 Gi4\_495473\_x27.....cgucgugggaacacggggugccgaacu..... 0  
 Gl1a\_5427878\_x27.....gugggaacacggggugcUgaacu..... 1

Gi1\_3777033\_x27.....gugAgaacacggggugccgaacu..... 1  
 Gi1\_3778464\_x27.....ggaacacggggugccgaacA..... 1  
 Gi3\_26569164\_x27.....acgucgCgggaacacggggugccgaacu..... 1  
 Gi1\_3778086\_x27.....ggaGcacggggugccgaacu..... 1  
 Gi2\_10066745\_x27.....gCgggaacacggggugccg..... 1  
 Gi3\_26570595\_x27.....cgGgggaacacggggugccga..... 1  
 Gi5\_8177426\_x27.....aacacggggugUccgaacu..... 1  
 Gi3\_26572647\_x27.....ggaacacggggugUccgaac..... 1  
 Gi5\_8171432\_x27.....gggaacacggggugcUgaacu..... 1  
 Gi2\_10066232\_x27.....Gucggagacgucgugggaacacg..... 1  
 Gi3\_26571999\_x27.....aucgUagacgucgugggaacacggg..... 1  
 Gi2\_10072037\_x27.....gacgucgugggaacacggggugccga..... 0  
 Gi1a\_5432603\_x27.....guAggaacacggggugccgaacu..... 1  
 Gi3\_26589198\_x27.....ugggaacacggggAgccgaac..... 1  
 Gi3\_26575617\_x27.....ucUugggaacacggggugccgaac..... 1  
 Gi3\_26570514\_x27.....ucgugggaacacUgggugccgaacu..... 1  
 Gi2\_10066799\_x27.....gcgaucggGgacgucgugggaacacgg..... 1  
 Gi2\_10064207\_x27.....gugggaacacggggugcUg..... 1  
 Gi3\_26572863\_x27.....guCggaacacggggugccgaacu..... 1  
 Gi5\_8170757\_x27.....aacaGggggugccgaacu..... 1  
 Gi3\_26575374\_x27.....gucgugggaacacggggugccgaGc..... 1  
 Gi3\_26575239\_x27.....ggaacacggggugccgaau..... 1  
 Gi3\_26574105\_x27.....acgucgugggaacCcgggugccgaacu..... 1  
 Gi3\_26574861\_x27.....aucggagGcgucgugggaacacgggg..... 1  
 Gi1\_3778194\_x27.....Cgaacacggggugccgaacu..... 1  
 Gi1\_3778707\_x27.....Gcgugggaacacggggugcc..... 1  
 Gi3\_26591385\_x27.....gggaacacggggAgccgaacu..... 1  
 Gi3\_26581314\_x27.....cUaucggagacgucgugggaacacg..... 1  
 Gi1\_3779652\_x27.....Ugugggaacacggggugccgaacu..... 1  
 Gi5\_8172080\_x27.....gucgugggaacacggggCgccgaacu..... 1  
 Gi3\_26583312\_x27.....acgucgugggGacacggggugccgaacu..... 1  
 Gi1a\_5435555\_x26.....ucggagacgucgugggaacacggggugc..... 0  
 Gi1\_3785429\_x26.....Ggucgugggaacacggggugccgaacu..... 1  
 Gi1\_3782231\_x26.....Cggaacacggggugccgaacu..... 1  
 Gi5\_8191842\_x26.....Aucgugggaacacggggugccgaacu..... 1  
 Gi3\_26604665\_x26.....aucggagacgucgugggCacacggg..... 1  
 Gi5\_8188306\_x26.....cgucgugggGcacggggugccgaacu..... 1  
 Gi3\_26619927\_x26.....gugggaacCcgggugccg..... 1  
 Gi2\_10085701\_x26.....Uacgucgugggaacacggggugc..... 1  
 Gi1a\_5438207\_x26.....Uucgugggaacacggggugccgaacu..... 1  
 Gi5\_8194052\_x26.....gugggaacacggggugcGgaacu..... 1  
 Gi2\_10075431\_x26.....Gcgucgugggaacacggggugccgaacu..... 1  
 Gi5\_8190802\_x26.....guggCaacacggggugccgaacu..... 1  
 Gi3\_26608383\_x26.....gaucggagacgucgugggaacacggggG..... 1  
 Gi3\_26616339\_x26.....gaacacggCgugccgaacu..... 1  
 Gi3\_26616027\_x26.....Gcggagacgucgugggaacacggggugcc..... 1  
 Gi2\_10086767\_x26.....cguNggaacacggggugccgaacu..... 1

|                                                             |   |
|-------------------------------------------------------------|---|
| Gi3_26605939_x26.....cgucgugggaaacacggggugccgaCcu.....      | 1 |
| Gi3_26609501_x26.....guggAaacacggggugcc.....                | 1 |
| Gi2_10078187_x26.....cggagacgucgugggaaacacggggugccg.....    | 0 |
| Gi3_26597723_x26.....cgCgggaacacggggugc.....                | 1 |
| Gi5_8192856_x26.....cgugggaaacacggggugccgaacG.....          | 1 |
| Gi2_10075795_x26.....uggAaacacggggugccgaacu.....            | 1 |
| Gi1_3782933_x26.....gugggaacaUggggugccgaacu.....            | 1 |
| Gi5_8182014_x26.....ugggaacacggggugccgCac.....              | 1 |
| Gi3_26621591_x26.....gucguAggaacacggggugccgaacu.....        | 1 |
| Gi2_10074677_x26.....Uagacgucgugggaaacacggggugcc.....       | 1 |
| Gi4_496309_x26.....ucggagacgucgugggaaacacggggugccg.....     | 0 |
| Gi2_10078577_x26.....acgucgugNgaacacggggugcc.....           | 1 |
| Gi3_26603859_x26.....cgucgugggaaacCcgggugccgaacu.....       | 1 |
| Gi2_10083725_x26.....acgucgugNgaacacggggugccgaacu.....      | 1 |
| Gi2_10081957_x26.....gucguAggaacacggggugc.....              | 1 |
| Gi5_8185966_x26.....ugggaacacggggugUcgaacu.....             | 1 |
| Gi5_8191140_x26.....gugggaacacggggGgccgaac.....             | 1 |
| Gi3_26608539_x26.....cgucgugggaaacacggggugccgaacu.....      | 1 |
| Gi3_26596085_x26.....cgugggaacacggggAgccgaac.....           | 1 |
| Gi3_26611477_x26.....gugggaacacggggAugcc.....               | 1 |
| Gi2_10080709_x26.....cggagacgucgugggaaacacggggugccgaac..... | 0 |
| Gi1_3782829_x26.....gggaGcacggggugccgaacu.....              | 1 |
| Gi2_10086793_x26..gcgaucggGgacgucgugggaaacacg.....          | 1 |
| Gi3_26601389_x26.....cgucgugggGaacacggggugccgaac.....       | 1 |
| Gi2_10076237_x26.....gugggaacacggggugccUaacu.....           | 1 |
| Gi5_8189502_x26.....ggagacgucgugggaaacacggggugccgaac.....   | 0 |
| Gi2_10075691_x26.....Uacgucgugggaaacacgggggu.....           | 1 |
| Gi5_8186694_x26.....gaacacggggUaccgaacu.....                | 1 |
| Gi3_26599543_x26.....cgugggaacacggggGgccgaac.....           | 1 |
| Gi3_26618783_x26.....cgGgggaacacggggugccg.....              | 1 |
| Gi1_3783193_x26.....Gcgucgugggaaacacggggugccgaacu.....      | 1 |
| Gi2_10085545_x26.....gucgugggaaacacggggugccgaacu.....       | 1 |
| Gl1a_5434619_x26.....cgGgggaacacggggugccgaacu.....          | 1 |
| Gl1a_5438857_x26.....gaucggagacgucgugggaaacac.....          | 0 |
| Gi1_3780515_x26.....gggGcacacggggugccgaacu.....             | 1 |
| Gi5_8192492_x26.....gugggCacacggggugccgaacu.....            | 1 |
| Gi2_10077511_x26.....gugggaacGcggggugccg.....               | 1 |
| Gi3_26614545_x26.....aucggagacgucgugggaaacacggggugccg.....  | 0 |
| Gi3_26632493_x25.....aucggagacgucgugAgaacacggg.....         | 1 |
| Gi3_26649768_x25.....acgucgugggaaacacggggugccgaGcu.....     | 1 |
| Gi3_26629593_x25.....Uaucggagacgucgugggaaacacggggugc.....   | 1 |
| Gi3_26639018_x25.....ugUgaacacggggugccg.....                | 1 |
| Gi5_8203659_x25.....ucguAggaacacggggugccgaacu.....          | 1 |
| Gi5_8198084_x25.....gGcgugggaaacacggggugccgaac.....         | 1 |
| Gi3_26649318_x25.....aGgucgugggaaacacggggugccgaac.....      | 1 |
| Gi3_26646543_x25.....ucgCgggaacacggggugccgaac.....          | 1 |
| Gi5_8202859_x25.....agacgucgugggaaacacggggugccga.....       | 0 |

|                                                           |   |
|-----------------------------------------------------------|---|
| Gi1a_5446512_x25.....cgucgugggaacacggggugccgaac.....      | 0 |
| Gi3_26630068_x25.....cgGgggaacacggggugc.....              | 1 |
| Gi3_26625618_x25....gaCcgagacgucgugggaacacggg.....        | 1 |
| Gi2_10090472_x25.....ggagacgucgugggaacacggggugccgaa.....  | 0 |
| Gi2_10103047_x25.....ggaacacAgggugccgaac.....             | 1 |
| Gi1_3790281_x25.....gggaacGcggggugccgaacu.....            | 1 |
| Gi3_26624793_x25.....gucgugggaacacggggugccgaUc.....       | 1 |
| Gi3_26642593_x25.....cgucgugggaacacggggGgcccgaac.....     | 1 |
| Gi2_10096097_x25.....acgucgugggaacacggggugccgaGc.....     | 1 |
| Gi5_8206509_x25.....gGgggaacacggggugccg.....              | 1 |
| Gi3_26624768_x25....aucgUagacgucgugggaacacggggg.....      | 1 |
| Gi5_8205909_x25.....aacUcggggugccgaacu.....               | 1 |
| Gi3_26635093_x25.....aacacUgggugccgaacu.....              | 1 |
| Gi3_26643543_x25.....ugggaGcacggggugccg.....              | 1 |
| Gi1_3787581_x25.....Uggaacacggggugccgaacuu.....           | 1 |
| Gi3_26635293_x25....Uaucggagacgucgugggaacacggggugcc.....  | 1 |
| Gi5_8205834_x25.....Gcgugggaacacggggugccgaac.....         | 1 |
| Gi3_26639968_x25.....cgugggaacacggAgugccgaac.....         | 1 |
| Gi1a_5443412_x25.....gucgugggaacacggggugccgaa.....        | 0 |
| Gi3_26647218_x25....auUggagacgucgugggaacacgggg.....       | 1 |
| Gi1_3790406_x25.....ggaacacAgggugccgaacu.....             | 1 |
| Gi3_26644068_x25.....gugggaacacggggugcU.....              | 1 |
| Gi3_26625668_x25.....cgucgugggaacacggggGgc.....           | 1 |
| Gi5_8201409_x25.....ggaacacggggugccgGacu.....             | 1 |
| Gi1_3791831_x25.....acgucgugggaacacggggugccgaa.....       | 0 |
| Gi2_10092447_x25.....ggaacacggggugccgUacu.....            | 1 |
| Gi3_26626368_x25.....gaaacacggggugccUaacu.....            | 1 |
| Gi2_10101872_x25.....cgucgugggaacacggggGgcc.....          | 1 |
| Gi3_26629668_x25....aucggGgacgucgugggaacacg.....          | 1 |
| Gi3_26642093_x25.....Caacacggggugccgaac.....              | 1 |
| Gi3_26628393_x25.....ugggaacUcggggugccgaacu.....          | 1 |
| Gi3_26639443_x25.....ugggaacCcgggugccgaac.....            | 1 |
| Gi1_3792931_x25.....gaacacggggugcUgaacu.....              | 1 |
| Gi1a_5444237_x25.....Ugugggaacacggggugccgaacu.....        | 1 |
| Gi1_3789581_x25.....Uggaacacggggugccgaac.....             | 1 |
| Gi5_8202134_x25.....ucUugggaacacggggugccgaacu.....        | 1 |
| Gi2_10093122_x25....aucggagacgucguggGcacggggugc.....      | 1 |
| Gi5_8206759_x25.....acgucgugggaacacggggugccgaacuuu.....   | 0 |
| Gi1_3790306_x25.....ucgugggaacacAgggugccgaacu.....        | 1 |
| Gi3_26622593_x25....cUaucggagacgucguggg.....              | 1 |
| Gi3_26642543_x25.....ugggaacacgAggugccgaac.....           | 1 |
| Gi3_26641868_x25.....gagacgucgugggaacacggggugccgaacA..... | 1 |
| Gi1_3792831_x25.....Uacacggggugccgaacu.....               | 1 |
| Gi3_26646393_x25....aucggagacgucgCgggaacacg.....          | 1 |
| Gi3_26631918_x25....aucAgagacgucgugggaacacg.....          | 1 |
| Gi3_26647918_x25....aucggagacgucguggGcacg.....            | 1 |
| Gi1_3794030_x24.....gGgggaacacggggugccg.....              | 1 |

Gi2\_10107811\_x24.....gucgugggaacacggggGgcc..... 1  
 Gi3\_26662592\_x24.....cgCgggaacacggggugccgaa..... 1  
 Gi5\_8217816\_x24.....gggaacaUggggugccgaacu..... 1  
 Gi5\_8211744\_x24.....ugggaacacggggugccgUacu..... 1  
 Gi2\_10114219\_x24.....gucgugggaacacggggugccgaGcu..... 1  
 Gi3\_26676248\_x24.....aucggagaNgucgugggaacacgggg..... 1  
 Gi3\_26675648\_x24.....gaacacggggugccgaCc..... 1  
 Gi3\_26666072\_x24.....aucggagacgucgugggaacCcggggu..... 1  
 Gi3\_26676944\_x24.....aucggagacgucgugggCacacgg..... 1  
 Gi3\_26655224\_x24.....aucggagacgucgugggaacacggggA..... 1  
 Gi5\_8208624\_x24.....gugggaacUcggggugccgaacu..... 1  
 Gi1\_3796478\_x24.....aucggGgacgucgugggaacacgggg..... 1  
 Gi2\_10107259\_x24.....gugggaacacggggugCcgaacu..... 1  
 Gi3\_26671904\_x24.....gugggaacacggggugCcgaac..... 1  
 Gi3\_26655272\_x24.....Gucggagacgucgugggaacac..... 1  
 Gi2\_10109851\_x24.....gggaacacggggUAccgaacu..... 1  
 Gi3\_26667872\_x24.....aucggagacgucgugggaGcacggg..... 1  
 Gi3\_26676608\_x24.....gugggaacaUggggugccga..... 1  
 Gi5\_8216664\_x24.....ucgugggaacacggggugccAaacu..... 1  
 Gi3\_26654600\_x24.....gacgucgugggaacacggggugccgaa..... 0  
 Gi2\_10117747\_x24.....gugggaacacggggAgccgaac..... 1  
 Gi2\_10117843\_x24.....ugggaacaUggggugccgaacu..... 1  
 Gi3\_26653304\_x24.....gugggaacacgAggugccgaa..... 1  
 Gi1\_3794894\_x24.....gugggaacacggggugccgGacu..... 1  
 Gi2\_10110499\_x24.....ggaacacggggAgccgaacu..... 1  
 Gi5\_8218056\_x24.....ucggagacgucgugggaacacggggugccg..... 0  
 Gi1\_3795278\_x24.....aacacggggGgccgaacu..... 1  
 G1a\_5457016\_x24.....gUaacacggggugccgaac..... 1  
 Gi3\_26670008\_x24.....aucggagacgucgugggaacGcggggu..... 1  
 Gi5\_8207208\_x24.....ucgugggaacacggggugccgaCcu..... 1  
 Gi3\_26672840\_x24.....aucggagaNgucgugggaacac..... 1  
 Gi1\_3794678\_x24.....agacgucgugggaacacggggug..... 0  
 Gi3\_26660672\_x24.....guAggaacacggggugccgaa..... 1  
 Gi3\_26675264\_x24.....ucgugggaacGcgggugccgaac..... 1  
 Gi3\_26668376\_x24.....gaCcacggggugccgaacu..... 1  
 Gi3\_26656184\_x24.....ggaacacgNggugccgaa..... 1  
 Gi3\_26656208\_x24.....cgCcgugggaacacggggugccgaac..... 1  
 Gi2\_10119259\_x24.....gggaacacggggCgccgaac..... 1  
 Gi1\_3794342\_x24.....gaacacggggugccAaacu..... 1  
 Gi3\_26649968\_x24.....cgugUgaacacggggugcc..... 1  
 Gi2\_10119643\_x24.....gaacacggggugcUgaacu..... 1  
 Gi1\_3795710\_x24.....gugggaacacggggugcUgaacu..... 1  
 Gi1\_3793454\_x24.....aacaUggggugccgaacu..... 1  
 Gi5\_8215992\_x24.....cUucgugggaacacggggugccgaac..... 1  
 Gi3\_26662376\_x24.....ugggaacacggggugccgUac..... 1  
 Gi3\_26661272\_x24.....acgucgugggaacacggAgugccgaacu..... 1  
 Gi3\_26650496\_x24.....cgugggaacacgggAugccgaac..... 1

Gi3\_26673104\_x24.....ggaacacggggugccgUacu..... 1  
Gi1\_3797438\_x24.....ggagacgucgCgggaacacggggugc..... 1  
Gi5\_8208744\_x24.....gucgugggaacCcggggugccgaacu..... 1  
Gi3\_26667392\_x24.....cgugggaacacggggugccgaaGu..... 1  
Gi3\_26654696\_x24.....ugggaacacggggugccgaCc..... 1  
G1a\_5455936\_x24.....gGgggaacacggggugccga..... 1  
Gi3\_26650256\_x24.....Ugucgugggaacacggggugccg..... 1  
Gi2\_10109827\_x24...cUaucgggagacgucgugg..... 1  
Gi3\_26666504\_x24.....cgucguAggaacacggggugccgaacu..... 1  
Gi1\_3796694\_x24.....Uagacgucgugggaacacggggugccgaacu..... 1  
Gi3\_26656136\_x24.....Uagacgucgugggaacacggggugccg..... 1  
Gi3\_26658080\_x24.....cgugggUacacggggugccgaac..... 1  
Gi2\_10108963\_x24.....gacgucgugggaacacggggugccgaacA..... 1  
Gi3\_26657000\_x24.....aacacggggugccUaacu..... 1  
Gi2\_10106059\_x24.....Acgugggaacacggggugccgaacu..... 1  
Gi5\_8219232\_x24.....ugggaacacggggGgccgaacu..... 1  
Gi5\_8214336\_x24.....gggaacacNgggugccgaac..... 1  
Gi3\_26660312\_x24.....aucggGgacgucgugggaacacggg..... 1  
Gi3\_26698592\_x23.....ggaacacggggugccgaacG..... 1  
Gi1\_3804763\_x23.....gugggaacacggggugccU..... 1  
Gi2\_10136605\_x23.....gaaUacggggugccgaacu..... 1  
Gi3\_26703537\_x23.....acgCcgugggaacacggggugccgaacu..... 1  
Gi2\_10135639\_x23.....ugggaacacggggugUcgaacu..... 1  
Gi3\_26703721\_x23.....ugggaCcacggggugccgaac..... 1  
G1a\_5465430\_x23.....ggaGcacggggugccgaacu..... 1  
Gi5\_8221225\_x23.....gugggaacaAggggugccgaacu..... 1  
Gi2\_10122667\_x23..Ucgaucggagacgucgugggaacacggg..... 1  
Gi2\_10122138\_x23.....ugggaacacggAgugccgaacu..... 1  
Gi2\_10123150\_x23.....Uagacgucgugggaacacggggugc..... 1  
Gi5\_8229390\_x23.....ggaacacgNgggugccgaac..... 1  
Gi1\_3800094\_x23.....gugggaacacAggggugccgaacu..... 1  
Gi3\_26681802\_x23.....gucgugggaacCcggggugccgaac..... 1  
Gi3\_26707562\_x23.....ggCaacacggggugccgaacu..... 1  
Gi1\_3800416\_x23.....ucgugggaacCcggggugccgaacu..... 1  
Gi2\_10129751\_x23.....gggaacacggggugcUgaacu..... 1  
Gi2\_10132281\_x23.....Uucgugggaacacggggugccg..... 1  
Gi5\_8226124\_x23.....cgugggaaNacggggugccgaac..... 1  
Gi1\_3801083\_x23.....gaacacggggugUcgaacu..... 1  
Gi3\_26700432\_x23.....ggaacacggggugccgUac..... 1  
Gi2\_10123035\_x23.....gUgacgucgugggaacacggggugcc..... 1  
Gi2\_10121724\_x23.....Gcgugggaacacggggugccg..... 1  
Gi5\_8224215\_x23.....gggaacacAggggugccgaacu..... 1  
Gi2\_10122391\_x23.....gugAgaacacggggugcc..... 1  
Gi2\_10126876\_x23.....gugggGacacggggugccg..... 1  
Gi3\_26686908\_x23.....ugggaUacggggugccgaacu..... 1  
Gi3\_26697718\_x23.....cgugggaGcacggggugccga..... 1  
Gi2\_10124714\_x23.....gugggaacacggggugccgaaA..... 1

Gi3\_26698155\_x23.....gugNgaacacggggugccgaac..... 1  
Gi2\_10124530\_x23.....aucggagacgucgugggGacacggggu..... 1  
Gi2\_10124829\_x23.....cgucgugggaGcacggggugccg..... 1  
Gi2\_10132212\_x23.....gggaacacggggugccgaGc..... 1  
Gi2\_10134834\_x23.....uggaacacgggguAccgaacu..... 1  
Gi1\_3802141\_x23.ugcgauccgagacgucgugggaaca..... 0  
Gi3\_26706619\_x23.....gucgugggaacacggggugccAaacu..... 1  
Gi2\_10122966\_x23.....gugggaacacUgggugccgaacu..... 1  
Gi3\_26703468\_x23.....gaUgucgugggaacacggggugccgaacu..... 1  
Gi3\_26689737\_x23.....aucggagacgucgCgggaacacggg..... 1  
Gi2\_10131637\_x23.....ggAaacacggggugccgaacu..... 1  
Gi2\_10131430\_x23.....cUgggaacacggggugccgaac..... 1  
Gi2\_10121770\_x23.....ucgugggaNcacggggugccgaac..... 1  
Gi1\_3804740\_x23.....gggaacacggggCgccgaacu..... 1  
Gi2\_10132971\_x23.....auUggagacgucgugggaaca..... 1  
Gi3\_26702410\_x23.....aCcacggggugccgaacu..... 1  
Gi5\_8233668\_x23.....Cugggaacacggggugccgaac..... 1  
Gi2\_10128923\_x23.....cgGgggaacacggggugcc..... 1  
Gi3\_26705630\_x23.....gugggaacacAggugccga..... 1  
Gi3\_26705676\_x23.....cUgagacgucgugggaacacggg..... 1  
Gi5\_8224399\_x23.....cUugggaacacggggugc..... 1  
Gi5\_8222835\_x23.....aacacggggugccgaaUu..... 1  
Gi5\_8228976\_x23.ugcgauccgagacgucgugggaacacg..... 0  
Gi5\_8225020\_x23.....gggaacacggggugccAaacu..... 1  
Gi3\_26701444\_x23.....aucggGgacgucgugggaacacggg..... 1  
Gi3\_26705009\_x23.....cUucgugggaacacggggugccgaa..... 1  
Gi2\_10134696\_x23.....gugggaacacggAgugccgaac..... 1  
Gi2\_10137157\_x23.....gggaacacggggugcAgaacu..... 1  
Gi2\_10135869\_x23.....ucgugggaacacAgggugccgaacu..... 1  
Gi5\_8222766\_x23.....gugggaacacggggugccgaGc..... 1  
Gi1\_3801497\_x23.....cUucgugggaacacggggugcc..... 1  
Gi3\_26685781\_x23.....aacaAggggugccgaacu..... 1  
Gi5\_8231920\_x23...gaucggagacgucgugggaaca..... 0  
Gl1a\_5467500\_x23.....cgugggaacacggggugccgCacu..... 1  
Gi3\_26681411\_x23.....ugggaacacggggugccgaaU..... 1  
Gi5\_8232817\_x23.....cgucgugggaacacggggugccgaacu..... 0  
Gi3\_26702640\_x23.....gugggaacacggggugccAaa..... 1  
Gi5\_8239327\_x22.....aacacggggugccgaaAu..... 1  
Gi3\_26731542\_x22.....Ugagacgucgugggaacacggggugccgaacu..... 1  
Gi3\_26726746\_x22.....cgucgugggaacacggggugccgaacuA..... 1  
Gi2\_10145470\_x22...gGucggagacgucgugggaacacggg..... 1  
Gi2\_10154886\_x22.....gugggGacacggggugccga..... 1  
Gi2\_10151190\_x22.....acgucgugggaacacggggugccgaa..... 0  
Gi3\_26725140\_x22.....gaacacgggUugccgaacu..... 1  
Gi3\_26736954\_x22.....aucggagacgucgugggCacacggggu..... 1  
Gi3\_26729782\_x22.....aacacggggugccgaacG..... 1  
Gi3\_26710092\_x22.....gugggaacacggggugUcgaa..... 1



|                                                             |   |
|-------------------------------------------------------------|---|
| Gi2_10140652_x22.....cggagacgucgugggaacacggggugccgaacu..... | 0 |
| Gi2_10141950_x22.....gugggaacGcggggugccga.....              | 1 |
| Gi3_26734578_x22.....cgucgugggaacGcggggugccgaac.....        | 1 |
| Gi3_26713744_x22.....ugggaaUacggggugccgaac.....             | 1 |
| Gi3_26719948_x22.....ugggaacacggggugccUaacu.....            | 1 |
| Gi3_26716956_x22.....gucgugggaacacggggUaccgaac.....         | 1 |
| Gi2_10144898_x22.....gggGacacggggugccgaac.....              | 1 |
| Gi3_26738516_x22.....gucgugggaacGcggggugccgaac.....         | 1 |
| Gi1_3813129_x22.....gucgugggaacacggggugccgaacuu.....        | 0 |
| Gi5_8236423_x22.....ucAugggaacacggggugccgaacu.....          | 1 |
| Gi1_3808069_x22.....cgucgugggaacacggggGgccgaacu.....        | 1 |
| Gi3_26738274_x22.....gugggaacacggUgugccg.....               | 1 |
| Gi3_26711346_x22.....ggagacgucgugggaacacggggugccgaacA.....  | 1 |
| Gi5_8236445_x22.....gaacacggAgugccgaacu.....                | 1 |
| Gi1_3808179_x22.....gugggaacacggggugccgaU.....              | 1 |
| Gi3_26718518_x22.....ucgugggaacacggggugccgaCc.....          | 1 |
| Gi3_26740232_x22.....gugggaacacggggugcUgaa.....             | 1 |
| Gi1_3812051_x22.....ucgugggaacacggggGgccgaacu.....          | 1 |
| Gi3_26729298_x22.....Uugggaacacggggugccgaacuu.....          | 1 |
| Gi3_26712754_x22.....Naacacggggugccgaacu.....               | 1 |
| Gi5_8242495_x22.....gggaacacgAggugccgaacu.....              | 1 |
| Gi1_5474763_x22.....cgugggaacacgAggugccgaacu.....           | 1 |
| Gi2_10140300_x22.....ucgugggaacacgggAugccgaacu.....         | 1 |
| Gi3_26734908_x22.....aacCggggugccgaacu.....                 | 1 |
| Gi1_3808883_x22.....guggAaacacggggugccgaacu.....            | 1 |
| Gi2_10144524_x22.....Agagacgucgugggaacacggggugcc.....       | 1 |
| Gi1_3808201_x22.....ucgugggaacacggggugccgaCcu.....          | 1 |
| Gi3_26732862_x22.....acgucgugggaacacAgggugccgaacu.....      | 1 |
| Gi1_5478437_x22.ugcgauccggagacgucguggga.....                | 0 |
| Gi1_3806991_x22.....gagacgucgugggaacacggggugccgaac.....     | 0 |
| Gi3_26720212_x22.....ugggaacacggAgugccgaac.....             | 1 |
| Gi2_10143270_x22.....cgGgggaacacggggugc.....                | 1 |
| Gi3_26727912_x22.....gggaacacggggugccgaG.....               | 1 |
| Gi3_26738714_x22.....Uaucggagacgucgugggaaca.....            | 1 |
| Gi3_26737438_x22.....gucgugggaacacggggugccgGac.....         | 1 |
| Gi2_10139860_x22.....cgugggaaNacggggugccga.....             | 1 |
| Gi2_10141752_x22.....ugggaacacggggugccgUacu.....            | 1 |
| Gi3_26716560_x22.....gCcgugggaacacggggugccgaac.....         | 1 |
| Gi1_3810401_x22.....Agggaacacggggugccgaacu.....             | 1 |
| Gi2_10142016_x22.....cgugggaacacggggugcGgaacu.....          | 1 |
| Gi1_3810753_x22.....ugggaacacggggugccgaGcu.....             | 1 |
| Gi3_26717154_x22.....Uucggagacgucgugggaacacggg.....         | 1 |
| Gi3_26722214_x22.....ugggaacacggggugAcgaacu.....            | 1 |
| Gi2_10151828_x22.....aucggagacgucgugggaCcacggggugc.....     | 1 |
| Gi2_10139486_x22.....agacgucgugggaacacggggugccgaa.....      | 0 |
| Gi5_8235917_x22.....Aggaacacggggugccgaac.....               | 1 |
| Gi2_10147340_x22.....cggagacgucgugggaacacggggugccga.....    | 0 |

|                                                             |   |
|-------------------------------------------------------------|---|
| Gi3_26715174_x22....gaucggagacgucgugggCacacggg.....         | 1 |
| Gi3_26712490_x22.ugcgaucggagacgucgugggaacacg.....           | 0 |
| Gi3_26721642_x22.....cgugggaacacggggugccgUac.....           | 1 |
| Gi3_26727846_x22.....uggNaacacggggugccgaacu.....            | 1 |
| Gi5_8235433_x22.....aacacgggAugccgaacu.....                 | 1 |
| Gi2_10151278_x22.....gggaaUacggggugccgaacu.....             | 1 |
| Gi5_8236071_x22...cgaucggagacgucgugggaacacggg.....          | 0 |
| G1a_5475379_x22...Uaucggagacgucguggga.....                  | 1 |
| Gi1_3810643_x22.....gacgucgCgggaacacggggugccgaacu.....      | 1 |
| Gi2_10145514_x22.....gugggaGcacggggugccga.....              | 1 |
| Gi1_3811061_x22.....Ggggaacacggggugccgaac.....              | 1 |
| Gi5_8243441_x22.....cgugggaaAacggggugccgaacu.....           | 1 |
| Gi2_10138980_x22.....cggagacgNcgugggaacacggggugcc.....      | 1 |
| Gi2_10139574_x22.....gugggaacacggAgugcc.....                | 1 |
| G1a_5477051_x22.....ggaacacggggugccgCacu.....               | 1 |
| Gi3_26718738_x22.....cgugggaacacgggAugccg.....              | 1 |
| Gi2_10151938_x22.....gGcgugggaacacggggugc.....              | 1 |
| Gi1_3816066_x21.....cgugggaacGcggggugccgaacu.....           | 1 |
| Gi2_10165933_x21.....cgucgugggaGcacggggugccgaacu.....       | 1 |
| Gi2_10156273_x21.....cgugggaacacggggugccgaUcu.....          | 1 |
| Gi3_26758362_x21.....cgucUugggaacacggggugccgaacu.....       | 1 |
| Gi1_3814239_x21.....cUgagacgucgugggaacacggggugcc.....       | 1 |
| Gi3_26762100_x21.....gggaacacggggugccgaacG.....             | 1 |
| Gi2_10163350_x21.....cgugggaacGcggggugccgaac.....           | 1 |
| Gi1_3817872_x21.....Uucgugggaacacggggugccgaac.....          | 1 |
| Gi2_10169734_x21.....gCgggaacacggggugccga.....              | 1 |
| Gi3_26763276_x21.....gggaacacgAggugccgaac.....              | 1 |
| Gi3_26770605_x21.....ugggaacacggggGgccgaac.....             | 1 |
| Gi3_26745258_x21.....gugggaacacgggguCccgaacu.....           | 1 |
| Gi5_8258109_x21.....gucgugggaacGcggggugccgaacu.....         | 1 |
| Gi1_3820497_x21.....ucgugggaacacggggugccgaacuu.....         | 0 |
| Gi3_26746266_x21....aucggagacgucgugggaacacggggugccgaac..... | 0 |
| Gi5_8255925_x21.....aacacggggugccgUacu.....                 | 1 |
| G1a_5489137_x21.....cgCgggaacacggggugccgaacu.....           | 1 |
| Gi5_8256555_x21.....acgucgugggaacacggggCgccgaacu.....       | 1 |
| Gi3_26755023_x21....aucggagacgucgugggaacacggggugccga.....   | 0 |
| Gi5_8261469_x21.....guUggaacacggggugccgaac.....             | 1 |
| Gi3_26753910_x21.....gaacacgggCugccgaacu.....               | 1 |
| Gi2_10165660_x21.....gugggaacacgUggugccgaacu.....           | 1 |
| Gi3_26769051_x21.....ucgugggaacacggAgugccgaacu.....         | 1 |
| G1a_5488801_x21..gcaucggagacgucgugggaacacggg.....           | 0 |
| Gi3_26767644_x21....aucggagacgucgCgggaacacggggu.....        | 1 |
| Gi3_26751243_x21....gaucggagacgucgugggaacacggggC.....       | 1 |
| Gi2_10157869_x21.....cguUggaacacggggugccgaacu.....          | 1 |
| Gi3_26758908_x21.....uAggaacacggggugccg.....                | 1 |
| Gi3_26744376_x21.....gaacacggggugcUgaac.....                | 1 |
| Gi2_10156399_x21.....gucAugggaacacggggugccgaacu.....        | 1 |

Gi3\_26748639\_x21.....cgucgugggaacacgggguAccgaacu..... 1  
 Gi2\_10168516\_x21.....Nugggaacacggggugccgaacu..... 1  
 Gi2\_10159318\_x21.....ugggaGcacggggugccgaac..... 1  
 Gi2\_10170028\_x21.....cgAggggaacacggggugcc..... 1  
 Gi2\_10158751\_x21.....gugggaacacggggugcGgaacu..... 1  
 Gi2\_10169398\_x21.....Ggugggaacacggggugccgaa..... 1  
 Gi1\_3820896\_x21.....cUugggaacacggggugccgaacuu..... 1  
 Gi5\_8254329\_x21.....gCcgugggaacacggggugccgaacu..... 1  
 Gi3\_26758950\_x21.....cgugggaaNacggggugccg..... 1  
 Gi3\_26742885\_x21.....ugggaacacgggguAccgaac..... 1  
 Gi2\_10158814\_x21.....gGcgucgugggaacacggggugccgaacu..... 1  
 Gi3\_26750172\_x21.....Uagacgucgugggaacacg..... 1  
 Gi2\_10164967\_x21.....gcgaucggagacgucgugggaacacggggugc..... 0  
 Gi3\_26768715\_x21.....gaucggagacgucgugggaGcacgggu..... 1  
 Gi2\_10173031\_x21.....ugggaCcacggggugccgaacu..... 1  
 Gi3\_26751600\_x21.....cgucgugggaacacggggugccgGacu..... 1  
 Gi5\_8258256\_x21.....ucgugggaacacggggugcUgaacu..... 1  
 Gi5\_8261994\_x21.....ggaacacggggGgccgaacu..... 1  
 Gi3\_26768043\_x21.....aGcggagacgucgugggaacacggggugc..... 1  
 Gi3\_26753196\_x21.....ucgugggaGcacggggugccgaac..... 1  
 Gi2\_10169146\_x21.....gggaacCcggggugccgaacu..... 1  
 Gi2\_10169062\_x21.....cgugggaGcacggggugccgaac..... 1  
 Gi3\_26743788\_x21.....gugggaacacggggugccgaacuuu..... 0  
 Gi3\_26759643\_x21.....aucggagaNgucgugggaacacgg..... 1  
 Gi3\_26762289\_x21.....gugUgaacacggggugccgaac..... 1  
 Gi3\_26750361\_x21.....ggaGacggggugccgaac..... 1  
 Gi2\_10172569\_x21.....gggaacGcggggugccgaac..... 1  
 Gi5\_8256954\_x21.....ucguggAaacacggggugccgaacu..... 1  
 Gi3\_26757270\_x21.....gugggaacacAgggugccg..... 1  
 Gi3\_26763192\_x21.....Gcgugggaacacggggugccg..... 1  
 Gi3\_26743704\_x21.....ucgugggaacacggggugUcgaacu..... 1  
 Gi1\_3813924\_x21.....cgucguggNaacacggggugccgaacu..... 1  
 Gi3\_26745657\_x21.....Cgggaacacggggugccgaa..... 1  
 Gl1\_5487352\_x21.....Uaucggagacgucgugggaacacggg..... 1  
 Gi3\_26754204\_x21.....ugggaacacggggugccgG..... 1  
 Gi1\_3814281\_x21.....cgaucggagacgucgugggaacacgggu..... 0  
 Gi3\_26769282\_x21.....gaaAacggggugccgaacu..... 1  
 Gi2\_10163413\_x21.....gucgugggaaAacggggugccgaacu..... 1  
 Gi3\_26799045\_x20.....aucggagacgucgugggaacGcggg..... 1  
 Gi3\_26794245\_x20.....ugggaacacggggugUcgaac..... 1  
 Gi5\_8277069\_x20.....gaacacgggAugccgaacu..... 1  
 Gi5\_8277049\_x20.....gaacGcggggugccgaac..... 1  
 Gi3\_26784645\_x20.....ucggagacgucgugggaacacggggugccg..... 0  
 Gi5\_8266309\_x20.....Acgugggaacacggggugccgaacu..... 1  
 Gi3\_26782065\_x20.....cgucgugggaacCcgggugcc..... 1  
 Gi5\_8275509\_x20.....aacacggggugcAgaacu..... 1  
 Gi2\_10178229\_x20.....cgugggaacacAgggugccgaac..... 1

Gi5\_8263669\_x20.....Ggggaacacggggugccgaa..... 1  
 Gi3\_26804745\_x20.....ucguggaacCcggggugccgaac..... 1  
 Gi5\_8268589\_x20.....uUggaacacggggugccgaacuu..... 1  
 Gi2\_10176509\_x20cugcgauacgagacgucgugggaacacg..... 0  
 Gi1\_3826590\_x20.....gugggaaUacggggugccgaacu..... 1  
 Gi2\_10182229\_x20.....ugUgaacacggggugccgaac..... 1  
 Gi3\_26801485\_x20.....cgGgggaacacggggugccgaa..... 1  
 Gi3\_26775365\_x20.....aucggagacgucguAggaacacggg..... 1  
 Gi3\_26785505\_x20.....cgAgggaacacggggugccga..... 1  
 Gi2\_10175749\_x20.....gugggaacacggggCgccga..... 1  
 Gi2\_10174549\_x20.....cgAcgugggaacacggggugccgaacu..... 1  
 Gi5\_8275669\_x20.....ucguggaacaUggggugccgaacu..... 1  
 Gi3\_26797925\_x20.....ggUacacggggugccgaa..... 1  
 Gi3\_26795005\_x20.....gugggUacacggggugccga..... 1  
 Gi1\_3823050\_x20.....uUggaacacggggugccgaacuu..... 1  
 Gi3\_26779045\_x20.gcgauacgagacgucgugggaacacggg..... 0  
 Gi2\_10182389\_x20.ugcgauacgagacgucgugggaacac..... 0  
 Gi5\_8268569\_x20.....gucgugggaacacggggugccgaGcu..... 1  
 Gi2\_10183909\_x20.....ucgugggaGcacggggugccgaac..... 1  
 Gi3\_26780825\_x20.....ugggaacacgggAugccgaac..... 1  
 Gi3\_26777645\_x20.....guggUaacacggggugccg..... 1  
 Gi5\_8273989\_x20.....agacgucgugggaacacggggugccgaacuA..... 1  
 Gi1\_3825710\_x20.....Uaacacggggugccgaacuu..... 1  
 Gi3\_26785065\_x20.....Uacgucgugggaacacggg..... 1  
 Gi3\_26791765\_x20.....ugggaacacggggAgccgaa..... 1  
 Gi3\_26786225\_x20.....ugggUacacggggugccgaac..... 1  
 Gi5\_8270509\_x20.....cgugggaacacggggugccgaUc..... 1  
 Gi3\_26788645\_x20.....aucggagaNgucgugggaacacggggugcc..... 1  
 Gi3\_26799225\_x20.....aucggagacgucgugggaacacggggCgcc..... 1  
 Gi2\_10181849\_x20.....gggaacacggggugccgCac..... 1  
 Gi1\_3828790\_x20.....cgugggaacacgUggugccgaacu..... 1  
 Gi3\_26786405\_x20.....cgugggaacGcggggugc..... 1  
 Gi3\_26783465\_x20.....cgAgggaacacggggugccg..... 1  
 Gi3\_26791265\_x20.....cgucguggNaacacggggugccg..... 1  
 Gi2\_10183689\_x20.....cgugggaaNacggggugc..... 1  
 Gi3\_26782965\_x20.....gggaacacggggugcAgaac..... 1  
 Gi3\_26798645\_x20.....gugggaacacggggugccgaaGu..... 1  
 Gi2\_10186869\_x20.....cgugggaacacggggugccAaac..... 1  
 Gi3\_26789965\_x20.....ugggaacaAgggugccgaacu..... 1  
 Gi2\_10185369\_x20.....gaacacgAggugccgaacu..... 1  
 Gi5\_8267029\_x20.....ggaacacggggugcUgaacu..... 1  
 Gi3\_26801745\_x20.....cgugggaaGacggggugccgaacu..... 1  
 Gi2\_10174109\_x20.....cgugUgaacacggggugcc..... 1  
 Gi2\_10175069\_x20.....acgucgugggaacacggggugccgCacu..... 1  
 Gi3\_26781065\_x20.....ucgugggaacacggggugccgGacu..... 1  
 Gi5\_8269269\_x20.....gucgCgggaacacggggugccgaacu..... 1  
 Gl1a\_5495320\_x20.....Aggaacacggggugccgaacu..... 1

Gi2\_10181569\_x20.....Ggggaacacggggugccgaa..... 1  
 Gi3\_26773145\_x20.....acgucgugggaacacggggugcAgaacu..... 1  
 Gi3\_26801945\_x20.....cgGcgugggaacacggggugccgaac..... 1  
 Gi3\_26774005\_x20.....ugggaacacggggCgccga..... 1  
 Gi5\_8265949\_x20.....gugNgaacacggggugccgaacu..... 1  
 Gi3\_26772865\_x20.....ugggaacGcggggugccgaa..... 1  
 Gi1\_3824090\_x20.....cguAggaacacggggugccgaacu..... 1  
 Gi3\_26780465\_x20.....aucggagacgucgugggaacCcggg..... 1  
 Gi2\_10178389\_x20.....cgucgugggGacacggggugccgaacu..... 1  
 Gi2\_10177009\_x20.....agacgucgNgggaacacggggugccgaacu..... 1  
 Gi2\_10181349\_x20.....auUggagacgucgugggaacac..... 1  
 Gi2\_10189929\_x20.....aucggagGcgucgugggaacacggggugc..... 1  
 Gi3\_26779625\_x20.....Ugagacgucgugggaaca..... 1  
 Gi3\_26809182\_x19.....aucggCgacgucgugggaacacg..... 1  
 Gi3\_26822919\_x19.....gugggaacacggggugccUaac..... 1  
 Gi3\_26808650\_x19.....cgugggaacacggggCgcc..... 1  
 Gi1\_3829914\_x19.....ugAgaacacggggugccgaacu..... 1  
 Gi3\_26806123\_x19.....ugggaacacggggugccgaaAu..... 1  
 Gi3\_26812469\_x19.....ucguUggaacacggggugccgaac..... 1  
 Gi2\_10202019\_x19.....Gucggagacgucgugggaacacggggug..... 1  
 Gi3\_26821171\_x19.....aacacgggCugccgaacu..... 1  
 Gi2\_10208859\_x19.....ggaacacggggugcAgaacu..... 1  
 Gi2\_10204698\_x19.....cgucguggNaacacggggugccg..... 1  
 Gi3\_26821133\_x19.....gaacGcggggugccgaac..... 1  
 Gi3\_26809448\_x19.....gGucggagacgucgugggaacacg..... 1  
 Gl1a\_5506721\_x19.....Cgaacacggggugccgaacu..... 1  
 Gi1\_3832498\_x19.....ggaacacggggugccgGacu..... 1  
 Gi2\_10202684\_x19.....ugggaacaNggggugccga..... 1  
 Gi3\_26821931\_x19.....cgucgugggaacacgAgggugccgaacu..... 1  
 Gi2\_10197421\_x19.....aucggagaNgucgugggaacacggggugcc..... 1  
 Gi3\_26808688\_x19.....ucguAggaacacggggugccgaac..... 1  
 Gi3\_26833863\_x19.....ucguggAaacacggggugccgaacu..... 1  
 Gi5\_8280256\_x19.....ugggaacacgggAugccgaacu..... 1  
 Gi1\_3832764\_x19.....ggagacgucgugggaacacggggug..... 0  
 Gi3\_26808593\_x19.....cgugggGacacggggugccgaa..... 1  
 Gi1\_3834778\_x19.....gagacgucgugggaacacggggugccga..... 0  
 Gi3\_26838404\_x19.....ucgugggaacacggggAaccgaacu..... 1  
 Gi3\_26819043\_x19.....Ggacgucgugggaacacggggugccgaacu..... 1  
 Gi3\_26808213\_x19.....gggaacaAggggugccgaacu..... 1  
 Gi3\_26817789\_x19.....auUggagacgucgugggaacacggggugcc..... 1  
 Gi3\_26808004\_x19.....cgugggGacacggggugcc..... 1  
 Gl1a\_5501952\_x19.....ucggagacgucgugggaGcag..... 1  
 Gi3\_26827346\_x19.....aucggagacgucgugggaacCcg..... 1  
 Gi1\_3833353\_x19.....acgucgugggaacacggggugccgaacuu..... 0  
 Gi3\_26806617\_x19.....ucgugggaacacgggAugccgaacu..... 1  
 Gi5\_8287096\_x19.....agacgucgNgggaacacggggugccgaacu..... 1  
 Gi1\_3833543\_x19.....cggagacgucgugggaacacggggugccgaacu..... 0

Gi3\_26828068\_x19....aucggagacgucgugggaacacA.....1  
 Gi3\_26833806\_x19.....gucAugggaacacggggugccgaacu.....1  
 Gi2\_10197877\_x19.....gggaacacggggugccgaaAu.....1  
 Gi3\_26813153\_x19.....acgucguAggaacacggggugcc.....1  
 Gi2\_10207206\_x19.....ggUgacgucgugggaacacggggugc.....1  
 Gi2\_10193564\_x19.....aGgucgugggaacacggggugcc.....1  
 Gi5\_8284208\_x19.....aUacgucgugggaacacggggugccgaac.....1  
 Gi2\_10194704\_x19.....gaacacggggUAccgaacu.....1  
 Gi3\_26820772\_x19.....cCugggaacacggggugcc.....1  
 Gi5\_8284455\_x19.....aacacggggugcGgaacu.....1  
 Gi3\_26823470\_x19.....cgucgugggaacacggggugcUgaacu.....1  
 Gi2\_10207035\_x19.....gugggaacacggggugccCaacu.....1  
 Gi2\_10196585\_x19.....Ggacgucgugggaacacggggugccgaac.....1  
 Gi3\_26805192\_x19.....ggaacacggggugccgaaUu.....1  
 Gi3\_26830044\_x19.....Uagacgucgugggaacac.....1  
 Gi1\_3831700\_x19.....guUgugggaacacggggugccgaacu.....1  
 Gi3\_26815205\_x19.....cggagacgucgugggaacCcgggugcc.....1  
 Gi2\_10196604\_x19.....ugggaacacggggugccgaUc.....1  
 Gi2\_10191227\_x19.....cgugggaacacgUggugccgaac.....1  
 Gi3\_26820392\_x19.....acgucgugggCacacggggugccgaacu.....1  
 Gi5\_8283467\_x19.....ucgAgggaacacggggugccgaacu.....1  
 Gi1\_3836412\_x19.....gugggaacacggUgugccgaacu.....1  
 Gi1\_3830693\_x19.....ucAugggaacacggggugccgaacu.....1  
 Gi2\_10204717\_x19.....Cucgugggaacacggggugccgaacu.....1  
 Gi2\_10194685\_x19....aucggagacgucgugggGacac.....1  
 Gi3\_26831868\_x19.....gugggUacacggggugcc.....1  
 Gi1\_3833448\_x19.....aacacggggugccgaCcu.....1  
 Gi3\_26831944\_x19.....ucgugAgaacacggggugccgaac.....1  
 Gi2\_10204603\_x19.....uCggaacacggggugccgaac.....1  
 Gi3\_26831393\_x19.....Ugugggaacacggggugcc.....1  
 Gi3\_26836960\_x19.....ugggaacacAgggugccga.....1  
 Gi2\_10192538\_x19....aucggagacAucgugggaacacggggU.....1  
 Gi3\_26814331\_x19.....gaacacggggugccgCac.....1  
 Gi3\_26807947\_x19.....ggaaUacggggugccgaacu.....1  
 Gi5\_8287229\_x19...Uaucggagacgucgugggaacacgg.....1  
 Gi5\_8280180\_x19.....gugUgaacacggggugccgaacu.....1  
 Gi2\_10206788\_x19.....cgucgugggaacacggggugccgaGcu.....1  
 Gi5\_8283315\_x19.....ucgugggaacacggggugUcgaacu.....1  
 Gi3\_26816554\_x19.....ggAaacacggggugccgaac.....1  
 Gi2\_10194191\_x19.....guggUaacacggggugccg.....1  
 Gi5\_8282384\_x19.....Ggugggaacacggggugccga.....1  
 Gi2\_10198086\_x19.....ggaacacggggUuccgaacu.....1  
 Gi1\_3843795\_x18.....acacggggugccgaacuu.....0  
 Gi3\_26845666\_x18....aCggagacgucgugggaacacgg.....1  
 Gi3\_26840914\_x18.....gUaacacggggugccgaac.....1  
 Gi3\_26859022\_x18.....gggaCcacggggugccgaacu.....1  
 Gi2\_10211566\_x18.....gugggaacacgggAugccgaac.....1

Gi3\_26873602\_x18.....uggAaacacggggugccgaac..... 1  
Gi3\_26854378\_x18.....gaacacgUggugccgaacu..... 1  
Gi2\_10218946\_x18.....acgucgugggGacacggggugccgaacu..... 1  
Gi5\_8298063\_x18.....ucgugggaacacggggugccGacu..... 1  
Gi5\_8294823\_x18.....ugggUacacggggugccgaacu..... 1  
G1a\_5511743\_x18.....gugggaacacggggugccAaacu..... 1  
Gi1\_3839151\_x18.....cUugggaacacggggugccg..... 1  
Gi2\_10215166\_x18.....gugggaaAacggggugccgaac..... 1  
Gi2\_10215796\_x18.....Cugggaacacggggugccg..... 1  
Gi3\_26855872\_x18.....gAcgugggaacacggggugccgaacu..... 1  
Gi3\_26856988\_x18.....aucggGgacgucgugggaacacggggu..... 1  
Gi2\_10221286\_x18.....gaacacggggugccAaacu..... 1  
Gi5\_8295327\_x18.....gagacgucgugggaacacggggugccgaacA..... 1  
Gi3\_26856196\_x18.....cgucgugggaacacggggCgc..... 1  
Gi1\_3840321\_x18.....cgugggaacacggggugccAaacu..... 1  
Gi2\_10211368\_x18.....ggaacacggggugccGac..... 1  
Gi1\_3839529\_x18.....gugggaacacggggugccgaa..... 0  
Gi2\_10215958\_x18.....Gcgucgugggaacacggggugcc..... 1  
Gi1\_3842913\_x18.....ugggaacacggggugcUgaacu..... 1  
G1a\_5518727\_x18.....cgugggaGcacggggugccgaacu..... 1  
Gi3\_26861254\_x18.....cgugggaacGcggggugccga..... 1  
Gi3\_26873764\_x18.....Cggaacacggggugccgaa..... 1  
Gi3\_26839222\_x18.....gggaacacNgggugccgaa..... 1  
Gi2\_10209820\_x18.....ugggaacCcgggugccgaacu..... 1  
Gi2\_10216282\_x18.....ggaaGacggggugccgaacu..... 1  
Gi2\_10224310\_x18.....agacgucgNgggaacacggggugcc..... 1  
G1a\_5514605\_x18.....ggaacacggggCgccgaacu..... 1  
Gi3\_26867104\_x18.....gggaacacggggugccGac..... 1  
Gi2\_10216156\_x18.....aucggagacgucgugggaacGcggggugc..... 1  
Gi1\_3838377\_x18.....ggUaacacggggugccgaacu..... 1  
Gi2\_10215490\_x18.....ugggaacacgAggugccgaacu..... 1  
G1a\_5520599\_x18.....gugggaacacggUgugccgaacu..... 1  
Gi2\_10220656\_x18.....Ccgagacgucgugggaacacggggugcc..... 1  
Gi2\_10213312\_x18.....cgucgugggaacCcgggugccgaacu..... 1  
Gi2\_10210720\_x18.....aGgucgugggaacacggggugccgaacu..... 1  
Gi3\_26853874\_x18.....gacgucgugggaGcacggggugccgaacu..... 1  
Gi3\_26839348\_x18.....gugggaacacggUgugccgaa..... 1  
Gi3\_26848978\_x18.....ucgugggaacacggggugccAaac..... 1  
Gi2\_10223608\_x18.....aucggagaNgucgugggaaca..... 1  
Gi2\_10210252\_x18.....Ggucgugggaacacggggugccga..... 1  
Gi5\_8296821\_x18.....cgucgugggaacCcgggugccgaacu..... 1  
Gi3\_26847448\_x18.....aacacggUgugccgaacu..... 1  
Gi2\_10215778\_x18.....gugUgaacacggggugccgaacu..... 1  
Gi3\_26864836\_x18.....cgucguAggaacacggggugcc..... 1  
Gi3\_26850130\_x18.....Uacgucgugggaacacgg..... 1  
Gi2\_10219252\_x18.....ugggaacacggggGgccgaacu..... 1  
Gi3\_26874952\_x18.....cAuggaacacggggugcc..... 1

Gi3\_26844478\_x18.....cgucUugggaacacggggugcc..... 1  
Gi3\_26859454\_x18.....cgugggaacacggggugAcgaac..... 1  
Gi3\_26845018\_x18.....gugggaaUacggggugccga..... 1  
Gi3\_26859562\_x18.....cgugggaacacggggUccgaacu..... 1  
Gi3\_26868922\_x18.....ucgugggaacacggggugcAgaacu..... 1  
Gi1\_3840033\_x18.....gggaacacAgggugccgaacu..... 1  
Gi3\_26869786\_x18.....cggagacgNcgugggaacacggggugcc..... 1  
Gi5\_8296047\_x18.....cgucgCgggaacacggggugccgaacu..... 1  
Gi2\_10211080\_x18.....ucgugggaacacggggugccgUacu..... 1  
Gi3\_26854612\_x18.....gaGcacggggugccgaac..... 1  
G1a\_5514857\_x18.....gugggaacacgAgggugccgaacu..... 1  
Gi1\_3838251\_x18.....ucggagacgucgugggaacacggggU..... 0  
G1a\_5516513\_x18.ugcgauccggagacgucgugggaacac..... 0  
Gi5\_8303337\_x18.....gaacacggggAgccgaacu..... 1  
Gi2\_10223824\_x18.....aucggagacgucgugggaacacggggCgc..... 1  
Gi1\_3838071\_x18.....cgucgugggaacacggggugccgCacu..... 1  
Gi2\_10227370\_x18..Ucgauccggagacgucguggga..... 1  
Gi5\_8293599\_x18.....gugggaacacggggugccgaUcu..... 1  
Gi3\_26848564\_x18.....ucgugggaacacggggugccgaaAu..... 1  
Gi1\_3839511\_x18.....gUagacgucgugggaacacggggugccg..... 1  
Gi3\_26857456\_x18.....gugggaacacggUgugccga..... 1  
Gi3\_26872090\_x18.....Acgugggaacacggggugccgaacu..... 1  
Gi5\_8300043\_x18.....ugggaacaNggggugccgaac..... 1  
Gi5\_8298099\_x18.Ggcgauccggagacgucgug..... 1  
Gi2\_10211296\_x18.....ugggUacacggggugccgaacu..... 1  
Gi5\_8294247\_x18.....gugggaacacggggugccUaacu..... 1  
Gi1\_3843003\_x18.....ucguAggaacacggggugccgaacu..... 1  
Gi2\_10223518\_x18.....Uacgucgugggaacacggggugccgaac..... 1  
Gi5\_8293113\_x18.....Ugucgugggaacacggggugccgaacu..... 1  
Gi2\_10217434\_x18.....Augggaacacggggugccgaa..... 1  
Gi5\_8296281\_x18.....ugggaacacggggUaccgaac..... 1  
Gi3\_26851624\_x18.....ggaacUcggggugccgaacu..... 1  
Gi2\_10219936\_x18.....Cggaacacggggugccgaac..... 1  
Gi1\_3844587\_x18.....ggagacgucgCgggaacacggggugccga..... 1  
Gi2\_10211692\_x18.....gaacaUggggugccgaacu..... 1  
Gi3\_26874880\_x18.....Ngugggaacacggggugccgaacu..... 1  
Gi3\_26862172\_x18.....gaacacCggggugccgaacu..... 1  
Gi1\_3845271\_x18.....ggaacacggggugccgaGcu..... 1  
G1a\_5514965\_x18.....gugggaacaUggggugccgaacu..... 1  
Gi2\_10212088\_x18.....ucUugggaacacggggugccgaacu..... 1  
Gi3\_26852344\_x18.....ggaNcacggggugccgaacu..... 1  
Gi3\_26859634\_x18.....cgucgugggaacacAgggugccgaacu..... 1  
Gi3\_26838790\_x18.....UagacgucgugggaacacggggU..... 1  
Gi2\_10217578\_x18.....acgucgugggaacacggggGgccgaacu..... 1  
Gi3\_26875150\_x18.....ggaaUacggggugccgaac..... 1  
Gi5\_8302491\_x18.....cgugggaUcacggggugccgaacu..... 1  
Gi2\_10222258\_x18.....acgucgugggaacacggggGgcc..... 1



Gi2\_10234455\_x17.....aucggagacgucguggaacGcggggu..... 1  
 Gi2\_10246168\_x17.....uggaacGcgggugccgaac..... 1  
 Gi2\_10240286\_x17.....gucguggaacacggggugcUgaacu..... 1  
 Gi1\_3852962\_x17.....guggaacacggAgugccgaacu..... 1  
 G1a\_5531573\_x17.....gugAgaacacggggugccgaacu..... 1  
 Gi3\_26876886\_x17.....aucggagGcgcgucguggaacacgg..... 1  
 Gi3\_26876750\_x17.....acgucguggaacacggggGgccgaac..... 1  
 Gi3\_26910223\_x17.....cguggaacacggggGgccga..... 1  
 Gi2\_10234880\_x17.....cguggaGcacggggugcc..... 1  
 Gi5\_8309698\_x17.....gucguggGacacggggugccgaacu..... 1  
 Gi1\_3854135\_x17.....aucggGgacgucguggaacacggggugcc..... 1  
 Gi3\_26907299\_x17.....Agggaacacggggugccgaa..... 1  
 Gi3\_26895331\_x17..Ucgaucggagacgucgug..... 1  
 Gi3\_26904239\_x17.....aCgggagacgucguggaacacgggg..... 1  
 Gi3\_26891846\_x17.....aucggagacgucguggGacacgg..... 1  
 Gi1\_3854475\_x17.....gAgaacacggggugccgaacu..... 1  
 Gi3\_26900737\_x17.....aucggagGcgcgucguggaacacgggg..... 1  
 Gi3\_26881884\_x17.....acgucguggaacacggggugccGac..... 1  
 Gi3\_26880167\_x17.....cguggGcacacggggugccgaac..... 1  
 Gi2\_10247681\_x17.....cggGgacgucguggaacacggggugccga..... 1  
 Gi3\_26903066\_x17.....ucguggaacacggggugccGacu..... 1  
 Gi2\_10232058\_x17.....cgucguggaacacggggGccg..... 1  
 Gi5\_8315546\_x17.....aacacggUgugccgaacu..... 1  
 G1a\_5522461\_x17.....Ccgucguggaacacggggugccgaacu..... 1  
 Gi3\_26912467\_x17..gcgaucggagacgucguggaacacggggug..... 0  
 Gi3\_26912484\_x17.....Uaucggagacgucguggaac..... 1  
 Gi3\_26899734\_x17.....cgugUgaacacggggugccga..... 1  
 Gi2\_10229270\_x17.....cguggaacacggggugccgaaA..... 1  
 Gi2\_10234081\_x17.....Ggucguggaacacggggugcc..... 1  
 G1a\_5529618\_x17.....guggAaacacggggugccgaacu..... 1  
 Gi2\_10248616\_x17.....guggUaacacggggugccga..... 1  
 Gi1\_3851381\_x17.....gggaacacggggGgccgaacu..... 1  
 Gi5\_8312605\_x17.....guggaacacggggGgccgaac..... 1  
 Gi2\_10248225\_x17.....cguggaacUguggugccgaac..... 1  
 Gi2\_10249041\_x17.....ucguggaacacggggugcUgaacu..... 1  
 Gi2\_10245845\_x17.....cguggGacacggggugcc..... 1  
 Gi3\_26894022\_x17.....acgucguggaacacggggugccgaUc..... 1  
 Gi5\_8321394\_x17.....cgugCgaacacggggugccgaacu..... 1  
 Gi3\_26905803\_x17.....ggaacUcggggugccgaac..... 1  
 Gi3\_26901808\_x17.....guggaacacUguggugccgaac..... 1  
 Gi5\_8319150\_x17..Uaucggagacgucguggaacac..... 1  
 Gi2\_10230341\_x17.....aCgggagacgucguggaacacg..... 1  
 Gi1\_3847505\_x17.....uggaacacggggugccAaacu..... 1  
 Gi3\_26893138\_x17.....gucguggGacacggggugccgaac..... 1  
 Gi2\_10230392\_x17..gcgaucggagacgucguggaacacggggug..... 0  
 Gi3\_26913130\_x17.....ggaacacggggugccgaaAu..... 1  
 Gi3\_26896810\_x17.....gaacacUguggugccgaacu..... 1

Gi2\_10234557\_x17....aucgUagacgucgugggaacacggggugc..... 1  
 Gi3\_26882088\_x17.ugcgaucggagacgucgugggaacacggg..... 0  
 Gi2\_10241221\_x17.....cAucgugggaacacggggugccgaacu..... 1  
 Gi3\_26877345\_x17....aucggagacgucgugggaacacAgg..... 1  
 Gi3\_26896385\_x17.....cgugggaacUcggggugccgaac..... 1  
 Gi1\_3854645\_x17.....ggaacGcggggugccgaacu..... 1  
 Gi3\_26901179\_x17.....acgucgugggaacGcggg..... 1  
 Gi2\_10233928\_x17....aucggagacgucgugggaCcac..... 1  
 Gi3\_26891506\_x17.....ugggaacacggggugUcгаа..... 1  
 Gi3\_26900686\_x17.....Ugagacgucgugggaacacggggugccgaac..... 1  
 Gi2\_10239504\_x17.....gaacacggggugUcгааacu..... 1  
 Gi5\_8309528\_x17.....cgAcgugggaacacggggugccgaacu..... 1  
 Gi3\_26894056\_x17.....cgugggGacacggggugccga..... 1  
 Gi3\_26907095\_x17.....ugggaacacggggugcUгаа..... 1  
 Gi3\_26877464\_x17..cgaucggagacgucgugggaacacggg..... 0  
 Gi3\_26896946\_x17.....gucgugAgaacacggggugccgaacu..... 1  
 Gi3\_26879589\_x17.....gucguggAaacacggggugccgaacu..... 1  
 Gi1\_3849715\_x17.....gggaacacggggugccgaGcu..... 1  
 Gi3\_26909577\_x17.....gugggaacaAggggugcc..... 1  
 Gi3\_26894855\_x17.....ugggaacacggggCgccc..... 1  
 Gi2\_10248242\_x17.....Ugagacgucgugggaacacggggu..... 1  
 Gi2\_10247970\_x17.....uAggaacacggggugccgaac..... 1  
 Gi2\_10231004\_x17.....uUggaacacggggugccgaacu..... 1  
 Gi3\_26906143\_x17.....gucgugggaacacgggAugccgaacu..... 1  
 Gi1\_3852248\_x17.....Cacacggggugccgaacu..... 1  
 Gi3\_26888939\_x17.....agacgucgNgggaacacggggugccgaacu..... 1  
 Gl1\_5528054\_x17....aucggagacgucgugggaacacggAgugcc..... 1  
 Gi1\_3852265\_x17....Uaucggagacgucgugg..... 1  
 Gi3\_26877719\_x17.....gugggaacacggggugUcгаа..... 1  
 Gi3\_26912603\_x17.....guggCaacacggggugccgaac..... 1  
 Gi5\_8310378\_x17.....ggAaacacggggugccgaacu..... 1  
 Gi2\_10244128\_x17.....gucgCgggaacacggggugccgaacu..... 1  
 Gi5\_8310854\_x17.....gugggaacacggggugccgaacG..... 1  
 Gi2\_10235220\_x17....aucggagacgucgugggaCcacggggugcc..... 1  
 Gi5\_8316345\_x17.....ugggaacacgggCugccgaacu..... 1  
 Gi2\_10244723\_x17.....guNggaacacggggugccgaacu..... 1  
 Gi3\_26878280\_x17.....cUgagacgucgugggaacac..... 1  
 Gi2\_10231140\_x17.....ggaacaUggggugccgaac..... 1  
 Gi1\_3854764\_x17.....gugggaacacggggugccgaU..... 1  
 Gl1\_5521849\_x17.....uAggaacacggggugccgaacu..... 1  
 Gi2\_10237668\_x17.....gggaGcacggggugccgaac..... 1  
 Gi5\_8316532\_x17.....ggaacacggggCgcccgaac..... 1  
 Gi2\_10247443\_x17.....ucgugggGacacggggugccgaac..... 1  
 Gi3\_26906500\_x17.....gucgugggaacaUggggugccgaacu..... 1  
 Gi3\_26882938\_x17.....ucgugggaaUacggggugccgaacu..... 1  
 Gi2\_10235050\_x17.....Ugagacgucgugggaacacggggug..... 1  
 Gi1\_3848882\_x17.....aacacgAgggugccgaacu..... 1

Gi3\_26893750\_x17.....Gggagacgucguggaacacggggugcc..... 1  
 Gi2\_10239555\_x17.....cguggaacacgCggugccgaacu..... 1  
 Gi2\_10235764\_x17.....aucggagacgucguggaacacggggCgcc..... 1  
 Gi5\_8320969\_x17.....ucgugAgaacacggggugccgaacu..... 1  
 Gi3\_26875339\_x17.....cggagacgucguggaacCcggggu..... 1  
 Gi2\_10232092\_x17.....uggaacacgggAugccgaacu..... 1  
 Gi1\_3849443\_x17.....gCaacacggggugccgaacu..... 1  
 Gi2\_10236223\_x17.....gAgaacacggggugccgaac..... 1  
 Gi2\_10238637\_x17.....gaacacggggGgccgaacu..... 1  
 Gi2\_10248208\_x17.....aucggagacgucgugggGaca..... 1  
 Gi2\_10234472\_x17.....Ugagacgucguggaacac..... 1  
 Gi1\_3858417\_x16.....cguggaacacggggugc..... 0  
 Gi3\_26949069\_x16.....Cucggagacgucguggaacacgggggu..... 1  
 Gi3\_26915997\_x16.....gGcgucguggaacacggggugccgaac..... 1  
 Gi3\_26922349\_x16.....gacgucguggaacacggggGgccgaacu..... 1  
 Gi3\_26946493\_x16.....aucAgagacgucguggaacacgggggu..... 1  
 Gi5\_8332400\_x16.....gAgggaacacggggugccgaac..... 1  
 Gi3\_26947821\_x16.....Uguggaacacggggugccga..... 1  
 Gi2\_10266985\_x16.....cggaUacgucguggaacacggggugcc..... 1  
 Gi3\_26943021\_x16.....agUcgucguggaacacggggugccgaacu..... 1  
 Gl1a\_5542717\_x16.....uGgaacacggggugccgaacu..... 1  
 Gi2\_10263721\_x16.....Uaucggagacgucguggaac..... 1  
 Gi3\_26946269\_x16.....cUgggaacacggggugccga..... 1  
 Gi3\_26919405\_x16.....acgucgugggGacacggggugccgaac..... 1  
 Gi3\_26939629\_x16.....ucguggaacacggggAuaccgaac..... 1  
 Gi3\_26946285\_x16.....gucgugggGcacggggugccgaac..... 1  
 Gi3\_26952061\_x16.....gAgggaacacggggugccg..... 1  
 Gi2\_10252233\_x16.....aacacggggugccgaaUu..... 1  
 Gi2\_10267145\_x16.....guggaacacggggugccgUac..... 1  
 Gi3\_26933677\_x16.....guggaacacgUggugccgaac..... 1  
 Gi3\_26923997\_x16.....ggaacacggggugAcgaac..... 1  
 Gi2\_10259737\_x16.....guggaacacggggugccgaaU..... 1  
 Gi5\_8323872\_x16.....cUucguggaacacggggugc..... 1  
 Gi3\_26948573\_x16.....gacgucguggaacacggggCgccgaac..... 1  
 Gi5\_8338224\_x16.....uggaacacggggugccgaaAu..... 1  
 Gi3\_26926621\_x16.....ucgugggACacggggugccgaacu..... 1  
 Gi3\_26914301\_x16.....uggaacacggggugccAa..... 1  
 Gi3\_26941741\_x16.....cgucguggaacacggggGgccg..... 1  
 Gi2\_10256089\_x16.....ucggagacgucguggaacacggggugccga..... 0  
 Gi1\_3861953\_x16.....acgucgugggAACacggggugccgCacu..... 1  
 Gi3\_26934733\_x16.....guggAaacacggggugccg..... 1  
 Gi2\_10260009\_x16.....cgucgugggAACGcggggugccgaacu..... 1  
 Gi3\_26940045\_x16.....gggaacacggggugAcgaacu..... 1  
 Gi3\_26917373\_x16.....acgucgugggAACacggggugcUgaacu..... 1  
 Gi1\_3855281\_x16.....gCgaacacggggugccgaacu..... 1  
 Gi3\_26947341\_x16.....aucggagacgucgUAggaacacg..... 1  
 Gi2\_10270937\_x16.....gaacacggAgugccgaacu..... 1

Gi3\_26915021\_x16.....cUgagacgucguggaacacggggugccga..... 1  
Gi3\_26919069\_x16.....uggaacacggggugccgaaA..... 1  
Gi3\_26914509\_x16.....guggaacacggggugAcga..... 1  
Gi2\_10269785\_x16.....guggaacacggggugAcgaaC..... 1  
Gi2\_10265865\_x16.....guggaacacggggugccgaG..... 1  
Gi3\_26925453\_x16.....guggaacacggAgugccg..... 1  
Gi5\_8334016\_x16.....gucgugggaGcacggggugccgaacu..... 1  
Gi2\_10254057\_x16.....cgucgugggGacacggggugccg..... 1  
Gi2\_10255673\_x16.....Gcggagacgucguggaacacg..... 1  
G1a\_5543101\_x16.....gggaacacNgggugccgaacu..... 1  
Gi3\_26943277\_x16...cUaucggagacgucguggaacacggggg..... 1  
Gi3\_26945245\_x16.....Ggucguggaacacggggugccga..... 1  
Gi2\_10261801\_x16.....aacacggggAccgaacu..... 1  
Gi2\_10252985\_x16.....guggaacacggggCgccc..... 1  
Gi3\_26948909\_x16.....gucguggaacacgAggugccgaacu..... 1  
Gi1\_3862353\_x16.....guggaacacgAggugccgaacu..... 1  
Gi2\_10258633\_x16.....guggaacacgggAugcc..... 1  
Gi4\_508468\_x16.....agacgucguggaacacggggugccgaacu..... 0  
Gi1\_3858817\_x16.....cguggaacUcggggugccgaacu..... 1  
Gi2\_10251209\_x16.....gugggUacacggggugccgaac..... 1  
Gi3\_26932061\_x16.....gugAgaacacggggugccga..... 1  
G1a\_5542141\_x16.....guggaacacggggugUcgaacu..... 1  
Gi1\_3855489\_x16.....guggaacacgggAugccgaacu..... 1  
Gi3\_26920941\_x16...aAcggagacgucguggaacacggg..... 1  
Gi3\_26947133\_x16.....ucgAgggaacacggggugccgaacu..... 1  
Gi4\_508724\_x16.....ggaacacggggugccgaacu..... 0  
Gi2\_10264681\_x16.....ggaaUacggggugccgaacu..... 1  
Gi2\_10266617\_x16.....Cuggaacacggggugccga..... 1  
Gi3\_26921437\_x16.....cgugggGacacggggugc..... 1  
Gi3\_26918093\_x16.....uggaacacUgggugccgaacu..... 1  
Gi2\_10267641\_x16.....gggaacacgAggugccgaacu..... 1  
Gi2\_10264569\_x16.....aacacggggugcGgaacu..... 1  
Gi2\_10267481\_x16.....gggaacacggggugccgaacG..... 1  
Gi3\_26920237\_x16.....aacacggCgugccgaacu..... 1  
Gi3\_26932205\_x16.....uggaacacggUgugccgaacu..... 1  
Gi3\_26948717\_x16...Uaucggagacgucguggg..... 1  
Gi3\_26951997\_x16.....cgucguggaacacggggAc..... 1  
Gi3\_26924189\_x16.....uggaacacggggugccAaa..... 1  
Gi5\_8326400\_x16.....gaacacggggugccgaaUu..... 1  
Gi3\_26924893\_x16.....gggNacacggggugccgaacu..... 1  
Gi1\_3854897\_x16.....uUggaacacggggugccga..... 1  
Gi1\_3855665\_x16.....cgCcguggaacacggggugccgaacu..... 1  
Gi1\_3860737\_x16.....uggaacacggggAgccgaacu..... 1  
Gi3\_26922685\_x16.....gggaacacNgggugccga..... 1  
Gi1\_3857585\_x16.....gucguggaacacggggugccgCacu..... 1  
Gi1\_3856865\_x16.....gggaacacggggugccgGacu..... 1  
Gi3\_26935917\_x16.....gucguggaacacggAgugccgaacu..... 1

Gi3\_26913757\_x16.....cguUgugggaacacggggugcc..... 1  
Gi2\_10261529\_x16.....Uagacgucgugggaacacggggug..... 1  
Gi3\_26941853\_x16.....acgucgugggaacacggggugccgGacu..... 1  
Gi3\_26919661\_x16.....cgugUgaacacggggugc..... 1  
Gi2\_10253673\_x16.....aacaUggggugccgaacu..... 1  
Gi3\_26914269\_x16.....gucgugggaacacggggugcAgaacu..... 1  
Gi1\_3862289\_x16.....Ugaacacggggugccgaa..... 1  
Gi2\_10252569\_x16.....ggaacacggggugccgaaUu..... 1  
Gi3\_26927149\_x16....Caucggagacgucgugggaacacggg..... 1  
Gi3\_26945933\_x16.....ggaacCcgggugccgaacu..... 1  
Gi3\_26937837\_x16.....Uucgugggaacacggggg..... 1  
Gi3\_26923933\_x16.....ugggaacacggggugcGgaacu..... 1  
Gi3\_26927021\_x16.....ucgugggaacacgAggugccgaacu..... 1  
Gi3\_26945453\_x16.....Ggucgugggaacacggggugc..... 1  
G1a\_5536733\_x16.....gggGacacggggugccgaacu..... 1  
Gi3\_26927741\_x16.....ugggaacacgggUugccgaa..... 1  
G1a\_5535933\_x16....cggagacgucgugggaacacggggug..... 0  
Gi2\_10264089\_x16.....gGcgugggaacacggggugccga..... 1  
Gi1\_3860353\_x16.....gGcgucgugggaacacggggugccgaacu..... 1  
Gi2\_10263897\_x16.....acgucgugggaacacggggCgcc..... 1  
Gi2\_10262121\_x16.....gggaacacggggugUcgaacu..... 1  
Gi1\_3857105\_x16.....gugggaacacggggUaccgaacu..... 1  
Gi1\_3857713\_x16.....gaacacggggGgccgaacu..... 1  
Gi3\_26914733\_x16.....ucgugggaacacggggGgccgaac..... 1  
Gi2\_10292455\_x15.....guUgugggaacacggggugccgaac..... 1  
Gi1\_3866567\_x15.....gugggaaAacggggugccgaacu..... 1  
Gi3\_26961460\_x15.....cgucgugggaacGcggggugcc..... 1  
Gi2\_10292410\_x15....gaucgAagacgucgugggaacacggg..... 1  
Gi3\_26992150\_x15.....cgugggaacGcggggugcc..... 1  
Gi3\_26957065\_x15.....gugggaacacgggAugccga..... 1  
Gi3\_26964910\_x15.....cgugUgaacacggggugccg..... 1  
Gi2\_10280290\_x15.....gggaacacggggugccgaUc..... 1  
Gi3\_26986090\_x15.....ucgugggCacacggggugccgaacu..... 1  
Gi2\_10288285\_x15....cUgagacgucgugggaacacg..... 1  
Gi2\_10278850\_x15.....gugggaacacggggCgccgaa..... 1  
Gi3\_26953795\_x15....gaucggagNcgucgugggaacacggg..... 1  
Gi1\_3866357\_x15.....gucgugggaacacggggugccgaaA..... 1  
Gi2\_10285135\_x15....aucAgagacgucgugggaaca..... 1  
Gi3\_26976115\_x15....aucAgagacgucgugggaacacggg..... 1  
Gi2\_10289020\_x15.....gucgugggaacacggggugccgCac..... 1  
G1a\_5546579\_x15....cUaucggagacgucgugg..... 1  
Gi2\_10282375\_x15.....gugggaacCcgggugccgaa..... 1  
Gi5\_8344022\_x15.....gugggaacacgUggugccgaacu..... 1  
Gi5\_8352467\_x15.....ucgugggaacacgAggugccgaacu..... 1  
Gi1\_3871667\_x15.....cgugggaaUacggggugccgaacu..... 1  
Gi3\_26958190\_x15....acgucguggAaacacggggugccgaacu..... 1  
Gi3\_26975725\_x15.....gggaacacggggugccgaaU..... 1

Gi3\_26987935\_x15.....cgucguggaGcacgggugccgaac..... 1  
Gi3\_26954680\_x15.....acgucguAggaacacgggugccgaacu..... 1  
Gi2\_10277275\_x15.....acgucguggaacacggggCgccgaacu..... 1  
Gi5\_8348927\_x15.....gggGacacggggugccgaac..... 1  
Gi2\_10286815\_x15.....gugggCacacggggugcc..... 1  
G1a\_5554544\_x15...Uaucggagacgucgugggaacacggggu..... 1  
Gi3\_26980240\_x15.....gggaacacggAgugccgaac..... 1  
Gi3\_26978905\_x15.....uggaacGcggggugccga..... 1  
Gi3\_26986045\_x15.....Ggacgucguggaacacggggugccgaac..... 1  
Gi2\_10289785\_x15....aucggagacgucguggaacacggggGgc..... 1  
Gi2\_10277770\_x15.....cggagacgucguggaGcacgggugcc..... 1  
Gi1\_3865442\_x15.....Cgggaacacggggugccgaac..... 1  
Gi2\_10294120\_x15.....gucguAggaacacggggugccgaacu..... 1  
Gi2\_10292485\_x15.....gucguggaacacAgggugccgaacu..... 1  
Gi3\_26953120\_x15.....ggaacacggggCgccgaa..... 1  
Gi3\_26957845\_x15.....Cgaacacggggugccgaa..... 1  
Gi2\_10286545\_x15....aucggagaNgucguggaacacggg..... 1  
Gi3\_26961295\_x15.....ggaacacggggAgccgaac..... 1  
Gi5\_8342417\_x15.....ggaaUacggggugccgaacu..... 1  
Gi5\_8342597\_x15.....ucgugggCacacggggugccgaacu..... 1  
Gi2\_10289995\_x15.....ucguggaacacggggugUcgaacu..... 1  
Gi3\_26991610\_x15....aucggagaUgucguggaacacggggu..... 1  
Gi3\_26969725\_x15.....gggaacGcggggugccgaa..... 1  
Gi2\_10282390\_x15.....ggaacacggggugcUgaac..... 1  
Gi2\_10274620\_x15....aucggagGcucguggaacacggggu..... 1  
Gi2\_10287400\_x15.....cguggaacacgggCugccgaacu..... 1  
Gi5\_8341052\_x15.....cgucguggaCcacggggugccgaacu..... 1  
Gi5\_8351357\_x15.....cguggCaacacggggugccgaacu..... 1  
Gi2\_10286245\_x15.....ucgugAgaacacggggugccgaacu..... 1  
Gi3\_26956360\_x15.....gucguggaacacggggugAcgaacu..... 1  
Gi1\_3866147\_x15.....gUgaacacggggugccgaacuu..... 1  
Gi1\_3864797\_x15.....Cacgucguggaacacggggugccgaacu..... 1  
Gi3\_26985610\_x15....gaucggagacgucgugggCacacggggu..... 1  
Gi3\_26976220\_x15.....ucAugggaacacggggugccgaac..... 1  
Gi2\_10280350\_x15...cgaucggagacgucguggaacacggggugcc..... 0  
Gi3\_26966320\_x15.....gaacacgggguCccgaacu..... 1  
Gi3\_26959030\_x15.....cgucguggaacGcggggugccga..... 1  
Gi2\_10293100\_x15.....cgCgggaacacggggugc..... 1  
Gi3\_26955925\_x15.....gugggCacacggggugcc..... 1  
Gi3\_26987845\_x15.....gugggaaGacggggugccgaacu..... 1  
Gi2\_10292560\_x15.....ucguggaacacggggugccgaGc..... 1  
Gi3\_26966620\_x15....Gcggagacgucguggaacacg..... 1  
Gi3\_26955235\_x15...cgaucggagacgucguggaacacggggu..... 0  
Gi5\_8349542\_x15.....uggaacacggggugccgaaUu..... 1  
Gi3\_26983330\_x15....Gcggagacgucguggaacacggggu..... 1  
Gi2\_10288480\_x15.....cgGgggaacacggggugccga..... 1  
Gi2\_10286065\_x15.....ggaacCggggugccgaacu..... 1

Gi2\_10292710\_x15.....ucgugggaacaUggggugccgaacu..... 1  
Gi5\_8339162\_x15.....cgGgggaacacggggugccgaac..... 1  
Gi2\_10286365\_x15.....gaacacggggugccgUacu..... 1  
Gi5\_8354492\_x15.....ucgugggaacacggggAgccgaacu..... 1  
Gi1\_3870557\_x15.....aacacgggAugccgaacu..... 1  
Gi2\_10285195\_x15...cUaucggagacgucgugggaacacggg..... 1  
Gi4\_510287\_x15.....Uggaacacggggugccgaacu..... 1  
Gi3\_26980600\_x15....aucggagacgucguAggaacacgggg..... 1  
Gi4\_510062\_x15.....ugggaacacggggugccgaac..... 0  
Gi3\_26986525\_x15.....gugggaCcacggggugcc..... 1  
Gi3\_26965330\_x15....aucggagacgucguggAaacacg..... 1  
Gi1\_3871277\_x15.....aGgucgugggaacacggggugccgaacu..... 1  
Gi5\_8341652\_x15.....gggaacacggggUAccgaacu..... 1  
Gi3\_26970535\_x15....Aaucggagacgucgugggaacacggg..... 1  
Gi3\_26990530\_x15.....gacgucgugggaacacggggCgccgaacu..... 1  
Gi3\_26961790\_x15.....acgucAugggaacacggggugccgaacu..... 1  
Gi1\_3868577\_x15....aGcggagacgucgugggaacacg..... 1  
Gi3\_26974450\_x15....gagacgucgugggaacacgggAugccg..... 1  
Gi3\_26985820\_x15.....gugggaacacggggugUcg..... 1  
Gi3\_26954005\_x15.....ugggCacacggggugccgaac..... 1  
Gi3\_26982400\_x15....Aaucggagacgucgugggaacacgggg..... 1  
Gi5\_8341307\_x15....cAucgugggaacacggggugccgaacu..... 1  
Gi2\_10285165\_x15.....gugggaacacggggugccgaaGu..... 1  
Gi1\_3865667\_x15.....acgucgugggaacacggggCgccgaacu..... 1  
Gi1\_3870692\_x15.....gaacacggggugccgaacA..... 1  
Gi3\_26990470\_x15.....gugggaacaUggggugccgaa..... 1  
G1a\_5544944\_x15.....cUugggaacacggggugc..... 1  
Gi2\_10281505\_x15.....cgucguggNaacacggggugc..... 1  
Gi3\_26977585\_x15.....Cucgugggaacacggggugccgaac..... 1  
Gi2\_10291165\_x15.....cgucguggNaacacggggugcc..... 1  
Gi3\_26971750\_x15.....Ugugggaacacggggugc..... 1  
Gi2\_10287070\_x15.....guggAaacacggggugcc..... 1  
Gi3\_26981710\_x15.....cgugggaacCcgggugccgaac..... 1  
Gi2\_10288990\_x15.....Agggaacacggggugccgaac..... 1  
Gi3\_27010203\_x14.....Uucgugggaacacggggug..... 1  
Gi2\_10303743\_x14.....cggagacgCcgugggaacacggggugcc..... 1  
Gi1\_3878522\_x14.....Uagacgucgugggaacacggggugcc..... 1  
G1a\_5570275\_x14.....cgAgggaacacggggugccgaacu..... 1  
Gi2\_10296127\_x14.....cguggUaacacggggugccgaacu..... 1  
Gi3\_27000389\_x14....aucggagacgucgugggaacGcgg..... 1  
Gi5\_8364455\_x14.....gugggaacGcggggugccgaac..... 1  
Gi5\_8364273\_x14.....uCggaacacggggugccgaac..... 1  
Gi5\_8361347\_x14....aGcggagacgucgugggaacacgg..... 1  
Gi2\_10300285\_x14.....gugggaGcacggggugccgaa..... 1  
Gi5\_8370349\_x14.....ucgugggaacacUgggugccgaacu..... 1  
Gi2\_10315055\_x14.....aacacggAgugccgaacu..... 1  
Gi2\_10306123\_x14.....gucgugggaacCcgggugccgaac..... 1

Gi5\_8356643\_x14.....gaacacggggugccgaacA..... 1  
Gi5\_8365561\_x14.....aCcacggggugccgaacu..... 1  
Gi2\_10304079\_x14.....gugggaacacggUgugccg..... 1  
Gi3\_27036845\_x14.....gaaGacggggugccgaacu..... 1  
Gi2\_10317505\_x14.....ugggaacacggggCgccgaac..... 1  
Gi2\_10316063\_x14.....Ugagacgucgugggaacacg..... 1  
Gi3\_27018715\_x14.....agacgucgugggaacacggggCgccgaacu..... 1  
Gi3\_27020339\_x14.....aucggGgacgucgugggaacacgg..... 1  
Gi2\_10310939\_x14.....aucggagacgucgugggaCcacggg..... 1  
Gi1\_3881728\_x14.....ugggaacacggggugccgGacu..... 1  
Gi1\_3876590\_x14.....ucgugAgaacacggggugccgaacu..... 1  
Gi3\_27033891\_x14.....aucggagacgucgugggaacacgAg..... 1  
Gi3\_27032603\_x14.....gggaacacggggugUcgaac..... 1  
Gi2\_10307593\_x14.....gugggaacacgggCugccgaacu..... 1  
Gi3\_27011687\_x14.....gugggaacacggggugccCaac..... 1  
Gi1\_3872894\_x14.....ugggaacCcgggugccgaacu..... 1  
Gi2\_10301125\_x14.....ggaacacgAggugccgaac..... 1  
Gi3\_26993571\_x14.....guUgugggaacacggggugcc..... 1  
Gi1\_3880790\_x14.....cgugggaCcacggggugccgaacu..... 1  
Gi1\_3879432\_x14.....cgugggaacacggggugcUgaacu..... 1  
Gi3\_26997533\_x14.....ugggaacacggggugAcgaac..... 1  
Gi2\_10306221\_x14.....Ugucgugggaacacggggugccgaacu..... 1  
Gi3\_26994859\_x14.....acgucgugAgaacacggggugccgaacu..... 1  
G1a\_5567461\_x14.....gugggaacacggAgugccgaacu..... 1  
G1a\_5560391\_x14.....aGcggagacgucgugggaacacggg..... 1  
Gi3\_27024875\_x14.....cgucguggAaacacggggugccgaacu..... 1  
Gi5\_8369117\_x14.....ggUacacggggugccgaac..... 1  
Gi3\_27004225\_x14.....ucgugggaacacggggugccgaacG..... 1  
Gi3\_27036117\_x14.....gGucggagacgucgugggaacac..... 1  
Gi3\_27035431\_x14.....gggaacacggggugcGgaacu..... 1  
Gi2\_10298759\_x14.....gggaacacgggAugccgaa..... 1  
Gi5\_8371203\_x14.....agacgucgugggaacacggggCgccgaacu..... 1  
Gi5\_8356979\_x14.....ugggaacacggggugAcgaacu..... 1  
Gi3\_26994803\_x14.....Ugucgugggaacacggggugcc..... 1  
Gi3\_26995573\_x14.....ugggaacacggggugcUga..... 1  
Gi4\_511002\_x14.....gGgggaacacggggugccgaa..... 1  
Gi1\_3879236\_x14.....gaacacggAgugccgaacu..... 1  
Gi1\_3877626\_x14.....aacacggggugcGgaacu..... 1  
Gi2\_10314453\_x14.....ugggaacacggggAgccgaacu..... 1  
Gi2\_10306333\_x14.....gugggaacacgggguAcc..... 1  
Gi3\_27000697\_x14.....aacacggggugAcgaacu..... 1  
Gi2\_10314537\_x14.....Uaucggagacgucgugggaacacgg..... 1  
Gi3\_27035683\_x14.....aucggagacgucgugggaAaacggg..... 1  
Gi1\_3875470\_x14.....ugggaaUacggggugccgaacu..... 1  
Gi1\_3877192\_x14.....gAaacacggggugccgaacu..... 1  
Gi1\_3882344\_x14.....ucUugggaacacggggugccgaacu..... 1  
Gi5\_8358449\_x14.....Cggaacacggggugccgaac..... 1



|                                                          |   |
|----------------------------------------------------------|---|
| Gi1_3881588_x14.....uggaacacggggugccgaa.....             | 0 |
| Gi2_10310645_x14.....Uguggaacacggggugcc.....             | 1 |
| Gi1_3879348_x14.....ucguggaacacggggugccGacu.....         | 1 |
| Gi3_27030545_x14.....cCucguggaacacggggugccgaacu.....     | 1 |
| Gi2_10315181_x14.....cguggaacacAggggugccgaacu.....       | 1 |
| Gi3_27023657_x14.....Gucggagacgucguggaacacggggugc.....   | 1 |
| Gi2_10302175_x14.....ggaacacggggAgccgaac.....            | 1 |
| Gi3_27009727_x14.....aucggagacgucguggaacCcgggg.....      | 1 |
| Gi5_8367521_x14.....cguggaacUcggggugccgaacu.....         | 1 |
| Gi2_10297919_x14.....gucgugggNacacggggugccgaac.....      | 1 |
| Gi5_8358253_x14.....cguggaacacggggugccUaacu.....         | 1 |
| Gi2_10312227_x14.....ucguggaacacggggugccAaacu.....       | 1 |
| Gi3_26997953_x14.....cgucguggaacacggAgugccgaacu.....     | 1 |
| Gi2_10299431_x14.....guggaacacggggGgccgaa.....           | 1 |
| Gi5_8366541_x14.....cgucguggaacacggggugccGacu.....       | 1 |
| Gi3_27003077_x14.....gugAgaacacggggugccgaa.....          | 1 |
| Gi3_26999073_x14.....acgucgugNgaacacggggugcc.....        | 1 |
| Gi2_10297961_x14.....cUgggaacacggggugcc.....             | 1 |
| Gi3_26996539_x14.....aucggagacgucguggaCcac.....          | 1 |
| Gi3_27016783_x14.....gaucggagacgucguggaGcacggg.....      | 1 |
| Gi5_8372323_x14.....aacacgggCugccgaacu.....              | 1 |
| Gi5_8362537_x14.....acgucguggaacacggggugccgaGcu.....     | 1 |
| Gi3_27016013_x14.....gUgaacacggggugccgaacuu.....         | 1 |
| Gi1_3882148_x14.....uggAaacacggggugccgaacu.....          | 1 |
| Gi2_10300131_x14.....aacacgAggugccgaacu.....             | 1 |
| Gi3_27017525_x14.....cAugggaacacggggugccga.....          | 1 |
| Gi3_27022593_x14.....gGcguggaacacggggugc.....            | 1 |
| Gi2_10305143_x14.....cguggaacacgAggugccgaac.....         | 1 |
| Gi1_3877444_x14.....gucguggaacacggggGgccgaacu.....       | 1 |
| Gi3_27023825_x14.....gaucggagacgucgugggGcacggggu.....    | 1 |
| Gi1_3875064_x14.....uggaacacNggggugccgaac.....           | 1 |
| Gi3_27006311_x14.....gacgucguggaacacgggAugccgaac.....    | 1 |
| Gi1_3873468_x14.....guggaacacggggugccgaaUu.....          | 1 |
| Gi2_10306417_x14.....ggagacguNguggaacacggggugcc.....     | 1 |
| Gi5_8364035_x14.....cUucguggaacacggggugccga.....         | 1 |
| Gi2_10310043_x14.....cguggaGcacggggugccga.....           | 1 |
| Gi3_27000347_x14.....Agggaacacggggugccga.....            | 1 |
| Gi5_8360171_x14.....cguggaacacggggugccgaUcu.....         | 1 |
| Gi2_10298927_x14.....cgucguggaacacggggugcUgaacu.....     | 1 |
| Gi1_3878494_x14.....ggagacgucCgggaacacggggugccgaacu..... | 1 |
| Gi1_3877024_x14.....ggGacacggggugccgaacu.....            | 1 |
| Gi3_27013899_x14.....cgucguggaacacggggAgccgaac.....      | 1 |
| Gi3_27032477_x14.....cgAcguggaacacggggugccgaac.....      | 1 |
| Gi3_27006283_x14.....aucggagacgucguggaacacggggAgcc.....  | 1 |
| Gi3_27033695_x14.....Uucggagacgucguggaacacggggg.....     | 1 |
| Gi1_5563275_x14.....aucggagacgucguggaGcacggggugc.....    | 1 |
| Gi2_10301293_x14.....gGgacgucguggaacacggggugccgaac.....  | 1 |

Gi2\_10309987\_x14.....gugggaacacggggugcA..... 1  
 Gi1\_3875750\_x14.....Acgugggaacacggggugccgaacu..... 1  
 Gi2\_10301741\_x14.....ugggGacacggggugccgaac..... 1  
 Gi2\_10307565\_x14.....gugggaacacggggugccgG..... 1  
 Gi3\_27008355\_x14.....gggGacacggggugccgaa..... 1  
 Gi5\_8362285\_x14.....ugggaacacggggugcGgaacu..... 1  
 Gi3\_27015467\_x14.....cUucgugggaacacggggg..... 1  
 Gi3\_27026667\_x14.....gugggaacacggcGugccgaac..... 1  
 Gi5\_8359023\_x14.....agacgucgugggGacacggggugccgaacu..... 1  
 Gi3\_27002013\_x14.....cgucgugggUacacggggugcc..... 1  
 Gi2\_10296155\_x14...cUaucggagacgucgugggaacacg..... 1  
 Gi3\_27058593\_x13.....gugggaacacggggUaccgaa..... 1  
 Gi2\_10328512\_x13.....gggaacacggggGgccgaac..... 1  
 Gi2\_10321050\_x13...Uucggagacgucgugggaacacgggg..... 1  
 Gi2\_10331086\_x13.....gUagacgucgugggaacac..... 1  
 Gi3\_27047608\_x13.....gugggaCcacggggugccga..... 1  
 Gi1\_3888257\_x13.....ucgugggaNcacggggugcc..... 1  
 Gi5\_8375678\_x13.....ggaacacgAggugccgaacu..... 1  
 Gi2\_10329318\_x13.....gugggaacacCgggugccgaacu..... 1  
 Gi1\_3887724\_x13.....cgugggaacacggggugccgaacAu..... 1  
 Gi2\_10336364\_x13.....gGgggaacacggggugccgaacuu..... 1  
 Gl1\_5583456\_x13.....ugggaacacggggCgccgaacu..... 1  
 Gi3\_27040796\_x13.....cgucgugggaacacggggugUcgaacu..... 1  
 Gi3\_27063962\_x13.....gugAgaacacggggugccg..... 1  
 Gi1\_3888842\_x13.....gggaacacggggUaccgaacu..... 1  
 Gi2\_10320712\_x13.....Uacgucgugggaacacgg..... 1  
 Gi2\_10324950\_x13.....ugggGacacggggugccga..... 1  
 Gi3\_27038872\_x13.....gggaacacgggCugccgaac..... 1  
 Gi2\_10318853\_x13.....cgugAgaacacggggugccgaac..... 1  
 Gi2\_10336780\_x13.....cgucgugggaacGcggggugcc..... 1  
 Gi3\_27055356\_x13.....ugggaaUacggggugccga..... 1  
 Gi3\_27067706\_x13.....ggUaacacggggugccgaa..... 1  
 Gi3\_27069578\_x13.....aacacggggugccgaUcu..... 1  
 Gi2\_10337352\_x13.....cggagacgucgugggaacacggggGgcc..... 1  
 Gi2\_10340979\_x13.....ggagacgucgugggaacacggggGgcc..... 1  
 Gi3\_27059893\_x13.....ugggaacacggggugccgCa..... 1  
 Gl1\_5579179\_x13.....gCaacacggggugccgaacu..... 1  
 Gi5\_8373663\_x13.....Agaacacggggugccgaac..... 1  
 Gi2\_10334284\_x13.....gaacacggggAgccgaacu..... 1  
 Gi3\_27050676\_x13.....ggaacGcggggugccgaa..... 1  
 Gi3\_27066016\_x13.....ucgugggaacacggggAgccgaac..... 1  
 Gi3\_27052431\_x13...gGucggagacgucgugggaacacgg..... 1  
 Gi2\_10324105\_x13.....gugggaCcacggggugccgaac..... 1  
 Gi2\_10336026\_x13.....gugggaacacggggugUc..... 1  
 Gi3\_27057670\_x13...Uaucggagacgucguggga..... 1  
 Gi3\_27077404\_x13...aucggagacgucgugggaaUacg..... 1  
 Gi3\_27074700\_x13.....gucgugggaaUacggggugccgaacu..... 1

G1a\_5574590\_x13...Uaucggagacgucguggg..... 1  
 Gi3\_27043461\_x13.....aacacggggugccgaGu..... 1  
 Gi5\_8378239\_x13.....gugggaacacAgggugccgaac..... 1  
 Gi1\_3889453\_x13.....cgucgugggGacacggggugccgaacu..... 1  
 Gi3\_27043396\_x13.....aaNacggggugccgaacu..... 1  
 G1a\_5572432\_x13.....gagacgucgugggaacacggggugccgaacu..... 0  
 Gi5\_8387677\_x13.ugcgauccgagacgucgugggaacacggg..... 0  
 Gi3\_27083124\_x13.....aucggGgacgucgugggaacacggggugcc..... 1  
 Gi3\_27052041\_x13.....aucggagacgucAugggaacacggg..... 1  
 Gi3\_27056357\_x13.....gggNacacggggugccgaac..... 1  
 Gi2\_10319269\_x13.....gugggaacacggggugccAa..... 1  
 G1a\_5578022\_x13.....Uucgugggaacacggggugcc..... 1  
 G1a\_5572367\_x13.....gggaacacggggugccgaCcu..... 1  
 Gi2\_10324014\_x13.....Cugggaacacggggugccgaa..... 1  
 Gi1\_3889180\_x13.....gaacacggggugccgaacAu..... 1  
 Gi3\_27076247\_x13.....Gcgucgugggaacacggggugcc..... 1  
 Gi3\_27061154\_x13.....cgucgugggaacaUggggugccgaacu..... 1  
 Gi2\_10332815\_x13cugcgauccgGgacgucgugggaacac..... 1  
 Gi3\_27074661\_x13.....gugggaacacggAgugccgaa..... 1  
 Gi1\_3888946\_x13...Uaucggagacgucgugggaacac..... 1  
 Gi2\_10332724\_x13.....gggaacacggggugUcgaac..... 1  
 G1a\_5581116\_x13.....gacgucgugggaacacggggugccgaac..... 0  
 Gi3\_27052184\_x13.....gggaacacgggCugccgaacu..... 1  
 Gi2\_10327797\_x13.....gugggaacacggUgugcc..... 1  
 Gi2\_10323767\_x13.....gUgacgucgugggaacacggggg..... 1  
 Gi1\_3890636\_x13.....aacaGggggugccgaacu..... 1  
 Gi1\_3883083\_x13.....gugggaacacggggugccgUacu..... 1  
 Gi2\_10341174\_x13.....cgugggaacacggggugcUgaac..... 1  
 Gi2\_10319945\_x13...aCcgagacgucgugggaacac..... 1  
 Gi3\_27061765\_x13.....ugggaaAacggggugccgaacu..... 1  
 Gi2\_10342331\_x13.....cgucgugggaacacggggGgc..... 1  
 Gi3\_27067251\_x13.....cgugggaacacgggguCccgaacu..... 1  
 Gi1\_3886372\_x13.....Agugggaacacggggugccgaacu..... 1  
 Gi3\_27064144\_x13.....ucgugggaacaUggggugccgaac..... 1  
 Gi2\_10321739\_x13...aucgUgacgucgugggaacacggggg..... 1  
 Gi2\_10337222\_x13.....gaacacgggAugccgaacu..... 1  
 Gi3\_27080758\_x13...cggagacgNcgugggaacacggggg..... 1  
 Gi1\_3892222\_x13.....gggaacacggggugccAaacu..... 1  
 Gi2\_10336520\_x13.....gugggaacacggggugcUga..... 1  
 Gi1\_3883343\_x13.....gucgugggaacacggggugccgaCcu..... 1  
 Gi5\_8373156\_x13.....cguUggaacacggggugccgaacu..... 1  
 Gi3\_27083969\_x13...Uucggagacgucgugggaacacg..... 1  
 Gi3\_27062051\_x13...gaucggagacgucgCgggaacacggg..... 1  
 Gi5\_8375054\_x13.....acgucgugggaacGcggggugccgaacu..... 1  
 Gi2\_10323715\_x13.....gugggGacacggggugccgaa..... 1  
 Gi3\_27063975\_x13.....gaacacgCggugccgaacu..... 1  
 Gi2\_10337521\_x13.....ugggaacacgUggugccgaacu..... 1

Gi3\_27065964\_x13.....cgucgugggaacacggggugccgaGc..... 1  
 Gi1\_3884266\_x13.....cggagacgucgugggaacacggggugccgaac..... 0  
 Gi5\_8384635\_x13.....ucgugggaCcacggggugccgaacu..... 1  
 Gi3\_27037988\_x13.....cgucgugggGcacggggugccg..... 1  
 Gi2\_10322467\_x13.....aUgucgugggaacacggggugcc..... 1  
 Gi1\_3889622\_x13.....cgugggaacacgggAugccgaacu..... 1  
 Gi2\_10326341\_x13.....guggCaacacggggugccgaac..... 1  
 Gi2\_10338496\_x13....gGucggagacgucgugggaacac..... 1  
 Gi5\_8388457\_x13....Uaucggagacgucgugggaacacg..... 1  
 Gi5\_8386247\_x13.....guggUaacacggggugccgaac..... 1  
 Gi5\_8380787\_x13.....cgNgggaacacggggugccgaacu..... 1  
 Gi5\_8383608\_x13.....acgucgCgggaacacggggugccgaacu..... 1  
 Gi5\_8390875\_x13.....aUgucgugggaacacggggugccgaacu..... 1  
 Gi3\_27074219\_x13.....aUacgucgugggaacacggggugccga..... 1  
 Gi5\_8387339\_x13.....cgucgugggaacacggggugccgaCcu..... 1  
 Gi3\_27053900\_x13....aucggagacgucgugAgaacacg..... 1  
 Gi3\_27048817\_x13.....acgucgugggaacacggggugccgaaAu..... 1  
 G1a\_5576917\_x13.....cgugggaacacggggCgccgaacu..... 1  
 G1a\_5574135\_x13.....gugggaUcacggggugccgaacu..... 1  
 Gi5\_8389458\_x13.....gucgugggaaAacggggugccgaacu..... 1  
 Gi2\_10329461\_x13....aucggagacgucgugggaacacggggugccgaacu..... 0  
 Gi3\_27045502\_x13.....Agucgugggaacacggggugccgaacu..... 1  
 Gi1\_3889206\_x13.....gGgggaacacggggugccgaacuu..... 1  
 G1a\_5579894\_x13.....Uggaacacggggugccgaa..... 1  
 Gi3\_27044813\_x13.....gugggaacacggggugcAga..... 1  
 Gi5\_8377017\_x13.....cgugggaacacggUgugccgaacu..... 1  
 Gi2\_10340134\_x13....ggagacgucgugggaacacggggCgcc..... 1  
 Gi3\_27054368\_x13....aGcggagacgucguggga..... 1  
 Gi2\_10340576\_x13.....guAggaacacggggugccg..... 1  
 Gi1\_3885969\_x13....cUgagacgucgugggaacacggggugc..... 1  
 Gi3\_27047751\_x13.....Ugucgugggaacacggggugccgaac..... 1  
 Gi5\_8380592\_x13.....aacacggggugccgaUcu..... 1  
 Gi2\_10340264\_x13.....cgugggaacGcggggugcc..... 1  
 Gi3\_27046724\_x13.....agGcugucgugggaacacggggugccgaacu..... 1  
 Gi2\_10331502\_x13.....guggUaacacggggugccgaa..... 1  
 Gi3\_27040822\_x13.....gUagacgucgugggaacacggggugccg..... 1  
 Gi3\_27069773\_x13.....gucgugggaacacAgggugccgaac..... 1  
 Gi1\_3892820\_x13.....gaacacggggUAccgaacu..... 1  
 Gi2\_10330462\_x13.....gugggaacacggggugAc..... 1  
 Gi5\_8386585\_x13.....cgugggaacacggggugccgaCc..... 1  
 Gi1\_3884799\_x13.....cgucgugggaacacggggugcU..... 1  
 Gi2\_10323975\_x13....aucggagacgucgugggaCcacggggug..... 1  
 Gi5\_8385727\_x13.....aacCcggggugccgaacu..... 1  
 Gi3\_27067849\_x13....aucggagacguUgugggaacacg..... 1  
 Gi1\_3887698\_x13.....uGgugggaacacggggugcc..... 1  
 Gi3\_27076377\_x13....gaucggagacgucgugggaacGcggggu..... 1  
 Gi5\_8378512\_x13.....ggaacacggggugAcgaacu..... 1

Gi1\_3884045\_x13.....gUagacgucgugggaacacggggugcc..... 1  
 Gi3\_27068837\_x13.....ugggaacacggggugcAga..... 1  
 Gi2\_10320426\_x13.....ggaacacggggugccAaac..... 1  
 Gi3\_27076078\_x13.....auUggagacgucgugggaacac..... 1  
 Gi3\_27048557\_x13.....cgugggUacacggggugc..... 1  
 Gi1\_3889765\_x13.....Agaacacggggugccgaac..... 1  
 Gi5\_8381749\_x13.....ucggagacgucgugggaacacggggugccgaacu..... 0  
 Gi3\_27065574\_x13.....gggaacacggggGgccgaa..... 1  
 Gi2\_10336377\_x13.....cgGcgugggaacacggggugcc..... 1  
 Gi3\_27083475\_x13.....gucgugggaacacggggugUcgaacu..... 1  
 Gi3\_27058710\_x13.....Cgggaacacggggugccg..... 1  
 Gi5\_8383738\_x13.....gucgGgggaacacggggugccgaacu..... 1  
 Gi3\_27039054\_x13.....aucggagacgucgugggaacacC..... 1  
 Gi2\_10339484\_x13.uUcgaucggagacgucgugggaaca..... 1  
 Gi2\_10336429\_x13.....ggagacgucgugggGacacggggugcc..... 1  
 Gi1\_3892859\_x13.....cgAcgugggaacacggggugccgaacu..... 1  
 Gi1\_5574616\_x13.uUcgaucggagacgucg..... 1  
 Gi2\_10328096\_x13.....aucggagacgucgugggaacacggggCg..... 1  
 Gi3\_27048648\_x13.....aacacgggUugccgaacu..... 1  
 Gi3\_27050845\_x13.....cgugggaacacgggUugccgaacu..... 1  
 Gi3\_27044189\_x13.....gucgugAgaacacggggugccgaac..... 1  
 Gi2\_10336793\_x13.....ggagacgucgugggaacacggggugccga..... 0  
 Gi3\_27128397\_x12.....cgucgugggaacacggggugccgaaAu..... 1  
 Gi1\_3894866\_x12.....gGcgugggaacacggggugcc..... 1  
 Gi2\_10356346\_x12.....gugggaacacggggugcAgaac..... 1  
 Gi3\_27132249\_x12.....ucgugggaaAacggggugccgaacu..... 1  
 Gi5\_8399046\_x12.....gugggGacacggggugccgaac..... 1  
 Gi5\_8408106\_x12.....cgugggaacacgggCugccgaacu..... 1  
 Gi2\_10350538\_x12.....aacaGggggugccgaacu..... 1  
 Gi3\_27090753\_x12.....gaacacggggugcGgaacu..... 1  
 Gi2\_10357774\_x12.....aucggagacgucgugggaacacggggAgcc..... 1  
 Gi3\_27111897\_x12.....ggaacacggggugAcgaacu..... 1  
 Gi2\_10364806\_x12.....aucggagacgucgugggaGca..... 1  
 Gi1\_3896738\_x12.....gaacacggggAgccgaacu..... 1  
 Gi3\_27125901\_x12.....cgugggaacacggggugccA..... 1  
 Gi3\_27130953\_x12.....aAcggagacgucgugggaacacg..... 1  
 Gi5\_8402454\_x12.....gugggaUcacggggugccgaacu..... 1  
 Gi1\_3901958\_x12.....gaacacgggAugccgaacu..... 1  
 Gi3\_27115485\_x12.....cgugUgaacacggggugccgaa..... 1  
 Gi3\_27125493\_x12...gaucggagNcgucgugggaacacgggg..... 1  
 Gi5\_8406534\_x12.....ugggaacacggggugccgaUcu..... 1  
 Gi3\_27111909\_x12.....gucgugggCacacggggugccgaacu..... 1  
 Gi1\_3897818\_x12.....acgucgCgggaacacggggugccgaac..... 1  
 Gi2\_10365538\_x12.....ggagacgucgugggaacGcgggugcc..... 1  
 Gi3\_27122781\_x12.....gacgucgugggaacacggggugccgCacu..... 1  
 Gi1\_5589691\_x12.....gUgaacacggggugccgaa..... 1  
 Gi2\_10356010\_x12.....gagacgucgugggaacacggggugccga..... 0

Gi5\_8396226\_x12.....uggaacacAgggugccgaac..... 1  
 Gi3\_27111585\_x12.....cguggaacacgUggugcc..... 1  
 Gi3\_27113721\_x12....aucggagacgCcguggaacacgg..... 1  
 Gi3\_27101145\_x12.....cguggaacacgUggugccga..... 1  
 Gi2\_10368946\_x12.....gggaacacgggAugccgaacu..... 1  
 Gi3\_27105885\_x12.....gucgugggUaacggggugccgaacu..... 1  
 Gi2\_10346302\_x12.....cgucgugggaacacggggugccgG..... 1  
 G1a\_5592811\_x12.....ugUgaacacggggugccgaacu..... 1  
 G1a\_5591923\_x12.....ggaacGcggggugccgaacu..... 1  
 Gi3\_27084489\_x12.....gucgugggaacacggggAgccgaacu..... 1  
 Gi2\_10353310\_x12.....gucgugggaacacggggCgcc..... 1  
 Gi1\_3903314\_x12.....ucgugggaNcacggggugccgaac..... 1  
 Gi3\_27108957\_x12.....cAuggaacacggggugccgaa..... 1  
 Gi2\_10359622\_x12.....gacgucgugggaacacggggCgcc..... 1  
 Gi5\_8397978\_x12.....Agucgugggaacacggggugccgaacu..... 1  
 Gi3\_27099693\_x12....aucggagacgucguAggaacacgggg..... 1  
 G1a\_5591767\_x12....aucggagacgucgugggaacGcggggugc..... 1  
 Gi2\_10360018\_x12.....gugCgaacacggggugccgaacu..... 1  
 Gi2\_10351978\_x12.....gugggaacacAgggugccga..... 1  
 Gi2\_10366342\_x12.....Ggugggaacacggggugccg..... 1  
 Gi3\_27130677\_x12.....acgucgugggaacaUggggugccgaacu..... 1  
 Gi3\_27088461\_x12.....gucgugggNcacggggugcc..... 1  
 Gi3\_27128193\_x12....aucggagacgucgCgggaacacggggugcc..... 1  
 Gi5\_8403450\_x12.....gggaacacggggugccgaCc..... 1  
 G1a\_5600383\_x12.....gacgucgugggaacacggg..... 0  
 Gi2\_10356790\_x12.....gugggaacacggggAgcc..... 1  
 Gi2\_10357450\_x12.....cgucguggNaacacggggugccga..... 1  
 Gi5\_8402286\_x12.....ucgugggaaUacggggugccgaacu..... 1  
 Gi2\_10352962\_x12.....gugggaacacgggguAccgaa..... 1  
 Gi3\_27111093\_x12.....cgucgCgggaacacggggugcc..... 1  
 Gi2\_10368346\_x12.....gCgaacacggggugccgaac..... 1  
 Gi3\_27104001\_x12.....acgucgugggaacacggggGgccgaac..... 1  
 Gi5\_8406426\_x12.....ugUgaacacggggugccgaac..... 1  
 Gi2\_10363066\_x12.....Gcgucgugggaacacggggugc..... 1  
 Gi2\_10353946\_x12.....gugggaacCcgggugccga..... 1  
 Gi2\_10349266\_x12....aGcgagacgucguggga..... 1  
 Gi3\_27114477\_x12....aucggagacgucgugggaacaUggg..... 1  
 G1a\_5593111\_x12.....agacgucgugggaacacggggugccgaac..... 0  
 Gi2\_10351690\_x12....gGucggagacgucguggga..... 1  
 Gi2\_10363522\_x12.....cgucgugggaacacggggGgccg..... 1  
 Gi5\_8405958\_x12.....ggaacacgggguAccgaacu..... 1  
 Gi2\_10366858\_x12.....gggaacacggggugccAaac..... 1  
 Gi3\_27088365\_x12.....gugggaacacgggUugccgaacu..... 1  
 Gi3\_27095721\_x12.....cgucgugggaacacggggCgccg..... 1  
 Gi2\_10361062\_x12.....ucguggAaacacggggugccgaacu..... 1  
 Gi2\_10368670\_x12.....cAgagacgucgugggaacacggggugcc..... 1  
 Gi5\_8406594\_x12.ugcgaucggagGcgucgugg..... 1

Gi5\_8395194\_x12.....ucgugggaacacggggugccgaUu..... 1  
Gi2\_10349122\_x12.....gAgggaacacggggugccga..... 1  
Gi3\_27092625\_x12.....cgucgugggaacacAgggugcc..... 1  
Gi5\_8406702\_x12.....gaacacggggugccgUacu..... 1  
Gi1\_3903482\_x12.....cgGcgugggaacacggggugccgaacu..... 1  
Gi2\_10356094\_x12.....gaucggagacgucgugggCacacggg..... 1  
Gi5\_8393562\_x12.....acgucgugggaacacggggGgccgaacu..... 1  
Gi5\_8394270\_x12.....gugggaacNcggggugccga..... 1  
Gi5\_8406462\_x12.....Uugggaacacggggugccgaacuuu..... 1  
Gi3\_27090825\_x12.....aucgUagacgucguggggaacacggggugcc..... 1  
Gi5\_8407974\_x12.....uUggaacacggggugccgaacuuu..... 1  
G1a\_5597455\_x12.....cgugggGacacggggugccgaacu..... 1  
Gi2\_10348558\_x12.....ucgugggaacacggggugccgCac..... 1  
Gi2\_10343602\_x12.....gGcgucgugggaacacggggugcc..... 1  
G1a\_5598271\_x12.....aGcggagacgucgugggaacacggggg..... 1  
Gi3\_27115845\_x12.....gGcgucgugggaacacggg..... 1  
Gi5\_8392950\_x12.....ucgugggaacacgggAugccgaacu..... 1  
Gi2\_10353058\_x12.....gugggUacacggggugccgaa..... 1  
G1a\_5596123\_x12.....ugggaacGcggggugccgaacu..... 1  
Gi3\_27104253\_x12.....gugggaacacgAgggugccg..... 1  
Gi3\_27119025\_x12.....cgucgugggaacacggggCgccga..... 1  
Gi2\_10353982\_x12.....gucgugAgaacacggggugccgaacu..... 1  
Gi3\_27131781\_x12.....gggUacacggggugccgaac..... 1  
G1a\_5596159\_x12.....ggaacacggggugccgaGcu..... 1  
Gi3\_27090801\_x12.....aucggagacgucgugggaacacggAgu..... 1  
Gi5\_8401134\_x12.....acgucgugggaacacggggugccgCacu..... 1  
Gi2\_10360234\_x12.....ugggaacacggggugccAaac..... 1  
Gi3\_27086025\_x12.....cgucUugggaacacggggugccg..... 1  
G1a\_5594791\_x12.....cgugggaacacggggugccgUacu..... 1  
Gi1\_3900458\_x12.....ucgugggaacacggggugccAaacu..... 1  
Gi3\_27088161\_x12.....gucgugggaacacggggugccAaac..... 1  
Gi2\_10362994\_x12.....auUggagacgucgugggaacacggggug..... 1  
Gi3\_27094389\_x12.....gaacacAgggugccgaac..... 1  
Gi1\_3898730\_x12.....ugggaacacgggUugccgaacu..... 1  
Gi1\_3901538\_x12.....gucgugggaacacggggCgccgaacu..... 1  
Gi3\_27095265\_x12.....cgugggaacacggggugccgGa..... 1  
Gi5\_8399490\_x12.....gggaacacggggugccgaGc..... 1  
Gi3\_27106053\_x12.....aCcgagacgucgugggaacacggggugcc..... 1  
Gi3\_27112029\_x12.....gugggaaUacggggugccgaa..... 1  
Gi3\_27089421\_x12.....Uagacgucgugggaacacggggugcc..... 1  
Gi3\_27118185\_x12.....gggaacacggggAgccgaac..... 1  
Gi5\_8400954\_x12.....gucguAggaacacggggugccgaacu..... 1  
Gi1\_3894578\_x12.....gaacacgAgggugccgaacu..... 1  
Gi3\_27096597\_x12.....Uucgugggaacacggggugccg..... 1  
Gi3\_27089613\_x12.....acAucgugggaacacggggugccgaacu..... 1  
Gi3\_27103689\_x12.....Agucgugggaacacggggugccgaac..... 1  
Gi5\_8404086\_x12.....Gcggagacgucgugggaacacg..... 1

Gi2\_10365430\_x12.....ucguUggaacacggggugccgaac..... 1  
Gi3\_27131097\_x12.....aUgucgugggaacacggggugccgaac..... 1  
G1a\_5596075\_x12.....Uaacacggggugccgaac..... 1  
Gi1\_3901862\_x12.....gugggaacacggggugcAgaacu..... 1  
Gi5\_8394318\_x12.....gaacacggggugccgaUcu..... 1  
Gi2\_10359022\_x12.....gggaacacAgggugccgaac..... 1  
Gi5\_8403738\_x12.....gggaacacggggugccgaaUu..... 1  
Gi3\_27093693\_x12.....uGgugggaacacggggugc..... 1  
Gi3\_27108285\_x12.....gucgugggaaUacggggugcc..... 1  
Gi2\_10350262\_x12.....aucggagacgucgugggGacacg..... 1  
Gi2\_10362814\_x12.....cgugggaacacggggugUcgaac..... 1  
Gi3\_27104313\_x12.....ugggaacacggggugccA..... 1  
Gi3\_27129081\_x12.....cgugggaacacggggGcg..... 1  
Gi2\_10356034\_x12.....gugggaacacggAgugccg..... 1  
Gi3\_27125529\_x12.....acgucgugggaacacggggAgccgaacu..... 1  
Gi5\_8403654\_x12.....ugggGacacggggugccgaac..... 1  
Gi1\_3902078\_x12.....gugggaacacggggugUcgaacu..... 1  
Gi3\_27125169\_x12.....gugggaacacggggugcGgaac..... 1  
Gi2\_10360870\_x12.....gUgacgucgugggaacac..... 1  
Gi1\_3895202\_x12.....acgucgugggGacacggggugccgaacu..... 1  
Gi3\_27126465\_x12.....gugggaacacgCggugccgaac..... 1  
Gi3\_27114297\_x12.....Aacgucgugggaacacggggugccgaac..... 1  
Gi2\_10363750\_x12.....aucggagacgucgugggaGcacggggugcc..... 1  
Gi3\_27103737\_x12.....gaacacggggugccgaaGu..... 1  
Gi2\_10366078\_x12.....gugggaacacggggugUcga..... 1  
Gi3\_27114021\_x12.....gGucggagacgucgugggaacacgggg..... 1  
Gi2\_10386632\_x11.....agUcgcgucgugggaacacggggugcc..... 1  
G1a\_5607071\_x11.....Uaucggagacgucgugggaa..... 1  
G1a\_5611350\_x11.....Gacacggggugccgaacu..... 1  
Gi3\_27141566\_x11.....guggAaacacggggugccgaa..... 1  
Gi2\_10387094\_x11.....cUucgugggaacacgggg..... 1  
Gi2\_10397731\_x11.....gugggaacacgCggugccgaacu..... 1  
Gi1\_3909028\_x11.....aAcggagacgucgugggaacacggg..... 1  
Gi5\_8429143\_x11.....gggaacacggggCgccgaac..... 1  
Gi3\_27182255\_x11.....gugggaacacggggAgccgaa..... 1  
Gi3\_27164149\_x11.....Aggaacacggggugccga..... 1  
Gi2\_10392880\_x11.....aucggagGcgucgugggaaca..... 1  
Gi2\_10382980\_x11.....acgCcgugggaacacggggugccgaacu..... 1  
Gi2\_10391967\_x11.....cgugggaacacUgggugccgaacu..... 1  
Gi5\_8412269\_x11.....gugggaacacggCgugccgaacu..... 1  
Gi5\_8410091\_x11.....Uacgucgugggaacacggggugccg..... 1  
Gi2\_10379108\_x11.....aGcggagacgucgugggaa..... 1  
Gi5\_8412181\_x11.....ggaacacggggAgccgaacu..... 1  
Gi2\_10376017\_x11.....ucgAgggaacacggggugccgaacu..... 1  
Gi2\_10377425\_x11.....cgugggaaNacggggugccgaa..... 1  
Gi3\_27168285\_x11.....gggaacCcgggugccgaac..... 1  
Gi1\_3905112\_x11.....aacacggAgugccgaacu..... 1



Gi1a\_5608699\_x11...gaucggagacgucgugggaaacacggggug..... 0  
 Gi3\_27145592\_x11.....ggaacacggggugccgaG..... 1  
 Gi2\_10385312\_x11.....Ugagacgucgugggaaacacggggugccg..... 1  
 Gi2\_10374851\_x11.....gugggaaacCcggggugccg..... 1  
 Gi5\_8418187\_x11.....gaacaAgggggugccgaacu..... 1  
 Gi5\_8430991\_x11.....ucgugggaacacggAgugccgaacu..... 1  
 Gi3\_27174302\_x11.....ggUgacgucgugggaaacacg..... 1  
 Gi2\_10381770\_x11.....gugggaacacggggGgccga..... 1  
 Gi3\_27157043\_x11.....Ugugggaacacggggugccgaa..... 1  
 Gi3\_27148815\_x11.....aGgucgugggaaacacggggugcc..... 1  
 Gi1\_3908148\_x11.....Uacgucgugggaaacacggggugcc..... 1  
 Gi3\_27169638\_x11.....aUacgucgugggaaacacggg..... 1  
 Gi3\_27176392\_x11.....cgugCgaacacggggugccgaac..... 1  
 Gi2\_10384806\_x11.....ggaacacggggguAccgaac..... 1  
 Gi3\_27136176\_x11.....Gucggagacgucguggga..... 1  
 Gi2\_10372035\_x11.....cggagGcgucgugggaaacacggggugcc..... 1  
 Gi3\_27176194\_x11.....ggaacacgUggugccgaacu..... 1  
 Gi3\_27138882\_x11.....cgucgugggaaacCcggggugccga..... 1  
 Gi3\_27144448\_x11.....guNggaacacggggugccgaac..... 1  
 Gi2\_10395190\_x11.....gAcgugggaacacggggugccgaacu..... 1  
 Gi2\_10380835\_x11.....aCcgagacgucgugggaaacacgggggu..... 1  
 Gi5\_8421916\_x11.uUcgauccgagacgucguggga..... 1  
 Gi2\_10380538\_x11.....agUcgucgugggaaacacggggugccgaacu..... 1  
 Gi3\_27136165\_x11.....acgucgugggaaacacgAggugccgaacu..... 1  
 Gi2\_10393243\_x11.....gggaacacggggugccgGac..... 1  
 Gi2\_10387039\_x11.....gUagacgucgugggaaacacggggug..... 1  
 Gi3\_27181969\_x11...cUaucggagacgucgugggaaacacgg..... 1  
 Gi5\_8413083\_x11.....gugggaacacgAggugccgaac..... 1  
 Gi3\_27153215\_x11.....acgucguggggaCcacggggugccgaacu..... 1  
 Gi5\_8426107\_x11.....aacacUgggugccgaacu..... 1  
 Gi2\_10388601\_x11.....cgugggaacacggUgugccgaacu..... 1  
 Gi3\_27158462\_x11.....gucgAgggaacacggggugccgaacu..... 1  
 Gi2\_10385708\_x11.....aucggagacgucgugggaaacacggggA..... 1  
 Gi2\_10374290\_x11.....ucgugggaacCcggggugccgaac..... 1  
 Gi2\_10382364\_x11.....cgugggaacacggggAgccgaac..... 1  
 Gi4\_517574\_x11.....Ggggaacacggggugccgaacu..... 1  
 Gi3\_27152181\_x11.....aucggGgacgucgugggaaacac..... 1  
 Gi1a\_5614023\_x11...Gucggagacgucgugggaaacacggg..... 1  
 Gi2\_10385224\_x11.....ugggaacacggggugccgaaAu..... 1  
 Gi3\_27142369\_x11...Uaucggagacgucgugggaaacacggggug..... 1  
 Gi3\_27152852\_x11.....Ggucgugggaaacacgggg..... 1  
 Gi5\_8420948\_x11...Uaucggagacgucgugggaaacacggg..... 1  
 Gi2\_10381220\_x11.....gugggaaUacggggugcc..... 1  
 Gi3\_27169022\_x11.....ugggaacacggCgugccgaacu..... 1  
 Gi2\_10390108\_x11...gGucggagacgucgugggaaacacg..... 1  
 Gi2\_10378360\_x11...aucggagacgucgugggGacacggg..... 1  
 Gi5\_8417758\_x11.....gGcgucgugggaaacacggggugccgaacu..... 1

Gi1\_3904551\_x11.....gCcgugggaacacggggugccgaacu..... 1  
 Gi3\_27179296\_x11.....ucgugggaCcacggggugccgaac..... 1  
 Gi1\_3912856\_x11.....ugggaacacgAggugccgaacu..... 1  
 Gi2\_10376908\_x11.....aucggagacgucgugggaaacGc..... 1  
 G1a\_5615453\_x11.....gugggaaUacggggugccgaacu..... 1  
 Gi1\_3913857\_x11.....ucgugggaacacggggugcUgaacu..... 1  
 Gi3\_27142083\_x11.....aucggagCcgucgugggaaacacg..... 1  
 G1a\_5601219\_x11.....ugggaacacggggugccgaGcu..... 1  
 Gi3\_27164303\_x11.....ugggaacacgUggugccgaacu..... 1  
 Gi3\_27165590\_x11.....Ucgucgugggaacacggggugccgaacu..... 1  
 Gi5\_8421168\_x11.....gaaNacggggugccgaacu..... 1  
 Gi2\_10390438\_x11.....gucgGgggaacacggggugccgaacu..... 1  
 G1a\_5604398\_x11.....gugggaacacggggAgccgaacu..... 1  
 Gi3\_27176458\_x11.....aucggagacAucgugggaacacggggg..... 1  
 Gi2\_10384542\_x11.....cggagacgucgugggaaacacggggCgcc..... 1  
 Gi3\_27176161\_x11.....aucggagacgucgugggUacacggg..... 1  
 Gi3\_27166184\_x11.....aucggagaUgucgugggaaacacgggg..... 1  
 Gi2\_10387501\_x11.....gggaacacggggugccgaUu..... 1  
 Gi3\_27185687\_x11.....cggagacgucgugggaaacGcggggugcc..... 1  
 Gi2\_10379306\_x11.....gugggaacacggggugcU..... 1  
 Gi5\_8430694\_x11.....ggaacCggggugccgaacu..... 1  
 Gi2\_10386720\_x11.....acgCcgugggaacacggggugcc..... 1  
 G1a\_5607126\_x11.....Ugagacgucgugggaaacacggggugcc..... 1  
 Gi2\_10371144\_x11.....cUaucggagacgucguggga..... 1  
 Gi3\_27168593\_x11.....gUagacgucgugggaaacacggggugccgaac..... 1  
 Gi1\_3905959\_x11.....ucgugggCacacggggugccgaacu..... 1  
 Gi3\_27180110\_x11.....Agaacacggggugccgaa..... 1  
 Gi5\_8410707\_x11.....gugggaacacggUgugccgaac..... 1  
 Gi3\_27156900\_x11.....aucggagacgucgugggaaacCggg..... 1  
 Gi2\_10395905\_x11.....cgugggaacacgUggugcc..... 1  
 Gi3\_27137452\_x11.....aucggagacgucgugggaaUacggg..... 1  
 Gi1\_3914990\_x11.....cgucgugggaacacggggugccga..... 0  
 Gi3\_27164622\_x11.....ucgugggaacacggggugccgaUu..... 1  
 Gi3\_27150410\_x11.....cgugggaGcacggggugcc..... 1  
 Gi3\_27159452\_x11.....Ugagacgucgugggaaacacggg..... 1  
 Gi2\_10392440\_x11.....aucggagacgucgugggCacacggggugc..... 1  
 Gi3\_27138002\_x11.....gggaaAacggggugccgaac..... 1  
 G1a\_5606928\_x11.....gggaGcacggggugccgaacu..... 1  
 Gi2\_10374059\_x11.....Ugacgucgugggaaacacggggugcc..... 1  
 Gi2\_10369681\_x11.....gCcgugggaacacggggugccgaac..... 1  
 Gi3\_27175908\_x11.....cgugggaacacggggCgcccga..... 1  
 Gi3\_27155459\_x11.....aucggagacgucgugggaaacGcggggugcc..... 1  
 Gi5\_8415525\_x11.....ugggaacacggCgugccgaacu..... 1  
 Gi3\_27184136\_x11.....uGggagacgucgugggaaacacg..... 1  
 G1a\_5616938\_x11.....ggUaacacggggugccgaacu..... 1  
 Gi5\_8421674\_x11.....gucAugggaacacggggugccgaacu..... 1  
 Gi5\_8430606\_x11.....acgCcgugggaacacggggugccgaacu..... 1

Gi3\_27144459\_x11.....gugggaUcacggggugccgaac..... 1  
 Gi3\_27177888\_x11.....gUagacgucgugggaacacggggugccgaacu..... 1  
 Gi5\_8409860\_x11.....cgugggaacacggggugccgaGc..... 1  
 Gi2\_10375918\_x11.....ugggaacacggggugccgGac..... 1  
 Gi2\_10392209\_x11.....cgNgggaacacggggugccgaacu..... 1  
 Gi2\_10390262\_x11.....gagacgucgugggaacacggggCgc..... 1  
 Gi1\_3914055\_x11.....agacgucgCgggaacacggggugccgaac..... 1  
 Gi2\_10376325\_x11.....cgaucggagacgucgAgggaacac..... 1  
 Gi2\_10372992\_x11.....cAugggaacacggggugccgaac..... 1  
 Gi4\_516705\_x11.....gCgggaacacggggugccgaacu..... 1  
 Gi2\_10369252\_x11.....ggagacgucgugggaacacAgggugc..... 1  
 Gi2\_10393419\_x11.....Cacacggggugccgaacu..... 1  
 Gi2\_10392473\_x11.....cgugggaacacggggucCccgaacu..... 1  
 Gi3\_27175314\_x11.....gugggaaAacggggugccga..... 1  
 Gi2\_10390086\_x11.....Aucgugggaacacggggugccgaac..... 1  
 Gi3\_27182244\_x11.....acgucgugggaacacggggCgcc..... 1  
 Gi2\_10376380\_x11.....cgCgugggaacacggggugccga..... 1  
 Gi3\_27162334\_x11.....cgucgugAgaacacggggugccgaacu..... 1  
 Gi3\_27178493\_x11.....cgugggaacacggggCgccg..... 1  
 Gi3\_27151433\_x11.....gggaacacggggugccUaacu..... 1  
 Gi3\_27176304\_x11.....gacgucgugggaacacggggG..... 1  
 Gi2\_10377810\_x11.....ucgugggaacacggggUaccgaacu..... 1  
 Gi2\_10385114\_x11.....aAcgggagacgucgugggaacacggggugcc..... 1  
 Gi3\_27147561\_x11.....gucgGgggaacacggggugccgaacu..... 1  
 Gi3\_27134394\_x11.....cguCggaacacggggugccgaacu..... 1  
 Gi1\_3911360\_x11.....gucgugggNacacggggugccgaacu..... 1  
 Gl1\_5602748\_x11.....cgaucggagacgucgugggaacacggggugc..... 0  
 Gi2\_10380010\_x11.....cgucgugggaacGcggggugccg..... 1  
 Gi5\_8414689\_x11.....ggaacacggggugccgaUcu..... 1  
 Gi5\_8411290\_x11.....gugggaacacggggugccgCac..... 1  
 Gi2\_10370407\_x11.....aucgUagacgucgugggaacacg..... 1  
 Gi3\_27173587\_x11.....cAucgugggaacacggggugcc..... 1  
 Gi3\_27184092\_x11.....gucgugggaacacUgggugccgaacu..... 1  
 Gi2\_10373311\_x11.....gaucggagacgucgugggGacacggggU..... 1  
 Gi2\_10385422\_x11.....Gggagacgucgugggaacacggggugc..... 1  
 Gi2\_10374092\_x11.....cgCcgugggaacacggggugc..... 1  
 Gi3\_27140367\_x11.....cCucgugggaacacggggugcc..... 1  
 Gl1\_5606609\_x11.....cgugggaacacggggugccgaGcu..... 1  
 Gi1\_3908995\_x11.....Ggggaacacggggugccgaacuu..... 1  
 Gi5\_8427185\_x11.....cgAgggaacacggggugccgaac..... 1  
 Gi2\_10382166\_x11.....ucgugggaacacgAggugccgaacu..... 1  
 Gi2\_10386126\_x11.....gacgucgugggaacacggggGgccgaacu..... 1  
 Gi2\_10386478\_x11.....uUgugggaacacggggugccgaac..... 1  
 Gi5\_8430309\_x11.....ggaacacggggugccgaaUu..... 1  
 Gi1\_3904727\_x11.....ugggaacaUggggugccgaacu..... 1  
 Gi2\_10370924\_x11.....gaucggagacgucgugggGacacggg..... 1  
 Gi5\_8420970\_x11.....gaacUcggggugccgaacu..... 1

Gi1\_3906168\_x11.....ucgugggGacacggggugccgaac..... 1  
 Gi3\_27181837\_x11.....aucggagaNgucgugggaacacggggugc..... 1  
 Gi5\_8426800\_x11.....cgucgugggaacacggggugccAaacu..... 1  
 Gi4\_517717\_x11.....gggaacacggggugccgaac..... 0  
 Gi2\_10376226\_x11.....cgucguAggaacacggggugccgaacu..... 1  
 Gi3\_27178218\_x11.....gugggUacacggggugccgaa..... 1  
 Gi3\_27135175\_x11.....ugAgaacacggggugccgaa..... 1  
 Gi2\_10391197\_x11.....gggaacacggggugccgUacu..... 1  
 Gi1a\_5607544\_x11.....cgugUgaacacggggugccgaacu..... 1  
 Gi5\_8411301\_x11.....cgucgugggaacacggAgugccgaacu..... 1  
 Gi2\_10383101\_x11.....aucggagGcgucgugggaacac..... 1  
 Gi3\_27186567\_x11.....aucggagaUgucgugggaacacg..... 1  
 Gi2\_10385389\_x11.....gugggaCcacggggugcc..... 1  
 Gi3\_27176601\_x11.....ucgugggaacacggggugcUgaac..... 1  
 Gi5\_8424853\_x11.....Uagacgucgugggaacacg..... 1  
 Gi3\_27133162\_x11.....cgucgugggaacGcggggugc..... 1  
 Gi2\_10375984\_x11.....gugggCacacggggugccgaac..... 1  
 Gi1\_3911899\_x11.....Ggacgucgugggaacacggggugccgaacu..... 1  
 Gi3\_27185126\_x11.....aucggagCcgucgugggaacacggg..... 1  
 Gi2\_10382529\_x11.....gucgugggaacacggggGgccgaac..... 1  
 Gi2\_10385862\_x11.....gggaCcacggggugccgaacu..... 1  
 Gi3\_27178328\_x11.....gucgugggaacacggggUaccgaacu..... 1  
 Gi2\_10394970\_x11.....cUucgugggaacacggggugccgaa..... 1  
 Gi5\_8413512\_x11.....gugggaacacggggugccCaacu..... 1  
 Gi2\_10390790\_x11.....Ucgaucggagacgucgugggaacac..... 1  
 Gi2\_10397544\_x11.....acgucgugNgaacacggggugc..... 1  
 Gi2\_10393111\_x11.....aucggagacgucgCgggaacacggggg..... 1  
 Gi3\_27152423\_x11.....Ugagacgucgugggaacacggggugccgaa..... 1  
 Gi3\_27165513\_x11.....cgugggaacacgUggugc..... 1  
 Gi3\_27177250\_x11.....Gcgugggaacacggggugccgaa..... 1  
 Gi5\_8415261\_x11.....gggaacacggAgugccgaacu..... 1  
 Gi2\_10369549\_x11.....ggagacgucgugggaacacggUgugcc..... 1  
 Gi5\_8419518\_x11.....ugggaacacggggugccgaacG..... 1  
 Gi2\_10377832\_x11.....aacacggggugcAgaacu..... 1  
 Gi5\_8420959\_x11.....acUucgugggaacacggggugccgaacu..... 1  
 Gi1a\_5616751\_x11.....cgugggaacacggggugccgaCcu..... 1  
 Gi3\_27148595\_x11.....acUucgugggaacacggggugccgaacu..... 1  
 Gi3\_27134856\_x11.....aucggagGcgucgugggaacacggggugcc..... 1  
 Gi5\_8422378\_x11.....gugggaacacggggugccGac..... 1  
 Gi1a\_5622757\_x10.....gaucggagacgucgugggaacacgggg..... 0  
 Gi2\_10425852\_x10.....cgugggaaNacggggugccg..... 1  
 Gi3\_27211362\_x10.....ugAgaacacggggugccga..... 1  
 Gi2\_10408812\_x10.....Uggagacgucgugggaacacggggugcc..... 1  
 Gi5\_8446366\_x10.....uAggaacacggggugccgaac..... 1  
 Gi1\_3926034\_x10.....gaacacggggugccgUacu..... 1  
 Gi3\_27234332\_x10.....cgucgugggaGcacggggugccg..... 1  
 Gi3\_27238252\_x10.....cgCcgugggaacacggggugccg..... 1

Gi3\_27205172\_x10.....aucggaAacgucgugggaaacacggggu..... 1  
 Gi2\_10427762\_x10.....cgGgggaacacggggugccg..... 1  
 Gi3\_27192932\_x10.....cAugggaacacggggugc..... 1  
 Gi5\_8443976\_x10.....Gucggagacgucgugggaaacacgg..... 1  
 Gi2\_10420632\_x10.....gucgugggaaacacggAgugccgaacu..... 1  
 Gi3\_27229732\_x10.....Ugagacgucgugggaaacacgg..... 1  
 Gi2\_10404192\_x10.....aucggagacgucguAggaacac..... 1  
 Gi3\_27192662\_x10.....aucggagacguUgugggaaacacggggu..... 1  
 Gi4\_519349\_x10.....Ggugggaacacggggugccgaacu..... 1  
 Gi3\_27225702\_x10.....ugggaaacacggAgugccgaa..... 1  
 Gi3\_27216132\_x10.....cgucgugggaaacacggggAgcc..... 1  
 Gi2\_10426542\_x10.....ucgugggaaacacggggugccgaUc..... 1  
 Gi5\_8432876\_x10.....ggaacacggggugccgaCcu..... 1  
 Gi2\_10423722\_x10.....Uagacgucgugggaaacacggggugccgaacu..... 1  
 Gi3\_27198422\_x10.....cUgagacgucgugggaaacacggggugc..... 1  
 Gi2\_10407982\_x10.....cgucgugggaaacacggggCgcc..... 1  
 Gi2\_10399922\_x10.....aucggagacgucgugggGacacggggugcc..... 1  
 Gi2\_10402092\_x10.....ucgugggaaacacAgggugccgaac..... 1  
 Gi3\_27224622\_x10.....cgucgugggaaacacggggugccgaUc..... 1  
 Gi3\_27220392\_x10.....uGggagacgucgugggaaacacggggugcc..... 1  
 Gi3\_27236482\_x10.....cgucguggNaacacggggugc..... 1  
 Gi2\_10416472\_x10.....gggUacacggggugccgaacu..... 1  
 Gi3\_27202302\_x10.....cUgagacgucgugggaaacacgg..... 1  
 Gi2\_10418932\_x10.....auUggagacgucgugggaaacacggg..... 1  
 Gi5\_8443746\_x10.....cgugggaaNacggggugccga..... 1  
 Gi3\_27224642\_x10.....cgugggaaacacggUgugccgaac..... 1  
 Gi3\_27192382\_x10.....ucgugggaaacacAgggugccgaac..... 1  
 Gi3\_27193052\_x10.....gUagacgucgugggaaacacggg..... 1  
 Gi2\_10421362\_x10.....aCcgagacgucgugggaaacacggggugc..... 1  
 Gi3\_27198852\_x10.....gugggaaacacggggugccgaC..... 1  
 Gi2\_10398782\_x10.....Ggucgugggaaacacggggugc..... 1  
 Gi3\_27235102\_x10.....aucggagacgucgugAgaacacggggu..... 1  
 Gi3\_27195202\_x10.....Acgugggaaacacggggugccgaac..... 1  
 Gi5\_8435556\_x10.Ggcgaucggagacgucgugga..... 1  
 Gi1\_3919754\_x10.....ggaacaUggggugccgaacu..... 1  
 Gi3\_27241342\_x10.....gacgucgugggaaacacggggugccgaGcu..... 1  
 Gi2\_10404452\_x10.....cgGgggaacacggggugccgaa..... 1  
 Gi3\_27216402\_x10...gUucggagacgucgugggaaacacggggu..... 1  
 Gi1\_3918424\_x10.....ucgGgggaacacggggugccgaacu..... 1  
 Gi3\_27201952\_x10.....gugggaaacaUggggugccg..... 1  
 Gi2\_10414272\_x10.....gggaacaAgggugccgaacu..... 1  
 Gi3\_27218592\_x10.....ugggaaacacgggUugccga..... 1  
 Gi3\_27222082\_x10.....aGcacggggugccgaacuu..... 1  
 Gi2\_10415442\_x10.....ucggagacgucgugggaaacacggggugccgaacu..... 0  
 Gi5\_8443816\_x10.....ggaacaAgggugccgaacu..... 1  
 Gi1\_3917144\_x10.....cgugggaaacacggggugcAgaacu..... 1  
 Gi1\_3927084\_x10.....ucggagacgucgugggaaacacggggugccgaacu..... 0

|                                                         |   |
|---------------------------------------------------------|---|
| Gi2_10422302_x10.....cgugggGacacggggugccgaa.....        | 1 |
| Gi4_520529_x10.....ggaacacggggugccgaac.....             | 0 |
| Gi2_10409832_x10....aucggagacGcgugggaacacggggugcc.....  | 1 |
| Gi5_8435956_x10.....ggaacaUggggugccgaacu.....           | 1 |
| Gi3_27195112_x10.....gggaacacggggugccgaC.....           | 1 |
| Gi3_27199492_x10.....cgucgugggaCcacggggugcc.....        | 1 |
| Gi2_10403842_x10.....gugggaacaUggggugcc.....            | 1 |
| Gi2_10419912_x10....aucggagGcgucgugggaacacggggugcc..... | 1 |
| Gi1_3926704_x10.....gaaUacggggugccgaacu.....            | 1 |
| Gi2_10415602_x10.....Gcgucgugggaacacggggugccgaac.....   | 1 |
| Gi3_27204542_x10...cUaucggagacgucgugggaacacggg.....     | 1 |
| Gi5_8431476_x10.....gggaaUacggggugccgaacu.....          | 1 |
| Gi3_27234592_x10....aucgUagacgucgugggaacacgg.....       | 1 |
| Gi2_10400452_x10.....cgCgggaacacggggugccg.....          | 1 |
| Gi2_10418412_x10.....ggaaGacggggugccgaac.....           | 1 |
| Gi3_27190862_x10.....gugggaacacggggugccgU.....          | 1 |
| Gi3_27207082_x10.....gugggaacacggggAgccga.....          | 1 |
| Gi2_10423152_x10....auUggagacgucgugggaacacggggugcc..... | 1 |
| Gi3_27209062_x10.....cggagacgucgugggaacacggggC.....     | 1 |
| Gi2_10403112_x10.....gacgucgugggaGcacggggugccgaacu..... | 1 |
| Gi5_8444216_x10.....ggaacacggAgugccgaacu.....           | 1 |
| Gi2_10410932_x10.....gugggaacacgAggugcc.....            | 1 |
| Gi1_3923864_x10.....ggaacacggggugcUgaacu.....           | 1 |
| Gi5_8433976_x10.....cgucgugggaacacggggugccgaaAu.....    | 1 |
| Gi2_10407392_x10.....ggagacgucgugggaGcacggggugcc.....   | 1 |
| Gi2_10420422_x10.....gucgugggaacacggggugccgaCc.....     | 1 |
| Gi3_27207532_x10.....cgGcgugggaacacggggugccg.....       | 1 |
| Gi1_3924384_x10.....gaacacggggugcAgaacu.....            | 1 |
| Gi3_27221502_x10.....Gggagacgucgugggaacacggggu.....     | 1 |
| Gi1_3921164_x10.....cgugggaacacggggugccgUacu.....       | 1 |
| Gi2_10422112_x10.....gGacacggggugccgaac.....            | 1 |
| Gi3_27217742_x10....aucggagacgucgugggaaAacg.....        | 1 |
| Gi3_27226482_x10.....ggaacacggggGgccgaa.....            | 1 |
| Gi2_10397872_x10.....aacacggggugUcgaacu.....            | 1 |
| Gi2_10410662_x10.....cggagacgucgugggaacGcggggugcc.....  | 1 |
| Gi3_27242532_x10.....gucgugggaacacggggugcUgaac.....     | 1 |
| Gi3_27200042_x10....aucggagacgucguggAaacacggg.....      | 1 |
| Gi3_27214082_x10....aucggagacGcgugggaacacggggugcc.....  | 1 |
| Gi2_10405782_x10....aucggagacgucgugggaGcacg.....        | 1 |
| Gi2_10423612_x10.....cgugggaacacggggugccgaC.....        | 1 |
| Gi5_8450856_x10.....gCaacacggggugccgaac.....            | 1 |
| Gi2_10408722_x10....aucggagacgucgugggaacGcg.....        | 1 |
| Gi3_27208182_x10.....gggaacacgUggugccgaacu.....         | 1 |
| Gi2_10421472_x10.....ugggaacacggggugccgC.....           | 1 |
| Gi3_27235862_x10.....ggaacacggUgugccgaac.....           | 1 |
| Gi3_27190562_x10.....gugggaacacggggugGcga.....          | 1 |
| Gi5_8441186_x10.....Uucgugggaacacggggugccgaa.....       | 1 |

G1a\_5628517\_x10.....gGcgugggaacacggggugccgaacu..... 1  
 Gi1\_3916694\_x10...Uaucggagacgucgugggaacacgg..... 1  
 Gi3\_27214452\_x10.....cgugggaacacggggugccgaC..... 1  
 Gi5\_8437276\_x10.....gggaGcacggggugccgaac..... 1  
 Gi2\_10408712\_x10.....cCucgugggaacacggggugccg..... 1  
 Gi5\_8432796\_x10...gaucggagacgucgugggaacacggggugcc..... 0  
 Gi2\_10407992\_x10...aucggagacgCcgugggaacac..... 1  
 Gi2\_10413112\_x10.....cguAggaacacggggugccgaac..... 1  
 Gi3\_27201972\_x10.....cggagacgucgugggaacacggggGgcc..... 1  
 G1a\_5633367\_x10.....cgugggaacacAgggugccgaacu..... 1  
 Gi5\_8437056\_x10.....cgugggaGcacggggugccgaac..... 1  
 Gi3\_27238342\_x10...gaCcgagacgucgugggaacacggggg..... 1  
 Gi2\_10426772\_x10.....cggagacgucgugggGacacggggugcc..... 1  
 Gi3\_27205182\_x10.....cgCgggaacacggggugccg..... 1  
 Gi3\_27229062\_x10.....cgugggaacacggggugccAa..... 1  
 Gi1\_3920144\_x10.....gaacacggggugccgaUcu..... 1  
 G1a\_5633237\_x10...cUgagacgucgugggaacacggggg..... 1  
 Gi3\_27220492\_x10.....Ugagacgucgugggaacacggggugccga..... 1  
 Gi3\_27214252\_x10.....gugggaacUcggggugcc..... 1  
 Gi3\_27216052\_x10.....gaNcacggggugccgaacu..... 1  
 Gi3\_27227032\_x10...aucAgagacgucgugggaacacgg..... 1  
 Gi1\_3923914\_x10.....cguggAaacacggggugccgaacu..... 1  
 Gi5\_8438476\_x10.....cgucguAggaacacggggugccgaacu..... 1  
 Gi3\_27206892\_x10.....cgucgugggaaUacggggugccgaacu..... 1  
 Gi3\_27215952\_x10.....cgucgugggaacacggggGgccga..... 1  
 Gi2\_10406942\_x10.....cggagacgucgugggaCcacggggugcc..... 1  
 Gi1\_3924304\_x10.....acgucgugggaacacggggGgccgaacu..... 1  
 Gi3\_27225582\_x10...aucggagacgucgugggaacacAg..... 1  
 Gi5\_8436716\_x10.....Cgggaacacggggugccgaac..... 1  
 Gi3\_27216792\_x10.....gggaacacggggCgccgaa..... 1  
 Gi2\_10423372\_x10.....gugggaacUcggggugccgaac..... 1  
 Gi5\_8432666\_x10.....cgugggaacaAgggugccgaacu..... 1  
 Gi2\_10408942\_x10.....Aacgucgugggaacacggggugcc..... 1  
 Gi5\_8436056\_x10.....ugggaacacggggugcUgaac..... 1  
 Gi5\_8432136\_x10.....Cgaacacggggugccgaac..... 1  
 Gi1\_3927204\_x10.....cgugggaacacggggAgccgaacu..... 1  
 Gi2\_10417822\_x10...aucggagacgucgugggaacacAggugc..... 1  
 Gi2\_10427352\_x10.....ggaacacggggugccgaaA..... 1  
 Gi3\_27220322\_x10...gaucggagacgucgugggaGcacg..... 1  
 Gi3\_27237422\_x10...aucAgagacgucgugggaacacgggg..... 1  
 Gi3\_27240942\_x10.....gggaacacggggugAcgaac..... 1  
 G1a\_5620767\_x10.....ggaacacAgggugccgaacu..... 1  
 Gi2\_10425742\_x10.....aUacgucgugggaacacggggugccg..... 1  
 Gi2\_10407872\_x10...cUgagacgucgugggaacacggggug..... 1  
 Gi1\_3917364\_x10.....ucgugggaacacggAgugccgaacu..... 1  
 Gi2\_10399542\_x10.....ucgugggaacacUgggugccgaacu..... 1  
 Gi3\_27217912\_x10.....cgucgugggaacacggggugcAgaacu..... 1

Gi3\_27199842\_x10.....gucgugggaaacacggggGgc..... 1  
Gi2\_10399012\_x10.....cguUgugggaaacacggggugccgaacu..... 1  
Gi1\_3919724\_x10.....cgugAgaacacggggugccgaacu..... 1  
Gi3\_27231222\_x10.....uggCaacacggggugccgaacu..... 1  
Gi2\_10417402\_x10.....gucgugggNacacggggugcc..... 1  
Gi3\_27212712\_x10....gaucggagGcgucgugggaaacacgggg..... 1  
Gi2\_10420582\_x10....gUucggagacgucgugggaaacacgggg..... 1  
Gi3\_27204982\_x10.....cgugggaUcacggggugccgaac..... 1  
Gi5\_8436366\_x10.....guggAaacacggggugccgaac..... 1  
Gi3\_27200462\_x10.....ucgugggUaacacggggugccgaacu..... 1  
Gi3\_27208562\_x10.....gGcgugggaaacacggggugccgaa..... 1  
Gi3\_27223012\_x10....cUaucggagacgucgugg..... 1  
Gi2\_10408962\_x10.....ucgugggaacGcggggugccgaac..... 1  
Gi2\_10416622\_x10.....ggagacgucgugggaaacacggggugccgaac..... 0  
Gi2\_10412572\_x10.....ugggaacacggggugccgaacG..... 1  
Gi5\_8448056\_x10.....gucgugggaaacacAgggugccgaacu..... 1  
Gi2\_10403922\_x10....aucggagacgucgugggaaacG..... 1  
Gi5\_8444506\_x10.....ugggaGcacggggugccgaac..... 1  
Gi2\_10421282\_x10.....gCgggaacacggggugccgaa..... 1  
Gi5\_8437666\_x10.....gAgaacacggggugccgaac..... 1  
Gi3\_27223552\_x10.....cCugggaacacggggugc..... 1  
Gi5\_8433016\_x10.....gugggaacacgggCugccgaacu..... 1  
Gi3\_27187772\_x10....aucggagaNgucguggga..... 1  
Gi2\_10401962\_x10.....cgAagacgucgugggaaacacggggugc..... 1  
Gi3\_27207892\_x10.....gUagacgucgugggaaacacgg..... 1  
Gi3\_27197342\_x10....aucggagacgucgugggaaacacAggg..... 1  
Gi2\_10405582\_x10.....gucgugggaaacGcggggugccgaac..... 1  
Gi3\_27233172\_x10.....gacgucgugggaaacacggggugccgCac..... 1  
Gi3\_27233262\_x10....aucggagacgucguggggaCcacggggugcc..... 1  
Gi5\_8449426\_x10.....ugggaacacggUgugccgaacu..... 1  
Gi3\_27222202\_x10.....gugggaacacggggugccC..... 1  
Gi3\_27229972\_x10.....gacgucgugggGaacacggggugccgaacu..... 1  
Gi3\_27237382\_x10.....gugggaacacggggugAcg..... 1  
Gi3\_27200492\_x10.....uggUaacacggggugccgaacu..... 1  
Gi5\_8451836\_x10.....gaacacggggugAcgaacu..... 1  
Gi3\_27203862\_x10....aucggagacgucguggAaacacgggg..... 1  
Gi3\_27209482\_x10.....ggagacguNguggaaacacggggugcc..... 1  
Gi3\_27206182\_x10....aucUgagacgucgugggaaacacg..... 1  
Gi3\_27187952\_x10.....ugggaacaGggggugccgaacu..... 1  
Gi2\_10419492\_x10.....ggGgacgucgugggaaacacggggugccgaacu..... 1  
Gi3\_27211332\_x10.....ugggaacUcggggugccgaac..... 1  
Gi3\_27199122\_x10.....cgucguggNaacacggggugccga..... 1  
Gi5\_8435916\_x10....Gucggagacgucgugggaaacacg..... 1  
Gi2\_10405372\_x10....aucggagacgucgugggaaacacggggAgc..... 1  
Gi2\_10413712\_x10.ugcgaucggagacgucgugggaaacacgggg..... 0  
Gi1\_3921984\_x10.....ggaacacggggugccAaacu..... 1  
G1a\_5630467\_x10.....gUagacgucgugggaaacacggggugcc..... 1



Gi1\_3919164\_x10.....cgucgugggaacCcggggugccgaacu..... 1  
 Gi1\_3928114\_x10.....cgugggaacacggggugUcgaacu..... 1  
 Gi2\_10421422\_x10.....ggaacacgggAugccgaacu..... 1  
 Gi1a\_5628187\_x10.....ugggGacacggggugccgaacu..... 1  
 Gi1a\_5630147\_x10.....aGcacggggugccgaacu..... 1  
 Gi3\_27200352\_x10....gaucggagacgucgugggaacCcggggu..... 1  
 Gi2\_10399102\_x10.....cgCcgugggaacacggggugccg..... 1  
 Gi3\_27203522\_x10.....cgucgugggGacacggggugc..... 1  
 Gi3\_27233682\_x10.....ugggaacacggggugccgGa..... 1  
 Gi4\_519379\_x10....gaucggagacgucgugggaacacggg..... 0  
 Gi2\_10402402\_x10.....gucgugggaacacggggAgccgaacu..... 1  
 Gi3\_27230512\_x10.....gggaGcacggggugccgaa..... 1  
 Gi5\_8446136\_x10.....uggNaacacggggugccgaacu..... 1  
 Gi2\_10428592\_x10.....gugggaacacggggugccgaC..... 1  
 Gi1\_3927864\_x10.....aacacggggugcUgaacu..... 1  
 Gi1\_3921234\_x10.....cgugggaacacggggUaccgaacu..... 1  
 Gi2\_10400442\_x10.....Cucgugggaacacggggugcc..... 1  
 Gi2\_10424272\_x10.....cgCgggaacacggggugccgaa..... 1  
 Gi5\_8449506\_x10.....ugggaacaAggggugccgaacu..... 1  
 Gi2\_10406832\_x10.....gugggaacaUggggugccg..... 1  
 Gi3\_27217892\_x10.....cgAgggaacacggggugccgaa..... 1  
 Gi2\_10414102\_x10.....ggaacacggAgugccgaac..... 1  
 Gi3\_27206612\_x10.....ggaacacgUggugccgaac..... 1  
 Gi3\_27225142\_x10....aucggagacgucgugggGacac..... 1  
 Gi2\_10404752\_x10.....gucgugggaacacggggugccAaacu..... 1  
 Gi2\_10398432\_x10.....ucgugggaacacggAgugccgaacu..... 1  
 Gi5\_8449806\_x10.....ggUaacacggggugccgaac..... 1  
 Gi5\_8450406\_x10.....gugggaacacggggugccAaac..... 1  
 Gi3\_27189142\_x10.....uGgugggaacacggggugccg..... 1  
 Gi2\_10403822\_x10.....ggaacacggggugccgaaAu..... 1  
 Gi2\_10427992\_x10.....cgucUugggaacacggggugccg..... 1  
 Gi2\_10453872\_x9.....ucgugggaacacggggugcAgaacu..... 1  
 Gi5\_8476464\_x9.....cgugggaacacgCggugccgaacu..... 1  
 Gi3\_27300808\_x9.....Aggagacgucgugggaacacggggugccg..... 1  
 Gi3\_27263368\_x9.....ggaacacggCgugccgaacu..... 1  
 Gi3\_27291511\_x9.....ucggagacgucgugggaacacggggugccgaac..... 0  
 Gi5\_8456376\_x9.....cguNggaacacggggugccgaacu..... 1  
 Gi2\_10443279\_x9....aucggagacgucgugggaacaUgggg..... 1  
 Gi2\_10449471\_x9.....gugggaacacggggUaccga..... 1  
 Gi3\_27252163\_x9.....cgucgugggaaUacggggugccgaac..... 1  
 Gi3\_27292978\_x9.....gugggaaUacggggugccg..... 1  
 Gi3\_27278812\_x9....aucggagacgucAugggaacacg..... 1  
 Gi1\_3929392\_x9.....gugggaacacggggAgccgaacu..... 1  
 Gi3\_27249121\_x9.....ucgugggaacacggAgugccgaac..... 1  
 Gi2\_10431822\_x9.....agacgucgugggaacCcggggugcc..... 1  
 Gi3\_27248716\_x9.....cgucAugggaacacggggugcc..... 1  
 Gi5\_8465628\_x9.....ucgugggaacacggggugccgaaAu..... 1

Gi1a\_5635489\_x9.....gggaacacggggugccgaGcu..... 1  
 Gi2\_10445178\_x9.....ggagGcgucgugggaacacggggugcc..... 1  
 Gi2\_10461765\_x9.....ugggGacacggggugccg..... 1  
 Gi5\_8460858\_x9.....ggaUcacggggugccgaacu..... 1  
 Gi2\_10461261\_x9.....Uacgucgugggaacacggg..... 1  
 Gi2\_10446519\_x9.....gacgucgugggaacacggggugccgaa..... 0  
 Gi2\_10447455\_x9.....gucgugggaaAacggggugcc..... 1  
 Gi2\_10436430\_x9.....cgGcgugggaacacggggugccg..... 1  
 Gi3\_27271729\_x9.....cgugggaGcacggggugccgaa..... 1  
 Gi3\_27302221\_x9.....gugggaacacggggugcAga..... 1  
 Gi3\_27280909\_x9.....gucgugggaacacggggGgcc..... 1  
 Gi2\_10447419\_x9.....Aaucggagacgucgugggaacacggg..... 1  
 Gi2\_10439418\_x9.....gcgauccggagacgucgugggaacacggggugcc..... 0  
 Gi5\_8460237\_x9.....acgucgugggaacacggggugcAgaacu..... 1  
 Gi5\_8464845\_x9.....acgucgugggaacCcggggugccgaacu..... 1  
 Gi2\_10459371\_x9.....ugggaacacggggugccgaCc..... 1  
 Gi2\_10432650\_x9.....cgucgugggaacacggggugUcgaacu..... 1  
 Gi3\_27295624\_x9.....gacgucgugggaacGcggggugccgaacu..... 1  
 Gi5\_8459526\_x9.uUcgauccggagacgucguggg..... 1  
 Gi2\_10449057\_x9.....gugggaacacggggugccA..... 1  
 Gi3\_27262486\_x9.....ggagacgucUugggaacacggggg..... 1  
 Gi3\_27248320\_x9.....ggagacgucgugggaacaUggggugccg..... 1  
 Gi3\_27280603\_x9.....gaacacggggugccCaacu..... 1  
 Gi2\_10441893\_x9.....Gucggagacgucgugggaac..... 1  
 Gi3\_27291565\_x9.....cCugggaacacggggugccgaa..... 1  
 Gi5\_8455953\_x9.....Nugggaacacggggugccgaacu..... 1  
 Gi5\_8469120\_x9.....cgucgugggaacacggggAgccgaacu..... 1  
 Gi2\_10436169\_x9.....Gcggagacgucgugggaacacggggugcc..... 1  
 Gi2\_10436727\_x9.....acgucgugggaacacggggGgccgaac..... 1  
 Gi3\_27305074\_x9.....gaucggagacgucgugggaacaAgggg..... 1  
 Gi3\_27301249\_x9.....Aacgucgugggaacacggggugccgaacu..... 1  
 Gi3\_27304561\_x9.....cgAcgugggaacacggggugcc..... 1  
 Gi3\_27300439\_x9.....aucggagacgucgugggaacacgA..... 1  
 Gi5\_8473818\_x9.....Augggaacacggggugcc..... 1  
 Gi3\_27302707\_x9.....gucgugggaacacggggCgcc..... 1  
 Gi3\_27256348\_x9.....gugggaacaAggggugccga..... 1  
 Gi4\_522819\_x9.....gagacgucgugggaacacggggugccgaacu..... 0  
 Gi2\_10453899\_x9.....cggagacgucgugggaacCcggggugc..... 1  
 Gi2\_10444836\_x9.....aAcggagacgucgugggaacacggggg..... 1  
 Gi5\_8461488\_x9.....ucggagacgucgugggaacacggggugccgaac..... 0  
 Gi2\_10432065\_x9.....ugggaacacgggUugccgaac..... 1  
 Gi2\_10436196\_x9.....aucggagacgucguAgggaacacggggg..... 1  
 Gi1\_3938167\_x9.....acgucgugggaGcacggggugccg..... 1  
 Gi2\_10457616\_x9.....cgugggaacacggggugccgaaGu..... 1  
 Gi2\_10460109\_x9.....aUacgucgugggaacacggggugccgaac..... 1  
 Gi2\_10443153\_x9.....gugggaUacggggugccga..... 1  
 Gi5\_8463639\_x9.....ggaacacgggAugccgaacu..... 1

Gi2\_10458903\_x9.....cgucgugggaacacggggugccgGacu..... 1  
Gi2\_10461090\_x9.....gCcgugggaacacggggugcc..... 1  
Gi2\_10460487\_x9....gaucggagacgucgugggaacGcggg..... 1  
G1a\_5635012\_x9.....gCgaacacggggugccgaacu..... 1  
G1a\_5649844\_x9.....gGgggaacacggggugccg..... 1  
Gi3\_27245296\_x9.....cgugAgaacacggggugcc..... 1  
Gi3\_27272953\_x9.....cgugggaacaGggggugccgaacu..... 1  
Gi2\_10449354\_x9.....aUgucgugggaacacggggugccgaacu..... 1  
Gi5\_8466888\_x9....aucggagaNgucgugggaacacgg..... 1  
Gi2\_10458219\_x9.....Aucgugggaacacggggugc..... 1  
Gi2\_10437573\_x9.....ugggaGcacggggugccga..... 1  
Gi3\_27299314\_x9.....gggaacacgggAugccgaac..... 1  
Gi2\_10452216\_x9.....cgCgggaacacggggugccga..... 1  
Gi3\_27298396\_x9.....cCugggaacacggggugccg..... 1  
G11\_3935224\_x9.....gaacacggggugccgaaUu..... 1  
Gi2\_10458579\_x9.....ggaUcacggggugccgaacu..... 1  
Gi2\_10438572\_x9.....gugggaacacggggUccgaacu..... 1  
Gi2\_10432254\_x9.....cgugggaacacggggUccgaacu..... 1  
Gi5\_8456079\_x9.....cgugggaacacggggugcGgaacu..... 1  
Gi5\_8465709\_x9.....ggaacacggggugccgaacG..... 1  
Gi2\_10437186\_x9.....gGgacgucgugggaacacggggugccgaacu..... 1  
Gi3\_27268633\_x9.....gucgugggaacaGggggugccgaacu..... 1  
Gi2\_10458480\_x9.....gugggaacacggggugGc..... 1  
G11\_3931516\_x9....aucggagacgucgugggaacacgU..... 1  
Gi3\_27301339\_x9....aucggagacAucgugggaacacg..... 1  
G11\_3929014\_x9.....aacacggggugccgaaUu..... 1  
Gi2\_10459119\_x9.....guAggaacacggggugccga..... 1  
Gi3\_27296704\_x9.....Uacgucgugggaacacggggugc..... 1  
Gi3\_27244648\_x9.....gucgugggCacacggggugccgaac..... 1  
Gi3\_27285310\_x9.....ucgugggaaUacggggugccgaac..... 1  
Gi3\_27286867\_x9....aucggagacgucgugggaacacggA..... 1  
Gi2\_10429428\_x9.....ugggaacGcggggugccga..... 1  
Gi3\_27298648\_x9.....cgAcgugggaacacggggugccg..... 1  
Gi5\_8464449\_x9.....gggaacacggggugccgaUc..... 1  
Gi5\_8461992\_x9.....gucgugAgaacacggggugccgaacu..... 1  
Gi3\_27292501\_x9....aucgAagacgucgugggaacacg..... 1  
Gi5\_8468445\_x9.....ugggCacacggggugccgaacu..... 1  
Gi2\_10457445\_x9.....ucgugggaacacggggAgccgaacu..... 1  
G11\_3941902\_x9.....ucgugggaGcacggggugcc..... 1  
G1a\_5647270\_x9.....gggaacacggggugccgCacu..... 1  
Gi5\_8474592\_x9.....agUcugcugggaacacggggugccgaacu..... 1  
G1a\_5635732\_x9....aucggagacgucgCgggaacacggg..... 1  
G11\_3933955\_x9.....ucgugggaacacUgggugccgaacu..... 1  
Gi3\_27300574\_x9.....cgucgugggaacacggggAgccgaacu..... 1  
Gi3\_27247753\_x9.....ggaacacggUgugccgaacu..... 1  
Gi3\_27280117\_x9.....agacgucgugggaacacggggugccgCacu..... 1  
Gi5\_8458887\_x9.....aaAacggggugccgaacu..... 1

Gi1\_3930607\_x9.....ucgugggaacacgAggugccgaacu..... 1  
 Gi2\_10429167\_x9.....gucgAgggaacacggggugccgaacu..... 1  
 Gi3\_27265501\_x9.....cgugggGacacggggugccg..... 1  
 Gi2\_10457994\_x9.....acgucgugggaacacggAgugccgaacu..... 1  
 Gi3\_27261676\_x9.....gaUgucgugggaacacggggugccgaac..... 1  
 Gl1\_5653984\_x9.....aCcgagacgucgugggaacacggg..... 1  
 Gi2\_10440642\_x9.....acgucgugNgaacacggggugccgaac..... 1  
 Gi3\_27292168\_x9.....cgucgugggaacacggggugccgaacG..... 1  
 Gi1\_3940669\_x9.....gacgucgugggGacacggggugccgaacu..... 1  
 Gi5\_8471883\_x9.....Uacgucgugggaacacggggugccgaac..... 1  
 Gi3\_27255277\_x9.....aucgUagacgucgugggaacacgggg..... 1  
 Gi2\_10444917\_x9.....aucggagacgCcgugggaacacggggugc..... 1  
 Gi1\_3933001\_x9.....Ggugggaacacggggugccga..... 1  
 Gi5\_8467140\_x9.....gucgugggaacacggggugccgGacu..... 1  
 Gi3\_27273997\_x9.....cgucgugggaacacggggugccA..... 1  
 Gi2\_10442775\_x9.....cguggAaacacggggugccgaac..... 1  
 Gi2\_10458192\_x9.....cCucgugggaacacggggugccgaacu..... 1  
 Gi3\_27303958\_x9.....ugggaacacAgggugccgaa..... 1  
 Gi3\_27298882\_x9.....aacacgUggugccgaacu..... 1  
 Gi3\_27290836\_x9.....Agugggaacacggggugccga..... 1  
 Gi2\_10452198\_x9.....aucggagaNgucgugggaacacg..... 1  
 Gi4\_521703\_x9.....gugggaacacggggugccgaGcu..... 1  
 Gi2\_10454430\_x9.....gaacacggggugccgaacG..... 1  
 Gi5\_8462667\_x9.....guNgggaacacggggugccgaacu..... 1  
 Gi3\_27303067\_x9.....cgucUugggaacacggggugc..... 1  
 Gi3\_27271360\_x9.....gacgucgugggaacacggggAgccgaacu..... 1  
 Gl1\_5648206\_x9.....aacacgggNugccgaacu..... 1  
 Gi3\_27271639\_x9.....aucggagacgucUugggaacacgggg..... 1  
 Gi1\_3937537\_x9.....gCcgugggaacacggggugcc..... 1  
 Gi3\_27273547\_x9.....gaucggagGcugcuggggaacacggg..... 1  
 Gi2\_10438923\_x9.....ugggCacacggggugccgaacu..... 1  
 Gi1\_3931075\_x9.....ucgAgggaacacggggugccgaacu..... 1  
 Gi1\_3928969\_x9.....uUggaacacggggugccg..... 1  
 Gi2\_10432209\_x9.....cgucgCgggaacacggggugccgaacu..... 1  
 Gi3\_27255700\_x9.....gaacacgAggugccgaac..... 1  
 Gi5\_8468013\_x9.....cUucgugggaacacggggugccgaa..... 1  
 Gi1\_3935872\_x9.....cgucgugggaacGcggggugccgaacu..... 1  
 Gi2\_10449363\_x9.....gUagacgucgugggaacacggggugccg..... 1  
 Gi2\_10444233\_x9.....aucggagacgucgugggaacCcgggg..... 1  
 Gi1\_3940453\_x9.....ucgugggaUacggggugccgaacu..... 1  
 Gi5\_8473062\_x9.....uGgugggaacacggggugccgaac..... 1  
 Gi5\_8453352\_x9.....cgugggaacacggggUccgaacu..... 1  
 Gi3\_27266014\_x9.....gacgCcgugggaacacggggugccgaacu..... 1  
 Gi2\_10439463\_x9.....cAugggaacacggggugcc..... 1  
 Gi3\_27280738\_x9.....ugggaacacggggugccgaUcu..... 1  
 Gi3\_27278353\_x9.....cguNgggaacacggggugccgaac..... 1  
 Gi3\_27259525\_x9.....cgugggaacacCgggugccgaacu..... 1

Gi2\_10441767\_x9.....agacgucgugggGacacggggugcc..... 1  
Gi3\_27296092\_x9.....acgucgugggaacacggggugccgaGc..... 1  
Gi1\_3930382\_x9.....ucguggaacaUggggugccgaacu..... 1  
Gi1\_3942172\_x9.....ucguggaacacggggCgcc..... 1  
Gi1\_3936925\_x9.....uggaacacggggugccgaCcu..... 1  
Gi2\_10433361\_x9.....cgugggaacacggggCgcc..... 1  
Gi3\_27302428\_x9.....uggaacacggggugccUaac..... 1  
Gi3\_27305506\_x9.....aucggagacgucgugggGacacggggugcc..... 1  
Gi1\_3939958\_x9.....aacacggggugcAgaacu..... 1  
Gi3\_27298702\_x9.....aucggaAacgucgugggaacacggg..... 1  
G1a\_5643670\_x9.....Uugggaacacggggugccgaa..... 1  
Gi2\_10461603\_x9.uUcgauccgagacgucgugggaacacg..... 1  
Gi5\_8465844\_x9.....ggaacacggggugccgaaAu..... 1  
Gi5\_8458833\_x9.....acgucAugggaacacggggugccgaacu..... 1  
Gi5\_8460264\_x9.....gggaacacggggugccGac..... 1  
Gi2\_10437987\_x9.....cgucgugNaacacggggugccgaac..... 1  
Gi5\_8461506\_x9.....ucguggaacacggggugcAgaacu..... 1  
Gi3\_27246250\_x9.....gggaacacggggugccgaUcu..... 1  
Gi5\_8468391\_x9.....acgucgugggaacacAgggugccgaacu..... 1  
Gi5\_8459112\_x9.....gugggaacacgCggugccgaacu..... 1  
Gi2\_10459893\_x9.....aucggagacgucgugggCaca..... 1  
Gi5\_8465961\_x9.....ggaacUcggggugccgaacu..... 1  
Gi2\_10459425\_x9.....gugAgaacacggggugccg..... 1  
Gi5\_8474070\_x9.....gggaacGcggggugccgaac..... 1  
Gi2\_10433415\_x9.....ggaacaAggggugccgaacu..... 1  
Gi3\_27304624\_x9.....ugggaacacggggugcGgaacu..... 1  
Gi3\_27253045\_x9.....gacgucgugggaacacggggAgccgaac..... 1  
Gi2\_10449084\_x9.....gaucggagacgucgugggaacacggggG..... 1  
Gi5\_8473242\_x9.....cgugggaacacggggugcGgaacu..... 1  
Gi3\_27280450\_x9.....uCggaacacggggugccg..... 1  
Gi5\_8467950\_x9.....gugggaGcaccggggugccgaac..... 1  
Gi2\_10452594\_x9.....cgucgugggaacacAgggugccgaacu..... 1  
Gi1\_3932947\_x9.....ugggaacacggggugccgaU..... 1  
Gi3\_27269461\_x9.....gUagacgucgugggaaca..... 1  
Gi3\_27259111\_x9.....cgucgAgggaacacggggugccgaacu..... 1  
G1a\_5638531\_x9.....cgugggaacacggggugcUgaacu..... 1  
Gi2\_10454394\_x9.....gGcgugggaacacggggugccg..... 1  
Gi2\_10448247\_x9.....guUggaacacggggugccgaa..... 1  
Gi5\_8465295\_x9.....cgucgugAgaacacggggugccgaacu..... 1  
Gi1\_3940219\_x9.....ucguggaacacggggugUcgaacu..... 1  
Gi3\_27294994\_x9.....acgucgugggaacacgggguAccgaacu..... 1  
Gi3\_27247816\_x9.....acgucgugggaacacggggugccgaaUu..... 1  
Gi3\_27255268\_x9.....ggaacacggggugccgaaA..... 1  
Gi2\_10457220\_x9.....gugggaaGacggggugccgaacu..... 1  
Gi3\_27304849\_x9.....acgucgCgggaacacggggugccgaac..... 1  
Gi1\_3930589\_x9.....aUgucgugggaacacggggugccgaacu..... 1  
Gi3\_27255727\_x9.....gaucggagacgucgugggCacac..... 1

Gi5\_8471091\_x9.....gggaacacNgggugccgaa..... 1  
Gi2\_10444701\_x9.....guCggaacacggggugccgaacu..... 1  
Gi2\_10432785\_x9.....aucggagacgCcgugggaacacgggggu..... 1  
Gi2\_10456716\_x9.....ugggaacacggggugccgaaUu..... 1  
Gi3\_27302842\_x9.....cgugggaaUacggggugc..... 1  
Gi4\_521595\_x9.....cgugggaaNacggggugccgaacu..... 1  
Gi3\_27258787\_x9.....gucgugggaacacggggugccgaaA..... 1  
Gi2\_10433532\_x9.....aucggagacgucgugggaacacAgggugc..... 1  
Gi2\_10461189\_x9.....Ugugggaacacggggugc..... 1  
Gi3\_27291799\_x9.....gugggaaAacggggugccg..... 1  
Gi2\_10442217\_x9.....aacacgggAugccgaacu..... 1  
G1a\_5641393\_x9.....Cgggaacacggggugccgaacu..... 1  
Gi3\_27246115\_x9.....aucggagacgucgugggaacacggggCgc..... 1  
Gi5\_8475861\_x9.....gaacCcgggugccgaacu..... 1  
G1a\_5638648\_x9.....gaacacggNgugccgaacu..... 1  
Gi5\_8469093\_x9.....auUggagacgucgugggaacacgg..... 1  
Gi5\_8467725\_x9.....acgucguAggaacacggggugccgaacu..... 1  
Gi5\_8459472\_x9.....gugggaacacggggugcUgaac..... 1  
G1l\_3938995\_x9.....Uacgucgugggaacacggggugccgaac..... 1  
Gi3\_27281242\_x9.....cAucgugggaacacggggugccgaac..... 1  
G1l\_3936007\_x9.....cgucgugggaGcacggggugccgaacu..... 1  
Gi4\_523332\_x9.....gUgaacacggggugccgaacu..... 1  
Gi2\_10443918\_x9.....aucggagacgucgugggaacGcggggug..... 1  
Gi3\_27246007\_x9.....cgucgugggaacacAgggugccgaac..... 1  
Gi3\_27261505\_x9.....aucggagaUgucgugggaacacggg..... 1  
Gi2\_10451118\_x9..Acgaucggagacgucgugggaacacggggugc..... 1  
Gi3\_27287182\_x9.....cggagacgucgugggaGcacgggggu..... 1  
Gi3\_27296083\_x9.....gugggaacacggggugc..... 1  
G1l\_3934063\_x9.....gucgugggaacacggggugccgGacu..... 1  
Gi3\_27260326\_x9.....ucgugggaUcacggggugccgaacu..... 1  
Gi3\_27246862\_x9.....acgucgugggaacGcggggugccgaac..... 1  
Gi2\_10459434\_x9.....gucgugggaacacggggugUcgaacu..... 1  
Gi2\_10454997\_x9.....gucguggAaacacggggugccgaacu..... 1  
Gi3\_27277183\_x9.....ugggGacacggggugccg..... 1  
Gi2\_10446726\_x9.....cUucgugggaacacggggug..... 1  
Gi3\_27289621\_x9...Aaucggagacgucgugggaacacgggg..... 1  
G1a\_5640034\_x9.....ggaacacggggugccgGacu..... 1  
Gi2\_10435629\_x9.....aucgUagacgucgugggaacacggggugcc..... 1  
Gi2\_10455420\_x9.....gucgugggaacacggggugccgaaAu..... 1  
Gi5\_8453541\_x9.....ugggaacacggggCgcccgaac..... 1  
Gi2\_10444143\_x9.....gaacacggggugcAgaacu..... 1  
Gi2\_10438734\_x9.....ggaacCcgggugccgaac..... 1  
Gi2\_10443162\_x9.....cgugggCcacggggugc..... 1  
Gi3\_27295102\_x9.....cggagacgucgugggaacacggggugccgaacA..... 1  
Gi3\_27270055\_x9.....gGgacgucgugggaacacggggugccgaacu..... 1  
Gi5\_8497785\_x8.....acgucgugggaGcacggggugccgaacu..... 1  
Gi3\_27316417\_x8.....cgucgugggUacacggggugccgaacu..... 1

Gi2\_10472250\_x8...gaucggagacgucgugggCaca..... 1  
 Gi2\_10496138\_x8...Aaucggagacgucgugggaacac..... 1  
 Gi3\_27309617\_x8...aucggagacgucgugggCacac..... 1  
 Gi5\_8491089\_x8.....acAucgugggaacacggggugccgaacu..... 1  
 Gi2\_10494626\_x8.....gugggaacacggggugGcgaac..... 1  
 Gi2\_10482482\_x8...aucggagGcgucgugggaacacggg..... 1  
 Gi3\_27372521\_x8.....agacgucgugggaacacggggugccAaacu..... 1  
 Gi1\_3943333\_x8.....cgucgGgggaacacggggugccgaacu..... 1  
 Gi2\_10484218\_x8...aucggagacgucguggAaacacggggugc..... 1  
 Gi2\_10479282\_x8.....gaacacggggugccUaacu..... 1  
 Gi2\_10481178\_x8...aucggagacgucgugggaacacAggg..... 1  
 Gi3\_27354313\_x8.....cgGcgugggaacacggggugccga..... 1  
 Gi2\_10493962\_x8.....gugggaacGcggggugccgaa..... 1  
 Gi5\_8484617\_x8.....guUggaacacggggugccga..... 1  
 Gi2\_10483698\_x8...aucgUagacgucgugggaacacggggug..... 1  
 Gi3\_27310329\_x8.....gugCgaacacggggugccgaac..... 1  
 Gi3\_27362449\_x8...cgucgugggaacacggggugAcgaacu..... 1  
 Gi2\_10488026\_x8.....ucgugggaacacggggugccgaaUu..... 1  
 Gi3\_27327289\_x8...gUucggagacgucgugggaacacggg..... 1  
 Gi2\_10486130\_x8.....cgugggaacacggGcguccgaacu..... 1  
 Gi3\_27355545\_x8...gucguAggaacacggggugccgaac..... 1  
 Gi3\_27358113\_x8.....gAaacacggggugccgaa..... 1  
 Gi2\_10464698\_x8...gucgugggaacacggggGgc..... 1  
 Gi5\_8498297\_x8.....gaacacggggugGcgaacu..... 1  
 Gi2\_10480970\_x8...Aaucggagacgucgugggaacacgggg..... 1  
 Gi2\_10496970\_x8.....gggaGcacggggugccgaa..... 1  
 Gi1\_3949269\_x8...gaucggagacgucgugggaacacgggg..... 0  
 Gi3\_27318673\_x8.....cgugggaacacgggAugcc..... 1  
 Gi3\_27337577\_x8.....gggaacacUggggugccgaacu..... 1  
 Gl1\_5654697\_x8.....gggaacacAgggugccgaacu..... 1  
 Gi3\_27318729\_x8.....gaacacggggGgccgaac..... 1  
 Gi5\_8485673\_x8.....aacacggggugccUaacu..... 1  
 Gi3\_27325793\_x8...gucgugggaacacggggugccgaacG..... 1  
 Gi5\_8502017\_x8.....ugAgaacacggggugccgaac..... 1  
 Gi3\_27343145\_x8...Gcgugggaacacggggugcc..... 1  
 Gi1\_3947581\_x8...Gcgucgugggaacacggggugcc..... 1  
 Gi1\_3949877\_x8...Uagacgucgugggaacacggggugccg..... 1  
 Gi2\_10463090\_x8...acgucgugggGcacggggugcc..... 1  
 Gl1\_5658201\_x8.....gGacacggggugccgaacu..... 1  
 Gi2\_10474170\_x8...ugUgaacacggggugccga..... 1  
 Gi5\_8478465\_x8...auUggagacgucgugggaacacg..... 1  
 Gi3\_27329913\_x8...cgucgugggaCcacggggugccgaac..... 1  
 Gl1\_5675177\_x8.....ggaacacggggGgccgaacu..... 1  
 Gi3\_27333657\_x8.....ggaacacggggugcGgaac..... 1  
 Gi3\_27365633\_x8...aaGacggggugccgaacu..... 1  
 Gi2\_10468514\_x8...gugggaaUacggggugccgaa..... 1  
 Gi3\_27375601\_x8...cgugggaacacgAgggugcc..... 1

|                                                           |   |
|-----------------------------------------------------------|---|
| Gi5_8500537_x8.....cUugggaacacggggugccg.....              | 1 |
| Gi3_27311593_x8.....gugggaacacggggugccgaaG.....           | 1 |
| Gi3_27364817_x8.....cgucgugggaacGcggggugccg.....          | 1 |
| Gi1_3946325_x8.....gaucggagacgucgugggaacacggg.....        | 0 |
| Gi2_10468346_x8.....ggaacacggggugccgaaA.....              | 1 |
| Gi2_10487314_x8.....gaucggagacgucgugggaacCcg.....         | 1 |
| Gi1_3956557_x8.....aacacggggugUcgaacu.....                | 1 |
| Gi2_10490114_x8.....gGcgucgugggaacacgggg.....             | 1 |
| Gi2_10479370_x8.....gaucggagacgucgugggaacacggggC.....     | 1 |
| Gi2_10488778_x8.....ggaacacgggAugccgaac.....              | 1 |
| Gi2_10483730_x8.....Ugacgucgugggaacacg.....               | 1 |
| Gi2_10478682_x8.....gaacacggggCgccgaac.....               | 1 |
| Gi2_10469354_x8.....cgugggaacacggggCgc.....               | 1 |
| Gi2_10486954_x8.....ggaacacggggugcAgaac.....              | 1 |
| Gi3_27308657_x8.....aucggagacguUgugggaacacggg.....        | 1 |
| Gi2_10495442_x8.....ggaacacggggugccgaCc.....              | 1 |
| Gi2_10467346_x8.....gucguggGacacggggugccgaac.....         | 1 |
| Gi3_27339945_x8.....guggCaacacggggugcc.....               | 1 |
| Gi2_10483090_x8.....cgugggaacacggggugccgaG.....           | 1 |
| Gi5_8488841_x8.....gaacacggggugcAgaacu.....               | 1 |
| Gi2_10488074_x8.....aucggagacgucgugggaacacggggugccga..... | 0 |
| Gi3_27321161_x8.....cguAggaacacggggugc.....               | 1 |
| Gi3_27311545_x8.....ggUgacgucgugggaacacgggg.....          | 1 |
| Gi1_3952373_x8.....Uacgucgugggaacacggggugccg.....         | 1 |
| Gi3_27317713_x8.....ggaacacggggUcCccgaacu.....            | 1 |
| Gi5_8496529_x8.....agacgucgCgggaacacggggugccgaacu.....    | 1 |
| Gi2_10495874_x8.....Uucgugggaacacggggugccgaa.....         | 1 |
| Gi5_8493257_x8.....aucggagacgucguggGacacgg.....           | 1 |
| Gi3_27373385_x8.....acgucgugggaacacggggugcAgaac.....      | 1 |
| Gi2_10468026_x8.....gUagacgucgugggaacacg.....             | 1 |
| Gi3_27322537_x8.....cgugggaaAacggggugccgaac.....          | 1 |
| Gi2_10497354_x8.....aucgUagacgucgugggaacac.....           | 1 |
| Gi3_27377209_x8.....ugggaacacgggAugccgaa.....             | 1 |
| Gi3_27308041_x8.....ugggaCcacggggugccgaa.....             | 1 |
| Gi3_27376297_x8.....cgugggaacacggggugAcg.....             | 1 |
| Gi5_8500633_x8.....gggaacacgggAugccgaacu.....             | 1 |
| Gi5_8496801_x8.....gugggaacacggAgugccg.....               | 1 |
| Gi3_27327585_x8.....agacgucgugggaacacggggCgccgaac.....    | 1 |
| Gi3_27316961_x8.....cgugggaacacggggugcGgaac.....          | 1 |
| Gi5_8486033_x8.....agacgucgugggaacGcggggugccgaacu.....    | 1 |
| Gi2_10497322_x8.....gggaacacggggAgccgaacu.....            | 1 |
| Gi5_8498777_x8.....cgugggaacacggggugcUgaac.....           | 1 |
| Gi2_10479786_x8.....cgugggaacCcgggugccgaac.....           | 1 |
| Gi3_27374905_x8.....cgugggaacacggggUac.....               | 1 |
| Gi2_10474434_x8.....gaucggagacgucgugggaacGcgggg.....      | 1 |
| Gi3_27372433_x8.....aucggaAacgucgugggaacacg.....          | 1 |
| Gi3_27347505_x8.....cgugggaGcacggggugccg.....             | 1 |



|                      |                                         |   |
|----------------------|-----------------------------------------|---|
| Gi1_3950485_x8.....  | uggaacacggggugcAgaacu.....              | 1 |
| Gi2_10478226_x8..... | gaacacggggugccgaUc.....                 | 1 |
| Gi2_10481698_x8..... | gaacacggggugccgaaAu.....                | 1 |
| Gi5_8480593_x8.....  | aucggagacgucguggaacacggggugccgaacu..... | 0 |
| Gi1_3953669_x8.....  | ggaacacggggGgcccgaacu.....              | 1 |
| Gi3_27352329_x8..... | aucgAagacgucguggaacacggggg.....         | 1 |
| Gi2_10481250_x8..... | cguggaacacUggggugccg.....               | 1 |
| Gi2_10475002_x8..... | ugCgaacacggggugccgaacu.....             | 1 |
| Gi3_27343889_x8..... | ggagacgucguggGacacggggg.....            | 1 |
| Gi1_3944237_x8.....  | acgucguggaacacggggugcAgaacu.....        | 1 |
| Gi2_10494330_x8..... | gaucggagNcgucguggaacacggggugc.....      | 1 |
| Gi3_27335441_x8..... | aucggagacgucguggaacacgggAu.....         | 1 |
| Gi1_3953661_x8.....  | uggaacacggggugUcgaacu.....              | 1 |
| Gi5_8479993_x8.....  | uggaacacggggugccUaacu.....              | 1 |
| Gi5_8491521_x8.....  | ucguggaacacggggugccgaacG.....           | 1 |
| Gi3_27332745_x8..... | ggagacgucguggaacacggggC.....            | 1 |
| Gi3_27375129_x8..... | ucguggaacacggggugccgaaU.....            | 1 |
| Gi3_27374049_x8..... | gaucggagacgucguggaacCcggg.....          | 1 |
| Gi2_10478602_x8..... | aucggagacgucguggaacacggggGgcc.....      | 1 |
| Gi3_27309697_x8..... | acgucgAgggaacacggggugccgaacu.....       | 1 |
| Gi3_27320001_x8..... | aucggagacgucguggaacGc.....              | 1 |
| Gi5_8496929_x8.....  | cguggUaacacggggugccgaacu.....           | 1 |
| Gi3_27329825_x8..... | ggaGcacggggugccgaa.....                 | 1 |
| Gi1_3951365_x8.....  | agacgucgNgggaacacggggugccgaacu.....     | 1 |
| Gi3_27355785_x8..... | cguggaacacggggugccgC.....               | 1 |
| Gi5_8479449_x8.....  | gggaacacggggugcAgaacu.....              | 1 |
| Gi3_27336489_x8..... | gggaacacggUgugccgaacu.....              | 1 |
| Gi2_10485634_x8..... | aucggagacgucgugAgaacacggggugc.....      | 1 |
| Gi3_27375937_x8..... | uggaacacggggugccCaacu.....              | 1 |
| Gi3_27343761_x8..... | gacgucguggaacacggggugccgaGc.....        | 1 |
| Gi2_10493074_x8..... | guggaacacAgggugccg.....                 | 1 |
| Gi3_27358681_x8..... | gaucggagacgucguggaacacggggA.....        | 1 |
| Gi5_8485441_x8.....  | gaUgucguggaacacggggugccgaacu.....       | 1 |
| Gi2_10486338_x8..... | cgaucggGgacgucguggaacacggggugc.....     | 1 |
| Gi2_10486658_x8..... | gaucggagacgucguggGacacg.....            | 1 |
| Gi2_10479002_x8..... | gaacacggggugccgUac.....                 | 1 |
| Gi2_10482610_x8..... | aAcggagacgucguggaacac.....              | 1 |
| Gi1_3948205_x8.....  | cguggaacacggggugccgGacu.....            | 1 |
| Gi2_10467378_x8..... | Ggucguggaacacggggugccgaac.....          | 1 |
| Gi2_10483658_x8..... | acgucguggaacacggggugUc.....             | 1 |
| Gi1_3946725_x8.....  | cguggaacacUggggugccgaacu.....           | 1 |
| Gi3_27318377_x8..... | ugNgaacacggggugccgaacu.....             | 1 |
| Gi1_3953205_x8.....  | gGacacggggugccgaac.....                 | 1 |
| Gi2_10485242_x8..... | Cguggaacacggggugccgaac.....             | 1 |
| Gl1_5673425_x8.....  | Uacgucguggaacacggggg.....               | 1 |
| Gi1_3956821_x8.....  | aUacgucguggaacacggg.....                | 1 |
| Gi5_8496785_x8.....  | aucggagacgucguggGacacg.....             | 1 |

Gi3\_27314993\_x8.....gugggaacacggggugcAg..... 1  
Gi3\_27365889\_x8.....ucgugggaacacgggAugccgaac..... 1  
Gi3\_27313425\_x8.....ucggagacgucgugggaacacggggCgcc..... 1  
Gi5\_84770889\_x8.....gucgugggaacUcggggugccgaacu..... 1  
Gi2\_10482354\_x8.....ugggaacacgggCugccgaacu..... 1  
Gi3\_27337305\_x8.....ugCgaacacggggugccgaacu..... 1  
Gi2\_10478858\_x8.....aucggagacgucgCgggaacacggggugc..... 1  
Gi2\_10490746\_x8.....cgugAgaacacggggugcc..... 1  
Gi1\_3945925\_x8.....agacgucgugggaacacggggCgccgaacu..... 1  
Gi5\_8495393\_x8.....gucgugggCacacggggugccgaacu..... 1  
Gi5\_8480049\_x8.....gggaacacggggugccgaaAu..... 1  
Gi2\_10498562\_x8.....Aucgugggaacacggggugcc..... 1  
Gi3\_27312201\_x8.....cgucgugggaacacggggugUc..... 1  
G1a\_5669241\_x8.....gugggaacacggggUAccgaacu..... 1  
Gi5\_8493785\_x8.....gugggaacacggggGgcc..... 1  
Gi2\_10472194\_x8.....acgucgugggaacCcgggugccgaacu..... 1  
Gi3\_27325121\_x8.....gucgugggaacacgggAgugccgaac..... 1  
Gi3\_27330817\_x8.....cguggAaacacggggugccga..... 1  
Gi1\_3947253\_x8.....Gucggagacgucgugggaacacg..... 1  
Gi3\_27376321\_x8.....aucggagacgucgugggaGcac..... 1  
Gi2\_10481154\_x8.....aucggagacgucgugggaGcacggggugc..... 1  
Gi3\_27330209\_x8.....ucguCggaacacggggugccgaacu..... 1  
Gi2\_10461922\_x8.....gGucggagacgucgugggaacacgggg..... 1  
Gi3\_27320257\_x8.....ugggaacacAgggugccg..... 1  
Gi1\_3942621\_x8.....gcgaucggagacgucgCgggaacacggggugcc..... 1  
Gi3\_27370209\_x8.....gAcgugggaacacggggugccgaac..... 1  
Gi2\_10463642\_x8.....cgucgugggaGcacggggugcc..... 1  
Gi2\_10468738\_x8.....ggaacacUgggugccgaacu..... 1  
Gi2\_10461890\_x8.....acgucgugggaGcacggggugccgaacu..... 1  
Gi2\_10477666\_x8.....uggUaacacggggugccgaacu..... 1  
Gi2\_10466090\_x8.....cUaucggagacgucgugggaacacggggU..... 1  
Gi2\_10496834\_x8.....cgugggaacacggggugccgG..... 1  
Gi2\_10496410\_x8.....cgucgugggGacacggggugccga..... 1  
Gi3\_27359169\_x8.....cgugggaacacUgggugccgaac..... 1  
Gi3\_27365881\_x8.....ugggaacacggggugUcga..... 1  
Gi3\_27348625\_x8.....gucgugggaacacggggG..... 1  
Gi3\_27344201\_x8.....aacacggggUccgaacu..... 1  
Gi5\_8498913\_x8.....gggaacacggggugUcgaacu..... 1  
Gi2\_10494930\_x8cugcgauccgagacgucgugggaacacggggU..... 0  
Gi1\_3950693\_x8.....cUugggaacacggggugccgaa..... 1  
Gi2\_10486090\_x8.....acgucgugggaacacggggugccgGcu..... 1  
Gi2\_10497050\_x8.....ucggagacgucgugggaacacggggugccg..... 0  
Gi1\_3947389\_x8.....gGgggaacacggggugccga..... 1  
Gi1\_3953149\_x8.....ucgugggaacacgggAugccgaacu..... 1  
Gi2\_10483338\_x8.....ucgugggaacacggggugccgGacu..... 1  
G1a\_5662161\_x8.....gugggUacacggggugccgaacu..... 1  
Gi2\_10469050\_x8.....Cgagacgucgugggaacacggggugcc..... 1

|                                                          |   |
|----------------------------------------------------------|---|
| Gi3_27314793_x8.....ggaaAacggggugccgaac.....             | 1 |
| Gi2_10490802_x8...gaucggagNcgucgugggaacacggggu.....      | 1 |
| Gi2_10484842_x8.....agacgucgugggaacacggggCgcc.....       | 1 |
| Gi2_10498290_x8.....Gcgugggaacacggggugcc.....            | 1 |
| Gi3_27370841_x8.....ggaNcacggggugccgaac.....             | 1 |
| Gi2_10480818_x8.....gaUgucgugggaacacggggugcc.....        | 1 |
| Gi3_27365289_x8.....cgugggaacacggggUAccga.....           | 1 |
| Gi2_10462282_x8.....cgAgggaacacggggugc.....              | 1 |
| Gi1_3950357_x8.....cgugggaacacggAgugccgaacu.....         | 1 |
| Gi3_27315289_x8.....cgAgggaacacggggugc.....              | 1 |
| Gi2_10480170_x8.....Gcggagacgucgugggaacacggggugc.....    | 1 |
| Gi3_27371225_x8.....gagGcgucgugggaacacggggugccgaacu..... | 1 |
| Gi2_10483754_x8.....cgugggaacacggggUAccgaac.....         | 1 |
| Gi3_27349345_x8.....cgucgCgggaacacggggugccgaac.....      | 1 |
| Gi5_8501737_x8.....gCgggaacacggggugccga.....             | 1 |
| Gi2_10475930_x8.....gucgugggUacacggggugccgaacu.....      | 1 |
| Gi3_27349305_x8.....cgCcgugggaacacggggugccga.....        | 1 |
| Gi3_27344217_x8.....cgugggaacacgCggugccgaac.....         | 1 |
| Gi1_3949909_x8.....gaacacggggugAcgaacu.....              | 1 |
| Gi2_10494506_x8.....gugggaacacggAgugccgaa.....           | 1 |
| Gi5_8478009_x8.....aacaAggggugccgaacu.....               | 1 |
| Gi5_8477193_x8...aucggagacgCcgugggaacacg.....            | 1 |
| Gi5_8477385_x8...Uaucggagacgucgugggaacacggggu.....       | 1 |
| Gi2_10489930_x8.....cgCcgugggaacacggggugcc.....          | 1 |
| Gi3_27365145_x8.....ugggaacCggggugccgaa.....             | 1 |
| Gi5_8478417_x8...aucggagacgucgugggaCcacgg.....           | 1 |
| Gi2_10481850_x8.....gggaacacggggugcGgaacu.....           | 1 |
| Gi1_3951181_x8.....gugggaacacggggugccgU.....             | 1 |
| Gi5_8480249_x8.....cgugggaaGacggggugccgaacu.....         | 1 |
| Gi2_10469034_x8.....cgugggaacacggggugccgaaU.....         | 1 |
| Gi5_8493801_x8.....cgugggaacacggCgugccgaacu.....         | 1 |
| Gi2_10470786_x8.....ugggaacacAgggugccgaac.....           | 1 |
| Gi3_27341249_x8.....cgugggaacacgggCugccgaac.....         | 1 |
| Gi3_27329009_x8.....cggagacgucgugggaacacggggG.....       | 1 |
| Gl1_5659185_x8.....ugggaacacggggAgccgaacu.....           | 1 |
| Gi3_27308233_x8...ucggagacgucgugggaacacggggugccga.....   | 0 |
| Gi1_3945525_x8.....gugggaacaAggggugccgaacu.....          | 1 |
| Gi2_10488002_x8.....cCucgugggaacacggggugcc.....          | 1 |
| Gi5_8492633_x8.....Augggaacacggggugccga.....             | 1 |
| Gi2_10493322_x8.....Cgggaacacggggugccgaac.....           | 1 |
| Gl1_5656425_x8.....gGgggaacacggggugccgaa.....            | 1 |
| Gi2_10492786_x8...aAcggagacgucgugggaacacggggugc.....     | 1 |
| Gi3_27322569_x8.....Ggucgugggaacacggggugccgaa.....       | 1 |
| Gi5_8481753_x8.....gugggaacacggggugccgaaU.....           | 1 |
| Gi3_27311337_x8.....Gacacggggugccgaacu.....              | 1 |
| Gi3_27337057_x8.....gugggaaAacggggugccgaa.....           | 1 |
| Gi2_10494474_x8...aucAgagacgucgugggaacacggggu.....       | 1 |

Gi5\_8497697\_x8.....ggaaGacggggugccgaacu..... 1  
 Gi2\_10492650\_x8..Ucgauccgagacgucgugggaaacacgg..... 1  
 Gi3\_27309137\_x8.....cggagacgCcgugggaacacgggggu..... 1  
 Gi2\_10470554\_x8.....ggaNcacggggugccgaacu..... 1  
 Gi2\_10465450\_x8.....gggaacacgAggugccgaac..... 1  
 Gi1\_3956037\_x8.....ggUacacggggugccgaac..... 1  
 Gi5\_8478761\_x8.....cgucgugggaacGcggggugccgaacu..... 1  
 Gi3\_27368201\_x8.....gUcgucgugggaacacggggugccgaacu..... 1  
 Gi2\_10480474\_x8...gaucggagNcgucguggga..... 1  
 Gi5\_8480481\_x8.....Aaacacggggugccgaac..... 1  
 Gi5\_8488417\_x8.....gucgugggaacacgAggugccgaacu..... 1  
 Gi3\_27336529\_x8.....gacgucgCgggaacacggggugccgaac..... 1  
 Gi3\_27374761\_x8.....cgCcgugggaacacggggugc..... 1  
 Gi2\_10487882\_x8.....gugggUacacggggugcc..... 1  
 Gi3\_27363097\_x8...aucggagacgucgugggaaUacgggg..... 1  
 Gi3\_27329473\_x8.....Aacgucgugggaacacggg..... 1  
 Gi3\_27351065\_x8...aucgAagacgucgugggaacacggg..... 1  
 Gi5\_8497001\_x8.....gggaacacggggugccgaC..... 1  
 Gi2\_10490850\_x8...gaucggagacgucgugggCacac..... 1  
 Gi3\_27363057\_x8.....cgugggaCcacggggugccga..... 1  
 Gi4\_524288\_x8.....guUggaacacggggugccgaacu..... 1  
 Gl1\_5655225\_x8.....ugggaacacAgggugccgaacu..... 1  
 Gi5\_8476889\_x8.....guAggaacacggggugccgaac..... 1  
 Gi2\_10487546\_x8...gaucggagacgucgugggGacac..... 1  
 Gi5\_8502265\_x8.....gacgucgugggaacacggggGgccgaacu..... 1  
 Gi5\_8484137\_x8.....cgucgugggaacacAgggugccgaacu..... 1  
 Gi3\_27341753\_x8...aucggagacgucgugggaacacggC..... 1  
 Gi1\_3954277\_x8.....ugggaacacggggugccgCac..... 1  
 Gi3\_27309673\_x8...ucCugggaacacggggugccgaacu..... 1  
 Gi2\_10490330\_x8...gaucggagacgucgugggC..... 1  
 Gi3\_27344929\_x8.....ugggaacGcggggugccg..... 1  
 Gi1\_3952973\_x8...aGcggagacgucgugggaacacgggggu..... 1  
 Gi3\_27359385\_x8...aucggagacgucUugggaacacggg..... 1  
 Gi1\_3957181\_x8.....ggagacgucgugggaGcacggggugccg..... 1  
 Gi2\_10476242\_x8.....cgucgugggaacacggggugccgaCcu..... 1  
 Gi1\_3952237\_x8.....Ggucgugggaacacggggugcc..... 1  
 Gi4\_525112\_x8.....Uucgugggaacacggggugccgaacu..... 1  
 Gi3\_27313969\_x8.....cgucgugggaAacggggugcc..... 1  
 Gi5\_8494497\_x8.....aacacggCgugccgaacu..... 1  
 Gi3\_27349129\_x8.uUcgauccgagacgucgugggaaca..... 1  
 Gi5\_8492865\_x8.....gucgugggaUacggggugccgaacu..... 1  
 Gl1\_5674769\_x8.....cCugggaacacggggugccgaacu..... 1  
 Gi5\_8487129\_x8.....Uagacgucgugggaacacggggugcc..... 1  
 Gi5\_8500569\_x8.....Cugggaacacggggugccga..... 1  
 Gi5\_8500817\_x8.....gGacacggggugccgaac..... 1  
 Gi3\_27353473\_x8...gucgugggaAacggggugccgaac..... 1  
 Gi1\_3947125\_x8.....cgucgugAgaacacggggugccgaacu..... 1

Gi3\_27307905\_x8....aucggagacgucGgggaacacg..... 1  
Gi3\_27307737\_x8.....aacacCgggugccgaacu..... 1  
Gi2\_10467218\_x8.....guggAaacacggggugccg..... 1  
Gi3\_27307721\_x8.....gggaacacggUgugccgaac..... 1  
Gi3\_27361489\_x8.....gggaacUcggggugccgaacu..... 1  
Gi2\_10487690\_x8.ugcgauccgagacgucgug..... 0  
Gi2\_10477778\_x8.....ugggaacacggggugcAgaac..... 1  
Gi2\_10475410\_x8.....cgugggaacacggAgugccgaac..... 1  
Gi5\_8502273\_x8.....gugggaacacggggAgccgaac..... 1  
Gi2\_10491178\_x8.....uAggaacacggggugccg..... 1  
G1a\_5672737\_x8..cgauccgaNacgucgug..... 1  
Gi3\_27356241\_x8.....agacgucguAggaacacggggugccgaacu..... 1  
Gi5\_8496665\_x8.....gugggaaAacggggugccgaac..... 1  
Gi2\_10465298\_x8.....cgugggaacacggggugUc..... 1  
Gi3\_27340001\_x8.....acgucgugggaacacggggGgcc..... 1  
Gi3\_27324201\_x8....aAcggagacgucgugggaacacggggU..... 1  
Gi2\_10492698\_x8.....cgucgugggaacacggggUAccgaacu..... 1  
Gi3\_27340729\_x8....aucggagacAucgugggaacacgg..... 1  
Gi5\_8480225\_x8.....acgucgugggaacacggggugccGacu..... 1  
Gi3\_27366785\_x8.....gugggaacacgggAugccgaa..... 1  
Gi2\_10485882\_x8.....ugggaacaNggggugccgaa..... 1  
Gi3\_27355913\_x8....aucggagacgucgugggaacaUg..... 1  
Gi1\_3950517\_x8.uUcgauccgagacgucguggga..... 1  
Gi1\_3945117\_x8.....cgugggaacacggggGgccgaacu..... 1  
Gi3\_27357017\_x8..Ucgauccgagacgucguggga..... 1  
Gi3\_27375449\_x8.....cCucgugggaacacggggugccgaac..... 1  
Gi1\_3948365\_x8.....ggaacCcggggugccgaacu..... 1  
Gi2\_10494914\_x8.....gacgucgugggaacGcggggugccgaacu..... 1  
Gi2\_10539171\_x7.....cguggCaacacggggugccgaacu..... 1  
Gi2\_10541061\_x7.....cUgagacgucgugggaaca..... 1  
Gi2\_10518164\_x7.....gggaaAacggggugccgaacu..... 1  
Gi5\_8506329\_x7.....ucgGgggaacacggggugccgaacu..... 1  
Gi3\_27430149\_x7.....cguUggaacacggggugccgaac..... 1  
Gi3\_27409380\_x7.....cCgagacgucgugggaacacggggugcc..... 1  
G1a\_5680959\_x7...gGucggagacgucguggga..... 1  
Gi5\_8521302\_x7.....gaacacggggugccgaUc..... 1  
Gi3\_27444079\_x7.....gucgugggaacacggggugccgaaUu..... 1  
Gi1\_3959026\_x7.....ugggaacacgggCugccgaacu..... 1  
Gi3\_27404816\_x7.....gCaacacggggugccgaa..... 1  
Gi1\_3970863\_x7.....gugggaacacgUgugccgaacu..... 1  
Gi2\_10512683\_x7....aucggUgacgucgugggaacacggggU..... 1  
Gi2\_10521510\_x7....gUucggagacgucgugggaacac..... 1  
Gi2\_10536266\_x7.....gGcucgugggaacacggggugccgaac..... 1  
Gi1\_3960020\_x7.....gGgacgucgugggaacacggggugcc..... 1  
Gi3\_27393728\_x7.....gGcucgugggaacacggggU..... 1  
Gi3\_27443911\_x7....ugggaacacggggUAccga..... 1  
Gi2\_10538821\_x7.....gaacUcggggugccgaacu..... 1

Gi2\_10501546\_x7.....aucggagaUgucgugggaacacggggugc..... 1  
 Gi2\_10502323\_x7.....cgugggaacacAgggugcc..... 1  
 Gi3\_27392188\_x7.....ucgGgggaacacggggugccgaac..... 1  
 Gi2\_10499824\_x7.....acgucgugggaacCggggugccgaacu..... 1  
 Gi5\_8512349\_x7.....gGgggaacacggggugccgaacuuu..... 1  
 Gi2\_10519774\_x7.....ggGgacgucgugggaacacggggugccgaac..... 1  
 Gi1\_3972116\_x7.....aUacgucgugggaacacggggugcc..... 1  
 Gi2\_10533333\_x7.....Ggacgucgugggaacacggggug..... 1  
 Gi1\_3965557\_x7.....gugggaacacggggugccgaUc..... 1  
 Gi5\_8518502\_x7.....gugggaacacggggugccgaCc..... 1  
 Gi5\_8523521\_x7.....aacacggggugAcgaacu..... 1  
 Gi1\_3964878\_x7.....ucgugggaacacggggCgccgaac..... 1  
 Gi1a\_5698571\_x7.....Gcggagacgucgugggaacacggg..... 1  
 Gi2\_10533564\_x7.....cgugUgaacacggggugc..... 1  
 Gi5\_8515611\_x7.....gacgucgugggaGcacggggugccgaacu..... 1  
 Gi2\_10507020\_x7.....Agugggaacacggggugcc..... 1  
 Gi2\_10530890\_x7.....gggaacUcggggugccgaacu..... 1  
 Gi5\_8524011\_x7.....aacacgggUugccgaacu..... 1  
 Gi3\_27454187\_x7.....gggaacacggggugccAaa..... 1  
 Gi2\_10505228\_x7.....aCcgagacgucgugggaaca..... 1  
 Gi5\_8510760\_x7.....acgucgugggaacacggggugccAaacu..... 1  
 Gi3\_27399517\_x7.....aucggagGcgucgugggaacac..... 1  
 Gi3\_27378468\_x7.....ucggagacgucgugggaacacggggugccgaacu..... 0  
 Gi3\_27425382\_x7.....agacgucgugggaacacggggUaccgaac..... 1  
 Gi1a\_5701105\_x7.....ucggagacgucgugggaacacggggugcc..... 0  
 Gi2\_10523435\_x7.....aacaAggggugccgaacu..... 1  
 Gi3\_27448783\_x7.....aucggagacgucgugggaacacggggGgcc..... 1  
 Gi3\_27381086\_x7.....agacgucgugggaGcacggg..... 1  
 Gi3\_27393378\_x7.....cggagacgCcgugggaacacggggugcc..... 1  
 Gi2\_10515490\_x7.....gcgaucggGgacgucgugggaacacggggugc..... 1  
 Gi3\_27404844\_x7.....gugggaacacggggUcccgaac..... 1  
 Gi3\_27449868\_x7.....cgucgugggaacacggggugccAaac..... 1  
 Gi2\_10530610\_x7.....gucgugggCacacggggugccgaacu..... 1  
 Gi2\_10502316\_x7.....gggaacacggggugcUgaac..... 1  
 Gi1\_3958389\_x7.....cCucgugggaacacggggugccgaacu..... 1  
 Gi5\_8524004\_x7.....ugggaacacggggugccgaGc..... 1  
 Gi2\_10531296\_x7.....gugAgaacacggggugccgaa..... 1  
 Gi3\_27412271\_x7.....cgucgugggaAacggggugccgaacu..... 1  
 Gi3\_27437604\_x7.....ggaacacggggugccUaacu..... 1  
 Gi3\_27421420\_x7.....ucggagacgucgugggaGcacggggU..... 1  
 Gi3\_27397697\_x7.....aucAgagacgucgugggaacacggggugcc..... 1  
 Gi5\_8530598\_x7.....uggCaacacggggugccgaacu..... 1  
 Gi1\_3962764\_x7.....ugggaacacgggAugccgaacu..... 1  
 Gi3\_27405110\_x7.....ugggaacacgUggugccga..... 1  
 Gi3\_27400021\_x7.....aucggagacgucUugggaacacg..... 1  
 Gi2\_10537743\_x7.....aucggagacgCcgugggaacacg..... 1  
 Gi4\_526830\_x7.....Augggaacacggggugccgaacu..... 1

Gi2\_10517562\_x7.....gUagacgucgugggaacacggggu..... 1  
Gi3\_27407357\_x7.....gggaCcacggggugccgaac..... 1  
Gi4\_529119\_x7.....Uugggaacacggggugccgaac..... 1  
Gi2\_10511304\_x7.....gucgugggaaUacggggugccgaacu..... 1  
Gi3\_27441741\_x7.....Ugugggaacacggggugccg..... 1  
Gi3\_27443484\_x7.....gugggaacaAggggugccgaa..... 1  
Gi2\_10510744\_x7.uUcgauccgagacgucguggga..... 1  
Gi2\_10539871\_x7.....uggAaacacggggugccgaac..... 1  
Gi3\_27390291\_x7.....gacgucgugggaacacAgggugccgaacu..... 1  
Gi5\_8521442\_x7.....agGcugcuggggaacacggggugccgaacu..... 1  
G1a\_5678145\_x7.....gggaacGcggggugccgaacu..... 1  
Gi3\_27441475\_x7.....cgucguggggaacacgggAugcc..... 1  
Gi2\_10519914\_x7.....gucgugggaGcacggggugccgaac..... 1  
Gi2\_10537918\_x7.....cgugggaacacggggugccUaacu..... 1  
G1a\_5691361\_x7.Ucgauccgagacgucgug..... 1  
Gi2\_10514041\_x7.....cgugggaacacgUggugc..... 1  
Gi3\_27395513\_x7.....cggagacgucgCgggaacacggggugcc..... 1  
G1a\_5695925\_x7.....gugggaacNcggggugcc..... 1  
Gi3\_27425578\_x7.....aucggagacgAcgugggaacacgg..... 1  
Gi2\_10499796\_x7.....cgAcguggggaacacggggugccga..... 1  
Gi5\_8513462\_x7.....gggaacacggggGgccgaac..... 1  
Gi3\_27409590\_x7.....cgugggaacacggAgugccgaa..... 1  
Gi3\_27386770\_x7.....ucggGgacgucgugggaacac..... 1  
Gi5\_8515023\_x7.....cgucAugggaacacggggugccgaacu..... 1  
Gi5\_8516402\_x7.....aucAgagacgucgugggaacacgg..... 1  
G11\_3971234\_x7.....cgugggaacacgggAugccga..... 1  
Gi5\_8519174\_x7.....aaNacggggugccgaacu..... 1  
Gi2\_10502162\_x7.....ggUaacacggggugccgaa..... 1  
Gi2\_10539549\_x7.....cgucgugAgaacacggggugccg..... 1  
Gi3\_27437142\_x7.....cgucgugggaacacggggCgccgaa..... 1  
Gi2\_10500685\_x7.....ggaacacggggugAcgaac..... 1  
Gi2\_10519718\_x7.....cgugggUaacacggggugccgaac..... 1  
Gi2\_10518577\_x7.....uUgugggaacacggggugccg..... 1  
Gi2\_10538674\_x7.....gugggaacacggggugccAaa..... 1  
Gi2\_10527810\_x7.....Ngugggaacacggggugccgaacu..... 1  
Gi4\_527439\_x7.....cUucgugggaacacggggugccga..... 1  
Gi2\_10499880\_x7.....cgucgCgggaacacggggugcc..... 1  
Gi3\_27436050\_x7.....gaucggagacgucgCgggaacacggggu..... 1  
Gi3\_27384446\_x7.....cAucguggggaacacggggugccg..... 1  
Gi3\_27403864\_x7.....ugggaacacgCggugccgaacu..... 1  
Gi2\_10538695\_x7.....ugggaacaNggggugccg..... 1  
G11\_3971045\_x7.....gugggaacacggCgugccgaacu..... 1  
Gi3\_27395065\_x7.....cgucgugggGaacacggggugcc..... 1  
Gi5\_8521645\_x7.....gucgugggaacacggggugccAaacu..... 1  
Gi3\_27449665\_x7.....cgugggaacacggggGgcc..... 1  
Gi2\_10536518\_x7.....acgucgugggaacacAgggugcc..... 1  
G11\_3969442\_x7.....cgugggCacacggggugccgaacu..... 1

Gi2\_10526879\_x7.....cgucgugggaacacggggugccgaUc..... 1  
 Gi3\_27396402\_x7.....Ggacgucgugggaacacggggugcc..... 1  
 Gi2\_10532906\_x7.....acgucgugggaacacggggugcAgaacu..... 1  
 Gi2\_10517065\_x7.....gCagacgucgugggaacacggggugcc..... 1  
 Gi1\_3966390\_x7.....ucgugggaacacggggguAccgaac..... 1  
 Gi5\_8505440\_x7.....aCacgucgugggaacacggggugccgaacu..... 1  
 Gi2\_10533165\_x7.....cggagacgucgugggaacacggggugUc..... 1  
 Gi3\_27390368\_x7.....ggagacgucgugggaaAacgggggu..... 1  
 Gi3\_27432858\_x7.....cgugggaacacggggugUcga..... 1  
 Gi5\_8527119\_x7.....gugggaacacggggugUcgaac..... 1  
 Gi3\_27416289\_x7.....gugggaaGacggggugccgaac..... 1  
 Gi3\_27428189\_x7.....cgugggaCcacggggugcc..... 1  
 Gi2\_10526865\_x7.....uCggaacacggggugccg..... 1  
 Gi2\_10530722\_x7.....aGgucgugggaacacggggugc..... 1  
 Gi1\_3965662\_x7.....gggaacacggAgugccgaacu..... 1  
 Gi3\_27449301\_x7.....cgucgugggaacacggggugccgC..... 1  
 Gi3\_27387057\_x7.....agacgCcgugggaacacggggugccgaacu..... 1  
 Gi2\_10516890\_x7.....gugggaacacggggguCccgaacu..... 1  
 Gi3\_27425354\_x7.....agacgucgCgggaacacggggugccgaac..... 1  
 Gl1\_5687245\_x7.....gugNgaacacggggugccgaacu..... 1  
 Gi1\_3965543\_x7.....cgucAugggaacacggggugccgaacu..... 1  
 Gi2\_10522560\_x7.....cggagacgucgCgggaacacggggugcc..... 1  
 Gi5\_8514267\_x7.....Ucugcuggggaacacggggugccgaacu..... 1  
 Gi2\_10516505\_x7.....cgucAugggaacacggggugc..... 1  
 Gi2\_10526949\_x7.....aucggagGcgucgugggaacacggggug..... 1  
 Gi2\_10506719\_x7.....ugggaacacggggugcGgaacu..... 1  
 Gi1\_3970835\_x7.....Uucgugggaacacggggug..... 1  
 Gi2\_10534600\_x7.....gugggaacacggUgugccga..... 1  
 Gi3\_27408351\_x7.....gacgucgugggaacacggggGgccgaac..... 1  
 Gi3\_27413391\_x7.....cgucgugggaacacgggAugccgaacu..... 1  
 Gi1\_3968847\_x7.....ggUgacgucgugggaacacggggugcc..... 1  
 Gi5\_8528533\_x7.....ggaacacggggUccgaacu..... 1  
 Gi3\_27431612\_x7.....gggaacacAgggugccgaa..... 1  
 Gi3\_27431955\_x7.....Nugggaacacggggugccgaac..... 1  
 Gl1\_5677319\_x7.....gugggaacacggggugccgaaUu..... 1  
 Gi1\_3959327\_x7.....gugggaacacggggugccgaacG..... 1  
 Gi2\_10500293\_x7.....aucggagacgucguggUa..... 1  
 Gi3\_27387834\_x7.....acguUgugggaacacggggugccgaacu..... 1  
 Gi1\_3970450\_x7.....ucgugggaacacggggguAccgaacu..... 1  
 Gl1\_5678460\_x7.....gugggaaAacggggugccgaacu..... 1  
 Gi3\_27455986\_x7.....acgGcgugggaacacggggugccgaacu..... 1  
 Gi5\_8514470\_x7.....cgucgugggaAacggggugccgaacu..... 1  
 Gi4\_527103\_x7.....cgugggaacacggggugccgaac..... 0  
 Gi5\_8518236\_x7.....gucgugggaacacggggugccgaaAu..... 1  
 Gi3\_27449637\_x7.....aucggagacAucgugggaacacggggugcc..... 1  
 Gi3\_27442357\_x7.....ugggaacacggggguAccgaa..... 1  
 Gi2\_10520488\_x7.....ugggaacacggggugcUga..... 1



Gi3\_27429743\_x7.....aucggagacgucgugggUacacg..... 1  
 Gi5\_8528022\_x7.....ggaacacggggugUcgaacu..... 1  
 Gi3\_27449630\_x7.....auUggagacgucgugggaacacggggugc..... 1  
 Gi5\_8515184\_x7.....Ugagacgucgugggaacacggggugccgaacu..... 1  
 Gi5\_8528575\_x7.....ucgugggaaAacggggugccgaacu..... 1  
 Gi3\_27439403\_x7.....aAcggagacgucgugggaacacgggg..... 1  
 Gi3\_27383802\_x7.....gaucggagacgCcgugggaacacggg..... 1  
 Gi2\_10506481\_x7.....aucAgagacgucgugggaacacggggugc..... 1  
 Gi3\_27435511\_x7.....ggaaAacggggugccgaacu..... 1  
 Gi3\_27419117\_x7.....gugNgaacacggggugccgaa..... 1  
 Gi3\_27417584\_x7.....cgucgCgggaacacggggugccg..... 1  
 Gi1\_3965207\_x7.....uGgugggaacacggggugccgaac..... 1  
 Gi2\_10534992\_x7.....cgugggaacaGggggugccgaacu..... 1  
 Gi2\_10518850\_x7.....agGcgucgugggaacacggggugc..... 1  
 Gi3\_27384950\_x7.....cgucguAggaacacggggugc..... 1  
 Gi1\_3969421\_x7.....ugggaGcacggggugccgaac..... 1  
 Gi2\_10507391\_x7.....aucggagacgucgugggaacacggggGg..... 1  
 Gi1\_3971794\_x7.....cgucguggNaacacggggugcc..... 1  
 Gi2\_10505676\_x7.....cgugUgaacacggggugccga..... 1  
 Gi3\_27447761\_x7.uUcgauccgagacgucguggga..... 1  
 Gi3\_27457295\_x7.....gggaacacggAgugccgaa..... 1  
 Gi5\_8510921\_x7.....ucgugggUacacggggugccgaacu..... 1  
 Gi1\_3971920\_x7.....cgucgugggaacacggggugccgaacu..... 0  
 Gi3\_27419271\_x7.....Aaucggagacgucgugggaacac..... 1  
 Gi3\_27445423\_x7.....aucgAagacgucgugggaacacgg..... 1  
 Gi3\_27408330\_x7.....cgugggaacGcggggugccg..... 1  
 Gi3\_27454999\_x7.....ggGacacggggugccgaa..... 1  
 Gi5\_8510991\_x7.....gucgugggUacacggggugccgaacu..... 1  
 Gi2\_10499985\_x7.....cgugUgaacacggggugccgaa..... 1  
 Gi2\_10524261\_x7.....gucgugggaaAacggggugc..... 1  
 Gi3\_27379910\_x7.....ugggaacacggggugcUg..... 1  
 Gi3\_27424339\_x7.....Gcgugggaacacggggugccga..... 1  
 Gi3\_27394890\_x7.....gaucggagaUgucgugggaacacg..... 1  
 Gi1\_3965795\_x7.....ggaacacgAggugccgaacu..... 1  
 Gi1\_3966873\_x7.....acgucgugggaacacggggugccgaGcu..... 1  
 Gl1\_5695729\_x7.....Agggaacacggggugccgaacu..... 1  
 Gi3\_27390235\_x7.....gugggaacacggggugccUa..... 1  
 Gi3\_27395023\_x7.....gaucggagacgucgugggaacacggggugccgaacu..... 0  
 Gi3\_27379420\_x7.....aucggagacgucgugggUacacgggg..... 1  
 Gi1\_3958928\_x7.....ugggaacacggggGgcccgaacu..... 1  
 Gl1\_5681176\_x7.....gugggaacacggggugAcgaaacu..... 1  
 Gi3\_27452990\_x7.....gucgugggaCcacggggugccgaacu..... 1  
 Gi1\_3972032\_x7.....gGcgugggaacacggggugccgaac..... 1  
 Gl1\_5683395\_x7.....aGcggagacgucgugggaacacggggugcc..... 1  
 Gl1\_5696730\_x7.....aucggagacgucgGgggaacacggg..... 1  
 Gi2\_10534817\_x7.....cggagacgNcgugggaacacggggugc..... 1  
 Gi2\_10511920\_x7.....gaCcgagacgucgugggaacacgggg..... 1

Gi2\_10516995\_x7.....Gcggagacgucgugggaaca..... 1  
Gi3\_27451618\_x7.....cgugggaacacggggugccUaac..... 1  
Gi5\_8522737\_x7.....gggaacacAgggugccgaac..... 1  
Gi2\_10520698\_x7.....aacacggggugccgaaAu..... 1  
Gi3\_27394435\_x7.....cguAggaacacggggugcc..... 1  
G1a\_5683416\_x7.....Gucggagacgucgugggaacacgggggu..... 1  
Gi3\_27456301\_x7.....cgugggaacacggggguAccg..... 1  
Gi3\_27383914\_x7.....gGgacgucgugggaacacggggugccgaac..... 1  
Gi3\_27415645\_x7.....gacgucguNggaaacacggggugccgaacu..... 1  
Gi3\_27390242\_x7.....gugggaacacCgggugccgaac..... 1  
Gi3\_27388583\_x7.....Agagacgucgugggaacacggggugcc..... 1  
Gi5\_8521099\_x7.....ugggaUcacggggugccgaacu..... 1  
G11\_3973768\_x7.....Gcgugggaacacggggugc..... 1  
Gi3\_27420391\_x7..Ucgauccgagacgucgugggaaca..... 1  
Gi3\_27426215\_x7.....cggagacgNcgugggaacacggg..... 1  
Gi3\_27439466\_x7.....gucgugggaUcacggggugccgaacu..... 1  
Gi3\_27396871\_x7.....cgucguggAaacacggggugccg..... 1  
Gi3\_27394925\_x7.....Cucggagacgucgugggaacacggg..... 1  
Gi2\_10539374\_x7.....aucggagacgucgugggCacac..... 1  
Gi5\_8504845\_x7.....aGcggagacgucgugggaacacgggggu..... 1  
G11\_3973439\_x7.....gUaacacggggugccgaa..... 1  
Gi3\_27381765\_x7.....cgugggaacacggggugcUgaa..... 1  
Gi3\_27411970\_x7.....gCgaacacggggugccgaa..... 1  
Gi3\_27429540\_x7.....gacgucgugggGacacggggugccgaac..... 1  
Gi5\_8509857\_x7.....Augggaacacggggugccgaacu..... 1  
Gi3\_27410451\_x7.....gaucggagacgucgugggCacacg..... 1  
Gi5\_8512720\_x7.....cgucgugggaacacggggugcUgaacu..... 1  
G14\_527852\_x7.....gugggaGcacggggugccgaacu..... 1  
Gi2\_10515707\_x7...gGucggagacgucgugggaacacggggug..... 1  
Gi2\_10529280\_x7.....Ugucgugggaacacggggugccg..... 1  
Gi2\_10519809\_x7...cUaucggagacgucgugggaaca..... 1  
Gi2\_10540431\_x7.....acgucgugggaacGcggggugccgaac..... 1  
G11\_3960083\_x7.....ucgugggaacacggggAgccgaacu..... 1  
Gi2\_10502925\_x7.....ggagacgCcgugggaacacggggugcc..... 1  
Gi5\_8505076\_x7.....ugggaacacggggugccgGac..... 1  
Gi3\_27393371\_x7.....aucggagacgucguggCaacacggg..... 1  
Gi2\_10502757\_x7.....ucgugggaacacggggGgcccgaac..... 1  
Gi2\_10520705\_x7.....Acgugggaacacggggugccgaac..... 1  
Gi5\_8503095\_x7.....cgucUugggaacacggggugccgaacu..... 1  
Gi2\_10499761\_x7.....gugggaUacggggugccg..... 1  
G11\_3963737\_x7.....Cucgugggaacacggggugccgaacu..... 1  
Gi2\_10534250\_x7..ugcgauccgagacgucgugggaacacggggugc..... 0  
Gi2\_10523722\_x7.....uAggaacacggggugccga..... 1  
Gi5\_8526223\_x7.....aacNcggggugccgaacu..... 1  
Gi2\_10512284\_x7.....cgucgugggaacacggggGgcccgaac..... 1  
Gi2\_10508931\_x7.....gucgugggaacacgggAugccgaacu..... 1  
Gi5\_8504530\_x7.....acgucgugggaacacggggUaccgaacu..... 1

Gi2\_10500881\_x7.....Ugagacgucgugggaacacggggugccgaacu..... 1  
 Gi2\_10527509\_x7.....cgugggCacacggggugcc..... 1  
 Gi1\_3958683\_x7.....Ggugggaacacggggugccg..... 1  
 Gi3\_27440558\_x7.....aucggagacgucgugggaacacggAg..... 1  
 Gi5\_8503242\_x7.....gGucggagacgucgugggaacacgg..... 1  
 Gi2\_10516351\_x7.....ucgugggaacacggggugUcgaac..... 1  
 Gi3\_27425781\_x7.....aucggagacgucgugggaaUacggggg..... 1  
 Gi3\_27390298\_x7.....aucggagacgAcgugggaacacggg..... 1  
 G1a\_5677165\_x7.ugcgauccgagacgucgugggaac..... 0  
 Gi2\_10525885\_x7.....guUggaacacggggugccga..... 1  
 Gi5\_8505762\_x7.....Ugugggaacacggggugccgaac..... 1  
 Gi3\_27383137\_x7.....cggagacgucgugggaacacggggCgcc..... 1  
 Gi3\_27393399\_x7.....acgucgugAgaacacggggugccgaac..... 1  
 Gi3\_27429064\_x7.....aucggagacgucAugggaacacgggg..... 1  
 Gi2\_10517933\_x7.....Gcggagacgucgugggaacacgggg..... 1  
 Gi1\_3972900\_x7.....cgugggaacCcggggugccgaacu..... 1  
 Gi2\_10499747\_x7.....aucAgagacgucgugggaacacggggugcc..... 1  
 Gi3\_27377817\_x7.....acgucgugggaacacggggugccAaacu..... 1  
 Gi3\_27429085\_x7.....gaucggagNcgucgugggaacacgggg..... 1  
 Gi4\_527677\_x7.....gugggaacacggggugccg..... 0  
 Gi3\_27395030\_x7.....ucgugggaacacggggugcAgaac..... 1  
 Gi5\_8524466\_x7.....Ggggaacacggggugccgaacuuu..... 1  
 Gi3\_27395177\_x7.....acgucguggUaacacggggugccgaacu..... 1  
 Gi3\_27407112\_x7.....gaucggGgacgucgugggaacacggg..... 1  
 Gi3\_27391488\_x7.....acgucgugggaacacggggugccgaCcu..... 1  
 Gi3\_27416121\_x7.....gucgugggaacacggggugccgUacu..... 1  
 Gi2\_10530918\_x7.....guUgugggaacacggggugcc..... 1  
 Gi1\_3968560\_x7.....gugggUacacggggugccgaacu..... 1  
 Gi2\_10504367\_x7.....aucggagaNgucgugggaacacggggug..... 1  
 Gi1\_3963422\_x7.....ugggaCcacggggugccgaacu..... 1  
 Gi3\_27395744\_x7.....ggagacgucgugggaacacggggG..... 1  
 Gi5\_8523080\_x7.....aacacggggugccgaaGu..... 1  
 Gi3\_27431073\_x7.....aucggagacgucgugAgaacacgg..... 1  
 Gi2\_10520376\_x7.....gucgugggaacGcggggugc..... 1  
 Gi3\_27454089\_x7.....gggaacacgAggugccgaa..... 1  
 Gi2\_10514055\_x7.....cggGgacgucgugggaacacggggugccgaacu..... 1  
 Gi3\_27433628\_x7.....aUacgucgugggaacacgggg..... 1  
 Gi2\_10523932\_x7.....ggaacacggggugccgaUcu..... 1  
 Gi2\_10531170\_x7.....aacacggggugccgUacu..... 1  
 Gi2\_10505403\_x7.....aUgucgugggaacacggggugc..... 1  
 Gi2\_10511248\_x7.....ugggaacacggggugAcgaacu..... 1  
 Gi3\_27403556\_x7.....Gcggagacgucgugggaacacggg..... 1  
 Gi2\_10518192\_x7.....cgucgugggaacacggAgugccgaacu..... 1  
 Gi2\_10540872\_x7.....cCugggaacacggggugc..... 1  
 G1a\_5683619\_x7.....aGcggagacgucguggga..... 1  
 Gi1\_3960118\_x7.....gucgugggaacCcggggugccgaacu..... 1  
 Gi3\_27378503\_x7.....ugggaaAacggggugccgaac..... 1

|                                                           |   |
|-----------------------------------------------------------|---|
| Gi3_27448524_x7.....aucAgagacgucgugggaacacggggugc.....    | 1 |
| Gi3_27449161_x7.....gugggCacacggggugccga.....             | 1 |
| Gi3_27393070_x7.....agacUucgugggaacacggggugccgaacu.....   | 1 |
| Gl1a_5699117_x7.....ggagacgucgugggaacacggggugccgaacu..... | 0 |
| Gi3_27378027_x7.....gaucggagacgucgugggaAacg.....          | 1 |
| Gi5_8504880_x7.Ggcgaucggagacgucguggg.....                 | 1 |
| Gi2_10513747_x7.....aucggagacgucUugggaacacggggugc.....    | 1 |
| Gi2_10531646_x7.....gugggaacacAgggugccgaa.....            | 1 |
| Gi1_3966040_x7.....gugggaacacggggGgccgaac.....            | 1 |
| Gi3_27397298_x7.....acgucgugggaGcacggggugccgaac.....      | 1 |
| Gi2_10508861_x7.....cgagacgucgugggaacacAgggugcc.....      | 1 |
| Gl1a_5700650_x7.....cgugggaacGcggggugccgaacu.....         | 1 |
| Gi1_3962309_x7.....gacgucgugggaacacggggCgccgaacu.....     | 1 |
| Gi2_10499817_x7.....cgAcgugggaacacggggugccg.....          | 1 |
| Gl1a_5696324_x7.....gugggCacacggggugccgaacu.....          | 1 |
| Gi1_3958837_x7.gcgauucggagacgucgugggaacacggggugcc.....    | 0 |
| Gi3_27452395_x7.....ugggaacacggAgugccga.....              | 1 |
| Gi3_27446382_x7.....gaucggGgacgucgugggaacac.....          | 1 |
| Gi2_10537190_x7.....uGgugggaacacggggugccg.....            | 1 |
| Gi3_27410962_x7.....gugggUacacggggugccg.....              | 1 |
| Gi2_10519564_x7.....cgugggaaGacggggugccgaacu.....         | 1 |
| Gi2_10517597_x7.....gugggaacacggggugAcg.....              | 1 |
| Gi3_27454719_x7.....cguAggaacacggggugccga.....            | 1 |
| Gi3_27392293_x7.....gaacacggggUccgaacu.....               | 1 |
| Gi3_27447005_x7.....cgucgugggGacacggggugccga.....         | 1 |
| Gl1a_5691830_x7.....cggagacgucgugggaacacggggugcc.....     | 0 |
| Gi1_3963961_x7.....ugggaacacggggUaccgaacu.....            | 1 |
| Gi3_27383942_x7.....cgucgugggaacacggggugccgG.....         | 1 |
| Gi3_27439389_x7.....cgugggaaUacggggugccga.....            | 1 |
| Gi2_10533872_x7.....agGcgucgugggaacacggggugcc.....        | 1 |
| Gi3_27404305_x7.....ggUgacgucgugggaacacggggugcc.....      | 1 |
| Gi1_3969722_x7.....cgugggaacacggggugccU.....              | 1 |
| Gi2_10528748_x7.....cgugggGacacggggugc.....               | 1 |
| Gi2_10509197_x7.....gugggaacaAggggugcc.....               | 1 |
| Gi5_8523241_x7.....aGcggagacgucgugggaacacggggugc.....     | 1 |
| Gi3_27384117_x7.....ucguUggaacacggggugc.....              | 1 |
| Gi3_27379175_x7.....cgucgugggaacacggCgugcc.....           | 1 |
| Gi2_10519298_x7.....aucggagacgucAugggaacacggggugcc.....   | 1 |
| Gi2_10514314_x7.....agacgCcgugggaacacggggugcc.....        | 1 |
| Gi3_27378545_x7.....acgucgugggaacCcggggugccgaac.....      | 1 |
| Gi2_10516491_x7.....Agugggaacacggggugccgaac.....          | 1 |
| Gi5_8505230_x7.....gaUcacggggugccgaac.....                | 1 |
| Gi2_10528888_x7.....ggaacacggggUccgaac.....               | 1 |
| Gi3_27395688_x7.....gugNgaacacggggugcc.....               | 1 |
| Gi3_27395611_x7.....acgucgugggaAacggggugccgaacu.....      | 1 |
| Gi1_3959369_x7.....gCgggaacacggggugcc.....                | 1 |
| Gi3_27446669_x7.....gggaGcacggggugccga.....               | 1 |

Gi2\_10530456\_x7.....aucggagacgucgugggaacacggggG..... 1  
Gi3\_27432018\_x7.....cgugggaacacggggAcc..... 1  
Gi3\_27387631\_x7.....acgucguAggaacacggggugccgaac..... 1  
Gi3\_27490324\_x6.....Aucgugggaacacggggugcc..... 1  
Gi4\_530301\_x6.....aucggagacgucgugggaacacggg..... 0  
Gi1\_3974755\_x6.....cUgagacgucgugggaacacggg..... 1  
Gi5\_8551477\_x6.....gaacacggCgugccgaacu..... 1  
Gi2\_10573589\_x6.....aGcggagacgucgugggaacacgggg..... 1  
G1a\_5706094\_x6.....ugggaacacgggUugccgaacu..... 1  
Gi3\_27548944\_x6.....ugggaacacgggUugccg..... 1  
Gi1\_3981397\_x6.....Ugucgugggaacacggggugccgaacu..... 1  
Gi3\_27471202\_x6.....cgucgugggUacacggggugccgaac..... 1  
Gi3\_27517822\_x6.....ucgugggaacacUgggugccgaac..... 1  
Gi3\_27466288\_x6.....gggaacGacggggugccgaacu..... 1  
Gi5\_8540473\_x6.ugcgauGcNagacgucgug..... 1  
Gi3\_27520012\_x6.....gggaacacggggAccgaa..... 1  
Gi2\_10561379\_x6.....cguCggaacacggggugccgaacu..... 1  
Gi1\_3977677\_x6.....ugggaacacAgggugccgaacu..... 1  
G1a\_5721892\_x6.....cgugggaacacggggugUcgaacu..... 1  
Gi2\_10574519\_x6.....gucgugggaacCcggggugcc..... 1  
Gi3\_27465184\_x6.....aAacgucgugggaacacggggugccgaacu..... 1  
Gi2\_10562999\_x6.....cgucgugggaacacggAgugccg..... 1  
Gi2\_10568093\_x6.....cgucgCgggaacacggggugc..... 1  
Gi2\_10564637\_x6.....ugggaUacggggugccgaac..... 1  
Gi3\_27537508\_x6.....cgugggaacacgggAugccga..... 1  
Gi5\_8541691\_x6.....Agugggaacacggggugccgaac..... 1  
Gi4\_532059\_x6.....gugggaacacggggugccgCacu..... 1  
Gi3\_27481096\_x6.....guCggaacacggggugccgaac..... 1  
Gi3\_27480568\_x6.....ggagacgucgugggaacacggggCgcc..... 1  
Gi5\_8549617\_x6.....gugCgaacacggggugccgaacu..... 1  
Gi3\_27499240\_x6.....Uucggagacgucgugggaacacgg..... 1  
Gi3\_27462730\_x6.....ggagacgucgugggaacacggggugccA..... 1  
Gi3\_27491014\_x6.....cggagacgucgugggGacacg..... 1  
Gi1\_3992011\_x6.....cUgagacgucgugggaacacgggg..... 1  
Gi1\_3991903\_x6.....Gucggagacgucgugggaacacgggg..... 1  
Gi3\_27538000\_x6.....aucggagacgucgugggaacaUgg..... 1  
Gi3\_27495946\_x6.....ugggUacacggggugccga..... 1  
Gi2\_10551683\_x6.....cgucgugggGacacggggugcc..... 1  
Gi2\_10574543\_x6.....gugggaacaUggggugccgaa..... 1  
Gi3\_27500524\_x6.....ugggaacacggggUcccgaacu..... 1  
Gi2\_10551251\_x6.....gaucggagacgucgugggaacaA..... 1  
Gi5\_8534803\_x6.....ugggaacacggggugccgaUc..... 1  
Gi2\_10582049\_x6.....ucgugggaacacggggugccgaacG..... 1  
Gi2\_10553639\_x6.....cggagacAucgugggaacacggggugcc..... 1  
Gi2\_10553837\_x6.....gucgugggaacaUggggugccgaacu..... 1  
Gi5\_8559145\_x6.....cUucgugggaacacggggugcc..... 1  
Gi2\_10562321\_x6.....ugggaacacggggugccUaacu..... 1

|                                                           |   |
|-----------------------------------------------------------|---|
| Gi5_8545945_x6.....uggaacaNggggugccgaa.....               | 1 |
| Gi4_530697_x6.....guggaacaacggggugccga.....               | 0 |
| Gi5_8559787_x6.....acgucguggaacacggggugcUgaacu.....       | 1 |
| Gl1_5723602_x6.....gugggaGcacggggugccgaac.....            | 1 |
| Gi3_27518986_x6.....cggagacgucguggaacCcg.....             | 1 |
| Gi2_10549859_x6.....gugggUacacggggugccga.....             | 1 |
| Gi3_27523294_x6.....gaucggagacgucguggaacGcg.....          | 1 |
| Gl1_5729320_x6.....Uggaacacggggugccgaac.....              | 1 |
| Gi3_27474820_x6.....uggaaGacggggugccgaacu.....            | 1 |
| Gi1_3981643_x6.....cggagacgucgCggaacacggggugccgaacu.....  | 1 |
| Gi3_27517228_x6.....cggagacgucgugggaaAacggggg.....        | 1 |
| Gi3_27547912_x6.....gaacacggggugcAgaac.....               | 1 |
| Gi3_27487138_x6.....gaacacggggAgccgaac.....               | 1 |
| Gi2_10580141_x6.....ggaacacggggugccgUac.....              | 1 |
| Gi3_27512758_x6.....cgucguggaacCggggugc.....              | 1 |
| Gi5_8535337_x6.....ggaacacggggugccgCac.....               | 1 |
| Gi3_27464242_x6.....cggagacgucguggaacacggggugUc.....      | 1 |
| Gi1_3989155_x6.....ucguUggaacacggggugccgaac.....          | 1 |
| Gi3_27492718_x6.....aucggagacgucguggaacacggggugcU.....    | 1 |
| Gi3_27507958_x6.....uggaacaacgAgggugccga.....             | 1 |
| Gi3_27502708_x6.....gucguggaacaAgggggugccgaacu.....       | 1 |
| Gi3_27549022_x6.....gggaacacggggugcUgaa.....              | 1 |
| Gi2_10569065_x6.....aucggagacgucguAggaacacggggugc.....    | 1 |
| Gi2_10554899_x6.....ucgugggaaUacggggugccgaacu.....        | 1 |
| Gi3_27480814_x6.....gugggCacacggggugccgaa.....            | 1 |
| Gi1_3984631_x6.....ggAaacacggggugccgaacu.....             | 1 |
| Gi3_27526900_x6.....acgucguggAaacacggggugccgaac.....      | 1 |
| Gi1_3983221_x6.....ucgugggaCcacggggugccgaacu.....         | 1 |
| Gi1_3979159_x6.....ucgugggaacCggggugcc.....               | 1 |
| Gi2_10579163_x6.....Ugugggaacacggggugccga.....            | 1 |
| Gi3_27503380_x6.....ugggaaUacggggugccgaa.....             | 1 |
| Gi3_27523426_x6.....cggagacgNcguggaacaacg.....            | 1 |
| Gi1_3985537_x6.....ucgugggaacacggggugccgaaAu.....         | 1 |
| Gi2_10578215_x6.....Aggagacgucguggaacacggggugcc.....      | 1 |
| Gi1_3985951_x6.....ggaacacgNggugccgaac.....               | 1 |
| Gl1_5725462_x6.....gggaacacgAgggugccgaacu.....            | 1 |
| Gi3_27472924_x6.....ugggaCcacggggugccga.....              | 1 |
| Gi3_27465340_x6.....cgucguggaacacggggUaccg.....           | 1 |
| Gi2_10577405_x6.....ggUacacggggugccgaa.....               | 1 |
| Gi1_3976117_x6.....uggaacaacggggugccgUacu.....            | 1 |
| Gi5_8555209_x6.....aucggagacgucguggaacacggggG.....        | 1 |
| Gi3_27542626_x6.....Ucgauccgagacgucguggaacacggggugcc..... | 1 |
| Gi2_10566221_x6.....acgucgCgggaacacggggugccgaacu.....     | 1 |
| Gi1_3982171_x6.....gugggGacacggggugccg.....               | 1 |
| Gi5_8562079_x6.....acgucgugAgaacacggggugccgaacu.....      | 1 |
| Gi5_8558617_x6.....uggUaacacggggugccgaacu.....            | 1 |
| Gi2_10571351_x6.....ggaacacggggugccgG.....                | 1 |

Gi2\_10573391\_x6.....aucggagacgucgugggGacacgg..... 1  
Gi3\_27533218\_x6.....cgucgugAgaacacggggugc..... 1  
Gi1\_3990199\_x6.....acgucgugggaCcacggggugccgaacu..... 1  
Gi1\_3990535\_x6.....gucgugggaaAacggggugccgaacu..... 1  
Gi3\_27546808\_x6.....aucggagacgCcgugggaacacgggg..... 1  
Gi2\_10568453\_x6.....cgucUugggaaacacggggugccgaacu..... 1  
Gi3\_27532846\_x6.....Aucgugggaacacggggugccga..... 1  
Gi3\_27480124\_x6.....gagacgucgugggaacacggggCgccgaacu..... 1  
Gi1a\_5710138\_x6.....cgugggaacacggggugccAaacu..... 1  
Gi3\_27472900\_x6.....agacgucgugggaacacggggugccgaUc..... 1  
Gi3\_27468658\_x6.....cgugggaacacggggAgcc..... 1  
Gi2\_10570421\_x6.....guggAaacacggggugccgaa..... 1  
Gi4\_531369\_x6.....cgugggaacacggggugccgaaAu..... 1  
Gi3\_27467758\_x6.....gucgugggaacCcgggugccga..... 1  
Gi3\_27462334\_x6.....cgAucgugggaacacggggugc..... 1  
Gi2\_10554305\_x6.....Uagacgucgugggaacacggggugccgaac..... 1  
Gi5\_8552443\_x6.....gugggaacacggggGgccgaa..... 1  
Gi5\_8560801\_x6.....Gcugcugggaacacggggugccgaac..... 1  
Gi2\_10561175\_x6.....aacacggggugccgaaGu..... 1  
Gi2\_10564235\_x6.....aAcggagacgucgugggaacacggg..... 1  
Gi2\_10569095\_x6.....gucgugggGacacggggugcc..... 1  
Gi5\_8558005\_x6.....gucgugggaacacggAgugccgaacu..... 1  
Gi2\_10564613\_x6.....Gcggagacgucgugggaacacggggu..... 1  
Gi5\_8552209\_x6.....Gucggagacgucgugggaacacgggg..... 1  
Gi3\_27498388\_x6.....gUagacgucgugggaacacgggg..... 1  
Gi3\_27493432\_x6.....gacguUgugggaacacggggugccgaacu..... 1  
Gi2\_10579025\_x6.....aucggagacgucgugggGac..... 1  
Gi2\_10563983\_x6.....aucggagacgucgCgggaacac..... 1  
Gi3\_27500578\_x6.....ugggaacCcggggugccga..... 1  
Gi3\_27494734\_x6.....gGcuggggaacacggggu..... 1  
Gi1\_3977089\_x6.....acgucgugggaacCcggggugccgaacu..... 1  
Gi1a\_5724346\_x6.....aucggagacgucgugggaacGcggg..... 1  
Gi2\_10579325\_x6.....gggaacacggggguAccgaac..... 1  
Gi2\_10583591\_x6.....Aacgucgugggaacacggggugccgaacu..... 1  
Gi2\_10567859\_x6.....Aaucggagacgucguggga..... 1  
Gi3\_27544822\_x6.....aucggagacgucgugggaacacgAggu..... 1  
Gi5\_8537767\_x6.....cgCgggaacacggggugccgaac..... 1  
Gi2\_10557551\_x6.....gucgugggaacacggggguAccgaacu..... 1  
Gi3\_27497632\_x6.....gUucggagacgucgugggaacacg..... 1  
Gi5\_8534389\_x6.....Uagacgucgugggaacacggggugccgaac..... 1  
Gi3\_27523498\_x6.....gacgucgugggaGcacggggu..... 1  
Gi2\_10545173\_x6.....cAucgugggaacacggggugccg..... 1  
Gi5\_8548681\_x6.....cgugggaacacggggugccgaa..... 0  
Gi2\_10582967\_x6.....ggagacgucgugggaacacAgggugcc..... 1  
Gi3\_27484510\_x6.....gugggaacacggggugccCa..... 1  
Gi2\_10563761\_x6.....cgucgugggaacGcggggugccga..... 1  
Gi2\_10561811\_x6.....aucggagacgucgCgggaacacggggugcc..... 1

Gi2\_10553915\_x6.....cgucgugggaGcacggggugccga..... 1  
Gi3\_27497932\_x6.....aucggagacgucgugggaaUacgg..... 1  
G1a\_5723032\_x6.....gugggaacacgUggugccgaacu..... 1  
Gi3\_27496432\_x6.....gaucggagacgucAugggaaacacggggu..... 1  
G1a\_5719312\_x6.....cgugggaaNacggggugcc..... 1  
Gi2\_10543289\_x6.....gggaUcacggggugccgaacu..... 1  
Gi2\_10571057\_x6.....gugggaacacggggugUcg..... 1  
Gi2\_10547999\_x6.....gaucggagacgCcgugggaaacacggggu..... 1  
Gi2\_10580105\_x6.....Caucggagacgucgugggaaacac..... 1  
Gi3\_27540184\_x6.....cgugAgaacacggggugccga..... 1  
Gi2\_10576919\_x6.....gugUgaacacggggugccgaac..... 1  
Gi2\_10541627\_x6.....gggNacacggggugccgaacu..... 1  
Gi2\_10546391\_x6.....gugggaacaAggggugccgaac..... 1  
Gi5\_8556115\_x6.....gaacacgUggugccgaacu..... 1  
Gi2\_10546925\_x6.....gGcgucgugggaaacacggggugccg..... 1  
Gi5\_8541745\_x6.....cgugAgaacacggggugccgaac..... 1  
Gi2\_10583351\_x6.....gucgugggaaacacgAggugccgaacu..... 1  
Gi2\_10564715\_x6.....aucgUagacgucgugggaaaca..... 1  
Gi1\_3977047\_x6.....ggaacacggggugccgaacAu..... 1  
Gi5\_8556715\_x6.....gaacacggggguCccgaacu..... 1  
Gi5\_8532505\_x6.....guCggaacacggggugccgaacu..... 1  
Gi5\_8560105\_x6.....ggaacGcggggugccgaac..... 1  
Gi2\_10567139\_x6.....gugAgaacacggggugccga..... 1  
Gi2\_10571309\_x6.....gaucggagGcgucgugggaaacacggggu..... 1  
Gi2\_10584983\_x6.....Gcgugggaaacacggggugccgaa..... 1  
Gi3\_27544666\_x6.....gaucggGgacgucgugggaaacacggggu..... 1  
Gi2\_10562627\_x6.....uGggagacgucgugggaaaca..... 1  
Gi3\_27522604\_x6.....ugggaacacUgggugccgaac..... 1  
G1a\_5727262\_x6.uUcgaucggagacgucgug..... 1  
Gi2\_10571087\_x6.....gugggaacacggggugcAg..... 1  
Gi1\_3992929\_x6.....gucgugggGacacggggugccgaacu..... 1  
Gi3\_27504250\_x6.....ugggaacCcggggugccg..... 1  
Gi1\_3981103\_x6.....cgugggaaacacggggugccgaaAu..... 1  
Gi2\_10578095\_x6.....cUaucggagacgucgugggaaacacggggug..... 1  
Gi3\_27470710\_x6.....agacgucgugggaaacGcggggugccgaac..... 1  
Gi1\_3980233\_x6.....ggGacacggggugccgaac..... 1  
Gi2\_10571339\_x6.....aucggGgacgucgugggaaacacggggugccga..... 1  
Gi3\_27517918\_x6.....gacgucgCgggaacacggggugccgaacu..... 1  
Gi3\_27475672\_x6.....agacgucgNgggaacacggggugccgaac..... 1  
Gi1\_3989461\_x6.....acgucgugggaaacacAgggugccgaacu..... 1  
Gi5\_8561431\_x6.....acguUgugggaaacacggggugccgaacu..... 1  
Gi2\_10584323\_x6.....gaucggagNcgucgugggaaacacggg..... 1  
Gi2\_10571207\_x6.....agacUucgugggaaacacggggugcc..... 1  
Gi5\_8533471\_x6.....gggaacacUgggugccgaacu..... 1  
Gi5\_8533993\_x6.....acgucgugggaaacacggggugccgaaUu..... 1  
Gi5\_8550457\_x6.....aucggagacgucgugggaaacacggggC..... 1  
Gi2\_10555181\_x6.....ggaacacggggugccgaacG..... 1



Gi2\_10563215\_x6.....uggaacacggggGgccga..... 1  
Gi2\_10550141\_x6...cUaucggagacgucgugggaacacggggugc..... 1  
Gi3\_27534934\_x6.....cgucgugggaacCggggugccgaac..... 1  
Gi5\_8553649\_x6.....acgucgugNgaacacggggugccgaac..... 1  
Gi2\_10572647\_x6.Ggcgaucggagacgucguggaaca..... 1  
G1a\_5713036\_x6.....guggaacacggggugGcgaacu..... 1  
Gi5\_8558023\_x6.....agacgucgugggaGcacggggugccgaacu..... 1  
Gi2\_10544357\_x6.....gaucggagacgucgugggaGcac..... 1  
Gi3\_27540322\_x6.....ucguggaacacggggGgc..... 1  
Gi2\_10582457\_x6.....gaucggagacgucgugggCacacggggugc..... 1  
G1a\_5727964\_x6.....aacacggggugccgaGcu..... 1  
Gi5\_8555041\_x6.....guggaacCggggugccga..... 1  
Gi5\_8540611\_x6.....cUgagacgucgugggaacacgg..... 1  
Gi5\_8546665\_x6.....Auggaaacacggggugccg..... 1  
Gi2\_10554503\_x6.....uggaacacggggugUcga..... 1  
Gi1\_3986707\_x6.....ucguggaacacggggugccgCac..... 1  
Gi3\_27503422\_x6.....aacacggggugGcgaacu..... 1  
Gi5\_8562745\_x6.....uGggagacgucgugggaacacg..... 1  
Gi2\_10556903\_x6.....gggaacacNggggugccgaa..... 1  
Gi3\_27514318\_x6.....guUgugggaacacggggugccga..... 1  
Gi2\_10545527\_x6.....aucggagacgucgugggGacacggggug..... 1  
Gi3\_27459520\_x6...Ggaucggagacgucgugggaacacg..... 1  
G1a\_5717860\_x6.....cguggAaacacggggugccgaacu..... 1  
Gi1\_3977773\_x6.....gggaacacggggugccgaaAu..... 1  
Gi3\_27529570\_x6.....cgucgugAgaacacggggugcc..... 1  
Gi2\_10557239\_x6.....ucgugggaaAacggggugccgaacu..... 1  
Gi5\_8547823\_x6.....guggaacacggggguAccgaac..... 1  
Gi5\_8535871\_x6.....guggaacacCgggugccgaacu..... 1  
Gi2\_10552991\_x6.....cgucgugggaCcacggggugccgaacu..... 1  
Gi3\_27511954\_x6.....ugggUacacggggugccgaa..... 1  
Gi2\_10559639\_x6.....acgucgugggaacCggggugcc..... 1  
Gi3\_27491392\_x6.....ugggaacaAggggugccgaac..... 1  
Gi2\_10561415\_x6.....gacgucgugggaGcacggggugcc..... 1  
G1a\_5711662\_x6.....uggaacCcgggugccgaacu..... 1  
Gi3\_27485446\_x6.....cguAggaacacggggugccg..... 1  
Gi5\_8554939\_x6.....gAcgugggaacacggggugccgaacu..... 1  
Gi2\_10580999\_x6.....acgucgugggaacacggggugccgGacu..... 1  
Gi5\_8545693\_x6.....Cuggaacacggggugccgaa..... 1  
Gi2\_10561931\_x6...aucggagacgucgugggaacCggggugcc..... 1  
Gi3\_27465472\_x6...aucggagCcgucgugggaacacggggugcc..... 1  
Gi2\_10558253\_x6...gaucggagacgCcgugggaacac..... 1  
Gi2\_10566743\_x6...ggagGcgucgugggaacacggggugc..... 1  
Gi2\_10576883\_x6.....Ucgucgugggaacacggggugccgaacu..... 1  
Gi3\_27498754\_x6.....agGcgucgugggaacacggggugccgaac..... 1  
Gi3\_27479794\_x6.....cgugggCacacggggugc..... 1  
Gi2\_10549661\_x6.....aacacggggugccgaacG..... 1  
Gi3\_27499330\_x6.....cgucgugggaCcacggggugccg..... 1

Gi1\_3974473\_x6.....gugNgaacacggggugccgaacu..... 1  
Gi2\_10558073\_x6.....gugggaacacggggugcAga..... 1  
Gi3\_27493522\_x6.....agUcgucgugggaacacggggugcc..... 1  
Gi3\_27542104\_x6.....cgugggaacacggggGgccga..... 1  
Gi2\_10565039\_x6.....aacUcggggugccgaacu..... 1  
Gi2\_10586807\_x6.....gucgugggaacacggggCgccgaac..... 1  
Gi2\_10582385\_x6.....Ggggaacacggggugccgaacuu..... 1  
Gi1\_3989227\_x6.....gUagacgucgugggaacacggggugccgaacu..... 1  
Gi5\_8552347\_x6.....cguAggaacacggggugccgaac..... 1  
Gi2\_10575371\_x6.....gacgucgugggaacacggggugccgCacu..... 1  
Gi2\_10546451\_x6.....cAucgugggaacacggggugcc..... 1  
Gi2\_10574801\_x6.....Gucggagacgucguggga..... 1  
Gi3\_27490438\_x6.....ugggaacacggggAgccga..... 1  
Gi2\_10570781\_x6.....ucUugggaacacggggugccgaac..... 1  
Gi2\_10541927\_x6.....ucguAggaacacggggugccgaac..... 1  
Gi2\_10560017\_x6.....ucgugggaacacggggugccAaac..... 1  
Gi2\_10550303\_x6.....gGucggagacgucgugggaacacggggugc..... 1  
Gi2\_10585091\_x6.....Ggacgucgugggaacacggggugccg..... 1  
Gi3\_27491578\_x6.....ucgugggaNcacggggugccgaa..... 1  
Gi2\_10588511\_x6.....aCcgagacgucgugggaacacgg..... 1  
Gi5\_8538787\_x6.....aUacgucgugggaacacggggugc..... 1  
Gi2\_10578701\_x6.....Agucgugggaacacggggugccgaacu..... 1  
Gi4\_529941\_x6.....gugggaacNcggggugccgaacu..... 1  
Gi3\_27458458\_x6.....aucAgagacgucgugggaacac..... 1  
Gi5\_8553199\_x6.....cgucgugggaacacggggGgc..... 1  
Gi2\_10564283\_x6.....gaacacggggugccgaGc..... 1  
Gi5\_8539555\_x6.....ggaacacggggGgccgaac..... 1  
Gi5\_8557087\_x6.....ggaGcacggggugccgaac..... 1  
Gi2\_10579931\_x6.....aucggagacgucgugggaacCc..... 1  
Gi2\_10572653\_x6.....cgugggaacCcgggugcc..... 1  
Gi3\_27473122\_x6.....aucggagacgucgCgggaacacgggg..... 1  
Gi3\_27471334\_x6.....gggaacacgUggugccgaac..... 1  
Gi5\_8531173\_x6.....gugggaacacggAgugccgaac..... 1  
Gi5\_8543407\_x6.....gAgggaacacggggugccgaa..... 1  
Gi2\_10580135\_x6.....cggagacgucgugggaacacggggAgcc..... 1  
Gi3\_27471124\_x6.....aucggagacgucguAggaacacggggugcc..... 1  
Gi2\_10559363\_x6.....gaucggagacgucgugggaGcacgggu..... 1  
Gi3\_27530728\_x6.....uAgugggaacacggggugccgaacu..... 1  
Gi3\_27480340\_x6.....cguggCaacacggggugccgaac..... 1  
Gi5\_8545657\_x6.....ucgugggaacacggggugccgUacu..... 1  
Gi1\_3988213\_x6.....Ggugggaacacggggugccgaac..... 1  
Gi1\_3985315\_x6.....gaacUcggggugccgaacu..... 1  
Gi5\_8551723\_x6.....gugggaacacggggugccgaaGu..... 1  
Gi1\_3984439\_x6.....ucguggAaacacggggugccgaacu..... 1  
Gi2\_10580081\_x6.....gucgugggaacacggggugcAgaacu..... 1  
Gi5\_8554033\_x6.....Ggucgugggaacacggggugccgaac..... 1  
Gi1\_3992575\_x6.....Cgaacacggggugccgaac..... 1

|                                                         |   |
|---------------------------------------------------------|---|
| Gi3_27527860_x6.....ggaacacgCggugccgaacu.....           | 1 |
| Gi3_27510364_x6.....cgucgugggaacacggggG.....            | 1 |
| Gi1_3980623_x6.....cgugggaacacgAggugccgaacu.....        | 1 |
| Gl1a_5712406_x6.....ugggaacacggggugccgGacu.....         | 1 |
| Gi5_8537095_x6.....aUacgucgugggaacacggggugcc.....       | 1 |
| Gi3_27542656_x6.....ucggagacgucgugggaacCcg.....         | 1 |
| Gi2_10556561_x6.....ugggaGcacggggugccg.....             | 1 |
| Gi5_8558239_x6.....aucggagacgucgugggaCcacg.....         | 1 |
| Gi2_10567565_x6.....ugggaGcacggggugccgaa.....           | 1 |
| Gi2_10559513_x6.....aucggagacgucgugggaacacggggAcc.....  | 1 |
| Gi2_10564181_x6.....cgucgCgggaacacggggugccg.....        | 1 |
| Gi3_27493138_x6.....Ccgagacgucgugggaacacggg.....        | 1 |
| Gi3_27487762_x6.....gaucggagacgucgugggaAacgggg.....     | 1 |
| Gi3_27527416_x6.....ucguggAaacacggggugccgaac.....       | 1 |
| Gi5_8550733_x6.....cUugggaacacggggugccgaacu.....        | 1 |
| Gi2_10568429_x6.....agGcgucgugggaacacggggugccgaacu..... | 1 |
| Gi3_27477076_x6.....Agucgugggaacacggggugcc.....         | 1 |
| Gi3_27507244_x6.....Aaucggagacgucgugggaacacg.....       | 1 |
| Gi1_3990775_x6.....ucgugggaGcacggggugccgaac.....        | 1 |
| Gi2_10576733_x6.....cggagacgucgugggaacacggggAcc.....    | 1 |
| Gi3_27512296_x6.....cAugggaacacggggugccg.....           | 1 |
| Gi2_10575983_x6.....ugggaacacggggugcUgaac.....          | 1 |
| Gi5_8541655_x6.....gugggaacacggggugccgaaA.....          | 1 |
| Gi5_8546353_x6.....Caacacggggugccgaac.....              | 1 |
| Gi1_3979669_x6.....gucgugggaacacAgggugccgaacu.....      | 1 |
| Gi3_27535750_x6.....ugggaacacggggugUcg.....             | 1 |
| Gi1_3976327_x6.....ggaaGacggggugccgaacu.....            | 1 |
| Gl1a_5731456_x6.....gugggaacacggggugccgaGc.....         | 1 |
| Gi2_10578527_x6.....Uucggagacgucgugggaacacggggugc.....  | 1 |
| Gi3_27496828_x6.....ugggaacacgggAugccga.....            | 1 |
| Gi2_10570871_x6.....Aaucggagacgucgugggaacacggggugc..... | 1 |
| Gl1a_5708002_x6.....aaUacggggugccgaacu.....             | 1 |
| Gi2_10575809_x6.....gaucggagGcgucgugggaacacggg.....     | 1 |
| Gi3_27524794_x6.....cUgagacgucgugggaacacggggug.....     | 1 |
| Gi2_10571615_x6.....ucguCggaacacggggugccgaacu.....      | 1 |
| Gi2_10584671_x6.....ggaacacggggugAcgaacu.....           | 1 |
| Gi3_27499444_x6.....agacgucgCgggaacacggggugccgaacu..... | 1 |
| Gi5_8547457_x6cugcgauccggagacgucgugggaacacgggg.....     | 0 |
| Gi2_10545911_x6.....ugggGcacggggugccgaa.....            | 1 |
| Gi5_8546407_x6.....cgugggaacacggggugccgaaGu.....        | 1 |
| Gi3_27487468_x6.....aacacgCggugccgaacu.....             | 1 |
| Gi3_27487738_x6.....ugggaacacgggCugccgaac.....          | 1 |
| Gi2_10579721_x6.....cgucgugggaacacggggAgccgaacu.....    | 1 |
| Gi2_10565819_x6.....ugggaacaUggggugccgaac.....          | 1 |
| Gi5_8532787_x6.....acgucgugggaacaUggggugccgaacu.....    | 1 |
| Gi1_3983515_x6.....ggaacGcggggugccgaac.....             | 1 |
| Gi5_8535733_x6.....Gucggagacgucgugggaacacggg.....       | 1 |

Gi3\_27510220\_x6....aucggagacgucgugggaaAacgg..... 1  
Gi2\_10552091\_x6...gaucggagNcgucgugggaaaca..... 1  
Gi3\_27502330\_x6.....agacgucguAggaacacggggugccgaac..... 1  
Gi3\_27487378\_x6.....acgucgugggaaacacggggugUcgaacu..... 1  
Gi1\_3987793\_x6....aucggagacgucgugggaaacacgggU..... 1  
Gi5\_8534191\_x6....aucggagacgucgugggaaGcacgg..... 1  
Gi1\_3976885\_x6.....gaacCcggggugccgaacu..... 1  
Gi5\_8534755\_x6.....gAaacacggggugccgaac..... 1  
Gi2\_10577987\_x6.....ugggaacacggAgugccga..... 1  
Gi5\_8549215\_x6.....acgucgugggaaacacggggugccgaaAu..... 1  
Gi3\_27543226\_x6.....cgugggaaacacgUggugccg..... 1  
G1a\_5722708\_x6.....ugggaacacgAggugccgaacu..... 1  
Gi1\_3988375\_x6.....ugggaacacggggugcGgaacu..... 1  
Gi2\_10589231\_x6.....gacgucgugggaaacacggggGgcc..... 1  
Gi5\_8562625\_x6.....cgugUgaacacggggugccgaac..... 1  
Gi2\_10570403\_x6.....agacgucgugggaaacacggggCgccgaacu..... 1  
Gi2\_10573655\_x6.....cgugggaaacacggAgugcc..... 1  
Gi5\_8532733\_x6.....ugggaacacggggCgccgaa..... 1  
Gi3\_27544960\_x6.....cgucgugggaaacacggggugccgaCc..... 1  
Gi2\_10554539\_x6.....Cucgugggaaacacggggugccgaac..... 1  
Gi3\_27527578\_x6.....ucgugggaaacacggggugccA..... 1  
Gi5\_8550385\_x6.....gggaacacggggugccgUacu..... 1  
Gi4\_530199\_x6.....ugggaacacggggugccgCacu..... 1  
Gi3\_27477928\_x6.....cgugggaaacacggggugcGcgaac..... 1  
Gi3\_27521188\_x6.....agacgucgNgggaacacggggugcc..... 1  
Gi5\_8538421\_x6.....ugggaaUacggggugccgaac..... 1  
G1a\_5704018\_x6.....ggGacacggggugccgaacu..... 1  
Gi2\_10576025\_x6....aucggagacAucgugggaaacac..... 1  
Gi3\_27548320\_x6.....ggaacaAggggugccgaac..... 1  
Gi2\_10585547\_x6.....agacgucgugggaaacacggggugAc..... 1  
Gi3\_27466534\_x6.....Ugucgugggaaacacggggugccga..... 1  
Gi1\_3975655\_x6....aucggGgacgucgugggaaaca..... 1  
Gi2\_10559723\_x6.....ggagacgucguAggaacacggggugcc..... 1  
Gi2\_10563743\_x6...gaucUgagacgucgugggaaacacggggU..... 1  
Gi3\_27493588\_x6....aucggagacgucgugggG..... 1  
Gi3\_27496444\_x6...gaucUgagacgucgugggaaacacggg..... 1  
Gi3\_27459772\_x6....aucggagacAucgugggaaacacggg..... 1  
Gi2\_10569881\_x6.....cgugggaaCcacggggugcc..... 1  
Gi5\_8549365\_x6....aGcggagacgucgugggaaacacgggg..... 1  
Gi3\_27494404\_x6.....ggaCcacggggugccgaac..... 1  
Gi3\_27531334\_x6.....ucgugggaaacacgAggugccgaac..... 1  
Gi3\_27520438\_x6....aucggagacgucgugAgaacac..... 1  
Gi3\_27499600\_x6.....gucguggAaacacggggugccgaac..... 1  
G1a\_5711182\_x6...gaucggagacgucgugggaaacacgggAugcc..... 1  
Gi3\_27481510\_x6.....ggCcacacggggugccgaacu..... 1  
Gi3\_27499300\_x6....aAcggagacgucgugggaaacacggggugcc..... 1  
Gi4\_533289\_x6.....ugggaacacggggugccgaacA..... 1

Gi1\_3986305\_x6.....gugggaacacggggGgccgaacu..... 1  
Gi3\_27481024\_x6.....ggaacacgggCugccgaacu..... 1  
Gi3\_27477304\_x6....aucggagacgucgugggUacacggggugcc..... 1  
Gi5\_8542339\_x6.....agacgAcgugggaaacacggggugcc..... 1  
Gi5\_8553313\_x6.....gugggaacCcggggugccgaa..... 1  
Gi2\_10566401\_x6.....cgucgugggaaacacggggCgc..... 1  
Gi5\_8547301\_x6.....acgucgugggaaacacgAggugccgaacu..... 1  
Gi3\_27535420\_x6.....cggGgacgucgugggaaacacggggugcc..... 1  
Gi2\_10568813\_x6....aucggaAacgucgugggaaaca..... 1  
Gi5\_8547415\_x6.....acgucgugggaaacacggAgugccgaacu..... 1  
Gi3\_27526510\_x6.....gGcgugggaaacacggggugccg..... 1  
Gi5\_8550493\_x6.....Aacgucgugggaaacacggggugccgaacu..... 1  
Gi3\_27542920\_x6....gaucggagNcgucgugggaaacacg..... 1  
Gi2\_10561979\_x6.....Gggagacgucgugggaaacacgggg..... 1  
Gi2\_10553333\_x6.....ggUgacgucgugggaaacacggggug..... 1  
Gi5\_8548369\_x6.....cgugggaaacacUgggugccgaacu..... 1  
Gi2\_10572743\_x6.....gugggaacacggAgugccga..... 1  
Gi1\_3991477\_x6.....ucgugggUacacggggugccgaacu..... 1  
Gi5\_8548825\_x6.....gggaacacCgggugccgaacu..... 1  
Gi2\_10581263\_x6.....ucgugggaaacacggggCgccg..... 1  
Gi5\_8559457\_x6.....cgucgugggaaacacgggAugccgaacu..... 1  
Gi2\_10567985\_x6....gaucggagacgucAugggaacacggg..... 1  
Gi3\_27460522\_x6....aucggagacgucgugggaaacacAggg..... 1  
Gi3\_27527092\_x6....aucggUgacgucgugggaaacacg..... 1  
Gi3\_27546226\_x6....gaucggagacgucgugggCacacgg..... 1  
Gi3\_27485512\_x6.....ucgugggaaacacggggCgc..... 1  
Gi3\_27471448\_x6....gaucggagacgucgugggGacac..... 1  
Gi2\_10582583\_x6.....gaaCcggggugccgaacu..... 1  
G1a\_5707444\_x6.....Cggaacacggggugccgaa..... 1  
Gi3\_27528220\_x6.....ggagacgucgugggGcacgggu..... 1  
Gi3\_27487342\_x6....aucggagacgucgugggaaacacgC..... 1  
Gi3\_27507490\_x6....aucggagUcgucgugggaaacacg..... 1  
Gi3\_27511516\_x6....gaGcggagacgucgugggaaacacggg..... 1  
Gi1\_3974401\_x6.....gacgCcgugggaaacacggggugccgaac..... 1  
G1a\_5727166\_x6....cgaucggagacgucgugggaaacacggggugcc..... 0  
Gi3\_27461278\_x6.....gugNgaacacggggugccga..... 1  
Gi3\_27542440\_x6....aucggagacgucgCgggaacacgg..... 1  
Gi3\_27506260\_x6.....cgucgGgggaacacggggugccgaacu..... 1  
Gi3\_27486640\_x6.....ucgugggaaacacggggugUcgaac..... 1  
Gi2\_10588295\_x6.....gucgugggNacacggggugccga..... 1  
Gi1\_3991435\_x6.....ucgugggaaacacggUgugccgaacu..... 1  
Gi3\_27493072\_x6....Agagacgucgugggaaacacgggg..... 1  
Gi3\_27518074\_x6.....acgucgGgggaacacggggugccgaacu..... 1  
Gi2\_10579841\_x6....aucAgagacgucgugggaaacac..... 1  
Gi3\_27462742\_x6....gaucggagacgucgugggGcacggg..... 1  
G1a\_5722474\_x6.....gugggaacacgggAugccgaacu..... 1  
Gi2\_10576529\_x6....aucggagacgucgugggaaacGcggg..... 1

Gi3\_27542158\_x6.....uGggagacgucgugggaacacggggu..... 1  
 Gi3\_27478432\_x6...gaucggagacgucgugggaacCcg..... 1  
 Gi3\_27473710\_x6.....Ggacgucgugggaacacggg..... 1  
 Gi2\_10579637\_x6.....gaUcacggggugccgaac..... 1  
 Gi3\_27538636\_x6.....cgugggaacacggggugcA..... 1  
 Gi2\_10561121\_x6.....ugggaacacggggugcAga..... 1  
 G1a\_5707936\_x6.....agacgucgugggaacacggggugccgaacu..... 0  
 Gi2\_10569377\_x6.....cgucgugggaAacggggugccgaacu..... 1  
 Gi2\_10590413\_x6.....cgucgugggaacacggggCgccga..... 1  
 Gi3\_27517396\_x6...gaucggagacgucgugggaacGcggg..... 1  
 Gi3\_27649222\_x5...aucggagacgucgugggaCcacggggugc..... 1  
 Gi2\_10615960\_x5.....acUucgugggaacacggggugccgaacu..... 1  
 Gi3\_27631947\_x5.....gugggaacacggCgugccga..... 1  
 Gi1\_3998300\_x5.....gucAugggaacacggggugccgaacu..... 1  
 Gi3\_27577552\_x5.....cgugggaacacggggugAc..... 1  
 Gi3\_27610292\_x5.....guAgugggaacacggggugccgaacu..... 1  
 Gi2\_10623490\_x5...cggagacgucgugggaacCgggggu..... 1  
 Gi5\_8598902\_x5.....Ggugggaacacggggugc..... 1  
 G1a\_5758102\_x5...aucggagacgucgugggCacacggg..... 1  
 Gi3\_27651042\_x5.....gugNgaacacggggugccg..... 1  
 Gi2\_10608595\_x5...cggagacgucgugggaacacggggugAc..... 1  
 Gi2\_10641110\_x5...aucggagCcgucgugggaaca..... 1  
 G1a\_5759912\_x5.....gugggaacacggggCgccgaac..... 1  
 Gi2\_10593250\_x5...cggagacgNcgugggaacacggggu..... 1  
 Gi3\_27626812\_x5...cgAcgugggaacacggggugccga..... 1  
 Gi3\_27556757\_x5...aucggagacgucgugggaacacggAgugcc..... 1  
 Gi3\_27605507\_x5.....gGgggaacacggggugccgaacuu..... 1  
 Gi1\_4011345\_x5...agacgCcgugggaacacggggugccgaac..... 1  
 Gi3\_27565932\_x5...gGgacgucgugggaacacggggu..... 1  
 Gi3\_27627277\_x5...gaAcggagacgucgugggaacacggggu..... 1  
 G1a\_5746677\_x5...auUggagacgucgugggaacacggg..... 1  
 Gi3\_27649887\_x5...aucggCgacgucgugggaacacgggg..... 1  
 G1a\_5733697\_x5.....Ugugggaacacggggugcc..... 1  
 Gi3\_27654457\_x5...gucgugggaacacgAggugccgaac..... 1  
 Gi2\_10625595\_x5.....Ugugggaacacggggugccgaa..... 1  
 Gi1\_4003525\_x5.....cgugggaacacggggugccgaaUu..... 1  
 Gi3\_27631387\_x5...agacgucgugggaacacAgggugccgaacu..... 1  
 Gi3\_27639827\_x5...aucUgagacgucgugggaacacggg..... 1  
 Gi3\_27608547\_x5...gucgugggaacaUggggugccgaac..... 1  
 Gi3\_27658552\_x5...cgugggaacacggggugccAaa..... 1  
 Gi2\_10611045\_x5...acgucgugggaacacggAgugcc..... 1  
 Gi1\_3999990\_x5...Gcggagacgucgugggaacacggggugcc..... 1  
 Gi2\_10591670\_x5...acgucgugggaGcacggggugcc..... 1  
 Gi1\_3995625\_x5...gUgaacacggggugccgaac..... 1  
 Gi1\_4015640\_x5...gggaacacgggAugccgaacu..... 1  
 Gi2\_10593060\_x5...ggagacgucgugggaacaUggggugcc..... 1  
 Gi5\_8569287\_x5...cgugggaaNacggggugcc..... 1

Gi1\_4004185\_x5.....uggaacacggggugccgaaU..... 1  
 Gi2\_10632070\_x5...gaucggagacgucgugggaacCcggggu..... 1  
 Gi3\_27605407\_x5.....cguAggaacacggggugccgaa..... 1  
 Gi3\_27638512\_x5....aucNgagacgucgugggaacacg..... 1  
 Gi3\_27619937\_x5.....gacgucgugggaGcacggg..... 1  
 Gl1a\_5734542\_x5.....uggaacacggggugccAaacu..... 1  
 Gi2\_10607560\_x5.....cgGcgugggaacacggggugccga..... 1  
 Gi5\_8595167\_x5.....cggagacgucgugggaacacggggugccgaa..... 0  
 Gi5\_8586247\_x5...Uaucggagacgucgugggaaca..... 1  
 Gi3\_27584132\_x5.....cggagacgucgugggaGcacggg..... 1  
 Gi3\_27565552\_x5..Ucgaucggagacgucgugggaacacggg..... 1  
 Gi3\_27658127\_x5....aucggGgacgucgugggaacacggggugc..... 1  
 Gi2\_10608230\_x5.....gaUgucgugggaacacggggugccgaacu..... 1  
 Gl1a\_5742917\_x5.....ggaacacggggugcUgaacu..... 1  
 Gi3\_27580032\_x5.....acgucgugggUacacggggugccgaacu..... 1  
 Gi2\_10649850\_x5.....gggaacacggggugcAgaac..... 1  
 Gi1\_4015885\_x5.....cgucgugggaacCcggggugcc..... 1  
 Gl1a\_5756177\_x5....aucAgagacgucgugggaacacgggggu..... 1  
 Gi3\_27633682\_x5.....ggaacacggggugUcgaa..... 1  
 Gi2\_10625435\_x5....aucggagacgucgugggaUac..... 1  
 Gi3\_27562212\_x5.....cgugggaacacggggugccgG..... 1  
 Gi2\_10612745\_x5.....agacgucgugggaacacggggAgcc..... 1  
 Gi3\_27613932\_x5....ucggagacgucgugggCacacg..... 1  
 Gi2\_10628195\_x5.....Ucgucgugggaacacggggugc..... 1  
 Gi3\_27597577\_x5.....gugggaacacggggugccgUa..... 1  
 Gi3\_27559272\_x5.....Gggagacgucgugggaacacggg..... 1  
 Gi5\_8571142\_x5.....cgugggaacGcggggugccga..... 1  
 Gi3\_27596417\_x5.....ucgugggaNcacggggugc..... 1  
 Gi3\_27621247\_x5....aucggagacgucgugggaacacgAgggugcc..... 1  
 Gi5\_8589577\_x5....aucggagacgucgugggCacacgg..... 1  
 Gi2\_10645235\_x5...gUucggagacgucgugggaacacggg..... 1  
 Gi3\_27595642\_x5.....cgucgugggaGcacgggggu..... 1  
 Gi2\_10596950\_x5.....agCcgucgugggaacacggggugccgaacu..... 1  
 Gi5\_8569842\_x5.....cgucgugggaacacggggguAccgaacu..... 1  
 Gi5\_8601012\_x5....aucggagacgucgugggaacacggggugccgaac..... 0  
 Gi3\_27635782\_x5.....cgugggaaUacggggugccg..... 1  
 Gi5\_8569227\_x5.....gacgucgugAgaacacggggugccgaacu..... 1  
 Gi1\_4001440\_x5.....ucgugggaacacggggugccgUacu..... 1  
 Gi2\_10621045\_x5.....cgucgugggGcacggggugc..... 1  
 Gi2\_10606790\_x5.....gugggaacacggggAgccgaa..... 1  
 Gi5\_8586912\_x5.....gCacacggggugccgaacu..... 1  
 Gi2\_10591300\_x5.....ucgugggaCcacggggugccgaacu..... 1  
 Gi2\_10608370\_x5.....gacgucgugggaacacggggAgccgaacu..... 1  
 Gi2\_10649510\_x5.....cgugggaaUacggggugccgaac..... 1  
 Gi2\_10628425\_x5....aCcgagacgucgugggaacacggggugc..... 1  
 Gi3\_27648432\_x5...gaCcgagacgucgugggaacacg..... 1  
 Gi1\_4012200\_x5.....gaacacggUgugccgaacu..... 1

Gi5\_8601102\_x5.....cguUgugggaacacggggugccgaacu..... 1  
Gi3\_27613947\_x5...gaucggagacgCcgugggaacacg..... 1  
Gi2\_10617175\_x5....aucggagacgucgugggCacacggggg..... 1  
Gi3\_27645367\_x5.....cNugggaacacggggugccgaacu..... 1  
Gi2\_10622640\_x5....Gucggagacgucgugggaacacgggg..... 1  
Gi2\_10644450\_x5...gcgaucggGgacgucgugggaacacggggugcc..... 1  
Gi1\_3997000\_x5.....cggGgacgucgugggaacacggggugc..... 1  
Gi3\_27615947\_x5.....gacgucgugggaacacggggugccgGac..... 1  
Gi3\_27656372\_x5.....gacgucgugggaacacggggugUcgaacu..... 1  
Gi2\_10629620\_x5.....agacgucgugggaacacggggCgc..... 1  
Gi3\_27623267\_x5....Cucggagacgucgugggaacacg..... 1  
Gi2\_10650305\_x5.....ucgugggaacacgggAugccgaac..... 1  
Gi2\_10628935\_x5....Caucggagacgucgugggaaca..... 1  
Gi1\_4017620\_x5.....acgCcgugggaacacggggugccgaacu..... 1  
Gi3\_27577687\_x5....aAcggagacgucgugggaacacggggugc..... 1  
Gi3\_27655467\_x5.....gaaUacggggugccgaac..... 1  
Gi2\_10628660\_x5...gaucggagacguUgugggaacacgggg..... 1  
Gi3\_27615887\_x5....cggagacgNcgugggaacac..... 1  
Gi3\_27620782\_x5.....Ugucgugggaacacggggugc..... 1  
Gi3\_27552022\_x5....ucggGgacgucgugggaacacggggugcc..... 1  
Gi5\_8576997\_x5.....Naacacggggugccgaacu..... 1  
Gi3\_27643857\_x5....gucgugggaacacggggugcGgaacu..... 1  
Gi2\_10591415\_x5.....gggaaUacggggugccgaac..... 1  
Gi2\_10593240\_x5.....ucgNgggaacacggggugccgaacu..... 1  
Gi3\_27558552\_x5....cgucguggNaacacgggg..... 1  
Gi3\_27584857\_x5....ggGgacgucgugggaacacggggugccgaacu..... 1  
Gi3\_27647537\_x5.....gggCacacggggugccgaacu..... 1  
Gi2\_10621425\_x5.....cgugggaacacggggCgccgaa..... 1  
Gi2\_10604745\_x5....agacgucgugggaCcacggggugcc..... 1  
Gi5\_8592217\_x5....agacUucgugggaacacggggugccgaacu..... 1  
Gi2\_10602650\_x5.....Agugggaacacggggugc..... 1  
Gi1\_4003655\_x5.....cgucgugggaacacggggAgccgaacu..... 1  
Gi2\_10617200\_x5.....ucgugggaacUcggggugccgaacu..... 1  
Gi2\_10609040\_x5....cgucguggAaacacggggugccgaacu..... 1  
Gi3\_27621852\_x5.....ggaacaAggggugccgaacu..... 1  
Gi3\_27616277\_x5.....gucgugggaacUcggggugccgaacu..... 1  
Gi2\_10618705\_x5...gaucggagacgucgugggaAacggg..... 1  
Gi2\_10636520\_x5.....Cgggaacacggggugccg..... 1  
Gi2\_10631680\_x5.....acgucguAggaacacggggugccgaacu..... 1  
Gi2\_10600840\_x5....aucggagacguUgugggaacacggggugc..... 1  
Gi5\_8575192\_x5.....gucgAgggaacacggggugccgaacu..... 1  
Gi3\_27643827\_x5....gaucggagacgucgugggaacCgggg..... 1  
Gi3\_27578362\_x5.....ucgAgggaacacggggugccgaac..... 1  
Gi2\_10639620\_x5....aucggagacgucgugggaacacggAgu..... 1  
Gi3\_27560157\_x5.....ugggaacaUggggugccgaa..... 1  
Gi2\_10626745\_x5....cgugggaacacggAgugccgaa..... 1  
Gi4\_535233\_x5.....cgAgggaacacggggugccgaacu..... 1



Gi2\_10649885\_x5.....gggaacacggggugAcgaacu..... 1  
Gi3\_27556102\_x5.....aucggagacgucgugggaaacCcggggugc..... 1  
Gi1\_3994090\_x5.....cgucgugggaacacggggugccgaGcu..... 1  
Gi2\_10635730\_x5.....gucgugggaaacGcggggugccga..... 1  
Gi2\_10644955\_x5.....gugNgaacacggggugccgaac..... 1  
Gi2\_10608310\_x5.....cgucgugAgaacacggggugccgaacu..... 1  
Gi3\_27564422\_x5.....cgugggaaUacggggugcc..... 1  
Gi2\_10639380\_x5.....gacgucgugggaGcacggggugccg..... 1  
G1a\_5739957\_x5.....Uucgugggaacacggggugccgaac..... 1  
Gi3\_27560987\_x5.....acgucgugggaacaUggggugccgaac..... 1  
Gi2\_10636265\_x5.....ggagacgCcgugggaacacggggugc..... 1  
Gi1\_4005680\_x5.....cgugggaacacggggugccgaaU..... 1  
Gi5\_8595952\_x5.....ggaacacggggugccgaUc..... 1  
Gi4\_537243\_x5.....Gcgugggaacacggggugccgaacu..... 1  
Gi5\_8584422\_x5.....ugggaaAacggggugccgaacu..... 1  
Gi1\_4016090\_x5.....Gucggagacgucgugggaacacggggugc..... 1  
Gi5\_8585717\_x5.....acgucgugggCacacggggugccgaacu..... 1  
Gi2\_10639670\_x5.....gggUacacggggugccgaac..... 1  
Gi1\_4002545\_x5.....ggaacacggggugUcgaacu..... 1  
Gi5\_8599942\_x5.....cgugggaaNacggggugc..... 1  
Gi1\_3996775\_x5.....aucggagacgucgugggaacacggU..... 1  
Gi2\_10608165\_x5.....agacgucgugggaacacggggugccgCacu..... 1  
Gi3\_27623942\_x5.....gaacCcggggugccgaac..... 1  
Gi3\_27624847\_x5.....Aaucggagacgucgugggaacacgg..... 1  
Gi2\_10630065\_x5.....cggagacgucgugggaacacggggGgc..... 1  
Gi1\_4014080\_x5.....acgucgugggaacGcggggugcc..... 1  
Gi3\_27613337\_x5.....acgucgugggaacacggUgugccgaacu..... 1  
Gi2\_10634825\_x5.....gaucggagacgucgugggGacacggggugc..... 1  
Gi2\_10620930\_x5.....cgAcgugggaacacggggugc..... 1  
Gi2\_10619910\_x5.....Caucggagacgucgugggaacacggggugcc..... 1  
Gi1\_3996840\_x5.....gggaacacggggAgccgaacu..... 1  
Gi1\_4016225\_x5.....gugggaacacggggugccgaGc..... 1  
Gi3\_27550282\_x5.....cgucgugggaacaUggggugccgaac..... 1  
Gi2\_10603395\_x5.....ugggaacacggggUaccgaac..... 1  
Gi2\_10598230\_x5.....cgucgugggaacacggggugccgCac..... 1  
Gi3\_27585872\_x5.....ugggaacacggggAgccg..... 1  
G1a\_5735972\_x5.....cgugAgaacacggggugccgaacu..... 1  
Gi2\_10640900\_x5.....gugggaUcacggggugccgaac..... 1  
Gi1\_3995040\_x5.....ggaacacggggAgccgaacu..... 1  
Gi5\_8590832\_x5.....gugggaacacggggugccA..... 1  
Gi3\_27640372\_x5.....cguggUaacacggggugccgaac..... 1  
G1a\_5737687\_x5.....gggaacacggggugcUgaacu..... 1  
Gi1\_3996550\_x5.....aacaAggggugccgaacu..... 1  
Gi3\_27632672\_x5.....Gcgucgugggaacacggggugccg..... 1  
Gi2\_10602200\_x5.....gaucggagCcgucgugggaacacggggu..... 1  
Gi3\_27619237\_x5.....ucggagacNucgugggaacacg..... 1  
Gi3\_27566312\_x5.....gCcgugggaacacggggugcc..... 1

Gi2\_10612595\_x5.....gacgucgugggaacacggggugccgaGcu..... 1  
 Gi3\_27631797\_x5.....cggagGcgucgugggaacacggggugcc..... 1  
 Gi1\_4012665\_x5.....gggaacacgAggugccgaacu..... 1  
 Gi1\_4004175\_x5.....acAucgugggaacacggggugccgaacu..... 1  
 Gi5\_8589652\_x5.....ugggaacGcggggugccgaac..... 1  
 Gi2\_10626965\_x5.....gucgugggaAacggggugccgaac..... 1  
 Gi3\_27595192\_x5..Ucgauccgagacgucgugggaacacgg..... 1  
 Gi5\_8588502\_x5.....aucggagacgucgugggaGcac..... 1  
 Gi3\_27600597\_x5.....gaacacgggAugccgaac..... 1  
 Gi2\_10641855\_x5.....cgugggaacacggggCgccga..... 1  
 Gi3\_27561137\_x5.....ggaacacggggugccUaac..... 1  
 Gi2\_10612375\_x5.....cgugggaacacggggugccAa..... 1  
 Gi5\_8600702\_x5.....gaacacgggCugccgaacu..... 1  
 Gi2\_10607130\_x5.....gugggaacacggCgugccgaac..... 1  
 Gi2\_10613945\_x5.....ugggaCcacggggugccgaac..... 1  
 Gi3\_27577582\_x5.....aCcgagacgucgugggaacacggggugc..... 1  
 Gi1\_4008600\_x5.....ucgugggaacacggggugcAgaacu..... 1  
 Gl1\_5746132\_x5.....aucggagaNgucgugggaacacgggggu..... 1  
 Gi3\_27559902\_x5..cgauccggaNacgucgugggaacacg..... 1  
 Gi3\_27611887\_x5.....gugggaacacggggugAcgaa..... 1  
 Gi5\_8567242\_x5.....cgugggaacGcggggugccgaac..... 1  
 Gi3\_27642367\_x5.....aucggGgacgucguggga..... 1  
 Gi1\_4008925\_x5.....cggagacgucgCgggaacacggggugccga..... 1  
 Gi2\_10627300\_x5.....cgugggaacacggggugAc..... 1  
 Gi3\_27626712\_x5.....gggaacacCgggugccgaacu..... 1  
 Gi2\_10644635\_x5.....ggaNcacggggugccgaac..... 1  
 Gi2\_10634520\_x5.....cgugggaacGcggggugc..... 1  
 Gi1\_3994075\_x5.....ugggaacacggggugAcgaacu..... 1  
 Gi3\_27552647\_x5...gauUggagacgucgugggaacacggg..... 1  
 Gi3\_27600987\_x5.....ggaacacggggUaccgaa..... 1  
 Gi2\_10622420\_x5.....guggAaacacggggugccga..... 1  
 Gi3\_27550917\_x5.....Cucgugggaacacggggugccga..... 1  
 Gi2\_10647065\_x5.....cUgagacgucgugggaacac..... 1  
 Gi2\_10593860\_x5.....aucggagacgucgugggCacacggg..... 1  
 Gi5\_8568412\_x5.....ucgugggaacacggggugccUaacu..... 1  
 Gi3\_27597267\_x5.....aucggagacgucgCggga..... 1  
 Gi3\_27589047\_x5.....acgAcgugggaacacggggugccgaacu..... 1  
 Gi3\_27565012\_x5.....gacgucguNggaacacggggugccgaac..... 1  
 Gi1\_4011665\_x5.....Uagacgucgugggaacacggggugccgaac..... 1  
 Gi3\_27573232\_x5.....aucggagacgucgugggaacaU..... 1  
 Gi3\_27620122\_x5.....gugggCacacggggugccg..... 1  
 Gl1\_5764787\_x5.....Gucggagacgucgugggaacacgg..... 1  
 Gi2\_10622490\_x5.....ucggagacNucgugggaacacg..... 1  
 Gi2\_10594750\_x5.....aucggagacgucgugggaacacAgggugcc..... 1  
 Gi3\_27589932\_x5.....cggAUacgucgugggaacacgggggu..... 1  
 Gi1\_4007150\_x5.....aucggGgacgucgugggaacacg..... 1  
 Gi4\_534893\_x5.....aUacgucgugggaacacggggugcc..... 1

|                                                           |   |
|-----------------------------------------------------------|---|
| Gi1_4000820_x5.....ucgugggaacacggggugccgaGc.....          | 1 |
| Gi5_8582687_x5.....gggaacacggggugcUgaac.....              | 1 |
| Gi5_8585482_x5.....gugggCacacggggugccgaac.....            | 1 |
| Gi5_8601362_x5.....agacgucgugggaaUacggggugccgaacu.....    | 1 |
| Gi1_4002605_x5.....aucggagacgucgugggaGcacgggu.....        | 1 |
| Gi1_4011250_x5.....aucggagacgucgugggaCcacg.....           | 1 |
| Gi3_27564522_x5.....cgugggaacaAggggugccgaac.....          | 1 |
| Gi5_8592657_x5.....Ggacgucgugggaacacggggugccgaac.....     | 1 |
| Gi2_10621805_x5.....gaGcggagacgucgugggaacacgggggu.....    | 1 |
| Gi3_27633832_x5.....ggGgacgucgugggaacacgggggu.....        | 1 |
| G1a_5750237_x5.....cgugggaaUacggggugccgaacu.....          | 1 |
| Gi3_27581497_x5.....ucgugggaacacggcGugccgaacu.....        | 1 |
| Gi2_10615775_x5.....aucggagacgucgugggaCcacg.....          | 1 |
| Gi5_8569687_x5.....acguGgugggaacacggggugccgaacu.....      | 1 |
| Gi3_27653967_x5.....gacgucgugggaacacggggugccgaUc.....     | 1 |
| Gi2_10592985_x5.....ggaacacgUggugccgaac.....              | 1 |
| Gi3_27619322_x5.....cggagacgNcgugggaacacggggugccga.....   | 1 |
| Gi3_27599372_x5.....gcgaucggagacgucgugggaacacggggugc..... | 0 |
| Gi1_3996070_x5.....gugggaacacggggugGcgaacu.....           | 1 |
| Gi5_8566107_x5.....ugggaacacggggAgccgaac.....             | 1 |
| Gi3_27606397_x5.....gugggaacaGggggugccgaac.....           | 1 |
| G1a_5763037_x5.....aucggagacgucgugggaGcacggg.....         | 1 |
| Gi5_8570842_x5.....cgucgugggaacaUggggugccgaacu.....       | 1 |
| Gi3_27617722_x5.....ugggaacacggggugAcga.....              | 1 |
| Gi3_27649982_x5.....gaucAgagacgucgugggaacacgggggu.....    | 1 |
| Gi2_10606810_x5.....aAcggagacgucgugggaacacggggug.....     | 1 |
| Gi3_27573472_x5.....cggagacgucgugggaacacAgggugcc.....     | 1 |
| Gi2_10592945_x5.....uGggagacgucgugggaacacggggugcc.....    | 1 |
| Gi1_4011395_x5.....Ggacgucgugggaacacgggg.....             | 1 |
| Gi5_8578042_x5.....aGcacggggugccgaacuuu.....              | 1 |
| Gi2_10606585_x5.....ucAugggaacacggggugccgaac.....         | 1 |
| Gi3_27649667_x5.....gauUggagacgucgugggaacacgggggu.....    | 1 |
| Gi3_27568352_x5.....aucggagacgucgugAgaacacggggugcc.....   | 1 |
| Gi2_10643485_x5.....ucggagacNucgugggaacacggggugcc.....    | 1 |
| Gi2_10598245_x5.....cgucAugggaacacggggugccgaacu.....      | 1 |
| Gi3_27629492_x5.....ucggagacgucgugggGacacgggggu.....      | 1 |
| Gi3_27555772_x5.....cgugggaacacggggugccgaG.....           | 1 |
| Gi2_10625370_x5.....ggaacacggcGugccgaacu.....             | 1 |
| Gi3_27602442_x5.....agacgucgugAgaacacggggugccgaacu.....   | 1 |
| Gi1_3993885_x5.....gucgugggaaAacggggugcc.....             | 1 |
| Gi5_8588257_x5.ugcgauccggagacgucgCggg.....                | 1 |
| Gi2_10608700_x5.....cgugggaacacgUggugccga.....            | 1 |
| Gi1_3998700_x5.....gCgggaacacggggugccgaac.....            | 1 |
| Gi2_10649895_x5.....gaucggagacgCcgugggaacacggggug.....    | 1 |
| Gi3_27594457_x5.....cgauccggaNacgucguggg.....             | 1 |
| G1a_5763747_x5.....ggaacacggggUccgaacu.....               | 1 |
| Gi2_10630670_x5.....aucggagacgucgugggaacacgAgggugcc.....  | 1 |

Gi2\_10592350\_x5.....ggUgacgucgugggaacacggggu..... 1  
Gi1\_4016075\_x5.....Ugagacgucgugggaacacggggu..... 1  
Gi3\_27622197\_x5.....ugggaaUacggggugccg..... 1  
Gi5\_8597122\_x5.....gcgccugcugcccaccuucgccgaguucg..... 0  
Gi3\_27587497\_x5.....cgugggaacacggggugUcg..... 1  
Gi5\_8578217\_x5.....agacgucgugggaacacggggugccgCacu..... 1  
Gi1\_4016450\_x5.....ggagacgucgugggaacacggggugccgaa..... 0  
Gi5\_8581477\_x5.....ggaacacggUgugccgaacu..... 1  
Gi2\_10595395\_x5.....ugggaacacUgggugccgaacu..... 1  
Gi2\_10616670\_x5.....aucggagacgucAugggaacacggggu..... 1  
Gi1\_4016370\_x5.....cgCgggaacacggggugccgaac..... 1  
Gi2\_10591130\_x5.....aUacgucgugggaacacggggug..... 1  
Gi5\_8590027\_x5.....cgAgggaacacggggugccga..... 1  
Gi2\_10643165\_x5.....acgucgugggaacacggggUaccgaacu..... 1  
Gi1\_3996665\_x5.....ucguggAaacacggggugcc..... 1  
Gi2\_10609305\_x5.....gugggaaAacggggugccg..... 1  
Gi5\_8570322\_x5.....aacacggggugccgaacG..... 1  
Gi3\_27602312\_x5.....gGucggagacgucgugggaacacggggugc..... 1  
Gi3\_27658747\_x5..Ucgauccgagacgucgugggaac..... 1  
Gi5\_8592562\_x5.....cgugggaacacAgggugccgaac..... 1  
Gi1\_3999865\_x5.....ggGgacgucgugggaaca..... 1  
G1a\_5753562\_x5.....Ugagacgucgugggaacacggggugc..... 1  
G1a\_5741272\_x5.....gggaacacggggCgccgaacu..... 1  
Gi3\_27563007\_x5.....aucggagacgucgugggaUcacg..... 1  
Gi2\_10648625\_x5..Ggagcggagacgucgugg..... 1  
Gi5\_8587942\_x5.....cgugggGacacggggugccgaac..... 1  
Gi1\_4002060\_x5.....uGgugggaacacggggugccg..... 1  
Gi3\_27583762\_x5.....gucgugggaacacgggAugccgaac..... 1  
G1a\_5761277\_x5.....cgugggaaNacggggugc..... 1  
Gi2\_10642885\_x5.....cgucgugggaacCcggggugccg..... 1  
Gi2\_10644095\_x5..Ucgauccgagacgucgugggaacacggggugc..... 1  
Gi3\_27561222\_x5.....ugggaUcacggggugccgaac..... 1  
Gi3\_27549682\_x5.....gugggaCcacggggugccgaa..... 1  
Gi2\_10632125\_x5.....cgucgugggUacacggggugccgaacu..... 1  
Gi5\_8564497\_x5.....gucgugggaacacgggAugccgaacu..... 1  
Gi2\_10627210\_x5.....Ugacgucgugggaacacggggugc..... 1  
Gi1\_4015705\_x5.....Gggagacgucgugggaacacggggugcc..... 1  
Gi2\_10594030\_x5.....gugggaacacggCgugcc..... 1  
Gi5\_8580582\_x5.....aucggagacgucgugggaacacggggCgc..... 1  
Gi5\_8578357\_x5.....gugggaaGacggggugccgaacu..... 1  
Gi2\_10599855\_x5.....cgucguggNaacacgggg..... 1  
Gi2\_10595960\_x5.....ugggaacCcggggugccgaac..... 1  
Gi2\_10633305\_x5.....aucgAagacgucgugggaacacggggugcc..... 1  
Gi3\_27640462\_x5.....cgucgugggaacacggggugccgaaUu..... 1  
Gi2\_10618165\_x5.....ggaacacggUgugccgaacu..... 1  
Gi3\_27602452\_x5.....gacgucgugggaGcacggggugccgaac..... 1  
Gi1\_4013190\_x5.....acgucgugggaacacggggugccgaaAu..... 1

Gi5\_8583082\_x5.....gugggaacacggggugccgaG..... 1  
Gi2\_10632510\_x5.....aucggagacgucgCgggaacacggg..... 1  
Gi5\_8570757\_x5.....ucggagacgucgugggGacacg..... 1  
Gi2\_10612915\_x5.....ucgugggaacacggggugAcgaacu..... 1  
Gi3\_27576387\_x5.....gGucggagacgucgugggaacacggggugcc..... 1  
Gi5\_8569047\_x5.....Gacacggggugccgaacuuu..... 1  
G1a\_5749992\_x5.....gugggaacacggggGgccgaac..... 1  
Gi5\_8594202\_x5.....gugggaacacggggGgccgaacuu..... 1  
Gi2\_10629335\_x5.....gaucggagacgucgugggaacGcggggug..... 1  
Gi1\_4004350\_x5.....aacacgCggugccgaacu..... 1  
Gi1\_4016875\_x5.....cguNggaacacggggugccgaacu..... 1  
Gi3\_27551162\_x5.....cgugggaacacAgggugccga..... 1  
Gi3\_27593767\_x5.....cUaucggagacgucgugggaacacggggugc..... 1  
Gi2\_10633510\_x5.....aucggagacgucgugggaCca..... 1  
Gi1\_4004275\_x5.....acgucgugggaGcacggggugccgaacu..... 1  
Gi2\_10645030\_x5.....ugAgaacacggggugccgaac..... 1  
Gi3\_27549627\_x5.....aGgucgugggaacacggg..... 1  
Gi1\_4014325\_x5.....cgGgggaacacggggugccgaac..... 1  
Gi5\_8581517\_x5.....gCgggaacacggggugccgaa..... 1  
Gi5\_8589802\_x5.....agacgucgugggaCcacggggugccgaacu..... 1  
Gi2\_10649355\_x5.....aacacgUggugccgaacu..... 1  
Gi3\_27642377\_x5.....Cacgucgugggaacacggggugccgaac..... 1  
Gi3\_27646647\_x5.....cgugggaacCcgggugccga..... 1  
Gi3\_27601432\_x5.....gggaacacggggugcGgaac..... 1  
Gi1\_3994290\_x5.....ggaacacggggugccgaCcu..... 1  
Gi2\_10621845\_x5.....gaucggagacgucgugggCacacgggu..... 1  
Gi2\_10620970\_x5.....gugggaacacggggUaccg..... 1  
Gi3\_27642907\_x5.....ucgugggaacGcggggugc..... 1  
Gi3\_27575027\_x5.....acgucgugggaaUacggggugccgaacu..... 1  
Gi2\_10640365\_x5.....ucgugggaacacggggugccgaaU..... 1  
Gi1\_4013680\_x5.....Ccgugggaacacggggugcc..... 1  
Gi5\_8586002\_x5.....cgucgugggaaUacggggugccgaacu..... 1  
Gi5\_8590872\_x5.....gugggaacacAgggugcc..... 1  
Gi3\_27570392\_x5.....gaacaUggggugccgaac..... 1  
G1a\_5761722\_x5.....gggaacacggggugccAaacu..... 1  
Gi2\_10620905\_x5.....uggggaacacggggugGcgaacu..... 1  
Gi5\_8563927\_x5.....gugggaacaUggggugccgaac..... 1  
Gi3\_27616272\_x5.....cgucgugggaacacggggugcU..... 1  
Gi2\_10633715\_x5.....gacgucgugggaacacggggCgccgaacu..... 1  
Gi3\_27636117\_x5.....gUagacgucgugggaacacggggugccga..... 1  
Gi1\_4009605\_x5.....gugggaacacggggugcU..... 1  
Gi2\_10607685\_x5.....gacAucgugggaacacggggugcc..... 1  
Gi3\_27590467\_x5.....gugggaacacggggAgccg..... 1  
Gi5\_8589502\_x5.....ugggaacacggggugccgCa..... 1  
Gi5\_8570187\_x5.....gucgugggaacacggggugUcgaacu..... 1  
Gi5\_8594957\_x5.....ugggaacacAgggugccgaa..... 1  
Gi3\_27653902\_x5..gcgaucggGgacgucgug..... 1

Gi3\_27566632\_x5.....uggaacacggggugcGgaac..... 1  
 Gi2\_10649455\_x5.....aucggCgacgucgugggaaacacggggugcc..... 1  
 Gi3\_27627192\_x5.....Uucggagacgucgugggaaacacggggugcc..... 1  
 Gi3\_27626237\_x5.....cgugggaacacggggugUcgaa..... 1  
 Gi3\_27628487\_x5.....aucggCgacgucgugggaaacacggggugcc..... 1  
 Gi3\_27613682\_x5.....cUucgugggaaacacggggug..... 1  
 Gi1\_4004080\_x5.....ggUgacgucgugggaaacacggggugccg..... 1  
 G1a\_5739052\_x5.....aucggagacgucgugggGacacgggggu..... 1  
 Gi1\_3995525\_x5.....cAucgugggaaacacggggugccgaacu..... 1  
 Gi1\_4016735\_x5.....gucgugggaaacacggggugccgaGcu..... 1  
 Gi2\_10592920\_x5.....ggaacacgUggugccgaacu..... 1  
 Gi5\_8595182\_x5.....gugggaacNcggggugccg..... 1  
 Gi5\_8578622\_x5.....gucgugggaaacacggggugcUgaacu..... 1  
 Gi3\_27612627\_x5.....gaucggagGcugcugggaaacacgggggu..... 1  
 Gi2\_10612860\_x5.....aucggagacgCcgugggaaaca..... 1  
 Gi2\_10650040\_x5.....gucgugggaaacGcggggugcc..... 1  
 Gi3\_27600732\_x5.....gucNugggaacacggggugccgaacu..... 1  
 Gi2\_10604175\_x5.....aucggagacgucgugggaaacGcggggugcc..... 1  
 Gi3\_27564817\_x5.....gaucggGgacgucgugggaaacacgg..... 1  
 Gi2\_10626485\_x5.....ggagacgucguggAaacacggggugcc..... 1  
 Gi2\_10593460\_x5.....agacgucgugggaaacacggggugccgaCcu..... 1  
 G1a\_5748337\_x5.....gugggaGcacggggugcc..... 1  
 Gi3\_27615937\_x5.....aacacggggGgccgaacuu..... 1  
 Gi3\_27552832\_x5.....Agucgugggaaacacggggugccg..... 1  
 Gi3\_27551352\_x5.....aucggagacgucguggAaacacggggugcc..... 1  
 Gi3\_27552732\_x5.....aucggagacgucgugggaaacUcggg..... 1  
 Gi3\_27650897\_x5.....aucggagacgucUugggaacacgggg..... 1  
 Gi2\_10609505\_x5.....aucggagacgucgugggCac..... 1  
 Gi3\_27606472\_x5.....gucguggUaacacggggugccgaacu..... 1  
 G1a\_5763782\_x5.....ugggaGcacggggugccgaacu..... 1  
 Gi2\_10645510\_x5.....cgugggaacacggggugccUaac..... 1  
 Gi2\_10597460\_x5.....ugggaacacggggCgccg..... 1  
 Gi2\_10624295\_x5.....ggaacUcggggugccgaacu..... 1  
 Gi3\_27603657\_x5.....cgucgugggaaacaUggggugcc..... 1  
 Gi1\_4009465\_x5.....gugggaacacggggugccgaaAu..... 1  
 Gi2\_10606500\_x5.....agacgucgugggGacacggggugccgaacu..... 1  
 Gi2\_10603635\_x5.....cgugggaacacggggugccGac..... 1  
 Gi5\_8601857\_x5.....gggaCcacggggugccgaacu..... 1  
 Gi3\_27645062\_x5.....Agugggaacacggggugccgaa..... 1  
 Gi3\_27583742\_x5.....ucgugggGacacggggugccgaa..... 1  
 Gi2\_10606490\_x5.....gucgugggaaacacggggugccgaGc..... 1  
 Gi1\_3997165\_x5.....gaacaAggggugccgaacu..... 1  
 Gi4\_535428\_x5.....ugggaacaNggggugccgaacu..... 1  
 Gi2\_10641160\_x5.....cgugggaaAacggggugccgaac..... 1  
 Gi2\_10600080\_x5.....ucgugggUaacacggggugccgaacu..... 1  
 Gi2\_10643380\_x5.....gaucggagNcugcugggaaacacggggugcc..... 1  
 Gi3\_27642262\_x5.....ggagacgucgugggaaacacggggugcc..... 1

Gi3\_27567497\_x5.....gggaaUacggggugccgaac..... 1  
Gi2\_10614910\_x5.....cgucgugggaCcacggggugccga..... 1  
Gi2\_10630270\_x5.....Uucgugggaacacgggggu..... 1  
Gi2\_10597775\_x5.....gucgugggaacacCgggugccgaacu..... 1  
Gi2\_10642765\_x5.....Aaacacggggugccgaac..... 1  
Gi3\_27624122\_x5.....cgugggaCcacggggugccgaa..... 1  
Gi3\_27612817\_x5.....gucgugggaaUacggggugccgaac..... 1  
Gi2\_10649795\_x5.....cgugggaacacggggugccgC..... 1  
Gi3\_27570952\_x5.....acUucgugggaacacggggugccgaac..... 1  
Gi3\_27631187\_x5.....cgucgugggaGcacggggugccga..... 1  
Gi3\_27590137\_x5.....agacgucgugggaacacgAgggugccgaacu..... 1  
Gi3\_27593882\_x5.....uggNaacacggggugccgaac..... 1  
Gi3\_27595087\_x5.....gGcugcugugggaacacggggugccg..... 1  
Gi5\_8577432\_x5.....cgugggaacacggggugccgCac..... 1  
Gi3\_27552992\_x5.....aucggagacgucguggCaacacg..... 1  
Gi2\_10625075\_x5.....cgucgugggaacacggggugccgaaAu..... 1  
Gi2\_10622155\_x5.....cgucgugggaacGcggggugc..... 1  
Gi3\_27584302\_x5.....ugggaacUcggggugccgaa..... 1  
Gi3\_27631722\_x5.....Ugagacgucgugggaacacgggg..... 1  
Gi3\_27561062\_x5.....ucgugggaacacggggCgccga..... 1  
Gi2\_10600680\_x5.....gugggaacacggggugUcgaa..... 1  
Gi2\_10614065\_x5.....cgCcgugggaacacggggugccgaac..... 1  
Gi2\_10640140\_x5.....cgugggaacCggggugc..... 1  
Gi5\_8596497\_x5.....Gucggagacgucgugggaacacgggg..... 1  
Gi2\_10615165\_x5.....gaucggagacgucgugggaacacAg..... 1  
Gi2\_10599745\_x5.....acgucgugggaacacggggGgc..... 1  
G1a\_5749012\_x5.....gugggaacacggggugccgaaAu..... 1  
Gi5\_8564632\_x5.....aGcggagacgucgugggaacacggggugcc..... 1  
G1a\_5750647\_x5.....gugggaacGcggggugcc..... 1  
Gi3\_27578607\_x5.....gaacacggggugccAaac..... 1  
Gi2\_10622360\_x5.Ggcgaucggagacgucgugggaacacg..... 1  
Gi1\_3997580\_x5.....gggaacaUggggugccgaacu..... 1  
Gi5\_8580852\_x5.....Ggacgucgugggaacacggggugcc..... 1  
G1a\_5746157\_x5.....ugggaacacggggugUcgaaacu..... 1  
Gi3\_27592862\_x5.....gaacacggggugccgUac..... 1  
Gi2\_10649530\_x5.....cgucgugggaacaUggggugccgaacu..... 1  
Gi1\_4011735\_x5.....ugggaacaNggggugccga..... 1  
Gi5\_8599957\_x5.....gaacacggggugccgaaAu..... 1  
Gi3\_27617847\_x5.....cgaucggagacgucgugggaCcacg..... 1  
Gi2\_10609180\_x5.....ucgCgggaacacggggugccgaac..... 1  
Gi3\_27554957\_x5.....ggaacacggggugccgGa..... 1  
Gi3\_27617292\_x5.....aucggGgacgucgugggaacacgggg..... 1  
Gi1\_3995050\_x5.....Ugagacgucgugggaacacggggugccgaacu..... 1  
Gi5\_8579752\_x5.....ugggaacGcggggugccgaa..... 1  
Gi5\_8585592\_x5.....agacgucgugggaacacAgggugccgaacu..... 1  
Gi2\_10617380\_x5.....aucggagaNgucgugggaac..... 1  
Gi3\_27579932\_x5.....gucgugggaacacggggugcAgaac..... 1

|                                                             |   |
|-------------------------------------------------------------|---|
| Gi2_10619500_x5.....gugggUacacggggugccg.....                | 1 |
| Gi3_27632152_x5.....gucAugggaacacggggugccgaac.....          | 1 |
| Gi2_10596250_x5.....cgugggaacacggggugccgUac.....            | 1 |
| Gi3_27585392_x5.....aucggagacgucgugggUacacgg.....           | 1 |
| Gi2_10624460_x5.....gugggaacacgAggugccg.....                | 1 |
| Gi3_27598937_x5.....aucggagacgucguAggaacacgg.....           | 1 |
| Gi2_10639475_x5.....gacgucgCgggaacacggggugccgaacu.....      | 1 |
| Gi3_27650557_x5.....aucggUgacgucgugggaaacacggg.....         | 1 |
| Gi2_10650100_x5.....aucggaAacgucgugggaaacac.....            | 1 |
| Gi3_27651132_x5.....gaucggagacgucgugggaaacacggggugccga..... | 0 |
| Gi2_10595450_x5.....gugggaacacgggAugccgaa.....              | 1 |
| Gi1_4002000_x5.....gugggaGcacggggugccga.....                | 1 |
| Gi2_10591100_x5.....cgucgCgggaacacggggugccgaac.....         | 1 |
| Gi3_27575072_x5.....Ccgucgugggaaacacggggugccgaacu.....      | 1 |
| Gi1_3994265_x5.....aacacggggugccgaaAu.....                  | 1 |
| Gi5_8579957_x5.....gaacacggggugccgaacG.....                 | 1 |
| Gi2_10620865_x5.....Ucgucgugggaaacacggggugcc.....           | 1 |
| Gi3_27636637_x5.....cgucAugggaacacggggugccg.....            | 1 |
| Gi2_10641105_x5.....ugggaacacggggugUcgaac.....              | 1 |
| Gi3_27552552_x5.....ugggaacacgAggugccgaa.....               | 1 |
| Gi2_10622470_x5.....ggaCcacggggugccgaacu.....               | 1 |
| Gi2_10594755_x5.....uGgugggaacacggggugc.....                | 1 |
| Gi1a_5748842_x5.....gAgaacacggggugccgaacu.....              | 1 |
| Gi3_27580537_x5.....cgucgugggaaacacggggUacc.....            | 1 |
| Gi1_3999295_x5.....gaucggagacgucguggga.....                 | 0 |
| Gi2_10631380_x5.....cgUagacgucgugggaaacacggggugc.....       | 1 |
| Gi2_10626295_x5.....cggagacgucgugAgaacacggggugcc.....       | 1 |
| Gi2_10600580_x5.....aucggagacAucgugggaaacacggggugcc.....    | 1 |
| Gi2_10623780_x5.....ucgugggCacacggggugccgaacu.....          | 1 |
| Gi3_27606362_x5.....gaucggagacgucgCgggaacacg.....           | 1 |
| Gi1a_5742372_x5.....cgucgugggaaacacggggugccgCacu.....       | 1 |
| Gi5_8582522_x5.....gggaacCcgggugccgaacu.....                | 1 |
| Gi3_27621702_x5.....gugggaacacggggugccCa.....               | 1 |
| Gi2_10632805_x5.....gggaacacggggugccgaC.....                | 1 |
| Gi5_8566967_x5.....cgucgugggaaacacggggugUcgaacu.....        | 1 |
| Gi4_537203_x5.....ugggaacacggggugccgaGcu.....               | 1 |
| Gi2_10616845_x5.....aucggagGcgucgugggaaacacg.....           | 1 |
| Gi1_4006235_x5.....gggaacacggggugcUgaacu.....               | 1 |
| Gi2_10645475_x5.....cgAgggaacacggggugccga.....              | 1 |
| Gi3_27552087_x5.....aAcggagacgucgugggaaacacgg.....          | 1 |
| Gi5_8592347_x5.....ugggaacCcgggugccgaac.....                | 1 |
| Gi1a_5747237_x5.....gugggaacacggggugcAgaacu.....            | 1 |
| Gi2_10634700_x5.....gucgugggaaacacggggugccgUacu.....        | 1 |
| Gi1_3999855_x5.....ugggGacacggggugccgaac.....               | 1 |
| Gi1_3994480_x5.....cgucgugggaaacacggggugccgaacu.....        | 1 |
| Gi2_10619975_x5.....gaucggagacgucgugggaaacacggggugcc.....   | 1 |
| Gi5_8579367_x5.....ggNacacggggugccgaacu.....                | 1 |



Gi2\_10595445\_x5.....aCcgagacgucgugggaacacggggug..... 1  
Gi3\_27631162\_x5.....cgucguAggaacacggggugccgaac..... 1  
Gi2\_10602725\_x5.....acgucgugggaacacggggCgc..... 1  
Gi3\_27609352\_x5.....agacgucgugggaacacggggugccCac..... 1  
Gi3\_27558222\_x5.....gagacgucgugggaacGcggggugccgaacu..... 1  
Gi5\_8593867\_x5.....Ugagacgucgugggaacacggggugcc..... 1  
Gi3\_27553877\_x5.....uGggagacgucgugggaacacggg..... 1  
Gi2\_10640475\_x5.....guUgugggaacacggggugc..... 1  
Gi3\_27553002\_x5.....gaucggagacgucgugggaacacggAgu..... 1  
Gi3\_27657422\_x5.....cgucgugggaacacggAgugcc..... 1  
Gi3\_27606737\_x5.....cgucgugggaacacggAgugc..... 1  
Gi3\_27629802\_x5.....cgucgugggaacacggggGgccgaa..... 1  
Gi3\_27570557\_x5.....cgugggaacacggggguAccgaa..... 1  
Gi5\_8574002\_x5.....gugggaGcacggggugcc..... 1  
Gi5\_8590827\_x5.....gggaacacggggugccAaac..... 1  
G1a\_5765337\_x5.....cgugggaacaUggggugccgaacu..... 1  
Gi2\_10599810\_x5.....aucggagacgucgugggaacacgAg..... 1  
Gi3\_27610897\_x5.....aucggagacguGgugggaacacgggg..... 1  
Gi2\_10613575\_x5.....ggagacguUgugggaacacggggugc..... 1  
Gi2\_10613490\_x5.....agacgucgugggaacCcgggugcc..... 1  
Gi2\_10620730\_x5.....ugggaacacggggugccgaUcu..... 1  
Gi5\_8569037\_x5.....cgucguggNaacacggggugccgaac..... 1  
G1a\_5732142\_x5.....ugggaacacggggugAcgaacu..... 1  
Gi1\_4003720\_x5.....Ggggaacacggggugccga..... 1  
Gi2\_10595835\_x5.....Agaacacggggugccgaa..... 1  
Gi1\_4013205\_x5.....aacacggggugccgaacG..... 1  
Gi3\_27614722\_x5.....gugggaacUcggggugccga..... 1  
Gi3\_27568507\_x5.....gaucggagacgucguggCacacggg..... 1  
Gi2\_10635645\_x5.....aaAacggggugccgaacu..... 1  
Gi3\_27597437\_x5.....Agugggaacacggggugcc..... 1  
Gi3\_27563487\_x5.....ggagacgucgugggaGcacggggugccg..... 1  
Gi2\_10624945\_x5.....cgugggaacacAgggugc..... 1  
Gi2\_10647105\_x5.....ucgugggaacacggggugccgaaAu..... 1  
Gi2\_10650345\_x5.....aCacgucgugggaacacggggugccgaacu..... 1  
Gi3\_27639007\_x5.....gucgugggaacacggggAgccgaac..... 1  
Gi3\_27555172\_x5.....ucggGgacgucgugggaacacgggg..... 1  
Gi3\_27633727\_x5.....ugggaacaUggggugccga..... 1  
Gi5\_8581212\_x5.....gggaacacggggAgccgaacu..... 1  
Gi1\_3997990\_x5.....aacacggggugccgaUcu..... 1  
Gi3\_27582067\_x5.....cgugggaacacgAggugc..... 1  
Gi3\_27558357\_x5.....aucggagacgucgugggaacacgAgg..... 1  
G1a\_5739467\_x5.....Ucgauccgagacgucgugggaacacggg..... 1  
Gi5\_8586837\_x5.....ggaNcacggggugccgaacu..... 1  
Gi1\_4004390\_x5.....cgucgugggaacacggggGgcc..... 1  
Gi5\_8576267\_x5.....guUgugggaacacggggugccgaac..... 1  
Gi2\_10591060\_x5.....cgugggaacacggggGgccgaac..... 1  
Gi1\_4000235\_x5.....ugggUacacggggugccgaacu..... 1

Gi2\_10632920\_x5.....aucggagacgucgugggaacacggggAg..... 1  
 Gi3\_27636997\_x5.....ucgugggaacacggggugAcgaacu..... 1  
 Gl1a\_5765417\_x5.....Agugggaacacggggugccgaacu..... 1  
 Gi3\_27633542\_x5.....ucgugggaacaAggggugccgaacu..... 1  
 Gi3\_27635562\_x5.....ggCaacacggggugccgaac..... 1  
 Gi2\_10608815\_x5.....ggUgacgucgugggaacacg..... 1  
 Gi2\_10639275\_x5.....aucggUgacgucgugggaacacggggugc..... 1  
 Gi3\_27623507\_x5.....ggagacgCcgugggaacacggggg..... 1  
 Gi2\_10610430\_x5.....acgucgugggaacacAgggugccgaacu..... 1  
 Gi5\_8578257\_x5.ugUgaucggagacgucgug..... 1  
 Gi5\_8568832\_x5.....Ugagacgucgugggaaca..... 1  
 Gi2\_10601305\_x5.....acAucgugggaacacggggugcc..... 1  
 Gi2\_10601805\_x5.....ucgugggaacacggggugccgGac..... 1  
 Gl1a\_5739392\_x5.....Agagacgucgugggaacacg..... 1  
 Gi5\_8563977\_x5.....acgucgugggaCcacggggugccgaacu..... 1  
 Gi3\_27551577\_x5.....gaucggagacgucgugggaCcac..... 1  
 Gi3\_27572327\_x5.....gGgacgucgugggaacacg..... 1  
 Gi5\_8579062\_x5.....cgugggaacacgUggugccgaac..... 1  
 Gi3\_27572722\_x5.....cgugggaacacggggugUc..... 1  
 Gl1a\_5735152\_x5.....ggaacacggggugccgUacu..... 1  
 Gi3\_27570417\_x5.....ggaacacAgggugccgaa..... 1  
 Gi2\_10646870\_x5.....Cucggagacgucgugggaacacggggugcc..... 1  
 Gi3\_27588092\_x5.....acgucgugggaGacggggugccgaacu..... 1  
 Gi3\_27559442\_x5.....ucgugggaNcacggggugccg..... 1  
 Gi2\_10601530\_x5.....gugggaacacggggugAcga..... 1  
 Gl1\_4006315\_x5.....gugggaacacggggugAcgaacu..... 1  
 Gl1\_4015060\_x5.....aGgucgugggaacacggggugcc..... 1  
 Gi5\_8586072\_x5.....Ggggaacacggggugccgaacuu..... 1  
 Gi3\_27572862\_x5.....cgucgugggCacacggggugcc..... 1  
 Gi3\_27712101\_x4.....ucggGgacgucgugggaaca..... 1  
 Gi2\_10686635\_x4.....gggaacacUgggugccgaacu..... 1  
 Gi2\_10690275\_x4.....cgugggaacacggggugccgaacuu..... 0  
 Gi5\_8606935\_x4.....gGgacgucgugggaacacg..... 1  
 Gi5\_8608747\_x4.....acgucgugggaacacggggugAcgaacu..... 1  
 Gi5\_8604307\_x4.....Cugggaacacggggugcc..... 1  
 Gi3\_27689197\_x4.....Gggagacgucgugggaacacgggg..... 1  
 Gl1\_4032420\_x4..gcgaucggagacgucgugggaacacggggugc..... 0  
 Gl1\_4020904\_x4.....Gucggagacgucgugggaacacggggugcc..... 1  
 Gl1a\_5810754\_x4.....ugggaacacggggugccgaCcu..... 1  
 Gi2\_10682075\_x4.....gaAcggagacgucguggga..... 1  
 Gi3\_27682281\_x4.....aucggagacgucGgggaacacggggg..... 1  
 Gi4\_541970\_x4.....Ugaacacggggugccgaacu..... 1  
 Gi3\_27782153\_x4.....acacggggugccAaacuu..... 1  
 Gl1\_4047472\_x4.....gucgugggaacacggggugccga..... 0  
 Gi3\_27726705\_x4.....gucgugggaacacggggugccgaaU..... 1  
 Gi2\_10675807\_x4.....gaucggagacgucgugggaacacggggAgc..... 1  
 Gi2\_10653591\_x4.....gggCacacggggugccgaacu..... 1

|                 |                                         |   |
|-----------------|-----------------------------------------|---|
| Gi5_8637743_x4  | ...gaucggagacgucgugggaacacggggugc       | 0 |
| Gi3_27710817_x4 | ...aCacgucgugggaacacggggugccgaacu       | 1 |
| Gi1_4034184_x4  | ...ucgugggaacacggggugccgaaA             | 1 |
| Gi2_10669911_x4 | ...agacgucAugggaacacggggugcc            | 1 |
| Gi3_27700041_x4 | ...cgucgugggaUacggggugcc                | 1 |
| Gi5_8609507_x4  | ...uggaacacgAggugccgaac                 | 1 |
| Gi3_27700709_x4 | ...gggaacacggggugccgaaGu                | 1 |
| Gi2_10720747_x4 | ...gucgugggGacacggggugc                 | 1 |
| Gi5_8650423_x4  | ...guUggaacacggggugcc                   | 1 |
| Gi3_27717021_x4 | ...agacUucgugggaacacggggugccgaac        | 1 |
| Gi5_8623699_x4  | ...gaacacggggugccgaCc                   | 1 |
| Gi5_8607371_x4  | ...cgugggaacacgggUugccgaacu             | 1 |
| Gi3_27699597_x4 | ...acgucgugUgaacacggggugccgaac          | 1 |
| Gi3_27791561_x4 | ...cgucgugggaacacgAggugccg              | 1 |
| Gi1_4038800_x4  | ...ucgCgggaacacggggugccg                | 1 |
| Gi1a_5787546_x4 | ...uggaacacggggUaccgaacu                | 1 |
| Gi3_27791701_x4 | ...gAgaacacggggugccgaa                  | 1 |
| Gi2_10668175_x4 | ...ucggagacgucgugggGaca                 | 1 |
| Gi3_27685641_x4 | ...Ccgagacgucgugggaacacggggugcc         | 1 |
| Gi2_10663627_x4 | ...cggagacgucgugggaUacggggugcc          | 1 |
| Gi1_4028944_x4  | ...ggagacgucgugggaUacggggug             | 1 |
| Gi1_4039552_x4  | ...cgugggaacacggggCgccaacu              | 1 |
| Gi2_10655259_x4 | ...Cgagacgucgugggaacacggggugccg         | 1 |
| Gi3_27757849_x4 | ...cgucgugggaacacggggugcUg              | 1 |
| Gi2_10654279_x4 | ...ggaacacgCggugccgaacu                 | 1 |
| Gi2_10716419_x4 | ...cgucgugggaacacggggAgccg              | 1 |
| Gi5_8641975_x4  | ugUgaucggagacgucguggga                  | 1 |
| Gi1a_5804558_x4 | ...gugggaacGcggggugccgaac               | 1 |
| Gi3_27694533_x4 | ...agacgucgugggaGcacggggugccgaac        | 1 |
| Gi1_4035276_x4  | ...uggaacacggAgugccgaacu                | 1 |
| Gi5_8633391_x4  | ...agacgucgugggaacacggggGgccgaacu       | 1 |
| Gi1_4018052_x4  | ...cggagacgNcgugggaacacggggugc          | 1 |
| Gi3_27698709_x4 | ...acgucgugggaacacggggugcUgaac          | 1 |
| Gi4_538806_x4   | ...gugggaacacggggGgccgaacu              | 1 |
| Gi5_8614831_x4  | ...Augggaacacggggugccgaa                | 1 |
| Gi2_10697039_x4 | ...acAucgugggaacacggggugccgaacu         | 1 |
| Gi1_4036040_x4  | ...gaucggagacgucgugggaacacggggugccgaacu | 0 |
| Gi3_27787737_x4 | ...gagacgucgugggaacacggggC              | 1 |
| Gi3_27721025_x4 | ...gggaacacggggugccUaac                 | 1 |
| Gi3_27758077_x4 | ...gucgugggGacacggggugccga              | 1 |
| Gi3_27716829_x4 | ...cgucgugAgaacacggggugccgaac           | 1 |
| Gi4_543682_x4   | ...gugggaacacggggugccgaacA              | 1 |
| Gi3_27785317_x4 | ...gaacacggggugccgGac                   | 1 |
| Gi4_542922_x4   | ...cgugggaacacggggugccgaGcu             | 1 |
| Gi1_4025240_x4  | ...Uugggaacacggggugccgaa                | 1 |
| Gi3_27672397_x4 | ...uggaacacggggUaccg                    | 1 |
| Gi2_10652883_x4 | ...aucggagacgucgugggaacGcgggg           | 1 |

Gi1a\_5788706\_x4.....Augggaacacggggugcc..... 1  
 Gi2\_10678655\_x4.....cgucgugggaacacggggugccgC..... 1  
 Gi2\_10715031\_x4.....cgugggaacacgAggugc..... 1  
 Gi3\_27681621\_x4.....aucggagacgCcgugggaacac..... 1  
 Gi2\_10678487\_x4.....ucggagacgucgugggaacacggggC..... 1  
 Gi1a\_5787506\_x4.....cUugggaacacggggugccg..... 1  
 Gi2\_10685459\_x4.....aucggagacgucgugggaacacgggAu..... 1  
 Gi3\_27746973\_x4.....cggagacgucgugggaGcacggggugcc..... 1  
 Gi3\_27672041\_x4.....uggAaacacggggugccgaa..... 1  
 Gi2\_10650619\_x4.....aCacgucgugggaacacggggugcc..... 1  
 Gi3\_27747221\_x4.....Ggacgucgugggaacacgggg..... 1  
 Gi4\_539850\_x4.....gucgGgggaacacggggugccgaaacu..... 1  
 Gi2\_10657419\_x4.....gacgucgugggaacGcggggugccg..... 1  
 Gi1\_4034220\_x4.....guUgugggaacacggggugcc..... 1  
 Gi5\_8622431\_x4.....guggUaacacggggugccga..... 1  
 Gi3\_27686881\_x4.....uGgugggaacacggggugccgaa..... 1  
 Gi1a\_5773834\_x4.....cgugggaCcacggggugccgaaacu..... 1  
 Gi2\_10693271\_x4.....ugggaacacgggAugccgaa..... 1  
 Gi3\_27766353\_x4.....gucAugggaacacggggg..... 1  
 Gi3\_27740641\_x4.....cgucgugggaGcacggggugcc..... 1  
 Gi4\_544010\_x4.....acAucgugggaacacggggugccgaaacu..... 1  
 Gi3\_27727617\_x4.....cgucgugggaacacggggugAc..... 1  
 Gi2\_10701339\_x4.....Aggaacacggggugccgaa..... 1  
 Gi3\_27766429\_x4.....agacgucgugggGcacggggugccgaaacu..... 1  
 Gi2\_10712855\_x4.....cAgagacgucgugggaacacggggugc..... 1  
 Gi3\_27693133\_x4.....gaacacggggugUcgaac..... 1  
 Gi2\_10676687\_x4.....gugggaacacggggugcGgaac..... 1  
 Gi1a\_5792706\_x4.....Aaacacggggugccgaaac..... 1  
 Gi2\_10688615\_x4.....ucgugggaacacggggugccgaaCc..... 1  
 Gi3\_27753817\_x4.....cgucguggAaacacggggugcc..... 1  
 Gi3\_27681205\_x4.....gGucggagacgucguggg..... 1  
 Gi2\_10668207\_x4.....ucgugggaacacggAgugccgaaac..... 1  
 Gi3\_27681253\_x4.....Nacacggggugccgaaacu..... 1  
 Gi3\_27668329\_x4.....Agggaacacggggugccg..... 1  
 Gi5\_8625051\_x4.....Ggacgucgugggaacacggggugc..... 1  
 Gi3\_27704857\_x4.....gacgucgugggaacacgggggAccgaaacu..... 1  
 Gi4\_543594\_x4.....gaacacggggugccgaaac..... 0  
 Gi2\_10710547\_x4.....ucgugggaNcacggggugccg..... 1  
 Gi2\_10679043\_x4.....aucggagacgucgCgggaacacggggug..... 1  
 Gi2\_10678711\_x4.....gUgacgucgugggaacacg..... 1  
 Gi3\_27737865\_x4.....ucggagacNucgugggaacacggg..... 1  
 Gi2\_10725371\_x4.....gucgugggaacacggggCgc..... 1  
 Gi3\_27679689\_x4.....ggagacgucgugggaacacgggggAccg..... 1  
 Gi5\_8614175\_x4.....aacacgUggugccgaaacu..... 1  
 Gi5\_8605867\_x4.....ggaaAacggggugccgaaacu..... 1  
 Gi2\_10669831\_x4.....gugggaacacgUggugcc..... 1  
 Gi3\_27708737\_x4.....ugAgaacacggggugccg..... 1

Gi3\_27661861\_x4.....aucggagCcgucgugggaacacgg..... 1  
Gi5\_8638459\_x4.....gggaaAacggggugccgaacu..... 1  
Gi3\_27783237\_x4.....aucggagacgucgugggaacaUggggg..... 1  
Gi5\_8608743\_x4.....aucggagacgucgugggaacCggggg..... 1  
Gi3\_27745049\_x4.....cgugggaacaUggggugccg..... 1  
Gi2\_10691099\_x4.....gucguAggaacacggggugcc..... 1  
Gi2\_10712363\_x4.....cgucgugggaacacggggugccgaaUu..... 1  
G1a\_5811330\_x4.....cUucgugggaacacggggugccgaacu..... 1  
Gi5\_8605439\_x4.....gucguggAaacacggggugccgaacu..... 1  
Gi3\_27736169\_x4.....ucgugCgaacacggggugccgaacu..... 1  
G1l\_4025284\_x4.....ucgugggaUcacggggugccgaacu..... 1  
Gi3\_27729773\_x4.....acgCcgugggaacacggggugccgaac..... 1  
Gi2\_10663239\_x4.....Agagacgucgugggaacacggggugc..... 1  
Gi3\_27788673\_x4.....gUcgucgugggaacacggggugccgaac..... 1  
Gi3\_27780785\_x4.....gaucUgagacgucgugggaacacg..... 1  
Gi3\_27695413\_x4.....Uucgugggaacacggggugccgaacuu..... 1  
Gi2\_10667991\_x4.....uCggaacacggggugccga..... 1  
G1l\_4019672\_x4.....gGucggagacgucgugggaacac..... 1  
Gi2\_10712459\_x4.....gaucggagacgucgugggaacacggggGgcc..... 1  
Gi2\_10722015\_x4.....gugggaacacgggAugccg..... 1  
Gi2\_10663799\_x4.....cgAgggaacacggggugccgaa..... 1  
G1l\_4031712\_x4.....ucguUggaacacggggugcc..... 1  
Gi2\_10715431\_x4.....gUcgucgugggaacacggggugccgaacu..... 1  
G1l\_4022344\_x4.....aucggagacgucgugggaU..... 1  
Gi2\_10700139\_x4.....acgucgugggaacacggggugccgaaAu..... 1  
Gi5\_8618463\_x4.....gugggaCcacggggugccgaac..... 1  
Gi2\_10677415\_x4.....aacacggggugccgaUcu..... 1  
Gi2\_10684399\_x4.....ggaacacgNggugccgaa..... 1  
Gi5\_8624335\_x4.....agacAucgugggaacacggggugccgaacu..... 1  
Gi2\_10663963\_x4.....gaucggagacgucgugggUacac..... 1  
Gi2\_10676187\_x4.....cggagacgucgugggaGcacggggugc..... 1  
Gi2\_10664399\_x4.....ucgugggaacacggggUaccg..... 1  
Gi2\_10714491\_x4.....guNggaaacacggggugccgaac..... 1  
Gi3\_27660885\_x4.....ugggUacacggggugccg..... 1  
G1a\_5789090\_x4.....cgugggaacacggggGgccgaacu..... 1  
Gi5\_8638359\_x4.....cgucguggAaacacggggugccgaacu..... 1  
Gi2\_10677459\_x4.....ggagacgucguAggaacacggggugc..... 1  
Gi4\_544670\_x4.....gggaacacggggugccgaacA..... 1  
Gi3\_27752181\_x4.....gugggaacacgggCugccgaac..... 1  
Gi3\_27714361\_x4.....gaucggagacgucAugggaacacggg..... 1  
Gi2\_10658047\_x4.....cgugggaacacgggAugc..... 1  
Gi2\_10673451\_x4.....gugggaacUCggggugcc..... 1  
Gi3\_27706781\_x4.....gugggaacacgCggugccga..... 1  
Gi3\_27662081\_x4.....ggagGcgucgugggaacacg..... 1  
Gi3\_27675697\_x4.....auUggagacgucguggga..... 1  
G1l\_4040904\_x4.....aUacgucgugggaacacgggg..... 1  
Gi3\_27680529\_x4.....acgucgugggCacacggggugcc..... 1

|                                                          |   |
|----------------------------------------------------------|---|
| Gi2_10655647_x4.....aucggagacgucgugggacC.....            | 1 |
| Gi4_538762_x4.....ggaacacggggugccgaacA.....              | 1 |
| Gi3_27718185_x4.....gGacacggggugccgaacuu.....            | 1 |
| Gl1a_5775038_x4.....Uacgucgugggaaacacggggugccgaacu.....  | 1 |
| Gi2_10720983_x4.....auUggagacgucgugggaaacacg.....        | 1 |
| Gl1a_5782854_x4.....aucggagacgucgugggGacacggg.....       | 1 |
| Gi2_10665791_x4.....acgucgugggaaAacggggugcc.....         | 1 |
| Gi5_8606687_x4.....cgugggaaacaUggggugccgaac.....         | 1 |
| Gi2_10668551_x4.....uggaaacacgggCugccgaac.....           | 1 |
| Gi1_4031656_x4.....aUacgucgugggaaacacggggugccgaac.....   | 1 |
| Gi5_8649291_x4.....aaGacggggugccgaacu.....               | 1 |
| Gi2_10660951_x4.....aucggagacgucgugggaaCcggggugc.....    | 1 |
| Gi5_8647759_x4.....ucgCgggaacacggggugccgaac.....         | 1 |
| Gi3_27789473_x4.....ucgNgggaacacggggugccgaacu.....       | 1 |
| Gi3_27768413_x4.....aAcggagacgucgugggaaacac.....         | 1 |
| Gi3_27741437_x4cugcgauccggagacgucgugggaaacacggggug.....  | 0 |
| Gi3_27670713_x4.....uggaaacacgggGgcccga.....             | 1 |
| Gi1_4036552_x4.....cggagacgucgugggGacacggggugcc.....     | 1 |
| Gi3_27760317_x4.....cgucgugggaaacacggggugcA.....         | 1 |
| Gi3_27756609_x4.....gggaacaUggggugccgaa.....             | 1 |
| Gi3_27676801_x4.....gucgugggaaacacAgggugcc.....          | 1 |
| Gi3_27742317_x4.....gaCcgagacgucgugggaaaca.....          | 1 |
| Gi1_4047696_x4.....ggaacacgggguUccgaacu.....             | 1 |
| Gi3_27788373_x4.....ugggCacacggggugccga.....             | 1 |
| Gl1a_5776970_x4.....gUagacgucgugggaaaca.....             | 1 |
| Gi3_27680781_x4.....Cucggagacgucgugggaaacacgg.....       | 1 |
| Gi1_4035844_x4.....acgucgugggaaacacgAggugccgaacu.....    | 1 |
| Gi4_542842_x4.....acgucgugNgaacacggggugccgaacu.....      | 1 |
| Gi3_27794153_x4.....aucggagacgucgugggGacacgggg.....      | 1 |
| Gi2_10713967_x4.....agacgucgNgggaacacggggugccg.....      | 1 |
| Gi3_27783429_x4.....cguUgugggaaacacggggugc.....          | 1 |
| Gi3_27684109_x4.....cggagGcgucgugggaaacacggggg.....      | 1 |
| Gi3_27749925_x4.....aucggagacgucgugggaaacacggggugcA..... | 1 |
| Gi2_10655827_x4.....agUcgucgugggaaacacggggugc.....       | 1 |
| Gi2_10711519_x4.....aucggagaNgucgugggaaacacgg.....       | 1 |
| Gi2_10679671_x4.....gaGcggagacgucgugggaaacacg.....       | 1 |
| Gi2_10702351_x4.....gucgCgggaacacggggugcc.....           | 1 |
| Gi2_10693239_x4.....ugggUacacggggugccgaac.....           | 1 |
| Gi3_27796145_x4.....ucgugggGacacggggugccgaa.....         | 1 |
| Gi2_10682655_x4.....aucggagacgucUugggaaca.....           | 1 |
| Gl1a_5772646_x4.....cUgagacgucgugggaaacacgg.....         | 1 |
| Gi2_10714919_x4.....aucggagacgucgugggaaacCcggggug.....   | 1 |
| Gi2_10683851_x4.....cgucgugggaaacacggggGg.....           | 1 |
| Gl1a_5775066_x4.....uggaaacacggggugccgaac.....           | 0 |
| Gi4_543830_x4.....Uaacacggggugccgaacu.....               | 1 |
| Gi3_27730721_x4.....guUgugggaaacacggggugc.....           | 1 |
| Gi2_10719719_x4.....cguggAaacacggggugcc.....             | 1 |

Gi2\_10679871\_x4.....ugggaacaAggggugccgaacu..... 1  
 Gi3\_27664669\_x4.....cgugggaacacgggAugccgaa..... 1  
 Gi2\_10722871\_x4.....gugggaacaUggggugccga..... 1  
 Gi1\_4035880\_x4.....Gcggagacgucgugggaacacg..... 1  
 Gi1\_4034680\_x4.....Gcgugggaacacggggugccg..... 1  
 Gi1\_4040048\_x4.....acgucgugggaacacggggugccgGacu..... 1  
 Gi2\_10710191\_x4.....gggaacacggggugGcgaacu..... 1  
 Gi2\_10718943\_x4.....guggCaacacggggugccg..... 1  
 Gi2\_10681079\_x4.....cgucgugggaacacAgggugccg..... 1  
 Gi5\_8609343\_x4.....gGcucgugggaacacggggugccg..... 1  
 Gi3\_27784761\_x4.....aucggagacgucGgggaacacggg..... 1  
 Gi2\_10655055\_x4.....cggauacgucgugggaacacggggugc..... 1  
 Gi1\_4034068\_x4.....gggaacacggggugccgaacAu..... 1  
 Gi4\_544682\_x4.....gugggaacacggggugcc..... 0  
 Gi2\_10666899\_x4.....gacgCcgugggaacacggggugcc..... 1  
 Gi3\_27703777\_x4.....Uacgucgugggaacacggggugccgaa..... 1  
 Gi2\_10713587\_x4.....gucgugggaacaUggggugccgaac..... 1  
 Gi3\_27692653\_x4.....cgucgugggCacacggggugccgaacu..... 1  
 Gi2\_10659323\_x4.....aucggagCcgucgugggaacacggggugcc..... 1  
 Gi3\_27768137\_x4.....aucggUgacgucgugggaacacggggg..... 1  
 Gi3\_27659185\_x4.....gCacacggggugccgaac..... 1  
 Gi3\_27728941\_x4.....aucggagacgucgugggaacacAgggugc..... 1  
 Gi4\_541694\_x4.....cgucgugggaacacggggGgccga..... 1  
 Gi3\_27744237\_x4.....acgucgugggaacacggggugccgGac..... 1  
 Gi3\_27750213\_x4.....aUacgucgugggaacacggggugccgaa..... 1  
 Gi1\_4027332\_x4.....uGgugggaacacggggugc..... 1  
 Gi2\_10720291\_x4..Ucgauccgagacgucgugggaaca..... 1  
 Gi3\_27756501\_x4.....aucggagacgucgugggCacacggggugcc..... 1  
 Gi2\_10702943\_x4.....aucggagacgucgugAgaacac..... 1  
 Gi2\_10696771\_x4.....gCacacggggugccgaacu..... 1  
 Gi2\_10688631\_x4...gUucggagacgucgugggaacacg..... 1  
 Gi3\_27771653\_x4.....gggGacacggggugccga..... 1  
 Gi1\_4043712\_x4.....cgucgugggaacacggggugccgaaUu..... 1  
 Gi1\_4018832\_x4.....acUucgugggaacacggggugccgaacu..... 1  
 Gl1a\_5774446\_x4.....gucgugggNacacggggugccgaacu..... 1  
 Gi5\_8624251\_x4.....gacgucgCgggaacacggggugccgaacu..... 1  
 Gi2\_10693883\_x4.....gucgugggaacacggAgugccgaac..... 1  
 Gi3\_27726681\_x4.....ucgugggaacCggggugccg..... 1  
 Gi3\_27786137\_x4.....Gggagacgucgugggaacacg..... 1  
 Gi2\_10653783\_x4.....gAgggaacacggggugccgaa..... 1  
 Gi5\_8648859\_x4.....cgugggaacacggggugccgaaU..... 1  
 Gi2\_10689999\_x4.....cAugggaacacggggugccgaa..... 1  
 Gi3\_27743201\_x4.....cgucgugggaacacgggAugc..... 1  
 Gi1\_4036300\_x4...Uaucggagacgucgugggaacacggggg..... 1  
 Gi2\_10660843\_x4.....gggaacacgggggUccgaacu..... 1  
 Gi1\_4038824\_x4.....acgucgugggaacCggggugccgaacu..... 1  
 Gi3\_27743773\_x4.....acguAgugggaacacggggugccgaacu..... 1

Gi3\_27750069\_x4.....agacgucgugggaacGcggggugccga..... 1  
Gi5\_8631911\_x4.....agacgucgugggaacacggggugccAaacu..... 1  
Gi3\_27708269\_x4...gaucggagGcgucgugggaacacg..... 1  
Gi3\_27724069\_x4.....ggagGcgucgugggaacacggggu..... 1  
Gi3\_27782029\_x4.....uUggagacgucgugggaacacggggugcc..... 1  
Gi3\_27670845\_x4.....cggagacgucgugggaGcacggg..... 1  
Gi5\_8618343\_x4.....cgucgugggaacacggggugccgaacG..... 1  
Gi2\_10693675\_x4.....uCGgaacacggggugccgaa..... 1  
Gi3\_27661253\_x4.....gaUgucgugggaacacggg..... 1  
Gi2\_10674867\_x4...aucggagacgucgugggaacacggAgugcc..... 1  
Gi3\_27679521\_x4...gaucggagacgucgugggGacacg..... 1  
Gi2\_10663879\_x4...gaucggagacgCcgugggaacacggggugc..... 1  
Gi3\_27771669\_x4.....ggaacacggggugGcgaac..... 1  
Gi5\_8647267\_x4.....Agggaacacggggugccgaac..... 1  
Gi2\_10653691\_x4.....Cgagacgucgugggaacacggggug..... 1  
Gi1\_4039560\_x4.....aacacggCgugccgaacu..... 1  
Gi2\_10664675\_x4...Gucggagacgucgugggaacacgg..... 1  
Gi2\_10666823\_x4.....ggagacgucgugggaacacggggCgc..... 1  
Gi5\_8622631\_x4.....cgucgugggaacacgAggugccgaacu..... 1  
Gi2\_10717987\_x4...gaCcgagacgucgugggaacac..... 1  
Gi2\_10708887\_x4.....agacgucgugggaacacggggugccgaGcu..... 1  
Gi3\_27777709\_x4.....ugggaacacggggugcAga..... 1  
G1a\_5803606\_x4.....ggaaUacggggugccgaacu..... 1  
Gi3\_27763373\_x4.....gucgugggaacacggggugUcgaac..... 1  
G1a\_5792278\_x4...Ggaucggagacgucgugg..... 1  
Gi2\_10712563\_x4.....ggagacgucgugggaacacggggAgcc..... 1  
Gi2\_10680359\_x4.....acgucAugggaacacggggugccgaacu..... 1  
Gi4\_543106\_x4.....Cugggaacacggggugccgaacu..... 1  
Gi2\_10652051\_x4.....cgugggaCcacggggugccgaac..... 1  
Gi3\_27669081\_x4.....cgugggaacaUggggugc..... 1  
Gi5\_8609639\_x4.....Agggaacacggggugccgaa..... 1  
Gi3\_27751249\_x4.....agacgucgugggaacacggggugccgGacu..... 1  
Gi5\_8629475\_x4.....gugggaacacggggugcAgaac..... 1  
Gi1\_4036720\_x4.....ugggaacacggggugccAaac..... 1  
Gi3\_27780277\_x4.....gUcgucgugggaacacggg..... 1  
Gi5\_8617719\_x4.....agacgucgugggaacacggggugccgaGcu..... 1  
Gi5\_8623475\_x4.....gaacaGggggugccgaacu..... 1  
G1a\_5771386\_x4...cgUucggagacgucgugg..... 1  
Gi1\_4020984\_x4.....acgucgugggaacacggggugcAg..... 1  
Gi3\_27749517\_x4.....acguUgugggaacacggggugccgaac..... 1  
Gi3\_27694661\_x4.....ggagacgucgugggGacacg..... 1  
Gi5\_8649775\_x4...aucgUagacgucgugggaacacg..... 1  
Gi3\_27666805\_x4.....gugggaacacggggugccUaa..... 1  
Gi1\_4041324\_x4.....Ggggaacacggggugccg..... 1  
Gi3\_27700957\_x4.....cgucgugggaacaUggggugc..... 1  
Gi1\_4028512\_x4.....aGgucgugggaacacggggugccg..... 1  
Gi3\_27696297\_x4...gaucggagacgucgCgggaacacgggg..... 1



Gi3\_27700981\_x4.....ggCacacggggugccgaac..... 1  
G1a\_5769530\_x4.....cgCgggaacacggggugcc..... 1  
Gi2\_10716187\_x4.....ggagacgucgugggaGcacggggugc..... 1  
Gi2\_10709723\_x4.....gaucggagacgucgugggGaca..... 1  
Gi3\_27784989\_x4.....cgucgugggaacacggggugccGUacu..... 1  
Gi2\_10687223\_x4.....ugggaacacggggAgccgaac..... 1  
Gi2\_10681247\_x4.....cggagacgucgugggaacacggggugccgaa..... 0  
Gi3\_27691109\_x4.....gAagacgucgugggaacacggggugcc..... 1  
G11\_4028444\_x4.....Ugugggaacacggggugccgaac..... 1  
G1a\_5787258\_x4.....cAugggaacacggggugccgaacu..... 1  
Gi2\_10678979\_x4.....gggaacacCggggugccgaacu..... 1  
Gi3\_27690821\_x4.....ucggagacgucgugggaacacggggC..... 1  
Gi2\_10664023\_x4.....aUacgucgugggaacacggggugccga..... 1  
Gi5\_8641103\_x4.....cGcggggugccgaacuuu..... 1  
Gi2\_10658199\_x4.....cggagacgucguggAaacacggggugcc..... 1  
G11\_4020016\_x4.....gggaacaAggggugccgaacu..... 1  
Gi3\_27677557\_x4.....gaucggagacgucgugggaacacAgg..... 1  
Gi2\_10683087\_x4.....gggaacacggggUugccgaacu..... 1  
Gi3\_27757225\_x4.....ucggagacgucgugggaacacggggAgcc..... 1  
Gi3\_27733157\_x4.....cgucguUggaacacggggugccgaacu..... 1  
Gi3\_27767317\_x4.....gaucggagacgucgugggaacacAggg..... 1  
Gi5\_8627811\_x4.....ugggaacacggggCugccgaac..... 1  
Gi2\_10658539\_x4.....ugggaacacggggGgccgaac..... 1  
Gi3\_27756629\_x4.....aucggagacgAcgugggaacacggggg..... 1  
Gi5\_8603019\_x4.....cgugggaacacCggggugccgaacu..... 1  
G11\_4035496\_x4.....gggaacacggggugAcgaacu..... 1  
Gi2\_10712927\_x4.....cgucgugggaacacgggggUaccg..... 1  
Gi3\_27671633\_x4.....gggaacacggggugAcgaa..... 1  
Gi2\_10676559\_x4.....gacgucgugggaCcacggggugccgaacu..... 1  
Gi3\_27670061\_x4.....gNgggaacacggggugccgaacu..... 1  
Gi2\_10682939\_x4.....ucggagacgucgugggaacGcggggugc..... 1  
Gi3\_27694593\_x4.....cgugAgaacacggggugc..... 1  
G1a\_5776298\_x4.....aacacggggugccAaacu..... 1  
G1a\_5772950\_x4.....cgugUgaacacggggugcc..... 1  
Gi2\_10686883\_x4.....gugggaacacggggugccGg..... 1  
Gi2\_10651807\_x4.....ugggaacaGggggugccgaacu..... 1  
Gi5\_8611779\_x4.....gugggaacacggggGgccga..... 1  
G1a\_5783022\_x4.....gugggaacacggggCgcc..... 1  
Gi2\_10723243\_x4.....gaacGcggggugccgaac..... 1  
G11\_4032256\_x4.....cUugggaacacggggugcc..... 1  
Gi3\_27708985\_x4.....ggagacgucgCgggaacacggggugcc..... 1  
Gi3\_27778029\_x4.....ggagacguNgugggaacacggggg..... 1  
G11\_4039688\_x4.....cgugggaaNacggggugccga..... 1  
Gi3\_27659837\_x4.....Gcggagacgucgugggaaca..... 1  
Gi3\_27763197\_x4.....aacGcggggugccgaacuu..... 1  
Gi5\_8629723\_x4.....cgugggaacacgggggUcccgaacu..... 1  
G11\_4029108\_x4.....Aaacacggggugccgaac..... 1

|                                                             |   |
|-------------------------------------------------------------|---|
| Gi1_5773222_x4.....aucggagacgucgugggaacacggggugccgaacu..... | 0 |
| Gi2_10708987_x4.....ggagacgucgugggaCacggggugcc.....         | 1 |
| Gi2_10706099_x4....gaucggagacgucgugggCacacg.....            | 1 |
| Gi5_8625791_x4.....cgugggaacacggggugccAaac.....             | 1 |
| Gi1_4033888_x4.....ugggaacacUgggugccgaacu.....              | 1 |
| Gi3_27696041_x4.....cgugggaacacggggAgccga.....              | 1 |
| Gi5_8643723_x4.....acgucgAgggaacacggggugccgaacu.....        | 1 |
| Gi1_4042664_x4.Ggcgaucggagacgucguggga.....                  | 1 |
| Gi2_10694191_x4.....aAacgucgugggaacacggggugccgaacu.....     | 1 |
| Gi3_27674365_x4.....gaacacggggugccgaaA.....                 | 1 |
| Gi5_8617403_x4.....gUagacgucgugggaaca.....                  | 1 |
| Gi2_10676867_x4....aucggagUcgucgugggaacacggggu.....         | 1 |
| Gi1_4041360_x4.....gaaNacggggugccgaacu.....                 | 1 |
| Gi2_10691555_x4.....cggagacgucgugggaacaUggggugcc.....       | 1 |
| Gi4_539354_x4.....aUacgucgugggaacacggggugccgaacu.....       | 1 |
| Gi5_8622475_x4.....cgugggaacacgAggugccgaac.....             | 1 |
| Gi3_27747437_x4.....ugggaacacggCgugccgaac.....              | 1 |
| Gi2_10722283_x4.....ucggagacgucAugggaacacggggugc.....       | 1 |
| Gi2_10666047_x4....aucggagacgucgugAgaacacggggugcc.....      | 1 |
| Gi5_8614939_x4....aucggagaNgucgugggaacacg.....              | 1 |
| Gi3_27666501_x4.....ggagacgucgugggaacacggggGgcc.....        | 1 |
| Gi2_10665959_x4.....ugggaacacggAgugccg.....                 | 1 |
| Gi1_4024168_x4.....gugggaacNcggggugccg.....                 | 1 |
| Gi2_10655223_x4....aucAgagacgucgugggaacacggg.....           | 1 |
| Gi1_4017984_x4.....gggaacacggggugccgaa.....                 | 0 |
| Gi3_27723269_x4....cUgagacgucgugggaacacggggugccgaacu.....   | 1 |
| Gi3_27669909_x4....aucggagacgucAugggaacacgggg.....          | 1 |
| Gi5_8622655_x4.....gugggaacacggggugAcgaaac.....             | 1 |
| Gi2_10697299_x4....aucggagCcgucgugggaacacggg.....           | 1 |
| Gi2_10684231_x4.....gugggaacaAggggugccgaa.....              | 1 |
| Gi1_4027448_x4.....ggaacaUggggugccgaac.....                 | 1 |
| Gi2_10678207_x4.....cgugggaacUcggggugcc.....                | 1 |
| Gi3_27685129_x4.....Ugacgucgugggaacacggggugccgaacu.....     | 1 |
| Gi5_8621247_x4.....uAgugggaacacggggugccgaacu.....           | 1 |
| Gi5_8604779_x4.....uUgugggaacacggggugccgaac.....            | 1 |
| Gi1_5812278_x4.....gugggaacGcggggugccga.....                | 1 |
| Gi2_10654827_x4.....cgucgugggaacacggggAgcc.....             | 1 |
| Gi2_10657707_x4.....agacgucgugggaacacggggugccgGacu.....     | 1 |
| Gi3_27738965_x4.....ucgNgggaacacggggugccgaac.....           | 1 |
| Gi2_10717167_x4.....acgucgugNgaacacggggugccg.....           | 1 |
| Gi1_4028704_x4.....gggaacacggggugccgUacu.....               | 1 |
| Gi3_27788965_x4.....gacgucgugggaacGcggg.....                | 1 |
| Gi2_10700615_x4.....agacgucgugggaacacggggugcUgaacu.....     | 1 |
| Gi2_10660671_x4....gaucUgagacgucgugggaacacggggug.....       | 1 |
| Gi5_8620015_x4.....gucgugggaacacggggugAcgaaacu.....         | 1 |
| Gi5_8630143_x4.....ucgNgggaacacggggugccgaacu.....           | 1 |
| Gi2_10713743_x4.....gacgucgugggaacacggggGgcc.....           | 1 |

Gi3\_27729553\_x4.....cgucgugggaacacggggAgccg..... 1  
 Gi3\_27716193\_x4....aucggagacgucgugggaacCc..... 1  
 Gi3\_27781861\_x4....aucggagacgucgugggaacacggggugAc..... 1  
 Gi5\_8635335\_x4.....Ngugggaacacggggugccgaacu..... 1  
 Gi5\_8621383\_x4.....gacgucgugggaacacggggCgcccgaacu..... 1  
 Gi2\_10691983\_x4.....ugAgaacacggggugccga..... 1  
 Gi1\_4046432\_x4.....ucgugggaacacggggGgcccgaac..... 1  
 Gi5\_8606787\_x4.....gugAgaacacggggugccgaac..... 1  
 Gi2\_10656135\_x4....gaucggagacgucgCgggaacacg..... 1  
 Gi2\_10679827\_x4.....gaacacggggugGcgaacu..... 1  
 Gi2\_10678563\_x4.....cgagacgucgugggaacacggggugcU..... 1  
 Gi2\_10688163\_x4....gaucggagacgucgCgggaacacggggug..... 1  
 Gi3\_27700353\_x4.....gacgucgugggaCcacggggugccgaacu..... 1  
 Gi2\_10707471\_x4....gaucggagacgucgugggaacGc..... 1  
 Gi2\_10708919\_x4.....ggCacacggggugccgaacu..... 1  
 Gi2\_10681047\_x4.....ucUugggaacacggggugccg..... 1  
 Gi2\_10653319\_x4.....acgucgugggCacacggggugc..... 1  
 Gi3\_27754081\_x4.....guUugggaacacgggggu..... 1  
 Gi5\_8603663\_x4.....ucgugggaacacggggugccgaGc..... 1  
 Gi3\_27762549\_x4.....acgNcgugggaacacggggugccgaacu..... 1  
 Gi2\_10708443\_x4.....cgucgugggaacacAgggugccga..... 1  
 Gi3\_27687213\_x4.....gagGcgucgugggaacacggggugccgaac..... 1  
 Gi1\_4029492\_x4.....Ugagacgucgugggaacacggggug..... 1  
 Gi3\_27663717\_x4....gaucggagacgucgugggaacacA..... 1  
 Gi5\_8604019\_x4.....ugggaacacggggugccAaa..... 1  
 Gi3\_27662149\_x4.....cgugggaacacggggugccCaacu..... 1  
 Gi3\_27697785\_x4.....gacgucguAggaacacggggugccgaacu..... 1  
 Gi1\_4037488\_x4.....ggagacgucgugggaacacggggugccgaac..... 0  
 Gi1\_4019344\_x4....aucggagacgucgugggaaca..... 0  
 Gl1\_5767646\_x4.....cgugggaacacggggguAccgaacu..... 1  
 Gi2\_10660479\_x4....aucggagacgucgugggCacacgg..... 1  
 Gi1\_4039732\_x4.....ugggaacacggAgugccgaac..... 1  
 Gi5\_8648679\_x4.....gaaAacggggugccgaacu..... 1  
 Gi1\_4047268\_x4.....ggagacgCcgugggaacacggggugcc..... 1  
 Gi2\_10718503\_x4.....aacacggUgugccgaacu..... 1  
 Gi3\_27739449\_x4.....cgucgugggaacacggUgugccgaacu..... 1  
 Gi3\_27772421\_x4.....ggNaacacggggugccgaacu..... 1  
 Gi5\_8635359\_x4.....gCgaacacggggugccgaac..... 1  
 Gi2\_10701731\_x4.....cgugggaacacggggugccAaa..... 1  
 Gi2\_10666131\_x4.....gggaaAacggggugccgaac..... 1  
 Gi2\_10656443\_x4.....ucgGgggaacacggggugccgaac..... 1  
 Gi1\_4032672\_x4.....gaacacggggugGcgaacu..... 1  
 Gi2\_10689119\_x4.....ucgugggaacacggggugcAgaac..... 1  
 Gi4\_538718\_x4.....gacgucgugggaacacggggugccgaacuuu..... 0  
 Gl1\_5786810\_x4.....cgugggaacacggggugccgaCc..... 1  
 Gl1\_5800046\_x4....aucggagGcgucgugggaacacggg..... 1  
 Gi3\_27724525\_x4.....cgagacgNcgugggaacacggggugc..... 1

Gi3\_27771821\_x4...Ggaucggagacgucguggg..... 1  
Gi2\_10666675\_x4.....gugggaCcacggggugccgaa..... 1  
G1a\_5788794\_x4....aucggagacgucgAgggaacacggggg..... 1  
Gi2\_10708799\_x4....aucggagaUgucgugggaacac..... 1  
Gi3\_27717725\_x4.....cgucgugggaaAacggggg..... 1  
Gi2\_10657643\_x4.....gacguUgugggaaacacggggg..... 1  
Gi3\_27778977\_x4.....cgugggaacacggAgugcc..... 1  
Gi2\_10722395\_x4.....ugNgaacacggggugccgaaacu..... 1  
Gi2\_10715947\_x4....aucggagacAucgugggaacacgggggugc..... 1  
Gi2\_10681195\_x4.....cgucgugggaaUacggggugccgaa..... 1  
Gi2\_10712395\_x4.....gacgCcgugggaaacacggggugccgaaacu..... 1  
Gi1\_4042292\_x4.....cgugggaaacacggggugccgC..... 1  
Gi2\_10670675\_x4....gaucggagNcgucgugggaaacac..... 1  
Gi3\_27666293\_x4.....cgugggaaacacgUggugccgaa..... 1  
Gi1\_4026088\_x4.....ugggaacacggggugccgGac..... 1  
Gi5\_8649447\_x4.....acgucgugggaaAacggggugccgaaacu..... 1  
Gi5\_8617687\_x4.....ggaacacggggugccgaGc..... 1  
Gi5\_8607575\_x4.....gucgugggNacacggggugccgaaac..... 1  
Gi4\_540638\_x4.....cAugggaacacggggugccgaaacu..... 1  
Gi2\_10696751\_x4.....cgAcgugggaaacacggggugcc..... 1  
Gi5\_8611951\_x4.....ugggaacacUgggugccgaaacu..... 1  
Gi5\_8604567\_x4.....gucgugggaaacacggggugccgaaUu..... 1  
Gi2\_10686083\_x4.....cCugggaaacacggggugccgaa..... 1  
G1a\_5775102\_x4....aucggagaNucgugggaaacacggg..... 1  
Gi3\_27707389\_x4....gaucggagacgCcgugggaaacacggggg..... 1  
Gi2\_10688691\_x4....Caucggagacgucgugggaaacacgggg..... 1  
Gi3\_27678173\_x4.....acgucAugggaacacggg..... 1  
Gi2\_10661295\_x4.....gugggaaacacggggugccU..... 1  
Gi5\_8604559\_x4.....agacgucguAggaaacacggggugccgaaacu..... 1  
Gi1\_4024348\_x4.....gacgucgugggaaacacggggGgccgaaacu..... 1  
Gi3\_27715657\_x4.....gugggaaacacggggugcGga..... 1  
Gi1\_4025724\_x4.....aCcacggggugccgaaacu..... 1  
Gi1\_4039392\_x4....auUggagacgucgugggaaacacggggugcc..... 1  
Gi3\_27769929\_x4.....cgucgugggaaacacgAggugcc..... 1  
Gi1\_4038064\_x4.....uAggaaacacggggugccgaaac..... 1  
Gi3\_27735993\_x4.....ucgugggaGcacggggugccg..... 1  
Gi3\_27690457\_x4....gaucggagacAucgugggaaacacg..... 1  
G1a\_5771934\_x4.ugcgauccggagacgucgugggaaacacggggg..... 0  
Gi2\_10697007\_x4.....ugggaaacacggggugccAa..... 1  
Gi1\_4024244\_x4.....gucgGgggaaacacggggugccgaaacu..... 1  
Gi2\_10653491\_x4.....cgugggaaacacggAgugccga..... 1  
Gi2\_10668115\_x4....gaucAgagacgucgugggaaacacggg..... 1  
Gi3\_27713849\_x4...Ggaucggagacgucgugggaaacacggggugcc..... 1  
Gi2\_10657403\_x4.....gacgucgugggaaacacggggugcAgaacu..... 1  
Gi2\_10679019\_x4.....ucgugggaaacacUgggugccgaaac..... 1  
Gi2\_10713623\_x4....aucggCgacgucgugggaaacac..... 1  
Gi2\_10660043\_x4....ucggagacNucgugggaaacacgggg..... 1

Gi2\_10678603\_x4.....aucggagacgucgugggaGcacggggug..... 1  
 Gi3\_27692733\_x4.....gacgucgAgggaacacggggugccgaacu..... 1  
 Gi1\_4025908\_x4.....cgugggaaNacggggugccgaac..... 1  
 Gi3\_27710389\_x4...gaucggagacgucgugggaacacggggGgc..... 1  
 Gi3\_27779025\_x4.....cgagacgNcgugggaacacgggg..... 1  
 Gi3\_27666957\_x4.....ggaaUacggggugccgaa..... 1  
 Gi3\_27707805\_x4.....aucggagacgucGgggaacacgggg..... 1  
 Gi3\_27734585\_x4.....aGacggggugccgaacu..... 1  
 Gi3\_27780521\_x4.....aucggagacgucgugggaAacggg..... 1  
 Gi1\_4047116\_x4.....Ncgugggaacacggggugccgaacu..... 1  
 G1a\_5793330\_x4...aucggagaNgucguggga..... 1  
 Gi3\_27665753\_x4.....gagacgucGgggaacacgggg..... 1  
 Gi2\_10706939\_x4.....aacNcggggugccgaacu..... 1  
 G1a\_5786962\_x4...aucggagacgucgugggaacGcgggg..... 1  
 Gi3\_27795205\_x4.....cgugggaacacggggGgccgaa..... 1  
 Gi3\_27697221\_x4.....cguUgugggaacacggggugccgaac..... 1  
 G1a\_5771198\_x4...aGcggagacgucgugggaacacggggugc..... 1  
 Gi5\_8608435\_x4...aucggagacgucgugggaCcacgggg..... 1  
 Gi3\_27770185\_x4.....ugggaacacggggugGcga..... 1  
 Gi2\_10663883\_x4.....acgucgugggaacacggggGgccgaac..... 1  
 Gi5\_8649595\_x4...aucggagacgucgugggaGcacg..... 1  
 Gi3\_27701465\_x4.....gucgugggNacacggggugccga..... 1  
 Gi3\_27777973\_x4.....ucggagacNucgugggaacac..... 1  
 Gi3\_27752597\_x4.....ucggagacgucgugggaGcacg..... 1  
 Gi5\_8631799\_x4...auUggagacgucgugggaacacgggg..... 1  
 Gi3\_27776133\_x4.....ucguUggaacacggggugccg..... 1  
 Gi2\_10704323\_x4.....acgucgugggaacacggggugccgaUc..... 1  
 Gi2\_10653139\_x4...aCcgagacgucgugggaacacggg..... 1  
 Gi2\_10700367\_x4.....gagGcucgugggaacacggggugc..... 1  
 Gi2\_10702883\_x4...gaucggagacgucgugggaacacgggAu..... 1  
 Gi1\_4031264\_x4.....aacacggggugAcgaacu..... 1  
 Gi3\_27695501\_x4.....ggAaacacggggugccga..... 1  
 Gi2\_10710563\_x4.....ugggaacCcgggugccga..... 1  
 Gi3\_27795073\_x4...aucggagacgucgugAgaacacgggg..... 1  
 Gi3\_27756937\_x4...aucggagacgucgugAaacacggggugccga..... 1  
 Gi2\_10669555\_x4...aucggagacgucGgggaacacg..... 1  
 Gi5\_8622043\_x4.....gggaacacgUggugccgaacu..... 1  
 Gi5\_8605147\_x4.....uAggaacacggggugccgaa..... 1  
 Gi3\_27702717\_x4.....ucgugggaacacggggugccgUac..... 1  
 Gi3\_27698393\_x4...aUgucgugggaacacggggugcc..... 1  
 Gi1\_4031496\_x4.....ugggaacacggggugccgaacAu..... 1  
 Gi1\_4023168\_x4.....gucgugggaacacggggugccAaacu..... 1  
 Gi2\_10657831\_x4...aucggagacgucgugggCcacggggug..... 1  
 Gi3\_27716605\_x4.....ugggaacacggggUcccgaac..... 1  
 Gi5\_8617675\_x4...cgugggaacacggggCgccgaac..... 1  
 Gi5\_8641743\_x4.....gugggaacCcgggugcc..... 1  
 Gi2\_10689127\_x4...gauUggagacgucgugggaacacggggugc..... 1

Gi5\_8624767\_x4.....aucggagaNgucgugggaacacggggu..... 1  
 Gi3\_27707665\_x4.....cgucUugggaacacggggugccga..... 1  
 Gi5\_8634123\_x4.....cgucguggNaacacggggugc..... 1  
 Gi3\_27778497\_x4.....aucggagacgucgugUgaacacg..... 1  
 Gi2\_10671239\_x4.....gaucggagacgucgugggaacG..... 1  
 Gi3\_27781837\_x4.....acAucgugggaacacggggugccgaac..... 1  
 Gi1\_4036740\_x4.....gGcugcuggggaacacggggugccg..... 1  
 Gi2\_10651315\_x4.....gggaacacggggugccgaG..... 1  
 Gi3\_27691521\_x4.....cgucgugggaGacggggugccgaacu..... 1  
 Gi2\_10680863\_x4.....gagacgucguggggaacGcggggug..... 1  
 Gi2\_10691303\_x4.....cgugggaGcacggggugc..... 1  
 Gi5\_8643479\_x4.....ggaacacgCggugccgaacu..... 1  
 Gi2\_10655843\_x4.....gugggaacacggggugccUaac..... 1  
 Gi3\_27756909\_x4.....ggaacacggggugcUgaa..... 1  
 Gi1\_4025728\_x4.....ucgCgggaacacggggugccgaac..... 1  
 Gi3\_27687029\_x4.....cgugggaacacggggGgc..... 1  
 Gi2\_10714363\_x4.....gggaacaAggggugccgaac..... 1  
 Gi5\_8639555\_x4.....cgucguggggaacacggggGgcc..... 1  
 Gi3\_27752789\_x4...cgUucggagacgucgugggaacacggggu..... 1  
 Gi3\_27703125\_x4.....gucguggggaacGcggggugc..... 1  
 Gi3\_27729933\_x4.....cgucguggggaacacggAgugccgaac..... 1  
 Gi2\_10722551\_x4.....cguAggaacacggggugcc..... 1  
 Gi2\_10686547\_x4.....ucgugggaGcacggggugccg..... 1  
 Gl1\_5807754\_x4.....gugggaacacggggGgcc..... 1  
 Gi3\_27785525\_x4.....gucgugggGacacggggugcc..... 1  
 Gi2\_10718483\_x4.....gugggaacacggggugcUgaa..... 1  
 Gi3\_27793241\_x4.....gugggaUcacggggugccga..... 1  
 Gi2\_10667583\_x4...gGucggagacgucgugggaac..... 1  
 Gi3\_27705125\_x4.....gggaacacggggugGcgaacu..... 1  
 Gi2\_10684815\_x4.....aucggagacguUgugggaacac..... 1  
 Gl1\_5801690\_x4.....cgugggaacacgggAugccgaacu..... 1  
 Gi3\_27790425\_x4.....cgugggaacCcggggugccgaa..... 1  
 Gi1\_4033860\_x4.....guggCaacacggggugccgaacu..... 1  
 Gi3\_27720185\_x4.....cgugggaacacggggugccgU..... 1  
 Gi2\_10718983\_x4...gaucggagacgucgugggaUacggg..... 1  
 Gi1\_4043060\_x4.....aucggagacgucgugggaacacggggug..... 0  
 Gi3\_27712817\_x4.....aucgCagacgucgugggaacacggg..... 1  
 Gi3\_27669709\_x4.....aucggagacgucgugggaacacgCg..... 1  
 Gi3\_27726041\_x4.....cUgagacgucgugggaacacggggugccg..... 1  
 Gi1\_4019580\_x4.....gugggaacacggggCgcc..... 1  
 Gi1\_4043696\_x4.....cgucguggggaacacggggugccgGacu..... 1  
 Gi3\_27776897\_x4.....cgucguAggaacacggggugccg..... 1  
 Gi3\_27760709\_x4.....aucggagacgucgugggaacCcggggugcc..... 1  
 Gi3\_27774305\_x4.....Gcugcuggggaacacggg..... 1  
 Gi2\_10708903\_x4.....gugggaacacgggguUccgaac..... 1  
 Gi2\_10703519\_x4.....Agucguggggaacacggggugcc..... 1  
 Gi2\_10677851\_x4.....ucgugggaacacggggCgccgaa..... 1

|                                                          |   |
|----------------------------------------------------------|---|
| Gi2_10683771_x4.....aucggagacgucgugAgaacacggg.....       | 1 |
| Gi1_4044024_x4...cgaucggagacgucgugg.....                 | 0 |
| Gi2_10700199_x4....gaucUgagacgucguggga.....              | 1 |
| Gi2_10654643_x4.....ugggaacacggggugccA.....              | 1 |
| Gi1_4025196_x4.....ggaacacggggCgccgaac.....              | 1 |
| Gi1_4023196_x4.....gucgugggaacGcggggugccgaacu.....       | 1 |
| Gi2_10683543_x4.....agacgucgCgggaacacggggugccgaacu.....  | 1 |
| Gi2_10661719_x4.....cgucgCgggaacacggggugccga.....        | 1 |
| Gi2_10650715_x4.....gucgugggaacCcggggugc.....            | 1 |
| Gi3_27733677_x4.....cgugggUacacggggugcc.....             | 1 |
| Gi3_27753805_x4.....cggagacgucgugggaacGcggggg.....       | 1 |
| Gi2_10703771_x4.....gGcugcuggggaacacggggugc.....         | 1 |
| Gi3_27726709_x4.....gacgucgugggaacacggggugccGacu.....    | 1 |
| Gi2_10652547_x4.....cgucAugggaacacggggugccga.....        | 1 |
| Gi1_4040668_x4.....cgucgugggaacacgggggAccgaacu.....      | 1 |
| Gi2_10695351_x4.....uggAaacacggggugccg.....              | 1 |
| Gi2_10720603_x4.....cgugggaGcacggggugccgaa.....          | 1 |
| Gi2_10718559_x4.....gggGacacggggugccgaa.....             | 1 |
| Gi2_10690583_x4.....gugggaacacgggAugccga.....            | 1 |
| Gi3_27782921_x4.....cggagacgucguAggaacacggggugcc.....    | 1 |
| Gi3_27775985_x4.....gacgucgugggaacacggggGgccg.....       | 1 |
| Gi3_27741129_x4.....aacacgggggUccgaacu.....              | 1 |
| Gi3_27705521_x4....aucggagaUgucgugggaacac.....           | 1 |
| Gl1_5801170_x4....gGucggagacgucgugggaacacggg.....        | 1 |
| Gi1_4038772_x4.....gucgugggaacacgAggugccgaacu.....       | 1 |
| Gi3_27719861_x4.....ugggaacaAggggugccgaa.....            | 1 |
| Gi2_10716535_x4.....cggagacguUgugggaacacggggugcc.....    | 1 |
| Gi3_27770577_x4.....gagacgucgugggaacacggggugccgaCcu..... | 1 |
| Gl1_5795834_x4....aucggagacgucgugggaCcacggg.....         | 1 |
| Gi1_4037992_x4.....ugggaacacggggugccgaUc.....            | 1 |
| Gi2_10673959_x4....aAcggagacgucgugggaacacg.....          | 1 |
| Gi2_10691855_x4....aucggagacgucgugggaCcacgg.....         | 1 |
| Gi3_27726945_x4.....gGcugcuggggaacacgg.....              | 1 |
| Gi3_27748285_x4.....cgucgugggaacacggggugccGac.....       | 1 |
| Gi2_10688771_x4.....cCucgugggaacacggggugccgaac.....      | 1 |
| Gi2_10663267_x4.....gugggaacacggggugccC.....             | 1 |
| Gi2_10697951_x4.....ucgugCgaacacggggugccgaacu.....       | 1 |
| Gi2_10706567_x4.....cgucgugggaacacAgggugc.....           | 1 |
| Gi3_27714501_x4.....cgugggaacacgggCugccga.....           | 1 |
| Gi2_10715419_x4....aucgUagacgucgugggaacacggg.....        | 1 |
| Gi1_4037020_x4.....ggaacacggggugccgCac.....              | 1 |
| Gi1_4044872_x4.....gugUgaacacggggugccgaacu.....          | 1 |
| Gi3_27688325_x4Gugcgauccggagacgucg.....                  | 1 |
| Gi3_27730009_x4.....gGgacgucgugggaacacggggugccg.....     | 1 |
| Gi3_27692645_x4....gaucggagCcgucgugggaacacgggg.....      | 1 |
| Gi1_4040776_x4.....gGcugggaacacggggug.....               | 1 |
| Gi2_10722983_x4.....ugggaacacgggAugccgaac.....           | 1 |

Gi2\_10700343\_x4.....aacacgggCugccgaacu..... 1  
Gi2\_10689619\_x4.....ucgugggUacacggggugccgaac..... 1  
Gi1\_4041564\_x4.....cgucgugggaacacAgggugccgaacu..... 1  
Gi1\_4021340\_x4.....cgugggaacacgggCugccgaacu..... 1  
Gi3\_27705049\_x4.....gaCcgagacgucgugggaacac..... 1  
Gi3\_27783021\_x4.....Cggaacacggggugccga..... 1  
Gi1\_4039652\_x4.....aucggGgacgucgugggaacac..... 1  
Gi2\_10665167\_x4.....cgucgugAgaacacggggugccga..... 1  
Gi3\_27674801\_x4.....ugggaacacgUggugccgaac..... 1  
Gi3\_27692461\_x4.....aucggagacgucgugggaacacgggU..... 1  
Gi1\_4031884\_x4.....auUggagacgucgugggaacacg..... 1  
Gi3\_27703261\_x4.....cgNgggaacacggggugccgaac..... 1  
Gi2\_10715967\_x4.....aucggagacgucgugggaacacgAggu..... 1  
Gi3\_27792301\_x4.....cgugggaacacAgggugcc..... 1  
Gi2\_10669615\_x4.....gugggaacacggUgugccgaa..... 1  
Gi1\_4018700\_x4.....guggUaacacggggugcc..... 1  
Gi3\_27733253\_x4.....cggagacgucgugAgaacacggggugcc..... 1  
Gi3\_27697101\_x4.....gggaacacggggugccgaCcuu..... 1  
Gi3\_27715809\_x4.....aucNgagacgucgugggaacacggggU..... 1  
Gi2\_10684891\_x4.....ggagacgucgugggaaca..... 0  
Gi3\_27759553\_x4.....cgugggCacacggggugccga..... 1  
Gi2\_10717723\_x4.....cggagacgucguUggaacacggggugc..... 1  
Gi2\_10701151\_x4.....gaucggagacgucgugggaacacggggGgc..... 1  
Gi1\_4037868\_x4.....aCcgagacgucgugggaacacg..... 1  
Gi1\_4042752\_x4.....ucguCggaacacggggugccgaacu..... 1  
Gi5\_8608663\_x4.....ugggaGcacggggugccgaa..... 1  
Gi3\_27702173\_x4.....gucgugggaacacggggugccgUac..... 1  
Gi3\_27717401\_x4.....cgugggaacaUggggugccga..... 1  
Gi2\_10688423\_x4.....acgucgugggaacGcggggugcc..... 1  
Gi2\_10713683\_x4.....ugggaGcacggggugccgaacu..... 1  
Gi1\_4025900\_x4.....cggagacgucgugggaacacggggugccgaacA..... 1  
Gi1\_4045568\_x4.....ggagacgucgugggGacacggggugcc..... 1  
Gi1a\_5797370\_x4.....gugggaCcacggggugccgaacu..... 1  
Gi5\_8640451\_x4.....agacgCcgugggaacacggggugccgaacu..... 1  
Gi3\_27761589\_x4.....aucggagacgucguAggaacac..... 1  
Gi3\_27701273\_x4.....ucggagacNucgugggaacacgg..... 1  
Gi5\_8624831\_x4.....uggAaacacggggugccgaa..... 1  
Gi1\_4040760\_x4.....gggaacUcggggugccgaacu..... 1  
Gi2\_10696715\_x4.....uggNaacacggggugccgaacu..... 1  
Gi1\_4028344\_x4.....cgCcgugggaacacggggugcc..... 1  
Gi3\_27775837\_x4.....gugggaacacggCgugcc..... 1  
Gi3\_27721625\_x4.....Gcggagacgucgugggaacac..... 1  
Gi3\_27788337\_x4.....ggaacacggggugcGgaacu..... 1  
Gi2\_10690667\_x4.....aucggagacgucgugggaacacggggugU..... 1  
Gi1\_4023156\_x4.....agacgucgugggaacacggggugcUgaacu..... 1  
Gi2\_10653975\_x4.....gacgucgugggaacacggggugccAaacu..... 1  
Gi2\_10711947\_x4.....cguAggaacacggggugccgaa..... 1



Gi3\_27794453\_x4.....ggaUcacggggugccgaac..... 1  
G1a\_5804378\_x4...Uaucggagacgucgugggaacacgg..... 1  
Gi3\_27760833\_x4.....uggaacacgAggugccg..... 1  
Gi3\_27687049\_x4.....acguGuggggaacacggggugccgaacu..... 1  
Gi3\_27781173\_x4.....ucgugggaacacggggCgccg..... 1  
Gi1\_4032344\_x4.....ucgugggaacacAgggugccgaac..... 1  
Gi2\_10661371\_x4.....gaacacggggugccAaac..... 1  
Gi3\_27684157\_x4.....gucguUggaacacggggugccgaacu..... 1  
Gi3\_27675701\_x4.....aucggagacgucgugggaGcacggggugcc..... 1  
Gi2\_10687451\_x4.....gAgaacacggggugccgaa..... 1  
Gi5\_8617983\_x4.....gugAgaacacggggugccga..... 1  
Gi5\_8627263\_x4.....gugggaacacggggugcUga..... 1  
Gi2\_10705439\_x4.....gUacacggggugccgaac..... 1  
Gi3\_27667609\_x4.....uggAaacacggggugccga..... 1  
Gi3\_27794513\_x4...Aaucggagacgucgugggaac..... 1  
Gi2\_10673467\_x4.....agacAucgugggaacacggggugcc..... 1  
Gi2\_10721699\_x4.....Ugagacgucgugggaacacggggugccgaa..... 1  
Gi1\_4042580\_x4.....aacNcggggugccgaacu..... 1  
Gi5\_8627695\_x4.....cCugggaacacggggugccgaac..... 1  
Gi5\_8625903\_x4.....Gcgugggaacacggggugcc..... 1  
G1a\_5797466\_x4.....guNggaaacacggggugccgaacu..... 1  
Gi3\_27681521\_x4.....ucguggGaacacggggugccg..... 1  
Gi4\_539622\_x4.....cgGgggaacacggggugccgaacu..... 1  
Gi1\_4036936\_x4.....gacgucgugggaacacggggGgccg..... 1  
Gi1\_4027792\_x4.....gucguAggaacacggggugccgaacu..... 1  
Gi3\_27659433\_x4.....aUcacggggugccgaacuu..... 1  
Gi3\_27731393\_x4.....cgugggaacacAgggugccg..... 1  
Gi3\_27794833\_x4...aucggagacgucAugggaacacgg..... 1  
Gi3\_27769557\_x4.....cgucgugggaacacggggugccUac..... 1  
Gi2\_10653815\_x4.....cgucgugggaacacggggGgccga..... 1  
Gi3\_27790589\_x4.....cgucgGgggaacacggggugcc..... 1  
Gi1\_4023716\_x4.....Gcgugggaacacggggugccga..... 1  
Gi2\_10710311\_x4.....ucguggGaacacggggugcc..... 1  
Gi3\_27666057\_x4...aucggCgacgucgugggaacacgg..... 1  
Gi3\_27793193\_x4.....Gggagacgucgugggaacac..... 1  
Gi2\_10698011\_x4.....gugggaacUcggggugccg..... 1  
Gi3\_27732497\_x4.....ucgugggUacacggggugccgaac..... 1  
Gi2\_10715627\_x4...aucggagacgucgugggaacacAgg..... 1  
Gi3\_27706697\_x4.....Agagacgucgugggaacacg..... 1  
Gi1\_4041168\_x4.....agacgucgugggaacacggggugccgCacu..... 1  
Gi5\_8639299\_x4.....gGgacgucgugggaacacggggugccgaacu..... 1  
G1a\_5802902\_x4.....uggAaacacggggugccgaacu..... 1  
Gi2\_10664755\_x4...Gucggagacgucguggga..... 1  
Gi1\_4038304\_x4.....uAgugggaacacggggugccgaacu..... 1  
Gi3\_27724617\_x4...gaucggagacgucguAggaacacg..... 1  
Gi2\_10665487\_x4.....cCugggaacacggggugccga..... 1  
Gi3\_27734657\_x4.....cgugggaacacggAgugccga..... 1

Gi4\_541546\_x4 .....gugggaacacggggugccgaUc..... 1  
 Gi3\_27792073\_x4.....acgucgugggaacacggggugcAga..... 1  
 Gi3\_27671713\_x4.....ugggaacacggggGgccga..... 1  
 Gi2\_10680839\_x4.....acgucgugggGacacggggugc..... 1  
 Gi1\_4021380\_x4.....Ucgucgugggaacacggggugccgaacu..... 1  
 Gi2\_10686251\_x4.....ucggagacgucgugggCacacg..... 1  
 Gi3\_27790997\_x4.....gagacgucNugggaacacggggugccgaacu..... 1  
 Gi2\_10675959\_x4.....cgucUugggaacacggggugcc..... 1  
 Gi2\_10686719\_x4.....aucggagacgucgugggaacaUggg..... 1  
 Gi3\_27695717\_x4.....agacgucgugggaacacggggugccgaGc..... 1  
 Gi2\_10694747\_x4.....cgugggGacacggggugccg..... 1  
 Gi3\_27712373\_x4.....cgucgugggaacacggggugccgaG..... 1  
 Gi2\_10702375\_x4.....uggAaacacggggugccga..... 1  
 Gi5\_8640219\_x4.....ucguCggaacacggggugccgaacu..... 1  
 Gi3\_27718989\_x4.....aucgUagacgucgugggaacac..... 1  
 Gi1\_4044232\_x4.....acgucgugggaacacggggugUcgaacu..... 1  
 Gi1\_4025856\_x4.....Ugaacacggggugccgaacu..... 1  
 Gi1\_4027268\_x4.....gugggaacCggggugccgaac..... 1  
 Gi2\_10677191\_x4.....gaucggagacgucgugggaacacAgg..... 1  
 Gi3\_27661909\_x4.....ucgugggaacCcggggugc..... 1  
 Gi5\_8610871\_x4.....gugggGacacggggugccga..... 1  
 Gi3\_27724549\_x4.....aucggagacgucgugggaacacggggugUc..... 1  
 Gi5\_8625411\_x4.....aucggagacgucgugggaCcacgggg..... 1  
 Gi5\_8647279\_x4.....Aggaacacggggugccgaa..... 1  
 Gi3\_27780773\_x4.....aucggagaGgucgugggaacacggg..... 1  
 Gi3\_27734901\_x4.....gggaacacggggugccgGa..... 1  
 Gi5\_8614675\_x4.....gaacacCgggugccgaacu..... 1  
 Gi2\_10655283\_x4.....cAugggaacacggggugc..... 1  
 Gi3\_27782337\_x4.....cgucgCgggaacacggggugccga..... 1  
 Gi1\_4040560\_x4.....gCaacacggggugccgaac..... 1  
 Gi2\_10675799\_x4.....gucgugggaacacggggugccgaUc..... 1  
 Gi2\_10669819\_x4.....gaucggGgacgucgugggaacacggggg..... 1  
 Gi3\_27706641\_x4.....ugggaacacggggugccgaaGu..... 1  
 Gi5\_8619859\_x4.....ucgugggaacacggUgugccgaacu..... 1  
 Gi3\_27729245\_x4.....gaucggagacgucgugggaaAacgg..... 1  
 Gi3\_27705485\_x4.....guggCaacacggggugccg..... 1  
 Gi3\_27687089\_x4.....cgucgugggaacacgAggugccgaac..... 1  
 Gi2\_10678687\_x4.....gugggaUcacggggugcc..... 1  
 Gi2\_10687287\_x4.....gaucggagacgucgugggG..... 1  
 Gi3\_27733249\_x4.....ugggaacacggggUccgaacu..... 1  
 Gi2\_10666627\_x4.....cgugggCacacggggugccgaac..... 1  
 Gi5\_8636703\_x4.....gacgucgugggaacacggggAgccgaacu..... 1  
 Gi1\_4033604\_x4.....gugggaacNcggggugccgaac..... 1  
 Gi2\_10697295\_x4.....acgucgugggCacacggggugccgaacu..... 1  
 Gi2\_10691219\_x4.....gaucggagacgucgugggaacacAgggg..... 1  
 Gi3\_27665969\_x4.....cgucgugggaaAacggggugc..... 1  
 Gi5\_8624055\_x4.....ugggaacacggggugccgaG..... 1

Gi1\_4037592\_x4.....aucggagaNgucgugggaacacggggu..... 1  
 Gi3\_27696765\_x4...cgUcggagacgucguggg..... 1  
 Gi2\_10697815\_x4.....cgucgugggaacacggggugccAaacu..... 1  
 Gi3\_27771361\_x4.....gucgugggaacacggggugAcgaac..... 1  
 G1a\_5799366\_x4.....gggaacacggggGgcccgaacu..... 1  
 Gi3\_27792861\_x4.....agUcgucgugggaacacggggugccgaac..... 1  
 Gi3\_27733805\_x4.....cgucgugggaacCggggugccg..... 1  
 Gi5\_8639815\_x4.....gggaacacggggugccgCac..... 1  
 G1a\_5810490\_x4.....Ggugggaacacggggugc..... 1  
 Gi5\_8624931\_x4.....gugggaacacggggCgcc..... 1  
 Gi3\_27683321\_x4.....aNcacggggugccgaacu..... 1  
 Gi3\_27670673\_x4.....Ccgucgugggaacacggggugccgaac..... 1  
 Gi3\_27714693\_x4.....cgugggaaAacggggugcc..... 1  
 Gi3\_27714377\_x4.....aucggagacgucgugggaacacg..... 1  
 Gi3\_27698385\_x4.....Gcggagacgucgugggaacacggggugc..... 1  
 Gi5\_8641007\_x4.....gucgugggaacacggggugAccgaacu..... 1  
 Gi1\_4030328\_x4.....Ggugggaacacggggugccgaacuu..... 1  
 Gi2\_10693955\_x4.....gaAcggagacgucgugggaacacggggu..... 1  
 Gi3\_27783793\_x4.....gggaacaAgggggugccgaac..... 1  
 Gi3\_27791829\_x4.....agacgucgugggaacacggggugcAgaacu..... 1  
 Gi3\_27722713\_x4.....cgugAgaacacggggugccg..... 1  
 Gi2\_10675075\_x4.....aUgucgugggaacacggggugccgaac..... 1  
 Gi2\_10701051\_x4.....cgUagacgucgugggaacacggggugcc..... 1  
 Gi2\_10706683\_x4.....ucgAgggaacacggggugccgaac..... 1  
 Gi5\_8627283\_x4.....gggaacacggUgugccgaacu..... 1  
 Gi3\_27717045\_x4.....gaAcggagacgucgugggaacacggg..... 1  
 Gi5\_8647967\_x4.....gugggaaUacggggugccgaac..... 1  
 Gi2\_10658167\_x4.....Uagacgucgugggaacacggg..... 1  
 G1a\_10691539\_x4.....ugggaUcacggggugccgaacu..... 1  
 G1a\_5797090\_x4.....guUggaacacggggugccgaac..... 1  
 Gi5\_8615267\_x4.....agacgucgugggaacacggggugccgGacu..... 1  
 Gi3\_27669845\_x4.....cgucgugggaacacggggugccgaaU..... 1  
 Gi2\_10657759\_x4.....acgucgugggaCcacggggugccgaacu..... 1  
 G1a\_5811798\_x4.....gaucggagacgucgugggaacacggggugc..... 0  
 Gi3\_27767441\_x4.....uUgugggaacacggggugc..... 1  
 Gi3\_27770241\_x4.....gggaacacgggAugccgaa..... 1  
 Gi2\_10682659\_x4.....Cgggaacacggggugccga..... 1  
 Gi3\_27661701\_x4.....cgugggaacacAgggugccgaa..... 1  
 Gi3\_27788733\_x4.....gaucggagacgucgugggaAacggg..... 1  
 Gi3\_27785953\_x4.....cgucgugAgaacacggggugccg..... 1  
 Gi2\_10658387\_x4.....cgugggaacacggggugcUgaa..... 1  
 Gi2\_10694179\_x4.....cgucgugggaacacggggugccA..... 1  
 Gi2\_10686939\_x4.....acgucgugggaGcacggggugccgaac..... 1  
 G1a\_4033264\_x4.....cgucgugggaacacggggugc..... 0  
 G1a\_4039724\_x4.....Nacacggggugccgaacu..... 1  
 Gi5\_8623515\_x4.....gggaacacggggGgcccga..... 1  
 Gi5\_8638159\_x4.....ucgugUgaacacggggugccgaacu..... 1

Gi2\_10692675\_x4.....acgucgugggaacacggggugcUgaacu..... 1  
 Gi1\_4020072\_x4.....cgucgugggaacacggggugcUgaacu..... 1  
 Gi2\_10722959\_x4...gaucggagGcgucgugggaacacggggugcc..... 1  
 Gi1\_4020944\_x4.....gggaacacggggugUcgaacu..... 1  
 Gi1\_4038836\_x4.....Aggaacacggggugccgaac..... 1  
 Gi4\_539458\_x4.....cgugggaacacggggugccgaCcu..... 1  
 Gi2\_10666631\_x4.....cgucgugggaacCggggugcc..... 1  
 Gi2\_10665855\_x4...Caucggagacgucgugggaacacggg..... 1  
 Gi3\_27669029\_x4.....gggaUcacggggugccgaac..... 1  
 Gi1\_4025912\_x4.....cgucgugggaacacggggugUcgaacu..... 1  
 Gi3\_27737053\_x4.....Uacgucgugggaacacggggugcc..... 1  
 Gi2\_10682535\_x4.....ucgugggaNcacggggugccgaa..... 1  
 Gi2\_10683255\_x4.....ggaacacggggugccAaa..... 1  
 Gi5\_8646047\_x4.....gugggaacacUgggugccgaacu..... 1  
 Gi3\_27665341\_x4...gGucggagacgucguggga..... 1  
 Gi1\_4030608\_x4.....ucgugggaacacggggugccUaacu..... 1  
 Gi2\_10696631\_x4.....gaacacggggugcGgaacu..... 1  
 Gi5\_8618879\_x4.....gugggaacacggggugccgCacuu..... 1  
 Gi5\_8634323\_x4.....Cacgucgugggaacacggggugccgaacu..... 1  
 Gi5\_8608931\_x4.....Ugacgucgugggaacacggggugccgaacu..... 1  
 Gl1\_5771014\_x4...Aaucggagacgucguggg..... 1  
 Gi3\_27716841\_x4.....cgugggaacacgggAugc..... 1  
 Gi4\_542342\_x4.....gugggaacGcggggugccgaacu..... 1  
 Gi2\_10655663\_x4.....gggaacacggggugccgaaU..... 1  
 Gi3\_27788077\_x4.....ucgGgggaacacggggugccg..... 1  
 Gi3\_27784565\_x4.....gacgucgugggaacGcggggugccgaac..... 1  
 Gi3\_27752801\_x4.....gGgacgucgugggaacac..... 1  
 Gi1\_4045516\_x4.....aaAacggggugccgaacu..... 1  
 Gi2\_10651487\_x4.....cgucgugggaacacgAggugccgaacu..... 1  
 Gi2\_10665843\_x4.....uGugggaacacggggugcc..... 1  
 Gi5\_8644647\_x4.....ucgugggaNcacggggugccgaac..... 1  
 Gi3\_27662145\_x4.....cgucAugggaacacggggugccgaac..... 1  
 Gi3\_27720757\_x4...cgUucggagacgucgugggaacacg..... 1  
 Gi3\_27723293\_x4.....acgucAugggaacacggggugccgaac..... 1  
 Gi2\_10700259\_x4.....Ugacgucgugggaacacggggugccgaac..... 1  
 Gl1\_5796122\_x4.....ggaacaUggggugccgaacu..... 1  
 Gi2\_10651723\_x4.....ucgugUgaacacggggugccgaacu..... 1  
 Gi2\_10714459\_x4...aucggCgacgucgugggaacacggggugc..... 1  
 Gi2\_10654507\_x4.....gagacgucgugggaacacgggggu..... 0  
 Gl1\_5792154\_x4...Ugagacgucgugggaacacg..... 1  
 Gi2\_10674407\_x4.....cgugggaacacgggAugcc..... 1  
 Gi3\_27741125\_x4...cgucguggNaacacggggugccgaa..... 1  
 Gi3\_27721385\_x4.....gucgugggaacacgggUgugccgaacu..... 1  
 Gi1\_4028996\_x4.....gAgggaacacggggugccgaac..... 1  
 Gi2\_10706547\_x4.....gggaacacgUgggugccgaacu..... 1  
 Gi3\_27777817\_x4...cAgagacgucgugggaacacggggugcc..... 1  
 Gi3\_27768609\_x4.....cguggAaacacggggugcc..... 1

|                                                        |   |
|--------------------------------------------------------|---|
| Gi5_8616231_x4.....guggaacNcggggugcc.....              | 1 |
| Gi1_4043352_x4.....acgucguggaacacggggugccAaacu.....    | 1 |
| Gi3_27715405_x4.....acgucguggaacacAgggugccgaac.....    | 1 |
| Gi3_27683429_x4.....gggaacacggggAgccgaa.....           | 1 |
| Gi1_4031100_x4.....aGcggagacgucguggaacacgg.....        | 1 |
| Gi3_27833243_x3.....Gcacggggugccgaacuu.....            | 1 |
| Gi2_10807972_x3.....ucguggaacacggggUAccgaac.....       | 1 |
| Gi1_4064406_x3.....uggaacacggggugccUaacu.....          | 1 |
| G1a_5834365_x3.....Caacacggggugccgaacu.....            | 1 |
| Gi3_27927203_x3.....ggaacacCgggugccgaacu.....          | 1 |
| Gi1_4078482_x3.....gagacgCcguggaacacggggugccgaacu..... | 1 |
| Gi5_8694914_x3.....ucguggaacCcgggugccgaac.....         | 1 |
| Gi3_27871103_x3.....gggUacacggggugccgaa.....           | 1 |
| G1a_5824249_x3.....gaacaUggggugccgaacu.....            | 1 |
| Gi2_10814386_x3.....gggaacacggggUcCcgaaacu.....        | 1 |
| Gi3_27866261_x3.....ucgugggaaAacggggugccgaac.....      | 1 |
| Gi2_10744408_x3.....uggaacacggggUcg.....               | 1 |
| Gi3_27815600_x3.....gacgCcguggaacacggggU.....          | 1 |
| Gi1_4075587_x3...gaucggagacgucguggaacacggggugc.....    | 0 |
| Gi3_27875294_x3.....uggaacacGggggugccgaac.....         | 1 |
| Gi3_27960317_x3.....acUcggggugccgaacuu.....            | 1 |
| Gi5_8675285_x3.....gggaacacgAggugccgaac.....           | 1 |
| Gi2_10790503_x3...gaucggagacgucguggaacacAgggugc.....   | 1 |
| Gi2_10760020_x3.....ggagacAucguggaacacggggug.....      | 1 |
| Gi5_8680040_x3.....ugggGacacggggugccgaa.....           | 1 |
| Gi1_4054194_x3.....ucguggGacacggggugcc.....            | 1 |
| Gi5_8663072_x3.....ucguggCaacacggggugccgaacu.....      | 1 |
| Gi2_10743982_x3.....ggaacacggggugccUaacu.....          | 1 |
| Gi2_10810327_x3....aucggagacguGguggaacacggg.....       | 1 |
| G1a_5874043_x3.....guggaacacggggugccgaaU.....          | 1 |
| Gi3_27920540_x3....auNggagacgucguggaacacggggU.....     | 1 |
| Gi2_10732465_x3.....aCcacggggugccgaacu.....            | 1 |
| Gi3_27903650_x3...gaucggagacgucguggaacGc.....          | 1 |
| Gi5_8688242_x3.....ggNaacacggggugccgaacu.....          | 1 |
| Gi3_27930542_x3....aucgUagacgucguggaacacggggugc.....   | 1 |
| Gi2_10764361_x3....ucggagacgucguggGacacg.....          | 1 |
| Gi5_8714552_x3.....Ggucguggaacacggggugcc.....          | 1 |
| Gi2_10796488_x3.....ggagacguNguggaacac.....            | 1 |
| Gi2_10744417_x3...gaucggagacAucguggaacacggggU.....     | 1 |
| Gi1_4063134_x3....aGcggagacgucguggaacacggg.....        | 1 |
| Gi2_10778941_x3....Uucggagacgucguggaacacggg.....       | 1 |
| Gi2_10813732_x3.....cguggaacacggggGgc.....             | 1 |
| Gi3_27852392_x3....aucggagacgucguggaacacggggGgc.....   | 1 |
| Gi2_10825000_x3.....cgucUuggaacacggggugc.....          | 1 |
| Gi2_10748488_x3....aucggCgacgucguggaacacggg.....       | 1 |
| Gi2_10822747_x3....ucUgagacgucguggaacacg.....          | 1 |
| Gi3_27886427_x3.....cguUguggaacacggggugccg.....        | 1 |

|                                                         |   |
|---------------------------------------------------------|---|
| Gi2_10783798_x3.....aucggagGcgucgugggaacacgg.....       | 1 |
| Gi3_27977213_x3.....Nuggggaacacggggugccgaac.....        | 1 |
| Gi1_4084722_x3...gaucggagacgucgugggaacacg.....          | 0 |
| Gi2_10737547_x3.....ugggUacacggggugccga.....            | 1 |
| Gi3_27956225_x3.....Aacgucgugggaacacggggugccg.....      | 1 |
| Gi3_27907553_x3.....agacgucgugggaacacggggugUcgaacu..... | 1 |
| Gi5_8683868_x3.....agacgucgAgggaacacggggugccgaacu.....  | 1 |
| Gi3_27836384_x3.....aucgAagacgucgugggaacacgggg.....     | 1 |
| Gi2_10733638_x3.....aucggagacgucgugggaacaUggggug.....   | 1 |
| Gi5_8703542_x3.....gugggaacacggggUccgaacu.....          | 1 |
| Gi2_10801072_x3.....aAcggagacgucgugggaaca.....          | 1 |
| Gi2_10806292_x3.....cgucgugggaCcacggggugccg.....        | 1 |
| Gi3_27840512_x3.....ucggagacgucgCgggaacacggggg.....     | 1 |
| Gi5_8657180_x3.....agacgucgugggaacacggggugAcgaacu.....  | 1 |
| Gi2_10728763_x3.....aGcggagacgucgugggaa.....            | 1 |
| Gi1_4052985_x3.....gCagacgucgugggaacacggggugcc.....     | 1 |
| Gi3_27824948_x3.....Uucggagacgucgugggaacacgggg.....     | 1 |
| Gl1a_5851702_x3.....gugggaacaAggggugccgaacu.....        | 1 |
| Gi3_27899126_x3.....Nggaacacggggugccgaac.....           | 1 |
| Gi2_10814467_x3.....ggNgacgucgugggaacacggggugcc.....    | 1 |
| Gi1_4066944_x3...gaucggagacgucgCgggaacacggggugccg.....  | 1 |
| Gi2_10753723_x3.....gaacacggggUccgaacu.....             | 1 |
| Gi5_8679695_x3.....guggAaacacggggugccga.....            | 1 |
| Gi1_4077195_x3.....gacgucgugggaacacggggugccgCacu.....   | 1 |
| Gi5_8655929_x3.....gacgucgugggaacaUggggugccgaacu.....   | 1 |
| Gl1a_5831893_x3.....gugggaacacgCgugccgaacu.....         | 1 |
| Gi2_10738363_x3.....cgugggaacacggggugccgGa.....         | 1 |
| Gi3_27796256_x3...cgaucggagacgucgugggaacCcg.....        | 1 |
| Gi2_10753561_x3.....Agggaacacggggugccga.....            | 1 |
| Gi3_27803624_x3.....Cgagacgucgugggaacacggggugccga.....  | 1 |
| Gi5_8708816_x3.....gNgggaacacggggugccgaacu.....         | 1 |
| Gi1_4079916_x3.....ugggaacacggggugccgaGc.....           | 1 |
| Gi5_8689673_x3.....gUacacggggugccgaac.....              | 1 |
| Gl1a_5853538_x3.....gggaacacggggUaccgaacu.....          | 1 |
| Gi2_10788151_x3.....ggaacacgggUugccgaacu.....           | 1 |
| Gi2_10806601_x3.....agacgucgugggGacacggggugccg.....     | 1 |
| Gi5_8710031_x3.....ucNugggaacacggggugccgaacu.....       | 1 |
| Gi5_8702921_x3.....gggaacacggCgugccgaacu.....           | 1 |
| Gi1_4061400_x3.....ucgugggaacacggggCgc.....             | 1 |
| Gi1_4084443_x3.....agacgucgugggaGcacggggugccgaacu.....  | 1 |
| Gi3_27887492_x3.....ggaacaGggggugccgaacu.....           | 1 |
| Gi3_27972641_x3...gaucggagacgucgugggaacacggggugUc.....  | 1 |
| Gi1_4050477_x3.....Ggugggaacacggggugccgaa.....          | 1 |
| Gi5_8692136_x3.....Gcuuuccagcgcgccugcugcccacc.....      | 1 |
| Gi1_4055457_x3.....aacUcggggugccgaacu.....              | 1 |
| Gi3_27843680_x3.....cgUagacgucgugggaacacggggugcc.....   | 1 |
| Gi5_8668676_x3.....gggaacacggggugccgUac.....            | 1 |

Gi2\_10809565\_x3.....Ccguccgugggaacacggggugcc..... 1  
Gi2\_10783732\_x3.....guggCaacacggggugcc..... 1  
Gi1\_4059753\_x3.....cUucgugggaacacggggugccg..... 1  
Gi2\_10744510\_x3.....agacgucgugggaaUacggggugccgaacu..... 1  
Gi1\_4087119\_x3.....aucggGgacgucgugggaacacggg..... 1  
Gi2\_10761445\_x3.....Ugucgugggaacacggggugccga..... 1  
Gi2\_10812781\_x3.....cguAggaacacggggugc..... 1  
Gi3\_27888302\_x3..Ucgauccgagacgucgugggaacacgggg..... 1  
Gi3\_27872360\_x3.....aucggagacgucgugggaacacCgg..... 1  
Gi3\_27924533\_x3.....agacgucgugggaaCcggggugccgaacu..... 1  
Gi2\_10805077\_x3...gaucggagacgucgugggaacGcggggugcc..... 1  
Gi5\_8714222\_x3.....ucgugggaacaAggggugccgaacu..... 1  
Gi2\_10763503\_x3.....ugggaacCcggggugccg..... 1  
Gi2\_10733626\_x3.....cgucguAggaacacggggugcc..... 1  
Gi3\_27887453\_x3.....acgucgugggaacacggggugcGgaacu..... 1  
Gi3\_27945371\_x3.....cgucAugggaacacggggugccga..... 1  
Gi3\_27962873\_x3.....Agagacgucgugggaacacggggugccg..... 1  
Gi1\_4068378\_x3.....uGggagacgucgugggaacacggg..... 1  
G1a\_5865688\_x3.....gucgugggaacacggggugccgCac..... 1  
Gi2\_10814248\_x3.....cUgagacgucgugggaacacggggugccga..... 1  
Gi3\_27965642\_x3...gaucggagacgucgugggGacacggggugc..... 1  
Gi3\_27898190\_x3.....gagacgucgugggGacacggggg..... 1  
Gi5\_8673011\_x3.....acgucguggAaacacggggugccgaacu..... 1  
Gi4\_552207\_x3.....cUucgugggaacacggggugcc..... 1  
Gi5\_8691200\_x3.....Cgacgucgugggaacacggggugccgaacu..... 1  
Gi2\_10812994\_x3.....agacgucgugggaacacAgggugccgaacu..... 1  
Gi5\_8670902\_x3...aucggagGcguccgugggaacacggggg..... 1  
Gi1\_4088715\_x3.....gaacacggggugccUaacu..... 1  
Gi2\_10811866\_x3.....gacgucgugggaacacAgggugcc..... 1  
Gi2\_10741327\_x3.....Cacgucgugggaacacggggugccgaacu..... 1  
Gi3\_27813023\_x3.....cggagacgucgugggaacacggggugcA..... 1  
Gi2\_10770409\_x3.....gaaAacggggugccgaacu..... 1  
Gi3\_27857210\_x3.....cgugggaacacgAgggugccga..... 1  
Gi2\_10727941\_x3.....agacgucgugggaacacAgggugcc..... 1  
Gi2\_10820815\_x3.....gacgucgugggaacacAgggugccgaacu..... 1  
Gi1\_4069098\_x3...aGcggagacgucgugggaacacggggugc..... 1  
Gi2\_10776682\_x3.....agacgucguAggaacacggggugcc..... 1  
Gi3\_27896564\_x3...cUgagacgucgugggaacacggggugccgaa..... 1  
G1a\_5848867\_x3.....gugggaacacggggugccgaUcu..... 1  
Gi2\_10734811\_x3...gaucggagacgCcgugggaacacggg..... 1  
Gi3\_27811070\_x3.....gugggaCcacggggugccg..... 1  
Gi2\_10771588\_x3.....gGcugggaacacggggugccgaa..... 1  
Gi3\_27891047\_x3.....agacgucgugggaacacggAgugccgaacu..... 1  
Gi5\_8690648\_x3.....acgNcgugggaacacggggugccgaacu..... 1  
Gi3\_27973244\_x3...cggagacgucgugggGacacggggg..... 1  
Gi2\_10817035\_x3...gaucggagacgucgugggaGcacggg..... 1  
Gi3\_27854351\_x3.....ucguCggaacacggggugccgaac..... 1

Gi2\_10788961\_x3.....ucggagacNucgugggaaca..... 1  
Gi3\_27918134\_x3.....agacgucgugggaacacggggugcUgaac..... 1  
Gi2\_10728835\_x3....gaucggagacgucgugggaacacggggGgcc..... 1  
Gi3\_27866378\_x3.....cgugggaacCggggugccgaa..... 1  
Gi1\_4078098\_x3.....gugggaacacggggugcUgaacuu..... 1  
Gi1\_4054245\_x3.....gCgcgucgugggaacacggggugccgaac..... 1  
Gi1\_4087809\_x3.....Aacgucgugggaacacggggugccgaacu..... 1  
Gi3\_27918344\_x3....aucggCgacgucgugggaacac..... 1  
Gi2\_10793074\_x3.....cgucgugggaacaUggggugcc..... 1  
Gi2\_10754992\_x3....gaucggagacgucgCgggaacacggggg..... 1  
Gi5\_8705045\_x3....gaucggagacgucgugggGacacggg..... 1  
G1a\_5817355\_x3.....gggaaAacggggugccgaacu..... 1  
Gi5\_8669942\_x3.....cgCcgugggaacacggggugc..... 1  
Gi3\_27886835\_x3.....Uagacgucgugggaacacggggugccgaa..... 1  
Gi2\_10823797\_x3.....ugggaacUcggggugccgaacu..... 1  
Gi5\_8685278\_x3.....ugggaacacgggggUcgggaacu..... 1  
Gi1\_4059837\_x3.....cgugggaacacgCggugccgaacu..... 1  
Gi2\_10787071\_x3.....gucgugggaacacgAggugccgaac..... 1  
Gi5\_8663684\_x3.....cgugggaacacgUggugccga..... 1  
Gi2\_10802776\_x3.....ggaacUcggggugccgaac..... 1  
Gi2\_10800697\_x3.....cgugggaacacgggUugccgaacu..... 1  
Gi3\_27867434\_x3.....ucgugggaacacggggugGcgaacu..... 1  
Gi1\_4065951\_x3.....cgucguAggaacacggggugccgaacu..... 1  
Gi5\_8687504\_x3.....cgugggaacacgUggugcc..... 1  
Gi2\_10773031\_x3.....gucguggCaacacggggugccgaacu..... 1  
Gi3\_27878600\_x3....cgaucggagGcgcgucgugggaacacg..... 1  
Gi2\_10810810\_x3.....gucgugggaacacggggG..... 1  
Gi3\_27809510\_x3....gaucggagacgucgugggaacCcggggugc..... 1  
Gi3\_27929750\_x3.....ucggGgacgucgugggaacacg..... 1  
Gi1\_4078071\_x3.....ugggaacacggggugccU..... 1  
Gi3\_27931577\_x3.....ggaacacgggUugccgaacu..... 1  
Gi1\_4085061\_x3.....ugggaacacgggggUcgggaacu..... 1  
Gi5\_8712389\_x3.....gacgucgugggaacacggggugccgCacu..... 1  
Gi5\_8674844\_x3.....gaacacggUgugccgaacu..... 1  
G1a\_5826538\_x3.....cgugggaacacggAgugcc..... 1  
Gi5\_8702360\_x3....aucggagacAucgugggaacacgg..... 1  
Gi5\_8686139\_x3.....gugggaacacgAggugccg..... 1  
Gi2\_10773808\_x3.....cgucgugggCacacggggugc..... 1  
Gi1\_4054542\_x3.....gugggaacacggggugccA..... 1  
Gi3\_27851615\_x3.....cgucCugggaacacggggugccgaacu..... 1  
Gi5\_8651198\_x3.....ucgugggaacacgCggugccgaacu..... 1  
Gi2\_10764298\_x3.....cgugggaacacCgggugccgaacu..... 1  
Gi5\_8707976\_x3.....ugggaacacggggugccCaacu..... 1  
Gi3\_27829442\_x3.....acgucgugggaacUcggggugccgaacu..... 1  
Gi3\_27878333\_x3.....gugggaacUcggggugccg..... 1  
Gi2\_10744261\_x3....gaucggagacgucgugggaGcacg..... 1  
Gi5\_8709728\_x3.....cgucUugggaacacggggugccga..... 1



Gi3\_27844754\_x3.....agUcgucgugggaacacggggugccga..... 1  
Gi5\_8686013\_x3.....aGcggagacgucgugggaacac..... 1  
Gi1\_4050819\_x3.....ucggCgacgucgugggaacacg..... 1  
Gi5\_8653586\_x3.....gggGacacggggugccgaa..... 1  
Gi2\_10732975\_x3.....aucggagUcgucgugggaacac..... 1  
Gi3\_27897830\_x3.....gaucggagacgucgugggGacacgggg..... 1  
G1a\_5856088\_x3..cUaucggagacgucguggga..... 1  
Gi5\_8667236\_x3.....cgCgggaacacggggugccga..... 1  
Gi1\_4053885\_x3.....cgucgugggaacacggAgugccgaacu..... 1  
Gi3\_27944438\_x3.....Ccgagacgucgugggaacacggggg..... 1  
Gi2\_10825702\_x3.....gggaacacggggCgcccga..... 1  
Gi3\_27948131\_x3.....uGgugggaacacggggugcc..... 1  
Gi3\_27806531\_x3.....guNggaacacggggugcc..... 1  
Gi1\_4072497\_x3.....acgucgugNgaaacacggggugcc..... 1  
Gi4\_549642\_x3.....Ugugggaacacggggugccgaacu..... 1  
Gi3\_27960779\_x3.....ggUgacgucgugggaacacggggugccg..... 1  
Gi3\_27913406\_x3.....cgucgugggaUcacggggugccgaacu..... 1  
Gi3\_27936596\_x3.....gugUgaacacggggugcc..... 1  
Gi1\_4084035\_x3.uUcgauccgagacgucgugggaacacg..... 1  
G1a\_5869159\_x3.....aAcggagacgucgugggaacacggg..... 1  
Gi2\_10732633\_x3.....ucggagacNucgugggaacacggggugc..... 1  
Gi1\_4070685\_x3.....uGggagacgucgugggaacacggggugc..... 1  
Gi3\_27920768\_x3.....gucgCgggaacacggggugc..... 1  
Gi2\_10814509\_x3.....ucgugggaAacggggugccgaac..... 1  
Gi5\_8693252\_x3.....guUgugggaacacggggugc..... 1  
Gi2\_10812325\_x3.....gacgucguNggaacacggggugc..... 1  
Gi3\_27922091\_x3.....gugggaacacgggAugccg..... 1  
Gi3\_27845351\_x3.....gucgugggGacacggggugc..... 1  
Gi2\_10784044\_x3.....ucguggCaacacggggugccgaac..... 1  
G1a\_5834704\_x3.....gaacacggggugccgGacu..... 1  
Gi3\_27880706\_x3.....Ucgucgugggaacacggggugcc..... 1  
Gi5\_8714897\_x3.....gacgucgugggGacacggggugccg..... 1  
Gi3\_27979796\_x3.....cgucgugggaacacggggugccgaUcu..... 1  
Gi5\_8688935\_x3.....gggaacacggggugccgaUcu..... 1  
Gi2\_10813606\_x3.....Gcgugggaacacggggugc..... 1  
Gi3\_27896687\_x3.....cgucUugggaacacggggugccgaac..... 1  
Gi2\_10803742\_x3.....gacgucgugggGacacggggugcc..... 1  
Gi2\_10729927\_x3.....gggaacacggggugccgGa..... 1  
Gi2\_10759894\_x3.....gagacgucgugggaGcacggggugc..... 1  
Gi2\_10760674\_x3.....gaanacggggugccgaacu..... 1  
Gi3\_27903698\_x3.....agacgucgugggaacacggggugccgaCcu..... 1  
Gi5\_8694893\_x3.....gugggaacacggggugccUaac..... 1  
Gi3\_27826904\_x3.....gucgugggaacacggggGgccga..... 1  
Gi1\_4066821\_x3.....ugggaacacggggugccgU..... 1  
Gi3\_27828461\_x3.....Gggagacgucgugggaacacggggugccga..... 1  
Gi1\_4077108\_x3.....ucgugggaacacggggugccAaac..... 1  
Gi3\_27826100\_x3.....ucggagacguUgugggaacacggggugcc..... 1

Gi2\_10759048\_x3.....ggagacgucAgggaacacggggugcc..... 1  
Gi2\_10749154\_x3.....gggaacacggggugUcgaac..... 1  
Gi3\_27970055\_x3.....ugggaacacggUgugccgaac..... 1  
Gi3\_27973571\_x3.....Cacgucgugggaacacggg..... 1  
Gi5\_8688389\_x3.....gCgggaacacggggugccg..... 1  
Gi2\_10746589\_x3.....aucggagGcgucgugggaaac..... 1  
Gi3\_27922535\_x3.....cgucgugggaacaAggggugccgaacu..... 1  
Gi1\_4051761\_x3.....gaUgucgugggaacacggggugccgaacu..... 1  
Gi5\_8674556\_x3.....ugggCacacggggugccgaac..... 1  
Gi2\_10759972\_x3.....Aagacgucgugggaacacggggugcc..... 1  
Gi2\_10740886\_x3.....aucggagacgucgugggaacaUgg..... 1  
Gi2\_10769197\_x3.....acgucgugggCacacggggugcc..... 1  
Gi5\_8657477\_x3.....aucggagacgucgugggaacGcgggg..... 1  
Gi2\_10780558\_x3.....aucggagacgucgugggaacacggggguAc..... 1  
Gi3\_27977231\_x3.....gugggaaGacggggugcc..... 1  
Gi3\_27801008\_x3.....cgUagacgucgugggaacacgggggu..... 1  
Gi3\_27824276\_x3.....cgucgugggaacacggggugUcgaac..... 1  
Gi1\_4084089\_x3.....gagacgucgugggGacacggggugccgaacu..... 1  
Gi3\_27928607\_x3.....cgNgggaacacggggugcc..... 1  
Gi1\_4084743\_x3.....acgucgugggaacaUggggugccgaacu..... 1  
Gi3\_27798299\_x3.....ucgugggaacacggggugccGac..... 1  
Gi1\_4050033\_x3.....agUcucgugggaacacggggugccg..... 1  
Gi2\_10786954\_x3.....Gggagacgucgugggaacac..... 1  
Gi2\_10825678\_x3.....gacgucguNgggaacacggggugccgaacu..... 1  
Gi2\_10782622\_x3.....ggagacgucgugggCacacggggugcc..... 1  
Gi2\_10825870\_x3.....cguNuggggaacacggggugccgaacu..... 1  
Gi2\_10823215\_x3.....gaucggagacgucgugggaacCcgggg..... 1  
Gi4\_545274\_x3.....gugggaacacggggugccGacu..... 1  
Gi3\_27964163\_x3.....ggaacacgAggugccgaa..... 1  
Gi5\_8668616\_x3.....gugggaaAacggggugccgaa..... 1  
Gi2\_10734031\_x3.....gUucggagacgucguggga..... 1  
Gi2\_10815637\_x3.....gacgucgugggaacacgAggugcc..... 1  
Gi2\_10743457\_x3.....cggagacgucgugggaacacggggGgc..... 1  
Gi3\_27949664\_x3.....ucggagacgCcgugggaacacg..... 1  
Gi2\_10739515\_x3.....ggaaAacggggugccgaac..... 1  
G1a\_5835253\_x3.....gGucggagacgucgugggaacacgggggu..... 1  
Gi3\_27807944\_x3.....cgucgugggaacacgggAugccga..... 1  
G1a\_5859121\_x3.....gucgugggaGcacggggugccgaacu..... 1  
Gi5\_8717567\_x3.....ugggaacacggggugccgCacuuu..... 1  
Gi3\_27903215\_x3.....Aucgugggaacacggggugc..... 1  
Gi5\_8708045\_x3.....cCugggaacacggggugccga..... 1  
Gi2\_10828168\_x3.....aucggagGcgucgugggaacacgggg..... 1  
Gi3\_27911228\_x3.....ggaUcacggggugccgaa..... 1  
Gi5\_8686553\_x3.....gugggaGcacggggugccga..... 1  
Gi3\_27891338\_x3.....gggaacacggggugUcga..... 1  
Gi2\_10740448\_x3.....cgaucggagacgucgugggGacacggg..... 1  
Gi2\_10827322\_x3.....gugNgaacacggggugcc..... 1

Gi5\_8704820\_x3.....gCggaacacggggugcc..... 1  
 Gi3\_27906536\_x3.....cguggaacacCgggugccgaac..... 1  
 Gi1\_4055004\_x3.....ucguggGacacggggugccg..... 1  
 Gi2\_10824904\_x3.....ucguggaacacggggugccA..... 1  
 Gi3\_27954656\_x3.....agacgucAugggaacacggggugccgaac..... 1  
 Gl1a\_5821882\_x3.....gUgaacacggggugccgaac..... 1  
 Gi5\_8668277\_x3.....cguggaacacggggugccgaaA..... 1  
 Gi3\_27859775\_x3.....cguNguggaacacggggugccgaacu..... 1  
 Gi5\_8711174\_x3.....aucggGgacgucguggaacacggggg..... 1  
 Gi2\_10821571\_x3.....aucggaAacgucguggaacacggggugc..... 1  
 Gi2\_10763785\_x3.....acgucguggaacacggggugcA..... 1  
 Gi3\_27806318\_x3.....guggaacacUgggugcc..... 1  
 Gi1\_4049220\_x3.....cgucUuggaacacggggugccgaacu..... 1  
 Gi1\_4051854\_x3.....gucguggaacacGggggugccgaacu..... 1  
 Gi3\_27842783\_x3.....gaucggagacgucguggaacacggggGgcc..... 1  
 Gi2\_10811071\_x3.....guAggaacacggggugccgaa..... 1  
 Gi3\_27854378\_x3.....Aguggaacacggggugc..... 1  
 Gi3\_27962891\_x3.....gggaacacggggugccgG..... 1  
 Gi2\_10824400\_x3.....gaucAgagacgucguggaacacggggugcc..... 1  
 Gi5\_8673848\_x3.....Cuggaacacggggugccg..... 1  
 Gi2\_10732843\_x3.....cguggaacacgAggugcc..... 1  
 Gi3\_27958847\_x3.....ucggagacgCcguggaacacgggg..... 1  
 Gi5\_8675660\_x3.....guggaacacgUggugccgaac..... 1  
 Gi2\_10807438\_x3.....ggaCcacggggugccgaac..... 1  
 Gi2\_10797019\_x3.....gaucggagacgucguggaacacAggg..... 1  
 Gi3\_27800747\_x3.....acgucgugUgaacacggggugccgaacu..... 1  
 Gi3\_27894110\_x3.....cguggaacacggggAgccg..... 1  
 Gi2\_10727827\_x3.....gggaacacggUgugccgaacu..... 1  
 Gi5\_8684675\_x3.....ucguggaacacggggugAcgaacu..... 1  
 Gi3\_27944294\_x3.....gggCcacggggugccgaac..... 1  
 Gi3\_27958811\_x3.....gaucggagacgucguggaaUacg..... 1  
 Gi3\_27934151\_x3.....auAggagacgucguggaacacggg..... 1  
 Gi2\_10770001\_x3.....ucguggaacacggggugcUgaac..... 1  
 Gi2\_10757557\_x3.....aucggagacgucguggaacacggAgugc..... 1  
 Gi3\_27807257\_x3.....Cagacgucguggaacacggggugccg..... 1  
 Gi2\_10730275\_x3.....cgUucggagacgucguggaacacggggug..... 1  
 Gi3\_27942323\_x3.....gaucggagNcgucguggaacac..... 1  
 Gi2\_10749646\_x3.....guggaaaAacggggugccgaa..... 1  
 Gi3\_27881657\_x3.....cguggaacacGggggugccgaac..... 1  
 Gi3\_27940103\_x3.....gaucggagacgucguggaacacggAg..... 1  
 Gi4\_550362\_x3.....Cuggaacacggggugccgaa..... 1  
 Gi3\_27850634\_x3.....cggagacgucguggaacGcgg..... 1  
 Gi2\_10792666\_x3.....Aacgucguggaacacggggugccg..... 1  
 Gi3\_27871451\_x3.....aucggagacguUguggaacac..... 1  
 Gi2\_10796053\_x3.....gucguggaacacGggggugccgaacu..... 1  
 Gi4\_549663\_x3.....guggUaacacggggugccgaacu..... 1  
 Gi2\_10784848\_x3.....ggaacacggggugccgCa..... 1

Gi2\_10772161\_x3.....cguggaacacgggCugcc..... 1  
 Gl1\_5870404\_x3.....gaacacgggGcgcgaacu..... 1  
 Gi3\_27922823\_x3.....guggaacacggCgugccgaa..... 1  
 Gi3\_27862109\_x3..Ucgagcagacgucguggaacacggggu..... 1  
 Gi4\_549291\_x3.....guggaacacgggugccgaaAu..... 1  
 Gi5\_8657315\_x3.....aacacCgggugccgaaacu..... 1  
 Gi2\_10790221\_x3.....aucggagacgucUuggaacac..... 1  
 Gl1\_5859607\_x3...gaucggagacgucguggCacacggg..... 1  
 Gi3\_27840224\_x3.....acgucguggaCcacgggugccgaa..... 1  
 Gi2\_10743616\_x3.....ggagacguUguggaacacgggugcc..... 1  
 Gi2\_10730686\_x3...gUucggagacgucguggaacacggggugc..... 1  
 Gi2\_10789240\_x3.....gugUgaacacggggugcc..... 1  
 Gi1\_4048068\_x3.....gugAgaacacggggugccgaa..... 1  
 Gi3\_27816350\_x3.....gugUgaacacggggugccga..... 1  
 Gi5\_8686865\_x3...gGucggagacgucguggaacac..... 1  
 Gi3\_27866264\_x3.....agacgucguggaacacggggugccgGcu..... 1  
 Gi1\_4049322\_x3.....gucguggNacacggggugcc..... 1  
 Gi3\_27939236\_x3.....cguggaUcacggggugcc..... 1  
 Gi5\_8662430\_x3.....gAgggaacacggggugccga..... 1  
 Gi5\_8674967\_x3.....Cuggaacacggggugccgaaacu..... 1  
 Gl1\_5845792\_x3.....uggaUcacggggugccgaaacu..... 1  
 Gi2\_10737913\_x3.....Aguggaacacggggugccga..... 1  
 Gi5\_8686478\_x3.....guggaacGcggggugccgaa..... 1  
 Gi1\_4063875\_x3.....ggGgacgucguggaacacggggugccgaaacu..... 1  
 Gi5\_8686193\_x3.....Ugagacgucguggaacacggggugccgaa..... 1  
 Gl1\_5832232\_x3..Ggcgaucgagacgucgu..... 1  
 Gi3\_27979301\_x3.....ucggagacgucguggCacacggggu..... 1  
 Gi5\_8682356\_x3.....uggaCcacggggugccgaa..... 1  
 Gi3\_27958547\_x3.....cggUacgucguggaacacggggugcc..... 1  
 Gi5\_8717435\_x3.....guggGacacggggugccg..... 1  
 Gi5\_8671109\_x3.....aucggagaNgucguggaacacggg..... 1  
 Gi1\_4061787\_x3.....cguggaaAacggggugccgaaacu..... 1  
 Gi2\_10766299\_x3.....acgucguggaacacgggAugccgaaacu..... 1  
 Gi2\_10810147\_x3.....aucggagacAucguggaaca..... 1  
 Gi3\_27958742\_x3...gaucggagacgucguggaGcac..... 1  
 Gi2\_10817485\_x3.....acgucguggaacacggggugccGac..... 1  
 Gi1\_4050567\_x3.....cgGggaacacggggugccga..... 1  
 Gi1\_4080390\_x3.....aacacgggNugccgaaacu..... 1  
 Gi3\_27887930\_x3.....aucggagacgucguggaacacAgggugcc..... 1  
 Gi3\_27976973\_x3...gaucggagacgucguggaacCcg..... 1  
 Gi3\_27973466\_x3.....Cucguggaacacggggugcc..... 1  
 Gi1\_4054014\_x3...aucggagaNgucguggaacacg..... 1  
 Gi5\_8663726\_x3.....cguggaacacggggugAcgaa..... 1  
 Gi1\_4088238\_x3.....acgucguggaacacggggugAcgaaacu..... 1  
 Gi5\_8651468\_x3.....guAggaacacggggugccga..... 1  
 Gi3\_27945755\_x3...gGucggagacgucguggaac..... 1  
 Gi2\_10749289\_x3.....guggaacacgggCugccgaa..... 1

|                                                         |   |
|---------------------------------------------------------|---|
| Gi2_10817107_x3.....aCcgagagacgucguggga.....            | 1 |
| Gi2_10760725_x3.....agacgCcgugggaacacggggugccg.....     | 1 |
| G1a_5872132_x3.....Augggaacacggggugccga.....            | 1 |
| Gi2_10823371_x3.....cgucgugggaacacgggAugccgaacu.....    | 1 |
| Gi2_10733548_x3.....aucggagacgucgugggaUacggggu.....     | 1 |
| Gi5_8702666_x3.....gacgucgugggaacacggggugccgGacu.....   | 1 |
| Gi2_10760065_x3.....guUggaacacggggugccgaacuu.....       | 1 |
| Gi1_4062036_x3.....ggagacguNgugggaacacggggugcc.....     | 1 |
| Gi5_8690675_x3.....cAugggaacacggggugccgaac.....         | 1 |
| Gi4_547317_x3.....cgugggGacacggggugccgaacu.....         | 1 |
| Gi3_27804146_x3.....cCucgugggaacacggggugc.....          | 1 |
| Gi5_8664836_x3.....gaacacUgggugccgaacu.....             | 1 |
| Gi3_27959276_x3.....aucggagacgucgugggaaca.....          | 0 |
| G1a_5854771_x3.....aGcggagacgucgugggaacacggggug.....    | 1 |
| Gi5_8654792_x3.....cgucgugggaacacggggugcAgaacu.....     | 1 |
| Gi4_551727_x3.....cgugggaacacggggugccgCacu.....         | 1 |
| Gi3_27842525_x3.....gaucggagacgucguAggaacac.....        | 1 |
| Gi2_10821178_x3.....cgugggaacGcggggugccga.....          | 1 |
| Gi1_4048494_x3.....agaUgucgugggaacacggggugccgaacu.....  | 1 |
| Gi3_27814484_x3.....gGgaucggagacgucgug.....             | 1 |
| Gi1_4052358_x3.....Ucgaucggagacgucgugggaaca.....        | 1 |
| Gi3_27947357_x3.....aucggagacgucgugggaacaUggggugc.....  | 1 |
| Gi5_8703941_x3.....aacacgCggugccgaacu.....              | 1 |
| Gi2_10826701_x3.....gucgugggaacacggggugcGgaacu.....     | 1 |
| Gi2_10792555_x3.....gucgugggaacacgggguAccgaac.....      | 1 |
| Gi2_10767676_x3.....Cgacgucgugggaacacggggugccgaacu..... | 1 |
| Gi5_8702669_x3.....gugggaacacggggugccgaCcuu.....        | 1 |
| Gi4_550197_x3.....cgugggaacacAgggugccgaacu.....         | 1 |
| Gi1_4065624_x3.....gucgugggaacacggggugcUgaacu.....      | 1 |
| Gi1_4087335_x3.....acguUgugggaacacggggugccgaacu.....    | 1 |
| Gi1_4080627_x3.....cgucAugggaacacggggugcc.....          | 1 |
| Gi1_4076895_x3.....cUgagacgucgugggaacacgggg.....        | 1 |
| Gi3_27845630_x3.....uNggaacacggggugccgaac.....          | 1 |
| Gi2_10756531_x3.....cUaucggagacgucgugggaacacgggg.....   | 1 |
| Gi2_10815088_x3.....Ugucgugggaacacggggugcc.....         | 1 |
| G1a_5851645_x3.....uggNaacacggggugccgaacu.....          | 1 |
| Gi2_10826314_x3.....aucggaAacgucgugggaacacggggug.....   | 1 |
| Gi5_8661320_x3.....gugggaacNcggggugccgaa.....           | 1 |
| Gi2_10726510_x3.....gaucggagacgucgugggaacaAggggu.....   | 1 |
| Gi2_10777318_x3.....gucgugggaacacggggugccgaacG.....     | 1 |
| G1a_5825074_x3.....cgugggaacCcgggugccgaacu.....         | 1 |
| Gi2_10726444_x3.....cgUucggagacgucgugg.....             | 1 |
| Gi2_10780222_x3.....gaCcgagacgucgugggaacacg.....        | 1 |
| Gi1_4056990_x3.....ggaacacgggguAccgaacu.....            | 1 |
| G1a_5864272_x3.....gugggaacacggggugccgaacG.....         | 1 |
| Gi2_10770121_x3.....cggagacgucgugggaacacggg.....        | 0 |
| Gi5_8678867_x3.....gggaacCcgggugccgaa.....              | 1 |

|                                                              |   |
|--------------------------------------------------------------|---|
| Gi1_4052940_x3.....cUugggaacacggggugc.....                   | 1 |
| Gi2_10776688_x3...gAucAgagacgucgugggaaacacgggggu.....        | 1 |
| Gi1_4077654_x3.....gugggaacacggggugUc.....                   | 1 |
| Gi1_4079394_x3.....ggagacgucgugUgaacacggggugccg.....         | 1 |
| G1a_5840815_x3.....Cugggaacacggggugcc.....                   | 1 |
| G1a_5829595_x3.....Gcggagacgucgugggaaacacgg.....             | 1 |
| G1a_5871601_x3.....gggaacacggggugccGacu.....                 | 1 |
| Gi2_10783210_x3.....agacgucgugggGacacggggugc.....            | 1 |
| Gi3_27965918_x3.....cgucguggAaacacggggugccga.....            | 1 |
| Gi5_8660984_x3.....aacacggggUccgaacu.....                    | 1 |
| Gi2_10769218_x3...gAucAgagacgucgugggaaacacggggugc.....       | 1 |
| Gi3_27933758_x3.....acgucgugggaaacacggggugAc.....            | 1 |
| Gi2_10820017_x3.....cgugggaacacgCggugccgaac.....             | 1 |
| Gi3_27801377_x3.....gacgucgugggaaacacggggugccgaacG.....      | 1 |
| Gi3_27918725_x3.....cggagacAucgugggaaacacgggggu.....         | 1 |
| Gi2_10807684_x3.....aucggGgacgucgugggaaacacggggugccgaac..... | 1 |
| Gi4_550170_x3.....cgucgugggaaacacggggugccgaac.....           | 0 |
| Gi3_27812246_x3.....aucggagacUucgugggaaacac.....             | 1 |
| Gi3_27894512_x3cugcgaCcgagacgucg.....                        | 1 |
| Gi1_4068357_x3.....aCacgucgugggaaacacggggugccgaacu.....      | 1 |
| Gi3_27862628_x3.....cgCcgugggaaacacggggugccgaa.....          | 1 |
| Gi1_4086882_x3.....gacAucgugggaaacacggggugccgaacu.....       | 1 |
| Gi2_10798951_x3.....aucggagacgucgugggUaca.....               | 1 |
| Gi3_27967730_x3.....Uugggaaacacggggugccgaacuuu.....          | 1 |
| Gi2_10817053_x3.....gucgCgggaacacggggugccgaac.....           | 1 |
| Gi3_27916112_x3.....gagacgucgugggaaacGcggggugccgaac.....     | 1 |
| Gi5_8714585_x3.....uCggaacacggggugccgaa.....                 | 1 |
| G1a_5850307_x3.....ggaacUcggggugccgaacu.....                 | 1 |
| Gi2_10784365_x3.....gucgugggUcacggggugccgaacu.....           | 1 |
| Gi3_27837236_x3.....guggCaacacggggugccga.....                | 1 |
| Gi2_10796734_x3.....gggaacacgggCugccgaacu.....               | 1 |
| Gi3_27852035_x3.....aucggagacgucgugggaaGacggg.....           | 1 |
| Gi2_10793458_x3.....gucgugggaaacacggggugAc.....              | 1 |
| Gi1_4059762_x3.....aacacggggugccgUacu.....                   | 1 |
| Gi2_10793869_x3.....aucggagacgucgugggUacacgggggu.....        | 1 |
| Gi4_545151_x3.....gUaacacggggugccgaac.....                   | 1 |
| Gi2_10776319_x3.....cggGgacgucgugggaaacacggggugccgaa.....    | 1 |
| Gi3_27902123_x3.....Uggagacgucgugggaaacacggggugccga.....     | 1 |
| Gi2_10737436_x3.....ggaacacgggCugccgaacu.....                | 1 |
| Gi3_27923294_x3.....ggAaacacggggugccgaa.....                 | 1 |
| Gi2_10745245_x3.....aucggagCcgucgugggaaacacgggggu.....       | 1 |
| Gi3_27866117_x3.....ggagacgucgugggaaacacggggA.....           | 1 |
| Gi2_10828048_x3.....cgGcgugggaaacacggggugccgaac.....         | 1 |
| G1a_5872516_x3.....cgAgggaacacggggugcc.....                  | 1 |
| Gi3_27935345_x3.....gaGcacggggugccgaacuu.....                | 1 |
| Gi1_4059270_x3.....guUggaacacggggugcc.....                   | 1 |
| Gi3_27809864_x3.....ucgugggaaacUcggggugccgaacu.....          | 1 |

Gi1\_4075395\_x3.....gGgacgucgugggaacacggggugccgaacu..... 1  
 Gi2\_10759132\_x3.....ugggaacacggggugccgaC..... 1  
 Gi2\_10803274\_x3....aucggUgacgucgugggaacacg..... 1  
 Gi2\_10825258\_x3.....acgucgugggaacacggggAgccgaacu..... 1  
 Gi2\_10734061\_x3....aucggagacguUgugggaacacg..... 1  
 Gi3\_27800000\_x3.....ggaacacgggguCccgaac..... 1  
 Gi2\_10728640\_x3....aucAgagacgucgugggaacacgggg..... 1  
 Gi3\_27847958\_x3.....gggaacacggggugUcga..... 1  
 Gi2\_10794130\_x3.....cgugggaacacggggCgccc..... 1  
 Gi3\_27943604\_x3.....agacgucgugggaacUcggggugccgaacu..... 1  
 Gi3\_27947759\_x3.....gggaacacggggugGcgaac..... 1  
 Gi3\_27801899\_x3...cgGucggagacgucguggg..... 1  
 Gi3\_27853268\_x3.....ggaCcacggggugccgaacu..... 1  
 Gi3\_27935435\_x3.....gUagacgucgugggaacacggggugccgaa..... 1  
 Gi3\_27888605\_x3.....gacgucgugggaacacgggAugccgaacu..... 1  
 Gi2\_10772365\_x3.....gUgacgucgugggaacacggggugccgaac..... 1  
 Gi3\_27810149\_x3....gaucggagacgucguggUacacgggg..... 1  
 Gi3\_27966812\_x3.....ucguggUaacacggggugccgaacu..... 1  
 Gi2\_10731217\_x3.....cgucgugggaacacggggugcUga..... 1  
 Gi3\_27821687\_x3.....ggaacacggggugGcgaacu..... 1  
 Gi2\_10786963\_x3.....cgugggaaUacggggugccga..... 1  
 Gi3\_27934034\_x3.....cgucgugggaacacggggugAcg..... 1  
 Gi2\_10752319\_x3....ucggUgacgucgugggaa..... 1  
 Gi3\_27925478\_x3....aucggagacgucgugggaUcacggg..... 1  
 Gi2\_10826347\_x3...cgaucggaNacgucgugg..... 1  
 Gi2\_10726195\_x3.....ucgugAgaacacggggugccgaac..... 1  
 Gi3\_27816263\_x3.....cgucguggUacacggggugccga..... 1  
 Gl1\_5849461\_x3....aucggagacgucgugggaCcacgggg..... 1  
 Gi5\_8683043\_x3.....agUcgcguggggaacacggggugccgaac..... 1  
 Gi1\_4056000\_x3.....ugggaacacggggugccgaaAu..... 1  
 Gl1\_5835199\_x3.....ugggaacacgggAugccgaacu..... 1  
 Gi3\_27926960\_x3.....acgucgugggaacacgAggugcc..... 1  
 Gi3\_27963212\_x3.....aacacggggUaccgaacu..... 1  
 Gi3\_27979745\_x3.....ugggaaAacggggugccga..... 1  
 Gl1\_5863120\_x3.....ggaacacgNggugccgaac..... 1  
 Gi3\_27796562\_x3....gaucggUgacgucgugggaacacgggg..... 1  
 Gi2\_10749811\_x3.....cgucgugggaCcacggggugc..... 1  
 Gi2\_10818886\_x3.....ggaaUacggggugccgaac..... 1  
 Gi2\_10742341\_x3.....cgugggaacacggggugcAgaac..... 1  
 Gi5\_8687252\_x3....aucgUagacgucgugggaacacgggg..... 1  
 Gi2\_10747471\_x3.....gaacacggggugccgaUcu..... 1  
 Gi1\_4059054\_x3.....gacgucgugggaGcacggggugccgaacu..... 1  
 Gi1\_4061859\_x3.....cgugUgaacacggggugccg..... 1  
 Gi3\_27938246\_x3....ucggagacgucguAggaacacggggugcc..... 1  
 Gi3\_27825662\_x3.....gggaacacggggCgccc..... 1  
 Gi2\_10760116\_x3.....cgucAugggaacacggggugcc..... 1  
 Gi2\_10745842\_x3....aucggCgacgucgugggaacacgggg..... 1

Gi5\_8711792\_x3.....cguUgugggaacacggggugc..... 1  
 Gi2\_10771786\_x3.....gugggaacacgggCugccg..... 1  
 Gi5\_8706155\_x3.....gacgucgCggaacacggggugccgaac..... 1  
 Gi5\_8694500\_x3.....aacacggggugGcgaacu..... 1  
 Gi3\_27800921\_x3.....ucgugggaNcacggggug..... 1  
 Gi1\_4075992\_x3.....gugggaacCcggggugcc..... 1  
 Gi2\_10734325\_x3.....ugggaaUacggggugccga..... 1  
 Gi1\_4071768\_x3.....acgucAugggaacacggggugccgaacu..... 1  
 G1a\_5828833\_x3.....gggaacaAggggugccgaacu..... 1  
 Gi2\_10820020\_x3.....aucggagacgucgugggUacacggggugc..... 1  
 Gi2\_10777213\_x3.....cgugggaacacggggUAccgaa..... 1  
 Gi3\_27908333\_x3.....cgaucggagacgucgugggCcacggg..... 1  
 Gi5\_8707220\_x3.....cgugggaacacggggCgccga..... 1  
 Gi3\_27883004\_x3.....cgugggaacCcggggugccg..... 1  
 Gi2\_10797907\_x3.....aucggagacgCcgugggaacacggggug..... 1  
 G1a\_5864809\_x3.....gAaacacggggugccgaacu..... 1  
 Gi2\_10764763\_x3.....ggUaacacggggugccga..... 1  
 Gi3\_27803093\_x3.....gaucggagacgucguggggaacaAggg..... 1  
 Gi5\_8664128\_x3.....acgucgugggaacGcggggugcc..... 1  
 Gi1\_4054662\_x3.....aucggagaNgucgugggaacacggggugcc..... 1  
 Gi5\_8691932\_x3.....Ggugggaacacggggugcc..... 1  
 Gi5\_8660855\_x3.....agacgucguggggaacacggggugcUgaacu..... 1  
 G1a\_5820790\_x3.....aucggagacgucguAggaacacggg..... 1  
 Gi3\_27814181\_x3.....aucggagacgucgCgggaacacggggugc..... 1  
 Gi3\_27906728\_x3.....cgucguggAaacacggggugc..... 1  
 Gi3\_27836417\_x3.....cggagacgucgCgggaacacggggU..... 1  
 Gi3\_27903353\_x3.....gacAucgugggaacacggggugccgaac..... 1  
 Gi2\_10747369\_x3.....gaacaAggggugccgaacu..... 1  
 Gi3\_27866645\_x3.....cgaucggagGcgucgugggaacacggggU..... 1  
 Gi5\_8692445\_x3.....auUggagacgucguggggaacacggggU..... 1  
 Gi3\_27910634\_x3.....gggaacacggggugccCaac..... 1  
 Gi2\_10783585\_x3.....gaucggagacguUguggga..... 1  
 G1a\_5871073\_x3.....ggaNcacggggugccgaacu..... 1  
 Gi3\_27929879\_x3.....cggagacgucguggggaacacgAggu..... 1  
 Gi3\_27855653\_x3.....acgucgugggaGcacggg..... 1  
 G1a\_5855146\_x3.....cgugggUacacggggugccgaacu..... 1  
 Gi5\_8675246\_x3.....aucggagacgucgugggCacacg..... 1  
 Gi2\_10758457\_x3.....aucggagaUgucguggggaacacggggugcc..... 1  
 Gi2\_10751338\_x3.....acgucgugggaAaacggggugc..... 1  
 Gi3\_27839732\_x3.....gaucggagaUgucguggggaacacggggU..... 1  
 Gi3\_27885230\_x3.....gugggaacaAggggugccg..... 1  
 Gi2\_10762717\_x3.....gaucggGgacgucguggggaacacg..... 1  
 Gi1\_4057707\_x3.....cgucgugggaacacgAggugccgaacu..... 1  
 Gi5\_8665718\_x3.....gacgucgugggGacacggggugccgaacu..... 1  
 Gi3\_27813986\_x3.....gaucggagacgucgugAgaacacggg..... 1  
 Gi1\_4047879\_x3.....cggagacgucguggggaacacggggug..... 0  
 Gi2\_10763002\_x3.....Cucggagacgucguggggaacacggggugc..... 1



|                                                            |   |
|------------------------------------------------------------|---|
| Gl1_5841409_x3.....aacacggggugccgGacu.....                 | 1 |
| Gi1_4055745_x3.....ucguggaaaAcggggugccgaacu.....           | 1 |
| Gl1_5857381_x3...gaucggagacgucguggaaacCgggggu.....         | 1 |
| Gi1_4074492_x3.....uggaaaAcggggugccgaacu.....              | 1 |
| Gi3_27815954_x3...gaucggagGcgucguggaaacac.....             | 1 |
| Gi5_8663048_x3.....gugggGacacggggugcc.....                 | 1 |
| Gi3_27935048_x3...aucggagacgucguggaaacaAggggu.....         | 1 |
| Gi2_10787461_x3...aucggagacgucguggaaacGcgg.....            | 1 |
| Gi3_27940097_x3.....Gggagacgucguggaaacacggggugccgaacu..... | 1 |
| Gi1_4060818_x3.....Acguggaaacacggggugcc.....               | 1 |
| Gi3_27929564_x3.....ggNacacggggugccgaacu.....              | 1 |
| Gi3_27921194_x3.....agacgucguggaaacacggggugccg.....        | 0 |
| Gl1_5868439_x3.....ggaacacggggCgccaac.....                 | 1 |
| Gi3_27926144_x3.....uUggagacgucguggaaacacg.....            | 1 |
| Gi3_27894605_x3.....gggaacacggggugcAgaa.....               | 1 |
| Gi2_10783987_x3.....gacgucguggaaacacggUgugcc.....          | 1 |
| Gi1_4080966_x3.....Auggaaacacggggugccga.....               | 1 |
| Gi5_8664650_x3.....gaacacgCggugccgaacu.....                | 1 |
| Gi1_4074750_x3.....gugggaacUcggggugccgaacu.....            | 1 |
| Gi3_27801683_x3.....uGguggaaacacggggugccga.....            | 1 |
| Gi2_10783036_x3.....Ggucguggaaacacggggugccgaa.....         | 1 |
| Gi3_27844277_x3.....ggaacacggggugccCaac.....               | 1 |
| Gi5_8683115_x3.....ggaacacggggAgccaac.....                 | 1 |
| Gi2_10768942_x3.....gugggaacacgAggugccgaa.....             | 1 |
| Gi3_27863798_x3.....cguggaaacacggggugcUga.....             | 1 |
| Gi3_27948608_x3.....uAguggaaacacggggugccgaac.....          | 1 |
| Gi2_10751461_x3...aucAgagacgucguggaaacacg.....             | 1 |
| Gi3_27883856_x3.....acgucguggUaacacggggugccgaac.....       | 1 |
| Gi1_4081590_x3...gUgacgucguggaaacacggggugcc.....           | 1 |
| Gi3_27950780_x3...gaucggagacAucguggaaacacgggu.....         | 1 |
| Gi1_4076373_x3.....gacgucguggaaacacAgggugccgaacu.....      | 1 |
| Gi3_27832094_x3.....cgucguggaaacacggggugccAa.....          | 1 |
| Gi3_27970904_x3...gaucggagacgucguggaaacacggggAgcc.....     | 1 |
| Gl1_5873851_x3.....gugggaacacAgggugcc.....                 | 1 |
| Gi2_10801255_x3.....ugggCacacggggugccg.....                | 1 |
| Gi2_10760446_x3.....ggUgacgucguggaaaca.....                | 1 |
| Gi2_10800646_x3.....gucguUggaacacggggugccgaacu.....        | 1 |
| Gl1_5831371_x3.....gugggaacNcggggugccg.....                | 1 |
| Gi3_27936638_x3.....gGgacgucguggaaacacggggugcc.....        | 1 |
| Gi2_10742797_x3.....gggaCcacggggugccgaac.....              | 1 |
| Gi3_27903941_x3...aucggagacgucguggaaUacggggugcc.....       | 1 |
| Gi3_27960848_x3.Ggcgaucggagacgucguggaaaca.....             | 1 |
| Gi1_4076163_x3.....gucguggaaacacggAgugccgaacu.....         | 1 |
| Gl1_5874613_x3.....Gcguggaaacacggggugccgaac.....           | 1 |
| Gi3_27843401_x3.....gacgucguggaaacacggggugccUacu.....      | 1 |
| Gi2_10758421_x3.....cguggaaacacggggugcUcga.....            | 1 |
| Gi2_10822783_x3.....uUggagacgucguggaaaca.....              | 1 |

Gi2\_10804405\_x3....aucggagacgucgugggaacacgggAug..... 1  
 Gi3\_27924137\_x3.....gugggaacacgUggugccga..... 1  
 Gi3\_27865241\_x3.....acgucgugggGacacggggugc..... 1  
 Gl1a\_5853256\_x3.....ugggaaUacggggugccgaacu..... 1  
 Gi3\_27932597\_x3....gaucggagacAucgugggaacacgggg..... 1  
 Gi2\_10750255\_x3.....gggaacacggAgugccgaac..... 1  
 Gi2\_10806037\_x3cugcgauccgagacgucgA..... 1  
 Gi3\_27913664\_x3.....gacgucgugggaacacggggugcUgaac..... 1  
 Gl1a\_5859112\_x3.ugcgauccgGgacgucgu..... 1  
 Gi3\_27955556\_x3.....gagacgucgugggaGcacggggu..... 1  
 Gl4\_548769\_x3....aucggagacgucgugggaacacgggggu..... 0  
 Gi3\_27891737\_x3.....Ugagacgucgugggaacacggggugc..... 1  
 Gi2\_10807750\_x3....aucggagacguAgugggaacacggggugc..... 1  
 Gi1\_4086681\_x3.....gugggaacacggggugccgCac..... 1  
 Gi3\_27851837\_x3.....gucguAggaacacggggugcc..... 1  
 Gi2\_10778554\_x3.....ggagacgucgugggaacacggggugAc..... 1  
 Gi3\_27965708\_x3.....Agagacgucgugggaacacggggugccgaa..... 1  
 Gi2\_10770733\_x3....cggagacgucgugggaacacAgggugc..... 1  
 Gi3\_27878072\_x3.....gggaacacNgggugccgaacuu..... 1  
 Gi3\_27832283\_x3.....cCucgugggaacacggggugccga..... 1  
 Gi1\_4059210\_x3.....acgucgugNgaacacggggugccgaac..... 1  
 Gi2\_10791646\_x3.....gacgucgugggaGcacggggugc..... 1  
 Gi3\_27877439\_x3....aucggagacguUgugggaacacggggugcc..... 1  
 Gi5\_8694947\_x3.....ugggUacacggggugccgaa..... 1  
 Gi3\_27924791\_x3....gaGcggagacgucgugggaacac..... 1  
 Gi3\_27824306\_x3....aucggagacgucgugggaacUcggggu..... 1  
 Gi2\_10739329\_x3.....acgucgugAgaacacggggugccgaacu..... 1  
 Gi3\_27833963\_x3.....aGgucgugggaacacggggugccga..... 1  
 Gi5\_8666564\_x3.....Aacgucgugggaacacggggugccgaac..... 1  
 Gi2\_10822879\_x3.....gucgugggaacacggggCgccg..... 1  
 Gi3\_27967715\_x3.....Ugagacgucgugggaacacggggug..... 1  
 Gi3\_27939089\_x3....gaGcggagacgucgugggaacacgggggu..... 1  
 Gi3\_27856013\_x3.....acgucgugAgaacacggggugccgaa..... 1  
 Gi2\_10823692\_x3.....Uggagacgucgugggaacacgggggu..... 1  
 Gl1a\_5857135\_x3.....ggaacacggggugcAgaacu..... 1  
 Gl4\_546303\_x3....aucggagacgucgugggaacacggggugc..... 0  
 Gl1\_4071414\_x3.....acgucgugggUacacggggugccgaacu..... 1  
 Gl1\_4064145\_x3.....gucgugggaacacggggugGc..... 1  
 Gi3\_27911222\_x3....cAgagacgucgugggaacacgggggu..... 1  
 Gl1\_4088517\_x3.....acUucgugggaacacggggugccg..... 1  
 Gi2\_10777033\_x3.....ggNacacggggugccgaacu..... 1  
 Gi2\_10799812\_x3.....gacgucguNggaacacgggggu..... 1  
 Gi2\_10823332\_x3.....cgugggaacGcggggugccg..... 1  
 Gi2\_10808470\_x3.....ugggaacaNggggugccgaacuu..... 1  
 Gi3\_27972911\_x3....aucggagaUgucgugggaacacgg..... 1  
 Gi2\_10806004\_x3.....gugggaacaAggggugccga..... 1  
 Gl1\_4065732\_x3.....ggaCcacggggugccgaacu..... 1

|                                                        |   |
|--------------------------------------------------------|---|
| Gi1_4080531_x3.....auUggagacgucgugggaacacgg.....       | 1 |
| Gi2_10814653_x3....gaucggagGcgucgugga.....             | 1 |
| Gi5_8671298_x3.....ucggagacNucgugggaacacg.....         | 1 |
| Gi2_10728463_x3.....ggagacgucgugAgaacacggggugcc.....   | 1 |
| Gi3_27948209_x3.....acgucgugNgaacacggggugccga.....     | 1 |
| Gl1a_5815156_x3.....cgugggaacacggggugccGacu.....       | 1 |
| Gi2_10737010_x3...cAaucggagacgucgugggaacacggggugc..... | 1 |
| Gi2_10761067_x3....aucggagacgucgugggaaUacggggugc.....  | 1 |
| Gi3_27960374_x3.....cggagGcgucgugggaacac.....          | 1 |
| Gi2_10812571_x3....aucggagacguUgugggaacacggggg.....    | 1 |
| Gi3_27928439_x3.....cgugggaacaUggggugcc.....           | 1 |
| Gi5_8681321_x3...cUaucggagacgucgugggaacacggg.....      | 1 |
| Gi2_10758526_x3.....acgucgugggaacacggggugGcgaacu.....  | 1 |
| Gi2_10768621_x3.....cgucgugggaacCcggggugccga.....      | 1 |
| Gi3_27942389_x3.....ucgugggaacCcggggug.....            | 1 |
| Gi2_10774135_x3.....acgucAugggaacacggggugccgaac.....   | 1 |
| Gi3_27821660_x3.....gugggaacacUgggugccga.....          | 1 |
| Gi3_27807353_x3.....cgugggaacacgCggugcc.....           | 1 |
| Gi3_27921188_x3.....gacgCcgugggaacacggggugccgaac.....  | 1 |
| Gi4_547791_x3.....gGgggaacacggggugccgaac.....          | 1 |
| Gi3_27803402_x3.....gugggaacacgUggugcc.....            | 1 |
| Gi3_27802805_x3....gaucggagacgCcgugggaacacgggg.....    | 1 |
| Gi1_4088400_x3.....Ggacgucgugggaacacggggugcc.....      | 1 |
| Gl1a_5826922_x3....aucggagacgucgugggaacacggggC.....    | 1 |
| Gi3_27825254_x3.....ucgugggaacacggggugcGgaacu.....     | 1 |
| Gi5_8697584_x3.....ugggaacacggggugccgaaU.....          | 1 |
| Gi2_10821940_x3..gcgaucggagacgucgug.....               | 0 |
| Gi3_27815522_x3.....ggaacacggggUuccgaa.....            | 1 |
| Gi3_27901427_x3.....cgucAugggaacacggggugc.....         | 1 |
| Gi1_4056027_x3.....Ugacgucgugggaacacggggugccgaacu..... | 1 |
| Gi3_27869987_x3.....ggagacgucgugggaacGcg.....          | 1 |
| Gi3_27901238_x3.....aacacggggugccCaacu.....            | 1 |
| Gi3_27946997_x3.....gugggaacacgUggugccgaa.....         | 1 |
| Gi2_10759594_x3.....cgugggaacacUgggugcc.....           | 1 |
| Gi3_27815444_x3.....uggAaacacggggugccg.....            | 1 |
| Gi1_4086879_x3.....cgugggaacacggggugcGgaacu.....       | 1 |
| Gi1_4075593_x3.....gacgucgugggaacCcggggugccgaacu.....  | 1 |
| Gl1a_5832430_x3.....cgGgggaacacggggugcc.....           | 1 |
| Gi5_8675609_x3.....acgAcgugggaacacggggugccgaacu.....   | 1 |
| Gi1_4052616_x3.....Augggaacacggggugccg.....            | 1 |
| Gi1_4061307_x3.....ggaacacggggugccgUacu.....           | 1 |
| Gi5_8696045_x3.....gggaGcacggggugccgaa.....            | 1 |
| Gi2_10758874_x3....aucggagacgucgugggaacacggggugAc..... | 1 |
| Gi5_8692325_x3....aucggagacgucguggaaUacg.....          | 1 |
| Gi3_27975788_x3.....cggGgacgucgugggaacacggg.....       | 1 |
| Gi5_8676794_x3.....guUggaacacggggugccgaa.....          | 1 |
| Gl1a_5834938_x3.....ugggaacacggggugcAgaacu.....        | 1 |

Gi1\_4055142\_x3.....cAgagacgucgugggaacacggggugcc..... 1  
Gi2\_10776541\_x3.....uAggaacacggggugccgaa..... 1  
Gi2\_10822456\_x3.....cgucguAggaacacggggugc..... 1  
Gi5\_8706362\_x3.....gggaacaUggggugccgaac..... 1  
Gi3\_27928310\_x3.....ucggagacgCcgugggaacacggggugcc..... 1  
Gi3\_27933242\_x3.....cgugggCacacggggugcc..... 1  
Gi3\_27927239\_x3....gaucgAagacgucgugggaacacggggg..... 1  
Gi3\_27874235\_x3.....cgucgugggaaAacggggugccga..... 1  
Gi2\_10738150\_x3.ugcgauccgCgacgucgugggaaca..... 1  
Gi5\_8698481\_x3.....ucgugggaacacgggUugccgaacu..... 1  
Gi2\_10774417\_x3.....gggaacCggggugccgaac..... 1  
Gi3\_27901463\_x3.....agacgucgugggaacGcggggugccgaacu..... 1  
Gi2\_10756315\_x3.....cgucgugggaacacgAggugccg..... 1  
Gi1\_4076172\_x3.....ucggagacgucgugggGacacg..... 1  
Gi2\_10768330\_x3....Caucggagacgucgugggaacacg..... 1  
Gi2\_10814581\_x3.....ucggagacgucgCgggaacacgggg..... 1  
Gi2\_10729516\_x3.....agacgucgugggaacacgggAugcc..... 1  
Gi1\_4080198\_x3.....ucgugggaCcacggggugcc..... 1  
Gi1\_4082853\_x3.....cgugggaacacggggCgccg..... 1  
Gi3\_27870863\_x3.....gucgugggaacGcggggugccga..... 1  
Gi3\_27918530\_x3....aucggagacgucgugggaaAac..... 1  
Gi1\_4074717\_x3.....gggaGcacggggugccgaac..... 1  
Gi3\_27968057\_x3....gaucggCgacgucgugggaacacggg..... 1  
Gi1\_4052958\_x3.....ucgugggaacacggggugAcgaaacu..... 1  
Gi4\_552456\_x3.....ugggaacacggggugccgaaAu..... 1  
Gi2\_10793179\_x3.....ucgugggaacacggggugccgaUcu..... 1  
Gi3\_27953717\_x3....Caucggagacgucgugggaacacgggg..... 1  
Gi2\_10817077\_x3.....cggUgacgucgugggaacacggggugcc..... 1  
Gi3\_27951293\_x3....aucCgagacgucgugggaacacggggugc..... 1  
Gi2\_10755268\_x3.....ggagacgucgugggaacacggggGgc..... 1  
Gi1\_4081326\_x3....gaucggagNcgucguggg..... 1  
Gi3\_27883913\_x3.....ugggCacacggggugccg..... 1  
Gi1\_4070493\_x3.....gAgggaacacggggugccga..... 1  
Gi2\_10805773\_x3.....gugggaacacUgggugccg..... 1  
Gi2\_10813573\_x3.....cgugggaacaAggggugccgaac..... 1  
Gi1\_4052178\_x3.....aacacgUggugccgaacu..... 1  
Gi1\_4049010\_x3.....gugggaCcacggggugccgaacu..... 1  
Gi2\_10757023\_x3.....ugggaacacggggugccgaaU..... 1  
Gi2\_10803373\_x3.....agacgucgugggaacGcggggugccgaacu..... 1  
Gi2\_10749727\_x3....aucggagacgCcgugggaac..... 1  
Gi2\_10810957\_x3....gaucggagacgucgugggaacCcggggugc..... 1  
Gi3\_27805952\_x3.....gugggaacacggggUuccg..... 1  
Gi3\_27886172\_x3.....ugggaacaGggggugccga..... 1  
Gi3\_27944330\_x3.....ggaacacggggugccgCa..... 1  
Gi2\_10817665\_x3....gGucggagacgucgugggaaca..... 1  
G1a\_5835508\_x3.....Ggugggaacacggggugcc..... 1  
Gi3\_27878966\_x3.....cggagacguUgugggaacacggggg..... 1

Gi2\_10728643\_x3.....cguggaacacggggGgccgaa..... 1  
Gi5\_8699957\_x3.....guggaacacAgggugccga..... 1  
Gi5\_8702303\_x3.....gggaacacggggugccgaaU..... 1  
Gi3\_27841475\_x3.....guggaacacgggguCcc..... 1  
Gi3\_27946538\_x3.....gucgugggNacacggggug..... 1  
G1a\_5861968\_x3.....guggaacacggCgugccgaacu..... 1  
Gi3\_27890897\_x3...cgaucggagacgucguggaacacggggG..... 1  
Gi3\_27811253\_x3...gaucggagacgucgugggaCcacg..... 1  
Gi5\_8706773\_x3.....ggGacacggggugccgaac..... 1  
Gi2\_10741690\_x3.....Aggaacacggggugccga..... 1  
Gi3\_27859553\_x3.....cggagacgucguUggaacacggggg..... 1  
Gi2\_10758130\_x3.....ggaacaAggggugccgaac..... 1  
Gi3\_27827144\_x3.....ggagacguUguggaacacggggg..... 1  
Gi2\_10748338\_x3.....gggaacacggggUccgaacu..... 1  
Gi2\_10795438\_x3.....cggagGcgucguggaacacggggg..... 1  
Gi4\_549546\_x3.....ucguUggaacacggggugccgaacu..... 1  
Gi2\_10781374\_x3.....uggaacGcggggugccg..... 1  
Gi3\_27834089\_x3.....ggagacgucguggaacGcggggugcc..... 1  
G1a\_5853475\_x3.....gaacacggggugccgaCcu..... 1  
Gi5\_8669738\_x3.....ucguggaacacggggugcGgaacu..... 1  
Gi2\_10796344\_x3.....aucggagacgucguggaaAacggggugc..... 1  
Gi5\_8715755\_x3.....guggaacacGggggugccgaacu..... 1  
Gi3\_27820862\_x3.....aucggagacAucguggaacac..... 1  
Gi2\_10749271\_x3...gaucggagacgucGgggaacacggggug..... 1  
Gi2\_10762348\_x3.....aucggagacguUguggaacacggggg..... 1  
Gi1\_4077852\_x3.....ugggCacacggggugccgaacu..... 1  
Gi5\_8701061\_x3.....agacgucguggaacacggggAgccgaacu..... 1  
Gi2\_10752463\_x3.....ucguggaacacggggAgccgaac..... 1  
G1a\_5815954\_x3...gUucggagacgucguggga..... 1  
Gi5\_8656670\_x3.....gugggaaUacggggugccg..... 1  
Gi2\_10740502\_x3...Uucggagacgucguggaacac..... 1  
Gi2\_10749670\_x3.....acgucAugggaacacggggugcc..... 1  
Gi3\_27952910\_x3.....cggauacgucguggaacacg..... 1  
Gi2\_10816861\_x3.....gucguggAaacacggggugccgaac..... 1  
Gi2\_10735225\_x3.....cggagacgucgugggaCcacggggugc..... 1  
Gi3\_27856406\_x3.....ucguggaacacggAgugccg..... 1  
Gi3\_27870818\_x3.....gacgucguggaacacggUgugccgaac..... 1  
Gi3\_27917177\_x3.....cgucguggaacUcggggugccga..... 1  
Gi3\_27863285\_x3.....aucggagacgAcguggaacacg..... 1  
Gi1\_4053558\_x3.....gugggGacacggggugcc..... 1  
Gi3\_27890750\_x3.....agaUgucguggaacacggggugccgaacu..... 1  
Gi1\_4048449\_x3.....cUgagacgucguggaacacggggugccgaacu..... 1  
Gi2\_10820941\_x3.....uggaacacggggugAcgaac..... 1  
G1a\_5869438\_x3.....guggaacacggAgugccga..... 1  
Gi5\_8705672\_x3.....cgGgggaacacggggugccga..... 1  
Gi3\_27929303\_x3...cAaucggagacgucguggaacacggggg..... 1  
Gi1\_4071327\_x3.....agacgucguggaacacAgggugccgaacu..... 1

Gi3\_27850148\_x3.....ggagacgucguAggaacacggggg..... 1  
G1a\_5825428\_x3.....gggaacacggggugccgUacu..... 1  
Gi2\_10809958\_x3.....gAagacgucgugggaaacacggggugcc..... 1  
Gi5\_8696801\_x3.....cgugggaacCcggggugccgaac..... 1  
Gi3\_27912089\_x3.....gugggaacacCggggugccga..... 1  
Gi3\_27881111\_x3.....gacAucgugggaaacacggggugccgaacu..... 1  
Gi3\_27807521\_x3.....cgucgugggaaacacggCgugccgaacu..... 1  
Gi1\_4075632\_x3.....cgugggaGcacggggugccgaa..... 1  
Gi5\_8705129\_x3.....acgucgugggaaUacggggugccgaacu..... 1  
Gi2\_10740481\_x3.....ggAaacacggggugccgaac..... 1  
G1a\_5850442\_x3....aCcgagacgucgugggaaacacggggg..... 1  
Gi3\_27918212\_x3....aucgUagacgucguggg..... 1  
Gi2\_10763998\_x3.....ggagacguNgugggaaacacggggugc..... 1  
Gi5\_8709968\_x3.....agacgucgugggaaacacgggggUaccgaacu..... 1  
G1a\_5826586\_x3.....Aaacacggggugccgaacu..... 1  
Gi5\_8695256\_x3.....ggaaGacggggugccgaac..... 1  
Gi5\_8699030\_x3.....cgugggaacGcggggugcc..... 1  
Gi3\_27894050\_x3.....ucggagacNucgugggaaacacggggg..... 1  
Gi5\_8693672\_x3.....gugggaacacggggugccgaC..... 1  
Gi3\_27957194\_x3.....gUagacgucgugggaaacacggggugc..... 1  
Gi1\_4086768\_x3.....Agagacgucgugggaaacacggggugcc..... 1  
Gi3\_27839636\_x3.....Ccgugggaacacggggugccgaa..... 1  
Gi2\_10779133\_x3.....ggagacAucgugggaaacacggggugcc..... 1  
Gi2\_10798459\_x3.....Uucggagacgucgugggaaacacggggugcc..... 1  
Gi3\_27942383\_x3....gauUggagacgucgugggaaacacg..... 1  
G1a\_5832079\_x3....gaucggagacgCcgugggaacacggg..... 1  
Gi1\_4074924\_x3.....ucgugggaacacggggugccgaUcu..... 1  
Gi1\_4076070\_x3.....gGcucgugggaaacacggggugcc..... 1  
Gi3\_27947603\_x3.....uggUaacacggggugccgaac..... 1  
G1a\_5821597\_x3.....ggaacCcggggugccgaacu..... 1  
Gi2\_10766044\_x3.....uggCaacacggggugccgaacu..... 1  
Gi5\_8705870\_x3.....ugggaacacggggugcAgaac..... 1  
Gi2\_10766893\_x3....gaucggagNcgucgugggaaacacg..... 1  
Gi2\_10775620\_x3.....ugggaacacggAgugccgaac..... 1  
Gi2\_10749937\_x3....aucggagacgAcgugggaaaca..... 1  
Gi2\_10756420\_x3.....acgucgugggaaacGcggggugc..... 1  
Gi1\_4081533\_x3.....cgugggaGcacggggugccg..... 1  
Gi2\_10784011\_x3.....Ugacgucgugggaaacacggggg..... 1  
Gi2\_10787239\_x3....Ggaucggagacgucgugggaaaca..... 1  
Gi2\_10811233\_x3.....cgucgugggaaacacggggUaccgaa..... 1  
Gi3\_27875804\_x3....Ggaucggagacgucgugggaaacacgg..... 1  
Gi3\_27931370\_x3.....acgucgugggaaGacggggugccgaac..... 1  
Gi1\_4059636\_x3.....ucguggUaacacggggugccgaacu..... 1  
Gi3\_27953096\_x3.....cgugggUaacacggggugccga..... 1  
Gi2\_10777042\_x3.....gacgucgugggaaacacggggugccgaaAu..... 1  
Gi2\_10813876\_x3.....gUagacgucgugggaaacacggggugccgaacu..... 1  
Gi2\_10808905\_x3.....gucguAggaacacggggugccgaac..... 1

Gi2\_10765219\_x3.....cgucgugggaacacggggugccC..... 1  
Gi5\_8698763\_x3.....uggaUcacgggugccgaac..... 1  
Gi1\_4069764\_x3.....uggaGcacgggugccgaacu..... 1  
Gi5\_8661548\_x3.....ugCgaacacgggugccgaacu..... 1  
Gi3\_27835814\_x3.....cgucguggaaAacggggugccg..... 1  
Gi2\_10794466\_x3.....aucggagacgucgugggaacacgggAugc..... 1  
Gi2\_10745254\_x3.....gaucgAagacgucgugggaaca..... 1  
Gi3\_27833312\_x3.....aucggagacgucgugggaUcacggggu..... 1  
Gi3\_27925109\_x3.....gcgaucggNgacgucgug..... 1  
G1a\_5866222\_x3.....aucggagacgucgugggaG..... 1  
Gi1\_4088766\_x3.....ggaGcacgggugccgaac..... 1  
Gi5\_8692316\_x3.....cAugggaacacgggugccga..... 1  
G1a\_5840905\_x3.....cUgagacgucgugggaacacg..... 1  
Gi2\_10736158\_x3.....cgugggaCcacgggugc..... 1  
Gi3\_27963245\_x3.....aucggagacgucgAgggaacacggggu..... 1  
Gi3\_27824693\_x3.....agacgucgugggaacacgggugccgaacG..... 1  
Gi3\_27912560\_x3.....guAgugggaacacgggugccgaac..... 1  
Gi5\_8686826\_x3.....gugggaacGcggggugccg..... 1  
Gi2\_10736995\_x3.....gaucggagacgucgugggaacCc..... 1  
Gi5\_8691650\_x3.....gggaacacgggugGcgaacu..... 1  
Gi1\_4085907\_x3.....acgucgugggaacaAggggugccgaacu..... 1  
Gi3\_27799826\_x3.....aucggagacgucgugggaacaAg..... 1  
Gi3\_27846467\_x3.....gugggaacacgggugGcga..... 1  
Gi3\_27918179\_x3.....guNggaacacgggugccga..... 1  
Gi3\_27859004\_x3.....gggaacacCgggugccgaac..... 1  
Gi3\_27953486\_x3.....gggaacacgggguUccgaac..... 1  
G1a\_5844055\_x3.....gaacacgggugccAaac..... 1  
Gi1\_4075824\_x3.....cgugggaacacgggugccgaCc..... 1  
G1a\_5835673\_x3.....aucggagacgucAugggaacacg..... 1  
Gi2\_10798792\_x3.....gaucggagacgucgugggaAacgggugc..... 1  
Gi3\_27839084\_x3.....gaucggagacgucguggGac..... 1  
Gi2\_10789837\_x3.....ggUgacgucgugggaacacgggugccgaa..... 1  
Gi2\_10818196\_x3.....gugggaacacgggguCccgaac..... 1  
Gi2\_10775545\_x3.....gaucggagGcugcugggaacacg..... 1  
Gi5\_8663633\_x3.....gugggaacacgggguCccgaacu..... 1  
Gi2\_10735897\_x3.....gaucggaAacgucgugggaacacggg..... 1  
G1a\_5826532\_x3.....gugggaacUcgggugccgaacu..... 1  
Gi3\_27907856\_x3.....gGgaucggagacgucgugggaaca..... 1  
Gi2\_10795309\_x3.....cgucgugggaUacgggugccgaacu..... 1  
Gi5\_8677325\_x3.....gucgugggaacacgggugccgUacu..... 1  
Gi2\_10787143\_x3.....gaucggagacgucAugggaacacgggugc..... 1  
Gi2\_10799326\_x3.....ugcgGucggagacgucguggga..... 1  
Gi1\_4088841\_x3.....gugggaacGcgggugcc..... 1  
Gi3\_27864185\_x3.....cgucgGgggaacacgggugccga..... 1  
Gi3\_27941927\_x3.....gacgucgugggaacacgggugcAgaacu..... 1  
G1a\_5862913\_x3.....gugggaacaGgggugccgaacu..... 1  
Gi2\_10790197\_x3.....gggaacacgggugccCaacu..... 1

Gi2\_10737316\_x3.ugcgaucgNagacgucgugggaaaca..... 1  
 Gi3\_27979238\_x3...Caucggagacgucgugggaaacac..... 1  
 Gi3\_27962765\_x3.....uggaacacgggCugccg..... 1  
 Gi1\_4074723\_x3.....guNggaaacacgggugccgaacu..... 1  
 Gi3\_27971141\_x3.....aucggagacgucgugggaaUcacggggugcc..... 1  
 Gi3\_27905708\_x3.....cgucgugggaaacacggggugccC..... 1  
 Gi5\_8715926\_x3.....aacacggggugccCaacu..... 1  
 Gi3\_27803885\_x3.....gucgGgggaacacggggugccga..... 1  
 Gi5\_8697986\_x3.....gggaacUcggggugccgaacu..... 1  
 Gi5\_8678357\_x3.....ucUugggaacacggggugccgaac..... 1  
 Gi1\_4059420\_x3.....cgucgugggaaAacggggugccgaacu..... 1  
 Gi2\_10784227\_x3.....gacgucguggAaacacggggugccg..... 1  
 Gi1a\_5822872\_x3.....gAaacacggggugccgaac..... 1  
 Gi5\_8688542\_x3.uUcgaucggagacgucgugggaaacacg..... 1  
 Gi5\_8652710\_x3.....cgugggaaacacggggUAccgaac..... 1  
 Gi2\_10809664\_x3...gaucggagacgucgugggaaGca..... 1  
 Gi2\_10826632\_x3.....cgAcgugggaaacacgggg..... 1  
 Gi3\_27803858\_x3.....gucgugggaaGcacggggU..... 1  
 Gi1a\_5876032\_x3...Uaucggagacgucgugggaaacac..... 1  
 Gi1\_4052067\_x3.....ggaacacggAgugccgaacu..... 1  
 Gi2\_10761133\_x3.....aUacgucgugggaaacacggggU..... 1  
 Gi1a\_5867491\_x3.....gggaaUacggggugccgaacu..... 1  
 Gi3\_27865178\_x3.....gacNucgugggaaacacggggugccgaacu..... 1  
 Gi3\_27910703\_x3.....cAgagacgucgugggaaacacg..... 1  
 Gi3\_27883538\_x3.....gacgucgugggaaacacgggAugccg..... 1  
 Gi3\_27921569\_x3.....gacgucgugggaaacCcgggugccgaac..... 1  
 Gi3\_27930425\_x3...gaucggagacgucgugggaaacaUggggugc..... 1  
 Gi3\_27934391\_x3.....gugggaaacacggggUccgaac..... 1  
 Gi4\_545877\_x3.....gugggaaacacggggugcUgaacu..... 1  
 Gi3\_27871880\_x3.....gucgugUgaacacggggugccgaacu..... 1  
 Gi3\_27879404\_x3.....gUgacgucgugggaaacacggggugccgaacu..... 1  
 Gi2\_10729045\_x3.....ggaacacgCggugccgaac..... 1  
 Gi3\_27869366\_x3.....cggagacgucgugggaaCcacggggU..... 1  
 Gi2\_10825615\_x3...gaCcgagacgucgugggaaacac..... 1  
 Gi2\_10743364\_x3.....acgucgugggaaacacggggugcU..... 1  
 Gi1\_4071903\_x3.....ucgugggaaacacAgggugcc..... 1  
 Gi2\_10791397\_x3.....ucgugggaaacacggUgugccgaacu..... 1  
 Gi1a\_5876332\_x3.....gugggaaacacggggugccgUacu..... 1  
 Gi2\_10740979\_x3.....ggagacgucgugggaaacacggggCgccg..... 1  
 Gi1\_4063695\_x3.....ggUgacgucgugggaaacacggggugc..... 1  
 Gi1a\_5849782\_x3...gaucggagacgucgugggaaGcacggg..... 1  
 Gi2\_10736134\_x3.....gacgucgugggaaacacggggCgccgaac..... 1  
 Gi2\_10740928\_x3...aucggaAacgucgugggaaacacggggU..... 1  
 Gi3\_27933230\_x3.....Gcggagacgucgugggaaacacgg..... 1  
 Gi1a\_5854384\_x3...cgugggaaacaAgggugccgaacu..... 1  
 Gi3\_27797693\_x3.....cgugggaaacacggggugccC..... 1  
 Gi2\_10788781\_x3.....cgugggaaacGcggggugccgaa..... 1



Gi3\_27824561\_x3.....ucgugggaacacggggugccUaacu..... 1  
 Gi2\_10759966\_x3.....aucggagacgucgugggCacacg..... 1  
 Gi3\_27857159\_x3.....Ngggaacacggggugccgaa..... 1  
 Gi2\_10737043\_x3.....gucgugggaacaAggggugccgaacu..... 1  
 Gi2\_10798342\_x3.....gaucggCgacgucguggga..... 1  
 Gi3\_27893177\_x3.....cgugggaacacggggugAcgaa..... 1  
 Gi3\_27978533\_x3.....gucgugggaacacgggAu..... 1  
 Gi2\_10779586\_x3.....cgaucggaNacgucgugggaacacggggu..... 1  
 Gi3\_27896921\_x3.....cgucgugggCacacggggugc..... 1  
 Gi2\_10734847\_x3.....cgugggaacacggggugccA..... 1  
 Gi3\_27860228\_x3.....gacgucgugggaacacAggggugccgaac..... 1  
 Gi3\_27812168\_x3.....gggaacaGggggugccgaac..... 1  
 Gi2\_10744240\_x3.....acgucgugNgaacacgggggu..... 1  
 Gi3\_27835445\_x3.....gucgAgggaacacggggugccgaac..... 1  
 Gi2\_10782271\_x3.....cggagacgucgCgggaacacgggggu..... 1  
 Gi5\_8664815\_x3.....gucgugggaacaGggggugccgaacu..... 1  
 Gi1\_4060938\_x3.....gggNacacggggugccgaacu..... 1  
 Gi2\_10798510\_x3.....gucgCgggaacacggggugc..... 1  
 Gi2\_10736659\_x3.....acgucgugggaacCggggugccgaac..... 1  
 Gi1\_4088286\_x3.....ugggaacacAggggugccgaac..... 1  
 Gi5\_8659343\_x3.....gugggaacacgggUugccgaacu..... 1  
 Gi2\_10816447\_x3.....Ngaacacggggugccgaacu..... 1  
 Gi5\_8694095\_x3.....cUgagacgucgugggaacacg..... 1  
 Gi2\_10812775\_x3.....gaucggagacgCcgugggaacacggggugcc..... 1  
 Gi5\_8697707\_x3.....Cucgugggaacacggggugccgaac..... 1  
 Gi2\_10804090\_x3.....agacgCcgugggaacacggggugccgaacu..... 1  
 Gi1\_4070628\_x3.....ugggaacaUggggugccgaac..... 1  
 Gi2\_10801885\_x3.....cgugggaacacggggugA..... 1  
 Gi2\_10779910\_x3.....ggagacgucgugggaacacggggugUc..... 1  
 Gi2\_10738555\_x3.....ucguAggaacacggggugccg..... 1  
 Gi2\_10819327\_x3.....gacgucgugggaacacggggugccgGacu..... 1  
 Gi5\_8663657\_x3.....gggaacacggggugcGgaacu..... 1  
 Gi3\_27877019\_x3.....cgucgugggaacacgggguAccgaac..... 1  
 Gi1\_4054935\_x3.....ugggaacacggggugccgaacG..... 1  
 Gi2\_10736221\_x3.....gaacacgggUugccgaacu..... 1  
 Gi1\_4073469\_x3.....cgaucggagacgucgugggGacacggggu..... 1  
 Gi3\_27953948\_x3.....ugggaacacggAgugccg..... 1  
 Gi5\_8697425\_x3.....gucgugggaacacggggugccgaCc..... 1  
 Gl1a\_5871514\_x3.....gugggaacacggggCgcca..... 1  
 Gi3\_27852401\_x3.....gacgucgugggaacacggAgugccgaacu..... 1  
 Gi3\_27834959\_x3.....gacgucgugggaacacggggugccgaaU..... 1  
 Gi3\_27974006\_x3.....ucggagacgucgugggaacacgggg..... 0  
 Gi2\_10822171\_x3.....cgugggaacacggggugGcgaac..... 1  
 Gi2\_10806874\_x3.....gggaacaUggggugccgaac..... 1  
 Gi3\_27809537\_x3.....cAgagacgucgugggaacac..... 1  
 Gi3\_27802835\_x3.....gugggaacacUggggugccgaa..... 1  
 Gi2\_10734931\_x3.....gaucggagacgucgugggaacacgAggugc..... 1

|                                                          |   |
|----------------------------------------------------------|---|
| Gi1_4059642_x3.....ucgugAgaacacggggugcc.....             | 1 |
| Gi3_27860627_x3.....ggagacgucgugggaaacG.....             | 1 |
| Gi2_10791268_x3.....auNggagacgucgugggaaacacggggug.....   | 1 |
| Gi1_4088328_x3.....guggaaacacCgggugccgaacu.....          | 1 |
| Gi5_8663171_x3.....uggaaacacgggUugccgaac.....            | 1 |
| Gi3_27846491_x3.....uggaaacacgggCugccgaa.....            | 1 |
| Gi2_10729423_x3.....aucggagacgucGgggaacacggggugc.....    | 1 |
| Gi3_27896396_x3.....ucgugggaaacacAgggugc.....            | 1 |
| G1a_5848498_x3.....cgugggaaacacggggCgcc.....             | 1 |
| Gi2_10786291_x3.....Ggucgugggaaacacgggg.....             | 1 |
| Gi1_4078929_x3...gaucggagacgucgugggaaacacgggg.....       | 0 |
| Gi2_10824700_x3.....uggaaacacAgggugccga.....             | 1 |
| G1a_5834758_x3.....gUagacgucgugggaaacacg.....            | 1 |
| Gi1_4060617_x3.....cgucgugggUacacggggugccgaacu.....      | 1 |
| Gi1_4080093_x3.....cgugggUacacggggugccgaacu.....         | 1 |
| Gi3_27813257_x3.....gucgugggaaacacggggugccUaacu.....     | 1 |
| Gi2_10821991_x3.....gugNgaacacggggugccg.....             | 1 |
| Gi2_10734526_x3.....gucgugggaaacacggggugGcgaacu.....     | 1 |
| Gi3_27866933_x3.....gggaacacggggugccgaaG.....            | 1 |
| Gi2_10740643_x3.....aucggagacgucgugggaaAacgggg.....      | 1 |
| Gi5_8667788_x3.....ggaacacggggugccAaac.....              | 1 |
| Gi5_8715584_x3.....aucggagCcgucgugggaaacacgggg.....      | 1 |
| G1a_5829289_x3.....Uucgugggaaacacggggugccga.....         | 1 |
| Gi1_4059369_x3...cgaucggGgacgucgugggaaac.....            | 1 |
| Gi2_10814404_x3.....aucggagacgucAugggaaca.....           | 1 |
| Gi1_4078182_x3.....gaacGcggggugccgaac.....               | 1 |
| Gi1_4053834_x3.....aucggagacgCcgugggaaacacg.....         | 1 |
| Gi1_4054857_x3.....Ugugggaaacacggggugccg.....            | 1 |
| Gi3_27824768_x3.....Ngaacacggggugccgaac.....             | 1 |
| Gi1_4073040_x3.....Cugggaaacacggggugccg.....             | 1 |
| Gi3_27870071_x3...gaucggGgacgucgugggaaacacg.....         | 1 |
| Gi1_4085475_x3.....cgugggGacacggggugccgaac.....          | 1 |
| Gi3_27896612_x3.....gucgGgggaacacggggugcc.....           | 1 |
| Gi3_27846809_x3.....guggaaacacgggUugccgaac.....          | 1 |
| Gi2_10811731_x3.....cgugggcCcacggggugccga.....           | 1 |
| Gi2_10772344_x3.....gucgugggaaacacggggugAcgaacu.....     | 1 |
| Gi2_10808959_x3.....gucgugggaaacacgUggugccgaacu.....     | 1 |
| Gi5_8682353_x3.....gacgucgugggaaacGcggggugccgaacu.....   | 1 |
| G1a_5850379_x3.....uggaaacacggggugcUgaacu.....           | 1 |
| Gi5_8709788_x3.....cgugggaaacacGggggugccgaacu.....       | 1 |
| Gi3_27868268_x3.....cgucgugggaaacacggggAgc.....          | 1 |
| Gi5_8682854_x3.....ucgugggaaacacggggGgccgaac.....        | 1 |
| Gi3_27836657_x3.....cgucgugggaaacacggggugAcgaac.....     | 1 |
| Gi2_10740382_x3.....agacUucgugggaaacacggggugccgaacu..... | 1 |
| Gi3_27953765_x3.....agaUgucgugggaaacacggggugccgaac.....  | 1 |
| G1a_5853190_x3.....cgugggaaacacggggugccgaacA.....        | 1 |
| Gi3_27884267_x3.....cAucgugggaaacacggggugc.....          | 1 |

Gi3\_27878522\_x3.....cguggaacacgggCugccgaa..... 1  
 Gi3\_27901826\_x3.....gucguggaacCcgggugcc..... 1  
 Gi1\_4062510\_x3.....cgucguggaacacggggCgcc..... 1  
 Gi2\_10822813\_x3...gaucggagacgucguAgga..... 1  
 Gi2\_10825567\_x3.....gucguggaacacggggugccgaaA..... 1  
 Gi3\_27846416\_x3...cgauUggagacgucgugggaacacggg..... 1  
 Gi1\_4078347\_x3.....gucgugAgaacacggggugccgaacu..... 1  
 Gi1\_4062069\_x3.....gGgacgucguggaacacggggugc..... 1  
 Gi3\_27878099\_x3cGgcgaucggagacgucg..... 1  
 Gi5\_8667566\_x3.....cgucgGgggaacacggggugccgaacu..... 1  
 Gi2\_10793518\_x3...aucggagacgucgugggaGcacgg..... 1  
 Gi3\_27894638\_x3.....cgucguggaacacAggg..... 1  
 Gi5\_8706923\_x3.....gaacacggggugccGac..... 1  
 Gl1a\_5836210\_x3.....guggAaacacggggugccga..... 1  
 Gi3\_27923399\_x3...gaucggagaUgucguggaacacgggg..... 1  
 Gi2\_10822768\_x3.....guggaacNcgggugccgaacuu..... 1  
 Gi5\_8680430\_x3.....gggaacaAgggugccgaacu..... 1  
 Gi2\_10784359\_x3...acgucgCgggaacacggggugcc..... 1  
 Gi1\_4074774\_x3.....aAacgucguggaacacggggugccgaacu..... 1  
 Gi5\_8680856\_x3...aucggagacgucgugggaGcacgggg..... 1  
 Gi2\_10795690\_x3...agacgucgugggaCcacggggugc..... 1  
 Gi5\_8662361\_x3.....cgaguucguugggagcgcaggcaggA..... 1  
 Gi3\_27924971\_x3.....ggagacgucguggaacCcggggu..... 1  
 Gi3\_27908183\_x3.....acgucguUggaacacggggugccgaacu..... 1  
 Gi5\_8694332\_x3...aCgggagacgucguggaacacgg..... 1  
 Gi3\_27838670\_x3.....gggaacacggggGgccga..... 1  
 Gi2\_10783819\_x3.....gacgucguggaacacggggAgcc..... 1  
 Gi2\_10804882\_x3.....cgucguggaacacggggugccUacu..... 1  
 Gi3\_27848435\_x3...gagacgucgCgggaacacggggugccgaac..... 1  
 Gi3\_27878891\_x3cugcgaucNgagacgucg..... 1  
 Gi4\_550002\_x3.....Ggacgucguggaacacggggugcc..... 1  
 Gi1\_4079169\_x3.....gacgucguggaacacggggugAcgaacu..... 1  
 Gi5\_8702969\_x3.....Uguggaacacggggugccga..... 1  
 Gi2\_10746376\_x3...cggagacgucguAggaacacggggugcc..... 1  
 Gi3\_27948998\_x3.....Aucguggaacacggggug..... 1  
 Gi3\_27960152\_x3.....acgucgugNgaacacggg..... 1  
 Gi5\_8655326\_x3.....gCgggaacacggggugccgaacuu..... 1  
 Gi2\_10764997\_x3...auUggagacgucguggaacacgg..... 1  
 Gl1a\_5840086\_x3.....Ggucguggaacacggggugccgaacu..... 1  
 Gi3\_27861509\_x3.....uggaacacggggugccUaa..... 1  
 Gi3\_27851339\_x3...aucNgagacgucguggaacacggg..... 1  
 Gi2\_10738690\_x3.....ucguggaUcacggggugccgaacu..... 1  
 Gi2\_10814737\_x3...gaucggagacgucguggaacacggggAgcc..... 1  
 Gi2\_10740571\_x3.....gggaacacggggCgccgaa..... 1  
 Gi1\_4078923\_x3.....ucguggaacacggggugcGgaacu..... 1  
 Gi2\_10820890\_x3.....Naacacggggugccgaacu..... 1  
 Gi1\_4071504\_x3...auUggagacgucguggaacacggggugc..... 1

Gi1\_4081626\_x3.....agacgucgugggGacacggggugccgaacu..... 1  
G1a\_5847826\_x3.....uggaacacggAgugccgaacu..... 1  
G1a\_5842435\_x3.....Uagacgucgugggaacacg..... 1  
Gi3\_27900527\_x3...gUucggagacgucgugggaacacgggg..... 1  
G1a\_5870518\_x3.....Augggaacacggggugccgaac..... 1  
Gi3\_27979223\_x3.....ggUgacgucgugggaacacgg..... 1  
Gi3\_27924209\_x3.....ucgCgggaacacggggugc..... 1  
Gi3\_27820901\_x3.....acacggggugccgCacuu..... 1  
Gi2\_10736566\_x3.....gugggaaAacggggugccga..... 1  
Gi5\_8679866\_x3.....cgugggUacacggggugccgaac..... 1  
Gi3\_27848702\_x3.....cAucgugggaacacggggugccga..... 1  
Gi3\_27867692\_x3.....Gcgucgugggaacacggggugccgaa..... 1  
Gi3\_27849941\_x3.....acgucgugggaacacggggugccA..... 1  
Gi5\_8655539\_x3.ugcgaCcgagacgucgug..... 1  
Gi1\_4088157\_x3....aucggagacgCcgugggaacac..... 1  
Gi3\_27904814\_x3...cgaucggaNacgucgugggaacacggg..... 1  
Gi5\_8716988\_x3.....gggaacacgggAugccgaac..... 1  
Gi1\_4085787\_x3.....uggaacacgggUgugccgaacu..... 1  
Gi3\_27846413\_x3.....cgucgugggaacaAggggugcc..... 1  
Gi5\_8674031\_x3.....ucCugggaacacggggugccgaacu..... 1  
Gi2\_10784206\_x3.....acgucgugAgaacacggggugc..... 1  
Gi5\_8706596\_x3.....gaacacggggugccgaacuu..... 0  
G1a\_5858080\_x3.....Ugagacgucgugggaaca..... 1  
Gi5\_8694233\_x3.....gucguUggaacacggggugccgaacu..... 1  
Gi2\_10738600\_x3.....cgucgugggaCcacggggugcc..... 1  
Gi2\_10790446\_x3.....acgucgugggaUacggggugcc..... 1  
Gi3\_27970433\_x3.....gucguggCaacacggggugccgaacu..... 1  
Gi2\_10743385\_x3...gaucggagacgucgugggaacacggggugccgaacu..... 0  
Gi5\_8670410\_x3...auUggagacgucgugggaaca..... 1  
G1a\_5814793\_x3....aucggagGcgucgugggaacacggggg..... 1  
Gi3\_27814334\_x3.....gggaacCcggggugccgaa..... 1  
Gi2\_10815790\_x3.....agacgucgugggaacacggggGgcc..... 1  
Gi3\_27865130\_x3.....gugggaaUcggggugccgaa..... 1  
Gi4\_548895\_x3.....cgCgggaacacggggugccgaacu..... 1  
Gi3\_27831113\_x3.....gCgaacacggggugccga..... 1  
Gi5\_8700644\_x3.ugcgaucAgagacgucgug..... 1  
Gi2\_10798681\_x3.....ggaacacggggugccgaacuu..... 0  
Gi3\_27804263\_x3.....ucgugggaaUacggggugc..... 1  
Gi1\_4047867\_x3.....cgucgugggaacacggggugccAaacu..... 1  
Gi1\_4088820\_x3.....gUagacgucgugggaacacggggg..... 1  
Gi2\_10798870\_x3...gaucggagaUgucgugggaacacggg..... 1  
Gi3\_27937094\_x3...Ggaucggagacgucgugggaacacggg..... 1  
Gi1\_4078362\_x3.....Cacgucgugggaacacggggugccg..... 1  
G1a\_5859400\_x3....aucggagacguUgugggaacacggggg..... 1  
Gi1\_4052421\_x3....aucggagacgucgugggaacacA..... 1  
Gi3\_27835448\_x3.....gucgugggNacacggggugc..... 1  
Gi3\_27957062\_x3.....gucgugggaGcacggggugccga..... 1

|                                                              |   |
|--------------------------------------------------------------|---|
| Gi2_10749709_x3.....ucgugggaacacggggugcGgaacu.....           | 1 |
| Gi5_8676833_x3.....cgucgAgggaacacggggugccgaacu.....          | 1 |
| Gi5_8715878_x3.....gucgugggaacaAggggugccgaacu.....           | 1 |
| Gi3_27884156_x3.....agacgucgugggaacacggggugc.....            | 0 |
| Gi3_27932672_x3.....gauUggagacgucgugggaacac.....             | 1 |
| Gi1_4081698_x3.....ggagGcgucgugggaacacggggugcc.....          | 1 |
| Gi5_8677709_x3.....gucgugggaacacggggugccgaacG.....           | 1 |
| Gi2_10802134_x3.....gagacgucgugggaacacAgggugcc.....          | 1 |
| Gi3_27946334_x3.....gaucggagacgucgugggaacacggggugccgaac..... | 0 |
| Gi5_8715218_x3.....ggaacacggggugccUaacu.....                 | 1 |
| Gi2_10750723_x3.....gauUggagacgucgugggaacacgggggu.....       | 1 |
| Gi3_27821141_x3.....gugggaacacggCgugccg.....                 | 1 |
| Gi1_4074405_x3.....ggaacacAgggugccgaac.....                  | 1 |
| G1a_5849527_x3.....ucggagacgucgugggGacacggg.....             | 1 |
| Gi1_4049751_x3.....gucgugggaacacggggGgcc.....                | 1 |
| Gi1_4084500_x3.....cgucgugggaacacggggugccU.....              | 1 |
| Gi2_10753072_x3.....gGcgugggaacacgggggu.....                 | 1 |
| Gi3_27916661_x3.....ggaacacggggugccgaa.....                  | 1 |
| Gi1_4060836_x3.....aacacggUgugccgaacu.....                   | 1 |
| Gi2_10813960_x3.....ucguUggaacacggggugc.....                 | 1 |
| Gi2_10762645_x3.....aucggagacgucgugggaacaAg.....             | 1 |
| Gi2_10805320_x3.....ucggGgacgucgugggaacacggggugccga.....     | 1 |
| Gi3_27804023_x3.....ggagacgucAugggaacacggggugcc.....         | 1 |
| Gi1_4080687_x3.....gacgucgugggaacacggggugccgGacu.....        | 1 |
| Gi3_27871544_x3.....ucggagacgucgugggaGcacggg.....            | 1 |
| Gi3_27870731_x3.....cggagacgucgugggaacUcggggugcc.....        | 1 |
| Gi3_27896831_x3.....cgucgugggaUacggggugc.....                | 1 |
| Gi3_27958514_x3.....gucgCgggaacacggggugccga.....             | 1 |
| Gi2_10791940_x3.....Acgugggaacacggggugccgaa.....             | 1 |
| Gi3_27860576_x3.....gugggaacacgggCugccga.....                | 1 |
| Gi5_8662922_x3.....Uucgugggaacacggggugc.....                 | 1 |
| Gi2_10729795_x3.....cgugAgaacacggggugc.....                  | 1 |
| Gi1_4072599_x3.....Ggacgucgugggaacacggg.....                 | 1 |
| Gi2_10731823_x3.....cgucguggNaacacggggug.....                | 1 |
| Gi4_550683_x3.....Gcgucgugggaacacggggugccgaacu.....          | 1 |
| Gi5_8671646_x3.....aucggagacgucgCgggaacacgg.....             | 1 |
| Gi3_27904043_x3.....aucggagGcgucguggga.....                  | 1 |
| G1a_5857465_x3.....gGcgugggaacacggggugccgaac.....            | 1 |
| Gi2_10784653_x3.....ucgugggaacacggggugUcg.....               | 1 |
| Gi2_10826827_x3.....ucgCgggaacacggggugc.....                 | 1 |
| Gi3_27949763_x3.....aucggagacgucgugggaacGcggggugc.....       | 1 |
| Gi3_27933566_x3.....gacguGgugggaacacggggugccgaacu.....       | 1 |
| Gi1_4074330_x3.....cgAgggaacacggggugccgaac.....              | 1 |
| Gi3_27942215_x3.....ggaacacUgggugccgaac.....                 | 1 |
| Gi2_10801654_x3.....agacgucgugggaacacggggugUcgaacu.....      | 1 |
| G1a_5870446_x3.....cUgagacgucgugggaacacggg.....              | 1 |
| Gi2_10758391_x3.....aacacCgggugccgaacu.....                  | 1 |

|                                                         |   |
|---------------------------------------------------------|---|
| Gi2_10746226_x3.....ucgugggaacacggggugccga.....         | 0 |
| Gi3_27958469_x3.....aucggagacUucgugggaacacggggugcc..... | 1 |
| Gi3_27861284_x3.....aucggaAacgucgugggaacacgg.....       | 1 |
| Gi3_27866273_x3.....gaucggagGcgucgugggaacacgg.....      | 1 |
| Gi2_10813285_x3.....aucggagUcgucgugggaaca.....          | 1 |
| Gi3_27975020_x3.....gacgucguNggaacacggggg.....          | 1 |
| Gi1_4069440_x3.....aucgUagacgucgugggaacacg.....         | 1 |
| Gi3_27861347_x3.....acgucgugCgaacacggggugccgaacu.....   | 1 |
| Gi3_27863897_x3.....aucggagCcgucgugggaacacggggg.....    | 1 |
| Gi2_10784431_x3.....aucgAagacgucgugggaaca.....          | 1 |
| Gi2_10817935_x3.....ucggagacgucGgggaacacggggugcc.....   | 1 |
| Gi3_27862712_x3.....aucggagacgucgugggaacacggggUcc.....  | 1 |
| Gi3_27948041_x3.....ugggCacacggggugccgaa.....           | 1 |
| Gi2_10825546_x3.....gaucggagacgucgugggGacacggg.....     | 1 |
| Gi3_27828755_x3.....aucggagacgucguggAaacac.....         | 1 |
| Gi2_10796512_x3.....aucggagacgucgugggaacCcggg.....      | 1 |
| Gi3_27885170_x3.....acgucgugggaacacggggugccgaaA.....    | 1 |
| Gi1_4078674_x3.....aucggagaNgucgugggaacacgg.....        | 1 |
| Gi3_27928865_x3.....cgugggaacacggggugAcga.....          | 1 |
| Gi3_27905858_x3.....cgucgugggaacacAgggugccg.....        | 1 |
| Gi5_8662676_x3.....gGcgucgugggaacacggggugccgaac.....    | 1 |
| Gi1_4088730_x3.....aacacggggugGcgaacu.....              | 1 |
| Gi2_10780180_x3.....cggagCcgucgugggaacacggggugcc.....   | 1 |
| Gi2_10763680_x3.....gaucUgagacgucgugggaaca.....         | 1 |
| Gi5_8689850_x3.....agacgucgNgggaacacggggugccgaac.....   | 1 |
| Gi3_27809156_x3.....Aagacgucgugggaacacggggg.....        | 1 |
| Gi2_10759915_x3.....gaucggagacgucgugggaAac.....         | 1 |
| Gi2_10771657_x3.....cguggAaacacggggugc.....             | 1 |
| Gi1_4061133_x3.....gugggaacacggggugccgaCc.....          | 1 |
| Gi2_10792939_x3.....agacgucgNgggaacacggggugc.....       | 1 |
| Gi3_27958685_x3...cUaucggagacgucgugggaacacggggugcc..... | 1 |
| Gi4_550260_x3.....aucggagacgucgugggaacac.....           | 0 |
| Gi1_4069623_x3.....Gggagacgucgugggaacacggggugc.....     | 1 |
| Gi2_10772284_x3.....ucgugggaacaAggggugccgaacu.....      | 1 |
| Gi1a_5816455_x3.....aucggagacgucgugggaacacA.....        | 1 |
| Gi3_27809198_x3.....cgucguggAaacacggggugccgaac.....     | 1 |
| Gi3_27901088_x3.....ucguggCaacacggggugccgaacu.....      | 1 |
| Gi5_8651819_x3.....ggaacacgAggugccgaac.....             | 1 |
| Gi5_8715548_x3.....gugAgaacacggggugccgaacuu.....        | 1 |
| Gi3_27848738_x3.....gacgucAugggaacacggggugccgaac.....   | 1 |
| Gi3_27973067_x3.....gaucggagacgucgugggaGcacgg.....      | 1 |
| Gi5_8651492_x3.....gucgugggaacacggggugcAgaacu.....      | 1 |
| Gi2_10797103_x3.....gaCcgagacgucgugggaaca.....          | 1 |
| Gi2_10784905_x3.....ucguUggaacacggggugccg.....          | 1 |
| Gi1_4070679_x3.....uAggaacacggggugccga.....             | 1 |
| Gi2_10794790_x3.....gugggaacacggggugccgaacuA.....       | 1 |
| Gi1_4075935_x3.....gggaacacggggGgccgaacu.....           | 1 |

|                                                          |   |
|----------------------------------------------------------|---|
| Gi1_5873899_x3.....aucggagacgucgugggaaacacggggguAcc..... | 1 |
| Gi2_10759261_x3.....acgucgugggaaacacggggugccgCac.....    | 1 |
| Gi3_27914399_x3.....cggagacgucgugggaaacCgggg.....        | 1 |
| Gi1_4055781_x3.....cggagacgucgugggaaacacggggugccga.....  | 0 |
| Gi1_5833633_x3.....gugggaGcacggggugccga.....             | 1 |
| Gi3_27818456_x3.....gaucAgagacgucgugggaaacacggg.....     | 1 |
| Gi2_10780711_x3.....ggagacgucgugggaaacacggggugcU.....    | 1 |
| Gi5_8716886_x3.....agacguUgugggaacacggggugccgaacu.....   | 1 |
| Gi3_27803915_x3.....acgucgugggaaacacggggAgccgaac.....    | 1 |
| Gi3_27972755_x3.....gucgugCgaacacggggugccgaacu.....      | 1 |
| Gi3_27913940_x3.....aCggagacgucgugggaaacac.....          | 1 |
| Gi4_545679_x3.....cgugggaacacggggugcc.....               | 0 |
| Gi2_10828039_x3.....gaucggagacgucgCgggaacacggg.....      | 1 |
| Gi3_27806324_x3.....cgugggaacacggggAgc.....              | 1 |
| Gi3_27841604_x3.Ggcgaucggagacgucguggg.....               | 1 |
| Gi5_8709332_x3.....ucgugggaacacggggugccgCac.....         | 1 |
| Gi2_10770793_x3.....ucgugggaacacgggAgugc.....            | 1 |
| Gi3_27907781_x3.....ggagaUgucgugggaaacacggggugcc.....    | 1 |
| Gi3_27962993_x3.....cCgagacgucgugggaaacacgggggu.....     | 1 |
| Gi3_27879392_x3.....gaacacggggUaccgaac.....              | 1 |
| Gi2_10800268_x3.....cgugggaacacggggugcU.....             | 1 |
| Gi2_10808542_x3.....gacgucguNggaacacggggugcc.....        | 1 |
| Gi1_4079571_x3.....gaacacggggugccgaaAu.....              | 1 |
| Gi3_27851591_x3.....aucggagacgucgugggGacacggggugc.....   | 1 |
| Gi2_10817542_x3.....cgucgugggaaacacggggugcUg.....        | 1 |
| Gi5_8673617_x3.....cgugggCacacggggugccgaac.....          | 1 |
| Gi2_10827943_x3.....gaacacggggugccgaCc.....              | 1 |
| Gi2_10808941_x3.....Agggaacacggggugccgaa.....            | 1 |
| Gi1_4064226_x3.....aucggagacgucgugggCcacggggugcc.....    | 1 |
| Gi2_10811815_x3.....Cacgucgugggaaacacgggg.....           | 1 |
| Gi2_10759816_x3.....gaacacggUgugccgaacu.....             | 1 |
| Gi5_8652890_x3.....gugggaacacggAgugccga.....             | 1 |
| Gi3_27970514_x3.....aAgucgugggaaacacggggugccgaacu.....   | 1 |
| Gi2_10759159_x3.....gaucggagacgucgugggaaacacggggCgc..... | 1 |
| Gi3_27797090_x3cugcgaucggagGcgucg.....                   | 1 |
| Gi3_27799364_x3.....Agugggaacacggggugccg.....            | 1 |
| Gi2_10730434_x3.....gugggaacacggggAgccga.....            | 1 |
| Gi4_550485_x3.....guAggaacacggggugccgaacu.....           | 1 |
| Gi2_10732903_x3.....aCacgucgugggaaacacggggugc.....       | 1 |
| Gi5_8668460_x3.....cgucgugggaaacacggggugccgUacu.....     | 1 |
| Gi3_27849020_x3.....Ngggaacacggggugccgaacu.....          | 1 |
| Gi2_10803469_x3.....gaucAgagacgucgugggaaacacggggug.....  | 1 |
| Gi1_5818777_x3..cUaucggagacgucgugggaaacag.....           | 1 |
| Gi2_10826707_x3.....ucguggCaacacggggugccgaacu.....       | 1 |
| Gi2_10748743_x3.....ugggaacacggggugccgCacuu.....         | 1 |
| Gi2_10750867_x3.....ggaGcacggggugccgaa.....              | 1 |
| Gi5_8681660_x3.....gggaacCggggugccgaac.....              | 1 |

|                                                           |   |
|-----------------------------------------------------------|---|
| Gi1_4073253_x3.....acgucgugggaacacggggugcUgaacu.....      | 1 |
| Gi1_4071018_x3.....ggagacgucgugggaacacggggugcAg.....      | 1 |
| Gi3_27846662_x3.....gggaacacggggugccgUa.....              | 1 |
| Gi3_27919037_x3.....gaucggagacgucguAggaacacgggg.....      | 1 |
| Gi1_4088802_x3.....Ugagacgucgugggaacacggggugc.....        | 1 |
| Gi3_27892274_x3.....gaCcgagacgucgugggaacacgg.....         | 1 |
| Gi3_27822065_x3.....agacAucgugggaacacggggugccgaacu.....   | 1 |
| G1a_5836057_x3.....ugAgaacacggggugccgaacu.....            | 1 |
| Gi1_4059972_x3.....Gcggagacgucgugggaacacggg.....          | 1 |
| Gi2_10812430_x3.....cgugggaacacgggAugccgaac.....          | 1 |
| Gi2_10778269_x3.....cgucgugggaacacggggCg.....             | 1 |
| Gi5_8684549_x3.....ugggaacacgggAugccgaac.....             | 1 |
| Gi2_10734352_x3.....Ccgucgugggaacacggggugccgaacu.....     | 1 |
| Gi5_8655449_x3.....gacgucguNggaacacggggugccgaacu.....     | 1 |
| G1a_5826928_x3.....aucgAagacgucgugggaacacggggug.....      | 1 |
| Gi3_27942146_x3.....cgugggaacacggggugccgaac.....          | 1 |
| Gi1_4081848_x3.....ucgugggaacacggggCgccg.....             | 1 |
| Gi3_27844175_x3.....gucgGgggaacacggggugc.....             | 1 |
| Gi2_10798300_x3.....gacgucgugggaacacggggugcU.....         | 1 |
| Gi5_8711654_x3.....cggagacgucgugggaacacggggugccgaacu..... | 0 |
| Gi3_28085984_x2.....gaucggagacgucgugggaaUacggggu.....     | 1 |
| Gi2_10888657_x2.....agacgucgugggaCcacggggugccga.....      | 1 |
| Gi2_10900213_x2.....gugggaacaUggggugccgaacuu.....         | 1 |
| Gi3_28172580_x2.....gucgugggUacacggggugcc.....            | 1 |
| Gi3_28249038_x2.....ucggagacgucguAggaacacgggg.....        | 1 |
| Gi5_8808971_x2.....ucggagacgucgugggaaAacg.....            | 1 |
| Gi3_28179206_x2.....aucAgagacgucguggga.....               | 1 |
| Gi3_28206988_x2.....Gcgcgugggaacacggggugccga.....         | 1 |
| Gi2_10955723_x2.....cgucgugggaacaAggggugccgaacu.....      | 1 |
| Gi2_10896615_x2.....gucAugggaacacggggugc.....             | 1 |
| Gi5_8778097_x2.....ugUgaacacggggugccgaa.....              | 1 |
| Gi5_8818629_x2.....gacgucgugggaacacggggugAcgaacu.....     | 1 |
| Gi3_28212936_x2.....ggagacgucgugggGacacggggugccgaac.....  | 1 |
| Gi3_28073474_x2.....gaUgucgugggaacacgggg.....             | 1 |
| Gi2_10949177_x2.....acgucgugggaacaUggggugccgaacu.....     | 1 |
| Gi5_8724763_x2.....gagacgucgugggaacacggggCgccgaacu.....   | 1 |
| Gi3_28003690_x2.....gacgucAugggaacacggggugccgaacu.....    | 1 |
| Gi1_4099585_x2.....cgugggaacaUggggugccgaacuu.....         | 1 |
| Gi5_8821819_x2.....aCcgagacgucgugggaacacgggg.....         | 1 |
| Gi4_561938_x2.....uUggaacacggggugccgaac.....              | 1 |
| Gi1_4119201_x2.....aucggagacgucgugggaacGcggggugc.....     | 1 |
| Gi3_28000514_x2.....ucguggAaacacggggugccg.....            | 1 |
| Gi2_10885701_x2.....cgucgugggaacacggggugccgaG.....        | 1 |
| Gi1_4134665_x2.....ggagacgucgugAgaacacggggugcc.....       | 1 |
| Gi3_27998130_x2.....gaAcggagacgucgugggaacacg.....         | 1 |
| Gi5_8735023_x2.....ggaacacggggugccgaCc.....               | 1 |
| Gi3_28099836_x2.....cguNgugggaacacggggugcc.....           | 1 |



|                                                          |   |
|----------------------------------------------------------|---|
| Gi2_10917105_x2.....cgugggaacacgggUugc.....              | 1 |
| Gi3_28195344_x2.....cgucgGgggaacacggggugccgaa.....       | 1 |
| Gi1_4126067_x2.....Agaacacggggugccgaa.....               | 1 |
| Gi2_10878159_x2.....ggUgacgucgugggaacacggg.....          | 1 |
| Gi1_4118323_x2.....cggagacgucgugggaacacgggAugcc.....     | 1 |
| Gi1_4146213_x2.....aucggagacgucgugggaac.....             | 0 |
| Gi1a_5975334_x2...cUaucggagacgucgugggaacacggggugc.....   | 1 |
| Gi2_10839501_x2.....agacgucgugggCacacggggugc.....        | 1 |
| Gi3_28170888_x2.....cgugggaacUcggggugcc.....             | 1 |
| Gi3_28139918_x2.....acgucgugggaacacggggugccgaacG.....    | 1 |
| Gi1_4098497_x2.....gacgucgugggaacacggggAgccgaacu.....    | 1 |
| Gi3_28253166_x2.....gggaacacggggugccUaa.....             | 1 |
| Gi5_8825251_x2.....agacgucgugggaacacgAggugccgaac.....    | 1 |
| Gi2_10926955_x2.....cgucgugggaacacgggAugccga.....        | 1 |
| Gi3_28120314_x2.....agacgucgugggaGcacggggugccga.....     | 1 |
| Gi2_10841517_x2...Aaucggagacgucgugggaacacg.....          | 1 |
| Gi3_28249076_x2.....cgucgugggaacacggggugcUga.....        | 1 |
| Gi2_10916803_x2.....aucggagacgucguAggaacacggggugcc.....  | 1 |
| Gi2_10911117_x2.....gacgucgugggaacacggggugUc.....        | 1 |
| Gi2_10938713_x2.....cgucgugggaacacggggCgccgaac.....      | 1 |
| Gi3_28075726_x2...aucggagacgucgugggaacacggggAgc.....     | 1 |
| Gi3_28048812_x2.....acgucgugggaacacgAggugccgaac.....     | 1 |
| Gi5_8789041_x2.....gagacguAguggggaacacggggugccgaacu..... | 1 |
| Gi2_10876289_x2.....ucgugggaacacgUggugccgaacu.....       | 1 |
| Gi1_4137465_x2.....aUacgucgugggaacacggggugccg.....       | 1 |
| Gi1_4091979_x2.....gugggaacacgAggugccga.....             | 1 |
| Gi1_4145523_x2.....gugggaacacgggAugccgaac.....           | 1 |
| Gi5_8801087_x2.....Aucgugggaacacggggugccgaac.....        | 1 |
| Gi1a_5921982_x2...gaucUgagacgucgugggaa.....              | 1 |
| Gi2_10844345_x2.....cAgagacgucgugggaacacggggu.....       | 1 |
| Gi3_28112124_x2.....ggagacgucgCgggaacacggggu.....        | 1 |
| Gi3_28200934_x2...gaucgAagacgucgugggaacac.....           | 1 |
| Gi1_4113635_x2.....ucgugggaacacggggugcUgaac.....         | 1 |
| Gi2_10939365_x2.....ucggagacgucgugggaacacggg.....        | 0 |
| Gi3_28225326_x2.....gacgucgugggaGcacgg.....              | 1 |
| Gi2_10958593_x2.....ucgugggaacCcggggugccg.....           | 1 |
| Gi3_28089504_x2...gaucggaAacgucgugggaacacggggu.....      | 1 |
| Gi3_28218064_x2.....uUgugggaacacggggugccg.....           | 1 |
| Gi3_28082188_x2.....gacgGcgugggaacacggggugccgaacu.....   | 1 |
| Gi2_10868369_x2.....gugggaacacggggugccgC.....            | 1 |
| Gi1_4127209_x2.....cggagacgucgugggaacacggggCgc.....      | 1 |
| Gi1_4109685_x2.....cgugggGacacggggugccgaacuu.....        | 1 |
| Gi2_10907137_x2...aucggagacgucgugggaacacgggCu.....       | 1 |
| Gi4_557542_x2.....Aggaacacggggugccgaacu.....             | 1 |
| Gi2_10984739_x2...aucggagacgucgugggaacGacggggugcc.....   | 1 |
| Gi3_28137172_x2.....gAgaacacggggugccga.....              | 1 |
| Gi5_8817069_x2.....agacgucgugggGacacggggugccgaac.....    | 1 |

|                                                           |   |
|-----------------------------------------------------------|---|
| Gi5_8805019_x2.....gaacacgAggugccgaac.....                | 1 |
| Gi5_8774857_x2....gGucggagacgucguggaacaacg.....           | 1 |
| Gi5_8749177_x2.....gggaacacgggCugccgaacu.....             | 1 |
| Gl1a_5880660_x2.....cgugggaGcacggggugcc.....              | 1 |
| Gi3_28215254_x2.....ugggaacacgggguCccg.....               | 1 |
| Gi2_10968607_x2...cUaucggagacgucgugggaacacggggugcc.....   | 1 |
| Gi2_10922909_x2...gaucggagacgucgugAgaac.....              | 1 |
| Gi2_10844861_x2.....ggAaacacggggugccgaa.....              | 1 |
| Gi3_27992908_x2.....gacgucguggaacaacgAggugccgaacu.....    | 1 |
| Gi5_8718753_x2.....Aagacgucguggaacaacg.....               | 1 |
| Gi2_10870583_x2.....gacgucguggaacaUggggugccg.....         | 1 |
| Gi1_4131159_x2.....agacgucgNgggaacacgggg.....             | 1 |
| Gi2_10987005_x2...gaucggagacgucguggaacaacggAgu.....       | 1 |
| Gi2_10884789_x2.....cguAgugggaacacggggugccgaa.....        | 1 |
| Gi3_28032234_x2...cgaCcgagacgucguggg.....                 | 1 |
| Gl1a_5963674_x2.....guAggaacacggggugcc.....               | 1 |
| Gi3_28041280_x2.....gagaUgucguggaacaacggggugccgaacu.....  | 1 |
| Gi3_28109972_x2.....ggagacgucgCgggaacacggg.....           | 1 |
| Gi3_28024354_x2.....gggaacaAggggugccgaa.....              | 1 |
| Gi1_4144845_x2....aucggagacgucgugggCacacg.....            | 1 |
| Gi3_28197746_x2...cgauGggagacgucguggaacaacg.....          | 1 |
| Gi2_10980135_x2.....cguUgugggaacacggggugccgaac.....       | 1 |
| Gi1_4104639_x2.....ucgugggaacacggggugcGgaac.....          | 1 |
| Gi3_28060804_x2.....cCucgugggaacacggggugccgaa.....        | 1 |
| Gi3_28123866_x2.....gacgucgugggaCcacggggugccgaac.....     | 1 |
| Gl1a_5931366_x2.....aacGcggggugccgaacu.....               | 1 |
| Gi3_28214290_x2.....cguCggaacacggggugccgaac.....          | 1 |
| Gi2_10836033_x2.ugcgauccggagacgucgugggG.....              | 1 |
| Gi2_10909949_x2.....gugUgaacacggggugccg.....              | 1 |
| Gi5_8781389_x2.....agacgucguggaacaacggggG.....            | 1 |
| Gi3_28103238_x2.....gugCgaacacggggugcc.....               | 1 |
| Gi1_4157847_x2.....gucgugggaacaacggggCg.....              | 1 |
| Gi3_28248788_x2...gaucAgagacgucguggaacaacggggugcc.....    | 1 |
| Gi1_4101931_x2.....cgugggaacacggggguAccgaacu.....         | 1 |
| Gi1_4149687_x2.....guCggaacacggggugccgaacu.....           | 1 |
| Gi3_27981546_x2.....gugggaaGacggggugccgaa.....            | 1 |
| Gi3_28116012_x2...auGggagacgucgugggaacaacggg.....         | 1 |
| Gi2_10881011_x2.....acgucgugggaacaacggggugccgaCcu.....    | 1 |
| Gi2_10896975_x2.....gucgugggaCcacggggugccgaacu.....       | 1 |
| Gi2_10845795_x2....ucggagacgucguggaacaacggggugccgaac..... | 0 |
| Gi3_28140428_x2....aucggagCcgucgugggaacaacgggg.....       | 1 |
| Gi1_4093351_x2.....gggaacacggggugcAgaacu.....             | 1 |
| Gi2_10936447_x2.....acgucCugggaacaacggggugcc.....         | 1 |
| Gi5_8718759_x2.....guggAaacacggggugccgaacu.....           | 1 |
| Gi2_10918017_x2....aCgggagacgucgugggaacaacgggg.....       | 1 |
| Gi5_8824179_x2.....gacgucgugggaacaGggggugccgaacu.....     | 1 |
| Gi2_10877497_x2.....gggaacacggggugUcgaa.....              | 1 |

Gi3\_28145044\_x2...cgaucggagacgucgugggaacacggggGgc..... 1  
 Gi1\_4126641\_x2.....gUagacgucgugggaacacggggugc..... 1  
 Gi3\_27990414\_x2.....ggagacgucguggAaacacggg..... 1  
 Gi5\_8765851\_x2.....gggaacacggggugccgaG..... 1  
 Gi2\_10841959\_x2.....gucguCggaacacggggugccgaacu..... 1  
 Gi4\_555934\_x2...gaucggagacgucgugggaacac..... 0  
 Gi3\_28074972\_x2.....ggagacgucgugggaacacggggCgccg..... 1  
 Gi2\_10961947\_x2.....gUcgucgugggaacacggggugcc..... 1  
 Gi2\_10861681\_x2.....aucggagacgucAugggaacac..... 1  
 Gi2\_10917993\_x2.....ucggagacgucUugggaacacggggugccgaacu..... 1  
 Gi5\_8781633\_x2.....cacgUggugccgaacuuu..... 1  
 Gi2\_10951503\_x2.....Acggagacgucgugggaac..... 1  
 Gi5\_8824367\_x2.....gugggaacacggggugAcga..... 1  
 Gi3\_28205242\_x2.....aucggagacguGgugggaacacg..... 1  
 Gi1\_4120017\_x2.....aacacUgggugccgaacu..... 1  
 Gi5\_8768611\_x2.....gugggaacNcggggugccgaacuu..... 1  
 Gi2\_10830487\_x2.....gagacgucNugggaacacggggug..... 1  
 Gl1\_5889030\_x2.....aucggagacgucguggAa..... 1  
 Gi2\_10837949\_x2.....gggaacacAgggugccgaa..... 1  
 Gi2\_10868637\_x2.....agacgucgugggaacCcggggugc..... 1  
 Gi3\_28148422\_x2.....acgucgugNgaacacggggugccg..... 1  
 Gi3\_28229724\_x2.....ggagacgucgugggaGcacggg..... 1  
 Gi5\_8799175\_x2.....gaacacggNgugccgaac..... 1  
 Gi3\_28242634\_x2.....aucggagacgucgugggaacaUggggugcc..... 1  
 Gi3\_28014496\_x2.....aucggagacgucgugggaacacUggg..... 1  
 Gi4\_561274\_x2.....gggaGcacggggugccgaacu..... 1  
 Gi3\_28196346\_x2.....gucgugggaacaUggggugcc..... 1  
 Gl1\_5980830\_x2.....gacgucgugggaacaUggggg..... 1  
 Gi3\_28003692\_x2.....ggagGcgucgugggaacacggggugccgaac..... 1  
 Gi2\_10959841\_x2.....gucgugggaacaUggggugcc..... 1  
 Gi2\_10959083\_x2.....gaUacgucgugggaacacggggugccg..... 1  
 Gi3\_28055278\_x2.....Cagacgucgugggaacacggggugccgaacu..... 1  
 Gi4\_564222\_x2.....cgugggaacacggggCgccgaacu..... 1  
 Gi5\_8761925\_x2.....cgUagacgucgugggaacacgg..... 1  
 Gi5\_8796891\_x2.....aucggagacguUgugggaacacgg..... 1  
 Gi2\_10936333\_x2.....gggaacaGggggugccgaac..... 1  
 Gi2\_10843569\_x2.....gggaaGacggggugccgaacu..... 1  
 Gi5\_8724131\_x2.....ugggaacacggggugccgaacuCu..... 1  
 Gi3\_28155426\_x2.....cgucgugggaacacggAgugccg..... 1  
 Gi1\_4114881\_x2.....cgugggaacacggggAuAccgaac..... 1  
 Gi2\_10951987\_x2.....cgucgugggaacacggAgugccga..... 1  
 Gi3\_28010504\_x2.....cgucgGgggaacacggggugccgaac..... 1  
 Gi2\_10911931\_x2.....cAucgugggaacacggggugc..... 1  
 Gi5\_8808355\_x2.....cacggggugccgaacuCu..... 1  
 Gi2\_10872375\_x2.....ggagUcgucgugggaacacggggugc..... 1  
 Gi5\_8804041\_x2.....gugggaacacggggGgccgaacuuu..... 1  
 Gi3\_27990322\_x2.....cgAcgugggaacacgggg..... 1

Gi3\_28074110\_x2.....ucgugggaacacggggugccGg..... 1  
Gi3\_28069094\_x2.....guNgugggaacacggggugccgaacu..... 1  
Gi2\_10830543\_x2.Cgcgaucggagacgucgugggaacacg..... 1  
G1a\_5907020\_x2.....gugggaacacUgggugccgaacu..... 1  
Gi5\_8787669\_x2.....gugggaacacggAgugccgaacu..... 1  
Gi1\_4095981\_x2.....Aucgugggaacacggggugcc..... 1  
Gi1\_4121715\_x2.....gGacacggggugccgaacu..... 1  
Gi1\_4128643\_x2.....acgucgugggaacacggggugccgaaUu..... 1  
Gi1\_4131707\_x2.....gacgCcgugggaacacggggugccgaacu..... 1  
Gi2\_10980771\_x2.....cgucgugggaGcacggggugccgaa..... 1  
G1a\_5887628\_x2.....aacacggggugcAgaacu..... 1  
Gi3\_28026510\_x2...gaucggagacgucgugggaGcacggggugcc..... 1  
Gi5\_8789333\_x2...gaucggagacgucguAggaacacgg..... 1  
Gi3\_28132138\_x2.....acgucgugggaacacggCgugccgaacu..... 1  
Gi5\_8760357\_x2...aucggagacgucgugGaaacacg..... 1  
Gi5\_8721055\_x2.....cgucguggNaacacggggugccga..... 1  
Gi3\_27986010\_x2...aucggagacgucguCggaacacggg..... 1  
Gi5\_8802355\_x2.....acCucgugggaacacggggugccgaacu..... 1  
Gi3\_28161648\_x2...Ggaucggagacgucgugg..... 1  
Gi2\_10955719\_x2.....gUgacgucgugggaacacggggugccg..... 1  
G1a\_5926390\_x2.....ucgugggaacacggggugccGac..... 1  
Gi3\_27988690\_x2.....acacggggCgccgaacu..... 1  
Gi2\_10925505\_x2.....Ccgugggaacacggggugccg..... 1  
Gi2\_10929051\_x2.....Gcgucgugggaacacggggugccg..... 1  
Gi5\_8736309\_x2...gGucggagacgucgugggaacacggg..... 1  
Gi1\_4120365\_x2.....agacgucguAggaacacggggugccgaacu..... 1  
Gi3\_28054708\_x2.....cgucgugggaacaUggggg..... 1  
Gi1\_4102319\_x2.....cCugggaacacggggugccgaac..... 1  
Gi2\_10836449\_x2...cgaucggaNacgucgugggaacacggg..... 1  
Gi5\_8815239\_x2.....gugggaacacggggugccAa..... 1  
Gi1\_4156689\_x2.....acgucgugggCacacggggugcc..... 1  
Gi5\_8763595\_x2.....gucCugggaacacggggugccgaacu..... 1  
Gi2\_10857583\_x2.....gucgugggaacacggggGgccc..... 1  
Gi3\_28239506\_x2.....cgucgugggaacacggUgugccg..... 1  
Gi2\_10958321\_x2.....gCgaacacggggugccgaa..... 1  
Gi1\_4091075\_x2.....gagacgucguAggaacacggggugcc..... 1  
Gi1\_4107425\_x2...gaucggagacgucgugggaacacgggU..... 1  
Gi3\_28217356\_x2.....gUgacgucgugggaacacggggugccgaac..... 1  
Gi2\_10858999\_x2.....acgucCugggaacacggggugccgaacu..... 1  
Gi2\_10859905\_x2.....ugggaacacgggCugccg..... 1  
Gi3\_28230738\_x2.....cgucgugggaacacggggGg..... 1  
Gi1\_4098811\_x2.....aCacgucgugggaacacggggugccg..... 1  
Gi2\_10901831\_x2.....ugggaacGcggggugccgaa..... 1  
Gi3\_28048970\_x2...aucggagUcugcugugggaacacggg..... 1  
Gi3\_28131384\_x2...aucggagacgucgugggaacacggggugGc..... 1  
Gi2\_10906705\_x2...aucggagacgucgugggaacacggggugccgaac..... 0  
Gi3\_28039174\_x2...ucggagacgucgugggaacCcgggugcc..... 1

Gi3\_28025000\_x2.....ucggagGcgucgugggaacacg..... 1  
 Gi3\_28091688\_x2.....ucggagacAucgugggaacacggggugcgc..... 1  
 Gi2\_10852223\_x2.....gugggaacacgCggugccgaac..... 1  
 Gi3\_28249422\_x2.....gggaacacgggCugccgaa..... 1  
 Gi3\_28153548\_x2.....cgugggaCcacggggugcgc..... 1  
 Gi2\_10829777\_x2.....Aacgucgugggaacacggggugc..... 1  
 Gi1\_4125553\_x2.....agacgucAugggaacacggggugccgaacu..... 1  
 Gi2\_10951857\_x2.....gaucggagacgucgugggaacacggggCg..... 1  
 G1a\_5908766\_x2.....aucggagacgucgugggaGcacggggu..... 1  
 Gi2\_10968351\_x2.....ucgugAgaacacggggugcgc..... 1  
 Gi2\_10945599\_x2.....cAugggaacacggggugcgc..... 1  
 Gi1\_4118171\_x2.....gacgucgugggaacacggggGgcc..... 1  
 Gi2\_10949629\_x2.....cgCcgugggaacacgggg..... 1  
 Gi4\_564438\_x2.....cgucguggNaacacggggugcgcga..... 1  
 Gi3\_28014108\_x2.....cgugggaacacggggugcU..... 1  
 Gi1\_4133275\_x2.....Agagacgucgugggaacacggggugccgaacu..... 1  
 Gi2\_10894997\_x2.....gUagacgucgugggaacacggggugcgcga..... 1  
 Gi2\_10837301\_x2.....ucAgagacgucgugggaacacg..... 1  
 Gi5\_8784759\_x2.....gggaacacggggugcgcCa..... 1  
 Gi1\_4117965\_x2.....gaacacggAgugccgaac..... 1  
 Gi5\_8724677\_x2.....gacgucgugggaUcacggggugccgaacu..... 1  
 Gi2\_10857515\_x2.....acgucgugggaUacggggugc..... 1  
 Gi1\_4096115\_x2.....agacgucgugggaGcacgggg..... 1  
 Gi1\_4092061\_x2.....acgucgugggaacacggggGgcc..... 1  
 Gi5\_8728661\_x2.....gugggaacacggggugccgaUUu..... 1  
 Gi5\_8737365\_x2.....gucgugggGacacggggugc..... 1  
 Gi5\_8749843\_x2.....auUggagacgucgugggaacacggg..... 1  
 Gi3\_28047746\_x2.....acgucgugggaacacggggugcA..... 1  
 Gi3\_28085154\_x2.....ugggaacacggggugccCa..... 1  
 Gi2\_10894963\_x2.....agacgucAugggaacacggggugccgaacu..... 1  
 G1a\_5929048\_x2.....cAugggaacacggggugcc..... 1  
 Gi3\_27991232\_x2.....cggagCcgucgugggaacacgggggu..... 1  
 Gi2\_10934383\_x2.....gagacgucgugggaacacg..... 0  
 Gi5\_8823631\_x2.....ggUaacacggggugccgaa..... 1  
 Gi5\_8770185\_x2.ugcgaAacggagacgucgug..... 1  
 Gi5\_8726961\_x2.....aucggGgacgucgugggaacac..... 1  
 Gi4\_565340\_x2.....agUcgcgugggaacacggggugcc..... 1  
 Gi3\_28130646\_x2.....gaucggagacAucgugggaacac..... 1  
 G1a\_5976884\_x2.....cgugggaacGcggggugcc..... 1  
 Gi3\_27999944\_x2.....cgugggaacacggAgugc..... 1  
 Gi5\_8809569\_x2.....aAcggagacgucgugggaacacgg..... 1  
 Gi1\_4151723\_x2.....cguggUaacacggggugccgaacu..... 1  
 Gi5\_8740729\_x2.....Gucggagacgucgugggaacacggggugcc..... 1  
 Gi2\_10869833\_x2.....gacgucGgggaacacggggugccgaacu..... 1  
 Gi3\_28221138\_x2.....ucgugggaacacggggUaccg..... 1  
 Gi2\_10849463\_x2.....aucggagacgucgugggaacacggggugUc..... 1  
 Gi1\_4106535\_x2.....gagacgucAugggaacacggggugcc..... 1

|                                                           |   |
|-----------------------------------------------------------|---|
| Gi3_28135242_x2.....aucggagacgucUugggaacacggggugc.....    | 1 |
| Gi2_10839745_x2.....gacgucgugggaacacgAggugccgaac.....     | 1 |
| Gi2_10891195_x2.....acgucgugggaacacggggugA.....           | 1 |
| Gi3_28076344_x2.....Ccgagacgucgugggaaca.....              | 1 |
| Gi1a_5902016_x2.....gGcgugggaacacggggugccga.....          | 1 |
| Gi1_4120043_x2.....aucggagaNgucgugggaacacggggugc.....     | 1 |
| Gi2_10981845_x2.....cCgagacgucgugggaacacggggugc.....      | 1 |
| Gi5_8821831_x2.....gugggaacaUggggugcc.....                | 1 |
| Gi2_10835319_x2.....aAacgucgugggaacacggggugccg.....       | 1 |
| Gi3_27994660_x2.....gucgugggaacCcggggugccg.....           | 1 |
| Gi3_28088992_x2.....gaucggagacgucgugggaacaUgggg.....      | 1 |
| Gi5_8746147_x2.....gugggaacacggggugUcga.....              | 1 |
| Gi2_10900327_x2.....cgugggaacaUggggugccga.....            | 1 |
| Gi2_10959107_x2.....cgucguggAaacacggggugc.....            | 1 |
| Gi2_10876263_x2.....gacgucgugggaacacggggugUcgaacu.....    | 1 |
| Gi2_10862219_x2.....cgugggaacacggggugAc.....              | 1 |
| Gi1_4139977_x2.....cgugggaacacggggugAcgaacu.....          | 1 |
| Gi2_10965771_x2.ugcgauccgagacgucgugggGaca.....            | 1 |
| Gi2_10952389_x2.....gaGcggagacgucgugggaaca.....           | 1 |
| Gi1a_5939222_x2.....gaucggagacgucguggGCa.....             | 1 |
| Gi5_8786053_x2.....gUcgucgugggaacacggggugccgaacu.....     | 1 |
| Gi2_10911905_x2.....cgUucggagacgucgugggaacacggg.....      | 1 |
| Gi2_10940331_x2.....cggagacgNcgugggaacacggggugccgaac..... | 1 |
| Gi2_10834945_x2.....ugUgaacacggggugccg.....               | 1 |
| Gi2_10962007_x2.....ucgugggaGcacggggugccgaa.....          | 1 |
| Gi3_28196438_x2.....ggagacgucgugggaaAacggggugcc.....      | 1 |
| Gi5_8729033_x2.....acgucgugggaaGacggggugccgaacu.....      | 1 |
| Gi3_28240870_x2.....gaucggagacgucguggGacacggg.....        | 1 |
| Gi2_10882981_x2.....ggagacgucgugggaacGcggggugc.....       | 1 |
| Gi1_4126551_x2.....ucgugggaacGcggggugccgaac.....          | 1 |
| Gi3_28117576_x2.....gacgucguggGacacgggg.....              | 1 |
| Gi3_28060764_x2.....aacacggAgugccgaacu.....               | 1 |
| Gi1a_5930410_x2.....gugggaacacggggGgccga.....             | 1 |
| Gi1_4141167_x2.....agacgucguggGacacggggugccgaac.....      | 1 |
| Gi5_8767393_x2.....acgucgugggaacCcggggugccgaac.....       | 1 |
| Gi5_8778685_x2.....aucggagacgucgugggaaAacgg.....          | 1 |
| Gi2_10900003_x2.....ggaacGcggggugccgaa.....               | 1 |
| Gi3_28178192_x2.....cggagacgCcgugggaacacggg.....          | 1 |
| Gi2_10956299_x2.....cggUgacgucgugggaacacggggugc.....      | 1 |
| Gi3_28178500_x2.....acgucgugggaacacgggAugccgaacu.....     | 1 |
| Gi5_8796759_x2.....aucggagacgucguggGacacgggg.....         | 1 |
| Gi2_10986747_x2.....acgucgugggaacacggGcgucc.....          | 1 |
| Gi3_27986984_x2.....ugggaacacggggUccga.....               | 1 |
| Gi5_8824405_x2.....ugggaacacggggugccUaac.....             | 1 |
| Gi3_28218010_x2.....cggUacgucgugggaacacggggugccga.....    | 1 |
| Gi5_8775817_x2.....ugggaacacgggCugccgaa.....              | 1 |
| Gi5_8783161_x2.....Aucgugggaacacggggugccgaa.....          | 1 |

Gi2\_10893899\_x2.....acguUgugggaacacggggugc..... 1  
 Gi2\_10959801\_x2.ugcgauccgagacgucgugggaaAa..... 1  
 Gi3\_28188740\_x2.....aacacggggugccgCacuu..... 1  
 Gi2\_10884221\_x2.....Cagacgucgugggaacacggggugccg..... 1  
 Gi3\_28115508\_x2.....ucggagacgucgugggCacac..... 1  
 Gi1\_4101189\_x2.....guAgugggaacacggggugccgaacu..... 1  
 Gi5\_8822113\_x2.....aucggagacAucgugggaacacg..... 1  
 Gi3\_28006960\_x2.....cgugggaacaAggggugccga..... 1  
 Gi3\_28063668\_x2.....ggaNcacggggugccgaa..... 1  
 Gi1\_4104319\_x2.....agacgucgugggaacGcggggugccg..... 1  
 Gi5\_8802959\_x2.....gugggaacacgggAugcc..... 1  
 Gi2\_10888463\_x2.....acgAcgugggaacacggggugc..... 1  
 Gl1\_5906790\_x2.....aucggGgacgucgugggaacacggg..... 1  
 Gi2\_10913657\_x2.....acgucguAggaacacggggugc..... 1  
 Gi3\_28221268\_x2.....aucggagaGgucgugggaacacg..... 1  
 Gl1\_5968806\_x2.....ugggaacacggggugccgaacG..... 1  
 Gi5\_8815801\_x2.....aucggagacgucgugggCacacggg..... 1  
 Gi2\_10895705\_x2.....gaCcgagacgucgugggaacacggggugc..... 1  
 Gi1\_4126593\_x2.....uUgugggaacacggggugccg..... 1  
 Gi3\_28045286\_x2.....ucgugggaacacggcGgugccgaac..... 1  
 Gi1\_4153617\_x2.....Uucgugggaacacggggugccgaacu..... 1  
 Gi3\_28091158\_x2.....gaucggagacgucgugggaacacggc..... 1  
 Gi2\_10991095\_x2.....ucggagacgucgugggaGcacg..... 1  
 Gi2\_10856693\_x2.....ugggaacacggggugcGgaac..... 1  
 Gi1\_4119241\_x2.....gugggaGcacggggugcc..... 1  
 Gl1\_5899480\_x2.....cgugggaacacggggCgc..... 1  
 Gi2\_10908759\_x2.....ggaacacggggugccgaaU..... 1  
 Gi1\_4109851\_x2.....gacgucgugggaCcacggggugccgaacu..... 1  
 Gi1\_4132253\_x2.....gggaacacggggugccgaaUu..... 1  
 Gi2\_10920719\_x2.....gaucggagacguGgugggaacacggggu..... 1  
 Gi1\_4130005\_x2.....guUggaacacggggugccg..... 1  
 Gi2\_10865327\_x2.....acgucgugggaGacggggugccgaacu..... 1  
 Gi2\_10830549\_x2.....gaacacCgggugccgaacu..... 1  
 Gi3\_28260336\_x2.....gaucggagacguUgugggaacacgggg..... 1  
 Gi5\_8806773\_x2.....gaNcacggggugccgaacu..... 1  
 Gi1\_4111317\_x2.....ugggaacacgggCugccg..... 1  
 Gi5\_8813193\_x2.....ucguAggaacacggggugccgaac..... 1  
 Gi2\_10962673\_x2.....cGgagacgucgugggaacacggggu..... 1  
 Gl1\_5971680\_x2.....gaucggagGcucgugggaacacggggu..... 1  
 Gi2\_10842913\_x2.....aucggagacgucgugggaUa..... 1  
 Gi3\_28002410\_x2.....gGcucgugggaacacggggugcc..... 1  
 Gi2\_10940923\_x2.....gaucggagacgucgugggCac..... 1  
 Gi5\_8737609\_x2.....cgugggaacacgUggugc..... 1  
 Gi5\_8777343\_x2.....gaucggagacgucgugggCacacg..... 1  
 Gi3\_28231924\_x2.....gaucggagacgucgugggaacacggggugccgaa..... 0  
 Gi1\_4106851\_x2.....gacgucgugggaacacggAgugccgaacu..... 1  
 Gi3\_28098804\_x2.....gucgugggaacacggggugccgU..... 1

Gi3\_28229906\_x2.....ucguggUaacacggggugccgaac..... 1  
 Gi2\_10883295\_x2.....agacAucgugggaacacggggugccgaacu..... 1  
 Gi2\_10856603\_x2.....aucggagacgucguAggaaca..... 1  
 Gl1a\_5888480\_x2.....aucggagaNgucgugggaacacggggugc..... 1  
 Gi3\_28241732\_x2.....ucgugggaacacCggggugccgaacu..... 1  
 Gi5\_8797357\_x2.....ggaacacUgggugccgaacu..... 1  
 Gi2\_10883079\_x2.....aucgCagacgucgugggaacacggggugc..... 1  
 Gi2\_10886183\_x2.....acgucgugggaaAacggggugccgaac..... 1  
 Gl1a\_5877092\_x2.....gugggaacNcggggugccga..... 1  
 Gi3\_28163080\_x2.....gaCcacggggugccgaac..... 1  
 Gi2\_10883349\_x2.....gaucggagacgucguggAaacacgggggu..... 1  
 Gi3\_28163576\_x2.....gacgucgugggaacacggggCgccg..... 1  
 Gi5\_8800917\_x2.....gugggaacacggggguAccga..... 1  
 Gi2\_10970951\_x2.....cgugggaacacgAggugccga..... 1  
 Gi5\_8820789\_x2.....acgucgugggaacacggggugUcgaacu..... 1  
 Gi3\_28258322\_x2.....gucgugggaacacggggugccgaaGu..... 1  
 Gi2\_10941677\_x2.....gaucggUgacgucgugggaacacgg..... 1  
 Gi3\_28017260\_x2.....Gcgugggaacacggggug..... 1  
 Gi2\_10934861\_x2.....cgugggaacacggggguAcc..... 1  
 Gi5\_8828775\_x2.....ugggaacacggggugUcgaac..... 1  
 Gi2\_10850973\_x2.ugcgauccgagacgucgugggaacacggggugcc..... 0  
 Gi1\_4155297\_x2.....Cugggaacacggggugccgaacu..... 1  
 Gi3\_28159726\_x2.....gacgucgugggaacacggggugccAaacu..... 1  
 Gi4\_559086\_x2.....uUgugggaacacggggugccgaacu..... 1  
 Gi2\_10876279\_x2.....gacgucgugggaacacggggugcUg..... 1  
 Gi5\_8803383\_x2.....ugggaacacggggugccgaacuC..... 1  
 Gi5\_8734725\_x2.....ugggaacacggggugcUgaacu..... 1  
 Gi3\_28164390\_x2.....Nugggaacacggggugcc..... 1  
 Gi1\_4113781\_x2.....gugggaaUacggggugccgaac..... 1  
 Gi2\_10932883\_x2.....ugggaacacggggugAcg..... 1  
 Gi5\_8808635\_x2.....cgugggaaNacggggugccg..... 1  
 Gi3\_28081320\_x2.....cgucgugggaacacggggugcUgaac..... 1  
 Gl1a\_5979918\_x2.....aacacggggugccgaaAu..... 1  
 Gi2\_10980859\_x2.....acgucgugggaacacgggAugccgaac..... 1  
 Gi1\_4156527\_x2.....acgucgugggaacacggggugccUaacu..... 1  
 Gi2\_10837923\_x2.....aucggagaAgucgugggaaca..... 1  
 Gi4\_560444\_x2.....gugggaacacggAgugccgaacu..... 1  
 Gi5\_8797611\_x2.....cgugggaacacggggugccgUac..... 1  
 Gi5\_8823893\_x2.....cguAggaacacggggugccga..... 1  
 Gi2\_10851569\_x2.....ugggaacacgggAugccga..... 1  
 Gi5\_8782699\_x2.....cgucgugggaacacggggAgccgaac..... 1  
 Gi4\_564840\_x2.....acgucgugggaacacggggugccgaac..... 0  
 Gi2\_10916997\_x2.....aucggagacgucgugAgaacacggggug..... 1  
 Gi3\_28185024\_x2.....cgucgugggaacacggggugccgCa..... 1  
 Gi2\_10982197\_x2.....cggagacgucgugggaCcacgggggu..... 1  
 Gi2\_10985337\_x2.....ugggaCcacggggugccga..... 1  
 Gi2\_10864083\_x2.....gCcgugggaacacggggugc..... 1



G1a\_5910466\_x2.....cgugggaacGcggggugc..... 1  
 Gi2\_10969445\_x2.....gagacgucgugggaacacgggAgugccg..... 1  
 Gi2\_10897281\_x2.....ggagacgucgugUgaacacggggugc..... 1  
 Gi2\_10931665\_x2.....aucggagacgucgugggUacac..... 1  
 Gi3\_28242404\_x2.....gcgaucggNgacgucgugggaacacgggggu..... 1  
 Gi1\_4089611\_x2.....gacgucgugggaacacggggugccgaGcu..... 1  
 Gi5\_8751665\_x2.....ugggaacacggggugccgaC..... 1  
 Gi3\_28113160\_x2.....gggaCcacggggugccgaa..... 1  
 Gi5\_8734731\_x2.....acgucgugggaacacggggugccgaGc..... 1  
 Gi5\_8812751\_x2.....ucgugggaacacggggugccgaUcu..... 1  
 Gi2\_10946539\_x2.....cggagacgucAugggaacacggggugcc..... 1  
 Gi2\_10855043\_x2.....agacgucgugggaGcacggggugcc..... 1  
 Gi3\_28212196\_x2.....ucUgagacgucgugggaacacggggugcc..... 1  
 Gi5\_8815895\_x2.....agacgucgugggaacGcggggugcc..... 1  
 Gi2\_10835083\_x2.....cgugggaacUcggggugccgaac..... 1  
 Gi3\_28079076\_x2.....aucggagacgucgAgggaacacg..... 1  
 G1a\_5958980\_x2.....gugggaacCcgggugcc..... 1  
 Gi1\_4113593\_x2.....aucggagacgucgugggaacGcggggugcc..... 1  
 Gi4\_563672\_x2.....Augggaacacggggugccgaa..... 1  
 Gi5\_8804191\_x2.....cgugggaacacggggugccgaC..... 1  
 Gi1\_4091283\_x2.....cAucgugggaacacggggugcc..... 1  
 Gi3\_28139608\_x2.....cguUgugggaacacggggugccga..... 1  
 Gi1\_4105933\_x2.....gugggaacacggUgugcc..... 1  
 Gi5\_8792057\_x2.....ugggaacacggggugccAaac..... 1  
 Gi3\_28021538\_x2.....Ncgugggaacacggggugccgaacu..... 1  
 Gi3\_28141550\_x2.....ucgugggaacacggggugccGgaac..... 1  
 Gi5\_8776827\_x2.....gucgugggaacacggggugccgaGc..... 1  
 Gi4\_555574\_x2.....ugggGacacggggugccgaacu..... 1  
 Gi1\_4130417\_x2.....cgggagacgucguggGcacacggggugc..... 1  
 Gi3\_28045496\_x2.....ggagacgucgugggaacacgggAugccg..... 1  
 Gi3\_28106792\_x2.....cgucgugggaacacCgggugccga..... 1  
 G1a\_5905206\_x2.....aucggagaNucgugggaacacg..... 1  
 Gi1\_4103487\_x2.....Augggaacacggggugccgaac..... 1  
 Gi3\_28149576\_x2.....cguNggaacacggggugc..... 1  
 Gi5\_8793035\_x2.....gaucggagacgucgugggaacacggggG..... 1  
 Gi3\_28056498\_x2.....cgucguggGacacgggg..... 1  
 Gi2\_10892301\_x2.....ucgugggaCcacggggugccg..... 1  
 Gi1\_4119349\_x2.....cgucgugggaacacggggugccgUacu..... 1  
 Gi2\_10851589\_x2.....ggagacgucguggGacacggggug..... 1  
 G1a\_5882998\_x2.....aucggagacgucgugggaCcac..... 1  
 Gi3\_28225604\_x2.....ggNacacggggugccgaac..... 1  
 Gi3\_28096118\_x2.....gagacgCcgugggaacacg..... 1  
 Gi5\_8796265\_x2.....gaCcacggggugccgaacu..... 1  
 Gi2\_10924207\_x2.....aucggagacgucguAggaacacgg..... 1  
 Gi3\_28213896\_x2.....gaacacggggugGcgaac..... 1  
 Gi2\_10905399\_x2.....gacgucguggGcacacggggugccgaacu..... 1  
 Gi3\_28141442\_x2.....aucggagacgucgugggaacacCgggu..... 1

|                                                             |   |
|-------------------------------------------------------------|---|
| Gi1_4112477_x2.....ucgugggaacacggggugccgaaUu.....           | 1 |
| Gi1_4107905_x2.....ggagGcgcugcuggggaacacggggugccgaaacu..... | 1 |
| Gi5_8789719_x2.....cUgagacgucguggggaacacggggugcc.....       | 1 |
| Gi3_27994720_x2.....gaucggagacguGuggggaacacg.....           | 1 |
| Gi2_10955077_x2.....Cggaacacggggugccga.....                 | 1 |
| Gi2_10971517_x2.....cggagacgCcguggggaacacggggugc.....       | 1 |
| Gi5_8783875_x2.....ucggagacgucguggggaacacggggugccA.....     | 1 |
| G1a_5925060_x2.....gggaacacggggugccga.....                  | 0 |
| Gi2_10947589_x2.....ucggagacgucguggggaacacAgggugcc.....     | 1 |
| Gi3_28136290_x2.....cguUggaacacggggugcc.....                | 1 |
| Gi2_10903377_x2.....acgucguggggaacacggggAgccgaac.....       | 1 |
| Gi2_10955087_x2.....gaGcggagacgucguggggaacacggggugcc.....   | 1 |
| Gi2_10963519_x2.....cggagacgucguggggaacacggggG.....         | 1 |
| Gi2_10933689_x2.....ggagacAucguggggaacacggggugc.....        | 1 |
| Gi2_10833363_x2.....gugggaCcacggggugccga.....               | 1 |
| Gi2_10955225_x2.....cgCcguggggaacacggggug.....              | 1 |
| Gi5_8811621_x2.....acgucguggggaGcacggggugccgaac.....        | 1 |
| Gi1_4155791_x2.....aucggagacgucAuggggaacacggggugcc.....     | 1 |
| Gi2_10902935_x2.....ugggaacacggggGgccgaa.....               | 1 |
| Gi2_10969453_x2.....ggaacacgggCugccgaac.....                | 1 |
| Gi5_8797835_x2.....gUucggagacgucguggggaacacg.....           | 1 |
| Gi3_28162188_x2.....gcgaucggagacgCcgugga.....               | 1 |
| Gi1_4150793_x2.....aaNacggggugccgaaacu.....                 | 1 |
| G1a_5933460_x2.....cguggggaacacggggugcAgaacu.....           | 1 |
| Gi5_8773127_x2.uAcgaucggagacgucgug.....                     | 1 |
| Gi4_563534_x2.....ucgCgggaacacggggugccgaaacu.....           | 1 |
| Gi3_28253934_x2.....aucggagaAgucguggggaacacggg.....         | 1 |
| Gi1_4143255_x2.....gaacacggggGcccgaacu.....                 | 1 |
| Gi3_28137584_x2.....gaucggagUcgucguggggaacacgg.....         | 1 |
| Gi5_8829593_x2.....acgucguggggaacacggggCgcc.....            | 1 |
| Gi3_28168812_x2.....aucggagacgucguggUaacacggg.....          | 1 |
| Gi3_28169278_x2.....cgucgugggUaacacggg.....                 | 1 |
| Gi2_10872431_x2.....gucgugggaCcacggggugcc.....              | 1 |
| Gi2_10953255_x2.....Gggagacgucguggggaacacg.....             | 1 |
| Gi3_28157458_x2.....cggagacgucgugggaaAacgggg.....           | 1 |
| Gi1_4132485_x2.....cgucgugggaaAacggggugcc.....              | 1 |
| Gi3_28105546_x2.....ucguggggaacacggggugccgG.....            | 1 |
| G1a_5904258_x2.....cguggggaacacggggCugccgaaacu.....         | 1 |
| Gi3_28060156_x2.....gucgGgggaacacggggugccgaaac.....         | 1 |
| Gi1_4139537_x2.....cUucguggggaacacggggugccgaaac.....        | 1 |
| Gi5_8820775_x2.....aacacggggugccgGacuuu.....                | 1 |
| Gi3_28052964_x2.....cgucgAggggaacacggggugccgaaac.....       | 1 |
| Gi3_28192290_x2.....ggUgacgucguggggaacacggggugccgaaac.....  | 1 |
| Gi3_28205088_x2.....gagacgucguggggaacacggggCgccg.....       | 1 |
| G1a_5946438_x2.....ugggaacaUggggugccgaaacu.....             | 1 |
| Gi1_4092105_x2.....cgucguggggaacGcggggugcc.....             | 1 |
| Gi5_8768275_x2.....aacacggggugccgaaacu.....                 | 0 |

|                                                          |   |
|----------------------------------------------------------|---|
| Gi1_4150179_x2.....ucUugggaacacggggugccgaac.....         | 1 |
| Gi5_8757785_x2.....cgugggaacacAgggugcc.....              | 1 |
| Gi5_8758805_x2.....cgucgugggaacCggggugc.....             | 1 |
| Gi1_5970036_x2.....ggaacacggggugAcggaacu.....            | 1 |
| Gi1_4094475_x2.....gucgugggaacacgAggug.....              | 1 |
| Gi1_5956778_x2.....aucggUgacgucgugggaacacggggugc.....    | 1 |
| Gi2_10829705_x2.....aucggagCcgucgugggaacacggggugc.....   | 1 |
| Gi2_10955355_x2.....ugggaacacggUgugccgaacu.....          | 1 |
| Gi3_28023428_x2.....cggagacgucgugggaacacgAggugccga.....  | 1 |
| Gi4_553128_x2.....cgucgugggaacacggggugc.....             | 0 |
| Gi1_4116953_x2.....acgucguAggaacacggggugccgaacu.....     | 1 |
| Gi5_8821753_x2.....cgucgugggCacacggggugccgaacu.....      | 1 |
| Gi5_8742173_x2.....Ggugggaacacggggugccg.....             | 1 |
| Gi1_4102743_x2.....ucAugggaacacggggugccgaac.....         | 1 |
| Gi3_28245304_x2.....gagacgucgugggaacacggggUaccgaacu..... | 1 |
| Gi1_4118955_x2.....gggaacaGggggugccgaacu.....            | 1 |
| Gi5_8784927_x2.....aucggagaUgucgugggaacacgg.....         | 1 |
| Gi3_27991356_x2.....cggGgacgucgugggaacac.....            | 1 |
| Gi2_10896623_x2.....gCcgugggaacacggggugccg.....          | 1 |
| Gi2_10931277_x2.....aucggagCcgucgugggaacac.....          | 1 |
| Gi1_4094585_x2.....ggaacacggggugccgaaU.....              | 1 |
| Gi2_10835799_x2.....gaucggCgacgucgugggaacacggg.....      | 1 |
| Gi3_28131006_x2.....gucgugggaacacggggGgccgaa.....        | 1 |
| Gi3_28142548_x2.....cgugAgaacacggggugccgaa.....          | 1 |
| Gi2_10830753_x2.....gggaacacggggugccgaaU.....            | 1 |
| Gi2_10938639_x2.....gacgucguNggaacacggggugccg.....       | 1 |
| Gi2_10902593_x2.....cggagacgucgugggUacacggggU.....       | 1 |
| Gi3_28136648_x2.....ggaacacggggAgccgaa.....              | 1 |
| Gi4_565140_x2.....cgugggaacacggggugccgGacu.....          | 1 |
| Gi3_28156666_x2.....cgucgugggaacUcggggugcc.....          | 1 |
| Gi2_10965385_x2.....cgucgugggaacacggggugcAga.....        | 1 |
| Gi5_8812003_x2.....aucggagacgucguAggaacacggg.....        | 1 |
| Gi2_10957045_x2.....gagacgucAugggaacacggggugccg.....     | 1 |
| Gi5_8787265_x2.....ggaacacgUggugccgaacu.....             | 1 |
| Gi1_4111519_x2.....gCgggaacacggggugccgaacuu.....         | 1 |
| Gi3_28177868_x2...cgauccgagacgucgugAgaacacg.....         | 1 |
| Gi5_8828047_x2.....acUcggggugccgaacuu.....               | 1 |
| Gi3_28099810_x2.....agacgucgCgggaacacgggg.....           | 1 |
| Gi3_27997460_x2.....aGcggagacgucgugggaacacggggug.....    | 1 |
| Gi3_28012386_x2.....cgugggaacacUgggugc.....              | 1 |
| Gi2_10935371_x2.....cggagacgucgugggaacacggUgugcc.....    | 1 |
| Gi3_28170272_x2.....ggagacgucgugggaacacggggUacc.....     | 1 |
| Gi1_4132711_x2.....gaacacggggugccgaaCc.....              | 1 |
| Gi3_28162096_x2.....agacgucguAggaacacggggugcc.....       | 1 |
| Gi3_28024428_x2.....cgugggaacaUggggugccgaa.....          | 1 |
| Gi3_28117766_x2...gaucggCgacgucgugggaacac.....           | 1 |
| Gi3_28208108_x2.....aCacgucgugggaacacggg.....            | 1 |

Gi2\_10950255\_x2.....agacgucgugggaaAacggggugc..... 1  
Gi3\_28170314\_x2.....gacgucgugggGacacggggugccg..... 1  
Gi5\_8797781\_x2....aucggagCcgucgugggaacacg..... 1  
Gi3\_28067858\_x2.....agacgAcgugggaacacggggugccgaacu..... 1  
Gi2\_10957873\_x2.....gaacacggggugccgaaUu..... 1  
Gi2\_10889875\_x2....aucggCgacgucgugggaa..... 1  
G1a\_5914574\_x2....aGcggagacgucgugggaacacg..... 1  
Gi5\_8762525\_x2.....gugggaacacAgggugccgaa..... 1  
Gi2\_10924127\_x2.....cgucgugggaacacggAgugcc..... 1  
Gi3\_28176814\_x2.....acAucgugggaacacggg..... 1  
Gi4\_566418\_x2.....aacacggggugccgaacA..... 1  
Gi3\_27994870\_x2.....gUgacgucgugggaacacg..... 1  
Gi3\_28101734\_x2.....acgucgugggaacacggggugAcgaacu..... 1  
Gi2\_10878435\_x2.....acgucgugggGacacggggugccgaac..... 1  
Gi2\_10943333\_x2.....agUcgucgugggaacacggggug..... 1  
Gi2\_10887693\_x2.....gacgucAugggaacacggggugccgaacu..... 1  
Gi2\_10961961\_x2.....gacgucgugggaacacggggUaccgaacu..... 1  
Gi5\_8718225\_x2.....gagacgucgugggaacacggggugcUgaacu..... 1  
Gi3\_28086572\_x2...gaucggagacgucgGgggaacacggg..... 1  
Gi1\_4153639\_x2.....agacgucgugggaacacggggAgccgaacu..... 1  
Gi5\_8808277\_x2.....gacgucguggAaacacggggugccgaacu..... 1  
Gi2\_10872953\_x2.....gucgugggaacGcggggugccgaa..... 1  
Gi2\_10917753\_x2....auUggagacgucgugggaacacggggugccg..... 1  
G1a\_5889382\_x2.....Uucgugggaacacggggugccgaa..... 1  
Gi5\_8800465\_x2.....ucgugggaacacggggugccgaUc..... 1  
Gi3\_28026996\_x2...cgaucggagacgucgugggaacCcg..... 1  
Gi4\_567214\_x2.....cgugAgaacacggggugccgaacu..... 1  
Gi1\_4150511\_x2....aucggagacgucgugggaCcacggg..... 1  
Gi3\_27996412\_x2....aucggagacgucUugggaacacgg..... 1  
Gi3\_28216548\_x2.....acgucgugggGacacggg..... 1  
Gi3\_27991632\_x2...gaucggCgacgucgugggaacacgggg..... 1  
Gi5\_8774219\_x2....aucggagGcugcugggaacacgg..... 1  
Gi2\_10873721\_x2....cggagacgucgugggaacacggggugGc..... 1  
Gi2\_10916585\_x2....aucggagacgucAgggaacacggg..... 1  
Gi4\_567268\_x2.....aaUacggggugccgaacu..... 1  
Gi3\_28061106\_x2.....gacgucgugggaacacggggugccgaaUu..... 1  
Gi3\_28008342\_x2.....gugggaacacggggNgccgaacu..... 1  
Gi3\_28066846\_x2.....ugggaacacggggGgccg..... 1  
G1a\_5928102\_x2....Gucggagacgucguggga..... 1  
Gi2\_10989293\_x2.....gacgucgugggaacacgggAugccgaacu..... 1  
Gi3\_28071538\_x2.....agacgCcgugggaacacggggugcc..... 1  
Gi3\_28242198\_x2.....cgugggaCcacggggugc..... 1  
Gi4\_554326\_x2.....cgucgugggaacacggggCgccga..... 1  
Gi2\_10957855\_x2.....cgugggaacacggggugUcgaa..... 1  
Gi2\_10860497\_x2.....cgucgugggaacaAggggugc..... 1  
Gi3\_28087522\_x2....aucggagacgucguggAaacacggg..... 1  
Gi3\_28057992\_x2.....agacgucgugggaacaUggggugcc..... 1

|                                                         |   |
|---------------------------------------------------------|---|
| Gi1a_5933084_x2.....Uacgucgugggaacacggg.....            | 1 |
| Gi3_28246310_x2.....aucggagacgucgugggaacacgUg.....      | 1 |
| Gi2_10845725_x2.....gugggaacacggggugccCa.....           | 1 |
| Gi5_8774735_x2....gaucggagacgucgugggaacCcg.....         | 1 |
| Gi2_10919353_x2.....Cgacgucgugggaacacgggggu.....        | 1 |
| Gi3_28237126_x2.....uggNaacacggggugccgaa.....           | 1 |
| Gi2_10896477_x2.....acgucgugggaGacggggugcc.....         | 1 |
| Gi3_27998160_x2.....gacgucgugggGacacggg.....            | 1 |
| Gi2_10850753_x2.....cgucgugggaacGcggggugccgaa.....      | 1 |
| Gi1_4100241_x2.....gaUcacggggugccgaacuu.....            | 1 |
| Gi1a_5943140_x2.....acgCcgugggaacacgggggu.....          | 1 |
| Gi5_8764523_x2.....ucggagacAucgugggaacacg.....          | 1 |
| Gi3_28046572_x2.....acgucgugggaacacAgggugcc.....        | 1 |
| Gi1_4140219_x2.....ggagacgucgugggaGcacggggugcc.....     | 1 |
| Gi1_4136725_x2....aucggagacAucgugggaacacg.....          | 1 |
| Gi1_4137739_x2.....ggagacgucgugggaacacggg.....          | 0 |
| Gi5_8787299_x2.....gugggaacacggggugccUac.....           | 1 |
| Gi1_4098033_x2.....ucgugggaacacggggug.....              | 0 |
| Gi5_8825465_x2.....cgucgugggGacacggggugc.....           | 1 |
| Gi3_27990978_x2...cgaucggaNacgucgugggaacacgg.....       | 1 |
| Gi3_28160022_x2.....gucguggAaacacggggugccga.....        | 1 |
| Gi3_28023034_x2.....acgucgugggaacacggggugUcgaac.....    | 1 |
| Gi3_28208054_x2...gUucggagacgucgugggaacacggggugc.....   | 1 |
| Gi3_28167592_x2.....agacgucgugggaacacgggAugccgaacu..... | 1 |
| Gi3_28198522_x2.....cggagacgucgCgggaacacgggg.....       | 1 |
| Gi1a_5912624_x2....Caucggagacgucguggga.....             | 1 |
| Gi2_10829211_x2.....gucgugggaacacUgggugccgaacu.....     | 1 |
| Gi1a_5938540_x2.....ucgugggaNcacggggugccgaac.....       | 1 |
| Gi5_8780973_x2.....gAgggaacacggggugccgaacuu.....        | 1 |
| Gi1_4153625_x2.....gugggaacacggggugccgaaGu.....         | 1 |
| Gi1_4103511_x2.....cggagacgucgugggaacacgCg.....         | 1 |
| Gi5_8826279_x2.....gugggaacacgggAugccgaac.....          | 1 |
| Gi5_8802721_x2.....Gcacggggugccgaacuuu.....             | 1 |
| Gi2_10831719_x2.....agacgucgugAgaacacggggugcc.....      | 1 |
| Gi3_28202132_x2....aucggagCcgucgugggaacac.....          | 1 |
| Gi3_28066582_x2.....Agagacgucgugggaaca.....             | 1 |
| Gi1a_5896378_x2...cgaucggagacgCcgugg.....               | 1 |
| Gi2_10989061_x2.....gagacgucgugggaacGcggggugccg.....    | 1 |
| Gi3_28100736_x2.....gagacgucgAgggaacac.....             | 1 |
| Gi1_4123699_x2.....cgugggaacacggggguAccg.....           | 1 |
| Gi3_28029820_x2.....cggagGcgucgugggaacacg.....          | 1 |
| Gi2_10857817_x2....gaucggagacgucguAgggaacacggggug.....  | 1 |
| Gi2_10846387_x2....cggagacgucgugggaacacggggCg.....      | 1 |
| Gi2_10976041_x2....gaucggagacgucguggAaacac.....         | 1 |
| Gi1_4096423_x2.....gugggaacacggggugccCaacu.....         | 1 |
| Gi3_28055120_x2....Caucggagacgucgugggaaca.....          | 1 |
| Gi3_28233724_x2.....acgucgugggGacacggggugccga.....      | 1 |

Gi3\_28243518\_x2.....aUacgucgugggaacacgggg..... 1  
 Gi3\_28064918\_x2.....cgAagacgucgugggaacacg..... 1  
 Gi4\_553760\_x2.....cgugggaacacggggugccgaacA..... 1  
 Gi3\_28150550\_x2.....agacgucgCgggaacacggggugcc..... 1  
 Gi3\_28227338\_x2.....cgucgugggaacacggggguAccga..... 1  
 Gi3\_28074980\_x2.....cguAguggggaacacggggugcc..... 1  
 Gi1a\_5950380\_x2.....aacacggggugccUaacu..... 1  
 Gi2\_10907903\_x2.....ggagGcgucgugggaacacg..... 1  
 Gi2\_10873901\_x2.....aucggaAacgucgugggaacacg..... 1  
 Gi1\_4124125\_x2.....cgugggaaNacggggugccgaacuu..... 1  
 Gi1\_4149933\_x2.....Ggggaacacggggugccgaa..... 1  
 Gi3\_28135038\_x2.....aUgucgugggaacacggggugccgaa..... 1  
 Gi2\_10908455\_x2.....gauUggagacgucgugggaacacgggg..... 1  
 Gi5\_8765133\_x2.....ucgugggaacacggggugGcgaacu..... 1  
 Gi2\_10925227\_x2.....guCggaacacggggugccgaac..... 1  
 Gi2\_10969295\_x2.....aucggagacgucgugggaacCcg..... 1  
 Gi3\_28176316\_x2.....gagacgucguggAaacacggggugccgaacu..... 1  
 Gi1\_4132777\_x2.....ucgugggaacacgAggugccgaac..... 1  
 Gi1\_4118541\_x2.....cgugggaacacggggguCccgaacu..... 1  
 Gi2\_10970081\_x2.....gacgucgugAgaacacggggugcc..... 1  
 Gi3\_28068040\_x2.....gaucggagCcgucgugggaacacgggg..... 1  
 Gi3\_28133388\_x2.....gucgugggaacacggggCgc..... 1  
 Gi1\_4120099\_x2.....gaacacggggugccgaaGu..... 1  
 Gi2\_10967795\_x2.....aucggagacgucguggCaacacgggggu..... 1  
 Gi2\_10990889\_x2.....gacgucgCgggaacacgggggu..... 1  
 Gi5\_8719899\_x2.....Gucggagacgucgugggaaca..... 1  
 Gi2\_10955833\_x2.....ucggGgacgucgugggaacacgggg..... 1  
 Gi2\_10896331\_x2.....gucAugggaacacggggugccgaac..... 1  
 Gi1a\_5922106\_x2.....guUggaacacggggugcc..... 1  
 Gi1\_4092611\_x2.....gucgugggaUacggggugcc..... 1  
 Gi1\_4138671\_x2.....cUgagacgucgugggaacacggggugccgaac..... 1  
 Gi5\_8718423\_x2.....uggAaacacggggugccgaac..... 1  
 Gi2\_10917387\_x2.....gucgugggCacacggggugccgaac..... 1  
 Gi5\_8794129\_x2.....gCcgugggaacacggggugccgaa..... 1  
 Gi3\_28022922\_x2.....cgugggaacaAgggggugcc..... 1  
 Gi1\_4126579\_x2.....cgugggaacacAgggugccgaacuu..... 1  
 Gi2\_10858545\_x2.....gCgaacacggggugccga..... 1  
 Gi2\_10992239\_x2.....gaucggGgacgucgugggaac..... 1  
 Gi3\_28181102\_x2.....Cgagacgucgugggaacacg..... 1  
 Gi3\_28052084\_x2.....gagacAucgugggaacacggggugccgaacu..... 1  
 Gi3\_28211088\_x2.....agacgucgugggaacacggggugccUac..... 1  
 Gi3\_28148690\_x2.....gagacgucgugggaacCcg..... 1  
 Gi1\_4106059\_x2.....aucggagaNgucgugggaacac..... 1  
 Gi3\_28147940\_x2.....acgucgugggaacacAgggugccgaa..... 1  
 Gi3\_28169928\_x2.....gaucggagaUgucguggg..... 1  
 Gi3\_28187906\_x2.....gacgucgugggaacCcggg..... 1  
 Gi3\_28227174\_x2.....ggagacgucAugggaacacg..... 1

|                                                          |   |
|----------------------------------------------------------|---|
| Gi5_8808935_x2.....aucgUagacgucgugggaacacgg.....         | 1 |
| Gi2_10912177_x2.....cgucgugggaacGcggggugccgaac.....      | 1 |
| Gi3_28185294_x2.....gUcgucgugggaacacgg.....              | 1 |
| Gi3_28043342_x2.....aucggagacgucgugggCacacgggg.....      | 1 |
| Gi5_8818889_x2.....aucggagacgucgugggaCcacggggugcc.....   | 1 |
| Gi3_28017780_x2.....acgucgugggaacaUggggugcc.....         | 1 |
| Gi3_28130550_x2.....gaaNacggggugccgaac.....              | 1 |
| G1a_5911814_x2.....gggNacacggggugccgaacu.....            | 1 |
| Gi2_10909523_x2.....gucgugggaacacAgggugc.....            | 1 |
| Gi5_8745129_x2.....agacgucgugggaacacggggugccgaacG.....   | 1 |
| Gi5_8718839_x2.....ucgugCgaacacggggugccgaacu.....        | 1 |
| Gi2_10981223_x2.....gugggaacacCgggugccgaac.....          | 1 |
| Gi3_28174772_x2.....gacgucgugggaacacggggugcAgaac.....    | 1 |
| Gi2_10836367_x2.....ucggagacgucgugggaGcacggggugc.....    | 1 |
| Gi4_561452_x2.....acgucgugggaacacggggugccgaaAu.....      | 1 |
| Gi3_28096346_x2.....cgaucggagacgucgugggGacacgg.....      | 1 |
| Gi3_28011902_x2.....gaUacgucgugggaacacggggugccgaacu..... | 1 |
| Gi3_28133770_x2.....ggUgacgucgugggaaca.....              | 1 |
| Gi3_28258036_x2.....gucgugggaAacggggugccga.....          | 1 |
| Gi3_28059268_x2.....acgucgugggaacacggggGgc.....          | 1 |
| Gi2_10843689_x2.....cgucgugggaacacAgggugcc.....          | 1 |
| Gi1_4120539_x2.....gGucggagacgucguggg.....               | 1 |
| Gi5_8743073_x2.....cgucgugggaacacggggugAcgaacu.....      | 1 |
| Gi2_10946067_x2.....aucggagacUucgugggaacacggggugcc.....  | 1 |
| Gi2_10877347_x2.....cgucgugggaGcacggggug.....            | 1 |
| Gi2_10916001_x2.....gaucggagacgucAugggaacac.....         | 1 |
| Gi3_28017160_x2.....ggagacgucgugggaacacggggAgcc.....     | 1 |
| G1a_5879238_x2.....gggaacacggAgugccgaacu.....            | 1 |
| G1a_5980070_x2.....gaucggagacgucgugggaacGcggggu.....     | 1 |
| Gi3_28127186_x2.....ggagacgCcgugggaacacggggugcc.....     | 1 |
| Gi5_8783353_x2.....gggaacacggggAccgaac.....              | 1 |
| Gi1_4132683_x2.....aCcgagacgucgugggaacacgg.....          | 1 |
| Gi3_28185946_x2.....cgaucggagGcgucguggg.....             | 1 |
| Gi3_28070634_x2.....gggaacacggggugccgaU.....             | 1 |
| Gi3_28019934_x2.....aucggaAacgucgugggaacacgggg.....      | 1 |
| Gi3_28164938_x2.....gacgucAugggaacacggggU.....           | 1 |
| Gi3_28049248_x2.....gaucggagacgucAugggaacacg.....        | 1 |
| Gi3_28077936_x2.....cAgagacgucgugggaacacggg.....         | 1 |
| Gi3_28049886_x2.....cggagacguAgugggaacacggggU.....       | 1 |
| Gi1_4121999_x2.....gggaacacggggugccgU.....               | 1 |
| Gi3_27995456_x2.....cgaucggagacgucgugggCacacgg.....      | 1 |
| Gi3_28098884_x2.....gaucggagacgucAugggaacacgg.....       | 1 |
| Gi1_4113107_x2.....aucggagCcgucgugggaacacg.....          | 1 |
| Gi3_28253040_x2.....aucggagacgucguggAaacacgg.....        | 1 |
| Gi5_8752233_x2.....cgucUugggaacacggggugc.....            | 1 |
| Gi1_4138001_x2.....aucggagacgucgugggaUacggggugcc.....    | 1 |
| Gi1_4115813_x2.....gggaaAacggggugccgaacu.....            | 1 |

|                 |                                      |   |
|-----------------|--------------------------------------|---|
| Gi4_557216_x2   | .....gugggGacacggggugccgaa           | 1 |
| Gi2_10925553_x2 | .....gagacgucgugggaacac              | 0 |
| Gi3_27995884_x2 | .....gaacUcggggugccgaac              | 1 |
| Gi2_10845181_x2 | .....cgugggaacaUggggugc              | 1 |
| Gi2_10912911_x2 | .....ugggaacacggggCgccga             | 1 |
| Gi2_10874763_x2 | .....agacgucgugggaCcacggggugccgaacu  | 1 |
| Gi5_8773353_x2  | .....Ugugggaacacggggugcc             | 1 |
| Gi4_557642_x2   | .....aucggagacgucgugggaacacggggugcA  | 1 |
| Gi1_4151351_x2  | .....Ggugggaacacggggugcc             | 1 |
| Gi3_28126384_x2 | .....aucggagacgucgugggaUcacgg        | 1 |
| Gi2_10921533_x2 | .....ugggaacacAgggugccgaa            | 1 |
| Gi1_4131425_x2  | .....cCucgugggaacacggggugcc          | 1 |
| Gi1_4132923_x2  | .....ggaacacggggGgccgaac             | 1 |
| Gi3_28014834_x2 | .....cggagacgucgugggCacacgggg        | 1 |
| Gi2_10961669_x2 | .....Aucgugggaacacggggugccg          | 1 |
| Gi2_10878065_x2 | .....cgugggaacacgUggugccg            | 1 |
| Gi2_10960601_x2 | .....aucggagacgucgugggaacacggggA     | 1 |
| Gi2_10889919_x2 | .....ucggagacgucguAggaaca            | 1 |
| Gi3_28036428_x2 | .....gugggaacNcggggugccgaacuu        | 1 |
| Gi3_28028284_x2 | .....aucggagacgucguCggaacacg         | 1 |
| Gi5_8730531_x2  | .....cgugggaacacggggugccgC           | 1 |
| Gi5_8718899_x2  | .....ggagGcucgugggaacacggggugccgaacu | 1 |
| Gi3_28054754_x2 | .....ucggagacgucgugggGacacggggugcc   | 1 |
| Gi5_8812499_x2  | .....guAggaacacggggugccgaa           | 1 |
| Gi3_28183748_x2 | .....ucgCgggaacacggggugccgaa         | 1 |
| Gi3_28222754_x2 | .....aucggagacgAcgugggaacacgggg      | 1 |
| Gi2_10842315_x2 | .....cgugggaacacggggugAcg            | 1 |
| Gi3_28002992_x2 | .....Ncugggaacacggggugccgaac         | 1 |
| Gi1_4130611_x2  | .....cgucgugggaGcacggggugcc          | 1 |
| Gi5_8725151_x2  | .....uUggaacacggggugccga             | 1 |
| Gi1a_5914404_x2 | .....aacacggggCgccgaacu              | 1 |
| Gi5_8820373_x2  | .....cgAgggaacacggggugc              | 1 |
| Gi2_10935719_x2 | .....ggagacgucgugggaacacgUggugc      | 1 |
| Gi2_10862737_x2 | .....gagacguUgugggaacacggggug        | 1 |
| Gi3_28008462_x2 | .....Cagacgucgugggaacacg             | 1 |
| Gi2_10990049_x2 | .....ucgugggCacacggggugccgaac        | 1 |
| Gi1a_5911524_x2 | .....Cugggaacacggggugccgaac          | 1 |
| Gi3_28054164_x2 | .....gugggaacaGggggugccgaa           | 1 |
| Gi5_8781473_x2  | .....gaacacggggCgccgaac              | 1 |
| Gi3_28243380_x2 | .....agacgucgAgggaacacggggugccgaacu  | 1 |
| Gi2_10889157_x2 | ugUgaucggagacgucguggga               | 1 |
| Gi5_8723707_x2  | .....gugggaacaUggggugccgaa           | 1 |
| Gi2_10865109_x2 | .....ggagacgucgugggaacacggggAcc      | 1 |
| Gi5_8724907_x2  | .....aucggagacgucguAggaacacggggugc   | 1 |
| Gi2_10986085_x2 | .....Ngaacacggggugccgaac             | 1 |
| Gi2_10970827_x2 | Ggaucggagacgucgugggaacacg            | 1 |
| Gi3_28219220_x2 | Aaucggagacgucgugggaacacggggugcc      | 1 |



|                 |                                     |   |
|-----------------|-------------------------------------|---|
| Gi2_10982137_x2 | cgaucggagacgucgugggaCcacggg         | 1 |
| Gi3_28211394_x2 | ucggCgacgucgugggaacacg              | 1 |
| Gi3_28062110_x2 | aucggagacgucgugUgaacacggg           | 1 |
| Gi2_10870177_x2 | aucggGgacgucgugggaacacggggugccgaacu | 1 |
| Gi2_10902581_x2 | ucgugggaacacggggGgccc               | 1 |
| Gi2_10979865_x2 | aucNgagacgucgugggaaca               | 1 |
| Gi2_10933579_x2 | gaucggagacgucgugggaacaUg            | 1 |
| Gi3_28221606_x2 | Aucgugggaacacggggugccgaa            | 1 |
| Gi3_28119844_x2 | auAggagacgucgugggaacacggggugcc      | 1 |
| Gi2_10876505_x2 | uGggagacgucgugggaacacggggg          | 1 |
| Gi1_4094233_x2  | gucgugggaacacggggGg                 | 1 |
| Gi3_28004550_x2 | gucgugggaacacAgggugc                | 1 |
| Gi1a_5965470_x2 | Aaucggagacgucgugggaacac             | 1 |
| Gi2_10992217_x2 | aucggagacgucgAgggaacacggggugc       | 1 |
| Gi5_8784403_x2  | cgugggaacacggggugccAa               | 1 |
| Gi2_10875665_x2 | gaucggagacgucgugggaUac              | 1 |
| Gi1a_5891532_x2 | uggUacacggggugccgaacu               | 1 |
| Gi1a_5888844_x2 | ggaacacgggAugccgaacu                | 1 |
| Gi3_28051548_x2 | ucggagacgucgugggaacGcg              | 1 |
| Gi2_10840855_x2 | aucggagacgucgugggaacacggggugcU      | 1 |
| Gi2_10941265_x2 | cgucgugggaacCggggg                  | 1 |
| Gi1_4152849_x2  | guggUaacacggggugccga                | 1 |
| Gi2_10916439_x2 | ugggaacacAgggugccg                  | 1 |
| Gi3_28237556_x2 | cggagacgucgugggaacCcgggg            | 1 |
| Gi1_4091761_x2  | gucgugggaacaUggggugcc               | 1 |
| Gi5_8796889_x2  | cgucgugggaacacUgggugccgaacu         | 1 |
| Gi2_10833741_x2 | ggagacguUgugggaacacggggug           | 1 |
| Gi2_10933493_x2 | gugggaacacUgggugccgaac              | 1 |
| Gi3_28156114_x2 | cgGcgugggaacacggggugccgaa           | 1 |
| Gi1a_5883136_x2 | guggUaacacggggugccga                | 1 |
| Gi1a_5905578_x2 | cUugggaacacggggugccgaac             | 1 |
| Gi5_8733227_x2  | Aagacgucgugggaacacggggugccgaacu     | 1 |
| Gi4_566234_x2   | gaucggagacgucguggga                 | 0 |
| Gi2_10940573_x2 | cgugggaacacgUggugccgaa              | 1 |
| Gi2_10843303_x2 | aucggagacgucgugggaAa                | 1 |
| Gi3_28008610_x2 | gagacgucgugCgaacacggggugccg         | 1 |
| Gi1_4140475_x2  | cgugggaacacgAggugccgaa              | 1 |
| Gi1_4156795_x2  | ucgugggaacacUgggugccgaac            | 1 |
| Gi1_4095909_x2  | cgugggaacacggggugccgaUc             | 1 |
| Gi2_10988925_x2 | gagacgucgCgggaacacggggugccgaacu     | 1 |
| Gi1a_5975062_x2 | gaCcgagacgucguggg                   | 1 |
| Gi5_8765195_x2  | ucgugggaacacggggUAccgaac            | 1 |
| Gi1_4105997_x2  | aucggagCgucgugggaacacg              | 1 |
| Gi3_28152780_x2 | acgucgugggaacacgggAugccgaac         | 1 |
| Gi2_10890059_x2 | acgucgugggaAacggggugccgaacu         | 1 |
| Gi5_8780103_x2  | cgugggGacacggggugccga               | 1 |
| Gi4_554166_x2   | uGgugggaacacggggugccgaacu           | 1 |

Gi3\_28233948\_x2...gaucggagacguUgugggaacacgggggu..... 1  
 Gl1a\_5892716\_x2...aAcggagacgucgugggaacacggggugcc..... 1  
 Gl1a\_5952064\_x2.....gaUcacggggugccgaacu..... 1  
 Gi3\_28210908\_x2.....cgugggaacacggggUccga..... 1  
 Gi2\_10951523\_x2.....acgucgugggaacCcggggu..... 1  
 Gi5\_8797871\_x2.....Gggagacgucgugggaacacgggg..... 1  
 Gi5\_8764251\_x2.....gucUugggaacacggggugccgaacu..... 1  
 Gi2\_10987353\_x2.....ucggagacgucgugggGacacggggugcc..... 1  
 Gi3\_28111116\_x2...gaucggagacgucgugggCaca..... 1  
 Gi2\_10944583\_x2.....cgugggaUacggggugcc..... 1  
 Gi1\_4144103\_x2.....cgugggaacacggggCgcccga..... 1  
 Gi3\_28032586\_x2.....gggaacaGggggugccgaacu..... 1  
 Gi2\_10943989\_x2.....agacgucgugggaacacggggugccgaacG..... 1  
 Gi2\_10986087\_x2.....cggagacgucgugAgaacacggggugc..... 1  
 Gi2\_10920821\_x2.....gagacguAgugggaacacggggug..... 1  
 Gi5\_8828787\_x2.....ucggagacgCcgugggaacacg..... 1  
 Gi2\_10886539\_x2.....ggaacacggggugccgaGu..... 1  
 Gl1a\_5926380\_x2...gcgaucggagacgCcgug..... 1  
 Gi2\_10974941\_x2.....Uacgucgugggaacacggggugccga..... 1  
 Gi3\_28157692\_x2.....Gggagacgucgugggaacacggggugc..... 1  
 Gi3\_28104536\_x2.....cgucgugggaacacggggugGcg..... 1  
 Gi3\_28031476\_x2...aucggagacgucgCgggaacac..... 1  
 Gi3\_28118672\_x2.....Ugaacacggggugccgaacuu..... 1  
 Gi2\_10984453\_x2...gaucggagaUgucgugggaacacgggg..... 1  
 Gi2\_10833139\_x2.....gugggaacacggggAgccg..... 1  
 Gi3\_28074714\_x2...cggagacgucgugggaacacggggAgcc..... 1  
 Gl1a\_5940748\_x2.....ggaUcacggggugccgaacu..... 1  
 Gi3\_28178040\_x2.....aacacggggugccgaaUuu..... 1  
 Gi2\_10864347\_x2.....cgugggaacaAgggggugcc..... 1  
 Gi3\_28047534\_x2.....Nugggaacacggggugccgaa..... 1  
 Gi3\_28120730\_x2.....gacgucgugggaacacggggC..... 1  
 Gi2\_10834125\_x2.....gggaacacggggAgccgaac..... 1  
 Gi5\_8817015\_x2...cgauccgagacgCcgugggaacacgggg..... 1  
 Gi4\_559224\_x2...guUggaacacggggugccgaac..... 1  
 Gi2\_10971685\_x2.....cgucgugggaacacggggugAc..... 1  
 Gi2\_10907027\_x2.....gacgucgugggaCcacggggugccg..... 1  
 Gl1a\_5949266\_x2...gaucUgagacgucgugggaacacgggggu..... 1  
 Gi5\_8735085\_x2.....cgucgugggaacaGggggugccgaacu..... 1  
 Gi2\_10835597\_x2.....cAugggaacacggggugccga..... 1  
 Gi2\_10941961\_x2.....ggagaUgucgugggaacacggggugcc..... 1  
 Gi2\_10828759\_x2...aucggagacgucgGgggaacac..... 1  
 Gi1\_4090317\_x2.....ggaacacggggugcAgaacu..... 1  
 Gi3\_28099774\_x2.....aacacggggugcUgaacuu..... 1  
 Gi3\_28208218\_x2.....ggagacguNgugggaacacg..... 1  
 Gi2\_10965165\_x2...aucggUgacgucgugggaacacggggug..... 1  
 Gi1\_4144693\_x2.....ucgugggaNcacggggugc..... 1  
 Gi2\_10883697\_x2.....cgugCgaacacggggugccgaac..... 1

|                                                          |   |
|----------------------------------------------------------|---|
| Gi3_28152540_x2.....aucggagacCucgugggaacacg.....         | 1 |
| Gi5_8826595_x2.....ucgugggaacacgggCugccgaacu.....        | 1 |
| Gi2_10954955_x2.....gacgucgugggaacacggggugccA.....       | 1 |
| Gi2_10858699_x2.....ggagacgucgugggaacacggggugcA.....     | 1 |
| Gi3_28257812_x2.....acgucgugggaacCcggggugccgaa.....      | 1 |
| Gl1a_5939666_x2.....aucggagaNgucgugggaacacggggugcc.....  | 1 |
| Gi2_10947361_x2.....ggagacgucgAgggaacac.....             | 1 |
| Gi1_4133543_x2.....gggaUcacggggugccgaacu.....            | 1 |
| Gi5_8751919_x2.....gucgugggaacacggggGgccgaac.....        | 1 |
| Gi5_8829071_x2.....gGcgugggaacacggggugccgaa.....         | 1 |
| Gi3_28088352_x2.....gGcgugggaacacggggugccgaacuu.....     | 1 |
| Gl1a_5925322_x2.....ggaacacggAgugccgaacu.....            | 1 |
| Gi4_554044_x2.....gucgugggNacacggggugccgaacu.....        | 1 |
| Gi1_4135611_x2.....cgugggaacacggggugccgaU.....           | 1 |
| Gi1_4153443_x2.....ggGgacgucgugggaacacggggugcc.....      | 1 |
| Gi3_28124784_x2.....gagacgucgugggaGcacggggugccgaacu..... | 1 |
| Gi3_28209402_x2.....aucggagacgucgugAgaacacggggugc.....   | 1 |
| Gl1a_5927080_x2.....gugggaacacgggCugccgaacu.....         | 1 |
| Gi5_8802515_x2.....ucgugggaacacggggugccgaa.....          | 0 |
| Gi2_10848809_x2...cgUucggagacgucguggga.....              | 1 |
| Gl1a_5902340_x2.....cgucgugggaacacggggGgccgaacu.....     | 1 |
| Gi2_10908593_x2.....ucgugggaNcacggggugcc.....            | 1 |
| Gi1_4157221_x2.....gGgacgucgugggaacacggggugccga.....     | 1 |
| Gi5_8811299_x2.....ucgGgggaacacggggugccgaac.....         | 1 |
| Gi3_28248462_x2.....ggagacguNgugggaaca.....              | 1 |
| Gi5_8814825_x2.....guAgugggaacacggggugccgaacu.....       | 1 |
| Gi3_28227286_x2...gaucggagNcgucgugggaacacgg.....         | 1 |
| Gi3_27994090_x2.....gacgucgugggGacacgg.....              | 1 |
| Gi5_8775277_x2.....cgugggaaUacggggugccgaac.....          | 1 |
| Gi5_8786763_x2.....Cucggagacgucgugggaacacg.....          | 1 |
| Gi5_8731191_x2.....aacacggggguCccgaacu.....              | 1 |
| Gl1a_5883766_x2.....aucggagacgucgugggaacCggg.....        | 1 |
| Gl1a_5938504_x2.....cgugggaacCggggugc.....               | 1 |
| Gi4_562910_x2.....cgugggaacacggggugc.....                | 0 |
| Gi1_4100263_x2.....gugggaacCcggggugccgaac.....           | 1 |
| Gl1a_5954882_x2.....gucgugggaacacggggGgccgaacu.....      | 1 |
| Gi1_4092871_x2.....cgucgugggaacacgggAugcc.....           | 1 |
| Gi3_28112914_x2.....gacgucgugggaacacAggggu.....          | 1 |
| Gi3_28224928_x2.....ucgugggaacacggggugccUaac.....        | 1 |
| Gi5_8719597_x2.....acgucgugggaacacggggCgccg.....         | 1 |
| Gi2_10959435_x2.....aucgAagacgucgugggaacacgggg.....      | 1 |
| Gi1_4100571_x2.....ucguggAaacacggggugccgaac.....         | 1 |
| Gi3_28126836_x2.....ucgugggaacCcggggugcc.....            | 1 |
| Gi1_4117609_x2.....gugggaacNcggggugccgaacuu.....         | 1 |
| Gi2_10882901_x2.....gugggCacacggggugccga.....            | 1 |
| Gi3_28140822_x2.....cgucgugggaacaGggggugccgaacu.....     | 1 |
| Gi2_10950651_x2.....ucggagacgucgugggaacCcgggg.....       | 1 |

Gi5\_8745701\_x2.....uggaacaacggggugcAga..... 1  
 Gi3\_27986222\_x2.....acgucgugggaacCcggggugccga..... 1  
 Gi2\_10959471\_x2.....cgucgugggaacCcggggugc..... 1  
 Gi3\_27994538\_x2.....Cagacgucgugggaacacggggugccgaac..... 1  
 Gi5\_8746537\_x2.....gugggaacaUggggugccga..... 1  
 Gi2\_10983665\_x2.....gaucggagacgucgugggaacacggggA..... 1  
 Gi3\_28187808\_x2.....cgucgCgggaacacggggugc..... 1  
 Gi2\_10841581\_x2.....gacgucgugggaacacggggugcUgaacu..... 1  
 Gi3\_28260340\_x2.....gaucggCgacgucgugggaacacgg..... 1  
 Gi3\_28182410\_x2.....ucgugggaacacAgggugccg..... 1  
 Gi3\_28169172\_x2.....gCagacgucgugggaacacg..... 1  
 Gi3\_27985100\_x2.....cggAUacgucgugggaacacgggg..... 1  
 Gi3\_27995778\_x2.....cggagacgucguAggaacacggggg..... 1  
 Gi3\_28146398\_x2.....aucggagacguAgugggaacacggggugcc..... 1  
 Gi2\_10832885\_x2.....cggagacAucgugggaacacggggugccgaacu..... 1  
 Gi5\_8801525\_x2.....aGucgugggaacacggggugccgaac..... 1  
 Gi3\_28004736\_x2.....gucAugggaacacggggugcc..... 1  
 Gi1\_4134563\_x2.....agacUucgugggaacacgggg..... 1  
 Gi3\_28158862\_x2.....gacgucgugggaacacggggugAcgaacu..... 1  
 Gi2\_10911365\_x2.....ggagacgucgugggaCcacggggugc..... 1  
 Gi3\_28213278\_x2.....cgugggaacacggUgugcc..... 1  
 Gi2\_10854111\_x2.....gacgucgugggaacacggggUac..... 1  
 Gi3\_28017500\_x2.....ugggaUcacggggugccgaa..... 1  
 Gi5\_8759569\_x2.....cgugggaacacggggugcAgaac..... 1  
 G1a\_5889564\_x2.....ggaacacgCggugccgaacu..... 1  
 Gi1\_4131065\_x2.....gucgugggaacCcggggug..... 1  
 G1a\_5926824\_x2.....cgugggaacacgUggugccgaacu..... 1  
 G1a\_5915572\_x2.....gugggaacacgUggugccga..... 1  
 Gi5\_8828711\_x2.....Aaucggagacgucgugggaacacg..... 1  
 Gi2\_10982243\_x2.....aucggagacgucgugAgaacacgggg..... 1  
 Gi4\_566686\_x2.....gaucggagacgucgugggaacacgggg..... 0  
 Gi4\_564580\_x2.....Ccgugggaacacggggugccgaacu..... 1  
 Gi3\_28194944\_x2.....acgucgugCaacacggggugccgaacu..... 1  
 Gi5\_8800295\_x2.....gugggaGcacggggugccgaa..... 1  
 Gi2\_10926347\_x2.....ggaAacgucgugggaacacggggugc..... 1  
 Gi2\_10982853\_x2.....Ccgagacgucgugggaacacggggugc..... 1  
 Gi5\_8817341\_x2.....ucgugggGacacggggugccgaac..... 1  
 Gi3\_27994086\_x2.....aucggagacgucgugggaacacggggCu..... 1  
 Gi2\_10957883\_x2.....acgucgugggaacUcggggugcc..... 1  
 Gi2\_10873739\_x2.....gaucAgagacgucguggga..... 1  
 Gi3\_28147950\_x2.....ucgugggaacCcggggugccga..... 1  
 Gi1\_4146097\_x2.....ggaacacggggugccgUac..... 1  
 Gi3\_28217294\_x2.....aucggagacguUguggga..... 1  
 Gi1\_4153651\_x2.....gggaacCcggggugccgaacu..... 1  
 Gi3\_28146750\_x2.....ggUgacgucgugggaacacgggg..... 1  
 Gi5\_8825989\_x2.....cgCgggaacacggggugc..... 1  
 Gi3\_28024012\_x2.....auAggagacgucguggga..... 1

|                                                         |   |
|---------------------------------------------------------|---|
| Gi1a_5977764_x2.....cgugggGacacggggugcc.....            | 1 |
| Gi5_8781563_x2.....gggaaUacggggugccgaac.....            | 1 |
| Gi2_10890049_x2.....cgucgugggaacacggggugA.....          | 1 |
| Gi2_10851067_x2.....aucggagacgucgugggaCcacgggg.....     | 1 |
| Gi2_10887913_x2.....ucgugggaacaUggggugccgaac.....       | 1 |
| Gi5_8828939_x2.....cgugggaacacggAgugccgaac.....         | 1 |
| Gi3_28083378_x2.....acgucgugggaacCcggg.....             | 1 |
| Gi3_28222854_x2.....uggUaacacggggugccgaa.....           | 1 |
| Gi5_8799679_x2.....cgugAgaacacggggugcc.....             | 1 |
| Gi2_10980431_x2.....gacgucgugggaCcacggggugccgaac.....   | 1 |
| Gi3_28205208_x2..cgaucggagacgucguggAaacacg.....         | 1 |
| Gi3_28045830_x2.....aucggagacgucguCggaacacggggugc.....  | 1 |
| Gi3_28175568_x2.....gaucggagacgucguggUacacggg.....      | 1 |
| Gi3_28138966_x2.....aucggagacguUgugggaacacgg.....       | 1 |
| Gi2_10869059_x2.....cgUagacgucgugggaacacggggg.....      | 1 |
| Gi1a_5900050_x2.....Gucggagacgucgugggaacacg.....        | 1 |
| Gi2_10918505_x2.....gagacgucgugggaacacggggugccgaa.....  | 0 |
| Gi5_8819157_x2.....ucggGgacgucgugggaacacg.....          | 1 |
| Gi2_10956395_x2.....acgucgugAgaacacggggugcc.....        | 1 |
| Gi3_28127928_x2.....cggagacgucgugggaacacgggAu.....      | 1 |
| Gi3_28061692_x2.....gacgucgugggaacacggggugccgaCcu.....  | 1 |
| Gi2_10876257_x2.....gaucggagacgucgugggaUacggggug.....   | 1 |
| Gi1_4113657_x2.....acgucgugggaacacggggGgccg.....        | 1 |
| Gi2_10931209_x2.....gaucggagacgucgugggUacacgggg.....    | 1 |
| Gi1_4139789_x2.....ugggaCcacggggugccgaac.....           | 1 |
| Gi3_27994840_x2Augcgaucggagacguc.....                   | 1 |
| Gi1_4149651_x2.....aCacgucgugggaacacggggugcc.....       | 1 |
| Gi2_10844929_x2.....aucggagacgucgugggaacacgAggug.....   | 1 |
| Gi1_4117193_x2.....ucgugggaacacggggugcA.....            | 1 |
| Gi1_4132021_x2.....ggaacacggggugccgaaAu.....            | 1 |
| Gi2_10978599_x2.....Ugagacgucgugggaacacggggugccga.....  | 1 |
| Gi1_4153685_x2.....gugggaGcacggggugccgaac.....          | 1 |
| Gi1_4143943_x2.....ugggaacacggggugccgaaGu.....          | 1 |
| Gi1a_5927938_x2.....gggUacacggggugccgaaacu.....         | 1 |
| Gi3_28079012_x2.....agacgucgugggaacacgAggugccgaac.....  | 1 |
| Gi3_28027472_x2.....Cucggagacgucgugggaacacggggugcc..... | 1 |
| Gi2_10899175_x2.....gucgugggaacacggggCgccga.....        | 1 |
| Gi3_28002284_x2.....gucgugggaacacggggugccCaac.....      | 1 |
| Gi3_28025412_x2.....cgucgugggaacacgAgg.....             | 1 |
| Gi2_10896905_x2.....gaacacgggggUcccgaacu.....           | 1 |
| Gi3_28204440_x2.....agacgucgugggaacacggggUaccgaacu..... | 1 |
| Gi3_27996056_x2.....Aagacgucgugggaacacggggugccg.....    | 1 |
| Gi3_28142652_x2.....aucggagacguAgugggaacacgggg.....     | 1 |
| Gi2_10896197_x2.....gucgugggNacacggggugccg.....         | 1 |
| Gi3_28049686_x2.....gggaacacggggugccgaGcuu.....         | 1 |
| Gi2_10978789_x2.....aacacUggggugccgaacu.....            | 1 |
| Gi1_4123717_x2.....cgucgugggaacacgggAugccgaacu.....     | 1 |

G1a\_5940784\_x2.....Gcgucgugggaacacggggu..... 1  
 Gi3\_28260530\_x2.....aucggagacgucguggAa..... 1  
 Gi2\_10908451\_x2.....ggaacacggggugccCaac..... 1  
 Gi3\_28151552\_x2.....cggagaUgucgugggaacacggggugcc..... 1  
 Gi2\_10984723\_x2.....gagacgucguggUaacacggggugcc..... 1  
 Gi1\_4144995\_x2.....uggaacaacggggugAcgaac..... 1  
 Gi2\_10975245\_x2.....agUcgucgugggaacacggggugccgaac..... 1  
 Gi3\_28107132\_x2.....aucggagacgucgugggaacacggggUAcc..... 1  
 Gi3\_28027504\_x2.....aucggagacAucgugggaacacgggg..... 1  
 Gi5\_8817981\_x2.....gugggaacaUggggugccg..... 1  
 Gi1\_4135067\_x2.....gucgugggaacacggggugccgaCc..... 1  
 Gi3\_28106058\_x2.....gaucggagacgucgugggaacacggggCgcc..... 1  
 Gi1\_4151531\_x2.....gacgucgugggaacacggggugcAgaacu..... 1  
 Gi3\_28185116\_x2.....ucgGgggaacacggggugccga..... 1  
 Gi3\_28058028\_x2.....gaacacggggugccgaau..... 1  
 Gi2\_10902313\_x2.....gcgaucggNgacgucgugggaacac..... 1  
 Gi1\_4153833\_x2.....gacgucgugcCaacacggggugccgaac..... 1  
 Gi2\_10890807\_x2.....ucggagacgCcgugggaacacggggugccga..... 1  
 Gi3\_28011654\_x2.....cgugggaacacggggugccgCa..... 1  
 Gi2\_10849697\_x2.....cggagacgucgugggCacacggggugcc..... 1  
 Gi3\_28250256\_x2.....ggaacacggcCgugccgaac..... 1  
 Gi3\_27997362\_x2.....cggagacgucgugggaacCcgggugc..... 1  
 Gi5\_8800859\_x2.....gacgucgugggaacacggggugccgaGcu..... 1  
 Gi1\_4121533\_x2.....gacgucgugggaacacggg..... 0  
 Gi2\_10902565\_x2.....agGcgucgugggaacacggggugccg..... 1  
 Gi1\_4104005\_x2.....ucgugggaacGcgggugcc..... 1  
 Gi3\_28034168\_x2.....gaucggagacgucguggAaacac..... 1  
 Gi2\_10832027\_x2.....gugggaacacggggugcG..... 1  
 Gi1\_4156167\_x2.....acgucgugggaacacggAgugcc..... 1  
 Gi3\_28140090\_x2.....aucggagacguGgugggaacacggg..... 1  
 Gi2\_10925115\_x2.....gggaacacggcCgugccgaac..... 1  
 Gi3\_28189456\_x2.....cggagacgucgCgggaacacgg..... 1  
 Gi1\_4153173\_x2.....ggagacgucgugggaacacggggU..... 1  
 Gi2\_10945567\_x2.....gaucggagGcgucgugggaacac..... 1  
 Gi1\_4125181\_x2.....gaucggagacgucgugggaacacggggU..... 1  
 Gi5\_8780207\_x2.....cgucgGgggaacacggggugccgaac..... 1  
 Gi2\_10863967\_x2.....ggaacacggggCgccga..... 1  
 Gi5\_8772941\_x2.....gucgugCgaacacggggugccgaacu..... 1  
 Gi3\_28211198\_x2.....cAaucggagacgucgugggaacacg..... 1  
 Gi1\_4133883\_x2.....ucgugggaacacgCggugccgaacu..... 1  
 Gi2\_10956569\_x2.....cgAcgugggaacacggggugccgaac..... 1  
 Gi1\_4111235\_x2.....ucggagGcgucgugggaacacg..... 1  
 Gi2\_10839399\_x2.....ucggUgacgucgugggaacacg..... 1  
 Gi3\_28025162\_x2.....gggaacacggggugccCaa..... 1  
 Gi3\_28259664\_x2.....gaucggagacgucgugggaacacggggCgc..... 1  
 Gi1\_4147287\_x2.....cgugggaacacggggCgccgaac..... 1  
 Gi1\_4158531\_x2.....gggaacacgUggugccgaacu..... 1

|                                                              |   |
|--------------------------------------------------------------|---|
| Gi3_28244206_x2.....gucgugggaaAacggggu.....                  | 1 |
| Gi5_8827979_x2.....Ggggaacacggggugccga.....                  | 1 |
| Gi2_10892095_x2.....acgucgugggaaacacggAgugccgaac.....        | 1 |
| Gi2_10963525_x2.....cggagacgucgugggaaacGcggggugc.....        | 1 |
| Gi1_4095367_x2.....gugggaacacggggugUcgaac.....               | 1 |
| Gi1_4153155_x2.....agacgucgugggaaacGcggggugccgaacu.....      | 1 |
| Gi3_28232438_x2.....ucggagacgucgugggaaacGcggg.....           | 1 |
| Gi1_4135219_x2.....aCcgagacgucgugggaaacacggggugcc.....       | 1 |
| Gi2_10900101_x2.....gaucggagacgucguAggaacac.....             | 1 |
| Gi5_8766741_x2.....ucAugggaacacggggugccgaac.....             | 1 |
| Gi1_4121037_x2.....gaaGacggggugccgaacu.....                  | 1 |
| Gi2_10916195_x2.....acgucgugggaaacUggggugccg.....            | 1 |
| Gi2_10989931_x2.....Cugggaacacggggugccgaacuu.....            | 1 |
| Gi1_4121709_x2.....gugggaGcacggggugccgaacuu.....             | 1 |
| Gi3_28167826_x2.....ggagacgucgugggGacacgg.....               | 1 |
| G1a_5925776_x2.....gGgacgucgugggaaacacg.....                 | 1 |
| Gi3_28083722_x2.....gagacgCcgugggaaacacggggugc.....          | 1 |
| Gi5_8727377_x2.....aucggagaNucgugggaaacacgggg.....           | 1 |
| Gi2_10865487_x2.....gucgugggaaacacggggugAcg.....             | 1 |
| G1a_5964546_x2.....cguAggaaacacggggugccgaacu.....            | 1 |
| Gi1_4151537_x2.....gugggaacCcggggugccgaacuu.....             | 1 |
| Gi3_28130048_x2.....gucgugggaaacacgAggugcc.....              | 1 |
| Gi3_28204130_x2.....gucgugggaaacCcggggugc.....               | 1 |
| Gi3_28158442_x2.....agacgucgugggaaacacggggAgcc.....          | 1 |
| Gi1_4137813_x2.....cgucgAgggaacacggggugccgaac.....           | 1 |
| Gi3_28160214_x2.....aucggGgacgucgugggaaacacggggugccgaac..... | 1 |
| Gi1_4090011_x2.....aGcggagacgucgugggaaac.....                | 1 |
| Gi1_4118895_x2.....acgucgugggaaacacggg.....                  | 0 |
| Gi5_8788643_x2.....gaacacgggUugccgaacu.....                  | 1 |
| G1a_5878350_x2.....auUggagacgucgugggaaacacg.....             | 1 |
| Gi1_4119585_x2.....cgAagacgucgugggaaacacggggugcc.....        | 1 |
| Gi3_28141660_x2.....Agaucggagacgucgugggaaacacggg.....        | 1 |
| Gi3_28114438_x2.....aucggagacgucCugggaacacgggg.....          | 1 |
| G1a_5964494_x2.....Cacacggggugccgaacu.....                   | 1 |
| Gi2_10947627_x2.....gaucggagacgucAugggaacacgggg.....         | 1 |
| Gi5_8736743_x2.....uGgugggaaacacggggugcc.....                | 1 |
| Gi3_28131848_x2.....Caacacggggugccgaacuu.....                | 1 |
| Gi5_8769845_x2.....cggagacgucgugggaaAacggg.....              | 1 |
| Gi2_10871215_x2.....aucggagacgCcgugggaaacacgggg.....         | 1 |
| Gi5_8774751_x2.....cgucUugggaacacggggugccgaac.....           | 1 |
| Gi5_8736693_x2.....cgucgugggaaacacggggGgccgaacuu.....        | 1 |
| Gi1_4146839_x2.....gaucggagacgucgugggaaacacggggugcc.....     | 0 |
| Gi3_28160886_x2.....cggagacgucgugggGacacggggugcc.....        | 1 |
| Gi1_4143291_x2.....aucAgagacgucgugggaaacacgggg.....          | 1 |
| Gi5_8771611_x2.....ggagacgucgugggaaacacggggugccgaacA.....    | 1 |
| Gi2_10855121_x2.....ggagacgucgugggaaUacggggugcc.....         | 1 |
| Gi5_8728983_x2.....gUagacgucgugggaaacacggggugccgaacu.....    | 1 |

Gi3\_27989112\_x2.....gAcgugggaacacggggugccga..... 1  
 Gi1\_4150617\_x2.....ucggCgacgucgugggaacacggggu..... 1  
 Gi5\_8770309\_x2.....Gucggagacgucgugggaacac..... 1  
 Gi3\_28156956\_x2.....cguggCaacacggggugcc..... 1  
 Gi3\_28186522\_x2.....gggaacacggCgugccgaacu..... 1  
 Gi3\_28184774\_x2.....aucggagacgucUagggaacacggggugcc..... 1  
 Gi3\_28077624\_x2.....gugCgaacacggggugccga..... 1  
 Gi1\_4128303\_x2.....gggaacacggUgugccgaacu..... 1  
 Gi2\_10894635\_x2.....gaucggagaUgucgugggaacacggggu..... 1  
 Gi5\_8807159\_x2.....gugggaaAacggggugccga..... 1  
 Gi2\_10867037\_x2.....ucggagGcgucgugggaaca..... 1  
 Gi2\_10945165\_x2.....cgucgugggaacacggggugccgaCc..... 1  
 Gi3\_28093608\_x2.....agacgucgugggaacaUggggugccgaacu..... 1  
 Gi1\_4113867\_x2.....ggagacgucguAggaacacggggugcc..... 1  
 Gl1\_5877556\_x2.....gugggaacCcgggugccgaac..... 1  
 Gi5\_8754761\_x2.....cgugUgaacacggggugccga..... 1  
 Gi1\_4134493\_x2.....cggagacgNcgugggaacacggggu..... 1  
 Gi2\_10931577\_x2.....cgugggaacacgggguAccga..... 1  
 Gl1\_5937132\_x2.....aucggagacgucgugggaacacggggA..... 1  
 Gi3\_28192218\_x2.....ucUgagacgucgugggaacacg..... 1  
 Gi2\_10885843\_x2.....gCgacgucgugggaacacggggugc..... 1  
 Gi5\_8737313\_x2.....cgGgggaacacggggugcc..... 1  
 Gi2\_10904979\_x2.....cgucUugggaacacggggugccgaac..... 1  
 Gi3\_28145282\_x2.....aucggagacgucguggAaacacggggugc..... 1  
 Gi1\_4143271\_x2.....gaucggagacgucgugggaGcac..... 1  
 Gi5\_8774635\_x2.....agacgucgugAgaacacggggugccgaacu..... 1  
 Gi5\_8785051\_x2.....aucggagacgCcgugggaacac..... 1  
 Gi2\_10992275\_x2.....aucggagacgucgugggCacacggggugcc..... 1  
 Gi1\_4131007\_x2.....gugggaacacggggugcA..... 1  
 Gl1\_5954060\_x2.....gucgugggNacacggggugccgaac..... 1  
 Gi3\_28018452\_x2.....aacacgggNugccgaacuu..... 1  
 Gi5\_8816251\_x2.....gacgucgugggaacacggggugccgaUcu..... 1  
 Gl1\_5940878\_x2.....aucggagGcgucgugggaacacgggg..... 1  
 Gi2\_10854613\_x2.....gugggaUcacggggugccgaa..... 1  
 Gl1\_5941972\_x2.....aUacgucgugggaacacggggugccgaac..... 1  
 Gi2\_10847465\_x2.....gacgucgugggaacacggggugccgaGc..... 1  
 Gi2\_10991787\_x2.....ggagacgucgCgggaacacggggugc..... 1  
 Gi3\_28237846\_x2.....acgucgugggaacacggggugccgaCc..... 1  
 Gi3\_28186506\_x2.....Cagacgucgugggaacacggggu..... 1  
 Gi1\_4137301\_x2.....cgucguAggaacacggggugcc..... 1  
 Gl1\_5951448\_x2.....ugggaacacggggugccgaUcu..... 1  
 Gi5\_8776731\_x2.....aGcggagacgucgugggaaca..... 1  
 Gi2\_10930565\_x2.....gaUacgucgugggaacacggggugc..... 1  
 Gi2\_10835865\_x2.....ggagacgucgugggaacCcgggugcc..... 1  
 Gi3\_28164150\_x2.....cgucgugggaacaUggggugccga..... 1  
 Gi2\_10867793\_x2.....gaucggagacAucgugggaacac..... 1  
 Gi2\_10868985\_x2.....acgucgugggaGcacggggu..... 1



Gi5\_8767315\_x2.....cgugggaacacggggugcUgaacuu..... 1  
 Gi5\_8795707\_x2....gaucggagacAucgugggaacacggg..... 1  
 Gi1\_4143281\_x2.....gCgaacacggggugccgaacuu..... 1  
 Gi3\_28135256\_x2.....cggCgacgucgugggaacacgggg..... 1  
 Gi3\_28250844\_x2....aucggagacgucgugUgaacacgggg..... 1  
 Gi3\_28044982\_x2.....gucgugggGacacgggg..... 1  
 Gi5\_8780513\_x2.....cgugggaacacgAggugccgaacuu..... 1  
 Gi5\_8736009\_x2.....ugNgaacacggggugccgaacu..... 1  
 Gi1\_4126433\_x2....ucggGgacgucgugggaacacg..... 1  
 Gi3\_28030300\_x2....gaucggagacgucgugAgaacacgggg..... 1  
 Gi2\_10864805\_x2.....gucgugggaacacggggugUc..... 1  
 Gi2\_10847181\_x2.....ggagacguNgugggaacacggggugccg..... 1  
 Gi1\_4093765\_x2....aucgUagacgucgugggaacacgg..... 1  
 Gi2\_10944499\_x2.....acgAcgugggaacacggggugccgaacu..... 1  
 Gi2\_10833489\_x2....cgUucggagacgucgugggaacacggggugc..... 1  
 Gl1a\_5975640\_x2.....Agaacacggggugccgaac..... 1  
 Gi2\_10863467\_x2....aucgAagacgucgugggaacacggggugc..... 1  
 Gi3\_28054952\_x2.....agacgucgugggaacacggggugAcgaacu..... 1  
 Gi2\_10838643\_x2.....ggagacgucgugggaaUacggggugc..... 1  
 Gi1\_4092969\_x2.....acgucgugggaacacggggCgcc..... 1  
 Gi5\_8821983\_x2.....ucgugggaacacAgggugccgaac..... 1  
 Gi5\_8731341\_x2....gaucggagacgucgugggCacacggg..... 1  
 Gi3\_28225864\_x2.....ggagacgucgugggaacacggggugcA..... 1  
 Gl1a\_5903494\_x2.....gCagacgucgugggaacacg..... 1  
 Gi2\_10991643\_x2.....Cacgucgugggaacacggggugcc..... 1  
 Gl1a\_5951326\_x2.....gacgucAugggaacacgggg..... 1  
 Gi3\_28019874\_x2....Gcggagacgucgugggaacacggggugccg..... 1  
 Gi3\_28196352\_x2.....Nugggaacacggggugccga..... 1  
 Gi3\_28045062\_x2....ucAgagacgucgugggaacacggg..... 1  
 Gi5\_8733875\_x2.....gugggaaUacggggugcc..... 1  
 Gi2\_10886115\_x2....gaucggagacgucguAggaacacgggg..... 1  
 Gi1\_4089383\_x2.....gacgucgugggaacacggggugccgGac..... 1  
 Gi2\_10986465\_x2.....gucgugggaacacggggugccgUac..... 1  
 Gi2\_10951341\_x2....Uucggagacgucgugggaacacg..... 1  
 Gi3\_28113002\_x2....cgaucggagacgucgugggaacacggggC..... 1  
 Gi3\_27984638\_x2.....gucgugggUacacggggugccgaac..... 1  
 Gi3\_28189526\_x2.....aUgucgugggaacacggggugccg..... 1  
 Gi3\_28049906\_x2.....ggagacgucgugggaacacggAgu..... 1  
 Gi5\_8815343\_x2.....Gacggggugccgaacuu..... 1  
 Gi2\_10913273\_x2....Ccgagacgucgugggaacacg..... 1  
 Gi4\_555468\_x2.....Cggaacacggggugccgaacu..... 1  
 Gi2\_10953277\_x2....aucggagacgucgugggG..... 1  
 Gi2\_10983489\_x2.....ggCaacacggggugccgaacu..... 1  
 Gi1\_4139185\_x2.....gugggaaGacggggugccgaacu..... 1  
 Gi2\_10870367\_x2....ucgugggaacCcggggugccgaa..... 1  
 Gi5\_8754979\_x2.....cacgggguNccgaacuu..... 1  
 Gi3\_28100298\_x2.....acGcggggugccgaacu..... 1

Gi2\_10877525\_x2.....gggaacacggggGgccgaa..... 1  
Gi3\_28001086\_x2.....acgucgugggaacacggggCgccg..... 1  
Gi3\_28220794\_x2.....agacgucgugggaacacgAgggugcc..... 1  
Gi3\_28211584\_x2.....gucAugggaacacggggug..... 1  
Gi2\_10958501\_x2.....cgugggaacaUggggugccgaa..... 1  
Gi1\_4129545\_x2.....gCacacggggugccgaaacu..... 1  
Gi2\_10843835\_x2.....gaCcgagacgucgugggaacacggggugcc..... 1  
Gi5\_8734691\_x2.....cgugggaGcacggggugcc..... 1  
Gi2\_10934913\_x2.....cgugggaacacggggAgccgaa..... 1  
Gi2\_10929449\_x2.....cggagaGgucgugggaacacggggugcc..... 1  
Gi3\_28159372\_x2.....gGucggagacgucgugggaacacggggug..... 1  
G1a\_5962704\_x2.....Uaucggagacgucgugggaacacg..... 1  
Gi5\_8774041\_x2.....gucguggCaacacggggugccgaaacu..... 1  
Gi2\_10848887\_x2.....aucggagacgucgugAgaacacg..... 1  
G1a\_5953002\_x2.....ggNaacacggggugccgaaacu..... 1  
Gi2\_10964205\_x2.....ucggagacgucgugggaGcacggggg..... 1  
Gi3\_28086502\_x2.....cgaucggagacgucgugggaGcacggggug..... 1  
Gi1\_4125693\_x2.....gggaacacNgggugccgaaacu..... 1  
Gi2\_10842157\_x2.....aucggagacgucgugggaacacCgggugc..... 1  
Gi3\_28213796\_x2.....Ccgugggaacacggggugc..... 1  
Gi3\_28093610\_x2.....gacgucgGgggaacacggg..... 1  
Gi2\_10857267\_x2.....ugggCacacggggugccgaaac..... 1  
Gi1\_4101551\_x2.....cggagacgNcgugggaacacggggugcc..... 1  
Gi5\_8817253\_x2.....cAugggaacacggggugc..... 1  
Gi2\_10887611\_x2.....aucggagacgucgugggaaUacg..... 1  
Gi3\_28258698\_x2.....gucgugggaacacggggAgcc..... 1  
Gi3\_28214636\_x2.....cgucgugggaGcacggggugccgaa..... 1  
Gi1\_4110939\_x2.....gugggaacacggggugccgaGcuu..... 1  
Gi3\_28025478\_x2.....ucNugggaacacggggugccgaaacu..... 1  
G1a\_5910074\_x2.....guAggaacacggggugccgaa..... 1  
G1a\_5902188\_x2.....gaucggagacgucguAggaacacggggg..... 1  
Gi3\_28022252\_x2.....aucggagacgucgAgggaacacgggg..... 1  
Gi2\_10860263\_x2.....gaUgucgugggaacacggggugccgaaac..... 1  
G1a\_5916242\_x2.....cgugggaacacggAgugccgaaacu..... 1  
Gi2\_10887663\_x2.....cguggCaacacggggugcc..... 1  
Gi1\_4098975\_x2.....ggaacacgggAugccgaaacu..... 1  
Gi2\_10863101\_x2.....ucgugggaGcacggggugcc..... 1  
Gi3\_28260520\_x2.....cgaucggGgacgucguggg..... 1  
Gi1\_4115209\_x2.....ugggaacacggggCgccgaaac..... 1  
Gi1\_4130411\_x2.....gucgugggaacacggggugcAgaacu..... 1  
Gi4\_561576\_x2.....gugggGacacggggugccgaaacu..... 1  
Gi3\_28013396\_x2.....cggagacgucgugggGacacggggugccga..... 1  
G1a\_5907902\_x2.....gucgugggaacacggggugccgGacu..... 1  
Gi5\_8778217\_x2.....ugggaacaNggggugccgaaacu..... 1  
Gi1\_4119935\_x2.....Naacacggggugccgaaacu..... 1  
Gi3\_28200094\_x2.....aucggagacgucgugggaacacUgg..... 1  
Gi5\_8760087\_x2.....aucggagacgucgCgggaacacggggg..... 1

Gi2\_10853633\_x2.....Uucggagacgucgugggaaca..... 1  
Gi3\_28117880\_x2.....cggagacgucgugggaacacgggA..... 1  
Gi2\_10842069\_x2.....ugggaacacggggugccgaacuC..... 1  
Gi2\_10920459\_x2.....ucgugggaacacggCgugccgaacu..... 1  
Gi5\_8769759\_x2.....cguAgugggaacacggggugccgaacu..... 1  
Gi5\_8828425\_x2.....Uucggagacgucgugggaacacggggg..... 1  
Gi2\_10931937\_x2.....cgGcuggggaacacggggugc..... 1  
Gi2\_10944369\_x2.....auAggagacgucgugggaacacggggug..... 1  
Gi5\_8724157\_x2.....cgucgugggaacacggggugccgaaUu..... 1  
Gi3\_28130332\_x2.....agacgucgNgggaacacgggg..... 1  
Gi2\_10982777\_x2.....ugggaacacgggUugccg..... 1  
Gi3\_28035482\_x2.....acgucgugggaacacggggGgccga..... 1  
Gi1\_4106421\_x2.....ucgugggCacacggggugccgaac..... 1  
Gi3\_28209830\_x2.....auGggagacgucgugggaacacggggg..... 1  
Gi3\_28075406\_x2.....ggagGcugcuggggaaca..... 1  
G1a\_5928576\_x2.....guggUaacacggggugcc..... 1  
Gi3\_28147186\_x2.....ucUugggaacacggggugc..... 1  
Gi1\_4132445\_x2.....acgucgugggaacacggAgugccgaacu..... 1  
Gi3\_28108522\_x2...cCaucggagacgucguggg..... 1  
Gi4\_562384\_x2.....ggaacacgNggugccgaac..... 1  
Gi1\_4123689\_x2.....Ucugcuggggaacacggggugcc..... 1  
Gi3\_28178882\_x2.....cggagacgucgCgggaacacggggugccgaacu..... 1  
Gi2\_10899543\_x2.....gucgugggaGcacggggugccga..... 1  
Gi3\_28067682\_x2.....cggagacgCcgugggaacacggggugc..... 1  
Gi3\_27992782\_x2.....ggGgacgucgugggaacacggggugcc..... 1  
Gi2\_10942205\_x2.....aucggagacgucguAggaacacg..... 1  
Gi3\_28070100\_x2.....ugggaacacUgggugccga..... 1  
Gi3\_28086824\_x2...cgGucggagacgucgugggaacacg..... 1  
Gi2\_10908651\_x2...gaucggagNcgucgugggaacacggggug..... 1  
Gi2\_10864319\_x2.....gacgucgugggGacacggggugccgaacu..... 1  
G1a\_5905498\_x2.....gggaacacggggugccgaC..... 1  
Gi1\_4103325\_x2.....guggAaacacggggugccgaac..... 1  
Gi3\_28024400\_x2.....Uagacgucgugggaacacggggugccga..... 1  
Gi3\_27993594\_x2.....ugggaacacggCgugccgaa..... 1  
G1a\_5955720\_x2.....Uacgucgugggaacacggggugccgaac..... 1  
Gi1\_4136963\_x2.....agacgucgugggaacacggggugccgaCcu..... 1  
Gi3\_28198812\_x2.....ggaacacggAgugccgaa..... 1  
Gi1\_4118465\_x2.....agUcugcuggggaacacacggggugccgaacu..... 1  
Gi2\_10911625\_x2...gaucggUgacgucgugggaacacggggg..... 1  
Gi3\_28069644\_x2.....ucgugggaacacggggUac..... 1  
Gi3\_28121946\_x2.....cgugggaacacggCgugccgaac..... 1  
Gi2\_10930725\_x2...auAggagacgucgugggaaca..... 1  
Gi3\_28068090\_x2.....acAucgugggaacacacggggugcc..... 1  
Gi3\_28208734\_x2.....ucUugggaacacggggugccga..... 1  
Gi3\_28173088\_x2.....ugggaCcacggggugccg..... 1  
Gi5\_8771285\_x2.....agaUgucgugggaacacggggugccgaacu..... 1  
Gi3\_28152214\_x2.....aucggagacgucguCggaacacggggg..... 1

Gi1\_4140677\_x2.....cgucgugggCacacggggugccgaacu..... 1  
 Gi2\_10935903\_x2.....aucggagacgucgugggaacacgCggugc..... 1  
 Gi3\_28083038\_x2.....uggaacacggggugcAg..... 1  
 Gi4\_559150\_x2.....cgugggaacaUggggugccgaacu..... 1  
 Gi1\_4120675\_x2.....aucggagacgucgugggaGcacggggugcc..... 1  
 Gi3\_28212462\_x2.....gacAucgugggaacacgggggu..... 1  
 Gi2\_10944383\_x2.....cgucguAggaacacggggugccga..... 1  
 Gi2\_10943467\_x2.....gaucggagacgucguAggaaca..... 1  
 Gi3\_28108864\_x2.....cgGucggagacgucgugggaacacgggggu..... 1  
 Gi3\_28182042\_x2.....cgucgugggaacacggggugcGgaacu..... 1  
 Gi2\_10977281\_x2.....gacgucgugggaacacAgggugccgaac..... 1  
 Gi1\_4117099\_x2.....acgucgugggaacacAgggugccg..... 1  
 Gi3\_28200704\_x2.....gaucggagacgucgugggaacGcggggugcc..... 1  
 Gi4\_558578\_x2.....uggaacacggggugccgGacu..... 1  
 Gi2\_10875041\_x2.....ugUgaacacggggugccgaa..... 1  
 Gi5\_8825617\_x2.....gacgucgCgggaacacggggugccg..... 1  
 Gi2\_10955383\_x2.....ggaacaGggggugccgaacu..... 1  
 Gi2\_10953771\_x2.....aucggagacgucgugggaUacggg..... 1  
 Gi2\_10990945\_x2.....acgucgCgggaacacggggugc..... 1  
 Gi3\_28012794\_x2.....gGucggagacgucgugggaaca..... 1  
 Gi2\_10877343\_x2.....cguUgugggaacacggggugcc..... 1  
 Gi3\_28122468\_x2.....gagacgucgCgggaacacggggugccgaacu..... 1  
 Gi2\_10976997\_x2.....uggaacacggggguCccgaacu..... 1  
 Gi2\_10853711\_x2.....aucAgagacgucguggga..... 1  
 Gi2\_10923721\_x2.....acgucgugggaacaUggggugc..... 1  
 Gi5\_8786291\_x2.....gugggaacacggggugccgG..... 1  
 Gi1\_4097963\_x2.....ucgugggaacacggUgugcc..... 1  
 Gi2\_10903109\_x2.....ggagacgucgugggaacaUggggugccgaacu..... 1  
 Gi1\_4150127\_x2.....uggaacacggggugcUgaacuu..... 1  
 Gi1\_4135015\_x2.....guAggaacacggggugcc..... 1  
 Gi3\_28049840\_x2.....cgucgugggaacacggggugccUaacu..... 1  
 Gi3\_28039276\_x2.....gucgugggaacacggggugccgaC..... 1  
 Gi3\_28206544\_x2.....aGcggagacgucgugggaac..... 1  
 Gi2\_10867485\_x2.....aucggagacgucgugggaUca..... 1  
 Gi3\_28165790\_x2.....gacgAcgugggaacacggggugccgaacu..... 1  
 Gi1\_4098391\_x2.....gugggaacacgggguAccgaac..... 1  
 Gi3\_28092844\_x2.....aucggagacgucgugggaaAacggggugcc..... 1  
 Gi4\_563258\_x2.....uggaacCcgggugccgaacu..... 1  
 Gi3\_28222614\_x2.....gUucggagacgucgugggaacacggggugccg..... 1  
 Gi2\_10986835\_x2.....uggaacacggCgugccgaacu..... 1  
 Gl1a\_5904904\_x2.....cgugggaacacggggugU..... 1  
 Gi2\_10952529\_x2.....cguCggaacacggggugccgaac..... 1  
 Gi3\_28216682\_x2.....Ccgugggaacacggggugccg..... 1  
 Gi4\_562610\_x2.....gugggaacacggggugccCaacu..... 1  
 Gi3\_28149706\_x2.....agacgucgUgAaacacggggugccgaac..... 1  
 Gl1a\_5931836\_x2.....ggaGacggggugccgaacu..... 1  
 Gi2\_10983475\_x2.....cgaucggagacgucguAggaacacggg..... 1

Gi1\_4133739\_x2.....uggaacaGggggugccgaacu..... 1  
 Gi1\_4153781\_x2.....gucguggaacaacggggCgccgaac..... 1  
 Gi3\_28001934\_x2....gaucAgagacgucguggaacaacacgg..... 1  
 Gi3\_28075318\_x2.....gucguggaacaacacggggugccga..... 1  
 Gi1\_4137903\_x2.....cgGcguggaacaacggggugcc..... 1  
 Gi1\_4107537\_x2.....cguggaacaacggggugccgaacuC..... 1  
 Gi3\_28098258\_x2.....ggUaacacggggugccga..... 1  
 Gi3\_28039218\_x2.....agacgucguggaGcacggggugccgaacu..... 1  
 Gi2\_10899575\_x2....gaucggagacgucguggaacaacggggGg..... 1  
 Gi2\_10835505\_x2.....ggagacgucgugggGacacg..... 1  
 G1a\_5954878\_x2.....guUggaacaacggggugccg..... 1  
 Gi3\_28163782\_x2.....cgucguCggaacaacggggugccg..... 1  
 Gi2\_10901013\_x2....gAagacgucguggaacaacggggugc..... 1  
 Gi3\_28215310\_x2.....gacgucguggaacaacggggC..... 1  
 Gi1\_4097495\_x2.....uggaacUcggggugccgaacu..... 1  
 Gi2\_10893231\_x2....aucggagacgCcguggga..... 1  
 Gi2\_10840785\_x2....aucgCagacgucguggaaca..... 1  
 Gi3\_27997404\_x2.....Aacgucguggaacaacggggg..... 1  
 G1a\_5977458\_x2.....gaacaacggggugccAaac..... 1  
 Gi2\_10927245\_x2.....cgCcguggaacaacggggugccgaa..... 1  
 G1a\_5941316\_x2.....guggaacaacggggugUcg..... 1  
 G1a\_5970886\_x2.....cguggaacaacggggugccgCac..... 1  
 Gi2\_10972641\_x2....gaucggagGcgucguggaacaacggggug..... 1  
 Gi3\_27990376\_x2.....acgucguggaacaacgUggugccgaacu..... 1  
 Gi5\_8780763\_x2.....cgugggaGcacggggugccga..... 1  
 Gi3\_28187048\_x2....gUucggagacgucguggaacaac..... 1  
 Gi3\_27991622\_x2.....ggagGcgucguggaacaacggggugcc..... 1  
 Gi2\_10945277\_x2.....acgucguggaacaacggggUacc..... 1  
 Gi1\_4113073\_x2.....cgugAgaacaacggggugccga..... 1  
 Gi1\_4133549\_x2.....ucguggaacaacggggugccgaacu..... 1  
 Gi2\_10849345\_x2.....cguAguggaacaacggggugccgaacu..... 1  
 Gi2\_10870841\_x2.....ggagacgucguggaacaacggggCg..... 1  
 Gi2\_10908427\_x2....aucggagUcgucguggaacaacgggg..... 1  
 Gi2\_10963435\_x2.....ucggagacgucguggaaUa..... 1  
 G1a\_5880852\_x2.....ggagacgucgugggGacacggggugcc..... 1  
 Gi5\_8754799\_x2.....aUacgucguggaacaacggggugccga..... 1  
 Gi3\_28136026\_x2.....agacgucguggaacaacggggCgcc..... 1  
 Gi2\_10885487\_x2.....ucguggaacaacCgggugccgaacu..... 1  
 G1a\_5957666\_x2.....gUagacgucguggaacaacggggugc..... 1  
 Gi2\_10879465\_x2....gaucggagacgucguggaGcacgg..... 1  
 G1a\_5913130\_x2.....gacgucgCgggaacaacggggugccgaacu..... 1  
 Gi2\_10880397\_x2....cgaucggagacgucgugggGacacg..... 1  
 Gi1\_4133395\_x2....aucggagacgucgugggGacacgggg..... 1  
 Gi2\_10861587\_x2.....guggaacaGggggugccgaac..... 1  
 Gi2\_10928277\_x2....aucggGgacgucguggaacaac..... 1  
 Gi5\_8754949\_x2.....gGgacgucguggaacaacggggugcc..... 1  
 Gi3\_28006104\_x2.....agacgucguggaGcacggggugcc..... 1

|                                                            |   |
|------------------------------------------------------------|---|
| Gi1_4147951_x2.....gugggaacacggggCgccgaacuu.....           | 1 |
| Gi5_8776153_x2.ugcgaucggagacgucgugggC.....                 | 1 |
| Gi3_28058118_x2....aucCgagacgucgugggaacacggg.....          | 1 |
| Gi5_8812551_x2.....gugggaacGcggggugcc.....                 | 1 |
| Gi2_10967511_x2.....cgucgugggaaAacggggugcc.....            | 1 |
| Gi5_8806797_x2....gaucggagacgucgugggaacacggggugccgaac..... | 0 |
| Gi5_8821035_x2.....cgucgugggaacacggggugccgCac.....         | 1 |
| Gi1_4140723_x2....aucAgagacgucgugggaacacg.....             | 1 |
| Gi3_28164240_x2.....ggaacacggggugccgaC.....                | 1 |
| Gi2_10872199_x2.....cgugggaacacggggugcUg.....              | 1 |
| Gi3_28098158_x2.....cgagacgucguUggaacacggggug.....         | 1 |
| Gi2_10938677_x2....gaucggagUcgucgugggaacacgggg.....        | 1 |
| Gi3_28190016_x2....aucggagacgucgugggaacUcgggg.....         | 1 |
| Gi5_8798575_x2....gaucggagacgucgugggaacGc.....             | 1 |
| Gi5_8783675_x2....aucggagacAucgugggaacacggggugc.....       | 1 |
| Gi3_28257918_x2.....Ccgucgugggaacacggggugcc.....           | 1 |
| Gi2_10936193_x2.....agacgucgugAgaacacggggugccgaacu.....    | 1 |
| G1a_5972376_x2....aucAgagacgucgugggaacacggg.....           | 1 |
| G1a_5887052_x2.....cggagacgNcgugggaacacg.....              | 1 |
| Gi1_4096163_x2.....gacgucgugggaacacggggugccgaacuu.....     | 0 |
| Gi3_28158326_x2.....gggaacacggggGgccgaacuu.....            | 1 |
| G1a_5878222_x2.....Cgagacgucgugggaaca.....                 | 1 |
| Gi2_10937979_x2....aucggagacgucAugggaacacggg.....          | 1 |
| Gi3_28135996_x2....cgaucggCgacgucgugggaacacg.....          | 1 |
| Gi2_10976441_x2.....gagacgucgugggaacacgggAugcc.....        | 1 |
| Gi5_8785417_x2....cgaucggagacgucgugggaacacAgg.....         | 1 |
| Gi2_10893201_x2.....ugggaacacggggugcUg.....                | 1 |
| Gi2_10953463_x2....aucggagaAgucgugggaacacgggg.....         | 1 |
| Gi5_8736497_x2.....acgucgugggaacacggggugccgUacu.....       | 1 |
| Gi3_28231686_x2....gaucggagUcgucgugggaacacggg.....         | 1 |
| Gi5_8801603_x2....aucggagacgucgugggaacCcg.....             | 1 |
| Gi2_10958021_x2.....gggNacacggggugccgaac.....              | 1 |
| Gi3_28002998_x2.....agacgucgugggaacaUggggugccgaa.....      | 1 |
| Gi1_4107867_x2.....ucUugggaacacggggugcc.....               | 1 |
| Gi3_28199844_x2.....agacgucgAgggaacacggggugccgaac.....     | 1 |
| Gi3_28180210_x2.....cgugggaacacgCggugccg.....              | 1 |
| Gi1_4100937_x2.....ucgCgggaacacggggugccga.....             | 1 |
| Gi3_28109778_x2.....ggagacgucgugggaacacggggugAc.....       | 1 |
| Gi5_8823805_x2.....gggaacacggggAgccgaac.....               | 1 |
| Gi2_10972775_x2.....ucgugggaaUacggggugccgaac.....          | 1 |
| Gi2_10925559_x2.....cgucgugggaacacggggUac.....             | 1 |
| Gi5_8827441_x2.....gggaacacggggugccUaac.....               | 1 |
| Gi5_8734129_x2....aucggCgacgucgugggaacacggg.....           | 1 |
| Gi3_28027242_x2.....cggagacgucgugggaacacAggg.....          | 1 |
| Gi3_28180040_x2....aucCgagacgucgugggaacacg.....            | 1 |
| Gi1_4143619_x2.....gagacgucgugggaacacg.....                | 0 |
| Gi3_28009436_x2....auAggagacgucgugggaacacgggg.....         | 1 |

|                                                         |   |
|---------------------------------------------------------|---|
| Gi5_8766015_x2.....aucggagacgucgugggUacacg.....         | 1 |
| Gi2_10938781_x2....gaAcggagacgucgugggaacacggg.....      | 1 |
| Gi2_10959753_x2.....gucgugggaacaUggggugc.....           | 1 |
| Gi3_28077452_x2.....gggaacacggggUcCcgaaac.....          | 1 |
| Gi5_8817775_x2.....cgugggaaUacggggugcc.....             | 1 |
| Gi3_28042864_x2.....cgucgugUgaacacggggugccgaacu.....    | 1 |
| Gi3_28010524_x2....gaucUgagacgucgugggaacacggggg.....    | 1 |
| Gi2_10874309_x2.....ugggaacacggggugccUac.....           | 1 |
| Gi2_10960373_x2.....aucggagacgucguggAaacac.....         | 1 |
| Gi2_10862497_x2.....agacgucgugggaacGcggggugc.....       | 1 |
| Gi5_8821309_x2....gaucggagacgucgugggaacCc.....          | 1 |
| Gi5_8819689_x2.....ucggagacgucgugUgaacacg.....          | 1 |
| Gi3_28022108_x2.....cgugggaacacggggugccU.....           | 1 |
| Gi1_4097115_x2.....uUgugggaacacggggugccgaac.....        | 1 |
| Gi3_28201312_x2....aucggagacgucguggUaacac.....          | 1 |
| Gi2_10871509_x2.....cggagacgucgugggaacC.....            | 1 |
| Gi5_8745471_x2.....gugggaacacggggugcUg.....             | 1 |
| Gi5_8745563_x2.ugcgauccgagacgucgugggG.....              | 1 |
| Gi1_4138555_x2.....gugggaacacggggCgccc.....             | 1 |
| Gi2_10832467_x2....gaucggagacgucgugAgaacacggggugc.....  | 1 |
| Gi5_8819765_x2.....gucgugggCacacggggugccgaac.....       | 1 |
| Gi2_10908667_x2.....Cggaacacggggugccgaa.....            | 1 |
| Gi5_8736069_x2.....gugggaacacgAggugccga.....            | 1 |
| Gi5_8779469_x2.....cgucgugggaacacggggugccUaacu.....     | 1 |
| Gi2_10953959_x2.....gacgucgugggaacacgAggugccgaacu.....  | 1 |
| Gi3_28256596_x2.....cggagacgucgugggaCcacggg.....        | 1 |
| Gi1_4111947_x2....aucggagacgucgugggGacacggggugcc.....   | 1 |
| Gi3_28096382_x2.....gCagacgucgugggaacacggggugcc.....    | 1 |
| Gi2_10948013_x2.....Ggacgucgugggaacacggggugccgaa.....   | 1 |
| Gi2_10898025_x2.....ggaacacggggugccUaac.....            | 1 |
| Gi3_28215880_x2.....cggGgacgucgugggaacacggggg.....      | 1 |
| Gi3_28192372_x2....gaucggagCcgucgugggaacacg.....        | 1 |
| Gi5_8744789_x2.....gugggaacacAgggugccgaacu.....         | 1 |
| Gi2_10962123_x2.....gaCcacggggugccgaacu.....            | 1 |
| G1a_5944926_x2..gcgauccggGgacgucgug.....                | 1 |
| Gi5_8787895_x2.....cggagacgucgugggaacacggggugc.....     | 0 |
| Gi5_8758991_x2.....gucgugggaacacggggAgccgaacu.....      | 1 |
| Gi3_27984736_x2.....gacgucguggAaacacggggg.....          | 1 |
| G1a_5931578_x2.....gugggaacacggggugAc.....              | 1 |
| Gi1_4143591_x2.....ucgugggaaUacggggugccga.....          | 1 |
| Gi1_4097523_x2....ucggGgacgucgugggaacacggg.....         | 1 |
| Gi2_10957469_x2....gaGcggagacgucgugggaacacggggugc.....  | 1 |
| Gi3_28039642_x2.....cggagacgucgugggaUacggggg.....       | 1 |
| G1a_5905042_x2....aucggagacgucgugggGacacggggugc.....    | 1 |
| Gi2_10838167_x2....Gucggagacgucgugggaacacggggugccg..... | 1 |
| Gi5_8737153_x2.....ggaacacggggugcAgaacu.....            | 1 |
| Gi3_28168786_x2.....agacgucgugggaCcacggggugc.....       | 1 |

|                 |                                   |   |
|-----------------|-----------------------------------|---|
| Gi3_27998142_x2 | gaucggUgacgucgugggaacacggg        | 1 |
| Gi5_8736171_x2  | cguggaacaacggggGgccgaac           | 1 |
| Gi5_8821747_x2  | aucggCgacgucgugggaacacgggg        | 1 |
| Gi3_28109482_x2 | gucguUggaacacggggugccgaac         | 1 |
| Gi3_28255052_x2 | agacgucAugggaacacggggugcc         | 1 |
| Gi4_557008_x2   | cggagacgucgugggaacacggggugccgaacu | 0 |
| Gi3_28126062_x2 | cgucgugggaacacggUgugccgaac        | 1 |
| Gi2_10835485_x2 | aucggagacgucgCgggaaca             | 1 |
| Gi1a_5925530_x2 | gggaacacggggugUcgaacu             | 1 |
| Gi2_10992219_x2 | gaucggagacguAgugggaacac           | 1 |
| Gi1a_5942076_x2 | aucggagacgucgugggaacacggggCgcc    | 1 |
| Gi3_28082998_x2 | gucgugggaacGcggggugcc             | 1 |
| Gi3_28138542_x2 | aacNcggggugccgaacuu               | 1 |
| Gi2_10977551_x2 | agacgucgugggaacacggggugcA         | 1 |
| Gi1_4116707_x2  | guUggaacacggggugccgaacuu          | 1 |
| Gi2_10876349_x2 | cguggaacaacggggugcGgaac           | 1 |
| Gi3_28110256_x2 | ggagacgCcgugggaacacg              | 1 |
| Gi1_4152381_x2  | cgGgggaacacggggugccg              | 1 |
| Gi1a_5964304_x2 | gAgggaacacggggugccga              | 1 |
| Gi2_10943517_x2 | aucggagacgucgugggaacacAgggug      | 1 |
| Gi3_28109550_x2 | gaacaAgggggugccgaac               | 1 |
| Gi2_10992205_x2 | cgaucggGgacgucguggga              | 1 |
| Gi5_8755265_x2  | acgucgugggaacacggggugccgaCcu      | 1 |
| Gi3_28157830_x2 | gacgucgugggaGcacggggugccg         | 1 |
| Gi2_10948839_x2 | cggagacgNcgugggaacac              | 1 |
| Gi1a_5922926_x2 | gugggaacacggggugccAa              | 1 |
| Gi3_28040158_x2 | Cgagacgucgugggaacacggggg          | 1 |
| Gi2_10888089_x2 | aaNacggggugccgaacu                | 1 |
| Gi3_28008748_x2 | ucgugggaacacggggugccgaacuu        | 0 |
| Gi5_8802797_x2  | acgucgugggaacacggggugccgaacG      | 1 |
| Gi1a_5877728_x2 | gucgugggaacacggggGgccgaac         | 1 |
| Gi5_8809417_x2  | Gggagacgucgugggaacacggggugccga    | 1 |
| Gi3_28221760_x2 | aucggagacgucgugggaacacgAggguc     | 1 |
| Gi3_28115514_x2 | ucggagacgucgCgggaacacgggg         | 1 |
| Gi4_554220_x2   | gacgucgugggaacacggggugccgaacu     | 0 |
| Gi2_10981261_x2 | aucggagacgucgugggaacUcggggg       | 1 |
| Gi2_10992093_x2 | gacgucgugggaacacggggugAc          | 1 |
| Gi2_10928321_x2 | ugggaCcacggggugccgaa              | 1 |
| Gi3_28047122_x2 | gacgucgugggCcacacggggugccg        | 1 |
| Gi3_28015224_x2 | cguggaacaacggggugccgaacuu         | 0 |
| Gi5_8782913_x2  | aucggagacgucgugAaacacgg           | 1 |
| Gi3_28192122_x2 | acgucgugggCcacacggggugccga        | 1 |
| Gi1a_5976004_x2 | cguggaacaacggggugccgaaAu          | 1 |
| Gi2_10932781_x2 | ucgugggaacacggggugcAg             | 1 |
| Gi3_28056580_x2 | cgaucggGgacgucgugggaacacg         | 1 |
| Gi2_10913127_x2 | agacgucgugggaacacggggCgccga       | 1 |
| Gi5_8783105_x2  | acgucgugggaacacggggAgccgaacu      | 1 |



Gi3\_28252774\_x2.....acguUgugggaacacggggugcc..... 1  
 Gi5\_8793531\_x2.....gugggCacacggggugccgaacuu..... 1  
 Gi3\_28166652\_x2.....ggagacgucgugggGacacggggugccg..... 1  
 Gi2\_10944323\_x2.....ugggaacacggggGgccg..... 1  
 Gi2\_10979939\_x2.....ggagacgucgugggaacacggggC..... 1  
 Gi1\_4129401\_x2.....uAggaacacggggugccg..... 1  
 Gi2\_10947955\_x2.....aucggagUcgucgugggaacacggg..... 1  
 Gi2\_10894573\_x2.....gUgacgucgugggaacacggggugccgaacu..... 1  
 Gi1\_4118011\_x2.....agacgucgNgggaacacggg..... 1  
 Gi2\_10949825\_x2.....gaucggagacgucguggAaacacggggugc..... 1  
 Gi5\_8756465\_x2.....cgAgggaacacggggugcc..... 1  
 Gi1\_4089943\_x2.....ugggaUcacggggugccgaacu..... 1  
 Gi3\_27983876\_x2.....Caucggagacgucgugggaacacggggugc..... 1  
 Gi2\_10922361\_x2.....gggaacacggggGgccga..... 1  
 Gi3\_28060006\_x2.....gaucggagNcgucgugggaac..... 1  
 Gl1\_5896394\_x2.....cgaucggGgacgucgugggaacacg..... 1  
 Gi3\_28204770\_x2.....aAacgucgugggaacacggggugccgaac..... 1  
 Gi4\_563882\_x2.....cgugggaacGcggggugccgaacu..... 1  
 Gi3\_28235222\_x2.....ucgugggaacacggggGuccgaacu..... 1  
 Gi2\_10889085\_x2.....gacgucgugggaacacggggugccgaCcu..... 1  
 Gi2\_10873873\_x2.....cgaucggCgacgucgugggaacacggg..... 1  
 Gi3\_28031826\_x2.....ggagacgucgugUgaacacggggugccg..... 1  
 Gi3\_28198862\_x2.....gacgucgugggaacacggggGgc..... 1  
 Gi2\_10857187\_x2.....acgucguAggaacacggggugcc..... 1  
 Gi1\_4112933\_x2.....guggCaacacggggugccga..... 1  
 Gi2\_10990765\_x2.....cgugggaacacAgggugccga..... 1  
 Gi2\_10871667\_x2.....cUgagacgucgugggaacacggggugccgaac..... 1  
 Gi5\_8773599\_x2.....cgucgugggaacacggggGgccgaa..... 1  
 Gi5\_8808773\_x2.....gucgugggGacacggggugccgaac..... 1  
 Gi3\_27996584\_x2.....Acgugggaacacggggugc..... 1  
 Gi2\_10914495\_x2.....cgugUgaacacggggugccg..... 1  
 Gi5\_8778727\_x2.....gugggaacGcggggugccgaacuu..... 1  
 Gi1\_4156945\_x2.....ucgugggaacacggggGgcc..... 1  
 Gi3\_28165908\_x2.....aaNacggggugccgaacuu..... 1  
 Gi3\_28122416\_x2.....acgucguggCaacacggggugccgaac..... 1  
 Gi2\_10862627\_x2.....gacgucguggAaacacggggugccgaac..... 1  
 Gl1\_5897378\_x2.....gggaacacggUgugccgaacu..... 1  
 Gi1\_4135163\_x2.....ugUgaacacggggugccg..... 1  
 Gi1\_4158485\_x2.....gucgugggaacacggggugc..... 0  
 Gi3\_28128300\_x2.....cgucgugggaUcacggggugccg..... 1  
 Gi5\_8774193\_x2.....aucggagacgucAugggaacacg..... 1  
 Gi2\_10833283\_x2.....cgucgugggaacacggggugUcgaac..... 1  
 Gi2\_10981571\_x2.....cgucgugggaacacggggugcUgaac..... 1  
 Gi1\_4122201\_x2.....ugggaacaAggggugccgaacu..... 1  
 Gi3\_28145966\_x2.....aacacggggugccAaacuu..... 1  
 Gi2\_10863149\_x2.....cUaucggagacgucgugggaacac..... 1  
 Gi3\_28147556\_x2.....acgucgCgggaacacggggugcc..... 1

|                                                           |   |
|-----------------------------------------------------------|---|
| Gi2_10842719_x2.....gacgucAugggaacacggggugccga.....       | 1 |
| Gi5_8764985_x2.....aUacgucgugggaacacggggu.....            | 1 |
| G1a_5920836_x2.....ugggaacacggggugccgUacu.....            | 1 |
| Gi4_565132_x2.....gugggaacacgggUgugccgaacu.....           | 1 |
| Gi1_4108217_x2.....gugggaacacggggCgccgaac.....            | 1 |
| Gi3_28044390_x2.....gucgugggaacacggggugccgG.....          | 1 |
| Gi3_28154800_x2.....gaucggagacgucgGgggaacacggggu.....     | 1 |
| Gi2_10900717_x2.....gagacgucguggGacacggggug.....          | 1 |
| Gi2_10976107_x2.....aucggagacgucguggAaacacggggu.....      | 1 |
| Gi3_28128170_x2.....gaucggagGcgcgucgugggaacacggggugc..... | 1 |
| Gi3_28213426_x2.....ucgCgggaacacggggugccg.....            | 1 |
| Gi2_10968809_x2.....gugggaUcacggggugccg.....              | 1 |
| Gi2_10963773_x2.....gaucAgagacgucgugggaacac.....          | 1 |
| Gi5_8722989_x2.....ugggGacacggggugccgaacuu.....           | 1 |
| Gi2_10886093_x2.....ggagacgucgugggaacacggggAgc.....       | 1 |
| Gi1_4122181_x2.....gcgaucggagacgucgug.....                | 0 |
| Gi1_4147283_x2.....Agucgugggaacacggggugccgaacu.....       | 1 |
| Gi2_10882243_x2.....ggagacgucgugggaacacggggugc.....       | 1 |
| Gi5_8777473_x2.....gggaacacggggugccgGa.....               | 1 |
| Gi5_8810231_x2.....gugggGacacggggugccgaacuu.....          | 1 |
| Gi3_28042172_x2.....gggaacGcggggugccga.....               | 1 |
| Gi5_8755197_x2.....gaucggagacgucgugggaGcacg.....          | 1 |
| Gi3_28023966_x2.....cggagacgucgugggaacacggc.....          | 1 |
| Gi3_28098124_x2.....ggaacacCgggugccgaac.....              | 1 |
| G1a_5973040_x2.....ggagacgucguAggaacacggggugcc.....       | 1 |
| Gi2_10834151_x2.....ggagacgucgugggaacacgggg.....          | 0 |
| G1a_5957082_x2.....gaucggagGcgcgucgugggaa.....            | 1 |
| Gi5_8776649_x2.....gggaacacggggugccCaacu.....             | 1 |
| Gi2_10897277_x2.....Ugacgucgugggaacacggggug.....          | 1 |
| Gi5_8793059_x2.....ugggaacacggAgugccgaac.....             | 1 |
| G1a_5948222_x2.....gugggGacacggggugccgaac.....            | 1 |
| Gi3_28161866_x2.....gucgugggaacacggggugGcgaac.....        | 1 |
| Gi2_10842217_x2.....agacgucgugggaGcacggggugccgaacu.....   | 1 |
| Gi2_10987301_x2.....cggagacgucguAggaacac.....             | 1 |
| Gi3_28067948_x2.....aucCgagacgucgugggaacacggggu.....      | 1 |
| Gi3_28027914_x2.....ucggagacgucgugggaGcacggggugcc.....    | 1 |
| Gi2_10854579_x2.....cguNggaacacggggugccg.....             | 1 |
| Gi3_28226406_x2.....cgucgugggaaAacggggugccgaac.....       | 1 |
| Gi3_28024446_x2.....auUggagacgucgugggaacacggggug.....     | 1 |
| Gi2_10864739_x2.....Gggagacgucgugggaacacggggug.....       | 1 |
| Gi3_28001992_x2.....gacgucgugAgaacacggggugccgaacu.....    | 1 |
| Gi1_4157797_x2.....gugCgaacacggggugccgaacu.....           | 1 |
| Gi1_4157775_x2.....ucggagacgucgugggaGcacg.....            | 1 |
| Gi1_4094605_x2.....gucgugggGacacggggug.....               | 1 |
| Gi5_8800503_x2.....agacgucgugggaacacAgggugc.....          | 1 |
| Gi3_28155664_x2.....acgucgugggaacacggggGgccg.....         | 1 |
| Gi1_4113937_x2.....gucgugggaaUacggggugccgaacu.....        | 1 |

Gi3\_28203016\_x2.....gacguUgugggaacacggggugccgaac..... 1  
Gi5\_8798069\_x2.....acacggggugccgaacuC..... 1  
Gi2\_10915455\_x2.....gaacacggNgugccgaac..... 1  
Gi3\_28256614\_x2.....cggagacgCcgugggaacacggggugccga..... 1  
Gi1\_4100793\_x2.....uUggagacgucgugggaacacggggugccgaacu..... 1  
Gi2\_10895655\_x2.....gaucggagacgucgugggaacacggAgugc..... 1  
Gi2\_10914777\_x2.....aucggagacgucgugggaAacggg..... 1  
Gi5\_8781643\_x2.....acgucgugggaacacggggGgccgaac..... 1  
Gi2\_10960419\_x2.....gucCugggaacacggggugccgaacu..... 1  
Gi5\_8806367\_x2.....gugggaacacggggCgccgaacu..... 1  
Gi5\_8820403\_x2.....agacgucgugggaacaUggggugccgaacu..... 1  
Gi2\_10937039\_x2.....Uagacgucgugggaacacggggugccgaa..... 1  
Gi3\_28151324\_x2.....gaacacggggCgccgaacu..... 1  
Gi1\_4137241\_x2.....cgugUgaacacggggugccga..... 1  
Gi2\_10935153\_x2.....aucggagacgucguggAaacacggggugcc..... 1  
Gi1\_4117687\_x2.....ugggaacCcggggugccgaac..... 1  
Gi3\_28114162\_x2.....acgucgugggCacacggggugccgaac..... 1  
Gi3\_28036890\_x2.....ggagacgucgCgggaacacg..... 1  
Gi2\_10898621\_x2.....gugggaacacgggUugccgaac..... 1  
Gi3\_27992106\_x2.....agacgucgugggaacCcggg..... 1  
Gi5\_8753689\_x2.....cgucgugggaacacggggugccgaaA..... 1  
Gi5\_8822455\_x2.....ggaacacggggugccgaacu..... 0  
Gi4\_560196\_x2.....gugggaacacggAgugccgaa..... 1  
Gi3\_28166032\_x2.....gacgucgugggaacacggggugcGgaacu..... 1  
Gi2\_10947027\_x2.....cgugggaacacggggugcAg..... 1  
Gi1\_4126445\_x2.....gucgugggCacacggggugcc..... 1  
Gi2\_10967435\_x2.....aucggaUacgucgugggaacacggggugc..... 1  
Gi2\_10956327\_x2.....cgucgugggaacaUggggugccgaac..... 1  
G1a\_5888630\_x2.....Caucggagacgucgugggaacacggggg..... 1  
Gi2\_10960639\_x2.....gggaacacgggCugccgaac..... 1  
Gi3\_28183690\_x2.....gucAugggaacacggggugc..... 1  
Gi3\_27997400\_x2.....cgucgugggaacacggggugcAgaac..... 1  
Gi2\_10913015\_x2.....cggagacgucgugggaacacggggC..... 1  
Gi2\_10860083\_x2.....cggagacgucgugggaUacg..... 1  
Gi1\_4112751\_x2.....Gcugcugggaacacggggugccg..... 1  
Gi5\_8772565\_x2cugcgaucggagacgucC..... 1  
Gi2\_10920981\_x2.....cgugggaacacggggugccCaac..... 1  
Gi2\_10901739\_x2.....Aaucggagacgucgugggaac..... 1  
G1a\_5950514\_x2.....aucggagaUgucgugggaacacggggg..... 1  
G1a\_5969678\_x2.....Cgaacacggggugccgaac..... 1  
Gi1\_4134495\_x2.....gaCcgagacgucgugg..... 1  
Gi3\_28068170\_x2.....gacgucgugggaUacggggugccgaacu..... 1  
Gi2\_10990875\_x2.....gucNugggaacacggggugccgaacu..... 1  
Gi2\_10882223\_x2.....gaucggagacgucgugggaacacggU..... 1  
Gi1\_4102039\_x2.....gugggaacacggggGgcc..... 1  
Gi3\_28247040\_x2.....cAgagacgucgugggaacacggggugccga..... 1  
G1a\_5918378\_x2.....cgugCgaacacggggugccgaacu..... 1

|                                                          |   |
|----------------------------------------------------------|---|
| Gi3_28145340_x2.....uggaacacggggugccgaacuu.....          | 0 |
| G1a_5877924_x2.....uggaacacggggGgccgaacu.....            | 1 |
| Gi1_4156311_x2.....Agggaacacggggugccgaacuu.....          | 1 |
| G1a_5914708_x2.....guggaacacggggugccAaac.....            | 1 |
| Gi5_8749499_x2.....gggaacacggggugccUaacu.....            | 1 |
| Gi1_4157585_x2.....gagacgucgCgggaacacggggugccgaacuu..... | 1 |
| G1a_5939628_x2.....gggaacCcggggugccgaacu.....            | 1 |
| Gi5_8725591_x2.....cgucgugggUacacggggugccgaacu.....      | 1 |
| Gi1_4128049_x2.....ggaacacggggugccGac.....               | 1 |
| Gi2_10919175_x2.....gagacgucgUggaacacggggugc.....        | 1 |
| Gi3_27980066_x2cugcgauccgCgacgucg.....                   | 1 |
| Gi1_4146693_x2.....Aucgugggaacacggggug.....              | 1 |
| Gi2_10956831_x2.....cgucgugggaacacggggAgccga.....        | 1 |
| Gi2_10963917_x2.....aucggagacgucgugggaUacggggugc.....    | 1 |
| G1a_5883252_x2.....ucgugggaacCcggggugccgaacu.....        | 1 |
| Gi2_10855313_x2.....gggaacacggggugccgaUcu.....           | 1 |
| Gi2_10991605_x2.....aucggagacgucgugggGacacgggg.....      | 1 |
| Gi2_10874129_x2.....acgucgugggaacacggggugc.....          | 1 |
| Gi2_10863939_x2.....gaucggagacgucgUgga.....              | 1 |
| Gi2_10984317_x2.....cgucguggCaacacggggugccgaacu.....     | 1 |
| Gi2_10854459_x2.....gacgucguAggaacacggggugccg.....       | 1 |
| Gi3_28135296_x2.....uggaacacggggugAcg.....               | 1 |
| Gi2_10948559_x2.....gugNgaacacggggugccga.....            | 1 |
| Gi2_10956509_x2.....gucgugAgaacacggggugc.....            | 1 |
| Gi3_28251820_x2.....aGgucgugggaacacggggugc.....          | 1 |
| Gi2_10832955_x2.....ggaaAacggggugccgaacu.....            | 1 |
| Gi2_10911607_x2.....aucggagacgucgugggaUacggggugcc.....   | 1 |
| Gi2_10859427_x2.....Uucggagacgucgugggaacacggggug.....    | 1 |
| Gi3_27994554_x2.....Aggagacgucgugggaacacggggugcc.....    | 1 |
| Gi5_8795007_x2.....guAggaacacggggugccgaacuuu.....        | 1 |
| Gi3_28069964_x2.....gaucggagNcgucguggg.....              | 1 |
| G1a_5932040_x2.....gucgugggaacacggggCgccgaacu.....       | 1 |
| Gi5_8801329_x2.....cUgagacgucgugggaacacggggugccga.....   | 1 |
| Gi1_4126403_x2.....acacggggugccgaacAu.....               | 1 |
| Gi2_10896027_x2.....aucggagaUgucgugggaacacggggg.....     | 1 |
| Gi3_28193986_x2.....auAggagacgucgugggaacac.....          | 1 |
| Gi3_28202836_x2.....cggagacgucguUggaacacggggugcc.....    | 1 |
| Gi3_27989034_x2.....gucgugggaaAacggggugc.....            | 1 |
| Gi5_8787401_x2.....aucggagacgucgugggaacGcg.....          | 1 |
| Gi2_10946765_x2.....aucggagacgucgugggaacaUggggugcc.....  | 1 |
| Gi3_28258590_x2.....agacgucgNgggaacacggggugccga.....     | 1 |
| Gi3_28014214_x2.....gggaacaAggggugccga.....              | 1 |
| Gi2_10908181_x2.....cgucgCgggaacacggggugccgaa.....       | 1 |
| Gi2_10837335_x2.....ggaacacggCgugccgaac.....             | 1 |
| Gi2_10842695_x2.....uGggagacgucgugggaacacggggugc.....    | 1 |
| Gi3_28222032_x2.....agacgucgugggaacacAgggugccgaac.....   | 1 |
| Gi1_4103357_x2.....ggUgacgucgugggaacacggggg.....         | 1 |

|                                                        |   |
|--------------------------------------------------------|---|
| Gi3_28222656_x2.....ucggagacNucgugggaacacggggugcc..... | 1 |
| Gi3_28128256_x2..gcgauUggagacgucgugggaacacggg.....     | 1 |
| G1a_5937186_x2...gGucggagacgucgugggaacacg.....         | 1 |
| Gi5_8737109_x2.....cgucgugggaacacggggGgcccgaac.....    | 1 |
| Gi2_10900525_x2.....gugggaacacUgggugccgaa.....         | 1 |
| Gi5_8755091_x2.....gacgucgugggaacacggggugccAaacu.....  | 1 |
| Gi5_8770265_x2.....ugggaacacggggugGcgaacu.....         | 1 |
| Gi2_10876763_x2.....acgucgugggaacUcggggugccgaacu.....  | 1 |
| Gi5_8768759_x2.....ggaacacggggugccgaa.....             | 0 |
| G1a_5978824_x2.....gaacacgAggugccgaacu.....            | 1 |
| Gi1_4136947_x2.....gucgugggaGcacggggugccgaac.....      | 1 |
| Gi3_28074076_x2.....ucgugggaacacggggAgc.....           | 1 |
| Gi3_28199500_x2..cgauccggaNacgucgugg.....              | 1 |
| Gi1_4097397_x2.....ugggaacacggggugccgC.....            | 1 |
| G1a_5908106_x2.....Nugggaacacggggugccgaacu.....        | 1 |
| Gi3_28186738_x2.....gucgugggaacacgCggugccgaac.....     | 1 |
| Gi4_559694_x2.....cgugggaacacgAggugccgaacu.....        | 1 |
| Gi1_4139205_x2...aucggagacgucgugggaacacggggCgc.....    | 1 |
| Gi2_10885567_x2.....cggagacgucgugggaGcacggggg.....     | 1 |
| Gi1_4090067_x2.....gacgucgugggaacacggggugUcgaacu.....  | 1 |
| Gi5_8807673_x2.....cgugUgaacacggggugccgaacu.....       | 1 |
| Gi1_4141075_x2...gaucggagacgucgugggaacacggggug.....    | 0 |
| Gi1_4156279_x2.....Ccgugggaacacggggugccgaac.....       | 1 |
| Gi3_28085854_x2.....cggagacgucgugAgaacacgggg.....      | 1 |
| Gi2_10976531_x2.....cgugggaaGacggggugccgaac.....       | 1 |
| Gi2_10959045_x2...cAucgugggaacacggggugccgaa.....       | 1 |
| Gi5_8747075_x2...Aaucggagacgucgugggaacacgg.....        | 1 |
| Gi3_28134156_x2.....gUagacgucgugggaacacggggug.....     | 1 |
| Gi5_8812281_x2.....cgugUgaacacggggugcc.....            | 1 |
| Gi5_8720715_x2...gaucggagacgucgugggaGcac.....          | 1 |
| Gi5_8757061_x2.....cgucgugggaacacggggugccgCa.....      | 1 |
| G1a_5938698_x2.....gugggaacacggggugccgCac.....         | 1 |
| G1a_5952398_x2.....ugggaacacggggugccga.....            | 0 |
| G1a_5896312_x2...aucggagacgucgugggCacacgg.....         | 1 |
| Gi2_10946283_x2.....ucgugggaacacUgggugccg.....         | 1 |
| Gi2_10900583_x2...gaucggagacgucGggga.....              | 1 |
| Gi3_28230044_x2.....acgucgugggaacacgggguAccgaac.....   | 1 |
| Gi5_8786021_x2.....guggUaacacggggugcc.....             | 1 |
| Gi2_10940941_x2.....ugAgaacacggggugccgaa.....          | 1 |
| Gi1_4142555_x2.....acgucgugggaacacgUggugcc.....        | 1 |
| Gi1_4121825_x2.....gugggaacacggggugccgaaAuu.....       | 1 |
| Gi2_10934883_x2.....cggagacgucgugggaacacgg.....        | 0 |
| Gi3_28187040_x2.....ugggaacacgUggugccg.....            | 1 |
| Gi1_4092417_x2.....acgAcgugggaacacggggugccgaacu.....   | 1 |
| Gi5_8768837_x2.....gugggaacacggggugUc.....             | 1 |
| Gi2_10984277_x2.....cgugggaacacggggugAcgaac.....       | 1 |
| Gi2_10876803_x2.....ggagacgucgugggaacacgAggugc.....    | 1 |

|                                                          |   |
|----------------------------------------------------------|---|
| Gi1_4128757_x2.....Aagacgucgugggaacacggggugccgaacu.....  | 1 |
| Gi1_4150153_x2.....gaGcacggggugccgaac.....               | 1 |
| Gi1_4132859_x2.ugcgauccgagacgucgu.....                   | 0 |
| Gi5_8770135_x2.....cUgagacgucgugggaacacggg.....          | 1 |
| Gi1_4148643_x2.....cguNgugggaacacggggugccgaacu.....      | 1 |
| Gi3_28197248_x2.....gacgucgugggaaUacggggugccgaac.....    | 1 |
| Gi2_10939799_x2.....gacgucgugggaGcacggggg.....           | 1 |
| Gi2_10977289_x2.....gacgucgugggaacacggggugccgaCc.....    | 1 |
| G1a_5928784_x2.....guggCaacacggggugccgaacu.....          | 1 |
| Gi5_8749845_x2.....gagGcgucgugggaacacggggugcc.....       | 1 |
| Gi1_4126397_x2..cUaucggagacgucgugggaacacggggg.....       | 1 |
| Gi1_4139175_x2.....acgucgugggaacacggggGgcccgaac.....     | 1 |
| Gi3_28094410_x2.....agacgucgugggaacacggggGgcccgaacu..... | 1 |
| Gi1_4090129_x2.....gacgucgugggaacacggggAugcc.....        | 1 |
| Gi2_10926605_x2.....gugggaacacggggugGcg.....             | 1 |
| Gi1_4106151_x2.....cgugggaacacggggugccgCac.....          | 1 |
| Gi3_28194714_x2.....gacgucgugggUacacggggugccgaacu.....   | 1 |
| Gi3_28004490_x2.....gggaacacggCGugccgaac.....            | 1 |
| G1a_5968046_x2....aucggagacgucgCgggaacacggggugcc.....    | 1 |
| Gi1_4112021_x2.....agacgucgugggaacacggggugccgU.....      | 1 |
| Gi1_4130177_x2.....Uagacgucgugggaacacggggugccga.....     | 1 |
| Gi2_10837971_x2.....acgucgugggaacaUggggugcc.....         | 1 |
| Gi3_28224952_x2.....agacgCcgugggaacacggggugccgaac.....   | 1 |
| Gi2_10919611_x2.....gaacacggggugccgGac.....              | 1 |
| G1a_5952608_x2....aucggagacgucgugggaacCggggugcc.....     | 1 |
| Gi1_4100663_x2..Ucgauccgagacgucgugggaacacggggugcc.....   | 1 |
| Gi2_10922995_x2.....acgucguAggaacacggggugccgaac.....     | 1 |
| Gi3_28118500_x2....ucggagacgucgugggaacacAgggg.....       | 1 |
| Gi2_10897301_x2.....cgAagacgucgugggaacacggggugcc.....    | 1 |
| Gi2_10877331_x2.....gucgGgggaacacggggugcc.....           | 1 |
| G1a_5923610_x2....aucggagacgucguAggaacacggggugcc.....    | 1 |
| Gi2_10854669_x2....aucggagacgucgugggaUacggggugcc.....    | 1 |
| Gi2_10969407_x2.....acUucgugggaacacggggugc.....          | 1 |
| Gi2_10901283_x2....aucgAagacgucgugggaacacggg.....        | 1 |
| Gi2_10962533_x2.....gagacgucgugggGacacggggugcc.....      | 1 |
| Gi3_28187958_x2.....ugggaacacggggugccCaac.....           | 1 |
| Gi2_10986393_x2.....agacgucgCgggaacacggggugc.....        | 1 |
| Gi2_10870553_x2.....gugggCacacggggugccg.....             | 1 |
| Gi1_4120607_x2.....ucguAggaacacggggugcc.....             | 1 |
| Gi4_565018_x2....cgucgugggaGcacggggugccga.....           | 1 |
| Gi3_28048580_x2..gGgaucggagacgucgugggaacac.....          | 1 |
| Gi5_8723941_x2.....gagacgucNugggaacacggggugccgaacu.....  | 1 |
| Gi2_10837071_x2.....gCgacgucgugggaacacggggugcc.....      | 1 |
| Gi2_10908915_x2.....ugggaacacgggUugccga.....             | 1 |
| Gi3_28258364_x2.ugUgauccgagacgucgugggaaca.....           | 1 |
| Gi1_4119441_x2.....ggagacgCcgugggaacacggggugccg.....     | 1 |
| Gi5_8777025_x2.....cgucgugggaacacgUggugccgaacu.....      | 1 |

Gi2\_10899171\_x2.....ggagacgucgugggaacaUggggugc..... 1  
Gi3\_28104288\_x2.....ggagacgucAugggaacacggggugccgaacu..... 1  
Gi2\_10939031\_x2....gaucggagacgCcguggga..... 1  
Gi1\_4133145\_x2.....gagacgucNugggaacacggggugccgaacu..... 1  
Gi5\_8778053\_x2.....cgucgugggaacaAggggugccgaacu..... 1  
Gi2\_10937229\_x2.....gagacgCcgugggaacacggggug..... 1  
Gi2\_10897685\_x2.....gacgucgugggaacacggggugccgUacu..... 1  
Gi1\_4106881\_x2....aucgUagacgucgugggaacacggggg..... 1  
G1a\_5884034\_x2.....ugggaacacggggugccgaaAu..... 1  
Gi1\_4139775\_x2....ucggagacgucgugggCacacg..... 1  
Gi5\_8746837\_x2.....Ggucgugggaacacggggugccga..... 1  
Gi2\_10850035\_x2....ucggagacgucgugggaacacggggAgcc..... 1  
Gi3\_28038066\_x2.....cggagacgucgugAgaacacg..... 1  
Gi1\_4134773\_x2....cggagacgucgugggaaAacggggugc..... 1  
Gi1\_4157229\_x2.....gucgugggaacacggggugcU..... 1  
Gi2\_10851075\_x2.....acgucgugUaacacggggugcc..... 1  
Gi2\_10940973\_x2....aucggagacgucgugggaacaUggggugc..... 1  
Gi3\_28092046\_x2.....cgucgugggaacacggAgugccga..... 1  
Gi3\_27994568\_x2....gaucggagacgucgugggaacacAgggg..... 1  
Gi4\_554284\_x2.....gucgugggaGcacggggugccgaacu..... 1  
Gi1\_4133243\_x2....ucUgagacgucgugggaacacggggugcc..... 1  
Gi2\_10871159\_x2.....gacgucgugggaacacggggugccgCac..... 1  
Gi2\_10883139\_x2.....ggagacgucgCgggaacacggggugcc..... 1  
Gi3\_28180702\_x2....gaucggagacgCcgugggaacac..... 1  
Gi5\_8789241\_x2....aucCgagacgucgugggaacacgg..... 1  
Gi1\_4154609\_x2.....gggaacacggggugccgaacG..... 1  
G1a\_5883254\_x2....aucggagaNgucgugggaacacgg..... 1  
G1a\_5941512\_x2....auUggagacgucgugggaacacggggugcc..... 1  
Gi1\_4119073\_x2.....agacgucgugggaacacggggugccgaGcu..... 1  
Gi2\_10926355\_x2....gaucggagacgucgugggaacCcggg..... 1  
Gi2\_10868255\_x2.....gacgucgugggaacacggggugccgaacG..... 1  
Gi3\_28171436\_x2....cCgagacgucgugggaacacggg..... 1  
Gi2\_10952963\_x2.....acgucgugggaacacggUgugcc..... 1  
Gi5\_8738373\_x2.....gugggaacacggggugcA..... 1  
Gi5\_8750819\_x2.....gggaacacggggugccgaacG..... 1  
G1a\_5937678\_x2.....ugggaacacgggCugccgaacu..... 1  
Gi5\_8789829\_x2....aucggagacgucgugggGacacgggg..... 1  
Gi3\_28105682\_x2....cgucgugggaacacUgggugccgaacu..... 1  
Gi2\_10872739\_x2.....ggagacgucgugggaacacggAgugc..... 1  
Gi2\_10863211\_x2.....gagacgucguAggaacacggggug..... 1  
Gi1\_4103949\_x2.....ucgugggaacacggggugccgaUc..... 1  
Gi3\_28006032\_x2.....gucgugggaacacgUggugccgaacu..... 1  
Gi2\_10843207\_x2....gauUggagacgucgugggaac..... 1  
Gi1\_4151703\_x2.....uggNaacacggggugccgaacu..... 1  
Gi3\_28107654\_x2....Ccgagacgucgugggaacacg..... 1  
G1a\_5968188\_x2.Agcgaucggagacgucgu..... 1  
G1a\_5900360\_x2.....gCgggaacacggggugccga..... 1

Gi3\_28182226\_x2.....ggaacacggggugccgaaGu..... 1  
 Gi3\_28035250\_x2.....acacUgggugccgaacuu..... 1  
 Gi3\_28202992\_x2.....aacacggggugccgaGcuu..... 1  
 Gi3\_28117158\_x2.....cgAagacgucgugggaaacacggggugcc..... 1  
 Gi1\_4153039\_x2.....cgucguggAaacacggggugccgaacu..... 1  
 Gi1\_4134525\_x2.....aacacggggCugccgaacu..... 1  
 Gi3\_28114000\_x2.....cgucgugggaaacacggggugcG..... 1  
 Gi2\_10866735\_x2.....ucggGgacgucgugggaaaca..... 1  
 G1a\_5943708\_x2.....gaacacggggugccgaacA..... 1  
 Gi2\_10982365\_x2.....cgugggaacacggggAgcc..... 1  
 Gi1\_4105781\_x2.....uUgugggaaacacggggugcc..... 1  
 Gi2\_10933189\_x2.....gaucgAagacgucgugggaaacacggggugc..... 1  
 Gi3\_28132520\_x2.....agacgucgugggaaacaGggggugccgaacu..... 1  
 Gi2\_10936783\_x2.....aucggagacgucgugggaaacacUgggu..... 1  
 Gi2\_10922011\_x2.....cgaucggagacgCcgugggaaacacg..... 1  
 Gi1\_4153287\_x2.....gaacacggggugccgaacuC..... 1  
 G1a\_5936326\_x2.....gcgaucggagacguUgug..... 1  
 Gi1\_4090983\_x2.....gugggaacacggAgugcc..... 1  
 Gi2\_10886105\_x2.....agacguUgugggaaacacggggugcc..... 1  
 Gi3\_28184422\_x2.....aucggagacgAcgugggaaacac..... 1  
 Gi5\_8756681\_x2.....Uucggagacgucgugggaaacacgg..... 1  
 Gi2\_10921209\_x2.....gaacacggggugccgaacuu..... 0  
 Gi3\_27989736\_x2.....gagacgCcgugggaaacac..... 1  
 Gi3\_28047014\_x2.....gaucggagacgucguAggaacacgg..... 1  
 Gi3\_28057370\_x2.....cggagacgucgugggaaacacggAgu..... 1  
 Gi2\_10969897\_x2.....agacgucgugggaaacacggggugc..... 1  
 Gi1\_4122509\_x2.....aGcggagacgucgugggaaacacggggugcc..... 1  
 G1a\_5907232\_x2.....acgucgugggGacacgggggu..... 1  
 Gi2\_10910645\_x2.....acgNcgugggaaacacggggugc..... 1  
 Gi3\_28073328\_x2.....gugggaUcacggggugcc..... 1  
 Gi2\_10949863\_x2.....gaucggCgacgucgugggaaacacggggugcc..... 1  
 Gi2\_10885247\_x2.....aucggagacgucgugggaaacacCgggu..... 1  
 Gi2\_10908475\_x2.....gaucggagacgucgugggaaAacgggu..... 1  
 Gi1\_4152341\_x2.....cgugUgaacacggggugccgaac..... 1  
 Gi5\_8721415\_x2.....gUgacgucgugggaaacacg..... 1  
 Gi5\_8792053\_x2.....gugggaacacggggugcGgaac..... 1  
 Gi2\_10957177\_x2.....aucggagacgucgGgggaacacgggggu..... 1  
 Gi2\_10931093\_x2.....agacgucgugggaaacaGggggugcc..... 1  
 Gi2\_10934069\_x2.....gUcgucgugggaaacacggggugccg..... 1  
 Gi5\_8766521\_x2.....aucggaAacgucgugggaaacacg..... 1  
 Gi3\_28166178\_x2.....agacguAgugggaaacacggggugccgaacu..... 1  
 Gi2\_10837539\_x2.....gggaacacggggugccUaac..... 1  
 Gi3\_28031916\_x2.....cgugggaAacggggugc..... 1  
 Gi5\_8719549\_x2.....acgucgugggaaacacggggCgcccga..... 1  
 G1a\_5879480\_x2.....ggaacacggggUAccgaacu..... 1  
 Gi2\_10837357\_x2.....ugggaaAacggggugccgaacu..... 1  
 Gi2\_10832141\_x2.....cgucgugggaaacacggggugAcg..... 1



Gi2\_10990731\_x2.....ggagacgucgugggaacacgggAugcc..... 1  
 Gi3\_28134304\_x2..gcgaucggagacgucgugggaacacAg..... 1  
 Gi4\_562596\_x2.....gaUcacggggugccgaacu..... 1  
 Gi3\_28090342\_x2.....gacgucgugggaacacgggAu..... 1  
 Gi1\_4117121\_x2...gaucggagacgucgugggaacaAggg..... 1  
 Gi5\_8721341\_x2.....gucgugggaacacgggguAccgaa..... 1  
 Gi3\_28214650\_x2.....cgucgugggaacacgggAugccgaac..... 1  
 Gi2\_10900793\_x2.....Gcgucgugggaacacggg..... 1  
 Gi3\_28110694\_x2.....cgucUugggaacacgggg..... 1  
 Gi1\_4126187\_x2...aucggagacgucgCgggaacacggggu..... 1  
 Gi1\_4154463\_x2.....ugggaacacgggUugccgaac..... 1  
 Gi5\_8768111\_x2.....gucgugggaacacggggugccgaUc..... 1  
 Gi5\_8820925\_x2...ucggagacgucgugggCacacg..... 1  
 Gi1\_4090801\_x2.....ucgugggaacacggggAgccgaac..... 1  
 Gi5\_8747205\_x2.....gacgucgugggaacCggggugccgaacu..... 1  
 Gi2\_10931727\_x2.....cggagacgucgugggGacacggggugc..... 1  
 Gi2\_10909273\_x2.....gacgucgCgggaacacggggugcc..... 1  
 Gi3\_28100228\_x2.....gucgugggaacacggggugGcgaacu..... 1  
 Gi3\_28020518\_x2...aucggUgacgucguggga..... 1  
 Gi3\_28169248\_x2.....gggaacacgggAugccga..... 1  
 Gi2\_10951671\_x2.....agacgAcgugggaacacggggugcc..... 1  
 Gi2\_10843535\_x2.....Agugggaacacggggugccg..... 1  
 Gi3\_28126828\_x2.....acgucgugggGacacggggugccg..... 1  
 Gi5\_8808409\_x2.....gugggGacacggggugccgaa..... 1  
 Gi5\_8775393\_x2.....gugggaGcacggggugccgaacu..... 1  
 Gi3\_28131340\_x2.....gacgucgugggaacGcggggugc..... 1  
 Gi1\_4137399\_x2.....gugggaacacggggugccgaacuC..... 1  
 Gi3\_27984628\_x2.....acgucgugggaacacggggCgccgaa..... 1  
 Gl1\_5954082\_x2.....gaacacggggugccgCacu..... 1  
 Gl1\_5927182\_x2.....gugggGacacggggugcc..... 1  
 Gi3\_28239358\_x2.....cgucUugggaacacggggugccgaa..... 1  
 Gi3\_28203366\_x2.....gacgucgugggaacacgggguAccgaac..... 1  
 Gi1\_4136507\_x2...gUucggagacgucgugggaacac..... 1  
 Gi1\_4092387\_x2.....gugggaacNcggggugcc..... 1  
 Gi3\_28190028\_x2.....ugggaacacggggugccUa..... 1  
 Gi3\_28113004\_x2...aucggagacgucCugggaacacggggu..... 1  
 Gi5\_8768107\_x2.....cgugggaacCggggugccga..... 1  
 Gi3\_28172888\_x2.....gucgugggCacacggggugcc..... 1  
 Gi5\_8807595\_x2.....cgugggaacacggggugccgGac..... 1  
 Gi3\_28128000\_x2...aucggagCcgucgugggaacacggggugc..... 1  
 Gi3\_28129056\_x2.....agacgucgNgggaacacggg..... 1  
 Gi2\_10967043\_x2.....gagacgucgugggaacacggggCg..... 1  
 Gi2\_10927537\_x2.....cguggUaacacggggugcc..... 1  
 Gi3\_28011132\_x2...gaucggagacAucgugggaac..... 1  
 Gi3\_28129382\_x2.....cgugggaacacggggugcAga..... 1  
 Gi1\_4099335\_x2...uGgugggaacacggggugccga..... 1  
 Gi3\_28050812\_x2.....uggCaacacggggugccgaac..... 1

Gi2\_10847689\_x2.....gugggaacacggggugcGg..... 1  
G1a\_5950074\_x2.....gacgucgugggaGcacgggu..... 1  
Gi2\_10880767\_x2.....gCagacgucgugggaacacggggugccg..... 1  
Gi3\_28131542\_x2.....gucgugggaacaGggggugccgaac..... 1  
Gi2\_10898275\_x2.....Ugacgucgugggaacacggggugccgaacu..... 1  
Gi2\_10829423\_x2.....aucggagacgAcgugggaacacgggggu..... 1  
Gi3\_28080450\_x2cugcgaucggagacgucgugggaacacggggugc..... 0  
Gi2\_10833275\_x2.....cguAggaacacggggugccga..... 1  
Gi3\_28128494\_x2.....guGgugggaacacggggugccgaacu..... 1  
Gi1\_4134449\_x2.....gucgugggaacacggggguAcc..... 1  
Gi2\_10957593\_x2.....gagacgucgugggaacacAgggugc..... 1  
G1a\_5962694\_x2.....ggagacgucgugggaGca..... 1  
Gi2\_10898677\_x2.....aucgUagacgucgugggaacacgg..... 1  
G1a\_5918408\_x2.....gugggaacacCgggugccgaacu..... 1  
Gi5\_8760997\_x2.....gagacgucgugggaacCggggugccgaacu..... 1  
Gi3\_28163290\_x2.....Cacgucgugggaacacgggggu..... 1  
Gi2\_10906691\_x2.....Cgacgucgugggaacacggggugcc..... 1  
Gi2\_10847647\_x2.....gucgugggaacacggggugccgaaUu..... 1  
Gi1\_4144837\_x2.....cgugggaacacggggugGcgaacu..... 1  
Gi1\_4155857\_x2.....cgugggaGcacggggugccgaac..... 1  
Gi2\_10899655\_x2.....cggagacgucgugggaacacgAgggugcc..... 1  
Gi2\_10834413\_x2.....cggagacgucguUggaacacggggugcc..... 1  
Gi2\_10983889\_x2.....gucgugggaacacggggAugccgaac..... 1  
Gi2\_10904361\_x2.....gagacgucgugggaGcacggggug..... 1  
Gi1\_4100401\_x2.....ugggaacacggggugccgCacuu..... 1  
Gi3\_28187768\_x2.....aucggagacgucgugggaacacgggAugcc..... 1  
Gi2\_10884813\_x2.....ucggagacgucgCgggaacacggggugc..... 1  
Gi3\_27987112\_x2.....cggagacgucAugggaacacggggugcc..... 1  
Gi1\_4121829\_x2.ugcgauNagacgucguggga..... 1  
G1a\_5962976\_x2.....gugggaacacAgggugccga..... 1  
Gi1\_4118231\_x2.....Gucggagacgucgugggaacacggg..... 1  
Gi1\_4125135\_x2.....gagacgucguAggaacacggggugccgaacu..... 1  
Gi2\_10880379\_x2.....gacgucgAgggaacacggggugccgaacu..... 1  
Gi3\_28125632\_x2.....gaucggagacgucgugUgaacacgggg..... 1  
G1a\_5980446\_x2.....auUggagacgucgugggaacacgggggu..... 1  
Gi5\_8738491\_x2.....acgucgugggaacacggggCgcccgaac..... 1  
Gi2\_10947657\_x2.....Gcgucgugggaacacgggggu..... 1  
Gi3\_28160854\_x2.....cggGgacgucgugggaacacgggg..... 1  
Gi1\_4146809\_x2.....Gggagacgucgugggaacacggg..... 1  
Gi1\_4113363\_x2.....gaacacggCgugccgaacu..... 1  
Gi2\_10878093\_x2.....cgucgugggaacacggggugccgaacG..... 1  
Gi2\_10910833\_x2.....agacgucguAggaacacggggugccgaacu..... 1  
Gi3\_28130842\_x2..Ccgaucggagacgucgugggaacacggggugcc..... 1  
Gi3\_28101492\_x2.....cgugggaacacggggugU..... 1  
Gi3\_28222432\_x2.....acgucgugggaacacggggugcU..... 1  
Gi2\_10869179\_x2.....cgucguAggaacacggggugccg..... 1  
Gi5\_8786199\_x2.....gaucggagNcgucgugggaacac..... 1

Gi1\_4125797\_x2.....ggagacgucgugUgaacacggggugcc..... 1  
G1a\_5912080\_x2.....aacacggAgugccgaacu..... 1  
Gi2\_10829627\_x2.....cguggaacacggggugAcgaa..... 1  
Gi2\_10937811\_x2.....ucggagacgucguggaacacAgggugc..... 1  
Gi3\_28096100\_x2.....cgucgugggaaUacggggugccg..... 1  
Gi3\_28228276\_x2.....cgucgCgggaacacgggg..... 1  
Gi2\_10950335\_x2.....acgucgCgggaacacggggugccgaac..... 1  
Gi3\_28051608\_x2...Ugaucggagacgucgugg..... 1  
Gi5\_8738047\_x2.....gagacgucguggaacacggggugccgaCcu..... 1  
Gi5\_8740827\_x2.....cguggaacacUgggugccgaac..... 1  
Gi3\_27995714\_x2cugcUaucggagacgucg..... 1  
Gi1\_4142589\_x2.....ggaacacggggugAcgaaacu..... 1  
Gi1\_4112383\_x2.....guggaacGcggggugccgaacuu..... 1  
Gi2\_10861573\_x2.....gacgAcguggaacacggggu..... 1  
Gi2\_10902343\_x2.....guggaacacgggUugccg..... 1  
Gi3\_28125734\_x2.....cgGcguggaacacggggugc..... 1  
G1a\_5894830\_x2.Ggcgaucggagacgucgug..... 1  
Gi2\_10841217\_x2...gaucggUgacgucguggaacacggg..... 1  
Gi3\_28226120\_x2.....gaUacgucguggaacacggggu..... 1  
Gi3\_28151474\_x2...gaucggagNcgucguggaacacggggugc..... 1  
Gi2\_10884511\_x2.....guggaacacggggugccgU..... 1  
Gi2\_10990197\_x2...auAggagacgucguggaacacggggugc..... 1  
Gi2\_10989117\_x2.....ggaacacggggugGcgaacu..... 1  
Gi3\_28175532\_x2.....acgucguggaacCcgggugcc..... 1  
Gi3\_28113938\_x2.....gacgucguggaacacggggA..... 1  
Gi2\_10833047\_x2.....cgucguggaacacggAgugc..... 1  
Gi3\_28139014\_x2.....ucguggaacacggggugccgaUcu..... 1  
G1a\_5954170\_x2.ugUgaucggagacgucgu..... 1  
G1a\_5889180\_x2.....gacgucguggaacacAgggu..... 1  
Gi1\_4107455\_x2.....ggaacUcggggugccgaacu..... 1  
Gi3\_28109940\_x2...ucggagacgAcguggaacacggggu..... 1  
Gi1\_4113187\_x2.....cgucguggGacacggggugccgaac..... 1  
Gi3\_28221492\_x2...gaucggagacgucguggaacacgggA..... 1  
Gi3\_28031700\_x2cCgcgaucggagacgucg..... 1  
Gi2\_10881207\_x2.....guggaacacggggUcc..... 1  
Gi3\_28047234\_x2...ucggagacgucgCgggaacacggggugc..... 1  
Gi5\_8808343\_x2.....gacgucguggaacacAgggugccgaacu..... 1  
Gi3\_28144652\_x2.....gggaacacUgggugccgaac..... 1  
Gi3\_28059750\_x2...gaucggagacgucgCgggaacacgg..... 1  
Gi3\_28198436\_x2...ucggagacgucguggaacCcgggugcc..... 1  
Gi1\_4154219\_x2.....cAuggaacacggggugccgaa..... 1  
Gi1\_4112913\_x2.....ggagacgucguggaacacggggAgccg..... 1  
Gi2\_10878071\_x2.....acgucgugAaacacggggugcc..... 1  
Gi1\_4130549\_x2.....ucguggaacCcgggugccg..... 1  
Gi3\_28086146\_x2...cggagacgucAuggaacacggggugccga..... 1  
Gi2\_10937129\_x2.....ucguggaacUcggggugccgaac..... 1  
Gi1\_4114499\_x2.....gUagacgucguggaacacggggugccgaa..... 1

|                                                          |   |
|----------------------------------------------------------|---|
| Gi2_10829903_x2.....gagacgucgugggaacGcggggugccgaacu..... | 1 |
| Gi3_27998202_x2.....gucgugggaacGacggggugccgaacu.....     | 1 |
| G1a_5972560_x2....Gucggagacgucgugggaacacgggg.....        | 1 |
| Gi3_28157016_x2.....gagacgucguAggaacacgggg.....          | 1 |
| Gi3_28030806_x2.....ucgugggaacacgggAugc.....             | 1 |
| Gi5_8736353_x2.....ugggaacacggggugccgGa.....             | 1 |
| Gi1_4151693_x2.....cgugggaacacggggugccgaUcu.....         | 1 |
| Gi4_561212_x2.....acgucgugggaacacggggCgccgaacu.....      | 1 |
| G1a_5958734_x2.....gUagacgucgugggaacac.....              | 1 |
| Gi1_4123177_x2.....cgAcgugggaacacggggugcc.....           | 1 |
| Gi2_10934365_x2.....cguNgugggaacacggggugccg.....         | 1 |
| Gi3_28058248_x2.....cggagacgucgugggaUacggggugcc.....     | 1 |
| Gi1_4141425_x2.....gucgCgggaacacggggugccgaac.....        | 1 |
| Gi5_8736219_x2.....cgugggaacacggggugGcgaac.....          | 1 |
| Gi3_28200802_x2....aucggagacgucgugggaacaAggg.....        | 1 |
| Gi5_8775467_x2.....gggaacaGggggugccgaacu.....            | 1 |
| Gi1_4121961_x2....aucggagacgucguggga.....                | 0 |
| Gi2_10914297_x2.....gucgugggaacacggUgugccgaacu.....      | 1 |
| Gi1_4132763_x2....gaucggagacgucgugggaacacgU.....         | 1 |
| Gi5_8755267_x2.....gugggaacacggggugccAaacuu.....         | 1 |
| Gi2_10869163_x2....aucggagacgucgugggaUcacg.....          | 1 |
| Gi3_28257988_x2.....gggaacacgAggugccga.....              | 1 |
| Gi3_28161996_x2.....cggagacgucgugggaacCc.....            | 1 |
| Gi3_28146456_x2....gaucggCgacgucgugggaacacgggg.....      | 1 |
| Gi5_8828577_x2.....Agugggaacacggggugcc.....              | 1 |
| Gi1_4095657_x2.....cgucgugggaacacggggugccgaCcu.....      | 1 |
| Gi2_10950975_x2.....cgAcgugggaacacggggug.....            | 1 |
| Gi1_4095145_x2.....cggGgacgucgugggaacacggggugcc.....     | 1 |
| Gi3_28118436_x2.....ucgugggaacacggggCgcc.....            | 1 |
| Gi5_8785047_x2.....acgucgugggaacacggggugccgCac.....      | 1 |
| Gi3_28260088_x2.....cggagacAucgugggaacacggggugcc.....    | 1 |
| Gi3_28221306_x2.....ucgugggaacacggggUccgaacu.....        | 1 |
| Gi2_10907677_x2.....cggagacgucgugggaGcac.....            | 1 |
| Gi2_10988447_x2.....acAucgugggaacacggggugccgaac.....     | 1 |
| Gi3_28065114_x2...Ugaucggagacgucgugggaacacg.....         | 1 |
| Gi1_4104505_x2.....ugggaacacggggugAcg.....               | 1 |
| Gi2_10898559_x2.....cggagacgucgugggaUcacggggugcc.....    | 1 |
| Gi3_28165772_x2.....gacgucgugggaacacggggugAcgaa.....     | 1 |
| Gi3_28173416_x2.....agacgucgugggaacacggggugUc.....       | 1 |
| Gi1_4152171_x2.....cgugCgaacacggggugccgaacu.....         | 1 |
| Gi5_8749593_x2.....cgugggaCcacggggugccgaac.....          | 1 |
| Gi3_28250992_x2.....agaUgucgugggaacacgggg.....           | 1 |
| Gi3_28002326_x2.....acgAcgugggaacacggggugccgaac.....     | 1 |
| Gi3_28230570_x2.....cgucguggUaacacggggugc.....           | 1 |
| Gi1_4156415_x2....aucggagacgucgugggaacacAg.....          | 1 |
| Gi4_558354_x2.....ggagacgucgugggaacacggggugcc.....       | 0 |
| Gi5_8747457_x2.....cgCcgugggaacacggggugccga.....         | 1 |

G1a\_5900890\_x2.....Ugucgugggaacacggggugccgaacu..... 1  
 Gi2\_10845111\_x2...gaucUgagacgucgugggaacacgg..... 1  
 Gi2\_10874755\_x2.....cgucguUggaacacggggugccgaac..... 1  
 Gi1\_4143731\_x2.....Cggaacacggggugccgaacuu..... 1  
 Gi3\_28076198\_x2.....cgagacgucgugggaacacggggCgcccga..... 1  
 Gi2\_10932549\_x2.....cgugggaaUacggggugc..... 1  
 G1a\_5879178\_x2.ugcgauccgagacgCcg..... 1  
 Gi3\_28017870\_x2.....guUgugggaacacggggugccgaa..... 1  
 G1a\_5944912\_x2.....cgugggaacacggUgugccgaacu..... 1  
 Gi5\_8805737\_x2.....acgucgugggaacacggggGgcc..... 1  
 Gi3\_28041212\_x2.....uUggaacacggggugccgaacuu..... 1  
 Gi3\_28118984\_x2.....ucUgagacgucgugggaacacggggugccg..... 1  
 Gi3\_28082510\_x2.....gagacgucgugggaacCgggggu..... 1  
 Gi5\_8789051\_x2.....gacgucgugggaCcacggggugccgaacu..... 1  
 Gi1\_4113335\_x2.....ugggaacacggggugcAgaac..... 1  
 Gi3\_28214950\_x2.....cggagGcgucgugggaacacggggugccga..... 1  
 Gi2\_10860131\_x2.....gucguggAaacacggggugcc..... 1  
 G1a\_5951788\_x2.....guAggaacacggggugccg..... 1  
 Gi3\_28066140\_x2.....Aggaacacggggugccgaacuu..... 1  
 Gi2\_10915091\_x2.....aucggagacgCcgugggaa..... 1  
 Gi1\_4131403\_x2.....gugggaacacggggugccgaUcu..... 1  
 Gi2\_10980797\_x2.....ucggagacgucgugggaacCggggugcc..... 1  
 Gi2\_10891069\_x2.....ggagacgucgugggaacacgAggug..... 1  
 Gi3\_28115648\_x2.....gagacgucgugggaacacggggugcUgaac..... 1  
 Gi5\_8801159\_x2.....ggaacacggggugccgaaGu..... 1  
 Gi2\_10958287\_x2.....Uggagacgucgugggaacacggggugc..... 1  
 Gi1\_4125215\_x2...gUucggagacgucguggg..... 1  
 Gi1\_4090741\_x2.....ucggagacgucgugggCacacggggugc..... 1  
 Gi5\_8817007\_x2.....Ggucgugggaacacggggugc..... 1  
 Gi2\_10972959\_x2.....agacgucgugggaacacggggugccgaGc..... 1  
 Gi5\_8799865\_x2.....gucgGgggaacacggggugccgaac..... 1  
 Gi1\_4147797\_x2.....gacgucgGgggaacacgggg..... 1  
 Gi5\_8741455\_x2.....gucgugggaacacggggugccgaUcu..... 1  
 Gi5\_8769055\_x2.....agacgucgugggaacacggggCgcccgaac..... 1  
 Gi4\_566500\_x2.....ugggaacacggggugccgaacuA..... 1  
 Gi3\_28113064\_x2.....cgugggCacacggggugccgaa..... 1  
 Gi2\_10888751\_x2.....cgugggaacUcggggugccga..... 1  
 Gi2\_10941885\_x2.....agacgucgugggaacacgAggugc..... 1  
 Gi5\_8729121\_x2...gaucggagacgucgugggaacaAgg..... 1  
 Gi1\_4140421\_x2.....ggaacacggggugccCaacu..... 1  
 Gi3\_28240156\_x2.....guggCaacacggggugccgaa..... 1  
 G1a\_5972652\_x2...cgauccgagacgucgugggaacacggggGgc..... 1  
 Gi1\_4090135\_x2.....gagacgucgugggaacCggggugccgaacu..... 1  
 Gi2\_10977443\_x2.....ucggagacgucgGggaaca..... 1  
 Gi5\_8742747\_x2...aucggagacgucgugggaacacAgggu..... 1  
 G1a\_5889360\_x2.....guggUaacacggggugccgaac..... 1  
 Gi5\_8761063\_x2.....cgugggaacacggggugccgG..... 1

Gi3\_28151726\_x2.....uGggagacgucgugggaacac..... 1  
Gi3\_28213308\_x2.....aucggagacgGcgugggaacacggggu..... 1  
Gi3\_28094334\_x2.....cggagacgNcgugggaacacggggug..... 1  
Gi1\_4107995\_x2.....ucgugUgaacacggggugccgaacu..... 1  
Gi3\_28219626\_x2.....gggaacacggggugccCaacu..... 1  
Gi3\_28078524\_x2.....ucgugggaacacggUgugccgaacu..... 1  
Gi3\_28053948\_x2.....Gggagacgucgugggaacacggggugccgaa..... 1  
Gi2\_10857089\_x2.....aucggagacgucgugggUacacg..... 1  
Gi3\_28222626\_x2.....cggagacgucgugggaacGc..... 1  
Gi3\_28248996\_x2.....gggaacacggggugccGc..... 1  
Gi3\_28259516\_x2.....aucggUgacgucgugggaacacggggugcc..... 1  
Gi1\_4132403\_x2.....ucgugggaacacggggGgc..... 1  
Gi2\_10986267\_x2.....ugggaacacgAggugccgaac..... 1  
Gi3\_28039124\_x2.....ugggaacacggUgugccgaa..... 1  
Gi3\_28167100\_x2.....gugggaacacgggUugccga..... 1  
G1a\_5892250\_x2.....ggaacacggggugccgaaAu..... 1  
Gi1\_4151335\_x2.....cUucgugggaacacggggugccga..... 1  
Gi5\_8773727\_x2.....ggaacacggggugccgGac..... 1  
Gi1\_4134573\_x2....Aaucggagacgucguggg..... 1  
Gi3\_28067618\_x2.....ucggagacgucgugggaacacggggG..... 1  
Gi3\_28199612\_x2.....ucgugggaacacggUgugccgaac..... 1  
Gi3\_28233816\_x2.....ggGgacgucgugggaaca..... 1  
Gi5\_8803293\_x2....aCcgagacgucgugggaaca..... 1  
Gi3\_28073838\_x2.....cggGgacgucgugggaacacggggugccga..... 1  
Gi2\_10965371\_x2.....cUgagacgucgugggaacacgggg..... 1  
Gi2\_10851393\_x2.....cggagacgucgugggaacGc..... 1  
Gi2\_10856103\_x2.....agacgucgugggaacacgAggugcc..... 1  
Gi2\_10986723\_x2.....aucggagUcgucgugggaacacg..... 1  
G1a\_5905062\_x2....aucggagacgucgugggCa..... 1  
Gi3\_28230914\_x2.....acgucgugggaacacggggugcGgaac..... 1  
G1a\_5927302\_x2.ugcgauccggagGcgucgu..... 1  
Gi2\_10849375\_x2.....gacgCcgugggaacacggggu..... 1  
Gi2\_10899143\_x2.....gggaacacNgggugccga..... 1  
Gi2\_10945959\_x2.....cggagacgucgugggaacGcggggug..... 1  
G1a\_5911902\_x2.....gaacacgggAugccgaacu..... 1  
Gi4\_566822\_x2.....aGcacggggugccgaacu..... 1  
Gi2\_10882991\_x2....aucggagacgucgugggaacC..... 1  
Gi2\_10888377\_x2.....aGgucgugggaacacggggugccgaac..... 1  
Gi1\_4113099\_x2.....agacgucgugggaCcacggggugccgaacu..... 1  
Gi2\_10947099\_x2.....ucgugggaacaAggggugccgaac..... 1  
Gi2\_10965689\_x2.....gucgugggaacacggggugccGac..... 1  
Gi2\_10837593\_x2.....acgucgugggaacacggggAgcc..... 1  
Gi2\_10848447\_x2....aucggagacgucgugggaAacggggugcc..... 1  
Gi2\_10923605\_x2....aucggagacgucguAggaacacggg..... 1  
Gi5\_8730099\_x2....aCcgagacgucgugggaacacg..... 1  
Gi2\_10974825\_x2.....aacacggggugAcgaacu..... 1  
Gi3\_27995724\_x2.....acgucgugggaacacggggGgc..... 1

Gi2\_10876245\_x2.Ggcgaucggagacgucgugggaacacggggugc..... 1  
 Gi3\_28191284\_x2.ugcgaucggagacgucgugggaacGcg..... 1  
 Gi1\_4101825\_x2.....cgugggaacacAgggugccga..... 1  
 Gi1\_4106303\_x2.....cgugggaacacUgggugccgaacu..... 1  
 Gi3\_28162798\_x2....gaucggagacgucgugggaacGcggggugc..... 1  
 Gi1\_4094563\_x2.....gugggaaAacggggugcc..... 1  
 Gi2\_10957553\_x2....gaucggagGcgucgugggaacacggggugc..... 1  
 Gi1\_4098425\_x2.....gggaaGacggggugccgaacu..... 1  
 Gi3\_28053398\_x2.....ggagacgucgugggaacacggggugccAaa..... 1  
 Gi5\_8778607\_x2.....gUagacgucgugggaacacggggugccgaac..... 1  
 Gi1\_4101717\_x2.....ggGacacggggugccgaa..... 1  
 Gi3\_28244302\_x2.....agacgucgugggaacacggggAgccgaacu..... 1  
 Gi1\_4145203\_x2.....gaacacggAgugccgaacuu..... 1  
 Gi1\_4101819\_x2.....gugggaacacUgggugccgaacu..... 1  
 Gi2\_10914149\_x2.....ucgugggaacacggggugccgUac..... 1  
 Gi3\_28051406\_x2....gaucggagacgucgCgggaac..... 1  
 Gi1\_4096131\_x2.....cguUgugggaacacggggugccgaacu..... 1  
 Gi2\_10922939\_x2.....gacgucgugggaacaUggggugccgaacu..... 1  
 Gi3\_28152088\_x2.....cgGcgugggaacacgggg..... 1  
 Gi4\_564142\_x2.....Ggucgugggaacacggggugccgaacu..... 1  
 Gi2\_10986517\_x2.....ggaacaGggggugccgaac..... 1  
 G1a\_5934368\_x2....gaucUgagacgucguggga..... 1  
 G1a\_5938368\_x2.....gugggaacacggggugccCaacu..... 1  
 Gi3\_28250554\_x2.ugcgaucggagacgucgugggaacacA..... 1  
 Gi2\_10945441\_x2.....gacgucguAggaacacggggugccgaacu..... 1  
 Gi5\_8736339\_x2.....aacacggggugccgaGcuuu..... 1  
 G1a\_5883074\_x2.....ggaacUcggggugccgaac..... 1  
 Gi2\_10906193\_x2.....gacgucgCgggaacacggggugccgaac..... 1  
 Gi5\_8771475\_x2.....gugggaacacggggugccgaacuC..... 1  
 Gi1\_4132743\_x2....gaucggagacgucgugggaaca..... 0  
 Gi3\_28147862\_x2.....cgucgugggaacacggggguCccgaac..... 1  
 Gi4\_562448\_x2.....gAgaacacggggugccgaacu..... 1  
 Gi3\_28228746\_x2.....ggaacacggggugcAga..... 1  
 Gi5\_8773587\_x2.....cgGcgugggaacacggggugc..... 1  
 Gi3\_28196202\_x2....Uucggagacgucgugggaacac..... 1  
 Gi5\_8751863\_x2....aucggagaUgucgugggaacacgggggu..... 1  
 Gi5\_8772133\_x2.....acgucguggUacacggggugccgaacu..... 1  
 Gi2\_10911019\_x2.....cgucUugggaacacgggg..... 1  
 Gi2\_10898649\_x2.....cgugggaacacggggugccCaacu..... 1  
 Gi3\_28217206\_x2.....ggagacgucgugggaAacggggugccg..... 1  
 Gi5\_8783919\_x2.....gaacacggggugcGgaacu..... 1  
 Gi2\_10917939\_x2....gaucggagaAgucgugggaacacgggggu..... 1  
 Gi3\_28088406\_x2....aucggagGcgucgugggaacacggggugc..... 1  
 Gi3\_28096076\_x2.....acgucgugggaacGcggggugcc..... 1  
 Gi1\_4108661\_x2.ugUgaucggagacgucguggga..... 1  
 Gi2\_10886591\_x2.....gggaacacggggugccgaacAu..... 1  
 Gi2\_10835245\_x2....aucggagacgucgugggaUcacgggggu..... 1

Gi3\_28119048\_x2.....agGcgucgugggaacacggggugcc..... 1  
 Gi3\_28196328\_x2.....cggagaUgucgugggaacacggggu..... 1  
 Gi2\_10891681\_x2.....ucNugggaacacggggugccgaacu..... 1  
 Gi1\_4119527\_x2....gaucggagacgucguAgg..... 1  
 Gi5\_8794027\_x2.....gucgugggaUcacggggugccgaacu..... 1  
 Gi3\_27991268\_x2.....cgucgugggaacacCgggugc..... 1  
 Gi5\_8776849\_x2.....gacgucgugggaacacggggguAccgaacu..... 1  
 Gi5\_8765189\_x2.....ggUgacgucgugggaacacggggugccgaacu..... 1  
 Gi5\_8816119\_x2.....acacggggCgcccgaacuuu..... 1  
 Gi5\_8743765\_x2.....cgugggaacacggggugcU..... 1  
 Gi5\_8798933\_x2.....acgucgugggGacacggggugcc..... 1  
 Gi2\_10830897\_x2....aucggCgacgucgugggaacacggggug..... 1  
 Gi2\_10885799\_x2.....gugggaacacgCggugcc..... 1  
 Gi5\_8790747\_x2.....acgucgugggaacacggggugccgaaA..... 1  
 Gi3\_28173636\_x2....ucgAagacgucgugggaacacggggugcc..... 1  
 Gi3\_28193946\_x2....Caucggagacgucgugggaacacgg..... 1  
 Gi3\_28139582\_x2.....ggagacgucgugggaacacggggugcUga..... 1  
 Gi5\_8736563\_x2....Gggagacgucgugggaacacg..... 1  
 Gi1\_4108507\_x2.....gggaacacggggugccgaUc..... 1  
 Gi1\_4117087\_x2.....gaGcacggggugccgaacuu..... 1  
 Gl1a\_5928186\_x2.....aacacggggGgccgaacu..... 1  
 Gi1\_4090285\_x2.....gaacacggggugccgaacG..... 1  
 Gi4\_553932\_x2.....gaacacggggugccgaacuuucU..... 1  
 Gl1a\_5968718\_x2.....ggaacacggggugccUaacu..... 1  
 Gi3\_28132614\_x2.....acgucgugggaacacggggAgcc..... 1  
 Gi2\_10855929\_x2.....gucgGgggaacacggggugccgaac..... 1  
 Gi2\_10956119\_x2.....cgucgugggaacacggggugcAgaacu..... 1  
 Gi3\_28214748\_x2.....gagacgucgugggaacacggggCgccgaac..... 1  
 Gi3\_28182160\_x2.....ugggaacacCgggugccgaacu..... 1  
 Gi3\_28099974\_x2....gaucggagacgucguggUaacacggg..... 1  
 Gl1a\_5978494\_x2.....gugggaaAacggggugcc..... 1  
 Gi2\_10923051\_x2....gaucggagacgucgugggaacacgggAugc..... 1  
 Gi3\_28148588\_x2.....ggagacgucgugggaGcacggggugccgaac..... 1  
 Gi3\_28137824\_x2.....gucgugggCacacggggugccg..... 1  
 Gi2\_10942743\_x2.....guUgugggaacacggggugccg..... 1  
 Gi1\_4154213\_x2....gcUaucggagacgucgugggaaca..... 1  
 Gi3\_28097308\_x2....aucggagacgucguUggaacacggg..... 1  
 Gi5\_8757671\_x2.....ugggaacacggggCgccgaacuuu..... 1  
 Gi1\_4147779\_x2.....acgucguAggaacacggggugcc..... 1  
 Gi1\_4142287\_x2.....gacgucgugggaacGcggggugccgaacu..... 1  
 Gi3\_28147552\_x2.....aAacgucgugggaacacggggugccga..... 1  
 Gi2\_10837173\_x2....cgaucggagacgucgugggaacacggggCg..... 1  
 Gi3\_28251202\_x2....gaucggGgacgucgugggaaca..... 1  
 Gi4\_564548\_x2.....aacaUggggugccgaacu..... 1  
 Gl1a\_5972136\_x2.....gaGcacggggugccgaacu..... 1  
 Gi2\_10904759\_x2.....Agucgugggaacacggggugccgaac..... 1  
 Gi1\_4149347\_x2.....gugggaacacgggCugccgaacu..... 1



Gi3\_28036598\_x2.....gugggaacacggggugGcg..... 1  
 Gi5\_8766979\_x2.....cacggggugccAaacuuu..... 1  
 Gi1\_4123809\_x2.....cUucgugggaacacggggugccgaa..... 1  
 Gi1\_4146363\_x2.....gucgugggCacacggggugccgaacu..... 1  
 Gi2\_10910865\_x2.....gacgucguUggaacacggggugcc..... 1  
 Gi1\_4137763\_x2.....cgugggaGcacggggugccga..... 1  
 Gi5\_8790609\_x2....aGcggagacgucgugggaacacggg..... 1  
 Gi1\_4114083\_x2....aucggagaNgucgugggaacacggg..... 1  
 Gi1\_4143435\_x2.....acgucgugggaacacggggCgccg..... 1  
 Gi3\_28060668\_x2....aucggagacgucgAgggaacacgg..... 1  
 Gi5\_8798731\_x2....cAgagacgucgugggaacacggggugccga..... 1  
 Gi3\_28037512\_x2.....gacgucgugggaacaUggggugccgaacu..... 1  
 Gi1\_4092337\_x2.....ggaacacggggugccgaaUu..... 1  
 Gi1\_4151833\_x2.....gagacgucgugggaacCgggggugccga..... 1  
 Gi2\_10975253\_x2.....gGcugcugugggaacacgg..... 1  
 G1a\_5920188\_x2.....gaaGacggggugccgaacu..... 1  
 Gi2\_10846431\_x2..gGgaucggagacgucgugggaacac..... 1  
 Gi3\_28231532\_x2.....gucCugggaacacggggugccgaacu..... 1  
 Gi2\_10981627\_x2.....cggagGcugcugugggaacacggggugc..... 1  
 Gi2\_10837567\_x2....aucggagacgucguAgggaacacggggug..... 1  
 Gi2\_10969951\_x2.....ucgugggaacacggggugccgaC..... 1  
 Gi5\_8767603\_x2.....gUgacgucgugggaacacggggugccgaacu..... 1  
 Gi5\_8810919\_x2.....ggaacacAgggugccgaac..... 1  
 Gi5\_8723193\_x2.....gugggaacacggggCgccgaa..... 1  
 Gi1\_4099943\_x2.....aacGcggggugccgaacu..... 1  
 Gi5\_8778199\_x2.....ggaaUacggggugccgaac..... 1  
 Gi3\_28143516\_x2.....gGcugugggaacacggggug..... 1  
 Gi2\_10920211\_x2.....Uagacgucgugggaacacggggugccga..... 1  
 Gi1\_4128487\_x2.....gugggaacacggggUccgaacu..... 1  
 Gi1\_4151997\_x2.....ugggaacacggggGgccgaac..... 1  
 Gi2\_10955159\_x2.....agacgucgugggaacacAgggugccg..... 1  
 G1a\_5903870\_x2.....gugggaacacggggugccgC..... 1  
 Gi5\_8799731\_x2....gaucggagNcgucgugggaacacg..... 1  
 Gi3\_28168004\_x2....Caucggagacgucgugggaacacg..... 1  
 Gi1\_4138689\_x2.....gaacacgggUugccgaacu..... 1  
 Gi3\_28128144\_x2....ucggagacgucgugggaacaUggggugcc..... 1  
 Gi5\_8795999\_x2.....cgucgugggaacCggggugccga..... 1  
 Gi2\_10923095\_x2....aucggagacgucguggAaacacggg..... 1  
 Gi5\_8824851\_x2.....Ggucgugggaacacggggugccgaa..... 1  
 Gi2\_10916171\_x2.....acUucgugggaacacggggugccgaac..... 1  
 Gi3\_28209404\_x2....ucAgagacgucgugggaacacgggu..... 1  
 Gi3\_28223854\_x2.....Gggagacgucgugggaacacgg..... 1  
 Gi2\_10893515\_x2....gaucggagacAucgugggaacacggg..... 1  
 Gi5\_8721073\_x2.....gugggaacaAgggugccgaac..... 1  
 Gi2\_10854813\_x2....aucggagacgucgugggaacaAgggugcc..... 1  
 Gi2\_10991397\_x2.....cggaCacgucgugggaacacggggugc..... 1  
 Gi2\_10983201\_x2.....Aacgucgugggaacacggggg..... 1

Gi3\_28151460\_x2.....gaGgucgugggaacacggg..... 1  
Gi3\_28023560\_x2.....ggagacgucgugAgaacacg..... 1  
Gi3\_28122554\_x2.....acgucgugggaacaAggggugccgaacu..... 1  
Gi5\_8829257\_x2.....cgugggaacacgAgggugcc..... 1  
Gi2\_10917071\_x2.....aucggagacguUgugggaacacggggugcc..... 1  
Gi2\_10972689\_x2.....gucgugggaacaAggggugcc..... 1  
Gi2\_10974105\_x2.....cggagacgucgugggaacacggggguAc..... 1  
Gi1\_4139897\_x2.....gagGcgucgugggaacacggggugccg..... 1  
Gi2\_10912651\_x2.....acgucgugUgaacacggggugccgaacu..... 1  
G1a\_5936878\_x2.....gggaacaUggggugccgaacu..... 1  
Gi3\_28025028\_x2.....gagacgucgugggaacGcggggugc..... 1  
Gi2\_10953413\_x2.....gauUggagacgucgugggaacacggg..... 1  
Gi2\_10898295\_x2.....gaucggagacAucguggga..... 1  
Gi2\_10950739\_x2.....gaucggagacgucgugggaacGcggggugc..... 1  
Gi4\_556458\_x2.....cgCcgugggaacacggggugcc..... 1  
Gi1\_4106965\_x2.....cggagGcgucgugggaacacggggugcc..... 1  
Gi3\_28146406\_x2.....gucgugggaacacggggCgcccga..... 1  
Gi3\_28081868\_x2.....cguggAaacacggggugccg..... 1  
Gi2\_10829419\_x2.....auAggagacgucgugggaacacggg..... 1  
G1a\_5956478\_x2.....aacacggggugccgCacu..... 1  
Gi2\_10936567\_x2.....cggagacgucgugggGacacgggggu..... 1  
Gi2\_10895413\_x2.....gggaaAacggggugccga..... 1  
Gi3\_28221752\_x2.....cgucgugggaacUcggggugccgaacu..... 1  
Gi1\_4138305\_x2.....aucggagacgucgugggaacacggggCgcc..... 1  
G1a\_5973564\_x2.....gucgugggaacacggggCgccgaac..... 1  
G1a\_5973830\_x2.....aAcggagacgucgugggaa..... 1  
Gi5\_8809047\_x2.....ucgugggUacacggggugccgaac..... 1  
Gi2\_10864285\_x2.....gucgugggaacCcggggugccg..... 1  
Gi2\_10954999\_x2.....gCucggagacgucgugggaac..... 1  
Gi1\_4125031\_x2.....ggaacacgNggugccgaa..... 1  
Gi3\_28181346\_x2.....gugggaacaGggggugcc..... 1  
Gi1\_4157721\_x2.....ugggaacacggggugccgaaUu..... 1  
Gi1\_4146415\_x2.....gUaacacggggugccgaacuu..... 1  
Gi3\_28238804\_x2.....cgugggaacacggggugcUg..... 1  
Gi5\_8741033\_x2.....Aaucggagacgucgugggaacacggg..... 1  
Gi1\_4093549\_x2.....Augggaacacggggugccgaacuu..... 1  
Gi2\_10892149\_x2.....agacgucgugggaacacggggugcU..... 1  
Gi2\_10985579\_x2.....agacgucgNgggaacacggggug..... 1  
Gi2\_10846593\_x2.....cgugggaaUacggggugccgaa..... 1  
Gi3\_28089426\_x2.....ggagacgucgugggCacacg..... 1  
Gi2\_10890755\_x2.....ucggagacgucgugggCacacgggggu..... 1  
G1a\_5966480\_x2.....gucGgaacacggggugccgaacu..... 1  
Gi2\_10952575\_x2.....ugggaacCcggggugccgaa..... 1  
Gi2\_10926381\_x2.....ugggaacacggggugccgaaGu..... 1  
Gi3\_27998906\_x2.....acgucgugAgaacacggggugccg..... 1  
Gi3\_28063360\_x2.....ucgugggaacacggggGgccgaa..... 1  
Gi3\_28456851\_x1.....uAggagacgucgugggaacacgggggu..... 1

Gi3\_28301402\_x1.....gagGcgucgugggaacacggggu..... 1  
Gi3\_28748198\_x1.....cggagacgucgCgggaacacggg..... 1  
Gi3\_28766777\_x1.....Cgagacgucgugggaaca..... 1  
Gi2\_11052448\_x1.....cgucgugggaacacggggCgccgaa..... 1  
Gi5\_8964123\_x1.....gggaacacggggugccgaaA..... 1  
Gi3\_28976737\_x1.....gaucggagacgucgucgCggaacacgg..... 1  
Gi1\_4321434\_x1.....ucggagacgucgugggCacacggggugcc..... 1  
Gi1\_4358604\_x1.....cgGgggaacacggggugccgaa..... 1  
Gi2\_11233788\_x1.....cggagacgucguggAaacacggggu..... 1  
Gi1\_4253439\_x1.....gucgugggaacacgCggugccgaaacu..... 1  
Gi1\_4277685\_x1.....agacgucgugggaacacggggugccgCac..... 1  
Gi3\_28455574\_x1.....acguGuggggaacacggggugccgaaac..... 1  
Gi2\_11016535\_x1.....gggaacacggggugcUga..... 1  
G1a\_6216976\_x1.....aucggagacgucgGgggaacacggggu..... 1  
Gi3\_28669973\_x1.....ucUugggaacacggggugccgaa..... 1  
Gi3\_28638991\_x1.....cgucgugggaacGacggggugccgaa..... 1  
Gi2\_11036049\_x1.....gaacacggggugcUgaac..... 1  
Gi1\_4244569\_x1.....ucgugggaacacCgggugccgaaacu..... 1  
Gi4\_567410\_x1.....ucgugggaAacggggugccgaaacu..... 1  
Gi2\_11149538\_x1.....acgucgugggaacacggggugUcgaacu..... 1  
Gi1\_4162733\_x1.....cggagacgucgugggaacacggCgugcc..... 1  
G1a\_6305847\_x1.....Aacgucgugggaacacggg..... 1  
Gi2\_11051435\_x1.....gauAggagacgucgugggaacacggg..... 1  
Gi3\_28969752\_x1.....ggagacguNuggggaacacggggugccgaaac..... 1  
Gi5\_8847915\_x1.....cggagacgucgugggaGcacg..... 1  
Gi5\_9004006\_x1.....cgugggaacacggggugGcga..... 1  
Gi1\_4221552\_x1.....gCagacgucgugggaacacggggu..... 1  
Gi3\_28761907\_x1.....cgugggaacacggCgugccgaa..... 1  
Gi2\_11407413\_x1.....aucggagacgucgucgAggaacacgggg..... 1  
Gi1\_4257816\_x1.....gaucggCgacgucgugggaacac..... 1  
Gi3\_28846831\_x1.....cggauacgucgugggaacacggggugc..... 1  
Gi3\_28442018\_x1.....agacgucgugUgaacacggggugccgaaacu..... 1  
G1a\_6316795\_x1.....aucggagacgucgugggC..... 1  
G1a\_6319343\_x1.....gcgaAcggagacgucgug..... 1  
Gi4\_614278\_x1.....ugggaGcacggggugccgaaacu..... 1  
Gi2\_11240731\_x1.....aucggagUcgucgugggaac..... 1  
Gi2\_11397058\_x1.....cgaucggagacgucgugAgaacacggggu..... 1  
Gi1\_4246421\_x1.....agacgucgugggaGcacggggugccgaaac..... 1  
Gi5\_8883901\_x1.....gucgugggaacacggggugccgCa..... 1  
Gi5\_8849730\_x1.....agaNucgugggaacacggggugccgaaacu..... 1  
Gi5\_8946142\_x1.....gucgugUgaacacggggugccgaaacu..... 1  
Gi3\_28984984\_x1.....aucggagacgucgugggGacacggggugccgaa..... 1  
Gi5\_8921524\_x1.....cggacacgucgugggaacacg..... 1  
Gi3\_28882310\_x1.....gucgugggaacacggggugccAa..... 1  
Gi3\_28575449\_x1.....cgaucggagacgucgugggGacacggggu..... 1  
Gi3\_28674117\_x1.....gagacgCgugggaacacggggugccgaaac..... 1  
Gi2\_11383108\_x1.....gacgAcgugggaacacggggugccgaaacu..... 1

Gi2\_11134312\_x1.....gucgugggaacacggggugccgG..... 1  
Gi3\_28402393\_x1.....ggagacgCcgugggaacacggggugccg..... 1  
Gi2\_11194019\_x1.....aucggagacgucguggAaacacggggugccg..... 1  
Gi2\_11262347\_x1.....gaaGacggggugccgaacu..... 1  
Gi3\_28804014\_x1.....gagacgucgugggaacacggggugccgGac..... 1  
Gi1\_4257776\_x1.....ucggagacgucgugggaacacA..... 1  
Gi1\_4258938\_x1.....ugggaacacUgggugccgaacu..... 1  
Gi4\_593420\_x1.....cgucgugggaCcacggggugccgaacu..... 1  
Gi3\_28296976\_x1.....cggagacgucgugggUacacg..... 1  
Gi3\_28917695\_x1.....cggagacgucgugggaCcacggggugccgaac..... 1  
Gi5\_8838093\_x1.....Cggaacacggggugccgaa..... 1  
Gi3\_28763748\_x1.....ggagacgucgugggaacacggggCgccgaa..... 1  
Gi2\_11026490\_x1.....cgaucggagacgucgugggaacaAggg..... 1  
Gi1\_4337151\_x1.....ggaacacgNggugccgaacu..... 1  
Gi2\_11374805\_x1.....Cucgugggaacacggggugc..... 1  
Gi5\_9065118\_x1.....ggGgacgucgugggaacacggggugccgaacu..... 1  
Gi2\_11012139\_x1.....acgucgugggGacacggg..... 1  
Gi2\_11323456\_x1.....gagacgucgugggaacacgAggug..... 1  
Gi1\_4185292\_x1.....gugggaUcacggggugcc..... 1  
Gi2\_11006268\_x1.....gaacacggggugUcgaac..... 1  
Gi3\_28282558\_x1.....ggagacgucgugggaaAacgg..... 1  
Gi5\_8883791\_x1.....gucguggAaacacggggugccgaac..... 1  
Gi1\_4217854\_x1.....gaucggGgacgucgugggaacacgggg..... 1  
Gi1\_4312147\_x1.....gugggaGcacggggugccg..... 1  
Gi1\_4298753\_x1.....gagGcgucgugggaacacggggugcc..... 1  
Gi5\_8940293\_x1.....aucggagacgucgugggaacGcggggugcc..... 1  
G1a\_6083080\_x1.....ucggGgacgucgugggaacacgg..... 1  
Gi3\_28313007\_x1.....aucggagacgucgugggaacacggggugccgaacA..... 1  
Gi3\_28438461\_x1.ugcUaucggagacgucguggga..... 1  
Gi4\_581858\_x1.....ugggaacaUggggugccgaacu..... 1  
Gi1\_4218014\_x1.....ugggaaGacggggugccgaacu..... 1  
Gi1\_4341334\_x1.....ugggaacacggggugccAa..... 1  
Gi1\_4374079\_x1.....agacgucgugggaacacggggugAcgaac..... 1  
Gi1\_4216317\_x1.....gagacgucgugggaacacggggugccgGacu..... 1  
Gi4\_568513\_x1.....cgugggaacacggggugcUgaacu..... 1  
Gi2\_11299570\_x1.....ggUgacgucgugggaacac..... 1  
Gi2\_11019232\_x1.....ggagacgucgugggaacacggggCgccgaac..... 1  
Gi5\_8918457\_x1.....acgucgugggaacacAgggugcc..... 1  
Gi1\_4195716\_x1.....agUcgucgugggaacacggggugccgaac..... 1  
Gi3\_28590680\_x1.....cggagacgucgugggaacacAg..... 1  
Gi3\_28987416\_x1.....aucggagacgucgugggCacacggggugc..... 1  
Gi5\_9115246\_x1.....gugggaacacggUgugccga..... 1  
Gi2\_11092218\_x1.....cCgagacgucgugggaacacg..... 1  
Gi5\_9106089\_x1.....gagacgucgugggaGcacggggugccgaac..... 1  
Gi3\_28840946\_x1.....cgUagacgucgugggaacacg..... 1  
G1a\_6055454\_x1.....Aggagacgucgugggaacacgg..... 1  
Gi1\_4321046\_x1.....ucguAggaacacggggugccga..... 1

Gi3\_28760111\_x1.....ucggagacgucguggAaacac..... 1  
Gi1\_4163111\_x1.....gugggaacacggggugccc..... 1  
Gi2\_11028080\_x1.....gugggCacacggggugcccga..... 1  
Gi2\_11246975\_x1.....gaacacggggugcccUaac..... 1  
Gi1\_4263292\_x1.....cggagacgucgugggaacacAgggugccc..... 1  
Gi5\_9058148\_x1.....ggaacacggggguAccgaac..... 1  
G1a\_6337559\_x1.....acgucgugggaacCcggggugcccgaacu..... 1  
Gi2\_11377701\_x1.....Cagacgucgugggaacacggg..... 1  
Gi1\_4308706\_x1.....gaacacggggugcUgaacuu..... 1  
Gi3\_28722129\_x1.....cgucgugggaacaUggggugccc..... 1  
Gi1\_4172265\_x1.....cgugggaacacggggugcccgaAuu..... 1  
Gi2\_11320052\_x1.....ugggaUcacggggugcccga..... 1  
Gi5\_9036365\_x1.....gucgugggaacacggggugA..... 1  
Gi2\_11366401\_x1.....aucNgagacgucgugggaacacggg..... 1  
Gi5\_8838128\_x1.....gagacgucgCgggaacacg..... 1  
Gi2\_11278877\_x1.....aucggagacAucgugggaacacg..... 1  
Gi2\_11019129\_x1.....cgauccgUgacgucguggga..... 1  
Gi1\_4193230\_x1.....ucgugggaaAacggggugcccgaac..... 1  
Gi5\_8853628\_x1.....gacgucgugggaacacgUggugccc..... 1  
Gi2\_11154462\_x1.....gcgaucggagGcugcugggaacacggggugc..... 1  
Gi2\_11048027\_x1.....ucgugUgaacacggggugcccgaac..... 1  
G1a\_6340966\_x1.....aucggagacgucgugggaacacggggCgc..... 1  
Gi3\_28886264\_x1.....Cgagacgucgugggaacacggggugcccga..... 1  
Gi1\_4248594\_x1.....aucggagacgCgugggaacacggg..... 1  
Gi3\_28518183\_x1.....gcgaucggagacgucgugggaacGcgggg..... 1  
Gi5\_9054541\_x1.....aucggagacgucgCgggaacacggg..... 1  
Gi3\_28960542\_x1.....ucggagacgucgugggaacGcgggg..... 1  
Gi1\_4253299\_x1.....agacgucgugggaaAacggggugcccgaacu..... 1  
Gi2\_11404387\_x1.....cguggAaacacggggugcccga..... 1  
Gi5\_8988568\_x1.uCcgaucggagacgucgug..... 1  
Gi1\_4202929\_x1.....ugggaGcacggggugcccga..... 1  
Gi2\_11228618\_x1.....ucggagacgucguggAaacacgggg..... 1  
Gi3\_28519114\_x1.....cgauccgagacgucAugggaacacggggugc..... 1  
Gi5\_9059131\_x1.....guAggaacacggggugcccgaacuu..... 1  
Gi1\_4183186\_x1.....cgugggaacacggggGgcccga..... 1  
Gi2\_11303879\_x1.....ucggUgacgucgugggaacacggggugc..... 1  
Gi1\_4354566\_x1.....gGucggagacgucgugggaacacgg..... 1  
Gi3\_28744307\_x1.....cgucgugggaacacgggUugcccgaacu..... 1  
Gi1\_4228142\_x1.....aucggagacgucguggAaacacggggugc..... 1  
Gi5\_8987132\_x1.....cgUagacgucgugggaacacg..... 1  
Gi1\_4251505\_x1.....gaacacggggugcGgaacuu..... 1  
Gi3\_28689043\_x1.....gucgugggaacUcggggugcccgaac..... 1  
G1a\_6350034\_x1.....ucggagacNucgugggaacacg..... 1  
Gi3\_28698580\_x1.....ucNugggaacacggggugcccgaac..... 1  
Gi1\_4363573\_x1.....ggaacacggggugcccgaC..... 1  
Gi1\_4210860\_x1.....aucCgagacgucgugggaacacgggg..... 1  
Gi3\_28961845\_x1.....ggagacgucgugggaacacggggguAccgaacu..... 1

Gi3\_28265457\_x1.....ggNgacgucgugggaacacggggugcc..... 1  
Gi2\_10993919\_x1.....aucgAagacgucgugggaacacg..... 1  
Gi3\_28750431\_x1.....cggGgacgucgugggaacacg..... 1  
Gi2\_11406260\_x1.....aCcgagacgucgugggaac..... 1  
Gi3\_28763838\_x1.....gacgucgGgggaacacggggugccgaac..... 1  
Gi1\_4365078\_x1.....ucggGgacgucgugggaacac..... 1  
Gi5\_8886489\_x1.....gaucggagacgAcgugggaacac..... 1  
Gi3\_28365029\_x1.....gaucggagacgucgugAgaacacgggg..... 1  
Gi3\_28299078\_x1.....gaucggagaUgucgugggaacacggggugcc..... 1  
Gi5\_9021777\_x1.....acgucgugggaacacggggGgccg..... 1  
Gi2\_11178714\_x1..gcgauccgagaUgucgugggaacac..... 1  
Gi3\_28398885\_x1..cgauccgagacgucgugggaacCcggggu..... 1  
Gi1\_4349748\_x1..ugcgauccgagacgucgugggGacacg..... 1  
Gi5\_9028627\_x1.....gaCcgagacgucgugggaacac..... 1  
Gi3\_28450276\_x1.....ggaacacUgggugccgaacu..... 1  
Gi2\_11228771\_x1.....acgucgugggaacacggggugccCaacu..... 1  
Gi5\_9126299\_x1.....uggaacaacggggugAcgaa..... 1  
Gi2\_11058282\_x1.....cggagacgucgugggaacacggGc..... 1  
Gi1\_4284261\_x1.....ucggagacgucgGgggaacacggggugcc..... 1  
Gi5\_8936831\_x1.....Ccgugggaacacggggugccgaac..... 1  
Gi3\_28613802\_x1.....gaucggagacgucgCgggaacac..... 1  
Gi2\_11226743\_x1.....ucgugggaacacggggugccgaG..... 1  
Gi3\_28892382\_x1.....gaucggagacguAguggg..... 1  
Gi3\_28841672\_x1.....gacgucgugggaacacggggAgccg..... 1  
Gi5\_9021659\_x1.....cgugggaacacAgggugc..... 1  
Gi2\_11230829\_x1.....cgGucggagacgucgugggaacacggggug..... 1  
Gi3\_28755922\_x1.....ggaacacggggugccgUa..... 1  
Gi2\_11030689\_x1.....gucgugggaacacggggugccCaac..... 1  
Gi3\_28276896\_x1.....gugggaacacggggUuccgaa..... 1  
Gi5\_8969411\_x1.....gggaUcacggggugccgaacu..... 1  
Gi3\_28952971\_x1.....gucgugggaacaGggggugc..... 1  
Gi2\_11407500\_x1.....gaucggagacUucgugggaacacgggggu..... 1  
Gi3\_28444159\_x1.....gaucggagacgucgugggCacacggggugcc..... 1  
Gi3\_28885176\_x1.....cgauccgCgacgucgugggaacacgg..... 1  
Gi2\_11174989\_x1.....cgucAugggaacacggggugccgaac..... 1  
Gi2\_11152910\_x1.....Nugggaacacggggugccg..... 1  
Gi3\_28966068\_x1.....cgauccgagacgucgugAgaacacggggugc..... 1  
Gi2\_11127173\_x1.....cgugggaacaAggggugccg..... 1  
Gi5\_9128095\_x1.....agacgucgugggaGacggggugccgaacu..... 1  
Gi3\_28359490\_x1.....ggagacgucgugggaacacggA..... 1  
G1a\_6354956\_x1.....cggagacgucgugggaacacggAgu..... 1  
Gi1\_4367021\_x1.....aucggCgacgucgugggaacacgg..... 1  
Gi1\_4295959\_x1.....ggagacgCcgugggaacacgggggu..... 1  
Gi4\_610214\_x1.....ucgugggGacacggggugccgaacu..... 1  
Gi2\_11219064\_x1.....gucguUggaacacggggugcc..... 1  
Gi2\_11239451\_x1.....gucgugggaacacggggugccgaaU..... 1  
Gi2\_11036928\_x1.....ucggagacgucgugggaacaUgggggu..... 1

Gi1\_4175660\_x1.....Gcgucgugggaacacggggugccga..... 1  
G1a\_6253053\_x1.Ggcgaucggagacgucguggaa..... 1  
Gi2\_11042777\_x1.....uggaacacgggUugccgaacuu..... 1  
Gi2\_11348646\_x1.gcgaucaAgagacgucguggaaca..... 1  
Gi3\_28803717\_x1.....ggagacgucguggaacaacggggCgccgaacu..... 1  
Gi1\_4228819\_x1.....ggagacgucguggCacacggggu..... 1  
Gi3\_28609466\_x1.....cgAcgugggaacacggggugccga..... 1  
Gi2\_11024026\_x1.....cgugggaacacggggugccgaU..... 1  
Gi5\_9110612\_x1.....ucggagUcgucguggaacaacg..... 1  
Gi2\_11373876\_x1.....aucggagacgAcgugggaacacg..... 1  
Gi2\_11085832\_x1.....ucguggaacaacggggCgc..... 1  
Gi5\_9021273\_x1.....gugggaUcacggggugccgaac..... 1  
Gi2\_11353211\_x1.....gauUggagacgucguggaacaac..... 1  
Gi3\_28939362\_x1.....ucguggAaacacggggugc..... 1  
Gi3\_28352054\_x1.....gaucggagacgucguggUacacgggg..... 1  
Gi5\_8929589\_x1.....Uucggagacgucguggaacaacg..... 1  
Gi3\_28476339\_x1.....gaucggagacgucguggaaAacggggugc..... 1  
Gi1\_4309682\_x1.....Ugagacgucguggaacaacg..... 1  
Gi2\_11060547\_x1.....cgucgugAgaacaacggggugccgaac..... 1  
Gi1\_4251046\_x1.....cggagCcgucgugggaacaacggg..... 1  
Gi3\_28764513\_x1.....cgugCgaacaacggggugcc..... 1  
Gi2\_11226407\_x1.....guNggaacaacggggugccga..... 1  
Gi3\_28363717\_x1.....gucgugAgaacaacggggugccga..... 1  
Gi2\_11263588\_x1.....gucgugggaacaacggggugAcga..... 1  
G1a\_6338310\_x1.....cCaucggagacgucgugg..... 1  
Gi2\_11072299\_x1.....gaucggagacgucguggaacaUggggu..... 1  
Gi4\_614044\_x1.....gugggaaAacggggugccga..... 1  
Gi3\_28376963\_x1.....agacgucguggCacacggggugccgaac..... 1  
G1a\_6330169\_x1.....gugggUacacggggugccga..... 1  
Gi5\_8898412\_x1.....uNgugggaacaacggggugccgaacu..... 1  
Gi5\_8989562\_x1.....gugggaacaacggAgugcc..... 1  
Gi3\_28398226\_x1.....gacgucgAgggaacaacggggugccgaac..... 1  
G1a\_6147158\_x1.....aucgUagacgucguggaacaacggggugccgaacu..... 1  
Gi5\_9035156\_x1.....cacggggugccgaGcuuu..... 1  
Gi2\_11285368\_x1.....gaCcgagacgucguggaacaacgggg..... 1  
G1a\_6008330\_x1.....cgGgggaacaacggggugccg..... 1  
Gi3\_28809779\_x1.....gucgugggaacaacggggugccUa..... 1  
Gi3\_28934296\_x1.....agacgucguggCaacaacggggugcc..... 1  
Gi5\_8915895\_x1.....cgugggaacaacggggAgccgaac..... 1  
G1a\_6261597\_x1.....gaucggagacgucAugggaacaacgggggu..... 1  
Gi2\_11077758\_x1.....acgucgugggaacaacgUggugccgaacu..... 1  
Gi2\_11089832\_x1.....aucggagacgucAugggaacaacgggg..... 1  
Gi2\_11210530\_x1.....gacgucGgggaacaacggggugccg..... 1  
Gi3\_28765612\_x1.ugcgaucgNagacgucguggaacaacg..... 1  
Gi2\_11239154\_x1.....cgucguCggaacaacggggugccgaac..... 1  
Gi2\_11109144\_x1.....gaGcgagacgucguggga..... 1  
Gi2\_11261123\_x1.....aucUgagacgucguggaacaacg..... 1

|                                                          |   |
|----------------------------------------------------------|---|
| Gi2_11317150_x1.....cgucgugggaacacggUgucgccaacu.....     | 1 |
| G1a_6321477_x1....aucggagacguUgugggaacacggg.....         | 1 |
| Gi2_11114207_x1...gUucggagacgucgugggaacacggggugcc.....   | 1 |
| G1a_6129081_x1....aucggagCcgucgugggaacacggggug.....      | 1 |
| Gi3_28650155_x1.....gggNacacggggugccga.....              | 1 |
| Gi3_28947489_x1.....ucggagacgucgugggGacacgg.....         | 1 |
| Gi2_11152785_x1.....cgugggaacaUggggugcc.....             | 1 |
| Gi3_28530137_x1.....guUggaacacggggugccgaacu.....         | 1 |
| Gi1_4316092_x1.....gacgucgugggaacacAgggugccg.....        | 1 |
| Gi1_4241130_x1.....gacgucgugggaacacggggugccgaaA.....     | 1 |
| G1a_6103203_x1.....agacgucgugggaacacggggCgccgaac.....    | 1 |
| Gi2_11109614_x1cugcgauccgagacgucgugggaacacggggug.....    | 0 |
| Gi2_11318445_x1.....gCagacgucgugggaacacg.....            | 1 |
| Gi5_8837433_x1....aucgAagacgucgugggaacacg.....           | 1 |
| Gi1_4257003_x1.....Ugagacgucgugggaacacggggugccga.....    | 1 |
| Gi3_28668853_x1..gcgauccgagacgCcgugggaacacggggug.....    | 1 |
| Gi5_8964368_x1.....ugggaacacggggugccgGacuuu.....         | 1 |
| Gi3_28762103_x1...gaucggagacgucgugggaacacgAggu.....      | 1 |
| Gi2_11319496_x1.....aacacgggUgccaacu.....                | 1 |
| Gi2_11261665_x1.....gacgucgugggaacacggggugcA.....        | 1 |
| Gi3_28293718_x1.....cgNgggaacacggggugc.....              | 1 |
| Gi2_11236329_x1.....gagacgucgugggaacacggggugA.....       | 1 |
| Gi3_28798795_x1.....acgucguAggaacacggg.....              | 1 |
| Gi3_28827987_x1...cgauccgagacgucgugggaacacgggAug.....    | 1 |
| Gi2_11398198_x1....auAggagacgucgugggaacacgggg.....       | 1 |
| Gi1_4177961_x1....gugggaaUacggggugccga.....              | 1 |
| Gi3_28698046_x1..gcgauccggaUacgucgugggaacacggggugcc..... | 1 |
| Gi5_9073909_x1.....cguUggaacacggggugccgaac.....          | 1 |
| Gi2_11126230_x1...gaucggagacgucgAgggaacacgg.....         | 1 |
| Gi3_28918801_x1...cgauccgagacgucgugggaAacgggg.....       | 1 |
| Gi3_28631322_x1...cgauccgagaUgucgugggaacacggggugc.....   | 1 |
| Gi3_28710470_x1.....ggagacgucgugggaUacggggugccgaacu..... | 1 |
| Gi1_4277803_x1.....guUggaacacggggugccgaac.....           | 1 |
| Gi2_11236211_x1.....Ccgugggaacacggggugccgaa.....         | 1 |
| Gi1_4334723_x1.....Gggagacgucgugggaacacggggugccgaac..... | 1 |
| Gi2_11330853_x1.....ggagacgucgugggaacUc.....             | 1 |
| Gi3_28893236_x1.....Ccgugggaacacggggug.....              | 1 |
| Gi2_11209537_x1.....agaNucgugggaacacggggugccg.....       | 1 |
| Gi5_9115802_x1.....gugggaacacggggugccgU.....             | 1 |
| Gi2_11105072_x1.....ucgugggaNcacggggugc.....             | 1 |
| Gi2_11344898_x1....aucggagacgucgugGcaacacggggugc.....    | 1 |
| Gi5_9102765_x1.....acgucgugggaacCcgggugccgaacu.....      | 1 |
| Gi1_4321912_x1.....ggagacgucgugggaCcacggggugccg.....     | 1 |
| Gi2_11193491_x1.....gugggaacacggCgugccg.....             | 1 |
| Gi2_11245553_x1.....gagacgucgugggGacacggggugccgaacu..... | 1 |
| Gi5_9105896_x1.....aacacggggUAccgaacu.....               | 1 |
| G1a_6294058_x1....ucggagacgucgugggaacacgggUugc.....      | 1 |



Gi2\_11291679\_x1.....ggaacacggggugGcgaac..... 1  
Gi5\_9053840\_x1.....guggUaacacggggugccgaa..... 1  
Gi2\_11368360\_x1.....acgucgAgggaacacggggugccgaac..... 1  
Gi5\_9114621\_x1.....gaacacggggugccAaac..... 1  
Gi3\_28690210\_x1.....cgucgugggaacacgCggugccgaacu..... 1  
Gi1\_4305702\_x1.ugcgauccgagacgucgCggga..... 1  
Gi2\_11349211\_x1.....gucgugggaacacggggugcUgaac..... 1  
Gi3\_28335812\_x1.....cguNgugggaacacggggugccga..... 1  
Gi3\_28301990\_x1.....acguGgugggaacacggggugc..... 1  
Gi1\_4182240\_x1.....cgugggaacacAgggugcc..... 1  
Gi1\_4176686\_x1.....ucggagacgucguggGacacgggg..... 1  
Gi1\_4216602\_x1.....ggaacacgggUugccgaacu..... 1  
Gi1\_4234656\_x1.....gacgucgugggaGcacggggugcc..... 1  
Gi2\_11379850\_x1.....gaaNacggggugccgaac..... 1  
Gi5\_9066133\_x1.....acgucguggGacacggggugccg..... 1  
Gi1\_4210768\_x1.....agacgucgugggaacacgAggugccgaacu..... 1  
Gi2\_11345249\_x1.....gCagacgucgugggaacacgggg..... 1  
Gi2\_11017755\_x1.....aucggagacgucgugggaAaac..... 1  
Gi3\_28928419\_x1.....ggagacgucAugggaacacgggg..... 1  
Gi5\_8885190\_x1.....ucgugggaacacggggugccgaaA..... 1  
Gi3\_28371009\_x1.....ggagacgucgugggaacacggggugccgaGcu..... 1  
Gi3\_28674695\_x1.....gaucggagacgucgugggaacCcgggugcc..... 1  
Gi2\_11009250\_x1.....aGcggagacgucgugggaacacggggugccg..... 1  
Gi2\_11049112\_x1.....gaucggagacgucgugggaacacggggugccA..... 1  
Gi2\_11391509\_x1.....cgugggaacacggggAgc..... 1  
Gi3\_28844504\_x1.....cggagacgucgugggaacacggggugcUga..... 1  
Gi3\_28959289\_x1.....gacgucguNggaacacggggugccg..... 1  
Gi4\_573284\_x1.....gugggaacacggggugccgCac..... 1  
Gi1\_4254808\_x1.....ggGgacgucgugggaacacggggugc..... 1  
Gl1\_6186868\_x1..gcgaucggagacgucgugggaacCggg..... 1  
Gi2\_11292824\_x1.....cggagacgucguUggaaca..... 1  
Gi2\_11089248\_x1.....uggUaacacggggugccgaac..... 1  
Gi2\_11190670\_x1.....ucggagacUucgugggaacacggggugc..... 1  
Gi2\_11266207\_x1.....cCugggaacacggggugccg..... 1  
Gi3\_28418242\_x1.....ggagacgucguggaaAa..... 1  
Gi2\_11120911\_x1.....aucggagacgucCgggaacacggggugccgaacu..... 1  
Gi2\_11165645\_x1..cgauccgagaUgucgugggaacac..... 1  
Gi3\_28899904\_x1..cgauccgagacGcgugggaacacggggugc..... 1  
Gi5\_8930734\_x1.....ggaacacgggAugccgaac..... 1  
Gi4\_594370\_x1.....gugggaacaUggggugccgaa..... 1  
Gi5\_9106071\_x1.....ugggaacacggggGgccgaacu..... 1  
Gi2\_11303226\_x1.....ugggaacacggggugccgCa..... 1  
Gi3\_28789674\_x1.....gucgugggaGcacggggug..... 1  
Gi3\_28870649\_x1.....gucGgggaacacgggg..... 1  
Gi5\_9042409\_x1.....cgucgugggaacacggggGgccga..... 1  
Gi1\_4377175\_x1.....ggagaUgucgugggaacacggggugcc..... 1  
Gi3\_28645519\_x1.....acgucgugggaacacgCggugccgaacu..... 1

|                                                       |   |
|-------------------------------------------------------|---|
| Gi5_9012986_x1.....aucggagGcgucgugggaacacg.....       | 1 |
| Gi3_28690423_x1...gaucggagacgucguAggaaca.....         | 1 |
| Gi3_28339036_x1.....gaacacggggugccCaac.....           | 1 |
| Gi2_11299500_x1...gaucggagGcgucgugggaacacgggg.....    | 1 |
| Gi1_4237513_x1.....gucgugUgaacacggggugccgaac.....     | 1 |
| Gi1_4179185_x1.....cggagacgucguAggaacacgggg.....      | 1 |
| Gi2_11158578_x1...gauNggagacgucguggga.....            | 1 |
| Gi3_28381297_x1.....cgucgAgggaacacggggugcc.....       | 1 |
| Gi2_11198754_x1.....gugggaacacgCggugccgaa.....        | 1 |
| Gi1_4198504_x1...cgUucggagacgucgugggaacacgggggu.....  | 1 |
| Gi1_4255536_x1...gaucggagNcgucgugggaacac.....         | 1 |
| Gi1_4235669_x1.....cAgagacgucgugggaacacggggugc.....   | 1 |
| Gi5_8988460_x1.....gggaacacggggugccga.....            | 0 |
| Gi3_28742930_x1....aNcggagacgucgugggaacacg.....       | 1 |
| G1a_5995102_x1.....gucguAggaacacggggugccgaacu.....    | 1 |
| Gi5_9063717_x1.....ggAaacacggggugccgaa.....           | 1 |
| Gi5_9047761_x1.....gacgucgugggaacacgAggugccgaacu..... | 1 |
| Gi2_11174564_x1.....cgugggCacacggggugccg.....         | 1 |
| Gi2_11035292_x1...gaucggagacgucgugggaUca.....         | 1 |
| Gi3_28457323_x1.....gucgugggaacacggggAgc.....         | 1 |
| Gi4_591294_x1....aucggagacgucgugggaacacgggg.....      | 0 |
| Gi3_28936340_x1.....ugggaacacggggugcGga.....          | 1 |
| Gi2_11386545_x1..gUgaucggagacgucgugggaaca.....        | 1 |
| Gi1_4249470_x1....aucggagaUgucgugggaacacggggugc.....  | 1 |
| Gi3_28442290_x1.....gagacgucgugggaCcacgggggu.....     | 1 |
| Gi1_4307621_x1.....aacacgggguCccgaacu.....            | 1 |
| Gi1_4377921_x1....ucggagacgucgugggaacacgggguCcc.....  | 1 |
| G1a_6228342_x1..gcgaGcggagacgucgug.....               | 1 |
| Gi5_8997585_x1.....gagacgucgugggaacGcggggugcc.....    | 1 |
| Gi2_11155321_x1.....cggagacgucguAggaacacgggg.....     | 1 |
| Gi3_28953795_x1.....acgCcgugggaacacggggugc.....       | 1 |
| Gi2_11399827_x1.....cgucguCggaacacggggugccgaacu.....  | 1 |
| Gi3_28301455_x1.....ugggaacacCgggugccga.....          | 1 |
| Gi2_11303807_x1.....cgucgugggaAacggggug.....          | 1 |
| Gi3_28302717_x1.....cgugggUacacggggugccgaa.....       | 1 |
| Gi3_28452897_x1.....cggagacgucguggAaacacggg.....      | 1 |
| Gi1_4360945_x1.....gugggaacacggggAgcc.....            | 1 |
| Gi3_28454039_x1..cgaucggagaGgucgugg.....              | 1 |
| Gi4_606299_x1....gggaacGcggggugccgaacu.....           | 1 |
| Gi3_28904865_x1.....aacacggggugUcgaacuu.....          | 1 |
| Gi2_11342860_x1....aucggagaUgucgugggaacacg.....       | 1 |
| Gi2_11119190_x1.....Ugucgugggaacacggggug.....         | 1 |
| Gi2_11055218_x1.....cggagacgucgugggaacaAggggugcc..... | 1 |
| Gi3_28600104_x1...gaucggaAacgucgugggaacacggggugc..... | 1 |
| Gi3_28601525_x1.....ggagacgucgugggaacacgggCugcc.....  | 1 |
| Gi3_28313448_x1.....acgucgugggaacacggggugUcga.....    | 1 |
| Gi2_11335249_x1....Nucggagacgucgugggaacacggggugc..... | 1 |

|                                                           |   |
|-----------------------------------------------------------|---|
| Gi2_10994511_x1.....uNgugggaacacggggugccgaacu.....        | 1 |
| Gi3_28496944_x1.....ucgugggaacacgggguU.....               | 1 |
| Gi4_593052_x1.....cgucgugggaacGcggggugccga.....           | 1 |
| Gi5_9000862_x1.....cgugggaacacggggAgccga.....             | 1 |
| Gi5_9075728_x1.....gagacgucgugggaacac.....                | 0 |
| Gi4_613587_x1.....aucggagacgucgugggaacacg.....            | 0 |
| Gi3_28446946_x1.....ucCgagacgucgugggaacacggggu.....       | 1 |
| G1a_6280664_x1.....aucggagacgucgugggaacacgggAug.....      | 1 |
| Gi1_4161799_x1.....gugAgaacacggggugcc.....                | 1 |
| Gi3_28372282_x1.....gacgucgugggaacacggA.....              | 1 |
| Gi3_28389100_x1.....gacgucguggCaacacggg.....              | 1 |
| Gi5_9110337_x1.....ucgCgggaacacggggugcc.....              | 1 |
| Gi2_11035066_x1.....ucggagacgucgCgggaacacggggugccga.....  | 1 |
| Gi3_28899503_x1.....Cacgucgugggaacacggggugccgaa.....      | 1 |
| Gi1_4243250_x1.....guggAaacacggggugcc.....                | 1 |
| Gi5_8840468_x1.....gucgugggaacacUgggugccgaacu.....        | 1 |
| Gi5_8954413_x1.....aAacgucgugggaacacggggugccgaacu.....    | 1 |
| G1a_6214333_x1.....cgugggGaacacggggugccgaac.....          | 1 |
| Gi2_11278921_x1.....gugggaacaAggggugccgaacuu.....         | 1 |
| Gi3_28859908_x1.....ucggagacgucgugggaacacggggugUc.....    | 1 |
| Gi3_28513312_x1.....acgucgugggaacacggggugGc.....          | 1 |
| Gi5_8990613_x1.....aucggagacgucgugggaacaUggggugc.....     | 1 |
| G1a_6113358_x1.....gaucggagacgucgugggaacCcg.....          | 1 |
| Gi2_11298417_x1.....gaucggagUcugcugggaacacgggg.....       | 1 |
| Gi5_8895035_x1.....ggaacacggCgugccgaacu.....              | 1 |
| G1a_6178501_x1.....aucgCagacgucgugggaacacggg.....         | 1 |
| Gi2_11056573_x1.....cgucguAggaacacggggug.....             | 1 |
| Gi2_10994775_x1.....gUgacgucgugggaacacggg.....            | 1 |
| Gi5_8974345_x1.....ucggagacgucgugggaacacggggCgc.....      | 1 |
| Gi2_11373772_x1.....aucggagacgucguggUaacacggggugcc.....   | 1 |
| Gi2_11175619_x1.....gagacguUgugggaacacggggugc.....        | 1 |
| Gi4_606850_x1.....cgugggaacUcggggugccgaacu.....           | 1 |
| Gi3_28558724_x1.....aucggagacgucgugggaacacggggugUcga..... | 1 |
| G1a_6280823_x1.....Nucggagacgucguggga.....                | 1 |
| Gi5_8863159_x1.....agacguAgugggaacacggggugccgaac.....     | 1 |
| G1a_6072823_x1.....gucgugggaacacggggUaccgaacu.....        | 1 |
| Gi2_11167320_x1.....aucggagacgucgugggaacacgCg.....        | 1 |
| Gi2_11270234_x1.....Cucggagacgucgugggaacacggggu.....      | 1 |
| Gi5_8977847_x1.....aucggagacgucguggAaacacgggggu.....      | 1 |
| Gi2_11253814_x1.....gNgggaacacggggugccgaacu.....          | 1 |
| Gi5_9030484_x1.....acgucgugggaUcacggggugccgaacu.....      | 1 |
| Gi2_11313016_x1.....ucggCgacgucgugggaacacg.....           | 1 |
| Gi5_8844974_x1.....gugggaacaAggggugccgaa.....             | 1 |
| Gi1_4312408_x1.....acgucgugggaacacggggUaccgaacu.....      | 1 |
| Gi5_9100563_x1.....acgAcgugggaacacggggugccgaac.....       | 1 |
| Gi2_10995459_x1.....ucggagacgucgugggGaacacgggg.....       | 1 |
| Gi3_28436183_x1.....ucgugggaacacggggAgccga.....           | 1 |

|                                                              |   |
|--------------------------------------------------------------|---|
| Gi3_28701466_x1.....Uucggagacgucguggga.....                  | 1 |
| Gi5_9128118_x1.....guGgugggaacacggggugc.....                 | 1 |
| G1a_6037056_x1.ugcgaucggagacguUgug.....                      | 1 |
| Gi3_28854988_x1.....gucguAggaacacggggugccgaa.....            | 1 |
| Gi2_11271014_x1.....gaCcgagacgucguggga.....                  | 1 |
| Gi3_28346618_x1.....aucggagacguAgugggaacacgg.....            | 1 |
| Gi5_9112485_x1.....Cggaacacggggugccgaa.....                  | 1 |
| Gi3_28961014_x1.....ggagacgucgugggaacacggggUccgaacu.....     | 1 |
| Gi1_4352531_x1.....aucggagacgCcgugggaacacggggugc.....        | 1 |
| Gi2_11272892_x1.....gucguAggaacacgggggu.....                 | 1 |
| Gi5_8869645_x1.....agacguUgugggaacacggggugccgaa.....         | 1 |
| Gi2_11051990_x1.....ucguCggaacacggggugccg.....               | 1 |
| Gi3_28890027_x1.....ggagacgucguggCaacacggggugcc.....         | 1 |
| Gi2_11160046_x1.....gaGcggagacgucgugggaac.....               | 1 |
| Gi3_28465492_x1.ugUgaucggagacgucgugggaacacggggugcc.....      | 1 |
| Gi5_9122159_x1.....acgucgugCgaacacggggugccg.....             | 1 |
| G1a_6140283_x1.....gaacacggggugccgaGc.....                   | 1 |
| G1a_6305844_x1.....ggaacacggggugccgaUc.....                  | 1 |
| Gi2_11143217_x1.gcgauccgNgacgucguggga.....                   | 1 |
| Gi2_11251930_x1...cgauccggagacgucgugggaacacgg.....           | 0 |
| Gi5_8939669_x1...Uaucggagacgucgugggaacacggggugc.....         | 1 |
| Gi4_581493_x1.....aUgucgugggaacacggggugccgaacu.....          | 1 |
| Gi1_4253826_x1.....acgucgugggaUacggggugccgaacu.....          | 1 |
| Gi1_4298845_x1.....gaacacgggCugccgaacu.....                  | 1 |
| Gi5_9132631_x1.....cgucgugggaacacggggugccgaC.....            | 1 |
| Gi3_28320894_x1.....cgucguggCaacacgggg.....                  | 1 |
| Gi3_28628842_x1.....aacacUgggugccgaacu.....                  | 1 |
| Gi5_9000891_x1.....acgucCugggaacacggggugccgaacu.....         | 1 |
| Gi2_11025720_x1.....cgucgugggaacaGggggugccga.....            | 1 |
| Gi2_11279612_x1...cgauccggagacAucgugg.....                   | 1 |
| Gi2_11120309_x1.....agacgucguAggaacacggggugccg.....          | 1 |
| Gi3_28351726_x1...gauccggagCcgucgugggaaca.....               | 1 |
| Gi2_11136483_x1.gcgauccggagacgCcgugggaaca.....               | 1 |
| Gi2_11298832_x1.....aucggagacgucgugggaacacggggugccgGacu..... | 1 |
| Gi1_4176704_x1.....cgucgugggaacaUggggugccgaacu.....          | 1 |
| Gi3_28984256_x1.gcgGucggagacgucguggga.....                   | 1 |
| Gi2_11039480_x1.gcgauccggagacgucguAggaaca.....               | 1 |
| G1a_6261013_x1...aGcggagacgucgugggaacacgg.....               | 1 |
| Gi3_28801094_x1.....ucggagacNucgugggaaca.....                | 1 |
| G1a_6171207_x1.....Agagacgucgugggaacac.....                  | 1 |
| Gi2_11168655_x1.....gacgucgugggaacacggggUaccga.....          | 1 |
| Gi2_11174346_x1...cgauccggagaUgucgugggaaca.....              | 1 |
| Gi3_28736345_x1.....ggagacgucgCgggaacacggggugccg.....        | 1 |
| Gi1_4158961_x1.....cgucgAgggaacacggggugccgaacu.....          | 1 |
| Gi2_11370912_x1.....gCcgucgugggaacacggggugc.....             | 1 |
| G1a_6307046_x1.....cgugggaacacgggAugcc.....                  | 1 |
| Gi3_28629260_x1...gauccggagacgCcgugggaacacggggugc.....       | 1 |

Gi1\_4372300\_x1.....ugggaUcacggggugccga..... 1  
Gi3\_28564823\_x1...cUaucggagacgucgugggaaacacggggugccgaacu..... 1  
Gi2\_11041503\_x1....aucggagacguGgugggaacacgggggu..... 1  
Gi5\_8919849\_x1.....agacgucgugggaaacacggggugccgaaUu..... 1  
Gi1\_4347727\_x1.....agacgucgugggaaacaAggggugcc..... 1  
Gi5\_8891410\_x1.....acgucgugggGcacggggugccg..... 1  
Gi2\_11163189\_x1.....ggagacgucAugggaacac..... 1  
Gi3\_28857296\_x1....aucggagacgucgugggaaUacggggugc..... 1  
Gi2\_11305029\_x1.....ucggagacgucgugggaaUcacgggggu..... 1  
Gi1\_4361548\_x1.....gaacacggNgugccgaac..... 1  
Gi2\_11045058\_x1....aucgCagacgucgugggaaacac..... 1  
Gi2\_11304191\_x1.....cgucgugAgaacacggggugcc..... 1  
G1a\_6224006\_x1.....gucgugggaaacacggggugccgaGcu..... 1  
Gi3\_28729254\_x1...cgaucggagacgucgugggaaacCcgggg..... 1  
Gi3\_28873993\_x1.....cgugggaaacacgCggugccgaa..... 1  
Gi2\_11407721\_x1.....gacgucgugggaaacacggggCgccc..... 1  
Gi3\_28327131\_x1.....gagacgucgugggUacacggggugccg..... 1  
Gi2\_11192409\_x1...cgaucAgagacgucgugggaaacacgggggu..... 1  
Gi5\_9045058\_x1....aucggagacgucgugggaaCca..... 1  
Gi3\_28902753\_x1.....Agagacgucgugggaaacacggggugccgaacu..... 1  
Gi2\_11190268\_x1.....cgugggaaacacgggAugccg..... 1  
Gi3\_28620541\_x1...gauNggagacgucgugggaaacacgggggu..... 1  
Gi2\_11193779\_x1.....gucgugggGacacggggugccga..... 1  
Gi3\_28400109\_x1...gaucggagacgucgugggaaacacggA..... 1  
Gi2\_11154024\_x1....aAcggagacgucgugggaa..... 1  
Gi1\_4169128\_x1.....Gcucgugggaaacacggggugccgaa..... 1  
G1a\_6227759\_x1...cgaucggagaGgucgugg..... 1  
G1a\_6286273\_x1....auGggagacgucgugggaaacacgggggu..... 1  
Gi3\_28704965\_x1.....acgNcgugggaaacacggggugccga..... 1  
Gi1\_4171303\_x1.....gugggaaAacggggugccga..... 1  
Gi1\_4239688\_x1....aucAgagacgucgugggaaacacggggugc..... 1  
Gi3\_28624244\_x1....ucggagacgucgugggaaAacggg..... 1  
Gi3\_28770002\_x1.....cggagacgucgugUgaacacggggugccga..... 1  
Gi3\_28869705\_x1.....cggagacgucgugggUacacggggugccga..... 1  
Gi4\_595893\_x1.....gAgggaacacggggugccgaacu..... 1  
Gi1\_4260727\_x1.....acgucgugggaaacacggggugccA..... 1  
G1a\_6339461\_x1...cgaucggaNacgucgugggaaacacg..... 1  
Gi1\_4387968\_x1.....gagacgucGgggaacacacggggugccgaacu..... 1  
Gi3\_28642153\_x1..gcgaucggagacgucgugggaaacG..... 1  
G1a\_5988080\_x1....aucggagacgucguCggaacacggggug..... 1  
Gi5\_9099488\_x1....aucggagacgucgCgggaacacggggugcc..... 1  
Gi5\_9126542\_x1.....ugggaacacacggggugccgaaGu..... 1  
Gi3\_28537806\_x1.....cggagacgucgugggaaGcac..... 1  
Gi3\_28624438\_x1.....cguGgugggaaacacggggugccgaac..... 1  
Gi1\_4297950\_x1.....ucgugggaaacCggggugccga..... 1  
G1a\_6188193\_x1....auUggagacgucgugggaa..... 1  
Gi3\_28587914\_x1.....ggGgacgucgugggaaacacggggugccg..... 1

Gi2\_11022005\_x1.....gucgCgggaacacggggugccg..... 1  
 Gi1\_4354567\_x1.....gagacgucguggaacCggggugcc..... 1  
 Gi2\_10998158\_x1.....ucguCggaacacggggugccgaac..... 1  
 Gi2\_11107572\_x1...cgaucggagacgucguAg..... 1  
 Gi3\_28560837\_x1.....acgucguggaacacggggugccAaac..... 1  
 Gi5\_8949968\_x1.....guggaacacggggugccgaGcuu..... 1  
 Gi3\_28399185\_x1.....ucCgagacgucguggaacacggggugcc..... 1  
 Gi5\_9063834\_x1.....aucggagacgucUuggaacacgg..... 1  
 G1a\_6023786\_x1.....cguggaacacgggCugcc..... 1  
 Gi3\_28613246\_x1.....aucggagaGgucguggaac..... 1  
 Gi1\_4210379\_x1.....gacgucguggaacUggggugccgaacu..... 1  
 Gi5\_9100188\_x1.....cCuggaacacggggugc..... 1  
 Gi3\_28494275\_x1.....gacgucguggCacacggggugcc..... 1  
 Gi2\_11359226\_x1.....acgucguggaacacUgggugccgaacu..... 1  
 Gi1\_4324673\_x1.....Cggaacacggggugccgaac..... 1  
 Gi1\_4178616\_x1.....ggagacgucguggaacCggggg..... 1  
 Gi3\_28466926\_x1.....gucguggaacacUggggugcc..... 1  
 Gi3\_28573965\_x1.....guggaacacgggCugcc..... 1  
 Gi1\_4181193\_x1.....guggUaacacggggugccgaac..... 1  
 Gi4\_603506\_x1.....agacgucguggaacacggggGgcc..... 1  
 Gi3\_28372241\_x1...cgaucggagacAucguggaacacg..... 1  
 Gi2\_11318160\_x1.....gucguggUaacacggggugccga..... 1  
 Gi2\_11159305\_x1.....ucggagacgucguggaacac..... 0  
 Gi2\_11316561\_x1..gcgaucgCagacgucgugga..... 1  
 Gi3\_28953636\_x1.....uggaacacggggugccgUa..... 1  
 Gi3\_28491215\_x1...gaucggagacgucguggaacacAgggugcc..... 1  
 Gi4\_613556\_x1.....guggaacacggggCgccgaacu..... 1  
 Gi3\_28430681\_x1..ugcgaucggagacgCcguggaacacggg..... 1  
 Gi3\_28460633\_x1.....cgucguggaacacggAgugccgaa..... 1  
 Gi5\_9026386\_x1.....gacgucguggaacacggggugccgaaA..... 1  
 Gi5\_8993805\_x1.....cAucguggaacacggggugccgaacu..... 1  
 Gi2\_11392069\_x1.....gucguggaacacUggggugccg..... 1  
 Gi1\_4162081\_x1.....ggNacacggggugccgaacu..... 1  
 Gi3\_28602142\_x1.....cggagacgucguggaacacCgggu..... 1  
 Gi3\_28626393\_x1.....ggagacgucguggaacacgggCu..... 1  
 Gi5\_9117675\_x1.....Ugucguggaacacggggugccgaac..... 1  
 Gi2\_11372141\_x1.....ucggagCcgucguggaaca..... 1  
 G1a\_6142400\_x1.....gucguggaacCcgggugccgaacu..... 1  
 Gi4\_591374\_x1.....gaacacggggugccgUacu..... 1  
 Gi5\_8923156\_x1.....ggaacacggggugAcgaac..... 1  
 Gi1\_4347714\_x1.....agacgucUuggaacacgggg..... 1  
 Gi2\_11272081\_x1.....agacgucguggaacacgggg..... 0  
 Gi2\_11285791\_x1.....ggGgacgucguggaacac..... 1  
 Gi1\_4284769\_x1.....gagacgucguggaacacggggGgccgaacu..... 1  
 Gi1\_4235221\_x1.....ggaacacggggugGcgaacu..... 1  
 Gi2\_11104214\_x1.....gacgucguggaacCggggugccgaac..... 1  
 Gi4\_593319\_x1.....uggaacacggggugccgaUcu..... 1

G1a\_6086531\_x1.....gaacacggggugAcgaacu..... 1  
 G1a\_6281835\_x1....aucggagacgucgugCga..... 1  
 Gi3\_28503006\_x1.....gagacgucguggUaacacggggugcc..... 1  
 Gi3\_28451417\_x1.....cggagacgucgCgggaacacg..... 1  
 Gi1\_4284375\_x1.....gagacgucguggaacaacggggCgcc..... 1  
 Gi1\_4377717\_x1.....gaacacggggugccgCac..... 1  
 Gi3\_28987088\_x1....aucggagaGgucgugggaacacggggg..... 1  
 Gi2\_11324113\_x1.....gacgucguggUaacacggggugccgaacu..... 1  
 Gi4\_603979\_x1.....ucAgagacgucguggaacaacggggugccg..... 1  
 Gi5\_9065787\_x1.....guggaacaacggCgugccgaac..... 1  
 Gi3\_28851917\_x1.....Aagacgucgugggaacac..... 1  
 Gi5\_9103817\_x1.....gagacgucguCggaacacggggugccgaacu..... 1  
 Gi1\_4253521\_x1.....guggaacaacAgggugccga..... 1  
 Gi5\_8972396\_x1.....uggaacaacgggAugccgaacu..... 1  
 Gi3\_28326972\_x1....ucggaAacgucguggaacaacggggugcc..... 1  
 Gi1\_4182911\_x1.....uggaacaacCgggugccg..... 1  
 Gi3\_28685992\_x1.....agacgucguggaacaAggggugcc..... 1  
 Gi5\_9119231\_x1....aucggCgacgucguggaacaacggggg..... 1  
 G1a\_6054648\_x1.....gaacacggggugUcgaacu..... 1  
 Gi3\_28422833\_x1....cgauccgagacgucgugggaacacggA..... 1  
 Gi5\_9029594\_x1.....cgucAugggaacaacggggugccga..... 1  
 Gi2\_11131470\_x1....gUccgagacgucgugggaac..... 1  
 Gi2\_11262405\_x1.....cgucgugggaacaUggggugccg..... 1  
 Gi3\_28314827\_x1.....cgucgugggaacGcggggg..... 1  
 G1a\_6122554\_x1....auNggagacgucguggga..... 1  
 Gi2\_11019642\_x1.....uggaacaacggCgugccga..... 1  
 Gi3\_28974874\_x1....auNggagacgucgugggaacacgggg..... 1  
 Gi3\_28861563\_x1....aucggagacguAgugggaacacgggg..... 1  
 Gi2\_11183980\_x1.....uggaacaacggggugccAaacuu..... 1  
 Gi3\_28612445\_x1.....uNggacaacggggugccgaa..... 1  
 G1a\_6227138\_x1.....ggaacaGggggugccgaacu..... 1  
 Gi3\_28369533\_x1.....cgugggaUacggggugccgaa..... 1  
 Gi3\_28277327\_x1.....ggagacgucgAgggaacacgggg..... 1  
 Gi3\_28948528\_x1.....gucgugggCacacggggugc..... 1  
 Gi2\_11184580\_x1....aucgCagacgucgugggaacacggggg..... 1  
 Gi3\_28284399\_x1.....gucgugggaacacggggA..... 1  
 Gi3\_28460163\_x1cugcgaucUgagacgucg..... 1  
 Gi5\_8844882\_x1.....aGgucgugggaacaacggggugccga..... 1  
 Gi2\_11326686\_x1.....gagacAucgugggaacaacggggugccgaac..... 1  
 G1a\_6120281\_x1....ucggagacgucgAgggaacacgg..... 1  
 Gi2\_11017046\_x1.....acgucgugggaacaacggggugccgG..... 1  
 Gi1\_4334945\_x1.....cgucgugggaacaacggggugccgaacG..... 1  
 G1a\_6196312\_x1....gaucggagacguAguggg..... 1  
 Gi1\_4379517\_x1.....cgugggaacacgCggugccgaa..... 1  
 Gi5\_9004407\_x1.....Nucgugggaacaacggggugccgaacu..... 1  
 Gi2\_11232290\_x1.....guggaacaacgggCugccgaa..... 1  
 Gi2\_11235612\_x1.....cgucgugggaacaacggggugcAgaac..... 1

Gi3\_28555284\_x1...gaucggagacgucgugggGacacggggugccg..... 1  
 Gl1a\_6013003\_x1...gaucggagacgucgugggGacacgggggu..... 1  
 Gl1a\_6129432\_x1.uUcggaucggagacgucgugggGacac..... 1  
 Gi4\_585450\_x1.....gugggGacacggggugccCaa..... 1  
 Gi3\_28474406\_x1.....ggagacgucgugggGacacgggAgugccGaa..... 1  
 Gi2\_11296848\_x1.....ucggGgagacgucgugggGacacggggugccGaa..... 1  
 Gi5\_8970834\_x1.....aucggagacgCcgugggGacacgggg..... 1  
 Gi3\_28282921\_x1.....ggagacgucgCggGacacggggugccGaa..... 1  
 Gl1a\_6239939\_x1.....ggagacgucgCggGacac..... 1  
 Gl1a\_6087919\_x1.....ucUgagacgucgugggGacacgggg..... 1  
 Gl1a\_6249423\_x1.....cgugggGacacggggGgcc..... 1  
 Gi3\_28452059\_x1.....aucggagacgucgugggGacacgUgg..... 1  
 Gi2\_11048757\_x1.....cAucgugggGacacggggugccGaa..... 1  
 Gl1a\_6063260\_x1.....ugggGacacggggugccCaa..... 1  
 Gi3\_28850112\_x1.....agacguUgugggGacacggggugcc..... 1  
 Gi3\_28878021\_x1.....acgucgugggGacacggggCgcccGaa..... 1  
 Gi3\_28519045\_x1.....gacgucgugggGacacggggugccAaac..... 1  
 Gl1\_4344238\_x1.....gucgugggGacacggggugcc..... 1  
 Gl1\_4346547\_x1.....aNcagggggugccGaa..... 1  
 Gi2\_10996622\_x1.....acAucgugggGacacgggg..... 1  
 Gi4\_607109\_x1.....aacacggggCgcccGaa..... 1  
 Gi4\_594598\_x1.....cAucgugggGacacggggugccGaa..... 1  
 Gi5\_8947473\_x1.....gugggGacacCggggugccGaa..... 1  
 Gi3\_28401243\_x1.....ggUgagacgucgugggGacacggggugccGaa..... 1  
 Gi3\_28671047\_x1.....cggaucggagacgucgCgg..... 1  
 Gi2\_11188468\_x1.....Caucggagacgucguggg..... 1  
 Gi2\_11158027\_x1.....NggaacacggggugccGaa..... 1  
 Gi2\_11296746\_x1.....ggagacgucAugggGacacggggugccGaa..... 1  
 Gi5\_8851618\_x1.ugcgauccggCgagcucguggg..... 1  
 Gi3\_28731951\_x1.....cgugggGacacggggugcAg..... 1  
 Gi3\_28364915\_x1.....ucggagUcgucgugggGacacg..... 1  
 Gi2\_11104901\_x1.....ggGacacggggugccGUac..... 1  
 Gi2\_11051332\_x1...gUcgagacgucgugggGacacggggug..... 1  
 Gi5\_8914105\_x1...gaucggagacgucgugggGacacgggggu..... 1  
 Gi2\_11114585\_x1.....cgucgugggGacacGcgggg..... 1  
 Gi4\_613763\_x1.....cgagacgucgugggGacacgggggu..... 0  
 Gi5\_9012929\_x1.....gacgGcgugggGacacggggugccGaa..... 1  
 Gi3\_28571767\_x1.....gacgucgugggGacacggggugccA..... 1  
 Gl1\_4367622\_x1.....ucgugggGacacggggAgcc..... 1  
 Gi2\_11028325\_x1.....gacgucgugggGaaUacggggugccGaa..... 1  
 Gi5\_9031246\_x1...gaucggagacgucgugggGaaAacgg..... 1  
 Gi3\_28426457\_x1.....agUcgucgugggGacacgggg..... 1  
 Gi3\_28607986\_x1.....ggGacacgggCugccGaa..... 1  
 Gi5\_8833249\_x1.....agacgucgugggGacacggggugcAgaacu..... 1  
 Gi2\_11099548\_x1.....ggGacacggggUccGaa..... 1  
 Gi3\_28507297\_x1.....ggagacgucgugggGacacggggugcAg..... 1  
 Gi5\_8903733\_x1.....ggGacacggggugGcGaa..... 1



|                                                             |   |
|-------------------------------------------------------------|---|
| Gi5_8965801_x1.....aucggagacgucgugAgaacacg.....             | 1 |
| Gi4_597154_x1.....Nugggaacacggggugccgaacu.....              | 1 |
| Gi1_4362612_x1.....ugggaacacggggugccgaC.....                | 1 |
| Gi5_8992399_x1.....cggagacgucgAgggaacacggggugcc.....        | 1 |
| Gi3_28599540_x1.....gaucggCgacgucguggggaacacggggugcc.....   | 1 |
| Gi2_11360876_x1.....aucggagacgucguCggaacacgggggu.....       | 1 |
| Gi1a_6111553_x1.....aucggagacgucgAgggaacac.....             | 1 |
| Gi5_8835117_x1.....cgugggaacacggggugUcga.....               | 1 |
| Gi2_11382090_x1.....ucguAggaacacggggugccgaa.....            | 1 |
| Gi5_8941019_x1.....gagacAucgugggaacacggggugccgaacu.....     | 1 |
| Gi1_4213114_x1.....aucggagacgucgugggGacacg.....             | 1 |
| Gi3_28316678_x1.....aucggagacgucgugggaacaUgggg.....         | 1 |
| Gi1_4276778_x1.....cgucgugggGacacggggugcc.....              | 1 |
| Gi2_11339040_x1.....aucggagacgucgugggaacacggggguAccga.....  | 1 |
| Gi2_11208892_x1.....gAcgugggaacacggggugccgaac.....          | 1 |
| Gi5_9134122_x1.....gggaaAacggggugccgaac.....                | 1 |
| Gi3_28541296_x1.....gucgugggaacacggggCugccgaac.....         | 1 |
| Gi1a_6160371_x1.....cggagacgucgugggaacacggggGg.....         | 1 |
| Gi3_28365802_x1.....cgNagacgucgugggaacacggg.....            | 1 |
| Gi1_4243984_x1.....ucgugggaacacggCgugc.....                 | 1 |
| Gi5_8861773_x1.....cguAgugggaacacggggugc.....               | 1 |
| Gi4_609071_x1.....gCgggaacacggggugccgaa.....                | 1 |
| Gi1_4389983_x1.....uCggaacacggggugccgaac.....               | 1 |
| Gi4_594957_x1.....ggUaacacggggugccgaacu.....                | 1 |
| Gi1a_6188484_x1.....cgaucggGgacgucgugg.....                 | 1 |
| Gi1_4308042_x1.....gugggaUacggggugccgaacuu.....             | 1 |
| Gi2_11063626_x1.....gagacgucgugggaacacggggugccgaacA.....    | 1 |
| Gi2_11352400_x1.....ggagacgucgugggaacacgg.....              | 0 |
| Gi3_28705546_x1.....gacgucgugggaacacAgggugccg.....          | 1 |
| Gi2_11393531_x1.....agacgucgugggaacacggggguAccg.....        | 1 |
| Gi3_28574005_x1..gGgaucggagacgucgugggaacacggggugcc.....     | 1 |
| Gi2_11184009_x1.....agacgucgugggaacacggggugccA.....         | 1 |
| Gi1_4306040_x1.....acgucgugggUacacggggugccg.....            | 1 |
| Gi1_4277707_x1.....gacgucgugggaacacggggugccgaaGu.....       | 1 |
| Gi1a_6353456_x1.....gagacgucgugggaacCgggggugccgaacu.....    | 1 |
| Gi3_28497246_x1.....ucggagacgucgugggCacacggggugccgaacu..... | 1 |
| Gi2_11293822_x1.....aucggagUcugcugugggaacacggggugcc.....    | 1 |
| Gi5_9009504_x1.....gugggaacacggggugccAaacuuu.....           | 1 |
| Gi5_9119523_x1.....acgucgugggaacGcggggugccg.....            | 1 |
| Gi1_4311416_x1.....Cggagacgucgugggaacacggggugc.....         | 1 |
| Gi2_11263006_x1.....ucggagGcgucgugggaacacgggggu.....        | 1 |
| Gi4_602801_x1.....gugggGacacggggugccgaa.....                | 1 |
| Gi1_4283632_x1.....gugggUacacggggugccgaa.....               | 1 |
| Gi3_28327253_x1..cgaucggagacgucgugggaacacggggGgc.....       | 1 |
| Gi2_11108648_x1.....ugggaaAacggggugccg.....                 | 1 |
| Gi3_28677495_x1.....cgugggaacacgggUugccgaac.....            | 1 |
| Gi3_28654984_x1.....Cagacgucgugggaacacggggugcc.....         | 1 |

|                 |                                      |   |
|-----------------|--------------------------------------|---|
| Gi5_8861451_x1  | .....gaucggagacgucgugggaac           | 0 |
| Gi2_11093274_x1 | .....gucgugggUacacggggugc            | 1 |
| Gi2_11052770_x1 | .....ggagacgucAugggaacacggggugc      | 1 |
| Gi2_11332576_x1 | .....cgugggaacacggggGgcc             | 1 |
| Gi1_4190714_x1  | .....aucggagacgucUugggaacacg         | 1 |
| Gi1_4334606_x1  | .....auUggagacgucgugggaacac          | 1 |
| Gi3_28496450_x1 | .....ucggagacgucguAggaacacg          | 1 |
| Gi2_11266200_x1 | .....cggagacgucgugggaacacggggAgc     | 1 |
| Gi5_9016641_x1  | .....gugggaacacgAggugccgaacu         | 1 |
| Gi1_4166431_x1  | .....acgucgugggaacacggggugccgaaA     | 1 |
| Gi3_28457155_x1 | .....agacgucgugggaacacggAgugccgaac   | 1 |
| Gi2_11306787_x1 | .....guNgugggaacacggggugccgaacu      | 1 |
| Gi1_4209235_x1  | .....gggaacacggggugccgaU             | 1 |
| Gi3_28951107_x1 | .....gaGcggagacgucgugggaacacg        | 1 |
| Gi1_4250914_x1  | .....gagacgucgugggaacacggggAgccgaacu | 1 |
| Gi3_28437187_x1 | .....ggagGcgucgugggaacacggggugccg    | 1 |
| Gi2_11086847_x1 | .....cgucgugggaacacggggugcGgaac      | 1 |
| Gi2_11322121_x1 | .....gacgucgugggaacacggggugU         | 1 |
| Gi3_28846454_x1 | .....Uggagacgucgugggaacac            | 1 |
| Gi2_11319461_x1 | .....ucgugggaacacggggugGcgaac        | 1 |
| Gi2_11362225_x1 | .....gGgaucggagacgucgugggaaca        | 1 |
| Gi5_9079270_x1  | .....gcgccugcuAcccaccuucgccgaguucg   | 1 |
| Gi1_4171750_x1  | .....gaacacgggAugccgaacu             | 1 |
| Gi2_11227396_x1 | .....ugggaacacggggugccgaaAuu         | 1 |
| Gi3_28800214_x1 | .....ucggagacgucgugggaUcagc          | 1 |
| Gi1_4188484_x1  | .....ucgNgggaacacggggugccgaac        | 1 |
| Gi2_11000973_x1 | .....cgugggaacacggCgugccga           | 1 |
| Gi5_8898557_x1  | .....agacgucAugggaacacggggugccgaacu  | 1 |
| Gi3_28535604_x1 | .....gcgaucAgagacgucguggga           | 1 |
| Gi1_4365450_x1  | .....gCgaacacggggugccgaac            | 1 |
| Gi1_4313346_x1  | .....ugggaacacAgggugccgaa            | 1 |
| Gi5_8903105_x1  | .....agacgucgugggaacacggggugccgaCcu  | 1 |
| Gi5_8896638_x1  | .....cggagacgucgugggaacacAgggugccga  | 1 |
| Gi3_28664626_x1 | .....Ngugggaacacggggugcc             | 1 |
| Gi3_28358830_x1 | .....acgucgugggaacacggggugccCaac     | 1 |
| Gi2_11257083_x1 | .....ucggagacgucgugggaacCcgggg       | 1 |
| Gi1_4159719_x1  | .....Ccgugggaacacggggugccgaacu       | 1 |
| Gi1_4176967_x1  | .....cgugggaacaAgggugccgaacu         | 1 |
| Gi5_8865464_x1  | .....Ggucgugggaacacggggugccgaacu     | 1 |
| Gi2_11022390_x1 | .....cgucgugggaGcacgggg              | 1 |
| Gi5_8961587_x1  | .....gaucggagacgucgAgggaacacgg       | 1 |
| Gi1_4262596_x1  | .....gugggaacaUggggugccga            | 1 |
| Gi4_592287_x1   | .....ggUacacggggugccgaac             | 1 |
| Gi2_11219382_x1 | .....cgaucUgagacgucguggga            | 1 |
| Gi5_9099013_x1  | .....aacacggggCgccgaacu              | 1 |
| Gi5_8925292_x1  | .....agacgucGgggaacacggggugcc        | 1 |
| Gi2_11207748_x1 | .....acgucgugggaacacggggugccAaac     | 1 |

Gi3\_28566894\_x1.....guggaacacgggguUcc..... 1  
Gi2\_11211176\_x1....aucggagacguAguggaac..... 1  
Gi3\_28288612\_x1.....gucguggAaacacggggugcc..... 1  
G1a\_6192155\_x1....aucggagacgucguAggaacacgg..... 1  
Gi3\_28650630\_x1.....gucguggaacacggggugccgaaAuu..... 1  
Gi5\_8900987\_x1.....Ugucguggaacacggggugc..... 1  
G1l\_4199651\_x1.....ucguAggaacacggggugc..... 1  
Gi2\_11403068\_x1.....cggagacAucguggaacacggggugc..... 1  
Gi2\_11171666\_x1.....gucgugggNacacggggugc..... 1  
Gi5\_9127786\_x1.....acgucguggaacacgggAugccgaaacu..... 1  
Gi5\_9054377\_x1.....gacgucguAggaacacggggugccgaaacu..... 1  
G1l\_4294549\_x1.....gAgggaacacggggugcc..... 1  
G1l\_4296635\_x1.....ggagacgucgugggGacacggggugccgaaacu..... 1  
Gi2\_11287943\_x1.....ucggagacgucguggaacGcg..... 1  
Gi2\_11290378\_x1.....Ugucguggaacacggggugccgaa..... 1  
G1l\_4221530\_x1.....cguggaacacggggugccgaUcuu..... 1  
Gi2\_11332785\_x1.....ucggagacgucguggaacacgAggu..... 1  
G1a\_6262369\_x1....aucggagacguAguggaacacg..... 1  
Gi3\_28511219\_x1.....uggaacacggUgugccga..... 1  
Gi2\_11027353\_x1.....uUguggaacacggggugccgaa..... 1  
G1l\_4267097\_x1.....gacgucguNggaacacggggugccgaa..... 1  
Gi5\_9130544\_x1.....acgucguggaacacggggugcAg..... 1  
G1a\_6079701\_x1....ucggagacgucgugCgaacacgg..... 1  
G1a\_6303357\_x1.....ggaacacggggugccgaaUu..... 1  
Gi2\_11225268\_x1.....cggagacgucgCgggaacacggggugc..... 1  
G1l\_4259484\_x1....Naucggagacgucgugg..... 1  
Gi2\_11302484\_x1....aucggagacgucUuggaacacg..... 1  
Gi5\_8886784\_x1....aucggagacgucguggaacacggggCgcc..... 1  
Gi3\_28505328\_x1....cgaucggagacguUguggaacacg..... 1  
Gi3\_28710754\_x1.....guCggaacacggggugcc..... 1  
G1a\_6105247\_x1.ugcgaucggagUcgucgu..... 1  
Gi2\_11184770\_x1.....cUgagacgucguggaacacggggugccgaaacu..... 1  
Gi2\_11160656\_x1.....cCgagacgucguggaacacggggugcc..... 1  
Gi3\_28646314\_x1....gaucggagacgucguCggaacacgggg..... 1  
Gi4\_608645\_x1.....acgucguggaacacggggugcAgaacu..... 1  
Gi2\_11305820\_x1.ugcgaucggagacgucAugggaacac..... 1  
Gi5\_9071436\_x1....aucggGgacgucguggaacacgg..... 1  
Gi5\_9089283\_x1.....cguggaacacggggugccgUacuu..... 1  
Gi3\_28547721\_x1....gaucggagacgucguggaacUggggu..... 1  
Gi3\_28395349\_x1....aucggagacgucguUggaacacggggugcc..... 1  
G1l\_4213625\_x1....Uaucggagacgucguggaacacg..... 1  
Gi2\_11060232\_x1.....cguggaacUcggggugccgaa..... 1  
Gi3\_28309083\_x1....ucggagacgucguAggaacacggggugc..... 1  
Gi2\_11331791\_x1..Acgaucggagacgucguggaac..... 1  
Gi4\_608543\_x1.....cgugggGcaccggggugccgaaacu..... 1  
Gi3\_28488260\_x1.....ucguggaacacggggugccgaG..... 1  
Gi2\_11006347\_x1....cggagacgucguggaacacggggugccgaGc..... 1

|                 |                                    |   |
|-----------------|------------------------------------|---|
| Gi1_4330232_x1  | uggNaacacggggugccga                | 1 |
| G1a_6339257_x1  | gaacacggAgugccgaac                 | 1 |
| Gi4_595022_x1   | Uugggaacacggggugccg                | 1 |
| Gi2_11164912_x1 | cgucguggNaacacggggugccga           | 1 |
| Gi3_28667676_x1 | cgucgugggaacacggggugccgaG          | 1 |
| Gi3_28481728_x1 | gucgugggaaAacggggugccg             | 1 |
| Gi2_11363373_x1 | ugggaacacggggugccgaacuuu           | 0 |
| Gi3_28940316_x1 | gNaacacggggugccgaacu               | 1 |
| Gi3_28529192_x1 | acgucAugggaacacggggugc             | 1 |
| Gi2_11099273_x1 | gagUcgucgugggaacacggggugcc         | 1 |
| Gi3_28819830_x1 | ucggagacgucgugggGacac              | 1 |
| Gi3_28373076_x1 | agacgucguggCaacacggggugccgaacu     | 1 |
| Gi3_28489445_x1 | cgugCgaacacggggugccg               | 1 |
| Gi3_28349692_x1 | aucNgagacgucguggga                 | 1 |
| Gi2_11351213_x1 | Gcggagacgucgugggaacacggggugccgaacu | 1 |
| Gi2_11332818_x1 | gaucggagacgucgugggUacacg           | 1 |
| Gi1_4344800_x1  | gggaCcacggggugccgaacu              | 1 |
| Gi2_11383505_x1 | gGucggagacgucgugggaacacgg          | 1 |
| Gi3_28539230_x1 | cgucguggUaacacggggugcc             | 1 |
| Gi3_28432417_x1 | gucgugggaacacggggugccUaac          | 1 |
| Gi3_28597425_x1 | acgucgugggaacacggggugccgC          | 1 |
| Gi2_10995722_x1 | aucggagacgucgugggC                 | 1 |
| Gi2_11388664_x1 | ugggaacacggggugccC                 | 1 |
| Gi5_9114184_x1  | ucgugggaacacggggugccgaGu           | 1 |
| Gi4_588879_x1   | aucggagacgucgugggaacacgg           | 0 |
| Gi1_4262054_x1  | aucggagacgucgugggaacacggggugccg    | 0 |
| Gi4_612920_x1   | cgucgCgggaacacggggugccgaacu        | 1 |
| Gi3_28326445_x1 | gcgaucggagacgucgugggGac            | 1 |
| Gi2_11104245_x1 | ucggagacgucgugggaacacAgggg         | 1 |
| G1a_6332582_x1  | cggagacgNcgugggaacacgg             | 1 |
| Gi1_4240760_x1  | gCcggugggaacacggggugc              | 1 |
| Gi3_28519736_x1 | cgaAcggagacgucgugggaacacggggugcc   | 1 |
| G1a_6174908_x1  | gGcgcgucgugggaacacggggugccgaacu    | 1 |
| Gi3_28636436_x1 | gggaacUcggggugccgaa                | 1 |
| Gi2_11315056_x1 | aucggaAacgucgugggaacacgg           | 1 |
| Gi5_8905663_x1  | aucggagacgucgugggaacaUg            | 1 |
| Gi3_28719816_x1 | acgucgugggaacacggggugAcg           | 1 |
| Gi2_11284172_x1 | cgugggaacacgAggugccgaa             | 1 |
| G1a_6123919_x1  | ggagacgucAugggaacacggggugcc        | 1 |
| Gi1_4243808_x1  | gaucggCgacgucgugggaacacg           | 1 |
| Gi1_4235862_x1  | cgaucggagacgucgugAgaacacggggugc    | 1 |
| Gi1_4377533_x1  | Uucggagacgucgugggaacacggggugcc     | 1 |
| Gi3_28279921_x1 | gaacacCgggugccgaac                 | 1 |
| Gi2_11316579_x1 | cguggUaacacggggugccgaa             | 1 |
| G1a_6276652_x1  | Cugggaacacggggugccga               | 1 |
| Gi5_8934022_x1  | cNucgugggaacacggggugccgaacu        | 1 |
| Gi1_4186063_x1  | agacgucgugggaacacgggUugccgaacu     | 1 |

|                 |                                      |       |   |
|-----------------|--------------------------------------|-------|---|
| Gi1a_6242302_x1 | .....gaucggagacgucgugCgaacacggggu    | ..... | 1 |
| Gi1_4252213_x1  | .....aucggagacgucguggaCcacggggu      | ..... | 1 |
| Gi3_28285986_x1 | .....ucgugggGacacggggugccga          | ..... | 1 |
| Gi1_4313108_x1  | .....ggagaUgucgugggaacacggggugccgaa  | ..... | 1 |
| Gi3_28721702_x1 | .....Aaucggagacgucguggaacacggggugc   | ..... | 1 |
| Gi2_11315309_x1 | .....cgucgugggaacacggggugGcgaacu     | ..... | 1 |
| Gi3_28748831_x1 | .....gauNggagacgucguggaacacgg        | ..... | 1 |
| Gi1_4168137_x1  | .....ucgugggaacacggggugccC           | ..... | 1 |
| Gi1_4236847_x1  | ..gcgaucggagacgucguggaacacgg         | ..... | 0 |
| Gi1_4173540_x1  | .....acgucgCgggaacacgggg             | ..... | 1 |
| Gi5_8847081_x1  | .....aucggagacgucguggaacacAgggugcc   | ..... | 1 |
| Gi2_11030075_x1 | ..cgauCAgagacgucguggaacacggggug      | ..... | 1 |
| Gi3_28563076_x1 | .....gaucggagacgucguggUacacggggugc   | ..... | 1 |
| Gi1a_5993826_x1 | .....Cucggagacgucgugga               | ..... | 1 |
| Gi2_11280481_x1 | .....cggagacgucguggCacacggggugc      | ..... | 1 |
| Gi1a_6246463_x1 | .....gaucggagacgucguggaacacAggg      | ..... | 1 |
| Gi3_28520225_x1 | .....cggagacgucguggaacacgCg          | ..... | 1 |
| Gi2_11207526_x1 | .....aacacggggUccgaacu               | ..... | 1 |
| Gi3_28638901_x1 | .....cggagacgucguggaacCggggugccgaacu | ..... | 1 |
| Gi3_28292654_x1 | .....cgugggaacacggggugccgaU          | ..... | 1 |
| Gi2_11269507_x1 | .....ucggagaUgucguggaacacggggugc     | ..... | 1 |
| Gi3_28611430_x1 | ..gcgaucggNgacgucguggaaca            | ..... | 1 |
| Gi5_8830864_x1  | .....aucggUgacgucguggaacacgg         | ..... | 1 |
| Gi1a_6302010_x1 | .....aucggagacgucguggUa              | ..... | 1 |
| Gi2_11135581_x1 | .....gucguggaGcacggggugcc            | ..... | 1 |
| Gi2_11190543_x1 | .....gaacacggggUccgaac               | ..... | 1 |
| Gi1_4217413_x1  | .....uGggagacgucguggaacacg           | ..... | 1 |
| Gi3_28287834_x1 | .....Ggacgucguggaacacggggugccga      | ..... | 1 |
| Gi3_28295471_x1 | .....ucguggaacacggggugcGgaa          | ..... | 1 |
| Gi3_28443476_x1 | .....ucguggCaacacggggugccgaac        | ..... | 1 |
| Gi2_11215260_x1 | .....gaucggagacgAcguggaacac          | ..... | 1 |
| Gi2_11313238_x1 | .....gacgucguggaacacggAgu            | ..... | 1 |
| Gi2_11021657_x1 | .....ggagGcgucguggaacacggggugccgaacu | ..... | 1 |
| Gi2_11400506_x1 | .....aucggagacgucguggaacacggggCgccg  | ..... | 1 |
| Gi2_11131858_x1 | .....guggaacacggggugccgaacuuu        | ..... | 0 |
| Gi2_11121382_x1 | .....Nucggagacgucguggaacac           | ..... | 1 |
| Gi3_28486721_x1 | .....gacgucguggaacacgAggu            | ..... | 1 |
| Gi2_11138332_x1 | .....ucguggaUcacggggugccg            | ..... | 1 |
| Gi2_11361272_x1 | .....gagacgucguggCaacacggggugccg     | ..... | 1 |
| Gi4_577034_x1   | .....uCggaacacggggugccgaacu          | ..... | 1 |
| Gi3_28700959_x1 | .....gucguggaCcacggggugcc            | ..... | 1 |
| Gi3_28768269_x1 | ..gcgaucggagCcgucguggaacacggg        | ..... | 1 |
| Gi5_8851294_x1  | .....agacAucguggaacacggggugc         | ..... | 1 |
| Gi1a_6309359_x1 | .....ggUgacgucguggaacacggggugc       | ..... | 1 |
| Gi3_28421987_x1 | .....ggaacaUggggugccgaa              | ..... | 1 |
| Gi3_28520791_x1 | .....gacgCcguggaacacgggg             | ..... | 1 |
| Gi3_28424450_x1 | .....aucggagacgucguggaacac           | ..... | 1 |

Gi5\_9116610\_x1.....gugggaacacgggCugccgaac..... 1  
 Gi4\_582188\_x1.....cgucguggAaacacggggugccgaacu..... 1  
 Gi3\_28277829\_x1.....ucggagCcgucgugggaacacgggggu..... 1  
 Gi1\_4302833\_x1.....ggagacgucgugggaCcacggggugcc..... 1  
 Gi2\_11284162\_x1.....aucggagacgucgugUgaacac..... 1  
 Gi3\_28291438\_x1.....ucggagacgucgugggaaAacgggggu..... 1  
 Gi1\_4192915\_x1.....acgucgugggaacacggggugccgaacAu..... 1  
 Gi3\_28554867\_x1.....aucggagacgucgAgggaacacggggugc..... 1  
 Gi3\_28478293\_x1.....acgucgAgggaacacggggugccgaac..... 1  
 Gi5\_8978110\_x1.....Ccgagacgucgugggaacacggggugc..... 1  
 Gi2\_11252218\_x1.....aucggagacgucgugggaacacgUggugc..... 1  
 Gi5\_9070564\_x1.....cCugggaacacggggugcc..... 1  
 Gi5\_8877379\_x1.....cgucgugAgaacacggggugccgaac..... 1  
 Gi1\_4363673\_x1.....aucggagacgucgugggCacacg..... 1  
 Gi1\_4220646\_x1.....cgucguUggaacacggggugccgaacu..... 1  
 Gi2\_11400935\_x1.....gaucggagacgucgugggCacacggggugcc..... 1  
 Gi5\_8849632\_x1.....agacgCcgugggaacacgggggu..... 1  
 Gi1\_4305764\_x1.....Ggucgugggaacacggggugccg..... 1  
 Gi2\_11009426\_x1.....uggNaacacggggugccga..... 1  
 Gi3\_28588148\_x1.....gucgugggaacacggCgugccgaacu..... 1  
 Gi2\_11200928\_x1.....aAacgucgugggaacacggggugccgaac..... 1  
 Gi2\_11073122\_x1.....gacguUgugggaacacggggugccgaacu..... 1  
 Gi3\_28494686\_x1.....acgucgugggaCcacggggugccga..... 1  
 Gi2\_11232949\_x1.....agacgucgugggaacacggUgugcc..... 1  
 Gi1\_4357204\_x1.....cgugggaUcacggggugccgaacu..... 1  
 Gi3\_28888607\_x1.....aucggagacguUgugggaacacgggg..... 1  
 Gi2\_11077724\_x1.....ugggaaUacggggugccg..... 1  
 Gi2\_11027849\_x1.....gaucggagacgucguggUaacacggggug..... 1  
 Gi2\_11082683\_x1.....cggagacgucgugggUaacacggggugcc..... 1  
 Gi3\_28454411\_x1.....cgauUggagacgucgugg..... 1  
 Gi3\_28279255\_x1..gcgaucggagacgucgugggaacacggggCg..... 1  
 Gi3\_28387432\_x1.....Ngaacacggggugccgaa..... 1  
 Gl1a\_6141618\_x1.....gugggaGcacggggugccg..... 1  
 Gi5\_9105805\_x1..ugcgauccgagacgucgugg..... 0  
 Gl1a\_6241761\_x1..ugcgauccgagGcgucgug..... 1  
 Gi2\_11374229\_x1.....gauNggagacgucgugggaacacgggggu..... 1  
 Gi3\_28604531\_x1.....agacgucguUggaacacggggugccgaa..... 1  
 Gi2\_11295142\_x1.....gaucggagacgucgugggaacacggggugcU..... 1  
 Gi5\_8877721\_x1.....gagacgucgugggaacacggggugUcgaacu..... 1  
 Gi3\_28873776\_x1cugcgauccgagacgucgugggaacacggggugcc..... 0  
 Gi2\_11350851\_x1.....cggagacgAcgugggaacacgggg..... 1  
 Gi2\_11299864\_x1.....gacgucgugggaacacggAgugc..... 1  
 Gi3\_28699517\_x1.....gggaacUcggggugccgaac..... 1  
 Gi5\_9027741\_x1.....cgugggaacacgggAugcc..... 1  
 Gi2\_11022979\_x1.....acgucgugggaacacggUgugccgaacu..... 1  
 Gi2\_11243474\_x1.....agacgucgugggaacacggggguAcc..... 1  
 Gi1\_4193166\_x1.....guUggaacacggggugccga..... 1

Gi3\_28919192\_x1.....acgucgugggaacacggggugccUaac..... 1  
 Gi4\_586926\_x1.....gugggaCcacggggugccga..... 1  
 Gi3\_28569282\_x1.....aacacggggugccgaaAuu..... 1  
 Gi3\_28632582\_x1.....aGucgugggaacacggggugccg..... 1  
 Gi5\_9093292\_x1.....gugggaacacggggugccUaa..... 1  
 Gi3\_28507296\_x1.ugcgauccgagacgucgugggGacacg..... 1  
 Gi3\_28285221\_x1.....aucggagacgucgugggaacacggggugcG..... 1  
 Gi1\_4239348\_x1.....ugggaUcacggggugccg..... 1  
 Gi3\_28889951\_x1.....guCggaacacggggugccga..... 1  
 Gi3\_28512206\_x1.....ggagacgucgugggaGca..... 1  
 Gl1a\_6038099\_x1.....gggaacacgUggugccgaacu..... 1  
 Gi2\_11273812\_x1.....cgucgugggaacacgggA..... 1  
 Gi1\_4195548\_x1.....cgggaCacgucgugggaacacggggugc..... 1  
 Gi5\_8956715\_x1.....Nugggaacacggggugccgaac..... 1  
 Gl1a\_6325276\_x1.ugcgauccgagCcgucgug..... 1  
 Gi3\_28394609\_x1.....agacgucgugggaacacggUgugcc..... 1  
 Gi1\_4252520\_x1.....gacgucgugggCacacggggugccgaacu..... 1  
 Gi2\_11038868\_x1.....cgauccgagGcgucgugggaacacgggggu..... 1  
 Gl1a\_6159069\_x1.....gugggaacacgggUugccgaacu..... 1  
 Gi1\_4372224\_x1.....Ggacgucgugggaacacggggugccg..... 1  
 Gi1\_4280795\_x1.....gucgugggaacacggggAgccgaacu..... 1  
 Gi1\_4357935\_x1.....gGgacgucgugggaacacgggggu..... 1  
 Gi2\_11304930\_x1.....ugggCacacggggugccga..... 1  
 Gi3\_28589088\_x1.....ucgugggaacacggggugUcgaa..... 1  
 Gi1\_4187439\_x1.....acgucgugggaacacggggugUcgaa..... 1  
 Gl1a\_6359687\_x1.....ucggagacgCcgugggaacacggg..... 1  
 Gi2\_11102839\_x1.gcgauccgagacgucgugggaacaAggggugc..... 1  
 Gi2\_11153955\_x1.....gacgucgugggaacacggCgugccgaac..... 1  
 Gi1\_4166878\_x1...gaucggagacgucgugggaCcaccg..... 1  
 Gi4\_568415\_x1.....Uagacgucgugggaacacggggugccgaacu..... 1  
 Gi3\_28275871\_x1.....cggNgacgucgugggaacacgggggu..... 1  
 Gi2\_11067626\_x1.....gggaacacggggugccCaac..... 1  
 Gi5\_8917688\_x1.....gugggaacacggggugcUgaacuu..... 1  
 Gi3\_28972920\_x1.....acguAgugggaacacggggugcc..... 1  
 Gi3\_28956126\_x1...gaucggaAacgucgugggaacacgggg..... 1  
 Gi3\_28470055\_x1.....aucggagacguAgugggaacacggggugc..... 1  
 Gi5\_8900742\_x1.....Ncgucgugggaacacggggugccgaacu..... 1  
 Gi5\_8994116\_x1.....aucAgagacgucgugggaacacggggugc..... 1  
 Gi5\_9118913\_x1.....cgucgugggaAacggggugcc..... 1  
 Gl1a\_6317876\_x1.....ggagacguAgugggaacacg..... 1  
 Gi3\_28757660\_x1.....cgugggaacacggggugcGga..... 1  
 Gi3\_28372447\_x1...gaucUgagacgucguggga..... 1  
 Gi5\_9057226\_x1.....acgucgugggaacaAgggggugccgaacu..... 1  
 Gi5\_8924870\_x1.....gugggaacacgggCugccga..... 1  
 Gi5\_8975097\_x1.....acgucguUggaacacggggugccgaacu..... 1  
 Gi3\_28695107\_x1.ugcgauccgagacgucgugggCacacgggggu..... 1  
 Gi5\_8998906\_x1.....gAcgugggaacacggggugccgaac..... 1

Gi1\_4235064\_x1.....gugggaacacggggugcUgaac..... 1  
 Gi1\_4188117\_x1.....ucggagacguUgugggaacacggggugcc..... 1  
 Gi2\_11013683\_x1...cgauccgagacgucguggggaacacggggAgc..... 1  
 Gi5\_9028438\_x1.....cgugggaacacggggugccgCacuu..... 1  
 Gi2\_11102292\_x1..gcgaucggagacgucguAggaacacgg..... 1  
 Gi3\_28327229\_x1...gaucggagacgCcgugggaacacggggug..... 1  
 Gi3\_28871711\_x1.....gagacgucguAggaacac..... 1  
 Gi2\_11340793\_x1..ugcgauccgagUcgucgugggaacacg..... 1  
 Gi2\_11115008\_x1.....gucgugggUacacggggugccga..... 1  
 Gi5\_9051358\_x1.....gaacacggggGgccgaac..... 1  
 Gi5\_8915090\_x1.....cgugggaUacacggggugccg..... 1  
 Gi2\_11072428\_x1.....ugggaacaUggggugccg..... 1  
 Gi2\_11261753\_x1....aucggagacgucguggUaacacg..... 1  
 Gi3\_28322465\_x1....aucggaAacgucgugggaacacggggugc..... 1  
 Gl1a\_6337510\_x1.....gggaacacAgggugccgaac..... 1  
 Gl1a\_6098345\_x1....aucgAagacgucgugggaacacggggg..... 1  
 Gi3\_28933056\_x1.....cgugggUacacggggugccg..... 1  
 Gi3\_28321809\_x1..ugcgauccgagacgucgugggaacacgggA..... 1  
 Gi2\_11287247\_x1..gcgaucggagacgucgugggaaUacggg..... 1  
 Gi5\_8862829\_x1.....gugUgaacacggggugccgaac..... 1  
 Gi2\_11403106\_x1...gaucggagacgucgugggaacUc..... 1  
 Gi3\_28436940\_x1.....gacgucgugggaacCcgggugccg..... 1  
 Gi2\_11164118\_x1....auGggagacgucgugggaa..... 1  
 Gi4\_575506\_x1.....cgucgugggaacacggAgugccga..... 1  
 Gi5\_8963786\_x1.....agacgucgugggaacGcggggugccga..... 1  
 Gi5\_8926046\_x1.....gacgucgGgggaacacggggugccgaacu..... 1  
 Gi3\_28889438\_x1....aucggagaUgucgugggaacacggggugcc..... 1  
 Gi2\_11096489\_x1.....cggagacgucgugggaacacgggCugc..... 1  
 Gi2\_11151208\_x1.....cggagacgNcgugggaacacg..... 1  
 Gi5\_9111872\_x1.....gugggaacacggggugccAaa..... 1  
 Gi2\_11176115\_x1.....ugggaacaAggggugccg..... 1  
 Gi2\_11197600\_x1.....Nacacggggugccgaacu..... 1  
 Gi3\_28854697\_x1.....gacgucguNgggaacacgg..... 1  
 Gi2\_11206647\_x1.....gagacgucgugggaacGcggg..... 1  
 Gi5\_8861866\_x1.....gucgugggaacacggggugccgaaA..... 1  
 Gi1\_4238347\_x1.....agacgucgugggaCcacggggugccg..... 1  
 Gi3\_28408678\_x1.....cgucgugggaacacgggCugcc..... 1  
 Gi2\_11142536\_x1....ucggagacgucgugggaacaUggggugc..... 1  
 Gi3\_28550786\_x1.....gacgGcgugggaacacggg..... 1  
 Gi1\_4347431\_x1.....gugggaacacggggUaccgaacu..... 1  
 Gi3\_28943300\_x1.....gacgucgugggaacacggggugUcgaac..... 1  
 Gl1a\_6124993\_x1.....ggagacgucgugggaacacggggg..... 0  
 Gi3\_28853315\_x1...gaucggagaUgucgugggaacacggg..... 1  
 Gi3\_28640612\_x1.....cggagacgucgugggGacacgggg..... 1  
 Gl1a\_6291836\_x1.....aCcacggggugccgaacu..... 1  
 Gi2\_11279997\_x1..gcgaucggGgacgucguggga..... 1  
 Gi5\_9125680\_x1.....gucgugggaCcacggggugccgaacu..... 1



|                                                           |   |
|-----------------------------------------------------------|---|
| Gi1_4200153_x1.....ucgugggaUcacggggugccgaac.....          | 1 |
| Gi2_11068086_x1.....acgucgugggaacacgggCugccgaac.....      | 1 |
| Gi1_4215512_x1.....agacgucgugggGacacggggug.....           | 1 |
| G1a_6162733_x1.....Cggaacacggggugccgaac.....              | 1 |
| Gi2_11050927_x1....gCucggagacgucguggga.....               | 1 |
| Gi2_11392425_x1.....aucggagacgucgugggaacacU.....          | 1 |
| G1a_5999763_x1.....cgugggaacacggggugAcgaacu.....          | 1 |
| Gi2_10999484_x1....gaucggagacgucguUggaacacggggu.....      | 1 |
| Gi1_4313177_x1.....gaacaGggggugccgaacu.....               | 1 |
| Gi2_11113674_x1.....ucgNgggaacacggggugccgaac.....         | 1 |
| Gi1_4325307_x1.....agacgucgugggaacacggggugccgaaA.....     | 1 |
| G1a_6268366_x1.ugcgauUggagacgucgug.....                   | 1 |
| Gi2_11200595_x1.....Ncgucgugggaacacggggugccgaacu.....     | 1 |
| Gi1_4245823_x1.....agacgucgugggaacacggggugccgaa.....      | 0 |
| Gi2_11007236_x1.....gggaacacgggAugccgaac.....             | 1 |
| Gi2_11178569_x1.....gGcgucgugggaacacggg.....              | 1 |
| Gi3_28925187_x1.....gagacgucNugggaacacggggugccga.....     | 1 |
| Gi5_8899164_x1....cgaucggagacgucgugggaGcacggg.....        | 1 |
| Gi3_28900061_x1.gcgaucggagacgCcgug.....                   | 1 |
| Gi3_28508231_x1.gcgaucggagacgucgugggaacacggggG.....       | 1 |
| Gi5_8861350_x1.....agacgucgugggaacacAgggugccgaac.....     | 1 |
| Gi3_28867015_x1.....ucggagacgAcgugggaacacggg.....         | 1 |
| Gi2_11179540_x1....Nucggagacgucgugggaacacggggug.....      | 1 |
| Gi5_8947631_x1.....gucgugggaGacggggugccgaacu.....         | 1 |
| Gi3_28814753_x1....aucggUgacgucgugggaacacggggugc.....     | 1 |
| Gi2_11176806_x1.....ggCacacggggugccgaac.....              | 1 |
| G1a_6108115_x1....aucggagacAucgugggaacacggggug.....       | 1 |
| Gi3_28607222_x1....aucgAagacgucgugggaacac.....            | 1 |
| Gi2_11042809_x1....gaucggagacgCcgugggaaca.....            | 1 |
| Gi1_4288307_x1....cggagacgucgugggaacacggggGgcc.....       | 1 |
| Gi2_11381741_x1.....gagacgucgugggaacacggggGgccgaac.....   | 1 |
| Gi2_11007020_x1....cggagacgucgugggaacacggggugccgaUc.....  | 1 |
| Gi3_28297220_x1.gcgaucggagacgucgugggaacacgAgggugccga..... | 1 |
| Gi3_28274293_x1.....ucgugggUacacggggugc.....              | 1 |
| Gi2_11250589_x1....aucggagacgCcgugggaacacgg.....          | 1 |
| Gi1_4173651_x1.....gaacacggggAgccgaacuu.....              | 1 |
| Gi1_4291028_x1.....cguNgugggaacacggggugcc.....            | 1 |
| Gi3_28701609_x1.....cgugggaacacggggguCc.....              | 1 |
| Gi2_11062559_x1.gcgaucggagCcgucgugggaacacggg.....         | 1 |
| Gi5_9083417_x1....gaucggagacgucgugggaGcacggg.....         | 1 |
| Gi2_11232856_x1.gcgaucAgagacgucgugggaacacggggugc.....     | 1 |
| Gi3_28837504_x1....acgucgugggaacacggggugccgaaU.....       | 1 |
| Gi3_28696400_x1....ucggagacgucgugggCacacggg.....          | 1 |
| G1a_6298679_x1.....Agugggaacacggggugccg.....              | 1 |
| Gi2_11128417_x1....gaucggagacgucgugggaacaAgg.....         | 1 |
| Gi2_11026220_x1.....gucgugAgaacacggggugccgaac.....        | 1 |
| Gi5_8977006_x1.....gagGcgucgugggaacacg.....               | 1 |

|                                                          |   |
|----------------------------------------------------------|---|
| Gi3_28769205_x1.ugcgauccgagacgucgugggaaacGcggg.....      | 1 |
| Gi3_28921192_x1.....agacgucgugggaaacacggggugccAaac.....  | 1 |
| Gi2_11309602_x1.....cguNggaacacggggugccga.....           | 1 |
| Gi3_28935847_x1.....ggagacgucgugggaaacacggggugccgaa..... | 1 |
| Gi3_28960192_x1.Ggcgauccgagacgucgugggaaacacg.....        | 1 |
| G1a_6180792_x1.....aucggagCcgucgugggaaacacg.....         | 1 |
| Gi3_28571796_x1.....cggagacgucgugggaaacacggggugcG.....   | 1 |
| G1a_6198196_x1.....gggaacacggggugcAgaac.....             | 1 |
| Gi2_11038292_x1.....cgugggaaacacggggugccg.....           | 1 |
| Gi5_9128761_x1...gaCcgagacgucgugggaaacacggg.....         | 1 |
| G1a_6159318_x1...cCaucggagacgucgugggaa.....              | 1 |
| Gi3_28822818_x1...cgauccgagacgucgugggaaacacggggugc.....  | 1 |
| Gi1_4348980_x1...ucggagacgAcgugggaaacacg.....            | 1 |
| Gi2_11267513_x1.....gucgugggaaacacggggGgccga.....        | 1 |
| Gi1_4292905_x1...aucggagacgucguAggaacacggggugc.....      | 1 |
| Gi2_11173199_x1.....cgNcgugggaaacacggggugccg.....        | 1 |
| Gi5_8883571_x1.....cgNcgugggaaacacggggugccgaacu.....     | 1 |
| Gi1_4287461_x1.....agacgucgugggaaacacggggugccgaaUu.....  | 1 |
| Gi1_4202635_x1.....gggaacacUgggugccgaacu.....            | 1 |
| Gi3_28610871_x1...cgauccgagacgGcguggg.....               | 1 |
| Gi3_28262342_x1.....acgucgugggaaacacggUgugccgaac.....    | 1 |
| G1a_5991861_x1.....gGcgugggaaacacggggugcc.....           | 1 |
| Gi3_28939792_x1...gauccgagacgucgugggaaacacgggCu.....     | 1 |
| Gi2_11381544_x1...gauccgagacgucgugggCacacgg.....         | 1 |
| G1a_6068387_x1.....cggagacgucgugggaaacacgg.....          | 1 |
| Gi2_11251484_x1...uUggagacgucgugggaaacacggggugc.....     | 1 |
| Gi1_4277911_x1.....gacgucgugggaaacacggggugc.....         | 0 |
| Gi2_11075590_x1...aucUgagacgucgugggaaaca.....            | 1 |
| Gi2_11139117_x1...Acgugggaaacacggggugccg.....            | 1 |
| Gi2_11013809_x1...gauccgagacgucgugggaaacacggCgugc.....   | 1 |
| Gi2_11142574_x1.....ggaacacggggugccgaacuA.....           | 1 |
| Gi2_10997053_x1.....uggaaacacggggUcCcg.....              | 1 |
| Gi1_4182935_x1...gauccgagacgucgugggaaacCc.....           | 1 |
| Gi3_28309053_x1...aucggagacgucgugggaaacacgggAugc.....    | 1 |
| Gi2_11005273_x1.....UcgucgugggaaacacggggU.....           | 1 |
| Gi5_9116677_x1...ggGgacgucgugggaaacacggggugccgaac.....   | 1 |
| Gi5_9021477_x1.Ggcgauccgagacgucgugggaaacacg.....         | 1 |
| Gi2_11352353_x1.....agacgucgugggaaacacggggUcc.....       | 1 |
| Gi2_10995911_x1.....gggaacaGgggugccgaa.....              | 1 |
| Gi2_11394419_x1.....gggCacacggggugccgaac.....            | 1 |
| Gi5_8835778_x1...gagacgucguggUaacacggggugccgaacu.....    | 1 |
| Gi1_4181743_x1.....gaacacAgggugccgaacuu.....             | 1 |
| G1a_6086624_x1...cgauccgagacgucgugggaaacacg.....         | 1 |
| Gi1_4346728_x1.ugcgauccggGgacgucgug.....                 | 1 |
| Gi4_610818_x1.....agacgucAuggaaacacggggugccgaacu.....    | 1 |
| G1a_6031269_x1.....cgucgugggaaacCcgggugccgaacu.....      | 1 |
| Gi1_4188349_x1.....gagacgucgugggaaacacAgggugcc.....      | 1 |

Gi2\_11378385\_x1.....ucgGgggaacacggggugcc..... 1  
Gi2\_11312041\_x1....gaucggagacguGgugggaacacggggugc..... 1  
Gi4\_590231\_x1.....gGcgugggaacacggggugccgaacu..... 1  
Gi4\_605228\_x1.....gugggaacGcggggugccgaa..... 1  
Gi2\_11264992\_x1.....aucGgagacgucgugggaaca..... 1  
Gi5\_9076818\_x1.....ucggagacgucgugggaacaUggggugc..... 1  
Gi3\_28378470\_x1.....Nggagacgucgugggaacacggg..... 1  
Gi1\_4261111\_x1.....acgucgugggaGcacggggugccga..... 1  
Gi5\_8998997\_x1....aucggagacgucgugggaacacAg..... 1  
Gi5\_9054952\_x1.....cgGcgugggaacacggggugccga..... 1  
Gi2\_11089528\_x1.....gggaacCcggggugccgaa..... 1  
Gi3\_28982243\_x1.....cggGgacgucgugggaacacggggug..... 1  
Gi2\_11335833\_x1....aucggagacgucgugggaacacggggguUccgaacu..... 1  
Gi5\_8944234\_x1.....gagGcgucgugggaacacggggugccgaacu..... 1  
Gi2\_11161038\_x1....aucggagacgucUugggaac..... 1  
Gi3\_28460484\_x1.....cgugggaacUcggggugccgaa..... 1  
Gi5\_9094003\_x1.....cggagacgucgugggaacCcggggugccga..... 1  
Gi1\_4252993\_x1.....acgucgugggaacacggggugcAga..... 1  
G1a\_5990979\_x1.....aacacAggggugccgaacu..... 1  
Gi1\_4378242\_x1.....gugggaacacggAgugccg..... 1  
Gi3\_28839003\_x1.....cggagacgucgGgggaacacg..... 1  
Gi5\_8992811\_x1.....cgugggaacacggggugUcgaac..... 1  
Gi3\_28386931\_x1.....gaNacgucgugggaacacggggugccgaacu..... 1  
Gi3\_28689443\_x1.....ucguUggaacacggggugccga..... 1  
Gi1\_4211794\_x1.....agaUgucgugggaacacggggugccga..... 1  
Gi1\_4376732\_x1.....gggaacacggggugcAgaacuu..... 1  
Gi2\_11197036\_x1....aucggagacguAgugggaacacgggggu..... 1  
Gi3\_28819728\_x1.....gagacgucgugggaacGc..... 1  
Gi1\_4365164\_x1....ucggagacgucgugggaacGacggg..... 1  
Gi1\_4181116\_x1....gcgaucggGgacgucgugggaaca..... 1  
Gi5\_8875773\_x1.....gugggaacCcggggugccg..... 1  
Gi5\_8967342\_x1.....cgugggaacacggggugAcg..... 1  
G1a\_6071132\_x1....Cucggagacgucgugggaacacgggggu..... 1  
Gi2\_11056555\_x1.....cgugggaacacggggguCccgaac..... 1  
Gi2\_11336074\_x1.....ggUgacgucgugggaacacggggugccgaac..... 1  
Gi3\_28410113\_x1.....gugAgaacacggggugccgaacuuu..... 1  
Gi3\_28330403\_x1....gaucggagacgucgugAgaacac..... 1  
G1a\_6059670\_x1.....gugUgaacacggggugccgaacu..... 1  
Gi1\_4220597\_x1.....gacgucgAgggaacacggggugc..... 1  
Gi2\_11260498\_x1.....acAucgugggaacacggggugc..... 1  
Gi2\_11379003\_x1.....ggagacgucgugggCacacggggugc..... 1  
G1a\_6121645\_x1.....gGcgucgugggaacacgggggu..... 1  
Gi3\_28987557\_x1.....gagacgucAugggaacacggggugccgaac..... 1  
Gi2\_11132058\_x1.....gugggaacacggggguCcc..... 1  
Gi5\_9091390\_x1.....acgucguggAaacacggggugccgaac..... 1  
Gi3\_28407636\_x1....ucAgagacgucgugggaacacg..... 1  
Gi3\_28931522\_x1.....ggagacgucgGgggaacacggggugcc..... 1

|                                                          |   |
|----------------------------------------------------------|---|
| Gi3_28331782_x1.....cgagacgucgugggaacGcg.....            | 1 |
| Gi2_11122132_x1.....ugggaacacUgggugccga.....             | 1 |
| Gi1_4185255_x1.....Agugggaacacggggugccg.....             | 1 |
| Gi2_11295679_x1.....Cacgucgugggaacacggg.....             | 1 |
| Gi5_9061967_x1.....cgugggaacGcggggugccg.....             | 1 |
| Gi5_9048542_x1....aucggagacgucguggCaacacggggugcc.....    | 1 |
| Gi2_11217758_x1....gaucggagacgucgugggaacacgAggugcc.....  | 1 |
| Gi3_28940733_x1....gaucAgagacgucgugggaacacgggg.....      | 1 |
| Gi2_11117813_x1....gaucggagacgucgugggaacacggggguCcc..... | 1 |
| Gi3_28457283_x1.....gggNacacggggugccgaa.....             | 1 |
| Gi1_4287996_x1.....gNgggaacacggggugccgaacu.....          | 1 |
| Gi1_4228476_x1.....gucgugggaacacggggguA.....             | 1 |
| G1a_6051036_x1.....gugggaacacggggugAcg.....              | 1 |
| Gi3_28696960_x1.....ggaacCcggggugccgaa.....              | 1 |
| Gi5_8943983_x1.....gggaUcacggggugccgaa.....              | 1 |
| Gi3_28869089_x1.....guUggaacacggggugccgaacuuu.....       | 1 |
| Gi1_4232884_x1.....gucguAggaacacggggugcc.....            | 1 |
| Gi2_11001701_x1....aucggagacgucgugggaacGacggggugc.....   | 1 |
| Gi4_583576_x1.....Gcgugggaacacggggugccgaac.....          | 1 |
| Gi1_4351102_x1.....cggaUacgucgugggaacacggggugccgaac..... | 1 |
| Gi2_11237307_x1....gaucggagCcgucgugggaaca.....           | 1 |
| Gi1_4196769_x1.....gggGacacggggugccgaacuu.....           | 1 |
| Gi5_8882536_x1....aucggagaNgucgugggaaca.....             | 1 |
| G1a_6304011_x1....aGcggagacgucgugggaacacggggugccga.....  | 1 |
| Gi5_9118162_x1....gaucgAagacgucgugggaacacg.....          | 1 |
| G1a_6146313_x1....cgaucgUagacgucgugg.....                | 1 |
| Gi2_11001833_x1.....acgucgugggaacacggggugcG.....         | 1 |
| G1a_6126336_x1.....gugggaacacggggguUccgaacu.....         | 1 |
| Gi3_28895345_x1.....gagacgucgugggaacUcggggugcc.....      | 1 |
| Gi3_28742442_x1....cgaucggagacgucgugA.....               | 1 |
| Gi3_28265323_x1.....cgGcgugggaacacgggggu.....            | 1 |
| Gi5_8900244_x1....aCcggagacgucgugggaacacgggggu.....      | 1 |
| Gi5_8918103_x1.....cgucgugAgaacacggggugcc.....           | 1 |
| Gi5_8961250_x1.....ugggaCcacggggugccgaa.....             | 1 |
| Gi2_11375522_x1.....aGgucgugggaacacggggugccg.....        | 1 |
| Gi2_11237102_x1.....gucgugggaacacggggugccCa.....         | 1 |
| Gi1_4168152_x1.....gacgucgugggaacacgggggu.....           | 0 |
| Gi3_28585302_x1....gcgaucggagacgucgugggGacacgggg.....    | 1 |
| Gi2_11048233_x1.....gaAgucgugggaacacggggugccgaac.....    | 1 |
| Gi5_9119474_x1.....gaacaAggggugccgaac.....               | 1 |
| Gi3_28768448_x1.....agacgAcgugggaacacggggugccgaac.....   | 1 |
| G1a_5987187_x1....aucggagacgucgugggaacacAgggug.....      | 1 |
| Gi3_28669637_x1....cggagacgucgugggaacacggggGg.....       | 1 |
| Gi3_28473154_x1....cgauAggagacgucgugggaacacgggggu.....   | 1 |
| Gi1_4338118_x1.....agacgucgugggaacacggggugc.....         | 0 |
| Gi1_4193349_x1.....ucgugggaacacggggguCccgaacu.....       | 1 |
| Gi2_11110621_x1.....gacgucgugAgaacacggggugccga.....      | 1 |

|                                                             |   |
|-------------------------------------------------------------|---|
| Gl1a_6164039_x1.....ucggagacgucAugggaacacgg....._x1.....    | 1 |
| Gl1a_6296990_x1.....cgugggGacacggggugc.....                 | 1 |
| Gi2_11396629_x1.....aucggCgacgucgugggaaac.....              | 1 |
| Gl1a_6290246_x1..gcgaucggGgacgucgugggaaacacggg.....         | 1 |
| Gi2_11242019_x1.....ggagacgucgCgggaacacggggugccgaac.....    | 1 |
| Gi2_11056980_x1.....ucggagacgucgugggaaUacggggugcc.....      | 1 |
| Gi2_11172414_x1.....gagacgucgugggaaacacggggugUc.....        | 1 |
| Gi2_11382992_x1.....aucggagacguAgugggaacacggggug.....       | 1 |
| Gi1_4222727_x1.....gagacgucgugggaaacaUggggugccgaacu.....    | 1 |
| Gi2_11301538_x1.....ggaacacgggCugccgaa.....                 | 1 |
| Gi3_28481112_x1.....gaaAacggggugccgaac.....                 | 1 |
| Gl1a_6084434_x1.....uGggagacgucgugggaaacacggggugc.....      | 1 |
| Gl1a_6264093_x1...gaucggagacgucgugggGacacg.....             | 1 |
| Gi2_11133419_x1.....cgugggaacaUggggugccg.....               | 1 |
| Gi3_28487504_x1.....gagGcgucgugggaaacacggggugccg.....       | 1 |
| Gi3_28975229_x1.....acCucgugggaaacacggggugccgaac.....       | 1 |
| Gi2_11095427_x1.....cggagacgucgugggaaacacggggGgccgaacu..... | 1 |
| Gl1a_6051906_x1.....aucggagacgucgugggaaCcacggggug.....      | 1 |
| Gi3_28301576_x1.....gucgCgggaacacggggugcc.....              | 1 |
| Gi2_11015461_x1.....cggagacguUgugggaaca.....                | 1 |
| Gi5_9012895_x1.....cgAcgugggaaacacggggugccgaac.....         | 1 |
| Gi3_28526175_x1.....gucgugggaaacacggAgugcc.....             | 1 |
| Gi2_11129670_x1.....aucggagacgCcgugggaaacacggg.....         | 1 |
| Gi1_4286711_x1.....gggaacacggggugccUaacu.....               | 1 |
| Gi3_28334282_x1.....gacgucgugggaaacacAgggugc.....           | 1 |
| Gi1_4217674_x1.....gagacgucgugggaaacacggggugcU.....         | 1 |
| Gi5_8876109_x1..ugcgaucggGgacgucgug.....                    | 1 |
| Gi3_28850893_x1.....aucggagacgucCugggaacacgg.....           | 1 |
| Gi2_11259521_x1.....Ugaacacggggugccgaacuu.....              | 1 |
| Gi1_4326970_x1.....gagacgucgugggaaacacggggug.....           | 0 |
| Gi2_11057831_x1.....ucggagacgucgugggaaacacgg.....           | 0 |
| Gi1_4378019_x1.....gagacgucgugggaaacacgCggugccg.....        | 1 |
| Gi3_28635145_x1.....gucgugggaaacacggggugccgUaacuu.....      | 1 |
| Gi3_28865295_x1.....cgugggaacaGggggugc.....                 | 1 |
| Gi5_9025564_x1.....gggaacacggggCgccgaa.....                 | 1 |
| Gi1_4250548_x1.....gaacacggggugGcgaacuu.....                | 1 |
| Gi5_9057325_x1.....acgucgugggaaacacUgggugccgaacu.....       | 1 |
| Gi1_4304043_x1.....Cgaacacggggugccgaa.....                  | 1 |
| Gi1_4348859_x1.....gggaacCcgggugccgaac.....                 | 1 |
| Gi2_11185418_x1.....aucggagacgucUugggaacacggggug.....       | 1 |
| Gi1_4226840_x1.....ggagGcgucgugggaaacacggggugccg.....       | 1 |
| Gi1_4226235_x1.....uUggaacacggggugccgaa.....                | 1 |
| Gl1a_6241347_x1.....guggAaacacggggugccg.....                | 1 |
| Gi3_28457274_x1.....gaacacgAggugccgaacuu.....               | 1 |
| Gi4_593541_x1.....cguggCaacacggggugccgaacu.....             | 1 |
| Gi2_11020009_x1.....cggagacgCcgugggaaacac.....              | 1 |
| Gi2_11065678_x1.....gugggaacacggggugcUgaacuu.....           | 1 |

Gi5\_9069336\_x1.....ucgugggGacacggggugcc..... 1  
 Gi2\_11033193\_x1.....aucggagacgucCugggaacacggggugc..... 1  
 Gi2\_11294509\_x1.....gucgugggaacacggggguAc..... 1  
 Gi1\_4238529\_x1.....cgugggaacacggggugccgCacuu..... 1  
 Gi2\_11146999\_x1.....gUucggagacgucgugggaacacgg..... 1  
 Gi2\_11373208\_x1.....gacgucgugggaacacgC..... 1  
 Gi2\_11252952\_x1.....gaucggagacAucgugggaac..... 1  
 Gi5\_8966854\_x1.....aacNcggggugccgaacuuu..... 1  
 G1a\_6061372\_x1.....ucggagacgucgugggaacacggggCgc..... 1  
 Gi1\_4286372\_x1.....cgugggaGcacggggugccgaacuu..... 1  
 G1a\_6122067\_x1.....cgucgugggaacacggggguAccgaacu..... 1  
 Gi3\_28849907\_x1.....ucggagGcgucgugggaacacgg..... 1  
 Gi2\_11403852\_x1.....gaucggagacgucgugggaUcacgggggu..... 1  
 Gi3\_28625773\_x1.....cgugggaacacggggguCccgaac..... 1  
 Gi1\_4349828\_x1.....cgucgugggaacGcggggugccgaac..... 1  
 Gi5\_8967059\_x1.....cgucgugggaGcacggggugcc..... 1  
 Gi5\_8843316\_x1.....acacAgggugccgaacuuu..... 1  
 Gi2\_11069416\_x1.....gucgugggaacacggggugccgaUcu..... 1  
 Gi3\_28472869\_x1.....ucggaAacgucgugggaaca..... 1  
 G1a\_6154179\_x1.....gugggaacUcggggugccgaac..... 1  
 Gi5\_9041173\_x1.....agacgucgugggaacacCggggugccgaacu..... 1  
 G1a\_6163377\_x1.....gugggaaAacggggugccgaac..... 1  
 G1a\_6206525\_x1.....ugggaacUcggggugccgaacu..... 1  
 Gi1\_4321838\_x1.....cggagacgucguggAaacacggggugcc..... 1  
 Gi5\_9005713\_x1.....gagacgucgugggaacacAgggugccgaacu..... 1  
 Gi3\_28470486\_x1.....gaucggagacgucgugggaacacggUgugcc..... 1  
 Gi3\_28483657\_x1.....agacgucgugggaacacUgggugccga..... 1  
 Gi2\_11027971\_x1.....acuuuccagcgccugcugcccacc..... 0  
 Gi1\_4300241\_x1.....acgucgugggaacacgggAugccgaa..... 1  
 G1a\_6008833\_x1.....gucgGgggaacacggggugccga..... 1  
 Gi3\_28927071\_x1.....Cacgucgugggaacacgg..... 1  
 Gi2\_11016155\_x1.....ucggagacgucgugggaacCcg..... 1  
 Gi3\_28970905\_x1.....cggagacgucgCgggaacacggggugccg..... 1  
 Gi2\_11319104\_x1.....gugggaacacUgggugccga..... 1  
 Gi3\_28385669\_x1.....ucggagacgucgugCgaacacgg..... 1  
 Gi3\_28902659\_x1.....cgucguggCaacacggggugcc..... 1  
 Gi2\_11154056\_x1.....gucgugggaUcacggggugccga..... 1  
 Gi2\_11125314\_x1.....cgucgugggaacacggggugAcgaacu..... 1  
 Gi1\_4184081\_x1.....ggagacgucgGgggaacacggggugcc..... 1  
 Gi1\_4348430\_x1.....Ngugggaacacggggugccgaa..... 1  
 Gi3\_28748348\_x1.....ggagacgucgugggaCcacg..... 1  
 Gi1\_4356747\_x1.....Ccgauccgagacgucgugggaaca..... 1  
 Gi1\_4247466\_x1.....ucggagacgucgugggaacaU..... 1  
 Gi2\_11250710\_x1.....gaucggagacgCcgugggaaca..... 1  
 Gi2\_11188389\_x1.....acgucgugggaacCcggggu..... 1  
 Gi5\_9070842\_x1.....ugggaacacggAgugccgaacuuu..... 1  
 Gi5\_8873257\_x1.....gUcugcugggaacacggggugccg..... 1

Gi1\_4354671\_x1.....agUcgcgucgugggaacacggg..... 1  
Gi1\_4304487\_x1.....cggaAacgcucgugggaacacggggugccgaacu..... 1  
Gi3\_28380441\_x1.....acacAgggugccgaacu..... 1  
Gi3\_28777758\_x1.....ggagacAucgugggaacacg..... 1  
Gi5\_9131723\_x1.....cguCggaacacggggugccgaacu..... 1  
Gi2\_11259100\_x1.....aucggagacgucAugggaacacggggugc..... 1  
Gi3\_28650059\_x1...cgaucggagacgucgugCg..... 1  
G1a\_6178871\_x1.....gucgGgggaacacggggugcc..... 1  
Gi2\_11103436\_x1.....ucggagacgCcgugggaacacggggugc..... 1  
Gi3\_28704902\_x1.....agacgucgugggaacacggggugGc..... 1  
Gi2\_11251211\_x1...cgaucggagacgucgugAgaacacggggugc..... 1  
Gi2\_11008785\_x1....aucNgagacgucgugggaacac..... 1  
Gi5\_9092483\_x1...gaucggagacgucgugggGacacgg..... 1  
Gi3\_28607416\_x1....aucggagacgucgugggaacacgggCugcc..... 1  
Gi1\_4366079\_x1.....Ugacgucgugggaacacggg..... 1  
Gi2\_11051097\_x1...cgaucggagacgucgugggaacacggggGgc..... 1  
Gi2\_11248684\_x1.....cgugggaacacgggCgugccgaac..... 1  
Gi2\_11144471\_x1....gauGggagacgucgugggaaca..... 1  
Gi1\_4160998\_x1.....cgugggaacacggCgugccgaacu..... 1  
Gi3\_28781955\_x1.....cggagGcgcgugggaacacggggug..... 1  
Gi3\_28619928\_x1....aucggagacgucgugggaacGcggggugccgaacu..... 1  
Gi2\_11234688\_x1.....agacgucgugggaacacggggugAcgaacu..... 1  
Gi1\_4160358\_x1.....ucgugggaacacggggugccCaacu..... 1  
Gi5\_8885329\_x1....aucggagacgucgugggaacacCgg..... 1  
Gi2\_11034061\_x1....aucggagacgucgugggaGacg..... 1  
Gi2\_11136317\_x1.....gucgugggaacacggggugAcgaac..... 1  
Gi1\_4377845\_x1.....ggaacCcggggugccgaac..... 1  
Gi3\_28922843\_x1.....gGgacgucgugggaacacggggugccgaa..... 1  
Gi2\_11242858\_x1cugcgaucggagacgucgug..... 0  
Gi1\_4264931\_x1.....cgugggaacacggggugccgG..... 1  
Gi2\_11331983\_x1.....Cucgugggaacacggggugccg..... 1  
Gi3\_28708777\_x1.....gggaCcacggggugccgaacu..... 1  
Gi3\_28330596\_x1.....gNgaacacggggugccgaacu..... 1  
G1a\_6266010\_x1.....gacgucgugggaacGcggggg..... 1  
Gi2\_11374027\_x1.....acgucgugggaacacggggugG..... 1  
Gi3\_28792042\_x1.gcUaucggagacgucgug..... 1  
Gi5\_9021961\_x1.....cgugggaacacgAggugccg..... 1  
Gi2\_11260415\_x1.....gUcgcgucgugggaacacggggugccgaac..... 1  
Gi2\_11364691\_x1.....ggGgacgucgugggaacacggggugccga..... 1  
Gi2\_11266953\_x1.....cguNggaacacggggugcc..... 1  
Gi3\_28781421\_x1.....gucguCggaacacggggugccgaac..... 1  
Gi3\_28712542\_x1....Uggagacgucgugggaacacggggg..... 1  
Gi3\_28809612\_x1.....ucgugggaNcacggggugcc..... 1  
Gi3\_28935123\_x1....aucggagacgucguUggaacacgggg..... 1  
Gi1\_4367521\_x1.....acgucgugggaacacggggugUc..... 1  
Gi5\_9094637\_x1.....gucNugggaacacggggugccgaacu..... 1  
Gi2\_11330531\_x1.....Ugugggaacacggggugccg..... 1

Gi4\_584151\_x1 .....ucgugggaacacggggugcAgaacu..... 1  
 Gi1\_4387209\_x1 .....uggaacaacggggugUcgaa..... 1  
 Gl1a\_6065650\_x1...gaucAgagacgucgugggaacacg..... 1  
 Gi3\_28421870\_x1.ugcgaCcgagacgucgugggaacacggggu..... 1  
 Gi1\_4306980\_x1.....gacgucguAggaacacggggugccgaacu..... 1  
 Gi3\_28985887\_x1.....ggagacgucgugggaacacggUgugcc..... 1  
 Gi2\_11089069\_x1.....cggagacgucgugggaacGcggggu..... 1  
 Gl1a\_6179055\_x1.....ucgugggaacacggggugccAaac..... 1  
 Gi3\_28356747\_x1.....gacgucgugggaacacgA..... 1  
 Gi2\_11093974\_x1.....gCucggagacgucgugggaacacg..... 1  
 Gi2\_11103727\_x1.....cggagacgucgugggaUacggggugc..... 1  
 Gi5\_9078797\_x1...gaucggagacgucgAgggaacacggggugc..... 1  
 Gi1\_4236554\_x1.....ggaacacggCgugccgaacu..... 1  
 Gi2\_11342256\_x1....aucggagacgucUugggaacacggggug..... 1  
 Gl1a\_6033122\_x1...gaucggGgacgucgugggaacacggg..... 1  
 Gl1a\_6127592\_x1..Ccgaucggagacgucgug..... 1  
 Gi3\_28871743\_x1.....ucgugggaacacggUgugccg..... 1  
 Gi4\_593204\_x1.....acgucgugggaGacggggugccgaacu..... 1  
 Gi1\_4245237\_x1.....gucgugggaacacgggAugccgaac..... 1  
 Gl1a\_6297151\_x1.....cgucgugggaacacggggAgccgaacu..... 1  
 Gi1\_4298364\_x1...cgauccggagacgucgugggaacacggg..... 0  
 Gi5\_9090674\_x1.....cggagacgCcgugggaacacggggugcc..... 1  
 Gi5\_8911937\_x1.....uggaacaacggggugcGgaa..... 1  
 Gi5\_9073721\_x1....aucggagacgucgCgggaacacg..... 1  
 Gi3\_28485673\_x1.....gagacgucgugggaacacAgggugccgaacu..... 1  
 Gi5\_9070689\_x1...gaucggagacgucgugggGacac..... 1  
 Gl1a\_5983233\_x1.....ucgugggaacacggggGgcccgaacu..... 1  
 Gi5\_8884907\_x1.....cggGgacgucgugggaacacggggugccga..... 1  
 Gi1\_4175909\_x1.....gugggUacacggggugccga..... 1  
 Gi1\_4315634\_x1...cgauccggagacgucgugggaacacggggugcc..... 0  
 Gi3\_28795395\_x1.....gucgugAgaacacggggugcc..... 1  
 Gi5\_9001165\_x1.....gagNcgucgugggaacacg..... 1  
 Gi4\_580276\_x1.....gugggaacaUggggugccgaacu..... 1  
 Gi1\_4220712\_x1....aucggagacgucAugggaacacgg..... 1  
 Gi2\_11096538\_x1.....cggagacgucgugggaacacggggugcG..... 1  
 Gi1\_4316594\_x1.....cggagaAgucgugggaacacggggugcc..... 1  
 Gi2\_11020073\_x1.....ggaAacgucgugggaacac..... 1  
 Gi2\_11310061\_x1....aucggagacgucguCggaac..... 1  
 Gl1a\_6070775\_x1.....gugggaacacggggGgccc..... 1  
 Gi3\_28531289\_x1.....cggagacgucgugggaacacggggugUcgaaacu..... 1  
 Gi2\_11111732\_x1....aucggagacgucguUggaacacggg..... 1  
 Gi1\_4351126\_x1.....gggaacacggAgugccgaacuu..... 1  
 Gi3\_28608278\_x1....uAggagacgucgugggaacacgggg..... 1  
 Gi2\_11285185\_x1.....ucgugggaacacggUgugccgaac..... 1  
 Gi5\_8947597\_x1.....gggaacacggggugAcgaacu..... 1  
 Gi2\_11196726\_x1.....agacUucgugggaacacgggg..... 1  
 Gi1\_4229862\_x1.....ggagacgucCugggaacacggggugccg..... 1



Gi2\_11205810\_x1.....gagacgucgugggaacaUggggug..... 1  
Gi5\_9046482\_x1.....cgucCugggaacacggggugccgaacu..... 1  
Gi1\_4233669\_x1.....Cggaacacggggugccg..... 1  
Gi5\_8979839\_x1.....ggagGcgucgugggaacacggggugccgaac..... 1  
Gi3\_28268539\_x1.....Acgugggaacacggggugccga..... 1  
Gi5\_9055764\_x1.....ucgugggaacacgUggugccgaacu..... 1  
G1a\_6052384\_x1.....cgugggaacacggggugUc..... 1  
Gi3\_28281579\_x1.....ggagacgucguggCaaca..... 1  
Gi3\_28509712\_x1.....cgugggaacacgCggugccga..... 1  
Gi2\_11096661\_x1.....gugggaacacggggugccgaaG..... 1  
Gi1\_4203629\_x1.....gaacacggggguAccgaacu..... 1  
Gi2\_11374152\_x1.....ggagGcgucgugggaacacggggug..... 1  
Gi2\_11292121\_x1.....agacgucgugggaacacggggguAccgaacu..... 1  
Gi2\_11177260\_x1.....ucggagacgucgCgggaacacg..... 1  
Gi2\_11144232\_x1.....gagacgucgCgggaacacggggugc..... 1  
Gi3\_28647994\_x1.....agacgucgugggaCcacggggugccgaacu..... 1  
Gi2\_11202202\_x1.....gggaacacggggugccgaaG..... 1  
Gi2\_11005262\_x1.....ucgNagacgucgugggaacacggggugcc..... 1  
G1a\_6237595\_x1....aucggagacgucgugggaacaG..... 1  
Gi3\_28390097\_x1.....ucAugggaacacggggugccgaa..... 1  
Gi5\_9127092\_x1....ucggagacgucguggGacacggggugc..... 1  
Gi3\_28923804\_x1....ucggagacgucgugggaacacggggugccA..... 1  
Gi2\_11350222\_x1.....gggaaAacggggugccgaa..... 1  
Gi2\_11181008\_x1....gaucUgagacgucgugggaacacggg..... 1  
Gi2\_11345128\_x1.....acgucgugggaCcacggggugcc..... 1  
Gi2\_11268528\_x1.....gacgucgugggaacaGggggugccgaac..... 1  
Gi3\_28858236\_x1.....agGcgucgugggaacacgggggu..... 1  
Gi3\_28823733\_x1....cAgagacgucgugggaacacgg..... 1  
Gi2\_10998464\_x1....ucggagacgucgugggaacacggggG..... 1  
Gi5\_8869238\_x1.....cNugggaacacggggugccgaacu..... 1  
Gi3\_28824308\_x1.....ggagacguNgugggaacacggggugccgaacu..... 1  
Gi3\_28797203\_x1....cggagacgucguggCaacacggggugcc..... 1  
Gi3\_28273123\_x1....gaucggagacgucgGgggaacacggggugcc..... 1  
Gi2\_11140793\_x1.....guNggaacacggggugcc..... 1  
Gi1\_4277537\_x1.....ugggaacacggggugcAga..... 1  
Gi2\_11337994\_x1....gaucggagacgucgugggaAacg..... 1  
G1a\_6045301\_x1....aucggagacgucgugggaacGcggggugcc..... 1  
Gi2\_11140736\_x1....acgucgugggaacacggggugcAga..... 1  
G1a\_6075533\_x1....gaucggagacgucgugAgaacacggg..... 1  
Gi2\_11106193\_x1....aucggagaAgucgugggaacacggggugc..... 1  
Gi2\_11156692\_x1....aucggagacgucgugggaacacgUgg..... 1  
Gi2\_11230623\_x1....agacguGgugggaacacggggugccga..... 1  
Gi5\_8862570\_x1.....cgucgugggaacacggUgugccgaa..... 1  
Gi1\_4258082\_x1.....ucgugggaacacggggCgcccga..... 1  
Gi5\_8982868\_x1.....Ngggaacacggggugccgaacu..... 1  
Gi5\_8880874\_x1.....ugggaacacgggUugccgaa..... 1  
Gi5\_9006416\_x1.....acgucgugggaacacgggAugccgaac..... 1

Gi1\_4358394\_x1.....ucgugggaacacgggAugccgaac..... 1  
 Gi2\_11024679\_x1.....gCgggaacacggggugccgaacuu..... 1  
 Gi3\_28419095\_x1.....ucgugAgaacacggggug..... 1  
 Gi2\_11089620\_x1.....ugggaacacggggAccg..... 1  
 Gi2\_11172867\_x1.....cgugggaacacgggAugccgaa..... 1  
 Gi3\_28787252\_x1...cgauccgagacgucgugggaaUacggggg..... 1  
 Gi3\_28756906\_x1.....ucggagacgucgugAgaacacggggugccg..... 1  
 Gi1\_4371409\_x1.....ggaUcacggggugccgaa..... 1  
 Gi1\_4231240\_x1.....gucgugggaacacgggAgcc..... 1  
 Gl1\_6050399\_x1.Ggcgaucggagacgucgugggaaacac..... 1  
 Gi5\_9109727\_x1.....cgugggaacCggggugcc..... 1  
 Gl1\_6182121\_x1....Gucggagacgucgugggaaacacggggugcc..... 1  
 Gi2\_11299263\_x1.....agaUgucgugggaacacggggugcc..... 1  
 Gi1\_4167450\_x1.....acacggggugccgaacuG..... 1  
 Gi2\_11265792\_x1.....gucgugggaacacggggugAcgaa..... 1  
 Gi5\_9136080\_x1....aucggagacgucgugggaaacacAgg..... 1  
 Gi2\_11286877\_x1...cgauccgagacgucgugggaaacacggA..... 1  
 Gl1\_6024170\_x1....aucggagacgucguggAaacacggg..... 1  
 Gl1\_6288706\_x1.....ggaGacggggugccgaac..... 1  
 Gi3\_28643150\_x1...cgauGggagacgucgugg..... 1  
 Gl1\_6068262\_x1.....ggaacacgggAgccgaacu..... 1  
 Gi2\_11067697\_x1....Ugagacgucgugggaaacacggggugccgaac..... 1  
 Gi3\_28369839\_x1...cgaAcggagacgucgugggaaacacggggg..... 1  
 Gi4\_598252\_x1.....uUggaacacggggugccga..... 1  
 Gi2\_11251118\_x1....auUggagacgucgugggaa..... 1  
 Gi3\_28465324\_x1.....ucgugggaacacggggAccga..... 1  
 Gi3\_28333779\_x1....ucggagacgCcgugggaacacgg..... 1  
 Gi5\_9039662\_x1.....cgucgugggaacacggAgugc..... 1  
 Gi1\_4183810\_x1.....cguUgugggaacacggggugcc..... 1  
 Gi3\_28660903\_x1....ucggagacNucgugggaaacacggggugccg..... 1  
 Gi3\_28419972\_x1....aucggagacguAguggga..... 1  
 Gi1\_4182887\_x1.....Aucgugggaacacggggugccgaac..... 1  
 Gi2\_11078691\_x1.....uNggaacacggggugccgaacu..... 1  
 Gi3\_28300774\_x1....ucggagacgucgugggGacacg..... 1  
 Gi2\_11381419\_x1.....gugggaacacgggCugcc..... 1  
 Gi3\_28715193\_x1.ugcgauAggagacgucgugggaaca..... 1  
 Gi5\_9073425\_x1.....ugggaacacggggugccgCacuu..... 1  
 Gi5\_9047038\_x1.....ugggaacacggggGgccgaac..... 1  
 Gi2\_11338212\_x1.....aacacggggugccCaacu..... 1  
 Gi3\_28846878\_x1.....ggagacgucgugggaaacacgAggugcc..... 1  
 Gi3\_28782756\_x1.....agacgucgugAaacacggggugcc..... 1  
 Gi3\_28834855\_x1....Aaucggagacgucgugggaaacacggggug..... 1  
 Gi1\_4361914\_x1.....Cgagacgucgugggaaacacggggugcc..... 1  
 Gi1\_4229365\_x1.ugcgauccgagacgucgugggaacaU..... 1  
 Gi3\_28302621\_x1....cggagacgucgugggCaacggggugcc..... 1  
 Gi3\_28477275\_x1.....ggNaacacggggugccgaac..... 1  
 Gi5\_9126307\_x1....aCcgagacgucgugggaaacac..... 1

Gi2\_11328085\_x1.....gugggaacacgUggugccgaa..... 1  
 Gi2\_11111328\_x1...gaucgAagacgucgugggaacacggggugcc..... 1  
 Gi2\_11154261\_x1.....gggaacacggggugccAaa..... 1  
 Gi2\_11319531\_x1.....ucUggggaacacggggugcc..... 1  
 G1a\_6002342\_x1....aucgAagacgucguggga..... 1  
 Gi2\_11341986\_x1.....aGgucgugggaacacggggg..... 1  
 Gi2\_11282619\_x1.....gacgucgugggaacacggCgugcc..... 1  
 Gi1\_4365103\_x1.....Uggagacgucgugggaacacggggugcc..... 1  
 Gi5\_9069917\_x1.....cgucgugggGacacggggugcc..... 1  
 Gi3\_28895158\_x1....gaucggagacguGgugggaacac..... 1  
 Gi3\_28470745\_x1....ucggagacgucgugggCacacggggugccgaac..... 1  
 Gi1\_4333800\_x1.....ucgugggaNcacggggugccgaa..... 1  
 Gi3\_28913650\_x1.....gucgugggaacacggggugcGgaac..... 1  
 Gi5\_9007944\_x1....gaucggagacgucgCgggaacacggg..... 1  
 Gi1\_4377773\_x1.....cggGgacgucgugggaacacggg..... 1  
 Gi3\_28371256\_x1.ugcgauCagagacgucguggga..... 1  
 Gi2\_10995274\_x1....aucCgagacgucgugggaacacggggg..... 1  
 Gi3\_28506213\_x1....gaucggagacgucgugggaacacgUggu..... 1  
 Gi2\_11020399\_x1....cgauCggUgacgucgugggaacac..... 1  
 Gi2\_11340229\_x1....aucggagaAgucgugggaacac..... 1  
 Gi3\_28477027\_x1....gaucggagacgucgugggUacacg..... 1  
 Gi5\_9132194\_x1....cgucgugggaaAacggggugc..... 1  
 Gi3\_28850844\_x1....aucggagCgucguggga..... 1  
 Gi5\_9015464\_x1.....gggaacacggggugcAgaac..... 1  
 Gi3\_28930192\_x1.....gagacgucgugggaacacAgggg..... 1  
 G1a\_5999316\_x1.....ggagacgucgCgggaacacggggugcc..... 1  
 Gi2\_11261738\_x1.....agacgucgugggaacacggggugccgCac..... 1  
 Gi3\_28278765\_x1.....gagacguAgugggaacacggggugcc..... 1  
 Gi1\_4203920\_x1.....cgucgugggaacacCgggugccgaacu..... 1  
 Gi3\_28667627\_x1....aucggagacgucgugCgaacacg..... 1  
 G1a\_6131714\_x1.....gGacacggggugccgaac..... 1  
 Gi2\_11370219\_x1.....gaacacggCgugccgaacu..... 1  
 Gi2\_11304067\_x1.....gucgugggaacUcggggugccgaacu..... 1  
 Gi2\_11205788\_x1....gaucggagacgucgugggaCcacggggug..... 1  
 Gi2\_11091492\_x1.....cggCgacgucgugggaacacggggugc..... 1  
 Gi2\_11066935\_x1.....ugggaacacggggugGcgaac..... 1  
 Gi2\_11357669\_x1.....cgucgugggaaGacggggugccgaacu..... 1  
 Gi4\_611240\_x1.....cgucguggNaacacggggugccgaacu..... 1  
 Gi3\_28381401\_x1.....gucgugggaacacggggugUcga..... 1  
 Gi5\_8949312\_x1.....gacgucgugggaacacgggggUAccgaac..... 1  
 Gi1\_4207211\_x1.....cguggCaacacggggugccgaac..... 1  
 Gi3\_28435301\_x1....gcgaucggagacgucgCg..... 1  
 Gi3\_28308229\_x1.....cgugggaacacgggCugc..... 1  
 G1a\_6045368\_x1.....gucgugggaacacggggugccgCacu..... 1  
 Gi3\_28267789\_x1....cgauUggagacgucguggg..... 1  
 Gi3\_28419657\_x1.....gagacgucgCgggaacacggggugcc..... 1  
 Gi3\_28647744\_x1....auNggagacgucgugggaacacggggugcc..... 1

|                                                       |   |
|-------------------------------------------------------|---|
| Gl1_6308708_x1.....guggaacUcggggugccg.....            | 1 |
| Gi3_28831095_x1.....cguggaacacggggugGc.....           | 1 |
| Gi2_11069611_x1.....gucguggaacacggggguAccgaa.....     | 1 |
| Gl1_6046062_x1.....cgugggGacacggggugccg.....          | 1 |
| Gl1_6284882_x1.....aucggagacgucguggaaAacgg.....       | 1 |
| Gi5_8866484_x1.....Nucggagacgucguggaaca.....          | 1 |
| Gl1_6104700_x1.....gucguggaacCcggggugccgaac.....      | 1 |
| Gi2_11067767_x1cugcgauccgagacgucguggaacacggggugc..... | 0 |
| Gi1_4273490_x1.....gucguggaacGcggggugcc.....          | 1 |
| Gi3_28632471_x1.....ggaacUcggggugccgaa.....           | 1 |
| Gi5_9031315_x1.....cggGgacgucguggaacacg.....          | 1 |
| Gi1_4308191_x1.....cgucguggaacacggggGccc.....         | 1 |
| Gi1_4367096_x1.....gagacgucguggaacacggggGgccc.....    | 1 |
| Gi2_11153668_x1.....cgucguggaacCcggggug.....          | 1 |
| Gl1_5984957_x1.....Gggagacgucguggaacacggg.....        | 1 |
| Gi5_8897427_x1.....gggaacacggggugcGgaac.....          | 1 |
| Gi2_11048847_x1.....gagGcugcuguggaacacggggugccg.....  | 1 |
| Gi3_28552596_x1.....gaucggagacgucguggaacUcg.....      | 1 |
| Gi2_11380980_x1.....ucggagacgucgugggGacacggggugc..... | 1 |
| Gi5_8942855_x1.....cgugggGacacggggugccg.....          | 1 |
| Gi2_11319250_x1.....gaucggagacgucguCgga.....          | 1 |
| Gi1_4169079_x1...Ugaucggagacgucguggaacacggggugc.....  | 1 |
| Gi3_28693438_x1.....aucggagacgucguggaacaGggggg.....   | 1 |
| Gi2_11033935_x1.....gacgucguggaacacgAggugccg.....     | 1 |
| Gi3_28710539_x1.....cggagacgucAugggaacacgggg.....     | 1 |
| Gi5_9111829_x1.....ggaacaUggggugccgaac.....           | 1 |
| Gi1_4338546_x1.....cgucgugUgaacacggggugccgaacu.....   | 1 |
| Gi3_28959176_x1...gaCcgagacgucguggaacacggggugc.....   | 1 |
| Gi5_9104027_x1...aucAgagacgucguggaacacggggg.....      | 1 |
| Gi3_28781346_x1.....cggagacgucgugUgaacacggg.....      | 1 |
| Gi2_11191537_x1.....Agagacgucguggaacac.....           | 1 |
| Gl1_6031185_x1...ucggGgacgucguggaacacggggugc.....     | 1 |
| Gi4_596086_x1...Gucggagacgucguggaacacggg.....         | 1 |
| Gi3_28295726_x1.....uggCaacacggggugccga.....          | 1 |
| Gi5_8926016_x1...aucggagacgucguggCaacacgg.....        | 1 |
| Gi3_28649852_x1.....gacgucguggaacacgggCugccgaac.....  | 1 |
| Gi2_11266595_x1.....ugggaacUcggggugccgaa.....         | 1 |
| Gi3_28911910_x1...ucggagacgucguggaacacgUggugcc.....   | 1 |
| Gi2_11312944_x1.....Nggagacgucguggaacacggggugcc.....  | 1 |
| Gi3_28717663_x1...ucggagacgucguggaacacggggugcA.....   | 1 |
| Gl1_6274652_x1.....ggagacgucguggaUcag.....            | 1 |
| Gl1_6194359_x1...cgucguggaacacggggCgcccgaac.....      | 1 |
| Gi1_4383125_x1.....ggagacgucguAggaacacggggugccg.....  | 1 |
| Gi2_11064369_x1...Ugaucggagacgucguggaacacggggugc..... | 1 |
| Gi2_11125258_x1.....ugggaacaUggggugccga.....          | 1 |
| Gi2_11341262_x1...gaucggagacguGguggaacac.....         | 1 |
| Gi5_9044316_x1.....acgucguggaGcacggggugccga.....      | 1 |

|                                                          |   |
|----------------------------------------------------------|---|
| Gi5_8895725_x1.....gucgugggaacacgCggugccgaacu.....       | 1 |
| Gi1_4361272_x1.....uggaacUcggggugccgaac.....             | 1 |
| G1a_6309085_x1...gaucggagacgucgGgggaacacggg.....         | 1 |
| Gi1_4168613_x1.....gacgucgugggaacGcggggugcc.....         | 1 |
| Gi3_28539980_x1.....cggagacgucgugggaGcacgg.....          | 1 |
| G1a_6292413_x1...cUaucggagacgucgugggaacacggg.....        | 1 |
| G1a_6023428_x1.....ucggagacguAgugggaacacggg.....         | 1 |
| Gi2_11234386_x1.....cgugggaCcacggggugccgaa.....          | 1 |
| Gi1_4218245_x1.....gacgucgugggaacacggggU.....            | 1 |
| Gi1_4208748_x1.....guggUaacacggggugccg.....              | 1 |
| Gi1_4361219_x1.....ucgugggaacacggAgugc.....              | 1 |
| Gi3_28535019_x1...gaucggagNcgucgugggaacacggggug.....     | 1 |
| G1a_6041689_x1...cUgagacgucgugggaacacggggugcc.....       | 1 |
| Gi3_28268982_x1...cUaucggagacgucgugggaacacggggug.....    | 1 |
| G1a_6093579_x1...aucggGgacgucguggga.....                 | 1 |
| G1a_6207996_x1...cgaucggagGcgucgugg.....                 | 1 |
| Gi1_4374556_x1...ucggagGcgucgugggaacacggggU.....         | 1 |
| Gi5_8959012_x1.....gucgugggaacacggggugAcgaac.....        | 1 |
| Gi5_9050285_x1.....cgugggaGacggggugccgaac.....           | 1 |
| Gi5_9062742_x1.....aGuuuccagcgccugcugcccacc.....         | 1 |
| Gi3_28676313_x1...cgaucggagacgucgugggaacacgAg.....       | 1 |
| Gi3_28611356_x1...ggagacgucgugAgaacacggg.....            | 1 |
| Gi1_4301563_x1.....Ugugggaacacggggugccgaacu.....         | 1 |
| Gi4_567819_x1.....aacacggggugcGgaacu.....                | 1 |
| Gi1_4227037_x1.....gagacgucgugggaacacggggugc.....        | 0 |
| Gi3_28820957_x1.....cggagaUgucgugggaacacggggug.....      | 1 |
| Gi3_28614328_x1.....cggagacgucgugggaacaAggggu.....       | 1 |
| Gi2_11131973_x1...gaucggagacgucgugggaUacggggugc.....     | 1 |
| Gi3_28371204_x1.....agacgucgugAgaacacgggg.....           | 1 |
| Gi3_28311423_x1.....Cagacgucgugggaacac.....              | 1 |
| Gi3_28597321_x1.....Ugacgucgugggaacacggg.....            | 1 |
| Gi3_28696072_x1.....cgucgugggaacaGggggugcc.....          | 1 |
| Gi5_8908959_x1.....ggagacgucgugggaacacggggCgccgaacu..... | 1 |
| Gi5_9129379_x1.....agUcgucgugggaacacggggugc.....         | 1 |
| Gi5_9038618_x1.ugcgaucggagacguGguggg.....                | 1 |
| Gi2_11395502_x1...gaucgCagacgucgugggaacacggg.....        | 1 |
| Gi5_9081657_x1...aucggagacgucgugggaacGcgg.....           | 1 |
| Gi2_11101598_x1.....gucgugggNacacggggugccgaa.....        | 1 |
| Gi2_11145603_x1.....acguGgugggaacacggggugccgaac.....     | 1 |
| Gi3_28567164_x1.gGgaucggagacgucgugggaacacgg.....         | 1 |
| Gi5_8849458_x1.....gugggaacacgggUugccgaac.....           | 1 |
| G1a_5987536_x1.....gagacgucgugggCacacg.....              | 1 |
| Gi2_11046128_x1.....ugggUaacacggggugccg.....             | 1 |
| Gi1_4273645_x1...Gucggagacgucgugggaac.....               | 1 |
| Gi1_4196233_x1.....cguAggaacacggggugccgaa.....           | 1 |
| Gi3_28391848_x1.....cguNggaacacggggugccga.....           | 1 |
| Gi2_11045764_x1.....acgucgugggaacacggggugccgaaU.....     | 1 |

Gi2\_11184970\_x1.....ggagacgucgugAgaacacggggugc..... 1  
 Gi2\_11337164\_x1.....ucUgagacgucguggaac..... 1  
 Gl1a\_6180255\_x1....aucggagacgucguggaacacggggCg..... 1  
 Gi1\_4165380\_x1....gauUggagacgucguggaacac..... 1  
 Gi2\_11109190\_x1.....gacgucAugggaacacggggugccg..... 1  
 Gi2\_11025666\_x1.....gacgucGgggaacacggggugc..... 1  
 Gi3\_28920438\_x1.....Ggucguggaacacggggug..... 1  
 Gi2\_11267514\_x1.....gagacgucguggaacacggggGgcc..... 1  
 Gi5\_8845074\_x1.....gaacacggggugcUgaac..... 1  
 Gi3\_28666005\_x1....auNggagacgucguggaacac..... 1  
 Gi1\_4242742\_x1.....ucgugUgaacacggggugccgaacu..... 1  
 Gi1\_4371076\_x1....uUggagacgucguggaacacg..... 1  
 Gi3\_28461376\_x1.....ggagacgucguggaaAacg..... 1  
 Gi2\_11298878\_x1.....ucguggUaacacggggugccg..... 1  
 Gl1a\_6035525\_x1.....gucgCgggaacacggggugccgaa..... 1  
 Gi3\_28396148\_x1.....gacgucguAggaacacggggg..... 1  
 Gi5\_9138141\_x1.....cgCcguggaacacggggugccgaa..... 1  
 Gi2\_11398153\_x1....aucggagacCucguggaacacggggugcc..... 1  
 Gi3\_28545432\_x1.....ggagacgucguggaacacUggggugcc..... 1  
 Gl1a\_6114215\_x1....aucggagacguAguggaacacggggug..... 1  
 Gi1\_4360015\_x1.....gucguggaacacggUgugccgaa..... 1  
 Gi1\_4363309\_x1.....gaacacggggUccgaacu..... 1  
 Gi3\_28569304\_x1.....gucguggaacacggggUc..... 1  
 Gi3\_28946301\_x1.....gucguAggaacacggggugc..... 1  
 Gi2\_11059342\_x1.....uggaacacggggAgccgaa..... 1  
 Gi1\_4191641\_x1.....Aguggaacacggggugccgaa..... 1  
 Gi2\_11373598\_x1....gaucggGgacgucguggaacac..... 1  
 Gi1\_4213608\_x1.....cgugggaaUacggggugccgaacu..... 1  
 Gi2\_11145485\_x1.....uggaacacggggugUcgaa..... 1  
 Gi2\_11139295\_x1.....ggagUcgucguggaacacg..... 1  
 Gi2\_11366038\_x1.....gacgucguggaacacAgggugccg..... 1  
 Gi1\_4213328\_x1....ucggagacgucguggaacacg..... 1  
 Gi5\_9051637\_x1.ugcgGucggagacgucgugga..... 1  
 Gi3\_28357202\_x1.ugcgGucggagacgucguggaacacggggugc..... 1  
 Gi4\_586383\_x1.....ucguggaNcacggggugccgaacu..... 1  
 Gi2\_11097283\_x1.....gacgucguggaacacggggugccg..... 1  
 Gi4\_569966\_x1.....agacgucguggaacacggggugccgaaAu..... 1  
 Gl1a\_6340869\_x1....gaAcggagacgucguggaacacggggg..... 1  
 Gi3\_28854769\_x1.....cggagacgucguggaacacUggggugccg..... 1  
 Gi1\_4191858\_x1.....ucguggaacUcggggugccgaac..... 1  
 Gi2\_11368649\_x1.ugcgaucggagacgucguggUaca..... 1  
 Gi3\_28413021\_x1....gaucggagacgucguggaacC..... 1  
 Gi1\_4174452\_x1.....Aguggaacacggggugccgaacu..... 1  
 Gi3\_28530083\_x1..gcgaucggNgacgucguggaacacggggug..... 1  
 Gi3\_28586968\_x1....gauUggagacgucguggaacacg..... 1  
 Gi4\_582315\_x1.....cgugggCacacggggugccgaacu..... 1  
 Gi2\_11299569\_x1.....ggagacgucguggaacacggggugc..... 1

|                                                         |   |
|---------------------------------------------------------|---|
| Gi2_11209035_x1.....gugggaacacggggugccgaU.....          | 1 |
| Gi3_28492013_x1....aucggagacgucgugggUacacggggugc.....   | 1 |
| Gi1_4194709_x1....aucggagacgucUugggaacacggggugcc.....   | 1 |
| Gi2_11136577_x1.....agacgucguUggaacacggggugc.....       | 1 |
| Gi2_11049792_x1.....ggaUcacggggugccgaac.....            | 1 |
| Gi1_4169405_x1..gcAaucggagacgucgugggaaca.....           | 1 |
| Gi3_28879426_x1.....cgugggaacacggggugccCaac.....        | 1 |
| Gi1_4272430_x1.....Ugacgucgugggaacacggggugccga.....     | 1 |
| Gi1_4335724_x1.....gUcgucgugggaacacggggugccgaacu.....   | 1 |
| G1a_6272810_x1.....gugAgaacacggggugcc.....              | 1 |
| Gi1_4204908_x1.ugcgauccggagacgucgug.....                | 0 |
| G1a_6023208_x1.....cgugggaacacggggugccgaaGu.....        | 1 |
| Gi1_4308274_x1.....acgucguggUaacacggggugccgaacu.....    | 1 |
| Gi4_610249_x1.....gugggaacacggggugccAaacu.....          | 1 |
| Gi3_28885665_x1.....gacguUgugggaacacggggugccg.....      | 1 |
| Gi2_11407747_x1.....ggaacacgUggugccgaa.....             | 1 |
| Gi3_28978457_x1.....gacgucgugggaacGcggggu.....          | 1 |
| Gi3_28863240_x1.....gacgucgugggaacacggggugcGgaac.....   | 1 |
| Gi5_8874169_x1.....cggagacgucAugggaacacggggugccga.....  | 1 |
| Gi1_4303677_x1....aucggagacgucgugggaacacgAggugcc.....   | 1 |
| Gi2_11327313_x1....aucggagacgucguggUaacacggggugc.....   | 1 |
| G1a_6104556_x1.....acgucAugggaacacgggggu.....           | 1 |
| Gi5_9136662_x1.....gugggaacacggggugccCaac.....          | 1 |
| Gi3_28984449_x1.....cgucguCggaacacggggugccgaacu.....    | 1 |
| Gi2_11302551_x1...Ggaucggagacgucgugggaacacggggugcc..... | 1 |
| Gi2_11045193_x1.....acgucgugggaaUacggggugccgaacu.....   | 1 |
| Gi3_28671249_x1...gaucggagacgucgugggaacacCgg.....       | 1 |
| Gi1_4367451_x1....aucggagacgucgugggaacacggggA.....      | 1 |
| Gi5_8858915_x1.....gggaacacggggugccgaacuu.....          | 0 |
| Gi3_28264287_x1.....Cgagacgucgugggaacacggggugccg.....   | 1 |
| Gi5_8947795_x1.....gaacacggggugccgaGc.....              | 1 |
| Gi2_11156479_x1...gaucggagacgucgugggaGc.....            | 1 |
| Gi2_11049593_x1...gaucggagacgucgugggaacUcgg.....        | 1 |
| Gi2_11400175_x1....aucggagacguGgugggaaca.....           | 1 |
| Gi3_28942214_x1.....ggaacacggggugAcgaa.....             | 1 |
| Gi2_11051689_x1....aucggagacAucgugggaacacggg.....       | 1 |
| Gi3_28979707_x1.....ggagUcgucgugggaacacggggugcc.....    | 1 |
| Gi2_10998672_x1.....cgGcgugggaacacggggugccgaa.....      | 1 |
| Gi1_4327231_x1....aucggagacguAgugggaacacg.....          | 1 |
| Gi2_11195136_x1...gaucggagacgucgugggaacacUg.....        | 1 |
| Gi2_11276055_x1.....cgucgugggaacaUggggugccgaa.....      | 1 |
| Gi3_28825958_x1....ucggagacgucguggAaacacggggugcc.....   | 1 |
| Gi2_11041587_x1....aucggagacgucgugUgaacacggggugc.....   | 1 |
| Gi5_9013130_x1.....gaacCggggugccgaac.....               | 1 |
| Gi2_11095334_x1.....Cgggaacacggggugccgaacuu.....        | 1 |
| Gi3_28827864_x1.....gagacguUgugggaacacggggugccgaac..... | 1 |
| Gi2_11010522_x1.....ugggaacacggggCgccgaacuu.....        | 1 |

Gi3\_28313565\_x1...gaucgCagacgucgugggaaacacggg..... 1  
Gi3\_28417224\_x1.....cgucgugggaaacacggggugGcgaacu..... 1  
Gi3\_28524184\_x1.....uggaaacacggggugGcgaac..... 1  
Gi3\_28648200\_x1...cgaucggagacgucgugggCacacg..... 1  
Gi2\_11244262\_x1.....ggaaacacUgggugccgaac..... 1  
Gi2\_11316834\_x1....aucggagacgCcgugggaaacacggggugcc..... 1  
Gi2\_11375174\_x1.....ucguggCaacacggggugccg..... 1  
G1a\_6263988\_x1.....Aguggaaacacggggugc..... 1  
Gi3\_28355036\_x1....ucggagacgucgugggaaacacggUgugcc..... 1  
Gi5\_9025447\_x1.....gCcgucgugggaaacacggggugccgaacu..... 1  
Gi2\_11024177\_x1.....Ggacgucgugggaaacacggggugccga..... 1  
Gi2\_11192095\_x1....ucggCgacgucgugggaaacacggggg..... 1  
Gi2\_11187456\_x1.ugcgaucggagacgucguAggaacacg..... 1  
Gi3\_28378003\_x1.....gagacgucgugggGcac..... 1  
Gi5\_8973741\_x1....aucggagCcgucgugggaaacacggggugcc..... 1  
Gi2\_11280939\_x1.....gacgCcgugggaaacacggggugcc..... 1  
Gi3\_28781570\_x1.....gucgugggaaacaAggggug..... 1  
Gi3\_28726464\_x1....aucggagacgucgugggGcacggggug..... 1  
Gi4\_593273\_x1.....cgucgugggaaacacggggugccgaaGu..... 1  
Gi3\_28696161\_x1.....ucgugggaaacacggggugGcgaac..... 1  
Gi1\_4374403\_x1.....acgucgugggGacacggggugccgaac..... 1  
Gi1\_4351635\_x1.....guUgugggaaacacggggugccgaac..... 1  
Gi3\_28800607\_x1.....ggagacgucgugggaaacaAggg..... 1  
Gi3\_28369650\_x1.....acgucgugGaaacacggggugccgaa..... 1  
Gi3\_28754020\_x1....aucggagUcgucgugggaaacacgg..... 1  
Gi2\_11395305\_x1.....gacgucgugggGcacgg..... 1  
Gi1\_4170939\_x1.....ggagacgucgugggaaacaUggggugccg..... 1  
Gi4\_600413\_x1.....acgucguAggaacacggggugccgaacu..... 1  
Gi3\_28860406\_x1...gaucggagUcgucgugggaaacacg..... 1  
Gi3\_28597326\_x1...cgaucggagacgucgugggaaUacg..... 1  
Gi2\_11135629\_x1.....gacgucgugggaaacacggggUaccgaac..... 1  
Gi5\_9113732\_x1....aucggagacgCcgugggaaacacggggugc..... 1  
Gi1\_4261278\_x1....ucggagacgucgugggaaacacAgggugc..... 1  
Gi3\_28286814\_x1.....cggagacgucgugggUacacggggg..... 1  
Gi3\_28422267\_x1.....gacgucgugggaaacacggggugcAg..... 1  
Gi1\_4335346\_x1....aucggagacgucgugggaaacaAg..... 1  
Gi2\_11067707\_x1...gaucggagaUgucgugggaaac..... 1  
Gi3\_28735004\_x1.....acgucguAggaacacggggugccga..... 1  
Gi1\_4365646\_x1.....gaacacgUggugccgaacu..... 1  
Gi2\_11143290\_x1...gaucggagUcgucgugggaaacacggg..... 1  
Gi2\_11150159\_x1.....ucgugggaaacaUggggugccg..... 1  
Gi5\_8889628\_x1.....gaacacggggugccgaaGu..... 1  
Gi2\_11407771\_x1.....gucAugggaaacacggggugcc..... 1  
Gi2\_11031273\_x1.....gugggaaGacggggugccg..... 1  
Gi2\_11049014\_x1....acgCcgugggaaacacggggugccgaac..... 1  
Gi1\_4217110\_x1.....guAggaacacggggugccg..... 1  
Gi2\_11219658\_x1.....agacgucgugggaaacacAgggugccgaac..... 1



Gi3\_28400757\_x1.....ucgNgggaacacggggugccgaa..... 1  
 Gi3\_28919368\_x1.....ggagacgucgugggGcacggggugccga..... 1  
 Gi2\_11371641\_x1.....cgucgugggGacacggggugccgaa..... 1  
 Gi2\_11398396\_x1.....cgucgugggaaacacgggAugccg..... 1  
 Gi3\_28437477\_x1.....gaucggagacgucgugggaaacacgggAu..... 1  
 Gl1\_6284147\_x1.....uGggagacgucgugggaaacacgg..... 1  
 Gi3\_28710095\_x1.....cggagacgucgugggaaacaUg..... 1  
 Gi2\_11203917\_x1.....ugggaacaAggggugccga..... 1  
 Gi3\_28779419\_x1.....acgucgugggaaacacggggugGcgaacu..... 1  
 Gi2\_11350065\_x1.....cgugggaaacacgggCugccgaac..... 1  
 Gi3\_28456118\_x1.....aucAgagacgucgugggaaacacggggug..... 1  
 Gi3\_28955330\_x1.....gacgucgugggCacacggggugccgaa..... 1  
 Gi3\_28940418\_x1.....cggagacgucguAggaacac..... 1  
 Gi3\_28917417\_x1.....gaucggagacgucgugggaaacaAggggugc..... 1  
 Gi1\_4275708\_x1.....gugggaacaUggggugccgaac..... 1  
 Gi3\_28320169\_x1.....auNggagacgucgugggaaacacggg..... 1  
 Gi3\_28678967\_x1.....gucgugggaaacacggggugccA..... 1  
 Gi5\_9058748\_x1.....cacggggCgccgaacuuu..... 1  
 Gi1\_4226635\_x1.....gugggaacacggggGgccg..... 1  
 Gi3\_28790043\_x1.....Cgagacgucgugggaaacacggggugcc..... 1  
 Gi2\_11041161\_x1.....cgaucggagacgucgugA..... 1  
 Gi2\_11297207\_x1.....gaucggagacgucguggAaacacggggug..... 1  
 Gi5\_9052346\_x1.....aucggagacgucgugggaaacCcg..... 1  
 Gi1\_4319177\_x1.....uGNgaacacggggugccgaacu..... 1  
 Gi1\_4318947\_x1.....uGgugggaaacacggggugccgaacu..... 1  
 Gi4\_578222\_x1.....aAacgucgugggaaacacggggugccgaacu..... 1  
 Gi3\_28532576\_x1.....cgucgugggaaGacggggugc..... 1  
 Gi3\_28585106\_x1.....cgaucggagacgucgugggaa..... 0  
 Gi3\_28546928\_x1.....uggNaacacggggugccg..... 1  
 Gi3\_28486565\_x1.....ggUgacgucgugggaaacacggggugccgaa..... 1  
 Gi5\_8948673\_x1.....cgugggUacacggggugccg..... 1  
 Gi1\_4324786\_x1.....gugggaacacggUgugccg..... 1  
 Gl1\_6031834\_x1.....cgugggaaacacggggUacc..... 1  
 Gi5\_9077813\_x1.....gAgggaacacggggugcc..... 1  
 Gi2\_11172828\_x1.....agacgucgugggGcacggggugccgaa..... 1  
 Gi3\_28670904\_x1.....gagacgucgugggaaacacggAgu..... 1  
 Gi3\_28698688\_x1.....uUgugggaaacacggggugccga..... 1  
 Gi3\_28531868\_x1.....acgucgugGCaacacggggugcc..... 1  
 Gi3\_28683621\_x1.....gaucggagUcgucgugggaaacac..... 1  
 Gi5\_8830153\_x1.....gugggaacacgggAugccg..... 1  
 Gi2\_11168924\_x1.....aucggagacgucgugUgaaca..... 1  
 Gi2\_11367779\_x1.....aucggagacgucgugGCaacacg..... 1  
 Gi3\_28474207\_x1.....Agagacgucgugggaaacacgg..... 1  
 Gl1\_6148186\_x1.....cggagacgucgugggaaacacggggG..... 1  
 Gl1\_6000709\_x1.....cgugggaaacacggggAgcc..... 1  
 Gl1\_6069674\_x1.....aucggagacgucgugggaaacacAgg..... 1  
 Gi4\_611245\_x1.....cgugggUacacggggugccgaacu..... 1

Gi3\_28806818\_x1.....gggaCcacggggugccga..... 1  
 Gi2\_11328269\_x1...cgauccgagacgucgugggaacGcg..... 1  
 Gi5\_9047066\_x1.....aacacgggNugccgaacuuu..... 1  
 Gi2\_11385480\_x1....aucggUgacgucgugggaaca..... 1  
 Gi2\_11046344\_x1.....gUcgucgugggaacacggggugc..... 1  
 Gi3\_28677341\_x1.....ggagacgucgugggaacC..... 1  
 Gi2\_11159723\_x1.....ggagacgucgugggGacacggggugc..... 1  
 Gi2\_11052441\_x1.....acgucguggUaacacggggugc..... 1  
 G1a\_6148154\_x1.....ggagacgucgugggaGcacggggugc..... 1  
 Gi2\_11192440\_x1.....gacgAcgugggaacacggggugccgaac..... 1  
 G1a\_6351561\_x1.....gacgucgugAgaacacgggggu..... 1  
 Gi3\_28365084\_x1...gaucggagacgucgCggga..... 1  
 Gi2\_11007063\_x1.....gugggaGcacggggugccgaacuu..... 1  
 Gi4\_590981\_x1.....gugggaacacggggugccgaCcu..... 1  
 Gi3\_28310413\_x1...gaucggagacgucgugggCacacggggug..... 1  
 Gi2\_11240605\_x1.....ggagacgucgugggaGcac..... 1  
 Gi3\_28649533\_x1....aucggagacgucgugggaGcacggggugc..... 1  
 Gi5\_9008524\_x1.....acgucgugggGacacggggugccgaac..... 1  
 Gi1\_4322125\_x1.....cggagacgucgugggCacacgggggu..... 1  
 Gi5\_9133410\_x1.....cgucgCgggaacacggggugcc..... 1  
 Gi3\_28644883\_x1.....agacgucgugggaacacggggGgccga..... 1  
 Gi3\_28567431\_x1....aucggagacgucguggUaacacg..... 1  
 Gi5\_9060158\_x1.....acgucUugggaacacggggugccgaacu..... 1  
 Gi2\_11329459\_x1.....gucgugggaacaGggggugcc..... 1  
 G1a\_6125455\_x1.....cgugggaacaUggggugcc..... 1  
 Gi1\_4371050\_x1.....cggGgacgucgugggaacacgggg..... 1  
 Gi5\_9075249\_x1...gaucggagacgucgugggaacacA..... 1  
 Gi2\_11091806\_x1.....Cgagacgucgugggaacacggggugc..... 1  
 Gi2\_11175808\_x1.....cgucgugggaacacggggugcU..... 1  
 Gi2\_10995180\_x1....aucggagacgucgugggaacacgggCug..... 1  
 Gi2\_11086522\_x1.....acgucgugggaacacgAgggugc..... 1  
 Gi3\_28598152\_x1.....gucgugggaUcacggggugccgaac..... 1  
 Gi2\_11012936\_x1....aucggagacgucgugCgaaca..... 1  
 Gi2\_11286042\_x1.....gugggaacacCgggugccga..... 1  
 Gi1\_4380178\_x1.....agGcgucgugggaacacgggg..... 1  
 G1a\_6301302\_x1.ugcgauccgagacgCcgug..... 1  
 Gi2\_11198690\_x1.....cgucUugggaacacggggugccgaacuu..... 1  
 Gi3\_28293751\_x1.....gacgucgugggaAacgggggu..... 1  
 Gi2\_11212906\_x1.....ucguggUaacacggggugccgaacu..... 1  
 Gi2\_11211815\_x1.....gucgugggaacaAggggugccga..... 1  
 Gi5\_8975200\_x1.....cgugggaacacggggugA..... 1  
 Gi5\_8944145\_x1....cggagacgucgugggaacacggggCgcc..... 1  
 Gi1\_4383926\_x1.....gAgaacacggggugccgaac..... 1  
 Gi3\_28534354\_x1.....ggagacgucgugggGacacggggugcc..... 1  
 Gi2\_11039844\_x1.....Ggucgugggaacacggggug..... 1  
 Gi1\_4199154\_x1.....acgucgugggaacacggggAgccg..... 1  
 Gi2\_11150113\_x1.....acgucgugNgaacacggg..... 1

Gi2\_11167562\_x1.....gggaacacggggugAcga..... 1  
 Gi1\_4303371\_x1.....guggaacaacggCgugccgaac..... 1  
 Gi3\_28418484\_x1.....agacguUgugggaacacggggugccgaa..... 1  
 Gi4\_595780\_x1.....guggaacaNcggggugccgaa..... 1  
 Gi2\_11215633\_x1.....agacgucgugggaacacggggugA..... 1  
 Gi2\_11020948\_x1.....cgucgAgggaacacggggugcc..... 1  
 Gi1\_4389435\_x1.....gucgugggaacaAggggug..... 1  
 Gi5\_9130670\_x1.....cgucguAggaacacggggugc..... 1  
 Gi2\_11071703\_x1.....agacgAcgugggaacacggggugccgaacu..... 1  
 Gi1\_4254025\_x1.....aucggagacgucgugggaaAa..... 1  
 Gi2\_11173721\_x1.....cgaucggagacgucgugggaacacggAgugc..... 1  
 Gi1\_5989035\_x1.....cgaucggagacgucgugggaacGcg..... 1  
 Gi2\_11146168\_x1.....agacguUgugggaacacggggugc..... 1  
 Gi1\_4387618\_x1.....aucggagacgucgugAgaacacggggugcc..... 1  
 Gi3\_28500268\_x1.....cgugggaacacgAggugccgaa..... 1  
 Gi2\_11120793\_x1.....gacgucguggAaacacggggugccgaacu..... 1  
 Gi5\_9089708\_x1.....gaucggagGcgucgugggaacacgg..... 1  
 Gi5\_9092885\_x1.....Nugggaacacggggugcc..... 1  
 Gi1\_4264808\_x1.....aucggCgacgucgugggaacacggg..... 1  
 Gi5\_8884408\_x1.....gggaacacgggUugccgaacu..... 1  
 Gi2\_11079536\_x1.....aucggagacgucguAggaac..... 1  
 Gi5\_8936835\_x1.....ggGacacggggugccgaa..... 1  
 Gi1\_4187734\_x1.....ucggagacgucguggGacacggg..... 1  
 Gi1\_4215914\_x1.....gAaacacggggugccgaac..... 1  
 Gi1\_4274394\_x1.....aucggagaAgucgugggaacac..... 1  
 Gi3\_28803049\_x1.....gggaacacgUggugccgaa..... 1  
 Gi1\_4191461\_x1.....cgugggaacacggggCgccgaa..... 1  
 Gi2\_11321855\_x1.....acgCcgugggaacacgggg..... 1  
 Gi1\_4228255\_x1.....agacgucgugggaacacggggCg..... 1  
 Gi3\_28556832\_x1.....agacgucgugggaacacggggugccCa..... 1  
 Gi3\_28932399\_x1.....gaucgAagacgucgugggaacacgg..... 1  
 Gi5\_9126757\_x1.....agacUucgugggaacacggggugccgaac..... 1  
 Gi3\_28709745\_x1.....ggagacgucguggAaacacg..... 1  
 Gi2\_11092400\_x1.....aucggagacgucguggCaacacggggugcc..... 1  
 Gi3\_28585683\_x1.....ucgugCgaacacggggugccgaac..... 1  
 Gi2\_11059341\_x1.....gacgucguAggaacacgggg..... 1  
 Gi2\_11360641\_x1.....gugggaacacgAggugccga..... 1  
 Gi1\_4216983\_x1.....cgugggaacacggggugccAaac..... 1  
 Gi2\_11203270\_x1.....ggagacgucgugggaacacgUggugcc..... 1  
 Gi5\_8914320\_x1.ugcgaucggagacgucgCg..... 1  
 Gi3\_28488184\_x1.....gucgugggaacacgggAugc..... 1  
 Gi2\_11212702\_x1.....cggagacgucgugggaacacggAgugcc..... 1  
 Gi1\_4272641\_x1.....cgugggaaNacggggugc..... 1  
 Gi1\_4186113\_x1.....agacgucguggGacacggg..... 1  
 Gi4\_581452\_x1.....cgAcgugggaacacggggugccgaacu..... 1  
 Gi3\_28830978\_x1.....cggagaUgucgugggaacacggg..... 1  
 Gi2\_11279987\_x1.....agGcgucgugggaacacggggugccgaa..... 1

|                 |                                 |   |
|-----------------|---------------------------------|---|
| Gi5_8919052_x1  | ucgugggaacacggggugUcgaac        | 1 |
| G1a_6171226_x1  | gUacacggggugccgaacu             | 1 |
| Gi5_8920619_x1  | gagacgucgugggaacacggggugccgUacu | 1 |
| Gi2_11000198_x1 | gagacgucgugggaacacggggugccgCac  | 1 |
| Gi2_11326759_x1 | acgucgugggaacGcggggugccga       | 1 |
| Gi5_9061142_x1  | cgugggaacacggggugccgaacuC       | 1 |
| Gi2_11109531_x1 | ggGgacgucgugggaacacggggugccgaa  | 1 |
| Gi2_11197139_x1 | aucggagacgucgugggaacUcggggugc   | 1 |
| Gi2_11302166_x1 | agacgucgugggaacacggggguC        | 1 |
| Gi2_11170853_x1 | acgucgugggaacCcggggugccg        | 1 |
| G1a_6235373_x1  | aucggagacgucgugggaacacgAggugcc  | 1 |
| G1a_6268154_x1  | Nugggaacacggggugccgaac          | 1 |
| Gi2_11383967_x1 | gggaacUcggggugccgaac            | 1 |
| Gi5_8895196_x1  | acgucguUggaacacggggugccga       | 1 |
| Gi1_4320291_x1  | acgucgAgggaacacggggugccg        | 1 |
| Gi1_4210662_x1  | gacgucgugggaacacggggugUc        | 1 |
| Gi3_28580305_x1 | gNacacggggugccgaacu             | 1 |
| Gi3_28887630_x1 | cgUagacgucgugggaacacggg         | 1 |
| G1a_6067513_x1  | cgucgugggaacacggggugcc          | 0 |
| Gi3_28711466_x1 | ucgugggaacacgAggugccgaa         | 1 |
| Gi2_11369247_x1 | gaacaGggggugccgaacu             | 1 |
| Gi3_28305872_x1 | aucggaAacgucguggga              | 1 |
| Gi3_28446645_x1 | cgucgugCgaacacggggugcc          | 1 |
| Gi3_28845923_x1 | ucgugggaacGcggggugccgaa         | 1 |
| Gi3_28758458_x1 | gaacacggggugccAaacuu            | 1 |
| Gi5_8885573_x1  | agacgucgugggaacacggggugccgaUcu  | 1 |
| Gi5_8870040_x1  | ucgugggaacacggggguUccgaacu      | 1 |
| Gi2_11050307_x1 | cgAagacgucgugggaacacg           | 1 |
| Gi2_11248778_x1 | cgucgugggaacacggggugccgGa       | 1 |
| Gi2_11344725_x1 | cgucgugCgaacacggggugccg         | 1 |
| Gi2_11283553_x1 | ggagacgucAugggaacacgggggu       | 1 |
| Gi5_8901598_x1  | gagacgucgugggaacacAgggugcc      | 1 |
| Gi1_4289869_x1  | cgugggaacacggggugccAa           | 1 |
| Gi3_28270302_x1 | cgugggaacacggggugcGg            | 1 |
| Gi1_4257841_x1  | ucgugAgaacacggggugccgaac        | 1 |
| G1a_6352813_x1  | cgucgugggaacacggUgugccgaacu     | 1 |
| Gi1_4167894_x1  | cgugggaacacCgggugccgaacuu       | 1 |
| Gi1_4253804_x1  | gaacacggggugccgaGc              | 1 |
| Gi4_579113_x1   | cAucgugggaacacggggugcc          | 1 |
| Gi3_28544314_x1 | gagacgucgugggaacaUggggugc       | 1 |
| Gi5_8966364_x1  | ucgugggaacUcggggugccgaacu       | 1 |
| G1a_6220338_x1  | cggGgacgucgugggaacacggggug      | 1 |
| Gi4_596344_x1   | cgaucggagacgucgugggaacacggg     | 0 |
| Gi3_28970846_x1 | gugggaacacggggugccgaCcuuu       | 1 |
| Gi2_11285815_x1 | gagacgucgugggaacacggggCgcc      | 1 |
| Gi5_9108995_x1  | gugAgaacacggggugccgaa           | 1 |
| Gi3_28332733_x1 | cgagacgucgugggaacGcggggugccgaac | 1 |

Gi2\_11323507\_x1.....agacAucgugggaacacggggug..... 1  
 Gi5\_8871754\_x1.....gucgugggaacacggggugGcgaacu..... 1  
 Gi1\_4389094\_x1.....gaUcacggggugccgaac..... 1  
 Gi2\_11230980\_x1.....gucgugggaacaAggggugc..... 1  
 Gi1\_4237793\_x1.....ugggaacaAggggugccgaac..... 1  
 Gi3\_28344063\_x1.....cggagacgCcgugggaacacggggugccgaacu..... 1  
 Gi2\_11183516\_x1.....aucggagacgucgugggaacUcgg..... 1  
 G1a\_6255725\_x1.....gaucggagacgucgCgggaa..... 1  
 Gi2\_11318283\_x1.....cAgagacgucgugggaaca..... 1  
 Gi2\_10995451\_x1.....cggagacgucgugggaUac..... 1  
 Gi5\_9072563\_x1.....gagacgucAugggaacacggggugccgaac..... 1  
 Gi3\_28484062\_x1.....ucggagacgucgugggaacacAgggugcc..... 1  
 Gi1\_4373741\_x1.....ucggagGcgucgugggaacacggggugcc..... 1  
 Gi5\_8949251\_x1.....gacgAcgugggaacacggggugccg..... 1  
 Gi3\_28876506\_x1.....gCcgugggaacacggggg..... 1  
 Gi3\_28525340\_x1.....ggagGcgucgugggaacacgg..... 1  
 Gi5\_9094334\_x1.....gaucggagacgucgugggaUacggggg..... 1  
 Gi2\_11238775\_x1.....cgUucggagacgucgugggaacacggggg..... 1  
 Gi1\_4317479\_x1.....cgugggaCcacggggugccga..... 1  
 Gi2\_11294547\_x1.....aucggagacCucgugggaacacggggugc..... 1  
 Gi2\_11304713\_x1.....aucggagacgucgugggaGc..... 1  
 Gi5\_9012387\_x1.....uggUaacacggggugccgaac..... 1  
 Gi2\_11115858\_x1.....gucgugggaacacgggAugcc..... 1  
 Gi3\_28834695\_x1.....guUgugggaacacggggugccgaacuu..... 1  
 Gi3\_28505872\_x1.....acgucgugggaaAacggg..... 1  
 G1a\_6332446\_x1.....gggaacacggAgugccgaac..... 1  
 Gi3\_28812085\_x1.....agacguAgugggaacacggggugccgaac..... 1  
 G1a\_6314570\_x1.....cgugggaacacggggugccUaacu..... 1  
 Gi3\_28913409\_x1.....agacgucgNgggaacacggggugccgaa..... 1  
 Gi1\_4288263\_x1.....gaacacggggugcGgaacu..... 1  
 Gi1\_4344071\_x1.....aGcggagacgucgugggaacacgggg..... 1  
 Gi3\_28283734\_x1.....ggagacgucgugUgaacacggggg..... 1  
 Gi1\_4283490\_x1.....gagacgucgugggGacacggggugccgaac..... 1  
 Gi2\_11050522\_x1.....gCcgugggaacacggggugccga..... 1  
 Gi2\_11251688\_x1.....cgaucAgagacgucgugg..... 1  
 Gi2\_11194247\_x1.....auNggagacgucgugggaacacggggugcc..... 1  
 Gi5\_8914936\_x1.ugcgaucggagacgCcguggg..... 1  
 Gi3\_28979578\_x1.....gacgucgugggaacGcgg..... 1  
 Gi5\_8855934\_x1.....ucguggUaacacggggugccgaacu..... 1  
 Gi5\_8850452\_x1.....acgucguAggaacacggggugccg..... 1  
 Gi2\_11094707\_x1.....gucguggUaacacggggugccgaacu..... 1  
 Gi2\_11346009\_x1.....aucggagacgucgugggaacGcggggugccg..... 1  
 Gi3\_28586507\_x1.....ucggagacgucguAggaacac..... 1  
 Gi1\_4225270\_x1.....cgugggaacacggAgugccga..... 1  
 Gi3\_28757017\_x1.....ucguAggaacacggggugc..... 1  
 Gi2\_11253260\_x1.....ucCugggaacacggggugccgaacu..... 1  
 Gi2\_11351434\_x1.....Nugggaacacggggugcc..... 1

G1a\_6297103\_x1.....gaacacggggugccgUacu..... 1  
 Gi2\_11115538\_x1.....aucggUgacgucgugggaaacacggggugcc..... 1  
 Gi5\_8907719\_x1.....aNcacggggugccgaacu..... 1  
 G1a\_6346181\_x1.....aucggagUcugcuggggaacacggg..... 1  
 Gi1\_4347899\_x1.....ggaacacggggugccgaacG..... 1  
 G1a\_6174635\_x1.....ucgugggaaacacggggGgccgaacu..... 1  
 Gi3\_28650794\_x1.....gggaaGacggggugccgaac..... 1  
 Gi1\_4169860\_x1.....ggagacgucgugggaaacacggggGgccg..... 1  
 G1a\_6140352\_x1.....gggaacacggggugAcgaacu..... 1  
 G1a\_6260743\_x1.....cgugggCacacggggugccgaacu..... 1  
 Gi2\_11309510\_x1.....aucggagacgucgGggga..... 1  
 G1a\_6107658\_x1.....cggagacgucgugggaaUcacggg..... 1  
 Gi5\_8989152\_x1.....cggagacgucgugggaaacGcggggugccga..... 1  
 G1a\_6186308\_x1.....Ugugggaaacacggggugccgaac..... 1  
 Gi5\_9002952\_x1.....Cagacgucgugggaaacacg..... 1  
 Gi1\_4170861\_x1.....ggagacgucgugggaaacacggggugcc..... 1  
 Gi3\_28406392\_x1.....ggagacgucgugggaaacaUg..... 1  
 Gi2\_11045643\_x1.....gacAucgugggaaacacggggugccgaacu..... 1  
 Gi2\_11282392\_x1.....Cacgucgugggaaacacggggugccg..... 1  
 Gi1\_4176724\_x1.....gaucggagacgucgGgggaacacggggg..... 1  
 Gi2\_11407091\_x1.ugcgauccggagacgucgAgggaaca..... 1  
 G1a\_6029292\_x1.....aCggagacgucgugggaaacacggggugc..... 1  
 Gi2\_11208194\_x1.....gggaacacggggugAcgaac..... 1  
 Gi5\_9124812\_x1.....aucggagaNucgugggaaacacggggugccgaacu..... 1  
 Gi2\_11212649\_x1.....gaucggagacgucgugggaaA..... 1  
 Gi3\_28545275\_x1.....acgucgugggaaacacggggugcGg..... 1  
 Gi1\_4191460\_x1.....ggagacgucgugggaaGcacggggug..... 1  
 Gi5\_8872390\_x1.....cgucgugggaaacacgCggugccgaacu..... 1  
 Gi3\_28406709\_x1.....ucgugggaaNcacggggugccga..... 1  
 Gi2\_11153262\_x1.....cgucgugggaaGcacggggugccgaac..... 1  
 G1a\_5981512\_x1.....acgucgugggCacacggggugccgaacu..... 1  
 Gi2\_11283667\_x1.....acguGgugggaaacacggggugc..... 1  
 Gi1\_4377172\_x1.....ggagacgucgugggaaacacgAggugcc..... 1  
 Gi2\_11329852\_x1.....acgucgugggaaacacggggCgccg..... 1  
 Gi2\_11342639\_x1..gcaucggagacgucgAgggaacac..... 1  
 Gi2\_11365374\_x1.....agacguAgugggaaacacggggugcc..... 1  
 Gi5\_8882425\_x1.....gacAucgugggaaacacggggugccgaacu..... 1  
 G1a\_6267152\_x1.....acgucgugggaaacacggggC..... 1  
 Gi5\_8990070\_x1.....agacgCcgugggaaacacggggugccga..... 1  
 Gi2\_11141227\_x1.....ugggaaacacCggugccgaac..... 1  
 Gi3\_28299218\_x1.....gagacgucgugggaaacGcggggugccg..... 1  
 Gi5\_9129798\_x1.....gugggaaacacggggugGcgaac..... 1  
 G1a\_6236719\_x1.ugcgauccggagacgucgugggaaacaA..... 1  
 G1a\_6278792\_x1...gaucggagacgCcgugggaa..... 1  
 Gi3\_28717228\_x1.....ucggGgacgucgugggaaacacggg..... 1  
 Gi3\_28728847\_x1.Ccgauccggagacgucgugggaaaca..... 1  
 Gi5\_8830122\_x1.....cgugggaaacacggggugccgaacuucU..... 1

Gl1a\_6021731\_x1.....aucggagacgucgugAga..... 1  
Gi2\_11142003\_x1.....ggagacgucgugggaGcacggggug..... 1  
Gi5\_8831947\_x1.....aucggagacgucgugggaacacgC..... 1  
Gi3\_28798346\_x1.....ggagacgucgugggaacGcggggugccg..... 1  
Gi3\_28298559\_x1.....gggaaAacggggugccga..... 1  
Gi2\_11003932\_x1.....cgugggaacaGggggugccgaac..... 1  
Gi3\_28898506\_x1.....gaucggagacgCcgugggaaca..... 1  
Gi2\_11033793\_x1.....ucggagaUgucgugggaacacggggugccga..... 1  
Gi1\_4271972\_x1.....gaacacggggCgcccgaacuu..... 1  
Gi3\_28335092\_x1.....gaacacggggugccgaag..... 1  
Gi2\_11405881\_x1.....cAaucggagacgucgugggaaca..... 1  
Gi1\_4203667\_x1.....aucggagacgucgugggaGcacgggg..... 1  
Gi2\_11209429\_x1.....gucgugggaacacUgggugccgaac..... 1  
Gi2\_11143052\_x1.....gacgucgugggaacaUggggg..... 1  
Gi3\_28348224\_x1.....gucgNgggaacacggggugccgaacu..... 1  
Gi1\_4260934\_x1.....gaacacggggugcUgaac..... 1  
Gl1a\_6118693\_x1.....ggaacGcggggugccgaac..... 1  
Gi3\_28912825\_x1.....cgucgugggaacacggggugccCaacu..... 1  
Gi2\_11025453\_x1.....ugggaacacggggugccgaG..... 1  
Gi3\_28835771\_x1.....gucguAggaacacggggugccga..... 1  
Gi1\_4289254\_x1.....Cagacgucgugggaacacggggugcc..... 1  
Gl1a\_6274699\_x1.....cgugggaacacggggAgccgaacu..... 1  
Gi4\_574424\_x1.....cgAgggaacacggggugccgaac..... 1  
Gi3\_28440927\_x1.....gaucggagacgucgugggaacacgggU..... 1  
Gi3\_28285457\_x1.....gaucggagacgucgugggaacacgAgggugcc..... 1  
Gi3\_28752703\_x1.....guNgggaacacggggugccg..... 1  
Gi1\_4294247\_x1.....gugggaacacggggugccgG..... 1  
Gi2\_11241448\_x1.....gagacgucNugggaacacggggugcc..... 1  
Gi3\_28311670\_x1.....gggaacacggggugcAga..... 1  
Gi2\_11119935\_x1.....ucggagaUgucgugggaacacggggugccgaac..... 1  
Gi3\_28376956\_x1.....ggagacgAacgugggaacacggggg..... 1  
Gi2\_11270187\_x1.....aucggagCcgucgugggaacacggggug..... 1  
Gi1\_4273006\_x1.....ggaacacggggugccAaa..... 1  
Gi1\_4159604\_x1.....ugggaacaNggggugccgaacuu..... 1  
Gi2\_11232537\_x1.....Ggaucggagacgucgugggaacacggg..... 1  
Gi1\_4262907\_x1.ugcgauccgUgacgucguggga..... 1  
Gi3\_28408942\_x1.....cggagacgucgugggaacacggggGgc..... 1  
Gi3\_28301295\_x1.....acgucCugggaacacggggugccgaacu..... 1  
Gi3\_28488476\_x1.....gggaacacUgggugccga..... 1  
Gi2\_11402514\_x1.....gacgucgugggaGcacggg..... 1  
Gi3\_28469600\_x1.....Ccacggggugccgaacuu..... 1  
Gi2\_11006413\_x1.....gaucggCgacgucgugggaacacgggggug..... 1  
Gi1\_4242639\_x1.....agacgCcgugggaacacggggugccgaacu..... 1  
Gi3\_28776448\_x1.....gugggaacacggggugccgGacuu..... 1  
Gi5\_9128444\_x1.....aucUgagacgucgugggaacacggggugc..... 1  
Gl1a\_6205048\_x1.....ggAaacacggggugccgaacu..... 1  
Gl1a\_6021679\_x1.....gucgCgggaacacggggugcc..... 1

Gi1\_4274004\_x1.....cgugggGacacggggugccg..... 1  
Gi2\_11000037\_x1....aucgCagacgucgugggaacacggg..... 1  
Gi3\_28345845\_x1....gaucggagacgucgugggaacacgAg..... 1  
Gi3\_28696299\_x1.....cAucgugggaacacgggg..... 1  
Gi3\_28343116\_x1....gaucggagacgucgugggaacUcggg..... 1  
Gi1\_4167554\_x1.....ggagCcgucgugggaacacggggugcc..... 1  
Gi3\_28325696\_x1.....Agagacgucgugggaacacggg..... 1  
Gi5\_9126357\_x1.....gagacgucgugggaacacggggugccgCacu..... 1  
Gi3\_28788656\_x1....gaucggagacgucAugggaacacgggg..... 1  
Gi1\_4291219\_x1.....acgucgugggaacacggggCgccga..... 1  
Gi1\_4226016\_x1.....ucgugggaacUcggggugccgaacu..... 1  
Gi3\_28866976\_x1..gcgaucggagacgucgugggaaA..... 1  
Gi2\_11399448\_x1....cggagaGgucgugggaacacggggugc..... 1  
Gi3\_28403958\_x1.....ggagacgucgugggGaca..... 1  
Gi2\_11316558\_x1..cgauccgagaAgucgugggaacacggggg..... 1  
Gi2\_11384316\_x1.....cgucgugggaacacggggugAcgaac..... 1  
Gi2\_11066318\_x1....auNggagacgucgugggaac..... 1  
Gi1a\_6338424\_x1..gcgaucggagacgucgugggGacacggg..... 1  
Gi3\_28645013\_x1.....gaUcacggggugccgaacuu..... 1  
Gi1\_4264564\_x1.....gucgugggaacCggggugccgaac..... 1  
Gi1a\_6104088\_x1....aucggaAacgucgugggaacacggggugcc..... 1  
Gi5\_9042045\_x1....aucggagacgucgugggaacaAggggu..... 1  
Gi2\_11162462\_x1..ugcgaucggagacgucgugAgaaca..... 1  
Gi5\_8843946\_x1....aucggagacgucgCgggaaca..... 1  
Gi4\_572863\_x1.....gGgggaacacggggugcc..... 1  
Gi5\_9002342\_x1.....gggaacacggggugccUaa..... 1  
Gi3\_28608585\_x1.....cgucgugggaacacggggugccgaaA..... 1  
Gi1\_4349705\_x1....cUgagacgucgugggaacacggggugccga..... 1  
Gi3\_28777639\_x1cuUcgauccgagacgucg..... 1  
Gi2\_11226058\_x1.....aAacgucgugggaacacggggugc..... 1  
Gi5\_9048108\_x1.....cgAcgugggaacacggggugc..... 1  
Gi3\_28385243\_x1....aucggagacgAcguggga..... 1  
Gi2\_11245932\_x1.....gagacgucgCgggaacacggg..... 1  
Gi3\_28383401\_x1.....cgugggaacacgAggugccg..... 1  
Gi3\_28968995\_x1....Gucggagacgucgugggaacacggggug..... 1  
Gi2\_11175233\_x1.....gucgugggaacacggggugccUa..... 1  
Gi4\_600211\_x1.....ucgugggaacacggggugccgGacu..... 1  
Gi5\_8880969\_x1....gaucggagacgucgugggaaAacgggu..... 1  
Gi1\_4225664\_x1..gcgaucggNgacgucgugggaaca..... 1  
Gi2\_11089030\_x1.....gucgugggGacacggggg..... 1  
Gi3\_28358968\_x1.....cgucguggUaacacggggugccgaacu..... 1  
Gi3\_28593955\_x1....gaucggagacgucgugggG..... 1  
Gi3\_28271374\_x1....auGggagacgucgugggaacac..... 1  
Gi3\_28595566\_x1....cCgagacgucgugggaacacggggugc..... 1  
Gi2\_11123841\_x1..Acgaucggagacgucgugggaacacgg..... 1  
Gi1\_4186002\_x1.....cggagacgucgugggaacacggggAgcc..... 1  
Gi3\_28698219\_x1.....ucggagacgucgCgggaacacg..... 1



|                 |                                       |   |
|-----------------|---------------------------------------|---|
| Gi5_8842613_x1  | .....aucggagaNgucgugggaacacggggugcc   | 1 |
| Gi5_8928931_x1  | .....aucggagacCucgugggaacac           | 1 |
| G1a_6264754_x1  | .....gaacacggAgugccgaacu              | 1 |
| Gi3_28582264_x1 | .....ggagacgucgugggGacacggggugccgaacu | 1 |
| Gi2_11359988_x1 | .....aucggagacgucguggCaacacggggug     | 1 |
| Gi2_11098890_x1 | .....gaucggagacgucguggCa              | 1 |
| G1a_6194097_x1  | .....aacacgAggugccgaacu               | 1 |
| Gi2_11134096_x1 | .....cgucgugggaacacggggugccgaaA       | 1 |
| Gi2_11122216_x1 | .....ucgugggaacacgggUugccgaacu        | 1 |
| Gi5_9031850_x1  | .....gucgugggaacCggggugc              | 1 |
| Gi2_11186675_x1 | .....guAgugggaacacggggugc             | 1 |
| Gi1_4202225_x1  | .....ggagacgucgugggaacacggggA         | 1 |
| Gi2_11192913_x1 | .....gaucggagacgucguggCacacgggg       | 1 |
| Gi2_11326366_x1 | .....uCggaacacggggugccgaacuu          | 1 |
| Gi5_9127997_x1  | .....agacgucgugggaacacgAggugccgaacu   | 1 |
| Gi5_8958855_x1  | .....Gcgucgugggaacacggggugccgaacuuu   | 1 |
| G1a_6102441_x1  | .....gucgGgggaacacggggugccgaacu       | 1 |
| Gi1_4224402_x1  | .....gcgaCcgagacgucgugggaacacggggugcc | 1 |
| Gi2_11316565_x1 | .....gagacgucNugggaacacggggugccg      | 1 |
| G1a_6061559_x1  | .....gugggaaUacggggugcc               | 1 |
| Gi2_11066590_x1 | .....acgucgugggaCcacggggugccgaa       | 1 |
| Gi2_11177349_x1 | .....gaucggagacguUgugggaacacg         | 1 |
| Gi1_4315132_x1  | .....aUacgucgugggaacacggggug          | 1 |
| Gi3_28920180_x1 | .....aucggagacgucgugggaacaAgg         | 1 |
| Gi5_8920118_x1  | .....ugcgauccgagacAucgug              | 1 |
| Gi5_8986576_x1  | .....agacgucgugggGacacgggg            | 1 |
| Gi3_28613139_x1 | .....aucggagacgucgGgggaacacgg         | 1 |
| Gi2_11002789_x1 | .....acUucgugggaacacggggugcc          | 1 |
| Gi3_28882733_x1 | .....gacgucgugggaacacgAggugccgaac     | 1 |
| Gi2_11258111_x1 | .....gaucggCgacgucgugggaaca           | 1 |
| Gi3_28431727_x1 | .....Uagacgucgugggaacacggggugc        | 1 |
| Gi3_28709324_x1 | .....ucggagacgucguAggaacacggggugccga  | 1 |
| Gi3_28831454_x1 | .....gucgugggaacacggUuguccgaac        | 1 |
| Gi3_28674912_x1 | .....cgGcgugggaacacggggug             | 1 |
| Gi3_28341371_x1 | .....ucggUgacgucgugggaacacg           | 1 |
| Gi3_28685726_x1 | .....ggagacgucgugggaacCgggg           | 1 |
| Gi3_28685508_x1 | .....gugggaUcacggggugccg              | 1 |
| Gi5_8892493_x1  | .....cgucgugggaacaUggggugc            | 1 |
| Gi1_4160997_x1  | .....ggagacgucgugggaacacggggugcU      | 1 |
| Gi2_11227566_x1 | .....cgucgugggaacCggggugccgaac        | 1 |
| Gi3_28708404_x1 | .....cgucgugggaacacgggA               | 1 |
| Gi1_4243622_x1  | .....ucgAagacgucgugggaacacggg         | 1 |
| Gi5_8916538_x1  | .....ggagacgucgugggaGca               | 1 |
| G1a_5985725_x1  | .....aCcgagacgucgugggaacacg           | 1 |
| G1a_6167777_x1  | .....ggaacacggggugccgaa               | 0 |
| Gi2_11377828_x1 | .....uUggagacgucgugggaacacgggg        | 1 |
| Gi3_28913129_x1 | .....gugggaUcacggggugccgaa            | 1 |

|                                                            |   |
|------------------------------------------------------------|---|
| Gi2_11162846_x1.....cggagacgucgugggaacaUggggg.....         | 1 |
| Gi3_28776890_x1.....cggagacgucgGgggaacacggggugc.....       | 1 |
| Gi5_8919435_x1.....ucggagacgucgGgggaacacg.....             | 1 |
| Gi5_8901062_x1.....gugggaacacggggugccgaGcuuu.....          | 1 |
| Gi3_28450023_x1.....ucgugggaUcacggggugccgaac.....          | 1 |
| Gi2_11093380_x1.....ugggaacUcggggugccg.....                | 1 |
| Gi1_4182043_x1.....gacguUgugggaacacggggugccgaacu.....      | 1 |
| Gi3_28684587_x1.....ucguCggaacacggggugccgaa.....           | 1 |
| Gi2_11154505_x1.....ucggagacgucgugggaacacggggGgc.....      | 1 |
| Gi5_8898858_x1.....cggagacgucgCgggaacacgg.....             | 1 |
| Gi3_28721043_x1.....ucggagacgucgugggCacacgg.....           | 1 |
| Gi5_9022941_x1.....cgCgggaacacggggugccg.....               | 1 |
| Gi1_4180935_x1.....agacgucgugggaacacAgg.....               | 1 |
| Gi2_11376716_x1.....cgucguAggaacacggggugccgaac.....        | 1 |
| Gi3_28550286_x1.....ugggaaAacggggugccg.....                | 1 |
| Gi2_11117672_x1..gcgaucggagacgucgugggaacGc.....            | 1 |
| G1a_6228389_x1....aucggagacgucgugggUcacggggug.....         | 1 |
| G1a_5996251_x1.....aUcacggggugccgaacu.....                 | 1 |
| Gi5_8951174_x1....aucggagacgucgugggCacacggggg.....         | 1 |
| Gi1_4200769_x1.....ggaacacgCggugccgaacu.....               | 1 |
| Gi3_28283830_x1.....ucguAggaacacggggugcc.....              | 1 |
| G1a_6267144_x1.....gggCacacggggugccgaa.....                | 1 |
| Gi5_9080605_x1.....ggaacacgggCugccgaac.....                | 1 |
| Gi1_4230356_x1.....ugggaacacggggugccgaCcuu.....            | 1 |
| G1a_6293632_x1....aucggagacgCcgugggaacacggggg.....         | 1 |
| Gi1_4353970_x1.....ggaacacgggAugccgaa.....                 | 1 |
| Gi1_4265337_x1.....cgucgugggaacacggggugcA.....             | 1 |
| Gi3_28863567_x1....gaucCgagacgucgugggaacacggg.....         | 1 |
| Gi5_9136098_x1.....gucgugggaacacggggCgccgaac.....          | 1 |
| Gi5_9122136_x1.....ggagacgucgugggUcacggggugccgaac.....     | 1 |
| Gi3_28944585_x1.....gagacgucgugggaacacggggugccgCac.....    | 1 |
| Gi1_4370999_x1.....ugggGacacggggugccgaacu.....             | 1 |
| Gi3_28984405_x1.....gggaacacCgggugccga.....                | 1 |
| Gi3_28529042_x1.....cggagacgucgugggaacacggggugGc.....      | 1 |
| Gi1_4267719_x1.....acgucgugggaacacggggugccgG.....          | 1 |
| Gi2_11293961_x1..gcgaucggagacgucCuggga.....                | 1 |
| G1a_6310935_x1.....acgucgugNgaacacggggugccgaacu.....       | 1 |
| Gi4_581821_x1...cgauccggagacgucgugggaacacg.....            | 0 |
| Gi3_28366023_x1....aucggagaNgucgugggaacacggggugccgaac..... | 1 |
| Gi3_28371975_x1.....cggauacgucgugggaacacggg.....           | 1 |
| Gi3_28732886_x1....gaucggagacgucgugggGacacgg.....          | 1 |
| Gi5_9065802_x1.....ugggaacacggggCgccgaacu.....             | 1 |
| G1a_6154411_x1....ucggagacgucgugggCacacggggg.....          | 1 |
| Gi3_28310555_x1..cgUucggagacgucgugggaacacggggugcc.....     | 1 |
| Gi2_11149992_x1.....cgucgugggaacCggggugccgaa.....          | 1 |
| Gi5_8848723_x1.....gugggaacacggggugAcgaacu.....            | 1 |
| Gi2_11379577_x1....gaucggagacgucgugggaacacggAg.....        | 1 |

|                 |                                     |   |
|-----------------|-------------------------------------|---|
| Gi1_4185100_x1  | .....gacgGcgugggaacacggggugccgaacu  | 1 |
| Gi1_4321439_x1  | .....Cgagacgucgugggaacacggggugccg   | 1 |
| Gi2_11085992_x1 | .....uggaacacggggugccgaacuA         | 1 |
| Gi3_28926728_x1 | .....agacgucgugggGacacggggg         | 1 |
| G1a_6104325_x1  | .....Gggagacgucgugggaacacggggug     | 1 |
| Gi5_9028734_x1  | .....agacgucgugggaacacggggC         | 1 |
| Gi5_9042728_x1  | .....Ugugggaacacggggugccg           | 1 |
| Gi2_11288922_x1 | .....aucggagacguUgugggaacacggg      | 1 |
| Gi3_28701033_x1 | .....ucgugggaacacgggggAcc           | 1 |
| Gi1_4353662_x1  | .....ucgugggaNcacggggugccga         | 1 |
| Gi5_9026751_x1  | .....cggagacgNcgugggaacacg          | 1 |
| Gi1_4377469_x1  | .....aucggagacgucgugggaGcacggggugc  | 1 |
| Gi5_8978347_x1  | .....gugNgaacacggggugccgaac         | 1 |
| Gi2_11101820_x1 | .....gagacUucgugggaacacggggugccgaac | 1 |
| Gi4_581968_x1   | .....ugggUacacggggugccgaacu         | 1 |
| Gi3_28296902_x1 | .....ggaacacgggAugccgaa             | 1 |
| Gi1_4201007_x1  | .....gugggaacaAggggugccgaacu        | 1 |
| Gi4_579560_x1   | .....gAcgugggaacacggggugccgaacu     | 1 |
| Gi5_9118463_x1  | .....gugggaacacggggugccgaacuucU     | 1 |
| Gi2_11010536_x1 | .....cgauccgagacgucgugAgaacacggg    | 1 |
| Gi5_8921649_x1  | .....cgucgugggaacacggggugccgC       | 1 |
| Gi3_28395315_x1 | .....gucgugggaacacgggCugccga        | 1 |
| Gi2_11343422_x1 | .....gagacgucgugggaacacggggugccU    | 1 |
| G1a_6228580_x1  | .....gugggaacacggggAgccga           | 1 |
| Gi1_4212425_x1  | .....ugggaacacggCgugccgaac          | 1 |
| Gi5_8993553_x1  | .....acgucgugggaacacgAggugccga      | 1 |
| Gi1_4199754_x1  | .....cggagacgucgugggaGca            | 1 |
| G1a_6004252_x1  | uCcgaucggagacgucguggga              | 1 |
| Gi5_8901159_x1  | .....gucgugggaacacggggugccgCac      | 1 |
| Gi3_28387725_x1 | .....Ggacgucgugggaacacggggugccgaa   | 1 |
| Gi2_10995035_x1 | .....acacggggugccgaacu              | 0 |
| Gi5_9085140_x1  | .....gaNcgagacgucgugggaacacggggugc  | 1 |
| Gi2_11049929_x1 | .....ucgugggaacacggCgugccgaac       | 1 |
| Gi5_9013684_x1  | .....ggagacguNgugggaaca             | 1 |
| Gi1_4389112_x1  | .....gacgucgugggCacacggggugccgaac   | 1 |
| Gi3_28419620_x1 | .....agacgucgugggUacacggggugccgaacu | 1 |
| Gi1_4212620_x1  | .....acgucgugggaacacggggugccAaacuu  | 1 |
| Gi2_11395899_x1 | .....ucggagacgucgugggGacacggggg     | 1 |
| Gi1_4357332_x1  | .....ucggagGcgucgugggaacacggg       | 1 |
| G1a_6010336_x1  | .....Cugggaacacggggugccgaa          | 1 |
| Gi3_28962588_x1 | .....gUacacggggugccgaacu            | 1 |
| Gi2_11149660_x1 | .....cgucgugggaUcacggggugccgaacu    | 1 |
| Gi1_4296549_x1  | .....ugggaacacggggugccgG            | 1 |
| Gi3_28390360_x1 | .....gacNucgugggaacacggggugccgaac   | 1 |
| Gi5_9120656_x1  | .....gaCcacggggugccgaac             | 1 |
| Gi2_11396301_x1 | .....aUacgucgugggaacacggggugccgaa   | 1 |
| Gi5_9001834_x1  | .....acgucgugggaGcacggggugcc        | 1 |

Gi5\_9133202\_x1.....aucggagaAgucgugggaacacg..... 1  
 Gi1\_4352745\_x1.....agacgucgugggCacacggg..... 1  
 Gi1\_4388622\_x1.....cgugggaacacAgggugccgaa..... 1  
 Gi2\_11037769\_x1.....gagacgucgugggaacacggggugcAgaacu..... 1  
 Gi3\_28519658\_x1.....cggagacgucgugggaacacggggugccgaCcu..... 1  
 Gi2\_11067835\_x1.....gucgugggUacacggggugcc..... 1  
 Gi3\_28536161\_x1.....aucggagacgucgugCgaacacggggugcc..... 1  
 Gi2\_11150795\_x1.....ggagacgucgugggaacacggggugccgaacA..... 1  
 Gi3\_28272552\_x1.....gacgucgugggaacacggggugccgaaAu..... 1  
 Gi3\_28914168\_x1.....gagacgucNugggaacacggggugccgaac..... 1  
 Gi3\_28615852\_x1.....cggagacgucgugggaacacggCgugcc..... 1  
 Gl1a\_6267886\_x1.....aucAgagacgucgugggaacacgggg..... 1  
 Gl1a\_6225477\_x1...Agaucggagacgucguggga..... 1  
 Gi1\_4278275\_x1.....agacgucgCgggaacacggggugcc..... 1  
 Gi1\_4359484\_x1.....Agucgugggaacacggggugcc..... 1  
 Gi2\_11016549\_x1.....acgucgugggaacacggAgugc..... 1  
 Gi4\_576311\_x1.....aucggagacgucgugggaGcacggggu..... 1  
 Gi3\_28461471\_x1.....aCacgucgugggaacacggggu..... 1  
 Gi2\_11271456\_x1.....agacgucgugggaacCggggugccgaacu..... 1  
 Gi1\_4210007\_x1.....gacgucgugggaacacgCggugccgaacu..... 1  
 Gl1a\_6022297\_x1.....aucggagacgucgugggaacacgUggg..... 1  
 Gi5\_9065795\_x1.ugcgauccgagacCucgug..... 1  
 Gi3\_28645186\_x1.....cgucgugggaacacgUggugccgaa..... 1  
 Gi2\_11111970\_x1.....gagacgucgGgggaacacggggugcc..... 1  
 Gi3\_28946482\_x1.....acgucgGgggaacacggggugccga..... 1  
 Gi2\_11305659\_x1.....aucggagacgucgugggaacacgCgugc..... 1  
 Gi3\_28278938\_x1.....aucggagacgucgugggaacacggggGg..... 1  
 Gi5\_9009949\_x1.....gugggaacacggggugccgaCcuuu..... 1  
 Gi2\_11046776\_x1.....ggagacgucgugggaacacgggggUA..... 1  
 Gi3\_28367784\_x1.....gucgugggNacacggggugccg..... 1  
 Gi5\_8912591\_x1.....gCagacgucgugggaacacggggugccgaacu..... 1  
 Gi1\_4287872\_x1.....Ccgagacgucgugggaacacggggugcc..... 1  
 Gi2\_11049427\_x1.....cgucgugggaacacggggugccAaac..... 1  
 Gi3\_28277162\_x1.....gaNcacggggugccgaac..... 1  
 Gi5\_8950790\_x1.....acgucgugggaacacggggugccgaUc..... 1  
 Gi3\_28370863\_x1...cgauccAgagacgucgugggaacacgg..... 1  
 Gi3\_28636792\_x1.ugcgauccNagacgucgugggaacacggg..... 1  
 Gi3\_28737263\_x1.....aUgucgugggaacacggggugccga..... 1  
 Gi2\_11117814\_x1.....agacgucgugggaacacggggGgc..... 1  
 Gi2\_11336807\_x1.....cgNcgugggaacacggggugccga..... 1  
 Gi1\_4351741\_x1.....ggagacgucgugggaacacAgggugccg..... 1  
 Gi3\_28910115\_x1...gaucAgagacgucgugggaac..... 1  
 Gi3\_28609319\_x1.....gucgugggaacacgUggugcc..... 1  
 Gi1\_4324705\_x1.....Cugggaacacggggugccga..... 1  
 Gi5\_8840126\_x1.ugcgauccgagacgucgCggga..... 1  
 Gi2\_11396992\_x1.....Uagacgucgugggaacacg..... 1  
 Gi1\_4251096\_x1.....ugggaacacggggugccgaCc..... 1

Gi2\_11051109\_x1.....acgucgugggaacacAgggugccgaac..... 1  
Gi3\_28544087\_x1...gaucggagacgucguAggaacacggggu..... 1  
Gi5\_9093918\_x1.....acgucgugggaacacggCgugccgaacu..... 1  
G1a\_6048821\_x1...gaucggagacguGgugggaacacggg..... 1  
Gi3\_28329246\_x1.....gagacgucguggUacacg..... 1  
Gi3\_28305390\_x1...gaucUgagacgucgugggaacacggg..... 1  
Gi1\_4255511\_x1.....gugggCacacggggugccgaacu..... 1  
Gi5\_9002749\_x1.....agacgCcgugggaacacggggugcc..... 1  
Gi1\_4387461\_x1.....ucgugggaacacggggugcU..... 1  
Gi3\_28352131\_x1...aucgAagacgucgugggaacacggggugcc..... 1  
Gi2\_11279985\_x1.ugcgauccgagCcgucguggga..... 1  
Gi4\_573194\_x1.....gggaacacggggGgccgaac..... 1  
G1a\_6096799\_x1...aucggGgacgucgugggaacacggggug..... 1  
Gi5\_9117987\_x1...cggagacgucguggAaacacggggugcc..... 1  
G1a\_6256606\_x1...gaucggagaUgucgugggaacacggg..... 1  
Gi2\_11140796\_x1...Caucggagacgucgugggaac..... 1  
Gi5\_8864756\_x1.....cgugggaacacggggugccgaacuuu..... 0  
Gi5\_8852407\_x1.....guggAaacacggggugccg..... 1  
Gi2\_11050836\_x1.....cgucgugggaacacggggguAcc..... 1  
Gi2\_11383022\_x1.....ggagacgucguggGacacggggugccga..... 1  
G1a\_6240322\_x1...gaAacggagacgucgugggaacacggggug..... 1  
Gi5\_9109384\_x1...aucggagacgucgugggaacGcggggugc..... 1  
Gi2\_11141086\_x1.....gCagacgucgugggaacacggggugc..... 1  
G1a\_5990736\_x1...Uaucggagacgucgugggaacacggg..... 1  
Gi2\_11181534\_x1.....ggCaacacggggugccgaac..... 1  
Gi2\_11327067\_x1.....acgucgugggaacacggggUc..... 1  
Gi3\_28951396\_x1...gaucggagacgucguggGacacggggug..... 1  
Gi1\_4328034\_x1.....gagGcucgugggaacacggggugccgaacu..... 1  
Gi3\_28317941\_x1.....agacgucgugggaGcacgggg..... 1  
Gi3\_28591313\_x1.....gucguggGacacggggugccg..... 1  
Gi1\_4325097\_x1.....acgucgugNgaacacggggugccg..... 1  
Gi2\_11340820\_x1.....CgagacgucgugggaacacggggU..... 1  
Gi1\_4294699\_x1.....gugggaacacggggugAcg..... 1  
Gi2\_11283134\_x1.....cguGgugggaacacggggugccgaacu..... 1  
Gi2\_11337680\_x1...cgaCcgagacgucgugggaaca..... 1  
Gi2\_11196410\_x1.....Aacgucgugggaacacggggugccgaac..... 1  
Gi3\_28688954\_x1...aucggagacgucgugggaacUcg..... 1  
Gi1\_4358823\_x1.ugcgauccgagacgucguggG..... 1  
Gi1\_4236708\_x1.....cgucgugggaacacAgggugc..... 1  
Gi2\_11081759\_x1.....ucguggAaacacggggugcc..... 1  
Gi3\_28802363\_x1.....Acgugggaacacggggugccgaa..... 1  
Gi3\_28773605\_x1.....ucgugggaacacggggAgccgaa..... 1  
Gi5\_8834795\_x1.....caUggggugccgaacuuu..... 1  
Gi3\_28640773\_x1.gcgauccgCgacgucgugggaac..... 1  
Gi5\_8982859\_x1...aAcggagacgucgugggaacacg..... 1  
Gi3\_28451035\_x1...aucggagaGgucgugggaacacgggg..... 1  
Gi5\_8868039\_x1.....acgucGgggaacacggggugccg..... 1

Gi3\_28496355\_x1.....cgucgugAgaacacgggg..... 1  
 Gi3\_28421892\_x1.....cgugggaacacgggguUcc..... 1  
 Gi1\_4353009\_x1.....ggaacacggggugccAaacuu..... 1  
 Gl1a\_6309915\_x1.....gAagacgucgugggaacac..... 1  
 Gi1\_4204723\_x1.....ggaacacgggAugccgaac..... 1  
 Gi5\_8938603\_x1.....acgucgCgggaacacggggugccga..... 1  
 Gi3\_28323001\_x1.....ucgugggaacacggggCg..... 1  
 Gi2\_11313935\_x1.....guCggaacacggggugccga..... 1  
 Gi3\_28266750\_x1.....cgaucggagacgucgugggaCcacggggugc..... 1  
 Gi2\_11244373\_x1.....cgugggaacacgggCugc..... 1  
 Gl1a\_6113405\_x1.....aucggagUcugcugugga..... 1  
 Gi2\_11043145\_x1.....gugggaCcacggggugccg..... 1  
 Gi3\_28808487\_x1.....gaucgAagacgucgugggaacacggggugcc..... 1  
 Gi2\_11182627\_x1.....cgugggUacacggggugcc..... 1  
 Gi3\_28855034\_x1.....gaCcgagacgucgugggaacacgggg..... 1  
 Gi3\_28693973\_x1.....agacgucgugggaacacgggAugcc..... 1  
 Gl1a\_6178726\_x1.....Caucggagacgucgugggaacacggg..... 1  
 Gi1\_4214702\_x1.....ggaacacggggugccgCacuu..... 1  
 Gi2\_11205191\_x1cugcgauCNagacgucgugggaacac..... 1  
 Gi1\_4272561\_x1.ugcgaCcgagacgucguggga..... 1  
 Gi2\_10992763\_x1.....cgaucggaAacgucguggga..... 1  
 Gi3\_28966487\_x1.....aucggagacgucgugggC..... 1  
 Gi3\_28423613\_x1.....gCcgugggaacacggggugccgaa..... 1  
 Gl1a\_6017874\_x1.....gugggaacacgggAugccgaac..... 1  
 Gi3\_28639240\_x1.....aCcgagacgucguggga..... 1  
 Gi3\_28626442\_x1.....gucgugggaacacgggguUccgaacu..... 1  
 Gi3\_28358481\_x1.....cgucgugUgaacacggggugccgaac..... 1  
 Gl1a\_6105516\_x1.....ugggaacacggUgugccgaacu..... 1  
 Gi2\_11392362\_x1.....cgucgugggaacacCgggugcc..... 1  
 Gi5\_8859094\_x1.....aAcggagacgucgugggaacacgggggu..... 1  
 Gi3\_28383594\_x1.....gucUugggaacacggggugccgaacu..... 1  
 Gi2\_11075460\_x1.....cgugggUacacggggugccga..... 1  
 Gi3\_28470174\_x1.....acgucgugggaacacgggCugccgaacu..... 1  
 Gi3\_28723983\_x1.....acgCcgugggaacacggggugccga..... 1  
 Gi1\_4233384\_x1.....cguUggaacacggggugccgaac..... 1  
 Gi2\_11337136\_x1.....gaucggagacgucgugggUacacggg..... 1  
 Gl1a\_6286137\_x1.....Agagacgucgugggaacacgggggu..... 1  
 Gi3\_28376670\_x1.....gucgugggaacacggggugcUga..... 1  
 Gi3\_28439009\_x1.....auAggagacgucgugggaac..... 1  
 Gi2\_11334057\_x1.....acgucgugggaacacggggUac..... 1  
 Gi2\_11101105\_x1.....cggagacgucgugggaacUc..... 1  
 Gi2\_11066836\_x1.....ucCugggaacacggggugccgaac..... 1  
 Gi1\_4374172\_x1.....Ugugggaacacggggugccgaa..... 1  
 Gi1\_4357092\_x1.....cgucgugggaacacggggugcGgaacu..... 1  
 Gl1a\_6050312\_x1.....gggaacacggggGgccgaac..... 1  
 Gi3\_28316642\_x1.....gauGggagacgucgugggaacacgggggu..... 1  
 Gi1\_4319560\_x1.ugcgaucggagacguAguggga..... 1

Gi1\_4220550\_x1.....uCggaacacggggugccg..... 1  
 Gi3\_28641239\_x1...gaucgAagacgucgugggaacacg..... 1  
 Gi3\_28749840\_x1.....agGcgucgugggaacacgggg..... 1  
 Gi5\_8942100\_x1....aucggagaUgucgugggaacacggggugc..... 1  
 Gi1\_4286095\_x1.....ggagacgucgugggaUcacggggugcc..... 1  
 Gi1\_4301727\_x1.....gGgggaacacggggugccgaa..... 1  
 Gi3\_28412574\_x1...cgaucggagacguAguggg..... 1  
 Gi1\_4195261\_x1.....ggaNcacggggugccgaacu..... 1  
 Gi3\_28643295\_x1.....ucgugggaacacggggguCccgaac..... 1  
 Gi5\_9132143\_x1.....gugggaacacggggugUcg..... 1  
 Gi1\_4386832\_x1.....cgugggaacacggUgugccgaacu..... 1  
 Gi5\_9137869\_x1.....cgucgCgggaacacggggugccga..... 1  
 Gi5\_9061018\_x1.....gagacgucgugggaUacggggugcc..... 1  
 Gi1\_4189844\_x1.....ucgugggUacacggggugccgaac..... 1  
 Gi3\_28682920\_x1.....cgucgugggaacacggggugccUaac..... 1  
 Gl1a\_6239717\_x1.....ggagacgucgugggaacacggggGgcc..... 1  
 Gi3\_28508747\_x1.....gaUacgucgugggaacacggggugcc..... 1  
 Gi5\_8846803\_x1.....agUcgucgugggaacacggggugccga..... 1  
 Gi3\_28727375\_x1...gUucggagacgucgugggaacacgg..... 1  
 Gi5\_9085734\_x1.ugcgaucggGgacgucguggg..... 1  
 Gi5\_8838329\_x1.....ucgugggaacacUggggugccgaac..... 1  
 Gi2\_11047973\_x1.....cacggggugccgaacuuu..... 0  
 Gi2\_11371211\_x1....aucggagacguUgugggaaca..... 1  
 Gi3\_28678342\_x1...gaucggagacgCcgugggaac..... 1  
 Gi2\_11114016\_x1....aucggagacgucguUggaacacggggg..... 1  
 Gi4\_580071\_x1....agacgucgugggaGcacggggugcc..... 1  
 Gl1a\_6032606\_x1.....gugggaacacggAgugcc..... 1  
 Gi5\_9002070\_x1.....gacgucgugggaacacggggugccgaaGu..... 1  
 Gi5\_8884807\_x1.....cgGcgugggaacacggggugcc..... 1  
 Gl1a\_6133257\_x1.....gugggaacCcgggugccga..... 1  
 Gi2\_11216679\_x1.....ggagacgucgugggaacacggggugGc..... 1  
 Gi3\_28905800\_x1.....gagacgucgugggaacacggggugccgaGcu..... 1  
 Gl1a\_6080479\_x1....aucggagacgCcgugggaacacggg..... 1  
 Gi2\_11096584\_x1.....agacgucgugggaacacggCgugccgaacu..... 1  
 Gi1\_4171532\_x1.....cgugggaaNacggggugccgaa..... 1  
 Gi3\_28884445\_x1...gaucgAagacgucguggga..... 1  
 Gi2\_11274013\_x1.....gagGcgucgugggaacacggggugcc..... 1  
 Gl1a\_6277796\_x1.....gacAucgugggaacacggggugccgaacu..... 1  
 Gi2\_11026953\_x1.....Ugucgugggaacacggggugc..... 1  
 Gl1a\_6319371\_x1...gaucggagNcgucgugggaacacgg..... 1  
 Gl1a\_6354557\_x1....aucggagacgucgugggUacacggggugcc..... 1  
 Gl1a\_6296126\_x1....Gucggagacgucgugggaacacggggug..... 1  
 Gi3\_28562618\_x1.....cggagacgucgugggaacacggggugccU..... 1  
 Gi2\_11396022\_x1.....agacgucguggAaacacggggugccgaacu..... 1  
 Gi3\_28665898\_x1....aucggagacgucguggCaacac..... 1  
 Gi2\_11304503\_x1...gaucggagacgucgugggaacacgggCu..... 1  
 Gi1\_4309413\_x1.....ucgugggaacacggAgugcc..... 1

Gi2\_11049566\_x1.....ggagGcgucgugggaacacggggugccga..... 1  
Gi3\_28983947\_x1.....cgNgggaacacggggugccg..... 1  
Gi5\_9075514\_x1.....cgucgugggaacacggggCgcc..... 1  
Gi1\_4296039\_x1.....ucggagCcgucgugggaacacg..... 1  
Gi3\_28753298\_x1.....Cagacgucgugggaacacggggugccga..... 1  
Gi3\_28817096\_x1.....gNucggagacgucgugggaacacggggg..... 1  
Gi5\_9052335\_x1.....aucggagacgucgugggaacGcggggg..... 1  
G1a\_5994533\_x1.....cgugggaaUacggggugcc..... 1  
Gi2\_11220667\_x1.....ucgugggaacCcggggugcc..... 1  
Gi2\_11221812\_x1.....cgugggaacacggggugccCa..... 1  
Gi5\_8942592\_x1.....gagacgCcgugggaacacggggugccgaacu..... 1  
Gi2\_11243256\_x1.....cgugggaacacggggugGcg..... 1  
Gi3\_28611007\_x1.....ucgugggaacaUggggugccgaa..... 1  
Gi1\_4229685\_x1.....gaucggagacgAcguggga..... 1  
Gi5\_8989656\_x1.....cggagacgNcgugggaacacggg..... 1  
Gi1\_4198265\_x1.....ggaacacggggugUcgaac..... 1  
Gi5\_8918902\_x1.....Gucggagacgucgugggaacacggggugc..... 1  
Gi2\_11227110\_x1.....gaucggagGcgucgugggaaca..... 1  
Gi3\_28545922\_x1.....cgaucggagacgucguggA..... 1  
Gi3\_28734763\_x1.....aucggagacgucguCggaacacggggugcc..... 1  
Gi3\_28764172\_x1.....acacggggugcAgaacuu..... 1  
G1a\_6065618\_x1.....gggaacacggggugccgCac..... 1  
G1a\_6219202\_x1.....ggaacacgUggugccgaacu..... 1  
Gi2\_11184356\_x1.....Naucggagacgucgugggaacacgggg..... 1  
Gi3\_28621897\_x1.....cgugggaacacggggugGcga..... 1  
Gi4\_598628\_x1.....ucgugggaacacggggugccgaaAu..... 1  
Gi1\_4310333\_x1.....ucggagacgucgugggaacacggggugccgaCcu..... 1  
Gi2\_11363769\_x1.....ggagacgucgugggaacacggg..... 0  
Gi3\_28362740\_x1.....gacgucgugggaaGacggggugcc..... 1  
Gi3\_28484871\_x1.....gGcgucgugggaacacggggugc..... 1  
Gi5\_9002715\_x1.....acgucAugggaacacggggugccgaac..... 1  
Gi3\_28261837\_x1.....aucggaAacgucgugggaacac..... 1  
Gi5\_8830987\_x1.....cgucgugggaacCcggggugccgaa..... 1  
Gi3\_28884493\_x1.....gagacgucgugggaCcacggggugccgaa..... 1  
Gi2\_11377300\_x1.....guggCaacacggggugccgaa..... 1  
Gi2\_11266148\_x1.....cgaucggagacgucgugggaUacggggug..... 1  
Gi3\_28469301\_x1.....gaucggagacgucgugggaUacggggug..... 1  
G1a\_6354139\_x1.....gaucggagacgucgCgggaacacg..... 1  
Gi3\_28942390\_x1.....guUgugggaacacggggugccg..... 1  
Gi3\_28657938\_x1.....agacgucgugggaacaAggggugccgaa..... 1  
G1a\_6023048\_x1.....aucggagacgucgugggaGacgg..... 1  
Gi3\_28923617\_x1.....ggaacacgCgggugccgaa..... 1  
Gi2\_11178993\_x1.....ucggagacguUgugggaacacgggg..... 1  
Gi5\_9094470\_x1.....gauUggagacgucgugggaacacgg..... 1  
Gi3\_28386764\_x1.....gCucggagacgucgugggaacacgggg..... 1  
Gi3\_28282448\_x1.....cggagacgucgGgggaacacggggugccga..... 1  
G1a\_6066440\_x1.....gaucggagacAucgugggaacacggggg..... 1



Gi2\_11377321\_x1.....gucgugAgaacacggggugcc..... 1  
 Gi3\_28915272\_x1.....gucgugggaacaccgAgugccgaa..... 1  
 Gi1\_4194444\_x1.....gaUacgucgugggaacacggggugccgaac..... 1  
 Gi1\_4218111\_x1.....uggaacGcggggugccgaacu..... 1  
 Gi3\_28282999\_x1.....cgucguggCaacacggggugccgaa..... 1  
 Gi5\_9057956\_x1.....Ucgucgugggaacacggggugcc..... 1  
 Gi2\_11081520\_x1.....cgugggaacacUggggugccga..... 1  
 Gi2\_11098686\_x1.....acgCcgugggaacacggggugc..... 1  
 Gi1a\_6273551\_x1...gaucggagacgucgugggaacacAgg..... 1  
 Gi1\_4385542\_x1.....ugggaacacggggugGcgaacu..... 1  
 Gi2\_11052966\_x1.....cgugggaacUcggggugc..... 1  
 Gi5\_9052491\_x1.....gggaacacgggAugccgaa..... 1  
 Gi5\_9063163\_x1.....gagacgucgugggaacacggggugccga..... 0  
 Gi2\_11080532\_x1.....gucNugggaacacggggugcc..... 1  
 Gi5\_9071272\_x1.....Gggagacgucgugggaacacggggugcc..... 1  
 Gi2\_11359900\_x1.....cggagacgucgugggaGcacggggug..... 1  
 Gi5\_8953989\_x1.....cggagacgucgugggaacCcggg..... 1  
 Gi5\_9110503\_x1.....gacguUgugggaacacggggugccgaacu..... 1  
 Gi5\_9119067\_x1...gaucggagacgucgugggCacacgggggu..... 1  
 Gi3\_28844831\_x1.....ucgugggCacacggggugccg..... 1  
 Gi5\_9090061\_x1.....gugggaacacggggugcU..... 1  
 Gi5\_9107454\_x1...aucggagacgucguCggaaca..... 1  
 Gi1\_4262353\_x1.....gagacgucgugggaacacggggugccgaGcu..... 1  
 Gi3\_28284230\_x1.....agacgucgugggaacacggggugAcgaac..... 1  
 Gi1\_4278034\_x1...aucggagacguUgugggaacacgggggu..... 1  
 Gi1\_4282937\_x1.....gaacacggggugccgaGcu..... 1  
 Gi3\_28272360\_x1.....ucggagacgucgugggaCcacggggugcc..... 1  
 Gi2\_11246362\_x1.....gucguggAaacacggggugc..... 1  
 Gi1a\_6039493\_x1.....gugAgaacacggggugccga..... 1  
 Gi1a\_6311154\_x1...Gucggagacgucgugggaacacggggugc..... 1  
 Gi1a\_6207866\_x1...aucggagacgucgugggaacacggggugcc..... 1  
 Gi2\_11339566\_x1...cgaucggCgacgucgug..... 1  
 Gi3\_28505302\_x1...cgaucggagacgucgugggaGcacg..... 1  
 Gi3\_28930894\_x1.....gacgucgugggaacaAggggugccgaacu..... 1  
 Gi2\_11029496\_x1.....cguNgugggaacacggggugccga..... 1  
 Gi3\_28592873\_x1.....ucguUggaacacggggugccgaa..... 1  
 Gi3\_28685837\_x1.....ugggaacacggggugccgaC..... 1  
 Gi2\_11262885\_x1.....acguUgugggaacacggg..... 1  
 Gi3\_28898609\_x1.....acgucgugggaUacggggugc..... 1  
 Gi2\_11286771\_x1...gaucggagacgucguggUaacac..... 1  
 Gi3\_28472402\_x1.....acgucGgggaacacggg..... 1  
 Gi3\_28555076\_x1.....cggagacgucguggGacacggggugccgaa..... 1  
 Gi3\_28790512\_x1...aucggagacgCcgugggaacacg..... 1  
 Gi3\_28388768\_x1...gaucggagacgucgugggCac..... 1  
 Gi1a\_6262195\_x1.....ggaacacggggugccgCac..... 1  
 Gi2\_11369715\_x1...aucggagacgucgugCga..... 1  
 Gi3\_28654801\_x1.....ggagacgucgugggaacacgg..... 1

Gi2\_11269530\_x1.....gacgucgugggUacacggggugccg..... 1  
 Gi4\_577620\_x1....aucggagacgucgCgggaacacgggg..... 1  
 Gi1\_4290876\_x1.....aacacggggugccgaaGu..... 1  
 Gi5\_8865706\_x1.....ugggaacacgggAugccgaa..... 1  
 Gi2\_11268480\_x1.....ggCgacgucgugggaaacacggggugccg..... 1  
 Gl1a\_6287046\_x1....aucggagaUgucgugggaaacacgg..... 1  
 Gi2\_11169569\_x1.....Agugggaacacggggugccgaa..... 1  
 Gi1\_4274446\_x1.....ugggCacacggggugccgaaacu..... 1  
 Gi3\_28628344\_x1....aucggagUcgucgugggaaacacgggg..... 1  
 Gi2\_11094568\_x1.....ggGacacggggugccgaa..... 1  
 Gi3\_28306897\_x1...gaucggagGcgucgugggaaac..... 1  
 Gi3\_28747708\_x1.....gucgugggaaacaAggggugcc..... 1  
 Gi5\_9079325\_x1.....cgucgugggaaacGcggggugcc..... 1  
 Gl1a\_6219313\_x1...gaucggagacgCcguggg..... 1  
 Gi5\_8840899\_x1.....ggagacgucgugAgaacacggggugccgaaacu..... 1  
 Gi1\_4350968\_x1.....cgucgugggaaacacggggugccgCac..... 1  
 Gi1\_4344880\_x1.....acgucgugggaaAacggggugcc..... 1  
 Gi3\_28366884\_x1.....gucgugggaaacaAggggu..... 1  
 Gi1\_4318897\_x1.....gaacacUgggugccgaaacu..... 1  
 Gi1\_4363032\_x1.....gaacacggggGgccgaaacu..... 1  
 Gi1\_4376885\_x1.....gagacgucgugggaaacacggggCgccgaaacu..... 1  
 Gi2\_11152408\_x1.....ggagacgucgugggaaacacggggA..... 1  
 Gi2\_11355053\_x1....aucggagacgucUugggaacacggg..... 1  
 Gi5\_9110036\_x1.....aAgucgugggaaacacggggugccgaaac..... 1  
 Gi3\_28880029\_x1.....cgucUugggaacacgggg..... 1  
 Gi2\_11150213\_x1.....cgucgugggaaacaAggggugccga..... 1  
 Gl1a\_6311891\_x1.....gugggaacacggggugccgaG..... 1  
 Gi1\_4281922\_x1.....gugggaacacggggGgccga..... 1  
 Gi2\_11245380\_x1.....gugggaacacggggGgccgaaacu..... 1  
 Gi3\_28564493\_x1....aucggagacgucgGgggaacacggggugcc..... 1  
 Gi1\_4333061\_x1.....aacacgggUugccgaaacu..... 1  
 Gi3\_28665445\_x1.....gucgugggaaacacCgggugccgaaac..... 1  
 Gi3\_28380579\_x1.....cgucgugggaaacacCgggugccgaaac..... 1  
 Gi2\_11227067\_x1....ucggagacgucgCgggaac..... 1  
 Gi5\_8859712\_x1.....ggaacacggggugcGgaac..... 1  
 Gi1\_4316718\_x1...gaucggGgacgucgugggaa..... 1  
 Gi2\_11145386\_x1.....agacgucgugggaaacaAggggugccgaaac..... 1  
 Gl1a\_6112209\_x1...gcaucggNgacgucgug..... 1  
 Gl1a\_6224222\_x1.....gugggaacacggUgugcc..... 1  
 Gl1a\_6286601\_x1.....aacaGggggugccgaaacu..... 1  
 Gi2\_11368314\_x1.....gagacgucgugAaacacggggugcc..... 1  
 Gi5\_9073329\_x1....aucggCgacgucgugggaaacacgg..... 1  
 Gi5\_8970245\_x1.....ugggaacacUgggugccgaaac..... 1  
 Gl1a\_6074248\_x1...gUucggagacgucgugggaa..... 1  
 Gi3\_28376061\_x1.....gNgggaacacggggugccg..... 1  
 Gi2\_11020348\_x1.....agacgucgCgggaacacggggugcc..... 1  
 Gi1\_4261436\_x1.....gacguUgugggaaacacggggugcc..... 1

Gi2\_11018557\_x1.....ggagacguUgugggaacacggggugccg..... 1  
Gi2\_11049179\_x1.....ggaacacggggugcUgaa..... 1  
Gi2\_11092766\_x1.....cgucCugggaaacacggggugcc..... 1  
Gi3\_28274840\_x1.....ucgugggaaAacggggugc..... 1  
Gi2\_11403194\_x1.....gggaacacggggugccgU..... 1  
Gi2\_11257228\_x1.....aucggagacgucguUggaacac..... 1  
Gi3\_28444518\_x1.....ggagacgucgugggaaacacggggugccgaaGu..... 1  
Gi5\_9111071\_x1.....gaUacgucgugggaaacacggggugccgaacu..... 1  
Gi2\_11036243\_x1.....ggagacgucgugggaaacacggAgugcc..... 1  
Gi3\_28306602\_x1.....cgucgugUgaaacacggggugcc..... 1  
Gi3\_28846082\_x1.....cggagacCucgugggaaacacgggggu..... 1  
Gi2\_11047456\_x1.....aucggCgacgucgugggaaaca..... 1  
Gi3\_28438187\_x1.....cgucguAggaacacgggg..... 1  
Gi5\_8838964\_x1.....aucggagacAucgugggaaacacggg..... 1  
G1a\_6043931\_x1.....aucggagacgucCugggaaacacggg..... 1  
Gi2\_11049787\_x1.....gagacgucgugggGacacggggugccgaac..... 1  
G1l\_4163057\_x1.....aucggagacgucgugggaaacGcgg..... 1  
G1a\_6273897\_x1.....cguAggaacacggggugc..... 1  
Gi5\_9016213\_x1.ugcgauccggagacgCcgug..... 1  
Gi3\_28575895\_x1.....gaucggagacUucgugggaaac..... 1  
Gi3\_28681754\_x1.....gucgugggaaGacggggugccgaac..... 1  
G1a\_6250241\_x1.....ggNacacggggugccgaacu..... 1  
Gi3\_28701913\_x1.....aucgCagacgucgugggaaacacgggggu..... 1  
Gi2\_11265305\_x1.....gucgugggaaacacUggggugc..... 1  
Gi5\_8838874\_x1.....cgugggaaacacgggUugccga..... 1  
Gi5\_9057239\_x1.....gucgugAgaacacggggugccgaa..... 1  
G1a\_6092977\_x1.....gucgugggaaAacggggugccgaacu..... 1  
Gi2\_11111627\_x1.....gucguggAaacacggggugccga..... 1  
Gi2\_11136356\_x1.....acgucgugggaaacacggggugccAa..... 1  
Gi2\_11097759\_x1.....cgGucggagacgucgugggaaacacg..... 1  
Gi2\_11399145\_x1.....Cgggaacacggggugccgaa..... 1  
Gi2\_11344286\_x1.....cgucgugggaaacacgUggugc..... 1  
Gi5\_9112394\_x1.....gaucggagacgucgugggGacacgg..... 1  
Gi2\_11013046\_x1.....ggagaGgucgugggaaacacggggugc..... 1  
Gi2\_11185723\_x1.....cggagacgucgGggaaacacggggugccgaac..... 1  
G1a\_6085353\_x1.....aucggagacgucAugggaaacacgggggu..... 1  
G1l\_4225351\_x1.....Aaacacggggugccgaacu..... 1  
Gi5\_8926581\_x1.ugcgUucggagacgucgug..... 1  
Gi3\_28277164\_x1.....gauUggagacgucgugggaaacacggggug..... 1  
Gi2\_11052282\_x1.....aucggagacgucgugCgaacacggg..... 1  
G1a\_6223544\_x1.....cgugAgaacacggggugccg..... 1  
Gi2\_11244921\_x1.....cggagacgucgugggaaacacggggAg..... 1  
G1l\_4334886\_x1.....acacggggugccgGacuu..... 1  
Gi3\_28275135\_x1.....gaucggaCacgucgugggaaacacggg..... 1  
Gi3\_28864370\_x1.....Agagacgucgugggaaacacggggugccga..... 1  
Gi3\_28389538\_x1.....gucgugggaaacacgCggugccgaacu..... 1  
Gi2\_11065201\_x1.....cggagacgucgugggCacac..... 1

Gi5\_8892423\_x1.....gugggaacaAggggugccg..... 1  
 Gl1a\_6095384\_x1....gaucggagaGucguggggaacacggg..... 1  
 Gi1\_4292600\_x1.....ucgugggaGcacggggugccg..... 1  
 Gi2\_11249860\_x1.....Cagacgucguggggaacacggggugcc..... 1  
 Gi3\_28969334\_x1....gaucggagacguUgugggaacac..... 1  
 Gi5\_8989045\_x1.....gaacacggggugccgUac..... 1  
 Gi2\_11121042\_x1.....acgucgugggaaCcggg..... 1  
 Gi5\_8991968\_x1.ugcgUucggagacgucguggga..... 1  
 Gi3\_28388970\_x1.....cgucgugggaaGacggggugccga..... 1  
 Gi3\_28666495\_x1.....cgucgugggaaacacgCggugcc..... 1  
 Gi5\_9012931\_x1.....cacggggugccgaCcuuu..... 1  
 Gi5\_8960443\_x1.....aAgucgugggaaacacggggugccgaacu..... 1  
 Gi2\_11098429\_x1.....cggagacgucguggggaacaGggggu..... 1  
 Gi5\_8893036\_x1.....Agugggaacacggggugccga..... 1  
 Gi1\_4349693\_x1.....uUggagacgucguggggaacacggggu..... 1  
 Gi3\_28742554\_x1.....agacgucgugggaaAacggggugccgaacu..... 1  
 Gi5\_9091988\_x1....aucggagacgucguggggaUcacggg..... 1  
 Gi1\_4196822\_x1.....cggGgacgucguggggaacacggggugccgaacu..... 1  
 Gi1\_4308148\_x1.....Aagacgucguggggaacacggggugcc..... 1  
 Gi3\_28898451\_x1.....cggagacgucguggggaacacggCgu..... 1  
 Gi2\_11051578\_x1....aucggagacgucgAgggaacacggggu..... 1  
 Gi3\_28757754\_x1.....agacgucguggggaacacggA..... 1  
 Gi2\_10995824\_x1.....gagacgucguggggaacacggggugccgaGcu..... 1  
 Gi1\_4377348\_x1.....acgucgugggaaCcggggugccg..... 1  
 Gi1\_4328951\_x1.....acgucgugggaaacacgAggugcc..... 1  
 Gl1a\_6359702\_x1.....cgugggaacacgAggugcc..... 1  
 Gi3\_28691979\_x1.....gagGcgucguggggaacacggggugccga..... 1  
 Gi3\_28834777\_x1.....gacgucguggggaacacggAgu..... 1  
 Gi1\_4226117\_x1.....gacgucguggggaacacggggugcA..... 1  
 Gi3\_28314915\_x1.....ucgugggCacacggggugc..... 1  
 Gi1\_4170323\_x1.....gugggaaUacggggugccgaacu..... 1  
 Gl1a\_6198867\_x1.ugcgauccgagaGucguggggaacac..... 1  
 Gi5\_8930543\_x1....ucggagacgucAugggaacacg..... 1  
 Gi2\_11380780\_x1.....gucguggggaacacggggAgcc..... 1  
 Gi3\_28323104\_x1.....cgucgugggGacacggggu..... 1  
 Gi2\_11269920\_x1....ucggagacgucguggggaacacUgggugc..... 1  
 Gi1\_4233892\_x1.....gCcgugggaacacggggugccgaac..... 1  
 Gi5\_8830799\_x1.....aaUacggggugccgaacu..... 1  
 Gi5\_8922883\_x1.....agacgucguggggaacacggggCgcc..... 1  
 Gi2\_11345048\_x1.....cgucgugCgaacacggggug..... 1  
 Gi5\_8940460\_x1....aucggagacgucguggggaGca..... 1  
 Gi3\_28312571\_x1.....ggagacgucguggggaacacggC..... 1  
 Gl1a\_6269880\_x1.ugcgauccgagacgucguggggaacacggggG..... 1  
 Gi5\_9002969\_x1.....gucguggggaGcacggggugccgaac..... 1  
 Gi4\_568442\_x1.....cgugggaacacggggugccgCac..... 1  
 Gi5\_9126180\_x1.....gugggaacacggggugGcgaacu..... 1  
 Gi2\_11116877\_x1.....cgucguCggaacacggggugc..... 1

Gi1a\_6162315\_x1.....ucgugggaNcacggggugccgaacu..... 1  
Gi5\_9062151\_x1.....uggaacacggggugccgUacuu..... 1  
Gi5\_8956334\_x1.....cgucguggNaacacggggugccgaacuu..... 1  
Gi1\_4235681\_x1.....gagacgucgugggGacacggggugccg..... 1  
Gi3\_28310791\_x1.....Uggagacgucgugggaacacggggugccgaa..... 1  
Gi5\_8885207\_x1.....acuuuccagcgccugcugcAcacc..... 1  
Gi3\_28291481\_x1.ugcgauccgagGcgucgugggaaaca..... 1  
Gi1\_4220624\_x1.....ucgugggaacacggggUccgaacu..... 1  
Gi2\_11168202\_x1.....gugNgaacacggggugccgaa..... 1  
Gi3\_28368727\_x1.....gagacguUgugggaacacggggugcc..... 1  
Gi2\_11377774\_x1.....aucggaCacgucgugggaacacggggug..... 1  
Gi3\_28441725\_x1.gcgGucggagacgucgug..... 1  
Gi2\_11355927\_x1.....cggagGcgucgugggaacacg..... 1  
Gi1\_4173509\_x1.....cgucgugggaacacggggugcAgaacu..... 1  
Gi3\_28406659\_x1.....gacgucgugggaacCgggggu..... 1  
Gi2\_11089647\_x1.....aucCgagacgucgugggaacacggggugcc..... 1  
Gi1\_4245204\_x1.....Ugucgugggaacacggggugccgaac..... 1  
Gi1\_4263470\_x1.....gggaGcacggggugccgaacuu..... 1  
Gi2\_11095363\_x1.....cggagacguGgugggaacacggggugc..... 1  
Gi1\_4356119\_x1.....ucggagacgucgugggGcacggggugc..... 1  
Gi2\_11365008\_x1.....cgucgugUgaacacggggugccg..... 1  
Gi3\_28761425\_x1.....cgaucggagaAgucgugggaacacgg..... 1  
Gi1\_4353308\_x1.....aucggGgacgucgugggaa..... 1  
Gi1\_4296669\_x1.....cgugggaacacggggUccgaacu..... 1  
Gi3\_28710505\_x1.....uGggagacgucgugggaacacgg..... 1  
Gi1a\_6005315\_x1.....gugggaacacgggAugccga..... 1  
Gi5\_8899412\_x1.....agacgucgugggaacacgUggugccgaac..... 1  
Gi1\_4214120\_x1.....acgucAugggaacacggggugcc..... 1  
Gi5\_9102220\_x1.ugcgauccgCagacgucgug..... 1  
Gi2\_11137979\_x1.....aucggagacgucAgggaacacg..... 1  
Gi3\_28421415\_x1.....agacgucAugggaacacggggugccgaacu..... 1  
Gi1a\_6177688\_x1.....Cgagacgucgugggaacacggggugcc..... 1  
Gi2\_11165110\_x1.....cgugggaacacggggugcA..... 1  
Gi1a\_6119043\_x1.....Cucgugggaacacggggugccgaacu..... 1  
Gi2\_11158862\_x1.....Ccgugggaacacggggugc..... 1  
Gi3\_28791687\_x1..cgGucggagacgucgugggaacacggggug..... 1  
Gi5\_8982994\_x1.....cgucgugggaacCggggugccga..... 1  
Gi3\_28924654\_x1.....ggGgacgucgugggaacacggggugccgaac..... 1  
Gi1\_4268351\_x1.....cggagacgucgugggGcacggg..... 1  
Gi2\_11219679\_x1.....uGggagacgucgugggaac..... 1  
Gi5\_8912030\_x1.....acgucgugggaaAacggggugccgaac..... 1  
Gi2\_11209155\_x1.....Nugggaacacggggugccgaa..... 1  
Gi2\_11161359\_x1.....cggacacgucgugggaacacggggugcc..... 1  
Gi2\_11378714\_x1.....aNacgucgugggaacacggggugccgaacu..... 1  
Gi3\_28666499\_x1.....ggagacgucgugggaacacggggugccgaGc..... 1  
Gi1a\_6127069\_x1.....cggagacgucgugggaacCggg..... 1  
Gi5\_9082286\_x1.....cggGgacgucgugggaacacggggugccgaac..... 1

Gi3\_28726619\_x1.....gagacgucgugggaacGcggggu..... 1  
Gi2\_11080560\_x1.....ugggaacacgUggugccgaac..... 1  
Gi3\_28806121\_x1.ugUgaucggagacgucguggga..... 1  
Gi1\_4247169\_x1.ugcgauccgagacgucgugggC..... 1  
Gi2\_11168236\_x1.....aucggagacguUgugggaacacgg..... 1  
Gi2\_11294737\_x1.....aucggagacgucgugggaacacggAgug..... 1  
Gi5\_9084613\_x1.....cgugggaacacCgggugc..... 1  
Gi3\_28551677\_x1..gcgauccgagacgucAugggaacacggg..... 1  
Gi1\_4270557\_x1...gaucAgagacgucgugggaacac..... 1  
Gi2\_11146186\_x1.....Cagacgucgugggaacacggggug..... 1  
Gi2\_11312390\_x1.....ugggaacacggggugcUgaacuu..... 1  
Gi2\_11115769\_x1.....gAgaacacggggugccga..... 1  
Gi2\_11213851\_x1.ugcgauccgagGcugcugggaacacg..... 1  
Gi2\_11122784\_x1...Caucggagacgucgugggaacacgggg..... 1  
Gi2\_11354351\_x1..cgauccgagacgucgugggG..... 1  
Gi1\_4377672\_x1.....ucggagacgucGgggaacacg..... 1  
Gi1\_4371963\_x1.....ggaacacggggugccAaac..... 1  
Gi2\_11056128\_x1.ugcgauccgagGcugcugggaaca..... 1  
Gi1\_4270663\_x1.....cgugggaacacggggugccUaacu..... 1  
Gi2\_11311439\_x1.....aucggCgacgucgugggaacacg..... 1  
G1a\_5989269\_x1.....ucgugggaacCcggggugccgaacu..... 1  
Gi1\_4248102\_x1.....acgCcgugggaacacggggugccg..... 1  
Gi5\_8945337\_x1...gaucggagacgCcgugggaacacgg..... 1  
Gi2\_11298835\_x1.....aucggagaAgucgugggaacacggggugcc..... 1  
Gi3\_28895903\_x1.....ggagacgucguggAaacacggggugccgaacu..... 1  
Gi3\_28820152\_x1.....gucgugggaacacCgggugc..... 1  
Gi3\_28609191\_x1..cgauccgagacgucgugggGacacggggug..... 1  
Gi5\_8987183\_x1.....acuuuccagcgccugcugccacU..... 1  
Gi3\_28530822\_x1.....aucggagacgucgugggaacacgCggu..... 1  
Gi3\_28732712\_x1.....agacgucgugggaacacggggugccA..... 1  
Gi2\_11228211\_x1.....cggagacgAcgugggaacacggggugcc..... 1  
Gi1\_4210203\_x1.....cgugggaacacggggugcU..... 1  
Gi3\_28528891\_x1...Nucggagacgucgugggaacacg..... 1  
Gi2\_11302310\_x1.....cggagacguGgugggaacacggggugcc..... 1  
G1a\_6024874\_x1.....cgugggaCcacgggugcc..... 1  
Gi2\_11157262\_x1.....agacgAcgugggaacacggggugccga..... 1  
Gi3\_28739695\_x1.....gggaacacgggUugccgaac..... 1  
Gi3\_288780562\_x1.....acgucgugggaacacCgggugccgaacu..... 1  
Gi1\_4332098\_x1...aGcggagacgucgugggaacac..... 1  
Gi5\_8969834\_x1...ucggagacgucgugggaacacggggugccgaCc..... 1  
Gi1\_4304902\_x1...aucggagacgucgUggaacacgg..... 1  
Gi5\_8945266\_x1.....cgugggaAacggggugccgaac..... 1  
Gi2\_11273180\_x1.....ucggagacgCcgugggaacacggggugcc..... 1  
Gi5\_9111722\_x1.....acuuuccagcgccugcugccAacc..... 1  
Gi2\_11342311\_x1.....gucgugggaUcacggggugc..... 1  
Gi1\_4201699\_x1...ucggagacgucgugAgaacacggggugc..... 1  
Gi2\_11302322\_x1...gaucggCgacgucgugggaacacg..... 1

Gi2\_11393676\_x1.....ggagacgucGgggaacacggggu..... 1  
Gi2\_11075217\_x1.....cgucguggCaacacggggugccgaac..... 1  
Gi3\_28524268\_x1.....ggagacgucgugggaacacggggugcUg..... 1  
Gi3\_28519238\_x1.....aCggagacgucgugggaacacggggugccgaacu..... 1  
Gi2\_11136319\_x1.....cgaucggagacgucgugggCacacggggu..... 1  
Gi3\_28460458\_x1.....Uggagacgucgugggaacacggggugcc..... 1  
Gi3\_28806670\_x1..gcaucggagacgucgugggaGcacgg..... 1  
Gi2\_11341473\_x1.....ucgGgggaacacggggugc..... 1  
Gi1\_4301087\_x1.....agacgucGgggaacacggggugccgaacu..... 1  
G1a\_6226892\_x1.....aucggGgacgucgugggaacacgggg..... 1  
Gi2\_11390185\_x1.....ggagacgucgugggaacacgAggu..... 1  
Gi2\_11148471\_x1.....cggagGcgucgugggaacacggggugccga..... 1  
G1a\_6042069\_x1...gaucggagacgucgugggaacacggCgu..... 1  
Gi2\_11015326\_x1.....gggaacacggggugNcgaacu..... 1  
Gi5\_8912141\_x1...aucAgagacgucgugggaacacggg..... 1  
Gi1\_4359343\_x1.....cggagacgucgugggaacacgggguU..... 1  
G1a\_6046166\_x1...cgaucggagacguUgugg..... 1  
Gi3\_28421556\_x1.....ucggagacguUgugggaacacggg..... 1  
Gi3\_28328078\_x1.....acacggggugccgaacuA..... 1  
Gi5\_9007074\_x1.....gugggaacacggggugccgaacuA..... 1  
Gi5\_8842873\_x1...uGggagacgucgugggaacacggggugc..... 1  
G1a\_6135016\_x1.....gacgucgugggaacacggggG..... 1  
Gi2\_11363988\_x1.....gucgugggaacacggAgugccga..... 1  
Gi2\_11050627\_x1.....gagacAucgugggaacacggg..... 1  
Gi2\_11219971\_x1...Cucggagacgucgugggaacacg..... 1  
Gi1\_4210946\_x1.....ugggaaAacggggugccgaac..... 1  
Gi2\_11099348\_x1...gaucggagacgucgugggaacacgUggu..... 1  
Gi2\_11112296\_x1.....cgugggaacaAggggugc..... 1  
Gi3\_28360407\_x1.....cgugCgaacacggggugc..... 1  
Gi2\_11404960\_x1...gaucAgagacgucgugggaacacgggg..... 1  
Gi2\_11201916\_x1.....gacgucgugggaacacggUgugccgaacu..... 1  
Gi5\_9078119\_x1.....uggaacaGggggugccgaacu..... 1  
Gi1\_4365898\_x1.....ucgugggaacacgggguAcc..... 1  
G1a\_6184934\_x1...gaucggagacgucgugggCacacggggu..... 1  
Gi3\_28796761\_x1.....aucggagacgucgugggaGc..... 1  
Gi2\_11011329\_x1.....cggagacgucGgggaacacggggugcc..... 1  
Gi3\_28801430\_x1.....gucguggAaacacggggugccgaacuu..... 1  
Gi3\_28282508\_x1...cgaucggagacgucGgggaacacggggugc..... 1  
Gi3\_28423845\_x1.....gAcgugggaacacggggugccg..... 1  
Gi3\_28649462\_x1.....cgugCgaacacggggugccgaa..... 1  
Gi3\_28859105\_x1.....gagacgucgugggaGcacggggugccgaac..... 1  
Gi1\_4223059\_x1...cgaucggagacgucgugggaacacggggC..... 1  
Gi5\_9049121\_x1...gaGcggagacgucgugggaacac..... 1  
Gi5\_8891910\_x1.....acgucgugggaacacggggguAccgaac..... 1  
Gi3\_28714802\_x1.....ucgugUgaacacggggugc..... 1  
Gi2\_11055295\_x1.....agacgucguggAaacacggggugccgaac..... 1  
Gi1\_4335477\_x1...aucggaAacgucgugggaacacggggu..... 1

Gi1a\_6216183\_x1.....gugggaacacggggugccA..... 1  
 Gi3\_28547828\_x1.....cgucgugggaacacggggC..... 1  
 Gi2\_10993107\_x1....gaucggagacgucguAggaacacg..... 1  
 Gi3\_28424303\_x1.....cggagacgucgugggaacacggggCccgaacu..... 1  
 Gi1\_4316056\_x1.....acgucgugggaacacggggCgcccga..... 1  
 Gi5\_9009872\_x1.....gugggaacacggUgugccgaa..... 1  
 Gi3\_28547849\_x1.....acgAcgugggaacacggggugcc..... 1  
 Gi2\_11111345\_x1.....ugggaacacggggugccU..... 1  
 Gi2\_11287167\_x1.....gacgGcgugggaacacggggugccg..... 1  
 Gi5\_9108470\_x1.....ugggaacacggggugccgaCc..... 1  
 Gi3\_28624533\_x1.....cggagacgucgCgggaacacggggugc..... 1  
 Gi1a\_6326137\_x1....gaucggagacgucgugggGacacggg..... 1  
 Gi2\_11221653\_x1....aucggagacguAgugggaacacggggugcc..... 1  
 Gi3\_28967156\_x1.....ugggaacacggggUccg..... 1  
 Gi2\_11173560\_x1.....ggNacacggggugccgaa..... 1  
 Gi3\_28961737\_x1.....cgucgugggaCcacggggugccga..... 1  
 Gi3\_28903472\_x1.....cggagacgucguAggaacacg..... 1  
 Gi3\_28748776\_x1.....gucgugggaAacggggugcc..... 1  
 Gi1a\_6338016\_x1.....ggaacacggggugccgaGc..... 1  
 Gi1\_4165828\_x1.....gacgucgugCgaacacggggugccgaacu..... 1  
 Gi2\_11027356\_x1.....agacgucguggAaacacggggugcc..... 1  
 Gi1a\_6230459\_x1....ucgAagacgucgugggaacacggggugc..... 1  
 Gi1\_4176367\_x1.....ucgugggaacacgAggugcc..... 1  
 Gi5\_8913835\_x1.....agacgucgugggaacaUggggugccgaac..... 1  
 Gi3\_28418216\_x1.....cggagacgucgugggaacCggggugccg..... 1  
 Gi3\_28409995\_x1.....cguUgugggaacacggggugccgaa..... 1  
 Gi3\_28913769\_x1.....ggGgacgucgugggaacacggggugccgaa..... 1  
 Gi5\_9131724\_x1.....cgucgugUgaacacggggugccgaacu..... 1  
 Gi2\_11088272\_x1.....guAgugggaacacggggugccgaacu..... 1  
 Gi1\_4255711\_x1.....gucgugggaacacgUggugccgaacu..... 1  
 Gi4\_576295\_x1.....cgucgugCgaacacggggugccga..... 1  
 Gi3\_28282095\_x1....cgaucAgagacgucgugg..... 1  
 Gi1a\_5991808\_x1.....acgucgugggaGcacgggg..... 1  
 Gi1\_4297033\_x1.....ugAgaacacggggugccgaac..... 1  
 Gi1\_4300663\_x1.....ggagacgucgugggaacacggggugAc..... 1  
 Gi1a\_6100032\_x1....aucggagacgucgugggaGcacgg..... 1  
 Gi3\_28601072\_x1.....cgucgugggaCcacggg..... 1  
 Gi5\_9056333\_x1.....cgucgugggaacacggggugccgaGc..... 1  
 Gi5\_8994048\_x1.....acgucgugggaacacggggugGcgaacu..... 1  
 Gi3\_28659872\_x1.....cggagacgucgugggaacGcggg..... 1  
 Gi2\_11150570\_x1....cgaucggagacgucgugCgaacacggg..... 1  
 Gi5\_8831284\_x1....aucggUgacgucgugggaacacg..... 1  
 Gi3\_28360987\_x1.....gaacacggggugccgaGcuu..... 1  
 Gi5\_8878051\_x1.....cgugggaacaAggggugcc..... 1  
 Gi1\_4251418\_x1.....ugggaacacggggCgcccga..... 1  
 Gi1\_4315077\_x1.....agacgucgugggaCcacggg..... 1  
 Gi2\_11139442\_x1.....cgugggaacacggggugGcga..... 1



Gi2\_11051408\_x1.....aucggagacgucCugggaacacggg..... 1  
Gi2\_11277633\_x1.....gacgGcgugggaacacggggugc..... 1  
G1a\_6343640\_x1.....gacgucgugggaacacgAggugccgaacu..... 1  
G1a\_6350341\_x1.....ggUacacggggugccgaac..... 1  
Gi5\_9121618\_x1.....acgucgugggaacacgUggugccgaacu..... 1  
Gi3\_28271475\_x1.....cAaucggagacgucgugggaacacggg..... 1  
Gi1\_4329871\_x1.....ggagacgucgugggaacac..... 0  
Gi5\_8912359\_x1.....gagacgucgugggUacacg..... 1  
Gi1\_4217692\_x1...cgaucggagacgucgugggaacacg..... 0  
Gi3\_28698943\_x1.....ugggaacacggggugcGg..... 1  
G1a\_6013865\_x1.....ggagacgucgugggaacGcggggugcc..... 1  
Gi2\_11318735\_x1...gaucggagacAucgugggaacacgggg..... 1  
Gi2\_11317960\_x1...aucggagacguAgugggaacacggg..... 1  
Gi2\_11133825\_x1.....cguggCaacacggggugccgaac..... 1  
Gi5\_9052480\_x1.....gucguggUaacacggggugccgaacu..... 1  
Gi1\_4382999\_x1.....cggagacgucgugggaacacgggUugcc..... 1  
Gi2\_11254872\_x1.....gucgugggaaAacggggugccga..... 1  
Gi3\_28575365\_x1.....cgucgAgggaacacggggugccg..... 1  
Gi2\_11198485\_x1...aucggagGcgucguggga..... 1  
Gi2\_11091014\_x1.....gacgucgugggaacGcggggugcc..... 1  
Gi3\_28911306\_x1.....ucguAggaacacggggugccga..... 1  
Gi1\_4381741\_x1.....ugggaacacggggAgccgaac..... 1  
G1a\_6081477\_x1...Uucggagacgucgugggaacacgg..... 1  
Gi3\_28437607\_x1.....ggagGcgucgugggaacacgggg..... 1  
G1a\_6226971\_x1...aucggagacAucgugggaacacg..... 1  
Gi2\_11346812\_x1.....acgucgCgggaacacggggu..... 1  
Gi2\_11065301\_x1.....gggaacaUggggugccgaa..... 1  
Gi2\_11022717\_x1.....acgucgugCgaacacggggugcc..... 1  
Gi5\_9137800\_x1.....acgCcgugggaacacggggugcc..... 1  
Gi3\_28926760\_x1...aucggagGcgucgugggaacacggggugccg..... 1  
Gi5\_9071434\_x1.....Uggaacacggggugccgaacu..... 1  
Gi3\_28981012\_x1.....cgucgugggaacacgCggugccga..... 1  
Gi3\_28407508\_x1.....gucgugggaacCcgggugccgaa..... 1  
Gi1\_4373856\_x1.....ggaacacUgggugccgaac..... 1  
Gi5\_9078889\_x1.....acuuucccNgcgcgccugcuccacc..... 1  
Gi2\_11181002\_x1...gaucggaAacgucgugggaacacggggu..... 1  
Gi1\_4237187\_x1.....ucgugggaacaUggggugccgaac..... 1  
Gi2\_11230717\_x1.....uggCaacacggggugccga..... 1  
Gi3\_28898760\_x1...gaucggagCcgucgugggaac..... 1  
Gi1\_4229726\_x1.....cgugggaaUacggggugccgaac..... 1  
G1a\_6088418\_x1...aucggCgacgucguggga..... 1  
Gi2\_11282359\_x1...gaucggagacgucgugggaacacgAg..... 1  
Gi2\_11268499\_x1.....cggGgacgucgugggaacacg..... 1  
Gi5\_9022172\_x1.....cgugggaacacgggCugccgaac..... 1  
G1a\_5998609\_x1...aucggagacgucgugggCacacggggugc..... 1  
Gi5\_8910228\_x1.ugcgaucggagacgAcguggg..... 1  
Gi3\_28472735\_x1.....gagacgucguggAaacacggggu..... 1

|                 |                                              |   |
|-----------------|----------------------------------------------|---|
| Gi4_598044_x1   | .....acgucgugggGacacggggugccgaacu.....       | 1 |
| Gi1_4308091_x1  | .ugcgaucggagacgucAugggaacacg.....            | 1 |
| Gi1_4303385_x1  | .....cggagacguUgugggaacacggggugc.....        | 1 |
| Gi3_28584806_x1 | .gcgaucggagacgucgugggCaca.....               | 1 |
| Gi1a_6184830_x1 | .....cgUagacgucgugggaacacggggugcc.....       | 1 |
| Gi5_9078714_x1  | .....cCucgugggaacacggggugccgaac.....         | 1 |
| Gi1_4182306_x1  | .....Aaucggagacgucgugggaacac.....            | 1 |
| Gi1_4214499_x1  | .....ucgugggCacacggggugccg.....              | 1 |
| Gi1a_6179147_x1 | .....cgugggaacacggggugccgaGc.....            | 1 |
| Gi2_11277824_x1 | .....aucggUgacgucgugggaacacgg.....           | 1 |
| Gi1_4173293_x1  | .....ucgugggaacacAgggugccg.....              | 1 |
| Gi3_28852602_x1 | .....ucgCgggaacacggggugccga.....             | 1 |
| Gi3_28755674_x1 | .....gacgucgugggaacacgAggugccg.....          | 1 |
| Gi5_8902340_x1  | .....cUgagacgucgugggaacacggggugccgaacu.....  | 1 |
| Gi3_28603341_x1 | .....agGcgucgugggaacacggg.....               | 1 |
| Gi5_8846252_x1  | .....gucgugggaacaUggggugccgaac.....          | 1 |
| Gi5_9085377_x1  | .....cgucAugggaacacggggugcc.....             | 1 |
| Gi2_11161862_x1 | .....agacgucgugggaGcacggggugccg.....         | 1 |
| Gi2_11074514_x1 | .....gacgucguAggaacacggggugcc.....           | 1 |
| Gi3_28408067_x1 | .....Nggaacacggggugccgaa.....                | 1 |
| Gi4_590441_x1   | .....ucggagacNucgugggaacacggggugccg.....     | 1 |
| Gi1_4273573_x1  | .....ggagacgucgugggaacacgggU.....            | 1 |
| Gi5_9136691_x1  | .....gggaacacggggugcAga.....                 | 1 |
| Gi4_584307_x1   | .....cgucgugggaacaAggggugccgaacu.....        | 1 |
| Gi2_11186647_x1 | .....agacgucgugggaacacggggugUc.....          | 1 |
| Gi2_11394312_x1 | .....CucgugggaacacgggU.....                  | 1 |
| Gi2_11286884_x1 | .....ucggagacgucgugggaacacgggUc.....         | 1 |
| Gi2_11032415_x1 | .....gaucggagacgucCgggaaca.....              | 1 |
| Gi2_11295727_x1 | .....acgucgugggaacacggggugccgUa.....         | 1 |
| Gi4_607299_x1   | .....gugggaacacggggugUcgaacu.....            | 1 |
| Gi3_28818848_x1 | .....Aacgucgugggaacacgg.....                 | 1 |
| Gi2_11352255_x1 | .....cNugggaacacggggugccgaacu.....           | 1 |
| Gi2_11374281_x1 | .....auUggagacgucguggga.....                 | 1 |
| Gi3_28947509_x1 | .....aNcggagacgucgugggaacacggggugcc.....     | 1 |
| Gi1_4269008_x1  | .....aacacggggugccgaacAu.....                | 1 |
| Gi3_28781011_x1 | .....cggagacgNcgugggaacacgg.....             | 1 |
| Gi2_11376987_x1 | .....gugCgaacacggggugccg.....                | 1 |
| Gi1_4357434_x1  | .....cgucgugggaUcacggggugccgaacu.....        | 1 |
| Gi2_11388080_x1 | .....gaUgucgugggaacacggg.....                | 1 |
| Gi1_4261592_x1  | .....gagacgucgugggaacacgggUugccgaacu.....    | 1 |
| Gi3_28854929_x1 | .ugcgaucggagacgucgu.....                     | 0 |
| Gi3_28817667_x1 | .....ucggagacgucgugggaacacgggUc.....         | 1 |
| Gi1_4223681_x1  | .....gaacacggggAgccgaac.....                 | 1 |
| Gi2_11226778_x1 | .....ucggagacNucgugggaacacggggugccgaacu..... | 1 |
| Gi2_11142159_x1 | .....ucggagacgucgugggaacUcg.....             | 1 |
| Gi3_28937594_x1 | .ugcgaucggagacgucAuggga.....                 | 1 |
| Gi2_11002326_x1 | .....aucggagacgucgugggaacacA.....            | 1 |

|                                                           |   |
|-----------------------------------------------------------|---|
| Gi3_28524549_x1.....gugggaacacCggggugccg.....             | 1 |
| Gi2_11085128_x1.....gagacAucgugggaacacggggugcc.....       | 1 |
| Gi2_11375706_x1.....gUgacgucgugggaacacggggugccgaa.....    | 1 |
| Gi3_28834232_x1...cgaucggagacgucAugggaacacg.....          | 1 |
| Gi3_28977484_x1...cgUucggagacgucgugggaacacggg.....        | 1 |
| G1a_6022813_x1.....cgCcgugggaacacggggugccgaaacu.....      | 1 |
| G1a_6041051_x1.....ggagGcgucgugggaacacggggugcc.....       | 1 |
| Gi3_28899099_x1.....agacguAgugggaacacggggugcc.....        | 1 |
| Gi2_11357594_x1.....aucggagacgucUugggaacacggggugcc.....   | 1 |
| Gi2_11005962_x1...cgaucggaNacgucgugggaaca.....            | 1 |
| Gi3_28832779_x1.....cggagaUgucgugggaacac.....             | 1 |
| Gi1_4332788_x1.....gacgucgugggaacacUgggugccgaaacu.....    | 1 |
| Gi4_603790_x1.....ucgugggaCcacggggugccgaaacu.....         | 1 |
| Gi2_11209536_x1.....uGgugggaacacggggugccgaa.....          | 1 |
| G1a_6148333_x1...gaucggagacgucgugggaG.....                | 1 |
| Gi2_11045692_x1.....cggagacgucguAggaacacggggug.....       | 1 |
| Gi3_28582111_x1...gaucggagacguUgugggaacacggggug.....      | 1 |
| Gi5_8935405_x1.....gugggaacacggggguAccgaaacu.....         | 1 |
| Gi3_28784955_x1.....ucggagacgucgugggaacGcggg.....         | 1 |
| Gi1_4219345_x1.....ggUgacgucgugggaacacggggugccgaaacu..... | 1 |
| Gi2_11042862_x1.....gagaGgucgugggaacacggggugcc.....       | 1 |
| Gi4_594338_x1.....gugggaacacggggAgccgaa.....              | 1 |
| Gi2_11112883_x1.....ugggaacacgAggugccgaa.....             | 1 |
| Gi5_9092231_x1.....cgucgugggaacacggAgugccgaaac.....       | 1 |
| Gi5_9119219_x1.....agacgCcgugggaacacggggugc.....          | 1 |
| Gi5_8866969_x1.....gagacgucgGgggaacacggggugccgaaacu.....  | 1 |
| Gi2_11247658_x1...cgaucggGgacgucgugggaacacggggug.....     | 1 |
| Gi3_28513195_x1.....cggagacgucgugggaGcacg.....            | 1 |
| Gi3_28285505_x1.ugcgauUggagacgucgugggaacacg.....          | 1 |
| Gi2_11208750_x1.....gggaacacggggugccCaa.....              | 1 |
| Gi3_28374121_x1...gaucggagacgucgugggUacacgg.....          | 1 |
| Gi3_28829698_x1.....gagacgucgCgggaacac.....               | 1 |
| Gi3_28474740_x1.....acgucgugggaaUacggggugc.....           | 1 |
| Gi2_11324468_x1...gaucggagacgucgAgggaacacggg.....         | 1 |
| Gi3_28904514_x1.....ggagacgucguAggaacacg.....             | 1 |
| Gi3_28417452_x1.....ucgugggaacaUggggugcc.....             | 1 |
| Gi2_11248222_x1.....gucgugggaCcacggggugccgaaac.....       | 1 |
| Gi2_11277907_x1...ucggagacgucgugggGac.....                | 1 |
| Gi3_28440090_x1...aucggagacgucguUggaacacggggg.....        | 1 |
| Gi3_28786713_x1.....ggagacgucgugggaacacggggugGcg.....     | 1 |
| Gi1_4267626_x1.....gaacaNggggugccgaaacu.....              | 1 |
| Gi2_11336103_x1.....cguCggaacacggggugc.....               | 1 |
| Gi3_28284361_x1.....cggagacgucgugggaacacgggC.....         | 1 |
| Gi5_9031043_x1.....agacgucgugggCacacggggugccgaaacu.....   | 1 |
| Gi1_4248030_x1.....Cugggaacacggggugccgaaac.....           | 1 |
| Gi2_11036010_x1...aucggagacgucguggUaaca.....              | 1 |
| Gi1_4310620_x1.....gacgucgugggaacacgg.....                | 0 |

Gi2\_11215995\_x1.....gugggaacacggggugccCaac..... 1  
Gi1\_4247374\_x1.....gagacgucgugggaacacggggugccgUacu..... 1  
Gi2\_11380236\_x1.....ucAugggaacacggggugccg..... 1  
Gi1\_4279659\_x1.....ucggGgacgucgugggaacacggggug..... 1  
G1a\_6167409\_x1.....cgucgugggaacacggggugccgaaA..... 1  
Gi3\_28451964\_x1.....Ucgucgugggaacacggggugccgaac..... 1  
G1a\_6157299\_x1.....gugggaacCcggggugccg..... 1  
Gi2\_11274199\_x1...Ugaucggagacgucgugggaacacggg..... 1  
Gi1\_4199774\_x1.....Ugacgucgugggaacacgggg..... 1  
Gi2\_11258921\_x1.....ucgugggaacacgggAgugccg..... 1  
G1a\_6282482\_x1.....gucgugggaacacgggAugccgaacu..... 1  
Gi5\_9022783\_x1...Nucggagacgucgugggaacacggg..... 1  
Gi1\_4181614\_x1...gaGcggagacgucgugggaacacggggugc..... 1  
Gi5\_9042450\_x1...agacgAcgugggaacacggggugccgaacu..... 1  
Gi2\_11159141\_x1.....gucgugggaacacggggugccUaacu..... 1  
Gi3\_28840116\_x1...gaucggagacgucguggAaacacggggug..... 1  
G1a\_6283284\_x1...cgGucggagacgucgugggaacacggg..... 1  
Gi3\_28308295\_x1...cgaucggagacgucgugggaAacg..... 1  
Gi2\_11137711\_x1...aucggagacgucgugggaGac..... 1  
Gi3\_28639192\_x1...gaucggagacgucgugggaacacgAgg..... 1  
Gi2\_11035696\_x1...aucggagacguUgugggaacacgggg..... 1  
Gi2\_11360713\_x1...cgaucggagacgucgugggaacacggggugG..... 1  
Gi2\_11015884\_x1...gaucggagacgucgCgggaacacgggg..... 1  
Gi5\_9116942\_x1.....gaGcacggggugccgaac..... 1  
Gi3\_28619017\_x1.....agacgucgugggGacacggggugccgaac..... 1  
Gi2\_11302414\_x1.....gggaacacgggAugccga..... 1  
Gi2\_11194918\_x1.....ggNaacacggggugccgaacu..... 1  
Gi3\_28793840\_x1...cgaucggaAacgucgugggaacacgg..... 1  
Gi3\_28648741\_x1.....ucgugggaacacgUggugccgaacu..... 1  
Gi1\_4336176\_x1.....ucgugggaNcacggggugccg..... 1  
Gi3\_28651294\_x1.....gaacacggggugccgaacuC..... 1  
Gi3\_28547856\_x1...aucggagacgucgugggaacUcggggugcc..... 1  
Gi5\_8978021\_x1.....agacgucgugggaacacggggGgcc..... 1  
Gi3\_28937614\_x1.....Uggagacgucgugggaacacggg..... 1  
Gi3\_28414968\_x1.....acgucgugggCacacggg..... 1  
Gi3\_28834636\_x1.....gUgacgucgugggaacacggggugc..... 1  
Gi1\_4235410\_x1.....Aacgucgugggaacacggggugcc..... 1  
Gi2\_11025496\_x1.....ggagacgucUugggaacacggggugcc..... 1  
G1a\_6118794\_x1...Ggaucggagacgucguggga..... 1  
Gi3\_28265443\_x1...ucggagacgucAugggaaca..... 1  
Gi3\_28863564\_x1...Ugaucggagacgucgugg..... 1  
Gi5\_8915373\_x1.....acguUgugggaacacggggugccga..... 1  
Gi1\_4368519\_x1...gaucUgagacgucgugggaacacgg..... 1  
Gi5\_8837866\_x1.....ugggaacacggggugccgaCcuuu..... 1  
Gi3\_28889505\_x1...aucggagacgucgugggaacacgggCgugc..... 1  
Gi1\_4311153\_x1.....aGgucgugggaacacggggugccga..... 1  
Gi2\_11085866\_x1.....gacgucgugggaGcacggggugccgaac..... 1

Gi3\_28689086\_x1.....cgucgugggCacacggggugccgaac..... 1  
 Gi2\_11329447\_x1.....ggaAacgucgugggaacacggggugcc..... 1  
 Gi3\_28708663\_x1cugcgauccgagacgucgA..... 1  
 Gi2\_11337516\_x1...cgauccgagacgucgCgggaacacggg..... 1  
 Gi5\_8980379\_x1.....gggaUcacggggugccgaac..... 1  
 Gi5\_8871380\_x1.....Ggugggaacacggggugccgaacu..... 1  
 Gi1\_4210269\_x1.....cgugggaacacggggugccgaacG..... 1  
 Gi3\_28540816\_x1..gcgaucAgagacgucgug..... 1  
 Gi5\_9071660\_x1.....cCucgugggaacacggggugcc..... 1  
 Gi2\_11239641\_x1.....ucgugggaacacgCggugccgaac..... 1  
 Gi1\_4222455\_x1....ucAgagacgucgugggaacacg..... 1  
 Gi3\_28421519\_x1.....ugggaaGacggggugccga..... 1  
 Gi2\_11313192\_x1.ugcAaucggagacgucgugggaaca..... 1  
 Gi2\_11216467\_x1.....cguggAaacacggggugccg..... 1  
 Gi1\_4234315\_x1....auAggagacgucgugggaacacggggugcc..... 1  
 Gi2\_11275693\_x1.....gugggaacaAgggggugccg..... 1  
 Gi2\_11298892\_x1.....Aucgugggaacacggggg..... 1  
 Gi2\_11149812\_x1...cgauAggagacgucguggga..... 1  
 Gi5\_8902953\_x1.....gugggaaGacggggugccgaac..... 1  
 Gi1\_4194308\_x1.....acguGgugggaacacggggugcc..... 1  
 Gi3\_28605923\_x1.....agacgucgugggaUcacggggugccgaacu..... 1  
 Gi2\_11182255\_x1..gcgaucggagacgucgugggaacacgA..... 1  
 Gi5\_9126426\_x1....ucAgagacgucgugggaacacggggugccg..... 1  
 Gl1\_6248365\_x1....auUggagacgucgugggaacacgggg..... 1  
 Gi2\_11383190\_x1.....agacgucgugggaacacgAggugccgaacu..... 1  
 Gi2\_11323986\_x1.....ggaCacgucgugggaacacggggugc..... 1  
 Gi1\_4213091\_x1.....gUagacgucgugggaacacggggug..... 1  
 Gi5\_8906366\_x1.....gacgucgugggaacacggggCgccgaac..... 1  
 Gi5\_8880801\_x1.....guAgugggaacacggggugccgaa..... 1  
 Gi3\_28597761\_x1...gaucggGgacgucgugggaacacggggugccgaacu..... 1  
 Gi2\_11382800\_x1.....ggagacgucgugAgaacacggggug..... 1  
 Gi3\_28950647\_x1.....gacgucgCgggaacacggggugccg..... 1  
 Gi3\_28670153\_x1.....ggagacgAcgugggaacacggggugccgaacu..... 1  
 Gi3\_28570008\_x1...gaucggagacgucCugggaacac..... 1  
 Gi5\_9003467\_x1...gaucggagacgucgugggUacacg..... 1  
 Gl1\_6105180\_x1....aucggagGcugcuggggaacacgg..... 1  
 Gi2\_11363200\_x1.....gucgCgggaacacggggugccga..... 1  
 Gi1\_4257859\_x1.....gaUacgucgugggaacacggggugccg..... 1  
 Gl1\_6315853\_x1....aucggagacgucgugAgaacacgg..... 1  
 Gl1\_6221211\_x1....ucggagacgucgugggGacacgg..... 1  
 Gi3\_28499134\_x1.....ugggaacacggggUuccgaac..... 1  
 Gi3\_28850568\_x1...cgaucggagacgucgugggaacacggggugccgaacu..... 0  
 Gi2\_11340687\_x1cugcgauccgagacgucgugggaacacggggugcc..... 0  
 Gi2\_10996223\_x1....aucggagacgucgugggaacacggggguc..... 1  
 Gi3\_28800576\_x1.....ugggaacacggCgugccg..... 1  
 Gi1\_4371425\_x1.....agacgucgNgggaacacggggugccga..... 1  
 Gi1\_4175306\_x1.....gaacacggggCgccgaac..... 1

Gi5\_8971729\_x1.....gNaacacgggugccgaacu..... 1  
Gi2\_11266754\_x1.....ggagacgucgugggGaca..... 1  
Gi2\_11182697\_x1.....uAgugggaacacggggugccgaa..... 1  
Gi5\_8932681\_x1.....cgGgggaacacggggugc..... 1  
Gi2\_11195983\_x1.....ucgugggaacacgggAugccgaa..... 1  
Gi2\_11303052\_x1.....cgaucggagacgucgugggGaca..... 1  
Gi1\_4168268\_x1.....cgGgggaacacggggugccgaacu..... 1  
Gi1\_4270238\_x1.....cgugggaacacggggAgccga..... 1  
Gi3\_28752628\_x1.....ucgugggaacacggggugUcg..... 1  
G1a\_6278743\_x1.....gaucggagacgucguggggaacacggggG..... 1  
Gi2\_11220327\_x1.....aucggagacgucguggggaacacgggAugcc..... 1  
Gi5\_9006177\_x1.....gucgugggaacacgggAugccgaa..... 1  
Gi1\_4201065\_x1.....ucgugggaacaUggggugccg..... 1  
Gi2\_11068476\_x1.....auGggagacgucguggggaaca..... 1  
Gi3\_28719942\_x1.....gucgugggNacacggggugccgaa..... 1  
Gi1\_4159483\_x1.....Ngaacacggggugccgaacu..... 1  
Gi2\_11024932\_x1.....ugggaacacUgggugccgaa..... 1  
Gi3\_28859388\_x1.....ggaacacggggugccgaaG..... 1  
Gi1\_4250180\_x1.....cgCgggaacacggggugccg..... 1  
Gi3\_28440561\_x1.....guUgugggaacacggggug..... 1  
G1a\_6156067\_x1.....aucggagacgucguggggaacacgCggu..... 1  
Gi1\_4172357\_x1.....agUcgucguggggaacacgggg..... 1  
Gi1\_4316066\_x1.....gaucggagGcgucguggggaacacggg..... 1  
Gi5\_9002786\_x1.....Aagacgucguggggaacacggggugcc..... 1  
Gi1\_4223275\_x1.....gacgucAugggaacacggggugccgaacu..... 1  
Gi3\_28726336\_x1.....Gcggagacgucguggggaacacggggugccgaacu..... 1  
Gi3\_28868339\_x1.....cgucguggggaacacgAggugccgaa..... 1  
Gi5\_9080062\_x1.....cgAgggaacacggggugccg..... 1  
Gi2\_11233367\_x1.....cggagacgucgugggaaAacggggugcc..... 1  
Gi2\_11376915\_x1.....ugggaacacggggugAcga..... 1  
Gi2\_11401936\_x1.....cgaucggagacgGcguggggaacacgggg..... 1  
Gi1\_4248276\_x1.....ugggaacacggggugAcga..... 1  
Gi3\_28548211\_x1.....ugggaacaGggggugccgaa..... 1  
Gi3\_28964234\_x1.....gucgAgggaacacggggugccga..... 1  
Gi3\_28700986\_x1.....gaucggagacgucgugggUcacggggu..... 1  
Gi5\_9050829\_x1.....guAgggaacacggggugcc..... 1  
Gi1\_4319371\_x1.....aucggagacgucguggggaacacggggugccgaac..... 0  
Gi5\_8886182\_x1.....cgucgugggaCcacggggugc..... 1  
Gi1\_4338964\_x1.....ucggagacNucguggggaacacggg..... 1  
Gi4\_596748\_x1.....cgugggGacacggggugcc..... 1  
Gi3\_28440211\_x1.....cgucguggggaacGcggggug..... 1  
Gi5\_8899975\_x1.....gaucggUgacgucguggggaacacg..... 1  
Gi2\_11403646\_x1.....gugCgaacacggggugccga..... 1  
Gi2\_11309524\_x1.....agacgucgugGCaacacggggugccg..... 1  
Gi5\_9011612\_x1.....cgucgugggUacacggggugcc..... 1  
Gi2\_11141800\_x1.ugcgaucggGgacgucguggggaacac..... 1  
Gi2\_11320009\_x1.....gaCcgagacgucguggggaacacgg..... 1

|                 |                                     |   |
|-----------------|-------------------------------------|---|
| Gi1_4314917_x1  | .....gucguUggaacacggggugccgaacu     | 1 |
| Gi5_9136005_x1  | .....cgucguggAaacacggggugccga       | 1 |
| Gi5_8911070_x1  | ...Aaucggagacgucguggaaacacgggggu    | 1 |
| Gi1_4342969_x1  | .....ucgugggaacCcggggugc            | 1 |
| Gi3_28412732_x1 | .....gacgucguggaaacacggggGgcc       | 1 |
| Gi2_11169527_x1 | ...gaucggagaAgucguggga              | 1 |
| Gi3_28915901_x1 | .....ugggaacacgggAugccg             | 1 |
| Gi2_11245133_x1 | .....uAggaacacggggugccgaacuu        | 1 |
| Gi2_11030349_x1 | .....ucgugggaUcacggggugccgaac       | 1 |
| Gi3_28275142_x1 | ...cgaucggaAacgucguggg              | 1 |
| Gi2_11354722_x1 | .....gNgaacacggggugccgaacu          | 1 |
| Gi3_28349413_x1 | ...cgagacgCcgugggaacacg             | 1 |
| Gi1a_5998643_x1 | .....cgugggaacacggggAgc             | 1 |
| Gi2_11305005_x1 | ...gaucggagacguAgugggaacacg         | 1 |
| Gi1_4260662_x1  | .....gucgugggaacacggggCgcc          | 1 |
| Gi3_28669747_x1 | .....gagacgucgugggCacac             | 1 |
| Gi5_8989660_x1  | ...gagacgAcgugggaacacggggugccgaacu  | 1 |
| Gi2_11015120_x1 | .....gggaacacgCggugccga             | 1 |
| Gi5_9048533_x1  | .....cgugggaacacggggugcG            | 1 |
| Gi2_11142050_x1 | .....gugggaacacggggugcGga           | 1 |
| Gi2_11178717_x1 | .....gucgugggaacCcggggugccga        | 1 |
| Gi3_28506660_x1 | ...aucggagaGgucgugggaacac           | 1 |
| Gi1_4314101_x1  | .....cgucgugggaacacggggugccCaac     | 1 |
| Gi4_572858_x1   | .....gggaacacggggCgccgaac           | 1 |
| Gi1_4370639_x1  | .....ggaacacggggugccgaUc            | 1 |
| Gi1_4202041_x1  | .....cgugggCacacggggugccgaac        | 1 |
| Gi3_28324786_x1 | .....acgucgugggaacacggggugcAga      | 1 |
| Gi2_11240191_x1 | ...aucggagacgucguCggaacacggggugc    | 1 |
| Gi3_28943635_x1 | ...gaucggagacgucguggUaacac          | 1 |
| Gi3_28530103_x1 | .....ugggaacacgCggugccgaac          | 1 |
| Gi5_9073317_x1  | .....ucgugggaacaGggggugccgaacu      | 1 |
| Gi1_4325387_x1  | .....ucgAgggaacacggggugccgaac       | 1 |
| Gi3_28424949_x1 | .....acgucgugggaacaUggggugccgaa     | 1 |
| Gi3_28526121_x1 | .....gucgugggUacacggggugc           | 1 |
| Gi3_28805356_x1 | ...gagacgucgugggaacacggggugcUg      | 1 |
| Gi1_4239272_x1  | .....Uggaacacggggugccga             | 1 |
| Gi2_11399793_x1 | ...gaucggagacgucgugggUaca           | 1 |
| Gi3_28752216_x1 | ...gaucggagacgucgugggaacacgggAugc   | 1 |
| Gi1_4200379_x1  | ...aucggagacgucgugAgaacacg          | 1 |
| Gi4_611330_x1   | .....gucgugggaacacggggugccgaa       | 0 |
| Gi5_9062086_x1  | ...ggagacgCcgugggaacacggggugccgaacu | 1 |
| Gi5_9113568_x1  | .....cgugggaacacgggAugccga          | 1 |
| Gi1_4180163_x1  | .....ggUaacacggggugccgaa            | 1 |
| Gi1_4342532_x1  | .....gucgugggaGcacggggugccgaacu     | 1 |
| Gi1a_6124519_x1 | ...gaGcggagacgucgugggaacacggg       | 1 |
| Gi3_28944921_x1 | ...cgucgugggaacCcggggugccgaa        | 1 |
| Gi2_11278650_x1 | .....cgucgugggaacacggggugccUa       | 1 |

|                                                          |   |
|----------------------------------------------------------|---|
| Gl1a_6147163_x1.....gucgugggaacaAggggugccgaacu.....      | 1 |
| Gi5_8841939_x1.....cggagacgucguUggaacacgg.....           | 1 |
| Gi1_4291944_x1.....aucggagacgucgugggaaGacgggg.....       | 1 |
| Gi1_4161904_x1.....cgugggaacacggggugAcgaaacu.....        | 1 |
| Gi3_28826872_x1.....cggagacgucguggAaacacgggggu.....      | 1 |
| Gl1a_6071780_x1.....gugggaacUcggggugcc.....              | 1 |
| Gi2_11406968_x1.....gaucggagacgucgugggGacacggggug.....   | 1 |
| Gl1a_6000882_x1.....gaacacggNgugccgaac.....              | 1 |
| Gi2_11172251_x1.....gaucCgagacgucgugggaacacgggggu.....   | 1 |
| Gi2_11223470_x1.....agacgucguggggaacacgUggugcc.....      | 1 |
| Gi1_4338332_x1.....gucgugggaaAacggggug.....              | 1 |
| Gi3_28281181_x1.....gagacgucguggggaacacgAgggugccga.....  | 1 |
| Gi2_10993495_x1.....cgugggaacacggggugG.....              | 1 |
| Gi2_11308969_x1.....gaucggagacgucAugggaacacg.....        | 1 |
| Gi1_4326793_x1.....gaNgucgugggaacacggggugccgaacu.....    | 1 |
| Gi2_11117463_x1.....cguUgugggaacacggggugc.....           | 1 |
| Gi3_28865742_x1.....gacAucgugggaacacgg.....              | 1 |
| Gi2_11186005_x1.....gagacgucguggggaacCcggggugccgaac..... | 1 |
| Gi3_28808414_x1.....gagacgucguggggaacGcggggugcc.....     | 1 |
| Gi5_9013356_x1.....gugggaacacggggugcUgaa.....            | 1 |
| Gi2_11351281_x1.....ggaacacggggugUcgaa.....              | 1 |
| Gi3_28808093_x1.....cggagacgCcguggggaacacgggg.....       | 1 |
| Gi1_4182374_x1.....Ugugggaacacggggugcc.....              | 1 |
| Gi3_28880478_x1.....gaucggagacguAguggggaacacg.....       | 1 |
| Gi2_11170283_x1.....aucggagaUgucgugggaacacgggg.....      | 1 |
| Gl1a_6048808_x1.....ggaacacggggugccgaaU.....             | 1 |
| Gi3_28635184_x1.....gugggaacacggggugcUgaacu.....         | 1 |
| Gl1a_6254318_x1.....gugggaacacggggugUcgaac.....          | 1 |
| Gi3_28341929_x1.....gacguGgugggaacacggggugccg.....       | 1 |
| Gi5_9017364_x1.....gucgugggaacacggggugccAaa.....         | 1 |
| Gi5_9124912_x1.....cacggggugccgGacuuu.....               | 1 |
| Gi5_8879695_x1.....aAcggagacgucgugggaacacggggugc.....    | 1 |
| Gi2_11228325_x1.....gacgucguggggaacacggggugccC.....      | 1 |
| Gi1_4245029_x1.....ucguUggaacacggggugccga.....           | 1 |
| Gi3_28608554_x1.....cgauccgagacgucAugggaacacgggggu.....  | 1 |
| Gi4_584424_x1.....cUucgugggaacacggggugc.....             | 1 |
| Gi2_11161697_x1.....ugggaacacggggugccgaGcuu.....         | 1 |
| Gi1_4198510_x1.....aucggagacgucgGgggaacacg.....          | 1 |
| Gi3_28821798_x1.....ggagacgucgugggaaUacggggugcc.....     | 1 |
| Gi1_4375876_x1.....Cucggagacgucgugggaacacg.....          | 1 |
| Gi3_28633542_x1.....gaucggagaUgucguggga.....             | 1 |
| Gi5_8954635_x1.....ucggUgacgucgugggaacacg.....           | 1 |
| Gi1_4198358_x1.....agacgucguggAaacacggggugccg.....       | 1 |
| Gi2_11213159_x1.....acgucgAgggaacacggggugcc.....         | 1 |
| Gi2_11094170_x1.....aucggagacgucguggggaacacgAgg.....     | 1 |
| Gi5_8957623_x1.....gacgucgugggaacacgggAugccgaacu.....    | 1 |
| Gi5_9103489_x1.....gugggaacacgUggugccgaacu.....          | 1 |



Gi5\_9123820\_x1.....cggCgacgucgugggaaacacg..... 1  
Gi1\_4360806\_x1.....uggaacacggggugccgaUcu..... 1  
Gi1\_4254092\_x1.....cguAggaacacggggugccgaac..... 1  
Gi2\_11324045\_x1.ugcgauccggaAacgucgugggga..... 1  
Gi2\_11104714\_x1.....cgucgugggaaUacggggugcc..... 1  
Gi2\_11059151\_x1.....cguUggaacacggggugccgaac..... 1  
Gi3\_28266684\_x1.....gacgucguggAaacacggggugccgaacu..... 1  
G1a\_6108943\_x1.....cggagacUucgugggaaacacgg..... 1  
Gi1\_4183875\_x1.....guggaacacggggugccgUac..... 1  
Gi4\_591999\_x1.....acgucgugggaaacacggggugccgGacu..... 1  
Gi1\_4173542\_x1.....ggaacacggggugccgaCc..... 1  
Gi2\_11383068\_x1.....cggagacgucgugggaaacacggggGcggcaacu..... 1  
Gi5\_8919882\_x1.....cgucgugGNaacacggggugccgaa..... 1  
Gi5\_8836340\_x1.....acuuucccGgcgcgccugcugcccacc..... 1  
Gi3\_28570625\_x1.....cgugggaaacacggggugcAga..... 1  
Gi3\_28447814\_x1.....aucggagacgucgugUgaacacgg..... 1  
Gi1\_4260454\_x1.....Ugucgugggaaacacggggugccg..... 1  
Gi3\_28763278\_x1.....ggagacgucgugggaaacacggggGgcccga..... 1  
Gi5\_9026259\_x1...gaucggagacgucgugAgaacacggg..... 1  
Gi1\_4242350\_x1.....agacUucgugggaaacacggggugccg..... 1  
Gi5\_9100429\_x1.....gugggCacacggggugccgaa..... 1  
Gi2\_11043744\_x1....aNcggagacgucgugggaaacacggggugc..... 1  
Gi3\_28758590\_x1....aucggagacgucgugggCacacggggug..... 1  
G1a\_6220950\_x1.ugcgauccAagacgucgu..... 1  
Gi2\_11079285\_x1.....cggagacgucgugggaaacacggAgug..... 1  
Gi1\_4196304\_x1.....aacacggggugccgaGcuu..... 1  
Gi3\_28790007\_x1.....ucgugggaaacacgggCugccgaac..... 1  
Gi4\_597262\_x1.....ugUgaacacggggugccgaacu..... 1  
Gi3\_28836463\_x1.....Agagacgucgugggaaacacggggugccgaac..... 1  
Gi5\_9014548\_x1....aucggagacgucgugggaaUacggggugc..... 1  
Gi5\_9126363\_x1.....guggUaacacggggugccg..... 1  
G1a\_6262157\_x1....aGcggagacgucgugggaa..... 1  
Gi1\_4246711\_x1.....gacgucgugggaaacacggggugcUgaacu..... 1  
G1a\_6001175\_x1....aucggagacgucgCgggaacacgg..... 1  
Gi2\_11006403\_x1.....cgugggaaUacggggugccg..... 1  
Gi2\_11259929\_x1...cgaCcgagacgucgugggga..... 1  
Gi5\_9067242\_x1.....gggaaGacggggugccgaacu..... 1  
Gi1\_4196698\_x1....aucggagacgucgugggaaacGcggggu..... 1  
Gi2\_11261287\_x1..gcgauccgagacgucguggggaGcac..... 1  
Gi1\_4292568\_x1....ucggagacgucgugggaaacGcggggugc..... 1  
G1a\_6087841\_x1.....guUggaacacggggugccga..... 1  
Gi2\_11388558\_x1.....agacgucgugggaaUacggggugcc..... 1  
Gi3\_28788106\_x1....ucggagacgucgugggGacacggggugccga..... 1  
Gi2\_11353305\_x1....ucggagacgucgugggaaacacggAgugc..... 1  
G1a\_6223974\_x1.....gUagacgucgugggaaacacggggugccgaacu..... 1  
Gi3\_28261718\_x1.....gucgugggaaacacggggugccAaa..... 1  
Gi3\_28904424\_x1.....gaAacgucgugggaaacacggggugccgaac..... 1

G1a\_6329013\_x1.....gacgucgCggaacacggggu..... 1  
 Gi4\_610217\_x1.....cUgggaacacgggugccgaac..... 1  
 Gi5\_9083321\_x1.....ggaacacgggguCccgaacu..... 1  
 Gi2\_11148400\_x1...cgaucggagacgucgugggUaca..... 1  
 Gi4\_580002\_x1.....ggaacacgggugccAaacu..... 1  
 Gi2\_11054077\_x1.....aCacgucgugggaacacgggugccgaac..... 1  
 Gi5\_9123941\_x1.....gagacgucgugggaacacgggugccGacu..... 1  
 Gi4\_595456\_x1.....gggaacacgggugccGacu..... 1  
 Gi4\_572315\_x1.....gggaacacgggugccAaacu..... 1  
 G1a\_6049012\_x1.....ggaacCcggggugccgaac..... 1  
 Gi5\_9014635\_x1.....cgucgugggaCcacgggugcc..... 1  
 Gi2\_11141422\_x1...cgaucggagacgGcgugg..... 1  
 Gi3\_28599689\_x1.....cNgagacgucgugggaacacggggu..... 1  
 Gi1\_4361988\_x1....aucggagacgucgugggGacacgggugc..... 1  
 Gi4\_584966\_x1.....gugggaacacgggugccgaGc..... 1  
 Gi2\_11312521\_x1...cgaucggCgacgucgugggaacacg..... 1  
 Gi3\_28949827\_x1.....agacgucCugggaacacgggugcc..... 1  
 Gi3\_28671797\_x1.....gacgucgugggaacacggAgugccgaa..... 1  
 Gi2\_11316296\_x1.gcgaucggagacgucAuggga..... 1  
 Gi5\_9028194\_x1.....acGcggggugccgaacuuu..... 1  
 Gi3\_28555824\_x1.....ucggagacgucgugggaUcac..... 1  
 Gi3\_28276170\_x1.gcgaGcggagacgucgugggaacacggggu..... 1  
 Gi5\_8978993\_x1.....agacgucgugggaacacgggugcAgaac..... 1  
 Gi1\_4273633\_x1.....cggagacgucgugggaacacgggugUc..... 1  
 Gi3\_28982565\_x1cugNgaucggagacgucg..... 1  
 Gi3\_28265582\_x1.....cggagacgucgugggaCcacggg..... 1  
 Gi1\_4209292\_x1.....acguAgugggaacacgggugccgaacu..... 1  
 Gi5\_8866100\_x1.....cgucgugggaUcacgggugccgaacu..... 1  
 Gi2\_11057141\_x1...gaucggagacgucgugggaacacgAggug..... 1  
 Gi2\_11220507\_x1....uUggagacgucgugggaacacgggugccgaacu..... 1  
 Gi5\_8898971\_x1.....ucgugggaGacgggugccgaacu..... 1  
 Gi2\_11029106\_x1.....gagacgucguggUaacacgggugccgaacu..... 1  
 Gi1\_4179569\_x1.....cgucguggNaacacgggugccgaa..... 1  
 Gi2\_11359732\_x1...gaucggagacgucgugggaacacgggugU..... 1  
 G1a\_6051418\_x1...gauUggagacgucgugggaacacggggu..... 1  
 Gi2\_11268285\_x1.....cguggUaacacgggugccgaac..... 1  
 Gi1\_4226949\_x1.....agacgucgugggaacacgggugccAa..... 1  
 Gi3\_28651206\_x1...cgauUggagacgucgugggaacacgggugcc..... 1  
 Gi4\_613890\_x1.....gugggaacacgggugccgaaUu..... 1  
 Gi5\_8992761\_x1.....cgucgugggaacacgggugcGgaacu..... 1  
 Gi2\_11043685\_x1.....cgugggaacacggAgugc..... 1  
 Gi5\_9097358\_x1.....ugggUaacacgggugccgaac..... 1  
 Gi3\_28765382\_x1....aucggagacgucgugggaacacgAggugccg..... 1  
 Gi3\_28501179\_x1.....cgucgugggaacacgggugGc..... 1  
 Gi2\_11169419\_x1...cCaucggagacgucguggga..... 1  
 Gi3\_28649692\_x1.....gucgCgggaacacgggug..... 1  
 Gi2\_11144443\_x1.....cgugggaacacgggAgccga..... 1

|                                                          |   |
|----------------------------------------------------------|---|
| Gi3_28294068_x1.....Cacgucgugggaacacggggugccg.....       | 1 |
| Gi1_4198491_x1.....ugggGacacggggugccgaa.....             | 1 |
| Gi2_11187240_x1.....ggagacgucguAggaacacgggggu.....       | 1 |
| Gi3_28524640_x1.ugcgauccggGgacgucgugggaacacgggggu.....   | 1 |
| Gi3_28899074_x1.....gagacgucgugggaacacggggugcAgaacu..... | 1 |
| Gi2_11103474_x1.....agacgucgugCgaacacggggugccgaa.....    | 1 |
| Gi3_28461412_x1.....ggagacgucgugggaacacggAg.....         | 1 |
| Gi5_8977242_x1.....aucggagaNgucgugggaacac.....           | 1 |
| Gi2_11390616_x1.....aucggagacgucgugggaGcacgggg.....      | 1 |
| Gi3_28822262_x1.....acgucgugggaaAacggggugcc.....         | 1 |
| Gi1_4245667_x1.....ggagacgucgugggaacacg.....             | 0 |
| Gi5_8934222_x1.....guUggaacacggggugccg.....              | 1 |
| Gi3_28562907_x1.....Ucgucgugggaacacggggugccg.....        | 1 |
| Gi3_28580297_x1.....ucggagacgucgugggaacaUgggggu.....     | 1 |
| Gi3_28374729_x1...cgaNcggagacgucgugggaacacg.....         | 1 |
| Gi3_28274578_x1...gaucggagacCucgugggaacacgggggu.....     | 1 |
| Gi5_8935414_x1...aucggagacgucgugggaacacU.....            | 1 |
| Gi1_4310762_x1...aucggGgacgucguggga.....                 | 1 |
| Gi2_11359708_x1...aucggagacgucgugAgaaca.....             | 1 |
| Gi2_11049741_x1...aucggagacguAgugggaaca.....             | 1 |
| Gi3_28348113_x1...ucggagacgCcgugggaacacggggugc.....      | 1 |
| Gi2_11257254_x1...agacgucgugggaacacggAgugcc.....         | 1 |
| Gi5_8968304_x1...gugUgaacacggggugccgaacuuu.....          | 1 |
| Gi5_9028812_x1...agacgucgugggaacacggggugccgaa.....       | 0 |
| Gi2_11113412_x1...cgucgugggaacacggggAgccgaa.....         | 1 |
| G1a_6185367_x1...aucggagacgucgugggaacacU.....            | 1 |
| Gi3_28364572_x1...gagacgucgugggaacacggggugccgaaU.....    | 1 |
| G1a_6167373_x1...Aaucggagacgucgugggaacacg.....           | 1 |
| Gi1_4245540_x1...cgucgugggaacacggggugccgaaAu.....        | 1 |
| Gi5_8983057_x1...cgucgugggaacacggggAgccga.....           | 1 |
| Gi2_10995106_x1...aucggagacgucgugggaacacggC.....         | 1 |
| Gi3_28698841_x1...gaucggagacgucgugUaacacgggggu.....      | 1 |
| Gi2_11183648_x1...gugggaacacggggugGcga.....              | 1 |
| Gi1_4213635_x1...guAggaacacggggugccgaa.....              | 1 |
| Gi1_4208002_x1...ucggagacgucgugggaacaAggggugccgaa.....   | 1 |
| Gi3_28335936_x1...cgucgAgggaacacggggugccgaa.....         | 1 |
| G1a_6301518_x1...aucggagacgucgugggGacacgg.....           | 1 |
| Gi2_11207418_x1...gacUucgugggaacacggggugccgaa.....       | 1 |
| G1a_6287478_x1...acgucgugggaacacggggugccgaaA.....        | 1 |
| G1a_6269382_x1...gacgucgugggaacacggggGgcccgaacu.....     | 1 |
| G1a_6066103_x1...gucgugggaaAacggggugcc.....              | 1 |
| Gi3_28562281_x1...cgauccgagacgucgGgggaacacg.....         | 1 |
| Gi1_4378067_x1...gucgugggaacacggggUcccgaacu.....         | 1 |
| Gi1_4259762_x1...cguUgugggaacacggggugccgaa.....          | 1 |
| Gi2_11217981_x1...cgucgugggaacacAgggug.....              | 1 |
| Gi1_4240272_x1...cgucgugggaacacggggUgcccgaacu.....       | 1 |
| Gi3_28721942_x1...cgucUgggaacacggggugc.....              | 1 |

|                                                           |   |
|-----------------------------------------------------------|---|
| Gi3_28320715_x1...cgGucggagacgucgugggaacacgg.....         | 1 |
| Gi1_4165978_x1.....cgugggaacacgUggugccgaacu.....          | 1 |
| Gi5_8999733_x1.....cgugggaacacgggguAccga.....             | 1 |
| Gi5_9018678_x1....aucggCgacgucgugggaacacg.....            | 1 |
| Gi1_4278910_x1....aucggagacguUgugggaacacggg.....          | 1 |
| Gi2_11239406_x1.....uGggagacgucgugggaacacg.....           | 1 |
| Gi2_11406577_x1.....cgucguAggaacacggggugccgaa.....        | 1 |
| Gi3_28908826_x1.uUcgauccgagacgucgugggaacacggg.....        | 1 |
| Gi3_28522506_x1.....cgucgugggaacacggggugG.....            | 1 |
| Gi1_4363205_x1.....gaacacCgggugccgaacu.....               | 1 |
| Gi5_9136118_x1.....Cagacgucgugggaacacggggugccgaac.....    | 1 |
| Gi2_11084563_x1...cgauccAgagacgucgugggaacacggggugcc.....  | 1 |
| Gi3_28274763_x1.....Nggaacacggggugccgaacu.....            | 1 |
| Gi5_8965818_x1.....agacgucgugggaacacggggugUcgaaacu.....   | 1 |
| Gi2_11389766_x1...cgauccgagGcgucgugggaacacggg.....        | 1 |
| Gi3_28331419_x1.....ugNgaacacggggugccgaa.....             | 1 |
| Gi3_28806727_x1...gaucggUgacgucguggga.....                | 1 |
| Gi3_28853400_x1...gaucggagaAgucguggga.....                | 1 |
| Gi3_28581080_x1.....gacgucgCgggaacacggg.....              | 1 |
| Gi2_11065411_x1.....agaUgucgugggaacacggggugccgaacu.....   | 1 |
| Gi1a_6138011_x1.....acgucgugggaacacAgggg.....             | 1 |
| Gi2_11296973_x1.....cgucguggAaacacggggugccg.....          | 1 |
| Gi2_11029800_x1.....cgucgugggaacacggggugcGgaacu.....      | 1 |
| Gi2_11023884_x1.....ggagacgucgugggaacacgggUugcc.....      | 1 |
| Gi1_4346989_x1...gaucggaAacgucguggg.....                  | 1 |
| Gi1a_6322999_x1.....aucgUagacgucgugggaacacggg.....        | 1 |
| Gi3_28794766_x1.....gugggaacacgCggugccgaa.....            | 1 |
| Gi3_28413707_x1.....gacguUgugggaacacgggg.....             | 1 |
| Gi2_11313391_x1.....agacgucgugggaacacggggugccgaUcu.....   | 1 |
| Gi5_8839575_x1.....agacgucgugggaacacggggugccgUacu.....    | 1 |
| Gi3_28612825_x1...gauAggagacgucgugggaacacggg.....         | 1 |
| Gi2_11184741_x1.....gucgugggaacacggggugccgC.....          | 1 |
| Gi2_11315886_x1.....cgugggaacacggggugGc.....              | 1 |
| Gi1_4341789_x1.....ggGgacgucgugggaacacggggug.....         | 1 |
| Gi3_28497722_x1...gaucggagacgucgugggaacUcggggugc.....     | 1 |
| Gi1a_6147459_x1....aucggagGcgucguggga.....                | 1 |
| Gi1_4253092_x1....aucggagaNgucgugggaacacggg.....          | 1 |
| Gi5_8933110_x1.....cCugggaacacggggugccgaacu.....          | 1 |
| Gi2_11142379_x1....ucggaUacgucgugggaac.....               | 1 |
| Gi3_28454117_x1.....gacgucgugggaacNcggggugccgaacu.....    | 1 |
| Gi2_11375270_x1.....acgucgugggaacacCggggugccgaa.....      | 1 |
| Gi5_9050914_x1.....gugggaacacAgggugccg.....               | 1 |
| Gi1_4302488_x1...gcgaucggagacgucgugggaacacggggugccga..... | 0 |
| Gi2_11397859_x1.....cgucguggGacacggggugccgaac.....        | 1 |
| Gi2_11381558_x1.....ggagacgucgugggaCcac.....              | 1 |
| Gi3_28446593_x1.....ucgugggaacacggggugUc.....             | 1 |
| Gi3_28453491_x1.....ggagacgucgugggaacacgggggUcc.....      | 1 |

Gi1\_4185341\_x1.....ucggagacgucgugggaaacacggggAgc..... 1  
Gi5\_9121769\_x1.....gugggaacacggggugcAga..... 1  
Gi5\_8915265\_x1.....cgugggaUcacggggugccga..... 1  
Gi5\_9132000\_x1.....ucgugggaacaGggggugccgaac..... 1  
Gi1\_4356185\_x1.....gggaacacggggugccgaaA..... 1  
Gi1\_4262225\_x1.....gugCgaacacggggugccg..... 1  
G1a\_6188052\_x1.....ucggagaUgucgugggaaacacggg..... 1  
Gi2\_11013576\_x1.....Aggagacgucgugggaaacacggggugccgaacu..... 1  
Gi3\_28793472\_x1.....ggagacgucgugUgaacacg..... 1  
Gi2\_11207060\_x1.....aucggagacAucguggga..... 1  
Gi5\_9072141\_x1.....guggAaacacggggugccgaa..... 1  
Gi3\_28539792\_x1.....ucggagCcgucgugggaaacacggg..... 1  
Gi5\_8881043\_x1.....cgucgugggaaacacggggAgccgaa..... 1  
Gi2\_11170750\_x1.....gacgucgugggaaacaGggggugccgaacu..... 1  
G1a\_6359722\_x1.....ucggagacgucgugggCacacggggugcc..... 1  
Gi2\_11219368\_x1.....aucggagacgucgugggaaacacggggugG..... 1  
Gi2\_11177364\_x1.....aucggagacgucgugggaaacacggggugcA..... 1  
Gi2\_11127496\_x1cugcgauccggagacgucgugggaaacaA..... 1  
Gi2\_11173634\_x1.....cgucgugggaaacaAgggggugccgaac..... 1  
Gi2\_11193429\_x1.....ugggaacacggggugccgGa..... 1  
Gi5\_8854846\_x1.....guUggaacacggggugccgaacuu..... 1  
Gi5\_8939837\_x1.....cggagacgucgugggaaUacggggugccga..... 1  
G1a\_6337277\_x1.....Gcggagacgucgugggaaacacggggugc..... 1  
Gi2\_11373037\_x1.....cguggAaacacggggugccga..... 1  
Gi3\_28422835\_x1.....aucggagacgucgugggaaacacggggCgccg..... 1  
Gi3\_28587462\_x1.....gacgucgugggaaCcacggggugccg..... 1  
Gi1\_4368496\_x1.....cgugggCacacggggugcc..... 1  
Gi3\_28580687\_x1.....cguggAaacacggggugc..... 1  
Gi1\_4381532\_x1.....Acggagacgucgugggaaacacggg..... 1  
Gi5\_8903263\_x1.....agaUgucgugggaaacacggggugc..... 1  
Gi3\_28788866\_x1.....cgucgugggaaacacUgggu..... 1  
G1a\_6137112\_x1.ugcgauccgNagacgucgug..... 1  
Gi2\_11161982\_x1.....aucggagacgucgCgggaacacgg..... 1  
Gi2\_11115456\_x1.....gacgucgugggGacacggggugccgaac..... 1  
Gi2\_11322340\_x1.....gacAucgugggaaacacggggugc..... 1  
G1a\_6102016\_x1.....gggaacacUgggugccgaacu..... 1  
Gi5\_9087430\_x1.....agacAucgugggaaacacggggugccgaac..... 1  
Gi2\_11197035\_x1.....gagacgucgCgggaacacggggug..... 1  
Gi3\_28412396\_x1.....ggagacgucgugUgaaca..... 1  
Gi2\_11105025\_x1.....cguNggaacacggggugccgaac..... 1  
Gi4\_599000\_x1.....gAgggaacacggggugccga..... 1  
Gi3\_28820825\_x1.....cggagacgucgugggaaGcacggggug..... 1  
Gi2\_11299687\_x1.....cgauccggagacgucgugggaaGcacggggug..... 1  
Gi2\_11007882\_x1.....cgucgGgggaacacggggugc..... 1  
Gi3\_28976063\_x1.....aCacgucgugggaaacacgggg..... 1  
Gi2\_11331752\_x1.....gacgucgugggaaacacggggugAcgaac..... 1  
Gi2\_11158685\_x1.....ggagUcucgugggaaacacgggggu..... 1

|                                                            |   |
|------------------------------------------------------------|---|
| Gi2_11166368_x1..gcgaucggaAacgucgugggaacacggg.....         | 1 |
| Gi3_28761144_x1.....ucggGgacgucgugggaacacggggugccgaac..... | 1 |
| Gi5_8949160_x1.....gucgCggaacacggggugc.....                | 1 |
| Gi3_28515481_x1.....gagacgucgugggaacCcgggugccgaac.....     | 1 |
| Gi3_28867521_x1.....gaucggagacgucgugggaacaG.....           | 1 |
| Gi4_601083_x1.....gacgucgugggaacacggggugccgaacA.....       | 1 |
| Gi1_4199416_x1.....gaucggagGcgucguggga.....                | 1 |
| Gi1a_6353752_x1.....gaucggagacgucgugggaacaUg.....          | 1 |
| Gi3_28284157_x1.....gacgucgugggaacacAgg.....               | 1 |
| Gi3_28886431_x1.....agacgucgugggaacacggggugccAa.....       | 1 |
| Gi2_11347618_x1.....cgucgugggaacacCggggug.....             | 1 |
| Gi2_11236290_x1.....gaacacgUggugccgaacu.....               | 1 |
| Gi1a_6286487_x1.....aucggGgacgucgugggaacacgg.....          | 1 |
| Gi2_11161770_x1.....aucggagacgucgugggaacacgggUugcc.....    | 1 |
| Gi5_9060248_x1.....aucggagacgucguggga.....                 | 0 |
| Gi3_28349541_x1.....gugggaacacUgggugccg.....               | 1 |
| Gi5_8977585_x1.....aucggagacgucgugggaacCc.....             | 1 |
| Gi2_11012093_x1.....aGgucgugggaacacggggugccga.....         | 1 |
| Gi2_11096801_x1.....aucggagUcgucgugggaacacggggug.....      | 1 |
| Gi3_28811831_x1.....acgGcgugggaacacggggugccgaa.....        | 1 |
| Gi4_586201_x1.....ggaacacgNggugccgaacu.....                | 1 |
| Gi2_11009185_x1.....gucgGgggaacacggggugccga.....           | 1 |
| Gi1_4319731_x1.....Uucgugggaacacggggugccga.....            | 1 |
| Gi2_11361321_x1.....ugggaacacggggugAcgaa.....              | 1 |
| Gi5_8930083_x1.....acgucgugggaacacggggAgcc.....            | 1 |
| Gi1_4324654_x1.....gucgugCgaacacggggugccgaac.....          | 1 |
| Gi5_9081824_x1.....ggaacacggggugcUgaac.....                | 1 |
| Gi5_8905360_x1..ugcgaucggagacgucguAgga.....                | 1 |
| Gi5_9056872_x1.....cgGgggaacacggggugccg.....               | 1 |
| Gi5_9017737_x1.....cAucgugggaacacggggugc.....              | 1 |
| Gi3_28757196_x1.....gggaacacggggAgccga.....                | 1 |
| Gi3_28656152_x1.....gaacacggggGgccgaacu.....               | 1 |
| Gi5_9117015_x1.....gugggaacacggggugccgUacuu.....           | 1 |
| Gi1_4283749_x1.....agacguUgugggaacacggggugccgaacu.....     | 1 |
| Gi2_11023222_x1.....ucggCgacgucgugggaaca.....              | 1 |
| Gi1a_6330985_x1.....gucgugggaacacggggugccgaCcu.....        | 1 |
| Gi3_28376664_x1.....ggagacgucgugggaacacAgggugccga.....     | 1 |
| Gi1_4373095_x1.....ugUgaacacggggugccga.....                | 1 |
| Gi5_8835995_x1..ugcgaucggCgacgucgugg.....                  | 1 |
| Gi3_28340748_x1.....aucggagacgucgugggaacacggggugA.....     | 1 |
| Gi2_11378683_x1.....ucgugggaacacggggugAcgaa.....           | 1 |
| Gi5_8841682_x1.....ggCacacggggugccgaacu.....               | 1 |
| Gi2_11123213_x1.....gacgucgugggaacaGggggu.....             | 1 |
| Gi5_9120124_x1.....cgucgugggaacacggggAgcc.....             | 1 |
| Gi3_28424052_x1.....cgucgugggaacaUgggg.....                | 1 |
| Gi3_28806899_x1.....cgaucggagacgCcgugg.....                | 1 |
| Gi3_28949602_x1.....ucggagacgucgugggaacacgggAugcc.....     | 1 |

|                                                        |   |
|--------------------------------------------------------|---|
| Gi1_4345552_x1.....gacgucguggAaacacggggugccgaacu.....  | 1 |
| Gi2_11145614_x1....aucNgagacgucgugggaacacggggu.....    | 1 |
| Gi5_9000953_x1.....gugggaacacggggCgccga.....           | 1 |
| Gi3_28628883_x1.ugcgaucggagacgucgugggaGcacg.....       | 1 |
| Gi3_28519424_x1.....gacgucgugggGacacggggu.....         | 1 |
| Gi2_11377878_x1.....ugggaacacgggAugccg.....            | 1 |
| Gi3_28599860_x1.....gagacguUgugggaacacg.....           | 1 |
| G1a_6232509_x1...cgaucggCgacgucgugggaa.....            | 1 |
| G1a_6094550_x1.....ggagacgucgugggaGcacg.....           | 1 |
| Gi5_8975565_x1....aucggagCcgucgugggaacacg.....         | 1 |
| Gi2_11095498_x1.....cggagacgucgugggaacacggUgug.....    | 1 |
| Gi2_11159848_x1....aucggagacgucAugggaacacg.....        | 1 |
| Gi2_11167446_x1....gaucggagacgucgugggaGcacggggugc..... | 1 |
| Gi1_4383907_x1.Gcggaucggagacgucgugggaacacg.....        | 1 |
| Gi2_11017653_x1.....cggagacgucgugggaacGcg.....         | 1 |
| Gi2_11164527_x1...cgaucggagacgucGcg.....               | 1 |
| Gi3_28371378_x1.....gucguAggaacacggggug.....           | 1 |
| Gi2_11064052_x1.....gacgucgugggaacGcgg.....            | 1 |
| Gi1_4305731_x1.....ucNugggaacacggggugccgaacu.....      | 1 |
| Gi2_11179885_x1.....gucgugggaacacggggugcU.....         | 1 |
| Gi3_28293053_x1.....gucgugggaacacggggugGcgaacuu.....   | 1 |
| Gi1_4223234_x1.....cgucUugggaacacggggugcc.....         | 1 |
| Gi4_572678_x1....aucggagacgucgugggaa.....              | 0 |
| Gi1_4168633_x1.....cgugggaacacggggugcUgaac.....        | 1 |
| Gi2_11092207_x1.....cgucgugAgaacacggggug.....          | 1 |
| Gi2_11126750_x1..gcgaucggGgacgucgugggaacac.....        | 1 |
| Gi3_28954476_x1.....ucggagaUgucgugggaacacg.....        | 1 |
| Gi3_28334452_x1.....agacgucCugggaacacggggugccgaac..... | 1 |
| Gi5_8879035_x1.....ucgugggaUcacggggugccgaacu.....      | 1 |
| Gi2_11174552_x1.....ucgugggaacacggggugGcgaacu.....     | 1 |
| Gi3_28326963_x1...gaCgggagacgucgugggaac.....           | 1 |
| Gi3_28663692_x1..gcgaucggCgacgucgugggaaca.....         | 1 |
| Gi4_612266_x1....cgucgugggaacacggggugUcga.....         | 1 |
| Gi3_28623698_x1..gcgauUggagacgucguggga.....            | 1 |
| Gi2_11071412_x1...gaucggagacgucguCggaacac.....         | 1 |
| Gi1_4248484_x1.....ucgugggaacacggggugccgaaGu.....      | 1 |
| Gi1_4224752_x1.....acgucgugAgaacacggggugccgaacu.....   | 1 |
| Gi3_28755289_x1.....gacgucgugggaacacggggugccUaacu..... | 1 |
| Gi5_9077807_x1....aAcggagacgucgugggaaca.....           | 1 |
| Gi5_8896171_x1....aucggagacguUgugggaacacg.....         | 1 |
| Gi5_9023895_x1.....ggagacgucgugggaacacggggA.....       | 1 |
| Gi2_11106786_x1.ugcgaucggagacgucgugggaaAac.....        | 1 |
| Gi3_28478675_x1.....gugggaacacggAgugccgaacuu.....      | 1 |
| Gi3_28351204_x1.ugcgaucggagacgucgugggaac.....          | 0 |
| Gi3_28511785_x1.....gucgugggaacacUgggugccgaac.....     | 1 |
| Gi3_28571428_x1.....cggagacgCcgugggaacacggggug.....    | 1 |
| G1a_6170019_x1....Uucggagacgucgugggaa.....             | 1 |

Gi3\_28943214\_x1.....ggagacgucgugggaacacggggugccgaUc..... 1  
Gi2\_11368706\_x1...cgaucggagacgucgugggaacacggggugcG..... 1  
Gi3\_28982958\_x1.....ggagacgucgGgggaacacggggugccg..... 1  
Gi5\_8905130\_x1.ugcgauCGNagacgucguggga..... 1  
Gi3\_28329679\_x1..gcgGucggagacgucgugggaaca..... 1  
Gi1\_4199689\_x1.....acgucgugAgaacacggggugccgaac..... 1  
G1a\_6168312\_x1....aucggUgacgucgugggaacacggg..... 1  
Gi3\_28641250\_x1.....cNucgugggaacacggggugccgaacu..... 1  
Gi5\_8923396\_x1.....ucgugggaacacgggAugccgaac..... 1  
G1a\_6251954\_x1.ugcgauCGgagaGgucgug..... 1  
G1a\_6123715\_x1....aucggagaAgucgugggaacacggg..... 1  
Gi3\_28841029\_x1...gaucggGgacgucgugggaacacgggg..... 1  
Gi4\_582119\_x1.....cgucgugggaacacggggugccgC..... 1  
Gi3\_28454112\_x1.....cggagGcucgugggaacacgg..... 1  
Gi3\_28715171\_x1.ugcgauCGgagGcucguggga..... 1  
Gi3\_28361834\_x1....aucggagacgucguCggaacac..... 1  
Gi5\_8903780\_x1.....cgucgugGNaacacggggugcc..... 1  
Gi2\_11404089\_x1.....gucgugggaacacggggugcAgaac..... 1  
Gi3\_28514084\_x1.....cggagacgucgugggaacacggAg..... 1  
Gi2\_11298505\_x1.....gacAucgugggaacacggggugccg..... 1  
Gi1\_4173581\_x1....aucggagacgucgugAgaacacgggg..... 1  
G1a\_6278417\_x1.....Cgagacgucgugggaacacg..... 1  
Gi3\_28823849\_x1.....gCcgucgugggaacacggggugccgaacu..... 1  
Gi1\_4347839\_x1....aucggagacgucgugggaacaUgggg..... 1  
Gi2\_11399549\_x1.....gagacgucgugggaGcacggggugccgaacu..... 1  
Gi1\_4287470\_x1....gaucggagacgucgugggaGacgg..... 1  
G1a\_6245419\_x1.....Agagacgucgugggaacacggggugcc..... 1  
Gi1\_4286657\_x1....aucggagacgucgugggaacacggggGgc..... 1  
Gi2\_11063874\_x1....aucggaAacgucgugggaacacggggugcc..... 1  
Gi3\_28919389\_x1....aucggagaAgucgugggaacacg..... 1  
Gi5\_9048218\_x1.....Ngaacacggggugccgaacu..... 1  
Gi3\_28525366\_x1....ucggagacgucgugggaacacU..... 1  
Gi3\_28505910\_x1....aucggagacgucgugggUacac..... 1  
Gi3\_28673157\_x1.....ggagacgucgugggaacacggggugUcgaacu..... 1  
G1a\_6195201\_x1.....gugggaacacgggAugccgaa..... 1  
Gi2\_11264232\_x1....aucggagacgucCugggaacac..... 1  
Gi5\_8912821\_x1.....gacgucgugggaacacggggugccgaCcu..... 1  
Gi2\_11111480\_x1.....gagacgucgugggaacacggggugcAgaac..... 1  
Gi3\_28841641\_x1.....ucguCggaacacggggugccg..... 1  
Gi2\_11027609\_x1....aucggagacgucgugggaacacgUg..... 1  
Gi3\_28278407\_x1.....cgucgugggaacacAgggugc..... 1  
Gi3\_28420941\_x1.....acgucguCggaacacggggugccgaac..... 1  
Gi3\_28658001\_x1....ucggagacgucgugggaAacgg..... 1  
Gi3\_28719019\_x1..gcgaCcgagacgucgugggaacacgg..... 1  
Gi5\_8895509\_x1....Ccgagacgucgugggaacacggggugccgaacu..... 1  
Gi2\_11384165\_x1.....Uggagacgucgugggaacacggggugccga..... 1  
Gi3\_28343123\_x1.....ggagacgucguAggaacacggggugccg..... 1



Gi1\_4293761\_x1....aucggagacgucgugggaacacggggC..... 1  
Gi1\_4181962\_x1....aucggagacgucgugggaacacgAggu..... 1  
Gi2\_11316137\_x1...cCaucggagacgucgugggaacacggggugc..... 1  
Gi2\_11237568\_x1.....ggagacgucgugggaacacggggugccU..... 1  
Gi2\_11037228\_x1.....agacgucgAgggaacacggggugccgaacu..... 1  
Gi5\_8900393\_x1.....aacacggggugccgaacuC..... 1  
Gi1\_4303606\_x1....ucggagUcguccgugggaacacg..... 1  
Gi2\_11296757\_x1.....ggagacguAgugggaacacg..... 1  
Gi1\_4357205\_x1.....agacUucgugggaacacggggugccgaac..... 1  
Gi3\_28697728\_x1.....cgucCugggaacacggggugccgaac..... 1  
Gi1\_4304041\_x1.....gugggaacacggggugccgaCcuu..... 1  
Gi1\_4218954\_x1.....cgCgggaacacggggugccgaacu..... 1  
Gi1\_4297365\_x1....aucggagacgucguggga..... 0  
Gi1\_4351838\_x1.....gUgacgucgugggaacacggggugccgaacu..... 1  
G1a\_6319072\_x1...gaucggagacgucgugggGa..... 1  
Gi3\_28976007\_x1.....gacgucgugggaacacggggugccgaCc..... 1  
Gi3\_28789552\_x1.....ggagacgucgugggaGcacggggugcc..... 1  
Gi3\_28307855\_x1....ucggagacgucgugggaCcacgggg..... 1  
Gi3\_28654476\_x1....aucggagacgucgugggaacacggggugccgCacu..... 1  
Gi3\_28667785\_x1...gaucggagacgucguggAaacacgggg..... 1  
Gi5\_9075650\_x1...gaucggagNcgucgugggaaca..... 1  
Gi2\_11107628\_x1.....gagacgucgugggGcacggg..... 1  
Gi3\_28971096\_x1...gaucggaAacgucgugggaacacggg..... 1  
Gi2\_11317950\_x1.....gacgucgugggUaacacgggg..... 1  
Gi3\_28538990\_x1....aucggagacgucgugUgaacac..... 1  
Gi1\_4375399\_x1...cgaucggagacgucgugggaacacgAggu..... 1  
Gi2\_11407229\_x1...cgaucggagaUgucgugggaacacggggug..... 1  
Gi1\_4261223\_x1.....ugggaacacggCgugccgaacu..... 1  
Gi2\_11290011\_x1.....ggagacguGgugggaacacggggugcc..... 1  
Gi3\_28519686\_x1.....acgucgugggaacacggggAgccga..... 1  
Gi1\_4203296\_x1.....ugggaacacggggugccCaacu..... 1  
Gi2\_11144616\_x1.....acgucgugggaCcacggg..... 1  
Gi2\_11126056\_x1.....ggUgacgucgugggaacacggggugccg..... 1  
Gi2\_11317084\_x1.....ucgugggaacacggCgugccg..... 1  
Gi2\_11083932\_x1.....cggagacgucgugggaacGcgggg..... 1  
Gi3\_28447587\_x1.....cggagCcgucgugggaacacggggugccga..... 1  
Gi3\_28753461\_x1.....gucgugggaUacggggugc..... 1  
Gi2\_11356550\_x1.....acgucgugggGcacggggugccg..... 1  
Gi2\_11313963\_x1.....gacgucgugggaacacgggAugccg..... 1  
G1a\_6149434\_x1...Uaucggagacgucgugggaacacggggugcc..... 1  
Gi3\_28667201\_x1.....aCacgucgugggaacacggggugccgaac..... 1  
Gi3\_28934792\_x1.....uUggagacgucgugggaacac..... 1  
G1a\_6339229\_x1.....gugggaacacgUggugccgaac..... 1  
Gi5\_8981909\_x1.....gagacgucgugggaGcacggggugccgaacu..... 1  
Gi2\_11141248\_x1...gaucggagacgucgugggaacCcg..... 1  
Gi2\_11316054\_x1....ucggagacgucgugggaacacgCggugc..... 1  
Gi2\_11197183\_x1.....gagaAgucgugggaacacggggug..... 1

Gi3\_28688249\_x1.....agacgucgugggGacacggggugcc..... 1  
Gi3\_28575009\_x1.....aucggagacgucguggCaacacgg..... 1  
Gi1\_4237917\_x1.....ugggaacacgggAugccgaacu..... 1  
Gi2\_10993964\_x1.....cggagacgucgugggaaacG..... 1  
Gi3\_28375273\_x1.....cggagacgucgugggaaacaUggggugccgaacu..... 1  
G1a\_6102128\_x1.....gaucggagacgucguggAaacacg..... 1  
Gi3\_28838756\_x1.....ucggagacgucgugggaaacaAgg..... 1  
Gi3\_28851059\_x1.....ggagacgucgugggaaacacgAggugccgaacu..... 1  
G1a\_6068185\_x1.....cggagacgucgugggAaacacggggg..... 1  
Gi4\_582014\_x1.....aGucgugggaaacacggggugccgaacu..... 1  
Gi2\_11363186\_x1.....agacgucgugggaaacaAggggugcc..... 1  
Gi1\_4343959\_x1.....gugggaacacggAgugccgaacu..... 1  
G1a\_6113765\_x1.....gugggaaUacggggugccgaac..... 1  
Gi5\_8893596\_x1.....gugggaaUacggggugccga..... 1  
Gi2\_11094266\_x1.....cgNagacgucgugggaaacacggggugcc..... 1  
Gi3\_28676665\_x1.....cggagacgucguUggaacacgg..... 1  
Gi5\_9137471\_x1.....Aggagacgucgugggaaacacgg..... 1  
Gi3\_28840271\_x1.....acacggggugccgaGcuu..... 1  
Gi1\_4164323\_x1.....gAcgugggaaacacggggugcc..... 1  
Gi2\_11187451\_x1.....gacgucgugggaaacacggAgugccgaacu..... 1  
Gi3\_28512612\_x1.....gaAcggagacgucgugggaaacac..... 1  
Gi5\_9133249\_x1.uUcgauccgagacgucgugggaaacacggg..... 1  
Gi3\_28377266\_x1.....acgucgugggaaacaUggggugccg..... 1  
Gi4\_609266\_x1.....ugggaacacggggUaccgaacu..... 1  
Gi1\_4290890\_x1.....acgucgGgggaacacggggugccgaacu..... 1  
G1a\_6242117\_x1.....gugggaacacggggugccgGa..... 1  
Gi2\_11071903\_x1.....gaucggagacgucguUgga..... 1  
Gi3\_28632611\_x1.....cgauUggagacgucgugggaaacacg..... 1  
Gi3\_28479734\_x1.....gagacgucgugggaaUcacgggg..... 1  
Gi5\_8993333\_x1.ugcgGucggagacgucgug..... 1  
Gi5\_8911239\_x1.....Agagacgucgugggaaacacggggugccgaacu..... 1  
Gi2\_11258788\_x1.....cgucgugggaaacUcggggugccgaacu..... 1  
Gi5\_9024730\_x1.....gaucggagacguUgugggaaacac..... 1  
Gi5\_8916653\_x1.....aucggagacAucgugggaaacacgggg..... 1  
Gi2\_11370550\_x1.....ugggaacaGggggugccga..... 1  
Gi4\_604087\_x1.....gugggaCcacggggugccgaacu..... 1  
Gi3\_28321553\_x1.....cggagacgucgugggaaacacggggugAc..... 1  
Gi3\_28557209\_x1.....aucggagacgucgugggaaacacggUgu..... 1  
Gi3\_28490721\_x1.....gagacgucgGgggaacacggggugccg..... 1  
Gi1\_4239204\_x1.....gaUgucgugggaaacacggggugccgaac..... 1  
Gi1\_4168117\_x1.....gagacgucgugggaaacaU..... 1  
Gi3\_28404112\_x1.....gaucggagacgucguggAaacacg..... 1  
Gi1\_4306784\_x1.....Ugagacgucgugggaaacacggggugccgaac..... 1  
Gi2\_11170763\_x1.....ucggagacgGcgugggaaac..... 1  
Gi5\_8964649\_x1.....cgugggAaacacggggugccg..... 1  
G1a\_6228161\_x1.....ucgugggaaacaUggggugccgaacu..... 1  
Gi1\_4169383\_x1.....ggagacgucgugggaaacacggggUacc..... 1

Gi5\_9025924\_x1.....gagacgucgugggaaUacggggugccgaacu..... 1  
 Gi3\_28835988\_x1.....gugggaacacCgggugcc..... 1  
 Gi1\_4261397\_x1.ugcgauccgagacgucguAggaaca..... 1  
 Gl1a\_6051007\_x1.....gaacacggggugccgaacG..... 1  
 Gi1\_4216619\_x1....aucggaAacgucgugggaaacacg..... 1  
 Gi1\_4266851\_x1...cgUucggagacgucgugg..... 1  
 Gi5\_8852939\_x1.....gacgucgugggaaacacgggAugccgaac..... 1  
 Gi4\_594707\_x1.....gucgugggaaacacggggugccgaCcu..... 1  
 Gi5\_8994390\_x1.....ugggaacacggggugAcgaac..... 1  
 Gi2\_11243662\_x1.....gugggaacacggggGgccgaacu..... 1  
 Gi2\_11108475\_x1....aucUgagacgucgugggaaacacggggugcc..... 1  
 Gi2\_11017544\_x1.....agacgucgNgggaacacggggugccgaac..... 1  
 Gi3\_28408443\_x1....aucggaCacgucgugggaaacacg..... 1  
 Gi1\_4304967\_x1.....acgucgugggaaacacgggggu..... 0  
 Gi3\_28865662\_x1...cgauccgagacgucgugggUacacg..... 1  
 Gi3\_28649176\_x1.....cgugggaaacacggggugccCa..... 1  
 Gi2\_11365939\_x1....aucggagacgucgugggGcacggg..... 1  
 Gi2\_11034665\_x1....Naucggagacgucgugggaaacacg..... 1  
 Gi2\_11330644\_x1....aucggagaGgucgugggaaac..... 1  
 Gi2\_11003597\_x1....aucggagacgucgGgggaaca..... 1  
 Gi3\_28403531\_x1.....Ngugggaacacggggugc..... 1  
 Gi2\_11380370\_x1....aucggUgacgucgugggga..... 1  
 Gl1a\_6198109\_x1....aucCgagacgucgugggaaacacggg..... 1  
 Gi1\_4321844\_x1.....gacgucgAgggaacacggggugccgaacu..... 1  
 Gi3\_28498459\_x1.ugcgauccgagacgucgugggGcacggg..... 1  
 Gl1a\_6025662\_x1....gaCcgagacgucgugggga..... 1  
 Gi4\_596900\_x1....Uaucggagacgucgugggaaacacggg..... 1  
 Gi5\_9131054\_x1.....agacgucgNgggaacacggggugc..... 1  
 Gi1\_4333661\_x1.....ggagacgucgugggaaacacAgggugccgaac..... 1  
 Gi2\_11344245\_x1.Ccgauccgagacgucgugggga..... 1  
 Gl1a\_6255644\_x1....Cucggagacgucgugggaaacacggggugcc..... 1  
 Gi3\_28782433\_x1....gaucggagacgucgugggaaUacggg..... 1  
 Gi1\_4385562\_x1.....gaacGcggggugccgaacuu..... 1  
 Gi1\_4225968\_x1....gucAugggaacacggggug..... 1  
 Gi3\_28626190\_x1.....gugggaaGacggggugccg..... 1  
 Gi1\_4275317\_x1.....Ggacgucgugggaaacacgggggu..... 1  
 Gi2\_11180874\_x1.....gCagacgucgugggaaacac..... 1  
 Gi3\_28894718\_x1....agUcgucgugggaaacacgggggu..... 1  
 Gi1\_4286345\_x1.....gucgugggaaacacgggAugccgaacu..... 1  
 Gi5\_8942499\_x1....cggagacgucguAggaacacggggugcc..... 1  
 Gi3\_28463846\_x1.....cgugggaaGacggggugcc..... 1  
 Gi2\_11203537\_x1....aucggagacgucgugggaaGacggg..... 1  
 Gi3\_28686881\_x1.....acgucgugggaaacacgggUugccgaacu..... 1  
 Gi2\_11083917\_x1...cgaCcgagacgucgugg..... 1  
 Gi5\_8974721\_x1.ugcgauccgUagacgucgugggga..... 1  
 Gi3\_28667129\_x1....gauNggagacgucgugggaaacacggg..... 1  
 Gi3\_28539664\_x1cugcgauccgagacAucg..... 1

Gi4\_574762\_x1 .....ucUugggaacacggggugccgaacu..... 1  
 Gi5\_9013992\_x1 .....acgNcgugggaacacggggugccgaac..... 1  
 Gi2\_11102776\_x1...cCaucggagacgucgugggaacacggg..... 1  
 Gl1a\_6102388\_x1.....gugggUacacggggugccg..... 1  
 Gi2\_11283954\_x1.....Ugagacgucgugggaaca..... 1  
 Gi5\_9042661\_x1.....ggaacacggggugcAgaac..... 1  
 Gi3\_28382763\_x1.....gucgugggaacacggggUcccga..... 1  
 Gi1\_4274982\_x1.....gugggGacacggggugccgaacu..... 1  
 Gi3\_28860731\_x1.....ucggagacgCcgugggaacac..... 1  
 Gl1a\_6148788\_x1.....cgugAgaacacggggugc..... 1  
 Gi5\_8904191\_x1.....ugggaacGcggggugccgaacu..... 1  
 Gi1\_4216898\_x1.....ucgugggaacacggggugAc..... 1  
 Gi3\_28746040\_x1.....acuuuccagcgcgccugcuccacc..... 0  
 Gi1\_4264811\_x1.....aacacggggugccCaacu..... 1  
 Gi1\_4386051\_x1....aucggagacAucgugggaacacgg..... 1  
 Gi5\_9072787\_x1.....Ncgugggaacacggggugccgaacu..... 1  
 Gi3\_28909974\_x1.....ggaacacggggugccUaa..... 1  
 Gi3\_28976878\_x1.....cgugggaaAacggggugccga..... 1  
 Gi3\_28880296\_x1.....ucggagacgucgugggGaca..... 1  
 Gi3\_28488947\_x1.....acAucgugggaacacggggugccga..... 1  
 Gi3\_28685119\_x1.....ucggagacgucguAggaacacggg..... 1  
 Gi2\_11299674\_x1.....acgucguAggaacacggggugccga..... 1  
 Gi2\_11142490\_x1.....cgugggaacCggggugccga..... 1  
 Gi3\_28321552\_x1.....gagacgucgCgggaacacggggugccg..... 1  
 Gi5\_9007837\_x1.....gucgugggaacacggggugccga..... 0  
 Gi3\_28443477\_x1....gaucggagNcgucguggga..... 1  
 Gi1\_4227219\_x1.....gucgugggaacacggggugccU..... 1  
 Gi3\_28385282\_x1...gcgGucggagacgucgugggaac..... 1  
 Gi3\_28519564\_x1....Aaucggagacgucguggga..... 1  
 Gi2\_11153738\_x1.....gagacgucgugggUacacggggugcc..... 1  
 Gl1a\_6196858\_x1....aucggagacgucUugggaacacgggggu..... 1  
 Gi5\_9054026\_x1....ucggagacgucgugggaacaUg..... 1  
 Gl1a\_6203553\_x1....aucggagacgucgCgggaacacggggug..... 1  
 Gi2\_11153641\_x1.....acgucgugggGacacggggugccga..... 1  
 Gi2\_11161779\_x1.....gaAacgucgugggaacacggggug..... 1  
 Gi2\_11301867\_x1....aucUgagacgucgugggaacacgggggu..... 1  
 Gi3\_28623253\_x1.....gaUgucgugggaacacggggugc..... 1  
 Gi5\_8956895\_x1.....gacgucgugggaacacggggugccgaaUu..... 1  
 Gi2\_11340629\_x1.....cgucguggCaacacggggugccg..... 1  
 Gi3\_28662811\_x1.....cgugggaacacggggUuccgaac..... 1  
 Gi1\_4309018\_x1....cggagacgucgugggGacacggg..... 1  
 Gi3\_28565920\_x1.....ggagacgucgugggaacacggcG..... 1  
 Gi2\_11267517\_x1.....agacUucgugggaacacggggug..... 1  
 Gi2\_11040538\_x1.....cgucgugggUacacggggugccg..... 1  
 Gi2\_11069401\_x1.Ggcgaucggagacgucgug..... 1  
 Gi2\_11047237\_x1...cgaucggagacgucgugggaacUcggg..... 1  
 Gi3\_28831303\_x1.....cgugggaacacggggAgccgaa..... 1

Gi3\_28658975\_x1..gUgaucggagacgucguggga..... 1  
Gi5\_8959579\_x1.....gacgucgugggUaacacggggugccgaacu..... 1  
Gi2\_11139457\_x1.....cggagacgucgugggaacaUggggugc..... 1  
Gi1\_4256876\_x1..ugcgauccggagacgucgugggaacCcg..... 1  
Gi1\_4281669\_x1...gaucggagacgucguggga..... 0  
Gi2\_11120544\_x1....Uucggagacgucgugggaacacggggugccg..... 1  
Gi1\_4287372\_x1.....gucgCgggaacacggggugcc..... 1  
Gi5\_9055896\_x1.....cggagacgucguggAaacacg..... 1  
Gi3\_28963555\_x1.....agacgucgugggaCcacggg..... 1  
Gi3\_28641579\_x1.....cgucgugggaacacgUggugcc..... 1  
Gi5\_8950464\_x1.....cguggAaacacggggugcc..... 1  
Gi1\_4211525\_x1.....gugggaacUcggggugccga..... 1  
Gi3\_28442213\_x1.....ucggagacgucgugggaacacggggugccgaacA..... 1  
Gi3\_28642937\_x1.....ggUgacgucgugggaacacggg..... 1  
Gi2\_11340626\_x1.....acgucgugggUaacggggugccgaacu..... 1  
Gi2\_11102523\_x1.....ugggaGacggggugccgaac..... 1  
G1a\_6142777\_x1...aucggagacgucgugggaacacggA..... 1  
Gi5\_8957692\_x1.....acgucgugggaacacggggCgccgaacuuu..... 1  
Gi3\_28728732\_x1...aucggagacgucAugggaacac..... 1  
Gi1\_4269182\_x1.....aUacggggugccgaacuu..... 1  
Gi3\_28908845\_x1.....cguAgugggaacacggggugccgaac..... 1  
Gi1\_4364444\_x1.....ugggaacacgUggugccgaacu..... 1  
Gi1\_4366032\_x1.....gugggaacacggggugccgaC..... 1  
Gi1\_4366622\_x1.....acgucgugggaacacggggugccgGac..... 1  
Gi5\_8890091\_x1.....Cagacgucgugggaacacggggugccgaacu..... 1  
Gi2\_11222580\_x1.....cgucgugggaacaUggggugccga..... 1  
Gi3\_28626639\_x1.....acgucgugggaacacggggugccgUac..... 1  
G1a\_6089406\_x1.....acgucgugggCacacgggggu..... 1  
Gi2\_11152317\_x1...auNggagacgucguggga..... 1  
Gi3\_28600190\_x1...cgaucggagGcgucgugggaacacggggug..... 1  
G1a\_6142119\_x1.....Agugggaacacggggugcc..... 1  
Gi3\_28436907\_x1.....cggagacgucguggUaacacggggugcc..... 1  
Gi1\_4372978\_x1.....ugggaacacCgggugccgaacu..... 1  
Gi1\_4280455\_x1.....gucgugggaacacggggugccgU..... 1  
Gi3\_28821829\_x1.....cggagacgucgugggaacCcggggugccgaac..... 1  
Gi1\_4296109\_x1.....ggagacgucgCgggaacacggggugccg..... 1  
Gi2\_11059337\_x1..ugcgauccggCgacgucgugggaacacg..... 1  
Gi1\_4382701\_x1.....gacgucgugggaGcacggggugccg..... 1  
Gi2\_11079842\_x1...aucgUagacgucgugggaac..... 1  
Gi3\_28548587\_x1.....cgugggaacacggggugccgUa..... 1  
Gi5\_9067359\_x1.....ugUgaacacggggugccgaacuu..... 1  
Gi1\_4201126\_x1.....acgucgugggaacacggAgugccga..... 1  
Gi2\_11389614\_x1.....cgugggaCcacggggugccg..... 1  
Gi2\_11279657\_x1.....agacgucgugggaCcacggggug..... 1  
Gi2\_10994799\_x1...ucggagacNucgugggaacacggggugccg..... 1  
G1a\_6131388\_x1.....cgugggaacacggggugcU..... 1  
Gi3\_28635814\_x1.....ggagacgucgugggaacCcg..... 1

Gi5\_9057409\_x1.....cgucgugggaacacggggCgccgaa..... 1  
Gi5\_9052130\_x1....gaucggagCcgucgugggaacacggg..... 1  
Gi1\_4280715\_x1.....cgucgugggaacacggAgugcc..... 1  
Gi2\_11335073\_x1.....ugggaacaAggggugccgaac..... 1  
Gi5\_8979669\_x1.....cAugggaacacggggugcc..... 1  
Gi2\_11068934\_x1..Ucgauccgagacgucgugggaacacggggug..... 1  
Gi3\_28659649\_x1.....gugggaacacggggugccgaacuG..... 1  
Gi2\_11165847\_x1....gaucggagacgucguAggaacacggggugc..... 1  
Gi1\_4184149\_x1.....ggagacgCcgugggaacacggggug..... 1  
Gi1\_4200199\_x1.....cgucgugggaacaUggggugcc..... 1  
Gi1\_4192652\_x1.....ugggaacacggggugccgUac..... 1  
Gi2\_11390123\_x1.....gucgugggaacacAgggugccgaac..... 1  
Gi3\_28459303\_x1....gaucggagacUucgugggaacacgggggu..... 1  
Gi2\_11189789\_x1....ucggagacgucgugggaacacggggCgcc..... 1  
G1a\_6298166\_x1.....gggaacacggggugccgaUcu..... 1  
G1a\_6137885\_x1..ugUgaucggagacgucgugggaacac..... 1  
Gi2\_11403042\_x1.....ucgugggaacacggggugcGgaac..... 1  
Gi2\_11310100\_x1.....cggagacgucgugggaacacCgggugcc..... 1  
G1a\_6084169\_x1.....cggagacgucgugggGacacgg..... 1  
Gi5\_9004274\_x1....gaucggCgacgucgugggaacacg..... 1  
Gi1\_4380325\_x1.....acgucgugggaaUacggggugcc..... 1  
Gi5\_9082662\_x1.....gacgCcgugggaacacggggugccgaacu..... 1  
Gi2\_11334202\_x1.....gggaacaGggggugccgaacu..... 1  
G1a\_6027256\_x1.....ugggaacacggggugcGgaacu..... 1  
Gi2\_11002249\_x1.....gacgucguNggaacacggggugccgaac..... 1  
Gi2\_11346639\_x1.....cgNagacgucgugggaacacggggug..... 1  
Gi5\_8992273\_x1....gaCggagacgucgugggaacacgggggu..... 1  
Gi3\_28754684\_x1....ucggagacgucgugggCacacggggugcc..... 1  
Gi1\_4373495\_x1.....gaNcacggggugccgaacu..... 1  
Gi1\_4367652\_x1.....acgucgugggaacacggggguAccg..... 1  
Gi3\_28365965\_x1.....acgucgAgggaacacggggugccgaa..... 1  
Gi1\_4203916\_x1.....cCgagacgucgugggaacacgggg..... 1  
Gi3\_28469430\_x1....gaucggagacgucgugggaacacCggggugc..... 1  
G1a\_6118201\_x1....gaucggagacgucgugggCacacg..... 1  
Gi2\_11092768\_x1....cCaucggagacgucgugggaacacgggg..... 1  
Gi3\_28859736\_x1.....gggaacacUgggugccgaa..... 1  
G1a\_6332167\_x1.....gugggCacacggggugccgaac..... 1  
G1a\_6040532\_x1.....gacguAgugggaacacggggugccgaac..... 1  
Gi2\_11055016\_x1.....agacgucgugggCacacggggugcc..... 1  
Gi5\_9039556\_x1.....gAagacgucgugggaaca..... 1  
Gi3\_28928490\_x1.....ucCugggaacacggggugcc..... 1  
G1a\_6177240\_x1.....gugggaacacggUgucccgaac..... 1  
Gi3\_28974497\_x1.....gacgucgugggaacacggAgugccgaac..... 1  
Gi2\_11359199\_x1....cgaucCgagacgucgugggaaca..... 1  
Gi3\_28406877\_x1.....gucgugggaacCgggggu..... 1  
G1a\_6203043\_x1.....cggagacgucgugggaAacggg..... 1  
Gi5\_8927479\_x1.....gucguAggaacacggggugc..... 1

Gi4\_590728\_x1 .....uAgugggaacacggggugccgaacu..... 1  
 Gi2\_11132193\_x1.....ggagacgucgugggaacacgggAugc..... 1  
 Gi1\_4376020\_x1.....cgugggaacacggggugccgaG..... 1  
 Gi3\_28357916\_x1...gaucggagacgucgAgggaacacgggg..... 1  
 Gi3\_28444400\_x1...gaucggagacgucgugggaaUacggg..... 1  
 Gi5\_9110107\_x1....aucggagacgCcgugggaacacgg..... 1  
 Gi5\_8877830\_x1.Cgcgaucggagacgucgugg..... 1  
 Gi2\_11334019\_x1.....acgucgugggaacaAggggugccgaac..... 1  
 Gi3\_28493002\_x1.....uggUaacacggggugccg..... 1  
 Gi3\_28479783\_x1.....gagacgucgugggaacacggggGgccgaa..... 1  
 Gi3\_28822714\_x1.....acacggggugcUgaacuu..... 1  
 Gi3\_28867739\_x1.gcgauccgagacgCcgugggaacacggggugcc..... 1  
 Gi2\_11236958\_x1....aucggagacgucgugggaacaA..... 1  
 Gi1\_4342565\_x1.....gucguAggaacacggggugc..... 1  
 Gi2\_11133397\_x1.....gAagacgucgugggaacacgggg..... 1  
 Gi3\_28322993\_x1...cgauccgagacgucgugggaacacAg..... 1  
 Gi5\_8961626\_x1.....cgucgugggaacacggggCgc..... 1  
 Gi2\_10992737\_x1...cAaucggagacgucgugg..... 1  
 Gi2\_11177082\_x1.....cggagacgucgugggaaGacggggugcc..... 1  
 Gi3\_28405978\_x1.Gcgauccgagacgucgugggaacacgggg..... 1  
 Gi2\_11243697\_x1.....gacAucgugggaacacgggg..... 1  
 Gi2\_11314741\_x1....ucggagacgucgugggaacacggggugcU..... 1  
 Gi2\_11370141\_x1....aucggagacgCcgugggaacac..... 1  
 Gi5\_9079600\_x1.....acgucguggCaacacggggugccgaacu..... 1  
 Gi3\_28592886\_x1.....gacgucguAggaacacggggugccgaac..... 1  
 Gi2\_11239555\_x1.....gaacacggggugAcgaacu..... 1  
 Gi1\_4356730\_x1.....ucgugggaacacggggugccgGac..... 1  
 Gi3\_28741759\_x1.gcgauccgagacgucguggAa..... 1  
 Gi3\_28728799\_x1.....cggagacgucguggAaacacggggug..... 1  
 Gi2\_11069415\_x1.....ugggaacacggggAgccgaacuu..... 1  
 Gi2\_11071325\_x1.....gagacgucgugggaCcacggg..... 1  
 Gi3\_28853130\_x1.....gucgGgggaacacggggugccgaa..... 1  
 Gi5\_9135157\_x1.....cggagacgucgugggaacacggggugAc..... 1  
 Gi2\_11178041\_x1.....agacgucgugggaacacgggAugc..... 1  
 Gi1\_4375631\_x1.....ggaacacggggugccgaUcu..... 1  
 Gi3\_28765925\_x1....aucggagacgucgugggaacacggggugAc..... 1  
 Gi3\_28519874\_x1.....Aagacgucgugggaacacggggugccgaac..... 1  
 Gi2\_10996528\_x1....aucggagacgucguggAaacacg..... 1  
 Gl1a\_6182882\_x1.....gggaGcacggggugccgaa..... 1  
 Gi2\_11062238\_x1.....cggagacgucgugggaacCcg..... 1  
 Gi2\_11271881\_x1.....ggaaAacggggugccgaa..... 1  
 Gl1a\_6128625\_x1.Cgcgaucggagacgucgug..... 1  
 Gi4\_590178\_x1 .....acgucgugggaGcacggggugccgaacu..... 1  
 Gi1\_4182277\_x1.....Nggaacacggggugccgaacu..... 1  
 Gl1a\_6058159\_x1.....gugNgaacacggggugcc..... 1  
 Gi3\_28392768\_x1....aucggaUacgucgugggaacacgggg..... 1  
 Gi2\_11232959\_x1.gcgauccgagacgucguggCaca..... 1

Gi1a\_6147677\_x1.....gggaacacggggugccgaaUu..... 1  
 Gi5\_8908267\_x1.....cguggAaacacggggugccga..... 1  
 Gi3\_28629045\_x1.....ucgugggUacacggggugccg..... 1  
 Gi3\_28638349\_x1.....gaUgucgugggaacacgg..... 1  
 Gi2\_11386734\_x1.....gagaUgucgugggaacacggggugcc..... 1  
 Gi2\_11069631\_x1.....agacgucguggCaacacggggugccgaacu..... 1  
 Gi3\_28816403\_x1.....acgucAugggaacacggggugccga..... 1  
 Gi5\_8888997\_x1.....aacacAgggugccgaacuuu..... 1  
 Gi3\_28676887\_x1.....aAgucgugggaacacggg..... 1  
 Gi5\_9111783\_x1.....gucgugggaacacgUggugccgaacu..... 1  
 Gi2\_11229693\_x1.....ggagacgucgugggaacacggggugAcg..... 1  
 Gi5\_8851453\_x1.....cgucgugggaacacgAggugcc..... 1  
 Gi3\_28929746\_x1.....gggaGcacggggugccgaacuu..... 1  
 Gi1a\_6225375\_x1.....aacacggggugccgaacA..... 1  
 Gi3\_28952967\_x1.....agacguAgugggaacacggg..... 1  
 Gi1a\_6231581\_x1.....gaucggagacgCcgugggaacacgg..... 1  
 Gi1a\_6103334\_x1.....gaucggagacgucguAgg..... 1  
 Gi2\_11354453\_x1.....gacgucgugggaacacggggAgccgaac..... 1  
 Gi4\_614186\_x1.....aUacgucgugggaacacgggggu..... 1  
 Gi1\_4364732\_x1.....aucggagacgucgugggGacacggg..... 1  
 Gi2\_11372242\_x1.....gacgCcgugggaacacgg..... 1  
 Gi5\_8931795\_x1.....gagacgucgugggaacaUggggugccgaac..... 1  
 Gi3\_28961305\_x1.....acgucgugggaacacggggugUcgaa..... 1  
 Gi3\_28604795\_x1.....gcgaucggagacgucgugggaacacggggC..... 1  
 Gi1\_4238778\_x1.....aucggagacgucgAgggaacacgggg..... 1  
 Gi2\_11068531\_x1.....gaucggagacgucgugggaacaU..... 1  
 Gi2\_11040731\_x1.....gaucggagacAucgugggaacacggggugc..... 1  
 Gi3\_28742213\_x1.....gggaacacggUgugccga..... 1  
 Gi2\_11139885\_x1.....aacacgggNugccgaacuuu..... 1  
 Gi1a\_6122923\_x1.....cgucgugggaacacAgggugccgaacu..... 1  
 Gi1a\_6041067\_x1.....aCcgagacgucgugggaa..... 1  
 Gi2\_11280509\_x1.....agacgucguAgggaacacggggugc..... 1  
 Gi5\_8920954\_x1.....ugcgauCagagacgucguggg..... 1  
 Gi5\_9001631\_x1.....Aagacgucgugggaacacggggugccgaac..... 1  
 Gi3\_28820838\_x1.....agacgucgugggaacacggggugcG..... 1  
 Gi3\_28318459\_x1.....gaucggagacgucgugggUacac..... 1  
 Gi1\_4336910\_x1.....gagacgucgugggaacacggggugccgaCcu..... 1  
 Gi3\_28384936\_x1.....cggagacgucgugggaGcacggggugccga..... 1  
 Gi1a\_6006199\_x1.....Uaucggagacgucgugggaacacggggugc..... 1  
 Gi2\_11024395\_x1.....Acgaucggagacgucgugggaacac..... 1  
 Gi3\_28327555\_x1.....cggagacgucgugggaacacgggAug..... 1  
 Gi2\_11049208\_x1.....ucggagacgucgugggaacacggcG..... 1  
 Gi5\_9128489\_x1.....ugggaacUcggggugccgaa..... 1  
 Gi1a\_6025976\_x1.....aucggagacgucgugggGacac..... 1  
 Gi2\_11333168\_x1.....ucggagacgucgugggaaAacggggugccgaac..... 1  
 Gi1a\_6134212\_x1.....gaucgAagacgucguggga..... 1  
 Gi3\_28537142\_x1.....ucggagCcgucgugggaaca..... 1



Gi2\_11017983\_x1.....ucggagacgucguAggaacacggggu..... 1  
Gi2\_11296607\_x1.....aucggagacgGcgugggaacacggggu..... 1  
Gi5\_9083808\_x1.....agacgucAugggaacacggggugccgaac..... 1  
Gi2\_11139144\_x1.....gaUacgucgugggaacacggggugcc..... 1  
Gi1\_4163744\_x1.....cCugggaacacggggugccga..... 1  
Gi5\_9008876\_x1.....gggaacacggggugccgaacuucU..... 1  
Gi2\_11242637\_x1.....cgucgugggaacacggggAgccgaac..... 1  
Gi1\_4264787\_x1.....uggCaacacggggugccgaacu..... 1  
Gi2\_11284298\_x1.....ucggagacgucgugggUacacggg..... 1  
Gi2\_11263757\_x1.....acgucgugggCacacggggugccg..... 1  
Gi1\_4276179\_x1.....acgucguAggaacacggggugccga..... 1  
Gi5\_8845597\_x1.....cgGcgugggaacacggggugccgaa..... 1  
G1a\_6231576\_x1....aucggagaNgucgugggaacacggggug..... 1  
Gi1\_4236751\_x1.....gugggaacaGggggugccgaacu..... 1  
Gi3\_28898992\_x1.....gacgucgugggUacacgg..... 1  
Gi2\_11268857\_x1.....cgucUugggaacacggggug..... 1  
Gi1\_4227243\_x1.....gugggaacaGggggugccgaacu..... 1  
Gi3\_28529002\_x1.....cgucgugggaCcacggggugccgaa..... 1  
Gi5\_9001287\_x1.....acgucgugggCacacggggugccgaac..... 1  
Gi1\_4268619\_x1.....ucgugggaacacggCgugccgaac..... 1  
Gi1\_4226444\_x1.....gugNgaacacggggugccgaacu..... 1  
Gi1\_4306361\_x1.....gucgugggaacacCgggugccgaac..... 1  
Gi4\_592146\_x1....gUucggagacgucgugggaacacggg..... 1  
Gi2\_11270146\_x1....aucggagacgucguCggaacacg..... 1  
Gi4\_580942\_x1....gugggaacacggggugccgCa..... 1  
Gi5\_9045048\_x1....aucggagacguAgugggaacacg..... 1  
Gi5\_9008784\_x1.ugcgauccgagGcgucguggga..... 1  
Gi3\_28383689\_x1.....cgucgGgggaacacggggugc..... 1  
Gi5\_9135289\_x1....auUggagacgucgugggaacac..... 1  
Gi3\_28271891\_x1....aucggagacgucgugggaacacgggguCc..... 1  
Gi5\_8844848\_x1.....ugggaacacggggAgccgaa..... 1  
Gi3\_28549792\_x1.....acgucgugggaacCcgggugccg..... 1  
Gi3\_28338406\_x1.....gucAugggaacacggggugccga..... 1  
Gi5\_9073143\_x1....gaucggagacgucgugggaCcacgg..... 1  
Gi3\_28877464\_x1.....cggagacgucgugggaacacgggguAcc..... 1  
Gi1\_4184200\_x1.....cgucgugggUacacggggugccgaac..... 1  
Gi1\_4389092\_x1.Cgcgauccgagacgucguggga..... 1  
G1a\_6198331\_x1.....cgugggaaNacggggugccg..... 1  
Gi5\_9075230\_x1.....gugggaacacggggGgccg..... 1  
G1a\_6047126\_x1.....gCcgugggaacacggggugccgaacu..... 1  
Gi2\_11060477\_x1.....acgucguggAaacacggggugccgaacu..... 1  
Gi2\_11152599\_x1.....acgucgugggaacacggggguAccg..... 1  
Gi2\_11137708\_x1.....gagacgucgugggUacacggg..... 1  
Gi2\_11368735\_x1....gaucggagacgucgugggaacacgAgg..... 1  
Gi4\_606336\_x1.....Uugggaacacggggugcc..... 1  
Gi1\_4215504\_x1....cgNagacgucgugggaacacggg..... 1  
Gi2\_11121342\_x1....gaucggagacgucgAgggaacacg..... 1

|                 |                                       |   |
|-----------------|---------------------------------------|---|
| Gi4_597808_x1   | ....gaucggagacgucgugggaaacacggggugcc  | 0 |
| Gi3_28909690_x1 | .....ggagacgucgugggaaacacggggugUcg    | 1 |
| Gi5_9047299_x1  | .....cgGgggaacacggggugccgaacu         | 1 |
| Gi3_28376014_x1 | .....cgugggaaacacUggggugccga          | 1 |
| Gi5_9019521_x1  | .....ugggaacacggggugcUgaa             | 1 |
| Gl1a_6313976_x1 | ....aucggagacgucgugggaaacacggggugccga | 0 |
| Gi3_28900221_x1 | .....cggagacgucgugggaaGacgg           | 1 |
| Gi1_4367624_x1  | .....cgucgugggaaacacggUgugcc          | 1 |
| Gi3_28553181_x1 | .....cgucguUggaacacggggugcc           | 1 |
| Gi2_11395772_x1 | .....ugggaacacggggugccAaa             | 1 |
| Gi2_11205226_x1 | ....aucggaAacgucgugggaaac             | 1 |
| Gi2_11070916_x1 | ....gaucggagaGgucgugggaaacacggg       | 1 |
| Gi1_4389916_x1  | .....gugggaCcacggggugccgaa            | 1 |
| Gi3_28453639_x1 | ....aucggagacgucgugggaaacUc           | 1 |
| Gi2_11192099_x1 | ....gaucggagaAgucgugggaaacac          | 1 |
| Gi2_11166385_x1 | Ucgauccgagacgucgug                    | 1 |
| Gi2_11119576_x1 | .....ucgugggaaAacggggugccg            | 1 |
| Gl1a_6144736_x1 | .....cgugggaaAacggggugccgaacu         | 1 |
| Gi4_599228_x1   | .....ugggaacacggggugccgaCcu           | 1 |
| Gi5_8932462_x1  | .....cgugggGacacggggugcc              | 1 |
| Gi3_28714803_x1 | .....ugggaUcacggggugccga              | 1 |
| Gi1_4378636_x1  | ....aucggGgacgucgugggaaacacg          | 1 |
| Gi3_28423166_x1 | .....agacAucgugggaaacacggggugccgaac   | 1 |
| Gi3_28666864_x1 | .....gaNacgucgugggaaacacggggg         | 1 |
| Gi2_11293279_x1 | .....ugggaaAacggggugccga              | 1 |
| Gi2_11227458_x1 | .....gggaacacgggggUaccgaa             | 1 |
| Gi5_9113849_x1  | .....agacgucgugggaaacacgggAugccgaacu  | 1 |
| Gi2_11159466_x1 | ....ucggagacgucgugggCacacggggugc      | 1 |
| Gi3_28754206_x1 | ....cggagacgNcgugggaaacacggggugccgaac | 1 |
| Gi3_28341461_x1 | ....cggagacgucgugggaaUacg             | 1 |
| Gi2_11076721_x1 | .....gacgucAugggaaacacggggugcc        | 1 |
| Gi5_8973610_x1  | .....ucAugggaaacacggggugcc            | 1 |
| Gi1_4347481_x1  | ....agacgucgugggGacacggggugccg        | 1 |
| Gi3_28953307_x1 | .....cgucgugggaaacacgAggugc           | 1 |
| Gi2_11310635_x1 | .....gacgucgugggGacacggggugccga       | 1 |
| Gl1a_6318592_x1 | .....gugggaacacggggugcAg              | 1 |
| Gi3_28273799_x1 | .....gagacgucgugggaaacacggggG         | 1 |
| Gi5_9041783_x1  | .....cgucgugggGacacggggugccga         | 1 |
| Gi3_28967852_x1 | .....acgucgugggaaacacgUggugccgaac     | 1 |
| Gi3_28767341_x1 | ....ucggagacgucgugAgaacac             | 1 |
| Gi3_28869066_x1 | ....cgUccgagacgucgugggaaacacgg        | 1 |
| Gi3_28347941_x1 | .....ggaacacgggggUcccga               | 1 |
| Gi3_28565825_x1 | .....gacNucgugggaaacacggggg           | 1 |
| Gi1_4186351_x1  | ....aucggGgacgucgugggaaacacgggg       | 1 |
| Gi3_28388021_x1 | .....agacgucgugggaaacacggggGgccgaac   | 1 |
| Gi3_28706022_x1 | ....aucggagacgucgugggaaacaGgg         | 1 |
| Gi2_11011475_x1 | ....aucggagacgAcgugggaaacacggg        | 1 |

Gi5\_8942401\_x1.....gUcguCgugggaacacggggugccgaac..... 1  
Gi2\_11366538\_x1.....ugggaacacAgggugccgaacuu..... 1  
G1a\_6295101\_x1....aucggagacguAgugggga..... 1  
Gi1\_4176189\_x1.....gagaUgucgugggaacacggggugccga..... 1  
Gi1\_4164095\_x1.....gagacAucgugggaacacggggugcc..... 1  
Gi3\_28324735\_x1.....gucguggUaacacggggugccgaac..... 1  
Gi3\_28641246\_x1.....gugggaacaUggggugccgaacuu..... 1  
Gi5\_8882956\_x1.....cgugggCacacggggugc..... 1  
Gi5\_9119926\_x1.....acUucgugggaacacggggugcc..... 1  
Gi1\_4260111\_x1....aucggaUacgucgugggaacacgg..... 1  
Gi2\_11345659\_x1.....gucgGgggaacacggggugc..... 1  
Gi3\_28924662\_x1....ucggagacgucgugggaacacggA..... 1  
Gi2\_11269828\_x1.....cgucgugggUacacggggugccga..... 1  
Gi3\_28382718\_x1...cgauCcgagaAgucgugggaacacggg..... 1  
Gi3\_28510280\_x1....aucgUagacgucgugggaacacggggugccg..... 1  
Gi1\_4387212\_x1...gCGAUggagacgucgugggaacacggggugcc..... 1  
Gi2\_11296947\_x1.....gagacgucgugggaacacggggugccAa..... 1  
Gi3\_28601753\_x1.....gugggaacacgUggugccg..... 1  
Gi3\_28950467\_x1.....Ggucgugggaacacggggg..... 1  
Gi5\_9019742\_x1.....ggaacacggggugccgaU..... 1  
Gi3\_28820847\_x1....cggagacgucgugggaacacggUgugcc..... 1  
Gi3\_28635531\_x1....cgucgugggaacacggggugccgGa..... 1  
G1a\_6210977\_x1....aucggCgacgucgugggaa..... 1  
Gi2\_11262688\_x1.....cgugggaacacggUgugccgaac..... 1  
Gi5\_8869600\_x1....cggagacgucgugggaacCcg..... 1  
Gi3\_28672611\_x1.....Aaacacggggugccgaacuu..... 1  
Gi2\_11101942\_x1.....ggaAacgucgugggaacacggggg..... 1  
Gi4\_575798\_x1....Uaucggagacgucguggg..... 1  
Gi5\_9056628\_x1....ucgAagacgucgugggaacacggggugccg..... 1  
Gi2\_11138736\_x1.....ggagacguNgugggaacacggggg..... 1  
Gi3\_28863548\_x1.....ggagaAgucgugggaacacggggugcc..... 1  
Gi3\_28269689\_x1.....ggagacgucgugggaacacggggCgccgaac..... 1  
Gi4\_608163\_x1.....gugggaacacggggGgccgaac..... 1  
Gi2\_11044939\_x1.....cgucgugggCacacggggugccg..... 1  
Gi1\_4222764\_x1.....agacgucgugggaacacggggCgccg..... 1  
Gi3\_28601959\_x1...cgauCggagacgucgugggaGcacgggg..... 1  
Gi3\_28654086\_x1.....cgCcgugggaacacggggg..... 1  
Gi1\_4327579\_x1.....cgugggaacGcggggugccgaacuu..... 1  
Gi1\_4262809\_x1.....ggagacguNgugggaacacggggg..... 1  
Gi3\_28756893\_x1.....agacgucgugggaacacggggugccgaCc..... 1  
G1a\_6092695\_x1...gaucggagCcgucguggga..... 1  
Gi1\_4173612\_x1....aucggagacgucgugggaGcacgg..... 1  
Gi5\_9062031\_x1.....gacgucgugggaacacggggugUcgaac..... 1  
Gi3\_28428655\_x1.....gacgucgugCgaacacggggg..... 1  
Gi5\_8908615\_x1.....gggaacacggggugccgUa..... 1  
Gi2\_11322706\_x1.....cgucgugggaacaUgggg..... 1  
Gi3\_28511794\_x1...gaucgCagacgucguggg..... 1

Gi3\_28265456\_x1.....aucggagaNgucgugggaacacggggug..... 1  
 Gi2\_11354638\_x1...cgauccgagGcgucgugggaacacgggg..... 1  
 Gi5\_9010226\_x1.....cAucgugggaacacggggugccgaac..... 1  
 Gi3\_28511947\_x1.....acgucgugggaaAacggggugccgaac..... 1  
 Gi2\_10996380\_x1.....cgucgGgggaacacggggugccga..... 1  
 Gi1\_4227620\_x1.....ucguUggaacacggggugc..... 1  
 Gi2\_11019653\_x1.....Cagacgucgugggaacacggggugccgaacu..... 1  
 Gi3\_28620771\_x1.....auNggagacgucgugggaacacg..... 1  
 Gi1\_4238386\_x1.....ucgugggaacacggggugccgaCc..... 1  
 Gi4\_583246\_x1.....uGggagacgucgugggaacacggggugccg..... 1  
 Gi5\_9079097\_x1.....cgGcgugggaacacggggugccgaac..... 1  
 Gl1a\_6137449\_x1.....agaGgucgugggaacacggggugccgaac..... 1  
 Gi4\_578090\_x1.....ucgugggaacacggggugccgCacu..... 1  
 Gi1\_4287734\_x1.....aacacggggGgccaacu..... 1  
 Gi3\_28542314\_x1...gaucggagacgucgugggaacaUg..... 1  
 Gi2\_11382773\_x1.....ucggagacgucgugggaacacggggugccgC..... 1  
 Gi3\_28901822\_x1.....agacgucgugggaacacggggugcUgaacu..... 1  
 Gi2\_11389470\_x1.....cggaAacgucgugggaacacggggugc..... 1  
 Gi5\_9027922\_x1.....gacgucgugAgaacacggggugccgaac..... 1  
 Gi2\_11282918\_x1.....ucggagacgucgugggaCcacggggugcc..... 1  
 Gi3\_28693857\_x1...gaucggagacgucgugggaAac..... 1  
 Gi1\_4314359\_x1.....cAucgugggaacacggggugccg..... 1  
 Gi2\_11152456\_x1.....cggUacgucgugggaacacggggug..... 1  
 Gi1\_4290912\_x1.....aucggagacgucgugUgaacacggg..... 1  
 Gl1a\_6300835\_x1...aucggagacgucgGggga..... 1  
 Gi1\_4245622\_x1.....gUgaacacggggugccga..... 1  
 Gi5\_9088964\_x1...Gcggagacgucgugggaacacggggugccg..... 1  
 Gi3\_28773855\_x1.....gucgugggCcacggggugccgaacu..... 1  
 Gi1\_4273302\_x1...cgauccgagacgucguggga..... 0  
 Gl1a\_6080951\_x1.....acgucgCgggaacacggggugccgaacu..... 1  
 Gi1\_4382265\_x1.....gucgugggaacacggggGgccgaac..... 1  
 Gi1\_4276589\_x1.....gggaacacggggugccga..... 0  
 Gi1\_4259982\_x1.....agacgucgugggUacacggggugccga..... 1  
 Gi3\_28938919\_x1.....aucggagacgGcgugggaacacggg..... 1  
 Gi2\_11234005\_x1.....aucggagacgucgugAga..... 1  
 Gi4\_612220\_x1.....gucgugggaacacggggugcc..... 0  
 Gi5\_9072733\_x1.....ugAgaacacggggugccgaa..... 1  
 Gi3\_28299403\_x1.....gacgucguggAaacacggggugccgaac..... 1  
 Gi4\_607288\_x1.....gacgucgugggaacacggggugccgaac..... 0  
 Gi3\_28846990\_x1.....gacgucgugUgaacacggggugccgaacu..... 1  
 Gi1\_4165796\_x1...aucggagacgucgugggaacacggAgugcc..... 1  
 Gi3\_28949719\_x1.....ucgugggaacacgggCugc..... 1  
 Gi3\_28620283\_x1...uGggagacgucgugggaacacggggugccgaacu..... 1  
 Gi1\_4268677\_x1.....cggagacgucgugAgaacacggggugcc..... 1  
 Gl1a\_6130414\_x1.....gugggaacacggggugccgaC..... 1  
 Gi1\_4390107\_x1.....gugggaacacggggugccgCacu..... 1  
 Gi3\_28466394\_x1.....aucggagacgucgugggaacaGggggugcc..... 1

Gi1\_4350702\_x1.....Caacacggggugccgaac..... 1  
 Gi3\_28738886\_x1...gaAcggagacgucguggg..... 1  
 Gi5\_9095296\_x1.....gugggaacacggggugAcg..... 1  
 Gi5\_8834137\_x1...gaucggagacgucguAggaacacggg..... 1  
 Gi5\_9008576\_x1.....Nacacggggugccgaacu..... 1  
 Gi3\_28294053\_x1.....cguggUaacacggggugcc..... 1  
 Gi1\_4384993\_x1.....cggagacgucgugggaacacggggugcUgaacu..... 1  
 Gi3\_28870413\_x1.....cggagacgucgugggaacacggggugccG..... 1  
 Gi2\_11016746\_x1...Caucggagacgucgugggaacacggggugc..... 1  
 Gi5\_8845673\_x1...ucggagacgucgugggaacacggggg..... 0  
 Gl1a\_6240287\_x1...Cucggagacgucgugggaacacg..... 1  
 Gi5\_8864114\_x1.ugcgauccgagaUgucgug..... 1  
 Gi5\_9133208\_x1.....ugggaacGcggggugccgaacuuu..... 1  
 Gi5\_8935202\_x1.....ugggaacacgUggugccgaacu..... 1  
 Gi2\_11177803\_x1.....agacgucgugggaacacggggugccAaac..... 1  
 Gi1\_4369423\_x1...aucggagacgucgugggCacacggggugc..... 1  
 Gi1\_4206682\_x1.....gacgucgugggaacacgggU..... 1  
 Gl1a\_6080009\_x1...gacgucguNggaacacggggg..... 1  
 Gi3\_28855456\_x1...cgauccgagGcugcugugggaacacggg..... 1  
 Gi3\_28368346\_x1...cgauccgagaAgucguggg..... 1  
 Gi3\_28580025\_x1.....gggaacacggggugccAa..... 1  
 Gi3\_28648270\_x1.....gggaacacgCggugccgaacu..... 1  
 Gi5\_8935193\_x1...ucgugggaacacgAggugccgaac..... 1  
 Gi2\_11069640\_x1...cgAagacgucgugggaacacggggg..... 1  
 Gi1\_4287044\_x1...cgAcgugggaacacggggugccg..... 1  
 Gi5\_9080998\_x1...acgucgugggaacacggggGgccga..... 1  
 Gi2\_11119321\_x1...aucggagacgucgugggaacaGggggg..... 1  
 Gi2\_11157416\_x1...gagacgucguggUaacacggggugccg..... 1  
 Gl1a\_6289547\_x1...aucggagaUgucgugggaacacggggg..... 1  
 Gi2\_11334589\_x1...Gcggagacgucgugggaacacggggugccgaac..... 1  
 Gi5\_8866143\_x1...gugggaacUcggggugcc..... 1  
 Gi5\_8913350\_x1...aucggagacgucgugggaCcacggggugc..... 1  
 Gi2\_11163239\_x1...ucgugggaacaGggggugccgaac..... 1  
 Gl1a\_6238480\_x1...ggagacgucgugggaacGcggggugccgaacu..... 1  
 Gi3\_28589281\_x1...cgCagacgucgugggaacacgg..... 1  
 Gi3\_28357068\_x1...ucgugggaacacggggAgccg..... 1  
 Gi1\_4293370\_x1...aucggagacgucgugggaaUac..... 1  
 Gi3\_28721805\_x1...gagacgucgugggaacacggggGgccgaacu..... 1  
 Gi5\_9130251\_x1...gGcuggggaacacggggugc..... 1  
 Gi1\_4339908\_x1...ugggaacacggggugccgaaUuu..... 1  
 Gi5\_8929604\_x1...aCcgagacgucgugggaacacggggugc..... 1  
 Gi5\_8992121\_x1...aacacggggugUcgaacuuu..... 1  
 Gi5\_9024949\_x1...cgauccgCgacgucgugggaacacggg..... 1  
 Gi3\_28306597\_x1...gugggaacacgCggugcc..... 1  
 Gi3\_28446081\_x1...cgucgugggUaacacggggugccg..... 1  
 Gi3\_28810669\_x1...Cgagacgucgugggaacacggggugccgaacu..... 1  
 Gi5\_9039648\_x1...agacgucgNggaacacggggugcc..... 1

Gi2\_11085652\_x1.....cggagCcgucgugggaacacg..... 1  
 Gi5\_9015251\_x1...cgaucggagacgucgugggaacGcggg..... 1  
 Gi3\_28954349\_x1.....ggagacgucgCgggaacacggggugccga..... 1  
 Gl1a\_6040503\_x1...gaucggagacgucgugggaacGcggg..... 1  
 Gl1a\_6090800\_x1...aucggCgacgucgugggaacacggggugcc..... 1  
 Gi3\_28784030\_x1..gcgaucggGgacgucgugggaacacggg..... 1  
 Gi1\_4262360\_x1.....gugggaacacggggugccgC..... 1  
 Gi3\_28642411\_x1...cgaucggagacgucgugggaacGcggggg..... 1  
 Gi5\_9093981\_x1.....cgugggaCcacggggugcc..... 1  
 Gi5\_9050265\_x1..ugcgauccgagacgucgugggaacaUggg..... 1  
 Gi1\_4231459\_x1.....gacgucgugggaacacggggugccgaacAu..... 1  
 Gi4\_613221\_x1.....gggaacacggggugccgaUc..... 1  
 Gi5\_8891951\_x1.....ggagacgucgugggaGcacggggugcc..... 1  
 Gi4\_602639\_x1.....Uugggaacacggggugccga..... 1  
 Gi3\_28742055\_x1.....gagacgucgugggGacac..... 1  
 Gi5\_8984390\_x1.....acacggggugccAaacuuu..... 1  
 Gl1a\_6324161\_x1...aucggagacgucguAggaacacg..... 1  
 Gi2\_11251319\_x1...gaucggagacgucgugggaacacgAggu..... 1  
 Gi5\_9090409\_x1.....gagacgucgugggaacacggggugccgaUu..... 1  
 Gi2\_11305613\_x1.....ggagacgucguAggaacacg..... 1  
 Gl1a\_6013126\_x1...gaAacggagacgucgugggaacacggg..... 1  
 Gi3\_28919112\_x1.....acguGuggggaacacggg..... 1  
 Gl1a\_6232655\_x1...aucggagacgucgugggaacacAgggugcc..... 1  
 Gi5\_9005172\_x1.....gugggaacacggggugccCaa..... 1  
 Gi2\_11095887\_x1...gaucggagacAucgugggaacacg..... 1  
 Gl1a\_5984762\_x1.....gugggaacacggggugccgaU..... 1  
 Gi2\_11121948\_x1.....acgucguCggaacacggggugcc..... 1  
 Gi2\_11360102\_x1...aucggagacgucgAgggaacac..... 1  
 Gi3\_28719656\_x1.....ucgugAgaacacggggugccg..... 1  
 Gi2\_11030583\_x1...gaucggagacgucgugggaacaUggggugc..... 1  
 Gl1a\_6050329\_x1.....gugggaacacAgggugccg..... 1  
 Gi3\_28391161\_x1...gaucggagacgucgugggaacacgAggugc..... 1  
 Gi2\_11351886\_x1.....gacgucgugggaacacggggugccgaUcu..... 1  
 Gi2\_11183169\_x1.....guAgugggaacacggggugccgaac..... 1  
 Gl1a\_6349815\_x1.....gucgugggaGcacggggugccga..... 1  
 Gl1a\_6238393\_x1...cgaucggagacgucgCgg..... 1  
 Gi2\_11220000\_x1...Uucggagacgucgugggaac..... 1  
 Gi3\_28333502\_x1...Aaucggagacgucguggg..... 1  
 Gi3\_28785958\_x1.....ucggagacgucgugggaacacA..... 1  
 Gi3\_28505990\_x1.....cgucgugggaacacgggAugccg..... 1  
 Gi1\_4366140\_x1.....cggagacgucguAggaacacggggugc..... 1  
 Gi2\_11209591\_x1.....ugggaacacggggUccgaac..... 1  
 Gi3\_28735066\_x1..gUgaucggagacgucgugggaacacggg..... 1  
 Gi4\_576649\_x1.....gggaacacggggugUccgaacu..... 1  
 Gi1\_4329851\_x1cugcgauccgagacgucg..... 0  
 Gi2\_11063790\_x1...gaucggagacgucgugggaGcacggggug..... 1  
 Gi1\_4249935\_x1.....gacgucgugggaacaUggggugcc..... 1

Gi1\_4301057\_x1.....gAcgugggaacacggggugccgaacu..... 1  
 Gi2\_11389529\_x1.....gGgacgucgugggaacacggg..... 1  
 Gi3\_28416704\_x1.....ucgugggaacacggggugccgaaA..... 1  
 Gi2\_11056571\_x1.....Cucggagacgucgugggaacac..... 1  
 Gl1a\_6104492\_x1.....cgugggaGcacggggugc..... 1  
 Gi5\_9114579\_x1.....cgugggCacacggggugcc..... 1  
 Gi3\_28341206\_x1.....cgaucggagacgucguAg..... 1  
 Gi1\_4356036\_x1.....cggGgacgucgugggaaca..... 1  
 Gi2\_11215171\_x1.....auGggagacgucgugggaacacggggugcc..... 1  
 Gi3\_28922491\_x1.....gaucggagacgAcgugggaacacggg..... 1  
 Gi1\_4359000\_x1.....aucggagUcgucgugggaacacggggg..... 1  
 Gi5\_8854180\_x1.....aucggagacgucgugggaacacggggA..... 1  
 Gi1\_4209898\_x1.....cgugggaacacAgggugccgaac..... 1  
 Gi1\_4368574\_x1.....gagacgucgugggaaAacggggugcc..... 1  
 Gi1\_4268525\_x1.....gcgaucggagGcgucgugggaaca..... 1  
 Gi5\_9058085\_x1.....aGgucgugggaacacggggugcc..... 1  
 Gi2\_11227608\_x1.....gagacgucgugggaacacCgggugccg..... 1  
 Gi2\_11165318\_x1.....cguggCaacacggggugc..... 1  
 Gi3\_28477941\_x1.....gucguggCaacacggggugccgaac..... 1  
 Gi1\_4343836\_x1.....cgugggaacacggggugccgaGcuu..... 1  
 Gi3\_28401241\_x1.....cgucgugggaacacAgggug..... 1  
 Gi3\_28564195\_x1.....gacgucgugggCacacggggugccgaacu..... 1  
 Gi3\_28976836\_x1.....gugggaacacggggugccgaGcuu..... 1  
 Gi5\_9125070\_x1.....aucggagacgucgugggCacacggggugc..... 1  
 Gi1\_4236731\_x1.....ugggaacacgggggAccga..... 1  
 Gi5\_8974473\_x1.....ugggaacacggggugccg..... 0  
 Gi2\_11192697\_x1.....cgaucggagacgucgugggaGcacggggugc..... 1  
 Gi3\_28297429\_x1.....aucggagacAucgugggaacacggggugc..... 1  
 Gi2\_11106863\_x1.....cgaucggGgacgucgugg..... 1  
 Gi4\_598230\_x1.....gugggaacacAgggugccgaacu..... 1  
 Gi2\_11388356\_x1.....aucggagaGgucgugggaacac..... 1  
 Gi2\_11170729\_x1.....ucggagacgucAugggaacacg..... 1  
 Gi1\_4255677\_x1.....gGcgugggaacacggggugccga..... 1  
 Gi2\_11110685\_x1.....gaucggagacgucguggAaac..... 1  
 Gi1\_4352285\_x1.....ggaacacggggAgccgaa..... 1  
 Gi5\_8951220\_x1.....guggUaacacggggugccgaacuu..... 1  
 Gi5\_9063292\_x1cugcgaucggagacgucgG..... 1  
 Gi5\_8939637\_x1.ugcgaucggagacguUgug..... 1  
 Gi1\_4287197\_x1.....Uggagacgucgugggaacacggg..... 1  
 Gl1a\_6260717\_x1.....cgugggaaAacggggugcc..... 1  
 Gl1a\_6334573\_x1.....gugggaacacggggugccgaacN..... 1  
 Gi4\_608104\_x1.....Uacacggggugccgaacu..... 1  
 Gi3\_28762275\_x1.ugUgaucggagacgucgugggaacacggggg..... 1  
 Gi3\_28307368\_x1.....agacAucgugggaacacggggugccga..... 1  
 Gi5\_9095659\_x1.....gagacgucAugggaacacg..... 1  
 Gi2\_11075933\_x1.....gaucggCgacgucgugggaacac..... 1  
 Gl1a\_6272183\_x1.ugcgaucgNagacgucgu..... 1

|                                                               |   |
|---------------------------------------------------------------|---|
| Gi5_8851026_x1.....aAcggagacgucgugggaacac.....                | 1 |
| Gi3_28546490_x1.....gGcgucgugggaacacgggg.....                 | 1 |
| Gi1_4329337_x1.....acgucgugggaacacgAggugccgaa.....            | 1 |
| Gi2_11324218_x1.....cgucgGgggaacacggggugccgaacu.....          | 1 |
| Gi4_5811165_x1.....aacacggggugccGacu.....                     | 1 |
| Gi1_4163567_x1.....cguAgugggaacacggggugcc.....                | 1 |
| Gi2_11052586_x1.....gaucggagNcgucgugggaac.....                | 1 |
| Gi1_4177938_x1.....acguAgugggaacacggggugcc.....               | 1 |
| Gi2_11106027_x1.....agacgucgugggaacacg.....                   | 0 |
| Gi3_28424149_x1.....gucgugggaAacggggugccgaa.....              | 1 |
| Gi2_11069077_x1.....ugggaacacgAggugccgaacuu.....              | 1 |
| G1a_6157895_x1.....Uucggagacgucgugggaacacggg.....             | 1 |
| Gi2_11228099_x1.....cgNgggaacacggggugc.....                   | 1 |
| G1a_5985157_x1.....Naucggagacgucgugggaacacggg.....            | 1 |
| Gi1_4218446_x1.....ucgugggaacacggCgugcc.....                  | 1 |
| Gi3_28971847_x1.....cAgagacgucgugggaacacgggg.....             | 1 |
| Gi5_8883554_x1.....gugUgaacacggggugccga.....                  | 1 |
| Gi3_28971499_x1.....gAcgugggaacacggggugccgaa.....             | 1 |
| Gi3_28695813_x1.....gaucggagNcgucgugggaacacggggugccgaacu..... | 1 |
| Gi3_28498611_x1.....gcgaucggNgacgucgugggaacacggg.....         | 1 |
| Gi3_28983999_x1.....ggNgacgucgugggaacacggggugccgaac.....      | 1 |
| Gi2_11017793_x1.....ggagacgucgugggaAacggggug.....             | 1 |
| Gi5_8841476_x1.....ugggaGacggggugccgaacu.....                 | 1 |
| Gi3_28768348_x1.....aucggCgacgucguggga.....                   | 1 |
| Gi3_28920158_x1.....aAacgucgugggaacacggggugcc.....            | 1 |
| Gi5_9033191_x1.....ucggagacgucgugggaacacggggugccga.....       | 0 |
| Gi1_4304126_x1.....aucggagGcgucgugggaacacggggugcc.....        | 1 |
| Gi1_4371872_x1.....aucggagacgucguAggaacacgggg.....            | 1 |
| Gi2_11355642_x1cugcgauccgagacgucAugggaacac.....               | 1 |
| Gi3_28799488_x1.....aacacAgggugccgaacuu.....                  | 1 |
| Gi3_28752444_x1.....ucggagacAucgugggaacacg.....               | 1 |
| Gi3_28678842_x1.....gucgugggaacacggggguAc.....                | 1 |
| Gi5_9037461_x1.....cggagacgNcgugggaacacggggugcc.....          | 1 |
| G1a_6044177_x1.....aucggagacgucguAgga.....                    | 1 |
| Gi1_4331717_x1.....gggaacacAgggugccgaacuu.....                | 1 |
| Gi2_11004909_x1.....cggagacgucgugggaacacggCgugcc.....         | 1 |
| Gi3_28538581_x1.....gaucggagacgucgAgggaacacggg.....           | 1 |
| Gi3_28303382_x1.....cggagacgucgugggaCcac.....                 | 1 |
| Gi2_11015945_x1.ugcgauccgagacgucgugggaGcac.....               | 1 |
| Gi1_4250194_x1.....aucggGgacgucgugggaacacgg.....              | 1 |
| Gi3_28766818_x1.....aucggagacgucgugggU.....                   | 1 |
| Gi1_4328121_x1.....ucgugggaacacgAggugc.....                   | 1 |
| Gi2_11306475_x1.....ucggagacAucgugggaacacg.....               | 1 |
| Gi2_11249705_x1.....gagGcgucgugggaacacggggug.....             | 1 |
| Gi5_8876238_x1.....aucggagacgucgugggaacaUgg.....              | 1 |
| Gi2_11273479_x1.....Uucggagacgucguggga.....                   | 1 |
| Gi2_11301282_x1.....agacgucgugggaacacggUgugccg.....           | 1 |



Gi1\_4279410\_x1.....ggaUcacggggugccgaac..... 1  
 Gi1\_4283802\_x1.....Cgacgucguggaacaacggggugccgaacu..... 1  
 Gi3\_28933719\_x1.....cggaUacgucguggaacaacacgg..... 1  
 Gi1\_4163381\_x1.....auUggagacgucguggaacaacggggg..... 1  
 Gi3\_28893300\_x1.....ucguggaacaacCggggugccgaac..... 1  
 Gi2\_11363026\_x1.ugcgGucggagacgucguggaacaacg..... 1  
 Gi3\_28706225\_x1.gcgauccggagacgucgAgggaacaacggggug..... 1  
 Gi1\_4328206\_x1.....acgAcgugggaacaacggggugcc..... 1  
 Gi4\_578893\_x1.....ucguggaacaacgggAugccgaacu..... 1  
 Gi4\_584811\_x1.....acgucguggaacaacggggugccAaacu..... 1  
 Gi3\_28855707\_x1...gaGcggagacgucguggaacaacgggg..... 1  
 Gi3\_28881309\_x1.....agacguUguggaacaacggggugccgaac..... 1  
 Gi3\_28973030\_x1.....auGggagacgucguggaacaacggggugcc..... 1  
 Gl1\_6256012\_x1...cgauccggagacgucguggaacaacCcg..... 1  
 Gi3\_28729773\_x1.....cggagacgucAugggaacaac..... 1  
 Gi2\_11295099\_x1...cgauccggagGcgucgugg..... 1  
 Gi2\_11225464\_x1...gauUggagacgucguggaacaacggggug..... 1  
 Gi1\_4266687\_x1.....cgucgugUgaacaacggggugcc..... 1  
 Gi3\_28867548\_x1.....gggGacacggggugccgaacuu..... 1  
 Gi3\_28870232\_x1.....gucgugUgaacaacggggugcc..... 1  
 Gi2\_11354918\_x1.....gucUuggaacaacggggugc..... 1  
 Gi2\_11398834\_x1.....gacgAcguggaacaacggggugcc..... 1  
 Gi3\_28633418\_x1.....aucggagacgucguggaacaacggggC..... 1  
 Gi3\_28278091\_x1.....ggagacgucguggaGcacggggugccgaacu..... 1  
 Gl1\_6086071\_x1.....ggUgacgucguggaacaac..... 1  
 Gi5\_8976376\_x1.....cguggaacaacggggugccgaGcuu..... 1  
 Gi1\_4216940\_x1.....ucguAggaacaacggggugccgaac..... 1  
 Gi1\_4239538\_x1.....gggaacaacggggugccCaacu..... 1  
 Gi5\_9075403\_x1.....gagacgucguggaacaacggAgugcc..... 1  
 Gi1\_4369014\_x1.....gUagacgucguggaacaacggggugccgaac..... 1  
 Gi4\_567386\_x1.....gucguggaacaacggggugccgaac..... 0  
 Gi3\_28913816\_x1...gaucggagacgucguggaacaacCggggugccg..... 1  
 Gi3\_28830852\_x1.....agacgucguggAaacaacggggugccgaacu..... 1  
 Gi2\_11203993\_x1...cgauccggagacgucgugggGacacgggg..... 1  
 Gi3\_28873125\_x1.....uggaacaacggggugcGgaa..... 1  
 Gi2\_11037527\_x1...gaAcggagacgucguggaacaac..... 1  
 Gi3\_28339001\_x1...gaucggagacgGcguggaacaac..... 1  
 Gi5\_9062997\_x1...cggagacgucguggaGcacggggugccga..... 1  
 Gi1\_4239662\_x1.....acgucguggaacaacggggugccgUacu..... 1  
 Gl1\_6195750\_x1.....gucguggaacaUggggugccgaacu..... 1  
 Gi5\_8885446\_x1...aucggagacgucgUgAgaacaacgg..... 1  
 Gl1\_6042831\_x1...cgGucggagacgucgugg..... 1  
 Gi1\_4248599\_x1.....cAugggaacaacggggugccg..... 1  
 Gi3\_28286901\_x1.....gggaacaacggggugcGgaa..... 1  
 Gi1\_4295637\_x1...aucggagacgucgugggCacacggg..... 1  
 Gi2\_11221858\_x1.....Gggagacgucguggaacaacggggugccgaac..... 1  
 Gi2\_10995213\_x1...aucggUgacgucguggaacaacggg..... 1

Gi3\_28592323\_x1..gcgaucggagacgucGgggaac..... 1  
 Gi4\_580719\_x1.....gugAgaacacggggugccgaa..... 1  
 Gi1\_4336150\_x1.....gugggaacaUggggugccgaa..... 1  
 Gi2\_11020513\_x1...gaucggagacgucguggggaacCcggggugcc..... 1  
 Gi5\_9100702\_x1.....ugggaacacggggguCccgaac..... 1  
 Gi2\_11112113\_x1..gcgaucggagacgucguggggaGcacggg..... 1  
 Gi2\_11269222\_x1.....gggaacacCggggugccgaa..... 1  
 G1a\_6281801\_x1.....gaUgucguggggaacacgggggu..... 1  
 Gi2\_11033926\_x1.....cggagGcgucgugggaaacac..... 1  
 Gi1\_4358053\_x1.....Aggaacacggggugccgaaacu..... 1  
 Gi3\_28308046\_x1.....cggagacgucguAggaacacggg..... 1  
 Gi5\_8935989\_x1.....ucggagGcgucgugggaaacacg..... 1  
 Gi3\_28638523\_x1.....acgucguggggaacGcggggugccgaa..... 1  
 Gi5\_8942016\_x1.....agaAguccguggggaacacggggugccgaaacu..... 1  
 Gi3\_28355585\_x1.....cgugggaaacacgggUugccga..... 1  
 G1a\_6044964\_x1.....Uacacggggugccgaaacu..... 1  
 Gi3\_28768028\_x1.....gagacgucguUggaacacggggugccgaaacu..... 1  
 Gi1\_4318304\_x1....aucAgagacgucgugggaaacacggg..... 1  
 Gi2\_11057906\_x1.....ucgugggaaacacgUggugccgaa..... 1  
 Gi3\_28607782\_x1...gaucggagacgucgAgggaacacggggugcc..... 1  
 Gi5\_8978876\_x1..uCcgauccggagacgucguggg..... 1  
 G1a\_6090110\_x1.....gugggaacaUggggugcc..... 1  
 Gi5\_8987804\_x1....ucggagacgCcgugggaaacacggggugccg..... 1  
 Gi2\_11047544\_x1.....gucguAggaacacggggugccga..... 1  
 Gi1\_4238517\_x1.....ggagacgucgugggaaacacAgggugcc..... 1  
 Gi5\_9033726\_x1.....agacgucgugggaaacacggAgugccgaaacu..... 1  
 Gi2\_11256879\_x1.....gugCgaacacggggugccgaa..... 1  
 Gi5\_8891709\_x1..ugcgaucggagaGgucgug..... 1  
 Gi3\_28517196\_x1....aucNgagacgucgugggaaacacgg..... 1  
 Gi3\_28979102\_x1.....agacgucgugggCacacggggugccgaaacu..... 1  
 Gi2\_11260703\_x1.....gacgucgugggaaacGcgggggu..... 1  
 Gi2\_11071134\_x1....ucggagacgucgugggaaacaAggggu..... 1  
 Gi3\_28818665\_x1...gaucggUgacgucgugggaaacacg..... 1  
 Gi3\_28830573\_x1...gaucggaAacgucgugggaaacacgg..... 1  
 Gi5\_8927889\_x1.....gggaacacggggugccgaaGu..... 1  
 Gi3\_28284084\_x1.....gUcgucgugggaaacacgggg..... 1  
 G1a\_6302445\_x1.....ggagacgucgugggaaacacggggAgc..... 1  
 Gi3\_28604440\_x1.....gucgugggaaUacggggug..... 1  
 Gi2\_11321644\_x1.....cgucgugggaaacUcggggugccga..... 1  
 Gi2\_11313891\_x1.....ggNacacggggugccgaa..... 1  
 G1a\_6295918\_x1....uAggagacgucgugggaaacacggg..... 1  
 Gi5\_8884275\_x1.....gaacacgUggugccgaa..... 1  
 G1a\_6317778\_x1.....Aagacgucgugggaaacacggggugcc..... 1  
 Gi3\_28492605\_x1.....ggagacgucgugggaaacacAgggugcc..... 1  
 Gi2\_11352659\_x1.....agacgucgugUgaacacggggugcc..... 1  
 Gi2\_11168234\_x1.....Aucgugggaaacacggggugccga..... 1  
 Gi2\_11272031\_x1...gaucggagacgucgCgggaacacggggugcc..... 1

Gi2\_11132054\_x1...cgaucggagaUgucgugg..... 1  
 Gi3\_28439760\_x1.....gUcgucgugggaacacggggg..... 1  
 Gi3\_28439722\_x1...gaucggagacguUgugggaacacggggugcc..... 1  
 Gi2\_11127342\_x1.....cguAggaacacggggugccg..... 1  
 Gi3\_28637153\_x1...gaucggaAacgucgugggaaca..... 1  
 Gi3\_28477132\_x1...gaucggagacgucgugggaacacgggguAc..... 1  
 Gi3\_28638042\_x1.....gucgugggaacacAgggg..... 1  
 Gi3\_28847302\_x1.....cggagacgucgugggaacacAgggugccga..... 1  
 Gi2\_11018488\_x1.....cgucguggAaacacggggugcc..... 1  
 Gi3\_28686319\_x1.....cggagUcgucgugggaacacggggg..... 1  
 Gi3\_28971012\_x1.....gaacacgggggUcccgaac..... 1  
 Gl1\_6125545\_x1...gauNggagacgucgugggaacacggg..... 1  
 Gi5\_9057716\_x1...ucggagacgucGgggaacacggggugccg..... 1  
 Gi1\_4361278\_x1.....ucgugggaacCggggugccgaac..... 1  
 Gi2\_11019730\_x1...aucggUgacgucgugggaac..... 1  
 Gi1\_4185083\_x1.....cgugggaacacCgggugccgaacu..... 1  
 Gi3\_28940806\_x1cAgcgaucggagacguc..... 1  
 Gi2\_11183463\_x1.....cgucgugggaAaacggggugc..... 1  
 Gi2\_11331618\_x1.....ucgugggaacacggggGgc..... 1  
 Gi2\_11375397\_x1.....Aagacgucgugggaacacggggugc..... 1  
 Gi2\_11253690\_x1.....gaUgucgugggaacacggggugccg..... 1  
 Gi1\_4262660\_x1.....agacgucgugggaacacggggCgccgaac..... 1  
 Gi5\_9081526\_x1...aucNgagacgucgugggaacacg..... 1  
 Gi3\_28623340\_x1...gaucggGgacgucgugggaacacggggugc..... 1  
 Gi3\_28813027\_x1.....ucgugggaacacgggCugccgaacu..... 1  
 Gi3\_28837199\_x1.....cCucgugggaacacggggugccg..... 1  
 Gi2\_11362446\_x1...cgaucggagacgucUugggaacacggggg..... 1  
 Gi5\_9089859\_x1...cggGgacgucgugggaacacgg..... 1  
 Gi2\_11406627\_x1.....acgucgugggaacacgAgggugccgaac..... 1  
 Gl1\_6249945\_x1.....Cacgucgugggaacacggggg..... 1  
 Gi3\_28377940\_x1.....ggagacgucguggUaacacggggugcc..... 1  
 Gi3\_28389722\_x1...cgaucggagacgAcgugggaacacggggg..... 1  
 Gi2\_11195074\_x1.....ggagacgucgugCgaacacggggugcc..... 1  
 Gi3\_28822896\_x1...gaucggagacgucAgggaacacg..... 1  
 Gi2\_11008922\_x1.....acgucgugggaacacggggugccgaacuuu..... 0  
 Gl1\_5985588\_x1...cgaucggagacgucgugggaacaAg..... 1  
 Gi2\_11222651\_x1.....cgugggaUcacggggugccgaa..... 1  
 Gi2\_11103829\_x1...cggagacgucguUggaacacggggg..... 1  
 Gi5\_8942983\_x1.....acuuCcccagcgcgccucgucgccacc..... 1  
 Gi2\_11130711\_x1.....gUagacgucgugggaacacggggugccgaac..... 1  
 Gi1\_4380575\_x1.....cgucgugggaacacggggugccgaUc..... 1  
 Gi3\_28747323\_x1.....gggUaacggggugccga..... 1  
 Gi3\_28938654\_x1.....gacAucgugggaacacggg..... 1  
 Gi2\_11107992\_x1...gaucggagacgucguggGacacggggugcc..... 1  
 Gi5\_9111466\_x1.....ucgugggaGcacggggugccgaac..... 1  
 Gi4\_598451\_x1...ucggGgacgucgugggaacacggggugccg..... 1  
 Gi2\_11250067\_x1.....cgugggaUcacggggugccgaac..... 1

Gi3\_28390595\_x1.....ucgugggUacacggggugcc..... 1  
 Gi2\_11097887\_x1.....agacUucgugggaacacggggugc..... 1  
 Gi3\_28742563\_x1...cgauccgagacgCcgugggaacacg..... 1  
 Gi3\_28755102\_x1.....aUgucgugggaacacggg..... 1  
 Gi1\_4179541\_x1.....gaacCcggggugccgaacuu..... 1  
 Gi2\_11311964\_x1.....cggagacgucgugggaacacgggAugc..... 1  
 Gi2\_11254875\_x1..gcaucggagGcgucgugggaacacggg..... 1  
 Gi3\_28311376\_x1.....ggagacgucgugggaacacggggugUc..... 1  
 Gi3\_28784516\_x1...cgauccgagacguUgugggaacacgg..... 1  
 Gi2\_11042107\_x1...gaucggagacAucgugggaaca..... 1  
 Gi3\_28641249\_x1...aucggagacgucgugggaacacU..... 1  
 Gi5\_8961656\_x1.....cgAcgugggaacacggggugccgaacuu..... 1  
 Gi2\_11185136\_x1.....gggaacGcggggugccgaa..... 1  
 Gl1\_6073333\_x1...cgauccgagacgucgAgg..... 1  
 Gi5\_8973750\_x1.....agacgucgNgggaacacggggugccga..... 1  
 Gi2\_11068560\_x1...cgauccgagacgucgugggaacacggggugccgaac..... 0  
 Gi3\_28929111\_x1.....agacgucgugAgaacacggg..... 1  
 Gi3\_28985797\_x1.....agacgucgugggaCcacggg..... 1  
 Gi2\_11079729\_x1...aucggagCcgucguggga..... 1  
 Gi1\_4320265\_x1.....agacgucgugggaacUcggg..... 1  
 Gi3\_28425386\_x1...cgauccgagacgucgugggaacac..... 0  
 Gi2\_11388318\_x1...ucggagacgucgugggaCcacgggg..... 1  
 Gi3\_28957394\_x1.....cguNgugggaacacggggugccgaa..... 1  
 Gi1\_4175926\_x1.....gggaacacggggugccgaCc..... 1  
 Gi2\_11107354\_x1.....cgugggaacacCgggugccgaac..... 1  
 Gi3\_28868573\_x1.....agacgucgugggGacacggg..... 1  
 Gi1\_4338853\_x1.....gggaacacNgggugccgaac..... 1  
 Gi3\_28961268\_x1...Caucggagacgucgugggaac..... 1  
 Gi3\_28292153\_x1.....agacgucgugggaacacgUg..... 1  
 Gi3\_28884649\_x1.....aacacggggAgccgaacuu..... 1  
 Gi2\_11131652\_x1...ucggagacgucgugggGacacggggugccga..... 1  
 Gi3\_28358715\_x1...aucggagacgucgugCgaacac..... 1  
 Gi5\_9076853\_x1.....gacgucgugggaacacggggAgccgaac..... 1  
 Gi2\_11086703\_x1.....cgucgugggaacNcggggugccgaacu..... 1  
 Gi3\_28282324\_x1.....agacgucgugggaacacggggAgccgaac..... 1  
 Gi1\_4168889\_x1..ugcgaucggagCcgucgugggaacacg..... 1  
 Gi2\_11279849\_x1...cgauccgagacgucgugggCacacggg..... 1  
 Gl1\_6131506\_x1.....cgugggaacacggggugccgaUc..... 1  
 Gi2\_11052501\_x1.....ggagacgucgugggaacacggggugU..... 1  
 Gi3\_28270108\_x1.....ggaacacggggugcGgaa..... 1  
 Gi2\_11187043\_x1.....agacgucgugggaacacggggGgccgaacu..... 1  
 Gi2\_11245625\_x1.....Uggaacacggggugccgaacuu..... 1  
 Gi3\_28550463\_x1...aucggagacgucgCgggaac..... 1  
 Gi3\_28770430\_x1.....gugggaaUacggggugccgaacuu..... 1  
 Gl1\_6277618\_x1...aucggagGcgucguggga..... 1  
 Gl1\_6205724\_x1...gauAggagacgucguggg..... 1  
 Gi2\_11119640\_x1...gaucggagaAgucgugggaacacggggugc..... 1

Gi3\_28578975\_x1.....acgucgugggaUcacggggugccgaacu..... 1  
 Gi3\_28481793\_x1.....ucguggAaacacggggugcc..... 1  
 Gi2\_11246696\_x1.....gacgucgugggaacacggggG..... 1  
 Gi2\_11216035\_x1.....cgGgggaacacggggugccgaacu..... 1  
 Gi1\_4370945\_x1...gaucggagacgucgugggaacaAgg..... 1  
 Gi3\_28442769\_x1.....cggagacgucgugggaacacgA..... 1  
 Gi3\_28531302\_x1....aucggaCacgucgugggaacac..... 1  
 G1a\_6110499\_x1.....ggagacguUgugggaacacg..... 1  
 Gi5\_8908821\_x1.....gucgugggaacacggggAgccgaa..... 1  
 Gi3\_28431241\_x1.....cggagacgucguUggaacacggggugc..... 1  
 Gi2\_11062368\_x1.....gagacgucgugggaacacgAggugccg..... 1  
 Gi3\_28475000\_x1.....cguggAaacacggggugccgaa..... 1  
 Gi3\_28724562\_x1...gauAggagacgucgugggaacacgggg..... 1  
 Gi5\_9032307\_x1.....gugggaacacggAgugccgaa..... 1  
 Gi1\_4357153\_x1.....acgucguggAaacacggggugccgaac..... 1  
 G1a\_6269004\_x1.....gaacGcggggugccgaacu..... 1  
 Gi5\_9012677\_x1.....agacUucgugggaacacggggugccga..... 1  
 G1a\_6168374\_x1....aucggagacgucgCgggaacacg..... 1  
 Gi3\_28557955\_x1.Ggcgaucggagacgucgugggaacacggg..... 1  
 Gi3\_28305892\_x1.....gucgugggaacacggggugccgaacAu..... 1  
 Gi1\_4313231\_x1.ugcgauCagagacgucguggga..... 1  
 Gi1\_4308898\_x1.....ggagacgucAugggaacacggggugcc..... 1  
 G1a\_5983383\_x1....ucggagacNucgugggaacacgg..... 1  
 Gi3\_28827535\_x1.....gucgugggaacacgggAugccgaa..... 1  
 Gi2\_11258456\_x1..gGgaucggagacgucgugggaacacggggug..... 1  
 G1a\_5990889\_x1.....aucAgagacgucgugggaacacggggugcc..... 1  
 G1a\_6203520\_x1.....guUgugggaacacggggugccgaacu..... 1  
 Gi3\_28630256\_x1.....ugggaacacggggugccgaU..... 1  
 G1a\_6157154\_x1.....gggaacacNgggugccgaa..... 1  
 Gi5\_8989723\_x1...gaucggagacgucgCgggaacacg..... 1  
 Gi2\_11165304\_x1.....gugggaaUacggggugccgaacu..... 1  
 Gi2\_11326731\_x1....aucggagacAucgugggaac..... 1  
 Gi1\_4164855\_x1.....ggaacacggggguCccgaacu..... 1  
 Gi3\_28657123\_x1....aucggagaAgucgugggaacac..... 1  
 Gi3\_28649949\_x1.....cgucgugggaUacggggugccga..... 1  
 Gi2\_11023500\_x1.....ggagacgucgAgggaacacggggug..... 1  
 Gi1\_4222540\_x1.....cgugggaCcacggggugccgaa..... 1  
 Gi2\_11377914\_x1.....ugggaacacgCggugccgaacu..... 1  
 Gi2\_11365463\_x1....ucggagacgucgugggaacacggggA..... 1  
 Gi3\_28326706\_x1.....gaAacgucgugggaacacggggugcc..... 1  
 Gi2\_11286382\_x1....ucggagacgucgugggaacacggggAcc..... 1  
 Gi3\_28704568\_x1.....gugggaacacgCggugccg..... 1  
 G1a\_6301986\_x1.....gggaacaGggggugccgaacu..... 1  
 Gi1\_4159800\_x1....aucggGgacgucgugggaacacggggugccga..... 1  
 Gi3\_28803938\_x1.uAcgaucggagacgucguggga..... 1  
 Gi3\_28443156\_x1...gaucggagacgAcgugggaacacgggg..... 1  
 Gi1\_4368174\_x1.....agacgucgugggaacacggggugccgaacu..... 0

Gi3\_28651090\_x1.....agacgucguggAaacacggg..... 1  
Gi2\_11045861\_x1.....gagacgucgugggaacacgAggugc..... 1  
Gi2\_11267058\_x1.....aucgCagacgucgugggaac..... 1  
Gi2\_11233125\_x1.....guUgugggaacacggggugccga..... 1  
Gi1\_4247871\_x1.....aucgAagacgucgugggaacacg..... 1  
Gi1\_4358353\_x1.....agacgucgugggaacacggggCgccga..... 1  
Gi2\_11218353\_x1.....gggaacacgUggugccgaac..... 1  
G1a\_6043620\_x1...gaCcgagacgucgugggaacacggggug..... 1  
G1a\_6003496\_x1...gaucggagacgucguggAa..... 1  
G1a\_6251801\_x1.....cgugggaacacggggguAc..... 1  
Gi4\_581586\_x1.....ugggaacacgggCugccgaacu..... 1  
Gi2\_11067447\_x1.....Ucgucgugggaacacggggugccgaac..... 1  
Gi1\_4202512\_x1.....Ggacgucgugggaacacggggugccgaac..... 1  
Gi2\_11049473\_x1.ugcgauGggagacgucgugggaacacgggggu..... 1  
Gi3\_28475834\_x1.....agacgucgugggCacacgggg..... 1  
Gi1\_4370461\_x1.....gugggaacacggggCgccga..... 1  
Gi2\_11149852\_x1...cgaucggagGcgucgugggaaca..... 1  
G1a\_6333416\_x1...gaucggagGcgucgugggaacacggggugc..... 1  
Gi2\_11366947\_x1.....ugggaacacggggugccUaa..... 1  
Gi3\_28974230\_x1.....cggagacgucAugggaacacgggggu..... 1  
G1a\_6161651\_x1.uCcgaucggagacgucgug..... 1  
G1a\_6120753\_x1...gaucggagUcgucgugggaa..... 1  
Gi2\_11025637\_x1.....cgucgugggaacacCgggugc..... 1  
Gi2\_11209156\_x1.....ucggagacgucguCggaacacggggugcc..... 1  
Gi3\_28544475\_x1...gaucggagacgucgugggaacacAgggug..... 1  
Gi2\_11047951\_x1...gaucggagCcgucgugggaacacgg..... 1  
Gi2\_11244211\_x1.Ggcgaucggagacgucguggga..... 1  
Gi1\_4219266\_x1.....guUgugggaacacggggug..... 1  
G1a\_6359019\_x1.....aacacggggugcUgaacu..... 1  
Gi5\_8935464\_x1.....gagacgucgAgggaacacg..... 1  
G1a\_6200068\_x1...gaucggagacguUguggg..... 1  
Gi3\_28693880\_x1.ugcgaucgNagacgucguggga..... 1  
Gi1\_4253692\_x1.....Agagacgucgugggaacacggggugccg..... 1  
Gi2\_11355746\_x1.....cCucgugggaacacggggugc..... 1  
Gi3\_28913448\_x1.....cgucgugggaacacgCggugccgaac..... 1  
Gi2\_11284205\_x1.....aucggagacgucguCggaacacggg..... 1  
Gi3\_28603933\_x1..gcgaucggagacgucgugggaaAa..... 1  
Gi3\_28270362\_x1.....Ngggaacacggggugccga..... 1  
Gi2\_11044452\_x1.....cgCagacgucgugggaacacggggugcc..... 1  
Gi2\_11049209\_x1.....ucggagacgucgugggaGca..... 1  
Gi5\_8951561\_x1.....ucgUagacgucgugggaacacg..... 1  
Gi5\_9137664\_x1.....acguUgugggaacacggggugccg..... 1  
G1a\_6266661\_x1...gaucggGgacgucgugggaacac..... 1  
Gi2\_10997572\_x1.....gacguAgugggaacacggggugccgaacu..... 1  
Gi2\_11343879\_x1.....cgucgugggaacacggggGgccgaa..... 1  
Gi1\_4259251\_x1.....gagacgucguggCaacacggggugccgaacu..... 1  
Gi5\_8959416\_x1.....cgugggaacacggggCgcc..... 1

Gi3\_28352860\_x1..gcgaucggagacgucgCgggaacacggggug..... 1  
 Gl1a\_6315379\_x1.....Aucgugggaacacggggugccgaa..... 1  
 Gi3\_28582409\_x1..gcgaGcggagacgucgugggaaca..... 1  
 Gi5\_9137612\_x1.....gggaacacAgggugccgaa..... 1  
 Gi4\_579186\_x1.....gggaacacggggugccgaaGu..... 1  
 Gi3\_28490816\_x1.....ucgugggaacacggggugccgaU..... 1  
 Gi2\_11024670\_x1.....cgucgugggaacacggggugccgaGc..... 1  
 Gi1\_4246617\_x1.....cgugggaacacggggugAcga..... 1  
 Gi5\_8970883\_x1.....gugggaacaGggggugccga..... 1  
 Gi3\_28510906\_x1..gcgaCcgagacgucgugggaacacggggugcc..... 1  
 Gi5\_8925555\_x1....aucggagacgucgugggaacGc..... 1  
 Gi3\_28944682\_x1.....gucgugggaacacggggAgccga..... 1  
 Gi1\_4300858\_x1.....gugggGacacggggugccgaac..... 1  
 Gi2\_11101813\_x1.....cggagacgucgugggaacCcgggug..... 1  
 Gi3\_28301838\_x1.....cggagacgucguAggaacacgg..... 1  
 Gi2\_11371713\_x1.....agacgucgugggaacacggg..... 0  
 Gi5\_8842241\_x1.....gugggaacaUggggugccgaacu..... 1  
 Gl1a\_6031618\_x1.....ggaacacggggugUcgaacu..... 1  
 Gi4\_574356\_x1.....acgucgGgggaacacggggugccgaacu..... 1  
 Gi2\_11272933\_x1.....ucgugggaacacggUgugccgaa..... 1  
 Gi2\_11366313\_x1.....acgucgugggaacacggggUccgaacu..... 1  
 Gi2\_11182787\_x1....cgaucAgagacgucgugggaacacggggugc..... 1  
 Gi2\_11310409\_x1....gaucggagacgucgugggaaUacgggg..... 1  
 Gi3\_28647270\_x1.....cgucgugAgaacacggggugccga..... 1  
 Gi2\_11350871\_x1.....agacgucguggAaacacggggugc..... 1  
 Gi2\_11252934\_x1.....ucgugggaacacggggCgcc..... 1  
 Gi3\_28302920\_x1.....Ngucgugggaacacggggugccgaacu..... 1  
 Gi2\_11224039\_x1....aucggagacgucgugggaacacggggugUcg..... 1  
 Gi3\_28950247\_x1.....cgugggaacacggggGgccg..... 1  
 Gi2\_11307867\_x1....aucggagacgucgugggCacacggg..... 1  
 Gi2\_11346551\_x1.....gacgucgugggCacacggg..... 1  
 Gi2\_11344786\_x1..ugcgaucggagacgucgugggaacacggggugccg..... 0  
 Gi3\_28959083\_x1....cgaucggagacgucgugAgaacacgggg..... 1  
 Gi2\_11222914\_x1.....ucgugggaUcacggggugcc..... 1  
 Gi1\_4334866\_x1.....gugggaacGcggggugccg..... 1  
 Gi3\_28450240\_x1.....uUgugggaacacggggug..... 1  
 Gi1\_4210373\_x1.....gaaAacggggugccgaacu..... 1  
 Gi2\_11280847\_x1....uNggagacgucgugggaacacg..... 1  
 Gi5\_9017207\_x1.....ucgugggaacacggggugcAgaac..... 1  
 Gi3\_28577626\_x1....cggagacgucgugggaacacggAgugccga..... 1  
 Gi2\_11094654\_x1....aucggagacgucguggAaacacgg..... 1  
 Gi4\_583534\_x1.....gugggaacacggggugcUgaa..... 1  
 Gi3\_28438928\_x1.....cgucgugggaCcacgggg..... 1  
 Gi2\_11379353\_x1.....Ugucgugggaacacggggugccgaac..... 1  
 Gi2\_11170793\_x1.....Agucgugggaacacggggugccga..... 1  
 Gi1\_4254413\_x1.....ugggaacacgCggugccgaacu..... 1  
 Gi2\_11280712\_x1..gcgaucggNgacgucgugggaacacggg..... 1

|                                                          |   |
|----------------------------------------------------------|---|
| Gi5_8930557_x1.....Ugacgucgugggaacacggggugccga.....      | 1 |
| Gi2_11031614_x1...gaucggagacgCcgugggaac.....             | 1 |
| Gi3_28389049_x1.....Ccgucgugggaacacggggugccgaa.....      | 1 |
| Gi3_28985650_x1.....agacgucgNgggaacacggggu.....          | 1 |
| Gl1a_6047474_x1.....gucgAgggaacacggggugccgaacu.....      | 1 |
| Gi3_28913063_x1.....gugggaacacggggugccNaac.....          | 1 |
| Gi5_9001498_x1.....ugggaaUacggggugccgaacuuu.....         | 1 |
| Gi2_11353046_x1.....cgugggaacaAggggugccga.....           | 1 |
| Gi3_28623172_x1.....cggagacgucgugggaacacggggugcUg.....   | 1 |
| Gi2_11118558_x1.....agacgucgNgggaacacggggugccgaa.....    | 1 |
| Gi2_11191714_x1.....gagacgucgugggaacacgggCug.....        | 1 |
| Gi3_28679122_x1.....gucgugggaacacggggugcAga.....         | 1 |
| Gi1_4381477_x1.....cgucguggUaacacggggugccgaacu.....      | 1 |
| Gi3_28512226_x1.....cgUagacgucgugggaacac.....            | 1 |
| Gi3_28309262_x1.....gaacacggNgugccgaacuu.....            | 1 |
| Gi3_28963821_x1.....gCcgugggaacacggggugccga.....         | 1 |
| Gi5_9092751_x1.....cgucguAggaacacggggugccgaac.....       | 1 |
| Gi2_11248460_x1.....gagacgucgugggaacacggggugccgCacu..... | 1 |
| Gi5_9107007_x1.....ucguUggaacacggggugccgaac.....         | 1 |
| Gi2_11242936_x1.....cgucgugggaacacAgggugccgaa.....       | 1 |
| Gl1a_6147578_x1...Aaucggagacgucguggga.....               | 1 |
| Gi3_28688492_x1.....agacgCcgugggaacacggg.....            | 1 |
| Gi1_4319439_x1.....gaUgucgugggaacacggggugccg.....        | 1 |
| Gi1_4354864_x1.....ucAugggaacacggggugccg.....            | 1 |
| Gi3_28609589_x1.....cggagacgucgugggaacacggggugcU.....    | 1 |
| Gi5_8834860_x1.ugcgaucgNagacgucguggg.....                | 1 |
| Gi3_28574391_x1.....gggaacUcggggugccga.....              | 1 |
| Gi1_4258367_x1...gaucggagacgucguggAaacac.....            | 1 |
| Gi1_4370350_x1.....cggagacgucgugggaacacg.....            | 0 |
| Gi5_8930869_x1.....aucggaUacgucgugggaacac.....           | 1 |
| Gi2_11168519_x1...gaucggagacgucgGgggaacacggggu.....      | 1 |
| Gi4_585580_x1.....Ucgucgugggaacacggggugccgaacu.....      | 1 |
| Gi3_28401813_x1...aucggagacgucguggCaacacggggu.....       | 1 |
| Gl1a_6315566_x1...aucggagacgucgugggaacaUggggu.....       | 1 |
| Gi1_4380659_x1.ugUgaucggagacgucgugggaaca.....            | 1 |
| Gi3_28978603_x1.....ucggagacgucgugggaacacggggugccgG..... | 1 |
| Gi2_11225544_x1...gaucggagacgucguUggaacac.....           | 1 |
| Gi2_11210708_x1.....cggaUacgucgugggaacacggggugccga.....  | 1 |
| Gi2_11285018_x1.....cggagacgucgugggaacacUgggugcc.....    | 1 |
| Gi2_11217651_x1.....cggagacgucgugggaAacggggu.....        | 1 |
| Gi3_28342185_x1...cgaucggagacgucgugUg.....               | 1 |
| Gi1_4258260_x1.....agacgucguggAaacacgggg.....            | 1 |
| Gi3_28712193_x1...gaucggagacgucgugUgaacacggggu.....      | 1 |
| Gi2_11053412_x1.....gucgugggaacacggggug.....             | 0 |
| Gl1a_6151794_x1.....gCgaacacggggugccgaa.....             | 1 |
| Gi3_28890054_x1.ugcgaucggagacgucgC.....                  | 1 |
| Gi3_28304405_x1.....cgugggaacacgggCugcc.....             | 1 |



Gi3\_28690215\_x1.....gacgucgugggaacaUggg..... 1  
G1a\_6316284\_x1.....ggagacgucguggAaacac..... 1  
Gi2\_11142885\_x1.ugcgaucgNagacgucgugggaacacg..... 1  
Gi1\_4237373\_x1.....ucgugggaacaAggggugccgaacu..... 1  
Gi2\_11118874\_x1.....cgucgugCgaacacggggugccgaacu..... 1  
Gi3\_28773657\_x1.....gugggaacacggggugccCaa..... 1  
Gi2\_11390093\_x1...cgaucggGgacgucgugggaacac..... 1  
G1a\_6330344\_x1...aucggagacgucgugAgaacacggggg..... 1  
Gi2\_11147578\_x1..gcgNucggagacgucgugggaacacggg..... 1  
G1a\_6103669\_x1.....gggaacacggggugcAgaacu..... 1  
G1a\_6302716\_x1.....ugggaacacggCgugccgaacu..... 1  
Gi5\_9053409\_x1...gaucggagacgucgugAgaacacgg..... 1  
Gi2\_11254428\_x1.....gucgugggaacGcggggugccg..... 1  
Gi2\_11303929\_x1.....cggaUacgucgugggaacacg..... 1  
Gi2\_10994167\_x1.....agacgucgugggaacGcggggugccgaac..... 1  
Gi3\_28638353\_x1.....agacgucgugAgaacacggggugcc..... 1  
Gi5\_8888406\_x1.....Ucugcuggggaacacggggugccgaacuuu..... 1  
Gi1\_4269759\_x1.....cgAgggaacacggggugccga..... 1  
Gi2\_11139991\_x1.....acgucgugggaacacgAggugccgaacu..... 1  
Gi5\_9105812\_x1.....acgucgugggaacGcggggugccgaac..... 1  
Gi1\_4193415\_x1.....cggagacgucgugggaacacAggggugc..... 1  
Gi5\_8987905\_x1.....aucgUagacgucgugggaacac..... 1  
Gi3\_28409597\_x1.....cggagacgucgugggaacacggggugccAa..... 1  
Gi1\_4264513\_x1.....gagacgucguggUaacacggggugccgaacu..... 1  
Gi5\_8936980\_x1.....agacgucguggAaacacggggugccgaacu..... 1  
Gi2\_11031034\_x1.....ucgugggaacacggggugUcgaa..... 1  
G1a\_6342655\_x1.....acguUgugggaacacggggg..... 1  
Gi4\_576864\_x1.....gucgugggaacCggggugccga..... 1  
Gi1\_4327534\_x1...cgaucggagacgucgugU..... 1  
Gi3\_28689546\_x1.....gucgugggaacacgggAugcc..... 1  
Gi5\_8876791\_x1.....ucgugggaacGcggggugccgaac..... 1  
Gi2\_11048682\_x1.....cgugggaacacggggugcAga..... 1  
Gi3\_28366014\_x1.....agacgucgugggaacacUgggugccgaa..... 1  
Gi2\_11333671\_x1...gaucggagacgucgugggaUacggggugcc..... 1  
Gi3\_28645682\_x1.....cCgagacgucgugggaacac..... 1  
Gi1\_4241795\_x1.....cgugUgaacacggggugccgaacuu..... 1  
Gi3\_28684411\_x1.....agacgucgugggaaUacggggugccga..... 1  
Gi2\_11059688\_x1.....Ngugggaacacggggugccgaac..... 1  
Gi5\_9015342\_x1.....gugggUacacggggugccga..... 1  
Gi3\_28328867\_x1.....ugggaacaAggggugccg..... 1  
Gi5\_9073395\_x1...gaucggagGcgucgugggaacac..... 1  
Gi1\_4298681\_x1...aucggagGcgucgugggaacacgggg..... 1  
Gi1\_4327042\_x1.....acgucgugggaacCggggugccg..... 1  
Gi2\_11345505\_x1.....aacCggggugccgaacu..... 1  
Gi2\_11359568\_x1...Aaucggagacgucgugggaacacggggug..... 1  
Gi4\_603920\_x1.....gugAgaacacggggugccgaacu..... 1  
Gi1\_4325068\_x1.....gaacacggggugccgCacuu..... 1

|                                                            |   |
|------------------------------------------------------------|---|
| Gi2_11184932_x1.....cgucgugggaacacggggugcA.....            | 1 |
| Gi2_11120754_x1.....gagacgucgugggaacacggAgugc.....         | 1 |
| Gi3_28910134_x1.....gggaacacggggugccAaacuu.....            | 1 |
| Gi2_11071102_x1.....ggagacgucgugggaacacggggugccgaaU.....   | 1 |
| Gi3_28928823_x1.....aacacggggugccgaCcuu.....               | 1 |
| Gi3_28985380_x1.....Aagacgucgugggaacacggggugccgaacu.....   | 1 |
| Gi2_11167559_x1.....cgucgugggaacacgAggugcc.....            | 1 |
| Gi3_28675818_x1.....agacgucgugggaacacggggugccgG.....       | 1 |
| Gi1_4237817_x1.....ucgugggaacacggggugccUaac.....           | 1 |
| Gi2_11298091_x1.....gacgucguUggaacacggggugccga.....        | 1 |
| Gi3_28491527_x1.....aacacggggugccgNacu.....                | 1 |
| G1a_6211101_x1.....cguAggaacacggggugcc.....                | 1 |
| Gi4_611346_x1....aAcggagacgucgugggaacacggggugcc.....       | 1 |
| Gi3_28397309_x1.....gagacgucgugggaacacggggCgcc.....        | 1 |
| Gi3_28281011_x1.....cgucgugggaacCgggg.....                 | 1 |
| Gi5_9032690_x1.....agacgucguggAaacacggggugccgaac.....      | 1 |
| G1a_6083496_x1....gGucggagacgucgugggaacac.....             | 1 |
| Gi1_4383027_x1....gaucggagacgucgugggaac.....               | 0 |
| Gi3_28879965_x1.....ggagacgucgugggaacacggggugccgaG.....    | 1 |
| Gi2_11156589_x1....cgauccgagacgCcgugggaacac.....           | 1 |
| Gi3_28793693_x1....gaucggagacgucgugggaacacggAgugcc.....    | 1 |
| Gi4_600927_x1.....guggUaacacggggugccgaac.....              | 1 |
| Gi1_4168797_x1.....gugggaacacAgggugccg.....                | 1 |
| Gi1_4387548_x1.....ggagacgucgugggaUacggggugccgaacu.....    | 1 |
| Gi3_28911891_x1....cgaAcggagacgucguggg.....                | 1 |
| Gi1_4302220_x1.....cggaAacgucgugggaacacggggugcc.....       | 1 |
| Gi2_11361519_x1.....gacgucgugggaacacAgggg.....             | 1 |
| Gi5_9133234_x1.....gugggaacacggggugccgC.....               | 1 |
| Gi2_11353185_x1.....gacgucgugAgaacacggggg.....             | 1 |
| Gi2_11019399_x1.....cggUgacgucgugggaacacggggug.....        | 1 |
| Gi2_11343646_x1..gcgaucggagCcgucgugggaacacgg.....          | 1 |
| Gi2_11316126_x1.....gaacacggggugccgaaGu.....               | 1 |
| Gi3_28902587_x1....aGcggagacgucgugggaacacggggugccgaac..... | 1 |
| Gi1_4244145_x1.....ugggaacGcggggugccg.....                 | 1 |
| Gi2_11038285_x1.....gggaacacggggugccUaacu.....             | 1 |
| G1a_6274293_x1.....gugggaacNcggggugccgaac.....             | 1 |
| Gi1_4212845_x1.....gacgCcgugggaacacggggg.....              | 1 |
| G1a_6172531_x1..ugcgauccgagacgucgugggaGc.....              | 1 |
| Gi2_11270476_x1.....aacacgCggugccgaacu.....                | 1 |
| G1a_6189167_x1.....Aggaacacggggugccgaac.....               | 1 |
| Gi3_28608358_x1.....ucgugggaacacggAgugccgaa.....           | 1 |
| Gi5_9136647_x1....aucgCagacgucgugggaaca.....               | 1 |
| Gi3_28294608_x1....gaucggagacgucgugggaacGcggggug.....      | 1 |
| Gi5_8980991_x1....cggaAacgucgugggaacacggggugccga.....      | 1 |
| Gi2_11165106_x1..gGgaucggagacgucgug.....                   | 1 |
| Gi3_28322829_x1.....cggagacgucgugCgaacacggggugcc.....      | 1 |
| Gi1_4176926_x1.....guGgugggaacacggggugccgaacu.....         | 1 |

|                                                             |   |
|-------------------------------------------------------------|---|
| Gi3_28786142_x1..Acgaucggagacgucgugggaaac.....              | 1 |
| Gi3_28740403_x1.....cguAgugggaaacacggggugccgaacu.....       | 1 |
| Gi2_11161591_x1.....Gggagacgucgugggaaacacggggugccgaacu..... | 1 |
| Gi2_11086516_x1...gaucggagacguUgugggaaacac.....             | 1 |
| Gi3_28819343_x1.....Ugucgugggaaacacggggugccgaa.....         | 1 |
| Gi2_11035008_x1.....ucgugggaaacacggggugccgGa.....           | 1 |
| Gi2_11131368_x1.....agacgucgugggaaacGcgggggu.....           | 1 |
| Gi2_11149341_x1.....aacacggCgugccgaacu.....                 | 1 |
| Gi3_28668560_x1.....ggaAacgucgugggaaacacgggggu.....         | 1 |
| G1a_6120579_x1.....ugggaaacaGggggugccgaacu.....             | 1 |
| Gi1_4321284_x1...ucggagacgucgugggaaacaUg.....               | 1 |
| Gi3_28840240_x1.....ugggaaNacggggugccgaacu.....             | 1 |
| Gi3_28963887_x1.....gggaaacacgUggugccga.....                | 1 |
| Gi3_28563241_x1...aucggaCacgucgugggaaacacggg.....           | 1 |
| Gi5_9042366_x1.....cgugggaaacacggggugccUaac.....            | 1 |
| Gi5_8970389_x1...aucggagacgucgugggaaacacggAg.....           | 1 |
| Gi2_11313772_x1.....ugggaaacacggggAgccga.....               | 1 |
| Gi3_28551081_x1...gaucUgagacgucgugggaaacacggggugcc.....     | 1 |
| Gi3_28847184_x1.....ugggaaacacgggCugccga.....               | 1 |
| Gi2_11122628_x1...Ugaucggagacgucgugg.....                   | 1 |
| Gi2_11113189_x1...gaCcgagacgucgugggaaacacggg.....           | 1 |
| Gi2_11015436_x1cugcgaucggagacgucgugAgaacacgggggu.....       | 1 |
| Gi5_8976831_x1.....gugggaaacacggggAgccgaa.....              | 1 |
| Gi3_28550189_x1.....gucgugggaaacacggggugccgaUcu.....        | 1 |
| Gi1_4356332_x1.....gugggaaacaUggggugcc.....                 | 1 |
| Gi5_9019608_x1.....cgucgugggaGcacggggugccga.....            | 1 |
| Gi3_28341450_x1...ucggagacguAgugggaaaca.....                | 1 |
| Gi5_8874552_x1.....gugggaaacacggggUaccgaa.....              | 1 |
| Gi1_4191378_x1...gaucggagacgucguggCaacacgg.....             | 1 |
| Gi1_4366900_x1...cgaucggagacgucgugggaaacacgg.....           | 0 |
| Gi3_28837703_x1.....aaUacggggugccgaacu.....                 | 1 |
| Gi3_28488998_x1.....Ggggaaacacggggugccgaacu.....            | 1 |
| Gi3_28737355_x1...cggagacgucgugggaaAacggggugcc.....         | 1 |
| Gi3_28659183_x1.....acgCcgugggaaacacggg.....                | 1 |
| Gi3_28375246_x1...cgaucggagacgucgugggaaacacgC.....          | 1 |
| Gi2_11266072_x1.....ucgugggaaacacAgggugccg.....             | 1 |
| Gi5_8846235_x1...aucggagacgucgugggaaacacggggugccgCacu.....  | 1 |
| Gi2_11066244_x1...aAcggagacgucgugggaa.....                  | 1 |
| Gi3_28942045_x1.....ucgugggaaacacggggugccgU.....            | 1 |
| Gi1_4165913_x1...ggagacgucgugggaaacacggggugcAgaacu.....     | 1 |
| Gi2_11308011_x1.....cAucgugggaaacacgggg.....                | 1 |
| G1a_6330843_x1.....gacgucgugggaaacacggggCgcccgaacu.....     | 1 |
| Gi3_28850216_x1..gcgaucggagGcgucgug.....                    | 1 |
| Gi1_4341799_x1...gaucggGgacgucgugggaaacacgggggu.....        | 1 |
| Gi5_9063069_x1.....gugggaUcacggggugccgaa.....               | 1 |
| Gi3_28973539_x1.....gagacgucgugggaaUacg.....                | 1 |
| Gi3_28652732_x1.....gacgucguAggaaacacggg.....               | 1 |

Gi3\_28641016\_x1...gaucggagacgucguggAaacacggggugc..... 1  
 Gi1\_4198464\_x1.....ucgugUgaacacggggugcc..... 1  
 Gi1\_4261978\_x1.....uGggagacgucguggaacacgggg..... 1  
 Gi1\_4319330\_x1.....agacgucguggaacacggggugccgUac..... 1  
 Gi3\_28282645\_x1.....guggaacacggggugcG..... 1  
 Gi2\_11139306\_x1.....ggaacacggggAgccgaa..... 1  
 Gi3\_28378442\_x1...gaucggagacAucguggaacacggg..... 1  
 Gi5\_9129050\_x1.....acgucguggaacGcggggugccga..... 1  
 Gi2\_11089603\_x1.....ugggCacacggggugccgaa..... 1  
 Gi5\_9006437\_x1.....Ugucguggaacacggggugccga..... 1  
 Gi2\_11297268\_x1...gaucggagacgucguggaacacgCggu..... 1  
 Gi1\_4259715\_x1.....ucgugggaCcacggggugccgaa..... 1  
 Gi3\_28446330\_x1.....ucgugggaCcacggggugccga..... 1  
 Gi3\_28879032\_x1.....ggagacguNguggaacacggggugccga..... 1  
 Gi5\_8985350\_x1...gaucggagacgucguggGacacg..... 1  
 Gi2\_11143258\_x1...aucggagacgucguggaaUacgggg..... 1  
 Gi3\_28423268\_x1.....ucguggCaacacggggugccgaa..... 1  
 Gi2\_11215250\_x1.....gagacgucguggaacacggggUccgaaacu..... 1  
 Gi2\_11250310\_x1.....uggaacacggggUaccga..... 1  
 Gi3\_28980992\_x1.....cgucguggaacacggggUA..... 1  
 Gi4\_600100\_x1.....acgucguggaacacggggugccgCacu..... 1  
 Gl1\_6040698\_x1...aucggagacgucguggaacCggggug..... 1  
 Gi2\_11107956\_x1.....cggagacgCcguggaacacg..... 1  
 Gi3\_28311568\_x1.....ucggagacgucguggaacacggggGgcc..... 1  
 Gi3\_28732975\_x1...aucUgagacgucguggaacacgggg..... 1  
 Gi3\_28594175\_x1...gaucggagacgucguggCacacggggugc..... 1  
 Gi3\_28550315\_x1.....cgucCuggaacacggggugccg..... 1  
 Gi2\_11379039\_x1.....gggaacacggCgugccgaaacu..... 1  
 Gi2\_11312986\_x1.....gacgucgCgggaacacgg..... 1  
 Gi1\_4164106\_x1.....acgucguggAaacacggggugcc..... 1  
 Gi2\_11062247\_x1.....guggaacacggggugAcgaa..... 1  
 Gi3\_28336215\_x1.....Aacgucguggaacacggggugcc..... 1  
 Gi3\_28635996\_x1.....acgucguggaacacggggugccCaacu..... 1  
 Gi2\_11145505\_x1...cgaucggagacgucguggaacacggggug..... 1  
 Gl1\_6085840\_x1.....cguggaacacggggugccA..... 1  
 Gl1\_6306128\_x1...Acggagacgucguggaacacgg..... 1  
 Gi5\_8896311\_x1.....acacggggugcUgaacuuu..... 1  
 Gi3\_28492636\_x1.....uggaacacgCggugccga..... 1  
 Gi2\_11255009\_x1.....guggaacacgCggugccg..... 1  
 Gi2\_11360434\_x1...cgUagacgucguggaac..... 1  
 Gi3\_28941250\_x1...cggagacgucguggaacacggggCgccgaaacu..... 1  
 Gi1\_4221133\_x1.....acgucgAgggaacacggggugccgaaacu..... 1  
 Gi1\_4334876\_x1.....acgucguggaacCggggugcc..... 1  
 Gi2\_11040597\_x1.....gugggaUcacggggugccga..... 1  
 Gi2\_11365090\_x1...aucggagaUgucguggaac..... 1  
 Gi2\_11214558\_x1...cgucgugggaCcacggggugccgaaacu..... 1  
 Gi4\_567457\_x1.....agacgucNgggaacacggggugccgaaacu..... 1

Gi1\_4218624\_x1.....gagaUgucgugggaacacggggugccgaacu..... 1  
G1a\_6245317\_x1....aucggagacgucgugAgaacacggg..... 1  
Gi1\_4308818\_x1.....aacacggggugccgaCcuu..... 1  
Gi2\_11156498\_x1...cgaucggagacgucgugggaGcacggg..... 1  
Gi5\_8877968\_x1....aucggGgacgucgugggaacacggggugc..... 1  
Gi5\_8921686\_x1.....gaAgucgugggaacacggggugccgaacu..... 1  
Gi4\_574258\_x1...gaAcggagacgucgugggaacacggg..... 1  
Gi2\_11200223\_x1.....agacgucgugCgaacacggggugc..... 1  
G1a\_6313170\_x1.....gugAgaacacggggugccgaac..... 1  
Gi2\_11106205\_x1.....gacgucgugggaCcacggggugcc..... 1  
Gi2\_11225060\_x1...gGucggagacgucgugggaacacggggugcc..... 1  
Gi3\_28654780\_x1.....cggagacgucgGgggaacacgggg..... 1  
Gi3\_28502334\_x1.....acgucgugggaacacggggugGcgaac..... 1  
Gi2\_11347654\_x1.....agacgucgugggaacacggggugccgaacuA..... 1  
Gi3\_28961832\_x1.....gacgucgugggCacacggg..... 1  
Gi1\_4367318\_x1.....agGcugcuggggaacacggggugccgaacu..... 1  
Gi1\_4272121\_x1.....cguUggaacacggggugccgaacu..... 1  
Gi2\_11245259\_x1.....acgucgugggaacacggggugccAaacu..... 1  
Gi2\_11193383\_x1....aucggagacgucgugggaacacgggCugcc..... 1  
Gi3\_28662362\_x1.....ggagacgucgugggCacacggggugcc..... 1  
Gi3\_28648564\_x1.....ggagacgucgugggaacacggggGgccga..... 1  
Gi3\_28582647\_x1....aucggagacgucgugggaacacggggGgccgaacu..... 1  
Gi3\_28505871\_x1.....ggagacgucgugggUacacggggugccgaa..... 1  
Gi2\_11220097\_x1.....acgucgugggaacacggggugccGUacu..... 1  
Gi3\_28969706\_x1.....cgucgugggaacacgUggugc..... 1  
Gi2\_11119671\_x1....ucggagacNucgugggaacac..... 1  
Gi2\_11077807\_x1....Nucggagacgucgugggaacacggggugcc..... 1  
Gi1\_4287381\_x1.....acgucgugggCacacggggugccgaacu..... 1  
G1a\_11135749\_x1.....ggagacgucgugggaaAacggggugcc..... 1  
G1a\_6120721\_x1....ucggagacgucgugggaacGcggggugc..... 1  
Gi2\_11384385\_x1...gaucggagacgucgugggaacacggggugccgaacA..... 1  
Gi2\_11380151\_x1....aucggagacAucgugggaacacggggug..... 1  
Gi2\_11106817\_x1....ucggagGcugcuggggaacacgggg..... 1  
Gi4\_569912\_x1.....gugggaacacggggugccgaG..... 1  
Gi1\_4384652\_x1.....gacgucgugggaaUacggggugcc..... 1  
Gi2\_11142481\_x1...gaucggagacgucguAggaacacggg..... 1  
Gi1\_4187356\_x1.....gCcgugggaacacggggug..... 1  
Gi3\_28627026\_x1..gcgaGcggagacgucgugggaacacggg..... 1  
Gi2\_11256263\_x1.....cgucgugggaacacgggggu..... 0  
Gi3\_28849959\_x1....aucggagacgucgugggaacacggggugccgaCc..... 1  
Gi5\_8920634\_x1.....ggagacgucgugAaacacggggugccgaacu..... 1  
Gi3\_28671939\_x1...gUucggagacgucgugggaacacggggug..... 1  
Gi5\_9013082\_x1.....cgugggaacacggAgugcc..... 1  
Gi2\_11353603\_x1...gaucggagacgucGggga..... 1  
Gi5\_9017717\_x1.....cgucgugggaCcacggggugccga..... 1  
Gi2\_11098121\_x1.....acgucgugggaacCcgggugc..... 1  
Gi1\_4216268\_x1....ucggagacgucgugggaCcacg..... 1

|                 |                                       |   |
|-----------------|---------------------------------------|---|
| Gi4_611087_x1   | .....ugggaacacggggugccgaa             | 0 |
| Gi2_11029013_x1 | .....gagacgucguAggaacacggggugc        | 1 |
| Gi3_28977401_x1 | .....gacgucgugggaaacCggggugccgaacu    | 1 |
| Gi2_11084750_x1 | .....aucggagacgucgugggaaacacggggGgccg | 1 |
| Gi1_4245930_x1  | .....ggaacacCgggugccgaacuu            | 1 |
| Gi2_11036564_x1 | .....gucgCgggaacacggggugccgaa         | 1 |
| Gi4_613083_x1   | .....cgugggaacacgUggugccgaacu         | 1 |
| Gi1_4322489_x1  | .....gggaacacggggugccgCac             | 1 |
| Gi3_28742296_x1 | .....ucgugggaacacgUggugccgaac         | 1 |
| Gi2_11237777_x1 | .....agacgucgugggaaacacggggCgccg      | 1 |
| Gi3_28459918_x1 | ..gcgaucggagacgucgCgggaacacggg        | 1 |
| G1a_6106449_x1  | .....ggagacgucgugggaaacacggggGgc      | 1 |
| Gi3_28315878_x1 | .....acacggggNgccgaacuu               | 1 |
| Gi3_28636499_x1 | ....auAggagacgucgugggaaacacgg         | 1 |
| Gi1_4220535_x1  | ....aucggagacgucgugggaaacaUg          | 1 |
| Gi3_28866673_x1 | .....cgucgugggaaacacCggg              | 1 |
| Gi2_11200488_x1 | ....ucggagacguUgugggaaacacggggugc     | 1 |
| Gi3_28677986_x1 | ....aucggagacUucgugggaaacacgg         | 1 |
| Gi3_28294614_x1 | .....cgucguggCaacacggggugc            | 1 |
| Gi2_11069502_x1 | .....ggagacgucgugggaaacCggggug        | 1 |
| Gi2_11389550_x1 | .....gucgugggaaacacggggugA            | 1 |
| Gi3_28808150_x1 | ....Caucggagacgucgugggaaacacggggugccg | 1 |
| Gi3_28391473_x1 | ....aucggagacgCcgugggaaacacgggg       | 1 |
| Gi3_28912650_x1 | ..Ucgauccggagacgucgugggaaacacggggug   | 1 |
| Gi2_11165980_x1 | .....cAucgugggaaacacggggugccgaac      | 1 |
| Gi2_11125928_x1 | ....gaucggagacgucgugggaaacUcggggugcc  | 1 |
| Gi2_11073660_x1 | .....uggAaacacggggugccgaacuu          | 1 |
| Gi3_28799723_x1 | ....aucggagacguAgugggaaacacg          | 1 |
| Gi3_28552725_x1 | .....ggagacgucgugggaaacac             | 0 |
| G1a_6085658_x1  | ....aucggagacgucgugggaaacacggCg       | 1 |
| Gi3_28673091_x1 | .....cgugggaaacaAggggugccg            | 1 |
| Gi3_28398628_x1 | ....ucggagacgCcgugggaaaca             | 1 |
| Gi2_11024595_x1 | .....gugggaacacggggugcAga             | 1 |
| Gi2_11097560_x1 | .....gugggaaGacggggugccgaa            | 1 |
| Gi2_11350056_x1 | ....aucggagacgucgugggaaacacAg         | 1 |
| Gi3_28620522_x1 | ....ucggagacgucgugggaaacaAggggu       | 1 |
| Gi3_28302697_x1 | ..gcgaCcgagacgucgugggaa               | 1 |
| Gi2_11351485_x1 | ....gaucggagCcgucgugggaaacacggggugcc  | 1 |
| G1a_6141373_x1  | .....cggagacgucgugggaaGcacggg         | 1 |
| Gi2_11234850_x1 | .....ggagacgucgugggaaacaA             | 1 |
| Gi5_8893126_x1  | .....gagacgucgugggaaGcacg             | 1 |
| Gi5_8935569_x1  | .....cguggAaacacggggugc               | 1 |
| G1a_6118270_x1  | ....aucgUagacgucgugggaaacacgggggu     | 1 |
| Gi4_609212_x1   | .....Caacacggggugccgaacu              | 1 |
| G1a_6328193_x1  | .....ggaacacggggCugccgaacu            | 1 |
| G1a_6214735_x1  | .....acgucgugggaaCcacggggugccgaacu    | 1 |
| G1a_6212267_x1  | .....cgugggaaacacggggCgccgaac         | 1 |

|                                                           |   |
|-----------------------------------------------------------|---|
| Gi1_4253366_x1.....gacgCcgugggaacacggggugcc.....          | 1 |
| Gi4_603115_x1....auAggagacgucgugggaacacggggugcc.....      | 1 |
| Gi2_11235763_x1.....ugggaacacggggugccgaU.....             | 1 |
| G1a_6164968_x1.ugcgauccgagacgucUug.....                   | 1 |
| Gi3_28911524_x1.....gucgugggaacacggggugA.....             | 1 |
| Gi2_11139858_x1.....agacgucgugggaacacgAggugccga.....      | 1 |
| Gi2_10993657_x1..cgauccgagacguUgugggaacacggg.....         | 1 |
| Gi3_28652015_x1.....cgucgugggaacaUggggugccgaa.....        | 1 |
| Gi3_28276702_x1.....cggagacgucgugggaacacgAg.....          | 1 |
| Gi1_4246474_x1.....acgucgugggaacacggggAgccgaacu.....      | 1 |
| Gi3_28295354_x1.....cgugggaacacgggUugccg.....             | 1 |
| Gi5_9115980_x1.....gugggaacacggggUaccg.....               | 1 |
| Gi3_28445666_x1.....gacgucgAgggaacacggg.....              | 1 |
| Gi5_8830899_x1.....ucgugggaacCcgggugcc.....               | 1 |
| Gi2_11392832_x1.....gacgucgugggaacacggggugAcg.....        | 1 |
| Gi2_11355610_x1.....Acggagacgucgugggaacacgggg.....        | 1 |
| Gi1_4244440_x1.....cgucgugggCacacggggugcc.....            | 1 |
| Gi5_8883935_x1.....acUucgugggaacacggggugccgaac.....       | 1 |
| Gi5_9021028_x1.....acgucgugggaCcacggggugccgaac.....       | 1 |
| Gi2_11352061_x1.....acgucgugggaacaAggggugccga.....        | 1 |
| Gi5_9060853_x1.....aucggagacgCcgugggaaca.....             | 1 |
| Gi3_28724451_x1.....cgNcgugggaacacggggugccgaacu.....      | 1 |
| Gi5_8832899_x1.....gggaacacggggUaccgaa.....               | 1 |
| Gi5_8862117_x1...gauccgagacgucgugAgaacacg.....            | 1 |
| G1a_6032304_x1.gUgauccgagacgucgug.....                    | 1 |
| Gi3_28630688_x1.....gagacgucgugggaacacgggg.....           | 0 |
| Gi3_28364139_x1....auAggagacgucgugggaacacg.....           | 1 |
| G1a_6045006_x1.....ggaacacggggugccgaCcu.....              | 1 |
| Gi1_4273652_x1.....acgucgugggaacacggggAgcc.....           | 1 |
| Gi5_8978669_x1.....gUaacacggggugccgaa.....                | 1 |
| Gi2_11079803_x1.....Gcggagacgucgugggaac.....              | 1 |
| G1a_6016308_x1.....gugggGacacggggugccga.....              | 1 |
| G1a_6139174_x1.....cgugggaacUcggggugcc.....               | 1 |
| Gi3_28983725_x1.....uGgugggaacacggggug.....               | 1 |
| Gi3_28384105_x1.....ggagacgucgugggaacacggggU.....         | 1 |
| Gi2_11202595_x1.....cggagacguGgugggaacacg.....            | 1 |
| Gi3_28629292_x1...gauccgagacgucgugAgaaca.....             | 1 |
| Gi3_28951989_x1...aucggagacgCcgugggaacacggggugccgaac..... | 1 |
| Gi3_28762678_x1...gauccgagacgucAugggaacacggggugc.....     | 1 |
| Gi1_4368670_x1...aucAgagacgucgugggaacacgggg.....          | 1 |
| Gi2_11205126_x1...aucggagacguAgugggaacacg.....            | 1 |
| Gi2_11198605_x1.....cgAgggaacacggggugccg.....             | 1 |
| G1a_6263650_x1.....cgugggaacUcggggugccgaacu.....          | 1 |
| Gi1_4307503_x1.....ggaacacggggUaccgaa.....                | 1 |
| Gi3_28834180_x1.....acgucgugggaacacAgg.....               | 1 |
| Gi1_4218468_x1...ucggagacgucAugggaacacg.....              | 1 |
| Gi3_28335977_x1.....cggagacgucgugggaacacA.....            | 1 |

|                                                         |   |
|---------------------------------------------------------|---|
| Gi3_28565849_x1.....Nugggaacacggggugccg.....            | 1 |
| Gi2_11383106_x1.....uGggagacgucgugggaaacacgggg.....     | 1 |
| Gi4_613798_x1.....gaacacggNgugccgaacu.....              | 1 |
| Gi3_28452377_x1.....gNgggaacacggggugccgaac.....         | 1 |
| Gi2_11100770_x1.....gugggaacacggggugGcgaa.....          | 1 |
| Gi2_11108709_x1.....aucggUgacgucgugggaa.....            | 1 |
| Gi2_11313282_x1.....cgucgugggaaacacgggCugccgaacu.....   | 1 |
| Gi3_28856103_x1.....gucgugggaaacacggCgugcc.....         | 1 |
| Gi2_11303853_x1.....gaucggagacgucgugggaaacacgggU.....   | 1 |
| Gi3_28738715_x1.....ucgugggaaacaAggggugccgaac.....      | 1 |
| Gi2_11083912_x1.....ucggagacgucgugAgaacacg.....         | 1 |
| Gi4_571901_x1 .ugcgauccgagacgucgugggaaacac.....         | 0 |
| Gi4_578422_x1 .ucgugggaaacacggggugccUaacu.....          | 1 |
| Gi2_11391185_x1.....ucAgagacgucgugggaaacacggggU.....    | 1 |
| Gi3_28272022_x1.....uNgugggaaacacggggugccgaacu.....     | 1 |
| Gi3_28838063_x1.uUcgauccgagacgucgugggaaacacggggU.....   | 1 |
| Gi2_11233902_x1.....cggagacgNcgugggaaaca.....           | 1 |
| Gi3_28282485_x1.....ucggagacgAcgugggaaacac.....         | 1 |
| Gi2_11046009_x1.....gucgugggaaacacggggAgccga.....       | 1 |
| Gi5_8835936_x1.....acuuuccagcgUgccugcugcccacc.....      | 1 |
| G1a_6328464_x1.....gucgugggNacacggggugcc.....           | 1 |
| Gi1_4174464_x1.....cgugggaaacCggggugccgaac.....         | 1 |
| Gi1_4238076_x1.....ucggagacgAcgugggaaacacggg.....       | 1 |
| Gi1_4238072_x1.....ucguCggaacacggggugcc.....            | 1 |
| Gi2_11295301_x1.....aCcgagacgucgugggaa.....             | 1 |
| Gi1_4261565_x1.....uggAaacacggggugccgaac.....           | 1 |
| Gi5_9132635_x1.....aucggagacgucgugggCacac.....          | 1 |
| Gi2_11332208_x1.....aucggagacgucgugggaaacacgggCugc..... | 1 |
| Gi5_8937934_x1...Aaucggagacgucgugggaaacac.....          | 1 |
| Gi1_4378064_x1.....ucggagacgCcgugggaaacacggg.....       | 1 |
| Gi5_8876633_x1...gaucggagacgucgugCgaacac.....           | 1 |
| Gi1_4219953_x1.....aUacgucgugggaaacacggggugccga.....    | 1 |
| Gi2_11043130_x1.....gacgucgugggUcacggggugccgaacu.....   | 1 |
| Gi3_28511681_x1.....gucgugggaaacacgAggugccga.....       | 1 |
| Gi5_9122974_x1.....aucgCagacgucgugggaaacacgg.....       | 1 |
| Gi3_28863222_x1.....cgugggaaacacggggugccgaag.....       | 1 |
| Gi2_11089791_x1.....cgucgugggaaacacggggugUc.....        | 1 |
| Gi5_9099298_x1.....agacgucgugggaaAacggggugccgaac.....   | 1 |
| G1a_6350803_x1.....aucggagacgucAugggaa.....             | 1 |
| Gi1_4338663_x1.....cgucguggNaacacggggugccg.....         | 1 |
| Gi5_8887481_x1.....cgucgugggaaacacggggugUcga.....       | 1 |
| Gi1_4310413_x1.....ucgugggaaacacgAggugccgaa.....        | 1 |
| Gi5_8922740_x1.....gacgucgAgggaacacggggugccgaacu.....   | 1 |
| Gi5_8939704_x1.....gucgugggaaacacggggugccgGac.....      | 1 |
| Gi2_11146208_x1.gcgauccgCgacgucgugggaa.....             | 1 |
| Gi3_28379325_x1.....ucggagacgucgugggaaacacgAggu.....    | 1 |
| Gi2_11113831_x1.....Ngggaacacggggugccgaacu.....         | 1 |



|                                                            |   |
|------------------------------------------------------------|---|
| Gi5_9012429_x1.....uggaacacggUgugccgaac.....               | 1 |
| Gi2_11059026_x1.ugcgauccggaCagcucguggaacacg.....           | 1 |
| Gi2_11353473_x1.....gagacgucguggaacacggggugcUg.....        | 1 |
| Gi2_11003544_x1.....ggagacgucguggaacacgAgggugcc.....       | 1 |
| Gi3_28788641_x1.....cggagacgucgugAgaacacggggugccg.....     | 1 |
| Gi2_11178120_x1.....aucggagacgucguggaacacggUgugcc.....     | 1 |
| Gi3_28663158_x1...gauAggagacgucguggaacacg.....             | 1 |
| G1a_6017559_x1...gaucgAagacgucguggaacacggggg.....          | 1 |
| Gi3_28682352_x1...gauNggagacgucguggaacacgggg.....          | 1 |
| Gi2_11088235_x1.....cguggaacacggAgugccg.....               | 1 |
| Gi3_28475142_x1...gaucggCgacgucguggaacacggggugc.....       | 1 |
| Gi5_8867879_x1.....gagacguUguggaacacg.....                 | 1 |
| Gi5_9027177_x1.....cguggaacCggggugccg.....                 | 1 |
| Gi2_11236659_x1.....Acggagacgucguggaacacgggg.....          | 1 |
| Gi3_28662572_x1.....gucguggaacacggUgugccgaacuu.....        | 1 |
| Gi1_4177384_x1...gaucggagCgcucguggg.....                   | 1 |
| Gi2_11313179_x1...Gucggagacgucguggaacacggggugccgaacu.....  | 1 |
| Gi3_28723611_x1.....gagacgucgugAgaacacggggugccgaacu.....   | 1 |
| Gi1_4199848_x1.....cgucguggaacacggggGgccgaac.....          | 1 |
| Gi2_11343345_x1.....guNggaacacggggugccgaa.....             | 1 |
| Gi2_11365158_x1.....gucguggaacacggggugccgaacuu.....        | 0 |
| Gi3_28332446_x1.....cgucguggCaacacggggugccgaacu.....       | 1 |
| Gi5_9062789_x1.....cgucCuggaacacggggugccgaacu.....         | 1 |
| Gi5_9039236_x1.....guggaacacggggUacc.....                  | 1 |
| Gi3_28262709_x1.....acacggggugcGgaacuu.....                | 1 |
| Gi3_28381291_x1.....gggaacacAgggugccga.....                | 1 |
| G1a_6244380_x1...Gucggagacgucguggaacac.....                | 1 |
| G1a_6061200_x1.ugcgauccgNagacgucguggaacac.....             | 1 |
| Gi2_11190821_x1.....cggagacgucguCggaacacgggg.....          | 1 |
| Gi1_4177614_x1.....ucggagacgucgCgggaacacggggugccgaacu..... | 1 |
| Gi3_28938742_x1.....ucggagacgucgugggCacacggggugc.....      | 1 |
| Gi5_8947306_x1.....gucguggaacacgAgggugccgaac.....          | 1 |
| Gi2_11158619_x1..gcgauccggagGgcucguggaacacggggug.....      | 1 |
| Gi2_11086451_x1.....ucguggaCcacggggugccgaac.....           | 1 |
| Gi2_11221025_x1.....ucggagacgucgugggCac.....               | 1 |
| Gi2_11403232_x1.....ggagacgucguggaacacUggggugccgaac.....   | 1 |
| Gi2_11334140_x1.ugcgauccggagacAucguggga.....               | 1 |
| Gi3_28560488_x1.....ggagCcgucguggaacacggg.....             | 1 |
| Gi2_11371625_x1...gaucggagacgucguggaaAa.....               | 1 |
| Gi1_4350577_x1.....gucguggaacacggggugccgCac.....           | 1 |
| Gi1_4354010_x1..gcgauccgNagacgucguggaacacggggugc.....      | 1 |
| G1a_6104028_x1...gaucggagacAucgugg.....                    | 1 |
| Gi1_4319359_x1.....uggaacacGggggugccga.....                | 1 |
| Gi1_4348697_x1..gcgauccggagacgucguggaacacggg.....          | 0 |
| Gi3_28867293_x1.....ggagCcgucguggaacacggggugccg.....       | 1 |
| Gi5_8889801_x1.....agacgucguggaacacggggugccgCac.....       | 1 |
| Gi4_582176_x1.....guggaacacggggGgccgaa.....                | 1 |

Gi3\_28505523\_x1.....uggaacacggggugGcg..... 1  
G1a\_6334834\_x1.....cggagacgucgugggaaAacggggug..... 1  
Gi3\_28858179\_x1.....agacgucgugggaaacacgUggugccgaacu..... 1  
Gi5\_8916650\_x1.....gggaCcacggggugccgaac..... 1  
Gi3\_28864141\_x1.....Uagacgucgugggaaacacggg..... 1  
Gi1\_4223786\_x1.....aucAgagacgucgugggaaacacgg..... 1  
Gi5\_8964789\_x1.....ucgugggaaacacCgggugccgaacu..... 1  
Gi5\_8831431\_x1.....acuuuccagcgccugcugcUcacc..... 1  
Gi3\_28387195\_x1.....gacgucgugggaaacaGggggugccg..... 1  
Gi2\_11079995\_x1.....gCgucgugggaaacacggggugccgaacu..... 1  
Gi2\_11320433\_x1.....ggagacgucgugUgaacacggggugcc..... 1  
Gi2\_11073667\_x1.....gagacgucgugggCacacggggug..... 1  
Gi3\_28423673\_x1.....gaUgucgugggaaacacggggugccg..... 1  
Gi3\_28818550\_x1.....gggaaacacggggUccgaacu..... 1  
Gi2\_11368188\_x1.....cAgagacgucgugggaaacacggggug..... 1  
Gi1\_4304939\_x1.....cggagacgucguUggaacacgggg..... 1  
Gi3\_28848243\_x1.....cggagacgucgugggaaCcacg..... 1  
Gi5\_8959021\_x1.....gagacgucgugggaaacCggggugcc..... 1  
Gi1\_4302803\_x1.....gacgucgugggaaacacgggCugccgaacu..... 1  
Gi3\_28594698\_x1.....cgugggaaacaGggggugccgaa..... 1  
Gi2\_11282802\_x1.....cgucgugggGacacgggg..... 1  
Gi1\_4294151\_x1.....acgucgugggaaacacggggugccgaUcu..... 1  
Gi2\_11001341\_x1.....cgucgugggaaUcacggggugccg..... 1  
Gi5\_8876728\_x1.....gucgugggaaacCggggugccgaac..... 1  
Gi3\_28297820\_x1.....acgucgugggaaacacggU..... 1  
G1a\_6039076\_x1...cgaucggagacgucgugggaaCcacggggugc..... 1  
Gi1\_4322613\_x1.....agacgucgugggaaacacggAgugcc..... 1  
G1a\_6055296\_x1...gaucggagacgucgugggaaGcac..... 1  
Gi3\_28922372\_x1.....gucgugggaaacacggggugUc..... 1  
Gi3\_28351635\_x1.....Ngggaaacacggggugccgaac..... 1  
Gi2\_11124407\_x1...cgaucggagacgucgCgggaaacac..... 1  
Gi3\_28543623\_x1.....Uggagacgucgugggaaacacg..... 1  
Gi3\_28774643\_x1.....gacgucgugAgaacacggggugc..... 1  
Gi3\_28443102\_x1.....agacUucgugggaaacacggggugcc..... 1  
Gi5\_9085664\_x1...gaucggagacgucgugggaaacaAggg..... 1  
Gi1\_4311077\_x1.....ucgugggaaGacggggugccgaacu..... 1  
Gi3\_28612262\_x1.....gagCcgucgugggaaacacggggugccgaacu..... 1  
Gi5\_8877566\_x1.....gugggaaacacggggugUcgaa..... 1  
Gi3\_28740229\_x1...Gucggagacgucgugggaaacacggggugccgaacu..... 1  
Gi3\_28673876\_x1.....Cucgugggaaacacggggug..... 1  
Gi2\_11312481\_x1.....cgucgugggaaacaUggggugc..... 1  
Gi3\_28510652\_x1.....ucgugggaaacacggggugcAg..... 1  
Gi1\_4385604\_x1.....cgucgugggaaacacggggugccgU..... 1  
Gi2\_11295828\_x1.....gucgugggaaacacgggCugccgaacu..... 1  
Gi1\_4288014\_x1.....aAacgucgugggaaacacggggugcc..... 1  
Gi1\_4272206\_x1.....cggagaUgucgugggaaacacggg..... 1  
Gi4\_610900\_x1.....ugggaaacacggggugcUgaacu..... 1

|                                                             |   |
|-------------------------------------------------------------|---|
| Gi2_11012039_x1.....aucgAagacgucgugggaaacac.....            | 1 |
| Gi4_593597_x1.....gggaacacgggUugccgaacu.....                | 1 |
| Gi3_28547924_x1.....gacgucgugggaaacacgCggugccgaacu.....     | 1 |
| Gi1_4312465_x1.....acgucgugggaaacacggggugc.....             | 0 |
| Gi1_4194113_x1.....uggUaacacggggugccgaacu.....              | 1 |
| Gi2_11364518_x1.....acgucgAgggaacacggggugc.....             | 1 |
| Gi3_28365121_x1...gauUggagacgucguggga.....                  | 1 |
| Gi1_4234322_x1.....cCugggaacacggggugccg.....                | 1 |
| Gi1a_6145285_x1.....gCgggaacacggggugccgaa.....              | 1 |
| Gi3_28399668_x1...gCucggagacgucgugggaaacacggggugc.....      | 1 |
| Gi3_28676114_x1.....ucggagacgucgGgggaacacgggggu.....        | 1 |
| Gi2_11225583_x1.....cggagacgucgugCgaacacgggggu.....         | 1 |
| Gi2_11157716_x1.....ggagacgucgugggaaacacggggAgccg.....      | 1 |
| Gi1a_6229925_x1...aucgUagacgucgugggaaacacgggg.....          | 1 |
| Gi3_28629756_x1.....ggagGcgucgugggaaacacggggugccgaacu.....  | 1 |
| Gi2_11379852_x1.....ggagacAucgugggaaacacggggugccgaacu.....  | 1 |
| Gi1_4227534_x1.....acgucgugggaaacacggggugccAa.....          | 1 |
| Gi3_28526411_x1.....gacgucguggUacacggggugccg.....           | 1 |
| Gi1_4302484_x1...cCaucggagacgucgugggaaacacgggggu.....       | 1 |
| Gi2_11143376_x1...gcgGucggagacgucguggga.....                | 1 |
| Gi3_28605245_x1...gaucggagacgucgugggaaacacGg.....           | 1 |
| Gi1a_6303637_x1...ugUgaucggagacgucgugggaa.....              | 1 |
| Gi2_11261113_x1...aucgCagacgucgugggaaacacgggggu.....        | 1 |
| Gi2_11032815_x1...ugcgauccggagacgucgugggaaacacA.....        | 1 |
| Gi2_11319798_x1...aucggagacgucgugggaaacacggAgugccgaacu..... | 1 |
| Gi2_11295790_x1.....guggCaacacggggugccga.....               | 1 |
| Gi5_8843374_x1.....agacgucguCggaacacggggugccgaacu.....      | 1 |
| Gi1_4267381_x1...gaCcgagacgucgugggaaacacgg.....             | 1 |
| Gi3_28797323_x1...gaucggagNcgucgugggaaaca.....              | 1 |
| Gi5_8833544_x1.....acgucgugggaaacacggggugcU.....            | 1 |
| Gi3_28859820_x1.....Aagacgucgugggaaacacggggugcc.....        | 1 |
| Gi2_11096317_x1.....gugggaacacgggUugccgaacu.....            | 1 |
| Gi2_11155939_x1...aucggagacguGugggaaacacggggugc.....        | 1 |
| Gi3_28535206_x1...Ugaucggagacgucgugggaaacacgggg.....        | 1 |
| Gi2_11166568_x1...Ggaucggagacgucgugggaaacacggggug.....      | 1 |
| Gi2_11162766_x1.....aNcacggggugccgaacu.....                 | 1 |
| Gi1a_6287074_x1.....acgucgugggaaacUcgggggu.....             | 1 |
| Gi3_28319666_x1...ugcgauccggGgacgucguggga.....              | 1 |
| Gi3_28617291_x1.....ggaacacggggugccAaa.....                 | 1 |
| Gi3_28279419_x1...gaucggagGcgucguggg.....                   | 1 |
| Gi3_28495759_x1.....acgucgugggaaUacggg.....                 | 1 |
| Gi3_28619953_x1.....ugggaacacUgggugccgaa.....               | 1 |
| Gi1_4307275_x1.....cgAgggaacacggggugccg.....                | 1 |
| Gi2_11264700_x1.....agacgucgugggaaacacUggggugcc.....        | 1 |
| Gi5_9045110_x1.....ugggaacacggggugccgUa.....                | 1 |
| Gi1a_6248337_x1...cgauccggagacgucguggCaacacggg.....         | 1 |
| Gi1_4338330_x1...gaucggagacgucgugggUacacgg.....             | 1 |

Gi1a\_6162471\_x1.....cguNggaacacggggugccgaacu..... 1  
Gi2\_11167665\_x1.....gacgucgugggaaGacggggugcc..... 1  
Gi2\_11162057\_x1.....cggagacgucgugggaaUcggggugcc..... 1  
Gi2\_11134102\_x1.....cgugggaaacacggggGgccga..... 1  
Gi1\_4371593\_x1.....ucggagacgucgugggaaacacggggugA..... 1  
Gi2\_11132452\_x1.....gagacgucgugggaaacaUggggugccgaacu..... 1  
Gi1\_4288269\_x1.....gagacgucgugggaaacacggggugccgaacu..... 0  
Gi3\_28921487\_x1.....aucggagacguAgugggaaacacggg..... 1  
Gi3\_28483621\_x1.....cggagacguUgugggaaacacggggugccgaacu..... 1  
Gi2\_11403354\_x1.....Cgacgucgugggaaacacggggugccgaac..... 1  
Gi1a\_6004077\_x1.Cgcgaucggagacgucgu..... 1  
Gi2\_11012581\_x1.ugcgaucggGgacgucgugggaaaca..... 1  
Gi2\_11036193\_x1.....gaucggagacgucgugUgaacac..... 1  
Gi1a\_6131155\_x1.....gaucggagacgucguUggaa..... 1  
Gi4\_588889\_x1.....gugggaaacacggggugccgUacu..... 1  
Gi2\_11095628\_x1.....gaucggagacgucgugGaaaca..... 1  
Gi2\_11080391\_x1.....cgugggaaacacgCggugccga..... 1  
Gi3\_28768230\_x1.....aucggagacgucgugggaaUac..... 1  
Gi2\_11138233\_x1.....cgauccgagacgucgugggaaGcacg..... 1  
Gi2\_11369382\_x1.....acgucgugggaaacacgggAugcc..... 1  
Gi3\_28962790\_x1.....gagaUgucgugggaaacacggggg..... 1  
Gi1\_4225865\_x1.....Agggaacacggggugccgaac..... 1  
Gi1\_4213141\_x1.....gAagacgucgugggaaacacggggugcc..... 1  
Gi1a\_6237566\_x1.....gacguUgugggaaacacggggg..... 1  
Gi1\_4179114\_x1.....agacgucgugggCacacggggugccgaacu..... 1  
Gi5\_9014322\_x1.....ucguggCaacacggggugccgaac..... 1  
Gi1a\_6359968\_x1.....gggaacacNgggugccgaac..... 1  
Gi5\_9035495\_x1.....gugggaaacacggUgugcc..... 1  
Gi3\_28826877\_x1.....cggagacgucgugggaaAacggg..... 1  
Gi3\_28749277\_x1.....acgucgugggaaacacggAgugccgaac..... 1  
Gi3\_28351861\_x1.....ucguggGacacggggugc..... 1  
Gi3\_28326781\_x1.....gaucUgagacgucgugggaaacacggggugccga..... 1  
Gi2\_11298927\_x1.....gaucggagacgucgCgggaacacggggugc..... 1  
Gi3\_28969845\_x1.....gAgggaacacggggugccgaacu..... 1  
Gi5\_8940636\_x1.....cgucgugggaaacacggggugccgaUcu..... 1  
Gi3\_28797821\_x1.....cgauccgagacgucgugAg..... 1  
Gi2\_11238122\_x1.....gagacgucAugggaaacacggggugc..... 1  
Gi3\_28656718\_x1.....cggagacgucgugggUacacgggg..... 1  
Gi2\_10993227\_x1.....gcgaucggagacgucgugUa..... 1  
Gi3\_28507154\_x1.....gucgugggaaacGcggggug..... 1  
Gi2\_11138303\_x1.....Caucggagacgucgugggaaacacggggug..... 1  
Gi2\_11256240\_x1.....aucggagacgucAugggaa..... 1  
Gi2\_11203010\_x1.....cgAcgugggaaacacggggugccgaa..... 1  
Gi1\_4269033\_x1.....gagacgucgugggaaGacggggugccgaacu..... 1  
Gi5\_9100732\_x1.....agacgucgugggaaCcacggggugccgaac..... 1  
Gi3\_28465573\_x1.....agacgucgugggaaAacggg..... 1  
Gi2\_11264968\_x1.....cggagaUgucgugggaaacacggggugcc..... 1

Gi2\_11389867\_x1..gNgaucggagacgucgugggga..... 1  
 Gi3\_28617598\_x1.....ggaacacggUgugccgaa..... 1  
 Gi3\_28807723\_x1.....gugggaacacgggUugccgaa..... 1  
 Gi2\_11008382\_x1...gauNggagacgucguggggaacacggggugc..... 1  
 Gi2\_11225956\_x1.....cguggUaacacggggugccg..... 1  
 Gi4\_611381\_x1.....cgugggaacacgggAugccgaaacu..... 1  
 Gi1\_4343112\_x1.....ggUaacacggggugccgaacu..... 1  
 Gi3\_28911772\_x1.....ggagGcgucguggggaacacggg..... 1  
 Gi3\_28823251\_x1.....cggagacgucguggggaacacAggg..... 1  
 Gi5\_9045666\_x1.....acgucgCgggaacacggggugccgaac..... 1  
 Gi2\_11245314\_x1.....ugggaaAacggggugccgaac..... 1  
 Gl1\_6115624\_x1.....Gcgugggaacacggggugccgaacu..... 1  
 Gi5\_8946509\_x1.....ggaacacggggUccgaac..... 1  
 Gi1\_4275440\_x1.....acgucguggggaacacggggugccgU..... 1  
 Gi3\_28688445\_x1.....gacguUgugggaacacggg..... 1  
 Gi3\_28932665\_x1.....gugUgaacacggggugccg..... 1  
 Gi2\_11060699\_x1.....cgucgugAgaacacggggugc..... 1  
 Gi2\_11276792\_x1.....gugggaacacUgggugcc..... 1  
 Gi3\_28861903\_x1.....gugggaacacggggugccU..... 1  
 Gi1\_4313307\_x1...gaucggagacgucguggggaacacggggugccU..... 1  
 Gl1\_5990322\_x1...ucggUgacgucguggggaacacggg..... 1  
 Gl1\_6288085\_x1.....ggaacacgAggugccgaacu..... 1  
 Gi2\_11113374\_x1.....cggagacgAcguggggaacacggggug..... 1  
 Gl1\_6053314\_x1...aucggCgacgucguggggaacacgggggu..... 1  
 Gi3\_28358039\_x1.....acgucgugNgaacacggggugccgaa..... 1  
 Gi5\_9030997\_x1.....gugggaacCggggugccga..... 1  
 Gi1\_4256705\_x1.....gugggaacNcggggugccga..... 1  
 Gi3\_28497345\_x1...aucggagaGgucguggggaacacggggugcc..... 1  
 Gi3\_28280943\_x1.ugcgGucggagacgucguggggaacacggg..... 1  
 Gi1\_4226661\_x1.....cgugggaacGcggggugccga..... 1  
 Gi2\_11131535\_x1...gaucggagacgucgugAgaacacggg..... 1  
 Gi2\_11290484\_x1.....gucguggggaacacggAgugc..... 1  
 Gi3\_28749761\_x1.....gacgucguggggaacacggC..... 1  
 Gi3\_28628184\_x1.....acguUgugggaacacggggugccg..... 1  
 Gi2\_11349767\_x1.....gucgugggaaUacggggugc..... 1  
 Gi2\_11302223\_x1...aucggagacgucguggggaacacgUggugcc..... 1  
 Gi3\_28265614\_x1.....gacgucguNgggaacacgggg..... 1  
 Gi2\_11357749\_x1.....cgucguggggaacacggggAgc..... 1  
 Gi2\_11128287\_x1.....agacgucguggggaacacCgggugcc..... 1  
 Gi1\_4368912\_x1.....cguAggaacacggggugccga..... 1  
 Gi2\_11049988\_x1.....agacgucguggggaacacgAggu..... 1  
 Gi3\_28776804\_x1.....acgucguggggaCcacggggugccg..... 1  
 Gi1\_4178136\_x1.ugcAaucggagacgucgugggga..... 1  
 Gl1\_6268538\_x1.....ucguggggaGcacggggugccgaac..... 1  
 Gi1\_4162420\_x1.....gaNcacggggugccgaacu..... 1  
 Gi3\_28624606\_x1.....agacgucguggggaacGcggggugcc..... 1  
 Gi3\_28345044\_x1...cgaucggagacgucguggUaacacgggggu..... 1

|                                                          |   |
|----------------------------------------------------------|---|
| Gi5_9076706_x1.....gugggaacaAggggugccga.....             | 1 |
| Gi1_4164747_x1.....ggagacgucgugggUacacggggugcc.....      | 1 |
| Gi2_11092695_x1.....ugggaacCggggugccgaacuu.....          | 1 |
| Gi5_8879834_x1.....ucggagacgucgugggaacacggggAgc.....     | 1 |
| G1a_6195089_x1.....cgucgugggaacacggggGgccc.....          | 1 |
| Gi4_569627_x1.....agacgucgNgggaacacggggugcc.....         | 1 |
| Gi5_9023819_x1.ugcgauccgagacgCcguggga.....               | 1 |
| G1a_6146714_x1.....gagacgucgugggaacacggggugcc.....       | 0 |
| Gi1_4186046_x1.....cgugggaacacggggugUcga.....            | 1 |
| Gi3_28384945_x1.....aucggagacgucgugggaacacAgggugccg..... | 1 |
| G1a_6004677_x1.....ggagacgucgugggaUcac.....              | 1 |
| Gi1_4390519_x1.....ucgugggGacacggggugc.....              | 1 |
| Gi3_28684693_x1.....gagacgucNugggaacacggggugc.....       | 1 |
| Gi1_4298453_x1.....gucguAggaacacggggugccgaac.....        | 1 |
| Gi3_28304591_x1.....ucggagacgucgugAgaacacggg.....        | 1 |
| Gi5_9037537_x1.....acgucgugggaacacggggugccgGac.....      | 1 |
| Gi3_28550308_x1.....gacgucgugggaUcacggggugccgaacu.....   | 1 |
| Gi3_28473782_x1.ugcgauccgagaUgucgugggaacacggg.....       | 1 |
| Gi3_28833409_x1.gcgauccgagacgucgugggaGc.....             | 1 |
| Gi2_11242630_x1.....ucggagaUgucgugggaaca.....            | 1 |
| Gi3_28346105_x1.....Uggagacgucgugggaacacgggg.....        | 1 |
| Gi3_28825764_x1.....gucgugggaacacggggugAc.....           | 1 |
| Gi4_578916_x1.....gugggaacCggggugccgaac.....             | 1 |
| Gi3_28610678_x1..cgauccgagacgucgugggaacacg.....          | 1 |
| Gi1_4311510_x1.....cggagacgucgugggaacacggggUacc.....     | 1 |
| G1a_6272141_x1.....gGucggagacgucguggg.....               | 1 |
| Gi3_28396967_x1.....ucgugggaacaUggggugc.....             | 1 |
| Gi3_28817209_x1.....cgucgugggaacacgAgggugccga.....       | 1 |
| Gi5_9082746_x1.....aucggagaNgucgugggaacacggggugc.....    | 1 |
| Gi2_11167698_x1..cgauccgagacgucgugggaacaA.....           | 1 |
| Gi1_4179380_x1.....ggagacgucgugggaacacggggugAcg.....     | 1 |
| G1a_6332303_x1..cgGucggagacgucgugggaacacggggugc.....     | 1 |
| Gi1_4223267_x1.gcgauccgagacgCcgugggaaca.....             | 1 |
| Gi3_28298735_x1..cgauccgagacgucgugggaacGcggg.....        | 1 |
| Gi3_28784244_x1.....cggagacgucguAggaacacgggg.....        | 1 |
| G1a_6314884_x1.....gugggaacacggggUcccgaacu.....          | 1 |
| Gi2_11074425_x1.....gucgugggaacacggAgugccgaa.....        | 1 |
| Gi2_11345632_x1.....gaucggagacguUgugggaacacggggugc.....  | 1 |
| G1a_6236074_x1.....gugggaacacggggugcUg.....              | 1 |
| Gi3_28482599_x1.....cgugggaacacgAgggugccgaacuu.....      | 1 |
| G1a_6046966_x1.....gAgggaacacggggugccg.....              | 1 |
| Gi5_9049872_x1.....aucAgagacgucgugggaacacg.....          | 1 |
| Gi3_28348600_x1.....ucggagGcgucgugggaacacggggugcc.....   | 1 |
| Gi5_9045984_x1.....aucggagacgucgCgggaacac.....           | 1 |
| Gi1_4359851_x1.....ucgugggaacacggggugcUgaa.....          | 1 |
| Gi1_4235144_x1.....gaucggagacgucguAggaacac.....          | 1 |
| Gi2_10997963_x1.....ucggagacgucgugggaacacggggCgc.....    | 1 |

Gi4\_594282\_x1 .....ucgugggaacacggggugccgaUc..... 1  
Gi2\_11072371\_x1.....agacgucgAgggaacacggggugc..... 1  
Gi1\_4162509\_x1.....cgAcgugggaacacggggugccgaac..... 1  
Gi2\_11010028\_x1.....gugggaacacCggggugcc..... 1  
Gi5\_8864211\_x1....gaucAgagacgucgugggaacacg..... 1  
Gi2\_11372063\_x1.....ggagacgucgugUgaacacggggugccgaacu..... 1  
Gi4\_576982\_x1 .....gugggaacCcggggugccgaa..... 1  
Gi3\_28885202\_x1....gaucggagacgGcgugggaacacggggugcc..... 1  
Gi5\_9020390\_x1.....cggagGcgucgugggaacacggggugccga..... 1  
Gi2\_11284294\_x1.....gucgugggaGcacggggugccg..... 1  
Gi1\_4297261\_x1.....gagacgucgugggaacacggggugcAgaacu..... 1  
Gi2\_11162603\_x1.....gacgucgugggGacacggg..... 1  
Gi3\_28396474\_x1.....gaUacgucgugggaacacggggugccgaac..... 1  
Gi2\_11000713\_x1.....agacgucgugggaacacggggAgccgaa..... 1  
Gi5\_8966727\_x1.....cgucgugggaacUcggggugccgaacu..... 1  
Gi1\_4386517\_x1.....acgucgugggGacacggggugcc..... 1  
Gi3\_28429624\_x1.....gacgucgugggaacacggggugAcgaac..... 1  
Gi1\_4182141\_x1.....gugggaacacAgggugccgaac..... 1  
Gi3\_28451547\_x1.....ggagacgucgugggaacaAgggggugcc..... 1  
Gi1\_4172999\_x1.....gucgAgggaacacggggug..... 1  
Gi2\_11124946\_x1.....gacgucgugggGacacggggugc..... 1  
Gi2\_11011623\_x1.....acgucAugggaacacgggggu..... 1  
Gi1\_4228465\_x1.ugcgGucggagacgucguggga..... 1  
Gi3\_28414537\_x1.....ucggagacgucguggAaacacgg..... 1  
Gi3\_28686692\_x1.....cAucgugggaacacggggug..... 1  
Gi3\_28663753\_x1.....ucggagacgucguggAaacacggg..... 1  
Gi3\_28359674\_x1....gaCcgagacgucgugggaacacggggug..... 1  
Gi1\_4207945\_x1.....cguUgugggaacacggggugccgaa..... 1  
Gi2\_11057667\_x1....gaucggagacguAgugggaacacggg..... 1  
Gi2\_11311963\_x1.....ucUgagacgucgugggaacacgggg..... 1  
Gi1\_4290416\_x1.....acgucgugggGacacggggugccg..... 1  
Gi1\_4259662\_x1.....acacggggNgccgaacu..... 1  
G1a\_6229599\_x1....aucggagacgucgCgggaacacgggggu..... 1  
Gi3\_28560422\_x1.....gacgucgugAgaacacggg..... 1  
Gi5\_8994114\_x1....aucggagacgucgugggaaAacggggugccgaacu..... 1  
Gi5\_9085833\_x1.....ucgugggCacacggggugccgaac..... 1  
Gi2\_11103153\_x1.....ucggagacgucgugggaacU..... 1  
Gi2\_11127371\_x1.....agacgucgugggaacaUggggugccga..... 1  
Gi1\_4277667\_x1.....gugggaacacggUgugccgaacu..... 1  
Gi3\_28302472\_x1.....acgucgugggaacCcggggugc..... 1  
Gi2\_11081100\_x1..gcgauUggagacgucgugggaacacggggugcc..... 1  
Gi3\_28616736\_x1.....ggagacgucgugggaacacAggg..... 1  
G1a\_6136106\_x1.....Cgagacgucgugggaacac..... 1  
Gi1\_4266689\_x1.....gucgugggNacacggggugccgaac..... 1  
Gi5\_8882314\_x1.....gugggaacaGggggugccgaac..... 1  
Gi5\_9029138\_x1.....gucgugggaacGcggggugc..... 1  
Gi2\_11117033\_x1....aucggagacgucguggAaaca..... 1

Gi2\_11011422\_x1.....ggagacgAcgugggaacacggggugcc..... 1  
Gi2\_11205538\_x1.....cUucgugggaacacggggugccgaacuu..... 1  
Gi1\_4366502\_x1.....gugggaacacgUggugccgaac..... 1  
Gi1\_4375775\_x1.....cgugggaacacggggGgccg..... 1  
Gi3\_28805041\_x1.....cgugggaacCggggugcc..... 1  
Gi5\_8861641\_x1.....ucggagacgucgugggaacacggggGgccgaacu..... 1  
Gi3\_28954213\_x1.....cgucgugggaacacgUggugccgaacu..... 1  
Gi5\_9014436\_x1.....ucgugggaacacggggugccgaCc..... 1  
Gi3\_28393995\_x1.....ucggagacgucguggAaacacggggugccgaacu..... 1  
Gi3\_28635394\_x1.....cggagacgucgugggCacacg..... 1  
Gi5\_8957289\_x1.....gCgaacacggggugccgaa..... 1  
Gi3\_28475874\_x1.....gaucggagacgucgugggaacUcggggg..... 1  
Gi3\_28573738\_x1.....agacgucgugggaCcacggggugccgaac..... 1  
G1a\_6351812\_x1.....aucggagacgucgugggaacacgggggAc..... 1  
Gi2\_11131711\_x1.....cggagacgAcgugggaacacggggugc..... 1  
Gi5\_8868082\_x1.....cgucgugAgaacacggggugccga..... 1  
Gi5\_8993166\_x1.....Uggagacgucgugggaacacggg..... 1  
Gi2\_11382264\_x1.....ugggaacacggggugGcga..... 1  
Gi3\_28303095\_x1.....aCacgucgugggaacacggggugcc..... 1  
Gi3\_28592308\_x1.....gaacacggggugcAgaacuu..... 1  
Gi1\_4159588\_x1.....aaGacggggugccgaacu..... 1  
Gi3\_28735867\_x1.....gacgucgugggaAacggg..... 1  
Gi3\_28553739\_x1.....Acggagacgucgugggaacacggg..... 1  
Gi3\_28633324\_x1.....cggagacgucgugggaCcacggggugccga..... 1  
Gi2\_11076189\_x1.....cgucgugggaacacggggugccUaacu..... 1  
Gi1\_4212787\_x1.....cgAcgugggaacacggggugccgaa..... 1  
Gi2\_11178163\_x1.....cgucgugggaacacgggAugccgaac..... 1  
Gi2\_11371633\_x1.....auNggagacgucgugggaacac..... 1  
G1a\_6290049\_x1.....aucgUagacgucgugggaacacggggugc..... 1  
Gi3\_28599898\_x1.....gaucggagacgAcgugggaacacg..... 1  
Gi3\_28427336\_x1.....ggGgacgucgugggaacacgg..... 1  
Gi3\_28517457\_x1.....aucggagGcgucgugggaacacggggug..... 1  
Gi1\_4268758\_x1.....gacgucgugggaacCggggugccgaacuu..... 1  
Gi2\_11367323\_x1.....ucggagacgucgugggaacacgUggugc..... 1  
Gi1\_4271903\_x1.....gaacacggNgugccgaacuu..... 1  
Gi5\_9063362\_x1.....cgugggaacacgUggugccg..... 1  
Gi2\_11380768\_x1.....gagacgAcgugggaacacggggugcc..... 1  
Gi2\_11310401\_x1.....gaucggagaUgucgugggaacacggggug..... 1  
G1a\_6272080\_x1.....ggaacacgAggugccgaac..... 1  
Gi5\_9132924\_x1.....gugggaacacCgggugccg..... 1  
Gi1\_4337533\_x1.....ucggagacgucgUggaacacg..... 1  
G1a\_6278688\_x1.....gggaacaUggggugccgaac..... 1  
G1a\_6030055\_x1.....gaucAgagacgucgugggaacacggggg..... 1  
Gi3\_28830050\_x1.....gcgaucggagacAucgugggaacacggg..... 1  
Gi1\_4281399\_x1.....gagacgucgugAgaacacggggugcc..... 1  
Gi5\_9000433\_x1.....cggagacgucgugggaacCcg..... 1  
Gi4\_614230\_x1.....guggUaacacggggugcc..... 1



|                      |                                        |   |
|----------------------|----------------------------------------|---|
| Gi3_28770403_x1..... | .aacaGggggugccgaacuu.....              | 1 |
| Gi2_11321236_x1..... | .cggagCcgucguggaacac.....              | 1 |
| Gi3_28798110_x1..... | .gucguggaacCggggugccgaacuu.....        | 1 |
| Gi1_4386977_x1.....  | .gagacgucguggaacacAgggugccgaacu.....   | 1 |
| Gi1_4257961_x1.....  | .gucgCgggaacacggggug.....              | 1 |
| Gi3_28744405_x1..... | .gacgucguggaCcacggg.....               | 1 |
| Gi1_4376531_x1.....  | .aAcggagacgucguggaacacg.....           | 1 |
| Gi3_28403665_x1..... | .ggaaAacggggugccgaa.....               | 1 |
| Gi3_28863936_x1..... | .acgucguggaacacgggg.....               | 0 |
| Gi3_28450378_x1..... | .cgaucggagacgucguggaacacAgg.....       | 1 |
| Gi5_9020430_x1.....  | .ugUgaucggagacgucgugg.....             | 1 |
| G1a_6191308_x1.....  | .aCcgagacgucgugga.....                 | 1 |
| Gi5_9091496_x1.....  | .agacgucguggaGcacggggu.....            | 1 |
| Gi2_11376466_x1..... | .gacgucguggaacacggggugA.....           | 1 |
| Gi1_4258278_x1.....  | .agacgucguggaacacAgggugccgaac.....     | 1 |
| Gi3_28296339_x1..... | .cgucguggaacUcggggugccgaac.....        | 1 |
| Gi2_11380506_x1..... | .ucggGgacgucguggaacacggg.....          | 1 |
| Gi2_11118174_x1..... | .uGggagacgucguggaacacggggugccg.....    | 1 |
| Gi3_28884437_x1..... | .gaucggagacgucgugAgaacacg.....         | 1 |
| Gi3_28599518_x1..... | .gcaucggagacgucguAggaacacggg.....      | 1 |
| Gi2_11097603_x1..... | .cgucUuggaacacggggugccgaa.....         | 1 |
| Gi2_10993327_x1..... | .agacUucguggaacacggggugccg.....        | 1 |
| Gi5_8888340_x1.....  | .cgucguggaacGcggggugccgaa.....         | 1 |
| G1a_6044266_x1.....  | .gaucggagacgucAugggaa.....             | 1 |
| Gi5_8892932_x1.....  | .gacgucguggaaUacggggugccgaacu.....     | 1 |
| Gi3_28285544_x1..... | .cgucguggaacacAgggugccgaa.....         | 1 |
| Gi3_28922041_x1..... | .gagacgucguggaacacgggAu.....           | 1 |
| G1a_6282132_x1.....  | .ugggCacacggggugccgaacu.....           | 1 |
| Gi2_11253774_x1..... | .ucguggaacacgggCugccgaacu.....         | 1 |
| Gi4_605617_x1.....   | .agacgucguggaacacggggugccgaacA.....    | 1 |
| Gi5_9038076_x1.....  | .gacgucguggaacaAgggggugccgaacu.....    | 1 |
| Gi1_4236988_x1.....  | .ggagacgucguggGacacggggugccg.....      | 1 |
| Gi5_8908142_x1.....  | .ggaacacggggugUcgaac.....              | 1 |
| Gi2_11394636_x1..... | .gcaucggagacgucguggaacacggggugccg..... | 0 |
| Gi3_28740015_x1..... | .cgucguCggaacacgggg.....               | 1 |
| Gi3_28977415_x1..... | .gUgacgucguggaacacggggugccg.....       | 1 |
| G1a_6249860_x1.....  | .gaacacggggGgccgaacu.....              | 1 |
| Gi5_9025853_x1.....  | .gaucggagacgucguggaacacC.....          | 1 |
| Gi1_4249657_x1.....  | .agacgucguggaGcacggggugccg.....        | 1 |
| Gi2_10995743_x1..... | .acgucguggaacacggggugcAgaac.....       | 1 |
| Gi3_28412195_x1..... | .gaucggagGcugcuggaacacggggugcc.....    | 1 |
| Gi3_28559790_x1..... | .gagacgucguggaaUacggggugccg.....       | 1 |
| Gi2_11313946_x1..... | .uggaacacggggUccgaacu.....             | 1 |
| Gi4_575825_x1.....   | .cCucguggaacacggggugcc.....            | 1 |
| Gi2_11245257_x1..... | .ugcgaucggagacgucguggaacacggg.....     | 0 |
| Gi1_4192229_x1.....  | .uggaacCcgggugccgaac.....              | 1 |
| Gi5_9088307_x1.....  | .aucggagacgucCgggaacacggggugc.....     | 1 |

|                                                            |   |
|------------------------------------------------------------|---|
| Gi5_8853643_x1.....gucgugggaaAacggggugcccgaac.....         | 1 |
| Gi1_4378010_x1.....agacgucgugggaacacggggCgcc.....          | 1 |
| Gi2_11125166_x1...cgUucggagacgucgugggaacacg.....           | 1 |
| Gi3_28438211_x1.....ggagacgucgugggaacacggggugGc.....       | 1 |
| Gi1_4340192_x1.....gagacgucgugggaacacggggugcccgaUcu.....   | 1 |
| Gi5_8855654_x1.....cgucgugggaacUcggggugcccga.....          | 1 |
| Gi2_11099041_x1.....gacgucgugggaacacggggC.....             | 1 |
| Gi1_4335636_x1.....gugggaaAacggggugcccg.....               | 1 |
| Gi2_11240880_x1.....uggNaacacggggugcccgaac.....            | 1 |
| Gi3_28273134_x1.....agacgucgugggaacacggggUcccgaacu.....    | 1 |
| Gi1_4238132_x1.....cguNggaacacggggugcccgaacu.....          | 1 |
| Gi2_11105844_x1.....gagacgucgugggaacacggggGg.....          | 1 |
| Gi2_11204538_x1.....ggagacgucgugggaacacggggugcccGg.....    | 1 |
| Gi1_4289542_x1.....agacgucgugAgaacacggggugcccgaacu.....    | 1 |
| G1a_5992043_x1....aucggagacgucgugggG.....                  | 1 |
| Gi3_28873479_x1....uUggagacgucgugggaacacggg.....           | 1 |
| Gi3_28897323_x1.....gagacgucgugCgaacacg.....               | 1 |
| Gi1_4298220_x1....aucggagacgucgugAgaacacg.....             | 1 |
| Gi3_28888350_x1.....ggagacgucgugggaacacAgggugcccg.....     | 1 |
| G1a_6075940_x1....gauUggagacgucgugggaa.....                | 1 |
| Gi4_582727_x1....aucggagacgucgugggaacacggggugcccgaacu..... | 0 |
| Gi3_28943492_x1.....cgucguggNaacacggggug.....              | 1 |
| G1a_6101519_x1.....cggagacgucgugggaaAacggggg.....          | 1 |
| Gi3_28289991_x1.....ucgAgggaacacggggugcccg.....            | 1 |
| Gi4_576836_x1.....ggagacgucgugggaacacg.....                | 0 |
| Gi5_9089982_x1.....ucgugggaacacggAgugcccgaac.....          | 1 |
| Gi2_11367057_x1.....agacgucgugggaacacgggAugcccgaacu.....   | 1 |
| Gi1_4256393_x1.....ggGgacgucgugggaacacggggg.....           | 1 |
| Gi2_11006797_x1.....acgucUugggaacacggggugccc.....          | 1 |
| Gi1_4286045_x1.....gacgucgugggaacacggggUaccgaacu.....      | 1 |
| Gi3_28406617_x1....aucggagacgucgugggaUcacgggg.....         | 1 |
| Gi1_4179046_x1.....gucgugggaacacggggugcccgaacG.....        | 1 |
| Gi4_587397_x1.....gAaacacggggugcccgaac.....                | 1 |
| Gi5_8976438_x1....aucggagacgucCugggaaca.....               | 1 |
| Gi5_9128641_x1.....cggagacgucgugAgaacacg.....              | 1 |
| Gi2_11391762_x1.....cgucgugggaacacggggugU.....             | 1 |
| Gi3_28560436_x1.....Ngucgugggaacacggggugcccga.....         | 1 |
| Gi5_9081282_x1.....ugggaacacggAgugcccga.....               | 1 |
| Gi5_9134488_x1....gaucggagGcugcuggggaacacg.....            | 1 |
| Gi2_11159961_x1....aucAgagacgucgugggaacacggggug.....       | 1 |
| Gi3_28603187_x1.....ugggaacacUggggugcccg.....              | 1 |
| G1a_6043230_x1.....cgGgggaacacggggugc.....                 | 1 |
| Gi2_11269360_x1.....ugggUacacggggugcccga.....              | 1 |
| Gi4_593381_x1.....cgugggaacacggggugcccga.....              | 0 |
| Gi2_11227824_x1....Uucggagacgucgugggaacacg.....            | 1 |
| Gi2_11015097_x1.....gGcugcugggaacacggggugcccga.....        | 1 |
| Gi2_11359345_x1.....cggagacgugugggaacacggggugccc.....      | 1 |

|                 |                                       |   |
|-----------------|---------------------------------------|---|
| Gi3_28626711_x1 | ...gaGcgagagacgucgugggaacacggggugc    | 1 |
| Gi5_9066459_x1  | ...gucgugggaacaUggggugccgaacu         | 1 |
| Gi3_28451338_x1 | ...ucgugggaacaUggggugccg              | 1 |
| Gi1_4355230_x1  | ...gUagacgucgugggaacacg               | 1 |
| Gi2_11123344_x1 | ...cggagacgucgugggaacacgUggugcc       | 1 |
| Gi3_28759881_x1 | ...ucgugggaGacggggugccgaacu           | 1 |
| Gi1a_6335055_x1 | ...gucgugggaacCggggugcc               | 1 |
| Gi5_9123985_x1  | ...acgucgugCgaacacggggugccgaacu       | 1 |
| Gi1_4353728_x1  | ...cgGcgugggaacacggggugccgaac         | 1 |
| Gi1a_6280309_x1 | ...aucggagacgucgugggaacaGg            | 1 |
| Gi1_4193491_x1  | ...cgugggaacacggggugcUg               | 1 |
| Gi3_28360762_x1 | ...ucggGgacgucgugggaacacggggugccgaacu | 1 |
| Gi3_28984842_x1 | ...gaucggagacgucgugggaUcacggg         | 1 |
| Gi2_11062890_x1 | ...gacgucgugggaacacggggUaccg          | 1 |
| Gi3_28852671_x1 | ...cggagacgucgugggCacacggggugcc       | 1 |
| Gi3_28561811_x1 | ...ggaacacggggugccgaacuu              | 0 |
| Gi5_9092452_x1  | ...acgucgugUgaacacggggugccgaacu       | 1 |
| Gi2_11174739_x1 | ...ggagacgucgugggaacacgAggugccg       | 1 |
| Gi1_4301257_x1  | ...ugggaacacggggUaccgaa               | 1 |
| Gi5_9001611_x1  | ...Caucggagacgucgugggaacacgg          | 1 |
| Gi1_4253668_x1  | ...cggaUacgucgugggaacacggg            | 1 |
| Gi2_11267082_x1 | ...cgucgugggaacacggGgugccg            | 1 |
| Gi3_28692720_x1 | ...cgucgugggaGcacgggg                 | 1 |
| Gi5_8882818_x1  | ...cacAgggugccgaacuuu                 | 1 |
| Gi2_11027473_x1 | ...cgucgugggaacacggggUcccga           | 1 |
| Gi2_11278526_x1 | ...gagacgucgugggaacacUgggugccg        | 1 |
| Gi3_28508441_x1 | ...gggaacacggggugccgU                 | 1 |
| Gi3_28544128_x1 | ...cggagacgNcgugggaacacggggugccgaa    | 1 |
| Gi3_28706961_x1 | ...cgucgugggaacacggggugcUgaa          | 1 |
| Gi2_11363551_x1 | ...gucUggggaacacggggugcc              | 1 |
| Gi1_4304294_x1  | ...agacgucgugggaacacggAgugccgaacu     | 1 |
| Gi2_11216776_x1 | ...acgucguAggaacacggggugccg           | 1 |
| Gi2_11287096_x1 | ...aucggagacUucgugggaacacggggg        | 1 |
| Gi5_9060290_x1  | ...ugcgaucggagacgucguAggaacacggg      | 1 |
| Gi1_4291230_x1  | ...ucggagGcgucgugggaacacggggugc       | 1 |
| Gi2_11220043_x1 | ...cggagacgucgugggaacacggggugccAa     | 1 |
| Gi3_28982643_x1 | ...aucggagacUucgugggaacacggggg        | 1 |
| Gi2_11028801_x1 | ...acgAcgugggaacacggggugccgaa         | 1 |
| Gi3_28788346_x1 | ...cgugggaacacAgggugc                 | 1 |
| Gi3_28274095_x1 | ...gaacacggggugccgaaAuu               | 1 |
| Gi2_11370411_x1 | ...gggaacaUggggugccga                 | 1 |
| Gi3_28277102_x1 | ...ucgugggaacacggggugccCaacu          | 1 |
| Gi1_4193181_x1  | ...acgucCugggaacacggggugccgaacu       | 1 |
| Gi1_4376033_x1  | ...gugggaacacggggugccAaac             | 1 |
| Gi1a_6187858_x1 | ...aucggagacgucgugggaCcacggggugc      | 1 |
| Gi3_28594618_x1 | ...cgucgugggaacacgggCugccgaacu        | 1 |
| Gi2_11041376_x1 | ...aucggagacgucgugggaacaGggggugc      | 1 |

|                 |                                        |   |
|-----------------|----------------------------------------|---|
| Gi5_8967416_x1  | .....gugggaacacgggAugccgaacuuu         | 1 |
| Gi3_28695975_x1 | .....gacgucgGgggaacacggggugccgaacu     | 1 |
| Gi1_4370002_x1  | .....ggaGacggggugccgaac                | 1 |
| Gi2_11232825_x1 | .....cggagacgNcgugggaaacacggggug       | 1 |
| Gi3_28613049_x1 | .....ggaacacggggugccCaacu              | 1 |
| Gi1_4287073_x1  | .....cggagacgucgugggaaAacggggugcc      | 1 |
| Gi2_11022786_x1 | .....cgucgugggaaacacggggugccgaacuu     | 0 |
| Gi3_28388223_x1 | .....cggCgacgucgugggaaacacggg          | 1 |
| Gi5_8866937_x1  | .....gggaacacgAggugccgaa               | 1 |
| Gi5_9117681_x1  | .....cgucgugggaaacacggggCgccgaac       | 1 |
| Gi4_572310_x1   | .....ggUacacggggugccgaacu              | 1 |
| Gi2_11344072_x1 | .....cgGcgugggaaacacgggg               | 1 |
| Gi1a_6295329_x1 | .....gucgugggaaacGcggggugccgaa         | 1 |
| Gi2_11265646_x1 | .....guNggaaacacggggugccg              | 1 |
| Gi5_8935415_x1  | .....acgucgugggaaacacUgggugccgaac      | 1 |
| Gi3_28642662_x1 | .....ucggagacgucgugggUacacg            | 1 |
| Gi3_28935112_x1 | .....gacgucAugggaacacggg               | 1 |
| Gi2_10996195_x1 | .....cgucguUggaacacggggugccgaacu       | 1 |
| Gi3_28410617_x1 | .....uggaaacacggggugccgaaG             | 1 |
| Gi5_9059690_x1  | .....ggaacacggggugccgaaU               | 1 |
| Gi3_28333671_x1 | .....ggagacgucgugggaaacacggggAgccgaacu | 1 |
| Gi1a_6092528_x1 | .....gacgucgugggaaacacgggAugccgaacu    | 1 |
| Gi2_11378585_x1 | ugcgauccggagacgucgugggaaacG            | 1 |
| Gi3_28942875_x1 | .....agacgucguggAaacacggggugccgaac     | 1 |
| Gi3_28766273_x1 | .....gaucggagaGgucgugggaaacacggggugc   | 1 |
| Gi3_28625720_x1 | .....gagacgucgugggaaacacggAgugccg      | 1 |
| Gi2_11386192_x1 | gcgauccggagacgucguAggaacac             | 1 |
| Gi1_4373690_x1  | .....gugggaacaUggggugccgaacuu          | 1 |
| Gi4_568166_x1   | .....gaCcgagacgucguggg                 | 1 |
| Gi4_597071_x1   | .....agacgucgugggaaacacggggCgcc        | 1 |
| Gi2_11017063_x1 | .....aucggagacgucgugggUac              | 1 |
| Gi4_603024_x1   | .....Augggaacacggggugccgaac            | 1 |
| Gi3_28514672_x1 | .....cggagacgucguUggaacacgggg          | 1 |
| Gi1_4339295_x1  | .....aucggagacgucgugggaaacacU          | 1 |
| Gi3_28519085_x1 | .....ucggagacgucgugggaaacacggAgugcc    | 1 |
| Gi2_11005485_x1 | .....ggagacgucguggAaacac               | 1 |
| Gi2_11330793_x1 | .....gagacgucgugggaaGacggggugccg       | 1 |
| Gi1a_6293762_x1 | .....Uucggagacgucgugggaaacacggggugc    | 1 |
| Gi5_8952561_x1  | .....gugggaacGcggggugccgaacuuu         | 1 |
| Gi3_28960715_x1 | .....gucgugggaaacacggggugccgaac        | 1 |
| Gi3_28744696_x1 | .....Gcgucgugggaaacacggggugc           | 1 |
| Gi3_28561960_x1 | .....ggagacgucguAggaacacggggugcc       | 1 |
| Gi2_10999194_x1 | .....gaucgAagacgucgugggaaacacggggg     | 1 |
| Gi1a_6048353_x1 | .....cgugggUacacggggugcc               | 1 |
| Gi2_10993217_x1 | .....auNggagacgucgugggaaaca            | 1 |
| Gi2_11293815_x1 | .....cgucgugggaaAacggggugccg           | 1 |
| Gi2_11037517_x1 | .....gacgCcgugggaaacacggg              | 1 |

|                        |                                  |   |
|------------------------|----------------------------------|---|
| Gl1a_6269816_x1.ugcgau | cgagacgucgugggaaAacggggu         | 1 |
| Gl1a_6330585_x1        | gacgucgugggaacacggggugccgaGcu    | 1 |
| Gi2_11388550_x1        | aucggagacgucgugggaGcacggggugccg  | 1 |
| Gi1_4187515_x1         | agacgucgugggaaUacggggugccgaacu   | 1 |
| Gi5_8921410_x1         | cgagacgucgugggaacacgAggugcc      | 1 |
| Gi2_11166154_x1        | gacgucgugggaacacggggug           | 0 |
| Gi1_4355707_x1         | aucggagacgucgGgggaacacgg         | 1 |
| Gi3_28738503_x1        | ucgugggaacacggggugccgaGu         | 1 |
| Gi3_28495366_x1        | gacgucgugggaacaAggggu            | 1 |
| Gi1_4352741_x1         | ggaacacggggUccgaac               | 1 |
| Gi3_28481962_x1        | ucgugggCacacggggugccgaac         | 1 |
| Gi2_11015664_x1        | cgauccgagacguUgugggaacacg        | 1 |
| Gi3_28614971_x1        | gaucggagacguGgugggaacacgg        | 1 |
| Gl1a_6336557_x1        | ucgugggaacacggggugccgaGc         | 1 |
| Gi1_4282144_x1         | aacacggggugccgCacuu              | 1 |
| Gi1_4161912_x1         | agacUucgugggaacacggggugccgaacu   | 1 |
| Gi2_11159606_x1        | acgucgugggaUcacggggugc           | 1 |
| Gi1_4364148_x1         | cgagacgucgugggaacacggggUaccgaacu | 1 |
| Gi1_4378877_x1         | aucggagacgucgugggaacacggggGgcc   | 1 |
| Gl1a_6143131_x1        | gugggaacacggggugccgGac           | 1 |
| Gi5_9134038_x1         | aucggagacgucgugggaaUacggggu      | 1 |
| Gi3_28709802_x1        | ucggGgacgucgugggaacacgg          | 1 |
| Gi3_28284005_x1        | ggagacgucgugggaacacAgggugccgaac  | 1 |
| Gl1a_6199135_x1        | ucguggAaacacggggugccgaacu        | 1 |
| Gi2_11063448_x1        | gagacgucgugggaacaAgggggugccg     | 1 |
| Gi2_11273514_x1        | gagacgucgugggaGcacggggugccg      | 1 |
| Gi2_11394826_x1        | aucggagacgAacgugggaacacgg        | 1 |
| Gi3_28303681_x1        | cgugCgaacacggggugccga            | 1 |
| Gi2_11053387_x1        | agacgucgugggaUcacggggugcc        | 1 |
| Gi3_28575795_x1        | acgucgugggaacacgCggugccgaac      | 1 |
| Gi2_11128826_x1        | cguggUaacacggggugccga            | 1 |
| Gi2_11299761_x1        | aucggagacUucgugggaacacg          | 1 |
| Gi5_8837114_x1         | ucgugggaaUacggggugcc             | 1 |
| Gi2_11179369_x1        | auUggagacgucgugggaac             | 1 |
| Gi1_4361376_x1         | aucggaAacgucgugggaacacggggugc    | 1 |
| Gi5_9123992_x1         | gggUaacacggggugccgaac            | 1 |
| Gi1_4286452_x1         | cguggUaacacggggugccga            | 1 |
| Gi2_11287647_x1        | cgucUugggaacacggggugccga         | 1 |
| Gi5_9115300_x1         | gucgugggaacCcgggugccgaa          | 1 |
| Gi5_8927338_x1         | gucgugggaacacggUgugccgaacu       | 1 |
| Gi3_28427025_x1        | aucggagacgucgugggaacacCggg       | 1 |
| Gi3_28675517_x1        | gagacgucgugggUaacac              | 1 |
| Gi5_9127830_x1         | aCacgucgugggaacacggggugccgaac    | 1 |
| Gl1a_6079466_x1        | cguggAaacacggggugcc              | 1 |
| Gi3_28314969_x1        | gaucggagaGgucgugggaacacgg        | 1 |
| Gi5_8879984_x1         | ugggaacacggggugccCaa             | 1 |
| Gi3_28524732_x1        | acgucgugggaaUacggggugccgaac      | 1 |

Gi3\_28718860\_x1.....gacgucgugggaacacggggugcUgaacu..... 1  
 Gi1\_4300009\_x1.....gggaacacggggugccCaac..... 1  
 Gi1\_4294471\_x1.....ugggaacaUggggugccga..... 1  
 Gi1\_4331276\_x1.....cgucgugggaCcacggggugccgaa..... 1  
 Gi4\_609763\_x1.....gucgCgggaacacggggugccgaac..... 1  
 Gi5\_9055481\_x1.....gacUucgugggaacacggggugccgaacu..... 1  
 Gi3\_28847478\_x1.....aucggagaAgucgugggaacacggggg..... 1  
 Gi5\_9080797\_x1.....cgucgugggaacacAgggugccgaac..... 1  
 Gi3\_28754549\_x1.....gucgugggaGcacggggugcc..... 1  
 Gi5\_8881241\_x1.....agacgucgCgggaacacggggugccgaac..... 1  
 Gi3\_28460031\_x1.....cgucgugggaacCgggggug..... 1  
 Gl1\_6337557\_x1.....aUacgucgugggaacacg..... 1  
 Gi3\_28425265\_x1.....gagacgucgugggaCcacggggugccg..... 1  
 Gi5\_8922235\_x1.....gGucggagacgucgugggaacacggggg..... 1  
 Gi2\_11253600\_x1.....gugggaacacgggggUccgaa..... 1  
 Gi3\_28968000\_x1.....aucggagaAgucgugggaacacggggugc..... 1  
 Gl1\_6023231\_x1.....gagacgucgugggaacacggggugccgaGcu..... 1  
 Gi2\_11101268\_x1.....ugggaacacCgggugccgaacu..... 1  
 Gi3\_28793495\_x1.....aucgAagacgucgugggaacacggggugc..... 1  
 Gi1\_4383069\_x1.uAcgaucggagacgucguggga..... 1  
 Gi2\_11152286\_x1.....aucggagacgucgugggaacacUg..... 1  
 Gi2\_11255422\_x1.....acgucgugggUacacggg..... 1  
 Gi3\_28719538\_x1.....agacgucgugggaacacggggugUcgaac..... 1  
 Gi3\_28865856\_x1.....cgucgugggaacCcgggg..... 1  
 Gi2\_11241650\_x1.....gacgucgugggaAacgggg..... 1  
 Gi3\_28922613\_x1.....ggagacgucgugggaacacggggugccCa..... 1  
 Gi2\_11109312\_x1.....auAggagacgucgugggaacac..... 1  
 Gl1\_5981694\_x1.....gaucggagCcgucgugggaacacggg..... 1  
 Gi1\_4387893\_x1.....ugggaacacggggugcUgaac..... 1  
 Gi1\_4218612\_x1.....ucgugggaacacggggugAcgaac..... 1  
 Gi2\_11366123\_x1.....ucgugggaacGcggggugccg..... 1  
 Gi3\_28770047\_x1.....gUagacgucgugggaacac..... 1  
 Gi5\_8901750\_x1.....aucggagacgucgugggaacacgggAu..... 1  
 Gi1\_4193510\_x1.....agacgGcgugggaacacggggugccgaacu..... 1  
 Gi2\_11178594\_x1.....agacgucgugggaacGcggggugccg..... 1  
 Gi2\_11164169\_x1.....aucggagaGgucgugggaacacgggg..... 1  
 Gl1\_6245439\_x1.....aucAgagacgucguggga..... 1  
 Gi3\_28307823\_x1.....ucgNagacgucgugggaacacggggugccg..... 1  
 Gi2\_11361845\_x1.....cgucgugggaacacUgggugccg..... 1  
 Gi2\_11157811\_x1.cugcgaucgAagacgucgugggaacacg..... 1  
 Gi3\_28721392\_x1.....cggagaAgucgugggaacacggggugcc..... 1  
 Gi5\_9033246\_x1.....gugggaacacggggugAc..... 1  
 Gi1\_4308358\_x1.....aucggagacgucgugggaGacg..... 1  
 Gl1\_6105967\_x1.....Ugagacgucgugggaacac..... 1  
 Gi3\_28685900\_x1.....cggagacgucgugggaacacggggugA..... 1  
 Gi3\_28660958\_x1.....cgugggaacacgggAgugccg..... 1  
 Gi2\_11182736\_x1.....Naucggagacgucgugggaacacgg..... 1

Gi2\_11252358\_x1.....gggUacacggggugccgaa..... 1  
Gi3\_28678067\_x1...Ngaucggagacgucgugggaacacggggugc..... 1  
Gi3\_28924007\_x1.....ggagacgucgugggaacacggggugccgCac..... 1  
Gi1\_4384370\_x1...Ucgauccgagacgucgugggaacacggggugc..... 1  
Gi1\_4213012\_x1.....Cugggaacacggggugcc..... 1  
Gi2\_11305615\_x1.....acgucgugggGacacgggggu..... 1  
G1a\_6268555\_x1.....cggagacgucAugggaacacgggggu..... 1  
Gi2\_11369767\_x1...gaucggagacgucgugggaCcacgg..... 1  
Gi1\_4360245\_x1.....cgAgggaacacggggugccgaa..... 1  
Gi3\_28502309\_x1.....ucggCgacgucgugggaacacggggugcc..... 1  
Gi2\_11172915\_x1...aucggagacgucgCgggaacacgggg..... 1  
Gi5\_9131771\_x1.....agacgucgugAgaacacggggugccgaac..... 1  
Gi2\_11164835\_x1.....cgucgAgggaacacggggugccg..... 1  
Gi2\_11172134\_x1.....cggagacgucgugggaacacggggugccCa..... 1  
Gi3\_28334246\_x1.....cgugggaacacCgggugc..... 1  
Gi5\_8909883\_x1.....cgucgugggaacacggggugccgGac..... 1  
G1a\_6318747\_x1.....gugggaacacggggugccgaacuC..... 1  
Gi5\_8871658\_x1.....gucgugggaacacggggGgcccga..... 1  
Gi3\_28733679\_x1...cgauccgagacgucgugggaacacgAggugc..... 1  
Gi3\_28634120\_x1...gaucggagacgucgugggaacCgcg..... 1  
Gi2\_11137722\_x1.ugcgauUgagacgucgugggaaca..... 1  
G1a\_6026972\_x1.....gugggaacacggggugccgaaGu..... 1  
G1a\_6203867\_x1...aucggagacgucgugggaacacCg..... 1  
Gi2\_10998623\_x1.....guAgugggaacacggggugcc..... 1  
Gi2\_11197076\_x1...ucggagGcgucgugggaacacggggugc..... 1  
Gi2\_10995116\_x1.....gCaacacggggugccgaa..... 1  
G1a\_6302622\_x1.....gucgugggaacacggggugUcga..... 1  
Gi1\_4390414\_x1.....gucgugggaGcacggggugcc..... 1  
Gi5\_8941712\_x1.ugcgauAggagacgucguggg..... 1  
Gi3\_28986285\_x1.....cggagacgucGgggaacacggggugcc..... 1  
Gi5\_9041758\_x1.....gggaacacggAgugccgaa..... 1  
Gi1\_4312210\_x1...ucUgagacgucgugggaacacg..... 1  
Gi2\_11192869\_x1.....cgucgugggCacacggggugccgaacu..... 1  
Gi5\_9087098\_x1...aucgUagacgucgugggaacacggg..... 1  
G1a\_6342976\_x1.....gaNcacggggugccgaacu..... 1  
Gi2\_11102524\_x1...gaucggagacgucgugggaacacgggUu..... 1  
Gi2\_11073889\_x1...gaucggagacgucgugggaacaUgg..... 1  
Gi4\_609651\_x1.....gGgggaacacggggugccga..... 1  
Gi3\_28324091\_x1.....gaacacAgggugccgaacuu..... 1  
Gi1\_4187370\_x1.....gucgugggGacacggggugccgaac..... 1  
Gi5\_9080550\_x1.....ugggaacacggggugcGgaac..... 1  
Gi4\_573087\_x1.....ugAgaacacggggugccgaacu..... 1  
Gi3\_28393591\_x1.....agacgucgugggaacacgUggugccgaac..... 1  
Gi3\_28570949\_x1...cgauccgGgacgucgugggaacacggg..... 1  
Gi3\_28724960\_x1.....gacgucgugAgaacacggggugccg..... 1  
Gi3\_28783433\_x1.....gggaacacggggugccgCacuu..... 1  
Gi2\_11189756\_x1...ucggagaGgucgugggaacacggggugc..... 1

Gi2\_11143733\_x1..Ccgaucggagacgucgugggaaacacgg..... 1  
Gi2\_11104041\_x1.....aucggagacgucUugggaaacacgggg..... 1  
Gi4\_581357\_x1.....gggGacacggggugccgaacu..... 1  
Gi1\_4184243\_x1.....ucgugggaaacacggggAgccga..... 1  
G1a\_6061753\_x1.....aucggagacgucgugggGcCacg..... 1  
Gi5\_9074058\_x1.....gaacaUggggugccgaac..... 1  
Gi2\_11169305\_x1.....ucAugggaaacacggggugc..... 1  
Gi2\_11328307\_x1.....ucggGgacgucgugggaaacacggggugccg..... 1  
Gi1\_4374811\_x1.....gAgaacacggggugccgaacuu..... 1  
Gi2\_11155296\_x1.....ucgugggaaacCcggggugc..... 1  
Gi3\_28877549\_x1.....cguAgugggaaacacggggugccgaa..... 1  
G1a\_6315337\_x1.....ggCacacggggugccgaacu..... 1  
Gi5\_9029107\_x1.....acgCcgugggaaacacggggugccg..... 1  
Gi1\_4380333\_x1.....aucggagacgucgugggaaacacggggugc..... 1  
Gi2\_11401389\_x1.....gacgucgugggaaAacggg..... 1  
Gi2\_11147062\_x1.....gaucggagacgucgugAgaacac..... 1  
Gi5\_8860336\_x1.....gugggaaacCcggggugccgaacuu..... 1  
Gi3\_28899965\_x1.....gaucggagacgucgugggaaUacggggugcc..... 1  
Gi1\_4360340\_x1.....cCgagacgucgugggaaacacggggugc..... 1  
Gi2\_11246202\_x1.....cgGucggagacgucgugggaaac..... 1  
Gi3\_28495361\_x1.....ggGgacgucgugggaaacacg..... 1  
Gi3\_28421554\_x1.....gagacgucCugggaaacacggggg..... 1  
G1a\_6115828\_x1.....cgucgugggaaacacggggugccgaacG..... 1  
Gi1\_4201816\_x1.....ucgGgggaaacacggggugccgaac..... 1  
G1a\_6271189\_x1.....ucgugggaaacacggggugccgCacu..... 1  
Gi2\_11026308\_x1.....gucgugggaaacacggggAgc..... 1  
G1a\_6034365\_x1.....aacacggggAgccgaacu..... 1  
Gi1\_4210685\_x1.....cgCcgugggaaacacggggugccgaa..... 1  
Gi2\_11143844\_x1.....gaucCgagacgucgugggaaacacgggg..... 1  
Gi5\_8942613\_x1.....cgCgggaaacacggggugcc..... 1  
Gi3\_28922844\_x1.....cgucgugggCacacggggugccg..... 1  
Gi1\_4229492\_x1.....aucggagGcgucgugggaaacacggggugc..... 1  
Gi5\_8871182\_x1.....cgucgugggaaacacAgggugccga..... 1  
Gi2\_11141085\_x1.....ucgugggaaacacgggAugccg..... 1  
Gi2\_11273039\_x1.....aucggagacgucgugggaaacG..... 1  
Gi1\_4386074\_x1.....ggagacgucgugggGacacggggg..... 1  
Gi2\_11184713\_x1.....cgugggaaAacggggugccga..... 1  
G1a\_6241029\_x1.....aUacgucgugggaaacacggggugccgaacu..... 1  
Gi5\_8877787\_x1.....ugggGacacggggugccgaacuuu..... 1  
Gi3\_28826782\_x1.....aucggUgacgucgugggaaacacgggg..... 1  
Gi3\_28527967\_x1.....aucggagacgucgugUaacacgggg..... 1  
Gi2\_11407411\_x1.....gucgugggaaacacggggugccAa..... 1  
Gi1\_4321968\_x1.....ucgugggaaUacggggugccgaac..... 1  
G1a\_6084836\_x1.....gggaaacacggggugccUaacu..... 1  
G1a\_6285320\_x1.....aucggagacgucgugggaaacacgAggu..... 1  
Gi3\_28765951\_x1.....gagacgucgugGcaacac..... 1  
Gi1\_4385702\_x1.....cgugggGacacggggugccga..... 1



Gi3\_28407367\_x1.....ucggagacgucguAggaacacgg.....1  
 Gi2\_11008238\_x1.....agacgucgNgggaacacggggu.....1  
 Gi2\_11114290\_x1.....cgugggaacacCggggugcc.....1  
 Gi2\_11091719\_x1.....gaacacgggguAccgaac.....1  
 Gi2\_11098030\_x1.....gaacacAgggugccgaac.....1  
 Gi1\_4185996\_x1.....ucggagacgucgugggGacacggggugcc.....1  
 G1a\_6153709\_x1.....ggagacgucguggggaacacggggugccGacu.....1  
 Gi4\_572025\_x1.....cgugUgaacacggggugccgaacu.....1  
 Gi5\_9067664\_x1.....gugggaacacgAggugccgaa.....1  
 Gi3\_28383812\_x1.....ugCgaacacggggugccgaa.....1  
 Gi2\_11270787\_x1.....gucguggggaacacggAgugcc.....1  
 Gi3\_28346408\_x1.....gagacgucguggggaacacggggugUcgaacu.....1  
 Gi1\_4178258\_x1.....ugggaaUacggggugccgaacuu.....1  
 G1a\_6070299\_x1.....aucggagacgucgugggCacacg.....1  
 Gi1\_4165622\_x1.....gugggaacacggggugccGac.....1  
 Gi3\_28863208\_x1.....gaNgucguggggaacacggggugccgaacu.....1  
 Gi5\_8924331\_x1.....cgugggaacacgAggugc.....1  
 Gi1\_4344108\_x1.....aucggagacgucgugggaaUacg.....1  
 Gi3\_28785885\_x1.....cgugggaacacggUgugccg.....1  
 Gi2\_11163716\_x1.....cgucguggggaacacggUgugccga.....1  
 Gi3\_28353338\_x1.ugcgauccgagacgucguggggaacacggggG.....1  
 Gi2\_11167879\_x1.....gaucggagacgucgugUgaacacggggugcc.....1  
 Gi3\_28639233\_x1.....cgucguggCaacacggggugccgaac.....1  
 Gi3\_28967781\_x1.....ggagacgucguAggaacacggggugccgaac.....1  
 Gi5\_8833801\_x1.....cguggAaacacggggugccg.....1  
 Gi5\_8873448\_x1.....guNgggaacacggggugccgaac.....1  
 Gi3\_28510892\_x1.gcgauccgagacgucguggggaacacggAgu.....1  
 Gi1\_4254420\_x1.....acgucgGgggaacacggggugccg.....1  
 Gi2\_11357807\_x1.....ucggagacgucguUggaacacggggugc.....1  
 Gi3\_28646681\_x1.....ggagacgucgugggUacacggggugcc.....1  
 Gi5\_8889851\_x1.....cgucgugUgaacacggggugc.....1  
 Gi2\_11011472\_x1.....aacacggggugGcgaacu.....1  
 Gi1\_4208248\_x1.....acgucguggggaacaUggggugcc.....1  
 Gi2\_11081268\_x1.....auGggagacgucguggggaacacggggugc.....1  
 Gi2\_11370615\_x1.....aucggagacUucguggggaacac.....1  
 Gi2\_11000214\_x1.....aucGUagacgucgugggaa.....1  
 G1a\_6180815\_x1.....Aucguggggaacacggggugcc.....1  
 Gi3\_28960393\_x1.....gugggaacacggggugcGgaa.....1  
 Gi3\_28705573\_x1.ugcgGucggagacgucguggggaacacg.....1  
 Gi2\_11153050\_x1..cgauccgagacgucguggggaacaUg.....1  
 Gi3\_28454791\_x1..cgauccgagacgucguUggaacacg.....1  
 Gi2\_11127008\_x1.....cgugggaacacggggugccC.....1  
 Gi2\_11303918\_x1.....gaGcacggggugccgaac.....1  
 Gi5\_9105841\_x1.....ggagacgucguggggaacacggggAgcc.....1  
 Gi3\_28958325\_x1.....gucguggggaacCcggggu.....1  
 Gi1\_4282194\_x1.....aGcacggggugccgaacuu.....1  
 Gi3\_28525123\_x1.ugGgauccgagacgucguggggaaca.....1

Gi2\_11267953\_x1.....cgucgugggaacacggggugccgaUcu..... 1  
G1a\_6320415\_x1.....uggaacaAggggugccgaacu..... 1  
Gi5\_8908494\_x1.....gugggaaUacggggugccgaa..... 1  
Gi1\_4298864\_x1.....cggagacgucgugggaacCggggugc..... 1  
Gi3\_28785048\_x1..Ccgaucggagacgucgug..... 1  
Gi3\_28566124\_x1.....ggagacgucgugggaacacggggugcAgaacu..... 1  
Gi1\_4194074\_x1.....Cucgugggaacacggggugcc..... 1  
Gi3\_28276001\_x1.....gagGcgucgugggaacacg..... 1  
Gi1\_4323432\_x1....aucggagacgucgCgggaacacggggugccgaacu..... 1  
Gi1\_4160338\_x1.....ucggGgacgucgugggaacacggggugc..... 1  
Gi3\_28946692\_x1....gaucggagacgucguggCaacacggg..... 1  
Gi2\_11193260\_x1.....cgucgugggaacacgCggugccgaacu..... 1  
Gi5\_8888806\_x1.ugcAaucggagacgucguggga..... 1  
Gi1\_4229878\_x1.....ucgugggaacacggggugAcg..... 1  
Gi3\_28540993\_x1.....ggagacgucgugggaacaUggggu..... 1  
Gi3\_28431944\_x1.....ggagacgucgugggaacCggggugccgaac..... 1  
Gi5\_9029165\_x1.ugcgauAggagacgucgug..... 1  
Gi5\_8853722\_x1.....agacgucgugggaacacggggugUc..... 1  
Gi3\_28747477\_x1.....ggagacguUgugggaacacggggugccgaa..... 1  
Gi1\_4212515\_x1.....gGgacgucgugggaacac..... 1  
Gi1\_4313097\_x1....aucggagGcgucgugggaacac..... 1  
G1a\_6354246\_x1....Ccgagacgucgugggaacacgggggu..... 1  
Gi1\_4331833\_x1.....gagacgucgugggaacacAggggugccga..... 1  
Gi2\_11052726\_x1..gcgauccgagacgucgugggaacGcggggug..... 1  
Gi1\_4211233\_x1.....acguGgugggaacacggggugccgaacu..... 1  
Gi5\_8873805\_x1.....gggaacacggggugUcgaac..... 1  
Gi2\_11266608\_x1.ugcgauccgagacgucAuggga..... 1  
Gi3\_28263794\_x1cugcgauccgagGcgucgugggaacacggggug..... 1  
Gi2\_11391111\_x1.....gagacgucguggAaacacggggugc..... 1  
Gi2\_11215735\_x1.....ucggagacgucgCgggaacacggggugcc..... 1  
Gi2\_11067240\_x1.....guggUaacacggggugccgaacuu..... 1  
Gi2\_11162054\_x1....aucggagacgucguggCaacac..... 1  
Gi2\_11280393\_x1.....gucgugggaacacggggugG..... 1  
Gi5\_8915270\_x1....cgauccgagacguUgugggaacacggg..... 1  
Gi3\_28421221\_x1....gaucggagacgucgugggaacGacggggugc..... 1  
Gi2\_11311733\_x1.ugcgauccgagacgucgugggC..... 1  
Gi1\_4223473\_x1.....ggagacgucgugggaacacgggggA..... 1  
Gi5\_9096254\_x1.....gggaacacgggggUccgaacu..... 1  
G1a\_6358968\_x1.....cUgagacgucgugggaacacggggug..... 1  
Gi2\_11222495\_x1.....cUgagacgucgugggaacacggggugccgaa..... 1  
Gi2\_11273739\_x1.....uNggaacacggggugccgaac..... 1  
Gi2\_11344132\_x1....cgauccgagacgucguggg..... 0  
Gi1\_4293264\_x1.ugUgauccgagacgucgugggaacacg..... 1  
Gi2\_11061458\_x1.....gagacgucgugggaacacgggAugccg..... 1  
Gi3\_28319817\_x1.....gagacgucgugggaacacgggAgugccgaacu..... 1  
Gi5\_9134079\_x1....aucggagacgucgugggaacaUggggg..... 1  
G1a\_6314687\_x1.....gugggaacacggggugcUgaa..... 1

Gi2\_11344205\_x1.....gacgucAugggaacacggggu..... 1  
Gi3\_28793683\_x1.....aacacgggAugccgaacu..... 1  
Gi2\_11004801\_x1.....gacgucgugggaaAacggggugccgaacu..... 1  
Gi5\_8917666\_x1.....cgAgggaacacggggugccgaacu..... 1  
G1a\_6219817\_x1.....gugggaacacggggugcG..... 1  
Gi2\_11141837\_x1.....gaacacggggugccgaaU..... 1  
Gi2\_11325036\_x1.....gaucggagacgucgAggga..... 1  
Gi5\_8977478\_x1.....agacUucgugggaacacggggugc..... 1  
Gi3\_28485697\_x1.....ucgugAgaacacggggugc..... 1  
Gi2\_11218858\_x1.....aucggagaNgucgugggaacacgggg..... 1  
G1a\_6204160\_x1.....gaucggagacgucgugggaacCggg..... 1  
Gi1\_4171445\_x1.....gaucggagacguUgugggaacacgg..... 1  
Gi3\_28935793\_x1.....gugggaacacggggGgccgaacuuu..... 1  
Gi5\_8940673\_x1.....cgucgugggGacacggggugccgaa..... 1  
Gi2\_11110293\_x1.....cgucgugggaacacgUgugccgaacu..... 1  
Gi3\_28412637\_x1.....cgucgugggaacacggUgugcc..... 1  
Gi3\_28304209\_x1.....gaCcgagacgucguggg..... 1  
Gi3\_28532652\_x1.....cgaucggaNacgucgugggaacacggggugc..... 1  
Gi3\_28835081\_x1.....ucgugggaacacggggGgccgaa..... 1  
Gi2\_11240536\_x1.....ucggagacgucguAggaaacacggggugc..... 1  
Gi3\_28557332\_x1.....ggagacgucgugggaaUacggg..... 1  
Gi1\_4160340\_x1.....gucgugggaacaUggggugccgaacu..... 1  
Gi1\_4300654\_x1.....cggagacgucgugggaaAacggggu..... 1  
Gi2\_11279178\_x1.....guUgugggaacacggggugccgaa..... 1  
Gi2\_11005546\_x1.....acgucgugggUacacggggugc..... 1  
Gi3\_28614813\_x1.....gucgugggaacaUggggugccg..... 1  
Gi4\_604161\_x1.....cgucgCgggaacacggggugccga..... 1  
Gi1\_4363714\_x1.....cgucgugAgaacacggggugccg..... 1  
Gi3\_28358297\_x1.....ggagacAucgugggaacacggggugcc..... 1  
Gi2\_11070603\_x1.....gacgucgugggUacacggggugccgaacu..... 1  
Gi2\_11217098\_x1.....acgucgugggaacacggggugccgaaGu..... 1  
Gi2\_11038644\_x1.....gaAacgucgugggaacacggggugc..... 1  
Gi2\_11298844\_x1.....uAggagacgucgugggaacacg..... 1  
Gi5\_8970944\_x1.....aucggagacgucgugggaacacggA..... 1  
Gi5\_9058015\_x1.....cggagacgNcgugggaacacgg..... 1  
Gi2\_11049177\_x1.....agacgucgGgggaacacggggug..... 1  
Gi3\_28873933\_x1.....cggagacgucguggUaacacggg..... 1  
Gi3\_28664024\_x1.....gaucggagacgucgugggaaA..... 1  
Gi1\_4369465\_x1.....cgucgugAgaacacggggugcc..... 1  
Gi5\_8939210\_x1.....uUgugggaacacggggugcc..... 1  
Gi5\_9056288\_x1.....aucggUgacgucgugggaacacggggugc..... 1  
Gi1\_4208410\_x1.....gucguggAaacacggggugccgaacu..... 1  
Gi5\_8937271\_x1.....aucggagacgucUugggaacacggggugc..... 1  
G1a\_6089179\_x1.....cgugggUacacggggugc..... 1  
Gi3\_28347973\_x1.....cggUgacgucgugggaacacggggu..... 1  
Gi3\_28971991\_x1.....acgucgugggaacacUggggugccgaacu..... 1  
G1a\_6335638\_x1.....aCcgagacgucgugggaacacgggg..... 1

|                                                          |   |
|----------------------------------------------------------|---|
| Gi1_4252164_x1.....ggaacacggggugGcgaac.....              | 1 |
| Gi2_11154062_x1.....aucggagacgucguggAaacacggggug.....    | 1 |
| Gi5_9107966_x1.....uggNaaacacggggugccgaac.....           | 1 |
| Gi2_11003426_x1.....cggagacgucguggaCcacggggugccg.....    | 1 |
| Gi1_4322404_x1.ugcgauccggagGcgucgugga.....               | 1 |
| Gi2_11135835_x1.....cgucgugggaacacggggugUcga.....        | 1 |
| Gi5_9047431_x1.....Agucgugggaacacggggugccgaac.....       | 1 |
| Gi3_28299653_x1.....ggagacgucguggaGcacgg.....            | 1 |
| Gi4_585560_x1.....guUgugggaacacggggugccgaacu.....        | 1 |
| Gi2_11377217_x1.....gacgucgugggaacacggggugccAa.....      | 1 |
| Gi3_28577996_x1.....ucgAgggaacacggggugc.....             | 1 |
| Gi3_28946124_x1.....cgugggaacacggggugccgaaAuu.....       | 1 |
| Gi3_28369862_x1.....ggaacaGggggugccgaac.....             | 1 |
| Gi2_11335531_x1....gaucggagCcgucgugggaacacggggugc.....   | 1 |
| Gi5_8901890_x1.....uggaacaacggggugccga.....              | 0 |
| Gi3_28457192_x1.....gAagacgucguggaacaacggggug.....       | 1 |
| Gi3_28398388_x1.....guGgugggaacacggggugccga.....         | 1 |
| Gi3_28789204_x1..gcUaucggagacgucgugggaacacggg.....       | 1 |
| Gi1_4278766_x1.....ggaacaGggggugccgaacu.....             | 1 |
| Gi5_8913558_x1.....cgucgugggaacacggggugcAga.....         | 1 |
| Gi1_4306063_x1.....acgucgugggaGcacggggugccgaacu.....     | 1 |
| Gi5_8977517_x1.....acNucgugggaacacggggugccgaac.....      | 1 |
| Gi1_4252500_x1.....gucgugggaGcacggggugccgaacu.....       | 1 |
| Gi3_28484806_x1.....uggUaacacggggugccga.....             | 1 |
| Gi1_4177610_x1.....gagacgucNugggaacacggggugcc.....       | 1 |
| Gi2_11172917_x1....ucggagacgucgugggaacC.....             | 1 |
| Gi1_4257220_x1.....Gcgugggaacacggggugccgaa.....          | 1 |
| Gi3_28876954_x1....gaucggagacgCcguggga.....              | 1 |
| Gi3_28594451_x1.....Acgugggaacacggggugccg.....           | 1 |
| Gi1_4234473_x1.....cgucguCggaacacggggugccgaacu.....      | 1 |
| Gi3_28538130_x1.....acacggggugccUaacuu.....              | 1 |
| Gi4_568772_x1.....gugggaacacgggAugccgaacu.....           | 1 |
| Gi2_11057443_x1.....gucgugggaacacgCggugccgaacu.....      | 1 |
| Gi3_28931493_x1..gcgaucggCgacgucgugga.....               | 1 |
| Gi2_11361831_x1.....ggCgacgucgugggaacacggggug.....       | 1 |
| Gi1_4275104_x1.....cggagacguUgugggaacacggggugcc.....     | 1 |
| Gi2_11389840_x1.....ugggaacacggggugcAg.....              | 1 |
| Gi4_594092_x1.....cgucgugggaacacggggugccgaCcu.....       | 1 |
| Gi3_28912351_x1.....gNgaacacggggugccgaac.....            | 1 |
| Gi2_11227967_x1.....gucgugUgaacacggggugc.....            | 1 |
| Gi3_28703389_x1....aucggagacgucguggaacaGg.....           | 1 |
| Gi1_4171662_x1.....gugggaaAacggggugccgaacu.....          | 1 |
| Gi1_4302348_x1.....gGgacgucgugggaacacggggugccg.....      | 1 |
| Gi3_28557589_x1....gaucggagacgucguggga.....              | 0 |
| Gi2_11268571_x1....auAggagacgucgugggaacacg.....          | 1 |
| Gi3_28477095_x1.....gagacgucgugggaaUacggggugccgaacu..... | 1 |
| Gi2_11103752_x1.....ucguggAaacacggggugccgaa.....         | 1 |

Gi1\_4205019\_x1.....agacgucNgggaacacggggugcc..... 1  
 Gi5\_9018180\_x1.....gcgccugcNgcccacucgccgaguucg..... 1  
 Gi3\_28932277\_x1Gugcgauccgagacgucgugggaaacacggggugcc..... 1  
 Gi5\_8854932\_x1.....ucgugggaaacacggggugc..... 0  
 Gi2\_11044372\_x1.....ucggagacgucgugggaaacaAgggggugc..... 1  
 Gi3\_28638459\_x1.....ggagacguUgugggaaacacggggugcc..... 1  
 Gi2\_11232517\_x1.....agacgucgugggaaacacggggugccgaUc..... 1  
 Gi3\_28500864\_x1.....cggagacgAcgugggaaacacggggugc..... 1  
 Gi2\_11113469\_x1.....gucguggUaacacggggugccgaac..... 1  
 Gi3\_28609142\_x1.....ucgCgggaacacggggugcc..... 1  
 Gi5\_9034524\_x1.....gaacacggggugccgaaG..... 1  
 Gi1\_4212416\_x1.....cgugggaaUacggggugccga..... 1  
 Gi2\_11281154\_x1.....uggaaacacggggugccgaaA..... 1  
 Gi5\_8833892\_x1.....cgugggaaacagAggugccga..... 1  
 Gi5\_9086086\_x1.ugcgauccggagCcgucgug..... 1  
 Gi2\_11291305\_x1.....gUgacgucgugggaaacacggggug..... 1  
 Gi5\_8867208\_x1.....cgAagacgucgugggaaacacgg..... 1  
 Gl1\_6347188\_x1.....acgucgugggaaacacggggugccgaCcu..... 1  
 Gi2\_11252424\_x1.....cguAgugggaaacacggggugccg..... 1  
 Gi2\_11157763\_x1..gcgauccggagacguUgugggaaacac..... 1  
 Gi2\_11061957\_x1.....aucggagUcgucgugggaaacacggggugc..... 1  
 Gi2\_11217973\_x1..gcgauccggagaUgucgugggaaacacggggug..... 1  
 Gi3\_28510708\_x1.....uggaaacacCgggugccgaac..... 1  
 Gi5\_9005993\_x1.....cggauacgucgugggaaacacggg..... 1  
 Gi2\_11092655\_x1.....cgugggaaacacAgggugccgaa..... 1  
 Gi2\_11264759\_x1.....ucggagacgAcgugggaaacacggggugccg..... 1  
 Gi3\_28508006\_x1..gaucUgagacgucgugggaaacac..... 1  
 Gl1\_6204197\_x1.....aucggagacgucgugggaaacacggggug..... 1  
 Gi3\_28677720\_x1.....gagacgucNugggaacacg..... 1  
 Gi2\_11060102\_x1.....aucggagacgucgugggaaacacgggA..... 1  
 Gi3\_28910063\_x1..gaucAgagacgucgugggaaacacggggugc..... 1  
 Gi2\_11401586\_x1.....gagacgucgugggaaacacggggCgccgaacu..... 1  
 Gi2\_11072583\_x1.....ggagacgucAugggaaacacggggugcc..... 1  
 Gi5\_9118483\_x1.....Ccgagacgucgugggaaacacg..... 1  
 Gi5\_9061516\_x1.....ucggagacgucgugggaaacGcggggugc..... 1  
 Gi3\_28988139\_x1.....Agucgugggaaacacggggugc..... 1  
 Gi3\_28810062\_x1.....ucggaAacgucgugggaaacacg..... 1  
 Gi5\_8936902\_x1.....aucggagGcucgugggaaacacggg..... 1  
 Gi2\_11004531\_x1.....cgucguggAaacacggggugccgaac..... 1  
 Gl1\_6295485\_x1.....cggagacgucgugggGacacgggggu..... 1  
 Gi3\_28468745\_x1.....ucggagacNucgugggaaacacggggugc..... 1  
 Gi3\_28778816\_x1.....ugNgaacacggggugccgaac..... 1  
 Gi3\_28268401\_x1.....Cacgucgugggaaacacgggg..... 1  
 Gi2\_11186867\_x1..gaucggagacgucgugggaaacacggggugccgaa..... 0  
 Gi3\_28776780\_x1.....gaacacggAgugccgaa..... 1  
 Gi1\_4360716\_x1.....ugNgaacacggggugccgaa..... 1  
 Gi2\_11275259\_x1.....cgugCgaacacggggugccgaa..... 1

|                 |                                    |   |
|-----------------|------------------------------------|---|
| Gi3_28739461_x1 | cgaucggagacgucGggg                 | 1 |
| Gi3_28876134_x1 | acgucgugggaacacggggugcUg           | 1 |
| Gi2_11165680_x1 | gacgucgugggaacacgCg                | 1 |
| Gi1_4270476_x1  | acgucgugggaacCggggugccgaac         | 1 |
| Gi2_11205831_x1 | gaacacggggugccgCac                 | 1 |
| Gi3_28444891_x1 | gaGgucgugggaacacggggugccgaacu      | 1 |
| Gi5_9100497_x1  | gugggUacacggggugccgaa              | 1 |
| Gi2_11170481_x1 | cgucgugggaacacggAg                 | 1 |
| Gi5_9071099_x1  | gaucggagacgucgugggaacaUgg          | 1 |
| Gi3_28921642_x1 | ucggagacgucGgggaacacg              | 1 |
| Gi1_4350110_x1  | cAugggaacacggggugccgaacu           | 1 |
| Gi4_599708_x1   | cgCgugggaacacggggugccga            | 1 |
| Gi3_28913224_x1 | gaucggagacgucgugggaacaUggg         | 1 |
| Gi3_28458349_x1 | ugggaacacggggUccgaa                | 1 |
| Gi1_4215247_x1  | aucggagacgucguAggaacacggggugcc     | 1 |
| Gi3_28502095_x1 | cguggCaacacggggugc                 | 1 |
| Gi3_28753758_x1 | aucCgagacgucgugggaacacggggugcc     | 1 |
| Gi3_28590111_x1 | gagGcucgugggaacac                  | 1 |
| Gi3_28642768_x1 | ucgugggaaUacggggugcc               | 1 |
| Gi5_8914257_x1  | uCcgaucggagacgucguggg              | 1 |
| Gi2_11108264_x1 | gaucggGgacgucgugggaacacggggugcc    | 1 |
| Gi2_11353363_x1 | ugcgaucggagacgucgugggaGcacg        | 1 |
| Gi2_11331443_x1 | agacgucgugggaacacggggugcAgaacu     | 1 |
| Gi1_4354270_x1  | acgucgugNgaacacggggugccgaacu       | 1 |
| Gi3_28657787_x1 | gaucggagacgucgugggaCcacggggg       | 1 |
| Gi2_11388002_x1 | cggagacgucgugggGacacggggugccga     | 1 |
| Gi5_8884589_x1  | ugcgaucggagGcucgug                 | 1 |
| Gi4_588749_x1   | gggaacacggggugccgaGc               | 1 |
| Gi1a_6280926_x1 | cgugAgaacacggggugcc                | 1 |
| Gi3_28782108_x1 | ugCgaacacggggugccgaac              | 1 |
| Gi1_4355038_x1  | gaucggagacAucgugggaacacgg          | 1 |
| Gi3_28650338_x1 | ugcgaucgNagacgucgugggaacacggggugcc | 1 |
| Gi1_4308242_x1  | gugggaacacgggCugcc                 | 1 |
| Gi1_4311543_x1  | Aaucggagacgucgugggaacacgg          | 1 |
| Gi3_28549748_x1 | acgucgugggaacacggAgugcc            | 1 |
| Gi2_11061984_x1 | Acggagacgucgugggaacacggggugcc      | 1 |
| Gi5_9103253_x1  | aacaGggggugccgaacu                 | 1 |
| Gi3_28353340_x1 | ucggagacgucAgggaacacg              | 1 |
| Gi3_28703347_x1 | cgucgugggaacacAgggugccga           | 1 |
| Gi5_9118646_x1  | gugggaacacUgggugccgaac             | 1 |
| Gi2_11240747_x1 | ggaacacggggugcGgaacu               | 1 |
| Gi2_11122002_x1 | gaucggagacgucgugggaacGcg           | 1 |
| Gi3_28828521_x1 | gaucggagacguAgugggaacacggg         | 1 |
| Gi5_8943162_x1  | aucggagacgucGgggaacacg             | 1 |
| Gi3_28939945_x1 | cgugggaaAacggggugccg               | 1 |
| Gi3_28610890_x1 | gacgucAugggaacacggggugccgaa        | 1 |
| Gi5_9023998_x1  | cggagacgucgugggaacacggggugccg      | 0 |

Gi5\_9094801\_x1.....gagacgucgCggaacacggggugccgaacu..... 1  
 Gi2\_11165297\_x1.....aucggagacgucgugggaaacacAggg..... 1  
 Gi5\_9061604\_x1.....cgucgugggaaacacggggugccgaCc..... 1  
 Gi5\_8846968\_x1.....gugggaaAacggggugccg..... 1  
 Gl1a\_6128669\_x1.....aucggagacgucgugggaaacaUggg..... 1  
 Gi3\_28375860\_x1.....gucgugggaaacacggCgu..... 1  
 Gi2\_11136373\_x1.....ggaaUacggggugccgaa..... 1  
 Gi5\_8984995\_x1.....aGcggagacgucgugggaaacacggggugccgaac..... 1  
 Gi3\_28565750\_x1.ugcgaucggagacgucgugggaaacacggggA..... 1  
 Gi2\_11114660\_x1.....gucgugggCacacggggugccg..... 1  
 Gi5\_8895326\_x1.....gacgucgugggaaacacggggugUcgaacu..... 1  
 Gi2\_11294285\_x1.....gaucggagacgucgugggAUC..... 1  
 Gi3\_28291287\_x1.....ucgugggaaacacggggugccUa..... 1  
 Gi1\_4210395\_x1.....gaucggagacgucgugggaaacCggggugcc..... 1  
 Gi2\_11046805\_x1.....cggagacgCcgugggaaacacggggug..... 1  
 Gl1a\_6338929\_x1.....cgGucggagacgucgugggaa..... 1  
 Gi2\_11131164\_x1.....ggagacgucgugggaaAac..... 1  
 Gl1a\_6329446\_x1.....Uucggagacgucgugggaaacacggggg..... 1  
 Gi1\_4296824\_x1.....ucggagacgucgugggaaacacggggUac..... 1  
 Gi2\_11325570\_x1.....gagacgucNugggaaacacggggugc..... 1  
 Gi3\_28369498\_x1.....agacgucgugggaaacacgAg..... 1  
 Gi3\_28825396\_x1.....gugggaaacacgggUugccg..... 1  
 Gi4\_613919\_x1.....agacgucgCggaacacggggugcc..... 1  
 Gi1\_4290685\_x1.....ugUgaacacggggugccgaac..... 1  
 Gi2\_11330146\_x1.....gaAcggagacgucgugggaaacacggggugc..... 1  
 Gi3\_28632708\_x1.....gaucggagacguGugggaaacacggg..... 1  
 Gi3\_28747170\_x1.....gacgucgugggaaacacgC..... 1  
 Gi2\_11267745\_x1.....acgAcgugggaaacacggggugccgaac..... 1  
 Gi2\_11297692\_x1.....gucgugggaaAacggggugccg..... 1  
 Gl1a\_6309047\_x1.....gugggaaacaUggggugccga..... 1  
 Gi3\_28985203\_x1.....gggaaacacggggugcUgaacuu..... 1  
 Gi3\_28838043\_x1.....gUucggagacgucgugg..... 1  
 Gi3\_28371285\_x1.....cgCcgugggaaacacggggg..... 1  
 Gi1\_4298224\_x1.....gaacacggggugccgGac..... 1  
 Gi2\_11294016\_x1.....gugggaaacacggggugccgaaUuu..... 1  
 Gi5\_9065640\_x1.....uggCaacacggggugccgaac..... 1  
 Gi5\_8978870\_x1.....aucggagacgucgugggaaacacggggAgc..... 1  
 Gi2\_11135499\_x1.....gucgugggaaacacAgggugccg..... 1  
 Gi4\_606182\_x1.....auUggagacgucgugggaaacacggggugcc..... 1  
 Gi3\_28955945\_x1.....cgugggCacacggggugccg..... 1  
 Gi3\_28270008\_x1.....ucUgagacgucgugggaaacac..... 1  
 Gl1a\_6238654\_x1.....gAagacgucgugggaaacacg..... 1  
 Gi3\_28771825\_x1.....ggagaUgucgugggaaaca..... 1  
 Gi3\_28527332\_x1.....Aagacgucgugggaaacacg..... 1  
 Gi3\_28872754\_x1.....gugggaaacaGggggugccg..... 1  
 Gi3\_28857202\_x1.....cgaucggagacgucgugggGacacg..... 1  
 Gi1\_4316270\_x1.....gugggaaacacggCgugcc..... 1

Gi3\_28757174\_x1.....ggagacgucgAgggaacacggggugccg..... 1  
 Gi5\_9108145\_x1.ugcAaucggagacgucguggg..... 1  
 Gi2\_11326745\_x1.....ucggagacgCcgugggaaca..... 1  
 Gi1\_4204810\_x1.....gugggaacacgggAugccga..... 1  
 Gi3\_28591573\_x1.....uUggagacgucgugggaacacggggugc..... 1  
 Gi4\_595930\_x1.....aucggagacgucgugggGacacggg..... 1  
 Gi5\_8976850\_x1.....gaaGacggggugccgaacu..... 1  
 G1a\_6102169\_x1.....ggagacgucgugAgaacacggggugcc..... 1  
 Gi3\_28587978\_x1.....ugggaacaUggggugccg..... 1  
 Gi5\_8891076\_x1.....gacguAgugggaacacggggugccgaacu..... 1  
 Gi5\_8842363\_x1.....ugggaacaGggggugccgaac..... 1  
 Gi2\_11076305\_x1.....ggagacguNgugggaacacggggug..... 1  
 Gi5\_8975075\_x1.....gucguAggaacacggggugccgaa..... 1  
 Gi3\_28695922\_x1.ugcgaucgNagacgucgugggaaca..... 1  
 G1a\_6173894\_x1.....ggaAacgucgugggaacacggggugcc..... 1  
 Gi1\_4298577\_x1.....Aacgucgugggaacacggggugccg..... 1  
 G1a\_6315686\_x1.....acgucgugggaacacggggugccgCacu..... 1  
 G1a\_6306008\_x1.....ggGgacgucgugggaacacg..... 1  
 G1a\_6020466\_x1.....Augggaacacggggugccgaa..... 1  
 Gi2\_11021923\_x1.....gggGacacggggugccga..... 1  
 Gi4\_605456\_x1.....gugggUacacggggugccgaacu..... 1  
 Gi1\_4185594\_x1.....gugggaacacggggAgccgaac..... 1  
 Gi3\_28960822\_x1.....aucggagacgucgugggaacacggUg..... 1  
 Gi1\_4321274\_x1.....cggaUacgucgugggaacacggggugccgaacu..... 1  
 Gi3\_28898556\_x1.....aucgUagacgucgugggaac..... 1  
 Gi2\_11236126\_x1.....cgaCcgagacgucgugggaacacggg..... 1  
 Gi1\_4239773\_x1.....gacgucgugggaacacggggugccgaCcu..... 1  
 Gi2\_11107633\_x1.....ggaacacUgggugccgaac..... 1  
 Gi3\_28500262\_x1.....gagacgucguAggaacacggggugccgaac..... 1  
 Gi3\_28487612\_x1.....gagacgucgugggaacaUggggugccg..... 1  
 Gi2\_11307466\_x1.....cggagacgucguggAaacac..... 1  
 Gi5\_9127627\_x1.....agacgucgugggaacacggggugccgaaAu..... 1  
 Gi1\_4220778\_x1.....agacgucgugggaGcacggg..... 1  
 Gi1\_4241418\_x1.....aucggagacgucgugggaacacggAgu..... 1  
 Gi5\_8851030\_x1.....acgucgugNgaacacggggugccg..... 1  
 Gi3\_28642193\_x1.....cgaucggagacgucgugggaUcacg..... 1  
 Gi2\_11152878\_x1.....cgNgggaacacggggugccga..... 1  
 Gi1\_4275502\_x1.....gugggaacacggUgugccgaac..... 1  
 Gi4\_609391\_x1.....ugggaacacAgggugccgaacu..... 1  
 Gi1\_4334935\_x1.ugcgaucggagacgCcguggga..... 1  
 Gi2\_11234105\_x1.....agacgucguggUaacacggggugccgaacu..... 1  
 Gi1\_4248734\_x1.....ugUgaacacggggugccgaacuu..... 1  
 Gi2\_11016297\_x1.....aucggagacgucguCggaacacggggugcc..... 1  
 Gi2\_11034163\_x1.....ggaacacggggugccgGa..... 1  
 Gi5\_9001101\_x1.....cgucgugggaaGacggggugc..... 1  
 Gi4\_588100\_x1.....cgucAugggaacacggggugccga..... 1  
 Gi1\_4252292\_x1.....acgucgugggaacacAgggugcc..... 1



Gi2\_11100541\_x1...gaucggagacgucgugggaacaUggggug... 1  
Gi5\_9103810\_x1...agacAucgugggaacacggggugcc... 1  
Gi1\_4215169\_x1...aucggagaAgucgugggaacacgggggu... 1  
Gi2\_11049827\_x1...gagacAucgugggaacacggggugccg... 1  
Gi3\_28325655\_x1...gaGcggagacgucguggg... 1  
Gi1\_4338528\_x1...uUgugggaacacggggugccga... 1  
Gi3\_28722370\_x1...gGgaucggagacgucgugggaacacggggug... 1  
Gi5\_9049361\_x1...gucgugggaacaAggggugccgaac... 1  
Gi3\_28467524\_x1...ggCaacacggggugccgaa... 1  
Gi5\_8945877\_x1...acuucccagUgcgccugcugcccacc... 1  
Gi5\_8857466\_x1...aucggagacgucgugggaGcacggggug... 1  
Gi3\_28937650\_x1...gUcgucgugggaacacggggugccg... 1  
Gi5\_9094242\_x1...gugNgaacacggggugccga... 1  
Gi3\_28339683\_x1...ucggagaAgucgugggaacacg... 1  
Gi5\_8968609\_x1...gaacacggggugccgCac... 1  
Gi3\_28638254\_x1...ucgugggaacacUggggugc... 1  
Gi3\_28332941\_x1...gucgugCgaacacggggugccgaac... 1  
Gi1\_4192132\_x1...gagacgAcgugggaacacggggugcc... 1  
Gi3\_28981373\_x1...aucggagacgucgugggUacacgggg... 1  
Gi2\_11043420\_x1...auGggagacgucgugggaacac... 1  
Gi3\_28628051\_x1...gucgugggCacacggggugccga... 1  
Gi3\_28363846\_x1...cgaCcgagacgucgugg... 1  
Gi3\_28820329\_x1...gacgucgugggaacCcg... 1  
Gi2\_11128233\_x1...aucggagCcgucgugggaacacg... 1  
G1a\_6109655\_x1...gucgugggCacacggggugccga... 1  
Gi3\_28378027\_x1...acgucgugggaacacggggUacc... 1  
Gi2\_11150037\_x1...aucggagacgucgAgggaaca... 1  
G1a\_6131602\_x1...Ugugggaacacggggugc... 1  
Gi3\_28646241\_x1...aucggagacgucgugggaacaAgggg... 1  
Gi3\_28689487\_x1...Cacacggggugccgaacu... 1  
Gi3\_28778685\_x1...gagacgucgugggaacCc... 1  
Gi1\_4351291\_x1...agacgucgugggaacacggggugccU... 1  
G1a\_6147959\_x1...gaucggagacgucgugggaacGcgggg... 1  
Gi2\_11392980\_x1...gagacguUgugggaacacggggugcc... 1  
Gi2\_11294108\_x1...acgucgugggaacacggggugAcgaacu... 1  
Gi2\_11192877\_x1...Agggaacacggggugccg... 1  
Gi3\_28857206\_x1...gucgugggaGcacggggugccgaa... 1  
Gi3\_28400955\_x1...agacgCcgugggaacacggggugccgaa... 1  
G1a\_6156976\_x1...gcgaucggagGcucgug... 1  
Gi2\_11068700\_x1...acgucguAgggaacacgggggu... 1  
Gi2\_11106474\_x1...agacgCcgugggaacacggggugc... 1  
Gi3\_28332919\_x1...aucggagacgucgugCgaacacggg... 1  
Gi2\_11050219\_x1...acgucguCggaacacgggggu... 1  
Gi1\_4238241\_x1...ucgugggaacacUgggugc... 1  
Gi3\_28862626\_x1...gacgucgugggaacGcggggugccg... 1  
Gi2\_11212318\_x1...gucgGgggaacacggggugccg... 1  
Gi3\_28917393\_x1...gaucAgagacgucgugggaacacg... 1



Gi2\_1434665\_x133011.....gugggaacacggggugccgaacu.....  
0  
Gi3\_8063661\_x119103.....gaacacggggugccgaacu.....  
0  
Gi3\_8697977\_x70155.....gugggaacacggggugccgaac.....  
0  
Gi5\_2465246\_x67119.....gugggaacacggggugccgaacu.....  
0  
Gi2\_1794525\_x65192.....cgugggaacacggggugccgaacu.....  
0  
Gi3\_9083182\_x57456.....aacacggggugccgaacu.....  
0  
Gi3\_9196498\_x54607.....ugggaacacggggugccgaacu.....  
0  
Gi5\_2632552\_x47532.....cgugggaacacggggugccgaacu.....  
0  
Gi3\_9849648\_x39171.....gggaacacggggugccgaacu.....  
0  
Gi3\_10365099\_x35048.....Uugggaacacggggugccgaacu.....  
1  
Gi3\_10400147\_x35013.....ggaacacggggugccgaacu.....  
0  
Gi3\_10560548\_x30012.....ggaacacggggugccgaac.....  
0  
Gi5\_2903321\_x29271.....aacacggggugccgaacu.....  
0  
Gi3\_10969964\_x24063.....gugggaacacggggugccgaacA.....  
1  
Gi5\_3059569\_x22896.....ugggaacacggggugccgaacu.....  
0  
Gi3\_11248361\_x22013.....cgugggaacacggggugccgaac.....  
0  
Gi3\_11270374\_x21828.....gugggaacacggggugcc.....  
0  
Gi2\_2498029\_x20890.....gugggaacacggggugccgaac.....  
0  
Gi3\_11398260\_x20135.....ugggaacacggggugccgaac.....  
0  
Gi2\_2518919\_x20131.....ggaacacggggugccgaacu.....  
0  
Gi5\_3172288\_x20011.....gaacacggggugccgaacu.....  
0  
Gi3\_11700602\_x17928.....gggaacacggggugccgaac.....  
0  
Gi2\_2576448\_x17286.....Uugggaacacggggugccgaacu.....  
1

Gi3\_11804884\_x16850.....ucgugggaacacggggugccgaacu.....  
0  
Gi2\_2593734\_x16668.....ugggaacacggggugccgaacu.....  
0  
Gi2\_2643387\_x16224.....gggaacacggggugccgaacu.....  
0  
Gi3\_11984592\_x15862.....gugggaacacggggugccga.....  
0  
Gi3\_12000454\_x15855.....Uaacacggggugccgaacu.....  
1  
Gi3\_12273191\_x14392.....gGgggaacacggggugccgaacu.....  
1  
Gi3\_12316259\_x14259.....cgugggaacacggggugccgaacA.....  
1  
Gi2\_2816430\_x13238.....aacacggggugccgaacu.....  
0  
Gi1\_1545627\_x13127.....gugggaacacggggugccgaacu.....  
0  
Gi1\_1571667\_x12719.....aacacggggugccgaacu.....  
0  
Gi3\_12559239\_x12622.....cUugggaacacggggugccgaacu.....  
1  
Gi2\_2906896\_x12602.....gugggaacacggggugcc.....  
0  
Gi2\_2931772\_x12203.....gaacacggggugccgaacu.....  
0  
Gi3\_12707463\_x11795.....gucgugggaacacggggugccgaacu.....  
0  
G1a\_2764528\_x11766.....gugggaacacggggugccgaacu.....  
0  
Gi5\_3567497\_x11394.....ggaacacggggugccgaacu.....  
0  
Gi5\_3578891\_x11040.....ucgugggaacacggggugccgaacu.....  
0  
Gi1\_1629613\_x10992.....gaacacggggugccgaacu.....  
0  
Gi5\_3622560\_x10645.....gggaacacggggugccgaacu.....  
0  
Gi3\_13008745\_x10559.....gugggaacacggggugccgaa.....  
0  
Gi2\_3131603\_x9318.....ggaacacggggugccgaac.....  
0  
Gi2\_3204185\_x8821.....ucgugggaacacggggugccgaacu.....  
0  
Gi5\_3754824\_x8567.....Uugggaacacggggugccgaacu.....  
1

Gi3\_13368980\_x8549.....gugggaacacggggugccg.....  
0  
Gi3\_13385977\_x8446.....cgucgugggaacacggggugccgaacu.....  
0  
Gi3\_13419752\_x8420.....Uugggaacacggggugccgaac.....  
1  
Gi1\_1717006\_x8199.....cgugggaacacggggugccgaacu.....  
0  
Gi3\_13598074\_x7829.....aucggagacgucgugggaacacggg.....  
0  
Gi3\_13690359\_x7531.....aucggagacgucgugggaacacg.....  
0  
Gi2\_3397579\_x7478.....cgugggaacacggggugccgaac.....  
0  
Gi1\_1772599\_x7300.....ucgugggaacacggggugccgaacu.....  
0  
Gi1\_1779899\_x7252.....ugggaacacggggugccgaacu.....  
0  
Gi2\_3462884\_x7005.....gGgggaacacggggugccgaacu.....  
1  
Gi3\_13952821\_x6649.....aucggagacgucgugggaacacgggg.....  
0  
Gi3\_13966109\_x6626.....ugggaacacggggugccgaacA.....  
1  
Gi3\_14044647\_x6441.....ggaacacggggugccgaacA.....  
1  
Gi3\_14120580\_x6174.....acgucgugggaacacggggugccgaacu.....  
0  
Gi3\_14163414\_x6077.....ucgugggaacacggggugccgaac.....  
0  
Gi2\_3600679\_x5869.....gugggaacacggggugccgaacA.....  
1  
Gi3\_14325748\_x5585.....ugggaacacggggugccgaa.....  
0  
Gi2\_3662960\_x5473.....gucgugggaacacggggugccgaacu.....  
0  
Gi2\_3711694\_x5322.....cUugggaacacggggugccgaacu.....  
1  
Gi2\_3743210\_x5193.....gugggaacacggggugccg.....  
0  
Gi3\_14503814\_x5146.....ugggaacacggggugccga.....  
0  
Gi3\_14514096\_x5110.....Uggaacacggggugccgaacu.....  
1  
Gi5\_4030023\_x4816.....gugggaacacggggugccgaac.....  
0

Gi5\_4039646\_x4802.....cgucgugggaacacggggugccgaacu.....  
0  
Gi1\_1936852\_x4772.....gggaacacggggugccgaacu.....  
0  
Gi1\_1955690\_x4631.....ggaacacggggugccgaacu.....  
0  
Gi3\_14826722\_x4528.....uUggaacacggggugccgaacu.....  
1  
Gi3\_14898149\_x4389.....Ugaacacggggugccgaacu.....  
1  
Gi3\_14919984\_x4333.....gucgugggaacacggggugccgaac.....  
0  
Gi3\_14950267\_x4314.....cgugggaacacggggugcc.....  
0  
Gi3\_14963195\_x4302.....gaacacggggugccgaac.....  
0  
Gi3\_14997439\_x4255.....gggaacacggggugccgaacA.....  
1  
Gi2\_3938664\_x4179.....gggaacacggggugccgaac.....  
0  
Gi2\_3951163\_x4151.....gugggaacacggggugccga.....  
0  
Gi3\_15097440\_x4078.....gaacacggggugccgaacA.....  
1  
Gi5\_4169765\_x3965.....cUugggaacacggggugccgaacu.....  
1  
Gi3\_15209990\_x3947.....cgugggaacacggggugccga.....  
0  
Gi3\_15276456\_x3855.....cgucgugggaacacggggugcc.....  
0  
Gi3\_15375097\_x3741.....Ugaacacggggugccgaac.....  
1  
Gi5\_4272399\_x3626.....gucgugggaacacggggugccgaacu.....  
0  
Gi3\_15478073\_x3592.....gGgggaacacggggugccgaac.....  
1  
Gi2\_4108274\_x3511.....cgucgugggaacacggggugccgaacu.....  
0  
Gi5\_4338890\_x3373.....gGgggaacacggggugccgaacu.....  
1  
Gi2\_4182182\_x3220.....cgugggaacacggggugcc.....  
0  
Gi3\_15764003\_x3192.....gUgaacacggggugccgaacu.....  
1  
Gi2\_4211031\_x3168.....aucggagacgucgugggaacacggggu.....  
0

Gi2\_4214199\_x3154.....cgugggaacacggggugccgaacA.....  
1  
G1a\_3091306\_x3090.....ggaacacggggugccgaacu.....  
0  
Gi3\_15861109\_x3071.....aucgggagacgucgugggaacacgg.....  
0  
Gi3\_15921905\_x3019.....Ggugggaacacggggugccgaacu.....  
1  
Gi2\_4269696\_x3008.....ugggaacacggggugccgaac.....  
0  
Gi5\_4412639\_x2992.....acgucgugggaacacggggugccgaacu.....  
0  
Gi2\_4296153\_x2901.....aucgggagacgucgugggaacacggggugc.....  
0  
G1a\_3120858\_x2850.....cgugggaacacggggugccgaacu.....  
0  
Gi3\_16082396\_x2840.....cgugggaacacggggugc.....  
0  
Gi3\_16096567\_x2821.....gUaacacggggugccgaacu.....  
1  
Gi2\_4327464\_x2792.....Uugggaacacggggugccgaac.....  
1  
Gi3\_16248655\_x2719.....Cugggaacacggggugccgaacu.....  
1  
Gi3\_16289142\_x2676.....aucgggagacgucgugggaacacgggg.....  
0  
Gi5\_4504505\_x2664.....Uaacacggggugccgaacu.....  
1  
G1a\_3154096\_x2645.....ugggaacacggggugccgaacu.....  
0  
Gi3\_16341999\_x2618.....Uugggaacacggggugcc.....  
1  
Gi2\_4431581\_x2539.....aucgggagacgucgugggaacac.....  
0  
Gi3\_16461911\_x2499.....aacacggggugccgaacA.....  
1  
Gi3\_16466907\_x2486.....cgugggaacacggggugccgaa.....  
0  
Gi2\_4459306\_x2481.....Ugaacacggggugccgaacu.....  
1  
Gi2\_4466727\_x2466.....ucgugggaacacggggugccgaac.....  
0  
Gi3\_16499062\_x2460.....gggaacacggggugccgaa.....  
0  
Gi3\_16518676\_x2441.....cgucgugggaacacggggugccgaac.....  
0

Gi3\_16545467\_x2428.....gUaacacggggugccgaac.....  
1  
Gi2\_4491170\_x2425.....gugggaacacggggugccgaa.....  
0  
Gi3\_16643558\_x2347.....Uggaacacggggugccgaac.....  
1  
Gi3\_16648252\_x2346.....ugggaacacggggugccg.....  
0  
Gi5\_4594294\_x2341.....gugggaacacggggugccgaacA.....  
1  
Gi3\_16791254\_x2203.....Ggggaacacggggugccgaacu.....  
1  
Gi2\_4593584\_x2197.....Uggaacacggggugccgaacu.....  
1  
Gi3\_16871628\_x2136.....gGacacggggugccgaacu.....  
1  
Gi3\_16882279\_x2126.....gugggaacNcggggugccgaacu.....  
1  
Gi3\_16903467\_x2107.....Augggaacacggggugccgaacu.....  
1  
Gi5\_4683050\_x2103.....ugggaacacggggugccgaacA.....  
1  
Gi3\_16928684\_x2092.....acgucgugggaacacggggugccgaac.....  
0  
Gi3\_16934960\_x2091.....cgugggaacacggggugccg.....  
0  
Gi5\_4687229\_x2066.....gggaacacggggugccgaac.....  
0  
Gi1\_2182073\_x2038.....cgucgugggaacacggggugccgaacu.....  
0  
Gi2\_4694926\_x2033.....cgggagacgucgugggaacacggggugcc.....  
0  
Gi5\_4703592\_x2029.....ugggaacacggggugccgaac.....  
0  
Gi3\_17070356\_x2005.....aucgggagacgucgugggaacacggggugcc.....  
0  
Gi3\_17110031\_x1960.....gacgucgugggaacacggggugccgaacu.....  
0  
Gi5\_4754590\_x1912.....uUggaacacggggugccgaacu.....  
1  
Gi3\_17183517\_x1905.....cgugggaaNacggggugccgaacu.....  
1  
Gi3\_17196833\_x1895.....aucgggagacgucgugggaacac.....  
0  
Gi2\_4747972\_x1892.....acgucgugggaacacggggugccgaacu.....  
0



Gi2\_4751755\_x1891.....aucggagacgucgugggaaca.....  
0  
Gi3\_17249501\_x1869.....Uugggaacacggggugccga.....  
1  
Gi2\_4789143\_x1843.....cgugggaacacggggugc.....  
0  
Gi3\_17407574\_x1767.....cUugggaacacggggugccgaac.....  
1  
Gi1a\_3336841\_x1748.....gggaacacggggugccgaacu.....  
0  
Gi3\_17442691\_x1747.....ggaacacggggugccgaa.....  
0  
Gi3\_17461856\_x1734....gaucggagacgucgugggaacacggg.....  
0  
Gi2\_4893280\_x1699.....Uaacacggggugccgaacu.....  
1  
Gi5\_4851747\_x1698.....cgugggaacacggggugccgaacA.....  
1  
Gi2\_4903457\_x1688.....aucggagacgucgugggaacacggggugcc.....  
0  
Gi3\_17603980\_x1650.....uUggaacacggggugccgaac.....  
1  
Gi3\_17670918\_x1614....gaucggagacgucgugggaacacgggggu.....  
0  
Gi1\_2244512\_x1612.....acgucgugggaacacggggugccgaacu.....  
0  
Gi3\_17687009\_x1601.....cgucgugggaacacggggugccg.....  
0  
Gi1\_2246124\_x1601.....Uugggaacacggggugccgaacu.....  
1  
Gi2\_5013053\_x1581.....gUaacacggggugccgaacu.....  
1  
Gi2\_5014634\_x1581.....cgucgugggaacacggggugccg.....  
0  
Gi3\_17792439\_x1544.....gCgggaacacggggugccgaacu.....  
1  
Gi3\_17804757\_x1535.....cgCgggaacacggggugccgaacu.....  
1  
Gi3\_17827658\_x1521.....gugggaacacggggCgccaacu.....  
1  
Gi2\_5088374\_x1492.....gggaacacggggugccgaacA.....  
1  
Gi3\_17889244\_x1487.....gugggGacacggggugccgaacu.....  
1  
Gi3\_17901117\_x1481.....gugggaacacggggGgccaacu.....  
1

Gi2\_5101745\_x1480.....ugggaacacggggugccgaacA.....  
1  
Gi5\_4964517\_x1471.....gggaacacggggugccgaacA.....  
1  
Gi2\_5116506\_x1469.....Uugggaacacggggugcc.....  
1  
G1a\_3417093\_x1462.....Uugggaacacggggugccgaacu.....  
1  
Gi3\_17950984\_x1451.....gugggaacacggggugccgaGcu.....  
1  
Gi5\_4980585\_x1450.....cgugggaacacggggugccgaac.....  
0  
Gi3\_17956783\_x1448.....gUgaacacggggugccgaac.....  
1  
Gi1\_2278079\_x1437.....Uaacacggggugccgaacu.....  
1  
Gi2\_5142644\_x1430.....gggagacgucgugggaacacggggugcc.....  
0  
Gi1\_2286667\_x1421.....ucgCgggaacacggggugccgaacu.....  
1  
Gi5\_4999235\_x1414.....Ugaacacggggugccgaacu.....  
1  
Gi3\_18041055\_x1409.....Uucgugggaacacggggugccgaacu.....  
1  
Gi2\_5172447\_x1403.....ugggaacacggggugccga.....  
0  
Gi1\_2297923\_x1382.....gucgugggaacacggggugccgaacu.....  
0  
Gi3\_18106627\_x1380.....guUggaacacggggugccgaacu.....  
1  
Gi2\_5197508\_x1379.....aucgggagacgucgugggaacacggg.....  
0  
Gi5\_5014528\_x1369.....Uggaacacggggugccgaacu.....  
1  
Gi5\_5019990\_x1359.....ggaacacggggugccgaac.....  
0  
Gi3\_18165432\_x1357.....ucgugggaacacggggugccgaacA.....  
1  
Gi2\_5224850\_x1355.....uUggaacacggggugccgaacu.....  
1  
Gi2\_5241045\_x1346.....gaucggagacgucgugggaacacgggu.....  
0  
Gi3\_18241935\_x1325.....agacgucgugggaacacggggugccgaacu.....  
0  
Gi2\_5287405\_x1300.....acgucgugggaacacggggugcc.....  
0

Gi2\_5290004\_x1297.....cgugggaacacggggugccga.....  
0  
Gi3\_18311187\_x1293.....gugggaGcacggggugccgaacu.....  
1  
Gi3\_18316358\_x1292.....gugggaacGcggggugccgaacu.....  
1  
Gi2\_5310584\_x1271.....gucgugggaacacggggugccgaac.....  
0  
Gi5\_5074131\_x1271.....agacgucgugggaacacggggugccgaacu.....  
0  
Gi3\_18362356\_x1267.....cgucgugggaacacggggugccgaacA.....  
1  
Gi2\_5344499\_x1246.....aucggagacgucgugggaacacggggug.....  
0  
Gi2\_5356932\_x1241.....gUgaacacggggugccgaacu.....  
1  
Gi3\_18423837\_x1240.....cgGgggaacacggggugccgaacu.....  
1  
Gi2\_5368059\_x1231.....agacgucgugggaacacggggugcc.....  
0  
Gi2\_5372973\_x1220.....cgucgugggaacacggggugcc.....  
0  
Gi3\_18490145\_x1214.....Uugggaacacggggugccgaa.....  
1  
Gi2\_5414040\_x1195.....aucggagacgucgugggaacacg.....  
0  
Gi3\_18574980\_x1178.....Aaacacggggugccgaacu.....  
1  
Gi2\_5438941\_x1177.....Ggugggaacacggggugccgaacu.....  
1  
Gi3\_18586732\_x1173.....cgucgugggaacacggggugccga.....  
0  
Gi3\_18585559\_x1173.....gaUcacggggugccgaacu.....  
1  
Gi2\_5451849\_x1165.....Ugaacacggggugccgaac.....  
1  
Gi3\_18622676\_x1152.....gGgggaacacggggugcc.....  
1  
Gi2\_5505511\_x1125.....cgugggaacacggggugccgaa.....  
0  
Gi2\_5507759\_x1120.....gGgggaacacggggugccgaac.....  
1  
Gi3\_18723411\_x1108.....gacgucgugggaacacggggugccgaac.....  
0  
Gi5\_5171782\_x1092.....gugggaacacggggugccga.....  
0

Gi3\_18769520\_x1087.....cggagacgucgugggaacacggggugcc.....  
 0  
 Gi3\_18785802\_x1083.....gugggaacacggggugccgCacu.....  
 1  
 Gi1\_2378013\_x1083.....Cgggaacacggggugccgaacu.....  
 1  
 Gi3\_18803090\_x1078.....gaacacggNgugccgaacu.....  
 1  
 Gi5\_5189063\_x1063.....ggaacacggggugccgaacA.....  
 1  
 Gi3\_18852239\_x1056.....cgugggaacacggggugccgCacu.....  
 1  
 Gi2\_5590002\_x1051.....gugggaacacggggGgccgaacu.....  
 1  
 Gi3\_18873269\_x1048....gaucggagacgucgugggaacacg.....  
 0  
 Gi2\_5593147\_x1046.....gugggaacNcggggugccgaacu.....  
 1  
 Gi3\_18879550\_x1045.....gaacacggggGgccgaacu.....  
 1  
 Gi3\_18895181\_x1038.....Uugggaacacggggugccg.....  
 1  
 Gi2\_5602530\_x1038.....gacgucgugggaacacggggugccgaacu.....  
 0  
 Gi1\_2388645\_x1037.....gugggaacacggggugccgaacA.....  
 1  
 Gi3\_18930286\_x1026.....cgugggaacacggggugccgaGcu.....  
 1  
 Gi3\_18936438\_x1024.....aGcacggggugccgaacu.....  
 1  
 Gi2\_5640495\_x1012.....ggaacacggggugccgaacA.....  
 1  
 Gi2\_5641507\_x1011.....ugggaacacggggugccg.....  
 0  
 Gi3\_18965997\_x1011.....Ugugggaacacggggugccgaacu.....  
 1  
 Gi1\_2404967\_x998.....cgCgggaacacggggugccgaacu..... 1  
 Gi2\_5716655\_x966.....gucgugggaacacggggugcc..... 0  
 Gi1\_2421588\_x960.....gCgggaacacggggugccgaacu..... 1  
 Gi2\_5724354\_x959....gaucggagacgucgugggaacacggg..... 0  
 Gi5\_5266060\_x950.....gugggaacacggggugcc..... 0  
 Gi1\_2426354\_x947.....ggaacacggggugccgaac..... 0  
 Gi3\_19185895\_x936.....ugggaacacggggugccgCacu.....  
 1  
 Gi2\_5758373\_x932.....Augggaacacggggugccgaacu..... 1  
 Gi3\_19195239\_x932.....gugggaacCcggggugccgaacu.....  
 1

Gi4\_255519\_x927.....gugggaacacggggugccgaacu..... 0  
 Gi3\_19228620\_x922.....gGgggaacacggggugccga.....  
 1  
 Gi2\_5772246\_x920.....aacacggggugccgaacA..... 1  
 Gi3\_19238742\_x919.....cgucgugggaacacggggugc.....  
 0  
 Gi1\_2435607\_x912.....ucgugggaacacggggugccgaac..... 0  
 Gi1\_2437431\_x908.....ucgugggaacacggggugcc..... 0  
 Gi1\_2438339\_x907.....cUugggaacacggggugccgaacu..... 1  
 Gi3\_19283423\_x905.....guggUaacacggggugccgaacu.....  
 1  
 Gi3\_19314932\_x896....gaucggagacgucgugggaacac.....  
 0  
 Gi5\_5305716\_x892.....gUaacacggggugccgaacu..... 1  
 Gi3\_19336339\_x887....aucggagacgucgugggaacacggggugc.....  
 0  
 Gi3\_19337226\_x887.....cgugggaGcacggggugccgaacu.....  
 1  
 Gi5\_5313715\_x884.....Ggggaacacggggugccgaacu..... 1  
 Gi3\_19346078\_x883.....Gacacggggugccgaacu.....  
 1  
 Gi3\_19353136\_x882.....gucgugggaacacggggugcc.....  
 0  
 Gi5\_5328573\_x862.....Ggugggaacacggggugccgaacu..... 1  
 Gi3\_19436709\_x861.....acgucgugggaacacggggugcc.....  
 0  
 Gi3\_19477784\_x849.....gugggaacacAgggugccgaacu.....  
 1  
 Gi1\_2463627\_x846.....aacacggggugccgaacA..... 1  
 Gi2\_5894717\_x846....gaucggagacgucgugggaacac..... 0  
 Gi3\_19487110\_x846.....ggagacgucgugggaacacggggugcc.....  
 0  
 Gi2\_5898094\_x843....aucggGgacgucgugggaaca..... 1  
 Gi3\_19501449\_x840.....cgAgggaacacggggugccgaacu.....  
 1  
 Gi3\_19505645\_x838.....cgugggGacacggggugccgaacu.....  
 1  
 Gi5\_5346371\_x836.....gacgucgugggaacacggggugccgaacu..... 0  
 Gi3\_19551295\_x824.....cgugggaacacggggGgccgaacu.....  
 1  
 G1a\_3705092\_x821.....gugggaacacggggugcc..... 0  
 Gi3\_19597896\_x808.....cggagacgucgugggaacacgggggu.....  
 0  
 Gi2\_5972240\_x807.....cgucgugggaacacggggugccga..... 0  
 Gi3\_19635652\_x799.....gAgggaacacggggugccgaacu.....  
 1

Gi3\_19638048\_x798.....gugggaacacggggugccgaCcu.....  
     1  
 Gi2\_6000086\_x787....aucggGgacgucgugggaacacggggugc..... 1  
 Gi2\_6000873\_x786.....cgugggaaNacggggugccgaacu..... 1  
 Gi3\_19702742\_x782.....agacgucgugggaacacggggugccgaac.....  
     0  
 Gi2\_6009494\_x781.....gCgggaacacggggugccgaacu..... 1  
 Gi5\_5388210\_x779.....gaacacggggugccgaac..... 0  
 Gi3\_19712107\_x778.....ugggaacaNggggugccgaacu.....  
     1  
 Gi2\_6025044\_x773.....agacgucgugggaacacggggugccgaacu..... 0  
 Gi3\_19752275\_x768.....cgugggaacacggggugccgaCcu.....  
     1  
 Gi2\_6041171\_x764.....gacgucgugggaacacggggugcc..... 0  
 Gi5\_5408852\_x752.....gUgaacacggggugccgaacu..... 1  
 Gi2\_6059364\_x751.....gUaacacggggugccgaac..... 1  
 Gi3\_19831848\_x748.....cgugggaacGcggggugccgaacu.....  
     1  
 Gi3\_19863131\_x742.....Ggggaacacggggugccgaac.....  
     1  
 Gi5\_5423735\_x735.....Augggaacacggggugccgaacu..... 1  
 Gi2\_6106547\_x727....aucggGgacgucgugggaacac..... 1  
 Gi1\_2524539\_x721.....gggaacacggggugccgaacA..... 1  
 Gi3\_19944198\_x720.....guAggaacacggggugccgaacu.....  
     1  
 Gi5\_5436081\_x717....aucgggagacgucgugggaacacg..... 0  
 Gi2\_6138250\_x715.....acgucgugggaacacggggugc..... 0  
 Gi3\_19977837\_x712....gaucgggagacgucgugggaacacgggg.....  
     0  
 Gi2\_6149646\_x710.....cgugggaacacggggugccg..... 0  
 Gi2\_6156032\_x709.....Uugggaacacggggugccg..... 1  
 Gi2\_6156741\_x709.....gugggaacacggggCgccgaacu..... 1  
 Gi5\_5452426\_x705.....ugggaacacggggugccgaa..... 0  
 Gi5\_5458036\_x697.....gugggaacacggggugccgaa..... 0  
 Gi1\_2530929\_x697.....gugggaacacggggugccgaac..... 0  
 Gi5\_5459430\_x696.....ucgugggaacacggggugccgaac..... 0  
 Gi3\_20027165\_x696.....gggaacacggggugccga.....  
     0  
 Gi1\_2534401\_x692.....gugggaacacggggugcc..... 0  
 Gi2\_6200666\_x687.....ggagacgucgugggaacacggggugc..... 0  
 Gi2\_6202725\_x686.....Cugggaacacggggugccgaacu..... 1  
 Gi3\_20061734\_x686.....ucgugggaacacggggugc.....  
     0  
 Gi3\_20075429\_x683.....Caacacggggugccgaacu.....  
     1  
 Gi2\_6219121\_x680.....gugggGacacggggugccgaacu..... 1

Gi3\_20087693\_x680.....cgugUgaacacggggugccgaacu.....  
     1  
 G1a\_3822562\_x678.....gaacacggggugccgaacu..... 0  
 Gi3\_20100593\_x678.....gaacacggggugccgaCcu.....  
     1  
 Gi3\_20103302\_x677.....cgugggaacaUggggugccgaacu.....  
     1  
 Gi2\_6230650\_x676.....cgucgugggaacacggggugc..... 0  
 Gi3\_20138255\_x668.....ggagacgucgugggaacacggggg.....  
     0  
 Gi2\_6261466\_x664.....guUggaacacggggugccgaacu..... 1  
 Gi2\_6259474\_x664.....gaacacggggugccgaacA..... 1  
 Gi1\_2549977\_x662.....gGgggaacacggggugccgaacu..... 1  
 Gi2\_6272692\_x658.....gugggaacGcggggugccgaacu..... 1  
 Gi2\_6277948\_x656.....gugggaacacggggugccgaGcu..... 1  
 Gi5\_5501608\_x654.....Uugggaacacggggugccgaac..... 1  
 Gi2\_6287759\_x653.....Uucgugggaacacggggugccgaacu..... 1  
 Gi3\_20231351\_x652.....gaacacggggugccgaGcu.....  
     1  
 Gi2\_6306563\_x644.....cUugggaacacggggugccgaac..... 1  
 Gi3\_20285750\_x643.....gaacGcggggugccgaacu.....  
     1  
 Gi2\_6335368\_x636....gaucggagacgucgugggaacacggggugc..... 0  
 Gi2\_6340450\_x634.....acgucgugggaacacggggugccgaac..... 0  
 Gi3\_20335512\_x633.....Gcgugggaacacggggugccgaacu.....  
     1  
 Gi3\_20333613\_x633.....aUcacggggugccgaacu.....  
     1  
 Gi5\_5530522\_x632.....cgugggaaNacggggugccgaacu..... 1  
 Gi2\_6352455\_x629.....gGgggaacacggggugcc..... 1  
 Gi2\_6356223\_x627.....cggagacgucgugggaacacggggugc..... 0  
 Gi2\_6372478\_x622.....Ggggaacacggggugccgaacu..... 1  
 Gi1\_2574227\_x619.....gacgucgugggaacacggggugccgaacu..... 0  
 Gi1\_2575463\_x616.....Ugaacacggggugccgaacu..... 1  
 Gi3\_20425189\_x613....aucggagacgucguggga.....  
     0  
 Gi3\_20433767\_x612.....acgucgugggaacacggggugccgaacA.....  
     1  
 G1a\_3889537\_x611.....gGgggaacacggggugccgaacu..... 1  
 Gi3\_20455698\_x606.....cUgggaacacggggugccgaacu.....  
     1  
 Gi1\_2583389\_x604.....uUggaacacggggugccgaacu..... 1  
 Gi2\_6418466\_x604....gaucggagacgucguggga..... 0  
 Gi2\_6427498\_x600.....ucgugggaacacggggugccgaacA..... 1  
 Gi3\_20496077\_x598.....gugggaacacggggugccAaacu.....  
     1

Gi3\_20524036\_x591.....cAugggaacacggggugccgaacu.....  
     1  
 Gi2\_6449532\_x591.....gugggaGcacggggugccgaacu..... 1  
 Gi3\_20534060\_x588.....cUucgugggaacacggggugccgaacu.....  
     1  
 Gi3\_20535824\_x588.....uAgggaacacggggugccgaacu.....  
     1  
 Gi1\_2589356\_x587.....Uggaacacggggugccgaacu..... 1  
 Gi3\_20555743\_x584.....gugggaacacggggugcUgaacu.....  
     1  
 Gi2\_6477610\_x580.....gaacacggggugccgaac..... 0  
 Gi3\_20572614\_x580.....cgugggaacacAgggugccgaacu.....  
     1  
 Gi2\_6501196\_x571.....cgCgggaacacggggugccgaacu..... 1  
 Gi3\_20621399\_x570.....gGgggaacacggggugccgaa.....  
     1  
 Gi2\_6509178\_x568.....cgGgggaacacggggugccgaacu..... 1  
 Gi3\_20641814\_x565.....Cugggaacacggggugccgaac.....  
     1  
 Gi1\_3939434\_x563.....aacacggggugccgaacu..... 0  
 Gi3\_20653089\_x562.....ucgugggaacacggggugccg.....  
     0  
 Gi2\_6525556\_x561.....gugggaacacggggugccgCacu..... 1  
 Gi3\_20660950\_x561.....gaGcacggggugccgaacu.....  
     1  
 Gi1\_2607734\_x560.....ugggaacacggggugccgaac..... 0  
 Gi2\_6532839\_x559.....Uggaacacggggugccgaac..... 1  
 Gi3\_20686091\_x556.....Uaacacggggugccgaac.....  
     1  
 Gi3\_20690539\_x556.....ucgggagacgucgugggaacacggggugcc.....  
     0  
 Gi1a\_3950603\_x553.....aucggagacgucgugggaacacggg..... 0  
 Gi5\_5626687\_x549.....gggaacacggggugccgaa..... 0  
 Gi3\_20726447\_x549.....aacacgggNugccgaacu.....  
     1  
 Gi3\_20755962\_x544.....gugggaacNcggggugccgaac.....  
     1  
 Gi5\_5641931\_x539.....cgugggaacacggggugccga..... 0  
 Gi2\_6591423\_x537.....Uugggaacacggggugccga..... 1  
 Gi2\_6592497\_x537.....gucgugggaacacggggugc..... 0  
 Gi2\_6604800\_x533.....ugggaacacggggugccgaa..... 0  
 Gi2\_6605333\_x533.....gaucggagacgucgugggaacacg..... 0  
 Gi3\_20866986\_x523.....gugAgaacacggggugccgaacu.....  
     1  
 Gi1a\_3984256\_x519.....gugggaacacggggugccga..... 0  
 Gi1\_2630453\_x519.....gucgCgggaacacggggugccgaacu..... 1  
 Gi2\_6654166\_x518.....ucgugggaacacggggugccg..... 0



Gi2\_6663968\_x514.....gggaacacggggugccgaa..... 0  
 Gi2\_6669610\_x511.....cgugggaacacggggugccgCacu..... 1  
 Gi3\_20927425\_x511.....gucgugggaacacggggugccgaacA.....  
 1  
 Gi3\_20933547\_x509.....gUacacggggugccgaacu.....  
 1  
 Gi4\_298421\_x509.....cgugggaacacggggugccgaacu..... 0  
 Gi2\_6688434\_x506.....cgucgugggaacacggggugccgaac..... 0  
 Gi2\_6691467\_x505.....ucggGgacgucgugggaacacg..... 1  
 Gi3\_20965425\_x503.....ucgggagacgucgugggaacacg.....  
 0  
 Gi5\_5684347\_x503.....gugggaacNcggggugccgaacu..... 1  
 Gi5\_5685353\_x502.....aucggagacgucgugggaacacgg..... 0  
 G1a\_4003648\_x501.....aucggagacgucgugggaacacggggg..... 0  
 G1a\_4008139\_x498.....gugggaacacggggugccgaac..... 0  
 G1a\_4011121\_x496.....cgugggaacacggggugcc..... 0  
 Gi3\_21024275\_x493.....gacgucgugggaacacggg.....  
 0  
 Gi5\_5704214\_x491.....aucggagacgucgugggaacacgggg..... 0  
 Gi3\_21053720\_x489.....Cgaacacggggugccgaacu.....  
 1  
 Gi3\_21053231\_x489.....cgugggaacacggggugccAaacu.....  
 1  
 Gi5\_5708616\_x486.....gugggaacacggggugccgaacuu..... 0  
 Gi2\_6754847\_x485.....gaucggagacgucgugggaaca..... 0  
 Gi3\_21074174\_x485.....aaUacggggugccgaacu.....  
 1  
 Gi1\_2653352\_x484.....cgucgCgggaacacggggugccgaacu..... 1  
 Gi3\_21090151\_x483.....Aggaacacggggugccgaacu.....  
 1  
 Gi2\_6764528\_x482.....ggGgacgucgugggaacacggggugcc..... 1  
 Gi2\_6774146\_x480.....gugggaacCcgggugccgaacu..... 1  
 Gi2\_6773666\_x480.....aucggGgacgucgugggaacacggg..... 1  
 Gi3\_21119024\_x479.....aacacggggugccgaacuu.....  
 0  
 Gi3\_21138590\_x475.....gGcugugggaacacggggugccgaacu.....  
 1  
 Gi3\_21144290\_x475.....gGgggaacacggggugccg.....  
 1  
 Gi3\_21178779\_x470.....Augggaacacggggugccgaac.....  
 1  
 Gi5\_5737314\_x470.....aacacggggugccgaacA..... 1  
 Gi3\_21189573\_x469.....Uucgugggaacacggggugccgaac.....  
 1  
 Gi5\_5745274\_x466.....gugggaacacggggugccg..... 0  
 Gi2\_6811953\_x465.....ucgggagacgucgugggaacacg..... 0

Gi3\_21225428\_x463.....gucgugggaacacggggugccga.....  
 0  
 Gi1\_2673628\_x459.....gugggaacacggggugccg..... 0  
 Gi5\_5767386\_x456.....aaUacggggugccgaacu..... 1  
 Gi2\_6849190\_x455.....aucggagacgucgugggaac..... 0  
 Gi3\_21277250\_x454.....ggaacacgNggugccgaacu.....  
 1  
 Gi3\_21273618\_x454.....cgugggaacacggggugcUgaacu.....  
 1  
 Gi2\_6855091\_x453.....ggaacacggggugccgaa..... 0  
 Gi3\_21301662\_x450.....uUggaacacggggugccgaa.....  
 1  
 Gi1\_2677719\_x450.....agacgucgugggaacacggggugccgaacu..... 0  
 Gi2\_6870001\_x450.....agacgucgugggaacacggggugc..... 0  
 Gi5\_5775083\_x449.....aGcacggggugccgaacu..... 1  
 Gi3\_21314237\_x448.....gaacacggggugccgCacu.....  
 1  
 Gi3\_21316924\_x447.....cgucgugggaacacgggg.....  
 0  
 Gi3\_21334759\_x445.....gugggaacacggggUaccgaacu.....  
 1  
 Gi5\_5781786\_x445.ugcgaucggagacgucgug..... 0  
 Gi3\_21342750\_x443.....Cgggaacacggggugccgaacu.....  
 1  
 Gi3\_21366587\_x440.....Cggaacacggggugccgaacu.....  
 1  
 Gi3\_21374493\_x438.....gaucggagacgucgugggaacacgg.....  
 0  
 Gi2\_6928292\_x434.....guggUaacacggggugccgaacu..... 1  
 Gi3\_21420601\_x432.....gugggaacaUggggugccgaacu.....  
 1  
 Gi1\_2690059\_x430.....ucgCgggaacacggggugcc..... 1  
 Gi2\_6946431\_x430.....cggGgacgucgugggaacacggggugc..... 1  
 Gi5\_5805893\_x429.....Gcgugggaacacggggugccgaacu..... 1  
 Gi3\_21442085\_x428.....gugggaacacggggugccgaUc.....  
 1  
 Gi3\_21442941\_x428.....uUggaacacggggugccga.....  
 1  
 Gi5\_5809746\_x427.....Gacacggggugccgaacu..... 1  
 Gi5\_5810600\_x427.....Uucgugggaacacggggugccgaacu..... 1  
 Gi3\_21454905\_x426.....Ggugggaacacggggugccgaac.....  
 1  
 Gi2\_6960982\_x425.....aucggGgacgucgugggaacacg..... 1  
 Gi3\_21464696\_x425.....gggaacacggggugccgaCcu.....  
 1  
 Gi3\_21470210\_x424.....gugggaacacggggugccgGacu.....  
 1

Gi1a\_4115331\_x422.....Ugaacacggggugccgaacu..... 1  
 Gi3\_21495525\_x420.....gugggaacacggggugUcgaacu.....  
 1  
 Gi2\_6981692\_x419.....cggagacgucgugggaacacggggu..... 0  
 Gi2\_6981273\_x419.....cgugggaacacggggugccgaCcu..... 1  
 Gi3\_21532298\_x416.....gugggaacacggUgugccgaacu.....  
 1  
 Gi3\_21552587\_x413.....gCgggaacacggggugccgaac.....  
 1  
 Gi3\_21566190\_x411.....gggaacacNgggugccgaacu.....  
 1  
 Gi2\_7023165\_x410.....gugggaacacggggugccgaCcu..... 1  
 Gi3\_21576442\_x409.....cguAggaacacggggugccgaacu.....  
 1  
 Gi3\_21578892\_x408.....gugggaacacgAggugccgaacu.....  
 1  
 Gi3\_21593951\_x405.....cggagacgucgugggaacacg.....  
 0  
 Gi1\_2710911\_x404.....aucggagacgucgugggaacacg..... 0  
 Gi3\_21620582\_x402.....cgucgugggaacacggggugccgaa.....  
 0  
 Gi3\_21647373\_x398.....ucggagacgucgugggaacacggggu.....  
 0  
 Gi3\_21658497\_x397.....gugggaacacggAgugccgaacu.....  
 1  
 Gi3\_21665630\_x396.....gugggaacacggggugccgaGc.....  
 1  
 Gi5\_5858005\_x396.....gugggaacacggggGgccgaacu..... 1  
 Gi3\_21683787\_x393.....Cugggaacacggggugcc.....  
 1  
 Gi5\_5865493\_x392.....cgGgggaacacggggugccgaacu..... 1  
 Gi5\_5879505\_x385.....cgCgggaacacggggugccgaacu..... 1  
 Gi1a\_4189285\_x379.....ugggaacacggggugccgaacA..... 1  
 Gi3\_21813581\_x374.....gugggaacacggggCgccgaac.....  
 1  
 Gi3\_21813955\_x374.....gaacacggggugccgGacu.....  
 1  
 Gi5\_5898479\_x374.....cgugggaacacggggugcc..... 0  
 Gi2\_7156442\_x374.....cgugggGacacggggugccgaacu..... 1  
 Gi2\_7160930\_x373.....gggaacacggggugccga..... 0  
 Gi1\_2746579\_x371.....cgugggaacacggggugccgaac..... 0  
 Gi3\_21839642\_x370.....gugggaacacggggGgccgaac.....  
 1  
 Gi3\_21844450\_x369.....cggagacgucgugggaacacggg.....  
 0  
 Gi3\_21848878\_x369.....cgugggaacacgUggugccgaacu.....  
 1

Gi3\_21875321\_x366.....cgugAgaacacggggugccgaacu.....  
     1  
 Gi3\_21878975\_x365.....guggAaacacggggugccgaacu.....  
     1  
 Gi3\_21886627\_x364.....ggUacacggggugccgaacu.....  
     1  
 Gi5\_5912906\_x363.....gugggGacacggggugccgaacu..... 1  
 Gi3\_21890988\_x363.....aacacggggGgccgaacu.....  
     1  
 Gi2\_7209198\_x363.....gAgggaacacggggugccgaacu..... 1  
 Gi3\_21888810\_x363.....agacgucgugggaacacggggugcc.....  
     0  
 Gi1\_2755728\_x362.....gugggaacacggggugccgaacuu..... 0  
 Gi2\_7227600\_x359.....aucggagacgucguggga..... 0  
 Gi3\_21920229\_x359.....ggagacgucgugggaacacg.....  
     0  
 Gi1\_2760408\_x359.....gUgaacacggggugccgaacu..... 1  
 Gi2\_7231906\_x358.....cgugggaacacggggugccgaGcu..... 1  
 Gi3\_21924892\_x358.....gugggaaUacggggugccgaacu.....  
     1  
 Gi1\_2762199\_x357.....gUaacacggggugccgaacu..... 1  
 Gi3\_21936329\_x357.....Agugggaacacggggugccgaacu.....  
     1  
 Gi2\_7246532\_x355.....ggGgacgucgugggaacacggggugc..... 1  
 Gi3\_21945230\_x355.....gacgucgugggaacacgggggu.....  
     0  
 Gi3\_21947005\_x355.....cUugggaacacggggugcc.....  
     1  
 Gi3\_21950908\_x354.....gagacgucgugggaacacggggugccgaacu.....  
     0  
 Gi1\_2765402\_x354.....cgucgugggaacacggggugcc..... 0  
 Gi3\_21959043\_x353.....ugggaacacggggugccgCac.....  
     1  
 Gi2\_7257846\_x352.....gugggaacacAgggugccgaacu..... 1  
 Gi2\_7262421\_x351.....Gcgugggaacacggggugccgaacu..... 1  
 Gi1\_2768927\_x350.....gucgugggaacacggggugcc..... 0  
 Gi5\_5957529\_x345.....ugggaacacggggugccgCacu..... 1  
 Gi3\_22045930\_x341.....ucgugggaacacggggugccgaa.....  
     0  
 Gi5\_5971873\_x338.....gGacacggggugccgaacu..... 1  
 Gi3\_22074093\_x337.....gugggGacacggggugccgaac.....  
     1  
 Gi5\_5975582\_x336.....gCgggaacacggggugccgaacu..... 1  
 Gi2\_7332098\_x336.....Ugugggaacacggggugccgaacu..... 1  
 Gi3\_22078811\_x336.....gacgucgugggaacacggggugccgaacA.....  
     1  
 Gi1\_2782276\_x335.....cgugggaacacggggugccga..... 0

Gi5\_5979277\_x335.....ugggaacaNggggugccgaacu..... 1  
 Gi2\_7335117\_x335.....cgugggaGcacggggugccgaacu..... 1  
 Gi3\_22101607\_x334.....Agaacacggggugccgaacu.....  
 1  
 Gi5\_5986971\_x333.....gugggaacacggggCgcccgaacu..... 1  
 Gi5\_5988969\_x333.....cgugggaacacggggugccgaGcu..... 1  
 Gi1\_2785611\_x332.....ggagacgucgugggaacacggggugcc..... 0  
 Gi5\_5992293\_x332.....Cugggaacacggggugccgaacu..... 1  
 Gi3\_22111938\_x332...cgaucggagacgucgugggaacacg.....  
 0  
 Gi3\_22123215\_x331.....Agaacacggggugccgaac.....  
 1  
 Gi3\_22148239\_x328.....ggaacacgNggugccgaac.....  
 1  
 Gi1\_2787918\_x328.....gCgggaacacggggugccg..... 1  
 Gi2\_7368916\_x327.....gUgaacacggggugccgaac..... 1  
 Gi2\_7373163\_x326.....cgAgggaacacggggugccgaacu..... 1  
 Gi5\_6006792\_x326.....gucgugggaacacggggugccgaac..... 0  
 Gi3\_22168136\_x325.....gaacacAgggugccgaacu.....  
 1  
 Gi2\_7381942\_x324.....guAgggaacacggggugccgaacu..... 1  
 Gi5\_6014257\_x323.....cUucgugggaacacggggugccgaacu..... 1  
 Gi1\_2795056\_x322.....aucggagacgucgCgggaacacgg..... 1  
 Gi1\_2797301\_x319.....acgucgugggaacacggggugcc..... 0  
 Gi2\_7410220\_x318...gaucggagacgucgugggaacacggggug..... 0  
 Gi3\_22222813\_x318.....aacGcggggugccgaacu.....  
 1  
 Gi1\_2797939\_x318.....ugggaacacggggugccgaacA..... 1  
 Gi5\_6024830\_x317.....guUggaacacggggugccgaacu..... 1  
 Gi2\_7417202\_x317...aucggagacgucgugggaacacgg..... 0  
 Gi3\_22243432\_x316.....aacacggggugccgaGcu.....  
 1  
 Gi3\_22254787\_x315.....cUugggaacacggggugccga.....  
 1  
 Gi2\_7432954\_x313.....gGgacgucgugggaacacggggugcc..... 1  
 Gi3\_22285171\_x311.....guUggaacacggggugccgaac.....  
 1  
 Gi4\_321304\_x310.....ugggaacacggggugccgaacu..... 0  
 Gi3\_22299763\_x309...cgaucggagacgucguggg.....  
 0  
 Gi2\_7449127\_x309.....gacgucgugggaacacggggugccg..... 0  
 Gi3\_22309644\_x308.....ugggGacacggggugccgaacu.....  
 1  
 Gi2\_7456834\_x308.....cggGgacgucgugggaacac..... 1  
 Gi3\_22318255\_x307.....gggaacacggggugccgaaA.....  
 1

Gi3\_22317027\_x307.....gacgucgugggaacacggggugccg.....  
     0  
 Gi5\_6054155\_x307.....gugggaacacggggugccgaGcu..... 1  
 Gi2\_7460519\_x307.....gGgggaacacggggugccg..... 1  
 Gi3\_22329900\_x306.....cgugggaacacgAggugccgaacu.....  
     1  
 Gi2\_7465729\_x306.....cgugggaacacggggCgccgaacu..... 1  
 Gi2\_7477315\_x304.....ucggagacgucgugggaaca..... 0  
 Gi3\_22354863\_x303.....Uggaacacggggugccgaa.....  
     1  
 Gi3\_22349712\_x303.....ggaacacggggugccgCacu.....  
     1  
 Gi3\_22384377\_x300.....ggaacacggggugccgCac.....  
     1  
 Gi3\_22378677\_x300.....ugggaGcacggggugccgaacu.....  
     1  
 Gi5\_6073549\_x299.....cgucgugggaacacggggugccgaacA..... 1  
 Gi2\_7521375\_x295.....Uugggaacacggggugccgaa..... 1  
 Gi3\_22447160\_x293.....gaacacggggugccAaacu.....  
     1  
 Gi3\_22441300\_x293.....gucgugggaacacggggugc.....  
     0  
 Gi2\_7536057\_x292.....gugggaacacggggugcUgaacu..... 1  
 Gi3\_22461473\_x291.....ggUacacggggugccgaac.....  
     1  
 Gi2\_7543054\_x291...cgaucggagacgucgugg..... 0  
 Gi3\_22467875\_x291.....ugggaacacggggCgccgaacu.....  
     1  
 Gi3\_22478029\_x290.....ggaacacggggCgccgaacu.....  
     1  
 Gi5\_6101490\_x290.....ucggagacgucgugggaacacg..... 0  
 Gi2\_7548566\_x289.....Agaacacggggugccgaac..... 1  
 Gi2\_7556077\_x288.....ggGgacgucgugggaaca..... 1  
 Gi3\_22500808\_x287.....uCggaacacggggugccgaacu.....  
     1  
 Gi3\_22522274\_x285.....gugggaacGcggggugccgaac.....  
     1  
 Gi3\_22526264\_x284.....cgugggaaUacggggugccgaacu.....  
     1  
 Gi2\_7580393\_x284...gaucggagacgucgugggaacacggggugcc..... 0  
 Gi3\_22534784\_x284...gaucggagacgucgugggaacacggggugc.....  
     0  
 Gi3\_22547230\_x282.....cUucgugggaacacggggugcc.....  
     1  
 Gi1\_2845298\_x281.....Gcgugggaacacggggugccgaacu..... 1  
 Gi2\_7605185\_x280.....ugggaacacggggugccgCacu..... 1

Gi3\_22562991\_x280....gaucggagacgucgugggaacacggggugcc.....  
 0  
 Gi5\_6138683\_x279.....gagacgucgugggaacacggggugccgaacu..... 0  
 Gi2\_7608536\_x279.....aucggGgacgucgugggaacacggggugcc..... 1  
 Gi3\_22579204\_x279.....ugggaacGcggggugccgaacu.....  
 1  
 Gi3\_22583102\_x278.....aacacggggugccGacu.....  
 1  
 Gi3\_22611622\_x276.....ugggaacNggggugccgaac.....  
 1  
 Gi3\_22607482\_x276.....gugggaacacggggAgccgaacu.....  
 1  
 Gi2\_7635117\_x275.....cUucgugggaacacggggugccgaacu..... 1  
 Gi2\_7632642\_x275.....cgugUgaacacggggugccgaacu..... 1  
 Gi3\_22620429\_x275.....gugggaacacgggAugccgaacu.....  
 1  
 Gi1\_2854984\_x274.....Caacacggggugccgaacu..... 1  
 Gi3\_22626184\_x274.....cgugggaCcacggggugccgaacu.....  
 1  
 Gi2\_7641697\_x274.....gucgugggaacacggggugccga..... 0  
 Gi1\_2853614\_x274.....ucggagacgucgugggaacacg..... 0  
 Gi3\_22634390\_x273.....gagacgucgugggaacacggggugccgaac.....  
 0  
 Gi2\_7642791\_x273.....ucggagacgucgugggaacacggggugcc..... 0  
 Gi2\_7655585\_x271.....cgugggaacGcggggugccgaacu..... 1  
 Gi5\_6167436\_x269.....Uggaacacggggugccgaac..... 1  
 Gi3\_22677752\_x269.....cgugggaacacggggUaccgaacu.....  
 1  
 Gi3\_22672641\_x269.....gugggaaAacggggugccgaacu.....  
 1  
 Gi3\_22673179\_x269.....gugggaacacggggugccGac.....  
 1  
 Gi2\_7667997\_x269.....aucggGgacgucgugggaacacggggg..... 1  
 Gi2\_7676042\_x267.....gacgucgugggaacacggggg..... 0  
 Gi5\_6173063\_x267.....gugggaacGcggggugccgaacu..... 1  
 Gi3\_22694116\_x267.....gugggaacacggggugccgaacG.....  
 1  
 Gl1a\_4420290\_x267.....gUaacacggggugccgaacu..... 1  
 Gi2\_7691476\_x265.....gacgucgugggaacacggggugc..... 0  
 Gi5\_6184234\_x264.....cgugggGacacggggugccgaacu..... 1  
 Gi2\_7699399\_x263.....ucggagacgucgugggaacacggggugc..... 0  
 Gi5\_6193187\_x262.....gugggaGcacggggugccgaacu..... 1  
 Gi5\_6197633\_x261.....acgucgugggaacacggggugccgaac..... 0  
 Gi5\_6196067\_x261.....cgugggaacacggggugccGacu..... 1  
 Gi5\_6197111\_x261.....Ugugggaacacggggugccgaacu..... 1  
 Gi2\_7719813\_x260.....aucggGgacgucgugggaa..... 1

Gi3\_22783220\_x259.....acacggggugccgaacuu.....  
 0  
 Gi2\_7724223\_x259.....gGgacgucgugggaacacggggugc..... 1  
 Gi2\_7727071\_x258.....ggaacacgNggugccgaacu..... 1  
 Gi2\_7734292\_x257.....cUugggaacacggggugcc..... 1  
 Gi3\_22807163\_x256.....cgugggaaNacggggugccgaac.....  
 1  
 Gi3\_22809979\_x256.....gGcgugggaacacggggugccgaac.....  
 1  
 Gi2\_7744291\_x255....gaucggagacgucgugggaacacgggg..... 0  
 Gi1\_2887914\_x255.....cgugggaacacggggugccg..... 0  
 Gi5\_6223644\_x254.....cgucgugggaacacggggugccgaac..... 0  
 Gi2\_7753201\_x254.....ugggaacaNggggugccgaacu..... 1  
 Gi3\_22833935\_x254.....ugUgaacacggggugccgaacu.....  
 1  
 Gi3\_22843812\_x253.....gugggUacacggggugccgaacu.....  
 1  
 Gi3\_22846342\_x253.....Aucgugggaacacggggugccgaacu.....  
 1  
 Gi1\_2892483\_x252.....cgCgggaacacggggugcc..... 1  
 Gi1\_2893239\_x252.....gugggaacacggggugccga..... 0  
 Gi3\_22872752\_x250.....ggaacacggggCgccgaac.....  
 1  
 Gi3\_22871752\_x250.....gaacacggggugcUgaacu.....  
 1  
 G1a\_4464036\_x249.....cUugggaacacggggugccgaacu..... 1  
 Gi5\_6242757\_x249.....gGgggaacacggggugccgaac..... 1  
 Gi2\_7783342\_x249....aucggGgacgucgugggaacacgg..... 1  
 Gi5\_6240516\_x249.....cgAgggaacacggggugccgaacu..... 1  
 Gi2\_7790041\_x248.....cCugggaacacggggugccgaacu..... 1  
 Gi2\_7787561\_x248.....uUggaacacggggugccgaac..... 1  
 Gi3\_22906604\_x248.....Uacgucgugggaacacggggugccgaacu.....  
 1  
 G1a\_4469990\_x247.....ggaacacggggugccgaacA..... 1  
 Gi1\_2904701\_x246.....aGcacggggugccgaacu..... 1  
 Gi3\_22922900\_x246.....gugggaacacggggugccgUacu.....  
 1  
 Gi1\_2906915\_x246.....ggagacgucgugggaacacggggugccg..... 0  
 Gi2\_7804100\_x246.....aGcacggggugccgaacu..... 1  
 Gi3\_22939106\_x245....Uaucggagacgucgugggaacacggg.....  
 1  
 G1a\_4475643\_x245.....gugggaacacggggugccg..... 0  
 Gi3\_22937146\_x245.....ugggaacacggggugccgU.....  
 1  
 Gi3\_22952543\_x244.....acgucgugggaacacggg.....  
 0  
 Gi5\_6261217\_x244.....aacacgggNugccgaacu..... 1



Gi2\_7809735\_x244.....gagacgucguggaacacggggugcc..... 0  
 Gi1\_2912295\_x243.....uggaacacggggugccgaacu..... 0  
 Gi1\_2915203\_x242.....aucggagacgucguggaacacggggugcc..... 0  
 Gi2\_7823837\_x242.....aucggagacgucguggaacacgggg..... 0  
 Gi3\_22973653\_x242.....cguggaacacggggugUcgaacu.....  
     1  
 Gi3\_22984514\_x241.....gggaacacggggugccgCacu.....  
     1  
 Gi2\_7833252\_x241.....guggaacacggggugccAaacu..... 1  
 Gi3\_22993410\_x240.....cgggagacgucguggaacac.....  
     0  
 G1a\_4487024\_x239.....aucggagacgucgugga..... 0  
 Gi2\_7844045\_x239.....gggaacacNgggugccgaacu..... 1  
 Gi2\_7842372\_x239.....gugggaacaUggggugccgaacu..... 1  
 Gi3\_23001553\_x239.....aaAacggggugccgaacu.....  
     1  
 Gi3\_23016100\_x238.....gugggaacCggggugccgaac.....  
     1  
 Gi3\_23014672\_x238.....cUugggaacacggggugc.....  
     1  
 Gi2\_7851431\_x238.....gugggaacacggggugccgGacu..... 1  
 Gi3\_23020146\_x238.....guggUaacacggggugccgaac.....  
     1  
 Gi2\_7863743\_x236.....ggaGcacggggugccgaacu..... 1  
 Gi5\_6293819\_x236.....gucguggaacacggggugccgaacA..... 1  
 Gi3\_23037682\_x236.....gugggaacacggggugcAgaacu.....  
     1  
 Gi1\_2930002\_x235.....cguggaacacggggugccgaacu..... 0  
 Gi3\_23052298\_x235.....uggaacacggggugccgaGcu.....  
     1  
 Gi3\_23053003\_x235.....cguggaacacggggugccgaacG.....  
     1  
 Gi2\_7867979\_x235.....gucguggaacacggggugccgaacA..... 1  
 Gi5\_6300402\_x234.....guggaacCcgggugccgaacu..... 1  
 Gi3\_23060757\_x234.....uGguggaacacggggugccgaacu.....  
     1  
 Gi5\_6302507\_x233.....cguggaacacggggugc..... 0  
 Gi1\_2932108\_x233.....Gggaacacggggugccgaacu..... 1  
 Gi3\_23080620\_x233.....ggUaacacggggugccgaacu.....  
     1  
 Gi3\_23082717\_x233.....uUggaacacggggugccg.....  
     1  
 G1a\_4505245\_x233.....ggaacacggggugccgaac..... 0  
 Gi1\_2934434\_x232.....gucguggaacacggggugccgaacA..... 1  
 Gi1\_2934666\_x232.....acgucgCgggaacacggggugccgaacu..... 1  
 Gi2\_7893605\_x231.....gGcguggaacacggggugccgaacu..... 1

Gi3\_23118110\_x230.....gggaacacNgggugccgaac.....  
     1  
 Gi3\_23113050\_x230.....cgugggaacacggggugccgaaAu.....  
     1  
 Gi3\_23136914\_x229.....gaacacggggugccgaacuu.....  
     0  
 Gi2\_7917898\_x227...cgaucggagacgucgugggaacacggg..... 0  
 Gi3\_23178388\_x225....aGcgggagacgucgugggaacacg.....  
     1  
 Gi1\_2949311\_x225.....gaacacggggugccgaac..... 0  
 Gi5\_6336932\_x225.....guggUaacacggggugccgaacu..... 1  
 Gi3\_23192755\_x224.....cgggagacgucgugggaacacgggg.....  
     0  
 Gi3\_23201914\_x223.....gugggaacacggggGgcc.....  
     1  
 G1a\_4530999\_x223.....cgugggaacacggggugc..... 0  
 Gi2\_7955244\_x223.....gugggaacacggUgugccgaacu..... 1  
 Gi5\_6353490\_x222.....cgugggaacacggggCgccgaacu..... 1  
 Gi3\_23225485\_x222....ucgggagacgucgugggaacacggg.....  
     0  
 G1a\_4536999\_x221.....Uggaacacggggugccgaacu..... 1  
 Gi2\_7967227\_x221.....gGgggaacacggggugccga..... 1  
 Gi2\_7968332\_x221.....cgugggaacacggggugcUga..... 1  
 Gi3\_23230130\_x221.....gggagacgucgugggaacacggggugccg.....  
     0  
 Gi3\_23235655\_x221....aGcgggagacgucgugggaacacggg.....  
     1  
 Gi3\_23251068\_x220.....Gcgugggaacacggggugccgaac.....  
     1  
 Gi3\_23244688\_x220.....gugggaGcacggggugccgaac.....  
     1  
 Gi3\_23245788\_x220.....ggaGcacggggugccgaacu.....  
     1  
 Gi3\_23256763\_x219.....gugggaCcacggggugccgaacu.....  
     1  
 Gi5\_6370944\_x219.....gaacacggNgugccgaacu..... 1  
 Gi2\_7983941\_x219.....aacacggggugccgaGcu..... 1  
 Gi2\_7983284\_x219.....Agaacacggggugccgaacu..... 1  
 Gi3\_23276622\_x217.....gagacgucgugggaacacggggg.....  
     0  
 Gi2\_7993097\_x217.....ggGgacgucgugggaacacg..... 1  
 Gi2\_8005442\_x216.....gGacacggggugccgaacu..... 1  
 G1a\_4550990\_x216.....gugggaacacggggugccgaacA..... 1  
 Gi5\_6392467\_x216.....cgucgugggaacacggggugc..... 0  
 Gi3\_23326407\_x214.....gugggaacacggggugccgaaUu.....  
     1  
 Gi4\_350396\_x213.....gugggaacacggggugccgaa..... 0

Gi1\_2979521\_x213.....aucggagacgucgugggaacacggggu..... 0  
 Gi3\_23348767\_x212.....cgugggaacacggAgugccgaacu.....  
 1  
 Gi3\_23345587\_x212.....cgugggUacacggggugccgaacu.....  
 1  
 Gi5\_6416161\_x211.....cgugUgaacacggggugccgaacu..... 1  
 Gi1\_2982062\_x211.....gggaacacggggugccgaacuu..... 0  
 Gi3\_23363588\_x211.....gugggaacacggggugccgaCc.....  
 1  
 Gi2\_8043172\_x211.....gugggaacacggggUaccgaacu..... 1  
 Gi3\_23382537\_x210.....gugggaacaUggggugcc.....  
 1  
 Gi2\_8052213\_x210.....gagacgucgugggaacacggggugc..... 0  
 Gi2\_8058071\_x209.....ucgugggaacacggggugccgaa..... 0  
 Gi5\_6424997\_x209.....aucggagacgucgugggaacacggg..... 0  
 Gi2\_8068484\_x208.....ggGgacgucgugggaacacggggu..... 1  
 Gi1\_2988772\_x208.....cgucgCgggaacacggggugcc..... 1  
 Gi3\_23404915\_x208.....ucgugggaacacggggugccga.....  
 0  
 Gi2\_8067652\_x208.....gugggaacacgAgggugccgaacu..... 1  
 Gi2\_8075951\_x207.....cgucgugggaacacggg..... 0  
 Gi3\_23420689\_x207.....gggaacacggggCgccgaacu.....  
 1  
 Gi3\_23429590\_x206.....agacgucgugggaacacggg.....  
 0  
 Gi3\_23442975\_x205.....Ugaacacggggugccgaa.....  
 1  
 Gi3\_23444820\_x205.....gAgggaacacggggugccgaac.....  
 1  
 Gi1\_2997669\_x205.....cggagacgucgugggaacacggggugcc..... 0  
 Gi3\_23459966\_x204.....Ggggaacacggggugccgaa.....  
 1  
 Gi2\_8098395\_x204.....gugAgaacacggggugccgaacu..... 1  
 Gi2\_8107965\_x203.....gucgugggaacacggggugccg..... 0  
 Gi3\_23467508\_x203.....Ggggaacacggggugccga.....  
 1  
 Gi3\_23466899\_x203.....gggaGcacggggugccgaacu.....  
 1  
 Gi3\_23477049\_x203....Uaucggagacgucgugggaacacggggu.....  
 1  
 Gi1\_3004409\_x203.....cgugggaacacggggugccgaacA..... 1  
 Gi3\_23488784\_x202.....gaacacggAgugccgaacu.....  
 1  
 Gi3\_23493632\_x202.....cggagacgucgugggaacacggggugccga.....  
 0  
 Gi5\_6470819\_x202.....aacacggggCgccgaacu..... 1  
 Gi2\_8120901\_x201.....guggAaacacggggugccgaacu..... 1

Gi3\_23502492\_x201.....ucgugggaacacggggugcc.....  
     0  
 Gi3\_23523331\_x200.....cgugggaacacggggugccgaaUu.....  
     1  
 Gi2\_8132932\_x200.....cgugggaaUacggggugccgaacu..... 1  
 Gi3\_23518931\_x200.....cgGgggaacacggggugccgaac.....  
     1  
 G1a\_4602587\_x199.....uUggaacacggggugccgaacu..... 1  
 Gi2\_8142888\_x198.....ggUacacggggugccgaacu..... 1  
 Gi2\_8150412\_x198.....ucgugggaacacggggugc..... 0  
 Gi3\_23558821\_x197.....gAaacacggggugccgaacu.....  
     1  
 Gi3\_23564928\_x197.....gggGacacggggugccgaacu.....  
     1  
 Gi5\_6495719\_x197.....cgugggaacacggggugccgaCcu..... 1  
 Gi3\_23579069\_x196.....Aggaacacggggugccgaac.....  
     1  
 Gi3\_23605197\_x194.....acgucgugggaacacggggugccg.....  
     0  
 Gi5\_6521848\_x193.....guAggaacacggggugccgaacu..... 1  
 Gi2\_8199875\_x192.....cAugggaacacggggugccgaacu..... 1  
 Gi3\_23638576\_x192.....gUgaacacggggugccgaa.....  
     1  
 Gi2\_8200451\_x192.....gugggaaAacggggugccgaacu..... 1  
 Gi2\_8202747\_x191.....gagacgucgugggaacacggggugccg..... 0  
 Gi3\_23646609\_x191.....cguggAaacacggggugccgaacu.....  
     1  
 Gi1\_3035987\_x191.....cUucgugggaacacggggugccgaacu..... 1  
 Gi1\_3038462\_x190.....gGacacggggugccgaacu..... 1  
 Gi3\_23659185\_x190.....gugggaacacggggugccAaac.....  
     1  
 Gi3\_23677007\_x189...cgaucggagacgucgugg.....  
     0  
 Gi2\_8225558\_x189.....gacgucgugggaacacggggugccgaac..... 0  
 Gi3\_23680787\_x189.....guAggaacacggggugccgaac.....  
     1  
 Gi1\_3042249\_x188.....acgucgugggaacacggggugccg..... 0  
 Gi3\_23712512\_x187.....gugggaacacAgggugccgaac.....  
     1  
 Gi4\_363236\_x187.....ucgugggaacacggggugccgaacu..... 0  
 Gi1\_3045436\_x187.....Uucgugggaacacggggugccgaacu..... 1  
 Gi2\_8238546\_x187.....ggagacgucgugggaacacggggug..... 0  
 Gi3\_23717926\_x186.....cgCgggaacacggggugccgaac.....  
     1  
 Gi5\_6562038\_x186.....Ugaacacggggugccgaac..... 1  
 Gi2\_8248078\_x186.....gugggaacacggAgugccgaacu..... 1  
 G1a\_4647473\_x186...cgaucggagacgucgugg..... 0

Gi2\_8265331\_x185.....gagacgucguggaacacggggug..... 0  
 Gi3\_23738900\_x185.....gugggaacacggggugccgaaA.....  
 1  
 Gi1\_3053794\_x185.....aucggagacgucgCgggaacacg..... 1  
 Gi3\_23752161\_x184.....gaacacggggguAccgaacu.....  
 1  
 Gi3\_23745169\_x184.....gCgaacacggggugccgaacu.....  
 1  
 Gi3\_23758969\_x184....gaucggagacgucguggaac.....  
 0  
 Gi5\_6582202\_x184.....ugggaacacggggugccgaacuu..... 0  
 Gi2\_8267916\_x184.....gugggaacacggggugccgaacuu..... 0  
 Gi2\_8278387\_x183.....ugggaacacggggugccgaacuu..... 0  
 Gi5\_6588611\_x183.....gAgggaacacggggugccgaacu..... 1  
 Gi3\_23763182\_x183.....gugggaacacggggugccgaU.....  
 1  
 G1a\_4660908\_x182.....gucguggaacacggggugccgaacu..... 0  
 Gi5\_6597354\_x181.....agacgucguggaacacggggugccgaac..... 0  
 Gi3\_23800118\_x181.....cUugggaacacggggugccgaa.....  
 1  
 Gi3\_23790706\_x181.....ugggaacacAgggugccgaacu.....  
 1  
 Gi3\_23795955\_x181.....cgugggaacacggggGgccgaacu.....  
 1  
 G1a\_4664176\_x181....gaucggagacgucguggaacacggg..... 0  
 Gi3\_23791973\_x181.....Cgaacacggggugccgaac.....  
 1  
 Gi3\_23791611\_x181.....cUucguggaacacggggugccgaac.....  
 1  
 Gi5\_6604946\_x180.....ugggaacacggggugccgaacuA..... 1  
 Gi3\_23807333\_x180.....gaacaUggggugccgaacu.....  
 1  
 Gi3\_23809853\_x180.....gggaacacggggGgccgaacu.....  
 1  
 Gi5\_6616796\_x179cugcgaucggagacgucgA..... 1  
 Gi2\_8311368\_x179.....gggaacacggggugccgaCcu..... 1  
 Gi3\_23843822\_x178.....gggaacacggggugccgaGcu.....  
 1  
 Gi5\_6624636\_x178....aucggagacgucguggaacacggggugc..... 0  
 Gi3\_23836346\_x178.....cgugggaacacggggugccgGacu.....  
 1  
 Gi5\_6622500\_x178.....cgugggaGcacggggugccgaacu..... 1  
 Gi3\_23843110\_x178.....aacacAgggugccgaacu.....  
 1  
 Gi2\_8316379\_x178.....ggaacacggggugccgCacu..... 1  
 Gi3\_23862248\_x177.....cUugggaacacggggugccg.....  
 1

Gi1\_3077791\_x177.....gaacaUggggugccgaacu..... 1  
 Gi3\_23848973\_x177.....cgugggaacacggggugcAgaacu.....  
 1  
 Gi3\_23873169\_x176.....gugggaacacggggugccgGac.....  
 1  
 Gi3\_23874753\_x176.....gaaUacggggugccgaacu.....  
 1  
 Gi1\_3079561\_x176.....ucgugggaacacggggugc..... 0  
 Gi3\_23866657\_x176.....gggaacGcggggugccgaacu.....  
 1  
 Gi2\_8337988\_x176.....Ugagacgucgugggaacacggggugcc..... 1  
 Gi2\_8348332\_x175.....ggagacgucgugggaacac..... 0  
 Gi3\_23881427\_x175.....gaacacggggGgccgaacu.....  
 1  
 Gi3\_23885102\_x175.....cgugggaacacggggugccgCac.....  
 1  
 Gi2\_8343432\_x175.....Aggaacacggggugccgaacu..... 1  
 Gi1\_3086232\_x175.....Gacacggggugccgaacu..... 1  
 Gi5\_6641405\_x175.....Aaacacggggugccgaacu..... 1  
 Gi5\_6642805\_x175.....cgugggaacGcggggugccgaacu..... 1  
 Gi2\_8346057\_x175.....cgugggaacacAgggugccgaacu..... 1  
 Gi3\_23905164\_x174.....ugggaacacggggugcUgaacu.....  
 1  
 Gi5\_6653442\_x174.....aacacggggugccgaGcu..... 1  
 Gi3\_23900640\_x174.....aGcgggagacgucgugggaacacggggg.....  
 1  
 Gi3\_23913853\_x173.....cgugggaacacggggugccgaUc.....  
 1  
 Gi2\_8368473\_x173.....gugggaaUacggggugccgaacu..... 1  
 Gi3\_23917659\_x173.....gugggaacacggggugAcgaacu.....  
 1  
 Gi1\_3091278\_x173.....ugggaacacggggugccga..... 0  
 Gi5\_6661059\_x173.....uUggaacacggggugccgaac..... 1  
 Gi3\_23936463\_x172.....ggagacgucgugggaacacggggugccgaacu.....  
 0  
 Gi5\_6665194\_x172.....gugggaacacAgggugccgaacu..... 1  
 G1a\_4693658\_x172.....ucgugggaacacggggugccgaacu..... 0  
 Gi5\_6668462\_x172.....cCugggaacacggggugccgaacu..... 1  
 Gi1\_3095076\_x172.....ucgugggaacacggggugccga..... 0  
 Gi2\_8386146\_x171.....ggGgacgucgugggaacacggg..... 1  
 Gi3\_23948989\_x171.....gucgugggaacacggggugccgaa.....  
 0  
 Gi5\_6671547\_x171.....acgucgugggaacacggggugccgaacA..... 1  
 G1a\_4699299\_x170.....gggaacacggggugccgaacA..... 1  
 Gi3\_23965713\_x170.....gaacacggggugUcgaacu.....  
 1  
 Gi5\_6679067\_x170.....gaUcacggggugccgaacu..... 1

Gi3\_23971493\_x170.....ucggagacgucgugggaaca.....  
 0  
 Gi3\_23993496\_x169.....gugggaacNcggggugcc.....  
 1  
 Gi3\_23991806\_x169.....gagacgucgugggaacacggggugccg.....  
 0  
 Gi3\_23995524\_x169.....Gucggagacgucgugggaacacg.....  
 1  
 Gi2\_8407000\_x168....Uaucggagacgucgugggaacacggggu..... 1  
 Gi5\_6698334\_x168.....gUaacacggggugccgaac..... 1  
 Gi2\_8417048\_x167.....cggGgacgucgugggaacacggg..... 1  
 Gi1\_3109978\_x167.....cgCgggaacacggggugccga..... 1  
 Gi3\_24023497\_x167.....gggaacacggggugccgaCc.....  
 1  
 Gi5\_6701015\_x167.ugcgaucggagacgucguggg..... 0  
 Gi3\_24017819\_x167.....ggaacGcggggugccgaacu.....  
 1  
 Gi2\_8414376\_x167.....Gacacggggugccgaacu..... 1  
 Gi3\_24053806\_x165.....gugggaacacggggugccgaaAu.....  
 1  
 Gi3\_24051496\_x165.....gugggaacacggggugccgaacuA.....  
 1  
 Gi5\_6725660\_x164.....gugggaacacggggugccgCacu..... 1  
 Gi2\_8455644\_x163.....agacgucgugggaacacggggugccg..... 0  
 Gi2\_8468799\_x162.....cUgagacgucgugggaacacggggugcc..... 1  
 Gi5\_6740006\_x162.....cgucgugggaacacggggugccga..... 0  
 Gi1\_3133296\_x161.....cgugggaacacggggugccgU..... 1  
 Gi1\_3133457\_x161.....gagacgucgugggaacacggggugccgaacu..... 0  
 Gi3\_24103978\_x161.....acgucgugggaacacggggugccga.....  
 0  
 Gi3\_24103817\_x161.....gggaacacgggUugccgaacu.....  
 1  
 Gi1\_3136516\_x161.....aucggagacgucgugggaacacgg..... 0  
 Gi1\_3140198\_x160.....ucgugggaacacggggugccgaacA..... 1  
 Gi3\_24128212\_x160.....gucgugggaacacggggguA.....  
 1  
 Gi1\_3138118\_x160.....cgCgggaacacggggugc..... 1  
 Gi3\_24120212\_x160.....cgugggaacacggggugccgUacu.....  
 1  
 Gi3\_24117172\_x160.....agacgucgugggaacacggggugccga.....  
 0  
 Gi2\_8496818\_x159.....cgugggaacacgUggugccgaacu..... 1  
 Gi2\_8492525\_x159.....cgucgugggaacacggggugccgaa..... 0  
 Gi3\_24140486\_x159.....aacacggggAgccgaacu.....  
 1  
 Gi3\_24147800\_x159.....gaacacggggAgccgaacu.....  
 1

Gi3\_24153188\_x158.....gugggaacacggggugcUgaac.....  
     1  
 Gi2\_8501089\_x158.....Uacgucgugggaacacggggugccgaacu..... 1  
 Gi3\_24155874\_x158.....Augggaacacggggugcc.....  
     1  
 Gi1\_3147341\_x158.....aucggagacgucgugggaacacggggugc..... 0  
 Gi1\_3146551\_x158.....ucgugggaacacggggugccg..... 0  
 Gi2\_8512749\_x157.....gugggaacNcggggugccgaac..... 1  
 Gi3\_24173187\_x157.....gagacgucgugggaacac.....  
     0  
 Gi5\_6784945\_x157.....gugggaacacggggugccgaCcu..... 1  
 Gi2\_8525884\_x156.....cggGgacgucgugggaacacggggugcc..... 1  
 Gi2\_8518084\_x156.....aacacgggNugccgaacu..... 1  
 Gi4\_380000\_x156.....acgucgugggaacacggggugccgaacu..... 0  
 Gi3\_24179914\_x156.....gAgaacacggggugccgaacu.....  
     1  
 Gi3\_24183814\_x156.....Agggaacacggggugccgaacu.....  
     1  
 Gi5\_6786980\_x156.....aUcacggggugccgaacu..... 1  
 Gi3\_24205432\_x155.....ucgugggaNcacggggugccgaacu.....  
     1  
 Gi3\_24219943\_x154.....Uacacggggugccgaacu.....  
     1  
 Gi5\_6806050\_x154.ugcgaucggagacgucgugga..... 0  
 Gi3\_24218865\_x154.....ugggaacacggggugccAaacu.....  
     1  
 G1a\_4751489\_x154...gaucggagacgucgugggaacacggggg..... 0  
 Gi3\_24221021\_x154.....Ugugggaacacggggugccgaac.....  
     1  
 Gi3\_24221175\_x154.....ucggagacgucgugggaacac.....  
     0  
 Gi3\_24215169\_x154.....ucgugUgaacacggggugccgaacu.....  
     1  
 Gi3\_24212397\_x154.....gagacgucgugggaacacg.....  
     0  
 Gi3\_24229013\_x153.....gggaacacggggugccgaacuu.....  
     0  
 Gi5\_6811577\_x153.....gGcgugggaacacggggugccgaacu..... 1  
 Gi2\_8565872\_x152.....aucggGgacgucguggga..... 1  
 Gi3\_24240636\_x152.....gacgucgugggaacacgg.....  
     0  
 Gi3\_24252340\_x152...gaucggagacgucgugggaaca.....  
     0  
 Gi3\_24251124\_x152.....ggGacacggggugccgaacu.....  
     1  
 Gi3\_24241700\_x152.....aacacggggugccgCacu.....  
     1



Gi1\_3172630\_x151.....Ggugggaacacggggugccgaacu..... 1  
 Gi2\_8583082\_x150....gaucggagacgucgugggaac..... 0  
 Gi5\_6838384\_x150....aucggagacgucgugggaacacgggg..... 0  
 Gi3\_24287758\_x150.....Uacgucgugggaacacggggugccgaac.....  
     1  
 Gi5\_6836284\_x150.....uGgugggaacacggggugccgaacu..... 1  
 Gi3\_24287008\_x150....gaucggagacgucguggg.....  
     0  
 Gi3\_24285808\_x150.....gugggCacacggggugccgaacu.....  
     1  
 Gi2\_8589668\_x149.....cgugAgaacacggggugccgaacu..... 1  
 Gi5\_6845857\_x149.....gaacacggggCgccgaacu..... 1  
 Gi3\_24294029\_x149.....cgugggaacCcgggugccgaacu.....  
     1  
 Gi3\_24302224\_x149.....gugggaacacggggUAccgaac.....  
     1  
 Gi4\_383349\_x149.....gggaacacggggugccgaacu..... 0  
 Gi3\_24311710\_x148.....ucgugggaacacggggugccgCacu.....  
     1  
 Gi2\_8599786\_x148.....cgucgugggaacacggggug..... 0  
 Gi2\_8606742\_x148.....gugggaacacggggugUcgaacu..... 1  
 Gi5\_6862596\_x147.....cAugggaacacggggugccgaacu..... 1  
 Gi3\_24328247\_x147...cgaucggagacgucgugggaacacgggg.....  
     0  
 Gi2\_8617342\_x147.....Ggugggaacacggggugccgaac..... 1  
 Gi5\_6860391\_x147.....cgucgugggaacacggggugcc..... 0  
 Gi3\_24349184\_x146.....ggaacacggggugccgaGcu.....  
     1  
 Gi2\_8625387\_x146.....gugggaacacggggAgccgaacu..... 1  
 Gi2\_8622029\_x146....aucggagacgucgugggaa..... 0  
 Gi5\_6883903\_x145....gaucggagacgucgugggaacacgg..... 0  
 Gi1\_3195581\_x145.....acgucgugggaacacggggugccgaacA..... 1  
 Gi5\_6877088\_x145.....cacggggugccgaacuuu..... 0  
 Gi1\_3194131\_x145....aucggagacgucgCgggaaca..... 1  
 Gi3\_24387219\_x144.....ggaGcacggggugccgaac.....  
     1  
 Gi3\_24378003\_x144.....ugggGacacggggugccgaac.....  
     1  
 Gi1\_3206809\_x143.....gacgucgugggaacacggggugcc..... 0  
 Gi5\_6896006\_x143.....ugggGacacggggugccgaacu..... 1  
 Gi2\_8679762\_x141.....ggaacacggggCgccgaacu..... 1  
 Gi3\_24437223\_x141.....cgugggaacacgggAugccgaacu.....  
     1  
 Gi2\_8680326\_x141.....cUugggaacacggggugc..... 1  
 Gi3\_24451933\_x140.....gaacacgAgggugccgaacu.....  
     1  
 Gi1\_3220917\_x140.....gucgugggaacacggggugccgaac..... 0

Gi3\_24447873\_x140.....cgugggaacacggggugccgaGc.....  
     1  
 Gi3\_24440593\_x140.....ggaacacggggugccgaGc.....  
     1  
 Gi3\_24481241\_x138.....cgugggaacacggggugccgaacuA.....  
     1  
 Gi1\_3228266\_x138.....gugggaacacggggugccgaacAu..... 1  
 Gi5\_6944862\_x138.....gacgucgugggaacacggggugccgaac..... 0  
 G1a\_4808926\_x138.....aucggagacgucgugggaacacggggugc..... 0  
 Gi3\_24474755\_x138.....cgaucggagacgucgugggaacacggg.....  
     0  
 Gi3\_24493911\_x137.....ugggaacacggggugccgGacu.....  
     1  
 Gi2\_8724426\_x137.....cgugggaacacggggugcUgaacu..... 1  
 Gi2\_8720316\_x137.....Cgaacacggggugccgaacu..... 1  
 Gi3\_24498432\_x137.....ggagacgucgugggaaca.....  
     0  
 Gi3\_24511428\_x136.....gCaacacggggugccgaacu.....  
     1  
 Gi2\_8726609\_x136.....Uucgugggaacacggggugcc..... 1  
 Gi3\_24511564\_x136.....gggaacacggggugccgCac.....  
     1  
 Gi1\_3238370\_x135.....gucgugggaacacggggug..... 0  
 G1a\_4820247\_x135.....gaucggagacgucguggga..... 0  
 Gi3\_24533529\_x135.....ugggaacacgggUugccgaacu.....  
     1  
 Gi3\_24532584\_x135.....cgAgggaacacggggugccgaac.....  
     1  
 Gi2\_8751502\_x134.....ggGgacgucgugggaacacggggug..... 1  
 Gi3\_24551946\_x134.....Cggaacacggggugccgaac.....  
     1  
 Gi2\_8748554\_x134.....gugggaacacggggGgccgaac..... 1  
 Gi5\_6976522\_x134.....gaucggagacgucgugggaacacggg..... 0  
 Gi3\_24545112\_x134.....Ggucgugggaacacggggugccgaacu.....  
     1  
 Gi5\_6975048\_x134.....Uugggaacacggggugccga..... 1  
 Gi5\_6974914\_x134.....aucggagacgucgugggaacac..... 0  
 Gi3\_24557440\_x134cugcgauccggagacgucg.....  
     0  
 Gi5\_6973574\_x134.....agacgucgugggaacacggggugcc..... 0  
 G1a\_4823877\_x134.....gaucggagacgucguggg..... 0  
 Gi3\_24546988\_x134.....guUggaacacggggugcc.....  
     1  
 Gi3\_24591938\_x132.....gugggaacacggggCgcc.....  
     1  
 Gi1\_3251485\_x132.....gaucggagacgucgugggaacac..... 0  
 Gi2\_8772811\_x132.....ucggagacgucgugggaacacggggu..... 0

Gi2\_8776771\_x132.....Augggaacacggggugccgaac..... 1  
 Gi2\_8774263\_x132.....ucggGgacgucgugggaa..... 1  
 Gi5\_6992079\_x132.....gugggaacacgggguAccgaacu..... 1  
 Gi3\_24612667\_x131.....ucgggagacgucgugggaacacgg.....  
 0  
 Gi2\_8782821\_x131.....cguAggaacacggggugccgaacu..... 1  
 Gi2\_8783607\_x131.....gaucggagacgucgugggaacacgg..... 0  
 Gi2\_8798879\_x130.....agacgucgugggaacacggggugccgaac..... 0  
 Gi3\_24622685\_x130.....gugggaacacggggugccgaUcu.....  
 1  
 G1a\_4837317\_x130.....aucggagacgucgugggaacacggggug..... 0  
 Gi5\_7007422\_x130.....aacacggggugccgaacuuu..... 0  
 Gi2\_8808449\_x129.....gGgggaacacggggugccgaa..... 1  
 Gi2\_8811029\_x129.....cUucgugggaacacggggugcc..... 1  
 Gi5\_7015988\_x129.....uCGgaacacggggugccgaacu..... 1  
 Gi5\_7018439\_x129.....cUugggaacacggggugccgaac..... 1  
 Gi3\_24632551\_x129....Uaucggagacgucgugggaacacg.....  
 1  
 Gi3\_24635002\_x129.....uCGgaacacggggugccga.....  
 1  
 Gi3\_24630745\_x129.....cgggagacgucgugggaacacggggugc.....  
 0  
 Gi5\_7021922\_x129.....ggaacacgNggugccgaacu..... 1  
 Gi2\_8818852\_x128.....cgugggaacaUggggugccgaacu..... 1  
 Gi5\_7025917\_x128.....Agaacacggggugccgaacu..... 1  
 Gi2\_8816548\_x128.....gGgacgucgugggaacac..... 1  
 Gi3\_24663904\_x128.....agacgucgugggaacacggggugccgaacA.....  
 1  
 Gi2\_8820644\_x128.....cgggagacgucgugggaacac..... 0  
 Gi2\_8815012\_x128.....Aaacacggggugccgaacu..... 1  
 Gi5\_7042880\_x127.....gacgucgugggaacacggggugccgaacA..... 1  
 Gi3\_24678899\_x127.....gUaacacggggugccgaa.....  
 1  
 Gi2\_8826761\_x127...cgaucggagacgucgugga..... 0  
 Gi3\_24672803\_x127.....gggaacacgggguAccgaacu.....  
 1  
 Gi3\_24678010\_x127...gcgaucggagacgucgug.....  
 0  
 Gi5\_7045787\_x126.....Uaacacggggugccgaac..... 1  
 Gi1\_3276686\_x126.....gacgucgCgggaacacggggu..... 1  
 Gi5\_7050449\_x126.....ucgugggaacacggggugcc..... 0  
 Gi3\_24694912\_x126.....gugggaacGcggggugcc.....  
 1  
 Gi3\_24684202\_x126.....ucgugggaacacggggCgccgaacu.....  
 1  
 Gi3\_24684454\_x126.....Ccugggaacacggggugccgaac.....  
 1

Gi2\_8843856\_x126.....gugggaacacggggugcAgaacu..... 1  
 Gi3\_24698053\_x125.....gacgucgugggaacacgggg..... 0  
 Gi1\_3280844\_x125.....cgucgugggaacacggggugccgaacA..... 1  
 Gi3\_24700053\_x125.....acgucgugggaacacggggugccgaa..... 0  
 Gi3\_24698928\_x125.....cgugggCacacggggugccgaacu..... 1  
 Gi2\_8852512\_x125.....uGgugggaacacggggugccgaacu..... 1  
 Gi2\_8860512\_x125.....ucggGgacgucgugggaacacggggugc..... 1  
 Gi1\_3283969\_x125.....Ugaacacggggugccgaac..... 1  
 Gi5\_7054093\_x125.....Cgggaacacggggugccgaacu..... 1  
 Gi2\_8864235\_x124.....aucggGgacgucgugggaacacggggug..... 1  
 Gi3\_24724102\_x124.....cgugggaacacggggAgccgaacu..... 1  
 Gi3\_24728070\_x124.....ggGacacggggugccgaac..... 1  
 Gi3\_24729310\_x124.....ggaacacggggugccgaUc..... 1  
 Gi2\_8866467\_x124....Uaucggagacgucgugggaacacggg..... 1  
 Gi5\_7063836\_x124.....ugggaacGcggggugccgaacu..... 1  
 Gi2\_8861383\_x124.....cgugggaacacgAggugccgaacu..... 1  
 Gi5\_7067804\_x124.....uAggaacacggggugccgaacu..... 1  
 Gi3\_24741871\_x123.....cgucgugggaacacggggg..... 0  
 Gi5\_7080021\_x123.....Caacacggggugccgaacu..... 1  
 Gi3\_24742732\_x123.....gCgggaacacggggugccgaa..... 1  
 Gi3\_24735598\_x123.....ugAgaacacggggugccgaacu..... 1  
 Gi3\_24740518\_x123.....gucgugggaacacggggugccgCacu..... 1  
 G1a\_4867154\_x122.....aucggagacgucgugggaacacggggugcc..... 0  
 Gi1\_3294845\_x122.....gaacacggggugccgaacuu..... 0  
 Gi5\_7086884\_x122.....gaucggagacgucgugggaacac..... 0  
 Gi5\_7087128\_x122.....gggaacacggggCgccgaacu..... 1  
 Gi3\_24753393\_x122.....gugggaacNcggggugccga..... 1  
 Gi2\_8892035\_x122.....ucgugggaacacggggugcc..... 0  
 Gi2\_8890083\_x122.....cgugggaacacggggugccAaacu..... 1  
 Gi2\_8903927\_x121.....gaacacggNgugccgaacu..... 1  
 Gi5\_7097702\_x121.....guggAaacacggggugccgaacu..... 1  
 G1a\_4873352\_x121.....gUgaacacggggugccgaacu..... 1  
 Gi2\_8915106\_x120....gaucggGgacgucgugggaa..... 1  
 Gi2\_8907546\_x120.....cgugggaacacggggugUcgaacu..... 1  
 Gi1\_3304766\_x120.....acgucgCgggaacacggggugc..... 1  
 Gi5\_7105063\_x120.....gugggaacaUggggugccgaacu..... 1

Gi3\_24789086\_x120.....ggUaacacggggugccgaac.....  
     1  
 Gi3\_24808060\_x119.....gugggaacUcggggugccgaacu.....  
     1  
 Gi3\_24801039\_x119.....Gucggagacgucgugggaacacggggu.....  
     1  
 Gi5\_7119297\_x119.....ugggaacacggggGgccgaacu..... 1  
 Gi3\_24796398\_x119.....gCaacacggggugccgaac.....  
     1  
 Gi3\_24802586\_x119.....guUgugggaacacggggugccgaacu.....  
     1  
 Gi2\_8929511\_x118.....gugggaacacggggugccgaaUu..... 1  
 Gi3\_24828520\_x118.....gggaacacggggugccgGacu.....  
     1  
 Gi1\_3312863\_x118.....ugggaacacggggugccg..... 0  
 Gi5\_7124289\_x118.....gaucggagacgucgugggaacacg..... 0  
 Gi5\_7126413\_x118.....ggUaacacggggugccgaacu..... 1  
 Gi5\_7124171\_x118.....cgugggaacacAgggugccgaacu..... 1  
 Gi2\_8939069\_x118...cgaucggagacgucgugggaacacg..... 0  
 Gi2\_8941901\_x118.ugcgaucggGgacgucgug..... 1  
 Gi2\_8940131\_x118.....cgugggaCcacggggugccgaacu..... 1  
 Gi5\_7127947\_x118.....aacGcggggugccgaacu..... 1  
 Gi2\_8934349\_x118.....Ggggaacacggggugccgaac..... 1  
 Gi2\_8935883\_x118.....uUggaacacggggugccga..... 1  
 Gi2\_8952902\_x117.....gUagacgucgugggaacacggggugcc..... 1  
 Gi3\_24839769\_x117.....aucggagacgucgugggaacacggggug.....  
     0  
 Gi2\_8954774\_x117.....gugggaacacggggugccgaGc..... 1  
 Gi2\_8948690\_x117.....Agugggaacacggggugccgaacu..... 1  
 Gi2\_8944010\_x117.....cggagacgucgugggaacacggggug..... 0  
 Gi3\_24840471\_x117.....gugggaacaUggggugccgaac.....  
     1  
 Gi5\_7131014\_x117.....gugggaacacggggugccAaacu..... 1  
 Gi2\_8950913\_x117.....Uucgugggaacacacggggugccgaac..... 1  
 Gi2\_8961159\_x116.....gugggUaacacggggugccgaacu..... 1  
 Gi5\_7144314\_x116.....ugggaacacggggugccgaacuuu..... 0  
 Gi2\_8965799\_x116.....cUucgugggaacacggggugccg..... 1  
 Gi3\_24858393\_x116.....aacacggggugcUgaacu.....  
     1  
 Gi3\_24854101\_x116.....gugggaacacggggugccgaacuu.....  
     0  
 Gi1\_3328227\_x115.....Aaacacggggugccgaacu..... 1  
 Gi2\_8972591\_x115.ugcgaucggagacgucgugggaaca..... 0  
 Gi5\_7153437\_x115.....gaacacggggugccgaCcu..... 1  
 Gi3\_24877885\_x115.....Augggaacacggggugccga.....  
     1  
 Gl1a\_4893984\_x115.ugcgaucggagacgucgu..... 0

Gi2\_8968221\_x115.....aaUacggggugccgaacu..... 1  
 Gi3\_24878460\_x115.....cgugggaacUcggggugccgaacu.....  
 1  
 Gi3\_24894705\_x114.....gCgggaacacggggugccga.....  
 1  
 Gi1\_3328686\_x114.....cggagacgucgCgggaacacggggugcc..... 1  
 Gi5\_7167498\_x114.....gugggaacacggggugccgGacu..... 1  
 Gi2\_8985868\_x114.....ggaacacggggugccgaGcu..... 1  
 Gi3\_24896415\_x114.....gucgugggaacacggggCgccgaacu.....  
 1  
 Gi3\_24892653\_x114.....Gucggagacgucgugggaacacggg.....  
 1  
 G1a\_4903123\_x113.....gaacacggggugccgaac..... 0  
 Gi3\_24900732\_x113.....uAggaacacggggugccgaac.....  
 1  
 G1a\_4902897\_x113.....aucggagacgucgugggaacacg..... 0  
 Gi3\_24912371\_x113.....gagacgucgugggaacacggggugcc.....  
 0  
 Gi2\_9000585\_x113.....gugggaacacggggugccgUacu..... 1  
 Gi3\_24905704\_x113.....cUucgugggaacacggggugccg.....  
 1  
 Gi2\_8994935\_x113.....ggagacgucgugggaacacg..... 0  
 Gi5\_7174512\_x113.....gugggaacacggggugcUgaacu..... 1  
 Gi2\_9002275\_x112.....gugggaacacggggugAcgaacu..... 1  
 G1a\_4907071\_x112.....Augggaacacggggugccgaacu..... 1  
 Gi3\_24919826\_x112.....cgugggaacacggggugccgaCc.....  
 1  
 Gi3\_24935058\_x112.....gggaacacggggCgccgaac.....  
 1  
 Gi2\_9002499\_x112.....cgugggaaNacggggugccgaac..... 1  
 Gi2\_9008435\_x112.....Ggacgucgugggaacacggggugcc..... 1  
 Gi2\_9028023\_x111.....cUugggaacacggggugccga..... 1  
 Gi2\_9023361\_x111.....gggaacacggggugccgCacu..... 1  
 Gi1\_3345348\_x111.....gaucggagacgucgCgggaacacgg..... 1  
 Gi3\_24952381\_x111.....aacacggggugccAaacu.....  
 1  
 Gi5\_7192724\_x111.....cgugggaacacgUggugccgaacu..... 1  
 Gi3\_24952936\_x111.....ugggaacaUggggugccgaacu.....  
 1  
 Gi1\_3345459\_x111.....ucggagacgucgugggaacacggggugcc..... 0  
 Gi5\_7192613\_x111.....acgucgugggaacacggggugcc..... 0  
 Gi1\_3345237\_x111.....aacacgggNugccgaacu..... 1  
 G1a\_4913099\_x111.....gugggaacacggggugccgaa..... 0  
 Gi2\_9024915\_x111.....cgaucggagacgucgugggaaca..... 0  
 Gi2\_9039576\_x110.....cgucgugggaacacggggugccgaacA..... 1  
 Gi3\_24965812\_x110.....ugUgaacacggggugccgaac.....  
 1

Gi1\_3347334\_x110....gaucggagacgucguggg..... 0  
 Gi1\_3346234\_x110.....ugggaacacggggugccgCacu..... 1  
 Gi3\_24977738\_x109.....gucgugggaacacggggug.....  
 0  
 Gi3\_24984387\_x109.....gugggaacaAggggugccgaacu.....  
 1  
 Gi2\_9051458\_x109...cgaucggagacgucgugggaacacggggug..... 0  
 Gi1\_3354560\_x109.....gugggaacNcggggugccgaacu..... 1  
 Gi2\_9039686\_x109.....ggUacacggggugccgaac..... 1  
 Gi2\_9042956\_x109.....gugggaacacggggugccgaaAu..... 1  
 Gi3\_24999015\_x108.....ggagacgucgugggaacacgg.....  
 0  
 G1a\_4927650\_x108.....cgucgugggaacacggggugccgaacu..... 0  
 Gi3\_24996639\_x108.....cgugggGacacggggugccgaac.....  
 1  
 Gi1\_3356292\_x108.....Cgggaacacggggugccga..... 1  
 Gi3\_24996855\_x108.....aUacgucgugggaacacggggugccgaacu.....  
 1  
 Gi3\_24998367\_x108.....ggagacgucgugggaacacggggugccgaac.....  
 0  
 Gi2\_9060966\_x108.....gugggaacacggggGgccgaac..... 1  
 Gi5\_7214765\_x108.....ugggaacacggggugccgGcu..... 1  
 Gi2\_9074254\_x107.....gugggGacacggggugccgaac..... 1  
 Gi5\_7230912\_x107.....cgugggaacacggggugccg..... 0  
 Gi5\_7228130\_x107.....gggaacacggggugccgCcu..... 1  
 G1a\_4931723\_x107....aucggagacgucgugggaacacgg..... 0  
 Gi1\_3360376\_x107.....Augggaacacggggugccgaacu..... 1  
 Gi3\_25006346\_x107.....ggaacacggggugccgGacu.....  
 1  
 Gi2\_9063875\_x107.....acgucgugggaacacggg..... 0  
 Gi3\_25038824\_x106.....ggaacGcggggugccgaac.....  
 1  
 Gi2\_9083588\_x106.....gacgucgugggaacacggg..... 0  
 Gi3\_25032570\_x106....gaucggagacgucguggga.....  
 0  
 Gi2\_9084648\_x106.....ggagacgucgugggaacacggggugccg..... 0  
 G1a\_4935758\_x106....aucggagacgucgugggaa..... 0  
 Gi1\_3368784\_x106.....ggaacacggggugccgaa..... 0  
 Gi5\_7243890\_x106.....Uacgucgugggaacacggggugccgaacu..... 1  
 Gi3\_25026846\_x106.....cggagacgucgugggaacacgg.....  
 0  
 Gi5\_7254194\_x105.....cgucgugggaacacggggugccgaa..... 0  
 Gi3\_25049656\_x105.....Cgggaacacggggugccgaac.....  
 1  
 Gi5\_7257745\_x104.....Aggaacacggggugccgaacu..... 1  
 Gi5\_7260761\_x104.....Uugggaacacggggugcc..... 1

Gi3\_25063253\_x104.....cgugggaacacggggugAcgaacu.....  
     1  
 Gi2\_9101229\_x104.....cgugggaacacggguAccgaacu..... 1  
 Gi5\_7256497\_x104.....gaacGcggggugccgaacu..... 1  
 Gi3\_25075837\_x104.....ugggaacacggggGgccgaac.....  
     1  
 Gi3\_25070429\_x104.....gCgggaacacggggugcc.....  
     1  
 Gi3\_25073965\_x104.....gggaacacggggugccgaGc.....  
     1  
 Gi2\_9107781\_x104.....gCgggaacacggggugccgaac..... 1  
 Gi2\_9104349\_x104.....ggaacacggggugccGacu..... 1  
 Gi5\_7270286\_x103.....gaacacggggugccgaGcu..... 1  
 Gi4\_416893\_x103.....aacacggggugccgaacu..... 0  
 Gi5\_7266372\_x103.....aucggagacgucguggaaca..... 0  
 Gi2\_9116040\_x103.....gugggaacacgggAugccgaacu..... 1  
 Gi5\_7271213\_x103.....gggaacacNgggugccgaacu..... 1  
 Gi1\_3379019\_x103.....gggaacacggggugccgaac..... 0  
 Gi1\_3381182\_x103.....cgucgugggaacacggggugccgaac..... 0  
 Gi2\_9118409\_x103.....ggaacacgNggugccgaac..... 1  
 Gi3\_25090890\_x103...cgaucggagacgucgugggaacacgg.....  
     0  
 Gi5\_7273479\_x103.....gugggaacacggUgugccgaacu..... 1  
 Gi5\_7268432\_x103.....aacacggggugccGacu..... 1  
 Gi5\_7286464\_x102.....cgugggaacacggggugccAaacu..... 1  
 Gi5\_7286260\_x102.....cgugggaCcacggggugccgaacu..... 1  
 Gi2\_9123621\_x102.....cguggAaacacggggugccgaacu..... 1  
 Gi2\_9121173\_x102.....acgucgugggaacacggggugccg..... 0  
 Gi3\_25101257\_x102.....Uucgugggaacacggggugcc.....  
     1  
 Gi2\_9130047\_x102.....cgugggaacacggggugccgaaAu..... 1  
 Gi2\_9129129\_x102.....ucggagacgucgugggaacacggg..... 0  
 Gi2\_9124437\_x102...cgaucggGgacgucguggaaca..... 1  
 Gi2\_9128415\_x102.....Cugggaacacggggugccgaac..... 1  
 Gi2\_9124845\_x102.....gugggaacacggggGgcc..... 1  
 Gi1\_3390755\_x101.....acgucgCgggaacacggggugccga..... 1  
 Gi5\_7290816\_x101.....ugggaGcacggggugccgaacu..... 1  
 Gi5\_7296876\_x101.....aUacgucgugggaacacggggugccgaacu..... 1  
 Gi3\_25120798\_x101.....cgugggaGcacggggugccgaac.....  
     1  
 Gi1\_3395564\_x100.....ucggagacgucgugggaacacggg..... 0  
 Gi3\_25137826\_x100.....ugggaacGcggggugccgaac.....  
     1  
 Gi3\_25138426\_x100.....gugggaacacgAggugccgaac.....  
     1  
 Gi1\_3394164\_x100.....aaUacggggugccgaacu..... 1  
 Gi1\_3395764\_x100.....ugggaacaNggggugccgaacu..... 1



Gi2\_9153574\_x100.....ggagacgucgugggaaacacgggggu..... 0  
 Gi3\_25138926\_x100.....gaacacgggAugccgaacu..... 1  
 1  
 Gi2\_9153174\_x100...cgauccgagacgucgugggaaacacggggugc..... 0  
 Gi2\_9149174\_x100.....gugggaacGcggggugccgaac..... 1  
 Gi2\_9143574\_x100...Uaucggagacgucgugggaaacac..... 1  
 Gi1\_3393764\_x100.....gacgucGcgggaacacggggugcc..... 1  
 Gi2\_9146674\_x100.....uAggaacacggggugccgaacu..... 1  
 Gi2\_9161106\_x99.....cggGgacgucgugggaaaca..... 1  
 Gi1\_3399141\_x99.....gaacacggNgugccgaacu..... 1  
 G1a\_4969722\_x99.....gggaacacggggugccgaa..... 0  
 Gi2\_9164670\_x99.....Uacgucgugggaaacacggggugcc..... 1  
 Gi2\_9158928\_x99.....ggaacGcggggugccgaacu..... 1  
 Gi1\_3398052\_x99.....uGgugggaacacggggugccgaacu..... 1  
 Gi5\_7316708\_x99.....cgugggaacacggggugcUgaacu..... 1  
 Gi3\_25160022\_x99.....ugggaacacggggugccgaCcu..... 1  
 G1a\_4964772\_x99.....ggagacgucgugggaaacacggggugcc..... 0  
 Gi1\_3396864\_x99....aucggagacgucgugggaaacacgggg..... 0  
 Gi3\_25150716\_x99.....ggaacacggggugccgGac..... 1  
 Gi2\_9165462\_x99.....gGgacgucgugggaaacacgggggu..... 1  
 Gi5\_7313342\_x99.....gUaacacggggugccgaac..... 1  
 Gi5\_7324670\_x98.....aacacggggAgccgaacu..... 1  
 Gi2\_9168996\_x98.ugcgauccgagacgucgugggaaacacg..... 0  
 Gi2\_9178306\_x98..gcgauccgagacgucgugggaaacac..... 0  
 Gi2\_9170368\_x98..gcgauccgagacgucgugggaa..... 0  
 Gi3\_25181163\_x98.....aacacggggGgccgaacu..... 1  
 Gi5\_7321534\_x98.....ugUgaacacggggugccgaacu..... 1  
 Gi3\_25183907\_x98...Caucggagacgucgugggaaacacgggggu..... 1  
 Gi2\_9171642\_x98....aucggGgacgucgugggaaacacgggg..... 1  
 Gi5\_7329464\_x97.....acgucgugggaaacacggggugccg..... 0  
 Gi3\_25197979\_x97.....uCggaacacggggugccgaac..... 1  
 Gi3\_25184787\_x97.....cgucgugggaaacacggggGgccgaacu..... 1  
 Gi2\_9182592\_x97.....aUacgucgugggaaacacggggugcc..... 1  
 Gi2\_9181428\_x97.....Gcgugggaacacggggugccgaac..... 1  
 Gi1\_3409604\_x97.....cggagacgucgugggaaacacggggugc..... 0  
 Gi2\_9188024\_x97.....aacacggggGgccgaacu..... 1  
 Gi3\_25206736\_x96.....gggaacacAgggugccgaacu..... 1  
 Gi3\_25216144\_x96.....Ggggaacacggggugccg..... 1  
 Gi2\_9199769\_x96.....gaacacggggGgccgaacu..... 1  
 Gi2\_9196025\_x96.....Ugagacgucgugggaaacacggggugc..... 1  
 Gi3\_25200688\_x96.....gucgugggaaacacggggGgccgaacu..... 1  
 Gi3\_25202800\_x96.....ggaacacggggGgccgaacu..... 1  
 Gi2\_9194393\_x96.....gggaGcacggggugccgaacu..... 1  
 Gi1\_3419378\_x95.....agacgucgugggaaacacgggg..... 0  
 Gi3\_25221199\_x95.....ugggaacacggggugcAgaacu..... 1  
 Gi2\_9206281\_x95.ugcgauccgagacgucgugggaa..... 0  
 Gi2\_9213786\_x95.....gggaacacggggGgccgaacu..... 1

Gi2\_9214736\_x95.....Cggaacacggggugccgaacu..... 1  
Gi2\_9206376\_x95.....ugggaGcacggggugccgaacu..... 1  
Gi5\_7358901\_x95.....aacacAgggugccgaacu..... 1  
Gi5\_7357951\_x95.....cgugAgaacacggggugccgaacu..... 1  
Gi5\_7355196\_x95.....Uugggaacacggggugccgaa..... 1  
Gi3\_25229369\_x95.....gucgugggNacacggggugccgaacu..... 1  
Gi3\_25234214\_x95.....cgucgugggaacacggggug..... 0  
Gi3\_25219299\_x95.....cUgagacgucgugggaacacggggugcc..... 1  
Gi3\_25234974\_x95.....gucgCgggaacacggggugccgaac..... 1  
Gi1\_3425983\_x94.....ggagacgucgCgggaacacggggugcc..... 1  
Gi3\_25247111\_x94.....Augggaacacggggugccg..... 1  
Gi5\_7368396\_x94.....ucgugggaacacggggugccgaacA..... 1  
G1a\_4994118\_x94.....ucgugggaacacggggugccgaac..... 0  
Gi5\_7363978\_x94.....acuuucccagcgccucguccacc..... 0  
Gi1\_3424573\_x94.....Uugggaacacggggugcc..... 1  
Gi3\_25247017\_x94.....Uaucggagacgucgugggaacac..... 1  
Gi3\_25246547\_x94.....ucggagacgucgugggaacacggggugc..... 0  
Gi3\_25236959\_x94.....agacgucgugggaacacgggg..... 0  
Gi5\_7371216\_x94.....gugggaacacgAggugccgaacu..... 1  
Gi2\_9222733\_x94.....cggagacgucgugggaacacg..... 0  
Gi2\_9221041\_x94.....ucgugggaacacggggCgccgaacu..... 1  
Gi2\_9217375\_x94.....cUugggaacacggggugccgaa..... 1  
Gi2\_9220665\_x94.....agacgucgugggaacacggggug..... 0  
Gi1\_3422035\_x94.....gagacgucgugggaacacggggugcc..... 0  
Gi1\_3426829\_x94.....gagacgucgCgggaacacggggugccgaacu..... 1  
Gi3\_25247675\_x94.....Gcgucgugggaacacggggugccgaacu..... 1  
Gi5\_7377542\_x93.....gugAgaacacggggugccgaacu..... 1  
Gi2\_9232999\_x93.ugcgauccgGgacgucguggga..... 1  
Gi1\_3427673\_x93.....cgugggaaNacggggugccgaacu..... 1  
G1a\_4994959\_x93.....gugggaacNcggggugccgaacu..... 1  
Gi3\_25269604\_x93.....guggAaacacggggugccgaac..... 1  
Gi2\_9231976\_x93.....Uaucggagacgucguggga..... 1  
Gi5\_7371404\_x93.....gugggaacacggAgugccgaacu..... 1  
Gi1\_3430649\_x93.....gucgCgggaacacggggugccg..... 1  
Gi3\_25273603\_x93.....ggaacacAgggugccgaacu..... 1  
Gi3\_25257700\_x93.....ugggaacacggggugUcgaacu..... 1  
Gi3\_25256770\_x93.....gugAgaacacggggugccgaac..... 1  
Gi3\_25271743\_x93.....ugggaacCcgggugccgaacu..... 1  
Gi2\_9232069\_x93.....acgucgugggaacacgggg..... 0  
Gi3\_25272301\_x93.ugcgauccgagacgucgugggaaca..... 0  
Gi2\_9231046\_x93.....Ggacgucgugggaacacg..... 1  
Gi3\_25282807\_x92.....gaacacggggugccgaaUu..... 1  
Gi5\_7387252\_x92.....acgucgugggaacacggggugccga..... 0  
Gi3\_25278943\_x92.....ugggaGcacggggugccgaac..... 1  
Gi3\_25274987\_x92.....gaacacggggugcAgaacu..... 1  
Gi3\_25284279\_x92.....Ugagacgucgugggaacacggggugcc..... 1  
Gi3\_25282163\_x92.....cgucgugggaacacggggGgcc..... 1

Gi3\_25281059\_x92.....uUgugggaacacggggugccgaacu..... 1  
 Gi2\_9243532\_x92.....gaUcacggggugccgaacu..... 1  
 Gi2\_9244360\_x92.....ucgugggaNcacggggugccgaacu..... 1  
 Gi4\_428363\_x92.....Uugggaacacggggugccgaacu..... 1  
 Gi2\_9251791\_x91.....aGcggagacgucgugggaacacgggggu..... 1  
 Gi3\_25293836\_x91.....Guggggaacacggggugcc..... 1  
 Gi3\_25296293\_x91.....cgugggaacacggggGgccgaac..... 1  
 Gi2\_9267187\_x90.....ggUaacacggggugccgaacu..... 1  
 Gi3\_25323173\_x90.....ucgugggGacacggggugccgaacu..... 1  
 Gl1a\_5013689\_x90.....Cggaacacggggugccgaacu..... 1  
 Gi3\_25313003\_x90.....aucggagacgucgugggaGcacg..... 1  
 Gi1\_3445729\_x90.ugcgauccgagacgucguggga..... 0  
 Gi2\_9265567\_x90.....ugggGacacggggugccgaacu..... 1  
 Gi3\_25321823\_x90.....gugNgaacacggggugccgaacu..... 1  
 Gi3\_25320023\_x90.....ggagacgucgugggaacacggg..... 0  
 Gi1\_3446719\_x89.....agacgucgugggaacacggggugcc..... 0  
 Gi1\_3450457\_x89.....aacacggggUAccgaacu..... 1  
 Gi2\_9273474\_x89.....ugggaacacggggGgccgaacu..... 1  
 Gi3\_25337101\_x89.....Uggaacacggggugccga..... 1  
 Gi1\_3451970\_x89.....gugggaacacggggGgccgaacu..... 1  
 Gi1\_3447520\_x89.....cgugggaacacggggugccgaa..... 0  
 Gi5\_7421987\_x89.....gugggaacacggggugccgaacuuu..... 0  
 Gi3\_25333452\_x89.....gugggaacacUgggugccgaacu..... 1  
 Gi5\_7421364\_x89.....Cucgugggaacacggggugccgaacu..... 1  
 Gi3\_25338970\_x89.....cgugggaacacggggugA..... 1  
 Gi3\_25356288\_x88.....ucgugggaGcacggggugccgaacu..... 1  
 Gi2\_9291623\_x88.....Augggaacacggggugcc..... 1  
 Gi5\_7430474\_x88.....agacgucgugggaacacggggugc..... 0  
 Gi5\_7432146\_x88.....cgugggaacacggggGgccgaacu..... 1  
 Gi3\_25351360\_x88.....aacacggggUAccgaacu..... 1  
 Gi3\_25346872\_x88.....ugggaacacggggugccgaGc..... 1  
 Gi2\_9295143\_x88.....guUggaacacggggugccgaac..... 1  
 Gi2\_9291447\_x88.....gugggaCcacggggugccgaacu..... 1  
 Gi3\_25351976\_x88.....ggagacgucgugggaacacggggugccgaa..... 0  
 Gi3\_25359192\_x88.....cAugggaacacggggugccgaac..... 1  
 Gi3\_25352504\_x88.....acgucgugggaacacggggugc..... 0  
 Gi2\_9286871\_x88.....gugggaacCcgggugccgaac..... 1  
 Gi3\_25363836\_x87.....gggaacacggggugccgGac..... 1  
 Gi3\_25372623\_x87.....ucgugggaacGcggggugccgaacu..... 1  
 Gi5\_7444123\_x87.....gagacgucgugggaacacg..... 0  
 Gi2\_9298103\_x87.....ggaacacggggGgccgaac..... 1  
 Gi3\_25372362\_x87.....gugggaacacggUgugccgaac..... 1  
 Gi3\_25377060\_x87.....Guggggaacacggggugccga..... 1  
 Gi3\_25371579\_x87.....gaacUcggggugccgaacu..... 1  
 Gi5\_7439164\_x87.....gaacacggggugccgaacuucU..... 1  
 Gi5\_7457254\_x86.....cCucgugggaacacggggugccgaacu..... 1  
 Gi4\_433136\_x86.....ugggaacacgggUugccgaacu..... 1

Gi5\_7453212\_x86.....Cgaacacggggugccgaacu..... 1  
 Gi5\_7453470\_x86.....gugggaaUacggggugccgaacu..... 1  
 Gi3\_25382074\_x86.....uGgugggaacacggggugccgaac..... 1  
 Gi1\_3465497\_x86.....gaacacggggCgccgaacu..... 1  
 Gi5\_7456308\_x86.....Uggaacacggggugccgaa..... 1  
 Gi3\_25384912\_x86.....gucgugggaacacggggugccgaCcu..... 1  
 Gi3\_25384740\_x86.....gugggaaacacggggGgccga..... 1  
 Gi3\_25394114\_x86.....gaacacggggugccgaUcu..... 1  
 Gi2\_9321799\_x85.....guUgugggaacacggggugccgaacu..... 1  
 Gi3\_25399912\_x85.....guggUaacacggggugcc..... 1  
 Gi3\_25407137\_x85.....aucggagacgucgugggaGcacggggu..... 1  
 Gi3\_25396342\_x85.....aucggagacgucgugggaac..... 0  
 Gi3\_25404247\_x85.....gcgaucggagacgucguggga..... 0  
 Gi3\_25402122\_x85.....aGgucgugggaacacggggugccgaacu..... 1  
 Gi1\_3470793\_x85.....aacacggggCgccgaacu..... 1  
 Gi3\_25410877\_x85.....gaucggagacgucgugggaacacggggug..... 0  
 Gi5\_7472510\_x85.....gaGcacggggugccgaacu..... 1  
 Gl1\_5041751\_x84.....gaucggagacgucgugggaa..... 0  
 Gi3\_25428055\_x84.....gugggaaUacggggugccgaac..... 1  
 Gi3\_25429651\_x84.....ucgCgggaacacggggugccgaacu..... 1  
 Gi1\_3475179\_x84.....Uugggaacacggggugccgaac..... 1  
 Gi5\_7474284\_x84.....ucgugggaacacggggugccgCacu..... 1  
 Gi2\_9331229\_x84cugcgaucggGgacgucgug..... 1  
 Gi5\_7477056\_x84.....ucgugggaacacggggCgccgaacu..... 1  
 Gi3\_25417891\_x84.....cgucgugggaacacggggugccgCacu..... 1  
 Gi2\_9350282\_x83.....ugggaacacggggugccgaGcu..... 1  
 Gi2\_9351195\_x83.....gagacgucgugggaacacggggugccgaacu..... 0  
 Gi2\_9347958\_x83.....gaucggGgacgucgugggaacacgggg..... 1  
 Gi5\_7491665\_x83.....ucgugggaNcacggggugccgaacu..... 1  
 Gi1\_3482014\_x83.....gugggGcacacggggugccgaacu..... 1  
 Gi2\_9344555\_x83.....aGcggagacgucgugggaacacggggugc..... 1  
 Gl1\_5047024\_x83.....Ggggaacacggggugccgaacu..... 1  
 Gi2\_9362214\_x82.....gugggaacacggggugccgaUc..... 1  
 Gi1\_3486937\_x82.....agacgucgCgggaacacggggugccgaacu..... 1  
 Gi1\_3482427\_x82.....gagacgucgCgggaacacgg..... 1  
 Gi2\_9361804\_x82.....gaacacggggugccgaCcu..... 1  
 Gi3\_25450627\_x82.....guUggaacacggggugccga..... 1  
 Gi4\_436403\_x82.....cgucgugggaacacggggugccga..... 0  
 Gi2\_9364002\_x81.....guUggaacacggggugcc..... 1  
 Gi3\_25483295\_x81.....aacacgAggugccgaacu..... 1  
 Gi3\_25470578\_x81.....gggaacacggggugcUgaacu..... 1  
 Gi4\_437222\_x81.....agacgucgugggaacacggggugcc..... 0  
 Gi2\_9364731\_x81.....gggaacGcggggugccgaacu..... 1  
 Gi2\_9364812\_x81.....ggaacacggggugccgCac..... 1  
 Gi3\_25479002\_x81.....cgugUgaacacggggugccgaac..... 1  
 Gi5\_7512478\_x81.....gugggaaAacggggugccgaacu..... 1  
 Gi3\_25467581\_x81.....aucggagaNgucgugggaacacg..... 1

Gi3\_25476977\_x81.....aacacggAgugccgaacu..... 1  
 Gi3\_25466933\_x81.....gggaacacggggugccgaUc..... 1  
 Gi2\_9371211\_x81.....gugggaGcacggggugccgaac..... 1  
 Gi2\_9374694\_x81.....gaucggGgacgucgugggaacacggg..... 1  
 Gi3\_25489096\_x80.....cUucgugggaacacggggugccga..... 1  
 Gi3\_25489336\_x80.....gugggaacacggggugUcgaac..... 1  
 Gi2\_9379179\_x80.....gggGacacggggugccgaacu..... 1  
 Gi3\_25500536\_x80.....gGacacggggugccgaac..... 1  
 Gi2\_9378139\_x80.....gggaacacggggGgccgaacu..... 1  
 Gi2\_9384619\_x80.....uUggaacacggggugccg..... 1  
 Gi3\_25500296\_x80.....gAaacacggggugccgaac..... 1  
 Gi2\_9381419\_x80.....gugggCacacggggugccgaacu..... 1  
 Gi3\_25490776\_x80.....aacaUggggugccgaacu..... 1  
 Gi2\_9393894\_x79.....gugggaacNcggggugcc..... 1  
 Gi3\_25507372\_x79.....gugggaacGcggggugccga..... 1  
 Gi5\_7539703\_x79.....cgugggaacacgAggugccgaacu..... 1  
 Gi1\_3498694\_x79.....Uacgucgugggaacacggggugccgaacu..... 1  
 Gi2\_9389944\_x79.....ggGacacggggugccgaacu..... 1  
 Gi3\_25512349\_x79.....gAgaacacggggugccgaac..... 1  
 Gi3\_25512507\_x79.....acgucgugNgaacacggggugccgaacu..... 1  
 Gi3\_25506898\_x79.....cgucguggNaacacggggugccgaacu..... 1  
 Gi2\_9397844\_x79.....gaacGcggggugccgaacu..... 1  
 Gi3\_25513613\_x79.....gugggaacCcgggugcc..... 1  
 Gi2\_9401361\_x78.....Uaucggagacgucgugggaacacggggugc..... 1  
 Gi3\_25539716\_x78.....ugggaacacggggAgccgaacu..... 1  
 Gi3\_25527470\_x78.....gugggaacacggggugccUaacu..... 1  
 Gl1\_5074078\_x78.....acgucgugggaacacggggg..... 0  
 Gi3\_25528718\_x78.ugcgaucggagacgucguggga..... 0  
 Gl1\_5071192\_x78.....Uugggaacacggggugcc..... 1  
 Gi3\_25525520\_x78.....Ccugggaacacggggugccgaacu..... 1  
 Gi3\_25535192\_x78.....ucgugggaacacggggugccgaGcu..... 1  
 Gi3\_25544813\_x77.....aacacggggugUcgaacu..... 1  
 Gi5\_7553801\_x77.....ggaacacggggGgccgaacu..... 1  
 Gi5\_7554802\_x77.....cguggAaacacggggugccgaacu..... 1  
 Gi3\_25549510\_x77.....cUgagacgucgugggaacacggggg..... 1  
 Gi1\_3507836\_x77.....cgCgggaacacggggugccgaa..... 1  
 Gi3\_25541733\_x77.....gacgucgugggaacacggggugcA..... 1  
 Gi3\_25548201\_x77.....aUgucgugggaacacggggugccgaacu..... 1  
 Gl1\_5079871\_x77.....Uaacacggggugccgaacu..... 1  
 Gi5\_7560654\_x77.....gacgucgugggaacacggggugccg..... 0  
 Gi3\_25556055\_x77.....gCcugggaacacggggugccgaacu..... 1  
 Gi3\_25570306\_x76.....gugggaacacggggAgccgaac..... 1  
 Gi3\_25562022\_x76.....Cugggaacacggggugccga..... 1  
 Gi3\_25559438\_x76.....gugggGacacggggugccga..... 1  
 Gi1\_3511838\_x76.....gUaacacggggugccgaac..... 1  
 Gi2\_9428745\_x76.....ucgugggaacacggggugccgCacu..... 1  
 Gl1\_5082764\_x76.....gucgugggaacacggggugccgaac..... 0

|                                                       |   |
|-------------------------------------------------------|---|
| Gi2_9442132_x75.....cggagacgucgugggaaca.....          | 0 |
| Gi3_25593285_x75.....auUggagacgucgugggaacacggg.....   | 1 |
| Gi3_25584885_x75.....ugAgaacacggggugccgaac.....       | 1 |
| Gi2_9443707_x75.....gCaacacggggugccgaacu.....         | 1 |
| Gi3_25597260_x75.....gugggaacacggggGgccgaa.....       | 1 |
| Gi1_3517983_x75.....agacgucgugggaacacggggugccg.....   | 0 |
| Gi1_3518658_x75.....ucgugggaacacggggGgccgaacu.....    | 1 |
| Gi1_3519858_x75.....aacacggggugccgaGcu.....           | 1 |
| Gi1_3520533_x75.....cggagacgucgugggaacacggg.....      | 0 |
| Gi3_25587960_x75.....ugggaacacggggugccgaUc.....       | 1 |
| Gi3_25589910_x75.....aacacggggugccgaCcu.....          | 1 |
| Gi3_25579485_x75.....ucgugggaacacggggugccAaacu.....   | 1 |
| Gi5_7574746_x75.....gUacacggggugccgaacu.....          | 1 |
| Gi3_25595160_x75.....aucggagaNgucgugggaacacgggg.....  | 1 |
| Gi2_9449107_x75.....gugggaUcacggggugccgaacu.....      | 1 |
| Gi1_3520608_x75.....gaUcacggggugccgaacu.....          | 1 |
| Gi3_25604893_x74.....gucgugggaacacggggugccg.....      | 0 |
| Gi1a_5093585_x74.....ggaacacggggugccAaacu.....        | 1 |
| Gi1_3522761_x74.....gugggaacacggggGgccgaacu.....      | 1 |
| Gi5_7593762_x74.....Ggucgugggaacacggggugccgaacu.....  | 1 |
| Gi2_9451563_x74.....Uaucggagacgucgugggaacacg.....     | 1 |
| Gi3_25599195_x74.....gucgugggaacacgggg.....           | 0 |
| Gi3_25615919_x74.....ggaacacggggugcUgaacu.....        | 1 |
| Gi5_7585918_x74.....aacacggggugccgCacu.....           | 1 |
| Gi2_9460887_x74.....cgugggaacacggggGgccgaacu.....     | 1 |
| Gi3_25603265_x74.....aacacggggugccgaaUu.....          | 1 |
| Gi3_25608963_x74.....aGcggagacgucgugggaacacgg.....    | 1 |
| Gi3_25607927_x74.....gaacCggggugccgaacu.....          | 1 |
| Gi2_9451341_x74.....gGgacgucgugggaacacg.....          | 1 |
| Gi3_25606669_x74.....gucgugggaacacggggCccgaac.....    | 1 |
| Gi5_7604253_x73.....acacggggugccgaacuuu.....          | 0 |
| Gi2_9470910_x73.....gacgucgugggaacacg.....            | 0 |
| Gi3_25629157_x73.....Ggucgugggaacacggggugcc.....      | 1 |
| Gi5_7598997_x73.....Uacacggggugccgaacu.....           | 1 |
| Gi5_7600092_x73.....gucgugggaacacggggugccgaa.....     | 0 |
| Gi2_9470180_x73.....ucggagacgucgugggaac.....          | 0 |
| Gi3_25629084_x73.....ggaacacggggGgccgaac.....         | 1 |
| Gi2_9477263_x72.....gugggaacacggggCgcc.....           | 1 |
| Gi5_7611069_x72.....gugggaacacggggugUcgaacu.....      | 1 |
| Gi3_25642554_x72.....gCgaacacggggugccgaac.....        | 1 |
| Gi5_7614669_x72.....Agggaacacggggugccgaacu.....       | 1 |
| Gi3_25647594_x72.....Uucgugggaacacggggugccga.....     | 1 |
| Gi5_7615317_x72.....cggagacgucgugggaacacggggugcc..... | 0 |
| Gi3_25635354_x72.....gugggaacNcggggugccgaa.....       | 1 |
| Gi3_25646514_x72.....gucgugggaacGcggggugccgaacu.....  | 1 |
| Gi5_7618701_x72.....ucgugggaacacggggugccgaGcu.....    | 1 |
| Gi3_25646226_x72.....gUagacgucgugggaacacggggugcc..... | 1 |

|                                                           |   |
|-----------------------------------------------------------|---|
| Gi4_447562_x72.....gugggaacacggggugccgaac.....            | 0 |
| Gi3_25644570_x72.....cgugggaacacggggugccgaUcu.....        | 1 |
| Gi3_25641042_x72.....ugggaacacggggugccgGac.....           | 1 |
| Gi5_7609773_x72.....gugggaacacgggAugccgaacu.....          | 1 |
| Gi2_9475535_x72.....gugggaacacggggugccAaac.....           | 1 |
| Gi1_3537261_x71.....cggagacgucgCgggaacacgg.....           | 1 |
| Gi2_9489840_x71.....cgugggaacacggAgugccgaacu.....         | 1 |
| Gi5_7620483_x71.....cgugggaacaUggggugccgaacu.....         | 1 |
| Gi3_25659115_x71.....gggaacGcggggugccgaac.....            | 1 |
| Gi3_25661742_x71.....gggaGcacggggugccgaac.....            | 1 |
| Gi2_9493461_x71..gcgaucggGgacgucgugggaaca.....            | 1 |
| Gi5_7629997_x71.....cgugggaacacggggugccgaaAu.....         | 1 |
| Gi3_25669410_x71.....gugggaacCcgggugccga.....             | 1 |
| Gi5_7630494_x71.....ggaacacggggugccgCacu.....             | 1 |
| Gi3_25665576_x71.....gaacacggggugccgUacu.....             | 1 |
| Gi3_25658263_x71.....cgugggaacGcggggugccgaac.....         | 1 |
| Gi3_25686670_x70.....ugggaacacggggGgccgaacu.....          | 1 |
| Gi5_7635978_x70.....Cggaacacggggugccgaacu.....            | 1 |
| G1a_5116682_x70.....ucggagacgucgugggaacacggg.....         | 0 |
| Gi1_3541156_x70.....agacgucgugggaacacgggg.....            | 0 |
| Gi3_25680930_x70.....gacgucgugggaacacggggugcc.....        | 0 |
| Gi3_25676660_x70.....cgucgugggaacacggggCgccgaacu.....     | 1 |
| Gi2_9497541_x70.....gucgugggaacacggggCgccgaacu.....       | 1 |
| Gi3_25679880_x70.....gugggaacacggCgugccgaacu.....         | 1 |
| Gi3_25674630_x70.....gugggaacacggggugcAgaac.....          | 1 |
| Gi2_9504331_x70.....Ggacgucgugggaacacggggugc.....         | 1 |
| G1a_5120665_x69.....gugggaacacggggGgccgaacu.....          | 1 |
| Gi1_3548742_x69.....ggagacgucgugggaacacggggugccgaacu..... | 0 |
| Gi2_9510503_x69.....Ggucgugggaacacggggugccgaacu.....      | 1 |
| Gi3_25696324_x69.....gugggaacNcggggugccg.....             | 1 |
| Gi3_25697704_x69.....gaacacggggugccgaaAu.....             | 1 |
| Gi3_25697428_x69.....cCugggaacacggggugccgaac.....         | 1 |
| Gi4_449333_x69.....gucgugggaacacggggugccgaacu.....        | 0 |
| Gi3_25691494_x69.....guggCaacacggggugccgaacu.....         | 1 |
| Gi3_25706950_x69.....ggaacacAgggugccgaac.....             | 1 |
| Gi3_25702051_x69.....gggaacaUggggugccgaacu.....           | 1 |
| Gi2_9512021_x69.....ugUgaacacggggugccgaacu.....           | 1 |
| Gi2_9510917_x69.....gggaacacggggugccgaGcu.....            | 1 |
| Gi3_25696669_x69.....Ugagacgucgugggaacacgggg.....         | 1 |
| Gi2_9516368_x69.....gucgugggaacacggggGgccgaacu.....       | 1 |
| Gi3_25710779_x68.....uUggagacgucgugggaacacgggg.....       | 1 |
| Gi3_25715063_x68.....ugggaacacAgggugccgaacu.....          | 1 |
| Gi2_9519316_x68.....ucgugggaacacggggugccgaaA.....         | 1 |
| Gi3_25725603_x68.....gugggaacacggggCgccga.....            | 1 |
| Gi3_25715267_x68.....ucgugggaacacggggug.....              | 0 |
| Gi2_9530400_x68.....cgugggaacacggggugcAgaacu.....         | 1 |
| Gi5_7660727_x68.....Agugggaacacggggugccgaacu.....         | 1 |

|                       |                                    |   |
|-----------------------|------------------------------------|---|
| Gi2_9519044_x68.....  | uggaacGcggggugccgaacu.....         | 1 |
| Gi3_25711935_x68..... | uggaacaNggggugccga.....            | 1 |
| Gi3_25710507_x68..... | gggaaUacggggugccgaacu.....         | 1 |
| Gi3_25719415_x68..... | gugggUacacggggugccgaac.....        | 1 |
| Gi3_25721455_x68..... | cUucgugggaacacggggugc.....         | 1 |
| Gi2_9529720_x68.....  | Gucggagacgucgugggaacacggggg.....   | 1 |
| Gi1_3559565_x67.....  | gggaacacNggggugccgaacu.....        | 1 |
| Gi3_25736079_x67..... | uggaacaNggggugccgaa.....           | 1 |
| Gi5_7672892_x67.....  | aacacggggugccAaacu.....            | 1 |
| Gi3_25738223_x67..... | Augggaacacggggugccgaa.....         | 1 |
| Gi3_25741104_x67..... | ugggUacacggggugccgaacu.....        | 1 |
| Gi3_25734806_x67..... | guAggaacacggggugcc.....            | 1 |
| Gi2_9535163_x67.....  | Cgggaacacggggugccgaacu.....        | 1 |
| Gi3_25731724_x67..... | aucggagacgucgugggaacacggggC.....   | 1 |
| Gi5_7674902_x67.....  | gaacacggggugccGacu.....            | 1 |
| Gi2_9532148_x67.....  | Ugaacacggggugccgaa.....            | 1 |
| Gi5_7670748_x67.....  | ggUaacacggggugccgaacu.....         | 1 |
| Gi2_9538580_x67.....  | gugggaacacggggUaccgaac.....        | 1 |
| Gi2_9532818_x67.....  | uggaacacggggugccgaGc.....          | 1 |
| Gi2_9539451_x67.....  | ucggGgacgucgugggaacacggggugcc..... | 1 |
| Gi2_9550151_x66.....  | cggGgacgucgugggaacacggggug.....    | 1 |
| Gi5_7682218_x66.....  | Uugggaacacggggugccg.....           | 1 |
| Gi3_25755235_x66..... | auUggagacgucgugggaacacg.....       | 1 |
| Gi3_25747711_x66..... | aucggagacgucgugggaCcacg.....       | 1 |
| Gi3_25747579_x66..... | Uacgucgugggaacacggg.....           | 1 |
| Gi3_25746787_x66..... | ucguggaNcacggggugccgaac.....       | 1 |
| Gi2_9556025_x66.....  | guggUaacacggggugccgaac.....        | 1 |
| Gi2_9553847_x66.....  | Caacacggggugccgaacu.....           | 1 |
| Gi3_25752925_x66..... | Uaucggagacgucgugggaacacgggg.....   | 1 |
| Gi2_9545267_x66.....  | Uggaacacggggugccgaa.....           | 1 |
| Gi3_25774692_x65..... | gugggaacacggggUacc.....            | 1 |
| Gi3_25773977_x65..... | gggGacacggggugccgaac.....          | 1 |
| Gi2_9560261_x65.....  | cgugggaacacggggugccgaaUu.....      | 1 |
| Gi3_25772287_x65..... | gggaacacggggGgccgaac.....          | 1 |
| Gi3_25766567_x65..... | gggaacacggggugccAaacu.....         | 1 |
| Gl1_5147067_x65.....  | acgucgugggaacacggggugccgaacu.....  | 0 |
| Gi5_7701811_x65.....  | cgugggaacacggggugUcgaacu.....      | 1 |
| Gi5_7703566_x65.....  | cggagacgucgugggaacacgg.....        | 0 |
| Gi3_25801051_x64..... | ugggaacacggAgugccgaacu.....        | 1 |
| Gi1_3573992_x64.....  | cgGgggaacacggggugccgaacu.....      | 1 |
| Gi5_7711909_x64.....  | gugggaacacggggAgccgaacu.....       | 1 |
| Gi5_7708325_x64.....  | uUggaacacggggugccgaa.....          | 1 |
| Gi2_9575545_x64.....  | uCggaacacggggugccgaacu.....        | 1 |
| Gi3_25796443_x64..... | aGcggagacgucgugggaacacgggg.....    | 1 |
| Gi3_25783963_x64..... | Gucggagacgucgugggaacacgg.....      | 1 |
| Gi3_25783259_x64..... | aucggagaNgucgugggaacacggg.....     | 1 |
| Gi2_9574073_x64.....  | gagacgucgugggaacacggg.....         | 0 |



Gi2\_9575609\_x64.....cgGgggaacacggggugccgaac..... 1  
 Gl1\_5154868\_x64.....cgaucggagacgucgugggaacacg..... 0  
 Gi3\_25788187\_x64.....gugggaaAacggggugccgaac..... 1  
 Gi1\_3571752\_x64.....Cugggaacacggggugccgaacu..... 1  
 Gi3\_25797659\_x64.....ggaacacgAggugccgaacu..... 1  
 Gi2\_9587205\_x63.....gaaacacggggugccgaGcu..... 1  
 Gi3\_25809636\_x63..gcgaucggagacgucgugggaacacggg..... 0  
 Gi3\_25804344\_x63.....ucgugggaacacggggGgccgaacu..... 1  
 Gi3\_25809951\_x63.....ggaacacggggugccAaac..... 1  
 Gl1\_5161155\_x63.....gugggaacacggggCgccgaacu..... 1  
 Gi1\_3574690\_x63.....ucgugggaNcacggggugccgaacu..... 1  
 Gi1\_3578155\_x63.....guUggaacacggggugccgaacu..... 1  
 Gi2\_9587331\_x63.....gAgaacacggggugccgaacu..... 1  
 Gi2\_9581472\_x63.....gAgggaacacggggugccgaac..... 1  
 Gi3\_25809888\_x63.....cgugCgaacacggggugccgaacu..... 1  
 Gi5\_7732398\_x62.....cgugggaacacggggugccGacu..... 1  
 Gi5\_7732026\_x62.....ggGacacggggugccgaacu..... 1  
 Gi3\_25828721\_x62.....gugggaacacggggugccgaaU..... 1  
 Gi2\_9592493\_x62....aGcggagacgucgugggaaca..... 1  
 Gi1\_3582331\_x62.....gacgucgugggaacacggggugccg..... 0  
 Gi2\_9600553\_x62.....Cgaacacggggugccgaac..... 1  
 Gi5\_7732770\_x62.....gaaacacggggugccGacu..... 1  
 Gi3\_25840935\_x62.....gaaacacggggugccgaacG..... 1  
 Gi1\_3580719\_x62.....aUcacggggugccgaacu..... 1  
 Gi2\_9604521\_x62.....ggagacgucgugggaacacggggugccgaacu..... 0  
 Gi3\_25825931\_x62.....ucgugggaacCcgggugccgaacu..... 1  
 Gi3\_25838207\_x62.....gugggaacacggggugGccaacu..... 1  
 Gi5\_7737048\_x62.....ggaGcacggggugccgaacu..... 1  
 Gi3\_25822893\_x62.....uggAaacacggggugccgaacu..... 1  
 Gi3\_25830953\_x62.....gugggaUcacggggugccgaacu..... 1  
 Gi3\_25855341\_x61.....Cacacggggugccgaacu..... 1  
 Gi2\_9605569\_x61.....cgugggaacacgggAugccgaacu..... 1  
 Gi2\_9608924\_x61.....cgugggaacacgggAgccgaacu..... 1  
 Gi2\_9612035\_x61.....gugggGacacggggugcc..... 1  
 Gi3\_25849241\_x61..gcgaucggagacgucgugggaaca..... 0  
 Gi2\_9614841\_x61.....Uaacacggggugccgaac..... 1  
 Gi5\_7745769\_x61....aucggagacgucgugggaacacggggugcc..... 0  
 Gi5\_7746501\_x61.....gugggaacacggggugccgaaAu..... 1  
 Gi3\_25851620\_x61.....gugggaacacggggugccA..... 1  
 Gi5\_7743085\_x61.....cguAgggaacacggggugccgaacu..... 1  
 Gi3\_25854121\_x61.....gggaacacAgggugccgaac..... 1  
 Gi3\_25857781\_x61.....ugggaacacgggAugccgaacu..... 1  
 Gi3\_25848143\_x61.....cgGcuggggaacacggggugccgaacu..... 1  
 Gi2\_9610266\_x61.....gugggaacacggggugccgaacG..... 1  
 Gi3\_25844910\_x61.....cgugggaacacggggugccAaac..... 1  
 Gi3\_25842714\_x61.....ggagacgucgugggaacacggggugc..... 0  
 Gi3\_25846862\_x61.....gucgugggaacCcgggugccgaacu..... 1

Gi2\_9614231\_x61.....aucggagacgucgugggaacacggggugccg..... 0  
Gi2\_9613499\_x61.....gAaacacggggugccgaacu..... 1  
Gi3\_25842592\_x61.....aacacggggugcAgaacu..... 1  
Gi3\_25877869\_x60.....cgugggaacaUggggugccgaac..... 1  
Gi3\_25875049\_x60.....gaacacggggugccgaUc..... 1  
Gi1\_3590960\_x60.....cgucgCgggaacacggggugccgaac..... 1  
Gi2\_9627725\_x60.....gGcgugggaacacggggugccgaac..... 1  
Gi2\_9626345\_x60.....gucgugggaacacggggugccgCacu..... 1  
Gi5\_7756696\_x60.....cgugggaaUacggggugccgaacu..... 1  
Gi5\_7759876\_x60.....Ccgucgugggaacacggggugccgaacu..... 1  
Gi1\_3592580\_x60.....aucggagacgucgugggaacac..... 0  
Gi2\_9628805\_x60.....Uucgugggaacacggggugc..... 1  
G1a\_5183065\_x60.....ucggagacgucgugggaacacgg..... 0  
Gi5\_7754296\_x60.....gggGaacacggggugccgaacu..... 1  
Gi3\_25863349\_x60.....ugggaCcacggggugccgaacu..... 1  
G1a\_5181925\_x60.....cggagacgucgugggaacacgggg..... 0  
Gi5\_7774313\_x59.....cgugggaacacggggUAccgaacu..... 1  
Gi5\_7769180\_x59.....aacacgAggugccgaacu..... 1  
Gi3\_25892346\_x59.....gugggaGcacggggugccga..... 1  
Gi3\_25887980\_x59.....ugggaaUacggggugccgaacu..... 1  
Gi5\_7777027\_x59.....guUgugggaacacggggugccgaacu..... 1  
Gi5\_7771953\_x59.....gggaacacggggugccgCacu..... 1  
Gi5\_7776024\_x59.....uUgugggaacacggggugccgaacu..... 1  
Gi3\_25897125\_x59.....gugggGaacacggggugccgaa..... 1  
Gi3\_25891815\_x59.....cgugggaacacAgggugccgaac..... 1  
Gi3\_25885148\_x59.....Ggugggaacacggggugccgaa..... 1  
Gi1\_3599080\_x59.....aacacggggugccgaacu..... 0  
Gi1\_3599788\_x59.....ucggagacgucgugggaacacggggugc..... 0  
Gi3\_25884027\_x59.....gucgugggaacacggggugccgGcu..... 1  
Gi1\_3597133\_x59.....gugggaacGcggggugccgaacu..... 1  
Gi3\_25883260\_x59.....gugggaacacggAgugccgaac..... 1  
Gi3\_25894883\_x59.....ugggaaacacggggUAccgaacu..... 1  
G1a\_5188964\_x59.....gacgucgugggaacacgggg..... 0  
Gi1\_3598372\_x59.....cgugggaacacggggugccgCacu..... 1  
Gi3\_25900000\_x58.....cgugggaaNacggggugcc..... 1  
Gi5\_7783775\_x58.....agacgucgugggaacacggggugccgaacA..... 1  
Gi3\_25917400\_x58.....aacaGggggugccgaacu..... 1  
Gi2\_9654633\_x58.....gugggaacaAggggugccgaacu..... 1  
Gi2\_9645353\_x58.....gUagacgucgugggaacacggggugc..... 1  
Gi3\_25912354\_x58.....gUgaacacggggugccga..... 1  
Gi1\_3601662\_x58.....gaacacggggugccgaCcu..... 1  
Gi2\_9645527\_x58.....aUcacggggugccgaacu..... 1  
Gi3\_25900232\_x58.....ugggaaacaUggggugccgaac..... 1  
Gi3\_25903596\_x58.....acgAcgugggaacacggggugccgaa..... 1  
G1a\_5194264\_x58.....gugggaacacggggugccgGcu..... 1  
Gi1\_3601488\_x58.....aacGcggggugccgaacu..... 1  
Gi3\_25904756\_x58.....gggaacacggggugUcgaacu..... 1

Gi3\_25907946\_x58.....aucggagacgucgugggaCcaccggg..... 1  
Gi1\_3604736\_x58.....gaacacggggugccgaGcu..... 1  
Gi5\_7780411\_x58.....ugggaacacggggugccAaacu..... 1  
Gi3\_25929832\_x57.....gugggaacacAgggugcc..... 1  
Gi3\_25927495\_x57.....ucgugggaacacggggugccgCac..... 1  
Gi3\_25927666\_x57.....aUacgucgugggaacacggggugccgaac..... 1  
Gi2\_9661991\_x57.....ucgugggaGcacggggugccgaacu..... 1  
Gi2\_9658058\_x57.....cUugggaacacggggugccg..... 1  
Gi2\_9661820\_x57.....ggaacacggggGgccgaacu..... 1  
Gi1\_3611999\_x57.....ucggagacgucgCgggaacacggggg..... 1  
Gi3\_25932511\_x57.....ggaacacggggugUcgaacu..... 1  
Gi2\_9656804\_x57.....gucgugggaacacggggugccgaCcu..... 1  
Gi3\_25928407\_x57.....ggaacacggggugccAaacu..... 1  
G1a\_5203261\_x57.....Cugggaacacggggugccgaacu..... 1  
Gi2\_9657260\_x57.....agacgucgugggaacacggggugccgaacA..... 1  
Gi2\_9658172\_x57.....cgugggUacacggggugccgaacu..... 1  
Gi5\_7801672\_x57.....agacgucgugggaacacggggg..... 0  
Gi3\_25921339\_x57.....gugggaacacggggCugccgaacu..... 1  
Gi2\_9657203\_x57.....cgugggaacacggggugccgUacu..... 1  
Gi5\_7801615\_x57.....ugggaacacggggugccgGacu..... 1  
Gi3\_25957454\_x56.....cggagacgucgugggaacacggggg..... 0  
G1a\_5211959\_x56.....cgugggaacacggggugccg..... 0  
Gi5\_7804592\_x56.....cggagacgucgugggaacacg..... 0  
Gi2\_9674438\_x56.....gcgaucggagacgucgugggaacacggg..... 0  
Gi2\_9671582\_x56.....Cugggaacacggggugcc..... 1  
Gi2\_9667214\_x56.....cggagacgucgugggaGca..... 1  
Gi1\_3614802\_x56.....agacgucgugggaacacggggugccgaac..... 0  
Gi5\_7811984\_x56.....gagacgucgugggaacacggggugcc..... 0  
Gi3\_25955550\_x56.....cguggCaacacggggugccgaacu..... 1  
Gi3\_25957230\_x56.....cgucgugggaacGcggggugccgaacu..... 1  
Gi3\_25940990\_x56.....agacgucgugggaacacggggg..... 0  
Gi3\_25953702\_x56.....ucguUggaacacggggugccgaacu..... 1  
Gi2\_9676398\_x56.....gucgugggNacacggggugccgaacu..... 1  
Gi5\_7810528\_x56.....aacaUggggugccgaacu..... 1  
Gi1\_3613346\_x56.....ggaacacgNggugccgaacu..... 1  
Gi2\_9684291\_x55.....ucggGgacgucgugggaacac..... 1  
Gi2\_9678736\_x55.....aacGcggggugccgaacu..... 1  
Gi3\_25962245\_x55.....gggaacacgAgggugccgaacu..... 1  
Gi2\_9679066\_x55.....gGcgugggaacacggggugcc..... 1  
Gi1\_3618268\_x55.....gcgaucggagacgucgCgggaacac..... 1  
Gi3\_25972585\_x55.....Cucgugggaacacggggugccgaacu..... 1  
Gi2\_9685886\_x55.....aGcggagacgucgugggaacac..... 1  
Gi5\_7823149\_x55.....Ggggaacacggggugccgaac..... 1  
G1a\_5219250\_x55.....gugggGacacggggugccgaacu..... 1  
Gi2\_9682861\_x55.....Ggacgucgugggaacacggggg..... 1  
Gi3\_25962080\_x55.....Cugggaacacggggugccgaa..... 1  
Gi5\_7826614\_x55.....aacacgggggUaccgaacu..... 1

Gi2\_9678296\_x55.....Aggaacacggggugccgaac..... 1  
Gi3\_25972475\_x55.....cguggaacacggggugcUgaac..... 1  
Gi3\_25961915\_x55.....gagacgucgugggaacacggggugccgaa..... 0  
Gi3\_25971210\_x55.....cguggaacacUgggugccgaacu..... 1  
Gi3\_25973190\_x55.....aacacgggAugccgaacu..... 1  
Gi3\_25975775\_x55.....cgucguggNaacacggggugcc..... 1  
Gi1\_3623592\_x54.....aucggagacgucgugggaacacggggU..... 1  
G1a\_5224932\_x54.....cggagacgucgugggaacacggg..... 0  
Gi5\_7826723\_x54.....aucggagacgucgugggaGcacggg..... 1  
Gi5\_7838171\_x54.....ucguggaacGcggggugccgaacu..... 1  
Gi5\_7827425\_x54.....Uuggaacacggggugccgaacuu..... 1  
Gi5\_7835039\_x54.....ucguggGacacggggugccgaacu..... 1  
Gi5\_7828019\_x54.....cguggaacacggggugccgaaUu..... 1  
Gi3\_25987842\_x54.....aucggagacgucgugggaCcacgggu..... 1  
Gi5\_7833851\_x54.....gCaacacggggugccgaacu..... 1  
Gi5\_7836011\_x54.....aacacggggugcUgaacu..... 1  
Gi1\_3623484\_x54.....ggUacacggggugccgaacu..... 1  
Gi2\_9694656\_x54.....uggaacacggggugcUgaacu..... 1  
Gi2\_9691416\_x54.....gCgggaacacggggugcc..... 1  
Gi3\_25988544\_x54.....Gucggagacgucgugggaacacgggg..... 1  
Gi5\_7834283\_x54.....cgucguggNaacacggggugccgaacu..... 1  
Gi2\_9698706\_x54.....gGgacgucgugggaacacggggug..... 1  
Gi5\_7836335\_x54.....uggaacacAgggugccgaacu..... 1  
Gi3\_25993242\_x54.....cgucgugggaGcacggggugccgaacu..... 1  
Gi5\_7832555\_x54.....gaucggagacgucgugggaacacggggU..... 0  
Gi2\_9702108\_x54.....gCgaacacggggugccgaacu..... 1  
Gi5\_7831259\_x54.....uggaacacgggUugccgaacu..... 1  
Gi2\_9693684\_x54.....cguggaacacggggugccGacu..... 1  
G1a\_5223960\_x54.....gCgggaacacggggugccgaacu..... 1  
Gi5\_7828343\_x54.....ugAgaacacggggugccgaacu..... 1  
Gi2\_9712340\_x53.....aGcggagacgucgugggaacacggggugcc..... 1  
Gi2\_9704867\_x53.....Ggggaacacggggugccga..... 1  
Gi3\_26008681\_x53.....gugggaacacggggugcGgaacu..... 1  
Gi5\_7843599\_x53.....cguggaacacggggugcAgaacu..... 1  
Gi3\_26003169\_x53.....acgucgugggaacacggggCgccgaacu..... 1  
Gi3\_26013451\_x53.....ugggGacacggggugccgaa..... 1  
Gi3\_26005819\_x53.....gugggaacacgggAugccgaac..... 1  
Gi3\_25997021\_x53.....Ggugggaacacggggugc..... 1  
Gi3\_25999883\_x53.....aacacggggugccgUacu..... 1  
Gi2\_9705556\_x53.....gucgugggaacacggggugccgaa..... 0  
Gi2\_9708047\_x53.....Ggugggaacacggggugcc..... 1  
Gi3\_26002374\_x53.....cgugggaaAacggggugccgaacu..... 1  
Gi3\_26000201\_x53.....ggAaacacggggugccgaacu..... 1  
Gi1\_3630976\_x53.....cgAgggaacacggggugccgaacu..... 1  
Gi2\_9715255\_x53.....gugggaacUcggggugccgaacu..... 1  
Gi3\_26000890\_x53.....gucgugggaGcacggggugccgaacu..... 1  
Gi3\_26005077\_x53.....uggaacacggggugccgUacu..... 1

|                       |                                      |   |
|-----------------------|--------------------------------------|---|
| Gl1_5230397_x53.....  | gggaacacggggugccgaac.....            | 0 |
| Gi1_3627478_x53.....  | cggagacgucguggaacaacggggu.....       | 0 |
| Gi2_9703224_x53.....  | cgaucggagacgucguggaacaac.....        | 0 |
| Gi1_3630128_x53.....  | Uugggaacacggggugccg.....             | 1 |
| Gi1_3628803_x53.....  | guggaacaacggggugccgaGcu.....         | 1 |
| Gi2_9718230_x52.....  | gggaacacggggugccgGacu.....           | 1 |
| Gl1_5241298_x52.....  | Uugggaacacggggugccgaac.....          | 1 |
| Gi3_26029740_x52..... | Ugagacgucguggaacaacg.....            | 1 |
| Gi3_26020224_x52..... | aGcggagacgucguggaacaac.....          | 1 |
| Gi5_7854871_x52.....  | cgucgugggaacacggggGgccgaacu.....     | 1 |
| Gi3_26023136_x52..... | gucgugggaacacggggugccgCac.....       | 1 |
| Gi3_26029324_x52..... | gAgggaacacggggugccga.....            | 1 |
| Gi2_9726706_x52.....  | cUucgugggaacacggggugccga.....        | 1 |
| Gi2_9725926_x52.....  | uUguggaacaacggggugccgaacu.....       | 1 |
| Gi5_7855391_x52.....  | ggaacacggggugccgaGcu.....            | 1 |
| Gi5_7852687_x52.....  | cgugggaacacggAgugccgaacu.....        | 1 |
| Gi1_3632450_x52.....  | gGcgugggaacacggggugccgaacu.....      | 1 |
| Gi3_26054548_x51..... | gugggaacacggggAccga.....             | 1 |
| Gi3_26038330_x51..... | ggaacacggggAgccgaacu.....            | 1 |
| Gi3_26043532_x51..... | ggaacacggggAccgaacu.....             | 1 |
| Gi2_9738328_x51.....  | gggaacacNggggugccgaac.....           | 1 |
| Gi2_9732412_x51.....  | gugggaacacAgggugccgaac.....          | 1 |
| Gi2_9734452_x51.....  | Uaucggagacgucguggaaca.....           | 1 |
| Gi2_9729046_x51.....  | gaGcacggggugccgaacu.....             | 1 |
| Gi3_26044807_x51..... | Cacgucgugggaacaacggggugccgaacu.....  | 1 |
| Gl1_5246559_x51.....  | Uugggaacacggggugccga.....            | 1 |
| Gi2_9739246_x51.....  | aUacgucgugggaacaacggggugccgaacu..... | 1 |
| Gi3_26041900_x51..... | gucgugggGacacggggugccgaacu.....      | 1 |
| Gi3_26048989_x51..... | cgugggaUcacggggugccgaacu.....        | 1 |
| Gi3_26056384_x51..... | gugUgaacacggggugccgaacu.....         | 1 |
| Gi3_26038738_x51..... | gaacaAggggugccgaacu.....             | 1 |
| Gl1_5246304_x51.....  | gugggaacGcggggugccgaacu.....         | 1 |
| Gi1_3644514_x50.....  | gaucggagacgucguggaacaacgg.....       | 0 |
| Gl1_5254831_x50.....  | ugcgaucggagacgucgug.....             | 0 |
| Gi1_3642014_x50.....  | Aggaacacggggugccgaacu.....           | 1 |
| Gl1_5250181_x50.....  | guUggaacacggggugccgaacu.....         | 1 |
| Gi3_26069186_x50..... | aucggagacgucguggaacaacCg.....        | 1 |
| Gl1_5247831_x50.....  | gucgugggaacaacggggugcc.....          | 0 |
| Gi3_26074336_x50..... | gugggaacacggggugccgaG.....           | 1 |
| Gi2_9748995_x50.....  | gugNgaacacggggugccgaacu.....         | 1 |
| Gi2_9755295_x50.....  | cgCgggaacacggggugccgaac.....         | 1 |
| Gi3_26060086_x50..... | cguNgggaacacggggugccgaacu.....       | 1 |
| Gi2_9750495_x50.....  | gugggaacCcggggugcc.....              | 1 |
| Gi2_9754595_x50.....  | cgugggaaNacggggugcc.....             | 1 |
| Gi3_26058986_x50..... | gugggaacacggggCgccgaa.....           | 1 |
| Gi2_9748195_x50.....  | acgucgugggaacaacggggugccgaacA.....   | 1 |
| Gi5_7878986_x50.....  | gaacacggggugcUgaacu.....             | 1 |

Gi2\_9753695\_x50.....ucggagacgucgugggaacaUggggugcc.....1  
 Gi3\_26075986\_x50.....ugggaacacAgggugccgaac.....1  
 Gi3\_26062736\_x50.....ggaacaUggggugccgaac.....1  
 Gi3\_26073286\_x50.....ugggaacacggggugccAaac.....1  
 Gi3\_26069086\_x50.....ggaacacggggugcUgaac.....1  
 Gi3\_26068386\_x50...gaucggagacgucguggCaacacggggu.....1  
 Gi5\_7880636\_x50.....gGgggaacacggggugccga.....1  
 Gi1\_3647056\_x49.....gagacgucgugggaacacggggugccg.....0  
 Gi3\_26085985\_x49.....gugggaacacggggGgccg.....1  
 Gl1a\_5256217\_x49.....ugggaacacggggugccgCacu.....1  
 Gi3\_26089023\_x49.....guUggaacacggggugccg.....1  
 Gi2\_9762991\_x49.....Augggaacacggggugccg.....1  
 Gi2\_9762109\_x49.....ugggaacacggggugccgaCcu.....1  
 Gi2\_9763726\_x49.....gUaacacggggugccgaacu.....1  
 Gi3\_26084074\_x49.....ucguAggaacacggggugccgaacu.....1  
 Gi2\_9757062\_x49.....gugggaacacggggugccgaUcu.....1  
 Gi3\_26093874\_x49.....gugggaGcacggggugccgaa.....1  
 Gi3\_26085593\_x49.....Uacgucgugggaacacggggu.....1  
 Gi1\_3648771\_x49.....gaacGcggggugccgaacu.....1  
 Gl1a\_5261264\_x49.....ggagacgucgugggaaca.....0  
 Gi2\_9761080\_x49.....Ggugggaacacggggugc.....1  
 Gi5\_7895445\_x49.....ggaacGcggggugccgaacu.....1  
 Gi2\_9759561\_x49.....cgAgggaacacggggugccgaac.....1  
 Gi1\_3650143\_x49.....ugggaacacggggGcgcgaacu.....1  
 Gi5\_7899512\_x49.....cggagacgucgugggaacacggg.....0  
 Gi5\_7894857\_x49.....gugggaacacggggugccgaaUu.....1  
 Gi3\_26080399\_x49.....gugggaacaGggggugccgaacu.....1  
 Gi5\_7889712\_x49.....cUggaacacggggugccga.....1  
 Gi3\_26083045\_x49.....cgugggaacacgUggugccgaac.....1  
 Gi2\_9773885\_x48.....gaacacggggugccgCacu.....1  
 Gl1a\_5262484\_x48.....Ggugggaacacggggugccgaacu.....1  
 Gi1\_3654041\_x48.....uUggaacacggggugccgaac.....1  
 Gi1\_3657401\_x48.....cgugUgaacacggggugccgaacu.....1  
 Gi2\_9770333\_x48.....gugggaacacggggugccgaCc.....1  
 Gi3\_26113184\_x48.....ucgugggaacacAgggugccgaacu.....1  
 Gi2\_9778013\_x48...cgaucggagacgucgugggaacacggggu.....0  
 Gi5\_7902368\_x48.....cgugggaacacgggAugccgaacu.....1  
 Gi1\_3657017\_x48.....gugggaGcacggggugccgaacu.....1  
 Gi2\_9776525\_x48.....gugggaacNcggggugccg.....1  
 Gi3\_26109872\_x48.....gggaacacggAgugccgaacu.....1  
 Gi5\_7901840\_x48.....gugggaacacggggugcAgaacu.....1  
 Gi3\_26102336\_x48.....gucgugggaacacggggugccgaacuu.....0  
 Gi3\_26100896\_x48.....cgugggaacacgCggugccgaacu.....1  
 Gi5\_7907408\_x48.....gggaacGcggggugccgaacu.....1  
 Gi5\_7913888\_x48.....ugggaacacggggugcUgaacu.....1  
 Gi3\_26114336\_x48.....Ggucgugggaacacggggugccgaac.....1  
 Gi3\_26116016\_x48.....ugggaacacggggugccgaaUu.....1

|                                                           |   |
|-----------------------------------------------------------|---|
| Gi1_3656201_x48.....ucgugggaacacggggugccgCacu.....        | 1 |
| Gi5_7909808_x48.....cgugggaacacggggugAcgaacu.....         | 1 |
| Gi3_26104208_x48....aucggagacgucgugggaacacggggG.....      | 1 |
| Gi2_9771389_x48.....gugggaGcacggggugcc.....               | 1 |
| Gi2_9788474_x47.....cgugggaacCcggggugccgaacu.....         | 1 |
| Gi3_26135720_x47....aucggagacgucgugggaGcacggg.....        | 1 |
| Gi5_7924329_x47.....gugggaacacggggugAcgaacu.....          | 1 |
| Gi4_472216_x47.....cUugggaacacggggugccgaacu.....          | 1 |
| Gi1_3664388_x47.....gugggaacacggggugccgCacu.....          | 1 |
| Gi1_3661521_x47.....ggagacgucgugggaacacggggg.....         | 0 |
| Gi3_26127448_x47.....Uagacgucgugggaacacggggugccgaacu..... | 1 |
| Gi5_7915822_x47.....gggaGcacggggugccgaacu.....            | 1 |
| Gi3_26129751_x47....auUggagacgucgugggaacacgg.....         | 1 |
| Gi5_7916903_x47.....ucgCgggaacacggggugccgaacu.....        | 1 |
| Gi3_26129093_x47.....gugggaacGcggggugccgaa.....           | 1 |
| Gi3_26124628_x47.....ggaUcacggggugccgaacu.....            | 1 |
| Gi3_26132289_x47.....gugggaCcacggggugccgaac.....          | 1 |
| Gi2_9787299_x47....Gucggagacgucgugggaacacggggugc.....     | 1 |
| Gi3_26116779_x47.....Uagacgucgugggaacacggggugccgaac.....  | 1 |
| Gi5_7925786_x47.....cgugggCcacggggugccgaacu.....          | 1 |
| Gi1_3663918_x47.....aacacggggAgccgaacu.....               | 1 |
| Gi1_3662931_x47.....ugggGcacggggugccgaacu.....            | 1 |
| Gi3_26142841_x46.....aacacggggugcGgaacu.....              | 1 |
| Gi3_26147855_x46.....gugggaacacggggugccgG.....            | 1 |
| Gi5_7939263_x46.....cgugggaacacggggAgccgaacu.....         | 1 |
| Gi5_7940275_x46.....gucgugggaacacggggugc.....             | 0 |
| Gi3_26137735_x46.....cggagacgucgugggaacacggggugccg.....   | 0 |
| Gi3_26148867_x46....aucggagacgucgugggaacGcggg.....        | 1 |
| Gi1_3668211_x46.....gaacacggggugccgCacu.....              | 1 |
| Gl1a_5280646_x46..gcgaucggagacgucgug.....                 | 0 |
| Gi5_7939079_x46....cggagacgucgugggaacacggggugccga.....    | 0 |
| Gi2_9803424_x46.....ucgugggGcacggggugccgaacu.....         | 1 |
| Gi2_9800296_x46.....cgugggCcacggggugccgaacu.....          | 1 |
| Gi3_26146337_x46.....guggUaacacggggugccga.....            | 1 |
| Gi3_26145555_x46.....gugggGcacggggugcc.....               | 1 |
| Gi1_3667199_x46....cggagacgucgugggaacacgggg.....          | 0 |
| Gi3_26151581_x46.....gaacacggNgugccgaac.....              | 1 |
| Gl1a_5280784_x46.....cgucgugggaacacggggugccgaacA.....     | 1 |
| Gi3_26156917_x46.....gugggaacacgUggugccgaacu.....         | 1 |
| Gi3_26144911_x46....aGcggagacgucgugggaacacggggugcc.....   | 1 |
| Gi3_26147901_x46.....cgugAgaacacggggugccgaac.....         | 1 |
| Gi3_26150937_x46.....gugggaacacggggugccgUac.....          | 1 |
| Gi3_26151535_x46....aucggagGcugcugugggaacacggg.....       | 1 |
| Gi1_3667245_x46.....uUgugggaacacggggugccgaacu.....        | 1 |
| Gi3_26140633_x46.....ggagacgucgugggaacacggggug.....       | 0 |
| Gi5_7941372_x45.....gaacacAgggugccgaacu.....              | 1 |
| Gi2_9811239_x45.....gugggaacacggggugccgCac.....           | 1 |

Gi3\_26176993\_x45.....gUagacgucgugggaacacggggu..... 1  
 Gi5\_7941147\_x45.....cgugggaacacggggugccgaacu..... 0  
 Gi3\_26169703\_x45.....Ggugggaacacggggugccg..... 1  
 Gi2\_9811914\_x45.....Uucgugggaacacggggugccga..... 1  
 Gi5\_7943982\_x45.....cgucgugggaacacggggCgccgaacu..... 1  
 Gi3\_26162188\_x45.....cgugggaacacgggCugccgaacu..... 1  
 Gi2\_9807864\_x45.....cUucgugggaacacggggugc..... 1  
 Gi3\_26167273\_x45.....cgugggaacacggggugccUaacu..... 1  
 Gi3\_26173078\_x45.....ugggaacacggggugccgaacG..... 1  
 Gi1\_3672150\_x45.....aacacggggugccgCacu..... 1  
 Gi3\_26168983\_x45.....gAgggaacacggggugcc..... 1  
 Gi1\_3673455\_x45.....ucggagacgucgugggaacacgggg..... 0  
 Gi3\_26175958\_x45.....ugggaacaNggggugccg..... 1  
 Gi2\_9816729\_x45.....Aucgugggaacacggggugccgaacu..... 1  
 Gi3\_26166418\_x45.....gugggaacCcgggugccgaa..... 1  
 Gi1\_3671610\_x45..gcgaucggagacgucgugggaaca..... 0  
 Gi2\_9824886\_x44.....ugggaacacAgggugccgaacu..... 1  
 Gi5\_7964143\_x44.....gugggUacacggggugccgaacu..... 1  
 Gi3\_26196845\_x44...Uaucggagacgucgugggaacacgg..... 1  
 Gi2\_9825062\_x44.....ggaacacggggugccgaGc..... 1  
 Gi2\_9823258\_x44.....ugggaacacggggugccgCac..... 1  
 Gi3\_26192709\_x44.....ggaacacggggugccgaCcu..... 1  
 Gi2\_9832234\_x44...gaucggGgacgucgugggaacacggggugc..... 1  
 Gi2\_9831882\_x44.....cgucgugggaacacggggGgccgaacu..... 1  
 Gi3\_26178057\_x44.....Agugggaacacggggugccgaac..... 1  
 Gi3\_26185933\_x44.....gugggaaUacggggugcc..... 1  
 Gi3\_26192753\_x44.....gugggaacacggAgugcc..... 1  
 Gi3\_26180521\_x44.....Aaacacggggugccgaac..... 1  
 Gi2\_9823390\_x44.....uUggaacacggggugccgaa..... 1  
 Gi4\_474816\_x44.....gGgggaacacggggugccgaacu..... 1  
 Gi1\_3677153\_x44.....gggaacacggggugccgaCcu..... 1  
 Gi3\_26188837\_x44.....cguUggaacacggggugccgaacu..... 1  
 Gi1\_3676493\_x44.....gacgucgugggaacacggggugccgaacA..... 1  
 Gl1a\_5294604\_x44.....ugggaacaNggggugccgaacu..... 1  
 Gi1\_3675965\_x44.....gugggaacCcgggugccgaacu..... 1  
 Gi3\_26189409\_x44.....ucgugggaacacggggCgccgaac..... 1  
 Gi3\_26191345\_x44.....ggagacgucgugggaacacggggugccga..... 0  
 Gi2\_9830738\_x44.....ggaacacAgggugccgaacu..... 1  
 Gi2\_9822510\_x44.....agacgucgugggaacacgggg..... 0  
 Gi3\_26185053\_x44.....gugggaacacggggugccAa..... 1  
 Gi2\_9829418\_x44...gaucggGgacgucgugggaacac..... 1  
 Gi5\_7961195\_x44.....aGgucgugggaacacggggugccgaacu..... 1  
 Gi3\_26179069\_x44.....gugggGacacggggugccg..... 1  
 Gi3\_26181533\_x44.....gggaacacggggugccgaaUu..... 1  
 Gi3\_26192665\_x44...cgaucggagacgucgugggaacacggggugc..... 0  
 Gl1a\_5301477\_x43.....gugggaGcacggggugccgaacu..... 1  
 Gi3\_26206733\_x43.....gCgggaacacggggugccg..... 1



Gi1a\_5300617\_x43.....gGgggaacacggggugcc..... 1  
 Gi2\_9836766\_x43.....cUgagacgucgugggaaacacggggugc..... 1  
 Gi5\_7971571\_x43.....acgucgugNgaacacggggugccgaacu..... 1  
 Gi3\_26218601\_x43.....aucggagacgucgugggaaacacgggA..... 1  
 Gi3\_26204970\_x43.....ggaacacggAgugccgaacu..... 1  
 Gi2\_9839690\_x43.....Agggaacacggggugccgaacu..... 1  
 Gi5\_7974796\_x43.....cgucgugggaaacacggggugccgCacu..... 1  
 Gi2\_9844764\_x43.....Uggaacacggggugccga..... 1  
 Gi1\_3682780\_x43.....aUacgucgugggaaacacggggugccgaacu..... 1  
 Gi2\_9845022\_x43.....ggaacacggggugcUgaacu..... 1  
 Gi3\_26210689\_x43.....cguggaaNacggggugccga..... 1  
 Gi3\_26220149\_x43.....guggaaacacAgggugccga..... 1  
 Gi3\_26207077\_x43.....uAggaaacacggggugccga..... 1  
 Gi3\_26211764\_x43.....cgucguggGacacggggugccgaacu..... 1  
 Gi3\_26214860\_x43.....ggaacaUggggugccgaacu..... 1  
 Gi3\_26209313\_x43.....ugggGacacggggugccga..... 1  
 Gi2\_9840120\_x43.....ugggaacaNggggugccgaac..... 1  
 Gi3\_26217053\_x43.....cgCcguggaaacacggggugccgaacu..... 1  
 Gi3\_26201917\_x43.....ucAuggaaacacggggugccgaacu..... 1  
 Gi1\_3680974\_x43.....uAggaaacacggggugccgaacu..... 1  
 Gi3\_26218945\_x43.....gagacgucgugggaaacacggggugc..... 0  
 Gi3\_26219762\_x43.....cggagacgucgugggaaacacggggugccgaacu..... 0  
 Gi3\_26198778\_x43.....auUggagacgucgugggaaacacggggu..... 1  
 Gi2\_9847129\_x43.....cggagacgucgugggaaacacgggg..... 0  
 Gi1\_3687041\_x42.....gAgggaacacggggugccgaacu..... 1  
 Gi3\_26223607\_x42.....gugggaacGcggggugccg..... 1  
 Gi1\_3689477\_x42.....gacgucgugggaaacacggggugccgaac..... 0  
 Gi5\_7987090\_x42.....gugggaCcacggggugccgaacu..... 1  
 Gi5\_7983226\_x42.....gAaacacggggugccgaacu..... 1  
 Gi3\_26225287\_x42.....aCcgagacgucgugggaaacacg..... 1  
 Gi2\_9850837\_x42.....gucgugggaaacCcggggugccgaacu..... 1  
 Gi3\_26226379\_x42.....gugggaacacggggugcUg..... 1  
 Gi3\_26232301\_x42.....ggaacacggggugccgaCc..... 1  
 Gi1\_3690989\_x42.....ugggaGcacggggugccgaacu..... 1  
 Gi2\_9849157\_x42.....gAgggaacacggggugccg..... 1  
 Gi3\_26226883\_x42.....ggaacacggAgugccgaac..... 1  
 Gi2\_9861001\_x42.....aGcgagacgucgugggaaacacg..... 1  
 Gi3\_26231125\_x42.....aUacgucgugggaaacacggggugcc..... 1  
 Gi2\_9847897\_x42.....cguggaaacacggggugAcgaacu..... 1  
 Gi1a\_5312145\_x42.....gaucggagacgucgugggaaacacg..... 0  
 Gi2\_9857473\_x42.....aUacgucgugggaaacacggggugc..... 1  
 Gi1\_3688595\_x42.....aacacggggugccAaacu..... 1  
 Gi2\_9848611\_x42.....cggGgacgucgugggaaacacggggu..... 1  
 Gi5\_7978984\_x42.....Uucgugggaaacacggggugccgaac..... 1  
 Gi5\_7986922\_x42.....gugggaacNcggggugccgaac..... 1  
 Gi3\_26239777\_x42.....aucggagGcucgugggaaacacg..... 1  
 Gi1\_3691157\_x42.....gaGcacggggugccgaacu..... 1

|                                                           |   |
|-----------------------------------------------------------|---|
| Gi3_26222893_x42.....guUggaacacggggugccgaa.....           | 1 |
| Gi2_9857515_x42.....gucgugggaacacggggg.....               | 0 |
| Gi5_7993166_x41.....gCgaacacggggugccgaacu.....            | 1 |
| Gi2_9866322_x41.....ggaacacggggugccAaacu.....             | 1 |
| Gi3_26252410_x41.....cgugggaacaAggggugccgaacu.....        | 1 |
| Gi2_9865338_x41.....gggaacacggAgugccgaacu.....            | 1 |
| Gi5_7996692_x41.....ggagacgucgugggaacacggggugccgaacu..... | 0 |
| Gi5_7998209_x41.....ucgugggaGcacggggugccgaacu.....        | 1 |
| Gi2_9871201_x41.....gaacacAgggugccgaacu.....              | 1 |
| Gi3_26248638_x41.....ggagacgucgugggaacacgggg.....         | 0 |
| Gi2_9864395_x41.....gUaacacggggugccgaa.....               | 1 |
| Gi3_26253804_x41.....Cugggaacacggggugccg.....             | 1 |
| Gi2_9868782_x41.....ucggGgacgucgugggaacacgg.....          | 1 |
| Gi5_7990952_x41.....ugggaacacggggAgccgaacu.....           | 1 |
| Gi2_9869684_x41.....aacacggggAgccgaacu.....               | 1 |
| Gi3_26240110_x41.....gCacacggggugccgaacu.....             | 1 |
| Gi1_3692076_x41.....ucgugggGacacggggugccgaacu.....        | 1 |
| Gi5_8001776_x41.....gggaacacggggGgccgaacu.....            | 1 |
| Gi1_3695848_x41.....Agaacacggggugccgaacu.....             | 1 |
| Gi3_26242529_x41.....gugAgaacacggggugcc.....              | 1 |
| Gi3_26266370_x40.....gaacacggUgugccgaacu.....             | 1 |
| Gi5_8012734_x40.....ucgugggaacCcggggugccgaacu.....        | 1 |
| Gi1a_5322628_x40.....cgugggaacacggggugccgaac.....         | 0 |
| Gi1_3700477_x40.....gugggaacacggggugccgaCcu.....          | 1 |
| Gi1_3701557_x40.....guggUaacacggggugccgaacu.....          | 1 |
| Gi3_26279330_x40.....aacUcggggugccgaacu.....              | 1 |
| Gi2_9885530_x40.....cgugggaacacggggugccgCac.....          | 1 |
| Gi3_26273970_x40.....cgCgggaacacggggugccga.....           | 1 |
| Gi3_26280010_x40.....gggaacCcggggugccgaacu.....           | 1 |
| Gi2_9880010_x40.....gggaacacggggugccgaCc.....             | 1 |
| Gi2_9876490_x40.....ucguUggaacacggggugccgaacu.....        | 1 |
| Gi3_26268970_x40.....Agggaacacggggugccgaac.....           | 1 |
| Gi1_3700597_x40.....acgucgugggaacacggggugccgaac.....      | 0 |
| Gi3_26273810_x40.....cguAggaacacggggugccgaac.....         | 1 |
| Gi2_9884250_x40.....ggUgacgucgugggaacacggggugcc.....      | 1 |
| Gi5_8010294_x40.....aacacggggugccgaCcu.....               | 1 |
| Gi1_3701277_x40.....cgugggaacacggggugccgaCcu.....         | 1 |
| Gi1_3702037_x40.....gUaacacggggugccgaacu.....             | 1 |
| Gi5_8009854_x40.....ucguUggaacacggggugccgaacu.....        | 1 |
| Gi5_8006734_x40.....gggaacacggggugccgaGcu.....            | 1 |
| Gi2_9884570_x40.....Gucggagacgucgugggaacac.....           | 1 |
| Gi3_26267770_x40.....aCcgagacgucgugggaacacggg.....        | 1 |
| Gi5_8015894_x40.....ugggaacacggggugccgaCcu.....           | 1 |
| Gi3_26296797_x39.....Aucgugggaacacggggugccgaac.....       | 1 |
| Gi2_9898462_x39.....guggUaacacggggugcc.....               | 1 |
| Gi3_26293170_x39.....gugggaGcacggggugccg.....             | 1 |
| Gi3_26286423_x39.....ggaacacggggUccgaacu.....             | 1 |

Gi2\_9899554\_x39.....guggaacGcggggugcc..... 1  
 Gi5\_8019767\_x39.....cguggUacacggggugccgaacu..... 1  
 Gi3\_26301087\_x39.....ggaacacgAggugccgaac..... 1  
 Gi2\_9892651\_x39.....acgucguggaacacggggugccga..... 0  
 Gi1\_3702917\_x39.....gacgucgCgggaacacggggugccgaac..... 1  
 Gl1a\_5335233\_x39.....cUugggaacacggggugcc..... 1  
 Gi3\_26295861\_x39.....cggagacgucguggaacacggggugccgaa..... 0  
 Gi3\_26294730\_x39.....ggaacacggggugcAgaacu..... 1  
 Gi1\_3706817\_x39.....cgucguggaacacggggugccg..... 0  
 Gi3\_26294886\_x39.....ugggaacacggggugcUgaac..... 1  
 Gi3\_26295666\_x39.....aucggagacgucguAggaacacggggugc..... 1  
 Gi2\_9888166\_x39.....Gucggagacgucguggaacacggg..... 1  
 Gi3\_26286579\_x39.....gGucggagacgucguggaacacggg..... 1  
 Gi3\_26286072\_x39.....gaUcacggggugccgaac..... 1  
 Gl1a\_5331567\_x39.....guggaacacggggugccgCacu..... 1  
 Gl1a\_5334726\_x39.....Ugaacacggggugccgaac..... 1  
 Gi2\_9898189\_x39.....Gucggagacgucguggaacacggggugcc..... 1  
 Gi3\_26294808\_x39.....cgCcguggaacacggggugcc..... 1  
 Gi5\_8023199\_x39.....ucggagacgucguggaacacggggugc..... 0  
 Gi3\_26287398\_x39.....aucggagacgucguggGacacggg..... 1  
 Gi3\_26291688\_x39.....gGcugcugggaacacggggugccgaacu..... 1  
 Gi1\_3708338\_x39.....gGgggaacacggggugcc..... 1  
 Gi2\_9895381\_x39.....agacgucguggaacacggggugccga..... 0  
 Gi2\_9894367\_x39.....aacacggggugccgCacu..... 1  
 Gi2\_9891988\_x39.....guAggaacacggggugccgaac..... 1  
 Gi3\_26293209\_x39.....gacgucguggaacacggggugc..... 0  
 Gi3\_26302803\_x39.....acgucguggaacacggggugccgCacu..... 1  
 Gi5\_8024603\_x39.....aacacggggGgcccgaacu..... 1  
 Gi2\_9896083\_x39.....Gucggagacgucguggaaca..... 1  
 Gi2\_9899983\_x39.....ggaacacggggugUcgaacu..... 1  
 Gi5\_8018675\_x39.....cUugggaacacggggugcc..... 1  
 Gi3\_26306296\_x38.....gugCgaacacggggugccgaacu..... 1  
 Gi5\_8035229\_x38.....ugggaacaUggggugccgaacu..... 1  
 Gi2\_9910371\_x38.....gugggaacacggggugccgGac..... 1  
 Gi1\_3714278\_x38.....ggaacacggggugccgCacu..... 1  
 Gl1a\_5341938\_x38.....gugggaacCcgggugccgaacu..... 1  
 Gi2\_9901175\_x38.....Uacgucguggaacacggggugccg..... 1  
 Gi1\_3708882\_x38.....ucguggaacGcggggugccgaacu..... 1  
 Gl1a\_5339012\_x38.....guggUaacacggggugccgaacu..... 1  
 Gi2\_9901555\_x38.....Ugugggaacacggggugccgaac..... 1  
 Gl1a\_5340570\_x38.....aucggagacgucguggaacac..... 0  
 Gi1\_3709718\_x38.....ucguggaacacggggugccgaa..... 0  
 Gi5\_8032949\_x38.....ugggaacacgAggugccgaacu..... 1  
 Gi3\_26316442\_x38.....Nugggaacacggggugccgaacu..... 1  
 Gi3\_26321610\_x38.....guggaacacggggugUc..... 1  
 Gi3\_26320166\_x38.....aucggagacgucguggaGcacgg..... 1  
 Gi3\_26319216\_x38.....gugggCacacggggugccgaac..... 1

Gi1\_3713860\_x38.....ggaacacggggCgccgaacu..... 1  
 Gi3\_26317772\_x38.....cgugggaacacggggugccgaaA..... 1  
 Gi3\_26319140\_x38.....Uucgugggaacacggggugc..... 1  
 Gi3\_26322598\_x38.....aucggagacgucgugggCacacg..... 1  
 Gi3\_26311046\_x38.....gugggaGcacggggugcc..... 1  
 Gi1\_3710782\_x38.....gugggaacacggggugccAaacu..... 1  
 Gi2\_9902543\_x38.....cgCcgugggaacacggggugccgaacu..... 1  
 Gi3\_26307170\_x38.....ugggaacacggggCgccgaa..... 1  
 Gi2\_9909497\_x38.....cgugggaacacggggugccgaCc..... 1  
 Gi1\_3710744\_x38.....acgucgCgggaacacggggugccg..... 1  
 Gi3\_26327044\_x38.....guUgugggaacacggggugccgaac..... 1  
 Gi2\_9912993\_x38.....cUucgugggaacacggggugccgaac..... 1  
 Gi3\_26316404\_x38.....uCggaacacggggugccgaa..... 1  
 Gi3\_26327310\_x38.....cgugggaCcacggggugccgaac..... 1  
 Gi5\_8031201\_x38.....gGgggaacacggggugccgaa..... 1  
 Gi1\_3713784\_x38.....gGgggaacacggggugccgaac..... 1  
 Gi1\_3710212\_x38.....ugggaacGcggggugccgaacu..... 1  
 Gi2\_9908167\_x38.....gagacgucgugggaacacggggugccgaac..... 0  
 Gi3\_26321572\_x38.....gugggaacacggggCgccg..... 1  
 Gl1\_5343686\_x38.....aucggagacgucgugggaacacgggg..... 0  
 Gi3\_26343001\_x37.....gaucggagacguUgugggaacacggg..... 1  
 Gi3\_26333640\_x37.....gaacacggggCgccgaa..... 1  
 Gi2\_9919814\_x37.....gugggaacacggggugcUgaac..... 1  
 Gi3\_26333344\_x37.....acgucgugggaacacggggGgccgaacu..... 1  
 Gi3\_26350290\_x37.....ugggCacacggggugccgaacu..... 1  
 Gi3\_26347071\_x37.....aucggagacgucgugggaCcacggg..... 1  
 Gi3\_26350660\_x37.....cguUgugggaacacggggugccgaacu..... 1  
 Gi3\_26346479\_x37.....gugggaacacggggugcUga..... 1  
 Gi2\_9913487\_x37.....cgugggaacacggggugccgaGc..... 1  
 Gi2\_9922774\_x37.....aacacAgggugccgaacu..... 1  
 Gi2\_9914486\_x37.....ggaacacggggugccgaCcu..... 1  
 Gi2\_9918001\_x37.....ggaGcacggggugccgaac..... 1  
 Gi1\_3716548\_x37.....ggaacacggggugccgaacu..... 0  
 Gi5\_8053663\_x37.....ucgugggaacacggggGgccgaacu..... 1  
 Gi1\_3715586\_x37.....Uucgugggaacacggggugcc..... 1  
 Gi3\_26346627\_x37.....cguggUaacacggggugccgaacu..... 1  
 Gl1\_5345768\_x37.....cgaucggagacgucgugggaacacggg..... 0  
 Gi1\_3719397\_x37.....Gcgugggaacacggggugccgaac..... 1  
 Gi3\_26338006\_x37.....Uaacacggggugccgaacu..... 1  
 Gi2\_9925882\_x37.....cgugggaacUcggggugccgaacu..... 1  
 Gi2\_9917113\_x37.....gcaucggagacgucgugggaacacgg..... 0  
 Gi3\_26336082\_x37.....ugggaacacgggUugccgaac..... 1  
 Gi2\_9924402\_x37.....aacacggggugccgGacu..... 1  
 Gl1\_5350800\_x37.....gGgggaacacggggugccgaac..... 1  
 Gi5\_8056192\_x36.....gAgaacacggggugccgaacu..... 1  
 Gi3\_26364971\_x36.....cgugggaacacggggugcGgaacu..... 1  
 Gi3\_26373251\_x36.....gaacacggggugGcgaacu..... 1

Gi5\_8060152\_x36.....aacacggAgugccgaacu..... 1  
Gi2\_9941031\_x36.....gugggaacacAgggugcc..... 1  
Gi3\_26363243\_x36.....cgugggaacacggggugccGac..... 1  
Gi3\_26372099\_x36.....cgucgugggaacacggggugccAaacu..... 1  
Gi3\_26361947\_x36.....guAggaacacggggugccga..... 1  
Gi3\_26371307\_x36.....ugggaaacacggggugccgaG..... 1  
Gi5\_8059684\_x36.uUcgauccgagacgucgug..... 1  
Gi3\_26359751\_x36.....gggaacacggggugccAaac..... 1  
Gi2\_9938691\_x36...Uaucggagacgucgugggaacacggggug..... 1  
Gi3\_26353163\_x36.....Gucggagacgucgugggaacacggggugcc..... 1  
Gi2\_9937935\_x36.....gGgacgucgugggaacacggggugccg..... 1  
Gi3\_26358563\_x36.....acgucgugggaacGcggggugccgaacu..... 1  
Gi5\_8062888\_x36.....cgCcgugggaacacggggugccgaacu..... 1  
Gi1\_3720579\_x36.....ggagacgucgugggaacacggggugc..... 0  
Gi3\_26361011\_x36.....agacgucgugggaacacggggugccgaa..... 0  
Gi1\_3724431\_x36.....Ugagacgucgugggaacacggggugcc..... 1  
Gi5\_8056264\_x36.....gaacacggggugccAaacu..... 1  
Gi1\_3726159\_x36.....ucgugggaacacggggugccgaGcu..... 1  
Gi3\_26362055\_x36.....aacacggggugccgaaAu..... 1  
Gi2\_9935739\_x36.....aacacggggugcUgaacu..... 1  
Gi1\_3722523\_x36.....uCGgaacacggggugccgaacu..... 1  
Gi2\_9935955\_x36.....cUgagacgucgugggaacacgggggu..... 1  
Gi1\_3723243\_x36...aucggagacgucgCgggaacacggggugcc..... 1  
Gi3\_26362235\_x36.....ucgugggaacacggggugccgaGc..... 1  
G1a\_5355887\_x36.....gagacgucgugggaacacg..... 0  
Gi3\_26374403\_x36..gcgaucggagacgucgugggaac..... 0  
Gi2\_9940923\_x36.....ucgugggaacGcggggugccgaacu..... 1  
G1a\_5359379\_x36.....ggaacacgNggugccgaacu..... 1  
Gi2\_9932031\_x36.....ucgugggaacacggggGgccgaacu..... 1  
Gi5\_8065480\_x36.....gUgaacacggggugccgaa..... 1  
Gi3\_26353991\_x36...aucggagacgCcgugggaacacgggggu..... 1  
Gi5\_8054860\_x36.....ggagacgucgugggaacacggggugcc..... 0  
Gi3\_26370947\_x36.....Gcugggaacacggggugc..... 1  
Gi3\_26357627\_x36..gcgaucggagacgucgugggaacacggggugcc..... 0  
Gi2\_9932535\_x36.....gUgaacacggggugccgaa..... 1  
Gi2\_9936747\_x36.....Uacacggggugccgaacu..... 1  
Gi3\_26374619\_x36.....ucgugggaacaUggggugccgaacu..... 1  
Gi5\_8068054\_x35.....gggUacacggggugccgaacu..... 1  
Gi3\_26396640\_x35..cgauccgagacgucgugggaacacggggugcc..... 0  
Gi1\_3727092\_x35.....ucguUggaacacggggugccgaacu..... 1  
Gi3\_26375535\_x35.....gggaacacggggugcUgaac..... 1  
Gi3\_26389220\_x35.....gugggaacacggggugccCaacu..... 1  
Gi5\_8078589\_x35.....gugggaacacggggugccgUacu..... 1  
Gi3\_26387330\_x35.....gggUacacggggugccgaacu..... 1  
Gi2\_9946269\_x35.....guAggaacacggggugcc..... 1  
Gi1\_3731292\_x35.....cCugggaacacggggugccgaacu..... 1  
Gi3\_26385965\_x35.....cgucgugggaacacggggugccgaGcu..... 1

Gi5\_8068264\_x35.....gaacaUggggugccgaacu..... 1  
 Gi3\_26385755\_x35.....ggaacCcgggugccgaac..... 1  
 Gi5\_8071484\_x35.....ggagacgucguggaaca..... 0  
 Gi3\_26378300\_x35.....ucgugAgaacacggggugccgaacu..... 1  
 Gi3\_26374870\_x35.....ucUgggaaacacggggugccgaacu..... 1  
 Gi1\_3730802\_x35.....cgugggaacacggggugccgaGcu..... 1  
 Gi3\_26394190\_x35.....gggaacacggggugccgaaAu..... 1  
 Gi3\_26386420\_x35.....aucggagacgucgugggGacacggggu..... 1  
 Gi3\_26385580\_x35.....ugggaacacggggugccgC..... 1  
 Gi3\_26384670\_x35.....Aggaacacggggugccgaa..... 1  
 Gi1\_3733112\_x35.....cgugggGacacggggugccgaacu..... 1  
 Gi3\_26394680\_x35.....aucggagacgucgugggaacGcg..... 1  
 Gi3\_26382535\_x35.....gGcgugggaacacggggugcc..... 1  
 Gi3\_26379875\_x35.....aucggagacgCcgugggaacacggg..... 1  
 Gi3\_26375570\_x35.....cgugggaacacggggugcAgaac..... 1  
 Gi3\_26381940\_x35.....cgugggaaNacggggugccgaa..... 1  
 Gi2\_9952009\_x35.....ucggGgacgucgugggaacacggggug..... 1  
 Gi1\_3730627\_x35.....guAggaacacggggugccgaacu..... 1  
 G1a\_5367175\_x35.....gugggaacacAgggugccgaacu..... 1  
 Gi2\_9955544\_x35.....gCaacacggggugccgaac..... 1  
 Gi2\_9955159\_x35.....gAgggaacacggggugcc..... 1  
 Gi5\_8076664\_x35.....ugggaacUcggggugccgaacu..... 1  
 G1a\_5362170\_x35.....cgaucggagacgucgugggaa..... 0  
 Gi3\_26376655\_x35.....cgucgCgggaacacggggugccgaacu..... 1  
 Gi3\_26377180\_x35.....cgugggaacacgAggugccgaac..... 1  
 Gi4\_486007\_x35.....aucggagacgucgugggaacacggggugcc..... 0  
 G1a\_5361225\_x35.....gacgucgugggaacacggggugccgaacu..... 0  
 Gi1\_3730417\_x35.....aucggagacgucgugggaacacggg..... 0  
 Gi3\_26394295\_x35.....cgugggaaUacggggugccgaac..... 1  
 Gi2\_9949279\_x35.....cgugggaacacggggCgccgaac..... 1  
 Gi1\_3733761\_x34.....aacacggggugccgGacu..... 1  
 Gi5\_8083733\_x34.....Augggaacacggggugccgaac..... 1  
 Gi2\_9968139\_x34.....ugggaacacggggugccgGacu..... 1  
 Gi2\_9965589\_x34.....cgaucggagacgucgugggaacacgggg..... 0  
 Gi2\_9962665\_x34.....gugggaacacggggGgccg..... 1  
 Gi2\_9963821\_x34cugcgaucggagacgucgugggaacac..... 0  
 Gi2\_9956919\_x34.....cgCgggaacacggggugcc..... 1  
 Gi1\_3733285\_x34.....cgugggaGcacggggugccgaacu..... 1  
 Gi3\_26416944\_x34.....gaacacggggugAcgaacu..... 1  
 Gi3\_26411470\_x34.....gaucggagacgucgugggaacacggggugccg..... 0  
 Gi3\_26409838\_x34.....ucgugggaacacggggugccgaUc..... 1  
 Gi5\_8092097\_x34.....gucgugggNacacggggugccgaacu..... 1  
 Gi2\_9956239\_x34.....gugggaacaUggggugccgaac..... 1  
 Gi5\_8081557\_x34.....Ccgugggaacacggggugccgaacu..... 1  
 Gi3\_26406132\_x34.....gAgggaacacggggugccgaa..... 1  
 G1a\_5370054\_x34.....cgugggaaNacggggugccgaacu..... 1  
 Gi2\_9956613\_x34.....aucggagaNgucgugggaacacggggugc..... 1

Gi3\_26417080\_x34.....gugggaacacggggugAcgaaC..... 1  
 Gi2\_9958007\_x34.....Augggaacacggggugccga..... 1  
 Gi2\_9958585\_x34.....aGcgagacgucgugggaacacggggug..... 1  
 Gi3\_26406472\_x34.....guggUaacacggggugccgaa..... 1  
 Gi3\_26418508\_x34.....uAggaaacacggggugccgaa..... 1  
 Gi2\_9959333\_x34.....aucggagacgucguggggaGcacggggu..... 1  
 Gi5\_8083699\_x34.....gucgugggaacacggggGgccgaacu..... 1  
 Gi3\_26410416\_x34.....ugggaGcacggggugccga..... 1  
 Gi3\_26405350\_x34.....gucgugggaacacggggGgccgaac..... 1  
 Gi5\_8091689\_x34.....ugggaacCcggggugccgaacu..... 1  
 G1a\_5368014\_x34.....gugggaacacggggugccgGacu..... 1  
 Gi3\_26414836\_x34.....Ugucgugggaacacggggugccgaacu..... 1  
 Gi3\_26399910\_x34.....ggaacacggggguAccgaac..... 1  
 Gi5\_8084481\_x34.....gGgggaacacggggugcc..... 1  
 Gi2\_9959265\_x34.....ugggaacacgggUugccgaacu..... 1  
 Gi2\_9971029\_x34.....cgucgugggaacacggggugccgCacu..... 1  
 G1a\_5371924\_x34.....gaucggagacgucgugggaacacgg..... 0  
 Gi3\_26412116\_x34.ugcgauccgagacgucguggggaacacggggu..... 0  
 Gi2\_9967493\_x34.....ggaacGcggggugccgaac..... 1  
 Gi2\_9961339\_x34.....gAaacacggggugccgaac..... 1  
 Gi2\_9982152\_x33.....Ggacgucgugggaacacggggugccgaacu..... 1  
 Gi1\_3738783\_x33.....Uugggaacacggggugccgaacuu..... 1  
 Gi1\_3740829\_x33.....Uugggaacacggggugccga..... 1  
 Gi3\_26429581\_x33.....gugggaacacgCggugccgaacu..... 1  
 Gi3\_26427106\_x33.....gucgugggaacacAgggugccgaacu..... 1  
 Gi3\_26430769\_x33.....Uacgucgugggaacacacggggugccg..... 1  
 Gi3\_26428888\_x33.....gggaacacgggAugccgaacu..... 1  
 Gi3\_26421166\_x33.....gagacgucgugggaacacggggugccga..... 0  
 Gi2\_9977862\_x33.....ugggaacacggggugccAaacu..... 1  
 Gi5\_8094633\_x33.....uggAaacacggggugccgaacu..... 1  
 Gi5\_8096745\_x33.....gGgggaacacggggugccgaacuu..... 1  
 Gi2\_9982317\_x33.....ggaacacggggugccgaUc..... 1  
 Gi2\_9984297\_x33.....cgugggaacacggggugccgaUc..... 1  
 Gi2\_9971988\_x33..gcgauccgagacgucgugggaaca..... 0  
 Gi3\_26437006\_x33.....gugggaacacggggugccgC..... 1  
 Gi3\_26439811\_x33.....cgugggaacacgggguAccgaac..... 1  
 Gi3\_26441857\_x33...gGucggagacgucgugggaacacggggu..... 1  
 G1a\_5382125\_x33.....Agaacacggggugccgaacu..... 1  
 Gi3\_26438590\_x33.....gucgugggNacacggggugccgaac..... 1  
 Gi2\_9979776\_x33.....ggGacacggggugccgaac..... 1  
 Gi3\_26427502\_x33.....ggaacacggggugUcgaac..... 1  
 Gi3\_26441329\_x33.....cguggAaacacggggugccgaac..... 1  
 Gi1\_3739542\_x33.....Ccgugggaacacggggugccgaacu..... 1  
 Gi3\_26420275\_x33.....cgucgugggaacacggggCgcc..... 1  
 Gi1\_3741456\_x33.....cgugggaacacggggCgccgaacu..... 1  
 G1a\_5382356\_x33.....gAgggaacacggggugccgaacu..... 1  
 Gi2\_9975849\_x33.....cgugggGacacggggugccgaac..... 1

Gi3\_26433607\_x33.....aCcgagacgucguggaacacggggu..... 1  
Gi5\_8096712\_x33.....aGcgagacgucguggaacacg..... 1  
Gi1\_3741753\_x33.....aucgagacgucgCgggaacacgggg..... 1  
Gi2\_9975189\_x33.....gugggaGcacggggugccg..... 1  
Gi2\_9979611\_x33.....guggaacacggUgugccgaac..... 1  
Gi3\_26432749\_x33.....guggaacacgAggugcc..... 1  
Gi2\_9978423\_x33.....gggaacaUggggugccgaacu..... 1  
Gi2\_9974793\_x33.....ugggaaUacggggugccgaacu..... 1  
Gi5\_8100573\_x33.....gaacacgAggugccgaacu..... 1  
Gi3\_26426677\_x33.....ugUgaacacggggugccga..... 1  
Gi5\_8093742\_x33.....cgGcguggaacacggggugccgaacu..... 1  
Gi2\_9983307\_x33.....Ggggaacacggggugccg..... 1  
Gi2\_9983802\_x33.....gucgugggGacacggggugccgaacu..... 1  
Gi1\_3747520\_x32.....gagacgucgCgggaacacggggugcc..... 1  
Gi5\_8108326\_x32.....Uagacgucguggaacacggggugccgaacu..... 1  
Gi5\_8109254\_x32.....Gguggaacacggggugccgaac..... 1  
Gi3\_26452478\_x32.....ucguggaacacggggugccgaCcu..... 1  
Gi3\_26458078\_x32.....cgGcguggaacacggggugcc..... 1  
Gi3\_26461022\_x32.....cUgagacgucguggaacacg..... 1  
Gi3\_26458462\_x32.....ucgugggGacacggggugccgaac..... 1  
Gi5\_8107078\_x32.....ucguggaacacggggUaccgaacu..... 1  
Gi1\_3747712\_x32.....gaacacggggugccgGacu..... 1  
Gi5\_8105638\_x32.....uggaacacggggUaccgaacu..... 1  
Gi3\_26449150\_x32.....cUucguggaacacgggg..... 1  
Gi2\_9997693\_x32.....aGcgagacgucguggaacacggg..... 1  
Gi3\_26445374\_x32.....gugggaaAacggggugcc..... 1  
Gi2\_9992317\_x32.....gCcguggaacacggggugccgaacu..... 1  
G1a\_5387533\_x32.....Uuggaacacggggugccg..... 1  
G1a\_5384269\_x32.....ggUacacggggugccgaacu..... 1  
Gi1\_3746368\_x32.....aucgagacgucgCgggaacacggggugc..... 1  
Gi2\_9997853\_x32.....aucggagaNgucguggaacac..... 1  
Gi3\_26453214\_x32.....gucguggaacacggggugccgGacu..... 1  
Gi2\_9995805\_x32.....gggaacacAgggugccgaacu..... 1  
Gi5\_8109126\_x32.....guggaacCcgggugccgaac..... 1  
Gi2\_9995933\_x32.....ucgGggaacacggggugccgaacu..... 1  
Gi3\_26451550\_x32.....cgugggaaNacggggugc..... 1  
Gi3\_26458686\_x32.....ggaacacgggAugccgaacu..... 1  
Gi3\_26458910\_x32.....ggaacacggggugcAgaacu..... 1  
Gi2\_9996253\_x32.....gugAgaacacggggugccgaac..... 1  
Gi1\_3745568\_x32.....cgaucgagacgucguggaacacggggU..... 1  
Gi3\_26447710\_x32.....gaaNacggggugccgaacu..... 1  
Gi3\_26453470\_x32.....cggagacgucguggaacacggggugccgaac..... 0  
Gi2\_9998013\_x32.....gggaacacggggugccAaacu..... 1  
Gi5\_8110886\_x32.....gCggaacacggggugccgaac..... 1  
Gi1\_3745504\_x32.....acgucguggaacacggggugccga..... 0  
Gi3\_26445854\_x32.....cguggaacacggUgugccgaacu..... 1  
Gi3\_26464606\_x32.....gaacacggggugccgaGc..... 1



|                                                         |   |
|---------------------------------------------------------|---|
| Gi3_26469214_x32.....gugggaacacggggAgcc.....            | 1 |
| Gi4_488999_x32.....gaacacggggugccgaacu.....             | 0 |
| Gi2_9992189_x32.....gugggaacacgAgggugccgaac.....        | 1 |
| Gi3_26468446_x32.....cgugggaacacggCgugccgaacu.....      | 1 |
| Gi3_26459518_x32.....gucgCgggaacacggggugccgaacu.....    | 1 |
| Gi3_26447390_x32.....guNggaacacggggugccgaacu.....       | 1 |
| Gi3_26483854_x31.....gucgugggaacacggggugccgaaAu.....    | 1 |
| Gi3_26482211_x31.....gugggaacacggggUccgaacu.....        | 1 |
| Gi2_10004327_x31.....aucggagacgucgugggaCcacggggu.....   | 1 |
| Gi4_489954_x31.....cgucgugggaacacggggugcc.....          | 0 |
| Gi3_26471268_x31.....cgGgggaacacggggugcc.....           | 1 |
| Gi1_3753431_x31.....cgucgugggaacacggggugccgaa.....      | 0 |
| Gi3_26484753_x31.....gucgugggaacacggggugccgac.....      | 1 |
| Gi3_26480661_x31.....aucgUagacgucgugggaacacg.....       | 1 |
| Gi1_3751695_x31.ugcgaucggagacgucgugggaacacg.....        | 0 |
| Gi2_10010992_x31.....gugggaacNcggggugccgaa.....         | 1 |
| Gi3_26473779_x31.....ugggaacacgggCugccgaacu.....        | 1 |
| Gi3_26489992_x31.....ggaacacggggugcAgaac.....           | 1 |
| Gi3_26474957_x31.....cgucgugggaacacggggugccgCac.....    | 1 |
| Gi3_26483141_x31.....cgugggaacacggggugUcgaac.....       | 1 |
| Gi5_8123185_x31.....Ggacgucgugggaacacggggugccgaacu..... | 1 |
| Gi2_10010713_x31.....gucgugggaacGcggggugccgaacu.....    | 1 |
| Gi2_10005846_x31.....cgucgugggaacacggggCgcccgaacu.....  | 1 |
| Gi3_26488380_x31.....ggaacacgggAugccgaac.....           | 1 |
| Gi5_8119062_x31.....ucgugggaacacAgggugccgaacu.....      | 1 |
| Gi3_26473965_x31.....gggaacaUggggugccgaac.....          | 1 |
| Gi2_10005660_x31.....cgugUgaacacggggugccgaac.....       | 1 |
| Gi2_10012294_x31.....ggGgacgucgugggaacacggggugccg.....  | 1 |
| Gi3_26472539_x31.....gugggaacaAgggugccgaac.....         | 1 |
| Gi5_8118721_x31.....ggaacacggggugccAaacu.....           | 1 |
| Gi2_10001599_x31.....aucggagaNgucgugggaacacggggu.....   | 1 |
| Gi5_8127773_x31.....gucgugggaacacggggugccgCacu.....     | 1 |
| Gi5_8121976_x31.....cgugggaacacggggugccgUacu.....       | 1 |
| Gi3_26484970_x31.....gugggaacacggggugAc.....            | 1 |
| Gi3_26480351_x31.....cgAcgugggaacacggggugccgaacu.....   | 1 |
| Gi3_26481374_x31.....gugggaacacggggugccgGa.....         | 1 |
| Gi1_3752098_x31.....Uaacacggggugccgaac.....             | 1 |
| Gi3_26487202_x31.....ggaaGacggggugccgaacu.....          | 1 |
| Gi1_3753338_x31.....ucgugggaGcacggggugccgaacu.....      | 1 |
| Gi2_10009752_x31...Uaucggagacgucgugggaacacgggg.....     | 1 |
| Gi5_8122844_x31.....gggaacacggggugccgGacu.....          | 1 |
| Gi1_3751943_x31...cgaucggagacgucgCgggaacacgggg.....     | 1 |
| Gi2_9999925_x31.....ggUaacacggggugccgaac.....           | 1 |
| Gi2_10012108_x31.....gugggaaUacggggugccgaac.....        | 1 |
| Gi1_5396526_x31.....ucggagacgucgugggaacacggggu.....     | 0 |
| Gi3_26473624_x31.....ggaacacggggugccgaUcu.....          | 1 |
| Gi2_9999429_x31.....guggCaacacggggugccgaacu.....        | 1 |

|                  |                                     |   |
|------------------|-------------------------------------|---|
| Gi4_490326_x31   | .....uUggaacacggggugccgaacu         | 1 |
| Gi3_26487822_x31 | .....gaacaGggggugccgaacu            | 1 |
| Gi2_10010930_x31 | .....ucgugggaacacggggugccgaGcu      | 1 |
| Gi2_10008729_x31 | .....aacacggggGgccgaacu             | 1 |
| Gi2_10012418_x31 | .....aacacggggugccgaCcu             | 1 |
| Gi2_10020145_x30 | .....Gggagacgucgugggaacacggggugcc   | 1 |
| Gi3_26517120_x30 | .....gugggaacacgggguAccg            | 1 |
| Gi2_10013965_x30 | .....ucAugggaacacggggugccgaacu      | 1 |
| Gi3_26494950_x30 | .....cgucguggNaacacggggugccgaac     | 1 |
| Gi2_10024435_x30 | .....auUggagacgucgugggaacacggggg    | 1 |
| Gi3_26494380_x30 | .....cAucgugggaacacggggugccgaacu    | 1 |
| Gi2_10029025_x30 | .....ucgCgggaacacggggugccgaacu      | 1 |
| Gi2_10027135_x30 | .....gaacacggggugccgGacu            | 1 |
| Gi5_8140765_x30  | .....gagacgucgugggaacacggggugccgaac | 0 |
| Gi5_8133085_x30  | .....gugggaacacggggugGcgaacu        | 1 |
| G1a_5401056_x30  | .....ggagacgucgugggaacacggggugc     | 0 |
| Gi3_26493420_x30 | .....ugUgaacacggggugccgaa           | 1 |
| Gi2_10025755_x30 | .....guggAaacacggggugccgaac         | 1 |
| Gi3_26497440_x30 | .....cgugggaacacggggugGcgaacu       | 1 |
| Gi5_8131495_x30  | .....ugggaaUacggggugccgaacu         | 1 |
| Gi4_491189_x30   | .....Uugggaacacggggugccgaa          | 1 |
| Gi2_10019155_x30 | .....Aagacgucgugggaacacggggug       | 1 |
| Gi1_3762185_x30  | .....cUugggaacacggggugccga          | 1 |
| Gi2_10017985_x30 | .....ucguAggaacacggggugccgaacu      | 1 |
| Gi3_26497290_x30 | .....ucgugggaacacggggugcUgaacu      | 1 |
| Gi2_10021645_x30 | .....aucggagacgucgugggaacacggggugA  | 1 |
| G1a_5402796_x30  | .....ggagacgucgugggaacacg           | 0 |
| Gi2_10015435_x30 | .....cgucguggNaacacggggugccgaacu    | 1 |
| Gi3_26498640_x30 | .....Ggucgugggaacacggggugccg        | 1 |
| Gi2_10014415_x30 | .....gGucggagacgucgugggaacacggggg   | 1 |
| Gi3_26504700_x30 | .....gggaacacgggguAccgaac           | 1 |
| Gi3_26497410_x30 | .....gugggaacUcggggugccgaac         | 1 |
| Gi3_26514900_x30 | .....gcgaucggagacgucgugggaacacgg    | 0 |
| Gi2_10019065_x30 | .....aucggagacgucgugggaacacggggC    | 1 |
| Gi1_3760325_x30  | .....ucggagacgucGgggaacacggggugcc   | 1 |
| Gi3_26511750_x30 | .....gggaacacggggugccgUacu          | 1 |
| Gi2_10022665_x30 | .....uGgugggaacacggggugccgaac       | 1 |
| Gi3_26508330_x30 | .....aucggagacgCcgugggaacacg        | 1 |
| Gi3_26503680_x30 | .....aacNcggggugccgaacu             | 1 |
| Gi2_10027435_x30 | .....auUggagacgucgugggaacacggggugc  | 1 |
| Gi3_26516880_x30 | .....Cgggaacacggggugccga            | 1 |
| Gi2_10021615_x30 | .....gugggaacacggggugUcgaac         | 1 |
| Gi1_3756665_x30  | .....gaacacAgggugccgaacu            | 1 |
| Gi1_3762245_x30  | .....cgucgCgggaacacggggugccg        | 1 |
| Gi2_10019665_x30 | .....gucgugggaacacggggugccgGacu     | 1 |
| Gi5_8130865_x30  | .....gaacacggggGgccgaacu            | 1 |
| G1a_5408346_x30  | .....cggagacgucgugggaacacg          | 0 |

Gi5\_8138905\_x30.....Gcgucgugggaacacggggugccgaacu..... 1  
Gi5\_8142385\_x30.....ggaacacggggugccgUacu..... 1  
Gi3\_26502780\_x30....aucggGgacgucgugggaacacgggggu..... 1  
Gi5\_8140885\_x30.....cgucgugggaacacggggugccgaGcu..... 1  
Gi3\_26509080\_x30.....cUgagacgucgugggaacacggg..... 1  
Gi1\_3756965\_x30.....cgugggaacacAgggugccgaacu..... 1  
Gi2\_10023295\_x30.....Ccgugggaacacggggugccgaacu..... 1  
Gi3\_26509320\_x30.....gucgugggaacacggggCgccgaac..... 1  
Gi5\_8141875\_x30.....cgugggaacCggggugccgaacu..... 1  
Gi1\_3763131\_x29.....ucggagacgucgCgggaacacggggugc..... 1  
Gi2\_10030947\_x29.....gugggaacacggCgugccgaacu..... 1  
Gi3\_26540051\_x29.....ucgGgggaacacggggugccgaacu..... 1  
Gi1\_3766669\_x29....aucggGgacgucgugggaacacggggugc..... 1  
Gi5\_8149378\_x29.....gucgugggaacacggggugccgaCcu..... 1  
Gi3\_26539587\_x29.....ugggaGcacggggugccgaa..... 1  
Gi3\_26542081\_x29.....gugggaacacggAgugccga..... 1  
Gi1\_3766988\_x29.....agacgucgugggaacacggggugccga..... 0  
Gi3\_26530771\_x29.....cgucAugggaacacggggugccgaacu..... 1  
Gi2\_10029439\_x29.....Ggucgugggaacacggggugccg..... 1  
Gi3\_26535266\_x29.....gugggaacacggUgugcc..... 1  
Gi2\_10039618\_x29.....gUgacgucgugggaacacggggugc..... 1  
Gi3\_26517837\_x29.....guAggaacacggggugccg..... 1  
Gi3\_26535556\_x29.....gGcgugggaacacggggugccga..... 1  
Gi3\_26535585\_x29.....gugggaacacCgggugccgaacu..... 1  
Gi3\_26531757\_x29....aucggagacgucgugggaacacggggugccgaacu..... 0  
Gi2\_10043330\_x29.....Uagacgucgugggaacacggggugccg..... 1  
Gi2\_10037037\_x29.....gugggaaAacggggugcc..... 1  
Gi2\_10030077\_x29.....Uugggaacacggggugccgaacu..... 1  
Gi2\_10037211\_x29.....cgugggaacacggggugccgaacG..... 1  
Gi3\_26528422\_x29.....ucgugggaacacggggAgccgaacu..... 1  
Gi5\_8152017\_x29.....Cacacggggugccgaacu..... 1  
Gi3\_26529611\_x29.....gugggaacacggggugcA..... 1  
Gi2\_10038313\_x29....ucggGgacgucgugggaacacgggggu..... 1  
Gi2\_10040256\_x29.....ugggaacacggggugcAgaacu..... 1  
Gi3\_26523898\_x29.....gacAucgugggaacacggggugc..... 1  
Gi3\_26533323\_x29.....Ugagacgucgugggaacacggggugccg..... 1  
Gi2\_10036283\_x29.....Cacgucgugggaacacggggugccgaac..... 1  
Gi3\_26527436\_x29.....Gcgucgugggaacacggggugccgaac..... 1  
Gi1\_3765712\_x29.....ugUgaacacggggugccgaacu..... 1  
Gi2\_10030860\_x29.....ugAgaacacggggugccgaacu..... 1  
Gi3\_26528451\_x29.....acgucgugNgaacacggggugccgaac..... 1  
Gi3\_26535179\_x29.....gucgugggaaAacggggugccgaacu..... 1  
Gl1a\_5408552\_x29....cggagacgucgugggaacacgg..... 0  
Gi3\_26541849\_x29.....Uggaacacggggugccgaacu..... 1  
Gi2\_10043533\_x29.....ucgugggaacacggggugccgaCcu..... 1  
Gi1\_3763160\_x29.....Aucgugggaacacggggugccgaacu..... 1  
Gi2\_10042431\_x29.....cgGcugggaacacggggugccgaacu..... 1

Gi2\_10041996\_x29.....ucgugggaacCcggggugccgaacu..... 1  
 Gi2\_10042576\_x29.....ggaacacgAggugccgaacu..... 1  
 Gi3\_26530713\_x29.....uUgugggaacacggggugccgaac..... 1  
 Gi3\_26532540\_x29.....cgNgggaacacggggugccgaacu..... 1  
 Gi2\_10030889\_x29.....gugggaacNcggggugccga..... 1  
 Gi3\_26519403\_x29.....gggaaAacggggugccgaacu..... 1  
 Gi1\_3765944\_x29.....cUugggaacacggggugccgaac..... 1  
 Gi3\_26538108\_x29.....guggAaacacggggugccga..... 1  
 Gi1\_3765422\_x29.....aacacAgggugccgaacu..... 1  
 Gi2\_10038632\_x29.....ggaacaUggggugccgaacu..... 1  
 Gi2\_10038922\_x29.....cgugCgaacacggggugccgaacu..... 1  
 Gi5\_8147986\_x29.....gaaUacggggugccgaacu..... 1  
 Gi1\_3764378\_x29.....cgugggaacacggggugcc..... 0  
 Gi3\_26522912\_x29..gcgaucggagacgucgugggaacacggggu..... 0  
 Gi5\_8149175\_x29.....gugggaacacggggugccgaUc..... 1  
 Gi5\_8148189\_x29.....ggaacacAgggugccgaacu..... 1  
 Gi3\_26541936\_x29.....cgAgggaacacggggugcc..... 1  
 Gi2\_10055949\_x28.....ggaacacggggGgccgaac..... 1  
 Gi3\_26563961\_x28.....gggaUcacggggugccgaacu..... 1  
 Gi3\_26547637\_x28.....gUagacgucgugggaacacg..... 1  
 Gi5\_8157757\_x28.....ugggaacacggggugcAgaacu..... 1  
 Gi2\_10048389\_x28.....ggaacacgggguAccgaacu..... 1  
 Gl1a\_5419226\_x28.....gucgugggaacacggggugccga..... 0  
 Gi3\_26566229\_x28.....aucggagacgucgugggaCcacg..... 1  
 Gi1\_3774384\_x28.....cAugggaacacggggugccgaacu..... 1  
 Gi2\_10058833\_x28.....cggGgacgucgugggaacacggggugccg..... 1  
 Gi5\_8165261\_x28.....acgucguggGacacggggugccgaacu..... 1  
 Gi2\_10050069\_x28.....cgggagacgucgugggaacCcggggugcc..... 1  
 Gi2\_10053233\_x28.....aucggagacgucgugggaGcac..... 1  
 Gi2\_10050321\_x28.....Ggugggaacacggggugccga..... 1  
 Gi3\_26561133\_x28.....gugggaacacAgggugccgaa..... 1  
 Gi2\_10054157\_x28.....cgugggaaAacggggugccgaacu..... 1  
 Gi3\_26544473\_x28.....ugggaacacggggugcAgaac..... 1  
 Gi2\_10047941\_x28.....ucgugggaacacggggCgccgaac..... 1  
 Gi2\_10058105\_x28...Uaucggagacgucgugggaacacggggugcc..... 1  
 Gi3\_26556821\_x28.....cgugggaacacggggugccgaaU..... 1  
 Gi1\_3770268\_x28.....cgucgugggaacacggggGgccgaacu..... 1  
 Gi2\_10057237\_x28.....gugggaacaGggggugccgaacu..... 1  
 Gi2\_10046961\_x28.....cgugggaUcacggggugccgaacu..... 1  
 Gi5\_8161621\_x28.....cgucguggGacacggggugccgaacu..... 1  
 Gl1a\_5419422\_x28.....ggagacgucgugggaacac..... 0  
 Gi2\_10047885\_x28...gaucggGgacgucgugggaacacggggug..... 1  
 Gi2\_10052141\_x28.....aucggGgacgucgugggaacacggggugccg..... 1  
 Gi3\_26559033\_x28.....gucgugggaacacggggugcUgaacu..... 1  
 Gi5\_8163217\_x28.....ugggaacacggAgugccgaacu..... 1  
 Gi2\_10048949\_x28.....cgugggGacacggggugccga..... 1  
 Gi2\_10053905\_x28.....ggaacacggAgugccgaacu..... 1

Gi3\_26563821\_x28.....acgucgugggaGcacggggugccgaacu..... 1  
Gi3\_26550409\_x28.....Uucgugggaacacggggugccgaa..... 1  
Gi3\_26550045\_x28.....cgCgggaacacggggugcc..... 1  
Gi3\_26572863\_x27.....guCggaacacggggugccgaacu..... 1  
Gi5\_8170757\_x27.....aacaGggggugccgaacu..... 1  
Gi3\_26575239\_x27.....ggaacacggggugccgaaU..... 1  
Gi3\_26574105\_x27.....acgucgugggaacCcgggugccgaacu..... 1  
Gi3\_26575374\_x27.....gucgugggaacacggggugccgaGc..... 1  
Gi1\_3778707\_x27.....Gcgugggaacacggggugcc..... 1  
Gi1\_3778194\_x27.....Cgaacacggggugccgaacu..... 1  
Gi3\_26574861\_x27.....aucggagGcgucgugggaacacggggug..... 1  
Gi3\_26591385\_x27.....gggaacacggggAgccgaacu..... 1  
Gi5\_8172080\_x27.....gucgugggaacacggggCgccgaacu..... 1  
Gi1\_3779652\_x27.....Ugugggaacacggggugccgaacu..... 1  
Gi3\_26581314\_x27.....cUaucggagacgucgugggaacacg..... 1  
Gi3\_26583312\_x27.....acgucgugggGacacggggugccgaacu..... 1  
Gi5\_8171432\_x27.....gggaacacggggugcUgaacu..... 1  
Gi2\_10072037\_x27.....gacgucgugggaacacggggugccga..... 0  
Gi3\_26571999\_x27.....aucgUagacgucgugggaacacggg..... 1  
Gi2\_10066232\_x27.....Gucggagacgucgugggaacacg..... 1  
Gi3\_26589198\_x27.....ugggaacacggggAgccgaac..... 1  
G1a\_5432603\_x27.....guAggaacacggggugccgaacu..... 1  
Gi3\_26575617\_x27.....ucUugggaacacggggugccgaac..... 1  
Gi3\_26570514\_x27.....ucgugggaacacUgggugccgaacu..... 1  
Gi2\_10066799\_x27.....gcgaucggGgacgucgugggaacacgg..... 1  
Gi2\_10064207\_x27.....gugggaacacggggugcUg..... 1  
G1a\_5427878\_x27.....gugggaacacggggugcUgaacu..... 1  
Gi4\_495473\_x27.....cgucgugggaacacggggugccgaacu..... 0  
Gi1\_3777033\_x27.....gugAgaacacggggugccgaacu..... 1  
Gi3\_26569164\_x27.....acgucgCgggaacacggggugccgaacu..... 1  
Gi1\_3778464\_x27.....ggaacacggggugccgaacA..... 1  
Gi1\_3778086\_x27.....ggaGcacggggugccgaacu..... 1  
Gi3\_26572647\_x27.....ggaacacggggUccgaac..... 1  
Gi5\_8177426\_x27.....aacacggggugUcgaacu..... 1  
Gi2\_10066745\_x27.....gCgggaacacggggugccg..... 1  
Gi3\_26570595\_x27.....cgGgggaacacggggugccga..... 1  
G1a\_5426096\_x27.....gugggaacacggggugccgaCcu..... 1  
Gi1\_3775980\_x27.....gggaacacggggugccgCacu..... 1  
Gi2\_10070579\_x27.....guUggaacacggggugccg..... 1  
Gi1\_3777573\_x27.....acgucgugNgaacacggggugccgaacu..... 1  
Gi2\_10069418\_x27.....gUgaacacggggugccga..... 1  
G1a\_5430767\_x27.....ucggagacgucgugggaacacg..... 0  
Gi2\_10068446\_x27.....cgugggaacacggggugGcgaacu..... 1  
Gi5\_8169461\_x27.....gaacacggggugUcgaacu..... 1  
Gi1\_3778329\_x27.....Ugagacgucgugggaacacggggugccg..... 1  
Gi3\_26582853\_x27.....cgucgugggaacacggggCgccgaac..... 1  
Gi5\_8177183\_x27.....ugggaCcacggggugccgaacu..... 1

Gi2\_10069580\_x27.....aacacggggugccAaacu..... 1  
 Gi3\_26601389\_x26.....cgucgugggGacacggggugccgaac..... 1  
 Gi2\_10086793\_x26..gcgacgGgacgucgugggaacacg..... 1  
 Gi2\_10076237\_x26.....gugggaacacggggugccUaacu..... 1  
 Gi3\_26599543\_x26.....cgugggaacacggggGgccgaac..... 1  
 Gi5\_8186694\_x26.....gaacacggggAccgaacu..... 1  
 Gi2\_10075691\_x26.....Uacgucgugggaacacggggg..... 1  
 Gi5\_8189502\_x26.....ggagacgucgugggaacacggggugccgaac..... 0  
 Gl1a\_5434619\_x26.....cgGgggaacacggggugccgaacu..... 1  
 Gi2\_10085545\_x26.....gucgugggaGcacggggugccgaacu..... 1  
 Gl1\_3783193\_x26.....Gcgucgugggaacacggggugccgaacu..... 1  
 Gi3\_26618783\_x26.....cgGgggaacacggggugccg..... 1  
 Gl1a\_5438857\_x26.....gaucggagacgucgugggaacac..... 0  
 Gi2\_10077511\_x26.....gugggaacGcggggugccg..... 1  
 Gi5\_8192492\_x26.....gugggCacacggggugccgaacu..... 1  
 Gl1\_3780515\_x26.....gggGacacggggugccgaacu..... 1  
 Gi3\_26614545\_x26.....aucggagacgucgugggaacacggggugccg..... 0  
 Gi3\_26603859\_x26.....cgucgugggaacCcgggugccgaacu..... 1  
 Gi2\_10081957\_x26.....gucguAggaacacggggugc..... 1  
 Gi2\_10083725\_x26.....acgucgugNgaacacggggugccgaacu..... 1  
 Gi5\_8185966\_x26.....ugggaacacggggugUcgaacu..... 1  
 Gi5\_8191140\_x26.....gugggaacacggggGgccgaac..... 1  
 Gi3\_26608539\_x26.....cgucgugggaCcacggggugccgaacu..... 1  
 Gi3\_26596085\_x26.....cgugggaacacggggAgccgaac..... 1  
 Gi3\_26611477\_x26.....gugggaacacgggAugcc..... 1  
 Gl1\_3782829\_x26.....gggaGcacggggugccgaacu..... 1  
 Gi2\_10080709\_x26.....cggagacgucgugggaacacggggugccgaac..... 0  
 Gi2\_10078187\_x26.....cggagacgucgugggaacacggggugccg..... 0  
 Gi3\_26609501\_x26.....guggAaacacggggugcc..... 1  
 Gi3\_26597723\_x26.....cgCgggaacacggggugc..... 1  
 Gi5\_8192856\_x26.....cgugggaacacggggugccgaacG..... 1  
 Gl1\_3782933\_x26.....gugggaacaUggggugccgaacu..... 1  
 Gi5\_8182014\_x26.....ugggaacacggggugccgCac..... 1  
 Gi2\_10075795\_x26.....uggAaacacggggugccgaacu..... 1  
 Gi2\_10074677\_x26.....Uagacgucgugggaacacggggugcc..... 1  
 Gi3\_26621591\_x26.....gucguAggaacacggggugccgaacu..... 1  
 Gi2\_10078577\_x26.....acgucgugNgaacacggggugcc..... 1  
 Gi4\_496309\_x26.....ucggagacgucgugggaacacggggugccg..... 0  
 Gl1\_3785429\_x26.....Ggucgugggaacacggggugccgaacu..... 1  
 Gi5\_8191842\_x26.....Aucgugggaacacggggugccgaacu..... 1  
 Gl1\_3782231\_x26.....Cggaacacggggugccgaacu..... 1  
 Gl1a\_5435555\_x26.....ucggagacgucgugggaacacggggugc..... 0  
 Gi5\_8188306\_x26.....cgucgugggaGcacggggugccgaacu..... 1  
 Gi3\_26604665\_x26.....aucggagacgucgugggCacacggg..... 1  
 Gi2\_10075431\_x26.....Gcgucgugggaacacggggugccgaacu..... 1  
 Gi5\_8194052\_x26.....gugggaacacggggugcGgaacu..... 1  
 Gl1a\_5438207\_x26.....Uucgugggaacacggggugccgaacu..... 1

Gi2\_10085701\_x26.....Uacgucgugggaacacggggugc..... 1  
 Gi3\_26619927\_x26.....gugggaacCcgggugccg..... 1  
 Gi5\_8190802\_x26.....guggCaacacggggugccgaacu..... 1  
 Gi3\_26608383\_x26.....gaucggagacgucgugggaacacggggG..... 1  
 Gi3\_26616339\_x26.....gaacacggCgugccgaacu..... 1  
 Gi3\_26616027\_x26.....Gcggagacgucgugggaacacggggugcc..... 1  
 Gi3\_26605939\_x26.....cgucgugggaacacggggugccgaCcu..... 1  
 Gi2\_10086767\_x26.....cguNggaacacggggugccgaacu..... 1  
 Gi3\_26641868\_x25.....gagacgucgugggaacacggggugccgaacA..... 1  
 Gi3\_26642543\_x25.....ugggaacacgAggugccgaac..... 1  
 Gi3\_26622593\_x25...cUaucggagacgucguggg..... 1  
 Gi1\_3790306\_x25.....ucgugggaacacAgggugccgaacu..... 1  
 Gi1\_3792831\_x25.....Uacacggggugccgaacu..... 1  
 Gi3\_26646393\_x25.....aucggagacgucgCgggaacacg..... 1  
 Gi3\_26647918\_x25.....aucggagacgucgugggGacacg..... 1  
 Gi3\_26631918\_x25.....aucAgagacgucgugggaacacg..... 1  
 Gi1\_3790406\_x25.....ggaacacAgggugccgaacu..... 1  
 Gi3\_26625668\_x25.....cgucgugggaacacggggGgc..... 1  
 Gi5\_8201409\_x25.....ggaacacggggugccgGacu..... 1  
 Gi3\_26644068\_x25.....gugggaacacggggugccU..... 1  
 Gi3\_26626368\_x25.....gaacacggggugccUaacu..... 1  
 Gi1\_3791831\_x25.....acgucgugggaacacggggugccgaa..... 0  
 Gi2\_10092447\_x25.....ggaacacggggugccgUacu..... 1  
 Gi2\_10101872\_x25.....cgucgugggaacacggggGgcc..... 1  
 Gi3\_26639443\_x25.....ugggaacCcgggugccgaac..... 1  
 Gi3\_26628393\_x25.....ugggaacUcggggugccgaacu..... 1  
 Gi3\_26642093\_x25.....Caacacggggugccgaac..... 1  
 Gi3\_26629668\_x25.....aucggGgacgucgugggaacacg..... 1  
 Gi5\_8202134\_x25.....ucUugggaacacggggugccgaacu..... 1  
 Gi1\_3792931\_x25.....gaacacggggugccUgaacu..... 1  
 Gi1\_3789581\_x25.....Uggaacacggggugccgaac..... 1  
 Gl1a\_5444237\_x25.....Ugugggaacacggggugccgaacu..... 1  
 Gi5\_8206759\_x25.....acgucgugggaacacggggugccgaacu..... 0  
 Gi2\_10093122\_x25.....aucggagacgucgugggGacacggggugc..... 1  
 Gi3\_26624793\_x25.....gucgugggaacacggggugccgaUc..... 1  
 Gi1\_3790281\_x25.....gggaacGcggggugccgaacu..... 1  
 Gi2\_10103047\_x25.....ggaacacAgggugccgaac..... 1  
 Gi3\_26642593\_x25.....cgucgugggaacacggggGccgaac..... 1  
 Gi2\_10096097\_x25.....acgucgugggaacacggggugccgaGc..... 1  
 Gi5\_8206509\_x25.....gGgggaacacggggugccg..... 1  
 Gi5\_8205909\_x25.....aacUcggggugccgaacu..... 1  
 Gi3\_26635093\_x25.....aacacUggggugccgaacu..... 1  
 Gi3\_26624768\_x25.....aucgUagacgucgugggaacacggggg..... 1  
 Gi3\_26635293\_x25...Uaucggagacgucgugggaacacggggugcc..... 1  
 Gi3\_26643543\_x25.....ugggaGcaccggggugccg..... 1  
 Gi1\_3787581\_x25.....Uggaacacggggugccgaacu..... 1  
 Gi5\_8205834\_x25.....Gcgugggaacacggggugccgaac..... 1

Gi3\_26639968\_x25.....cguggaacacggAgugccgaac..... 1  
 Gi3\_26647218\_x25.....auUggagacgucguggaacacggg..... 1  
 Gl1a\_5443412\_x25.....gucguggaacacggggugccgaa..... 0  
 Gi3\_26632493\_x25.....aucggagacgucgugAgaacacggg..... 1  
 Gi3\_26629593\_x25.....Uaucggagacgucguggaacacggggugc..... 1  
 Gi3\_26649768\_x25.....acgucguggaacacggggugccgaGcu..... 1  
 Gi5\_8203659\_x25.....ucguAggaacacggggugccgaacu..... 1  
 Gi3\_26639018\_x25.....ugUgaacacggggugccg..... 1  
 Gi5\_8202859\_x25.....agacgucguggaacacggggugccga..... 0  
 Gi3\_26646543\_x25.....ucgCgggaacacggggugccgaac..... 1  
 Gi3\_26649318\_x25.....aGgucguggaacacggggugccgaac..... 1  
 Gi5\_8198084\_x25.....gGcguggaacacggggugccgaac..... 1  
 Gi3\_26630068\_x25.....cgGgggaacacggggugc..... 1  
 Gl1a\_5446512\_x25.....cgucguggaacacggggugccgaac..... 0  
 Gi3\_26625618\_x25.....gaCcgagacgucguggaacacggg..... 1  
 Gi2\_10090472\_x25.....ggagacgucguggaacacggggugccgaa..... 0  
 Gi3\_26654696\_x24.....uggaacacggggugccgaCc..... 1  
 Gi3\_26667392\_x24.....cguggaacacggggugccgaGu..... 1  
 Gi5\_8208744\_x24.....gucguggaacCggggugccgaacu..... 1  
 Gi3\_26650256\_x24.....Ugucguggaacacggggugccg..... 1  
 Gl1a\_5455936\_x24.....gGgggaacacggggugccga..... 1  
 Gi3\_26656136\_x24.....Uagacgucguggaacacggggugccg..... 1  
 Gi3\_26666504\_x24.....cgucguAggaacacggggugccgaacu..... 1  
 Gi2\_10109827\_x24.....cUaucggagacgucgugg..... 1  
 Gl1\_3796694\_x24.....Uagacgucguggaacacggggugccgaacu..... 1  
 Gi3\_26658080\_x24.....cgugggUacacggggugccgaac..... 1  
 Gi3\_26657000\_x24.....aacacggggugccUaacu..... 1  
 Gi2\_10108963\_x24.....gacgucguggaacacggggugccgaacA..... 1  
 Gi5\_8219232\_x24.....uggaacacggggGgccgaacu..... 1  
 Gi2\_10106059\_x24.....Acguggaacacggggugccgaacu..... 1  
 Gi3\_26660312\_x24.....aucggGgacgucguggaacacggg..... 1  
 Gi5\_8214336\_x24.....gggaacacNgggugccgaac..... 1  
 Gl1\_3795278\_x24.....aacacggggGgccgaacu..... 1  
 Gi3\_26660672\_x24.....guAggaacacggggugccgaa..... 1  
 Gl1\_3794678\_x24.....agacgucguggaacacggggug..... 0  
 Gi3\_26670008\_x24.....aucggagacgucguggaacGcgggu..... 1  
 Gi5\_8207208\_x24.....ucguggaacacggggugccgaCcu..... 1  
 Gi3\_26672840\_x24.....aucggagaNgucguggaacac..... 1  
 Gl1a\_5457016\_x24.....gUaacacggggugccgaac..... 1  
 Gi3\_26675264\_x24.....ucguggaacGcggggugccgaac..... 1  
 Gi3\_26649968\_x24.....cgugUgaacacggggugcc..... 1  
 Gi2\_10119643\_x24.....gaacacggggugcUgaacu..... 1  
 Gl1\_3794342\_x24.....gaacacggggugccAaacu..... 1  
 Gi3\_26656184\_x24.....ggaacacgNggugccgaa..... 1  
 Gi3\_26668376\_x24.....gaCcacggggugccgaacu..... 1  
 Gi3\_26656208\_x24.....cgCcguggaacacggggugccgaac..... 1  
 Gi2\_10119259\_x24.....gggaacacggggCgccgaac..... 1



Gi1\_3795710\_x24.....gugggaacacggggugcUgaacu..... 1  
 Gi3\_26662376\_x24.....ugggaacacggggugccgUac..... 1  
 Gi5\_8215992\_x24.....cUucgugggaacacggggugccgaac..... 1  
 Gi1\_3793454\_x24.....aacaUggggugccgaacu..... 1  
 Gi3\_26650496\_x24.....cgugggaacacgggAugccgaac..... 1  
 Gi3\_26661272\_x24.....acgucgugggaacacggAgugccgaacu..... 1  
 Gi1\_3797438\_x24.....ggagacgucgCgggaacacggggugc..... 1  
 Gi3\_26673104\_x24.....ggaacacggggugccgUacu..... 1  
 Gi2\_10109851\_x24.....gggaacacggggUAccgaacu..... 1  
 Gi3\_26655272\_x24.....Gucggagacgucgugggaacac..... 1  
 Gi3\_26667872\_x24.....aucggagacgucgugggaGcacggg..... 1  
 Gi3\_26676608\_x24.....gugggaacaUggggugccga..... 1  
 Gi5\_8216664\_x24.....ucgugggaacacggggugccAaacu..... 1  
 Gi2\_10117843\_x24.....ugggaacaUggggugccgaacu..... 1  
 Gi2\_10117747\_x24.....gugggaacacggggAgccgaac..... 1  
 Gi3\_26654600\_x24.....gacgucgugggaacacggggugccgaa..... 0  
 Gi3\_26653304\_x24.....gugggaacacgAggugccgaa..... 1  
 Gi5\_8218056\_x24.....ucggagacgucgugggaacacggggugccg..... 0  
 Gi2\_10110499\_x24.....ggaacacggggAgccgaacu..... 1  
 Gi1\_3794894\_x24.....gugggaacacggggugccgGacu..... 1  
 Gi2\_10107811\_x24.....gucgugggaacacggggGgcc..... 1  
 Gi1\_3794030\_x24.....gGgggaacacggggugccg..... 1  
 Gi3\_26662592\_x24.....cgCgggaacacggggugccgaa..... 1  
 Gi5\_8211744\_x24.....ugggaacacggggugccgUacu..... 1  
 Gi5\_8217816\_x24.....gggaacaUggggugccgaacu..... 1  
 Gi3\_26675648\_x24.....gaacacggggugccgaCc..... 1  
 Gi3\_26676248\_x24.....aucggagaNgucgugggaacacgggg..... 1  
 Gi2\_10114219\_x24.....gucgugggaacacggggugccgaGcu..... 1  
 Gi3\_26655224\_x24.....aucggagacgucgugggaacacggggA..... 1  
 Gi3\_26666072\_x24.....aucggagacgucgugggaacCcggggu..... 1  
 Gi3\_26676944\_x24.....aucggagacgucgugggCacacgg..... 1  
 Gi1\_3796478\_x24.....aucggGgacgucgugggaacacggggu..... 1  
 Gi5\_8208624\_x24.....gugggaacUcggggugccgaacu..... 1  
 Gi3\_26671904\_x24.....gugggaacacggggugGcgaac..... 1  
 Gi2\_10107259\_x24.....gugggaacacggggugGcgaacu..... 1  
 Gi2\_10137157\_x23.....gggaacacggggugcAgaacu..... 1  
 Gi2\_10134696\_x23.....gugggaacacggAgugccgaac..... 1  
 Gi3\_26705009\_x23.....cUucgugggaacacggggugccgaa..... 1  
 Gi5\_8222766\_x23.....gugggaacacggggugccgaGc..... 1  
 Gi2\_10135869\_x23.....ucgugggaacacAgggugccgaacu..... 1  
 Gi1\_3801497\_x23.....cUucgugggaacacggggugcc..... 1  
 Gi5\_8231920\_x23.....gaucggagacgucgugggaaca..... 0  
 Gi3\_26685781\_x23.....aacaAggggugccgaacu..... 1  
 Gl1\_5467500\_x23.....cgugggaacacggggugccgCacu..... 1  
 Gi3\_26702640\_x23.....gugggaacacggggugccAaa..... 1  
 Gi5\_8232817\_x23.....cgucgugggaacacggggugccgaacu..... 0  
 Gi3\_26681411\_x23.....ugggaacacggggugccgaaU..... 1

Gi2\_10131637\_x23.....ggAaacacggggugccgaacu..... 1  
 Gi3\_26689737\_x23.....aucggagacgucgCgggaacacggg..... 1  
 Gi3\_26703468\_x23.....gaUgucgugggaacacggggugccgaacu..... 1  
 Gi2\_10122966\_x23.....gugggaacacUgggugccgaacu..... 1  
 Gi3\_26706619\_x23.....gucgugggaacacggggugccAaacu..... 1  
 Gi2\_10131430\_x23.....cUgggaacacggggugccgaac..... 1  
 Gi2\_10121770\_x23.....ucgugggaNcacggggugccgaac..... 1  
 Gi2\_10132971\_x23.....auUggagacgucgugggaaca..... 1  
 Gi1\_3804740\_x23.....gggaacacggggCgccgaacu..... 1  
 Gi2\_10128923\_x23.....cgGgggaacacggggugcc..... 1  
 Gi5\_8233668\_x23.....Cugggaacacggggugccgaac..... 1  
 Gi3\_26702410\_x23.....aCcacggggugccgaacu..... 1  
 Gi3\_26705630\_x23.....gugggaacacgAgggugccga..... 1  
 Gi3\_26705676\_x23.....cUgagacgucgugggaacacgggg..... 1  
 Gi5\_8228976\_x23.ugcgauccgagacgucgugggaacacg..... 0  
 Gi5\_8225020\_x23.....gggaacacggggugccAaacu..... 1  
 Gi5\_8222835\_x23.....aacacggggugccgaaUu..... 1  
 Gi5\_8224399\_x23.....cUugggaacacggggugc..... 1  
 Gi3\_26701444\_x23.....aucggCgacgucgugggaacacggg..... 1  
 Gi2\_10132281\_x23.....Uucgugggaacacggggugccg..... 1  
 Gi2\_10121724\_x23.....Gcgugggaacacggggugccg..... 1  
 Gi5\_8224215\_x23.....gggaacacAgggugccgaacu..... 1  
 Gi3\_26700432\_x23.....ggaacacggggugccgUac..... 1  
 Gi2\_10123035\_x23.....gUgacgucgugggaacacggggugcc..... 1  
 Gi5\_8226124\_x23.....cgugggaaNacggggugccgaac..... 1  
 Gi1\_3801083\_x23.....gaacacggggugUcgaacu..... 1  
 Gi3\_26686908\_x23.....ugggaUcacggggugccgaacu..... 1  
 Gi2\_10122391\_x23.....gugAgaacacggggugcc..... 1  
 Gi2\_10126876\_x23.....gugggGacacggggugccg..... 1  
 Gi3\_26697718\_x23.....cgugggaGcacggggugccga..... 1  
 Gi2\_10124530\_x23.....aucggagacgucgugggGacacggggu..... 1  
 Gi3\_26698155\_x23.....gugNgaacacggggugccgaac..... 1  
 Gi2\_10124714\_x23.....gugggaacacggggugccgaaA..... 1  
 Gi2\_10132212\_x23.....gggaacacggggugccgaGc..... 1  
 Gi2\_10124829\_x23.....cgucgugggaGcacggggugccg..... 1  
 Gi1\_3802141\_x23.ugcgauccgagacgucgugggaaca..... 0  
 Gi2\_10134834\_x23.....ugggaacacgggguAccgaacu..... 1  
 Gi3\_26703537\_x23.....acgCcgugggaacacggggugccgaacu..... 1  
 Gi2\_10135639\_x23.....ugggaacacggggugUcgaacu..... 1  
 Gi1\_3804763\_x23.....gugggaacacggggugccU..... 1  
 Gi3\_26698592\_x23.....ggaacacggggugccgaacG..... 1  
 Gi2\_10136605\_x23.....gaaUacggggugccgaacu..... 1  
 Gi3\_26703721\_x23.....ugggaCcacggggugccgaac..... 1  
 Gi5\_8221225\_x23.....gugggaacaAggggugccgaacu..... 1  
 Gl1\_5465430\_x23.....ggaGcacggggugccgaacu..... 1  
 Gi2\_10122667\_x23..Ucgauccgagacgucgugggaacacggg..... 1  
 Gi3\_26681802\_x23.....gucgugggaacCggggugccgaac..... 1

Gi1\_3800094\_x23.....guggaacacAgggugccgaacu..... 1  
 Gi2\_10123150\_x23.....Uagacgucguggaacacggggugc..... 1  
 Gi5\_8229390\_x23.....ggaacacgNggugccgaac..... 1  
 Gi2\_10122138\_x23.....uggaacacggAgugccgaacu..... 1  
 Gi2\_10129751\_x23.....gggaacacggggugcUgaacu..... 1  
 Gi1\_3800416\_x23.....ucguggaacCcggggugccgaacu..... 1  
 Gi3\_26707562\_x23.....ggCaacacggggugccgaacu..... 1  
 Gi3\_26722214\_x22.....uggaacacggggugAcgaacu..... 1  
 Gi3\_26717154\_x22....Uucggagacgucguggaacacggg..... 1  
 Gi2\_10142016\_x22.....cguggaacacggggugcGgaacu..... 1  
 Gi1\_3810753\_x22.....uggaacacggggugccgaGcu..... 1  
 Gi5\_8235917\_x22.....Aggaacacggggugccgaac..... 1  
 Gi2\_10139486\_x22.....agacgucguggaacacggggugccgaa..... 0  
 Gi2\_10151828\_x22....aucggagacgucguggaCcacggggugc..... 1  
 Gi3\_26715174\_x22....gaucggagacgucguggCcacggg..... 1  
 Gi2\_10147340\_x22....cggagacgucguggaacacggggugccga..... 0  
 Gi3\_26727846\_x22.....uggNaacacggggugccgaacu..... 1  
 Gi2\_10151278\_x22.....gggaaUacggggugccgaacu..... 1  
 Gi5\_8235433\_x22.....aacacgggAugccgaacu..... 1  
 Gi3\_26721642\_x22.....cguggaacacggggugccgUac..... 1  
 Gi3\_26712490\_x22.ugcgaucggagacgucguggaacacg..... 0  
 Gi5\_8236071\_x22....cgaucggagacgucguggaacacggg..... 0  
 Gl1a\_5475379\_x22....Uaucggagacgucgugga..... 1  
 Gi2\_10145514\_x22.....gugggaGcacggggugccga..... 1  
 Gi1\_3811061\_x22.....Ggggaacacggggugccgaac..... 1  
 Gi1\_3810643\_x22....gacgucgCgggaacacggggugccgaacu..... 1  
 Gi2\_10139574\_x22.....guggaacacggAgugcc..... 1  
 Gi2\_10138980\_x22....cggagacgNcguggaacacggggugcc..... 1  
 Gi5\_8243441\_x22....cgugggaaAacggggugccgaacu..... 1  
 Gl1a\_5477051\_x22.....ggaacacggggugccgCacu..... 1  
 Gi2\_10151938\_x22.....gGcguggaacacggggugc..... 1  
 Gi3\_26718738\_x22.....cguggaacacgggAugccg..... 1  
 Gi3\_26732862\_x22....acgucguggaacacAgggugccgaacu..... 1  
 Gi1\_3808201\_x22.....ucguggaacacggggugccgaCcu..... 1  
 Gi2\_10144524\_x22....Agagacgucguggaacacggggugcc..... 1  
 Gi1\_3808883\_x22.....guggAaacacggggugccgaacu..... 1  
 Gi3\_26734908\_x22.....aacCggggugccgaacu..... 1  
 Gi1\_3806991\_x22....gagacgucguggaacacggggugccgaac..... 0  
 Gl1a\_5478437\_x22.ugcgaucggagacgucguggaa..... 0  
 Gi3\_26720212\_x22.....uggaacacggAgugccgaac..... 1  
 Gi3\_26738714\_x22....Uaucggagacgucguggaaca..... 1  
 Gi3\_26727912\_x22.....gggaacacggggugccgaG..... 1  
 Gi2\_10143270\_x22....cgGgggaacacggggugc..... 1  
 Gi2\_10139860\_x22....cgugggaaNacggggugccga..... 1  
 Gi3\_26737438\_x22....gucguggaacacggggugccgGac..... 1  
 Gi1\_3810401\_x22.....Agggaacacggggugccgaacu..... 1  
 Gi3\_26716560\_x22....gCcguggaacacggggugccgaac..... 1

Gi2\_10141752\_x22.....ugggaacacggggugccgUacu..... 1  
 Gi1\_3813129\_x22.....gucgugggaacacggggugccgaacuu..... 0  
 Gi3\_26738516\_x22.....gucgugggaacGcggggugccgaac..... 1  
 Gi5\_8236423\_x22.....ucAuggggaacacggggugccgaacu..... 1  
 Gi1\_3808069\_x22.....cgucgugggaacacggggGgccgaacu..... 1  
 Gi5\_8236445\_x22.....gaacacggAgugccgaacu..... 1  
 Gi3\_26711346\_x22.....ggagacgucgugggaacacggggugccgaacA..... 1  
 Gi3\_26738274\_x22.....gugggaacacggUgugccg..... 1  
 Gi1\_3812051\_x22.....ucgugggaacacggggGgccgaacu..... 1  
 Gi3\_26740232\_x22.....gugggaacacggggugcUgaa..... 1  
 Gi3\_26718518\_x22.....ucgugggaacacggggugccgaCc..... 1  
 Gi1\_3808179\_x22.....gugggaacacggggugccgaaU..... 1  
 Gi3\_26712754\_x22.....Naacacggggugccgaacu..... 1  
 Gi3\_26729298\_x22.....Uugggaacacggggugccgaacuu..... 1  
 Gi5\_8242495\_x22.....gggaacacgAggugccgaacu..... 1  
 Gi2\_10140300\_x22.....ucgugggaacacgggAugccgaacu..... 1  
 Gi1a\_5474763\_x22.....cgugggaacacgAggugccgaacu..... 1  
 Gi3\_26731542\_x22.....Ugagacgucgugggaacacggggugccgaacu..... 1  
 Gi5\_8239327\_x22.....aacacggggugccgaaAu..... 1  
 Gi2\_10151190\_x22.....acgucgugggaacacggggugccgaa..... 0  
 Gi2\_10154886\_x22.....gugggGacacggggugccga..... 1  
 Gi2\_10145470\_x22.....gGucggagacgucgugggaacacggg..... 1  
 Gi3\_26726746\_x22.....cgucgugggaacacggggugccgaacuA..... 1  
 Gi3\_26736954\_x22.....aucggagacgucgugggCacacggggg..... 1  
 Gi3\_26725140\_x22.....gaacacgggUugccgaacu..... 1  
 Gi3\_26734578\_x22.....cgucgugggaacGcggggugccgaac..... 1  
 Gi2\_10141950\_x22.....gugggaacGcggggugccga..... 1  
 Gi2\_10140652\_x22.....cgagacgucgugggaacacggggugccgaacu..... 0  
 Gi3\_26710092\_x22.....gugggaacacggggugUcga..... 1  
 Gi3\_26729782\_x22.....aacacggggugccgaacG..... 1  
 Gi3\_26713744\_x22.....ugggaaUacggggugccgaac..... 1  
 Gi3\_26716956\_x22.....gucgugggaacacggggUaccgaac..... 1  
 Gi3\_26719948\_x22.....ugggaacacggggugccUaacu..... 1  
 Gi2\_10144898\_x22.....gggGacacggggugccgaac..... 1  
 Gi3\_26743788\_x21.....gugggaacacggggugccgaacuu..... 0  
 Gi3\_26750361\_x21.....ggaaGacggggugccgaac..... 1  
 Gi3\_26762289\_x21.....gugUgaacacggggugccgaac..... 1  
 Gi3\_26759643\_x21.....aucggagaNgucgugggaacacgg..... 1  
 Gi5\_8256954\_x21.....ucguggAaacacggggugccgaacu..... 1  
 Gi2\_10172569\_x21.....gggaacGcggggugccgaac..... 1  
 Gi1\_3813924\_x21.....cgucguggNaacacggggugccgaacu..... 1  
 Gi3\_26763192\_x21.....Gcugggaacacggggugccg..... 1  
 Gi3\_26757270\_x21.....ugggaacacAgggugccg..... 1  
 Gi3\_26743704\_x21.....ucgugggaacacggggugUcgaacu..... 1  
 Gi3\_26754204\_x21.....ugggaacacggggugccgG..... 1  
 Gi1a\_5487352\_x21.....Uaucggagacgucgugggaacacggg..... 1  
 Gi3\_26745657\_x21.....Cgggaacacggggugccgaa..... 1

|                                                          |   |
|----------------------------------------------------------|---|
| Gi1_3814281_x21..cgaucggagacgucgugggaaacacggggu.....     | 0 |
| Gi2_10163413_x21.....gucgugggaaAacggggugccgaacu.....     | 1 |
| Gi3_26769282_x21.....gaaAacggggugccgaacu.....            | 1 |
| Gi3_26742885_x21.....ugggaacacgggguAccgaac.....          | 1 |
| Gi3_26768715_x21...gaucggagacgucgugggGcacggggu.....      | 1 |
| Gi2_10164967_x21..gcgaucggagacgucgugggaaacacggggugc..... | 0 |
| Gi3_26750172_x21.....Uagacgucgugggaaacacg.....           | 1 |
| Gi2_10158814_x21.....gGcgucgugggaaacacggggugccgaacu..... | 1 |
| Gi3_26751600_x21.....cgucgugggaaacacggggugccgGacu.....   | 1 |
| Gi2_10173031_x21.....ugggaCcacggggugccgaacu.....         | 1 |
| Gi5_8258256_x21.....ucgugggaaacacggggugcUgaacu.....      | 1 |
| Gi5_8261994_x21.....ggaacacggggGgccgaacu.....            | 1 |
| Gi3_26768043_x21....aGcggagacgucgugggaaacacggggugc.....  | 1 |
| Gi2_10169146_x21.....gggaacCcggggugccgaacu.....          | 1 |
| Gi3_26753196_x21.....ucgugggGcacggggugccgaac.....        | 1 |
| Gi2_10169062_x21.....cgugggaGcacggggugccgaac.....        | 1 |
| Gi2_10165660_x21.....gugggaacacgUggugccgaacu.....        | 1 |
| Gi3_26751243_x21...gaucggagacgucgugggaaacacggggC.....    | 1 |
| Gi3_26767644_x21....aucggagacgucgCgggaacacggggu.....     | 1 |
| Gi1_5488801_x21..gcgaucggagacgucgugggaaacacggg.....      | 0 |
| Gi3_26769051_x21.....ucgugggaaacacggAgugccgaacu.....     | 1 |
| Gi2_10157869_x21.....cguUggaaacacggggugccgaacu.....      | 1 |
| Gi3_26748639_x21.....cgucgugggaaacacgggguAccgaacu.....   | 1 |
| Gi3_26744376_x21.....gaacacggggugcUgaac.....             | 1 |
| Gi2_10156399_x21.....gucAugggaaacacggggugccgaacu.....    | 1 |
| Gi3_26758908_x21.....uAggaacacggggugccg.....             | 1 |
| Gi2_10170028_x21.....cgAgggaacacggggugcc.....            | 1 |
| Gi2_10159318_x21.....ugggaGcacggggugccgaac.....          | 1 |
| Gi2_10168516_x21.....Nugggaacacggggugccgaacu.....        | 1 |
| Gi2_10158751_x21.....gugggaacacggggugcGgaacu.....        | 1 |
| Gi3_26758950_x21.....cgugggaaNacggggugccg.....           | 1 |
| Gi1_3820896_x21.....cUgggaaacacggggugccgaacu.....        | 1 |
| Gi5_8254329_x21.....gCcgugggaaacacggggugccgaacu.....     | 1 |
| Gi2_10169398_x21.....Ggugggaaacacggggugccgaa.....        | 1 |
| Gi2_10165933_x21.....cgucgugggGcacggggugccgaacu.....     | 1 |
| Gi1_3816066_x21.....cgugggaaacGcggggugccgaacu.....       | 1 |
| Gi1_3814239_x21.....cUgagacgucgugggaaacacggggugcc.....   | 1 |
| Gi3_26758362_x21.....cgucUugggaaacacggggugccgaacu.....   | 1 |
| Gi2_10156273_x21.....cgugggaaacacggggugccgaUcu.....      | 1 |
| Gi2_10163350_x21.....cgugggaaacGcggggugccgaac.....       | 1 |
| Gi3_26762100_x21.....gggaacacggggugccgaacG.....          | 1 |
| Gi3_26745258_x21.....gugggaaacacggggguCccgaacu.....      | 1 |
| Gi5_8258109_x21.....gucgugggaaacGcggggugccgaacu.....     | 1 |
| Gi3_26770605_x21.....ugggaaacacggggGgccgaac.....         | 1 |
| Gi3_26763276_x21.....gggaacacgAggugccgaac.....           | 1 |
| Gi2_10169734_x21.....gCgggaaacacggggugccga.....          | 1 |
| Gi1_3817872_x21.....Uucgugggaaacacggggugccgaac.....      | 1 |

|                                                              |   |
|--------------------------------------------------------------|---|
| Gi3_26746266_x21.....aucggagacgucgugggaacacggggugccgaac..... | 0 |
| Gi1_3820497_x21.....ucgugggaacacggggugccgaacuu.....          | 0 |
| G1a_5489137_x21.....cgCgggaacacggggugccgaacu.....            | 1 |
| Gi5_8255925_x21.....aacacggggugccgUacu.....                  | 1 |
| Gi3_26755023_x21.....aucggagacgucgugggaacacggggugccga.....   | 0 |
| Gi5_8256555_x21.....acgucgugggaacacggggCgccgaacu.....        | 1 |
| Gi3_26753910_x21.....gaacacgggCugccgaacu.....                | 1 |
| Gi5_8261469_x21.....guUggaacacggggugccgaac.....              | 1 |
| Gi2_10181849_x20.....gggaacacggggugccgCac.....               | 1 |
| Gi1_3828790_x20.....cgugggaacacgUggugccgaacu.....            | 1 |
| Gi3_26799225_x20.....aucggagacgucgugggaacacggggCgcc.....     | 1 |
| Gi3_26782965_x20.....gggaacacggggugcAgaac.....               | 1 |
| Gi3_26783465_x20.....cgAgggaacacggggugccg.....               | 1 |
| Gi3_26791265_x20.....cgucguggNaacacggggugccg.....            | 1 |
| Gi2_10183689_x20.....cgugggaaNacggggugc.....                 | 1 |
| Gi3_26786405_x20.....cgugggaacGcggggugc.....                 | 1 |
| Gi2_10185369_x20.....gaacacgAggugccgaacu.....                | 1 |
| Gi3_26798645_x20.....gugggaacacggggugccgaGu.....             | 1 |
| Gi3_26789965_x20.....ugggaacaAggggugccgaacu.....             | 1 |
| Gi2_10186869_x20.....cgugggaacacggggugccAaac.....            | 1 |
| Gi2_10175069_x20.....acgucgugggaacacggggugccgCacu.....       | 1 |
| Gi2_10174109_x20.....cgugUgaacacggggugcc.....                | 1 |
| Gi5_8267029_x20.....ggaacacggggugcUgaacu.....                | 1 |
| Gi3_26801745_x20.....cgugggaacGacggggugccgaacu.....          | 1 |
| G1a_5495320_x20.....Aggaacacggggugccgaacu.....               | 1 |
| Gi5_8269269_x20.....gucgCgggaacacggggugccgaacu.....          | 1 |
| Gi3_26781065_x20.....ucgugggaacacggggugccgGacu.....          | 1 |
| Gi1_3824090_x20.....cguAggaacacggggugccgaacu.....            | 1 |
| Gi3_26772865_x20.....ugggaacGcggggugccgaa.....               | 1 |
| Gi3_26773145_x20.....acgucgugggaacacggggugcAgaacu.....       | 1 |
| Gi3_26774005_x20.....ugggaacacggggCgccga.....                | 1 |
| Gi3_26801945_x20.....cgGcuggggaacacggggugccgaac.....         | 1 |
| Gi5_8265949_x20.....gugNgaacacggggugccgaacu.....             | 1 |
| Gi2_10181569_x20.....Ggggaacacggggugccgaa.....               | 1 |
| Gi2_10178389_x20.....cgucgugggGacacggggugccgaacu.....        | 1 |
| Gi3_26780465_x20.....aucggagacgucgugggaacCcggg.....          | 1 |
| Gi3_26779625_x20.....Ugagacgucgugggaaca.....                 | 1 |
| Gi2_10189929_x20.....aucggagGcugucgugggaacacggggugc.....     | 1 |
| Gi2_10181349_x20.....auUggagacgucgugggaacac.....             | 1 |
| Gi2_10177009_x20.....agacgucgNgggaacacggggugccgaacu.....     | 1 |
| Gi5_8268569_x20.....gucgugggaacacggggugccgaGcu.....          | 1 |
| Gi2_10183909_x20.....ucgugggaGcacggggugccgaac.....           | 1 |
| Gi5_8273989_x20.....agacgucgugggaacacggggugccgaacuA.....     | 1 |
| Gi3_26780825_x20.....ugggaacacgggAugccgaac.....              | 1 |
| Gi3_26777645_x20.....guggUaacacggggugccg.....                | 1 |
| Gi3_26785065_x20.....Uacgucgugggaacacgggg.....               | 1 |
| Gi3_26791765_x20.....ugggaacacggggAgccgaa.....               | 1 |

Gi1\_3825710\_x20.....Uaacacggggugccgaacuu..... 1  
 Gi3\_26786225\_x20.....ugggUacacggggugccgaac..... 1  
 Gi5\_8270509\_x20.....cguggaacacggggugccgaUc..... 1  
 Gi3\_26788645\_x20.....aucggagaNgucgugggaacacggggugcc..... 1  
 Gi1\_3826590\_x20.....gugggaaUacggggugccgaacu..... 1  
 Gi2\_10176509\_x20cugcgauccgagacgucgugggaacacg..... 0  
 Gi2\_10182229\_x20.....ugUgaacacggggugccgaac..... 1  
 Gi3\_26785505\_x20.....cgAgggaacacggggugccga..... 1  
 Gi3\_26775365\_x20.....aucggagacgucguAggaacacggg..... 1  
 Gi3\_26801485\_x20.....cgGgggaacacggggugccgaa..... 1  
 Gi3\_26797925\_x20.....ggUacacggggugccgaa..... 1  
 Gi5\_8275669\_x20.....ucgugggaacaUggggugccgaacu..... 1  
 Gi2\_10175749\_x20.....gugggaacacggggCgcca..... 1  
 Gi2\_10174549\_x20.....cgAcgugggaacacggggugccgaacu..... 1  
 Gi1\_3823050\_x20.....uUggaacacggggugccgaacuu..... 1  
 Gi3\_26795005\_x20.....gugggUacacggggugccga..... 1  
 Gi3\_26779045\_x20.gcgauccgagacgucgugggaacacggg..... 0  
 Gi2\_10182389\_x20.ugcgauccgagacgucgugggaacac..... 0  
 Gi3\_26794245\_x20.....ugggaacacggggugUcgaac..... 1  
 Gi3\_26799045\_x20.....aucggagacgucgugggaacGcggg..... 1  
 Gi5\_8277069\_x20.....gaacacgggAugccgaacu..... 1  
 Gi3\_26784645\_x20.....ucggagacgucgugggaacacggggugccg..... 0  
 Gi5\_8277049\_x20.....gaacGcggggugccgaac..... 1  
 Gi5\_8266309\_x20.....Acgugggaacacggggugccgaacu..... 1  
 Gi2\_10178229\_x20.....cgugggaacacAgggugccgaac..... 1  
 Gi5\_8275509\_x20.....aacacggggugcAgaacu..... 1  
 Gi3\_26782065\_x20.....cgucgugggaacCcgggugcc..... 1  
 Gi3\_26804745\_x20.....ucgugggaacCcgggugccgaac..... 1  
 Gi5\_8263669\_x20.....Ggggaacacggggugccgaa..... 1  
 Gi5\_8268589\_x20.....uUggaacacggggugccgaacuu..... 1  
 Gi3\_26831944\_x19.....ucgugAgaacacggggugccgaac..... 1  
 Gi3\_26831868\_x19.....gugggUacacggggugcc..... 1  
 Gi1\_3833448\_x19.....aacacggggugccgaCcu..... 1  
 Gi2\_10204603\_x19.....uCggaacacggggugccgaac..... 1  
 Gi3\_26831393\_x19.....Ugugggaacacggggugcc..... 1  
 Gi2\_10192538\_x19.....aucggagacAucgugggaacacggggu..... 1  
 Gi3\_26836960\_x19.....ugggaacacAgggugccga..... 1  
 Gi3\_26807947\_x19.....ggaaUacggggugccgaacu..... 1  
 Gi3\_26814331\_x19.....gaacacggggugccgCac..... 1  
 Gi5\_8280180\_x19.....gugUgaacacggggugccgaacu..... 1  
 Gi2\_10206788\_x19.....cgucgugggaacacggggugccgaGcu..... 1  
 Gi5\_8287229\_x19.....Uaucggagacgucgugggaacacgg..... 1  
 Gi5\_8282384\_x19.....Ggugggaacacggggugccga..... 1  
 Gi2\_10194191\_x19.....guggUaacacggggugccg..... 1  
 Gi3\_26816554\_x19.....ggAaacacggggugccgaac..... 1  
 Gi5\_8283315\_x19.....ucgugggaacacggggugUcgaacu..... 1  
 Gi2\_10198086\_x19.....ggaacacgggguUccgaacu..... 1

Gi3\_26820772\_x19.....cCugggaacacggggugcc..... 1  
Gi2\_10194704\_x19.....gaacacgggguAccgaacu..... 1  
Gi2\_10196585\_x19.....Ggacgucgugggaacacggggugccgaac..... 1  
Gi3\_26823470\_x19.....cgucgugggaacacggggugcUgaacu..... 1  
Gi2\_10207035\_x19.....gugggaacacggggugccCaacu..... 1  
Gi5\_8284455\_x19.....aacacggggugcGgaacu..... 1  
Gi1\_3831700\_x19.....guUgugggaacacggggugccgaacu..... 1  
Gi3\_26815205\_x19.....cggagacgucgugggaacCcggggugcc..... 1  
Gi3\_26830044\_x19.....Uagacgucgugggaacac..... 1  
Gi3\_26805192\_x19.....ggaacacggggugccgaaUu..... 1  
Gi3\_26820392\_x19.....acgucgugggCacacggggugccgaacu..... 1  
Gi2\_10196604\_x19.....ugggaacacggggugccgaUc..... 1  
Gi2\_10191227\_x19.....cgugggaacacgUggugccgaac..... 1  
Gi1\_3830693\_x19.....ucAugggaacacggggugccgaacu..... 1  
Gi5\_8283467\_x19.....ucgAgggaacacggggugccgaacu..... 1  
Gi1\_3836412\_x19.....gugggaacacggUgugccgaacu..... 1  
Gi2\_10204717\_x19.....Cucgugggaacacggggugccgaacu..... 1  
Gi2\_10194685\_x19.....aucggagacgucgugggGacac..... 1  
Gi3\_26808688\_x19.....ucguAgggaacacggggugccgaac..... 1  
Gi1\_3832764\_x19.....ggagacgucgugggaacacggggug..... 0  
Gi3\_26808593\_x19.....cgugggGacacggggugccgaa..... 1  
Gi5\_8280256\_x19.....ugggaacacgggAugccgaacu..... 1  
Gi3\_26833863\_x19.....ucguggAaacacggggugccgaacu..... 1  
Gi3\_26817789\_x19.....auUggagacgucgugggaacacggggugcc..... 1  
Gi3\_26808213\_x19.....gggaacaAggggugccgaacu..... 1  
Gi3\_26819043\_x19.....Ggacgucgugggaacacggggugccgaacu..... 1  
Gi3\_26838404\_x19.....ucgugggaacacgggguAccgaacu..... 1  
Gi1\_3834778\_x19.....gagacgucgugggaacacggggugccga..... 0  
Gi3\_26827346\_x19.....aucggagacgucgugggaacCcg..... 1  
Gl1\_5501952\_x19.....ucggagacgucgugggaGcacg..... 1  
Gi3\_26808004\_x19.....cgugggGacacggggugcc..... 1  
Gi5\_8287096\_x19.....agacgucgNgggaacacggggugccgaacu..... 1  
Gi1\_3833353\_x19.....acgucgugggaacacggggugccgaacuu..... 0  
Gi3\_26806617\_x19.....ucgugggaacacgggAugccgaacu..... 1  
Gi3\_26828068\_x19.....aucggagacgucgugggaacacA..... 1  
Gi1\_3833543\_x19.....cggagacgucgugggaacacggggugccgaacu..... 0  
Gi3\_26813153\_x19.....acgucguAgggaacacggggugcc..... 1  
Gi3\_26833806\_x19.....gucAugggaacacggggugccgaacu..... 1  
Gi2\_10197877\_x19.....gggaacacggggugccgaaAu..... 1  
Gi2\_10207206\_x19.....ggUgacgucgugggaacacggggugc..... 1  
Gi2\_10193564\_x19.....aGgucgugggaacacggggugcc..... 1  
Gi5\_8284208\_x19.....aUacgucgugggaacacggggugccgaac..... 1  
Gi3\_26809182\_x19.....aucggCgacgucgugggaacacg..... 1  
Gi1\_3829914\_x19.....ugAgaacacggggugccgaacu..... 1  
Gi3\_26808650\_x19.....cgugggaacacggggCgcu..... 1  
Gi3\_26822919\_x19.....gugggaacacggggugccUaac..... 1  
Gi3\_26806123\_x19.....ugggaacacggggugccgaaAu..... 1



Gi2\_10204698\_x19.....cgucguggNaacacggggugccg..... 1  
Gi2\_10208859\_x19.....ggaacacggggugcAgaacu..... 1  
Gi3\_26812469\_x19.....ucguUggaacacggggugccgaac..... 1  
Gi3\_26821171\_x19.....aacacgggCugccgaacu..... 1  
Gi2\_10202019\_x19.....Gucggagacgucguggaacaacggggug..... 1  
Gi3\_26809448\_x19.....gGucggagacgucguggaacaacg..... 1  
Gi3\_26821133\_x19.....gaacGcggggugccgaac..... 1  
Gi2\_10202684\_x19.....ugggaacaNggggugccga..... 1  
Gi1\_3832498\_x19.....ggaacacggggugccgGacu..... 1  
G1a\_5506721\_x19.....Cgaacacggggugccgaacu..... 1  
Gi2\_10197421\_x19.....aucggagaNgucguggaacaacggggugcc..... 1  
Gi3\_26821931\_x19.....cgucguggaacaacgAgggugccgaacu..... 1  
Gi1\_3839511\_x18.....gUagacgucguggaacaacggggugccg..... 1  
Gi5\_8293599\_x18.....gugggaacaacggggugccgaUcu..... 1  
Gi2\_10227370\_x18..Ucgaucggagacgucgugga..... 1  
Gi3\_26848564\_x18.....ucguggaacaacggggugccgaaAu..... 1  
Gi5\_8298099\_x18..Ggcgaucggagacgucgug..... 1  
Gi5\_8300043\_x18.....ugggaacaNggggugccgaac..... 1  
Gi3\_26857456\_x18.....gugggaacaacggUgugccga..... 1  
Gi3\_26872090\_x18.....Acgugggaacaacggggugccgaacu..... 1  
Gi5\_8293113\_x18.....Ugucguggaacaacggggugccgaacu..... 1  
Gi2\_10223518\_x18.....Uacgucguggaacaacggggugccgaac..... 1  
Gi5\_8294247\_x18.....gugggaacaacggggugccUaacu..... 1  
Gi1\_3843003\_x18.....ucguAggaacaacggggugccgaacu..... 1  
Gi2\_10211296\_x18.....ugggUacacggggugccgaacu..... 1  
Gi3\_26851624\_x18.....ggaacUcggggugccgaacu..... 1  
Gi5\_8296281\_x18.....ugggaacaacggggUaccgaac..... 1  
Gi2\_10217434\_x18.....Augggaacaacggggugccgaa..... 1  
Gi1\_3844587\_x18.....ggagacgucgCgggaacaacggggugccga..... 1  
Gi2\_10219936\_x18.....Cggaacaacggggugccgaac..... 1  
Gi2\_10212088\_x18.....ucUugggaacaacggggugccgaacu..... 1  
Gi1\_3845271\_x18.....ggaacaacggggugccgaGcu..... 1  
G1a\_5514965\_x18.....gugggaacaUggggugccgaacu..... 1  
Gi2\_10211692\_x18.....gaacaUggggugccgaacu..... 1  
Gi3\_26862172\_x18.....gaacaacCggggugccgaacu..... 1  
Gi3\_26874880\_x18.....Ngugggaacaacggggugccgaacu..... 1  
Gi3\_26838790\_x18.....Uagacgucguggaacaacggggg..... 1  
Gi3\_26859634\_x18.....cgucgugggaacaacAgggugccgaacu..... 1  
Gi3\_26852344\_x18.....ggaNcaccggggugccgaacu..... 1  
Gi2\_10222258\_x18.....acgucgugggaacaacggggGgcc..... 1  
Gi3\_26875150\_x18.....ggaaUacggggugccgaac..... 1  
Gi5\_8302491\_x18.....cgugggaUcacggggugccgaacu..... 1  
Gi2\_10217578\_x18.....acgucgugggaacaacggggGgccgaacu..... 1  
Gi3\_26874952\_x18.....cAugggaacaacggggugcc..... 1  
Gi2\_10219252\_x18.....ugggaacaacggggGgccgaacu..... 1  
Gi3\_26850130\_x18.....Uacgucgugggaacaacgg..... 1  
Gi3\_26845018\_x18.....gugggaUacggggugccga..... 1

Gi3\_26859454\_x18.....cgugggaacacggggugAcgaac..... 1  
Gi3\_26844478\_x18.....cgucUugggaacacggggugcc..... 1  
Gi3\_26859562\_x18.....cgugggaacacggggUccgaacu..... 1  
Gi1\_3840033\_x18.....gggaacacAgggugccgaacu..... 1  
Gi3\_26868922\_x18.....ucgugggaacacggggugcAgaacu..... 1  
Gi3\_26869786\_x18.....cggagacgNcgugggaacacggggugcc..... 1  
Gi3\_26854612\_x18.....gaGcacggggugccgaac..... 1  
Gi2\_10211080\_x18.....ucgugggaacacggggugccgUacu..... 1  
Gi5\_8296047\_x18.....cgucgCgggaacacggggugccgaacu..... 1  
G1a\_5516513\_x18.ugcgauccggagacgucgugggaacac..... 0  
Gi1\_3838251\_x18.....ucggagacgucgugggaacacggggg..... 0  
G1a\_5514857\_x18.....gugggaacacgAgggugccgaacu..... 1  
Gi2\_10223824\_x18.....aucggagacgucgugggaacacggggCgc..... 1  
Gi1\_3838071\_x18.....cgucgugggaacacggggugccgCacu..... 1  
Gi5\_8303337\_x18.....gaacacggggAgccgaacu..... 1  
Gi1\_3839529\_x18.....gugggaacacggggugccgaa..... 0  
Gi2\_10211368\_x18.....ggaacacggggugccgGac..... 1  
Gi3\_26856196\_x18.....cgucgugggaacacggggCgc..... 1  
Gi1\_3840321\_x18.....cgugggaacacggggugccAaacu..... 1  
Gi1\_3842913\_x18.....ugggaacacggggugcUgaacu..... 1  
Gi2\_10215958\_x18.....Gcgucgugggaacacggggugcc..... 1  
G1a\_5518727\_x18.....cgugggaGcacggggugccgaacu..... 1  
Gi3\_26861254\_x18.....cgugggaacGcggggugccga..... 1  
Gi2\_10216282\_x18.....ggaacGacggggugccgaacu..... 1  
Gi2\_10224310\_x18.....agacgucgNgggaacacggggugcc..... 1  
Gi2\_10209820\_x18.....ugggaacCcgggugccgaacu..... 1  
Gi3\_26839222\_x18.....gggaacacNgggugccgaa..... 1  
Gi3\_26873764\_x18.....Cggaacacggggugccgaa..... 1  
Gi1\_3838377\_x18.....ggUaacacggggugccgaacu..... 1  
Gi2\_10216156\_x18.....aucggagacgucgugggaacGcggggugc..... 1  
Gi3\_26867104\_x18.....gggaacacggggugccgUac..... 1  
G1a\_5514605\_x18.....ggaacacggggCgccgaacu..... 1  
Gi2\_10220656\_x18.....Ccgagacgucgugggaacacggggugcc..... 1  
G1a\_5520599\_x18.....gugggaacacggUgugccgaacu..... 1  
Gi2\_10215490\_x18.....ugggaacacgAgggugccgaacu..... 1  
Gi5\_8296821\_x18.....cgucgugggaacCcgggugccgaacu..... 1  
Gi3\_26848978\_x18.....ucgugggaacacggggugccAaac..... 1  
Gi2\_10223608\_x18.....aucggagaNgucgugggaaca..... 1  
Gi3\_26839348\_x18.....gugggaacacggUgugccgaa..... 1  
Gi2\_10210252\_x18.....Ggucgugggaacacggggugccga..... 1  
Gi3\_26853874\_x18.....gacgucgugggaGcacggggugccgaacu..... 1  
Gi2\_10213312\_x18.....cgucgugggaacCcgggugccgaacu..... 1  
Gi2\_10210720\_x18.....aGgucgugggaacacggggugccgaacu..... 1  
Gi2\_10215778\_x18.....gugUgaacacggggugccgaacu..... 1  
Gi3\_26864836\_x18.....cgucguAggaacacggggugcc..... 1  
Gi3\_26847448\_x18.....aacacggUgugccgaacu..... 1  
Gi3\_26845666\_x18.....aCcgagacgucgugggaacacgg..... 1

Gi1\_3843795\_x18.....acacggggugccgaacu..... 0  
Gi3\_26873602\_x18.....uggAaacacggggugccgaac..... 1  
Gi3\_26854378\_x18.....gaacacgUggugccgaacu..... 1  
Gi2\_10211566\_x18.....gugggaacacgggAugccgaac..... 1  
Gi3\_26859022\_x18.....gggaCcacggggugccgaacu..... 1  
Gi3\_26840914\_x18.....gUaacacggggugccgaac..... 1  
Gi5\_8294823\_x18.....ugggUaacacggggugccgaacu..... 1  
Gi5\_8298063\_x18.....ucgugggaacacggggugccgGacu..... 1  
Gi2\_10218946\_x18.....acgucgugggGacacggggugccgaacu..... 1  
G1a\_5511743\_x18.....gugggaacacggggugccAaacu..... 1  
Gi2\_10215166\_x18.....gugggaaAacggggugccgaac..... 1  
Gi1\_3839151\_x18.....cUugggaacacggggugccg..... 1  
Gi2\_10215796\_x18.....Cugggaacacggggugccg..... 1  
Gi3\_26855872\_x18.....gAcgugggaacacggggugccgaacu..... 1  
Gi3\_26856988\_x18.....aucggCgacgucgugggaacacggggg..... 1  
Gi5\_8295327\_x18.....gagacgucgugggaacacggggugccgaacA..... 1  
Gi2\_10221286\_x18.....gaacacggggugccAaacu..... 1  
Gi3\_26906143\_x17.....gucgugggaacacgggAugccgaacu..... 1  
Gi1\_3852248\_x17.....Cacacggggugccgaacu..... 1  
Gi2\_10231004\_x17.....uUggaacacggggugccgaacu..... 1  
Gi2\_10247970\_x17.....uAggaacacggggugccgaac..... 1  
Gi1\_3852265\_x17.....Uaucggagacgucguggg..... 1  
G1a\_5528054\_x17.....aucggagacgucgugggaacacggAgugcc..... 1  
Gi3\_26888939\_x17.....agacgucgNgggaacacggggugccgaacu..... 1  
Gi5\_8310854\_x17.....gugggaacacggggugccgaacG..... 1  
Gi2\_10244128\_x17.....gucgCgggaacacggggugccgaacu..... 1  
Gi2\_10235220\_x17.....aucggagacgucgugggaCcacggggugcc..... 1  
Gi3\_26912603\_x17.....guggCaacacggggugccgaac..... 1  
Gi5\_8310378\_x17.....ggAaacacggggugccgaacu..... 1  
Gi3\_26877719\_x17.....gugggaacacggggugUcga..... 1  
Gi2\_10231140\_x17.....ggaacaUggggugccgaac..... 1  
Gi3\_26878280\_x17.....cUgagacgucgugggaacac..... 1  
Gi2\_10244723\_x17.....guNggaacacggggugccgaacu..... 1  
Gi5\_8316345\_x17.....ugggaacacgggCugccgaacu..... 1  
Gi2\_10247443\_x17.....ucgugggGacacggggugccgaac..... 1  
Gi5\_8316532\_x17.....ggaacacggggCgccgaac..... 1  
Gi2\_10237668\_x17.....gggaGcacggggugccgaac..... 1  
Gi1\_3854764\_x17.....gugggaacacggggugccgaU..... 1  
G1a\_5521849\_x17.....uAggaacacggggugccgaacu..... 1  
Gi3\_26893750\_x17.....Gggagacgucgugggaacacggggugcc..... 1  
Gi1\_3848882\_x17.....aacacgAgggugccgaacu..... 1  
Gi2\_10235050\_x17.....Ugagacgucgugggaacacggggug..... 1  
Gi3\_26906500\_x17.....gucgugggaacaUggggugccgaacu..... 1  
Gi3\_26882938\_x17.....ucgugggaaUacggggugccgaacu..... 1  
Gi2\_10232092\_x17.....ugggaacacgggAugccgaacu..... 1  
Gi3\_26875339\_x17.....cggagacgucgugggaacCcgggg..... 1  
Gi1\_3849443\_x17.....gCaacacggggugccgaacu..... 1

Gi5\_8320969\_x17.....ucgugAgaacacggggugccgaacu..... 1  
 Gi2\_10235764\_x17.....aucggagacgucgugggaacacggggCgcc..... 1  
 Gi2\_10239555\_x17.....cgugggaacacgCggugccgaacu..... 1  
 Gi2\_10238637\_x17.....gaacacggggGgccgaacu..... 1  
 Gi2\_10234472\_x17.....Ugagacgucgugggaacac..... 1  
 Gi2\_10248208\_x17.....aucggagacgucgugggGaca..... 1  
 Gi2\_10236223\_x17.....gAgaacacggggugccgaac..... 1  
 Gi2\_10234557\_x17.....aucgUagacgucgugggaacacggggugc..... 1  
 Gi3\_26896810\_x17.....gaacacUgggugccgaacu..... 1  
 Gi2\_10241221\_x17.....cAucgugggaacacggggugccgaacu..... 1  
 Gi3\_26877345\_x17.....aucggagacgucgugggaacacAgg..... 1  
 Gi3\_26882088\_x17.ugcgaucggagacgucgugggaacacggg..... 0  
 Gi3\_26901179\_x17.....acgucgugggaacGcggg..... 1  
 Gi2\_10233928\_x17.....aucggagacgucgugggaCcac..... 1  
 Gi3\_26896385\_x17.....cgugggaacUcggggugccgaac..... 1  
 Gi1\_3854645\_x17.....ggaacGcggggugccgaacu..... 1  
 Gi2\_10239504\_x17.....gaacacggggugUcgaacu..... 1  
 Gi5\_8309528\_x17.....cgAucgugggaacacggggugccgaacu..... 1  
 Gi3\_26900686\_x17.....Ugagacgucgugggaacacggggugccgaac..... 1  
 Gi3\_26891506\_x17.....ugggaacacggggugUcgaac..... 1  
 Gi3\_26894056\_x17.....cgugggGacacggggugccga..... 1  
 Gi3\_26896946\_x17.....gucgugAgaacacggggugccgaacu..... 1  
 Gi3\_26877464\_x17.....cgaucggagacgucgugggaacacgggg..... 0  
 Gi3\_26907095\_x17.....ugggaacacggggugcUgaa..... 1  
 Gi3\_26909577\_x17.....gugggaacaAggggugcc..... 1  
 Gi1\_3849715\_x17.....gggaacacggggugccgaGcu..... 1  
 Gi3\_26879589\_x17.....gucguggAaacacggggugccgaacu..... 1  
 Gi2\_10248242\_x17.....Ugagacgucgugggaacacggggg..... 1  
 Gi3\_26894855\_x17.....ugggaacacggggCgccg..... 1  
 Gi5\_8315546\_x17.....aacacggUgugccgaacu..... 1  
 G1a\_5522461\_x17.....Ccgucgugggaacacggggugccgaacu..... 1  
 Gi3\_26912484\_x17.....Uaucggagacgucgugggaac..... 1  
 Gi3\_26912467\_x17.....gcgaucggagacgucgugggaacacggggg..... 0  
 Gi2\_10229270\_x17.....cgugggaacacggggugccgaaA..... 1  
 Gi3\_26899734\_x17.....cgugUgaacacggggugccga..... 1  
 Gi2\_10234081\_x17.....Ggucgugggaacacggggugcc..... 1  
 G1a\_5529618\_x17.....guggAaacacggggugccgaacu..... 1  
 Gi3\_26894022\_x17.....acgucgugggaacacggggugccgaUc..... 1  
 Gi2\_10245845\_x17.....cgugggGacacggggugcc..... 1  
 Gi2\_10249041\_x17.....ucgugggaacacggggugcUgaacu..... 1  
 Gi2\_10248225\_x17.....cgugggaacaUggggugccgaac..... 1  
 Gi1\_3851381\_x17.....gggaacacggggGgccgaacu..... 1  
 Gi2\_10248616\_x17.....guggUaacacggggugccga..... 1  
 Gi5\_8312605\_x17.....gugggaacacggggCgccgaac..... 1  
 Gi5\_8319150\_x17.....Uaucggagacgucgugggaacac..... 1  
 Gi3\_26901808\_x17.....gugggaacacUgggugccgaac..... 1  
 Gi3\_26905803\_x17.....ggaacUcggggugccgaac..... 1

|                                                         |   |
|---------------------------------------------------------|---|
| Gi5_8321394_x17.....cgugCgaacacggggugccgaacu.....       | 1 |
| Gi2_10230392_x17..gcgaucggagacgucgugggaacacggggug.....  | 0 |
| Gi3_26913130_x17.....ggaacacggggugccgaaAu.....          | 1 |
| Gi3_26893138_x17.....gucgugggGacacggggugccgaac.....     | 1 |
| Gi1_3847505_x17.....ugggaacacggggugccAaacu.....         | 1 |
| Gi2_10230341_x17....aCcgagacgucgugggaacacg.....         | 1 |
| Gi2_10246168_x17.....ugggaacGcggggugccgaac.....         | 1 |
| Gi2_10234455_x17....aucggagacgucgugggaacGcggggu.....    | 1 |
| Gi2_10240286_x17.....gucgugggaacacggggugcUgaacu.....    | 1 |
| Gi1_3852962_x17.....gugggaacacggAgugccgaacu.....        | 1 |
| G1a_5531573_x17.....gugAgaacacggggugccgaacu.....        | 1 |
| Gi3_26910223_x17.....cgugggaacacggggCgccga.....         | 1 |
| Gi2_10234880_x17.....cgugggaGcacggggugcc.....           | 1 |
| Gi3_26876750_x17.....acgucgugggaacacggggCgccgaac.....   | 1 |
| Gi3_26876886_x17....aucggagGcucgugggaacacgg.....        | 1 |
| Gi3_26895331_x17..Ucgaucggagacgucgug.....               | 1 |
| Gi3_26904239_x17....aCcgagacgucgugggaacacgggg.....      | 1 |
| Gi3_26907299_x17.....Agggaacacggggugccgaa.....          | 1 |
| Gi5_8309698_x17.....gucgugggGacacggggugccgaacu.....     | 1 |
| Gi1_3854135_x17....aucggGgacgucgugggaacacggggugcc.....  | 1 |
| Gi3_26891846_x17....aucggagacgucgugggGacacgg.....       | 1 |
| Gi2_10232058_x17.....cgucgugggaacacggggCgccg.....       | 1 |
| Gi3_26903066_x17.....ucgugggaacacggggugccgUacu.....     | 1 |
| Gi3_26880167_x17.....cgugggCacacggggugccgaac.....       | 1 |
| Gi2_10247681_x17....cggGgacgucgugggaacacggggugccga..... | 1 |
| Gi3_26900737_x17....aucggagGcucgugggaacacgggg.....      | 1 |
| Gi3_26881884_x17.....acgucgugggaacacggggugccgCac.....   | 1 |
| Gi1_3854475_x17.....gAgaacacggggugccgaacu.....          | 1 |
| Gi1_3856865_x16.....gggaacacggggugccgGacu.....          | 1 |
| Gi1_3857585_x16.....gucgugggaacacggggugccgCacu.....     | 1 |
| Gi1_3860737_x16.....ugggaacacggggAgccgaacu.....         | 1 |
| Gi3_26922685_x16.....gggaacacNgggugccga.....            | 1 |
| Gi3_26914269_x16.....gucgugggaacacggggugcAgaacu.....    | 1 |
| Gi1_3862289_x16.....Ugaacacggggugccgaa.....             | 1 |
| Gi3_26919661_x16.....cgugUgaacacggggugc.....            | 1 |
| Gi2_10253673_x16.....aacaUggggugccgaacu.....            | 1 |
| Gi3_26941853_x16.....acgucgugggaacacggggugccgGacu.....  | 1 |
| Gi2_10261529_x16.....Uagacgucgugggaacacggggug.....      | 1 |
| Gi3_26935917_x16.....gucgugggaacacggAgugccgaacu.....    | 1 |
| Gi3_26913757_x16.....cguUgugggaacacggggugcc.....        | 1 |
| Gi3_26945933_x16.....ggaacCcggggugccgaacu.....          | 1 |
| Gi2_10252569_x16.....ggaacacggggugccgaaUu.....          | 1 |
| Gi3_26927149_x16...Caucggagacgucgugggaacacggg.....      | 1 |
| Gi3_26945453_x16.....Ggucgugggaacacggggugc.....         | 1 |
| Gi3_26927021_x16.....ucgugggaacacgAggugccgaacu.....     | 1 |
| Gi3_26923933_x16.....ugggaacacggggugcGgaacu.....        | 1 |
| Gi3_26937837_x16.....Uucgugggaacacggggu.....            | 1 |

G1a\_5535933\_x16.....cggagacgucgugggaaacacggggug..... 0  
 Gi3\_26927741\_x16.....ugggaacacgggUugccgaa..... 1  
 G1a\_5536733\_x16.....gggGacacggggugccgaacu..... 1  
 Gi2\_10264089\_x16.....gGcuggggaacacggggugccga..... 1  
 Gi1\_3860353\_x16.....gGcugcugggaaacacggggugccgaacu..... 1  
 Gi2\_10263897\_x16.....acgucgugggaaacacggggGgcc..... 1  
 Gi2\_10262121\_x16.....gggaacacggggugUcgaacu..... 1  
 Gi3\_26914733\_x16.....ucgugggaaacacggggGgccgaac..... 1  
 Gi1\_3857713\_x16.....gaacacggggGgccgaacu..... 1  
 Gi1\_3857105\_x16.....guggaaacacggggUaccgaacu..... 1  
 G1a\_5542141\_x16.....guggaaacacggggugUcgaacu..... 1  
 Gi3\_26932061\_x16.....gugAgaacacggggugccga..... 1  
 Gi2\_10251209\_x16.....gugggUacacggggugccgaac..... 1  
 Gi1\_3858817\_x16.....cgugggaaacUcggggugccgaacu..... 1  
 Gi4\_508468\_x16.....agacgucgugggaaacacggggugccgaacu..... 0  
 Gi3\_26920941\_x16.....aAcggagacgucgugggaaacacggg..... 1  
 Gi1\_3855489\_x16.....guggaaacacgggAugccgaacu..... 1  
 Gi4\_508724\_x16.....ggaacacggggugccgaacu..... 0  
 Gi3\_26947133\_x16.....ucgAgggaacacggggugccgaacu..... 1  
 Gi3\_26921437\_x16.....cgugggGacacggggugc..... 1  
 Gi3\_26918093\_x16.....ugggaacacUgggugccgaacu..... 1  
 Gi2\_10266617\_x16.....Cugggaacacggggugccga..... 1  
 Gi2\_10264681\_x16.....ggaaUacggggugccgaacu..... 1  
 Gi3\_26948717\_x16.....Uaucggagacgucguggg..... 1  
 Gi3\_26932205\_x16.....ugggaacacggUgugccgaacu..... 1  
 Gi3\_26920237\_x16.....aacacggCgugccgaacu..... 1  
 Gi2\_10267481\_x16.....gggaacacggggugccgaacG..... 1  
 Gi2\_10264569\_x16.....aacacggggugcGgaacu..... 1  
 Gi2\_10267641\_x16.....gggaacacgAggugccgaacu..... 1  
 Gi5\_8326400\_x16.....gaacacggggugccgaaUu..... 1  
 Gi3\_26924189\_x16.....ugggaacacggggugccAaa..... 1  
 Gi3\_26951997\_x16.....cgucgugggaaacacggggUac..... 1  
 Gi1\_3855665\_x16.....cgCcgugggaaacacggggugccgaacu..... 1  
 Gi1\_3854897\_x16.....uUggaacacggggugccga..... 1  
 Gi3\_26924893\_x16.....gggNacacggggugccgaacu..... 1  
 Gi3\_26940045\_x16.....gggaacacggggugAcgaacu..... 1  
 Gi3\_26917373\_x16.....acgucgugggaaacacggggugcUgaacu..... 1  
 Gi2\_10260009\_x16.....cgucgugggaaacGcggggugccgaacu..... 1  
 Gi3\_26947341\_x16.....aucggagacgucguAggaacacg..... 1  
 Gi1\_3855281\_x16.....gCgaacacggggugccgaacu..... 1  
 Gi2\_10269785\_x16.....gugggaacacggggugAcgaac..... 1  
 Gi2\_10265865\_x16.....gugggaacacggggugccgaG..... 1  
 Gi3\_26915021\_x16.....cUgagacgucgugggaaacacggggugccga..... 1  
 Gi3\_26914509\_x16.....gugggaacacggggugAcga..... 1  
 Gi3\_26919069\_x16.....ugggaacacggggugccgaaA..... 1  
 Gi2\_10270937\_x16.....gaacacggAgugccgaacu..... 1  
 Gi3\_26925453\_x16.....gugggaacacggAgugccg..... 1

Gi2\_10254057\_x16.....cgucgugggGacacggggugccg..... 1  
 Gi5\_8334016\_x16.....gucgugggaGcacggggugccgaacu..... 1  
 Gi2\_10255673\_x16.....Gcggagacgucgugggaacacg..... 1  
 Gi3\_26945245\_x16.....Ggucgugggaacacggggugccga..... 1  
 Gi3\_26943277\_x16.....cUaucggagacgucgugggaacacggggu..... 1  
 Gl1a\_5543101\_x16.....gggaacacNgggugccgaacu..... 1  
 Gi2\_10258633\_x16.....gugggaacacgggAugcc..... 1  
 Gi3\_26948909\_x16.....gucgugggaacacgAggugccgaacu..... 1  
 Gi2\_10252985\_x16.....gugggaacacggggCgccg..... 1  
 Gi1\_3862353\_x16.....gugggaacacgAggugccgaacu..... 1  
 Gi2\_10261801\_x16.....aacacgggguAccgaacu..... 1  
 Gi3\_26915997\_x16.....gGcugucgugggaacacggggugccgaac..... 1  
 Gi3\_26949069\_x16.....Cucggagacgucgugggaacacggggu..... 1  
 Gi1\_3858417\_x16.....cgugggaacacggggugc..... 0  
 Gi3\_26943021\_x16.....agUcugucgugggaacacggggugccgaacu..... 1  
 Gi2\_10266985\_x16.....cggaUacgucgugggaacacggggugcc..... 1  
 Gi3\_26947821\_x16.....Ugugggaacacggggugccga..... 1  
 Gi5\_8332400\_x16.....gAgggaacacggggugccgaac..... 1  
 Gi3\_26922349\_x16.....gacgucgugggaacacggggGgccgaacu..... 1  
 Gi3\_26946493\_x16.....aucAgagacgucgugggaacacggggu..... 1  
 Gi3\_26946269\_x16.....cUugggaacacggggugccga..... 1  
 Gi2\_10263721\_x16.....Uaucggagacgucgugggaac..... 1  
 Gl1a\_5542717\_x16.....uGgaacacggggugccgaacu..... 1  
 Gi3\_26919405\_x16.....acgucgugggGacacggggugccgaac..... 1  
 Gi3\_26952061\_x16.....gAgggaacacggggugccg..... 1  
 Gi3\_26946285\_x16.....gucgugggaGcacggggugccgaac..... 1  
 Gi3\_26939629\_x16.....ucgugggaacacgggguAccgaac..... 1  
 Gi3\_26948573\_x16.....gacgucgugggaacacggggCgccgaac..... 1  
 Gi5\_8323872\_x16.....cUucgugggaacacggggugc..... 1  
 Gi2\_10259737\_x16.....gugggaacacggggugccgaaU..... 1  
 Gi3\_26933677\_x16.....gugggaacacgUggugccgaac..... 1  
 Gi3\_26923997\_x16.....ggaacacggggugAcgaac..... 1  
 Gi2\_10267145\_x16.....gugggaacacggggugccgUac..... 1  
 Gi2\_10252233\_x16.....aacacggggugccgaaUu..... 1  
 Gi5\_8338224\_x16.....ugggaacacggggugccgaaAu..... 1  
 Gi1\_3861953\_x16.....acgucgugggaacacggggugccgCacu..... 1  
 Gi3\_26934733\_x16.....guggAaacacggggugccg..... 1  
 Gi2\_10256089\_x16.....ucggagacgucgugggaacacggggugccga..... 0  
 Gi3\_26941741\_x16.....cgucgugggaacacggggGgccg..... 1  
 Gi3\_26914301\_x16.....ugggaacacggggugccAa..... 1  
 Gi3\_26926621\_x16.....ucgugggaCcacggggugccgaacu..... 1  
 Gi1\_3871277\_x15.....aGgucgugggaacacggggugccgaacu..... 1  
 Gi3\_26970535\_x15.....Aaucggagacgucgugggaacacggg..... 1  
 Gi5\_8341652\_x15.....gggaacacgggguAccgaacu..... 1  
 Gi3\_26965330\_x15.....aucggagacgucguggAaacacg..... 1  
 Gi3\_26986525\_x15.....gugggaCcacggggugcc..... 1  
 Gi4\_510062\_x15.....ugggaacacggggugccgaac..... 0

Gi3\_26990530\_x15.....gacgucgugggaacacggggCgccgaacu..... 1  
Gi3\_26954005\_x15.....ugggCacacggggugccgaac..... 1  
Gi3\_26985820\_x15.....gugggaacacggggugUcg..... 1  
Gi3\_26974450\_x15.....gagacgucgugggaacacgggAugccg..... 1  
Gi1\_3868577\_x15.....aGcggagacgucgugggaacacg..... 1  
Gi3\_26961790\_x15.....acgucAugggaacacggggugccgaacu..... 1  
Gi1\_3865667\_x15.....acgucgugggaacacggggCgccgaacu..... 1  
Gi2\_10285165\_x15.....gugggaacacggggugccgaaGu..... 1  
Gi5\_8341307\_x15.....cAucgugggaacacggggugccgaacu..... 1  
Gi3\_26982400\_x15.....Aaucggagacgucgugggaacacgggg..... 1  
Gi2\_10281505\_x15.....cgucguggNaacacggggugc..... 1  
G1a\_5544944\_x15.....cUugggaacacggggugc..... 1  
Gi1\_3870692\_x15.....gaacacggggugccgaacA..... 1  
Gi3\_26990470\_x15.....gugggaacaUggggugccgaa..... 1  
Gi3\_26977585\_x15.....Cucgugggaacacggggugccgaac..... 1  
Gi3\_26971750\_x15.....Ugugggaacacggggugc..... 1  
Gi2\_10291165\_x15.....cgucguggNaacacggggugcc..... 1  
Gi2\_10288990\_x15.....Agggaacacggggugccgaac..... 1  
Gi3\_26981710\_x15.....cgugggaacCcgggugccgaac..... 1  
Gi2\_10287070\_x15.....guggAaacacggggugcc..... 1  
Gi3\_26985610\_x15.....gaucggagacgucguggCacacgggg..... 1  
Gi1\_3864797\_x15.....Cacgucgugggaacacggggugccgaacu..... 1  
Gi1\_3866147\_x15.....gUgaacacggggugccgaacuu..... 1  
Gi3\_26956360\_x15.....gucgugggaacacggggugAcgaacu..... 1  
Gi3\_26959030\_x15.....cgucgugggaacGcggggugccga..... 1  
Gi3\_26966320\_x15.....gaacacggggUccgaacu..... 1  
Gi2\_10280350\_x15.....cgaucggagacgucgugggaacacggggugcc..... 0  
Gi3\_26976220\_x15.....ucAugggaacacggggugccgaac..... 1  
Gi2\_10292560\_x15.....ucgugggaacacggggugccgaGc..... 1  
Gi3\_26987845\_x15.....gugggaaGacggggugccgaacu..... 1  
Gi3\_26955925\_x15.....gugggCacacggggugcc..... 1  
Gi2\_10293100\_x15.....cgCgggaacacggggugc..... 1  
Gi2\_10288480\_x15.....cgGgggaacacggggugccga..... 1  
Gi3\_26983330\_x15.....Gcggagacgucgugggaacacgggg..... 1  
Gi5\_8349542\_x15.....ugggaacacggggugccgaaUu..... 1  
Gi3\_26966620\_x15.....Gcggagacgucgugggaacacg..... 1  
Gi3\_26955235\_x15.....cgaucggagacgucgugggaacacggggug..... 0  
Gi5\_8339162\_x15.....cgGgggaacacggggugccgaac..... 1  
Gi2\_10292710\_x15.....ucgugggaacaUggggugccgaacu..... 1  
Gi2\_10286065\_x15.....ggaacCcgggugccgaacu..... 1  
Gi1\_3870557\_x15.....aacacgggAugccgaacu..... 1  
Gi2\_10286365\_x15.....gaacacggggugccgUacu..... 1  
Gi5\_8354492\_x15.....ucgugggaacacggggAgccgaacu..... 1  
Gi3\_26980600\_x15.....aucggagacgucguAggaacacgggg..... 1  
Gi4\_510287\_x15.....Uggaacacggggugccgaacu..... 1  
Gi2\_10285195\_x15.....cUaucggagacgucgugggaacacggg..... 1  
G1a\_5554544\_x15.....Uaucggagacgucgugggaacacgggg..... 1



Gi2\_10286815\_x15.....gugggCacacggggugcc..... 1  
Gi2\_10277275\_x15.....acgucgugggaacacggggCgccgaacu..... 1  
Gi3\_26954680\_x15.....acgucguAggaacacggggugccgaacu..... 1  
Gi5\_8348927\_x15.....gggGacacggggugccgaac..... 1  
Gi3\_26978905\_x15.....ugggaacGcggggugccga..... 1  
Gi3\_26986045\_x15.....Ggacgucgugggaacacggggugccgaac..... 1  
Gi3\_26980240\_x15.....gggaacacggAgugccgaac..... 1  
Gi2\_10277770\_x15.....cggagacgucgugggaGcacggggugcc..... 1  
Gi2\_10289785\_x15.....aucggagacgucgugggaacacggggGgc..... 1  
Gi3\_26953120\_x15.....ggaacacggggCgccgaa..... 1  
Gi2\_10292485\_x15.....gucgugggaacacAgggugccgaacu..... 1  
Gi1\_3865442\_x15.....Cgggaacacggggugccgaac..... 1  
Gi2\_10294120\_x15.....gucguAggaacacggggugccgaacu..... 1  
Gi5\_8342597\_x15.....ucgugggCacacggggugccgaacu..... 1  
Gi3\_26961295\_x15.....ggaacacggggAgccgaac..... 1  
Gi2\_10286545\_x15.....aucggagaNgucgugggaacacggg..... 1  
Gi3\_26957845\_x15.....Cgaacacggggugccgaa..... 1  
Gi5\_8342417\_x15.....ggaUacggggugccgaacu..... 1  
Gi2\_10282390\_x15.....ggaacacggggugcUgaac..... 1  
Gi3\_26991610\_x15.....aucggagaUgucgugggaacacgggg..... 1  
Gi3\_26969725\_x15.....gggaacGcggggugccgaa..... 1  
Gi2\_10289995\_x15.....ucgugggaacacggggugUcgaacu..... 1  
Gi2\_10287400\_x15.....cgugggaacacgggCugccgaacu..... 1  
Gi2\_10274620\_x15.....aucggagGcucgugggaacacgggg..... 1  
Gi2\_10286245\_x15.....ucgugAgaacacggggugccgaacu..... 1  
Gi5\_8351357\_x15.....cguggCaacacggggugccgaacu..... 1  
Gi5\_8341052\_x15.....cgucgugggaCcacggggugccgaacu..... 1  
Gi1\_3866567\_x15.....gugggaaAacggggugccgaacu..... 1  
Gi2\_10292455\_x15.....guUgugggaacacggggugccgaac..... 1  
Gi3\_26992150\_x15.....cgugggaacGcggggugcc..... 1  
Gi2\_10292410\_x15.....gaucgAagacgucgugggaacacggg..... 1  
Gi3\_26961460\_x15.....cgucgugggaacGcggggugcc..... 1  
Gi2\_10280290\_x15.....gggaacacggggugccgaUc..... 1  
Gi3\_26957065\_x15.....gugggaacacgggAugccga..... 1  
Gi3\_26964910\_x15.....cgugUgaacacggggugccg..... 1  
Gi2\_10278850\_x15.....gugggaacacggggCgccgaa..... 1  
Gi3\_26986090\_x15.....ucgugggCacacggggugccgaacu..... 1  
Gi2\_10288285\_x15.....cUgagacgucgugggaacacg..... 1  
Gi1\_3866357\_x15.....gucgugggaacacggggugccgaaA..... 1  
Gi3\_26953795\_x15.....gaucggagNcgucgugggaacacggg..... 1  
G1a\_5546579\_x15.....cUaucggagacgucgugg..... 1  
Gi2\_10282375\_x15.....gugggaacCcgggugccgaa..... 1  
Gi2\_10289020\_x15.....gucgugggaacacggggugccgCac..... 1  
Gi3\_26976115\_x15.....aucAgagacgucgugggaacacggg..... 1  
Gi2\_10285135\_x15.....aucAgagacgucgugggaaca..... 1  
Gi1\_3871667\_x15.....cgugggaaUacggggugccgaacu..... 1  
Gi3\_26987935\_x15.....cgucgugggaGcacggggugccgaac..... 1

Gi3\_26975725\_x15.....gggaacacggggugccgaaU..... 1  
Gi3\_26958190\_x15.....acgucguggAaacacggggugccgaacu..... 1  
Gi5\_8352467\_x15.....ucgugggaacacgAgggugccgaacu..... 1  
Gi5\_8344022\_x15.....gugggaacacgUggugccgaacu..... 1  
Gi3\_27017525\_x14.....cAugggaacacggggugccga..... 1  
Gi3\_27023825\_x14....gaucggagacgucgugggGacacggggu..... 1  
Gi1\_3877444\_x14.....gucgugggaacacggggGgccgaacu..... 1  
Gi2\_10305143\_x14.....cgugggaacacgAgggugccgaac..... 1  
Gi3\_27022593\_x14.....gGcgugggaacacggggugc..... 1  
Gi3\_27000347\_x14.....Agggaacacggggugccga..... 1  
Gi5\_8364035\_x14.....cUucgugggaacacggggugccga..... 1  
Gi2\_10310043\_x14.....cgugggaGcacggggugccga..... 1  
Gi5\_8360171\_x14.....cgugggaacacggggugccgaUcu..... 1  
Gi1\_3873468\_x14.....gugggaacacggggugccgaaUu..... 1  
Gi3\_27006311\_x14.....gacgucgugggaacacgggAugccgaac..... 1  
Gi2\_10306417\_x14.....ggagacguNgugggaacacggggugcc..... 1  
Gi1\_3875064\_x14.....ugggaacaNggggugccgaac..... 1  
Gi3\_27006283\_x14....aucggagacgucgugggaacacggggAgcc..... 1  
Gi3\_27032477\_x14.....cgAcgugggaacacggggugccgaac..... 1  
Gi1\_3877024\_x14.....ggGacacggggugccgaacu..... 1  
Gi1\_3878494\_x14.....ggagacgucgCgggaacacggggugccgaacu..... 1  
Gi3\_27013899\_x14.....cgucgugggaacacggggAgccgaac..... 1  
Gi2\_10298927\_x14.....cgucgugggaacacggggugcUgaacu..... 1  
Gi1\_5563275\_x14....aucggagacgucgugggaGcacggggugc..... 1  
Gi3\_27033695\_x14....Uucggagacgucgugggaacacggggu..... 1  
Gi2\_10301741\_x14.....ugggGacacggggugccgaac..... 1  
Gi1\_3875750\_x14.....Acgugggaacacggggugccgaacu..... 1  
Gi2\_10309987\_x14.....gugggaacacggggugcA..... 1  
Gi2\_10301293\_x14.....gGgacgucgugggaacacggggugccgaac..... 1  
Gi3\_27008355\_x14.....gggGacacggggugccgaa..... 1  
Gi2\_10307565\_x14.....gugggaacacggggugccgG..... 1  
Gi3\_27002013\_x14.....cgucgugggUacacggggugcc..... 1  
Gi2\_10296155\_x14....cUaucggagacgucgugggaacacg..... 1  
Gi5\_8359023\_x14.....agacgucgugggGacacggggugccgaacu..... 1  
Gi3\_27026667\_x14.....gugggaacacggCgugccgaac..... 1  
Gi3\_27015467\_x14.....cUucgugggaacacggggu..... 1  
Gi5\_8362285\_x14.....ugggaacacggggugcGgaacu..... 1  
Gi2\_10314537\_x14....Uaucggagacgucgugggaacacgg..... 1  
Gi3\_27000697\_x14.....aacacggggugAcgaacu..... 1  
Gi2\_10314453\_x14.....ugggaacacggggAgccgaacu..... 1  
Gi2\_10306333\_x14.....gugggaacacgggguAcc..... 1  
Gi1\_3882344\_x14.....ucUugggaacacggggugccgaacu..... 1  
Gi1\_3875470\_x14.....ugggaaUacggggugccgaacu..... 1  
Gi1\_3877192\_x14.....gAaacacggggugccgaacu..... 1  
Gi3\_27035683\_x14....aucggagacgucgugggaaAacggggu..... 1  
Gi1\_3881588\_x14.....ugggaacacggggugccgaa..... 0  
Gi5\_8358449\_x14.....Cggaacacggggugccgaac..... 1

Gi2\_10302175\_x14.....ggaacacggggAgccgaac..... 1  
Gi3\_27023657\_x14.....Gucggagacgucgugggaacacggggugc..... 1  
Gi2\_10310645\_x14.....Ugugggaacacggggugcc..... 1  
Gi3\_27030545\_x14.....cCucgugggaacacggggugccgaacu..... 1  
Gi2\_10315181\_x14.....cgugggaacaAggggugccgaacu..... 1  
Gi1\_3879348\_x14.....ucgugggaacacggggugccGacu..... 1  
Gi3\_27009727\_x14.....aucggagacgucgugggaacCcgggg..... 1  
Gi3\_26997953\_x14.....cgucgugggaacacggAgugccgaacu..... 1  
Gi2\_10299431\_x14.....gugggaacacggggGgccgaa..... 1  
Gi5\_8366541\_x14.....cgucgugggaacacggggugccGacu..... 1  
Gi5\_8358253\_x14.....cgugggaacacggggugccUaacu..... 1  
Gi2\_10312227\_x14.....ucgugggaacacggggugccAaacu..... 1  
Gi2\_10297919\_x14.....gucgugggNacacggggugccgaac..... 1  
Gi5\_8367521\_x14.....cgugggaacUcggggugccgaacu..... 1  
Gi3\_27016783\_x14.....gaucggagacgucgugggaGcacggg..... 1  
Gi2\_10297961\_x14.....cCugggaacacggggugcc..... 1  
Gi3\_26996539\_x14.....aucggagacgucgugggaCcac..... 1  
Gi3\_26999073\_x14.....acgucgugNgaacacggggugcc..... 1  
Gi3\_27003077\_x14.....gugAgaacacggggugccgaa..... 1  
Gi3\_27016013\_x14.....gUgaacacggggugccgaacu..... 1  
Gi5\_8362537\_x14.....acgucgugggaacacggggugccGcu..... 1  
Gi2\_10300131\_x14.....aacacgAggugccgaacu..... 1  
Gi1\_3882148\_x14.....uggAaacacggggugccgaacu..... 1  
Gi5\_8372323\_x14.....aacacgggCugccgaacu..... 1  
Gi2\_10307593\_x14.....gugggaacacgggCugccgaacu..... 1  
Gi3\_27032603\_x14.....gggaacacggggugUcgaac..... 1  
Gi1\_3872894\_x14.....ugggaacCggggugccgaacu..... 1  
Gi3\_27011687\_x14.....gugggaacacggggugccCaac..... 1  
Gi1\_3880790\_x14.....cgugggaCcacggggugccgaacu..... 1  
Gi2\_10301125\_x14.....gggaacacgAggugccgaac..... 1  
Gi3\_26993571\_x14.....guUgugggaacacggggugcc..... 1  
G1a\_5560391\_x14.....aGcggagacgucgugggaacacggg..... 1  
Gi3\_27024875\_x14.....cgucguggAaacacggggugccgaacu..... 1  
Gi2\_10306221\_x14.....Ugucgugggaacacacggggugccgaacu..... 1  
G1a\_5567461\_x14.....gugggaacacggAgugccgaacu..... 1  
Gi3\_26994859\_x14.....acgucgugAgaacacggggugccgaacu..... 1  
Gi3\_26997533\_x14.....ugggaacacggggugAcggaac..... 1  
Gi1\_3879432\_x14.....cgugggaacacggggugcUgaacu..... 1  
Gi3\_27004225\_x14.....ucgugggaacacggggugccgaacG..... 1  
Gi5\_8369117\_x14.....ggUacacggggugccgaac..... 1  
Gi2\_10298759\_x14.....gggaacacgggAugccgaa..... 1  
Gi3\_27035431\_x14.....gggaacacggggugcGgaacu..... 1  
Gi3\_27036117\_x14.....gGucggagacgucgugggaacac..... 1  
Gi3\_26994803\_x14.....Ugucgugggaacacggggugcc..... 1  
Gi5\_8371203\_x14.....agacgucgugggaacacggggCgccgaacu..... 1  
Gi5\_8356979\_x14.....ugggaacacggggugAcgaacu..... 1  
Gi1\_3877626\_x14.....aacacggggugcGgaacu..... 1

Gi1\_3879236\_x14.....gaacacggAgugccgaacu..... 1  
 Gi3\_26995573\_x14.....ugggaacacggggugcUga..... 1  
 Gi4\_511002\_x14.....gGgggaacacggggugccgaa..... 1  
 Gi2\_10296127\_x14.....cguggUaacacggggugccgaacu..... 1  
 Gi1\_5570275\_x14.....cgAgggaacacggggugccgaacu..... 1  
 Gi1\_3878522\_x14.....Uagacgucgugggaacacggggugcc..... 1  
 Gi2\_10303743\_x14.....cggagacgCcgugggaacacggggugcc..... 1  
 Gi3\_27010203\_x14.....Uucgugggaacacggggug..... 1  
 Gi2\_10300285\_x14.....gugggaGcacggggugccgaa..... 1  
 Gi5\_8361347\_x14.....aGcggagacgucgugggaacacgg..... 1  
 Gi5\_8364273\_x14.....uCggaacacggggugccgaac..... 1  
 Gi5\_8364455\_x14.....gugggaacGcggggugccgaac..... 1  
 Gi3\_27000389\_x14.....aucggagacgucgugggaacGcgg..... 1  
 Gi2\_10306123\_x14.....gucgugggaacCcgggugccgaac..... 1  
 Gi2\_10315055\_x14.....aacacggAgugccgaacu..... 1  
 Gi5\_8370349\_x14.....ucgugggaacacUgggugccgaacu..... 1  
 Gi5\_8356643\_x14.....gaacacggggugccgaacA..... 1  
 Gi3\_27018715\_x14.....agacgucgugggaacacggggCgccgaacu..... 1  
 Gi3\_27020339\_x14.....aucggGgacgucgugggaacacgg..... 1  
 Gi2\_10317505\_x14.....ugggaacacggggCgccgaac..... 1  
 Gi2\_10316063\_x14.....Ugagacgucgugggaacacg..... 1  
 Gi2\_10304079\_x14.....gugggaacacggUgugccg..... 1  
 Gi3\_27036845\_x14.....gaaGacggggugccgaacu..... 1  
 Gi5\_8365561\_x14.....aCcacggggugccgaacu..... 1  
 Gi3\_27033891\_x14.....aucggagacgucgugggaacacgAg..... 1  
 Gi1\_3881728\_x14.....ugggaacacggggugccgGacu..... 1  
 Gi2\_10310939\_x14.....aucggagacgucgugggaCcacggg..... 1  
 Gi1\_3876590\_x14.....ucgugAgaacacggggugccgaacu..... 1  
 Gi3\_27069773\_x13.....gucgugggaacacAgggugccgaac..... 1  
 Gi1\_3892820\_x13.....gaacacggggUaccgaacu..... 1  
 Gi3\_27040822\_x13.....gUagacgucgugggaacacggggugccg..... 1  
 Gi2\_10331502\_x13.....guggUaacacggggugccgaa..... 1  
 Gi3\_27046724\_x13.....agGcgcgucgugggaacacggggugccgaacu..... 1  
 Gi1\_3884799\_x13.....cgucgugggaacacggggugcU..... 1  
 Gi5\_8386585\_x13.....cgugggaacacggggugccgaCc..... 1  
 Gi2\_10330462\_x13.....gugggaacacggggugAc..... 1  
 Gi3\_27067849\_x13.....aucggagacguUgugggaacacg..... 1  
 Gi1\_3887698\_x13.....uGgugggaacacggggugcc..... 1  
 Gi5\_8385727\_x13.....aacCcgggugccgaacu..... 1  
 Gi2\_10323975\_x13.....aucggagacgucgugggaCcacggggug..... 1  
 Gi2\_10320426\_x13.....ggaacacggggugccAaac..... 1  
 Gi1\_3884045\_x13.....gUagacgucgugggaacacggggugcc..... 1  
 Gi3\_27068837\_x13.....ugggaacacggggugcAga..... 1  
 Gi3\_27076377\_x13.....gaucggagacgucgugggaacGcgggu..... 1  
 Gi5\_8378512\_x13.....ggaacacggggugAcgaacu..... 1  
 Gi5\_8381749\_x13.....ucggagacgucgugggaacacggggugccgaacu..... 0  
 Gi3\_27076078\_x13.....auUggagacgucgugggaacac..... 1

Gi3\_27048557\_x13.....cgugggUacacggggugc..... 1  
 Gi1\_3889765\_x13.....Agaacacggggugccgaac..... 1  
 Gi2\_10336377\_x13.....cgGcgugggaacacggggugcc..... 1  
 Gi3\_27083475\_x13.....gucgugggaacacggggugUcgaacu..... 1  
 Gi3\_27065574\_x13.....gggaacacggggGgccgaa..... 1  
 Gi2\_10328096\_x13.....aucggagacgucgugggaacacggggCg..... 1  
 Gi1\_3892859\_x13.....cgAcgugggaacacggggugccgaacu..... 1  
 G1a\_5574616\_x13.uUcgauccgagacgucgu..... 1  
 Gi3\_27039054\_x13.....aucggagacgucgugggaacac..... 1  
 Gi2\_10336429\_x13.....ggagacgucgugggGacacggggugcc..... 1  
 Gi2\_10339484\_x13.uUcgauccgagacgucgugggaaca..... 1  
 Gi3\_27058710\_x13.....Cgggaacacggggugccg..... 1  
 Gi5\_8383738\_x13.....gucgGgggaacacggggugccgaacu..... 1  
 Gi2\_10336793\_x13.....ggagacgucgugggaacacggggugccga..... 0  
 Gi3\_27044189\_x13.....gucgugAgaacacggggugccgaac..... 1  
 Gi3\_27048648\_x13.....aacacgggUugccgaacu..... 1  
 Gi3\_27050845\_x13.....cgugggaacacgggUugccgaacu..... 1  
 Gi2\_10322467\_x13.....aUgucgugggaacacggggugcc..... 1  
 Gi5\_8384635\_x13.....ucgugggaCcacggggugccgaacu..... 1  
 Gi3\_27037988\_x13.....cgucgugggGacacggggugccg..... 1  
 Gi1\_3884266\_x13.....cggagacgucgugggaacacggggugccgaac..... 0  
 Gi2\_10338496\_x13.....gGucggagacgucgugggaacac..... 1  
 Gi2\_10326341\_x13.....guggCaacacggggugccgaac..... 1  
 Gi1\_3889622\_x13.....cgugggaacacgggAugccgaacu..... 1  
 Gi3\_27048817\_x13.....acgucgugggaacacggggugccgaaAu..... 1  
 G1a\_5576917\_x13.....cgugggaacacggggCgccgaacu..... 1  
 Gi5\_8383608\_x13.....acgucgCgggaacacggggugccgaacu..... 1  
 Gi5\_8380787\_x13.....cgNgggaacacggggugccgaacu..... 1  
 Gi3\_27053900\_x13.....aucggagacgucgugAgaacacg..... 1  
 Gi5\_8387339\_x13.....cgucgugggaacacggggugccgaCcu..... 1  
 Gi3\_27074219\_x13.....aUacgucgugggaacacggggugccga..... 1  
 Gi5\_8390875\_x13.....aUgucgugggaacacggggugccgaacu..... 1  
 Gi5\_8386247\_x13.....guggUaacacggggugccgaac..... 1  
 Gi5\_8388457\_x13.....Uaucggagacgucgugggaacacg..... 1  
 Gi2\_10329461\_x13.....aucggagacgucgugggaacacggggugccgaacu..... 0  
 Gi3\_27045502\_x13.....Agucgugggaacacggggugccgaacu..... 1  
 G1a\_5574135\_x13.....gugggaUcacggggugccgaacu..... 1  
 Gi5\_8389458\_x13.....gucgugggaaAacggggugccgaacu..... 1  
 Gi3\_27044813\_x13.....gugggaacacggggugcAga..... 1  
 Gi1\_3889206\_x13.....gGgggaacacggggugccgaacuu..... 1  
 G1a\_5579894\_x13.....Uggaacacggggugccgaa..... 1  
 Gi2\_10340134\_x13.....ggagacgucgugggaacacggggCgcc..... 1  
 Gi5\_8377017\_x13.....cgugggaacacggUgugccgaacu..... 1  
 Gi3\_27047751\_x13.....Ugucgugggaacacggggugccgaac..... 1  
 Gi1\_3885969\_x13.....cUgagacgucgugggaacacggggugc..... 1  
 Gi2\_10340576\_x13.....guAggaacacggggugccg..... 1  
 Gi3\_27054368\_x13.....aGcggagacgucguggga..... 1

Gi2\_10340264\_x13.....cgugggaacGcggggugcc..... 1  
 Gi5\_8380592\_x13.....aacacggggugccgaUcu..... 1  
 Gi2\_10319269\_x13.....gugggaacacggggugccAa..... 1  
 Gi3\_27056357\_x13.....gggNacacggggugccgaac..... 1  
 Gi3\_27052041\_x13.....aucgggagacgucAugggaacacggg..... 1  
 Gi3\_27083124\_x13.....aucggGgacgucgugggaacacggggugcc..... 1  
 Gi2\_10324014\_x13.....Cugggaacacggggugccgaa..... 1  
 G1a\_5572367\_x13.....gggaacacggggugccgaCcu..... 1  
 G1a\_5578022\_x13.....Uucgugggaacacggggugcc..... 1  
 Gi2\_10332815\_x13cugcgauccggGgacgucgugggaacac..... 1  
 Gi3\_27061154\_x13.....cgucgugggaacaUggggugccgaacu..... 1  
 Gi1\_3889180\_x13.....gaacacggggugccgaacAu..... 1  
 Gi3\_27076247\_x13.....Gcgucgugggaacacggggugcc..... 1  
 Gi1\_3890636\_x13.....aacaGggggugccgaacu..... 1  
 Gi2\_10341174\_x13.....cgugggaacacggggugcUgaac..... 1  
 Gi1\_3883083\_x13.....gugggaacacggggugccUacu..... 1  
 Gi2\_10327797\_x13.....gugggaacacggUgugcc..... 1  
 Gi2\_10323767\_x13.....gUgacgucgugggaacacggggg..... 1  
 Gi1\_3888946\_x13...Uaucggagacgucgugggaacac..... 1  
 Gi3\_27074661\_x13.....gugggaacacggAgugccgaa..... 1  
 Gi3\_27052184\_x13.....gggaacacgggCugccgaacu..... 1  
 Gi2\_10332724\_x13.....ggaacacggggugUcgaac..... 1  
 G1a\_5581116\_x13.....gacgucgugggaacacggggugccgaac..... 0  
 Gi1\_3886372\_x13.....Agugggaacacggggugccgaacu..... 1  
 Gi3\_27064144\_x13.....ucgugggaacaUggggugccgaac..... 1  
 Gi2\_10342331\_x13.....cgucgugggaacacggggGgc..... 1  
 Gi3\_27061765\_x13.....ugggaaAacggggugccgaacu..... 1  
 Gi3\_27067251\_x13.....cgugggaacacgggggUccgaacu..... 1  
 Gi2\_10319945\_x13....aCcgagacgucgugggaacac..... 1  
 Gi3\_27080758\_x13.....cggagacgNcgugggaacacggggg..... 1  
 Gi1\_3892222\_x13.....gggaacacggggugccAaacu..... 1  
 Gi2\_10337222\_x13.....gaacacgggAugccgaacu..... 1  
 Gi2\_10321739\_x13....aucgUagacgucgugggaacacggggg..... 1  
 Gi3\_27083969\_x13....Uucggagacgucgugggaacacg..... 1  
 Gi5\_8375054\_x13.....acgucgugggaacGcggggugccgaacu..... 1  
 Gi3\_27062051\_x13....gaucggagacgucgCgggaacacggg..... 1  
 Gi2\_10336520\_x13.....gugggaacacggggugcUga..... 1  
 Gi5\_8373156\_x13.....cguUggaacacggggugccgaacu..... 1  
 Gi1\_3883343\_x13.....gucgugggaacacggggugccgaCcu..... 1  
 Gi3\_27065964\_x13.....cgucgugggaacacggggugccgaGc..... 1  
 Gi2\_10337521\_x13.....ugggaacacgUggugccgaacu..... 1  
 Gi3\_27063975\_x13.....gaacacgCggugccgaacu..... 1  
 Gi2\_10323715\_x13.....gugggGacacggggugccgaa..... 1  
 Gi3\_27047608\_x13.....gugggaCcacggggugccga..... 1  
 Gi1\_3888257\_x13.....ucgugggaNcacggggugcc..... 1  
 Gi2\_10331086\_x13.....gUgacgucgugggaacac..... 1  
 Gi2\_10328512\_x13.....gggaacacggggGgcccgaac..... 1

Gi3\_27058593\_x13.....gugggaacacgggguAccgaa..... 1  
 Gi2\_10321050\_x13.....Uucggagacgucgugggaacacggggu..... 1  
 Gi2\_10336364\_x13.....gGgggaacacggggugccgaacuu..... 1  
 Gi1\_3887724\_x13.....cgugggaacacggggugccgaacAu..... 1  
 Gi2\_10329318\_x13.....gugggaacacCgggugccgaacu..... 1  
 Gi5\_8375678\_x13.....ggaacacgAgggugccgaacu..... 1  
 Gi3\_27063962\_x13.....gugAgaacacggggugccg..... 1  
 Gi1\_3888842\_x13.....gggaacacgggguAccgaacu..... 1  
 Gi3\_27040796\_x13.....cgucgugggaacacggggugUcgaacu..... 1  
 Gl1\_5583456\_x13.....ugggaacacggggCgccgaacu..... 1  
 Gi2\_10336780\_x13.....cgucgugggaacGcggggugcc..... 1  
 Gi2\_10318853\_x13.....cgugAgaacacggggugccgaac..... 1  
 Gi2\_10320712\_x13.....Uacgucgugggaacacgg..... 1  
 Gi3\_27038872\_x13.....gggaacacgggCugccgaac..... 1  
 Gi2\_10324950\_x13.....ugggGacacggggugccga..... 1  
 Gi2\_10337352\_x13.....cggagacgucgugggaacacggggGgcc..... 1  
 Gi3\_27069578\_x13.....aacacggggugccgaUcu..... 1  
 Gl1\_5579179\_x13.....gCaacacggggugccgaacu..... 1  
 Gi3\_27059893\_x13.....ugggaacacggggugccgCa..... 1  
 Gi2\_10340979\_x13.....ggagacgucgugggaacacggggGgcc..... 1  
 Gi3\_27067706\_x13.....ggUaacacggggugccgaa..... 1  
 Gi3\_27055356\_x13.....ugggaaUacggggugccga..... 1  
 Gi3\_27052431\_x13.....gGucggagacgucgugggaacacgg..... 1  
 Gi3\_27066016\_x13.....ucgugggaacacggggAgccgaac..... 1  
 Gi5\_8373663\_x13.....Agaacacggggugccgaac..... 1  
 Gi3\_27050676\_x13.....ggaacGcggggugccgaa..... 1  
 Gi2\_10334284\_x13.....gaacacggggAgccgaacu..... 1  
 Gl1\_5574590\_x13.....Uaucggagacgucguggg..... 1  
 Gi3\_27074700\_x13.....gucgugggaaUacggggugccgaacu..... 1  
 Gi3\_27057670\_x13.....Uaucggagacgucguggga..... 1  
 Gi3\_27077404\_x13.....aucggagacgucgugggaaUacg..... 1  
 Gi2\_10324105\_x13.....gugggaCcacggggugccgaac..... 1  
 Gi2\_10336026\_x13.....gugggaacacggggugUc..... 1  
 Gi5\_8387677\_x13.ugcgauccggagacgucgugggaacacggg..... 0  
 Gi1\_3889453\_x13.....cgucgugggGacacggggugccgaacu..... 1  
 Gl1\_5572432\_x13.....gagacgucgugggaacacggggugccgaacu..... 0  
 Gi3\_27043396\_x13.....aaNacggggugccgaacu..... 1  
 Gi3\_27043461\_x13.....aacacggggugccgaaGu..... 1  
 Gi5\_8378239\_x13.....gugggaacacAgggugccgaac..... 1  
 Gi3\_27095265\_x12.....cgugggaacacggggugccgGa..... 1  
 Gi1\_3901538\_x12.....gucgugggaacacggggCgccgaacu..... 1  
 Gi3\_27094389\_x12.....gaacacAgggugccgaac..... 1  
 Gi1\_3898730\_x12.....ugggaacacgggUugccgaacu..... 1  
 Gi3\_27088161\_x12.....gucgugggaacacggggugccAaac..... 1  
 Gi2\_10362994\_x12.....auUggagacgucgugggaacacggggug..... 1  
 Gi3\_27089421\_x12.....Uagacgucgugggaacacggggugcc..... 1  
 Gi3\_27112029\_x12.....gugggaaUacggggugccgaa..... 1

Gi3\_27106053\_x12....aCcgagacgucgugggaaacacggggugcc.....1  
Gi5\_8399490\_x12.....gggaacacggggugccgaGc.....1  
Gi3\_27096597\_x12.....Uucgugggaaacacggggugccg.....1  
Gi5\_8400954\_x12.....gucguAggaacacggggugccgaacu.....1  
Gi1\_3894578\_x12.....gaacacgAggugccgaacu.....1  
Gi3\_27118185\_x12.....gggaacacggggAgccgaac.....1  
Gi3\_27131097\_x12.....aUgucgugggaaacacggggugccgaac.....1  
Gi5\_8404086\_x12.....Gcggagacgucgugggaaacacg.....1  
Gi2\_10365430\_x12.....ucguUggaacacggggugccgaac.....1  
Gi3\_27089613\_x12.....acAucgugggaaacacggggugccgaacu.....1  
Gi3\_27103689\_x12.....Agucgugggaaacacggggugccgaac.....1  
Gi3\_27108285\_x12.....gucgugggaaUacggggugcc.....1  
Gi2\_10350262\_x12.....aucggagacgucgugggGacacg.....1  
Gi3\_27093693\_x12.....uGgugggaaacacggggugc.....1  
Gi5\_8403738\_x12.....gggaacacggggugccgaUu.....1  
Gi2\_10359022\_x12.....gggaacacAgggugccgaac.....1  
Gi1\_3901862\_x12.....guggaaacacggggugcAgaacu.....1  
Gi5\_8394318\_x12.....gaacacggggugccgaUcu.....1  
Gi1a\_5596075\_x12.....Uaacacggggugccgaac.....1  
Gi3\_27104313\_x12.....ugggaacacggggugccA.....1  
Gi2\_10362814\_x12.....cguggaaacacggggugUcgaac.....1  
Gi1\_3902078\_x12.....guggaaacacggggugUcgaacu.....1  
Gi5\_8403654\_x12.....ugggGacacggggugccgaac.....1  
Gi3\_27125529\_x12.....acgucgugggaaacacggggAgccgaacu.....1  
Gi2\_10356034\_x12.....guggaaacacggAgugccg.....1  
Gi3\_27129081\_x12.....cguggaaacacggggGcg.....1  
Gi3\_27114021\_x12....gGucggagacgucgugggaaacacgggg.....1  
Gi3\_27103737\_x12.....gaacacggggugccgaGu.....1  
Gi2\_10363750\_x12....aucggagacgucgugggGcaccggggugcc.....1  
Gi2\_10366078\_x12.....guggaaacacggggugUcga.....1  
Gi3\_27114297\_x12.....Aacgucgugggaaacacggggugccgaac.....1  
Gi3\_27126465\_x12.....guggaaacacGcgugccgaac.....1  
Gi2\_10360870\_x12.....gUgacgucgugggaaacac.....1  
Gi3\_27125169\_x12.....guggaaacacggggugcGgaac.....1  
Gi1\_3895202\_x12.....acgucguggGacacggggugccgaacu.....1  
Gi2\_10361062\_x12.....ucguggAaacacggggugccgaacu.....1  
Gi3\_27095721\_x12.....cgucgugggaaacacggggGcgccg.....1  
Gi3\_27088365\_x12.....guggaaacacggUugccgaacu.....1  
Gi2\_10349122\_x12.....gAggaaacacggggugccga.....1  
Gi5\_8395194\_x12.....ucgugggaaacacggggugccgaUu.....1  
Gi5\_8406594\_x12.ugcgaucggagGcgucgugg.....1  
Gi2\_10368670\_x12.....cAgagacgucgugggaaacacggggugcc.....1  
Gi5\_8394270\_x12.....guggaaacNcggggugccga.....1  
Gi5\_8393562\_x12.....acgucgugggaaacacggggGgcccgaacu.....1  
Gi2\_10356094\_x12....gaucggagacgucgugggCacacggg.....1  
Gi5\_8406702\_x12.....gaacacggggugccgUacu.....1  
Gi1\_3903482\_x12.....cgGcugggaaacacggggugccgaacu.....1



Gi3\_27092625\_x12.....cgucgugggaacacAgggugcc..... 1  
G1a\_5597455\_x12.....cgugggGaacacggggugccgaacu..... 1  
Gi2\_10348558\_x12.....ucgugggaacacggggugccgCac..... 1  
Gi5\_8407974\_x12.....uUggaacacggggugccgaacuuu..... 1  
Gi5\_8406462\_x12.....Uuggaacacggggugccgaacuuu..... 1  
Gi3\_27090825\_x12.....aucgUagacgucgugggaacacggggugcc..... 1  
G1a\_5598271\_x12.....aGcggagacgucgugggaacacggggg..... 1  
Gi3\_27115845\_x12.....gGcgcgucgugggaacacggg..... 1  
Gi2\_10343602\_x12.....gGcgcgucgugggaacacggggugcc..... 1  
Gi2\_10353058\_x12.....gugggUaacacggggugccgaa..... 1  
Gi5\_8392950\_x12.....ucgugggaacacgggAugccgaacu..... 1  
Gi3\_27131781\_x12.....gggUaacacggggugccgaac..... 1  
G1a\_5596159\_x12.....ggaacacggggugccgaGcu..... 1  
Gi3\_27119025\_x12.....cgucgugggaacacggggCgccga..... 1  
Gi3\_27104253\_x12.....gugggaacacgAgggugccg..... 1  
Gi2\_10353982\_x12.....gucgugAgaacacggggugccgaacu..... 1  
G1a\_5596123\_x12.....uggaacGcggggugccgaacu..... 1  
Gi1\_3900458\_x12.....ucgugggaacacggggugccAaac..... 1  
Gi2\_10360234\_x12.....uggaacacggggugccAaac..... 1  
G1a\_5594791\_x12.....cgugggaacacggggugccUacu..... 1  
Gi3\_27086025\_x12.....cgucUugggaacacggggugccg..... 1  
Gi5\_8401134\_x12.....acgucgugggaacacggggugccgCacu..... 1  
Gi3\_27090801\_x12.....aucggagacgucgugggaacacggAgu..... 1  
Gi2\_10353310\_x12.....gucgugggaacacggggCgcc..... 1  
Gi3\_27084489\_x12.....gucgugggaacacggggAgccgaacu..... 1  
G1a\_5591923\_x12.....ggaacGcggggugccgaacu..... 1  
Gi3\_27099693\_x12.....aucggagacgucguAggaacacgggg..... 1  
Gi2\_10360018\_x12.....gugCgaacacggggugccgaacu..... 1  
G1a\_5591767\_x12.....aucggagacgucgugggaacGcggggugc..... 1  
Gi3\_27108957\_x12.....cAugggaacacggggugccgaa..... 1  
Gi5\_8397978\_x12.....Agucgugggaacacggggugccgaacu..... 1  
Gi2\_10359622\_x12.....gacgucgugggaacacggggCgcc..... 1  
Gi1\_3903314\_x12.....ucgugggaNcacggggugccgaac..... 1  
Gi2\_10366342\_x12.....Gugggaacacacggggugccg..... 1  
Gi2\_10351978\_x12.....gugggaacacAgggugccga..... 1  
Gi5\_8403450\_x12.....gggaacacggggugccgaCc..... 1  
Gi3\_27128193\_x12.....aucggagacgucgCgggaacacggggugcc..... 1  
Gi3\_27088461\_x12.....gucgugggNcacacggggugcc..... 1  
Gi3\_27130677\_x12.....acgucgugggaacaUggggugccgaacu..... 1  
Gi2\_10357450\_x12.....cgucguggNaacacggggugccga..... 1  
Gi2\_10356790\_x12.....gugggaacacggggAgcc..... 1  
G1a\_5600383\_x12.....gacgucgugggaacacggg..... 0  
Gi3\_27104001\_x12.....acgucgugggaacacggggGgccgaac..... 1  
Gi2\_10368346\_x12.....gCgaacacggggugccgaac..... 1  
Gi2\_10352962\_x12.....gugggaacacggggAaccgaa..... 1  
Gi5\_8402286\_x12.....ucgugggaaUacggggugccgaacu..... 1  
Gi3\_27111093\_x12.....cgucgCgggaacacggggugcc..... 1

Gi2\_10363066\_x12.....Gcgucgugggaacacggggugc..... 1  
 Gi5\_8406426\_x12.....ugUgaacacggggugccgaac..... 1  
 Gi2\_10366858\_x12.....gggaacacggggugccAaac..... 1  
 Gi5\_8405958\_x12.....ggaacacggggUAccgaacu..... 1  
 Gi2\_10363522\_x12.....cgucgugggaacacggggGgccg..... 1  
 Gi3\_27114477\_x12.....aucggagacgucgugggaacaUggg..... 1  
 Gl1\_5593111\_x12.....agacgucgugggaacacggggugccgaac..... 0  
 Gi2\_10349266\_x12.....aGcggagacgucguggga..... 1  
 Gi2\_10353946\_x12.....gugggaacCcgggugccga..... 1  
 Gi2\_10351690\_x12.....gGucggagacgucguggga..... 1  
 Gi3\_27132249\_x12.....ucgugggaaAacggggugccgaacu..... 1  
 Gi2\_10356346\_x12.....gugggaacacggggugcAgaac..... 1  
 Gi3\_27128397\_x12.....cgucgugggaacacggggugccgaaAu..... 1  
 Gi1\_3894866\_x12.....gGcgugggaacacggggugcc..... 1  
 Gi2\_10350538\_x12.....aacaGggggugccgaacu..... 1  
 Gi3\_27090753\_x12.....gaacacggggugcGgaacu..... 1  
 Gi5\_8408106\_x12.....cgugggaacacgggCugccgaacu..... 1  
 Gi5\_8399046\_x12.....gugggGacacggggugccgaac..... 1  
 Gi3\_27125901\_x12.....cgugggaacacggggugccA..... 1  
 Gi1\_3896738\_x12.....gaacacggggAgccgaacu..... 1  
 Gi2\_10357774\_x12.....aucggagacgucgugggaacacggggAgcc..... 1  
 Gi2\_10364806\_x12.....aucggagacgucgugggaGca..... 1  
 Gi3\_27111897\_x12.....ggaacacggggugAcgaacu..... 1  
 Gi5\_8402454\_x12.....gugggaUcacggggugccgaacu..... 1  
 Gi3\_27130953\_x12.....aAcggagacgucgugggaacacg..... 1  
 Gi3\_27125493\_x12.....gaucggagNcgucgugggaacacggggU..... 1  
 Gi3\_27115485\_x12.....cgugUgaacacggggugccgaa..... 1  
 Gi5\_8406534\_x12.....ugggaacacggggugccgaUcu..... 1  
 Gi1\_3901958\_x12.....gaacacgggAugccgaacu..... 1  
 Gi3\_27122781\_x12.....gacgucgugggaacacggggugccgCacu..... 1  
 Gl1\_5589691\_x12.....gUgaacacggggugccgaa..... 1  
 Gi2\_10365538\_x12.....ggagacgucgugggaacGcggggugcc..... 1  
 Gi3\_27111909\_x12.....gucgugggCacacggggugccgaacu..... 1  
 Gi1\_3897818\_x12.....acgucgCgggaacacggggugccgaac..... 1  
 Gi5\_8396226\_x12.....ugggaacacAgggugccgaac..... 1  
 Gi2\_10368946\_x12.....gggaacacgggAugccgaacu..... 1  
 Gi3\_27101145\_x12.....cgugggaacacgUggugccga..... 1  
 Gi3\_27111585\_x12.....cgugggaacacgUggugcc..... 1  
 Gi3\_27113721\_x12.....aucggagacgCcgugggaacacg..... 1  
 Gi2\_10356010\_x12.....gagacgucgugggaacacggggugccga..... 0  
 Gl1\_5592811\_x12.....ugUgaacacggggugccgaacu..... 1  
 Gi2\_10346302\_x12.....cgucgugggaacacggggugccgG..... 1  
 Gi3\_27105885\_x12.....gucgugggUacacggggugccgaacu..... 1  
 Gi1\_3908995\_x11.....Ggggaacacggggugccgaacuu..... 1  
 Gl1\_5606609\_x11.....cgugggaacacggggugccgaGcu..... 1  
 Gi5\_8427185\_x11.....cgAgggaacacggggugccgaac..... 1  
 Gi2\_10382166\_x11.....ucgugggaacacgAgggugccgaacu..... 1

Gi2\_10374092\_x11.....cgCcgugggaacacggggugc..... 1  
 Gi3\_27140367\_x11.....cCucgugggaacacggggugcc..... 1  
 Gi2\_10385422\_x11.....Gggagacgucgugggaacacggggugc..... 1  
 Gi2\_10373311\_x11.....gaucggagacgucgugggGacacggggu..... 1  
 Gi3\_27184092\_x11.....gucgugggaacacUgggugccgaacu..... 1  
 Gi3\_27173587\_x11.....cAucgugggaacacggggugcc..... 1  
 Gi1\_3904727\_x11.....ugggaacaUggggugccgaacu..... 1  
 Gi5\_8430309\_x11.....ggaacacggggugccgaaUu..... 1  
 Gi2\_10386478\_x11.....uUgugggaacacggggugccgaac..... 1  
 Gi2\_10386126\_x11.....gacgucgugggaacacggggGgccgaacu..... 1  
 Gi3\_27178218\_x11.....gugggUacacggggugccgaa..... 1  
 Gi2\_10391197\_x11.....gggaacacggggugccgUacu..... 1  
 Gi3\_27135175\_x11.....ugAgaacacggggugccgaa..... 1  
 Gi2\_10376226\_x11.....cgucguAggaacacggggugccgaacu..... 1  
 Gi4\_517717\_x11.....gggaacacggggugccgaac..... 0  
 Gi5\_8426800\_x11.....cgucgugggaacacggggugccAaacu..... 1  
 Gi3\_27181837\_x11.....aucggagaNgucgugggaacacggggugc..... 1  
 Gi5\_8420970\_x11.....gaacUcggggugccgaacu..... 1  
 Gi2\_10370924\_x11.....gaucggagacgucgugggGacacggg..... 1  
 Gi1\_3906168\_x11.....ucgugggGacacggggugccgaac..... 1  
 Gi3\_27176601\_x11.....ucgugggaacacggggugcUgaac..... 1  
 Gi2\_10385389\_x11.....gugggaCcacggggugcc..... 1  
 Gi3\_27186567\_x11.....aucggagaUgucgugggaacacg..... 1  
 Gi2\_10383101\_x11.....aucggagGcgucgugggaacac..... 1  
 Gi5\_8411301\_x11.....cgucgugggaacacggAgugccgaacu..... 1  
 Gl1a\_5607544\_x11.....cgugUgaacacggggugccgaacu..... 1  
 Gi2\_10382529\_x11.....gucgugggaacacggggGgccgaac..... 1  
 Gi2\_10385862\_x11.....gggaCcacggggugccgaacu..... 1  
 Gi3\_27185126\_x11.....aucggagCcgucgugggaacacggg..... 1  
 Gi1\_3911899\_x11.....Ggacgucgugggaacacggggugccgaacu..... 1  
 Gi2\_10375984\_x11.....gugggCcacggggugccgaac..... 1  
 Gi3\_27133162\_x11.....cgucgugggaacGcggggugc..... 1  
 Gi5\_8424853\_x11.....Uagacgucgugggaacacg..... 1  
 Gi2\_10393111\_x11.....aucggagacgucGgggaacacggggu..... 1  
 Gi2\_10397544\_x11.....acgucgugNgaacacggggugc..... 1  
 Gi2\_10390790\_x11.....Ucgaucggagacgucgugggaacac..... 1  
 Gi5\_8413512\_x11.....gugggaacacggggugccCaacu..... 1  
 Gi2\_10394970\_x11.....cUucgugggaacacggggugccgaa..... 1  
 Gi3\_27178328\_x11.....gucgugggaacacgggguAccgaacu..... 1  
 Gi2\_10369549\_x11.....ggagacgucgugggaacacggUgugcc..... 1  
 Gi5\_8419518\_x11.....ugggaacacggggugccgaacG..... 1  
 Gi5\_8415261\_x11.....gggaacacggAgugccgaacu..... 1  
 Gi3\_27177250\_x11.....Gcuggggaacacggggugccgaa..... 1  
 Gi3\_27152423\_x11.....Ugagacgucgugggaacacggggugccgaa..... 1  
 Gi3\_27165513\_x11.....cgugggaacacgUggugc..... 1  
 Gi5\_8422378\_x11.....gugggaacacggggugccgGac..... 1  
 Gl1a\_5616751\_x11.....cgugggaacacggggugccgaCcu..... 1

Gi3\_27148595\_x11.....acUucgugggaaacacggggugccgaacu..... 1  
Gi3\_27134856\_x11.....aucggagGcgucgugggaaacacggggugcc..... 1  
Gi2\_10377832\_x11.....aacacggggugcAgaacu..... 1  
Gi5\_8420959\_x11.....acUucgugggaaacacggggugccgaacu..... 1  
Gi3\_27138002\_x11.....gggaaAacggggugccgaac..... 1  
Gi2\_10374059\_x11.....Ugacgucgugggaaacacggggugcc..... 1  
G1a\_5606928\_x11.....gggaGcacggggugccgaacu..... 1  
Gi2\_10392440\_x11.....aucggagacgucgugggCacacggggugc..... 1  
G11\_3914990\_x11.....cgucgugggaaacacggggugccga..... 0  
Gi3\_27150410\_x11.....cguggggGcacggggugcc..... 1  
Gi3\_27159452\_x11.....Ugagacgucgugggaaacacggg..... 1  
Gi3\_27164622\_x11.....ucgugggaaacacggggugccgaaUu..... 1  
Gi3\_27137452\_x11.....aucggagacgucgugggaaUacggg..... 1  
Gi3\_27175908\_x11.....cgugggaaacacggggGcaccgaa..... 1  
Gi2\_10369681\_x11.....gCcgugggaaacacggggugccgaac..... 1  
Gi3\_27177888\_x11.....gUagacgucgugggaaacacggggugccgaacu..... 1  
Gi3\_27144459\_x11.....gugggaUcacggggugccgaac..... 1  
Gi5\_8430606\_x11.....acgCcgugggaaacacggggugccgaacu..... 1  
Gi3\_27155459\_x11.....aucggagacgucgugggaaacGcggggugcc..... 1  
Gi5\_8421674\_x11.....gucAugggaaacacggggugccgaacu..... 1  
G1a\_5616938\_x11.....ggUaacacggggugccgaacu..... 1  
Gi5\_8415525\_x11.....ugggaaacacggGcgugccgaacu..... 1  
Gi3\_27184136\_x11.....uGggagacgucgugggaaacacg..... 1  
Gi2\_10390262\_x11.....gagacgucgugggaaacacggggGcg..... 1  
Gi5\_8409860\_x11.....cgugggaaacacggggugccgaGc..... 1  
Gi2\_10392209\_x11.....cgNgggaaacacggggugccgaacu..... 1  
Gi2\_10375918\_x11.....ugggaaacacggggugccgGac..... 1  
Gi4\_516705\_x11.....gCgggaaacacggggugccgaacu..... 1  
Gi2\_10372992\_x11.....cAugggaaacacggggugccgaac..... 1  
Gi2\_10376325\_x11.....cgaucggagacgucgAgggaaacac..... 1  
G11\_3914055\_x11.....agacgucgCgggaaacacggggugccgaac..... 1  
Gi3\_27175314\_x11.....gugggaaAacggggugccga..... 1  
Gi2\_10392473\_x11.....cgugggaaacacgggguCccgaacu..... 1  
Gi2\_10390086\_x11.....Aucgugggaaacacggggugccgaac..... 1  
Gi2\_10393419\_x11.....Cacacggggugccgaacu..... 1  
Gi2\_10369252\_x11.....ggagacgucgugggaaacacAgggugc..... 1  
Gi2\_10377810\_x11.....ucgugggaaacacgggguAccgaacu..... 1  
Gi3\_27147561\_x11.....gucGgggaaacacggggugccgaacu..... 1  
Gi2\_10385114\_x11.....aAcggagacgucgugggaaacacggggugcc..... 1  
Gi3\_27176304\_x11.....gacgucgugggaaacacggggG..... 1  
Gi3\_27151433\_x11.....gggaaacacggggugccUaacu..... 1  
Gi2\_10376380\_x11.....cgCcgugggaaacacggggugccga..... 1  
Gi3\_27182244\_x11.....acgucgugggaaacacggggGccc..... 1  
Gi3\_27178493\_x11.....cgugggaaacacggggGcgg..... 1  
Gi3\_27162334\_x11.....cgucgugAgaacacggggugccgaacu..... 1  
Gi5\_8414689\_x11.....ggaacacggggugccgaUcu..... 1  
Gi2\_10380010\_x11.....cgucgugggaaacGcggggugccg..... 1

Gi2\_10370407\_x11....aucgUagacgucgugggaaacacg..... 1  
Gi5\_8411290\_x11.....gugggaacacggggugccgCac..... 1  
Gi1\_3911360\_x11.....gucgugggNacacggggugccgaacu..... 1  
Gi3\_27134394\_x11.....cguCggaacacggggugccgaacu..... 1  
G1a\_5602748\_x11....cgaucggagacgucgugggaaacacggggugc..... 0  
Gi2\_10387039\_x11.....gUagacgucgugggaaacacggggug..... 1  
Gi5\_8413083\_x11.....gugggaacacgAggugccgaac..... 1  
Gi3\_27181969\_x11....cUaucggagacgucgugggaaacacgg..... 1  
Gi2\_10393243\_x11.....gggaacacggggugccgGac..... 1  
Gi2\_10380538\_x11.....agUcgucgugggaaacacggggugccgaacu..... 1  
Gi5\_8421916\_x11.uUcgaucggagacgucgugggaa..... 1  
Gi3\_27136165\_x11.....acgucgugggaaacacgAggugccgaacu..... 1  
Gi2\_10380835\_x11....aCcgagacgucgugggaaacacggggug..... 1  
Gi3\_27152181\_x11.....aucggGgacgucgugggaaacac..... 1  
Gi4\_517574\_x11.....Ggggaacacggggugccgaacu..... 1  
Gi2\_10385708\_x11....aucggagacgucgugggaaacacggggA..... 1  
Gi2\_10382364\_x11.....cgugggaaacacggggAgccgaac..... 1  
Gi2\_10374290\_x11.....ucgugggaaacCcgggugccgaacu..... 1  
Gi5\_8426107\_x11.....aacacUggggugccgaacu..... 1  
Gi3\_27153215\_x11.....acgucgugggaaacacggggugccgaacu..... 1  
Gi3\_27158462\_x11.....gucgAgggaacacggggugccgaacu..... 1  
Gi2\_10388601\_x11.....cgugggaaacacggUgugccgaacu..... 1  
Gi3\_27152852\_x11.....Ggucgugggaaacacgggg..... 1  
Gi3\_27142369\_x11....Uaucggagacgucgugggaaacacggggug..... 1  
Gi2\_10385224\_x11.....ugggaacacggggugccgaaAu..... 1  
G1a\_5614023\_x11....Gucggagacgucgugggaaacacggg..... 1  
Gi2\_10376908\_x11....aucggagacgucgugggaaacGc..... 1  
Gi1\_3912856\_x11.....ugggaacacgAggugccgaacu..... 1  
Gi3\_27179296\_x11.....ucgugggaaacacggggugccgaacu..... 1  
Gi1\_3904551\_x11.....gCcgugggaaacacggggugccgaacu..... 1  
G1a\_5615453\_x11.....gugggaaUacggggugccgaacu..... 1  
Gi2\_10378360\_x11....aucggagacgucgugggGacacggg..... 1  
Gi3\_27169022\_x11.....ugggaacacggCgugccgaacu..... 1  
Gi2\_10390108\_x11....gGucggagacgucgugggaaacacg..... 1  
Gi5\_8417758\_x11.....gGcugcugggaaacacggggugccgaacu..... 1  
Gi2\_10381220\_x11.....gugggaaUacggggugcc..... 1  
Gi5\_8420948\_x11....Uaucggagacgucgugggaaacacggg..... 1  
Gi3\_27164303\_x11.....ugggaacacgUggugccgaacu..... 1  
Gi3\_27165590\_x11.....Ucgucgugggaaacacggggugccgaacu..... 1  
G1a\_5601219\_x11.....ugggaacacggggugccgaGcu..... 1  
Gi3\_27142083\_x11....aucggagCcgucgugggaaacacg..... 1  
Gi1\_3913857\_x11.....ucgugggaaacacggggugcUgaacu..... 1  
Gi5\_8430694\_x11.....ggaacCcgggugccgaacu..... 1  
Gi2\_10379306\_x11.....gugggaacacggggugcU..... 1  
Gi3\_27185687\_x11....cggagacgucgugggaaacGcggggugcc..... 1  
Gi2\_10384542\_x11....cggagacgucgugggaaacacggggCgcc..... 1  
Gi2\_10387501\_x11.....gggaacacggggugccgaaUu..... 1

Gi3\_27166184\_x11.....aucggagaUgucgugggaacacgggg..... 1  
Gi3\_27176161\_x11.....aucggagacgucgugggUacacggg..... 1  
Gi3\_27176458\_x11.....aucggagacAucgugggaacacggggg..... 1  
G1a\_5604398\_x11.....gugggaacacggggAgccgaacu..... 1  
Gi2\_10390438\_x11.....gucgGgggaacacggggugccgaacu..... 1  
Gi5\_8421168\_x11.....gaaNacggggugccgaacu..... 1  
Gi3\_27168593\_x11.....gUagacgucgugggaacacggggugccgaac..... 1  
Gi1\_3905959\_x11.....ucgugggCacacggggugccgaacu..... 1  
Gi3\_27180110\_x11.....Agaacacggggugccgaa..... 1  
Gi2\_10371144\_x11.....cUaucggagacgucguggga..... 1  
G1a\_5607126\_x11.....Ugagacgucgugggaacacggggugcc..... 1  
Gi2\_10386720\_x11.....acgCcgugggaacacggggugcc..... 1  
Gi2\_10395905\_x11.....cgugggaacacgUggugcc..... 1  
Gi3\_27156900\_x11.....aucggagacgucgugggaacCcg..... 1  
Gi5\_8410707\_x11.....gugggaacacggUgugccgaac..... 1  
Gi5\_8429143\_x11.....gggaacacggggCgccgaac..... 1  
Gi2\_10397731\_x11.....gugggaacacgCggugccgaacu..... 1  
Gi1\_3909028\_x11.....aAcggagacgucgugggaacacggg..... 1  
Gi3\_27141566\_x11.....guggAaacacggggugccgaa..... 1  
Gi2\_10387094\_x11.....cUucgugggaacacgggg..... 1  
G1a\_5611350\_x11.....Gacacggggugccgaacu..... 1  
G1a\_5607071\_x11.....Uaucggagacgucgugggaa..... 1  
Gi2\_10386632\_x11.....agUcgcgucgugggaacacggggugcc..... 1  
Gi5\_8412269\_x11.....gugggaacacggCgugccgaacu..... 1  
Gi2\_10391967\_x11.....cgugggaacacUgggugccgaacu..... 1  
Gi2\_10382980\_x11.....acgCcgugggaacacggggugccgaacu..... 1  
Gi3\_27182255\_x11.....gugggaacacggggAgccgaa..... 1  
Gi3\_27164149\_x11.....Aggaacacggggugccga..... 1  
Gi2\_10392880\_x11.....aucggagGcgcgucgugggaaca..... 1  
Gi2\_10376017\_x11.....ucgAgggaacacggggugccgaacu..... 1  
Gi5\_8412181\_x11.....ggaacacggggAgccgaacu..... 1  
Gi5\_8410091\_x11.....Uacgucgugggaacacggggugccg..... 1  
Gi2\_10379108\_x11.....aGcggagacgucgugggaac..... 1  
Gi3\_27145592\_x11.....ggaacacggggugccgaG..... 1  
Gi3\_27168285\_x11.....gggaacCcgggugccgaac..... 1  
G1a\_5608699\_x11.....gaucggagacgucgugggaacacggggug..... 0  
Gi1\_3905112\_x11.....aacacggAgugccgaacu..... 1  
Gi2\_10377425\_x11.....cgugggaaNacggggugccgaa..... 1  
Gi5\_8430991\_x11.....ucgugggaacacggAgugccgaacu..... 1  
Gi5\_8418187\_x11.....gaacaAggggugccgaacu..... 1  
Gi2\_10385312\_x11.....Ugagacgucgugggaacacggggugccg..... 1  
Gi2\_10374851\_x11.....gugggaacCcgggugccg..... 1  
Gi3\_27148815\_x11.....aGgucgugggaacacggggugcc..... 1  
Gi2\_10381770\_x11.....gugggaacacggggGgccga..... 1  
Gi3\_27157043\_x11.....Ugugggaacacggggugccgaa..... 1  
Gi3\_27174302\_x11.....ggUgacgucgugggaacacg..... 1  
Gi3\_27176392\_x11.....cgugCgaacacggggugccgaac..... 1

Gi2\_10384806\_x11.....ggaacacgggguAccgaac..... 1  
 Gi3\_27169638\_x11.....aUacgucgugggaaacacggg..... 1  
 Gi1\_3908148\_x11.....Uacgucgugggaaacacggggugcc..... 1  
 Gi3\_27138882\_x11.....cgucgugggaaacCcggggugccga..... 1  
 Gi2\_10395190\_x11.....gAcgugggaaacacggggugccgaacu..... 1  
 Gi3\_27144448\_x11.....guNggaacacggggugccgaac..... 1  
 Gi3\_27176194\_x11.....ggaacacgUggugccgaacu..... 1  
 Gi2\_10372035\_x11.....cggagGcgucgugggaaacacggggugcc..... 1  
 Gi3\_27136176\_x11.....Gucggagacgucguggg..... 1  
 Gi2\_10405582\_x10.....gucgugggaaacGcggggugccgaac..... 1  
 Gi3\_27233172\_x10.....gacgucgugggaaacacggggugccgCac..... 1  
 Gi3\_27197342\_x10.....aucggagacgucgugggaaacacAgggg..... 1  
 Gi5\_8433016\_x10.....guggaaacacgggCugccgaacu..... 1  
 Gi3\_27223552\_x10.....cUgggaaacacggggugc..... 1  
 Gi2\_10401962\_x10.....cgAagacgucgugggaaacacggggugc..... 1  
 Gi3\_27207892\_x10.....gUagacgucgugggaaacacgg..... 1  
 Gi3\_27187772\_x10.....aucggagaNgucguggg..... 1  
 Gi3\_27203862\_x10.....aucggagacgucgugggAaacacggggg..... 1  
 Gi3\_27209482\_x10.....ggagacguNgugggaaacacggggugcc..... 1  
 Gi5\_8451836\_x10.....gaacacggggugAcgaacu..... 1  
 Gi3\_27237382\_x10.....guggaaacacggggugAcg..... 1  
 Gi3\_27229972\_x10.....gacgucgugggGaacacggggugccgaacu..... 1  
 Gi3\_27222202\_x10.....guggaaacacggggugccC..... 1  
 Gi3\_27200492\_x10.....uggUaacacggggugccgaacu..... 1  
 Gi5\_8449426\_x10.....uggaaacacggUgugccgaacu..... 1  
 Gi3\_27233262\_x10.....aucggagacgucgugggAaacacggggugcc..... 1  
 Gi2\_10405372\_x10.....aucggagacgucgugggaaacacggggAgc..... 1  
 Gi5\_8435916\_x10.....Gucggagacgucgugggaaacacg..... 1  
 Gi3\_27199122\_x10.....cgucguggNaacacggggugccga..... 1  
 Gi3\_27211332\_x10.....ugggaaacUcggggugccgaac..... 1  
 Gi2\_10419492\_x10.....ggGgacgucgugggaaacacggggugccgaacu..... 1  
 Gi3\_27206182\_x10.....aucUgagacgucgugggaaacacg..... 1  
 Gi3\_27187952\_x10.....ugggaaacGggggugccgaacu..... 1  
 Gi2\_10421422\_x10.....ggaacacgggAugccgaacu..... 1  
 Gl1a\_5630147\_x10.....aGcacggggugccgaacu..... 1  
 Gl1a\_5628187\_x10.....ugggGaacacggggugccgaacu..... 1  
 Gl1\_3919164\_x10.....cgucgugggaaacCcggggugccgaacu..... 1  
 Gl1a\_5630467\_x10.....gUagacgucgugggaaacacggggugcc..... 1  
 Gl1\_3928114\_x10.....cguggaaacacggggugUcgaacu..... 1  
 Gi2\_10413712\_x10.ugcgauccggagacgucgugggaaacacggggg..... 0  
 Gl1\_3921984\_x10.....ggaacacggggugccAaacu..... 1  
 Gi3\_27233682\_x10.....ugggaaacacggggugccgGa..... 1  
 Gi3\_27203522\_x10.....cgucgugggGaacacggggugc..... 1  
 Gi2\_10399102\_x10.....cgCcguggaaacacggggugccg..... 1  
 Gi4\_519379\_x10...gaucggagacgucgugggaaacacggg..... 0  
 Gi3\_27200352\_x10...gaucggagacgucgugggaaacCcgggg..... 1  
 Gi2\_10424272\_x10.....cgCgggaaacacggggugccgaa..... 1

Gi1\_3921234\_x10.....cguggaacacgggguAccgaacu..... 1  
Gi2\_10400442\_x10.....Cucguggaacacggggugcc..... 1  
Gi1\_3927864\_x10.....aacacggggugcUgaacu..... 1  
Gi2\_10428592\_x10.....gugggaacacggggugccgaC..... 1  
Gi3\_27230512\_x10.....gggaGcacggggugccgaa..... 1  
Gi2\_10402402\_x10.....gucguggaacacggggAgccgaacu..... 1  
Gi5\_8446136\_x10.....uggNaacacggggugccgaacu..... 1  
Gi3\_27189142\_x10.....uGguggaacacggggugccg..... 1  
Gi2\_10403822\_x10.....ggaacacggggugccgaaAu..... 1  
Gi5\_8450406\_x10.....guggaacacggggugccAaac..... 1  
Gi5\_8449806\_x10.....ggUaacacggggugccgaac..... 1  
Gi2\_10414102\_x10.....ggaacacggAgugccgaac..... 1  
Gi3\_27217892\_x10.....cgAgggaacacggggugccgaa..... 1  
Gi2\_10398432\_x10.....ucguggaacacggAgugccgaacu..... 1  
Gi2\_10404752\_x10.....gucguggaacacggggugccAaacu..... 1  
Gi3\_27206612\_x10.....ggaacacgUggugccgaac..... 1  
Gi3\_27225142\_x10.....aucggagacgucgugggGacac..... 1  
Gi5\_8449506\_x10.....ugggaacaAggggugccgaacu..... 1  
Gi2\_10406832\_x10.....gugggaacaUggggugccg..... 1  
Gi2\_10427992\_x10.....cgucUuggaacacggggugccg..... 1  
Gi3\_27229062\_x10.....cguggaacacggggugccAa..... 1  
Gi1a\_5633237\_x10.....cUgagacgucguggaacacggggu..... 1  
Gi1\_3920144\_x10.....gaacacggggugccgaUcu..... 1  
Gi3\_27205182\_x10.....cgCgggaacacggggugccg..... 1  
Gi2\_10426772\_x10.....cggagacgucgugggGacacggggugcc..... 1  
Gi5\_8437056\_x10.....cgugggaGcacggggugccgaac..... 1  
Gi3\_27238342\_x10.....gaCcgagacgucguggaacacggggu..... 1  
Gi1\_3924304\_x10.....acgucguggaacacggggGgccgaacu..... 1  
Gi5\_8436716\_x10.....Cgggaacacggggugccgaac..... 1  
Gi3\_27225582\_x10.....aucggagacgucguggaacacAg..... 1  
Gi3\_27215952\_x10.....cgucguggaacacggggGgccga..... 1  
Gi2\_10406942\_x10.....cggagacgucgugggaCcacggggugcc..... 1  
Gi3\_27227032\_x10.....aucAgagacgucguggaacacgg..... 1  
Gi3\_27206892\_x10.....cgucgugggaaUacggggugccgaacu..... 1  
Gi1\_3923914\_x10.....cguggAaacacggggugccgaacu..... 1  
Gi5\_8438476\_x10.....cgucguAggaacacggggugccgaacu..... 1  
Gi3\_27214252\_x10.....gugggaacUcggggugcc..... 1  
Gi3\_27220492\_x10.....Ugagacgucguggaacacggggugccga..... 1  
Gi3\_27216052\_x10.....gaNcacggggugccgaacu..... 1  
Gi2\_10408942\_x10.....Aacgucguggaacacggggugcc..... 1  
Gi5\_8432666\_x10.....cgugggaacaAggggugccgaacu..... 1  
Gi5\_8432136\_x10.....Cgaacacggggugccgaac..... 1  
Gi5\_8436056\_x10.....uggaacacggggugcUgaac..... 1  
Gi2\_10423372\_x10.....gugggaacUcggggugccgaac..... 1  
Gi3\_27216792\_x10.....gggaacacggggCgccgaa..... 1  
Gi3\_27220322\_x10.....gaucggagacgucgugggaGcacg..... 1  
Gi3\_27237422\_x10.....aucAgagacgucguggaacacgggg..... 1



Gi2\_10427352\_x10.....ggaacacggggugccgaaA..... 1  
Gi2\_10417822\_x10.....aucggagacgucgugggaacacgAggugc..... 1  
Gi1\_3927204\_x10.....cguggaacaacggggAgccgaacu..... 1  
Gi3\_27199842\_x10.....gucgugggaacacggggGgc..... 1  
Gi3\_27217912\_x10.....cgucgugggaacacggggugcAgaacu..... 1  
Gi2\_10399012\_x10.....cguUgugggaacacggggugccgaacu..... 1  
Gi2\_10399542\_x10.....ucgugggaacacUgggugccgaacu..... 1  
Gi3\_27240942\_x10.....gggaacacggggugAcgaac..... 1  
Gi2\_10407872\_x10.....cUgagacgucgugggaacacggggug..... 1  
Gi1\_3917364\_x10.....ucgugggaacacgAgugccgaacu..... 1  
G1a\_5620767\_x10.....ggaacacAgggugccgaacu..... 1  
Gi2\_10425742\_x10.....aUacgucgugggaacacggggugccg..... 1  
Gi5\_8436366\_x10.....guggAaacacggggugccgaac..... 1  
Gi2\_10420582\_x10.....gUucggagacgucgugggaacacggggg..... 1  
Gi3\_27204982\_x10.....cguggaUacacggggugccgaac..... 1  
Gi1\_3919724\_x10.....cgugAgaacacggggugccgaacu..... 1  
Gi3\_27212712\_x10.....gaucggagGcgucgugggaacacgggg..... 1  
Gi2\_10417402\_x10.....gucgugggNacacggggugcc..... 1  
Gi3\_27231222\_x10.....uggCaacacggggugccgaacu..... 1  
Gi2\_10412572\_x10.....ugggaacacggggugccgaacG..... 1  
Gi2\_10416622\_x10.....ggagacgucgugggaacacggggugccgaac..... 0  
Gi2\_10408962\_x10.....ucgugggaacGcggggugccgaac..... 1  
Gi3\_27223012\_x10.....cUaucggagacgucgugg..... 1  
Gi3\_27200462\_x10.....ucgugggUacacggggugccgaacu..... 1  
Gi3\_27208562\_x10.....gGcgugggaacacggggugccgaa..... 1  
Gi5\_8437666\_x10.....gAgaacacggggugccgaac..... 1  
Gi2\_10421282\_x10.....gCgggaacacggggugccgaa..... 1  
Gi5\_8444506\_x10.....ugggaGcacggggugccgaac..... 1  
Gi2\_10403922\_x10.....aucggagacgucgugggaacG..... 1  
Gi5\_8448056\_x10.....gucgugggaacacAgggugccgaacu..... 1  
Gi3\_27209062\_x10.....cggagacgucgugggaacacggggC..... 1  
Gi2\_10410932\_x10.....gugggaacacgAggugcc..... 1  
Gi5\_8444216\_x10.....ggaacacggAgugccgaacu..... 1  
Gi2\_10403112\_x10.....gacgucgugggaGcacggggugccgaacu..... 1  
Gi2\_10423152\_x10.....auUggagacgucgugggaacacggggugcc..... 1  
Gi2\_10418412\_x10.....ggaaGacggggugccgaac..... 1  
Gi3\_27207082\_x10.....gugggaacacggggAgccga..... 1  
Gi3\_27190862\_x10.....gugggaacacggggugccgU..... 1  
Gi2\_10400452\_x10.....cgCgggaacacggggugccg..... 1  
Gi3\_27217742\_x10.....aucggagacgucgugggaaAacg..... 1  
Gi3\_27221502\_x10.....Gggagacgucgugggaacacggggg..... 1  
Gi1\_3921164\_x10.....cgugggaacacggggugccgUacu..... 1  
Gi2\_10422112\_x10.....gGacacggggugccgaac..... 1  
Gi3\_27207532\_x10.....cgGcgugggaacacggggugccg..... 1  
Gi1\_3924384\_x10.....gaacacggggugcAgaacu..... 1  
Gi2\_10420422\_x10.....gucgugggaacacggggugccgaCc..... 1  
Gi5\_8433976\_x10.....cgucgugggaacacggggugccgaaAu..... 1

Gi1\_3923864\_x10.....ggaacacggggugcUgaacu..... 1  
Gi2\_10407392\_x10.....ggagacgucgugggaGcacggggugcc..... 1  
Gi2\_10397872\_x10.....aacacggggugUcgaacu..... 1  
Gi2\_10410662\_x10.....cggagacgucguggaacGcggggugcc..... 1  
Gi3\_27226482\_x10.....ggaacacggggGgccgaa..... 1  
Gi3\_27208182\_x10.....gggaacacgUggugccgaacu..... 1  
Gi5\_8450856\_x10.....gCaacacggggugccgaac..... 1  
Gi2\_10408722\_x10.....aucggagacgucguggaacGcg..... 1  
Gi2\_10423612\_x10.....cguggaacacggggugccgaC..... 1  
Gi2\_10405782\_x10.....aucggagacgucgugggaGcacg..... 1  
Gi3\_27200042\_x10.....aucggagacgucguggAaacacggg..... 1  
Gi3\_27242532\_x10.....gucguggaacacggggugcUgaac..... 1  
Gi3\_27214082\_x10.....aucggagacgCcguggaacacggggugcc..... 1  
Gi2\_10421472\_x10.....uggaacacggggugccgC..... 1  
Gi3\_27214452\_x10.....cguggaacacggggugccgaC..... 1  
Gi1\_3916694\_x10.....Uaucggagacgucguggaacacgg..... 1  
G1a\_5628517\_x10.....gGcguggaacacggggugccgaacu..... 1  
Gi5\_8441186\_x10.....Uucguggaacacggggugccgaa..... 1  
Gi3\_27190562\_x10.....guggaacacggggugGcga..... 1  
Gi3\_27235862\_x10.....ggaacacggUgugccgaac..... 1  
Gi2\_10408712\_x10.....cCucguggaacacggggugccg..... 1  
Gi2\_10407992\_x10.....aucggagacgCcguggaacac..... 1  
Gi5\_8432796\_x10.....gaucggagacgucguggaacacggggugcc..... 0  
Gi5\_8437276\_x10.....gggaGcacggggugccgaac..... 1  
G1a\_5633367\_x10.....cguggaacacAgggugccgaacu..... 1  
Gi3\_27201972\_x10.....cggagacgucguggaacacggggGgcc..... 1  
Gi2\_10413112\_x10.....cguAggaacacggggugccgaac..... 1  
Gi3\_27234332\_x10.....cgucgugggaGcacggggugccg..... 1  
Gi5\_8446366\_x10.....uAggaacacggggugccgaac..... 1  
Gi1\_3926034\_x10.....gaacacggggugccgUacu..... 1  
Gi2\_10408812\_x10.....Uggagacgucguggaacacggggugcc..... 1  
Gi2\_10425852\_x10.....cguggaaNacggggugccg..... 1  
G1a\_5622757\_x10.....gaucggagacgucguggaacacgggg..... 0  
Gi3\_27211362\_x10.....ugAgaacacggggugccga..... 1  
Gi2\_10426542\_x10.....ucguggaacacggggugccgaUc..... 1  
Gi5\_8432876\_x10.....ggaacacggggugccgaCcu..... 1  
Gi4\_519349\_x10.....Gguggaacacggggugccgaacu..... 1  
Gi3\_27192662\_x10.....aucggagacguUguggaacacgggg..... 1  
Gi3\_27216132\_x10.....cgucguggaacacggggAgcc..... 1  
Gi3\_27225702\_x10.....uggaacacggAgugccgaa..... 1  
Gi5\_8443976\_x10.....Gucggagacgucguggaacacgg..... 1  
Gi2\_10404192\_x10.....aucggagacgucguAggaacac..... 1  
Gi3\_27229732\_x10.....Ugagacgucguggaacacgg..... 1  
Gi2\_10420632\_x10.....gucguggaacacggAgugccgaacu..... 1  
Gi3\_27238252\_x10.....cgCcguggaacacggggugccg..... 1  
Gi3\_27192932\_x10.....cAugggaacacggggugc..... 1  
Gi2\_10427762\_x10.....cgGggaacacggggugccg..... 1

Gi3\_27205172\_x10.....aucggaAacgucgugggaaacacggggu..... 1  
Gi2\_10402092\_x10.....ucguggaacacAgggugccgaac..... 1  
Gi2\_10399922\_x10.....aucggagacgucgugggGacacggggugcc..... 1  
Gi2\_10407982\_x10.....cgucguggaacacggggCgcc..... 1  
Gi3\_27198422\_x10.....cUgagacgucgugggaaacacggggugc..... 1  
Gi2\_10423722\_x10.....Uagacgucgugggaaacacggggugccgaacu..... 1  
Gi3\_27202302\_x10.....cUgagacgucgugggaaacacgg..... 1  
Gi5\_8443746\_x10.....cguggaaNacggggugccga..... 1  
Gi2\_10418932\_x10.....auUggagacgucgugggaaacacggg..... 1  
Gi3\_27236482\_x10.....cgucguggNaacacggggugc..... 1  
Gi3\_27220392\_x10.....uGggagacgucgugggaaacacggggugcc..... 1  
Gi2\_10416472\_x10.....gggUacacggggugccgaacu..... 1  
Gi3\_27224622\_x10.....cgucguggaaacacggggugccgaUc..... 1  
Gi5\_8435556\_x10.Ggcgaucggagacgucguggga..... 1  
Gi3\_27195202\_x10.....Acguggaacacggggugccgaac..... 1  
Gi3\_27198852\_x10.....guggaacacggggugccgaC..... 1  
Gi3\_27235102\_x10.....aucggagacgucgugAgaacacggggu..... 1  
Gi2\_10398782\_x10.....Ggucguggaacacggggugc..... 1  
Gi2\_10421362\_x10.....aCcgagacgucgugggaaacacggggugc..... 1  
Gi3\_27193052\_x10.....gUagacgucgugggaaacacggg..... 1  
Gi3\_27192382\_x10.....ucguggaacacAgggugccgaac..... 1  
Gi3\_27224642\_x10.....cguggaacaccgUgugccgaac..... 1  
Gi3\_27201952\_x10.....guggaacaUggggugccg..... 1  
Gi2\_10414272\_x10.....gggaacaAgggugccgaacu..... 1  
Gi1\_3918424\_x10.....ucgGgggaacacggggugccgaacu..... 1  
Gi2\_10404452\_x10.....cgGgggaacacggggugccgaa..... 1  
Gi3\_27216402\_x10...gUucggagacgucgugggaaacacggggu..... 1  
Gi3\_27241342\_x10.....gacgucgugggaaacacggggugccgaGcu..... 1  
Gi1\_3919754\_x10.....ggaacaUggggugccgaacu..... 1  
Gi5\_8435956\_x10.....ggaacaUggggugccgaacu..... 1  
Gi4\_520529\_x10.....ggaacacggggugccgaac..... 0  
Gi2\_10422302\_x10.....cguggGacacggggugccgaa..... 1  
Gi1\_3927084\_x10.....ucggagacgucgugggaaacacggggugccgaacu..... 0  
Gi2\_10409832\_x10.....aucggagacgCcguggaacacggggugcc..... 1  
Gi5\_8443816\_x10.....ggaacaAgggugccgaacu..... 1  
Gi1\_3917144\_x10.....cguggaacacggggugcAgaacu..... 1  
Gi3\_27222082\_x10.....aGcacggggugccgaacu..... 1  
Gi3\_27218592\_x10.....uggaacacgggUugccga..... 1  
Gi2\_10415442\_x10.....ucggagacgucgugggaaacacggggugccgaacu..... 0  
Gi5\_8431476\_x10.....gggaaUacggggugccgaacu..... 1  
Gi3\_27204542\_x10...cUaucggagacgucgugggaaacacggg..... 1  
Gi3\_27234592\_x10.....aucgUagacgucgugggaaacacgg..... 1  
Gi2\_10415602\_x10.....Gcgucguggaacacggggugccgaac..... 1  
Gi3\_27199492\_x10.....cgucguggaCcacggggugcc..... 1  
Gi1\_3926704\_x10.....gaaUacggggugccgaacu..... 1  
Gi2\_10419912\_x10.....aucggagGcgucgugggaaacacggggugcc..... 1  
Gi2\_10403842\_x10.....guggaacaUggggugcc..... 1

Gi3\_27195112\_x10.....gggaacacggggugccgaC..... 1  
Gi2\_10448247\_x9.....guUggaacacggggugccgaa..... 1  
Gi2\_10454394\_x9.....gGcgugggaacacggggugccg..... 1  
Gi3\_27259111\_x9.....cgucgAgggaacacggggugccgaacu..... 1  
G1a\_5638531\_x9.....cgugggaacacggggugcUgaacu..... 1  
Gi3\_27269461\_x9.....gUagacgucgugggaaca..... 1  
Gi1\_3932947\_x9.....ugggaacacggggugccgaU..... 1  
Gi5\_8467950\_x9.....gugggaGcacggggugccgaac..... 1  
Gi2\_10452594\_x9.....cgucgugggaacacAgggugccgaacu..... 1  
Gi2\_10432785\_x9.....aucggagacgCcgugggaacacgggggu..... 1  
Gi1\_3930589\_x9.....aUgucgugggaacacggggugccgaacu..... 1  
Gi2\_10444701\_x9.....guCggaacacggggugccgaacu..... 1  
Gi3\_27255727\_x9.....gaucggagacgucguggCacac..... 1  
Gi5\_8471091\_x9.....gggaacacNgggugccgaa..... 1  
Gi2\_10457220\_x9.....gugggaaGacggggugccgaacu..... 1  
Gi3\_27255268\_x9.....ggaacacggggugccgaaA..... 1  
Gi3\_27304849\_x9.....acgucgCgggaacacggggugccgaac..... 1  
Gi3\_27294994\_x9.....acgucgugggaacacggggguAccgaacu..... 1  
Gi1\_3940219\_x9.....ucgugggaacacggggugUcgaacu..... 1  
Gi5\_8465295\_x9.....cgucgugAgaacacggggugccgaacu..... 1  
Gi3\_27247816\_x9.....acgucgugggaacacggggugccgaaUu..... 1  
Gi2\_10442217\_x9.....aacacgggAugccgaacu..... 1  
G1a\_5641393\_x9.....Cgggaacacggggugccgaacu..... 1  
Gi3\_27246115\_x9.....aucggagacgucgugggaacacggggCgc..... 1  
Gi3\_27291799\_x9.....gugggaaAacggggugccg..... 1  
Gi2\_10461189\_x9.....Ugugggaacacggggugc..... 1  
Gi2\_10433532\_x9.....aucggagacgucgugggaacacAgggugc..... 1  
Gi3\_27258787\_x9.....gucgugggaacacggggugccgaaA..... 1  
Gi4\_521595\_x9.....cgugggaaNacggggugccgaacu..... 1  
Gi2\_10456716\_x9.....ugggaacacggggugccgaaUu..... 1  
Gi3\_27302842\_x9.....cgugggaaUacggggugc..... 1  
Gi1\_3936007\_x9.....cgucgugggaGcacggggugccgaacu..... 1  
Gi3\_27281242\_x9.....cAucgugggaacacggggugccgaac..... 1  
Gi4\_523332\_x9.....gUgaacacggggugccgaacu..... 1  
Gi1\_3938995\_x9.....Uacgucgugggaacacggggugccgaac..... 1  
Gi5\_8459472\_x9.....gugggaacacggggugcUgaac..... 1  
Gi5\_8475861\_x9.....gaacCggggugccgaacu..... 1  
Gi5\_8467725\_x9.....acgucguAggaacacggggugccgaacu..... 1  
Gi5\_8469093\_x9.....auUggagacgucgugggaacacgg..... 1  
G1a\_5638648\_x9.....gaacacggNgugccgaacu..... 1  
Gi1\_3934063\_x9.....gucgugggaacacggggugccgGacu..... 1  
Gi2\_10451118\_x9.....Acgaucggagacgucgugggaacacggggugc..... 1  
Gi3\_27261505\_x9.....aucggagaUgucgugggaacacggg..... 1  
Gi3\_27296083\_x9.....gugggaacacggggugGc..... 1  
Gi3\_27287182\_x9.....cggagacgucgugggaGcacgggggu..... 1  
Gi2\_10443918\_x9.....aucggagacgucgugggaacGcggggug..... 1  
Gi3\_27246007\_x9.....cgucgugggaacacAgggugccgaac..... 1

G1a\_5640034\_x9.....ggaacacggggugccgGacu..... 1  
 Gi3\_27277183\_x9.....ugggGacacggggugccg..... 1  
 Gi2\_10446726\_x9.....cUucgugggaacacggggug..... 1  
 Gi3\_27289621\_x9....Aaucggagacgucgugggaacacgggg..... 1  
 Gi2\_10454997\_x9.....gucguggAaacacggggugccgaacu..... 1  
 Gi2\_10459434\_x9.....gucgugggaacacggggugUcgaacu..... 1  
 Gi3\_27246862\_x9.....acgucgugggaacGcggggugccgaac..... 1  
 Gi3\_27260326\_x9.....ucgugggaUcacggggugccgaacu..... 1  
 Gi2\_10444143\_x9.....gaacacggggugcAgaacu..... 1  
 Gi5\_8453541\_x9.....ugggaacacggggCgccgaac..... 1  
 Gi2\_10435629\_x9....aucgUagacgucgugggaacacggggugcc..... 1  
 Gi2\_10455420\_x9.....gucgugggaacacggggugccgaaAu..... 1  
 Gi3\_27270055\_x9.....gGgacgucgugggaacacggggugccgaacu..... 1  
 Gi3\_27295102\_x9....cggagacgucgugggaacacggggugccgaacA..... 1  
 Gi2\_10438734\_x9.....ggaacCcggggugccgaac..... 1  
 Gi2\_10443162\_x9.....cgugggCacacggggugc..... 1  
 Gi2\_10442775\_x9.....cguggAaacacggggugccgaac..... 1  
 Gi3\_27273997\_x9.....cgucgugggaacacggggugccA..... 1  
 Gi2\_10458192\_x9.....cCucgugggaacacggggugccgaacu..... 1  
 Gi2\_10444917\_x9....aucggagacgCcgugggaacacggggugc..... 1  
 Gi3\_27255277\_x9....aucgUagacgucgugggaacacgggg..... 1  
 Gi5\_8467140\_x9.....gucgugggaacacggggugccgGacu..... 1  
 Gi1\_3933001\_x9.....Ggugggaacacggggugccga..... 1  
 Gi5\_8471883\_x9.....Uacgucgugggaacacggggugccgaac..... 1  
 Gi1\_3940669\_x9.....gacgucgugggGacacggggugccgaacu..... 1  
 Gi4\_521703\_x9.....gugggaacacggggugccgaGcu..... 1  
 Gi2\_10452198\_x9....aucggagaNgucgugggaacacg..... 1  
 Gi5\_8462667\_x9.....guNggaacacggggugccgaacu..... 1  
 Gi2\_10454430\_x9.....gaacacggggugccgaacG..... 1  
 Gi3\_27290836\_x9.....Agugggaacacggggugccga..... 1  
 Gi3\_27298882\_x9.....aacacgUggugccgaacu..... 1  
 Gi3\_27303958\_x9.....ugggaacacAgggugccgaa..... 1  
 Gi2\_10438923\_x9.....ugggCacacggggugccgaacu..... 1  
 Gi3\_27273547\_x9....gaucggagGcgucgugggaacacggg..... 1  
 Gi1\_3937537\_x9.....gCcgugggaacacggggugcc..... 1  
 Gi3\_27271639\_x9....aucggagacgucUugggaacacgggg..... 1  
 Gi3\_27303067\_x9.....cgucUugggaacacggggugc..... 1  
 G1a\_5648206\_x9.....aacacgggNugccgaacu..... 1  
 Gi3\_27271360\_x9.....gacgucgugggaacacggggAgccgaacu..... 1  
 Gi1\_3935872\_x9.....cgucgugggaacGcggggugccgaacu..... 1  
 Gi5\_8468013\_x9.....cUucgugggaacacggggugccgaa..... 1  
 Gi2\_10432209\_x9.....cgucgCgggaacacggggugccgaacu..... 1  
 Gi1\_3928969\_x9.....uUggaacacggggugccg..... 1  
 Gi3\_27255700\_x9.....gaacacgAggugccgaac..... 1  
 Gi1\_3931075\_x9....ucgAgggaacacggggugccgaacu..... 1  
 Gi2\_10439463\_x9.....cAugggaacacggggugcc..... 1  
 Gi3\_27266014\_x9.....gacgCcgugggaacacggggugccgaacu..... 1

Gi3\_27278353\_x9.....cguNggaacacggggugccgaac..... 1  
Gi3\_27280738\_x9.....ugggaacacggggugccgaUcu..... 1  
Gi5\_8473062\_x9.....uGgugggaacacggggugccgaac..... 1  
Gi2\_10444233\_x9.....aucggagacgucguggggaacCcggggu..... 1  
Gi1\_3940453\_x9.....ucgugggaUacggggugccgaacu..... 1  
Gi5\_8453352\_x9.....cgugggaacacggggguUccgaacu..... 1  
Gi2\_10449363\_x9.....gUagacgucguggggaacacggggugccg..... 1  
Gi1\_3942172\_x9.....ucgugggaacacggggCgcc..... 1  
Gi1\_3930382\_x9.....ucgugggaacaUggggugccgaacu..... 1  
Gi1\_3936925\_x9.....ugggaacacggggugccgaCcu..... 1  
Gi3\_27296092\_x9.....acgucgugggaacacggggugccgaGc..... 1  
Gi3\_27259525\_x9.....cgugggaacacCgggugccgaacu..... 1  
Gi2\_10441767\_x9.....agacgucgugggGacacggggugcc..... 1  
Gi5\_8461506\_x9.....ucgugggaacacggggugcAgaacu..... 1  
Gi2\_10437987\_x9.....cgucguggNaacacggggugccgaac..... 1  
Gi5\_8459112\_x9.....gugggaacacgCggugccgaacu..... 1  
Gi5\_8468391\_x9.....acgucgugggaacacAgggugccgaacu..... 1  
Gi3\_27246250\_x9.....gggaacacggggugccgaUcu..... 1  
Gi5\_8458833\_x9.....acgucAugggaacacggggugccgaacu..... 1  
Gi5\_8460264\_x9.....gggaacacggggugccgGac..... 1  
G1a\_5643670\_x9.....Uugggaacacggggugccgaa..... 1  
Gi3\_27298702\_x9.....aucggaAacgucguggggaacacggg..... 1  
Gi1\_3939958\_x9.....aacacggggugcAgaacu..... 1  
Gi5\_8465844\_x9.....ggaacacggggugccgaaAu..... 1  
Gi2\_10461603\_x9.uUcgauccgagacgucguggggaacacg..... 1  
Gi3\_27302428\_x9.....ugggaacacggggugccUaac..... 1  
Gi2\_10433361\_x9.....cgugggaacacggggCgcc..... 1  
Gi3\_27305506\_x9.....aucggagacgucgugggGacacggggugcc..... 1  
Gi5\_8473242\_x9.....cgugggaacacggggugGcgaacu..... 1  
Gi3\_27280450\_x9.....uCggaacacggggugccg..... 1  
Gi2\_10449084\_x9...gaucggagacgucguggggaacacggggG..... 1  
Gi3\_27253045\_x9.....gacgucguggggaacacggggAgccgaac..... 1  
Gi3\_27304624\_x9.....ugggaacacggggugGcgaacu..... 1  
Gi2\_10433415\_x9.....ggaacaAggggugccgaacu..... 1  
Gi5\_8465961\_x9.....ggaacUcggggugccgaacu..... 1  
Gi2\_10459893\_x9.....aucggagacgucgugggCaca..... 1  
Gi5\_8474070\_x9.....gggaacGcggggugccgaac..... 1  
Gi2\_10459425\_x9.....gugAgaacacggggugccg..... 1  
Gi3\_27245296\_x9.....cgugAgaacacggggugcc..... 1  
G1a\_5649844\_x9.....gGgggaacacggggugccg..... 1  
Gi3\_27272953\_x9.....cgugggaacaGggggugccgaacu..... 1  
Gi2\_10460487\_x9...gaucggagacgucguggggaacCcggg..... 1  
Gi2\_10461090\_x9.....gCcguggggaacacggggugcc..... 1  
G1a\_5635012\_x9.....gCgaacacggggugccgaacu..... 1  
Gi2\_10460109\_x9.....aUacgucguggggaacacggggugccgaac..... 1  
Gi2\_10457616\_x9.....cgugggaacacggggugccgaaGu..... 1  
Gi2\_10458903\_x9.....cgucguggggaacacggggugccgGacu..... 1

Gi5\_8463639\_x9.....ggaacacgggAugccgaacu..... 1  
Gi2\_10443153\_x9.....gugggaaUacggggugccga..... 1  
Gi2\_10437573\_x9.....ugggaGcacggggugccga..... 1  
Gi3\_27299314\_x9.....gggaacacgggAugccgaac..... 1  
Gi2\_10452216\_x9.....cgCgggaacacggggugccga..... 1  
Gi2\_10458219\_x9.....Aucgugggaacacggggugc..... 1  
Gi5\_8466888\_x9.....aucggagaNgucgugggaacacgg..... 1  
Gi2\_10449354\_x9.....aUgucgugggaacacggggugccgaacu..... 1  
Gi2\_10458579\_x9.....ggaUcacggggugccgaacu..... 1  
Gi3\_27298396\_x9.....cCugggaacacggggugccg..... 1  
Gi1\_3935224\_x9.....gaacacggggugccgaaUu..... 1  
Gi2\_10458480\_x9.....gugggaacacggggugc..... 1  
Gi5\_8456079\_x9.....cgugggaacacggggugcGgaacu..... 1  
Gi2\_10432254\_x9.....cgugggaacacggggUccgaacu..... 1  
Gi2\_10438572\_x9.....gugggaacacggggUccgaacu..... 1  
Gi3\_27268633\_x9.....gucgugggaacaGggggugccgaacu..... 1  
Gi2\_10437186\_x9.....gGgacgucgugggaacacggggugccgaacu..... 1  
Gi5\_8465709\_x9.....ggaacacggggugccgaacG..... 1  
Gi3\_27285310\_x9.....ucgugggaaUacggggugccgaac..... 1  
Gi2\_10429428\_x9.....ugggaaCgcgggugccga..... 1  
Gi3\_27286867\_x9.....aucggagacgucgugggaacacggA..... 1  
Gi3\_27296704\_x9.....Uacgucgugggaacacggggugc..... 1  
Gi3\_27244648\_x9.....gucgugggCacacggggugccgaac..... 1  
Gi2\_10459119\_x9.....guAggaacacggggugccga..... 1  
Gi1\_3929014\_x9.....aacacggggugccgaaUu..... 1  
Gi1\_3931516\_x9.....aucggagacgucgugggaacacgU..... 1  
Gi3\_27301339\_x9.....aucggagacAucgugggaacacg..... 1  
Gi5\_8474592\_x9.....agUcucgugggaacacggggugccgaacu..... 1  
G1a\_5647270\_x9.....gggaacacggggugccgCacu..... 1  
Gi1\_3933955\_x9.....ucgugggaacacUgggugccgaacu..... 1  
G1a\_5635732\_x9.....aucggagacgucgCgggaacacggg..... 1  
Gi5\_8468445\_x9.....ugggCacacggggugccgaacu..... 1  
Gi3\_27292501\_x9.....aucgAagacgucgugggaacacg..... 1  
Gi1\_3941902\_x9.....ucgugggaGcacggggugcc..... 1  
Gi2\_10457445\_x9.....ucgugggaacacggggAgccgaacu..... 1  
Gi5\_8461992\_x9.....gucgugAgaacacggggugccgaacu..... 1  
Gi5\_8464449\_x9.....gggaacacggggugccgaUc..... 1  
Gi3\_27298648\_x9.....cgAcgugggaacacggggugccg..... 1  
Gi2\_10429167\_x9.....gucgAgggaacacggggugccgaacu..... 1  
Gi1\_3930607\_x9.....ucgugggaacacgAggugccgaacu..... 1  
Gi3\_27280117\_x9.....agacgucgugggaacacggggugccgCacu..... 1  
Gi5\_8458887\_x9.....aaAacggggugccgaacu..... 1  
Gi3\_27300574\_x9.....cgucgugggaacacggggAgccgaacu..... 1  
Gi3\_27247753\_x9.....ggaacacggUgugccgaacu..... 1  
Gi2\_10440642\_x9.....acgucgugNgaacacggggugccgaac..... 1  
Gi3\_27292168\_x9.....cgucgugggaacacggggugccgaacG..... 1  
Gi3\_27261676\_x9.....gaUgucgugggaacacggggugccgaac..... 1

G1a\_5653984\_x9.....aCcgagacgucgugggaacacggg..... 1  
 Gi3\_27265501\_x9.....cgugggGacacggggugccg..... 1  
 Gi2\_10457994\_x9.....acgucgugggaacacggAgugccgaacu..... 1  
 Gi2\_10453872\_x9.....ucgugggaacacggggugcAgaacu..... 1  
 Gi5\_8476464\_x9.....cgugggaacacgCggugccgaacu..... 1  
 Gi3\_27292978\_x9.....gugggaaUacggggugccg..... 1  
 Gi2\_10449471\_x9.....gugggaacacggggguAccga..... 1  
 Gi3\_27252163\_x9.....cgucgugggaaUacggggugccgaac..... 1  
 Gi5\_8456376\_x9.....cguNggaacacggggugccgaacu..... 1  
 Gi2\_10443279\_x9.....aucggagacgucgugggaacaUggggg..... 1  
 Gi3\_27300808\_x9.....Aggagacgucgugggaacacggggugccg..... 1  
 Gi3\_27263368\_x9.....ggaacacggCgugccgaacu..... 1  
 Gi3\_27291511\_x9.....ucggagacgucgugggaacacggggugccgaac..... 0  
 G1a\_5635489\_x9.....ggaacacggggugccgaGcu..... 1  
 Gi5\_8465628\_x9.....ucgugggaacacggggugccgaaAu..... 1  
 Gi2\_10431822\_x9.....agacgucgugggaacGcggggugcc..... 1  
 Gi3\_27248716\_x9.....cgucAugggaacacggggugcc..... 1  
 Gi3\_27249121\_x9.....ucgugggaacacggAgugccgaac..... 1  
 Gi1\_3929392\_x9.....gugggaacacggggAgccgaacu..... 1  
 Gi3\_27278812\_x9.....aucggagacgucAugggaacacg..... 1  
 Gi3\_27302221\_x9.....gugggaacacggggugcAga..... 1  
 Gi2\_10447455\_x9.....gucgugggaaAacggggugcc..... 1  
 Gi2\_10446519\_x9.....gacgucgugggaacacggggugccgaa..... 0  
 Gi3\_27271729\_x9.....cgugggaGcacggggugccgaa..... 1  
 Gi2\_10436430\_x9.....cgGcgugggaacacggggugccg..... 1  
 Gi2\_10461261\_x9.....Uacgucgugggaacacggg..... 1  
 Gi5\_8460858\_x9.....ggaUcacggggugccgaacu..... 1  
 Gi2\_10461765\_x9.....ugggGacacggggugccg..... 1  
 Gi2\_10445178\_x9.....ggagGcgucgugggaacacggggugcc..... 1  
 Gi2\_10449057\_x9.....gugggaacacggggugccA..... 1  
 Gi3\_27295624\_x9.....gacgucgugggaacGcggggugccgaacu..... 1  
 Gi2\_10459371\_x9.....ugggaacacggggugccgaCc..... 1  
 Gi2\_10432650\_x9.....cgucgugggaacacggggugUcgaacu..... 1  
 Gi5\_8459526\_x9.uUcgaucggagacgucgugg..... 1  
 Gi5\_8460237\_x9.....acgucgugggaacacggggugcAgaacu..... 1  
 Gi5\_8464845\_x9.....acgucgugggaacCcgggugccgaacu..... 1  
 Gi3\_27280909\_x9.....gucgugggaacacggggGgcc..... 1  
 Gi2\_10439418\_x9..gcgaucggagacgucgugggaacacggggugcc..... 0  
 Gi2\_10447419\_x9..Aaucggagacgucgugggaacacggg..... 1  
 Gi5\_8455953\_x9.....Nugggaacacggggugccgaacu..... 1  
 Gi2\_10436169\_x9.....Gcggagacgucgugggaacacggggugcc..... 1  
 Gi5\_8469120\_x9.....cgucgugggaacacggggAgccgaacu..... 1  
 Gi3\_27291565\_x9.....cCugggaacacggggugccgaa..... 1  
 Gi3\_27248320\_x9.....ggagacgucgugggaacaUggggugccg..... 1  
 Gi3\_27280603\_x9.....gaacacggggugccCaacu..... 1  
 Gi2\_10441893\_x9.....Gucggagacgucgugggaac..... 1  
 Gi3\_27262486\_x9.....ggagacgucUugggaacacggggg..... 1



|                                                           |   |
|-----------------------------------------------------------|---|
| Gi5_8473818_x9.....Augggaacacggggugcc.....                | 1 |
| Gi3_27300439_x9.....aucggagacgucgugggaacacgA.....         | 1 |
| Gi3_27304561_x9.....cgAcgugggaacacggggugcc.....           | 1 |
| Gi3_27256348_x9.....gugggaacaAggggugccga.....             | 1 |
| Gi3_27302707_x9.....gucgugggaacacggggCgcc.....            | 1 |
| Gi3_27305074_x9.....gaucggagacgucgugggaacaAggggu.....     | 1 |
| Gi2_10436727_x9.....acgucgugggaacacggggCgccgaac.....      | 1 |
| Gi3_27301249_x9.....Aacgucgugggaacacggggugccgaacu.....    | 1 |
| Gi1_3938167_x9.....acgucgugggaGcacggggugccg.....          | 1 |
| Gi2_10436196_x9.....aucggagacgucguAggaacacgggggu.....     | 1 |
| Gi2_10432065_x9.....ugggaacacgggUugccgaac.....            | 1 |
| Gi2_10444836_x9.....aAcggagacgucgugggaacacgggggu.....     | 1 |
| Gi2_10453899_x9.....cggagacgucgugggaacCggggugc.....       | 1 |
| Gi5_8461488_x9.....ucggagacgucgugggaacacggggugccgaac..... | 0 |
| Gi4_522819_x9.....gagacgucgugggaacacggggugccgaacu.....    | 0 |
| Gi5_8480481_x8.....Aaacacggggugccgaac.....                | 1 |
| Gi2_10480474_x8.....gaucggagNcgucguggga.....              | 1 |
| Gi5_8488417_x8.....gucgugggaacacgAggugccgaacu.....        | 1 |
| Gi3_27368201_x8.....gUcgucgugggaacacggggugccgaacu.....    | 1 |
| Gi5_8478761_x8.....cgucgugggaacCggggugccgaacu.....        | 1 |
| Gi1_3956037_x8.....ggUacacggggugccgaac.....               | 1 |
| Gi2_10465450_x8.....gggaacacgAggugccgaac.....             | 1 |
| Gi2_10470554_x8.....ggaNcacggggugccgaacu.....             | 1 |
| Gi2_10492650_x8..Ucgauccgagacgucgugggaacacgg.....         | 1 |
| Gi3_27309137_x8.....cggagacgCcgugggaacacgggggu.....       | 1 |
| Gi2_10490850_x8.....gaucggagacgucgugggCacac.....          | 1 |
| Gi5_8497001_x8.....gggaacacggggugccgaC.....               | 1 |
| Gi3_27351065_x8.....aucgAagacgucgugggaacacggg.....        | 1 |
| Gi3_27374761_x8.....cgCcgugggaacacggggugc.....            | 1 |
| Gi3_27329473_x8.....Aacgucgugggaacacggg.....              | 1 |
| Gi3_27363097_x8.....aucggagacgucgugggaaUacgggg.....       | 1 |
| Gi2_10487882_x8.....gugggUacacggggugcc.....               | 1 |
| Gi3_27336529_x8.....gacgucgCgggaacacggggugccgaac.....     | 1 |
| Gi3_27341753_x8.....aucggagacgucgugggaacacggC.....        | 1 |
| Gi3_27309673_x8.....ucCugggaacacggggugccgaacu.....        | 1 |
| Gi2_10490330_x8.....gaucggagacgucgugggC.....              | 1 |
| Gi1_3954277_x8.....ugggaacacggggugccgCac.....             | 1 |
| Gi5_8484137_x8.....cgucgugggaacacAgggugccgaacu.....       | 1 |
| Gi5_8476889_x8.....guAggaacacggggugccgaac.....            | 1 |
| Gi5_8502265_x8.....gacgucgugggaacacggggGgccgaacu.....     | 1 |
| Gi2_10487546_x8.....gaucggagacgucgugggGacac.....          | 1 |
| Gl1_5655225_x8.....ugggaacacAgggugccgaacu.....            | 1 |
| Gi4_524288_x8.....guUggaacacggggugccgaacu.....            | 1 |
| Gi3_27363057_x8.....cgugggaCcacggggugccga.....            | 1 |
| Gi5_8487129_x8.....Uagacgucgugggaacacggggugcc.....        | 1 |
| Gl1_5674769_x8.....cCugggaacacggggugccgaacu.....          | 1 |
| Gi5_8500569_x8.....Cugggaacacggggugccga.....              | 1 |

|                                                         |   |
|---------------------------------------------------------|---|
| Gi3_27349129_x8.uUcgaucggagacgucgugggaaaca.....         | 1 |
| Gi5_8494497_x8.....aacacggCgugccgaacu.....              | 1 |
| Gi3_27313969_x8.....cgucgugggaaAacggggugcc.....         | 1 |
| Gi5_8492865_x8.....gucgugggaaUacggggugccgaacu.....      | 1 |
| Gi1_3952237_x8.....Ggucgugggaaacacggggugcc.....         | 1 |
| Gi2_10476242_x8.....cgucgugggaaacacggggugccgaCcu.....   | 1 |
| Gi4_525112_x8.....Uucgugggaaacacggggugccgaacu.....      | 1 |
| Gi3_27344929_x8.....ugggaacGcggggugccg.....             | 1 |
| Gi3_27359385_x8.....aucggagacgucUugggaacacggg.....      | 1 |
| Gi1_3957181_x8.....ggagacgucgugggGcacggggugccg.....     | 1 |
| Gi1_3952973_x8.....aGcggagacgucgugggaaacacggggg.....    | 1 |
| Gi2_10487690_x8.ugcgaucggagacgucgug.....                | 0 |
| Gi3_27361489_x8.....gggaacUcggggugccgaacu.....          | 1 |
| Gi2_10467218_x8.....guggAaacacggggugccg.....            | 1 |
| Gi3_27307721_x8.....gggaacacggUgugccgaac.....           | 1 |
| Gi3_27353473_x8.....gucgugggaaAacggggugccgaac.....      | 1 |
| Gi5_8500817_x8.....gGacacggggugccgaac.....              | 1 |
| Gi3_27307737_x8.....aacacCgggugccgaacu.....             | 1 |
| Gi1_3947125_x8.....cgucgugAgaacacggggugccgaacu.....     | 1 |
| Gi3_27307905_x8.....aucggagacgucGgggaacacg.....         | 1 |
| Gi3_27356241_x8.....agacgucguAggaacacggggugccgaacu..... | 1 |
| Gi1_5672737_x8.....cgaucggaNacgucgugg.....              | 1 |
| Gi5_8496665_x8.....gugggaaAacggggugccgaac.....          | 1 |
| Gi2_10475410_x8.....cgugggaaacacggAgugccgaac.....       | 1 |
| Gi2_10491178_x8.....uAggaacacggggugccg.....             | 1 |
| Gi5_8502273_x8.....gugggaacacggggAgcgaac.....           | 1 |
| Gi2_10477778_x8.....ugggaacacggggugcAgaac.....          | 1 |
| Gi3_27340729_x8.....aucggagacAucgugggaaacacgg.....      | 1 |
| Gi5_8480225_x8.....acgucgugggaaacacggggugccGacu.....    | 1 |
| Gi3_27324201_x8.....aAcggagacgucgugggaaacacgggg.....    | 1 |
| Gi2_10492698_x8.....cgucgugggaaacacggggguAccgaacu.....  | 1 |
| Gi3_27340001_x8.....acgucgugggaaacacggggGgcc.....       | 1 |
| Gi2_10465298_x8.....cgugggaaacacggggugUc.....           | 1 |
| Gi2_10494914_x8.....gacgucgugggaaacGcggggugccgaacu..... | 1 |
| Gi3_27357017_x8..Ucgaucggagacgucguggg.....              | 1 |
| Gi3_27375449_x8.....cCucgugggaaacacggggugccgaac.....    | 1 |
| Gi1_3948365_x8.....ggaacCcgggugccgaacu.....             | 1 |
| Gi1_3945117_x8.....cgugggaaacacggggGgccgaacu.....       | 1 |
| Gi2_10485882_x8.....ugggaacaNggggugccgaa.....           | 1 |
| Gi3_27366785_x8.....gugggaacacgggAugccgaa.....          | 1 |
| Gi1_3950517_x8.uUcgaucggagacgucguggg.....               | 1 |
| Gi3_27355913_x8.....aucggagacgucgugggaaacaUg.....       | 1 |
| Gi2_10481154_x8.....aucggagacgucgugggGcacggggugc.....   | 1 |
| Gi3_27325121_x8.....gucgugggaaacacggAgugccgaac.....     | 1 |
| Gi2_10472194_x8.....acgucgugggaaacCggggugccgaacu.....   | 1 |
| Gi3_27376321_x8.....aucggagacgucgugggGcac.....          | 1 |
| Gi1_3947253_x8.....Gucggagacgucgugggaaacacg.....        | 1 |

|                                                         |   |
|---------------------------------------------------------|---|
| Gi3_27330817_x8.....cguggAaacacggggugccga.....          | 1 |
| Gi5_8493785_x8.....guggaaacacggggGgcc.....              | 1 |
| Gi5_8480049_x8.....gggaacacggggugccgaaAu.....           | 1 |
| Gi5_8495393_x8.....gucgugggCacacggggugccgaacu.....      | 1 |
| G1a_5669241_x8.....gugggaacacggggguAccgaacu.....        | 1 |
| Gi3_27312201_x8.....cgucgugggaacacggggugUc.....         | 1 |
| Gi2_10498562_x8.....Aucgugggaacacggggugcc.....          | 1 |
| Gi2_10468738_x8.....ggaacacUgggugccgaacu.....           | 1 |
| Gi2_10461890_x8.....acgucgugggaGcacggggugccgaacu.....   | 1 |
| Gi3_27320257_x8.....ugggaacacAgggugccg.....             | 1 |
| Gi2_10463642_x8.....cgucgugggaGcacggggugcc.....         | 1 |
| Gi3_27370209_x8.....gAcgugggaacacggggugccgaac.....      | 1 |
| Gi1_3942621_x8..gCGaucggagacgucgCgggaacacggggugcc.....  | 1 |
| Gi2_10461922_x8...gGucggagacgucgugggaacacgggg.....      | 1 |
| Gi3_27330209_x8.....ucguCggaacacggggugccgaacu.....      | 1 |
| Gi1_3950693_x8.....cUugggaacacggggugccgaa.....          | 1 |
| Gi2_10494930_x8cugcgaucggagacgucgugggaacacgggg.....     | 0 |
| Gi3_27344201_x8.....aacacggggUccgaacu.....              | 1 |
| Gi5_8498913_x8.....gggaacacggggugUcgaacu.....           | 1 |
| Gi3_27348625_x8.....gucgugggaacacggggG.....             | 1 |
| Gi3_27365881_x8.....ugggaacacggggugUcga.....            | 1 |
| Gi2_10496834_x8.....cgugggaacacggggugccgG.....          | 1 |
| Gi3_27359169_x8.....cgugggaacacUgggugccgaac.....        | 1 |
| Gi2_10496410_x8.....cgucgugggGcacacggggugccga.....      | 1 |
| Gi2_10477666_x8.....uggUaacacggggugccgaacu.....         | 1 |
| Gi2_10466090_x8..cUaucggagacgucgugggaacacgggg.....      | 1 |
| Gi3_27370841_x8.....ggaNcacggggugccgaac.....            | 1 |
| Gi2_10498290_x8.....Gcgugggaacacggggugcc.....           | 1 |
| Gi1_3950357_x8.....cgugggaacacggAgugccgaacu.....        | 1 |
| Gi2_10462282_x8.....cgAgggaacacggggugc.....             | 1 |
| Gi2_10480818_x8.....gaUgucgugggaacacggggugcc.....       | 1 |
| Gi3_27365289_x8.....cgugggaacacggggUaccga.....          | 1 |
| Gi2_10490802_x8...gaucggagNcgucgugggaacacgggg.....      | 1 |
| Gi3_27314793_x8.....ggaaAacggggugccgaac.....            | 1 |
| Gi2_10484842_x8.....agacgucgugggaacacggggGgcc.....      | 1 |
| Gi1_3947389_x8.....gGgggaacacggggugccga.....            | 1 |
| Gi2_10497050_x8.....ucggagacgucgugggaacacggggugccg..... | 0 |
| Gi2_10469050_x8.....Cgagacgucgugggaacacggggugcc.....    | 1 |
| Gi2_10483338_x8.....ucgugggaacacggggugccGacu.....       | 1 |
| G1a_5662161_x8.....gugggUaacacggggugccgaacu.....        | 1 |
| Gi1_3953149_x8.....ucgugggaacacgggAugccgaacu.....       | 1 |
| Gi2_10486090_x8.....acgucgugggaacacggggugccgaGcu.....   | 1 |
| Gi3_27349305_x8.....cgCcgugggaacacggggugccga.....       | 1 |
| Gi2_10475930_x8.....gucgugggUaacacggggugccgaacu.....    | 1 |
| Gi3_27344217_x8.....cgugggaacacgCggugccgaac.....        | 1 |
| Gi5_8501737_x8.....gCgggaacacggggugccga.....            | 1 |
| Gi2_10480170_x8.....Gcggagacgucgugggaacacggggugc.....   | 1 |

Gi3\_27349345\_x8.....cgucgCgggaacacggggugccgaac..... 1  
 Gi2\_10483754\_x8.....cgugggaacacggggAccgaac..... 1  
 Gi3\_27371225\_x8.....gagGcgucgugggaacacggggugccgaacu..... 1  
 Gi3\_27315289\_x8.....cgAggggaacacggggugc..... 1  
 Gi2\_10481850\_x8.....gggaacacggggugcGgaacu..... 1  
 Gi3\_27365145\_x8.....ugggaacCcggggugccgaa..... 1  
 Gi5\_8478417\_x8.....aucggagacgucgugggaCcaccg..... 1  
 Gi2\_10489930\_x8.....cgCcgugggaacacggggugcc..... 1  
 Gi5\_8477385\_x8...Uaucggagacgucgugggaacacggggg..... 1  
 Gi5\_8477193\_x8.....aucggagacgCcgugggaacacg..... 1  
 Gi2\_10494506\_x8.....gugggaacacggAgugccgaa..... 1  
 Gi1\_3949909\_x8.....gaacacggggugAcgaacu..... 1  
 Gi5\_8478009\_x8.....aacaAggggugccgaacu..... 1  
 Gi3\_27329009\_x8.....cggagacgucgugggaacacggggG..... 1  
 Gi3\_27341249\_x8.....cgugggaacacgggCugccgaac..... 1  
 Gi3\_27308233\_x8.....ucggagacgucgugggaacacggggugccga..... 0  
 Gl1\_5659185\_x8.....ugggaacacggggAgccgaacu..... 1  
 Gi2\_10470786\_x8.....ugggaacacAgggugccgaac..... 1  
 Gi5\_8493801\_x8.....cgugggaacacggCgugccgaacu..... 1  
 Gi2\_10469034\_x8.....cgugggaacacggggugccgaaU..... 1  
 Gi1\_3951181\_x8.....gugggaacacggggugccgU..... 1  
 Gi5\_8480249\_x8.....cgugggaaGacggggugccgaacu..... 1  
 Gi5\_8497697\_x8.....ggaaGacggggugccgaacu..... 1  
 Gi3\_27311337\_x8.....Gacacggggugccgaacuu..... 1  
 Gi2\_10494474\_x8.....aucAgagacgucgugggaacacggggg..... 1  
 Gi3\_27337057\_x8.....gugggaaAacggggugccgaa..... 1  
 Gi2\_10492786\_x8.....aAcggagacgucgugggaacacggggugc..... 1  
 Gi5\_8481753\_x8.....gugggaacacggggugccgaaU..... 1  
 Gi3\_27322569\_x8.....Ggucgugggaacacggggugccgaa..... 1  
 Gi2\_10493322\_x8.....Cgggaacacggggugccgaac..... 1  
 Gi5\_8492633\_x8.....Augggaacacggggugccga..... 1  
 Gl1\_5656425\_x8.....gGgggaacacggggugccgaa..... 1  
 Gi1\_3945525\_x8.....gugggaacaAggggugccgaacu..... 1  
 Gi2\_10488002\_x8.....cCucgugggaacacggggugcc..... 1  
 Gi5\_8486033\_x8.....agacgucgugggaacGcggggugccgaacu..... 1  
 Gi3\_27316961\_x8.....cgugggaacacggggugcGgaac..... 1  
 Gi3\_27327585\_x8.....agacgucgugggaacacggggCgccgaac..... 1  
 Gi5\_8496801\_x8.....gugggaacacggAgugccg..... 1  
 Gi3\_27376297\_x8.....cgugggaacacggggugAcg..... 1  
 Gi3\_27308041\_x8.....ugggaCcacggggugccgaa..... 1  
 Gi5\_8500633\_x8.....gggaacacgggAugccgaacu..... 1  
 Gi2\_10468026\_x8.....gUagacgucgugggaacacg..... 1  
 Gi3\_27377209\_x8.....ugggaacacgggAugccgaa..... 1  
 Gi2\_10497354\_x8.....aucgUagacgucgugggaacac..... 1  
 Gi3\_27322537\_x8.....cgugggaaAacggggugccgaac..... 1  
 Gi5\_8480593\_x8.....aucggagacgucgugggaacacggggugccgaacu..... 0  
 Gi3\_27352329\_x8.....aucgAagacgucgugggaacacggggg..... 1

Gi1\_3953669\_x8.....ggaacacggggGgccgaacu..... 1  
Gi2\_10478226\_x8.....gaaacacggggugccgaUc..... 1  
Gi2\_10481698\_x8.....gaaacacggggugccgaaAu..... 1  
Gi3\_27347505\_x8.....cgugggaGcacggggugccg..... 1  
Gi3\_27372433\_x8.....aucggaAacgucgugggaacacg..... 1  
Gi1\_3950485\_x8.....uggaacacggggugcAgaacu..... 1  
Gi5\_8498777\_x8.....cgugggaacacggggugcUgaac..... 1  
Gi3\_27374905\_x8.....cgugggaacacggggUac..... 1  
Gi2\_10479786\_x8.....cgugggaacCcggggugccgaac..... 1  
Gi2\_10497322\_x8.....gggaacacggggAgccgaacu..... 1  
Gi2\_10474434\_x8.....gaucggagacgucgugggaacGcggggU..... 1  
Gi3\_27332745\_x8.....ggagacgucgugggaacacggggC..... 1  
Gi3\_27375129\_x8.....ucgugggaacacggggugccgaaU..... 1  
Gi5\_8479993\_x8.....uggaacacggggugccUaacu..... 1  
Gi5\_8491521\_x8.....ucgugggaacacggggugccgaacG..... 1  
Gi1\_3953661\_x8.....uggaacacggggugUcgaacu..... 1  
Gi1\_3944237\_x8.....acgucgugggaacacggggugcAgaacu..... 1  
Gi3\_27343889\_x8.....ggagacgucgugggGcacggggU..... 1  
Gi3\_27335441\_x8.....aucggagacgucgugggaacacggggAu..... 1  
Gi2\_10494330\_x8.....gaucggagNcgucgugggaacacggggugc..... 1  
Gi2\_10481250\_x8.....cgugggaacacUgggugccg..... 1  
Gi2\_10475002\_x8.....ugCgaacacggggugccgaacu..... 1  
Gi3\_27355785\_x8.....cgugggaacacggggugccgC..... 1  
Gi3\_27336489\_x8.....gggaacacggUgugccgaacu..... 1  
Gi5\_8479449\_x8.....gggaacacggggugcAgaacu..... 1  
Gi3\_27329825\_x8.....ggaGcacggggugccgaa..... 1  
Gi5\_8496929\_x8.....cguggUaacacggggugccgaacu..... 1  
Gi1\_3951365\_x8.....agacgucgNgggaacacggggugccgaacu..... 1  
Gi3\_27309697\_x8.....acgucgAgggaacacggggugccgaacu..... 1  
Gi3\_27320001\_x8.....aucggagacgucgugggaacGc..... 1  
Gi3\_27374049\_x8.....gaucggagacgucgugggaacCcggg..... 1  
Gi2\_10478602\_x8.....aucggagacgucgugggaacacggggGgcc..... 1  
Gi2\_10486658\_x8.....gaucggagacgucgugggGcacg..... 1  
Gi2\_10486338\_x8.....cgaucggGgacgucgugggaacacggggugc..... 1  
Gi5\_8485441\_x8.....gaUgucgugggaacacggggugccgaacu..... 1  
Gi2\_10482610\_x8.....aAcggagacgucgugggaacac..... 1  
Gi2\_10479002\_x8.....gaaacacggggugccgUac..... 1  
Gi2\_10493074\_x8.....gugggaacacAgggugccg..... 1  
Gi3\_27358681\_x8.....gaucggagacgucgugggaacacggggA..... 1  
Gi3\_27343761\_x8.....gacgucgugggaacacggggugccgaGc..... 1  
Gi3\_27375937\_x8.....ugggaacacggggugccCaacu..... 1  
Gi2\_10485634\_x8.....aucggagacgucgugAgaacacggggugc..... 1  
Gi3\_27318377\_x8.....ugNgaacacggggugccgaacu..... 1  
Gi1\_3953205\_x8.....gGacacggggugccgaac..... 1  
Gi2\_10485242\_x8.....Ccgugggaacacggggugccgaac..... 1  
Gi1\_3946725\_x8.....cgugggaacaUggggugccgaacu..... 1  
Gi1\_3948205\_x8.....cgugggaacacggggugccgGacu..... 1

Gi2\_10483658\_x8.....acgucgugggaacacggggugUc..... 1  
 Gi2\_10467378\_x8.....Ggucgugggaacacggggugccgaac..... 1  
 Gi3\_27365889\_x8.....ucgugggaacacgggAugccgaac..... 1  
 Gi3\_27314993\_x8.....gugggaacacggggugcAg..... 1  
 Gl1\_5673425\_x8.....Uacgucgugggaacacggggu..... 1  
 Gi1\_3956821\_x8.....aUacgucgugggaacacggg..... 1  
 Gi5\_8496785\_x8.....aucggagacgucgugggGacacg..... 1  
 Gi2\_10490746\_x8.....cgugAgaacacggggugcc..... 1  
 Gi1\_3945925\_x8.....agacgucgugggaacacggggCgccgaacu..... 1  
 Gi3\_27337305\_x8.....ugCgaacacggggugccgaacu..... 1  
 Gi2\_10482354\_x8.....ugggaacacgggCugccgaacu..... 1  
 Gi2\_10478858\_x8.....aucggagacgucgCgggaacacggggugc..... 1  
 Gi3\_27313425\_x8.....ucggagacgucgugggaacacggggCgcc..... 1  
 Gi5\_8477089\_x8.....gucgugggaacUcggggugccgaacu..... 1  
 Gi2\_10484218\_x8.....aucggagacgucguggAaacacggggugc..... 1  
 Gi1\_3943333\_x8.....cgucgGgggaacacggggugccgaacu..... 1  
 Gi3\_27372521\_x8.....agacgucgugggaacacggggugccAaacu..... 1  
 Gi3\_27309617\_x8.....aucggagacgucgugggCacac..... 1  
 Gi2\_10496138\_x8.....Aaucggagacgucgugggaacac..... 1  
 Gi2\_10482482\_x8.....aucggagGcugcuggggaacacggg..... 1  
 Gi2\_10494626\_x8.....gugggaacacggggugGcgaac..... 1  
 Gi5\_8491089\_x8.....acAucgugggaacacggggugccgaacu..... 1  
 Gi5\_8497785\_x8.....acgucgugggaGcacggggugccgaacu..... 1  
 Gi2\_10472250\_x8.....gaucggagacgucgugggCaca..... 1  
 Gi3\_27316417\_x8.....cgucgugggUacacggggugccgaacu..... 1  
 Gi5\_8484617\_x8.....guUggaacacggggugccga..... 1  
 Gi2\_10483698\_x8.....aucgUagacgucgugggaacacggggug..... 1  
 Gi2\_10493962\_x8.....gugggaacGcggggugccgaa..... 1  
 Gi3\_27354313\_x8.....cgGcgugggaacacggggugccga..... 1  
 Gi2\_10481178\_x8.....aucggagacgucgugggaacacAgggu..... 1  
 Gi2\_10479282\_x8.....gaacacggggugccUaacu..... 1  
 Gi3\_27355545\_x8.....gucguAggaacacggggugccgaac..... 1  
 Gi3\_27358113\_x8.....gAaacacggggugccgaa..... 1  
 Gi2\_10486130\_x8.....cgugggaacacggCgugccgaacu..... 1  
 Gi3\_27327289\_x8.....gUucggagacgucgugggaacacggg..... 1  
 Gi2\_10488026\_x8.....ucgugggaacacggggugccgaaUu..... 1  
 Gi3\_27362449\_x8.....cgucgugggaacacggggugAcgaacu..... 1  
 Gi3\_27310329\_x8.....gugCgaacacggggugccgaac..... 1  
 Gi5\_8485673\_x8.....aacacggggugccUaacu..... 1  
 Gl1\_5654697\_x8.....gggaacacAgggugccgaacu..... 1  
 Gi3\_27318729\_x8.....gaacacggggGgccgaac..... 1  
 Gi3\_27318673\_x8.....cgugggaacacgggAugcc..... 1  
 Gi1\_3949269\_x8.....gaucggagacgucgugggaacacggggu..... 0  
 Gi2\_10496970\_x8.....gggaGcacggggugccgaa..... 1  
 Gi3\_27337577\_x8.....gggaacacUgggugccgaacu..... 1  
 Gi2\_10464698\_x8.....gucgugggaacacggggGgc..... 1  
 Gi5\_8498297\_x8.....gaacacggggugGcgaacu..... 1

|                 |                                      |   |
|-----------------|--------------------------------------|---|
| Gi2_10480970_x8 | ...Aaucggagacgucgugggaaacacggggu     | 1 |
| Gi3_27365633_x8 | ...aaGacggggugccgaacu                | 1 |
| Gi3_27333657_x8 | ...ggaacacggggugcGgaac               | 1 |
| Gl1_5675177_x8  | ...ggaacacggggGgccgaacu              | 1 |
| Gi5_8478465_x8  | ...auUggagacgucgugggaaacacg          | 1 |
| Gi3_27329913_x8 | ...cgucgugggaCcacggggugccgaac        | 1 |
| Gi2_10463090_x8 | ...acgucgugggGacacggggugcc           | 1 |
| Gi1_3949877_x8  | ...Uagacgucgugggaacacggggugccg       | 1 |
| Gi2_10474170_x8 | ...ugUgaacacggggugccga               | 1 |
| Gl1_5658201_x8  | ...gGacacggggugccgaacu               | 1 |
| Gi3_27343145_x8 | ...Gcgugggaacacggggugcc              | 1 |
| Gi5_8502017_x8  | ...ugAgaacacggggugccgaac             | 1 |
| Gi3_27325793_x8 | ...gucgugggaacacggggugccgaacG        | 1 |
| Gi1_3947591_x8  | ...Gcgucgugggaacacggggugcc           | 1 |
| Gi1_3956557_x8  | ...aacacggggugUcgaacu                | 1 |
| Gi2_10487314_x8 | ...gaucggagacgucgugggaaacCcg         | 1 |
| Gi2_10468346_x8 | ...gggaacacggggugccgaaA              | 1 |
| Gi1_3946325_x8  | ...gaucggagacgucgugggaaacacggg       | 0 |
| Gi3_27364817_x8 | ...cgucgugggaacGcggggugccg           | 1 |
| Gi3_27375601_x8 | ...cgugggaacacgAgggugcc              | 1 |
| Gi2_10468514_x8 | ...gugggaaUacggggugccgaa             | 1 |
| Gi3_27311593_x8 | ...gugggaacacggggugccgaaG            | 1 |
| Gi5_8500537_x8  | ...cUugggaacacggggugccg              | 1 |
| Gi3_27339945_x8 | ...guggCaacacggggugcc                | 1 |
| Gi2_10483090_x8 | ...cgugggaacacggggugccgaG            | 1 |
| Gi2_10486954_x8 | ...ggaacacggggugcAgaac               | 1 |
| Gi2_10469354_x8 | ...cgugggaacacggggGgc                | 1 |
| Gi2_10467346_x8 | ...gucgugggGacacggggugccgaac         | 1 |
| Gi2_10495442_x8 | ...ggaacacggggugccgaCc               | 1 |
| Gi3_27308657_x8 | ...aucggagacguUgugggaacacggg         | 1 |
| Gi2_10478682_x8 | ...gaacacggggGgccgaac                | 1 |
| Gi2_10483730_x8 | ...Ugacgucgugggaacacg                | 1 |
| Gi2_10479370_x8 | ...gaucggagacgucgugggaaacacggggC     | 1 |
| Gi2_10490114_x8 | ...gGcgucgugggaacacggggu             | 1 |
| Gi2_10488778_x8 | ...ggaacacgggAugccgaac               | 1 |
| Gi3_27373385_x8 | ...acgucgugggaacacggggugcAgaac       | 1 |
| Gi5_8493257_x8  | ...aucggagacgucguggGacacgg           | 1 |
| Gi2_10495874_x8 | ...Uucgugggaacacggggugccgaa          | 1 |
| Gi5_8496529_x8  | ...agacgucgCgggaacacggggugccgaacu    | 1 |
| Gi3_27317713_x8 | ...ggaacacgggguCccgaacu              | 1 |
| Gi1_3952373_x8  | ...Uacgucgugggaacacggggugccg         | 1 |
| Gi2_10488074_x8 | ...aucggagacgucgugggaaacacggggugccga | 0 |
| Gi5_8488841_x8  | ...gaacacggggugcAgaacu               | 1 |
| Gi3_27311545_x8 | ...ggUgacgucgugggaacacggggu          | 1 |
| Gi3_27321161_x8 | ...cguAggaacacggggugc                | 1 |
| Gi3_27395030_x7 | ...ucgugggaacacggggugcAgaac          | 1 |
| Gi3_27395177_x7 | ...acgucguggUaacacggggugccgaacu      | 1 |

|                                                           |   |
|-----------------------------------------------------------|---|
| Gi5_8524466_x7.....Gggaacacggggugccgaacuu.....            | 1 |
| Gi3_27377817_x7.....acgucguggaacaacggggugccAaacu.....     | 1 |
| Gi4_527677_x7.....guggaacaacggggugccg.....                | 0 |
| Gi3_27429085_x7....gaucggagNcgucguggaacaacgggg.....       | 1 |
| Gi1_3972900_x7.....cguggaacCcggggugccgaacu.....           | 1 |
| Gi2_10499747_x7....aucAgagacgucguggaacaacggggugcc.....    | 1 |
| Gi3_27429064_x7....aucggagacgucAuggaaacacgggg.....        | 1 |
| Gi2_10517933_x7....Gcggagacgucguggaacaacgggg.....         | 1 |
| Gi5_8523080_x7.....aacacggggugccgaGu.....                 | 1 |
| Gi3_27431073_x7....aucggagacgucgugAgaacacgg.....          | 1 |
| Gi3_27395744_x7.....ggagacgucguggaacaacggggG.....         | 1 |
| Gi2_10520376_x7.....gucguggaacaacCcggggugc.....           | 1 |
| Gi1_3963422_x7.....uggaCcacggggugccgaacu.....             | 1 |
| Gi2_10504367_x7....aucggagaNgucguggaacaacggggug.....      | 1 |
| Gi3_27416121_x7.....gucguggaacaacggggugccgUacu.....       | 1 |
| Gi3_27391488_x7.....acgucguggaacaacggggugccgaCcu.....     | 1 |
| Gi3_27407112_x7....gaucggGgacgucguggaacaacgggg.....       | 1 |
| Gi1_3968560_x7.....guggUacacggggugccgaacu.....            | 1 |
| Gi2_10530918_x7.....guUguggaacaacggggugcc.....            | 1 |
| Gi2_10518192_x7.....cgucguggaacaacggAgugccgaacu.....      | 1 |
| Gi3_27403556_x7....Gcggagacgucguggaacaacgggg.....         | 1 |
| Gi2_10505403_x7....aUgucguggaacaacggggugc.....            | 1 |
| Gi2_10531170_x7.....aacacggggugccgUacu.....               | 1 |
| Gi2_10511248_x7.....uggaacaacggggugAcgaacu.....           | 1 |
| Gi2_10514055_x7....cggGgacgucguggaacaacggggugccgaacu..... | 1 |
| Gi3_27454089_x7.....gggaacaacAggugccgaa.....              | 1 |
| Gi2_10523932_x7.....ggaacaacggggugccgaUcu.....            | 1 |
| Gi3_27433628_x7....aUacgucguggaacaacgggg.....             | 1 |
| Gi3_27378027_x7....gaucggagacgucguggaaAacg.....           | 1 |
| Gi5_8504880_x7.Ggcgaucggagacgucgugg.....                  | 1 |
| G1a_5699117_x7.....ggagacgucguggaacaacggggugccgaacu.....  | 0 |
| Gi3_27393070_x7.....agacUucguggaacaacggggugccgaacu.....   | 1 |
| Gi3_27449161_x7.....gugggCacacggggugccga.....             | 1 |
| Gi2_10513747_x7....aucggagacgucUuggaacaacggggugc.....     | 1 |
| G1a_5683619_x7....aGcggagacgucgugga.....                  | 1 |
| Gi2_10540872_x7.....cCuggaacaacggggugc.....               | 1 |
| Gi3_27448524_x7....aucAgagacgucguggaacaacggggugc.....     | 1 |
| Gi3_27378503_x7.....uggaaAacggggugccgaac.....             | 1 |
| Gi1_3960118_x7.....gucguggaacaacCcggggugccgaacu.....      | 1 |
| G1a_5700650_x7.....cguggaacaacCcggggugccgaacu.....        | 1 |
| Gi2_10508861_x7....cggagacgucguggaacaacAgggugcc.....      | 1 |
| Gi3_27397298_x7....acgucguggaGcacggggugccgaac.....        | 1 |
| Gi1_3966040_x7.....guggaacaacggggGgcgaac.....             | 1 |
| Gi2_10531646_x7.....guggaacaacAgggugccgaa.....            | 1 |
| Gi3_27454719_x7....cguAggaacaacggggugccga.....            | 1 |
| Gi2_10537190_x7....uGguggaacaacggggugccg.....             | 1 |
| Gi2_10517597_x7.....guggaacaacggggugAcg.....              | 1 |



Gi3\_27410962\_x7.....gugggUacacggggugccg..... 1  
Gi2\_10519564\_x7.....cgugggaaGacggggugccgaacu..... 1  
Gi3\_27446382\_x7....gaucggGgacgucgugggaacac..... 1  
Gi2\_10499817\_x7.....cgAcgugggaaacacggggugccg..... 1  
Gi1\_3962309\_x7.....gacgucgugggaacacggggCgcccgaacu..... 1  
Gi1\_3958837\_x7..gcgaucggagacgucgugggaacacggggugcc..... 0  
Gi3\_27452395\_x7.....ugggaacacggAgugccga..... 1  
G1a\_5696324\_x7.....gugggCacacggggugccgaacu..... 1  
Gi1\_3969722\_x7.....cgugggaacacggggugccU..... 1  
Gi2\_10528748\_x7.....cgugggGacacggggugc..... 1  
Gi2\_10533872\_x7.....agGcgcgucgugggaacacggggugcc..... 1  
Gi3\_27439389\_x7.....cgugggaaUacggggugccga..... 1  
Gi3\_27383942\_x7.....cgucgugggaacacggggugccG..... 1  
Gi3\_27404305\_x7.....ggUgacgucgugggaacacggggugcc..... 1  
G1a\_5691830\_x7.....cggagacgucgugggaacacggggugcc..... 0  
Gi3\_27447005\_x7.....cgucgugggGacacggggugccga..... 1  
Gi1\_3963961\_x7.....ugggaacacggggUAccgaacu..... 1  
Gi3\_27392293\_x7.....gaacacggggUccgaacu..... 1  
Gi3\_27432018\_x7.....cgugggaacacggggUacc..... 1  
Gi3\_27446669\_x7.....gggaGcacggggugccga..... 1  
Gi2\_10530456\_x7....aucggagacgucgugggaacacggggG..... 1  
Gi1\_3959369\_x7.....gCgggaacacggggugcc..... 1  
Gi3\_27395611\_x7.....acgucgugggaaAacggggugccgaacu..... 1  
Gi3\_27387631\_x7.....acgucguAggaacacggggugccgaac..... 1  
Gi2\_10516491\_x7.....Agugggaacacggggugccgaac..... 1  
Gi3\_27378545\_x7.....acgucgugggaaacCcgggugccgaac..... 1  
Gi3\_27395688\_x7.....gugNgaacacggggugcc..... 1  
Gi2\_10528888\_x7.....ggaacacggggUccgaac..... 1  
Gi5\_8505230\_x7.....gaUcacggggugccgaac..... 1  
Gi2\_10514314\_x7.....agacgCcgugggaaacacggggugcc..... 1  
Gi5\_8523241\_x7....aGcggagacgucgugggaacacggggugc..... 1  
Gi2\_10509197\_x7.....gugggaacaAggggugcc..... 1  
Gi2\_10519298\_x7....aucggagacgucAugggaacacggggugcc..... 1  
Gi3\_27379175\_x7.....cgucgugggaaacacggCgugcc..... 1  
Gi3\_27384117\_x7.....ucguUggaacacggggugc..... 1  
Gi3\_27394890\_x7....gaucggagaUgucgugggaacacg..... 1  
Gi1\_3965795\_x7.....ggaacacgAggugccgaacu..... 1  
Gi2\_10499985\_x7.....cgugUgaacacggggugccgaa..... 1  
Gi5\_8510991\_x7.....gucgugggUacacggggugccgaacu..... 1  
Gi3\_27379910\_x7.....ugggaacacggggugcUg..... 1  
Gi3\_27424339\_x7.....Gcgugggaaacacggggugccga..... 1  
Gi2\_10524261\_x7.....gucgugggaaAacggggugc..... 1  
Gi3\_27445423\_x7....aucgAagacgucgugggaacacg..... 1  
Gi3\_27454999\_x7.....ggGacacggggugccgaa..... 1  
Gi3\_27408330\_x7.....cgugggaaacCcgggugccg..... 1  
Gi5\_8510921\_x7.....ucgugggUacacggggugccgaacu..... 1  
Gi3\_27457295\_x7.....gggaacacggAgugccgaa..... 1

Gi3\_27447761\_x7.uUcgauccgagacgucguggga..... 1  
Gi3\_27419271\_x7...Aaucggagacgucgugggaacac..... 1  
Gi1\_3971920\_x7.....cgucgugggaacacggggugccgaacu..... 0  
Gi3\_27451618\_x7.....cgugggaacacggggugccUaac..... 1  
Gi2\_10516995\_x7.....Gcggagacgucgugggaaca..... 1  
Gi2\_10511920\_x7...gaCcgagacgucgugggaacacggggu..... 1  
Gi3\_27394435\_x7.....cguAggaacacggggugcc..... 1  
Gi2\_10520698\_x7.....aacacggggugccgaaAu..... 1  
Gi5\_8522737\_x7.....gggaacacAgggugccgaac..... 1  
Gi2\_10534817\_x7.....cggagacgNcgugggaacacggggugc..... 1  
G1a\_5696730\_x7...aucggagacgucgGgggaacacggg..... 1  
G1a\_5681176\_x7.....gugggaacacggggugAcgaaacu..... 1  
Gi1\_3958928\_x7.....ugggaacacggggGgccaacu..... 1  
Gi3\_27379420\_x7...aucggagacgucgugggUacacggggu..... 1  
G1a\_5683395\_x7...aGcggagacgucgugggaacacggggugcc..... 1  
Gi3\_27452990\_x7.....gucgugggaCcacggggugccgaacu..... 1  
Gi1\_3972032\_x7.....gGcuggggaacacggggugccgaac..... 1  
Gi3\_27390235\_x7.....gugggaacacggggugccUa..... 1  
G1a\_5695729\_x7.....Agggaacacggggugccgaacu..... 1  
Gi1\_3966873\_x7.....acgucgugggaacacggggugccgaGcu..... 1  
Gi3\_27395023\_x7...gaucggagacgucgugggaacacggggugccgaacu..... 0  
Gi5\_8521099\_x7.....ugggaUcacggggugccgaacu..... 1  
Gi3\_27388583\_x7.....Agagacgucgugggaacacggggugcc..... 1  
Gi3\_27383914\_x7.....gGgacgucgugggaacacggggugccgaac..... 1  
Gi3\_27456301\_x7.....cgugggaacacggggUaccg..... 1  
G1a\_5683416\_x7...Gucggagacgucgugggaacacgggggu..... 1  
Gi3\_27390242\_x7.....gugggaacacCgggugccgaac..... 1  
Gi3\_27415645\_x7.....gacgucguNgggaacacggggugccgaacu..... 1  
Gi3\_27410451\_x7...gaucggagacgucgugggCacacg..... 1  
Gi5\_8509857\_x7.....Augggaacacggggugccgaacu..... 1  
Gi3\_27429540\_x7.....gacgucgugggGacacggggugccgaac..... 1  
Gi3\_27411970\_x7.....gCgaacacggggugccgaa..... 1  
Gi2\_10515707\_x7...gGucggagacgucgugggaacacggggug..... 1  
Gi4\_527852\_x7.....gugggaGcacggggugccgaacu..... 1  
Gi5\_8512720\_x7.....cgucgugggaacacggggugcUgaacu..... 1  
Gi1\_3973439\_x7.....gUaacacggggugccgaa..... 1  
Gi3\_27381765\_x7.....cgugggaacacggggugcUgaa..... 1  
Gi5\_8504845\_x7...aGcggagacgucgugggaacacgggggu..... 1  
Gi2\_10539374\_x7...aucggagacgucgugggCacac..... 1  
Gi1\_3973768\_x7.....Gcuggggaacacggggugc..... 1  
Gi3\_27426215\_x7.....cggagacgNcgugggaacacggg..... 1  
Gi3\_27394925\_x7...Cucggagacgucgugggaacacggg..... 1  
Gi3\_27396871\_x7.....cgucguggAaacacggggugccg..... 1  
Gi3\_27439466\_x7.....gucgugggaUcacggggugccgaacu..... 1  
Gi3\_27420391\_x7..Ucgauccgagacgucgugggaaca..... 1  
Gi2\_10502925\_x7.....ggagacgCcgugggaacacggggugcc..... 1  
Gi1\_3960083\_x7.....ucgugggaacacggggAgccaacu..... 1

Gi2\_10540431\_x7.....acgucgugggaacGcggggugccgaac..... 1  
 Gi2\_10519809\_x7...cUaucggagacgucgugggaaca..... 1  
 Gi2\_10529280\_x7.....Ugucgugggaacacggggugccg..... 1  
 Gi5\_8526223\_x7.....aacNcggggugccgaacu..... 1  
 Gi2\_10534250\_x7.ugcgauccgagacgucgugggaacacggggugc..... 0  
 Gi2\_10523722\_x7.....uAggaacacggggugccga..... 1  
 Gi2\_10520705\_x7.....Acgugggaacacggggugccgaac..... 1  
 Gi1\_3963737\_x7.....Cucgugggaacacggggugccgaacu..... 1  
 Gi2\_10499761\_x7.....gugggaaUacggggugccg..... 1  
 Gi5\_8503095\_x7.....cgucUugggaacacggggugccgaacu..... 1  
 Gi5\_8505076\_x7.....ugggaacacggggugccgGac..... 1  
 Gi2\_10502757\_x7.....ucgugggaacacggggGgccgaac..... 1  
 Gi3\_27393371\_x7....aucggagacgucguggCaacacggg..... 1  
 Gi2\_10527509\_x7.....cgugggCacacggggugcc..... 1  
 Gi3\_27440558\_x7....aucggagacgucgugggaacacggAg..... 1  
 Gi1\_3958683\_x7.....Ggugggaacacggggugccg..... 1  
 Gi2\_10500881\_x7.....Ugagacgucgugggaacacggggugccgaacu..... 1  
 Gi5\_8504530\_x7.....acgucgugggaacacggggguAccgaacu..... 1  
 Gi2\_10508931\_x7.....gucgugggaacacgggAugccgaacu..... 1  
 Gi2\_10512284\_x7.....cgucgugggaacacggggGgccgaac..... 1  
 Gi3\_27393399\_x7.....acgucgugAgaacacggggugccgaac..... 1  
 Gi5\_8505762\_x7.....Ugugggaacacggggugccgaac..... 1  
 Gi3\_27383137\_x7.....cggagacgucgugggaacacggggCgcc..... 1  
 Gi2\_10525885\_x7.....guUggaacacggggugccga..... 1  
 G1a\_5677165\_x7.ugcgauccgagacgucgugggaac..... 0  
 Gi3\_27390298\_x7....aucggagacgAcgugggaacacggg..... 1  
 Gi3\_27425781\_x7....aucggagacgucgugggaaUacggggg..... 1  
 Gi2\_10516351\_x7.....ucgugggaacacggggugUcgaac..... 1  
 Gi5\_8503242\_x7....gGucggagacgucgugggaacacgg..... 1  
 Gi3\_27437142\_x7.....cgucgugggaacacggggCgccgaa..... 1  
 Gi2\_10539549\_x7.....cgucgugAgaacacggggugccg..... 1  
 Gi2\_10502162\_x7.....ggUaacacggggugccgaa..... 1  
 Gi5\_8516402\_x7....aucAgagacgucgugggaacacgg..... 1  
 Gi5\_8519174\_x7.....aaNacggggugccgaacu..... 1  
 Gi1\_3971234\_x7.....cgugggaacacgggAugccga..... 1  
 Gi3\_27403864\_x7.....ugggaacacgCggugccgaacu..... 1  
 Gi3\_27384446\_x7.....cAucgugggaacacggggugccg..... 1  
 Gi3\_27436050\_x7....gaucggagacgucgCgggaacacggggg..... 1  
 Gi2\_10499880\_x7.....cgucgCgggaacacggggugcc..... 1  
 Gi4\_527439\_x7.....cUucgugggaacacggggugccga..... 1  
 Gi2\_10519718\_x7.....cgugggUacacggggugccgaac..... 1  
 Gi2\_10518577\_x7.....uUgugggaacacggggugccg..... 1  
 Gi2\_10527810\_x7.....Ngugggaacacggggugccgaacu..... 1  
 Gi2\_10538674\_x7.....gugggaacacggggugccAaa..... 1  
 Gi2\_10500685\_x7.....ggaacacggggugAcgaac..... 1  
 Gi5\_8505440\_x7.....aCacgucgugggaacacggggugccgaacu..... 1  
 Gi1\_3966390\_x7.....ucgugggaacacggggguAccgaac..... 1

Gi3\_27390368\_x7.....ggagacgucgugggaaAacggggu..... 1  
Gi2\_10533165\_x7.....cggagacgucgugggaacacggggugUc..... 1  
Gi2\_10517065\_x7.....gCagacgucgugggaacacggggugcc..... 1  
Gi2\_10532906\_x7.....acgucgugggaacacggggugcAgaacu..... 1  
Gi3\_27449665\_x7.....cgugggaacacggggGgcc..... 1  
Gi3\_27396402\_x7.....Ggacgucgugggaacacggggugcc..... 1  
Gi1\_3969442\_x7.....cgugggCacacggggugccgaacu..... 1  
Gi2\_10526879\_x7.....cgucgugggaacacggggugccgaUc..... 1  
Gi2\_10536518\_x7.....acgucgugggaacacAgggugcc..... 1  
Gi3\_27395065\_x7.....cgucgugggGacacggggugcc..... 1  
Gi1\_3971045\_x7.....gugggaacacggCgugccgaacu..... 1  
Gi2\_10538695\_x7.....ugggaacaNggggugccg..... 1  
Gi5\_8521645\_x7.....gucgugggaacacggggugccAaacu..... 1  
Gi2\_10526865\_x7.....uCggaacacggggugccg..... 1  
Gi3\_27428189\_x7.....cgugggaCcacggggugcc..... 1  
Gi3\_27416289\_x7.....gugggaGacggggugccgaac..... 1  
Gi5\_8527119\_x7.....gugggaacacggggugUcgaac..... 1  
Gi3\_27432858\_x7.....cgugggaacacggggugUcga..... 1  
Gi2\_10516505\_x7.....cgucAugggaacacggggugc..... 1  
Gi5\_8514267\_x7.....Ucucgugggaacacggggugccgaacu..... 1  
Gi2\_10522560\_x7.....cggagacgucgCgggaacacggggugcc..... 1  
Gi1\_3965543\_x7.....cgucAugggaacacggggugccgaacu..... 1  
G1a\_5687245\_x7.....gugNgaacacggggugccgaacu..... 1  
Gi2\_10506719\_x7.....ugggaacacggggugcGgaacu..... 1  
Gi1\_3970835\_x7.....Uucgugggaacacggggug..... 1  
Gi2\_10526949\_x7.....aucggagGcgucgugggaacacggggug..... 1  
Gi3\_27425354\_x7.....agacgucgCgggaacacggggugccgaac..... 1  
Gi3\_27387057\_x7.....agacgCcgugggaacacggggugccgaacu..... 1  
Gi2\_10516890\_x7.....gugggaacacggggUcccgaacu..... 1  
Gi3\_27449301\_x7.....cgucgugggaacacggggugccgC..... 1  
Gi2\_10530722\_x7.....aGgucgugggaacacggggugc..... 1  
Gi1\_3965662\_x7.....gggaacacggAgugccgaacu..... 1  
Gi3\_27455986\_x7.....acgGcgugggaacacggggugccgaacu..... 1  
Gi5\_8514470\_x7.....cgucgugggaaAacggggugccgaacu..... 1  
Gi2\_10500293\_x7.....aucggagacgucgugggUa..... 1  
Gi3\_27387834\_x7.....acguUgugggaacacggggugccgaacu..... 1  
Gi1\_3959327\_x7.....gugggaacacggggugccgaacG..... 1  
G1a\_5678460\_x7.....gugggaaAacggggugccgaacu..... 1  
Gi1\_3970450\_x7.....ucgugggaacacggggUaccgaacu..... 1  
Gi3\_27431612\_x7.....gggaacacAgggugccgaa..... 1  
Gi5\_8528533\_x7.....ggaacacggggUcccgaacu..... 1  
G1a\_5677319\_x7.....gugggaacacggggugccgaaUu..... 1  
Gi3\_27431955\_x7.....Nugggaacacggggugccgaac..... 1  
Gi2\_10534600\_x7.....gugggaacacggUgugccga..... 1  
Gi3\_27408351\_x7.....gacgucgugggaacacggggGgccgaac..... 1  
Gi3\_27413391\_x7.....cgucgugggaacacgggAugccgaacu..... 1  
Gi1\_3968847\_x7.....ggUgacgucgugggaacacggggugcc..... 1

|                      |                                       |   |
|----------------------|---------------------------------------|---|
| Gi5_8528022_x7.....  | ggaacacggggugUcgaacu.....             | 1 |
| Gi2_10520488_x7..... | ugggaacacggggugcUga.....              | 1 |
| Gi3_27429743_x7..... | aucggagacgucgugggUacacg.....          | 1 |
| Gi3_27449637_x7..... | aucggagacAucgugggaacacggggugcc.....   | 1 |
| Gi3_27442357_x7..... | ugggaacacggggguAccgaa.....            | 1 |
| Gi5_8518236_x7.....  | gucgugggaacacggggugccgaaAu.....       | 1 |
| Gi4_527103_x7.....   | cgugggaacacggggugccgaac.....          | 0 |
| Gi2_10507391_x7..... | aucggagacgucgugggaacacggggGg.....     | 1 |
| Gi1_3969421_x7.....  | ugggaGcacggggugccgaac.....            | 1 |
| Gi3_27384950_x7..... | cgucguAggaacacggggugc.....            | 1 |
| Gi1_3971794_x7.....  | cgucguggNaacacggggugcc.....           | 1 |
| Gi2_10505676_x7..... | cgugUgaacacggggugccga.....            | 1 |
| Gi1_3965207_x7.....  | uGgugggaacacggggugccgaac.....         | 1 |
| Gi3_27417584_x7..... | cgucgCgggaacacggggugccg.....          | 1 |
| Gi2_10518850_x7..... | agGcgucgugggaacacggggugc.....         | 1 |
| Gi2_10534992_x7..... | cgugggaacaGggggugccgaacu.....         | 1 |
| Gi3_27435511_x7..... | ggaaAacggggugccgaacu.....             | 1 |
| Gi3_27419117_x7..... | gugNgaacacggggugccgaa.....            | 1 |
| Gi3_27449630_x7..... | auUggagacgucgugggaacacggggugc.....    | 1 |
| Gi2_10506481_x7..... | aucAgagacgucgugggaacacggggugc.....    | 1 |
| Gi3_27383802_x7..... | gaucggagacgCcgugggaacacggg.....       | 1 |
| Gi5_8528575_x7.....  | ucgugggaaAacggggugccgaacu.....        | 1 |
| Gi3_27439403_x7..... | aAcggagacgucgugggaacacgggg.....       | 1 |
| Gi5_8515184_x7.....  | Ugagacgucgugggaacacggggugccgaacu..... | 1 |
| Gi3_27430149_x7..... | cguUggaacacggggugccgaac.....          | 1 |
| Gi3_27409380_x7..... | cGgagacgucgugggaacacggggugcc.....     | 1 |
| Gi5_8506329_x7.....  | ucgGgggaacacggggugccgaacu.....        | 1 |
| Gi2_10518164_x7..... | gggaaAacggggugccgaacu.....            | 1 |
| Gi2_10541061_x7..... | cUgagacgucgugggaaca.....              | 1 |
| Gi2_10539171_x7..... | cguggCaacacggggugccgaacu.....         | 1 |
| Gi2_10501546_x7..... | aucggagaUgucgugggaacacggggugc.....    | 1 |
| Gi3_27392188_x7..... | ucgGgggaacacggggugccgaac.....         | 1 |
| Gi2_10502323_x7..... | cgugggaacacAgggugcc.....              | 1 |
| Gi2_10538821_x7..... | gaacUcggggugccgaacu.....              | 1 |
| Gi3_27443911_x7..... | ugggaacacggggguAccga.....             | 1 |
| Gi3_27393728_x7..... | gGcgucgugggaacacggggg.....            | 1 |
| Gi2_10512683_x7..... | aucggUgacgucgugggaacacggggg.....      | 1 |
| Gi1_3970863_x7.....  | gugggaacacgUggugccgaacu.....          | 1 |
| Gi1_3960020_x7.....  | gGgacgucgugggaacacggggugcc.....       | 1 |
| Gi2_10521510_x7..... | gUucggagacgucgugggaacac.....          | 1 |
| Gi2_10536266_x7..... | gGcgucgugggaacacggggugccgaac.....     | 1 |
| Gi5_8521302_x7.....  | gaacacggggugccgaUc.....               | 1 |
| Gi3_27444079_x7..... | gucgugggaacacggggugccgaaUu.....       | 1 |
| G1a_5680959_x7.....  | gGucggagacgucguggga.....              | 1 |
| Gi3_27404816_x7..... | gCaacacggggugccgaa.....               | 1 |
| Gi1_3959026_x7.....  | ugggaacacgggCugccgaacu.....           | 1 |
| G1a_5698571_x7.....  | Gcggagacgucgugggaacacggg.....         | 1 |

|                                                             |   |
|-------------------------------------------------------------|---|
| Gi1_3964878_x7.....ucgugggaacacggggCgccgaac.....            | 1 |
| Gi5_8523521_x7.....aacacggggugAcgaacu.....                  | 1 |
| Gi2_10507020_x7.....Agugggaacacggggugcc.....                | 1 |
| Gi5_8515611_x7.....gacgucgugggaGcacggggugccgaacu.....       | 1 |
| Gi2_10533564_x7.....cgugUgaacacggggugc.....                 | 1 |
| Gi5_8518502_x7.....gugggaacacggggugccgaCc.....              | 1 |
| Gi1_3965557_x7.....gugggaacacggggugccgaUc.....              | 1 |
| Gi1_3972116_x7.....aUacgucgugggaacacggggugcc.....           | 1 |
| Gi2_10519774_x7.....ggGgacgucgugggaacacggggugccgaac.....    | 1 |
| Gi2_10533333_x7.....Ggacgucgugggaacacggggug.....            | 1 |
| Gi2_10499824_x7.....acgucgugggaacGcggggugccgaacu.....       | 1 |
| Gi5_8512349_x7.....gGgggaacacggggugccgaacuuu.....           | 1 |
| Gi1a_5701105_x7.....ucggagacgucgugggaacacggggugcc.....      | 0 |
| Gi2_10523435_x7.....aacaAggggugccgaacu.....                 | 1 |
| Gi3_27378468_x7.....ucggagacgucgugggaacacggggugccgaacu..... | 0 |
| Gi3_27425382_x7.....agacgucgugggaacacggggugAccgaac.....     | 1 |
| Gi5_8510760_x7.....acgucgugggaacacggggugccAaac.....         | 1 |
| Gi3_27454187_x7.....gggaacacggggugccAaa.....                | 1 |
| Gi2_10505228_x7.....aCcgagacgucgugggaaca.....               | 1 |
| Gi3_27399517_x7.....aucggagGcgucgugggaacac.....             | 1 |
| Gi5_8524011_x7.....aacacgggUugccgaacu.....                  | 1 |
| Gi2_10530890_x7.....gggaacUcggggugccgaacu.....              | 1 |
| Gi1_3958389_x7.....cCucgugggaacacggggugccgaacu.....         | 1 |
| Gi3_27449868_x7.....cgucgugggaacacggggugccAaac.....         | 1 |
| Gi2_10530610_x7.....gucgugggCacacggggugccgaacu.....         | 1 |
| Gi2_10502316_x7.....gggaacacggggugcUgaac.....               | 1 |
| Gi3_27404844_x7.....gugggaacacggggugCccgaac.....            | 1 |
| Gi3_27381086_x7.....agacgucgugggaGcacggg.....               | 1 |
| Gi3_27448783_x7.....aucggagacgucgugggaacacggggGgcc.....     | 1 |
| Gi2_10515490_x7.....gcgaucggGgacgucgugggaacacggggugc.....   | 1 |
| Gi3_27393378_x7.....cggagacgCcgugggaacacggggugcc.....       | 1 |
| Gi3_27405110_x7.....ugggaacacgUggugccga.....                | 1 |
| Gi1_3962764_x7.....ugggaacacgggAugccgaacu.....              | 1 |
| Gi5_8530598_x7.....uggCaacacggggugccgaacu.....              | 1 |
| Gi3_27400021_x7.....aucggagacgucUugggaacacg.....            | 1 |
| Gi3_27437604_x7.....ggaacacggggugccUaacu.....               | 1 |
| Gi3_27397697_x7.....aucAgagacgucgugggaacacggggugcc.....     | 1 |
| Gi3_27421420_x7.....ucggagacgucgugggaGcacggggg.....         | 1 |
| Gi3_27412271_x7.....cgucgugggaaAacggggugccgaacu.....        | 1 |
| Gi5_8524004_x7.....ugggaacacggggugccgaGc.....               | 1 |
| Gi2_10531296_x7.....gugAgaacacggggugccgaa.....              | 1 |
| Gi2_10539871_x7.....uggAaacacggggugccgaac.....              | 1 |
| Gi2_10510744_x7.uUcgauccgagacgucguggga.....                 | 1 |
| Gi3_27443484_x7.....gugggaacaAggggugccgaa.....              | 1 |
| Gi3_27441741_x7.....Ugugggaacacggggugccg.....               | 1 |
| Gi4_529119_x7.....Uugggaacacggggugccgaac.....               | 1 |
| Gi2_10511304_x7.....gucgugggaaUacggggugccgaacu.....         | 1 |

Gi2\_10537743\_x7.....aucggagacgCcgugggaacacg..... 1  
Gi2\_10517562\_x7.....gUagacgucgugggaacacggggu..... 1  
Gi3\_27407357\_x7.....gggaCcacggggugccgaac..... 1  
Gi4\_526830\_x7.....Augggaacacggggugccgaacu..... 1  
Gi3\_27409590\_x7.....cgugggaacacggAgugccgaa..... 1  
Gi5\_8513462\_x7.....gggaacacggggGgccgaac..... 1  
Gi5\_8515023\_x7.....cgucAugggaacacggggugccgaacu..... 1  
Gi3\_27386770\_x7.....ucggGgacgucgugggaacac..... 1  
Gi3\_27395513\_x7.....cggagacgucgCgggaacacggggugcc..... 1  
Gi2\_10514041\_x7.....cgugggaacacgUggugc..... 1  
G1a\_5691361\_x7..Ucgaucggagacgucgug..... 1  
Gi2\_10499796\_x7.....cgAcgugggaacacggggugccga..... 1  
Gi3\_27425578\_x7.....aucggagacgAcgugggaacacgg..... 1  
G1a\_5695925\_x7.....gugggaacNcggggugcc..... 1  
Gi2\_10519914\_x7.....gucgugggaGcacggggugccgaac..... 1  
Gi2\_10537918\_x7.....cgugggaacacggggugccUaacu..... 1  
G1a\_5678145\_x7.....gggaacGcggggugccgaacu..... 1  
Gi5\_8521442\_x7.....agGcgucgugggaacacggggugccgaacu..... 1  
Gi3\_27390291\_x7.....gacgucgugggaacacAgggugccgaacu..... 1  
Gi3\_27441475\_x7.....cgucgugggaacacgggAugcc..... 1  
Gi5\_8549215\_x6.....acgucgugggaacacggggugccgaaAu..... 1  
Gi2\_10577987\_x6.....ugggaacacggAgugccga..... 1  
G1a\_5722708\_x6.....ugggaacacgAggugccgaacu..... 1  
Gi3\_27543226\_x6.....cgugggaacacgUggugccg..... 1  
Gi5\_8534191\_x6.....aucggagacgucgugggaGcacgg..... 1  
Gi1\_3987793\_x6.....aucggagacgucgugggaacacgggU..... 1  
Gi5\_8534755\_x6.....gAaacacggggugccgaac..... 1  
Gi1\_3976885\_x6.....gaacCcggggugccgaacu..... 1  
Gi3\_27487378\_x6.....acgucgugggaacacggggugUcgaacu..... 1  
Gi3\_27502330\_x6.....agacgucguAggaacacggggugccgaac..... 1  
Gi3\_27527578\_x6.....ucgugggaacacggggugccA..... 1  
Gi5\_8550385\_x6.....gggaacacggggugccgUacu..... 1  
Gi3\_27521188\_x6.....agacgucgNgggaacacggggugcc..... 1  
Gi3\_27477928\_x6.....cgugggaacacggggugGcgaac..... 1  
Gi4\_530199\_x6.....ugggaacacggggugccgCacu..... 1  
Gi5\_8532733\_x6.....ugggaacacggggCgccgaa..... 1  
Gi2\_10554539\_x6.....Cucgugggaacacggggugccgaac..... 1  
Gi3\_27544960\_x6.....cgucgugggaacacggggugccgaCc..... 1  
Gi2\_10589231\_x6.....gacgucgugggaacacggggGgcc..... 1  
Gi1\_3988375\_x6.....ugggaacacggggugcGgaacu..... 1  
Gi2\_10573655\_x6.....cgugggaacacggAgugcc..... 1  
Gi2\_10570403\_x6.....agacgucgugggaacacggggCgccgaacu..... 1  
Gi5\_8562625\_x6.....cgugUgaacacggggugccgaac..... 1  
Gi3\_27494404\_x6.....ggaCcacggggugccgaac..... 1  
Gi3\_27531334\_x6.....ucgugggaacacgAggugccgaac..... 1  
Gi5\_8549365\_x6.....aGcggagacgucgugggaacacgggg..... 1  
Gi2\_10569881\_x6.....cgugggaCcacggggugcc..... 1

Gi2\_10563743\_x6...gaucUgagacgucgugggaacacggggu..... 1  
Gi3\_27459772\_x6...aucggagacAucgugggaacacggg..... 1  
Gi3\_27496444\_x6...gaucUgagacgucgugggaacacggg..... 1  
Gi3\_27493588\_x6...aucggagacgucgugggG..... 1  
Gi2\_10585547\_x6...agacgucgugggaacacggggugAc..... 1  
Gi1\_3975655\_x6...aucggGgacgucgugggaaca..... 1  
Gi2\_10559723\_x6...ggagacgucguAggaacacggggugcc..... 1  
Gi3\_27466534\_x6...Ugucgugggaacacggggugccga..... 1  
Gi2\_10576025\_x6...aucggagacAucgugggaacac..... 1  
G1a\_5704018\_x6...ggGacacggggugccgaacu..... 1  
Gi5\_8538421\_x6...ugggaaUacggggugccgaac..... 1  
Gi3\_27548320\_x6...ggaacaAggggugccgaac..... 1  
Gi2\_10566401\_x6...cgucgugggaacacggggCgc..... 1  
Gi5\_8547301\_x6...acgucgugggaacacgAggugccgaacu..... 1  
Gi3\_27477304\_x6...aucggagacgucgugggUacacggggugcc..... 1  
Gi1\_3986305\_x6...gugggaacacggggGgccgaacu..... 1  
Gi3\_27481024\_x6...ggaacacgggCugccgaacu..... 1  
Gi4\_533289\_x6...ugggaacacggggugccgaacA..... 1  
Gi3\_27481510\_x6...ggCacacggggugccgaacu..... 1  
Gi3\_27499300\_x6...aAcggagacgucgugggaacacggggugcc..... 1  
Gi5\_8542339\_x6...agacgAcgugggaacacggggugcc..... 1  
Gi5\_8553313\_x6...gugggaacCggggugccgaa..... 1  
G1a\_5711182\_x6...gaucggagacgucgugggaacacgggAugcc..... 1  
Gi3\_27499600\_x6...gucguggAaacacggggugccgaac..... 1  
Gi3\_27520438\_x6...aucggagacgucgugAgaacac..... 1  
Gi5\_8548825\_x6...gggaacacCgggugccgaacu..... 1  
Gi2\_10581263\_x6...ucgugggaacacggggCgccg..... 1  
Gi1\_3991477\_x6...ucgugggUacacggggugccgaacu..... 1  
Gi5\_8559457\_x6...cgucgugggaacacgggAugccgaacu..... 1  
Gi2\_10561979\_x6...Gggagacgucgugggaacacggggu..... 1  
Gi2\_10572743\_x6...gugggaacacggAgugccga..... 1  
Gi5\_8548369\_x6...cgugggaacacUgggugccgaacu..... 1  
Gi2\_10553333\_x6...ggUgacgucgugggaacacggggug..... 1  
Gi3\_27542920\_x6...gaucggagNcgucgugggaacacg..... 1  
Gi5\_8550493\_x6...Aacgucgugggaacacggggugccgaacu..... 1  
Gi2\_10568813\_x6...aucggaAacgucgugggaaca..... 1  
Gi3\_27535420\_x6...cggGgacgucgugggaacacggggugcc..... 1  
Gi3\_27526510\_x6...gGcgugggaacacggggugccg..... 1  
Gi5\_8547415\_x6...acgucgugggaacacggAgugccgaacu..... 1  
Gi3\_27528220\_x6...ggagacgucgugggaGcacggggu..... 1  
G1a\_5707444\_x6...Cggaacacggggugccgaa..... 1  
Gi3\_27511516\_x6...gaGcggagacgucgugggaacacggg..... 1  
Gi3\_27507490\_x6...aucggagUcgucgugggaacacg..... 1  
Gi3\_27487342\_x6...aucggagacgucgugggaacacgC..... 1  
Gi2\_10582583\_x6...gaacCggggugccgaacu..... 1  
Gi3\_27471448\_x6...gaucggagacgucgugggGacac..... 1  
Gi3\_27527092\_x6...aucggUgacgucgugggaacacg..... 1



|                                                         |   |
|---------------------------------------------------------|---|
| Gi3_27485512_x6.....ucgugggaacacggggCgc.....            | 1 |
| Gi3_27546226_x6...gaucggagacgucgugggCacacgg.....        | 1 |
| Gi2_10567985_x6...gaucggagacgucAugggaacacggg.....       | 1 |
| Gi3_27460522_x6...aucggagacgucguggggaacacAggg.....      | 1 |
| Gi3_27462742_x6...gaucggagacgucgugggGcacgggg.....       | 1 |
| Gi2_10579841_x6...aucAgagacgucguggggaacac.....          | 1 |
| Gi3_27493072_x6.....Agagacgucguggggaacacggggg.....      | 1 |
| Gi3_27518074_x6.....acgucgGgggaacacggggugccgaacu.....   | 1 |
| Gi3_27486640_x6.....ucgugggaacacggggugUcgaac.....       | 1 |
| Gi1_3991435_x6.....ucgugggaacacggUgugccgaacu.....       | 1 |
| Gi2_10588295_x6.....gucgugggNacacggggugccga.....        | 1 |
| Gi1_3974401_x6.....gacgCcguggggaacacggggugccgaac.....   | 1 |
| Gi3_27542440_x6...aucggagacgucgGggaacacgg.....          | 1 |
| Gi3_27506260_x6.....cgucgGgggaacacggggugccgaacu.....    | 1 |
| Gl1_5727166_x6..cgaucggagacgucguggggaacacggggugcc.....  | 0 |
| Gi3_27461278_x6.....gugNgaacacggggugccga.....           | 1 |
| Gi3_27517396_x6...gaucggagacgucguggggaacGcggg.....      | 1 |
| Gi2_10569377_x6.....cgucgugggaaAacggggugccgaacu.....    | 1 |
| Gi2_10590413_x6.....cgucguggggaacacggggGgccga.....      | 1 |
| Gi2_10561121_x6.....ugggaacacggggugcAga.....            | 1 |
| Gl1_5707936_x6.....agacgucguggggaacacggggugccgaacu..... | 0 |
| Gi2_10579637_x6.....gaUcacggggugccgaac.....             | 1 |
| Gi3_27478432_x6...gaucggagacgucguggggaacCcg.....        | 1 |
| Gi3_27473710_x6.....Ggacgucguggggaacacggg.....          | 1 |
| Gi3_27542158_x6.....uGggagacgucguggggaacacgggg.....     | 1 |
| Gi3_27538636_x6.....cguggggaacacggggugcA.....           | 1 |
| Gi2_10576529_x6...aucggagacgucguggggaacGcggg.....       | 1 |
| Gl1_5722474_x6.....guggggaacacgggAugccgaacu.....        | 1 |
| Gi2_10558073_x6.....guggggaacacggggugcAga.....          | 1 |
| Gi1_3974473_x6.....gugNgaacacggggugccgaacu.....         | 1 |
| Gi3_27499330_x6.....cgucguggggaCcacggggugccg.....       | 1 |
| Gi3_27542104_x6.....cguggggaacacggggGgccga.....         | 1 |
| Gi3_27493522_x6...agUcgucguggggaacacggggugcc.....       | 1 |
| Gi2_10549661_x6.....aacacggggugccgaacG.....             | 1 |
| Gi3_27479794_x6.....cgugggCacacggggugc.....             | 1 |
| Gi3_27498754_x6...agGcgucguggggaacacggggugccgaac.....   | 1 |
| Gi2_10576883_x6.....Ucgucguggggaacacggggugccgaacu.....  | 1 |
| Gi2_10566743_x6.....ggagGcgucguggggaacacggggugc.....    | 1 |
| Gi3_27465472_x6...aucggagCcgucguggggaacacggggugcc.....  | 1 |
| Gi2_10558253_x6...gaucggagacgCcguggggaacac.....         | 1 |
| Gi2_10570781_x6.....ucUggggaacacggggugccgaac.....       | 1 |
| Gi2_10560017_x6.....ucgugggaacacggggugccAaac.....       | 1 |
| Gi2_10541927_x6.....ucguAggaacacggggugccgaac.....       | 1 |
| Gi2_10550303_x6...gGucggagacgucguggggaacacggggugc.....  | 1 |
| Gi2_10546451_x6.....cAucguggggaacacggggugcc.....        | 1 |
| Gi3_27490438_x6.....ugggaacacggggAgccga.....            | 1 |
| Gi2_10574801_x6...Gucggagacgucgugggga.....              | 1 |

Gi2\_10586807\_x6.....gucgugggaacacggggCgccgaac..... 1  
Gi2\_10565039\_x6.....aacUcggggugccgaacu..... 1  
Gi2\_10575371\_x6.....gacgucgugggaacacggggugccgCacu..... 1  
Gi5\_8552347\_x6.....cguAggaacacggggugccgaac..... 1  
Gi2\_10582385\_x6.....Ggggaacacggggugccgaacu..... 1  
Gi1\_3989227\_x6.....gUagacgucgugggaacacggggugccgaacu..... 1  
Gi2\_10572653\_x6.....cgugggaacCggggugcc..... 1  
Gi5\_8557087\_x6.....ggaGcacggggugccgaac..... 1  
Gi2\_10579931\_x6.....aucggagacgucgugggaacCc..... 1  
Gi3\_27473122\_x6.....aucggagacgucgCgggaacacgggg..... 1  
Gi5\_8539555\_x6.....ggaacacggggGgccgaac..... 1  
Gi2\_10564283\_x6.....gaacacggggugccgaGc..... 1  
Gi2\_10578701\_x6.....Agucgugggaacacggggugccgaacu..... 1  
Gi4\_529941\_x6.....gugggaacNcggggugccgaacu..... 1  
Gi5\_8538787\_x6.....aUacgucgugggaacacggggugc..... 1  
Gi5\_8553199\_x6.....cgucgugggaacacggggGgc..... 1  
Gi3\_27458458\_x6.....aucAgagacgucgugggaacac..... 1  
Gi2\_10585091\_x6.....Ggacgucgugggaacacggggugccg..... 1  
Gi2\_10588511\_x6.....aGcggagacgucgugggaacacgg..... 1  
Gi3\_27491578\_x6.....ucgugggaNcacggggugccgaa..... 1  
Gi3\_27527860\_x6.....ggaacacgCggugccgaacu..... 1  
Gi1\_3992575\_x6.....Cgaacacggggugccgaac..... 1  
Gi5\_8554033\_x6.....Ggucgugggaacacggggugccgaac..... 1  
Gi2\_10580081\_x6.....gucgugggaacacggggugcAgaacu..... 1  
Gi3\_27510364\_x6.....cgucgugggaacacggggG..... 1  
Gi5\_8545657\_x6.....ucgugggaacacggggugccgUacu..... 1  
Gi1\_3984439\_x6.....ucguggAaacacggggugccgaacu..... 1  
Gi5\_8551723\_x6.....gugggaacacggggugccgaaGu..... 1  
Gi1\_3988213\_x6.....Ggugggaacacggggugccgaac..... 1  
Gi1\_3985315\_x6.....gaacUcggggugccgaacu..... 1  
Gi5\_8531173\_x6.....gugggaacacggAgugccgaac..... 1  
Gi3\_27480340\_x6.....cguggCaacacggggugccgaac..... 1  
Gi3\_27530728\_x6.....uAgugggaacacggggugccgaacu..... 1  
Gi2\_10559363\_x6.....gaucggagacgucgugggaGcacgggg..... 1  
Gi3\_27471124\_x6.....aucggagacgucguAggaacacggggugcc..... 1  
Gi5\_8543407\_x6.....gAgggaacacggggugccgaa..... 1  
Gi2\_10580135\_x6.....cggagacgucgugggaacacggggAgcc..... 1  
Gi3\_27471334\_x6.....gggaacacgUggugccgaac..... 1  
Gi3\_27493138\_x6.....Ccgagacgucgugggaacacggg..... 1  
Gi3\_27487762\_x6.....gaucggagacgucgugggaAacgggg..... 1  
Gi2\_10556561\_x6.....ugggaGcacggggugccg..... 1  
Gi2\_10564181\_x6.....cgucgCgggaacacggggugccg..... 1  
Gi2\_10567565\_x6.....ugggaGcacggggugccgaa..... 1  
Gi5\_8558239\_x6.....aucggagacgucgugggaCcacg..... 1  
Gi2\_10559513\_x6.....aucggagacgucgugggaacacggggAcc..... 1  
Gi5\_8537095\_x6.....aUacgucgugggaacacggggugcc..... 1  
Gla\_5712406\_x6.....ugggaacacggggugccgGacu..... 1

Gi3\_27542656\_x6.....ucggagacgucgugggaacCcg..... 1  
Gi1\_3980623\_x6.....cgugggaacacgAggugccgaacu..... 1  
Gi3\_27535750\_x6.....ugggaacacggggugUcg..... 1  
Gi5\_8546353\_x6.....Caacacggggugccgaac..... 1  
Gi1\_3979669\_x6.....gucgugggaacacAgggugccgaacu..... 1  
Gi3\_27512296\_x6.....cAugggaacacggggugccg..... 1  
Gi5\_8541655\_x6.....gugggaacacggggugccgaaA..... 1  
Gi2\_10575983\_x6.....ugggaacacggggugcUGaac..... 1  
Gi1\_3990775\_x6.....ucgugggaGcacggggugccgaac..... 1  
Gi3\_27507244\_x6.....Aaucggagacgucgugggaacacg..... 1  
Gi2\_10576733\_x6.....cggagacgucgugggaacacggggguAcc..... 1  
Gi3\_27477076\_x6.....Agucgugggaacacggggugcc..... 1  
Gi5\_8550733\_x6.....cUugggaacacggggugccgaacu..... 1  
Gi2\_10568429\_x6.....agGcgucgugggaacacggggugccgaacu..... 1  
Gi3\_27527416\_x6.....ucguggAaacacggggugccgaac..... 1  
Gi3\_27499444\_x6.....agacgucgCgggaacacggggugccgaacu..... 1  
Gi2\_10584671\_x6.....ggaacacggggugAcgaacu..... 1  
Gi2\_10571615\_x6.....ucguCggaacacggggugccgaacu..... 1  
Gi3\_27524794\_x6.....cUgagacgucgugggaacacggggug..... 1  
Gi3\_27496828\_x6.....ugggaacacgggAugccga..... 1  
Gi2\_10575809\_x6.....gaucggagGcgucgugggaacacggg..... 1  
G1a\_5708002\_x6.....aaUacggggugccgaacu..... 1  
Gi2\_10570871\_x6.....Aaucggagacgucgugggaacacggggugc..... 1  
Gi1\_3976327\_x6.....ggaaGacggggugccgaacu..... 1  
G1a\_5731456\_x6.....gugggaacacggggugccgaGc..... 1  
Gi2\_10578527\_x6.....Uucggagacgucgugggaacacggggugc..... 1  
Gi5\_8535733\_x6.....Gucggagacgucgugggaacacggg..... 1  
Gi2\_10552091\_x6.....gaucggagNcgucgugggaaca..... 1  
Gi3\_27510220\_x6.....aucggagacgucgugggaaAacgg..... 1  
Gi2\_10565819\_x6.....ugggaacaUggggugccgaac..... 1  
Gi2\_10579721\_x6.....cgucgugggaacacggggAgccgaacu..... 1  
Gi1\_3983515\_x6.....ggaacGcggggugccgaac..... 1  
Gi5\_8532787\_x6.....acgucgugggaacaUggggugccgaacu..... 1  
Gi3\_27487468\_x6.....aacacgCggugccgaacu..... 1  
Gi3\_27487738\_x6.....ugggaacacgggCugccgaac..... 1  
Gi5\_8546407\_x6.....cgugggaacacggggugccgaaGu..... 1  
Gi2\_10545911\_x6.....ugggGacacggggugccgaa..... 1  
Gi5\_8547457\_x6cugcgauccgagacgucgugggaacacgggg..... 0  
Gi3\_27500578\_x6.....ugggaacCcgggugccga..... 1  
Gi2\_10563983\_x6.....aucggagacgucgCgggaacac..... 1  
Gi3\_27494734\_x6.....gGcgugggaacacgggg..... 1  
Gi3\_27493432\_x6.....gacguUgugggaacacggggugccgaacu..... 1  
Gi3\_27498388\_x6.....gUagacgucgugggaacacgggg..... 1  
Gi2\_10579025\_x6.....aucggagacgucguggGac..... 1  
Gi2\_10564235\_x6.....aAcggagacgucgugggaacacggg..... 1  
Gi2\_10561175\_x6.....aacacggggugccgaaGu..... 1  
Gi5\_8560801\_x6.....Gcgucgugggaacacggggugccgaac..... 1

|                                                         |   |
|---------------------------------------------------------|---|
| Gi5_8552209_x6.....Gucggagacgucgugggaacacgggg.....      | 1 |
| Gi2_10564613_x6.....Gcggagacgucgugggaacacggggu.....     | 1 |
| Gi2_10569095_x6.....gucgugggGacacggggugcc.....          | 1 |
| Gi5_8558005_x6.....gucgugggaacacggAgugccgaacu.....      | 1 |
| Gi4_531369_x6.....cgugggaacacggggugccgaaAu.....         | 1 |
| Gi2_10570421_x6.....guggAaacacggggugccgaa.....          | 1 |
| Gi3_27462334_x6.....cgAcgugggaacacggggugc.....          | 1 |
| Gi5_8552443_x6.....gugggaacacggggGgccgaa.....           | 1 |
| Gi2_10554305_x6.....Uagacgucgugggaacacggggugccgaac..... | 1 |
| Gi3_27467758_x6.....gucgugggaacCcggggugccga.....        | 1 |
| Gi3_27484510_x6.....gugggaacacggggugccCa.....           | 1 |
| Gi2_10563761_x6.....cgucgugggaacGcggggugccga.....       | 1 |
| Gi2_10561811_x6.....aucggagacgucgCgggaacacggggugcc..... | 1 |
| Gi5_8548681_x6.....cgugggaacacggggugccgaa.....          | 0 |
| Gi2_10545173_x6.....cAucgugggaacacggggugccg.....        | 1 |
| Gi3_27523498_x6.....gacgucgugggaGcacggggu.....          | 1 |
| Gi2_10582967_x6.....ggagacgucgugggaacacAgggugcc.....    | 1 |
| Gi3_27497632_x6.....gUucggagacgucgugggaacacg.....       | 1 |
| Gi2_10557551_x6.....gucgugggaacacggggguAccgaacu.....    | 1 |
| Gi5_8534389_x6.....Uagacgucgugggaacacggggugccgaac.....  | 1 |
| Gi2_10579325_x6.....gggaacacggggguAccgaac.....          | 1 |
| Gl1_5724346_x6.....aucggagacgucgugggaacCcggg.....       | 1 |
| Gi1_3977089_x6.....acgucgugggaacCcggggugccgaacu.....    | 1 |
| Gi3_27544822_x6.....aucggagacgucgugggaacacgAggu.....    | 1 |
| Gi5_8537767_x6.....cgCgggaacacggggugccgaac.....         | 1 |
| Gi2_10583591_x6.....Aacgucgugggaacacggggugccgaacu.....  | 1 |
| Gi2_10567859_x6.....Aaucggagacgucguggga.....            | 1 |
| Gi2_10564715_x6.....aucGUagacgucgugggaaca.....          | 1 |
| Gi5_8541745_x6.....cgugAgaacacggggugccgaac.....         | 1 |
| Gi2_10583351_x6.....gucgugggaacacgAggugccgaacu.....     | 1 |
| Gi5_8556115_x6.....gaacacgUggugccgaacu.....             | 1 |
| Gi2_10546925_x6.....gGcucgugggaacacggggugccg.....       | 1 |
| Gi2_10546391_x6.....gugggaacaAggggugccgaac.....         | 1 |
| Gi2_10580105_x6.....Caucggagacgucgugggaacac.....        | 1 |
| Gi2_10547999_x6.....gaucggagacgCcgugggaacacggggu.....   | 1 |
| Gi3_27540184_x6.....cgugAgaacacggggugccga.....          | 1 |
| Gi2_10571057_x6.....gugggaacacggggugUcg.....            | 1 |
| Gi2_10541627_x6.....gggNacacggggugccgaacu.....          | 1 |
| Gi2_10576919_x6.....gugUgaacacggggugccgaac.....         | 1 |
| Gi2_10543289_x6.....gggaUcacggggugccgaacu.....          | 1 |
| Gl1_5719312_x6.....cgugggaaNacggggugcc.....             | 1 |
| Gi3_27496432_x6.....gaucggagacgucAugggaacacggggu.....   | 1 |
| Gl1_5723032_x6.....gugggaacacgUggugccgaacu.....         | 1 |
| Gi2_10553915_x6.....cgucgugggaGcacggggugccga.....       | 1 |
| Gi3_27497932_x6.....aucggagacgucgugggaUacgg.....        | 1 |
| Gl1_5727262_x6.uUcgaucggagacgucgug.....                 | 1 |
| Gi3_27522604_x6.....ugggaacacUgggugccgaac.....          | 1 |

Gi1\_3992929\_x6.....gucgugggGacacggggugccgaacu..... 1  
Gi2\_10571087\_x6.....gugggaacacggggugcAg..... 1  
Gi2\_10562627\_x6.....uGggagacgucgugggaaca..... 1  
Gi3\_27544666\_x6.....gaucggGgacgucgugggaacacggggg..... 1  
Gi2\_10584983\_x6.....Gcgugggaacacggggugccgaa..... 1  
Gi2\_10571309\_x6.....gaucggagGcgucgugggaacacggggg..... 1  
Gi5\_8556715\_x6.....gaacacgggggUcccgaacu..... 1  
Gi1\_3977047\_x6.....ggaacacggggugccgaacAu..... 1  
Gi2\_10567139\_x6.....gugAgaacacggggugccga..... 1  
Gi5\_8560105\_x6.....ggaacGcggggugccgaac..... 1  
Gi5\_8532505\_x6.....guCggaacacggggugccgaacu..... 1  
Gi5\_8533471\_x6.....gggaacacUgggugccgaacu..... 1  
Gi2\_10571207\_x6.....agacUucgugggaacacggggugcc..... 1  
Gi2\_10584323\_x6.....gaucggagNcgucgugggaacacggg..... 1  
Gi5\_8561431\_x6.....acguUgugggaacacggggugccgaacu..... 1  
Gi1\_3989461\_x6.....acgucgugggaacacAgggugccgaacu..... 1  
Gi3\_27475672\_x6.....agacgucgNgggaacacggggugccgaac..... 1  
Gi3\_27517918\_x6.....gacgucgCgggaacacggggugccgaacu..... 1  
Gi1\_3981103\_x6.....cgugggaacacggggugccgaaAu..... 1  
Gi3\_27504250\_x6.....ugggaacCcggggugccg..... 1  
Gi2\_10571339\_x6.....aucggGgacgucgugggaacacggggugccga..... 1  
Gi3\_27470710\_x6.....agacgucgugggaacGcggggugccgaac..... 1  
Gi2\_10578095\_x6.....cUaucggagacgucgugggaacacggggug..... 1  
Gi1\_3980233\_x6.....ggGacacggggugccgaac..... 1  
Gi5\_8540611\_x6.....cUgagacgucgugggaacacgg..... 1  
Gi5\_8555041\_x6.....gugggaacGcggggugccga..... 1  
G1a\_5727964\_x6.....aacacggggugccgaGcu..... 1  
Gi2\_10544357\_x6.....gaucggagacgucgugggaGcac..... 1  
G1a\_5713036\_x6.....gugggaacacggggugGcgaacu..... 1  
Gi5\_8558023\_x6.....agacgucgugggaGcacggggugccgaacu..... 1  
Gi2\_10572647\_x6.Ggcgaucggagacgucgugggaaca..... 1  
Gi2\_10582457\_x6.....gaucggagacgucgugggCacacggggugc..... 1  
Gi3\_27540322\_x6.....ucgugggaacacggggGgc..... 1  
Gi5\_8553649\_x6.....acgucgugNgaacacggggugccgaac..... 1  
Gi3\_27534934\_x6.....cgucgugggaacCcggggugccgaac..... 1  
Gi5\_8550457\_x6.....aucggagacgucgugggaacacggggC..... 1  
Gi5\_8533993\_x6.....acgucgugggaacacggggugccgaaUu..... 1  
Gi2\_10563215\_x6.....ugggaacacggggGgccga..... 1  
Gi2\_10550141\_x6.....cUaucggagacgucgugggaacacggggugc..... 1  
Gi2\_10555181\_x6.....ggaacacggggugccgaacG..... 1  
G1a\_5717860\_x6.....cguggAaacacggggugccgaacu..... 1  
Gi3\_27514318\_x6.....guUgugggaacacggggugccga..... 1  
Gi3\_27459520\_x6.....Ggaucggagacgucgugggaacacg..... 1  
Gi2\_10545527\_x6.....aucggagacgucgugggGacacggggug..... 1  
Gi1\_3986707\_x6.....ucgugggaacacggggugccgCac..... 1  
Gi3\_27503422\_x6.....aacacggggugGcgaacu..... 1  
Gi5\_8562745\_x6.....uGggagacgucgugggaacacg..... 1

Gi2\_10556903\_x6.....gggaacacNggggugccgaa..... 1  
Gi2\_10554503\_x6.....ugggaacacggggugUcga..... 1  
Gi5\_8546665\_x6.....Augggaacacggggugccg..... 1  
Gi5\_8545693\_x6.....Cugggaacacggggugccgaa..... 1  
Gi2\_10580999\_x6.....acgucgugggaacacggggugccgGacu..... 1  
Gi5\_8554939\_x6.....gAcgugggaacacggggugccgaaacu..... 1  
Gi2\_10561931\_x6.....aucggagacgucgugggaacCcggggugcc..... 1  
Gi2\_10559639\_x6.....acgucgugggaacCcggggugcc..... 1  
Gi3\_27485446\_x6.....cguAggaacacggggugccg..... 1  
G1a\_5711662\_x6.....ugggaacCcggggugccgaaacu..... 1  
Gi2\_10561415\_x6.....gacgucgugggaGcacggggugcc..... 1  
Gi3\_27491392\_x6.....ugggaacaAggggugccgaaac..... 1  
Gi2\_10552991\_x6.....cgucgugggaCcacggggugccgaaacu..... 1  
Gi3\_27511954\_x6.....ugggUacacggggugccgaa..... 1  
Gi3\_27529570\_x6.....cgucgugAgaacacggggugcc..... 1  
Gi1\_3977773\_x6.....gggaacacggggugccgaaAu..... 1  
Gi2\_10557239\_x6.....ucgugggaaAacggggugccgaaacu..... 1  
Gi5\_8535871\_x6.....gugggaacacCgggugccgaaacu..... 1  
Gi5\_8547823\_x6.....gugggaacacggggguAccgaaac..... 1  
G1a\_5706094\_x6.....ugggaacacgggUugccgaaacu..... 1  
Gi3\_27517822\_x6.....ucgugggaacacUgggugccgaaac..... 1  
Gi3\_27548944\_x6.....ugggaacacgggUugccg..... 1  
Gi3\_27471202\_x6.....cgucgugggUacacggggugccgaaac..... 1  
Gi1\_3981397\_x6.....Ugucgugggaacacggggugccgaaacu..... 1  
Gi2\_10573589\_x6.....aGcggagacgucgugggaacacgggg..... 1  
Gi5\_8551477\_x6.....gaacacggCgugccgaaacu..... 1  
Gi1\_3974755\_x6.....cUgagacgucgugggaacacggg..... 1  
Gi4\_530301\_x6.....aucggagacgucgugggaacacggg..... 0  
Gi3\_27490324\_x6.....Aucgugggaacacggggugcc..... 1  
Gi2\_10564637\_x6.....ugggaaUacggggugccgaaac..... 1  
Gi2\_10568093\_x6.....cgucgCgggaacacggggugc..... 1  
Gi2\_10562999\_x6.....cgucgugggaacacggAgugccg..... 1  
Gi3\_27537508\_x6.....cgugggaacacgggAugccga..... 1  
G1a\_5721892\_x6.....cgugggaacacggggugUcgaacu..... 1  
Gi1\_3977677\_x6.....ugggaacacAgggugccgaaacu..... 1  
Gi2\_10561379\_x6.....cguCggaacacggggugccgaaacu..... 1  
Gi2\_10574519\_x6.....gucgugggaacCcggggugcc..... 1  
Gi3\_27465184\_x6.....aAacgucgugggaacacggggugccgaaacu..... 1  
Gi3\_27466288\_x6.....gggaaGacggggugccgaaacu..... 1  
Gi5\_8540473\_x6.ugcgaucgNagacgucgug..... 1  
Gi3\_27520012\_x6.....gggaacacggggguAccgaa..... 1  
Gi2\_10574543\_x6.....gugggaacaUggggugccgaa..... 1  
Gi2\_10551251\_x6.....gaucggagacgucgugggaacaA..... 1  
Gi3\_27500524\_x6.....ugggaacacggggguCccgaaacu..... 1  
Gi3\_27538000\_x6.....aucggagacgucgugggaacaUgg..... 1  
Gi1\_3991903\_x6.....Gucggagacgucgugggaacacgggggu..... 1  
Gi2\_10551683\_x6.....cgucgugggGacacggggugcc..... 1

Gi3\_27495946\_x6.....ugggUacacggggugccga..... 1  
 Gi3\_27491014\_x6.....cggagacgucgugggGacacg..... 1  
 Gi3\_27462730\_x6.....ggagacgucgugggaacacggggugccA..... 1  
 Gi1\_3992011\_x6.....cUgagacgucgugggaacacggggg..... 1  
 Gi4\_532059\_x6.....gugggaacacggggugccgCacu..... 1  
 Gi5\_8541691\_x6.....Agugggaacacggggugccgaac..... 1  
 Gi3\_27499240\_x6.....Uucggagacgucgugggaacacgg..... 1  
 Gi5\_8549617\_x6.....gugCgaacacggggugccgaacu..... 1  
 Gi3\_27480568\_x6.....ggagacgucgugggaacacggggCgcc..... 1  
 Gi3\_27481096\_x6.....guCggaacacggggugccgaac..... 1  
 G1a\_5723602\_x6.....gugggaGcacggggugccgaac..... 1  
 Gi3\_27518986\_x6.....cggagacgucgugggaacCcg..... 1  
 Gi5\_8545945\_x6.....ugggaacaNggggugccgaa..... 1  
 Gi2\_10562321\_x6.....ugggaacacggggugccUaacu..... 1  
 Gi5\_8559787\_x6.....acgucgugggaacacggggugcUgaacu..... 1  
 Gi4\_530697\_x6.....gugggaacacggggugccga..... 0  
 Gi2\_10582049\_x6.....ucgugggaacacggggugccgaacG..... 1  
 Gi5\_8559145\_x6.....cUucgugggaacacggggugcc..... 1  
 Gi2\_10553639\_x6.....cggagacAucgugggaacacggggugcc..... 1  
 Gi2\_10553837\_x6.....gucgugggaacaUggggugccgaacu..... 1  
 Gi5\_8534803\_x6.....ugggaacacggggugccgaUc..... 1  
 Gi3\_27512758\_x6.....cgucgugggaacCcggggugc..... 1  
 Gi2\_10580141\_x6.....ggaacacggggugccgUac..... 1  
 G1a\_5729320\_x6.....Uggaacacggggugccgaac..... 1  
 Gi3\_27487138\_x6.....gaacacggggAgccgaac..... 1  
 Gi3\_27547912\_x6.....gaacacggggugcAgaac..... 1  
 Gi1\_3981643\_x6.....cggagacgucgCggaacacggggugccgaacu..... 1  
 Gi3\_27517228\_x6.....cggagacgucgugggaaAacgggg..... 1  
 Gi3\_27474820\_x6.....ugggaaGacggggugccgaacu..... 1  
 Gi3\_27523294\_x6.....gaucggagacgucgugggaacGcg..... 1  
 Gi2\_10549859\_x6.....gugggUacacggggugccga..... 1  
 Gi2\_10554899\_x6.....ucgugggaaUacggggugccgaacu..... 1  
 Gi3\_27549022\_x6.....gggaacacggggugcUgaa..... 1  
 Gi2\_10569065\_x6.....aucggagacgucguAggaacacggggugc..... 1  
 Gi1\_3979159\_x6.....ucgugggaacCcggggugcc..... 1  
 Gi2\_10579163\_x6.....Ugugggaacacggggugccga..... 1  
 Gi3\_27526900\_x6.....acgucguggAaacacggggugccgaac..... 1  
 Gi1\_3983221\_x6.....ucgugggaCcacggggugccgaacu..... 1  
 Gi3\_27480814\_x6.....gugggCacacggggugccgaa..... 1  
 Gi1\_3984631\_x6.....ggAaacacggggugccgaacu..... 1  
 Gi3\_27507958\_x6.....ugggaacacgAgggugccga..... 1  
 Gi3\_27502708\_x6.....gucgugggaacaAggggugccgaacu..... 1  
 Gi3\_27492718\_x6.....aucggagacgucgugggaacacggggugcU..... 1  
 Gi1\_3989155\_x6.....ucguUggaacacggggugccgaac..... 1  
 Gi3\_27464242\_x6.....cggagacgucgugggaacacggggugcU..... 1  
 Gi5\_8535337\_x6.....ggaacacggggugccgCac..... 1  
 Gi3\_27542626\_x6..Ucgauccggagacgucgugggaacacggggugcc..... 1

Gi5\_8555209\_x6....aucggagacgucgugggaacacggggG..... 1  
Gi1\_3976117\_x6.....uggaacacggggugccgUacu..... 1  
Gi1\_3985951\_x6.....ggaacacgNggugccgaac..... 1  
Gi2\_10578215\_x6.....Aggagacgucgugggaacacggggugcc..... 1  
Gi2\_10577405\_x6.....ggUacacggggugccgaa..... 1  
Gi3\_27465340\_x6.....cgucgugggaacacggggUaccg..... 1  
Gi3\_27472924\_x6.....ugggaCcacggggugccga..... 1  
G1a\_5725462\_x6.....gggaacacgAggugccgaacu..... 1  
Gi1\_3985537\_x6.....ucgugggaacacggggugccgaaAu..... 1  
Gi3\_27503380\_x6.....ugggaaUacggggugccgaa..... 1  
Gi3\_27523426\_x6.....cggagacgNcgugggaacacg..... 1  
G1a\_5710138\_x6.....cgugggaacacggggugccAaacu..... 1  
Gi3\_27468658\_x6.....cgugggaacacggggAgcc..... 1  
Gi3\_27472900\_x6.....agacgucgugggaacacggggugccgaUc..... 1  
Gi1\_3990535\_x6.....gucgugggaAacggggugccgaacu..... 1  
Gi1\_3990199\_x6.....acgucgugggaCcacggggugccgaacu..... 1  
Gi3\_27480124\_x6.....gagacgucgugggaacacggggCgcccgaacu..... 1  
Gi3\_27532846\_x6.....Aucgugggaacacggggugccga..... 1  
Gi2\_10568453\_x6.....cgucUugggaacacggggugccgaacu..... 1  
Gi3\_27546808\_x6....aucggagacgCcgugggaacacgggg..... 1  
Gi2\_10573391\_x6....aucggagacgucgugggGacacgg..... 1  
Gi2\_10571351\_x6.....ggaacacggggugccgaG..... 1  
Gi3\_27533218\_x6.....cgucgugAgaacacggggugc..... 1  
Gi1\_3982171\_x6.....gugggGacacggggugccg..... 1  
Gi2\_10566221\_x6.....acgucgCgggaacacggggugccgaacu..... 1  
Gi5\_8558617\_x6.....uggUaacacggggugccgaacu..... 1  
Gi5\_8562079\_x6.....acgucgugAgaacacggggugccgaacu..... 1  
Gi2\_10650100\_x5....aucggaAacgucgugggaacac..... 1  
Gi2\_10595450\_x5.....gugggaacacgggAugccgaa..... 1  
Gi3\_27651132\_x5....gaucggagacgucgugggaacacggggugccga..... 0  
Gi3\_27598937\_x5....aucggagacgucguAggaacacgg..... 1  
Gi3\_27650557\_x5....aucggUgacgucgugggaacacggg..... 1  
Gi2\_10639475\_x5.....gacgucgCgggaacacggggugccgaacu..... 1  
Gi3\_27632152\_x5.....gucAugggaacacggggugccgaac..... 1  
Gi2\_10596250\_x5.....cgugggaacacggggugccgUac..... 1  
Gi2\_10619500\_x5.....gugggUacacggggugccg..... 1  
Gi2\_10624460\_x5.....gugggaacacgAggugccg..... 1  
Gi3\_27585392\_x5....aucggagacgucgugggUacacgg..... 1  
Gi5\_8585592\_x5.....agacgucgugggaacacAgggugccgaacu..... 1  
Gi5\_8579752\_x5.....uggaacGcggggugccgaa..... 1  
Gi1\_3995050\_x5.....Ugagacgucgugggaacacggggugccgaacu..... 1  
Gi3\_27579932\_x5.....gucgugggaacacggggugcAgaac..... 1  
Gi2\_10617380\_x5....aucggagaNgucgugggaac..... 1  
G1a\_5748842\_x5.....gAgaacacggggugccgaacu..... 1  
Gi2\_10594755\_x5.....uGgugggaacacggggugc..... 1  
Gi2\_10622470\_x5.....ggaCcacggggugccgaacu..... 1  
Gi3\_27580537\_x5....cgucgugggaacacggggUacc..... 1



|                                                          |   |
|----------------------------------------------------------|---|
| Gi3_27636637_x5.....cgucAugggaacacggggugccg.....         | 1 |
| Gi2_10620865_x5.....Ucgucgugggaacacggggugcc.....         | 1 |
| Gi5_8579957_x5.....gaacacggggugccgaacG.....              | 1 |
| Gi3_27552552_x5.....ugggaacacgAggugccgaa.....            | 1 |
| Gi2_10641105_x5.....ugggaacacggggugUcgaac.....           | 1 |
| Gi2_10591100_x5.....cgucgCgggaacacggggugccgaac.....      | 1 |
| Gi1_4002000_x5.....gugggaGcacggggugccga.....             | 1 |
| Gi3_27575072_x5.....Ccgucgugggaacacggggugccgaacu.....    | 1 |
| Gi1_3994265_x5.....aacacggggugccgaaAu.....               | 1 |
| Gi2_10634700_x5.....gucgugggaacacggggugccgUacu.....      | 1 |
| G1a_5747237_x5.....gugggaacacggggugcAgaacu.....          | 1 |
| Gi5_8592347_x5.....ugggaacCcgggugccgaac.....             | 1 |
| Gi3_27552087_x5.....aAcggagacgucgugggaacacgg.....        | 1 |
| Gi1_3994480_x5.....cgucgugggaCcacggggugccgaacu.....      | 1 |
| Gi1_3999855_x5.....ugggGacacggggugccgaac.....            | 1 |
| Gi2_10616845_x5.....aucggagGcgucgugggaacacg.....         | 1 |
| Gi4_537203_x5.....ugggaacacggggugccgaGcu.....            | 1 |
| Gi5_8566967_x5.....cgucgugggaacacggggugUcgaacu.....      | 1 |
| Gi2_10645475_x5.....cgAgggaacacggggugccga.....           | 1 |
| Gi1_4006235_x5.....gggaacacggggugcUgaacu.....            | 1 |
| G1a_5742372_x5.....cgucgugggaacacggggugccgCacu.....      | 1 |
| Gi3_27606362_x5.....gaucggagacgucgCgggaacacg.....        | 1 |
| Gi2_10623780_x5.....ucgugggCacacggggugccgaacu.....       | 1 |
| Gi2_10600580_x5.....aucggagacAucgugggaacacggggugcc.....  | 1 |
| Gi2_10632805_x5.....gggaacacggggugccgaC.....             | 1 |
| Gi3_27621702_x5.....gugggaacacggggugccCa.....            | 1 |
| Gi5_8582522_x5.....gggaacCcgggugccgaacu.....             | 1 |
| Gi1_3999295_x5.....gaucggagacgucguggga.....              | 0 |
| Gi2_10626295_x5.....cggagacgucgugAgaacacggggugcc.....    | 1 |
| Gi2_10631380_x5.....cgUagacgucgugggaacacggggugc.....     | 1 |
| Gi3_27657422_x5.....cgucgugggaacacggAgugcc.....          | 1 |
| Gi3_27553002_x5.....gaucggagacgucgugggaacacggAgu.....    | 1 |
| Gi2_10640475_x5.....guUgugggaacacggggugc.....            | 1 |
| Gi3_27553877_x5.....uGggagacgucgugggaacacggg.....        | 1 |
| Gi5_8593867_x5.....Ugagacgucgugggaacacggggugcc.....      | 1 |
| Gi3_27629802_x5.....cgucgugggaacacggggGgccgaa.....       | 1 |
| Gi3_27606737_x5.....cgucgugggaacacggAgugc.....           | 1 |
| Gi3_27609352_x5.....agacgucgugggaacacggggugccgCac.....   | 1 |
| Gi2_10602725_x5.....acgucgugggaacacggggCgc.....          | 1 |
| Gi3_27558222_x5.....gagacgucgugggaacGcggggugccgaacu..... | 1 |
| Gi3_27631162_x5.....cgucguAggaacacggggugccgaac.....      | 1 |
| Gi5_8579367_x5.....ggNacacggggugccgaacu.....             | 1 |
| Gi2_10619975_x5.....gaucggagacgucgugggaGcacggggugcc..... | 1 |
| Gi2_10595445_x5.....aCcgagacgucgugggaacacggggug.....     | 1 |
| Gi2_10635645_x5.....aaAcggggugccgaacu.....               | 1 |
| Gi1_4013205_x5.....aacacggggugccgaacG.....               | 1 |
| Gi2_10595835_x5.....Agaacacggggugccgaa.....              | 1 |

Gi1\_4003720\_x5.....Ggggaacacggggugccga..... 1  
Gi3\_27614722\_x5.....gugggaacUcggggugccga..... 1  
Gi3\_27568507\_x5....gaucggagacgucgugggCacacgggg..... 1  
Gi5\_8569037\_x5.....cgucguggNaacacggggugccgaac..... 1  
Gi2\_10620730\_x5.....ugggaacacggggugccgaUcu..... 1  
Gi2\_10613490\_x5.....agacgucgugggaacCcggggugcc..... 1  
Gi2\_10613575\_x5.....ggagacguUgugggaacacggggugc..... 1  
G1a\_5732142\_x5.....ugggaacacggggugAcgaacu..... 1  
G1a\_5765337\_x5.....cgugggaacaUggggugccgaacu..... 1  
Gi5\_8590827\_x5.....gggaacacggggugccAaac..... 1  
Gi5\_8574002\_x5.....gugggaGcacggggugcc..... 1  
Gi3\_27570557\_x5.....cgugggaacacggggUAccgaa..... 1  
Gi3\_27610897\_x5....aucggagacguGgugggaacacggggg..... 1  
Gi2\_10599810\_x5....aucggagacgucgugggaacacgAg..... 1  
Gi2\_10591060\_x5.....cgugggaacacggggGgccgaac..... 1  
Gi5\_8576267\_x5.....guUgugggaacacggggugccgaac..... 1  
G1a\_5739467\_x5..Ucgauccggagacgucgugggaacacggg..... 1  
Gi3\_27558357\_x5....aucggagacgucgugggaacacgAgg..... 1  
Gi1\_4004390\_x5.....cgucgugggaacacggggGgcc..... 1  
Gi5\_8586837\_x5.....ggaNcacggggugccgaacu..... 1  
Gi5\_8581212\_x5.....gggaacacggggAgccgaacu..... 1  
Gi3\_27582067\_x5.....cgugggaacacgAggugc..... 1  
Gi1\_3997990\_x5.....aacacggggugccgaUcu..... 1  
Gi2\_10624945\_x5.....cgugggaacacAgggugc..... 1  
Gi3\_27563487\_x5.....ggagacgucgugggaGcacggggugccg..... 1  
Gi3\_27597437\_x5.....Agugggaacacggggugcc..... 1  
Gi3\_27633727\_x5.....ugggaacaUggggugccga..... 1  
Gi3\_27555172\_x5....ucggGgacgucgugggaacacggggg..... 1  
Gi3\_27639007\_x5.....gucgugggaacacggggAgccgaac..... 1  
Gi2\_10647105\_x5.....ucgugggaacacggggugccgaaAu..... 1  
Gi2\_10650345\_x5.....aCacgucgugggaacacggggugccgaacu..... 1  
Gi2\_10601805\_x5.....ucgugggaacacggggugccgGac..... 1  
Gi2\_10601305\_x5.....acAucgugggaacacggggugcc..... 1  
Gi5\_8568832\_x5.....Ugagacgucgugggaaca..... 1  
Gi5\_8563977\_x5.....acgucgugggaCcacggggugccgaacu..... 1  
G1a\_5739392\_x5.....Agagacgucgugggaacacg..... 1  
Gi2\_10610430\_x5.....acgucgugggaacacAgggugccgaacu..... 1  
Gi3\_27623507\_x5.....ggagacgCcgugggaacacggggg..... 1  
Gi5\_8578257\_x5.ugUgauccggagacgucgug..... 1  
Gi3\_27635562\_x5.....ggCaacacggggugccgaac..... 1  
Gi3\_27633542\_x5.....ucgugggaacaAgggugccgaacu..... 1  
G1a\_5765417\_x5.....Agugggaacacggggugccgaacu..... 1  
Gi2\_10608815\_x5.....ggUgacgucgugggaacacg..... 1  
Gi2\_10639275\_x5....aucggUgacgucgugggaacacggggugc..... 1  
Gi3\_27636997\_x5.....ucgugggaacacggggugAcgaacu..... 1  
Gi2\_10632920\_x5....aucggagacgucgugggaacacggggAg..... 1  
Gi1\_4000235\_x5.....ugggUacacggggugccgaacu..... 1

Gi5\_8586072\_x5.....Ggggaacacggggugccgaacu..... 1  
Gi3\_27572862\_x5.....cgucgugggCacacggggugcc..... 1  
Gi1\_4006315\_x5.....gugggaacacggggugAcgaacu..... 1  
Gi2\_10601530\_x5.....gugggaacacggggugAcga..... 1  
Gi3\_27559442\_x5.....ucgugggaNcacggggugccg..... 1  
Gi3\_27588092\_x5.....acgucgugggaaGacggggugccgaacu..... 1  
Gi1\_4015060\_x5.....aGgucgugggaacacggggugcc..... 1  
Gi3\_27551577\_x5.....gaucggagacgucgugggaCcac..... 1  
Gi2\_10646870\_x5.....Cucggagacgucgugggaacacggggugcc..... 1  
Gi3\_27570417\_x5.....ggaacacAgggugccgaa..... 1  
Gi5\_8579062\_x5.....cgugggaacacgUggugccgaac..... 1  
Gi3\_27572722\_x5.....cgugggaacacggggugUc..... 1  
G1a\_5735152\_x5.....ggaacacggggugccgUacu..... 1  
Gi3\_27572327\_x5.....gGgacgucgugggaacacg..... 1  
Gi2\_10595960\_x5.....ugggaacCggggugccgaac..... 1  
Gi2\_10599855\_x5.....cgucguggNaacacgggg..... 1  
Gi2\_10618165\_x5.....ggaacacggUgugccgaacu..... 1  
Gi3\_27640462\_x5.....cgucgugggaacacggggugccgaaUu..... 1  
Gi2\_10633305\_x5.....aucgAagacgucgugggaacacggggugcc..... 1  
Gi2\_10594030\_x5.....gugggaacacggCgugcc..... 1  
Gi5\_8578357\_x5.....gugggaaGacggggugccgaacu..... 1  
Gi5\_8580582\_x5.....aucggagacgucgugggaacacggggCgc..... 1  
Gi2\_10632125\_x5.....cgucgugggUacacggggugccgaacu..... 1  
Gi3\_27549682\_x5.....gugggaCcacggggugccgaa..... 1  
Gi1\_4015705\_x5.....Gggagacgucgugggaacacggggugcc..... 1  
Gi2\_10627210\_x5.....Ugacgucgugggaacacggggugc..... 1  
Gi5\_8564497\_x5.....gucgugggaacacgggAugccgaacu..... 1  
Gi2\_10642885\_x5.....cgucgugggaacCcgggugccg..... 1  
Gi3\_27561222\_x5.....ugggaUcacggggugccgaac..... 1  
Gi2\_10644095\_x5..Ucgauccgagacgucgugggaacacggggugc..... 1  
Gi2\_10633510\_x5.....aucggagacgucgugggaCca..... 1  
Gi3\_27551162\_x5.....cgugggaacacAgggugccga..... 1  
Gi3\_27593767\_x5..cUaucggagacgucgugggaacacggggugc..... 1  
Gi1\_4016875\_x5.....cguNggaacacggggugccgaacu..... 1  
Gi2\_10629335\_x5.....gaucggagacgucgugggaacGcggggug..... 1  
Gi1\_4004350\_x5.....aacacgCggugccgaacu..... 1  
Gi2\_10645030\_x5.....ugAgaacacggggugccgaac..... 1  
Gi1\_4004275\_x5.....acgucgugggaGcacggggugccgaacu..... 1  
Gi3\_27576387\_x5.....gGucggagacgucgugggaacacggggugcc..... 1  
Gi2\_10612915\_x5.....ucgugggaacacggggugAcgaacu..... 1  
Gi5\_8570757\_x5.....ucggagacgucguggGacacg..... 1  
Gi5\_8594202\_x5.....gugggaacacggggGgccgaacu..... 1  
G1a\_5749992\_x5.....gugggaacacggggGgccgaac..... 1  
Gi5\_8569047\_x5.....Gacacggggugccgaacuuu..... 1  
Gi5\_8583082\_x5.....gugggaacacggggugccgaG..... 1  
Gi1\_4013190\_x5.....acgucgugggaacacggggugccgaaAu..... 1  
Gi2\_10632510\_x5.....aucggagacgucCgggaacacggg..... 1

Gi3\_27602452\_x5.....gacgucgugggaGcacggggugccgaac..... 1  
Gi1\_4009605\_x5.....guggaacaacggggugcU..... 1  
Gi3\_27636117\_x5.....gUagacgucgugggaacacggggugccga..... 1  
Gi3\_27616272\_x5.....cgucgugggaacacggggugcU..... 1  
Gi2\_10633715\_x5.....gacgucgugggaacacggggCgccgaacu..... 1  
Gi2\_10620905\_x5.....ugggaacacggggugGcgaacu..... 1  
Gi5\_8563927\_x5.....guggaacaUggggugccgaac..... 1  
Gi5\_8570187\_x5.....gucgugggaacacggggugUcgaacu..... 1  
Gi5\_8589502\_x5.....uggaacaacggggugccCa..... 1  
Gi3\_27590467\_x5.....guggaacaacggggAgccg..... 1  
Gi2\_10607685\_x5.....gacAucgugggaacacggggugcc..... 1  
Gi2\_10640365\_x5.....ucgugggaacacggggugccgaaU..... 1  
Gi3\_27570392\_x5.....gaacaUggggugccgaac..... 1  
G1a\_5761722\_x5.....gggaacaacggggugccAaacu..... 1  
Gi5\_8590872\_x5.....guggaacaacAgggugcc..... 1  
Gi5\_8586002\_x5.....cgucguggaaUacggggugccgaacu..... 1  
Gi1\_4013680\_x5.....Ccuggggaacacggggugcc..... 1  
Gi2\_10620970\_x5.....guggaacaacggggUaccg..... 1  
Gi2\_10621845\_x5.....gaucggagacgucgugggCacacggggg..... 1  
Gi1\_3994290\_x5.....ggaacaacggggugccgaCcu..... 1  
Gi3\_27601432\_x5.....gggaacaacggggugcGgaac..... 1  
Gi3\_27575027\_x5.....acgucgugggaUacggggugccgaacu..... 1  
Gi3\_27642907\_x5.....ucgugggaacGcggggugc..... 1  
Gi1\_4014325\_x5.....cgGgggaacacggggugccgaac..... 1  
Gi3\_27549627\_x5.....aGgucgugggaacacggg..... 1  
Gi2\_10649355\_x5.....aacacgUggugccgaacu..... 1  
Gi3\_27646647\_x5.....cgugggaacCggggugccga..... 1  
Gi3\_27642377\_x5.....Cacgucgugggaacacggggugccgaac..... 1  
Gi5\_8581517\_x5.....gCgggaacacggggugccgaa..... 1  
Gi5\_8589802\_x5.....agacgucgugggaCcacggggugccgaacu..... 1  
Gi5\_8595182\_x5.....guggaacNcggggugccg..... 1  
Gi1\_4016735\_x5.....gucgugggaacacggggugccgaGcu..... 1  
Gi2\_10592920\_x5.....ggaacacgUggugccgaacu..... 1  
Gi3\_27612627\_x5.....gaucggagGcucgugggaacacggggg..... 1  
Gi5\_8578622\_x5.....gucgugggaacacggggugcUgaacu..... 1  
Gi3\_27613682\_x5.....cUucgugggaacacggggug..... 1  
Gi3\_27628487\_x5.....aucggCgacgucgugggaacacggggugcc..... 1  
Gi1\_3995525\_x5.....cAucgugggaacacggggugccgaacu..... 1  
G1a\_5739052\_x5.....aucggagacgucgugggGacacggggg..... 1  
Gi1\_4004080\_x5.....ggUgacgucgugggaacacggggugccg..... 1  
Gi2\_10649455\_x5.....aucggCgacgucgugggaacacggggugcc..... 1  
Gi3\_27626237\_x5.....cgugggaacacggggugUcga..... 1  
Gi3\_27627192\_x5.....Uucggagacgucgugggaacacggggugcc..... 1  
Gi3\_27653902\_x5.....gcgaucggGgacgucgug..... 1  
Gi5\_8594957\_x5.....uggaacaacAgggugccgaa..... 1  
Gi3\_27566632\_x5.....uggaacaacggggugcGgaac..... 1  
Gi2\_10645510\_x5.....cgugggaacacggggugccUaac..... 1

Gi3\_27603657\_x5.....cgucgugggaacaUggggugcc..... 1  
Gi2\_10624295\_x5.....ggaacUcggggugccgaacu..... 1  
Gi2\_10597460\_x5.....ugggaacacggggCgccg..... 1  
Gi2\_10609505\_x5.....aucggagacgucgugggCac..... 1  
Gi3\_27650897\_x5.....aucggagacgucUugggaacacgggg..... 1  
Gi3\_27552732\_x5.....aucggagacgucguggggaacUcggg..... 1  
G1a\_5763782\_x5.....ugggaGcacggggugccgaacu..... 1  
Gi3\_27606472\_x5.....gucguggUaacacggggugccgaacu..... 1  
Gi3\_27615937\_x5.....aacacggggCgccgaacuu..... 1  
G1a\_5748337\_x5.....gugggaGcacggggugcc..... 1  
Gi2\_10593460\_x5.....agacgucgugggaacacggggugccgaCcu..... 1  
Gi3\_27551352\_x5.....aucggagacgucguggAaacacggggugcc..... 1  
Gi3\_27552832\_x5.....Agucgugggaacacggggugccg..... 1  
Gi2\_10650040\_x5.....gucgugggaacGcggggugcc..... 1  
Gi3\_27600732\_x5.....gucNugggaacacggggugccgaacu..... 1  
Gi2\_10604175\_x5.....aucggagacgucguggggaacGcggggugcc..... 1  
Gi2\_10612860\_x5.....aucggagacgCcgugggaaca..... 1  
Gi2\_10626485\_x5.....ggagacgucguggAaacacggggugcc..... 1  
Gi3\_27564817\_x5.....gaucggGgacgucgugggaacacgg..... 1  
Gi2\_10630270\_x5.....Uucgugggaacacgggg..... 1  
Gi2\_10614910\_x5.....cgucgugggaCcacggggugccga..... 1  
Gi3\_27642262\_x5.....ggagacgucguggggaCcacggggugcc..... 1  
Gi2\_10643380\_x5.....gaucggagNcgucgugggaacacggggugcc..... 1  
Gi3\_27567497\_x5.....gggaaUacggggugccgaac..... 1  
G11\_3997165\_x5.....gaacaAgggggugccgaacu..... 1  
Gi2\_10641160\_x5.....cgugggaaAacggggugccgaac..... 1  
Gi2\_10600080\_x5.....ucgugggUaacacggggugccgaacu..... 1  
Gi4\_535428\_x5.....ugggaacaNggggugccgaacu..... 1  
Gi2\_10606500\_x5.....agacgucguggGacacggggugccgaacu..... 1  
G11\_4009465\_x5.....gugggaacacggggugccgaaAu..... 1  
Gi2\_10606490\_x5.....gucgugggaacacggggugccgaGc..... 1  
Gi3\_27583742\_x5.....ucgugggGacacggggugccgaa..... 1  
Gi3\_27645062\_x5.....Agugggaacacggggugccgaa..... 1  
Gi5\_8601857\_x5.....gggaCcacggggugccgaacu..... 1  
Gi2\_10603635\_x5.....cgugggaacacggggugccgGac..... 1  
Gi2\_10622155\_x5.....cgucgugggaacGcggggugc..... 1  
Gi3\_27631722\_x5.....Ugagacgucgugggaacacgggg..... 1  
Gi3\_27561062\_x5.....ucgugggaacacggggCgccga..... 1  
Gi3\_27584302\_x5.....ugggaacUcggggugccgaa..... 1  
Gi5\_8577432\_x5.....cgugggaacacggggugccgCac..... 1  
Gi3\_27595087\_x5.....gGcucgugggaacacggggugccg..... 1  
Gi2\_10625075\_x5.....cgucgugggaacacggggugccgaaAu..... 1  
Gi3\_27552992\_x5.....aucggagacgucguggCaacacg..... 1  
Gi3\_27570952\_x5.....acUucgugggaacacggggugccgaac..... 1  
Gi2\_10649795\_x5.....cgugggaacacggggugccgC..... 1  
Gi3\_27624122\_x5.....cgugggaCcacggggugccgaa..... 1  
Gi3\_27612817\_x5.....gucgugggaaUacggggugccgaac..... 1

Gi3\_27593882\_x5.....uggNaacacggggugccgaac..... 1  
Gi3\_27590137\_x5.....agacgucgugggaacacagAggugccgaacu..... 1  
Gi3\_27631187\_x5.....cgucgugggaGcacggggugccga..... 1  
Gi2\_10642765\_x5.....Aaacacggggugccgaac..... 1  
Gi2\_10597775\_x5.....gucgugggaacacCggggugccgaacu..... 1  
Gi5\_8599957\_x5.....gaacacggggugccgaAu..... 1  
Gi1\_4011735\_x5.....ugggaacaNggggugccga..... 1  
Gi2\_10649530\_x5.....cgucgugggaacaUggggugccgaacu..... 1  
Gi3\_27592862\_x5.....gaacacggggugccgUac..... 1  
Gi3\_27554957\_x5.....ggaacacggggugccgGa..... 1  
Gi3\_27617292\_x5.....aucggGgacgucgugggaacacgggg..... 1  
Gi3\_27617847\_x5.....cgaucggagacgucgugggaCcacg..... 1  
Gi2\_10609180\_x5.....ucgCgggaacacggggugccgaac..... 1  
Gi1\_3997580\_x5.....gggaacaUggggugccgaacu..... 1  
G1a\_5746157\_x5.....ugggaacacggggugUcgaacu..... 1  
Gi5\_8580852\_x5.....Ggacgucgugggaacacggggugcc..... 1  
G1a\_5749012\_x5.....gugggaacacggggugccgaAu..... 1  
Gi2\_10599745\_x5.....acgucgugggaacacggggGgc..... 1  
Gi5\_8596497\_x5.....Gucggagacgucgugggaacacgggggu..... 1  
Gi2\_10615165\_x5.....gaucggagacgucgugggaacacAg..... 1  
Gi2\_10622360\_x5.....Ggcgaucggagacgucgugggaacacg..... 1  
Gi5\_8564632\_x5.....aGcggagacgucgugggaacacggggugcc..... 1  
Gi3\_27578607\_x5.....gaacacggggugccAaac..... 1  
G1a\_5750647\_x5.....gugggaacGcggggugcc..... 1  
Gi2\_10614065\_x5.....cgCcgugggaacacggggugccgaac..... 1  
Gi2\_10600680\_x5.....gugggaacacggggugUcgaa..... 1  
Gi2\_10640140\_x5.....cgugggaacCcggggugc..... 1  
Gi3\_27585872\_x5.....ugggaacacggggAgccg..... 1  
Gi2\_10640900\_x5.....gugggaUcacggggugccgaac..... 1  
G1a\_5735972\_x5.....cgugAgaacacggggugccgaacu..... 1  
Gi2\_10603395\_x5.....ugggaacacggggguAccgaac..... 1  
Gi3\_27550282\_x5.....cgucgugggaacaUggggugccgaac..... 1  
Gi1\_4016225\_x5.....gugggaacacggggugccgaGc..... 1  
Gi2\_10598230\_x5.....cgucgugggaacacggggugccgCac..... 1  
Gi2\_10634825\_x5.....gaucggagacgucgugggGacacggggugc..... 1  
Gi2\_10620930\_x5.....cgAcgugggaacacggggugc..... 1  
Gi3\_27613337\_x5.....acgucgugggaacacgggUgugccgaacu..... 1  
Gi2\_10619910\_x5.....Caucggagacgucgugggaacacggggugcc..... 1  
Gi1\_3996840\_x5.....gggaacacggggAgccgaacu..... 1  
Gi3\_27623942\_x5.....gaacCcggggugccgaac..... 1  
Gi2\_10608165\_x5.....agacgucgugggaacacggggugccgCacu..... 1  
Gi1\_3996775\_x5.....aucggagacgucgugggaacacggU..... 1  
Gi1\_4014080\_x5.....acgucgugggaacGcggggugcc..... 1  
Gi2\_10630065\_x5.....cggagacgucgugggaacacggggGgc..... 1  
Gi3\_27624847\_x5.....Aaucggagacgucgugggaacacgg..... 1  
Gi3\_27600597\_x5.....gaacacgggAugccgaac..... 1  
Gi5\_8588502\_x5.....aucggagacgucgugggaGcac..... 1

Gi2\_10626965\_x5.....gucgugggaaAacggggugccgaac..... 1  
 Gi3\_27595192\_x5..Ucgauccgagacgucgugggaaacacgg..... 1  
 Gi5\_8589652\_x5.....ugggaacGcggggugccgaac..... 1  
 Gi1\_4004175\_x5.....acAucgugggaaacacggggugccgaacu..... 1  
 Gi2\_10612375\_x5.....cgugggaaacacggggugccAa..... 1  
 Gi3\_27561137\_x5.....ggaacacggggugccUaac..... 1  
 Gi2\_10641855\_x5.....cgugggaaacacggggGgccga..... 1  
 Gi2\_10612595\_x5.....gacgucgugggaaacacggggugccgaGcu..... 1  
 Gi3\_27619237\_x5.....ucggagacNucgugggaaacacg..... 1  
 Gi3\_27566312\_x5.....gCcgugggaaacacggggugcc..... 1  
 Gi1\_4012665\_x5.....gggaacacgAggugccgaacu..... 1  
 Gi3\_27631797\_x5.....cggagGcgucgugggaaacacggggugcc..... 1  
 Gi2\_10602200\_x5.....gaucggagCcgucgugggaaacacggggg..... 1  
 Gi3\_27632672\_x5.....Gcgucgugggaaacacggggugccg..... 1  
 Gi3\_27640372\_x5.....cguggUaacacggggugccgaac..... 1  
 Gi5\_8590832\_x5.....gugggaacacggggugccA..... 1  
 Gi1\_3995040\_x5.....ggaacacggggAgccgaacu..... 1  
 Gi1\_3996550\_x5.....aacaAggggugccgaacu..... 1  
 G1a\_5737687\_x5.....gggaacacggggugcUgaacu..... 1  
 Gi3\_27559902\_x5...cgauccggaNacgucgugggaaacacg..... 1  
 Gi5\_8567242\_x5.....cgugggaaacGcggggugccgaac..... 1  
 Gi3\_27611887\_x5.....gugggaacacggggugAcgaa..... 1  
 Gi2\_10613945\_x5.....ugggaCcacggggugccgaac..... 1  
 G1a\_5746132\_x5.....aucggagaNucgugggaaacacggggg..... 1  
 Gi1\_4008600\_x5.....ucgugggaaacacggggugcAgaacu..... 1  
 Gi3\_27577582\_x5...aCcgagacgucgugggaaacacggggugc..... 1  
 Gi2\_10607130\_x5.....gugggaacacggcGugccgaac..... 1  
 Gi5\_8600702\_x5.....gaacacgggCugccgaacu..... 1  
 Gi3\_27620122\_x5.....gugggCacacggggugccg..... 1  
 Gi1\_4011665\_x5.....Uagacgucgugggaaacacggggugccgaac..... 1  
 Gi3\_27573232\_x5...aucggagacgucgugggaaacaU..... 1  
 Gi3\_27565012\_x5.....gacgucguNggaacacggggugccgaac..... 1  
 G1a\_5764787\_x5...Gucggagacgucgugggaaacacgg..... 1  
 Gi2\_10593860\_x5...aucggagacgucgugggCacacggg..... 1  
 Gi2\_10647065\_x5.....cUgagacgucgugggaaacac..... 1  
 Gi2\_10622420\_x5.....guggAaacacggggugccga..... 1  
 Gi3\_27550917\_x5.....Cucgugggaaacacggggugccga..... 1  
 Gi5\_8568412\_x5.....ucgugggaaacacggggugccUaacu..... 1  
 Gi3\_27600987\_x5.....ggaacacggggUaccgaa..... 1  
 Gi3\_27589047\_x5.....acgAcgugggaaacacggggugccgaacu..... 1  
 Gi3\_27597267\_x5...aucggagacgucgCggga..... 1  
 Gi2\_10644635\_x5.....ggaNcacggggugccgaac..... 1  
 Gi1\_3994075\_x5.....ugggaacacggggugAcgaacu..... 1  
 Gi2\_10634520\_x5.....cgugggaaacGcggggugc..... 1  
 Gi3\_27552647\_x5...gauUggagacgucgugggaaacacggg..... 1  
 Gi3\_27642367\_x5...aucggGgacgucguggga..... 1  
 Gi2\_10627300\_x5.....cgugggaaacacggggugAc..... 1

Gi3\_27626712\_x5.....gggaacacCggggugccgaacu..... 1  
Gi1\_4008925\_x5.....cggagacgucgCgggaacacggggugccga..... 1  
Gi2\_10615775\_x5.....aucggagacgucguggggaCcacg..... 1  
Gi3\_27581497\_x5.....ucgugggaaacacggCgugccgaacu..... 1  
Gi3\_27653967\_x5.....gacgucgugggaaacacggggugccgaUc..... 1  
Gi5\_8569687\_x5.....acguGgugggaaacacggggugccgaacu..... 1  
Gi2\_10621805\_x5.....gaGcggagacgucgugggaaacacgggggu..... 1  
Gi3\_27633832\_x5.....ggGgacgucgugggaaacacgggggu..... 1  
Gi1a\_5750237\_x5.....cgugggaaUacggggugccgaacu..... 1  
Gi5\_8592657\_x5.....Ggacgucgugggaaacacggggugccgaac..... 1  
Gi3\_27564522\_x5.....cgugggaaacAgggggugccgaac..... 1  
Gi5\_8601362\_x5.....agacgucgugggaaUacggggugccgaacu..... 1  
Gi1\_4011250\_x5.....aucggagacgucguggggaCcacg..... 1  
Gi1\_4002605\_x5.....aucggagacgucguggggaGcacgggggu..... 1  
Gi1\_4007150\_x5.....aucggGgacgucgugggaaacacg..... 1  
Gi3\_27589932\_x5.....cggUacgucgugggaaacacgggggu..... 1  
Gi2\_10594750\_x5.....aucggagacgucgugggaaacacAgggugcc..... 1  
Gi2\_10622490\_x5.....ucggagacNucgugggaaacacg..... 1  
Gi5\_8582687\_x5.....gggaacacggggugcUgaac..... 1  
Gi1\_4000820\_x5.....ucgugggaaacacggggugccgaGc..... 1  
Gi5\_8585482\_x5.....gugggCacacggggugccgaac..... 1  
Gi4\_534893\_x5.....aUacgucgugggaaacacggggugcc..... 1  
Gi2\_10606585\_x5.....ucAugggaacacggggugccgaac..... 1  
Gi5\_8578042\_x5.....aGcacggggugccgaacuuu..... 1  
Gi1\_4011395\_x5.....Ggacgucgugggaaacacgggg..... 1  
Gi2\_10598245\_x5.....cgucAugggaacacggggugccgaacu..... 1  
Gi2\_10643485\_x5.....ucggagacNucgugggaaacacggggugcc..... 1  
Gi3\_27568352\_x5.....aucggagacgucgugAgaacacggggugcc..... 1  
Gi3\_27649667\_x5.....gauUggagacgucgugggaaacacgggggu..... 1  
Gi3\_27649982\_x5.....gaucAgagacgucgugggaaacacgggggu..... 1  
Gi3\_27617722\_x5.....ugggaacacggggugAcga..... 1  
Gi5\_8570842\_x5.....cgucgugggaaacaUggggugccgaacu..... 1  
Gi2\_10592945\_x5.....uGggagacgucgugggaaacacggggugcc..... 1  
Gi3\_27573472\_x5.....cggagacgucgugggaaacacAgggugcc..... 1  
Gi2\_10606810\_x5.....aAcggagacgucgugggaaacacggggug..... 1  
Gi5\_8566107\_x5.....ugggaacacggggAgccgaac..... 1  
Gi1\_3996070\_x5.....gugggaacacggggugGcgaacu..... 1  
Gi1a\_5763037\_x5.....aucggagacgucguggggaGcacggg..... 1  
Gi3\_27606397\_x5.....gugggaacaGggggugccgaac..... 1  
Gi2\_10592985\_x5.....ggaacacgUggugccgaac..... 1  
Gi3\_27599372\_x5.....gcaucggagacgucgugggaaacacggggugc..... 0  
Gi3\_27619322\_x5.....cggagacgNcgugggaaacacggggugccga..... 1  
Gi2\_10592350\_x5.....ggUgacgucgugggaaacacgggggu..... 1  
Gi2\_10630670\_x5.....aucggagacgucgugggaaacacgAgggugcc..... 1  
Gi1\_4016075\_x5.....Ugagacgucgugggaaacacgggggu..... 1  
Gi3\_27622197\_x5.....ugggaaUacggggugccg..... 1  
Gi1\_3998700\_x5.....gCgggaacacggggugccgaac..... 1



Gi2\_10608700\_x5.....cgugggaacacgUggugccga..... 1  
 Gl1\_5763747\_x5.....ggaacacggguUccgaacu..... 1  
 Gi3\_27594457\_x5...cgaucggaNacgucguggg..... 1  
 Gi2\_10649895\_x5...gaucggagacgCcgugggaacacggggug..... 1  
 Gi3\_27602442\_x5.....agacgucgugAgaacacggggugccgaacu..... 1  
 Gi1\_3993885\_x5.....gucgugggaaAacggggugcc..... 1  
 Gi5\_8588257\_x5.ugcgauccgagacgucgCggg..... 1  
 Gi3\_27555772\_x5.....cgugggaacacggggugccgaG..... 1  
 Gi3\_27629492\_x5.....ucggagacgucgugggGacacggggg..... 1  
 Gi2\_10625370\_x5.....ggaacacggCgugccgaacu..... 1  
 Gi2\_10648625\_x5...Ggaucggagacgucgugg..... 1  
 Gi5\_8587942\_x5.....cgugggGacacggggugccgaac..... 1  
 Gi3\_27563007\_x5.....aucggagacgucgugggaUcacg..... 1  
 Gl1\_5741272\_x5.....gggaacacggggCgccgaacu..... 1  
 Gl1\_5761277\_x5.....cgugggaNacggggugc..... 1  
 Gi3\_27583762\_x5.....gucgugggaacacgggAugccgaac..... 1  
 Gi1\_4002060\_x5.....uGgugggaacacggggugccg..... 1  
 Gi1\_3999865\_x5.....ggGgacgucgugggaaca..... 1  
 Gi5\_8592562\_x5.....cgugggaacacAgggugccgaac..... 1  
 Gi3\_27658747\_x5..Ucgauccgagacgucgugggaac..... 1  
 Gi5\_8570322\_x5.....aacacggggugccgaacG..... 1  
 Gi3\_27602312\_x5...gGucggagacgucgugggaacacggggugc..... 1  
 Gl1\_5753562\_x5.....Ugagacgucgugggaacacggggugc..... 1  
 Gi1\_4016370\_x5.....cgCgggaacacggggugccgaac..... 1  
 Gi2\_10591130\_x5.....aUacgucgugggaacacggggug..... 1  
 Gi2\_10616670\_x5.....aucggagacgucAugggaacacggggg..... 1  
 Gi2\_10595395\_x5.....ugggaacacUgggugccgaacu..... 1  
 Gi5\_8581477\_x5.....ggaacacggUgugccgaacu..... 1  
 Gi1\_3996665\_x5.....ucguggAaacacggggugcc..... 1  
 Gi2\_10609305\_x5.....gugggaaAacggggugccg..... 1  
 Gi2\_10643165\_x5.....acgucgugggaacacggggUaccgaacu..... 1  
 Gi5\_8590027\_x5.....cgAgggaacacggggugccga..... 1  
 Gi5\_8597122\_x5.....gcgccugcugcccaccuucgccgaguucg..... 0  
 Gi1\_4016450\_x5.....ggagacgucgugggaacacggggugccgaa..... 0  
 Gi5\_8578217\_x5.....agacgucgugggaacacggggugccgCacu..... 1  
 Gi3\_27587497\_x5.....cgugggaacacggggugUcg..... 1  
 Gi2\_10625595\_x5.....Ugugggaacacggggugccgaa..... 1  
 Gi3\_27654457\_x5.....gucgugggaacacgAggugccgaac..... 1  
 Gl1\_5733697\_x5.....Ugugggaacacggggugcc..... 1  
 Gi3\_27649887\_x5...aucggCgacgucgugggaacacgggg..... 1  
 Gl1\_5746677\_x5...auUggagacgucgugggaacacggg..... 1  
 Gi1\_4003525\_x5.....cgugggaacacggggugccgaaUu..... 1  
 Gi3\_27631387\_x5.....agacgucgugggaacacAgggugccgaacu..... 1  
 Gi2\_10593250\_x5.....cggagacgNcgugggaacacggggg..... 1  
 Gi3\_27556757\_x5...aucggagacgucgugggaacacggAgugcc..... 1  
 Gi3\_27626812\_x5.....cgAcgugggaacacggggugccga..... 1  
 Gl1\_5759912\_x5.....gugggaacacggggCgccgaac..... 1

Gi2\_10641110\_x5.....aucggagCcgucgugggaaca..... 1  
Gi3\_27627277\_x5....gaAcggagacgucgugggaacacggggu..... 1  
Gi3\_27565932\_x5.....gGgacgucgugggaacacggggu..... 1  
Gi1\_4011345\_x5.....agacgCcgugggaacacggggugccgaac..... 1  
Gi3\_27605507\_x5.....gGgggaacacggggugccgaacuu..... 1  
G1a\_5758102\_x5....aucggagacgucgugggCacacggg..... 1  
Gi5\_8598902\_x5.....Ggugggaacacggggugc..... 1  
Gi2\_10608595\_x5.....cggagacgucgugggaacacggggugAc..... 1  
Gi3\_27651042\_x5.....gugNgaacacggggugccg..... 1  
Gi3\_27649222\_x5....aucggagacgucgugggaCcacggggugc..... 1  
Gi3\_27631947\_x5.....gugggaacacggCgugccga..... 1  
Gi2\_10615960\_x5.....acUucgugggaacacggggugccgaacu..... 1  
Gi3\_27610292\_x5.....guAgugggaacacggggugccgaacu..... 1  
Gi2\_10623490\_x5.....cggagacgucgugggaacCcggggu..... 1  
Gi3\_27577552\_x5.....cgugggaacacggggugAc..... 1  
Gi1\_3998300\_x5.....gucAugggaacacggggugccgaacu..... 1  
Gi3\_27638512\_x5....aucNgagacgucgugggaacacg..... 1  
Gi3\_27605407\_x5.....cguAggaacacggggugccgaa..... 1  
Gi3\_27619937\_x5.....gacgucgugggaGcacggg..... 1  
Gi2\_10632070\_x5....gaucggagacgucgugggaacCcggggu..... 1  
Gi1\_4004185\_x5.....ugggaacacggggugccgaaU..... 1  
Gi2\_10593060\_x5.....ggagacgucgugggaacaUggggugcc..... 1  
Gi1\_4015640\_x5.....gggaacacgggAugccgaacu..... 1  
Gi2\_10591670\_x5.....acgucgugggaGcacggggugcc..... 1  
Gi1\_3995625\_x5.....gUgaacacggggugccgaac..... 1  
Gi5\_8569287\_x5.....cgugggaaNacggggugcc..... 1  
Gi2\_10611045\_x5.....acgucgugggaacacggAgugcc..... 1  
Gi3\_27658552\_x5.....cgugggaacacggggugccAaa..... 1  
Gi3\_27608547\_x5.....gucgugggaacaUggggugccgaac..... 1  
Gi3\_27639827\_x5....aucUgagacgucgugggaacacggg..... 1  
Gi1\_3999990\_x5....Gcggagacgucgugggaacacggggugcc..... 1  
Gi3\_27597577\_x5.....gugggaacacggggugccgUa..... 1  
Gi2\_10628195\_x5.....Ucgucgugggaacacggggugc..... 1  
Gi5\_8571142\_x5.....cgugggaacGcggggugccga..... 1  
Gi3\_27559272\_x5.....Gggagacgucgugggaacacggg..... 1  
Gi2\_10625435\_x5....aucggagacgucgugggaUac..... 1  
Gi3\_27562212\_x5.....cgugggaacacggggugccgG..... 1  
Gi3\_27633682\_x5.....ggaacacggggugUcgaa..... 1  
G1a\_5756177\_x5....aucAgagacgucgugggaacacggggu..... 1  
Gi3\_27613932\_x5....ucggagacgucgugggCacacg..... 1  
Gi2\_10612745\_x5.....agacgucgugggaacacggggAgcc..... 1  
G1a\_5742917\_x5.....ggaacacggggugcUgaacu..... 1  
Gi2\_10608230\_x5.....gaUgucgugggaacacggggugccgaacu..... 1  
Gi3\_27658127\_x5....aucggGgacgucgugggaacacggggugc..... 1  
Gi2\_10649850\_x5.....gggaacacggggugcAgaac..... 1  
Gi3\_27580032\_x5.....acgucgugggUacacggggugccgaacu..... 1  
Gi3\_27565552\_x5..Ucgauccgagacgucgugggaacacggg..... 1

|                                                           |   |
|-----------------------------------------------------------|---|
| Gi3_27584132_x5.....cgagagacgucgugggaGcacggg.....         | 1 |
| Gi1_4015885_x5.....cgucgugggaacCggggugcc.....             | 1 |
| Gi2_10607560_x5.....cgGcgugggaacacggggugccga.....         | 1 |
| Gi1a_5734542_x5.....ugggaacacggggugccAaacu.....           | 1 |
| Gi5_8586247_x5...Uaucggagacgucgugggaaca.....              | 1 |
| Gi5_8595167_x5.....cggagacgucgugggaacacggggugccgaa.....   | 0 |
| Gi2_10621045_x5.....cgucgugggGacacggggugc.....            | 1 |
| Gi2_10606790_x5.....gugggaacacggggAgccgaa.....            | 1 |
| Gi2_10608370_x5.....gacgucgugggaacacggggAgccgaacu.....    | 1 |
| Gi5_8586912_x5.....gCacacggggugccgaacu.....               | 1 |
| Gi2_10591300_x5.....ucgugggaCcacggggugccgaacu.....        | 1 |
| Gi1_4001440_x5.....ucgugggaacacggggugccgUacu.....         | 1 |
| Gi5_8569227_x5.....gacgucgugAgaacacggggugccgaacu.....     | 1 |
| Gi3_27635782_x5.....cgugggaUacggggugccg.....              | 1 |
| Gi2_10645235_x5...gUucggagacgucgugggaacacggg.....         | 1 |
| Gi5_8589577_x5.....aucggagacgucgugggCacacgg.....          | 1 |
| Gi5_8601012_x5...aucggagacgucgugggaacacggggugccgaac.....  | 0 |
| Gi2_10596950_x5.....agCcgucgugggaacacggggugccgaacu.....   | 1 |
| Gi5_8569842_x5.....cgucgugggaacacggggAaccgaacu.....       | 1 |
| Gi3_27595642_x5.....cgucgugggaGcacgggg.....               | 1 |
| Gi3_27621247_x5...aucggagacgucgugggaacacgAggugcc.....     | 1 |
| Gi3_27596417_x5.....ucgugggaNcacggggugc.....              | 1 |
| Gi2_10629620_x5.....agacgucgugggaacacggggCgc.....         | 1 |
| Gi2_10650305_x5.....ucgugggaacacgggAugccgaac.....         | 1 |
| Gi3_27623267_x5...Cucggagacgucgugggaacacg.....            | 1 |
| Gi3_27656372_x5.....gacgucgugggaacacggggugUcgaacu.....    | 1 |
| Gi3_27615947_x5.....gacgucgugggaacacggggugccgGac.....     | 1 |
| Gi1_3997000_x5.....cggGgacgucgugggaacacggggugc.....       | 1 |
| Gi3_27645367_x5.....cNugggaacacggggugccgaacu.....         | 1 |
| Gi2_10617175_x5...aucggagacgucgugggCacacgggg.....         | 1 |
| Gi3_27613947_x5...gaucggagacgCcgugggaacacg.....           | 1 |
| Gi2_10644450_x5...gcgaucggGgacgucgugggaacacggggugcc.....  | 1 |
| Gi2_10622640_x5...Gucggagacgucgugggaacacgggg.....         | 1 |
| Gi3_27648432_x5...gaCcgagacgucgugggaacacg.....            | 1 |
| Gi2_10649510_x5.....cgugggaUacggggugccgaac.....           | 1 |
| Gi2_10628425_x5...aCcgagacgucgugggaacacggggugcc.....      | 1 |
| Gi5_8601102_x5.....cguUgugggaacacggggugccgaacu.....       | 1 |
| Gi1_4012200_x5.....gaacacggUgugccgaacu.....               | 1 |
| Gi2_10593240_x5.....ucgNgggaacacggggugccgaacu.....        | 1 |
| Gi3_27558552_x5.....cgucguggNaacacgggg.....               | 1 |
| Gi3_27647537_x5.....gggCacacggggugccgaacu.....            | 1 |
| Gi3_27584857_x5.....ggGgacgucgugggaacacggggugccgaacu..... | 1 |
| Gi3_27643857_x5.....gucgugggaacacggggugcGgaacu.....       | 1 |
| Gi5_8576997_x5.....Naacacggggugccgaacu.....               | 1 |
| Gi2_10591415_x5.....gggaaUacggggugccgaac.....             | 1 |
| Gi3_27615887_x5.....cggagacgNcgugggaacac.....             | 1 |
| Gi3_27620782_x5.....Ugucgugggaacacggggugc.....            | 1 |

Gi2\_10628660\_x5...gaucggagacguUgugggaacacgggggu..... 1  
Gi3\_27552022\_x5.....ucggGgacgucguggggaacacggggugcc..... 1  
Gi3\_27577687\_x5.....aAcggagacgucguggggaacacggggugc..... 1  
Gi1\_4017620\_x5.....acgCcguggggaacacggggugccgaacu..... 1  
Gi2\_10628935\_x5...Caucggagacgucguggggaaca..... 1  
Gi3\_27655467\_x5.....gaaUacggggugccgaac..... 1  
Gi5\_8575192\_x5.....gucgAgggaacacggggugccgaacu..... 1  
Gi3\_27578362\_x5.....ucgAgggaacacggggugccgaac..... 1  
Gi3\_27643827\_x5...gaucggagacgucguggggaacGcgggg..... 1  
Gi2\_10600840\_x5.....aucggagacguUgugggaacacggggugc..... 1  
Gi2\_10631680\_x5.....acgucguAggaacacggggugccgaacu..... 1  
Gi2\_10618705\_x5...gaucggagacgucgugggaaAacggg..... 1  
Gi2\_10636520\_x5.....Cgggaacacggggugccg..... 1  
Gi2\_10617200\_x5.....ucgugggaacUcggggugccgaacu..... 1  
Gi1\_4003655\_x5.....cgucguggggaacacggggAgccgaacu..... 1  
Gi3\_27616277\_x5.....gucguggggaacUcggggugccgaacu..... 1  
Gi3\_27621852\_x5.....ggaacaAggggugccgaacu..... 1  
Gi2\_10609040\_x5...cgucguggAaacacggggugccgaacu..... 1  
Gi2\_10621425\_x5...cguggggaacacggggGgccgaa..... 1  
Gi2\_10602650\_x5.....Agugggaacacggggugc..... 1  
Gi5\_8592217\_x5...agacUucguggggaacacggggugccgaacu..... 1  
Gi2\_10604745\_x5.....agacgucguggggaCcacggggugcc..... 1  
Gi5\_8585717\_x5...acgucgugggCcacacggggugccgaacu..... 1  
Gi1\_4016090\_x5...Gucggagacgucguggggaacacggggugc..... 1  
Gi5\_8599942\_x5...cgugggaaNacggggugc..... 1  
Gi1\_4002545\_x5...ggaacacggggugUcgaacu..... 1  
Gi2\_10639670\_x5...gggUacacggggugccgaac..... 1  
Gi2\_10636265\_x5...ggagacgCcguggggaacacggggugc..... 1  
Gi3\_27560987\_x5...acgucguggggaacaUggggugccgaac..... 1  
G1a\_5739957\_x5...Uucguggggaacacggggugccgaac..... 1  
Gi5\_8584422\_x5...ugggaaAacggggugccgaacu..... 1  
Gi4\_537243\_x5...Gcguggggaacacggggugccgaacu..... 1  
Gi5\_8595952\_x5...ggaacacggggugccgaUc..... 1  
Gi1\_4005680\_x5...cguggggaacacggggugccgaaU..... 1  
Gi1\_3994090\_x5...cgucguggggaacacggggugccgaGcu..... 1  
Gi3\_27556102\_x5...aucggagacgucguggggaacCcgggugc..... 1  
Gi2\_10639380\_x5...gacgucguggggaGcacggggugccg..... 1  
Gi2\_10635730\_x5...gucguggggaacGcggggugccga..... 1  
Gi2\_10608310\_x5...cgucgugAgaacacggggugccgaacu..... 1  
Gi3\_27564422\_x5...cgugggaaUacggggugcc..... 1  
Gi2\_10644955\_x5...gugNgaacacggggugccgaac..... 1  
Gi2\_10649885\_x5...gggaacacggggugAcgaacu..... 1  
Gi4\_535233\_x5...cgAgggaacacggggugccgaacu..... 1  
Gi2\_10639620\_x5...aucggagacgucguggggaacacggAgu..... 1  
Gi2\_10626745\_x5...cguggggaacacggAgugccgaa..... 1  
Gi3\_27560157\_x5...ugggaacaUggggugccgaa..... 1  
Gi2\_10661371\_x4...gaaacacggggugccAaac..... 1

Gi3\_27684157\_x4.....gucguUggaacacggggugccgaacu..... 1  
Gi3\_27675701\_x4.....aucggagacgucgugggaGcacggggugcc..... 1  
Gi3\_27781173\_x4.....ucgugggaacacggggGgccg..... 1  
Gi3\_27687049\_x4.....acguGgugggaacacggggugccgaacu..... 1  
Gi3\_27760833\_x4.....ugggaacacgAggugccg..... 1  
Gi1\_4032344\_x4.....ucgugggaacacAgggugccgaac..... 1  
Gi2\_10653975\_x4.....gacgucgugggaacacggggugccAaacu..... 1  
Gi3\_27788337\_x4.....ggaacacggggugcGgaacu..... 1  
Gi1\_4023156\_x4.....agacgucgugggaacacggggugcUgaacu..... 1  
Gi2\_10690667\_x4.....aucggagacgucgugggaacacggggugU..... 1  
G1a\_5804378\_x4...Uaucggagacgucgugggaacacgg..... 1  
Gi2\_10711947\_x4.....cguAggaacacggggugccgaa..... 1  
Gi3\_27794453\_x4.....ggaUcacggggugccgaac..... 1  
Gi2\_10696715\_x4.....uggNaacacggggugccgaacu..... 1  
Gi3\_27721625\_x4.....Gcggagacgucgugggaacac..... 1  
Gi1\_4028344\_x4.....cgCgugggaacacggggugcc..... 1  
Gi3\_27775837\_x4.....gugggaacacggCgugcc..... 1  
Gi2\_10710311\_x4.....ucgugggGcacggggugcc..... 1  
Gi3\_27666057\_x4.....aucggCgacgucgugggaacacgg..... 1  
Gi1\_4023716\_x4.....Gcgugggaacacggggugccga..... 1  
Gi3\_27793193\_x4.....Gggagacgucgugggaacac..... 1  
Gi2\_10653815\_x4.....cgucgugggaacacggggGgccga..... 1  
Gi3\_27790589\_x4.....cgucgGgggaacacggggugcc..... 1  
Gi3\_27769557\_x4.....cgucgugggaacacggggugccUac..... 1  
Gi3\_27731393\_x4.....cgugggaacacAgggugccg..... 1  
Gi3\_27794833\_x4.....aucggagacgucAugggaacacgg..... 1  
Gi2\_10715627\_x4.....aucggagacgucgugggaacacAgg..... 1  
Gi3\_27732497\_x4.....ucgugggUcacggggugccgaac..... 1  
Gi2\_10698011\_x4.....gugggaacUcggggugccg..... 1  
Gi3\_27681521\_x4.....ucgugggGcacggggugccg..... 1  
Gi5\_8625903\_x4.....Gcgugggaacacggggugcc..... 1  
G1a\_5797466\_x4.....guNggaacacggggugccgaacu..... 1  
Gi5\_8627695\_x4.....cCugggaacacggggugccgaac..... 1  
Gi1\_4027792\_x4.....gucguAggaacacggggugccgaacu..... 1  
Gi3\_27659433\_x4.....aUcacggggugccgaacuu..... 1  
Gi1\_4036936\_x4.....gacgucgugggaacacggggGgccg..... 1  
Gi4\_539622\_x4.....cgGgggaacacggggugccgaacu..... 1  
Gi2\_10673467\_x4.....agacAucgugggaacacggggugcc..... 1  
Gi3\_27794513\_x4...Aaucggagacgucgugggaac..... 1  
Gi1\_4042580\_x4.....aacNcggggugccgaacu..... 1  
Gi2\_10721699\_x4.....Ugagacgucgugggaacacggggugccgaa..... 1  
Gi5\_8617983\_x4.....gugAgaacacggggugccga..... 1  
Gi2\_10687451\_x4.....gAgaacacggggugccgaa..... 1  
Gi3\_27667609\_x4.....uggAaacacggggugccga..... 1  
Gi2\_10705439\_x4.....gUcacggggugccgaac..... 1  
Gi5\_8627263\_x4.....gugggaacacggggugcUga..... 1  
Gi3\_27718989\_x4.....aucgUagacgucgugggaacac..... 1

Gi5\_8640219\_x4.....ucguCggaacacggggugccgaacu..... 1  
Gi3\_27695717\_x4.....agacgucgugggaacacggggugccgaGc..... 1  
Gi2\_10702375\_x4.....uggAaacacggggugccga..... 1  
Gi3\_27712373\_x4.....cgucgugggaacacggggugccgaG..... 1  
Gi2\_10694747\_x4.....cgugggGacacggggugccg..... 1  
Gi1\_4044232\_x4.....acgucgugggaacacggggugUcgaacu..... 1  
Gi2\_10675959\_x4.....cgucUugggaacacggggugcc..... 1  
Gi2\_10686719\_x4.....aucggagacgucgugggaacaUggg..... 1  
Gi3\_27790997\_x4.....gagacgucNugggaacacggggugccgaacu..... 1  
Gi2\_10686251\_x4.....ucggagacgucgugggCacacg..... 1  
Gi4\_541546\_x4.....gugggaacacggggugccgaUc..... 1  
Gi3\_27671713\_x4.....ugggaacacggggGgccga..... 1  
Gi3\_27792073\_x4.....acgucgugggaacacggggugcAga..... 1  
Gi1\_4021380\_x4.....Ucgucgugggaacacggggugccgaacu..... 1  
Gi2\_10680839\_x4.....acgucgugggGacacggggugc..... 1  
G1a\_5802902\_x4.....uggAaacacggggugccgaacu..... 1  
Gi5\_8639299\_x4.....gGgacgucgugggaacacggggugccgaacu..... 1  
Gi1\_4041168\_x4.....agacgucgugggaacacggggugccgCacu..... 1  
Gi3\_27706697\_x4.....Agagacgucgugggaacacg..... 1  
Gi2\_10665487\_x4.....cCugggaacacggggugccga..... 1  
Gi3\_27724617\_x4.....gaucggagacgucguAggaacacg..... 1  
Gi3\_27734657\_x4.....cgugggaacacggAgugccga..... 1  
Gi1\_4038304\_x4.....uAgugggaacacggggugccgaacu..... 1  
Gi2\_10664755\_x4.....Gucggagacgucgugggaa..... 1  
Gi2\_10666627\_x4.....cgugggCacacggggugccgaac..... 1  
Gi2\_10687287\_x4.....gaucggagacgucgugggG..... 1  
Gi3\_27733249\_x4.....ugggaacacggggUccgaacu..... 1  
Gi2\_10678687\_x4.....gugggaUcacggggugcc..... 1  
Gi3\_27687089\_x4.....cgucgugggaacacgAggugccgaac..... 1  
Gi3\_27729245\_x4.....gaucggagacgucgugggaaAacgg..... 1  
Gi3\_27705485\_x4.....guggCaacacggggugccg..... 1  
Gi2\_10691219\_x4.....gaucggagacgucgugggaacacAgggu..... 1  
Gi5\_8624055\_x4.....ugggaacacggggugccgaG..... 1  
Gi3\_27665969\_x4.....cgucgugggaaAacggggugc..... 1  
Gi2\_10697295\_x4.....acgucgugggCacacggggugccgaacu..... 1  
Gi5\_8636703\_x4.....gacgucgugggaacacggggAgccgaacu..... 1  
Gi1\_4033604\_x4.....gugggaacNcggggugccgaac..... 1  
Gi3\_27782337\_x4.....cgucgCgggaacacggggugccga..... 1  
Gi2\_10655283\_x4.....cAugggaacacggggugc..... 1  
Gi5\_8614675\_x4.....gaacacCgggugccgaacu..... 1  
Gi5\_8619859\_x4.....ucgugggaacacggUgugccgaacu..... 1  
Gi2\_10675799\_x4.....gucgugggaacacggggugccgaUc..... 1  
Gi3\_27706641\_x4.....ugggaacacggggugccgaaGu..... 1  
Gi2\_10669819\_x4.....gaucggGgacgucgugggaacacggggg..... 1  
Gi1\_4040560\_x4.....gCaacacggggugccgaac..... 1  
Gi5\_8625411\_x4.....aucggagacgucgugggaCcacgggg..... 1  
Gi3\_27724549\_x4.....aucggagacgucgugggaacacggggugUc..... 1

Gi5\_8610871\_x4.....gugggGacacggggugccga..... 1  
 Gi3\_27734901\_x4.....gggaacacggggugccgGa..... 1  
 Gi3\_27780773\_x4....aucggagaGgucgugggaaacacggg..... 1  
 Gi5\_8647279\_x4.....Aggaacacggggugccgaa..... 1  
 Gi1\_4027268\_x4.....gugggaacGcggggugccgaac..... 1  
 Gi1\_4025856\_x4.....Ugaacacggggugccgaacuu..... 1  
 Gi3\_27661909\_x4.....ucgugggaacCggggugc..... 1  
 Gi2\_10677191\_x4....gaucggagacgucgugggaaacacAgg..... 1  
 Gi2\_10675075\_x4.....aUgucgugggaaacacggggugccgaac..... 1  
 Gi3\_27722713\_x4.....cgugAgaacacggggugccg..... 1  
 Gi3\_27791829\_x4.....agacgucgugggaaacacggggugcAgaacu..... 1  
 Gi3\_27714693\_x4.....cgugggaaAacggggugcc..... 1  
 Gi3\_27714377\_x4....aucggagacgucgugggaaGacg..... 1  
 Gi3\_27683321\_x4.....aNcacggggugccgaacu..... 1  
 Gi5\_8624931\_x4.....gugggaacacggggCgcc..... 1  
 Gi3\_27670673\_x4.....Ccgucgugggaaacacggggugccgaac..... 1  
 Gl1a\_5810490\_x4.....Ggugggaacacggggugc..... 1  
 Gi3\_27783793\_x4.....gggaacaAggggugccgaac..... 1  
 Gi1\_4030328\_x4.....Ggugggaacacggggugccgaacuu..... 1  
 Gi2\_10693955\_x4....gaAcggagacgucgugggaaacacgggg..... 1  
 Gi5\_8641007\_x4.....gucgugggaaacacggggAaccgaacu..... 1  
 Gi3\_27698385\_x4.....Gcggagacgucgugggaaacacggggugc..... 1  
 Gi3\_27733805\_x4.....cgucgugggaaacCggggugccg..... 1  
 Gi5\_8639815\_x4.....gggaacacggggugccgCac..... 1  
 Gi2\_10697815\_x4.....cgucgugggaaacacggggugccAaacu..... 1  
 Gi3\_27696765\_x4....cgUucggagacgucguggg..... 1  
 Gi1\_4037592\_x4....aucggagaNgucgugggaaacacgggg..... 1  
 Gi3\_27792861\_x4.....agUcgucgugggaaacacggggugccgaac..... 1  
 Gl1a\_5799366\_x4.....gggaacacggggGgccgaacu..... 1  
 Gi3\_27771361\_x4.....gucgugggaaacacggggugAcgaac..... 1  
 Gi1\_4038836\_x4.....Aggaacacggggugccgaac..... 1  
 Gi2\_10722959\_x4....gaucggagGcucgugggaaacacggggugcc..... 1  
 Gi1\_4020944\_x4.....gggaacacggggugUcgaacu..... 1  
 Gi4\_539458\_x4.....cgugggaacacggggugccgaCcu..... 1  
 Gi2\_10666631\_x4.....cgucgugggaaacCggggugcc..... 1  
 Gi5\_8638159\_x4.....ucgugUgaacacggggugccgaacu..... 1  
 Gi5\_8623515\_x4.....gggaacacggggGgccgaa..... 1  
 Gi2\_10686939\_x4.....acgucgugggaaacacggggugccgaac..... 1  
 Gi1\_4039724\_x4.....Nacacggggugccgaacu..... 1  
 Gi1\_4033264\_x4.....cgucgugggaaacacggggugc..... 0  
 Gi3\_27785953\_x4.....cgucgugAgaacacggggugccg..... 1  
 Gi2\_10694179\_x4.....cgucgugggaaacacggggugccA..... 1  
 Gi2\_10658387\_x4.....cgugggaacacggggugcUgaa..... 1  
 Gi1\_4020072\_x4.....cgucgugggaaacacggggugcUgaacu..... 1  
 Gi2\_10692675\_x4.....acgucgugggaaacacggggugcUgaacu..... 1  
 Gi3\_27770241\_x4.....gggaacacgggAugccgaa..... 1  
 Gi3\_27767441\_x4.....uUgugggaacacggggugc..... 1

|                 |                                   |   |
|-----------------|-----------------------------------|---|
| Gi1a_5811798_x4 | ...gaucggagacgucgugggaacacggggugc | 0 |
| Gi2_10657759_x4 | ...acgucgugggaCacggggugccgaacu    | 1 |
| Gi3_27788733_x4 | ...gaucggagacgucgugggaaAacggg     | 1 |
| Gi3_27661701_x4 | ...cgugggaaacacAgggugccgaa        | 1 |
| Gi2_10682659_x4 | ...Cgggaacacggggugccga            | 1 |
| Gi5_8647967_x4  | ...gugggaaUacggggugccgaac         | 1 |
| Gi2_10691539_x4 | ...ugggaUcacggggugccgaacu         | 1 |
| Gi2_10658167_x4 | ...Uagacgucgugggaacacggg          | 1 |
| Gi3_27717045_x4 | ...gaAcggagacgucgugggaacacggg     | 1 |
| Gi5_8627283_x4  | ...gggaacacggUgugccgaacu          | 1 |
| Gi2_10706683_x4 | ...ucgAgggaacacggggugccgaac       | 1 |
| Gi2_10701051_x4 | ...cgUagacgucgugggaacacggggugcc   | 1 |
| Gi3_27669845_x4 | ...cgucgugggaacacggggugccgaaU     | 1 |
| Gi5_8615267_x4  | ...agacgucgugggaacacggggugccgGacu | 1 |
| Gi1a_5797090_x4 | ...guUggaacacggggugccgaac         | 1 |
| Gi2_10655663_x4 | ...gggaacacggggugccgaaU           | 1 |
| Gi3_27784565_x4 | ...gacgucgugggaacGcggggugccgaac   | 1 |
| Gi3_27788077_x4 | ...ucgGgggaacacggggugccg          | 1 |
| Gi1a_5771014_x4 | ...Aaucggagacgucguggg             | 1 |
| Gi4_542342_x4   | ...gugggaacGcggggugccgaacu        | 1 |
| Gi3_27716841_x4 | ...cgugggaacacgggAugc             | 1 |
| Gi5_8634323_x4  | ...Cacgucgugggaacacggggugccgaacu  | 1 |
| Gi5_8608931_x4  | ...Ugacgucgugggaacacggggugccgaacu | 1 |
| Gi5_8618879_x4  | ...gugggaacacggggugccgCacuu       | 1 |
| Gi3_27669029_x4 | ...gggaUcacggggugccgaac           | 1 |
| Gi2_10665855_x4 | ...Caucggagacgucgugggaacacggg     | 1 |
| Gi3_27665341_x4 | ...gGucggagacgucguggga            | 1 |
| Gi2_10696631_x4 | ...gaacacggggugcGgaacu            | 1 |
| Gi1_4030608_x4  | ...ucgugggaacacggggugccUaacu      | 1 |
| Gi2_10683255_x4 | ...ggaaacacggggugccAaa            | 1 |
| Gi5_8646047_x4  | ...gugggaacacUgggugccgaacu        | 1 |
| Gi2_10682535_x4 | ...ucgugggaNcacggggugccgaa        | 1 |
| Gi3_27737053_x4 | ...Uacgucgugggaacacggggugcc       | 1 |
| Gi1_4025912_x4  | ...cgucgugggaacacggggugUcgaacu    | 1 |
| Gi3_27715405_x4 | ...acgucgugggaacacAgggugccgaac    | 1 |
| Gi1_4043352_x4  | ...acgucgugggaacacggggugccAaacu   | 1 |
| Gi5_8616231_x4  | ...gugggaacNcggggugcc             | 1 |
| Gi3_27683429_x4 | ...gggaacacggggAgccgaa            | 1 |
| Gi1_4031100_x4  | ...aGcggagacgucgugggaacacggg      | 1 |
| Gi3_27768609_x4 | ...cguggAaacacggggugcc            | 1 |
| Gi3_27777817_x4 | ...cAgagacgucgugggaacacggggugcc   | 1 |
| Gi2_10706547_x4 | ...gggaacacgUggugccgaacu          | 1 |
| Gi2_10654507_x4 | ...gagacgucgugggaacacggggg        | 0 |
| Gi2_10714459_x4 | ...aucggCgacgucgugggaacacggggugc  | 1 |
| Gi2_10651723_x4 | ...ucgugUgaacacggggugccgaacu      | 1 |
| Gi1_4028996_x4  | ...gAgggaacacggggugccgaac         | 1 |
| Gi3_27721385_x4 | ...gucgugggaacacggUgugccgaacu     | 1 |



Gi3\_27741125\_x4.....cgucguggNaacacggggugccgaa..... 1  
Gi2\_10674407\_x4.....cgugggaacacgggAugcc..... 1  
G1a\_5792154\_x4.....Ugagacgucgugggaacacg..... 1  
Gi2\_10665843\_x4.....uGgugggaacacggggugcc..... 1  
Gi5\_8644647\_x4.....ucgugggaNcacggggugccgaac..... 1  
Gi1\_4045516\_x4.....aaAacggggugccgaacu..... 1  
Gi3\_27752801\_x4.....gGgacgucgugggaacac..... 1  
Gi2\_10651487\_x4.....cgucgugggaacacgAggugccgaacu..... 1  
Gi3\_27723293\_x4.....acgucAugggaacacggggugccgaac..... 1  
G1a\_5796122\_x4.....ggaacaUggggugccgaacu..... 1  
Gi2\_10700259\_x4.....Ugacgucgugggaacacggggugccgaac..... 1  
Gi3\_27662145\_x4.....cgucAugggaacacggggugccgaac..... 1  
Gi3\_27720757\_x4...cgUucggagacgucgugggaacacg..... 1  
Gi2\_10661295\_x4.....gugggaacacggggugccU..... 1  
Gi3\_27678173\_x4.....acgucAugggaacacggg..... 1  
Gi2\_10688691\_x4...Caucggagacgucgugggaacacggggu..... 1  
G1a\_5775102\_x4...aucggagaNgucgugggaacacggg..... 1  
Gi3\_27707389\_x4...gaucggagacgCcgugggaacacggggu..... 1  
Gi1\_4024348\_x4.....gacgucgugggaacacggggGgccgaacu..... 1  
Gi5\_8604559\_x4.....agacgucguAggaacacggggugccgaacu..... 1  
Gi1\_4026088\_x4.....ugggaacacggggugccgGac..... 1  
Gi5\_8607575\_x4.....gucgugggNcacggggugccgaac..... 1  
Gi5\_8617687\_x4.....ggaacacggggugccgaGc..... 1  
Gi5\_8649447\_x4.....acgucgugggaaAacggggugccgaacu..... 1  
Gi3\_27666293\_x4.....cgugggaacacgUggugccgaa..... 1  
Gi2\_10686083\_x4.....cCugggaacacggggugccgaa..... 1  
Gi5\_8604567\_x4.....gucgugggaacacggggugccgaaUu..... 1  
Gi2\_10696751\_x4.....cgAcgugggaacacggggugcc..... 1  
Gi5\_8611951\_x4.....ugggaacacUgggugccgaacu..... 1  
Gi4\_540638\_x4.....cAugggaacacggggugccgaacu..... 1  
Gi3\_27778977\_x4.....cgugggaacacggAgugcc..... 1  
Gi2\_10657643\_x4.....gacguUgugggaacacggggu..... 1  
Gi1\_4042292\_x4.....cgugggaacacggggugccgC..... 1  
Gi2\_10670675\_x4...gaucggagNcgucgugggaacac..... 1  
Gi2\_10681195\_x4.....cgucgugggaaUacggggugccgaa..... 1  
Gi2\_10715947\_x4...aucggagacAucgugggaacacggggugc..... 1  
Gi2\_10712395\_x4.....gacgCcgugggaacacggggugccgaacu..... 1  
Gi2\_10722395\_x4.....ugNgaacacggggugccgaacu..... 1  
Gi2\_10708799\_x4...aucggagaUgucgugggaacac..... 1  
G1a\_5788794\_x4...aucggagacgucgAgggaacacggggu..... 1  
Gi3\_27771821\_x4...Ggaucggagacgucguggg..... 1  
Gi2\_10666675\_x4.....gugggaCcacggggugccgaa..... 1  
Gi3\_27717725\_x4.....cgucgugggaaAacggggu..... 1  
Gi1\_4025908\_x4.....cgugggaaNacggggugccgaac..... 1  
Gi3\_27692733\_x4.....gacgucgAgggaacacggggugccgaacu..... 1  
Gi2\_10678603\_x4...aucggagacgucgugggaGcacggggug..... 1  
Gi3\_27710389\_x4...gaucggagacgucgugggaacacggggGgc..... 1

Gi2\_10660043\_x4.....ucggagacNucgugggaacacgggg..... 1  
Gi2\_10713623\_x4.....aucggCgacgucgugggaacac..... 1  
Gi1\_4024244\_x4.....gucgGgggaacacggggugccgaacu..... 1  
Gi2\_10697007\_x4.....ugggaacacggggugccAa..... 1  
Gi2\_10657403\_x4.....gacgucgugggaacacggggugcAgaacu..... 1  
Gi2\_10679019\_x4.....ucgugggaacacUgggugccgaac..... 1  
Gi3\_27713849\_x4...Ggaucggagacgucgugggaacacggggugcc..... 1  
Gi2\_10668115\_x4...gaucAgagacgucgugggaacacggg..... 1  
Gi2\_10653491\_x4.....cgugggaacacggAgugccga..... 1  
Gi1\_4038064\_x4.....uAggaacacggggugccgaac..... 1  
Gi3\_27769929\_x4.....cgucgugggaacacgAgggugcc..... 1  
Gi1\_4025724\_x4.....aCcacggggugccgaacu..... 1  
Gi1\_4039392\_x4...auUggagacgucgugggaacacggggugcc..... 1  
Gi3\_27715657\_x4.....gugggaacacggggugcGga..... 1  
G1a\_5771934\_x4.ugcgauccggagacgucgugggaacacgggggu..... 0  
Gi3\_27690457\_x4...gaucggagacAucgugggaacacg..... 1  
Gi3\_27735993\_x4.....ucgugggaGcacggggugccg..... 1  
Gi2\_10653139\_x4...aCcgagacgucgugggaacacggg..... 1  
Gi2\_10704323\_x4.....acgucgugggaacacggggugccgaUc..... 1  
Gi5\_8631799\_x4...auUggagacgucgugggaacacgggg..... 1  
Gi3\_27776133\_x4.....ucguUggaacacggggugccg..... 1  
Gi3\_27695501\_x4.....ggAaacacggggugccga..... 1  
Gi2\_10702883\_x4...gaucggagacgucgugggaacacgggAu..... 1  
Gi1\_4031264\_x4.....aacacggggugAcgaacu..... 1  
Gi2\_10700367\_x4.....gagGcucgugggaacacggggugc..... 1  
Gi5\_8649595\_x4...aucggagacgucgugggaGcacg..... 1  
Gi2\_10663883\_x4.....acgucgugggaacacggggGgccgaac..... 1  
Gi3\_27752597\_x4...ucggagacgucgugggaGcacg..... 1  
Gi3\_27777973\_x4...ucggagacNucgugggaacac..... 1  
Gi3\_27701465\_x4.....gucgugggNacacggggugccga..... 1  
Gi3\_27697221\_x4.....cguUgugggaacacggggugccgaac..... 1  
Gi3\_27795205\_x4.....cgugggaacacggggGgccgaa..... 1  
G1a\_5786962\_x4...aucggagacgucgugggaacGcgggggu..... 1  
Gi2\_10706939\_x4.....aacNcggggugccgaacu..... 1  
Gi5\_8608435\_x4...aucggagacgucgugggaCcacgggggu..... 1  
G1a\_5771198\_x4...aGcggagacgucgugggaacacggggugc..... 1  
Gi3\_27770185\_x4.....ugggaacacggggugGcga..... 1  
Gi3\_27707805\_x4...aucggagacgucgGgggaacacgggg..... 1  
Gi3\_27666957\_x4.....ggaaUacggggugccgaa..... 1  
Gi3\_27779025\_x4...cggagacgNcgugggaacacgggg..... 1  
Gi3\_27665753\_x4.....gagacgucgCgggaacacgggggu..... 1  
G1a\_5793330\_x4...aucggagaNucguggga..... 1  
Gi1\_4047116\_x4.....Ncgugggaacacggggugccgaacu..... 1  
Gi3\_27780521\_x4...aucggagacgucgugggaAacggg..... 1  
Gi3\_27734585\_x4.....aGacggggugccgaacuu..... 1  
Gi5\_8643479\_x4.....ggaacacgCggugccgaacu..... 1  
Gi2\_10680863\_x4.....gagacgucgugggaacGcggggug..... 1

Gi2\_10691303\_x4.....cgugggaGcacggggugc..... 1  
Gi3\_27691521\_x4.....cgucgugggaacGacggggugccgaacu..... 1  
Gi5\_8639555\_x4.....cgucgugggaacacggggGgcc..... 1  
Gi2\_10714363\_x4.....gggaacaAggggugccgaac..... 1  
Gi3\_27687029\_x4.....cgugggaacacggggGgc..... 1  
Gi1\_4025728\_x4.....ucgCgggaacacggggugccgaac..... 1  
Gi3\_27756909\_x4.....ggaacacggggugcUgaa..... 1  
Gi2\_10655843\_x4.....gugggaacacggggugccUaac..... 1  
Gi2\_10671239\_x4.....gaucggagacgucguggaacG..... 1  
Gi3\_27778497\_x4.....aucggagacgucgugUgaacacg..... 1  
Gi3\_27707665\_x4.....cgucUugggaacacggggugccga..... 1  
Gi5\_8624767\_x4.....aucggagaNgucgugggaacacgggggu..... 1  
Gi5\_8634123\_x4.....cgucguggNaacacggggugc..... 1  
Gi5\_8617675\_x4.....cgugggaacacggggCgccgaac..... 1  
Gi5\_8641743\_x4.....gugggaacCcggggugcc..... 1  
Gi2\_10689127\_x4.....gauUggagacgucgugggaacacggggugc..... 1  
Gi3\_27716605\_x4.....ugggaacacggggUcccgaac..... 1  
Gi1\_4036740\_x4.....gGcugcugggaacacggggugccg..... 1  
Gi2\_10651315\_x4.....gggaacacggggugccgaG..... 1  
Gi3\_27781837\_x4.....acAucgugggaacacggggugccgaac..... 1  
Gi3\_27698393\_x4.....aUgucgugggaacacggggugcc..... 1  
Gi3\_27702717\_x4.....ucgugggaacacggggugccgUac..... 1  
Gi5\_8605147\_x4.....uAggaacacggggugccgaa..... 1  
Gi5\_8622043\_x4.....gggaacacgUggugccgaacu..... 1  
Gi2\_10657831\_x4.....aucggagacgucguggCacacggggug..... 1  
Gi1\_4023168\_x4.....gucgugggaacacggggugccAaacu..... 1  
Gi1\_4031496\_x4.....ugggaacacggggugccgaacAu..... 1  
Gi2\_10710563\_x4.....ugggaacCcggggugccga..... 1  
Gi3\_27795073\_x4.....aucggagacgucgugAgaacacgggg..... 1  
Gi2\_10669555\_x4.....aucggagacgucgCgggaacacg..... 1  
Gi3\_27756937\_x4.....aucggagacgucguggAaacacggggugccga..... 1  
Gi3\_27712817\_x4.....aucgCagacgucgugggaacacggg..... 1  
Gi3\_27760709\_x4.....aucggagacgucgugggaacCcggggugcc..... 1  
Gi1\_4043696\_x4.....cgucgugggaacacggggugccgGacu..... 1  
Gi3\_27776897\_x4.....cgucguAggaacacggggugccg..... 1  
Gi3\_27726041\_x4.....cUgagacgucgugggaacacggggugccg..... 1  
Gi3\_27669709\_x4.....aucggagacgucgugggaacacgCg..... 1  
Gi1\_4019580\_x4.....gugggaacacggggCgcc..... 1  
Gi3\_27790425\_x4.....cgugggaacCcggggugccgaa..... 1  
G1a\_5801690\_x4.....cgugggaacacgggAugccgaacu..... 1  
Gi3\_27705125\_x4.....gggaacacggggugGcgaacu..... 1  
Gi2\_10684815\_x4.....aucggagacguUguggaacac..... 1  
Gi1\_4043060\_x4.....aucggagacgucgugggaacacggggug..... 0  
Gi3\_27720185\_x4.....cgugggaacacggggugccgU..... 1  
Gi2\_10718983\_x4.....gaucggagacgucgugggaaUacggg..... 1  
Gi1\_4033860\_x4.....guggCaacacggggugccgaacu..... 1  
Gi2\_10686547\_x4.....ucgugggaGcacggggugccg..... 1

Gi2\_10722551\_x4.....cguAggaacacggggugcc..... 1  
 Gi3\_27793241\_x4.....gugggaUcacggggugccga..... 1  
 Gi2\_10667583\_x4...gGucggagacgucgugggaac..... 1  
 Gl1a\_5807754\_x4.....gugggaacacggggGgcc..... 1  
 Gi2\_10718483\_x4.....gugggaacacggggugcUgaa..... 1  
 Gi3\_27785525\_x4.....gucgugggGcacggggugcc..... 1  
 Gi3\_27752789\_x4...cgUucggagacgucgugggaacacgggggu..... 1  
 Gi3\_27703125\_x4.....gucgugggaacGcggggugc..... 1  
 Gi3\_27729933\_x4.....cgucgugggaacacgggAgugccgaac..... 1  
 Gi3\_27719861\_x4.....ugggaacaAggggugccgaa..... 1  
 Gi3\_27705521\_x4....aucggagaUgucgugggaacac..... 1  
 Gl1\_4038772\_x4.....gucgugggaacacgAggugccgaacu..... 1  
 Gl1a\_5801170\_x4...gGucggagacgucgugggaacacggg..... 1  
 Gl1a\_5795834\_x4....aucggagacgucgugggaCcacggg..... 1  
 Gi2\_10673959\_x4....aAcggagacgucgugggaacacg..... 1  
 Gl1\_4037992\_x4.....ugggaacacggggugccgaUc..... 1  
 Gi2\_10716535\_x4.....cggagacguUgugggaacacggggugcc..... 1  
 Gi3\_27770577\_x4.....gagacgucgugggaacacggggugccgaCcu..... 1  
 Gi2\_10718559\_x4.....gggGacacggggugccgaa..... 1  
 Gi2\_10720603\_x4.....cgugggaGcacggggugccgaa..... 1  
 Gi2\_10690583\_x4.....gugggaacacgggAugccga..... 1  
 Gi2\_10695351\_x4.....uggAaacacggggugccg..... 1  
 Gl1\_4040668\_x4.....cgucgugggaacacggggguAccgaacu..... 1  
 Gi3\_27741129\_x4.....aacacggggguCccgaacu..... 1  
 Gi3\_27775985\_x4.....gacgucgugggaacacggggGgccg..... 1  
 Gi3\_27782921\_x4....cggagacgucguAggaacacggggugcc..... 1  
 Gi3\_27753805\_x4....cggagacgucgugggaacGcgggggu..... 1  
 Gi3\_27733677\_x4.....cgugggUacacggggugcc..... 1  
 Gi2\_10650715\_x4.....gucgugggaacCcggggugc..... 1  
 Gi2\_10652547\_x4.....cgucAugggaacacggggugccga..... 1  
 Gi3\_27726709\_x4.....gacgucgugggaacacggggugccgGacu..... 1  
 Gi2\_10703771\_x4.....gGcgucgugggaacacggggugc..... 1  
 Gi2\_10677851\_x4.....ucgugggaacacggggCgccgaa..... 1  
 Gi2\_10708903\_x4.....gugggaacacggggUccgaac..... 1  
 Gi2\_10703519\_x4.....Agucgugggaacacggggugcc..... 1  
 Gi3\_27774305\_x4.....Gcgucgugggaacacggg..... 1  
 Gl1\_4023196\_x4.....gucgugggaacGcggggugccgaacu..... 1  
 Gl1\_4025196\_x4.....ggaacacggggCgccgaac..... 1  
 Gi2\_10661719\_x4.....cgucgCgggaacacggggugccga..... 1  
 Gi2\_10683543\_x4.....agacgucgCgggaacacggggugccgaacu..... 1  
 Gl1\_4044024\_x4...cgaucggagacgucgugg..... 0  
 Gi2\_10654643\_x4.....ugggaacacggggugccA..... 1  
 Gi2\_10700199\_x4...gaucUgagacgucguggga..... 1  
 Gi2\_10683771\_x4....aucggagacgucgugAgaacacggg..... 1  
 Gl1\_4039652\_x4....aucggGgacgucgugggaacac..... 1  
 Gi2\_10665167\_x4....cgucgugAgaacacggggugccga..... 1  
 Gi3\_27692461\_x4....aucggagacgucgugggaacacgggU..... 1

|                                                           |   |
|-----------------------------------------------------------|---|
| Gi3_27674801_x4.....uggaacacgUggugccgaac.....             | 1 |
| Gi2_10722983_x4.....uggaacacgggAugccgaac.....             | 1 |
| Gi1_4040776_x4.....gGcgugggaacacggggug.....               | 1 |
| Gi3_27692645_x4...gaucggagCcgucgugggaacacggggg.....       | 1 |
| Gi3_27730009_x4.....gGgacgucgugggaacacggggugccg.....      | 1 |
| Gi1_4044872_x4.....gugUgaacacggggugccgaacu.....           | 1 |
| Gi3_27688325_x4Gugcgauccgagacgucg.....                    | 1 |
| Gi3_27705049_x4...gaCcgagacgucgugggaacac.....             | 1 |
| Gi1_4021340_x4.....cgugggaacacgggCugccgaacu.....          | 1 |
| Gi3_27783021_x4.....Cggaacacggggugccga.....               | 1 |
| Gi2_10689619_x4.....ucgugggUacacggggugccgaac.....         | 1 |
| Gi1_4041564_x4.....cgucgugggaacacAgggugccgaacu.....       | 1 |
| Gi2_10700343_x4.....aacacgggCugccgaacu.....               | 1 |
| Gi2_10706567_x4.....cgucgugggaacacAgggugc.....            | 1 |
| Gi2_10697951_x4.....ucgugCgaacacggggugccgaacu.....        | 1 |
| Gi2_10663267_x4.....gugggaacacggggugccC.....              | 1 |
| Gi2_10688771_x4.....cCucgugggaacacggggugccgaac.....       | 1 |
| Gi3_27748285_x4.....cgucgugggaacacggggugccgGac.....       | 1 |
| Gi2_10715419_x4...aucgUagacgucgugggaacacggg.....          | 1 |
| Gi3_27714501_x4.....cgugggaacacgggCugccga.....            | 1 |
| Gi1_4037020_x4.....ggaacacggggugccgCac.....               | 1 |
| Gi2_10691855_x4...aucggagacgucgugggaCcacgg.....           | 1 |
| Gi3_27726945_x4.....gGcgucgugggaacacgg.....               | 1 |
| Gi3_27701273_x4...ucggagacNucgugggaacacgg.....            | 1 |
| Gi3_27761589_x4...aucggagacgucguAggaacac.....             | 1 |
| Gi1_4040760_x4.....gggaacUcggggugccgaacu.....             | 1 |
| Gi5_8624831_x4.....uggAaacacggggugccgaa.....              | 1 |
| Gi3_27717401_x4.....cgugggaacaUggggugccga.....            | 1 |
| Gi2_10688423_x4.....acgucgugggaacGcggggugcc.....          | 1 |
| Gi2_10713683_x4.....ugggaGcacggggugccgaacu.....           | 1 |
| Gi5_8608663_x4.....ugggaGcacggggugccgaa.....              | 1 |
| Gi3_27702173_x4.....gucgugggaacacggggugccgUac.....        | 1 |
| Gi5_8640451_x4.....agacgCcgugggaacacggggugccgaacu.....    | 1 |
| Gi1_4045568_x4.....ggagacgucgugggGacacggggugcc.....       | 1 |
| Gi1a_5797370_x4.....gugggaCcacggggugccgaacu.....          | 1 |
| Gi1_4025900_x4.....cggagacgucgugggaacacggggugccgaacA..... | 1 |
| Gi2_10717723_x4.....cggagacgucguUggaacacggggugc.....      | 1 |
| Gi2_10701151_x4...gaucggagacgucgugggaacacggggGgc.....     | 1 |
| Gi3_27759553_x4.....cgugggCacacggggugccga.....            | 1 |
| Gi1_4042752_x4.....ucguCggaacacggggugccgaacu.....         | 1 |
| Gi1_4037868_x4...aCcgagacgucgugggaacacg.....              | 1 |
| Gi2_10669615_x4.....gugggaacacgggUgugccgaa.....           | 1 |
| Gi3_27792301_x4.....cgugggaacacAgggugcc.....              | 1 |
| Gi1_4031884_x4...auUggagacgucgugggaacacg.....             | 1 |
| Gi2_10715967_x4...aucggagacgucgugggaacacgAggu.....        | 1 |
| Gi3_27703261_x4.....cgNgggaacacggggugccgaac.....          | 1 |
| Gi2_10684891_x4.....ggagacgucgugggaaca.....               | 0 |

Gi3\_27715809\_x4.....aucNgagacgucgugggaacacggggu..... 1  
Gi3\_27697101\_x4.....gggaacacggggugccgaCcuu..... 1  
Gi3\_27733253\_x4.....cggagacgucgugAgaacacggggugcc..... 1  
Gi1\_4018700\_x4.....guggUaacacggggugcc..... 1  
Gi2\_10653783\_x4.....gAgggaacacggggugccgaa..... 1  
Gi3\_27786137\_x4.....Gggagacgucgugggaacacg..... 1  
Gi3\_27726681\_x4.....ucgugggaacCggggugccg..... 1  
Gi2\_10660843\_x4.....ggaacacgggguCccgaacu..... 1  
Gi1\_4038824\_x4.....acgucgugggaacGcggggugccgaacu..... 1  
Gi1\_4036300\_x4.....Uaucggagacgucgugggaacacggggu..... 1  
Gi3\_27743201\_x4.....cgucgugggaacacgggAugc..... 1  
Gi2\_10689999\_x4.....cAugggaacacggggugccgaa..... 1  
Gi5\_8648859\_x4.....cgugggaacacggggugccgaaU..... 1  
Gi1\_4018832\_x4.....acUucgugggaacacggggugccgaacu..... 1  
Gi5\_8624251\_x4.....gacgucgCgggaacacggggugccgaacu..... 1  
G1a\_5774446\_x4.....gucgugggNacacggggugccgaacu..... 1  
Gi3\_27771653\_x4.....gggGacacggggugccga..... 1  
Gi2\_10688631\_x4.....gUucggagacgucgugggaacacg..... 1  
Gi1\_4043712\_x4.....cgucgugggaacacggggugccgaaUu..... 1  
Gi2\_10696771\_x4.....gCacacggggugccgaacu..... 1  
Gi2\_10702943\_x4.....aucggagacgucgugAgaacac..... 1  
Gi3\_27756501\_x4.....aucggagacgucgugggCacacggggugcc..... 1  
Gi2\_10693883\_x4.....gucgugggaacacgggAgugccgaac..... 1  
Gi3\_27728941\_x4.....aucggagacgucgugggaacacAgggugc..... 1  
Gi3\_27659185\_x4.....gCacacggggugccgaac..... 1  
Gi1\_4027332\_x4.....uGgugggaacacggggugc..... 1  
Gi2\_10720291\_x4..Ucgauccgagacgucgugggaaca..... 1  
Gi3\_27750213\_x4.....aUacgucgugggaacacggggugccgaa..... 1  
Gi3\_27744237\_x4.....acgucgugggaacacggggugccgGac..... 1  
Gi4\_541694\_x4.....cgucgugggaacacggggGgccga..... 1  
Gi3\_27692653\_x4.....cgucgugggCacacggggugccgaacu..... 1  
Gi2\_10713587\_x4.....gucgugggaacaUggggugccgaac..... 1  
Gi3\_27768137\_x4.....aucggUgacgucgugggaacacggggu..... 1  
Gi2\_10659323\_x4.....aucggagCcgucgugggaacacggggugcc..... 1  
Gi3\_27777709\_x4.....ugggaacacggggugcAga..... 1  
Gi3\_27763373\_x4.....gucgugggaacacggggugUcgaac..... 1  
G1a\_5803606\_x4.....ggaaUacggggugccgaacu..... 1  
Gi1\_4039560\_x4.....aacacggCgugccgaacu..... 1  
Gi2\_10666823\_x4.....ggagacgucgugggaacacggggCgc..... 1  
Gi2\_10664675\_x4.....Gucggagacgucgugggaacacgg..... 1  
Gi5\_8647267\_x4.....Agggaacacggggugccgaac..... 1  
Gi2\_10653691\_x4.....Cgagacgucgugggaacacggggug..... 1  
Gi3\_27771669\_x4.....ggaacacggggugGcgaac..... 1  
Gi2\_10663879\_x4.....gaucggagacgCcgugggaacacggggugc..... 1  
Gi2\_10708887\_x4.....agacgucgugggaacacggggugccgaGcu..... 1  
Gi2\_10717987\_x4.....gaGcggagacgucgugggaacac..... 1  
Gi5\_8622631\_x4.....cgucgugggaacacgAggugccgaacu..... 1

Gi3\_27661253\_x4.....gaUgucgugggaacacggg..... 1  
Gi3\_27679521\_x4....gaucggagacgucgugggGacacg..... 1  
Gi2\_10674867\_x4....aucggagacgucgugggaacacggAgugcc..... 1  
Gi5\_8631911\_x4.....agacgucgugggaacacggggugccAaacu..... 1  
Gi3\_27750069\_x4.....agacgucgugggaacGcggggugccga..... 1  
Gi3\_27708269\_x4....gaucggagGcgucgugggaacacg..... 1  
Gi3\_27743773\_x4.....acguAgugggaacacggggugccgaacu..... 1  
Gi2\_10693675\_x4.....uCGgaacacggggugccgaa..... 1  
Gi5\_8618343\_x4.....cgucgugggaacacggggugccgaacG..... 1  
Gi3\_27670845\_x4....cggagacgucgugggaGcacggg..... 1  
Gi3\_27782029\_x4....uUggagacgucgugggaacacggggugcc..... 1  
Gi3\_27724069\_x4.....ggagGcgucgugggaacacggggg..... 1  
G1a\_5769530\_x4.....cgCgggaacacggggugcc..... 1  
Gi3\_27784989\_x4.....cgucgugggaacacggggugccgUacu..... 1  
Gi2\_10687223\_x4.....uggaacacggggAgccgaac..... 1  
Gi2\_10709723\_x4....gaucggagacgucgugggGaca..... 1  
Gi2\_10716187\_x4.....ggagacgucgugggaGcacggggugc..... 1  
Gi1\_4028512\_x4.....aGgucgugggaacacggggugccg..... 1  
Gi3\_27700957\_x4.....cgucgugggaacaUggggugc..... 1  
Gi1\_4041324\_x4.....Ggggaacacggggugccg..... 1  
Gi3\_27666805\_x4.....guggaacacggggugccUaa..... 1  
Gi3\_27749517\_x4.....acguUgugggaacacggggugccgaac..... 1  
Gi5\_8649775\_x4....aucgUagacgucgugggaacacg..... 1  
Gi3\_27694661\_x4.....ggagacgucgugggGacacg..... 1  
Gi3\_27700981\_x4.....ggCacacggggugccgaac..... 1  
Gi3\_27696297\_x4....gaucggagacgucgCgggaacacgggg..... 1  
Gi5\_8617719\_x4.....agacgucgugggaacacggggugccgaGcu..... 1  
Gi3\_27780277\_x4.....gUcgucgugggaacacggg..... 1  
Gi1\_4036720\_x4.....uggaacacggggugccAaac..... 1  
G1a\_5771386\_x4...cgUucggagacgucgugg..... 1  
Gi1\_4020984\_x4.....acgucgugggaacacggggugcAg..... 1  
Gi5\_8623475\_x4.....gaacaGggggugccgaacu..... 1  
Gi5\_8609639\_x4.....Agggaacacggggugccgaa..... 1  
Gi3\_27669081\_x4.....cgugggaacaUggggugc..... 1  
Gi4\_543106\_x4.....Cugggaacacggggugccgaacu..... 1  
Gi2\_10652051\_x4.....cgugggaCcacggggugccgaac..... 1  
Gi2\_10712563\_x4.....ggagacgucgugggaacacggggAgcc..... 1  
G1a\_5792278\_x4...Ggaucggagacgucgugg..... 1  
Gi2\_10680359\_x4.....acgucAugggaacacggggugccgaacu..... 1  
Gi5\_8629475\_x4.....guggaacacggggugcAgaac..... 1  
Gi3\_27751249\_x4.....agacgucgugggaacacggggugccGacu..... 1  
Gi5\_8627811\_x4.....uggaacacggggCugccgaac..... 1  
Gi3\_27767317\_x4....gaucggagacgucgugggaacacAggg..... 1  
Gi2\_10676559\_x4.....gacgucgugggaCcacggggugccgaacu..... 1  
Gi3\_27671633\_x4.....gggaacacggggugAcgaa..... 1  
Gi2\_10712927\_x4.....cgucgugggaacacggggUaccg..... 1  
Gi5\_8603019\_x4.....cgugggaacacCggggugccgaacu..... 1

Gi1\_4035496\_x4.....gggaacacggggugAcgaacu..... 1  
 Gi3\_27756629\_x4....aucggagacgAcgugggaacacggggg..... 1  
 Gi2\_10658539\_x4.....ugggaacacggggGgccgaac..... 1  
 Gi2\_10683087\_x4.....gggaacacgggUugccgaacu..... 1  
 Gi3\_27733157\_x4.....cgucguUggaacacggggugccgaacu..... 1  
 Gi3\_27757225\_x4....ucggagacgucgugggaacacggggAgcc..... 1  
 Gi2\_10658199\_x4.....cggagacgucguggAaacacggggugcc..... 1  
 Gi5\_8641103\_x4.....cGcggggugccgaacuuu..... 1  
 Gi2\_10664023\_x4.....aUacgucgugggaacacggggugccga..... 1  
 Gi3\_27690821\_x4....ucggagacgucgugggaacacggggC..... 1  
 Gi2\_10678979\_x4.....gggaacacCggggugccgaacu..... 1  
 Gl1a\_5787258\_x4.....cAugggaacacggggugccgaacu..... 1  
 Gi3\_27677557\_x4....gaucggagacgucgugggaacacAgg..... 1  
 Gi1\_4020016\_x4.....gggaacaAggggugccgaacu..... 1  
 Gi3\_27691109\_x4.....gAagacgucgugggaacacggggugcc..... 1  
 Gi2\_10681247\_x4....cggagacgucgugggaacacggggugccgaa..... 0  
 Gi1\_4028444\_x4.....Ugugggaacacggggugccgaac..... 1  
 Gi3\_27696041\_x4.....cgugggaacacggggAgccga..... 1  
 Gi5\_8625791\_x4.....cgugggaacacggggugccAaac..... 1  
 Gi1\_4033888\_x4.....ugggaacacUgggugccgaacu..... 1  
 Gi2\_10694191\_x4.....aAacgucgugggaacacggggugccgaacu..... 1  
 Gi1\_4042664\_x4.Ggcgaucggagacgucguggga..... 1  
 Gi5\_8643723\_x4.....acgucgAgggaacacggggugccgaacu..... 1  
 Gi5\_8629723\_x4.....cgugggaacacggggCccgaacu..... 1  
 Gi3\_27763197\_x4.....aacGcggggugccgaacu..... 1  
 Gi1\_4029108\_x4.....Aaacacggggugccgaac..... 1  
 Gi3\_27659837\_x4....Gcggagacgucgugggaaca..... 1  
 Gi1\_4039688\_x4.....cgugggaaNacggggugccga..... 1  
 Gi3\_27778029\_x4.....ggagacguNgugggaacacggggg..... 1  
 Gi3\_27708985\_x4.....ggagacgucgCgggaacacggggugcc..... 1  
 Gi2\_10706099\_x4....gaucggagacgucgugggCacacg..... 1  
 Gi2\_10708987\_x4.....ggagacgucgugggaCcacggggugcc..... 1  
 Gl1a\_5773222\_x4....aucggagacgucgugggaacacggggugccgaacu..... 0  
 Gi5\_8611779\_x4.....gugggaacacggggGgccga..... 1  
 Gl1a\_5783022\_x4.....gugggaacacggggCgcc..... 1  
 Gi1\_4032256\_x4.....cUugggaacacggggugcc..... 1  
 Gi2\_10723243\_x4.....gaacGcggggugccgaac..... 1  
 Gi3\_27670061\_x4.....gNgggaacacggggugccgaacu..... 1  
 Gi2\_10651807\_x4.....ugggaacaGggggugccgaacu..... 1  
 Gi2\_10686883\_x4.....gugggaacacggggugccGga..... 1  
 Gl1a\_5776298\_x4.....aacacggggugccAaacu..... 1  
 Gl1a\_5772950\_x4.....cgugUgaacacggggugcc..... 1  
 Gi3\_27694593\_x4.....cgugAgaacacggggugc..... 1  
 Gi2\_10682939\_x4....ucggagacgucgugggaacGcggggugc..... 1  
 Gi3\_27723269\_x4....cUgagacgucgugggaacacggggugccgaacu..... 1  
 Gi3\_27669909\_x4....aucggagacgucAugggaacacgggg..... 1  
 Gi2\_10655223\_x4....aucAgagacgucgugggaacacggg..... 1



|                      |                                     |   |
|----------------------|-------------------------------------|---|
| Gi1_4017984_x4.....  | gggaacacggggugccgaa.....            | 0 |
| Gi1_4027448_x4.....  | ggaacaUggggugccgaac.....            | 1 |
| Gi2_10684231_x4..... | gugggaacaAggggugccgaa.....          | 1 |
| Gi2_10697299_x4..... | aucggagCcgucgugggaacacggg.....      | 1 |
| Gi5_8622655_x4.....  | gugggaacacggggugAcgaac.....         | 1 |
| Gi3_27666501_x4..... | ggagacgucgugggaacacggggGgcc.....    | 1 |
| Gi2_10665959_x4..... | ugggaacacggAgugccg.....             | 1 |
| Gi5_8614939_x4.....  | aucggagaNgucgugggaacacg.....        | 1 |
| Gi1_4024168_x4.....  | gugggaacNcggggugccg.....            | 1 |
| Gi3_27747437_x4..... | ugggaacacggGgugccgaac.....          | 1 |
| Gi2_10666047_x4..... | aucggagacgucgugAgaacacggggugcc..... | 1 |
| Gi2_10722283_x4..... | ucggagacgucAugggaacacggggugc.....   | 1 |
| Gi3_27674365_x4..... | gaacacggggugccgaaA.....             | 1 |
| Gi5_8617403_x4.....  | gUagacgucgugggaaca.....             | 1 |
| Gi2_10676867_x4..... | aucggagUcgucgugggaacacggggg.....    | 1 |
| Gi5_8622475_x4.....  | cgugggaacacgAggugccgaac.....        | 1 |
| Gi2_10691555_x4..... | cggagacgucgugggaacaUggggugcc.....   | 1 |
| Gi1_4041360_x4.....  | gaaNacggggugccgaacu.....            | 1 |
| Gi4_539354_x4.....   | aUacgucgugggaacacggggugccgaacu..... | 1 |
| Gi3_27700353_x4..... | gacgucgugggaCcacggggugccgaacu.....  | 1 |
| Gi2_10688163_x4..... | gaucggagacgucgCgggaacacggggug.....  | 1 |
| Gi2_10708919_x4..... | ggCacacggggugccgaacu.....           | 1 |
| Gi2_10707471_x4..... | gaucggagacgucgugggaacGc.....        | 1 |
| Gi2_10679827_x4..... | gaacacggggugGcgaacu.....            | 1 |
| Gi2_10678563_x4..... | cggagacgucgugggaacacggggugcU.....   | 1 |
| Gi5_8606787_x4.....  | gugAgaacacggggugccgaac.....         | 1 |
| Gi2_10656135_x4..... | gaucggagacgucgCgggaacacg.....       | 1 |
| Gi3_27754081_x4..... | guUgugggaacacggggg.....             | 1 |
| Gi5_8603663_x4.....  | ucgugggaacacggggugccgaGc.....       | 1 |
| Gi2_10681047_x4..... | ucUggggaacacggggugccg.....          | 1 |
| Gi2_10653319_x4..... | acgucgugggCacacggggugc.....         | 1 |
| Gi2_10691983_x4..... | ugAgaacacggggugccga.....            | 1 |
| Gi5_8621383_x4.....  | gacgucgugggaacacggggCgcccgaacu..... | 1 |
| Gi3_27781861_x4..... | aucggagacgucgugggaacacggggugAc..... | 1 |
| Gi5_8635335_x4.....  | Ngugggaacacggggugccgaacu.....       | 1 |
| Gi3_27716193_x4..... | aucggagacgucgugggaacCc.....         | 1 |
| Gi1_4046432_x4.....  | ucgugggaacacggggGgccgaac.....       | 1 |
| Gi3_27788965_x4..... | gacgucgugggaacGcggg.....            | 1 |
| Gi2_10700615_x4..... | agacgucgugggaacacggggugcUgaacu..... | 1 |
| Gi1_4028704_x4.....  | gggaacacggggugccgUacu.....          | 1 |
| Gi5_8620015_x4.....  | gucgugggaacacggggugAcgaacu.....     | 1 |
| Gi2_10660671_x4..... | gaucUgagacgucgugggaacacggggug.....  | 1 |
| Gi2_10717167_x4..... | acgucgugNgaacacggggugccg.....       | 1 |
| Gi2_10654827_x4..... | cgucgugggaacacggggAgcc.....         | 1 |
| Gi3_27738965_x4..... | ucgNgggaacacggggugccgaac.....       | 1 |
| Gi2_10657707_x4..... | agacgucgugggaacacggggugccgGacu..... | 1 |
| Gi3_27729553_x4..... | cgucgugggaacacggggAgccg.....        | 1 |

Gi5\_8630143\_x4.....ucgNgggaacacggggugccgaacu..... 1  
Gi2\_10713743\_x4.....gacgucgugggaacacggggGgccg..... 1  
Gi5\_8621247\_x4.....uAgugggaacacggggugccgaacu..... 1  
Gi2\_10678207\_x4.....cgugggaacUcggggugcc..... 1  
Gi3\_27685129\_x4.....Ugacgucgugggaacacggggugccgaacu..... 1  
G1a\_5812278\_x4.....gugggaacGcggggugccga..... 1  
Gi5\_8604779\_x4.....uUgugggaacacggggugccgaac..... 1  
Gi4\_538718\_x4.....gacgucgugggaacacggggugccgaacuuu..... 0  
Gi2\_10689119\_x4.....ucgugggaacacggggugcAgaac..... 1  
Gi1\_4032672\_x4.....gaacacggggugGcgaacu..... 1  
Gi3\_27724525\_x4.....cggagacgNcgugggaacacggggugc..... 1  
G1a\_5800046\_x4.....aucggagGcgcgucgugggaacacggg..... 1  
G1a\_5786810\_x4.....cgugggaacacggggugccgaCc..... 1  
Gi3\_27772421\_x4.....ggNaacacggggugccgaacu..... 1  
Gi3\_27739449\_x4.....cgucgugggaacacggUgugccgaacu..... 1  
Gi2\_10656443\_x4.....ucgGgggaacacggggugccgaac..... 1  
Gi2\_10666131\_x4.....gggaaAacggggugccgaac..... 1  
Gi2\_10701731\_x4.....cgugggaacacggggugccAaa..... 1  
Gi5\_8635359\_x4.....gCgaacacggggugccgaac..... 1  
Gi1\_4019344\_x4.....aucggagacgucgugggaaca..... 0  
G1a\_5767646\_x4.....cgugggaacacggggUAccgaacu..... 1  
Gi1\_4037488\_x4.....ggagacgucgugggaacacggggugccgaac..... 0  
Gi2\_10718503\_x4.....aacacggUgugccgaacu..... 1  
Gi1\_4047268\_x4.....ggagacgCcgugggaacacggggugcc..... 1  
Gi5\_8648679\_x4.....gaaAacggggugccgaacu..... 1  
Gi1\_4039732\_x4.....ugggaacacggAgugccgaac..... 1  
Gi2\_10660479\_x4.....aucggagacgucgugggCacacgg..... 1  
Gi2\_10708443\_x4.....cgucgugggaacacAgggugccga..... 1  
Gi1\_4029492\_x4.....Ugagacgucgugggaacacggggug..... 1  
Gi3\_27687213\_x4.....gagGcgcgucgugggaacacggggugccgaac..... 1  
Gi3\_27762549\_x4.....acgNcgugggaacacggggugccgaacu..... 1  
Gi3\_27697785\_x4.....gacgucguAggaacacggggugccgaacu..... 1  
Gi3\_27662149\_x4.....cgugggaacacggggugccCaacu..... 1  
Gi5\_8604019\_x4.....ugggaacacggggugccAaa..... 1  
Gi3\_27663717\_x4.....gaucggagacgucgugggaacacA..... 1  
Gi5\_8607371\_x4.....cgugggaacacgggUugccgaacu..... 1  
Gi5\_8623699\_x4.....gaacacggggugccgaCc..... 1  
Gi3\_27717021\_x4.....agacUucgugggaacacggggugccgaac..... 1  
Gi5\_8650423\_x4.....guUggaacacggggugcc..... 1  
Gi2\_10720747\_x4.....gucgugggGacacggggugc..... 1  
Gi3\_27700709\_x4.....gggaacacggggugccgaaGu..... 1  
Gi3\_27791561\_x4.....cgucgugggaacacgAggugccg..... 1  
Gi3\_27699597\_x4.....acgucgugUgaacacggggugccgaac..... 1  
Gi3\_27700041\_x4.....cgucgugggaaUacggggugcc..... 1  
Gi2\_10669911\_x4.....agacgucAugggaacacggggugcc..... 1  
Gi5\_8609507\_x4.....ugggaacacgAggugccgaac..... 1  
Gi3\_27782153\_x4.....acacggggugccAaacuu..... 1

Gi4\_541970\_x4 .....Ugaacacggggugccgaacu..... 1  
 Gi2\_10682075\_x4...gaAcggagacgucguggga..... 1  
 Gl1\_5810754\_x4.....uggaacacggggugccgaCcu..... 1  
 Gi3\_27682281\_x4....aucggagacgucgGgggaacacggggg..... 1  
 Gi3\_27710817\_x4.....aCacgucgugggaacacggggugccgaacu..... 1  
 Gi1\_4034184\_x4.....ucgugggaacacggggugccgaaA..... 1  
 Gi5\_8637743\_x4...gaucggagacgucgugggaacacggggugc..... 0  
 Gi2\_10653591\_x4.....gggCacacggggugccgaacu..... 1  
 Gi2\_10675807\_x4...gaucggagacgucgugggaacacggggAgc..... 1  
 Gi3\_27726705\_x4.....gucgugggaacacggggugccgaaU..... 1  
 Gi1\_4047472\_x4.....gucgugggaacacggggugccga..... 0  
 Gi5\_8608747\_x4.....acgucgugggaacacggggugAcgaacu..... 1  
 Gi2\_10690275\_x4.....cgugggaacacggggugccgaacuu..... 0  
 Gi2\_10686635\_x4.....gggaacacUgggugccgaacu..... 1  
 Gi5\_8606935\_x4.....gGgacgucgugggaacacg..... 1  
 Gi3\_27712101\_x4.....ucggGgacgucgugggaaca..... 1  
 Gi1\_4020904\_x4...Gucggagacgucgugggaacacggggugcc..... 1  
 Gi5\_8604307\_x4.....Cugggaacacggggugcc..... 1  
 Gi1\_4032420\_x4..gcgauccggagacgucgugggaacacggggugc..... 0  
 Gi3\_27689197\_x4.....Gggagacgucgugggaacacgggg..... 1  
 Gi4\_543682\_x4.....gugggaacacggggugccgaacA..... 1  
 Gi3\_27758077\_x4.....gucgugggGacacggggugccga..... 1  
 Gi3\_27716829\_x4.....cgucgugAgaacacggggugccgaac..... 1  
 Gi3\_27787737\_x4.....gagacgucgugggaacacggggC..... 1  
 Gi3\_27721025\_x4.....gggaacacggggugccUaac..... 1  
 Gi3\_27672397\_x4.....ugggaacacggggUaccg..... 1  
 Gi2\_10652883\_x4....aucggagacgucgugggaacGcgggg..... 1  
 Gl1\_5788706\_x4.....Augggaacacggggugcc..... 1  
 Gi1\_4025240\_x4.....Uugggaacacggggugccgaa..... 1  
 Gi3\_27785317\_x4.....gaacacggggugccgGac..... 1  
 Gi4\_542922\_x4.....cgugggaacacggggugccgaGcu..... 1  
 Gi5\_8633391\_x4.....agacgucgugggaacacggggGgccgaacu..... 1  
 Gi1\_4035276\_x4.....uggaacacggAgugccgaacu..... 1  
 Gi3\_27694533\_x4.....agacgucgugggaGcacggggugccgaac..... 1  
 Gi1\_4036040\_x4...gaucggagacgucgugggaacacggggugccgaacu..... 0  
 Gi2\_10697039\_x4.....acAucgugggaacacggggugccgaacu..... 1  
 Gi5\_8614831\_x4.....Augggaacacggggugccgaa..... 1  
 Gi4\_538806\_x4.....gugggaacacggggGgccgaacu..... 1  
 Gi3\_27698709\_x4.....acgucgugggaacacggggugcUgaac..... 1  
 Gi1\_4018052\_x4....cggagacgNcgugggaacacggggugc..... 1  
 Gi2\_10654279\_x4.....ggaacacgCggugccgaacu..... 1  
 Gi3\_27757849\_x4.....cgucgugggaacacggggugcUg..... 1  
 Gl1\_5804558\_x4.....gugggaacGcggggugccgaac..... 1  
 Gi5\_8641975\_x4.ugUgucggagacgucguggga..... 1  
 Gi2\_10716419\_x4.....cgucgugggaacacggggAgccg..... 1  
 Gi2\_10668175\_x4.....ucggagacgucgugggGaca..... 1  
 Gi1\_4038800\_x4.....ucgCgggaacacggggugccg..... 1

Gl1a\_5787546\_x4.....ugggaacacgggguAccgaacu..... 1  
Gi3\_27791701\_x4.....gAgaacacggggugccgaa..... 1  
Gi2\_10655259\_x4.....Cgagacgucgugggaaacacggggugccg..... 1  
Gi1\_4039552\_x4.....cgugggaacacggggCgccaacu..... 1  
Gi1\_4028944\_x4.....ggagacgucgugggaaUacggggug..... 1  
Gi2\_10663627\_x4.....cggagacgucgugggaaUacggggugcc..... 1  
Gi3\_27685641\_x4.....Ccgagacgucgugggaaacacggggugcc..... 1  
Gi2\_10668207\_x4.....ucgugggaacacggAgugccgaac..... 1  
Gi3\_27681205\_x4.....gGucggagacgucguggg..... 1  
Gi3\_27753817\_x4.....cgucguggAaacacggggugcc..... 1  
Gi3\_27668329\_x4.....Agggaacacggggugccg..... 1  
Gi3\_27681253\_x4.....Nacacggggugccgaacu..... 1  
Gi2\_10701339\_x4.....Aggaacacggggugccgaa..... 1  
Gi3\_27766429\_x4.....agacgucgugggGacacggggugccgaacu..... 1  
Gi3\_27727617\_x4.....cgucguggaaacacggggugAc..... 1  
Gi2\_10688615\_x4.....ucgugggaacacggggugccgaCc..... 1  
Gl1a\_5792706\_x4.....Aaacacggggugccgaac..... 1  
Gi3\_27693133\_x4.....gaacacggggugUcgaac..... 1  
Gi2\_10676687\_x4.....gugggaacacggggugcGgaac..... 1  
Gi2\_10712855\_x4.....cAgagacgucgugggaaacacggggugc..... 1  
Gi3\_27686881\_x4.....uGgugggaacacggggugccgaa..... 1  
Gl1a\_5773834\_x4.....cgugggaCcacggggugccgaacu..... 1  
Gi5\_8622431\_x4.....guggUaacacggggugccga..... 1  
Gi1\_4034220\_x4.....guUgugggaacacggggugcc..... 1  
Gi4\_544010\_x4.....acAucgugggaacacggggugccgaacu..... 1  
Gi3\_27740641\_x4.....cgucgugggaGcacggggugcc..... 1  
Gi2\_10693271\_x4.....ugggaacacgggAugccgaa..... 1  
Gi3\_27766353\_x4.....gucAugggaacacggggg..... 1  
Gl1a\_5787506\_x4.....cUugggaacacggggugccg..... 1  
Gi2\_10685459\_x4.....aucggagacgucgugggaaacacgggAu..... 1  
Gi2\_10678487\_x4.....ucggagacgucgugggaaacacggggC..... 1  
Gi3\_27681621\_x4.....aucggagacgCcgugggaacac..... 1  
Gi2\_10715031\_x4.....cgugggaacacgAggugc..... 1  
Gi2\_10678655\_x4.....cgucgugggaacacggggugccgC..... 1  
Gi2\_10657419\_x4.....gacgucgugggaaacGcggggugccg..... 1  
Gi4\_539850\_x4.....gucgGgggaacacggggugccgaacu..... 1  
Gi3\_27747221\_x4.....Ggacgucgugggaaacacgggg..... 1  
Gi2\_10650619\_x4.....aCacgucgugggaaacacggggugcc..... 1  
Gi3\_27672041\_x4.....uggAaacacggggugccgaa..... 1  
Gi3\_27746973\_x4.....cggagacgucgugggaaGcacggggugcc..... 1  
Gi5\_8605439\_x4.....gucguggAaacacggggugccgaacu..... 1  
Gi3\_27729773\_x4.....acgCcgugggaacacggggugccgaac..... 1  
Gi1\_4025284\_x4.....ucgugggaUacggggugccgaacu..... 1  
Gi3\_27736169\_x4.....ucgugCgaacacggggugccgaacu..... 1  
Gi5\_8638459\_x4.....gggaaAacggggugccgaacu..... 1  
Gi3\_27661861\_x4.....aucggagCcgucgugggaaacacgg..... 1  
Gl1a\_5811330\_x4.....cUucgugggaacacggggugccgaacu..... 1

Gi2\_10712363\_x4.....cgucgugggaacacggggugccgaUu..... 1  
 Gi2\_10691099\_x4.....gucguAggaacacggggugcc..... 1  
 Gi3\_27745049\_x4.....cgugggaacaUggggugccg..... 1  
 Gi5\_8608743\_x4....aucggagacgucgugggaacCcggggu..... 1  
 Gi3\_27783237\_x4....aucggagacgucgugggaacaUgggggu..... 1  
 Gi2\_10669831\_x4.....gugggaacacgUgggugcc..... 1  
 Gi5\_8605867\_x4.....ggaaAacggggugccgaacu..... 1  
 Gi5\_8614175\_x4.....aacacgUggugccgaacu..... 1  
 Gi3\_27708737\_x4.....ugAgaacacggggugccg..... 1  
 Gi2\_10710547\_x4.....ucgugggaNcacggggugccg..... 1  
 Gi4\_543594\_x4.....gaacacggggugccgaac..... 0  
 Gi2\_10678711\_x4.....gUgacgucgugggaacacg..... 1  
 Gi2\_10679043\_x4....aucggagacgucgCgggaacacggggug..... 1  
 Gi3\_27704857\_x4.....gacgucgugggaacacggggguAccgaacu..... 1  
 Gi5\_8625051\_x4.....Ggacgucgugggaacacggggugc..... 1  
 Gi2\_10725371\_x4.....gucgugggaacacggggCgc..... 1  
 Gi3\_27679689\_x4....ggagacgucgugggaacacggggguAccg..... 1  
 Gi3\_27737865\_x4....ucggagacNucgugggaacacggg..... 1  
 Gi3\_27714361\_x4...gaucggagacgucAugggaacacggg..... 1  
 Gi3\_27752181\_x4.....gugggaacacgggCugccgaac..... 1  
 Gi4\_544670\_x4.....gggaacacggggugccgaacA..... 1  
 Gi2\_10677459\_x4....ggagacgucguAggaacacggggugc..... 1  
 Gi5\_8638359\_x4.....cgucguggAaacacggggugccgaacu..... 1  
 Gi3\_27662081\_x4....ggagGcugcuggggaacacg..... 1  
 Gi3\_27706781\_x4.....gugggaacacgCggugccga..... 1  
 Gi3\_27675697\_x4....auUggagacgucguggga..... 1  
 Gi2\_10673451\_x4.....gugggaacUcggggugcc..... 1  
 Gi2\_10658047\_x4.....cgugggaacacgggAugc..... 1  
 Gi3\_27660885\_x4....ugggUacacggggugccg..... 1  
 Gi2\_10714491\_x4.....guNggaacacggggugccgaac..... 1  
 Gi2\_10676187\_x4....cggagacgucgugggaGcacggggugc..... 1  
 Gi2\_10664399\_x4.....ucgugggaacacggggguAccg..... 1  
 Gi2\_10663963\_x4...gaucggagacgucgugggUacac..... 1  
 Gl1a\_5789090\_x4.....cgugggaacacggggGgccgaacu..... 1  
 Gi2\_10700139\_x4.....acgucgugggaacacggggugccgaAu..... 1  
 Gi1\_4031712\_x4.....ucguUggaacacggggugcc..... 1  
 Gi1\_4022344\_x4....aucggagacgucgugggaU..... 1  
 Gi2\_10715431\_x4.....gUcugcuggggaacacggggugccgaacu..... 1  
 Gi2\_10722015\_x4.....gugggaacacgggAugccg..... 1  
 Gi2\_10663799\_x4.....cgAgggaacacggggugccgaa..... 1  
 Gi2\_10684399\_x4.....ggaacacgNggugccgaa..... 1  
 Gi2\_10677415\_x4.....aacacggggugccgaUcu..... 1  
 Gi5\_8624335\_x4....agacAucgugggaacacggggugccgaacu..... 1  
 Gi5\_8618463\_x4.....gugggaCcacggggugccgaac..... 1  
 Gi2\_10663239\_x4....Agagacgucgugggaacacggggugc..... 1  
 Gi2\_10667991\_x4.....uCggaacacggggugccga..... 1  
 Gi2\_10712459\_x4...gaucggagacgucgugggaacacggggGgcc..... 1

Gi1\_4019672\_x4...gGucggagacgucgugggaacac..... 1  
 Gi3\_27695413\_x4.....Uucgugggaacacggggugccgaacu..... 1  
 Gi3\_27780785\_x4...gaucUgagacgucgugggaacacg..... 1  
 Gi3\_27788673\_x4.....gUcugcugugggaacacggggugccgaac..... 1  
 Gi2\_10660951\_x4....aucggagacgucgugggaacCcggggugc..... 1  
 Gi3\_27670713\_x4.....ugggaacacggggGgccgaa..... 1  
 Gi3\_27741437\_x4cugcgaucggagacgucgugggaacacggggug..... 0  
 Gi3\_27768413\_x4....aAcggagacgucgugggaacac..... 1  
 Gi3\_27789473\_x4.....ucgNgggaacacggggugccgaacu..... 1  
 Gi5\_8647759\_x4.....ucgCgggaacacggggugccgaac..... 1  
 Gi2\_10668551\_x4.....ugggaacacgggCugccgaac..... 1  
 Gi1\_4031656\_x4.....aUacgucgugggaacacggggugccgaac..... 1  
 Gi5\_8649291\_x4.....aaGacggggugccgaacu..... 1  
 Gl1a\_5782854\_x4....aucggagacgucgugggGacacggg..... 1  
 Gi2\_10720983\_x4....auUggagacgucgugggaacacg..... 1  
 Gl1a\_5775038\_x4.....Uacgucgugggaacacggggugccgaacu..... 1  
 Gi4\_538762\_x4.....ggaacacggggugccgaacA..... 1  
 Gi3\_27718185\_x4.....gGacacggggugccgaacu..... 1  
 Gi5\_8606687\_x4.....cgugggaacaUggggugccgaac..... 1  
 Gi2\_10665791\_x4.....acgucgugggaaAacggggugcc..... 1  
 Gi3\_27680529\_x4.....acgucgugggCacacggggugcc..... 1  
 Gi1\_4040904\_x4.....aUacgucgugggaacacgggg..... 1  
 Gi2\_10655647\_x4....aucggagacgucgugggaCc..... 1  
 Gi2\_10682655\_x4....aucggagacgucUugggaaca..... 1  
 Gi3\_27796145\_x4.....ucgugggaGcacggggugccgaa..... 1  
 Gi2\_10693239\_x4.....ugggUacacggggugccgaac..... 1  
 Gi2\_10714919\_x4....aucggagacgucgugggaacCcggggug..... 1  
 Gl1a\_5772646\_x4....cUgagacgucgugggaacacgg..... 1  
 Gi2\_10683851\_x4.....cgucgugggaacacggggGg..... 1  
 Gi2\_10711519\_x4....aucggagaNgucgugggaacacgg..... 1  
 Gi2\_10655827\_x4.....agUcugcugugggaacacggggugc..... 1  
 Gi3\_27749925\_x4....aucggagacgucgugggaacacggggugcA..... 1  
 Gi3\_27684109\_x4....cggagGcugcugugggaacacgggg..... 1  
 Gi2\_10702351\_x4.....gucgCgggaacacggggugcc..... 1  
 Gi2\_10679671\_x4....gaGcggagacgucgugggaacacg..... 1  
 Gi4\_542842\_x4....acgucgugNgaacacggggugccgaacu..... 1  
 Gi3\_27680781\_x4....Cucggagacgucgugggaacacgg..... 1  
 Gi1\_4035844\_x4.....acgucgugggaacacgAggugccgaacu..... 1  
 Gi3\_27783429\_x4.....cguUgugggaacacggggugc..... 1  
 Gi2\_10713967\_x4....agacgucgNgggaacacggggugccg..... 1  
 Gi3\_27794153\_x4....aucggagacgucgugggGacacgggg..... 1  
 Gi3\_27756609\_x4.....gggaacaUggggugccgaa..... 1  
 Gi3\_27676801\_x4.....gucgugggaacacAgggugcc..... 1  
 Gi3\_27760317\_x4....cgucgugggaacacggggugcA..... 1  
 Gi1\_4036552\_x4....cggagacgucgugggGacacggggugcc..... 1  
 Gl1a\_5776970\_x4.....gUagacgucgugggaaca..... 1  
 Gi3\_27788373\_x4.....ugggCacacggggugccga..... 1

|                 |                                   |   |
|-----------------|-----------------------------------|---|
| Gi3_27742317_x4 | ...gaCcgagacgucgugggaaca          | 1 |
| Gi1_4047696_x4  | ...ggaacacggguUccgaacu            | 1 |
| Gi1_4034068_x4  | ...ggaacacgggugccgaacAu           | 1 |
| Gi2_10655055_x4 | ...cggaUacgucgugggaacacggggugc    | 1 |
| Gi3_27784761_x4 | ...aucggagacgucGgggaacacggg       | 1 |
| Gi5_8609343_x4  | ...gGcugcuggggaacacggggugccg      | 1 |
| Gi3_27703777_x4 | ...Uacgucgugggaacacggggugccgaa    | 1 |
| Gi2_10666899_x4 | ...gacgCcgugggaacacggggugcc       | 1 |
| Gi4_544682_x4   | ...gugggaacacggggugcc             | 0 |
| Gi2_10681079_x4 | ...cgucgugggaacacAgggugccg        | 1 |
| Gi1_4040048_x4  | ...acgucgugggaacacggggugccGacu    | 1 |
| Gi2_10718943_x4 | ...guggCaacacggggugccg            | 1 |
| Gi2_10710191_x4 | ...gggaacacggggugGcgaacu          | 1 |
| Gi1_4034680_x4  | ...Gcgugggaacacggggugccg          | 1 |
| Gi2_10719719_x4 | ...cguggAaacacggggugcc            | 1 |
| Gi3_27730721_x4 | ...guUgugggaacacggggugc           | 1 |
| Gi4_543830_x4   | ...Uaacacggggugccgaacu            | 1 |
| Gi1_4035880_x4  | ...Gcggagacgucgugggaacacg         | 1 |
| Gi2_10679871_x4 | ...ugggaacaAggggugccgaacu         | 1 |
| Gi2_10722871_x4 | ...gugggaacaUggggugccga           | 1 |
| Gi3_27664669_x4 | ...cgugggaacacgggAugccgaa         | 1 |
| Gl1a_5775066_x4 | ...ugggaacacggggugccgaac          | 0 |
| Gi3_27974006_x3 | ...ucggagacgucgugggaacacgggg      | 0 |
| Gi3_27834959_x3 | ...gacgucgugggaacacggggugccgaaU   | 1 |
| Gl1a_5871514_x3 | ...gugggaacacggggCgcga            | 1 |
| Gi5_8697425_x3  | ...gucgugggaacacggggugccgaCc      | 1 |
| Gi3_27852401_x3 | ...gacgucgugggaacacggAgugccgaacu  | 1 |
| Gi3_27953948_x3 | ...ugggaacacggAgugccg             | 1 |
| Gi3_27802835_x3 | ...gugggaacacUggggugccgaa         | 1 |
| Gi2_10734931_x3 | ...gaucggagacgucgugggaacacgAggugc | 1 |
| Gi2_10822171_x3 | ...cgugggaacacggggugGcgaac        | 1 |
| Gi3_27809537_x3 | ...cAgagacgucgugggaacac           | 1 |
| Gi2_10806874_x3 | ...gggaacaUggggugccgaac           | 1 |
| Gi2_10779910_x3 | ...ggagacgucgugggaacacggggugUc    | 1 |
| Gi2_10801885_x3 | ...cgugggaacacggggugA             | 1 |
| Gi1_4070628_x3  | ...ugggaacaUggggugccgaac          | 1 |
| Gi2_10804090_x3 | ...agacgCcgugggaacacggggugccgaacu | 1 |
| Gi2_10736221_x3 | ...gaacacgggUugccgaacu            | 1 |
| Gi1_4054935_x3  | ...ugggaacacggggugccgaacG         | 1 |
| Gi1_4073469_x3  | ...cgaucggagacgucgugggGacacgggu   | 1 |
| Gi2_10819327_x3 | ...gacgucgugggaacacggggugccGacu   | 1 |
| Gi5_8663657_x3  | ...gggaacacggggugcGgaacu          | 1 |
| Gi3_27877019_x3 | ...cgucgugggaacacggggugAccgaac    | 1 |
| Gi2_10738555_x3 | ...ucguAggaacacggggugccg          | 1 |
| Gi2_10736659_x3 | ...acgucgugggaacCcgggugccgaac     | 1 |
| Gi1_4088286_x3  | ...ugggaacacAgggugccgaac          | 1 |
| Gi5_8664815_x3  | ...gucgugggaacaGggggugccgaacu     | 1 |

Gi2\_10798510\_x3.....gucgCgggaacacggggugc..... 1  
Gi1\_4060938\_x3.....gggNacacggggugccgaacu..... 1  
Gi3\_27835445\_x3.....gucgAgggaacacggggugccgaac..... 1  
Gi2\_10744240\_x3.....acgucgugNgaacacggggg..... 1  
Gi2\_10782271\_x3.....cggagacgucgCgggaacacggggg..... 1  
Gi3\_27812168\_x3.....gggaacaGggggugccgaac..... 1  
Gi2\_10816447\_x3.....Ngaacacggggugccgaacu..... 1  
Gi5\_8697707\_x3.....Cucgugggaacacggggugccgaac..... 1  
Gi2\_10812775\_x3.....gaucggagacgGcgugggaacacggggugcc..... 1  
Gi5\_8694095\_x3.....cUgagacgucgugggaacacg..... 1  
Gi5\_8659343\_x3.....gugggaacacgggUugccgaacu..... 1  
Gi3\_27857159\_x3.....Ngggaacacggggugccgaa..... 1  
Gi2\_10759966\_x3.....aucggagacgucgugggCacacg..... 1  
Gi2\_10737043\_x3.....gucgugggaacaAggggugccgaacu..... 1  
Gi3\_27896921\_x3.....cgucgugggCacacggggugc..... 1  
Gi2\_10779586\_x3.....cgaucggaNacgucgugggaacacggggg..... 1  
Gi3\_27978533\_x3.....gucgugggaacacgggAu..... 1  
Gi3\_27893177\_x3.....cgugggaacacggggugAcgaa..... 1  
Gi3\_27860228\_x3.....gacgucgugggaacacAgggugccgaac..... 1  
Gi2\_10734847\_x3.....cgugggaacacggggugccA..... 1  
Gi2\_10798342\_x3.....gaucggCgacgucguggga..... 1  
Gi3\_27868268\_x3.....cgucgugggaacacggggAgc..... 1  
Gi5\_8682854\_x3.....ucgugggaacacggggGgccgaac..... 1  
Gi5\_8709788\_x3.....cgugggaacaGggggugccgaacu..... 1  
Gi2\_10808959\_x3.....gucgugggaacacgUggugccgaacu..... 1  
Gi2\_10772344\_x3.....gucgugggaacacggggugAcgaacu..... 1  
G1a\_5850379\_x3.....ugggaacacggggugcUgaacu..... 1  
Gi5\_8682353\_x3.....gacgucgugggaacGcggggugccgaacu..... 1  
Gi3\_27896612\_x3.....gucgGgggaacacggggugcc..... 1  
Gi3\_27846809\_x3.....gugggaacacgggUugccgaac..... 1  
Gi2\_10811731\_x3.....cgugggaCcacggggugccga..... 1  
Gi3\_27884267\_x3.....cAucgugggaacacggggugc..... 1  
G1a\_5853190\_x3.....cgugggaacacggggugccgaacA..... 1  
Gi3\_27953765\_x3.....agaUgucgugggaacacggggugccgaac..... 1  
Gi3\_27836657\_x3.....cgucgugggaacacggggugAcgaac..... 1  
Gi2\_10740382\_x3.....agacUucgugggaacacggggugccgaacu..... 1  
Gi3\_27824768\_x3.....Ngaacacggggugccgaac..... 1  
Gi1\_4054857\_x3.....Ugugggaacacggggugccg..... 1  
Gi1\_4053834\_x3.....aucggagacgCcgugggaacacg..... 1  
Gi1\_4078182\_x3.....gaacGcggggugccgaac..... 1  
Gi2\_10814404\_x3.....aucggagacgucAugggaaca..... 1  
Gi1\_4085475\_x3.....cgugggGacacggggugccgaac..... 1  
Gi1\_4073040\_x3.....Cugggaacacggggugccg..... 1  
Gi3\_27870071\_x3.....gaucggGgacgucgugggaacacg..... 1  
Gi5\_8715584\_x3.....aucggagGcugcugugggaacacgggg..... 1  
Gi2\_10821991\_x3.....gugNgaacacggggugccg..... 1  
Gi2\_10740643\_x3.....aucggagacgucgugggaaAacggggg..... 1



Gi5\_8667788\_x3.....ggaacacggggugccAaac..... 1  
 Gi3\_27866933\_x3.....gggaacacggggugccgaaG..... 1  
 Gi2\_10734526\_x3.....gucgugggaacacggggugGcgaacu..... 1  
 Gi1\_4059369\_x3...cgaucggGgacgucguggggaaca..... 1  
 Gl1a\_5829289\_x3.....Uucgugggaacacggggugccga..... 1  
 Gi3\_27846491\_x3.....ugggaacacgggCugccgaa..... 1  
 Gi2\_10729423\_x3....aucggagacgucgGgggaacacggggugc..... 1  
 Gi5\_8663171\_x3.....ugggaacacgggUugccgaac..... 1  
 Gi2\_10824700\_x3.....ugggaacacAgggugccga..... 1  
 Gi1\_4078929\_x3...gaucggagacgucguggggaacacgggg..... 0  
 Gl1a\_5848498\_x3.....cgugggaacacggggCgcc..... 1  
 Gi2\_10786291\_x3.....Ggucgugggaacacgggg..... 1  
 Gi3\_27896396\_x3.....ucgugggaacacAgggugc..... 1  
 Gi1\_4088328\_x3.....gugggaacacCgggugccgaacu..... 1  
 Gi2\_10791268\_x3....auNggagacgucguggggaacacggggug..... 1  
 Gi3\_27860627\_x3.....ggagacgucguggggaacG..... 1  
 Gi1\_4059642\_x3.....ucgugAgaacacggggugcc..... 1  
 Gi3\_27813257\_x3.....gucgugggaacacggggugccUaacu..... 1  
 Gi1\_4080093\_x3.....cgugggUacacggggugccgaacu..... 1  
 Gi1\_4060617\_x3.....cgucgugggUacacggggugccgaacu..... 1  
 Gl1a\_5834758\_x3.....gUagacgucguggggaacacg..... 1  
 Gi4\_550002\_x3.....Ggacgucguggggaacacggggugcc..... 1  
 Gi3\_27878891\_x3cugcgauNagacgucg..... 1  
 Gi2\_10804882\_x3.....cgucgugggaacacggggugccUacu..... 1  
 Gi3\_27848435\_x3.....gagacgucgCgggaacacggggugccgaac..... 1  
 Gi2\_10783819\_x3.....gacgucguggggaacacggggAgcc..... 1  
 Gi5\_8655326\_x3.....gCgggaacacggggugccgaacuu..... 1  
 Gi3\_27960152\_x3.....acgucgugNgaacacggg..... 1  
 Gi2\_10764997\_x3....auUggagacgucguggggaacacgg..... 1  
 Gi3\_27948998\_x3.....Aucgugggaacacggggug..... 1  
 Gi2\_10746376\_x3.....cggagacgucguAggaacacggggugcc..... 1  
 Gi1\_4079169\_x3.....gacgucguggggaacacggggugAcgaacu..... 1  
 Gi5\_8702969\_x3.....Ugugggaacacggggugccga..... 1  
 Gi3\_27908183\_x3.....acgucguUggaacacggggugccgaacu..... 1  
 Gi3\_27924971\_x3.....ggagacgucguggggaacGcggggu..... 1  
 Gi5\_8662361\_x3.....cgaguucguugggagcgcaggcaggA..... 1  
 Gi5\_8680856\_x3....aucggagacgucguggggaGcacggggu..... 1  
 Gi1\_4074774\_x3.....aAacgucguggggaacacggggugccgaacu..... 1  
 Gi2\_10795690\_x3.....agacgucguggggaCcacggggugc..... 1  
 Gi3\_27838670\_x3.....gggaacacggggGgccga..... 1  
 Gi5\_8694332\_x3....aCcgagacgucguggggaacacgg..... 1  
 Gl1a\_5836210\_x3.....guggAaacacggggugccga..... 1  
 Gi3\_27894638\_x3.....cgucguggggaacacAggg..... 1  
 Gi5\_8706923\_x3.....gaacacggggugccGac..... 1  
 Gi5\_8680430\_x3.....gggaacaAggggugccgaacu..... 1  
 Gi3\_27923399\_x3...gaucggagaUgucguggggaacacgggg..... 1  
 Gi2\_10822768\_x3.....gugggaacNcggggugccgaacuu..... 1

Gi2\_10784359\_x3.....acgucgCggsaacacggggugcc..... 1  
 Gi2\_10822813\_x3...gaucggagacgucguAgga..... 1  
 Gi1\_4062510\_x3.....cgucguggsaacacggggCgcc..... 1  
 Gi3\_27878522\_x3.....cguggsaacacgggCugccgaa..... 1  
 Gi3\_27901826\_x3.....gucguggsaacCggggugcc..... 1  
 Gi2\_10793518\_x3.....aucggagacgucguggsaacGcacgg..... 1  
 Gi1\_4062069\_x3.....gGgacgucguggsaacacggggugc..... 1  
 Gi5\_8667566\_x3.....cgucgGggsaacacggggugccgaacu..... 1  
 Gi3\_27878099\_x3cGgcgaucggagacgucg..... 1  
 Gi1\_4078347\_x3.....gucgugAgaacacggggugccgaacu..... 1  
 Gi3\_27846416\_x3...cgauUggagacgucguggsaacacggg..... 1  
 Gi2\_10825567\_x3.....gucguggsaacacggggugccgaaA..... 1  
 Gi4\_548895\_x3.....cgCggsaacacggggugccgaacu..... 1  
 Gi3\_27865130\_x3.....gugggsaacUcggggugccgaa..... 1  
 Gi3\_27814334\_x3.....gggsaacCggggugccgaa..... 1  
 Gi5\_8670410\_x3...auUggagacgucguggsaaca..... 1  
 Gl1\_5814793\_x3...aucggagCcgucguggsaacacgggg..... 1  
 Gi2\_10815790\_x3.....agacgucguggsaacacggggGgcc..... 1  
 Gi2\_10743385\_x3...gaucggagacgucguggsaacacggggugccgaacu..... 0  
 Gi3\_27970433\_x3.....gucguggCaacacggggugccgaacu..... 1  
 Gi2\_10790446\_x3.....acgucguggsaaUacggggugcc..... 1  
 Gi3\_27937094\_x3...Ggaucggagacgucguggsaacacggg..... 1  
 Gi2\_10798870\_x3...gaucggagaUgucguggsaacacggg..... 1  
 Gi1\_4088820\_x3.....gUagacgucguggsaacacgggg..... 1  
 Gi1\_4047867\_x3.....cgucguggsaacacggggugccAaacu..... 1  
 Gi3\_27804263\_x3.....ucguggsaaUacggggugc..... 1  
 Gi2\_10798681\_x3.....ggsaacacggggugccgaacu..... 0  
 Gi5\_8700644\_x3.ugcgauCagagacgucgug..... 1  
 Gi3\_27831113\_x3.....gCgaacacggggugccga..... 1  
 Gi5\_8716988\_x3.....gggsaacacgggAugccgaac..... 1  
 Gi3\_27904814\_x3...cgauCggaNacgucguggsaacacggg..... 1  
 Gi1\_4085787\_x3.....ugggsaacacggUgugccgaacu..... 1  
 Gi1\_4088157\_x3...aucggagacgCcguggsaacac..... 1  
 Gi3\_27849941\_x3.....acgucguggsaacacggggugccA..... 1  
 Gi3\_27867692\_x3.....Gcgucguggsaacacggggugccgaa..... 1  
 Gi5\_8655539\_x3.ugcgaCcgagacgucgug..... 1  
 Gi2\_10738600\_x3.....cgucguggsaCcacggggugcc..... 1  
 Gi2\_10784206\_x3.....acgucgugAgaacacggggugc..... 1  
 Gi5\_8694233\_x3.....gucguUggsaacacggggugccgaacu..... 1  
 Gl1\_5858080\_x3.....Ugagacgucguggsaaca..... 1  
 Gi5\_8706596\_x3.....gaaacacggggugccgaacu..... 0  
 Gi5\_8674031\_x3.....ucCuggsaacacggggugccgaacu..... 1  
 Gi3\_27846413\_x3.....cgucguggsaacaAggggugcc..... 1  
 Gl1\_5870518\_x3.....Auggsaacacggggugccgaac..... 1  
 Gl1\_5842435\_x3.....Uagacgucguggsaacacg..... 1  
 Gi3\_27900527\_x3...gUucggagacgucguggsaacacgggg..... 1  
 Gl1\_5847826\_x3.....ugggsaacacggAgugccgaacu..... 1

Gi3\_27848702\_x3.....cAucgugggaacacggggugccga..... 1  
 Gi5\_8679866\_x3.....cgugggUacacggggugccgaac..... 1  
 Gi3\_27924209\_x3.....ucgCgggaacacggggugc..... 1  
 Gi2\_10736566\_x3.....gugggaaAacggggugccga..... 1  
 Gi3\_27820901\_x3.....acacggggugccgCacuu..... 1  
 Gi3\_27979223\_x3.....ggUgacgucgugggaacacgg..... 1  
 Gi3\_27851339\_x3.....aucNgagacgucgugggaacacggg..... 1  
 Gi2\_10738690\_x3.....ucgugggaUacacggggugccgaacu..... 1  
 G1a\_5840086\_x3.....Ggucgugggaacacggggugccgaacu..... 1  
 Gi3\_27861509\_x3.....ugggaacacggggugccUaa..... 1  
 G1l\_4081626\_x3.....agacgucgugggGacacggggugccgaacu..... 1  
 G1l\_4071504\_x3.....auUggagacgucgugggaacacggggugc..... 1  
 G1l\_4078923\_x3.....ucgugggaacacggggugcGgaacu..... 1  
 Gi2\_10820890\_x3.....Naacacggggugccgaacu..... 1  
 Gi2\_10740571\_x3.....gggaacacggggCgccga..... 1  
 Gi2\_10814737\_x3.....gaucggagacgucgugggaacacggggAgcc..... 1  
 Gi2\_10826827\_x3.....ucgCgggaacacggggugc..... 1  
 Gi2\_10784653\_x3.....ucgugggaacacggggugUcg..... 1  
 Gi3\_27949763\_x3.....aucggagacgucgugggaacCggggugc..... 1  
 Gi3\_27933566\_x3.....gacguGgugggaacacggggugccgaacu..... 1  
 Gi5\_8671646\_x3.....aucggagacgucgCgggaacacgg..... 1  
 Gi3\_27904043\_x3.....aucggagGcgucguggga..... 1  
 G1a\_5857465\_x3.....gGcgugggaacacggggugccgaac..... 1  
 Gi2\_10731823\_x3.....cgucguggNaacacggggug..... 1  
 G1l\_4072599\_x3.....Ggacgucgugggaacacggg..... 1  
 Gi4\_550683\_x3.....Gcucgugggaacacggggugccgaacu..... 1  
 Gi3\_27861284\_x3.....aucggaAacgucgugggaacacgg..... 1  
 Gi2\_10746226\_x3.....ucgugggaacacggggugccga..... 0  
 Gi2\_10758391\_x3.....aacacCggggugccgaacu..... 1  
 Gi3\_27958469\_x3.....aucggagacUucgugggaacacggggugcc..... 1  
 Gi2\_10801654\_x3.....agacgucgugggaacacggggugUcgaacu..... 1  
 Gi3\_27942215\_x3.....ggaacacUgggugccgaac..... 1  
 G1a\_5870446\_x3.....cUgagacgucgugggaacacggg..... 1  
 G1l\_4074330\_x3.....cgAgggaacacggggugccgaac..... 1  
 Gi3\_27958514\_x3.....gucgCgggaacacggggugccga..... 1  
 Gi3\_27896831\_x3.....cgucgugggaaUacggggugc..... 1  
 G1l\_4080687\_x3.....gacgucgugggaacacggggugccgGacu..... 1  
 Gi3\_27804023\_x3.....ggagacgucAugggaacacggggugcc..... 1  
 Gi2\_10805320\_x3.....ucggGgacgucgugggaacacggggugccga..... 1  
 Gi3\_27870731\_x3.....cggagacgucgugggaacUcggggugcc..... 1  
 Gi3\_27871544\_x3.....ucggagacgucgugggaGcacggg..... 1  
 Gi2\_10729795\_x3.....cgugAgaacacggggugc..... 1  
 Gi5\_8662922\_x3.....Uucgugggaacacggggugc..... 1  
 Gi2\_10791940\_x3.....Acgugggaacacggggugccga..... 1  
 Gi3\_27860576\_x3.....gugggaacacgggCugccga..... 1  
 G1l\_4084500\_x3.....cgucgugggaacacggggugccU..... 1  
 G1l\_4049751\_x3.....gucgugggaacacggggGgcc..... 1

|                                                              |   |
|--------------------------------------------------------------|---|
| Gi1_4074405_x3.....ggaacacAgggugccgaac.....                  | 1 |
| Gl1a_5849527_x3.....ucggagacgucguggGacacggg.....             | 1 |
| Gi2_10762645_x3.....aucggagacgucguggaacaAg.....              | 1 |
| Gi1_4060836_x3.....aacacggUgugccgaacu.....                   | 1 |
| Gi2_10813960_x3.....ucguUggaacacggggugc.....                 | 1 |
| Gi2_10753072_x3.....gGcgugggaacacggggg.....                  | 1 |
| Gi3_27916661_x3.....ggaaGacggggugccgaa.....                  | 1 |
| Gi5_8676833_x3.....cgucgAgggaacacggggugccgaacu.....          | 1 |
| Gi2_10749709_x3.....ucguggaacaacggggugcGgaacu.....           | 1 |
| Gi3_27957062_x3.....gucgugggaGcacggggugccga.....             | 1 |
| Gi3_27932672_x3.....gauUggagacgucguggaacaac.....             | 1 |
| Gi5_8715878_x3.....gucgugggaacaAggggugccgaacu.....           | 1 |
| Gi3_27884156_x3.....agacgucgugggaacaacggggugc.....           | 0 |
| Gi3_27835448_x3.....gucgugggNacacggggugc.....                | 1 |
| Gl1a_5859400_x3.....aucggagacguUguggaacaacggggg.....         | 1 |
| Gi1_4078362_x3.....Cacgucgugggaacaacggggugccg.....           | 1 |
| Gi1_4052421_x3.....aucggagacgucguggaacaacA.....              | 1 |
| Gi2_10750723_x3.....gauUggagacgucgugggaacaacggggg.....       | 1 |
| Gi3_27821141_x3.....gugggaacaacggCgugccg.....                | 1 |
| Gi5_8715218_x3.....ggaacacggggugccUaacu.....                 | 1 |
| Gi5_8677709_x3.....gucgugggaacaacggggugccgaacG.....          | 1 |
| Gi2_10802134_x3.....gagacgucgugggaacaacAgggugcc.....         | 1 |
| Gi3_27946334_x3.....gaucggagacgucguggaacaacggggugccgaac..... | 0 |
| Gi1_4081698_x3.....ggagGcucgugggaacaacggggugcc.....          | 1 |
| Gi1_4069623_x3.....Gggagacgucgugggaacaacggggugc.....         | 1 |
| Gi3_27958685_x3.....cUaucggagacgucgugggaacaacggggugcc.....   | 1 |
| Gi4_550260_x3.....aucggagacgucgugggaacaac.....               | 0 |
| Gi3_27848738_x3.....gacgucAugggaacaacggggugccgaac.....       | 1 |
| Gi5_8715548_x3.....gugAgaacaacggggugccgaacu.....             | 1 |
| Gi5_8651819_x3.....ggaacacgAggugccgaac.....                  | 1 |
| Gi3_27901088_x3.....ucguggCaacaacggggugccgaacu.....          | 1 |
| Gi3_27809198_x3.....cgucguggAaacaacggggugccgaac.....         | 1 |
| Gi2_10772284_x3.....ucgugggaacaAggggugccgaacu.....           | 1 |
| Gl1a_5816455_x3.....aucggagacgucgugggaacaacA.....            | 1 |
| Gi2_10771657_x3.....cguggAaacaacggggugc.....                 | 1 |
| Gi3_27809156_x3.....Aagacgucgugggaacaacggggg.....            | 1 |
| Gi2_10759915_x3.....gaucggagacgucgugggaaAac.....             | 1 |
| Gi5_8689850_x3.....agacgucgNgggaacaacggggugccgaac.....       | 1 |
| Gi2_10792939_x3.....agacgucgNgggaacaacggggugc.....           | 1 |
| Gi1_4061133_x3.....gugggaacaacggggugccgaCc.....              | 1 |
| Gi2_10796512_x3.....aucggagacgucgugggaacCggg.....            | 1 |
| Gi3_27828755_x3.....aucggagacgucguggAaacaac.....             | 1 |
| Gi2_10825546_x3.....gaucggagacgucgugggGacacggg.....          | 1 |
| Gi2_10780180_x3.....cggagCcgucgugggaacaacggggugcc.....       | 1 |
| Gi1_4088730_x3.....aacacggggugGcgaacu.....                   | 1 |
| Gi2_10763680_x3.....gaucUgagacgucgugggaaca.....              | 1 |
| Gi5_8662676_x3.....gGcucgugggaacaacggggugccgaac.....         | 1 |

|                                                           |   |
|-----------------------------------------------------------|---|
| Gi3_27905858_x3.....cgucgugggaacacAgggugccg.....          | 1 |
| Gi3_27928865_x3.....cgugggaacacggggugAcga.....            | 1 |
| Gi1_4078674_x3....aucggagaNgucgugggaacacgg.....           | 1 |
| Gi3_27885170_x3.....acgucgugggaacacggggugccgaaA.....      | 1 |
| Gi1_4069440_x3....aucgUagacgucgugggaacacg.....            | 1 |
| Gi3_27975020_x3.....gacgucguNggaacacggggg.....            | 1 |
| Gi2_10813285_x3....aucggagUcugcuggggaaca.....             | 1 |
| Gi3_27866273_x3....gaucggagGcgucgugggaacacgg.....         | 1 |
| Gi3_27948041_x3.....ugggCacacggggugccgaa.....             | 1 |
| Gi3_27862712_x3....aucggagacgucgugggaacacggggUcc.....     | 1 |
| Gi2_10817935_x3....ucggagacgucgGgggaacacggggugcc.....     | 1 |
| Gi2_10784431_x3....aucgAagacgucguggggaaca.....            | 1 |
| Gi3_27863897_x3....aucggagCcgucgugggaacacggggg.....       | 1 |
| Gi3_27861347_x3.....acgucgugCgaacacggggugccgaaCu.....     | 1 |
| Gi3_27806324_x3.....cgugggaacacggggAgc.....               | 1 |
| Gi5_8709332_x3.....ucgugggaacacggggugccgCac.....          | 1 |
| Gi3_27841604_x3.Ggcgaucggagacgucguggga.....               | 1 |
| Gi2_10828039_x3....gaucggagacgucgCgggaacacggg.....        | 1 |
| Gi3_27907781_x3.....ggagaUgucgugggaacacggggugcc.....      | 1 |
| Gi3_27962993_x3.....cCgagacgucgugggaacacggggg.....        | 1 |
| Gi2_10770793_x3.....ucgugggaacacgggAgugc.....             | 1 |
| Gi3_27803915_x3.....acgucgugggaacacggggAgccgaac.....      | 1 |
| Gi5_8716886_x3.....agacguUgugggaacacggggugccgaaCu.....    | 1 |
| Gi2_10780711_x3.....ggagacgucgugggaacacggggugcU.....      | 1 |
| Gi4_545679_x3.....cgugggaacacggggugcc.....                | 0 |
| Gi3_27913940_x3....aCcgagacgucgugggaacac.....             | 1 |
| Gi3_27972755_x3.....gucgugCgaacacggggugccgaaCu.....       | 1 |
| Gi1_4070679_x3.....uAggaacacggggugccga.....               | 1 |
| Gi2_10794790_x3.....gugggaacacggggugccgaaCuA.....         | 1 |
| Gi2_10784905_x3.....ucguUggaacacggggugccg.....            | 1 |
| Gi3_27818456_x3....gaucAgagacgucgugggaacacggg.....        | 1 |
| G1a_5833633_x3.....gugggaGcacggggugccga.....              | 1 |
| Gi1_4055781_x3.....cggagacgucgugggaacacggggugccga.....    | 0 |
| Gi3_27914399_x3.....cggagacgucgugggaacCcggg.....          | 1 |
| Gi2_10759261_x3.....acgucgugggaacacggggugccgCac.....      | 1 |
| G1a_5873899_x3....aucggagacgucgugggaacacgggggUacc.....    | 1 |
| Gi1_4075935_x3.....gggaacacggggGgccgaaCu.....             | 1 |
| Gi3_27973067_x3....gaucggagacgucgugggaGcacgg.....         | 1 |
| Gi2_10797103_x3....gaCcgagacgucgugggaaca.....             | 1 |
| Gi5_8651492_x3.....gucgugggaacacggggugcAgaacu.....        | 1 |
| Gi5_8655449_x3.....gacgucguNggaacacggggugccgaaCu.....     | 1 |
| Gi2_10812430_x3.....cgugggaacacgggAugccgaac.....          | 1 |
| Gi2_10734352_x3.....CcgucgugggaacacggggugccgaaCu.....     | 1 |
| Gi2_10778269_x3.....cgucgugggaacacggggCg.....             | 1 |
| Gi5_8684549_x3.....ugggaacacgggAugccgaac.....             | 1 |
| Gi1_4059972_x3....Gcggagacgucgugggaacacggg.....           | 1 |
| Gi5_8711654_x3.....cggagacgucgugggaacacggggugccgaaCu..... | 0 |

Gi2\_10798300\_x3.....gacgucgugggaacacggggugcU..... 1  
Gi1\_4081848\_x3.....ucgugggaacacggggCgccg..... 1  
Gi3\_27844175\_x3.....gucgGgggaacacggggugc..... 1  
Gi3\_27942146\_x3.....cgugggaaGacggggugccgaac..... 1  
G1a\_5826928\_x3....aucgAagacgucgugggaacacggggug..... 1  
Gi2\_10750867\_x3.....ggaGcacggggugccgaa..... 1  
Gi2\_10826707\_x3.....ucguggCaacacggggugccgaacu..... 1  
Gi2\_10748743\_x3.....ugggaacacggggugccgCacuu..... 1  
Gi2\_10803469\_x3....gaucAgagacgucgugggaacacggggug..... 1  
G1a\_5818777\_x3...cUaucggagacgucgugggaacacg..... 1  
Gi5\_8668460\_x3.....cgucgugggaacacggggugccgUacu..... 1  
Gi3\_27849020\_x3.....Ngggaacacggggugccgaacu..... 1  
Gi1\_4088802\_x3.....Ugagacgucgugggaacacggggugc..... 1  
Gi3\_27822065\_x3.....agacAucgugggaacacggggugccgaacu..... 1  
G1a\_5836057\_x3.....ugAgaacacggggugccgaacu..... 1  
Gi3\_27892274\_x3....gaCcgagacgucgugggaacacgg..... 1  
Gi1\_4071018\_x3.....ggagacgucgugggaacacggggugcAg..... 1  
Gi3\_27846662\_x3.....gggaacacggggugccgUa..... 1  
Gi3\_27919037\_x3....gaucggagacgucguAggaacacgggg..... 1  
Gi5\_8681660\_x3.....gggaacCggggugccgaac..... 1  
Gi1\_4073253\_x3.....acgucgugggaacacggggugcUgaacu..... 1  
Gi3\_27799364\_x3.....Agugggaacacggggugccg..... 1  
Gi3\_27797090\_x3cugcgauccggagGcgucg..... 1  
Gi2\_10759159\_x3....gaucggagacgucgugggaacacggggCgc..... 1  
Gi3\_27970514\_x3.....aAucgugggaacacggggugccgaacu..... 1  
Gi2\_10732903\_x3.....aCacgucgugggaacacggggugc..... 1  
Gi4\_550485\_x3.....guAggaacacggggugccgaacu..... 1  
Gi2\_10730434\_x3.....gugggaacacggggAgccga..... 1  
Gi3\_27851591\_x3....aucggagacgucgugggGacacggggugc..... 1  
Gi1\_4079571\_x3.....gaacacggggugccgaaAu..... 1  
Gi3\_27879392\_x3.....gaacacggggUaccgaac..... 1  
Gi2\_10808542\_x3.....gacgucguNgggaacacggggugcc..... 1  
Gi2\_10800268\_x3.....cgugggaacacggggugcU..... 1  
Gi5\_8652890\_x3.....gugggaacacggAgugccga..... 1  
Gi2\_10811815\_x3.....CacgucgugggaacacggggU..... 1  
Gi2\_10808941\_x3.....Agggaacacggggugccgaa..... 1  
Gi1\_4064226\_x3....aucggagacgucgugggaCcacggggugcc..... 1  
Gi2\_10759816\_x3.....gaacacggUgugccgaacu..... 1  
Gi2\_10827943\_x3.....gaacacggggugccgaCc..... 1  
Gi2\_10817542\_x3.....cgucgugggaacacggggugcUg..... 1  
Gi5\_8673617\_x3.....cgugggCacacggggugccgaac..... 1  
Gi3\_27832283\_x3.....cCucgugggaacacggggugccga..... 1  
Gi3\_27878072\_x3.....gggaacacNgggugccgaacuu..... 1  
Gi3\_27851837\_x3.....gucguAggaacacggggugcc..... 1  
Gi2\_10770733\_x3.....cggagacgucgugggaacacAgggugc..... 1  
Gi3\_27965708\_x3.....Agagacgucgugggaacacggggugccgaa..... 1  
Gi2\_10778554\_x3.....ggagacgucgugggaacacggggugAc..... 1

Gi3\_27924791\_x3...gaGcgagacgucgugggaacac..... 1  
 Gi5\_8694947\_x3.....ugggUacacggggugccgaa..... 1  
 Gi2\_10791646\_x3.....gacgucgugggaGcacggggugc..... 1  
 Gi3\_27877439\_x3.....aucggagacguUgugggaacacggggugcc..... 1  
 Gi1\_4059210\_x3.....acgucgugNgaacacggggugccgaac..... 1  
 Gi3\_27932597\_x3.....gaucggagacAucgugggaacacgggg..... 1  
 Gl1a\_5853256\_x3.....ugggaaUacggggugccgaacu..... 1  
 Gi2\_10750255\_x3.....gggaacacggAgugccgaac..... 1  
 Gi3\_27924137\_x3.....gugggaacacgUggugccga..... 1  
 Gi3\_27865241\_x3.....acgucgugggGacacggggugc..... 1  
 Gi2\_10804405\_x3.....aucggagacgucgugggaacacgggAug..... 1  
 Gi2\_10822783\_x3.....uUggagacgucgugggaaca..... 1  
 Gi4\_548769\_x3.....aucggagacgucgugggaacacggggu..... 0  
 Gi3\_27955556\_x3.....gagacgucgugggaGcacggggu..... 1  
 Gi1\_4086681\_x3.....gugggaacacggggugccgCac..... 1  
 Gi2\_10807750\_x3.....aucggagacguAgugggaacacggggugc..... 1  
 Gi3\_27891737\_x3.....Ugagacgucgugggaacacggggugc..... 1  
 Gi3\_27913664\_x3.....gacgucgugggaacacggggugcUgaac..... 1  
 Gl1a\_5859112\_x3.ugcgauccggGgacgucgu..... 1  
 Gi2\_10806037\_x3cugcgauccggagacgucgA..... 1  
 Gi3\_27903941\_x3.....aucggagacgucgugggaUacggggugcc..... 1  
 Gi2\_10742797\_x3.....gggaCcacggggugccgaac..... 1  
 Gi3\_27936638\_x3.....gGgacgucgugggaacacggggugcc..... 1  
 Gl1a\_5831371\_x3.....gugggaacNcggggugccg..... 1  
 Gi2\_10800646\_x3.....gucguUggaacacggggugccgaacu..... 1  
 Gi2\_10760446\_x3.....ggUgacgucgugggaaca..... 1  
 Gi3\_27843401\_x3.....gacgucgugggaacacggggugccgUacu..... 1  
 Gi2\_10758421\_x3.....cgugggaacacggggugUcga..... 1  
 Gl1a\_5874613\_x3.....Gcgugggaacacggggugccgaac..... 1  
 Gi1\_4076163\_x3.....gucgugggaacacggAgugccgaacu..... 1  
 Gi3\_27960848\_x3.Ggcgauccggagacgucgugggaaca..... 1  
 Gi3\_27948608\_x3.....uAgugggaacacggggugccgaac..... 1  
 Gi2\_10768942\_x3.....gugggaacacgAgggugccgaa..... 1  
 Gi3\_27863798\_x3.....cgugggaacacggggugcUga..... 1  
 Gl1a\_5873851\_x3.....gugggaacacAgggugcc..... 1  
 Gi2\_10801255\_x3.....ugggCcacggggugccg..... 1  
 Gi1\_4076373\_x3.....gacgucgugggaacacAgggugccgaacu..... 1  
 Gi3\_27970904\_x3.....gaucggagacgucgugggaacacggggAgcc..... 1  
 Gi3\_27832094\_x3.....cgucgugggaacacggggugccAa..... 1  
 Gi1\_4081590\_x3.....gUgacgucgugggaacacggggugcc..... 1  
 Gi3\_27950780\_x3.....gaucggagacAucgugggaacacggggu..... 1  
 Gi2\_10751461\_x3.....aucAgagacgucgugggaacacg..... 1  
 Gi3\_27883856\_x3.....acgucguggUaacacggggugccgaac..... 1  
 Gi2\_10768621\_x3.....cgucgugggaacCggggugccga..... 1  
 Gi3\_27942389\_x3.....ucgugggaacCggggug..... 1  
 Gi5\_8681321\_x3...cUaucggagacgucgugggaacacggg..... 1  
 Gi2\_10758526\_x3.....acgucgugggaacacggggugGcgaacu..... 1

Gi3\_27928439\_x3.....cgugggaacaUggggugcc..... 1  
 Gi2\_10812571\_x3....aucggagacguUgugggaacacggggu..... 1  
 Gi3\_27802805\_x3....gaucggagacgCcgugggaacacgggg..... 1  
 Gi3\_27803402\_x3.....gugggaacacgUggugcc..... 1  
 Gi4\_547791\_x3.....gGgggaacacggggugccgaac..... 1  
 Gi1\_4088400\_x3.....Ggacgucguggggaacacggggugcc..... 1  
 Gi3\_27921188\_x3.....gacgCcgugggaacacggggugccgaac..... 1  
 Gi3\_27807353\_x3.....cgugggaacacgCggugcc..... 1  
 Gi3\_27821660\_x3.....gugggaacacUgggugccga..... 1  
 Gi2\_10774135\_x3.....acgucAugggaacacggggugccgaac..... 1  
 G1a\_5815156\_x3.....cgugggaacacggggugccgGacu..... 1  
 Gi3\_27948209\_x3.....acgucgugNgaacacggggugccga..... 1  
 Gi3\_27960374\_x3.....cggagGcugcuggggaacac..... 1  
 Gi2\_10737010\_x3...cAaucggagacgucguggggaacacggggugc..... 1  
 Gi2\_10761067\_x3....aucggagacgucgugggaaUacggggugc..... 1  
 Gi2\_10806004\_x3.....gugggaacaAggggugccga..... 1  
 Gi1\_4065732\_x3.....ggaCcacggggugccgaacu..... 1  
 Gi2\_10808470\_x3.....ugggaacaNggggugccgaacu..... 1  
 Gi2\_10823332\_x3.....cgugggaacGcggggugccg..... 1  
 Gi3\_27972911\_x3....aucggagaUgucguggggaacacgg..... 1  
 Gi2\_10777033\_x3.....ggNacacggggugccgaacu..... 1  
 Gi2\_10799812\_x3.....gacgucguNggaacacggggu..... 1  
 Gi3\_27911222\_x3....cAgagacgucguggggaacacggggu..... 1  
 Gi1\_4088517\_x3.....acUucguggggaacacggggugccg..... 1  
 Gi2\_10814653\_x3....gaucggagGcugcugggga..... 1  
 Gi2\_10728463\_x3.....ggagacgucgugAgaacacggggugcc..... 1  
 Gi5\_8671298\_x3....ucggagacNucguggggaacacg..... 1  
 Gi1\_4080531\_x3....auUggagacgucguggggaacacgg..... 1  
 Gi3\_27939089\_x3....gaGcggagacgucguggggaacacggggu..... 1  
 G1a\_5857135\_x3.....ggaacacggggugcAgaacu..... 1  
 Gi2\_10823692\_x3.....Uggagacgucguggggaacacggggu..... 1  
 Gi3\_27856013\_x3.....acgucgugAgaacacggggugccgaa..... 1  
 Gi3\_27967715\_x3.....Ugagacgucguggggaacacggggug..... 1  
 Gi2\_10822879\_x3.....gucguggggaacacggggCgccg..... 1  
 Gi5\_8666564\_x3.....Aacgucguggggaacacggggugccgaac..... 1  
 Gi3\_27833963\_x3.....aGgucguggggaacacggggugccga..... 1  
 Gi2\_10739329\_x3.....acgucgugAgaacacggggugccgaacu..... 1  
 Gi3\_27824306\_x3....aucggagacgucguggggaacUcggggu..... 1  
 Gi1\_4064145\_x3.....gucguggggaacacggggugGc..... 1  
 Gi4\_546303\_x3....aucggagacgucguggggaacacggggugc..... 0  
 Gi1\_4071414\_x3.....acgucgugggUacacggggugccgaacu..... 1  
 Gi1\_4055142\_x3.....cAgagacgucguggggaacacggggugcc..... 1  
 G1a\_5834938\_x3.....ugggaacacggggugcAgaacu..... 1  
 Gi3\_27975788\_x3.....cggGgacgucguggggaacacggg..... 1  
 Gi5\_8676794\_x3.....guUggaacacggggugccgaa..... 1  
 Gi5\_8692325\_x3....aucggagacgucgugggaaUacg..... 1  
 Gi3\_27933242\_x3.....cgugggCacacggggugcc..... 1



Gi3\_27928310\_x3.....ucggagacgCcgugggaacacggggugcc..... 1  
Gi2\_10822456\_x3.....cgucguAggaaacacggggugc..... 1  
Gi5\_8706362\_x3.....gggaacaUggggugccgaac..... 1  
Gi2\_10776541\_x3.....uAggaaacacggggugccgaa..... 1  
Gi1\_4061307\_x3.....ggaacacggggugccgUacu..... 1  
Gi1\_4052616\_x3.....Augggaacacggggugccg..... 1  
Gi5\_8675609\_x3.....acgAcgugggaacacggggugccgaacu..... 1  
Gi5\_8696045\_x3.....gggaGcacggggugccgaa..... 1  
Gi2\_10758874\_x3.....aucggagacgucgugggaacacggggugAc..... 1  
Gi3\_27946997\_x3.....gugggaacacgUggugccgaa..... 1  
Gi2\_10759594\_x3.....cgugggaacacUggggugcc..... 1  
Gi3\_27901238\_x3.....aacacggggugccCaacu..... 1  
Gi1\_4056027\_x3.....Ugacgucgugggaacacggggugccgaacu..... 1  
Gi3\_27869987\_x3.....ggagacgucgugggaacGcg..... 1  
G1a\_5832430\_x3.....cgGgggaacacggggugcc..... 1  
Gi1\_4075593\_x3.....gacgucgugggaacCcgggugccgaacu..... 1  
Gi1\_4086879\_x3.....cgugggaacacggggugcGgaacu..... 1  
Gi3\_27815444\_x3.....uggAaacacggggugccg..... 1  
Gi3\_27825254\_x3.....ucgugggaacacggggugcGgaacu..... 1  
Gi5\_8697584\_x3.....ugggaacacggggugccgaaU..... 1  
G1a\_5826922\_x3.....aucggagacgucgugggaacacggggC..... 1  
Gi3\_27815522\_x3.....ggaacacggggUccgaa..... 1  
Gi3\_27901427\_x3.....cgucAugggaacacggggugc..... 1  
Gi2\_10821940\_x3..gcgaucggagacgucgug..... 0  
Gi2\_10749727\_x3.....aucggagacgCcgugggaac..... 1  
Gi2\_10810957\_x3.....gaucggagacgucgugggaacCcgggugc..... 1  
Gi2\_10803373\_x3.....agacgucgugggaacGcggggugccgaacu..... 1  
Gi2\_10757023\_x3.....ugggaacacggggugccgaaU..... 1  
Gi1\_4049010\_x3.....gugggaCcacggggugccgaacu..... 1  
G1a\_5835508\_x3.....Ggugggaacacggggugcc..... 1  
Gi2\_10817665\_x3..gGucggagacgucgugggaaca..... 1  
Gi3\_27944330\_x3.....ggaacacggggugccgCa..... 1  
Gi3\_27886172\_x3.....ugggaacaGggggugccga..... 1  
Gi3\_27805952\_x3.....gugggaacacggggUccg..... 1  
Gi2\_10755268\_x3.....ggagacgucgugggaacacggggGgc..... 1  
Gi1\_4081326\_x3..gaucggagNcgucgugg..... 1  
Gi3\_27951293\_x3.....aucCgagacgucgugggaacacggggugc..... 1  
Gi2\_10817077\_x3.....cggUgacgucgugggaacacggggugcc..... 1  
Gi1\_4052178\_x3.....aacacgUggugccgaacu..... 1  
Gi2\_10805773\_x3.....gugggaacacUggggugccg..... 1  
Gi2\_10813573\_x3.....cgugggaacaAgggugccgaac..... 1  
Gi1\_4070493\_x3.....gAgggaacacggggugccga..... 1  
Gi3\_27883913\_x3.....ugggCcacggggugccg..... 1  
Gi3\_27968057\_x3..gaucggCgacgucgugggaacacggg..... 1  
Gi1\_4074717\_x3.....gggaGcacggggugccgaac..... 1  
Gi3\_27918530\_x3.....aucggagacgucgugggaAac..... 1  
Gi1\_4082853\_x3.....cgugggaacacggggCgccc..... 1

Gi3\_27870863\_x3.....gucgugggaacGcggggugccga..... 1  
Gi3\_27953717\_x3...Caucggagacgucgugggaacacgggg..... 1  
Gi4\_552456\_x3.....ugggaacacggggugccgaaAu..... 1  
Gi1\_4052958\_x3.....ucgugggaacacggggugAcgaaacu..... 1  
Gi2\_10793179\_x3.....ucgugggaacacggggugccgaUcu..... 1  
Gi2\_10774417\_x3.....gggaacCcggggugccgaac..... 1  
Gi5\_8698481\_x3.....ucgugggaacacgggUugccgaacu..... 1  
Gi2\_10738150\_x3.ugcgauccgCgacgucgugggaaca..... 1  
Gi3\_27927239\_x3...gaucgAagacgucgugggaacacggggg..... 1  
Gi3\_27874235\_x3.....cgucgugggaAacggggugccga..... 1  
Gi2\_10729516\_x3.....agacgucgugggaacacgggAugcc..... 1  
Gi1\_4080198\_x3.....ucgugggaCcacggggugcc..... 1  
Gi2\_10768330\_x3...Caucggagacgucgugggaacacg..... 1  
Gi2\_10814581\_x3.....ucggagacgucgCgggaacacggggg..... 1  
Gi1\_4076172\_x3...ucggagacgucgugggGacacg..... 1  
Gi3\_27901463\_x3.....agacgucgugggaacGcggggugccgaacu..... 1  
Gi2\_10756315\_x3.....cgucgugggaacacgAggugccg..... 1  
Gi2\_10749670\_x3.....acgucAugggaacacggggugcc..... 1  
Gi2\_10740502\_x3...Uucggagacgucgugggaacac..... 1  
G1a\_5815954\_x3...gUucggagacgucguggga..... 1  
Gi2\_10752463\_x3.....ucgugggaacacggggAgccgaac..... 1  
Gi5\_8656670\_x3.....gugggaaUacggggugccg..... 1  
Gi3\_27856406\_x3.....ucgugggaacacggAgugccg..... 1  
Gi2\_10735225\_x3.....cggagacgucgugggaCcacggggugc..... 1  
Gi3\_27870818\_x3.....gacgucgugggaacacggUuguccgaac..... 1  
Gi2\_10816861\_x3.....gucguggAaacacggggugccgaac..... 1  
Gi3\_27952910\_x3.....cggAUacgucgugggaacacg..... 1  
Gi5\_8715755\_x3.....gugggaacaGggggugccgaacu..... 1  
Gi2\_10749271\_x3...gaucggagacgucgGgggaacacggggg..... 1  
Gi3\_27820862\_x3...aucggagacAucgugggaacac..... 1  
Gi5\_8669738\_x3.....ucgugggaacacggggugcGgaacu..... 1  
Gi2\_10796344\_x3...aucggagacgucgugggaAacggggugc..... 1  
Gi5\_8701061\_x3...agacgucgugggaacacggggAgccgaacu..... 1  
Gi1\_4077852\_x3.....ugggCacacggggugccgaacu..... 1  
Gi2\_10762348\_x3...aucggagacguUgugggaacacggggg..... 1  
Gi3\_27859553\_x3...cggagacgucguUggaacacggggg..... 1  
Gi2\_10758130\_x3.....ggaacaAgggggugccgaac..... 1  
Gi2\_10741690\_x3...Aggaacacggggugccga..... 1  
Gi5\_8706773\_x3.....ggGacacggggugccgaac..... 1  
Gi3\_27811253\_x3...gaucggagacgucgugggaCcacg..... 1  
Gi2\_10781374\_x3.....ugggaacGcggggugccg..... 1  
G1a\_5853475\_x3...gaacacggggugccgaCcu..... 1  
Gi3\_27834089\_x3...ggagacgucgugggaacGcggggugcc..... 1  
Gi4\_549546\_x3.....ucguUggaacacggggugccgaacu..... 1  
Gi2\_10748338\_x3.....gggaacacggggUuccgaacu..... 1  
Gi2\_10795438\_x3...cggagGcugcugggaacacggggg..... 1  
Gi3\_27827144\_x3...ggagacguUgugggaacacggggg..... 1

Gi5\_8702303\_x3.....gggaacacggggugccgaaU..... 1  
 Gi5\_8699957\_x3.....gugggaacacAgggugccga..... 1  
 Gi3\_27841475\_x3.....gugggaacacgggggUccc..... 1  
 Gi2\_10728643\_x3.....cgugggaacacggggGgccgaa..... 1  
 Gi3\_27878966\_x3.....cgagagacuUgugggaacacgggggU..... 1  
 Gl1\_5861968\_x3.....gugggaacacgggCgugccgaacu..... 1  
 Gi3\_27890897\_x3.....cgaucggagacgucgugggaacacggggG..... 1  
 Gi3\_27946538\_x3.....gucgugggNacacggggug..... 1  
 Gl1\_5821597\_x3.....ggaacCcggggugccgaacu..... 1  
 Gi5\_8705870\_x3.....ugggaacacggggugcAgaac..... 1  
 Gi2\_10766044\_x3.....uggCaacacggggugccgaacu..... 1  
 Gi3\_27947603\_x3.....uggUaacacggggugccgaac..... 1  
 Gi1\_4074924\_x3.....ucgugggaacacggggugccgaUcu..... 1  
 Gi1\_4076070\_x3.....gCgucgugggaacacggggugcc..... 1  
 Gi2\_10756420\_x3.....acgucgugggaacGcggggugc..... 1  
 Gi1\_4081533\_x3.....cgugggaGcacggggugccg..... 1  
 Gi2\_10749937\_x3.....aucggagacgAcgugggaaca..... 1  
 Gi2\_10775620\_x3.....ugggaacacgggAagucggaac..... 1  
 Gi2\_10766893\_x3.....gaucggagNcgucgugggaacacg..... 1  
 Gi5\_8693672\_x3.....gugggaacacggggugccgaC..... 1  
 Gi1\_4086768\_x3.....Agagacgucgugggaacacggggugcc..... 1  
 Gi3\_27957194\_x3.....gUagacgucgugggaacacggggugc..... 1  
 Gi3\_27894050\_x3.....ucggagacNucgugggaacacggggU..... 1  
 Gi5\_8695256\_x3.....ggaacGacggggugccgaac..... 1  
 Gi5\_8699030\_x3.....cgugggaacGcggggugcc..... 1  
 Gi5\_8709968\_x3.....agacgucgugggaacacggggUaccgaacu..... 1  
 Gl1\_5826586\_x3.....Aaacacggggugccgaacu..... 1  
 Gl1\_5832079\_x3.....gaucggagacgCcgugggaacacggg..... 1  
 Gi3\_27942383\_x3.....gauUggagacgucgugggaacacg..... 1  
 Gi2\_10798459\_x3.....Uucggagacgucgugggaacacggggugcc..... 1  
 Gi2\_10779133\_x3.....ggagacAucgugggaacacggggugcc..... 1  
 Gi3\_27839636\_x3.....Ccgugggaacacggggugccgaa..... 1  
 Gi5\_8696801\_x3.....cgugggaacCcggggugccgaac..... 1  
 Gl1\_5825428\_x3.....gggaacacggggugccgUacu..... 1  
 Gi2\_10809958\_x3.....gAagacgucgugggaacacggggugcc..... 1  
 Gi2\_10763998\_x3.....ggagacguNgugggaacacggggugc..... 1  
 Gl1\_5850442\_x3.....aCcgagacgucgugggaacacggggU..... 1  
 Gi2\_10740481\_x3.....ggAaacacggggugccgaac..... 1  
 Gi3\_27918212\_x3.....aucgUagacgucguggga..... 1  
 Gi5\_8705129\_x3.....acgucgugggaaUacggggugccgaacu..... 1  
 Gi3\_27912089\_x3.....gugggaacacCggggugccga..... 1  
 Gl1\_4075632\_x3.....cgugggaGcacggggugccgaa..... 1  
 Gi3\_27807521\_x3.....cgucgugggaacacgggCgugccgaacu..... 1  
 Gi3\_27881111\_x3.....gacAucgugggaacacggggugccgaacu..... 1  
 Gi3\_27890750\_x3.....agaUgucgugggaacacggggugccgaacu..... 1  
 Gl1\_4053558\_x3.....gugggGacacggggugcc..... 1  
 Gi3\_27917177\_x3.....cgucgugggaacUcggggugccga..... 1

Gi3\_27863285\_x3....aucggagacgAcgugggaacacg..... 1  
Gi1\_4071327\_x3.....agacgucgugggaacacAgggugccgaacu..... 1  
Gi3\_27929303\_x3...cAaucggagacgucgugggaacacggggu..... 1  
Gi3\_27850148\_x3.....ggagacgucguAggaacacggggu..... 1  
Gi5\_8705672\_x3.....cgGgggaacacggggugccga..... 1  
Gi2\_10820941\_x3.....ugggaacacggggugAcgaac..... 1  
G1a\_5869438\_x3.....gugggaacacggAgugccga..... 1  
Gi1\_4048449\_x3.....cUgagacgucgugggaacacggggugccgaacu..... 1  
Gi2\_10789837\_x3.....ggUgacgucgugggaacacggggugccgaa..... 1  
Gi3\_27839084\_x3...gaucggagacgucgugggGac..... 1  
Gi2\_10798792\_x3...gaucggagacgucgugggaaAacggggugc..... 1  
G1a\_5835673\_x3...aucggagacgucAugggaacacg..... 1  
Gi2\_10735897\_x3...gaucggaAacgucgugggaacacggg..... 1  
G1a\_5826532\_x3.....gugggaacUcggggugccgaacu..... 1  
Gi2\_10775545\_x3...gaucggagGcgucgugggaacacg..... 1  
Gi5\_8663633\_x3.....gugggaacacggggUcccgaacu..... 1  
Gi2\_10818196\_x3.....gugggaacacggggUcccgaac..... 1  
Gi3\_27918179\_x3.....guNggaacacggggugccga..... 1  
Gi3\_27846467\_x3.....gugggaacacggggugGcgaa..... 1  
Gi3\_27799826\_x3....aucggagacgucgugggaacaAg..... 1  
Gi1\_4085907\_x3.....acgucgugggaacaAggggugccgaacu..... 1  
Gi5\_8691650\_x3.....gggaacacggggugGcgaacu..... 1  
Gi2\_10736995\_x3...gaucggagacgucgugggaacCc..... 1  
Gi3\_27912560\_x3.....guAgugggaacacggggugccgaac..... 1  
Gi3\_27824693\_x3.....agacgucgugggaacacggggugccgaacG..... 1  
Gi5\_8686826\_x3.....gugggaacGcggggugccg..... 1  
Gi1\_4075824\_x3.....cgugggaacacggggugccgaCc..... 1  
Gi3\_27953486\_x3.....gggaacacggggUcccgaac..... 1  
G1a\_5844055\_x3.....gaacacggggugccAaacu..... 1  
Gi3\_27859004\_x3.....gggaacacCgggugccgaac..... 1  
Gi1\_4088766\_x3.....ggaGcacggggugccgaac..... 1  
G1a\_5866222\_x3....aucggagacgucgugggaG..... 1  
Gi5\_8692316\_x3.....cAugggaacacggggugccga..... 1  
Gi3\_27925109\_x3...gcgaucggNgacgucgug..... 1  
Gi3\_27833312\_x3....aucggagacgucgugggaUcacggggu..... 1  
Gi2\_10745254\_x3...gaucgAagacgucgugggaaca..... 1  
Gi2\_10794466\_x3....aucggagacgucgugggaacacgggAugc..... 1  
Gi2\_10736158\_x3.....cgugggaCcacggggugc..... 1  
Gi3\_27963245\_x3....aucggagacgucgAgggaacacggggu..... 1  
G1a\_5840905\_x3....cUgagacgucgugggaacacg..... 1  
Gi2\_10777042\_x3.....gacgucgugggaacacggggugccgaaAu..... 1  
Gi2\_10808905\_x3.....gucguAggaacacggggugccgaac..... 1  
Gi2\_10813876\_x3.....gUagacgucgugggaacacggggugccgaacu..... 1  
Gi3\_27953096\_x3.....cgugggUacacggggugccga..... 1  
Gi3\_27931370\_x3.....acgucgugggaGacggggugccgaac..... 1  
Gi3\_27875804\_x3...Ggaucggagacgucgugggaacacgg..... 1  
Gi1\_4059636\_x3.....ucguggUaacacggggugccgaacu..... 1

Gi2\_10784011\_x3.....Ugacgucgugggaaacacggggg..... 1  
Gi2\_10811233\_x3.....cgucgugggaaacacgggggAccgaa..... 1  
Gi2\_10787239\_x3...Ggaucggagacgucgugggaaaca..... 1  
Gi3\_27835814\_x3.....cgucgugggaaAacggggugccg..... 1  
Gi1\_4069764\_x3.....ugggaGcacggggugccgaacu..... 1  
Gi5\_8661548\_x3.....ugCgaacacggggugccgaacu..... 1  
Gi5\_8698763\_x3.....ugggaUcacggggugccgaac..... 1  
Gi2\_10765219\_x3.....cgucgugggaaacacggggugccC..... 1  
G1a\_5876332\_x3.....gugggaacacggggugccGUacu..... 1  
Gi1\_4071903\_x3.....ucgugggaaacacAgggugcc..... 1  
Gi2\_10743364\_x3.....acgucgugggaaacacggggugcU..... 1  
Gi2\_10791397\_x3.....ucgugggaaacacggUGugccgaacu..... 1  
Gi3\_27869366\_x3.....cggagacgucgugggaaCcacggggg..... 1  
Gi2\_10825615\_x3...gaCcgagacgucgugggaaacac..... 1  
Gi2\_10729045\_x3.....ggaacacgCggugccgaac..... 1  
Gi2\_10788781\_x3.....cgugggaaacCcgggugccgaa..... 1  
Gi3\_27824561\_x3.....ucgugggaaacacggggugccUaacu..... 1  
Gi2\_10740928\_x3...aucggaAacgucgugggaaacacgggg..... 1  
Gi2\_10736134\_x3.....gacgucgugggaaacacggggCgccgaac..... 1  
Gi3\_27797693\_x3.....cgugggaaacacggggugccC..... 1  
G1a\_5854384\_x3.....cgugggaaacaAggggugccgaacu..... 1  
Gi3\_27933230\_x3...Gcggagacgucgugggaaacacgg..... 1  
G1a\_5849782\_x3...gaucggagacgucgugggaaGcacggg..... 1  
Gi1\_4063695\_x3.....ggUGacgucgugggaaacacggggugc..... 1  
Gi2\_10740979\_x3.....ggagacgucgugggaaacacggggCgccg..... 1  
Gi3\_27921569\_x3.....gacgucgugggaaacCcgggugccgaac..... 1  
Gi3\_27883538\_x3.....gacgucgugggaaacacgggAugccg..... 1  
Gi3\_27910703\_x3.....cAgagacgucgugggaaacacg..... 1  
Gi3\_27871880\_x3.....gucgugUGaacacggggugccgaacu..... 1  
Gi3\_27879404\_x3.....gUgacgucgugggaaacacggggugccgaacu..... 1  
Gi3\_27934391\_x3.....gugggaacacgggggUuccgaac..... 1  
Gi4\_545877\_x3.....gugggaacacggggugcUgaacu..... 1  
Gi3\_27930425\_x3...gaucggagacgucgugggaaacaUggggugc..... 1  
Gi5\_8652710\_x3.....cgugggaaacacgggggUaccgaac..... 1  
G1a\_5822872\_x3.....gAaacacggggugccgaac..... 1  
Gi5\_8688542\_x3.uUcgauccgagacgucgugggaaacacg..... 1  
Gi2\_10809664\_x3...gaucggagacgucgugggaaGca..... 1  
Gi1\_4059420\_x3.....cgucgugggaaAacggggugccgaacu..... 1  
Gi2\_10784227\_x3.....gacgucguggAaacacggggugccg..... 1  
Gi5\_8678357\_x3.....ucUugggaacacggggugccgaac..... 1  
Gi5\_8697986\_x3.....gggaacUcggggugccgaacu..... 1  
Gi5\_8715926\_x3.....aacacggggugccCaacu..... 1  
Gi3\_27905708\_x3.....cgucgugggaaacacggggugccC..... 1  
Gi3\_27803885\_x3.....gucgGgggaacacggggugccga..... 1  
Gi3\_27865178\_x3.....gacNucgugggaaacacggggugccgaacu..... 1  
G1a\_5867491\_x3.....gggaaUacggggugccgaacu..... 1  
Gi1\_4052067\_x3.....ggaacacggAgugccgaacu..... 1

Gi1a\_5876032\_x3...Uaucggagacgucgugggaacac..... 1  
Gi3\_27803858\_x3.....gucgugggaGcacgggu..... 1  
Gi2\_10826632\_x3.....cgAcgugggaacacgggg..... 1  
Gi2\_10761133\_x3.....aUacgucgugggaacacgggg..... 1  
Gi1\_4088841\_x3.....gugggaacGcggggugcc..... 1  
Gi3\_27864185\_x3.....cgucgGgggaacacggggugccga..... 1  
Gi3\_27941927\_x3.....gacgucgugggaacacggggugcAgaacu..... 1  
Gi2\_10787143\_x3...gaucggagacgucAugggaacacggggugc..... 1  
Gi2\_10799326\_x3.ugcgGucggagacgucguggga..... 1  
Gi2\_10795309\_x3.....cgucgugggaaUacggggugccgaacu..... 1  
Gi3\_27907856\_x3.gGgaucggagacgucgugggaaca..... 1  
Gi5\_8677325\_x3.....gucgugggaacacggggugccgUacu..... 1  
Gi3\_27971141\_x3...aucggagacgucgugggaUcacggggugcc..... 1  
Gi3\_27962765\_x3.....ugggaacacgggCugccg..... 1  
Gi1\_4074723\_x3.....guNggaaacacggggugccgaacu..... 1  
Gi2\_10790197\_x3.....gggaacacggggugccCaacu..... 1  
Gi3\_27979238\_x3...Caucggagacgucgugggaacac..... 1  
Gi2\_10737316\_x3.ugcgaucgNagacgucgugggaaca..... 1  
Gi1a\_5862913\_x3.....gugggaacaGggggugccgaacu..... 1  
Gi2\_10749646\_x3.....gugggaaAacggggugccgaa..... 1  
Gi4\_550362\_x3.....Cugggaacacggggugccgaa..... 1  
Gi3\_27940103\_x3...gaucggagacgucgugggaacacggAg..... 1  
Gi3\_27881657\_x3.....cgugggaacaGggggugccgaac..... 1  
Gi2\_10730275\_x3...cgUucggagacgucgugggaacacggggug..... 1  
Gi3\_27942323\_x3...gaucggagNcgucgugggaacac..... 1  
Gi2\_10784848\_x3.....ggaacacggggugccgCa..... 1  
Gi2\_10772161\_x3.....cgugggaacacgggCugcc..... 1  
Gi4\_549663\_x3.....guggUaacacggggugccgaacu..... 1  
Gi2\_10796053\_x3.....gucgugggaacaGggggugccgaacu..... 1  
Gi3\_27871451\_x3...aucggagacguUgugggaacac..... 1  
Gi2\_10792666\_x3.....Aacgucgugggaacacggggugccg..... 1  
Gi3\_27850634\_x3...cggagacgucgugggaacGcgg..... 1  
Gi3\_27958811\_x3...gaucggagacgucgugggaaUacg..... 1  
Gi3\_27934151\_x3...auAggagacgucgugggaacacggg..... 1  
Gi3\_27944294\_x3.....gggCacacggggugccgaac..... 1  
Gi3\_27807257\_x3.....Cagacgucgugggaacacggggugccg..... 1  
Gi2\_10757557\_x3...aucggagacgucgugggaacacggAgugc..... 1  
Gi2\_10770001\_x3.....ucgugggaacacggggugcUgaac..... 1  
Gi2\_10824400\_x3...gaucAgagacgucgugggaacacggggugcc..... 1  
Gi3\_27962891\_x3.....gggaacacggggugccgG..... 1  
Gi3\_27854378\_x3.....Agugggaacacggggugc..... 1  
Gi2\_10727827\_x3.....gggaacacggUgugccgaacu..... 1  
Gi5\_8684675\_x3.....ucgugggaacacggggugAcgaacu..... 1  
Gi3\_27894110\_x3.....cgugggaacacggggAgccg..... 1  
Gi3\_27800747\_x3...acgucgugUgaacacggggugccgaacu..... 1  
Gi3\_27958847\_x3...ucggagacgCcgugggaacacggggg..... 1  
Gi2\_10732843\_x3.....cgugggaacacgAggugcc..... 1

Gi2\_10797019\_x3...gaucggagacgucgugggaacaAggg..... 1  
 Gi5\_8675660\_x3.....guggaacaacgUggugccgaac..... 1  
 Gi2\_10807438\_x3.....ggaCcacggggugccgaac..... 1  
 Gi5\_8673848\_x3.....Cugggaacaacggggugccg..... 1  
 Gi5\_8711174\_x3.....aucggGgacgucgugggaacacggggu..... 1  
 Gi3\_27859775\_x3.....cguNgugggaacacggggugccgaacu..... 1  
 Gi1\_4049220\_x3.....cgucUugggaacacggggugccgaacu..... 1  
 Gi3\_27806318\_x3.....gugggaacacUgggugcc..... 1  
 Gi2\_10763785\_x3.....acgucgugggaacacggggugcA..... 1  
 Gi2\_10821571\_x3.....aucggaAacgucgugggaacacggggugc..... 1  
 G1a\_5821882\_x3.....gUgaacacggggugccgaac..... 1  
 Gi5\_8668277\_x3.....cgugggaacacggggugccgaaA..... 1  
 Gi3\_27954656\_x3.....agacgucAugggaacacggggugccgaac..... 1  
 Gi2\_10811071\_x3.....guAggaacacggggugccgaa..... 1  
 Gi3\_27842783\_x3...gaucggagacgucgugggaacacggggGgcc..... 1  
 Gi1\_4051854\_x3.....gucgugggaacaGggggugccgaacu..... 1  
 Gi2\_10810147\_x3.....aucggagacAucgugggaaca..... 1  
 Gi2\_10766299\_x3.....acgucgugggaacacgggAugccgaacu..... 1  
 Gi1\_4061787\_x3.....cgugggaaAacggggugccgaacu..... 1  
 Gi5\_8671109\_x3.....aucggagaNgucgugggaacacggg..... 1  
 Gi5\_8717435\_x3.....gugggGacacggggugccg..... 1  
 Gi3\_27958547\_x3.....cggUacgucgugggaacacggggugcc..... 1  
 Gi2\_10817485\_x3.....acgucgugggaacacggggugccGac..... 1  
 Gi3\_27958742\_x3...gaucggagacgucgugggaGcac..... 1  
 Gi5\_8686478\_x3.....gugggaacGcggggugccgaa..... 1  
 G1a\_5845792\_x3.....ugggaUcacggggugccgaacu..... 1  
 Gi2\_10737913\_x3.....Agugggaacacggggugccga..... 1  
 Gi5\_8682356\_x3.....ugggaCcacggggugccgaac..... 1  
 Gi3\_27979301\_x3.....ucggagacgucgugggCacacggggu..... 1  
 Gi5\_8686193\_x3.....Ugagacgucgugggaacacggggugccgaac..... 1  
 G1a\_5832232\_x3.Ggcgauccgagacgucgu..... 1  
 Gi1\_4063875\_x3.....ggGgacgucgugggaacacggggugccgaacu..... 1  
 Gi1\_4048068\_x3.....gugAgaacacggggugccgaac..... 1  
 Gi2\_10789240\_x3.....gugUgaacacggggugcc..... 1  
 Gi2\_10743616\_x3.....ggagacguUgugggaacacggggugcc..... 1  
 Gi2\_10730686\_x3...gUucggagacgucgugggaacacggggugc..... 1  
 Gi3\_27840224\_x3.....acgucgugggaCcacggggugccgaac..... 1  
 Gi5\_8662430\_x3.....gAgggaacacggggugccga..... 1  
 Gi5\_8674967\_x3.....Cugggaacaacggggugccgaacu..... 1  
 Gi1\_4049322\_x3.....gucgugggNacacggggugcc..... 1  
 Gi3\_27939236\_x3.....cgugggaUcacggggugcc..... 1  
 Gi3\_27866264\_x3.....agacgucgugggaacacggggugccgaGcu..... 1  
 Gi5\_8686865\_x3...gGucggagacgucgugggaacac..... 1  
 Gi3\_27816350\_x3.....gugUgaacacggggugccga..... 1  
 Gi4\_549291\_x3.....gugggaacacggggugccgaaAu..... 1  
 Gi3\_27862109\_x3...Ucgauccgagacgucgugggaacacggggu..... 1  
 Gi3\_27922823\_x3.....gugggaacacggCgugccgaa..... 1

Gi1a\_5870404\_x3.....gaacacggggCgccgaacu..... 1  
Gi1a\_5859607\_x3....gaucggagacgucgugggCacacggg..... 1  
Gi2\_10790221\_x3....aucggagacgucUugggaacac..... 1  
Gi5\_8657315\_x3.....aacacCgggugccgaacu..... 1  
Gi5\_8703941\_x3.....aacacCgggugccgaacu..... 1  
Gi3\_27947357\_x3....aucggagacgucgugggaacaUggggugc..... 1  
Gi1\_4052358\_x3..Ucgauccgagacgucgugggaaca..... 1  
Gi4\_550197\_x3.....cgugggaacacAgggugccgaacu..... 1  
Gi5\_8702669\_x3.....gugggaacacggggugccgaCcuu..... 1  
Gi2\_10792555\_x3.....gucgugggaacacggggUaccgaac..... 1  
Gi2\_10826701\_x3.....gucgugggaacacggggugcGgaacu..... 1  
Gi2\_10767676\_x3.....Cgacgucgugggaacacggggugccgaacu..... 1  
Gi5\_8654792\_x3.....cgucgugggaacacggggugcAgaacu..... 1  
Gi1a\_5854771\_x3....aGcggagacgucgugggaacacggggug..... 1  
Gi5\_8664836\_x3.....gaacacUgggugccgaacu..... 1  
Gi3\_27804146\_x3.....cCucgugggaacacggggugc..... 1  
Gi3\_27959276\_x3....aucggagacgucgugggaaca..... 0  
Gi3\_27814484\_x3..gGgaucggagacgucgug..... 1  
Gi1\_4048494\_x3.....agaUgucgugggaacacggggugccgaacu..... 1  
Gi2\_10821178\_x3.....cgugggaacCggggugccga..... 1  
Gi4\_551727\_x3.....cgugggaacacggggugccgCacu..... 1  
Gi3\_27842525\_x3....gaucggagacgucguAggaacac..... 1  
Gi1a\_5872132\_x3.....Augggaacacggggugccga..... 1  
Gi2\_10760725\_x3.....agacgCcgugggaacacggggugccg..... 1  
Gi2\_10817107\_x3....aCcgagacgucguggga..... 1  
Gi2\_10749289\_x3.....gugggaacacgggCugccgaac..... 1  
Gi4\_547317\_x3.....cgugggGacacggggugccgaacu..... 1  
Gi5\_8690675\_x3.....cAugggaacacggggugccgaac..... 1  
Gi1\_4062036\_x3.....ggagacguNgugggaacacggggugcc..... 1  
Gi5\_8702666\_x3.....gacgucgugggaacacggggugccgGacu..... 1  
Gi2\_10760065\_x3.....guUggaacacggggugccgaacuu..... 1  
Gi2\_10733548\_x3....aucggagacgucgugggaUaccgggu..... 1  
Gi2\_10823371\_x3.....cgucgugggaacacgggAugccgaacu..... 1  
Gi3\_27973466\_x3.....Cucgugggaacacggggugcc..... 1  
Gi3\_27976973\_x3...gaucggagacgucgugggaacCcg..... 1  
Gi5\_8663726\_x3.....cgugggaacacggggugAcgaac..... 1  
Gi1\_4054014\_x3....aucggagaNgucgugggaacacg..... 1  
Gi3\_27887930\_x3....aucggagacgucgugggaacacAgggugcc..... 1  
Gi1\_4050567\_x3.....cgGgggaacacggggugccga..... 1  
Gi1\_4080390\_x3.....aacacgggNugccgaacuu..... 1  
Gi3\_27945755\_x3...gGucggagacgucgugggaac..... 1  
Gi1\_4088238\_x3.....acgucgugggaacacggggugAcgaacu..... 1  
Gi5\_8651468\_x3.....guAggaacacggggugccga..... 1  
Gi5\_8660984\_x3.....aacacgggguUccgaacu..... 1  
Gi3\_27965918\_x3.....cgucguggAaacacggggugccga..... 1  
Gi1a\_5871601\_x3.....gggaacacggggugccgGacu..... 1  
Gi2\_10783210\_x3.....agacgucgugggGacacggggugc..... 1



Gi3\_27933758\_x3.....acgucgugggaacacggggugAc..... 1  
 Gi2\_10769218\_x3...gaucAgagacgucgugggaacacggggugc..... 1  
 Gi1\_4077654\_x3.....gugggaacacggggugUc..... 1  
 Gi1\_4079394\_x3.....ggagacgucgugUgaacacggggugccg..... 1  
 Gi2\_10776688\_x3...gaucAgagacgucgugggaacacgggggu..... 1  
 Gi5\_8678867\_x3.....gggaacCcggggugccgaa..... 1  
 Gi1\_4052940\_x3.....cUugggaacacggggugc..... 1  
 G1a\_5829595\_x3.....Gcggagacgucgugggaacacgg..... 1  
 G1a\_5840815\_x3.....Cugggaacacggggugcc..... 1  
 Gi2\_10726444\_x3...cgUucggagacgucgugg..... 1  
 G1a\_5825074\_x3.....cgugggaacCcggggugccgaacu..... 1  
 Gi2\_10777318\_x3.....gucgugggaacacggggugccgaacG..... 1  
 Gi2\_10726510\_x3...gaucggagacgucgugggaacaAggggu..... 1  
 Gi5\_8661320\_x3.....gugggaacNcggggugccgaa..... 1  
 Gi2\_10770121\_x3...cgagacgucgugggaacacggg..... 0  
 G1a\_5864272\_x3.....gugggaacacggggugccgaacG..... 1  
 Gi1\_4056990\_x3.....ggaacacggggUAccgaacu..... 1  
 Gi2\_10780222\_x3...gaCcgagacgucgugggaacacg..... 1  
 Gi3\_27845630\_x3.....uNggaacacggggugccgaac..... 1  
 Gi2\_10756531\_x3...cUaucggagacgucgugggaacacgggg..... 1  
 Gi1\_4076895\_x3.....cUgagacgucgugggaacacgggg..... 1  
 Gi1\_4087335\_x3.....acguUgugggaacacggggugccgaacu..... 1  
 Gi1\_4065624\_x3.....gucgugggaacacggggugcUgaacu..... 1  
 Gi1\_4080627\_x3.....cgucAugggaacacggggugcc..... 1  
 Gi2\_10826314\_x3...aucggaAacgucgugggaacacggggug..... 1  
 G1a\_5851645\_x3.....uggNaacacggggugccgaacu..... 1  
 Gi2\_10815088\_x3.....Ugucgugggaacacggggugcc..... 1  
 G1a\_5872516\_x3.....cgAgggaacacggggugcc..... 1  
 Gi1\_4075395\_x3...gGgacgucgugggaacacggggugccgaacu..... 1  
 Gi1\_4059270\_x3.....guUggaacacggggugcc..... 1  
 Gi3\_27809864\_x3.....ucgugggaacUcggggugccgaacu..... 1  
 Gi3\_27935345\_x3.....gaGcacggggugccgaacu..... 1  
 Gi2\_10776319\_x3...cggGgacgucgugggaacacggggugccgaa..... 1  
 Gi3\_27902123\_x3...Uggagacgucgugggaacacggggugccga..... 1  
 Gi4\_545151\_x3.....gUaacacggggugccgaac..... 1  
 Gi2\_10793869\_x3...aucggagacgucgugggUacacgggggu..... 1  
 Gi1\_4059762\_x3.....aacacggggugccgUacu..... 1  
 Gi2\_10793458\_x3.....gucgugggaacacggggugAc..... 1  
 Gi2\_10828048\_x3...cgGcgugggaacacggggugccgaac..... 1  
 Gi3\_27866117\_x3...ggagacgucgugggaacacggggA..... 1  
 Gi2\_10745245\_x3...aucggagCcgucgugggaacacgggggu..... 1  
 Gi3\_27923294\_x3.....ggAaacacggggugccgaa..... 1  
 Gi2\_10737436\_x3.....ggaacacgggCugccgaacu..... 1  
 Gi3\_27967730\_x3.....Uugggaacacggggugccgaacuuu..... 1  
 Gi2\_10798951\_x3...aucggagacgucgugggUaca..... 1  
 Gi3\_27916112\_x3...gagacgucgugggaacGcggggugccgaac..... 1  
 Gi2\_10817053\_x3.....gucgCgggaacacggggugccgaac..... 1

|                                                             |   |
|-------------------------------------------------------------|---|
| Gi1_4086882_x3.....gacAucgugggaacacggggugccgaacu.....       | 1 |
| Gi3_27862628_x3.....cgCcgugggaacacggggugccgaa.....          | 1 |
| Gi3_27894512_x3cugcgaCcgagacgucg.....                       | 1 |
| Gi1_4068357_x3.....aCacgucgugggaacacggggugccgaacu.....      | 1 |
| Gi3_27852035_x3.....aucggagacgucgugggaGacggg.....           | 1 |
| Gi2_10784365_x3.....gucgugggaUcacggggugccgaacu.....         | 1 |
| Gi2_10796734_x3.....gggaacacgggCugccgaacu.....              | 1 |
| Gi3_27837236_x3.....guggCaacacggggugccga.....               | 1 |
| Gi1a_5850307_x3.....ggaacUcggggugccgaacu.....               | 1 |
| Gi5_8714585_x3.....uCggaacacggggugccgaa.....                | 1 |
| Gi2_10807684_x3.....aucggGgacgucgugggaacacggggugccgaac..... | 1 |
| Gi4_550170_x3.....cgucgugggaacacggggugccgaac.....           | 0 |
| Gi3_27918725_x3.....cggagacAucgugggaacacggggg.....          | 1 |
| Gi2_10820017_x3.....cgugggaacacgCggugccgaac.....            | 1 |
| Gi3_27801377_x3.....gacgucgugggaacacggggugccgaacG.....      | 1 |
| Gi3_27812246_x3.....aucggagacUucgugggaacac.....             | 1 |
| Gi2_10742341_x3.....cgugggaacacggggugcAgaac.....            | 1 |
| Gi2_10749811_x3.....cgucgugggaCcacggggugc.....              | 1 |
| Gi2_10818886_x3.....ggaaUacggggugccgaac.....                | 1 |
| Gi3_27963212_x3.....aacacggggUaccgaacuu.....                | 1 |
| Gi3_27926960_x3.....acgucgugggaacacgAggugcc.....            | 1 |
| Gi1a_5835199_x3.....ugggaacacgggAugccgaacu.....             | 1 |
| Gi5_8683043_x3.....agUcugcuggggaacacggggugccgaac.....       | 1 |
| Gi1a_5849461_x3.....aucggagacgucgugggaCcacgggg.....         | 1 |
| Gi1_4056000_x3.....ugggaacacggggugccgaaAu.....              | 1 |
| Gi3_27796562_x3.....gaucggUgacgucgugggaacacgggg.....        | 1 |
| Gi1a_5863120_x3.....ggaacacgNggugccgaac.....                | 1 |
| Gi3_27979745_x3.....ugggaaAacggggugccga.....                | 1 |
| Gi2_10731217_x3.....cgucgugggaacacggggugcUga.....           | 1 |
| Gi3_27966812_x3.....ucguggUaacacggggugccgaacu.....          | 1 |
| Gi3_27810149_x3.....gaucggagacgucgugggUacacgggg.....        | 1 |
| Gi2_10772365_x3.....gUgacgucgugggaacacggggugccgaac.....     | 1 |
| Gi3_27888605_x3.....gacgucgugggaacacgggAugccgaacu.....      | 1 |
| Gi2_10726195_x3.....ucgugAgaacacggggugccgaac.....           | 1 |
| Gi2_10826347_x3.....cgaucggaNacgucgugg.....                 | 1 |
| Gi3_27925478_x3.....aucggagacgucgugggaUcacggg.....          | 1 |
| Gi3_27816263_x3.....cgucgugggUacacggggugccga.....           | 1 |
| Gi2_10752319_x3.....ucggUgacgucgugggaa.....                 | 1 |
| Gi3_27934034_x3.....cgucgugggaacacggggugAcg.....            | 1 |
| Gi2_10786963_x3.....cgugggaaUacggggugccga.....              | 1 |
| Gi3_27821687_x3.....ggaacacggggugGcgaacu.....               | 1 |
| Gi2_10734061_x3.....aucggagacguUgugggaacacg.....            | 1 |
| Gi2_10825258_x3.....acgucgugggaacacggggAgccgaacu.....       | 1 |
| Gi2_10759132_x3.....ugggaacacggggugccgaC.....               | 1 |
| Gi2_10803274_x3.....aucggUgacgucgugggaacacg.....            | 1 |
| Gi3_27853268_x3.....ggaCcacggggugccgaacu.....               | 1 |
| Gi3_27801899_x3.....cgGucggagacgucguggg.....                | 1 |

Gi3\_27935435\_x3.....gUagacgucgugggaacacggggugccgaa..... 1  
 Gi3\_27947759\_x3.....gggaacacggggugGcgaac..... 1  
 Gi3\_27943604\_x3.....agacgucgugggaacUcggggugccgaacu..... 1  
 Gi2\_10794130\_x3.....cgugggaacacggggGgccg..... 1  
 Gi3\_27847958\_x3.....gggaacacggggugUcga..... 1  
 Gi2\_10728640\_x3.....aucAgagacgucgugggaacacgggg..... 1  
 Gi3\_27800000\_x3.....ggaacacggggUcccgaac..... 1  
 Gi3\_27906728\_x3.....cgucguggAaacacggggugc..... 1  
 Gi3\_27814181\_x3.....aucggagacgucGgggaacacggggugc..... 1  
 Gi3\_27903353\_x3.....gacAucgugggaacacggggugccgaac..... 1  
 Gi3\_27836417\_x3.....cggagacgucGgggaacacggggg..... 1  
 Gl1\_5820790\_x3.....aucggagacgucgUggaacacggg..... 1  
 Gi5\_8691932\_x3.....Ggugggaacacggggugcc..... 1  
 Gi5\_8660855\_x3.....agacgucgugggaacacggggugcUgaacu..... 1  
 Gi3\_27929879\_x3.....cggagacgucgugggaacacgAggu..... 1  
 Gl1\_5871073\_x3.....ggaNcacggggugccgaacu..... 1  
 Gi2\_10783585\_x3.....gaucggagacgUguggga..... 1  
 Gi3\_27910634\_x3.....gggaacacggggugccCaac..... 1  
 Gi5\_8692445\_x3.....auUggagacgucgugggaacacggggg..... 1  
 Gi3\_27866645\_x3.....cgaucggagGcucgugggaacacggggg..... 1  
 Gi2\_10747369\_x3.....gaacaAggggugccgaacu..... 1  
 Gi5\_8664128\_x3.....acgucgugggaacGcggggugcc..... 1  
 Gi2\_10764763\_x3.....ggUaacacggggugccga..... 1  
 Gi3\_27803093\_x3.....gaucggagacgucgugggaacaAggg..... 1  
 Gi2\_10797907\_x3.....aucggagacGcuggggaacacggggg..... 1  
 Gi3\_27883004\_x3.....cgugggaacCcggggugccg..... 1  
 Gl1\_5864809\_x3.....gAaacacggggugccgaacu..... 1  
 Gi1\_4054662\_x3.....aucggagaNcucgugggaacacggggugcc..... 1  
 Gi1\_4075992\_x3.....gugggaacCcggggugcc..... 1  
 Gi3\_27800921\_x3.....ucgugggaNcacgggggug..... 1  
 Gi5\_8694500\_x3.....aacacggggugGcgaacu..... 1  
 Gi5\_8706155\_x3.....gacgucGcgggaacacggggugccgaac..... 1  
 Gi5\_8707220\_x3.....cgugggaacacggggGcggca..... 1  
 Gi3\_27908333\_x3.....cgaucggagacgucgugggaCcacggg..... 1  
 Gi2\_10777213\_x3.....cgugggaacacggggUaccgaa..... 1  
 Gi2\_10820020\_x3.....aucggagacgucgugggUacacggggugc..... 1  
 Gi2\_10734325\_x3.....ugggaaUacggggugccga..... 1  
 Gl1\_5828833\_x3.....gggaacaAggggugccgaacu..... 1  
 Gi1\_4071768\_x3.....acgucAugggaacacggggugccgaacu..... 1  
 Gi5\_8687252\_x3.....aucgUagacgucgugggaacacggggg..... 1  
 Gi2\_10771786\_x3.....gugggaacacgggCugccg..... 1  
 Gi5\_8711792\_x3.....cguUgugggaacacggggugc..... 1  
 Gi2\_10745842\_x3.....aucggCgacgucgugggaacacggggg..... 1  
 Gi2\_10760116\_x3.....cgucAugggaacacggggugcc..... 1  
 Gi3\_27825662\_x3.....gggaacacggggGgccga..... 1  
 Gi1\_4061859\_x3.....cgugUgaacacggggugccg..... 1  
 Gi1\_4059054\_x3.....gacgucgugggaGcacggggugccgaacu..... 1

Gi2\_10747471\_x3.....gaacacggggugccgaUcu..... 1  
 Gi3\_27938246\_x3.....ucggagacgucguAggaacacggggugcc..... 1  
 Gi3\_27801683\_x3.....uGgugggaacacggggugccga..... 1  
 Gi1\_4074750\_x3.....gugggaacUcggggugccgaacu..... 1  
 Gi1\_4080966\_x3.....Augggaacacggggugccga..... 1  
 Gi5\_8664650\_x3.....gaacacgCggugccgaacu..... 1  
 Gi5\_8683115\_x3.....ggaacacggggAgccgaac..... 1  
 Gi3\_27844277\_x3.....ggaacacggggugccCaac..... 1  
 Gi2\_10783036\_x3.....Ggucgugggaacacggggugccgaa..... 1  
 Gi3\_27929564\_x3.....ggNacacggggugccgaacu..... 1  
 Gi1\_4060818\_x3.....Acgugggaacacggggugcc..... 1  
 Gi3\_27940097\_x3.....Gggagacgucgugggaacacggggugccgaacu..... 1  
 Gi3\_27935048\_x3.....aucggagacgucgugggaacaAggggu..... 1  
 Gi2\_10787461\_x3.....aucggagacgucgugggaacGcgg..... 1  
 Gi2\_10783987\_x3.....gacgucgugggaacacggUgugcc..... 1  
 Gi3\_27926144\_x3.....uUggagacgucgugggaacacg..... 1  
 Gl1a\_5868439\_x3.....ggaacacggggCgcccgaac..... 1  
 Gi3\_27894605\_x3.....gggaacacggggugccAgaa..... 1  
 Gi3\_27921194\_x3.....agacgucgugggaacacggggugccg..... 0  
 Gi2\_10763002\_x3.....Cucggagacgucgugggaacacggggugc..... 1  
 Gi1\_4047879\_x3.....cggagacgucgugggaacacggggug..... 0  
 Gl1a\_5841409\_x3.....aacacggggugccgGacu..... 1  
 Gi3\_27813986\_x3.....gaucggagacgucgugAgaacacggg..... 1  
 Gi1\_4057707\_x3.....cgucgugggaacacgAggugccgaacu..... 1  
 Gi2\_10762717\_x3.....gaucggGgacgucgugggaacacg..... 1  
 Gi3\_27885230\_x3.....gugggaacaAggggugccg..... 1  
 Gi5\_8665718\_x3.....gacgucgugggGacacggggugccgaacu..... 1  
 Gi5\_8663048\_x3.....gugggGacacggggugcc..... 1  
 Gi3\_27815954\_x3.....gaucggagGcucgugggaacac..... 1  
 Gi1\_4074492\_x3.....ugggaaAacggggugccgaacu..... 1  
 Gl1a\_5857381\_x3.....gaucggagacgucgugggaacCcggggu..... 1  
 Gi1\_4055745\_x3.....ucgugggaaAacggggugccgaacu..... 1  
 Gi5\_8675246\_x3.....aucggagacgucguggGcacacg..... 1  
 Gl1a\_5855146\_x3.....cgugggUacacggggugccgaacu..... 1  
 Gi3\_27855653\_x3.....acgucgugggaGcacggg..... 1  
 Gi2\_10751338\_x3.....acgucgugggaaAacggggugc..... 1  
 Gi3\_27839732\_x3.....gaucggagaUgucgugggaacacggggu..... 1  
 Gi2\_10758457\_x3.....aucggagaUgucgugggaacacggggugcc..... 1  
 Gi2\_10732465\_x3.....aCcacggggugccgaacu..... 1  
 Gl1a\_5874043\_x3.....gugggaacacggggugccgaaU..... 1  
 Gi3\_27920540\_x3.....auNggagacgucgugggaacacggggu..... 1  
 Gi2\_10764361\_x3.....ucggagacgucgugggGacacg..... 1  
 Gi5\_8714552\_x3.....Ggucgugggaacacggggugcc..... 1  
 Gi5\_8688242\_x3.....ggNaacacggggugccgaacu..... 1  
 Gi3\_27903650\_x3.....gaucggagacgucgugggaacGc..... 1  
 Gi3\_27930542\_x3.....aucGUagacgucgugggaacacggggugc..... 1  
 Gi2\_10760020\_x3.....ggagacAucgugggaacacggggug..... 1

|                      |                                       |   |
|----------------------|---------------------------------------|---|
| Gi5_8675285_x3.....  | gggaacacgAggugccgaac.....             | 1 |
| Gi2_10790503_x3....  | gaucggagacgucguggaacaacAgggugc.....   | 1 |
| Gi2_10810327_x3....  | aucggagacguGguggaacaacggg.....        | 1 |
| Gi2_10743982_x3..... | ggaacacggggugccUaacu.....             | 1 |
| Gi5_8663072_x3.....  | ucguggCaacacggggugccgaacu.....        | 1 |
| Gi5_8680040_x3.....  | ugggGacacggggugccgaa.....             | 1 |
| Gi1_4054194_x3.....  | ucguggGacacggggugcc.....              | 1 |
| Gi2_10814386_x3..... | gggaacacggggUcCccgaacu.....           | 1 |
| Gi3_27866261_x3..... | ucgugggaaAacggggugccgaac.....         | 1 |
| Gi3_27875294_x3..... | ugggaacaGggggugccgaac.....            | 1 |
| Gi3_27815600_x3..... | gacgCcgugggaacacggggg.....            | 1 |
| Gi1_4075587_x3....   | gaucggagacgucgugggaacacggggugc.....   | 0 |
| Gi3_27960317_x3..... | acUcggggugccgaacuu.....               | 1 |
| Gi2_10744408_x3..... | ugggaacacggggugUcg.....               | 1 |
| G1a_5834365_x3.....  | Caacacggggugccgaacu.....              | 1 |
| Gi1_4064406_x3.....  | ugggaacacggggugccUaacu.....           | 1 |
| Gi2_10807972_x3..... | ucgugggaacacggggUaccgaac.....         | 1 |
| Gi3_27833243_x3..... | Gcacggggugccgaacuu.....               | 1 |
| G1a_5824249_x3.....  | gaacaUggggugccgaacu.....              | 1 |
| Gi3_27871103_x3..... | gggUacacggggugccgaa.....              | 1 |
| Gi5_8694914_x3.....  | ucgugggaacCcgggugccgaac.....          | 1 |
| Gi3_27927203_x3..... | ggaacacCggggugccgaacu.....            | 1 |
| Gi1_4078482_x3.....  | gagacgCcgugggaacacggggugccgaacu.....  | 1 |
| Gi5_8657180_x3.....  | agacgucgugggaacacggggugAcgaacu.....   | 1 |
| Gi1_4052985_x3.....  | gCagacgucgugggaacacggggugcc.....      | 1 |
| Gi2_10728763_x3..... | aGcgagacgucgugggaa.....               | 1 |
| Gi2_10806292_x3..... | cgucgugggaCcacggggugccg.....          | 1 |
| Gi3_27840512_x3..... | ucggagacgucgCgggaacacggggg.....       | 1 |
| Gi2_10801072_x3..... | aAcggagacgucgugggaaca.....            | 1 |
| Gi1_4066944_x3....   | gaucggagacgucgCgggaacacggggugccg..... | 1 |
| Gi2_10814467_x3..... | ggNgacgucgugggaacacggggugcc.....      | 1 |
| Gi3_27899126_x3..... | Nggaacacggggugccgaac.....             | 1 |
| G1a_5851702_x3.....  | gugggaacaAggggugccgaacu.....          | 1 |
| Gi3_27824948_x3..... | Uucggagacgucgugggaacaacgggg.....      | 1 |
| Gi5_8683868_x3.....  | agacgucgAgggaacacggggugccgaacu.....   | 1 |
| Gi3_27907553_x3..... | agacgucgugggaacacggggugUcgaacu.....   | 1 |
| Gi3_27956225_x3..... | Aacgucgugggaacacggggugccg.....        | 1 |
| Gi5_8703542_x3.....  | gugggaacacggggUccgaacu.....           | 1 |
| Gi3_27836384_x3..... | aucgAagacgucgugggaacacgggg.....       | 1 |
| Gi2_10733638_x3....  | aucggagacgucgugggaacaUggggug.....     | 1 |
| Gi2_10822747_x3..... | ucUgagacgucgugggaacacg.....           | 1 |
| Gi3_27886427_x3..... | cgUgugggaacacggggugccg.....           | 1 |
| Gi2_10737547_x3..... | ugggUacacggggugccga.....              | 1 |
| Gi1_4084722_x3....   | gaucggagacgucgugggaacacg.....         | 0 |
| Gi3_27977213_x3..... | Ngugggaacacggggugccgaac.....          | 1 |
| Gi2_10783798_x3..... | aucggagGcugcugggaacacgg.....          | 1 |
| Gi2_10744417_x3..... | gaucggagacAucgugggaacacggggg.....     | 1 |

Gi2\_10796488\_x3.....ggagacguNguggaacac..... 1  
Gi2\_10748488\_x3.....aucggCgacgucguggaacacggg..... 1  
Gi2\_10825000\_x3.....cgucUuggaacacggggugc..... 1  
Gi2\_10778941\_x3.....Uucggagacgucguggaacacggg..... 1  
Gi2\_10813732\_x3.....cguggaacacggggGgc..... 1  
Gi3\_27852392\_x3.....aucggagacgucguggaacacggggGgc..... 1  
Gi1\_4063134\_x3.....aGcggagacgucguggaacacggg..... 1  
Gi2\_10744510\_x3.....agacgucguggaaUacggggugccgaacu..... 1  
Gi2\_10761445\_x3.....Ugucguggaacacggggugccga..... 1  
Gi1\_4087119\_x3.....aucggGgacgucguggaacacggg..... 1  
Gi2\_10809565\_x3.....Ccgucguggaacacggggugcc..... 1  
Gi1\_4059753\_x3.....cUucguggaacacggggugccg..... 1  
Gi2\_10783732\_x3.....guggCaacacggggugcc..... 1  
Gi2\_10805077\_x3.....gaucggagacgucguggaacGcggggugcc..... 1  
Gi5\_8714222\_x3.....ucguggaacAaggggugccgaacu..... 1  
Gi3\_27872360\_x3.....aucggagacgucguggaacacCgg..... 1  
Gi3\_27924533\_x3.....agacgucguggaacCggggugccgaacu..... 1  
Gi3\_27888302\_x3.....Ucgauccgagacgucguggaacacggg..... 1  
Gi2\_10812781\_x3.....cguAggaacacggggugc..... 1  
Gi3\_27887492\_x3.....ggaacaGggggugccgaacu..... 1  
Gi1\_4084443\_x3.....agacgucguggaGcacggggugccgaacu..... 1  
Gi1\_4061400\_x3.....ucguggaacacggggCgc..... 1  
Gi3\_27843680\_x3.....cgUagacgucguggaacacggggugcc..... 1  
Gi1\_4055457\_x3.....aacUcggggugccgaacu..... 1  
Gi5\_8668676\_x3.....gggaacacggggugccgUac..... 1  
Gi5\_8692136\_x3.....Gcuuuccagcgccugcuccacc..... 1  
Gi1\_4050477\_x3.....Gguggaacacggggugccgaa..... 1  
Gi3\_27972641\_x3.....gaucggagacgucguggaacacggggugUc..... 1  
Gi2\_10788151\_x3.....ggaacacgggUugccgaacu..... 1  
G1a\_5853538\_x3.....gggaacacggggUaccgaacu..... 1  
Gi5\_8702921\_x3.....gggaacacggCgugccgaacu..... 1  
Gi5\_8710031\_x3.....ucNuggaacacggggugccgaacu..... 1  
Gi2\_10806601\_x3.....agacgucguggGacacggggugccg..... 1  
Gi1\_4077195\_x3.....gacgucguggaacacggggugccgCacu..... 1  
Gi5\_8679695\_x3.....guggAaacacggggugccga..... 1  
Gi2\_10753723\_x3.....gaacacggggUuccgaacu..... 1  
Gi5\_8689673\_x3.....gUacacggggugccgaac..... 1  
Gi1\_4079916\_x3.....uggaacacggggugccgaGc..... 1  
Gi2\_10753561\_x3.....Agggaacacggggugccga..... 1  
Gi3\_27796256\_x3.....cgauccgagacgucguggaacCcg..... 1  
Gi5\_8708816\_x3.....gNgggaacacggggugccgaacu..... 1  
Gi3\_27803624\_x3.....Cgagacgucguggaacacggggugccga..... 1  
Gi5\_8655929\_x3.....gacgucguggaacAuggggugccgaacu..... 1  
Gi2\_10738363\_x3.....cguggaacacggggugccgGa..... 1  
G1a\_5831893\_x3.....guggaacacgCggugccgaacu..... 1  
Gi2\_10776682\_x3.....agacgucguAggaacacggggugcc..... 1  
Gi1\_4069098\_x3.....aGcggagacgucguggaacacggggugc..... 1

Gi2\_10820815\_x3.....gacgucgugggaacacAgggugccgaacu..... 1  
Gi2\_10727941\_x3.....agacgucgugggaacacAgggugcc..... 1  
G1a\_5848867\_x3.....gugggaacacggggugccgaUcu..... 1  
Gi3\_27896564\_x3.....cUgagacgucgugggaacacggggugccgaa..... 1  
Gi4\_552207\_x3.....cUucgugggaacacggggugcc..... 1  
Gi5\_8691200\_x3.....Cgacgucgugggaacacggggugccgaacu..... 1  
Gi5\_8673011\_x3.....acgucguggAaacacggggugccgaacu..... 1  
Gi3\_27857210\_x3.....cgugggaacacgAggugccga..... 1  
Gi2\_10770409\_x3.....gaaAacggggugccgaacu..... 1  
Gi3\_27813023\_x3.....cggagacgucgugggaacacggggugcA..... 1  
G1l\_4088715\_x3.....gaacacggggugccUaacu..... 1  
Gi2\_10811866\_x3.....gacgucgugggaacacAgggugcc..... 1  
Gi2\_10741327\_x3.....Cacgucgugggaacacggggugccgaacu..... 1  
Gi5\_8670902\_x3.....aucggagGcugcugggaacacggggg..... 1  
Gi2\_10812994\_x3.....agacgucgugggaacacAgggugccgaacu..... 1  
Gi3\_27965642\_x3.....gaucggagacgucgugggGacacggggugc..... 1  
Gi2\_10814248\_x3.....cUgagacgucgugggaacacggggugccga..... 1  
G1a\_5865688\_x3.....gucgugggaacacggggugccgCac..... 1  
G1l\_4068378\_x3.....uGggagacgucgugggaacacggg..... 1  
Gi3\_27962873\_x3.....Agagacgucgugggaacacggggugccg..... 1  
Gi3\_27898190\_x3.....gagacgucgugggGacacggggg..... 1  
Gi2\_10733626\_x3.....cgucguAggaacacggggugcc..... 1  
Gi2\_10763503\_x3.....uggaacCggggugccg..... 1  
Gi3\_27887453\_x3.....acgucgugggaacacggggugcGgaacu..... 1  
Gi3\_27945371\_x3.....cgucAugggaacacggggugccga..... 1  
Gi2\_10800697\_x3.....cgugggaacacgggUugccgaacu..... 1  
Gi3\_27878600\_x3.....cgaucggagGcugcugggaacacg..... 1  
Gi2\_10773031\_x3.....gucguggCaacacggggugccgaacu..... 1  
Gi5\_8687504\_x3.....cgugggaacacgUggugcc..... 1  
Gi3\_27867434\_x3.....ucgugggaacacggggugGcgaacu..... 1  
G1l\_4065951\_x3.....cgucguAggaacacggggugccgaacu..... 1  
G1l\_4059837\_x3.....cgugggaacacgCggugccgaacu..... 1  
Gi5\_8685278\_x3.....uggaacacgggggUcccgaacu..... 1  
Gi2\_10802776\_x3.....ggaacUcggggugccgaac..... 1  
Gi5\_8663684\_x3.....cgugggaacacgUggugccga..... 1  
Gi2\_10787071\_x3.....gucgugggaacacgAggugccgaac..... 1  
Gi3\_27918344\_x3.....aucggCgacgucgugggaacac..... 1  
G1l\_4087809\_x3.....Aacgucgugggaacacggggugccgaacu..... 1  
G1l\_4054245\_x3.....gGcugcugggaacacggggugccgaac..... 1  
G1l\_4078098\_x3.....gugggaacacggggugcUgaacuu..... 1  
Gi3\_27886835\_x3.....Uagacgucgugggaacacggggugccgaa..... 1  
Gi2\_10823797\_x3.....uggaacUcggggugccgaacu..... 1  
Gi5\_8669942\_x3.....cgCcgugggaacacggggugc..... 1  
G1a\_5817355\_x3.....gggaaAacggggugccgaacu..... 1  
Gi2\_10793074\_x3.....cgucgugggaacaUggggugcc..... 1  
Gi5\_8705045\_x3.....gaucggagacgucgugggGacacggg..... 1  
Gi2\_10754992\_x3.....gaucggagacgucgCgggaacacggggg..... 1

Gi2\_10817035\_x3...gaucggagacgucgugggaGcacggg..... 1  
Gi3\_27973244\_x3.....cggagacgucgugggGacacggggu..... 1  
Gi5\_8690648\_x3.....acgNcgugggaacacggggugccgaacu..... 1  
Gi3\_27811070\_x3.....gugggaCcacggggugccg..... 1  
Gi2\_10734811\_x3...gaucggagacgCcgugggaacacggg..... 1  
Gi3\_27891047\_x3.....agacgucgugggaacacggAgugccgaacu..... 1  
Gi2\_10771588\_x3.....gGcgugggaacacggggugccgaa..... 1  
Gi2\_10728835\_x3...gaucggagacgucgugggaacacggggGgcc..... 1  
Gi3\_27918134\_x3.....agacgucgugggaacacggggugcUgaac..... 1  
Gi3\_27866378\_x3.....cgugggaacGcggggugccgaa..... 1  
Gi3\_27854351\_x3.....ucguCggaacacggggugccgaac..... 1  
Gi2\_10788961\_x3.....ucggagacNucgugggaaca..... 1  
Gi2\_10732633\_x3...ucggagacNucgugggaacacggggugc..... 1  
G1a\_5869159\_x3...aAcggagacgucgugggaacacggg..... 1  
Gi1\_4084035\_x3.uUcgaucggagacgucgugggaacacg..... 1  
Gi1\_4070685\_x3...uGggagacgucgugggaacacggggugc..... 1  
Gi3\_27936596\_x3.....gugUgaacacggggugcc..... 1  
Gi3\_27913406\_x3.....cgucgugggaUcacggggugccgaacu..... 1  
Gi2\_10814509\_x3.....ucgugggaAacggggugccgaac..... 1  
Gi3\_27920768\_x3.....gucgCgggaacacggggugc..... 1  
Gi1\_4053885\_x3...cgucgugggaacacggAgugccgaacu..... 1  
Gi5\_8667236\_x3.....cgCgggaacacggggugccga..... 1  
Gi2\_10732975\_x3...aucggagUcgcgugggaacac..... 1  
G1a\_5856088\_x3...cUaucggagacgucguggga..... 1  
Gi3\_27897830\_x3...gaucggagacgucgugggGacacgggg..... 1  
Gi5\_8653586\_x3.....gggGacacggggugccgaa..... 1  
Gi1\_4050819\_x3...ucggCgacgucgugggaacacg..... 1  
Gi5\_8686013\_x3...aGcggagacgucgugggaacac..... 1  
Gi3\_27960779\_x3...ggUgacgucgugggaacacggggugccg..... 1  
Gi4\_549642\_x3...Ugugggaacacggggugccgaacu..... 1  
Gi1\_4072497\_x3...acgucgugNgaacacggggugcc..... 1  
Gi3\_27948131\_x3...uGgugggaacacggggugcc..... 1  
Gi3\_27806531\_x3...guNgggaacacggggugcc..... 1  
Gi3\_27944438\_x3...Ccgagacgucgugggaacacgggggu..... 1  
Gi2\_10825702\_x3...gggaacacggggGgccga..... 1  
Gi5\_8651198\_x3...ucgugggaacacgCggugccgaacu..... 1  
Gi3\_27851615\_x3...cgucCugggaacacggggugccgaacu..... 1  
Gi1\_4054542\_x3...gugggaacacggggugccA..... 1  
Gi5\_8709728\_x3...cgucUugggaacacggggugccga..... 1  
Gi3\_27878333\_x3...gugggaacUcggggugccg..... 1  
Gi2\_10744261\_x3...gaucggagacgucgugggaGcacg..... 1  
Gi3\_27844754\_x3...agUcgcgucgugggaacacggggugccga..... 1  
Gi3\_27829442\_x3...acgucgugggaacUcggggugccgaacu..... 1  
Gi5\_8707976\_x3...ugggaacacggggugccCaacu..... 1  
Gi2\_10764298\_x3...cgugggaacacCggggugccgaacu..... 1  
Gi5\_8712389\_x3...gacgucgugggaacacggggugccgCacu..... 1  
Gi5\_8674844\_x3...gaacacggUgugccgaacu..... 1



Gi1\_4085061\_x3.....uggaacacgggguCccgaacu..... 1  
Gi1\_4078071\_x3.....uggaacacgggugccU..... 1  
Gi3\_27929750\_x3.....ucggGgacgucgugggaacacg..... 1  
Gi3\_27931577\_x3.....ggaacacgggUugccgaacu..... 1  
Gi3\_27809510\_x3.....gaucggagacgucgugggaacCcggggugc..... 1  
Gi2\_10810810\_x3.....gucgugggaacacggggG..... 1  
Gi2\_10773808\_x3.....cgucgugggCacacggggugc..... 1  
Gi5\_8686139\_x3.....gugggaacacgAggugccg..... 1  
G1a\_5826538\_x3.....cgugggaacacggAgugcc..... 1  
Gi5\_8702360\_x3.....aucggagacAucgugggaacacgg..... 1  
Gi3\_27801008\_x3.....cgUagacgucgugggaacacgggggU..... 1  
Gi5\_8657477\_x3.....aucggagacgucgugggaacCcgggg..... 1  
Gi3\_27977231\_x3.....gugggaGacggggugcc..... 1  
Gi2\_10780558\_x3.....aucggagacgucgugggaacacggggUac..... 1  
Gi2\_10769197\_x3.....acgucgugggCacacggggugcc..... 1  
Gi2\_10759972\_x3.....Aagacgucgugggaacacggggugcc..... 1  
Gi2\_10740886\_x3.....aucggagacgucgugggaacaUgg..... 1  
Gi1\_4084089\_x3.....gagacgucgugggGacacggggugccgaacu..... 1  
Gi3\_27824276\_x3.....cgucgugggaacacggggugUcgaac..... 1  
Gi3\_27970055\_x3.....uggaacacgggUugccgaac..... 1  
Gi2\_10749154\_x3.....gggaacacggggugUcgaac..... 1  
Gi3\_27826100\_x3.....ucggagacguUgugggaacacggggugcc..... 1  
Gi1\_4077108\_x3.....ucgugggaacacggggugccAaac..... 1  
Gi2\_10759048\_x3.....ggagacgucgAgggaacacggggugcc..... 1  
Gi3\_27922535\_x3.....cgucgugggaacaAggggugccgaacu..... 1  
Gi1\_4051761\_x3.....gaUgucgugggaacacggggugccgaacu..... 1  
Gi5\_8674556\_x3.....ugggCacacggggugccgaac..... 1  
Gi2\_10746589\_x3.....aucggagGcgucgugggaac..... 1  
Gi5\_8688389\_x3.....gCgggaacacggggugccg..... 1  
Gi3\_27973571\_x3.....Cacgucgugggaacacggg..... 1  
Gi2\_10759894\_x3.....gagacgucgugggaGcacggggugc..... 1  
Gi2\_10760674\_x3.....gaanacggggugccgaacu..... 1  
Gi2\_10803742\_x3.....gacgucgugggGacacggggugcc..... 1  
Gi2\_10729927\_x3.....gggaacacggggugccgGa..... 1  
Gi2\_10813606\_x3.....Gcgugggaacacggggugc..... 1  
Gi3\_27896687\_x3.....cgucUugggaacacggggugccgaac..... 1  
Gi3\_27828461\_x3.....Gggagacgucgugggaacacggggugccga..... 1  
Gi3\_27826904\_x3.....gucgugggaacacggggGgccga..... 1  
Gi1\_4066821\_x3.....uggaacacggggugccgU..... 1  
Gi3\_27903698\_x3.....agacgucgugggaacacggggugccgaCcu..... 1  
Gi5\_8694893\_x3.....gugggaacacggggugccUaac..... 1  
Gi3\_27880706\_x3.....Ucgucgugggaacacggggugcc..... 1  
G1a\_5834704\_x3.....gaacacggggugccgGacu..... 1  
Gi2\_10784044\_x3.....ucguggCaacacggggugccgaac..... 1  
Gi3\_27922091\_x3.....gugggaacacgggAugccg..... 1  
Gi3\_27845351\_x3.....gucgugggGacacggggugc..... 1  
Gi5\_8693252\_x3.....guUgugggaacacggggugc..... 1

Gi2\_10812325\_x3.....gacgucguNggaacacggggugc..... 1  
Gi5\_8688935\_x3.....gggaacacggggugccgaUcu..... 1  
Gi3\_27979796\_x3.....cgucgugggaacacggggugccgaUcu..... 1  
Gi5\_8714897\_x3.....gacgucgugggGacacggggugccg..... 1  
Gi5\_8717567\_x3.....uggaacacggggugccgCacuuu..... 1  
Gi2\_10828168\_x3.....aucggagGcgucgugggaacacgggg..... 1  
Gi5\_8708045\_x3.....cCugggaacacggggugccga..... 1  
Gi3\_27903215\_x3.....Aucgugggaacacggggugc..... 1  
G1a\_5859121\_x3.....gucgugggaGcacggggugccgaacu..... 1  
Gi2\_10824904\_x3.....ucgugggaacacggggugccA..... 1  
Gi3\_27906536\_x3.....cgugggaacacCgggugccgaac..... 1  
Gi1\_4055004\_x3.....ucgugggGacacggggugccg..... 1  
Gi5\_8704820\_x3.....gCgggaacacggggugcc..... 1  
Gi2\_10827322\_x3.....gugNgaacacggggugcc..... 1  
Gi2\_10740448\_x3...cgaucggagacgucgugggGacacggg..... 1  
Gi3\_27891338\_x3.....gggaacacggggugUcgaa..... 1  
Gi5\_8686553\_x3.....gugggaGcacggggugccga..... 1  
Gi3\_27911228\_x3.....ggaUcacggggugccgaa..... 1  
Gi2\_10743457\_x3.....cgagacgucgugggaacacggggCgc..... 1  
Gi3\_27807944\_x3.....cgucgugggaacacgggAugccga..... 1  
G1a\_5835253\_x3...gGucggagacgucgugggaacacgggg..... 1  
Gi2\_10739515\_x3.....ggaaAacggggugccgaac..... 1  
Gi3\_27949664\_x3.....ucggagacgCcgugggaacacg..... 1  
Gi2\_10823215\_x3...gaucggagacgucgugggaacCcgggg..... 1  
Gi2\_10825870\_x3.....cguNgugggaacacggggugccgaacu..... 1  
Gi2\_10782622\_x3.....ggagacgucgugggCacacggggugcc..... 1  
Gi2\_10815637\_x3.....gacgucgugggaacacgAgggugcc..... 1  
Gi2\_10734031\_x3...gUucggagacgucguggga..... 1  
Gi4\_545274\_x3.....gugggaacacggggugccgGacu..... 1  
Gi3\_27964163\_x3.....ggaacacgAggugccgaa..... 1  
Gi5\_8668616\_x3.....gugggaaAacggggugccgaa..... 1  
G1l\_4084743\_x3.....acgucgugggaacaUggggugccgaacu..... 1  
Gi3\_27928607\_x3.....cgNgggaacacggggugcc..... 1  
Gi2\_10825678\_x3.....gacgucguNggaacacggggugccgaacu..... 1  
Gi2\_10786954\_x3.....Gggagacgucgugggaacac..... 1  
Gi3\_27798299\_x3.....ucgugggaacacggggugccgGac..... 1  
G1l\_4050033\_x3.....agUcgcgucgugggaacacggggugccg..... 1  
Gi2\_10933189\_x2...gaucgAagacgucgugggaacacggggugc..... 1  
Gi2\_10922011\_x2...cgaucggagacgCcgugggaacacg..... 1  
Gi2\_10936783\_x2...aucggagacgucgugggaacacUgggu..... 1  
Gi3\_28132520\_x2...agacgucgugggaacaGggggugccgaacu..... 1  
G1a\_5943708\_x2.....gaacacggggugccgaacA..... 1  
Gi2\_10982365\_x2.....cgugggaacacggggAgcc..... 1  
G1l\_4105781\_x2.....uUgugggaacacggggugcc..... 1  
Gi2\_10866735\_x2...ucggGgacgucgugggaaca..... 1  
Gi3\_28114000\_x2...cgucgugggaacacggggugcG..... 1  
G1l\_4134525\_x2.....aacacgggCugccgaacu..... 1

|                                                          |   |
|----------------------------------------------------------|---|
| Gi1_4122509_x2.....aGcggagacgucgugggaacacggggugcc.....   | 1 |
| Gi2_10969897_x2.....agacgucgugggaacacggggugGc.....       | 1 |
| Gi3_28057370_x2.....cggagacgucgugggaacacggAgu.....       | 1 |
| Gi3_28047014_x2.....gaucggagacgucguAggaacacgg.....       | 1 |
| Gi3_27989736_x2.....gagacgCcgugggaacac.....              | 1 |
| Gi2_10921209_x2.....gaacacggggugccgaacuu.....            | 0 |
| Gi2_10886105_x2.....agacguUgugggaacacggggugcc.....       | 1 |
| Gi1_4090983_x2.....gugggaacacggAgugcc.....               | 1 |
| G1a_5936326_x2..gcgauccggagacguUgug.....                 | 1 |
| Gi1_4153287_x2.....gaacacggggugccgaacuC.....             | 1 |
| Gi5_8756681_x2....Uucggagacgucgugggaacacgg.....          | 1 |
| Gi3_28184422_x2....aucggagacgAcgugggaacac.....           | 1 |
| Gi2_10843207_x2....gauUggagacgucgugggaac.....            | 1 |
| Gi1_4151703_x2....uggNaacacggggugccgaacu.....            | 1 |
| Gi2_10863211_x2....gagacgucguAggaacacggggug.....         | 1 |
| Gi3_28006032_x2....gucgugggaacacgUggugccgaacu.....       | 1 |
| Gi1_4103949_x2....ucgugggaacacggggugccgaUc.....          | 1 |
| Gi2_10872739_x2....ggagacgucgugggaacacggAgugc.....       | 1 |
| Gi3_28105682_x2....cgucgugggaacacUggugccgaacu.....       | 1 |
| Gi1_4153039_x2....cgucguggAaacacggggugccgaacu.....       | 1 |
| Gi3_28035250_x2....acacUggugccgaacuu.....                | 1 |
| Gi3_28182226_x2....ggaacacggggugccgaGu.....              | 1 |
| Gi3_28117158_x2....cgAagacgucgugggaacacggggugcc.....     | 1 |
| Gi3_28202992_x2....aacacggggugccgaGcuu.....              | 1 |
| G1a_5900360_x2....gCgggaacacggggugccga.....              | 1 |
| Gi3_28107654_x2....Ccgagacgucgugggaacacg.....            | 1 |
| G1a_5968188_x2..Agcgauccggagacgucgu.....                 | 1 |
| Gi2_10868255_x2....gacgucgugggaacacggggugccgaacG.....    | 1 |
| Gi3_28171436_x2....cCgagacgucgugggaacacggg.....          | 1 |
| Gi2_10952963_x2....acgucgugggaacacggUgugcc.....          | 1 |
| Gi1_4119073_x2....agacgucgugggaacacggggugccgaGcu.....    | 1 |
| G1a_5941512_x2....auUggagacgucgugggaacacggggugcc.....    | 1 |
| Gi1_4154609_x2....gggaacacggggugccgaacG.....             | 1 |
| G1a_5883254_x2....aucggagaNgucgugggaacacgg.....          | 1 |
| Gi2_10926355_x2....gaucggagacgucgugggaacCcggg.....       | 1 |
| Gi5_8789241_x2....aucCgagacgucgugggaacacgg.....          | 1 |
| Gi2_10871159_x2....gacgucgugggaacacggggugccGac.....      | 1 |
| Gi1_4133243_x2....ucUgagacgucgugggaacacggggugcc.....     | 1 |
| Gi3_28180702_x2....gaucggagacgCcgugggaacac.....          | 1 |
| Gi2_10883139_x2....ggagacgucgCgggaacacggggugcc.....      | 1 |
| Gi5_8789829_x2....aucggagacgucguggGacacgggg.....         | 1 |
| G1a_5937678_x2....ugggaacacggggCugccgaacu.....           | 1 |
| Gi5_8750819_x2....gggaacacggggugccgaacG.....             | 1 |
| Gi5_8738373_x2....gugggaacacggggugcA.....                | 1 |
| Gi2_10939031_x2....gaucggagacgCcguggga.....              | 1 |
| Gi3_28104288_x2....ggagacgucAugggaacacggggugccgaacu..... | 1 |
| Gi2_10899171_x2....ggagacgucgugggaacaUggggugc.....       | 1 |

Gi5\_8777025\_x2.....cgucgugggaacacgUggugccgaacu..... 1  
Gi2\_10937229\_x2.....gagacgCcgugggaacacggggug..... 1  
Gi5\_8778053\_x2.....cgucgugggaacaAggggugccgaacu..... 1  
Gi1\_4133145\_x2.....gagacgucNugggaacacggggugccgaacu..... 1  
Gi3\_28258364\_x2.ugUgaucggagacgucgugggaaca..... 1  
Gi2\_10908915\_x2.....ugggaacacgggUugccga..... 1  
Gi2\_10837071\_x2.....gCgacgucgugggaacacggggugcc..... 1  
Gi1\_4119441\_x2.....ggagacgCcgugggaacacggggugccg..... 1  
Gi3\_27994568\_x2...gaucggagacgucgugggaacacAggggu..... 1  
Gi4\_554284\_x2.....gucgugggaGcacggggugccgaacu..... 1  
Gi1\_4157229\_x2.....gucgugggaacacggggugcU..... 1  
Gi1\_4134773\_x2.....cggagacgucgugggaaAacggggugc..... 1  
Gi3\_28038066\_x2.....cggagacgucgugAgaacacg..... 1  
Gi2\_10850035\_x2.....ucggagacgucgugggaacacggggAgcc..... 1  
Gi5\_8746837\_x2.....Ggucgugggaacacggggugccga..... 1  
Gi3\_28092046\_x2.....cgucgugggaacacggAgugccga..... 1  
Gi2\_10940973\_x2...aucggagacgucgugggaacaUggggugc..... 1  
Gi2\_10851075\_x2.....acgucguggUaacacggggugcc..... 1  
G1a\_5884034\_x2.....ugggaacacggggugccgaaAu..... 1  
Gi1\_4139775\_x2.....ucggagacgucgugggCacacg..... 1  
Gi2\_10897685\_x2.....gacgucgugggaacacggggugccgUacu..... 1  
Gi1\_4106881\_x2...aucgUagacgucgugggaacacgggggu..... 1  
Gi3\_28172888\_x2.....gucgugggCacacggggugcc..... 1  
Gi5\_8807595\_x2.....cgugggaacacggggugccgGac..... 1  
Gi3\_28190028\_x2.....ugggaacacggggugccUa..... 1  
Gi3\_28113004\_x2...aucggagacgucCugggaacacgggggu..... 1  
Gi5\_8768107\_x2.....cgugggaacCcggggugccga..... 1  
Gi1\_4136507\_x2...gUucggagacgucgugggaacac..... 1  
Gi1\_4092387\_x2.....gugggaacNcggggugcc..... 1  
G1a\_5954082\_x2.....gaacacggggugccgCacu..... 1  
Gi3\_28203366\_x2.....gacgucgugggaacacggggguAccgaac..... 1  
G1a\_5927182\_x2.....gugggGacacggggugcc..... 1  
Gi3\_28239358\_x2.....cgucUugggaacacggggugccgaa..... 1  
Gi2\_10880767\_x2.....gCagacgucgugggaacacggggugccg..... 1  
Gi2\_10898275\_x2.....Ugacgucgugggaacacggggugccgaacu..... 1  
Gi3\_28131542\_x2.....gucgugggaacaGggggugccgaac..... 1  
Gi2\_10847689\_x2.....gugggaacacggggugcGg..... 1  
Gi3\_28050812\_x2.....uggCaacacggggugccgaac..... 1  
G1a\_5950074\_x2.....gacgucgugggaGcacgggggu..... 1  
Gi3\_28011132\_x2...gaucggagacAucgugggaac..... 1  
Gi2\_10927537\_x2.....cguggUaacacggggugcc..... 1  
Gi1\_4099335\_x2.....uGgugggaacacggggugccga..... 1  
Gi3\_28129382\_x2.....cgugggaacacggggugcAga..... 1  
Gi2\_10967043\_x2.....gagacgucgugggaacacggggCg..... 1  
Gi3\_28129056\_x2.....agacgucgNgggaacacggg..... 1  
Gi3\_28128000\_x2...aucggagCcgucgugggaacacggggugc..... 1  
Gi3\_28169248\_x2.....gggaacacgggAugccga..... 1

Gi2\_10951671\_x2.....agacgAcgugggaacacggggugcc..... 1  
 Gi3\_28020518\_x2.....aucggUgacgucguggga..... 1  
 Gi2\_10909273\_x2.....gacgucgCgggaacacggggugcc..... 1  
 Gi3\_28100228\_x2.....gucgugggaacacggggugGcgaacu..... 1  
 Gi2\_10931727\_x2.....cgagacgucgugggGacacggggugc..... 1  
 Gi1\_4137399\_x2.....guggaacacggggugccgaacuC..... 1  
 Gi3\_27984628\_x2.....acgucgugggaacacggggGcggcga..... 1  
 Gi3\_28131340\_x2.....gacgucgugggaacGcggggugc..... 1  
 Gi5\_8775393\_x2.....gugggaGcacggggugccgaacu..... 1  
 Gi2\_10843535\_x2.....Agugggaacacggggugccg..... 1  
 Gi5\_8808409\_x2.....gugggGacacggggugccga..... 1  
 Gi3\_28126828\_x2.....acgucgugggGacacggggugccg..... 1  
 Gi1\_4154463\_x2.....uggaacacgggUugccgaac..... 1  
 Gi1\_4126187\_x2.....aucggagacgucgCgggaacacgggg..... 1  
 Gi3\_28110694\_x2.....cgucUugggaacacgggg..... 1  
 Gi1\_4117121\_x2.....gaucggagacgucgugggaacaAggg..... 1  
 Gi2\_10900793\_x2.....Gcugcuggggaacacggg..... 1  
 Gi3\_28214650\_x2.....cgucgugggaacacgggAugccgaac..... 1  
 Gi5\_8721341\_x2.....gucgugggaacacggggAccga..... 1  
 Gi3\_28134304\_x2..gcgaucggagacgucgugggaacacAg..... 1  
 Gi2\_10990731\_x2.....ggagacgucgugggaacacgggAugcc..... 1  
 Gi3\_28090342\_x2.....gacgucgugggaacacgggAu..... 1  
 Gi4\_562596\_x2.....gaUcacggggugccgaacu..... 1  
 Gi2\_10837357\_x2.....ugggaaAacggggugccgaacu..... 1  
 Gi2\_10832141\_x2.....cgucgugggaacacggggugAcg..... 1  
 Gl1\_5879480\_x2.....ggaacacggggAccgaacu..... 1  
 Gi5\_8747205\_x2.....gacgucgugggaacCggggugccgaacu..... 1  
 Gi1\_4090801\_x2.....ucgugggaacacggggAgccgaac..... 1  
 Gi5\_8820925\_x2.....ucggagacgucgugggCacacg..... 1  
 Gi5\_8768111\_x2.....gucgugggaacacggggugccgaUc..... 1  
 Gi1\_4152341\_x2.....cgugUgaacacggggugccgaac..... 1  
 Gi2\_10957177\_x2.....aucggagacgucgGgggaacacgggg..... 1  
 Gi5\_8721415\_x2.....gUgacgucgugggaacacg..... 1  
 Gi5\_8792053\_x2.....gugggaacacggggugcGgaac..... 1  
 Gi2\_10885247\_x2.....aucggagacgucgugggaacacCgggu..... 1  
 Gi2\_10908475\_x2.....gaucggagacgucgugggaaAacgggg..... 1  
 Gi3\_28073328\_x2.....gugggaUcacggggugcc..... 1  
 Gi2\_10910645\_x2.....acgNcgugggaacacggggugc..... 1  
 Gl1\_5907232\_x2.....acgucgugggGacacgggg..... 1  
 Gi2\_10949863\_x2.....gaucggCgacgucgugggaacacggggugcc..... 1  
 Gi5\_8719549\_x2.....acgucgugggaacacggggCgcccga..... 1  
 Gi3\_28031916\_x2.....cgugggaaAacggggugc..... 1  
 Gi2\_10837539\_x2.....gggaacacggggugccUaac..... 1  
 Gi3\_28166178\_x2.....agacguAgugggaacacggggugccgaacu..... 1  
 Gi5\_8766521\_x2.....aucggaAacgucgugggaacacg..... 1  
 Gi2\_10934069\_x2.....gUcugcuggggaacacggggugccg..... 1  
 Gi2\_10931093\_x2.....agacgucgugggaacaGggggugcc..... 1

Gi2\_10902343\_x2.....gugggaacacgggUugccg..... 1  
Gi2\_10861573\_x2.....gacgAcgugggaacacggggu..... 1  
Gi2\_10841217\_x2....gaucggUgacgucgugggaacacggg..... 1  
G1a\_5894830\_x2.Ggcgaucggagacgucgug..... 1  
Gi3\_28125734\_x2.....cgGcgugggaacacggggugc..... 1  
Gi1\_4112383\_x2.....gugggaacGcggggugccgaacu..... 1  
Gi1\_4142589\_x2.....ggaacacggggugAcgaacu..... 1  
Gi3\_27995714\_x2cugcUaucggagacgucg..... 1  
Gi3\_28175532\_x2.....acgucgugggaacCcggggugcc..... 1  
Gi2\_10989117\_x2.....ggaacacggggugGcgaacu..... 1  
Gi2\_10884511\_x2.....gugggaacacggggugccgU..... 1  
Gi2\_10990197\_x2....auAggagacgucgugggaacacggggugc..... 1  
Gi3\_28151474\_x2....gaucggagNcgucgugggaacacggggugc..... 1  
Gi3\_28226120\_x2.....gaUacgucgugggaacacggggu..... 1  
Gi3\_28222432\_x2.....acgucgugggaacacggggugcU..... 1  
Gi5\_8786199\_x2....gaucggagNcgucgugggaacac..... 1  
Gi2\_10869179\_x2.....cgucguAggaacacggggugccg..... 1  
Gi3\_28130842\_x2..Ccgaucggagacgucgugggaacacggggugcc..... 1  
Gi2\_10878093\_x2.....cgucgugggaacacggggugccgaacG..... 1  
Gi2\_10910833\_x2.....agacgucguAggaacacggggugccgaacu..... 1  
Gi3\_28101492\_x2.....cgugggaacacggggugU..... 1  
Gi1\_4146809\_x2.....Gggagacgucgugggaacacggg..... 1  
Gi1\_4113363\_x2.....gaacacggCgugccgaacu..... 1  
Gi5\_8738047\_x2.....gagacgucgugggaacacggggugccgaCcu..... 1  
Gi3\_28051608\_x2...Ugaucggagacgucgugg..... 1  
Gi2\_10950335\_x2.....acgucgCgggaacacggggugccgaac..... 1  
Gi5\_8740827\_x2.....cgugggaacacUgggugccgaac..... 1  
Gi3\_28228276\_x2.....cgucgCgggaacacgggg..... 1  
Gi3\_28096100\_x2.....cgucgugggaaUacggggugccg..... 1  
Gi2\_10829627\_x2.....cgugggaacacggggugAcgaa..... 1  
Gi2\_10937811\_x2....ucggagacgucgugggaacacAgggugc..... 1  
G1a\_5912080\_x2.....aacacggAgugccgaacu..... 1  
Gi1\_4125797\_x2.....ggagacgucgugUgaacacggggugcc..... 1  
Gi1\_4125135\_x2.....gagacgucguAggaacacggggugccgaacu..... 1  
Gi1\_4118231\_x2....Gucggagacgucgugggaacacggg..... 1  
Gi3\_27987112\_x2.....cggagacgucAugggaacacggggugcc..... 1  
Gi2\_10884813\_x2....ucggagacgucgCgggaacacggggugc..... 1  
G1a\_5962976\_x2.....gugggaacacAgggugccga..... 1  
Gi1\_4121829\_x2.ugcgaucgNagacgucguggga..... 1  
Gi2\_10983889\_x2.....gucgugggaacacgggAugccgaac..... 1  
Gi3\_28187768\_x2....aucggagacgucgugggaacacgggAugcc..... 1  
Gi1\_4100401\_x2.....ugggaacacggggugccgCacuu..... 1  
Gi2\_10904361\_x2.....gagacgucgugggaGcacggggug..... 1  
Gi2\_10834413\_x2.....cggagacgucguUggaacacggggugcc..... 1  
Gi5\_8738491\_x2.....acgucgugggaacacggggCgccgaac..... 1  
Gi3\_28160854\_x2....cggGgacgucgugggaacacgggg..... 1  
Gi2\_10947657\_x2.....Gcgucgugggaacacggggu..... 1

|                 |                                     |   |
|-----------------|-------------------------------------|---|
| Gi3_28125632_x2 | ...gaucggagacgucgugUgaacacgggg      | 1 |
| G1a_5980446_x2  | ...auUggagacgucguggaacaacgggg       | 1 |
| Gi2_10880379_x2 | ...gacgucgAgggaacacggggugccgaacu    | 1 |
| G1a_5962694_x2  | ...ggagacgucguggaGca                | 1 |
| Gi3_28128494_x2 | ...guGguggaacaacggggugccgaacu       | 1 |
| Gi2_10833275_x2 | ...cguAggaacaacggggugccga           | 1 |
| Gi2_10957593_x2 | ...gagacgucguggaacaacAgggugc        | 1 |
| Gi1_4134449_x2  | ...gucguggaacaacggggAcc             | 1 |
| Gi2_10829423_x2 | ...aucggagacgAcguggaacaacgggg       | 1 |
| Gi3_28080450_x2 | cugcgauccggagacgucguggaacaacggggugc | 0 |
| Gi2_10899655_x2 | ...cggagacgucguggaacaacAgggugcc     | 1 |
| Gi1_4155857_x2  | ...cguggaGcacggggugccgaac           | 1 |
| Gi1_4144837_x2  | ...cguggaacaacggggugGcgaacu         | 1 |
| Gi2_10847647_x2 | ...gucguggaacaacggggugccgaaUu       | 1 |
| Gi2_10906691_x2 | ...Cgacgucguggaacaacggggugcc        | 1 |
| Gi5_8760997_x2  | ...gagacgucguggaacaacCggggugccgaacu | 1 |
| Gi3_28163290_x2 | ...Cacgucguggaacaacgggg             | 1 |
| G1a_5918408_x2  | ...guggaacaacCggggugccgaacu         | 1 |
| Gi2_10898677_x2 | ...aucgUagacgucguggaacaacgg         | 1 |
| Gi2_10988447_x2 | ...acAucguggaacaacggggugccgaac      | 1 |
| Gi2_10907677_x2 | ...cggagacgucguggaGcac              | 1 |
| Gi3_28221306_x2 | ...ucguggaacaacggggUccgaacu         | 1 |
| Gi3_28065114_x2 | ...Ugaucggagacgucguggaacaacg        | 1 |
| Gi3_28260088_x2 | ...cggagacAucguggaacaacggggugcc     | 1 |
| Gi5_8785047_x2  | ...acgucguggaacaacggggugccgCac      | 1 |
| Gi3_28173416_x2 | ...agacgucguggaacaacggggugUc        | 1 |
| Gi1_4152171_x2  | ...cgugCgaacaacggggugccgaacu        | 1 |
| Gi3_28165772_x2 | ...gacgucguggaacaacggggugAcgaa      | 1 |
| Gi1_4104505_x2  | ...uggaacaacggggugAcg               | 1 |
| Gi2_10898559_x2 | ...cggagacgucguggaUcacggggugcc      | 1 |
| Gi5_8775467_x2  | ...gggaacaGggggugccgaacu            | 1 |
| Gi1_4121961_x2  | ...aucggagacgucgugga                | 0 |
| Gi3_28200802_x2 | ...aucggagacgucguggaacaAagg         | 1 |
| Gi3_28058248_x2 | ...cggagacgucguggaUacggggugcc       | 1 |
| Gi2_10934365_x2 | ...cguNguggaacaacggggugccg          | 1 |
| Gi1_4123177_x2  | ...cgAcguggaacaacggggugcc           | 1 |
| G1a_5958734_x2  | ...gUagacgucguggaacaac              | 1 |
| Gi5_8736219_x2  | ...cguggaacaacggggugGcgaac          | 1 |
| Gi1_4141425_x2  | ...gucgCgggaacaacggggugccgaac       | 1 |
| Gi1_4151693_x2  | ...cguggaacaacggggugccgaUcu         | 1 |
| Gi4_561212_x2   | ...acgucguggaacaacggggCgccaacu      | 1 |
| Gi1_4095145_x2  | ...cggGgacgucguggaacaacggggugcc     | 1 |
| Gi2_10950975_x2 | ...cgAcguggaacaacggggug             | 1 |
| Gi1_4095657_x2  | ...cgucguggaacaacggggugccgaCcu      | 1 |
| Gi5_8828577_x2  | ...Aguggaacaacggggugcc              | 1 |
| Gi3_28118436_x2 | ...ucguggaacaacggggCgcc             | 1 |
| Gi3_28146456_x2 | ...gaucggCgacgucguggaacaacgggg      | 1 |

Gi3\_28161996\_x2.....cggagacgucgugggaacCc..... 1  
Gi3\_28257988\_x2.....gggaacacgAggugccga..... 1  
Gi2\_10869163\_x2.....aucggagacgucgugggaUcacg..... 1  
Gi5\_8755267\_x2.....gugggaacacggggugccAaacuu..... 1  
Gi1\_4132763\_x2.....gaucggagacgucgugggaacacgU..... 1  
Gi2\_10914297\_x2.....gucgugggaacacggUgugccgaacu..... 1  
Gi2\_10878071\_x2.....acgucguggAaacacggggugcc..... 1  
Gi1\_4112913\_x2.....ggagacgucgugggaacacggggAgccg..... 1  
Gi1\_4154219\_x2.....cAugggaacacggggugccgaa..... 1  
Gi3\_28059750\_x2.....gaucggagacgucgCgggaacacgg..... 1  
Gi3\_28198436\_x2.....ucggagacgucgugggaacGcggggugcc..... 1  
Gi3\_28144652\_x2.....gggaacacUgggugccgaac..... 1  
G1a\_5972560\_x2.....Gucggagacgucgugggaacacgggg..... 1  
Gi5\_8736353\_x2.....ugggaacacggggugccgGa..... 1  
Gi3\_28157016\_x2.....gagacgucguAggaacacggggg..... 1  
Gi3\_28030806\_x2.....ucgugggaacacgggAugc..... 1  
Gi3\_27998202\_x2.....gucgugggaAacGacggggugccgaacu..... 1  
Gi2\_10829903\_x2.....gagacgucgugggaacGcggggugccgaacu..... 1  
Gi2\_10937129\_x2.....ucgugggaacUcggggugccgaac..... 1  
Gi3\_28086146\_x2.....cggagacgucAugggaacacggggugccga..... 1  
Gi1\_4130549\_x2.....ucgugggaacCcggggugccg..... 1  
Gi1\_4114499\_x2.....gUagacgucgugggaacacggggugccgaa..... 1  
Gi3\_28109940\_x2.....ucggagacgAcgugggaacacggggg..... 1  
G1a\_5954170\_x2.ugUgaucggagacgucgu..... 1  
Gi3\_28139014\_x2.....ucgugggaacacggggugccgaUcu..... 1  
G1a\_5889180\_x2.....gacgucgugggaacacAgggg..... 1  
Gi1\_4107455\_x2.....ggaacUcggggugccgaacu..... 1  
Gi3\_28113938\_x2.....gacgucgugggaacacggggA..... 1  
Gi2\_10833047\_x2.....cgucgugggaacacggAgugc..... 1  
Gi5\_8808343\_x2.....gacgucgugggaacacAgggugccgaacu..... 1  
Gi3\_28047234\_x2.....ucggagacgucgCgggaacacggggugc..... 1  
Gi2\_10881207\_x2.....gugggaacacggggUcc..... 1  
Gi3\_28031700\_x2cCgcgaucggagacgucg..... 1  
Gi3\_28221492\_x2.....gaucggagacgucgugggaacacgggA..... 1  
Gi1\_4113187\_x2.....cgucgugggGacacggggugccgaac..... 1  
Gi1\_4151335\_x2.....cUucgugggaacacggggugccga..... 1  
G1a\_5892250\_x2.....ggaacacggggugccgaaAu..... 1  
Gi5\_8773727\_x2.....ggaacacggggugccgGac..... 1  
Gi3\_28039124\_x2.....ugggaacacggUgugccgaa..... 1  
Gi2\_10986267\_x2.....ugggaacacgAggugccgaac..... 1  
Gi1\_4132403\_x2.....ucgugggaacacggggGgc..... 1  
Gi3\_28167100\_x2.....gugggaacacgggUugccga..... 1  
Gi2\_10857089\_x2.....aucggagacgucgugggUcacg..... 1  
Gi3\_28259516\_x2.....aucggUgacgucgugggaacacggggugcc..... 1  
Gi3\_28248996\_x2.....gggaacacggggugccgC..... 1  
Gi3\_28222626\_x2.....cggagacgucgugggaacGc..... 1  
Gi3\_28073838\_x2.....cggGgacgucgugggaacacggggugccga..... 1



Gi5\_8803293\_x2.....aCcgagacgucguggaaca..... 1  
Gi3\_28199612\_x2.....ucguggaacaacggUgugccgaac..... 1  
Gi3\_28067618\_x2.....ucggagacgucguggaacaacggggG..... 1  
Gi3\_28233816\_x2.....ggGgacgucguggaaca..... 1  
Gi1\_4134573\_x2....Aaucggagacgucguggg..... 1  
Gi1\_4140421\_x2.....ggaacacggggugccCaacu..... 1  
Gi5\_8729121\_x2....gaucggagacgucguggaacaAgg..... 1  
G1a\_5972652\_x2....cgaucggagacgucguggaacaacggggGgc..... 1  
Gi3\_28240156\_x2.....guggCaacacggggugccga..... 1  
Gi2\_10941885\_x2.....agacgucguggaacaacAggugc..... 1  
Gi2\_10888751\_x2.....cguggaacUcggggugccga..... 1  
Gi5\_8769055\_x2.....agacgucguggaacaacggggGcggcaac..... 1  
Gi5\_8741455\_x2.....gucguggaacaacggggugccgaUcu..... 1  
Gi1\_4147797\_x2.....gacgucGgggaacaacggggg..... 1  
Gi3\_28113064\_x2.....cgugggCacacggggugccga..... 1  
Gi4\_566500\_x2.....uggaacaacggggugccgaacuA..... 1  
Gi5\_8799865\_x2.....gucgGgggaacaacggggugccgaac..... 1  
Gi3\_28053948\_x2.....Gggagacgucguggaacaacggggugccga..... 1  
Gi3\_28219626\_x2.....gggaacaacggggugccCaacu..... 1  
Gi3\_28094334\_x2.....cggagacgNcgugggaacaacggggug..... 1  
Gi1\_4107995\_x2.....ucgugUgaacaacggggugccgaacu..... 1  
Gi3\_28213308\_x2....aucggagacgGcuggggaacaacggggg..... 1  
Gi3\_28078524\_x2.....ucguggaacaacggUgugccgaacu..... 1  
G1a\_5889360\_x2.....guggUaacacggggugccgaac..... 1  
Gi5\_8761063\_x2.....cguggaacaacggggugccgG..... 1  
Gi2\_10977443\_x2.....ucggagacgucgCgggaaca..... 1  
Gi5\_8742747\_x2....aucggagacgucguggaacaacAgggg..... 1  
Gi3\_28151726\_x2.....uGggagacgucguggaacaac..... 1  
Gi1\_4090135\_x2.....gagacgucguggaacGcggggugccgaacu..... 1  
Gi1\_4113335\_x2.....uggaacaacggggugcAgaac..... 1  
Gi5\_8789051\_x2.....gacgucguggaCcacggggugccgaacu..... 1  
Gi2\_10860131\_x2.....gucguggAaacacggggugcc..... 1  
Gi3\_28214950\_x2.....cggagGcugcuggggaacaacggggugccga..... 1  
Gi3\_28082510\_x2.....gagacgucguggaacaacCggggg..... 1  
Gi3\_28118984\_x2.....ucUgagacgucguggaacaacggggugccg..... 1  
Gi3\_28041212\_x2.....uUggaacaacggggugccgaacu..... 1  
Gi5\_8805737\_x2.....acgucguggaacaacggggGgcc..... 1  
G1a\_5944912\_x2.....cguggaacaacggUgugccgaacu..... 1  
Gi3\_28017870\_x2.....guUgugggaacaacggggugccga..... 1  
G1a\_5879178\_x2.ugcgaucggagacgCcg..... 1  
Gi2\_10932549\_x2.....cgugggaaUacggggugc..... 1  
Gi5\_8801159\_x2.....ggaacaacggggugccgaaGu..... 1  
Gi3\_28115648\_x2.....gagacgucguggaacaacggggugcUgaac..... 1  
Gi2\_10980797\_x2.....ucggagacgucguggaacGcggggugcc..... 1  
Gi2\_10891069\_x2.....ggagacgucguggaacaacAggug..... 1  
Gi5\_8817007\_x2.....Ggucguggaacaacggggugc..... 1  
Gi2\_10972959\_x2.....agacgucguggaacaacggggugccgaGc..... 1

|                                                         |   |
|---------------------------------------------------------|---|
| Gi1_4090741_x2.....ucggagacgucgugggCacacggggugc.....    | 1 |
| Gi2_10958287_x2.....Uggagacgucgugggaacacggggugc.....    | 1 |
| Gi1_4125215_x2....gUucggagacgucguggg.....               | 1 |
| Gi2_10915091_x2....aucggagacgCcgugggaa.....             | 1 |
| Gi1_4131403_x2.....gugggaacacggggugccgaUcu.....         | 1 |
| Gi3_28066140_x2.....Aggaacacggggugccgaacuu.....         | 1 |
| G1a_5951788_x2.....guAggaacacggggugccg.....             | 1 |
| G1a_5900890_x2.....Ugucgugggaacacggggugccgaacu.....     | 1 |
| Gi5_8747457_x2.....cgCcgugggaacacggggugccga.....        | 1 |
| Gi4_558354_x2.....ggagacgucgugggaacacggggugcc.....      | 0 |
| Gi3_28230570_x2.....cgucguggUaacacggggugc.....          | 1 |
| Gi1_4156415_x2....aucggagacgucgugggaacacAg.....         | 1 |
| Gi3_28250992_x2.....agaUgucgugggaacacgggg.....          | 1 |
| Gi5_8749593_x2.....cgugggaCcacggggugccgaac.....         | 1 |
| Gi3_28002326_x2.....acgAcgugggaacacggggugccgaac.....    | 1 |
| Gi3_28076198_x2.....cggagacgucgugggaacacggggCgccga..... | 1 |
| Gi1_4143731_x2.....Cggaacacggggugccgaacuu.....          | 1 |
| Gi2_10874755_x2.....cgucguUggaacacggggugccgaac.....     | 1 |
| Gi2_10845111_x2....gaucUgagacgucgugggaacacgg.....       | 1 |
| Gi3_28228746_x2.....ggaacacggggugcAgaa.....             | 1 |
| Gi4_562448_x2.....gAgaacacggggugccgaacu.....            | 1 |
| Gi1_4132743_x2....gaucggagacgucgugggaaca.....           | 0 |
| Gi5_8771475_x2.....gugggaacacggggugccgaacuC.....        | 1 |
| Gi3_28147862_x2.....cgucgugggaacacgggguCccgaac.....     | 1 |
| Gi2_10906193_x2.....gacgucgCgggaacacggggugccgaac.....   | 1 |
| Gi2_10917939_x2....gaucggagaAgucgugggaacacgggg.....     | 1 |
| Gi5_8783919_x2.....gaacacggggugcGgaacu.....             | 1 |
| Gi3_28088406_x2....aucggagGcucgugggaacacggggugc.....    | 1 |
| Gi2_10898649_x2.....cgugggaacacggggugccCaacu.....       | 1 |
| Gi3_28217206_x2.....ggagacgucgugggaaAacggggugccg.....   | 1 |
| Gi5_8772133_x2.....acgucgugggUaacacggggugccgaacu.....   | 1 |
| Gi2_10911019_x2.....cgucUugggaacacgggg.....             | 1 |
| Gi5_8751863_x2....aucggagaUgucgugggaacacgggg.....       | 1 |
| Gi3_28196202_x2....Uucggagacgucgugggaacac.....          | 1 |
| Gi5_8773587_x2.....cgGcgugggaacacggggugc.....           | 1 |
| Gi2_10914149_x2.....ucgugggaacacggggugccgUac.....       | 1 |
| Gi3_28051406_x2....gaucggagacgucgCgggaac.....           | 1 |
| Gi1_4101819_x2.....gugggaacacUgggugccgaacu.....         | 1 |
| Gi1_4145203_x2.....gaacacggAgugccgaacuu.....            | 1 |
| Gi3_28244302_x2.....agacgucgugggaacacggggAgccgaacu..... | 1 |
| Gi3_28053398_x2.....ggagacgucgugggaacacggggugccAaa..... | 1 |
| Gi1_4098425_x2.....gggaaGacggggugccgaacu.....           | 1 |
| Gi2_10957553_x2....gaucggagGcucgugggaacacggggugc.....   | 1 |
| Gi1_4101717_x2.....ggGacacggggugccgaa.....              | 1 |
| Gi5_8778607_x2.....gUagacgucgugggaacacggggugccgaac..... | 1 |
| Gi5_8736339_x2.....aacacggggugccgaGcuuu.....            | 1 |
| G1a_5883074_x2.....ggaacUcggggugccgaac.....             | 1 |

Gi2\_10945441\_x2.....gacgucguAggaacacggggugccgaacu..... 1  
Gi3\_28250554\_x2.ugcgauccgagacgucgugggaacacA..... 1  
G1a\_5938368\_x2.....gugggaacacggggugccCaacu..... 1  
G1a\_5934368\_x2....gaucUgagacgucguggga..... 1  
Gi2\_10986517\_x2.....ggaacaGggggugccgaac..... 1  
Gi4\_564142\_x2.....Ggucgugggaacacggggugccgaacu..... 1  
Gi2\_10922939\_x2.....gacgucgugggaacaUggggugccgaacu..... 1  
Gi1\_4096131\_x2.....cguUgugggaacacggggugccgaacu..... 1  
Gi3\_28152088\_x2.....cgGcgugggaacacgggg..... 1  
Gi5\_8730099\_x2....aCcgagacgucgugggaacacg..... 1  
Gi2\_10923605\_x2....aucggagacgucguAggaacacggg..... 1  
Gi2\_10974825\_x2.....aacacggggugAcgaacu..... 1  
Gi2\_10848447\_x2....aucggagacgucgugggaAacggggugcc..... 1  
Gi2\_10837593\_x2.....acgucgugggaacacggggAgcc..... 1  
Gi2\_10947099\_x2.....ucgugggaacaAgggggugccgaac..... 1  
Gi2\_10965689\_x2.....gucgugggaacacggggugccGac..... 1  
Gi3\_28162798\_x2....gaucggagacgucgugggaacGcggggugc..... 1  
Gi1\_4094563\_x2.....gugggaaAacggggugcc..... 1  
Gi1\_4101825\_x2.....cgugggaacacAgggugccga..... 1  
Gi3\_28191284\_x2.ugcgauccgagacgucgugggaacGcg..... 1  
Gi2\_10876245\_x2.Ggcgauccgagacgucgugggaacacggggugc..... 1  
Gi1\_4106303\_x2.....cgugggaacacUgggugccgaacu..... 1  
Gi3\_27995724\_x2.....acgucgugggaacacggggGgc..... 1  
Gi3\_28230914\_x2.....acgucgugggaacacggggugcGgaac..... 1  
G1a\_5927302\_x2.ugcgauccgagGcgucgu..... 1  
Gi2\_10849375\_x2.....gacgCcgugggaacacggggu..... 1  
Gi2\_10851393\_x2.....cggagacgucgugggaacGc..... 1  
Gi2\_10856103\_x2.....agacgucgugggaacacgAggugcc..... 1  
G1a\_5905062\_x2....aucggagacgucgugggCa..... 1  
Gi2\_10986723\_x2....aucggagUcgucgugggaacacg..... 1  
Gi2\_10965371\_x2....cUgagacgucgugggaacacgggg..... 1  
Gi2\_10882991\_x2....aucggagacgucgugggaacC..... 1  
G1a\_5911902\_x2.....gaacacggggAugccgaacu..... 1  
Gi4\_566822\_x2.....aGcacggggugccgaacu..... 1  
Gi1\_4113099\_x2.....agacgucgugggaCcacggggugccgaacu..... 1  
Gi2\_10888377\_x2.....aGgucgugggaacacggggugccgaac..... 1  
Gi2\_10899143\_x2.....gggaacacNgggugccga..... 1  
Gi2\_10945959\_x2.....cggagacgucgugggaacGcggggug..... 1  
Gi5\_8767603\_x2.....gUgacgucgugggaacacggggugccgaacu..... 1  
Gi2\_10969951\_x2.....ucgugggaacacggggugccgaC..... 1  
Gi2\_10837567\_x2....aucggagacgucguAggaacacggggug..... 1  
Gi2\_10981627\_x2.....cggagGcgucgugggaacacggggugc..... 1  
G1a\_5920188\_x2.....gaaGacggggugccgaacu..... 1  
Gi3\_28231532\_x2.....gucCugggaacacggggugccgaacu..... 1  
Gi2\_10846431\_x2..gGgauccgagacgucgugggaacac..... 1  
Gi2\_10975253\_x2.....gGcgucgugggaacacgg..... 1  
Gi2\_10920211\_x2.....Uagacgucgugggaacacggggugccga..... 1

Gi3\_28143516\_x2.....gGcgugggaacacggggug..... 1  
Gi5\_8723193\_x2.....gugggaacacggggCgccgaa..... 1  
Gi5\_8810919\_x2.....ggaacacAgggugccgaac..... 1  
Gi5\_8778199\_x2.....ggaUacggggugccgaac..... 1  
Gi1\_4099943\_x2.....aacGcggggugccgaacu..... 1  
Gi3\_28036598\_x2.....gugggaacacggggugGcg..... 1  
Gi1\_4149347\_x2.....gugggaacacgggCugccgaacu..... 1  
Gi2\_10904759\_x2.....Agucgugggaacacggggugccgaac..... 1  
G1a\_5972136\_x2.....gaGcacggggugccgaacu..... 1  
Gi3\_28037512\_x2.....gacgucgugggaacaUggggugccgaacu..... 1  
Gi1\_4092337\_x2.....ggaacacggggugccgaaUu..... 1  
Gi5\_8798731\_x2.....cAgagacgucgugggaacacggggugccga..... 1  
Gi1\_4151833\_x2.....gagacgucgugggaacGcggggugccga..... 1  
Gi5\_8790609\_x2.....aGcggagacgucgugggaacacgggg..... 1  
Gi1\_4137763\_x2.....cgugggaGcacggggugccga..... 1  
Gi3\_28060668\_x2.....aucggagacgucgAgggaacacgg..... 1  
Gi1\_4143435\_x2.....acgucgugggaacacggggCgccg..... 1  
Gi1\_4114083\_x2.....aucggagaNgucgugggaacacgggg..... 1  
Gi1\_4123809\_x2.....cUucgugggaacacggggugccgaa..... 1  
Gi5\_8766979\_x2.....cacggggugccAaacuuu..... 1  
Gi2\_10910865\_x2.....gacgucguUggaacacggggugcc..... 1  
Gi1\_4146363\_x2.....gucgugggCacacggggugccgaacu..... 1  
G1a\_5978494\_x2.....gugggaaAacggggugcc..... 1  
Gi3\_28099974\_x2.....gaucggagacgucguggUaacacggg..... 1  
Gi3\_28214748\_x2.....gagacgucgugggaacacggggCgccgaac..... 1  
Gi3\_28182160\_x2.....ugggaacacCgggugccgaacu..... 1  
Gi3\_28132614\_x2.....acgucgugggaacacggggAgcc..... 1  
G1a\_5968718\_x2.....ggaacacggggugccUaacu..... 1  
Gi4\_553932\_x2.....gaacacggggugccgaacuucU..... 1  
Gi1\_4090285\_x2.....gaacacggggugccgaacG..... 1  
G1a\_5928186\_x2.....aacacggggGgccgaacu..... 1  
Gi2\_10956119\_x2.....cgucgugggaacacggggugcAgaacu..... 1  
Gi2\_10855929\_x2.....gucgGgggaacacggggugccgaac..... 1  
Gi1\_4108507\_x2.....gggaacacggggugccgaUc..... 1  
Gi1\_4117087\_x2.....gaGcacggggugccgaacu..... 1  
Gi4\_564548\_x2.....aacaUggggugccgaacu..... 1  
Gi3\_28251202\_x2.....gaucggGgacgucgugggaaca..... 1  
Gi2\_10837173\_x2.....cgaucggagacgucgugggaacacggggCg..... 1  
Gi1\_4142287\_x2.....gacgucgugggaacGcggggugccgaacu..... 1  
Gi3\_28147552\_x2.....aAacgucgugggaacacggggugccga..... 1  
Gi3\_28097308\_x2.....aucggagacgucguUggaacacggg..... 1  
Gi1\_4147779\_x2.....acgucguAggaacacggggugcc..... 1  
Gi5\_8757671\_x2.....ugggaacacggggCgccgaacu..... 1  
Gi3\_28148588\_x2.....ggagacgucgugggaGcacggggugccgaac..... 1  
Gi3\_28137824\_x2.....gucgugggCacacggggugccg..... 1  
Gi2\_10923051\_x2.....gaucggagacgucgugggaacacgggAugc..... 1  
Gi1\_4154213\_x2..gcUaucggagacgucgugggaaca..... 1

Gi2\_10942743\_x2.....guUgugggaacacggggugccg..... 1  
Gi5\_8765189\_x2.....ggUgacgucgugggaacacggggugccgaacu..... 1  
Gi5\_8776849\_x2.....gacgucgugggaacacggggguAccgaacu..... 1  
Gi3\_27991268\_x2.....cgucgugggaacacCgggugc..... 1  
Gi5\_8794027\_x2.....gucgugggaUcacggggugccgaacu..... 1  
Gi1\_4119527\_x2.....gaucggagacgucguAgg..... 1  
Gi2\_10891681\_x2.....ucNugggaacacggggugccgaacu..... 1  
Gi2\_10886591\_x2.....gggaacacggggugccgaacAu..... 1  
Gi3\_28096076\_x2.....acgucgugggaacGcggggugcc..... 1  
Gi1\_4108661\_x2.ugUgaucggagacgucguggga..... 1  
Gi3\_28119048\_x2.....agGcgucgugggaacacggggugcc..... 1  
Gi3\_28196328\_x2.....cggagaUgucgugggaacacgggggu..... 1  
Gi2\_10835245\_x2.....aucggagacgucgugggaUcacgggggu..... 1  
Gi5\_8736563\_x2.....Gggagacgucgugggaacacg..... 1  
Gi3\_28193946\_x2.....Caucggagacgucgugggaacacgg..... 1  
Gi3\_28139582\_x2.....ggagacgucgugggaacacggggugcUga..... 1  
Gi3\_28173636\_x2.....ucgAagacgucgugggaacacggggugcc..... 1  
Gi5\_8790747\_x2.....acgucgugggaacacggggugccgaaA..... 1  
Gi2\_10830897\_x2.....aucggCgacgucgugggaacacggggug..... 1  
Gi2\_10885799\_x2.....gugggaacacgCgggugcc..... 1  
Gi5\_8816119\_x2.....acacggggCgcccgaacuuu..... 1  
Gi5\_8798933\_x2.....acgucgugggGacacggggugcc..... 1  
Gi5\_8743765\_x2.....cgugggaacacggggugcU..... 1  
Gi2\_10985579\_x2.....agacgucgNgggaacacggggug..... 1  
Gi2\_10846593\_x2.....cgugggaaUacggggugccgaa..... 1  
Gi2\_10892149\_x2.....agacgucgugggaacacggggugcU..... 1  
Gi5\_8741033\_x2.....Aaucggagacgucgugggaacacggg..... 1  
Gi3\_28238804\_x2.....cgugggaacacggggugcUg..... 1  
Gi1\_4093549\_x2.....Augggaacacggggugccgaacu..... 1  
Gi3\_28063360\_x2.....ucgugggaacacggggGgccgaa..... 1  
Gi3\_27998906\_x2.....acgucgugAgaacacggggugccg..... 1  
Gi2\_10926381\_x2.....ugggaacacggggugccgaaGu..... 1  
Gi2\_10890755\_x2.....ucggagacgucgugggCacacgggggu..... 1  
Gi2\_10952575\_x2.....ugggaacCcggggugccgaa..... 1  
G1a\_5966480\_x2.....gugCgaacacggggugccgaacu..... 1  
Gi3\_28089426\_x2.....ggagacgucgugggCacacg..... 1  
Gi2\_10936567\_x2.....cggagacgucgugggGacacgggggu..... 1  
G1a\_5956478\_x2.....aacacggggugccgCacu..... 1  
Gi3\_28081868\_x2.....cguggAaacacggggugccg..... 1  
Gi2\_10829419\_x2.....auAggagacgucgugggaacacggg..... 1  
Gi3\_28146406\_x2.....gucgugggaacacggggGgccga..... 1  
Gi1\_4106965\_x2.....cggagGcgucgugggaacacggggugcc..... 1  
Gi4\_556458\_x2.....cgCcgugggaacacggggugcc..... 1  
Gi2\_10950739\_x2.....gaucggagacgucgugggaacGcggggugc..... 1  
Gi3\_28025028\_x2.....gagacgucgugggaacGcggggugc..... 1  
G1a\_5936878\_x2.....gggaacaUggggugccgaacu..... 1  
Gi2\_10898295\_x2.....gaucggagacAucguggga..... 1

Gi2\_10953413\_x2...gauUggagacgucgugggaacacggg..... 1  
Gi3\_28181346\_x2.....gugggaacaGggggugcc..... 1  
Gi1\_4125031\_x2.....ggaacacgNggugccgaa..... 1  
Gi1\_4146415\_x2.....gUaacacggggugccgaaacu..... 1  
Gi1\_4157721\_x2.....ugggaacacggggugccgaaUu..... 1  
Gi2\_10864285\_x2.....gucgugggaacCcggggugccg..... 1  
Gi5\_8809047\_x2.....ucgugggUacacggggugccgaa..... 1  
Gi2\_10954999\_x2...gCucggagacgucgugggaac..... 1  
Gi1\_4138305\_x2...aucggagacgucgugggaacacggggCgcc..... 1  
Gi3\_28221752\_x2.....cgucgugggaacUcggggugccgaaacu..... 1  
Gi2\_10895413\_x2.....gggaaAacggggugccga..... 1  
G1a\_5973564\_x2.....gucgugggaacacggggCgccgaa..... 1  
G1a\_5973830\_x2...aAcggagacgucguggga..... 1  
Gi3\_28122554\_x2.....acgucgugggaacaAggggugccgaaacu..... 1  
Gi3\_28023560\_x2.....ggagacgucgugAgaacacg..... 1  
Gi3\_28151460\_x2.....gaGgucgugggaacacggg..... 1  
Gi2\_10983201\_x2.....Aacgucgugggaacacgggg..... 1  
Gi5\_8721073\_x2.....gugggaacaAggggugccgaa..... 1  
Gi2\_10854813\_x2...aucggagacgucgugggaacaAggggugcc..... 1  
Gi2\_10991397\_x2.....cggacacgucgugggaacacggggugc..... 1  
Gi2\_10893515\_x2...gaucggagacAucgugggaacacggg..... 1  
Gi2\_10912651\_x2.....acgucgugUgaacacggggugccgaaacu..... 1  
Gi1\_4139897\_x2.....gagGcucgugggaacacggggugccg..... 1  
Gi2\_10972689\_x2.....gucgugggaacaAggggugcc..... 1  
Gi2\_10917071\_x2...aucggagacguUgugggaacacggggugcc..... 1  
Gi2\_10974105\_x2...cggagacgucgugggaacacgggguAc..... 1  
Gi5\_8829257\_x2.....cgugggaacacgAggugcc..... 1  
Gi3\_28128144\_x2...ucggagacgucgugggaacaUggggugcc..... 1  
Gi2\_10923095\_x2...aucggagacgucguggAaacacggg..... 1  
Gi5\_8795999\_x2.....cgucgugggaacGcggggugccga..... 1  
Gi1\_4138689\_x2.....gaacacgggUugccgaaacu..... 1  
Gi3\_28168004\_x2...Caucggagacgucgugggaacacg..... 1  
G1a\_5903870\_x2.....gugggaacacggggugccgC..... 1  
Gi5\_8799731\_x2...gaucggagNcucgugggaacacg..... 1  
Gi1\_4128487\_x2.....gugggaacacggggUccgaaacu..... 1  
Gi1\_4151997\_x2.....ugggaacacggggGgccgaa..... 1  
Gi2\_10955159\_x2.....agacgucgugggaacacAggggugccg..... 1  
Gi3\_28223854\_x2...Gggagacgucgugggaacacgg..... 1  
Gi3\_28209404\_x2...ucAgagacgucgugggaacacggggu..... 1  
Gi2\_10916171\_x2...acUucgugggaacacggggugccgaa..... 1  
Gi5\_8824851\_x2...Ggucgugggaacacggggugccgaa..... 1  
Gi3\_28075406\_x2...ggagGcucgugggaaca..... 1  
G1a\_5928576\_x2.....guggUaacacggggugcc..... 1  
Gi3\_28209830\_x2...auGggagacgucgugggaacacggggu..... 1  
Gi1\_4132445\_x2...acgucgugggaacacggAgugccgaaacu..... 1  
Gi3\_28147186\_x2...ucUugggaacacggggugc..... 1  
Gi2\_10982777\_x2.....ugggaacacgggUugccg..... 1

Gi1\_4106421\_x2.....ucgugggCacacggggugccgaac..... 1  
 Gi3\_28035482\_x2.....acgucgugggaacacggggGgccga..... 1  
 Gi2\_10944369\_x2.....auAggagacgucgugggaacacggggug..... 1  
 Gi3\_28130332\_x2.....agacgucgNgggaacacgggg..... 1  
 Gi5\_8724157\_x2.....cgucgugggaacacggggugccgaUu..... 1  
 Gi2\_10842069\_x2.....ugggaacacggggugccgaacuC..... 1  
 Gi2\_10931937\_x2.....cgGcgugggaacacggggugc..... 1  
 Gi5\_8828425\_x2.....Uucggagacgucgugggaacacgggggu..... 1  
 Gi2\_10920459\_x2.....ucgugggaacacggcGugccgaacu..... 1  
 Gi5\_8769759\_x2.....cguAgugggaacacggggugccgaacu..... 1  
 Gi3\_27992782\_x2.....ggGgacgucgugggaacacggggugcc..... 1  
 Gi2\_10942205\_x2.....aucggagacgucguAggaacacg..... 1  
 Gi3\_28067682\_x2.....cggagacgCcgugggaacacggggugc..... 1  
 Gi3\_28070100\_x2.....ugggaacacUgggugccga..... 1  
 Gi1\_4123689\_x2.....Ucugcugugggaacacggggugcc..... 1  
 Gi2\_10899543\_x2.....gucgugggaGcacggggugccga..... 1  
 Gi3\_28178882\_x2.....cggagacgucgCgggaacacggggugccgaacu..... 1  
 Gi4\_562384\_x2.....ggaacacgNggugccgaac..... 1  
 Gi3\_28108522\_x2...cCaucggagacgucguggg..... 1  
 Gi1\_4130411\_x2.....gucgugggaacacggggugcAgaacu..... 1  
 Gi2\_10863101\_x2.....ucgugggaGcacggggugcc..... 1  
 Gi1\_4115209\_x2.....ugggaacacggggCgccgaac..... 1  
 Gi3\_28260520\_x2...cgaucggGgacgucguggg..... 1  
 Gi1\_4098975\_x2.....ggaacacgggAugccgaacu..... 1  
 G1a\_5916242\_x2.....cgugggaacacggAgugccgaacu..... 1  
 Gi2\_10887663\_x2.....cguggCaacacggggugcc..... 1  
 Gi2\_10860263\_x2.....gaUgucgugggaacacggggugccgaac..... 1  
 Gi1\_4119935\_x2.....Naacacggggugccgaacu..... 1  
 Gi3\_28117880\_x2.....cggagacgucgugggaacacgggA..... 1  
 Gi2\_10853633\_x2.....Uucggagacgucgugggaaca..... 1  
 Gi5\_8760087\_x2.....aucggagacgucgCgggaacacgggggu..... 1  
 Gi3\_28200094\_x2.....aucggagacgucgugggaacacUgg..... 1  
 Gi3\_28013396\_x2.....cggagacgucgugggGacacggggugccga..... 1  
 Gi5\_8778217\_x2.....uggaacaNggggugccgaacuu..... 1  
 G1a\_5907902\_x2.....gucgugggaacacggggugccGacu..... 1  
 Gi4\_561576\_x2.....gugggGacacggggugccgaacu..... 1  
 Gi3\_28093610\_x2.....gacgucgGgggaacacggg..... 1  
 Gi2\_10857267\_x2.....ugggCacacggggugccgaac..... 1  
 Gi3\_28213796\_x2.....Ccgugggaacacggggugc..... 1  
 Gi2\_10842157\_x2.....aucggagacgucgugggaacacCgggugc..... 1  
 Gi1\_4125693\_x2.....gggaacacNgggugccgaacuu..... 1  
 Gi3\_28086502\_x2...cgaucggagacgucgugggaGcacggggug..... 1  
 Gi2\_10964205\_x2.....ucggagacgucgugggaGcacgggggu..... 1  
 G1a\_5902188\_x2...gaucggagacgucguAggaacacgggggu..... 1  
 Gi3\_28022252\_x2.....aucggagacgucgAgggaacacgggg..... 1  
 Gi1\_4110939\_x2.....gugggaacacggggugccgaGcuu..... 1  
 G1a\_5910074\_x2.....guAggaacacggggugccgaa..... 1

Gi3\_28025478\_x2.....ucNugggaacacggggugccgaacu..... 1  
Gi3\_28258698\_x2.....gucgugggaacacggggAgcc..... 1  
Gi3\_28214636\_x2.....cgucgugggaGcacggggugccgaa..... 1  
Gi1\_4101551\_x2.....cggagacgNcgugggaacacggggugcc..... 1  
Gi5\_8817253\_x2.....cAugggaacacggggugc..... 1  
Gi2\_10887611\_x2.....aucggagacgucgugggaaUacg..... 1  
Gi1\_4129545\_x2.....gCacacggggugccgaacu..... 1  
Gi2\_10843835\_x2.....gaCcgagacgucgugggaacacggggugcc..... 1  
Gi2\_10958501\_x2.....cgugggaacaUggggugccgaa..... 1  
Gi5\_8754979\_x2.....cacgggguNccgaacuuu..... 1  
Gi3\_28100298\_x2.....acGcggggugccgaacuu..... 1  
Gi3\_28211584\_x2.....gucAugggaacacggggug..... 1  
Gi3\_28220794\_x2.....agacgucgugggaacacgAgggugcc..... 1  
Gi2\_10877525\_x2.....gggaacacggggGgccgaa..... 1  
Gi3\_28001086\_x2.....acgucgugggaacacggggGgccg..... 1  
G1a\_5953002\_x2.....ggNaacacggggugccgaacu..... 1  
Gi2\_10848887\_x2.....aucggagacgucgugAgaacacg..... 1  
Gi3\_28159372\_x2.....gGucggagacgucgugggaacacggggug..... 1  
Gi5\_8774041\_x2.....gucguggCaacacggggugccgaacu..... 1  
G1a\_5962704\_x2.....Uaucggagacgucgugggaacacg..... 1  
Gi2\_10934913\_x2.....cgugggaacacggggAgccgaa..... 1  
Gi2\_10929449\_x2.....cggagaGgucgugggaacacggggugcc..... 1  
Gi5\_8734691\_x2.....cgugggaGcacggggugcc..... 1  
Gi1\_4137903\_x2.....cgGcugugggaacacggggugcc..... 1  
Gi3\_28075318\_x2.....gucgugggaacacAgggugccga..... 1  
Gi3\_28001934\_x2.....gaucAgagacgucgugggaacacg..... 1  
Gi2\_10983475\_x2.....cgaucggagacgucguAggaacacggg..... 1  
Gi1\_4153781\_x2.....gucgugggaacacggggGgccgaa..... 1  
Gi1\_4133739\_x2.....ugggaacaGggggugccgaacu..... 1  
Gi3\_28163782\_x2.....cgucguCggaacacggggugccg..... 1  
Gi2\_10835505\_x2.....ggagacgucgugggGacacg..... 1  
G1a\_5954878\_x2.....guUggaacacggggugccg..... 1  
Gi3\_28039218\_x2.....agacgucgugggaGcacggggugccgaacu..... 1  
Gi2\_10899575\_x2.....gaucggagacgucgugggaacacggggGg..... 1  
Gi1\_4107537\_x2.....cgugggaacacggggugccgaacu..... 1  
Gi3\_28098258\_x2.....ggUaacacggggugccga..... 1  
Gi3\_28039276\_x2.....gucgugggaacacggggugccgaC..... 1  
Gi1\_4135015\_x2.....guAggaacacggggugcc..... 1  
Gi3\_28049840\_x2.....cgucgugggaacacggggugccUaacu..... 1  
Gi1\_4150127\_x2.....ugggaacacggggugcUgaacuu..... 1  
Gi3\_28206544\_x2.....aGcggagacgucgugggaac..... 1  
Gi2\_10903109\_x2.....ggagacgucgugggaacaUggggugccgaacu..... 1  
Gi1\_4097963\_x2.....ucgugggaacacgggUgugcc..... 1  
Gi2\_10853711\_x2.....aucAgagacgucguggga..... 1  
Gi5\_8786291\_x2.....gugggaacacggggugccgG..... 1  
Gi2\_10923721\_x2.....acgucgugggaacaUggggugc..... 1  
Gi2\_10877343\_x2.....cguUgugggaacacggggugcc..... 1



Gi2\_10976997\_x2.....uggaacacgggguCccgaacu..... 1  
Gi3\_28122468\_x2.....gagacgucgCgggaacacggggugccgaacu..... 1  
G1a\_5931836\_x2.....ggaAGacggggugccgaacu..... 1  
Gi3\_28149706\_x2.....agacgucgugAgaacacggggugccgaac..... 1  
Gi2\_10952529\_x2.....cguCggaacacggggugccgaac..... 1  
G1a\_5904904\_x2.....cguggaacacggggugU..... 1  
Gi2\_10986835\_x2.....uggaacacggCgugccgaacu..... 1  
Gi4\_562610\_x2.....guggaacacggggugccCaacu..... 1  
Gi3\_28216682\_x2.....Ccguggaacacggggugccg..... 1  
Gi4\_563258\_x2.....uggaacCcgggugccgaacu..... 1  
Gi3\_28222614\_x2...gUucggagacgucguggaacacggggugccg..... 1  
Gi1\_4098391\_x2.....guggaacacgggguAccgaac..... 1  
Gi2\_10867485\_x2.....aucggagacgucguggaUca..... 1  
Gi3\_28165790\_x2.....gacgAcguggaacacggggugccgaacu..... 1  
Gi3\_28092844\_x2.....aucggagacgucguggaaAacggggugcc..... 1  
Gi2\_10943467\_x2...gaucggagacgucguAggaaca..... 1  
Gi2\_10977281\_x2.....gacgucguggaacacAgggugccgaac..... 1  
Gi3\_28182042\_x2.....cgucguggaacacggggugccGgaacu..... 1  
Gi3\_28108864\_x2...cgGucggagacgucguggaacacggggu..... 1  
Gi2\_10944383\_x2.....cgucguAggaacacggggugccga..... 1  
Gi3\_28212462\_x2.....gacAucguggaacacggggu..... 1  
Gi4\_559150\_x2.....cuguggaacUggggugccgaacu..... 1  
Gi1\_4120675\_x2...aucggagacgucguggaGcaccggggugcc..... 1  
Gi2\_10935903\_x2...aucggagacgucguggaacacgCggugc..... 1  
Gi3\_28083038\_x2.....uggaacacggggugcAg..... 1  
Gi2\_10990945\_x2.....acgucgCgggaacacggggugc..... 1  
Gi3\_28012794\_x2...gGucggagacgucguggaac..... 1  
Gi5\_8825617\_x2.....gacgucgCgggaacacggggugccg..... 1  
Gi2\_10953771\_x2...aucggagacgucguggaaUacggg..... 1  
Gi2\_10955383\_x2.....ggaacaGggggugccgaacu..... 1  
Gi2\_10875041\_x2.....ugUgaacacggggugccgaa..... 1  
Gi4\_558578\_x2.....uggaacacggggugccgGacu..... 1  
Gi1\_4117099\_x2.....acgucguggaacacAgggugccg..... 1  
Gi3\_28200704\_x2...gaucggagacgucguggaacGcggggugcc..... 1  
G1a\_5955720\_x2.....Uacgucguggaacacggggugccgaac..... 1  
Gi3\_28198812\_x2.....ggaacacggAgugccgaa..... 1  
Gi1\_4136963\_x2.....agacgucguggaacacggggugccgaCcu..... 1  
Gi3\_28024400\_x2.....Uagacgucguggaacacggggugccga..... 1  
Gi1\_4103325\_x2.....guggAaacacggggugccgaac..... 1  
Gi3\_27993594\_x2.....uggaacacggCgugccgaa..... 1  
G1a\_5905498\_x2.....gggaacacggggugccgaC..... 1  
Gi2\_10864319\_x2.....gacgucguggGacacggggugccgaacu..... 1  
Gi2\_10908651\_x2...gaucggagNcgucguggaacacggggug..... 1  
Gi3\_28086824\_x2...cgGucggagacgucguggaacacg..... 1  
Gi1\_4140677\_x2.....cgucguggCacacggggugccgaacu..... 1  
Gi5\_8771285\_x2.....agaUgucguggaacacggggugccgaacu..... 1  
Gi3\_28152214\_x2...aucggagacgucguCggaacacggggu..... 1

Gi3\_28173088\_x2.....ugggaCcacggggugccg..... 1  
 Gi3\_28068090\_x2.....acAucgugggaacacggggugcc..... 1  
 Gi2\_10930725\_x2....auAggagacgucgugggaaca..... 1  
 Gi3\_28208734\_x2.....ucUugggaacacggggugccga..... 1  
 Gi3\_28069644\_x2.....ucgugggaacacggggguAc..... 1  
 Gi2\_10911625\_x2....gaucggUgacgucgugggaacacgggggu..... 1  
 Gi1\_4118465\_x2.....agUcgucgugggaacacggggugccgaacu..... 1  
 Gi3\_28121946\_x2.....cgugggaacacggCgugccgaac..... 1  
 Gi2\_10958021\_x2.....gggNacacggggugccgaac..... 1  
 Gi5\_8801603\_x2....aucggagacgucgugggaacCcg..... 1  
 Gi2\_10953463\_x2....aucggagaAgucgugggaacacgggggu..... 1  
 Gi5\_8785417\_x2....cgaucggagacgucgugggaacacAgg..... 1  
 Gi2\_10893201\_x2.....ugggaacacggggugcUg..... 1  
 Gi3\_28231686\_x2....gaucggagUcgucgugggaacacggg..... 1  
 Gi5\_8736497\_x2.....acgucgugggaacacggggugccgUacu..... 1  
 Gi3\_28135996\_x2....cgaucggCgacgucgugggaacacg..... 1  
 Gi2\_10937979\_x2....aucggagacgucAugggaacacggg..... 1  
 Gi2\_10976441\_x2.....gagacgucgugggaacacgggAugcc..... 1  
 Gi3\_28158326\_x2.....gggaacacggggGgccgaacuu..... 1  
 Gl1\_5878222\_x2.....Cgagacgucgugggaaca..... 1  
 Gi5\_8823805\_x2.....gggaacacggggAgccgaac..... 1  
 Gi1\_4100937\_x2.....ucgCgggaacacggggugccga..... 1  
 Gi3\_28109778\_x2.....ggagacgucgugggaacacggggugAc..... 1  
 Gi3\_28180210\_x2.....cgugggaacacgCggugccg..... 1  
 Gi3\_28199844\_x2.....agacgucgAgggaacacggggugccgaac..... 1  
 Gi1\_4107867\_x2.....ucUugggaacacggggugcc..... 1  
 Gi3\_28002998\_x2.....agacgucgugggaacaUggggugccgaa..... 1  
 Gi2\_10872199\_x2.....cgugggaacacggggugcUg..... 1  
 Gi3\_28164240\_x2.....ggaacacggggugccgaC..... 1  
 Gi5\_8821035\_x2.....cgucgugggaacacggggugccgCac..... 1  
 Gi5\_8806797\_x2....gaucggagacgucgugggaacacggggugccgaac..... 0  
 Gi1\_4140723\_x2....aucAgagacgucgugggaacacg..... 1  
 Gi2\_10967511\_x2.....cgucgugggaaAacggggugcc..... 1  
 Gi1\_4096163\_x2.....gacgucgugggaacacggggugccgaacuu..... 0  
 Gi2\_10936193\_x2.....agacgucgugAgaacacggggugccgaacu..... 1  
 Gl1\_5972376\_x2....aucAgagacgucgugggaacacggg..... 1  
 Gl1\_5887052\_x2.....cggagacgNcgugggaacacg..... 1  
 Gi3\_28257918\_x2.....Ccgucgugggaacacggggugcc..... 1  
 Gi5\_8783675\_x2....aucggagacAucgugggaacacggggugc..... 1  
 Gi2\_10938677\_x2....gaucggagUcgucgugggaacacgggggu..... 1  
 Gi3\_28098158\_x2.....cggagacgucguUggaacacggggug..... 1  
 Gi3\_28190016\_x2....aucggagacgucgugggaacUcgggg..... 1  
 Gi5\_8798575\_x2....gaucggagacgucgugggaacGc..... 1  
 Gl1\_5880852\_x2.....ggagacgucgugggGacacggggugcc..... 1  
 Gi2\_10885487\_x2.....ucgugggaacacCggggugccgaacu..... 1  
 Gi5\_8754799\_x2.....aUacgucgugggaacacggggugccga..... 1  
 Gi3\_28136026\_x2.....agacgucgugggaacacggggCgcc..... 1

Gi2\_10963435\_x2.....ucggagacgucgugggaaUa..... 1  
Gi2\_10908427\_x2.....aucggagUcgucgugggaaacacgggg..... 1  
Gi2\_10870841\_x2.....ggagacgucgugggaaacacggggCg..... 1  
Gi2\_10849345\_x2.....cguAgugggaaacacggggugccgaacu..... 1  
Gi1\_4133549\_x2.....ucgugggaaacacggggugccgaacAu..... 1  
Gi3\_28058118\_x2.....aucCgagacgucgugggaaacacggg..... 1  
Gi5\_8812551\_x2.....gugggaaacGcggggugcc..... 1  
Gi3\_28006104\_x2.....agacgucgugggaaacacggggugcc..... 1  
Gi5\_8754949\_x2.....gGgacgucgugggaaacacggggugcc..... 1  
Gi2\_10928277\_x2.....aucggGgacgucgugggaaac..... 1  
Gi5\_8776153\_x2.ugcgauccgagacgucgugggC..... 1  
Gi1\_4147951\_x2.....gugggaaacacggggCgcccgaacu..... 1  
Gi1\_4133395\_x2.....aucggagacgucgugggGacacgggg..... 1  
Gi2\_10861587\_x2.....gugggaaacGggggugccgaac..... 1  
G1a\_5957666\_x2.....gUagacgucgugggaaacacggggugc..... 1  
Gi2\_10880397\_x2...cgauccgagacgucgugggGacacg..... 1  
G1a\_5913130\_x2.....gacgucgCgggaacacggggugccgaacu..... 1  
Gi2\_10879465\_x2...gaucggagacgucgugggaaacacggg..... 1  
Gi3\_27997404\_x2.....Aacgucgugggaaacacgggg..... 1  
Gi2\_10840785\_x2.....aucgCagacgucgugggaaac..... 1  
Gi3\_28215310\_x2.....gacgucgugggaaacacgggC..... 1  
Gi2\_10893231\_x2.....aucggagacgCcguggg..... 1  
Gi1\_4097495\_x2.....ugggaaacUcggggugccgaacu..... 1  
Gi2\_10901013\_x2.....gAagacgucgugggaaacacggggugc..... 1  
Gi2\_10945277\_x2.....acgucgugggaaacacggggAcc..... 1  
Gi3\_27991622\_x2.....ggagGcgucgugggaaacacggggugcc..... 1  
Gi3\_28187048\_x2...gUucggagacgucgugggaaacac..... 1  
Gi1\_4113073\_x2.....cgugAgaacacggggugccga..... 1  
Gi5\_8780763\_x2.....cgugggaaacacggggugccga..... 1  
Gi2\_10972641\_x2...gaucggagGcgucgugggaaacacggggug..... 1  
Gi3\_27990376\_x2.....acgucgugggaaacacgUggugccgaacu..... 1  
G1a\_5941316\_x2.....gugggaaacacggggugUcg..... 1  
G1a\_5970886\_x2.....cgugggaaacacggggugccgCac..... 1  
G1a\_5977458\_x2.....gaacacggggugccAaac..... 1  
Gi2\_10927245\_x2.....cgCcgugggaaacacggggugccgaa..... 1  
Gi5\_8755265\_x2.....acgucgugggaaacacggggugccgaCcu..... 1  
Gi3\_28157830\_x2.....gacgucgugggaaacacggggugccg..... 1  
Gi2\_10948839\_x2.....cggagacgNcgugggaaacac..... 1  
G1a\_5964304\_x2.....gAggaaacacggggugccga..... 1  
Gi1\_4152381\_x2.....cgGggaaacacggggugccg..... 1  
Gi2\_10992205\_x2...cgauccgGgacgucguggg..... 1  
Gi3\_28109550\_x2.....gaacaAggggugccgaac..... 1  
Gi2\_10943517\_x2.....aucggagacgucgugggaaacacAgggug..... 1  
Gi3\_28110256\_x2.....ggagacgCcgugggaaacacg..... 1  
Gi2\_10977551\_x2.....agacgucgugggaaacacggggugcA..... 1  
Gi3\_28138542\_x2.....aacNcggggugccgaacu..... 1  
Gi2\_10876349\_x2.....cgugggaaacacggggugcGgaac..... 1

|                                                           |   |
|-----------------------------------------------------------|---|
| Gi1_4116707_x2.....guUggaacacggggugccgaacu.....           | 1 |
| Gi3_28115514_x2.....ucggagacgucgCgggaacacgggg.....        | 1 |
| Gi2_10981261_x2.....aucggagacgucgugggaaacUcggggg.....     | 1 |
| Gi4_554220_x2.....gacgucgugggaaacacggggugccgaacu.....     | 0 |
| Gi3_28221760_x2.....aucggagacgucgugggaaacacgAggguc.....   | 1 |
| G1a_5877728_x2.....gucgugggaaacacggggGgccgaac.....        | 1 |
| Gi5_8802797_x2.....acgucgugggaaacacggggugccgaacG.....     | 1 |
| Gi3_28008748_x2.....ucgugggaaacacggggugccgaacu.....       | 0 |
| Gi2_10888089_x2.....aaNacggggugccgaacu.....               | 1 |
| Gi5_8809417_x2.....Gggagacgucgugggaaacacggggugccga.....   | 1 |
| G1a_5922926_x2.....guggaaacacggggugccAa.....              | 1 |
| Gi3_28040158_x2.....Cgagacgucgugggaaacacgggg.....         | 1 |
| G1a_5905042_x2.....aucggagacgucgugggGacacggggugc.....     | 1 |
| Gi3_28039642_x2.....cggagacgucgugggaaUacgggg.....         | 1 |
| Gi2_10957469_x2.....gaGcggagacgucgugggaaacacggggugc.....  | 1 |
| Gi2_10838167_x2.....Gucggagacgucgugggaaacacggggugccg..... | 1 |
| Gi3_28082998_x2.....gucgugggaaacGcggggugcc.....           | 1 |
| G1a_5925530_x2.....gggaacacggggugUcgaacu.....             | 1 |
| G1a_5942076_x2.....aucggagacgucgugggaaacacggggCgcc.....   | 1 |
| Gi2_10992219_x2.....gaucggagacguAgugggaaac.....           | 1 |
| Gi4_557008_x2.....cggagacgucgugggaaacacggggugccgaacu..... | 0 |
| Gi5_8821747_x2.....aucggCgacgucgugggaaacacgggg.....       | 1 |
| Gi3_28109482_x2.....gucguUggaacacggggugccgaac.....        | 1 |
| Gi3_28255052_x2.....agacgucAugggaaacacggggugcc.....       | 1 |
| Gi2_10835485_x2.....aucggagacgucgCgggaaca.....            | 1 |
| Gi3_28126062_x2.....cgucgugggaaacacgUgugccgaac.....       | 1 |
| Gi5_8737153_x2.....ggaacacggggugcAgaacu.....              | 1 |
| Gi5_8736171_x2.....cgugggaaacacggggGgccgaac.....          | 1 |
| Gi3_27998142_x2.....gaucggUgacgucgugggaaacacggg.....      | 1 |
| Gi3_28168786_x2.....agacgucgugggaaCcacggggugcc.....       | 1 |
| Gi1_4111947_x2.....aucggagacgucgugggGacacggggugcc.....    | 1 |
| Gi3_28096382_x2.....gCagacgucgugggaaacacggggugcc.....     | 1 |
| Gi3_28256596_x2.....cggagacgucgugggaaCcacggg.....         | 1 |
| Gi2_10948013_x2.....Ggacgucgugggaaacacggggugccgaa.....    | 1 |
| Gi5_8779469_x2.....cgucgugggaaacacggggugccUaacu.....      | 1 |
| Gi2_10953959_x2.....gacgucgugggaaacacgAggugccgaacu.....   | 1 |
| Gi2_10908667_x2.....Cggaacacggggugccgaa.....              | 1 |
| Gi5_8819765_x2.....gucgugggCacacggggugccgaac.....         | 1 |
| Gi2_10832467_x2.....gaucggagacgucgugAgaacacggggugc.....   | 1 |
| Gi5_8736069_x2.....guggaaacacgAggugccga.....              | 1 |
| Gi5_8745563_x2.ugcgauccggagacgucgugggG.....               | 1 |
| Gi5_8745471_x2.....guggaaacacggggugcUg.....               | 1 |
| Gi1_4138555_x2.....guggaaacacggggCgccg.....               | 1 |
| Gi3_27984736_x2.....gacgucguggAaacacgggg.....             | 1 |
| Gi1_4097523_x2.....ucggGgacgucgugggaaacacggg.....         | 1 |
| Gi1_4143591_x2.....ucgugggaaUacggggugccga.....            | 1 |
| G1a_5931578_x2.....guggaaacacggggugAc.....                | 1 |

|                                                          |   |
|----------------------------------------------------------|---|
| Gi5_8744789_x2.....gugggaacacAgggugccgaacu.....          | 1 |
| Gi5_8787895_x2.....cggagacgucgugggaacacggggugc.....      | 0 |
| Gi5_8758991_x2.....gucgugggaacacggggAgccgaacu.....       | 1 |
| Gl1a_5944926_x2..gcgauccggGgacgucgug.....                | 1 |
| Gi2_10962123_x2.....gaCcacggggugccgaacu.....             | 1 |
| Gi3_28192372_x2.....gaucggagCcgucgugggaacacg.....        | 1 |
| Gi3_28215880_x2.....cggGgacgucgugggaacacggggg.....       | 1 |
| Gi2_10898025_x2.....ggaacacggggugccUaac.....             | 1 |
| Gi2_10959753_x2.....gucgugggaacaUggggugc.....            | 1 |
| Gi2_10938781_x2.....gaAcggagacgucgugggaacacggg.....      | 1 |
| Gi5_8766015_x2.....aucggagacgucgugggUacacg.....          | 1 |
| Gi1_4143619_x2.....gagacgucgugggaacacg.....              | 0 |
| Gi3_28180040_x2.....aucCgagacgucgugggaacacg.....         | 1 |
| Gi3_28009436_x2.....auAggagacgucgugggaacacggggg.....     | 1 |
| Gi5_8827441_x2.....gggaacacggggugccUaac.....             | 1 |
| Gi2_10925559_x2.....cgucgugggaacacggggUac.....           | 1 |
| Gi2_10972775_x2.....ucgugggaaUacggggugccgaac.....        | 1 |
| Gi3_28027242_x2.....cggagacgucgugggaacacAgggg.....       | 1 |
| Gi5_8734129_x2.....aucggCgacgucgugggaacacggg.....        | 1 |
| Gi3_28022108_x2.....cgugggaacacggggugccU.....            | 1 |
| Gi2_10871509_x2.....cggagacgucgugggaacC.....             | 1 |
| Gi3_28201312_x2.....aucggagacgucguggUaacac.....          | 1 |
| Gi1_4097115_x2.....uUgugggaacacggggugccgaac.....         | 1 |
| Gi5_8819689_x2.....ucggagacgucgugUgaacacg.....           | 1 |
| Gi5_8821309_x2.....gaucggagacgucgugggaacCc.....          | 1 |
| Gi2_10960373_x2.....aucggagacgucguggAaacac.....          | 1 |
| Gi2_10874309_x2.....ugggaacacggggugccgUac.....           | 1 |
| Gi2_10862497_x2.....agacgucgugggaacGcggggugc.....        | 1 |
| Gi5_8817775_x2.....cgugggaaUacggggugcc.....              | 1 |
| Gi3_28077452_x2.....gggaacacggggUaccgaac.....            | 1 |
| Gi3_28010524_x2.....gaucUgagacgucgugggaacacggggg.....    | 1 |
| Gi3_28042864_x2.....cgucgugUgaacacggggugccgaacu.....     | 1 |
| Gi4_565132_x2.....gugggaacacgggUgugccgaacu.....          | 1 |
| Gi2_10842719_x2.....gacgucAugggaacacggggugccga.....      | 1 |
| Gi5_8764985_x2.....aUacgucgugggaacacggggg.....           | 1 |
| Gi3_28147556_x2.....acgucgCgggaacacggggugcc.....         | 1 |
| Gl1a_5920836_x2.....ugggaacacggggugccgUacu.....          | 1 |
| Gi2_10863149_x2..cUaucggagacgucgugggaacac.....           | 1 |
| Gi3_28145966_x2.....aacacggggugccAaacuu.....             | 1 |
| Gi5_8722989_x2.....ugggGacacggggugccgaacu.....           | 1 |
| Gi2_10963773_x2.....gaucAgagacgucgugggaacac.....         | 1 |
| Gi3_28213426_x2.....ucgCgggaacacggggugccg.....           | 1 |
| Gi2_10968809_x2.....gugggaUcacggggugccg.....             | 1 |
| Gi1_4122181_x2..gcgauccggagacgucgug.....                 | 0 |
| Gi2_10886093_x2.....ggagacgucgugggaacacggggAgc.....      | 1 |
| Gi3_28128170_x2.....gaucggagGcugcugugggaacacggggugc..... | 1 |
| Gi2_10976107_x2.....aucggagacgucguggAaacacggggg.....     | 1 |

Gi2\_10900717\_x2.....gagacgucgugggGacacggggug..... 1  
Gi3\_28154800\_x2...gaucggagacgucGgggaacacggggu..... 1  
Gi3\_28044390\_x2.....gucgugggaacacggggugccgG..... 1  
Gi1\_4108217\_x2.....gugggaacacggggGcgccaac..... 1  
Gi3\_28165908\_x2.....aaNacggggugccgaacuu..... 1  
Gi1\_4156945\_x2.....ucgugggaacacggggGgcc..... 1  
Gi5\_8778727\_x2.....gugggaacGcggggugccgaacuu..... 1  
Gi2\_10914495\_x2.....cgugUgaacacggggugccg..... 1  
Gi5\_8808773\_x2.....gucgugggGacacggggugccgaac..... 1  
Gi5\_8773599\_x2.....cgucgugggaacacggggGgccgaa..... 1  
Gi2\_10871667\_x2.....cUgagacgucgugggaacacggggugccgaac..... 1  
Gi3\_27996584\_x2.....Acgugggaacacggggugc..... 1  
Gi2\_10833283\_x2.....cgucgugggaacacggggugUcgaac..... 1  
Gi1\_4122201\_x2.....ugggaacaAggggugccgaacu..... 1  
Gi2\_10981571\_x2.....cgucgugggaacacggggugcUgaac..... 1  
Gi5\_8774193\_x2....aucggagacgucAugggaacacg..... 1  
Gi1\_4135163\_x2.....ugUgaacacggggugccg..... 1  
G1a\_5897378\_x2.....gggaacacgggUgugccgaacu..... 1  
Gi2\_10862627\_x2.....gacgucguggAaacacggggugccgaac..... 1  
Gi3\_28122416\_x2.....acgucguggCaacacggggugccgaac..... 1  
Gi3\_28128300\_x2.....cgucgugggaUcacggggugccg..... 1  
Gi1\_4158485\_x2.....gucgugggaacacggggugc..... 0  
Gi3\_28060006\_x2...gaucggagNcgucgugggaac..... 1  
G1a\_5896394\_x2...cgaucggGgacgucgugggaacacg..... 1  
Gi2\_10922361\_x2.....gggaacacggggGgccga..... 1  
Gi3\_27983876\_x2...Caucggagacgucgugggaacacggggugc..... 1  
Gi5\_8756465\_x2.....cgAgggaacacggggugcc..... 1  
Gi1\_4089943\_x2.....ugggaUcacggggugccgaacu..... 1  
Gi2\_10949825\_x2...gaucggagacgucguggAaacacggggugc..... 1  
Gi1\_4118011\_x2.....agacgucgNgggaacacggg..... 1  
Gi1\_4112933\_x2.....guggCaacacggggugccga..... 1  
Gi2\_10990765\_x2.....cgugggaacacAgggugccga..... 1  
Gi2\_10857187\_x2.....acgucguAggaacacggggugcc..... 1  
Gi2\_10873873\_x2...cgaucggCgacgucgugggaacacggg..... 1  
Gi2\_10889085\_x2.....gacgucgugggaacacggggugccgaCcu..... 1  
Gi3\_28198862\_x2.....gacgucgugggaacacggggGgc..... 1  
Gi3\_28031826\_x2.....ggagacgucgugUgaacacggggugccg..... 1  
Gi3\_28204770\_x2.....aAacgucgugggaacacggggugccgaac..... 1  
Gi3\_28235222\_x2.....ucgugggaacacggggGccgaacu..... 1  
Gi4\_563882\_x2.....cgugggaacGcggggugccgaacu..... 1  
Gi3\_28056580\_x2...cgaucggGgacgucgugggaacacg..... 1  
G1a\_5976004\_x2.....cgugggaacacggggugccgaaAu..... 1  
Gi2\_10932781\_x2.....ucgugggaacacggggugcAg..... 1  
Gi5\_8783105\_x2.....acgucgugggaacacggggAgccgaacu..... 1  
Gi2\_10913127\_x2.....agacgucgugggaacacggggGccga..... 1  
Gi3\_28192122\_x2.....acgucguggGcacacggggugccga..... 1  
Gi3\_28047122\_x2.....gacgucguggGcacacggggugccg..... 1

|                                                            |   |
|------------------------------------------------------------|---|
| Gi5_8782913_x2.....aucggagacgucguggAaacacgg.....           | 1 |
| Gi3_28015224_x2.....cgugggaacacggggugccgaacuu.....         | 0 |
| Gi2_10992093_x2.....gacgucgugggaacacggggugAc.....          | 1 |
| Gi2_10928321_x2.....ugggaCcacggggugccgaa.....              | 1 |
| Gi2_10947955_x2.....aucggagUcgucgugggaacacggg.....         | 1 |
| Gi2_10894573_x2.....gUgacgucgugggaacacggggugccgaacu.....   | 1 |
| Gi2_10944323_x2.....ugggaacacggggGgccg.....                | 1 |
| Gi1_4129401_x2.....uAggaacacggggugccg.....                 | 1 |
| Gi2_10979939_x2.....ggagacgucgugggaacacggggC.....          | 1 |
| Gi3_28166652_x2.....ggagacgucgugggGacacggggugccg.....      | 1 |
| Gi5_8793531_x2.....gugggCcacggggugccgaacuu.....            | 1 |
| Gi3_28252774_x2.....acguUgugggaacacggggugcc.....           | 1 |
| Gi3_28166032_x2.....gacgucgugggaacacggggugcGgaacu.....     | 1 |
| Gi4_560196_x2.....gugggaacacggAgugccgaa.....               | 1 |
| Gi1_4126445_x2.....gucgugggCcacggggugcc.....               | 1 |
| Gi2_10947027_x2.....cgugggaacacggggugcAg.....              | 1 |
| Gi5_8822455_x2.....ggaacacggggugccgaacuu.....              | 0 |
| Gi5_8753689_x2.....cgucgugggaacacggggugccgaaA.....         | 1 |
| Gi3_28036890_x2.....ggagacgucgCgggaacacg.....              | 1 |
| Gi3_28114162_x2.....acgucgugggCcacggggugccgaac.....        | 1 |
| Gi3_27992106_x2.....agacgucgugggaacGcggg.....              | 1 |
| Gi2_10898621_x2.....gugggaacacgggUugccgaac.....            | 1 |
| Gi2_10901739_x2.....Aaucggagacgucgugggaac.....             | 1 |
| Gi2_10920981_x2.....cgugggaacacggggugccCaac.....           | 1 |
| Gi1a_5950514_x2.....aucggagaUgucgugggaacacggggg.....       | 1 |
| Gi5_8772565_x2cugcgaucggagacgucgC.....                     | 1 |
| Gi2_10860083_x2.....cggagacgucgugggaaUacg.....             | 1 |
| Gi1_4112751_x2.....Gcucgugggaacacggggugccg.....            | 1 |
| Gi1a_5888630_x2.....Caucggagacgucgugggaacacggggg.....      | 1 |
| Gi2_10956327_x2.....cgucgugggaacaUggggugccgaac.....        | 1 |
| Gi2_10967435_x2.....aucggaUacgucgugggaacacggggugc.....     | 1 |
| Gi3_27997400_x2.....cgucgugggaacacggggugcAgaac.....        | 1 |
| Gi2_10913015_x2.....cggagacgucgugggaacacggggC.....         | 1 |
| Gi3_28183690_x2.....gucAugggaacacggggugc.....              | 1 |
| Gi2_10960639_x2.....gggaacacgggCugccgaac.....              | 1 |
| Gi2_10960419_x2.....gucCugggaacacggggugccgaacu.....        | 1 |
| Gi5_8781643_x2.....acgucgugggaacacggggGgccgaac.....        | 1 |
| Gi1_4100793_x2.....uUggagacgucgugggaacacggggugccgaacu..... | 1 |
| Gi3_28256614_x2.....cggagacgCcgugggaacacggggugccga.....    | 1 |
| Gi2_10914777_x2.....aucggagacgucgugggaaAacggg.....         | 1 |
| Gi2_10895655_x2.....gaucggagacgucgugggaacacggAgugc.....    | 1 |
| Gi1_4137241_x2.....cgugUgaacacggggugccga.....              | 1 |
| Gi1_4117687_x2.....ugggaacGcggggugccgaac.....              | 1 |
| Gi2_10935153_x2.....aucggagacgucguggAaacacggggugcc.....    | 1 |
| Gi2_10937039_x2.....Uagacgucgugggaacacggggugccgaa.....     | 1 |
| Gi3_28151324_x2.....gaacacggggCgccgaacuu.....              | 1 |
| Gi5_8806367_x2.....gugggaacacggggCgccgaacuu.....           | 1 |

|                                                         |   |
|---------------------------------------------------------|---|
| Gi5_8820403_x2.....agacgucgugggaacaUggggugccgaacu.....  | 1 |
| Gi1_4157775_x2.....ucggagacgucgugggaGcacg.....          | 1 |
| Gi1_4157797_x2.....gugCgaacacggggugccgaacu.....         | 1 |
| Gi3_28001992_x2.....gacgucgugAgaacacggggugccgaacu.....  | 1 |
| Gi2_10864739_x2.....Gggagacgucgugggaacacggggug.....     | 1 |
| Gi3_28024446_x2.....auUggagacgucgugggaacacggggug.....   | 1 |
| Gi3_28226406_x2.....cgucgugggaaAacggggugccgaac.....     | 1 |
| Gi3_28027914_x2.....ucggagacgucgugggaGcacggggugcc.....  | 1 |
| Gi3_28067948_x2.....aucCgagacgucgugggaacacgggggu.....   | 1 |
| Gi2_10854579_x2.....cguNggaacacggggugccg.....           | 1 |
| Gi2_10915455_x2.....gaacacggNgugccgaac.....             | 1 |
| Gi3_28203016_x2.....gacguUgugggaacacggggugccgaac.....   | 1 |
| Gi5_8798069_x2.....acacggggugccgaacuC.....              | 1 |
| Gi1_4113937_x2.....gucgugggaaUacggggugccgaacu.....      | 1 |
| Gi3_28155664_x2.....acgucgugggaacacggggGgccg.....       | 1 |
| Gi5_8800503_x2.....agacgucgugggaacacAgggugc.....        | 1 |
| Gi1_4094605_x2.....gucgugggGacacggggug.....             | 1 |
| Gi2_10834151_x2.....ggagacgucgugggaacacgggg.....        | 0 |
| G1a_5957082_x2...gaucggagGcgcgucguggaa.....             | 1 |
| Gi3_28098124_x2.....ggaacacCggggugccgaac.....           | 1 |
| Gi3_28023966_x2.....cggagacgucgugggaacacggc.....        | 1 |
| G1a_5973040_x2.....ggagacgucguAggaacacggggugcc.....     | 1 |
| Gi5_8755197_x2...gaucggagacgucgugggaGcacg.....          | 1 |
| Gi3_28042172_x2.....gggaacGcggggugccga.....             | 1 |
| Gi5_8810231_x2.....gugggGacacggggugccgaacu.....         | 1 |
| Gi2_10882243_x2.....ggagacgucgugggaacCcgggugc.....      | 1 |
| Gi1_4147283_x2.....Agucgugggaacacggggugccgaacu.....     | 1 |
| Gi5_8777473_x2.....gggaacacggggugccgGa.....             | 1 |
| Gi2_10987301_x2.....cggagacgucguAggaacac.....           | 1 |
| Gi2_10842217_x2.....agacgucgugggaGcacggggugccgaacu..... | 1 |
| Gi3_28161866_x2.....gucgugggaacacggggugGcgaac.....      | 1 |
| G1a_5948222_x2.....gugggGacacggggugccgaac.....          | 1 |
| Gi5_8776649_x2.....gggaacacggggugccCaacu.....           | 1 |
| Gi5_8793059_x2.....ugggaacacggAgugccgaac.....           | 1 |
| Gi2_10897277_x2.....Ugacgucgugggaacacggggug.....        | 1 |
| Gi5_8737109_x2.....cgucgugggaacacggggGgccgaac.....      | 1 |
| G1a_5937186_x2...gGucggagacgucgugggaacacg.....          | 1 |
| Gi3_28128256_x2...gcgauUggagacgucgugggaacacggg.....     | 1 |
| Gi1_4103357_x2.....ggUgacgucgugggaacacgggggu.....       | 1 |
| Gi3_28222656_x2.....ucggagacNucgugggaacacggggugcc.....  | 1 |
| G1a_5978824_x2.....gaacacgAggugccgaacu.....             | 1 |
| Gi1_4136947_x2.....gucgugggaGcacggggugccgaac.....       | 1 |
| Gi5_8770265_x2.....ugggaacacggggugGcgaacu.....          | 1 |
| Gi5_8768759_x2.....ggaacacggggugccgaa.....              | 0 |
| Gi2_10876763_x2.....acgucgugggaacUcggggugccgaacu.....   | 1 |
| Gi5_8755091_x2.....gacgucgugggaacacggggugccAaacu.....   | 1 |
| Gi2_10900525_x2.....gugggaacacUgggugccgaa.....          | 1 |



Gi3\_28014214\_x2.....gggaacaAggggugccga..... 1  
Gi3\_28258590\_x2.....agacgucgNgggaacacggggugccga..... 1  
Gi2\_10946765\_x2.....aucggagacgucgugggaacaUggggugcc..... 1  
Gi5\_8787401\_x2.....aucggagacgucgugggaacGcg..... 1  
Gi3\_28193986\_x2.....auAggagacgucgugggaacac..... 1  
Gi3\_28202836\_x2.....cggagacgucguUggaacacggggugcc..... 1  
Gi3\_27989034\_x2.....gucgugggaaAacggggugc..... 1  
Gi2\_10896027\_x2.....aucggagaUgucgugggaacacggggg..... 1  
Gi1\_4126403\_x2.....acacggggugccgaacAu..... 1  
Gi2\_10837335\_x2.....ggaacacggCGugccgaac..... 1  
Gi3\_28222032\_x2.....agacgucgugggaacacAggggugccgaac..... 1  
Gi2\_10842695\_x2.....uGggagacgucgugggaacacggggugc..... 1  
Gi2\_10908181\_x2.....cgucgCgggaacacggggugccgaa..... 1  
Gi2\_10854459\_x2.....gacgucguAggaacacggggugccg..... 1  
Gi3\_28135296\_x2.....uggaacaacggggugAcg..... 1  
Gi2\_10874129\_x2.....acgucgugggaacacggggugGc..... 1  
Gi2\_10991605\_x2.....aucggagacgucgugggGacacgggg..... 1  
Gi2\_10984317\_x2.....cgucgugGCaacacggggugccgaacu..... 1  
Gi2\_10863939\_x2.....gaucggagacgucgugAga..... 1  
Gi2\_10855313\_x2.....gggaacacggggugccgaUcu..... 1  
G1a\_5883252\_x2.....ucgugggaacGcggggugccgaacu..... 1  
Gi2\_10963917\_x2.....aucggagacgucgugggaUcacggggugc..... 1  
G1a\_5932040\_x2.....gucgugggaacacggggGcgggaacu..... 1  
Gi5\_8801329\_x2.....cUgagacgucgugggaacacggggugccga..... 1  
Gi2\_10859427\_x2.....Uucggagacgucgugggaacacggggug..... 1  
Gi2\_10911607\_x2.....aucggagacgucgugggaUcacggggugcc..... 1  
Gi3\_27994554\_x2.....Aggagacgucgugggaacacggggugcc..... 1  
Gi3\_28069964\_x2.....gaucggagNcgucguggg..... 1  
Gi5\_8795007\_x2.....guAggaacacggggugccgaacuuu..... 1  
Gi2\_10832955\_x2.....ggaaAacggggugccgaacu..... 1  
Gi2\_10948559\_x2.....gugNgaacacggggugccga..... 1  
Gi2\_10956509\_x2.....gucgugAgaacacggggugc..... 1  
Gi3\_28251820\_x2.....aGgucgugggaacacggggugc..... 1  
Gi2\_10882223\_x2.....gaucggagacgucgugggaacacggU..... 1  
Gi2\_10990875\_x2.....gucNugggaacacggggugccgaacu..... 1  
G1a\_5918378\_x2.....cgugCgaacacggggugccgaacu..... 1  
Gi3\_28247040\_x2.....cAgagacgucgugggaacacggggugccga..... 1  
Gi1\_4102039\_x2.....gugggaacacggggGgcc..... 1  
Gi3\_28068170\_x2.....gacgucgugggaUacggggugccgaacu..... 1  
Gi1\_4134495\_x2.....gaCcgagacgucguggg..... 1  
G1a\_5969678\_x2.....Cgaacacggggugccgaac..... 1  
Gi1\_4146693\_x2.....Aucgugggaacacggggug..... 1  
Gi3\_27980066\_x2cugcgaucggCgacgucg..... 1  
Gi5\_8725591\_x2.....cgucgugggUacacggggugccgaacu..... 1  
Gi1\_4128049\_x2.....ggaacacggggugccgGac..... 1  
Gi2\_10919175\_x2.....gagacgucgugAgaacacggggugc..... 1  
Gi2\_10956831\_x2.....cgucgugggaacacggggAgccga..... 1

|                                                          |   |
|----------------------------------------------------------|---|
| Gi1_4157585_x2.....gagacgucgCggaacacggggugccgaacu.....   | 1 |
| G1a_5939628_x2.....gggaacCggggugccgaacu.....             | 1 |
| Gi1_4156311_x2.....Agggaacacggggugccgaacu.....           | 1 |
| Gi5_8749499_x2.....gggaacacggggugccUaacu.....            | 1 |
| G1a_5914708_x2.....gugggaacacggggugccAaac.....           | 1 |
| G1a_5877924_x2.....ugggaacacggggGgccgaacu.....           | 1 |
| Gi3_28145340_x2.....ugggaacacggggugccgaacu.....          | 0 |
| G1a_5923610_x2.....aucggagacgucguAggaacacggggugcc.....   | 1 |
| Gi2_10877331_x2.....gucgGgggaacacggggugcc.....           | 1 |
| Gi2_10854669_x2.....aucggagacgucgugggaaUacggggugcc.....  | 1 |
| Gi3_28118500_x2.....ucggagacgucgugggaaacacAgggg.....     | 1 |
| Gi2_10922995_x2.....acgucguAggaacacggggugccgaac.....     | 1 |
| Gi2_10897301_x2.....cgAagacgucgugggaaacacggggugcc.....   | 1 |
| G1a_5952608_x2.....aucggagacgucgugggaaacCggggugcc.....   | 1 |
| Gi2_10919611_x2.....gaacacggggugccGac.....               | 1 |
| Gi1_4100663_x2..Ucgauccgagacgucgugggaaacacggggugcc.....  | 1 |
| Gi5_8723941_x2.....gagacgucNugggaacacggggugccgaacu.....  | 1 |
| Gi3_28048580_x2..gGgauccgagacgucgugggaaacac.....         | 1 |
| Gi1_4120607_x2.....ucguAggaacacggggugcc.....             | 1 |
| Gi4_565018_x2.....cgucgugggGacacggggugccga.....          | 1 |
| Gi2_10870553_x2.....gugggCacacggggugccg.....             | 1 |
| Gi2_10969407_x2.....acUucgugggaaacacggggugcc.....        | 1 |
| Gi2_10901283_x2.....aucgAagacgucgugggaaacacggg.....      | 1 |
| Gi2_10986393_x2.....agacgucgCggaacacggggugc.....         | 1 |
| Gi3_28187958_x2.....ugggaacacggggugccCaac.....           | 1 |
| Gi2_10962533_x2.....gagacgucgugggGacacggggugcc.....      | 1 |
| Gi1_4139175_x2.....acgucgugggaaacacggggCgccgaac.....     | 1 |
| Gi5_8749845_x2.....gagGcugcugggaaacacggggugcc.....       | 1 |
| Gi1_4126397_x2..cUaucggagacgucgugggaaacacggggg.....      | 1 |
| G1a_5928784_x2.....guggCaacacggggugccgaacu.....          | 1 |
| Gi1_4090129_x2.....gacgucgugggaaacacgggAugcc.....        | 1 |
| Gi3_28094410_x2.....agacgucgugggaaacacggggGgccgaacu..... | 1 |
| Gi2_10977289_x2.....gacgucgugggaaacacggggugccgaCc.....   | 1 |
| Gi2_10939799_x2.....gacgucgugggGacacgggg.....            | 1 |
| Gi3_28197248_x2.....gacgucgugggaaUacggggugccgaac.....    | 1 |
| Gi1_4148643_x2.....cguNgugggaaacacggggugccgaacu.....     | 1 |
| Gi3_28224952_x2.....agacgCcgugggaaacacggggugccgaac.....  | 1 |
| Gi2_10837971_x2.....acgucgugggaaacaUggggugcc.....        | 1 |
| Gi1_4112021_x2.....agacgucgugggaaacacggggugccgU.....     | 1 |
| G1a_5968046_x2.....aucggagacgucgCggaacacggggugcc.....    | 1 |
| Gi1_4130177_x2.....Uagacgucgugggaaacacggggugccga.....    | 1 |
| Gi2_10926605_x2.....gugggaacacggggugGcg.....             | 1 |
| Gi3_28004490_x2.....gggaacacggCgugccgaac.....            | 1 |
| Gi1_4106151_x2.....cgugggaaacacggggugccGac.....          | 1 |
| Gi3_28194714_x2.....gacgucgugggUacacggggugccgaacu.....   | 1 |
| Gi2_10984277_x2.....cgugggaaacacggggugAcgaac.....        | 1 |
| Gi1_4121825_x2.....gugggaacacggggugccgaaAuu.....         | 1 |

|                                                          |   |
|----------------------------------------------------------|---|
| Gi5_8768837_x2.....gugggaacacggggugUc.....               | 1 |
| Gi1_4092417_x2.....acgAcgugggaacacggggugccgaacu.....     | 1 |
| Gi3_28187040_x2.....ugggaacacgUggugccg.....              | 1 |
| Gi2_10934883_x2.....cggagacgucgugggaacacgg.....          | 0 |
| Gi2_10900583_x2.....gaucggagacgucGggga.....              | 1 |
| Gi3_28230044_x2.....acgucgugggaacacggggUAccgaac.....     | 1 |
| Gi1_4142555_x2.....acgucgugggaacacgUggugcc.....          | 1 |
| Gi2_10940941_x2.....ugAgaacacggggugccgaa.....            | 1 |
| Gi5_8786021_x2.....guggUaacacggggugcc.....               | 1 |
| Gi1_4128757_x2.....Aagacgucgugggaacacggggugccgaacu.....  | 1 |
| Gi2_10876803_x2.....ggagacgucgugggaacacgAgggugc.....     | 1 |
| Gi5_8770135_x2.....cUgagacgucgugggaacacggg.....          | 1 |
| Gi1_4132859_x2.ugcgauccggagacgucgu.....                  | 0 |
| Gi1_4150153_x2.....gaGcacggggugccgaac.....               | 1 |
| Gi1_4141075_x2.....gaucggagacgucgugggaacacggggug.....    | 0 |
| Gi1_4156279_x2.....Ccgugggaacacggggugccgaac.....         | 1 |
| Gi5_8807673_x2.....cgugUgaacacggggugccgaacuu.....        | 1 |
| Gi3_28085854_x2.....cggagacgucgugAgaacacgggg.....        | 1 |
| Gi1_4090067_x2.....gacgucgugggaacacggggugUcgaacu.....    | 1 |
| Gi2_10885567_x2.....cggagacgucgugggaGcacgggg.....        | 1 |
| Gi4_559694_x2.....cgugggaacacgAgggugccgaacu.....         | 1 |
| Gi3_28186738_x2.....gucgugggaacacgCggugccgaac.....       | 1 |
| Gi1_4139205_x2.....aucggagacgucgugggaacacggggCgc.....    | 1 |
| Gi3_28199500_x2.....cgauccggaNacgucgugg.....             | 1 |
| Gi1_4097397_x2.....ugggaacacggggugccgC.....              | 1 |
| Gi3_28074076_x2.....ucgugggaacacggggAgc.....             | 1 |
| G1a_5908106_x2.....Nugggaacacggggugccgaacu.....          | 1 |
| G1a_5952398_x2.....ugggaacacggggugccga.....              | 0 |
| Gi2_10946283_x2.....ucgugggaacacUgggugccg.....           | 1 |
| G1a_5896312_x2.....aucggagacgucguggGcacacgg.....         | 1 |
| Gi5_8757061_x2.....cgucgugggaacacggggugccgCa.....        | 1 |
| Gi5_8720715_x2.....gaucggagacgucgugggaGcac.....          | 1 |
| G1a_5938698_x2.....gugggaacacggggugccgCac.....           | 1 |
| Gi3_28134156_x2.....gUagacgucgugggaacacggggug.....       | 1 |
| Gi5_8812281_x2.....cgugUgaacacggggugcc.....              | 1 |
| Gi5_8747075_x2.....Aaucggagacgucgugggaacacgg.....        | 1 |
| Gi2_10959045_x2.....cAucgugggaacacggggugccgaa.....       | 1 |
| Gi2_10976531_x2.....cgugggaaGacggggugccgaac.....         | 1 |
| Gi5_8794129_x2.....gCcgugggaacacggggugccgaa.....         | 1 |
| Gi2_10917387_x2.....gucgugggCacacggggugccgaac.....       | 1 |
| Gi5_8718423_x2.....uggAaacacggggugccgaac.....            | 1 |
| Gi3_28022922_x2.....cgugggaacaAggggugcc.....             | 1 |
| G1a_5922106_x2.....guUggaacacggggugcc.....               | 1 |
| Gi1_4092611_x2.....gucgugggaaUacggggugcc.....            | 1 |
| Gi1_4138671_x2.....cUgagacgucgugggaacacggggugccgaac..... | 1 |
| Gi2_10896331_x2.....gucAugggaacacggggugccgaac.....       | 1 |
| Gi2_10955833_x2.....ucggGgacgucgugggaacacgggg.....       | 1 |

Gi3\_28148690\_x2.....gagacgucgugggaacCcg..... 1  
Gi3\_28147940\_x2.....acgucgugggaacacAgggugccgaa..... 1  
Gi1\_4106059\_x2....aucggagaNgucgugggaacac..... 1  
Gi3\_28211088\_x2.....agacgucgugggaacacggggugccgUac..... 1  
Gi2\_10992239\_x2.....gaucggGgacgucgugggaac..... 1  
Gi2\_10858545\_x2.....gCgaacacggggugccga..... 1  
Gi3\_28181102\_x2.....Cgagacgucgugggaacacg..... 1  
Gi3\_28052084\_x2.....gagacAucgugggaacacggggugccgaacu..... 1  
Gi1\_4126579\_x2.....cgugggaacacAgggugccgaacuu..... 1  
Gi3\_28176316\_x2.....gagacgucguggAaacacggggugccgaacu..... 1  
Gi5\_8765133\_x2.....ucgugggaacacggggugGcgaacu..... 1  
Gi2\_10969295\_x2....aucggagacgucgugggaacCcg..... 1  
Gi2\_10925227\_x2.....guCggaacacggggugccgaac..... 1  
Gi3\_28135038\_x2.....aUgucgugggaacacggggugccgaa..... 1  
Gi2\_10908455\_x2...gauUggagacgucgugggaacacgggg..... 1  
Gi2\_10873901\_x2....aucggaAacgucgugggaacacg..... 1  
Gi1\_4149933\_x2.....Ggggaacacggggugccgaa..... 1  
Gi1\_4124125\_x2.....cgugggaNacggggugccgaacuu..... 1  
Gi2\_10990889\_x2.....gacgucgCgggaacacggggg..... 1  
Gi2\_10967795\_x2....aucggagacgucguggCaacacggggg..... 1  
Gi5\_8719899\_x2....Gucggagacgucgugggaaca..... 1  
Gi3\_28068040\_x2....gaucggagCcgucgugggaacacggg..... 1  
Gi1\_4120099\_x2.....gaacacggggugccgaaGu..... 1  
Gi3\_28133388\_x2.....gucgugggaacacggggCgc..... 1  
Gi1\_4118541\_x2.....cgugggaacacggggGuccgaacu..... 1  
Gi1\_4132777\_x2.....ucgugggaacacgAggugccgaac..... 1  
Gi2\_10970081\_x2.....gacgucgugAgaacacggggugcc..... 1  
Gi3\_28243518\_x2.....aUacgucgugggaacacgggg..... 1  
Gi3\_28064918\_x2....cgAagacgucgugggaacacg..... 1  
Gi1\_4096423\_x2.....gugggaacacggggugccCaacu..... 1  
Gi2\_10976041\_x2...gaucggagacgucguggAaacac..... 1  
Gi3\_28233724\_x2.....acgucgugggGacacggggugccga..... 1  
Gi3\_28055120\_x2....Caucggagacgucgugggaaca..... 1  
Gi1\_4123699\_x2.....cgugggaacacggggGuAccg..... 1  
Gi2\_10846387\_x2.....cggagacgucgugggaacacggggCg..... 1  
Gi2\_10857817\_x2...gaucggagacgucguAgggaacacgggggug..... 1  
Gi3\_28029820\_x2.....cggagGcgucgugggaacacg..... 1  
G1a\_5896378\_x2...cgaucggagacgCcgugg..... 1  
Gi3\_28066582\_x2.....Agagacgucgugggaaca..... 1  
Gi3\_28202132\_x2....aucggagCcgucgugggaacac..... 1  
Gi2\_10831719\_x2.....agacgucgugAgaacacggggugcc..... 1  
Gi3\_28100736\_x2.....gagacgucgAgggaacac..... 1  
Gi2\_10989061\_x2.....gagacgucgugggaacGcggggugccg..... 1  
G1a\_5950380\_x2.....aacacggggugccUaacu..... 1  
Gi3\_28074980\_x2.....cguAgugggaacacggggugcc..... 1  
Gi3\_28227338\_x2.....cgucgugggaacacggggGuAccga..... 1  
Gi2\_10907903\_x2.....ggagGcgucgugggaacacg..... 1

Gi3\_28150550\_x2.....agacgucgCgggaacacggggugcc..... 1  
 Gi4\_553760\_x2.....cgugggaacacggggugccgaacA..... 1  
 Gi5\_8780973\_x2.....gAgggaacacggggugccgaacu..... 1  
 Gi2\_10829211\_x2.....gucgugggaacacUgggugccgaacu..... 1  
 G1a\_5938540\_x2.....ucgugggaNcacggggugccgaac..... 1  
 G1a\_5912624\_x2.....Caucggagacgucguggga..... 1  
 Gi3\_28198522\_x2.....cggagacgucgCgggaacacgggg..... 1  
 Gi3\_28167592\_x2.....agacgucgugggaacacgggAugccgaacu..... 1  
 Gi3\_28160022\_x2.....gucguggAaacacggggugccga..... 1  
 Gi3\_28208054\_x2.....gUucggagacgucgugggaacacggggugc..... 1  
 Gi3\_28023034\_x2.....acgucgugggaacacggggugUcgaac..... 1  
 Gi5\_8802721\_x2.....Gcacggggugccgaacu..... 1  
 Gi5\_8826279\_x2.....gugggaacacgggAugccgaac..... 1  
 Gi1\_4103511\_x2.....cggagacgucgugggaacacgCg..... 1  
 Gi1\_4153625\_x2.....gugggaacacggggugccgaGu..... 1  
 Gi2\_10889919\_x2.....ucggagacgucguAggaaca..... 1  
 Gi3\_28036428\_x2.....gugggaacNcggggugccgaacu..... 1  
 Gi2\_10960601\_x2.....aucggagacgucgugggaacacgggguA..... 1  
 Gi3\_28014834\_x2.....cggagacgucgugggCacacggggg..... 1  
 Gi1\_4132923\_x2.....ggaacacggggGgccgaac..... 1  
 Gi1\_4131425\_x2.....cCucgugggaacacggggugcc..... 1  
 Gi2\_10878065\_x2.....cgugggaacacgUggugccg..... 1  
 Gi2\_10961669\_x2.....Aucgugggaacacggggugccg..... 1  
 Gi2\_10921533\_x2.....ugggaacacAgggugccgaa..... 1  
 Gi3\_28126384\_x2.....aucggagacgucgugggaUcacgg..... 1  
 Gi1\_4151351\_x2.....Ggugggaacacggggugcc..... 1  
 Gi4\_557642\_x2.....aucggagacgucgugggaacacggggugcA..... 1  
 Gi3\_28002992\_x2.....Ncugggaacacggggugccgaac..... 1  
 Gi1\_4130611\_x2.....cgucgugggaGcacggggugcc..... 1  
 Gi2\_10842315\_x2.....cgugggaacacggggugAcg..... 1  
 Gi3\_28222754\_x2.....aucggagacgAcgugggaacacgggg..... 1  
 Gi3\_28054754\_x2.....ucggagacgucgugggGacacggggugcc..... 1  
 Gi3\_28183748\_x2.....ucgCgggaacacggggugccgaa..... 1  
 Gi5\_8812499\_x2.....guAggaacacggggugccgaa..... 1  
 Gi3\_28028284\_x2.....aucggagacgucguCggaacacg..... 1  
 Gi5\_8718899\_x2.....ggagGcgucgugggaacacggggugccgaacu..... 1  
 Gi5\_8730531\_x2.....cgugggaacacggggugccgC..... 1  
 Gi1\_4113107\_x2.....aucggagCcgucgugggaacacg..... 1  
 Gi5\_8752233\_x2.....cgucUugggaacacggggugc..... 1  
 Gi3\_28253040\_x2.....aucggagacgucguggAaacacg..... 1  
 Gi1\_4121999\_x2.....gggaacacggggugccgU..... 1  
 Gi3\_28049886\_x2.....cggagacguAgugggaacacggggg..... 1  
 Gi3\_28098884\_x2.....gaucggagacgucAugggaacacg..... 1  
 Gi3\_27995456\_x2.....cgaucggagacgucgugggCacacg..... 1  
 Gi3\_28077936\_x2.....cAgagacgucgugggaacacggg..... 1  
 Gi3\_28049248\_x2.....gaucggagacgucAugggaacacg..... 1  
 Gi3\_28019934\_x2.....aucggaAacgucgugggaacacgggg..... 1

Gi3\_28164938\_x2.....gacgucAugggaacacggggu..... 1  
Gi2\_10874763\_x2.....agacgucgugggaCcacgggugccgaacu..... 1  
Gi2\_10912911\_x2.....ugggaacacggggCgccga..... 1  
Gi5\_8773353\_x2.....Ugugggaacacggggugcc..... 1  
Gi2\_10925553\_x2.....gagacgucgugggaacac..... 0  
Gi4\_557216\_x2.....gugggGacacggggugccgaa..... 1  
Gi2\_10845181\_x2.....cgugggaacaUggggugc..... 1  
Gi3\_27995884\_x2.....gaacUcggggugccgaac..... 1  
Gi1\_4115813\_x2.....gggaaAacggggugccgaacu..... 1  
Gi1\_4138001\_x2.....aucggagacgucgugggaaUacggggugcc..... 1  
Gi2\_10916001\_x2.....gaucggagacgucAugggaacac..... 1  
Gi3\_28017160\_x2.....ggagacgucgugggaacacggggAgcc..... 1  
Gi2\_10946067\_x2.....aucggagacUucgugggaacacggggugcc..... 1  
Gi2\_10877347\_x2.....cgucgugggaGcacggggug..... 1  
Gi1\_4120539\_x2.....gGucggagacgucguggg..... 1  
Gi2\_10843689\_x2.....cgucgugggaacacAgggugcc..... 1  
Gi5\_8743073\_x2.....cgucgugggaacacggggugAcgaacu..... 1  
Gi3\_28059268\_x2.....acgucgugggaacacggggCgc..... 1  
Gi3\_28258036\_x2.....gucgugggaaAacggggugccga..... 1  
Gi5\_8783353\_x2.....gggaacacggggUaccgaac..... 1  
Gi3\_28070634\_x2.....gggaacacggggugccgaU..... 1  
Gi3\_28185946\_x2.....cgaucggagGcugcugggg..... 1  
Gi1\_4132683\_x2.....aCcgagacgucgugggaacacgg..... 1  
Gi3\_28127186\_x2.....ggagacgCcgugggaacacggggugcc..... 1  
G1a\_5980070\_x2.....gaucggagacgucgugggaacGcggggu..... 1  
G1a\_5879238\_x2.....gggaacacggAgugccgaacu..... 1  
Gi3\_28017780\_x2.....acgucgugggaacaUggggugcc..... 1  
Gi5\_8818889\_x2.....aucggagacgucgugggaCcacggggugcc..... 1  
Gi3\_28043342\_x2.....aucggagacgucgugggCcacgggg..... 1  
G1a\_5911814\_x2.....gggNacacggggugccgaacu..... 1  
Gi3\_28130550\_x2.....gaaNacggggugccgaac..... 1  
Gi5\_8808935\_x2.....aucgUagacgucgugggaacacgg..... 1  
Gi3\_28185294\_x2.....gUcugcugugggaacacgg..... 1  
Gi2\_10912177\_x2.....cgucgugggaacGcggggugccgaac..... 1  
Gi3\_28227174\_x2.....ggagacgucAugggaacacg..... 1  
Gi3\_28169928\_x2.....gaucggagaUgucguggg..... 1  
Gi3\_28187906\_x2.....gacgucgugggaacCcggg..... 1  
Gi2\_10836367\_x2.....ucggagacgucgugggaGcacggggugc..... 1  
Gi3\_28133770\_x2.....ggUgacgucgugggaaca..... 1  
Gi3\_28011902\_x2.....gaUacgucgugggaacacggggugccgaacu..... 1  
Gi3\_28096346\_x2.....cgaucggagacgucgugggGacacgg..... 1  
Gi4\_561452\_x2.....acgucgugggaacacggggugccgaaAu..... 1  
Gi3\_28174772\_x2.....gacgucgugggaacacggggugcAgaac..... 1  
Gi2\_10981223\_x2.....gugggaacacCggggugccgaac..... 1  
Gi5\_8718839\_x2.....ucgugCgaacacggggugccgaacu..... 1  
Gi2\_10909523\_x2.....gucgugggaacacAgggugc..... 1  
Gi5\_8745129\_x2.....agacgucgugggaacacggggugccgaacG..... 1

G1a\_5952064\_x2.....gaUcacggggugccgaacu..... 1  
 G1a\_5892716\_x2....aAcggagacgucgugggaacacggggugcc..... 1  
 Gi3\_28233948\_x2....gaucggagacguUgugggaacacgggggu..... 1  
 Gi2\_10890059\_x2.....acgucgugggaaAacggggugccgaacu..... 1  
 Gi4\_554166\_x2.....uGgugggaacacggggugccgaacu..... 1  
 Gi5\_8780103\_x2.....cgugggGacacggggugccga..... 1  
 Gi1\_4105997\_x2....aucggagGcgucgugggaacacg..... 1  
 Gi3\_28152780\_x2.....acgucgugggaacacgggAugccgaac..... 1  
 Gi3\_28032586\_x2.....gggaacaGggggugccgaacu..... 1  
 Gi2\_10944583\_x2.....cgugggaaUacggggugcc..... 1  
 Gi1\_4144103\_x2.....cgugggaacacggggGgcccga..... 1  
 Gi2\_10987353\_x2....ucggagacgucgugggGacacggggugcc..... 1  
 Gi3\_28111116\_x2....gaucggagacgucgugggCaca..... 1  
 Gi2\_10951523\_x2.....acgucgugggaacCcggggu..... 1  
 Gi3\_28210908\_x2.....cgugggaacacggggUccga..... 1  
 Gi5\_8764251\_x2.....gucUugggaacacggggugccgaacu..... 1  
 Gi5\_8797871\_x2.....Gggagacgucgugggaacacggg..... 1  
 G1a\_5883136\_x2.....guggUaacacggggugccga..... 1  
 Gi3\_28156114\_x2.....cgGcgugggaacacggggugccgaa..... 1  
 G1a\_5905578\_x2.....cUugggaacacggggugccgaac..... 1  
 Gi2\_10833741\_x2.....ggagacguUgugggaacacggggug..... 1  
 Gi2\_10933493\_x2.....gugggaacacUgggugccgaac..... 1  
 Gi2\_10916439\_x2.....ugggaacacAgggugccg..... 1  
 Gi1\_4152849\_x2.....guggUaacacggggugccga..... 1  
 Gi2\_10941265\_x2.....cgucgugggaacCcgggg..... 1  
 Gi2\_10840855\_x2....aucggagacgucgugggaacacggggugcU..... 1  
 Gi1\_4091761\_x2.....gucgugggaacaUggggugcc..... 1  
 Gi5\_8796889\_x2.....cgucgugggaacacUgggugccgaacu..... 1  
 Gi3\_28237556\_x2.....cggagacgucgugggaacCcgggg..... 1  
 G1a\_5888844\_x2.....ggaacacgggAugccgaacu..... 1  
 Gi3\_28051548\_x2....ucggagacgucgugggaacGcg..... 1  
 Gi5\_8765195\_x2.....ucgugggaacacggggUaccgaac..... 1  
 Gi2\_10988925\_x2.....gagacgucGgggaacacggggugccgaacu..... 1  
 G1a\_5975062\_x2....gaCcgagacgucguggg..... 1  
 Gi3\_28008610\_x2.....gagacgucgugCgaacacggggugccg..... 1  
 Gi2\_10843303\_x2....aucggagacgucgugggaaAa..... 1  
 Gi2\_10940573\_x2.....cgugggaacacgUggugccgaa..... 1  
 Gi1\_4156795\_x2.....ucgugggaacacUgggugccgaac..... 1  
 Gi1\_4095909\_x2.....cgugggaacacggggugccgaUc..... 1  
 Gi1\_4140475\_x2.....cgugggaacacgAggugccgaa..... 1  
 Gi4\_566234\_x2....gaucggagacgucgugggaa..... 0  
 Gi5\_8733227\_x2.....Aagacgucgugggaacacggggugccgaacu..... 1  
 Gi2\_10979865\_x2....aucNgagacgucgugggaaca..... 1  
 Gi2\_10902581\_x2.....ucgugggaacacggggGgccc..... 1  
 Gi2\_10870177\_x2....aucggGgacgucgugggaacacggggugccgaacu..... 1  
 Gi3\_28062110\_x2....aucggagacgucgugUgaacacggg..... 1  
 Gi3\_28211394\_x2....ucggCgacgucgugggaacacg..... 1

Gi3\_28219220\_x2...Aaucggagacgucgugggaaacacggggugcc..... 1  
 Gi2\_10982137\_x2...cgaucggagacgucgugggacacacggg..... 1  
 Gi2\_10970827\_x2...Ggaucggagacgucgugggaaacacg..... 1  
 Gi2\_10992217\_x2...aucggagacgucgAgggaacacggggugc..... 1  
 G1a\_5891532\_x2.....ugggUacacggggugccgaacu..... 1  
 Gi5\_8784403\_x2.....cgugggaaacacggggugccAa..... 1  
 Gi2\_10875665\_x2...gaucggagacgucgugggaaUac..... 1  
 G1a\_5965470\_x2...Aaucggagacgucgugggaaacac..... 1  
 Gi3\_28119844\_x2...auAggagacgucgugggaaacacggggugcc..... 1  
 Gi3\_28004550\_x2.....gucgugggaaacacAgggugc..... 1  
 Gi1\_4094233\_x2.....gucgugggaaacacggggGg..... 1  
 Gi2\_10876505\_x2...uGggagacgucgugggaaacacggggg..... 1  
 Gi2\_10933579\_x2...gaucggagacgucgugggaaacaUg..... 1  
 Gi3\_28221606\_x2.....Aucgugggaaacacggggugccgaa..... 1  
 Gi2\_10990049\_x2.....ucgugggCacacggggugccgaac..... 1  
 Gi2\_10862737\_x2.....gagacguUgugggaaacacggggug..... 1  
 Gi5\_8820373\_x2.....cgAgggaacacggggugc..... 1  
 Gi2\_10935719\_x2...ggagacgucgugggaaacacgUggugc..... 1  
 Gi3\_28008462\_x2.....Cagacgucgugggaaacacg..... 1  
 G1a\_5914404\_x2.....aacacggggCgccgaacu..... 1  
 Gi5\_8725151\_x2.....uUggaacacggggugccga..... 1  
 Gi2\_10865109\_x2...ggagacgucgugggaaacacgggggAcc..... 1  
 Gi5\_8723707\_x2.....gugggaaacaUggggugccgaa..... 1  
 Gi2\_10986085\_x2.....Ngaacacggggugccgaac..... 1  
 Gi5\_8724907\_x2...aucggagacgucguAggaacacggggugc..... 1  
 Gi3\_28243380\_x2...agacgucgAgggaacacggggugccgaacu..... 1  
 Gi5\_8781473\_x2.....gaacacggggCgccgaac..... 1  
 Gi2\_10889157\_x2.ugUgaucggagacgucgugggaa..... 1  
 Gi3\_28054164\_x2.....gugggaaacaGggggugccgaa..... 1  
 G1a\_5911524\_x2.....Cugggaaacacggggugccgaac..... 1  
 Gi3\_27994090\_x2.....gacgucgugggGacacgg..... 1  
 Gi5\_8786763\_x2...Cucggagacgucgugggaaacacg..... 1  
 Gi5\_8775277\_x2.....cgugggaaUacggggugccgaac..... 1  
 Gi3\_28227286\_x2...gaucggagNcgucgugggaaacacgg..... 1  
 Gi5\_8811299\_x2.....ucgGggaaacacggggugccgaac..... 1  
 Gi1\_4157221\_x2.....gGgacgucgugggaaacacggggugccga..... 1  
 Gi5\_8814825\_x2.....guAgugggaaacacggggugccgaacu..... 1  
 Gi3\_28248462\_x2.....ggagacguNgugggaaaca..... 1  
 G1a\_5954882\_x2.....gucgugggaaacacggggGgccgaacu..... 1  
 Gi1\_4100263\_x2.....gugggaaacCggggugccgaac..... 1  
 Gi4\_562910\_x2.....cgugggaaacacggggugc..... 0  
 G1a\_5883766\_x2...aucggagacgucgugggaaacCcggg..... 1  
 Gi5\_8731191\_x2.....aacacggggCccgaacu..... 1  
 G1a\_5938504\_x2.....cgugggaaacCggggugc..... 1  
 Gi3\_28088352\_x2...gGcgugggaaacacggggugccgaacuu..... 1  
 G1a\_5925322\_x2.....ggaacacggAgugccgaacu..... 1  
 Gi4\_554044\_x2.....gucgugggNacacggggugccgaacu..... 1



Gi1\_4133543\_x2.....gggaUcacggggugccgaacu..... 1  
 Gi5\_8751919\_x2.....gucguggaacaacggggGgccgaac..... 1  
 Gi2\_10947361\_x2.....ggagacgucgAgggaacac..... 1  
 Gi5\_8829071\_x2.....gGcgugggaacaacggggugccgaa..... 1  
 Gi2\_10858699\_x2.....ggagacgucguggaacaacggggugcA..... 1  
 Gi3\_28257812\_x2.....acgucgugggaacCcggggugccgaa..... 1  
 Gl1a\_5939666\_x2.....aucggagaNgucguggaacaacggggugcc..... 1  
 Gi2\_10908593\_x2.....ucguggaNcacggggugcc..... 1  
 Gi2\_10848809\_x2.....cgUucggagacgucgugga..... 1  
 Gl1a\_5902340\_x2.....cgucguggaacaacggggGgccgaacu..... 1  
 Gi3\_28209402\_x2.....aucggagacgucgugAgaacaacggggugc..... 1  
 Gi5\_8802515\_x2.....ucguggaacaacggggugccgaa..... 0  
 Gl1a\_5927080\_x2.....guggaacaacgggCugccgaacu..... 1  
 Gi1\_4135611\_x2.....cguggaacaacggggugccgaU..... 1  
 Gi3\_28124784\_x2.....gagacgucguggaGcacggggugccgaacu..... 1  
 Gi1\_4153443\_x2.....ggGgacgucguggaacaacggggugcc..... 1  
 Gl1a\_5949266\_x2.....gaucUgagacgucguggaacaacggggg..... 1  
 Gi2\_10835597\_x2.....cAugggaacaacggggugccga..... 1  
 Gi5\_8735085\_x2.....cgucguggaacaGggggugccgaacu..... 1  
 Gi2\_10907027\_x2.....gacgucguggaCcacggggugccg..... 1  
 Gi3\_28120730\_x2.....gacgucguggaacaacggggC..... 1  
 Gi3\_28047534\_x2.....Nugggaacaacggggugccgaa..... 1  
 Gi4\_559224\_x2.....guUggaacaacggggugccgaac..... 1  
 Gi2\_10971685\_x2.....cgucguggaacaacggggugAC..... 1  
 Gi2\_10834125\_x2.....gggaacaacggggAgccgaac..... 1  
 Gi5\_8817015\_x2.....cgaucggagacgCcuguggaacaacgggg..... 1  
 Gi2\_10833139\_x2.....guggaacaacggggAgccg..... 1  
 Gi3\_28074714\_x2.....cggagacgucguggaacaacggggAgcc..... 1  
 Gi2\_10984453\_x2.....gaucggagaUgucguggaacaacgggg..... 1  
 Gi2\_10864347\_x2.....cguggaacaAggggugcc..... 1  
 Gi3\_28178040\_x2.....aacacggggugccgaUuu..... 1  
 Gl1a\_5940748\_x2.....ggaUcacggggugccgaacu..... 1  
 Gi2\_10954955\_x2.....gacgucguggaacaacggggugccA..... 1  
 Gi5\_8826595\_x2.....ucguggaacaacggggCugccgaacu..... 1  
 Gi3\_28152540\_x2.....aucggagacCucguggaacaacg..... 1  
 Gi2\_10883697\_x2.....cgugCgaacaacggggugccgaac..... 1  
 Gi2\_10965165\_x2.....aucggUgacgucguggaacaacggggug..... 1  
 Gi1\_4144693\_x2.....ucguggaNcacggggugc..... 1  
 Gi2\_10828759\_x2.....aucggagacgucgGgggaacac..... 1  
 Gi2\_10941961\_x2.....ggagaUgucguggaacaacggggugcc..... 1  
 Gi3\_28208218\_x2.....ggagacguNguggaacaacg..... 1  
 Gi3\_28099774\_x2.....aacacggggugcUgaacuu..... 1  
 Gi1\_4090317\_x2.....ggaacaacggggugcAgaacu..... 1  
 Gi2\_10986087\_x2.....cggagacgucgugAgaacaacggggugc..... 1  
 Gi5\_8828787\_x2.....ucggagacgCcuguggaacaacg..... 1  
 Gi2\_10920821\_x2.....gagacguAguggaacaacggggug..... 1  
 Gi2\_10943989\_x2.....agacgucguggaacaacggggugccgaacG..... 1

|                                                        |   |
|--------------------------------------------------------|---|
| Gi3_28104536_x2.....cgucgugggaacacggggugGcg.....       | 1 |
| Gi3_28118672_x2.....Ugaacacggggugccgaacuu.....         | 1 |
| Gi3_28031476_x2....aucggagacgucgCgggaacac.....         | 1 |
| Gi2_10974941_x2.....Uacgucgugggaacacggggugccga.....    | 1 |
| Gi3_28157692_x2.....Gggagacgucgugggaacacggggugc.....   | 1 |
| Gi2_10886539_x2.....ggaacacggggugccgaaGu.....          | 1 |
| Gi1a_5926380_x2..gcgaucggagacgCcgug.....               | 1 |
| Gi3_28222854_x2.....uggUaacacggggugccgaa.....          | 1 |
| Gi5_8828939_x2.....cgugggaacacggAgugccgaac.....        | 1 |
| Gi2_10887913_x2.....ucgugggaacaUggggugccgaac.....      | 1 |
| Gi3_28083378_x2.....acgucgugggaacCgggg.....            | 1 |
| Gi2_10890049_x2.....cgucgugggaacacggggugA.....         | 1 |
| Gi5_8781563_x2.....gggaaUacggggugccgaac.....           | 1 |
| Gi2_10851067_x2....aucggagacgucgugggaCcacgggg.....     | 1 |
| Gi5_8825989_x2.....cgCgggaacacggggugc.....             | 1 |
| Gi1a_5977764_x2.....cgugggGacacggggugcc.....           | 1 |
| Gi3_28024012_x2....auAggagacgucguggga.....             | 1 |
| Gi3_28175568_x2....gaucggagacgucgugggUacacggg.....     | 1 |
| Gi3_28045830_x2....aucggagacgucguCggaacacggggugc.....  | 1 |
| Gi5_8799679_x2.....cgugAgaacacggggugcc.....            | 1 |
| Gi3_28205208_x2...cgaucggagacgucguggAaacacg.....       | 1 |
| Gi2_10980431_x2.....gacgucgugggaCcacggggugccgaac.....  | 1 |
| Gi2_10982853_x2.....Ccgagacgucgugggaacacggggugc.....   | 1 |
| Gi2_10926347_x2.....ggaAacgucgugggaacacggggugc.....    | 1 |
| Gi5_8800295_x2.....gugggaGcacggggugccgaa.....          | 1 |
| Gi2_10982243_x2....aucggagacgucgugAgaacacggggu.....    | 1 |
| Gi3_28194944_x2.....acgucguggCaacacggggugccgaacu.....  | 1 |
| Gi4_564580_x2.....Ccgugggaacacggggugccgaacu.....       | 1 |
| Gi4_566686_x2...gaucggagacgucgugggaacacgggggu.....     | 0 |
| Gi1a_5915572_x2.....gugggaacacgUggugccga.....          | 1 |
| Gi5_8828711_x2....Aaucggagacgucgugggaacacg.....        | 1 |
| Gi3_28217294_x2....aucggagacguUguggga.....             | 1 |
| Gi1_4146097_x2.....ggaacacggggugccgUac.....            | 1 |
| Gi1_4153651_x2.....gggaacGcggggugccgaacuu.....         | 1 |
| Gi3_28146750_x2.....ggUgacgucgugggaacacgggg.....       | 1 |
| Gi2_10873739_x2....gaucAgagacgucguggga.....            | 1 |
| Gi3_28147950_x2.....ucgugggaacGcggggugccga.....        | 1 |
| Gi3_27994086_x2....aucggagacgucgugggaacacggggCu.....   | 1 |
| Gi2_10957883_x2.....acgucgugggaacUcggggugcc.....       | 1 |
| Gi5_8817341_x2.....ucgugggGacacggggugccgaac.....       | 1 |
| Gi3_27995778_x2.....cggagacgucguAggaacacggggu.....     | 1 |
| Gi3_27985100_x2.....cggauacgucgugggaacacgggg.....      | 1 |
| Gi3_28169172_x2.....gCagacgucgugggaacacg.....          | 1 |
| Gi3_28182410_x2.....ucgugggaacacAgggugccg.....         | 1 |
| Gi3_28260340_x2....gaucggCgacgucgugggaacacgg.....      | 1 |
| Gi2_10841581_x2.....gacgucgugggaacacggggugcUgaacu..... | 1 |
| Gi3_28187808_x2.....cgucgCgggaacacggggugc.....         | 1 |

G1a\_5889564\_x2.....ggaacacgCggugccgaacu..... 1  
 G1a\_5926824\_x2.....cguggaacacgUggugccgaacu..... 1  
 G11\_4131065\_x2.....gucguggaacCcggggug..... 1  
 G13\_28017500\_x2.....ugggaUcacggggugccgaa..... 1  
 G12\_10854111\_x2.....gacgucguggaacacggggguAc..... 1  
 G13\_28213278\_x2.....cguggaacacggUgugcc..... 1  
 G15\_8759569\_x2.....cguggaacacggggugcAgaac..... 1  
 G12\_10832885\_x2.....cggagacAucguggaacacggggugccgaacu..... 1  
 G15\_8801525\_x2.....aGgucguggaacacggggugccgaac..... 1  
 G12\_10911365\_x2.....ggagacgucguggaacCcacggggugc..... 1  
 G13\_28158862\_x2.....gacgucguggaacacggggugAcgaacu..... 1  
 G11\_4134563\_x2.....agacUucguggaacacggg..... 1  
 G13\_28004736\_x2.....gucAugggaacacggggugcc..... 1  
 G13\_28146398\_x2.....aucggagacguAguggaacacggggugcc..... 1  
 G11\_4100571\_x2.....ucguggAaacacggggugccgaac..... 1  
 G13\_28126836\_x2.....ucguggaacCcgggggugcc..... 1  
 G12\_10959435\_x2.....aucgAagacgucguggaacacggggg..... 1  
 G13\_28224928\_x2.....ucguggaacacggggugccUaac..... 1  
 G15\_8719597\_x2.....acgucguggaacacggggCgccc..... 1  
 G11\_4092871\_x2.....cgucguggaacacgggAugcc..... 1  
 G13\_28112914\_x2.....gacgucguggaacacAgggu..... 1  
 G13\_27994538\_x2.....Cagacgucguggaacacggggugccgaac..... 1  
 G12\_10983665\_x2.....gaucggagacgucguggaacacggggA..... 1  
 G15\_8746537\_x2.....guggaacUggggugccga..... 1  
 G15\_8745701\_x2.....uggaacacggggugcAga..... 1  
 G12\_10950651\_x2.....ucggagacgucguggaacGcggg..... 1  
 G12\_10959471\_x2.....cgucguggaacCcggggugc..... 1  
 G13\_27986222\_x2.....acgucguggaacGcggggugccga..... 1  
 G12\_10882901\_x2.....gugggCacacggggugccga..... 1  
 G11\_4117609\_x2.....guggaacNcggggugccgaacu..... 1  
 G13\_28140822\_x2.....cgucguggaacGggggugccgaacu..... 1  
 G11\_4104005\_x2.....ucguggaacGcggggugcc..... 1  
 G12\_10902565\_x2.....agGcucguggaacacggggugccg..... 1  
 G13\_27997362\_x2.....cggagacgucguggaacCcggggugc..... 1  
 G11\_4121533\_x2.....gacgucguggaacacggg..... 0  
 G15\_8800859\_x2.....gacgucguggaacacggggugccgaGcu..... 1  
 G11\_4153173\_x2.....ggagacgucguggaacacggggU..... 1  
 G13\_28189456\_x2.....cggagacgucguggaacacgg..... 1  
 G12\_10925115\_x2.....gggaacacggCgugccgaac..... 1  
 G11\_4125181\_x2.....gaucggagacgucguggaacacggggU..... 1  
 G12\_10945567\_x2.....gaucggagGcucguggaacac..... 1  
 G13\_28140090\_x2.....aucggagacguGguggaacacggg..... 1  
 G11\_4156167\_x2.....acgucguggaacacggAgugcc..... 1  
 G13\_28034168\_x2.....gaucggagacgucguggAaacac..... 1  
 G12\_10832027\_x2.....guggaacacggggugcG..... 1  
 G13\_28027504\_x2.....aucggagacAucguggaacacgggg..... 1  
 G13\_28107132\_x2.....aucggagacgucguggaacacggggUacc..... 1

Gi2\_10975245\_x2.....agUcgucgugggaacacggggugccgaac..... 1  
 Gi1\_4144995\_x2.....uggaacacggggugAcgaac..... 1  
 Gi1\_4135067\_x2.....gucgugggaacacggggugccgaCc..... 1  
 Gi5\_8817981\_x2.....gugggaacaUggggugccg..... 1  
 Gi2\_10984723\_x2.....gagacgucgugUaacacggggugcc..... 1  
 Gi3\_28151552\_x2.....cggagaUgucgugggaacacggggugcc..... 1  
 Gi2\_10849697\_x2.....cggagacgucgugggCacacggggugcc..... 1  
 Gi3\_28011654\_x2.....cgugggaacacggggugccCa..... 1  
 Gi3\_28250256\_x2.....ggaacacggCgugccgaac..... 1  
 Gi2\_10890807\_x2.....ucggagacgCcgugggaacacggggugccga..... 1  
 Gi1\_4153833\_x2.....gacgucguggCaacacggggugccgaac..... 1  
 Gi1\_4151531\_x2.....gacgucgugggaacacggggugcAgaacu..... 1  
 Gi3\_28106058\_x2.....gaucggagacgucgugggaacacggggCgcc..... 1  
 Gi2\_10902313\_x2.....gcgaucggNgacgucgugggaacac..... 1  
 Gi3\_28058028\_x2.....gaacacggggugccgaaU..... 1  
 Gi3\_28185116\_x2.....ucgGgggaacacggggugccga..... 1  
 Gi3\_27996056\_x2.....Aagacgucgugggaacacggggugccg..... 1  
 Gi3\_28204440\_x2.....agacgucgugggaacacggggUaccgaacu..... 1  
 Gi3\_28002284\_x2.....gucgugggaacacggggugccCaac..... 1  
 Gi2\_10896905\_x2.....gaacacggggUcccgaacu..... 1  
 Gi3\_28025412\_x2.....cgucgugggaacacgAgg..... 1  
 Gi3\_28027472\_x2.....Cucggagacgucgugggaacacggggugcc..... 1  
 Gi3\_28079012\_x2.....agacgucgugggaacacgAggugccgaac..... 1  
 Gl1\_5927938\_x2.....gggUacacggggugccgaacu..... 1  
 Gi2\_10899175\_x2.....gucgugggaacacggggCgccga..... 1  
 Gi2\_10908451\_x2.....ggaacacggggugccCaac..... 1  
 Gi1\_4123717\_x2.....cgucgugggaacacgggAugccgaacu..... 1  
 Gi2\_10978789\_x2.....aacacUgggugccgaacu..... 1  
 Gi3\_28049686\_x2.....gggaacacggggugccgaGcuu..... 1  
 Gi3\_28260530\_x2.....aucggagacgucguggAa..... 1  
 Gl1\_5940784\_x2.....GcgucgugggaacacggggU..... 1  
 Gi2\_10896197\_x2.....gucgugggNacacggggugccg..... 1  
 Gi3\_28142652\_x2.....aucggagacguAgugggaacacggggU..... 1  
 Gi1\_4113657\_x2.....acgucgugggaacacggggGgccg..... 1  
 Gi2\_10876257\_x2.....gaucggagacgucgugggaUacggggug..... 1  
 Gi2\_10956395\_x2.....acgucgugAgaacacggggugcc..... 1  
 Gi5\_8819157\_x2.....ucggGgacgucgugggaacacg..... 1  
 Gi3\_28061692\_x2.....gacgucgugggaacacggggugccgaCcu..... 1  
 Gi3\_28127928\_x2.....cggagacgucgugggaacacgggAu..... 1  
 Gi2\_10918505\_x2.....gagacgucgugggaacacggggugccgaa..... 0  
 Gl1\_5900050\_x2.....Gucggagacgucgugggaacacg..... 1  
 Gi2\_10869059\_x2.....cgUagacgucgugggaacacggggU..... 1  
 Gi3\_28138966\_x2.....aucggagacguUgugggaacacg..... 1  
 Gi1\_4143943\_x2.....uggaacacggggugccgaaGu..... 1  
 Gi1\_4153685\_x2.....gugggaGcacggggugccgaac..... 1  
 Gi2\_10978599\_x2.....Ugagacgucgugggaacacggggugccga..... 1  
 Gi1\_4132021\_x2.....ggaacacggggugccgaaAu..... 1

Gi1\_4117193\_x2.....ucgugggaacacggggugcA..... 1  
 Gi2\_10844929\_x2.....aucggagacgucgugggaacacgAggug..... 1  
 Gi1\_4149651\_x2.....aCacgucgugggaacacggggugcc..... 1  
 Gi1\_4139789\_x2.....ugggaCcacggggugccgaac..... 1  
 Gi2\_10931209\_x2....gaucggagacgucgugggUacacggggg..... 1  
 Gi3\_27994840\_x2Augcgauccggagacgucg..... 1  
 Gi3\_28160886\_x2.....cggagacgucgugggGacacggggugcc..... 1  
 Gi1\_4146839\_x2....gaucggagacgucgugggaacacggggugcc..... 0  
 Gi5\_8736693\_x2.....cgucgugggaacacggggGgcccgaacu..... 1  
 Gi2\_10871215\_x2....aucggagacgCcgugggaacacgggg..... 1  
 Gi5\_8774751\_x2.....cgucUugggaacacggggugccgaac..... 1  
 Gi5\_8736743\_x2.....uGgugggaacacggggugcc..... 1  
 Gi2\_10947627\_x2....gaucggagacgucAugggaacacggggg..... 1  
 Gi5\_8769845\_x2....cggagacgucgugggaaAacggg..... 1  
 Gi3\_28131848\_x2.....Caacacggggugccgaacu..... 1  
 Gi3\_28156956\_x2.....cguggCaacacggggugcc..... 1  
 Gi5\_8770309\_x2....Gucggagacgucgugggaacac..... 1  
 Gi3\_28186522\_x2.....gggaacacggCgugccgaacu..... 1  
 Gi3\_28184774\_x2....aucggagacgucUugggaacacggggugcc..... 1  
 Gi5\_8771611\_x2....ggagacgucgugggaacacggggugccgaacA..... 1  
 Gi1\_4150617\_x2....ucggCgacgucgugggaacacggggg..... 1  
 Gi3\_27989112\_x2....gAcgugggaacacggggugccga..... 1  
 Gi5\_8728983\_x2....gUagacgucgugggaacacggggugccgaacu..... 1  
 Gi2\_10855121\_x2....ggagacgucgugggaaUacggggugcc..... 1  
 Gi1\_4143291\_x2....aucAgagacgucgugggaacacggggg..... 1  
 Gi1\_4090011\_x2....aGcggagacgucgugggaac..... 1  
 Gi3\_28160214\_x2....aucggGgacgucgugggaacacggggugccgaac..... 1  
 Gi1\_4137813\_x2....cgucgAgggaacacggggugccgaac..... 1  
 Gi3\_28158442\_x2....agacgucgugggaacacggggAgcc..... 1  
 Gi1\_4151537\_x2....gugggaacCcggggugccgaacu..... 1  
 Gi3\_28204130\_x2....gucgugggaacCcggggugc..... 1  
 Gi3\_28130048\_x2....gucgugggaacacgAggugcc..... 1  
 Gi5\_8727377\_x2....aucggagaNgucgugggaacacgggg..... 1  
 Gi2\_10865487\_x2....gucgugggaacacggggugAcg..... 1  
 Gl1a\_5964546\_x2....cguAgggaacacggggugccgaacu..... 1  
 Gl1a\_5964494\_x2....Cacacggggugccgaacu..... 1  
 Gi3\_28114438\_x2....aucggagacgucCugggaacacgggg..... 1  
 Gl1a\_5878350\_x2....auUggagacgucgugggaacacg..... 1  
 Gi3\_28141660\_x2....Agaucggagacgucgugggaacacggg..... 1  
 Gi1\_4119585\_x2....cgAagacgucgugggaacacggggugcc..... 1  
 Gi5\_8788643\_x2....gaacacgggUugccgaacu..... 1  
 Gi1\_4118895\_x2....acgucgugggaacacggg..... 0  
 Gi3\_28232438\_x2....ucggagacgucgugggaGcacgg..... 1  
 Gi1\_4153155\_x2....agacgucgugggaacGcggggugccgaacu..... 1  
 Gi1\_4095367\_x2....gugggaacacggggugUcgaaac..... 1  
 Gi2\_10963525\_x2....cggagacgucgugggaacGcggggugc..... 1  
 Gi3\_28244206\_x2....gucgugggaAacggggg..... 1

Gi2\_10892095\_x2.....acgucgugggaacacggAgugccgaac..... 1  
 Gi5\_8827979\_x2.....Gggaacacgggugccga..... 1  
 Gi1\_4158531\_x2.....gggaacacgUggugccgaacu..... 1  
 Gl1a\_5925776\_x2.....gGgacgucgugggaacacg..... 1  
 Gi3\_28083722\_x2.....gagacgCcgugggaacacggggugc..... 1  
 Gi3\_28167826\_x2.....ggagacgucgugggGacacgg..... 1  
 Gi2\_10989931\_x2.....Cugggaacacggggugccgaacuu..... 1  
 Gi2\_10916195\_x2.....acgucgugggaacaUggggugccg..... 1  
 Gi1\_4121037\_x2.....gaaGacggggugccgaacu..... 1  
 Gi1\_4121709\_x2.....gugggaGcacggggugccgaacuu..... 1  
 Gi2\_10900101\_x2.....gaucggagacgucguAggaacac..... 1  
 Gi1\_4135219\_x2.....aCcgagacgucgugggaacacggggugcc..... 1  
 Gi5\_8766741\_x2.....ucAugggaacacggggugccgaac..... 1  
 Gi5\_8772941\_x2.....gucgugCgaacacggggugccgaacu..... 1  
 Gi3\_28211198\_x2.....cAaucggagacgucgugggaacacg..... 1  
 Gi2\_10863967\_x2.....ggaacacggggCgccgaa..... 1  
 Gi5\_8780207\_x2.....cgucgGgggaacacggggugccgaac..... 1  
 Gi3\_28259664\_x2.....gaucggagacgucgugggaacacggggCgc..... 1  
 Gi1\_4147287\_x2.....cgugggaacacggggCgccgaac..... 1  
 Gi1\_4111235\_x2.....ucggagGcgucgugggaacacg..... 1  
 Gi3\_28025162\_x2.....gggaacacggggugccCaa..... 1  
 Gi2\_10839399\_x2.....ucggUgacgucgugggaacacg..... 1  
 Gi1\_4133883\_x2.....ucgugggaacacgCggugccgaacu..... 1  
 Gi2\_10956569\_x2.....cgAcgugggaacacggggugccgaac..... 1  
 Gi2\_10886115\_x2.....gaucggagacgucguAggaacacggggu..... 1  
 Gi2\_10986465\_x2.....gucgugggaacacggggugccgUac..... 1  
 Gi2\_10951341\_x2.....Uucggagacgucgugggaacacg..... 1  
 Gi1\_4089383\_x2.....gacgucgugggaacacggggugccgGac..... 1  
 Gi5\_8733875\_x2.....gugggaaUacggggugcc..... 1  
 Gi3\_28019874\_x2.....Gcggagacgucgugggaacacggggugccg..... 1  
 Gi3\_28196352\_x2.....Nugggaacacggggugccga..... 1  
 Gi3\_28045062\_x2.....ucAgagacgucgugggaacacggg..... 1  
 Gl1a\_5903494\_x2.....gCagacgucgugggaacacg..... 1  
 Gi3\_28225864\_x2.....ggagacgucgugggaacacggggugcA..... 1  
 Gl1a\_5951326\_x2.....gacgucAugggaacacggggu..... 1  
 Gi2\_10991643\_x2.....Cacgucgugggaacacggggugcc..... 1  
 Gi1\_4139185\_x2.....gugggaaGacggggugccgaacu..... 1  
 Gi2\_10870367\_x2.....ucgugggaacCcggggugccgaa..... 1  
 Gi2\_10983489\_x2.....ggCaacacggggugccgaacu..... 1  
 Gi2\_10953277\_x2.....aucggagacgucgugggG..... 1  
 Gi4\_555468\_x2.....Cggaacacggggugccgaacu..... 1  
 Gi2\_10913273\_x2.....Ccgagacgucgugggaacacg..... 1  
 Gi5\_8815343\_x2.....Gacggggugccgaacuu..... 1  
 Gi3\_28049906\_x2.....ggagacgucgugggaacacggAgu..... 1  
 Gi3\_28189526\_x2.....aUgucgugggaacacggggugccg..... 1  
 Gi3\_28113002\_x2.....cgaucggagacgucgugggaacacggggC..... 1  
 Gi3\_27984638\_x2.....gucgugggUacacggggugccgaac..... 1

Gi2\_10864805\_x2.....gucgugggaacacggggugUc..... 1  
Gi2\_10847181\_x2.....ggagacguNgugggaacacggggugccg..... 1  
Gi3\_28044982\_x2.....gucgugggGacacgggggu..... 1  
Gi3\_28250844\_x2.....aucggagacgucgugUgaacacgggg..... 1  
Gi3\_28030300\_x2.....gaucggagacgucgugAgaacacgggggu..... 1  
Gi1\_4126433\_x2.....ucggGgacgucgugggaacacg..... 1  
Gi5\_8736009\_x2.....ugNgaacacggggugccgaacu..... 1  
Gi5\_8780513\_x2.....cgugggaacacgAggugccgaacuu..... 1  
Gi1\_4143281\_x2.....gCgaacacggggugccgaacuu..... 1  
Gi5\_8795707\_x2.....gaucggagacAucgugggaacacgggg..... 1  
Gi3\_28135256\_x2.....cggCgacgucgugggaacacgggggu..... 1  
Gi2\_10867793\_x2.....gaucggagacAucgugggaacac..... 1  
Gi5\_8767315\_x2.....cgugggaacacggggugcUgaacuu..... 1  
Gi2\_10868985\_x2.....acgucgugggaGcacgggggu..... 1  
Gi5\_8731341\_x2.....gaucggagacgucgugggCacacggg..... 1  
Gi5\_8821983\_x2.....ucgugggaacacAgggugccgaac..... 1  
Gi1\_4092969\_x2.....acgucgugggaacacggggCgcc..... 1  
Gi2\_10863467\_x2.....aucgAagacgucgugggaacacggggugc..... 1  
G1a\_5975640\_x2.....Agaacacggggugccgaac..... 1  
Gi2\_10944499\_x2.....acgAcgugggaacacggggugccgaacu..... 1  
Gi2\_10833489\_x2.....cgUucggagacgucgugggaacacggggugc..... 1  
Gi2\_10838643\_x2.....ggagacgucgugggaUacggggugc..... 1  
Gi3\_28054952\_x2.....agacgucgugggaacacggggugAcgaacu..... 1  
Gi1\_4093765\_x2.....aucgUagacgucgugggaacacgg..... 1  
Gi2\_10854613\_x2.....gugggaUcacggggugccgaa..... 1  
G1a\_5940878\_x2.....aucggagGcucgugggaacacgggg..... 1  
G1a\_5941972\_x2.....aUacgucgugggaacacggggugccgaac..... 1  
Gi3\_28018452\_x2.....aacacgggNugccgaacuu..... 1  
G1a\_5954060\_x2.....gucgugggNacacggggugccgaac..... 1  
Gi5\_8816251\_x2.....gacgucgugggaacacggggugccgaUcu..... 1  
Gi5\_8774635\_x2.....agacgucgugAgaacacggggugccgaacu..... 1  
Gi1\_4131007\_x2.....gugggaacacggggugcA..... 1  
Gi2\_10992275\_x2.....aucggagacgucgugggCacacggggugcc..... 1  
Gi5\_8785051\_x2.....aucggagacGcugugggaacac..... 1  
Gi3\_28164150\_x2.....cgucgugggaacaUggggugccga..... 1  
Gi2\_10835865\_x2.....ggagacgucgugggaacCcgggugcc..... 1  
Gi2\_10930565\_x2.....gaUacgucgugggaacacggggugc..... 1  
Gi5\_8776731\_x2.....aGcggagacgucgugggaaca..... 1  
G1a\_5951448\_x2.....ugggaacacggggugccgaUcu..... 1  
Gi1\_4137301\_x2.....cgucguAggaacacggggugcc..... 1  
Gi3\_28237846\_x2.....acgucgugggaacacggggugccgaCc..... 1  
Gi2\_10991787\_x2.....ggagacgucGgggaacacggggugc..... 1  
Gi2\_10847465\_x2.....gacgucgugggaacacggggugccgaGc..... 1  
Gi3\_28186506\_x2.....Cagacgucgugggaacacgggggu..... 1  
Gi5\_8754761\_x2.....cgugUgaacacggggugccga..... 1  
Gi1\_4113867\_x2.....ggagacgucguAggaacacggggugcc..... 1  
Gi3\_28093608\_x2.....agacgucgugggaacaUggggugccgaacu..... 1

Gi2\_10867037\_x2.....ucggagGcgucgugggaaca..... 1  
Gi2\_10945165\_x2.....cgucgugggaacacggggugccgaCc..... 1  
G1a\_5877556\_x2.....gugggaacCcggggugccgaac..... 1  
Gi5\_8807159\_x2.....gugggaaAacggggugccga..... 1  
Gi2\_10894635\_x2....gaucggagaUgucgugggaacacgggggu..... 1  
Gi3\_28077624\_x2.....gugCgaacacggggugccga..... 1  
Gi1\_4128303\_x2.....gggaacacggUgugccgaacu..... 1  
Gi3\_28145282\_x2....aucggagacgucguggAaacacggggugc..... 1  
Gi1\_4143271\_x2....gaucggagacgucgugggaGcac..... 1  
Gi2\_10904979\_x2.....cgucUugggaacacggggugccgaac..... 1  
Gi5\_8737313\_x2.....cgGgggaacacggggugcc..... 1  
Gi3\_28192218\_x2....ucUgagacgucgugggaacacg..... 1  
G1a\_5937132\_x2....aucggagacgucgugggaacacggggA..... 1  
Gi2\_10885843\_x2.....gCgacgucgugggaacacggggugc..... 1  
Gi2\_10931577\_x2.....cgugggaacacggggguAccga..... 1  
Gi1\_4134493\_x2.....cggagacgNcgugggaacacgggggu..... 1  
Gi3\_28218064\_x2....uUgugggaacacggggugccg..... 1  
Gi3\_28089504\_x2....gaucggaAacgucgugggaacacgggggu..... 1  
Gi2\_10868369\_x2.....gugggaacacggggugccgC..... 1  
Gi3\_28082188\_x2.....gacgGcgugggaacacggggugccgaacu..... 1  
Gi2\_10958593\_x2.....ucgugggaacCcggggugccg..... 1  
Gi2\_10939365\_x2....ucggagacgucgugggaacacggg..... 0  
Gi3\_28225326\_x2.....gacgucgugggaGcacgg..... 1  
Gi1\_4113635\_x2.....ucgugggaacacggggugcUgaac..... 1  
Gi2\_10870583\_x2.....gacgucgugggaacaUggggugccg..... 1  
Gi5\_8718753\_x2....Aagacgucgugggaacacg..... 1  
Gi1\_4131159\_x2.....agacgucgNgggaacacgggg..... 1  
Gi5\_8749177\_x2.....gggaacacgggCugccgaacu..... 1  
Gi5\_8774857\_x2....gGucggagacgucgugggaacacg..... 1  
Gi3\_27992908\_x2.....gacgucgugggaacacgAggugccgaacu..... 1  
Gi2\_10844861\_x2.....ggAaacacggggugccgaa..... 1  
Gi2\_10922909\_x2....gaucggagacgucgugAgaac..... 1  
Gi2\_10968607\_x2....cUaucggagacgucgugggaacacggggugcc..... 1  
G1a\_5880660\_x2.....cgugggaGcacggggugcc..... 1  
Gi3\_28215254\_x2.....ugggaacacgggguCccg..... 1  
Gi3\_28137172\_x2.....gAgaacacggggugccga..... 1  
Gi2\_10984739\_x2....aucggagacgucgugggaaGacggggugcc..... 1  
Gi5\_8805019\_x2.....gaacacgAggugccgaac..... 1  
Gi5\_8817069\_x2.....agacgucguggGacacggggugccgaac..... 1  
Gi1\_4109685\_x2.....cgugggGacacggggugccgaacu..... 1  
Gi1\_4127209\_x2....cggagacgucgugggaacacggggCgc..... 1  
Gi4\_557542\_x2.....Aggaacacggggugccgaacu..... 1  
Gi2\_10907137\_x2....aucggagacgucgugggaacacgggCu..... 1  
Gi2\_10938713\_x2.....cgucgugggaacacggggCgccgaac..... 1  
Gi2\_10841517\_x2....Aaucggagacgucgugggaacacg..... 1  
Gi3\_28120314\_x2....agacgucgugggaGcacggggugccga..... 1  
Gi2\_10911117\_x2.....gacgucgugggaacacggggugUc..... 1



Gi2\_10916803\_x2.....aucggagacgucguAggaacacggggugcc..... 1  
 Gi3\_28249076\_x2.....cgucgugggaacacggggugcUga..... 1  
 Gi2\_10926955\_x2.....cgucgugggaacacgggAugccga..... 1  
 Gi5\_8825251\_x2.....agacgucgugggaacacgAggugccgaac..... 1  
 Gi3\_28253166\_x2.....gggaacacggggugccUaa..... 1  
 Gi5\_8801087\_x2.....Aucgugggaacacggggugccgaac..... 1  
 Gi3\_28200934\_x2.....gaucgAagacgucgugggaacac..... 1  
 Gi3\_28112124\_x2.....ggagacgucgCgggaacacggggg..... 1  
 Gi2\_10844345\_x2.....cAgagacgucgugggaacacggggg..... 1  
 Gl1a\_5921982\_x2.....gaucUgagacgucgugggaa..... 1  
 Gi1\_4145523\_x2.....gugggaacacgggAugccgaac..... 1  
 Gi1\_4137465\_x2.....aUacgucgugggaacacggggugccg..... 1  
 Gi1\_4091979\_x2.....gugggaacacgAggugccga..... 1  
 Gi5\_8789041\_x2.....gagacguAgugggaacacggggugccgaacu..... 1  
 Gi3\_28048812\_x2.....acgucgugggaacacgAggugccgaac..... 1  
 Gi3\_28075726\_x2.....aucggagacgucgugggaacacggggAgc..... 1  
 Gi2\_10876289\_x2.....ucgugggaacacgUggugccgaacu..... 1  
 Gi3\_28099836\_x2.....cguNgugggaacacggggugcc..... 1  
 Gi2\_10917105\_x2.....cgugggaacacgggUugc..... 1  
 Gi3\_28195344\_x2.....cgucgGgggaacacggggugccgaa..... 1  
 Gi5\_8735023\_x2.....ggaacacggggugccgaCc..... 1  
 Gi1\_4134665\_x2.....ggagacgucgugAgaacacggggugcc..... 1  
 Gi2\_10885701\_x2.....cgucgugggaacacggggugccgaG..... 1  
 Gi1\_4119201\_x2.....aucggagacgucgugggaacGcggggugc..... 1  
 Gi3\_28000514\_x2.....ucguggAaacacggggugccg..... 1  
 Gi3\_27998130\_x2.....gaAcggagacgucgugggaacacg..... 1  
 Gi5\_8821819\_x2.....aCcggagacgucgugggaacacgggg..... 1  
 Gi1\_4099585\_x2.....cgugggaacaUggggugccgaacu..... 1  
 Gi3\_28003690\_x2.....gacgucAugggaacacggggugccgaacu..... 1  
 Gi4\_561938\_x2.....uUggaacacggggugccgaac..... 1  
 Gi3\_28139918\_x2.....acgucgugggaacacggggugccgaacG..... 1  
 Gi1\_4098497\_x2.....gacgucgugggaacacggggAgccgaacu..... 1  
 Gi2\_10839501\_x2.....agacgucgugggCacacggggugc..... 1  
 Gi3\_28170888\_x2.....cgugggaacUcggggugcc..... 1  
 Gi1\_4126067\_x2.....Agaacacggggugccgaa..... 1  
 Gi2\_10878159\_x2.....ggUgacgucgugggaacacggg..... 1  
 Gl1a\_5975334\_x2.....cUaucggagacgucgugggaacacggggugc..... 1  
 Gi1\_4146213\_x2.....aucggagacgucgugggaac..... 0  
 Gi1\_4118323\_x2.....cggagacgucgugggaacacgggAugcc..... 1  
 Gi3\_28249038\_x2.....ucggagacgucguAggaacacggggg..... 1  
 Gi2\_10900213\_x2.....gugggaacaUggggugccgaacu..... 1  
 Gi3\_28172580\_x2.....gucgugggUacacggggugcc..... 1  
 Gi3\_28085984\_x2.....gaucggagacgucgugggaUacggggg..... 1  
 Gi2\_10888657\_x2.....agacgucgugggaCcacggggugccga..... 1  
 Gi2\_10949177\_x2.....acgucgugggaacaUggggugccgaacu..... 1  
 Gi5\_8724763\_x2.....gagacgucgugggaacacggggCgccgaacu..... 1  
 Gi3\_28073474\_x2.....gaUgucgugggaacacggggg..... 1

Gi3\_28212936\_x2.....ggagacgucgugggGacacggggugccgaac..... 1  
 Gi2\_10955723\_x2.....cgucgugggaacaAggggugccgaacu..... 1  
 Gi5\_8818629\_x2.....gacgucgugggaacacggggugAcgaacu..... 1  
 Gi5\_8778097\_x2.....ugUgaacacggggugccgaa..... 1  
 Gi2\_10896615\_x2.....gucAugggaacacggggugc..... 1  
 Gi5\_8808971\_x2.....ucggagacgucgugggaaAacg..... 1  
 Gi3\_28206988\_x2.....Gcgucgugggaacacggggugccga..... 1  
 Gi3\_28179206\_x2.....aucAgagacgucguggga..... 1  
 Gi3\_28155426\_x2.....cgucgugggaacacggAgugccg..... 1  
 Gi5\_8724131\_x2.....ugggaacacggggugccgaacuCu..... 1  
 Gi2\_10843569\_x2.....gggaaGacggggugccgaacu..... 1  
 Gi5\_8796891\_x2.....aucggagacguUgugggaacacgg..... 1  
 Gi5\_8761925\_x2.....cgUagacgucgugggaacacgg..... 1  
 Gi2\_10936333\_x2.....gggaacaGggggugccgaac..... 1  
 Gi4\_564222\_x2.....cgugggaacacggggCgccgaacu..... 1  
 Gi3\_28055278\_x2.....Cagacgucgugggaacacggggugccgaacu..... 1  
 Gi2\_10872375\_x2.....ggagUcgucgugggaacacggggugc..... 1  
 Gi5\_8804041\_x2.....gugggaacacggggGgccgaacuuu..... 1  
 Gi5\_8808355\_x2.....cacggggugccgaacuCu..... 1  
 Gi3\_28010504\_x2.....cgucGgggaacacggggugccgaac..... 1  
 Gi2\_10911931\_x2.....cAucgugggaacacggggugc..... 1  
 Gi1\_4114881\_x2.....cgugggaacacggggguAccgaac..... 1  
 Gi2\_10951987\_x2.....cgucgugggaacacggAgugccga..... 1  
 Gi1\_4120017\_x2.....aacacUgggugccgaacu..... 1  
 Gi2\_10830487\_x2.....gagacgucNugggaacacggggug..... 1  
 Gi5\_8768611\_x2.....gugggaacNcggggugccgaacuu..... 1  
 Gi3\_28205242\_x2.....aucggagacguGgugggaacacg..... 1  
 Gi5\_8824367\_x2.....gugggaacacggggugAcga..... 1  
 Gi5\_8781633\_x2.....cacgUgggugccgaacuuu..... 1  
 Gi2\_10951503\_x2.....Acggagacgucgugggaac..... 1  
 Gi2\_10959841\_x2.....gucgugggaacaUggggugcc..... 1  
 Gi3\_28003692\_x2.....ggagGcgucgugggaacacggggugccgaac..... 1  
 Gl1\_5980830\_x2.....gacgucgugggaacaUgggggu..... 1  
 Gi2\_10959083\_x2.....gaUacgucgugggaacacggggugccg..... 1  
 Gi4\_561274\_x2.....gggaGcacggggugccgaacu..... 1  
 Gi3\_28014496\_x2.....aucggagacgucgugggaacacUggg..... 1  
 Gi3\_28196346\_x2.....gucgugggaacaUggggugcc..... 1  
 Gi3\_28242634\_x2.....aucggagacgucgugggaacaUggggugcc..... 1  
 Gi5\_8799175\_x2.....gaacacggNgugccgaac..... 1  
 Gi3\_28229724\_x2.....ggagacgucgugggaGcacggg..... 1  
 Gi3\_28148422\_x2.....acgucgugNgaacacggggugccg..... 1  
 Gl1\_5889030\_x2.....aucggagacgucguggAa..... 1  
 Gi2\_10868637\_x2.....agacgucgugggaacCcggggugc..... 1  
 Gi2\_10837949\_x2.....gggaacacAgggugccgaa..... 1  
 Gi2\_10845795\_x2.....ucggagacgucgugggaacacggggugccgaac..... 0  
 Gi3\_28140428\_x2.....aucggagCcgucgugggaacacgggg..... 1  
 Gi2\_10896975\_x2.....gucgugggaCcacggggugccgaacu..... 1

Gi3\_27981546\_x2.....gugggaaGacggggugccgaa..... 1  
 Gi2\_10881011\_x2.....acgucgugggaacacggggugccgaCcu..... 1  
 Gi3\_28116012\_x2....auGggagacgucgugggaacacggg..... 1  
 Gi1\_4149687\_x2.....guCggaacacggggugccgaacu..... 1  
 Gi1\_4101931\_x2.....cgugggaacacggggUAccgaacu..... 1  
 Gi1\_4157847\_x2.....gucgugggaacacggggCg..... 1  
 Gi3\_28103238\_x2.....gugCgaacacggggugcc..... 1  
 Gi3\_28248788\_x2....gaucAgagacgucgugggaacacggggugcc..... 1  
 Gi2\_10917993\_x2.....ucggagacgucUugggaacacggggugccgaacu..... 1  
 Gi2\_10961947\_x2.....gUcgucgugggaacacggggugcc..... 1  
 Gi2\_10861681\_x2....aucggagacgucAugggaacac..... 1  
 Gi3\_28074972\_x2.....ggagacgucgugggaacacggggCgccc..... 1  
 Gi1\_4126641\_x2.....gUagacgucgugggaacacggggugc..... 1  
 Gi4\_555934\_x2....gaucggagacgucgugggaacac..... 0  
 Gi2\_10841959\_x2.....gucguCggaacacggggugccgaacu..... 1  
 Gi5\_8765851\_x2.....gggaacacggggugccgaG..... 1  
 Gi3\_27990414\_x2.....ggagacgucguggAaacacggg..... 1  
 Gi2\_10918017\_x2....aCggagacgucgugggaacacgggg..... 1  
 Gi3\_28145044\_x2....cgauCggagacgucgugggaacacggggGgc..... 1  
 Gi2\_10877497\_x2.....gggaacacggggugUcgaa..... 1  
 Gi5\_8824179\_x2....gacgucgugggaacaGggggugccgaacu..... 1  
 Gi2\_10936447\_x2.....acgucCugggaacacggggugcc..... 1  
 Gi1\_4093351\_x2.....gggaacacggggugcAgaacu..... 1  
 Gi5\_8718759\_x2.....guggAaacacggggugccgaacu..... 1  
 Gi3\_28024354\_x2.....gggaacaAggggugccgaa..... 1  
 Gi3\_28109972\_x2.....ggagacgucgCgggaacacggg..... 1  
 Gi3\_28197746\_x2....cgauGggagacgucgugggaacacg..... 1  
 Gi2\_10980135\_x2.....cguUgugggaacacggggugccgaac..... 1  
 Gi1\_4144845\_x2....aucggagacgucgugggCacacgg..... 1  
 Gl1\_5963674\_x2.....guAggaacacggggugcc..... 1  
 Gi3\_28041280\_x2.....gagaUgucgugggaacacggggugccgaacu..... 1  
 Gi2\_10884789\_x2.....cguAgugggaacacggggugccgaa..... 1  
 Gi2\_10987005\_x2....gaucggagacgucgugggaacacggAgu..... 1  
 Gi3\_28032234\_x2....cgaCcgagacgucguggg..... 1  
 Gi2\_10836033\_x2.ugcgauCggagacgucgugggG..... 1  
 Gi5\_8781389\_x2.....agacgucgugggaacacggggG..... 1  
 Gi2\_10909949\_x2.....gugUgaacacggggugccg..... 1  
 Gi3\_28214290\_x2.....cguCggaacacggggugccgaac..... 1  
 Gl1\_5931366\_x2.....aacGcggggugccgaacu..... 1  
 Gi3\_28123866\_x2.....gacgucgugggaCcacggggugccgaac..... 1  
 Gi3\_28060804\_x2.....cCucgugggaacacggggugccgaa..... 1  
 Gi1\_4104639\_x2.....ucgugggaacacggggugcGgaac..... 1  
 Gi3\_28039174\_x2....ucggagacgucgugggaacCcgggugcc..... 1  
 Gi3\_28131384\_x2....aucggagacgucgugggaacacggggugGc..... 1  
 Gi2\_10906705\_x2....aucggagacgucgugggaacacggggugccgaac..... 0  
 Gi3\_28048970\_x2....aucggagUcgucgugggaacacggg..... 1  
 Gl1\_5908766\_x2....aucggagacgucgugggaGcacggggg..... 1

Gi2\_10951857\_x2...gaucggagacgucgugggaaacacggggCg..... 1  
Gi2\_10945599\_x2.....cAugggaacacggggugccg..... 1  
Gi2\_10968351\_x2.....ucgugAgaacacggggugccg..... 1  
Gi1\_4125553\_x2.....agacgucAugggaacacggggugccgaacu..... 1  
Gi2\_10829777\_x2.....Aacgucgugggaaacacggggugc..... 1  
Gi3\_28249422\_x2.....gggaacacgggCugccgaa..... 1  
Gi3\_28153548\_x2.....cgugggaCcacggggugccg..... 1  
Gi3\_28025000\_x2.....ucggagGcgucgugggaaacacg..... 1  
Gi3\_28091688\_x2.....ucggagacAucgugggaaacacggggugccg..... 1  
Gi2\_10852223\_x2.....gugggaacacgCggugccgaac..... 1  
Gi3\_28239506\_x2.....cgucgugggaaacacgggUgugccg..... 1  
Gi2\_10857583\_x2.....gucgugggaaacacggggGgccc..... 1  
Gi5\_8763595\_x2.....gucCugggaaacacggggugccgaacu..... 1  
Gi5\_8815239\_x2.....gugggaacacggggugccAa..... 1  
Gi1\_4156689\_x2.....acgucgugggCacacggggugcc..... 1  
Gi2\_10836449\_x2...cgaucggaNacgucgugggaaacacggg..... 1  
Gi1\_4102319\_x2.....cCugggaacacggggugccgaac..... 1  
Gi3\_28054708\_x2.....cgucgugggaaacaUggggu..... 1  
Gi1\_4098811\_x2.....aCacgucgugggaaacacggggugccg..... 1  
Gi3\_28230738\_x2.....cgucgugggaaacacggggGg..... 1  
Gi2\_10901831\_x2.....ugggaacGcggggugccgaa..... 1  
Gi2\_10858999\_x2.....acgucCugggaaacacggggugccgaacu..... 1  
Gi3\_28217356\_x2.....gUgacgucgugggaaacacggggugccgaac..... 1  
Gi2\_10859905\_x2.....ugggaacacgggCugccg..... 1  
Gi1\_4091075\_x2.....gagacgucguAggaacacggggugcc..... 1  
Gi1\_4107425\_x2...gaucggagacgucgugggaaacacgggU..... 1  
Gi2\_10958321\_x2.....gCgaacacggggugccgaa..... 1  
Gi5\_8802355\_x2.....acCucgugggaaacacggggugccgaacu..... 1  
Gi5\_8760357\_x2...aucggagacgucguggAaacacg..... 1  
Gi3\_27986010\_x2...aucggagacgucguCggaacacggg..... 1  
Gi5\_8721055\_x2.....cgucguggNaacacggggugccga..... 1  
Gi3\_28026510\_x2...gaucggagacgucgugggGcacggggugcc..... 1  
G1a\_5887628\_x2.....aacacggggugcAgaacu..... 1  
Gi3\_28132138\_x2.....acgucgugggaaacacgggCgugccgaacu..... 1  
Gi5\_8789333\_x2...gaucggagacgucguAggaacacgg..... 1  
Gi2\_10925505\_x2.....Ccugggaaacacggggugccg..... 1  
Gi3\_27988690\_x2.....acacggggGcccgaacu..... 1  
Gi1\_4120365\_x2.....agacgucguAggaacacggggugccgaacu..... 1  
Gi5\_8736309\_x2...gGucggagacgucgugggaaacacggg..... 1  
Gi2\_10929051\_x2.....Gcgucgugggaaacacggggugccg..... 1  
G1a\_5926390\_x2.....ucgugggaaacacggggugccgCac..... 1  
Gi2\_10955719\_x2.....gUgacgucgugggaaacacggggugccg..... 1  
Gi3\_28161648\_x2...Ggaucggagacgucgugg..... 1  
G1a\_5907020\_x2.....gugggaacacUgggugccgaacu..... 1  
Gi1\_4095981\_x2.....Aucgugggaaacacggggugcc..... 1  
Gi5\_8787669\_x2.....gugggaacacgggAgugccgaacu..... 1  
Gi3\_27990322\_x2...cgAcgugggaaacacgggg..... 1

Gi2\_10830543\_x2.Cgcgaucggagacgucgugggaaacacg..... 1  
Gi3\_28069094\_x2.....guNuggggaacacggggugccgaacu..... 1  
Gi3\_28074110\_x2.....ucgugggaaacacggggugccgGa..... 1  
Gi2\_10980771\_x2.....cgucgugggGacacggggugccgaa..... 1  
Gi1\_4131707\_x2.....gacgCcgugggaaacacggggugccgaacu..... 1  
Gi1\_4128643\_x2.....acgucgugggaaacacggggugccgaaUu..... 1  
Gi1\_4121715\_x2.....gGacacggggugccgaacuu..... 1  
Gi3\_28218010\_x2.....cggAUacgucgugggaaacacggggugccga..... 1  
Gi5\_8775817\_x2.....uggaaacacgggCugccgaa..... 1  
Gi5\_8824405\_x2.....uggaaacacggggugccUaac..... 1  
Gi3\_27986984\_x2.....uggaaacacggggUcccga..... 1  
Gi5\_8796759\_x2.....aucggagacgucgugggGacacggggU..... 1  
Gi2\_10986747\_x2.....acgucgugggaaacacggCgugcc..... 1  
Gi3\_28178192\_x2.....cggagacgCcgugggaaacacggg..... 1  
Gi3\_28178500\_x2.....acgucgugggaaacacgggAugccgaacu..... 1  
Gi2\_10956299\_x2.....cggUgacgucgugggaaacacggggugc..... 1  
Gi1\_4141167\_x2.....agacgucgugggGacacggggugccgaac..... 1  
Gi2\_10900003\_x2.....ggaacGcggggugccgaa..... 1  
Gi5\_8778685\_x2.....aucggagacgucgugggaaAacgg..... 1  
Gi5\_8767393\_x2.....acgucgugggaaacCggggugccgaac..... 1  
Gi2\_10884221\_x2.....Cagacgucgugggaaacacggggugccg..... 1  
Gi3\_28115508\_x2.....ucggagacgucgugggCacac..... 1  
Gi3\_28188740\_x2.....aacacggggugccgCacuu..... 1  
Gi2\_10959801\_x2.ugcgaucggagacgucgugggaaAa..... 1  
Gi2\_10893899\_x2.....acguUgugggaaacacggggugc..... 1  
Gi5\_8783161\_x2.....Aucgugggaaacacggggugccgaa..... 1  
Gi2\_10911905\_x2..cgUucggagacgucgugggaaacacggg..... 1  
Gi5\_8786053\_x2.....gUcugcugggaaacacggggugccgaacu..... 1  
Gi2\_10952389\_x2...gaGcggagacgucgugggaaaca..... 1  
G1a\_5939222\_x2...gaucggagacgucgugggCa..... 1  
Gi2\_10959107\_x2.....cgucguggAaacacggggugc..... 1  
Gi1\_4139977\_x2.....cgugggaaacacggggugAcgaacu..... 1  
Gi2\_10965771\_x2.ugcgaucggagacgucgugggGaca..... 1  
Gi2\_10862219\_x2.....cgugggaaacacggggUac..... 1  
Gi2\_10876263\_x2.....gacgucgugggaaacacggggugUcgaacu..... 1  
Gi5\_8821831\_x2.....gugggaacaUggggugcc..... 1  
Gi2\_10981845\_x2.....cCgagacgucgugggaaacacggggugc..... 1  
Gi1\_4120043\_x2...aucggagaNucgugggaaacacggggugc..... 1  
G1a\_5902016\_x2.....gGcugggaaacacggggugccga..... 1  
Gi3\_28076344\_x2...Ccggagacgucgugggaaaca..... 1  
Gi2\_10900327\_x2.....cgugggaaacaUggggugccga..... 1  
Gi3\_28088992\_x2...gaucggagacgucgugggaaacaUgggg..... 1  
Gi5\_8746147\_x2.....gugggaacacggggugUcga..... 1  
Gi3\_27994660\_x2.....gucgugggaaacCggggugccg..... 1  
Gi2\_10835319\_x2...aAacgucgugggaaacacggggugccg..... 1  
G1a\_5930410\_x2...gugggaacacggggGgccga..... 1  
Gi3\_28117576\_x2.....gacgucgugggGacacgggg..... 1

Gi3\_28060764\_x2.....aacacggAgugccgaacuu..... 1  
 Gi2\_10882981\_x2.....ggagacgucgugggaaacGcggggugc..... 1  
 Gi3\_28240870\_x2....gaucggagacgucgugggGacacggg..... 1  
 Gi3\_28196438\_x2.....ggagacgucgugggaaAacggggugcc..... 1  
 Gi5\_8729033\_x2.....acgucgugggaaGacggggugccgaacu..... 1  
 Gi1\_4126551\_x2.....ucgugggaaacGcggggugccgaac..... 1  
 Gi2\_10834945\_x2.....ugUgaacacggggugccg..... 1  
 Gi2\_10940331\_x2.....cggagacgNcgugggaaacacggggugccgaac..... 1  
 Gi2\_10962007\_x2.....ucgugggaaGcacggggugccgaa..... 1  
 Gi5\_8726961\_x2....aucggGgacgucgugggaaacac..... 1  
 Gi3\_28130646\_x2....gaucggagacAucgugggaaacac..... 1  
 Gi4\_565340\_x2.....agUcgucgugggaaacacggggugcc..... 1  
 Gi5\_8770185\_x2.ugcgaAacggagacgucgug..... 1  
 Gi5\_8823631\_x2.....ggUaacacggggugccgaa..... 1  
 Gi2\_10934383\_x2.....gagacgucgugggaaacacg..... 0  
 Gi3\_27991232\_x2.....cggagCcgucgugggaaacacggggg..... 1  
 Gl1a\_5929048\_x2.....cAuggaaacacggggugcc..... 1  
 Gi2\_10894963\_x2.....agacgucAugggaaacacggggugccgaacu..... 1  
 Gi3\_28085154\_x2.....uggaaacacggggugccCa..... 1  
 Gi3\_28047746\_x2.....acgucgugggaaacacggggugcA..... 1  
 Gi1\_4106535\_x2.....gagacgucAuggaaacacggggugcc..... 1  
 Gi2\_10849463\_x2....aucggagacgucgugggaaacacggggugUc..... 1  
 Gi2\_10891195\_x2.....acgucgugggaaacacggggugA..... 1  
 Gi2\_10839745\_x2.....gacgucgugggaaacacgAggugccgaac..... 1  
 Gi3\_28135242\_x2....aucggagacgucUuggaaacacggggugc..... 1  
 Gi5\_8740729\_x2....Gucggagacgucgugggaaacacggggugcc..... 1  
 Gi1\_4151723\_x2.....cguggUaacacggggugccgaacu..... 1  
 Gi3\_28221138\_x2.....ucgugggaaacacggggUaccg..... 1  
 Gi2\_10869833\_x2.....gacgucGggaaacacggggugccgaacu..... 1  
 Gi5\_8809569\_x2....aAcggagacgucgugggaaacacgg..... 1  
 Gl1a\_5976884\_x2.....cguggaaacGcggggugcc..... 1  
 Gi3\_27999944\_x2.....cgugggaaacacggAgugc..... 1  
 Gi2\_10894997\_x2.....gUagacgucgugggaaacacggggugccgaa..... 1  
 Gi5\_8784759\_x2.....ggaaacacggggugccgCa..... 1  
 Gi2\_10837301\_x2....ucAgagacgucgugggaaacacg..... 1  
 Gi4\_564438\_x2.....cgucguggNaacacggggugccga..... 1  
 Gi2\_10949629\_x2.....cgCcgugggaaacacgggg..... 1  
 Gi1\_4133275\_x2....Agagacgucgugggaaacacggggugccgaacu..... 1  
 Gi3\_28014108\_x2.....cgugggaaacacggggugcU..... 1  
 Gi1\_4118171\_x2.....gacgucgugggaaacacggggGgcc..... 1  
 Gi5\_8749843\_x2....auUggagacgucgugggaaacacggg..... 1  
 Gi5\_8737365\_x2.....gucguggGacacggggugc..... 1  
 Gi5\_8728661\_x2.....guggaaacacggggugccgaaUuu..... 1  
 Gi1\_4092061\_x2.....acgucgugggaaacacggggGgcc..... 1  
 Gi1\_4096115\_x2.....agacgucgugggaaGcacgggg..... 1  
 Gi2\_10857515\_x2.....acgucgugggaaUacggggugc..... 1  
 Gi5\_8724677\_x2.....gacgucgugggaaUcacggggugccgaacu..... 1

|                                                             |   |
|-------------------------------------------------------------|---|
| Gi1_4117965_x2.....gaacacggAgugccgaac.....                  | 1 |
| Gi2_10876279_x2.....gacgucgugggaacacggggugcUg.....          | 1 |
| Gi4_559086_x2.....uUgugggaacacggggugccgaacu.....            | 1 |
| Gi3_28159726_x2.....gacgucgugggaacacggggugccAaacu.....      | 1 |
| Gi1_4155297_x2.....Cugggaacacggggugccgaacuu.....            | 1 |
| Gi5_8828775_x2.....ugggaacacggggugUcgaac.....               | 1 |
| Gi2_10850973_x2.ugcgauccgagacgucgugggaacacggggugcc.....     | 0 |
| Gi5_8808635_x2.....cgugggaaNacggggugccg.....                | 1 |
| Gi1a_5979918_x2.....aacacggggugccgaaAu.....                 | 1 |
| Gi3_28081320_x2.....cgucgugggaacacggggugcUgaac.....         | 1 |
| Gi5_8734725_x2.....ugggaacacggggugcUgaacuu.....             | 1 |
| Gi2_10932883_x2.....ugggaacacggggugAcg.....                 | 1 |
| Gi1_4113781_x2.....gugggaaUacggggugccgaac.....              | 1 |
| Gi3_28164390_x2.....Nugggaacacggggugcc.....                 | 1 |
| Gi5_8803383_x2.....ugggaacacggggugccgaacuC.....             | 1 |
| Gi3_28163576_x2.....gacgucgugggaacacggggCgccc.....          | 1 |
| Gi2_10883349_x2.....gaucggagacgucguggAaacacggggg.....       | 1 |
| Gi2_10970951_x2.....cgugggaacacgAggugccga.....              | 1 |
| Gi5_8800917_x2.....gugggaacacggggUaccga.....                | 1 |
| Gi2_10886183_x2.....acgucgugggaaAacggggugccgaac.....        | 1 |
| Gi3_28163080_x2.....gaCcacggggugccgaac.....                 | 1 |
| Gi1a_5877092_x2.....gugggaacNcggggugccga.....               | 1 |
| Gi3_28241732_x2.....ucgugggaacacCgggugccgaacu.....          | 1 |
| Gi1a_5888480_x2.....aucggagaNucgugggaacacggggugc.....       | 1 |
| Gi2_10856603_x2.....aucggagacgucguAggaaca.....              | 1 |
| Gi2_10883079_x2.....aucgCagacgucgugggaacacggggugc.....      | 1 |
| Gi5_8797357_x2.....ggaacacUggggugccgaacu.....               | 1 |
| Gi3_28098804_x2.....gucgugggaacacggggugccgU.....            | 1 |
| Gi1_4106851_x2.....gacgucgugggaacacggAgugccgaacu.....       | 1 |
| Gi2_10883295_x2.....agacAucgugggaacacggggugccgaacu.....     | 1 |
| Gi3_28229906_x2.....ucguggUaacacggggugccgaac.....           | 1 |
| Gi2_10934861_x2.....cgugggaacacggggUacc.....                | 1 |
| Gi3_28017260_x2.....Gcgugggaacacggggug.....                 | 1 |
| Gi2_10941677_x2.....gaucggUgacgucgugggaacacgg.....          | 1 |
| Gi3_28258322_x2.....gucgugggaacacggggugccgaaGu.....         | 1 |
| Gi5_8820789_x2.....acgucgugggaacacggggugUcgaacu.....        | 1 |
| Gi2_10865327_x2.....acgucgugggaaGacggggugccgaacu.....       | 1 |
| Gi1_4109851_x2.....gacgucgugggaCcacggggugccgaacu.....       | 1 |
| Gi1_4130005_x2.....guUggaacacggggugccg.....                 | 1 |
| Gi1_4132253_x2.....gggaacacggggugccgaaUu.....               | 1 |
| Gi2_10920719_x2.....gaucggagacguGuggggaacacggggg.....       | 1 |
| Gi2_10908759_x2.....ggaacacggggugccgaaU.....                | 1 |
| Gi1_4119241_x2.....gugggaGcacggggugcc.....                  | 1 |
| Gi2_10856693_x2.....ugggaacacggggugcGgaac.....              | 1 |
| Gi1a_5899480_x2.....cgugggaacacggggCgc.....                 | 1 |
| Gi3_28231924_x2.....gaucggagacgucgugggaacacggggugccgaa..... | 0 |
| Gi5_8777343_x2.....gaucggagacgucguggCacacg.....             | 1 |

|                                                          |   |
|----------------------------------------------------------|---|
| Gi2_10842913_x2.....aucggagacgucgugggaaUa.....           | 1 |
| G1a_5971680_x2....gaucggagGcgucgugggaacacggggu.....      | 1 |
| Gi5_8737609_x2.....cgugggaacacgUggugc.....               | 1 |
| Gi2_10940923_x2....gaucggagacgucgugggCac.....            | 1 |
| Gi3_28002410_x2.....gGcgucgugggaacacggggugcc.....        | 1 |
| Gi5_8806773_x2.....gaNcacggggugccgaacu.....              | 1 |
| Gi1_4111317_x2.....ugggaacacgggCugccg.....               | 1 |
| Gi2_10962673_x2.....cGgagacgucgugggaacacggggu.....       | 1 |
| Gi5_8813193_x2.....ucguAggaacacggggugccgaac.....         | 1 |
| Gi3_28260336_x2....gaucggagacguUgugggaacacgggg.....      | 1 |
| Gi2_10830549_x2.....gaacacCggggugccgaacu.....            | 1 |
| G1a_5906790_x2....aucggGgacgucgugggaacacggg.....         | 1 |
| Gi5_8802959_x2.....gugggaacacgggAugcc.....               | 1 |
| Gi2_10888463_x2.....acgAcgugggaacacggggugc.....          | 1 |
| Gi1_4104319_x2.....agacgucgugggaacGcggggugccg.....       | 1 |
| Gi3_28063668_x2.....ggaNcacggggugccgaa.....              | 1 |
| Gi1_4101189_x2.....guAgugggaacacggggugccgaacu.....       | 1 |
| Gi3_28006960_x2.....cgugggaacaAggggugccga.....           | 1 |
| Gi5_8822113_x2....aucggagacAucgugggaacacg.....           | 1 |
| Gi3_28091158_x2....gaucggagacgucgugggaacacggC.....       | 1 |
| Gi1_4153617_x2.....Uucgugggaacacggggugccgaacu.....       | 1 |
| Gi2_10991095_x2....ucggagacgucgugggaGcacg.....           | 1 |
| Gi2_10895705_x2....gaCcgagacgucgugggaacacggggugc.....    | 1 |
| Gi5_8815801_x2....aucggagacgucgugggCacacggg.....         | 1 |
| Gi3_28045286_x2.....ucgugggaacacggCgugccgaac.....        | 1 |
| Gi1_4126593_x2.....uUgugggaacacggggugccg.....            | 1 |
| G1a_5968806_x2.....ugggaacacggggugccgaacG.....           | 1 |
| Gi3_28221268_x2....aucggagaGgucgugggaacacg.....          | 1 |
| Gi2_10913657_x2.....acgucguAggaacacggggugc.....          | 1 |
| Gi5_8789719_x2....cUgagacgucgugggaacacggggugcc.....      | 1 |
| Gi1_4107905_x2.....ggagGcgucgugggaacacggggugccgaacu..... | 1 |
| Gi1_4112477_x2.....ucgugggaacacggggugccgaaUu.....        | 1 |
| Gi3_28141442_x2....aucggagacgucgugggaacacCgggu.....      | 1 |
| Gi3_28213896_x2.....gaacacggggugGcgaac.....              | 1 |
| Gi2_10924207_x2....aucggagacgucguAggaacacgg.....         | 1 |
| Gi2_10905399_x2.....gacgucgugggCacacggggugccgaacu.....   | 1 |
| G1a_5925060_x2.....gggaacacggggugccga.....               | 0 |
| Gi5_8783875_x2....ucggagacgucgugggaacacggggugccA.....    | 1 |
| Gi2_10903377_x2.....acgucgugggaacacggggAgccgaac.....     | 1 |
| Gi3_28136290_x2.....cguUggaacacggggugcc.....             | 1 |
| Gi2_10947589_x2....ucggagacgucgugggaacacAgggugcc.....    | 1 |
| Gi2_10971517_x2....cggagacgCcgugggaacacggggugc.....      | 1 |
| Gi2_10955077_x2.....Cggaacacggggugccga.....              | 1 |
| Gi3_27994720_x2....gaucggagacguGgugggaacacg.....         | 1 |
| Gi3_28106792_x2.....cgucgugggaacacCggggugccga.....       | 1 |
| Gi3_28045496_x2.....ggagacgucgugggaacacgggAugccg.....    | 1 |
| Gi1_4130417_x2.....cggagacgucgugggCacacggggugc.....      | 1 |



|                 |                                          |   |
|-----------------|------------------------------------------|---|
| Gi4_555574_x2   | .....ugggGacacggggugccgaacu.....         | 1 |
| Gi5_8776827_x2  | .....gucgugggaacacggggugccgaGc.....      | 1 |
| Gi3_28141550_x2 | .....ucgugggaacacggggugcGgaac.....       | 1 |
| Gi1_4091283_x2  | .....cAucgugggaacacggggugcc.....         | 1 |
| Gi3_28139608_x2 | .....cguUgugggaacacggggugccga.....       | 1 |
| Gi5_8804191_x2  | .....cgugggaacacggggugccgaC.....         | 1 |
| Gi4_563672_x2   | .....Augggaacacggggugccgaa.....          | 1 |
| Gi3_28021538_x2 | .....Ncgugggaacacggggugccgaacu.....      | 1 |
| Gi5_8792057_x2  | .....ugggaacacggggugccAaac.....          | 1 |
| Gi1_4105933_x2  | .....gugggaacacggUgugcc.....             | 1 |
| Gi3_28096118_x2 | .....gagacgCcgugggaacacg.....            | 1 |
| Gi5_8796265_x2  | .....gaCcacggggugccgaacu.....            | 1 |
| Gi3_28225604_x2 | .....ggNacacggggugccgaac.....            | 1 |
| Gi2_10892301_x2 | .....ucgugggaCcacggggugccg.....          | 1 |
| G1a_5882998_x2  | .....aucggagacgucgugggaCcac.....         | 1 |
| Gi2_10851589_x2 | .....ggagacgucgugggGacacggggug.....      | 1 |
| Gi1_4119349_x2  | .....cgucgugggaacacggggugccGacu.....     | 1 |
| Gi3_28149576_x2 | .....cguNggaacacggggugc.....             | 1 |
| Gi1_4103487_x2  | .....Augggaacacggggugccgaac.....         | 1 |
| G1a_5905206_x2  | .....aucggagaNgucgugggaacacg.....        | 1 |
| Gi3_28056498_x2 | .....cgucgugggGacacgggg.....             | 1 |
| Gi5_8793035_x2  | .....gaucggagacgucgugggaacacggggG.....   | 1 |
| Gi1_4089611_x2  | .....gacgucgugggaacacggggugccgaGcu.....  | 1 |
| Gi3_28113160_x2 | .....gggaCcacggggugccgaa.....            | 1 |
| Gi5_8751665_x2  | .....ugggaacacggggugccgaC.....           | 1 |
| Gi3_28242404_x2 | .....gcgaucggNgacgucgugggaacacggggu..... | 1 |
| Gi2_10931665_x2 | .....aucggagacgucgugggUacac.....         | 1 |
| Gi2_10897281_x2 | .....ggagacgucgugUgaacacggggugc.....     | 1 |
| Gi3_28079076_x2 | .....aucggagacgucgAgggaacacg.....        | 1 |
| Gi1_4113593_x2  | .....aucggagacgucgugggaacGcggggugcc..... | 1 |
| G1a_5958980_x2  | .....gugggaacCcggggugcc.....             | 1 |
| Gi5_8815895_x2  | .....agacgucgugggaacGcggggugcc.....      | 1 |
| Gi2_10835083_x2 | .....cgugggaacUcggggugccgaac.....        | 1 |
| Gi2_10855043_x2 | .....agacgucgugggaGcacggggugcc.....      | 1 |
| Gi2_10946539_x2 | .....cggagacgucAugggaacacggggugcc.....   | 1 |
| Gi3_28212196_x2 | .....ucUgagacgucgugggaacacggggugcc.....  | 1 |
| Gi5_8812751_x2  | .....ucgugggaacacggggugccgaUcu.....      | 1 |
| Gi5_8734731_x2  | .....acgucgugggaacacggggugccgaGc.....    | 1 |
| Gi4_564840_x2   | .....acgucgugggaacacggggugccgaac.....    | 0 |
| Gi5_8782699_x2  | .....cgucgugggaacacggggAgccgaac.....     | 1 |
| Gi2_10851569_x2 | .....ugggaacacgggAugccga.....            | 1 |
| Gi5_8823893_x2  | .....cguAggaacacggggugccga.....          | 1 |
| Gi5_8797611_x2  | .....cgugggaacacggggugccgUac.....        | 1 |
| Gi4_560444_x2   | .....gugggaacacggAgugccgaacu.....        | 1 |
| Gi2_10980859_x2 | .....acgucgugggaacacgggAugccgaac.....    | 1 |
| Gi2_10837923_x2 | .....aucggagaAgucgugggaaca.....          | 1 |
| Gi1_4156527_x2  | .....acgucgugggaacacggggugccUaacu.....   | 1 |

|                                                           |   |
|-----------------------------------------------------------|---|
| Gi2_10969445_x2.....gagacgucgugggaacacggAgugccg.....      | 1 |
| Gl1a_5910466_x2.....cguggaacCggggugc.....                 | 1 |
| Gi2_10985337_x2.....ugggaCcacggggugccga.....              | 1 |
| Gi2_10864083_x2.....gCcgugggaacacggggugc.....             | 1 |
| Gi2_10916997_x2.....aucggagacgucgugAgaacacggggug.....     | 1 |
| Gi2_10982197_x2.....cggagacgucgugggaCcacggggu.....        | 1 |
| Gi3_28185024_x2.....cgucgugggaacacggggugccgCa.....        | 1 |
| Gi3_27991356_x2.....cggGgacgucgugggaacac.....             | 1 |
| Gi1_4118955_x2.....gggaacaGggggugccgaacu.....             | 1 |
| Gi5_8784927_x2.....aucggagaUgucgugggaacacgg.....          | 1 |
| Gi1_4102743_x2.....ucAugggaacacggggugccgaac.....          | 1 |
| Gi5_8742173_x2.....Ggugggaacacggggugccg.....              | 1 |
| Gi3_28245304_x2.....gagacgucgugggaacacggggguAccgaacu..... | 1 |
| Gi1_4116953_x2.....acgucguAggaacacggggugccgaacu.....      | 1 |
| Gi5_8821753_x2.....cgucgugggCcacggggugccgaacu.....        | 1 |
| Gi3_28131006_x2.....gucgugggaacacggggGgccgaa.....         | 1 |
| Gi1_4094585_x2.....ggaacacggggugccgaaU.....               | 1 |
| Gi2_10835799_x2.....gaucggCgacgucgugggaacacggg.....       | 1 |
| Gi2_10931277_x2.....aucggagCcgucgugggaacac.....           | 1 |
| Gi2_10896623_x2.....gCcgugggaacacggggugccg.....           | 1 |
| Gi5_8757785_x2.....cgugggaacacAgggugcc.....               | 1 |
| Gi5_8758805_x2.....cgucgugggaacCcggggugc.....             | 1 |
| Gi5_8768275_x2.....aacacggggugccgaacu.....                | 0 |
| Gi1_4092105_x2.....cgucgugggaacCggggugcc.....             | 1 |
| Gi1_4150179_x2.....ucUugggaacacggggugccgaac.....          | 1 |
| Gl1a_5946438_x2.....ugggaacaUggggugccgaacu.....           | 1 |
| Gi3_28205088_x2.....gagacgucgugggaacacggggCgccg.....      | 1 |
| Gi3_28052964_x2.....cgucgAgggaacacggggugccgaac.....       | 1 |
| Gi3_28192290_x2.....ggUgacgucgugggaacacggggugccgaac.....  | 1 |
| Gi4_553128_x2.....cgucgugggaacacggggugc.....              | 0 |
| Gi3_28023428_x2.....cggagacgucgugggaacacgAggugccga.....   | 1 |
| Gi2_10829705_x2.....aucggagCcgucgugggaacacggggugc.....    | 1 |
| Gi2_10955355_x2.....ugggaacacggUgugccgaacu.....           | 1 |
| Gi1_4094475_x2.....gucgugggaacacgAggug.....               | 1 |
| Gl1a_5970036_x2.....ggaacacggggugAcgaacu.....             | 1 |
| Gl1a_5956778_x2.....aucggUgacgucgugggaacacggggugc.....    | 1 |
| Gi2_10953255_x2.....Gggagacgucgugggaacacg.....            | 1 |
| Gi2_10872431_x2.....gucgugggaCcacggggugcc.....            | 1 |
| Gi3_28169278_x2.....cgucgugggUacacgggg.....               | 1 |
| Gi1_4139537_x2.....cUucgugggaacacggggugccgaac.....        | 1 |
| Gi5_8820775_x2.....aacacggggugccgGacuuu.....              | 1 |
| Gl1a_5904258_x2.....cgugggaacacgggCugccgaacu.....         | 1 |
| Gi3_28060156_x2.....gucgGgggaacacggggugccgaac.....        | 1 |
| Gi3_28157458_x2.....cggagacgucgugggaAacgggg.....          | 1 |
| Gi3_28105546_x2.....ucgugggaacacggggugccgG.....           | 1 |
| Gi1_4132485_x2.....cgucgugggaAacggggugcc.....             | 1 |
| Gi5_8797835_x2.....gUucggagacgucgugggaacacg.....          | 1 |

|                                                         |   |
|---------------------------------------------------------|---|
| Gi3_28162188_x2..gcgaucggagacgCcguggga.....             | 1 |
| Gi2_10969453_x2.....ggaacacgggCugccgaac.....            | 1 |
| Gi2_10902935_x2.....uggaacacggggGgccgaa.....            | 1 |
| Gi5_8811621_x2.....acgucgugggaGcacggggugccgaac.....     | 1 |
| Gi1_4155791_x2....aucggagacgucAugggaacacggggugcc.....   | 1 |
| Gi2_10955225_x2.....cgCcgugggaacacggggug.....           | 1 |
| Gi2_10963519_x2.....cggagacgucgugggaacacggggG.....      | 1 |
| Gi2_10955087_x2....gaGcggagacgucgugggaacacggggugcc..... | 1 |
| Gi2_10833363_x2.....gugggaCcacggggugccga.....           | 1 |
| Gi2_10933689_x2.....ggagacAucgugggaacacggggugc.....     | 1 |
| Gi3_28137584_x2....gaucggagUcgucgugggaacacgg.....       | 1 |
| Gi1_4143255_x2.....gaacacgggguCccgaacu.....             | 1 |
| Gi3_28168812_x2....aucggagacgucguggUaacacggg.....       | 1 |
| Gi5_8829593_x2.....acgucgugggaacacggggCgcc.....         | 1 |
| Gi3_28253934_x2....aucggagaAgucgugggaacacggg.....       | 1 |
| Gi4_563534_x2.....ucgCgggaacacggggugccgaacu.....        | 1 |
| Gi5_8773127_x2.uAcgaucggagacgucgug.....                 | 1 |
| Gi1a_5933460_x2.....cgugggaacacggggugcAgaacu.....       | 1 |
| Gi1_4150793_x2.....aaNacggggugccgaacu.....              | 1 |
| Gi5_8774735_x2....gaucggagacgucgugggaacCcg.....         | 1 |
| Gi2_10845725_x2.....gugggaacacggggugccCa.....           | 1 |
| Gi2_10919353_x2.....Cgacgucgugggaacacgggg.....          | 1 |
| Gi3_28246310_x2....aucggagacgucgugggaacacgUg.....       | 1 |
| Gi3_28057992_x2.....agacgucgugggaacaUggggugcc.....      | 1 |
| Gi1a_5933084_x2.....Uacgucgugggaacacggg.....            | 1 |
| Gi2_10957855_x2.....cgugggaacacggggugUcgaa.....         | 1 |
| Gi3_28087522_x2....aucggagacgucguggAaacacgggg.....      | 1 |
| Gi2_10860497_x2.....cgucgugggaacaAggggugc.....          | 1 |
| Gi1_4098033_x2.....ucgugggaacacggggug.....              | 0 |
| Gi5_8787299_x2.....gugggaacacggggugccgUac.....          | 1 |
| Gi1_4137739_x2.....ggagacgucgugggaacacggg.....          | 0 |
| Gi1_4136725_x2....aucggagacAucgugggaacacg.....          | 1 |
| Gi3_27990978_x2....cgaucggaNacgucgugggaacacgg.....      | 1 |
| Gi5_8825465_x2.....cgucguggGacacggggugc.....            | 1 |
| Gi1_4140219_x2.....ggagacgucgugggaGcacggggugcc.....     | 1 |
| Gi3_28046572_x2.....acgucgugggaacacAggggugcc.....       | 1 |
| Gi1a_5943140_x2.....acgCcgugggaacacgggg.....            | 1 |
| Gi1_4100241_x2.....gaUcacggggugccgaacu.....             | 1 |
| Gi2_10850753_x2.....cgucgugggaacGcggggugccgaa.....      | 1 |
| Gi5_8764523_x2....ucggagacAucgugggaacacg.....           | 1 |
| Gi3_28237126_x2.....uggNaacacggggugccgaa.....           | 1 |
| Gi2_10896477_x2.....acgucgugggaGacggggugcc.....         | 1 |
| Gi3_27998160_x2.....gacgucguggGacacggg.....             | 1 |
| Gi4_567214_x2.....cgugAgaacacggggugccgaacu.....         | 1 |
| Gi3_28026996_x2....cgaucggagacgucgugggaacCcg.....       | 1 |
| Gi2_10917753_x2....auUggagacgucgugggaacacggggugccg..... | 1 |
| Gi5_8800465_x2.....ucgugggaacacggggugccgaUc.....        | 1 |

G1a\_5889382\_x2.....Uucgugggaacacggggugccgaa..... 1  
 Gi5\_8808277\_x2.....gacgucguggAaacacggggugccgaacu..... 1  
 Gi2\_10872953\_x2.....gucgugggaacGcggggugccgaa..... 1  
 Gi3\_28242198\_x2.....cgugggaCcacggggugc..... 1  
 Gi2\_10989293\_x2.....gacgucgugggaacacgggAugccgaacu..... 1  
 Gi3\_28071538\_x2.....agacgCcgugggaacacggggugcc..... 1  
 G1a\_5928102\_x2.....Gucggagacgucguggga..... 1  
 Gi4\_554326\_x2.....cgucgugggaacacggggCgccga..... 1  
 Gi3\_28008342\_x2.....gugggaacacggggNgccgaacu..... 1  
 Gi3\_28066846\_x2.....ugggaacacggggGgccg..... 1  
 Gi3\_28061106\_x2.....gacgucgugggaacacggggugccgaaUu..... 1  
 Gi3\_28216548\_x2.....acgucgugggGacacggg..... 1  
 Gi2\_10916585\_x2.....aucggagacgucgAgggaacacggg..... 1  
 Gi4\_567268\_x2.....aaUacggggugccgaacu..... 1  
 Gi2\_10873721\_x2.....cggagacgucgugggaacacggggugGc..... 1  
 Gi5\_8774219\_x2.....aucggagGcugcuggggaacacgg..... 1  
 Gi3\_27991632\_x2.....gaucggCgacgucgugggaacacggggg..... 1  
 Gi1\_4150511\_x2.....aucggagacgucgugggaCcacgggg..... 1  
 Gi3\_27996412\_x2.....aucggagacgucUugggaacacgg..... 1  
 Gi3\_27994870\_x2.....gUgacgucgugggaacacg..... 1  
 Gi2\_10924127\_x2.....cgucgugggaacacggAgugcc..... 1  
 Gi5\_8762525\_x2.....gugggaacacAgggugccgaa..... 1  
 G1a\_5914574\_x2.....aGcggagacgucgugggaacacg..... 1  
 Gi4\_566418\_x2.....aacacggggugccgaacA..... 1  
 Gi3\_28176814\_x2.....acAucgugggaacacggg..... 1  
 Gi3\_28067858\_x2.....agacgAcgugggaacacggggugccgaacu..... 1  
 Gi5\_8797781\_x2.....aucggagCcgucgugggaacacg..... 1  
 Gi3\_28170314\_x2.....gacgucgugggGacacggggugccg..... 1  
 Gi2\_10957873\_x2.....gaacacggggugccgaaUu..... 1  
 Gi2\_10889875\_x2.....aucggCgacgucgugggaa..... 1  
 Gi2\_10950255\_x2.....agacgucgugggaaAacggggugc..... 1  
 Gi5\_8718225\_x2.....gagacgucgugggaacacggggugcUgaacu..... 1  
 Gi3\_28086572\_x2.....gaucggagacgucgGgggaacacggg..... 1  
 Gi1\_4153639\_x2.....agacgucgugggaacacggggAgccgaacu..... 1  
 Gi2\_10943333\_x2.....agUcgucgugggaacacggggug..... 1  
 Gi2\_10961961\_x2.....gacgucgugggaacacggggUaccgaacu..... 1  
 Gi2\_10887693\_x2.....gacgucAugggaacacggggugccgaacu..... 1  
 Gi3\_28101734\_x2.....acgucgugggaacacggggugAcgaacu..... 1  
 Gi2\_10878435\_x2.....acgucgugggGacacggggugccgaac..... 1  
 Gi1\_4111519\_x2.....gCgggaacacggggugccgaacuu..... 1  
 Gi5\_8787265\_x2.....ggaacacgUggugccgaacu..... 1  
 Gi2\_10965385\_x2.....cgucgugggaacacggggugcAga..... 1  
 Gi2\_10957045\_x2.....gagacgucAugggaacacggggugccg..... 1  
 Gi5\_8812003\_x2.....aucggagacgucguAggaacacggg..... 1  
 Gi3\_28136648\_x2.....ggaacacggggAgccgaa..... 1  
 Gi3\_28156666\_x2.....cgucgugggaacUcggggugcc..... 1  
 Gi4\_565140\_x2.....cgugggaacacggggugccGacu..... 1

Gi3\_28142548\_x2.....cgugAgaacacggggugccgaa..... 1  
Gi2\_10902593\_x2.....cggagacgucgugggUacacggggu..... 1  
Gi2\_10938639\_x2.....gacgucguNggaacacggggugccg..... 1  
Gi2\_10830753\_x2.....gggaacacggggugccgaU..... 1  
Gi3\_28117766\_x2.....gaucggCgacgucgugggaacac..... 1  
Gi3\_28208108\_x2.....aCacgucguggggaacacggg..... 1  
Gi3\_28024428\_x2.....cgugggaacaUggggugccgaa..... 1  
Gi3\_28162096\_x2.....agacgucguAggaacacggggugcc..... 1  
Gi2\_10935371\_x2.....cggagacgucgugggaacacggUgugcc..... 1  
Gi3\_28012386\_x2.....cgugggaacacUgggugc..... 1  
Gi1\_4132711\_x2.....gaacacggggugccgaCc..... 1  
Gi3\_28170272\_x2.....ggagacgucgugggaacacggggUacc..... 1  
Gi3\_28099810\_x2.....agacgucgCgggaacacgggg..... 1  
Gi3\_28177868\_x2.....cgaucggagacgucgugAgaacacg..... 1  
Gi5\_8828047\_x2.....acUcggggugccgaacuuu..... 1  
Gi3\_27997460\_x2.....aGcggagacgucgugggaacacggggug..... 1  
Gi2\_11122628\_x1..Ugaucggagacgucgugg..... 1  
Gi3\_28847184\_x1.....ugggaacacgggCugccga..... 1  
Gi3\_28551081\_x1..gaucUgagacgucgugggaacacggggugcc..... 1  
Gi5\_8970389\_x1.....aucggagacgucgugggaacacggAg..... 1  
Gi2\_11313772\_x1.....ugggaacacggggAgccga..... 1  
Gi5\_9042366\_x1.....cgugggaacacggggugccUaac..... 1  
Gi5\_8976831\_x1.....gugggaacacggggAgccgaa..... 1  
Gi3\_28550189\_x1.....gucgugggaacacggggugccgaUcu..... 1  
Gi2\_11015436\_x1cugcgauccgagacgucgugAgaacacggggu..... 1  
Gi2\_11113189\_x1.....gaCcgagacgucgugggaacacggg..... 1  
Gi2\_11149341\_x1.....aacacggCgugccgaacu..... 1  
Gi2\_11131368\_x1.....agacgucgugggaacGcggggu..... 1  
Gi2\_11035008\_x1.....ucgugggaacacggggugccgGa..... 1  
Gi3\_28963887\_x1.....gggaacacgUggugccga..... 1  
Gi3\_28563241\_x1.....aucggaCacgucgugggaacacggg..... 1  
Gi3\_28840240\_x1.....ugggaaNacggggugccgaacu..... 1  
G1a\_6120579\_x1.....ugggaacaGggggugccgaacu..... 1  
Gi3\_28668560\_x1.....ggaAacgucgugggaacacggggu..... 1  
Gi1\_4321284\_x1.....ucggagacgucgugggaacaUg..... 1  
Gi3\_28322829\_x1.....cggagacgucgugCgaacacggggugcc..... 1  
Gi3\_28819343\_x1.....Ugucgugggaacacggggugccgaa..... 1  
Gi2\_11161591\_x1.....Gggagacgucgugggaacacggggugccgaacu..... 1  
Gi2\_11086516\_x1..gaucggagacguUgugggaacac..... 1  
Gi3\_28740403\_x1.....cguAgugggaacacggggugccgaacu..... 1  
Gi3\_28786142\_x1..Acgaucggagacgucgugggaac..... 1  
Gi1\_4176926\_x1.....guGgugggaacacggggugccgaacu..... 1  
Gi5\_9136647\_x1.....aucgCagacgucgugggaaca..... 1  
Gi3\_28608358\_x1.....ucgugggaacacggAgugccgaa..... 1  
G1a\_6189167\_x1.....Aggaacacggggugccgaac..... 1  
Gi2\_11270476\_x1.....aacacgCggugccgaacu..... 1  
Gi2\_11165106\_x1..gGgaucggagacgucgug..... 1

Gi5\_8980991\_x1.....cggaAacgucgugggaacacggggugccga..... 1  
 Gi3\_28294608\_x1...gaucggagacgucgugggaacGcggggug..... 1  
 Gi3\_28378442\_x1...gaucggagacAucgugggaacacggg..... 1  
 Gi2\_11139306\_x1.....ggaacacggggAgccgaa..... 1  
 Gi3\_28282645\_x1.....guggaacaacggggugcG..... 1  
 Gi1\_4319330\_x1.....agacgucgugggaacacggggugccgUac..... 1  
 Gi1\_4341799\_x1...gaucggGgacgucgugggaacacgggggu..... 1  
 Gi3\_28850216\_x1..gcgaucggagGcgucgug..... 1  
 Gi1a\_6330843\_x1.....gacgucgugggaacacggggCgccgaacu..... 1  
 Gi2\_11308011\_x1.....cAucgugggaacacggg..... 1  
 Gi1\_4261978\_x1...uGggagacgucgugggaacacgggg..... 1  
 Gi3\_28652732\_x1.....gacgucguAggaacacggg..... 1  
 Gi3\_28641016\_x1...gaucggagacgucguggAaacacggggugc..... 1  
 Gi1\_4198464\_x1.....ucgugUgaacacggggugcc..... 1  
 Gi3\_28973539\_x1.....gagacgucgugggaUacg..... 1  
 Gi5\_9063069\_x1.....gugggaUcacggggugccgaa..... 1  
 Gi3\_28375246\_x1...cgauccgagacgucgugggaacacgC..... 1  
 Gi3\_28659183\_x1.....acgCcgugggaacacggg..... 1  
 Gi3\_28737355\_x1.....cggagacgucgugggaAacggggugcc..... 1  
 Gi1\_4165913\_x1.....ggagacgucgugggaacacggggugcAgaacu..... 1  
 Gi3\_28942045\_x1.....ucgugggaacacggggugccgU..... 1  
 Gi2\_11066244\_x1...aAcggagacgucguggga..... 1  
 Gi2\_11266072\_x1.....ucgugggaacacAgggugccg..... 1  
 Gi5\_8846235\_x1...aucggagacgucgugggaacacggggugccgCacu..... 1  
 Gi5\_8874552\_x1.....gugggaacacggggUaccgaa..... 1  
 Gi3\_28341450\_x1...ucggagacguAgugggaaca..... 1  
 Gi5\_9019608\_x1.....cgucgugggaGcacggggugccga..... 1  
 Gi1\_4356332\_x1.....gugggaacaUggggugcc..... 1  
 Gi3\_28488998\_x1.....Ggggaacacggggugccgaacuu..... 1  
 Gi1\_4366900\_x1...cgauccgagacgucgugggaacacgg..... 0  
 Gi3\_28837703\_x1.....aaUaccggggugccgaacuu..... 1  
 Gi1\_4191378\_x1...gaucggagacgucguggCaacacgg..... 1  
 Gi3\_28491527\_x1.....aacacggggugccgNacu..... 1  
 Gi2\_11298091\_x1.....gacgucguUggaacacggggugccga..... 1  
 Gi1\_4237817\_x1.....ucgugggaacacggggugccUaac..... 1  
 Gi3\_28397309\_x1.....gagacgucgugggaacacggggCgcc..... 1  
 Gi1a\_6211101\_x1.....cguAggaacacggggugcc..... 1  
 Gi4\_611346\_x1...aAcggagacgucgugggaacacggggugcc..... 1  
 Gi2\_11071102\_x1.....ggagacgucgugggaacacggggugccgaaU..... 1  
 Gi3\_28928823\_x1.....aacacggggugccgCcuu..... 1  
 Gi3\_28985380\_x1.....Aagacgucgugggaacacggggugccgaacu..... 1  
 Gi3\_28910134\_x1.....gggaacacggggugccAaacuu..... 1  
 Gi2\_11184932\_x1.....cgucgugggaacacggggugcA..... 1  
 Gi2\_11120754\_x1.....gagacgucgugggaacacggAgugc..... 1  
 Gi1\_4325068\_x1.....gaacacggggugccgCacu..... 1  
 Gi3\_28675818\_x1.....agacgucgugggaacacggggugccgG..... 1  
 Gi2\_11167559\_x1.....cgucgugggaacacgAgggugcc..... 1

|                 |                                        |   |
|-----------------|----------------------------------------|---|
| Gi2_11359568_x1 | ...Aaucggagacgucgugggaaacacggggug      | 1 |
| Gi2_11345505_x1 | ...aacCcggggugccgaacu                  | 1 |
| Gi1_4327042_x1  | ...acgucgugggaacCcggggugccg            | 1 |
| Gi4_603920_x1   | ...gugAgaacacggggugccgaacu             | 1 |
| Gi3_28328867_x1 | ...uggaacaAggggugccg                   | 1 |
| Gi5_9015342_x1  | ...gugggUacacggggugccga                | 1 |
| Gi2_11059688_x1 | ...Ngugggaacacggggugccgaac             | 1 |
| Gi5_9073395_x1  | ...gaucggagGcgucgugggaaacac            | 1 |
| Gi1_4298681_x1  | ...aucggagGcgucgugggaaacacgggg         | 1 |
| Gl1a_6274293_x1 | ...gugggaacNcggggugccgaac              | 1 |
| Gi2_11038285_x1 | ...gggaacacggggugccUaacu               | 1 |
| Gi1_4244145_x1  | ...ugggaacGcggggugccg                  | 1 |
| Gi3_28902587_x1 | ...aGcggagacgucgugggaaacacggggugccgaac | 1 |
| Gl1a_6172531_x1 | ugcgauccggagacgucgugggaaGc             | 1 |
| Gi1_4212845_x1  | ...gacgGcgugggaaacacgggggu             | 1 |
| Gi5_9133234_x1  | ...gugggaacacggggugccgC                | 1 |
| Gi2_11361519_x1 | ...gacgucgugggaaacacAggggu             | 1 |
| Gi3_28911891_x1 | ...cgaAcggagacgucguggg                 | 1 |
| Gi1_4302220_x1  | ...cggaAacgucgugggaaacacggggugcc       | 1 |
| Gi2_11316126_x1 | ...gaacacggggugccgaaGu                 | 1 |
| Gi2_11343646_x1 | gcgauccggagCcgucgugggaaacacgg          | 1 |
| Gi2_11019399_x1 | ...cggUgacgucgugggaaacacggggug         | 1 |
| Gi2_11353185_x1 | ...gacgucgugAgaacacgggggu              | 1 |
| Gi3_28879965_x1 | ...ggagacgucgugggaaacacggggugccgaG     | 1 |
| Gi1_4383027_x1  | ...gaucggagacgucgugggaaac              | 0 |
| Gl1a_6083496_x1 | ...gGucggagacgucgugggaaacac            | 1 |
| Gi1_4387548_x1  | ...ggagacgucgugggaaUacggggugccgaacu    | 1 |
| Gi1_4168797_x1  | ...gugggaacacAgggugccg                 | 1 |
| Gi4_600927_x1   | ...guggUaacacggggugccgaac              | 1 |
| Gi3_28793693_x1 | ...gaucggagacgucgugggaaacacggAgugcc    | 1 |
| Gi2_11156589_x1 | ...cgauccggagacgGcgugggaaacac          | 1 |
| Gi3_28281011_x1 | ...cgucgugggaaacCcgggg                 | 1 |
| Gi5_9032690_x1  | ...agacgucgugAaacacggggugccgaac        | 1 |
| Gi3_28638353_x1 | ...agacgucgugAgaacacggggugcc           | 1 |
| Gi2_10994167_x1 | ...agacgucgugggaaacGcggggugccgaac      | 1 |
| Gi5_8888406_x1  | ...Ucgucgugggaaacacggggugccgaacuuu     | 1 |
| Gl1a_6103669_x1 | ...gggaacacggggugcAgaacu               | 1 |
| Gi2_11147578_x1 | gcgNucggagacgucgugggaaacacggg          | 1 |
| Gl1a_6330344_x1 | ...aucggagacgucgugAgaacacgggggu        | 1 |
| Gi2_11390093_x1 | ...cgauccggGgacgucgugggaaacac          | 1 |
| Gi3_28773657_x1 | ...gugggaacacggggugccCaa               | 1 |
| Gi2_11303929_x1 | ...cggaUacgucgugggaaacacg              | 1 |
| Gi5_9053409_x1  | ...gaucggagacgucgugAgaacacgg           | 1 |
| Gi2_11254428_x1 | ...gucgugggaaacGcggggugccg             | 1 |
| Gl1a_6302716_x1 | ...ugggaacacggCgugccgaacu              | 1 |
| Gi2_11053412_x1 | ...gucgugggaaacacggggug                | 0 |
| Gl1a_6151794_x1 | ...gCgaacacggggugccgaa                 | 1 |

Gi3\_28712193\_x1...gaucggagacgucgugUgaacacggggu..... 1  
Gi1\_4258260\_x1.....agacgucguggAaacacggg..... 1  
Gi2\_11118874\_x1.....cgucgugCgaacacggggugccgaacu..... 1  
Gi1\_4237373\_x1.....ucguggaacaAggggugccgaacu..... 1  
G1a\_6316284\_x1.....ggagacgucguggAaacac..... 1  
Gi2\_11142885\_x1.ugcgauCGNagacgucgugggaacacg..... 1  
Gi3\_28690215\_x1.....gacgucgugggaacaUggg..... 1  
Gi3\_28890054\_x1.ugcgauCGgagacgucGC..... 1  
Gi3\_28304405\_x1.....cguggaacaacgggCugcc..... 1  
Gi2\_11285018\_x1.....cggagacgucgugggaacacUgggugcc..... 1  
Gi2\_11210708\_x1.....cgaUacgucgugggaacacggggugccga..... 1  
Gi2\_11225544\_x1...gaucggagacgucguUggaacac..... 1  
Gi3\_28342185\_x1...cgauCGgagacgucgugUg..... 1  
Gi2\_11217651\_x1.....cggagacgucgugggaAaacggggu..... 1  
Gi3\_28366014\_x1.....agacgucgugggaacacUgggugccgaa..... 1  
Gi2\_11333671\_x1...gaucggagacgucgugggaUacggggugcc..... 1  
Gi1\_4241795\_x1.....cgugUgaacacggggugccgaacu..... 1  
Gi3\_28684411\_x1.....agacgucgugggaUacggggugccga..... 1  
Gi3\_28645682\_x1.....cCgagacgucgugggaacac..... 1  
Gi2\_11031034\_x1.....ucguggaacaacggggugUcgaa..... 1  
Gi2\_11048682\_x1.....cguggaacaacggggugcAga..... 1  
Gi5\_8876791\_x1.....ucguggaacGcggggugccgaac..... 1  
Gi3\_28689546\_x1.....gucguggaacaacgggAugcc..... 1  
G1a\_6342655\_x1.....acguUguggaacaacggggu..... 1  
Gi4\_576864\_x1.....gucguggaacCggggugccga..... 1  
Gi1\_4327534\_x1...cgauCGgagacgucgugU..... 1  
Gi3\_28409597\_x1.....cggagacgucgugggaacacggggugccAa..... 1  
Gi5\_8987905\_x1.....aucGUagacgucgugggaacac..... 1  
Gi5\_8936980\_x1.....agacgucguggAaacacggggugccgaacu..... 1  
Gi1\_4264513\_x1.....gagacgucguggUaacacggggugccgaacu..... 1  
Gi2\_11139991\_x1.....acgucgugggaacacgAggugccgaacu..... 1  
Gi1\_4269759\_x1.....cgAgggaacaacggggugccga..... 1  
Gi1\_4193415\_x1.....cggagacgucgugggaacacAgggugc..... 1  
Gi5\_9105812\_x1.....acgucgugggaacGcggggugccgaac..... 1  
Gi1\_4381477\_x1.....cgucguggUaacacggggugccgaacu..... 1  
Gi2\_11191714\_x1.....gagacgucgugggaacacgggCug..... 1  
Gi3\_28679122\_x1.....gucgugggaacacggggugcAga..... 1  
Gi2\_11118558\_x1.....agacgucNgggaacacggggugccgaa..... 1  
Gi3\_28512226\_x1.....cgUagacgucgugggaacac..... 1  
Gi3\_28309262\_x1.....gaacacggNgugccgaacu..... 1  
Gi2\_11353046\_x1.....cguggaacaAggggugccga..... 1  
Gi5\_9001498\_x1.....ugggaaUacggggugccgaacuuu..... 1  
Gi3\_28623172\_x1.....cggagacgucgugggaacacggggugcUg..... 1  
Gi3\_28913063\_x1.....guggaacaacggggugccNaac..... 1  
Gi3\_28985650\_x1.....agacgucNgggaacacggggu..... 1  
G1a\_6047474\_x1.....gucgAgggaacaacggggugccgaacu..... 1  
Gi1\_4254413\_x1.....ugggaacaacgCgggugccgaacu..... 1



Gi2\_11170793\_x1.....Agucgugggaacacggggugccga..... 1  
 Gi3\_28389049\_x1.....Ccgucgugggaacacggggugccgaa..... 1  
 Gi2\_11031614\_x1....gaucggagacgCcgugggaac..... 1  
 Gi5\_8930557\_x1.....Ugacgucgugggaacacggggugccga..... 1  
 Gi2\_11280712\_x1..gcgaucggNgacgucgugggaacacggg..... 1  
 Gi4\_585580\_x1.....Ucgucgugggaacacggggugccgaacu..... 1  
 Gi2\_11168519\_x1....gaucggagacgucGgggaacacggggg..... 1  
 Gi5\_8930869\_x1....aucggaUacgucgugggaacac..... 1  
 Gi3\_28978603\_x1....ucggagacgucgugggaacacggggugccgG..... 1  
 Gl1\_6315566\_x1....aucggagacgucgugggaacaUggggg..... 1  
 Gi1\_4380659\_x1.ugUgaucggagacgucgugggaaca..... 1  
 Gi3\_28401813\_x1....aucggagacgucguggCaacacgggg..... 1  
 Gi1\_4258367\_x1....gaucggagacgucguggAaacac..... 1  
 Gi1\_4370350\_x1....cggagacgucgugggaacacg..... 0  
 Gi3\_28574391\_x1.....gggaacUcggggugccga..... 1  
 Gi5\_8834860\_x1.ugcgauNagacgucgugg..... 1  
 Gi1\_4354864\_x1.....ucAugggaacacggggugccg..... 1  
 Gi3\_28609589\_x1....cggagacgucgugggaacacggggugcU..... 1  
 Gi1\_4319439\_x1.....gaUgucgugggaacacggggugccg..... 1  
 Gi3\_28688492\_x1.....agacgCcgugggaacacggg..... 1  
 Gi2\_11248460\_x1....gagacgucgugggaacacggggugccgCacu..... 1  
 Gi3\_28963821\_x1.....gCcgugggaacacggggugccga..... 1  
 Gi5\_9092751\_x1.....cgucguAggaacacggggugccgaac..... 1  
 Gi2\_11242936\_x1.....cgucgugggaacacAgggugccgaa..... 1  
 Gl1\_6147578\_x1....Aaucggagacgucguggga..... 1  
 Gi5\_9107007\_x1.....ucguUggaacacggggugccgaac..... 1  
 Gi2\_11198605\_x1.....cgAgggaacacggggugccg..... 1  
 Gi2\_11205126\_x1....aucggagacguAgugggaacacg..... 1  
 Gi1\_4307503\_x1.....ggaacacggggguAccgaac..... 1  
 Gl1\_6263650\_x1.....cgugggaacUcggggugccgaacu..... 1  
 Gi2\_11202595\_x1....cggagacguGgugggaacacg..... 1  
 Gi3\_28629292\_x1....gaucggagacgucgugAgaaca..... 1  
 Gi3\_28384105\_x1.....ggagacgucgugggaacacgggggU..... 1  
 Gi1\_4368670\_x1....aucAgagacgucgugggaacacgggg..... 1  
 Gi3\_28762678\_x1....gaucggagacgucAugggaacacggggugc..... 1  
 Gi3\_28951989\_x1....aucggagacgCcgugggaacacggggugccgaac..... 1  
 Gl1\_6045006\_x1.....ggaacacggggugccgaCcu..... 1  
 Gi3\_28364139\_x1....auAggagacgucgugggaacacg..... 1  
 Gi3\_28983725\_x1.....uGgugggaacacggggug..... 1  
 Gl1\_6139174\_x1.....cgugggaacUcggggugcc..... 1  
 Gl1\_6016308\_x1.....gugggGacacggggugccga..... 1  
 Gi2\_11079803\_x1....Gcggagacgucgugggaac..... 1  
 Gi1\_4273652\_x1.....acgucgugggaacacggggAgcc..... 1  
 Gi5\_8978669\_x1.....gUaacacggggugccgaa..... 1  
 Gl1\_6032304\_x1..gUgaucggagacgucgug..... 1  
 Gi5\_8832899\_x1.....gggaacacggggguAccgaa..... 1  
 Gi3\_28724451\_x1....cgNcgugggaacacggggugccgaacu..... 1

|                 |                                            |   |
|-----------------|--------------------------------------------|---|
| Gi5_8862117_x1  | .....gaucggagacgucgugAgaacacg.....         | 1 |
| Gi5_9060853_x1  | .....aucggagacgCcgugggaaca.....            | 1 |
| Gi2_11352061_x1 | .....acgucgugggaacaAggggugccga.....        | 1 |
| Gi3_28630688_x1 | .....gagacgucgugggaacacgggg.....           | 0 |
| Gi2_11046009_x1 | .....gucgugggaacacggggAgccga.....          | 1 |
| Gi1_4238076_x1  | .....ucggagacgAcgugggaacacgggg.....        | 1 |
| Gi1_4174464_x1  | .....cgugggaacGcgggugccgaac.....           | 1 |
| G1a_6328464_x1  | .....gucgugggNacacggggugcc.....            | 1 |
| Gi5_8835936_x1  | .....acuuucccagcgUgccugugcccacc.....       | 1 |
| Gi3_28272022_x1 | .....uNgugggaacacggggugccgaacu.....        | 1 |
| Gi2_11391185_x1 | .....ucAgagacgucgugggaacacggggg.....       | 1 |
| Gi3_28282485_x1 | .....ucggagacgAcgugggaacac.....            | 1 |
| Gi2_11233902_x1 | .....cggagacgNcgugggaaca.....              | 1 |
| Gi3_28838063_x1 | uUcgauccgagacgucgugggaacacggggg.....       | 1 |
| Gi2_11083912_x1 | .....ucggagacgucgugAgaacacg.....           | 1 |
| Gi3_28738715_x1 | .....ucgugggaacaAggggugccgaac.....         | 1 |
| Gi2_11303853_x1 | .....gaucggagacgucgugggaacacgggU.....      | 1 |
| Gi3_28856103_x1 | .....gucgugggaacacggcCgugcc.....           | 1 |
| Gi4_578422_x1   | .....ucgugggaacacggggugccUaacu.....        | 1 |
| Gi4_571901_x1   | ugcgauccgagacgucgugggaacac.....            | 0 |
| Gi3_28335977_x1 | .....cggagacgucgugggaacacA.....            | 1 |
| Gi1_4218468_x1  | .....ucggagacgucAugggaacacg.....           | 1 |
| Gi3_28834180_x1 | .....acgucgugggaacacAgg.....               | 1 |
| Gi2_11313282_x1 | .....cgucgugggaacacgggCugccgaacu.....      | 1 |
| Gi2_11108709_x1 | .....aucggUgacgucgugggaa.....              | 1 |
| Gi2_11100770_x1 | .....gugggaacacggggugGcgaa.....            | 1 |
| Gi3_28452377_x1 | .....gNgggaacacggggugccgaac.....           | 1 |
| Gi4_613798_x1   | .....gaacacggNgugccgaacu.....              | 1 |
| Gi3_28565849_x1 | .....Nugggaacacggggugccg.....              | 1 |
| Gi2_11383106_x1 | .....uGggagacgucgugggaacacgggg.....        | 1 |
| Gi2_11351485_x1 | .....gaucggagCcgucgugggaacacggggugcc.....  | 1 |
| Gi3_28302697_x1 | gcgaCcgagacgucguggga.....                  | 1 |
| Gi3_28620522_x1 | .....ucggagacgucgugggaacaAgggg.....        | 1 |
| Gi2_11234850_x1 | .....ggagacgucgugggaacaA.....              | 1 |
| G1a_6141373_x1  | .....cggagacgucgugggaGcacggg.....          | 1 |
| Gi3_28398628_x1 | .....ucggagacgCcgugggaaca.....             | 1 |
| Gi3_28673091_x1 | .....cgugggaacaAggggugccg.....             | 1 |
| Gi3_28552725_x1 | .....ggagacgucgugggaacac.....              | 0 |
| G1a_6085658_x1  | .....aucggagacgucgugggaacacggCg.....       | 1 |
| Gi2_11350056_x1 | .....aucggagacgucgugggaacacAg.....         | 1 |
| Gi2_11097560_x1 | .....gugggaaGacggggugccgaa.....            | 1 |
| Gi2_11024595_x1 | .....gugggaacacggggugcAga.....             | 1 |
| Gi3_28808150_x1 | .....Caucggagacgucgugggaacacggggugccg..... | 1 |
| Gi3_28391473_x1 | .....aucggagacgCcgugggaacacgggg.....       | 1 |
| Gi2_11389550_x1 | .....gucgugggaacacggggugA.....             | 1 |
| Gi2_11069502_x1 | .....ggagacgucgugggaacGcggggug.....        | 1 |
| Gi3_28294614_x1 | .....cgucgugCaacacggggugc.....             | 1 |

Gi3\_28677986\_x1.....aucggagacUucgugggaacacgg..... 1  
Gi3\_28799723\_x1.....aucggagacguAgugggaacacg..... 1  
Gi2\_11073660\_x1.....uggAaacacggggugccgaacuu..... 1  
Gi3\_28912650\_x1..Ucgauccgagacgucgugggaacacggggug..... 1  
Gi2\_11125928\_x1.....gaucggagacgucgugggaacUcggggugcc..... 1  
Gi2\_11165980\_x1.....cAucgugggaacacggggugccgaac..... 1  
Gi3\_28866673\_x1.....cgucgugggaacacCggg..... 1  
Gi1\_4220535\_x1.....aucggagacgucgugggaacaUg..... 1  
Gi3\_28636499\_x1.....auAggagacgucgugggaacacgg..... 1  
Gi3\_28315878\_x1.....acacggggNgccgaacuu..... 1  
Gi2\_11200488\_x1.....ucggagacguUgugggaacacggggugc..... 1  
Gi5\_8883935\_x1.....acUucgugggaacacggggugccgaac..... 1  
Gi5\_9021028\_x1.....acgucgugggaCcacggggugccgaac..... 1  
Gi1\_4244440\_x1.....cgucgugggCacacggggugcc..... 1  
Gi2\_11355610\_x1.....Acggagacgucgugggaacacgggg..... 1  
Gi5\_9115980\_x1.....gugggaacacggggUaccg..... 1  
Gi3\_28295354\_x1.....cgugggaacacgggUugccg..... 1  
Gi3\_28276702\_x1.....cggagacgucgugggaacacgAg..... 1  
Gi1\_4246474\_x1.....acgucgugggaacacggggAgccgaacu..... 1  
Gi3\_28652015\_x1.....cgucgugggaacaUggggugccgaa..... 1  
Gi2\_10993657\_x1.....cgauccgagacguUgugggaacacggg..... 1  
Gi2\_11139858\_x1.....agacgucgugggaacacgAggugccga..... 1  
Gi3\_28911524\_x1.....gucgugggaacacggggugA..... 1  
Gi2\_11392832\_x1.....gacgucgugggaacacggggugAcg..... 1  
Gi5\_8830899\_x1.....ucgugggaacCggggugcc..... 1  
Gi3\_28445666\_x1.....gacgucgAgggaacacggg..... 1  
Gi2\_11235763\_x1.....ugggaacacggggugccgaU..... 1  
Gi1\_4253366\_x1.....gacgCcgugggaacacggggugcc..... 1  
Gi4\_603115\_x1.....auAggagacgucgugggaacacggggugcc..... 1  
G1a\_6212267\_x1.....cgugggaacacggggCgcccgaac..... 1  
G1a\_6214735\_x1.....acgucgugggaCcacggggugccgaacu..... 1  
G1a\_6328193\_x1.....ggaacacgggCugccgaacu..... 1  
G1a\_6164968\_x1..ugcgauccgagacgucUg..... 1  
Gi5\_8893126\_x1.....gagacgucgugggaGcacg..... 1  
Gi4\_609212\_x1.....Caacacggggugccgaacu..... 1  
G1a\_6118270\_x1.....aucgUagacgucgugggaacacggggg..... 1  
Gi5\_8935569\_x1.....cguggAaacacggggugc..... 1  
Gi3\_28627026\_x1..gcgaGcggagacgucgugggaacacggg..... 1  
Gi1\_4187356\_x1.....gCcgugggaacacggggug..... 1  
Gi3\_28849959\_x1.....aucggagacgucgugggaacacggggugccgaCc..... 1  
Gi2\_11256263\_x1.....cgucgugggaacacggggg..... 0  
Gi2\_11380151\_x1.....aucggagacAucgugggaacacggggug..... 1  
Gi2\_11384385\_x1.....gaucggagacgucgugggaacacggggugccgaacA..... 1  
Gi2\_11135749\_x1.....ggagacgucgugggaAacggggugcc..... 1  
G1a\_6120721\_x1.....ucggagacgucgugggaacCggggugc..... 1  
Gi1\_4287381\_x1.....acgucgugggCacacggggugccgaacu..... 1  
Gi2\_11077807\_x1.....Nucggagacgucgugggaacacggggugcc..... 1

Gi2\_11119671\_x1.....ucggagacNucgugggaacac..... 1  
 Gi2\_11142481\_x1...gaucggagacgucguAggaaacacggg..... 1  
 Gi1\_4384652\_x1.....gacgucgugggaaUacggggugcc..... 1  
 Gi2\_11106817\_x1.....ucggagGcgucgugggaaacacgggg..... 1  
 Gi4\_569912\_x1.....gugggaacacggggugccgaG..... 1  
 Gi3\_28648564\_x1.....ggagacgucgugggaaacacggggCgccga..... 1  
 Gi3\_28582647\_x1....aucggagacgucgugggaaacacggggGgccgaacu..... 1  
 Gi3\_28662362\_x1.....ggagacgucgugggCacacggggugcc..... 1  
 Gi3\_28969706\_x1.....cgucgugggaaacacgUggugc..... 1  
 Gi2\_11220097\_x1.....acgucgugggaaacacggggugccUacu..... 1  
 Gi3\_28505871\_x1.....ggagacgucgugggUacacggggugccgaa..... 1  
 Gi1\_4367318\_x1.....agGcgucgugggaaacacggggugccgaacu..... 1  
 Gi2\_11347654\_x1.....agacgucgugggaaacacggggugccgaacuA..... 1  
 Gi3\_28961832\_x1.....gacgucgugggCacacggg..... 1  
 Gi3\_28502334\_x1.....acgucgugggaaacacggggugGcgaac..... 1  
 Gi3\_28654780\_x1.....cggagacgucgGggaaacacgggg..... 1  
 Gi2\_11193383\_x1....aucggagacgucgugggaaacacggggCugcc..... 1  
 Gi2\_11245259\_x1.....acgucgugggaaacacggggugccAaacu..... 1  
 Gi1\_4272121\_x1.....cguUggaacacggggugccgaacu..... 1  
 Gi3\_28742296\_x1.....ucgugggaaacacgUggugccgaac..... 1  
 Gi2\_11237777\_x1.....agacgucgugggaaacacggggCgccg..... 1  
 Gi1\_4322489\_x1.....ggaaacacggggugccgCac..... 1  
 Gi4\_613083\_x1.....cgugggaaacacgUggugccgaacu..... 1  
 G1a\_6106449\_x1.....ggagacgucgugggaaacacggggGgc..... 1  
 Gi3\_28459918\_x1..gcgaucggagacgucgCgggaacacggg..... 1  
 Gi2\_11029013\_x1.....gagacgucguAggaaacacggggugc..... 1  
 Gi4\_611087\_x1.....ugggaacacggggugccgaa..... 0  
 Gi2\_11036564\_x1.....gucgCgggaacacggggugccgaa..... 1  
 Gi1\_4245930\_x1.....ggaacacCggggugccgaacu..... 1  
 Gi2\_11084750\_x1....aucggagacgucgugggaaacacggggGgccg..... 1  
 Gi3\_28977401\_x1.....gacgucgugggaaacCggggugccgaacu..... 1  
 Gi2\_11098121\_x1.....acgucgugggaaacCggggugc..... 1  
 Gi5\_9017717\_x1.....cgucgugggaaacacggggugccga..... 1  
 Gi1\_4216268\_x1.....ucggagacgucgugggaaacacg..... 1  
 Gi5\_9013082\_x1.....cgugggaaacacggAgugcc..... 1  
 Gi3\_28671939\_x1...gUucggagacgucgugggaaacacggggug..... 1  
 Gi5\_8920634\_x1.....ggagacgucgugGaaacacggggugccgaacu..... 1  
 Gi2\_11353603\_x1...gaucggagacgucgGggga..... 1  
 Gi3\_28311568\_x1.....ucggagacgucgugggaaacacggggGgcc..... 1  
 Gi2\_11107956\_x1.....cggagacgCcgugggaaacacg..... 1  
 G1a\_6040698\_x1....aucggagacgucgugggaaacCggggug..... 1  
 Gi4\_600100\_x1.....acgucgugggaaacacggggugccgCacu..... 1  
 Gi3\_28550315\_x1.....cgucCugggaaacacggggugccg..... 1  
 Gi3\_28594175\_x1...gaucggagacgucgugggCacacggggugc..... 1  
 Gi3\_28732975\_x1....aucUgagacgucgugggaaacacgggg..... 1  
 Gi3\_28423268\_x1.....ucguggCaacacggggugccgaa..... 1  
 Gi2\_11215250\_x1.....gagacgucgugggaaacacggggUccgaacu..... 1

Gi2\_11143258\_x1.....aucggagacgucgugggaaUacgggg..... 1  
Gi3\_28980992\_x1.....cgucgugggaacacgggguA..... 1  
Gi2\_11250310\_x1.....ugggaacacgggguAccga..... 1  
Gi1\_4259715\_x1.....ucgugggaCcacggggugccgaa..... 1  
Gi5\_8985350\_x1....gaucggagacgucgugggGacacg..... 1  
Gi3\_28879032\_x1.....ggagacguNgugggaacacggggugccga..... 1  
Gi3\_28446330\_x1.....ucgugggaCcacggggugccga..... 1  
Gi2\_11089603\_x1.....ugggCacacggggugccgaa..... 1  
Gi5\_9129050\_x1.....acgucgugggaacGcggggugccga..... 1  
Gi2\_11297268\_x1....gaucggagacgucguggggaacacgCggu..... 1  
Gi5\_9006437\_x1.....Ugucgugggaacacggggugccga..... 1  
Gi4\_574258\_x1....gaAcggagacgucguggggaacacggg..... 1  
Gi5\_8921686\_x1.....gaAgucgugggaacacggggugccgaacu..... 1  
Gi5\_8877968\_x1....aucggGgacgucguggggaacacggggugc..... 1  
Gi2\_11225060\_x1....gGucggagacgucguggggaacacggggugcc..... 1  
Gi2\_11106205\_x1.....gacgucgugggaCcacggggugcc..... 1  
G1a\_6313170\_x1.....gugAgaacacggggugccgaac..... 1  
Gi2\_11200223\_x1.....agacgucgugCgaacacggggugc..... 1  
Gi1\_4218624\_x1.....gagaUgucgugggaacacggggugccgaacu..... 1  
Gi4\_567457\_x1.....agacgucgNgggaacacggggugccgaacu..... 1  
Gi2\_11214558\_x1.....cgucgugggaCcacggggugccgaac..... 1  
Gi2\_11156498\_x1....cgauccgagacgucguggggaGcacggg..... 1  
Gi1\_4308818\_x1.....aacacggggugccgaCcuu..... 1  
G1a\_6245317\_x1....aucggagacgucgugAgaacacggg..... 1  
Gi3\_28941250\_x1.....cggagacgucguggggaacacggggGgccgaacu..... 1  
Gi2\_11360434\_x1....cgUagacgucguggggaaca..... 1  
Gi2\_11255009\_x1.....gugggaacacgCggugccg..... 1  
Gi2\_11040597\_x1.....gugggaUcacggggugccga..... 1  
Gi2\_11365090\_x1....aucggagaUgucguggggaaca..... 1  
Gi1\_4334876\_x1.....acgucgugggaacCcgggugcc..... 1  
Gi1\_4221133\_x1.....acgucgAgggaacacggggugccgaacu..... 1  
Gi1\_4164106\_x1.....acgucguggAaacacggggugcc..... 1  
Gi2\_11312986\_x1.....gacgucgCgggaacacgg..... 1  
Gi2\_11379039\_x1.....gggaacacggCgugccgaacu..... 1  
Gi5\_8896311\_x1.....acacggggugcUgaacuuu..... 1  
Gi3\_28492636\_x1.....ugggaacacgCggugccga..... 1  
G1a\_6306128\_x1....Acggagacgucguggggaacacgg..... 1  
G1a\_6085840\_x1.....cgugggaacacggggugccA..... 1  
Gi2\_11145505\_x1....cgauccgagacgucguggggaCcacggggug..... 1  
Gi3\_28336215\_x1.....Aacgucguggggaacacggggugcc..... 1  
Gi3\_28635996\_x1.....acgucguggggaacacggggugccCaacu..... 1  
Gi2\_11062247\_x1.....gugggaacacggggugAcgaa..... 1  
Gi1\_4213141\_x1.....gAagacgucguggggaacacggggugcc..... 1  
Gi1\_4225865\_x1.....Agggaacacggggugccgaac..... 1  
Gi5\_9014322\_x1.....ucguggCaacacggggugccgaac..... 1  
Gi1\_4179114\_x1.....agacgucguggCcacggggugccgaacu..... 1  
G1a\_6237566\_x1.....gacguUguggggaacacggggg..... 1

Gi3\_28768230\_x1.....aucggagacgucgugggaaUac..... 1  
Gi2\_11080391\_x1.....cgugggaaacacgCggugccga..... 1  
Gi2\_11095628\_x1.....gaucggagacgucguggAaaca..... 1  
Gi3\_28962790\_x1.....gagaUgucgugggaaacacggggu..... 1  
Gi2\_11369382\_x1.....acgucgugggaaacacgggAugcc..... 1  
Gi2\_11138233\_x1.....cgauccgagacgucgugggGcaccg..... 1  
Gi3\_28921487\_x1.....aucggagacguAgugggaaacacggg..... 1  
Gi4\_588889\_x1.....gugggaacacggggugccgUacu..... 1  
G1a\_6131155\_x1.....gaucggagacgucguUggaa..... 1  
Gi2\_11036193\_x1.....gaucggagacgucgugUgaacac..... 1  
G1a\_6004077\_x1.Cgcgaucggagacgucgu..... 1  
Gi2\_11012581\_x1.ugcgaucggGgacgucgugggaaaca..... 1  
Gi3\_28483621\_x1.....cggagacguUgugggaaacacggggugccgaacu..... 1  
Gi2\_11403354\_x1.....Cgacgucgugggaaacacggggugccgaac..... 1  
Gi2\_11162057\_x1.....cggagacgucgugggaaacUcggggugcc..... 1  
Gi2\_11167665\_x1.....gacgucgugggaaGacggggugcc..... 1  
G11\_4288269\_x1.....gagacgucgugggaaacacggggugccgaacu..... 0  
Gi2\_11132452\_x1.....gagacgucgugggaaacaUggggugccgaacu..... 1  
G11\_4371593\_x1.....ucggagacgucgugggaaacacggggugA..... 1  
Gi2\_11134102\_x1.....cgugggaaacacggggGgccga..... 1  
Gi3\_28465573\_x1.....agacgucgugggaaAacggg..... 1  
Gi2\_11264968\_x1.....cggagaUgucgugggaaacacggggugcc..... 1  
Gi5\_9100732\_x1.....agacgucgugggaaCcacggggugccgaac..... 1  
Gi2\_11203010\_x1.....cgAcgugggaaacacggggugccgaa..... 1  
G11\_4269033\_x1.....gagacgucgugggaaGacggggugccgaacu..... 1  
Gi2\_11256240\_x1.....aucggagacgucAugggaa..... 1  
Gi2\_11138303\_x1.....Caucggagacgucgugggaaacacggggug..... 1  
Gi2\_11008382\_x1.....gauNggagacgucgugggaaacacggggugc..... 1  
Gi3\_28807723\_x1.....gugggaacacgggUugccgaa..... 1  
Gi3\_28617598\_x1.....ggaacacggUgugccgaa..... 1  
Gi2\_11389867\_x1..gNgaucggagacgucgugggaa..... 1  
Gi3\_28656718\_x1.....cggagacgucgugggUaacacggg..... 1  
Gi2\_11238122\_x1.....gagacgucAugggaaacacggggugc..... 1  
Gi3\_28507154\_x1.....gucgugggaaacGcggggug..... 1  
Gi2\_10993227\_x1..gCgaucggagacgucguggUa..... 1  
Gi3\_28969845\_x1.....gAgggaacacggggugccgaacu..... 1  
Gi2\_11298927\_x1.....gaucggagacgucgCgggaacacggggugc..... 1  
Gi3\_28797821\_x1..cgauccgagacgucgugAg..... 1  
Gi5\_8940636\_x1.....cgucgugggaaacacggggugccgaUcu..... 1  
Gi3\_28826877\_x1.....cggagacgucgugggaaAacggg..... 1  
Gi3\_28749277\_x1.....acgucgugggaaacacggAgugccgaac..... 1  
Gi5\_9035495\_x1.....gugggaacacggUgugcc..... 1  
G1a\_6359968\_x1.....gggaacacNgggugccgaac..... 1  
Gi3\_28326781\_x1.....gaucUgagacgucgugggaaacacggggugccga..... 1  
Gi3\_28351861\_x1.....ucgugggGacacggggugc..... 1  
G11\_4227534\_x1.....acgucgugggaaacacggggugccAa..... 1  
G11\_4302484\_x1..cCaucggagacgucgugggaaacacgggg..... 1

Gi3\_28526411\_x1.....gacgucgugggUacacggggugccg..... 1  
 Gi2\_11379852\_x1.....ggagacAucgugggaacacggggugccgaacu..... 1  
 Gi3\_28629756\_x1.....ggagGcgucgugggaacacggggugccgaacu..... 1  
 Gi3\_28399668\_x1...gCucggagacgucgugggaacacggggugc..... 1  
 Gi1\_4234322\_x1.....cCugggaacacggggugccg..... 1  
 Gl1a\_6145285\_x1.....gCgggaacacggggugccgaa..... 1  
 Gl1a\_6229925\_x1....aucgUagacgucgugggaacacgggg..... 1  
 Gi2\_11157716\_x1.....ggagacgucgugggaacacggggAgccg..... 1  
 Gi2\_11225583\_x1.....cggagacgucgugCgaacacggggg..... 1  
 Gi3\_28676114\_x1.....ucggagacgucgGgggaacacggggg..... 1  
 Gi4\_593597\_x1.....gggaacacgggUugccgaacu..... 1  
 Gi2\_11012039\_x1....aucgAagacgucgugggaacac..... 1  
 Gi2\_11364518\_x1.....acgucgAgggaacacggggugc..... 1  
 Gi3\_28365121\_x1....gauUggagacgucguggga..... 1  
 Gi1\_4194113\_x1.....uggUaacacggggugccgaacu..... 1  
 Gi1\_4312465\_x1.....acgucgugggaacacggggugc..... 0  
 Gi3\_28547924\_x1.....gacgucgugggaacacgCggugccgaacu..... 1  
 Gi5\_9045110\_x1.....ugggaacacggggugccgUa..... 1  
 Gi2\_11264700\_x1.....agacgucgugggaacacUgggugcc..... 1  
 Gi1\_4307275\_x1.....cgAgggaacacggggugccg..... 1  
 Gl1a\_6162471\_x1.....cguNgggaacacggggugccgaacu..... 1  
 Gi1\_4338330\_x1....gaucggagacgucgugggUacacgg..... 1  
 Gl1a\_6248337\_x1....cgauccggagacgucguggCaacacggg..... 1  
 Gi3\_28319666\_x1.ugcgauccggGgacgucguggga..... 1  
 Gl1a\_6287074\_x1.....acgucgugggaacUcggggg..... 1  
 Gi2\_11162766\_x1.....aNcacggggugccgaacu..... 1  
 Gi3\_28619953\_x1.....ugggaacacUgggugccgaa..... 1  
 Gi3\_28495759\_x1.....acgucgugggaaUacggg..... 1  
 Gi3\_28279419\_x1....gaucggagGcgucguggg..... 1  
 Gi3\_28617291\_x1.....ggaacacggggugccAaa..... 1  
 Gi2\_11096317\_x1.....gugggaacacgggUugccgaacu..... 1  
 Gi3\_28859820\_x1.....Aagacgucgugggaacacggggugcc..... 1  
 Gi5\_8833544\_x1.....acgucgugggaacacggggugcU..... 1  
 Gi2\_11166568\_x1....Ggaucggagacgucgugggaacacgggggug..... 1  
 Gi3\_28535206\_x1....Ugaucggagacgucgugggaacacgggg..... 1  
 Gi2\_11155939\_x1....aucggagacguGgugggaacacggggugc..... 1  
 Gi2\_11261113\_x1....aucgCagacgucgugggaacacggggg..... 1  
 Gl1a\_6303637\_x1.ugUgaucggagacgucguggga..... 1  
 Gi3\_28605245\_x1....gaucggagacgucgugggaacaGg..... 1  
 Gi2\_11143376\_x1....gCGGucggagacgucguggga..... 1  
 Gi3\_28797323\_x1....gaucggagNcgucgugggaaca..... 1  
 Gi1\_4267381\_x1....gaCcgagacgucgugggaacacgg..... 1  
 Gi2\_11295790\_x1.....guggCaacacggggugccga..... 1  
 Gi2\_11319798\_x1....aucggagacgucgugggaacacggAgugccgaacu..... 1  
 Gi5\_8843374\_x1.....agacgucguCggaacacggggugccgaacu..... 1  
 Gi2\_11032815\_x1.ugcgauccggagacgucgugggaacacA..... 1  
 Gi3\_28387195\_x1.....gacgucgugggaacaGggggugccg..... 1

Gi3\_28818550\_x1.....gggaacacgggguUccgaacu..... 1  
 Gi2\_11368188\_x1.....cAgagacgucgugggaacacggggug..... 1  
 Gi3\_28423673\_x1.....gaUgucgugggaacacggggugccg..... 1  
 Gi2\_11073667\_x1.....gagacgucgugggCacacggggug..... 1  
 Gi2\_11320433\_x1.....ggagacgucgugUgaacacggggugcc..... 1  
 Gi2\_11079995\_x1.....gCgucgugggaacacggggugccgaacu..... 1  
 Gi1\_4223786\_x1....aucAgagacgucgugggaacacgg..... 1  
 Gi3\_28864141\_x1.....Uagacgucgugggaacacggg..... 1  
 Gi5\_8831431\_x1.....acuucccagcgccugcugcUcacc..... 1  
 Gi5\_8964789\_x1.....ucgugggaacacCgggugccgaacu..... 1  
 Gl1a\_6334834\_x1.....cggagacgucgugggaAacggggug..... 1  
 Gi3\_28505523\_x1.....ugggaacacggggugGcg..... 1  
 Gi5\_8916650\_x1.....gggaCcacggggugccgaac..... 1  
 Gi3\_28858179\_x1.....agacgucgugggaacacgUggugccgaacu..... 1  
 Gl1a\_6104028\_x1....gaucggagacAucguggg..... 1  
 Gi1\_4319359\_x1.....ugggaacaGggggugccga..... 1  
 Gi3\_28560488\_x1.....ggagCcgucgugggaacacggg..... 1  
 Gi1\_4350577\_x1.....gucgugggaacacggggugccgCac..... 1  
 Gi1\_4354010\_x1..gcgauccgNgacgucgugggaacacggggugc..... 1  
 Gi2\_11371625\_x1....gaucggagacgucgugggaAa..... 1  
 Gi2\_11334140\_x1..ugcgauccgagacAucguggga..... 1  
 Gi4\_582176\_x1.....gugggaacacggggGgcccga..... 1  
 Gi5\_8889801\_x1.....agacgucgugggaacacggggugccgCac..... 1  
 Gi3\_28867293\_x1.....ggagCcgucgugggaacacggggugccg..... 1  
 Gi1\_4348697\_x1..gcgauccgagacgucgugggaacacggg..... 0  
 Gi4\_610900\_x1.....ugggaacacggggugcUgaacu..... 1  
 Gi2\_11295828\_x1.....gucgugggaacacggggCugccgaacu..... 1  
 Gi1\_4288014\_x1.....aAacgucgugggaacacggggugcc..... 1  
 Gi1\_4272206\_x1.....cggagaUgucgugggaacacggg..... 1  
 Gi1\_4385604\_x1.....cgucgugggaacacggggugccgU..... 1  
 Gi3\_28443102\_x1.....agacUucgugggaacacggggugcc..... 1  
 Gi3\_28774643\_x1.....gacgucgugAgaacacggggugc..... 1  
 Gi3\_28543623\_x1.....Uggagacgucgugggaacacg..... 1  
 Gi2\_11124407\_x1....cgauccgagacgucgCgggaacac..... 1  
 Gi3\_28510652\_x1.....ucgugggaacacggggugcAg..... 1  
 Gi2\_11312481\_x1.....cgucgugggaacaUggggugc..... 1  
 Gi3\_28740229\_x1....Gucggagacgucgugggaacacggggugccgaacu..... 1  
 Gi3\_28673876\_x1.....Cucgugggaacacggggg..... 1  
 Gi5\_8877566\_x1.....gugggaacacggggugUcgaa..... 1  
 Gi1\_4311077\_x1.....ucgugggaGacggggugccgaacu..... 1  
 Gi5\_9085664\_x1....gaucggagacgucgugggaacaAggg..... 1  
 Gi3\_28612262\_x1.....gagCcgucgugggaacacggggugccgaacu..... 1  
 Gi1\_4322613\_x1.....agacgucgugggaacacggAgugcc..... 1  
 Gl1a\_6039076\_x1....cgauccgagacgucgugggaCcacggggugc..... 1  
 Gi3\_28297820\_x1.....acgucgugggaacacggU..... 1  
 Gi5\_8876728\_x1.....gucgugggaacCggggugccgaac..... 1  
 Gi3\_28351635\_x1.....Ngggaacacggggugccgaac..... 1



Gi3\_28922372\_x1.....gucgugggaacacggggugUc..... 1  
 Gl1\_6055296\_x1....gaucggagacgucgugggaGcac..... 1  
 Gi3\_28848243\_x1.....cggagacgucgugggaCcacg..... 1  
 Gi1\_4304939\_x1.....cggagacgucguUggaacacgggg..... 1  
 Gi2\_11001341\_x1.....cgucgugggaUcacggggugccg..... 1  
 Gi1\_4294151\_x1.....acgucgugggaacacggggugccgaUcu..... 1  
 Gi3\_28594698\_x1.....cgugggaacaGggggugccga..... 1  
 Gi2\_11282802\_x1.....cgucgugggGacacgggg..... 1  
 Gi1\_4302803\_x1.....gacgucgugggaacacgggCugccgaacu..... 1  
 Gi5\_8959021\_x1.....gagacgucgugggaacCggggugcc..... 1  
 Gi2\_11059026\_x1.ugcgauccggaCacgucgugggaacacg..... 1  
 Gi5\_9012429\_x1.....uggaacaacggUgugccgaac..... 1  
 Gi3\_28788641\_x1.....cggagacgucgugAgaacacggggugccg..... 1  
 Gi2\_11178120\_x1....aucggagacgucgugggaacacggUgugcc..... 1  
 Gi2\_11353473\_x1.....gagacgucgugggaacacggggugcUg..... 1  
 Gi2\_11003544\_x1.....ggagacgucgugggaacacgAggugcc..... 1  
 Gi5\_8922740\_x1.....gacgucgAgggaacacggggugccgaacu..... 1  
 Gi1\_4310413\_x1.....ucgugggaacacgAggugccgaa..... 1  
 Gi5\_8887481\_x1.....cgucgugggaacacggggugUcga..... 1  
 Gi1\_4338663\_x1.....cgucguggNaacacggggugccg..... 1  
 Gi2\_11113831\_x1.....Ngggaacacggggugccgaacu..... 1  
 Gi3\_28379325\_x1....ucggagacgucgugggaacacgAggu..... 1  
 Gi2\_11146208\_x1..gcgauccgCgacgucguggga..... 1  
 Gi5\_8939704\_x1.....gucgugggaacacggggugccgGac..... 1  
 Gi1\_4219953\_x1.....aUacgucgugggaacacggggugccga..... 1  
 Gi2\_11043130\_x1.....gacgucgugggaUcacggggugccgaacu..... 1  
 Gi5\_8876633\_x1....gaucggagacgucgugCgaacac..... 1  
 Gl1\_6350803\_x1....aucggagacgucAugggaa..... 1  
 Gi3\_28863222\_x1.....cgugggaacacggggugccgaG..... 1  
 Gi2\_11089791\_x1.....cgucgugggaacacggggugUc..... 1  
 Gi5\_9099298\_x1.....agacgucgugggaaAacggggugccgaac..... 1  
 Gi3\_28511681\_x1.....gucgugggaacacgAggugccga..... 1  
 Gi5\_9122974\_x1....aucgCagacgucgugggaacacgg..... 1  
 Gi5\_9132635\_x1....aucggagacgucgugggCacac..... 1  
 Gi2\_11295301\_x1....aCggagacgucgugggaa..... 1  
 Gi1\_4261565\_x1.....uggAaacacggggugccgaac..... 1  
 Gi1\_4238072\_x1.....ucguCggaacacggggugcc..... 1  
 Gi1\_4378064\_x1....ucggagacgCgugggaacacggg..... 1  
 Gi5\_8937934\_x1....Aaucggagacgucgugggaacac..... 1  
 Gi2\_11332208\_x1....aucggagacgucgugggaacacgggCugc..... 1  
 Gi3\_28938742\_x1....ucggagacgucgugggCacacggggugc..... 1  
 Gi1\_4177614\_x1....ucggagacgucgCgggaacacggggugccgaacu..... 1  
 Gi2\_11190821\_x1.....cggagacgucguCggaacacggggg..... 1  
 Gl1\_6061200\_x1.ugcgauccgNagacgucgugggaacac..... 1  
 Gl1\_6244380\_x1....Gucggagacgucgugggaacac..... 1  
 Gi3\_28381291\_x1.....gggaacacAgggugccga..... 1  
 Gi2\_11403232\_x1.....ggagacgucgugggaacaUggggugccgaac..... 1

|                                                              |   |
|--------------------------------------------------------------|---|
| Gi2_11221025_x1.....ucggagacgucgugggCac.....                 | 1 |
| Gi2_11086451_x1.....ucgugggaCcacggggugccgaac.....            | 1 |
| Gi2_11158619_x1..gcgaucggagGcgucgugggaaacacggggug.....       | 1 |
| Gi5_8947306_x1.....gucgugggaacacgAggugccgaac.....            | 1 |
| Gi2_11365158_x1.....gucgugggaacacggggugccgaacuu.....         | 0 |
| Gi2_11343345_x1.....guNggaacacggggugccgaa.....               | 1 |
| Gi1_4199848_x1.....cgucgugggaacacggggGgcccgaac.....          | 1 |
| Gi3_28723611_x1.....gagacgucgugAgaacacggggugccgaacu.....     | 1 |
| Gi3_28262709_x1.....acacggggugcGgaacuu.....                  | 1 |
| Gi5_9039236_x1.....gugggaacacggggAcc.....                    | 1 |
| Gi3_28332446_x1.....cgucguggCaacacggggugccgaacu.....         | 1 |
| Gi5_9062789_x1.....cgucCugggaacacggggugccgaacu.....          | 1 |
| Gi3_28662572_x1.....gucgugggaacacggUgugccgaacuu.....         | 1 |
| Gi2_11236659_x1.....Acggagacgucgugggaaacacgggg.....          | 1 |
| Gi5_9027177_x1.....cgugggaacCcggggugccg.....                 | 1 |
| Gi5_8867879_x1.....gagacguUgugggaacacg.....                  | 1 |
| Gi2_11313179_x1....Gucggagacgucgugggaaacacggggugccgaacu..... | 1 |
| Gi1_4177384_x1....gaucggagGcgucguggg.....                    | 1 |
| Gl1a_6017559_x1....gaucgAagacgucgugggaaacacgggg.....         | 1 |
| Gi3_28663158_x1....gauAggagacgucgugggaaacacg.....            | 1 |
| Gi2_11088235_x1.....cgugggaacacggAgugccg.....                | 1 |
| Gi3_28475142_x1....gaucggCgacgucgugggaaacacggggugc.....      | 1 |
| Gi3_28682352_x1....gauNggagacgucgugggaaacacgggg.....         | 1 |
| Gi1_4281399_x1.....gagacgucgugAgaacacggggugcc.....           | 1 |
| Gi3_28830050_x1..gcgaucggagacAucgugggaaacacggg.....          | 1 |
| Gl1a_6030055_x1....gaucAgagacgucgugggaaacacgggg.....         | 1 |
| Gi5_9000433_x1.....cggagacgucgugggaaacCcg.....               | 1 |
| Gi2_11380768_x1.....gagacgAcgugggaaacacggggugcc.....         | 1 |
| Gl1a_6278688_x1.....gggaacaUggggugccgaac.....                | 1 |
| Gi5_9132924_x1.....gugggaacacCgggugccg.....                  | 1 |
| Gi1_4337533_x1....ucggagacgucguAggaacacg.....                | 1 |
| Gi2_11310401_x1....gaucggagaUgucgugggaaacacggggug.....       | 1 |
| Gl1a_6272080_x1.....ggaacacgAggugccgaac.....                 | 1 |
| Gi1_4268758_x1.....gacgucgugggaaacGcggggugccgaacuu.....      | 1 |
| Gi3_28517457_x1....aucggagGcgucgugggaaacacggggug.....        | 1 |
| Gi3_28427336_x1.....ggGgacgucgugggaaacacg.....               | 1 |
| Gi5_9063362_x1.....cgugggaacacgUggugccg.....                 | 1 |
| Gi1_4271903_x1.....gaacacggNgugccgaacuu.....                 | 1 |
| Gi2_11367323_x1....ucggagacgucgugggaaacacgUggugc.....        | 1 |
| Gi1_4212787_x1.....cgAcgugggaaacacggggugccgaa.....           | 1 |
| Gi2_11076189_x1.....cgucgugggaaacacggggugccUaacu.....        | 1 |
| Gi3_28633324_x1....cggagacgucgugggaaacacggggugccga.....      | 1 |
| Gi3_28735867_x1.....gacgucgugggaaAacggg.....                 | 1 |
| Gi3_28553739_x1....Acggagacgucgugggaaacacggg.....            | 1 |
| Gi1_4159588_x1.....aaGacggggugccgaacu.....                   | 1 |
| Gi3_28599898_x1....gaucggagacgAcgugggaaacacg.....            | 1 |
| Gl1a_6290049_x1....aucgUagacgucgugggaaacacggggugc.....       | 1 |

Gi2\_11371633\_x1.....auNggagacgucgugggaaacac..... 1  
 Gi2\_11178163\_x1.....cgucgugggaaacacgggAugccgaac..... 1  
 Gi5\_9020430\_x1.ugUgaucggagacgucguggg..... 1  
 Gi3\_28450378\_x1...cgaucggagacgucgugggaaacacAgg..... 1  
 G1a\_6191308\_x1....aCcgagacgucguggga..... 1  
 Gi3\_28863936\_x1.....acgucgugggaaacacgggg..... 0  
 Gi3\_28403665\_x1.....ggaaAacggggugccgaa..... 1  
 Gi3\_28744405\_x1.....gacgucgugggaaCcacggg..... 1  
 Gi1\_4257961\_x1.....gucgCgggaacacggggug..... 1  
 Gi1\_4376531\_x1....aAcggagacgucgugggaaacacg..... 1  
 Gi3\_28770403\_x1.....aacaGggggugccgaacuu..... 1  
 Gi4\_614230\_x1.....guggUaacacggggugcc..... 1  
 Gi1\_4386977\_x1.....gagacgucgugggaaacacAgggugccgaacu..... 1  
 Gi3\_28798110\_x1.....gucgugggaaacCggggugccgaacuu..... 1  
 Gi2\_11321236\_x1.....cggagCcgucgugggaaacac..... 1  
 Gi2\_11103153\_x1.....ucggagacgucgugggaaacU..... 1  
 Gi5\_9085833\_x1.....ucgugggCacacggggugccgaac..... 1  
 Gi2\_11081100\_x1..gcgauUggagacgucgugggaaacacggggugcc..... 1  
 Gi3\_28302472\_x1.....acgucgugggaaacCggggugc..... 1  
 Gi1\_4277667\_x1.....gugggaacacggUgugccgaacuu..... 1  
 Gi2\_11127371\_x1.....agacgucgugggaaacaUggggugccga..... 1  
 Gi1\_4290416\_x1.....acgucgugggGacacggggugccg..... 1  
 Gi1\_4259662\_x1.....acacggggNgccgaacuu..... 1  
 Gi5\_8994114\_x1....aucggagacgucgugggaaAacggggugccgaacu..... 1  
 Gi3\_28560422\_x1.....gacgucgugAgaacacggg..... 1  
 G1a\_6229599\_x1....aucggagacgucgCgggaacacggggg..... 1  
 Gi3\_28663753\_x1.....ucggagacgucguggAaacacggg..... 1  
 Gi3\_28414537\_x1.....ucggagacgucguggAaacacgg..... 1  
 Gi3\_28686692\_x1.....cAucgugggaaacacggggug..... 1  
 Gi1\_4228465\_x1.ugcgGucggagacgucguggga..... 1  
 Gi2\_11124946\_x1.....gacgucgugggGacacggggugc..... 1  
 Gi2\_11011623\_x1.....acgucAugggaacacggggg..... 1  
 Gi2\_11311963\_x1....ucUgagacgucgugggaaacacgggg..... 1  
 Gi2\_11057667\_x1....gaucggagacguAgugggaacacggg..... 1  
 Gi1\_4207945\_x1.....cguUgugggaaacacggggugccgaa..... 1  
 Gi3\_28359674\_x1....gaCcgagacgucgugggaaacacggggug..... 1  
 Gi3\_28429624\_x1.....gacgucgugggaaacacggggugAcgaa..... 1  
 Gi5\_8966727\_x1.....cgucgugggaaacUcggggugccgaacu..... 1  
 Gi1\_4386517\_x1.....acgucgugggGacacggggugcc..... 1  
 Gi3\_28396474\_x1.....gaUacgucgugggaaacacggggugccgaac..... 1  
 Gi2\_11000713\_x1.....agacgucgugggaaacacggggAgccgaa..... 1  
 Gi2\_11162603\_x1.....gacgucgugggGacacggg..... 1  
 Gi1\_4297261\_x1.....gagacgucgugggaaacacggggugcAgaacu..... 1  
 Gi2\_11284294\_x1.....gucgugggGacacggggugccg..... 1  
 Gi1\_4172999\_x1.....gucgAgggaacacggggug..... 1  
 Gi3\_28451547\_x1.....ggagacgucgugggaaacaAggggugcc..... 1  
 Gi1\_4182141\_x1.....gugggaacacAgggugccgaac..... 1

Gi3\_28573738\_x1.....agacgucgugggaCcacggggugccgaac..... 1  
 Gi3\_28475874\_x1....gaucggagacgucgugggaacUcggggu..... 1  
 Gi5\_8957289\_x1.....gCgaacacggggugccgaa..... 1  
 Gi3\_28635394\_x1.....cggagacgucgugggCacacg..... 1  
 Gi3\_28592308\_x1.....gaacacggggugcAgaacuu..... 1  
 Gi3\_28303095\_x1.....aCacgucgugggaacacggggugcc..... 1  
 Gi2\_11382264\_x1.....ugggaacacggggugGcga..... 1  
 Gi5\_8993166\_x1.....Uggagacgucgugggaacacggg..... 1  
 Gi5\_8868082\_x1.....cgucgugAgaacacggggugccga..... 1  
 Gi2\_11131711\_x1.....cggagacgAcgugggaacacggggugc..... 1  
 G1a\_6351812\_x1....aucggagacgucgugggaacacggggguAc..... 1  
 Gi3\_28954213\_x1.....cgucgugggaacacgUggugccgaacu..... 1  
 Gi5\_9014436\_x1.....ucgugggaacacggggugccgaCc..... 1  
 Gi5\_8861641\_x1....ucggagacgucgugggaacacggggGgccgaacu..... 1  
 Gi3\_28805041\_x1.....cgugggaacCggggugcc..... 1  
 Gi1\_4375775\_x1.....cgugggaacacggggGgccg..... 1  
 Gi1\_4366502\_x1.....gugggaacacgUggugccgaac..... 1  
 Gi3\_28393995\_x1....ucggagacgucguggAaacacggggugccgaacu..... 1  
 Gi2\_11117033\_x1....aucggagacgucguggAaaca..... 1  
 Gi2\_11205538\_x1.....cUucgugggaacacggggugccgaacu..... 1  
 Gi2\_11011422\_x1.....ggagacgAcgugggaacacggggugcc..... 1  
 Gi3\_28616736\_x1....ggagacgucgugggaacacAggg..... 1  
 Gi5\_9029138\_x1.....gucgugggaacGcggggugc..... 1  
 Gi5\_8882314\_x1.....gugggaacaGggggugccgaac..... 1  
 Gi1\_4266689\_x1.....gucgugggNacacggggugccgaac..... 1  
 G1a\_6136106\_x1....Cgagacgucgugggaacac..... 1  
 Gi3\_28396967\_x1.....ucgugggaacaUggggugc..... 1  
 Gi3\_28817209\_x1.....cgucgugggaacacgAggugccga..... 1  
 Gi1\_4311510\_x1....cggagacgucgugggaacacggggguAcc..... 1  
 G1a\_6272141\_x1....gGucggagacgucgugg..... 1  
 Gi3\_28825764\_x1.....gucgugggaacacggggugAc..... 1  
 Gi4\_578916\_x1.....gugggaacCggggugccgaac..... 1  
 Gi3\_28610678\_x1....cgaucCgagacgucgugggaacacg..... 1  
 Gi3\_28346105\_x1....Uggagacgucgugggaacacgggg..... 1  
 Gi1\_4223267\_x1....gcgaucggagacgCcgugggaaca..... 1  
 G1a\_6332303\_x1....cgGucggagacgucgugggaacacggggugc..... 1  
 Gi1\_4179380\_x1.....ggagacgucgugggaacacggggugAcg..... 1  
 Gi2\_11167698\_x1....cgaucggagacgucgugggaacaA..... 1  
 Gi5\_9082746\_x1....aucggagaNgucgugggaacacggggugc..... 1  
 Gi3\_28304591\_x1....ucggagacgucgugAgaacacggg..... 1  
 Gi1\_4298453\_x1.....gucguAggaacacggggugccgaac..... 1  
 Gi1\_4390519\_x1.....ucgugggGacacggggugc..... 1  
 Gi3\_28684693\_x1.....gagacgucNugggaacacggggugc..... 1  
 G1a\_6004677\_x1.....ggagacgucgugggaUcac..... 1  
 Gi3\_28384945\_x1....aucggagacgucgugggaacacAgggugccg..... 1  
 Gi2\_11242630\_x1....ucggagaUgucgugggaaca..... 1  
 Gi3\_28833409\_x1....gcgaucggagacgucgugggaGc..... 1

Gi3\_28473782\_x1.ugcgauccggagaUgucguggggaacacggg..... 1  
Gi3\_28550308\_x1.....gacgucguggggaUcacggggugccgaacu..... 1  
Gi5\_9037537\_x1.....acgucguggggaacacggggugccGac..... 1  
Gi4\_569627\_x1.....agacgucgNgggaacacggggugcc..... 1  
G1a\_6195089\_x1.....cgucguggggaacacggggGgccg..... 1  
Gi5\_8879834\_x1.....ucggagacgucguggggaacacggggAgc..... 1  
Gi1\_4164747\_x1.....ggagacgucgugggUacacggggugcc..... 1  
Gi2\_11092695\_x1.....ugggaacCcggggugccgaacu..... 1  
Gi1\_4186046\_x1.....cguggggaacacggggugUcga..... 1  
G1a\_6146714\_x1.....gagacgucguggggaacacggggugcc..... 0  
Gi5\_9023819\_x1.ugcgauccggagacgCcgugggga..... 1  
Gi1\_4162420\_x1.....gaNcacggggugccgaacu..... 1  
Gi1\_4178136\_x1.ugcAaucggagacgucgugggga..... 1  
G1a\_6268538\_x1.....ucguggggaGcacggggugccgaac..... 1  
Gi3\_28776804\_x1.....acgucguggggaCcacggggugccg..... 1  
Gi2\_11049988\_x1.....agacgucguggggaacacgAggu..... 1  
Gi5\_9076706\_x1.....guggggaacaAggggugccga..... 1  
Gi3\_28345044\_x1.....cgauccggagacgucgugggUaacacggggg..... 1  
Gi3\_28624606\_x1.....agacgucguggggaacCgggggugcc..... 1  
Gi4\_576982\_x1.....guggggaacCcggggugccgaa..... 1  
Gi2\_11372063\_x1.....ggagacgucgugUgaacacgggggugccgaacu..... 1  
Gi5\_9020390\_x1.....cggagGcucguggggaacacgggggugccga..... 1  
Gi3\_28885202\_x1.....gauccggagacgCcguggggaacacgggggugcc..... 1  
Gi2\_11072371\_x1.....agacgucgAggggaacacgggggugc..... 1  
Gi5\_8864211\_x1.....gaucAgagacgucguggggaacacg..... 1  
Gi2\_11010028\_x1.....guggggaacacCggggugcc..... 1  
Gi1\_4162509\_x1.....cgAcguggggaacacgggggugccgaac..... 1  
Gi3\_28348600\_x1.....ucggagGcucguggggaacacgggggugcc..... 1  
G1a\_6046966\_x1.....gAggggaacacgggggugccg..... 1  
Gi5\_9049872\_x1.....aucAgagacgucguggggaacacg..... 1  
Gi4\_594282\_x1.....ucguggggaacacgggggugccgaUc..... 1  
Gi2\_10997963\_x1.....ucggagacgucguggggaacacggggCgc..... 1  
Gi1\_4235144\_x1.....gauccggagacgucguAgggaacac..... 1  
Gi1\_4359851\_x1.....ucguggggaacacgggggugcUgaa..... 1  
Gi5\_9045984\_x1.....aucggagacgucgCgggaacac..... 1  
G1a\_6314884\_x1.....guggggaacacgggggUcccgaacu..... 1  
Gi3\_28298735\_x1.....cgauccggagacgucguggggaacCcggg..... 1  
Gi3\_28784244\_x1.....cggagacgucguAgggaacacgggg..... 1  
Gi3\_28482599\_x1.....cguggggaacacgAggugccgaacu..... 1  
G1a\_6236074\_x1.....guggggaacacgggggugcUg..... 1  
Gi2\_11074425\_x1.....gucguggggaacacgAgugccgaa..... 1  
Gi2\_11345632\_x1.....gauccggagacguUguggggaacacgggggugc..... 1  
G1a\_6288085\_x1.....ggaacacgAggugccgaacu..... 1  
G1a\_5990322\_x1.....ucggUgacgucguggggaacacggg..... 1  
Gi2\_11113374\_x1.....cggagacgAcguggggaacacgggggug..... 1  
Gi2\_11276792\_x1.....guggggaacacUggggugcc..... 1  
Gi1\_4313307\_x1.....gauccggagacgucguggggaacacgggggugccU..... 1

Gi3\_28861903\_x1.....gugggaacacggggugccU..... 1  
Gi3\_28688445\_x1.....gacguUgugggaacacggg..... 1  
Gi5\_8946509\_x1.....ggaacacggggUccgaac..... 1  
Gi1\_4275440\_x1.....acgucgugggaacacggggugccgU..... 1  
G1a\_6115624\_x1.....Gcgugggaacacggggugccgaacu..... 1  
Gi2\_11245314\_x1.....ugggaaAacggggugccgaac..... 1  
Gi2\_11060699\_x1.....cgucgugAgaacacggggugc..... 1  
Gi3\_28932665\_x1.....gugUgaacacggggugccg..... 1  
Gi1\_4343112\_x1.....ggUaacacggggugccgaacuu..... 1  
Gi4\_611381\_x1.....cgugggaacacgggAugccgaacu..... 1  
Gi2\_11225956\_x1.....cguggUaacacggggugccg..... 1  
Gi5\_9045666\_x1.....acgucgCgggaacacggggugccgaac..... 1  
Gi3\_28823251\_x1.....cggagacgucgugggaacacAggg..... 1  
Gi3\_28911772\_x1.....ggagGcgucgugggaacacggg..... 1  
Gi2\_11302223\_x1.....aucggagacgucgugggaacacgUggugcc..... 1  
Gi2\_11349767\_x1.....gucgugggaUacggggugc..... 1  
Gi1\_4368912\_x1.....cguAggaacacggggugccga..... 1  
Gi2\_11128287\_x1.....agacgucgugggaacacCgggugcc..... 1  
Gi2\_11357749\_x1.....cgucgugggaacacggggAgc..... 1  
Gi3\_28265614\_x1.....gacgucguNggaacacgggg..... 1  
Gi3\_28749761\_x1.....gacgucgugggaacacggc..... 1  
Gi2\_11290484\_x1.....gucgugggaacacggAgugc..... 1  
Gi3\_28628184\_x1.....acguUgugggaacacggggugccg..... 1  
Gi3\_28358039\_x1.....acgucgugNgaacacggggugccgaa..... 1  
Gi2\_11131535\_x1.....gaucggagacgucgugAgaacacggg..... 1  
Gi1\_4226661\_x1.....cgugggaacGcggggugccga..... 1  
Gi3\_28280943\_x1.ugcgGucggagacgucgugggaacacggg..... 1  
Gi3\_28497345\_x1.....aucggagaGgucgugggaacacggggugcc..... 1  
Gi1\_4256705\_x1.....gugggaacNcggggugccga..... 1  
Gi5\_9030997\_x1.....gugggaacCggggugccga..... 1  
G1a\_6053314\_x1.....aucggCgacgucgugggaacacggggU..... 1  
Gi3\_28561960\_x1.....ggagacgucguAggaacacggggugcc..... 1  
Gi2\_11293815\_x1.....cgucgugggaaAacggggugccg..... 1  
G1a\_6269816\_x1.ugcgaucggagacgucgugggaaAacgggU..... 1  
Gi2\_11037517\_x1.....gacgGcgugggaacacggg..... 1  
Gi2\_10993217\_x1.....auNggagacgucgugggaaca..... 1  
Gi2\_10999194\_x1.....gaucgAagacgucgugggaacacggggU..... 1  
G1a\_6048353\_x1.....cgugggUaacacggggugcc..... 1  
Gi5\_8952561\_x1.....gugggaacGcggggugccgaacuu..... 1  
Gi3\_28744696\_x1.....Gcgucgugggaacacggggugc..... 1  
Gi3\_28960715\_x1.....gucgugggaCcacggggugccgaac..... 1  
Gi1\_4373690\_x1.....gugggaacaUggggugccgaacuu..... 1  
Gi4\_597071\_x1.....agacgucgugggaacacggggCgcc..... 1  
Gi4\_568166\_x1.....gaCgggagacgucguggg..... 1  
Gi2\_11017063\_x1.....aucggagacgucgugggaUcac..... 1  
Gi2\_11386192\_x1.....gcgaucggagacgucguAggaacac..... 1  
Gi3\_28625720\_x1.....gagacgucgugggaacacgggAgugccg..... 1

G1a\_6293762\_x1.....Uucggagacgucgugggaaacacggggugc..... 1  
 Gi2\_11330793\_x1.....gagacgucgugggaaGacggggugccg..... 1  
 Gi3\_28519085\_x1.....ucggagacgucgugggaaacacggAgugcc..... 1  
 Gi2\_11005485\_x1.....ggagacgucgugggAaacac..... 1  
 Gi3\_28514672\_x1.....cggagacgucguUggaacacgggg..... 1  
 Gi1\_4339295\_x1.....aucggagacgucgugggaaacacU..... 1  
 Gi4\_603024\_x1.....Auggaaacacggggugccgaac..... 1  
 Gi3\_28333671\_x1.....ggagacgucgugggaaacacggggAgccgaacu..... 1  
 G1a\_6092528\_x1.....gacgucgugggaaacacgggAugccgaacu..... 1  
 Gi5\_9059690\_x1.....ggaacacggggugccgaaU..... 1  
 Gi3\_28410617\_x1.....uggaaacacggggugccgaaG..... 1  
 Gi2\_10996195\_x1.....cgucguUggaacacggggugccgaacu..... 1  
 Gi3\_28766273\_x1.....gaucggagaGgucgugggaaacacggggugc..... 1  
 Gi3\_28942875\_x1.....agacgucgugggAaacacggggugccgaac..... 1  
 Gi2\_11378585\_x1.ugcgaucggagacgucgugggaaacG..... 1  
 Gi5\_9134038\_x1.....aucggagacgucgugggaaUacgggggU..... 1  
 G1a\_6143131\_x1.....guggaaacacggggugccgGac..... 1  
 Gi1\_4378877\_x1.....aucggagacgucgugggaaacacggggGgcc..... 1  
 Gi1\_4364148\_x1.....cggagacgucgugggaaacacggggUAccgaacu..... 1  
 Gi3\_28284005\_x1.....ggagacgucgugggaaacacAgggugccgaac..... 1  
 Gi3\_28709802\_x1.....ucggGgacgucgugggaaacacgg..... 1  
 Gi3\_28614971\_x1.....gaucggagacguGgugggaaacacgg..... 1  
 Gi2\_11015664\_x1.....cgauccggagacguUgugggaaacacg..... 1  
 Gi3\_28481962\_x1.....ucgugggCacacggggugccgaac..... 1  
 Gi1\_4352741\_x1.....ggaacacggggUccgaac..... 1  
 Gi2\_11159606\_x1.....acgucgugggaaUacggggugc..... 1  
 G1a\_6336557\_x1.....ucgugggaaacacggggugccgaGc..... 1  
 Gi1\_4282144\_x1.....aacacggggugccgCacuu..... 1  
 Gi1\_4161912\_x1.....agacUucgugggaaacacggggugccgaacu..... 1  
 Gi2\_11166154\_x1.....gacgucgugggaaacacggggug..... 0  
 Gi3\_28738503\_x1.....ucgugggaaacacggggugccgaaGu..... 1  
 Gi1\_4355707\_x1.....aucggagacgucGgggaacacgg..... 1  
 Gi5\_8921410\_x1.....cggagacgucgugggaaacacgAggugcc..... 1  
 Gi3\_28495366\_x1.....gacgucgugggaaacaAggggu..... 1  
 Gi2\_11388550\_x1.....aucggagacgucgugggaaGcacggggugccg..... 1  
 G1a\_6330585\_x1.....gacgucgugggaaacacggggugccgaGcu..... 1  
 Gi1\_4187515\_x1.....agacgucgugggaaUacggggugccgaacu..... 1  
 Gi3\_28982643\_x1.....aucggagacUucgugggaaacacggggU..... 1  
 Gi2\_11370411\_x1.....gggaacaUggggugccga..... 1  
 Gi3\_28274095\_x1.....gaacacggggugccgaaAuu..... 1  
 Gi3\_28788346\_x1.....cgugggaaacacAgggugc..... 1  
 Gi2\_11028801\_x1.....acgAcgugggaaacacggggugccgaa..... 1  
 Gi3\_28706961\_x1.....cgucgugggaaacacggggugcUgaa..... 1  
 Gi2\_11363551\_x1.....gucUugggaaacacggggugcc..... 1  
 Gi1\_4304294\_x1.....agacgucgugggaaacacggAgugccgaacu..... 1  
 Gi3\_28508441\_x1.....gggaacacggggugccgU..... 1  
 Gi3\_28544128\_x1.....cggagacgNcgugggaaacacggggugccgaa..... 1

|                                                            |   |
|------------------------------------------------------------|---|
| Gi2_11220043_x1.....cggagacgucgugggaacacggggugccAa.....    | 1 |
| Gi1_4291230_x1.....ucggagGcgucgugggaacacggggugc.....       | 1 |
| Gi5_9060290_x1.ugcgauccgagacgucguAggaacacggg.....          | 1 |
| Gi2_11216776_x1.....acgucguAggaacacggggugccg.....          | 1 |
| Gi2_11287096_x1.....aucggagacUucgugggaacacgggggu.....      | 1 |
| Gi2_11027473_x1.....cgucgugggaacacggggguCccgaa.....        | 1 |
| Gi2_11267082_x1.....cgucgugggaacacggCgugccg.....           | 1 |
| Gi3_28692720_x1.....cgucgugggaGcacggg.....                 | 1 |
| Gi5_8882818_x1.....cacAgggugccgaacuuu.....                 | 1 |
| Gi1_4253668_x1.....cggaUacgucgugggaacacggg.....            | 1 |
| Gi5_9001611_x1...Caucggagacgucgugggaacacgg.....            | 1 |
| Gi1_4301257_x1.....ugggaacacggggguAccgaa.....              | 1 |
| Gi2_11278526_x1.....gagacgucgugggaacacUgggugccg.....       | 1 |
| Gi2_11174739_x1.....ggagacgucgugggaacacgAggugccg.....      | 1 |
| Gi3_28561811_x1.....ggaacacggggugccgaacuu.....             | 0 |
| Gi5_9092452_x1.....acgucgugUgaacacggggugccgaacu.....       | 1 |
| Gi3_28852671_x1.....cggagacgucgugggCacacggggugcc.....      | 1 |
| Gi2_11062890_x1.....gacgucgugggaacacggggguAccg.....        | 1 |
| Gi5_8935415_x1.....acgucgugggaacacUgggugccgaac.....        | 1 |
| Gi2_11265646_x1.....guNggaacacggggugccg.....               | 1 |
| Gi1a_6295329_x1.....gucgugggaacGcggggugccgaa.....          | 1 |
| Gi2_11344072_x1.....cgGcgugggaacacggg.....                 | 1 |
| Gi3_28935112_x1.....gacgucAugggaacacggg.....               | 1 |
| Gi3_28642662_x1.....ucggagacgucgugggUacacg.....            | 1 |
| Gi5_9117681_x1.....cgucgugggaacacggggCgcccgaac.....        | 1 |
| Gi3_28388223_x1.....cggCgacgucgugggaacacggg.....           | 1 |
| Gi5_8866937_x1.....gggaacacgAggugccgaa.....                | 1 |
| Gi4_572310_x1.....ggUacacggggugccgaacu.....                | 1 |
| Gi1_4370002_x1.....ggaaGacggggugccgaac.....                | 1 |
| Gi3_28695975_x1.....gacgucGgggaacacggggugccgaacu.....      | 1 |
| Gi5_8967416_x1.....gugggaacacgggAugccgaacuuu.....          | 1 |
| Gi2_11041376_x1.....aucggagacgucgugggaacaGggggugc.....     | 1 |
| Gi3_28594618_x1.....cgucgugggaacacgggCugccgaacu.....       | 1 |
| Gi2_11022786_x1.....cgucgugggaacacggggugccgaacuu.....      | 0 |
| Gi3_28613049_x1.....ggaacacggggugccCaacu.....              | 1 |
| Gi1_4287073_x1.....cggagacgucguggaaAacggggugcc.....        | 1 |
| Gi2_11232825_x1.....cggagacgNcgugggaacacggggug.....        | 1 |
| Gi1_4193181_x1.....acgucCugggaacacggggugccgaacu.....       | 1 |
| Gi3_28277102_x1.....ucgugggaacacggggugccCaacu.....         | 1 |
| Gi1a_6187858_x1...aucggagacgucgugggaCcacggggugc.....       | 1 |
| Gi1_4376033_x1.....gugggaacacggggugccAaac.....             | 1 |
| Gi4_576836_x1.....ggagacgucgugggaacacg.....                | 0 |
| Gi5_9089982_x1.....ucgugggaacacggAgugccgaac.....           | 1 |
| Gi1a_6101519_x1.....cggagacgucguggaaAacgggggu.....         | 1 |
| Gi3_28289991_x1.....ucgAgggaacacggggugccg.....             | 1 |
| Gi3_28943492_x1.....cgucguggNaacacggggug.....              | 1 |
| Gi4_582727_x1.....aucggagacgucgugggaacacggggugccgaacu..... | 0 |



Gi2\_11006797\_x1.....acgucUugggaacacggggugcc..... 1  
 Gi1\_4256393\_x1.....ggGgacgucgugggaacacggggu..... 1  
 Gi2\_11367057\_x1.....agacgucgugggaacacgggAugccgaacu..... 1  
 Gl1a\_5992043\_x1.....aucggagacgucgugggG..... 1  
 Gi3\_28873479\_x1.....uUggagacgucgugggaacacggg..... 1  
 Gi1\_4289542\_x1.....agacgucgugAgaacacggggugccgaacu..... 1  
 Gi2\_11204538\_x1.....ggagacgucgugggaacacggggugccGg..... 1  
 Gl1a\_6075940\_x1.....gauUggagacgucgugggaa..... 1  
 Gi3\_28888350\_x1.....ggagacgucgugggaacacAgggugccg..... 1  
 Gi3\_28897323\_x1.....gagacgucgugCgaacacg..... 1  
 Gi1\_4298220\_x1.....aucggagacgucguAggaacacg..... 1  
 Gi2\_11240880\_x1.....uggNaacacggggugccgaac..... 1  
 Gi2\_11105844\_x1.....gagacgucgugggaacacggggGg..... 1  
 Gi1\_4238132\_x1.....cguNggaaacacggggugccgaacu..... 1  
 Gi3\_28273134\_x1.....agacgucgugggaacacggggUccgaacu..... 1  
 Gi1\_4340192\_x1.....gagacgucgugggaacacggggugccgaUcu..... 1  
 Gi3\_28438211\_x1.....ggagacgucgugggaacacggggugGc..... 1  
 Gi2\_11125166\_x1.....cgUucggagacgucgugggaacacg..... 1  
 Gi1\_4335636\_x1.....gugggaaAacggggugccg..... 1  
 Gi2\_11099041\_x1.....gacgucgugggaacacggggC..... 1  
 Gi5\_8855654\_x1.....cgucgugggaacUcggggugccga..... 1  
 Gi5\_9123985\_x1.....acgucgugCgaacacggggugccgaacu..... 1  
 Gl1a\_6335055\_x1.....gucgugggaacCcgggugcc..... 1  
 Gi3\_28759881\_x1.....ucgugggaacGacggggugccgaacu..... 1  
 Gi2\_11123344\_x1.....cggagacgucgugggaacacgUggugcc..... 1  
 Gi3\_28984842\_x1.....gaucggagacgucgugggaUcacggg..... 1  
 Gi3\_28360762\_x1.....ucggGgacgucgugggaacacggggugccgaacu..... 1  
 Gi1\_4193491\_x1.....cgugggaacacggggugcUg..... 1  
 Gl1a\_6280309\_x1.....aucggagacgucgugggaacaGg..... 1  
 Gi1\_4353728\_x1.....cgGcgugggaacacggggugccgaac..... 1  
 Gi4\_593381\_x1.....cgugggaacacggggugccgaa..... 0  
 Gi2\_11269360\_x1.....ugggUacacggggugccgaa..... 1  
 Gl1a\_6043230\_x1.....cgGgggaacacggggugc..... 1  
 Gi1\_4355230\_x1.....gUagacgucgugggaacacg..... 1  
 Gi3\_28451338\_x1.....ucgugggaacaUggggugccg..... 1  
 Gi2\_11359345\_x1.....cggagacguAgugggaacacggggugcc..... 1  
 Gi3\_28626711\_x1.....gaGcggagacgucgugggaacacggggugc..... 1  
 Gi5\_9066459\_x1.....gucgugggaacaUggggugccgaacu..... 1  
 Gi2\_11015097\_x1.....gGcgucgugggaacacggggugccga..... 1  
 Gi2\_11227824\_x1.....Uucggagacgucgugggaacacgg..... 1  
 Gi2\_11159961\_x1.....aucAgagacgucgugggaacacggggug..... 1  
 Gi5\_9134488\_x1.....gaucggagGcgucgugggaacacg..... 1  
 Gi5\_9081282\_x1.....ugggaacacggAgugccgaa..... 1  
 Gi3\_28560436\_x1.....Ngucgugggaacacggggugccgaa..... 1  
 Gi2\_11391762\_x1.....cgucgugggaacacggggugU..... 1  
 Gi3\_28603187\_x1.....ugggaacacUggggugccg..... 1  
 Gi1\_4286045\_x1.....gacgucgugggaacacggggUaccgaacu..... 1

|                                                          |   |
|----------------------------------------------------------|---|
| Gi5_9128641_x1.....cggagacgucguAggaacacg.....            | 1 |
| Gi5_8976438_x1....aucggagacgucCugggaaca.....             | 1 |
| Gi4_587397_x1.....gAaacacggggugccgaac.....               | 1 |
| Gi1_4179046_x1.....gucgugggaacacggggugccgaacG.....       | 1 |
| Gi3_28406617_x1....aucggagacgucgugggaUcacgggg.....       | 1 |
| Gi5_8892932_x1.....gacgucgugggaaUacggggugccgaacu.....    | 1 |
| Gi1a_6044266_x1...gaucggagacgucAugggaa.....              | 1 |
| Gi5_8888340_x1.....cgucgugggaacGcggggugccgaa.....        | 1 |
| Gi4_605617_x1.....agacgucgugggaacacggggugccgaacA.....    | 1 |
| Gi2_11253774_x1.....ucgugggaacacgggCugccgaacu.....       | 1 |
| Gi1a_6282132_x1.....ugggCacacggggugccgaacu.....          | 1 |
| Gi3_28922041_x1.....gagacgucgugggaacacgggAu.....         | 1 |
| Gi3_28285544_x1.....cgucgugggaacacAgggugccgaa.....       | 1 |
| Gi3_28884437_x1...gaucggagacgucgugAgaacacg.....          | 1 |
| Gi2_11118174_x1....uGggagacgucgugggaacacggggugccg.....   | 1 |
| Gi2_11380506_x1....ucggGgacgucgugggaacacggg.....         | 1 |
| Gi3_28296339_x1.....cgucgugggaacUcggggugccgaac.....      | 1 |
| Gi2_10993327_x1.....agacUucgugggaacacggggugccg.....      | 1 |
| Gi2_11097603_x1.....cgucUugggaacacggggugccgaa.....       | 1 |
| Gi3_28599518_x1..gcgaucggagacgucguAggaacacggg.....       | 1 |
| Gi2_11376466_x1.....gacgucgugggaacacggggugA.....         | 1 |
| Gi5_9091496_x1.....agacgucgugggaGcacggggu.....           | 1 |
| Gi1_4258278_x1.....agacgucgugggaacacAgggugccgaac.....    | 1 |
| Gi5_8853643_x1.....gucgugggaaAacggggugccgaac.....        | 1 |
| Gi1_4378010_x1.....agacgucgugggaacacggggCgcc.....        | 1 |
| Gi3_28559790_x1.....gagacgucgugggaaUacggggugccg.....     | 1 |
| Gi3_28412195_x1...gaucggagGcgucgugggaacacggggugcc.....   | 1 |
| Gi5_9088307_x1....aucggagacgucgCgggaacacggggugc.....     | 1 |
| Gi1_4192229_x1.....ugggaacCcggggugccgaac.....            | 1 |
| Gi2_11245257_x1.ugcgaucggagacgucgugggaacacggg.....       | 0 |
| Gi4_575825_x1.....cCucgugggaacacggggugcc.....            | 1 |
| Gi2_11313946_x1.....ugggaacacgggguUccgaacu.....          | 1 |
| Gi5_9025853_x1...gaucggagacgucgugggaacacC.....           | 1 |
| Gi1a_6249860_x1.....gaacacggggGgccgaacu.....             | 1 |
| Gi3_28977415_x1.....gUgacgucgugggaacacggggugccg.....     | 1 |
| Gi2_10995743_x1.....acgucgugggaacacggggugcAgaac.....     | 1 |
| Gi1_4249657_x1.....agacgucgugggaGcacggggugccg.....       | 1 |
| Gi5_9038076_x1.....gacgucgugggaacaAggggugccgaacu.....    | 1 |
| Gi3_28740015_x1.....cgucguCggaacacggggu.....             | 1 |
| Gi2_11394636_x1..gcgaucggagacgucgugggaacacggggugccg..... | 0 |
| Gi5_8908142_x1.....ggaacacggggugUcgaac.....              | 1 |
| Gi1_4236988_x1.....ggagacgucguggGcacacggggugccg.....     | 1 |
| Gi3_28510892_x1..gcgaucggagacgucgugggaacacggAgu.....     | 1 |
| Gi5_8873448_x1.....guNggaacacggggugccgaac.....           | 1 |
| Gi5_8889851_x1.....cgucgugUgaacacggggugc.....            | 1 |
| Gi2_11357807_x1....ucggagacgucguUggaacacggggugc.....     | 1 |
| Gi3_28646681_x1.....ggagacgucguggUacacggggugcc.....      | 1 |

Gi1\_4254420\_x1.....acgucgGgggaacacggggugccg..... 1  
Gi3\_28967781\_x1.....ggagacgucguAggaacacggggugccgaac..... 1  
Gi3\_28639233\_x1.....cgucguggCaacacggggugccgaac..... 1  
Gi2\_11167879\_x1...gaucggagacgucgugUgaacacggggugcc..... 1  
Gi2\_11163716\_x1.....cgucgugggaacacggUgugccga..... 1  
Gi3\_28353338\_x1.ugcgauccgagacgucgugggaacacggggG..... 1  
Gi5\_8833801\_x1.....cguggAaacacggggugccg..... 1  
Gi1\_4178258\_x1.....ugggaaUacggggugccgaacuu..... 1  
Gi3\_28346408\_x1.....gagacgucgugggaacacggggugUcgaacu..... 1  
Gi3\_28383812\_x1.....ugCgaacacggggugccgaa..... 1  
Gi2\_11270787\_x1.....gucgugggaacacggAgugcc..... 1  
Gi3\_28785885\_x1.....cgugggaacacggUgugccg..... 1  
Gi5\_8924331\_x1.....cgugggaacacgAggugc..... 1  
Gi1\_4344108\_x1...aucggagacgucgugggaaUacg..... 1  
Gi3\_28863208\_x1.....gaNgucgugggaacacggggugccgaacu..... 1  
Gi1\_4165622\_x1.....gugggaacacggggugccgGac..... 1  
G1a\_6070299\_x1...aucggagacgucguggGcacacg..... 1  
Gi1\_4185996\_x1...ucggagacgucguggGcacacggggugcc..... 1  
Gi2\_11098030\_x1.....gaacacAgggugccgaac..... 1  
Gi5\_9067664\_x1.....gugggaacacgAggugccgaa..... 1  
G1a\_6153709\_x1...ggagacgucgugggaacacggggugccgUacu..... 1  
Gi4\_572025\_x1.....cgugUgaacacggggugccgaacu..... 1  
Gi3\_28276001\_x1.....gagGcugcuguggaacacg..... 1  
Gi1\_4323432\_x1...aucggagacgucgCgggaacacggggugccgaacu..... 1  
Gi1\_4194074\_x1.....Cucgugggaacacggggugcc..... 1  
Gi3\_28566124\_x1.....ggagacgucgugggaacacggggugcAgaacu..... 1  
Gi3\_28785048\_x1..Ccgaucggagacgucgug..... 1  
Gi5\_8888806\_x1.ugcAaucggagacgucguggga..... 1  
Gi2\_11193260\_x1.....cgucgugggaacacgCggugccgaacu..... 1  
Gi3\_28946692\_x1...gaucggagacgucguggCaacacggg..... 1  
Gi1\_4160338\_x1...ucggGgacgucgugggaacacggggugc..... 1  
Gi3\_28958325\_x1.....gucgugggaacCcggggu..... 1  
Gi5\_9105841\_x1.....ggagacgucgugggaacacggggAgcc..... 1  
Gi2\_11303918\_x1.....gaGcacggggugccgaac..... 1  
Gi3\_28454791\_x1...cgauccgagacgucguUggaacacg..... 1  
Gi2\_11127008\_x1.....cgugggaacacggggugccC..... 1  
Gi1\_4298864\_x1.....cggagacgucgugggaacCcgggugc..... 1  
Gi5\_8908494\_x1.....gugggaaUacggggugccgaa..... 1  
Gi2\_11267953\_x1.....cgucgugggaacacggggugccgaUcu..... 1  
G1a\_6320415\_x1.....ugggaacaAgggugccgaacu..... 1  
Gi1\_4282194\_x1.....aGcacggggugccgaacu..... 1  
Gi3\_28525123\_x1.ugGgaucggagacgucgugggaaca..... 1  
G1a\_6180815\_x1.....Aucgugggaacacggggugcc..... 1  
Gi2\_11000214\_x1...aucgUagacgucgugggaa..... 1  
Gi2\_11153050\_x1...cgauccgagacgucgugggaacaUg..... 1  
Gi3\_28705573\_x1.ugcgGucggagacgucgugggaacacg..... 1  
Gi3\_28960393\_x1.....gugggaacacggggugcGgaa..... 1

Gi1\_4208248\_x1.....acgucguggaacaUggggugcc..... 1  
 Gi2\_11011472\_x1.....aacacggggugGcgaacu..... 1  
 Gi2\_11370615\_x1.....aucggagacUucguggaacac..... 1  
 Gi2\_11081268\_x1.....auGggagacgucguggaacacggggugc..... 1  
 Gi2\_11147062\_x1.....gaucggagacgucgugAgaacac..... 1  
 Gi2\_11401389\_x1.....gacgucgugggaaAacggg..... 1  
 Gi1\_4380333\_x1.....aucggagacgucguggaacacggggugGc..... 1  
 Gi5\_9029107\_x1.....acgCcguggaacacggggugccg..... 1  
 Gi2\_11246202\_x1.....cgGucggagacgucguggaaca..... 1  
 Gi1\_4360340\_x1.....cGagacgucguggaacacggggugc..... 1  
 Gi3\_28899965\_x1.....gaucggagacgucgugggaaUacggggugcc..... 1  
 Gi5\_8860336\_x1.....guggaacCcgggugccgaacu..... 1  
 Gi3\_28877549\_x1.....cguAguggaacacggggugccgaa..... 1  
 Gi2\_11155296\_x1.....ucguggaacCcgggugc..... 1  
 Gi2\_11328307\_x1.....ucggGgacgucguggaacacggggugccg..... 1  
 Gi1\_4374811\_x1.....gAgaacacggggugccgaacu..... 1  
 G1a\_6315337\_x1.....ggCacacggggugccgaacu..... 1  
 Gi4\_581357\_x1.....gggGacacggggugccgaacu..... 1  
 Gi1\_4184243\_x1.....ucguggaacacggggAgccga..... 1  
 Gi2\_11169305\_x1.....ucAugggaacacggggugc..... 1  
 Gi5\_9074058\_x1.....gaacaUggggugccgaac..... 1  
 G1a\_6061753\_x1.....aucggagacgucguggaCcacg..... 1  
 Gi5\_9080550\_x1.....uggaacacggggugcGgaac..... 1  
 Gi2\_11143733\_x1.....Ccgauccgagacgucguggaacacgg..... 1  
 Gi2\_11104041\_x1.....aucggagacgucUugggaacacgggg..... 1  
 Gi2\_11189756\_x1.....ucggagaGgucguggaacacggggugc..... 1  
 Gi3\_28783433\_x1.....gggaacacggggugccgCacuu..... 1  
 Gi3\_28724960\_x1.....gacgucgugAgaacacggggugccg..... 1  
 Gi3\_28393591\_x1.....agacgucguggaacacgUggugccgaac..... 1  
 Gi3\_28570949\_x1.....cgauccgGgacgucguggaacacggg..... 1  
 Gi4\_573087\_x1.....ugAgaacacggggugccgaacu..... 1  
 G1a\_6084836\_x1.....gggaacacggggugccUaacu..... 1  
 Gi1\_4321968\_x1.....ucguggaaUacggggugccgaac..... 1  
 Gi3\_28527967\_x1.....aucggagacgucgugUaacacgggg..... 1  
 Gi2\_11407411\_x1.....gucguggaacacggggugccAa..... 1  
 Gi2\_11091719\_x1.....gaacacgggUaccgaac..... 1  
 Gi2\_11114290\_x1.....cguggaacacCgggugcc..... 1  
 Gi2\_11008238\_x1.....agacgucNgggaacacggggg..... 1  
 Gi3\_28407367\_x1.....ucggagacgucguAggaacacgg..... 1  
 Gi1\_4385702\_x1.....cgugggGacacggggugccga..... 1  
 Gi3\_28765951\_x1.....gagacgucgugCaacac..... 1  
 G1a\_6285320\_x1.....aucggagacgucguggaacacgAggu..... 1  
 Gi2\_11273039\_x1.....aucggagacgucguggaacaG..... 1  
 Gi2\_11141085\_x1.....ucguggaacacgggAugccg..... 1  
 Gi5\_8871182\_x1.....cgucguggaacacAgggugccga..... 1  
 Gi5\_8877787\_x1.....ugggGacacggggugccgaacuuu..... 1  
 Gi3\_28826782\_x1.....aucggUgacgucguggaacacgggg..... 1

G1a\_6241029\_x1.....aUacgucgugggaacacggggugccgaacu..... 1  
 Gi2\_11184713\_x1.....cgugggaaAacggggugccga..... 1  
 Gi1\_4386074\_x1.....ggagacgucgugggaGcacggggu..... 1  
 G1a\_6034365\_x1.....aacacggggAgccgaacu..... 1  
 G1a\_6271189\_x1.....ucgugggaacacggggugccgCacu..... 1  
 Gi2\_11026308\_x1.....gucgugggaacacggggAgc..... 1  
 Gi1\_4229492\_x1.....aucggagGcgucgugggaacacggggugc..... 1  
 Gi3\_28922844\_x1.....cgucgugggCacacggggugccg..... 1  
 Gi2\_11143844\_x1.....gaucCgagacgucgugggaacacgggg..... 1  
 Gi5\_8942613\_x1.....cgCgggaacacggggugcc..... 1  
 Gi1\_4210685\_x1.....cgCcgugggaacacggggugccgaa..... 1  
 Gi3\_28495361\_x1.....ggGgacgucgugggaacacg..... 1  
 Gi1\_4201816\_x1.....ucgGgggaacacggggugccgaac..... 1  
 G1a\_6115828\_x1.....cgucgugggaacacggggugccgaacG..... 1  
 Gi3\_28421554\_x1.....gagacgucCugggaacacgggggu..... 1  
 Gi3\_28502309\_x1.....ucggCgacgucgugggaacacggggugcc..... 1  
 Gi1\_4360245\_x1.....cgAgggaacacggggugccgaa..... 1  
 Gi2\_11369767\_x1.....gaucggagacgucgugggaCcacgg..... 1  
 Gi3\_28334246\_x1.....cgugggaacacCgggugc..... 1  
 Gi2\_11172134\_x1.....cggagacgucgugggaacacggggugccCa..... 1  
 Gi2\_11164835\_x1.....cgucgAgggaacacggggugccg..... 1  
 Gi5\_9131771\_x1.....agacgucgugAgaacacggggugccgaac..... 1  
 Gi2\_11172915\_x1.....aucggagacgucgCgggaacacgggg..... 1  
 Gi1\_4384370\_x1.....Ucgaucggagacgucgugggaacacggggugc..... 1  
 Gi3\_28924007\_x1.....ggagacgucgugggaacacggggugccgCac..... 1  
 Gi3\_28678067\_x1.....Ngauccgagacgucgugggaacacggggugc..... 1  
 Gi2\_11252358\_x1.....gggUacacggggugccgaa..... 1  
 Gi2\_11182736\_x1.....Nauccgagacgucgugggaacacgg..... 1  
 Gi3\_28660958\_x1.....cgugggaacacggAgugccg..... 1  
 G1a\_6268555\_x1.....cggagacgucAugggaacacgggggu..... 1  
 Gi2\_11305615\_x1.....acgucgugggGacacgggggu..... 1  
 Gi1\_4213012\_x1.....Cugggaacacggggugcc..... 1  
 Gi1\_4308358\_x1.....aucggagacgucgugggaAacg..... 1  
 Gi3\_28685900\_x1.....cggagacgucgugggaacacggggugA..... 1  
 G1a\_6105967\_x1.....Ugagacgucgugggaacac..... 1  
 Gi2\_11361845\_x1.....cgucgugggaacacUgggugccg..... 1  
 Gi3\_28721392\_x1.....cggagaAgucgugggaacacggggugcc..... 1  
 Gi2\_11157811\_x1cugcgauccAagacgucgugggaacacg..... 1  
 Gi3\_28307823\_x1.....ucgNagacgucgugggaacacggggugccg..... 1  
 G1a\_6245439\_x1.....aucAgagacgucguggga..... 1  
 Gi5\_9033246\_x1.....gugggaacacggggugAc..... 1  
 G1a\_6342976\_x1.....gaNcacggggugccgaacu..... 1  
 Gi5\_9087098\_x1.....aucgUagacgucgugggaacacgggg..... 1  
 Gi2\_11192869\_x1.....cgucgugggCacacggggugccgaacu..... 1  
 Gi1\_4187370\_x1.....gucgugggGacacggggugccgaac..... 1  
 Gi3\_28324091\_x1.....gaacacAgggugccgaacuu..... 1  
 Gi4\_609651\_x1.....gGgggaacacggggugccga..... 1

Gi2\_11073889\_x1...gaucggagacgucgugggaacaUgg..... 1  
 Gi2\_11102524\_x1...gaucggagacgucgugggaacacgggUu..... 1  
 Gi1\_4390414\_x1.....gucgugggaGcacggggugcc..... 1  
 Gl1a\_6302622\_x1.....gucgugggaacacggggugUcga..... 1  
 Gi1\_4312210\_x1.....ucUgagacgucgugggaacacg..... 1  
 Gi3\_28986285\_x1.....cggagacgucgGgggaacacggggugcc..... 1  
 Gi5\_9041758\_x1.....gggaacacggAgugccgaa..... 1  
 Gi5\_8941712\_x1.ugcgauAggagacgucguggg..... 1  
 Gi2\_10998623\_x1.....guAgugggaacacggggugcc..... 1  
 Gi2\_10995116\_x1.....gCaacacggggugccgaa..... 1  
 Gi2\_11197076\_x1.....ucggagGcgucgugggaacacggggugc..... 1  
 Gi5\_8871658\_x1.....gucgugggaacacggggGgccgaa..... 1  
 Gl1a\_6318747\_x1.....gugggaacacggggugccgaacuC..... 1  
 Gi5\_8909883\_x1.....cgucgugggaacacggggugccgGac..... 1  
 Gl1a\_6203867\_x1.....aucggagacgucgugggaacacCg..... 1  
 Gl1a\_6026972\_x1.....gugggaacacggggugccgaaGu..... 1  
 Gi2\_11137722\_x1.ugcgauUgagacgucgugggaaca..... 1  
 Gi3\_28733679\_x1...cgaucggagacgucgugggaacacgAggugc..... 1  
 Gi3\_28634120\_x1...gaucggagacgucgugggaacGcgg..... 1  
 Gi3\_28847478\_x1...aucggagaAgucgugggaacacggggg..... 1  
 Gi5\_9055481\_x1.....gacUucgugggaacacggggugccgaacu..... 1  
 Gl1a\_6079466\_x1.....cguggAaacacggggugcc..... 1  
 Gi3\_28675517\_x1.....gagacgucgugggUacac..... 1  
 Gi5\_9127830\_x1.....aCacgucgugggaacacggggugccgaaac..... 1  
 Gi3\_28427025\_x1...aucggagacgucgugggaacacCggg..... 1  
 Gi4\_609763\_x1.....gucgCgggaacacggggugccgaaac..... 1  
 Gi1\_4331276\_x1.....cgucgugggaCcacggggugccgaa..... 1  
 Gi1\_4294471\_x1.....ugggaacaUggggugccgaa..... 1  
 Gi1\_4300009\_x1.....gggaacacggggugccCaac..... 1  
 Gi3\_28718860\_x1.....gacgucgugggaacacggggugcUgaacu..... 1  
 Gi3\_28314969\_x1...gaucggagaGgucgugggaacacgg..... 1  
 Gi3\_28524732\_x1.....acgucgugggaUacggggugccgaaac..... 1  
 Gi5\_8879984\_x1.....ugggaacacggggugccCaa..... 1  
 Gi5\_8837114\_x1.....ucgugggaaUacggggugcc..... 1  
 Gi5\_9115300\_x1.....gucgugggaacCcgggugccgaa..... 1  
 Gi5\_8927338\_x1.....gucgugggaacacggUgugccgaacu..... 1  
 Gi2\_11287647\_x1.....cgucUugggaacacggggugccga..... 1  
 Gi1\_4361376\_x1...aucggaAacgucgugggaacacggggugc..... 1  
 Gi1\_4286452\_x1.....cgugggUacacggggugccgaa..... 1  
 Gi5\_9123992\_x1.....gggUacacggggugccgaaac..... 1  
 Gi2\_11179369\_x1...auUggagacgucgugggaac..... 1  
 Gi2\_11394826\_x1...aucggagacgAcgugggaacacgg..... 1  
 Gi2\_11273514\_x1.....gagacgucgugggaGcacggggugccg..... 1  
 Gl1a\_6199135\_x1.....ucguggAaacacggggugccgaacu..... 1  
 Gi2\_11063448\_x1.....gagacgucgugggaacaAgggggugccg..... 1  
 Gi2\_11299761\_x1...aucggagacUucgugggaacacg..... 1  
 Gi3\_28575795\_x1...acgucgugggaacacgCggugccgaaac..... 1

Gi2\_11053387\_x1.....agacgucgugggaUcacggggugcc..... 1  
Gi2\_11128826\_x1.....cguggUaacacggggugccga..... 1  
Gi3\_28303681\_x1.....cgugCgaacacggggugccga..... 1  
Gi2\_11366123\_x1.....ucgugggaacCggggugccg..... 1  
Gi1\_4387893\_x1.....uggaacaacggggugcUgaac..... 1  
Gi1\_4218612\_x1.....ucgugggaacacggggugAcgaac..... 1  
G1a\_5981694\_x1...gaucggagCcgucgugggaacacggg..... 1  
Gi2\_11164169\_x1...aucggagaGgucgugggaacacggg..... 1  
Gi2\_11178594\_x1.....agacgucgugggaacCggggugccg..... 1  
Gi1\_4193510\_x1.....agacgCcgugggaacacggggugccgaacu..... 1  
Gi5\_8901750\_x1...aucggagacgucgugggaacacgggAu..... 1  
Gi3\_28770047\_x1.....gUagacgucgugggaacac..... 1  
Gi2\_11255422\_x1.....acgucgugggUacacggg..... 1  
Gi3\_28719538\_x1.....agacgucgugggaacacggggugUcgaac..... 1  
Gi2\_11152286\_x1...aucggagacgucgugggaacacUg..... 1  
Gi2\_11109312\_x1...auAggagacgucgugggaacac..... 1  
Gi3\_28922613\_x1.....ggagacgucgugggaacacggggugccCa..... 1  
Gi2\_11241650\_x1.....gacgucgugggaAacggggu..... 1  
Gi3\_28865856\_x1.....cgucgugggaacCgggggu..... 1  
Gi3\_28968000\_x1...aucggagaAgucgugggaacacggggugc..... 1  
Gi2\_11253600\_x1.....gugggaacacggggUuccgaa..... 1  
Gi3\_28425265\_x1.....gagacgucgugggaCcacggggugccg..... 1  
Gi5\_8922235\_x1...gGucggagacgucgugggaacacgggggu..... 1  
Gi1\_4383069\_x1.uAcgaucggagacgucguggga..... 1  
Gi3\_28793495\_x1...aucgAagacgucgugggaacacggggugc..... 1  
Gi2\_11101268\_x1.....ugggaacacCgggugccgaacu..... 1  
G1a\_6023231\_x1.....gagacgucgugggaacacggggugccgaGcu..... 1  
Gi3\_28460031\_x1.....cgucgugggaacCcggggug..... 1  
Gi5\_8881241\_x1.....agacgucgCgggaacacggggugccgaac..... 1  
Gi3\_28754549\_x1.....gucgugggaGcacggggugcc..... 1  
Gi5\_9080797\_x1.....cgucgugggaacacAgggugccgaac..... 1  
G1a\_6337557\_x1.....aUacgucgugggaacacg..... 1  
Gi3\_28739461\_x1...cgaucggagacgucgGggg..... 1  
Gi3\_28876134\_x1.....acgucgugggaacacggggugcUg..... 1  
Gi2\_11205831\_x1.....gaacacggggugccgCac..... 1  
Gi3\_28444891\_x1.....gaGgucgugggaacacggggugccgaacu..... 1  
Gi1\_4270476\_x1.....acgucgugggaacCcggggugccgaac..... 1  
Gi2\_11165680\_x1.....gacgucgugggaacacgCg..... 1  
Gi3\_28268401\_x1.....Cacgucgugggaacacggg..... 1  
Gi3\_28778816\_x1.....ugNgaacacggggugccgaac..... 1  
Gi3\_28468745\_x1...ucggagacNucgugggaacacggggugc..... 1  
G1a\_6295485\_x1.....cggagacgucgugggGacacggggu..... 1  
Gi3\_28776780\_x1.....gaacacggAgugccgaac..... 1  
Gi1\_4360716\_x1.....ugNgaacacggggugccgaac..... 1  
Gi2\_11275259\_x1.....cgugCgaacacggggugccgaa..... 1  
Gi2\_11186867\_x1...gaucggagacgucgugggaacacggggugccgaa..... 0  
Gi2\_11004531\_x1.....cgucguggAaacacggggugccgaac..... 1

Gi5\_8936902\_x1.....aucggagGcgucgugggaacacggg..... 1  
 Gi5\_9061516\_x1.....ucggagacgucgugggaacCggggugc..... 1  
 Gi5\_9118483\_x1.....Cgggagacgucgugggaacacg..... 1  
 Gi2\_11072583\_x1.....ggagacgucAugggaacacggggugcc..... 1  
 Gi3\_28810062\_x1.....ucggaAacgucgugggaacacg..... 1  
 Gi3\_28988139\_x1.....Agucgugggaacacggggugc..... 1  
 Gi4\_588749\_x1.....gggaacacggggugccgaGc..... 1  
 Gi5\_8884589\_x1.ugcgauccgagGcgucgug..... 1  
 Gi3\_28782108\_x1.....ugCgaacacggggugccgaac..... 1  
 Gi1\_4355038\_x1.....gaucggagacAucgugggaacacgg..... 1  
 G1a\_6280926\_x1.....cgugAgaacacggggugcc..... 1  
 Gi2\_11353363\_x1.ugcgauccgagacgucgugggaGcacg..... 1  
 Gi2\_11331443\_x1.....agacgucgugggaacacggggugcAgaacu..... 1  
 Gi2\_11108264\_x1.....gaucggGgacgucgugggaacacggggugcc..... 1  
 Gi5\_8914257\_x1.uCcgauccgagacgucguggg..... 1  
 Gi3\_28642768\_x1.....ucgugggaUacggggugcc..... 1  
 Gi2\_11388002\_x1.....cggagacgucgugggGacacggggugccga..... 1  
 Gi1\_4354270\_x1.....acgucgugNgaacacggggugccgaacuu..... 1  
 Gi3\_28657787\_x1.....gaucggagacgucgugggaCcacggggg..... 1  
 Gi3\_28753758\_x1.....aucCgagacgucgugggaacacggggugcc..... 1  
 Gi3\_28590111\_x1.....gagGcgucgugggaacac..... 1  
 Gi3\_28921642\_x1.....ucggagacgucGgggaacacg..... 1  
 Gi1\_4350110\_x1.....cAugggaacacggggugccgaacuu..... 1  
 Gi4\_599708\_x1.....cgCgugggaacacggggugccga..... 1  
 Gi2\_11170481\_x1.....cgucgugggaacacggAg..... 1  
 Gi5\_9071099\_x1.....gaucggagacgucgugggaacaUgg..... 1  
 Gi5\_9100497\_x1.....gugggUacacggggugccgaa..... 1  
 Gi3\_28502095\_x1.....cguggCaacacggggugc..... 1  
 Gi1\_4215247\_x1.....aucggagacgucguAggaacacggggugcc..... 1  
 Gi3\_28458349\_x1.....ugggaacacggggUccgaa..... 1  
 Gi3\_28913224\_x1.....gaucggagacgucgugggaacaUggg..... 1  
 Gi1\_4171662\_x1.....gugggaaAacggggugccgaacuu..... 1  
 Gi3\_28703389\_x1.....aucggagacgucgugggaacaGg..... 1  
 Gi2\_11103752\_x1.....ucguggAaacacggggugccgaa..... 1  
 Gi3\_28477095\_x1.....gagacgucgugggaUacggggugccgaacu..... 1  
 Gi1\_4205019\_x1.....agacgucgNgggaacacggggugcc..... 1  
 Gi2\_11268571\_x1.....auAggagacgucgugggaacacg..... 1  
 Gi3\_28557589\_x1.....gaucggagacgucguggga..... 0  
 Gi1\_4302348\_x1.....gGgacgucgugggaacacggggugccg..... 1  
 Gi2\_11057443\_x1.....gucgugggaacacgCggugccgaacu..... 1  
 Gi3\_28931493\_x1.gcgauccgCgacgucguggga..... 1  
 Gi4\_568772\_x1.....gugggaacacggggAugccgaacu..... 1  
 Gi3\_28538130\_x1.....acacggggugccUaacuu..... 1  
 Gi1\_4234473\_x1.....cgucguCggaacacggggugccgaacu..... 1  
 Gi2\_11227967\_x1.....gucgugUgaacacggggugc..... 1  
 Gi3\_28912351\_x1.....gNgaacacggggugccgaac..... 1  
 Gi4\_594092\_x1.....cgucgugggaacacggggugccgaCcu..... 1



Gi2\_11389840\_x1.....uggaacacggggugcAg..... 1  
Gi1\_4275104\_x1.....cggagacguUguggaacacggggugcc..... 1  
Gi2\_11361831\_x1.....ggCgacgucguggaacacggggug..... 1  
Gi2\_11172917\_x1.....ucggagacgucguggaacC..... 1  
Gi3\_28594451\_x1.....Acguggaacacggggugccg..... 1  
Gi3\_28876954\_x1.....gaucggagacgCcguggga..... 1  
Gi1\_4257220\_x1.....Gcguggaacacggggugccgaa..... 1  
Gi1\_4177610\_x1.....gagacgucNuggaacacggggugcc..... 1  
Gi3\_28484806\_x1.....uggUaacacggggugccga..... 1  
Gi5\_8977517\_x1.....acNucguggaacacggggugccgaac..... 1  
Gi1\_4252500\_x1.....gucgugggaGcacggggugccgaacu..... 1  
Gi3\_28677720\_x1.....gagacgucNuggaacacg..... 1  
Gi3\_28508006\_x1.....gaucUgagacgucguggaacac..... 1  
G1a\_6204197\_x1.....aucggagacgucgugggaGcacggggug..... 1  
Gi2\_11264759\_x1.....ucggagacgAcguggaacacggggugccg..... 1  
Gi2\_11092655\_x1.....cguggaacacAgggugccgaa..... 1  
Gi5\_9005993\_x1.....cggaUacgucguggaacacggg..... 1  
Gi3\_28510708\_x1.....uggaacacCgggugccgaac..... 1  
Gi2\_11217973\_x1..gcgaucggagaUgucguggaacacggggug..... 1  
Gi2\_11060102\_x1.....aucggagacgucguggaacacgggA..... 1  
Gi3\_28910063\_x1...gaucAgagacgucguggaacacggggugc..... 1  
Gi2\_11401586\_x1.....gagacgucguggaacacggggCgccgaacu..... 1  
Gi2\_11291305\_x1.....gUgacgucguggaacacggggug..... 1  
Gi5\_9086086\_x1..ugcgaucggagCcgucgug..... 1  
Gi5\_8833892\_x1.....cguggaacacgAggugccga..... 1  
Gi2\_11281154\_x1.....uggaacacggggugccgaaA..... 1  
Gi2\_11061957\_x1.....aucggagUcugcuguggaacacggggugc..... 1  
Gi2\_11252424\_x1.....cguAguggaacacggggugccg..... 1  
Gi2\_11157763\_x1..gcgaucggagacguUguggaacac..... 1  
G1a\_6347188\_x1.....acgucguggaacacggggugccgaCcu..... 1  
Gi5\_8867208\_x1.....cgAagacgucguggaacacgg..... 1  
Gi2\_11113469\_x1.....gucguggUaacacggggugccgaac..... 1  
Gi1\_4212416\_x1.....cgugggaaUacggggugccga..... 1  
Gi5\_9034524\_x1.....gaacacggggugccgaaG..... 1  
Gi3\_28609142\_x1.....ucgCgggaacacggggugcc..... 1  
Gi3\_28638459\_x1.....ggagacguUguggaacacggggugcc..... 1  
Gi2\_11044372\_x1.....ucggagacgucguggaacAagggugc..... 1  
Gi5\_8854932\_x1.....ucguggaacacggggugc..... 0  
Gi3\_28932277\_x1Gugcgaucggagacgucguggaacacggggugcc..... 1  
Gi5\_9018180\_x1.....gcccugcNgcccaccuucgcccaguucg..... 1  
Gi3\_28500864\_x1.....cggagacgAcguggaacacggggugc..... 1  
Gi2\_11232517\_x1.....agacgucguggaacacggggugccgaUc..... 1  
Gi2\_11003426\_x1.....cggagacgucgugggaCcacggggugccg..... 1  
G1a\_6335638\_x1...aCcgagacgucguggaacacgggg..... 1  
Gi3\_28971991\_x1.....acgucguggaacacUgggugccgaacu..... 1  
Gi5\_9107966\_x1.....uggNaacacggggugccgaac..... 1  
Gi2\_11154062\_x1.....aucggagacgucguggAaacacggggug..... 1

Gi1\_4252164\_x1.....ggaacacggggugGcgaac..... 1  
Gi3\_28664024\_x1....gaucggagacgucgugggaaA..... 1  
Gi3\_28873933\_x1.....cggagacgucguggUaacacggg..... 1  
Gi3\_28347973\_x1.....cggUgacgucgugggaacacggggu..... 1  
G1a\_6089179\_x1.....cgugggUacacggggugc..... 1  
Gi5\_8937271\_x1....aucggagacgucUugggaacacggggugc..... 1  
Gi5\_9056288\_x1....aucggUgacgucgugggaacacggggugc..... 1  
Gi1\_4208410\_x1.....gucguggAaacacggggugccgaacu..... 1  
Gi5\_8939210\_x1.....uUgugggaacacggggugcc..... 1  
Gi1\_4369465\_x1.....cgucgugAgaacacggggugcc..... 1  
Gi2\_11298844\_x1.....uAggagacgucgugggaacacg..... 1  
Gi5\_8970944\_x1....aucggagacgucgugggaacacggA..... 1  
Gi2\_11038644\_x1.....gaAacgucgugggaacacggggugc..... 1  
Gi2\_11217098\_x1.....acgucgugggaacacggggugccgaaGu..... 1  
Gi2\_11070603\_x1.....gacgucgugggUacacggggugccgaacu..... 1  
Gi3\_28358297\_x1.....ggagacAucgugggaacacggggugcc..... 1  
Gi5\_9058015\_x1.....cggagacgNcgugggaacacgg..... 1  
Gi2\_11049177\_x1.....agacgucgGgggaacacggggug..... 1  
Gi5\_8913558\_x1.....cgucgugggaacacggggugcAga..... 1  
Gi1\_4278766\_x1.....ggaacaGggggugccgaacu..... 1  
Gi1\_4306063\_x1.....acgucgugggaGcacggggugccgaacu..... 1  
Gi3\_28789204\_x1.gcUaucggagacgucgugggaacacggg..... 1  
Gi3\_28457192\_x1.....gAagacgucgugggaacacggggu..... 1  
Gi5\_8901890\_x1.....ugggaacacggggugccga..... 0  
Gi2\_11335531\_x1....gaucggagCcgucgugggaacacggggugc..... 1  
Gi3\_28369862\_x1.....ggaacaGggggugccgaac..... 1  
Gi3\_28946124\_x1.....cgugggaacacggggugccgaaAuu..... 1  
Gi3\_28398388\_x1.....guGgugggaacacggggugccga..... 1  
Gi4\_585560\_x1....guUgugggaacacggggugccgaacu..... 1  
Gi3\_28577996\_x1.....ucgAgggaacacggggugc..... 1  
Gi2\_11377217\_x1.....gacgucgugggaacacggggugccAa..... 1  
Gi1\_4322404\_x1.ugcgauccgagGcgucguggga..... 1  
Gi3\_28299653\_x1.....ggagacgucgugggaGcacgg..... 1  
Gi5\_9047431\_x1.....Agucgugggaacacggggugccgaac..... 1  
Gi2\_11135835\_x1.....cgucgugggaacacggggugUcga..... 1  
Gi2\_11222495\_x1....cUgagacgucgugggaacacggggugccgaa..... 1  
G1a\_6358968\_x1....cUgagacgucgugggaacacggggug..... 1  
Gi5\_9096254\_x1.....gggaacacggggUccgaacu..... 1  
Gi2\_11061458\_x1.....gagacgucgugggaacacgggAugccg..... 1  
Gi1\_4293264\_x1.ugUgaucggagacgucgugggaacacg..... 1  
Gi2\_11344132\_x1....cgauccgagacgucgugg..... 0  
Gi2\_11273739\_x1.....uNggaaacacggggugccgaac..... 1  
Gi2\_11162054\_x1....aucggagacgucguggCaacac..... 1  
Gi2\_11067240\_x1.....guggUaacacggggugccgaacu..... 1  
Gi1\_4223473\_x1.....ggagacgucgugggaacacggggua..... 1  
Gi2\_11311733\_x1.ugcgauccgagacgucgugggC..... 1  
Gi3\_28421221\_x1....gaucggagacgucgugggaaGacggggugc..... 1

Gi5\_8915270\_x1...cgaucggagacguUgugggaacacggg..... 1  
Gi2\_11280393\_x1.....gucgugggaacacggggugG..... 1  
Gi1\_4211233\_x1.....acguGgugggaacacggggugccgaacu..... 1  
Gi2\_11052726\_x1..gcgaucggagacgucguggggaacCgggggug..... 1  
Gi1\_4331833\_x1.....gagacgucgugggaacacAgggugccga..... 1  
Gi2\_11215735\_x1.....ucggagacgucgCgggaacacggggugcc..... 1  
Gi2\_11391111\_x1.....gagacgucguggAaacacggggugc..... 1  
Gi3\_28263794\_x1cugcgauccggagGcgucguggggaacacggggug..... 1  
Gi5\_8873805\_x1.....gggaacacggggugUcgaac..... 1  
Gi2\_11266608\_x1..ugcgauccggagacgucAuggga..... 1  
Gi3\_28431944\_x1.....ggagacgucguggggaacCggggugccgaac..... 1  
Gi3\_28540993\_x1.....ggagacgucguggggaacaUggggg..... 1  
Gi1\_4229878\_x1.....ucgugggaacacggggugAcg..... 1  
G1a\_6354246\_x1.....Ccgagacgucguggggaacacggggg..... 1  
Gi3\_28747477\_x1.....ggagacguUgugggaacacggggugccgaa..... 1  
Gi1\_4212515\_x1.....gGgacgucguggggaacac..... 1  
Gi1\_4313097\_x1....aucggagGcgucguggggaacac..... 1  
Gi5\_9029165\_x1..ugcgauAggagacgucgug..... 1  
Gi5\_8853722\_x1.....agacgucguggggaacacggggugUc..... 1  
Gi3\_28614813\_x1.....gucgugggaacaUggggugccg..... 1  
Gi2\_11005546\_x1.....acgucguggUacacggggugc..... 1  
Gi2\_11279178\_x1.....guUgugggaacacggggugccgaa..... 1  
Gi1\_4363714\_x1.....cgucgugAgaacacggggugccg..... 1  
Gi4\_604161\_x1.....cgucgCgggaacacggggugccga..... 1  
Gi3\_28532652\_x1..cgaucggaNacgucguggggaacacggggugc..... 1  
Gi1\_4300654\_x1.....cggagacgucgugggaaAacggggg..... 1  
Gi1\_4160340\_x1.....gucgugggaacaUggggugccgaacu..... 1  
Gi3\_28557332\_x1.....ggagacgucgugggaaUacggg..... 1  
Gi2\_11240536\_x1.....ucggagacgucguAggaacacggggugc..... 1  
Gi3\_28835081\_x1.....ucgugggaacacggggCgccgaa..... 1  
Gi3\_28485697\_x1.....ucgugAgaacacggggugc..... 1  
Gi5\_8977478\_x1.....agacUucgugggaacacggggugc..... 1  
Gi2\_11325036\_x1...gaucggagacgucAggga..... 1  
Gi3\_28304209\_x1...gaCcgagacgucgugg..... 1  
Gi3\_28412637\_x1.....cgucguggggaacacggUgugcc..... 1  
Gi3\_28935793\_x1.....gugggaacacggggGgccgaacuuu..... 1  
Gi5\_8940673\_x1.....cgucguggGacacggggugccgaa..... 1  
Gi2\_11110293\_x1.....cgucgugggaacacgUggugccgaacu..... 1  
Gi1\_4171445\_x1...gaucggagacguUgugggaacacgg..... 1  
G1a\_6204160\_x1...gaucggagacgucguggggaacCggg..... 1  
Gi2\_11218858\_x1....aucggagaNucguggggaacacgggg..... 1  
Gi3\_28793683\_x1.....aacacgggAugccgaacuu..... 1  
Gi2\_11004801\_x1.....gacgucgugggaAacggggugccgaacu..... 1  
Gi2\_11344205\_x1.....gacgucAugggaacacggggg..... 1  
Gi5\_9134079\_x1....aucggagacgucguggggaacaUggggg..... 1  
G1a\_6314687\_x1.....gugggaacacggggugcUgaa..... 1  
Gi3\_28319817\_x1.....gagacgucguggggaacacggAgugccgaacu..... 1

Gi2\_11141837\_x1.....gaacacggggugccgaaU..... 1  
 Gl1a\_6219817\_x1.....gugggaacacggggugcG..... 1  
 Gi5\_8917666\_x1.....cgAgggaacacggggugccgaacu..... 1  
 Gl1a\_6086833\_x1.....gCgggaacacggggugccg..... 1  
 Gi3\_28689405\_x1.....ucggagacguAgugggaacacggggugcc..... 1  
 Gi2\_11274415\_x1.....acguUgugggaacacggggugccgaacu..... 1  
 Gi1\_4301382\_x1..gGgaucggagacgucguggaaca..... 1  
 Gi1\_4238241\_x1.....ucgugggaacacUgggugc..... 1  
 Gi2\_11050219\_x1.....acgucguCggaacacggggg..... 1  
 Gi2\_11239936\_x1.....gagacgucgugAgaacacggg..... 1  
 Gi3\_28917393\_x1..gaucAgagacgucguggaacaacg..... 1  
 Gi2\_11212318\_x1.....gucgGgggaacacggggugccg..... 1  
 Gi3\_28862626\_x1.....gacgucguggaacGcggggugccg..... 1  
 Gl1a\_6156976\_x1..gcgaucggagGcucgug..... 1  
 Gi3\_28400955\_x1.....agacgCcgugggaacacggggugccgaa..... 1  
 Gi2\_11106474\_x1.....agacgCcgugggaacacggggugc..... 1  
 Gi3\_28332919\_x1....aucggagacgucgugCgaacacggg..... 1  
 Gi2\_11068700\_x1.....acgucguAggaacacggggg..... 1  
 Gi3\_28778685\_x1.....gagacgucguggaacc..... 1  
 Gi3\_28857206\_x1.....gucgugggaGcacggggugccgaa..... 1  
 Gi2\_11192877\_x1.....Agggaacacggggugccg..... 1  
 Gi2\_11294108\_x1.....acgucgugggaacacggggugAcgaacu..... 1  
 Gi2\_11392980\_x1.....gagacguUgugggaacacggggugcc..... 1  
 Gi1\_4351291\_x1.....agacgucgugggaacacggggugccU..... 1  
 Gl1a\_6147959\_x1...gaucggagacgucguggaaccGcggg..... 1  
 Gi5\_9113386\_x1.....ggaacacgggUugccgaacu..... 1  
 Gi5\_9021586\_x1.....gggNacacggggugccgaacu..... 1  
 Gi2\_11057975\_x1.....agacgucgCgggaacacggggugccgaa..... 1  
 Gi3\_28614369\_x1.....ggagacgucguggaacaacgAggugccg..... 1  
 Gi2\_11332601\_x1.....cgugggaacacgggAugccga..... 1  
 Gi3\_28341878\_x1.....cguggUaacacggggugc..... 1  
 Gi1\_4365653\_x1.....ggGgacgucguggaacaacg..... 1  
 Gi3\_28498903\_x1....aucggagacgucgugggaGacggg..... 1  
 Gi2\_11095984\_x1.....gaNcacggggugccgaacu..... 1  
 Gi5\_8867061\_x1.....cgucguCggaacacggggugccgaacu..... 1  
 Gi5\_8991885\_x1.....cgugggaacacggggAgcc..... 1  
 Gi3\_28858800\_x1.....cggagacguAgugggaacacg..... 1  
 Gi2\_11403226\_x1...gaucUgagacgucgugggaacacggggugcc..... 1  
 Gi2\_11176360\_x1.....gCgacgucgugggaacacggggug..... 1  
 Gi3\_28342228\_x1....aucggagacgucgugggaacacUgggu..... 1  
 Gi1\_4305564\_x1.....ggagacgucgugAaacacggggug..... 1  
 Gi3\_28300504\_x1.....Agagacgucgugggaacacggggug..... 1  
 Gi1\_4284095\_x1....Acggagacgucguggaacaacg..... 1  
 Gi5\_9034431\_x1.....gacgucguggaacaacggggugcGgaacu..... 1  
 Gi2\_11396983\_x1....aucggagacguAgugggaacac..... 1  
 Gi1\_4213093\_x1.....Augggaacacggggugcc..... 1  
 Gi2\_11021932\_x1....Nucggagacgucgugga..... 1

Gi1\_4164506\_x1.....aucggagacgucUugggaaacacggggugccgaacu..... 1  
Gi2\_11179539\_x1.....ucggagacgucgugggGcacgggg..... 1  
G1a\_5984082\_x1.....ucggagacgucgugggaaacGcggggugcc..... 1  
Gi5\_9053179\_x1.....cCgagacgucgugggaaacacggg..... 1  
Gi1\_4281657\_x1.....aucgUagacgucgugggaaacac..... 1  
G1a\_6043588\_x1..gcgauAggagacgucgugggaaacacggg..... 1  
Gi2\_11100541\_x1...gaucggagacgucgugggaaacaUggggug..... 1  
Gi4\_588100\_x1.....cgucAugggaaacacggggugccga..... 1  
Gi1\_4252292\_x1.....acgucgugggaaacacAgggugcc..... 1  
Gi5\_9001101\_x1.....cgucgugggaaGacggggugc..... 1  
Gi1\_4338528\_x1.....uUgugggaaacacggggugccga..... 1  
Gi3\_28325655\_x1...gaGcggagacgucguggg..... 1  
Gi1\_4215169\_x1.....aucggagaAgucgugggaaacacgggggu..... 1  
Gi2\_11049827\_x1.....gagacAucgugggaaacacggggugccg..... 1  
Gi5\_9103810\_x1.....agacAucgugggaaacacggggugcc..... 1  
Gi1\_4248734\_x1.....ugUgaacacggggugccgaacu..... 1  
Gi2\_11034163\_x1.....ggaacacggggugccgGa..... 1  
Gi2\_11016297\_x1.....aucggagacgucguCggaacacggggugcc..... 1  
Gi5\_8851030\_x1.....acgucgugNgaacacggggugccg..... 1  
Gi1\_4241418\_x1.....aucggagacgucgugggaaacacggAgu..... 1  
Gi2\_11234105\_x1.....agacgucguggUaacacggggugccgaacu..... 1  
Gi1\_4334935\_x1..ugcgauccggagacgCcguggg..... 1  
Gi4\_609391\_x1.....ugggaaacacAgggugccgaacu..... 1  
Gi1\_4275502\_x1.....gugggaaacacggUgugccgaac..... 1  
Gi2\_11152878\_x1.....cgNgggaacacggggugccga..... 1  
Gi3\_28642193\_x1...cgauccggagacgucgugggaaUcacg..... 1  
Gi2\_11307466\_x1.....cggagacgucguggAaacac..... 1  
Gi3\_28500262\_x1.....gagacgucguAggaacacggggugccgaac..... 1  
Gi3\_28487612\_x1.....gagacgucgugggaaacaUggggugccg..... 1  
Gi1\_4220778\_x1.....agacgucgugggaaGcacggg..... 1  
Gi5\_9127627\_x1.....agacgucgugggaaacacggggugccgaaAu..... 1  
Gi3\_28646241\_x1.....aucggagacgucgugggaaacaAgggg..... 1  
G1a\_6131602\_x1.....Ugugggaaacacggggugc..... 1  
Gi3\_28689487\_x1.....Cacacggggugccgaacu..... 1  
Gi3\_28628051\_x1.....gucgugggCacacggggugccga..... 1  
Gi3\_28738027\_x1.....acgucgugggaaacacggggAcc..... 1  
Gi2\_11150037\_x1.....aucggagacgucgAgggaaca..... 1  
Gi2\_11128233\_x1.....aucggagCcgucgugggaaacacg..... 1  
G1a\_6109655\_x1.....gucgugggCacacggggugccga..... 1  
Gi3\_28820329\_x1.....gacgucgugggaaacCcg..... 1  
Gi3\_28363846\_x1...cgaCcgagacgucgugg..... 1  
Gi3\_28638254\_x1.....ucgugggaaacacUgggugc..... 1  
Gi5\_8968609\_x1.....gaacacggggugccgCac..... 1  
Gi2\_11043420\_x1...auGggagacgucgugggaaacac..... 1  
Gi3\_28981373\_x1.....aucggagacgucgugggUaacacgggg..... 1  
Gi1\_4192132\_x1.....gagacgAcgugggaaacacggggugcc..... 1  
Gi3\_28332941\_x1.....gucgugCgaacacggggugccgaac..... 1

Gi3\_28467524\_x1.....ggCaacacggggugccgaa..... 1  
Gi5\_8945877\_x1.....acuuuccagUgcgccugugcccacc..... 1  
Gi3\_28722370\_x1..gGgaucggagacgucgugggaacacggggug..... 1  
Gi5\_9049361\_x1.....gucgugggaacaAggggugccgaaac..... 1  
Gi3\_28339683\_x1.....ucggagaAgucgugggaacacg..... 1  
Gi5\_9094242\_x1.....gugNgaacacggggugccga..... 1  
Gi5\_8857466\_x1....aucggagacgucgugggaGcacggggug..... 1  
Gi3\_28937650\_x1.....gUcgucgugggaacacggggugccg..... 1  
Gi2\_11326745\_x1.....ucggagacgCcgugggaaca..... 1  
Gi1\_4204810\_x1.....gugggaacacgggAugccga..... 1  
Gi1\_4316270\_x1.....gugggaacacggCgugcc..... 1  
Gi3\_28857202\_x1..cgaucggagacgucgugggGacacg..... 1  
Gi3\_28872754\_x1.....gugggaacaGggggugccg..... 1  
Gi5\_9108145\_x1.ugcAaucggagacgucguggg..... 1  
Gi3\_28757174\_x1.....ggagacgucgAgggaacacggggugccg..... 1  
Gi3\_28955945\_x1.....cgugggCacacggggugccg..... 1  
Gi3\_28270008\_x1.....ucUgagacgucgugggaacac..... 1  
Gi4\_606182\_x1....auUggagacgucgugggaacacggggugcc..... 1  
Gi2\_11135499\_x1.....gucgugggaacacAgggugccg..... 1  
Gi3\_28527332\_x1.....Aagacgucgugggaacacg..... 1  
Gi3\_28771825\_x1.....ggagaUgucgugggaaca..... 1  
G1a\_6238654\_x1.....gAagacgucgugggaacacg..... 1  
Gi5\_8978870\_x1....aucggagacgucgugggaacacggggAgc..... 1  
Gi2\_11294016\_x1.....gugggaacacggggugccgaaUuu..... 1  
Gi5\_9065640\_x1.....uggCaacacggggugccgaaac..... 1  
Gi2\_11107633\_x1.....ggaacacUgggugccgaaac..... 1  
Gi1\_4239773\_x1.....gacgucgugggaacacggggugccgaCcu..... 1  
Gi2\_11236126\_x1..cgaCcgagacgucgugggaacacggg..... 1  
Gi4\_605456\_x1.....gugggUacacggggugccgaaacu..... 1  
Gi2\_11021923\_x1.....gggGacacggggugccga..... 1  
G1a\_6020466\_x1.....Augggaacacggggugccgaa..... 1  
G1a\_6315686\_x1.....acgucgugggaacacggggugccgCacu..... 1  
G1a\_6306008\_x1.....ggGgacgucgugggaacacg..... 1  
Gi1\_4298577\_x1.....Aacgucgugggaacacggggugccg..... 1  
Gi3\_28695922\_x1.ugcgaucgNagacgucgugggaaca..... 1  
G1a\_6173894\_x1.....ggaAacgucgugggaacacggggugcc..... 1  
Gi1\_4321274\_x1.....cggaUacgucgugggaacacggggugccgaaacu..... 1  
Gi3\_28898556\_x1....aucgUagacgucgugggaac..... 1  
Gi3\_28960822\_x1....aucggagacgucgugggaacacggUg..... 1  
Gi1\_4185594\_x1.....gugggaacacggggAgccgaaac..... 1  
Gi5\_8891076\_x1.....gacguAgugggaacacggggugccgaaacu..... 1  
G1a\_6102169\_x1.....ggagacgucgugAgaacacggggugcc..... 1  
Gi3\_28587978\_x1.....ugggaacaUggggugccg..... 1  
Gi5\_8975075\_x1.....gucguAggaacacggggugccgaa..... 1  
Gi5\_8842363\_x1.....ugggaacaGggggugccgaaac..... 1  
Gi2\_11076305\_x1.....ggagacguNgugggaacacggggug..... 1  
Gi4\_595930\_x1....aucggagacgucgugggGacacggg..... 1

|                                                           |   |
|-----------------------------------------------------------|---|
| Gi3_28591573_x1.....uUggagacgucgugggaacacggggugc.....     | 1 |
| Gi5_8976850_x1.....gaaGacggggugccgaacu.....               | 1 |
| Gi5_8984995_x1....aGcggagacgucgugggaacacggggugccgaac..... | 1 |
| Gi2_11114660_x1.....gucgugggCacacggggugccg.....           | 1 |
| Gi3_28565750_x1.ugcgaucggagacgucgugggaacacggggA.....      | 1 |
| Gi5_9023998_x1.....cggagacgucgugggaacacggggugccg.....     | 0 |
| Gi3_28610890_x1.....gacgucAugggaacacggggugccgaa.....      | 1 |
| Gi5_8943162_x1....aucggagacgucGgggaacacg.....             | 1 |
| Gi3_28939945_x1.....cgugggaaAacggggugccg.....             | 1 |
| Gi3_28828521_x1....gaucggagacguAgugggaacacggg.....        | 1 |
| Gi2_11136373_x1.....ggaaUacggggugccgaa.....               | 1 |
| Gi3_28375860_x1.....gucgugggaacacggCgu.....               | 1 |
| G1a_6128669_x1....aucggagacgucgugggaacaUggg.....          | 1 |
| Gi5_8846968_x1.....gugggaaAacggggugccg.....               | 1 |
| Gi5_9061604_x1.....cgucgugggaacacggggugccgaCc.....        | 1 |
| Gi5_9094801_x1.....gagacgucgCgggaacacggggugccgaacu.....   | 1 |
| Gi2_11165297_x1....aucggagacgucgugggaacacAggg.....        | 1 |
| Gi5_9103253_x1.....aacaGggggugccgaacuuu.....              | 1 |
| Gi2_11061984_x1....Acggagacgucgugggaacacggggugcc.....     | 1 |
| Gi2_11240747_x1.....ggaacacggggugcGgaacu.....             | 1 |
| Gi2_11122002_x1....gaucggagacgucgugggaacGcg.....          | 1 |
| Gi3_28703347_x1.....cgucgugggaacacAgggugccga.....         | 1 |
| Gi5_9118646_x1.....gugggaacacUgggugccgaac.....            | 1 |
| Gi3_28353340_x1....ucggagacgucgAgggaacacg.....            | 1 |
| Gi3_28650338_x1.ugcgaucgNagacgucgugggaacacggggugcc.....   | 1 |
| Gi3_28549748_x1.....acgucgugggaacacggAgugcc.....          | 1 |
| Gi1_4308242_x1.....gugggaacacgggCugcc.....                | 1 |
| Gi1_4311543_x1....Aaucggagacgucgugggaacacgg.....          | 1 |
| Gi2_11297692_x1.....gucgugggaaAacggggugccg.....           | 1 |
| G1a_6309047_x1.....gugggaacaUggggugccga.....              | 1 |
| Gi2_11267745_x1.....acgAcgugggaacacggggugccgaac.....      | 1 |
| Gi1_4298224_x1.....gaacacggggugccgGac.....                | 1 |
| Gi3_28371285_x1.....cgCcgugggaacacggggg.....              | 1 |
| Gi3_28838043_x1....gUucggagacgucgugg.....                 | 1 |
| Gi3_28985203_x1.....gggaacacggggugcUgaacuu.....           | 1 |
| Gi4_613919_x1....agacgucgCgggaacacggggugcc.....           | 1 |
| Gi3_28825396_x1.....gugggaacacgggUugccg.....              | 1 |
| Gi3_28369498_x1.....agacgucgugggaacacgAg.....             | 1 |
| Gi3_28747170_x1.....gacgucgugggaacacgC.....               | 1 |
| Gi3_28632708_x1....gaucggagacguGgugggaacacggg.....        | 1 |
| Gi2_11330146_x1....gaAcggagacgucgugggaacacggggugc.....    | 1 |
| Gi1_4290685_x1.....ugUgaacacggggugccgaac.....             | 1 |
| Gi2_11131164_x1.....ggagacgucgugggaaAac.....              | 1 |
| Gi2_11046805_x1.....cggagacgCcgugggaacacggggug.....       | 1 |
| G1a_6338929_x1....cgGucggagacgucgugggaa.....              | 1 |
| Gi2_11325570_x1.....gagacgucNugggaacacggggugc.....        | 1 |
| Gi1_4296824_x1....ucggagacgucgugggaacacgggguAc.....       | 1 |

Gi1a\_6329446\_x1...Uucggagacgucgugggaaacacggggu..... 1  
Gi2\_11294285\_x1...gaucggagacgucgugggUc..... 1  
Gi5\_8895326\_x1.....gacgucgugggaaacacggggugUcgaacu..... 1  
Gi1\_4210395\_x1...gaucggagacgucgugggaaacGcggggugcc..... 1  
Gi3\_28291287\_x1.....ucgugggaaacacggggugccUa..... 1  
Gi2\_11259929\_x1...cgaCcgagacgucgugggga..... 1  
Gi5\_9067242\_x1.....gggaaGacggggugccgaacu..... 1  
Gi1\_4196698\_x1...aucggagacgucgugggaaacGcggggu..... 1  
Gi4\_597262\_x1.....ugUgaacacggggugccgaacu..... 1  
Gi3\_28836463\_x1.....Agagacgucgugggaaacacggggugccgaac..... 1  
Gi5\_9014548\_x1...aucggagacgucgugggaaUacggggugc..... 1  
Gi3\_28790007\_x1.....ucgugggaaacacgggCugccgaac..... 1  
Gi2\_11079285\_x1.....cggagacgucgugggaaacacggAgug..... 1  
Gi1\_4196304\_x1.....aacacggggugccgaGcuu..... 1  
Gi1a\_6220950\_x1.ugcgauacgAagacgucgu..... 1  
Gi2\_11006403\_x1.....cgugggaaUacggggugccg..... 1  
Gi1\_4246711\_x1.....gacgucgugggaaacacggggugcUgaacu..... 1  
Gi1a\_6001175\_x1...aucggagacgucgCgggaacacgg..... 1  
Gi1a\_6262157\_x1...aGcggagacgucgugggaa..... 1  
Gi5\_9126363\_x1.....guggUaacacggggugccg..... 1  
Gi5\_9026259\_x1...gaucggagacgucgugAgaacacggg..... 1  
Gi3\_28763278\_x1.....ggagacgucgugggaaacacggggGgccgaa..... 1  
Gi1\_4260454\_x1.....Ugucgugggaaacacggggugccg..... 1  
Gi3\_28447814\_x1...aucggagacgucgugUgaacacgg..... 1  
Gi3\_28570625\_x1.....cgugggaaacacggggugcAga..... 1  
Gi5\_8836340\_x1.....acuuucccGgcgcccugcugcccacc..... 1  
Gi3\_28758590\_x1...aucggagacgucgugggCacacggggug..... 1  
Gi2\_11043744\_x1...aNcggagacgucgugggaaacacggggugc..... 1  
Gi5\_9100429\_x1.....gugggCacacggggugccgaa..... 1  
Gi1\_4242350\_x1.....agacUucgugggaaacacggggugccg..... 1  
Gi5\_8919882\_x1.....cgucguggNaacacggggugccgaa..... 1  
Gi2\_11383068\_x1...cggagacgucgugggaaacacggggCgccgaacu..... 1  
Gi1\_4361988\_x1...aucggagacgucgugggGacacggggugc..... 1  
Gi3\_28599689\_x1.....cNgagacgucgugggaaacacgggggu..... 1  
Gi2\_11141422\_x1...cgaucggagacgGcgugg..... 1  
Gi5\_9014635\_x1.....cgucgugggCcacggggugcc..... 1  
Gi1a\_6049012\_x1.....ggaacCcggggugccgaac..... 1  
Gi2\_11312521\_x1...cgaucggCgacgucgugggaaacacg..... 1  
Gi4\_584966\_x1.....gugggaacacggggugccgaGc..... 1  
Gi2\_11054077\_x1.....aCacgucgugggaaacacggggugccgaac..... 1  
Gi4\_580002\_x1.....ggaacacggggugccAaacu..... 1  
Gi5\_9083321\_x1.....ggaacacggggguCccgaacu..... 1  
Gi2\_11148400\_x1...cgaucggagacgucgugggUaca..... 1  
Gi4\_572315\_x1.....gggaacacggggugccAaacu..... 1  
Gi4\_595456\_x1.....gggaacacggggugccGacu..... 1  
Gi5\_9123941\_x1.....gagacgucgugggaaacacggggugccGacu..... 1  
Gi2\_11353305\_x1...ucggagacgucgugggaaacacggAgugc..... 1



Gi3\_28788106\_x1.....ucggagacgucgugggGacacggggugccga..... 1  
 Gi4\_610217\_x1.....cUgggaacacggggugccgaac..... 1  
 Gl1\_6329013\_x1.....gacgucgCggaacacgggggu..... 1  
 Gi3\_28904424\_x1.....gaAacgucgugggaaacacggggugccgaac..... 1  
 Gl1\_6223974\_x1.....gUagacgucgugggaaacacggggugccgaacu..... 1  
 Gi3\_28261718\_x1.....gucgugggaaacacggggugccAaa..... 1  
 Gi1\_4292568\_x1.....ucggagacgucgugggaaacGcggggugc..... 1  
 Gi2\_11261287\_x1..gcgaucggagacgucgugggGcac..... 1  
 Gi2\_11388558\_x1.....agacgucgugggaaUacggggugcc..... 1  
 Gl1\_6087841\_x1.....guUggaacacggggugccga..... 1  
 Gi3\_28880478\_x1..gaucggagacguAgugggaaacacg..... 1  
 Gi1\_4182374\_x1.....Ugugggaaacacggggugcc..... 1  
 Gi2\_11351281\_x1.....ggaacacggggugUcgaa..... 1  
 Gi3\_28808093\_x1.....cggagacgCcgugggaaacacgggg..... 1  
 Gi3\_28808414\_x1.....gagacgucgugggaaacGcggggugcc..... 1  
 Gi5\_9013356\_x1.....gugggaaacacggggugcUgaa..... 1  
 Gi2\_11186005\_x1.....gagacgucgugggaaacCggggugccgaac..... 1  
 Gi3\_28635184\_x1.....gugggaaacacggggugcUgaaacu..... 1  
 Gl1\_6048808\_x1.....ggaacacggggugccgaaU..... 1  
 Gi2\_11170283\_x1.....aucggagaUgucgugggaaacacgggg..... 1  
 Gi2\_11308969\_x1..gaucggagacgucAugggaaacacg..... 1  
 Gi2\_10993495\_x1.....cgugggaaacacggggugG..... 1  
 Gi3\_28865742\_x1.....gacAucgugggaaacacgg..... 1  
 Gi1\_4326793\_x1.....gaNucgugggaaacacggggugccgaacu..... 1  
 Gi2\_11117463\_x1.....cguUgugggaaacacggggugc..... 1  
 Gl1\_6000882\_x1.....gaacacggNgugccgaac..... 1  
 Gi2\_11223470\_x1.....agacgucgugggaaacacgUggugcc..... 1  
 Gi2\_11172251\_x1..gaucCgagacgucgugggaaacacgggggu..... 1  
 Gl1\_6071780\_x1.....gugggaaacUcggggugcc..... 1  
 Gi2\_11406968\_x1..gaucggagacgucgugggGacacggggug..... 1  
 Gi3\_28826872\_x1.....cggagacgucguggAaacacgggggu..... 1  
 Gi1\_4291944\_x1.....aucggagacgucgugggaaGacgggg..... 1  
 Gi1\_4161904\_x1.....cgugggaaacacggggugAcgaacu..... 1  
 Gi5\_8841939\_x1.....cggagacgucguUggaacacgg..... 1  
 Gi3\_28281181\_x1.....gagacgucgugggaaacacgAggugccga..... 1  
 Gi1\_4338332\_x1.....gucgugggaaAacggggug..... 1  
 Gi1\_4342532\_x1.....gucgugggGcacggggugccgaacu..... 1  
 Gi1\_4180163\_x1.....ggUaacacggggugccgaa..... 1  
 Gl1\_6147163\_x1.....gucgugggaaacAggggugccgaacu..... 1  
 Gi2\_11278650\_x1.....cgucgugggaaacacggggugccUa..... 1  
 Gi3\_28944921\_x1.....cgucgugggaaacCggggugccgaa..... 1  
 Gl1\_6124519\_x1..gaGcggagacgucgugggaaacacggg..... 1  
 Gi3\_28266684\_x1.....gacgucguggAaacacggggugccgaacu..... 1  
 Gi2\_11059151\_x1.....cguUggaacacggggugccgaac..... 1  
 Gi2\_11324045\_x1..ugcgaucggaAacgucgugggaa..... 1  
 Gi2\_11104714\_x1.....cgucgugggaaUacggggugcc..... 1  
 Gi1\_4173542\_x1.....ggaacacggggugccgaCc..... 1

|                                                         |   |
|---------------------------------------------------------|---|
| Gi1_4183875_x1.....gugggaacacggggugccgUac.....          | 1 |
| Gi4_591999_x1.....acgucgugggaacacggggugccgGacu.....     | 1 |
| Gi1a_6108943_x1.....cggagacUucgugggaacacgg.....         | 1 |
| Gi5_8957623_x1.....gacgucgugggaacacgggAugccgaacu.....   | 1 |
| Gi2_11094170_x1.....aucggagacgucgugggaacacgAgg.....     | 1 |
| Gi2_11213159_x1.....acgucgAgggaacacggggugcc.....        | 1 |
| Gi1_4198358_x1.....agacgucguggAaacacggggugccg.....      | 1 |
| Gi3_28633542_x1.....gaucggagaUgucguggga.....            | 1 |
| Gi5_8954635_x1.....ucggUgacgucgugggaacacg.....          | 1 |
| Gi1_4375876_x1.....Cucggagacgucgugggaacacg.....         | 1 |
| Gi1_4254092_x1.....cguAggaacacggggugccgaac.....         | 1 |
| Gi1_4360806_x1.....ugggaacacggggugccgaUcu.....          | 1 |
| Gi5_9123820_x1.....cggCgacgucgugggaacacg.....           | 1 |
| Gi5_9103489_x1.....gugggaacacgUggugccgaacuu.....        | 1 |
| Gi4_584424_x1.....cUucgugggaacacggggugc.....            | 1 |
| Gi3_28821798_x1.....ggagacgucgugggaUacggggugcc.....     | 1 |
| Gi1_4198510_x1.....aucggagacgucgGgggaacacg.....         | 1 |
| Gi2_11161697_x1.....ugggaacacggggugccgaGcuu.....        | 1 |
| Gi5_9124912_x1.....cacggggugccgGacuuu.....              | 1 |
| Gi5_9017364_x1.....gucgugggaacacggggugccAaa.....        | 1 |
| Gi5_8879695_x1.....aAcggagacgucgugggaacacggggugc.....   | 1 |
| Gi3_28341929_x1.....gacguGugggaacacggggugccg.....       | 1 |
| Gi1a_6254318_x1.....gugggaacacggggugUcgaac.....         | 1 |
| Gi3_28608554_x1.....cgauccgagacgucAugggaacacgggg.....   | 1 |
| Gi1_4245029_x1.....ucguUggaacacggggugccga.....          | 1 |
| Gi2_11228325_x1.....gacgucgugggaacacggggugccC.....      | 1 |
| Gi3_28669747_x1.....gagacgucgugggCacac.....             | 1 |
| Gi1_4260662_x1.....gucgugggaacacggggCgcc.....           | 1 |
| Gi1a_5998643_x1.....cgugggaacacggggAgc.....             | 1 |
| Gi2_11305005_x1.....gaucggagacguAgugggaacacg.....       | 1 |
| Gi3_28349413_x1.....cggagacgCcgugggaacacg.....          | 1 |
| Gi2_11354722_x1.....gNgaacacggggugccgaacu.....          | 1 |
| Gi2_11015120_x1.....gggaacacgCggugccga.....             | 1 |
| Gi5_8989660_x1.....gagacgAcgugggaacacggggugccgaacu..... | 1 |
| Gi2_11245133_x1.....uAggaacacggggugccgaacuu.....        | 1 |
| Gi3_28915901_x1.....ugggaacacgggAugccg.....             | 1 |
| Gi2_11169527_x1.....gaucggagaAgucguggga.....            | 1 |
| Gi3_28275142_x1.....cgauccgaAacgucguggg.....            | 1 |
| Gi2_11030349_x1.....ucgugggaUcacggggugccgaac.....       | 1 |
| Gi1_4314917_x1.....gucguUggaacacggggugccgaacu.....      | 1 |
| Gi5_9011612_x1.....cgucgugggUacacggggugcc.....          | 1 |
| Gi2_11320009_x1.....gaCcgagacgucgugggaacacgg.....       | 1 |
| Gi2_11141800_x1.ugcgauccgGgacgucgugggaacac.....         | 1 |
| Gi3_28412732_x1.....gacgucgugggaacacggggGgcc.....       | 1 |
| Gi1_4342969_x1.....ucgugggaacCggggugc.....              | 1 |
| Gi5_8911070_x1.....Aaucggagacgucgugggaacacgggg.....     | 1 |
| Gi5_9136005_x1.....cgucguggAaacacggggugccga.....        | 1 |

|                                                           |   |
|-----------------------------------------------------------|---|
| Gi1_4338964_x1.....ucggagacNucgugggaacacggg.....          | 1 |
| Gi5_8886182_x1.....cgucgugggaCcacggggugc.....             | 1 |
| Gi1_4319371_x1....aucggagacgucgugggaacacggggugccgaac..... | 0 |
| Gi5_9050829_x1.....guAggaacacggggugcc.....                | 1 |
| Gi2_11309524_x1.....agacgucguggCaacacggggugccg.....       | 1 |
| Gi2_11403646_x1.....gugCgaacacggggugccga.....             | 1 |
| Gi3_28440211_x1.....cgucgugggaacGcggggug.....             | 1 |
| Gi5_8899975_x1....gaucggUgacgucgugggaacacg.....           | 1 |
| Gi4_596748_x1.....cguggGacacggggugcc.....                 | 1 |
| Gi4_611330_x1.....gucgugggaacacggggugccgaa.....           | 0 |
| Gi1_4200379_x1....aucggagacgucgugAgaacacg.....            | 1 |
| Gi5_9113568_x1.....cgugggaacacgggAugccga.....             | 1 |
| Gi5_9062086_x1.....ggagacgCcgugggaacacggggugccgaacu.....  | 1 |
| Gi3_28424949_x1.....acgucgugggaacaUggggugccgaa.....       | 1 |
| Gi3_28526121_x1.....gucgugggUacacggggugc.....             | 1 |
| Gi1_4325387_x1.....ucgAgggaacacggggugccgaac.....          | 1 |
| Gi3_28752216_x1....gaucggagacgucgugggaacacgggAugc.....    | 1 |
| Gi2_11399793_x1....gaucggagacgucgugggUaca.....            | 1 |
| Gi1_4239272_x1.....Uggaacacggggugccga.....                | 1 |
| Gi3_28805356_x1.....gagacgucgugggaacacggggugcUg.....      | 1 |
| Gi2_11240191_x1....aucggagacgucguCggaacacggggugc.....     | 1 |
| Gi3_28324786_x1.....acgucgugggaacacggggugcAga.....        | 1 |
| Gi1_4202041_x1.....cgugggCacacggggugccgaac.....           | 1 |
| Gi1_4370639_x1.....ggaacacggggugccgaUc.....               | 1 |
| Gi4_572858_x1.....gggaacacggggCgcgaac.....                | 1 |
| Gi1_4314101_x1.....cgucgugggaacacggggugccCaac.....        | 1 |
| Gi3_28530103_x1.....ugggaacacgCggugccgaac.....            | 1 |
| Gi5_9073317_x1.....ucgugggaacaGggggugccgaacu.....         | 1 |
| Gi3_28943635_x1....gaucggagacgucguggUaacac.....           | 1 |
| Gi2_11142050_x1.....gugggaacacggggugcGga.....             | 1 |
| Gi5_9048533_x1.....cgugggaacacggggugcG.....               | 1 |
| Gi3_28506660_x1....aucggagaGgucgugggaacac.....            | 1 |
| Gi2_11178717_x1.....gucgugggaacCcggggugccga.....          | 1 |
| Gi2_11220327_x1....aucggagacgucgugggaacacgggAugcc.....    | 1 |
| Gi1_4159483_x1.....Ngaacacggggugccgaacu.....              | 1 |
| Gi3_28719942_x1.....gucgugggNacacggggugccgaa.....         | 1 |
| Gi2_11068476_x1....auGggagacgucgugggaaca.....             | 1 |
| Gi1_4201065_x1.....ucgugggaacaUggggugccg.....             | 1 |
| Gi5_9006177_x1.....gucgugggaacacgggAugccgaac.....         | 1 |
| Gi2_11303052_x1....cgaucggagacgucguggGaca.....            | 1 |
| Gi1_4168268_x1.....cgGgggaacacggggugccgaacu.....          | 1 |
| Gi1_4270238_x1.....cgugggaacacggggAgccga.....             | 1 |
| Gi2_11195983_x1.....ucgugggaacacgggAugccgaa.....          | 1 |
| Gi5_8932681_x1.....cgGgggaacacggggugc.....                | 1 |
| Gi2_11182697_x1.....uAgugggaacacggggugccgaa.....          | 1 |
| Gi2_11266754_x1.....ggagacgucgugggGaca.....               | 1 |
| Gi3_28752628_x1.....ucgugggaacacggggugUcg.....            | 1 |

G1a\_6278743\_x1...gaucggagacgucgugggaacacggggG..... 1  
 Gi2\_10996223\_x1...aucggagacgucgugggaacacggggG..... 1  
 Gi2\_11340687\_x1cugcgaucggagacgucgugggaacacggggugcc..... 0  
 Gi5\_8971729\_x1.....gNaacacggggugccgaacu..... 1  
 Gi1\_4175306\_x1.....gaacacggggGcgccgaac..... 1  
 Gi1\_4371425\_x1.....agacgucgNgggaacacggggugccga..... 1  
 Gi3\_28800576\_x1.....ugggaacacggGgugccg..... 1  
 G1a\_6221211\_x1.....ucggagacgucgugggGacacgg..... 1  
 Gi3\_28850568\_x1...cgauccgagacgucgugggaacacggggugccgaacu..... 0  
 Gi3\_28499134\_x1.....ugggaacacggggUccgaac..... 1  
 Gi3\_28548211\_x1.....ugggaacaGggggugccgaa..... 1  
 Gi3\_28964234\_x1.....gucgAgggaacacggggugccga..... 1  
 Gi1\_4248276\_x1.....ugggaacacggggugAcga..... 1  
 Gi3\_28700986\_x1...gaucggagacgucgugggaUcacgggg..... 1  
 Gi2\_11233367\_x1.....cggagacgucgugggaaAacggggugcc..... 1  
 Gi2\_11401936\_x1...cgauccgagacgGcgugggaacacgggg..... 1  
 Gi2\_11376915\_x1.....ugggaacacggggugAcga..... 1  
 Gi5\_9002786\_x1.....Aagacgucgugggaacacggggugcc..... 1  
 Gi1\_4316066\_x1...gaucggagGcgucgugggaacacggg..... 1  
 Gi1\_4172357\_x1.....agUcgucgugggaacacgggg..... 1  
 Gi5\_9080062\_x1.....cgAgggaacacggggugccg..... 1  
 Gi3\_28868339\_x1.....cgucgugggaacacgAggugccgaa..... 1  
 Gi3\_28726336\_x1.....Gcggagacgucgugggaacacggggugccgaacu..... 1  
 Gi1\_4223275\_x1.....gacgucAugggaacacggggugccgaacu..... 1  
 Gi1\_4250180\_x1.....cgCgggaacacggggugccg..... 1  
 Gi3\_28859388\_x1.....ggaacacggggugccgaaG..... 1  
 Gi2\_11024932\_x1.....ugggaacacUgggugccgaa..... 1  
 G1a\_6156067\_x1...aucggagacgucgugggaacacgCggu..... 1  
 Gi3\_28440561\_x1.....guUgugggaacacggggug..... 1  
 Gi3\_28515481\_x1.....gagacgucgugggaacCcgggugccgaac..... 1  
 Gi3\_28867521\_x1...gaucggagacgucgugggaacaG..... 1  
 Gi5\_8949160\_x1.....gucgCgggaacacggggugc..... 1  
 Gi2\_11166368\_x1...gcgaucggaAacgucgugggaacacggg..... 1  
 Gi3\_28761144\_x1...ucggGgacgucgugggaacacggggugccgaac..... 1  
 G1a\_6353752\_x1...gaucggagacgucgugggaacaUg..... 1  
 Gi1\_4199416\_x1...gaucggagGcgucguggga..... 1  
 Gi4\_601083\_x1...gacgucgugggaacacggggugccgaacA..... 1  
 Gi2\_11007882\_x1.....cgucgGgggaacacggggugc..... 1  
 Gi2\_11299687\_x1...cgauccgagacgucgugggaGcacggggug..... 1  
 Gi2\_11158685\_x1.....ggagUcgucgugggaacacgggg..... 1  
 Gi2\_11331752\_x1.....gacgucgugggaacacggggugAcgaac..... 1  
 Gi3\_28976063\_x1.....aCacgucgugggaacacgggg..... 1  
 Gi5\_9087430\_x1.....agacAucgugggaacacggggugccgaac..... 1  
 Gi2\_11197035\_x1.....gagacgucgCgggaacacggggug..... 1  
 G1a\_6102016\_x1.....gggaacacUgggugccgaacu..... 1  
 Gi2\_11322340\_x1.....gacAucgugggaacacggggugc..... 1  
 Gi2\_11115456\_x1.....gacgucgugggGacacggggugccgaac..... 1

Gi3\_28820825\_x1.....cgagagacgucgugggaGcaccggggug..... 1  
Gi4\_599000\_x1.....gAgggaacacggggugccga..... 1  
Gi3\_28412396\_x1.....ggagacgucgugUgaaca..... 1  
Gi2\_11105025\_x1.....cguNggaacacggggugccgaac..... 1  
Gi3\_28587462\_x1.....gacgucgugggaCcaccggggugccg..... 1  
Gi2\_11373037\_x1.....cguggAaacacggggugccga..... 1  
Gi3\_28422835\_x1.....aucggagacgucgugggaacacggggGgccg..... 1  
G1a\_6337277\_x1.....Gcggagacgucgugggaacacggggugc..... 1  
Gi5\_8939837\_x1.....cggagacgucgugggaUacggggugccga..... 1  
Gi5\_8854846\_x1.....guUggaacacggggugccgaacuu..... 1  
G1a\_6137112\_x1.ugcgauCGNagacgucgug..... 1  
Gi2\_11161982\_x1.....aucggagacgucgCgggaacacgg..... 1  
Gi3\_28788866\_x1.....cgucgugggaacacUgggu..... 1  
Gi3\_28580687\_x1.....cguggAaacacggggugc..... 1  
Gi1\_4381532\_x1.....Acggagacgucgugggaacacggg..... 1  
Gi5\_8903263\_x1.....agaUgucgugggaacacggggugc..... 1  
Gi1\_4368496\_x1.....cguggGcacacggggugcc..... 1  
Gi2\_11123213\_x1.....gacgucgugggaacaGgggu..... 1  
Gi5\_8841682\_x1.....ggCacacggggugccgaacu..... 1  
Gi2\_11378683\_x1.....ucgugggaacacggggugAcgaac..... 1  
Gi3\_28340748\_x1.....aucggagacgucgugggaacacggggugA..... 1  
Gi1\_4373095\_x1.....ugUgaacacggggugccga..... 1  
Gi5\_8835995\_x1.ugcgauCGGcagcuguggg..... 1  
Gi1\_4345552\_x1.....gacgucguggAaacacggggugccgaacu..... 1  
Gi3\_28949602\_x1.....ucggagacgucgugggaacacgggAugcc..... 1  
Gi3\_28806899\_x1.....cgauCGgagacgCcgugg..... 1  
Gi3\_28424052\_x1.....cgucgugggaacaUgggg..... 1  
Gi5\_9120124\_x1.....cgucgugggaacacggggAgcc..... 1  
Gi5\_9017737\_x1.....cAucgugggaacacggggugc..... 1  
Gi5\_9056872\_x1.....cgGgggaacacggggugccg..... 1  
Gi3\_28376664\_x1.....ggagacgucgugggaacacAgggugccga..... 1  
G1a\_6330985\_x1.....gucgugggaacacggggugccgaCcu..... 1  
Gi1\_4283749\_x1.....agacguUgugggaacacggggugccgaacu..... 1  
Gi2\_11023222\_x1.....ucggCgacgucgugggaaca..... 1  
Gi3\_28656152\_x1.....gaacacggggGgccgaacu..... 1  
Gi5\_9117015\_x1.....gugggaacacggggugccgUacuuu..... 1  
Gi3\_28757196\_x1.....gggaacacggggAgccga..... 1  
Gi2\_11009185\_x1.....gucgGgggaacacggggugccga..... 1  
Gi4\_586201\_x1.....ggaacacgNggugccgaacu..... 1  
Gi3\_28811831\_x1.....acgGcuggggaacacggggugccgaa..... 1  
Gi2\_11096801\_x1.....aucggagUcgucgugggaacacggggug..... 1  
Gi2\_11012093\_x1.....aGgucgugggaacacggggugccga..... 1  
Gi5\_8977585\_x1.....aucggagacgucgugggaacCc..... 1  
Gi5\_8905360\_x1.ugcgauCGgagacgucguAgga..... 1  
Gi5\_9081824\_x1.....ggaacacggggugcUgaac..... 1  
Gi1\_4324654\_x1.....gucgugCgaacacggggugccgaac..... 1  
Gi5\_8930083\_x1.....acgucgugggaacacggggAgcc..... 1

|                      |                                         |   |
|----------------------|-----------------------------------------|---|
| Gi2_11361321_x1..... | uggaacacggggugAcgaa.....                | 1 |
| Gi1_4319731_x1.....  | Uucguggaacacggggugccga.....             | 1 |
| Gi2_11236290_x1..... | gaacacgUggugccgaacu.....                | 1 |
| Gi2_11347618_x1..... | cgucguggaacacCgggug.....                | 1 |
| Gi3_28284157_x1..... | gacgucguggaacacAgg.....                 | 1 |
| Gi3_28886431_x1..... | agacgucguggaacacggggugccAa.....         | 1 |
| Gi3_28349541_x1..... | guggaacacUggggugccg.....                | 1 |
| Gi2_11161770_x1..... | aucggagacgucguggaacacgggUugcc.....      | 1 |
| Gi5_9060248_x1.....  | aucggagacgucgugga.....                  | 0 |
| G1a_6286487_x1.....  | aucggGgacgucguggaacacgg.....            | 1 |
| Gi2_11397859_x1..... | cgucguggGacacggggugccgaac.....          | 1 |
| Gi1_4302488_x1.....  | gcgaucggagacgucguggaacacggggugccga..... | 0 |
| Gi2_11381558_x1..... | ggagacgucguggaCcac.....                 | 1 |
| Gi3_28612825_x1..... | gauAggagacgucguggaacacggg.....          | 1 |
| Gi5_8839575_x1.....  | agacgucguggaacacggggugccgUacu.....      | 1 |
| Gi5_9050914_x1.....  | guggaacacAgggugccg.....                 | 1 |
| Gi2_11375270_x1..... | acgucguggaacacCgggugccgaa.....          | 1 |
| Gi2_11142379_x1..... | ucggaUacgucguggaac.....                 | 1 |
| Gi5_8933110_x1.....  | cCuggaacacggggugccgaacu.....            | 1 |
| Gi3_28454117_x1..... | gacgucguggaacNcggggugccgaacu.....       | 1 |
| Gi1_4253092_x1.....  | aucggagaNgucguggaacacggg.....           | 1 |
| G1a_6147459_x1.....  | aucggagCcgucgugga.....                  | 1 |
| Gi2_11315886_x1..... | cguggaacacggggugGc.....                 | 1 |
| Gi1_4341789_x1.....  | ggGgacgucguggaacacggggug.....           | 1 |
| Gi3_28497722_x1..... | gaucggagacgucguggaacUcggggugc.....      | 1 |
| Gi2_11184741_x1..... | gucguggaacacggggugccgC.....             | 1 |
| Gi3_28794766_x1..... | guggaacacgCggugccgaa.....               | 1 |
| Gi3_28413707_x1..... | gacguUguggaacacggggu.....               | 1 |
| G1a_6322999_x1.....  | aucgUagacgucguggaacacggg.....           | 1 |
| Gi2_11313391_x1..... | agacgucguggaacacggggugccgaUcu.....      | 1 |
| Gi3_28331419_x1..... | ugNgaacacggggugccgaa.....               | 1 |
| Gi2_11389766_x1..... | cgaucggagCcgucguggaacacggg.....         | 1 |
| Gi3_28806727_x1..... | gaucggUgacgucgugga.....                 | 1 |
| Gi2_11023884_x1..... | ggagacgucguggaacacgggUugcc.....         | 1 |
| Gi1_4346989_x1.....  | gaucggaAacgucgugg.....                  | 1 |
| Gi2_11029800_x1..... | cgucguggaacacggggugcGgaacu.....         | 1 |
| Gi2_11296973_x1..... | cgucguggAaacacggggugccg.....            | 1 |
| G1a_6138011_x1.....  | acgucguggaacacAgggu.....                | 1 |
| Gi2_11065411_x1..... | agaUgucguggaacacggggugccgaacu.....      | 1 |
| Gi3_28581080_x1..... | gacgucgCgggaacacggg.....                | 1 |
| Gi3_28853400_x1..... | gaucggagaAgucgugga.....                 | 1 |
| Gi2_11177364_x1..... | aucggagacgucguggaacacggggugcA.....      | 1 |
| Gi2_11219368_x1..... | aucggagacgucguggaacacggggugG.....       | 1 |
| Gi2_11170750_x1..... | gacgucguggaacGggggugccgaacu.....        | 1 |
| G1a_6359722_x1.....  | ucggagacgucguggCacacggggugcc.....       | 1 |
| Gi2_11193429_x1..... | uggaacacggggugccgGa.....                | 1 |
| Gi2_11127496_x1..... | cugcgaucggagacgucguggaacA.....          | 1 |

|                                                            |   |
|------------------------------------------------------------|---|
| Gi2_11173634_x1.....cgucgugggaacaAggggugccgaac.....        | 1 |
| Gi5_9072141_x1.....guggAaacacggggugccgaa.....              | 1 |
| Gi3_28793472_x1.....ggagacgucgugUgaacacg.....              | 1 |
| Gi2_11207060_x1.....aucggagacAucguggga.....                | 1 |
| Gi5_8881043_x1.....cgucgugggaacacggggAgccgaa.....          | 1 |
| Gi3_28539792_x1.....ucggagCcgucgugggaacacggg.....          | 1 |
| Gi1_4356185_x1.....gggaacacggggugccgaaA.....               | 1 |
| Gi5_9132000_x1.....ucgugggaacaGggggugccgaac.....           | 1 |
| Gi5_8915265_x1.....cgugggaUcacggggugccga.....              | 1 |
| Gi2_11013576_x1.....Aggagacgucgugggaacacggggugccgaacu..... | 1 |
| G1a_6188052_x1.....ucggagaUgucgugggaacacggg.....           | 1 |
| Gi1_4262225_x1.....gugCgaacacggggugccg.....                | 1 |
| Gi5_9121769_x1.....gugggaacacggggugcAga.....               | 1 |
| Gi1_4185341_x1.....ucggagacgucgugggaacacggggAgc.....       | 1 |
| Gi3_28453491_x1.....ggagacgucgugggaacacggggUcc.....        | 1 |
| Gi3_28446593_x1.....ucgugggaacacggggugUc.....              | 1 |
| Gi1_4208002_x1.....ucggagacgucgugggaacaAggggugccgaacu..... | 1 |
| G1a_6287478_x1.....acgucgugggaacacggggugccgaacA.....       | 1 |
| Gi3_28335936_x1.....cgucgAgggaacacggggugccgaa.....         | 1 |
| G1a_6301518_x1.....aucggagacgucgugggGacacgg.....           | 1 |
| Gi2_11207418_x1.....gacUucgugggaacacggggugccgaac.....      | 1 |
| Gi3_28698841_x1.....gaucggagacgucguggUaacacggggU.....      | 1 |
| Gi5_8983057_x1.....cgucgugggaacacggggAgccga.....           | 1 |
| Gi2_10995106_x1.....aucggagacgucgugggaacacggC.....         | 1 |
| Gi1_4245540_x1.....cgucgugggaacacggggugccgaaAu.....        | 1 |
| G1a_6167373_x1.....Aaucggagacgucgugggaacacg.....           | 1 |
| Gi1_4213635_x1.....guAggaacacggggugccgaa.....              | 1 |
| Gi2_11183648_x1.....gugggaacacggggugGcga.....              | 1 |
| Gi5_9028812_x1.....agacgucgugggaacacggggugccgaa.....       | 0 |
| Gi2_11257254_x1.....agacgucgugggaacacggAgugcc.....         | 1 |
| Gi5_8968304_x1.....gugUgaacacggggugccgaacu.....            | 1 |
| Gi3_28364572_x1.....gagacgucgugggaacacggggugccgaaU.....    | 1 |
| G1a_6185367_x1.....aucggagacgucgugggaacacU.....            | 1 |
| Gi2_11113412_x1.....cgucgugggaacacggggAgccgaa.....         | 1 |
| Gi2_11359708_x1.....aucggagacgucgugAgaaca.....             | 1 |
| Gi3_28348113_x1.....ucggagacgCcgugggaacacggggugc.....      | 1 |
| Gi2_11049741_x1.....aucggagacguAgugggaaca.....             | 1 |
| Gi3_28274763_x1.....Nggaacacggggugccgaacu.....             | 1 |
| Gi5_8965818_x1.....agacgucgugggaacacggggugUcgaacu.....     | 1 |
| Gi2_11084563_x1.....cgaucAgagacgucgugggaacacggggugcc.....  | 1 |
| Gi3_28522506_x1.....cgucgugggaacacggggugG.....             | 1 |
| Gi3_28908826_x1.uUcgaucggagacgucgugggaacacggg.....         | 1 |
| Gi2_11406577_x1.....cgucguAggaacacggggugccgaa.....         | 1 |
| Gi2_11239406_x1.....uGggagacgucgugggaacacg.....            | 1 |
| Gi5_9136118_x1.....Cagacgucgugggaacacggggugccgaac.....     | 1 |
| Gi1_4363205_x1.....gaacacCgggugccgaacu.....                | 1 |
| Gi1_4165978_x1.....cgugggaacacgUggugccgaacu.....           | 1 |

|                                                             |   |
|-------------------------------------------------------------|---|
| Gi3_28320715_x1...cgGucggagacgucgugggaaacacgg.....          | 1 |
| Gi3_28721942_x1.....cgucCugggaaacacggggugc.....             | 1 |
| Gi1_4278910_x1....aucggagacguUgugggaaacacggg.....           | 1 |
| Gi5_8999733_x1.....cgugggaaacacggggUAccga.....              | 1 |
| Gi5_9018678_x1....aucggCgacgucgugggaaacacg.....             | 1 |
| Gi1_4259762_x1.....cguUgugggaaacacggggugccgaacu.....        | 1 |
| Gi1_4378067_x1.....gucgugggaaacacggggUcccgaacu.....         | 1 |
| Gi3_28562281_x1...cgauccgagacgucgGgggaacacg.....            | 1 |
| G1a_6066103_x1.....gucgugggaaAacggggugcc.....               | 1 |
| G1a_6269382_x1.....gacgucgugggaaacacggggGgccgaacu.....      | 1 |
| Gi1_4240272_x1.....cgucgugggaaacacgggCugccgaacu.....        | 1 |
| Gi2_11217981_x1.....cgucgugggaaacacAgggug.....              | 1 |
| Gi2_11043685_x1.....cgugggaaacacggAgugc.....                | 1 |
| Gi5_8992761_x1.....cgucgugggaaacacggggugcGgaacu.....        | 1 |
| Gi4_613890_x1.....gugggaaacacggggugccgaUu.....              | 1 |
| Gi3_28765382_x1....aucggagacgucgugggaaacacgAgggugccg.....   | 1 |
| Gi5_9097358_x1.....uggUacacggggugccgaac.....                | 1 |
| Gi5_8898971_x1.....ucgugggaaGacggggugccgaacu.....           | 1 |
| Gi2_11220507_x1....uUggagacgucgugggaaacacggggugccgaacu..... | 1 |
| Gi2_11057141_x1....gaucggagacgucgugggaaacacgAgggug.....     | 1 |
| Gi5_8866100_x1.....cgucgugggUacacggggugccgaacu.....         | 1 |
| Gi3_28651206_x1....cgauUggagacgucgugggaaacacggggugcc.....   | 1 |
| G1a_6051418_x1....gauUggagacgucgugggaaacacggggU.....        | 1 |
| Gi1_4226949_x1.....agacgucgugggaaacacggggugccAa.....        | 1 |
| Gi2_11268285_x1.....cguggUaacacggggugccgaac.....            | 1 |
| Gi2_11359732_x1....gaucggagacgucgugggaaacacggggugU.....     | 1 |
| Gi1_4179569_x1.....cgucguggNaacacggggugccgaa.....           | 1 |
| Gi2_11029106_x1.....gagacgucguggUaacacggggugccgaacu.....    | 1 |
| Gi3_28982565_x1cugNgauccgagacgucg.....                      | 1 |
| Gi3_28265582_x1.....cggagacgucgugggaaCcacggg.....           | 1 |
| Gi1_4273633_x1.....cggagacgucgugggaaacacggggugUc.....       | 1 |
| Gi1_4209292_x1.....acguAgugggaaacacggggugccgaacu.....       | 1 |
| Gi3_28671797_x1.....gacgucgugggaaacacggAgugccgaa.....       | 1 |
| Gi3_28949827_x1.....agacgucCugggaaacacggggugcc.....         | 1 |
| Gi5_8978993_x1.....agacgucgugggaaacacggggugcAgaac.....      | 1 |
| Gi3_28276170_x1..gcgaGcggagacgucgugggaaacacggggU.....       | 1 |
| Gi2_11316296_x1..gcgaucggagacgucAuggga.....                 | 1 |
| Gi5_9028194_x1.....acGcggggugccgaacuuu.....                 | 1 |
| Gi3_28555824_x1....ucggagacgucgugggaaUcac.....              | 1 |
| Gi5_8935414_x1....aucggagacgucgugggaaacacU.....             | 1 |
| Gi1_4310762_x1....aucggGgacgucgugggaa.....                  | 1 |
| Gi1_4245667_x1.....ggagacgucgugggaaacacg.....               | 0 |
| Gi3_28822262_x1.....acgucgugggaaAacggggugcc.....            | 1 |
| Gi3_28274578_x1....gaucggagacCucgugggaaacacggggU.....       | 1 |
| Gi3_28374729_x1....cgaNcggagacgucgugggaaacacg.....          | 1 |
| Gi3_28580297_x1....ucggagacgucgugggaaacaUggggU.....         | 1 |
| Gi3_28562907_x1.....Ucugcugggaaacacggggugccg.....           | 1 |



Gi5\_8934222\_x1.....guUggaacacggggugccg..... 1  
Gi3\_28899074\_x1.....gagacgucgugggaaacacggggugcAgaacu..... 1  
Gi3\_28524640\_x1.ugcgauccggGgacgucgugggaaacacgggggu..... 1  
Gi2\_11390616\_x1.....aucggagacgucgugggaaGcacgggg..... 1  
Gi5\_8977242\_x1.....aucggagaNgucgugggaaacac..... 1  
Gi3\_28461412\_x1.....ggagacgucgugggaaacacggAg..... 1  
Gi2\_11103474\_x1.....agacgucgucGgaacacggggugccgaacu..... 1  
Gi3\_28649692\_x1.....gucgCgggaacacggggug..... 1  
Gi2\_11169419\_x1.....cCaucggagacgucgugggaa..... 1  
Gi3\_28501179\_x1.....cgucgugggaaacacggggugGc..... 1  
Gi1\_4198491\_x1.....ugggGacacggggugccgaa..... 1  
Gi2\_11187240\_x1.....ggagacgucguAggaacacgggggu..... 1  
Gi3\_28294068\_x1.....Cacgucgugggaaacacggggugccg..... 1  
Gi2\_11144443\_x1.....cgugggaaacacggggAgccga..... 1  
Gi2\_11071903\_x1.....gaucggagacgucguUgga..... 1  
Gi3\_28632611\_x1.....cgauUggagacgucgugggaaacacg..... 1  
G1a\_6242117\_x1.....gugggaacacggggugccgGa..... 1  
Gi4\_609266\_x1.....ugggaacacggggUaccgaacu..... 1  
Gi1\_4290890\_x1.....acgucgGgggaacacggggugccgaacu..... 1  
Gi3\_28377266\_x1.....acgucgugggaaacacUggggugccg..... 1  
Gi5\_8911239\_x1.....Agagacgucgugggaaacacggggugccgaacu..... 1  
Gi5\_8993333\_x1.ugcgGucggagacgucgug..... 1  
Gi3\_28479734\_x1.....gagacgucgugggaaUcacgggggu..... 1  
Gi3\_28676665\_x1.....cggagacgucguUggaacacgg..... 1  
Gi2\_11094266\_x1.....cgNagacgucgugggaaacacggggugcc..... 1  
Gi5\_9133249\_x1.uUcgauccggagacgucgugggaaacacgggg..... 1  
Gi3\_28512612\_x1.....gaAcggagacgucgugggaaacac..... 1  
Gi2\_11187451\_x1.....gacgucgugggaaacacggAgugccgaacu..... 1  
Gi3\_28840271\_x1.....acacggggugccgGcuu..... 1  
Gi1\_4164323\_x1.....gAcgugggaaacacggggugcc..... 1  
Gi5\_9137471\_x1.....Aggagacgucgugggaaacacgg..... 1  
Gi4\_582014\_x1.....aGgucgugggaaacacggggugccgaacu..... 1  
G1a\_6068185\_x1.....cggagacgucgugggaaCcacgggggu..... 1  
Gi5\_8893596\_x1.....gugggaaUaccggggugccga..... 1  
G1a\_6113765\_x1.....gugggaaUaccggggugccgaac..... 1  
Gi1\_4343959\_x1.....gugggaaacacggAgugccgaacuu..... 1  
Gi2\_11363186\_x1.....agacgucgugggaaacacAgggggugcc..... 1  
Gi2\_10993964\_x1.....cggagacgucgugggaaacG..... 1  
Gi3\_28851059\_x1.....ggagacgucgugggaaacacgAgggugccgaacu..... 1  
Gi3\_28838756\_x1.....ucggagacgucgugggaaacacAgg..... 1  
Gi3\_28375273\_x1.....cggagacgucgugggaaacacUggggugccgaacu..... 1  
G1a\_6102128\_x1.....gaucggagacgucguggAaacacg..... 1  
G1a\_6051007\_x1.....gaacacggggugccgaacG..... 1  
Gi1\_4266851\_x1..cgUucggagacgucgugg..... 1  
Gi1\_4216619\_x1.....aucggaAacgucgugggaaacacg..... 1  
Gi5\_9025924\_x1.....gagacgucgugggaaUaccggggugccgaacu..... 1  
Gi1\_4169383\_x1.....ggagacgucgugggaaacacggggUacc..... 1

G1a\_6228161\_x1.....ucgugggaacaUggggugccgaacu..... 1  
 Gi2\_11170763\_x1.....ucggagacgGcgugggaac..... 1  
 Gi5\_8964649\_x1.....cgugggaGcacggggugccg..... 1  
 Gi1\_4261397\_x1.ugcgauccgagacgucguAggaaca..... 1  
 Gi3\_28835988\_x1.....gugggaacacCggggugcc..... 1  
 Gi1\_4239204\_x1.....gaUgucgugggaacacggggugccgaac..... 1  
 Gi3\_28490721\_x1.....gagacgucgGgggaacacggggugccg..... 1  
 Gi3\_28557209\_x1.....aucggagacgucgugggaacacgggUgu..... 1  
 Gi1\_4306784\_x1.....Ugagacgucgugggaacacggggugccgaac..... 1  
 Gi1\_4168117\_x1.....gagacgucgugggaacaU..... 1  
 Gi3\_28404112\_x1.....gaucggagacgucguggAaacacg..... 1  
 Gi5\_8916653\_x1.....aucggagacAucgugggaacacgggggu..... 1  
 Gi5\_9024730\_x1.....gaucggagacguUgugggaacac..... 1  
 Gi2\_11258788\_x1.....cgucgugggaacUcggggugccgaacu..... 1  
 Gi3\_28321553\_x1.....cggagacgucgugggaacacggggugAc..... 1  
 Gi4\_604087\_x1.....gugggaCcacggggugccgaacu..... 1  
 Gi2\_11370550\_x1.....ugggaacaGggggugccga..... 1  
 Gi3\_28789552\_x1.....ggagacgucgugggaGcacggggugcc..... 1  
 Gi3\_28307855\_x1.....ucggagacgucgugggaCcacgggggu..... 1  
 Gi3\_28976007\_x1.....gacgucgugggaacacggggugccgaCc..... 1  
 G1a\_6319072\_x1.....gaucggagacgucguggGg..... 1  
 Gi5\_9075650\_x1.....gaucggagNcgucgugggaaca..... 1  
 Gi3\_28667785\_x1.....gaucggagacgucguggAaacacgggggu..... 1  
 Gi3\_28654476\_x1.....aucggagacgucgugggaacacggggugccgCacu..... 1  
 Gi1\_4218954\_x1.....cgCgggaacacggggugccgaacu..... 1  
 Gi1\_4304041\_x1.....gugggaacacggggugccgaCcu..... 1  
 Gi1\_4351838\_x1.....gUgacgucgugggaacacggggugccgaacu..... 1  
 Gi1\_4297365\_x1.....aucggagacgucgugggaa..... 0  
 Gi1\_4357205\_x1.....agacUucgugggaacacggggugccgaac..... 1  
 Gi2\_11296757\_x1.....ggagacguAgugggaacacg..... 1  
 Gi3\_28697728\_x1.....cgucCugggaacacggggugccgaac..... 1  
 Gi2\_11237568\_x1.....ggagacgucgugggaacacggggugccU..... 1  
 Gi1\_4303606\_x1.....ucggagUcgucgugggaacacg..... 1  
 Gi5\_8900393\_x1.....aacacggggugccgaacuC..... 1  
 Gi2\_11037228\_x1.....agacgucgAgggaacacggggugccgaacu..... 1  
 Gi3\_28688249\_x1.....agacgucgugggGcacggggugcc..... 1  
 Gi2\_11197183\_x1.....gagaAgucgugggaacacggggug..... 1  
 Gi2\_11316054\_x1.....ucggagacgucgugggaacacgCggugc..... 1  
 Gi2\_11141248\_x1.....gaucggagacgucgugggaacCcg..... 1  
 G1a\_6339229\_x1.....gugggaacacgUggugccgaac..... 1  
 Gi5\_8981909\_x1.....gagacgucgugggaGcacggggugccgaacu..... 1  
 Gi1\_4237917\_x1.....ugggaacacgggAugccgaacu..... 1  
 Gi3\_28575009\_x1.....aucggagacgucguggCaacacg..... 1  
 Gi2\_11356550\_x1.....acgucgugggGcacggggugccg..... 1  
 Gi3\_28753461\_x1.....gucgugggaaUacggggugc..... 1  
 Gi3\_28447587\_x1.....cggagCcgucgugggaacacggggugccga..... 1  
 Gi3\_28667201\_x1.....aCacgucgugggaacacggggugccgaac..... 1

Gi3\_28934792\_x1.....uUggagacgucgugggaacac..... 1  
 Gl1\_6149434\_x1...Uaucggagacgucgugggaacacggggugcc..... 1  
 Gi2\_11313963\_x1.....gacgucgugggaacacgggAugccg..... 1  
 Gi2\_11144616\_x1.....acgucgugggaCcacggg..... 1  
 Gi1\_4203296\_x1.....ugggaacacggggugccCaacu..... 1  
 Gi3\_28519686\_x1.....acgucgugggaacacggggAgccga..... 1  
 Gi2\_11290011\_x1.....ggagacguGgugggaacacggggugcc..... 1  
 Gi1\_4261223\_x1.....ugggaacacggCgugccgaacu..... 1  
 Gi2\_11083932\_x1.....cggagacgucgugggaacGcgggg..... 1  
 Gi2\_11317084\_x1.....ucgugggaacacggCgugccg..... 1  
 Gi2\_11126056\_x1.....ggUgacgucgugggaacacggggugccg..... 1  
 Gi2\_11317950\_x1.....gacgucgugggUacacggggg..... 1  
 Gi3\_28971096\_x1...gaucggaAacgucgugggaacacggg..... 1  
 Gi2\_11107628\_x1.....gagacgucgugggGacacggg..... 1  
 Gi1\_4375399\_x1...cgaucggagacgucgugggaacacgAggu..... 1  
 Gi2\_11407229\_x1...cgaucggagaUgucgugggaacacggggug..... 1  
 Gi3\_28538990\_x1....aucggagacgucgugUgaacac..... 1  
 Gi2\_11399549\_x1....gagacgucgugggaGcacggggugccgaacu..... 1  
 Gi3\_28823849\_x1.....gCgucgugggaacacggggugccgaacu..... 1  
 Gi1\_4347839\_x1....aucggagacgucgugggaacaUgggg..... 1  
 Gi1\_4286657\_x1....aucggagacgucgugggaacacggggGgc..... 1  
 Gi2\_11063874\_x1....aucggaAacgucgugggaacacggggugcc..... 1  
 Gi1\_4287470\_x1...gaucggagacgucgugggaGacgg..... 1  
 Gl1\_6245419\_x1.....Agagacgucgugggaacacggggugcc..... 1  
 Gi3\_28715171\_x1.ugcgaucggagGcucguggga..... 1  
 Gi3\_28454112\_x1.....cggagGcucgugggaacacgg..... 1  
 Gi4\_582119\_x1.....cgucgugggaacacggggugccgC..... 1  
 Gl1\_6278417\_x1.....Cgagacgucgugggaacacg..... 1  
 Gi3\_28514084\_x1.....cggagacgucgugggaacacggAg..... 1  
 Gi2\_11298505\_x1.....gacAucgugggaacacggggugccg..... 1  
 Gi1\_4173581\_x1....aucggagacgucgugAgaacacgggg..... 1  
 Gi2\_11404089\_x1.....gucgugggaacacggggugcAgaac..... 1  
 Gi5\_8903780\_x1.....cgucgugNaacacggggugcc..... 1  
 Gi3\_28361834\_x1....aucggagacgucguCggaacac..... 1  
 Gi3\_28841029\_x1...gaucggGgacgucgugggaacacgggg..... 1  
 Gl1\_6123715\_x1....aucggagaAgucgugggaacacggg..... 1  
 Gl1\_6251954\_x1.ugcgaucggagaGgucgug..... 1  
 Gi5\_8923396\_x1.....ucgugggaacacgggAugccgaac..... 1  
 Gi3\_28943214\_x1.....ggagacgucgugggaacacggggugccgaUc..... 1  
 Gi3\_28571428\_x1.....cggagacgCcgugggaacacggggug..... 1  
 Gl1\_6170019\_x1....Uucggagacgucguggga..... 1  
 Gi3\_28511785\_x1.....gucgugggaacacUgggugccgaac..... 1  
 Gi3\_28641250\_x1.....cNucgugggaacacggggugccgaacu..... 1  
 Gi1\_4199689\_x1.....acgucgugAgaacacggggugccgaac..... 1  
 Gi3\_28329679\_x1.gcgGucggagacgucgugggaaca..... 1  
 Gl1\_6168312\_x1....aucggUgacgucgugggaacacggg..... 1  
 Gi5\_8905130\_x1.ugcgaucgNagacgucguggga..... 1

Gi3\_28982958\_x1.....ggagacgucGgggaacacggggugccg..... 1  
 Gi2\_11368706\_x1...cgaucggagacgucgugggaaacacggggugcG..... 1  
 Gi1\_4293761\_x1....aucggagacgucgugggaaacacggggC..... 1  
 Gi2\_11384165\_x1.....Uggagacgucgugggaaacacggggugccga..... 1  
 Gi3\_28343123\_x1.....ggagacgucguAggaacacggggugccg..... 1  
 Gi5\_8895509\_x1.....Ccgagacgucgugggaaacacggggugccgaacu..... 1  
 Gi3\_28719019\_x1..gcgaCcgagacgucgugggaaacacgg..... 1  
 Gi2\_11316137\_x1...cCaucggagacgucgugggaaacacggggugc..... 1  
 Gi1\_4181962\_x1....aucggagacgucgugggaaacacgAggu..... 1  
 Gi3\_28278407\_x1.....cgucgugggaaacacAgggugc..... 1  
 Gi3\_28420941\_x1.....acgucguCggaacacggggugccgaac..... 1  
 Gi2\_11027609\_x1....aucggagacgucgugggaaacacgUg..... 1  
 Gi3\_28658001\_x1.....ucggagacgucgugggaaAacgg..... 1  
 Gi2\_11111480\_x1.....gagacgucgugggaaacacggggugcAgaac..... 1  
 Gi5\_8912821\_x1.....gacgucgugggaaacacggggugccgaCcu..... 1  
 Gi2\_11264232\_x1....aucggagacgucCugggaaacac..... 1  
 G1a\_6195201\_x1.....gugggaaacacgggAugccgaa..... 1  
 Gi3\_28673157\_x1.....ggagacgucgugggaaacacggggugUcgaacu..... 1  
 Gi3\_28841641\_x1.....ucguCggaacacggggugccg..... 1  
 Gi5\_9048218\_x1.....Ngaacacggggugccgaacu..... 1  
 Gi3\_28919389\_x1....aucggagaAgucgugggaaacacg..... 1  
 Gi3\_28505910\_x1....aucggagacgucgugggUacac..... 1  
 Gi3\_28525366\_x1....ucggagacgucgugggaaacacU..... 1  
 Gi1\_4383907\_x1..Ggcgaucggagacgucgugggaaacacg..... 1  
 Gi2\_11167446\_x1...gaucggagacgucgugggGcacggggugc..... 1  
 Gi2\_11159848\_x1....aucggagacgucAugggaaacacg..... 1  
 Gi2\_11095498\_x1.....cggagacgucgugggaaacacggUgug..... 1  
 Gi2\_11179885\_x1.....gucgugggaaacacggggugcU..... 1  
 Gi1\_4305731\_x1.....ucNuggaaacacggggugccgaacu..... 1  
 Gi3\_28371378\_x1.....gucguAggaacacggggug..... 1  
 Gi2\_11164527\_x1...cgaucggagacgucgCgg..... 1  
 Gi2\_11064052\_x1.....gacgucgugggaaacGcgg..... 1  
 Gi2\_11017653\_x1.....cggagacgucgugggaaacGcg..... 1  
 Gi5\_8975565\_x1....aucggagCcgucgugggaaacacgg..... 1  
 G1a\_6232509\_x1...cgaucggCgacgucgugggaa..... 1  
 G1a\_6094550\_x1.....ggagacgucgugggGcacg..... 1  
 Gi3\_28519424\_x1.....gacgucgugggGcacggggu..... 1  
 Gi3\_28599860\_x1.....gagacguUgugggaaacacg..... 1  
 Gi2\_11377878\_x1.....ugggaaacacgggAugccg..... 1  
 Gi2\_11145614\_x1....aucNgagacgucgugggaaacacggggu..... 1  
 Gi5\_9000953\_x1.....gugggaaacacggggCgccga..... 1  
 Gi3\_28628883\_x1..ugcgaucggagacgucgugggGcacg..... 1  
 Gi3\_28478675\_x1.....gugggaaacacggAgugccgaacuu..... 1  
 Gi2\_11106786\_x1..ugcgaucggagacgucgugggaaAac..... 1  
 Gi5\_9023895\_x1.....ggagacgucgugggaaacacggggA..... 1  
 Gi3\_28351204\_x1..ugcgaucggagacgucgugggaaac..... 0  
 Gi1\_4248484\_x1.....ucgugggaaacacggggugccgaaGu..... 1

Gi5\_8896171\_x1.....aucggagacguUgugggaacacg..... 1  
Gi5\_9077807\_x1.....aAcggagacgucgugggaaca..... 1  
Gi1\_4224752\_x1.....acgucgugAgaacacggggugccgaacu..... 1  
Gi3\_28755289\_x1.....gacgucgugggaacacggggugccUaacu..... 1  
Gi3\_28326963\_x1.....gaCcgagacgucgugggaac..... 1  
Gi2\_11174552\_x1.....ucgugggaacacggggugGcgaacu..... 1  
Gi5\_8879035\_x1.....ucgugggaUcacggggugccgaacu..... 1  
Gi3\_28623698\_x1..gcgauUggagacgucguggga..... 1  
Gi2\_11071412\_x1...gaucggagacgucguCggaacac..... 1  
Gi3\_28663692\_x1..gcgaucggCgacgucgugggaaca..... 1  
Gi4\_612266\_x1.....cgucgugggaacacggggugUcga..... 1  
Gi2\_11092207\_x1.....cgucgugAgaacacggggug..... 1  
Gi1\_4168633\_x1.....cgugggaacacggggugcUgaac..... 1  
Gi4\_572678\_x1.....aucggagacgucguggga..... 0  
Gi1\_4223234\_x1.....cgucUugggaacacggggugcc..... 1  
Gi3\_28293053\_x1.....gucgugggaacacggggugGcgaacuu..... 1  
Gi3\_28334452\_x1.....agacgucCugggaacacggggugccgaac..... 1  
Gi3\_28954476\_x1.....ucggagaUgucgugggaacacg..... 1  
Gi2\_11126750\_x1..gcgaucggGgacgucgugggaacac..... 1  
G1a\_6040532\_x1.....gacguAgugggaacacggggugccgaac..... 1  
G1a\_6332167\_x1.....gugggCacacggggugccgaac..... 1  
Gi3\_28859736\_x1.....gggaacacUgggugccgaa..... 1  
Gi2\_11092768\_x1..cCaucggagacgucgugggaacacgggg..... 1  
G1a\_6118201\_x1...gaucggagacgucgugggCacacg..... 1  
Gi3\_28469430\_x1...gaucggagacgucgugggaacacCgggugc..... 1  
Gi3\_28928490\_x1.....ucCugggaacacggggugcc..... 1  
Gi5\_9039556\_x1.....gAagacgucgugggaaca..... 1  
Gi2\_11055016\_x1.....agacgucgugggCacacggggugcc..... 1  
Gi3\_28754684\_x1.....ucggagacgucgugggCacacggggugcc..... 1  
Gi5\_8992273\_x1...gaCcgagacgucgugggaacacgggggu..... 1  
Gi2\_11346639\_x1.....cgNagacgucgugggaacacggggug..... 1  
Gi1\_4203916\_x1.....cCgagacgucgugggaacacgggg..... 1  
Gi3\_28365965\_x1.....acgucgAgggaacacggggugccgaa..... 1  
Gi1\_4367652\_x1.....acgucgugggaacacggggguAccg..... 1  
Gi1\_4373495\_x1.....gaNcacggggugccgaacu..... 1  
Gi5\_9082662\_x1.....gacgCcgugggaacacggggugccgaacu..... 1  
Gi1\_4380325\_x1.....acgucgugggaUacggggugcc..... 1  
Gi5\_9004274\_x1...gaucggCgacgucgugggaacacg..... 1  
G1a\_6084169\_x1.....cggagacgucgugggGacacgg..... 1  
Gi2\_11002249\_x1.....gacgucguNggaacacggggugccgaac..... 1  
G1a\_6027256\_x1.....ugggaacacggggugcGgaacu..... 1  
Gi2\_11334202\_x1.....gggaacaGggggugccgaacu..... 1  
G1a\_6137885\_x1.ugUgaucggagacgucgugggaacac..... 1  
G1a\_6298166\_x1.....gggaacacggggugccgaUcu..... 1  
Gi2\_11189789\_x1.....ucggagacgucgugggaacacggggCgcc..... 1  
Gi3\_28459303\_x1...gaucggagacUucgugggaacacgggggu..... 1  
Gi2\_11310100\_x1.....cggagacgucgugggaacacCgggugcc..... 1

Gi2\_11403042\_x1.....ucgugggaacacggggugcGgaac..... 1  
 Gi1\_4342565\_x1.....gucguAggaacacggggugc..... 1  
 Gi2\_11236958\_x1....aucggagacgucgugggaacaA..... 1  
 Gi3\_28867739\_x1..gcgaucggagacgCcgugggaacacggggugcc..... 1  
 Gi2\_11133397\_x1.....gAagacgucgugggaacacgggggu..... 1  
 Gi3\_28322993\_x1...cgauccgagacgucgugggaacacAg..... 1  
 Gi5\_8877830\_x1.Cgcgaucggagacgucgugg..... 1  
 Gi3\_28822714\_x1.....acacggggugcUgaacuu..... 1  
 Gi3\_28493002\_x1.....uggUaacacggggugccg..... 1  
 Gi3\_28479783\_x1.....gagacgucgugggaacacggggGgccgaa..... 1  
 Gi2\_11334019\_x1.....acgucgugggaacaAggggugccgaac..... 1  
 Gi3\_28357916\_x1...gaucggagacgucgAgggaacacgggggu..... 1  
 Gi2\_11132193\_x1.....ggagacgucgugggaacacgggAugc..... 1  
 Gi1\_4376020\_x1.....cgugggaacacggggugccgaG..... 1  
 Gi5\_9110107\_x1....aucggagacgCcgugggaacacgg..... 1  
 Gi3\_28444400\_x1...gaucggagacgucgugggaUacggg..... 1  
 Gi2\_11359199\_x1...cgauccgagacgucgugggaaca..... 1  
 Gl1\_6177240\_x1.....gugggaacacggUgugccgaac..... 1  
 Gi3\_28974497\_x1.....gacgucgugggaacacggAgugccgaac..... 1  
 Gi4\_590728\_x1.....uAgugggaacacggggugccgaacu..... 1  
 Gi5\_8927479\_x1.....gucguAggaacacggggugc..... 1  
 Gl1\_6203043\_x1.....cggagacgucgugggaAacggg..... 1  
 Gi3\_28406877\_x1.....gucgugggaacCgggggu..... 1  
 Gi5\_8890091\_x1.....Cagacgucgugggaacacggggugccgaacu..... 1  
 Gi2\_11222580\_x1.....cgucgugggaacaUggggugccga..... 1  
 Gi3\_28626639\_x1.....acgucgugggaacacggggugccgUac..... 1  
 Gi1\_4366622\_x1.....acgucgugggaacacggggugccgGac..... 1  
 Gi1\_4366032\_x1.....gugggaacacggggugccgaC..... 1  
 Gi1\_4364444\_x1.....ugggaacacgUggugccgaacu..... 1  
 Gl1\_6089406\_x1.....acgucgugggCacacgggggu..... 1  
 Gi1\_4269182\_x1.....aUaccggggugccgaacuu..... 1  
 Gi3\_28908845\_x1.....cguAgugggaacacggggugccgaac..... 1  
 Gi3\_28728732\_x1....aucggagacgucAugggaacac..... 1  
 Gi3\_28442213\_x1....ucggagacgucgugggaacacggggugccgaacA..... 1  
 Gi1\_4211525\_x1.....gugggaacUcggggugccga..... 1  
 Gi5\_8950464\_x1.....cguggAaacacggggugcc..... 1  
 Gi3\_28641579\_x1.....cgucgugggaacacgUggugcc..... 1  
 Gi3\_28963555\_x1.....agacgucgugggaCcacggg..... 1  
 Gi5\_8957692\_x1.....acgucgugggaacacggggCgccgaacuu..... 1  
 Gl1\_6142777\_x1....aucggagacgucgugggaacacggA..... 1  
 Gi2\_11102523\_x1.....ugggaaGacggggugccgaac..... 1  
 Gi2\_11340626\_x1.....acgucgugggUacacggggugccgaacu..... 1  
 Gi3\_28642937\_x1.....ggUgacgucgugggaacacggg..... 1  
 Gi1\_4281669\_x1...gaucggagacgucguggga..... 0  
 Gi1\_4256876\_x1.ugcgaucggagacgucgugggaacCcg..... 1  
 Gi2\_11139457\_x1.....cggagacgucgugggaacaUggggugc..... 1  
 Gi5\_8959579\_x1.....gacgucgugggUacacggggugccgaacu..... 1

|                                                          |   |
|----------------------------------------------------------|---|
| Gi3_28658975_x1..gUgaucggagacgucguggga.....              | 1 |
| Gi5_9055896_x1.....cggagacgucguggAaacacg.....            | 1 |
| Gi1_4287372_x1.....gucgCggaacacggggugcc.....             | 1 |
| Gi2_11120544_x1.....Uucggagacgucgugggaacacggggugccg..... | 1 |
| Gi1_4200199_x1.....cgucgugggaacaUggggugcc.....           | 1 |
| Gi1_4192652_x1.....uggaacacggggugccgUac.....             | 1 |
| Gi1_4184149_x1.....ggagacgCcgugggaacacggggug.....        | 1 |
| Gi2_11390123_x1.....gucgugggaacacAgggugccgaac.....       | 1 |
| Gi2_11335073_x1.....uggaacaAggggugccgaac.....            | 1 |
| Gi1_4280715_x1.....cgucgugggaacacggAgugcc.....           | 1 |
| Gi5_9052130_x1...gaucggagCcgucgugggaacacggg.....         | 1 |
| Gi5_9057409_x1.....cgucgugggaacacggggCgccgaa.....        | 1 |
| Gi3_28635814_x1.....ggagacgucgugggaacCcg.....            | 1 |
| G1a_6131388_x1.....cgugggaacacggggugcU.....              | 1 |
| Gi2_11165847_x1...gaucggagacgucguAggaacacggggugc.....    | 1 |
| Gi3_28659649_x1.....gugggaacacggggugccgaacuG.....        | 1 |
| Gi2_11068934_x1..Ucgaucggagacgucgugggaacacggggug.....    | 1 |
| Gi5_8979669_x1.....cAugggaacacggggugcc.....              | 1 |
| Gi1_4201126_x1.....acgucgugggaacacggAgugccga.....        | 1 |
| Gi5_9067359_x1.....ugUgaacacggggugccgaacu.....           | 1 |
| Gi2_10994799_x1.....ucggagacNucgugggaacacggggugccg.....  | 1 |
| Gi2_11279657_x1.....agacgucgugggaCcacggggug.....         | 1 |
| Gi2_11389614_x1.....cgugggaCcacggggugccg.....            | 1 |
| Gi1_4280455_x1.....gucgugggaacacggggugccgU.....          | 1 |
| Gi1_4372978_x1.....uggaacacCgggugccgaacu.....            | 1 |
| Gi3_28436907_x1.....cggagacgucguggUaacacggggugcc.....    | 1 |
| Gi3_28600190_x1...cgauccgagGcgucgugggaacacggggug.....    | 1 |
| G1a_6142119_x1.....Agugggaacacggggugcc.....              | 1 |
| Gi2_11152317_x1....auNggagacgucguggga.....               | 1 |
| Gi3_28548587_x1.....cgugggaacacggggugccgUa.....          | 1 |
| Gi2_11079842_x1....aucgUagacgucgugggaac.....             | 1 |
| Gi1_4296109_x1.....ggagacgucgCgggaacacggggugccg.....     | 1 |
| Gi2_11059337_x1..ugcgaucggCgacgucgugggaacacg.....        | 1 |
| Gi1_4382701_x1.....gacgucgugggaGcacggggugccg.....        | 1 |
| Gi3_28821829_x1.....cggagacgucgugggaacCggggugccgaac..... | 1 |
| Gi2_11142490_x1.....cgugggaacCggggugccga.....            | 1 |
| Gi3_28321552_x1.....gagacgucgCgggaacacggggugccg.....     | 1 |
| Gi2_11299674_x1.....acgucguAggaacacggggugccga.....       | 1 |
| Gi3_28685119_x1.....ucggagacgucguAggaacacggg.....        | 1 |
| Gi5_9007837_x1.....gucgugggaacacggggugccga.....          | 0 |
| Gi3_28443477_x1...gaucggagNcgucguggga.....               | 1 |
| Gi3_28860731_x1.....ucggagacgCcgugggaacac.....           | 1 |
| Gi1_4274982_x1.....gugggGacacggggugccgaacu.....          | 1 |
| Gi3_28382763_x1.....gucgugggaacacgggguCccgaa.....        | 1 |
| Gi3_28488947_x1.....acAucgugggaacacggggugccga.....       | 1 |
| Gi3_28880296_x1.....ucggagacgucgugggGaca.....            | 1 |
| Gi5_9072787_x1.....Ncgugggaacacggggugccgaacu.....        | 1 |

Gi3\_28909974\_x1.....ggaacacggggugccUaa..... 1  
 Gi3\_28976878\_x1.....cgugggaaAacggggugccga..... 1  
 Gi1\_4386051\_x1....aucggagacAucgugggaacacgg..... 1  
 Gi1\_4264811\_x1.....aacacggggugccCaacu..... 1  
 Gi1\_4216898\_x1.....ucgugggaacacggggugAc..... 1  
 Gi3\_28746040\_x1.....acuuuccagcgcgccugcugcccacc..... 0  
 Gl1a\_6148788\_x1.....cgugAgaacacggggugc..... 1  
 Gi5\_8904191\_x1.....ugggaacGcggggugccgaacuu..... 1  
 Gl1a\_6102388\_x1.....gugggUacacggggugccg..... 1  
 Gi2\_11102776\_x1...cCaucggagacgucguggggaacacggg..... 1  
 Gi5\_9013992\_x1.....acgNcgugggaacacggggugccgaac..... 1  
 Gi5\_9042661\_x1.....ggaacacggggugcAgaac..... 1  
 Gi2\_11283954\_x1.....Ugagacgucgugggaaca..... 1  
 Gi3\_28539664\_x1cugcgaucggagacAucg..... 1  
 Gi4\_574762\_x1.....ucUugggaacacggggugccgaacu..... 1  
 Gi2\_11040538\_x1.....cgucgugggUacacggggugccg..... 1  
 Gi3\_28565920\_x1.....ggagacgucgugggaacacggcG..... 1  
 Gi2\_11267517\_x1.....agacUucguggggaacacggggug..... 1  
 Gi1\_4309018\_x1.....cggagacgucgugggGacacggg..... 1  
 Gi3\_28831303\_x1.....cgugggaacacggggAgccgaa..... 1  
 Gi2\_11047237\_x1...cgauccgagacgucgugggaacUcggg..... 1  
 Gi2\_11069401\_x1.Ggcgaucggagacgucgug..... 1  
 Gi5\_8956895\_x1.....gacgucgugggaacacggggugccgaaUu..... 1  
 Gi3\_28662811\_x1.....cgugggaacacggggUccgaac..... 1  
 Gi2\_11340629\_x1.....cgucguggCaacacggggugccg..... 1  
 Gi2\_11161779\_x1.....gaAacgucguggggaacacggggug..... 1  
 Gi2\_11153641\_x1.....acgucgugggGacacggggugccga..... 1  
 Gl1a\_6203553\_x1....aucggagacgucgCgggaacacggggug..... 1  
 Gi3\_28623253\_x1.....gaUgucgugggaacacggggugc..... 1  
 Gi2\_11301867\_x1....aucUgagacgucguggggaacacggggg..... 1  
 Gi3\_28519564\_x1...Aaucggagacgucguggga..... 1  
 Gi3\_28385282\_x1...gcgGucggagacgucgugggaac..... 1  
 Gi1\_4227219\_x1.....gucgugggaacacggggugccU..... 1  
 Gl1a\_6196858\_x1....aucggagacgucUugggaacacggggg..... 1  
 Gi5\_9054026\_x1....ucggagacgucgugggaacaUg..... 1  
 Gi2\_11153738\_x1.....gagacgucgugggUacacggggugcc..... 1  
 Gi3\_28498459\_x1.ugcgaucggagacgucgugggaGcacggg..... 1  
 Gl1a\_6198109\_x1....aucCgagacgucguggggaacacggg..... 1  
 Gi1\_4321844\_x1.....gacgucgAgggaacacggggugccgaacu..... 1  
 Gi2\_11380370\_x1....aucggUgacgucguggga..... 1  
 Gi3\_28403531\_x1.....Ngugggaacacggggugc..... 1  
 Gi1\_4333661\_x1.....ggagacgucguggggaacacAgggugccgaac..... 1  
 Gi5\_9131054\_x1.....agacgucgNgggaacacggggugc..... 1  
 Gi4\_596900\_x1...Uaucggagacgucgugggaacacggg..... 1  
 Gl1a\_6025662\_x1...gaCcgagacgucguggga..... 1  
 Gi2\_11330644\_x1....aucggagaGgucgugggaac..... 1  
 Gi2\_11034665\_x1...Naucggagacgucguggggaacacg..... 1



|                                                            |   |
|------------------------------------------------------------|---|
| Gi2_11365939_x1.....aucggagacgucgugggGcaccggg.....         | 1 |
| Gi3_28649176_x1.....cgugggaacacggggugccCa.....             | 1 |
| Gi2_11003597_x1.....aucggagacgucGgggaaca.....              | 1 |
| Gi2_11243662_x1.....gugggaacacggggGgccgaacuu.....          | 1 |
| Gi3_28865662_x1...cgaucggagacgucgugggUacacg.....           | 1 |
| Gi1_4304967_x1.....acgucguggaacacggggg.....                | 0 |
| Gi3_28408443_x1.....aucggaCacgucgugggaaacacg.....          | 1 |
| Gi2_11108475_x1.....aucUgagacgucgugggaaacacggggugcc.....   | 1 |
| Gi2_11017544_x1.....agacgucgNgggaacacggggugccgaac.....     | 1 |
| Gi4_594707_x1.....gucguggaacacggggugccgaCcu.....           | 1 |
| Gi5_8852939_x1.....gacgucgugggaaacacgggAugccgaac.....      | 1 |
| Gi5_8994390_x1.....ugggaacacggggugAcgaac.....              | 1 |
| Gi5_8974721_x1.ugcgaucgUagacgucguggg.....                  | 1 |
| Gi2_11083917_x1...cgaCcgagacgucgugg.....                   | 1 |
| Gi3_28686881_x1.....acgucgugggaaacacgggUugccgaacu.....     | 1 |
| Gi3_28463846_x1.....cgugggaGacggggugcc.....                | 1 |
| Gi2_11203537_x1.....aucggagacgucgugggaaGacggg.....         | 1 |
| Gi3_28667129_x1...gauNggagacgucgugggaaacacggg.....         | 1 |
| Gi1_4275317_x1.....Ggacgucgugggaaacacggggg.....            | 1 |
| Gi3_28626190_x1.....gugggaaGacggggugccg.....               | 1 |
| Gi1_4286345_x1.....gucgugggaaacacgggAugccgaacu.....        | 1 |
| Gi5_8942499_x1.....cggagacgucguAggaacacggggugcc.....       | 1 |
| Gi3_28894718_x1.....agUcgucgugggaaacacggggg.....           | 1 |
| Gi2_11180874_x1.....gCagacgucgugggaaacac.....              | 1 |
| Gi1_4385562_x1.....gaacGcggggugccgaacuu.....               | 1 |
| Gi1_4225968_x1.....gucAugggaacacggggug.....                | 1 |
| G1a_6255644_x1...Cucggagacgucgugggaaacacggggugcc.....      | 1 |
| Gi2_11344245_x1.Cgcgaucggagacgucguggg.....                 | 1 |
| Gi3_28782433_x1...gaucggagacgucgugggaaUacgggg.....         | 1 |
| Gi2_11076721_x1.....gacgucAugggaacacggggugcc.....          | 1 |
| Gi3_28953307_x1.....cgucgugggaaacacgAgggugc.....           | 1 |
| Gi1_4347481_x1.....agacgucgugggGacacggggugccg.....         | 1 |
| Gi5_8973610_x1.....ucAugggaacacggggugcc.....               | 1 |
| Gi3_28341461_x1.....cggagacgucgugggaaUacg.....             | 1 |
| Gi3_28754206_x1.....cggagacgNcgugggaaacacggggugccgaac..... | 1 |
| Gi2_11159466_x1.....ucggagacgucgugggCacacggggugc.....      | 1 |
| Gi3_28666864_x1.....gaNacgucgugggaaacacggggg.....          | 1 |
| Gi2_11293279_x1.....ugggaaAacggggugccga.....               | 1 |
| Gi3_28423166_x1.....agacAucgugggaaacacggggugccgaac.....    | 1 |
| Gi1_4378636_x1...aucggCgacgucgugggaaacacg.....             | 1 |
| Gi5_9113849_x1.....agacgucgugggaaacacgggAugccgaacu.....    | 1 |
| Gi2_11227458_x1.....gggaacacgggggUaccgaa.....              | 1 |
| Gi4_599228_x1.....ugggaacacggggugccgaCcu.....              | 1 |
| G1a_6144736_x1.....cgugggaaAacggggugccgaacu.....           | 1 |
| Gi3_28714803_x1.....ugggaUcacggggugccga.....               | 1 |
| Gi5_8932462_x1.....cgugggGacacggggugcc.....                | 1 |
| Gi3_28924662_x1.....ucggagacgucgugggaaacacggA.....         | 1 |

Gi2\_11269828\_x1.....cgucgugggUacacggggugccga..... 1  
Gi2\_11345659\_x1.....gucgGgggaacacggggugc..... 1  
Gi1\_4260111\_x1....aucggaUacgucgugggaacacgg..... 1  
Gi3\_28510280\_x1....aucgUagacgucgugggaacacggggugccg..... 1  
Gi3\_28382718\_x1....cgaucggagaAgucgugggaacacggg..... 1  
Gi1\_4164095\_x1.....gagacAucgugggaacacggggugcc..... 1  
Gi1\_4176189\_x1.....gagaUgucgugggaacacggggugccga..... 1  
G1a\_6295101\_x1....aucggagacguAguggga..... 1  
Gi2\_11366538\_x1.....ugggaacacAgggugccgaacuu..... 1  
Gi5\_9119926\_x1.....acUucgugggaacacggggugc..... 1  
Gi5\_8882956\_x1.....cgugggCacacggggugc..... 1  
Gi3\_28324735\_x1.....gucguggUaacacggggugccgaac..... 1  
Gi3\_28641246\_x1.....gugggaacaUggggugccgaacuu..... 1  
Gi3\_28706022\_x1....aucggagacgucgugggaacaGgg..... 1  
Gi3\_28388021\_x1.....agacgucgugggaacacggggGgccgaac..... 1  
Gi1\_4186351\_x1....aucggGgacgucgugggaacacggg..... 1  
Gi3\_28565825\_x1.....gacNucgugggaacacgggg..... 1  
Gi5\_8942401\_x1.....gUcugcugggaacacggggugccgaac..... 1  
Gi2\_11011475\_x1....aucggagacgAcgugggaacacggg..... 1  
Gi3\_28967852\_x1.....acgucgugggaacacgUggugccgaac..... 1  
Gi5\_9041783\_x1.....cgucgugggGacacggggugccga..... 1  
Gi3\_28273799\_x1.....gagacgucgugggaacacggggG..... 1  
Gi2\_11310635\_x1.....gacgucgugggGacacggggugccga..... 1  
G1a\_6318592\_x1.....gugggaacacggggugcAg..... 1  
Gi3\_28347941\_x1.....ggaacacggggUcccga..... 1  
Gi3\_28869066\_x1....cgUucgagacgucgugggaacacgg..... 1  
Gi3\_28767341\_x1.....ucggagacgucgugAgaacac..... 1  
Gi3\_28271891\_x1....aucggagacgucgugggaacacggggUcc..... 1  
Gi5\_9135289\_x1....auUggagacgucgugggaacac..... 1  
Gi3\_28383689\_x1.....cgucgGgggaacacggggugc..... 1  
Gi5\_9045048\_x1....aucggagacguAgugggaacacg..... 1  
Gi5\_9008784\_x1.ugcgaucggagGcugcugugga..... 1  
Gi4\_580942\_x1.....gugggaacacggggugccgCa..... 1  
Gi1\_4389092\_x1.Cgcgaucggagacgucgugga..... 1  
G1a\_6198331\_x1.....cgugggaaNacggggugccg..... 1  
Gi1\_4184200\_x1.....cgucgugggUaacacggggugccgaac..... 1  
Gi3\_28877464\_x1.....cggagacgucgugggaacacggggUacc..... 1  
Gi5\_9073143\_x1....gaucggagacgucgugggaCcacgg..... 1  
Gi3\_28549792\_x1.....acgucgugggaacCcggggugccg..... 1  
Gi3\_28338406\_x1.....gucAugggaacacggggugccga..... 1  
Gi5\_8844848\_x1.....ugggaacacggggAgccgaa..... 1  
Gi1\_4306361\_x1.....gucgugggaacacCgggugccgaac..... 1  
Gi1\_4268619\_x1.....ucgugggaacacggCgugccgaac..... 1  
Gi1\_4226444\_x1.....gugNgaacacggggugccgaacuu..... 1  
Gi5\_9001287\_x1.....acgucgugggCacacggggugccgaac..... 1  
Gi2\_11270146\_x1....aucggagacgucguCggaacacg..... 1  
Gi4\_592146\_x1....gUucggagacgucgugggaacacggg..... 1

|                                                         |   |
|---------------------------------------------------------|---|
| Gi3_28898992_x1.....gacgucgugggUacacgg.....             | 1 |
| Gi2_11268857_x1.....cgucUugggaaacacggggug.....          | 1 |
| Gi1_4236751_x1.....gugggaacaGggggugccgaacu.....         | 1 |
| Gi3_28529002_x1.....cgucgugggaCcacggggugccgaa.....      | 1 |
| Gi1_4227243_x1.....gugggaacaGggggugccgaacu.....         | 1 |
| G1a_6231576_x1....aucggagaNgucgugggaacacggggug.....     | 1 |
| Gi3_28453639_x1....aucggagacgucgugggaacUc.....          | 1 |
| Gi1_4389916_x1.....gugggaCcacggggugccgaa.....           | 1 |
| Gi2_11166385_x1..Ucgauccgagacgucgug.....                | 1 |
| Gi2_11119576_x1.....ucgugggaaAacggggugccg.....          | 1 |
| Gi2_11192099_x1...gaucggagaAgucgugggaacac.....          | 1 |
| Gi3_28376014_x1.....cgugggaacacUgggugccga.....          | 1 |
| Gi5_9047299_x1.....cgGgggaacacggggugccgaacu.....        | 1 |
| Gi3_28909690_x1.....ggagacgucgugggaacacggggugUcg.....   | 1 |
| Gi4_597808_x1...gaucggagacgucgugggaacacggggugcc.....    | 0 |
| Gi2_11121342_x1...gaucggagacgucAgggaacacg.....          | 1 |
| Gi2_11070916_x1...gaucggagaGgucgugggaacacggg.....       | 1 |
| Gi2_11205226_x1....aucggaAacgucgugggaac.....            | 1 |
| Gi3_28553181_x1.....cgucguUggaacacggggugcc.....         | 1 |
| Gi2_11395772_x1.....ugggaacacggggugccAaa.....           | 1 |
| Gi3_28900221_x1.....cggagacgucgugggaGacgg.....          | 1 |
| Gi1_4367624_x1.....cgucgugggaacacggUgugcc.....          | 1 |
| G1a_6313976_x1....aucggagacgucgugggaacacggggugccga..... | 0 |
| Gi5_9019521_x1.....ugggaacacggggugcUgaa.....            | 1 |
| Gi1_4215504_x1.....cgNagacgucgugggaacacggg.....         | 1 |
| Gi4_606336_x1.....Uugggaacacggggugcc.....               | 1 |
| G1a_6047126_x1.....gCcgugggaacacggggugccgaacu.....      | 1 |
| Gi5_9075230_x1.....gugggaacacggggGgccc.....             | 1 |
| Gi2_11368735_x1...gaucggagacgucgugggaacacgAgg.....      | 1 |
| Gi2_11137708_x1.....gagacgucgugggUacacggg.....          | 1 |
| Gi2_11060477_x1.....acgucguggAaacacggggugccgaacu.....   | 1 |
| Gi2_11152599_x1.....acgucgugggaacacggggUaccg.....       | 1 |
| Gi3_28384936_x1.....cggagacgucgugggaGcacggggugccga..... | 1 |
| G1a_6006199_x1...Uaucggagacgucgugggaacacggggugc.....    | 1 |
| Gi5_8920954_x1..ugcgauccAgagacgucguggg.....             | 1 |
| Gi2_11280509_x1.....agacgucguAggaacacggggugc.....       | 1 |
| G1a_6041067_x1....aCcgagacgucguggga.....                | 1 |
| Gi2_11139885_x1.....aacacgggNugccgaacuuu.....           | 1 |
| G1a_6122923_x1.....cgucgugggaacacAgggugccgaacu.....     | 1 |
| Gi3_28318459_x1...gaucggagacgucgugggUacac.....          | 1 |
| Gi1_4336910_x1.....gagacgucgugggaacacggggugccgaCcu..... | 1 |
| Gi5_9001631_x1.....Aagacgucgugggaacacggggugccgaac.....  | 1 |
| Gi3_28820838_x1.....agacgucgugggaacacggggugcG.....      | 1 |
| Gi3_28604795_x1..gcgauccgagacgucgugggaacacggggC.....    | 1 |
| Gi3_28742213_x1.....gggaacacggUgugccga.....             | 1 |
| Gi2_11040731_x1...gaucggagacAucgugggaacacggggugc.....   | 1 |
| Gi2_11068531_x1...gaucggagacgucgugggaacaU.....          | 1 |

Gi1\_4238778\_x1.....aucggagacgucgAgggaacacgggg..... 1  
Gi2\_11372242\_x1.....gacgCcgugggaacacgg..... 1  
Gi1\_4364732\_x1.....aucggagacgucgugggGacacggg..... 1  
Gi3\_28961305\_x1.....acgucgugggaacacggggugUcgaa..... 1  
Gi5\_8931795\_x1.....gagacgucgugggaacaUggggugccgaac..... 1  
Gi2\_11284298\_x1.....ucggagacgucgugggUacacgggg..... 1  
Gi5\_8845597\_x1.....cgGcgugggaacacggggugccgaa..... 1  
Gi1\_4276179\_x1.....acgucguAggaacacggggugccga..... 1  
Gi2\_11263757\_x1.....acgucgugggCacacggggugccg..... 1  
Gi1\_4163744\_x1.....cCugggaacacggggugccga..... 1  
Gi2\_11139144\_x1.....gaUacgucgugggaacacggggugcc..... 1  
Gi5\_9083808\_x1.....agacgucAugggaacacggggugccgaac..... 1  
Gi1\_4264787\_x1.....uggCaacacggggugccgaacu..... 1  
Gi2\_11242637\_x1.....cgucgugggaacacggggAgccgaac..... 1  
Gi5\_9008876\_x1.....gggaacacggggugccgaacuucU..... 1  
Gi2\_11017983\_x1.....ucggagacgucguAggaacacgggg..... 1  
Gi3\_28537142\_x1.....ucggagCcgucgugggaaca..... 1  
Gi2\_11333168\_x1.....ucggagacgucgugggaAacggggugccgaac..... 1  
G1a\_6134212\_x1...gaucgAagacgucguggga..... 1  
Gi2\_11296607\_x1.....aucggagacgCcgugggaacacgggg..... 1  
Gi3\_28327555\_x1.....cggagacgucgugggaacacgggAug..... 1  
Gi2\_11024395\_x1...Acgaucggagacgucgugggaacac..... 1  
G1a\_6025976\_x1...aucggagacgucgugggGacac..... 1  
Gi5\_9128489\_x1.....ugggaacUcggggugccgaa..... 1  
Gi2\_11049208\_x1.....ucggagacgucgugggaacacggCg..... 1  
G1a\_6128625\_x1.Cgcgaucggagacgucgug..... 1  
Gi2\_11271881\_x1.....ggaaAacggggugccgaa..... 1  
Gi2\_11062238\_x1.....cggagacgucgugggaacCcg..... 1  
G1a\_6182882\_x1.....gggaGcacggggugccgaa..... 1  
Gi4\_590178\_x1.....acgucgugggaGcacggggugccgaacu..... 1  
Gi3\_28853130\_x1.....gucgGgggaacacggggugccgaa..... 1  
Gi5\_9135157\_x1.....cggagacgucgugggaacacggggugAc..... 1  
Gi2\_11069415\_x1.....ugggaacacggggAgccgaacu..... 1  
Gi2\_11071325\_x1.....gagacgucgugggaCcacggg..... 1  
Gi3\_28765925\_x1.....aucggagacgucgugggaacacggggAc..... 1  
Gi1\_4375631\_x1.....ggaacacggggugccgaUcu..... 1  
Gi3\_28519874\_x1.....Aagacgucgugggaacacggggugccgaac..... 1  
Gi2\_10996528\_x1.....aucggagacgucguggAaacacg..... 1  
Gi2\_11178041\_x1.....agacgucgugggaacacgggAugc..... 1  
Gi3\_28592886\_x1.....gacgucguAggaacacggggugccgaac..... 1  
Gi5\_9079600\_x1.....acgucguggCaacacggggugccgaacu..... 1  
Gi2\_11370141\_x1.....aucggagacgCcgugggaacac..... 1  
Gi3\_28728799\_x1.....cggagacgucguggAaacacggggug..... 1  
Gi3\_28741759\_x1.gcgauccggagacgucguggAa..... 1  
Gi1\_4356730\_x1.....ucgugggaacacggggugccgGac..... 1  
Gi2\_11239555\_x1.....gaacacggggugAcgaacu..... 1  
Gi2\_11177082\_x1.....cggagacgucgugggaGacggggugcc..... 1

Gi2\_10992737\_x1...cAaucggagacgucgugg..... 1  
Gi5\_8961626\_x1.....cgucgugggaacacggggCgc..... 1  
Gi2\_11314741\_x1.....ucggagacgucgugggaacacggggugcU..... 1  
Gi2\_11243697\_x1.....gacAucgugggaacacggggU..... 1  
Gi3\_28405978\_x1.GgcgaucggagacgucgugggaacacggggU..... 1  
G1a\_6231581\_x1...gaucggagacgCcgugggaacacggg..... 1  
Gi3\_28952967\_x1.....agacguAgugggaacacgggg..... 1  
Gi2\_11354453\_x1.....gacgucgugggaacacggggAgccgaac..... 1  
Gi4\_614186\_x1.....aUacgucgugggaacacggggU..... 1  
G1a\_6103334\_x1...gaucggagacgucguAgg..... 1  
Gi3\_28929746\_x1.....gggaGcacggggugccgaacuu..... 1  
Gi5\_8851453\_x1.....cgucgugggaacacgAggugcc..... 1  
Gi2\_11229693\_x1.....ggagacgucgugggaacacggggugAcg..... 1  
Gi5\_9111783\_x1.....gucgugggaacacgUggugccgaacu..... 1  
G1a\_6225375\_x1.....aacacggggugccgaacA..... 1  
Gi2\_11069631\_x1.....agacgucguggCaacacggggugccgaacu..... 1  
Gi2\_11386734\_x1.....gagaUgucgugggaacacggggugcc..... 1  
Gi3\_28638349\_x1.....gaUgucgugggaacacggg..... 1  
Gi3\_28676887\_x1.....aAgucgugggaacacgggg..... 1  
Gi5\_8888997\_x1.....aacacAgggugccgaacuuu..... 1  
Gi3\_28816403\_x1.....acgucAugggaacacggggugccga..... 1  
Gi2\_11232959\_x1..gcgaucggagacgucgugggCaca..... 1  
G1a\_6058159\_x1.....gugNgaacacggggugcc..... 1  
Gi3\_28392768\_x1....aucggaUacgucgugggaacacgggg..... 1  
Gi1\_4182277\_x1.....Nggaacacggggugccgaacu..... 1  
Gi3\_28629045\_x1.....ucgugggUacacggggugccg..... 1  
Gi5\_8908267\_x1.....cguggAaacacggggugccga..... 1  
G1a\_6147677\_x1.....gggaacacggggugccgaaUu..... 1  
Gi3\_28416704\_x1.....ucgugggaacacggggugccgaaA..... 1  
Gi2\_11389529\_x1.....gGgacgucgugggaacacgggg..... 1  
Gi1\_4329851\_x1cugcgauccggagacgucg..... 0  
Gi3\_28735066\_x1..gUgaucggagacgucgugggaacacggg..... 1  
Gi2\_11209591\_x1.....ugggaacacggggUuccgaac..... 1  
Gi4\_576649\_x1.....gggaacacggggugUcgaacu..... 1  
Gi1\_4366140\_x1.....cggagacgucguAggaacacggggugc..... 1  
Gi1\_4301057\_x1.....gAcgugggaacacggggugccgaacu..... 1  
Gi1\_4249935\_x1.....gacgucgugggaacaUggggugcc..... 1  
Gi2\_11063790\_x1...gaucggagacgucgugggaGcacggggug..... 1  
Gi3\_28785958\_x1.....ucggagacgucgugggaacacA..... 1  
Gi3\_28333502\_x1...Aaucggagacgucguggg..... 1  
Gi2\_11220000\_x1...Uucggagacgucgugggaac..... 1  
G1a\_6238393\_x1...cgauccggagacgucgCgg..... 1  
Gi3\_28505990\_x1.....cgucgugggaacacggggAugccg..... 1  
G1a\_6050329\_x1.....gugggaacacAgggugccg..... 1  
Gi3\_28391161\_x1...gaucggagacgucgugggaacacgAggugc..... 1  
G1a\_6349815\_x1.....gucgugggaGcacggggugccga..... 1  
Gi2\_11351886\_x1.....gacgucgugggaacacggggugccgaUcu..... 1

|                                                           |   |
|-----------------------------------------------------------|---|
| Gi2_11183169_x1.....guAgugggaacacggggugccgaac.....        | 1 |
| Gi5_9125070_x1....aucggagacgucguggCacacggggugc.....       | 1 |
| Gi3_28976836_x1.....gugggaacacggggugccgaGcuu.....         | 1 |
| Gi2_11192697_x1...cgauccgagacgucgugggaGcacggggugc.....    | 1 |
| Gi5_8974473_x1.....uggaacaacggggugccg.....                | 0 |
| Gi1_4236731_x1.....uggaacaacggggguAccga.....              | 1 |
| Gi5_9058085_x1.....aGgucgugggaacacggggugcc.....           | 1 |
| Gi1_4268525_x1..gcgaucggagGcgucgugggaaca.....             | 1 |
| Gi1_4209898_x1.....cgugggaacacAgggugccgaac.....           | 1 |
| Gi1_4368574_x1.....gagacgucgugggaAacggggugcc.....         | 1 |
| Gi5_8854180_x1....aucggagacgucgugggaacacggggA.....        | 1 |
| Gi1_4359000_x1....aucggagUcgucgugggaacacgggggu.....       | 1 |
| Gi3_28922491_x1...gaucggagacGAcgugggaacacggg.....         | 1 |
| Gi3_28564195_x1.....gacgucguggCacacggggugccgaacu.....     | 1 |
| Gi1_4343836_x1.....cgugggaacacggggugccgaGcuu.....         | 1 |
| Gi3_28401241_x1.....cgucgugggaacacAgggug.....             | 1 |
| Gi2_11165318_x1.....cguggCaacacggggugc.....               | 1 |
| Gi2_11227608_x1.....gagacgucgugggaacacCgggugccg.....      | 1 |
| Gi3_28477941_x1.....gucguggCaacacggggugccgaac.....        | 1 |
| Gi3_28341206_x1...cgauccgagacgucguAg.....                 | 1 |
| Gi5_9114579_x1.....cgugggCacacggggugcc.....               | 1 |
| Gi2_11215171_x1....auGggagacgucgugggaacacggggugcc.....    | 1 |
| Gi1_4356036_x1.....cggGgacgucgugggaaca.....               | 1 |
| Gi2_11056571_x1....Cucggagacgucgugggaacac.....            | 1 |
| G1a_6104492_x1.....cgugggaGcacggggugc.....                | 1 |
| G1a_6090800_x1....aucggCgacgucgugggaacacggggugcc.....     | 1 |
| G1a_6040503_x1...gaucggagacgucgugggaacGcggg.....          | 1 |
| Gi3_28954349_x1.....ggagacgucGgggaacacggggugccga.....     | 1 |
| Gi5_9015251_x1...cgauccgagacgucgugggaacGcggg.....         | 1 |
| Gi3_28642411_x1...cgauccgagacgucgugggaacGcgggggu.....     | 1 |
| Gi1_4262360_x1.....gugggaacacggggugccgC.....              | 1 |
| Gi3_28784030_x1..gcgaucggGgacgucgugggaacacggg.....        | 1 |
| Gi3_28306597_x1.....gugggaacacgCggugcc.....               | 1 |
| Gi5_8992121_x1.....aacacggggugUcgaacu.....                | 1 |
| Gi5_9024949_x1...cgauccgCgacgucgugggaacacggg.....         | 1 |
| Gi5_8929604_x1....aCcgagacgucgugggaacacggggugc.....       | 1 |
| Gi5_9130251_x1.....gGcgugggaacacggggugc.....              | 1 |
| Gi1_4339908_x1.....uggaacaacggggugccgaaUuu.....           | 1 |
| Gi2_11085652_x1.....cggagCcgucgugggaacacg.....            | 1 |
| Gi5_9039648_x1.....agacgucNgggaacacggggugcc.....          | 1 |
| Gi3_28810669_x1.....Cgagacgucgugggaacacggggugccgaacu..... | 1 |
| Gi3_28446081_x1.....cgucguggUacacggggugccg.....           | 1 |
| Gi3_28357068_x1.....ucgugggaacacggggAgccg.....            | 1 |
| Gi3_28589281_x1....cgCagacgucgugggaacacgg.....            | 1 |
| Gi3_28721805_x1.....gagacgucgugggaacacggggGgcccgaacu..... | 1 |
| Gi1_4293370_x1....aucggagacgucgugggaUac.....              | 1 |
| Gi2_11163239_x1.....ucgugggaacaGggggugccgaac.....         | 1 |

|                 |                                         |   |
|-----------------|-----------------------------------------|---|
| Gi5_8913350_x1  | .....aucggagacgucgugggaCcacggggugc      | 1 |
| G1a_6238480_x1  | .....ggagacgucgugggaacCggggugccgaacu    | 1 |
| G1a_5984762_x1  | .....guggaacaacggggugccgaU              | 1 |
| Gi2_11030583_x1 | .....gaucggagacgucgugggaacaUggggugc     | 1 |
| Gi3_28719656_x1 | .....ucgugAgaacacggggugccg              | 1 |
| Gi2_11360102_x1 | .....aucggagacgucgAgggaacac             | 1 |
| Gi2_11121948_x1 | .....acgucguCggaacacggggugcc            | 1 |
| G1a_6232655_x1  | .....aucggagacgucgugggaacacAgggugcc     | 1 |
| Gi3_28919112_x1 | .....acguGgugggaacacggg                 | 1 |
| G1a_6013126_x1  | .....gaAcggagacgucgugggaacacggg         | 1 |
| Gi2_11305613_x1 | .....ggagacgucguAggaacacg               | 1 |
| Gi2_11095887_x1 | .....gaucggagacAucgugggaacacg           | 1 |
| Gi5_9005172_x1  | .....guggaacaacggggugccCaa              | 1 |
| G1a_6324161_x1  | .....aucggagacgucguAggaacacg            | 1 |
| Gi5_9090409_x1  | .....gagacgucgugggaacacggggugccgaUu     | 1 |
| Gi2_11251319_x1 | .....gaucggagacgucgugggaacacgAggu       | 1 |
| Gi4_602639_x1   | .....Uuggaacaacggggugccga               | 1 |
| Gi5_8891951_x1  | .....ggagacgucgugggaGcacggggugcc        | 1 |
| Gi4_613221_x1   | .....gggaacaacggggugccgaUc              | 1 |
| Gi1_4231459_x1  | .....gacgucgugggaacacggggugccgaacAu     | 1 |
| Gi5_9050265_x1  | ugcgauccggagacgucgugggaacaUggg          | 1 |
| Gi5_9093981_x1  | .....cgugggaCcacggggugcc                | 1 |
| Gi3_28742055_x1 | .....gagacgucguggGacac                  | 1 |
| Gi5_8984390_x1  | .....acacggggugccAaacuuu                | 1 |
| Gi5_9095296_x1  | .....guggaacaacggggugAcg                | 1 |
| Gi1_4350702_x1  | .....Caacacggggugccgaac                 | 1 |
| Gi3_28738886_x1 | .....gaAcggagacgucgugg                  | 1 |
| Gi3_28466394_x1 | .....aucggagacgucgugggaacaGggggugcc     | 1 |
| Gi1_4390107_x1  | .....guggaacaacggggugccgCacuu           | 1 |
| G1a_6130414_x1  | .....guggaacaacggggugccgaC              | 1 |
| Gi3_28620283_x1 | .....uGggagacgucgugggaacacggggugccgaacu | 1 |
| Gi1_4268677_x1  | .....cggagacgucgugAgaacacggggugcc       | 1 |
| Gi3_28870413_x1 | .....cggagacgucgugggaacacggggugccgG     | 1 |
| Gi1_4384993_x1  | .....cggagacgucgugggaacacggggugcUgaacu  | 1 |
| Gi2_11016746_x1 | .....Caucggagacgucgugggaacacggggugc     | 1 |
| Gi3_28294053_x1 | .....cguggUaacacggggugcc                | 1 |
| Gi5_9008576_x1  | .....Nacacggggugccgaacu                 | 1 |
| Gi5_8834137_x1  | .....gaucggagacgucguAggaacacggg         | 1 |
| Gi3_28846990_x1 | .....gacgucgugUgaacacggggugccgaacu      | 1 |
| Gi4_607288_x1   | .....gacgucgugggaacacggggugccgaac       | 0 |
| Gi3_28299403_x1 | .....gacgucguggAaacacggggugccgaac       | 1 |
| Gi5_9072733_x1  | .....ugAgaacacggggugccgaa               | 1 |
| Gi4_612220_x1   | .....gucgugggaacacggggugcc              | 0 |
| Gi2_11234005_x1 | .....aucggagacgucgugAga                 | 1 |
| Gi3_28949719_x1 | .....ucgugggaacacgggCugc                | 1 |
| Gi1_4165796_x1  | .....aucggagacgucgugggaacacggAgugcc     | 1 |
| Gi1_4276589_x1  | .....gggaacaacggggugccga                | 0 |

|                                                            |   |
|------------------------------------------------------------|---|
| Gi3_28938919_x1.....aucggagacgGcgugggaacacggg.....         | 1 |
| Gi1_4259982_x1.....agacgucgugggUacacggggugccga.....        | 1 |
| G1a_6080951_x1.....acgucgCggaacacggggugccgaacu.....        | 1 |
| Gi1_4273302_x1...cgauccgagacgucguggga.....                 | 0 |
| Gi3_28773855_x1.....gucgugggCacacggggugccgaacuu.....       | 1 |
| Gi1_4382265_x1.....gucgugggaacacggggGgccgaac.....          | 1 |
| Gi1_4287044_x1.....cgAcgugggaacacggggugccg.....            | 1 |
| Gi5_9080998_x1.....acgucgugggaacacggggGgccga.....          | 1 |
| Gi2_11069640_x1.....cgAagacgucgugggaacacggggg.....         | 1 |
| Gi5_8935193_x1.....ucgugggaacacgAggugccgaac.....           | 1 |
| Gi3_28648270_x1.....gggaacacgCggugccgaacu.....             | 1 |
| Gi5_8866143_x1.....gugggaacUcggggugcc.....                 | 1 |
| Gi2_11334589_x1.....Gcggagacgucgugggaacacggggugccgaac..... | 1 |
| G1a_6289547_x1....aucggagaUgucgugggaacacggggug.....        | 1 |
| Gi2_11119321_x1....aucggagacgucgugggaacaGggggg.....        | 1 |
| Gi2_11157416_x1.....gagacgucguggUaacacggggugccg.....       | 1 |
| Gi3_28368346_x1...cgauccgagaAgucguggg.....                 | 1 |
| G1a_6080009_x1.....gacgucguNggaacacggggg.....              | 1 |
| Gi3_28855456_x1...cgauccgagGcgucgugggaacacggg.....         | 1 |
| Gi3_28580025_x1.....gggaacacggggugccAa.....                | 1 |
| Gi1_4206682_x1.....gacgucgugggaacacgggU.....               | 1 |
| Gi1_4369423_x1....aucggagacgucgugggCacacggggugc.....       | 1 |
| Gi2_11177803_x1.....agacgucgugggaacacggggugccAaac.....     | 1 |
| Gi5_8935202_x1.....ugggaacacgUggugccgaacu.....             | 1 |
| G1a_6240287_x1....Cucggagacgucgugggaacacg.....             | 1 |
| Gi5_8845673_x1....ucggagacgucgugggaacacggggg.....          | 0 |
| Gi5_9133208_x1.....ugggaacGcggggugccgaacuu.....            | 1 |
| Gi5_8864114_x1.ugcgauccgagaUgucgug.....                    | 1 |
| Gi2_11044939_x1.....cgucgugggCacacggggugccg.....           | 1 |
| Gi1_4222764_x1.....agacgucgugggaacacggggCgccg.....         | 1 |
| Gi3_28756893_x1.....agacgucgugggaacacggggugccgaCc.....     | 1 |
| Gi1_4262809_x1.....ggagacguNgugggaacacggggg.....           | 1 |
| Gi3_28654086_x1.....cgCcgugggaacacggggug.....              | 1 |
| Gi1_4327579_x1.....cgugggaacGcggggugccgaacuu.....          | 1 |
| Gi3_28601959_x1...cgauccgagacgucgugggaGcacggggg.....       | 1 |
| Gi3_28863548_x1.....ggagaAgucgugggaacacggggugcc.....       | 1 |
| Gi5_9056628_x1....ucgAagacgucgugggaacacggggugccg.....      | 1 |
| Gi4_575798_x1....Uaucggagacgucguggg.....                   | 1 |
| Gi2_11138736_x1.....ggagacguNgugggaacacggggg.....          | 1 |
| Gi4_608163_x1.....gugggaacacggggGgccgaac.....              | 1 |
| Gi3_28269689_x1.....ggagacgucgugggaacacggggGgccgaac.....   | 1 |
| Gi5_8869600_x1.....cggagacgucgugggaacCcgg.....             | 1 |
| G1a_6210977_x1....aucggCgacgucgugggaa.....                 | 1 |
| Gi2_11262688_x1.....cgugggaacacggUgugccgaac.....           | 1 |
| Gi3_28635531_x1.....cgucgugggaacacggggugccgGa.....         | 1 |
| Gi2_11101942_x1.....ggaAacgucgugggaacacggggg.....          | 1 |
| Gi3_28672611_x1.....Aaacacggggugccgaacuu.....              | 1 |



Gi3\_28601753\_x1.....gugggaacacgUggugccg..... 1  
Gi2\_11296947\_x1.....gagacgucgugggaacacggggugccAa..... 1  
Gi1\_4387212\_x1..gcgauUggagacgucgugggaacacggggugcc..... 1  
Gi3\_28820847\_x1.....cggagacgucgugggaacacggUgugcc..... 1  
Gi5\_9019742\_x1.....ggaacacggggugccgaU..... 1  
Gi3\_28950467\_x1.....Ggucgugggaacacggggg..... 1  
Gi2\_11152456\_x1.....cggaUacgucgugggaacacggggug..... 1  
Gi1\_4314359\_x1.....cAucgugggaacacggggugccg..... 1  
Gi3\_28693857\_x1...gaucggagacgucgugggaaAac..... 1  
Gi5\_9027922\_x1.....gacgucgugAgaacacggggugccgaac..... 1  
Gi2\_11282918\_x1.....ucggagacgucgugggaCcacggggugcc..... 1  
Gi2\_11389470\_x1.....cggaAacgucgugggaacacggggugc..... 1  
Gi5\_9088964\_x1.....Gcggagacgucgugggaacacggggugccg..... 1  
Gi1\_4245622\_x1.....gUgaacacggggugccga..... 1  
G1a\_6300835\_x1...aucggagacgucgGgggaa..... 1  
Gi1\_4290912\_x1...aucggagacgucgugUgaacacggg..... 1  
G1a\_6137449\_x1.....agaGgucgugggaacacggggugccgaac..... 1  
Gi5\_9079097\_x1.....cgGcugugggaacacggggugccgaac..... 1  
Gi4\_583246\_x1...uGggagacgucgugggaacacggggugccg..... 1  
Gi1\_4238386\_x1.....ucgugggaacacggggugccgaCc..... 1  
Gi3\_28620771\_x1...auNggagacgucgugggaacacg..... 1  
Gi3\_28901822\_x1.....agacgucgugggaacacggggugcUgaacu..... 1  
Gi2\_11382773\_x1.....ucggagacgucgugggaacacggggugccgC..... 1  
Gi3\_28542314\_x1...gaucggagacgucgugggaacaUg..... 1  
Gi1\_4287734\_x1.....aacacggggGgccgaacuu..... 1  
Gi4\_578090\_x1...ucgugggaacacggggugccgCacu..... 1  
Gi1\_4227620\_x1.....ucguUggaacacggggugc..... 1  
Gi2\_10996380\_x1.....cgucgGgggaacacggggugccga..... 1  
Gi3\_28511947\_x1.....acgucgugggaaAacggggugccgaac..... 1  
Gi5\_9010226\_x1.....cAucgugggaacacggggugccgaac..... 1  
Gi2\_11019653\_x1.....Cagacgucgugggaacacggggugccgaacu..... 1  
Gi3\_28428655\_x1.....gacgucgugCgaacacggggg..... 1  
Gi5\_8908615\_x1.....gggaacacggggugccgUa..... 1  
Gi1\_4173612\_x1...aucggagacgucgugggaGcacgg..... 1  
Gi5\_9062031\_x1.....gacgucgugggaacacggggugUcgaac..... 1  
G1a\_6092695\_x1...gaucggagCcgucguggga..... 1  
Gi2\_11354638\_x1...cgaucggagGcgucgugggaacacgggg..... 1  
Gi3\_28511794\_x1...gaucgCagacgucguggg..... 1  
Gi3\_28265456\_x1...aucggagaNgucgugggaacacggggug..... 1  
Gi2\_11322706\_x1.....cgucgugggaacaUgggg..... 1  
Gi3\_28940806\_x1cAgcgaucggagacgucg..... 1  
Gi1\_4185083\_x1.....cgugggaacacCgggugccgaacu..... 1  
G1a\_6125545\_x1...gauNggagacgucgugggaacacggg..... 1  
Gi3\_28971012\_x1.....gaacacggggUcccgaac..... 1  
Gi3\_28686319\_x1...cggagUcgucgugggaacacggggg..... 1  
Gi2\_11019730\_x1...aucggUgacgucgugggaac..... 1  
Gi1\_4361278\_x1.....ucgugggaacCggggugccgaac..... 1

Gi5\_9057716\_x1.....ucggagacgucgGgggaacacggggugccc..... 1  
 Gi2\_11018488\_x1.....cgucguggAaacacggggugcc..... 1  
 Gi3\_28847302\_x1.....cggagacgucgugggaacacAgggugccga..... 1  
 Gi3\_28439760\_x1.....gUcugcugugggaacacggggg..... 1  
 Gi3\_28439722\_x1.....gaucggagacguUgugggaacacggggugcc..... 1  
 Gi2\_11132054\_x1.....cgaucggagaUgucgugg..... 1  
 Gi2\_11272031\_x1.....gaucggagacgucgCgggaacacggggugcc..... 1  
 Gi3\_28492605\_x1.....ggagacgucgugggaacacAgggugcc..... 1  
 Gi2\_11168234\_x1.....Aucgugggaacacggggugccga..... 1  
 Gi2\_11352659\_x1.....agacgucgugUgaacacggggugcc..... 1  
 Gi3\_28638042\_x1.....gucgugggaacacAgggg..... 1  
 Gi3\_28477132\_x1.....gaucggagacgucgugggaacacgggggUac..... 1  
 Gi3\_28637153\_x1.....gaucggaAacgucgugggaaca..... 1  
 Gi2\_11127342\_x1.....cguAggaacacggggugccg..... 1  
 Gl1\_5985588\_x1.....cgaucggagacgucgugggaacaAg..... 1  
 Gi2\_11008922\_x1.....acgucgugggaacacggggugccgaaacuuu..... 0  
 Gi3\_28822896\_x1.....gaucggagacgucgAgggaacacg..... 1  
 Gi3\_28389722\_x1.....cgaucggagacgAcgugggaacacggggg..... 1  
 Gi2\_11195074\_x1.....ggagacgucgugCgaacacggggugcc..... 1  
 Gi3\_28377940\_x1.....ggagacgucgugUaacacggggugcc..... 1  
 Gl1\_6249945\_x1.....Cacgucgugggaacacggggg..... 1  
 Gi2\_11406627\_x1.....acgucgugggaacacgAggugccgaac..... 1  
 Gi5\_8942983\_x1.....acuuCcccagcgcgccugcuccacc..... 1  
 Gi2\_11103829\_x1.....cggagacgucguUggaacacggggg..... 1  
 Gi2\_11222651\_x1.....cgugggaUcacggggugccgaa..... 1  
 Gi2\_11362446\_x1.....cgaucggagacgucUugggaacacggggg..... 1  
 Gi3\_28837199\_x1.....cCucgugggaacacggggugccg..... 1  
 Gi3\_28813027\_x1.....ucgugggaacacgggCugccgaacu..... 1  
 Gi3\_28623340\_x1.....gaucggGgacgucgugggaacacggggugc..... 1  
 Gi5\_9089859\_x1.....cggGgacgucgugggaacacgg..... 1  
 Gi5\_9081526\_x1.....aucNgagacgucgugggaacacg..... 1  
 Gl1\_4262660\_x1.....agacgucgugggaacacggggCgccgaac..... 1  
 Gi2\_11331618\_x1.....ucgugggaacacggggGgc..... 1  
 Gi2\_11183463\_x1.....cgucgugggaaAacggggugc..... 1  
 Gi2\_11253690\_x1.....gaUgucgugggaacacggggugccg..... 1  
 Gi2\_11375397\_x1.....Aagacgucgugggaacacggggugc..... 1  
 Gl1\_4318304\_x1.....aucAgagacgucgugggaacacggg..... 1  
 Gi3\_28355585\_x1.....cgugggaacacggggUugccga..... 1  
 Gl1\_6044964\_x1.....Uacacggggugccgaacu..... 1  
 Gi3\_28768028\_x1.....gagacgucguUggaacacggggugccgaacu..... 1  
 Gi5\_8942016\_x1.....agaAgucgugggaacacggggugccgaacu..... 1  
 Gi5\_8935989\_x1.....ucggagGcugcugugggaacacg..... 1  
 Gi3\_28638523\_x1.....acgucgugggaacGcggggugccgaa..... 1  
 Gi3\_28607782\_x1.....gaucggagacgucgAgggaacacggggugcc..... 1  
 Gi2\_11057906\_x1.....ucgugggaacacgUggugccgaac..... 1  
 Gl1\_6281801\_x1.....gaUgucgugggaacacggggg..... 1  
 Gi2\_11269222\_x1.....gggaacacCgggugccgaac..... 1

Gi2\_11112113\_x1..gcgaucggagacgucgugggGcaccggg..... 1  
Gi3\_28308046\_x1.....cggagacgucguAggaacacggg..... 1  
Gi1\_4358053\_x1.....Aggaacacggggugccgaacu..... 1  
Gi2\_11033926\_x1.....cggagGcgucgugggaaacac..... 1  
Gi3\_28592323\_x1..gcgaucggagacgucGgggaac..... 1  
Gi2\_10995213\_x1.....aucggUgacgucgugggaaacacggg..... 1  
Gi3\_28286901\_x1.....gggaacacggggugcGgaa..... 1  
Gi2\_11221858\_x1.....Gggagacgucgugggaaacacggggugccgaac..... 1  
Gi1\_4295637\_x1....aucggagacgucgugggCacacggg..... 1  
Gi1\_4248599\_x1.....cAugggaacacggggugccg..... 1  
Gi5\_9100702\_x1.....ugggaacacggggCccgaac..... 1  
Gi2\_11020513\_x1...gaucggagacgucgugggaaacCcgggugcc..... 1  
Gi1\_4336150\_x1.....gugggaaacaUggggugccgaa..... 1  
Gi4\_580719\_x1.....gugAgaacacggggugccgaa..... 1  
Gi5\_8885446\_x1....aucggagacgucgugAgaacacgg..... 1  
G1a\_6195750\_x1.....gucgugggaaacaUggggugccgaacu..... 1  
G1a\_6042831\_x1...cgGucggagacgucgugg..... 1  
Gi2\_11321644\_x1.....cgucgugggaaacUcggggugccga..... 1  
G1a\_6317778\_x1.....Aagacgucgugggaaacacggggugcc..... 1  
Gi5\_8884275\_x1.....gaacacgUggugccgaac..... 1  
G1a\_6295918\_x1....uAggagacgucgugggaaacacggg..... 1  
Gi2\_11313891\_x1.....ggNacacggggugccgaac..... 1  
Gi5\_8927889\_x1.....gggaacacggggugccgaaGu..... 1  
Gi3\_28830573\_x1...gaucggaAacgucgugggaaacacgg..... 1  
Gi3\_28604440\_x1.....gucgugggaaUacggggug..... 1  
G1a\_6302445\_x1.....ggagacgucgugggaaacacggggAgc..... 1  
Gi3\_28284084\_x1.....gUcgucgugggaaacacgggg..... 1  
Gi2\_11071134\_x1.....ucggagacgucgugggaaacaAggggu..... 1  
Gi2\_11260703\_x1.....gacgucgugggaaacGcggggu..... 1  
Gi3\_28979102\_x1.....agacgucgugggCacacggggugccgaacu..... 1  
Gi3\_28517196\_x1....aucNgagacgucgugggaaacacgg..... 1  
Gi5\_8891709\_x1..ugcgaucggagaGgucgug..... 1  
Gi3\_28818665\_x1...gaucggUgacgucgugggaaacacg..... 1  
Gi5\_8987804\_x1....ucggagacgCcgugggaaacacggggugccg..... 1  
G1a\_6090110\_x1.....gugggaacaUggggugcc..... 1  
Gi5\_8978876\_x1..uCcgaucggagacgucguggg..... 1  
Gi2\_11256879\_x1.....gugCgaacacggggugccgaac..... 1  
Gi5\_9033726\_x1.....agacgucgugggaaacacggAgugccgaacu..... 1  
Gi1\_4238517\_x1.....ggagacgucgugggaaacacAgggugcc..... 1  
Gi2\_11047544\_x1.....gucguAggaacacggggugccga..... 1  
Gi3\_28706225\_x1..gcgaucggagacgucAgggaacacggggug..... 1  
Gi2\_11363026\_x1..ugcgGucggagacgucgugggaaacacg..... 1  
Gi1\_4163381\_x1....auUggagacgucgugggaaacacgggggu..... 1  
Gi3\_28893300\_x1.....ucgugggaaacacCggggugccgaac..... 1  
Gi3\_28933719\_x1.....cggauacgucgugggaaacacgg..... 1  
Gi3\_28973030\_x1....auGggagacgucgugggaaacacggggugcc..... 1  
G1a\_6256012\_x1...cgaucggagacgucgugggaaacCcg..... 1

Gi3\_28881309\_x1.....agacguUgugggaacacggggugccgaac..... 1  
Gi3\_28855707\_x1....gaGcggagacgucgugggaacacgggg..... 1  
Gi1\_4328206\_x1.....acgAcgugggaacacggggugcc..... 1  
Gi4\_578893\_x1.....ucgugggaacacgggAugccgaacu..... 1  
Gi4\_584811\_x1.....acgucgugggaacacggggugccAaacu..... 1  
Gi1\_4283802\_x1.....Cgacgucgugggaacacggggugccgaacu..... 1  
Gi1\_4279410\_x1.....ggaUcacggggugccgaac..... 1  
Gi2\_11301282\_x1.....agacgucgugggaacacggUgugccg..... 1  
Gi5\_8876238\_x1....aucggagacgucgugggaacaUgg..... 1  
Gi2\_11273479\_x1....Uucggagacgucguggga..... 1  
Gi3\_28766818\_x1....aucggagacgucgugggU..... 1  
Gi1\_4250194\_x1....aucggGgacgucgugggaacacgg..... 1  
Gi2\_11249705\_x1.....gagGcucgugggaacacggggug..... 1  
Gi2\_11306475\_x1....ucggagacAucgugggaacacg..... 1  
Gi1\_4328121\_x1.....ucgugggaacacgAggugc..... 1  
Gi1\_4331717\_x1.....gggaacacAgggugccgaacuu..... 1  
Gi3\_28538581\_x1....gaucggagacgucgAgggaacacggg..... 1  
Gi2\_11004909\_x1....cggagacgucgugggaacacggCgugcc..... 1  
G1a\_6044177\_x1....aucggagacgucguAgga..... 1  
Gi5\_9037461\_x1....cggagacgNcgugggaacacggggugcc..... 1  
Gi3\_28678842\_x1.....gucgugggaacacggggguAc..... 1  
Gi2\_11015945\_x1....ugcgaucggagacgucgugggaGcac..... 1  
Gi3\_28303382\_x1....cggagacgucgugggaCcac..... 1  
Gi3\_28873125\_x1.....ugggaacacggggugcGgaa..... 1  
Gi2\_11203993\_x1....cgauccgagacgucgugggGacacgggg..... 1  
Gi1\_4239662\_x1.....acgucgugggaacacggggugccgUacu..... 1  
Gi5\_9062997\_x1....cggagacgucgugggaGcacggggugccga..... 1  
Gi3\_28339001\_x1....gaucggagacgGcuggggaacac..... 1  
Gi2\_11037527\_x1....gaAcggagacgucgugggaac..... 1  
Gi5\_9075403\_x1.....gagacgucgugggaacacggAgugcc..... 1  
Gi1\_4239538\_x1.....gggaacacggggugccCaacu..... 1  
Gi3\_28830852\_x1.....agacgucguggAaacacggggugccgaacu..... 1  
Gi4\_567386\_x1.....gucgugggaacacggggugccgaac..... 0  
Gi3\_28913816\_x1....gaucggagacgucgugggaacCcggggugccg..... 1  
Gi1\_4369014\_x1.....gUagacgucgugggaacacggggugccgaac..... 1  
Gi3\_28870232\_x1.....gucgugUgaacacggggugcc..... 1  
Gi1\_426687\_x1.....cgucgugUgaacacggggugcc..... 1  
Gi3\_28867548\_x1.....gggGacacggggugccgaacuu..... 1  
G1a\_6086071\_x1.....ggUgacgucgugggaacac..... 1  
Gi1\_4216940\_x1.....ucguAggaacacggggugccgaac..... 1  
Gi5\_8976376\_x1....cgugggaacacggggugccgaGcuu..... 1  
Gi3\_28633418\_x1....aucggagacgucgugggaacacgggC..... 1  
Gi3\_28278091\_x1.....ggagacgucgugggaGcacggggugccgaacu..... 1  
Gi2\_11398834\_x1.....gacgAcgugggaacacggggugcc..... 1  
Gi2\_11354918\_x1.....gucUugggaacacggggugc..... 1  
Gi2\_11225464\_x1....gauUggagacgucgugggaacacggggug..... 1  
Gi2\_11295099\_x1....cgauccgagGcucgugg..... 1

|                                                              |   |
|--------------------------------------------------------------|---|
| Gi3_28729773_x1.....cgagagacgucAugggaacac.....               | 1 |
| Gi3_28546490_x1.....gGcgucgugggaacacgggg.....                | 1 |
| Gi5_8851026_x1....aAcggagacgucgugggaacac.....                | 1 |
| Gl1a_6272183_x1.ugcgauCGNagacgucgu.....                      | 1 |
| Gi2_11075933_x1....gaucggCgacgucgugggaacac.....              | 1 |
| Gi4_581165_x1.....aacacggggugccgGacu.....                    | 1 |
| Gi2_11324218_x1.....cgucgGgggaacacggggugccgaacu.....         | 1 |
| Gi1_4329337_x1.....acgucgugggaacacgAggugccgaa.....           | 1 |
| Gi4_608104_x1.....Uacacggggugccgaacu.....                    | 1 |
| Gi5_9095659_x1.....gagacgucAugggaacacg.....                  | 1 |
| Gi3_28307368_x1.....agacAucgugggaacacggggugccga.....         | 1 |
| Gi3_28762275_x1.ugUgaucggagacgucgugggaacacggggu.....         | 1 |
| Gi5_9063292_x1cugcgauCGgagacgucG.....                        | 1 |
| Gi5_8951220_x1.....guggUaacacggggugccgaacuu.....             | 1 |
| Gl1a_6334573_x1.....gugggaacacggggugccgaacN.....             | 1 |
| Gl1a_6260717_x1.....cgugggaaAacggggugcc.....                 | 1 |
| Gi1_4287197_x1.....Uggagacgucgugggaacacggg.....              | 1 |
| Gi5_8939637_x1.ugcgauCGgagacguUgug.....                      | 1 |
| Gi4_598230_x1.....gugggaacacAgggugccgaacu.....               | 1 |
| Gi2_11388356_x1....aucggagaGgucgugggaacac.....               | 1 |
| Gi2_11106863_x1....cgauCGGgacgucgugg.....                    | 1 |
| Gi3_28297429_x1....aucggagacAucgugggaacacggggugc.....        | 1 |
| Gi2_11110685_x1....gaucggagacgucguggAaac.....                | 1 |
| Gi1_4352285_x1.....ggaacacggggAgccgaa.....                   | 1 |
| Gi2_11170729_x1....ucggagacgucAugggaacacg.....               | 1 |
| Gi1_4255677_x1.....gGcgugggaacacggggugccga.....              | 1 |
| Gi3_28920158_x1.....aAacgucgugggaacacggggugcc.....           | 1 |
| Gi5_8841476_x1.....ugggaaGacggggugccgaacu.....               | 1 |
| Gi3_28768348_x1....aucggCgacgucguggga.....                   | 1 |
| Gi3_28752444_x1....ucggagacAucgugggaacacg.....               | 1 |
| Gi3_28799488_x1.....aacacAgggugccgaacuu.....                 | 1 |
| Gi1_4371872_x1....aucggagacgucguAggaacacgggg.....            | 1 |
| Gi2_11355642_x1cugcgauCGgagacgucAugggaacac.....              | 1 |
| Gi1_4304126_x1....aucggagGcgucgugggaacacggggugcc.....        | 1 |
| Gi5_9033191_x1....ucggagacgucgugggaacacggggugccga.....       | 0 |
| Gi5_8883554_x1.....gugUgaacacggggugccga.....                 | 1 |
| Gi3_28971847_x1.....cAgagacgucgugggaacacgggg.....            | 1 |
| Gi3_28983999_x1.....ggNgacgucgugggaacacggggugccgaac.....     | 1 |
| Gi2_11017793_x1.....ggagacgucgugggaaAacggggug.....           | 1 |
| Gi3_28498611_x1..gcgauCGNgacgucgugggaacacggg.....            | 1 |
| Gi3_28971499_x1.....gAcgugggaacacggggugccgaa.....            | 1 |
| Gi3_28695813_x1....gaucggagNcgucgugggaacacggggugccgaacu..... | 1 |
| Gi3_28424149_x1.....gucgugggaaAacggggugccgaa.....            | 1 |
| Gi2_11069077_x1.....ugggaacacgAggugccgaacuu.....             | 1 |
| Gi2_11106027_x1.....agacgucgugggaacacg.....                  | 0 |
| Gi1_4218446_x1.....ucgugggaacacggCgugcc.....                 | 1 |
| Gl1a_5985157_x1....Naucggagacgucgugggaacacggg.....           | 1 |

|                                                            |   |
|------------------------------------------------------------|---|
| Gi2_11228099_x1.....cgNgggaacacggggugc.....                | 1 |
| Gl1a_6157895_x1....Uucggagacgucguggaacaacggg.....          | 1 |
| Gi2_11052586_x1....gaucggagNcgucguggaacaac.....            | 1 |
| Gi1_4163567_x1.....cguAgugggaacacggggugcc.....             | 1 |
| Gi1_4177938_x1.....acguAgugggaacacggggugcc.....            | 1 |
| Gi2_11366313_x1.....acgucgugggaacacggggUccgaacu.....       | 1 |
| Gi2_11272933_x1.....ucgugggaacacggUgugccgaa.....           | 1 |
| Gi4_574356_x1.....acgucGgggaacacggggugccgaacu.....         | 1 |
| Gi2_11310409_x1....gaucggagacgucgugggaaUacggggg.....       | 1 |
| Gi2_11182787_x1....cgauAgagacgucguggaacaacggggugc.....     | 1 |
| Gi2_11101813_x1.....cggagacgucguggaacaCgggggug.....        | 1 |
| Gi1_4300858_x1.....gugggGacacggggugccgaac.....             | 1 |
| Gi3_28944682_x1.....gucgugggaacacggggAgccga.....           | 1 |
| Gi3_28510906_x1..gcgaCcgagacgucguggaacaacggggugcc.....     | 1 |
| Gi5_8925555_x1....aucggagacgucguggaacaGc.....              | 1 |
| Gl1a_6031618_x1.....ggaacacggggugUcgaacu.....              | 1 |
| Gi5_8842241_x1.....gugggaacaUggggugccgaacuu.....           | 1 |
| Gi3_28301838_x1.....cggagacgucguAggaacaacgg.....           | 1 |
| Gi2_11371713_x1.....agacgucguggaacaacggg.....              | 0 |
| Gi1_4246617_x1.....cgugggaacacggggugAcga.....              | 1 |
| Gi5_8970883_x1.....gugggaacaGggggugccga.....               | 1 |
| Gi2_11024670_x1.....cgucgugggaacacggggugccgaGc.....        | 1 |
| Gi3_28490816_x1.....ucgugggaacacggggugccgaU.....           | 1 |
| Gi4_579186_x1.....gggaacacggggugccgaaGu.....               | 1 |
| Gi4_583534_x1.....gugggaacacggggugcUgaa.....               | 1 |
| Gi3_28577626_x1.....cggagacgucguggaacaacggAgugccga.....    | 1 |
| Gi2_11094654_x1....aucggagacgucguggAaacacgg.....           | 1 |
| Gi2_11379353_x1.....Ugucgugggaacacggggugccgaac.....        | 1 |
| Gi3_28438928_x1.....cgucgugggaCcacgggg.....                | 1 |
| Gi3_28450240_x1.....uUgugggaacacggggug.....                | 1 |
| Gi1_4334866_x1.....gugggaacGcggggugccg.....                | 1 |
| Gi5_9017207_x1.....ucgugggaacacggggugcAgaac.....           | 1 |
| Gi2_11280847_x1.....uNggagacgucguggaacaacg.....            | 1 |
| Gi1_4210373_x1.....gaaAacggggugccgaacu.....                | 1 |
| Gi2_11222914_x1.....ucgugggaUcacggggugcc.....              | 1 |
| Gi2_11344786_x1..ugcgauccggagacgucguggaacaacggggugccg..... | 0 |
| Gi3_28959083_x1....cgauccggagacgucgugAgaacaacgggg.....     | 1 |
| Gi2_11346551_x1.....gacgucgugggCacacggg.....               | 1 |
| Gi3_28647270_x1.....cgucgugAgaacaacacggggugccga.....       | 1 |
| Gi2_11307867_x1....aucggagacgucgugggCacacgggg.....         | 1 |
| Gi3_28950247_x1.....cgugggaacacggggGgccg.....              | 1 |
| Gi2_11224039_x1....aucggagacgucguggaacaacggggugUcg.....    | 1 |
| Gi2_11350871_x1.....agacgucguggAaacacggggugc.....          | 1 |
| Gi2_11252934_x1.....ucgugggaacacggggCgcc.....              | 1 |
| Gi3_28302920_x1.....Ngucgugggaacacggggugccgaacu.....       | 1 |
| Gi1_4219266_x1.....guUgugggaacacggggug.....                | 1 |
| Gi2_11244211_x1..Ggcgaucggagacgucguggga.....               | 1 |

Gi1a\_6120753\_x1...gaucggagUcgucgugggaa..... 1  
Gi2\_11025637\_x1.....cgucgugggaaacacCgggugc..... 1  
Gi2\_11047951\_x1...gaucggagCcgucgugggaaacacgg..... 1  
Gi3\_28544475\_x1...gaucggagacgucgugggaaacacAgggug..... 1  
Gi2\_11209156\_x1.....ucggagacgucguCggaacacggggugcc..... 1  
Gi2\_11149852\_x1...cgauccggagGcgucgugggaaaca..... 1  
Gi1\_4370461\_x1.....gugggaaacacggggCgccga..... 1  
Gi3\_28475834\_x1.....agacgucgugggCacacgggg..... 1  
Gi2\_11049473\_x1.ugcgauGggagacgucgugggaaacacgggggu..... 1  
Gi1\_4202512\_x1.....Ggacgucgugggaaacacggggugccgaac..... 1  
Gi1a\_6161651\_x1.uCcgauccggagacgucgug..... 1  
Gi2\_11366947\_x1.....ugggaaacacggggugccUaa..... 1  
Gi3\_28974230\_x1.....cggagacgucAuggaaacacgggggu..... 1  
Gi1a\_6333416\_x1...gaucggagGcgucgugggaaacacggggugc..... 1  
Gi4\_581586\_x1.....ugggaaacacggggCugccgaacu..... 1  
Gi1a\_6003496\_x1...gaucggagacgucgugggAa..... 1  
Gi1a\_6251801\_x1.....cgugggaaacacggggguAc..... 1  
Gi2\_11067447\_x1.....Ucgucgugggaaacacggggugccgaac..... 1  
Gi3\_28352860\_x1.gcgauccggagacgucgCgggaaacacggggug..... 1  
Gi1a\_6315379\_x1.....Aucgugggaaacacggggugccgaa..... 1  
Gi5\_8959416\_x1.....cgugggaaacacggggCgcc..... 1  
Gi1\_4259251\_x1.....gagacgucgugggCaacacggggugccgaacu..... 1  
Gi5\_9137612\_x1.....gggaaacacAgggugccgaa..... 1  
Gi3\_28582409\_x1.gcgaGcggagacgucgugggaaaca..... 1  
Gi5\_9137664\_x1.....acguUgugggaaacacggggugccg..... 1  
Gi5\_8951561\_x1.....ucgUagacgucgugggaaacacg..... 1  
Gi2\_11343879\_x1.....cgucgugggaaacacggggGgccgaa..... 1  
Gi2\_10997572\_x1.....gacguAgugggaaacacggggugccgaacu..... 1  
Gi1a\_6266661\_x1...gaucggGgacgucgugggaaacac..... 1  
Gi2\_11049209\_x1.....ucggagacgucgugggaaGca..... 1  
Gi2\_11044452\_x1.....cgCagacgucgugggaaacacggggugcc..... 1  
Gi3\_28270362\_x1.....Ngggaaacacggggugccga..... 1  
Gi3\_28693880\_x1.ugcgauccgNagacgucgugggaa..... 1  
Gi1a\_6200068\_x1...gaucggagacguUguggg..... 1  
Gi5\_8935464\_x1.....gagacgucgAgggaaacacg..... 1  
Gi1a\_6359019\_x1.....aacacggggugcUgaacu..... 1  
Gi2\_11284205\_x1...aucggagacgucguCggaacacggg..... 1  
Gi3\_28603933\_x1.gcgauccggagacgucgugggaaAa..... 1  
Gi3\_28913448\_x1.....cgucgugggaaacacgCggugccgaac..... 1  
Gi2\_11355746\_x1.....cCucgugggaaacacggggugc..... 1  
Gi1\_4253692\_x1.....Agagacgucgugggaaacacggggugccg..... 1  
Gi3\_28827535\_x1.....gucgugggaaacacgggAugccgaa..... 1  
Gi1a\_5983383\_x1...ucggagacNucgugggaaacacgg..... 1  
Gi1\_4313231\_x1.ugcgauccAgagacgucgugggaa..... 1  
Gi1\_4308898\_x1.....ggagacgucAuggaaacacggggugcc..... 1  
Gi1a\_5990889\_x1...aucAgagacgucgugggaaacacggggugcc..... 1  
Gi2\_11258456\_x1.gGauccggagacgucgugggaaacacggggug..... 1

Gi3\_28557955\_x1.Ggcgaucggagacgucgugggaaacacggg..... 1  
G1a\_6168374\_x1....aucggagacgucgCgggaacacg..... 1  
Gi5\_9012677\_x1.....agacUucgugggaacacggggugccga..... 1  
G1a\_6269004\_x1.....gaacGcggggugccgaacu..... 1  
Gi3\_28305892\_x1.....gucgugggaacacggggugccgaacAu..... 1  
Gi5\_8908821\_x1.....gucgugggaacacggggAgccgaa..... 1  
G1a\_6110499\_x1.....ggagacguUgugggaacacg..... 1  
Gi3\_28724562\_x1....gauAggagacgucgugggaaacacgggg..... 1  
Gi5\_9032307\_x1.....gugggaacacggAgugccgaa..... 1  
Gi1\_4357153\_x1.....acgucguggAaacacggggugccgaac..... 1  
Gi3\_28475000\_x1.....cguggAaacacggggugccgaa..... 1  
Gi2\_11062368\_x1.....gagacgucgugggaaacacgAgggugccg..... 1  
Gi3\_28431241\_x1.....cggagacgucguUggaacacggggugc..... 1  
Gi2\_11216035\_x1.....cgGgggaacacggggugccgaacu..... 1  
Gi2\_11246696\_x1.....gacgucgugggaacacggggG..... 1  
Gi3\_28531302\_x1....aucggaCacgucgugggaaacac..... 1  
Gi3\_28442769\_x1.....cggagacgucgugggaaacacgA..... 1  
Gi1\_4370945\_x1....gaucggagacgucgugggaaacaAgg..... 1  
Gi1\_4247871\_x1....aucgAagacgucgugggaaacacg..... 1  
Gi2\_11233125\_x1.....guUgugggaaacacggggugccga..... 1  
Gi2\_11267058\_x1....aucgCagacgucgugggaaac..... 1  
Gi2\_11218353\_x1.....gggaacacgUggugccgaac..... 1  
G1a\_6043620\_x1....gaCcggagacgucgugggaaacacggggug..... 1  
Gi1\_4358353\_x1.....agacgucgugggaaacacggggCgccga..... 1  
Gi1\_4159800\_x1....aucggGgacgucgugggaaacacggggugccga..... 1  
G1a\_6301986\_x1.....gggaacaGggggugccgaacu..... 1  
Gi3\_28704568\_x1.....gugggaacacgCggugccg..... 1  
Gi2\_11286382\_x1....ucggagacgucgugggaaacacggggAcc..... 1  
Gi2\_11045861\_x1.....gagacgucgugggaaacacgAggguc..... 1  
Gi3\_28651090\_x1.....agacgucguggAaacacggg..... 1  
Gi1\_4368174\_x1.....agacgucgugggaaacacggggugccgaacu..... 0  
Gi3\_28443156\_x1....gaucggagacgAcgugggaaacacgggg..... 1  
Gi3\_28803938\_x1.uAcgaucggagacgucguggg..... 1  
Gi1\_4222540\_x1.....cgugggaCcacggggugccgaa..... 1  
Gi2\_11023500\_x1.....ggagacgucgAgggaacacggggug..... 1  
Gi3\_28326706\_x1.....gaAacgucgugggaaacacggggugcc..... 1  
Gi2\_11365463\_x1....ucggagacgucgugggaaacacggggA..... 1  
Gi2\_11377914\_x1.....ugggaacacgCggugccgaacu..... 1  
Gi1\_4164855\_x1.....ggaacacgggguCccgaacu..... 1  
Gi2\_11326731\_x1....aucggagacAucgugggaaac..... 1  
Gi5\_8989723\_x1....gaucggagacgucgCgggaacacgg..... 1  
Gi2\_11165304\_x1.....gugggaaUacggggugccgaacu..... 1  
G1a\_6157154\_x1.....gggaacacNgggugccgaa..... 1  
Gi3\_28630256\_x1.....ugggaacacggggugccgaU..... 1  
G1a\_6203520\_x1....guUgugggaaacacggggugccgaacu..... 1  
Gi3\_28649949\_x1.....cgucgugggaaUacggggugccga..... 1  
Gi3\_28657123\_x1....aucggagaAgucgugggaaac..... 1



|                                                             |   |
|-------------------------------------------------------------|---|
| Gi2_11185136_x1.....gggaacGcggggugccgaa.....                | 1 |
| Gi2_11042107_x1...gaucggagacAucgugggaaca.....               | 1 |
| Gi3_28641249_x1....aucggagacgucgugggaacacU.....             | 1 |
| Gi5_8961656_x1.....cgAcgugggaacacggggugccgaacuu.....        | 1 |
| Gi2_11068560_x1...cgaucggagacgucgugggaacacggggugccgaac..... | 0 |
| Gi5_8973750_x1.....agacgucgNgggaacacggggugccga.....         | 1 |
| G1a_6073333_x1...cgaucggagacgucgAgg.....                    | 1 |
| Gi2_11254875_x1..gcgaucggagGcgucgugggaacacggg.....          | 1 |
| Gi2_11311964_x1.....cggagacgucgugggaacacgggAugc.....        | 1 |
| Gi1_4179541_x1.....gaacCcggggugccgaacuu.....                | 1 |
| Gi3_28755102_x1.....aUgucgugggaacacggg.....                 | 1 |
| Gi2_11097887_x1.....agacUucgugggaacacggggugc.....           | 1 |
| Gi3_28742563_x1...cgaucggagacgCcgugggaacacg.....            | 1 |
| Gi3_28784516_x1...cgaucggagacguUgugggaacacgg.....           | 1 |
| Gi3_28311376_x1.....ggagacgucgugggaacacggggugUc.....        | 1 |
| Gi2_11250067_x1.....cgugggaUcacggggugccgaac.....            | 1 |
| Gi4_598451_x1....ucggGgacgucgugggaacacggggugccg.....        | 1 |
| Gi5_9111466_x1....ucgugggaGcacggggugccgaac.....             | 1 |
| Gi2_11107992_x1...gaucggagacgucgugggGacacggggugcc.....      | 1 |
| Gi3_28390595_x1.....ucgugggUcacggggugcc.....                | 1 |
| Gi2_11130711_x1.....gUagacgucgugggaacacggggugccgaac.....    | 1 |
| Gi3_28747323_x1.....gggUcacggggugccga.....                  | 1 |
| Gi3_28938654_x1.....gacAucgugggaacacggg.....                | 1 |
| Gi1_4380575_x1.....cgucgugggaacacggggugccgaUc.....          | 1 |
| Gi3_28550463_x1....aucggagacgucgCgggaac.....                | 1 |
| Gi2_11245625_x1.....Uggaacacggggugccgaacuu.....             | 1 |
| Gi2_11187043_x1.....agacgucgugggaacacggggGgccgaacu.....     | 1 |
| Gi3_28270108_x1.....ggaacacggggugcGgaa.....                 | 1 |
| Gi3_28481793_x1.....ucguggAaacacggggugcc.....               | 1 |
| Gi2_11119640_x1...gaucggagaAgucgugggaacacggggugc.....       | 1 |
| Gi3_28578975_x1.....acgucgugggaUcacggggugccgaacu.....       | 1 |
| G1a_6277618_x1....aucggagGcgucgugggaa.....                  | 1 |
| Gi3_28770430_x1.....gugggaaUacggggugccgaacuu.....           | 1 |
| G1a_6205724_x1...gauAggagacgucguggg.....                    | 1 |
| G1a_6131506_x1.....cgugggaacacggggugccgaUc.....             | 1 |
| Gi2_11279849_x1...cgaucggagacgucgugggCacacggg.....          | 1 |
| Gi1_4168889_x1.ugcgaucggagCcgucgugggaacacg.....             | 1 |
| Gi2_11052501_x1.....ggagacgucgugggaacacggggugU.....         | 1 |
| Gi2_11131652_x1....ucggagacgucgugggGacacggggugccga.....     | 1 |
| Gi3_28884649_x1.....aacacggggAgccgaacuu.....                | 1 |
| Gi3_28292153_x1.....agacgucgugggaacacgUg.....               | 1 |
| Gi3_28961268_x1...Caucggagacgucgugggaac.....                | 1 |
| Gi3_28282324_x1.....agacgucgugggaacacggggAgccgaac.....      | 1 |
| Gi2_11086703_x1.....cgucgugggaacNcggggugccgaacu.....        | 1 |
| Gi5_9076853_x1.....gacgucgugggaacacggggAgccgaac.....        | 1 |
| Gi3_28358715_x1....aucggagacgucgugCgaacac.....              | 1 |
| Gi3_28425386_x1...cgaucggagacgucgugggaacac.....             | 0 |

Gi1\_4320265\_x1.....agacgucgugggaacUcggg..... 1  
Gi2\_11079729\_x1.....aucggagCcgucguggga..... 1  
Gi3\_28985797\_x1.....agacgucgugggaCcacgggg..... 1  
Gi3\_28929111\_x1.....agacgucgugAgaacacggg..... 1  
Gi3\_28868573\_x1.....agacgucgugggGacacggg..... 1  
Gi1\_4338853\_x1.....gggaacacNgggugccgaac..... 1  
Gi2\_11107354\_x1.....cgugggaacacCgggugccgaac..... 1  
Gi2\_11388318\_x1.....ucggagacgucgugggaCcacggggu..... 1  
Gi3\_28957394\_x1.....cguNgugggaacacggggugccgaa..... 1  
Gi1\_4175926\_x1.....gggaacacggggugccgaCc..... 1  
Gi3\_28378003\_x1.....gagacgucgugggaGcac..... 1  
Gi5\_8973741\_x1.....aucggagCcgucgugggaacacggggugcc..... 1  
Gi2\_11187456\_x1.ugcgauccgagacgucguAggaacacg..... 1  
Gi2\_11192095\_x1.....ucggCgacgucgugggaacacggggu..... 1  
Gi3\_28726464\_x1.....aucggagacgucgugggaGcacggggug..... 1  
Gi2\_11280939\_x1.....gacgGcgugggaacacggggugcc..... 1  
Gi3\_28781570\_x1.....gucgugggaacaAggggug..... 1  
Gi1a\_6263988\_x1.....Agugggaacacggggugc..... 1  
Gi2\_11375174\_x1.....ucguggCaacacggggugccg..... 1  
Gi2\_11316834\_x1.....aucggagacgGcgugggaacacggggugcc..... 1  
Gi2\_11244262\_x1.....gggaacacUgggugccgaac..... 1  
Gi3\_28648200\_x1.....cgauccgagacgucgugggCacacg..... 1  
Gi2\_11024177\_x1.....Ggacgucgugggaacacggggugccga..... 1  
Gi5\_9025447\_x1.....gCcgucgugggaacacggggugccgaacu..... 1  
Gi3\_28355036\_x1.....ucggagacgucgugggaacacggUgugcc..... 1  
Gi3\_28313565\_x1.....gaucgCagacgucgugggaacacggg..... 1  
Gi2\_11010522\_x1.....ugggaacacggggCgccgaacuu..... 1  
Gi2\_11095334\_x1.....Cgggaacacggggugccgaacuu..... 1  
Gi3\_28827864\_x1.....gagacguUgugggaacacggggugccgaac..... 1  
Gi5\_9013130\_x1.....gaacCggggugccgaac..... 1  
Gi3\_28524184\_x1.....ugggaacacggggugGcgaac..... 1  
Gi3\_28417224\_x1.....cgucgugggaacacggggugGcgaacu..... 1  
Gi3\_28825958\_x1.....ucggagacgucguggAaacacggggugcc..... 1  
Gi2\_11276055\_x1.....cgucgugggaacaUgggugccgaa..... 1  
Gi2\_11195136\_x1.....gaucggagacgucgugggaacacUg..... 1  
Gi2\_11041587\_x1.....aucggagacgucgugUgaacacggggugc..... 1  
Gi1\_4335346\_x1.....aucggagacgucgugggaacaAg..... 1  
Gi3\_28422267\_x1.....gacgucgugggaacacggggugcAg..... 1  
Gi3\_28286814\_x1.....cggagacgucgugggUaacgggggu..... 1  
Gi1\_4365646\_x1.....gaacacgUggugccgaacu..... 1  
Gi3\_28735004\_x1.....acgucguAggaacacggggugccga..... 1  
Gi2\_11067707\_x1.....gaucggagaUgucgugggaac..... 1  
Gi3\_28597326\_x1.....cgauccgagacgucgugggaUacg..... 1  
Gi1\_4261278\_x1.....ucggagacgucgugggaacacAgggugc..... 1  
Gi5\_9113732\_x1.....aucggagacgCcgugggaacacggggugc..... 1  
Gi2\_11135629\_x1.....gacgucgugggaacacggggUaccgaac..... 1  
Gi3\_28860406\_x1.....gaucggagUcgucgugggaacacg..... 1

|                 |                                          |   |
|-----------------|------------------------------------------|---|
| Gi4_600413_x1   | .....acgucguAggaacacggggugccgaacu.....   | 1 |
| Gi1_4170939_x1  | .....ggagacgucguggaacaUggggugccg.....    | 1 |
| Gi2_11395305_x1 | .....gacgucguggaCcaccg.....              | 1 |
| Gi3_28369650_x1 | .....acgucguggAaacacggggugccgaa.....     | 1 |
| Gi3_28800607_x1 | .....ggagacgucguggaacaAggg.....          | 1 |
| Gi3_28754020_x1 | .....aucggagUcgucguggaacaacgg.....       | 1 |
| Gi1_4351635_x1  | .....guUguggaacaacggggugccgaac.....      | 1 |
| Gi1_4374403_x1  | .....acgucguggGacacggggugccgaac.....     | 1 |
| Gi3_28696161_x1 | .....ucguggaacaacggggugGcgaac.....       | 1 |
| Gi4_593273_x1   | .....cgucguggaacaacggggugccgaaGu.....    | 1 |
| Gi2_11407747_x1 | .....ggaacacgUggugccgaa.....             | 1 |
| Gi4_610249_x1   | .....guggaacaacggggugccAaacu.....        | 1 |
| Gi3_28885665_x1 | .....gacguUguggaacaacggggugccg.....      | 1 |
| G1a_6023208_x1  | .....cguggaacaacggggugccgaaGu.....       | 1 |
| Gi1_4308274_x1  | .....acgucguggUaacacggggugccgaacu.....   | 1 |
| Gi1_4204908_x1  | ugcgauccgagacgucgug.....                 | 0 |
| G1a_6272810_x1  | .....gugAgaacacggggugcc.....             | 1 |
| Gi1_4335724_x1  | .....gUcgucguggaacaacggggugccgaacu.....  | 1 |
| Gi3_28978457_x1 | .....gacgucguggaacaacGcggggu.....        | 1 |
| Gi2_11136577_x1 | .....agacgucguUggaacaacggggugc.....      | 1 |
| Gi2_11049792_x1 | .....ggaUcacggggugccgaac.....            | 1 |
| Gi1_4194709_x1  | .....aucggagacgucUuggaacaacggggugcc..... | 1 |
| Gi3_28492013_x1 | .....aucggagacgucguggUaacacggggugc.....  | 1 |
| Gi3_28879426_x1 | .....cguggaacaacggggugccCaac.....        | 1 |
| Gi1_4272430_x1  | .....Ugacgucguggaacaacggggugccga.....    | 1 |
| Gi1_4169405_x1  | gcAaucggagacgucguggaaca.....             | 1 |
| Gi4_582315_x1   | .....cgugggCacacggggugccgaacu.....       | 1 |
| Gi3_28586968_x1 | .....gauUggagacgucguggaacaacgg.....      | 1 |
| Gi2_11299569_x1 | .....ggagacgucguggaaAacggggugc.....      | 1 |
| Gi2_11209035_x1 | .....guggaacaacggggugccgaU.....          | 1 |
| Gi3_28413021_x1 | .....gaucggagacgucguggaacaC.....         | 1 |
| Gi2_11368649_x1 | ugcgauccgagacgucguggUaca.....            | 1 |
| Gi3_28854769_x1 | .....cggagacgucguggaacaUggggugccg.....   | 1 |
| Gi1_4191858_x1  | .....ucguggaacaacUcggggugccgaac.....     | 1 |
| Gi3_28530083_x1 | gcaucggNgacgucguggaacaacggggug.....      | 1 |
| Gi1_4174452_x1  | .....Aguggaacaacggggugccgaacu.....       | 1 |
| Gi3_28942214_x1 | .....ggaacacggggugAcgaa.....             | 1 |
| Gi2_11400175_x1 | .....aucggagacguGguggaaca.....           | 1 |
| Gi2_11049593_x1 | .....gaucggagacgucguggaacaUcgg.....      | 1 |
| Gi2_11156479_x1 | .....gaucggagacgucguggaGc.....           | 1 |
| Gi1_4327231_x1  | .....aucggagacguAguggaacaacg.....        | 1 |
| Gi2_10998672_x1 | .....cgGcuguggaacaacggggugccgaa.....     | 1 |
| Gi3_28979707_x1 | .....ggagUcgucguggaacaacggggugcc.....    | 1 |
| Gi2_11051689_x1 | .....aucggagacAucguggaacaacggg.....      | 1 |
| Gi5_8858915_x1  | .....gggaacaacggggugccgaacu.....         | 0 |
| Gi5_8947795_x1  | .....gaacaacggggugccgaGc.....            | 1 |
| Gi3_28264287_x1 | .....Cgagacgucguggaacaacggggugccg.....   | 1 |

Gi2\_11045193\_x1.....acgucgugggaaUacggggugccgaacu..... 1  
Gi2\_11302551\_x1...Ggaucggagacgucgugggaaacacggggugcc..... 1  
Gi3\_28984449\_x1.....cgucguCggaacacggggugccgaacu..... 1  
Gi1\_4367451\_x1....aucggagacgucgugggaaacacggggA..... 1  
Gi3\_28671249\_x1....gaucggagacgucgugggaaacacCgg..... 1  
Gi2\_11327313\_x1....aucggagacgucgugggUaacacggggugc..... 1  
Gi5\_8874169\_x1.....cggagacgucAugggaacacggggugccga..... 1  
Gi1\_4303677\_x1....aucggagacgucgugggaaacacgAggugcc..... 1  
Gi3\_28863240\_x1.....gacgucgugggaaacacggggugcGgaac..... 1  
Gi5\_9136662\_x1.....gugggaacacggggugccCaac..... 1  
G1a\_6104556\_x1.....acgucAugggaacacgggggu..... 1  
G1a\_6180255\_x1....aucggagacgucgugggaaacacggggCg..... 1  
Gi2\_11337164\_x1.....ucUgagacgucgugggaaac..... 1  
Gi2\_11184970\_x1.....ggagacgucgugAgaacacggggugc..... 1  
Gi2\_11045764\_x1.....acgucgugggaaacacggggugccgaUU..... 1  
Gi2\_11109190\_x1.....gacgucAugggaacacggggugccg..... 1  
Gi1\_4165380\_x1....gauUggagacgucgugggaaacac..... 1  
Gi1\_4196233\_x1.....cguAgggaacacggggugccgaa..... 1  
Gi1\_4273645\_x1....Gucggagacgucgugggaaac..... 1  
Gi3\_28391848\_x1.....cguNggaaacacggggugccga..... 1  
G1a\_5987536\_x1.....gagacgucgugggCacacg..... 1  
Gi2\_11046128\_x1.....ugggUaacacggggugccg..... 1  
Gi2\_11145603\_x1.....acguGgugggaaacacggggugccgaac..... 1  
Gi3\_28567164\_x1..gGgaucggagacgucgugggaaacacgg..... 1  
Gi5\_8849458\_x1.....gugggaacacgggUugccgaac..... 1  
Gi1\_4213328\_x1....ucggagacgucgugggaaAacg..... 1  
Gi2\_11366038\_x1.....gacgucgugggaaacacAgggugccg..... 1  
Gi2\_11139295\_x1.....ggagUcgucgugggaaacacg..... 1  
Gi2\_11145485\_x1.....ugggaacacggggugUcgaa..... 1  
Gi1\_4213608\_x1.....cgugggaaUacggggugccgaacu..... 1  
G1a\_6340869\_x1....gaAacggagacgucgugggaaacacgggggu..... 1  
Gi2\_11097283\_x1.....gacgucgugggaaAacggggugccg..... 1  
Gi4\_569966\_x1....agacgucgugggaaacacggggugccgaaAu..... 1  
Gi3\_28357202\_x1.ugcgGucggagacgucgugggaaacacggggugc..... 1  
Gi4\_586383\_x1....ucgugggaNcacggggugccgaacu..... 1  
Gi5\_9051637\_x1.ugcgGucggagacgucgugggaa..... 1  
Gi1\_4360015\_x1.....gucgugggaaacacggUgugccgaac..... 1  
G1a\_6114215\_x1....aucggagacguAgugggaaacacggggug..... 1  
Gi3\_28545432\_x1.....ggagacgucgugggaaacaUggggugcc..... 1  
Gi2\_11398153\_x1....aucggagacCucgugggaaacacggggugcc..... 1  
Gi2\_11373598\_x1....gaucggGgacgucgugggaaaca..... 1  
Gi1\_4191641\_x1.....Agugggaacacacggggugccgaac..... 1  
Gi2\_11059342\_x1.....ugggaacacggggAgccgaa..... 1  
Gi3\_28946301\_x1.....gucguAggaaacacggggugc..... 1  
Gi1\_4363309\_x1.....gaacacggggguUccgaacu..... 1  
Gi3\_28569304\_x1.....gucgugggaaacacggggguCc..... 1  
Gi2\_11298878\_x1.....ucguggUaacacggggugccg..... 1

Gi3\_28461376\_x1.....ggagacgucgugggaaAacg..... 1  
Gi1\_4242742\_x1.....ucgugUgaacacgggugccgaacuu..... 1  
Gi1\_4371076\_x1.....uUggagacgucgugggaacacg..... 1  
Gi5\_9138141\_x1.....cgCcgugggaacacgggugccgaa..... 1  
Gi3\_28396148\_x1.....gacgucguAggaacacggggu..... 1  
G1a\_6035525\_x1.....gucgCgggaacacgggugccgaa..... 1  
Gi2\_11267514\_x1.....gagacgucgugggaacacggggGgcc..... 1  
Gi2\_11025666\_x1.....gacgucgGgggaacacggggugc..... 1  
Gi3\_28920438\_x1.....Ggucgugggaacacggggug..... 1  
Gi3\_28666005\_x1.....auNggagacgucgugggaacac..... 1  
Gi5\_8845074\_x1.....gaacacgggugcUgaac..... 1  
G1a\_6309085\_x1.....gaucggagacgucgGgggaacacggg..... 1  
Gi1\_4361272\_x1.....ugggaacUcggggugccgaac..... 1  
Gi1\_4208748\_x1.....guggUaacacgggugccg..... 1  
G1a\_6023428\_x1.....ucggagacguAgugggaacacggg..... 1  
Gi2\_11234386\_x1.....cgugggaCcacgggugccgaa..... 1  
Gi1\_4218245\_x1.....gacgucgugggaacacggggU..... 1  
G1a\_6292413\_x1.....cUaucggagacgucgugggaacacggg..... 1  
Gi3\_28539980\_x1.....cggagacgucgugggaGcacgg..... 1  
Gi1\_4168613\_x1.....gacgucgugggaacCggggugcc..... 1  
Gi1\_4383125\_x1.....ggagacgucguAggaacacggggugccg..... 1  
G1a\_6194359\_x1.....cgucgugggaacacggggCgccgaac..... 1  
Gi5\_9044316\_x1.....acgucgugggaGcacggggugccga..... 1  
Gi5\_8895725\_x1.....gucgugggaacacgCggugccgaacu..... 1  
Gi2\_11341262\_x1.....gaucggagacguGgugggaacac..... 1  
Gi2\_11064369\_x1.....Ugaucggagacgucgugggaacacggggugc..... 1  
Gi2\_11125258\_x1.....ugggaacaUggggugccga..... 1  
Gi3\_28911910\_x1.....ucggagacgucgugggaacacgUggugcc..... 1  
Gi3\_28717663\_x1.....ucggagacgucgugggaacacggggugcA..... 1  
G1a\_6274652\_x1.....ggagacgucgugggaUcacg..... 1  
Gi2\_11312944\_x1.....Nggagacgucgugggaacacggggugcc..... 1  
Gi3\_28649852\_x1.....gacgucgugggaacacgggCugccgaac..... 1  
Gi3\_28295726\_x1.....uggCaacacggggugccga..... 1  
Gi5\_8926016\_x1.....aucggagacgucguggCaacacgg..... 1  
Gi4\_596086\_x1.....Gucggagacgucgugggaacacggg..... 1  
G1a\_6031185\_x1.....ucggGgacgucgugggaacacggggugc..... 1  
Gi2\_11266595\_x1.....ugggaacUcggggugccgaa..... 1  
Gi2\_11395502\_x1.....gaucgCagacgucgugggaacacggg..... 1  
Gi5\_9038618\_x1.ugcgaucggagacguGguggg..... 1  
Gi2\_11101598\_x1.....gucgugggNacacggggugccgaa..... 1  
Gi5\_9081657\_x1.....aucggagacgucgugggaacCggg..... 1  
Gi5\_8908959\_x1.....ggagacgucgugggaacacggggCgccgaacu..... 1  
Gi3\_28597321\_x1.....Ugacgucgugggaacacggg..... 1  
Gi3\_28696072\_x1.....cgucgugggaacaGggggugcc..... 1  
Gi3\_28311423\_x1.....Cagacgucgugggaacac..... 1  
Gi2\_11131973\_x1.....gaucggagacgucgugggaUacggggugc..... 1  
Gi3\_28371204\_x1.....agacgucgugAgaacacgggg..... 1

|                                                         |   |
|---------------------------------------------------------|---|
| Gi3_28614328_x1.....cggagacgucgugggaacaAggggu.....      | 1 |
| Gi5_9129379_x1.....agUcguccgugggaacacggggugc.....       | 1 |
| Gi1_4301563_x1.....Ugugggaacacggggugccgaacu.....        | 1 |
| Gi3_28611356_x1.....ggagacgucgugAgaacacggg.....         | 1 |
| Gi3_28676313_x1.....cgauccgagacgucgugggaacacgAg.....    | 1 |
| Gi3_28820957_x1.....cggagaUgucgugggaacacggggug.....     | 1 |
| Gi1_4227037_x1.....gagacgucgugggaacacggggugc.....       | 0 |
| Gi4_567819_x1.....aacacggggugcGgaacu.....               | 1 |
| Gi1a_6041689_x1.....cUgagacgucgugggaacacggggugcc.....   | 1 |
| Gi1_4361219_x1.....ucgugggaacacggAguc.....              | 1 |
| Gi3_28535019_x1.....gaucggagNcgucgugggaacacggggug.....  | 1 |
| Gi5_9062742_x1.....aGuuuccagcgccugcugcccacc.....        | 1 |
| Gi5_9050285_x1.....cgugggaGacggggugccgaac.....          | 1 |
| Gi5_8959012_x1.....gucgugggaacacggggugAcgaac.....       | 1 |
| Gi1_4374556_x1.....ucggagGcguccgugggaacacgggggu.....    | 1 |
| Gi1a_6207996_x1.....cgauccgagGcguccgugg.....            | 1 |
| Gi3_28268982_x1.....cUaucggagacgucgugggaacacggggug..... | 1 |
| Gi1a_6093579_x1.....aucggGgacgucguggga.....             | 1 |
| Gi3_28830978_x1.....cggagaUgucgugggaacacggg.....        | 1 |
| Gi1_4186113_x1.....agacgucgugggGacacggg.....            | 1 |
| Gi4_581452_x1.....cgAcgugggaacacggggugccgaacu.....      | 1 |
| Gi1_4272641_x1.....cgugggaNacggggugc.....               | 1 |
| Gi1a_6171226_x1.....gUacacggggugccgaacu.....            | 1 |
| Gi5_8919052_x1.....ucgugggaacacggggugUcgaac.....        | 1 |
| Gi2_11279987_x1.....agGcguccgugggaacacggggugccgaa.....  | 1 |
| Gi3_28585683_x1.....ucgugCgaacacggggugccgaac.....       | 1 |
| Gi2_11092400_x1.....aucggagacgucgugGCaacacggggugcc..... | 1 |
| Gi3_28488184_x1.....gucgugggaacacgggAugc.....           | 1 |
| Gi2_11212702_x1.....cggagacgucgugggaacacggAgugcc.....   | 1 |
| Gi5_8914320_x1.ugcgaucggagacgucgCg.....                 | 1 |
| Gi2_11203270_x1.....ggagacgucgugggaacacgUggugcc.....    | 1 |
| Gi1_4216983_x1.....cgugggaacacggggugccAaac.....         | 1 |
| Gi2_11360641_x1.....gugggaacacgAggugccga.....           | 1 |
| Gi2_11059341_x1.....gacgucguAggaacacgggggu.....         | 1 |
| Gi1_4228255_x1.....agacgucgugggaacacggggCg.....         | 1 |
| Gi1_4191461_x1.....cgugggaacacggggCgcccga.....          | 1 |
| Gi2_11321855_x1.....acgCcgugggaacacgggggu.....          | 1 |
| Gi3_28709745_x1.....ggagacgucguggAaacacg.....           | 1 |
| Gi5_9126757_x1.....agacUucgugggaacacggggugccgaac.....   | 1 |
| Gi3_28932399_x1.....gaucgAagacgucgugggaacacgg.....      | 1 |
| Gi3_28556832_x1.....agacgucgugggaacacggggugccgCa.....   | 1 |
| Gi1_4215914_x1.....gAaacacggggugccgaac.....             | 1 |
| Gi1_4187734_x1.....ucggagacgucgugggGacacggg.....        | 1 |
| Gi5_8936835_x1.....ggGacacggggugccgaa.....              | 1 |
| Gi2_11079536_x1.....aucggagacgucguAggaac.....           | 1 |
| Gi5_8884408_x1.....gggaacacgggUugccgaacu.....           | 1 |
| Gi3_28803049_x1.....gggaacacgUggugccgaa.....            | 1 |

|                                                         |   |
|---------------------------------------------------------|---|
| Gi1_4274394_x1.....aucggagaAgucgugggaacac.....          | 1 |
| Gi3_28887630_x1.....cgUagacgucgugggaacacggg.....        | 1 |
| Gi3_28580305_x1.....gNacacggggugccgaacu.....            | 1 |
| Gi1_4210662_x1.....gacgucgugggaacacggggugUc.....        | 1 |
| Gi3_28446645_x1.....cgucgugCgaacacggggugcc.....         | 1 |
| Gi3_28305872_x1.....aucggaAacgucguggga.....             | 1 |
| Gi2_11369247_x1.....gaacaGggggugccgaacu.....            | 1 |
| Gi3_28711466_x1.....ucgugggaacacgAggugccgaa.....        | 1 |
| G1a_6067513_x1.....cgucgugggaacacggggugcc.....          | 0 |
| Gi1_4320291_x1.....acgucgAgggaacacggggugccg.....        | 1 |
| Gi5_8895196_x1.....acgucguUggaacacggggugccga.....       | 1 |
| Gi2_11383967_x1.....gggaaCcgggugccgaac.....             | 1 |
| G1a_6268154_x1.....Nugggaacacggggugccgaac.....          | 1 |
| Gi2_11109531_x1.....ggGgacgucgugggaacacggggugccgaa..... | 1 |
| Gi5_9061142_x1.....cgugggaacacggggugccgaacuC.....       | 1 |
| Gi2_11170853_x1.....acgucgugggaacCcgggugccg.....        | 1 |
| G1a_6235373_x1.....aucggagacgucgugggaacacgAggugcc.....  | 1 |
| Gi2_11302166_x1.....agacgucgugggaacacgggguc.....        | 1 |
| Gi2_11197139_x1.....aucggagacgucgugggaacUcggggugc.....  | 1 |
| Gi2_11000198_x1.....gagacgucgugggaacacggggugccgCac..... | 1 |
| Gi5_8920619_x1.....gagacgucgugggaacacggggugccgUacu..... | 1 |
| Gi2_11326759_x1.....acgucgugggaacCcgggugccga.....       | 1 |
| Gi5_8944145_x1.....cggagacgucgugggaacacggggCgcc.....    | 1 |
| Gi5_8975200_x1.....cgugggaacacggggugA.....              | 1 |
| Gi1_4383926_x1.....gAgaacacggggugccgaac.....            | 1 |
| Gi2_11212906_x1.....ucguggUaacacggggugccgaacu.....      | 1 |
| Gi3_28293751_x1.....gacgucgugggaAacggggu.....           | 1 |
| Gi2_11198690_x1.....cgucUugggaacacggggugccgaacu.....    | 1 |
| G1a_6301302_x1.ugcgauccgagacgCcgug.....                 | 1 |
| Gi2_11211815_x1.....gucgugggaacaAgggugccga.....         | 1 |
| Gi2_11086522_x1.....acgucgugggaacacgAggugc.....         | 1 |
| Gi3_28598152_x1.....gucgugggaUcacggggugccgaac.....      | 1 |
| Gi1_4380178_x1.....agGcugcuggggaacacgggg.....           | 1 |
| Gi2_11286042_x1.....gugggaacacCgggugccga.....           | 1 |
| Gi2_11012936_x1.....aucggagacgucgugCgaaca.....          | 1 |
| Gi2_10995180_x1.....aucggagacgucgugggaacacgggCug.....   | 1 |
| Gi2_11175808_x1.....cgucgugggaacacggggugcU.....         | 1 |
| Gi5_9075249_x1.....gaucggagacgucgugggaacacA.....        | 1 |
| Gi2_11091806_x1.....Cgagacgucgugggaacacggggugc.....     | 1 |
| G1a_6125455_x1.....cgugggaacaUggggugcc.....             | 1 |
| Gi1_4371050_x1.....cggGgacgucgugggaacacgggg.....        | 1 |
| Gi2_11120793_x1.....gacgucguggAaacacggggugccgaacu.....  | 1 |
| Gi3_28500268_x1.....cgugggaacacgAggugccgaa.....         | 1 |
| Gi1_4387618_x1.....aucggagacgucgugAgaacacggggugcc.....  | 1 |
| Gi1_4264808_x1.....aucggCgacgucgugggaacacggg.....       | 1 |
| Gi5_9092885_x1.....Nugggaacacggggugcc.....              | 1 |
| Gi5_9089708_x1.....gaucggagCcgucgugggaacacgg.....       | 1 |

Gl1a\_5989035\_x1...cgaucggagacgucgugggaaacGcg..... 1  
Gi1\_4254025\_x1....aucggagacgucgugggaaAa..... 1  
Gi2\_11173721\_x1...cgaucggagacgucgugggaaacacggAgugc..... 1  
Gi2\_11071703\_x1.....agacgAcgugggaaacacggggugccgaacu..... 1  
Gi5\_9130670\_x1.....cgucguAggaacacggggugc..... 1  
Gi2\_11020948\_x1.....cgucgAgggaaacacggggugcc..... 1  
Gi1\_4389435\_x1.....gucgugggaaacaAggggug..... 1  
Gi2\_11146168\_x1.....agacguUgugggaaacacggggugc..... 1  
Gi4\_595780\_x1.....gugggaacNcggggugccgaa..... 1  
Gi3\_28418484\_x1.....agacguUgugggaaacacggggugccgaa..... 1  
Gi2\_11215633\_x1.....agacgucgugggaaacacggggugA..... 1  
Gi3\_28534354\_x1.....ggagacgucgugggGacacggggugcc..... 1  
Gi1\_4303371\_x1.....gugggaacacggCgugccgaa..... 1  
Gi2\_11167562\_x1.....gggaacacggggugAcga..... 1  
Gi1\_4199154\_x1.....acgucgugggaaacacggggAgccg..... 1  
Gi2\_11150113\_x1.....acgucgugNgaacacggg..... 1  
Gi2\_11039844\_x1.....Ggucgugggaaacacggggug..... 1  
Gi3\_28474207\_x1.....Agagacgucgugggaaacacgg..... 1  
Gi2\_11367779\_x1....aucggagacgucguggCaacacg..... 1  
Gi2\_11168924\_x1....aucggagacgucgugUgaaca..... 1  
Gl1a\_6069674\_x1....aucggagacgucgugggaaacacAgg..... 1  
Gl1a\_6000709\_x1.....cgugggaaacacggggAgcc..... 1  
Gl1a\_6148186\_x1.....cggagacgucgugggaaacacggggG..... 1  
Gi3\_28531868\_x1.....acgucguggCaacacggggugcc..... 1  
Gi3\_28698688\_x1.....uUgugggaaacacggggugccga..... 1  
Gi5\_8830153\_x1.....gugggaacacggggAugccg..... 1  
Gi3\_28683621\_x1....gaucggagUcugcugggaaacac..... 1  
Gl1a\_6031834\_x1.....cgugggaaacacggggAcc..... 1  
Gi3\_28670904\_x1.....gagacgucgugggaaacacggAgu..... 1  
Gi5\_9077813\_x1.....gAgggaaacacggggugcc..... 1  
Gi2\_11172828\_x1.....agacgucgugggGcacggggugccgaa..... 1  
Gi3\_28486565\_x1.....ggUgacgucgugggaaacacggggugccgaa..... 1  
Gi1\_4324786\_x1.....gugggaacacggUgugccg..... 1  
Gi5\_8948673\_x1.....cgugggUacacggggugccg..... 1  
Gi3\_28644883\_x1.....agacgucgugggaaacacggggCgcccga..... 1  
Gi5\_9133410\_x1.....cgucgCgggaacacggggugcc..... 1  
Gi1\_4322125\_x1.....cggagacgucgugggCacacgggggu..... 1  
Gi2\_11329459\_x1.....gucgugggaaacaGggggugcc..... 1  
Gi5\_9060158\_x1.....acgucUugggaacacggggugccgaacu..... 1  
Gi3\_28567431\_x1....aucggagacgucguggUaacacg..... 1  
Gi4\_590981\_x1.....gugggaacacggggugccgaCcu..... 1  
Gi2\_11007063\_x1.....gugggaGcacggggugccgaacuu..... 1  
Gi3\_28365084\_x1....gaucggagacgucgCggga..... 1  
Gl1a\_6351561\_x1.....gacgucgugAgaacacgggggu..... 1  
Gl1a\_6148154\_x1.....ggagacgucgugggGcacggggugc..... 1  
Gi2\_11192440\_x1.....gacgAcgugggaaacacggggugccgaac..... 1  
Gi5\_9008524\_x1.....acgucgugggGacacggggugccgaaac..... 1



Gi3\_28649533\_x1.....aucggagacgucgugggGcacggggugc..... 1  
Gi3\_28310413\_x1...gaucggagacgucgugggCacacggggug..... 1  
Gi2\_11240605\_x1.....ggagacgucgugggGcac..... 1  
Gi2\_11052441\_x1.....acgucguggUaacacggggugc..... 1  
Gi2\_11159723\_x1.....ggagacgucgugggGacacggggugc..... 1  
Gi3\_28677341\_x1.....ggagacgucgugggaacC..... 1  
Gi2\_11046344\_x1.....gUcgucgugggaacacggggugc..... 1  
Gi3\_28806818\_x1.....gggaCcacggggugccga..... 1  
Gi4\_611245\_x1.....cgugggUacacggggugccgaacu..... 1  
Gi2\_11385480\_x1...aucggUgacgucgugggaacA..... 1  
Gi5\_9047066\_x1.....aacacgggNugccgaacuuu..... 1  
Gi2\_11328269\_x1...cgauccgagacgucgugggaacGcg..... 1  
G1a\_6284147\_x1...uGggagacgucgugggaacacgg..... 1  
Gi3\_28437477\_x1...gaucggagacgucgugggaacacgggAu..... 1  
Gi2\_11398396\_x1.....cgucgugggaacacgggAugccg..... 1  
Gi2\_11371641\_x1.....cgucgugggGacacggggugccgaa..... 1  
Gi3\_28710095\_x1.....cggagacgucgugggaacUg..... 1  
Gi3\_28919368\_x1.....ggagacgucgugggGcacggggugccga..... 1  
Gi3\_28400757\_x1.....ucgNgggaacacggggugccgaa..... 1  
Gi2\_11219658\_x1.....agacgucgugggaacacAgggugccgaac..... 1  
Gi1\_4217110\_x1.....guAggaacacggggugccg..... 1  
Gi2\_11049014\_x1.....acgCcgugggaacacggggugccgaac..... 1  
Gi5\_8889628\_x1.....gaacacggggugccgaaGu..... 1  
Gi2\_11150159\_x1.....ucgugggaacUggggugccg..... 1  
Gi2\_11143290\_x1...gaucggagUcgucgugggaacacggg..... 1  
Gi2\_11031273\_x1.....gugggaaGacggggugccg..... 1  
Gi2\_11407771\_x1.....gucAugggaacacggggugcc..... 1  
Gi1\_4318947\_x1.....uGgugggaacacggggugccgaacuu..... 1  
Gi4\_578222\_x1.....aAacgucgugggaacacggggugccgaacu..... 1  
Gi3\_28532576\_x1.....cgucgugggaaGacggggugc..... 1  
Gi3\_28546928\_x1.....uggNaacacggggugccg..... 1  
Gi3\_28585106\_x1...cgauccgagacgucgugggaa..... 0  
Gi2\_11297207\_x1...gaucggagacgucguggAaacacggggug..... 1  
Gi2\_11041161\_x1...cgauccgagacgucgugA..... 1  
Gi3\_28790043\_x1.....Cgagacgucgugggaacacggggugcc..... 1  
Gi5\_9052346\_x1...aucggagacgucgugggaacCcg..... 1  
Gi1\_4319177\_x1.....ugNgaacacggggugccgaacu..... 1  
Gi3\_28917417\_x1...gaucggagacgucgugggaacAaggggugc..... 1  
Gi1\_4275708\_x1.....gugggaaUggggugccgaac..... 1  
Gi3\_28940418\_x1.....cggagacgucguAggaacac..... 1  
Gi3\_28955330\_x1.....gacgucgugggCacacggggugccgaac..... 1  
Gi1\_4226635\_x1.....gugggaaacacggggGgccc..... 1  
Gi5\_9058748\_x1.....cacgggGcgggaacuuu..... 1  
Gi3\_28678967\_x1.....gucgugggaacacggggugccA..... 1  
Gi3\_28320169\_x1...auNggagacgucgugggaacacggg..... 1  
Gi2\_11350065\_x1...cgugggaacacgggCugccgaac..... 1  
Gi3\_28779419\_x1.....acgucgugggaacacggggugGcgaacu..... 1

Gi2\_11203917\_x1.....ugggaacaAggggugccga..... 1  
Gi3\_28456118\_x1....aucAgagacgucgugggaaacacggggug..... 1  
Gi3\_28345845\_x1....gaucggagacgucgugggaaacacgAg..... 1  
Gi2\_11000037\_x1....aucgCagacgucgugggaaacacggg..... 1  
G1a\_6021679\_x1.....gucgCgggaacacggggugcc..... 1  
Gi1\_4274004\_x1.....cgugggGacacggggugccg..... 1  
Gi3\_28325696\_x1.....Agagacgucgugggaaacacggg..... 1  
Gi1\_4167554\_x1.....ggagCcgucgugggaaacacggggugcc..... 1  
Gi3\_28343116\_x1....gaucggagacgucgugggaaacUcggg..... 1  
Gi3\_28696299\_x1.....cAucgugggaaacacgggg..... 1  
Gi1\_4242639\_x1.....agacgCcgugggaaacacggggugccgaacu..... 1  
Gi5\_9128444\_x1....aucUgagacgucgugggaaacacggggugc..... 1  
G1a\_6205048\_x1.....ggAaacacggggugccgaacu..... 1  
Gi3\_28776448\_x1.....gugggaacacggggugccgGacuu..... 1  
Gi3\_28488476\_x1.....gggaacacUgggugccga..... 1  
Gi3\_28301295\_x1.....acgucCugggaaacacggggugccgaacu..... 1  
Gi3\_28408942\_x1.....cggagacgucgugggaaacacggggGgc..... 1  
Gi1\_4262907\_x1.ugcgauccgUgacgucgugggaa..... 1  
Gi1\_4159604\_x1.....ugggaacaNggggugccgaacu..... 1  
Gi2\_11232537\_x1...Ggaucggagacgucgugggaaacacggg..... 1  
Gi2\_11006413\_x1....gaucggCgacgucgugggaaacacggggug..... 1  
Gi3\_28469600\_x1.....Ccacggggugccgaacu..... 1  
Gi2\_11402514\_x1.....gacgucgugggaaGcacggg..... 1  
Gi3\_28376956\_x1.....ggagacgAcgugggaaacacggggg..... 1  
Gi1\_4273006\_x1.....ggaacacggggugccAaa..... 1  
Gi2\_11270187\_x1....aucggagCcgucgugggaaacacggggug..... 1  
Gi5\_9048108\_x1.....cgAcgugggaaacacggggugc..... 1  
Gi2\_11226058\_x1.....aAacgucgugggaaacacggggugc..... 1  
Gi3\_28777639\_x1cuUcgauccgagacgucg..... 1  
Gi2\_11175233\_x1.....gucgugggaaacacggggugccUa..... 1  
Gi3\_28383401\_x1.....cgugggaaacacgAgggugccg..... 1  
Gi3\_28968995\_x1....Gucggagacgucgugggaaacacggggug..... 1  
Gi3\_28385243\_x1....aucggagacgAcgugggaa..... 1  
Gi2\_11245932\_x1.....gagacgucgCgggaacacggg..... 1  
Gi5\_9042045\_x1....aucggagacgucgugggaaacaAggggu..... 1  
Gi1\_4264564\_x1.....gucgugggaaacGcggggugccgaac..... 1  
G1a\_6104088\_x1....aucggaAacgucgugggaaacacggggugcc..... 1  
Gi3\_28645013\_x1.....gaUcacggggugccgaacu..... 1  
Gi1\_4349705\_x1.....cUgagacgucgugggaaacacggggugccga..... 1  
Gi3\_28608585\_x1.....cgucgugggaaacacggggugccgaaA..... 1  
Gi5\_9002342\_x1.....gggaacacggggugccUaa..... 1  
Gi5\_8843946\_x1....aucggagacgucgCgggaaca..... 1  
Gi4\_572863\_x1.....gGgggaacacggggugcc..... 1  
Gi2\_11162462\_x1.ugcgauccgagacgucgugAgaaca..... 1  
Gi2\_11316558\_x1....cgauccgagaAgucgugggaaacacggggg..... 1  
Gi3\_28403958\_x1.....ggagacgucgugggGaca..... 1  
Gi2\_11399448\_x1.....cggagaGgucgugggaaacacggggugc..... 1

Gi3\_28866976\_x1..gcgaucggagacgucgugggaaA..... 1  
 Gi2\_11066318\_x1....auNggagacgucgugggAAC..... 1  
 GlA\_6338424\_x1..gcgaucggagacgucgugggGacacggg..... 1  
 Gi2\_11384316\_x1.....cgucgugggAACacggggugAcgaac..... 1  
 Gi3\_28788656\_x1...gaucggagacgucAuggAACacgggg..... 1  
 Gi5\_9126357\_x1.....gagacgucgugggAACacggggugccgCacu..... 1  
 Gi1\_4226016\_x1.....ucgugggAACUcggggugccgaacu..... 1  
 Gi1\_4291219\_x1.....acgucgugggAACacggggGcggca..... 1  
 Gi2\_11142003\_x1.....ggagacgucgugggAGcagggggug..... 1  
 GlA\_6021731\_x1....aucggagacgucgugAga..... 1  
 Gi5\_8830122\_x1.....cgugggAACacggggugccgaacuucU..... 1  
 Gi3\_28898506\_x1...gaucggagacgCcgugggAAC..... 1  
 Gi3\_28298559\_x1.....gggAACacggggugccga..... 1  
 Gi2\_11003932\_x1.....cgugggAACaGggggugccgaac..... 1  
 Gi3\_28798346\_x1.....ggagacgucgugggAACGcggggugccg..... 1  
 Gi5\_8831947\_x1....aucggagacgucgugggAACacgC..... 1  
 Gi3\_28717228\_x1....ucggGgacgucgugggAACacggg..... 1  
 GlA\_6278792\_x1...gaucggagacgCcgugggAAC..... 1  
 GlA\_6236719\_x1..ugcgaucggagacgucgugggAACaA..... 1  
 Gi3\_28728847\_x1..CgcgaucggagacgucgugggAAC..... 1  
 Gi5\_8882425\_x1.....gacAucgugggAACacggggugccgaacu..... 1  
 Gi2\_11342639\_x1..gcgaucggagacgucgAgggAACac..... 1  
 Gi2\_11365374\_x1.....agacguAgugggAACacggggugcc..... 1  
 Gi5\_9129798\_x1.....gugggAACacggggugGcgaac..... 1  
 Gi3\_28299218\_x1.....gagacgucgugggAACGcggggugccg..... 1  
 Gi2\_11141227\_x1.....ugggAACacCgggugccgaac..... 1  
 Gi5\_8990070\_x1.....agacgCcgugggAACacggggugccga..... 1  
 GlA\_6267152\_x1.....acgucgugggAACacggggC..... 1  
 GlA\_5981512\_x1.....acgucgugggCacacggggugccgaacu..... 1  
 Gi2\_11153262\_x1.....cgucgugggAGcagggggugccgaac..... 1  
 Gi3\_28406709\_x1.....ucgugggANcacggggugccga..... 1  
 Gi1\_4377172\_x1.....ggagacgucgugggAACacgAggugcc..... 1  
 Gi2\_11329852\_x1.....acgucgugggAACacggggGcgg..... 1  
 Gi2\_11283667\_x1.....acguGgugggAACacggggugc..... 1  
 Gi2\_11241448\_x1.....gagacgucNugggAACacggggugcc..... 1  
 Gi1\_4294247\_x1.....gugggAACacggggugccgG..... 1  
 Gi2\_11119935\_x1....ucggagaUgucgugggAACacggggugccgaac..... 1  
 Gi3\_28311670\_x1.....gggAACacggggugcAga..... 1  
 GlA\_6118693\_x1.....ggaacGcggggugccgaac..... 1  
 Gi3\_28912825\_x1.....cgucgugggAACacggggugccCaacu..... 1  
 Gi1\_4260934\_x1.....gAACacggggugcUgaac..... 1  
 Gi3\_28285457\_x1...gaucggagacgucgugggAACacgAggugcc..... 1  
 Gi3\_28752703\_x1.....guNggAACacggggugccg..... 1  
 Gi3\_28440927\_x1...gaucggagacgucgugggAACacgggU..... 1  
 Gi4\_574424\_x1.....cgAgggAACacggggugccgaac..... 1  
 GlA\_6274699\_x1.....cgugggAACacggggAgccgaacu..... 1  
 Gi1\_4289254\_x1.....CagacgucgugggAACacggggugcc..... 1

Gi3\_28835771\_x1.....gucguAggaacacggggugccga..... 1  
Gi2\_11025453\_x1.....ugggaacacggggugccgaG..... 1  
Gi2\_11143052\_x1.....gacgucgugggaacaUggggg..... 1  
Gi3\_28348224\_x1.....gucgNgggaacacggggugccgaacu..... 1  
Gi2\_11209429\_x1.....gucgugggaacacUggggugccgaac..... 1  
Gi1\_4271972\_x1.....gaacacggggCgccgaacu..... 1  
Gi2\_11033793\_x1.....ucggagaUgucgugggaacacggggugccga..... 1  
Gi2\_11405881\_x1...cAaucggagacgucgugggaaca..... 1  
Gi1\_4203667\_x1...aucggagacgucgugggaGcacgggg..... 1  
Gi3\_28335092\_x1.....gaacacggggugccgaG..... 1  
Gi2\_11253260\_x1.....ucCugggaacacggggugccgaacu..... 1  
Gi3\_28757017\_x1.....ucguAggaacacggggugc..... 1  
Gi1\_4225270\_x1.....cgugggaacacggAgugccga..... 1  
Gi3\_28586507\_x1.....ucggagacgucguAggaacac..... 1  
Gi2\_11346009\_x1...aucggagacgucgugggaacGcggggugccg..... 1  
G1a\_6297103\_x1.....gaacacggggugccgUacu..... 1  
Gi2\_11351434\_x1.....Nugggaacacggggugcc..... 1  
Gi5\_8850452\_x1.....acgucguAggaacacggggugccg..... 1  
Gi5\_8855934\_x1.....ucguggUaacacggggugccgaacu..... 1  
Gi3\_28979578\_x1.....gacgucgugggaacGcgg..... 1  
Gi2\_11194247\_x1...auNggagacgucgugggaacacggggugcc..... 1  
Gi5\_8914936\_x1.ugcgaucggagacgCcgugg..... 1  
Gi2\_11094707\_x1.....gucguggUaacacggggugccgaacu..... 1  
Gi1\_4283490\_x1.....gagacgucguggGacacggggugccgaac..... 1  
Gi3\_28283734\_x1.....ggagacgucgugUgaacacggggg..... 1  
Gi2\_11251688\_x1...cgaucAgagacgucgugg..... 1  
Gi2\_11050522\_x1.....gCcgugggaacacggggugccga..... 1  
Gi3\_28812085\_x1.....agacguAgugggaacacggggugccgaac..... 1  
G1a\_6332446\_x1.....gggaacacggAgugccgaac..... 1  
Gi1\_4288263\_x1.....gaacacggggugcGgaacu..... 1  
Gi1\_4344071\_x1...aGcggagacgucgugggaacacgggg..... 1  
G1a\_6314570\_x1.....cgugggaacacggggugccUacu..... 1  
Gi3\_28913409\_x1.....agacgucgNgggaacacggggugccgaa..... 1  
Gi3\_28545275\_x1.....acgucgugggaacacggggugcGg..... 1  
Gi2\_11212649\_x1...gaucggagacgucgugggaaA..... 1  
Gi5\_9124812\_x1...aucggagaNucgugggaacacggggugccgaacu..... 1  
Gi2\_11208194\_x1.....gggaacacggggugAcgaac..... 1  
Gi5\_8872390\_x1.....cgucgugggaacacgCgugccgaacu..... 1  
Gi1\_4191460\_x1.....ggagacgucgugggaGcacggggug..... 1  
Gi2\_11045643\_x1.....gacAucgugggaacacggggugccgaacu..... 1  
Gi3\_28406392\_x1.....ggagacgucgugggaacaUg..... 1  
Gi1\_4170861\_x1.....ggagacguGgugggaacacggggugcc..... 1  
Gi5\_9002952\_x1.....Cagacgucgugggaacacg..... 1  
G1a\_6186308\_x1.....Ugugggaacacggggugccgaac..... 1  
G1a\_6029292\_x1...aCcgagacgucgugggaacacggggugc..... 1  
Gi2\_11407091\_x1.ugcgaucggagacgucgAgggaaca..... 1  
Gi1\_4176724\_x1...gaucggagacgucgGgggaacacggggg..... 1

|                                                          |   |
|----------------------------------------------------------|---|
| Gi2_11282392_x1.....Cacgucgugggaacacggggugccg.....       | 1 |
| Gi5_8989152_x1.....cggagacgucgugggaacCggggugccga.....    | 1 |
| G1a_6107658_x1.....cggagacgucgugggaUcacggg.....          | 1 |
| Gi2_11309510_x1.....aucggagacgucGggga.....               | 1 |
| G1a_6260743_x1.....cgugggCacacggggugccgaacu.....         | 1 |
| G1a_6346181_x1.....aucggagUcgucgugggaacacggg.....        | 1 |
| Gi5_8907719_x1.....aNcacggggugccgaacu.....               | 1 |
| Gi2_11115538_x1.....aucggUgacgucgugggaacacggggugcc.....  | 1 |
| G1a_6140352_x1.....gggaacacggggugAcgaacu.....            | 1 |
| Gi1_4169860_x1.....ggagacgucgugggaacacggggGgccg.....     | 1 |
| Gi3_28650794_x1.....gggaaGacggggugccgaac.....            | 1 |
| G1a_6174635_x1.....ucgugggaacacggggGgccgaacu.....        | 1 |
| Gi1_4347899_x1.....ggaacacggggugccgaacG.....             | 1 |
| Gi2_11285815_x1.....gagacgucgugggaacacggggCgcc.....      | 1 |
| Gi3_28970846_x1.....gugggaacacggggugccgaCcuuu.....       | 1 |
| Gi4_596344_x1...cgauccgagacgucgugggaacacggg.....         | 0 |
| G1a_6220338_x1.....cggGgacgucgugggaacacggggug.....       | 1 |
| Gi2_11323507_x1.....agacAucgugggaacacggggug.....         | 1 |
| Gi3_28332733_x1.....cggagacgucgugggaacCggggugccgaac..... | 1 |
| Gi5_9108995_x1.....gugAgaacacggggugccgaa.....            | 1 |
| Gi5_8966364_x1.....ucgugggaacUcggggugccgaacu.....        | 1 |
| Gi3_28544314_x1.....gagacgucgugggaacaUggggugc.....       | 1 |
| Gi4_579113_x1.....cAucgugggaacacggggugcc.....            | 1 |
| Gi1_4253804_x1.....gaacacggggugccgaGc.....               | 1 |
| Gi3_28270302_x1.....cgugggaacacggggugcGg.....            | 1 |
| Gi1_4289869_x1.....cgugggaacacggggugccAa.....            | 1 |
| Gi2_11283553_x1.....ggagacgucAugggaacacggggg.....        | 1 |
| Gi5_8901598_x1.....gagacgucgugggaacacAgggugcc.....       | 1 |
| Gi1_4167894_x1.....cgugggaacacCggggugccgaacu.....        | 1 |
| G1a_6352813_x1.....cgucgugggaacacggUgugccgaacu.....      | 1 |
| Gi1_4257841_x1.....ucgugAgaacacggggugccgaac.....         | 1 |
| Gi3_28758458_x1.....gaacacggggugccAaacuu.....            | 1 |
| Gi3_28845923_x1.....ucgugggaacGcggggugccgaa.....         | 1 |
| Gi2_11344725_x1.....cgucgugCgaacacggggugccg.....         | 1 |
| Gi2_11248778_x1.....cgucgugggaacacggggugccGg.....        | 1 |
| Gi2_11050307_x1.....cgAagacgucgugggaacacg.....           | 1 |
| Gi5_8870040_x1.....ucgugggaacacggggUccgaacu.....         | 1 |
| Gi5_8885573_x1.....agacgucgugggaacacggggugccgaUcu.....   | 1 |
| Gi5_9012387_x1.....uggUaacacggggugccgaac.....            | 1 |
| Gi2_11304713_x1.....aucggagacgucgugggaGc.....            | 1 |
| Gi2_11294547_x1.....aucggagacCucgugggaacacggggugc.....   | 1 |
| Gi1_4317479_x1.....cgugggaCcacggggugccga.....            | 1 |
| Gi3_28505872_x1.....acgucgugggaAacggg.....               | 1 |
| Gi3_28834695_x1.....guUgugggaacacggggugccgaacu.....      | 1 |
| Gi2_11115858_x1.....gucgugggaacacgggAugcc.....           | 1 |
| Gi5_9094334_x1...gaucggagacgucgugggaUacgggg.....         | 1 |
| Gi3_28525340_x1.....ggagGcucgugggaacacgg.....            | 1 |

Gi2\_11238775\_x1...cgUucggagacgucgugggaaacacgggggu..... 1  
 Gi2\_10995451\_x1.....cggagacgucgugggaaUac..... 1  
 Gi5\_8949251\_x1.....gacgAcgugggaaacacggggugccg..... 1  
 Gi3\_28876506\_x1.....gCcgugggaaacacgggggu..... 1  
 Gi3\_28484062\_x1.....ucggagacgucgugggaaacacAgggugcc..... 1  
 Gi1\_4373741\_x1.....ucggagGcgucgugggaaacacggggugcc..... 1  
 Gi5\_9072563\_x1.....gagacgucAugggaacacggggugccgaac..... 1  
 Gi2\_11230980\_x1.....gucgugggaaacAggggugc..... 1  
 Gi1\_4389094\_x1.....gaUcacggggugccgaac..... 1  
 Gi5\_8871754\_x1.....gucgugggaaacacggggugGcgaacu..... 1  
 Gi2\_11318283\_x1.....cAgagacgucgugggaaac..... 1  
 Gl1\_6255725\_x1...gaucggagacgucgCgggaa..... 1  
 Gi2\_11183516\_x1...aucggagacgucgugggaaUcgg..... 1  
 Gi3\_28344063\_x1.....cggagacgCcgugggaaacacggggugccgaacu..... 1  
 Gi1\_4237793\_x1.....ugggaacaAggggugccgaac..... 1  
 Gi2\_11271456\_x1.....agacgucgugggaaacCcggggugccgaacu..... 1  
 Gi3\_28461471\_x1.....aCacgucgugggaaacacgggggu..... 1  
 Gi3\_28645186\_x1.....cgucgugggaaacacgUggugccgaa..... 1  
 Gi5\_9065795\_x1.ugcgauccggagacCucgug..... 1  
 Gl1\_6022297\_x1...aucggagacgucgugggaaacacgUggu..... 1  
 Gi1\_4210007\_x1.....gacgucgugggaaacacgCggugccgaacu..... 1  
 Gi1\_4278275\_x1.....agacgucgCgggaacacggggugcc..... 1  
 Gl1\_6225477\_x1...Agaucggagacgucgugggaa..... 1  
 Gi4\_576311\_x1...aucggagacgucgugggaaGcacgggggu..... 1  
 Gi1\_4359484\_x1.....Agucgugggaaacacggggugcc..... 1  
 Gi2\_11016549\_x1.....acgucgugggaaacacgAgugc..... 1  
 Gi2\_11150795\_x1.....ggagacgucgugggaaacacggggugccgaacA..... 1  
 Gi3\_28272552\_x1.....gacgucgugggaaacacggggugccgaaAu..... 1  
 Gl1\_6267886\_x1...aucAgagacgucgugggaaacacgggg..... 1  
 Gi3\_28615852\_x1.....cggagacgucgugggaaacacgGcugcc..... 1  
 Gi3\_28914168\_x1.....gagacgucNugggaacacggggugccgaac..... 1  
 Gi1\_4352745\_x1.....agacgucgugggCacacggg..... 1  
 Gi3\_28536161\_x1...aucggagacgucgugCgaacacggggugcc..... 1  
 Gi2\_11067835\_x1.....gucgugggUacacggggugcc..... 1  
 Gi3\_28519658\_x1.....cggagacgucgugggaaacacggggugccgaCcu..... 1  
 Gi2\_11037769\_x1.....gagacgucgugggaaacacggggugcAgaacu..... 1  
 Gi1\_4388622\_x1.....cgugggaaacacAgggugccgaa..... 1  
 Gi3\_28609319\_x1.....gucgugggaaacacgUggugcc..... 1  
 Gi2\_11336807\_x1.....cgNcgugggaaacacggggugccga..... 1  
 Gi3\_28910115\_x1...gaucAgagacgucgugggaaac..... 1  
 Gi1\_4351741\_x1.....ggagacgucgugggaaacacAgggugccg..... 1  
 Gi2\_11117814\_x1.....agacgucgugggaaacacggggGgc..... 1  
 Gi3\_28636792\_x1.ugcgauccgNagacgucgugggaaacacggg..... 1  
 Gi3\_28737263\_x1.....aUgucgugggaaacacggggugccga..... 1  
 Gi5\_8840126\_x1.ugcgauccggagacgucgCggga..... 1  
 Gi1\_4324705\_x1.....Cugggaacacggggugccga..... 1  
 Gi2\_11049427\_x1.....cgucgugggaaacacggggugccAaac..... 1

Gi3\_28370863\_x1...cgauCgagacgucgugggaaacacgg..... 1  
Gi5\_8950790\_x1.....acgucgugggaaacacggggugccgaUc..... 1  
Gi3\_28277162\_x1.....gaNcacggggugccgaac..... 1  
Gi5\_9009949\_x1.....gugggaacacggggugccgaCcuuu..... 1  
Gi1\_4287872\_x1.....Ccgagacgucgugggaaacacggggugcc..... 1  
Gi5\_8912591\_x1.....gCagacgucgugggaaacacggggugccgaacu..... 1  
Gi3\_28367784\_x1.....gucgugggNacacggggugccg..... 1  
Gi2\_11046776\_x1.....ggagacgucgugggaaacacggggUa..... 1  
Gi2\_11111970\_x1.....gagacgucgGgggaacacggggugcc..... 1  
Gi3\_28946482\_x1.....acgucgGgggaacacggggugccga..... 1  
Gi3\_28278938\_x1.....aucggagacgucgugggaaacacggggGg..... 1  
Gi2\_11305659\_x1.....aucggagacgucgugggaaacacggGguc..... 1  
Gi5\_8921649\_x1.....cgucgugggaaacacggggugccgC..... 1  
Gi2\_11010536\_x1...cgauCggagacgucgugAgaacacggg..... 1  
Gi2\_11343422\_x1.....gagacgucgugggaaacacggggugccU..... 1  
G1a\_6228580\_x1.....gugggaacacggggAgccga..... 1  
Gi3\_28395315\_x1.....gucgugggaaacacgggCugccga..... 1  
Gi3\_28296902\_x1.....ggaacacgggAugccgaa..... 1  
Gi5\_9118463\_x1.....gugggaacacggggugccgaacuucU..... 1  
Gi1\_4201007\_x1.....gugggaacaAggggugccgaacu..... 1  
Gi4\_579560\_x1.....gAcgugggaaacacggggugccgaacu..... 1  
Gi5\_9026751\_x1.....cggagacgNcgugggaaacag..... 1  
Gi1\_4377469\_x1.....aucggagacgucgugggGcacggggugc..... 1  
Gi5\_8978347\_x1.....gugNgaacacggggugccgaac..... 1  
Gi1\_4353662\_x1.....ucgugggaaNcacggggugccga..... 1  
Gi3\_28701033\_x1.....ucgugggaaacacggggUacc..... 1  
Gi4\_581968\_x1.....ugggUacacggggugccgaacu..... 1  
Gi2\_11101820\_x1.....gagacUucgugggaaacacggggugccgaac..... 1  
G1a\_6104325\_x1.....Gggagacgucgugggaaacacggggug..... 1  
Gi2\_11288922\_x1.....aucggagacguUgugggaaacacggg..... 1  
Gi5\_9042728\_x1.....Ugugggaaacacggggugccg..... 1  
Gi5\_9028734\_x1.....agacgucgugggaaacacggggC..... 1  
Gi5\_9133202\_x1.....aucggagaAgucgugggaaacag..... 1  
Gi1\_4296549\_x1.....ugggaacacggggugccgG..... 1  
Gi2\_11149660\_x1.....cgucgugggUacacggggugccgaacu..... 1  
G1a\_6010336\_x1.....Cugggaacacggggugccgaa..... 1  
Gi3\_28962588\_x1.....gUacacggggugccgaacu..... 1  
Gi5\_9001834\_x1.....acgucgugggGcacggggugcc..... 1  
Gi2\_11396301\_x1.....aUacgucgugggaaacacggggugccgaa..... 1  
Gi3\_28390360\_x1.....gacNucgugggaaacacggggugccgaac..... 1  
Gi5\_9120656\_x1.....gaCcacggggugccgaac..... 1  
Gi1\_4212620\_x1.....acgucgugggaaacacggggugccAaacuu..... 1  
Gi3\_28419620\_x1.....agacgucgugggUacacggggugccgaacu..... 1  
Gi1\_4357332\_x1.....ucggagGcucgugggaaacacggg..... 1  
Gi2\_11395899\_x1.....ucggagacgucgugggGcacacggggU..... 1  
Gi5\_8901159\_x1.....gucgugggaaacacggggugccgCac..... 1  
G1a\_6004252\_x1.uCcgauCggagacgucgugggaa..... 1

|                 |                                     |   |
|-----------------|-------------------------------------|---|
| Gi1_4212425_x1  | .....uggaacacggCgugccgaac           | 1 |
| Gi5_8993553_x1  | .....acgucguggaacacgAggugccga       | 1 |
| Gi1_4199754_x1  | .....cggagacgucguggaGca             | 1 |
| Gi1_4389112_x1  | .....gacgucguggCacacgggugccgaac     | 1 |
| Gi2_11049929_x1 | .....ucguggaacacggCgugccgaac        | 1 |
| Gi5_9013684_x1  | .....ggagacguNguggaaca              | 1 |
| Gi2_10995035_x1 | .....acacgggugccgaacuu              | 0 |
| Gi5_9085140_x1  | .....gaNcggagacgucguggaacacgggugc   | 1 |
| Gi3_28387725_x1 | .....Ggacgucguggaacacgggugccgaa     | 1 |
| G1a_6267144_x1  | .....gggCacacgggugccgaa             | 1 |
| Gi3_28283830_x1 | .....ucguAggaacacgggugcc            | 1 |
| Gi1_4200769_x1  | .....ggaacacgCggugccgaacu           | 1 |
| Gi5_8951174_x1  | .....aucggagacgucguggCacacggggu     | 1 |
| Gi1_4353970_x1  | .....ggaacacgggAugccgaa             | 1 |
| G1a_6293632_x1  | .....aucggagacgCcguggaacacggggu     | 1 |
| Gi1_4230356_x1  | .....uggaacacgggugccgaCcuu          | 1 |
| Gi5_9080605_x1  | .....ggaacacgggCugccgaac            | 1 |
| Gi1_4180935_x1  | .....agacgucguggaacacAgg            | 1 |
| G1a_6228389_x1  | .....aucggagacgucguggUacacgggug     | 1 |
| G1a_5996251_x1  | .....aUcacgggugccgaacu              | 1 |
| Gi2_11117672_x1 | .....gcaucggagacgucguggaacGc        | 1 |
| Gi3_28550286_x1 | .....uggaaAacgggugccg               | 1 |
| Gi2_11376716_x1 | .....cgucguAggaacacgggugccgaac      | 1 |
| Gi3_28684587_x1 | .....ucguCggaacacgggugccgaa         | 1 |
| Gi2_11093380_x1 | .....uggaacUcgggugccg               | 1 |
| Gi1_4182043_x1  | .....gacguUguggaacacgggugccgaacu    | 1 |
| Gi5_9022941_x1  | .....cgCgggaacacgggugccg            | 1 |
| Gi3_28721043_x1 | .....ucggagacgucguggCacacgg         | 1 |
| Gi5_8898858_x1  | .....cggagacgucgCgggaacacgg         | 1 |
| Gi2_11154505_x1 | .....ucggagacgucguggaacacgggGgc     | 1 |
| Gi3_28776890_x1 | .....cggagacgucgGgggaacacgggugc     | 1 |
| Gi2_11162846_x1 | .....cggagacgucguggaacacUggggu      | 1 |
| Gi2_11377828_x1 | .....uUggagacgucguggaacacggggu      | 1 |
| Gi3_28913129_x1 | .....gugggaUcacgggugccgaa           | 1 |
| Gi3_28450023_x1 | .....ucgugggaUcacgggugccgaac        | 1 |
| Gi5_8901062_x1  | .....gugggaacacgggugccgaGcuuu       | 1 |
| Gi5_8919435_x1  | .....ucggagacgucgGgggaacacg         | 1 |
| Gi1_4185100_x1  | .....gacgCguguggaacacgggugccgaacu   | 1 |
| Gi2_11379577_x1 | .....gaucggagacgucguggaacacggAg     | 1 |
| Gi2_11085992_x1 | .....uggaacacgggugccgaacuA          | 1 |
| Gi3_28926728_x1 | .....agacgucguggGacacggggu          | 1 |
| Gi1_4321439_x1  | .....Cgagacgucguggaacacgggugccg     | 1 |
| Gi3_28310555_x1 | .....cgUucggagacgucguggaacacgggugcc | 1 |
| G1a_6154411_x1  | .....ucggagacgucguggCacacggggu      | 1 |
| Gi5_9065802_x1  | .....uggaacacgggCgccaacu            | 1 |
| Gi3_28371975_x1 | .....cggaUacgucguggaacacggg         | 1 |
| Gi3_28732886_x1 | .....gaucggagacgucguggGacacgg       | 1 |



|                                                             |   |
|-------------------------------------------------------------|---|
| Gi5_8848723_x1.....guggaacaacggggugAcgaacuu.....            | 1 |
| Gi2_11149992_x1.....cgucgugggaacCcggggugccgaa.....          | 1 |
| Gi1_4267719_x1.....acgucgugggaacacggggugccgG.....           | 1 |
| Gi3_28529042_x1.....cggagacgucgugggaacacggggugGc.....       | 1 |
| Gi3_28366023_x1.....aucggagaNgucgugggaacacggggugccgaac..... | 1 |
| Gl1a_6310935_x1.....acgucgugNgaacacggggugccgaacu.....       | 1 |
| Gi4_581821_x1..cgaucggagacgucgugggaacacg.....               | 0 |
| Gi2_11293961_x1..gcgaucggagacgucCuggga.....                 | 1 |
| Gi5_9122136_x1.....ggagacgucgugggUacacggggugccgaac.....     | 1 |
| Gi3_28944585_x1.....gagacgucgugggaacacggggugccgCac.....     | 1 |
| Gi5_9136098_x1.....gucgugggaacacggggCgcccgaac.....          | 1 |
| Gi1_4265337_x1.....cgucgugggaacacggggugcA.....              | 1 |
| Gi3_28863567_x1...gaucCgagacgucgugggaacacggg.....           | 1 |
| Gi3_28984405_x1.....gggaacacCgggugccga.....                 | 1 |
| Gi1_4370999_x1.....ugggGacacggggugccgaacuu.....             | 1 |
| Gi2_11122216_x1.....ucgugggaacacgggUugccgaacu.....          | 1 |
| Gi1_4202225_x1.....ggagacgucgugggaacacggggA.....            | 1 |
| Gi2_11186675_x1.....guAgugggaacacggggugc.....               | 1 |
| Gi5_9031850_x1.....gucgugggaacCcggggugc.....                | 1 |
| Gi3_28582264_x1.....ggagacgucgugggGacacggggugccgaacu.....   | 1 |
| Gl1a_6264754_x1.....gaacacggAgugccgaacu.....                | 1 |
| Gi2_11134096_x1.....cgucgugggaacacggggugccgaaA.....         | 1 |
| Gi2_11098890_x1...gaucggagacgucguggCa.....                  | 1 |
| Gl1a_6194097_x1.....aacacgAggugccgaacu.....                 | 1 |
| Gi2_11359988_x1.....aucggagacgucguggCaacacggggug.....       | 1 |
| Gi5_8842613_x1.....aucggagaNgucgugggaacacggggugcc.....      | 1 |
| Gi3_28698219_x1.....ucggagacgucgCgggaacacg.....             | 1 |
| Gi1_4186002_x1.....cggagacgucgugggaacacggggAgcc.....        | 1 |
| Gi2_11123841_x1..Acgaucggagacgucgugggaacacgg.....           | 1 |
| Gi5_8928931_x1.....aucggagacCucgugggaacac.....              | 1 |
| Gi1_4225664_x1..gcgaucggNgacgucgugggaaca.....               | 1 |
| Gi5_8880969_x1...gaucggagacgucgugggaaAacggggg.....          | 1 |
| Gi4_600211_x1.....ucgugggaacacggggugccgGacu.....            | 1 |
| Gi3_28595566_x1.....cGagacgucgugggaacacggggugc.....         | 1 |
| Gi3_28271374_x1....auGggagacgucgugggaacac.....              | 1 |
| Gi3_28593955_x1...gaucggagacgucguggG.....                   | 1 |
| Gi3_28358968_x1.....cgucguggUaacacggggugccgaacu.....        | 1 |
| Gi2_11089030_x1.....gucgugggGacacggggg.....                 | 1 |
| Gi2_11227566_x1.....cgucgugggaacCcggggugccgaac.....         | 1 |
| Gi1_4160997_x1.....ggagacgucgugggaacacggggugcU.....         | 1 |
| Gi5_8892493_x1.....cgucgugggaacaUggggugc.....               | 1 |
| Gi3_28685726_x1.....ggagacgucgugggaacCcgggg.....            | 1 |
| Gi3_28685508_x1.....gugggaUcacggggugccg.....                | 1 |
| Gi3_28341371_x1.....ucggUgacgucgugggaacacg.....             | 1 |
| Gi3_28674912_x1.....cgGcgugggaacacggggug.....               | 1 |
| Gl1a_6167777_x1.....ggaacacggggugccgaa.....                 | 0 |
| Gl1a_5985725_x1....aCcgagacgucgugggaacacg.....              | 1 |

Gi1\_4243622\_x1.....ucgAagacgucgugggaacacggg..... 1  
Gi5\_8916538\_x1.....ggagacgucgugggaGca..... 1  
Gi3\_28708404\_x1.....cgucgugggaacacgggA..... 1  
Gi3\_28709324\_x1.....ucggagacgucguAggaacacggggugccga..... 1  
Gi3\_28431727\_x1.....Uagacgucgugggaacacggggugc..... 1  
Gi3\_28882733\_x1.....gacgucgugggaacacgAggugccgaac..... 1  
Gi2\_11258111\_x1.....gaucggCgacgucgugggaaca..... 1  
Gi2\_11002789\_x1.....acUucgugggaacacggggugcc..... 1  
Gi5\_8920118\_x1.ugcgauccgagacAucgug..... 1  
Gi5\_8986576\_x1.....agacgucgugggGacacggggg..... 1  
Gi3\_28613139\_x1.....aucggagacgucgGgggaacacgg..... 1  
Gi3\_28831454\_x1.....gucgugggaacacggUGugccgaac..... 1  
G1a\_6061559\_x1.....gugggaaUacggggugcc..... 1  
Gi2\_11316565\_x1.....gagacgucNugggaacacggggugccg..... 1  
Gi3\_28920180\_x1.....aucggagacgucgugggaacaAgg..... 1  
Gi1\_4315132\_x1.....aUacgucgugggaacacggggug..... 1  
Gi2\_11177349\_x1.....gaucggagacguUgugggaacacg..... 1  
Gi2\_11066590\_x1.....acgucgugggaCcacggggugccgaa..... 1  
Gi5\_9127997\_x1.....agacgucgugggaacacgAggugccgaacu..... 1  
Gi2\_11326366\_x1.....uCGgaacacggggugccgaacuu..... 1  
Gi2\_11192913\_x1.....gaucggagacgucgugggCacacgggg..... 1  
Gi1\_4224402\_x1..gcgaCcgagacgucgugggaacacggggugcc..... 1  
G1a\_6102441\_x1.....gucgGgggaacacggggugccgaacu..... 1  
Gi5\_8958855\_x1.....Gcucgugggaacacggggugccgaacuu..... 1  
Gi3\_28484871\_x1.....gGcucgugggaacacggggugc..... 1  
Gi5\_9002715\_x1.....acgucAugggaacacggggugccgaac..... 1  
Gi3\_28362740\_x1.....gacgucgugggaGacggggugcc..... 1  
Gi2\_11363769\_x1.....ggagacgucgugggaacacggg..... 0  
Gi4\_598628\_x1.....ucgugggaacacggggugccgaaAu..... 1  
Gi1\_4310333\_x1.....ucggagacgucgugggaacacggggugccgaCcu..... 1  
Gi2\_11184356\_x1..Naucggagacgucgugggaacacgggg..... 1  
Gi3\_28621897\_x1.....cgugggaacacggggugGcga..... 1  
G1a\_6219202\_x1.....ggaacacgUggugccgaacu..... 1  
Gi3\_28764172\_x1.....acacggggugcAgaacuu..... 1  
G1a\_6065618\_x1.....gggaacacggggugccgCac..... 1  
Gi3\_28734763\_x1.....aucggagacgucguCggaacacggggugcc..... 1  
Gi3\_28545922\_x1..cgauccgagacgucguggA..... 1  
Gi1\_4198265\_x1.....ggaacacggggugUcgaac..... 1  
Gi5\_8989656\_x1.....cggagacgNcgugggaacacggg..... 1  
Gi1\_4229685\_x1.....gaucggagacgAcguggga..... 1  
Gi3\_28611007\_x1.....ucgugggaacaUggggugccgaa..... 1  
Gi2\_11227110\_x1.....gaucggagGcucgugggaaca..... 1  
Gi5\_8918902\_x1.....Gucggagacgucgugggaacacggggugc..... 1  
Gi5\_9052335\_x1.....aucggagacgucgugggaacGcggggg..... 1  
Gi3\_28817096\_x1..gNucggagacgucgugggaacacgggg..... 1  
G1a\_5994533\_x1.....cgugggaaUacggggugcc..... 1  
Gi3\_28753298\_x1.....Cagacgucgugggaacacggggugccga..... 1

|                                                         |   |
|---------------------------------------------------------|---|
| Gi5_9075514_x1.....cgucgugggaacacggggCgcc.....          | 1 |
| Gi1_4296039_x1.....ucggagCcgucgugggaacacg.....          | 1 |
| Gi3_28983947_x1.....cgNgggaacacggggugccg.....           | 1 |
| Gi2_11243256_x1.....cgugggaacacggggugGcg.....           | 1 |
| Gi5_8942592_x1.....gagacgCcgugggaacacggggugccgaacu..... | 1 |
| Gi2_11221812_x1.....cgugggaacacggggugccCa.....          | 1 |
| Gi2_11220667_x1.....ucgugggaacCggggugcc.....            | 1 |
| Gi5_9063163_x1.....gagacgucgugggaacacggggugccga.....    | 0 |
| Gi5_9052491_x1.....gggaacacgggAugccgaa.....             | 1 |
| Gi2_11080532_x1.....gucNugggaacacggggugcc.....          | 1 |
| Gi1_4194444_x1.....gaUacgucgugggaacacggggugccgaac.....  | 1 |
| Gi3_28915272_x1.....gucgugggaacacggAgugccgaa.....       | 1 |
| Gi2_11377321_x1.....gucgugAgaacacggggugcc.....          | 1 |
| G1a_6066440_x1...gaucggagacAucgugggaacacggggg.....      | 1 |
| Gi2_11052966_x1.....cgugggaacUcggggugc.....             | 1 |
| G1a_6273551_x1...gaucggagacgucgugggaacacAgg.....        | 1 |
| Gi1_4385542_x1.....ugggaacacggggugGcgaacu.....          | 1 |
| Gi5_9057956_x1.....Ucgcgugggaacacggggugcc.....          | 1 |
| Gi2_11081520_x1.....cgugggaacacUgggugccga.....          | 1 |
| Gi2_11098686_x1.....acgCcgugggaacacggggugc.....         | 1 |
| Gi1_4218111_x1.....ugggaacGcggggugccgaacu.....          | 1 |
| Gi3_28282999_x1.....cgucguggCaacacggggugccgaa.....      | 1 |
| G1a_6023048_x1...aucggagacgucgugggaacGacgg.....         | 1 |
| Gi3_28386764_x1...gCucggagacgucgugggaacacgggg.....      | 1 |
| Gi5_9094470_x1...gauUggagacgucgugggaacacgg.....         | 1 |
| Gi3_28282448_x1.....cggagacgucgGgggaacacggggugccga..... | 1 |
| Gi2_11178993_x1.....ucggagacguUgugggaacacgggg.....      | 1 |
| Gi3_28923617_x1.....ggaacacgCggugccgaac.....            | 1 |
| Gi2_11266148_x1...cgaucggagacgucgugggaaUacggggug.....   | 1 |
| Gi3_28469301_x1...gaucggagacgucgugggaaUacggggug.....    | 1 |
| Gi2_11377300_x1.....guggCaacacggggugccgaa.....          | 1 |
| Gi3_28884493_x1.....gagacgucgugggaCcacgggugccgaac.....  | 1 |
| Gi5_8830987_x1.....cgucgugggaacCggggugccgaa.....        | 1 |
| Gi3_28261837_x1...aucggaAacgucgugggaacac.....           | 1 |
| Gi3_28657938_x1.....agacgucgugggaacaAggggugccgaac.....  | 1 |
| Gi3_28942390_x1.....guUgugggaacacggggugccg.....         | 1 |
| G1a_6354139_x1...gaucggagacgucgCgggaacacg.....          | 1 |
| Gi5_9002070_x1.....gacgucgugggaacacggggugccgaaGu.....   | 1 |
| G1a_6032606_x1.....gugggaacacggAgugcc.....              | 1 |
| Gi4_580071_x1.....agacgucgugggaGcacggggugcc.....        | 1 |
| Gi2_11114016_x1...aucggagacgucguUggaacacgggg.....       | 1 |
| Gi3_28678342_x1...gaucggagacgCcgugggaac.....            | 1 |
| Gi2_11371211_x1...aucggagacguUgugggaaca.....            | 1 |
| Gi2_11047973_x1.....cacggggugccgaacuuu.....             | 0 |
| G1a_6133257_x1.....gugggaacCggggugccga.....             | 1 |
| Gi5_8884807_x1.....cgGcuggggaacacggggugcc.....          | 1 |
| G1a_6239717_x1...ggagacgucgugggaacacggggGgcc.....       | 1 |

Gi3\_28682920\_x1.....cgucgugggaacacggggugccUaac..... 1  
Gi5\_8838329\_x1.....ucgugggaacacUgggugccgaac..... 1  
Gi5\_9085734\_x1.ugcgauccggGgacgucguggg..... 1  
Gi3\_28727375\_x1...gUucggagacgucguggggaacacgg..... 1  
Gi3\_28508747\_x1.....gaUacgucgugggaacacggggugcc..... 1  
Gi5\_8846803\_x1.....agUcgucgugggaacacggggugccga..... 1  
Gi5\_9132143\_x1.....gugggaacacggggugUcg..... 1  
Gi1\_4189844\_x1.....ucgugggUacacggggugccgaac..... 1  
Gi5\_9061018\_x1.....gagacgucgugggaaUacggggugcc..... 1  
Gi5\_9137869\_x1.....cgucgCgggaacacggggugccga..... 1  
Gi1\_4386832\_x1.....cgugggaacacggUgugccgaacu..... 1  
Gi3\_28412574\_x1...cgauccggagacguAguggg..... 1  
Gi1\_4301727\_x1.....gGgggaacacggggugccgaa..... 1  
Gi1\_4286095\_x1.....ggagacgucgugggaUacggggugcc..... 1  
Gi3\_28643295\_x1.....ucgugggaacacggggUcccgaac..... 1  
Gi1\_4195261\_x1.....ggaNcacggggugccgaacu..... 1  
Gi3\_28562618\_x1.....cggagacgucgugggaacacggggugccgU..... 1  
Gi1\_4309413\_x1.....ucgugggaacacggAgugcc..... 1  
Gi2\_11049566\_x1.....ggagGcgucgugggaacacggggugccga..... 1  
Gi2\_11304503\_x1...gaucggagacgucguggggaacacgggCu..... 1  
Gi2\_11396022\_x1.....agacgucguggAaacacggggugccgaacu..... 1  
Gi3\_28665898\_x1.....aucggagacgucguggCaacac..... 1  
G1a\_6319371\_x1...gaucggagNcgucgugggaacacgg..... 1  
Gi2\_11026953\_x1.....Ugucgugggaacacggggugc..... 1  
G1a\_6277796\_x1.....gacAucgugggaacacggggugccgaacu..... 1  
G1a\_6296126\_x1...Gucggagacgucgugggaacacggggug..... 1  
G1a\_6354557\_x1...aucggagacgucgugggUacacggggugcc..... 1  
G1a\_6080479\_x1...aucggagacgCcgugggaacacggg..... 1  
Gi2\_11096584\_x1.....agacgucgugggaacacggCgugccgaacu..... 1  
Gi2\_11274013\_x1.....gagGcgucgugggaacacggggugcc..... 1  
Gi3\_28884445\_x1...gaucgAagacgucguggga..... 1  
Gi1\_4171532\_x1.....cgugggaaNacggggugccgaa..... 1  
Gi3\_28905800\_x1.....gagacgucgugggaacacggggugccgaGcu..... 1  
Gi2\_11216679\_x1.....ggagacgucgugggaacacggggugGc..... 1  
Gi3\_28966487\_x1...aucggagacgucgugggC..... 1  
Gi2\_10992763\_x1...cgauccggaAacgucguggga..... 1  
Gi1\_4272561\_x1.ugcgaCcgagacgucguggga..... 1  
Gi2\_11205191\_x1cugcgauNagacgucgugggaacac..... 1  
Gi2\_11182627\_x1.....cgugggUacacggggugcc..... 1  
Gi3\_28808487\_x1...gaucgAagacgucgugggaacacggggugcc..... 1  
Gi2\_11043145\_x1.....gugggaCcacggggugccg..... 1  
G1a\_6113405\_x1...aucggagUcgucguggga..... 1  
Gi3\_28266750\_x1...cgauccggagacgucgugggaCcacggggugc..... 1  
Gi2\_11313935\_x1.....guCggaacacggggugccga..... 1  
Gi2\_11244373\_x1.....cgugggaacacgggCugc..... 1  
Gi1\_4214702\_x1.....gggaacacggggugccgCacuu..... 1  
G1a\_6178726\_x1...Caucggagacgucgugggaacacggg..... 1

Gi3\_28693973\_x1.....agacgucgugggaacacgggAugcc..... 1  
 Gi3\_28855034\_x1....gaCcgagacgucgugggaacacggg..... 1  
 Gi1\_4204723\_x1.....ggaacacgggAugccgaac..... 1  
 Gl1\_6309915\_x1.....gAagacgucgugggaacac..... 1  
 Gi1\_4353009\_x1.....ggaacacggggugccAaacuu..... 1  
 Gi3\_28421892\_x1.....cgugggaacacgggguUcc..... 1  
 Gi5\_8938603\_x1.....acgucgCgggaacacggggugccga..... 1  
 Gi3\_28323001\_x1.....ucgugggaacacggggCg..... 1  
 Gi3\_28451035\_x1....aucggagaGgucgugggaacacggg..... 1  
 Gi5\_8982859\_x1....aAcggagacgucgugggaacacg..... 1  
 Gi3\_28640773\_x1.gcgauccgCgacgucgugggaac..... 1  
 Gi5\_8834795\_x1.....caUggggugccgaacuuu..... 1  
 Gi3\_28496355\_x1.....cgucgugAgaacacggg..... 1  
 Gi5\_8868039\_x1.....acgucgGgggaacacggggugccg..... 1  
 Gi1\_4220550\_x1.....uCggaacacggggugccg..... 1  
 Gi1\_4319560\_x1.ugcgauccgagacguAguggga..... 1  
 Gi5\_8942100\_x1....aucggagaUgucgugggaacacggggugc..... 1  
 Gi3\_28749840\_x1.....agGcgucgugggaacacggg..... 1  
 Gi3\_28641239\_x1....gaucgAagacgucgugggaacacg..... 1  
 Gi1\_4374172\_x1.....Ugugggaacacggggugccgaa..... 1  
 Gi2\_11101105\_x1.....cggagacgucgugggaacUc..... 1  
 Gi2\_11066836\_x1.....ucCugggaacacggggugccgaac..... 1  
 Gi2\_11334057\_x1.....acgucgugggaacacggggUac..... 1  
 Gi3\_28316642\_x1....gauGggagacgucgugggaacacggggu..... 1  
 Gl1\_6050312\_x1.....gggaacacggggGgccgaac..... 1  
 Gi1\_4357092\_x1.....cgucgugggaacacggggugcGgaacu..... 1  
 Gi2\_11075460\_x1.....cgugggUacacggggugccga..... 1  
 Gi3\_28383594\_x1.....gucUugggaacacggggugccgaacu..... 1  
 Gi5\_8859094\_x1....aAcggagacgucgugggaacacggggu..... 1  
 Gi3\_28439009\_x1....auAggagacgucgugggaac..... 1  
 Gi3\_28376670\_x1.....gucgugggaacacggggugcUga..... 1  
 Gi1\_4233384\_x1.....cguUggaacacggggugccgaac..... 1  
 Gi2\_11337136\_x1....gaucggagacgucgugggUacacggg..... 1  
 Gl1\_6286137\_x1.....Agagacgucgugggaacacggggu..... 1  
 Gi3\_28723983\_x1.....acgCcgugggaacacggggugccga..... 1  
 Gi3\_28470174\_x1.....acgucgugggaacacgggCugccgaacu..... 1  
 Gi3\_28639240\_x1....aCcgagacgucguggga..... 1  
 Gl1\_6017874\_x1.....gugggaacacgggAugccgaac..... 1  
 Gi3\_28423613\_x1.....gCcgugggaacacggggugccgaa..... 1  
 Gi2\_11392362\_x1.....cgucgugggaacacCgggugcc..... 1  
 Gl1\_6105516\_x1.....ugggaacacggUgugccgaacu..... 1  
 Gi3\_28358481\_x1.....cgucgugUgaacacggggugccgaac..... 1  
 Gi3\_28626442\_x1.....gucgugggaacacggggUccgaacu..... 1  
 Gl1\_6240322\_x1....gaAcggagacgucgugggaacacggggug..... 1  
 Gi2\_11383022\_x1.....ggagacgucgugggGacacggggugccga..... 1  
 Gi2\_11050836\_x1.....cgucgugggaacacggggUacc..... 1  
 Gi5\_8864756\_x1.....cgugggaacacggggugccgaacuuu..... 0

Gi5\_8852407\_x1.....guggAaacacggggugccg..... 1  
Gi2\_11141086\_x1.....gCagacgucgugggaacacggggugc..... 1  
Gi5\_9109384\_x1....aucggagacgucgugggaacGcggggugc..... 1  
Gi2\_11279985\_x1.ugcgaucggagCcgucguggga..... 1  
Gi3\_28352131\_x1....aucgAagacgucgugggaacacggggugcc..... 1  
Gi5\_9002749\_x1.....agacgCcgugggaacacggggugcc..... 1  
Gi1\_4387461\_x1.....ucgugggaacacggggugcU..... 1  
Gi1\_4255511\_x1.....gugggCacacggggugccgaacu..... 1  
Gi2\_11140796\_x1...Caucggagacgucgugggaac..... 1  
G1a\_6256606\_x1...gaucggagaUgucgugggaacacggg..... 1  
G1a\_6096799\_x1....aucggGgacgucgugggaacacggggug..... 1  
Gi5\_9117987\_x1.....cggagacgucguggAaacacggggugcc..... 1  
Gi4\_573194\_x1.....gggaacacggggGgccgaac..... 1  
Gi5\_9093918\_x1.....acgucgugggaacacggCgugccgaacu..... 1  
Gi3\_28544087\_x1...gaucggagacgucguAggaacacgggg..... 1  
Gi3\_28305390\_x1...gaucUgagacgucgugggaacacgggg..... 1  
Gi3\_28329246\_x1.....gagacgucguggUacacg..... 1  
G1a\_6048821\_x1...gaucggagacguGgugggaacacggg..... 1  
Gi2\_11051109\_x1.....acgucgugggaacacAgggugccgaac..... 1  
Gi1\_4251096\_x1.....ugggaacacggggugccgaCc..... 1  
Gi2\_11396992\_x1.....Uagacgucgugggaacacg..... 1  
Gi3\_28773605\_x1.....ucgugggaacacggggAgccgaa..... 1  
Gi3\_28802363\_x1.....Acgugggaacacggggugccgaa..... 1  
Gi1\_4358823\_x1.ugcgaucggagacgucgugggG..... 1  
Gi3\_28688954\_x1....aucggagacgucgugggaacUcg..... 1  
Gi2\_11081759\_x1.....ucguggAaacacggggugcc..... 1  
Gi1\_4236708\_x1.....cgucgugggaacacAgggugc..... 1  
Gi2\_11340820\_x1.....Cgagacgucgugggaacacgggg..... 1  
Gi2\_11196410\_x1.....Aacgucgugggaacacggggugccgaac..... 1  
Gi2\_11337680\_x1...cgaCcgagacgucgugggaaca..... 1  
Gi1\_4294699\_x1.....gugggaacacggggugAcg..... 1  
Gi2\_11283134\_x1.....cguGgugggaacacggggugccgaacu..... 1  
Gi2\_11327067\_x1.....acgucgugggaacacggggUc..... 1  
Gi2\_11181534\_x1.....ggCaacacggggugccgaac..... 1  
G1a\_5990736\_x1...Uaucggagacgucgugggaacacgggg..... 1  
Gi1\_4325097\_x1.....acgucgugNgaacacggggugccg..... 1  
Gi3\_28591313\_x1.....gucgugggGacacggggugccg..... 1  
Gi3\_28317941\_x1.....agacgucgugggaGcacgggg..... 1  
Gi1\_4328034\_x1.....gagGcugcugugggaacacggggugccgaacu..... 1  
Gi3\_28951396\_x1...gaucggagacgucgugggGacacggggug..... 1  
Gi2\_11345048\_x1.....cgucgugCgaacacggggug..... 1  
Gi5\_8922883\_x1.....agacgucgugggaacacggggCgcc..... 1  
Gi5\_8830799\_x1.....aaUacggggugccgaacuuu..... 1  
Gi1\_4233892\_x1.....gCcgugggaacacggggugccgaac..... 1  
G1a\_6269880\_x1.ugcgaucggagacgucgugggaacacggggG..... 1  
Gi3\_28312571\_x1.....ggagacgucgugggaacacggc..... 1  
Gi5\_8940460\_x1....aucggagacgucgugggaGca..... 1

Gi3\_28323104\_x1.....cgucgugggGacacggggu..... 1  
Gi2\_11269920\_x1.....ucggagacgucgugggaacacUgggugc..... 1  
Gi2\_11380780\_x1.....gucgugggaacacggggAgcc..... 1  
G1a\_6198867\_x1.ugcgauccgagGgucgugggaacac..... 1  
Gi5\_8930543\_x1.....ucggagacgucAugggaacacg..... 1  
Gi1\_4170323\_x1.....gugggaaUacggggugccgaacuu..... 1  
Gi3\_28834777\_x1.....gacgucgugggaacacggAgu..... 1  
Gi3\_28691979\_x1.....gagGcgucgugggaacacggggugccga..... 1  
Gi1\_4328951\_x1.....acgucgugggaacacgAggugcc..... 1  
G1a\_6359702\_x1.....cgugggaacacgAggugcc..... 1  
Gi2\_10995824\_x1.....gagacgucgugggaacacggggugccgaGcu..... 1  
Gi1\_4377348\_x1.....acgucgugggaacGcggggugccg..... 1  
Gi3\_28314915\_x1.....ucgugggCacacggggugc..... 1  
Gi1\_4226117\_x1.....gacgucgugggaacacggggugcA..... 1  
Gi3\_28898451\_x1.....cggagacgucgugggaacacggCgu..... 1  
Gi1\_4308148\_x1.....Aagacgucgugggaacacggggugcc..... 1  
Gi1\_4196822\_x1.....cggGgacgucgugggaacacggggugccgaacu..... 1  
Gi5\_9091988\_x1.....aucggagacgucgugggaUcacggg..... 1  
Gi3\_28757754\_x1.....agacgucgugggaacacggA..... 1  
Gi2\_11051578\_x1.....aucggagacgucAgggaacacggggu..... 1  
Gi3\_28406659\_x1.....gacgucgugggaacCgggggu..... 1  
Gi1\_4173509\_x1.....cgucgugggaacacggggugcAgaacu..... 1  
Gi2\_11355927\_x1.....cggagGcgucgugggaacacg..... 1  
Gi3\_28441725\_x1..gcgGucggagacgucgug..... 1  
Gi2\_11365008\_x1.....cgucgugUgaacacggggugccg..... 1  
Gi1\_4356119\_x1.....ucggagacgucgugggaGcacggggugc..... 1  
Gi2\_11095363\_x1.....cggagacguGgugggaacacggggugc..... 1  
Gi2\_11089647\_x1.....aucCgagacgucgugggaacacggggugcc..... 1  
Gi1\_4245204\_x1.....Ugucgugggaacacggggugccgaac..... 1  
Gi1\_4263470\_x1.....gggaGcacggggugccgaacuu..... 1  
Gi3\_28368727\_x1.....gagacguUgugggaacacggggugcc..... 1  
Gi2\_11168202\_x1.....gugNgaacacggggugccgaa..... 1  
Gi2\_11377774\_x1.....aucggaCacgucgugggaacacggggug..... 1  
Gi5\_8885207\_x1.....acuuuccagcgccugcugcAcacc..... 1  
Gi3\_28310791\_x1.....Uggagacgucgugggaacacggggugccgaa..... 1  
Gi1\_4235681\_x1.....gagacgucgugggGacacggggugccg..... 1  
Gi1\_4220624\_x1.....ucgugggaacacggggUccgaacu..... 1  
Gi3\_28291481\_x1.ugcgauccgagGcgucgugggaaca..... 1  
G1a\_6162315\_x1.....ucgugggaNcacggggugccgaacu..... 1  
Gi2\_11116877\_x1.....cgucguCggaacacggggugc..... 1  
Gi5\_9126180\_x1.....gugggaacacggggugGcgaacuu..... 1  
Gi5\_9002969\_x1.....gucgugggaGcacggggugccgaac..... 1  
Gi4\_568442\_x1.....cgugggaacacggggugccgCac..... 1  
Gi5\_8956334\_x1.....cgucguggNaacacggggugccgaacuu..... 1  
Gi5\_9062151\_x1.....ugggaacacggggugccgUacu..... 1  
Gi2\_11244921\_x1.....cggagacgucgugggaacacggggAg..... 1  
G1a\_6223544\_x1.....cgugAgaacacggggugccg..... 1

Gi3\_28864370\_x1.....Agagacgucgugggaacacggggugccga..... 1  
Gi3\_28389538\_x1.....gucgugggaacacgCggugccgaacu..... 1  
Gi3\_28275135\_x1...gaucggaCacgucgugggaacacggg..... 1  
Gi1\_4334886\_x1.....acacggggugccgGacuu..... 1  
Gi5\_8926581\_x1.ugcgUucggagacgucgug..... 1  
G1a\_6085353\_x1....aucggagacgucAugggaacacggggu..... 1  
Gi1\_4225351\_x1.....Aaacacggggugccgaacu..... 1  
Gi2\_11185723\_x1.....cggagacgucGgggaacacggggugccgaac..... 1  
Gi2\_11013046\_x1.....ggagaGgucgugggaacacggggugc..... 1  
Gi2\_11052282\_x1....aucggagacgucgugCgaacacggg..... 1  
Gi3\_28277164\_x1...gauUggagacgucgugggaacacggggug..... 1  
Gi2\_11399145\_x1.....Cgggaacacggggugccgaa..... 1  
Gi5\_9112394\_x1...gaucggagacgucgugggaGcacgg..... 1  
Gi2\_11344286\_x1....cgucgugggaacacgUggugc..... 1  
Gi5\_8838874\_x1.....cgugggaacacgggUugccga..... 1  
Gi5\_9057239\_x1.....gucgugAgaacacggggugccgaa..... 1  
Gi2\_11265305\_x1.....gucgugggaacacUgggugc..... 1  
Gi3\_28701913\_x1....aucgCagacgucgugggaacacggggu..... 1  
G1a\_6250241\_x1.....ggNacacggggugccgaacu..... 1  
Gi2\_11097759\_x1...cgGucggagacgucgugggaacacg..... 1  
Gi2\_11136356\_x1.....acgucgugggaacacggggugccAa..... 1  
Gi2\_11111627\_x1.....gucguggAaacacggggugccga..... 1  
G1a\_6092977\_x1.....gucgugggaaAacggggugccgaacu..... 1  
Gi2\_11098429\_x1.....cggagacgucgugggaacaGggggu..... 1  
Gi5\_8960443\_x1.....aAgucgugggaacacggggugccgaacu..... 1  
Gi3\_28742554\_x1.....agacgucgugggaAaacggggugccgaacu..... 1  
Gi1\_4349693\_x1....uUggagacgucgugggaacacgggggu..... 1  
Gi5\_8893036\_x1.....Agugggaacacggggugccga..... 1  
Gi2\_11121042\_x1.....acgucgugggaacCggg..... 1  
Gi5\_9012931\_x1.....cacggggugccgaCcuuu..... 1  
Gi3\_28666495\_x1.....cgucgugggaacacgCggugcc..... 1  
Gi3\_28388970\_x1.....cgucgugggaGacggggugccga..... 1  
Gi5\_8991968\_x1.ugcgUucggagacgucguggga..... 1  
Gi2\_11249860\_x1.....Cagacgucgugggaacacggggugcc..... 1  
Gi5\_8989045\_x1.....gaacacggggugccgUac..... 1  
Gi3\_28969334\_x1...gaucggagacguUgugggaacac..... 1  
G1a\_6095384\_x1...gaucggagaGgucgugggaacacggg..... 1  
Gi5\_8892423\_x1.....gugggaacaAggggugccg..... 1  
Gi2\_11065201\_x1.....cggagacgucgugggCacac..... 1  
Gi1\_4292600\_x1.....ucgugggaGcacggggugccg..... 1  
Gi5\_8970245\_x1.....ugggaacacUgggugccgaac..... 1  
Gi5\_9073329\_x1....aucggCgacgucgugggaacacgg..... 1  
Gi2\_11368314\_x1.....gagacgucguggAaacacggggugcc..... 1  
G1a\_6286601\_x1.....aacaGggggugccgaacu..... 1  
Gi3\_28376061\_x1.....gNgggaacacggggugccg..... 1  
G1a\_6074248\_x1...gUucggagacgucguggga..... 1  
Gi5\_8859712\_x1.....ggaacacggggugcGgaac..... 1



Gi2\_11227067\_x1.....ucggagacgucGgggaac..... 1  
 Gi3\_28380579\_x1.....cgucguggaacaacCgggugccgaac..... 1  
 Gi3\_28564493\_x1.....aucggagacgucGgggaacacggggugcc..... 1  
 Gi1\_4333061\_x1.....aacacgggUugccgaacu..... 1  
 Gi3\_28665445\_x1.....gucguggaacaacCgggugccgaac..... 1  
 Gi2\_11245380\_x1.....guggaacaacggggCgccgaacu..... 1  
 Gl1a\_6224222\_x1.....guggaacaacggUgugcc..... 1  
 Gl1a\_6112209\_x1..gcgaucggNgacgucgug..... 1  
 Gi2\_11145386\_x1.....agacgucguggaacaAggggugccgaac..... 1  
 Gi1\_4316718\_x1...gaucggGgacgucguggaa..... 1  
 Gi1\_4281922\_x1.....guggaacaacggggGgccga..... 1  
 Gi2\_11150213\_x1.....cgucguggaacaAggggugccga..... 1  
 Gl1a\_6311891\_x1.....guggaacaacggggugccgaG..... 1  
 Gi3\_28880029\_x1.....cgucUugggaacaacggggg..... 1  
 Gi1\_4318897\_x1.....gaacacUgggugccgaacu..... 1  
 Gi5\_9110036\_x1.....aAgucguggaacaacggggugccgaac..... 1  
 Gi2\_11355053\_x1.....aucggagacgucUugggaacaacggg..... 1  
 Gi2\_11152408\_x1.....ggagacgucguggaacaacggggA..... 1  
 Gi1\_4376885\_x1.....gagacgucguggaacaacggggCgccgaacu..... 1  
 Gi1\_4363032\_x1.....gaacacggggGgccgaacu..... 1  
 Gl1a\_6273897\_x1.....cguAggaacaacggggugc..... 1  
 Gi1\_4163057\_x1.....aucggagacgucguggaacaacCggg..... 1  
 Gi2\_11049787\_x1.....gagacgucguggGacacggggugccgaac..... 1  
 Gi3\_28681754\_x1.....gucgugggaGacggggugccgaac..... 1  
 Gi5\_9016213\_x1..ugcgauccgagacgCcgug..... 1  
 Gi3\_28575895\_x1...gaucggagacUucguggaaca..... 1  
 Gi2\_11047456\_x1.....aucggCgacgucguggaaca..... 1  
 Gi3\_28846082\_x1.....cggagacCucgugggaacaacggggg..... 1  
 Gi3\_28306602\_x1.....cgucgugUgaacaacggggugcc..... 1  
 Gi2\_11036243\_x1.....ggagacgucguggaacaacggAgugcc..... 1  
 Gl1a\_6043931\_x1.....aucggagacgucCugggaacaacggg..... 1  
 Gi5\_8838964\_x1.....aucggagacAucguggaacaacggg..... 1  
 Gi3\_28438187\_x1.....cgucguAggaacaacgggg..... 1  
 Gi5\_9111071\_x1.....gaUacgucguggaacaacggggugccgaacu..... 1  
 Gi3\_28444518\_x1.....ggagacgucguggaacaacggggugccgaGu..... 1  
 Gi2\_11257228\_x1.....aucggagacgucguUggaacaac..... 1  
 Gi2\_11018557\_x1.....ggagacguUguggaacaacggggugccg..... 1  
 Gi1\_4261436\_x1.....gacguUguggaacaacggggugcc..... 1  
 Gi2\_11020348\_x1.....agacgucgCgggaacaacggggugcc..... 1  
 Gi2\_11403194\_x1.....gggaacaacggggugccgU..... 1  
 Gi3\_28274840\_x1.....ucgugggaAaacggggugc..... 1  
 Gi2\_11092766\_x1.....cgucCugggaacaacggggugcc..... 1  
 Gi2\_11049179\_x1.....ggaacaacggggugcUgaa..... 1  
 Gi2\_11262885\_x1.....acguUguggaacaacggg..... 1  
 Gi3\_28592873\_x1.....ucguUggaacaacggggugccgaa..... 1  
 Gi3\_28685837\_x1.....uggaacaacggggugccgaC..... 1  
 Gi2\_11029496\_x1.....cguNguggaacaacggggugccga..... 1

Gi2\_11286771\_x1...gaucggagacgucguggUaacac..... 1  
Gi3\_28898609\_x1.....acgucgugggaaUacggggugcc..... 1  
G1a\_6311154\_x1...Gucggagacgucguggaacacggggugc..... 1  
G1a\_6039493\_x1.....gugAgaacacggggugccga..... 1  
Gi3\_28930894\_x1.....gacgucgugggaaacaAggggugccgaacu..... 1  
Gi3\_28505302\_x1...cgauccgagacgucgugggGcacg..... 1  
Gi2\_11339566\_x1...cgauccgCgacgucgugg..... 1  
G1a\_6207866\_x1...aucggagacgucgugggaaGacggggugcc..... 1  
G11\_4282937\_x1.....gaacacggggugccgaGcuu..... 1  
G11\_4278034\_x1...aucggagacguUgugggaaacacgggggu..... 1  
Gi3\_28284230\_x1.....agacgucgugggaaacacggggugAcgaac..... 1  
Gi2\_11246362\_x1.....gucguggAaacacggggugc..... 1  
Gi3\_28272360\_x1...ucggagacgucgugggaaCcacggggugcc..... 1  
Gi5\_9110503\_x1.....gacguUgugggaaacacggggugccgaacu..... 1  
Gi2\_11359900\_x1...cggagacgucgugggaaGcacggggug..... 1  
Gi5\_8953989\_x1...cggagacgucgugggaaacCcggg..... 1  
Gi5\_9071272\_x1...Gggagacgucgugggaaacacggggugcc..... 1  
G11\_4262353\_x1.....gagacgucgugggaaacacggggugccgaGcu..... 1  
Gi5\_9107454\_x1...aucggagacgucguCggaaca..... 1  
Gi5\_9090061\_x1.....gugggaaacacggggugcU..... 1  
Gi3\_28844831\_x1...ucgugggCacacggggugccg..... 1  
Gi5\_9119067\_x1...gaucggagacgucgugggCacacgggggu..... 1  
G11\_4350968\_x1...cgucgugggaaacacggggugccgCac..... 1  
Gi5\_8840899\_x1...ggagacgucgugAgaacacggggugccgaacu..... 1  
G1a\_6219313\_x1...gaucggagacgCcguggg..... 1  
Gi3\_28366884\_x1...gucgugggaaacaAggggu..... 1  
G11\_4344880\_x1...acgucgugggaaAacggggugcc..... 1  
G11\_4274446\_x1...ugggCacacggggugccgaacu..... 1  
Gi2\_11169569\_x1...Agugggaaacacggggugccgaa..... 1  
Gi5\_9079325\_x1...cgucgugggaaacGcggggugcc..... 1  
Gi3\_28747708\_x1...gucgugggaaacaAggggugcc..... 1  
Gi3\_28306897\_x1...gaucggagGcugcuguggaac..... 1  
Gi3\_28628344\_x1...aucggagUcgucgugggaaacacgggggu..... 1  
Gi2\_11094568\_x1...ggGacacggggugccgaa..... 1  
G11\_4290876\_x1...aacacggggugccgaaGu..... 1  
Gi3\_28654801\_x1...ggagacgucgugggaaGacgg..... 1  
G14\_577620\_x1...aucggagacgucgCgggaaacacgggg..... 1  
Gi2\_11269530\_x1...gacgucgugggUacacggggugccg..... 1  
Gi2\_11369715\_x1...aucggagacgucgugCga..... 1  
Gi2\_11268480\_x1...ggCgacgucgugggaaacacggggugccg..... 1  
G1a\_6287046\_x1...aucggagaUgucgugggaaacacgg..... 1  
Gi5\_8865706\_x1...ugggaaacacgggAugccgaa..... 1  
Gi3\_28388768\_x1...gaucggagacgucgugggCac..... 1  
Gi3\_28790512\_x1...aucggagacgGcugugggaaacacg..... 1  
Gi3\_28555076\_x1...cggagacgucgugggGacacggggugccgaa..... 1  
Gi3\_28472402\_x1...acgucgCgggaaacacggg..... 1  
G1a\_6262195\_x1...ggaacacggggugccgCac..... 1

|                                                          |   |
|----------------------------------------------------------|---|
| Gi1_4315077_x1.....agacgucgugggaCcacggg.....             | 1 |
| Gi1_4251418_x1.....uggaacacggggCgccgaa.....              | 1 |
| Gi2_11051408_x1.....aucggagacgucCugggaacacggg.....       | 1 |
| Gi2_11277633_x1.....gacgGcgugggaacacggggugc.....         | 1 |
| Gi2_11139442_x1.....cgugggaacacggggugGcga.....           | 1 |
| Gi3_28360987_x1.....gaacacggggugccgaGcuu.....            | 1 |
| Gi5_8831284_x1.....aucggUgacgucgugggaacacg.....          | 1 |
| Gi5_8878051_x1.....cgugggaacaAggggugcc.....              | 1 |
| Gi3_28659872_x1.....cggagacgucgugggaacGcgggg.....        | 1 |
| Gi2_11150570_x1.....cgauccgagacgucgugCgaacacggg.....     | 1 |
| Gi5_8994048_x1.....acgucgugggaacacggggugGcgaacu.....     | 1 |
| Gi5_9056333_x1.....cgucgugggaacacggggugccgaGc.....       | 1 |
| Gi1_4297033_x1.....ugAgaacacggggugccgaac.....            | 1 |
| Gi3_28282095_x1.....cgauccAgagacgucguggg.....            | 1 |
| G1a_5991808_x1.....acgucgugggaGcacgggggu.....            | 1 |
| Gi3_28601072_x1.....cgucgugggaCcacgggg.....              | 1 |
| G1a_6100032_x1.....aucggagacgucgugggaGcacgg.....         | 1 |
| Gi1_4300663_x1.....ggagacgucgugggaacacggggugAc.....      | 1 |
| Gi2_11065301_x1.....gggaacaUggggugccgaa.....             | 1 |
| Gi2_11346812_x1.....acgucgCgggaacacgggggu.....           | 1 |
| Gi3_28437607_x1.....ggagGcgucgugggaacacgggg.....         | 1 |
| G1a_6081477_x1.....Uucggagacgucgugggaacacggg.....        | 1 |
| G1a_6226971_x1.....aucggagacAucgugggaacacg.....          | 1 |
| Gi5_9071434_x1.....Uggaacacggggugccgaacuuu.....          | 1 |
| Gi3_28926760_x1.....aucggagGcgucgugggaacacggggugccg..... | 1 |
| Gi5_9137800_x1.....acgCcgugggaacacggggugcc.....          | 1 |
| Gi2_11022717_x1.....acgucgugCgaacacggggugcc.....         | 1 |
| Gi2_11198485_x1.....aucggagGcgucguggga.....              | 1 |
| Gi3_28575365_x1.....cgucgAgggaacacggggugccg.....         | 1 |
| Gi1_4381741_x1.....uggaacacggggAgccgaac.....             | 1 |
| Gi3_28911306_x1.....ucguAggaacacggggugccga.....          | 1 |
| Gi2_11091014_x1.....gacgucgugggaacGcggggugcc.....        | 1 |
| Gi2_11133825_x1.....cguggCaacacggggugccgaac.....         | 1 |
| Gi2_11317960_x1.....aucggagacguAgugggaacacggg.....       | 1 |
| Gi2_11254872_x1.....gucgugggaaAacggggugccga.....         | 1 |
| Gi5_9052480_x1.....gucguggUaacacggggugccgaacu.....       | 1 |
| Gi1_4382999_x1.....cggagacgucgugggaacacgggUugcc.....     | 1 |
| Gi5_8912359_x1.....gagacgucgugggUacacg.....              | 1 |
| Gi5_9121618_x1.....acgucgugggaacacgUggugccgaacu.....     | 1 |
| Gi3_28271475_x1.....cAaucggagacgucgugggaacacggg.....     | 1 |
| Gi1_4329871_x1.....ggagacgucgugggaacac.....              | 0 |
| G1a_6343640_x1.....gacgucgugggaacacgAggugccgaacu.....    | 1 |
| G1a_6350341_x1.....ggUaacacggggugccgaac.....             | 1 |
| Gi2_11318735_x1.....gaucggagacAucgugggaacacgggg.....     | 1 |
| Gi3_28698943_x1.....uggaacacggggugcGg.....               | 1 |
| G1a_6013865_x1.....ggagacgucgugggaacGcggggugcc.....      | 1 |
| Gi1_4217692_x1.....cgauccgagacgucgugggaacacg.....        | 0 |

Gi2\_11287167\_x1.....gacgGcgugggaacacggggugccg..... 1  
Gi2\_11111345\_x1.....ugggaacacggggugccU..... 1  
Gi3\_28624533\_x1.....cggagacgucgCgggaacacggggugc..... 1  
Gi5\_9108470\_x1.....ugggaacacggggugccgaCc..... 1  
Gi3\_28424303\_x1.....cggagacgucgugggaacacggggguCccgaacu..... 1  
Gi2\_10993107\_x1.....gaucggagacgucguAggaacacg..... 1  
G1a\_6216183\_x1.....gugggaacacggggugccA..... 1  
Gi3\_28547828\_x1.....cgucgugggaacacggggC..... 1  
Gi3\_28547849\_x1.....acgAcgugggaacacggggugcc..... 1  
Gi5\_9009872\_x1.....gugggaacacggUgugccgaa..... 1  
Gi1\_4316056\_x1.....acgucgugggaacacggggCgcccga..... 1  
Gi3\_28714802\_x1.....ucgugUgaacacggggugc..... 1  
Gi5\_8891910\_x1.....acgucgugggaacacggggguAccgaac..... 1  
Gi1\_4335477\_x1.....aucggaAacgucgugggaacacgggggu..... 1  
Gi2\_11055295\_x1.....agacgucguggAaacacggggugccgaac..... 1  
Gi3\_28282508\_x1.....cgauccgagacgucgGgggaacacggggugc..... 1  
Gi3\_28801430\_x1.....gucguggAaacacggggugccgaacuu..... 1  
Gi5\_9049121\_x1.....gaGcggagacgucgugggaacac..... 1  
Gi1\_4223059\_x1.....cgauccgagacgucgugggaacacggggC..... 1  
Gi3\_28859105\_x1.....gagacgucgugggaGcacggggugccgaac..... 1  
Gi3\_28423845\_x1.....gAcgugggaacacggggugccg..... 1  
Gi3\_28649462\_x1.....cgugCgaacacggggugccgaa..... 1  
Gi3\_28409995\_x1.....cguUgugggaacacggggugccgaa..... 1  
Gi3\_28418216\_x1.....cggagacgucgugggaacCcggggugccg..... 1  
Gi5\_8913835\_x1.....agacgucgugggaacaUggggugccgaac..... 1  
Gi4\_576295\_x1.....cgucgugCgaacacggggugccga..... 1  
Gi2\_11088272\_x1.....guAgugggaacacggggugccgaacu..... 1  
Gi1\_4255711\_x1.....gucgugggaacacgUggugccgaacu..... 1  
Gi5\_9131724\_x1.....cgucgugUgaacacggggugccgaacu..... 1  
Gi3\_28913769\_x1.....ggGgacgucgugggaacacggggugccgaa..... 1  
Gi1\_4176367\_x1.....ucgugggaacacgAggugcc..... 1  
Gi3\_28903472\_x1.....cggagacgucguAggaacacg..... 1  
G1a\_6230459\_x1.....ucgAagacgucgugggaacacggggugc..... 1  
Gi2\_11027356\_x1.....agacgucguggAaacacggggugcc..... 1  
Gi1\_4165828\_x1.....gacgucgugCgaacacggggugccgaacu..... 1  
G1a\_6338016\_x1.....ggaacacggggugccgaGc..... 1  
Gi3\_28748776\_x1.....gucgugggaaAacggggugcc..... 1  
Gi2\_11173560\_x1.....ggNacacggggugccgaa..... 1  
Gi3\_28967156\_x1.....ugggaacacggggUccg..... 1  
Gi2\_11221653\_x1.....aucggagacguAgugggaacacggggugcc..... 1  
G1a\_6326137\_x1.....gaucggagacgucguggGacacggg..... 1  
Gi3\_28961737\_x1.....cgucgugggaCcacggggugccga..... 1  
Gi2\_11341473\_x1.....ucgGgggaacacggggugc..... 1  
Gi1\_4301087\_x1.....agacgucgGgggaacacggggugccgaacu..... 1  
Gi3\_28806670\_x1.....gcgauccgagacgucgugggaGcacgg..... 1  
Gi3\_28460458\_x1.....Uggagacgucgugggaacacggggugcc..... 1  
Gi2\_11390185\_x1.....ggagacgucgugggaacacgAggu..... 1

Gi2\_11148471\_x1.....cggagGcgucgugggaacacggggugccga..... 1  
 Gl1\_6226892\_x1.....aucggGgacgucgugggaacacgggg..... 1  
 Gi3\_28519238\_x1.....aCcgagacgucgugggaacacggggugccgaacu..... 1  
 Gi3\_28524268\_x1.....ggagacgucgugggaacacggggugcUg..... 1  
 Gi2\_11075217\_x1.....cgucguggCaacacggggugccgaac..... 1  
 Gi2\_11393676\_x1.....ggagacgucgCgggaacacggggg..... 1  
 Gi2\_11136319\_x1...cgaucggagacgucgugggCacacggggg..... 1  
 Gi5\_9111722\_x1.....acuuucccagcgccugcugccAacc..... 1  
 Gi2\_11273180\_x1.....ucggagacgCcgugggaacacggggugcc..... 1  
 Gi5\_8945266\_x1.....cgugggaaAacggggugccgaac..... 1  
 Gi1\_4201699\_x1.....ucggagacgucgugAgaacacggggugc..... 1  
 Gi2\_11302322\_x1...gaucggCgacgucgugggaacacg..... 1  
 Gi2\_11342311\_x1.....gucgugggaUcaccggggugc..... 1  
 Gi2\_11157262\_x1.....agacgAcgugggaacacggggugccga..... 1  
 Gi2\_11302310\_x1.....cggagacguGgugggaacacggggugcc..... 1  
 Gl1\_6024874\_x1.....cgugggaCcaccggggugcc..... 1  
 Gi3\_28528891\_x1...Nucggagacgucgugggaacacg..... 1  
 Gi1\_4304902\_x1.....aucggagacgucguAggaacacgg..... 1  
 Gi5\_8969834\_x1.....ucggagacgucgugggaacacggggugccgaCc..... 1  
 Gi1\_4332098\_x1...aGcggagacgucgugggaacac..... 1  
 Gi3\_28780562\_x1.....acgucgugggaacacCggggugccgaacu..... 1  
 Gi3\_28739695\_x1.....gggaacacgggUugccgaac..... 1  
 Gi3\_28796761\_x1...aucggagacgucgugggaGc..... 1  
 Gl1\_6184934\_x1...gaucggagacgucgugggCacacggggg..... 1  
 Gi1\_4365898\_x1.....ucgugggaacacgggggUacc..... 1  
 Gi5\_9078119\_x1.....ugggaacaGggggugccgaacu..... 1  
 Gi2\_11011329\_x1.....cggagacgucgGgggaacacggggugcc..... 1  
 Gi2\_11099348\_x1...gaucggagacgucgugggaacacgUggg..... 1  
 Gi2\_11112296\_x1.....cgugggaacaAgggggugc..... 1  
 Gi1\_4210946\_x1.....ugggaaAacggggugccgaac..... 1  
 Gi2\_11201916\_x1.....gacgucgugggaacacgggUgugccgaacu..... 1  
 Gi2\_11404960\_x1...gaucAgagacgucgugggaacacgggg..... 1  
 Gi3\_28360407\_x1.....cgugCgaacacggggugc..... 1  
 Gi2\_11050627\_x1.....gagacAucgugggaacacggg..... 1  
 Gi2\_11363988\_x1.....gucgugggaacacggAgugccga..... 1  
 Gl1\_6135016\_x1.....gacgucgugggaacacggggG..... 1  
 Gi5\_8842873\_x1...uGggagacgucgugggaacacggggugc..... 1  
 Gi2\_11219971\_x1...Cucggagacgucgugggaacacg..... 1  
 Gi1\_4359343\_x1.....cggagacgucgugggaacacgggggU..... 1  
 Gi5\_8912141\_x1...aucAgagacgucgugggaacacggg..... 1  
 Gl1\_6042069\_x1...gaucggagacgucgugggaacacggCgu..... 1  
 Gi2\_11015326\_x1.....gggaacacgggggugNcgaacu..... 1  
 Gi5\_9007074\_x1.....gugggaacacggggugccgaacuA..... 1  
 Gi3\_28328078\_x1.....acacggggugccgaacuA..... 1  
 Gl1\_6046166\_x1...cgaucggagacguUgugg..... 1  
 Gi3\_28421556\_x1...ucggagacguUgugggaacacggg..... 1  
 Gi3\_28806121\_x1.ugUgaucggagacgucguggga..... 1

Gi2\_11080560\_x1.....uggaacacgUggugccgaac..... 1  
Gi3\_28726619\_x1.....gagacgucgugggaacCcggggu..... 1  
Gi5\_9082286\_x1.....cggGgacgucgugggaacacggggugccgaac..... 1  
G1a\_6127069\_x1.....cggagacgucgugggaacCcggg..... 1  
Gi2\_11294737\_x1.....aucggagacgucgugggaacacggAgug..... 1  
Gi2\_11168236\_x1.....aucggagacguUgugggaacacgg..... 1  
Gi1\_4247169\_x1.ugcgauccgagacgucguggC..... 1  
Gi1\_4268351\_x1.....cggagacgucgugggaGcacggg..... 1  
Gi5\_8982994\_x1.....cgucgugggaacCcggggugccga..... 1  
Gi3\_28924654\_x1.....ggGgacgucgugggaacacggggugccgaac..... 1  
Gi3\_28666499\_x1.....ggagacgucgugggaacacggggugccgaGc..... 1  
Gi2\_11378714\_x1.....aNacgucgugggaacacggggugccgaacu..... 1  
Gi2\_11161359\_x1.....cggCaacgucgugggaacacggggugcc..... 1  
Gi2\_11209155\_x1.....Nugggaacacggggugccgaa..... 1  
Gi2\_11219679\_x1.....uGggagacgucgugggaac..... 1  
Gi5\_8912030\_x1.....acgucgugggaAacggggugccgaac..... 1  
G1a\_6177688\_x1.....Cgagacgucgugggaacacggggugcc..... 1  
Gi3\_28421415\_x1.....agacgucAugggaacacggggugccgaacu..... 1  
Gi2\_11137979\_x1.....aucggagacgucAgggaacacg..... 1  
Gi5\_9102220\_x1.ugcgauccgagacgucgug..... 1  
Gi3\_28791687\_x1...cgGucggagacgucgugggaacacggggug..... 1  
Gi2\_11158862\_x1.....Ccgugggaacacggggugc..... 1  
G1a\_6119043\_x1.....Cucgugggaacacggggugccgaacu..... 1  
Gi2\_11165110\_x1.....cgugggaacacggggugcA..... 1  
Gi3\_28710505\_x1.....uGggagacgucgugggaacacgg..... 1  
Gi1\_4296669\_x1.....cgugggaacacggggguUccgaacu..... 1  
Gi1\_4353308\_x1.....aucggGgacgucguggga..... 1  
Gi3\_28761425\_x1...cgauccgagaAgucgugggaacacgg..... 1  
Gi1\_4214120\_x1.....acgucAugggaacacggggugcc..... 1  
G1a\_6005315\_x1.....gugggaacacggggAugccga..... 1  
Gi5\_8899412\_x1.....agacgucgugggaacacgUggugccgaac..... 1  
Gi5\_8987183\_x1.....acuuuccagcgccugcugccacU..... 1  
Gi3\_28609191\_x1...cgauccgagacgucguggGacacggggug..... 1  
Gi3\_28820152\_x1.....gucgugggaacacCgggugc..... 1  
Gi1\_4210203\_x1.....cgugggaacacggggugcU..... 1  
Gi2\_11228211\_x1.....cggagacgAcgugggaacacggggugcc..... 1  
Gi3\_28530822\_x1.....aucggagacgucgugggaacacgCggu..... 1  
Gi3\_28732712\_x1.....agacgucgugggaacacggggugccA..... 1  
Gi2\_11298835\_x1.....aucggagaAgucgugggaacacggggugcc..... 1  
Gi5\_8945337\_x1...gauccgagacgCcgugggaacacgg..... 1  
Gi1\_4248102\_x1.....acgCcgugggaacacggggugccg..... 1  
Gi3\_28895903\_x1.....ggagacgucguggAaacacggggugccgaacu..... 1  
Gi1\_4371963\_x1.....ggaacacggggugccAaac..... 1  
Gi1\_4377672\_x1.....ucggagacgucgGgggaacacg..... 1  
Gi2\_11213851\_x1.ugcgauccgagGcgucgugggaacacg..... 1  
Gi2\_11354351\_x1...cgauccgagacgucguggG..... 1  
Gi2\_11122784\_x1...Caucggagacgucgugggaacacgggg..... 1

Gi2\_11115769\_x1.....gAgaacacggggugccga..... 1  
Gi2\_11312390\_x1.....ugggaacacggggugcUgaacuu..... 1  
G1a\_5989269\_x1.....ucgugggaacCggggugccgaacu..... 1  
Gi1\_4270663\_x1.....cgugggaacacggggugccUaacu..... 1  
Gi2\_11311439\_x1.....aucggCgacgucgugggaacacg..... 1  
Gi2\_11056128\_x1.ugcgauccgagGcgucgugggaaca..... 1  
Gi5\_9084613\_x1.....cgugggaacacCgggugc..... 1  
Gi1\_4270557\_x1...gaucAgagacgucgugggaacac..... 1  
Gi2\_11146186\_x1.....Cagacgucgugggaacacggggug..... 1  
Gi3\_28551677\_x1..gcgaucggagacgucAugggaacacggg..... 1  
Gi3\_28421519\_x1.....ugggaaGacggggugccga..... 1  
Gi1\_4222455\_x1.....ucAgagacgucgugggaacacg..... 1  
Gi2\_11313192\_x1.ugcAaucggagacgucgugggaaca..... 1  
Gi1\_4210269\_x1.....cgugggaacacggggugccgaacG..... 1  
Gi5\_8871380\_x1.....Ggugggaacacggggugccgaacuu..... 1  
Gi5\_8980379\_x1.....gggaUcacggggugccgaac..... 1  
Gi3\_28708663\_x1.cugcgauccgagacgucgA..... 1  
Gi2\_11337516\_x1...cgauccgagacgucgCgggaacacggg..... 1  
Gi2\_11239641\_x1.....ucgugggaacacgCggugccgaac..... 1  
Gi3\_28540816\_x1..gcgaucAgagacgucgug..... 1  
Gi5\_9071660\_x1.....cCucgugggaacacggggugcc..... 1  
Gi3\_28889505\_x1.....aucggagacgucgugggaacacggCgugc..... 1  
Gi5\_8837866\_x1.....ugggaacacggggugccgaCcuu..... 1  
Gi1\_4368519\_x1...gaucUgagacgucgugggaacacgg..... 1  
Gi3\_28863564\_x1...Ugaucggagacgucgugg..... 1  
Gi5\_8915373\_x1.....acguUgugggaacacggggugccga..... 1  
Gi3\_28689086\_x1.....cgucgugggCacacggggugccgaac..... 1  
Gi2\_11329447\_x1.....ggaAacgucgugggaacacggggugcc..... 1  
Gi2\_11085866\_x1.....gacgucgugggaGcacggggugccgaac..... 1  
Gi1\_4311153\_x1.....aGucgugggaacacggggugccga..... 1  
Gi2\_11025496\_x1.....ggagacgucUugggaacacggggugcc..... 1  
Gi3\_28265443\_x1.....ucggagacgucAugggaaca..... 1  
G1a\_6118794\_x1...Ggaucggagacgucguggga..... 1  
Gi2\_11363200\_x1.....gucgCgggaacacggggugccga..... 1  
Gi5\_9003467\_x1...gaucggagacgucgugggUacacg..... 1  
G1a\_6105180\_x1.....aucggagGcgucgugggaacacgg..... 1  
Gi3\_28670153\_x1.....ggagacgAcgugggaacacggggugccgaacu..... 1  
Gi3\_28570008\_x1...gaucggagacgucCugggaacac..... 1  
G1a\_6315853\_x1...aucggagacgucgugAgaacacgg..... 1  
Gi1\_4257859\_x1.....gaUacgucgugggaacacggggugccg..... 1  
Gi3\_28950647\_x1.....gacgucgCgggaacacggggugccg..... 1  
Gi2\_11382800\_x1.....ggagacgucgugAgaacacggggug..... 1  
Gi2\_11383190\_x1.....agacgucgugggaacacgAggugccgaacu..... 1  
G1a\_6248365\_x1...auUggagacgucgugggaacacgggg..... 1  
Gi5\_9126426\_x1...ucAgagacgucgugggaacacggggugccg..... 1  
Gi2\_11182255\_x1..gcgaucggagacgucgugggaacacgA..... 1  
Gi5\_8880801\_x1.....guAgugggaacacggggugccgaa..... 1

Gi5\_8906366\_x1.....gacgucgugggaacacggggCgccgaac..... 1  
Gi3\_28597761\_x1...gaucggGgacgucgugggaacacggggugccgaacu..... 1  
Gi1\_4213091\_x1.....gUagacgucgugggaacacggggug..... 1  
Gi2\_11323986\_x1.....ggaCacgucgugggaacacggggugc..... 1  
Gi1\_4234315\_x1....auAggagacgucgugggaacacggggugcc..... 1  
Gi2\_11216467\_x1.....cguggAaacacggggugccg..... 1  
Gi3\_28605923\_x1.....agacgucgugggaUcacggggugccgaacu..... 1  
Gi2\_11149812\_x1...cgauAggagacgucguggga..... 1  
Gi5\_8902953\_x1.....gugggaGacggggugccgaac..... 1  
Gi1\_4194308\_x1.....acguGgugggaacacggggugcc..... 1  
Gi2\_11298892\_x1.....Aucgugggaacacgggggu..... 1  
Gi2\_11275693\_x1.....gugggaacaAggggugccg..... 1  
Gi1\_4181614\_x1...gaGcggagacgucgugggaacacggggugc..... 1  
Gi5\_9022783\_x1....Nucggagacgucgugggaacacggg..... 1  
G1a\_6282482\_x1.....gucgugggaacacgggAugccgaacu..... 1  
Gi2\_11258921\_x1.....ucgugggaacacggAgugccg..... 1  
Gi2\_11159141\_x1.....gucgugggaacacggggugccUaacu..... 1  
Gi5\_9042450\_x1.....agacgAcgugggaacacggggugccgaacu..... 1  
Gi2\_11274199\_x1...Ugaucggagacgucgugggaacacggg..... 1  
Gi1\_4199774\_x1.....Ugacgucgugggaacacgggg..... 1  
G1a\_6167409\_x1.....cgucgugggaacacggggugccgaaA..... 1  
Gi1\_4279659\_x1....ucggGgacgucgugggaacacggggug..... 1  
Gi2\_11380236\_x1.....ucAugggaacacggggugccg..... 1  
Gi2\_11215995\_x1.....gugggaacacggggugccCaac..... 1  
Gi1\_4310620\_x1.....gacgucgugggaacacgg..... 0  
Gi1\_4247374\_x1....gagacgucgugggaacacggggugccgUacu..... 1  
G1a\_6157299\_x1.....gugggaacCcggggugccg..... 1  
Gi3\_28451964\_x1.....Ucgucgugggaacacggggugccgaac..... 1  
Gi3\_28284361\_x1.....cggagacgucgugggaacacgggC..... 1  
Gi5\_9031043\_x1.....agacgucgugggCacacggggugccgaacu..... 1  
Gi1\_4248030\_x1.....Cugggaacacggggugccgaac..... 1  
Gi2\_11036010\_x1....aucggagacgucguggUaaca..... 1  
Gi3\_28547856\_x1....aucggagacgucgugggaacUcggggugcc..... 1  
Gi3\_28651294\_x1.....gaacacggggugccgaacuC..... 1  
Gi1\_4235410\_x1.....Aacgucgugggaacacggggugcc..... 1  
Gi3\_28834636\_x1.....gUgacgucgugggaacacggggugc..... 1  
Gi3\_28414968\_x1.....acgucgugggCacacggg..... 1  
Gi3\_28937614\_x1....Uggagacgucgugggaacacggg..... 1  
Gi5\_8978021\_x1.....agacgucgugggaacacggggGgcc..... 1  
Gi2\_11302414\_x1.....gggaacacgggAugccga..... 1  
Gi5\_9116942\_x1.....gaGcacggggugccgaac..... 1  
Gi3\_28619017\_x1.....agacgucgugggGacacggggugccgaac..... 1  
Gi1\_4336176\_x1.....ucgugggaNcacggggugccg..... 1  
Gi3\_28648741\_x1.....ucgugggaacacgUggugccgaacu..... 1  
Gi3\_28793840\_x1...cgaucggaAacgucgugggaacacgg..... 1  
Gi2\_11194918\_x1.....ggNaacacggggugccgaacu..... 1  
Gi2\_11035696\_x1....aucggagacguUgugggaacacgggg..... 1



Gi3\_28639192\_x1...gaucggagacgucgugggaaacacgAgg..... 1  
 Gi2\_11137711\_x1...aucggagacgucgugggaaGac..... 1  
 Gi2\_11015884\_x1...gaucggagacgucgCgggaacacgggg..... 1  
 Gi2\_11360713\_x1...cgauccggagacgucgugggaaacacggggugG..... 1  
 G1a\_6283284\_x1...cgGucggagacgucgugggaaacacggg..... 1  
 Gi3\_28840116\_x1...gaucggagacgucgugggAaacacggggug..... 1  
 Gi3\_28308295\_x1...cgauccggagacgucgugggaaAacg..... 1  
 Gi2\_11357594\_x1...aucggagacgucUugggaaacacggggugcc..... 1  
 Gi2\_11209536\_x1...uGgugggaaacacggggugccgaa..... 1  
 Gi1\_4332788\_x1...gacgucgugggaaacacUgggugccgaacu..... 1  
 Gi4\_603790\_x1...ucguggggACcaccggggugccgaacu..... 1  
 Gi3\_28832779\_x1...cggagaUgucgugggaaacac..... 1  
 Gi2\_11005962\_x1...cgauccggaNacgucgugggaaac..... 1  
 Gi3\_28834232\_x1...cgauccggagacgucAugggaaacacg..... 1  
 Gi2\_11375706\_x1...gUgacgucgugggaaacacggggugccgaa..... 1  
 G1a\_6041051\_x1...ggagGcucgugggaaacacggggugcc..... 1  
 Gi3\_28899099\_x1...agacguAgugggaaacacggggugcc..... 1  
 G1a\_6022813\_x1...cgCgugggaaacacggggugccgaacu..... 1  
 Gi3\_28977484\_x1...cgUucggagacgucgugggaaacacggg..... 1  
 Gi2\_11142159\_x1...ucggagacgucgugggaaacUcg..... 1  
 Gi2\_11226778\_x1...ucggagacNucgugggaaacacggggugccgaacu..... 1  
 Gi2\_11085128\_x1...gagacAucgugggaaacacggggugcc..... 1  
 Gi3\_28524549\_x1...gugggaaacacCgggugccg..... 1  
 Gi2\_11002326\_x1...aucggagacgucgugggaaacacA..... 1  
 Gi3\_28937594\_x1...ugcgaucggagacgucAuggga..... 1  
 Gi3\_28854929\_x1...ugcgaucggagacgucgu..... 0  
 Gi1\_4261592\_x1...gagacgucgugggaaacacgggUugccgaacu..... 1  
 Gi1\_4357434\_x1...cgucguggggAUcacggggugccgaacu..... 1  
 Gi2\_11388080\_x1...gaUgucgugggaaacacggg..... 1  
 Gi3\_28781011\_x1...cggagacgNcgugggaaacacgg..... 1  
 Gi2\_11376987\_x1...gugCgaacacggggugccg..... 1  
 Gi1\_4269008\_x1...aacacggggugccgaacAu..... 1  
 Gi1\_4223681\_x1...gaacacggggAgccgaac..... 1  
 Gi3\_28817667\_x1...ucggagacgucgugggaaacacgggguAc..... 1  
 Gi2\_11248222\_x1...gucguggggACcacggggugccgaac..... 1  
 Gi3\_28417452\_x1...ucguggggaaacUggggugcc..... 1  
 Gi3\_28904514\_x1...ggagacgucguAggaaacacg..... 1  
 Gi2\_11324468\_x1...gaucggagacgucgAggaaacacggg..... 1  
 Gi1\_4267626\_x1...gaacaNggggugccgaacu..... 1  
 Gi2\_11336103\_x1...cguCggaacacggggugc..... 1  
 Gi3\_28786713\_x1...ggagacgucgugggaaacacggggugGcg..... 1  
 Gi3\_28440090\_x1...aucggagacgucguUggaacacggggu..... 1  
 Gi2\_11277907\_x1...ucggagacgucgugggGac..... 1  
 Gi3\_28285505\_x1...ugcgauUggagacgucgugggaaacacg..... 1  
 Gi3\_28513195\_x1...cggagacgucguggggGcac..... 1  
 Gi3\_28474740\_x1...acgucgugggaaUacggggugc..... 1  
 Gi3\_28829698\_x1...gagacgucgCgggaacac..... 1

Gi3\_28374121\_x1...gaucggagacgucgugggUacacgg..... 1  
Gi2\_11208750\_x1.....gggaacacggggugccCaa..... 1  
Gi5\_8866969\_x1.....gagacgucgGgggaacacggggugccgaacu..... 1  
Gi2\_11247658\_x1...cgauccgGgacgucguggggaacacggggug..... 1  
Gi3\_28784955\_x1.....ucggagacgucguggggaacGcggg..... 1  
Gi5\_8935405\_x1.....gugggaacacggggUaccgaacu..... 1  
Gi3\_28582111\_x1...gaucggagacguUguggggaacacggggug..... 1  
Gi2\_11045692\_x1.....cgagacgucguAggaacacggggug..... 1  
G1a\_6148333\_x1...gaucggagacgucgugggG..... 1  
Gi5\_9119219\_x1.....agacgCcguggggaacacggggugc..... 1  
Gi5\_9092231\_x1.....cgucguggggaacacggAgugccgaac..... 1  
Gi2\_11042862\_x1.....gagaGgucguggggaacacggggugcc..... 1  
Gi2\_11112883\_x1.....ugggaacacgAggugccgaa..... 1  
Gi4\_594338\_x1.....gugggaacacggggAgccgaa..... 1  
Gi1\_4219345\_x1.....ggUgacgucguggggaacacggggugccgaacu..... 1  
Gi5\_9078714\_x1.....cCucguggggaacacggggugccgaac..... 1  
G1a\_6184830\_x1...cgUagacgucguggggaacacggggugcc..... 1  
Gi2\_11277824\_x1...aucggUgacgucguggggaacacgg..... 1  
G1a\_6179147\_x1...cguggggaacacggggugccgaGc..... 1  
Gi1\_4214499\_x1...ucgugggCacacggggugccg..... 1  
Gi1\_4182306\_x1...Aaucggagacgucguggggaacac..... 1  
Gi4\_598044\_x1...acgucgugggGacacggggugccgaacu..... 1  
Gi3\_28472735\_x1...gagacgucgugggAaacacggggg..... 1  
Gi3\_28584806\_x1...gcgauccgagacgucgugggCaca..... 1  
Gi1\_4303385\_x1...cggagacguUguggggaacacggggugc..... 1  
Gi1\_4308091\_x1...ugcgauccgagacgucAuggggaacacg..... 1  
Gi2\_11230717\_x1...uggCaacacggggugccga..... 1  
Gi1\_4237187\_x1...ucgugggaacaUggggugccgaac..... 1  
Gi5\_9078889\_x1...acuuucccNgcgcgccucgcccacc..... 1  
Gi2\_11181002\_x1...gaucggaAacgucguggggaacacgggg..... 1  
Gi1\_4373856\_x1...ggaacacUgggugccgaac..... 1  
Gi5\_8910228\_x1...ugcgauccgagacgAcguggg..... 1  
G1a\_5998609\_x1...aucggagacgucgugggCacacggggugc..... 1  
Gi5\_9022172\_x1...cgugggaacacggggCugccgaac..... 1  
G1a\_6088418\_x1...aucggCgacgucguggg..... 1  
Gi2\_11268499\_x1...cggGgacgucguggggaacacg..... 1  
Gi2\_11282359\_x1...gaucggagacgucguggggaacacgAg..... 1  
Gi1\_4229726\_x1...cgugggaaUaccgggugccgaac..... 1  
Gi3\_28898760\_x1...gaucggagCcgucguggggaac..... 1  
Gi3\_28407508\_x1...gucguggggaacCggggugccgaa..... 1  
Gi3\_28981012\_x1...cgucguggggaacacgCggugccga..... 1  
Gi2\_11295727\_x1...acgucguggggaacacggggugccgUa..... 1  
Gi2\_11286884\_x1...ucggagacgucguggggaacacggggUac..... 1  
Gi2\_11032415\_x1...gaucggagacgucgCgggaaca..... 1  
Gi3\_28947509\_x1...aNcggagacgucguggggaacacggggugcc..... 1  
Gi2\_11352255\_x1...cNugggaacacggggugccgaacu..... 1  
Gi2\_11374281\_x1...auUggagacgucguggg..... 1

Gi3\_28818848\_x1.....Aacgucgugggaacacgg..... 1  
 Gi4\_607299\_x1.....gugggaacacggggugUcgaacu..... 1  
 Gi4\_584307\_x1.....cgucgugggaacaAggggugccgaacu..... 1  
 Gi5\_9136691\_x1.....gggaacacggggugcAga..... 1  
 Gi2\_11394312\_x1.....Cucgugggaacacgggggu..... 1  
 Gi2\_11186647\_x1.....agacgucgugggaacacggggugUc..... 1  
 Gi4\_590441\_x1.....ucggagacNucgugggaacacggggugccg..... 1  
 Gi3\_28408067\_x1.....Nggaacacggggugccgaa..... 1  
 Gi2\_11074514\_x1.....gacgucguAggaacacggggugcc..... 1  
 Gi2\_11161862\_x1.....agacgucgugggaGcacggggugccg..... 1  
 Gi1\_4273573\_x1.....ggagacgucgugggaacacgggU..... 1  
 Gi3\_28755674\_x1.....gacgucgugggaacacgAggugccg..... 1  
 Gi5\_8902340\_x1.....cUgagacgucgugggaacacggggugccgaacu..... 1  
 Gi3\_28852602\_x1.....ucgCgggaacacggggugccga..... 1  
 Gi1\_4173293\_x1.....ucgugggaacacAgggugccg..... 1  
 Gi5\_9085377\_x1.....cgucAugggaacacggggugcc..... 1  
 Gi5\_8846252\_x1.....gucgugggaacaUggggugccgaac..... 1  
 Gi3\_28603341\_x1.....agGcgucgugggaacacggg..... 1  
 Gi2\_11219064\_x1.....gucguUggaacacggggugcc..... 1  
 Gi2\_11036928\_x1.....ucggagacgucgugggaacaUggggU..... 1  
 Gi2\_11239451\_x1.....gucgugggaacacggggugccgaaU..... 1  
 Gi1\_4295959\_x1.....ggagacgCcgugggaacacggggU..... 1  
 Gi4\_610214\_x1.....ucgugggGacacggggugccgaacu..... 1  
 Gi3\_28609466\_x1.....cgAcgugggaacacggggugccgaa..... 1  
 Gi1\_4228819\_x1.....ggagacgucgugggCacacggggU..... 1  
 Gi2\_11348646\_x1..gcgaucAgagacgucgugggaaca..... 1  
 Gi3\_28803717\_x1.....ggagacgucgugggaacacggggCgcccgaacu..... 1  
 Gi1\_4175660\_x1.....Gcgucgugggaacacggggugccga..... 1  
 Gi2\_11042777\_x1.....ugggaacacgggUugccgaacuu..... 1  
 Gl1\_6253053\_x1.Gcggaucggagacgucguggaa..... 1  
 Gi5\_9128095\_x1.....agacgucgugggaGacggggugccgaacu..... 1  
 Gi2\_11127173\_x1.....cgugggaacaAggggugccg..... 1  
 Gi2\_11152910\_x1.....Nugggaacacggggugccg..... 1  
 Gi3\_28966068\_x1..cgaucggagacgucgugAgaacacggggugc..... 1  
 Gi2\_11174989\_x1.....cgucAugggaacacggggugccgaac..... 1  
 Gi3\_28885176\_x1..cgaucggCgacgucgugggaacacgg..... 1  
 Gi3\_28444159\_x1..gaucggagacgucgugggCacacggggugcc..... 1  
 Gi1\_4367021\_x1...aucggCgacgucgugggaacacgg..... 1  
 Gl1\_6354956\_x1.....cggagacgucgugggaacacggAgu..... 1  
 Gi3\_28359490\_x1.....ggagacgucgugggaacacggA..... 1  
 Gi2\_11407500\_x1..gaucggagacUucgugggaacacggggU..... 1  
 Gi3\_28952971\_x1.....gucgugggaacaGggggugc..... 1  
 Gi5\_8969411\_x1.....gggaUcacggggugccgaacu..... 1  
 Gi3\_28276896\_x1.....gugggaacacggggUuccgaa..... 1  
 Gi5\_9021659\_x1.....cgugggaacacAgggugc..... 1  
 Gi2\_11230829\_x1..cgGucggagacgucgugggaacacggggug..... 1  
 Gi3\_28892382\_x1...gaucggagacguAguggg..... 1

Gi3\_28841672\_x1.....gacgucgugggaacacggggAgccg..... 1  
 Gi3\_28755922\_x1.....ggaacacggggugccgUa..... 1  
 Gi2\_11030689\_x1.....gucgugggaacacggggugccCaac..... 1  
 Gi4\_614044\_x1.....gugggaaAacggggugccgaa..... 1  
 Gi2\_11072299\_x1....gaucggagacgucgugggaacaUggggg..... 1  
 G1a\_6338310\_x1....cCaucggagacgucgugg..... 1  
 Gi2\_11263588\_x1.....gucgugggaacacggggugAcga..... 1  
 Gi3\_28363717\_x1.....gucgugAgaacacggggugccga..... 1  
 G1a\_6330169\_x1.....gugggUacacggggugccga..... 1  
 Gi3\_28376963\_x1.....agacgucgugggCacacggggugccgaac..... 1  
 Gi3\_28476339\_x1....gaucggagacgucgugggaAacggggugc..... 1  
 Gi2\_11226407\_x1.....guNggaacacggggugccga..... 1  
 Gi3\_28764513\_x1.....cgugCgaacacggggugcc..... 1  
 Gi1\_4251046\_x1....cggagGcugcuggggaacacggg..... 1  
 Gi2\_11060547\_x1.....cgucgugAgaacacggggugccgaac..... 1  
 Gi1\_4309682\_x1.....Ugagacgucgugggaacacg..... 1  
 Gi5\_8929589\_x1....Uucggagacgucgugggaacacg..... 1  
 Gi3\_28352054\_x1....gaucggagacgucgugggUacacgggg..... 1  
 Gi3\_28939362\_x1.....ucguggAaacacggggugc..... 1  
 Gi2\_11373876\_x1....aucggagacgAcgugggaacacg..... 1  
 Gi5\_9110612\_x1....ucggagUcugcuggggaacacg..... 1  
 Gi2\_11024026\_x1.....cgugggaacacggggugccgaU..... 1  
 Gi2\_11353211\_x1....gauUggagacgucgugggaacac..... 1  
 Gi5\_9021273\_x1.....gugggaUcacggggugccgaac..... 1  
 Gi2\_11085832\_x1.....ucgugggaacacggggGgc..... 1  
 Gi1\_4251505\_x1.....gaacacggggugcGgaacuu..... 1  
 Gi5\_8987132\_x1....cgUagacgucgugggaacacg..... 1  
 Gi1\_4228142\_x1....aucggagacgucguggAaacacggggugc..... 1  
 Gi3\_28744307\_x1.....cgucgugggaacacgggUugccgaacu..... 1  
 Gi1\_4210860\_x1....aucCgagacgucgugggaacacgggg..... 1  
 Gi3\_28698580\_x1.....ucNugggaacacggggugccgaac..... 1  
 Gi1\_4363573\_x1.....ggaacacggggugccgaC..... 1  
 G1a\_6350034\_x1....ucggagacNucgugggaacacg..... 1  
 Gi3\_28689043\_x1.....gucgugggaacUcggggugccgaac..... 1  
 Gi1\_4202929\_x1.....ugggaGcacggggugccga..... 1  
 Gi5\_8988568\_x1.uCcgaucggagacgucgug..... 1  
 Gi2\_11404387\_x1.....cguggAaacacggggugccgaa..... 1  
 Gi1\_4253299\_x1.....agacgucgugggaAacggggugccgaacu..... 1  
 Gi1\_4354566\_x1....gGucggagacgucgugggaacacgg..... 1  
 Gi1\_4183186\_x1.....cgugggaacacggggGgccgaa..... 1  
 Gi2\_11303879\_x1....ucggUgacgucgugggaacacggggugc..... 1  
 Gi5\_9059131\_x1.....guAggaacacggggugccgaacu..... 1  
 Gi3\_28519114\_x1....cgaucggagacgucAugggaacacggggugc..... 1  
 Gi2\_11228618\_x1....ucggagacgucguggAaacacgggg..... 1  
 Gi2\_11278877\_x1....aucggagacAucgugggaacacg..... 1  
 Gi2\_11019129\_x1....cgaucggUgacgucguggga..... 1  
 Gi5\_8838128\_x1.....gagacgucgCgggaacacg..... 1

Gi5\_9036365\_x1.....gucgugggaacacggggugA..... 1  
 Gi2\_11366401\_x1.....aucNgagacgucgugggaacacggg..... 1  
 Gi3\_28960542\_x1.....ucggagacgucgugggaacGcggggg..... 1  
 Gi5\_9054541\_x1.....aucggagacgucgCgggaacacggg..... 1  
 Gi3\_28518183\_x1..gcgaucggagacgucgugggaacGcggggg..... 1  
 Gi1\_4248594\_x1.....aucggagacgCcgugggaacacgggg..... 1  
 Gi2\_11048027\_x1.....ucgugUgaacacggggugccgaac..... 1  
 Gl1a\_6340966\_x1.....aucggagacgucgugggaacacggggCgc..... 1  
 Gi3\_28886264\_x1.....Cgagacgucgugggaacacggggugccgaa..... 1  
 Gi5\_8853628\_x1.....gacgucgugggaacacgUggugccg..... 1  
 Gi2\_11154462\_x1..gcgaucggagGcucgugggaacacggggugc..... 1  
 Gi1\_4193230\_x1.....ucgugggaaAacggggugccgaac..... 1  
 Gi1\_4308706\_x1.....gaacacggggugcUgaacuu..... 1  
 Gi2\_11377701\_x1.....Cagacgucgugggaacacggg..... 1  
 Gl1a\_6337559\_x1.....acgucgugggaacCcggggugccgaacu..... 1  
 Gi2\_11320052\_x1.....ugggaUcacggggugccga..... 1  
 Gi1\_4172265\_x1.....cgugggaacacggggugccgaaAuu..... 1  
 Gi3\_28722129\_x1.....cgucgugggaacaUggggugccg..... 1  
 Gi2\_11058282\_x1.....cggagacgucgugggaacacggCg..... 1  
 Gi5\_9126299\_x1.....ugggaacacggggugAcgaa..... 1  
 Gi3\_28450276\_x1.....ggaacacUgggugccgaacu..... 1  
 Gi2\_11228771\_x1.....acgucgugggaacacggggugccCaacu..... 1  
 Gi3\_28613802\_x1..gaucggagacgucgCgggaacac..... 1  
 Gi2\_11226743\_x1.....ucgugggaacacggggugccgaG..... 1  
 Gi5\_8936831\_x1.....Ccgugggaacacggggugccgaac..... 1  
 Gi1\_4284261\_x1.....ucggagacgucgGgggaacacggggugcc..... 1  
 Gi3\_28398885\_x1..cgauccgagacgucgugggaacCcgggg..... 1  
 Gi2\_11178714\_x1..gcgaucggagaUgucgugggaacac..... 1  
 Gi5\_9021777\_x1.....acgucgugggaacacggggGgccc..... 1  
 Gi3\_28299078\_x1..gaucggagaUgucgugggaacacggggugcc..... 1  
 Gi5\_9028627\_x1..gaCcgagacgucgugggaacac..... 1  
 Gi1\_4349748\_x1..ugcgaucggagacgucgugggGacacg..... 1  
 Gi2\_10993919\_x1.....aucgAagacgucgugggaacacg..... 1  
 Gi3\_28365029\_x1..gaucggagacgucgugAgaacacgggg..... 1  
 Gi5\_8886489\_x1..gaucggagacgAcgugggaacac..... 1  
 Gi1\_4365078\_x1.....ucggGgacgucgugggaacac..... 1  
 Gi3\_28763838\_x1.....gacgucgGgggaacacggggugccgaac..... 1  
 Gi2\_11406260\_x1..aCcgagacgucgugggaac..... 1  
 Gi3\_28750431\_x1.....cggGgacgucgugggaacacg..... 1  
 Gi3\_28265457\_x1.....ggNgacgucgugggaacacggggugcc..... 1  
 Gi3\_28961845\_x1.....ggagacgucgugggaacacggggUaccgaacu..... 1  
 Gi1\_4312147\_x1.....gugggaGcacggggugccg..... 1  
 Gl1a\_6083080\_x1.....ucggGgacgucgugggaacacgg..... 1  
 Gi5\_8940293\_x1.....aucggagacgucgugggaacGcggggugcc..... 1  
 Gi1\_4298753\_x1.....gagGcucgugggaacacggggugcc..... 1  
 Gi1\_4185292\_x1.....gugggaUcacggggugcc..... 1  
 Gi2\_11323456\_x1.....gagacgucgugggaacacgAggug..... 1

Gi2\_11012139\_x1.....acgucgugggGacacggg..... 1  
Gi1\_4217854\_x1....gaucggGgacgucgugggaacacggg..... 1  
Gi3\_28282558\_x1.....ggagacgucgugggaaAacgg..... 1  
Gi5\_8883791\_x1.....gucguggAaacacggggugccgaac..... 1  
Gi2\_11006268\_x1.....gaacacggggugUcgaac..... 1  
Gi1\_4337151\_x1.....ggaacacgNggugccgaacuu..... 1  
Gi2\_11026490\_x1...cgauccgagacgucgugggaacaAggg..... 1  
Gi5\_9065118\_x1.....ggGgacgucgugggaacacggggugccgaacu..... 1  
Gi2\_11374805\_x1.....Cucgugggaacacggggugc..... 1  
Gi4\_593420\_x1.....cgucguggaCcacggggugccgaacu..... 1  
Gi3\_28296976\_x1.....cgagacgucgugggUacacg..... 1  
Gi1\_4258938\_x1.....uggaacaacUgggugccgaacuu..... 1  
Gi3\_28804014\_x1.....gagacgucgugggaacacggggugccGac..... 1  
Gi1\_4257776\_x1.....ucggagacgucgugggaacacA..... 1  
Gi3\_28763748\_x1.....ggagacgucgugggaacacggggCgccgaa..... 1  
Gi3\_28917695\_x1.....cgagacgucgugggaCcacggggugccgaac..... 1  
Gi5\_8838093\_x1.....Cgggaacacggggugccgaa..... 1  
Gi1\_4163111\_x1.....gugggaacacggggugcc..... 1  
Gi3\_28760111\_x1.....ucggagacgucguggAaacac..... 1  
Gi1\_4321046\_x1.....ucguAggaacacggggugccga..... 1  
Gi5\_9058148\_x1.....ggaacacggggUAccgaac..... 1  
Gi1\_4263292\_x1.....cggagacgucgugggaacacAgggugcc..... 1  
Gi2\_11246975\_x1.....gaacacggggugccUaac..... 1  
Gi2\_11028080\_x1.....gugggCacacggggugccgaa..... 1  
Gi5\_9106089\_x1.....gagacgucgugggaGcacggggugccgaac..... 1  
Gi1a\_6055454\_x1.....Aggagacgucgugggaacacgg..... 1  
Gi3\_28840946\_x1.....cgUagacgucgugggaacacg..... 1  
Gi3\_28590680\_x1.....cggagacgucgugggaacacAg..... 1  
Gi1\_4195716\_x1.....agUcugcuggggaacacggggugccgaac..... 1  
Gi5\_8918457\_x1.....acgucgugggaacacAgggugcc..... 1  
Gi2\_11019232\_x1.....ggagacgucgugggaacacggggCgccgaac..... 1  
Gi4\_568513\_x1.....cgugggaacacggggugcUgaacu..... 1  
Gi2\_11299570\_x1.....ggUgacgucgugggaacac..... 1  
Gi2\_11092218\_x1.....cGgagacgucgugggaacacg..... 1  
Gi5\_9115246\_x1.....gugggaacacggUgugccga..... 1  
Gi3\_28987416\_x1....aucggagacgucgugggCacacggggugc..... 1  
Gi1\_4218014\_x1.....ugggaaGacggggugccgaacu..... 1  
Gi3\_28438461\_x1.ugcUaucggagacgucguggga..... 1  
Gi4\_581858\_x1.....ugggaacaUggggugccgaacu..... 1  
Gi3\_28313007\_x1....aucggagacgucgugggaacacggggugccgaacA..... 1  
Gi1\_4216317\_x1.....gagacgucgugggaacacggggugccGacu..... 1  
Gi1\_4374079\_x1.....agacgucgugggaacacggggugAcgaa..... 1  
Gi1\_4341334\_x1.....ugggaacacggggugccAa..... 1  
Gi5\_9004006\_x1.....cgugggaacacggggugGcga..... 1  
Gi5\_8847915\_x1.....cggagacgucgugggaGcacg..... 1  
Gi2\_11051435\_x1....gauAggagacgucgugggaacacggg..... 1  
Gi3\_28969752\_x1.....ggagacguNgugggaacacggggugccgaac..... 1

G1a\_6305847\_x1.....Aacgucgugggaacacggg..... 1  
 Gi3\_28846831\_x1.....cggAUacgucgugggaacacggggugc..... 1  
 Gi1\_4257816\_x1...gaucggCgacgucgugggaacac..... 1  
 Gi3\_28761907\_x1.....cgugggaacacggCgugccgaa..... 1  
 Gi1\_4221552\_x1.....gCagacgucgugggaacacggggu..... 1  
 Gi2\_11407413\_x1.....aucggagacgucguAggaacacgggg..... 1  
 Gi1\_4244569\_x1.....ucgugggaacacCgggugccgaacu..... 1  
 Gi4\_567410\_x1.....ucgugggaaAacggggugccgaacu..... 1  
 Gi2\_11036049\_x1.....gaacacggggugcUgaac..... 1  
 Gi3\_28638991\_x1.....cgucgugggaAacggggugccgaa..... 1  
 Gi3\_28669973\_x1.....ucUugggaacacggggugccgaa..... 1  
 Gi1\_4162733\_x1.....cggagacgucgugggaacacggCgugcc..... 1  
 Gi2\_11149538\_x1.....acgucgugggaacacggggugUcgaacu..... 1  
 Gi3\_28455574\_x1.....acguGgugggaacacggggugccgaac..... 1  
 Gi1\_4253439\_x1.....gucgugggaacacgCggugccgaacu..... 1  
 Gi1\_4277685\_x1.....agacgucgugggaacacggggugccgCac..... 1  
 Gi2\_11233788\_x1.....cggagacgucguggAaacacggggu..... 1  
 Gi1\_4358604\_x1.....cgGgggaacacggggugccgaa..... 1  
 G1a\_6216976\_x1...aucggagacgucgGgggaacacggggu..... 1  
 Gi2\_11016535\_x1.....gggaacacggggugcUga..... 1  
 Gi5\_8964123\_x1.....gggaacacggggugccgaaA..... 1  
 Gi2\_11052448\_x1.....cgucgugggaacacggggCgccgaa..... 1  
 Gi3\_28766777\_x1.....Cgagacgucgugggaaca..... 1  
 Gi3\_28456851\_x1.....uAggagacgucgugggaacacggggu..... 1  
 Gi3\_28301402\_x1.....gagGcugcugggaacacggggu..... 1  
 Gi3\_28748198\_x1.....cggagacgucgCgggaacacggg..... 1  
 Gi1\_4321434\_x1...ucggagacgucgugggCacacggggugcc..... 1  
 Gi3\_28976737\_x1...gaucggagacgucguCggaacacgg..... 1  
 Gi3\_28402393\_x1.....ggagacgCcgugggaacacggggugccg..... 1  
 Gi2\_11134312\_x1.....gucgugggaacacggggugccgG..... 1  
 Gi2\_11383108\_x1.....gacgAcgugggaacacggggugccgaacu..... 1  
 Gi2\_11262347\_x1.....gaaGacggggugccgaacu..... 1  
 Gi2\_11194019\_x1...aucggagacgucguggAaacacggggugccg..... 1  
 Gi5\_8921524\_x1.....cggaCacgucgugggaacacg..... 1  
 Gi3\_28674117\_x1.....gagacgCcgugggaacacggggugccgaac..... 1  
 Gi3\_28575449\_x1...cgaucggagacgucgugggGacacggggu..... 1  
 Gi3\_28882310\_x1.....gucgugggaacacggggugccAa..... 1  
 Gi5\_8883901\_x1.....gucgugggaacacggggugccgCa..... 1  
 Gi1\_4246421\_x1.....agacgucgugggaGcacggggugccgaac..... 1  
 Gi2\_11397058\_x1...cgaucggagacgucgugAgaacacggggu..... 1  
 Gi2\_11240731\_x1...aucggagUcugcuggggaac..... 1  
 Gi3\_28984984\_x1...aucggagacgucgugggGacacggggugccga..... 1  
 Gi5\_8946142\_x1.....gucgugUgaacacggggugccgaacu..... 1  
 Gi5\_8849730\_x1.....agaNgucgugggaacacggggugccgaacu..... 1  
 G1a\_6319343\_x1...gcgaAcggagacgucgug..... 1  
 G1a\_6316795\_x1...aucggagacgucgugggC..... 1  
 Gi3\_28442018\_x1.....agacgucgugUgaacacggggugccgaacu..... 1

Gi4\_614278\_x1 .....ugggaGcacggggugccgaacu..... 1  
 Gi2\_11342860\_x1.....aucggagaUgucgugggaacacg..... 1  
 Gi3\_28313448\_x1.....acgucgugggaacacggggugUcga..... 1  
 Gi3\_28601525\_x1.....ggagacgucgugggaacacgggCugcc..... 1  
 Gi3\_28600104\_x1.....gaucggaAacgucgugggaacacggggugc..... 1  
 Gi2\_11119190\_x1.....Ugucgugggaacacggggug..... 1  
 Gi2\_11055218\_x1.....cggagacgucgugggaacaAgggggugcc..... 1  
 Gi3\_28454039\_x1.....cgauccgagaGgucgugg..... 1  
 Gi1\_4360945\_x1.....gugggaacacggggAgcc..... 1  
 Gi4\_606299\_x1.....gggaacGcggggugccgaacu..... 1  
 Gi3\_28904865\_x1.....aacacggggugUcgaacuu..... 1  
 Gi5\_8997585\_x1.....gagacgucgugggaacGcggggugcc..... 1  
 G1a\_6228342\_x1.....gcgaGcgggagacgucgug..... 1  
 Gi1\_4377921\_x1.....ucggagacgucgugggaacacgggguCcc..... 1  
 Gi3\_28302717\_x1.....cgugggUacacggggugccgaa..... 1  
 Gi3\_28452897\_x1.....cggagacgucguggAaacacggg..... 1  
 Gi3\_28301455\_x1.....ugggaacacCgggugccga..... 1  
 Gi2\_11303807\_x1.....cgucgugggaAacggggug..... 1  
 Gi2\_11399827\_x1.....cgucguCggaacacggggugccgaacu..... 1  
 Gi2\_11155321\_x1.....cggagacgucguAggaacacgggg..... 1  
 Gi3\_28953795\_x1.....acgCcgugggaacacggggugc..... 1  
 Gi1\_4307621\_x1.....aacacgggguCccgaacu..... 1  
 Gi3\_28442290\_x1.....gagacgucgugggaCcacggggu..... 1  
 Gi3\_28899503\_x1.....Cacgucgugggaacacggggugccgaa..... 1  
 Gi2\_11035066\_x1.....ucggagacgucgCgggaacacggggugccga..... 1  
 Gi5\_9110337\_x1.....ucgCgggaacacggggugcc..... 1  
 Gi3\_28389100\_x1.....gacgucguggCaacacggg..... 1  
 Gi5\_8954413\_x1.....aAacgucgugggaacacggggugccgaacu..... 1  
 Gi5\_8840468\_x1.....gucgugggaacacUgggugccgaacu..... 1  
 Gi1\_4243250\_x1.....guggAaacacggggugcc..... 1  
 G1a\_6280664\_x1.....aucggagacgucgugggaacacggggAug..... 1  
 Gi1\_4161799\_x1.....gugAgaacacggggugcc..... 1  
 Gi3\_28446946\_x1.....ucCgagacgucgugggaacacggggu..... 1  
 Gi4\_613587\_x1.....aucggagacgucgugggaacacg..... 0  
 Gi3\_28372282\_x1.....gacgucgugggaacacgggA..... 1  
 Gi5\_9000862\_x1.....cgugggaacacggggAgccga..... 1  
 Gi5\_9075728\_x1.....gagacgucgugggaacac..... 0  
 Gi2\_10994511\_x1.....uNgugggaacacggggugccgaacu..... 1  
 Gi3\_28496944\_x1.....ucgugggaacacggggU..... 1  
 Gi2\_11335249\_x1.....Nucggagacgucgugggaacacggggugc..... 1  
 Gi4\_593052\_x1.....cgucgugggaacGcggggugccga..... 1  
 Gi4\_594370\_x1.....gugggaacaUggggugccgaa..... 1  
 Gi2\_11120911\_x1.....aucggagacgucgCgggaacacggggugccgaacu..... 1  
 Gi3\_28418242\_x1.....ggagacgucgugggaAa..... 1  
 Gi5\_8930734\_x1.....ggaacacgggAugccgaac..... 1  
 Gi3\_28899904\_x1.....cgauccgagacGcugggaacacggggugc..... 1  
 Gi2\_11165645\_x1.....cgauccgagaUgucgugggaacac..... 1



Gi2\_11190670\_x1.....ucggagacUucgugggaacacggggugc..... 1  
 Gi2\_11089248\_x1.....uggUaacacggggugccgaac..... 1  
 Gi2\_11292824\_x1.....cggagacgucguUggaaca..... 1  
 Gl1a\_6186868\_x1...gcgauccggagacgucgugggaacCcggg..... 1  
 Gi2\_11266207\_x1.....cCugggaacacggggugccg..... 1  
 Gi2\_11391509\_x1.....cgugggaacacggggAgc..... 1  
 Gi3\_28674695\_x1...gaucggagacgucgugggaacCcggggugcc..... 1  
 Gi2\_11009250\_x1...aGcggagacgucgugggaacacggggugccg..... 1  
 Gi2\_11049112\_x1...gaucggagacgucgugggaacacggggugccA..... 1  
 Gi1\_4254808\_x1.....ggGgacgucgugggaacacggggugc..... 1  
 Gi4\_573284\_x1.....gugggaacacggggugccgCac..... 1  
 Gi3\_28959289\_x1.....gacgucguNggaaacacggggugccg..... 1  
 Gi3\_28844504\_x1...cggagacgucgugggaacacggggugcUga..... 1  
 Gi2\_11386545\_x1...gUgauccggagacgucgugggaaca..... 1  
 Gi3\_28936340\_x1.....ugggaacacggggugcGga..... 1  
 Gi4\_591294\_x1...aucggagacgucgugggaacacgggg..... 0  
 Gi1\_4249470\_x1...aucggagaUgucgugggaacacggggugc..... 1  
 Gi3\_28742930\_x1...aNcggagacgucgugggaacacg..... 1  
 Gi5\_8988460\_x1.....gggaacacggggugccga..... 0  
 Gi1\_4235669\_x1...cAgagacgucgugggaacacggggugc..... 1  
 Gi3\_28457323\_x1.....gucgugggaacacggggAgc..... 1  
 Gi2\_11035292\_x1...gaucggagacgucgugggaUca..... 1  
 Gi2\_11174564\_x1.....cgugggCacacggggugccg..... 1  
 Gi5\_9047761\_x1.....gacgucgugggaacacgAggugccgaacu..... 1  
 Gi5\_9063717\_x1.....ggAaacacggggugccgaa..... 1  
 Gl1a\_5995102\_x1.....gucguAggaacacggggugccgaacu..... 1  
 Gi3\_28690423\_x1...gaucggagacgucguAggaaca..... 1  
 Gi5\_9012986\_x1...aucggagGcugcugggaacacg..... 1  
 Gi3\_28645519\_x1.....acgucgugggaacacgCggugccgaacu..... 1  
 Gi2\_11198754\_x1.....gugggaacacgCggugccgaa..... 1  
 Gi1\_4255536\_x1...gaucggagNcugcugggaacac..... 1  
 Gi1\_4198504\_x1...cgUucggagacgucgugggaacacggggg..... 1  
 Gi3\_28381297\_x1.....cgucgAgggaacacggggugcc..... 1  
 Gi1\_4237513\_x1.....gucgugUgaacacggggugccgaac..... 1  
 Gi1\_4179185\_x1...cggagacgucguAggaacacgggg..... 1  
 Gi2\_11158578\_x1...gauNggagacgucguggga..... 1  
 Gi2\_11299500\_x1...gaucggagGcgucgugggaacacgggg..... 1  
 Gi3\_28339036\_x1.....gaacacggggugccCaac..... 1  
 Gi3\_28870649\_x1.....gucgGgggaacacggggg..... 1  
 Gi3\_28789674\_x1.....gucgugggaGcacggggug..... 1  
 Gi5\_9042409\_x1.....cgucgugggaacacggggGgccga..... 1  
 Gi2\_11303226\_x1.....ugggaacacggggugccgCa..... 1  
 Gi5\_9106071\_x1.....ugggaacacggggGgccgaacuuu..... 1  
 Gi1\_4377175\_x1...ggagaUgucgugggaacacggggugcc..... 1  
 Gi5\_9114621\_x1.....gaacacggggugccAaac..... 1  
 Gi5\_9053840\_x1...guggUaacacggggugccgaa..... 1  
 Gi2\_11291679\_x1.....ggaacacggggugGcgaaac..... 1

Gi2\_11368360\_x1.....acgucgAgggaacacggggugccgaac..... 1  
G1a\_6294058\_x1.....ucggagacgucguggaacaacgggUugc..... 1  
Gi2\_11349211\_x1.....gucgugggaacacggggugcUgaac..... 1  
Gi1\_4305702\_x1.ugcgauccgagacgucgCggga..... 1  
Gi3\_28690210\_x1.....cgucgugggaacacgCggugccgaacu..... 1  
Gi2\_11193491\_x1.....gugggaacacggCgugccg..... 1  
Gi2\_11344898\_x1.....aucggagacgucguggCaacacggggugc..... 1  
Gi5\_9102765\_x1.....acgucgugggaacCcggggugccgaacuuu..... 1  
Gi1\_4321912\_x1.....ggagacgucgugggaCcacggggugccg..... 1  
Gi2\_11105072\_x1.....ucgugggaNcacggggugc..... 1  
Gi5\_9105896\_x1.....aacacggggguAccgaacuuu..... 1  
Gi2\_11245553\_x1.....gagacgucgugggGacacggggugccgaacu..... 1  
Gi1\_4334723\_x1.....Gggagacgucgugggaacacggggugccgaac..... 1  
Gi2\_11236211\_x1.....Ccgugggaacacggggugccgaa..... 1  
Gi3\_28710470\_x1.....ggagacgucgugggaaUacggggugccgaacu..... 1  
Gi1\_4277803\_x1.....guUggaacacggggugccgaac..... 1  
Gi3\_28631322\_x1...cgauccgagaUgucgugggaacacggggugc..... 1  
Gi3\_28918801\_x1...cgauccgagacgucgugggaaAacgggggu..... 1  
Gi5\_9115802\_x1.....gugggaacacggggugccgU..... 1  
Gi3\_28893236\_x1.....Ccgugggaacacggggug..... 1  
Gi2\_11209537\_x1.....agaNucgugggaacacggggugccg..... 1  
Gi2\_11330853\_x1.....ggagacgucgugggaacUc..... 1  
Gi3\_28827987\_x1...cgauccgagacgucgugggaacacgggAug..... 1  
Gi3\_28798795\_x1.....acgucguAggaacacggg..... 1  
Gi3\_28293718\_x1.....cgNgggaacacggggugc..... 1  
Gi2\_11236329\_x1.....gagacgucgugggaacacggggugA..... 1  
Gi2\_11261665\_x1.....gacgucgugggaacacggggugcA..... 1  
Gi5\_9073909\_x1.....cguUggaacacggggugccgaac..... 1  
Gi2\_11126230\_x1...gauccgagacgucgAgggaacacgg..... 1  
Gi1\_4177961\_x1.....gugggaaUacggggugccga..... 1  
Gi3\_28698046\_x1...gcgauccggaUacgucgugggaacacggggugcc..... 1  
Gi2\_11398198\_x1...auAggagacgucgugggaacacgggggu..... 1  
Gi3\_28371009\_x1.....ggagacgucgugggaacacggggugccgaGcu..... 1  
Gi3\_28928419\_x1.....ggagacgucAugggaacacgggggu..... 1  
Gi2\_11017755\_x1.....aucggagacgucgugggaaAac..... 1  
Gi2\_11345249\_x1.....gCagacgucgugggaacacgggggu..... 1  
Gi5\_8885190\_x1.....ucgugggaacacggggugccgaaA..... 1  
Gi1\_4216602\_x1.....ggaacacgggUugccgaacu..... 1  
Gi5\_9066133\_x1.....acgucgugggGacacggggugccg..... 1  
Gi1\_4210768\_x1.....agacgucgugggaacacgAggugccgaacu..... 1  
Gi2\_11379850\_x1.....gaaNacggggugccgaac..... 1  
Gi1\_4234656\_x1.....gacgucgugggaGcacggggugcc..... 1  
Gi1\_4182240\_x1.....cgugggaacacAgggugcc..... 1  
Gi3\_28301990\_x1.....acguGgugggaacacggggugc..... 1  
Gi3\_28335812\_x1.....cguNuggggaacacggggugccga..... 1  
Gi1\_4176686\_x1.....ucggagacgucgugggGacacgggg..... 1  
Gi3\_28765612\_x1.ugcgauccgNagacgucgugggaacacg..... 1

|                                                            |   |
|------------------------------------------------------------|---|
| Gi2_11210530_x1.....gacgucGgggaacacggggugccg.....          | 1 |
| Gi2_11109144_x1...gaGcggagacgucguggga.....                 | 1 |
| Gi2_11261123_x1....aucUgagacgucgugggaacacg.....            | 1 |
| Gi2_11239154_x1.....cgucguCggaacacggggugccgaac.....        | 1 |
| Gi5_8915895_x1.....cgugggaacacggggAgccgaac.....            | 1 |
| Gi3_28934296_x1.....agacgucguggCaacacggggugcc.....         | 1 |
| Gi2_11089832_x1....aucggagacgucAugggaacacgggg.....         | 1 |
| Gi2_11077758_x1.....acgucgugggaacacgUggugccgaacu.....      | 1 |
| G1a_6261597_x1...gaucggagacgucAugggaacacgggg.....          | 1 |
| Gi3_28809779_x1.....gucgugggaacacggggugccUa.....           | 1 |
| Gi2_11285368_x1...gaCcgagacgucgugggaacacgggg.....          | 1 |
| G1a_6008330_x1.....cgGgggaacacggggugccg.....               | 1 |
| Gi5_9035156_x1.....cacggggugccgaGcuuu.....                 | 1 |
| G1a_6147158_x1....aucGUagacgucgugggaacacggggugccgaacu..... | 1 |
| Gi5_8989562_x1.....gugggaacacggAgugcc.....                 | 1 |
| Gi5_8898412_x1.....uNgugggaacacggggugccgaacu.....          | 1 |
| Gi3_28398226_x1.....gacgucGagggaacacggggugccgaac.....      | 1 |
| Gi3_28668853_x1...gcgaucggagacgCcgugggaacacggggug.....     | 1 |
| Gi5_8837433_x1....aucGAagacgucgugggaacacg.....             | 1 |
| Gi1_4257003_x1.....Ugagacgucgugggaacacggggugccga.....      | 1 |
| Gi2_11319496_x1.....aacacgggUugccgaacu.....                | 1 |
| Gi3_28762103_x1...gaucggagacgucgugggaacacgAggu.....        | 1 |
| Gi5_8964368_x1.....ugggaacacggggugccGacuuu.....            | 1 |
| Gi2_11109614_x1cugcgauccgagacgucgugggaacacggggug.....      | 0 |
| Gi1_4241130_x1.....gacgucgugggaacacggggugccgaAA.....       | 1 |
| G1a_6103203_x1.....agacgucgugggaacacggggCgcgaac.....       | 1 |
| Gi2_11318445_x1.....gCagacgucgugggaacacg.....              | 1 |
| Gi2_11152785_x1.....cgugggaacaUggggugcc.....               | 1 |
| Gi3_28947489_x1....ucggagacgucgugggGacacgg.....            | 1 |
| Gi1_4316092_x1.....gacgucgugggaacacAgggugccg.....          | 1 |
| Gi3_28530137_x1.....guUggaacacggggugccgaacu.....           | 1 |
| Gi2_11114207_x1...gUucggagacgucgugggaacacggggugcc.....     | 1 |
| G1a_6129081_x1....aucggagCcgucgugggaacacggggug.....        | 1 |
| G1a_6321477_x1....aucggagacguUgugggaacacggg.....           | 1 |
| Gi2_11317150_x1.....cgucgugggaacacggUgugccgaacu.....       | 1 |
| Gi3_28650155_x1.....gggNacacggggugccga.....                | 1 |
| Gi2_11272081_x1.....agacgucgugggaacacgggg.....             | 0 |
| Gi1_4347714_x1.....agacgucUugggaacacgggg.....              | 1 |
| Gi2_11285791_x1.....ggGgacgucgugggaacac.....               | 1 |
| Gi2_11372141_x1....ucggagCcgucgugggaaca.....               | 1 |
| Gi5_9117675_x1.....Ugucgugggaacacggggugccgaac.....         | 1 |
| Gi3_28626393_x1.....ggagacgucgugggaacacggggCu.....         | 1 |
| Gi1_4162081_x1.....ggNacacggggugccgaacu.....               | 1 |
| Gi3_28602142_x1....cggagacgucgugggaacacCgggu.....          | 1 |
| Gi5_8993805_x1.....cAucgugggaacacggggugccgaacu.....        | 1 |
| Gi2_11392069_x1.....gucgugggaacaUggggugccg.....            | 1 |
| Gi5_8923156_x1.....ggaacacggggugAcgaac.....                | 1 |

|                 |                                           |   |
|-----------------|-------------------------------------------|---|
| Gi4_591374_x1   | .....gaacacggggugccgUacu.....             | 1 |
| G1a_6142400_x1  | .....gucguggaacCcgggugccgaacu.....        | 1 |
| Gi4_613556_x1   | .....guggaacacggggCgcccgaacu.....         | 1 |
| Gi3_28491215_x1 | .....gaucggagacgucgugggaacacAgggugcc..... | 1 |
| Gi3_28953636_x1 | .....uggaacacggggugccgUa.....             | 1 |
| Gi2_11316561_x1 | .....gcgaucgCagacgucguggga.....           | 1 |
| Gi5_9026386_x1  | .....gacgucguggaacacggggugccgaaA.....     | 1 |
| Gi3_28460633_x1 | .....cgucguggaacacggAgugccgaa.....        | 1 |
| Gi3_28430681_x1 | .....ugcgaucggagacgCcguggaacacggg.....    | 1 |
| Gi4_603506_x1   | .....agacgucguggaacacggggGgcc.....        | 1 |
| Gi1_4181193_x1  | .....guggUaacacggggugccgaac.....          | 1 |
| Gi3_28573965_x1 | .....guggaacacgggCugcc.....               | 1 |
| Gi2_11159305_x1 | .....ucggagacgucguggaacac.....            | 0 |
| Gi2_11318160_x1 | .....gucguggUaacacggggugccga.....         | 1 |
| Gi3_28372241_x1 | .....cgaucggagacAucguggaacacg.....        | 1 |
| Gi2_11019642_x1 | .....uggaacacggCgugccga.....              | 1 |
| Gi3_28314827_x1 | .....cgucguggaacGcggggu.....              | 1 |
| G1a_6122554_x1  | .....auNggagacgucguggga.....              | 1 |
| Gi2_11262405_x1 | .....cgucguggaacaUggggugccg.....          | 1 |
| Gi2_11131470_x1 | .....gUucggagacgucgugggaac.....           | 1 |
| Gi5_9029594_x1  | .....cgucAugggaacacggggugccga.....        | 1 |
| Gi2_11183980_x1 | .....uggaacacggggugccAaacuu.....          | 1 |
| Gi3_28861563_x1 | .....aucggagacguAguggaacacgggg.....       | 1 |
| Gi3_28974874_x1 | .....auNggagacgucgugggaacacgggg.....      | 1 |
| Gi5_8972396_x1  | .....uggaacacgggAugccgaacu.....           | 1 |
| Gi3_28326972_x1 | .....ucggaAacgucguggaacacggggugcc.....    | 1 |
| Gi1_4253521_x1  | .....guggaacacAgggugccga.....             | 1 |
| Gi3_28422833_x1 | .....cgaucggagacgucguggaacacggA.....      | 1 |
| G1a_6054648_x1  | .....gaacacggggugUcgaacu.....             | 1 |
| Gi5_9119231_x1  | .....aucggCgacgucguggaacacggggu.....      | 1 |
| Gi3_28685992_x1 | .....agacgucguggaacacAggggugcc.....       | 1 |
| Gi1_4182911_x1  | .....uggaacacCgggugccg.....               | 1 |
| Gi4_603979_x1   | .....ucAgagacgucguggaacacggggugccg.....   | 1 |
| Gi2_11324113_x1 | .....gacgucguggUaacacggggugccgaacu.....   | 1 |
| Gi3_28987088_x1 | .....aucggagaGgucguggaacacggggu.....      | 1 |
| Gi1_4377717_x1  | .....gaacacggggugccgCac.....              | 1 |
| Gi1_4284375_x1  | .....gagacgucguggaacacggggCgcc.....       | 1 |
| Gi3_28503006_x1 | .....gagacgucguggUaacacggggugcc.....      | 1 |
| Gi3_28451417_x1 | .....cggagacgucgCgggaacacg.....           | 1 |
| Gi5_9103817_x1  | .....gagacgucguCggaacacggggugccgaacu..... | 1 |
| Gi3_28851917_x1 | .....Aagacgucguggaacac.....               | 1 |
| Gi5_9065787_x1  | .....guggaacacggCgugccgaac.....           | 1 |
| G1a_6086531_x1  | .....gaacacggggugAcgaacu.....             | 1 |
| Gi4_593319_x1   | .....uggaacacggggugccgaUcu.....           | 1 |
| Gi2_11104214_x1 | .....gacgucguggaacCcggggugccgaac.....     | 1 |
| Gi1_4284769_x1  | .....gagacgucguggaacacggggGgccgaacu.....  | 1 |
| Gi1_4235221_x1  | .....ggaacacggggugCcgaaacu.....           | 1 |

Gi1a\_6281835\_x1.....aucggagacgucgugCga..... 1  
 Gi5\_9126542\_x1.....ugggaacacggggugccgaaGu..... 1  
 Gi4\_595893\_x1.....gAgggaacacggggugccgaacu..... 1  
 Gi3\_28869705\_x1.....cggagacgucgugggUacacggggugccga..... 1  
 Gi5\_9099488\_x1.....aucggagacgucgCggaacacggggugcc..... 1  
 Gi1a\_5988080\_x1.....aucggagacgucguCggaacacggggug..... 1  
 Gi1\_4387968\_x1.....gagacgucgGgggaacacggggugccgaacu..... 1  
 Gi3\_28642153\_x1..gcgaucggagacgucgugggaaacG..... 1  
 Gi1a\_6339461\_x1..cgauccggaNacgucgugggaaacag..... 1  
 Gi1\_4260727\_x1.....acgucgugggaaacacggggugccA..... 1  
 Gi3\_28770002\_x1.....cggagacgucgugUgaacacggggugccga..... 1  
 Gi3\_28624244\_x1.....ucggagacgucgugggaaAacggg..... 1  
 Gi1\_4239688\_x1.....aucAgagacgucgugggaaacacggggugc..... 1  
 Gi1\_4171303\_x1.....gugggaaAacggggugccga..... 1  
 Gi1a\_6286273\_x1.....auGggagacgucgugggaaacacgggggu..... 1  
 Gi1a\_6227759\_x1..cgauccggagaGgucgugg..... 1  
 Gi3\_28704965\_x1.....acgNcgugggaaacacggggugccga..... 1  
 Gi1\_4324673\_x1.....Cggaacacggggugccgaac..... 1  
 Gi2\_11359226\_x1.....acgucgugggaaacacUgggugccgaacu..... 1  
 Gi3\_28494275\_x1.....gacgucgugggCacacggggugcc..... 1  
 Gi3\_28466926\_x1.....gucgugggaaacacUgggugcc..... 1  
 Gi1\_4178616\_x1.....ggagacgucgugggaaacCgggggu..... 1  
 Gi1a\_6023786\_x1.....cgugggaaacacggggCugcc..... 1  
 Gi5\_9100188\_x1.....cCugggaacacggggugc..... 1  
 Gi1\_4210379\_x1.....gacgucgugggaaacaUggggugccgaacu..... 1  
 Gi3\_28613246\_x1.....aucggagaGgucgugggaaac..... 1  
 Gi5\_8949968\_x1.....gugggaacacggggugccgaGcuu..... 1  
 Gi2\_11107572\_x1..cgauccggagacgucguAg..... 1  
 Gi3\_28560837\_x1.....acgucgugggaaacacggggugccAaac..... 1  
 Gi2\_10998158\_x1.....ucguCggaacacggggugccgaac..... 1  
 Gi5\_9063834\_x1.....aucggagacgucUugggaacacgg..... 1  
 Gi3\_28399185\_x1.....ucCgagacgucgugggaaacacggggugcc..... 1  
 Gi3\_28624438\_x1.....cguGgugggaaacacggggugccgaac..... 1  
 Gi3\_28537806\_x1.....cggagacgucgugggaaacGcac..... 1  
 Gi1\_4354567\_x1.....gagacgucgugggaaacGcggggugcc..... 1  
 Gi2\_11022005\_x1.....gucgCgggaacacggggugccg..... 1  
 Gi3\_28587914\_x1.....ggGgacgucgugggaaacacggggugccg..... 1  
 Gi1a\_6188193\_x1.....auUggagacgucgugggaa..... 1  
 Gi1\_4297950\_x1.....ucgugggaaacCggggugccga..... 1  
 Gi1\_4176704\_x1.....cgucgugggaaacaUggggugccgaacu..... 1  
 Gi3\_28801094\_x1.....ucggagacNucgugggaaaca..... 1  
 Gi1a\_6261013\_x1.....aGcggagacgucgugggaaacacgg..... 1  
 Gi2\_11039480\_x1..gcgaucggagacgucguAggaaca..... 1  
 Gi3\_28984256\_x1..gcgGucggagacgucgugggaa..... 1  
 Gi2\_11120309\_x1.....agacgucguAggaacacggggugccg..... 1  
 Gi2\_11025720\_x1.....cgucgugggaaacaGggggugccga..... 1  
 Gi2\_11279612\_x1..cgauccggagacAucgugg..... 1

Gi5\_9000891\_x1.....acgucCugggaacacggggugccgaacu..... 1  
 Gi3\_28628842\_x1.....aacacUgggugccgaacuu..... 1  
 Gi2\_11298832\_x1....aucggagacgucgugggaacacggggugccGacu..... 1  
 Gi2\_11136483\_x1..gcgaucggagacgCcgugggaaca..... 1  
 Gi3\_28351726\_x1....gaucggagCcgucgugggaaca..... 1  
 Gi1\_4253826\_x1.....acgucgugggaUacggggugccgaacu..... 1  
 Gi4\_581493\_x1.....aUgucgugggaacacggggugccgaacu..... 1  
 Gi3\_28320894\_x1.....cgucguggCaacacgggg..... 1  
 Gi5\_9132631\_x1.....cgucgugggaacacggggugccgaC..... 1  
 Gi1\_4298845\_x1.....gaacacgggCugccgaacu..... 1  
 Gi2\_11251930\_x1..cgauccgagacgucgugggaacacgg..... 0  
 Gi5\_8939669\_x1...Uaucggagacgucgugggaacacggggugc..... 1  
 Gi2\_11190268\_x1.....cgugggaacacgggAugccg..... 1  
 Gi3\_28902753\_x1.....Agagacgucgugggaacacggggugccgaacu..... 1  
 Gi5\_9045058\_x1....aucggagacgucgugggaCca..... 1  
 Gi2\_11154024\_x1....aAcggagacgucguggga..... 1  
 Gi1\_4169128\_x1.....Gcucgugggaacacggggugccgaa..... 1  
 Gi2\_11193779\_x1.....gucguggGacacggggugccga..... 1  
 Gi3\_28400109\_x1...gaucggagacgucgugggaacacggA..... 1  
 Gi3\_28620541\_x1...gauNggagacgucgugggaacacgggg..... 1  
 Gl1\_6224006\_x1.....gucgugggaacacggggugccgaGcu..... 1  
 Gi2\_11304191\_x1.....cgucgugAgaacacggggugcc..... 1  
 Gi2\_11045058\_x1....aucgCagacgucgugggaacac..... 1  
 Gi2\_11407721\_x1.....gacgucgugggaacacggggCgccc..... 1  
 Gi3\_28873993\_x1.....cgugggaacacgCggugccgaa..... 1  
 Gi2\_11192409\_x1...cgauccgagacgucgugggaacacgggg..... 1  
 Gi3\_28327131\_x1.....gagacgucgugggUacacggggugccg..... 1  
 Gi3\_28729254\_x1...cgauccgagacgucgugggaacCcggg..... 1  
 Gi2\_11305029\_x1....ucggagacgucgugggaUcacgggg..... 1  
 Gi3\_28857296\_x1....aucggagacgucgugggaUacggggugc..... 1  
 Gi5\_8891410\_x1.....acgucgugggaGcacggggugccg..... 1  
 Gi1\_4347727\_x1.....agacgucgugggaacaAggggugcc..... 1  
 Gi2\_11163189\_x1.....ggagacgucAugggaacac..... 1  
 Gi5\_8919849\_x1.....agacgucgugggaacacggggugccgaaUu..... 1  
 Gi1\_4361548\_x1.....gaacacggNgugccgaac..... 1  
 Gi2\_11174346\_x1...cgauccgagaUgucgugggaaca..... 1  
 Gi3\_28736345\_x1.....ggagacgucgCgggaacacggggugccg..... 1  
 Gi1\_4158961\_x1.....cgucgAgggaacacggggugccgaacu..... 1  
 Gi2\_11168655\_x1.....gacgucgugggaacacggggUaccga..... 1  
 Gl1\_6171207\_x1.....Agagacgucgugggaacac..... 1  
 Gi3\_28564823\_x1...cUaucggagacgucgugggaacacggggugccgaacu..... 1  
 Gi2\_11041503\_x1....aucggagacguGgugggaacacgggg..... 1  
 Gi1\_4372300\_x1.....ugggaUcacggggugccga..... 1  
 Gl1\_6307046\_x1.....cgugggaacacgggAugcc..... 1  
 Gi3\_28629260\_x1...gaucggagacgCcgugggaacacggggugc..... 1  
 Gi2\_11370912\_x1.....gCcgucgugggaacacggggugc..... 1  
 Gi5\_8977847\_x1....aucggagacgucguggAaacacgggg..... 1

Gi2\_11270234\_x1....Cucggagacgucgugggaacacggggu..... 1  
Gi2\_11253814\_x1.....gNgggaacacggggugccgaacu..... 1  
Gi3\_28558724\_x1....aucggagacgucgugggaacacggggugUcga..... 1  
Gi4\_606850\_x1.....cgugggaacUcggggugccgaacu..... 1  
Gi2\_11167320\_x1....aucggagacgucgugggaacacgCg..... 1  
G1a\_6072823\_x1.....gucgugggaacacggggUaccgaacu..... 1  
Gi5\_8863159\_x1.....agacguAgugggaacacggggugccgaac..... 1  
G1a\_6280823\_x1....Nucggagacgucguggga..... 1  
G1a\_6178501\_x1....aucgCagacgucgugggaacacggg..... 1  
Gi5\_8895035\_x1.....ggaacacggCgugccgaacu..... 1  
Gi2\_11175619\_x1.....gagacguUgugggaacacggggugc..... 1  
Gi5\_8974345\_x1....ucggagacgucgugggaacacggggCgc..... 1  
Gi2\_11373772\_x1....aucggagacgucguggUaacacggggugcc..... 1  
Gi2\_10994775\_x1.....gUgacgucgugggaacacggg..... 1  
Gi2\_11056573\_x1.....cgucguAggaacacggggug..... 1  
Gi5\_8990613\_x1....aucggagacgucgugggaacaUggggugc..... 1  
G1a\_6113358\_x1....gaucggagacgucgugggaacCcgg..... 1  
Gi3\_28513312\_x1.....acgucgugggaacacggggugGc..... 1  
Gi3\_28859908\_x1....ucggagacgucgugggaacacggggugUc..... 1  
Gi2\_11278921\_x1.....gugggaacaAggggugccgaacu..... 1  
G1a\_6214333\_x1.....cgugggGacacggggugccgaac..... 1  
Gi2\_11298417\_x1....gaucggagUcugcuggggaacacgggg..... 1  
Gi5\_9122159\_x1.....acgucgugCgaacacggggugccg..... 1  
Gi3\_28465492\_x1..ugUgaucggagacgucgugggaacacggggugcc..... 1  
Gi2\_11160046\_x1....gaGcggagacgucgugggaac..... 1  
Gi2\_11143217\_x1..gcgaucggNgacgucguggga..... 1  
G1a\_6305844\_x1.....ggaacacggggugccgaUc..... 1  
G1a\_6140283\_x1.....gaacacggggugccgaGc..... 1  
Gi2\_11272892\_x1.....gucguAggaacacgggggu..... 1  
Gi1\_4352531\_x1....aucggagacgCcgugggaacacggggugc..... 1  
Gi3\_28890027\_x1.....ggagacgucguggCaacacggggugcc..... 1  
Gi2\_11051990\_x1.....ucguCggaacacggggugccg..... 1  
Gi5\_8869645\_x1.....agacguUgugggaacacggggugccgaac..... 1  
Gi3\_28854988\_x1.....gucguAggaacacggggugccgaa..... 1  
G1a\_6037056\_x1..ugcgaucggagacguUgug..... 1  
Gi5\_9128118\_x1.....guGgugggaacacggggugc..... 1  
Gi3\_28701466\_x1....Uucggagacgucguggga..... 1  
Gi3\_28436183\_x1.....ucgugggaacacggggAgccga..... 1  
Gi5\_9112485\_x1.....Cggaacacggggugccgaa..... 1  
Gi3\_28961014\_x1.....ggagacgucgugggaacacggggUuccgaacu..... 1  
Gi3\_28346618\_x1....aucggagacguAgugggaacacgg..... 1  
Gi2\_11271014\_x1....gaCcgagacgucguggga..... 1  
Gi5\_9030484\_x1.....acgucgugggaUcacggggugccgaacu..... 1  
Gi2\_10995459\_x1....ucggagacgucgugggGacacgggg..... 1  
Gi1\_4312408\_x1.....acgucgugggaacacggggUaccgaacu..... 1  
Gi5\_9100563\_x1.....acgAcgugggaacacggggugccgaac..... 1  
Gi2\_11313016\_x1....ucggCgacgucgugggaacacg..... 1

Gi5\_8844974\_x1.....gugggaacaAggggugccgaa..... 1  
 Gi1\_4259484\_x1....Naucggagacgucguggg..... 1  
 Gi2\_11225268\_x1.....cggagacgucgCgggaacacggggugc..... 1  
 Gl1a\_6303357\_x1.....ggaacacggggugccgaaUu..... 1  
 Gl1a\_6079701\_x1.....ucggagacgucgugCgaacacgg..... 1  
 Gi5\_9130544\_x1.....acgucgugggaacacggggugcAg..... 1  
 Gi3\_28710754\_x1.....guCggaacacggggugcc..... 1  
 Gi3\_28505328\_x1....cgauccggagacguUgugggaacacg..... 1  
 Gi5\_8886784\_x1....aucggagacgucgugggaacacggggCgcc..... 1  
 Gi2\_11302484\_x1....aucggagacgucUugggaacacg..... 1  
 Gi2\_11287943\_x1....ucggagacgucgugggaacGcg..... 1  
 Gi1\_4294549\_x1.....gAgggaacacggggugcc..... 1  
 Gi1\_4296635\_x1.....ggagacgucguggGacacggggugccgaacu..... 1  
 Gi2\_11027353\_x1.....uUgugggaacacggggugccgaa..... 1  
 Gi1\_4267097\_x1.....gacgucguNggaacacggggugccgaac..... 1  
 Gi3\_28511219\_x1.....ugggaacacggUgugccga..... 1  
 Gl1a\_6262369\_x1....aucggagacguAgugggaacacg..... 1  
 Gi2\_11332785\_x1....ucggagacgucgugggaacacgAggu..... 1  
 Gi2\_11290378\_x1.....Ugucgugggaacacggggugccgaa..... 1  
 Gi1\_4221530\_x1.....cgugggaacacggggugccgaUcuu..... 1  
 Gi5\_9054377\_x1.....gacgucguAggaacacggggugccgaacu..... 1  
 Gi5\_9127786\_x1.....acgucgugggaacacgggAugccgaacu..... 1  
 Gi2\_11171666\_x1.....gucgugggNacacggggugc..... 1  
 Gi2\_11403068\_x1....cggagacAucgugggaacacggggugc..... 1  
 Gi2\_11211176\_x1....aucggagacguAgugggaac..... 1  
 Gi3\_28566894\_x1.....gugggaacacggguUcc..... 1  
 Gi2\_11207748\_x1....acgucgugggaacacggggugccAaac..... 1  
 Gi1\_4199651\_x1.....ucguAggaacacggggugc..... 1  
 Gi5\_8900987\_x1.....Ugucgugggaacacggggugc..... 1  
 Gi3\_28650630\_x1.....gucgugggaacacggggugccgaaAuu..... 1  
 Gi3\_28288612\_x1.....gucguggAaacacggggugcc..... 1  
 Gl1a\_6192155\_x1....aucggagacgucguAggaacacgg..... 1  
 Gi3\_28488260\_x1....ucgugggaacacggggugccgaG..... 1  
 Gi4\_608543\_x1.....cgugggaGcacggggugccgaacu..... 1  
 Gi2\_11331791\_x1..Acgaucggagacgucgugggaaca..... 1  
 Gi4\_595022\_x1.....Uugggaacacggggugccg..... 1  
 Gl1a\_6339257\_x1.....gaacacggAgugccgaac..... 1  
 Gi1\_4330232\_x1.....uggNaacacggggugccga..... 1  
 Gi2\_11006347\_x1....cggagacgucgugggaacacggggugccgaGc..... 1  
 Gi3\_28395349\_x1....aucggagacgucguUggaacacggggugcc..... 1  
 Gi3\_28547721\_x1....gaucggagacgucgugggaacaUgggu..... 1  
 Gi3\_28309083\_x1....ucggagacgucguAggaacacggggugc..... 1  
 Gi1\_4213625\_x1....Uaucggagacgucgugggaacacg..... 1  
 Gi2\_11060232\_x1....cgugggaacUcggggugccgaa..... 1  
 Gi5\_9071436\_x1....aucggGgacgucgugggaacacgg..... 1  
 Gi2\_11305820\_x1.ucggaucggagacgucAugggaacac..... 1  
 Gi4\_608645\_x1....acgucgugggaacacggggugcAgaacu..... 1



Gi5\_9089283\_x1.....cgugggaacacggggugccgUacuu..... 1  
G1a\_6105247\_x1.ugcgauccgagUcgucgu..... 1  
Gi2\_11160656\_x1.....cCgagacgucgugggaacacggggugcc..... 1  
Gi3\_28646314\_x1...gaucggagacgucguCggaacacgggg..... 1  
Gi2\_11184770\_x1.....cUgagacgucgugggaacacggggugccgaacu..... 1  
Gi1\_4166431\_x1.....acgucgugggaacacggggugccgaaA..... 1  
Gi5\_9016641\_x1.....gugggaacacgAggugccgaacu..... 1  
Gi2\_11266200\_x1.....cggagacgucgugggaacacggggAgc..... 1  
Gi2\_11086847\_x1.....cgucgugggaacacggggugcGgaac..... 1  
Gi1\_4209235\_x1.....gggaacacggggugccgaU..... 1  
Gi3\_28951107\_x1...gaGcggagacgucgugggaacacg..... 1  
Gi3\_28437187\_x1.....ggagGcgucgugggaacacggggugccg..... 1  
Gi1\_4250914\_x1.....gagacgucgugggaacacggggAgccgaacu..... 1  
Gi2\_11306787\_x1.....guNgugggaacacggggugccgaacu..... 1  
Gi3\_28457155\_x1.....agacgucgugggaacacggAgugccgaac..... 1  
Gi1\_4334606\_x1...auUggagacgucgugggaacac..... 1  
Gi1\_4190714\_x1...aucggagacgucUugggaacacg..... 1  
Gi2\_11332576\_x1.....cgugggaacacggggGgcc..... 1  
Gi2\_11052770\_x1.....ggagacgucAugggaacacggggugc..... 1  
Gi3\_28496450\_x1.....ucggagacgucguAggaacacg..... 1  
Gi2\_11108648\_x1.....ugggaAacggggugccg..... 1  
Gi3\_28327253\_x1...cgauccgagacgucgugggaacacggggCgc..... 1  
Gi1\_4283632\_x1.....gugggUacacggggugccgaa..... 1  
Gi4\_602801\_x1.....gugggGacacggggugccgaac..... 1  
Gi2\_11093274\_x1.....gucgugggUacacggggugc..... 1  
Gi5\_8861451\_x1...gaucggagacgucgugggaac..... 0  
Gi3\_28654984\_x1.....Cagacgucgugggaacacggggugcc..... 1  
Gi3\_28677495\_x1.....cgugggaacacgggUugccgaac..... 1  
Gi5\_9119523\_x1.....acgucgugggaacCggggugccg..... 1  
Gi5\_9009504\_x1.....gugggaacacggggugccAaacuuu..... 1  
Gi2\_11293822\_x1...aucggagUcgucgugggaacacggggugcc..... 1  
Gi2\_11263006\_x1...ucggagGcgucgugggaacacggggg..... 1  
Gi1\_4311416\_x1...Ccgagacgucgugggaacacggggugc..... 1  
Gi2\_11219382\_x1...cgaucUgagacgucguggga..... 1  
Gi4\_592287\_x1.....ggUacacggggugccgaac..... 1  
Gi1\_4262596\_x1.....gugggaacaUggggugccga..... 1  
Gi5\_8961587\_x1...gaucggagacgucgAgggaacacgg..... 1  
Gi5\_8925292\_x1.....agacgucgGgggaacacggggugcc..... 1  
Gi5\_9099013\_x1.....aacacggggGgccgaacu..... 1  
Gi3\_28358830\_x1.....acgucgugggaacacggggugccCaac..... 1  
Gi3\_28664626\_x1.....Ngugggaacacggggugcc..... 1  
Gi2\_11022390\_x1.....cgucgugggaGcacgggg..... 1  
Gi1\_4176967\_x1.....cgugggaacaAggggugccgaacu..... 1  
Gi1\_4159719\_x1.....Ccgugggaacacggggugccgaacu..... 1  
Gi5\_8865464\_x1.....Ggucgugggaacacggggugccgaacu..... 1  
Gi2\_11257083\_x1.....ucggagacgucgugggaacCgggg..... 1  
Gi1\_4313346\_x1.....ugggaacacAgggugccgaa..... 1

Gi3\_28535604\_x1..gcgaucAgagacgucguggga..... 1  
Gi5\_8898557\_x1.....agacgucAugggaacacggggugccgaacu..... 1  
Gi1\_4365450\_x1.....gCgaacacggggugccgaac..... 1  
Gi2\_11000973\_x1.....cgugggaacacggCgugccga..... 1  
Gi5\_8896638\_x1.....cggagacgucgugggaacacAgggugccga..... 1  
Gi5\_8903105\_x1.....agacgucgugggaacacggggugccgaCcu..... 1  
Gi2\_11362225\_x1..gGgaucggagacgucgugggaaca..... 1  
Gi5\_9079270\_x1.....gcccugcuAcccaccuucgcccaguuucg..... 1  
Gi2\_11319461\_x1.....ucgugggaacacggggugGcgaac..... 1  
Gi2\_11322121\_x1.....gacgucgugggaacacggggugU..... 1  
Gi3\_28846454\_x1.....Uggagacgucgugggaacac..... 1  
Gi1\_4188484\_x1.....ucgNgggaacacggggugccgaac..... 1  
Gi3\_28800214\_x1.....ucggagacgucgugggaUcacg..... 1  
Gi2\_11227396\_x1.....ugggaacacggggugccgaaAuu..... 1  
Gi1\_4171750\_x1.....gaacacgggAugccgaacuu..... 1  
Gi3\_28316678\_x1....aucggagacgucgugggaacaUgggg..... 1  
Gi1\_4213114\_x1....aucggagacgucgugggGacacg..... 1  
Gi5\_8941019\_x1....gagacAucgugggaacacggggugccgaacu..... 1  
Gi2\_11382090\_x1.....ucguAggaacacggggugccgaa..... 1  
Gi5\_8835117\_x1.....cgugggaacacggggugUcga..... 1  
Gi3\_28599540\_x1....gaucggCgacgucgugggaacacggggugcc..... 1  
Gi5\_8992399\_x1....cggagacgucgAgggaacacggggugcc..... 1  
Gi1\_4362612\_x1.....ugggaacacggggugccgaC..... 1  
Gi4\_597154\_x1.....Nugggaacacggggugccgaacu..... 1  
Gi5\_8965801\_x1....aucggagacgucgugAgaacacg..... 1  
Gi5\_8903733\_x1.....ggaacacggggugGcgaac..... 1  
Gi2\_11360876\_x1....aucggagacgucguCggaacacgggggu..... 1  
G1a\_6111553\_x1....aucggagacgucgAgggaacac..... 1  
Gi3\_28426457\_x1.....agUcgucgugggaacacgggg..... 1  
Gi3\_28507297\_x1.....ggagacgucgugggaacacggggugcAg..... 1  
Gi2\_11099548\_x1.....gggaacacggggguUccgaac..... 1  
Gi5\_8833249\_x1.....agacgucgugggaacacggggugcAgaacu..... 1  
Gi3\_28607986\_x1.....ggaacacgggCugccgaac..... 1  
Gi3\_28571767\_x1.....gacgucgugggaacacggggugccA..... 1  
Gi5\_9012929\_x1.....gacgGcgugggaacacggggugccgaacu..... 1  
Gi5\_9031246\_x1....gaucggagacgucguggaaAacgg..... 1  
Gi1\_4367622\_x1.....ucgugggaacacggggAgcc..... 1  
Gi2\_11028325\_x1.....gacgucgugggaUacggggugccgaacu..... 1  
Gi1\_4277707\_x1.....gacgucgugggaacacggggugccgaaGu..... 1  
G1a\_6353456\_x1.....gagacgucgugggaacCcgggugccgaacu..... 1  
Gi1\_4306040\_x1.....acgucgugggUacacggggugccg..... 1  
Gi2\_11184009\_x1.....agacgucgugggaacacggggugccA..... 1  
Gi3\_28497246\_x1....ucggagacgucgugggCacacggggugccgaacu..... 1  
Gi2\_11063626\_x1.....gagacgucgugggaacacggggugccgaacA..... 1  
Gi1\_4308042\_x1.....gugggaUcacggggugccgaacuu..... 1  
G1a\_6188484\_x1....cgaucggGgacgucgugg..... 1  
Gi2\_11393531\_x1.....agacgucgugggaacacggggUaccg..... 1

|                                                             |   |
|-------------------------------------------------------------|---|
| Gi3_28574005_x1..gGgaucggagacgucgugggaaacacggggugcc.....    | 1 |
| Gi2_11352400_x1.....ggagacgucgugggaaacacgg.....             | 0 |
| Gi3_28705546_x1.....gacgucgugggaaacacAgggugccg.....         | 1 |
| Gi4_594957_x1.....ggUaacacggggugccgaacu.....                | 1 |
| Gi5_9134122_x1.....gggaaAacggggugccgaac.....                | 1 |
| Gi2_11208892_x1.....gAcgugggaaacacggggugccgaac.....         | 1 |
| Gi3_28541296_x1.....gucgugggaaacacgggCugccgaac.....         | 1 |
| G1a_6160371_x1.....cggagacgucgugggaaacacggggGg.....         | 1 |
| Gi2_11339040_x1.....aucggagacgucgugggaaacacggggguAccga..... | 1 |
| Gi1_4276778_x1.....cgucgugggGacacggggugcc.....              | 1 |
| Gi1_4389983_x1.....uCggaacacggggugccgaac.....               | 1 |
| Gi4_609071_x1.....gCgggaacacggggugccgaa.....                | 1 |
| Gi5_8861773_x1.....cguAgugggaaacacggggugc.....              | 1 |
| Gi1_4243984_x1.....ucgugggaaacacggCgugc.....                | 1 |
| Gi3_28365802_x1.....cgNagacgucgugggaaacacggg.....           | 1 |
| Gi4_585450_x1.....gugggaacacggggugccCaa.....                | 1 |
| Gi2_11296848_x1.....ucggGgacgucgugggaaacacggggugccgaac..... | 1 |
| Gi3_28474406_x1.....ggagacgucgugggaaacacggAgugccgaa.....    | 1 |
| Gi5_9004407_x1.....Ngucgugggaaacacggggugccgaacu.....        | 1 |
| Gi1_4334945_x1.....cgucgugggaaacacggggugccgaacG.....        | 1 |
| Gi1_4379517_x1.....cgugggaaacacgCggugccgaa.....             | 1 |
| G1a_6196312_x1...gaucggagacguAguggg.....                    | 1 |
| G1a_6129432_x1.uUcgaucggagacgucgugggaaacac.....             | 1 |
| G1a_6013003_x1...gaucggagacgucgugggaaacacggggg.....         | 1 |
| Gi3_28555284_x1...gaucggagacgucgugggGacacggggugccg.....     | 1 |
| Gi2_11235612_x1.....cgucgugggaaacacggggugcAgaac.....        | 1 |
| Gi2_11232290_x1.....gugggaacacgggCugccgaa.....              | 1 |
| Gi2_11326686_x1.....gagacAucgugggaaacacggggugccgaac.....    | 1 |
| Gi5_8844882_x1.....aGgucgugggaaacacggggugccga.....          | 1 |
| Gi3_28460163_x1cugcgaucUgagacgucg.....                      | 1 |
| Gi2_11017046_x1.....acgucgugggaaacacggggugccgG.....         | 1 |
| G1a_6120281_x1.....ucggagacgucgAgggaacacgg.....             | 1 |
| Gi3_28277327_x1.....ggagacgucgAgggaacacgggg.....            | 1 |
| Gi3_28369533_x1.....cgugggaaUacggggugccgaa.....             | 1 |
| G1a_6227138_x1.....ggaacaGggggugccgaacu.....                | 1 |
| Gi3_28612445_x1.....uNggaacacggggugccgaa.....               | 1 |
| Gi3_28284399_x1.....gucgugggaaacacggggA.....                | 1 |
| Gi2_11184580_x1...aucgCagacgucgugggaaacacggggug.....        | 1 |
| Gi3_28948528_x1.....gucgugggCacacggggugc.....               | 1 |
| Gi5_8851618_x1.ugcgaucggCgacgucguggg.....                   | 1 |
| Gi3_28731951_x1.....cgugggaaacacggggugcAg.....              | 1 |
| Gi2_11296746_x1.....ggagacgucAugggaacacggggugccgaacu.....   | 1 |
| Gi2_11188468_x1...Caucggagacgucguggg.....                   | 1 |
| Gi2_11158027_x1.....Nggaacacggggugccgaacu.....              | 1 |
| Gi4_613763_x1.....cggagacgucgugggaaacacgggg.....            | 0 |
| Gi5_8914105_x1...gaucggagacgucgugggGacacgggg.....           | 1 |
| Gi2_11114585_x1.....cgucgugggaaacGcggg.....                 | 1 |

Gi2\_11104901\_x1.....gggaacacggggugccgUac..... 1  
 Gi2\_11051332\_x1...gUucggagacgucgugggaaacacggggug..... 1  
 Gi3\_28364915\_x1.....ucggagUcgucgugggaaacacg..... 1  
 Gi1\_4344238\_x1.....gucgugggGacacggggugcc..... 1  
 Gi3\_28519045\_x1.....gacgucgugggaaacacggggugccAaac..... 1  
 Gi3\_28878021\_x1.....acgucgugggaaacacggggCgccga..... 1  
 Gi3\_28850112\_x1.....agacguUgugggaaacacggggugcc..... 1  
 Gi3\_28671047\_x1...cgaucggagacgucgCgg..... 1  
 Gi5\_8947473\_x1.....guggaaacacCgggugccgaacuuu..... 1  
 Gi3\_28401243\_x1.....ggUgacgucgugggaaacacggggugccgaacu..... 1  
 Gi4\_594598\_x1.....cAucgugggaaacacggggugccgaacu..... 1  
 Gi4\_607109\_x1.....aacacggggCgccgaacu..... 1  
 Gi2\_10996622\_x1.....acAucgugggaaacacggg..... 1  
 Gi1\_4346547\_x1.....aNcacggggugccgaacu..... 1  
 Gi3\_28452059\_x1....aucggagacgucgugggaaacacgUgg..... 1  
 Gl1a\_6063260\_x1.....uggaaacacggggugccgCac..... 1  
 Gi2\_11048757\_x1.....cAucgugggaaacacggggugccga..... 1  
 Gi5\_8970834\_x1....aucggagacgCcgugggaaacacgggg..... 1  
 Gl1a\_6249423\_x1.....cgugggaaacacggggGgcc..... 1  
 Gl1a\_6239939\_x1.....ggagacgucgCgggaacac..... 1  
 Gl1a\_6087919\_x1....ucUgagacgucgugggaaacacggg..... 1  
 Gi3\_28282921\_x1.....ggagacgucgCgggaacacggggugccgaa..... 1  
 Gi1\_4195548\_x1.....cgggaCacgucgugggaaacacggggugc..... 1  
 Gi2\_11273812\_x1.....cgucgugggaaacacgggA..... 1  
 Gl1a\_6038099\_x1.....gggaacacgUggugccgaacu..... 1  
 Gi3\_28889951\_x1.....guCggaacacggggugccga..... 1  
 Gi3\_28512206\_x1.....ggagacgucgugggGca..... 1  
 Gl1a\_6159069\_x1.....guggaaacacgggUugccgaacu..... 1  
 Gi1\_4372224\_x1.....Ggacgucgugggaaacacggggugccg..... 1  
 Gi2\_11038868\_x1...cgaucggagGcgucgugggaaacacgggggu..... 1  
 Gi1\_4252520\_x1.....gacgucgugggCacacggggugccgaacu..... 1  
 Gi3\_28394609\_x1.....agacgucgugggaaacacggUgugcc..... 1  
 Gl1a\_6325276\_x1.ugcgauccggagCcgucgug..... 1  
 Gi5\_8956715\_x1.....Nuggaaacacggggugccgaac..... 1  
 Gi3\_28507296\_x1.ugcgauccggagacgucgugggGacacg..... 1  
 Gi1\_4239348\_x1.....ugggaUcacggggugccg..... 1  
 Gi3\_28285221\_x1....aucggagacgucgugggaaacacggggugcG..... 1  
 Gi4\_586926\_x1.....gugggaCcacggggugccga..... 1  
 Gi3\_28919192\_x1.....acgucgugggaaacacggggugccUaac..... 1  
 Gi5\_9093292\_x1.....guggaaacacggggugccUaa..... 1  
 Gi3\_28632582\_x1.....aGgucgugggaaacacggggugccg..... 1  
 Gi3\_28569282\_x1.....aacacggggugccgaaAuu..... 1  
 Gi5\_9027741\_x1.....cguggaaacacgggAugcc..... 1  
 Gi3\_28699517\_x1.....gggaacUcggggugccgaac..... 1  
 Gi2\_11299864\_x1.....gacgucgugggaaacacggAgugc..... 1  
 Gi1\_4193166\_x1.....guUggaacacggggugccga..... 1  
 Gi2\_11243474\_x1.....agacgucgugggaaacacggggguAcc..... 1

Gi2\_11022979\_x1.....acgucgugggaacacggUgugccgaacu..... 1  
Gi3\_28972920\_x1.....acguAgugggaacacggggugcc..... 1  
Gi5\_8917688\_x1.....gugggaacacggggugcUgaacuu..... 1  
Gi3\_28956126\_x1...gaucggaAacgucgugggaacacgggg..... 1  
Gi1\_4166878\_x1...gaucggagacgucgugggaCcacgg..... 1  
Gi4\_568415\_x1.....Uagacgucgugggaacacggggugccgaacu..... 1  
Gi2\_11153955\_x1.....gacgucgugggaacacggCgugccgaac..... 1  
Gi3\_28275871\_x1.....cggNgacgucgugggaacacgggg..... 1  
Gi2\_11067626\_x1.....gggaacacggggugccCaac..... 1  
Gi2\_11102839\_x1..gcgaucggagacgucgugggaacaAggggugc..... 1  
G1a\_6359687\_x1.....ucggagacgCcgugggaacacggg..... 1  
Gi1\_4280795\_x1.....gucgugggaacacggggAgccgaacu..... 1  
Gi1\_4187439\_x1.....acgucgugggaacacggggugUcgaac..... 1  
Gi3\_28589088\_x1.....ucgugggaacacggggugUcгаа..... 1  
Gi1\_4357935\_x1.....gGgacgucgugggaacacgggg..... 1  
Gi2\_11304930\_x1.....ugggCacacggggugccga..... 1  
Gi2\_11232949\_x1.....agacgucgugggaacacggUgugcc..... 1  
Gi2\_11077724\_x1.....ugggaaUacggggugccg..... 1  
Gi2\_11027849\_x1...gaucggagacgucguggUaacacggggug..... 1  
Gi3\_28888607\_x1....aucggagacguUgugggaacacgggg..... 1  
Gi1\_4357204\_x1.....cgugggaUcacggggugccgaacu..... 1  
Gi5\_8849632\_x1.....agacgCcgugggaacacgggg..... 1  
Gi1\_4220646\_x1.....cgucguUggaacacggggugccgaacu..... 1  
Gi2\_11400935\_x1...gaucggagacgucgugggCacacggggugcc..... 1  
Gi5\_8877379\_x1.....cgucgugAgaacacggggugccgaac..... 1  
Gi1\_4363673\_x1....aucggagacgucgugggCacacg..... 1  
Gi5\_9070564\_x1.....cCugggaacacggggugcc..... 1  
Gi3\_28494686\_x1.....acgucgugggaCcacggggugccga..... 1  
Gi2\_11073122\_x1.....gacguUgugggaacacggggugccgaacu..... 1  
Gi2\_11200928\_x1.....aAacgucgugggaacacggggugccgaac..... 1  
Gi3\_28588148\_x1.....gucgugggaacacggCgugccgaacu..... 1  
Gi1\_4305764\_x1.....Ggucgugggaacacggggugccg..... 1  
Gi2\_11009426\_x1.....uggNaacacggggugccga..... 1  
Gi2\_11252218\_x1....aucggagacgucgugggaacacgUggugc..... 1  
Gi5\_8978110\_x1....Ccgagacgucgugggaacacggggugc..... 1  
Gi3\_28478293\_x1.....acgucgAgggaacacggggugccgaac..... 1  
Gi3\_28554867\_x1....aucggagacgucgAgggaacacggggugc..... 1  
Gi2\_11284162\_x1....aucggagacgucgugUgaacac..... 1  
Gi1\_4192915\_x1.....acgucgugggaacacggggugccgaacAu..... 1  
Gi3\_28291438\_x1....ucggagacgucgugggaAacgggg..... 1  
Gi2\_11295142\_x1...gaucggagacgucgugggaacacggggugcU..... 1  
Gi2\_11350851\_x1....cggagacgAcgugggaacacgggg..... 1  
Gi3\_28873776\_x1cugcgauccgagacgucgugggaacacggggugcc..... 0  
Gi5\_8877721\_x1.....gagacgucgugggaacacggggugUcgaacu..... 1  
Gi2\_11374229\_x1...gauNggagacgucgugggaacacgggg..... 1  
G1a\_6241761\_x1..ugcgauccggagGcgucgug..... 1  
Gi3\_28604531\_x1.....agacgucguUggaacacggggugccгаа..... 1

|                                                           |   |
|-----------------------------------------------------------|---|
| Gi5_9105805_x1.ugcgauccgagacgucgugg.....                  | 0 |
| G1a_6141618_x1.....gugggaGcacgggugccg.....                | 1 |
| Gi3_28454411_x1...cgauUggagacgucgugg.....                 | 1 |
| Gi2_11082683_x1.....cggagacgucgugggUacacggggugcc.....     | 1 |
| Gi3_28387432_x1.....Ngaacacggggugccgaa.....               | 1 |
| Gi3_28279255_x1..gcgauccgagacgucgugggaacacggggCg.....     | 1 |
| Gi2_11313238_x1.....gacgucgugggaacacggAgu.....            | 1 |
| Gi2_11215260_x1...gaucggagacgAcgugggaacac.....            | 1 |
| Gi3_28443476_x1.....ucguggCaacacggggugccgaac.....         | 1 |
| Gi2_11021657_x1.....ggagGcgucgugggaacacggggugccgaacu..... | 1 |
| Gi3_28287834_x1.....Ggacgucgugggaacacggggugccga.....      | 1 |
| Gi1_4217413_x1....uGggagacgucgugggaacacg.....             | 1 |
| Gi2_11190543_x1.....gaacacggggguCccgaac.....              | 1 |
| Gi2_11135581_x1.....gucgugggaGcacgggugcc.....             | 1 |
| G1a_6302010_x1....aucggagacgucguggUa.....                 | 1 |
| Gi3_28295471_x1.....ucgugggaacacggggugcGgaa.....          | 1 |
| Gi3_28611430_x1..gcgauccgNgacgucgugggaaca.....            | 1 |
| Gi5_8830864_x1....aucggUgacgucgugggaacacg.....            | 1 |
| Gi3_28638901_x1.....cggagacgucgugggaacCggggugccgaacu..... | 1 |
| Gi2_11207526_x1.....aacacggggguCccgaacu.....              | 1 |
| Gi3_28520225_x1.....cggagacgucgugggaacacgCg.....          | 1 |
| Gi2_11269507_x1....ucggagaUgucgugggaacacggggugc.....      | 1 |
| Gi3_28292654_x1.....cgugggaacacggggugccgaU.....           | 1 |
| Gi4_582188_x1....cgucguggAaacacggggugccgaacu.....         | 1 |
| Gi1_4302833_x1.....ggagacgucgugggaCcacggggugcc.....       | 1 |
| Gi3_28277829_x1....ucggagCcgucgugggaacacgggggu.....       | 1 |
| G1a_6309359_x1.....ggUgacgucgugggaacacggggugc.....        | 1 |
| Gi5_8851294_x1.....agacAucgugggaacacggggugc.....          | 1 |
| Gi3_28768269_x1..gcgauccgagCcgucgugggaacacggg.....        | 1 |
| Gi5_9116610_x1.....gugggaacacgggCugccgaac.....            | 1 |
| Gi3_28424450_x1....aucggagacgucgGgggaacac.....            | 1 |
| Gi3_28421987_x1.....ggaacaUggggugccgaa.....               | 1 |
| Gi3_28520791_x1.....gacgCcgugggaacacgggg.....             | 1 |
| Gi2_11361272_x1.....gagacgucguggCaacacggggugccg.....      | 1 |
| Gi4_577034_x1....uCggaacacggggugccgaacu.....              | 1 |
| Gi2_11138332_x1.....ucgugggaUcacggggugccg.....            | 1 |
| Gi3_28700959_x1.....gucgugggaCcacggggugcc.....            | 1 |
| Gi2_11400506_x1....aucggagacgucgugggaacacggggCgccg.....   | 1 |
| Gi3_28486721_x1.....gacgucgugggaacacgAggu.....            | 1 |
| Gi2_11121382_x1....Nucggagacgucgugggaacac.....            | 1 |
| Gi2_11131858_x1.....gugggaacacggggugccgaacuuu.....        | 0 |
| Gi2_11104245_x1....ucggagacgucgugggaacacAggggu.....       | 1 |
| Gi1_4240760_x1.....gCcgugggaacacggggugc.....              | 1 |
| G1a_6332582_x1....cggagacgNcgugggaacacgg.....             | 1 |
| Gi4_588879_x1....aucggagacgucgugggaacacgg.....            | 0 |
| Gi5_9114184_x1.....ucgugggaacacggggugccgaaGu.....         | 1 |
| Gi2_11388664_x1.....ugggaacacggggugcc.....                | 1 |

|                                                            |   |
|------------------------------------------------------------|---|
| Gi3_28326445_x1..gcgaucggagacgucgugggGac.....              | 1 |
| Gi1_4262054_x1....aucggagacgucgugggaacacggggugccg.....     | 0 |
| Gi4_612920_x1.....cgucgCggaacacggggugccgaacu.....          | 1 |
| Gi2_11351213_x1....Gcggagacgucgugggaacacggggugccgaacu..... | 1 |
| Gi3_28349692_x1....aucNgagacgucguggga.....                 | 1 |
| Gi3_28489445_x1.....cgugCgaacacggggugccg.....              | 1 |
| Gi3_28597425_x1.....acgucgugggaacacggggugccgC.....         | 1 |
| Gi2_10995722_x1....aucggagacgucgugggC.....                 | 1 |
| Gi3_28432417_x1.....gucgugggaacacggggugccUaac.....         | 1 |
| Gi3_28539230_x1.....cgucguggUaacacggggugcc.....            | 1 |
| Gi2_11383505_x1...gGucggagacgucgugggaacacgg.....           | 1 |
| Gi1_4344800_x1.....gggaCcacggggugccgaacu.....              | 1 |
| Gi2_11332818_x1...gaucggagacgucgugggUacacg.....            | 1 |
| Gi3_28481728_x1.....gucgugggaAacggggugccg.....             | 1 |
| Gi3_28667676_x1.....cgucgugggaacacggggugccgaaG.....        | 1 |
| Gi2_11164912_x1.....cgucguggNaacacggggugccgaa.....         | 1 |
| Gi3_28819830_x1.....ucggagacgucgugggGacac.....             | 1 |
| Gi3_28373076_x1.....agacgucguggCaacacggggugccgaacu.....    | 1 |
| Gi2_11099273_x1.....gagUcugcugugggaacacggggugcc.....       | 1 |
| Gi3_28940316_x1.....gNaacacggggugccgaacu.....              | 1 |
| Gi3_28529192_x1.....acgucAugggaacacggggugc.....            | 1 |
| Gi2_11363373_x1.....ugggaacacggggugccgaacuuu.....          | 0 |
| Gi5_8847081_x1....aucggagacgucgugggaacacAgggugcc.....      | 1 |
| Gi1_6246463_x1....gaucggagacgucgugggaacacAggggu.....       | 1 |
| Gi1_5993826_x1....Cucggagacgucguggga.....                  | 1 |
| Gi2_11280481_x1....cggagacgucgugggCacacggggugc.....        | 1 |
| Gi2_11030075_x1...cgauCAgagacgucgugggaacacggggug.....      | 1 |
| Gi3_28563076_x1...gaucggagacgucgugggUaacacggggugc.....     | 1 |
| Gi2_11315309_x1.....cgucgugggaacacggggugGcgaacu.....       | 1 |
| Gi3_28748831_x1...gauNggagacgucgugggaacacgg.....           | 1 |
| Gi3_28721702_x1...Aaucggagacgucgugggaacacggggugc.....      | 1 |
| Gi1_4173540_x1.....acgucgCggaacacgggg.....                 | 1 |
| Gi1_4236847_x1..gcgaucggagacgucgugggaacacgg.....           | 0 |
| Gi1_4168137_x1.....ucgugggaacacggggugccC.....              | 1 |
| Gi2_11316579_x1.....cguggUaacacggggugccgaa.....            | 1 |
| Gi1_4377533_x1....Uucggagacgucgugggaacacggggugcc.....      | 1 |
| Gi3_28279921_x1.....gaacacCgggugccgaac.....                | 1 |
| Gi1_4235862_x1...cgauCggagacgucgugAgaacacggggugc.....      | 1 |
| Gi1_4313108_x1.....ggagaUgucgugggaacacggggugccgaa.....     | 1 |
| Gi3_28285986_x1.....ucgugggGacacggggugccga.....            | 1 |
| Gi1_6242302_x1...gaucggagacgucgugCgaacacgggggu.....        | 1 |
| Gi1_4186063_x1.....agacgucgugggaacacggggUugccgaacu.....    | 1 |
| Gi1_4252213_x1....aucggagacgucgugggaCcacgggggu.....        | 1 |
| Gi1_6276652_x1.....Cugggaacacggggugccga.....               | 1 |
| Gi5_8934022_x1.....cNucgugggaacacggggugccgaacu.....        | 1 |
| Gi3_28719816_x1.....acgucgugggaacacggggugAcg.....          | 1 |
| Gi5_8905663_x1....aucggagacgucgugggaacaUg.....             | 1 |

Gi2\_11315056\_x1.....aucggaAacgucgugggaacacgg..... 1  
Gi3\_28636436\_x1.....gggaacUcggggugccgaa..... 1  
G1a\_6174908\_x1.....gGcgucgugggaacacggggugccgaacu..... 1  
Gi3\_28519736\_x1...cgaAccgagacgucgugggaacacggggugcc..... 1  
Gi1\_4243808\_x1...gaucggCgacgucgugggaacacg..... 1  
G1a\_6123919\_x1.....ggagacgucAugggaacacggggugcc..... 1  
Gi2\_11284172\_x1.....cgugggaacacAgggugccgaa..... 1  
Gi5\_8992811\_x1.....cgugggaacacggggugUcgaac..... 1  
Gi3\_28386931\_x1.....gaNacgucgugggaacacggggugccgaacu..... 1  
Gi3\_28689443\_x1.....ucguUggaacacggggugccga..... 1  
Gi3\_28460484\_x1.....cgugggaacUcggggugccgaa..... 1  
Gi2\_11161038\_x1...aucggagacgucUugggaaac..... 1  
Gi1\_4378242\_x1.....gugggaacacggAgugccg..... 1  
Gi3\_28839003\_x1.....cggagacgucGgggaacacg..... 1  
G1a\_5990979\_x1.....aacacAgggugccgaacu..... 1  
Gi1\_4252993\_x1.....acgucgugggaacacggggugcAga..... 1  
Gi5\_9094003\_x1.....cggagacgucgugggaacCcgggugccga..... 1  
Gi2\_11089528\_x1.....gggaacCcgggugccgaa..... 1  
Gi5\_9054952\_x1.....cgGcgugggaacacggggugccga..... 1  
Gi1\_4261111\_x1.....acgucgugggaGcacggggugccga..... 1  
Gi5\_8998997\_x1...aucggagacgucgugggaacacAg..... 1  
Gi5\_8944234\_x1.....gagGcgucgugggaacacggggugccgaacu..... 1  
Gi3\_28982243\_x1.....cggGgacgucgugggaacacggggug..... 1  
Gi2\_11335833\_x1...aucggagacgucgugggaacacggggUccgaacu..... 1  
Gi2\_11264992\_x1...aucCgagacgucgugggaaca..... 1  
Gi4\_605228\_x1.....gugggaacGcggggugccgaa..... 1  
Gi4\_590231\_x1.....gGcgugggaacacggggugccgaacu..... 1  
Gi1\_4188349\_x1.....gagacgucgugggaacacAgggugcc..... 1  
Gi2\_11378385\_x1.....ucgGgggaacacggggugcc..... 1  
Gi2\_11312041\_x1...gaucggagacguGugggaacacggggugc..... 1  
Gi3\_28378470\_x1.....Nggagacgucgugggaacacggg..... 1  
Gi5\_9076818\_x1...ucggagacgucgugggaacaUggggugc..... 1  
Gi3\_28987557\_x1.....gagacgucAugggaacacggggugccgaac..... 1  
Gi2\_11132058\_x1.....gugggaacacggggUccc..... 1  
Gi3\_28330403\_x1...gaucggagacgucgugAgaacac..... 1  
G1a\_6059670\_x1.....gugUgaacacggggugccgaacu..... 1  
Gi2\_11379003\_x1.....ggagacgucgugggCacacggggugc..... 1  
G1a\_6121645\_x1.....gGcgucgugggaacacggggU..... 1  
Gi2\_11260498\_x1.....acAucgugggaacacggggugc..... 1  
Gi1\_4220597\_x1.....gacgucgAgggaacacggggugc..... 1  
Gi2\_11056555\_x1.....cgugggaacacggggUcccgaac..... 1  
G1a\_6071132\_x1...CucggagacgucgugggaacacggggU..... 1  
Gi5\_8967342\_x1.....cgugggaacacggggugAcg..... 1  
Gi5\_8875773\_x1.....gugggaacCcgggugccg..... 1  
Gi3\_28410113\_x1.....gugAgaacacggggugccgaacuuu..... 1  
Gi2\_11336074\_x1...ggUgacgucgugggaacacggggugccgaac..... 1  
Gi2\_11197036\_x1...aucggagacguAgugggaacacggggU..... 1



|                      |                                      |   |
|----------------------|--------------------------------------|---|
| Gi1_4376732_x1.....  | gggaacacggggugcAgaacuu.....          | 1 |
| Gi1_4211794_x1.....  | agaUgucgugggaacacggggugccga.....     | 1 |
| Gi1_4181116_x1..     | gcgaucggGgacgucgugggaaca.....        | 1 |
| Gi1_4365164_x1.....  | ucggagacgucgugggaaGacggg.....        | 1 |
| Gi3_28819728_x1..... | gagacgucgugggaacGc.....              | 1 |
| Gi3_28262342_x1..... | acgucgugggaacacggUgugccgaac.....     | 1 |
| Gi3_28610871_x1..    | cgaucggagacGcguggg.....              | 1 |
| Gi3_28939792_x1..    | gaucggagacgucgugggaacacgggCu.....    | 1 |
| Gl1a_5991861_x1..... | gGcgugggaacacggggugcc.....           | 1 |
| Gi1_4348980_x1.....  | ucggagacGAcgugggaacacg.....          | 1 |
| Gi3_28822818_x1..    | cgaucGgagacgucgugggaacacggggugc..... | 1 |
| Gl1a_6159318_x1..    | cCaucggagacgucgugggaa.....           | 1 |
| Gi5_8883571_x1.....  | cgNcgugggaacacggggugccgaacu.....     | 1 |
| Gi2_11173199_x1..... | cgNcgugggaacacggggugccg.....         | 1 |
| Gi1_4287461_x1.....  | agacgucgugggaacacggggugccgaaUu.....  | 1 |
| Gi1_4202635_x1.....  | gggaacacUgggugccgaacu.....           | 1 |
| Gi1_4292905_x1....   | aucggagacgucguAggaacacggggugc.....   | 1 |
| Gi2_11267513_x1..... | gucgugggaacacggggGgccga.....         | 1 |
| Gi3_28571796_x1..... | cggagacgucgugggaacacggggugcG.....    | 1 |
| Gl1a_6198196_x1..... | gggaacacggggugcAgaac.....            | 1 |
| Gi5_9128761_x1....   | gaCcgagacgucgugggaacacggg.....       | 1 |
| Gi2_11038292_x1..... | cgugggaGcacggggugccg.....            | 1 |
| Gi3_28921192_x1..... | agacgucgugggaacacggggugccAaac.....   | 1 |
| Gi2_11309602_x1..... | cguNggaaacacggggugccga.....          | 1 |
| Gl1a_6180792_x1....  | aucggagCcgucgugggaacacg.....         | 1 |
| Gi3_28960192_x1..    | Ggcgaucggagacgucgugggaacacg.....     | 1 |
| Gi3_28935847_x1..... | ggagacgucgugggaGcacggggugccgaa.....  | 1 |
| Gl1a_6086624_x1..    | cgaucggagacgucgugggaGcacg.....       | 1 |
| Gi1_4346728_x1..     | ugcgauccggGgacgucgug.....            | 1 |
| Gl1a_6031269_x1..... | cgucgugggaacGcggggugccgaacu.....     | 1 |
| Gi4_610818_x1.....   | agacgucAugggaacacggggugccgaacu.....  | 1 |
| Gi2_11394419_x1..... | gggCacacggggugccgaac.....            | 1 |
| Gi2_10995911_x1..... | gggaacaGggggugccgaa.....             | 1 |
| Gi1_4181743_x1.....  | gaacacAgggugccgaacu.....             | 1 |
| Gi5_8835778_x1.....  | gagacgucguggUaacacggggugccgaacu..... | 1 |
| Gi5_9116677_x1.....  | ggGgacgucgugggaacacggggugccgaac..... | 1 |
| Gi2_11005273_x1..... | Ucgucgugggaacacggggu.....            | 1 |
| Gi3_28309053_x1....  | aucggagacgucgugggaacacgggAugc.....   | 1 |
| Gi1_4182935_x1....   | gaucggagacgucgugggaacCc.....         | 1 |
| Gi2_11352353_x1..... | agacgucgugggaacacgggguUcc.....       | 1 |
| Gi5_9021477_x1..     | Ggcgaucggagacgucgugggaacacg.....     | 1 |
| Gi1_4277911_x1.....  | gacgucgugggaacacggggugc.....         | 0 |
| Gi2_11075590_x1....  | aucUgagacgucgugggaaca.....           | 1 |
| Gl1a_6068387_x1..... | cggagacgucgugggaGcacgg.....          | 1 |
| Gi2_11251484_x1..... | uUggagacgucgugggaacacggggugc.....    | 1 |
| Gi2_11381544_x1....  | gaucggagacgucgugggCacacgg.....       | 1 |
| Gi2_10997053_x1..... | ugggaacacgggguCccg.....              | 1 |

Gi2\_11142574\_x1.....ggaacacggggugccgaacuA..... 1  
 Gi2\_11013809\_x1...gaucggagacgucgugggaaacacggCgugc..... 1  
 Gi2\_11139117\_x1.....Acgugggaacacggggugccg..... 1  
 Gi3\_28925187\_x1.....gagacgucNugggaacacggggugccga..... 1  
 Gi2\_11178569\_x1.....gGcgucgugggaaacacggg..... 1  
 Gi5\_8861350\_x1.....agacgucgugggaaacacAgggugccgaac..... 1  
 Gi3\_28508231\_x1..gcgauccgagacgucgugggaaacacggggG..... 1  
 Gi3\_28900061\_x1..gcgauccgagacgCcgug..... 1  
 Gi5\_8899164\_x1...cgauccgagacgucgugggGcacggg..... 1  
 Gi2\_11007236\_x1.....gggaacacgggAugccgaac..... 1  
 G1a\_6268366\_x1..ugcgauUggagacgucgug..... 1  
 Gi1\_4325307\_x1.....agacgucgugggaaacacggggugccgaaA..... 1  
 Gi2\_11113674\_x1.....ucgNgggaacacggggugccgaac..... 1  
 G1a\_5999763\_x1.....cgugggaaacacggggugAcgaaacu..... 1  
 Gi1\_4313177\_x1.....gaacaGggggugccgaacu..... 1  
 Gi2\_10999484\_x1...gaucggagacgucguUggaacacgggg..... 1  
 Gi1\_4245823\_x1.....agacgucgugggaaacacggggugccgaa..... 0  
 Gi2\_11200595\_x1.....Ncgucgugggaaacacggggugccgaacu..... 1  
 G1a\_6162733\_x1.....Cggaacacggggugccgaac..... 1  
 Gi1\_4215512\_x1.....agacgucgugggGacacggggug..... 1  
 Gi2\_11068086\_x1.....acgucgugggaaacacgggCugccgaac..... 1  
 Gi1\_4200153\_x1.....ucgugggUcacggggugccgaac..... 1  
 Gi2\_11392425\_x1...aucggagacgucgugggaaacacU..... 1  
 Gi2\_11050927\_x1...gCucggagacgucguggg..... 1  
 Gi3\_28837504\_x1.....acgucgugggaaacacggggugccgaaU..... 1  
 Gi5\_9083417\_x1...gaucggagacgucgugggGcacggg..... 1  
 Gi2\_11232856\_x1..gcgauccgagacgucgugggaaacacggggugc..... 1  
 Gi2\_11062559\_x1..gcgauccgagCcgucgugggaaacacggg..... 1  
 Gi3\_28701609\_x1.....cgugggaaacacggggUcc..... 1  
 Gi3\_28769205\_x1..ugcgauccgagacgucgugggaaacGcggg..... 1  
 Gi5\_8977006\_x1.....gagGcgucgugggaaacag..... 1  
 Gi2\_11026220\_x1.....gucgugAgaacacggggugccgaac..... 1  
 Gi2\_11128417\_x1...gaucggagacgucgugggaaacaAgg..... 1  
 G1a\_6298679\_x1.....Agugggaaacacggggugccg..... 1  
 Gi3\_28696400\_x1.....ucggagacgucgugggCacacggg..... 1  
 Gi3\_28297220\_x1..gcgauccgagacgucgugggaaacacgAggugccga..... 1  
 Gi2\_11007020\_x1.....cggagacgucgugggaaacacggggugccgaUc..... 1  
 Gi2\_11381741\_x1.....gagacgucgugggaaacacggggGgccgaac..... 1  
 Gi1\_4291028\_x1.....cguNgugggaaacacggggugcc..... 1  
 Gi1\_4173651\_x1.....gaacacggggAgccgaacu..... 1  
 Gi2\_11250589\_x1...aucggagacgCcgugggaaacacgg..... 1  
 Gi3\_28274293\_x1.....ucgugggUacacggggugc..... 1  
 Gi2\_11042809\_x1...gaucggagacgCcgugggaaaca..... 1  
 Gi3\_28607222\_x1...aucgAagacgucgugggaaacac..... 1  
 G1a\_6108115\_x1...aucggagacAucgugggaaacacggggug..... 1  
 Gi1\_4288307\_x1.....cggagacgucgugggaaacacggggGgcc..... 1  
 Gi5\_8947631\_x1.....gucgugggaaGacggggugccgaacu..... 1

Gi2\_11179540\_x1.....Nucggagacgucgugggaacacggggug..... 1  
 Gi3\_28867015\_x1.....ucggagacgAcgugggaacacggg..... 1  
 Gi2\_11176806\_x1.....ggCacacggggugccgaac..... 1  
 Gi3\_28814753\_x1.....aucggUgacgucgugggaacacggggugc..... 1  
 Gi5\_8915090\_x1.....cgugggaUcacggggugccg..... 1  
 Gi2\_11261753\_x1.....aucggagacgucguggUaacacg..... 1  
 Gi2\_11072428\_x1.....ugggaacaUggggugccg..... 1  
 Gi3\_28871711\_x1.....gagacgucguAggaacac..... 1  
 Gi2\_11102292\_x1..gcgauccggagacgucguAggaacacggg..... 1  
 Gi3\_28327229\_x1.....gaucggagacgCcgugggaacacggggug..... 1  
 Gi5\_9051358\_x1.....gaacacggggGgccgaac..... 1  
 Gi2\_11115008\_x1.....gucgugggUacacggggugccga..... 1  
 Gi2\_11340793\_x1..ugcgauccggagUcgucgugggaacacg..... 1  
 Gi5\_8998906\_x1.....gAcgugggaacacggggugccgaac..... 1  
 Gi3\_28695107\_x1..ugcgauccggagacgucgugggCacacggggg..... 1  
 Gi5\_8975097\_x1.....acgucguUggaacacggggugccgaacu..... 1  
 Gi5\_9057226\_x1.....acgucgugggaacaAggggugccgaacu..... 1  
 Gi5\_8924870\_x1.....gugggaacacgggCugccga..... 1  
 Gi3\_28372447\_x1..gaucUgagacgucguggga..... 1  
 Gi5\_9028438\_x1.....cgugggaacacggggugccgCacuu..... 1  
 Gi1\_4235064\_x1.....gugggaacacggggugcUgaac..... 1  
 Gi1\_4188117\_x1.....ucggagacguUgugggaacacggggugcc..... 1  
 Gi2\_11013683\_x1..cgauccggagacgucgugggaacacggggAgc..... 1  
 Gi5\_8900742\_x1.....Ncgucgugggaacacggggugccgaacu..... 1  
 Gi3\_28470055\_x1.....aucggagacguAgugggaacacggggugc..... 1  
 Gi5\_9118913\_x1.....cgucgugggaAacggggugcc..... 1  
 Gl1\_6317876\_x1.....ggagacguAgugggaacacg..... 1  
 Gi3\_28757660\_x1.....cgugggaacacggggugcGga..... 1  
 Gi5\_8994116\_x1.....aucAgagacgucgugggaacacggggugc..... 1  
 Gl1\_6291836\_x1.....aCcacggggugccgaacu..... 1  
 Gl1\_6124993\_x1.....ggagacgucgugggaacacggggg..... 0  
 Gi3\_28853315\_x1.....gaucggagaUgucgugggaacacggg..... 1  
 Gi3\_28640612\_x1.....cggagacgucgugggGacacgggg..... 1  
 Gi3\_28943300\_x1.....gacgucgugggaacacggggugUcgaac..... 1  
 Gi5\_9125680\_x1.....gucgugggaCcacggggugccgaacu..... 1  
 Gi2\_11279997\_x1..gcgauccggGgacgucguggga..... 1  
 Gi2\_11142536\_x1.....ucggagacgucgugggaacaUggggugc..... 1  
 Gi3\_28408678\_x1.....cgucgugggaacacgggCugcc..... 1  
 Gi1\_4238347\_x1.....agacgucgugggaCcacggggugccg..... 1  
 Gi5\_8861866\_x1.....gucgugggaacacggggugccgaaA..... 1  
 Gi2\_11206647\_x1.....gagacgucgugggaacGcggg..... 1  
 Gi1\_4347431\_x1.....gugggaacacggggUaccgaacu..... 1  
 Gi3\_28550786\_x1.....gacgCcgugggaacacggg..... 1  
 Gi5\_9111872\_x1.....gugggaacacggggugccAaa..... 1  
 Gi2\_11096489\_x1.....cggagacgucgugggaacacgggCugc..... 1  
 Gi2\_11151208\_x1.....cggagacgNcgugggaacacg..... 1  
 Gi3\_28889438\_x1.....aucggagaUgucgugggaacacggggugcc..... 1

|                                                              |   |
|--------------------------------------------------------------|---|
| Gi5_8926046_x1.....gacgucgGgggaacacggggugccgaacu.....        | 1 |
| Gi5_8963786_x1.....agacgucguggaacGcggggugccga.....           | 1 |
| Gi3_28854697_x1.....gacgucguNggaacacgg.....                  | 1 |
| Gi2_11176115_x1.....ugggaacaAgggggugccg.....                 | 1 |
| Gi2_11197600_x1.....Nacacggggugccgaacu.....                  | 1 |
| Gi2_11287247_x1..gcgaucggagacgucgugggaaUacggg.....           | 1 |
| G1a_6098345_x1....aucgAagacgucguggaacacgggggu.....           | 1 |
| G1a_6337510_x1.....gggaacacAgggugccgaac.....                 | 1 |
| Gi3_28933056_x1.....cgugggUacacggggugccg.....                | 1 |
| Gi3_28321809_x1..ugcgaucggagacgucgugggaaacacggA.....         | 1 |
| Gi3_28322465_x1....aucggaAacgucgugggaaacacggggugc.....       | 1 |
| Gi4_575506_x1.....cgucgugggaaacacggAgugccga.....             | 1 |
| Gi2_11164118_x1....auGggagacgucgugggaa.....                  | 1 |
| Gi3_28436940_x1.....gacgucgugggaaacCcgggugccg.....           | 1 |
| Gi2_11403106_x1...gaucggagacgucgugggaaUc.....                | 1 |
| Gi5_8862829_x1.....gugUgaacacggggugccgaac.....               | 1 |
| Gi3_28330596_x1.....gNgaacacggggugccgaacu.....               | 1 |
| Gi3_28708777_x1.....gggaCcacggggugccgaacu.....               | 1 |
| Gi2_11364691_x1.....ggGgacgucgugggaaacacggggugccga.....      | 1 |
| Gi2_11266953_x1.....cguNggaacacggggugcc.....                 | 1 |
| Gi2_11260415_x1....gUcugcugugggaaacacggggugccgaac.....       | 1 |
| Gi3_28792042_x1..gcUaucggagacgucgug.....                     | 1 |
| Gi5_9021961_x1.....cgugggaaacacgAggugccg.....                | 1 |
| Gi2_11374027_x1.....acgucgugggaaacacggggugG.....             | 1 |
| G1a_6266010_x1.....gacgucgugggaaacGcgggggu.....              | 1 |
| Gi1_4264931_x1.....cgugggaaacacggggugccgG.....               | 1 |
| Gi3_28922843_x1.....gGgacgucgugggaaacacggggugccgaa.....      | 1 |
| Gi2_11242858_x1cugcgaucggagacgucgug.....                     | 0 |
| Gi2_11331983_x1.....Cucgugggaaacacggggugccg.....             | 1 |
| Gi2_11034061_x1....aucggagacgucgugggaaGacg.....              | 1 |
| Gi5_8885329_x1....aucggagacgucgugggaaacacCgg.....            | 1 |
| Gi2_11234688_x1.....agacgucgugggaaacacggggugAcgaacu.....     | 1 |
| Gi1_4160358_x1.....ucgugggaaacacggggugccCaacu.....           | 1 |
| Gi3_28619928_x1....aucggagacgucgugggaaacGcggggugccgaacu..... | 1 |
| Gi1_4377845_x1.....ggaacCcggggugccgaac.....                  | 1 |
| Gi2_11136317_x1.....gucgugggaaacacggggugAcgaac.....          | 1 |
| Gi2_11248684_x1.....cgugggaaacacggCgugccgaac.....            | 1 |
| Gi2_11144471_x1...gauGggagacgucgugggaaaca.....               | 1 |
| Gi2_11051097_x1..cgaucggagacgucgugggaaacacggggGgc.....       | 1 |
| Gi3_28781955_x1....cggagGcugcugugggaaacacggggug.....         | 1 |
| Gi1_4160998_x1.....cgugggaaacacggCgugccgaacu.....            | 1 |
| Gi2_11103727_x1....cggagacgucgugggaaUacggggugc.....          | 1 |
| Gi1_4236554_x1.....ggaacacggCgugccgaacu.....                 | 1 |
| Gi5_9078797_x1...gaucggagacgucgAgggaacacggggugc.....         | 1 |
| Gi2_11093974_x1...gCucggagacgucgugggaaacacg.....             | 1 |
| Gi3_28871743_x1.....ucgugggaaacacggUgugccg.....              | 1 |
| G1a_6127592_x1..Ccgaucggagacgucgug.....                      | 1 |

Gi2\_11342256\_x1....aucggagacgucUugggaacacggggug..... 1  
G1a\_6033122\_x1....gaucggGgacgucgugggaacacggg..... 1  
Gi3\_28985887\_x1.....ggagacgucgugggaacacggUgugcc..... 1  
Gi1\_4306980\_x1.....gacgucguAggaacacggggugccgaacu..... 1  
Gi3\_28356747\_x1.....gacgucgugggaacacgA..... 1  
G1a\_6179055\_x1.....ucgugggaacacggggugccAaac..... 1  
Gi2\_11089069\_x1.....cggagacgucgugggaacGcgggggu..... 1  
Gi1\_4387209\_x1.....ugggaacacggggugUcgaa..... 1  
Gi4\_584151\_x1.....ucgugggaacacggggugcAgaacu..... 1  
Gi3\_28421870\_x1.ugcgaCcgagacgucgugggaacacgggggu..... 1  
G1a\_6065650\_x1....gaucAgagacgucgugggaacacg..... 1  
Gi3\_28712542\_x1.....Uggagacgucgugggaacacgggggu..... 1  
Gi3\_28781421\_x1.....gucguCggaacacggggugccgaac..... 1  
Gi2\_11330531\_x1.....Ugugggaacacggggugccg..... 1  
Gi5\_9094637\_x1.....gucNugggaacacggggugccgaacu..... 1  
Gi1\_4367521\_x1.....acgucgugggaacacggggugUc..... 1  
Gi3\_28935123\_x1....aucggagacgucguUggaacacgggg..... 1  
Gi3\_28809612\_x1.....ucgugggaNcacggggugcc..... 1  
Gi3\_28483657\_x1.....agacgucgugggaacacUgggugccga..... 1  
Gi5\_9005713\_x1.....gagacgucgugggaacacAgggugccgaacu..... 1  
Gi1\_4321838\_x1.....cggagacgucguggAaacacggggugcc..... 1  
Gi3\_28470486\_x1....gaucggagacgucgugggaacacggUgugcc..... 1  
G1a\_6206525\_x1.....ugggaacUcggggugccgaacu..... 1  
G1a\_6163377\_x1.....gugggaaAacggggugccgaac..... 1  
Gi5\_9041173\_x1.....agacgucgugggaacacCgggugccgaacu..... 1  
Gi2\_11027971\_x1.....acuuucccagcgcgccucgugccacc..... 0  
Gi1\_4300241\_x1.....acgucgugggaacacgggAugccgaa..... 1  
Gi5\_8967059\_x1.....cgucgugggaGcacggggugcc..... 1  
Gi1\_4349828\_x1.....cgucgugggaacGcggggugccgaac..... 1  
G1a\_6154179\_x1.....gugggaacUcggggugccgaac..... 1  
Gi2\_11069416\_x1.....gucgugggaacacggggugccgaUcu..... 1  
Gi3\_28472869\_x1....ucggaAacgucgugggaaca..... 1  
Gi5\_8843316\_x1.....acacAgggugccgaacuuu..... 1  
Gi3\_28625773\_x1.....cgugggaacacggggguCccgaac..... 1  
Gi2\_11403852\_x1....gaucggagacgucgugggaUcacgggggu..... 1  
Gi3\_28849907\_x1....ucggagGcgucgugggaacacgg..... 1  
G1a\_6061372\_x1....ucggagacgucgugggaacacggggCgc..... 1  
G1a\_6122067\_x1.....cgucgugggaacacggggguAccgaacu..... 1  
Gi1\_4286372\_x1.....cgugggaGcacggggugccgaacuu..... 1  
Gi3\_28607416\_x1....aucggagacgucgugggaacacgggCugcc..... 1  
Gi5\_9092483\_x1....gaucggagacgucguggGacacgg..... 1  
Gi2\_11008785\_x1....aucNgagacgucgugggaacac..... 1  
Gi2\_11251211\_x1....cgaucggagacgucgugAgaacacggggugc..... 1  
Gi1\_4366079\_x1.....Ugacgucgugggaacacggg..... 1  
Gi3\_28650059\_x1....cgaucggagacgucgugCg..... 1  
Gi2\_11259100\_x1....aucggagacgucAugggaacacggggugc..... 1  
Gi5\_9131723\_x1.....cguCggaacacggggugccgaacu..... 1

Gi3\_28380441\_x1.....acacAgggugccgaacuu..... 1  
Gi3\_28777758\_x1.....ggagacAucgugggaacacg..... 1  
Gi1\_4304487\_x1.....cggaAacgucgugggaacacggggugccgaacu..... 1  
Gi5\_8873257\_x1.....gUcgcgucgugggaacacggggugccg..... 1  
Gi1\_4354671\_x1.....agUcgcgucgugggaacacggg..... 1  
Gi3\_28704902\_x1.....agacgucgugggaacacggggugGc..... 1  
Gi2\_11103436\_x1.....ucggagacgCcgugggaacacggggugc..... 1  
G1a\_6178871\_x1.....gucgGgggaacacggggugcc..... 1  
Gi1\_4356747\_x1..Ccgaucggagacgucgugggaaca..... 1  
Gi3\_28748348\_x1.....ggagacgucgugggaCcacg..... 1  
Gi1\_4348430\_x1.....Ngugggaacacggggugccgaa..... 1  
Gi2\_11125314\_x1.....cgucgugggaacacggggugAcgaacu..... 1  
Gi1\_4184081\_x1.....ggagacgucgGgggaacacggggugcc..... 1  
Gi2\_11154056\_x1.....gucgugggaUcacggggugccga..... 1  
Gi3\_28902659\_x1.....cgucguggCaacacggggugcc..... 1  
Gi2\_11188389\_x1.....acgucgugggaacGcggggg..... 1  
Gi5\_9070842\_x1.....ugggaacacggAgugccgaacuuu..... 1  
Gi2\_11250710\_x1...gaucggagacgGcgugggaaca..... 1  
Gi1\_4247466\_x1.....ucggagacgucgugggaacaU..... 1  
G1a\_6008833\_x1.....gucgGgggaacacggggugccga..... 1  
Gi3\_28385669\_x1.....ucggagacgucgugCgaacacgg..... 1  
Gi2\_11319104\_x1.....gugggaacacUggggugccga..... 1  
Gi3\_28970905\_x1.....cggagacgucgCgggaacacggggugccg..... 1  
Gi3\_28927071\_x1.....Cacgucgugggaacacgg..... 1  
Gi2\_11016155\_x1.....ucggagacgucgugggaacCcg..... 1  
Gi2\_11259521\_x1.....Ugaacacggggugccgaacuu..... 1  
Gi3\_28850893\_x1...aucggagacgucCugggaacacgg..... 1  
Gi1\_4217674\_x1.....gagacgucgugggaacacggggugcU..... 1  
Gi5\_8876109\_x1.ugcgaucggGgacgucgug..... 1  
Gi2\_11015461\_x1.....cggagacguUgugggaaca..... 1  
Gi3\_28301576\_x1.....gucgCgggaacacggggugcc..... 1  
Gi3\_28334282\_x1.....gacgucgugggaacacAgggugc..... 1  
Gi1\_4286711\_x1.....gggaacacggggugccUaacu..... 1  
Gi2\_11129670\_x1...aucggagacgGcgugggaacacggg..... 1  
Gi5\_9012895\_x1.....cgAcgugggaacacggggugccgaac..... 1  
Gi3\_28526175\_x1.....gucgugggaacacggAgugcc..... 1  
Gi3\_28487504\_x1.....gagGcgcgucgugggaacacggggugccg..... 1  
Gi2\_11133419\_x1.....cgugggaacaUggggugccg..... 1  
G1a\_6051906\_x1...aucggagacgucgugggaCcacggggug..... 1  
Gi2\_11095427\_x1.....cggagacgucgugggaacacggggGgccgaacu..... 1  
Gi3\_28975229\_x1.....acCucgugggaacacggggugccgaac..... 1  
Gi2\_11242019\_x1.....ggagacgucgCgggaacacggggugccgaac..... 1  
G1a\_6290246\_x1..gcgaucggGgacgucgugggaacacggg..... 1  
Gi2\_11396629\_x1...aucggCgacgucgugggaac..... 1  
G1a\_6264093\_x1...gaucggagacgucguggGacacg..... 1  
G1a\_6084434\_x1...uGggagacgucgugggaacacggggugc..... 1  
Gi2\_11301538\_x1.....ggaacacgggCugccgaa..... 1

Gi3\_28481112\_x1.....gaaAacggggugccgaac..... 1  
 Gi2\_11172414\_x1.....gagacgucgugggaacacggggugUc..... 1  
 Gi2\_11382992\_x1.....aucggagacguAgugggaacacggggug..... 1  
 Gi1\_4222727\_x1.....gagacgucgugggaacaUggggugccgaacu..... 1  
 Gi2\_11056980\_x1.....ucggagacgucgugggaUacggggugcc..... 1  
 Gi5\_8966854\_x1.....aacNcggggugccgaacuu..... 1  
 Gi2\_11252952\_x1.....gaucggagacAucgugggaac..... 1  
 Gi2\_11373208\_x1.....gacgucgugggaacacgC..... 1  
 Gi2\_11033193\_x1.....aucggagacgucCugggaacacggggugc..... 1  
 Gi5\_9069336\_x1.....ucgugggGacacggggugcc..... 1  
 Gi2\_11146999\_x1.....gUucggagacgucgugggaacacgg..... 1  
 Gi1\_4238529\_x1.....cgugggaacacggggugccgCacuu..... 1  
 Gi2\_11294509\_x1.....gucgugggaacacggggguAc..... 1  
 Gi1\_4226235\_x1.....uUggaacacggggugccgaa..... 1  
 Gi1\_4226840\_x1.....ggagGcgucgugggaacacggggugccg..... 1  
 Gi2\_11185418\_x1.....aucggagacgucUugggaacacgggggu..... 1  
 Gi1\_4304043\_x1.....Cgaacacggggugccgaa..... 1  
 Gi1\_4348859\_x1.....gggaacCggggugccgaac..... 1  
 Gi2\_11065678\_x1.....gugggaacacggggugcUgaacuu..... 1  
 Gi2\_11020009\_x1.....cggagacgCcgugggaacac..... 1  
 Gi4\_593541\_x1.....cguggCaacacggggugccgaacu..... 1  
 Gi3\_28457274\_x1.....gaacacgAggugccgaacuu..... 1  
 G1a\_6241347\_x1.....guggAaacacggggugccg..... 1  
 Gi1\_4378019\_x1.....gagacgucgugggaacacgCggugccg..... 1  
 Gi3\_28635145\_x1.....gucgugggaacacggggugccgUacuu..... 1  
 Gi1\_4326970\_x1.....gagacgucgugggaacacggggug..... 0  
 Gi2\_11057831\_x1.....ucggagacgucgugggaacacgg..... 0  
 Gi5\_9057325\_x1.....acgucgugggaacacUgggugccgaacu..... 1  
 Gi1\_4250548\_x1.....gaacacggggugGcgaacuu..... 1  
 Gi5\_9025564\_x1.....gggaacacggggCgccgaa..... 1  
 Gi3\_28865295\_x1.....cgugggaacaGggggugc..... 1  
 Gi1\_4232884\_x1.....gucguAggaacacggggugcc..... 1  
 Gi3\_28869089\_x1.....guUggaacacggggugccgaacuu..... 1  
 Gi5\_8943983\_x1.....gggaUcacggggugccgaa..... 1  
 Gi4\_583576\_x1.....Gcgugggaacacggggugccgaac..... 1  
 Gi2\_11001701\_x1.....aucggagacgucgugggaacGacggggugc..... 1  
 Gi3\_28696960\_x1.....ggaacCggggugccgaa..... 1  
 G1a\_6051036\_x1.....gugggaacacggggugAcg..... 1  
 Gi1\_4228476\_x1.....gucgugggaacacggggguA..... 1  
 Gi1\_4287996\_x1.....gNgggaacacggggugccgaacu..... 1  
 Gi3\_28457283\_x1.....gggNacacggggugccgaa..... 1  
 Gi2\_11117813\_x1.....gaucggagacgucgugggaacacggggguCcc..... 1  
 Gi5\_9061967\_x1.....cgugggaacGcggggugccg..... 1  
 Gi2\_11295679\_x1.....Cacgucgugggaacacggg..... 1  
 Gi3\_28940733\_x1.....gaucAgagacgucgugggaacacgggg..... 1  
 Gi2\_11217758\_x1.....gaucggagacgucgugggaacacgAggugcc..... 1  
 Gi5\_9048542\_x1.....aucggagacgucguggCaacacggggugcc..... 1

|                                                         |   |
|---------------------------------------------------------|---|
| Gi3_28931522_x1.....ggagacgucGgggaacacggggugcc.....     | 1 |
| Gi3_28407636_x1.....ucAgagacgucgugggaacacg.....         | 1 |
| Gi5_9091390_x1.....acgucguggAaacacggggugccgaac.....     | 1 |
| Gi3_28331782_x1.....cggagacgucgugggaacGcg.....          | 1 |
| Gi2_11122132_x1.....ugggaacacUgggugccga.....            | 1 |
| Gi1_4185255_x1.....Agugggaacacggggugccg.....            | 1 |
| Gi3_28669637_x1.....cggagacgucgugggaacacggggGg.....     | 1 |
| Gi3_28768448_x1.....agacgAcgugggaacacggggugccgaac.....  | 1 |
| G1a_5987187_x1....aucggagacgucgugggaacacAgggug.....     | 1 |
| G1a_6164039_x1....ucggagacgucAugggaacacgg.....          | 1 |
| Gi2_11110621_x1.....gacgucgugAgaacacggggugccga.....     | 1 |
| G1a_6296990_x1.....cgugggGacacggggugc.....              | 1 |
| Gi1_4338118_x1.....agacgucgugggaacacggggugc.....        | 0 |
| Gi1_4193349_x1.....ucgugggaacacgggguCccgaacu.....       | 1 |
| Gi3_28473154_x1..cgauAggagacgucgugggaacacggggg.....     | 1 |
| Gi2_11375522_x1.....aGgucgugggaacacggggugccg.....       | 1 |
| Gi5_8961250_x1.....ugggaCcacggggugccgaa.....            | 1 |
| Gi5_8918103_x1.....cgucgugAgaacacggggugcc.....          | 1 |
| Gi5_8900244_x1....aCgggagacgucgugggaacacggggg.....      | 1 |
| Gi2_11048233_x1.....gaAgucgugggaacacggggugccgaac.....   | 1 |
| Gi5_9119474_x1.....gaacaAggggugccgaac.....              | 1 |
| Gi3_28585302_x1..gcgaucggagacgucgugggGacacgggg.....     | 1 |
| Gi1_4168152_x1.....gacgucgugggaacacggggg.....           | 0 |
| Gi2_11237102_x1.....gucgugggaacacggggugccCa.....        | 1 |
| Gi3_28895345_x1.....gagacgucgugggaacUcggggugcc.....     | 1 |
| G1a_6126336_x1.....gugggaacacggggUccgaacu.....          | 1 |
| Gi2_11001833_x1.....acgucgugggaacacggggugcG.....        | 1 |
| Gi3_28265323_x1.....cgGcgugggaacacggggg.....            | 1 |
| Gi3_28742442_x1..cgaucggagacgucgugA.....                | 1 |
| Gi1_4196769_x1.....gggGacacggggugccgaacu.....           | 1 |
| Gi5_8882536_x1....aucggagaNgucgugggaaca.....            | 1 |
| G1a_6304011_x1....aGcggagacgucgugggaacacggggugccga..... | 1 |
| Gi2_11237307_x1....gaucggagCcgucgugggaaca.....          | 1 |
| Gi1_4351102_x1....cggaUacgucgugggaacacggggugccgaac..... | 1 |
| G1a_6146313_x1..cgaucgUagacgucgugg.....                 | 1 |
| Gi5_9118162_x1....gaucgAagacgucgugggaacacg.....         | 1 |
| Gi2_11069611_x1.....gucgugggaacacggggUaccgaa.....       | 1 |
| Gi3_28831095_x1.....cgugggaacacggggugGc.....            | 1 |
| Gi2_11067767_x1cugcgaucggagacgucgugggaacacggggugc.....  | 0 |
| G1a_6104700_x1.....gucgugggaacCcggggugccgaac.....       | 1 |
| Gi5_8866484_x1....Nucggagacgucgugggaaca.....            | 1 |
| G1a_6284882_x1....aucggagacgucgugggaaAacgg.....         | 1 |
| G1a_6046062_x1.....cgugggGacacggggugccg.....            | 1 |
| Gi3_28435301_x1..gcgaucggagacgucGg.....                 | 1 |
| Gi1_4207211_x1.....cguggCaacacggggugccgaac.....         | 1 |
| Gi5_8949312_x1.....gacgucgugggaacacggggUaccgaac.....    | 1 |
| G1a_6308708_x1.....gugggaacUcggggugccg.....             | 1 |



Gi3\_28647744\_x1.....auNggagacgucgugggaaacacggggugcc..... 1  
Gi3\_28419657\_x1.....gagacgucgCgggaacacggggugcc..... 1  
Gi3\_28308229\_x1.....cgugggaacacgggCugc..... 1  
G1a\_6045368\_x1.....gucgugggaacacggggugccgCacu..... 1  
Gi3\_28267789\_x1...cgauUggagacgucguggg..... 1  
Gi2\_11357669\_x1.....cgucgugggaaGacggggugccgaacu..... 1  
Gi2\_11066935\_x1.....ugggaacacggggugGcgaac..... 1  
Gi3\_28381401\_x1.....gucgugggaacacggggugUcga..... 1  
Gi4\_611240\_x1.....cgucguggNaacacggggugccgaacu..... 1  
Gi2\_11304067\_x1.....gucgugggaacUcggggugccgaacu..... 1  
Gi2\_11091492\_x1.....cggCgacgucgugggaaacacggggugc..... 1  
Gi2\_11205788\_x1...gaucggagacgucgugggaaCcacggggug..... 1  
Gi3\_28781346\_x1.....cggagacgucgugUgaacacggg..... 1  
Gi5\_9104027\_x1...aucAgagacgucgugggaaacacggggg..... 1  
Gi3\_28959176\_x1...gaCcgagacgucgugggaaacacggggugc..... 1  
Gi2\_11191537\_x1.....Agagacgucgugggaaacac..... 1  
Gi3\_28693438\_x1...aucggagacgucgugggaaacaGggggg..... 1  
Gi1\_4169079\_x1...Ugaucggagacgucgugggaaacacggggugc..... 1  
Gi2\_11319250\_x1...gaucggagacgucguCgga..... 1  
Gi1\_4338546\_x1.....cgucgugUgaacacggggugccgaacu..... 1  
Gi5\_9111829\_x1.....ggaacaUggggugccgaac..... 1  
Gi3\_28710539\_x1.....cggagacgucAugggaaacacgggg..... 1  
Gi2\_11033935\_x1.....gacgucgugggaaacacgAggugccg..... 1  
Gi2\_11048847\_x1.....gagGcgucgugggaaacacggggugccg..... 1  
Gi5\_8942855\_x1.....cgugggGacacggggugccg..... 1  
Gi2\_11380980\_x1...ucggagacgucgugggGacacggggugc..... 1  
Gi3\_28552596\_x1...gaucggagacgucgugggaaacUcg..... 1  
Gi1\_4367096\_x1.....gagacgucgugggaaacacggggGgcc..... 1  
Gi1\_4308191\_x1.....cgucgugggaaacacggggGccc..... 1  
Gi5\_9031315\_x1.....cggGgacgucgugggaaacag..... 1  
Gi3\_28632471\_x1.....ggaacUcggggugccgaa..... 1  
Gi1\_4273490\_x1.....gucgugggaaacGcggggugcc..... 1  
Gi5\_8897427\_x1.....gggaacacggggugcGgaac..... 1  
G1a\_5984957\_x1.....Gggagacgucgugggaaacacggg..... 1  
Gi2\_11153668\_x1.....cgucgugggaaacCcggggug..... 1  
G1a\_6002342\_x1...aucgAagacgucguggga..... 1  
Gi2\_11282619\_x1.....gacgucgugggaaacacggCgugcc..... 1  
Gi1\_4365103\_x1.....Uggagacgucgugggaaacacggggugcc..... 1  
Gi2\_11341986\_x1.....aGgucgugggaaacacggggg..... 1  
Gi2\_11328085\_x1.....gugggaacacgUggugccgaa..... 1  
Gi5\_9126307\_x1...aCcgagacgucgugggaaacac..... 1  
Gi3\_28302621\_x1...cggagacgucgugggaaCcacggggugcc..... 1  
Gi3\_28477275\_x1.....ggNaacacggggugccgaac..... 1  
Gi1\_4229365\_x1.ugcgauCggagacgucgugggaaacaU..... 1  
Gi1\_4361914\_x1.....Cgagacgucgugggaaacacggggugcc..... 1  
Gi3\_28834855\_x1...Aaucggagacgucgugggaaacacggggug..... 1  
Gi2\_11319531\_x1.....ucUgggaaacacggggugcc..... 1

Gi2\_11154261\_x1.....gggaacacggggugccAaa..... 1  
 Gi2\_11111328\_x1...gaucgAagacgucgugggaaacacggggugcc..... 1  
 Gi3\_28846878\_x1.....ggagacgucgugggaaacacgAgggugcc..... 1  
 Gi3\_28782756\_x1.....agacgucguggAaacacggggugcc..... 1  
 Gi3\_28715193\_x1.ugcgauAggagacgucgugggaaaca..... 1  
 Gi5\_9073425\_x1.....ugggaacacggggugccgCacuu..... 1  
 Gi2\_11381419\_x1.....gugggaacacggggCugcc..... 1  
 Gi3\_28300774\_x1.....ucggagacgucgugggGacacg..... 1  
 Gi2\_11338212\_x1.....aacacggggugccCaacu..... 1  
 Gi5\_9047038\_x1.....ugggaacacggggGgccgaac..... 1  
 Gi2\_11370219\_x1.....gaacacggCgugccgaacu..... 1  
 Gl1\_6131714\_x1.....gGacacggggugccgaac..... 1  
 Gi3\_28667627\_x1...aucggagacgucgugCgaacacg..... 1  
 Gi2\_11261738\_x1.....agacgucgugggaaacacggggugccgCac..... 1  
 Gi3\_28278765\_x1.....gagacguAgugggaaacacggggugcc..... 1  
 Gi1\_4203920\_x1.....cgucgugggaaacacCgggugccgaacu..... 1  
 Gl1\_5999316\_x1.....ggagacgucgCgggaacacggggugcc..... 1  
 Gi5\_9132194\_x1.....cgucgugggaaAacggggugc..... 1  
 Gi3\_28477027\_x1...gaucggagacgucgugggUacacg..... 1  
 Gi2\_11340229\_x1...aucggagaAgucgugggaaacac..... 1  
 Gi5\_9015464\_x1.....gggaacacggggugcAgaac..... 1  
 Gi3\_28850844\_x1...aucggagCcgucgugggaa..... 1  
 Gi3\_28930192\_x1.....gagacgucgugggaaacacAgggg..... 1  
 Gi3\_28371256\_x1.ugcgauCagagacgucgugggaa..... 1  
 Gi2\_10995274\_x1...aucCgagacgucgugggaaacacggggg..... 1  
 Gi5\_9007944\_x1...gaucggagacgucgCgggaacacgggg..... 1  
 Gi1\_4377773\_x1.....cggGgacgucgugggaaacacggg..... 1  
 Gi2\_11020399\_x1...cgauccgUgacgucgugggaaacac..... 1  
 Gi3\_28506213\_x1...gaucggagacgucgugggaaacacgUggg..... 1  
 Gi3\_28913650\_x1.....gucgugggaaacacggggugcGgaac..... 1  
 Gi1\_4333800\_x1.....ucgugggaaNcacggggugccgaa..... 1  
 Gi3\_28470745\_x1...ucggagacgucgugggCacacggggugccgaac..... 1  
 Gi5\_9069917\_x1.....cgucgugggGacacggggugcc..... 1  
 Gi3\_28895158\_x1...gaucggagacguGgugggaaacac..... 1  
 Gi2\_11337994\_x1...gaucggagacgucgugggaaAacg..... 1  
 Gl1\_6075533\_x1...gaucggagacgucgugAgaacacggg..... 1  
 Gi2\_11140736\_x1.....acgucgugggaaacacggggugcAga..... 1  
 Gl1\_6045301\_x1...aucggagacgucgugggaaacGcggggugcc..... 1  
 Gi3\_28797203\_x1.....cggagacgucguggCaacacggggugcc..... 1  
 Gi3\_28273123\_x1...gaucggagacgucgGgggaacacggggugcc..... 1  
 Gi3\_28824308\_x1.....ggagacguNugggaaacacggggugccgaacu..... 1  
 Gi1\_4277537\_x1.....ugggaacacggggugcAga..... 1  
 Gi2\_11140793\_x1.....guNggaacacggggugcc..... 1  
 Gi3\_28858236\_x1.....agGcgucgugggaaacacggggg..... 1  
 Gi2\_11345128\_x1.....acgucgugggaaCcacggggugcc..... 1  
 Gi2\_11268528\_x1.....gacgucgugggaaacaGggggugccgaac..... 1  
 Gi5\_8869238\_x1.....cNugggaacacggggugccgaacu..... 1

Gi2\_10998464\_x1.....ucggagacgucgugggaacacggggG.....1  
Gi3\_28823733\_x1.....cAgagacgucgugggaacacgg.....1  
Gi2\_11350222\_x1.....gggaaAacggggugccgaa.....1  
Gi3\_28923804\_x1.....ucggagacgucgugggaacacggggugccA.....1  
Gi5\_9127092\_x1.....ucggagacgucgugggGacacggggugc.....1  
Gi2\_11181008\_x1.....gaucUgagacgucgugggaacacggg.....1  
Gi5\_9039662\_x1.....cgucgugggaacacggAgugc.....1  
Gi3\_28333779\_x1.....ucggagacgCcgugggaacacgg.....1  
Gi3\_28465324\_x1.....ucgugggaacacggggguAccga.....1  
Gi2\_11251118\_x1.....auUggagacgucguggga.....1  
Gi4\_598252\_x1.....uUggaacacggggugccga.....1  
Gi3\_28369839\_x1.....cgaAcggagacgucgugggaacacgggg.....1  
Gi2\_11078691\_x1.....uNggaacacggggugccgaacu.....1  
Gi1\_4182887\_x1.....Aucgugggaacacggggugccgaac.....1  
Gi3\_28419972\_x1.....aucggagacguAguggga.....1  
Gi3\_28660903\_x1.....ucggagacNucgugggaacacggggugccg.....1  
Gi1\_4183810\_x1.....cguUgugggaacacggggugcc.....1  
Gi2\_11286877\_x1.....cgaucggagacgucgugggaacacggA.....1  
Gi2\_11265792\_x1.....gucgugggaacacggggugAcgaa.....1  
Gi5\_9136080\_x1.....aucggagacgucgugggaacacAgg.....1  
Gi1\_4167450\_x1.....acacggggugccgaacuG.....1  
Gi2\_11067697\_x1.....Ugagacgucgugggaacacggggugccgaac.....1  
G1a\_6068262\_x1.....ggaacacggggAgccgaacu.....1  
Gi3\_28643150\_x1.....cgauGggagacgucgugg.....1  
G1a\_6288706\_x1.....ggaaGacggggugccgaac.....1  
G1a\_6024170\_x1.....aucggagacgucguggAaacacggg.....1  
Gi2\_11089620\_x1.....ugggaacacggggguAccg.....1  
Gi3\_28419095\_x1.....ucgugAgaacacggggug.....1  
Gi2\_11024679\_x1.....gCgggaacacggggugccgaacu.....1  
Gi1\_4358394\_x1.....ucgugggaacacgggAugccgaac.....1  
G1a\_6182121\_x1.....Gucggagacgucgugggaacacggggugcc.....1  
Gi5\_9109727\_x1.....cgugggaacCcgggugcc.....1  
Gi2\_11299263\_x1.....agaUgucgugggaacacggggugcc.....1  
Gi1\_4231240\_x1.....gucgugggaacacggggAgcc.....1  
G1a\_6050399\_x1.GgcgauCggagacgucgugggaacac.....1  
Gi1\_4371409\_x1.....ggaUcacggggugccgaa.....1  
Gi3\_28787252\_x1.....cgauCggagacgucgugggaUacgggg.....1  
Gi3\_28756906\_x1.....ucggagacgucgugAgaacacggggugccg.....1  
Gi2\_11172867\_x1.....cgugggaacacgggAugccgaa.....1  
Gi5\_8982868\_x1.....Ngggaacacggggugccgaacu.....1  
Gi1\_4258082\_x1.....ucgugggaacacggggCgccc.....1  
Gi5\_8862570\_x1.....cgucgugggaacacggUgugccgaa.....1  
Gi2\_11230623\_x1.....agacguGgugggaacacggggugccga.....1  
Gi2\_11156692\_x1.....aucggagacgucgugggaacacgUgg.....1  
Gi2\_11106193\_x1.....aucggagaAgucgugggaacacggggugc.....1  
Gi5\_8880874\_x1.....ugggaacacgggUugccgaa.....1  
Gi5\_9006416\_x1.....acgucgugggaacacgggAugccgaac.....1

|                                                            |   |
|------------------------------------------------------------|---|
| Gi2_11096538_x1.....cggagacgucgugggaacacggggugcG.....      | 1 |
| Gi2_11020073_x1.....ggaAacgucgugggaacac.....               | 1 |
| Gi1_4316594_x1.....cggagaAgucgugggaacacggggugcc.....       | 1 |
| Gi3_28795395_x1.....gucgugAgaacacggggugcc.....             | 1 |
| Gi1_4315634_x1...cgaucggagacgucgugggaacacggggugcc.....     | 0 |
| Gi1_4175909_x1.....gugggUacacggggugccga.....               | 1 |
| Gi5_8884907_x1.....cggGgacgucgugggaacacggggugccga.....     | 1 |
| Gi1_4220712_x1.....aucggagacgucAugggaacacgg.....           | 1 |
| Gi4_580276_x1.....gugggaacaUggggugccgaacu.....             | 1 |
| Gi5_9001165_x1.....gagNcgucgugggaacacg.....                | 1 |
| Gi5_9070689_x1...gaucggagacgucgugggGacac.....              | 1 |
| Gi3_28485673_x1.....gagacgucgugggaacacAgggugccgaacu.....   | 1 |
| Gi5_8911937_x1.....ugggaacacggggugcGaa.....                | 1 |
| Gi5_9073721_x1.....aucggagacgucgCgggaacacg.....            | 1 |
| Gl1a_5983233_x1.....ucgugggaacacggggCgccgaacu.....         | 1 |
| Gi1_4245237_x1.....gucgugggaacacgggAugccgaac.....          | 1 |
| Gi4_593204_x1.....acgucgugggaGacggggugccgaacu.....         | 1 |
| Gi5_9090674_x1.....cggagacgCgugggaacacggggugcc.....        | 1 |
| Gi1_4298364_x1...cgaucggagacgucgugggaacacggg.....          | 0 |
| Gl1a_6297151_x1.....cgucgugggaacacggggAgccgaacu.....       | 1 |
| Gi3_28647994_x1.....agacgucgugggaCcacggggugccgaacu.....    | 1 |
| Gi2_11144232_x1.....gagacgucgCgggaacacggggugc.....         | 1 |
| Gi3_28390097_x1.....ucAugggaacacggggugccgaa.....           | 1 |
| Gl1a_6237595_x1.....aucggagacgucgugggaacaG.....            | 1 |
| Gi2_11005262_x1.....ucgNagacgucgugggaacacggggugcc.....     | 1 |
| Gi2_11202202_x1.....gggaacacggggugccgaaG.....              | 1 |
| Gi3_28509712_x1.....cgugggaacacgCggugccga.....             | 1 |
| Gi2_11096661_x1.....gugggaacacggggugccgaaG.....            | 1 |
| Gi3_28281579_x1.....ggagacgucguggCaaca.....                | 1 |
| Gi2_11177260_x1.....ucggagacgucgCgggaacacg.....            | 1 |
| Gi2_11374152_x1.....ggagGcgucgugggaacacggggug.....         | 1 |
| Gi2_11292121_x1.....agacgucgugggaacacggggAccgaacu.....     | 1 |
| Gi1_4203629_x1.....gaacacggggAccgaacuu.....                | 1 |
| Gi5_8979839_x1.....ggagGcgucgugggaacacggggugccgaac.....    | 1 |
| Gi1_4233669_x1.....Cgggaacacggggugccg.....                 | 1 |
| Gi5_9046482_x1.....cgucCugggaacacggggugccgaacuu.....       | 1 |
| Gi2_11205810_x1.....gagacgucgugggaacaUggggug.....          | 1 |
| Gi1_4229862_x1.....ggagacgucCugggaacacggggugccg.....       | 1 |
| Gi2_11196726_x1.....agacUucgugggaacacgggg.....             | 1 |
| Gl1a_6052384_x1.....cgugggaacacggggugUc.....               | 1 |
| Gi5_9055764_x1.....ucgugggaacacgUggugccgaacu.....          | 1 |
| Gi3_28268539_x1.....Acgugggaacacggggugccga.....            | 1 |
| Gi2_11111732_x1...aucggagacgucguUggaacacggg.....           | 1 |
| Gi3_28531289_x1.....cggagacgucgugggaacacggggugUcgaacu..... | 1 |
| Gl1a_6070775_x1.....gugggaacacggggGgccg.....               | 1 |
| Gi2_11310061_x1...aucggagacgucguCggaac.....                | 1 |
| Gi2_11285185_x1.....ucgugggaacacggUgugccgaac.....          | 1 |



|                   |                            |   |
|-------------------|----------------------------|---|
| Gi3_19064345_x976 | .....auauGggacaaggugcuuu   | 1 |
| Gi3_19073123_x974 | .....auauaggGcaaggugcuuu   | 1 |
| Gi3_19174648_x938 | .....auauaggacaGggugcuuu   | 1 |
| Gi3_19633252_x800 | .....aGauaggacaaggugcuu    | 1 |
| Gi3_19663465_x789 | .....auGuaggacaaggugcuuu   | 1 |
| Gi3_19671350_x787 | .....Guauaggacaaggugcuu    | 1 |
| Gi3_19687069_x785 | .....auauaggacaaggugcuuuau | 0 |
| Gi5_5382741_x784  | .....auauagggaNaaggugcuuu  | 1 |
| Gi3_19699613_x783 | .....auauagggaNaaggugcuuuu | 1 |
| Gi5_5392090_x774  | .....Guauaggacaaggugcuuu   | 1 |
| Gi2_6302693_x645  | .....auauagggaNaaggugcuuu  | 1 |
| Gi3_20289606_x642 | .....Uuauaggacaaggugcuuu   | 1 |
| Gi2_6446576_x592  | .....auaggacaaggugcuuuu    | 0 |
| Gi3_20680524_x557 | .....auauaggacaagUugcuuu   | 1 |
| Gi2_6589811_x538  | .....auauaggacaaggugcuuuGu | 1 |
| Gi4_297399_x513   | .....auauaggacaaggugcuu    | 0 |
| Gi5_5705196_x491  | .....auauaggacaaggugcuuuau | 0 |
| Gi3_21250341_x459 | .....auaCaggacaaggugcuuu   | 1 |
| Gi5_5813584_x425  | .....aGauaggacaaggugcuu    | 1 |
| Gi3_21514378_x418 | .....auUuaggacaaggugcuuuu  | 1 |
| Gi3_21535619_x415 | .....auauagggaNaaggugcuu   | 1 |
| Gi3_21553826_x413 | .....Auauauaggacaaggugcuu  | 1 |
| Gi3_21858459_x368 | .....aAauaggacaaggugcuuu   | 1 |
| Gi2_7206652_x364  | .....aGauaggacaaggugcuu    | 1 |
| Gi2_7209924_x363  | .....auUuaggacaaggugcuuu   | 1 |
| Gi5_5923370_x359  | .....auUuaggacaaggugcuuu   | 1 |
| Gi3_22009135_x347 | .....uauaggacaaggugcuuu    | 0 |
| Gi5_5984967_x334  | .....Auauauaggacaaggugcuuu | 1 |
| Gi2_7372837_x326  | .....auauaggacaaggugcCuu   | 1 |
| Gi3_22158695_x326 | .....auauaAgacaaggugcuuu   | 1 |
| Gi2_7394213_x321  | .....Guauaggacaaggugcuu    | 1 |
| Gi3_22250062_x315 | .....auauagggaUaaggugcuuu  | 1 |
| Gi1a_4326987_x309 | .....auauaggacaaggugcuu    | 0 |
| Gi1_2809470_x306  | .....auauaggacaaggugcuu    | 0 |
| Gi1_2813739_x304  | .....Guauaggacaaggugcuuu   | 1 |
| Gi1_2812523_x304  | .....aGauaggacaaggugcuuu   | 1 |
| Gi3_22359100_x302 | .....auaggacaaggugcuuuu    | 0 |
| Gi3_22389767_x299 | .....auauaggacaaggugcuuuG  | 1 |
| Gi3_22444523_x293 | .....auauaggacaaggugcCuua  | 1 |
| Gi5_6096546_x291  | .....Guauaggacaaggugcuu    | 1 |
| Gi2_7570140_x286  | .....Auauauaggacaaggugcuu  | 1 |
| Gi3_22624266_x274 | .....auauaggacaCggugcuuuu  | 1 |
| Gi1_2862836_x268  | .....uauaggacaaggugcuuu    | 0 |
| Gi5_6172262_x267  | .....auauaggacaaggugcCuu   | 1 |
| Gi3_22734967_x263 | .....auauaggCcaaggugcuuu   | 1 |
| Gi3_22788644_x258 | .....auauaggacaaggugAcuuu  | 1 |
| Gi3_22835967_x254 | .....aCauaggacaaggugcuuuu  | 1 |

|                   |                            |       |   |
|-------------------|----------------------------|-------|---|
| Gi3_22831903_x254 | .....auauagAacaaggugcuuu   | ..... | 1 |
| Gi2_7755229_x253  | .....auauaggacaaggCgcuuu   | ..... | 1 |
| Gi3_22849125_x253 | .....auauaggacaaggAgcuuu   | ..... | 1 |
| Gi3_22849884_x253 | .....auUuaggacaaggugcuu    | ..... | 1 |
| Gi5_6231990_x252  | .....auauaggacGaggugcuuu   | ..... | 1 |
| Gi3_22861469_x251 | .....auauaggacaaggCgcuua   | ..... | 1 |
| Gi3_22955952_x243 | .....auauaggacaaggugUuuu   | ..... | 1 |
| Gi2_7819963_x243  | .....auauaggacaaggugcuuC   | ..... | 1 |
| Gi5_6268497_x242  | .....aCauaggacaaggugcuuu   | ..... | 1 |
| Gi5_6301572_x234  | .....auauaggaNaaggugcuu    | ..... | 1 |
| Gi5_6311581_x232  | .....auauaggacaaggugcuuC   | ..... | 1 |
| Gi5_6310885_x232  | .....aGauaggacaaggugcuua   | ..... | 1 |
| Gi5_6318959_x230  | .....auauaggacaCggugcuuu   | ..... | 1 |
| Gi3_23128899_x229 | .....auauaggacaaggugcuuu   | ..... | 1 |
| Gi3_23156031_x227 | .....auauaggGcaaggugcuua   | ..... | 1 |
| Gi3_23169832_x226 | .....auauaggacaaggugcCu    | ..... | 1 |
| Gi1_2948860_x226  | .....auauaggacaaggugcuuuU  | ..... | 1 |
| Gi3_23201468_x223 | .....auaggacaaggugcuuuU    | ..... | 1 |
| Gi5_6378591_x218  | .....uauauaggacaaggugcuuu  | ..... | 0 |
| Gi3_23295034_x216 | .....auauaggacaaAgugcuuu   | ..... | 1 |
| Gi3_23304100_x215 | .....auauaggacGaggugcuua   | ..... | 1 |
| Gi3_23354703_x212 | .....auauaggacaGggugcuua   | ..... | 1 |
| Gi5_6419115_x211  | .....auauaggGcaaggugcuuu   | ..... | 1 |
| Gi2_8051163_x210  | .....auaggacaaggugcuuuGu   | ..... | 1 |
| Gi2_8068068_x208  | .....auauGggacaaggugcuuu   | ..... | 1 |
| Gi3_23424001_x207 | .....uauauaggacaaggugcuuu  | ..... | 0 |
| Gi3_23455070_x204 | .....uauaggacaaggugcuua    | ..... | 0 |
| Gi2_8109386_x203  | .....Guauaggacaaggugcuua   | ..... | 1 |
| Gi3_23501688_x201 | .....auauGggacaaggugcuua   | ..... | 1 |
| Gi2_8134931_x199  | .....auauaggaNaaggugcuu    | ..... | 1 |
| Gi2_8138712_x199  | .....aGauaggacaaggugcuua   | ..... | 1 |
| Gi2_8149026_x198  | .....aCauaggacaaggugcuuu   | ..... | 1 |
| Gi3_23608301_x194 | .....Cuauaggacaaggugcuuu   | ..... | 1 |
| Gi3_23617980_x193 | .....auaggacaaggugcuuaucuc | ..... | 0 |
| Gi3_23638960_x192 | .....auauUggacaaggugcuuu   | ..... | 1 |
| Gi3_23639536_x192 | .....Cauauaggacaaggugcuu   | ..... | 1 |
| Gi5_6532420_x191  | .....auauaggacaaggCgcuuu   | ..... | 1 |
| Gi3_23691709_x188 | .....aggacaaggugcuuaucuc   | ..... | 0 |
| Gi3_23739825_x185 | .....auauaggacUaggugcuuu   | ..... | 1 |
| Gi2_8281681_x183  | .....auauaggGcaaggugcuuu   | ..... | 1 |
| Gl1a_4659085_x183 | .....auauaggacaaggugcuua   | ..... | 0 |
| Gi1_3062030_x181  | .....auauaggacaaggugcuuuGu | ..... | 1 |
| Gi2_8303817_x180  | .....auauaggacaCggugcuuu   | ..... | 1 |
| Gi3_23808593_x180 | .....aGaggacaaggugcuua     | ..... | 1 |
| Gi5_6623390_x178  | .....auauaggacaGggugcuuu   | ..... | 1 |
| Gi2_8318515_x178  | .....auauaggacaGggugcuuu   | ..... | 1 |
| Gi1_3075844_x177  | .....auauaggaNaaggugcuuu   | ..... | 1 |

|                   |                              |   |
|-------------------|------------------------------|---|
| Gi3_23875457_x176 | .....auauaggacaUggugcuuu     | 1 |
| Gi2_8335876_x176  | .....uauaggacaaggugcuuuG     | 1 |
| Gi3_23929755_x172 | .....auauaggacGaggugcuu      | 1 |
| Gi2_8375013_x172  | .....uauaggacaaggugcuuu      | 0 |
| Gi3_23972173_x170 | .....auauCggacaaggugcuuu     | 1 |
| Gi3_23991975_x169 | .....auauaggacaCggugcuu      | 1 |
| Gi3_24034462_x166 | .....AuauauaggacaaggugcuuuA  | 1 |
| Gi5_6723364_x164  | .....GuauaggacaaggugcuuuA    | 1 |
| Gi1_3124362_x163  | .....auauaggacaaggugcuuuA    | 0 |
| Gi5_6741140_x162  | .....auauGggacaaggugcuuu     | 1 |
| Gi3_24107520_x161 | .....auauaggacaaggugcuuA     | 1 |
| Gi2_8525416_x156  | .....auauaggacGaggugcuuu     | 1 |
| Gi3_24225641_x154 | .....auaAaggacaaggugcuuu     | 1 |
| Gi3_24278758_x150 | .....auaggacaaggugcuuuG      | 1 |
| Gi3_24277258_x150 | .....auauaggUcaaggugcuuu     | 1 |
| Gi3_24294178_x149 | .....auauaggacaaggGgcuuu     | 1 |
| Gi3_24336038_x147 | .....aCauaggacaaggugcuu      | 1 |
| Gi3_24360375_x145 | .....auauaggacaaggugcuAu     | 1 |
| Gi3_24354720_x145 | .....auGuaggacaaggugcuuuA    | 1 |
| Gi3_24373971_x144 | .....GuaggacaaggugcuuuA      | 1 |
| Gi2_8704208_x139  | .....auGuaggacaaggugcuuu     | 1 |
| Gi3_24457524_x139 | .....auauaggGcaaggugcuu      | 1 |
| Gi3_24471007_x139 | .....UuauaggacaaggugcuuuA    | 1 |
| Gi3_24484415_x138 | .....auauaggacaaggugcuCua    | 1 |
| Gi3_24509252_x136 | .....auauaggacaaggugAuuu     | 1 |
| Gi2_8750832_x134  | .....auUuaggacaaggugcuu      | 1 |
| Gi3_24554894_x134 | .....auauaggacaaggCgcuu      | 1 |
| Gi3_24550070_x134 | .....auauaggacaaggugcuuCa    | 1 |
| Gi2_8830444_x127  | .....auauaggaNaaggugcuuuA    | 1 |
| Gi3_24690502_x126 | .....auauGggacaaggugcuu      | 1 |
| Gi1_3281969_x125  | .....Auauauaggacaaggugcuuu   | 1 |
| Gi5_7092983_x121  | .....auauaggaNaaggugcuuuA    | 1 |
| Gi2_8910186_x120  | .....Uuauaggacaaggugcuuu     | 1 |
| Gi3_24823682_x118 | .....auauaggacaagUugcuuuA    | 1 |
| Gi3_24844917_x117 | .....acuauauaggacaaggugcuuuA | 0 |
| Gi3_24832047_x117 | .....aAuaggacaaggugcuuuA     | 1 |
| Gi2_8943308_x117  | .....auauaggacaaggugcCu      | 1 |
| Gi5_7138385_x117  | .....auGuaggacaaggugcuuu     | 1 |
| Gi3_24852361_x116 | .....cuauauaggacaaggugcuuu   | 0 |
| Gi1_3325007_x115  | .....auauaggacaaggugcuuuG    | 1 |
| Gi3_24918360_x113 | .....auaCaggacaaggugcuuuA    | 1 |
| Gi5_7182475_x112  | .....Uuauaggacaaggugcuuu     | 1 |
| Gi3_24921506_x112 | .....auauaggacCaggugcuuu     | 1 |
| Gi5_7183595_x112  | .....auauaggacaagUugcuuu     | 1 |
| Gi5_7204629_x109  | .....auUuaggacaaggugcuu      | 1 |
| Gi5_7209861_x109  | .....auauaggacaaggugcCu      | 1 |
| Gi5_7218005_x108  | .....acuauauaggacaaggugcuuu  | 0 |



|                   |                                 |   |
|-------------------|---------------------------------|---|
| Gi5_7224593_x108  | .....auaCaggacaaggugcuuu        | 1 |
| Gi1_3359306_x107  | .....auUuaggacaaggugcuuu        | 1 |
| Gi3_25056796_x105 | .....auauaggacaagCugcuuu        | 1 |
| Gi3_25064605_x104 | .....auaggacaNggugcuuu          | 1 |
| Gi2_9139651_x101  | .....auauaggGcaaggugcuu         | 1 |
| Gi3_25118778_x101 | .....auauaggacaGggugcuu         | 1 |
| Gi2_9163977_x99   | .....auaCaggacaaggugcuuu        | 1 |
| Gi3_25217104_x96  | .....Uuauaggacaaggugcuu         | 1 |
| Gi5_7355006_x95   | .....auauaggacaaggugcuuuaucucg  | 0 |
| Gi3_25261141_x93  | .....auGuaggacaaggugcuu         | 1 |
| Gi2_9238748_x92   | .....auauaggacaagUugcuuu        | 1 |
| Gi5_7389736_x92   | .....auauaggacaCggugcuu         | 1 |
| Gi5_7394320_x91   | .....auauaggGcaaggugcuu         | 1 |
| Gi5_7401054_x91   | .....Auauauaggacaaggugcuu       | 1 |
| Gi3_25336656_x89  | .....auauaggacaaggugcAuu        | 1 |
| Gi3_25377495_x87  | .....auaNaggacaaggugcuuu        | 1 |
| Gi5_7452438_x86   | .....aggacaaggugcuuuaucucg      | 0 |
| Gi1_3464551_x86   | .....auauaggacaaggugcCuu        | 1 |
| Gi5_7500244_x82   | .....auauaggacaaggCgcuu         | 1 |
| Gi3_25478273_x81  | .....auauaggacaUggugcuuu        | 1 |
| Gi3_25518590_x79  | .....auauaggacaagUugcuu         | 1 |
| Gi1_3501535_x78   | .....auauaggacaaggCgcuuu        | 1 |
| Gi5_7554032_x77   | .....aAauaggacaaggugcuuu        | 1 |
| Gi2_9422033_x77   | .....auauaggacaGggugcuu         | 1 |
| Gi2_9429429_x76   | .....auauaggacaCggugcuu         | 1 |
| Gi3_25578735_x75  | .....auauaggacaaggugcGuu        | 1 |
| Gi5_7577071_x75   | .....aCauaggacaaggugcuu         | 1 |
| Gi5_7598924_x73   | .....auauaggacGaggugcuu         | 1 |
| Gi2_9470107_x73   | .....aAauaggacaaggugcuuu        | 1 |
| Gi5_7631275_x71   | .....auauGggacaaggugcuu         | 1 |
| Gi1a_5110955_x71  | .....Cauauaggacaaggugcuuu       | 1 |
| Gi5_7640038_x70   | .....auauaggacUaggugcuuu        | 1 |
| Gi1_3541926_x70   | .....auauaggacaaggugcuuuaucucgc | 0 |
| Gi5_7638918_x70   | .....auUuaggacaaggugcuuu        | 1 |
| Gi5_7646785_x69   | .....auauaAgacaaggugcuuu        | 1 |
| Gi2_9543471_x67   | .....aCauaggacaaggugcuu         | 1 |
| Gi3_25736749_x67  | .....auauaggCcaaggugcuuu        | 1 |
| Gi3_25736012_x67  | .....auaCaggacaaggugcuu         | 1 |
| Gi3_25780217_x65  | .....auauagCacaaggugcuuu        | 1 |
| Gi2_9561626_x65   | .....auauaggacaagguAcuuu        | 1 |
| Gi5_7702331_x65   | .....acuauauaggacaaggugcuuu     | 0 |
| Gi1a_5157364_x64  | .....auaggacaaggugcuuuau        | 0 |
| Gi1_3574120_x64   | .....auauaggacaaggugcuuC        | 1 |
| Gi2_9597825_x62   | .....auauaAgacaaggugcuuu        | 1 |
| Gi1_3585357_x61   | .....auauaggacGaggugcuuu        | 1 |
| Gi5_7753211_x61   | .....agggggugugugggggcgcuu      | 0 |
| Gi2_9611425_x61   | .....auUuaggacaaggugcuuu        | 1 |

|                  |                              |   |
|------------------|------------------------------|---|
| Gi3_25843385_x61 | ..... auauaUgacaaggugcuuu    | 1 |
| Gi3_25860949_x60 | ..... auauaAgacaaggugcuuu    | 1 |
| Gi5_7755856_x60  | ..... auauaggCcaaggugcuuu    | 1 |
| Gi5_7767882_x59  | ..... auauaggacaaggugUuuu    | 1 |
| Gi3_25888157_x59 | ..... auauUggacaaggugcuu     | 1 |
| Gi2_9634911_x59  | ..... auauaggacaaggugcUua    | 1 |
| Gi1_3616146_x56  | ..... aCauaggacaaggugcuuu    | 1 |
| Gi3_25950622_x56 | ..... auauaggacaagguAcuuu    | 1 |
| Gi5_7834229_x54  | ..... Guauaggacaaggugcuuuu   | 1 |
| Gi3_25984170_x54 | ..... auauaggaUaaggugcuuu    | 1 |
| Gi1_3629333_x53  | ..... acuauauaggacaaggugcuuu | 0 |
| Gi1_3631718_x53  | ..... auauaggacaaggugcuuuu   | 0 |
| Gi5_7840843_x53  | ..... auauaggacaaggCgcuuu    | 1 |
| Gi2_9726394_x52  | ..... auauaggacaCggugcuuu    | 1 |
| Gi1_3632814_x52  | ..... auauaggGcaaggugcuuu    | 1 |
| Gi2_9740113_x51  | ..... auauaggacaAagugcuuu    | 1 |
| Gi2_9743295_x50  | ..... auaAaggacaaggugcuuu    | 1 |
| Gi5_7882436_x50  | ..... auauaggacaUggugcuuu    | 1 |
| Gi3_26059686_x50 | ..... auauaggacaaggugUuuu    | 1 |
| Gi5_7899365_x49  | ..... aCauaggacaaggugcuuu    | 1 |
| Gi3_26094707_x49 | ..... aAauaggacaaggugcuu     | 1 |
| Gi2_9758140_x49  | ..... auauaggacaaggCgcuuu    | 1 |
| Gi1_3646860_x49  | ..... auauaggacaCggugcuuu    | 1 |
| Gi2_9755837_x49  | ..... auauGggacaaggugcuu     | 1 |
| Gi2_9777293_x48  | ..... auauaggacaagAugcuuu    | 1 |
| Gi2_9773213_x48  | ..... auauaggacaaggugUuuu    | 1 |
| Gi5_7913744_x48  | ..... auauaggacaGggugcuuu    | 1 |
| Gi3_26112464_x48 | ..... auauagAacaaggugcuuu    | 1 |
| Gi5_7919253_x47  | ..... auauaggacaGggugcuu     | 1 |
| Gi3_26134968_x47 | ..... auauaggacaagAugcuuu    | 1 |
| Gi5_7917984_x47  | ..... auGuaggacaaggugcuu     | 1 |
| Gi3_26129281_x47 | ..... auauaggacaaggugcuAua   | 1 |
| Gi3_26140863_x46 | ..... auauaggCcaaggugcuu     | 1 |
| Gi4_473696_x46   | ..... aGauaggacaaggugcuuu    | 1 |
| Gi3_26152041_x46 | ..... auauaggaAaaggugcuuu    | 1 |
| Gi3_26151167_x46 | ..... auUggacaaggugcuuu      | 1 |
| Gi5_7939539_x46  | ..... aGaggacaaggugcuuu      | 1 |
| Gi5_7937055_x46  | ..... auauUggacaaggugcuuu    | 1 |
| Gi5_7949967_x45  | ..... auauaggaUaaggugcuuu    | 1 |
| Gi3_26173843_x45 | ..... auauaggacaaggAgcuuu    | 1 |
| Gi1_3670035_x45  | ..... auauaggacaGggugcuuu    | 1 |
| Gi2_9807414_x45  | ..... auauaggCcaaggugcuuu    | 1 |
| Gi5_7947582_x45  | ..... auauaggacaCggugcuuu    | 1 |
| Gi5_7953297_x45  | ..... auauaggacaagguAcuuu    | 1 |
| Gi2_9815919_x45  | ..... auauaggacUaggugcuuu    | 1 |
| Gi5_7963043_x44  | ..... auauaggacaaggAgcuuu    | 1 |
| Gi5_7965463_x44  | ..... auauCggacaaggugcuuu    | 1 |

|                       |                               |   |
|-----------------------|-------------------------------|---|
| Gi1a_5296452_x44..... | aGauaggacaaggugcuuu.....      | 1 |
| Gi3_26194997_x44..... | Guauauaggacaaggugcuuu.....    | 1 |
| Gi2_9832454_x44.....  | gcuucugucacgcacuaauauagg..... | 0 |
| Gi5_7956003_x44.....  | auauaggUcaaggugcuuu.....      | 1 |
| Gi3_26205056_x43..... | auauaAgacaaggugcuu.....       | 1 |
| Gi2_9838099_x43.....  | auauaggacGaggugcuu.....       | 1 |
| Gi2_9841281_x43.....  | auauaggGcaaggugcuuu.....      | 1 |
| Gi2_9838056_x43.....  | auauaggacaaggAgcuuu.....      | 1 |
| Gi5_7967443_x43.....  | Uuauaggacaaggugcuu.....       | 1 |
| Gi3_26225959_x42..... | auauaggacaaggGgcuuu.....      | 1 |
| Gi3_26225665_x42..... | auauaggacUaggugcuuu.....      | 1 |
| Gi3_26238433_x42..... | aCaggacaaggugcuuu.....        | 1 |
| Gi5_7987930_x42.....  | auauaggacaagAugcuu.....       | 1 |
| Gi5_7985704_x42.....  | auauaggGcaaggugcuuu.....      | 1 |
| Gi3_26237593_x42..... | avaggacaaggugcCuua.....       | 1 |
| Gi1_3696422_x41.....  | Uuauaggacaaggugcuuu.....      | 1 |
| Gi3_26255362_x41..... | auauaggacaaAgugcuuu.....      | 1 |
| Gi2_9862673_x41.....  | auauaggacaaggCgcuu.....       | 1 |
| Gi3_26245317_x41..... | auauUggacaaggugcuuu.....      | 1 |
| Gi5_8007294_x40.....  | auaAaggacaaggugcuuu.....      | 1 |
| Gi5_8007254_x40.....  | auauagAacaaggugcuu.....       | 1 |
| Gi3_26276850_x40..... | auNuaggacaaggugcuu.....       | 1 |
| Gi5_8015054_x40.....  | auauaggacaagUugcuu.....       | 1 |
| Gi3_26276610_x40..... | auauaggacaaggugcuGu.....      | 1 |
| Gi2_9881490_x40.....  | auauaggacaaggugAuuu.....      | 1 |
| Gi5_8009134_x40.....  | Cuauaggacaaggugcuuu.....      | 1 |
| Gi5_8021561_x39.....  | auauaggacaaAgugcuuu.....      | 1 |
| Gi4_481421_x39.....   | Guauaggacaaggugcuuu.....      | 1 |
| Gi1_3706661_x39.....  | auauGggacaaggugcuuu.....      | 1 |
| Gi3_26303388_x39..... | auaggGcaaggugcuuu.....        | 1 |
| Gi2_9897604_x39.....  | aCauaggacaaggugcuuu.....      | 1 |
| Gi3_26299449_x39..... | auCuaggacaaggugcuuu.....      | 1 |
| Gi2_9905735_x38.....  | auauaggacaUggugcuuu.....      | 1 |
| Gi2_9904747_x38.....  | auGuaggacaaggugcuu.....       | 1 |
| Gi3_26321420_x38..... | auauaCgacaaggugcuuu.....      | 1 |
| Gi3_26323396_x38..... | auauaggacaaggugcuuG.....      | 1 |
| Gi5_8046300_x37.....  | auauaggacaaggugcuAu.....      | 1 |
| Gi5_8049297_x37.....  | auaCaggacaaggugcuu.....       | 1 |
| Gi3_26335786_x37..... | auauaggacaaggAugcuu.....      | 1 |
| Gi5_8063644_x36.....  | auauaggacaaggugcuuCa.....     | 1 |
| Gi2_9955719_x35.....  | auauaggacaaggugcuuA.....      | 1 |
| Gi2_9945814_x35.....  | auauaggacaagUugcuu.....       | 1 |
| Gi2_9949034_x35.....  | auauCggacaaggugcuuu.....      | 1 |
| Gi3_26383865_x35..... | auaggacaGggugcuuu.....        | 1 |
| Gi3_26387855_x35..... | auaGaggacaaggugcuuu.....      | 1 |
| Gi3_26378510_x35..... | Cuauaggacaaggugcuuu.....      | 1 |
| Gi2_9952219_x35.....  | auauaggaUaaggugcuuu.....      | 1 |

|                       |                             |   |
|-----------------------|-----------------------------|---|
| Gi5_8089751_x34.....  | auauaggacGaggugcuuu.....    | 1 |
| Gi2_9966371_x34.....  | auauUggacaaggugcuuu.....    | 1 |
| Gi2_9960387_x34.....  | Uuauaggacaaggugcuu.....     | 1 |
| Gi3_26408682_x34..... | ..auagUacaaggugcuuu.....    | 1 |
| Gi2_9968581_x34.....  | ..auaCaggacaaggugcuu.....   | 1 |
| Gi3_26398278_x34..... | ..auaAaggacaaggugcuuu.....  | 1 |
| Gi3_26430868_x33..... | ..auaggacaaggCgcuuu.....    | 1 |
| Gi2_9980304_x33.....  | ..auauagAacaaggugcuuu.....  | 1 |
| Gi3_26428327_x33..... | ..auauaggacaaAgugcuu.....   | 1 |
| Gi2_9998365_x32.....  | ..Cuauaggacaaggugcuuu.....  | 1 |
| Gi5_8116550_x32.....  | ..auauGggacaaggugcuuu.....  | 1 |
| Gi2_9995677_x32.....  | ..auauGggacaaggugcuuu.....  | 1 |
| Gi1_3754919_x31.....  | ..auGuaggacaaggugcuuu.....  | 1 |
| Gi3_26477871_x31..... | ..auaggacGaggugcuuu.....    | 1 |
| Gi4_491008_x31.....   | ..auauaggaNaaggugcuuu.....  | 1 |
| Gi3_26470958_x31..... | ..auauaggacaaggugcuA.....   | 1 |
| Gi3_26472446_x31..... | ..auauaggacaaggugUuu.....   | 1 |
| Gi5_8123836_x31.....  | ..auaNaggacaaggugcuuu.....  | 1 |
| Gi5_8122162_x31.....  | ..auauaggacaaggugcCuua..... | 1 |
| Gi3_26504430_x30..... | ..auauaggacaUggugcuu.....   | 1 |
| Gi4_491669_x30.....   | ..aGauaggacaaggugcuuu.....  | 1 |
| Gi3_26513010_x30..... | ..Nuauaggacaaggugcuuu.....  | 1 |
| Gi3_26497800_x30..... | ..auauaggacaagguAcuu.....   | 1 |
| Gi1a_5399316_x30..... | ..Guauaggacaaggugcuuu.....  | 1 |
| Gi3_26526508_x29..... | ..auauaggaUaaggugcuu.....   | 1 |
| Gi3_26543212_x29..... | ..auauaggacaaggugcAuaa..... | 1 |
| Gi3_26536136_x29..... | ..auauCggacaaggugcuuu.....  | 1 |
| Gi5_8159129_x28.....  | ..auauaggacaaggugcuuA.....  | 1 |
| Gi1_3770100_x28.....  | ..auauaggacaagUugcuuu.....  | 1 |
| Gi3_26566453_x28..... | ..auGggacaaggugcuuu.....    | 1 |
| Gi3_26546349_x28..... | ..auauaggUcaaggugcuuu.....  | 1 |
| Gi3_26562197_x28..... | ..auauagAacaaggugcuu.....   | 1 |
| Gi2_10072442_x27..... | ..auauaggacaaggugcAuu.....  | 1 |
| Gi4_495338_x27.....   | ..Guauaggacaaggugcuuu.....  | 1 |
| Gi5_8191738_x26.....  | ..auauaggacaaggugAuuu.....  | 1 |
| Gi3_26612595_x26..... | ..auauaggacaaggugcuuuU..... | 1 |
| Gi5_8187500_x26.....  | ..auauaggaAaaggugcuuu.....  | 1 |
| Gi2_10096197_x25..... | ..auauaggacaaggugcuuCa..... | 1 |
| Gi1_3793281_x25.....  | ..auaggacaaggugcuuuU.....   | 1 |
| Gi3_26626918_x25..... | ..auaAaggacaaggugcuu.....   | 1 |
| Gi3_26673872_x24..... | ..auauaggacaaggAgcuu.....   | 1 |
| Gi3_26668496_x24..... | ..auauaggUcaaggugcuu.....   | 1 |
| Gi2_10110931_x24..... | ..auauaggUcaaggugcuu.....   | 1 |
| Gi2_10109995_x24..... | ..auauaggacGaggugcuuu.....  | 1 |
| Gi1_3797918_x24.....  | ..auaCaggacaaggugcuuu.....  | 1 |
| Gi1a_5457256_x24..... | ..auauaggaNaaggugcuuu.....  | 1 |
| Gi3_26653640_x24..... | ..auauaggacUaggugcuu.....   | 1 |

|                  |                                |   |
|------------------|--------------------------------|---|
| Gi5_8223295_x23  | . . . . .Guaggacaaggugcuuuu    | 1 |
| Gi5_8231713_x23  | . . . . .auauaAgacaaggugcuu    | 1 |
| Gi3_26682837_x23 | . . . . .auauaggacaaggGgcuu    | 1 |
| Gi3_26702226_x23 | . . . . .aGauaggacaaggugcuuuau | 1 |
| Gi3_26684769_x23 | . . . . .auauaggacaaggugAuuua  | 1 |
| Gi3_26703422_x23 | . . . . .auaggacaCggugcuuuu    | 1 |
| Gi2_10137180_x23 | . . . . .auauaggacaaggGgcuuu   | 1 |
| Gi3_26722258_x22 | . . . . .auauaggacaaCgugcuuu   | 1 |
| Gi5_8244079_x22  | . . . . .auaggacaNggugcuuuu    | 1 |
| Gi2_10155084_x22 | . . . . .Uuauaggacaaggugcuuuu  | 1 |
| Gi3_26726328_x22 | . . . . .Guauaggacaaggugcuuuau | 1 |
| Gi2_10144788_x22 | . . . . .auauaggacaaggugcuCua  | 1 |
| Gi2_10140916_x22 | . . . . .auauaggacaGggugcuuuu  | 1 |
| Gi2_10150794_x22 | . . . . .auauaggacaaggugcuAu   | 1 |
| Gi5_8257584_x21  | . . . . .auauaggacaagUugcuuuu  | 1 |
| Gi5_8248974_x21  | . . . . .aAuuaggacaaggugcuu    | 1 |
| Gi3_26748324_x21 | . . . . .auaggauAaggugcuuuu    | 1 |
| Gi5_8255652_x21  | . . . . .auauaggCcaaggugcuu    | 1 |
| Gi1_3819636_x21  | . . . . .auaAaggacaaggugcuuu   | 1 |
| Gi3_26767056_x21 | . . . . .auauaggacaagguUcuuu   | 1 |
| Gi2_10163119_x21 | . . . . .auauaggacaaggugUuu    | 1 |
| Gi2_10165408_x21 | . . . . .auaCaggacaaggugcuuuu  | 1 |
| Gi5_8275629_x20  | . . . . .auauaggacCaggugcuuu   | 1 |
| Gi3_26779265_x20 | . . . . .auauagUacaaggugcuuu   | 1 |
| Gi5_8275889_x20  | . . . . .auUggacaaggugcuuuu    | 1 |
| Gi5_8264869_x20  | . . . . .auauaggacaaggugUuu    | 1 |
| Gi5_8276809_x20  | . . . . .auaCaggacaaggugcuuuu  | 1 |
| Gi3_26799005_x20 | . . . . .auauaggacaaggugcuuAa  | 1 |
| Gi5_8283562_x19  | . . . . .auGuaggacaaggugcuuuu  | 1 |
| Gi3_26834452_x19 | . . . . .auauaggacCaggugcuuuu  | 1 |
| Gi5_8291694_x19  | . . . . .auauaggacaaggGgcuuu   | 1 |
| Gi3_26823223_x19 | . . . . .auauaggacaaggugGuuu   | 1 |
| Gi5_8279154_x19  | . . . . .auaggacaaggCgcuuuu    | 1 |
| Gi2_10202209_x19 | . . . . .auauUggacaaggugcuu    | 1 |
| Gi3_26828163_x19 | . . . . .auauaggacaagguCcuuu   | 1 |
| Gi3_26826187_x19 | . . . . .auaNaggacaaggugcuuuu  | 1 |
| Gi2_10201107_x19 | . . . . .aGaggacaaggugcuuuu    | 1 |
| Gi4_505812_x18   | . . . . .auauaggauNaaggugcuuuu | 1 |
| Gi2_10226578_x18 | . . . . .aAuuaggacaaggugcuu    | 1 |
| Gi3_26866168_x18 | . . . . .auauCggacaaggugcuu    | 1 |
| Gi5_8292735_x18  | . . . . .auauagCacaaggugcuuu   | 1 |
| Gi2_10209892_x18 | . . . . .auauaggCcaaggugcuu    | 1 |
| Gi5_8302365_x18  | . . . . .auauaggacaaAgugcuu    | 1 |
| Gi5_8294085_x18  | . . . . .auauaggacaaggugcuCua  | 1 |
| Gi2_10245148_x17 | . . . . .auauaAgacaaggugcuu    | 1 |
| Gi3_26905412_x17 | . . . . .auauaggauAaggugcuuu   | 1 |
| Gi2_10240779_x17 | . . . . .auauaggacCaggugcuuu   | 1 |

|                  |                            |   |
|------------------|----------------------------|---|
| Gi3_26909288_x17 | .....auaAgacaaggugcuuuu    | 1 |
| Gi5_8319252_x17  | .....auauaggacaaggAgcuu    | 1 |
| Gi5_8315444_x17  | .....auauagAacaaggugcuuuu  | 1 |
| Gi2_10238756_x17 | .....auaNaggacaaggugcuuu   | 1 |
| Gi3_26897439_x17 | .....auaggacaaggGgcuuuu    | 1 |
| Gi1_3850667_x17  | .....auauaAgacaaggugcuuu   | 1 |
| Gi1_3860465_x16  | .....auauUggacaaggugcuuu   | 1 |
| Gi2_10271545_x16 | .....auauaggacaaAgugcuu    | 1 |
| Gi3_26927245_x16 | .....auauaggacaagCugcuuuu  | 1 |
| Gi2_10265689_x16 | .....auGuaggacaaggugcuuuu  | 1 |
| Gi3_26926925_x16 | .....auauaggacaaggugcuuuC  | 1 |
| Gi3_26915309_x16 | .....auaggacaaggugcuCua    | 1 |
| Gi5_8323168_x16  | .....auauaggacaaggugcAuu   | 1 |
| Gi2_10256761_x16 | .....auauaggacaagCugcuuu   | 1 |
| Gi3_26942941_x16 | .....auaNaggacaaggugcuu    | 1 |
| Gi5_8344547_x15  | .....Uuuauaggacaaggugcuuuu | 1 |
| Gi1_3869267_x15  | .....auauaggacaaggugUuuu   | 1 |
| Gi2_10290850_x15 | .....auauaggacaaggugcGuu   | 1 |
| Gi3_26971480_x15 | .....uauaAgacaaggugcuuu    | 1 |
| Gi3_26972365_x15 | .....auaggacaaggugcuuCa    | 1 |
| Gi3_27020269_x14 | .....Cuauaggacaaggugcuu    | 1 |
| Gi5_8359331_x14  | .....auauUggacaaggugcuu    | 1 |
| Gi2_10317673_x14 | .....auauaggacaaggGgcuu    | 1 |
| Gi3_26997323_x14 | .....auCuaggacaaggugcuuuu  | 1 |
| Gi5_8357651_x14  | .....auauCggacaaggugcuu    | 1 |
| Gi3_27008635_x14 | .....aUgacaaggugcuuuaucu   | 1 |
| Gi4_511772_x14   | .....aGauaggacaaggugcuu    | 1 |
| Gi5_8371441_x14  | .....auauaggacaaggugcuuuG  | 1 |
| Gi5_8360409_x14  | .....auauaggacaagCugcuuu   | 1 |
| Gi1_3884201_x13  | .....auauaggacaaggGgcuuu   | 1 |
| Gi3_27075168_x13 | .....auauaggacaaggugAuu    | 1 |
| Gi5_8385974_x13  | .....aGauaggacaaggugcuuuu  | 1 |
| Gi5_8384440_x13  | .....Guauauaggacaaggugcuuu | 1 |
| Gi5_8382256_x13  | .....auauaggaUaaggugcuu    | 1 |
| Gi3_27048713_x13 | .....auauaggacaaUgugcuuu   | 1 |
| Gi1_3883564_x13  | .....auauaggacaagguAcuuu   | 1 |
| Gi5_8389029_x13  | .....auauaggacaagAugcuu    | 1 |
| Gi5_8382139_x13  | .....Cuauaggacaaggugcuu    | 1 |
| Gi2_10327641_x13 | .....auauaggCcaaggugcuuuu  | 1 |
| Gi5_8379864_x13  | .....auaggGcaaggugcuuuu    | 1 |
| Gi5_8390147_x13  | .....auauaggacaUggugcuuuu  | 1 |
| Gi3_27069968_x13 | .....auauaCgacaaggugcuuuu  | 1 |
| Gi2_10321830_x13 | .....auauagAacaaggugcuu    | 1 |
| Gi3_27120777_x12 | .....Uuaggacaaggugcuuuu    | 1 |
| Gi5_8395866_x12  | .....auaAaggacaaggugcuu    | 1 |
| Gi5_8397246_x12  | .....auauaggCcaaggugcuuuu  | 1 |
| Gi2_10353766_x12 | .....auaAaggacaaggugcuu    | 1 |

|                       |                             |   |
|-----------------------|-----------------------------|---|
| Gi5_8401050_x12.....  | auauaggacaaggugcAu.....     | 1 |
| Gi1_3894602_x12.....  | auauaggacaaggugcuuA.....    | 1 |
| Gi5_8400522_x12.....  | auauaggacaaggugcuA.....     | 1 |
| Gi5_8401902_x12.....  | auauaAgacaaggugcuuuA.....   | 1 |
| Gi5_8406366_x12.....  | .auaggacaGggugcuuuA.....    | 1 |
| Gi5_8409534_x12.....  | auauaggacaaggguAuu.....     | 1 |
| Gi2_10349950_x12..... | auauaggacaaggugUuuuuA.....  | 1 |
| Gi3_27093057_x12..... | .aAaggacaaggugcuuuA.....    | 1 |
| Gi5_8405874_x12.....  | auauaggacaaggguAuuuuA.....  | 1 |
| Gi2_10357570_x12..... | .aAauaggacaaggugcuuuA.....  | 1 |
| Gi1_3904034_x12.....  | auauaggacUaggugcuuu.....    | 1 |
| Gi5_8405886_x12.....  | auauaggacaaggugcGuu.....    | 1 |
| Gi2_10363546_x12..... | .auauaggacaagUugcuuuA.....  | 1 |
| G1a_5603694_x11.....  | auauaggacaGggugcuuu.....    | 1 |
| Gi2_10383574_x11..... | .auauaggacCaggugcuu.....    | 1 |
| Gi4_517552_x11.....   | auUuaggacaaggugcuuu.....    | 1 |
| Gi3_27133734_x11..... | .auauaggacaaggugcAu.....    | 1 |
| Gi3_27172850_x11..... | .auauaggaaAaggugcuuuA.....  | 1 |
| G1a_5605256_x11.....  | auauaggacaaggugcCuu.....    | 1 |
| Gi5_8427119_x11.....  | auauaggUcaaggugcuu.....     | 1 |
| Gi2_10373454_x11..... | .auauaggacaaUgugcuuu.....   | 1 |
| Gi2_10382221_x11..... | .Cuauaggacaaggugcuu.....    | 1 |
| Gi1_3912405_x11.....  | auauaggacaaggugAuuu.....    | 1 |
| Gi5_8415723_x11.....  | auauagAacaaggugcuu.....     | 1 |
| Gi5_8422433_x11.....  | auauaggacaaggAgcuuuA.....   | 1 |
| Gi2_10377942_x11..... | .auauaggaaUaaggugcuu.....   | 1 |
| Gi2_10376655_x11..... | .auCuaggacaaggugcuuu.....   | 1 |
| Gi4_518421_x11.....   | .Guauaggacaaggugcuu.....    | 1 |
| Gi3_27151103_x11..... | .auauaggacaaUgugcuuuA.....  | 1 |
| Gi3_27156449_x11..... | .auUuaggacaaggugcuuuau..... | 1 |
| Gi5_8427207_x11.....  | auauaggacaUggugcuu.....     | 1 |
| Gi5_8413600_x11.....  | .auaggacaaggugcuCua.....    | 1 |
| Gi3_27157186_x11..... | .auaggacaagAugcuuuA.....    | 1 |
| Gi5_8417076_x11.....  | .auauaggacaaAgugcuuuA.....  | 1 |
| Gi1_3926584_x10.....  | .Gauaggacaaggugcuuu.....    | 1 |
| Gi4_520499_x10.....   | auauaggacaGggugcuuu.....    | 1 |
| Gi3_27194042_x10..... | .auaggacCaggugcuuuA.....    | 1 |
| Gi2_10425392_x10..... | .auaAaggacaaggugcuuuA.....  | 1 |
| Gi5_8451776_x10.....  | .Gauauaggacaaggugcuuu.....  | 1 |
| Gi2_10425262_x10..... | .auauaggaaUaaggugcuuuA..... | 1 |
| Gi3_27209282_x10..... | .auaggacaaggguUcuuuA.....   | 1 |
| Gi5_8440156_x10.....  | .aAauaggacaaggugcuuuA.....  | 1 |
| Gi2_10408392_x10..... | .GuaggacaaggugcuuuA.....    | 1 |
| Gi3_27199872_x10..... | .auauagCacaaggugcuu.....    | 1 |
| Gi4_520229_x10.....   | .auauaggacaaggugcCua.....   | 1 |
| Gi5_8442996_x10.....  | .auauaggacaaggugcuAua.....  | 1 |
| Gi2_10406372_x10..... | .auauaggUcaaggugcuuuA.....  | 1 |

|                  |                             |   |
|------------------|-----------------------------|---|
| Gi3_27235452_x10 | .....auauaggacaaggugcGu     | 1 |
| Gi5_8442056_x10  | .....Nuauaggacaaggugcuuu    | 1 |
| Gi3_27217862_x10 | .....uGuauaggacaaggugcuuu   | 1 |
| Gi1_3922174_x10  | .....auauaggacaagAugcuuu    | 1 |
| Gi1_3917154_x10  | .....Guauaggacaaggugcuu     | 1 |
| Gi3_27202522_x10 | .....Guauauaggacaaggugcuu   | 1 |
| Gi2_10415342_x10 | .....Guauauaggacaaggugcuu   | 1 |
| Gi4_519959_x10   | .....auauaggacaaggCgcuuu    | 1 |
| Gi3_27197412_x10 | .....auauagCacaaggugcuua    | 1 |
| Gi4_523737_x9    | .....auauaggacaaggugcuuC    | 1 |
| Gi3_27244729_x9  | .....auauaggaAaaggugcuu     | 1 |
| Gi5_8470911_x9   | .....auauaggacaaggugAuu     | 1 |
| Gi1a_5654227_x9  | .....auauaggGcaaggugcuuu    | 1 |
| Gi1_3941425_x9   | .....Cuauaggacaaggugcuuu    | 1 |
| Gi4_523512_x9    | .....auauaggacaGggugcuua    | 1 |
| Gi2_10433280_x9  | .....auauaggacUaggugcuu     | 1 |
| Gi2_10442262_x9  | .....auauaggacaaggAgcuu     | 1 |
| Gi5_8460849_x9   | .....auauaggacUaggugcuua    | 1 |
| Gi2_10439733_x9  | .....auauaggacaagguAuu      | 1 |
| Gi2_10445817_x9  | .....auauaggacaaggugcuuuC   | 1 |
| Gi5_8463756_x9   | .....auaggacaaggugcCuua     | 1 |
| Gi2_10435377_x9  | .....auauCggacaaggugcuu     | 1 |
| Gi4_521352_x9    | .....auUuaggacaaggugcuua    | 1 |
| Gi2_10446042_x9  | .....Cuauaggacaaggugcuua    | 1 |
| Gi2_10441155_x9  | .....auauaggacaaggugAuu     | 1 |
| Gi2_10452810_x9  | .....auauUggacaaggugcuua    | 1 |
| Gi3_27298342_x9  | .....auaggacaagguAcuua      | 1 |
| Gi4_522234_x9    | .....auGuaggacaaggugcuuu    | 1 |
| Gi4_521415_x9    | .....auauaggacaCggugcuuu    | 1 |
| Gi5_8453505_x9   | .....auauaggacaagAugcuua    | 1 |
| Gi3_27270046_x9  | .....Guaggacaaggugcuuuau    | 1 |
| Gi3_27275743_x9  | .....auauaggaNaaggugcuuuau  | 1 |
| Gi4_523755_x9    | .....auauaggacaaggugcCuu    | 1 |
| Gi5_8485785_x8   | .....auauaggacaagCugcuu     | 1 |
| Gi1a_5656545_x8  | .....auauaggacaCggugcuuu    | 1 |
| Gi1_3944245_x8   | .....auauCggacaaggugcuuu    | 1 |
| Gi2_10466242_x8  | .....auauaggUcaaggugcuu     | 1 |
| Gi3_27334225_x8  | .....auauaUgacaaggugcuua    | 1 |
| Gi3_27335177_x8  | .....Gcuauauaggacaaggugcuua | 1 |
| Gi3_27376969_x8  | .....auauaggacaagCugcuu     | 1 |
| Gi4_525856_x8    | .....auauaggacaaggugcCu     | 1 |
| Gi3_27324121_x8  | .....auauaggacaaggugcGuua   | 1 |
| Gi5_8489737_x8   | .....auauaggacaaggGgcuu     | 1 |
| Gi1_3946125_x8   | .....auauaggacaaggAgcuuu    | 1 |
| Gi1_3949061_x8   | .....aGauaggacaaggugcuu     | 1 |
| Gi2_10462154_x8  | .....auauaggaAaaggugcuuu    | 1 |
| Gi1a_5676273_x8  | .....aGauaggacaaggugcuu     | 1 |



|                      |                             |   |
|----------------------|-----------------------------|---|
| Gi2_10488090_x8..... | ..auauaAgacaaggugcuuuu..... | 1 |
| Gi2_10473930_x8..... | ..auaggacaNggugcuuuu.....   | 1 |
| Gi5_8478345_x8.....  | ..auauaggacUaggugcuu.....   | 1 |
| Gi2_10474714_x8..... | ..auauaggacaaggugcuA.....   | 1 |
| Gi3_27329001_x8..... | ..auauaggacaaggugcuGua..... | 1 |
| Gi3_27337281_x8..... | ..auagAacaaggugcuuuu.....   | 1 |
| Gi5_8478953_x8.....  | ..auNuaggacaaggugcuuu.....  | 1 |
| Gi2_10470098_x8..... | ..auauaggacaaggugcuuG.....  | 1 |
| Gi1_3949229_x8.....  | ..aAauaggacaaggugcuuu.....  | 1 |
| Gi1a_5676321_x8..... | ..aCauaggacaaggugcuuu.....  | 1 |
| Gi3_27340017_x8..... | ..Nuauaggacaaggugcuuuu..... | 1 |
| Gi5_8500913_x8.....  | ..auauaggacaaggugUuuuu..... | 1 |
| Gi1a_5655513_x8..... | ..auUuaggacaaggugcuuu.....  | 1 |
| Gi2_10491834_x8..... | ..auauaggacaUggugcuu.....   | 1 |
| Gi1_3942525_x8.....  | ..auauaggUcaaggugcuuu.....  | 1 |
| Gi2_10520775_x7..... | ..auauaggacaagAugcuuuu..... | 1 |
| Gi5_8526860_x7.....  | ..auauaggacaagguCcuuu.....  | 1 |
| Gi3_27445038_x7..... | ..auaggacUaggugcuuuu.....   | 1 |
| Gi4_527012_x7.....   | ..auauaggGcaaggugcuuu.....  | 1 |
| Gi5_8521960_x7.....  | ..auaNaggacaaggugcuu.....   | 1 |
| Gi2_10527180_x7..... | ..auauaggacaagAugcuu.....   | 1 |
| Gi5_8529170_x7.....  | ..auauagUacaaggugcuuu.....  | 1 |
| Gi5_8525642_x7.....  | ..auauUggacaaggugcuuuu..... | 1 |
| Gi1a_5693412_x7..... | ..aGauaggacaaggugcuuuu..... | 1 |
| Gi5_8516227_x7.....  | ..auagUacaaggugcuuuu.....   | 1 |
| Gi2_10501028_x7..... | ..auauagCacaaggugcuuu.....  | 1 |
| Gi1_3960328_x7.....  | ..auaggacaaggugcuuuu.....   | 0 |
| Gi3_27452388_x7..... | ..auauaggacaagguCcuuuu..... | 1 |
| Gi3_27441496_x7..... | ..auauaggacaagguUcuuuu..... | 1 |
| Gi3_27420314_x7..... | ..aGaggacaaggugcuuuu.....   | 1 |
| Gi4_526802_x7.....   | ..auauGggacaaggugcuuu.....  | 1 |
| Gi3_27394953_x7..... | ..auauGggacaaggugcuuuu..... | 1 |
| Gi1_3966138_x7.....  | ..auauaggacaagCugcuuu.....  | 1 |
| Gi2_10523673_x7..... | ..auaNaggacaaggugcuu.....   | 1 |
| Gi3_27384054_x7..... | ..auauaggacaaggugcuuGa..... | 1 |
| Gi2_10520355_x7..... | ..auauaggacaaCgugcuuu.....  | 1 |
| Gi5_8526748_x7.....  | ..auauaggacaaggugcuGu.....  | 1 |
| Gi2_10523834_x7..... | ..auauaUgacaaggugcuuu.....  | 1 |
| Gi1_3960244_x7.....  | ..auauagAacaaggugcuuu.....  | 1 |
| Gi3_27410367_x7..... | ..auNuaggacaaggugcuu.....   | 1 |
| Gi3_27442742_x7..... | ..auaggUcaaggugcuuuu.....   | 1 |
| Gi5_8507561_x7.....  | ..auGggacaaggugcuuuu.....   | 1 |
| Gi3_27423478_x7..... | ..aCauaggacaaggugcuuuu..... | 1 |
| Gi4_527670_x7.....   | ..auauaggGcaaggugcuuuu..... | 1 |
| Gi2_10508483_x7..... | ..Gauaggacaaggugcuuu.....   | 1 |
| Gi3_27451919_x7..... | ..Gauaggacaaggugcuuu.....   | 1 |
| Gi1_3961833_x7.....  | ..auauaggCcaaggugcuuu.....  | 1 |

|                 |                        |   |
|-----------------|------------------------|---|
| Gi3_27410864_x7 | .auauaggacaCggugcuuuau | 1 |
| Gi2_10509295_x7 | .Nuauaggacaaggugcuuu   | 1 |
| Gi3_27411781_x7 | .auaggacaNggugcuuuau   | 1 |
| Gi5_8542549_x6  | .auauaggacaaggugAuuuu  | 1 |
| Gi2_10553549_x6 | .auauaggacaaggGgcuuuu  | 1 |
| Gi4_532767_x6   | .auauaggNaaggugcuu     | 1 |
| Gi3_27471922_x6 | .auaggacaaAgugcuuuu    | 1 |
| Gi5_8538691_x6  | .auauaggNaaggugcuuuau  | 1 |
| Gi3_27458308_x6 | .cuauauaggGcaaggugcuuu | 1 |
| Gi3_27499030_x6 | .uGuaggacaaggugcuuu    | 1 |
| Gi1_3983443_x6  | .auauaggacaaAgugcuuu   | 1 |
| Gi2_10570385_x6 | .auauagUacaaggugcuuu   | 1 |
| Gi2_10577633_x6 | .auauagAacaaggugcuuuu  | 1 |
| Gi2_10548719_x6 | .auauaggacaaggugcuAua  | 1 |
| Gi1a_5729542_x6 | .auauaAgacaaggugcuuu   | 1 |
| Gi2_10589549_x6 | .auauaggacaUggugcuuuu  | 1 |
| Gi5_8550517_x6  | .aAaggacaaggugcuuuu    | 1 |
| Gi3_27500398_x6 | .auNuaggacaaggugcuuuu  | 1 |
| Gi2_10563629_x6 | .auauaggacaaggugcuGu   | 1 |
| Gi3_27538294_x6 | .auaGaggacaaggugcuuuu  | 1 |
| Gi5_8559307_x6  | .auauaggAaaggugcuu     | 1 |
| Gi3_27459334_x6 | .auauaggacaaggugcuG    | 1 |
| Gi1a_5730772_x6 | .auauaggacaagUugcuuu   | 1 |
| Gi5_8553703_x6  | .auauaUgacaaggugcuu    | 1 |
| Gi5_8562781_x6  | .auaggacaaggGgcuuuu    | 1 |
| Gi3_27546838_x6 | .auCuaggacaaggugcuu    | 1 |
| Gi1_3993367_x6  | .auauaggacCaggugcuuu   | 1 |
| Gi5_8537773_x6  | .aCaggacaaggugcuuuu    | 1 |
| Gi3_27462958_x6 | .auauaggacCaggugcuu    | 1 |
| Gi5_8536003_x6  | .auaggacaaggugcuAua    | 1 |
| Gi5_8546773_x6  | .auauaggacaagguUcuuu   | 1 |
| Gi3_27520330_x6 | .auauagUacaaggugcuuuu  | 1 |
| Gi5_8560669_x6  | .auauaggacaaggugcGuua  | 1 |
| Gi2_10588883_x6 | .auauaggacaagguAcuuu   | 1 |
| Gi5_8560201_x6  | .auauaggacaaggGgcuuuu  | 1 |
| Gi3_27516700_x6 | .auauaggacaaCgugcuuuu  | 1 |
| Gi5_8560429_x6  | .auauaCgacaaggugcuuu   | 1 |
| Gi3_27496198_x6 | .auaCgacaaggugcuuuu    | 1 |
| Gi5_8561665_x6  | .auaGaggacaaggugcuuu   | 1 |
| Gi4_531519_x6   | .auUuaggacaaggugcuu    | 1 |
| Gi5_8552971_x6  | .auauaggGcaaggugcuuuu  | 1 |
| Gi1a_5753972_x5 | .auauaggacaaggCgcuuu   | 1 |
| Gi3_27571462_x5 | .Gauauaggacaaggugcuuu  | 1 |
| Gi2_10609540_x5 | .Auauauaggacaaggugcuuu | 1 |
| Gi2_10625665_x5 | .auauaggGaaggugcuuu    | 1 |
| Gi3_27637677_x5 | .Cuaggacaaggugcuuuu    | 1 |
| Gi2_10646840_x5 | .auauaggacaagCugcuu    | 1 |

|                 |                              |   |
|-----------------|------------------------------|---|
| Gi2_10632795_x5 | .....auaggacaaggugcCuua      | 1 |
| Gi2_10650105_x5 | .....auauaggacaaAgugcuua     | 1 |
| Gi1_4009880_x5  | .....uaCaggacaaggugcuuu      | 1 |
| Gi4_538178_x5   | .....auauaggacGaggugcuu      | 1 |
| Gi4_534708_x5   | .....aCauaggacaaggugcuua     | 1 |
| Gi5_8571497_x5  | .....auauaggacaagCugcuua     | 1 |
| Gi4_534653_x5   | .....aCauaggacaaggugcuuu     | 1 |
| Gi5_8570602_x5  | .....Uuaggacaaggugcuua       | 1 |
| Gi2_10621770_x5 | .....Ucuucugucacgcacuauauagg | 1 |
| Gi3_27591487_x5 | .....auauaggGcaaggugcuua     | 1 |
| Gi1_4015450_x5  | .....uauaggacaaggCgcuuu      | 1 |
| Gi4_538158_x5   | .....Uuauaggacaaggugcuuu     | 1 |
| Gi2_10640905_x5 | .....auNuaggacaaggugcuuu     | 1 |
| Gi3_27589122_x5 | .....auagUacaaggugcuua       | 1 |
| Gi1a_5739662_x5 | .....auauaggacGaggugcuuu     | 1 |
| Gi4_536348_x5   | .....aAauaggacaaggugcuua     | 1 |
| Gi5_8568157_x5  | .....auauaUgacaaggugcuuu     | 1 |
| Gi3_27551697_x5 | .....auauaggacaagguUcuu      | 1 |
| Gi5_8597522_x5  | .....auauCggacaaggugcuua     | 1 |
| Gi4_534158_x5   | .....auauaggacaaggugcuuA     | 1 |
| Gi2_10643430_x5 | .....auauaggacaagCugcuua     | 1 |
| Gi3_27563772_x5 | .....uauaggacaaggugcCuu      | 1 |
| Gi2_10610370_x5 | .....auauaggacaaggAgcuua     | 1 |
| Gi1_4009255_x5  | .....auauaggauaaggugcuuu     | 1 |
| Gi5_8591582_x5  | .....auauaggUcaaggugcuua     | 1 |
| Gi1_3997195_x5  | .....auauaggacaaggugcuAu     | 1 |
| Gi2_10595400_x5 | .....auCuaggacaaggugcuu      | 1 |
| Gi3_27588442_x5 | .....Uuauauaggacaaggugcuuu   | 1 |
| Gi5_8587887_x5  | .....auauaggacaaggugcuuuC    | 1 |
| Gi3_27656562_x5 | .....aggacaagNugcuuaucu      | 1 |
| Gi2_10596375_x5 | .....auaggacaGggugcuua       | 1 |
| Gi3_27615717_x5 | .....auauaCgacaaggugcuu      | 1 |
| Gi5_8573482_x5  | .....auauaggacaaUgugcuu      | 1 |
| Gi3_27554032_x5 | .....cGauauaggacaaggugcuuu   | 1 |
| Gi2_10627710_x5 | .....auauCggacaaggugcuua     | 1 |
| Gi2_10624120_x5 | .....auauaCgacaaggugcuuu     | 1 |
| Gi1_4001190_x5  | .....uGuaggacaaggugcuuu      | 1 |
| Gi4_533828_x5   | .....auauaggacGaggugcuuu     | 1 |
| Gi5_8574837_x5  | .....auauaggacaaCgugcuuu     | 1 |
| Gi3_27762501_x4 | .....auauaggacaagguCcuu      | 1 |
| Gi3_27722341_x4 | .....auauaggacaaggCgcuuuau   | 1 |
| Gi1_4040828_x4  | .....Nuauaggacaaggugcuuu     | 1 |
| Gi3_27737421_x4 | .....Gggacaaggugcuuaucu      | 1 |
| Gi1_4029444_x4  | .....Auauauaggacaaggugcuu    | 1 |
| Gi1_4044384_x4  | .....auauaUgacaaggugcuuu     | 1 |
| Gi2_10704487_x4 | .....auauaggacaaggugcuuAa    | 1 |
| Gi2_10656467_x4 | .....auauaggacaaggugGuuu     | 1 |

|                 |                            |       |   |
|-----------------|----------------------------|-------|---|
| Gi1a_5772454_x4 | ..... auauaggacaGggugcuu   | ..... | 1 |
| Gi1_4035176_x4  | ..... auauaggacaaggugcGuu  | ..... | 1 |
| Gi5_8625975_x4  | ..... auaAaggacaaggugcuuuu | ..... | 1 |
| Gi5_8614727_x4  | ..... auauaggacaagguUcuu   | ..... | 1 |
| Gi3_27674741_x4 | ..... auauaggacaaggugUuuuu | ..... | 1 |
| Gi1_4043932_x4  | ..... uauGggacaaggugcuuu   | ..... | 1 |
| Gi1_4039540_x4  | ..... auauagCacaaggugcuuu  | ..... | 1 |
| Gi2_10691143_x4 | ..... auauaggacaaggugcAuuu | ..... | 1 |
| Gi5_8616451_x4  | ..... auaNaggacaaggugcuuuu | ..... | 1 |
| Gi5_8630907_x4  | ..... auaggacGaggugcuuuu   | ..... | 1 |
| Gi3_27779369_x4 | ..... auauagUacaaggugcuu   | ..... | 1 |
| Gi3_27776341_x4 | ..... auauaUgacaaggugcuu   | ..... | 1 |
| Gi1_4032516_x4  | ..... auUuaggacaaggugcuu   | ..... | 1 |
| Gi5_8633587_x4  | ..... auaggacaaggugUuuuu   | ..... | 1 |
| Gi2_10700003_x4 | ..... auauaggacaagguCuuu   | ..... | 1 |
| Gi5_8638859_x4  | ..... auaggacaCggugcuuuu   | ..... | 1 |
| Gi3_27687757_x4 | ..... auaggacaaggAgcuuuu   | ..... | 1 |
| Gi2_10705583_x4 | ..... auauaggacaaggugcAu   | ..... | 1 |
| Gi3_27766205_x4 | ..... auaNgacaaggugcuuuu   | ..... | 1 |
| Gi3_27703477_x4 | ..... aNauaggacaaggugcuuu  | ..... | 1 |
| Gi5_8649979_x4  | ..... Uuauaggacaaggugcuuuu | ..... | 1 |
| Gi3_27785689_x4 | ..... auauagAacaaggugcuuuu | ..... | 1 |
| Gi2_10686935_x4 | ..... auauagUacaaggugcuu   | ..... | 1 |
| Gi1_4028560_x4  | ..... auauaggacaagguCuuu   | ..... | 1 |
| Gi1a_5778906_x4 | ..... auauGggacaaggugcuuu  | ..... | 1 |
| Gi1a_5795626_x4 | ..... Guauaggacaaggugcuu   | ..... | 1 |
| Gi5_8617543_x4  | ..... auauaggacaaggugcAuuu | ..... | 1 |
| Gi4_541558_x4   | ..... Uuauaggacaaggugcuuuu | ..... | 1 |
| Gi5_8631127_x4  | ..... auauaggacCaggugcuu   | ..... | 1 |
| Gi3_27694133_x4 | ..... auaggacaaggugcuuuC   | ..... | 1 |
| Gi1a_5773758_x4 | ..... auauaggacaaggugcCu   | ..... | 1 |
| Gi3_27735965_x4 | ..... auaggacaUggugcuuuu   | ..... | 1 |
| Gi3_27788653_x4 | ..... uauaUgacaaggugcuuu   | ..... | 1 |
| Gi5_8614407_x4  | ..... uauauaggNcaaggugcuuu | ..... | 1 |
| Gi3_27726673_x4 | ..... auauaggacaaggugGuu   | ..... | 1 |
| Gi5_8637955_x4  | ..... auCuaggacaaggugcuuu  | ..... | 1 |
| Gi2_10703471_x4 | ..... auauaggacaaggugcGuu  | ..... | 1 |
| Gi3_27725769_x4 | ..... uaGaggacaaggugcuuuu  | ..... | 1 |
| Gi3_27713521_x4 | ..... auaggacaaggugUuuu    | ..... | 1 |
| Gi5_8630895_x4  | ..... auauaggacaaggugcuG   | ..... | 1 |
| Gi5_8615383_x4  | ..... auauaggacaaUgugcuuu  | ..... | 1 |
| Gi1_4023736_x4  | ..... auaggacaaggugcuuuu   | ..... | 0 |
| Gi5_8602247_x4  | ..... Gggacaaggugcuuuucucg | ..... | 1 |
| Gi1_4027460_x4  | ..... uauaggacNaggugcuuu   | ..... | 1 |
| Gi3_27673305_x4 | ..... Gauaggacaaggugcuuuu  | ..... | 1 |
| Gi3_27782097_x4 | ..... uauauaggNcaaggugcuuu | ..... | 1 |
| Gi3_27755149_x4 | ..... uaCaggacaaggugcuuu   | ..... | 1 |

|                 |                                |   |
|-----------------|--------------------------------|---|
| Gi1_4024104_x4  | ..... auaggacaaggugcuuuG       | 1 |
| Gi5_8607991_x4  | ..... auauaggacaaggugGuuu      | 1 |
| Gi3_27854768_x3 | ..... auuaggacaaggugcuu        | 1 |
| Gi3_27956645_x3 | ..... auauaggacaaggugcuu       | 1 |
| Gi2_10770106_x3 | ..... auauagCacaaggugcuu       | 1 |
| Gi3_27879341_x3 | ..... auauaggacaUgugcuu        | 1 |
| Gi5_8678891_x3  | ..... auaggacaaggugcuuCa       | 1 |
| Gi2_10785295_x3 | ..... auUggacaaggugcuuuu       | 1 |
| Gi5_8685623_x3  | ..... auauaggacaaggugcuuuu     | 1 |
| Gi1_4065726_x3  | ..... auauaggacaaggugcCu       | 1 |
| G1a_5850475_x3  | ..... auauaggacaaggugcuuuu     | 1 |
| Gi2_10815913_x3 | ..... auuaggacaaggugcuuu       | 1 |
| Gi3_27926561_x3 | ..... auagCacaaggugcuuuu       | 1 |
| Gi5_8717585_x3  | ..... auuaggacaaggugcuuuu      | 1 |
| Gi4_548418_x3   | ..... auauaggacaCggugcuuuu     | 1 |
| Gi5_8673887_x3  | ..... auauaggacaaggugcuuu      | 1 |
| Gi5_8695115_x3  | ..... aUgggguguguggggggcccguu  | 1 |
| Gi5_8695016_x3  | ..... auauaggacaaggugcuuGa     | 1 |
| G1a_5857519_x3  | ..... auauaggacaaggugcuu       | 1 |
| Gi2_10818013_x3 | ..... auauaggacaaggugGuu       | 1 |
| Gi3_27800216_x3 | ..... Uggacaaggugcuuuau        | 1 |
| Gi2_10828015_x3 | ..... auauaggacaaggucuu        | 1 |
| Gi5_8716568_x3  | ..... Nuauaggacaaggugcuuuu     | 1 |
| Gi5_8715206_x3  | ..... aAauaggacaaggugcuuuu     | 1 |
| Gi5_8653904_x3  | ..... auaggacaaggugAuuuu       | 1 |
| Gi2_10782976_x3 | ..... uauaggacNaggugcuu        | 1 |
| Gi3_27957938_x3 | ..... Uuauauaggacaaggugcuu     | 1 |
| Gi5_8699786_x3  | ..... auUuaggacaaggugcuuuu     | 1 |
| Gi1_4051710_x3  | ..... auauaggacaCggugcuu       | 1 |
| Gi4_544728_x3   | ..... auauaggacaagguAcuuu      | 1 |
| G1a_5855854_x3  | ..... auauaggacaagAugcuu       | 1 |
| Gi5_8651150_x3  | ..... auauagCacaaggugcuuuu     | 1 |
| Gi4_550440_x3   | ..... Cuauaggacaaggugcuuu      | 1 |
| Gi2_10800703_x3 | ..... auauaggacaaggugcuu       | 1 |
| Gi3_27817679_x3 | ..... auaggacaaggugAuuuu       | 1 |
| Gi5_8686853_x3  | ..... auauaggacaaggugcuuuu     | 1 |
| Gi1_4069050_x3  | ..... auauagUacaaggugcuu       | 1 |
| Gi4_545316_x3   | ..... auauaggacaUggugcuuuu     | 1 |
| Gi2_10750558_x3 | ..... auauaggacaaggugcuuuu     | 0 |
| Gi1_4074066_x3  | ..... auNuaggacaaggugcuuu      | 1 |
| Gi5_8656601_x3  | ..... auauaggacaaggugcCuauucug | 1 |
| Gi1_4068876_x3  | ..... auauaggacaaggugGuuu      | 1 |
| G1a_5817025_x3  | ..... auauaggacGaggugcuu       | 1 |
| Gi4_547569_x3   | ..... auuaggacaaggugcuuu       | 1 |
| Gi2_10807009_x3 | ..... auauaggacaaggugcuuuU     | 1 |
| Gi3_27852437_x3 | ..... auaggacGaggugcuuuu       | 1 |
| Gi3_27905816_x3 | ..... Guaggacaaggugcuuuuucuc   | 1 |

|                 |                            |   |
|-----------------|----------------------------|---|
| Gi1_4080192_x3  | .....auaNaggacaaggugcuuu   | 1 |
| Gi5_8703188_x3  | .....aNauaggacaaggugcuuu   | 1 |
| Gi5_8651600_x3  | .....auauaggacCaggugcuuu   | 1 |
| Gi2_10728637_x3 | .....auauaggacaaggugcuG    | 1 |
| Gi3_27811679_x3 | .....uauaggacaaggCgcuuu    | 1 |
| Gi4_545163_x3   | .....auaCaggacaaggugcuuu   | 1 |
| Gi3_27967988_x3 | .....cuauauaggacaaggugcuuC | 1 |
| Gi5_8716277_x3  | .....aUgacaaggugcuuuauucug | 1 |
| Gi1a_5816212_x3 | .....auauaggGcaaggugcuu    | 1 |
| Gi5_8687171_x3  | .....auauaggacaaggugcuuAa  | 1 |
| Gi5_8717270_x3  | .....auauaggacaaggugcuGua  | 1 |
| Gi3_27969848_x3 | .....auaggacaaggugcuuuuC   | 1 |
| Gi3_27951386_x3 | .....auaggacaaggugcuAua    | 1 |
| Gi3_27975635_x3 | .....cCauauaggacaaggugcuuu | 1 |
| Gi1_4086387_x3  | .....auauaggNaaggugcuu     | 1 |
| Gi3_27846962_x3 | .....aGaggacaaggugcuuuauuc | 1 |
| Gi3_27963380_x3 | .....Cauauaggacaaggugcuuu  | 1 |
| Gi5_8695538_x3  | .....uauauGggacaaggugcuuu  | 1 |
| Gi1a_5856559_x3 | .....auauaggacaaggugcuuC   | 1 |
| Gi3_27893156_x3 | .....auaggacaaggugcCuuu    | 1 |
| Gi3_27901637_x3 | .....auauaggUaaggugcuuuau  | 1 |
| Gi5_8661098_x3  | .....auauaggacaaggugcuuG   | 1 |
| Gi3_27943568_x3 | .....uauaggacGaggugcuuu    | 1 |
| Gi2_10790086_x3 | .....auauaggacaaggugAuuu   | 1 |
| Gi1_4060014_x3  | .....aGauaggacaaggugcuuuau | 1 |
| Gi2_10785403_x3 | .....auaggCcaaggugcuuu     | 1 |
| Gi2_10782067_x3 | .....aNauaggacaaggugcuuu   | 1 |
| Gi1a_5867074_x3 | .....auauaggUaaggugcuuu    | 1 |
| Gi1_4086819_x3  | .....auauaggAaaggugcuuu    | 1 |
| Gi1a_5833150_x3 | .....auauaggacaaggugUuuu   | 1 |
| Gi3_27942026_x3 | .....auaggCcaaggugcuuu     | 1 |
| Gi4_550353_x3   | .....auauaggacaaggCgcuu    | 1 |
| Gi3_27893783_x3 | .....uauaggGcaaggugcuuu    | 1 |
| Gi3_27939251_x3 | .....auaggacaaggugcAuu     | 1 |
| Gi4_551301_x3   | .....auauaggacaaggAgcuuu   | 1 |
| Gi1_4079391_x3  | .....Guauaggacaaggugcuuu   | 1 |
| Gi3_27842192_x3 | .....uUuaggacaaggugcuuu    | 1 |
| Gi2_10726852_x3 | .....auagUacaaggugcuuu     | 1 |
| Gi5_8698337_x3  | .....uauauaggacaaggugcCuu  | 1 |
| Gi3_27804086_x3 | .....aggacaaggugcCuuauc    | 1 |
| Gi2_10811617_x3 | .....auaggacaaggCgcuuu     | 1 |
| Gi5_8703191_x3  | .....auaggacaaggAgcuuu     | 1 |
| Gi1a_5861533_x3 | .....auGuaggacaaggugcuuu   | 1 |
| Gi2_10746997_x3 | .....auaggacaaggugcuuCa    | 1 |
| Gi2_10827697_x3 | .....auauaggacCaggugcuuu   | 1 |
| Gi5_8691914_x3  | .....Cuauaggacaaggugcuuu   | 1 |
| Gi1a_5943228_x2 | .....auauagAacaaggugcuuu   | 1 |

|                 |                             |   |
|-----------------|-----------------------------|---|
| Gi4_560182_x2   | .....auauaggacaaggAgcuu     | 1 |
| Gi1_4107237_x2  | .....auauaggacaUggugcuuu    | 1 |
| Gi2_10967921_x2 | .....uaCaggacaaggugcuuu     | 1 |
| G1a_5946356_x2  | .....aAauaggacaaggugcuuu    | 1 |
| Gi5_8751473_x2  | .....auaggacaagAugcuua      | 1 |
| Gi5_8773029_x2  | .....Gcuauauaggacaaggugcuua | 1 |
| Gi1_4113265_x2  | .....auauaggacaaggugcuGu    | 1 |
| Gi5_8730989_x2  | .....aggacaagNugcuuuauucug  | 1 |
| Gi5_8742761_x2  | .....auaggacaUggugcuua      | 1 |
| G1a_5961158_x2  | .....auauUggacaaggugcuuu    | 1 |
| Gi3_28060862_x2 | .....uauauaggacaaggugcuu    | 0 |
| Gi3_28196802_x2 | .....auauaggacaaggugcuua    | 1 |
| Gi3_28182974_x2 | .....aggaGaaggugcuuuau      | 1 |
| Gi4_554638_x2   | .....auauaggacaaggugcuua    | 1 |
| Gi5_8786241_x2  | .....auauaCgacaaggugcuu     | 1 |
| Gi4_561672_x2   | .....auauGggacaaggugcuu     | 1 |
| Gi4_561876_x2   | .....Uuauaggacaaggugcuu     | 1 |
| Gi4_566386_x2   | .....auauaggacGaggugcuua    | 1 |
| Gi5_8720863_x2  | .....auaggCcaaggugcuua      | 1 |
| Gi3_28218828_x2 | .....uauauaggGcaaggugcuuu   | 1 |
| Gi5_8747521_x2  | .....aNauaggacaaggugcuua    | 1 |
| Gi2_10831015_x2 | .....uauaggacaaggCgcuuu     | 1 |
| G1a_5936982_x2  | .....auUuaggacaaggugcuua    | 1 |
| Gi1_4136839_x2  | .....uauaggacGaggugcuuu     | 1 |
| Gi4_565322_x2   | .....auauaUgacaaggugcuu     | 1 |
| Gi1_4138459_x2  | .....uauaggacaaggugcCuu     | 1 |
| Gi2_10963561_x2 | .....auaAgacaaggugcuua      | 1 |
| Gi3_28062816_x2 | .....Uuauaggacaaggugcuuuau  | 1 |
| Gi2_10949303_x2 | .....uaGaggacaaggugcuuu     | 1 |
| Gi3_28232288_x2 | .....uauGggacaaggugcuua     | 1 |
| Gi1_4120455_x2  | .....auauaCgacaaggugcuuu    | 1 |
| Gi4_554936_x2   | .....auauaggacaaggugcuCua   | 1 |
| Gi3_28184634_x2 | .....cuGuauaggacaaggugcuuu  | 1 |
| Gi3_28211328_x2 | .....auaggacaaggCgcuuuau    | 1 |
| G1a_5962400_x2  | .....auauaCgacaaggugcuuu    | 1 |
| Gi5_8762547_x2  | .....auaGaggacaaggugcuu     | 1 |
| Gi5_8825813_x2  | .....acCauauaggacaaggugcuua | 1 |
| Gi5_8750137_x2  | .....acGauauaggacaaggugcuuu | 1 |
| Gi3_28160038_x2 | .....Nuauaggacaaggugcuu     | 1 |
| Gi5_8768281_x2  | .....auGuaggacaaggugcuuuau  | 1 |
| Gi5_8748203_x2  | .....auaggaUaaggugcuua      | 1 |
| G1a_5939948_x2  | .....auauaggacaaggugcGuu    | 1 |
| Gi4_564888_x2   | .....auauaggacaaggCgcuua    | 1 |
| Gi1_4145291_x2  | .....auauaggacaaggCgcuua    | 1 |
| G1a_5954358_x2  | .....aAauaggacaaggugcuu     | 1 |
| Gi1_4124009_x2  | .....auauaggacaaggugcuuG    | 1 |
| Gi2_10846743_x2 | .....uauaUgacaaggugcuuu     | 1 |

|                 |                                  |   |
|-----------------|----------------------------------|---|
| Gi3_28032124_x2 | .....uauGggacaaggugcuuu          | 1 |
| Gi4_554478_x2   | .....aAauaggacaaggugcuuu         | 1 |
| Gi2_10931911_x2 | .....auGggacaaggugcuuu           | 1 |
| Gi1_4120391_x2  | .....auauaggaNaaggugcuuuauucucgc | 1 |
| Gi2_10948585_x2 | .....auaggacaaggugcuAua          | 1 |
| Gi4_564218_x2   | .....auauaggUcaaggugcuuu         | 1 |
| Gi1a_5905548_x2 | .....auauaggacaaggugAuuu         | 1 |
| Gi4_562646_x2   | .....auauUggacaaggugcuu          | 1 |
| Gi5_8772525_x2  | .....uauauaggacaGggugcuuu        | 1 |
| Gi5_8732081_x2  | .....auauagCacaaggugcuu          | 1 |
| Gi3_28254316_x2 | .....auauaggacaagUugcuuuau       | 1 |
| Gi1a_5929434_x2 | .....aCauaggacaaggugcuu          | 1 |
| Gi3_28247660_x2 | .....auauaggacaaggugcCuuau       | 1 |
| Gi5_8822993_x2  | .....auauaggacaaggugcuu          | 1 |
| Gi1_4139887_x2  | .....aCauaggacaaggugcuuuauucucgc | 1 |
| Gi3_28199688_x2 | .....aggacaaggugcuuuuAuccu       | 1 |
| Gi4_555190_x2   | .....auauaggacaagguAuuuu         | 1 |
| Gi4_554788_x2   | .....auauaAgacaaggugcuuu         | 1 |
| Gi5_8789765_x2  | .....auaggacaagguAuuuu           | 1 |
| Gi4_553878_x2   | .....auauaAgacaaggugcuuu         | 1 |
| Gi4_556312_x2   | .....auaAaggacaaggugcuuu         | 1 |
| Gi5_8809325_x2  | .....Guauaggacaaggugcuuuauucucgc | 1 |
| Gi3_28197774_x2 | .....auauaggacaaggugGuuuu        | 1 |
| Gi2_10881175_x2 | .....uauaggacaaggugcuu           | 1 |
| Gi3_28035912_x2 | .....auaggacaaggugcuuuGu         | 1 |
| Gi5_8805857_x2  | .....auaAgacaaggugcuuu           | 1 |
| Gi5_8814101_x2  | .....uGuauaggacaaggugcuuu        | 1 |
| Gi2_10968943_x2 | .....uauUggacaaggugcuuu          | 1 |
| Gi5_8822871_x2  | .....auauaggacGaggugcuuuau       | 1 |
| Gi5_8747717_x2  | .....auaggAaaggugcuuu            | 1 |
| Gi3_28217276_x2 | .....Cauaggacaaggugcuuu          | 1 |
| Gi4_555174_x2   | .....auaCaggacaaggugcuuu         | 1 |
| Gi1_4107283_x2  | .....auauCggacaaggugcuuuauucucgc | 1 |
| Gi5_8810341_x2  | .....uauaggacaaggugcuuu          | 0 |
| Gi1_4119623_x2  | .....Uuuaggacaaggugcuu           | 1 |
| Gi3_28145984_x2 | .....auaggacaaggugcuCuaucuc      | 1 |
| Gi1a_5934618_x2 | .....Gauauaggacaaggugcuuu        | 1 |
| Gi1a_5972352_x2 | .....auauGggacaaggugcuu          | 1 |
| Gi2_10861945_x2 | .....auaggacaagguAuuuu           | 1 |
| Gi1a_5883444_x2 | .....aCauaggacaaggugcuuu         | 1 |
| Gi2_10904297_x2 | .....auaggacaaggugcuuuau         | 0 |
| Gi3_28234090_x2 | .....uauUuaggacaaggugcuuu        | 1 |
| Gi5_8788895_x2  | .....auauaggacaaggugcCuuau       | 1 |
| Gi3_28097070_x2 | .....uaAaggacaaggugcuuu          | 1 |
| Gi2_10938251_x2 | .....auauaUgacaaggugcuuu         | 1 |
| Gi2_10889641_x2 | .....auauaggacUaggugcuuu         | 1 |
| Gi5_8791325_x2  | .....Gggggugugugggggcgccuu       | 1 |



|                      |                               |   |
|----------------------|-------------------------------|---|
| Gi2_10935473_x2..... | .aAaggacaaggugcuuuu.....      | 1 |
| G1a_5933332_x2.....  | .auauaggacaagguAcuuu.....     | 1 |
| Gi5_8741431_x2.....  | .acuaAauaggacaaggugcuuu.....  | 1 |
| Gi3_28043808_x2..... | .auaAaggacaaggugcuuuau.....   | 1 |
| Gi1_4093355_x2.....  | .uUuaggacaaggugcuuu.....      | 1 |
| Gi2_10858967_x2..... | .aCaggacaaggugcuuuu.....      | 1 |
| Gi3_28212496_x2..... | .acuauauaggacaGggugcuuuu..... | 1 |
| Gi5_8790831_x2.....  | .auauaggacaGggugcuuuau.....   | 1 |
| Gi1_4125097_x2.....  | .auauaggacaaggugcAuu.....     | 1 |
| Gi5_8737543_x2.....  | .auauaggacaaggugGuu.....      | 1 |
| Gi5_8819211_x2.....  | .uuauaggacaaggCgcuuu.....     | 1 |
| Gi3_28067222_x2..... | .Guauauaggacaaggugcuuuu.....  | 1 |
| Gi2_10960229_x2..... | .auauaggAaaggugcuu.....       | 1 |
| Gi5_8771487_x2.....  | .auaggacaaAgugcuuuu.....      | 1 |
| G1a_5973868_x2.....  | .Guaggacaaggugcuuuau.....     | 1 |
| Gi1_4148807_x2.....  | .auCuaggacaaggugcuuu.....     | 1 |
| Gi3_28197318_x2..... | .Uuaggacaaggugcuuuauuc.....   | 1 |
| Gi4_553472_x2.....   | .auauaggCcaaggugcuuu.....     | 1 |
| Gi3_28103422_x2..... | .cuauGuaggacaaggugcuuu.....   | 1 |
| Gi5_8786263_x2.....  | .aCauaggacaaggugcuuuu.....    | 1 |
| Gi3_27999602_x2..... | .auauaggacaGggugcuuuu.....    | 1 |
| Gi5_8761479_x2.....  | .auauGggacaaggugcuuuucg.....  | 1 |
| Gi1_4100433_x2.....  | .auaGaggacaaggugcuuu.....     | 1 |
| Gi3_28187014_x2..... | .auUggacaaggugcuuuauuc.....   | 1 |
| Gi3_28073592_x2..... | .auauaggacaaCgugcuu.....      | 1 |
| Gi3_28216614_x2..... | .aCgacaaggugcuuuauuc.....     | 1 |
| G1a_5908556_x2.....  | .auauaggacaaggugcCuua.....    | 1 |
| G1a_5939304_x2.....  | .auaCaggacaaggugcuuu.....     | 1 |
| Gi2_10914581_x2..... | .auNuaggacaaggugcuuuu.....    | 1 |
| Gi3_27988602_x2..... | .uuauauaggacaaggugcuuC.....   | 1 |
| Gi1_4104821_x2.....  | .auauGggacaaggugcuuuu.....    | 1 |
| G1a_5945888_x2.....  | .Uuauaggacaaggugcuuu.....     | 1 |
| Gi3_28248358_x2..... | .auauaggacaaggugcuuCau.....   | 1 |
| Gi3_28091156_x2..... | .auGuaggacaaggugcuuuu.....    | 1 |
| Gi3_28040398_x2..... | .uaAauaggacaaggugcuuu.....    | 1 |
| Gi3_28080642_x2..... | .Aauaggacaaggugcuuu.....      | 1 |
| Gi1_4101633_x2.....  | .Guauauaggacaaggugcuuu.....   | 1 |
| Gi3_28218154_x2..... | .uuauaggacNaggugcuuuu.....    | 1 |
| Gi2_10965881_x2..... | .auaGaggacaaggugcuu.....      | 1 |
| Gi5_8790079_x2.....  | .uaCauaggacaaggugcuuu.....    | 1 |
| Gi5_8820365_x2.....  | .auauaggacaaggugcGu.....      | 1 |
| Gi5_8753335_x2.....  | .auaGaggacaaggugcuuuu.....    | 1 |
| Gi2_10887881_x2..... | .uuauaggacaaggugcuuuu.....    | 0 |
| Gi3_28167942_x2..... | .uaGauaggacaaggugcuuu.....    | 1 |
| Gi5_8791507_x2.....  | .auauaggacaaCgugcuu.....      | 1 |
| Gi4_555150_x2.....   | .auauaggacaaAgugcuuuu.....    | 1 |
| Gi3_28054014_x2..... | .acuauauaggacaaggugcuu.....   | 0 |

|                      |                                     |   |
|----------------------|-------------------------------------|---|
| Gi3_28197388_x2..... | uUuuaggacaaggugcuuu.....            | 1 |
| G1a_5899252_x2.....  | auaNaggacaaggugcuuu.....            | 1 |
| Gi2_10979577_x2..... | auauaggaAaaggugcuuu.....            | 1 |
| Gi3_27991156_x2..... | auagUacaaggugcuuuauauc.....         | 1 |
| Gi3_28924329_x1..... | Uuuuuaggacaaggugcuuu.....           | 1 |
| Gi3_28351673_x1..... | Nuaggacaaggugcuuu.....              | 1 |
| Gi2_11261739_x1..... | aNauaggacaaggugcuu.....             | 1 |
| G1a_6033554_x1.....  | auaggacaaggCgcuuuau.....            | 1 |
| G1a_6301063_x1.....  | auCuaggacaaggugcuuu.....            | 1 |
| Gi5_8887887_x1.....  | acAuuuuaggacaaggugcuuu.....         | 1 |
| Gi3_28271265_x1..... | uuaggacaagguAcuuu.....              | 1 |
| Gi2_11111711_x1..... | auaggacaaggugUuuu.....              | 1 |
| Gi2_11230754_x1..... | uGuaggacaaggugcuuu.....             | 1 |
| Gi3_28404139_x1..... | auagCacaaggugcuuuauauc.....         | 1 |
| Gi4_602952_x1.....   | auauaggacUaggugcuuu.....            | 1 |
| Gi2_11267806_x1..... | uuuuaggacaaggugcuuu.....            | 0 |
| Gi2_11098825_x1..... | auaggaAaaggugcuuu.....              | 1 |
| Gi5_9032313_x1.....  | aGauaggacaaggugcuuuauaucg.....      | 1 |
| Gi3_28462308_x1..... | aggacaagguAcuuuauauc.....           | 1 |
| Gi4_575656_x1.....   | auauaggacaaggugUuuu.....            | 1 |
| Gi1_4227149_x1.....  | auaggacaaggugcuuuauU.....           | 1 |
| Gi3_28785751_x1..... | acuuuuaggacGaggugcuuu.....          | 1 |
| Gi5_8941011_x1.....  | auaggacaaggugcuuuC.....             | 1 |
| Gi2_11158704_x1..... | auaggGcaaggugcuuu.....              | 1 |
| G1a_6171423_x1.....  | auaggacaagCugcuuuau.....            | 1 |
| Gi3_28721022_x1..... | aNauaggacaaggugcuu.....             | 1 |
| Gi5_8916561_x1.....  | uuuuaggacCaggugcuuu.....            | 1 |
| Gi4_569997_x1.....   | uuuuUgacaaggugcuuu.....             | 1 |
| Gi4_591650_x1.....   | uuuuaggacaCggugcuu.....             | 1 |
| G1a_6040055_x1.....  | uuuuaggacaaggugcuAua.....           | 1 |
| Gi1_4177641_x1.....  | uuuuaggacaaAgugcuuuau.....          | 1 |
| Gi2_11169976_x1..... | auNuaggacaaggugcuu.....             | 1 |
| Gi1_4367584_x1.....  | uuuuaggacaCggugcuuuauaucg.....      | 1 |
| G1a_6343286_x1.....  | cagggggacuccaggggguguggggggccc..... | 0 |
| Gi1_4222625_x1.....  | uuuuaggaNaaggugcuuuau.....          | 1 |
| Gi3_28754253_x1..... | uuuuaggacaaggugAuuu.....            | 1 |
| Gi1_4288686_x1.....  | uuuaggGcaaggugcuuu.....             | 1 |
| Gi5_8997365_x1.....  | aUuuuuaggacaaggugcuuu.....          | 1 |
| Gi3_28962776_x1..... | uuuaggacaaggugUuuu.....             | 1 |
| Gi2_11244461_x1..... | uuuuaggacaaUgugcuuu.....            | 1 |
| Gi4_596404_x1.....   | uuuuaggacaaAgugcuuu.....            | 1 |
| Gi3_28557752_x1..... | acuuuuaggacaCggugcuuu.....          | 1 |
| Gi3_28726756_x1..... | uuuuaggaAaaggugcuuu.....            | 1 |
| Gi4_567845_x1.....   | uuuuaggacaagAugcuu.....             | 1 |
| Gi4_576446_x1.....   | uuuuagUacaaggugcuu.....             | 1 |
| Gi3_28537600_x1..... | uuuuaggacaaggugcuuuauaucU.....      | 1 |
| Gi3_28693675_x1..... | uuuuaggaGaaggugcuuu.....            | 1 |

|                 |                                 |   |
|-----------------|---------------------------------|---|
| Gi3_28417831_x1 | .....acuaGauaggacaaggugcuuuu    | 1 |
| Gi5_9072162_x1  | .....acuaauuaNgacaaggugcuuu     | 1 |
| Gi1_4204455_x1  | .....auauaggGcaaggugcuuuu       | 1 |
| Gl1a_6074654_x1 | .....auGuaggacaaggugcuu         | 1 |
| Gi2_11190328_x1 | .....auaggacCaggugcuuuu         | 1 |
| Gl1a_6086124_x1 | .....Auuauaggacaaggugcuuu       | 1 |
| Gi1_4207733_x1  | .....auauaggGcaaggugcuuuuucucgc | 1 |
| Gi3_28490604_x1 | .....uauauaggacaaggugcCuu       | 1 |
| Gl1a_6161620_x1 | .....auUuaggacaaggugcuu         | 1 |
| Gi1_4266038_x1  | .....uaAaggacaaggugcuuu         | 1 |
| Gl1a_6293169_x1 | .....auaggacaNggugcuuuau        | 1 |
| Gi4_568702_x1   | .....Auuauaggacaaggugcuuu       | 1 |
| Gi1_4341317_x1  | .....auauaggaUaaggugcuu         | 1 |
| Gi5_8998987_x1  | .....auauaggaGaaggugcuu         | 1 |
| Gi3_28740498_x1 | .....aggacaaggugcuAuuau         | 1 |
| Gl1a_6156992_x1 | .....auauaggacaagCugcuuuu       | 1 |
| Gi3_28346383_x1 | .....aggacaaggugUuuuau          | 1 |
| Gi3_28693056_x1 | .....uauaggacNaggugcuuu         | 1 |
| Gl1a_6183233_x1 | .....auauaggaUaaggugcuu         | 1 |
| Gi1_4304948_x1  | .....aCauaggacaaggugcuu         | 1 |
| Gi3_28839699_x1 | .....auauaggacaaggugcuuuUu      | 1 |
| Gi5_9014645_x1  | .....acuaauuaggacaaggugUuuu     | 1 |
| Gi1_4231795_x1  | .....acAuuauaggacaaggugcuuu     | 1 |
| Gl1a_6252744_x1 | .....auauaAgacaaggugcuu         | 1 |
| Gi1_4229848_x1  | .....Aaggacaaggugcuuuau         | 1 |
| Gi5_9002076_x1  | .....auauaggacaagguCcuu         | 1 |
| Gi4_593635_x1   | .....auauagCacaaggugcuuu        | 1 |
| Gi2_11363447_x1 | .....uauaggGcaaggugcuuu         | 1 |
| Gi4_598205_x1   | .....auauagAacaaggugcuuu        | 1 |
| Gi5_8936101_x1  | .....uauauaggCcaaggugcuuu       | 1 |
| Gi4_606476_x1   | .....auaAaggacaaggugcuuu        | 1 |
| Gi3_28958536_x1 | .....aGuauauaggacaaggugcuuuu    | 1 |
| Gi1_4274554_x1  | .....uauagCacaaggugcuuu         | 1 |
| Gi3_28792823_x1 | .....uauagAacaaggugcuuu         | 1 |
| Gi3_28536070_x1 | .....uauauaggacaaggugUuuu       | 1 |
| Gi5_8850062_x1  | .....agggggugCgugggggcgccuu     | 1 |
| Gi1_4246514_x1  | .....Gaggacaaggugcuuuau         | 1 |
| Gi5_9118259_x1  | .....auauaggacaagguCcuuuu       | 1 |
| Gi1_4295243_x1  | .....auGuaggacaaggugcuu         | 1 |
| Gi3_28960869_x1 | .....auaUgacaaggugcuuuau        | 1 |
| Gi3_28398127_x1 | .....auaggacaagguAcuuuau        | 1 |
| Gi4_591124_x1   | .....auauaggacaaggugUuuu        | 1 |
| Gi2_11369033_x1 | .....Nuauaggacaaggugcuu         | 1 |
| Gi4_596389_x1   | .....auauagAacaaggugcuuuu       | 1 |
| Gi5_8862427_x1  | .....uaAuuaggacaaggugcuuu       | 1 |
| Gi4_576771_x1   | .....auauaggacaaggGgcuuuu       | 1 |
| Gi3_28895804_x1 | .....auauaggacaaggugcuu         | 1 |

|                 |                               |   |
|-----------------|-------------------------------|---|
| Gi1a_6013072_x1 | .....auauaggacaCggugcuu       | 1 |
| Gi3_28864647_x1 | .....auaggacaaCgugcuuu        | 1 |
| Gi3_28630863_x1 | .....uauaggacaaggugcuAu       | 1 |
| Gi2_11144607_x1 | .....uauaggacaaggugcCuu       | 1 |
| Gi1_4302620_x1  | .....uauaggacaCggugcuuu       | 1 |
| Gi3_28562049_x1 | .....auauaggacaaNgugcuuu      | 1 |
| Gi5_9044120_x1  | .....acuauauaggacGaggugcuuu   | 1 |
| Gi2_11077464_x1 | .....auaNaggacaaggugcuuu      | 1 |
| Gi2_11080613_x1 | .....auauaggacaaCgugcuu       | 1 |
| Gi5_9098111_x1  | .....agggggAgugugggggcgccuu   | 1 |
| Gi3_28299832_x1 | .....auaggacaaggugcuuuCcuc    | 1 |
| Gi1_4165219_x1  | .....Aauaggacaaggugcuuu       | 1 |
| Gi3_28939730_x1 | .....uauauaggacaaAgugcuuu     | 1 |
| Gi5_8973272_x1  | .....auauaggacaaggugcuuuUucg  | 1 |
| Gi5_9000246_x1  | .....auauaggacaaUgugcuuu      | 1 |
| Gi1_4343226_x1  | .....auauaggacaaUgugcuuu      | 1 |
| Gi4_603211_x1   | .....auauaggaUaaggugcuuu      | 1 |
| Gi2_11172053_x1 | .....cuauauaggacaaggugcuu     | 0 |
| Gi5_8983541_x1  | .....uauauaggacaaggGgcuuu     | 1 |
| Gi5_8903696_x1  | .....uauGuaggacaaggugcuuu     | 1 |
| Gi1_4158815_x1  | .....auauaggacaaggugcCuuau    | 1 |
| Gi1_4224924_x1  | .....auauaggacaaCgugcuuu      | 1 |
| Gi3_28412465_x1 | .....auaUgacaaggugcuuu        | 1 |
| Gi2_11364357_x1 | .....uauaggCcaaggugcuuu       | 1 |
| Gi3_28987320_x1 | .....auaggacaaggugcuuuGucuc   | 1 |
| Gi3_28879184_x1 | .....auauaggacaUggugcuuu      | 1 |
| Gi3_28638075_x1 | .....uauaAaggacaaggugcuuu     | 1 |
| Gi1_4212391_x1  | .....auauaggacaagAugcuu       | 1 |
| Gi1_4222728_x1  | .....gcuucugucacgcacuauauagg  | 0 |
| Gi5_9034824_x1  | .....auauaUgacaaggugcuuu      | 1 |
| Gi3_28394854_x1 | .....auCggacaaggugcuuu        | 1 |
| Gi3_28641058_x1 | .....Gauauaggacaaggugcuu      | 1 |
| Gi4_591183_x1   | .....auauaggaAaaggugcuuu      | 1 |
| Gi3_28811505_x1 | .....uauNggacaaggugcuuu       | 1 |
| Gi4_570781_x1   | .....auauaCgacaaggugcuuu      | 1 |
| Gi5_8961963_x1  | .....auauaggacaaggCgcuuu      | 1 |
| Gi1a_6065057_x1 | .....auauaggacaaggugcuuuG     | 1 |
| Gi5_9137327_x1  | .....auauGggacaaggugcuuu      | 1 |
| Gi3_28283542_x1 | .....auagCacaaggugcuuu        | 1 |
| Gi3_28766269_x1 | .....auGggacaaggugcuuu        | 1 |
| Gi5_9004206_x1  | .....auauaggacaaggugUuuuacucg | 1 |
| Gi5_9000043_x1  | .....agNacaaggugcuuuacucg     | 1 |
| Gi1_4190805_x1  | .....auaAaggacaaggugcuu       | 1 |
| Gi2_11367615_x1 | .....Uuaggacaaggugcuuu        | 1 |
| Gi1_4211657_x1  | .....uaggacaaggugcuuu         | 0 |
| Gi1_4213573_x1  | .....uauaggacaaggugcuuu       | 0 |
| Gi3_28540502_x1 | .....auUggacaaggugcuuu        | 1 |

|                 |                                 |   |
|-----------------|---------------------------------|---|
| Gi2_11207985_x1 | .....auaggacUaggugcuuuu         | 1 |
| Gi1a_6157957_x1 | .....auauaggacaaggCgcuuuu       | 1 |
| Gi2_11315218_x1 | .....cuauaCaggacaaggugcuu       | 1 |
| Gi4_598574_x1   | .....Auauauaggacaaggugcuu       | 1 |
| Gi1a_6173454_x1 | .....auauaggacCaggugcuuu        | 1 |
| Gi2_11205280_x1 | .....Cuaggacaaggugcuuuu         | 1 |
| Gi1_4164818_x1  | .....auauaggCcaaggugcuuuau      | 1 |
| Gi4_596131_x1   | .....auauaggacaagAugcuuuu       | 1 |
| Gi1_4312704_x1  | .....uauaggacaaggugUuuu         | 1 |
| Gi3_28533315_x1 | .....uauauaggUcaaggugcuuu       | 1 |
| Gi1_4330344_x1  | .....uauauaggacaaggugcuuu       | 0 |
| Gi3_28816077_x1 | .....aAgacaaggugcuuuaucu        | 1 |
| Gi1a_5984876_x1 | .....auauaggacaaggugcuuA        | 1 |
| Gi3_28637734_x1 | .....Nuaggacaaggugcuuuu         | 1 |
| Gi1_4323394_x1  | .....auauagAacaaggugcuuuau      | 1 |
| Gi4_576879_x1   | .....auauaggacCaggugcuuu        | 1 |
| Gi5_8860602_x1  | .....acuauauaggacaGggugcuuu     | 1 |
| Gi5_9053701_x1  | .....agggggugNuggggggCGgcuu     | 1 |
| Gi1_4271109_x1  | .....auauaggacaaggugcuuCaucucgc | 1 |
| Gi5_9071863_x1  | .....acuauauUggacaaggugcuuu     | 1 |
| Gi5_9037731_x1  | .....auaggacaaggugcAuuu         | 1 |
| Gi3_28961900_x1 | .....auauaggacUaggugcuuuu       | 1 |
| Gi2_11128263_x1 | .....gcuucugucGcgcacuauauagg    | 1 |
| Gi5_9034692_x1  | .....auauaggacaaggugcuCuau      | 1 |
| Gi3_28841740_x1 | .....auauaggacaaggUncuuu        | 1 |
| Gi3_28606618_x1 | .....auauaggacaaggugcuuuuA      | 1 |
| Gi3_28927376_x1 | .....auaggacaaggAgcuuuauauc     | 1 |
| Gi5_8975425_x1  | .....auauaggUcaaggugcuuuauaucgc | 1 |
| Gi5_8956284_x1  | .....Uuauauaggacaaggugcuuu      | 1 |
| Gi3_28297825_x1 | .....auaggacaaggugcuuAa         | 1 |
| Gi4_587127_x1   | .....auauUggacaaggugcuuuu       | 1 |
| Gi1_4263867_x1  | .....Guauaggacaaggugcuuuauaucgc | 1 |
| Gi5_9130851_x1  | .....auagAacaaggugcuuuu         | 1 |
| Gi3_28442812_x1 | .....cuUuauaggacaaggugcuuu      | 1 |
| Gi4_571152_x1   | .....auauaggacaagUugcuuu        | 1 |
| Gi2_11129481_x1 | .....auauaggacaaggUccuu         | 1 |
| Gi1_4332956_x1  | .....auauaggacaaggugcuuCa       | 1 |
| Gi5_9089453_x1  | .....aAgggguguguggggggCGgcuu    | 1 |
| Gi1_4362571_x1  | .....aCauaggacaaggugcuuuu       | 1 |
| Gi2_11044723_x1 | .....auauagCacaaggugcuuuu       | 1 |
| Gi3_28316054_x1 | .....auaggacaagCugcuuuu         | 1 |
| Gi1a_6174042_x1 | .....Nuauaggacaaggugcuuu        | 1 |
| Gi3_28671777_x1 | .....auaggacaNggugcuuuauauc     | 1 |
| Gi5_8888057_x1  | .....auCuaggacaaggugcuu         | 1 |
| Gi5_8860758_x1  | .....acuauauaggGcaaggugcuuuu    | 1 |
| Gi1_4344479_x1  | .....auaggacaagAugcuuuu         | 1 |
| Gi2_11112194_x1 | .....auauaggacaaggUccuuu        | 1 |

|                 |                                      |   |
|-----------------|--------------------------------------|---|
| Gi5_8829911_x1  | .....auauagUacaaggugcuu.....         | 1 |
| Gi1_4329384_x1  | .....aGauaggacaaggugcuuua.....       | 1 |
| Gi1_4185534_x1  | .....uauUggacaaggugcuuu.....         | 1 |
| Gi1_4251462_x1  | .....auauaggCcaaggugcuuuauucgc.....  | 1 |
| Gi1_4378438_x1  | .....acuauauaggacaagAugcuuu.....     | 1 |
| Gi1_4380869_x1  | .....uauaggacaagAugcuuu.....         | 1 |
| Gi4_611932_x1   | .....auauaggacaaggugAuuuu.....       | 1 |
| Gi1_4365407_x1  | .....auauaggacUaggugcuu.....         | 1 |
| Gi4_580196_x1   | .....auauaggacaUggugcuu.....         | 1 |
| Gi5_9061263_x1  | .....auauaggGaaggugcuuu.....         | 1 |
| Gi1_4334267_x1  | .....auUuaggacaaggugcuuuau.....      | 1 |
| Gi4_598617_x1   | .....auauaggUaaggugcuu.....          | 1 |
| Gi3_28358607_x1 | .....uaggacaaggugcuuuauuc.....       | 0 |
| Gi4_604779_x1   | .....auauaggGcaaggugcuu.....         | 1 |
| Gi1a_6060498_x1 | .....auauaggacUaggugcuu.....         | 1 |
| Gi1_4331814_x1  | .....Ucuauauaggacaaggugcuuu.....     | 1 |
| Gi5_9118867_x1  | .....aggacaaggugcuuuauUucg.....      | 1 |
| Gi5_9073682_x1  | .....Gauaggacaaggugcuu.....          | 1 |
| Gi1_4251607_x1  | .....auauGggacaaggugcuuuau.....      | 1 |
| Gi2_11282304_x1 | .....uauGggacaaggugcuuu.....         | 1 |
| Gi2_11300251_x1 | .....auauaggNaaggugcuuuau.....       | 1 |
| Gi1a_6301918_x1 | .....auauagAacaaggugcuu.....         | 1 |
| Gi1_4382142_x1  | .....auauaggacaaggugAuuuu.....       | 1 |
| Gi3_28498826_x1 | .....auaggacaaggugcuGua.....         | 1 |
| Gi5_9028407_x1  | .....Cuauaggacaaggugcuuuauucgc.....  | 1 |
| Gi1_4315385_x1  | .....auauaggacaaggugcuuuauucgcU..... | 1 |
| Gi2_11146951_x1 | .....uaAaggacaaggugcuuu.....         | 1 |
| Gi3_28506883_x1 | .....aggacaUggugcuuuauuc.....        | 1 |
| Gi2_11156160_x1 | .....auauaggacaagguCcuuu.....        | 1 |
| Gi3_28834269_x1 | .....aggacaaggugcuuuauucC.....       | 1 |
| Gi4_612734_x1   | .....auauaggacaaAgugcuu.....         | 1 |
| Gi3_28674257_x1 | .....auaggacaaggugcCuauuc.....       | 1 |
| Gi4_614130_x1   | .....auauaggacaGggugcuu.....         | 1 |
| Gi5_8832659_x1  | .....aggacaaggugcuuuuacucg.....      | 1 |
| Gi2_11303524_x1 | .....auauaggacaaggugGuuuu.....       | 1 |
| Gi5_8894846_x1  | .....auauaggacaaggugUuuuu.....       | 1 |
| Gi1_4262359_x1  | .....auauaCgacaaggugcuuu.....        | 1 |
| Gi5_8853082_x1  | .....aggacaaggugUuuuuauucgc.....     | 1 |
| Gi4_589630_x1   | .....auCuaggacaaggugcuuu.....        | 1 |
| Gi2_11190511_x1 | .....gcuucCgucacgcacuauuagg.....     | 1 |
| Gi5_9036865_x1  | .....uauuagAacaaggugcuuu.....        | 1 |
| Gi5_9002970_x1  | .....agggguguguggggggUggcuu.....     | 1 |
| Gi1_4322430_x1  | .....auauGggacaaggugcuuuauucgc.....  | 1 |
| Gi3_28465577_x1 | .....auaggacaaggugcuuauCau.....      | 1 |
| Gi2_11101690_x1 | .....auauaggacaaUgugcuu.....         | 1 |
| Gi3_28546312_x1 | .....cuauauaggacaUggugcuuu.....      | 1 |
| Gi3_28988808_x1 | .....auaggacaaAgugcuuuau.....        | 1 |

|                 |                                     |   |
|-----------------|-------------------------------------|---|
| Gi4_592392_x1   | .....auauaggaGaaggugcuuu.....       | 1 |
| Gi4_596359_x1   | .....auauaggacaaggGgcuuu.....       | 1 |
| Gi2_11003583_x1 | .....auauaCgacaaggugcuu.....        | 1 |
| Gi4_606683_x1   | .....auauaggacaaggugcuuCa.....      | 1 |
| Gi1a_6354093_x1 | .....auauaUgacaaggugcuua.....       | 1 |
| Gi1_4302165_x1  | .....auUuaggacaaggugcuua.....       | 1 |
| Gi3_28874013_x1 | .....acuauauaggacaaggugcAuua.....   | 1 |
| Gi4_588302_x1   | .....auaggacaaggugcuua.....         | 0 |
| Gi2_11093082_x1 | .....auGggacaaggugcuuuau.....       | 1 |
| Gi3_28785082_x1 | .....uauaggacaaggugcuuU.....        | 1 |
| Gi2_11380271_x1 | .....gcuucugucacgcacuaAagg.....     | 1 |
| Gi1_4219050_x1  | .....auauaAgacaaggugcuua.....       | 1 |
| Gi5_9108896_x1  | .....cuauauaggacaaggugcuuu.....     | 0 |
| Gi5_9004190_x1  | .....Gcuauauaggacaaggugcuuu.....    | 1 |
| Gi1_4212360_x1  | .....auauaggGcaaggugcuu.....        | 1 |
| Gi4_595048_x1   | .....auauaggacaaggugAuu.....        | 1 |
| Gi2_11269743_x1 | .....acuauauaNgacaaggugcuua.....    | 1 |
| Gi1_4216173_x1  | .....auauaggacaaggugcuuuauU.....    | 1 |
| Gi4_585301_x1   | .....auauaggacaaggAgcuua.....       | 1 |
| Gi1a_6119714_x1 | .....aGaggacaaggugcuuuau.....       | 1 |
| Gi5_8842811_x1  | .....aggggguguguggggggcggcAu.....   | 1 |
| Gi2_11142616_x1 | .....auauaggacaaggugcuGua.....      | 1 |
| Gi5_8996197_x1  | .....auCggacaaggugcuua.....         | 1 |
| Gi1a_6296554_x1 | .....Guauaggacaaggugcuua.....       | 1 |
| Gi3_28953174_x1 | .....uauaggacaaggugcuGu.....        | 1 |
| Gi1_4222225_x1  | .....auauagCacaaggugcuu.....        | 1 |
| Gi5_9061641_x1  | .....auaggacaaggugcuuGa.....        | 1 |
| Gi5_8896456_x1  | .....auauagUacaaggugcuua.....       | 1 |
| Gi5_9029121_x1  | .....auauaggacaaggugcuuuauCcg.....  | 1 |
| Gi5_9013366_x1  | .....auauaggacaagAugcuuuauCucg..... | 1 |
| Gi3_28264627_x1 | .....uauaggacaaggugcuuU.....        | 1 |
| Gi3_28927306_x1 | .....acuauauaggacaaggugcCuua.....   | 1 |
| Gi3_28884433_x1 | .....auaggacaaUgugcuua.....         | 1 |
| Gi1a_6037915_x1 | .....auauaggUcaaggugcuuu.....       | 1 |
| Gi3_28441069_x1 | .....auaggacaGggugcuuuauCuc.....    | 1 |
| Gi3_28352369_x1 | .....auaggacaaggugcuuCaucuc.....    | 1 |
| Gi3_28917669_x1 | .....uauaggacaaggGgcuua.....        | 1 |
| Gi5_8972314_x1  | .....uUuauaggacaaggugcuuu.....      | 1 |
| Gi1_4262603_x1  | .....uauaUgacaaggugcuuu.....        | 1 |
| Gi3_28331375_x1 | .....auaCaggacaaggugcuuuau.....     | 1 |
| Gi1_4204115_x1  | .....auaggacaaggugcuuuGu.....       | 1 |
| Gi5_8847574_x1  | .....auauaggacaaggugcuAuau.....     | 1 |
| Gi2_11036787_x1 | .....auaggacaaggugcuGua.....        | 1 |
| Gi3_28747693_x1 | .....cuauauGggacaaggugcuuu.....     | 1 |
| Gi4_608717_x1   | .....auauagUacaaggugcuuu.....       | 1 |
| Gi2_11351528_x1 | .....gcuucugucacAcacuaauagg.....    | 1 |
| Gi5_8937341_x1  | .....auauaggacaagguAcuuuau.....     | 1 |

|                 |                              |   |
|-----------------|------------------------------|---|
| Gi4_605813_x1   | .....auauaggacaagUugcuuua    | 1 |
| G1a_6049145_x1  | .....auauaggacaagCugcuuu     | 1 |
| Gi1_4296525_x1  | .....aNauaggacaaggugcuuu     | 1 |
| Gi3_28538703_x1 | .....auauaggacGaggugcuuuau   | 1 |
| Gi1_4329888_x1  | .....auauaggacaaggugUuuuuau  | 1 |
| Gi2_11093838_x1 | .....uauaggacaaggugcuuuC     | 1 |
| Gi3_28923575_x1 | .....aCaggacaaggugcuuuau     | 1 |
| G1a_6154132_x1  | .....Uuauaggacaaggugcuuua    | 1 |
| Gi3_28307479_x1 | .....auaggacaaggugcGuua      | 1 |
| Gi5_8861086_x1  | .....aggggguguguggggggCGgcCu | 1 |
| Gi3_28905217_x1 | .....auaggacaaggugcAuuaucuc  | 1 |
| Gi5_8851243_x1  | .....auauaggacaCggugcuuuau   | 1 |
| Gi1_4279170_x1  | .....auaggacaaAgugcuuuau     | 1 |
| Gi4_604704_x1   | .....aNauaggacaaggugcuuu     | 1 |
| Gi2_11406645_x1 | .....auauaggacGaggugcuuuau   | 1 |
| G1a_6145220_x1  | .....auaggacGaggugcuuuau     | 1 |
| Gi1_4345201_x1  | .....uauaggacaaggugcuGu      | 1 |
| Gi2_11184129_x1 | .....auaggacaaUgugcuuu       | 1 |
| Gi3_28532837_x1 | .....aggacaaggugcuuuGucu     | 1 |
| Gi1_4307979_x1  | .....auauaggacaagUugcuu      | 1 |
| Gi3_28334241_x1 | .....uauauaggacaaggugcuAu    | 1 |
| Gi1_4249705_x1  | .....auauaggacaaggAgcuu      | 1 |
| Gi1_4305993_x1  | .....auauaggacaaggCgcuu      | 1 |
| Gi3_28399269_x1 | .....uaCaggacaaggugcuuu      | 1 |
| Gi4_602172_x1   | .....auauaggacaUggugcuuu     | 1 |
| Gi5_8991254_x1  | .....auCuaggacaaggugcuuu     | 1 |
| Gi5_8845454_x1  | .....auaggacaagguUcuuu       | 1 |
| Gi2_11387305_x1 | .....gUuucugucacgcacuaauagg  | 1 |
| Gi1_4189708_x1  | .....auauaggacaaggGgcuuu     | 1 |
| Gi3_28889896_x1 | .....auaggGcaaggugcuuuaucuc  | 1 |
| Gi3_28292008_x1 | .....acuauCuaggacaaggugcuuu  | 1 |
| Gi3_28481740_x1 | .....Cuaggacaaggugcuuuau     | 1 |
| Gi2_11169414_x1 | .....auaggacaagguUcuuu       | 1 |
| Gi5_8885881_x1  | .....Nuauaggacaaggugcuu      | 1 |
| Gi5_8867212_x1  | .....auaggacUaggugcuuu       | 1 |
| Gi3_28807855_x1 | .....auauCggacaaggugcuuu     | 1 |
| Gi5_9026283_x1  | .....acuauauaggCcaaggugcuuu  | 1 |
| Gi4_595073_x1   | .....auauCggacaaggugcuuu     | 1 |
| Gi1_4281170_x1  | .....auauaggacaaggugUuu      | 1 |
| Gi1_4314504_x1  | .....acuauaCaggacaaggugcuuu  | 1 |
| Gi3_28708157_x1 | .....auauaggacaaNgugcuuu     | 1 |
| Gi2_11020658_x1 | .....auauaCgacaaggugcuuu     | 1 |
| Gi1_4293485_x1  | .....aggacaaggugcuuuacuU     | 1 |
| Gi3_28868489_x1 | .....uauGuaggacaaggugcuuu    | 1 |
| Gi5_8922667_x1  | .....Cuaggacaaggugcuuu       | 1 |
| Gi3_28890389_x1 | .....uauaggacaaggGgcuuu      | 1 |
| Gi3_28824415_x1 | .....auauaggacaaggugcuuuGu   | 1 |



|                 |                                  |   |
|-----------------|----------------------------------|---|
| Gi3_28480960_x1 | .....acuauauaggacaaggGcuuua      | 1 |
| Gi1_4214411_x1  | .....auauaggaNaaggugcuua         | 1 |
| Gi2_11272628_x1 | .....Cauauaggacaaggugcuu         | 1 |
| Gi3_28663433_x1 | .....auauNggacaaggugcuuu         | 1 |
| Gi5_9016012_x1  | .....uauauaggacGaggugcuuu        | 1 |
| Gi1_4297694_x1  | .....auauaggacaGggugcuu          | 1 |
| Gi4_599447_x1   | .....auauaggCcaaggugcuua         | 1 |
| Gi5_8899930_x1  | .....acuauauaggacaaggugcuuC      | 1 |
| Gi1_4192556_x1  | .....aGauaggacaaggugcuuuauucucg  | 1 |
| Gi5_8989545_x1  | .....uauUuaggacaaggugcuuu        | 1 |
| Gi2_11157617_x1 | .....uauaggacaaggugAuuu          | 1 |
| Gi3_28423227_x1 | .....cuauauaggacaaggGcuuu        | 1 |
| Gi3_28514545_x1 | .....cuauauagNacaaggugcuuu       | 1 |
| Gi3_28389806_x1 | .....auaggacaagguCuuuauucuc      | 1 |
| Gi4_572840_x1   | .....auauaggacaaggugcuuAa        | 1 |
| Gi5_8908593_x1  | .....acuauauaAgacaaggugcuua      | 1 |
| Gi3_28398195_x1 | .....aggacaaggAgcuuuaucu         | 1 |
| Gi3_28463171_x1 | .....uauauaggacaaggugcuuu        | 0 |
| Gi1_4300896_x1  | .....auauUggacaaggugcuuuauucucg  | 1 |
| Gi1a_6098716_x1 | .....auauaggacaaggugAuuua        | 1 |
| Gi2_11305151_x1 | .....auauaggacaagguUcuuu         | 1 |
| Gi3_28443783_x1 | .....auauaggacaaggugcuuuauucucAc | 1 |
| Gi5_8875915_x1  | .....auauaggacaaggugcuuuuC       | 1 |
| Gi4_573698_x1   | .....auGuaggacaaggugcuua         | 1 |
| Gi4_597589_x1   | .....auCuaggacaaggugcuu          | 1 |
| Gi1a_6176862_x1 | .....Nuauaggacaaggugcuua         | 1 |
| Gi3_28506255_x1 | .....auaggacaagUugcuua           | 1 |
| Gi4_594658_x1   | .....auaGaggacaaggugcuuu         | 1 |
| Gi4_580703_x1   | .....auauaggacaagAugcuu          | 1 |
| Gi4_598336_x1   | .....auauaggacaaggugcuuuG        | 1 |
| Gi2_11291921_x1 | .....auaggacGaggugcuua           | 1 |
| Gi3_28484984_x1 | .....auaggacaaggugcuuuauucCc     | 1 |
| Gi4_575251_x1   | .....auaNaggacaaggugcuuu         | 1 |
| Gi5_8927656_x1  | .....uauauaggacaagAugcuu         | 1 |
| Gi3_28595929_x1 | .....Cuaggacaaggugcuuuauucuc     | 1 |
| Gi1a_6153141_x1 | .....auauaggacaaggugcuAu         | 1 |
| Gi3_28837081_x1 | .....auaggacaCggugcuuuau         | 1 |
| Gi3_28371541_x1 | .....aggacaaggGcuuuaucu          | 1 |
| Gi3_28393175_x1 | .....aggacaaggugcuuuauucA        | 1 |
| Gi1_4245509_x1  | .....auauaggaAaaggugcuua         | 1 |
| Gi1_4342333_x1  | .....uauaggacaaggAgcuu           | 1 |
| Gi2_11321165_x1 | .....auauaggacaaggugcGu          | 1 |
| Gi5_8837392_x1  | .....auauaggacaaggAgcuuuau       | 1 |
| Gi4_574802_x1   | .....Nuauaggacaaggugcuua         | 1 |
| Gi2_11178825_x1 | .....auaUgacaaggugcuua           | 1 |
| Gi5_8946621_x1  | .....auGuaggacaaggugcuuuauucucg  | 1 |
| Gi5_8963527_x1  | .....uaGaggacaaggugcuuu          | 1 |



|                         |                               |   |
|-------------------------|-------------------------------|---|
| Gi5_4735327_x1938.....  | uccggugugguauaacggc.....      | 0 |
| Gi1_2205398_x1827.....  | uccggugugguauaacgg.....       | 0 |
| Gi3_17540579_x1690..... | ugguuuucacccaguagaucgg.....   | 0 |
| Gi3_17570796_x1671..... | uuuucacccaguagaucgg.....      | 0 |
| Gi3_17666074_x1615..... | gguuuucacccaguagauc.....      | 0 |
| Gi5_4982035_x1447.....  | uccggugugguauaacgg.....       | 0 |
| Gi3_18039646_x1409..... | uccggugugguauaacggcu.....     | 0 |
| Gi1_2314232_x1342.....  | uccggugugguauaacggcuagca..... | 0 |
| Gi2_5270358_x1317.....  | uuuucacccaguagaucgg.....      | 0 |
| Gi5_5059974_x1297.....  | uuuucacccaguagaucgg.....      | 0 |
| Gi3_18606522_x1158..... | guucgauucccggaucgg.....       | 0 |
| Gi3_18628430_x1149..... | guucgauucccggaucgga.....      | 0 |
| Gi3_18722301_x1110..... | Gccggugugguauaacggcuagc.....  | 1 |
| Gi5_5159674_x1106.....  | guuuucacccaguagaucgg.....     | 0 |
| Gi5_5181554_x1080.....  | uuuucacccaguagaucgg.....      | 0 |
| G1a_3576810_x1050.....  | gguuuucacccaguagaucgg.....    | 0 |
| Gi2_5610827_x1033.....  | guucgauucccggaucgg.....       | 0 |
| Gi1_2395855_x1022.....  | uccggugugguauaacggc.....      | 0 |
| Gi5_5213996_x1012.....  | guucgauucccggaucgg.....       | 0 |
| G1a_3614137_x968.....   | uccggugugguauaacggcuagc.....  | 0 |
| Gi2_5717621_x965.....   | gguucgauucccggauc.....        | 0 |
| Gi5_5261285_x959.....   | ugguuuucacccaguagaucgg.....   | 0 |
| Gi1_2423505_x952.....   | guucgauucccggaucgg.....       | 0 |
| Gi1_2439246_x904.....   | guuuucacccaguagaucgg.....     | 0 |
| Gi1_2464473_x842.....   | uuuucacccaguagaucgg.....      | 0 |
| Gi3_19680001_x786.....  | uccggugugguauaacggcuagA.....  | 1 |
| Gi3_19719875_x775.....  | uuuucacccaguagaucgg.....      | 0 |
| Gi2_6021950_x774.....   | guucgauucccggaucgga.....      | 0 |
| Gi1_2516496_x739.....   | uccggugugguauaacgA.....       | 1 |
| Gi2_6232676_x675.....   | uccggugugguauaacggcu.....     | 0 |
| Gi1_2556535_x648.....   | ccggugugguauaacggcuagca.....  | 0 |
| Gi1_2571740_x624.....   | uuuucacccaguagaucgg.....      | 0 |
| Gi1_2584597_x603.....   | Uguuuucacccaguagaucgg.....    | 1 |
| Gi3_20515743_x593.....  | gguucgauucccggaucg.....       | 0 |
| Gi3_20531705_x589.....  | gguucgauucccggauc.....        | 0 |
| Gi1_2606610_x563.....   | gguuuucacccaguagaucgg.....    | 0 |
| Gi2_6541734_x554.....   | gguucgauucccggaucgg.....      | 0 |
| Gi5_5620617_x554.....   | Gccggugugguauaacggcuagc.....  | 1 |
| Gi2_6628080_x525.....   | Gccggugugguauaacggcuagc.....  | 1 |
| G1a_3990448_x514.....   | uccggugugguauaacggcuag.....   | 0 |
| Gi1_2647994_x489.....   | uccggugugguauaacggcu.....     | 0 |
| Gi5_5710560_x486.....   | guucgauucccggaucggagc.....    | 0 |
| Gi3_21130494_x477.....  | guucgauucccggaucggagcC.....   | 1 |
| Gi3_21162287_x472.....  | gguucgauucccggaucggagcC.....  | 1 |
| Gi3_21170307_x471.....  | Gccggugugguauaacggcua.....    | 1 |
| Gi3_21219403_x464.....  | gguucgauucccggaucgga.....     | 0 |
| Gi3_21252177_x459.....  | ccggugugguauaacggcua.....     | 0 |

|                   |                               |        |   |
|-------------------|-------------------------------|--------|---|
| Gi3_21274072_x454 | .....Gccggugugguauaacggcuagca | .....  | 1 |
| Gi1_2681305_x445  | .....uccggugugguauaacggcuagA  | .....  | 1 |
| Gi3_21359105_x441 | .....ugguuuucacccaguagauc     | .....  | 0 |
| Gi2_6955867_x427  | .....Uguuuucacccaguagauccg    | .....  | 1 |
| Gi5_5817406_x424  | .....gguuuucacccaguagauc      | .....  | 0 |
| Gi5_5822901_x422  | .....cggugugguauaacggcuagc    | .....  | 0 |
| Gi2_7030530_x408  | .....gguucgauucccggaucggagcC  | .....  | 1 |
| Gi3_21625395_x401 | .....ggugugguauaacggcua       | .....  | 0 |
| Gi3_21685359_x393 | .....uGcggugugguauaacggcuagc  | .....  | 1 |
| Gi3_21734480_x386 | .....gGuuucacccaguagauccg     | .....  | 1 |
| Gi3_21755267_x383 | .....gguucgauucccggaucgg      | .....  | 0 |
| Gi1_2736781_x382  | .....ccggugugguauaacggcua     | .....  | 0 |
| Gi2_7172100_x371  | .....ugguuuucacccaguagauccg   | .....  | 0 |
| Gi3_21863235_x367 | .....auccggguucgauucccgga     | .....  | 0 |
| Gi3_21874589_x366 | .....gguucgauucccggaucggagc   | .....  | 0 |
| Gi3_21909438_x361 | .....guuuucacccaguagaucc      | .....  | 0 |
| Gi1_2757173_x361  | .....gUuuuucacccaguagauccg    | .....  | 1 |
| Gi3_21918434_x359 | .....Uuuuucacccaguagauccg     | .....  | 1 |
| Gi5_5939729_x353  | .....gguucgauucccggaucgg      | .....  | 0 |
| Gi5_5961660_x344  | .....gguucgauucccggauc        | .....  | 0 |
| Gi1a_4267103_x338 | .....uccggugugguauaacggc      | .....  | 0 |
| Gi5_5973224_x337  | .....gguucgauucccggaucggagc   | .....  | 0 |
| Gi3_22086875_x336 | .....cgauucccggaucggagc       | .....  | 0 |
| Gi4_317119_x335   | .....uccggugugguauaacggcuagc  | .....0 | 0 |
| Gi2_7376744_x325  | .....gguucgauucccggaucggagc   | .....  | 0 |
| Gi5_6009724_x325  | .....Uguuuucacccaguagauccg    | .....  | 1 |
| Gi3_22180134_x324 | .....ccggugugguauaacggcuagc   | .....  | 0 |
| Gi2_7389705_x322  | .....gguucgauucccggaucg       | .....  | 0 |
| Gi3_22218349_x319 | .....Gccggugugguauaacggc      | .....  | 1 |
| Gi5_6023241_x318  | .....uccggugugguauaacggcuagA  | .....  | 1 |
| Gi2_7440444_x311  | .....gguucgauucccggaucggga    | .....  | 0 |
| Gi1_2802979_x311  | .....ugguuuucacccaguagauccg   | .....  | 0 |
| Gi3_22307179_x309 | .....gGuuucacccaguagauccg     | .....  | 1 |
| Gi1_2809163_x307  | .....guagauccggguucgauucc     | .....  | 0 |
| Gi1_2808549_x307  | .....Gccggugugguauaacggcuag   | .....  | 1 |
| Gi1_2812218_x305  | .....Gccggugugguauaacggcuagc  | .....  | 1 |
| Gi1_2814043_x304  | .....ccggugugguauaacggcuagc   | .....  | 0 |
| Gi2_7479745_x303  | .....gguuuucacccaguagauc      | .....  | 0 |
| Gi3_22385277_x300 | .....guucgauucccggaucg        | .....  | 0 |
| Gi3_22392757_x299 | .....guagauccggguucgauucc     | .....  | 0 |
| Gi3_22407069_x297 | .....Uuuuucacccaguagauccg     | .....  | 1 |
| Gi3_22425714_x295 | .....cggugugguauaacggcua      | .....  | 0 |
| Gi1_2833018_x289  | .....cggugugguauaacggcuagca   | .....  | 0 |
| Gi2_7586911_x283  | .....gUuuuucacccaguagauccg    | .....  | 1 |
| Gi5_6145344_x277  | .....ugguuuucacccaguagaucc    | .....  | 0 |
| Gi5_6150304_x275  | .....ugguuuucacccaguagauccg   | .....  | 0 |
| Gi3_22633571_x273 | .....ucUggugugguauaacggcuagc  | .....  | 1 |

|                   |                                    |   |
|-------------------|------------------------------------|---|
| Gi1_2857710_x272  | .....guucgauucccggaucgga           | 0 |
| Gi1_2859336_x270  | .....ggugugguauaacggcuagc          | 0 |
| Gi5_6165822_x269  | .....guucgauucccggaucg             | 0 |
| G1a_4420824_x267  | .....uccggugugguauaacggcua         | 0 |
| Gi3_22715945_x265 | .....agauccggguucgauucc            | 0 |
| Gi2_7694651_x264  | .....Uuuuucaccaguagauccg           | 1 |
| Gi2_7694123_x264  | .....ccggugugguauaacggcua          | 0 |
| Gi3_22759847_x261 | .....uccggugugguauaacgA            | 1 |
| Gi5_6216248_x256  | .....ugguuuucaccaguagauc           | 0 |
| Gi3_22818413_x255 | .....gguuuucaccaguagaucc           | 0 |
| Gi3_22832411_x254 | .....uuucaccaguagauccg             | 0 |
| Gi5_6222628_x254  | .....agauccggguucgauucc            | 0 |
| Gi1_2891977_x253  | .....ccggugugguauaacggcuagcau      | 0 |
| Gi2_7772352_x251  | .....ccggugugguauaacggcuagc        | 0 |
| Gi2_7777606_x250  | .....uuucaccaguagauccg             | 0 |
| Gi2_7776856_x250  | .....ggugugguauaacggcuagc          | 0 |
| Gi5_6257309_x245  | .....guucgauucccggaucgga           | 0 |
| Gi3_22975831_x242 | .....uccgguguNguauaacggcuagc       | 1 |
| Gi3_22974379_x242 | .....Uguuuucaccaguagauccgg         | 1 |
| Gi2_7823111_x242  | .....gguuuucaccaguagaucc           | 0 |
| Gi5_6280521_x239  | .....ccggugugguauaacggcua          | 0 |
| Gi3_23004421_x239 | .....Aguuuucaccaguagauccg          | 1 |
| Gi1_2927881_x236  | .....Uuuuucaccaguagauccg           | 1 |
| Gi5_6309261_x232  | .....uccggugugguauaacggcuagcaugacu | 0 |
| Gi2_7902356_x230  | .....guucgauucccggaucggagc         | 0 |
| G1a_4533006_x223  | .....uccggugugguauaacggcuagcau     | 0 |
| G1a_4536557_x221  | .....guuuucaccaguagauccg           | 0 |
| Gi5_6374885_x218  | .....Aguuuucaccaguagauccg          | 1 |
| Gi1_2970303_x216  | .....ggaucccggaucgg                | 0 |
| Gi5_6393758_x215  | .....ggCuuuucaccaguagauccg         | 1 |
| Gi3_23336433_x213 | .....ggCuuuucaccaguagauccg         | 1 |
| Gi2_8032811_x212  | .....gGuuuucaccaguagauccg          | 1 |
| Gi2_8036627_x212  | .....ccaguagauccggguucgauucc       | 0 |
| Gi2_8039374_x211  | .....Guuuucaccaguagauccg           | 1 |
| Gi3_23368863_x211 | .....Uguuuucaccaguagauc            | 1 |
| Gi1_2986893_x209  | .....Gccggugugguauaacggcua         | 1 |
| Gi2_8053891_x209  | .....guucgauucccggaucggagcC        | 1 |
| Gi5_6437300_x208  | .....ggaucccggaucg                 | 0 |
| Gi2_8075744_x207  | .....ugguuuucaccaguagauc           | 0 |
| Gi2_8080298_x207  | .....Gccggugugguauaacggcuagca      | 1 |
| Gi5_6445158_x206  | .....Uuuuucaccaguagauccg           | 1 |
| Gi5_6460701_x203  | .....cggugugguauaacggcua           | 0 |
| G1a_4596773_x202  | .....uccggugugguauaacgg            | 0 |
| Gi3_23503899_x201 | .....gguuuucaccaguagGuccg          | 1 |
| Gi3_23549743_x198 | .....uccggCgugguauaacggcuagc       | 1 |
| Gi2_8146056_x198  | .....guuuucaccaguagauccg           | 0 |
| Gi3_23559806_x197 | .....uccggugugguauaacggcuaA        | 1 |

|                   |                                    |   |
|-------------------|------------------------------------|---|
| Gi3_23560200_x197 | .....gauccggguucgauucc             | 0 |
| Gi2_8162221_x196  | .....uuucacccaguagauc              | 0 |
| Gi5_6505538_x195  | .....gUuuuucacccaguagaucgg         | 1 |
| Gi5_6516045_x194  | .....uGcggugugguauaacggcuagc       | 1 |
| Gi3_23622033_x193 | .....ccggugugguauaacggcuag         | 0 |
| Gi1_3031568_x193  | .....uucacccaguagaucgg             | 0 |
| Gi3_23635888_x192 | .....ccggugugguauaacggcuagca       | 0 |
| Gi5_6528781_x192  | .....gguuuucacccCguagaucgg         | 1 |
| Gi5_6540995_x190  | .....uuucacccaguagaucgg            | 0 |
| Gi5_6545722_x189  | .....Gccggugugguauaacggcua         | 1 |
| Gi5_6550994_x188  | .....ccggugugguauaacggcuag         | 0 |
| Gi5_6561666_x186  | .....gguccggugugguauaacggc         | 0 |
| Gi3_23720902_x186 | .....uGcggugugguauaacggcuagca      | 1 |
| Gi3_23733720_x185 | .....gguuCucacccaguagaucgg         | 1 |
| Gi3_23741857_x184 | .....gguuuucacccaguagau            | 0 |
| Gi3_23802652_x181 | .....aguagaucggguucgauucc          | 0 |
| Gi3_23795050_x181 | .....gguuuucacccCguagaucgg         | 1 |
| Gi5_6605666_x180  | .....gguucgauucccggaucgga          | 0 |
| Gi1_3070143_x179  | .....agaucggguucgauucc             | 0 |
| Gi3_23861717_x177 | .....uuucacccaguagaucgg            | 0 |
| Gi3_23908992_x174 | .....Gccggugugguauaacggcuagca      | 1 |
| Gi2_8366224_x173  | .....ccggugugguauaacggc            | 0 |
| Gi2_8363975_x173  | .....uGcggugugguauaacggcuagc       | 1 |
| Gi5_6664162_x172  | .....gguuuucacccaguagGuccg         | 1 |
| Gi5_6662614_x172  | .....gguucgauucccggaucggagcC       | 1 |
| Gi2_8384949_x171  | .....uucacccaguagaucgg             | 0 |
| Gi5_6675651_x171  | .....gguucgauucccggaucggagcCc      | 1 |
| Gi3_23953948_x171 | .....uUguuuucacccaguagaucgg        | 1 |
| Gi3_23976253_x170 | .....uGcggugugguauaacggcua         | 1 |
| Gi3_23997541_x168 | .....gguucgauucccggaucggagcCc      | 1 |
| Gi2_8409856_x168  | .....Cugugguauaacggcuagca          | 1 |
| Gi5_6704188_x167  | .....guuuucacccaguagauc            | 0 |
| Gi1_3111648_x167  | .....gguuuucacccaguagauc           | 0 |
| Gi3_24016650_x167 | .....gguuuucacccaguagaucgg         | 1 |
| Gi1_3111481_x167  | .....Gccggugugguauaacggcuagca      | 1 |
| Gi3_24070547_x164 | .....uccggugugguauaacggcuagcaugacu | 0 |
| Gi3_24079840_x163 | .....gguucgauucccggaucggagc        | 0 |
| Gi5_6734319_x163  | .....gguucgauucccggaucggagcC       | 1 |
| Gi3_24072179_x163 | .....cugguuuucacccaguagauc         | 0 |
| Gi3_24084404_x163 | .....gguCuuacccaguagaucgg          | 1 |
| Gi2_8470256_x161  | .....gguucgauucccggaucg            | 0 |
| Gi3_24125012_x160 | .....gUuuuucacccaguagaucgg         | 1 |
| Gi3_24148436_x159 | .....ccggugugguauaacggc            | 0 |
| Gi5_6778507_x158  | .....uccggguucgauucccggc           | 0 |
| Gi2_8512435_x157  | .....Gccggugugguauaacggc           | 1 |
| Gi3_24194890_x156 | .....cugguuuucacccaguagaucgg       | 0 |
| Gi5_6794152_x155  | .....gguuuucacccaguagaucgg         | 1 |

|                        |                                 |   |
|------------------------|---------------------------------|---|
| Gi1_3157185_x155.....  | ccggugugguauaacggcuag.....      | 0 |
| Gi3_24211781_x154..... | gguuuuCcccaguagauccg.....       | 1 |
| Gi3_24241244_x152..... | Cccggugugguauaacggcuagc.....    | 1 |
| Gi3_24258258_x151..... | uccgguguAguauaacggc.....        | 1 |
| Gi2_8579332_x150.....  | .....agauccggguucgauucc.....    | 0 |
| Gi5_6848241_x149.....  | .....gguuuCcaccaguagauccg.....  | 1 |
| Gi2_8596522_x149.....  | .....guuuucaccaguagaucc.....    | 0 |
| Gi2_8619253_x147.....  | ccggugugguauaacggcuagcau.....   | 0 |
| Gi3_24328982_x147..... | uUcggugugguauaacggcuagc.....    | 1 |
| Gi2_8613373_x147.....  | ccggugugguauaacggcuag.....      | 0 |
| Gi3_24332216_x147..... | ccggugugguauaacggcu.....        | 0 |
| Gi5_6875923_x146.....  | .....ugugguauaacggcuagc.....    | 0 |
| Gi1a_4779400_x146..... | .....uuuucaccaguagauccg.....    | 0 |
| Gi5_6874609_x146.....  | .....gguCuucaccaguagauccg.....  | 1 |
| Gi3_24374259_x144..... | .....guagauccggguucgauu.....    | 0 |
| Gi3_24379299_x144..... | ucUggugugguauaacggcuagca.....   | 1 |
| Gi5_6886945_x144.....  | .....gguuuuCcccaguagauccg.....  | 1 |
| Gi3_24369651_x144..... | .....gugugguauaacggcuagc.....   | 0 |
| Gi2_8660891_x143.....  | .....uagauccggguucgauucc.....   | 0 |
| Gi2_8655171_x143.....  | .....guucgauucccggaucggag.....  | 0 |
| Gi5_6903284_x142.....  | .....Guuucaccaguagauccgg.....   | 1 |
| Gi3_24456133_x140..... | ucUggugugguauaacggcua.....      | 1 |
| Gi5_6920949_x140.....  | ucUggugugguauaacggcuagc.....    | 1 |
| Gi2_8689587_x140.....  | .....ugugguauaacggcuagc.....    | 0 |
| Gi1_3223282_x139.....  | .....gGuuucaccaguagauccgg.....  | 1 |
| Gi3_24466281_x139..... | .....ugguuuucaccaguagauccg..... | 0 |
| Gi5_6934345_x139.....  | .....gguuCucaccaguagauccg.....  | 1 |
| Gi2_8701567_x139.....  | .....gguucgauucccggaucUgg.....  | 1 |
| Gi5_6943206_x138.....  | .....Uuuuucaccaguagauccgg.....  | 1 |
| Gi3_24491719_x137..... | uccggugugguauaacggUuagc.....    | 1 |
| Gi3_24490623_x137..... | Gccggugugguauaacgg.....         | 1 |
| Gi3_24541224_x135..... | .....ugugguauaacggcuagc.....    | 0 |
| Gi4_391712_x135.....   | uccggugugguauaacggcuagca.....   | 0 |
| Gi3_24547256_x134..... | .....gguuuCcaccaguagauccg.....  | 1 |
| Gi3_24586922_x132..... | ggGuuucaccaguagauccg.....       | 1 |
| Gi2_8788323_x131.....  | uccggugugguauaacggcuagA.....    | 1 |
| Gi2_8783345_x131.....  | ccggugugguauaacggA.....         | 1 |
| Gi5_7008592_x130.....  | .....gguuuucaccaguagCuccg.....  | 1 |
| Gi3_24625285_x130..... | .....Uuucgauucccggaucgg.....    | 1 |
| Gi3_24642226_x129..... | .....cccggcaucggagcucuuu.....   | 0 |
| Gi3_24646612_x129..... | .....Uuucgauucccggaucggga.....  | 1 |
| Gi5_7050575_x126.....  | cgugugguauaacggcuagca.....      | 0 |
| Gi1_3284469_x125.....  | .....Guuucaccaguagauccg.....    | 1 |
| Gi1_3281344_x125.....  | uccggugugguauaacggcuaA.....     | 1 |
| Gi3_24736213_x123..... | .....guucgauucccggaucggag.....  | 0 |
| Gi2_8887399_x122.....  | .....Uuucgauucccggaucgg.....    | 1 |
| Gi5_7087738_x122.....  | .....cgguucgauucccggauc.....    | 0 |

|                   |                                      |   |
|-------------------|--------------------------------------|---|
| Gi2_8902596_x121  | .....Uguucgauucccggauc.....          | 1 |
| Gl1a_4872989_x121 | .....gguucgauucccggaucgg.....        | 0 |
| Gi3_24794366_x120 | .....gguuuucaccagaguagCuccg.....     | 1 |
| Gi3_24779966_x120 | .....cgguucgauucccggaucgga.....      | 0 |
| Gi3_24801991_x119 | .....uccggugugguauaacggcuagcaA.....  | 1 |
| Gl1a_4879470_x119 | .....Uguuuucaccagauagauccg.....      | 1 |
| Gi5_7125351_x118  | .....gguuuucaccagauGgaucgg.....      | 1 |
| Gi3_24827576_x118 | .....uGcggugugguauaacggc.....        | 1 |
| Gi3_24842109_x117 | .....gUuuuuucaccagauagauc.....       | 1 |
| Gi5_7139555_x117  | .....uccggugugguauaGcggcuagc.....    | 1 |
| Gi2_8952551_x117  | .....ucUggugugguauaacggcuagc.....    | 1 |
| Gl1a_4890395_x116 | .....uccggugugguauaacggcuagca.....   | 0 |
| Gi5_7140254_x116  | .....uccggugugNguauaacggcuagc.....   | 1 |
| Gi1_3328112_x115  | .....uGcggugugguauaacggcuag.....     | 1 |
| Gi3_24870065_x115 | .....gguucgauucccggaucggag.....      | 0 |
| Gi3_24879495_x115 | .....uccggugugguauaacggcCagc.....    | 1 |
| Gi3_24879610_x115 | .....uccgUugugguauaacggcuagc.....    | 1 |
| Gi3_24876850_x115 | .....uccggCgugguauaacggcuag.....     | 1 |
| Gi5_7153092_x115  | .....gGuuuucaccagauagauccg.....      | 1 |
| Gi1_3324202_x115  | .....cugguuuuucaccagauagauccgg.....  | 0 |
| Gi5_7167156_x114  | .....Uuuucgauucccggaucgg.....        | 1 |
| Gi3_24954812_x110 | .....cgauucccggaucggagcucuu.....     | 0 |
| Gi1_3346784_x110  | .....Uuuuuucaccagauagauccgg.....     | 1 |
| Gi1_3352925_x109  | .....ggugugguauaacggcuag.....        | 0 |
| Gi2_9055350_x108  | .....Gccggugugguauaacggcuag.....     | 1 |
| Gi4_412251_x108   | .....gguuuucaccagauagauccg.....      | 0 |
| Gi2_9070616_x107  | .....Guucaccagauagauccg.....         | 1 |
| Gi5_7243784_x106  | .....Gccggugugguauaacggcuagca.....   | 1 |
| Gi3_25053856_x105 | .....gugugguauaacggcuagca.....       | 0 |
| Gi3_25056481_x105 | .....uccggugugguGuaacggcuagc.....    | 1 |
| Gi2_9102789_x104  | .....ugguuuuucaccagauagauccgggu..... | 0 |
| Gi5_7265649_x104  | .....Cuuuucaccagauagauccgg.....      | 1 |
| Gl1a_4948998_x103 | .....uccggguucgauucccgga.....        | 0 |
| Gi5_7269050_x103  | .....Gccggugugguauaacggcuag.....     | 1 |
| Gi3_25097173_x103 | .....uccggugugguauaacAgcuagc.....    | 1 |
| Gi3_25087594_x103 | .....uccggugugguauaacggcuGgc.....    | 1 |
| Gi5_7274200_x103  | .....uccggugugguauaacggcu.....       | 0 |
| Gi2_9129027_x102  | .....guucgauucccggaucUgg.....        | 1 |
| Gi3_25114721_x102 | .....uccggugugguauaGcggcuagc.....    | 1 |
| Gl1a_4956645_x101 | .....gguuuucaccagauagauc.....        | 0 |
| Gi3_25125444_x101 | .....Gccggugugguauaacggcuag.....     | 1 |
| Gi2_9138439_x101  | .....gugguauaacggcuagcau.....        | 0 |
| Gi3_25147226_x100 | .....uccggugugNguauaacggcuagca.....  | 1 |
| Gi5_7300789_x100  | .....auccggguucgauucccgga.....       | 0 |
| Gi5_7311362_x99   | .....gguuuucaccagauagaucc.....       | 0 |
| Gi1_3399834_x99   | .....caguagauccggguucgauu.....       | 0 |
| Gi3_25176655_x98  | .....ggAuuuucaccagauagauccg.....     | 1 |



Gi2\_9170858\_x98.....uccgguguguaaaccggcuagc.....1  
 Gi2\_9184726\_x97.....Uuucgauucccggaucgga.....1  
 Gi3\_25199628\_x97.....uccgguguggCauaacggcuagc.....1  
 Gi2\_9187927\_x97.....Gccggugugguuaaacgg.....1  
 Gi5\_7357286\_x95.....Cauccggguucgauucccgga.....1  
 Gi1\_3421373\_x95.....Uuucgauucccggaucgga.....1  
 Gi3\_25246829\_x94.....agauccggguucgauucc.....0  
 Gi1\_3423915\_x94.....uGcggugugguuaaacggcua.....1  
 Gi3\_25240437\_x94.....uccggugCgguuaaacggcuagc.....1  
 Gi1\_3426547\_x94.....ggugugguuaaacggcuagcau.....0  
 Gi1\_3430370\_x93.....uguuuuacccaguagauccgg.....0  
 Gi1\_3433156\_x92.....uccggugugguuaaGcggcuagc.....1  
 Gi1\_3437480\_x92.....gGuuucacccaguagauccg.....1  
 Gi3\_25290719\_x92.....gguuuucacccGguagauccg.....1  
 Gi1\_3434720\_x92.....uGcggugugguuaaacggcuagc.....1  
 Gi3\_25304938\_x91.....gguucgauucccggcGucggagc.....1  
 Gi1\_3441488\_x91.....guucgauucccggaucg.....0  
 Gi2\_9264757\_x90.....ccggguucgauucccggaucgga.....0  
 Gi2\_9279793\_x89.....uGcggugugguuaaacggcuagca.....1  
 Gi5\_7420830\_x89.....uUguuuucacccaguagauccg.....1  
 Gi5\_7423233\_x89.....ggugugguuaaacggcuagc.....0  
 Gi3\_25361744\_x88.....uccggugugguuaCaacggcuagc.....1  
 Gi2\_9283527\_x88.....uccggugugguuaaGcggcuagc.....1  
 Gi2\_9296363\_x87.....gguucgauucccggaucggag.....0  
 Gi5\_7439947\_x87.....Gccggugugguuaaacggcuagcau.....1  
 Gi5\_7441948\_x87.....gguuuucacccGguagauccg.....1  
 Gi5\_7451922\_x86.....ggugugguuaaacggcuagcau.....0  
 Gi5\_7456136\_x86.....guucgauucccggaucggagcuA.....1  
 Gi5\_7470895\_x85.....cggugugguuaaacggcuag.....0  
 Gi5\_7461800\_x85.....uccggugugguuaaacggcuagAa.....1  
 Gi3\_25423855\_x84.....gguucgauucccggaCcgagc.....1  
 Gi1\_3474675\_x84.....cccaguagauccggguucgauucc.....0  
 Gi5\_7474956\_x84.....Cguuuucacccaguagauccg.....1  
 Gi5\_7511749\_x81.....uUcggugugguuaaacggcuagc.....1  
 Gi3\_25476653\_x81.....Cguuuucacccaguagauccg.....1  
 Gi1\_3493661\_x80.....Gccggugugguuaaacgg.....1  
 Gi5\_7524147\_x80.....gguuuucacccaguagaCccg.....1  
 Gi5\_7542200\_x78.....cgauucccggaucggagcucuuu.....0  
 Gi3\_25550742\_x77.....accaguagauccggguucgauucc.....0  
 Gi5\_7561270\_x77.....uccggugugguuaaacggcuagcaA.....1  
 Gi5\_7560885\_x77.....uGcggugugguuaaacggcua.....1  
 Gi3\_25572434\_x76.....gguuuucacccaguagaCccg.....1  
 Gi5\_7572774\_x76.....Gccggugugguuaaacggc.....1  
 Gi3\_25562326\_x76.....cggugugguuaaacggcuagcau.....0  
 GlA\_5085804\_x76.....gUuuuuacccaguagauccg.....1  
 Gi3\_25588260\_x75.....uccggugugguuaaGcggcua.....1  
 Gi1\_3518133\_x75.....uccggugugguuaaGcggcuag.....1

|                       |                                |   |
|-----------------------|--------------------------------|---|
| Gi5_7584121_x75.....  | ucgauucccggaucggagcC.....      | 1 |
| Gi3_25588485_x75..... | uccggugugguauCacggcuagc.....   | 1 |
| Gi1_3520308_x75.....  | uGcggugugguauaacggcuagca.....  | 1 |
| Gi3_25609407_x74..... | Uguucgauucccggauc.....         | 1 |
| Gi3_25601933_x74..... | gguuuucacccaguGgaucgg.....     | 1 |
| Gi3_25615771_x74..... | uccgguguNguauaacggcu.....      | 1 |
| Gi2_9472005_x73.....  | gguccggugugguauaacggcuagc..... | 0 |
| Gi3_25626821_x73..... | ucgauucccggaucggagcC.....      | 1 |
| Gi3_25618134_x73..... | uGcggugugguauaacggcuagcau..... | 1 |
| Gi5_7607684_x73.....  | gguucgauucccggaucggag.....     | 0 |
| Gi1_3533474_x72.....  | ucUggugugguauaacggcuag.....    | 1 |
| Gi3_25640754_x72..... | gguuuucacccaguagaucAg.....     | 1 |
| Gi3_25644138_x72..... | uccggugugguauaacggcuagcG.....  | 1 |
| Gi3_25667564_x71..... | gguuuucacccaguagaucCA.....     | 1 |
| Gi5_7622684_x71.....  | uccggugugguGuaaacggcuagc.....  | 1 |
| Gi2_9492964_x71.....  | Gccggugugguauaacggcuag.....    | 1 |
| Gi3_25672037_x71..... | ucUggugugguauaacggc.....       | 1 |
| Gi3_25663446_x71..... | gGucgauucccggaucgg.....        | 1 |
| Gi2_9484870_x71.....  | Gccggugugguauaacggcuagcau..... | 1 |
| Gi5_7625382_x71.....  | ggGuuucacccaguagaucgg.....     | 1 |
| Gi3_25671824_x71..... | uUcggugugguauaacggcuagca.....  | 1 |
| Gi5_7637938_x70.....  | gauccggguucgauucccggauc.....   | 0 |
| Gi3_25684780_x70..... | guuCucacccaguagaucgg.....      | 1 |
| Gi2_9495091_x70.....  | gugugguauaacggcuagc.....       | 0 |
| Gi5_7654168_x69.....  | uccggCgugguauaacggcuagc.....   | 1 |
| Gi3_25701982_x69..... | gguccggugugguauaacggcu.....    | 0 |
| Gi2_9519180_x68.....  | uccggCgugguauaacggcuagc.....   | 1 |
| Gi2_9521220_x68.....  | gGuuucacccaguagauc.....        | 1 |
| Gi5_7660795_x68.....  | uccgguguggCauaacggcuagc.....   | 1 |
| Gi2_9537977_x67.....  | uccggugugguauaacggcuGgc.....   | 1 |
| Gi5_7668068_x67.....  | gAuuuucacccaguagaucgg.....     | 1 |
| Gi1_3564122_x66.....  | uccgguguNguauaacggcuagc.....   | 1 |
| Gi3_25763419_x66..... | uccggugugguauaacggcuagAa.....  | 1 |
| Gi1_3562142_x66.....  | uccgguguNguauaacggcuag.....    | 1 |
| Gi2_9566501_x65.....  | ggguucgauucccggaucggagc.....   | 0 |
| Gi2_9565526_x65.....  | gUuucgauucccggauc.....         | 1 |
| Gi3_25787483_x64..... | Uguucgauucccggaucg.....        | 1 |
| Gi1a_5153972_x64..... | gguucgauucccggaucg.....        | 0 |
| Gi3_25786907_x64..... | Uguucgauucccggaucgga.....      | 1 |
| Gi3_25814046_x63..... | gguuuucCcccaguagaucgg.....     | 1 |
| Gi3_25807494_x63..... | uccggugugguGuaaacggcu.....     | 1 |
| Gi3_25808250_x63..... | uccggugugguauaacggcuCgc.....   | 1 |
| Gi5_7722498_x63.....  | uccggugugguauaacggcuGgc.....   | 1 |
| Gi1a_5158824_x63..... | guucgauucccggaucgg.....        | 0 |
| Gi3_25822955_x62..... | uccggCgugguauaacgg.....        | 1 |
| Gi1_3580533_x62.....  | Uguuuucacccaguagaucgg.....     | 1 |
| Gi3_25820971_x62..... | uccgguguNguauaacggc.....       | 1 |

|                  |                                |        |   |
|------------------|--------------------------------|--------|---|
| Gi3_25856561_x61 | .....uccgUugugguauaacggcua     | .....  | 1 |
| G1a_5174484_x61  | .....cugguuucacccaguagauc      | .....0 |   |
| Gi2_9614902_x61  | .....gguuuucacccaguagaucgg     | .....0 |   |
| Gi2_9613865_x61  | .....Cccggugugguauaacggcuagc   | .....1 |   |
| Gi2_9608497_x61  | .....Uguucgauucccggaucgg       | .....1 |   |
| Gi2_9609961_x61  | .....uccggugugguCaacggcuagc    | .....1 |   |
| Gi2_9605447_x61  | .....uccggguucgauucccggaucgga  | .....0 |   |
| Gi5_7754716_x60  | .....gguuuucacccaguagaucAg     | .....1 |   |
| Gi3_25865089_x60 | .....gGucgauucccggaucgga       | .....1 |   |
| Gi3_25870309_x60 | .....guucgauucccggaucggagcuA   | .....1 |   |
| Gi2_9622145_x60  | .....uccggugugguGuaacggcuagc   | .....1 |   |
| Gi5_7759636_x60  | .....uccgUugugguauaacggcuagc   | .....1 |   |
| Gi1_3595040_x60  | .....guucgauucccggaucggagcCc   | .....1 |   |
| Gi3_25864249_x60 | .....guuuCacccaguagaucgg       | .....1 |   |
| Gi2_9637507_x59  | .....uuuucacccaguagaucgg       | .....0 |   |
| Gi3_25881254_x59 | .....uccggCgugguauaacggc       | .....1 |   |
| Gi5_7767823_x59  | .....gguccggugugguauaacggcuagc | .....0 |   |
| Gi2_9633023_x59  | .....ggguucgauucccggaucggag    | .....0 |   |
| Gi3_25889750_x59 | .....aucggguucgauucccggaucgga  | .....0 |   |
| Gi2_9631194_x59  | .....uUcggugugguauaacggcuagc   | .....1 |   |
| G1a_5193212_x59  | .....ugguuuucacccaguagaucgg    | .....0 |   |
| Gi5_7785631_x58  | .....ggAuuucacccaguagaucgg     | .....1 |   |
| Gi3_25905162_x58 | .....uUcggugugguauaacggcua     | .....1 |   |
| Gi5_7783253_x58  | .....Gccggugugguauaacgg        | .....1 |   |
| Gi3_25902610_x58 | .....uccggugugguauaacggcuagcC  | .....1 |   |
| G1a_5193684_x58  | .....ugguuuucacccaguagaucgg    | .....0 |   |
| G1a_5196120_x58  | .....gugguauaacggcuagca        | .....0 |   |
| Gi3_25928578_x57 | .....gguuuucacUcaguagaucgg     | .....1 |   |
| Gi3_25923847_x57 | .....ggguucgauucccggaucg       | .....0 |   |
| Gi3_25936843_x57 | .....uccggugugguauaacgAcuagc   | .....1 |   |
| Gi5_7795630_x57  | .....gguuuucacccaguagaucA      | .....1 |   |
| Gi3_25928635_x57 | .....gguuuucacccaguagaucUg     | .....1 |   |
| Gi3_25931713_x57 | .....uccggCgugguauaacggcuagca  | .....1 |   |
| Gi5_7792495_x57  | .....ggugugguauaacggcuag       | .....0 |   |
| Gi3_25955830_x56 | .....Ggguuuucacccaguagaucgg    | .....1 |   |
| Gi2_9676958_x56  | .....gGucgauucccggaucgg        | .....1 |   |
| Gi3_25950062_x56 | .....uccggugugguauaacggcCa     | .....1 |   |
| Gi3_25949166_x56 | .....Cccggugugguauaacggcuagca  | .....1 |   |
| Gi3_25940486_x56 | .....gguuuucaccUaguagaucgg     | .....1 |   |
| Gi5_7804312_x56  | .....Cccggugugguauaacggcuagc   | .....1 |   |
| Gi2_9681816_x55  | .....ucUgugugguauaacggcuagca   | .....1 |   |
| Gi5_7821224_x55  | .....gguccggugugguauaacgg      | .....0 |   |
| Gi3_25976710_x55 | .....Guuucacccaguagaucgg       | .....1 |   |
| Gi2_9687096_x55  | .....uccgUugugguauaacggcuagc   | .....1 |   |
| Gi1_3627210_x54  | .....uccggCgugguauaacggcuag    | .....1 |   |
| Gi5_7828073_x54  | .....gguuuucCcccaguagaucgg     | .....1 |   |
| Gi2_9702216_x54  | .....gguucgauucccggaCcgagc     | .....1 |   |

|                       |                                      |   |
|-----------------------|--------------------------------------|---|
| Gi2_9701082_x54.....  | uGcggugugguauaacggc.....             | 1 |
| Gi3_25991568_x54..... | .gguuuucaccaAuagauccg.....           | 1 |
| Gi5_7839677_x53.....  | .gguuuucacUcaguagauccg.....          | 1 |
| Gi5_7842115_x53.....  | .Uguuuucacccaguagauc.....            | 1 |
| Gi1_3627425_x53.....  | .ucUggugugguauaacggcua.....          | 1 |
| Gi3_25999088_x53..... | .gguuuucacccagCagauccg.....          | 1 |
| Gi2_9710326_x53.....  | .uccggugugguauaacAgcuagc.....        | 1 |
| Gi3_26018092_x52..... | .....uucgauucccggaucggagcC.....      | 1 |
| Gi5_7854715_x52.....  | .....gGucgauucccggaucgg.....         | 1 |
| Gi3_26025320_x52..... | .....cgauucccggaucggag.....          | 0 |
| Gi1_3633854_x52.....  | .....guucgauucccggaCcg.....          | 1 |
| Gi3_26021784_x52..... | .....gAuuuucacccaguagauccg.....      | 1 |
| Gi5_7858563_x52.....  | .uccggugugguCaacggcuagc.....         | 1 |
| Gi5_7852531_x52.....  | .uccggugugguauaacAgcuagc.....        | 1 |
| Gi3_26017520_x52..... | .....gUuucgauucccggauc.....          | 1 |
| Gi2_9728058_x52.....  | .....gguuuucacccaguagauccggguuc..... | 0 |
| Gi5_7852739_x52.....  | .uccggugugguauaacggcCagc.....        | 1 |
| Gi3_26034160_x52..... | .....uucgauucccggaucggga.....        | 0 |
| Gi3_26020016_x52..... | .Cccggugugguauaacggcuagcau.....      | 1 |
| Gi3_26019912_x52..... | .uccgguguggCauaacggcu.....           | 1 |
| Gi3_26034680_x52..... | .Gccggugugguauaacggcu.....           | 1 |
| Gi3_26020172_x52..... | .....gguuuuUaccaguagauccg.....       | 1 |
| Gi3_26052049_x51..... | .uccggugugguauaaUggcuagc.....        | 1 |
| Gi5_7872217_x51.....  | .....uagauccggguucgauucccgga.....    | 0 |
| Gi5_7869259_x51.....  | .....gguuuucaccUaguagauccg.....      | 1 |
| Gi5_7876836_x50.....  | .uccggugugguauaacggcuagcauga.....    | 0 |
| Gi2_9746195_x50.....  | .....gguucgauucccggaucggagcA.....    | 1 |
| Gi5_7877236_x50.....  | .ucUggugugguauaacggcua.....          | 1 |
| Gi5_7885336_x50.....  | .uccggugugguauaacggcuagcaugac.....   | 0 |
| Gi3_26064236_x50..... | .....ucUggugugguauaacggcuagcau.....  | 1 |
| Gi3_26077136_x50..... | .uGcggugugguauaacggcuag.....         | 1 |
| Gi3_26077236_x50..... | .....ccggugugguauaacggcuagA.....     | 1 |
| Gi3_26093776_x49..... | .uccggugugguauGacggcuagc.....        | 1 |
| Gl1a_5256021_x49..... | .....guucgauucccggaucggga.....       | 0 |
| Gi1_3652789_x49.....  | .ucUggugugguauaacggcuagc.....        | 1 |
| Gi1_3651417_x49.....  | .ucUggugugguauaacggcuagca.....       | 1 |
| Gi3_26093678_x49..... | .....gguuuucacccaguagauAcg.....      | 1 |
| Gi1_3649702_x49.....  | .Gccggugugguauaacggcuagcau.....      | 1 |
| Gi3_26079860_x49..... | .uccgguguggCauaacggcuagca.....       | 1 |
| Gi3_26086524_x49..... | .uGcggugugguauaacgg.....             | 1 |
| Gi5_7900394_x49.....  | .uccggugugguauCacggcuagc.....        | 1 |
| Gi2_9774509_x48.....  | .uGcggugugguauaacgg.....             | 1 |
| Gi2_9772637_x48.....  | .uccgguguggCauaacggcuagc.....        | 1 |
| Gi3_26097824_x48..... | .....gguucgauucccggcUuc.....         | 1 |
| Gi3_26106416_x48..... | .....Cccggugugguauaacggcu.....       | 1 |
| Gi3_26098016_x48..... | .uccggugugguauaacggcuAc.....         | 1 |
| Gi5_7923013_x47.....  | .....ccggugugguauaacggcuagA.....     | 1 |

|                  |                                  |       |   |
|------------------|----------------------------------|-------|---|
| Gi3_26131161_x47 | .....gguuuucacAcaguagauccg       | ..... | 1 |
| Gi3_26131725_x47 | .....Accaguagauccggguucgauucc    | ..... | 1 |
| Gi5_7917655_x47  | .....uGcggugugguauaacggcuagcau   | ..... | 1 |
| Gi3_26136848_x47 | .....uccggugCgguauaacggcuagca    | ..... | 1 |
| Gi2_9789696_x47  | .....Guuucacccaguagauccgg        | ..... | 1 |
| Gi2_9785842_x47  | .....uccgguguNguauaacggcuagca    | ..... | 1 |
| Gi1a_5277929_x47 | .....uguuuuucacccaguagauU        | ..... | 1 |
| Gi3_26123406_x47 | .....gguucgauucccggaucggagcCc    | ..... | 1 |
| Gi1_3662555_x47  | .....guucgauucccggcGucgg         | ..... | 1 |
| Gi5_7915352_x47  | .....gguuuucacccagCagauccg       | ..... | 1 |
| Gi3_26128247_x47 | .....cccaguagauccggguucgauucc    | ..... | 0 |
| Gi3_26147579_x46 | .....gguuuucacccaguagaAccg       | ..... | 1 |
| Gi5_7930615_x46  | .....gGuuucacccaguagauccgg       | ..... | 1 |
| Gi5_7940919_x46  | .....uguuuuucacccaguagauccgA     | ..... | 1 |
| Gi1_3667337_x46  | .....uccggugugguauaacggcuagcauga | ..... | 0 |
| Gi1a_5285108_x46 | .....gguucgauucccggauc           | ..... | 0 |
| Gi3_26172178_x45 | .....gUuucgauucccggaucg          | ..... | 1 |
| Gi3_26159038_x45 | .....uGuucacccaguagauccg         | ..... | 1 |
| Gi2_9819024_x45  | .....Uguucgauucccggaucggagc      | ..... | 1 |
| Gi2_9815154_x45  | .....Uguucgauucccggaucg          | ..... | 1 |
| Gi3_26168128_x45 | .....uccggugugguauaacggcuagU     | ..... | 1 |
| Gi5_7952622_x45  | .....gCuuuucacccaguagauccg       | ..... | 1 |
| Gi3_26174113_x45 | .....gguucgauucccggaucggagcuA    | ..... | 1 |
| Gi3_26167903_x45 | .....uccggugugguauaacAgcua       | ..... | 1 |
| Gi1_3674265_x45  | .....Uuagauccggguucgauucc        | ..... | 1 |
| Gi1_3677901_x44  | .....uccggugugguauaacAgcuagc     | ..... | 1 |
| Gi1_3677989_x44  | .....gugugguauaacggcuag          | ..... | 0 |
| Gi2_9826206_x44  | .....uGcggugugguauaacggcu        | ..... | 1 |
| Gi5_7961371_x44  | .....uccggugCgguauaacggcuagc     | ..... | 1 |
| Gi2_9840937_x43  | .....gGucgauucccggaucgga         | ..... | 1 |
| Gi3_26217655_x43 | .....Ugugugguauaacggcu           | ..... | 1 |
| Gi5_7968561_x43  | .....uGcggugugguauaacggcuagca    | ..... | 1 |
| Gi3_26201014_x43 | .....uccAgugugguauaacggcuagc     | ..... | 1 |
| Gi2_9837411_x43  | .....uccggugugguauaacggcuagcC    | ..... | 1 |
| Gi3_26214129_x43 | .....uccAgugugguauaacggcu        | ..... | 1 |
| Gi3_26203121_x43 | .....uccggAgugguauaacggcuagc     | ..... | 1 |
| Gi3_26215290_x43 | .....uccgguguAguauaacggcuagc     | ..... | 1 |
| Gi2_9841367_x43  | .....Ugugugguauaacggcuagc        | ..... | 1 |
| Gi2_9837669_x43  | .....guucgauucccggaucggagcCc     | ..... | 1 |
| Gi5_7985956_x42  | .....gguuuucacAcaguagauccg       | ..... | 1 |
| Gi1_3687839_x42  | .....uUcggugugguauaacggcuagc     | ..... | 1 |
| Gi3_26232679_x42 | .....uccggugugguCaaccggcu        | ..... | 1 |
| Gi3_26226169_x42 | .....guuuucacccaguagauccggguucg  | ..... | 0 |
| Gi5_7984906_x42  | .....gguuuucacccaguagauAccg      | ..... | 1 |
| Gi2_9856885_x42  | .....uccggCgugguauaacggc         | ..... | 1 |
| Gi1_3687251_x42  | .....uccggugugguauaacggcuagcU    | ..... | 1 |
| Gi3_2622221_x42  | .....uguuuuCcaccaguagauccg       | ..... | 1 |

|                  |                                  |   |
|------------------|----------------------------------|---|
| Gi3_26251303_x41 | .....gguuuucacccaguagauUcg       | 1 |
| Gi2_9869192_x41  | .....uccggugugguauaacggcA        | 1 |
| Gi1_3693224_x41  | .....uccggugugguauaacAgcuag      | 1 |
| Gi1_3694946_x41  | .....uccggugugguauaacggcuagcC    | 1 |
| Gi1_3692855_x41  | .....uccggugugguauaacggcuGgc     | 1 |
| Gi5_7993002_x41  | .....gguuuucaUccaguagauccg       | 1 |
| Gi3_26251754_x41 | .....uccggugugguauaacggcCagca    | 1 |
| Gi2_9867019_x41  | .....uccggugCgguauaacggcuagc     | 1 |
| Gi5_7992100_x41  | .....Uuucgauucccggaucggagc       | 1 |
| Gi2_9866568_x41  | .....uccggugugguauaGcggcuagca    | 1 |
| Gi5_7993248_x41  | .....Guuucacccaguagauccg         | 1 |
| Gi3_26281010_x40 | .....uccggugugguauaacAgcuagca    | 1 |
| Gi2_9876250_x40  | .....uccggugugguauaacggcCagc     | 1 |
| Gi3_26271170_x40 | .....uccggugugguauCacggcua       | 1 |
| Gi2_9876970_x40  | .....gUuucgauucccggaucgg         | 1 |
| Gi1_3700637_x40  | .....gguuuucacccaguagauccgU      | 1 |
| Gi3_26273890_x40 | .....uUguuuucacccaguagaucc       | 1 |
| Gi5_8007534_x40  | .....gguuuucacccaguagauUg        | 1 |
| Gi4_480875_x39   | .....guucgauucccggaucgg          | 0 |
| Gi3_26293872_x39 | .....uccggugugguauaCcgguagc      | 1 |
| Gi2_9897721_x39  | .....gguccggugugguauaacggcuagcau | 0 |
| Gi3_26283420_x39 | .....Uguucgauucccggaucggagc      | 1 |
| Gi3_26285253_x39 | .....gguuuCcacccaguagauccgg      | 1 |
| Gi3_26304948_x39 | .....uccggugGgguauaacggcuagc     | 1 |
| Gi5_8026280_x39  | .....guucgauucccggaCcgg          | 1 |
| Gi3_26283108_x39 | .....uccggugugguauaGcggc         | 1 |
| Gi2_9896434_x39  | .....ucUggugugguauaacggc         | 1 |
| Gi2_9898735_x39  | .....Uguuuucacccaguagaucc        | 1 |
| Gi1_3705296_x39  | .....uccgUugugguauaacggcuag      | 1 |
| Gi2_9888634_x39  | .....uccggugugguauCacggcuagc     | 1 |
| Gi5_8041043_x38  | .....uccgguguNguauaacggcua       | 1 |
| Gi2_9909231_x38  | .....ccaguagauccggguucgauucccgga | 0 |
| Gi5_8034165_x38  | .....cggugugguauaacggcu          | 0 |
| Gi2_9905355_x38  | .....ucgauucccggaucggagc         | 0 |
| Gi3_26320318_x38 | .....gguucgauucccggaCcgg         | 1 |
| Gi3_26320546_x38 | .....uccgguguAguauaacggcua       | 1 |
| Gi3_26324004_x38 | .....Uguucgauucccggaucgg         | 1 |
| Gi5_8040853_x38  | .....gguuuucacccaguagauUcg       | 1 |
| Gi3_26316936_x38 | .....Accggugugguauaacggcuagc     | 1 |
| Gi1_3710706_x38  | .....uccgUugugguauaacggcuagc     | 1 |
| Gi3_26341484_x37 | .....gCuuuucacccaguagauccg       | 1 |
| Gi2_9921479_x37  | .....cccaguagauccggguucgauucc    | 0 |
| Gi3_26349143_x37 | .....uccgguguNguauaacggcuagcau   | 1 |
| Gi1_3716400_x37  | .....uccgguguggCauaacggcuag      | 1 |
| Gi5_8050296_x37  | .....Uguucgauucccggaucgg         | 1 |
| Gi3_26337562_x37 | .....Uuuuucacccaguagaucc         | 1 |
| Gi5_8051998_x37  | .....gUuuuucacccaguagaucc        | 1 |

|                  |                               |   |
|------------------|-------------------------------|---|
| Gi1_3720433_x37  | uccgguguNguauaacggcuagca      | 1 |
| Gi3_26327498_x37 | uccggugCgguauaacggcua         | 1 |
| Gi1_3720322_x37  | uccgguguNguauaacggcua         | 1 |
| Gi2_9921220_x37  | guucgauucccgAcaucgg           | 1 |
| Gi1_3718472_x37  | uccggCgugguauaacggcua         | 1 |
| Gi5_8045190_x37  | ggugugguauaacggcuagca         | 0 |
| Gi3_26347145_x37 | Guuucacccaguagauccgg          | 1 |
| Gi5_8050333_x37  | gguuuuUaccaguagauccg          | 1 |
| Gi3_26336674_x37 | Uuagauccggguucgauucc          | 1 |
| Gi2_9941427_x36  | uccgguguNguauaacggc           | 1 |
| Gi3_26370155_x36 | uccggGuAugguauaacggcuagc      | 1 |
| Gi5_8067208_x36  | Uguucgauuccggcauc             | 1 |
| Gi1_3722667_x36  | Gccggugugguauaacggc           | 1 |
| Gi1_3721443_x36  | uUcggugugguauaacggcuag        | 1 |
| Gi3_26364359_x36 | ccggguucgauuccggcaucgga       | 0 |
| Gi3_26359031_x36 | gguucgauucccgcaCcgga          | 1 |
| Gi3_26374511_x36 | Uuucgauuccggcaucg             | 1 |
| Gi5_8069244_x35  | uGcggugugguauaacggcuag        | 1 |
| Gi1_3729647_x35  | gguuuucaNccaguagauccg         | 1 |
| Gi1_3728457_x35  | uccggugugguGuaacggcuag        | 1 |
| Gi1_3732062_x35  | gGucgauucccgcaucgg            | 1 |
| Gi3_26391530_x35 | gguucgauucUcggcaucgg          | 1 |
| Gi3_26391600_x35 | uccggugugguauaGcggcuagca      | 1 |
| Gi5_8073619_x35  | uccggugugguauaacggcuagU       | 1 |
| Gi2_9943539_x35  | ggCuuucacccaguagauccg         | 1 |
| Gi1_3734543_x34  | uccggCgugguauaacggcuagc       | 1 |
| Gi1_3733455_x34  | Cguucgauucccgcaucgg           | 1 |
| Gi5_8090499_x34  | uccggCgugguauaacggcuag        | 1 |
| Gi2_9968513_x34  | uccggugugguauaacggcuagcaugacu | 0 |
| Gi1_3736345_x34  | gUuuucacccaguagauccgg         | 1 |
| Gi3_26397292_x34 | uccggugugguCaacggcuagca       | 1 |
| Gi3_26413986_x34 | gguuuucacccaguaAaucgg         | 1 |
| Gi3_26408818_x34 | uccggugugguGuaacggcuagca      | 1 |
| Gi2_9963923_x34  | uccggugugguauaacggcuagU       | 1 |
| Gi5_8089003_x34  | gguucgauucccgcaucggagcCc      | 1 |
| Gi5_8082339_x34  | Uuucgauucccgcaucg             | 1 |
| Gi3_26428723_x33 | gUuucgauucccgcaucgga          | 1 |
| Gi3_26438854_x33 | uccggugugguauaacggcuCgca      | 1 |
| Gi3_26438887_x33 | gguuuucaUccaguagauccg         | 1 |
| Gi2_9976641_x33  | Uguucgauucccgcaucgga          | 1 |
| Gi3_26422090_x33 | gguuGucacccaguagauccg         | 1 |
| Gi3_26435983_x33 | uccggugugAuauaacggcuagc       | 1 |
| Gi1_3740961_x33  | uccggugugguCaacggcuag         | 1 |
| Gi2_9981756_x33  | uccgguguNguauaacggcua         | 1 |
| Gi5_8103939_x33  | uccggugugguauaacgAcuagc       | 1 |
| Gi1_3738981_x33  | gguuuucacccCguagauccg         | 1 |
| Gi1_3740367_x33  | guucgauucccgcaucggagc         | 0 |

|                  |                                     |   |
|------------------|-------------------------------------|---|
| Gi2_9980106_x33  | .....gguucgauucccggcGucggagc.....   | 1 |
| Gi2_9994653_x32  | .....uucgauucccggaucgga.....        | 0 |
| Gi3_26456830_x32 | .....uccggugAgguauaacggcuagc.....   | 1 |
| Gi1_3744800_x32  | .....uccggugugguauaacggcuGg.....    | 1 |
| Gi3_26446526_x32 | .....ucgauucccggaucggagc.....       | 0 |
| Gi3_26455454_x32 | .....gguuuucacccUguagauccg.....     | 1 |
| Gi1_3748736_x32  | .....gguCuucacccaguagauccg.....     | 1 |
| Gi3_26462302_x32 | .....cUgugugguauaacggcua.....       | 1 |
| Gi5_8110822_x32  | .....gguucgauucccggaucggagcuA.....  | 1 |
| Gi3_26468830_x32 | .....uccgUugugguauaacggcuagca.....  | 1 |
| Gi5_8110054_x32  | .....Uguucgauucccggaucggagc.....    | 1 |
| Gi1_3755353_x31  | .....Cccggugugguauaacggcuagc.....   | 1 |
| Gi5_8119341_x31  | .....ucUggugugguauaacggcuagcau..... | 1 |
| Gi3_26485962_x31 | .....uccggugugguCuaacggcuagc.....   | 1 |
| Gi5_8118442_x31  | .....Uuucgauucccggaucgga.....       | 1 |
| Gi3_26469532_x31 | .....ucUggugugguauaacggcuag.....    | 1 |
| Gi1_3750734_x31  | .....uGuucacccaguagauccg.....       | 1 |
| Gi1_3753307_x31  | .....ggCuucacccaguagauccg.....      | 1 |
| Gi1_3750951_x31  | .....uGcggugugguauaacgg.....        | 1 |
| Gi3_26478026_x31 | .....gguAuucacccaguagauccg.....     | 1 |
| Gi5_8118814_x31  | .....uccggCgugguauaacggcua.....     | 1 |
| Gi5_8130315_x31  | .....guucgauucccggaCcg.....         | 1 |
| Gi1_3760985_x30  | .....uccggugCgguauaacggcuag.....    | 1 |
| Gi1_3758105_x30  | .....uccggugugguGuaacggcuagc.....   | 1 |
| Gi3_26493300_x30 | .....ucgauucccggaucgga.....         | 0 |
| Gi3_26505870_x30 | .....Uguuuucacccaguagaucc.....      | 1 |
| Gi5_8142535_x30  | .....gUuucgauucccggaucgg.....       | 1 |
| Gi3_26498310_x30 | .....ucUggugugguauaacgg.....        | 1 |
| Gi3_26504760_x30 | .....uUcggugugguauaacggc.....       | 1 |
| Gi2_10025695_x30 | .....Uguuuucacccaguagaucc.....      | 1 |
| Gi3_26516520_x30 | .....guucgauucccggcGucgga.....      | 1 |
| Gi2_10017265_x30 | .....uccAgugugguauaacggcuagc.....   | 1 |
| Gi3_26511420_x30 | .....uccggugugguauCacggc.....       | 1 |
| Gi3_26517630_x30 | .....uccggugugguauaacggcuGgca.....  | 1 |
| Gi2_10019725_x30 | .....uccggugugguGuaacggc.....       | 1 |
| Gl1_5401386_x30  | .....Gccggugugguauaacggcuagc.....   | 1 |
| Gi1_3759635_x30  | .....Cccggugugguauaacggcuag.....    | 1 |
| Gi2_10036109_x29 | .....uccggCgugguauaacggcua.....     | 1 |
| Gi5_8153873_x29  | .....gguuuucacccaguCgauccg.....     | 1 |
| Gi5_8144390_x29  | .....ucUggugugguauaacggcuag.....    | 1 |
| Gi2_10032774_x29 | .....gguCuucacccaguagauccg.....     | 1 |
| Gi5_8145405_x29  | .....uccggugugguauaacggcuAc.....    | 1 |
| Gi5_8148885_x29  | .....uccgguguNguauaacggcuagcau..... | 1 |
| Gl1_5408668_x29  | .....uguuuuucacccaguagauc.....      | 0 |
| Gi3_26539732_x29 | .....uccgguguNguauaacgg.....        | 1 |
| Gi1_3767916_x29  | .....uccggCgugguauaacggcuagca.....  | 1 |
| Gi3_26539964_x29 | .....uccgAugugguauaacggcuagc.....   | 1 |



|                       |                                  |   |
|-----------------------|----------------------------------|---|
| Gi2_10037559_x29..... | .gguuuucacccaguagauccg.....      | 1 |
| Gi5_8156945_x28.....  | .guucgauucccggcGucgg.....        | 1 |
| Gi5_8161733_x28.....  | .Ggguuuucacccaguagauccg.....     | 1 |
| Gi3_26557941_x28..... | .guuuucacccaguagGuccg.....       | 1 |
| Gi1_3773320_x28.....  | .Uuucgauucccggaucgga.....        | 1 |
| Gi5_8156385_x28.....  | .uccggugugguauaacggGuagc.....    | 1 |
| Gi1_3770968_x28.....  | .Aguuuucacccaguagauccg.....      | 1 |
| Gi1_3769316_x28.....  | .gguucgauucccggaucg.....         | 0 |
| Gi1_3773740_x28.....  | .uccggugugguauaacggcCagc.....    | 1 |
| Gi3_26549037_x28..... | .uccggugugggCauaacggc.....       | 1 |
| Gi2_10057629_x28..... | .uGcggugugguauaacggcuagcau.....  | 1 |
| Gi3_26556541_x28..... | .guucgauucccggaCcgga.....        | 1 |
| Gi3_26548029_x28..... | .gauucccggaucggagc.....          | 1 |
| Gi5_8165093_x28.....  | .uccggugugguauaacggcuagcC.....   | 1 |
| Gi3_26553713_x28..... | .uccggAgugguauaacggcua.....      | 1 |
| Gi5_8159297_x28.....  | .uccggugugguauaGcggcua.....      | 1 |
| Gi2_10046541_x28..... | .uUcggugugguauaacggcuagca.....   | 1 |
| Gi3_26554665_x28..... | .uccggugugguauaacggcuaAca.....   | 1 |
| Gi2_10054493_x28..... | .Gccggugugguauaacggcu.....       | 1 |
| Gi3_26592546_x27..... | .Cccggugugguauaacggc.....        | 1 |
| Gi5_8178938_x27.....  | .uccggugugguauaacggUuagc.....    | 1 |
| Gi3_26568057_x27..... | .gUuucgauucccggaucggagc.....     | 1 |
| Gi3_26588334_x27..... | .uccggugugguauaacggcuG.....      | 1 |
| Gi3_26574456_x27..... | .auucccggaucggagcC.....          | 1 |
| Gi1_3774873_x27.....  | .uccggguucgauucccggaucgg.....    | 0 |
| Gi2_10067744_x27..... | .guucgauucccggaCcgga.....        | 1 |
| Gi2_10070228_x27..... | .uGuucacccaguagauccg.....        | 1 |
| Gi1a_5433008_x27..... | .Gccggugugguauaacggcuag.....     | 1 |
| Gi5_8178128_x27.....  | .ggugugguauaacggcuagcaugacu..... | 0 |
| Gi3_26588604_x27..... | .gguucgauucccggaCcgga.....       | 1 |
| Gi5_8173754_x27.....  | .ucUggugugguauaacggcuagca.....   | 1 |
| Gi1_3775845_x27.....  | .gguuuucacccaguagCuccg.....      | 1 |
| Gi2_10076289_x26..... | .ucUggugugguauaacggcua.....      | 1 |
| Gi3_26595565_x26..... | .gguuuucUccaguagauccg.....       | 1 |
| Gi1_3786209_x26.....  | .uccgguguAguauaacggcuag.....     | 1 |
| Gi3_26596839_x26..... | .uccgguaugguauaacggcua.....      | 1 |
| Gi2_10085337_x26..... | .uGcggugugguauaacggcuag.....     | 1 |
| Gi2_10075977_x26..... | .uucgauucccggaucgg.....          | 0 |
| Gi5_8183392_x26.....  | .gGucgauucccggaucggagc.....      | 1 |
| Gi1_3780749_x26.....  | .uccggugugguauaacggcuagAa.....   | 1 |
| Gi3_26602611_x26..... | .uccggugugguauaacgAcuagca.....   | 1 |
| Gi1_3784597_x26.....  | .uccggugugguauaGcggcua.....      | 1 |
| Gi2_10086819_x26..... | .gguuuucacccaguagGuccg.....      | 1 |
| Gi1_3784675_x26.....  | .uccggugugguauaacggcuG.....      | 1 |
| Gi2_10079071_x26..... | .gUuuuucacccaguagaucc.....       | 1 |
| Gi5_8180688_x26.....  | .uccgguguNguauaacggcuagca.....   | 1 |
| Gi5_8190464_x26.....  | .gguucgauucccggaucggagcucu.....  | 0 |

|                       |                                    |   |
|-----------------------|------------------------------------|---|
| Gi3_26601623_x26..... | .gguuucaccAaguagauccg.....         | 1 |
| Gi5_8189138_x26.....  | .uccggugugguauaacggcuCgc.....      | 1 |
| Gi5_8180844_x26.....  | .gguuucaccccUguagauccg.....        | 1 |
| Gi2_10084479_x26..... | ..gUuucgauucccggaucg.....          | 1 |
| Gi5_8185602_x26.....  | .gguuucacccaAuagauccg.....         | 1 |
| Gi5_8190178_x26.....  | .gguuGucaccaguagauccg.....         | 1 |
| Gi3_26595279_x26..... | .uccggugugguauCacggcuagca.....     | 1 |
| Gi1_3791181_x25.....  | .uccggugugguGuaacggcuagca.....     | 1 |
| G1a_5447137_x25.....  | ..Uuuucacccaguagauccg.....         | 1 |
| Gi2_10101497_x25..... | .uccggugugguauaacggcuCgc.....      | 1 |
| Gi3_26624018_x25..... | .uccAgugugguauaacggcuagca.....     | 1 |
| Gi2_10100472_x25..... | ..Cccggugugguauaacggcuagca.....    | 1 |
| Gi1_3791731_x25.....  | ..guucgauucccggaucggagcC.....      | 1 |
| Gi5_8205009_x25.....  | .uccggugugguauaGcggcuagca.....     | 1 |
| Gi2_10101197_x25..... | .uccgguguNguauaacgg.....           | 1 |
| Gi2_10095072_x25..... | ..Aguuuacaccaguagauccg.....        | 1 |
| Gi3_26643168_x25..... | .uccggugugguUuaacggcuagc.....      | 1 |
| Gi1_3793181_x25.....  | .uccgguguCguauaacggcuagc.....      | 1 |
| Gi2_10098697_x25..... | .gUugugguauaacggcuagc.....         | 1 |
| Gi3_26636818_x25..... | .uccgguguNguauaacggcuag.....       | 1 |
| Gi2_10095972_x25..... | ..gUuucgauucccggaucgga.....        | 1 |
| Gi3_26626493_x25..... | .uccggugugguauaaUggcu.....         | 1 |
| G1a_5446662_x25.....  | .gguCucacccaguagauccg.....         | 1 |
| Gi1_3791106_x25.....  | .gguuucGcccaguagauccg.....         | 1 |
| Gi1_3792781_x25.....  | ..Ugugugguauaacggcuagc.....        | 1 |
| Gi3_26645368_x25..... | ..guucgauucccggaCcg.....           | 1 |
| Gi2_10100397_x25..... | ..ucUggugugguauaacgg.....          | 1 |
| Gi5_8203234_x25.....  | .uccggugugguauaaUggcuagc.....      | 1 |
| Gi1_3797078_x24.....  | ..gguCucacccaguagauccg.....        | 1 |
| G1a_5454400_x24.....  | ..guucgauucccggaucggagc.....       | 0 |
| Gi5_8216064_x24.....  | ..cggugugguauaacggcuagcaugacu..... | 0 |
| G1a_5452720_x24.....  | ..cccaguagauccggguucgauucc.....    | 0 |
| Gi2_10120771_x24..... | .uccggugugguauaaUggcuagc.....      | 1 |
| Gi2_10106827_x24..... | ..guuuucGcccaguagauccg.....        | 1 |
| G1a_5452480_x24.....  | .uccggugugguauaacggcu.....         | 0 |
| Gi2_10121083_x24..... | .Accggugugguauaacggcuagc.....      | 1 |
| Gi3_26659832_x24..... | ..gUuucgauucccggaucg.....          | 1 |
| Gi3_26678456_x24..... | .uccggCgugguauaacggcuagca.....     | 1 |
| Gi3_26658896_x24..... | ..guucgauucccggcGucgg.....         | 1 |
| Gi3_26666672_x24..... | ..aUauccggguucgauucc.....          | 1 |
| Gi1_3794390_x24.....  | ..Ucggugugguauaacggcu.....         | 1 |
| Gi5_8218152_x24.....  | .uccggCgugguauaacgg.....           | 1 |
| Gi3_26659448_x24..... | ..gUugugguauaacggcu.....           | 1 |
| Gi3_26659688_x24..... | ..guuuucacNcaguagauccg.....        | 1 |
| Gi1_3795446_x24.....  | ..ucUggugugguauaacgg.....          | 1 |
| Gi5_8213904_x24.....  | .uccggugugguauaacggcCa.....        | 1 |
| Gi2_10113475_x24..... | .gguuucacccCguagauccg.....         | 1 |

|                       |                                    |   |
|-----------------------|------------------------------------|---|
| Gi5_8213472_x24.....  | guucgauucccggaucggagcAc.....       | 1 |
| Gi3_26655488_x24..... | guuuucacccCguagaucgg.....          | 1 |
| Gi3_26669648_x24..... | uccggugCgguauaacggc.....           | 1 |
| Gi3_26663600_x24..... | uccggCgugguauaacggcuag.....        | 1 |
| Gi2_10112659_x24..... | uccggugugguauaGcggc.....           | 1 |
| Gi2_10118323_x24..... | ucgauucccggaucggagcC.....          | 1 |
| Gi3_26674952_x24..... | ggauccgauucccggaucggga.....        | 1 |
| Gi1_3796046_x24.....  | uUguuuucacccaguagaucgg.....        | 1 |
| Gi3_26650304_x24..... | uccggugugguGuaacggc.....           | 1 |
| Gi5_8217960_x24.....  | uUcggugugguauaacggcuagcau.....     | 1 |
| Gi1_3800945_x23.....  | uccggugugguauaacggcuagcauAacu..... | 1 |
| Gi1_3805798_x23.....  | cUgugugguauaacggcuagca.....        | 1 |
| Gi3_26680675_x23..... | guuuucacNcaguagaucgg.....          | 1 |
| Gi2_10125726_x23..... | Uuucgauucccggaucgg.....            | 1 |
| Gi1_3804510_x23.....  | uccggugugguauCacggcuag.....        | 1 |
| Gi3_26681227_x23..... | gguccggugugguauaacggcuagc.....     | 0 |
| Gi2_10126646_x23..... | gguCuucacccaguagaucgg.....         | 1 |
| Gi2_10128325_x23..... | ucUggugugguauaacggcuag.....        | 1 |
| Gi1_3803935_x23.....  | uccggugugguauaacggcuagU.....       | 1 |
| Gi3_26697212_x23..... | uccggGgugguauaacggcuagc.....       | 1 |
| Gi2_10137640_x23..... | Uuuuucacccaguagaucgg.....          | 1 |
| Gi2_10137502_x23..... | gUuucgauucccggaucggagc.....        | 1 |
| Gi2_10131844_x23..... | uccggugugguauaacgAcuagc.....       | 1 |
| Gi1_3801865_x23.....  | Aguccggugugguauaacggcuagcau.....   | 1 |
| Gi3_26691439_x23..... | guuuucacccaguagGuccgg.....         | 1 |
| Gi5_8225825_x23.....  | uccgguguAguauaacggcuag.....        | 1 |
| Gi3_26691347_x23..... | uccggugugguauaaUggcuagca.....      | 1 |
| Gi5_8232472_x23.....  | Accggugugguauaacggcuagc.....       | 1 |
| Gi1_3800301_x23.....  | Uguucgauucccggaucgg.....           | 1 |
| Gi2_10131821_x23..... | uuucacccaguagaucgg.....            | 0 |
| Gi5_8222858_x23.....  | uGcggugugguauaacggc.....           | 1 |
| Gi3_26716472_x22..... | uccggugugguauaacggcuagcCu.....     | 1 |
| Gi4_500608_x22.....   | uccggugugguauaacggcuagcau.....     | 0 |
| Gi5_8235323_x22.....  | Cccggugugguauaacggcua.....         | 1 |
| Gi3_26736514_x22..... | uccgguguggCauaacggcuagcau.....     | 1 |
| Gi3_26721004_x22..... | cUauucccggaucggagc.....            | 1 |
| Gi2_10145778_x22..... | uccggugugguauaacggcuaAc.....       | 1 |
| Gi3_26717132_x22..... | uccggugugguauaacggcuagG.....       | 1 |
| Gi1_3810225_x22.....  | Cccggugugguauaacggcua.....         | 1 |
| Gi5_8235147_x22.....  | cccaguagaucggguucgau.....          | 0 |
| Gi3_26738296_x22..... | uccgUugugguauaacggc.....           | 1 |
| Gi5_8235499_x22.....  | uccgAugugguauaacggcuagc.....       | 1 |
| Gi3_26733324_x22..... | gguuuuAaccaguagaucgg.....          | 1 |
| Gi5_8247181_x22.....  | uccAgugugguauaacggcuagc.....       | 1 |
| Gi5_8235257_x22.....  | uccggAgugguauaacggcuagc.....       | 1 |
| Gi3_26726042_x22..... | uccgguguAguauaacgg.....            | 1 |
| Gi3_26711390_x22..... | uccggugugguauaacggcuagcaC.....     | 1 |

|                       |                                     |   |
|-----------------------|-------------------------------------|---|
| Gi1_3810203_x22.....  | uccggugugguauaacggcCag.....         | 1 |
| Gi3_26726416_x22..... | gguuuucacccaguCgaucgg.....          | 1 |
| Gi1_3810995_x22.....  | uccgguguAguauaacgg.....             | 1 |
| Gi3_26722632_x22..... | Accggugugguauaacggcua.....          | 1 |
| Gi1_3809829_x22.....  | uccggugugguauaacggcuaAc.....        | 1 |
| Gi5_8245993_x22.....  | uccggugugguCaacggcua.....           | 1 |
| Gi3_26712248_x22..... | gguuuAcacccaguagauccg.....          | 1 |
| Gi5_8234597_x22.....  | gguuuucacccaguaAaucgg.....          | 1 |
| Gi5_8262855_x21.....  | uGcggugugguauaacgg.....             | 1 |
| Gi1_3819174_x21.....  | uccggugugguauaacggcuCgc.....        | 1 |
| Gi3_26755569_x21..... | gUuuuucacccaguagaucc.....           | 1 |
| Gi5_8259768_x21.....  | uccgguguNguauaacggc.....            | 1 |
| Gi1_3820014_x21.....  | uccggugugguauaacggcCa.....          | 1 |
| Gi5_8258172_x21.....  | uccggugugguauaacAgcua.....          | 1 |
| Gi5_8263002_x21.....  | uUguuuucacccaguagauc.....           | 1 |
| Gi2_10158079_x21..... | uccggugugguauaacggcuagcCu.....      | 1 |
| Gi5_8259243_x21.....  | gguuuucacccaguagGuccgg.....         | 1 |
| Gi2_10164484_x21..... | uccgguguAguauaacggcuagc.....        | 1 |
| Gi2_10155790_x21..... | uccggCgugguauaacgg.....             | 1 |
| Gi3_26772327_x21..... | gguuuucacccaguagauccc.....          | 1 |
| Gi3_26755716_x21..... | Uaucggguucgauucc.....               | 1 |
| Gi1_3818607_x21.....  | uccggugugguauaacgAcuagc.....        | 1 |
| Gi1_3820833_x21.....  | uccggugugguauaacggcCagca.....       | 1 |
| Gi2_10171897_x21..... | guucgauucccggcGucggagc.....         | 1 |
| Gi3_26746770_x21..... | guCuucacccaguagauccgg.....          | 1 |
| Gi1_3817284_x21.....  | uGcggugugguauaacggcuagcau.....      | 1 |
| Gi2_10172086_x21..... | gCuucacccaguagauccg.....            | 1 |
| Gi1_3818040_x21.....  | uccgguAugguauaacggcuag.....         | 1 |
| Gi5_8251494_x21.....  | uGuucacccaguagauccg.....            | 1 |
| Gi2_10164925_x21..... | gguuuCcacccaguagauccg.....          | 1 |
| Gi5_8249016_x21.....  | gUuucgauucccggcaucggagc.....        | 1 |
| Gi3_26753721_x21..... | uGuucacccaguagauccgg.....           | 1 |
| Gi2_10161376_x21..... | uccggugugguauaGcgg.....             | 1 |
| Gi3_26749731_x21..... | uccgguguAguauaacggcuagca.....       | 1 |
| Gi1_3820455_x21.....  | guucgauucccggcaucggagcuA.....       | 1 |
| Gi5_8263023_x21.....  | gguuuucUccaguagauccg.....           | 1 |
| Gi1_3826970_x20.....  | uccgUugugguauaacggcua.....          | 1 |
| Gi2_10186569_x20..... | uUguuuucacccaguagauccg.....         | 1 |
| Gi5_8271029_x20.....  | Cccggugugguauaacggcuagca.....       | 1 |
| Gi2_10181729_x20..... | uccggugugguauaacggcuagcG.....       | 1 |
| Gi5_8269349_x20.....  | uccggugugguauaacggcuagcaugacug..... | 0 |
| Gi5_8275089_x20.....  | ucUggugugguauaacggc.....            | 1 |
| Gi3_26802045_x20..... | Cuuucacccaguagauccg.....            | 1 |
| Gi5_8269689_x20.....  | Aguuuucacccaguagauccgg.....         | 1 |
| Gi5_8268209_x20.....  | uUguuuucacccaguagauccgg.....        | 1 |
| Gi5_8269989_x20.....  | gguuuucacccaguagaCccgg.....         | 1 |
| Gi3_26782165_x20..... | uccggugugguauaacggcCagcau.....      | 1 |

Gi5\_8277309\_x20.....gguuuAcaccaguagauccg..... 1  
 Gi5\_8266929\_x20.....cUgugugguauaacggcuagc..... 1  
 Gi5\_8274869\_x20.....uccggugugAuauaacggcuagc..... 1  
 Gi5\_8275389\_x20.....gguAuucacccaguagauccg..... 1  
 Gi5\_8270429\_x20.....Uguccggugugguauaacggc..... 1  
 Gi2\_10180889\_x20.....Cccggugugguauaacggc..... 1  
 Gi3\_26796625\_x20.....uccAgugugguauaacggc..... 1  
 Gi3\_26782445\_x20.....gguuuucacccaguUgauccg..... 1  
 Gi3\_26798565\_x20.....uccggugugguGuaacggcuagcau..... 1  
 Gi2\_10190449\_x20.....uccggugCgguauaacggc..... 1  
 Gi5\_8275309\_x20.....agauccggguucgauuccggcaucggagc..... 0  
 Gi4\_503893\_x20.....uccggugugguauaacggc..... 0  
 Gi3\_26793885\_x20.....uccggugugguauaacgAcua..... 1  
 Gi3\_26836675\_x19.....gCuucacccaguagauccgg..... 1  
 Gi2\_10208308\_x19.....uccgAugugguauaacggcuagc..... 1  
 Gi1\_3834170\_x19.....uUcggugugguauaacggcu..... 1  
 Gi2\_10203995\_x19.....uccgguguggCauaacggcuagca..... 1  
 Gi1\_3835101\_x19.....uccggugugguauaacggcuU..... 1  
 Gi5\_8277710\_x19.....uUcggugugguauaacggcu..... 1  
 Gi5\_8284835\_x19.....Cccggugugguauaacggcuag..... 1  
 Gi5\_8280807\_x19.....gguuuucaccAaguagauccg..... 1  
 Gi3\_26820943\_x19.....uccgguguAguauaacggcuag..... 1  
 Gi5\_8288673\_x19.....uccgUugugguauaacggcu..... 1  
 Gi2\_10194609\_x19.....uccggugugguGuaacggcuagca..... 1  
 Gi1\_3830446\_x19.....gguuuucacccaguagauUg..... 1  
 Gi2\_10204413\_x19.....uccgUugugguauaacggc..... 1  
 Gi5\_8291884\_x19.....uccggCgugguauaacggc..... 1  
 Gi3\_26809334\_x19.....uccggugugguUuaacggcu..... 1  
 Gi3\_26813229\_x19.....gguccggugugguauaacggcuagca..... 0  
 Gi1\_3834702\_x19.....Guucacccaguagauccgg..... 1  
 Gi5\_8291903\_x19.....gguucgauuccggcaCcgagc..... 1  
 Gi5\_8284037\_x19.....uccggugugguGuaacggcuagca..... 1  
 Gi3\_26820126\_x19.....Uugugguauaacggcuagca..... 1  
 Gi1\_3836070\_x19.....gguuuucacccaguagUuccg..... 1  
 Gi3\_26816839\_x19.....uuuUaccaguagauccgg..... 1  
 Gi5\_8284436\_x19.....uccggugugguauaGcggcuagcau..... 1  
 Gi3\_26817542\_x19.....uccggugugguauaGcggcuag..... 1  
 Gi2\_10203748\_x19.....uccgguguNguauaacggcuagcau..... 1  
 Gi1\_3832232\_x19.....uGcggugugguauaacggc..... 1  
 Gi5\_8285899\_x19.....uccggugGgguauaacggcuagc..... 1  
 Gi3\_26817314\_x19.....uccggugugguauGacggcu..... 1  
 Gi3\_26824819\_x19.....Uuagauccggguucgau..... 1  
 Gi5\_8286051\_x19.....uccggCgugguauaacggcuagca..... 1  
 Gi1\_3831871\_x19.....ccggugugguauaacggcuagAa..... 1  
 Gi4\_504655\_x19.....Uguuuucacccaguagauccg..... 1  
 Gi2\_10197269\_x19.....uccggCgugguauaacggcuagca..... 1  
 Gi5\_8281567\_x19.....uccgguguAguauaacggcuagc..... 1

|                  |                                |   |
|------------------|--------------------------------|---|
| Gi1_3836621_x19  | .gguuuucacccaguagaCccg         | 1 |
| Gi1_3832137_x19  | .Cguuuucacccaguagaucgg         | 1 |
| Gi5_8280275_x19  | .gUuucgauucccggauc             | 1 |
| Gi5_8278261_x19  | .gguuuucacccaUuagaucgg         | 1 |
| Gi2_10221430_x18 | .uccggugCgguauaacggcuagcau     | 1 |
| Gi3_26854180_x18 | .gguccggugugguauaacggcuagcauga | 0 |
| Gi3_26860228_x18 | .guCuucacccaguagaucgg          | 1 |
| Gi5_8296911_x18  | .ucUggugugguauaacgg            | 1 |
| Gi1_3840573_x18  | .uuCucacccaguagaucgg           | 1 |
| Gi5_8294751_x18  | .uUcggugugguauaacggcuagca      | 1 |
| Gi2_10215526_x18 | .guucgauucccgGucgg             | 1 |
| Gi3_26856520_x18 | .Auuuucacccaguagaucgg          | 1 |
| Gi1_3845001_x18  | .uccggugugguGuaacggcua         | 1 |
| Gi5_8295291_x18  | .gguuuucacccaguGgaucgg         | 1 |
| Gi2_10216516_x18 | .guuuucacNcaguagaucgg          | 1 |
| Gi2_10225300_x18 | .uccggugugguauaacggcCa         | 1 |
| Gi1_3841329_x18  | .uccggugugguauaacgAcuag        | 1 |
| Gi5_8302887_x18  | .uccggAgugguauaacggcua         | 1 |
| Gi5_8302311_x18  | .guucgauucccgGucg              | 1 |
| Gi3_26858374_x18 | .uccggugugguauCacgg            | 1 |
| Gi2_10210522_x18 | .ggGuuucacccaguagaucgg         | 1 |
| Gi5_8304975_x18  | .gguuuuAaccaguagaucgg          | 1 |
| Gi2_10210738_x18 | .uccggugugguauaacAgcuagca      | 1 |
| Gi5_8299737_x18  | .uccgguguAguauaacggcua         | 1 |
| Gi5_8296479_x18  | .uccggugugguGuaacggc           | 1 |
| Gi5_8304075_x18  | .Uguucgauucccggaucg            | 1 |
| Gi2_10226074_x18 | .uccggAgugguauaacggcuagc       | 1 |
| Gi5_8297523_x18  | .gguuuucacccaguagUuccg         | 1 |
| Gi3_26848312_x18 | .ucAggugugguauaacggcuagc       | 1 |
| Gi1_3843867_x18  | .guucgauucccgAcaucgg           | 1 |
| Gi1_3837801_x18  | .uGuucacccaguagaucgg           | 1 |
| Gi1_3842391_x18  | .uUcggugugguauaacggcuagca      | 1 |
| Gi1a_5513813_x18 | .gGuuucacccaguagaucgg          | 1 |
| Gi2_10227226_x18 | .gguccggugugguauaacg           | 0 |
| Gi3_26859490_x18 | .gguuuucacccaUuagaucgg         | 1 |
| Gi1_3844317_x18  | .uccggugugguauaacggUuag        | 1 |
| Gi3_26839546_x18 | .guucgauucccggaucggagcAc       | 1 |
| Gi2_10232534_x17 | .gguucgauucccggaCc             | 1 |
| Gi5_8312843_x17  | .uccggugugAuauaacggcuag        | 1 |
| Gi2_10240422_x17 | .Uugguauaacggcuagcau           | 1 |
| Gi1_3850718_x17  | .uccggugugguauaCcgguag         | 1 |
| Gi2_10232041_x17 | .uuCucacccaguagaucgg           | 1 |
| Gi5_8314815_x17  | .uccgguguggCauaacggcuagcau     | 1 |
| Gi3_26881459_x17 | .uccgUugugguauaacgg            | 1 |
| Gi5_8309273_x17  | .uccggugugguGuaacggcua         | 1 |
| Gi2_10250027_x17 | .uccggugAgguauaacggcuagc       | 1 |
| Gi5_8318266_x17  | .aUaucggguucgauucc             | 1 |

|                                                         |   |
|---------------------------------------------------------|---|
| Gi3_26876784_x17.....uccggAgugguauaacggc.....           | 1 |
| Gi5_8310446_x17.....uccgguguggCauaacggcua.....          | 1 |
| Gi1_3852350_x17.....gUuucgauucccggaucgg.....            | 1 |
| Gi3_26904681_x17.....aucggguucgauucccggaucggag.....     | 0 |
| Gi3_26908506_x17.....gUuucgauucccggaucggag.....         | 1 |
| Gi1_3852554_x17.....uccggugugguauaacggcuGgca.....       | 1 |
| Gi5_8318742_x17.....uccgguAugguauaacggcuagc.....        | 1 |
| Gi1_3854373_x17.....uccggugugguaCaacggcuagc.....        | 1 |
| Gi3_26884842_x17.....uccgAugugguauaacggcua.....         | 1 |
| Gi2_10230630_x17.....gguccggugugguauaacggcuagca.....    | 0 |
| Gi2_10244553_x17.....Uuuuucacccaguagaucc.....           | 1 |
| Gi5_8309885_x17.....uccggugugguauCacggcua.....          | 1 |
| Gi3_26904868_x17.....Cccggugugguauaacgg.....            | 1 |
| Gi2_10241884_x17.....guuCucacccaguagauccg.....          | 1 |
| Gi1_3848049_x17.....uccggugCgguaauaacggcuagc.....       | 1 |
| Gi5_8322125_x17.....uccggugCgguaauaacggcua.....         | 1 |
| Gi3_26875322_x17.....Uguuuucacccaguagau.....            | 1 |
| Gi1_3853319_x17.....uccggugugguauCacggcuagc.....        | 1 |
| Gi2_10240524_x17.....gguucgauucccggaucggagcCc.....      | 1 |
| Gi5_8313523_x17.....uUcggugugguauaacggcuag.....         | 1 |
| Gi3_26878229_x17.....uagauccggguucgauucccggaucggag..... | 0 |
| Gi1_3850973_x17.....aUauccggguucgauucc.....             | 1 |
| Gi5_8317926_x17.....uccggugugguCuaaacggcuagc.....       | 1 |
| Gi3_26876291_x17.....uccggugugguaCaacggcuagca.....      | 1 |
| Gi3_26944125_x16.....uccgguAugguauaacggc.....           | 1 |
| Gi3_26933213_x16.....uUcggugugguauaacggcuagca.....      | 1 |
| Gi3_26932189_x16.....guuuucacccCguagauccgg.....         | 1 |
| Gi3_26930941_x16.....uccNgugugguauaacggcuagc.....       | 1 |
| Gi2_10254665_x16.....ucUggugugguauaacggcuagca.....      | 1 |
| Gi3_26928909_x16.....uccggAgugguauaacggcuagca.....      | 1 |
| Gi3_26950189_x16.....uccggugugguauGacggcuagca.....      | 1 |
| Gi3_26931533_x16.....uccggugugguauaacggcuagUa.....      | 1 |
| Gi2_10259097_x16.....uccggugugguauaacggcCagca.....      | 1 |
| Gi3_26931741_x16.....uccggugugguauaacAgc.....           | 1 |
| Gi1_3858449_x16.....uccggugugguauaacAgcuagca.....       | 1 |
| Gi1_3855457_x16.....uccAgugugguauaacggcuag.....         | 1 |
| Gi1_3861297_x16.....uccgguguNguauaacgg.....             | 1 |
| Gi3_26950605_x16.....uccggugugAuauaacggcua.....         | 1 |
| Gi3_26932173_x16.....uccggugugguauaacggcuUgc.....       | 1 |
| Gi3_26947229_x16.....Uuucgauucccggaucggag.....          | 1 |
| Gi2_10259449_x16.....Uuucgauucccggaucggag.....          | 1 |
| Gi3_26931213_x16.....uccggugugguGuaacgg.....            | 1 |
| Gi3_26942445_x16.....gguuuucacccaguagauccg.....         | 1 |
| Gi1_5533885_x16.....Uguucgauucccggaucgg.....            | 1 |
| Gi3_26924941_x16.....uccUgugugguauaacggcuagc.....       | 1 |
| Gi2_10268585_x16.....uUguuuucacccaguagauc.....          | 1 |
| Gi2_10264905_x16.....gguuuucacccaguagaucAg.....         | 1 |

|                       |                                |   |
|-----------------------|--------------------------------|---|
| Gi2_10250665_x16..... | guuuuaccccaguagGuccg.....      | 1 |
| Gi3_26934301_x16..... | gGucgauucccggaucg.....         | 1 |
| Gi3_26913965_x16..... | gguCuucaccccaguagaucgg.....    | 1 |
| Gi1_3857521_x16.....  | uccggCgugguauaacgg.....        | 1 |
| Gi5_8334544_x16.....  | gUuucgauucccggaucg.....        | 1 |
| Gi3_26932781_x16..... | uccggugugguauaacggUuagca.....  | 1 |
| Gi5_8324208_x16.....  | uccgUugugguauaacggcuag.....    | 1 |
| Gi5_8326544_x16.....  | uGuucaccccaguagaucgg.....      | 1 |
| Gi3_26932333_x16..... | uccgUugugguauaacggcuag.....    | 1 |
| Gi1_3863281_x16.....  | uccggugugguauaaUggcuag.....    | 1 |
| Gi3_26916605_x16..... | uUcggugugguauaacgg.....        | 1 |
| Gi1_3858001_x16.....  | guCuucaccccaguagaucgg.....     | 1 |
| Gi1a_5538925_x16..... | gguuuCcaccaguagaucgg.....      | 1 |
| Gi5_8326064_x16.....  | gUuccggugugguauaacggc.....     | 1 |
| Gi3_26935309_x16..... | gguuuuaccccCguagaucgg.....     | 1 |
| Gi5_8338922_x15.....  | gguuuuaccccCguagaucgg.....     | 1 |
| Gi5_8353562_x15.....  | Ugugugguauaacggcuagcau.....    | 1 |
| Gi1_3870062_x15.....  | Gcggugugguauaacggcuagca.....   | 1 |
| Gi1_3870152_x15.....  | gGagauccggguucgauucc.....      | 1 |
| Gi5_8351177_x15.....  | gguuuucaAccaguagaucgg.....     | 1 |
| Gi3_26976085_x15..... | uccggugugguauaacggcC.....      | 1 |
| Gi5_8351447_x15.....  | uccggugugguauaacggcuagcCu..... | 1 |
| Gi5_8352317_x15.....  | uccggugugguauaacggcuGgca.....  | 1 |
| Gi5_8342447_x15.....  | uccggugugguUuaaacggcuagc.....  | 1 |
| Gi1_3867602_x15.....  | Ugugugguauaacggcuag.....       | 1 |
| Gi2_10275775_x15..... | uccgguguNguauaacggcuag.....    | 1 |
| Gi1_3871487_x15.....  | uccgguguggCauaacggcuagc.....   | 1 |
| Gi2_10288390_x15..... | Uuucgauucccggaucggagc.....     | 1 |
| Gi1_3867857_x15.....  | guuuuaccccaguagGuccg.....      | 1 |
| Gi2_10290970_x15..... | guCuucaccccaguagaucgg.....     | 1 |
| Gi1_3869477_x15.....  | uccgAugugguauaacggcua.....     | 1 |
| Gi5_8350337_x15.....  | uUguuuuaccccaguagauc.....      | 1 |
| Gi2_10289275_x15..... | uccgUugugguauaacgg.....        | 1 |
| Gi2_10282660_x15..... | uUguuuuaccccaguagaucgggu.....  | 1 |
| Gi1_3864467_x15.....  | uccgguguggCauaacggcuagca.....  | 1 |
| Gi2_10292530_x15..... | guucgauucccggaCcgagc.....      | 1 |
| Gi3_26961940_x15..... | Gccggugugguauaacggcuagcau..... | 1 |
| Gi5_8345057_x15.....  | ggCuuuaccccaguagaucgg.....     | 1 |
| Gi2_10283860_x15..... | uccggugGgguauaacggcuagc.....   | 1 |
| Gi3_26966185_x15..... | uUcggugugguauaacggcuag.....    | 1 |
| Gi1_3869147_x15.....  | Cccggugugguauaacggcuagca.....  | 1 |
| Gi5_8345072_x15.....  | uccggugugguCaacggcuagca.....   | 1 |
| Gi3_26992930_x15..... | ugguuucNcccaguagaucgg.....     | 1 |
| Gi5_8346302_x15.....  | gguuuucaNccaguagaucgg.....     | 1 |
| Gi2_10290280_x15..... | guuuuaccccCguagaucgg.....      | 1 |
| Gi3_26973115_x15..... | uccggugugguauaacggcuaUc.....   | 1 |
| Gi3_26955055_x15..... | Ggguuuuaccccaguagauc.....      | 1 |



|                  |                                     |   |
|------------------|-------------------------------------|---|
| Gi3_26972305_x15 | .....ugguGuucacccaguagaucgg.....    | 1 |
| Gi1_3871067_x15  | .....Ggguuuucacccaguagaucgg.....    | 1 |
| Gi2_10279855_x15 | .....uccggugugguGuaacgg.....        | 1 |
| Gi3_27004729_x14 | .....uccggugugguauaUcggcuagc.....   | 1 |
| Gi3_27023797_x14 | .....uccggugugguGaacggcuagc.....    | 1 |
| Gi5_8367157_x14  | .....cUgugugguauaacggcua.....       | 1 |
| Gi3_27032155_x14 | .....Aguuuucacccaguagaucgg.....     | 1 |
| Gi5_8370181_x14  | .....guuuucacNcaguagaucgg.....      | 1 |
| Gi3_27019793_x14 | .....uGcggugugguauaacggcu.....      | 1 |
| Gi2_10316455_x14 | .....uuGucacccaguagaucgg.....       | 1 |
| Gi2_10314271_x14 | .....uUcggugugguauaacggcua.....     | 1 |
| Gi1_3881098_x14  | .....gguuuucaccUaguagaucgg.....     | 1 |
| Gi1_3875680_x14  | .....uccggugCgguauaacggcua.....     | 1 |
| Gi1_3879306_x14  | .....gUuuuucacccaguagauc.....       | 1 |
| Gi1_3875372_x14  | .....gguucgauucccggaCcg.....        | 1 |
| Gi3_27009489_x14 | .....uccggugugguauaGcggcuagca.....  | 1 |
| Gi2_10297359_x14 | .....uccggugCgguauaacggcuagca.....  | 1 |
| Gi2_10309147_x14 | .....gguuuucGcccaguagaucgg.....     | 1 |
| Gi2_10308545_x14 | .....uccggugGuaauaacggcua.....      | 1 |
| Gi3_27019653_x14 | .....ggCuucacccaguagauc.....        | 1 |
| Gi3_27017399_x14 | .....uccggugugguCuaacggcuagca.....  | 1 |
| Gi3_27032925_x14 | .....guuuucacccGguagaucgg.....      | 1 |
| Gi1_3873412_x14  | .....uccggugugguauaaUggcuagc.....   | 1 |
| Gi3_27004211_x14 | .....gguucgauucccggaCcg.....        | 1 |
| Gi1_3873216_x14  | .....uccgguguggCuaaacggcua.....     | 1 |
| Gi3_27029369_x14 | .....guuuucGcccaguagaucgg.....      | 1 |
| Gi1_3874896_x14  | .....uccggAgugguauaacggcuagc.....   | 1 |
| Gi3_27032505_x14 | .....gguuuucacNccaguagaucgg.....    | 1 |
| Gi1_3876170_x14  | .....Uguuuucacccaguagauc.....       | 1 |
| Gi1_3879376_x14  | .....uccggugugguauaacgAcua.....     | 1 |
| Gi5_8358841_x14  | .....uccggugugguauaacggcuagcaC..... | 1 |
| Gi2_10300313_x14 | .....guuuucacccGguagaucgg.....      | 1 |
| Gi2_10315909_x14 | .....uUcggugugguauaacgg.....        | 1 |
| Gi3_27023965_x14 | .....Uguucgauucccggaucggag.....     | 1 |
| Gi1_3877822_x14  | .....uccgguaAugguauaacggcuagc.....  | 1 |
| Gi5_8366835_x14  | .....Uuuuucacccaguagauc.....        | 1 |
| Gi2_10309357_x14 | .....uccggugugguauaacAgc.....       | 1 |
| Gi2_10314257_x14 | .....gUuuuucacccaguagauc.....       | 1 |
| Gi1_3877920_x14  | .....uccggugugguauaacAgcua.....     | 1 |
| Gi1_3879586_x14  | .....guucgauucccggaCucgg.....       | 1 |
| Gi3_27024651_x14 | .....guuuCcaccaguagaucgg.....       | 1 |
| Gi2_10305353_x14 | .....uccggugugguCuaacggcuagc.....   | 1 |
| Gi3_27019429_x14 | .....uuCucacccaguagaucgg.....       | 1 |
| Gi1_3872978_x14  | .....ggGuuuucacccaguagaucgg.....    | 1 |
| Gi2_10296379_x14 | .....uccggugugguGuaacggcuagca.....  | 1 |
| Gi2_10311093_x14 | .....uccgguaAugguauaacggcuagc.....  | 1 |
| Gi3_27013577_x14 | .....Accggugugguauaacggcuagca.....  | 1 |

|                       |                                        |   |
|-----------------------|----------------------------------------|---|
| Gi3_26993977_x14..... | uccggugCgguauaacggcuagcau.....         | 1 |
| Gi2_10309063_x14..... | uccggugugguauaacggcuCgca.....          | 1 |
| Gi2_10303701_x14..... | uccggCgugguauaacggcuag.....            | 1 |
| Gi2_10327355_x13..... | Cccggugugguauaacggcua.....             | 1 |
| Gi2_10318073_x13..... | uccggAgugguauaacggcuagca.....          | 1 |
| Gi2_10332919_x13..... | .....aUauccggguucgauucc.....           | 1 |
| Gi3_27067563_x13..... | .....agaucggguucgauucccggaucggagc..... | 0 |
| Gi5_8386858_x13.....  | .....gguuuucacccaguUgaucgg.....        | 1 |
| Gi1_3885020_x13.....  | uccggAgugguauaacggcuag.....            | 1 |
| Gi5_8384245_x13.....  | uccggugugguauaaUggcua.....             | 1 |
| Gi3_27058970_x13..... | .....gguuuucacccaguagaucggA.....       | 1 |
| Gi1_3890792_x13.....  | uccgUugugguauaacggcuagca.....          | 1 |
| Gi5_8379253_x13.....  | uccggugCgguauaacggcuag.....            | 1 |
| Gi1a_5584951_x13..... | .....gguucgauucccggaucgga.....         | 0 |
| Gi3_27078951_x13..... | uccggugugguauGacggc.....               | 1 |
| Gi2_10328707_x13..... | uccgUugugguauaacggcuag.....            | 1 |
| Gi1_3883421_x13.....  | uccggugugguauaGcggcuagca.....          | 1 |
| Gi5_8387222_x13.....  | uccggugugguauaCggcua.....              | 1 |
| Gi3_27074908_x13..... | .....Uuucgauucccggaucggagc.....        | 1 |
| Gi5_8378629_x13.....  | uccggugugguauGacggcuag.....            | 1 |
| Gi3_27048739_x13..... | .....gguuuucacccaguagUuccg.....        | 1 |
| Gi1_3891546_x13.....  | uccggugugguauGacggcuag.....            | 1 |
| Gi3_27040783_x13..... | Cccggugugguauaacggcuag.....            | 1 |
| Gi3_27052756_x13..... | .....gguucgauucccggcGucg.....          | 1 |
| Gi3_27072971_x13..... | uccggugAgguauaacggcua.....             | 1 |
| Gi5_8380683_x13.....  | .....gGucgauucccggaucg.....            | 1 |
| Gi5_8381229_x13.....  | .....gguuuucacccagCagaucgg.....        | 1 |
| Gi2_10327056_x13..... | uccggugugguauGacggcuag.....            | 1 |
| Gi3_27054563_x13..... | .....Uugugguauaacggcuag.....           | 1 |
| Gi3_27048102_x13..... | .....gguuuucacccaguagaucGg.....        | 1 |
| Gi1_3892911_x13.....  | Agucggugugguauaacggcua.....            | 1 |
| Gi2_10337508_x13..... | .....gguuuucacccaguGgaucgg.....        | 1 |
| Gi1_3883772_x13.....  | .....gguuuCcaccaguagaucgg.....         | 1 |
| Gi3_27055564_x13..... | uccggAgugguauaacggcuagcau.....         | 1 |
| Gi2_10335558_x13..... | uccgUugugguauaacggcuagca.....          | 1 |
| Gi5_8384622_x13.....  | uUcggugugguauaacgg.....                | 1 |
| Gi5_8388613_x13.....  | .....guucgauuccAgcaucgg.....           | 1 |
| Gi3_27041069_x13..... | uccggugugguCuaacggcua.....             | 1 |
| Gi1_3890480_x13.....  | uccgUugugguauaacgg.....                | 1 |
| Gi5_8376822_x13.....  | uccggugugguauaacAgcuagcau.....         | 1 |
| Gi3_27064976_x13..... | uccggugugguauaacggU.....               | 1 |
| Gi2_10340849_x13..... | uccggugugAuauaacggcuagc.....           | 1 |
| Gi5_8384817_x13.....  | uccAgugugguauaacggcua.....             | 1 |
| Gi3_27048934_x13..... | uccggugugguauaacggA.....               | 1 |
| Gi1_3890714_x13.....  | uccggugugguauaacggcuagcG.....          | 1 |
| Gi3_27066419_x13..... | .....gguGuucacccaguagaucgg.....        | 1 |
| Gi3_27050949_x13..... | .....uuuucGcccaguagaucgg.....          | 1 |

|                       |                                     |   |
|-----------------------|-------------------------------------|---|
| Gi2_10322298_x13..... | .....gguucgauucccggaCcgga.....      | 1 |
| Gi3_27058801_x13..... | .....gguucgauuccAgcaucgga.....      | 1 |
| Gi3_27051183_x13..... | .....ggCuucacccaguagauccgg.....     | 1 |
| Gi1_3890831_x13.....  | .....gUugugguauaacggcuagc.....      | 1 |
| Gi5_8373364_x13.....  | .....cUgugugguauaacggcuagca.....    | 1 |
| Gi2_10323949_x13..... | .....uccggugugguGuaacggcua.....     | 1 |
| Gi5_8373377_x13.....  | .....gguuuucacccGguagauccg.....     | 1 |
| Gi1_3887737_x13.....  | .....gguuuucGcccaguagaucc.....      | 1 |
| Gi3_27040029_x13..... | .....ggGuuucacccaguagauccgg.....    | 1 |
| Gi5_8390355_x13.....  | .....gGuuucacccaguagaucc.....       | 1 |
| Gi3_27044371_x13..... | .....uccggugugguauaaGggcuagc.....   | 1 |
| Gi3_27042369_x13..... | .....uccggugugguCaacggc.....        | 1 |
| Gi3_27073062_x13..... | .....uccggugugguauaacggcuagcGu..... | 1 |
| Gi3_27123513_x12..... | .....uccggugAgguauaacggcuagca.....  | 1 |
| Gi2_10357330_x12..... | .....gguucgauuccgggcGucggagc.....   | 1 |
| Gi5_8407494_x12.....  | .....uggCuucacccaguagauccg.....     | 1 |
| Gi3_27093933_x12..... | .....uccggugugguauaacggUua.....     | 1 |
| Gi3_27098085_x12..... | .....uccgAugugguauaacggcuagc.....   | 1 |
| Gi1_3904370_x12.....  | .....uccggugugguauaacggcuG.....     | 1 |
| Gi5_8402010_x12.....  | .....uccggugugguauaacggcCag.....    | 1 |
| Gi3_27114117_x12..... | .....aGccggguucgauucccgga.....      | 1 |
| Gi3_27132729_x12..... | .....gguuGucacccaguagauccg.....     | 1 |
| Gi2_10364578_x12..... | .....gguuuucacccaguagGuccgg.....    | 1 |
| Gi3_27114381_x12..... | .....gguuuucGcccaguagauccgg.....    | 1 |
| Gi3_27115989_x12..... | .....uccggugugguauaCcgguca.....     | 1 |
| Gi3_27096393_x12..... | .....uUcggugugguauaacggc.....       | 1 |
| Gi2_10363642_x12..... | .....gguucgaCucccggaucgg.....       | 1 |
| Gi3_27093297_x12..... | .....gguuuucCcccaguagauccg.....     | 1 |
| Gi2_10360450_x12..... | .....uccggugugguauGacggc.....       | 1 |
| Gi2_10356766_x12..... | .....ucGggugugguauaacggc.....       | 1 |
| Gi2_10363186_x12..... | .....uccAgugugguauaacggcuagc.....   | 1 |
| Gi1_3899498_x12.....  | .....uccggugAgguauaacggcuagc.....   | 1 |
| Gi5_8400690_x12.....  | .....uccggCgugguauaacggcuagcau..... | 1 |
| Gi5_8406102_x12.....  | .....uccggugugguauCacggcuagca.....  | 1 |
| Gi2_10352938_x12..... | .....uccgAugugguauaacggcuagca.....  | 1 |
| Gi3_27111249_x12..... | .....uccggGgugguauaacggcua.....     | 1 |
| Gi3_27089997_x12..... | .....uccgguguAguauaacgg.....        | 1 |
| Gi5_8392002_x12.....  | .....ggAuucacccaguagauccg.....      | 1 |
| Gi1_3897218_x12.....  | .....ugguCuucacccaguagauccg.....    | 1 |
| Gi3_27098313_x12..... | .....gguucgauucccggaCc.....         | 1 |
| Gi3_27097029_x12..... | .....uccgguAugguauaacggcuagca.....  | 1 |
| Gi3_27101961_x12..... | .....guuuucacNcaguagauccg.....      | 1 |
| Gi1_3894974_x12.....  | .....gguucgauucccCgcaucgg.....      | 1 |
| Gi2_10368202_x12..... | .....gguucgauucccggaucggagcAc.....  | 1 |
| Gi1_3895442_x12.....  | .....uccggugugguauaacAg.....        | 1 |
| Gi2_10359034_x12..... | .....uccAgugugguauaacggcuagca.....  | 1 |
| Gi1_3898070_x12.....  | .....                               | 1 |

|                       |                                    |   |
|-----------------------|------------------------------------|---|
| Gi3_27110409_x12..... | uccggugugguauaacggcuagAau.....     | 1 |
| Gi3_27105777_x12..... | uccggugugguaCaacggcuag.....        | 1 |
| Gi5_8397858_x12.....  | .....cUgguuucgauuccggcau.....      | 1 |
| Gi1_3896510_x12.....  | uccgguguAguauaacggcua.....         | 1 |
| Gi2_10363246_x12..... | uccggugugguauaacggcuagAa.....      | 1 |
| Gi3_27094317_x12..... | uccggugugguauaaUggc.....           | 1 |
| Gi1_3901778_x12.....  | uUguuuucacccaguagauccgg.....       | 1 |
| Gi3_27115101_x12..... | ugguuuucacccaguagGuccg.....        | 1 |
| Gi1_3898574_x12.....  | uccggugugguauaacggcuagcaUacu.....  | 1 |
| Gi5_8395314_x12.....  | uccggugugguauaacAgcuag.....        | 1 |
| Gi2_10353658_x12..... | uccggugugguaCaacggcuagca.....      | 1 |
| Gi5_8391930_x12.....  | Uguuuucacccaguagaucc.....          | 1 |
| Gi5_8401866_x12.....  | Cgguuuucacccaguagauccg.....        | 1 |
| Gi5_8392962_x12.....  | ucAggugugguauaacggcuagc.....       | 1 |
| Gi1_3903806_x12.....  | Gcggugugguauaacggcua.....          | 1 |
| Gi5_8408466_x12.....  | .....guucgauuccggcaucggagcucu..... | 0 |
| Gi1_3899882_x12.....  | ccggCgugguauaacggcuag.....         | 1 |
| Gi5_8398590_x12.....  | uccgguguNguauaacggcuag.....        | 1 |
| Gi2_10346326_x12..... | Ggguuuucacccaguagauccg.....        | 1 |
| Gi5_8394882_x12.....  | uccggGgugguauaacggcuagc.....       | 1 |
| Gi1_3901082_x12.....  | uUcggugugguauaacgg.....            | 1 |
| Gi3_27104553_x12..... | uuGucacccaguagauccg.....           | 1 |
| Gi3_27120993_x12..... | guuuucacccaguagauUg.....           | 1 |
| Gi3_27085929_x12..... | uccggugugCuaaacggcuagc.....        | 1 |
| Gi5_8403234_x12.....  | .....gguucgauuccgggcGucggagc.....  | 1 |
| Gi5_8405094_x12.....  | Ugugugguauaacggcuag.....           | 1 |
| Gi2_10344718_x12..... | uccgguguggCauaacggc.....           | 1 |
| Gi2_10360078_x12..... | uccGUugugguauaacggcua.....         | 1 |
| Gi1_3898442_x12.....  | uccAgugugguauaacggcua.....         | 1 |
| Gi3_27093069_x12..... | Accggugugguauaacggc.....           | 1 |
| Gi2_10348018_x12..... | uccggugCgguauaacggcua.....         | 1 |
| Gi3_27104661_x12..... | uccggugugguauUacggcuagca.....      | 1 |
| Gi3_27095445_x12..... | uccggugugAuauaacggc.....           | 1 |
| Gi3_27117237_x12..... | uccggugCgguauaacggcuag.....        | 1 |
| Gi2_10344394_x12..... | .....guucgauuccggcaCcgga.....      | 1 |
| Gi3_27128541_x12..... | gCuucacccaguagauccg.....           | 1 |
| Gi3_27125517_x12..... | guuuucacccaguagaCccgg.....         | 1 |
| Gi3_27116853_x12..... | uccggugugguauaacgUcuagc.....       | 1 |
| Gi3_27123813_x12..... | guuuucGcccaguagauccgg.....         | 1 |
| Gi1_3901226_x12.....  | uccggugugguCuaacggcuag.....        | 1 |
| Gi2_10352314_x12..... | Cuuucacccaguagauccg.....           | 1 |
| Gi3_27183586_x11..... | .....guucgauuccggcaCcgag.....      | 1 |
| Gi5_8416119_x11.....  | ugguuuucNcccaguagauccg.....        | 1 |
| Gi5_8421157_x11.....  | .....Uguucgauuccggcaucgga.....     | 1 |
| Gi1_3910953_x11.....  | uccggugugguaCaacggcuagca.....      | 1 |
| Gi5_8426536_x11.....  | .....uuuucacccaguagaCccg.....      | 1 |
| Gi3_27183542_x11..... | .....Aguuuucacccaguagaucc.....     | 1 |

|                       |                                  |   |
|-----------------------|----------------------------------|---|
| Gi3_27160013_x11..... | guucgauuccUggcaucgga.....        | 1 |
| Gi1_3905277_x11.....  | gGucgauucccggaucgga.....         | 1 |
| Gi2_10392748_x11..... | uccggugugguaCaacggcua.....       | 1 |
| Gi5_8418451_x11.....  | uccgguguAguauaacggc.....         | 1 |
| Gi5_8413446_x11.....  | gguNuucacccaguagaucgg.....       | 1 |
| Gi2_10376259_x11..... | gGucgauucccggaucggagc.....       | 1 |
| Gi2_10390174_x11..... | uccgguguggCauaacggcua.....       | 1 |
| Gi3_27183905_x11..... | uccNgugugguauaacggcuagca.....    | 1 |
| Gi5_8421520_x11.....  | guuuucacccaguagaCccg.....        | 1 |
| Gi2_10381440_x11..... | uccggGgugguauaacggcuagc.....     | 1 |
| Gi2_10383343_x11..... | ccggugugguaCaacggcua.....        | 1 |
| Gi2_10382628_x11..... | uccggCgugguauaacggcuagcau.....   | 1 |
| Gi5_8428527_x11.....  | guucGaCucccggaucgg.....          | 1 |
| Gi2_10393540_x11..... | ggauccgauucccggaucg.....         | 1 |
| Gi2_10370154_x11..... | gguuuucacccaguagCuccg.....       | 1 |
| Gi2_10388623_x11..... | uccggugugguauaacggcuagG.....     | 1 |
| Gi5_8416724_x11.....  | guCuucacccaguagaucgg.....        | 1 |
| Gi5_8418099_x11.....  | Ugugugguauaacggcuagc.....        | 1 |
| Gi1_3911459_x11.....  | ucUggugugguauaacggcuagcau.....   | 1 |
| Gi1_3914011_x11.....  | auccggguucgauucccggaucggag.....  | 0 |
| Gi2_10372585_x11..... | uuuucGcccaguagaucgg.....         | 1 |
| Gi2_10371705_x11..... | Cccggugugguauaacgg.....          | 1 |
| Gi2_10391164_x11..... | uccgguguggCauaacggcuagcau.....   | 1 |
| Gi5_8412478_x11.....  | Cccggugugguauaacggc.....         | 1 |
| Gi1_3907092_x11.....  | uccggugugguauaacggcuCgca.....    | 1 |
| Gi3_27164171_x11..... | cUgguucgauucccggaucgga.....      | 1 |
| Gi5_8428670_x11.....  | guuCucacccaguagaucgg.....        | 1 |
| Gi2_10385653_x11..... | gGucgauucccggaucg.....           | 1 |
| Gi5_8414117_x11.....  | uccggugugguaCaacggcuagcau.....   | 1 |
| Gi1_3908874_x11.....  | gauucccggaucggagcC.....          | 1 |
| Gi3_27151873_x11..... | guucgauucccggaucgagc.....        | 1 |
| Gi5_8420794_x11.....  | Guucacccaguagaucgg.....          | 1 |
| Gi3_27164490_x11..... | Ugguucgauucccggaucg.....         | 1 |
| Gi5_8414744_x11.....  | uccggugugguGuaacggcuag.....      | 1 |
| Gl1a_5605047_x11..... | uGcggugugguauaacggcuagc.....     | 1 |
| Gi2_10378866_x11..... | gguuuucacccGguagaucgg.....       | 1 |
| Gi1_3909193_x11.....  | Accggugugguauaacggcuagc.....     | 1 |
| Gi1_3913153_x11.....  | gguccggugugguauaacggcuagcau..... | 0 |
| Gi2_10382771_x11..... | uccgguguAguauaacggcuagca.....    | 1 |
| Gi1_3912570_x11.....  | gguuuucacccaguagaucAg.....       | 1 |
| Gi2_10377700_x11..... | uccggugugguauaacAgcuagcau.....   | 1 |
| Gi3_27173433_x11..... | guucgauucccggaucggagcA.....      | 1 |
| Gi5_8431134_x11.....  | guuuucacccCguagaucgg.....        | 1 |
| Gi5_8416064_x11.....  | guuuucacccaguagGuccg.....        | 1 |
| Gi5_8429517_x11.....  | uccgUugugguauaacggcuagcau.....   | 1 |
| Gi5_8428263_x11.....  | uuGucacccaguagaucgg.....         | 1 |
| Gi3_27144360_x11..... | aUaucggguucgauucc.....           | 1 |

|                       |                                     |   |
|-----------------------|-------------------------------------|---|
| Gi5_8423137_x11.....  | uccggugugguauaGcggcuag.....         | 1 |
| Gi4_518091_x11.....   | gUuuuucacccaguagauccg.....          | 1 |
| Gi2_10385675_x11..... | ccgguguggAauaacggcuagc.....         | 1 |
| Gi3_27168582_x11..... | guucgauucccgAcaucgga.....           | 1 |
| Gi1_3915034_x11.....  | ccggugugNuauaacggcuagca.....        | 1 |
| Gi5_8430210_x11.....  | uccgUugugguauaacgg.....             | 1 |
| Gi2_10405632_x10..... | uGcggugugguauaacggcu.....           | 1 |
| Gi1_3928734_x10.....  | uccggugCgguauaacgg.....             | 1 |
| Gi1_3916524_x10.....  | guuuucacccCguagauccg.....           | 1 |
| Gi5_8448546_x10.....  | uccggugugguauaacggcuCg.....         | 1 |
| Gi5_8434646_x10.....  | aguagauccggguucgauuccggc.....       | 0 |
| Gi3_27230042_x10..... | uccggugGgguauaacggcuagca.....       | 1 |
| Gi2_10426032_x10..... | gguuuucacccaguagauUg.....           | 1 |
| Gi2_10414582_x10..... | aguagauccggguucgauuccggcaucgga..... | 0 |
| Gi3_27234472_x10..... | uccggugugguauaGcggcu.....           | 1 |
| Gi3_27222892_x10..... | gguuuucacccaguagauccAg.....         | 1 |
| Gi3_27225292_x10..... | uccggugugguauaacAg.....             | 1 |
| Gi3_27219452_x10..... | uccggugCgguauaacgg.....             | 1 |
| Gi5_8442576_x10.....  | Uguucgauuccggcaucggag.....          | 1 |
| Gi1_3921684_x10.....  | uccggugCgguauaacggcuagca.....       | 1 |
| Gi3_27233192_x10..... | uccggugugguauaacggcuCgcau.....      | 1 |
| Gi3_27244172_x10..... | uccggugugguauaacgAc.....            | 1 |
| Gi3_27227802_x10..... | uccggugugguauaacggcuagcU.....       | 1 |
| Gi1_3923614_x10.....  | Gccggugugguauaacggcu.....           | 1 |
| Gi1_3926724_x10.....  | uccgguguNguauaacggcuagcau.....      | 1 |
| Gi3_27242012_x10..... | uccggugugguauGacgg.....             | 1 |
| Gi2_10410302_x10..... | uccggGgugguauaacggcuagca.....       | 1 |
| Gi3_27239772_x10..... | gguNuucacccaguagauccg.....          | 1 |
| Gi2_10409592_x10..... | Uguucgauuccggcaucggag.....          | 1 |
| Gi3_27242772_x10..... | uccggugGgguauaacggc.....            | 1 |
| Gi2_10422442_x10..... | uccggugugguauaacggcC.....           | 1 |
| Gi1_3923894_x10.....  | gguuuucacccagCagauccg.....          | 1 |
| Gi3_27212572_x10..... | uccgAugugguauaacggc.....            | 1 |
| Gi3_27226742_x10..... | aUuagauccggguucgauucc.....          | 1 |
| Gi2_10428022_x10..... | Uugugguauaacggcuagc.....            | 1 |
| Gi3_27201992_x10..... | uccggugugguauUacggcuagc.....        | 1 |
| Gi1_3919014_x10.....  | gguuuucacccaguaAauccg.....          | 1 |
| Gi3_27231582_x10..... | cgauuccNgcacggagc.....              | 1 |
| Gi1_3924984_x10.....  | uccggugugguauCacggcu.....           | 1 |
| Gi5_8450956_x10.....  | uccggugugguCaacggcuag.....          | 1 |
| Gi5_8448026_x10.....  | gguuAucacccaguagauccg.....          | 1 |
| Gi2_10410772_x10..... | gguucgauuccggcGucgga.....           | 1 |
| Gi1_3926854_x10.....  | gguuuuUaccaguagauccg.....           | 1 |
| Gi1_3928004_x10.....  | uccggugugguauaacggUuagc.....        | 1 |
| Gi3_27219282_x10..... | uccggugugguGuaacggcuag.....         | 1 |
| Gi5_8433376_x10.....  | uUcggugugguauaacggc.....            | 1 |
| Gi2_10403642_x10..... | uuuucacccaguagGuccg.....            | 1 |

|                  |                                    |   |
|------------------|------------------------------------|---|
| Gi2_10415922_x10 | .....gGuuucacccaguagaucgg          | 1 |
| Gi3_27200402_x10 | .....uccggugugguauaacAgcuag        | 1 |
| Gi1_3919064_x10  | .....Accggugugguauaacggcuagca      | 1 |
| Gi5_8432846_x10  | .....gGuuucacccaguagauc            | 1 |
| Gi5_8432046_x10  | .....uccggugugguauaGcgg            | 1 |
| Gi1_3918314_x10  | .....gguuuucacAcaguagaucgg         | 1 |
| Gi5_8451606_x10  | .....gguuuucacccGguagaucgg         | 1 |
| Gi5_8434246_x10  | .....uccggugugguauaacggUuagcau     | 1 |
| Gi5_8440126_x10  | .....gGucgauucccggaucggga          | 1 |
| Gi1_3922154_x10  | .....gguucgauucccggauc             | 0 |
| Gi5_8433106_x10  | .....uccgUugugguauaacggcuagca      | 1 |
| Gi3_27216002_x10 | .....uccgCugugguauaacggcuagc       | 1 |
| Gi2_10404432_x10 | .....guucgauucccggaucggagcuA       | 1 |
| Gi1_3921934_x10  | .....gguuuucacccaguGgaucgg         | 1 |
| Gi5_8449956_x10  | .....uccggugugguauaacggcCag        | 1 |
| Gi5_8433496_x10  | .....guagaucggguucgauucccggaucggag | 0 |
| Gi5_8450516_x10  | .....uccUgugugguauaacggcuagc       | 1 |
| Gi2_10419712_x10 | .....gguucgauucccggaucggagcuA      | 1 |
| Gi3_27213972_x10 | .....uccUgugugguauaacggcua         | 1 |
| Gi1_3920364_x10  | .....guuCucacccaguagaucgg          | 1 |
| Gi3_27213202_x10 | .....uUguuuucacccaguagaucgg        | 1 |
| Gi3_27209772_x10 | .....gguucgauucccggaCcg            | 1 |
| Gi3_27208612_x10 | .....gguuAucacccaguagaucgg         | 1 |
| Gi5_8449666_x10  | .....uGucacccaguagaucgg            | 1 |
| Gi2_10405832_x10 | .....uccggugugguauaGcggcua         | 1 |
| Gi2_10401452_x10 | .....guucgauucccggaCcg             | 1 |
| Gi2_10400462_x10 | .....uccggugugguauaaUggcuag        | 1 |
| Gi1_3927604_x10  | .....Ugugugguauaacggcuagcau        | 1 |
| Gi5_8442156_x10  | .....uccggugugguauaacAgcuagca      | 1 |
| Gi3_27197972_x10 | .....gguuuucacccaguagauc           | 1 |
| Gi2_10417792_x10 | .....Uguuuucacccaguagaucgg         | 1 |
| Gi2_10429112_x10 | .....uccggugugguauaCcgcuagc        | 1 |
| Gi5_8439856_x10  | .....uccggugugguauaacggcuUgc       | 1 |
| Gi3_27192732_x10 | .....uccAgugugguauaacggcuagcau     | 1 |
| Gi3_27226722_x10 | .....guucgauucccggaCcgagc          | 1 |
| Gi1_3919204_x10  | .....uccggCgugguauaacggcuagcau     | 1 |
| Gi3_27240832_x10 | .....uccggugugguauaGcgg            | 1 |
| Gi1_3919514_x10  | .....uccgAugugguauaacggcuag        | 1 |
| Gi1_3924624_x10  | .....uccggugugguauaacggcuagUa      | 1 |
| Gi5_8442616_x10  | .....Cccggugugguauaacggcuagcau     | 1 |
| Gi3_27237092_x10 | .....gguuuucacccCguagauc           | 1 |
| Gi3_27209892_x10 | .....Guucacccaguagaucgg            | 1 |
| Gi1_3916624_x10  | .....uccggugugguauaacgAcuagca      | 1 |
| Gi5_8452156_x10  | .....uuuucGcccaguagaucgg           | 1 |
| Gi2_10422072_x10 | .....uccggugugguauGacggcuagca      | 1 |
| Gi2_10399592_x10 | .....guucgaCucccggaucgg            | 1 |
| Gi3_27268417_x9  | .....uccggugugguauaacggcuGg        | 1 |

Gi2\_10453944\_x9.....Auucgauucccggaucgg..... 1  
 Gi1\_3939877\_x9.....uccggugugguauaaUggcua..... 1  
 Gi5\_8474187\_x9.....uuuucacccGguagaucgg..... 1  
 Gi2\_10458453\_x9.....uccUgugugguauaacggcuagc..... 1  
 Gi5\_8472189\_x9.....Uauccggguucgauucccggauc..... 1  
 Gi1\_3939382\_x9.....gUgugguauaacggcuag..... 1  
 Gl1a\_5640790\_x9.....Gccggugugguauaacggcua..... 1  
 Gi5\_8457780\_x9.....guuuucacccaguGgaucgg..... 1  
 Gi1\_3931003\_x9.....uccggugugguauaacggcuagcaugacugg..... 0  
 Gi3\_27301834\_x9.....uUggguauaacggcuagc..... 1  
 Gi3\_27263404\_x9.....uccggugugguCuaacggc..... 1  
 Gi2\_10446456\_x9.....uccggugugguauCacggcua..... 1  
 Gi3\_27288460\_x9.....gguuuucacccaguagaucggguucgauu..... 0  
 Gi2\_10438662\_x9.....Cguuuucacccaguagaucgg..... 1  
 Gi1\_3940786\_x9.....uuCucacccaguagaucgg..... 1  
 Gi5\_8471307\_x9.....guucgauucccggaucAg..... 1  
 Gi1\_3941596\_x9.....uccgguAugguauaacggcua..... 1  
 Gi2\_10444845\_x9.....uccggugugguuaCaacggcuag..... 1  
 Gi3\_27279253\_x9.....gguucgauNcccggauc..... 1  
 Gi5\_8453199\_x9.....uccggugGgguauaacggcua..... 1  
 Gi5\_8453433\_x9.....Cuuucacccaguagaucgg..... 1  
 Gi5\_8474556\_x9.....uuuucaccNaguagaucgg..... 1  
 Gi1\_3940318\_x9.....gCuuuucacccaguagaucgg..... 1  
 Gi1\_3940993\_x9.....ugguuuucacccUguagaucgg..... 1  
 Gi3\_27304210\_x9.....guucgGuucccggaucgg..... 1  
 Gi3\_27249823\_x9.....uccgguAugguauaacgg..... 1  
 Gi5\_8456313\_x9.....uccggugugguauaacggcuGg..... 1  
 Gl1a\_5635228\_x9.....gguucgauucccggaucggagcC..... 1  
 Gi5\_8469363\_x9.....guuuucGcccaguagaucgg..... 1  
 Gi5\_8469930\_x9.....gguucgauucccggaCcgga..... 1  
 Gi3\_27251524\_x9.....uccggugugguUuaacggcuagca..... 1  
 Gi3\_27256879\_x9.....uccggugugguauaaUggcuag..... 1  
 Gi3\_27254422\_x9.....gguuuucacccGguagaucgg..... 1  
 Gi3\_27274276\_x9.....gguuuucacccaguagCuccgg..... 1  
 Gi3\_27304498\_x9.....guuuucacccGguagaucgg..... 1  
 Gi1\_3929185\_x9.....ucUggugugguauaacggc..... 1  
 Gi3\_27306298\_x9.....guuuucacccaguGgaucgg..... 1  
 Gi3\_27253792\_x9.....gguuuucacccagGagaucgg..... 1  
 Gi1\_3938401\_x9.....uccggugugguCuaacggcuagc..... 1  
 Gi1\_3939337\_x9.....uccggCgugguauaacggc..... 1  
 Gi3\_27287632\_x9.....gGucgauucccggaucggagc..... 1  
 Gi3\_27281269\_x9.....uccggugugguauaacggcAagc..... 1  
 Gi1\_3938338\_x9.....uccggugGgguauaacggcuagc..... 1  
 Gi1\_3942046\_x9.....uuucacccaguagaucgg..... 0  
 Gi2\_10461558\_x9.....uccggugugguauaacggUuagc..... 1  
 Gi2\_10434945\_x9.....guucgauucccggaucgUagc..... 1  
 Gl1a\_5643940\_x9.....gguccggugugguauaacggcuagcaugacu..... 0



Gi3\_27265357\_x9.....gguuuucacccaguagaucU.....1  
 Gi5\_8464881\_x9.....uuuucacccaguagGuccg.....1  
 Gl1\_5646667\_x9.....gguuuucaNccaguagaucg.....1  
 Gi3\_27256465\_x9.....gguuCucacccaguagaucgg.....1  
 Gi5\_8453235\_x9.....guuuucacNcaguagaucgg.....1  
 Gi5\_8463450\_x9.....uuCucacccaguagaucg.....1  
 Gi5\_8476185\_x9.....gguuuucGcccaguagaucgg.....1  
 Gi2\_10445295\_x9.....uccgguguggCauaacgg.....1  
 Gi2\_10456905\_x9.....guuuucacccaguagaCccg.....1  
 Gi1\_3939652\_x9.....guucgauuccUggcaucgg.....1  
 Gi5\_8463315\_x9.....uuCucacccaguagaucgg.....1  
 Gi5\_8469993\_x9.....uccggugugguauaacggcCagcau.....1  
 Gi5\_8458446\_x9.....uccggugugguauaacggcuGgcau.....1  
 Gi1\_3937339\_x9.....uccggugugguauaGcgg.....1  
 Gi2\_10445250\_x9.....guucgauuccAgcaucgg.....1  
 Gi1\_3931912\_x9.....uccgguguggCauaacggcuagcau.....1  
 Gi3\_27296569\_x9.....uccggugugguauCacggcuag.....1  
 Gi3\_27302806\_x9.....guucgauuccggUaucgg.....1  
 Gi5\_8464215\_x9.....Ggguuuucacccaguagauc.....1  
 Gl1\_5637514\_x9.....Guuucacccaguagaucg.....1  
 Gi3\_27258238\_x9.....gguuuucacccaguagaCccgg.....1  
 Gi5\_8461479\_x9.....Accggugugguauaacggcua.....1  
 Gi1\_3933469\_x9.....uccggugugguauaacggcuC.....1  
 Gl1\_5639476\_x9.....uGcggugugguauaacggcuag.....1  
 Gi5\_8456970\_x9.....gUuucgauuccggcaucgga.....1  
 Gi3\_27287695\_x9.....Guucacccaguagaucgg.....1  
 Gi3\_27261946\_x9.....uccggugugguaAaacggcuagc.....1  
 Gi1\_3935098\_x9.....uccgguguAguauaacggc.....1  
 Gi2\_10446861\_x9.....uccggugugguauaacggAcuagca.....1  
 Gi5\_8454999\_x9.....uccggugugguauaacggcuCgcau.....1  
 Gi5\_8463459\_x9.....Ggguuuucacccaguagaucgg.....1  
 Gi3\_27294481\_x9.....uccggugugguauaCcgguagca.....1  
 Gi3\_27278245\_x9.....Cccggugugguauaacggcu.....1  
 Gi3\_27272746\_x9.....uuuucacccaguagaucA.....1  
 Gi3\_27255178\_x9.....guGuucacccaguagaucgg.....1  
 Gi2\_10460469\_x9.....uUcggugugguauaacggcuagcau.....1  
 Gi3\_27254485\_x9.....uccggugugguauaacUgcuagc.....1  
 Gi4\_522063\_x9.....uccggugugguauaacggcua.....0  
 Gi2\_10446573\_x9.....uccggugugguauaacggcuGgca.....1  
 Gi3\_27301231\_x9.....ugguuCucacccaguagaucg.....1  
 Gi5\_8471181\_x9.....uccggugugguauaacggAuagc.....1  
 Gi1\_3937501\_x9.....uccggugugguauaacggcuCg.....1  
 Gi2\_10431345\_x9.....uccggugugguauaacggcAagc.....1  
 Gi2\_10438842\_x9.....guucgauuccggcGucgga.....1  
 Gi3\_27278344\_x9.....ucAggugugguauaacggc.....1  
 Gi1\_3928861\_x9.....gUugugguauaacggcuagcau.....1  
 Gi2\_10433640\_x9.....guuuucacccaguagaucUg.....1

Gi4\_521514\_x9 .....uccggugugguauaacggcuag..... 0  
 Gi3\_27252964\_x9 .....uccggugugguauaUcggcua..... 1  
 Gi5\_8458275\_x9 .....uCuucacccaguagauccg..... 1  
 Gi5\_8466132\_x9 .....gUuuuucacccaguagaucc..... 1  
 Gi3\_27302266\_x9 .....guucgauucccAgcaucgg..... 1  
 Gi1\_3935818\_x9 .....uccggugugAuauaacggcuag..... 1  
 Gi5\_8454072\_x9 .....Ggauccggguucgauuccc..... 1  
 Gi5\_8486185\_x8 .....cUgugugguauaacggcuag..... 1  
 Gi5\_8491033\_x8 .....gguuuucaGccaguagauccg..... 1  
 Gi5\_8497337\_x8 .....gguuCucacccaguagauccgg..... 1  
 Gi3\_27324073\_x8 .....uUcggugugguauaacggcu..... 1  
 Gi1\_3944693\_x8 .....uccggugugguCuaacggcua..... 1  
 Gi2\_10490266\_x8 .....gUUUCcaccaguagauccg..... 1  
 Gl1a\_5655593\_x8 .....gguuuucacccaguagGuccg..... 1  
 Gi1\_3954949\_x8 .....gguuuucacccaguagauUcg..... 1  
 Gi5\_8483777\_x8 .....guucgauuccUggcaucgg..... 1  
 Gi2\_10496546\_x8 .....uccAgugugguauaacggcuagca..... 1  
 Gl1a\_5667801\_x8 .....gUuucgauucccggcaucgg..... 1  
 Gi2\_10474618\_x8 .....uccggugugguauCacggc..... 1  
 Gi5\_8498697\_x8 .....uccgguguggCauaacggcuagca..... 1  
 Gi3\_27321633\_x8 .....Gcggugugguauaacggcua..... 1  
 Gi2\_10462258\_x8 .....uuuucacccaguGgauccg..... 1  
 Gl1a\_5656617\_x8 .....Uugguauaacggcuagca..... 1  
 Gi5\_8493737\_x8 .....gUgugugguauaacggcuag..... 1  
 Gi3\_27335081\_x8 .....uCuucacccaguagauccg..... 1  
 Gi5\_8477737\_x8 .....Cuuucacccaguagauccgg..... 1  
 Gi1\_3944389\_x8 .....uccggugugguauaaUggcuagca..... 1  
 Gi3\_27313137\_x8 .....gguucgauNccggcaucg..... 1  
 Gl1a\_5660905\_x8 .....Gccggugugguauaacggc..... 1  
 Gi5\_8478065\_x8 .....gguCuucacccaguagauccgg..... 1  
 Gi4\_524304\_x8 .....Gccggugugguauaacggcuagc..... 1  
 Gi5\_8478849\_x8 .....uccggugugguauaacgAcua..... 1  
 Gi2\_10495498\_x8 .....uccgguguAguauaacggc..... 1  
 Gi2\_10495458\_x8 .....uccgguguAguauaacgg..... 1  
 Gi5\_8487889\_x8 .....uccggugugguauaUcggcuagc..... 1  
 Gi2\_10489906\_x8 .....guucgauucccgAcaucgga..... 1  
 Gi3\_27346649\_x8 .....gguuuucaGccaguagauccg..... 1  
 Gl1a\_5657329\_x8 .....Uuucgauucccggcaucgg..... 1  
 Gi3\_27309409\_x8 .....gUUUcaccUaguagauccgg..... 1  
 Gi5\_8482841\_x8 .....Gccggugugguauaacggcuagcaugacu..... 1  
 Gi2\_10466554\_x8 .....Auuuucacccaguagauccg..... 1  
 Gi5\_8484057\_x8 .....caguagauccggguucgauucccggcaucgg..... 0  
 Gi3\_27356633\_x8 .....Cuuuucacccaguagauccg..... 1  
 Gi3\_27352025\_x8 .....ucUggugugguauaacggcu..... 1  
 Gi5\_8482897\_x8 .....gguuuCcaccaguagauccgg..... 1  
 Gi3\_27310985\_x8 .....gUuccggugugguauaacggcua..... 1  
 Gi5\_8490449\_x8 .....gguuuucacccaguagauccAg..... 1

Gi5\_8491809\_x8.....uccggugugguauaacgCcuagc..... 1  
Gi5\_8493905\_x8.....uccggugugguauaacggcCagca..... 1  
Gi3\_27312593\_x8.....uccggugugguauaCgggc..... 1  
Gi3\_27350049\_x8.....uccggugugguauaCgggcuag..... 1  
Gi5\_8489969\_x8.....gCuucacccaguagaucgg..... 1  
Gi3\_27310353\_x8.....ggGuucacccaguagaucgg..... 1  
Gi5\_8491553\_x8.....Auucgauucccggaucgg..... 1  
Gi5\_8481985\_x8.....uccggugugguauaGcggc..... 1  
Gi1\_3946717\_x8.....gguuuAcacccaguagaucgg..... 1  
Gi1\_3946565\_x8.....gCuucacccaguagaucgg..... 1  
Gi1\_3947949\_x8.....uccggAgugguauaacggcua..... 1  
G1a\_5661225\_x8.....gguuuaccccCguagaucgg..... 1  
Gi2\_10485818\_x8.....uccggugugguauaacggcuG..... 1  
Gi3\_27359553\_x8.....guuuucacccaguagaucAg..... 1  
Gi3\_27376817\_x8.....Auucgauucccggaucgg..... 1  
Gi5\_8494609\_x8.....gguucgauucccggcGuc..... 1  
Gi2\_10487762\_x8.....gGucgauucccggaucggag..... 1  
Gi5\_8496977\_x8.....uccggugugguauaacAgc..... 1  
Gi3\_27339377\_x8.....guucgaCucccggaucgga..... 1  
Gi3\_27364681\_x8.....uccggugugguauaacAgcuagcau..... 1  
G1a\_5675073\_x8.....Gccggugugguauaacggcuagcau..... 1  
Gi2\_10489266\_x8.....uccggugugguauaacggU..... 1  
Gi3\_27363137\_x8.....guuuucacUcaguagaucgg..... 1  
Gi5\_8476993\_x8.....agaucgggNuucgauuccc..... 1  
Gi2\_10478834\_x8.....uccggugugAuauaacggcuagca..... 1  
Gi2\_10478210\_x8.....uccggAgugguauaacggc..... 1  
Gi3\_27373513\_x8.....uccggugugguauaacggcuU..... 1  
Gi3\_27368169\_x8.....guuuucacccaguCgaucgg..... 1  
Gi5\_8488297\_x8.....guuuucacccCguagaucgg..... 1  
Gi1\_3942181\_x8.....uccggugugguauaacggUuagca..... 1  
Gi5\_8481465\_x8.....uccAgugugguauaacggcuag..... 1  
Gi1\_3949301\_x8.....gguuuucacccaguagauccA..... 1  
Gi1\_3956789\_x8.....uccggugugguauaacggcCagcau..... 1  
Gi3\_27355921\_x8.....uccggugugguauaacggcuC..... 1  
Gi3\_27329745\_x8.....uccgguguNguauaacggcu..... 1  
Gi1\_3952965\_x8.....uccggugugguauCacggcuagca..... 1  
Gi2\_10496250\_x8.....Cccggugugguauaacggcuag..... 1  
Gi2\_10478538\_x8.....gGuucacccaguagauc..... 1  
Gi1\_3948501\_x8.....guuuucGcccaguagaucgg..... 1  
Gi1\_3949805\_x8.....gAuuuucacccaguagaucgg..... 1  
Gi5\_8482641\_x8.....uccggugugguauaacggcuCgca..... 1  
Gi3\_27355161\_x8.....uuuucaccNaguagaucgg..... 1  
Gi5\_8489513\_x8.....gguuuUacccaguagaucgg..... 1  
Gi2\_10488730\_x8.....gguucgauucccggaCcg..... 1  
Gi3\_27317593\_x8.....uccggugGguauaacggcuagcau..... 1  
Gi1\_3943773\_x8.....Uuucgauucccggaucg..... 1  
Gi2\_10469842\_x8.....uccggugugguauaGcggcuagcau..... 1

Gi5\_8498705\_x8.....uccggugCgguauaacggcuagca..... 1  
Gi3\_27347489\_x8.....ggAuucacccaguagaucgg..... 1  
Gi1\_3954477\_x8.....uccggugGgguauaacggcuag..... 1  
Gi3\_27362217\_x8.....Auuucacccaguagaucgg..... 1  
Gi2\_10466722\_x8.....uccggugugguUuaacggcuagc..... 1  
Gi5\_8480993\_x8.....uccggugugguCuaacggcuag..... 1  
Gi3\_27354425\_x8.....cUauucccggaucggagcucuu..... 1  
Gi5\_8481217\_x8.....uccggugugguauGacgg..... 1  
Gi2\_10466082\_x8.....gguucgauucccggcGucg..... 1  
Gi3\_27348049\_x8.....guucgauCcccggaucgg..... 1  
Gi2\_10471714\_x8.....uccggugugguauGcggcuag..... 1  
Gi5\_8495353\_x8.....gguuuucacccagAagaucgg..... 1  
Gi5\_8493241\_x8.....uccggugugAuauaacggcua..... 1  
Gi5\_8502385\_x8.....gguuuucacccaguagaucGg..... 1  
Gi5\_8498161\_x8.....uccggugugguauaacggcuagAau..... 1  
Gi3\_27361049\_x8.....gguuuCcaccaguagauc..... 1  
Gi1\_3957037\_x8.....uccgguguggCauaacgg..... 1  
Gi2\_10486418\_x8.....gguuuucacccUguagaucgg..... 1  
Gi2\_10469978\_x8.....uccggugugguGuaacggcuag..... 1  
Gi2\_10466002\_x8.....gUguucgauucccggaucggag..... 1  
Gi3\_27377193\_x8.....uuuucacccaguagaucUg..... 1  
Gi5\_8484785\_x8.....uuuucaccNaguagaucgg..... 1  
Gi3\_27355305\_x8.....guucgauuccUggcaucgg..... 1  
Gi2\_10494178\_x8.....gguucgauucccggaCcgag..... 1  
Gi5\_8493593\_x8.....gguucgauucccggcGucgga..... 1  
Gi1a\_5667857\_x8.....Uguucgauucccggaucg..... 1  
Gi5\_8486849\_x8.....uccggugugguauaacggcuagG..... 1  
Gi1\_3942509\_x8.....gguuuucaUccaguagaucgg..... 1  
Gi3\_27357521\_x8.....guucgauuNccggcaucgg..... 1  
Gi1\_3945269\_x8.....gguuuaccccUguagaucgg..... 1  
Gi1\_3973733\_x7.....uccggugAgguauaacggcuag..... 1  
Gi3\_27390067\_x7.....gUuuucacccaguagau..... 1  
Gi2\_10538646\_x7.....Aguucgauucccggauc..... 1  
Gi1\_3960468\_x7.....Gcggugugguauaacggcuagcau..... 1  
Gi5\_8517690\_x7.....Cccggugugguauaacgg..... 1  
Gi1\_3967776\_x7.....guuuucacccaguagaucAg..... 1  
Gi5\_8523178\_x7.....guuuucacccaguagaucUg..... 1  
Gi2\_10523393\_x7.....uccggGgugguauaacggcua..... 1  
Gi5\_8504698\_x7.....uccggAgugguauaacggcuagcau..... 1  
Gi3\_27445255\_x7.....uccggGgugguauaacgg..... 1  
Gi1\_3966404\_x7.....gguuuucacccaguagGuccgg..... 1  
Gi3\_27455867\_x7.....uccggugugguauaacggAuagc..... 1  
Gi3\_27441139\_x7.....Gcggugugguauaacggcuagc..... 1  
Gi2\_10539780\_x7.....uuuCcaccaguagaucgg..... 1  
Gi3\_27457036\_x7.....uccggugugguauaacggcAa..... 1  
Gi5\_8515233\_x7.....uggCuucacccaguagaucgg..... 1  
Gi5\_8520070\_x7.....guGuucacccaguagaucgg..... 1

Gi5\_8513861\_x7.....uccggugGgguauaacggcuagcau..... 1  
 Gi1\_3969463\_x7.....uccggugugAuuaaacggcua..... 1  
 Gi3\_27426012\_x7.....uuuAcacccaguagaucgg..... 1  
 Gi5\_8510550\_x7.....guuCucacccaguagaucgg..... 1  
 Gi1\_3968854\_x7.....guuuucacNcaguagaucgg..... 1  
 Gl1a\_5679944\_x7.....Gccggguucgauucccgga..... 1  
 Gi3\_27379581\_x7.....gguucgauucccggcGuc..... 1  
 Gi3\_27424598\_x7.....uccgUugugguauaacggcuagcau..... 1  
 Gi2\_10506887\_x7.....guucgauucccggaucAg..... 1  
 Gi3\_27379336\_x7.....Cgguuucacccaguagaucgg..... 1  
 Gi5\_8519160\_x7.....uccgguguggAuaaacggcuagc..... 1  
 Gi3\_27422435\_x7.....guAuucacccaguagaucgg..... 1  
 Gi5\_8523332\_x7.....uccggugugguauCacggcuag..... 1  
 Gi3\_27412054\_x7.....cUgugugguauaacggcuagcau..... 1  
 Gi5\_8523164\_x7.....Auuuucacccaguagaucgg..... 1  
 Gi2\_10510471\_x7.....uCuucacccaguagaucgg..... 1  
 Gi5\_8502927\_x7.....uccggugugguGuaaacggcuagcau..... 1  
 Gi1\_3960664\_x7.....guuuucacccaguagaucAg..... 1  
 Gi5\_8523612\_x7.....gguuuucacccaguagaucU..... 1  
 Gi3\_27380568\_x7.....gguuuucacccaguagaucggC..... 1  
 Gi5\_8518243\_x7.....uuuCcacccaguagaucgg..... 1  
 Gi1\_3970359\_x7.....Accggugugguauaacggcua..... 1  
 Gi5\_8530465\_x7.....uccggugugguauaacggcuagcGu..... 1  
 Gi2\_10536112\_x7.....uccggugCgguauaacgg..... 1  
 Gi5\_8524669\_x7.....guAuucacccaguagaucgg..... 1  
 Gi2\_10506131\_x7.....uccggugugguauaacggcCag..... 1  
 Gi1\_3964563\_x7.....gguuuucacccaguagUuccg..... 1  
 Gi5\_8528078\_x7.....gguuuucacccaguagaAccg..... 1  
 Gi1\_3962939\_x7.....gguuuucCcccaguagaucgg..... 1  
 Gi3\_27411928\_x7.....gguuuucacccaguagaucggA..... 1  
 Gi3\_27393441\_x7.....Cuucgauucccggaucgga..... 1  
 Gi1\_3974286\_x7.....guuuCcacccaguagaucgg..... 1  
 Gi2\_10537169\_x7.....Accggugugguauaacggc..... 1  
 Gi5\_8521316\_x7.....gguuuucCcccaguagaucgg..... 1  
 Gi5\_8520749\_x7.....Ggguuuucacccaguagauc..... 1  
 Gi5\_8517354\_x7.....Auuuucacccaguagaucgg..... 1  
 Gi3\_27447488\_x7.....uuuucacccaguagaucUgg..... 1  
 Gi1\_3966432\_x7.....gguuuucacUcaguagaucgg..... 1  
 Gi1\_3964416\_x7.....Cuucacccaguagaucgg..... 1  
 Gi5\_8521974\_x7.....uuGucacccaguagaucgg..... 1  
 Gi5\_8521932\_x7.....uCuucacccaguagaucgg..... 1  
 Gi5\_8508520\_x7.....guucgauCcccggcaucgg..... 1  
 Gi3\_27397291\_x7.....uccggugugguauaaAgggcua..... 1  
 Gi3\_27390088\_x7.....uccggugugguauaacggcuaAcau..... 1  
 Gi3\_27447047\_x7.....ggugugguNuaaacggcua..... 1  
 Gi5\_8507337\_x7.....uccgguguggCauaacgg..... 1  
 Gi2\_10523645\_x7.....Gucacccaguagaucgg..... 1

Gi5\_8514484\_x7.....gguucgauucccggaCcg..... 1  
 Gi3\_27439242\_x7.....aguagaucggguucgauucccggaucgga..... 0  
 Gi2\_10499586\_x7.....gguucgauucccggaGucggag..... 1  
 Gi3\_27455489\_x7.....uccggugAgguauaacggcuagca..... 1  
 Gi3\_27381107\_x7.....gguucgauucccggaGucgg..... 1  
 Gl1a\_5682051\_x7.....uccggCgugguauaacggcua..... 1  
 Gi3\_27439361\_x7.....uccCgugugguauaacggcuagc..... 1  
 Gi5\_8516920\_x7.....uccggugugguauaacgAcuagca..... 1  
 Gi3\_27451730\_x7.....uguuuuacccaguagaCc..... 1  
 Gi1\_3968399\_x7.....uccgguguNguauaacggc..... 1  
 Gi2\_10522896\_x7.....uccAgugugguauaacggcua..... 1  
 Gi3\_27393581\_x7.....uccggugugguauCacggcuagca..... 1  
 Gi3\_27426159\_x7.....uuCucaccaguagaucgg..... 1  
 Gi1\_3965130\_x7.....Accggugugguauaacggcuag..... 1  
 Gi2\_10511976\_x7.....uUugguauaacggcuagc..... 1  
 Gi3\_27389549\_x7.....guuuucaccaguagaucAgg..... 1  
 Gi2\_10527425\_x7.....Accggugugguauaacggcuag..... 1  
 Gi1\_3968602\_x7.....guCcgauucccggaucgga..... 1  
 Gi5\_8506154\_x7.....gguuuucaccUaguagaucgg..... 1  
 Gi1\_3968182\_x7.....Cccggugugguauaacggcuagca..... 1  
 Gi3\_27416030\_x7.....guuuucaUccaguagaucgg..... 1  
 Gi2\_10515511\_x7.....Gcggugugguauaacggcua..... 1  
 Gi2\_10532276\_x7.....uccggugugguauaacggcuGg..... 1  
 Gi3\_27411557\_x7.....gGucgauucccggaucggag..... 1  
 Gi3\_27432921\_x7.....uccUgugugguauaacggcuagca..... 1  
 Gi3\_27407581\_x7.....guuuucaUccaguagaucgg..... 1  
 Gi5\_8524732\_x7.....ugguuuacccaguagaucUg..... 1  
 Gi1\_3971507\_x7.....Auucgauucccggaucgga..... 1  
 Gi1\_3972200\_x7.....ccggugugNuauaacggcuagca..... 1  
 Gi5\_8507666\_x7.....Uguccggugugguauaacggcuagc..... 1  
 Gi2\_10501112\_x7.....uccggAgugguauaacgg..... 1  
 Gi5\_8520546\_x7.....uccggugugguauaacggcuaA..... 1  
 Gi2\_10512704\_x7.....guuuucaccaguGgaucgg..... 1  
 Gi2\_10539941\_x7.....uUcggugugguauaacggcuag..... 1  
 Gi3\_27401757\_x7.....uccgguguggGauaacggcuagca..... 1  
 Gi2\_10535895\_x7.....Cccggugugguauaacggcuagca..... 1  
 Gi2\_10527838\_x7.....uccggugugguauUcggcuagc..... 1  
 Gi5\_8506336\_x7.....uuuucacUcaguagaucgg..... 1  
 Gi3\_27455965\_x7.....uccggugugguauaacgCcuagc..... 1  
 Gi5\_8529562\_x7.....uccggugCgguauaacggc..... 1  
 Gi3\_27406090\_x7.....guuuucaccaguagaucAgg..... 1  
 Gi3\_27448006\_x7.....gguuuucaccaguagCuc..... 1  
 Gi3\_27412460\_x7.....gguuuucaccagCagauc..... 1  
 Gi5\_8515030\_x7.....cgguguggNuauaacggcuagc..... 1  
 Gl1a\_5682940\_x7.....ucUggugugguauaacggcuagc..... 1  
 Gl1a\_5682219\_x7.....gUuuuuacccaguagauc..... 1  
 Gi3\_27451779\_x7.....ccggugugNuauaacggcua..... 1

Gi3\_27380841\_x7.....uccgCugugguauaacggcua.....1  
Gi3\_27431143\_x7.....gUguucgauucccggaucg.....1  
Gi1\_3958641\_x7.....gguucgauucccggaCcgagc.....1  
Gi1\_3967923\_x7.....gguucgauuccAgcaucgg.....1  
Gi3\_27426341\_x7.....uccggugugguauaUcggcuagca.....1  
Gi3\_27418620\_x7.....uccggugugggGauaacggcua.....1  
Gi3\_27385573\_x7.....gguuuucacccaguagauAgg.....1  
Gi5\_8525376\_x7.....uccgguguNguauaacgg.....1  
Gi3\_27450792\_x7.....uuuucacccagCagauccgg.....1  
Gi3\_27448391\_x7.....guuuuUacccaguagaucgg.....1  
Gi2\_10504094\_x7.....uccggugugguauaacgAc.....1  
Gi3\_27433537\_x7.....gguuuuGacccaguagaucgg.....1  
Gi2\_10537435\_x7.....uccggugugguauaacgA.....1  
Gi5\_8524291\_x7.....gUugugguauaacggcuagc.....1  
Gi1\_3960391\_x7.....uccggugugguauaacggUua.....1  
Gi2\_10537470\_x7.....gguuuucacccaguagaCccg.....1  
Gi5\_8522961\_x7.....uccggugugggGauaacggcuagc.....1  
G1a\_5693783\_x7.....ggCuucacccaguagaucgg.....1  
Gi1\_3961322\_x7.....uccggugugggGauaacggcuagc.....1  
Gi3\_27408281\_x7.....ugguuuucacccaguagGuc.....1  
Gi3\_27447341\_x7.....gguucgauuccUgcaucgga.....1  
Gi2\_10537043\_x7.....gUuucgauucccggaucggag.....1  
Gi3\_27411830\_x7.....uAguuuucacccaguagaucgg.....1  
Gi3\_27452794\_x7.....gguuuucacAcaguagaucgg.....1  
G1a\_5680623\_x7.....Uguucgauucccggauc.....1  
Gi3\_27395044\_x7.....uccggugGguauaacggcua.....1  
Gi3\_27389213\_x7.....uccAgugugguauaacgg.....1  
Gi3\_27399454\_x7.....Guccggguucgauucccgga.....1  
Gi5\_8542243\_x6.....ccggugugguGuaaacggcua.....1  
Gi3\_27463798\_x6.....gguucgauucccggaUaucgga.....1  
Gi2\_10584929\_x6.....gAuuuucacccaguagaucgg.....1  
Gi3\_27493576\_x6.....uAcggugugguauaacggcuagc.....1  
Gi5\_8546875\_x6.....uccggGgugguauaacggcua.....1  
Gi5\_8535853\_x6.....gguucgauNcccggauc.....1  
Gi2\_10549505\_x6.....uccggUaugguauaacggcuagca.....1  
Gi2\_10552751\_x6.....gguucgauuccUggcaucgga.....1  
Gi3\_27484108\_x6.....uccggugugguCaacgg.....1  
Gi3\_27521134\_x6.....Agugugguauaacggcua.....1  
Gi1\_3975259\_x6.....gguuuacacccaguagauUcg.....1  
Gi3\_27467668\_x6.....gguucgauNcccggaucgga.....1  
Gi3\_27524002\_x6.....gguucgauucccggcCucgg.....1  
Gi3\_27511738\_x6.....gguucgauucccggaCcg.....1  
Gi5\_8558167\_x6.....gguuuucacccagGagauccg.....1  
Gi3\_27524356\_x6.....uccggugGguauaacggcuag.....1  
Gi1\_3989971\_x6.....uccggugugguauaacggcuagG.....1  
Gi5\_8552689\_x6.....gguuuucacccaguagauGcg.....1  
Gi1\_3979321\_x6.....guCuucacccaguagaucgg.....1

Gi1\_3981031\_x6.....uccggugugguauaacAgcuagcau..... 1  
 Gi2\_10580795\_x6.....uccggugugguauaacggcuaCc..... 1  
 Gl1a\_5724166\_x6.....uccgguguNguauaacggcuagc..... 1  
 Gi3\_27499684\_x6.....gguuuucacccagAagaucgg..... 1  
 Gi3\_27525508\_x6.....gguuuucaccUaguagauc..... 1  
 Gi3\_27465334\_x6.....ugguuuucGcccaguagaucgg..... 1  
 Gi2\_10588115\_x6.....uccggugugguauaacggcuGgc au..... 1  
 Gi2\_10549553\_x6.....uccggugugguauCacggcuag..... 1  
 Gi5\_8562007\_x6.....uccgguguggCauaacggcuag..... 1  
 Gi3\_27545188\_x6.....Agguuuuucacccaguagaucgg..... 1  
 Gi1\_3982135\_x6.....uccgguguggCauaacggc..... 1  
 Gi5\_8557141\_x6.....uccAgugugguauaacggcuagcau..... 1  
 Gi2\_10581857\_x6.....gguuuucacUcaguagaucgg..... 1  
 Gi5\_8554411\_x6.....guuuuucacccaguaAaucgg..... 1  
 Gi1\_3978631\_x6.....Gucacccaguagaucgg..... 1  
 Gi3\_27463600\_x6.....Cguuuuucacccaguagauc..... 1  
 Gi2\_10570541\_x6.....uccggugugguauaacAgcua..... 1  
 Gl1a\_5711200\_x6.....gguucgauucccggcUucgga..... 1  
 Gi3\_27469624\_x6.....Gagauccggguucgauucc..... 1  
 Gi3\_27515974\_x6.....guuuuucacccaguaAaucgg..... 1  
 Gi3\_27476962\_x6.....Cuucgauucccggaucgg..... 1  
 Gi3\_27467950\_x6.....gguuuucacccaguagauGcg..... 1  
 Gi3\_27487714\_x6.....uccgguguggAauaacggcua..... 1  
 Gi3\_27507514\_x6.....ugguuuucacccaguagauccA..... 1  
 Gi1\_3982495\_x6.....cUggugugguauaacggcua..... 1  
 Gi3\_27468574\_x6.....auucccggaucggagcCc..... 1  
 Gi1\_3979603\_x6.....uuuuUaccaguagaucgg..... 1  
 Gi2\_10543049\_x6.....Ugguucgauucccggaucggag..... 1  
 Gi5\_8548093\_x6.....guucgauucccggaCcgga..... 1  
 Gi3\_27472360\_x6.....uuuucaccNaguagaucgg..... 1  
 Gi5\_8537005\_x6.....gguccggugugguauaacggcua..... 0  
 Gi2\_10590443\_x6.....uccgAugugguauaacggc..... 1  
 Gi2\_10547111\_x6.....gguucgGuucccggaucgg..... 1  
 Gi3\_27511798\_x6.....guucgauucccggcGucggag..... 1  
 Gi2\_10567103\_x6.....guuuuucacccaguagauUcg..... 1  
 Gi1\_3979681\_x6.....guuuuucacccaguagauccA..... 1  
 Gi2\_10562753\_x6.....ugguuuucNcccaguagaucgg..... 1  
 Gi3\_27486940\_x6.....uuuucacccaguagauAccg..... 1  
 Gi1\_3984235\_x6.....uccggugugguauaacggcuagcauU..... 1  
 Gi1\_3981823\_x6.....uuuucacccaguagGuuccgg..... 1  
 Gl1a\_5724892\_x6.....gguuuucacccaguGgauccg..... 1  
 Gi3\_27480652\_x6.....uccggugugguauaacggcuCg..... 1  
 Gi3\_27510892\_x6.....guuCucacccaguagaucgg..... 1  
 Gi2\_10569701\_x6.....gguucgauucccggaCcg..... 1  
 Gi3\_27523618\_x6.....uccggugCgguauaacggcu..... 1  
 Gi1\_3992887\_x6.....uccggugugguauaacUgc..... 1  
 Gl1a\_5730178\_x6.....gguuuucacccGguagaucgg..... 1



Gi5\_8557345\_x6.....uccggugugguauaacggcAagc..... 1  
Gi2\_10579079\_x6.....uccggugugguauaUcggcuagcau..... 1  
Gi3\_27539002\_x6..... .gguucgauucccggcaucggagcA..... 1  
Gi2\_10546397\_x6.....uccggugCgguauaacggcuag..... 1  
Gi3\_27535306\_x6.....uccggugugguauaacgAcuag..... 1  
Gi1\_3977815\_x6..... .guuuucacccagCagaucgg..... 1  
G1a\_5709598\_x6.....Cccggugugguauaacggcuagc..... 1  
Gi3\_27523156\_x6..... .guGuucacccaguagaucgg..... 1  
Gi5\_8550685\_x6..... .ucUggguucgauucccggc..... 1  
Gi1\_3986095\_x6..... .uuuucacccaguagGuccg..... 1  
Gi3\_27470722\_x6..... .gguucgauuccUggcaucg..... 1  
Gi2\_10585103\_x6..... .uccggugugguauaacggUuagca..... 1  
Gi3\_27468742\_x6..... .guuuucacUcaguagaucgg..... 1  
Gi1\_3986239\_x6..... .guuuucacccaguGgaucgg..... 1  
Gi5\_8558929\_x6..... .uccggAgugguauaacggcuagca..... 1  
Gi1\_3976639\_x6..... .uccggCgugguauaacggcu..... 1  
Gi2\_10582565\_x6..... .uccggugugguCuaacgg..... 1  
Gi1\_3979927\_x6..... .uccggGgugguauaacggcua..... 1  
Gi3\_27485086\_x6..... .uccggugAgguauaacgg..... 1  
Gi5\_8562361\_x6..... .gguuuucacccaguUgaucgg..... 1  
Gi3\_27479674\_x6..... .cUauucccggcaucggag..... 1  
Gi5\_8554399\_x6..... .guuuCcaccaguagaucgg..... 1  
Gi1\_3991069\_x6..... .Cccggugugguauaacgg..... 1  
Gi3\_27534748\_x6..... .uccgguguggCauaacggcuag..... 1  
Gi3\_27461734\_x6..... .uccggugugguauaacggcuagcUu..... 1  
Gi2\_10552205\_x6..... .uccggugugAuauaacggc..... 1  
Gi3\_27527998\_x6..... .guuuucacccaguagaCccg..... 1  
Gi2\_10547945\_x6..... .uccggAgugguauaacggcua..... 1  
Gi3\_27526060\_x6..... .uuuucacccaguagGuccg..... 1  
Gi2\_10556015\_x6..... .guucgauucccggcaCcgag..... 1  
Gi2\_10572419\_x6..... .uccggugugguauaaGggcuagc..... 1  
Gi2\_10547795\_x6..... .uccggugugguauaacggcCagcau..... 1  
G1a\_5731144\_x6..... .uggCuuucacccaguagaucgg..... 1  
Gi5\_8547517\_x6..... .guCuucacccaguagaucgg..... 1  
Gi3\_27519736\_x6..... .Gguagaucggguucgauucc..... 1  
Gi2\_10548581\_x6..... .gUuuuucacccaguagaucgg..... 1  
Gi3\_27459436\_x6..... .uccggugugguUuaacggcuagcau..... 1  
Gi2\_10563023\_x6..... .uuAucacccaguagaucgg..... 1  
Gi3\_27495112\_x6..... .uccggAgugguauaacggcu..... 1  
Gi5\_8554135\_x6..... .uccggugAgguauaacggcua..... 1  
Gi1\_3985747\_x6..... .uccggAgugguauaacggcuagca..... 1  
Gi3\_27530842\_x6..... .uccggugugguUuaacggc..... 1  
Gi2\_10564853\_x6..... .guuuucacccaguagaucg..... 1  
Gi2\_10565207\_x6..... .guucgauuccUggcaucgg..... 1  
G1a\_5708938\_x6..... .uccggugugguauaacgAcuagc..... 1  
Gi3\_27502354\_x6..... .uccAgugugguauaacggcu..... 1  
Gi1\_3992899\_x6..... .uccgguguAguauaacggcuagc..... 1

Gi5\_8542423\_x6.....gguuuucacAcaguagaucgg..... 1  
Gi3\_27468442\_x6.....cAauucccggaucggagc..... 1  
Gi2\_10559387\_x6.....uccgguguNguauaacggcu..... 1  
Gi2\_10557527\_x6.....gguuuucacccaguagaucCA..... 1  
Gi3\_27461056\_x6.....uccggugugguauaacggcuUgca..... 1  
Gi3\_27524638\_x6.....gGagaucggguucgauucc..... 1  
Gi3\_27539152\_x6.....cGggugugguauaacggcuagc..... 1  
Gi2\_10543439\_x6.....gguucgauNcccggcaucgg..... 1  
Gi3\_27497434\_x6.....uccgguguggCauaacgg..... 1  
Gi5\_8538715\_x6.....uccggugugguauGacggcuag..... 1  
Gi1\_3981247\_x6.....uccggugugguauaacggcuAca..... 1  
Gi2\_10586093\_x6.....gguucgauucccggaucAg..... 1  
Gi1\_3993481\_x6.....guucgauucccggcGucg..... 1  
Gi1\_3976021\_x6.....uuuucaccGguagaucgg..... 1  
Gi2\_10549949\_x6.....ucAggugugguauaacggcuagca..... 1  
Gi2\_10543565\_x6.....uccggugugguauaacggcuagGa..... 1  
Gi2\_10559813\_x6.....gguuuucacAcaguagaucgg..... 1  
Gi5\_8552179\_x6.....Ugugugguauaacggcuagca..... 1  
Gi5\_8536975\_x6.....uccggugugguauaacggcuAca..... 1  
Gi5\_8557405\_x6.....uccggugugguauaacggUuag..... 1  
G1a\_5731798\_x6.....Aguuuucacccaguagaucgg..... 1  
Gi1\_3979003\_x6.....gguuuucacccaguagaucggguucgau..... 0  
Gi3\_27540994\_x6.....gguuuucacccaguagCuccgg..... 1  
Gi2\_10589735\_x6.....uuuucaccNaguagaucgg..... 1  
Gi2\_10545881\_x6.....guucgauucccggcGucg..... 1  
Gi5\_8533873\_x6.....Gccggugugguauaacggcuagcaugac..... 1  
Gi2\_10578713\_x6.....Gagaucggguucgauucc..... 1  
Gi5\_8551843\_x6.....uccggugugguauaacggcuC..... 1  
Gi3\_27506386\_x6.....Accggugugguauaacggcuagcau..... 1  
Gi5\_8560279\_x6.....uccgAugugguauaacggcuagcau..... 1  
Gi3\_27458770\_x6.....uccggugugguauaacggcuCc..... 1  
Gi2\_10573109\_x6.....gguuuAcacccaguagaucgg..... 1  
Gi5\_8544379\_x6.....uccggugugguauGacggcuagca..... 1  
Gi3\_27520060\_x6.....uccggugugguauaaAggcuagc..... 1  
Gi1\_3982609\_x6.....uccggugugguUuaaacggcuag..... 1  
Gi2\_10543865\_x6.....gUguucgauucccggaucggagc..... 1  
Gi2\_10571729\_x6.....uccggugugguaCaacggcuagcau..... 1  
Gi3\_27520120\_x6.....uccggugugAuauaacggcuagca..... 1  
Gi3\_27504508\_x6.....gguuuucCcccaguagauc..... 1  
Gi2\_10581059\_x6.....gguucgauucccggcCuc..... 1  
Gi3\_27488770\_x6.....uuuucaccGguagaucgg..... 1  
Gi5\_8549275\_x6.....gguuuucaccGguagaucgg..... 1  
Gi5\_8562817\_x6.....uccgAugugguauaacggcuagca..... 1  
Gi2\_10544921\_x6.....uGucacccaguagaucgg..... 1  
Gi1\_3992161\_x6.....guucgauucccggaCcgga..... 1  
Gi3\_27486028\_x6.....uccgguguggAuaaacggcuagc..... 1  
Gi2\_10554935\_x6.....uccgCugugguauaacggcuagc..... 1

Gi5\_8541337\_x6.....uAcgggugugguauaacggcua..... 1  
 Gi2\_10553873\_x6.....Ugguucgauucccggaucggagc..... 1  
 Gi2\_10550405\_x6.....uccggugugguauaacggcuagcaC..... 1  
 Gi5\_8535829\_x6.....uUugguauaacggcuagc..... 1  
 Gi2\_10546529\_x6.....gguucgauNcccggauc..... 1  
 Gi3\_27494878\_x6.....uccggugAgguauaacggc..... 1  
 Gi2\_10587143\_x6.....Gcggugugguauaacggc..... 1  
 Gi5\_8555773\_x6.....gguucgauucccggaCcgag..... 1  
 Gi1\_3986905\_x6.....uccggugugguaCaacggcua..... 1  
 Gi2\_10578185\_x6.....Ggguuucacccaguagauc..... 1  
 Gi5\_8550967\_x6.....gguGuucacccaguagaucgg..... 1  
 Gl1a\_5723716\_x6.....uGcggugugguauaacggc..... 1  
 Gi1\_3992053\_x6.....gguuGucacccaguagaucgg..... 1  
 Gi3\_27530962\_x6.....ucAggugugguauaacggcuagcau..... 1  
 Gi1\_3987619\_x6.....guuuucacccCguagaucgg..... 1  
 Gi1\_3984349\_x6.....gguucgauCcccggaucgg..... 1  
 Gi1\_3987181\_x6.....uccggugGgguaaacggcua..... 1  
 Gi5\_8533705\_x6.....uccggugugguauaacggcuagUa..... 1  
 Gi1\_3988345\_x6.....Gcggugugguauaacggcuag..... 1  
 Gi5\_8582672\_x5.....gguucgauucccggaUgg..... 1  
 Gi5\_8590502\_x5.....gguucgauucccggcGucgg..... 1  
 Gi1\_3995810\_x5.....uGcaccaguagaucgg..... 1  
 Gi1\_4006945\_x5.....Cuuuucacccaguagaucgg..... 1  
 Gi3\_27609542\_x5.....ugguuuucacccaguagaucAg..... 1  
 Gi2\_10609585\_x5.....uccggugGgguaaacggc..... 1  
 Gi3\_27573627\_x5.....ggCuucacccaguagauc..... 1  
 Gi5\_8596972\_x5.....uccggugugguauGacggcuagcau..... 1  
 Gi5\_8569252\_x5.....ggAuucacccaguagaucgg..... 1  
 Gi2\_10638120\_x5.....gguuuucacccaguagaucAg..... 1  
 Gi3\_27634142\_x5.....guagaucggguucgauucccggc..... 0  
 Gi1\_4005270\_x5.....uccggugAgguauaacggcuagca..... 1  
 Gi2\_10592400\_x5.....uUcggugugguauaacggcu..... 1  
 Gi5\_8581382\_x5.....guuuucacccaguagaucAgg..... 1  
 Gi2\_10636945\_x5.....Cuucgauucccggaucgg..... 1  
 Gi2\_10599555\_x5.....gAuucgauucccggauc..... 1  
 Gi2\_10592710\_x5.....uccggugugguauaacAgcuag..... 1  
 Gi2\_10640630\_x5.....guuuucacccaguagaucA..... 1  
 Gi1\_4005060\_x5.....uccggugugguauaacggcuagcaugacu..... 0  
 Gl1a\_5757292\_x5.....uccggugugguauaacggcuGgc..... 1  
 Gi1\_4010720\_x5.....Ggguuuucacccaguagaucgg..... 1  
 Gi5\_8591757\_x5.....gguucgauucccggaCcg..... 1  
 Gi5\_8570912\_x5.....gguuuucacccaCuagaucgg..... 1  
 Gi4\_537743\_x5.....Uuucgauucccggaucgg..... 1  
 Gi2\_10646355\_x5.....uccggugugguauCacgg..... 1  
 Gi1\_4010030\_x5.....gguucgauucccggaucggagcuA..... 1  
 Gi5\_8593167\_x5.....uccggugugguauaacggcuagUau..... 1  
 Gi5\_8582547\_x5.....gguuuucacccaguaUaucgg..... 1

Gi3\_27581097\_x5.....uccgguUugguauaacggcuagc.....1  
Gi3\_27626357\_x5.....uccggugugguaAaacggcua.....1  
Gi5\_8583587\_x5.....Accggugugguauaacgg.....1  
Gi1\_3996295\_x5.....uccgAugugguauaacggcuagca.....1  
Gi3\_27594017\_x5.....uuAucacccaguagauccgg.....1  
Gi3\_27577512\_x5.....guucgauucccgGucg.....1  
Gi1\_4004040\_x5.....ccggugugguauaacgAcua.....1  
Gi3\_27573792\_x5.....Cuuucacccaguagauccgg.....1  
Gi5\_8581347\_x5.....guucgauuccAgcaucg.....1  
Gi2\_10610555\_x5.....uccggugugguaCaacgg.....1  
Gi3\_27579917\_x5.....Uguccggugugguauaacggcua.....1  
Gi2\_10613805\_x5.....ucGggugugguauaacggcuagc.....1  
Gi5\_8583857\_x5.....uccggugugguauaacggcuaAcau.....1  
Gi1\_4009260\_x5.....uccggugugguauaacggcuagcCu.....1  
G1a\_5758417\_x5.....Gccggugugguauaacggcuagca.....1  
Gi5\_8567572\_x5.....uuuucacccaguGgauccgg.....1  
Gi5\_8588592\_x5.....Cuucacccaguagauccg.....1  
Gi5\_8565147\_x5.....uccgguguAguauaacggcuagca.....1  
Gi3\_27601252\_x5.....guucgauucccgAcaucgg.....1  
Gi2\_10615105\_x5.....agUuccggguucgauucc.....1  
Gi3\_27653252\_x5.....guuuucaccUaguagauccg.....1  
Gi5\_8593317\_x5.....cggCgugguauaacggcuagc.....1  
Gi2\_10638790\_x5.....uAacggugugguauaacggcuagc.....1  
Gi2\_10614565\_x5.....Uguccggugugguauaacggcuagc.....1  
Gi1\_4011460\_x5.....Auagauccggguucgauucc.....1  
Gi2\_10649425\_x5.....guuuucaccUaguagauccg.....1  
Gi5\_8573847\_x5.....uccggugugguauCacggcuagca.....1  
Gi3\_27554297\_x5.....guuUgauucccggaucgg.....1  
G1a\_5753077\_x5.....uUguuuucacccaguagauccg.....1  
Gi1\_4014020\_x5.....uUcggugugguauaacggcuagcau.....1  
Gi3\_27565027\_x5.....uccAgugugguauaacggcuag.....1  
Gi1\_3997015\_x5.....uuuucacccaguGgauccgg.....1  
Gi1\_4001990\_x5.....uccggugugguauGacggcua.....1  
Gi2\_10605665\_x5.....ccggugugNuauaacggcuagcau.....1  
Gi2\_10638490\_x5.....uccggugugAuauaacggcuagcau.....1  
Gi3\_27596982\_x5.....uccggugugguauUacggc.....1  
Gi2\_10644890\_x5.....gguucgauucAcggcauc.....1  
Gi1\_4006100\_x5.....guGcgauucccggaucgg.....1  
Gi1\_3998035\_x5.....uccggugugguauUcggcuag.....1  
Gi3\_27550412\_x5.....uccgguguggGauaacggcuagc.....1  
Gi3\_27584057\_x5.....gguuuucacccaguGgauc.....1  
Gi5\_8601852\_x5.....ggNuuucacccaguagauccg.....1  
Gi2\_10615910\_x5.....uccggugugguauaacggcuaUc.....1  
Gi1\_3995520\_x5.....uccUgugugguauaacggcuagc.....1  
Gi5\_8598452\_x5.....uccggugugguauaacggcuagcG.....1  
Gi1\_3997305\_x5.....guucgauuNccggcaucgg.....1  
Gi2\_10645620\_x5.....uccggugugguauaacgAcuagcau.....1

Gi5\_8564332\_x5.....guuuucacUcaguagaucgg..... 1  
Gi5\_8590162\_x5.....uccNuguguguaaaacggcuagc..... 1  
Gi1\_4017590\_x5.....gguCuucacccaguagaucgg..... 1  
Gi1\_4009270\_x5.....guucgauucccggaucggagcA..... 1  
Gi2\_10640310\_x5.....guucUauucccggaucgg..... 1  
Gi2\_10592670\_x5.....Uguccgguguguaaaacggcuagcau..... 1  
Gi1\_4015685\_x5.....gguuuucacccaguagaucA..... 1  
Gi5\_8584622\_x5.....uuuucacccagCagaucgg..... 1  
Gi3\_27565377\_x5.....ucGgguguguaaaacggcuagc..... 1  
Gi5\_8592427\_x5.....gguuuucacccaguagaucUgg..... 1  
Gi1\_4006380\_x5.....guuuucacAcaguagaucgg..... 1  
Gi1\_3995350\_x5.....uccgguguguaaaacggcC..... 1  
Gi3\_27635547\_x5.....uccgguguguaauGacggcuag..... 1  
Gi1\_4004920\_x5.....uccggugAgguuaaaacggcua..... 1  
Gi5\_8565517\_x5.....gguucgauucccggaucggagcA..... 1  
Gi5\_8598352\_x5.....gguuuucacccagCagaucgg..... 1  
Gi1\_4002880\_x5.....guucgauucccggaucggagc..... 1  
Gi5\_8597882\_x5.....Gagaucggguucgauucccgga..... 1  
Gi1\_3999200\_x5.....uGcgguguguaaaacggcu..... 1  
Gi3\_27617612\_x5.....uccgguguguaCuaacgg..... 1  
Gi3\_27616902\_x5.....uccgguguguaGaacggcua..... 1  
Gi2\_10596330\_x5.....ccggugugNuuaaaacggc..... 1  
Gi1\_4001765\_x5.....cUgguguguaaaacggcuagca..... 1  
Gi1\_4013570\_x5.....uccggugAgguuaaaacggcuagc..... 1  
Gi1\_3997240\_x5.....gguuuucacccaguagaucUgg..... 1  
Gi3\_27629507\_x5.....gguucgauucccggaucgg..... 1  
Gi2\_10599645\_x5.....uccAguguguaaaacggcuagcau..... 1  
Gi2\_10593090\_x5.....uuuUaccaguagaucgg..... 1  
Gi1\_4013505\_x5.....guuuucacccaguagaucUg..... 1  
Gi2\_10606385\_x5.....Aguucgauucccggaucgg..... 1  
Gi1\_4001235\_x5.....guucgGuucccggaucgg..... 1  
Gi1\_4004705\_x5.....guuuucGcccaguagaucgg..... 1  
Gi2\_10641385\_x5.....Guucacccaguagauc..... 1  
Gi1\_3994540\_x5.....gguuuucacccaAuagaucgg..... 1  
Gi3\_27641622\_x5.....uccgguguguaaaacggcGagc..... 1  
Gi2\_10624435\_x5.....gguuuuAaccaguagaucgg..... 1  
Gi1\_3995875\_x5.....Gcgguguguaaaacggcuagc..... 1  
Gi5\_8581907\_x5.....Guucacccaguagaucgg..... 1  
Gi3\_27580357\_x5.....guucgaCuucccggaucg..... 1  
Gi3\_27658287\_x5.....uuAucacccaguagaucgg..... 1  
G1a\_5749827\_x5.....ucUgguguguaaaacgg..... 1  
G1a\_5751712\_x5.....uccgguguguaGuaacggcuagc..... 1  
Gi3\_27631137\_x5.....uccCguguguaaaacggcua..... 1  
Gi2\_10649705\_x5.....gGgguuaaaacggcuagcau..... 1  
Gi5\_8567197\_x5.....gguccgguguguaaaacggcuagcaugacuA..... 1  
Gi2\_10638095\_x5.....uccgguguguaaaacgAcuag..... 1  
Gi5\_8597947\_x5.....ugguuuucacccaguagGuccg..... 1

Gi1\_4013575\_x5.....uccUgugugguauaacggcuag..... 1  
 Gi1\_4010910\_x5.....uccgguguAguauaacggcuagca..... 1  
 Gi5\_8576357\_x5.....guucgauucccggaucgA..... 1  
 Gi5\_8598517\_x5.....cgguUugguauaacggcuagc..... 1  
 Gi1\_3998475\_x5.....guucgaCucccggaucgga..... 1  
 Gi2\_10596545\_x5.....Accggugugguauaacggcuagcau..... 1  
 Gi1\_4007885\_x5.....guuuucacccaguagaucAg..... 1  
 Gi1\_4004730\_x5.....guuCucacccaguagauccgg..... 1  
 Gi1\_4006885\_x5.....guGuucacccaguagauccg..... 1  
 Gi3\_27580837\_x5.....uGucacccaguagauccg..... 1  
 Gi2\_10625300\_x5.....gguuuucaAccaguagauccg..... 1  
 Gi5\_8581152\_x5.....Gcggugugguauaacggcua..... 1  
 Gi2\_10640090\_x5.....ucAggugugguauaacggcuagc..... 1  
 Gl1\_5743317\_x5.....gguucgauucccggaucgagc..... 0  
 Gi5\_8592852\_x5.....uccggugugguauGacggcua..... 1  
 Gi3\_27583172\_x5.....gguucgauucccggaucA..... 1  
 Gi3\_27562887\_x5.....uccggugugguauaacggcAagca..... 1  
 Gi3\_27593812\_x5.....Auucgauucccggaucgga..... 1  
 Gi3\_27632007\_x5.....uccggugugguauaacggcuGgcau..... 1  
 Gi3\_27580667\_x5.....ggNuuucacccaguagauccg..... 1  
 Gi1\_4007950\_x5.....uccgguguggGauaacggcuagca..... 1  
 Gi2\_10596070\_x5.....guuuucacccaguaAauccg..... 1  
 Gi5\_8582417\_x5.....guuuucacccagCagaucgg..... 1  
 Gi3\_27612442\_x5.....guagauccgggGucgauuccc..... 1  
 Gi2\_10649465\_x5.....guCcgauucccggaucg..... 1  
 Gi1\_4001795\_x5.....uccgguguggGauaacggcua..... 1  
 Gi5\_8569947\_x5.....uccggugugguCuaacggcua..... 1  
 Gl1\_5734837\_x5.....Gccggugugguauaacgg..... 1  
 Gi2\_10638920\_x5.....uccgAugugguauaacggcuagca..... 1  
 Gi3\_27551172\_x5.....guuuucacccagCagaucgg..... 1  
 Gi5\_8578237\_x5.....gUuccggugugguauaacggcuagc..... 1  
 Gi5\_8591237\_x5.....gguccggugugguGuaacggc..... 1  
 Gi5\_8569917\_x5.....uccggugugguauaacCgcuagc..... 1  
 Gi2\_10629455\_x5.....gCucgauucccggaucgga..... 1  
 Gi3\_27624172\_x5.....uccggugugguauaacggcuaCca..... 1  
 Gi2\_10650370\_x5.....uccggugugguauaacggcuC..... 1  
 Gi1\_4002695\_x5.....uccggugugguauaacCggcua..... 1  
 Gi3\_27641562\_x5.....uccgguguAguauaacggcuagcau..... 1  
 Gi5\_8585932\_x5.....ggugugguauaacgAcuag..... 1  
 Gi2\_10628685\_x5.....Uguccggugugguauaacggcuagcauga..... 1  
 Gl1\_5750377\_x5.....gguuuucacccagCagaucgg..... 1  
 Gi3\_27592027\_x5.....gguuuucacccaguaUauccg..... 1  
 Gi3\_27614197\_x5.....uccggugGguauaacgg..... 1  
 Gi1\_4005055\_x5.....agUuccggguucgauuccc..... 1  
 Gi3\_27566502\_x5.....gguucgauucccggcGucg..... 1  
 Gi3\_27623567\_x5.....uccggugugguauaacggUuag..... 1  
 Gi3\_27575687\_x5.....ugguuucacccGguagauccg..... 1

Gi3\_27604582\_x5.....uuuucacAcaguagauccg.....1  
Gi1\_4008365\_x5.....uccggugugguauaacggcuU.....1  
Gi3\_27622497\_x5.....guuuucacccaguagauUcgg.....1  
Gi1\_4000130\_x5.....Accggugugguauaacgg.....1  
Gi2\_10637370\_x5.....uuuucacccGguagauccg.....1  
Gi3\_27628992\_x5.....guucgGuucccggaucgga.....1  
Gi3\_27588207\_x5.....agUuccggguucgauucc.....1  
Gi2\_10632270\_x5.....uccgguguAguauaacggcuag.....1  
Gi3\_27645677\_x5.....uccggAgugguauaacgg.....1  
Gi3\_27657457\_x5.....guuuucacccaguagauccA.....1  
Gi5\_8600897\_x5.....uccggugugguauaacgUcuagc.....1  
Gi3\_27638597\_x5.....gguuuucacAcaguagaucc.....1  
Gi2\_10621060\_x5.....uccggugugguauUacggcuagc.....1  
Gi3\_27625222\_x5.....guuuuUaccaguagauccgg.....1  
Gi2\_10600215\_x5.....uccggugugguauCcggc.....1  
Gi5\_8578072\_x5.....uccggugugguauaacggUua.....1  
Gi5\_8577192\_x5.....uccggugugguauUacggcuagc.....1  
Gi5\_8601407\_x5.....ucNggugugguauaacggcuagc.....1  
Gi2\_10616770\_x5.....guAuucacccaguagauccg.....1  
Gi5\_8591227\_x5.....Cuuuucacccaguagauccg.....1  
Gi1a\_5739702\_x5.....gUuucgauucccggaucg.....1  
Gi5\_8574822\_x5.....uccggugugguauaaAggcuagc.....1  
Gi5\_8582247\_x5.....ucAggugugguauaacggcuagcau.....1  
Gi3\_27656907\_x5.....guucgauucccCgcaucgg.....1  
Gi3\_27565032\_x5.....cGgguuuucacccaguagaucc.....1  
Gi5\_8572402\_x5.....gguuuucacUcaguagauccgg.....1  
Gi1\_3999950\_x5.....uccggGgugguauaacggcuagc.....1  
Gi5\_8565907\_x5.....uccgAugugguauaacggcu.....1  
Gi1\_4012520\_x5.....uccNgugugguauaacggcuag.....1  
Gi2\_10600360\_x5.....ucUggugugguauaacggcu.....1  
Gi3\_27613407\_x5.....uccgUugugguauaacggcu.....1  
Gi1\_3995555\_x5.....gguNuucacccaguagauccg.....1  
Gi3\_27655992\_x5.....gguucgauucccAgcaucgg.....1  
Gi3\_27602202\_x5.....uccggugugguauGacggcuagcau.....1  
Gi2\_10712511\_x4.....uccggugugUuauaacggcuagc.....1  
Gi2\_10713395\_x4.....guCuucacccaguagaucc.....1  
Gi2\_10696359\_x4.....uccggugugguauaacggAuagc.....1  
Gi2\_10684667\_x4.....uuuucacccaguagauAccg.....1  
Gi5\_8625143\_x4.....uccggugugguauaacggcuacCa.....1  
Gi5\_8625375\_x4.....uuuUaccaguagauccgg.....1  
Gi5\_8630219\_x4.....uccggugugguauaacggcGagcau.....1  
Gi5\_8632543\_x4.....guucUauucccggaucgga.....1  
Gi2\_10724839\_x4.....guGuucacccaguagauccg.....1  
Gi5\_8627051\_x4.....guuuucacccaguagauccA.....1  
Gi2\_10709563\_x4.....Ggugguauaacggcuagc.....1  
Gi1\_4018028\_x4.....ccggGgugguauaacggcu.....1  
Gi3\_27701597\_x4.....guuuuAaccaguagauccg.....1

Gi1\_4041912\_x4.....uuuucacccaguGgaucgg.....1  
 Gi1\_4018716\_x4.....gGucgauucccggaucggagc.....1  
 Gi5\_8643103\_x4.....gguguAguauaacggcuag.....1  
 Gl1a\_5772070\_x4.....gguuuucCcccaguagaucgg.....1  
 Gi5\_8630727\_x4.....uuuuUacccaguagaucgg.....1  
 Gi3\_27669117\_x4.....ggGucgauucccggaucg.....1  
 Gl1a\_5802086\_x4.....gguuuucacccaguagCuccg.....1  
 Gi3\_27769849\_x4.....Accggugugguauaacggcuag.....1  
 Gi3\_27664569\_x4.....guuuucacccaguagaucUgg.....1  
 Gl1a\_5794790\_x4.....uccggugugguauaacggcuagA.....1  
 Gi1\_4039428\_x4.....uccggugugguauaacggcuagcaC.....1  
 Gi1\_4044700\_x4.....uccgguguggAauaacggcuagc.....1  
 Gi2\_10703323\_x4.....guuuucacccaguCgaucgg.....1  
 Gi2\_10695175\_x4.....uccggugugguauCacggcu.....1  
 Gi1\_4046184\_x4.....uccggugugguGuaacggcuagcau.....1  
 Gi3\_27794965\_x4.....uccggugugguauaUcggc.....1  
 Gi2\_10679503\_x4.....Gcggugugguauaacggcuagcau.....1  
 Gi5\_8645627\_x4.....gUuucgauucccggaucggagcucuu.....1  
 Gi2\_10721031\_x4.....auccggguucgauucccgga.....0  
 Gi5\_8640671\_x4.....uccggugugguauaacgAcuag.....1  
 Gi3\_27780273\_x4.....gguuuucacccaguagGuc.....1  
 Gi3\_27786553\_x4.....Ggauucccggaucggagc.....1  
 Gi1\_4029720\_x4.....uccggugugguauaacggcAagca.....1  
 Gi5\_8621495\_x4.....gguuuCcaccaguagauc.....1  
 Gi3\_27690425\_x4.....uccgguguUguauaacggcuagc.....1  
 Gi1\_4040156\_x4.....ucAggugugguauaacggcuag.....1  
 Gi5\_8610403\_x4.....uccggugugAuaaacggcuagcau.....1  
 Gi3\_27711209\_x4.....Aguucgauucccggaucg.....1  
 Gi3\_27770301\_x4.....cgauucccggaucggagcuA.....1  
 Gi2\_10703647\_x4.....gugugguauaCcgguagc.....1  
 Gi2\_10705287\_x4.....uuucacccaguagGuccg.....1  
 Gi3\_27791265\_x4.....uuuucacccaguagaCccg.....1  
 Gi5\_8630311\_x4.....guucgauucccgUcaucgg.....1  
 Gi3\_27743797\_x4.....guucgauucccgAcaucg.....1  
 Gi1\_4041028\_x4.....uuGucacccaguagaucgg.....1  
 Gi4\_541086\_x4.....gguuuucacccaguagaucgg.....0  
 Gi1\_4037436\_x4.....uccgAugugguauaacgg.....1  
 Gi3\_27744117\_x4.....cggugugguauaacggcGa.....1  
 Gi2\_10659307\_x4.....uccggugugguauaacggcuagcGu.....1  
 Gi2\_10661711\_x4.....ccggugugNuauaacggcu.....1  
 Gi2\_10706211\_x4.....uccggugAgguauaacggcuagcau.....1  
 Gi1\_4041592\_x4.....uccggugugguauGacggcuagcau.....1  
 Gi3\_27782349\_x4.....ucNggugugguauaacggcuagca.....1  
 Gi3\_27685461\_x4.....guuuucaccAaguagaucgg.....1  
 Gi3\_27688725\_x4.....guCcgauucccggaucgg.....1  
 Gi3\_27734049\_x4.....gguuuucacccaguGgaucgg.....1  
 Gi3\_27692369\_x4.....gguuuucacccagCagaucgg.....1



Gi3\_27707437\_x4.....uguuuuuacccaguaAauccg.....1  
Gi5\_8635535\_x4.....gguuuucGcccaguagauc.....1  
Gi1\_4045124\_x4.....ccggugugguauaacggcuGg.....1  
Gi5\_8647631\_x4.....uuuucacccaguagauccA.....1  
Gi4\_539706\_x4.....uccggugugguauaacgg.....0  
Gi1\_4032308\_x4.....uccggugugguauaGcggc.....1  
Gi3\_27700441\_x4.....gguucgauucccAgcaucggagc.....1  
Gi2\_10710167\_x4.....uccggugugguauGacgg.....1  
Gi5\_8631287\_x4.....guucgauUccggcaucgg.....1  
Gi5\_8643351\_x4.....uccggugCgguauaacgg.....1  
Gi5\_8639979\_x4.....guuuuacccaguagaucAgg.....1  
Gi5\_8602831\_x4.....Accggugugguauaacggcuagcau.....1  
Gi1\_4039040\_x4.....guucUauucccggcaucgg.....1  
Gi3\_27704185\_x4.....gguucgauucccAgcaucg.....1  
Gi3\_27731697\_x4.....gguuuucacGcaguagauccg.....1  
Gi5\_8633063\_x4.....uccggugugguauaacggAua.....1  
Gi2\_10677767\_x4.....guGcgauucccggcaucgg.....1  
Gi3\_27769217\_x4.....Uuuuucacccaguagauccggguucg.....1  
Gi5\_8628531\_x4.....gguuuuGacccaguagauccg.....1  
Gi3\_27733037\_x4.....guaAauccggguucgauuccc.....1  
Gi5\_8609475\_x4.....guuuucaccaAuagauccg.....1  
Gi2\_10696915\_x4.....guucgauNccggcaucgg.....1  
Gi3\_27784013\_x4.....gguuuGcaccaguagauccg.....1  
Gi5\_8625599\_x4.....uccggugugguauaCcggcua.....1  
Gi3\_27775781\_x4.....uccNgugugguauaacggcua.....1  
Gi1\_4018116\_x4.....gguccggugugguauaacggcuagcauga.....0  
G1a\_5785754\_x4.....ggGuuucacccaguagauccg.....1  
Gi2\_10673707\_x4.....uuucaccaAuagauccg.....1  
Gi1\_4037164\_x4.....uccAgugugguauaacgg.....1  
Gi3\_27738297\_x4.....uccggugugguUuaacgg.....1  
Gi1\_4023812\_x4.....gguAuucacccaguagauccg.....1  
Gi3\_27659961\_x4.....uccgguguggAuaaacggc.....1  
Gi2\_10723279\_x4.....ugguCuucacccaguagauc.....1  
Gi1\_4017912\_x4.....gguuuuacccaguagaucU.....1  
Gi2\_10678307\_x4.....uccggugugguauaacggcuagcaugacug.....0  
Gi1\_4046568\_x4.....ccggugCgguauaacggcuagc.....1  
Gi5\_8636491\_x4.....gguuuucacGcaguagauccg.....1  
Gi5\_8649439\_x4.....gguuuuacccaguagaucAgg.....1  
Gi3\_27684805\_x4.....gguucgauuccUggcaucgg.....1  
Gi1\_4043596\_x4.....Nccggugugguauaacggcuag.....1  
G1a\_5812174\_x4.....uccgUugugguauaacggcuagc.....1  
Gi3\_27741241\_x4.....uccgAugugguauaacggcuagcau.....1  
Gi1\_4023012\_x4.....gCuuuacccaguagauccgg.....1  
Gi4\_542470\_x4.....guuuuacccaguagauccg.....0  
Gi1\_4042976\_x4.....guuuuacccaguagauccggU.....1  
Gi2\_10710327\_x4.....ugguuuuacccaguagGuccg.....1  
Gi3\_27743957\_x4.....ugguuucNcccaguagauc.....1

Gi2\_10686575\_x4.....uccggugugguauaacgUcuagca.....guucgauucccggaucggagcAc..... 1  
Gi2\_10684983\_x4.....uccggugugguauaacgAuag.....guucgauucccggaucggagcAc..... 1  
Gi1\_4042680\_x4.....uccggugugguauaacgAuag.....guucgauucccggaucggagcAc..... 1  
Gi3\_27752577\_x4.....uccggugugguauaacgcuagcau.....guucgauucccggaucggagcAc..... 1  
Gi1\_4024904\_x4.....ccggugugguauaacggcuagcC.....guucgauucccggaucggagcAc..... 1  
G1a\_5775454\_x4.....ucUggugugguauaacggcua.....guucgauucccggaucggagcAc..... 1  
Gi3\_27737649\_x4.....gguuuucacUcaguagauccgg.....guucgauucccggaucggagcAc..... 1  
Gi1\_4029076\_x4.....ugguGuucacccaguagauccg.....guucgauucccggaucggagcAc..... 1  
Gi1\_4018276\_x4.....ucGggugugguauaacggcuagca.....guucgauucccggaucggagcAc..... 1  
Gi3\_27756641\_x4.....gguucgauucccAgcauc.....guucgauucccggaucggagcAc..... 1  
Gi3\_27690609\_x4.....guucUauucccggaucgg.....guucgauucccggaucggagcAc..... 1  
Gi3\_27723829\_x4.....Accggugugguauaacgg.....guucgauucccggaucggagcAc..... 1  
Gi2\_10675987\_x4.....gguucgauucccggaucggagA.....guucgauucccggaucggagcAc..... 1  
Gi3\_27786237\_x4.....ggCgugguauaacggcua.....guucgauucccggaucggagcAc..... 1  
Gi5\_8642595\_x4.....uuAucacccaguagauccg.....guucgauucccggaucggagcAc..... 1  
Gi5\_8619863\_x4.....Agguuuucacccaguagauccg.....guucgauucccggaucggagcAc..... 1  
Gi1\_4036912\_x4.....uccggugugguauaacggGuag.....guucgauucccggaucggagcAc..... 1  
Gi2\_10724703\_x4.....guuCucacccaguagauccg.....guucgauucccggaucggagcAc..... 1  
Gi5\_8635127\_x4.....guucgauuNccggcaucgg.....guucgauucccggaucggagcAc..... 1  
Gi5\_8635463\_x4.....Ggugguauaacggcuagc.....guucgauucccggaucggagcAc..... 1  
Gi2\_10699735\_x4.....uccggugugguauaacggcuagcau.....guucgauucccggaucggagcAc..... 1  
Gi3\_27674877\_x4.....uccggugugguauaaAggcuagca.....guucgauucccggaucggagcAc..... 1  
Gi5\_8638223\_x4.....ugguuuCcaccaguagauccg.....guucgauucccggaucggagcAc..... 1  
Gi1\_4025460\_x4.....uccggugugguauaacggcuag.....guucgauucccggaucggagcAc..... 1  
Gi5\_8646475\_x4.....ugguuucaccUaguagauccg.....guucgauucccggaucggagcAc..... 1  
Gi3\_27684325\_x4.....uccggugugguauUacggcua.....guucgauucccggaucggagcAc..... 1  
Gi3\_27740761\_x4.....uccggugugguauaacCgcuagc.....guucgauucccggaucggagcAc..... 1  
Gi1\_4043184\_x4.....uuUaccaguagauccgg.....guucgauucccggaucggagcAc..... 1  
Gi3\_27741813\_x4.....aguagauccgggGucgauucc.....guucgauucccggaucggagcAc..... 1  
G1a\_5793102\_x4.....uccggugugguauaacgAcua.....guucgauucccggaucggagcAc..... 1  
Gi3\_27752529\_x4.....ccggugugNuuaaacggcuagc.....guucgauucccggaucggagcAc..... 1  
Gi3\_27723421\_x4.....guuuucaAccaguagauccg.....guucgauucccggaucggagcAc..... 1  
Gi2\_10689519\_x4.....uccggugugguauaacggcuagc.....guucgauucccggaucggagcAc..... 1  
Gi1\_4021452\_x4.....cGggugugguauaacggcuagca.....guucgauucccggaucggagcAc..... 1  
Gi3\_27760401\_x4.....guucgauucccggaucAga.....guucgauucccggaucggagcAc..... 1  
Gi1\_4034096\_x4.....uccgUugugguauaacggcuagcau.....guucgauucccggaucggagcAc..... 1  
G1a\_5792266\_x4.....gguuCucacccaguagaucc.....guucgauucccggaucggagcAc..... 1  
Gi2\_10690323\_x4.....ugguuucNccaguagaucc.....guucgauucccggaucggagcAc..... 1  
G1a\_5799046\_x4.....uccggugugguauaacAgcuagc.....guucgauucccggaucggagcAc..... 1  
Gi1\_4018284\_x4.....uuuucaccNaguagauccg.....guucgauucccggaucggagcAc..... 1  
Gi3\_27751325\_x4.....gGgugguauaacggcuagc.....guucgauucccggaucggagcAc..... 1  
Gi5\_8611723\_x4.....gauccggguucgauuccc.....guucgauucccggaucggagcAc..... 0  
Gi2\_10694447\_x4.....uccggugugguauaacggcuUg.....guucgauucccggaucggagcAc..... 1  
Gi3\_27761441\_x4.....gguuuucacccaguagauUcgg.....guucgauucccggaucggagcAc..... 1  
G1a\_5780622\_x4.....Accggugugguauaacggcuagc.....guucgauucccggaucggagcAc..... 1  
Gi1\_4024204\_x4.....guucgauucccggaucAg.....guucgauucccggaucggagcAc..... 1  
Gi5\_8634255\_x4.....uccgAugugguauaacggcuag.....guucgauucccggaucggagcAc..... 1

Gi2\_10697967\_x4.....ccaguagaNccggguucgauucc..... 1  
Gi2\_10712523\_x4.....uccggugugguaGaacggc..... 1  
Gi2\_10668267\_x4.....uGcaccagaguagauccgg..... 1  
Gi3\_27737785\_x4.....uAuucaccagaguagauccg..... 1  
Gi4\_541454\_x4.....uGcggugugguauaacggcuagc..... 1  
Gi3\_27755033\_x4.....gguuuucaccagaguagaCc..... 1  
Gi3\_27750053\_x4.....uuuucaccaguCgauccg..... 1  
Gi1\_4047552\_x4.....guucgauucccgAcaucgga..... 1  
Gi3\_27778713\_x4.....ggugugguauaacggcuagc..... 0  
Gi3\_27765213\_x4.....ggCucgauucccggaucg..... 1  
G1a\_5789210\_x4.....uUguuuucaccagaguagauccgg..... 1  
Gi3\_27792009\_x4.....uccCgugugguauaacggc..... 1  
Gi5\_8640827\_x4.....cggugugguauaacggcCagc..... 1  
Gi3\_27699997\_x4.....aguagauccgggCucgauucc..... 1  
Gi1\_4035188\_x4.....Ucggugugguauaacggcuagca..... 1  
Gi3\_27745681\_x4.....Cuuuucaccagaguagauccgg..... 1  
Gi3\_27780625\_x4.....guuuucaccagGagauccgg..... 1  
Gi3\_27787633\_x4.....ugguuuucaccagaguagauAcg..... 1  
Gi5\_8635043\_x4.....guucgauucUcggcaucgg..... 1  
Gi3\_27707641\_x4.....uccggugugUuauaacggc..... 1  
Gi5\_8612003\_x4.....uccggugugguCuaacgg..... 1  
Gi3\_27667805\_x4.....gguuuucaccagaguagauA..... 1  
Gi3\_27685973\_x4.....agauccggNuucgauucc..... 1  
Gi3\_27715845\_x4.....ggugugguauCacggcua..... 1  
Gi5\_8648015\_x4.....uccggugugguauaacgAcuagcau..... 1  
Gi3\_27733181\_x4.....uccggugugguauaacgCc..... 1  
Gi1\_4018096\_x4.....Cuucgauucccggaucgg..... 1  
Gi3\_27774709\_x4.....uucccggaucggagcCc..... 1  
Gi1\_4033964\_x4.....guucgauucccggaUgg..... 1  
Gi3\_27695757\_x4.....uccgAugugguauaacgg..... 1  
Gi3\_27681961\_x4.....uccgAugugguauaacggcuag..... 1  
Gi1\_4028752\_x4.....uccggugugguauaacAg..... 1  
G1a\_5802866\_x4.....uccggugugguauaacggcuagc..... 1  
Gi1\_4019284\_x4.....gguuuuAaccagaguagauccg..... 1  
Gi3\_27744429\_x4.....Cguuuucaccagaguagauccgg..... 1  
Gi5\_8602359\_x4.....gguuuucaccagaguagauccC..... 1  
Gi3\_27728737\_x4.....uccggugugguauaacggAua..... 1  
Gi1\_4039072\_x4.....guuuucaccagaguagaCccg..... 1  
G1a\_5807306\_x4.....uccggCgugguauaacggcuag..... 1  
Gi3\_27770597\_x4.....ugUuuuuucaccagaguagauccg..... 1  
Gi2\_10669567\_x4.....guucgauucccgUaucgg..... 1  
Gi1\_4033692\_x4.....ccggugugNuauaacggcuagc..... 1  
Gi5\_8609755\_x4.....uuuucaccagugGuccgg..... 1  
Gi3\_27686297\_x4.....uccUgugugguauaacggc..... 1  
Gi2\_10692343\_x4.....gUuccggugugguauaacggcuagcau..... 1  
Gi2\_10693895\_x4.....guucgauucccgGucggag..... 1  
Gi1\_4030880\_x4.....uuAucaccagaguagauccg..... 1

Gi1\_4033396\_x4.....uccggugugAuauaacggcuagca.....1  
 Gi5\_8629415\_x4.....guuuCcaccagauagauccg.....1  
 Gi5\_8642339\_x4.....uccgguAugguauaacggcuag.....1  
 Gi5\_8643255\_x4.....Gggugugguauaacggcuagc.....1  
 Gi1\_4041940\_x4.....uccUgugugguauaacggcuagcau.....1  
 Gi2\_10697979\_x4.....uccggugugguauaaUggcuagca.....1  
 Gi2\_10724639\_x4.....uccggugugguauaacggcuagcU.....1  
 Gi5\_8641971\_x4.....guuuucGcccagauagauccg.....1  
 Gi3\_27746005\_x4.....ugguuuucaccagauGgauccg.....1  
 Gi1\_4039100\_x4.....uccggugGgguauaacggcuagca.....1  
 Gi1\_4033656\_x4.....agaucggNuucgauucc.....1  
 Gi1\_4020872\_x4.....uccggugugguauaacggcAa.....1  
 Gi2\_10720731\_x4.....gguCcgauucccgcaucgg.....1  
 Gi1\_4042468\_x4.....uccgUugugguauaacggc.....1  
 G1a\_5779286\_x4.....Uguuuucaccagauagauc.....1  
 Gi2\_10689187\_x4.....ggAuuuacaccagauagauccg.....1  
 Gi2\_10710255\_x4.....guuuucaccUguagauccg.....1  
 Gi5\_8621863\_x4.....uccggugugguauaaUggc.....1  
 Gi2\_10721899\_x4.....guucgauucUcggcaucgg.....1  
 Gi5\_8629367\_x4.....uccggugugguauaacggcuagc.....1  
 Gi5\_8630447\_x4.....uccggugCgguauaacggcuagcau.....1  
 Gi3\_27702913\_x4.....uccggugugguauaaUggcu.....1  
 Gi1\_4024356\_x4.....gguuuucaccagauCgauccg.....1  
 Gi5\_8647775\_x4.....uccggugugguauaacggcuagcU.....1  
 Gi3\_27740369\_x4.....ccggCgugguauaacggc.....1  
 Gi2\_10653067\_x4.....uccAgugugguauaacggc.....1  
 Gi2\_10669423\_x4.....ccagauagauccggguucgCuuccc.....1  
 Gi5\_8615919\_x4.....gguuuucaccUguagauccg.....1  
 Gi3\_27791281\_x4.....uccggugugguauCacggcu.....1  
 Gi5\_8646359\_x4.....uccggugugguauaaUggcuagca.....1  
 Gi5\_8603983\_x4.....gUugugguauaacggcuagcau.....1  
 Gi3\_27768517\_x4.....ggCucgauucccggauc.....1  
 Gi1\_4029404\_x4.....uccggugugguauaaAggcuag.....1  
 Gi2\_10667863\_x4.....gguucgauNcccgcaucggagc.....1  
 Gi1\_4043912\_x4.....ccggCgugguauaacggcuagca.....1  
 Gi5\_8628191\_x4.....uccAgugugguauaacggc.....1  
 Gi3\_27771609\_x4.....uccggugugguCuaacggcuag.....1  
 Gi3\_27716381\_x4.....guucgauCcccggcaucgga.....1  
 Gi1\_4026424\_x4.....uccggugugguauaacUgcuag.....1  
 Gi1\_4047356\_x4.....Uugugguauaacggcuag.....1  
 Gi1\_4021808\_x4.....cGggugugguauaacggcuagc.....1  
 Gi3\_27701357\_x4.....Ggauccggguucgauucc.....1  
 Gi5\_8617243\_x4.....Uguccggugugguauaacgg.....1  
 Gi2\_10688567\_x4.....gUuccggugugguauaacggcuagc.....1  
 Gi3\_27706317\_x4.....uuuucacUcagauagauccg.....1  
 Gi1\_4026236\_x4.....uccgCugugguauaacggcua.....1  
 Gi1\_4022892\_x4.....ugguuuucNccagauagauccg.....1

Gi1\_4022560\_x4.....uccggugugguaCaacggc..... 1  
Gi3\_27686161\_x4.....uccggCgugguuaaacggcuagcaugacu..... 1  
Gi3\_27793513\_x4.....cGggugugguuaaacggcua..... 1  
Gi2\_10665035\_x4.....uccggugugguuaaCcgguagca..... 1  
Gi5\_8626635\_x4.....gCucgauucccggaucggagc..... 1  
Gi2\_10708843\_x4.....Cgguuuucacccaguagaucgg..... 1  
Gi3\_27756689\_x4.....uccggugugUuaaacggcuagc..... 1  
G1a\_5771558\_x4.....uGcggugugguuaaacgg..... 1  
Gi2\_10673307\_x4.....gguuuucacccaguUgaucgg..... 1  
Gi2\_10719379\_x4.....uccggAgugguuaaacggcuagcau..... 1  
Gi3\_27724129\_x4.....guuuucacccagCagaucgg..... 1  
Gi3\_27792977\_x4.....guuuucacccaguUgaucgg..... 1  
Gi1\_4038776\_x4.....uccggugugguauCacggcuagcau..... 1  
Gi2\_10673867\_x4.....uccggugugguaCaacggc..... 1  
Gi3\_27662117\_x4.....gUuccggugugguuaaacggcuagcauga..... 1  
Gi5\_8612495\_x4.....gguuuucacccaguagCuccgg..... 1  
G1a\_5810426\_x4.....gguuuucaccUaguagaucgg..... 1  
Gi3\_27772717\_x4.....guCcgauucccggaucg..... 1  
Gi3\_27658949\_x4.....uccgguguggCauaacggcu..... 1  
Gi4\_541918\_x4.....uccggugugguuaaacggcuGgc..... 1  
Gi2\_10724115\_x4.....uccggugugguCuaacggc..... 1  
Gi5\_8617471\_x4.....ggCucgauucccggaucggagc..... 1  
Gi2\_10686363\_x4.....uccgguguggAuaaacggcuagc..... 1  
Gi2\_10686911\_x4.....uccgAugugguuaaacgg..... 1  
Gi5\_8631379\_x4.....uccggugugguGuaacgg..... 1  
Gi2\_10671319\_x4.....ccggugugNuuaaacggcuagc..... 1  
Gi1\_4040764\_x4.....uuuucGcccaguagaucgg..... 1  
Gi1\_4030088\_x4.....uccggugugguGuaacggc..... 1  
Gi3\_27742689\_x4.....gguucgauucccggaucAga..... 1  
Gi3\_27673949\_x4.....guuuucacccaguCgaucgg..... 1  
Gi3\_27666085\_x4.....uuGucacccaguagaucgg..... 1  
Gi1\_4033356\_x4.....uccggugugguuaaacAgc..... 1  
Gi3\_27708537\_x4.....gguguggCauaacggcua..... 1  
Gi3\_27671941\_x4.....ugguuuucacUcaguagaucgg..... 1  
Gi3\_27696437\_x4.....Gugguuuucacccaguagaucgg..... 1  
Gi1\_4042056\_x4.....guuuucacccaguagaucUgg..... 1  
Gi3\_27732009\_x4.....uccggAgugguuaaacggcuag..... 1  
Gi5\_8643127\_x4.....gUuucgauucccggaucggag..... 1  
Gi3\_27759677\_x4.....uAuccggugugguuaaacggcuagca..... 1  
Gi1\_4032040\_x4.....uCuucacccaguagaucgg..... 1  
Gi1\_4027836\_x4.....uCuucacccaguagaucgg..... 1  
Gi3\_27687833\_x4.....guuuucacccaguagCuccg..... 1  
Gi4\_539750\_x4.....uccggCgugguuaaacggcuagc..... 1  
Gi1\_4021072\_x4.....cggugugguuaaacggcuagcC..... 1  
Gi3\_27724857\_x4.....gguuuucacccaAuagau..... 1  
Gi3\_27775017\_x4.....uccggugugguuaaacUgcua..... 1  
Gi3\_27730281\_x4.....uccggugugguuaaacggcAagcau..... 1

Gi2\_10689875\_x4.....Gccggguucgauucccggaucgga..... 1  
Gi5\_8642947\_x4.....ugguuuucNcccaguagauccgg..... 1  
Gi2\_10708971\_x4.....uccggugugguauaaUggc..... 1  
Gi2\_10664707\_x4.....Accggugugguauaacggcua..... 1  
Gi5\_8611523\_x4.....Accggugugguauaacggcuagca..... 1  
G1a\_5773470\_x4.....gguuuucGcccaguagauccg..... 1  
Gi1\_4032300\_x4.....uccggGgugguauaacggcuag..... 1  
Gi5\_8619911\_x4.....guuuucCcccaguagauccg..... 1  
Gi2\_10688043\_x4.....uccggugugguauaacggcuaAcau..... 1  
Gi1\_4026512\_x4.....uccgguaAugguauaacggc..... 1  
Gi1\_4020844\_x4.....uccggugugguauaacggcuUgc..... 1  
Gi2\_10716375\_x4.....Cuucaccaguagauccg..... 1  
Gi1\_4022196\_x4.....gguuuucacccGguagauccgg..... 1  
Gi1\_4025668\_x4.....guucgauucccggcGucgga..... 1  
Gi5\_8622943\_x4.....uccgguaAugguauaacggcua..... 1  
Gi5\_8631611\_x4.....guucgGuucccggaucg..... 1  
Gi5\_8611675\_x4.....uccggugugguauaaUggcuag..... 1  
Gi3\_27731177\_x4.....cccggcaucggagcucuC..... 1  
Gi2\_10688071\_x4.....gguuuucacAcaguagaucc..... 1  
Gi2\_10710923\_x4.....uccggugugguauaacggUua..... 1  
Gi3\_27778973\_x4.....Aguucgauucccggaucg..... 1  
Gi1\_4029280\_x4.....uccggugugguauaaCggcuagc..... 1  
Gi2\_10652335\_x4.....Accggugugguauaacggcuagca..... 1  
Gi2\_10660335\_x4.....uccggugugguuaGaaccggcuagc..... 1  
Gi3\_27765153\_x4.....gGagauccggguucgauu..... 1  
Gi5\_8648767\_x4.....ucAggugugguauaacggcua..... 1  
G1a\_5794658\_x4.....gGucgauucccggaucg..... 1  
Gi5\_8619599\_x4.....ugguuuucNcccaguagaucc..... 1  
Gi5\_8639183\_x4.....uccggugugguauaacggcuagcaugacC..... 1  
Gi1\_4038756\_x4.....cGggugugguauaacggcua..... 1  
Gi3\_27754809\_x4.....uccgguguCguauaacggcuagc..... 1  
Gi1\_4021988\_x4.....guuuucacAcaguagauccgg..... 1  
Gi1\_4035960\_x4.....agaucggguucgCuuccc..... 1  
Gi2\_10680799\_x4.....gguuuucacccCguagaucc..... 1  
Gi2\_10668751\_x4.....uuuucacUcaguagauccg..... 1  
Gi3\_27775997\_x4.....uccggugugguauaacggAuagca..... 1  
Gi1\_4034924\_x4.....Accggugugguauaacggcuagca..... 1  
Gi1\_4023420\_x4.....guuuucaccUaguagauccg..... 1  
Gi5\_8648999\_x4.....uccgAugugguauaacggc..... 1  
Gi1\_4027284\_x4.....uccggugugguauaacgCcuag..... 1  
Gi3\_27717381\_x4.....guuuucaccaguagauUgc..... 1  
Gi3\_27775873\_x4.....gCucgauucccggaucg..... 1  
Gi2\_10680423\_x4.....uccggugugguauaacggcuagUa..... 1  
Gi5\_8627799\_x4.....uccggugugguauaaUggcuagcau..... 1  
Gi5\_8610663\_x4.....uuAucaccaguagauccgg..... 1  
Gi4\_544402\_x4.....uGcggugugguauaacggcuagca..... 1  
Gi5\_8696936\_x3.....uccggugugguUuaaacggcuagcau..... 1

Gi1\_4075620\_x3.....Cguuuucacccaguagaucgg..... 1  
 Gi1\_4069821\_x3.....gUUUUCACCCGUAGAUCCGG..... 1  
 Gi1\_4074165\_x3.....uccggugugguGuaacgg..... 1  
 Gi5\_8686931\_x3.....gUUUUCACCCAGUAGCUC..... 1  
 Gi3\_27903005\_x3.....uccggugugguAaacggcuag..... 1  
 Gi3\_27947135\_x3.....Ucggugugguauaacggcua..... 1  
 Gi3\_27838415\_x3.....Ucggugugguauaacggcuagc..... 1  
 Gi3\_27863015\_x3.....uccggugugguauaacgC..... 1  
 Gi2\_10827352\_x3.....gUuccggugugguauaacg..... 1  
 Gi3\_27812954\_x3.....ccggugugguCaacggc..... 1  
 Gi1\_4079631\_x3.....ccggugugguCaacggcua..... 1  
 Gi5\_8689226\_x3.....uuuucaccUaguagaucgg..... 1  
 Gi3\_27915110\_x3.....gguucgauucccggaucggUgc..... 1  
 Gi5\_8668640\_x3.....Ggauucccggaucggagcucuuu..... 1  
 Gi2\_10803658\_x3.....guuuucacccaguUgaucgg..... 1  
 Gi5\_8715362\_x3.....guucgauucccggcGucgga..... 1  
 Gi5\_8670980\_x3.....guuuAcacccaguagaucgg..... 1  
 Gi1a\_5835019\_x3.....uuuucacccUguagaucgg..... 1  
 Gi2\_10759936\_x3.....uccgguguggAauaacggcuagca..... 1  
 Gi1\_4048554\_x3.....guucgCuucccggaucgg..... 1  
 Gi5\_8690462\_x3.....Auuucacccaguagaucgg..... 1  
 Gi1\_4061901\_x3.....gguguAguauaacggcuag..... 1  
 Gi5\_8713139\_x3.....guucgcaCucccggaucgg..... 1  
 Gi2\_10759243\_x3.....guucgauuccAgcaucgga..... 1  
 Gi3\_27955394\_x3.....uccggugugguauaacggAu..... 1  
 Gi3\_27841136\_x3.....gguguAguauaacggcua..... 1  
 Gi5\_8670995\_x3.....ccggugugguauaacggcuagc..... 0  
 Gi1\_4074306\_x3.....ugguCuucacccaguagaucgg..... 1  
 Gi3\_27967241\_x3.....uccgguguNguauaacggcuagcaugacu..... 1  
 Gi3\_27889217\_x3.....uccggugugguauaacggcuagcaugGcu..... 1  
 Gi2\_10822951\_x3.....uccggugugguGuaacggcu..... 1  
 Gi1\_4051638\_x3.....cggugugguauaacggcuagUa..... 1  
 Gi5\_8669645\_x3.....uguuuuucNccaguagauc..... 1  
 Gi3\_27806870\_x3.....gCucgauucccggaucgga..... 1  
 Gi1\_4070739\_x3.....ggugugguauaacAgcuagc..... 1  
 Gi2\_10811314\_x3.....uccggugugguauaacggcuagAau..... 1  
 Gi2\_10778041\_x3.....uccggugugguauaaUgg..... 1  
 Gi3\_27912731\_x3.....gUUUUCACCCGUAGAUCCGG..... 1  
 Gi1\_4059714\_x3.....AGUUUUCACCCAGUAGAUCCGG..... 1  
 Gi5\_8658773\_x3.....uccggugugguauaaGggcua..... 1  
 Gi1\_4063719\_x3.....ccgguguAguauaacggcua..... 1  
 Gi5\_8661905\_x3.....uCGUUUUCACCCAGUAGAUCCGG..... 1  
 Gi5\_8695283\_x3.....uccggugugguauCacggcuagcau..... 1  
 Gi3\_27875945\_x3.....agauccggguCcgauucc..... 1  
 Gi1\_4082016\_x3.....uccggugugguauaacggcuagcGu..... 1  
 Gi5\_8717975\_x3.....gguuCucacccaguagauc..... 1  
 Gi2\_10758007\_x3.....guucgauucccggaucUgga..... 1

Gi2\_10827838\_x3.....guucgGuucccggaucgga..... 1  
 Gi1\_4081122\_x3.....uccggugugguauaacgAc..... 1  
 Gi1\_4065912\_x3.....gguuuucGcccaguagauccgg..... 1  
 Gi1\_4080987\_x3.....guucgaCucccggaucgga..... 1  
 Gi5\_8660714\_x3.....uuuucacccaguagauccgg..... 1  
 Gi3\_27910985\_x3.....gguuuucaccAaguagauccgg..... 1  
 G1a\_5848951\_x3.....ucgauucccggaucggagc..... 0  
 Gi3\_27870035\_x3.....uccggugugguauaacgG..... 1  
 Gi5\_8702363\_x3.....guuuucaccUaguagauccgg..... 1  
 Gi5\_8667029\_x3.....guuuucacccaguagauUcg..... 1  
 Gi2\_10729522\_x3.....uuuucacccUguagauccg..... 1  
 Gi3\_27968564\_x3.....Cguucgauucccggaucgga..... 1  
 Gi5\_8673041\_x3.....guucgauucccCgcaucgg..... 1  
 Gi5\_8667752\_x3.....uccAgugugguauaacggcuagca..... 1  
 Gi5\_8679317\_x3.....uggGuuucacccaguagauccg..... 1  
 Gi3\_27934463\_x3.....uuuucacccaguagauccg..... 1  
 Gi1\_4072734\_x3.....uccgguguUguauaacggcuag..... 1  
 Gi2\_10791166\_x3.....guuuucacccagCagauccg..... 1  
 Gi2\_10823125\_x3.....ucAggugugguauaacggc..... 1  
 Gi1\_4081473\_x3.....ggNuuucacccaguagauccg..... 1  
 Gi1\_4051158\_x3.....gguuuucacccaguGgauc..... 1  
 Gi2\_10787527\_x3.....uAuucacccaguagauccg..... 1  
 Gi3\_27949637\_x3.....guCcgauucccggaucgga..... 1  
 Gi3\_27968777\_x3.....guucgauuccUggcaucg..... 1  
 G1a\_5847187\_x3.....uccggugugguauaacggcuagc..... 1  
 G1a\_5816140\_x3.....gguuuucacccaguagauccgg..... 0  
 Gi5\_8680493\_x3.....guucgaCucccggaucggagc..... 1  
 Gi2\_10806775\_x3.....uccggugugguUuaacggcuag..... 1  
 Gi3\_27919139\_x3.....ucGggugugguauaacggcua..... 1  
 Gi1\_4069965\_x3.....ccggugugguauaacggcuagca..... 1  
 Gi2\_10756330\_x3.....uccggugugguauUacggcua..... 1  
 Gi5\_8670848\_x3.....uccggugugCuauaacggcuagc..... 1  
 Gi5\_8679272\_x3.....gguuGucacccaguagauccgg..... 1  
 Gi5\_8672990\_x3.....gguAuucacccaguagauccgg..... 1  
 G1a\_5842849\_x3.....uccggugugguauGacggc..... 1  
 Gi1\_4048455\_x3.....gguucgauNcccggcaucgg..... 1  
 Gi2\_10750330\_x3.....cgguugugguauaacggcua..... 0  
 Gi1\_4066101\_x3.....Cuuucacccaguagauccgg..... 1  
 Gi5\_8705408\_x3.....uccggugugguCuaacggcuagca..... 1  
 Gi3\_27911987\_x3.....uuuucacccGguagauccg..... 1  
 Gi5\_8666393\_x3.....ugguuuucGcccaguagauccg..... 1  
 Gi1\_4054461\_x3.....uccggugugguauaacAgcu..... 1  
 Gi3\_27861032\_x3.....guAuucacccaguagauccg..... 1  
 Gi3\_27806615\_x3.....uccggugAgguauaacggcuagca..... 1  
 Gi3\_27968168\_x3.....gguuCucacccaguagauccg..... 1  
 Gi3\_27802667\_x3.....gguuuucacAcaguagauccgg..... 1  
 Gi3\_27859844\_x3.....guuuucacccaguGgaucgg..... 1



Gi2\_10827193\_x3.....ccggugugguauaacggcuagcCu.....1  
 Gi5\_8674325\_x3.....Cguuuucacccaguagauccgg.....1  
 Gi1\_4078554\_x3.....gCucgauucccggaucgg.....1  
 Gi3\_27949304\_x3.....gguucgauucccgAcaucgga.....1  
 Gi2\_10774831\_x3.....gguccggugugguauaacggcuagcaugacu.....0  
 Gi2\_10731901\_x3.....uccggGgugguauaacggc.....1  
 Gi2\_10742356\_x3.....guuuucaUccaguagauccg.....1  
 Gi1\_4065078\_x3.....guagaucgggGucgauucc.....1  
 Gi3\_27892973\_x3.....Gcggugugguauaacggc.....1  
 Gi5\_8717393\_x3.....gguucgauCcccggaucg.....1  
 Gi2\_10768546\_x3.....guuGgauucccggaucgga.....1  
 Gi5\_8668055\_x3.....uguuuuacacccaguagauccA.....1  
 Gi3\_27906347\_x3.....uccggugugguUuaacggcuag.....1  
 Gi2\_10729819\_x3.....ccggugugguauaacggcCa.....1  
 Gi3\_27931529\_x3.....uccgguguggAauaacgg.....1  
 Gi1\_4071699\_x3.....guuuucacccaguGgauccgg.....1  
 Gi3\_27942374\_x3.....gguucgauNcccggaucggagc.....1  
 Gi5\_8660717\_x3.....uuuucacccaguCgauccg.....1  
 Gi1\_4060185\_x3.....cGgguuuuacacccaguagauccgg.....1  
 Gl1\_5842114\_x3.....uccggugugguauaacggcCagc.....1  
 Gi1\_4079334\_x3.....uccggugugguCuaacggcuagcau.....1  
 Gi1\_4064982\_x3.....ccAgugugguauaacggcuagca.....1  
 Gi5\_8679857\_x3.....guucgauucccggaucggagcA.....1  
 Gi1\_4049088\_x3.....cccaguagauccggguucgauCccc.....1  
 Gl1\_5836006\_x3.....gguucgauucccggaCcgagc.....1  
 Gi5\_8712893\_x3.....uccggugugguauaacggUuagca.....1  
 Gl1\_5815843\_x3.....Ggguuuuacacccaguagauccgg.....1  
 Gi5\_8685869\_x3.....guucgauucccggaucggagcuc.....0  
 Gi2\_10749379\_x3.....gguuuucacccaguaAauccg.....1  
 Gi1\_4052295\_x3.....uccNgugugguauaacggcuagc.....1  
 Gl1\_5865358\_x3.....uccgguguggCauaacggcuag.....1  
 Gl1\_5862724\_x3.....gguuuucacccaguagauUg.....1  
 Gi2\_10742413\_x3.....Aguucgauucccggaucg.....1  
 Gi5\_8693510\_x3.....uuuucacAcaguagauccg.....1  
 Gi5\_8678816\_x3.....ccggugugNuuaaacggcua.....1  
 Gi3\_27919337\_x3.....cugguuuuacacccaguagCuc.....1  
 Gi1\_4062561\_x3.....uccgCugugguauaacggcuag.....1  
 Gi3\_27874970\_x3.....cugguuuuGcccaguagauccg.....1  
 Gi1\_4063287\_x3.....ccAgugugguauaacggcuagc.....1  
 Gi5\_8717837\_x3.....guuuucacccaguagauAg.....1  
 Gi3\_27810005\_x3.....cgUuucccggaucggagc.....1  
 Gi5\_8685383\_x3.....guucgauuccAgcaucgga.....1  
 Gi5\_8705936\_x3.....gguucgauucccggaucAgagc.....1  
 Gi2\_10761280\_x3.....guuuUacccaguagauccg.....1  
 Gi5\_8661173\_x3.....Uggugugguauaacggcua.....1  
 Gi5\_8704736\_x3.....Accggugugguauaacggc.....1  
 Gi1\_4073727\_x3.....ucGggugugguauaacggcuagc.....1

Gi2\_10821646\_x3.....uccUgugugguauaacggc.....1  
Gi3\_27896012\_x3.....uGucacccaguagaucgg.....1  
Gi3\_27900776\_x3.....Aguucgauucccggaucggagc.....1  
Gi5\_8702753\_x3.....uccgguguAguauaacggcuagcau.....1  
Gi3\_27936176\_x3.....ccggugugguauaacggcuagca.....1  
Gi1\_4051146\_x3.....uuuucacccaguagaucggU.....1  
Gi2\_10816834\_x3.....ccggugugguauaacggcua.....1  
Gi1\_4057236\_x3.....ccggugugguauaacggcua.....1  
Gi2\_10747390\_x3.....gCuuuucacccaguagaucgg.....1  
Gi5\_8715773\_x3.....uccgguguggAauaacggcuagca.....1  
Gi5\_8715941\_x3.....gguuuucacccaguaCaucgg.....1  
Gi1\_4081782\_x3.....ugguuuucGcccaguagaucgg.....1  
Gi3\_27808334\_x3.....gguuuucacccagCagaucgg.....1  
Gi2\_10745173\_x3.....uccggugugguauaacggGuagc.....1  
Gi3\_27931865\_x3.....guuuucacccaguagaucCC.....1  
Gi3\_27931652\_x3.....guuuucCcccaguagaucgg.....1  
Gi3\_27913760\_x3.....gguuuucacUcaguagauc.....1  
Gi5\_8711270\_x3.....uccggugugguauaacggcua.....1  
G1a\_5814838\_x3.....uccggugugguauaacggcua.....1  
Gi5\_8674955\_x3.....guGcgauucccggaucgg.....1  
Gi1\_4080705\_x3.....ccggugugguauaacggA.....1  
Gi1\_4069569\_x3.....uccggugugguauaacggcuaC.....1  
Gi3\_27883382\_x3.....guucUauucccggaucgga.....1  
Gi3\_27919547\_x3.....ucAggugugguauaacggcuagca.....1  
Gi1\_4080150\_x3.....uccggugugguauaacggcuagca.....1  
Gi1\_4058643\_x3.....uccggugugguauaacggcuaC.....1  
Gi2\_10752727\_x3.....uccggugugguauaacggc.....1  
Gi1\_4070898\_x3.....guuUgauucccggaucgga.....1  
Gi3\_27856253\_x3.....uuucacccNguagaucgg.....1  
Gi3\_27810869\_x3.....Cgugugguauaacggcua.....1  
Gi5\_8685830\_x3.....guucgauuccUggcaucgga.....1  
Gi2\_10822453\_x3.....cGggugugguauaacggcuagc.....1  
Gi2\_10801297\_x3.....uccggugugguauaacggcuagUau.....1  
G1a\_5854729\_x3.....gGgguauaacggcuagca.....1  
Gi2\_10760257\_x3.....uccggugugguauaacggUuagcau.....1  
Gi1\_4076676\_x3.....uccggugugguauaacggcuagc.....1  
Gi1\_4063659\_x3.....ugguuuucacccaguagauc.....0  
Gi5\_8690720\_x3.....Aguucgauucccggaucggagc.....1  
Gi3\_27908048\_x3.....uccUgugugguauaacggcuagcau.....1  
G1a\_5830480\_x3.....uccggugugguauaacAgcua.....1  
Gi1\_4062171\_x3.....guagGuuccggguucgauuccc.....1  
Gi1\_4048203\_x3.....ccggugugNuauaacggcua.....1  
Gi3\_27815168\_x3.....uccggugugguauaacAgg.....1  
Gi3\_27930353\_x3.....guCuucacccaguagauc.....1  
Gi3\_27931373\_x3.....uccNugugguauaacgg.....1  
G1a\_5830864\_x3.....uccggugugguauaacggcuag.....1

Gi2\_10783369\_x3.....guGcgauucccggaucgga.....1  
 Gi2\_10788925\_x3.....gguuuucaNccaguagauc.....1  
 Gi1\_4050822\_x3.....guuuucacccGguagaucg.....1  
 Gi1\_4078239\_x3.....uccggugugguaGaacggcuag.....1  
 Gi2\_10794034\_x3.....gguuuuUacccaguagaucg.....1  
 G1a\_5861779\_x3.....Ggguuucacccaguagaucg.....1  
 Gi5\_8674973\_x3.....gguuuucacccaguagaucgA.....1  
 Gi2\_10779739\_x3.....guucgauucccggcUucgga.....1  
 G1a\_5846191\_x3.....uccggugugguauaaUggcuagc.....1  
 Gi5\_8652095\_x3.....cggugugguauGacggcuagc.....1  
 Gi3\_27892007\_x3.....guuuucacccaguagaucgC.....1  
 Gi5\_8668988\_x3.....gguuuucacccaguaAaucgg.....1  
 Gi2\_10805299\_x3.....uuuAcacccaguagaucg.....1  
 Gi1\_4076229\_x3.....gguGuucacccaguagaucg.....1  
 Gi4\_550038\_x3.....guucgauucccggaucggagcCc.....1  
 Gi1\_4051560\_x3.....gguuuucacccaUuagaucg.....1  
 Gi3\_27871841\_x3.....uAcggugugguauaacggcua.....1  
 Gi3\_27931571\_x3.....guucgauucccggaucgg.....1  
 Gi1\_4070406\_x3.....uccggugugguauaaGggcuag.....1  
 Gi5\_8674196\_x3.....gCucgauucccggaucg.....1  
 Gi1\_4075863\_x3.....gguucgauucccggaucggagc.....0  
 G1a\_5872225\_x3.....gAuuuucacccaguagaucg.....1  
 Gi3\_27835466\_x3.....guuuucaccAaguagaucgg.....1  
 Gi3\_27969260\_x3.....guucgauucccggaucggagcuc.....0  
 Gi1\_4087995\_x3.....uuuucacccGguagaucg.....1  
 Gi2\_10736287\_x3.....ggCuucacccaguagaucgg.....1  
 Gi3\_27835703\_x3.....uccggGgugguauaacggcuagca.....1  
 Gi1\_4070847\_x3.....guucgauuccUggcuagcga.....1  
 Gi5\_8694038\_x3.....uccggugugguauUacggcua.....1  
 Gi5\_8688782\_x3.....uuuucacccagCagaucg.....1  
 Gi3\_27967595\_x3.....ggugugguauaGcggcua.....1  
 Gi5\_8671673\_x3.....uccgguAugguauaacgg.....1  
 Gi3\_27858512\_x3.....uccgguguggAauaacggcuagca.....1  
 Gi2\_10797823\_x3.....uuuucacccaguagaucUg.....1  
 Gi3\_27871901\_x3.....uccggugugguauaUcgg.....1  
 G1a\_5821729\_x3.....Auuuucacccaguagaucg.....1  
 Gi5\_8684414\_x3.....agaucggggGucgauucc.....1  
 Gi2\_10756537\_x3.....ccggugugNuauaacggcuag.....1  
 Gi3\_27919664\_x3.....guuuucacccUguagaucgg.....1  
 Gi3\_27815717\_x3.....ugguuuucacUcaguagauc.....1  
 Gi3\_27897497\_x3.....cugguuuucacccagCagaucg.....1  
 Gi5\_8663117\_x3.....uccggugAgguauaacggc.....1  
 Gi3\_27973295\_x3.....uccggugugguGuaacggcu.....1  
 Gi1\_4062531\_x3.....uccggugugguauaacggGuagc.....1  
 Gi2\_10820245\_x3.....guuNucacccaguagaucg.....1  
 Gi3\_27800918\_x3.....Aguucgauucccggauc.....1  
 Gi2\_10749850\_x3.....uccgAugugguauaacggcuagca.....1

Gi1\_4083231\_x3.....ccggGgugguauaacggcuagcau..... 1  
Gi1\_4061655\_x3.....Accggugugguauaacggcuagcau..... 1  
Gi1\_4065252\_x3.....uccggugugCuauaacggcuagcau..... 1  
Gi3\_27913643\_x3.....agauccggguucgUuuccc..... 1  
Gi2\_10779139\_x3.....guuCucacccaguagaucc..... 1  
Gi1\_4080144\_x3.....guuuAcacccaguagaucg..... 1  
Gi1\_4056813\_x3.....uuuucacccaguagUuccg..... 1  
Gi3\_27843695\_x3.....gguuuucacccUguagaucgg..... 1  
Gi3\_27909290\_x3.....Cuucacccaguagaucg..... 1  
Gi3\_27799799\_x3.....gguuuucacccaguagaucUgg..... 1  
Gi3\_27799433\_x3.....uccgguguCguauaacggcuagca..... 1  
Gi3\_27930545\_x3.....Augugguauaacggcuagc..... 1  
Gi2\_10804111\_x3.....guuuAcacccaguagaucg..... 1  
Gi5\_8677193\_x3.....guuuucacccaguagaucAg..... 1  
Gi3\_27946844\_x3.....uccggugugguauaacgCcuagca..... 1  
Gi2\_10750093\_x3.....uccggugugAuauaacgg..... 1  
G1a\_5823520\_x3.....guuuucacccaguagGuccg..... 1  
Gi5\_8682401\_x3.....gguuuucacccaguagaCc..... 1  
Gi1\_4058883\_x3.....gguucgauucccggaucggagcCc..... 1  
Gi5\_8705147\_x3.....gguuuAcacccaguagaucgg..... 1  
Gi2\_10767637\_x3.....uccggugugguauUacggc..... 1  
Gi1\_4078635\_x3.....guucgauucccUgcaucgg..... 1  
Gi2\_10735768\_x3.....uccgguguggAauaacggcuagca..... 1  
Gi2\_10783282\_x3.....Gcaguagaucggguucgauuccc..... 1  
Gi5\_8681774\_x3.....uccggugugAuauaacggcuagca..... 1  
Gi5\_8654879\_x3.....ucGggugugguauaacggcuag..... 1  
Gi1\_4071456\_x3.....uAguuuucacccaguagaucgg..... 1  
Gi3\_27929888\_x3.....gguucgauucccggcCuc..... 1  
Gi2\_10777432\_x3.....guuuucacccaguagaAcc..... 1  
Gi3\_27853196\_x3.....uccgguAugguauaacggcuag..... 1  
Gi2\_10748584\_x3.....uccggugugguauaacggcuAca..... 1  
Gi1\_4082841\_x3.....Uuucgauucccggaucggagc..... 1  
Gi1\_4059573\_x3.....guagaucggggCucgauuccc..... 1  
Gi3\_27978188\_x3.....uCuucacccaguagaucgg..... 1  
Gi1\_4069620\_x3.....Ucggugugguauaacggcuagc..... 1  
Gi1\_4053957\_x3.....uccggugugguauUacggcuagc..... 1  
Gi5\_8671454\_x3.....gCuuuacacccaguagaucgg..... 1  
Gi1\_4056960\_x3.....uccggugugguauaacCgcu..... 1  
Gi3\_27969617\_x3.....uccgCugugguauaacggcuagca..... 1  
G1a\_5837905\_x3.....uccggCgugguauaacggc..... 1  
Gi2\_10801639\_x3.....guucgauuNccggcaucgga..... 1  
Gi5\_8706029\_x3.....uAcggugugguauaacggcuagcau..... 1  
Gi5\_8666495\_x3.....ucacccagCagaucggguu..... 1  
Gi2\_10782013\_x3.....uuucacccaguGgaucg..... 1  
Gi2\_10808443\_x3.....gguuuucacccaguagaUcg..... 1  
Gi1\_4048410\_x3.....uccggugugguauaacggAuagc..... 1  
Gi1\_4062429\_x3.....uccggugugguauGacgg..... 1

Gi2\_10806859\_x3.....gguucgaCucccggaucgg..... 1  
Gi3\_27947303\_x3.....uccUgugugguauaacgg..... 1  
Gi5\_8698667\_x3.....uccggugugguauaacggU..... 1  
Gi3\_27863342\_x3.....uccggugugguauaacggcuaUca..... 1  
Gi1\_4060230\_x3.....gguucgauucUcggcaucgga..... 1  
Gi2\_10825780\_x3.....guCcgauucccggaucgga..... 1  
Gi5\_8677106\_x3.....gguuuucacccaguGgauc..... 1  
Gi1\_4073706\_x3.....gguuuucCcccaguagaucgg..... 1  
Gi3\_27850286\_x3.....uccggugugguauaacggcGa..... 1  
Gi5\_8680103\_x3.....uccggugugguauaacgA..... 1  
Gi3\_27805679\_x3.....gguucgauucccgUauc..... 1  
Gi3\_27829739\_x3.....gguucgauucccggcUucgg..... 1  
Gi2\_10814890\_x3.....uccggGgugguauaacgg..... 1  
Gi2\_10745689\_x3.....ugguuuucacccGguagaucgg..... 1  
Gi1\_4060896\_x3.....uccggugugguCaacggcuagcau..... 1  
Gi2\_10743070\_x3.....gguuuucaccAaguagaucgg..... 1  
Gi5\_8683721\_x3.....cggCgugguauaacggcua..... 1  
Gi3\_27934010\_x3.....ucAggugugguauaacggcua..... 1  
Gi5\_8678387\_x3.....uccNgugugguauaacggcuag..... 1  
Gi3\_27879785\_x3.....uccgCugugguauaacggcuagcau..... 1  
Gi2\_10727530\_x3.....uuCcaccaguagaucgg..... 1  
Gi5\_8657621\_x3.....ggGucgauucccggaucgg..... 1  
Gi1\_4076922\_x3.....Accggugugguauaacggc..... 1  
Gi3\_27903629\_x3.....aGccggguucgauucccggaucggag..... 1  
Gi5\_8701718\_x3.....Gccggguucgauucccggc..... 1  
Gi2\_10776901\_x3.....uagaucggguucgGuucc..... 1  
Gi1\_4059240\_x3.....ccgguguggCauaacggcuagca..... 1  
Gi5\_8653361\_x3.....uccggugugguUuaacggc..... 1  
Gi2\_10752994\_x3.....guCcgauucccggaucggagc..... 1  
Gi5\_8669228\_x3.....uccgUugugguauaacggc..... 1  
Gi3\_27838190\_x3.....ggAuuucacccaguagauc..... 1  
Gi3\_27911078\_x3.....gguCuucacccaguagauc..... 1  
Gi1\_4051845\_x3.....uccggugugguCaacggcu..... 1  
Gi1\_4075527\_x3.....gguuuucacccUguagaucgg..... 1  
Gi5\_8668949\_x3.....uccggugugguauaUcggcuagcau..... 1  
Gi2\_10820410\_x3.....uuuucUcccaguagaucgg..... 1  
Gi2\_10773634\_x3.....gguucgauCcccggcauc..... 1  
Gi5\_8708906\_x3.....gguucgauucccggaucgAagc..... 1  
Gi3\_27824258\_x3.....auccggguNcgauuccggca..... 1  
Gi1\_4069026\_x3.....guuuucacccaguagGuccgg..... 1  
G1a\_5835445\_x3.....Cuucacccaguagaucgg..... 1  
Gi1\_4063956\_x3.....uccggugugguauaaGggcuagc..... 1  
Gi1\_4069140\_x3.....guagaucggguucgCuuccc..... 1  
Gi5\_8669981\_x3.....guuuucacccCguagauc..... 1  
Gi1\_4075746\_x3.....uuGucacccaguagaucgg..... 1  
Gi2\_10746625\_x3.....gguucgauucUcggcaucgga..... 1  
Gi3\_27868688\_x3.....guagaucggguucgGuu..... 1

Gi3\_27849536\_x3.....uccggCgugguauaacggcu.....1  
 Gi1\_4068642\_x3.....gAucgauucccggaucgg.....1  
 Gi2\_10728229\_x3.....uccggugugguauaacggcuagcaA.....1  
 Gi3\_27908162\_x3.....uuuuUacccaguagaucgg.....1  
 Gi2\_10776355\_x3.....uccggugugguauaCcgguag.....1  
 Gi3\_27972089\_x3.....gguuuucacccaguagaucgUg.....1  
 Gi5\_8684573\_x3.....uguuuuucacccGguagaucgg.....1  
 Gi1\_4059402\_x3.....uuAucacccaguagaucgg.....1  
 Gi5\_8661665\_x3.....gguucgauNcccggaucgg.....1  
 Gi3\_27859898\_x3.....uguuuuucacccCguagaucgg.....1  
 Gi5\_8670800\_x3.....uccggugugguauaacAg.....1  
 Gi5\_8700620\_x3.....uguuuuucacccaguGgaucc.....1  
 Gi5\_8713796\_x3.....uccgguguUguauaacggcuagc.....1  
 Gi1\_4048407\_x3.....uccgUugugguauaacggcu.....1  
 Gi2\_10741051\_x3.....uccggugugguauaacggcuUgc.....1  
 Gi3\_27923225\_x3.....uccggugugguuaGaacggcuagcau.....1  
 Gi3\_27919400\_x3.....gguucgGuucccggaucg.....1  
 Gi5\_8698235\_x3.....uccggugugguauaacggcuacC.....1  
 Gi3\_27874019\_x3.....accaguagaucggggCucgauucc.....1  
 Gi3\_27927491\_x3.....gguucgGuucccggaucggga.....1  
 Gi2\_10807810\_x3.....gguucgauuccCgcauc.....1  
 Gi3\_27942170\_x3.....uccggugugguauaCcggu.....1  
 Gi2\_10799305\_x3.....uuucacccNguagaucgg.....1  
 Gi5\_8675912\_x3.....gguccggugCgguauaacggc.....1  
 Gi3\_27814604\_x3.....gguucgauuccAgcaucggga.....1  
 Gi3\_27906407\_x3.....guuuucacAcaguagaucgg.....1  
 Gi1\_4068717\_x3.....gguucgauucccggaucggga.....1  
 Gi2\_10729465\_x3.....guucgauuccAgcaucggag.....1  
 Gi1\_4062090\_x3.....uccggugugguauaUcgg.....1  
 Gi2\_10787779\_x3.....ccggugugguauaacggcCagc.....1  
 Gi5\_8679887\_x3.....guuuucacccaguagUuccg.....1  
 Gi5\_8681396\_x3.....guuuucaUccaguagaucgg.....1  
 Gi5\_8675249\_x3.....uguuuuucacccaguagGuc.....1  
 Gi1\_4065945\_x3.....uccgCugugguauaacggcuagc.....1  
 Gi5\_8660360\_x3.....uguuuuucaccUaguagauc.....1  
 Gl1a\_5834383\_x3.....uUcggugugguauaacggcuagc.....1  
 Gi1\_4061913\_x3.....ugguuCucacccaguagaucgg.....1  
 Gi2\_10768615\_x3.....guuuucacccaguagau.....0  
 Gi2\_10789591\_x3.....cGggugugguauaacggcu.....1  
 Gi1\_4048659\_x3.....ccggugugguGuaacggcuagca.....1  
 Gi1\_4057482\_x3.....uccggugugguauaacggAuagca.....1  
 Gi2\_10823020\_x3.....uccggugugguauaaUggcu.....1  
 Gi5\_8716868\_x3.....uuuucGcccaguagaucgg.....1  
 Gi3\_27909311\_x3.....uuucacccaguCgaucgg.....1  
 Gi3\_27850040\_x3.....uguuuuucacccaguagaCccg.....1  
 Gi2\_10736026\_x3.....gguAaucacccaguagaucgg.....1  
 Gi1\_4080939\_x3.....guucgauucccggaucgg.....1

Gi2\_10740256\_x3.....guucgauucccggaucCg..... 1  
 Gi2\_10730089\_x3.....gCucgauucccggaucggagc..... 1  
 Gi2\_10762795\_x3.....ggAucgauucccggauc..... 1  
 Gi2\_10804750\_x3.....uuucacccaguUgaucg..... 1  
 G1a\_5859940\_x3.....gguuuucaUccaguagaucg..... 1  
 Gi2\_10811518\_x3.....gguuuucacNcaguagauc..... 1  
 Gi3\_27951560\_x3.....ccAgugugguauaacggcua..... 1  
 G1a\_5845033\_x3.....gguuuucacccaguagauAcg..... 1  
 G11\_4053708\_x3.....uccggugugguauaacggU..... 1  
 Gi3\_27953399\_x3.....uccggugugguauaUcggcuagcau..... 1  
 Gi3\_27886424\_x3.....uccggugugguauaacggUuagcau..... 1  
 Gi3\_27972338\_x3.....uccggugugguauaCcg..... 1  
 Gi2\_10742653\_x3.....gguuuucacAcaguagaucg..... 1  
 Gi5\_8697191\_x3.....guuuucacAcaguagaucg..... 1  
 Gi3\_27799592\_x3.....uuucacccaguagaCccg..... 1  
 Gi5\_8698661\_x3.....uccggugugguauaaGggcuagc..... 1  
 Gi5\_8661605\_x3.....uccggugugguCaacggc..... 1  
 Gi5\_8671709\_x3.....uccggugugguauaacggcuagAaugacu..... 1  
 Gi2\_10794052\_x3.....Cuuuucacccaguagaucg..... 1  
 G1a\_5859016\_x3.....uucgauucccggaucggagc..... 0  
 Gi2\_10770028\_x3.....uccggugugguauaacgCcuagca..... 1  
 Gi5\_8661842\_x3.....uccAgugugguauaacgg..... 1  
 Gi3\_27894377\_x3.....Ucggugugguauaacggcuagca..... 1  
 Gi5\_8695745\_x3.....ucgauucccggaucggagcCc..... 1  
 Gi2\_10813588\_x3.....uccggugugguauaaAggcuagc..... 1  
 Gi2\_10733953\_x3.....cggugugguGuaacggc..... 1  
 Gi2\_10739305\_x3.....uccggugugAuuaaacggcuag..... 1  
 G11\_4083381\_x3.....uccggAgugguauaacggc..... 1  
 Gi3\_27846053\_x3.....gguucgaCucccggauc..... 1  
 Gi3\_27906257\_x3.....guucgauucccggaucUgg..... 1  
 Gi2\_10783615\_x3.....uuucaccUaguagaucg..... 1  
 Gi3\_27930623\_x3.....Gugguuuucacccaguagauc..... 1  
 G1a\_5843056\_x3.....uccggugugguauaacggcuagU..... 1  
 Gi3\_27892181\_x3.....gguuuucacccaguCgauc..... 1  
 Gi3\_27820805\_x3.....uccggugAgguauaacggcuag..... 1  
 Gi5\_8690444\_x3.....gguuuucaNccaguagauc..... 1  
 Gi2\_10768699\_x3.....uccggugugguCuaacggcu..... 1  
 Gi3\_27868481\_x3.....uccggugugguauaaGggcua..... 1  
 Gi3\_27892961\_x3.....guucgauucUcggcaucgga..... 1  
 Gi5\_8692082\_x3.....guuuucacUcaguagaucg..... 1  
 Gi3\_27845045\_x3.....Gcgauucccggaucgga..... 1  
 Gi3\_27855719\_x3.....uccggugugguauaacgCcu..... 1  
 Gi5\_8661455\_x3.....uccggugugguauaacUgcuauc..... 1  
 Gi3\_27976319\_x3.....cggugugguNauaacggcua..... 1  
 Gi5\_8712998\_x3.....gguccgguNugguauaacggc..... 1  
 Gi3\_27812201\_x3.....guCcgauucccggaucgga..... 1  
 G11\_4067535\_x3.....uccggugugguauGacggc..... 1

Gi2\_10751995\_x3.....uuucGcccaguagauccgg.....1  
 Gi1\_4068183\_x3.....gguuuucacccaguUgauccg.....1  
 G1a\_5831794\_x3.....Uuucgauucccggaucgga.....1  
 Gi5\_8710565\_x3.....cUgugugguauaacggcu.....1  
 Gi1\_4070835\_x3.....guuuucaccUaguagauccgg.....1  
 Gi5\_8669924\_x3.....guuuucacccaguagCuccg.....1  
 Gi5\_8665622\_x3.....gguuuucacccagCagauc.....1  
 Gi2\_10741990\_x3.....gguucgauucccggaucA.....1  
 Gi3\_27821297\_x3.....guucgauucccCgcaucgga.....1  
 Gi1\_4061523\_x3.....ccggCgugguauaacggcua.....1  
 Gi1\_4059138\_x3.....ucUggugugguauaacggcu.....1  
 Gi1\_4052487\_x3.....gguuuucacccaguagCuccg.....1  
 Gi3\_27910382\_x3.....cgauucccggaucggGgc.....1  
 Gi2\_10826050\_x3.....gguCuucacccaguagauc.....1  
 Gi3\_27870737\_x3.....uccggugugguauaacggcuagGa.....1  
 Gi5\_8653712\_x3.....gguuuucacccCguagauc.....1  
 Gi3\_27961244\_x3.....guucAauucccggaucgg.....1  
 Gi5\_8710091\_x3.....ugguuuucacccagCagauccg.....1  
 Gi1\_4076199\_x3.....gguuuucacccaguGgauccgg.....1  
 Gi3\_27873452\_x3.....guagauccggguucgauC.....1  
 Gi3\_27969839\_x3.....ugguuuucaUccaguagauccg.....1  
 G1a\_5836624\_x3.....uccggCgugguauaacggcuagc.....1  
 Gi3\_27908711\_x3.....ggugugguCuaacggcua.....1  
 Gi1\_4052643\_x3.....uccggugugguauaacggcAag.....1  
 Gi3\_27951860\_x3.....guucgauucAcggcaucgg.....1  
 Gi3\_27946601\_x3.....guagauccggCucgauuccc.....1  
 Gi2\_10827007\_x3.....uccggugugguauaaAggcuagca.....1  
 Gi2\_10759363\_x3.....uccggugugguauaGcggcu.....1  
 Gi3\_27979892\_x3.....uggAuuucacccaguagauc.....1  
 Gi3\_27915386\_x3.....Ggauucccggaucggag.....1  
 Gi5\_8688914\_x3.....guucgauucccggaucgggGucggagcucu.....1  
 G1a\_5840443\_x3.....uccggugugguauaacAgcuag.....1  
 Gi2\_10801552\_x3.....uccgguAugguauaacggcua.....1  
 Gi5\_8660225\_x3.....gguucgGuucccggauc.....1  
 Gi1\_4048362\_x3.....gGucgauucccggaucg.....1  
 Gi3\_27811715\_x3.....uCucacccaguagauccg.....1  
 Gi5\_8693561\_x3.....guuuucacccaguCgauccg.....1  
 Gi5\_8678702\_x3.....uccggGugguauaacggcuagcau.....1  
 Gi1\_4072113\_x3.....gguucgauucccggaucgggagcC.....1  
 Gi3\_27896066\_x3.....ccggCgugguauaacggcua.....1  
 Gi1\_4080156\_x3.....uccUgugugguauaacggcuagca.....1  
 Gi5\_8707598\_x3.....gauccggguucgauucccgga.....0  
 Gi5\_8713400\_x3.....gCuuuucacccaguagauccgg.....1  
 Gi1\_4076415\_x3.....guuuCcaccaguagauccgg.....1  
 Gi1\_4081320\_x3.....uccgguAugguauaacggcuagcau.....1  
 Gi1\_4089018\_x3.....guuuucacccaguCgauccg.....1  
 Gi2\_10781590\_x3.....uucacccaNuagauccgg.....1



G1a\_5842102\_x3.....ggAuuucacccaguagaucgg..... 1  
 Gi5\_8651744\_x3.....ugguuucacccaguagCuccg..... 1  
 Gi5\_8655101\_x3.....uccggugugguUuaacggcuag..... 1  
 Gi3\_27962237\_x3.....ccggugugguauaacggcuagcau..... 0  
 Gi1\_4064313\_x3.....ggugCgguauaacggcuagcau..... 1  
 Gi3\_27937031\_x3.....guucgGuuccggcaucg..... 1  
 G1a\_5858026\_x3.....uGcggugugguauaacggcuagcau..... 1  
 Gi3\_27861416\_x3.....gguucgauNcccggcaucggag..... 1  
 Gi5\_8685596\_x3.....uccggugugguAaacggcua..... 1  
 Gi3\_27851648\_x3.....cGcggcaucggagcucuuu..... 1  
 Gi5\_8701040\_x3.....ugguuucacccaguagaucAg..... 1  
 Gi2\_10818376\_x3.....uccggugugguauGacggcuag..... 1  
 Gi2\_10768861\_x3.....gguCcgauuccggcauc..... 1  
 Gi2\_10814140\_x3.....uccggugugguauGacggcuagcau..... 1  
 Gi1\_4073580\_x3.....uccggugugguauGacggcuagc..... 1  
 Gi3\_27935366\_x3.....guucgauucUcggcaucgg..... 1  
 Gi3\_27862880\_x3.....guuCucacccaguagauc..... 1  
 Gi5\_8711105\_x3.....cggugugguGuaacggcuagc..... 1  
 Gi2\_10734586\_x3.....uccggugugguauaacggcuaA..... 1  
 Gi3\_27934172\_x3.....uuucaccAaguagaucgg..... 1  
 Gi5\_8669630\_x3.....uccggugugguauaacggA..... 1  
 Gi3\_27854057\_x3.....aucggguNcgauuccggcaucgga..... 1  
 Gi3\_27894980\_x3.....gguuuucacccaUuagauc..... 1  
 Gi2\_10826527\_x3.....uccggugugguauaacggcuU..... 1  
 Gi5\_8689130\_x3.....uuucacAcaguagaucgg..... 1  
 Gi5\_8664308\_x3.....uccggAgugguauaacggcuag..... 1  
 Gi3\_27817193\_x3.....Nccggugugguauaacggcuagc..... 1  
 Gi3\_27977807\_x3.....uccggugugUuauaacggcua..... 1  
 Gi3\_27944483\_x3.....ugguuucNcccaguagaucgg..... 1  
 Gi3\_27869627\_x3.....uccggugugguauaacgUcuag..... 1  
 G1a\_5827492\_x3.....uccggugugguCaacggcuagc..... 1  
 G1a\_5847103\_x3.....uccggugugguauaGcggc..... 1  
 Gi3\_27925691\_x3.....gGgugguauaacggcuagca..... 1  
 Gi2\_10767157\_x3.....ccaguGgauccggguucgauucc..... 1  
 Gi1\_4076514\_x3.....Auuucacccaguagaucgg..... 1  
 Gi1\_4062351\_x3.....uccgguguCguauaacggcua..... 1  
 Gi3\_27966776\_x3.....guucgaCuuccggcaucggagc..... 1  
 Gi3\_27974918\_x3.....ugguuucacccaguagCuc..... 1  
 G1a\_5836987\_x3.....gCuuuucacccaguagaucgg..... 1  
 Gi3\_28065872\_x2.....cccaguagNuccggguucgauucc..... 1  
 Gi3\_28140212\_x2.....gguucgaCuuccggcaucg..... 1  
 Gi5\_8745465\_x2.....guucgauuUccggcaucg..... 1  
 Gi1\_4090899\_x2.....ccggugugguauaacggcCag..... 1  
 Gi2\_10838125\_x2.....ccgguguAguauaacggcua..... 1  
 Gi2\_10870705\_x2.....gguucgauuccggcaAcggagc..... 1  
 Gi2\_10901445\_x2.....uccgguguUguauaacggcuagc..... 1  
 Gi3\_28057414\_x2.....gguccggugugguCaacggcuagcauga..... 1

Gi3\_28088074\_x2.....guuuuacccaAuagauccg..... 1  
 Gi5\_8744947\_x2.....guucgauuccUggcaucg..... 1  
 Gi3\_28065536\_x2.....agaucUggguucgauucc..... 1  
 Gi1\_4095527\_x2.....ccggGgugguauaacggcuagc..... 1  
 Gi1\_4130235\_x2.....uccgguguggGauaacggcuag..... 1  
 Gi2\_10987769\_x2.....cGggugugguauaacggc..... 1  
 Gi3\_28140590\_x2.....guucgauucccgAcaucggagc..... 1  
 Gi1\_4089297\_x2.....guAuucacccaguagauccgg..... 1  
 Gi1\_4130677\_x2.....ccgguguAguauaacggcuagc..... 1  
 Gi3\_28180718\_x2.....aCaucggguucgauucc..... 1  
 Gi3\_28017590\_x2.....gauccgggNucgauucc..... 1  
 Gi5\_8799915\_x2.....gguGuucacccaguagauccgg..... 1  
 Gi2\_10871563\_x2.....gguucgauucccgAcaucggagc..... 1  
 Gi1\_4093809\_x2.....uccggugugUuuuacggcuag..... 1  
 Gi1\_4132473\_x2.....uccggugugguauaUcggcuagc..... 1  
 Gi1\_4153969\_x2.....uccggugAgguauaacggcuagcau..... 1  
 Gi3\_28160916\_x2.....gAuucacccaguagauccgg..... 1  
 Gl1\_5894184\_x2.....uccggugCgguauaacggcuagc..... 1  
 Gi2\_10871393\_x2.....gguuuuacccaUuagauccg..... 1  
 Gi3\_28124884\_x2.....Cuagauccggguucgauucc..... 1  
 Gi2\_10906603\_x2.....guucgauAcccggcaucgg..... 1  
 Gl1\_5946508\_x2.....ugguuCucacccaguagauc..... 1  
 Gi1\_4147745\_x2.....ccggugugguauaaUggcuagca..... 1  
 Gi3\_28161666\_x2.....ccggugugNuauaacggcuagca..... 1  
 Gi3\_28020220\_x2.....gguuuuacccaguagaCcc..... 1  
 Gi3\_28008766\_x2.....cCgugugguauaacggcu..... 1  
 Gi5\_8720441\_x2.....uccggugugguUuuacggcuagcaugacu..... 1  
 Gi2\_10843895\_x2.....uccggugGgguauaacggcu..... 1  
 Gi5\_8814561\_x2.....gguuuucacGcaguagauccgg..... 1  
 Gi1\_4110669\_x2.....ccgAugugguauaacggcuagcau..... 1  
 Gi5\_8790847\_x2.....gguuuucaAccaguagauccgg..... 1  
 Gi3\_27988878\_x2.....uuucacccaguagaucUg..... 1  
 Gi5\_8826711\_x2.....uccUgugugguauaacggc..... 1  
 Gi3\_28258374\_x2.....uccggugugguauaaGggcuagcau..... 1  
 Gi5\_8820535\_x2.....ugguuuuacccaguagGuccgg..... 1  
 Gi2\_10866165\_x2.....uccggugugguauaacAgcu..... 1  
 Gi5\_8721353\_x2.....ucAggugugguauaacggcuag..... 1  
 Gi5\_8809849\_x2.....uuuAcacccaguagauccgg..... 1  
 Gi4\_554508\_x2.....uccggugugguauaaUggcuagc..... 1  
 Gi5\_8769843\_x2.....uAcggugugguauaacggcuagc..... 1  
 Gi3\_28202828\_x2.....guucgauuccAgcaucggagc..... 1  
 Gl1\_5935240\_x2.....cugguuuuacccaAuagauc..... 1  
 Gi3\_28210200\_x2.....gCuuuuacccaguagauccgg..... 1  
 Gi3\_28220474\_x2.....gguuuuacccaguaCaucgg..... 1  
 Gl1\_5937834\_x2.....uccgguguNguauaacggcu..... 1  
 Gi3\_28175786\_x2.....Ggauccggguucgauucc..... 1  
 Gi5\_8789535\_x2.....guucgauuccggcauAgg..... 1

Gi1\_4142211\_x2.....uccggugugguauaacggcuagAau..... 1  
 Gi3\_28016152\_x2.....gguCcgauuccggcaucg..... 1  
 Gi1\_4091641\_x2.....uuuucacccaguagaCccg..... 1  
 Gi2\_10936683\_x2.....ccggugugguauGacggc..... 1  
 Gi1\_4125515\_x2.....Cucacccaguagaucgg..... 1  
 Gi1\_4110661\_x2.....gguuuucUcccaguagaucgg..... 1  
 Gi1\_4148309\_x2.....cagCagaucggguucgauu..... 1  
 Gi5\_8741443\_x2.....uGcggugugguauaacggcuagcaugacu..... 1  
 G1a\_5932430\_x2.....uccgCugugguauaacggcuagc..... 1  
 Gi1\_4144467\_x2.....cGggugugguauaacggcuagcau..... 1  
 Gi2\_10930727\_x2.....guucgauCcccggaucgga..... 1  
 Gi2\_10972465\_x2.....ccgAugugguauaacggc..... 1  
 Gi2\_10964089\_x2.....Gucgauucccggaucgga..... 1  
 Gi2\_10926939\_x2.....uccggugugguuaCaacggcu..... 1  
 G1a\_5892508\_x2.....guucgauucccggaucggagcCc..... 1  
 Gi2\_10984631\_x2.....gguGuucacccaguagaucgg..... 1  
 Gi2\_10903417\_x2.....ccggugugguauaacggcuagca..... 0  
 Gi5\_8755651\_x2.....uccggugugguauaacggAuagcau..... 1  
 Gi5\_8726155\_x2.....uAguuuucacccaguagaucgg..... 1  
 Gi2\_10943685\_x2.....gguuUgauuccggcaucgg..... 1  
 Gi3\_28077448\_x2.....uccgguguggAauaacggcuag..... 1  
 Gi2\_10961527\_x2.....ccaguagaucggUguucgauucc..... 1  
 Gi5\_8758937\_x2.....Auuucacccaguagaucgg..... 1  
 Gi3\_28025888\_x2.....uuuucacccagCagaucgg..... 1  
 Gi1\_4121591\_x2.....ggugugguauCacggcuagc..... 1  
 Gi5\_8814341\_x2.....gUuccggugugguauaacgg..... 1  
 Gi2\_10866945\_x2.....ccggugugguauCacggcuagcau..... 1  
 Gi3\_28127586\_x2.....uccggugugCuauaacggcu..... 1  
 Gi3\_28032328\_x2.....guucgauucccggaucgga..... 1  
 Gi3\_28124550\_x2.....aguagaucggguucgauuUc..... 1  
 Gi1\_4152793\_x2.....uNuucacccaguagaucgg..... 1  
 Gi1\_4109245\_x2.....uggCuuuacccaguagaucgg..... 1  
 Gi3\_28210446\_x2.....gguucgauucccggaucggagcucu..... 0  
 Gi1\_4129215\_x2.....uccggCgugguauaacggcuagcauga..... 1  
 Gi1\_4097437\_x2.....guuuucacccaguagauAaccg..... 1  
 Gi5\_8827983\_x2.....cggugugguauaacggcuagU..... 1  
 Gi1\_4101377\_x2.....uccggugugAuauaacggcuagc..... 1  
 Gi1\_4138203\_x2.....ccggugugguauaacggcuAca..... 1  
 Gi1\_4131033\_x2.....uccggugugguauaaUggcuagcau..... 1  
 Gi2\_10953547\_x2.....guucgauucccggaucggc..... 1  
 Gi3\_28220292\_x2.....guuuucacccaguagauGcgg..... 1  
 Gi2\_10869101\_x2.....uccggugugguauaaUggcuagcau..... 1  
 Gi2\_10917335\_x2.....guucUauucccggaucgga..... 1  
 Gi3\_28003380\_x2.....ucGggugugguauaacggcuagcau..... 1  
 Gi3\_28122594\_x2.....guagaucggguucgGuucc..... 1  
 Gi2\_10937359\_x2.....ccggugugguauaaUggcuag..... 1  
 Gi1\_4109781\_x2.....ccggugCgguauaacggcuagca..... 1

Gi1\_4091755\_x2.....guuuAcaccaguguagauccgg..... 1  
Gi3\_28022938\_x2.....uuGcaccaguguagauccgg..... 1  
Gi1\_4155951\_x2.....uccggAgugguauaacgg..... 1  
Gi1\_4157321\_x2.....cugguuucGcccaguguagauccgg..... 1  
Gi5\_8800211\_x2.....guuuucaccaguguagGuccgg..... 1  
Gi3\_28118588\_x2.....gAuuuucaccaguguagaucc..... 1  
Gi5\_8719407\_x2.....gguuuucacccaUuagauccgg..... 1  
Gi2\_10976449\_x2.....ccggugugguauaaUggcua..... 1  
Gi5\_8753875\_x2.....guucgauucccggaucUg..... 1  
Gi1\_4119903\_x2.....cggugugguauaacggcuCgca..... 1  
Gi2\_10912845\_x2.....uccggugugguauaaAgg..... 1  
Gi2\_10919643\_x2.....uuuCcaccaguguagaucc..... 1  
Gi5\_8763975\_x2.....Cguucgauucccggaucggagc..... 1  
Gi1\_4107487\_x2.....gCucgauucccggaucgga..... 1  
Gi5\_8819257\_x2.....gAuuuucaccaguguagauccgg..... 1  
Gi5\_8784155\_x2.....guuUgauucccggaucgga..... 1  
Gi5\_8804979\_x2.....uccggGugguauaacggcuagca..... 1  
Gi2\_10901571\_x2.....ccggguucgauuccgggcCucgga..... 1  
Gi2\_10846151\_x2.....guucgauuccUgcaucgga..... 1  
Gi1\_4096435\_x2.....ccUgugugguauaacggcua..... 1  
Gi5\_8829203\_x2.....ccggCgugguauaacggcuag..... 1  
Gi5\_8758133\_x2.....uccgguguUguauaacgg..... 1  
Gi2\_10980101\_x2.....ggugugguauCacggcuagc..... 1  
Gi1\_4093009\_x2.....uccggugugguUuaaacggcua..... 1  
Gi5\_8776347\_x2.....ucGggugugguauaacggcuagc..... 1  
Gi2\_10831117\_x2.....Gccggugugguauaacggcuagcaugacug..... 1  
Gi2\_10888327\_x2.....guucgauuccgggcUucgg..... 1  
Gi5\_8737151\_x2.....uAcggugugguauaacgg..... 1  
Gi3\_28137742\_x2.....Ucggugugguauaacggcuag..... 1  
Gi3\_28139048\_x2.....uccggugugAuauaacgg..... 1  
Gi4\_554698\_x2.....guucgauuccgggcCucgg..... 1  
Gi1\_4113341\_x2.....uAcggugugguauaacggcuagca..... 1  
Gi5\_8752015\_x2.....guuUgauucccggaucggagc..... 1  
Gi5\_8758055\_x2.....guucgauuccgggcCucgg..... 1  
G1a\_5939692\_x2.....uccggguucgCuuccggca..... 1  
Gi2\_10986145\_x2.....gguucgauucAcggcaucggagc..... 1  
G1a\_5949962\_x2.....uGcggugugguauaacggcua..... 1  
Gi3\_28156034\_x2.....uguuuucaccaguguagUuccg..... 1  
Gi1\_4138501\_x2.....uccgguCugguauaacggcuag..... 1  
Gi3\_28231708\_x2.....ggugugguauaacggcuG..... 1  
Gi3\_28104460\_x2.....Cguucgauucccggauc..... 1  
Gi5\_8813967\_x2.....guuuucaccaguguagCuccgg..... 1  
Gi1\_4136115\_x2.....uccggugugguauaaUgg..... 1  
Gi3\_28179080\_x2.....uuuucCcccaguguagauccg..... 1  
Gi3\_28027082\_x2.....Gggugugguauaacggcua..... 1  
Gi3\_28097658\_x2.....gguuuucaccaguguagauCA..... 1  
Gi5\_8794805\_x2.....gguuuuAaccaguguagauccgg..... 1

Gi3\_28020616\_x2.....ccAgugugguauaacggcuagca..... 1  
 Gi3\_28081876\_x2.....guagauccggguucgCuucc..... 1  
 Gi2\_10941623\_x2.....gguuuucacccaguagGuc..... 1  
 Gi3\_28014094\_x2.....gguucgauucUcggcaucgga..... 1  
 Gi5\_8826937\_x2.....Cuucgauuccggcaucgg..... 1  
 Gi2\_10889521\_x2.....gguucgauNcccggcaucggag..... 1  
 Gi3\_28101032\_x2.....uccggugugguauaacAgcu..... 1  
 Gi3\_28221804\_x2.....cGggugugguauaacggc..... 1  
 Gi2\_10916245\_x2.....uccggugugguauaacCg..... 1  
 Gi3\_28101572\_x2.....uccgguCugguauaacggcuagc..... 1  
 Gi2\_10830183\_x2.....guuUgauuccggcaucgg..... 1  
 Gi3\_28109010\_x2.....gguguAguauaacggcuag..... 1  
 Gi5\_8799341\_x2.....guuuucaccUaguagaucgg..... 1  
 Gi1\_4129581\_x2.....guucgauuccggcaucgU..... 1  
 Gi3\_28072724\_x2.....ccggugugguauaGcggcua..... 1  
 Gi1\_4091173\_x2.....guuAucacccaguagaucgg..... 1  
 Gi1\_4092551\_x2.....gguucgauuccggcauUgg..... 1  
 Gi3\_28125394\_x2.....gguuuucaccAaguagauc..... 1  
 Gi1\_4124769\_x2.....uuucacccaguagaucgg..... 0  
 Gl1\_5963870\_x2.....Aguucgauuccggcaucgg..... 1  
 Gi5\_8771871\_x2.....uuuucacccaguagaCccgg..... 1  
 Gi2\_10925611\_x2.....uccggugugguauCacggcuagcau..... 1  
 Gi5\_8814425\_x2.....Gggugugguauaacggcuag..... 1  
 Gi5\_8729929\_x2.....uccgguguUguauaacggcua..... 1  
 Gi1\_4104249\_x2.....ccggugugguauCacggcuagca..... 1  
 Gi3\_28040680\_x2.....gguuuucacccGguagauc..... 1  
 Gi5\_8801377\_x2.....guucgauuAccggcaucgg..... 1  
 Gi5\_8772665\_x2.....agaucggguucgCuucc..... 1  
 Gi1\_4147859\_x2.....gguuuucaccUaguagauc..... 1  
 Gi3\_28187750\_x2.....gguuuuUaccaguagaucgg..... 1  
 Gi5\_8734719\_x2.....uuuucacccaguagaUcgg..... 1  
 Gi3\_28042354\_x2.....cugguuuucacccGguagaucgg..... 1  
 Gi5\_8781259\_x2.....uccggugugguauaUcggcuagca..... 1  
 Gi3\_28121376\_x2.....gguucgauucccgAcauc..... 1  
 Gi5\_8726463\_x2.....ccgguguggCauaacggcua..... 1  
 Gi2\_10860883\_x2.....uccgguguggAauaacggcuag..... 1  
 Gi2\_10890061\_x2.....uccggugugguCuaaacggcuagca..... 1  
 Gi2\_10966207\_x2.....ugguuuucacccaguagaucgg..... 0  
 Gi1\_4154639\_x2.....gguuuucacccGguagauc..... 1  
 Gi3\_28225366\_x2.....uccggugugguauaacgU..... 1  
 Gi3\_28173668\_x2.....uucgauuccggcGucgga..... 1  
 Gi3\_27998036\_x2.....guucgauuccAggcaucgg..... 1  
 Gi3\_28112980\_x2.....gguucgauCcccggcaucgg..... 1  
 Gi1\_4122903\_x2.....uuuucacccaguagaUcg..... 1  
 Gi2\_10970115\_x2.....gguuuucacccaguCgaucgg..... 1  
 Gi3\_28183382\_x2.....uuuucacccaAuagaucgg..... 1  
 Gi1\_4093079\_x2.....ccggugugguauaGcggcuagca..... 1

Gi2\_10905083\_x2.....guucgaCucccggaucgga..... 1  
Gi3\_28127388\_x2.....cugguuuuNaccaguagauc..... 1  
Gi1\_4129247\_x2.....ggugugguauaacggcuCgc..... 1  
Gi3\_28112812\_x2.....ccgguguAguauaacggcuag..... 1  
Gi1\_4105073\_x2.....gguuuucaccaguaUauccg..... 1  
Gi3\_28207574\_x2.....ugguuuucaccaguagaucc..... 1  
Gi3\_28032468\_x2.....uccggugugguaGaacggcuagca..... 1  
Gi5\_8758505\_x2.....uccgguAugguauaacggcuagcau..... 1  
Gi3\_28222126\_x2.....uccggugugguauaacggcuUgcau..... 1  
Gi5\_8722879\_x2.....guucgaCucccggaucg..... 1  
Gi3\_28134720\_x2.....auccggguucgauuccAgca..... 1  
Gi3\_28046604\_x2.....guagauccggguucgauCccc..... 1  
Gi5\_8805003\_x2.....auccggguucgGuucccgga..... 1  
Gi5\_8776283\_x2.....uccgguUugguauaacggcuagc..... 1  
Gi3\_28046198\_x2.....uccggugugAuauaacggcuagcau..... 1  
Gi2\_10882769\_x2.....ugguuuCcaccaguagauccg..... 1  
Gi5\_8732833\_x2.....uccggugugguauCacgg..... 1  
Gi3\_28130614\_x2.....agaucggguucgCuucc..... 1  
Gi1\_4107911\_x2.....uuuucaccagCagaucg..... 1  
Gi1\_4101199\_x2.....ccggugugguauaacggcuagcau..... 1  
Gi3\_28040452\_x2.....ugguuuucacccaAuagauccg..... 1  
Gi2\_10932301\_x2.....ccUguagauccggguucgauucc..... 1  
Gi5\_8815783\_x2.....uuuucaccaguagauccg..... 0  
Gi5\_8744243\_x2.....gguucgauucccggaucggGgc..... 1  
Gi3\_28081490\_x2.....Ggugguauaacggcuagc..... 1  
Gi3\_28123010\_x2.....gguuuucaccaguagCu..... 1  
Gi2\_10871539\_x2.....guucgauAcccggaucgga..... 1  
Gi3\_28162454\_x2.....gguucgCuucccggauc..... 1  
Gi2\_10849847\_x2.....uccggugAgguauaacggcu..... 1  
Gi3\_27989998\_x2.....Cuagauccggguucgauu..... 1  
Gi5\_8761269\_x2.....ggugugguauaacggcCagcau..... 1  
Gi4\_560564\_x2.....gguuuucaNccaguagauccg..... 1  
Gi2\_10950271\_x2.....gguuuucGcccaguagauc..... 1  
Gi2\_10850907\_x2.....gguucgauucccggcCucgg..... 1  
Gi5\_8755255\_x2.....cggugugguauaacggcuagc..... 1  
Gi1\_4115051\_x2.....uuuucaccaguagauGcg..... 1  
Gi1a\_5897346\_x2.....gguuuucacccaUuagauc..... 1  
Gi5\_8789489\_x2.....gCuucgauucccggaucggag..... 1  
Gi3\_28238622\_x2.....gguCcgauucccggauc..... 1  
Gi2\_10960413\_x2.....guuuuAaccaguagauccg..... 1  
Gi2\_10953817\_x2.....Cccggugugguauaacggcu..... 1  
Gi3\_28051316\_x2.....guucgauucccggaucA..... 1  
Gi2\_10957675\_x2.....gguuuucacGcaguagauccg..... 1  
Gi2\_10867791\_x2.....uCuucaccaguagaucc..... 1  
Gi1\_4113707\_x2.....gguccggugugguauaacggcuagc..... 0  
Gi2\_10868269\_x2.....Auucgauucccggaucggagc..... 1  
Gi3\_28136916\_x2.....uccggugugguauGacggcu..... 1

Gi2\_10839075\_x2.....uccggugugguauaacggcuaU.....1  
Gi3\_28015784\_x2.....guucgaGucccggaucgg.....1  
Gi2\_10932775\_x2.....uccggugugguauaacggcuCg.....1  
Gi3\_28147656\_x2.....uccggugugguauaaGgg.....1  
Gi2\_10969661\_x2.....guuuucaAccaguagaucgg.....1  
Gi3\_28156880\_x2.....gguucgauuccUggcaucgga.....1  
Gi3\_28170592\_x2.....gguuuucacccaguCgaucgg.....1  
Gi5\_8783299\_x2.....uccgguguggAauaacggcua.....1  
G1a\_5973434\_x2.....gguCuucacccaguagauc.....1  
Gi3\_28114678\_x2.....guucgauucccggaucAg.....1  
Gi5\_8824633\_x2.....gCuuuucacccaguagauc.....1  
Gi3\_28006208\_x2.....gCuucgauucccggaucggag.....1  
Gi3\_28038844\_x2.....gAucgauucccggaucgg.....1  
Gi1\_4137445\_x2.....uccggGgugguauaacggc.....1  
Gi1\_4112577\_x2.....uccggGgugguauaacgg.....1  
Gi2\_10966353\_x2.....ugugguauaacggcuGgc.....1  
Gi1\_4146151\_x2.....Cuucgauucccggaucgga.....1  
Gi1\_4109081\_x2.....guuuuAaccaguagaucgg.....1  
Gi2\_10900367\_x2.....uccggugugguauGacggcua.....1  
Gi1\_4109301\_x2.....uccggugugguUuaaacggcuagca.....1  
Gi2\_10861899\_x2.....uccgguguUguauaacggcuagca.....1  
Gi5\_8753243\_x2.....Gggugugguauaacggcua.....1  
Gi3\_27992586\_x2.....gAuuucacccaguagaucgg.....1  
Gi5\_8733411\_x2.....cggugugguauaacggcuagc.....1  
Gi3\_28213456\_x2.....uccggugugUuauaacggcuagca.....1  
Gi1\_4093785\_x2.....cggAgugguauaacggcuagca.....1  
Gi5\_8740527\_x2.....uuuucacccaguaAaucgg.....1  
Gi1\_4109161\_x2.....gguuuucacccaguagGuc.....1  
Gi5\_8803317\_x2.....guucgauucccggaucAggagc.....1  
Gi1\_4113917\_x2.....Cccggugugguauaacggcu.....1  
Gi1\_4141593\_x2.....Uccaguagaucggguucgauuccc.....1  
Gi3\_28202890\_x2.....uCguuuucacccaguagaucgg.....1  
Gi1\_4122279\_x2.....gguuuucUcccaguagaucgg.....1  
Gi1\_4130225\_x2.....guagaucggguuUgauuccc.....1  
Gi5\_8791479\_x2.....uccUgugugguauaacggcuagcau.....1  
Gi1\_4101947\_x2.....uccggugugguuaGaacggcua.....1  
Gi5\_8822711\_x2.....uuucGcccaguagaucgg.....1  
Gi1\_4089657\_x2.....ccggugugguauaacggcuagUa.....1  
Gi3\_28173904\_x2.....gUuccggugugguauaacggcuagca.....1  
Gi1\_4126505\_x2.....uccUgugugguauaacggcua.....1  
Gi5\_8768979\_x2.....uggCuucacccaguagaucgg.....1  
Gi3\_28213462\_x2.....uAcggugugguauaacggc.....1  
Gi3\_28190746\_x2.....guucgauNccggcaucgga.....1  
Gi3\_28139064\_x2.....gguuuucaccAaguagauc.....1  
Gi3\_28002680\_x2.....uccggugugguauaacUg.....1  
Gi3\_28123838\_x2.....uuuucacccaguUgaucgg.....1  
Gi3\_28083546\_x2.....Gggugugguauaacggcuagcau.....1

Gi2\_10844585\_x2.....gguucgauucccAgcauc..... 1  
Gi3\_28049318\_x2.....cccggaucggagcCcuuu..... 1  
Gi2\_10956657\_x2.....gguCcgauucccggaucggag..... 1  
Gi3\_28055486\_x2.....ugguuuaccccaguagaucUg..... 1  
Gi2\_10984699\_x2.....uccgUugugguauaacggcuagcau..... 1  
Gi1\_4093203\_x2.....guuuuaccccagCagaucggg..... 1  
Gi5\_8751183\_x2.....guucgauucccggaucggag..... 0  
Gi3\_28099506\_x2.....guagaucNggauccgauucc..... 1  
G1a\_5884736\_x2.....uccggugugguauaacgAc..... 1  
Gi4\_565982\_x2.....gguucgauucccggaucggg..... 0  
Gi2\_10975057\_x2.....cGggugugguauaacggcuagcau..... 1  
Gi3\_27987352\_x2.....guucgauucccUgcaucggg..... 1  
Gi3\_28095194\_x2.....uccggugugguauaacggcG..... 1  
Gi2\_10916239\_x2.....gguuuuaccccaguagUuccgg..... 1  
G1a\_5916846\_x2.....Gccggugugguauaacggcu..... 1  
Gi3\_28180500\_x2.....Cccggugugguauaacggcuagcaugacu..... 1  
Gi2\_10897083\_x2.....gAuucgauucccggaucggg..... 1  
Gi4\_553580\_x2.....gguccggugugguauaacggcuagAa..... 1  
Gi3\_28017190\_x2.....uccggugugguauaaGggc..... 1  
Gi2\_10894011\_x2.....gguuuuacccUaguagaucgg..... 1  
Gi3\_28183272\_x2.....uccggugugguauaaUggcuagcau..... 1  
G1a\_5893646\_x2.....ucUggugugguauaacggcuagcau..... 1  
Gi1\_4115477\_x2.....uccCgugugguauaacggcuagc..... 1  
Gi5\_8751951\_x2.....uuuucacccaguagaucUgg..... 1  
Gi5\_8796553\_x2.....guAuucacccaguagaucggg..... 1  
Gi1\_4138283\_x2.....guuuucaUccaguagaucgg..... 1  
Gi1\_4106481\_x2.....guuuuacccaguaCaucggg..... 1  
Gi2\_10983731\_x2.....guuuuacccagGagaucgg..... 1  
G1a\_5909228\_x2.....uccggugugguauaaUggcuag..... 1  
Gi2\_10902121\_x2.....guuuGcaccaguagaucgg..... 1  
Gi3\_27993114\_x2.....uccggugugUuauaacggcuag..... 1  
Gi5\_8825437\_x2.....uccggugugguauaacggcuUc..... 1  
Gi2\_10865317\_x2.....ugguuuaccccaguagGuc..... 1  
Gi5\_8748495\_x2.....ugguuuaccccaguagaCccg..... 1  
Gi1\_4118663\_x2.....gguucgauucccggaCcgga..... 1  
Gi4\_564066\_x2.....uccggugugguCuaacggcuagc..... 1  
G1a\_5889602\_x2.....gguuuuaccccCguagauc..... 1  
Gi3\_28116276\_x2.....ugguuuucacAcaguagauc..... 1  
Gi3\_28220032\_x2.....ucNggugugguauaacggcuagc..... 1  
Gi3\_28098954\_x2.....cgauucccggaucggCgc..... 1  
Gi5\_8726877\_x2.....guuuuAaccaguagaucgg..... 1  
Gi5\_8826979\_x2.....cggCgugguauaacggcuag..... 1  
Gi5\_8728157\_x2.....guucgauucccggaucAgagc..... 1  
Gi3\_27986918\_x2.....uuuucacccaguagaucUcg..... 1  
Gi5\_8772567\_x2.....Aguuuuaccccaguagauc..... 1  
G1a\_5960762\_x2.....uccggugugguauGacgg..... 1  
Gi1\_4116709\_x2.....uccggugugUuauaacggcuagc..... 1



Gi2\_10957763\_x2.....uuucacccGguagauccg.....1  
Gi1\_4151685\_x2.....Auuucacccaguagauccgg.....1  
Gi5\_8767361\_x2.....gguucgauCcccggcauc.....1  
Gi3\_28210386\_x2.....guGuucacccaguagaucc.....1  
Gi2\_10833997\_x2.....uccggugugguauaacggGuagc.....1  
Gi2\_10935553\_x2.....uGuucacccaguagaucc.....1  
Gi5\_8757707\_x2.....uccggugugguauCacggc.....1  
Gi3\_28020760\_x2.....uccgguCugguauaacggcua.....1  
Gi4\_561404\_x2.....gguuuucGcccaguagauccg.....1  
Gi3\_28127700\_x2.....guuUgauuccggcaucgga.....1  
Gi1\_4132697\_x2.....ccggugugguauaacggcuGgca.....1  
Gi3\_28181840\_x2.....uccgguguggGauaacggcuagcau.....1  
Gi5\_8741309\_x2.....gUugugguauaacggcuagcaugacu.....1  
Gi5\_8823291\_x2.....guuuuaccAaguagauccgg.....1  
Gi3\_28121308\_x2.....uccggugugguAAaacggcuagca.....1  
Gi5\_8802405\_x2.....ugugguauNacggcuagc.....1  
Gi3\_28141026\_x2.....gguuuucacccaguagauccgU.....1  
Gi3\_28070802\_x2.....gguucgauucAcggcauc.....1  
Gi2\_10950427\_x2.....uccgguguggCauaacggcu.....1  
Gi5\_8795815\_x2.....uccggGgugguauaacggcuagcaugacu.....1  
Gi5\_8825129\_x2.....guuuucacccaguagaAccg.....1  
Gi3\_28132424\_x2.....gauccggguucgGuuccc.....1  
Gi2\_10871341\_x2.....guAcgauuccggcaucgga.....1  
Gi5\_8761437\_x2.....Uguucgauuccggcaucggagcucu.....1  
Gi5\_8813923\_x2.....uccggugugguauaacUgcuagcau.....1  
Gi4\_557246\_x2.....uccggugugguauaacggcuagcC.....1  
Gi2\_10899289\_x2.....ccaguagauccggguucgauucAc.....1  
Gi1a\_5958022\_x2.....gUuucgauuccggcaucggagc.....1  
Gi2\_10858141\_x2.....gguuuucaGccaguagauccg.....1  
Gi3\_28168954\_x2.....agaucggguucgauCccc.....1  
Gi2\_10893715\_x2.....Gcggguucgauuccggcaucgga.....1  
Gi2\_10974755\_x2.....uuucacAcaguagauccg.....1  
Gi3\_28256564\_x2.....guucgauuccggcaucgA.....1  
Gi5\_8798743\_x2.....uccggugugguuaGaacgg.....1  
Gi5\_8829471\_x2.....uccggugugguauaacggcuagcaugGcu.....1  
Gi1\_4147755\_x2.....gguguAguauaacggcua.....1  
Gi2\_10954027\_x2.....uGcggugugguauaacggcuagcaugacu.....1  
Gi2\_10947205\_x2.....uccAgugugguauaacgg.....1  
Gi3\_28135648\_x2.....guuuucacccaguagaAccg.....1  
Gi5\_8803327\_x2.....agaucUggguucgauuccc.....1  
Gi2\_10969363\_x2.....gguuuucacccaguaAauccgg.....1  
Gi2\_10902155\_x2.....gguucgGuuccggcauc.....1  
Gi1a\_5910234\_x2.....uUcggugugguauaacggc.....1  
Gi3\_28158538\_x2.....uccggugugguauaaUgg.....1  
Gi3\_28128392\_x2.....Cuucgauuccggcaucg.....1  
Gi5\_8829193\_x2.....ugguGuucacccaguagauccg.....1  
Gi2\_10951837\_x2.....gguucgaCuuccggcaucgga.....1

Gi5\_8780157\_x2.....gguucgaCucccggaucgg..... 1  
Gi2\_10981439\_x2.....uccgCugugguuaaacggc..... 1  
Gi3\_28239498\_x2.....uggCuuucacccaguagauc..... 1  
Gi2\_10980637\_x2.....uccggguucgauucccggc..... 0  
Gi5\_8725089\_x2.....cgauucccggaucggagcCcuu..... 1  
Gi3\_28024240\_x2.....uccggugugguuaCaacggcu..... 1  
Gi2\_10927887\_x2.....ccggguucgauucUcggcaucgga..... 1  
Gi5\_8789663\_x2.....guucgauucccgUaucgga..... 1  
Gi3\_28223454\_x2.....ucAggugugguuaaacggcuag..... 1  
Gi1\_4110571\_x2.....ccgguguggCauaacggcua..... 1  
Gi3\_28222510\_x2.....Accggugugguuaaacggcu..... 1  
Gi5\_8797229\_x2.....gguucgauucccggaCc..... 1  
Gi3\_28037708\_x2.....uuuucacccaguagauccgA..... 1  
G1a\_5894232\_x2.....ucUggugugguuaaacggc..... 1  
Gi3\_28231886\_x2.....gguucgauucccggaucAg..... 1  
Gi5\_8799571\_x2.....Uggugugguuaaacggcuag..... 1  
Gi3\_28235810\_x2.....uccggGgugguuaaacggcu..... 1  
Gi2\_10949407\_x2.....Gcggugugguuaaacggcuag..... 1  
Gi5\_8822193\_x2.....gguucgauucccggaucggagcCcu..... 1  
Gi5\_8747115\_x2.....uccggugugguuaaaGggcuag..... 1  
Gi2\_10973319\_x2.....guAcgauucccggaucggag..... 1  
Gi1\_4146521\_x2.....ggugugguuaaacgAcuagc..... 1  
Gi5\_8756327\_x2.....uccCgugugguuaaacggcuagc..... 1  
Gi5\_8730031\_x2.....Ucggugugguuaaacggcuag..... 1  
Gi3\_28162002\_x2.....guuAucacccaguagauccgg..... 1  
Gi2\_10880885\_x2.....gguucgaCucccggauc..... 1  
Gi5\_8828343\_x2.....uuuucacccaguUgauccgg..... 1  
Gi5\_8728349\_x2.....Cguucgauucccggaucg..... 1  
Gi2\_10929365\_x2.....uuuucacccaguagaucA..... 1  
Gi2\_10837497\_x2.....guucgauucccggaucgg..... 1  
G1a\_5890904\_x2.....uccggugugguauCacggcuagc..... 1  
Gi5\_8815231\_x2.....Uuucgauucccggaucggagcucu..... 1  
Gi5\_8827135\_x2.....ugguuuucacccCguagauc..... 1  
Gi2\_10949625\_x2.....Agguuuucacccaguagauc..... 1  
Gi2\_10832019\_x2.....uccggugGgguuaaacggcuagcau..... 1  
Gi2\_10836677\_x2.....uccgAugugguuaaacggcua..... 1  
Gi2\_10970159\_x2.....uccggAgugguuaaacggcu..... 1  
Gi1\_4148999\_x2.....Gccggguucgauucccggaucgg..... 1  
Gi5\_8736013\_x2.....guucgauucAcggcaucggagc..... 1  
Gi1\_4154703\_x2.....uccggugugguuaaaGcggcuagcau..... 1  
Gi5\_8796485\_x2.....uuuucacccaguGgaucgg..... 1  
Gi2\_10860833\_x2.....uuuucacccagCagauc..... 1  
Gi2\_10903201\_x2.....gguNcgauucccggauc..... 1  
Gi3\_28094856\_x2.....gCuucgauucccggaucgga..... 1  
Gi1\_4104657\_x2.....uccgguguUguuaaacggcuagc..... 1  
Gi5\_8806319\_x2.....uuuucacUcaguagauccgg..... 1  
Gi2\_10871695\_x2.....uccggugugguCuaacggcua..... 1

Gi5\_8788163\_x2.....cgAugugguauaacggcua..... 1  
 Gi3\_28167740\_x2.....Uugguuuucacccaguagauccg..... 1  
 Gi2\_10865525\_x2.....ggCuuucacccaguagaucc..... 1  
 Gi2\_10954433\_x2.....uccggCgugguauaacggcu..... 1  
 Gi5\_8820397\_x2.....gguuuucacccaguCgauccgg..... 1  
 Gi5\_8721105\_x2.....uUcggugugguauaacggcuagcaugacu..... 1  
 Gi1\_4153137\_x2.....cUggugugguauaacggcuagc..... 1  
 Gi5\_8757819\_x2.....uguuuuAcacccaguagaucc..... 1  
 Gi5\_8761373\_x2.....guCcgauucccggaucgggagc..... 1  
 Gi5\_8723219\_x2.....guuuucacccaguCgauccgg..... 1  
 Gi2\_10843385\_x2.....uccgAugugguauaacggcuag..... 1  
 Gi5\_8777959\_x2.....gguuuucacccaguagauccGgg..... 1  
 Gi3\_28029036\_x2.....uuuucacccCguagauccgg..... 1  
 Gi5\_8730423\_x2.....uccggGgugguauaacggc..... 1  
 Gi5\_8800237\_x2.....uguuuuucacccaguGgauccgg..... 1  
 Gi3\_28228996\_x2.....uuuucGcccaguagauccgg..... 1  
 Gi2\_10981133\_x2.....guuAucacccaguagauccg..... 1  
 Gi4\_564388\_x2.....Gccggugugguauaacggcuagca..... 1  
 Gi5\_8769863\_x2.....cggugugguauaacggcAag..... 1  
 Gi3\_28113472\_x2.....gCuucgauucccggaucg..... 1  
 Gi1\_4110801\_x2.....uuuucaccUaguagauccg..... 1  
 Gi1\_4153567\_x2.....ggugugguNuaacggcuagc..... 1  
 Gi1\_4134363\_x2.....cgguAugguauaacggcuagca..... 1  
 Gi5\_8751493\_x2.....uggGuuucacccaguagauccgg..... 1  
 Gi1\_4117483\_x2.....guuUgauucccggaucg..... 1  
 Gi2\_10890255\_x2.....uccggugugguauaacgCcuagc..... 1  
 Gi2\_10884497\_x2.....ugguuuucNcccaguagauccgggu..... 1  
 Gi5\_8750243\_x2.....Accggugugguauaacggcuag..... 1  
 Gi2\_10970843\_x2.....ccggugugguauaacggcuagAau..... 1  
 Gi2\_10970741\_x2.....uccggugugguauaaGggc..... 1  
 Gi3\_28096444\_x2.....uccggugugguauaaAggc..... 1  
 Gi2\_10938165\_x2.....ccggugCgguauaacggcuagcau..... 1  
 Gi3\_28046244\_x2.....gguCcgauucccggaucgggagc..... 1  
 Gi1\_4153405\_x2.....agauccgggCucgauuccc..... 1  
 Gi5\_8733437\_x2.....Gccggugugguauaacggcu..... 1  
 Gi3\_28149178\_x2.....guuuucacccaguaAauccgg..... 1  
 Gi2\_10869451\_x2.....uccgCugugguauaacggcuagca..... 1  
 Gi3\_28133680\_x2.....gguuuucCcccaguagauccgg..... 1  
 Gi2\_10857259\_x2.....uccNgugugguauaacgg..... 1  
 Gl1a\_5894674\_x2.....gguucgauucccggcGuc..... 1  
 Gi1\_4101029\_x2.....ucAggugugguauaacggcuagca..... 1  
 Gi1\_4109287\_x2.....uuuucacccagCaguaccgg..... 1  
 Gi2\_10959775\_x2.....gguuuucacccCguagauccgg..... 1  
 Gi3\_28012940\_x2.....ugAuuuucacccaguagauccg..... 1  
 Gi2\_10946785\_x2.....uccggugugguauaacgAcua..... 1  
 Gi5\_8740719\_x2.....guucgauucccggaucCg..... 1  
 Gi2\_10874307\_x2.....gugugguauaacggcuacAc..... 1

Gi5\_8823089\_x2.....uUcggguucgauucccggc..... 1  
Gi3\_28133196\_x2.....uccggugugguauaacggcAag..... 1  
Gi1\_4132741\_x2.....guuuuacaccaAuagauccg..... 1  
Gi2\_10988617\_x2.....guucgauucccggaucUga..... 1  
Gi5\_8807061\_x2.....gguuuucaGccaguagauccgg..... 1  
Gi5\_8726469\_x2.....ggugugguauaacggcCagc..... 1  
Gi5\_8719387\_x2.....ccggugugNuuaaacggcuag..... 1  
Gi4\_553174\_x2.....uccggugCgguauaacggcuagca..... 1  
Gi2\_10925301\_x2.....uccggGgugguauaacggcuag..... 1  
Gi3\_28221560\_x2.....ugguuuCcaccaguagauc..... 1  
Gi2\_10889027\_x2.....uccggugugguauaacgAcu..... 1  
Gi5\_8740335\_x2.....uuuucCcccaguagauccg..... 1  
Gi2\_10949875\_x2.....guucgauucccgUaucgga..... 1  
Gi3\_28160030\_x2.....gCagaucggguucgauucc..... 1  
G1a\_5933930\_x2.....uccgguguAguauaacggcuagc..... 1  
Gi5\_8788689\_x2.....ugguCuucacccaguagauccg..... 1  
Gi5\_8752807\_x2.....gguuuucaccUaguagauc..... 1  
Gi1\_4118211\_x2.....uuuucacccUguagauccg..... 1  
Gi1\_4134975\_x2.....guuuuacccaguagCuccgg..... 1  
Gi3\_28119708\_x2.....Gggguucgauucccggaucgga..... 1  
Gi1\_4089399\_x2.....ccggugugguauaacggcuagU..... 1  
Gi2\_10931279\_x2.....ugguuucacccaguaAauc..... 1  
Gi5\_8800605\_x2.....uccgguUugguauaacgg..... 1  
Gi2\_10871039\_x2.....uCucacccaguagauccg..... 1  
Gi5\_8772935\_x2.....uccggugugguauaacggcuagcCugacu..... 1  
Gi5\_8798621\_x2.....ugguuucacccaguagaCc..... 1  
Gi1\_4137125\_x2.....uuuucacccaguagaucAg..... 1  
Gi1\_4100431\_x2.....uccggugugguauaacggUuagcau..... 1  
Gi1\_4133423\_x2.....guGgauccggguucgauucc..... 1  
Gi5\_8752945\_x2.....ggAuuucacccaguagauc..... 1  
Gi3\_28245546\_x2.....ggAucgauucccggauc..... 1  
Gi5\_8748029\_x2.....ggugugguauaacggcuGccau..... 1  
G1a\_5910512\_x2.....uccgguguggCauaacggcuagc..... 1  
Gi5\_8799779\_x2.....cgguguggNauaacggcua..... 1  
G1a\_5953700\_x2.....guucgauucccggcGucggagc..... 1  
Gi1\_4129171\_x2.....Cccggugugguauaacggc..... 1  
Gi3\_28023370\_x2.....Uguccggugugguauaacggcuagca..... 1  
Gi5\_8806381\_x2.....uccgguguCguauaacggc..... 1  
Gi5\_8797313\_x2.....uuuucUccaguagauccg..... 1  
Gi1\_4145003\_x2.....uccggugugguCuaaacggcuagca..... 1  
Gi1\_4091275\_x2.....ggCuucacccaguagauccgg..... 1  
Gi3\_28005492\_x2.....uccggugugguauaacgUcuagca..... 1  
Gi5\_8726391\_x2.....gguuAgauucccggauc..... 1  
Gi5\_8738179\_x2.....guucgauAcccggaucg..... 1  
Gi2\_10969587\_x2.....gguccggugugguauaacggcuagc..... 1  
Gi2\_10858509\_x2.....gguucgauucccggaucAgagc..... 1  
Gi1\_4121599\_x2.....cgguguggNauaacggcuagca..... 1

G1a\_5942434\_x2.....uGcggguucgauucccgga..... 1  
 Gi1\_4105089\_x2.....uccAgugugguauaacggcuagca..... 1  
 Gi4\_556740\_x2.....ugguuuucacccaguagaucgg..... 0  
 Gi3\_28201030\_x2.....cgguguAguauaacggcua..... 1  
 Gi2\_10928191\_x2.....guucgauucccggaucAgga..... 1  
 Gi5\_8757315\_x2.....Agugguauaacggcuagc..... 1  
 Gi2\_10833897\_x2.....gguAcgauucccggauc..... 1  
 Gi5\_8752169\_x2.....Aauccggguucgauucccggauc..... 1  
 Gi5\_8765875\_x2.....Cgguuuucacccaguagaucgg..... 1  
 Gi2\_10881329\_x2.....uccggugugguauaacggcuUgca..... 1  
 Gi1\_4091487\_x2.....guuuucacccaguagauc..... 0  
 Gi5\_8792291\_x2.....gAugugguauaacggcuagc..... 1  
 Gi4\_553884\_x2.....guuuucacccaguagaucgg..... 0  
 Gi2\_10950127\_x2.....gguucgauucccgAcaucggag..... 1  
 Gi3\_28185182\_x2.....uuucacccaguagaUcg..... 1  
 Gi1\_4132595\_x2.....gguuuucacccaguagaAccg..... 1  
 Gi5\_8793617\_x2.....gguccggugugguauaacAgc..... 1  
 Gi2\_10895629\_x2.....guuuucacUcaguagaucgg..... 1  
 Gi5\_8762287\_x2.....ucGggugugguauaacggcuagca..... 1  
 Gi2\_10910815\_x2.....guucgauucccggaucAgg..... 1  
 Gi3\_28258740\_x2.....guuuucacccaCuagaucgg..... 1  
 Gi5\_8738141\_x2.....cgguguggCauaacggcuagc..... 1  
 Gi3\_28029408\_x2.....uCcgauucccggaucgga..... 1  
 Gi5\_8725533\_x2.....uccgguguggGauaacggcuagca..... 1  
 Gi1\_4105177\_x2.....guuuucacccaguagaUcgg..... 1  
 Gi3\_28250372\_x2.....gguuGucacccaguagaucgg..... 1  
 Gi3\_28125366\_x2.....uuGcacccaguagaucgg..... 1  
 Gi1\_4114411\_x2.....gUuccggugugguauaacggcuagcauga..... 1  
 Gi3\_27980282\_x2.....guagaucggggGucgauu..... 1  
 Gi2\_10954811\_x2.....gUuuuucacccaguagaucggguuc..... 1  
 Gi1\_4103383\_x2.....guagaucggguucgGuuccc..... 1  
 Gi2\_10893279\_x2.....agaucgggAucgauucc..... 1  
 Gi1\_4117105\_x2.....uccggugugguauCacggcu..... 1  
 Gi2\_10960277\_x2.....guucgauuccUggcaucggag..... 1  
 Gi5\_8779017\_x2.....gguccggCgugguauaacggcuagc..... 1  
 Gi4\_556622\_x2.....uUcggugugguauaacggcuagc..... 1  
 Gi2\_10957867\_x2.....ccaguagaucggguucAauuccc..... 1  
 Gi3\_28228602\_x2.....Augugguauaacggcuagca..... 1  
 G1a\_5947642\_x2.....gguuuucacccaguagaucAg..... 1  
 Gi2\_10856309\_x2.....uccggAgugguauaacggcuag..... 1  
 Gi2\_10883131\_x2.....gguucgauuccAgcaucggag..... 1  
 G1a\_5966164\_x2.....uccgguguAguauaacggcuag..... 1  
 Gi5\_8738277\_x2.....gguCuucacccaguagauc..... 1  
 Gi5\_8782995\_x2.....ugguuuucacAcaguagaucgg..... 1  
 Gi2\_10970295\_x2.....guguUguauaacggcuagc..... 1  
 Gi5\_8735137\_x2.....guucgauucccggaCcgagc..... 1  
 Gi1\_4127501\_x2.....uccggugugguUuaaacggcuagc..... 1

Gi2\_10932977\_x2.....uuuucaccaguCgaucgg.....1  
 Gi5\_8796681\_x2.....Cuucgauucccggaucggagc.....1  
 G1a\_5902744\_x2.....uccggugugguaCaacggc.....1  
 Gi2\_10969531\_x2.....ccggugugguGuaacggcuagcau.....1  
 Gi3\_28220284\_x2.....gguuuucacccagauagauccg.....1  
 Gi3\_28065936\_x2.....gguuuucacccagauagauccg.....1  
 Gi2\_10856279\_x2.....guuuucacccaAuagauccg.....1  
 Gi5\_8823009\_x2.....cggugCgguauaacggcuag.....1  
 Gi2\_10992319\_x2.....Cuucgauucccggaucggga.....1  
 Gi5\_8758863\_x2.....Ugugugguauaacggcuagcaugacu.....1  
 Gi2\_10901561\_x2.....Accggugugguauaacgg.....1  
 Gi3\_28075530\_x2.....uccggugugguauaacggcuagUau.....1  
 Gi5\_8742295\_x2.....guGuucacccagauagauccgg.....1  
 Gi2\_10954355\_x2.....ggCucgauucccggauc.....1  
 Gi2\_10988699\_x2.....gguCucacccagauagaucc.....1  
 Gi1\_4113333\_x2.....gguuuucacccaUuagauccgg.....1  
 Gi2\_10977179\_x2.....cuguuuucacccagauagauccg.....0  
 Gi3\_28196980\_x2.....guuuucacNcaguagaucc.....1  
 Gi2\_10989457\_x2.....uagauccggguucgauUc.....1  
 Gi1\_4092875\_x2.....uAcggugugguauaacggcuagc.....1  
 Gi2\_10935647\_x2.....guuuucacccagauagCuccg.....1  
 Gi5\_8813491\_x2.....uccgguguCguauaacggcuagc.....1  
 Gi3\_28156578\_x2.....uguuuucacccagauagauUcg.....1  
 Gi1\_4149379\_x2.....gguucgauucccggaCcg.....1  
 Gi1\_4108159\_x2.....uccggugugguauaacgAcuagcau.....1  
 Gi1\_4096691\_x2.....gguuuucacccagGagauccg.....1  
 Gi2\_10856491\_x2.....uccggugugguUuaacgg.....1  
 Gi5\_8780557\_x2.....uguuuucacccagauagaAccg.....1  
 Gi1\_4119727\_x2.....Uguccggugugguauaacggcuagcauga.....1  
 Gi4\_564032\_x2.....gguuuucacccagauagauc.....0  
 Gi3\_28251534\_x2.....uuucaccUaguagauccgg.....1  
 G1a\_5914796\_x2.....uccggugCgguauaacggc.....1  
 Gi5\_8739455\_x2.....gguuuucacccagauagauccg.....1  
 Gi3\_28050264\_x2.....gguuuucacccaUuagauccgg.....1  
 Gi3\_28211652\_x2.....ugUuuuucacccagauagauc.....1  
 Gi2\_10976467\_x2.....gguuuucacccagCagauc.....1  
 Gi2\_10939627\_x2.....uccggugugguauaacggcuagGau.....1  
 G1a\_5917902\_x2.....guucgauuccAgcaucggagc.....1  
 Gi3\_28111510\_x2.....gguucgauucUcggcauc.....1  
 Gi3\_28153528\_x2.....gguucgauuccggcUucgg.....1  
 Gi5\_8773497\_x2.....ggugugguauaacggcuUgcaugacu.....1  
 Gi5\_8820971\_x2.....gguuuucacUcaguagaucc.....1  
 Gi2\_10976989\_x2.....uuuucacccagauagauccA.....1  
 Gi2\_10895467\_x2.....gCuucgauucccggaucgg.....1  
 Gi1\_4147495\_x2.....uccggugugguauaacggcuagca.....1  
 Gi5\_8726147\_x2.....uccggugugAuauaacgg.....1  
 Gi2\_10922503\_x2.....guAcgauucccggaucgg.....1

Gi2\_10925321\_x2.....uccggugugguauaaAggcuagcau.....1  
Gi2\_10853159\_x2.....Cgguucgauucccggaucggagc.....1  
Gi3\_28211238\_x2.....guucgauucccgCcaucgg.....1  
G1a\_5932108\_x2.....uccggugugguauaacggUuag.....1  
G1a\_5965278\_x2.....gguucgauucccgGucggagc.....1  
Gi2\_10960145\_x2.....uucgauuccUggcaucgga.....1  
G1a\_5904168\_x2.....uccgguguNguauaacgg.....1  
Gi2\_10887271\_x2.....uccggugugguauaacggA.....1  
Gi3\_28097192\_x2.....guaNauccggguucgauucc.....1  
Gi2\_10935113\_x2.....gguucgauucccggaucggC.....1  
Gi5\_8740095\_x2.....guuuUaccagauagauccg.....1  
Gi2\_10915085\_x2.....guucgauucccgUaucggagc.....1  
Gi3\_28252842\_x2.....ggCucgauucccggaucgga.....1  
Gi2\_10986219\_x2.....uccggugugguCuaacggcuagcau.....1  
Gi1\_4123905\_x2.....uAcggugugguauaacggcua.....1  
Gi1\_4108927\_x2.....uccNgugugguauaacggcua.....1  
Gi2\_10846075\_x2.....gguuuCaccagauagaucc.....1  
Gi5\_8787887\_x2.....uccggugugUuauaacggcuag.....1  
Gi5\_8798369\_x2.....uccgguguAguauaacggcuagcaugacu.....1  
Gi5\_8772041\_x2.....gguucgauuccUgcaucggagc.....1  
Gi2\_10880809\_x2.....Auucgauucccggaucgga.....1  
Gi3\_28199718\_x2.....gguuuucacccaAuagaucgg.....1  
Gi1\_4102099\_x2.....gguuuucaccAaguagaucgg.....1  
Gi5\_8743775\_x2.....uuuuAaccagauagauccg.....1  
Gi2\_10980569\_x2.....guucgauucccgGaucgg.....1  
Gi2\_10863529\_x2.....gguuuucUccagauagauccg.....1  
Gi3\_28229282\_x2.....cgauuccNgcaucggagcucu.....1  
Gi3\_28049584\_x2.....uGguuuucaccagauagaucc.....1  
Gi3\_28189094\_x2.....uccgCugugguauaacggc.....1  
Gi5\_8731499\_x2.....uccggugugguauaaUgg.....1  
Gi5\_8789091\_x2.....uccggugugguCaacgg.....1  
Gi5\_8741067\_x2.....uGguuuucaccagauagauccg.....1  
Gi2\_10924933\_x2.....uccggugGguauaacggcuagca.....1  
Gi5\_8745497\_x2.....guuuucaccagauGgauccgg.....1  
Gi2\_10830693\_x2.....gguuuucaccagauagGucc.....1  
Gi2\_10950829\_x2.....Uguuuucaccagauagauccggguuc.....1  
Gi1\_4136671\_x2.....gCgugguauaacggcuag.....1  
Gi1\_4123307\_x2.....uccggugugguauaCcggcuagcau.....1  
Gi5\_8794259\_x2.....guucgauNccggcaucggagc.....1  
Gi5\_8804031\_x2.....ugugguauCacggcuagc.....1  
Gi1\_4146631\_x2.....ugguuuAcaccagauagauccg.....1  
Gi3\_28058776\_x2.....uccggugugguauUacgg.....1  
Gi3\_28257542\_x2.....gguuuucaNccagauagaucc.....1  
Gi1\_4116761\_x2.....uccggugugGcauacggcu.....1  
Gi2\_10881873\_x2.....uccggugugguauaacggcAagca.....1  
Gi2\_10912321\_x2.....ggGucgauucccggaucgga.....1  
Gi2\_10873801\_x2.....uccggugugguAaacggcua.....1

Gi5\_8766063\_x2.....cggugugguauaacggcuagGa..... 1  
 Gi2\_10919001\_x2.....uccggugugCuauaacggcuagc..... 1  
 Gi5\_8729063\_x2.....uuuucacccaguagauccAg..... 1  
 Gi5\_8718677\_x2.....gguuuucacccaguagUuccgg..... 1  
 Gi1\_4094547\_x2.....uccggugugAguauaacggcuagcau..... 1  
 Gl1a\_5970136\_x2.....uccggugugguauaacggcCag..... 1  
 Gl1a\_5955900\_x2.....gguuuucacccaUuagauccg..... 1  
 Gi3\_28043688\_x2.....uccCgugugguauaacggcuagca..... 1  
 Gi3\_27989900\_x2.....guagauUcggguucgauu..... 1  
 Gi5\_8752143\_x2.....gguCcgauucccggaucggagc..... 1  
 Gi2\_10989631\_x2.....guucgGuucccggaucgg..... 1  
 Gi5\_8766217\_x2.....uccggugugguauaacgUcuagcau..... 1  
 Gi2\_10854717\_x2.....gguuuaccccUguagaucc..... 1  
 Gi1\_4124179\_x2.....gguuuucaNccaguagauccgg..... 1  
 Gi2\_10977075\_x2.....uccggugugguCuaaacggcuag..... 1  
 Gi1\_4137401\_x2.....gguuCucacccaguagauccgg..... 1  
 Gi3\_28208396\_x2.....ggCucgauucccggaucggagc..... 1  
 Gi5\_8765517\_x2.....uccggugugAuaaacggc..... 1  
 Gi1\_4092713\_x2.....Gggugugguauaacggcuagca..... 1  
 Gi1\_4110459\_x2.....uccgguUugguauaacggcuag..... 1  
 Gi3\_28026106\_x2.....Cgauccggguucgauucc..... 1  
 Gi3\_28092628\_x2.....gguucgauUccgggaucgga..... 1  
 Gi5\_8818081\_x2.....gguuuacacccaAuagauccgg..... 1  
 Gi2\_10875771\_x2.....guucgauucccgCcaucgga..... 1  
 Gi2\_10939349\_x2.....guucgauCcccggaucggag..... 1  
 Gi1\_4139709\_x2.....uuuucacccaguagauccgA..... 1  
 Gi3\_27989340\_x2.....Cguucgauucccggaucggagc..... 1  
 Gi5\_8827155\_x2.....guCcgauucccggaucgg..... 1  
 Gi2\_10959811\_x2.....gAuuuucacccaguagaucc..... 1  
 Gi3\_28045784\_x2.....uggGuuucacccaguagauccg..... 1  
 Gi1\_4155833\_x2.....uuuNcaccaguagauccg..... 1  
 Gi1\_4121239\_x2.....ccggugCgguauaacggcua..... 1  
 Gi5\_8763403\_x2.....Cuucgauucccggaucg..... 1  
 Gi5\_8740545\_x2.....cgauucccggaucggagcucu..... 0  
 Gi3\_28173126\_x2.....cccgggaucggagcucCuu..... 1  
 Gi1\_4123105\_x2.....uccggugugCguauaacggcuag..... 1  
 Gi1\_4099493\_x2.....uCcaccaguagauccgg..... 1  
 Gi4\_566312\_x2.....ucUggugugguauaacggcuagc..... 1  
 Gi3\_28063284\_x2.....uAugguauaacggcuagc..... 1  
 Gi3\_28055248\_x2.....ggugugguauaacAgcua..... 1  
 Gi3\_28129184\_x2.....gguucgauucccggcCucggag..... 1  
 Gi1\_4153139\_x2.....ucAggugugguauaacggcuagc..... 1  
 Gi2\_10960141\_x2.....uucgauucccggaCcgga..... 1  
 Gi5\_8766555\_x2.....uuuucacccaguagauAcg..... 1  
 Gi5\_8722695\_x2.....uuuucacccaguCgauccgg..... 1  
 Gi5\_8746269\_x2.....guucgauucccggaucCgagc..... 1  
 Gi2\_10836489\_x2.....guucgauucccggaucggagc..... 1



Gi1\_4139547\_x2.....guucAauucccggaucg..... 1  
 Gl1a\_5951610\_x2.....gUUUucacNcaguagauccg..... 1  
 Gi3\_28259506\_x2.....uccgguguUguauaacggcua..... 1  
 Gi3\_28213450\_x2.....AgUUUucacccaguagau..... 1  
 Gi3\_28245022\_x2.....gguucgauucccgAcaucggag..... 1  
 Gi3\_28094840\_x2.....uccgguguggGauaacggc..... 1  
 Gi2\_10933927\_x2.....gCucgauucccggaucgg..... 1  
 Gi5\_8763821\_x2.....uggCuuucacccaguagau..... 1  
 Gi4\_556770\_x2.....uccggugugguauaGcgguagc..... 1  
 Gi3\_28145978\_x2.....ccggugCgguaauaacggcua..... 1  
 Gi3\_28236136\_x2.....ggGUUucacccaguagauc..... 1  
 Gi5\_8824249\_x2.....uccggugugCuauaacggcua..... 1  
 Gl1a\_5950006\_x2.....uccggugCgguaauaacggcuag..... 1  
 Gi3\_28071764\_x2.....uuuCcaccaguagaucgg..... 1  
 Gi1\_4112609\_x2.....gguucgauucccgGucggagc..... 1  
 Gi1\_4157325\_x2.....uccggAgugguauaacggcuagcau..... 1  
 Gi5\_8807429\_x2.....uccgguguggAauaacgg..... 1  
 Gi2\_10846251\_x2.....ggugugguNuaacggcuagc..... 1  
 Gi3\_28255468\_x2.....uggAUUucacccaguagaucgg..... 1  
 Gi3\_28001914\_x2.....AUUucacccaguagaucgg..... 1  
 Gi3\_28018196\_x2.....guCcgauucccggaucggag..... 1  
 Gi3\_28054390\_x2.....guuNgauucccggaucgga..... 1  
 Gi5\_8779743\_x2.....gaucggguucgauUccggcauc..... 1  
 Gi5\_8779107\_x2.....ugguuCucacccaguagaucgg..... 1  
 Gi1\_4125537\_x2.....cCgugugguauaacggcuagca..... 1  
 Gi5\_8782921\_x2.....gguuuucacccaguagGuc..... 1  
 Gi1\_4139955\_x2.....gguucgauuccAgcaucgg..... 1  
 Gi1\_4120509\_x2.....gUUUUAcaccaguagaucgg..... 1  
 Gi1\_4112201\_x2.....gguuuucacccaguagaUcgg..... 1  
 Gi5\_8794329\_x2.....uccgguguggCauaacggc..... 1  
 Gi1\_4143699\_x2.....agaucggguucgauucc..... 0  
 Gi3\_28141818\_x2.....ccggugugguauaacggcuagUa..... 1  
 Gi3\_28081164\_x2.....ggAucgauucccggaucgg..... 1  
 Gi3\_28197958\_x2.....uccgguguggGauaacggcu..... 1  
 Gi2\_10971883\_x2.....Cgugugguauaacggcuagc..... 1  
 Gi3\_28168802\_x2.....Ucggugugguauaacggcu..... 1  
 Gi1\_4099269\_x2.....gguucgauucccggaucgga..... 0  
 Gi5\_8815111\_x2.....uccCgugugguauaacggcua..... 1  
 Gi1\_4121385\_x2.....uccggugugguauaAggcuagc..... 1  
 Gi2\_10892337\_x2.....gguucgauUaccggcaucggagc..... 1  
 Gi3\_28014480\_x2.....uccggugugguauaacCgcuag..... 1  
 Gi2\_10933257\_x2.....uccggugAgguauaacggcua..... 1  
 Gi2\_10906035\_x2.....ccggugugguauaacAgc..... 1  
 Gi5\_8744337\_x2.....uccggugugguauaGcgguagcaugacu..... 1  
 Gi2\_10878977\_x2.....cUggguucgauucccggaucgga..... 1  
 Gi3\_28103968\_x2.....agGagauccggguucgauucc..... 1  
 Gi3\_28226292\_x2.....uccggugugguauaacCgcu..... 1

Gi4\_559662\_x2 .....ggGuuucacccaguagaucgg..... 1  
 Gi5\_8761465\_x2.....guucUauucccggaucggagc..... 1  
 Gi4\_553044\_x2 .....gguucgauucccggauc..... 0  
 Gi5\_8772509\_x2 .....gguucgauNcccggaucg..... 1  
 Gi2\_10909843\_x2.....uccggugugguauaacgUcua..... 1  
 Gi3\_28111294\_x2.....guucgCuucccggaucgg..... 1  
 Gi2\_10973581\_x2.....guucgauCcccggaucgg..... 1  
 Gi3\_28172068\_x2.....cgauucUcggcaucggagc..... 1  
 Gi3\_28250786\_x2.....Ggauucccggaucggagcucuu..... 1  
 Gi2\_10855447\_x2.....uccggugugguauaacggcuCgcau..... 1  
 Gi3\_28117024\_x2.....Auuucacccaguagaucgg..... 1  
 Gi2\_10835941\_x2.....Gcggugugguauaacggcuagc..... 1  
 Gi5\_8728697\_x2.....Ucggugugguauaacggcua..... 1  
 Gi5\_8742469\_x2.....gguucgGuucccggaucg..... 1  
 Gi4\_559956\_x2 .....guucgauucccggcGucgg..... 1  
 Gi2\_10845619\_x2.....uccUgugugguauaacggcuagca..... 1  
 Gi2\_10942543\_x2.....gguuuucacccaAuagaucgg..... 1  
 Gi5\_8772079\_x2.....uccggugugguauaCcgguag..... 1  
 Gi1\_4149363\_x2.....gguuuucacccaguagUuccgg..... 1  
 Gi5\_8779067\_x2.....guucgauucccggaucgAa..... 1  
 Gi2\_10947837\_x2.....uuuucacAcaguagaucgg..... 1  
 Gi1\_4157659\_x2.....Uguucgauucccggaucg..... 1  
 Gi5\_8722823\_x2.....gguucgauucccAgcaucggagc..... 1  
 Gi3\_28134816\_x2.....guucgauucccggaAcgga..... 1  
 Gi2\_10869579\_x2.....ggCuuucacccaguagauc..... 1  
 Gi1\_4123217\_x2.....Uguucgauucccggauc..... 1  
 Gi1\_4130043\_x2.....uccgguguggAaaaacggcua..... 1  
 Gi5\_8801317\_x2.....cggugugguauaacggcuagA..... 1  
 Gi2\_10941713\_x2.....uCcaccaguagaucgg..... 1  
 Gi1\_4133149\_x2.....gguuCucacccaguagauc..... 1  
 Gi5\_8770311\_x2.....cggugugguauaacggcuCgc..... 1  
 Gi1\_5945070\_x2.....gUuucgauucccggauc..... 1  
 Gi3\_27986748\_x2.....guucAauucccggaucggag..... 1  
 Gi3\_28178408\_x2.....uccgguguggAauaacggcuagcau..... 1  
 Gi3\_28169572\_x2.....ucAggugugguauaacgg..... 1  
 Gi1\_4105101\_x2.....cGcaguagaucggguucgauucc..... 1  
 Gi5\_8773313\_x2.....uccggugugguUuaaacggcuagca..... 1  
 Gi1\_4139407\_x2.....gguucgauucccggcGucgg..... 1  
 Gi5\_8731307\_x2.....guuuucacccaguagaucUgg..... 1  
 Gi2\_10944631\_x2.....guucgauucccggaAcgga..... 1  
 Gi3\_27985994\_x2.....ugguuuucGcccaguagauc..... 1  
 Gi1\_4151709\_x2.....ggAuuucacccaguagaucgg..... 1  
 Gi5\_8818215\_x2.....gguucAauucccggaucgg..... 1  
 Gi3\_28179870\_x2.....ccggugugguauaacggcCagc..... 1  
 Gi3\_28144200\_x2.....gguuuucaAccaguagauc..... 1  
 Gi3\_28093140\_x2.....gguucgauCcccggaucggagc..... 1  
 Gi3\_28234614\_x2.....guucgauucccggaucggagcucuu..... 0

Gi1\_4158027\_x2.....guuuucacccaguagCuccg..... 1  
Gi2\_10903867\_x2.....ugguuCucacccaguagauccg..... 1  
Gi3\_28186874\_x2.....ucGggugugguauaacggcuag..... 1  
Gi2\_10852079\_x2.....Ggguuuucacccaguagauccgggu..... 1  
Gi2\_10984417\_x2.....uccggugugguauaUcggcuagca..... 1  
Gi2\_10853895\_x2.....cUggugugguauaacggcua..... 1  
Gi3\_28248886\_x2.....uccNgugugguauaacggc..... 1  
Gi3\_28158892\_x2.....uuuuGacccaguagauccg..... 1  
Gi3\_28233734\_x2.....ugguuuucacccaguCgauccg..... 1  
Gi3\_28148990\_x2.....gguuuucUcccaguagauccg..... 1  
Gi3\_27984986\_x2.....agauccggguucAauucc..... 1  
Gi5\_8784747\_x2.....cggGgugguauaacggcuagc..... 1  
Gi2\_10865959\_x2.....Accggugugguauaacggcu..... 1  
Gi2\_10940713\_x2.....ccggugugguauaGcggc..... 1  
Gi1\_4146289\_x2.....gCucgauucccggaucg..... 1  
Gi1\_4097663\_x2.....uuuucacccaguagaCccg..... 1  
Gi1\_4094081\_x2.....guucgauUccggcaucgga..... 1  
Gi5\_8731495\_x2.....uggGuuucacccaguagau..... 1  
Gi2\_10955765\_x2.....guucgauucccggaucAga..... 1  
Gi1\_4138441\_x2.....ccggugugguauaacGcuagc..... 1  
G1a\_5938774\_x2.....guuuCcacccaguagauccg..... 1  
Gi5\_8722545\_x2.....gguucgauucccggaucggagA..... 1  
Gi5\_8753409\_x2.....gguuuucacccaAuagauccg..... 1  
Gi2\_10886913\_x2.....uuuucacccaguaAaucc..... 1  
Gi3\_28239860\_x2.....gauccggguucgaCuccc..... 1  
Gi5\_8749465\_x2.....gguucgaCucccggaucggagc..... 1  
Gi5\_8761967\_x2.....cgguguggNauaacggcu..... 1  
Gi2\_10925327\_x2.....uuuucacccaguagauAg..... 1  
Gi3\_28041750\_x2.....ucUggugugguauaacggcuagcaugacu..... 1  
Gi3\_28149410\_x2.....gguuAucacccaguagau..... 1  
Gi3\_28005234\_x2.....guuuucacccagAagauccg..... 1  
Gi5\_8722463\_x2.....cgguguggNauaacggcuagcaugacu..... 1  
Gi5\_8731797\_x2.....gCuucgauucccggaucgg..... 1  
Gi3\_28078060\_x2.....uccgguguUguauaacggc..... 1  
Gi5\_8732521\_x2.....uccggguucgGuucccggc..... 1  
Gi3\_28252934\_x2.....uccgguguCguauaacggcua..... 1  
Gi5\_8746063\_x2.....ugguuuucacccaguagauAcgg..... 1  
Gi2\_10872925\_x2.....uccggugugguauaacggcGagca..... 1  
Gi5\_8786959\_x2.....Uguccggugugguauaacggcua..... 1  
Gi3\_28010498\_x2.....cugguCuucacccaguagauccg..... 1  
Gi5\_8769033\_x2.....gguccggugugguauCacgg..... 1  
Gi1\_4100873\_x2.....guucgauucccggaCcgagc..... 1  
Gi2\_10900561\_x2.....uccgguguggCauaacggcuag..... 1  
Gi3\_28175410\_x2.....ggGgugguauaacggcua..... 1  
Gi5\_8823555\_x2.....uccggAgugguauaacgg..... 1  
Gi1\_4092213\_x2.....guucgauucccggaucAga..... 1  
Gi2\_10986413\_x2.....guucUauucccggaucg..... 1

Gi3\_28146798\_x2.....ccgguguggCauaacggcuagc.....1  
G1a\_5963552\_x2.....guuuuaccccCguagauccg.....1  
Gi1\_4096225\_x2.....guucgauucccggaucggG.....1  
Gi2\_10948985\_x2.....uuuucacccaguagauccGg.....1  
Gi2\_10849895\_x2.....agaucggNuucgauucc.....1  
Gi1\_4108951\_x2.....uccggugugguauaacggcGa.....1  
Gi1\_4112117\_x2.....cUggugugguauaacggcuagcau.....1  
Gi2\_10901797\_x2.....uuuucacccaguagaCccg.....1  
G1a\_5964376\_x2.....uUcggugugguauaacggcua.....1  
Gi2\_10923993\_x2.....Nccggugugguauaacggcuagc.....1  
Gi5\_8765773\_x2.....ggCucgauucccggauc.....1  
Gi3\_28035642\_x2.....guucgauucccggcCucgga.....1  
Gi2\_10846981\_x2.....ucgauucccggaCcgga.....1  
Gi3\_28055154\_x2.....uccggugugguauaaGggcuagca.....1  
Gi5\_8802383\_x2.....guucgauucccggaAcgg.....1  
Gi5\_8770077\_x2.....uccggugugguauaacggcuagGa.....1  
Gi3\_28174380\_x2.....ucgauucccggaCcgga.....1  
Gi2\_10975383\_x2.....uccggugugguauaCcggcua.....1  
G1a\_5947658\_x2.....uGuuaccccaguagauccg.....1  
Gi2\_10951297\_x2.....ggugugguauaacggcuaAc.....1  
Gi5\_8735353\_x2.....uccggugugguauaacggc.....1  
Gi2\_10889431\_x2.....Aguucgauucccggaucggagc.....1  
G1a\_5903088\_x2.....uucgGuucccggaucggagc.....1  
Gi1\_4106411\_x2.....uccggugugguauaacggcuaCc.....1  
Gi3\_28071772\_x2.....gguuUgauucccggauc.....1  
Gi3\_28213706\_x2.....gguucgauucccggaUgga.....1  
Gi3\_28171890\_x2.....uuuucacccaguagaCccgg.....1  
Gi2\_10860633\_x2.....uuucGcccaguagauccg.....1  
Gi1\_4100605\_x2.....gguuuuaccccaguagauccAgg.....1  
Gi2\_10923587\_x2.....uuuucacccaguagaCcc.....1  
Gi2\_10847869\_x2.....Ucggugugguauaacggcuagc.....1  
Gi1\_4093903\_x2.....guuuuaccccagGagauccg.....1  
Gi2\_10930635\_x2.....ccggugugguGuaacggcuagc.....1  
Gi5\_8814411\_x2.....gguucgauucccgAcaucg.....1  
Gi3\_28041880\_x2.....uuuucaUccaguagauccg.....1  
Gi3\_28000366\_x2.....ccggugugguauaCcggcuaagc.....1  
Gi5\_8815075\_x2.....uccggugugguGuaacggcuagcaugacu.....1  
Gi2\_10918135\_x2.....gguucgauucccggcGucgg.....1  
G1a\_5882706\_x2.....uccggugugguauaacggcuCgca.....1  
Gi1\_4100783\_x2.....uuuucaccNaguagauccgg.....1  
Gi2\_10854843\_x2.....guucgauuUccggcaucggag.....1  
Gi3\_28125364\_x2.....gAuuuuaccccaguagauccgg.....1  
Gi5\_8779127\_x2.....uccggugAgguauaacggcuag.....1  
Gi5\_8793441\_x2.....guCcgauucccggaucg.....1  
Gi1\_4112593\_x2.....ccggugugguauaacggcCa.....1  
Gi2\_10897557\_x2.....uGcgauucccggaucgga.....1  
Gi3\_27988720\_x2.....ccggugugAuauaacggcuagc.....1

Gi1\_4103785\_x2.....uccggugugguauaCcgg..... 1  
Gi2\_10950039\_x2.....uccggugugguauaacggcGa..... 1  
Gi5\_8750369\_x2.....gAuucgauucccggaucgg..... 1  
G1a\_5966880\_x2.....cGgguuuucacccaguagauc..... 1  
Gi1\_4158139\_x2.....guuuucacccaguCgaucgg..... 1  
Gi2\_10831559\_x2.....uccggugugguauaacgC..... 1  
Gi3\_28256590\_x2.....uuuucUccaguagaucgg..... 1  
Gi1\_4099447\_x2.....Aguucgauucccggaucgg..... 1  
Gi2\_10875751\_x2.....uccgguguggGauaacggcua..... 1  
Gi3\_28111008\_x2.....gguucgauucccggaucg..... 1  
Gi3\_28197826\_x2.....cGggugugguauaacggcuagca..... 1  
Gi3\_28063864\_x2.....uccggugugguauaacggcuagGau..... 1  
Gi3\_28259960\_x2.....uccggugugguauaacggcuagcaG..... 1  
Gi2\_10849447\_x2.....gguucgauuccUgcaucggagc..... 1  
Gi1\_4106507\_x2.....ucGggugugguauaacggcuag..... 1  
Gi1\_4129903\_x2.....Uccggugugguauaacggcuag..... 1  
Gi1\_4139921\_x2.....guuuucaccAaguagaucgg..... 1  
Gi2\_10850165\_x2.....gUuccggugugguauaacggcuagcauga..... 1  
Gi5\_8771149\_x2.....uccggugugguauaacggcAa..... 1  
Gi3\_27995912\_x2.....cggugugguauaacggcuagc..... 0  
Gi1\_4091425\_x2.....guuuucacUcaguagaucgg..... 1  
Gi1\_4133957\_x2.....gguuuucacccagCagauc..... 1  
Gi1\_4145399\_x2.....uuuCcaccaguagaucgg..... 1  
Gi5\_8780591\_x2.....gguccggugugguauaCcggc..... 1  
Gi3\_28043274\_x2.....uGcggugugguauaacggcuagcaugacu..... 1  
Gi4\_567284\_x2.....uUguuuucacccaguagaucgg..... 1  
Gi2\_10933811\_x2.....gCuucgauucccggauc..... 1  
Gi3\_28039876\_x2.....gugCgguauaacggcuagc..... 1  
Gi3\_28226766\_x2.....uccggugugAuauaacggcuag..... 1  
Gi1\_4136811\_x2.....guucgauucccggaucAgga..... 1  
Gi2\_10860345\_x2.....gguucgCuucccggaucgg..... 1  
Gi3\_28115482\_x2.....cgUguucgauucccggaucgga..... 1  
Gi3\_28023632\_x2.....uccggGgugguauaacggc..... 1  
G1a\_5929054\_x2.....uuAucacccaguagaucgg..... 1  
Gi3\_28099100\_x2.....ggAucgauucccggaucggag..... 1  
Gi5\_8742037\_x2.....uccggugAgguauaacggcuagcau..... 1  
Gi1\_4110723\_x2.....uccggugugguauaacggAua..... 1  
Gi2\_10951559\_x2.....Cuuucacccaguagaucgg..... 1  
Gi5\_8796297\_x2.....gguuuUacccaguagaucgg..... 1  
Gi2\_10938189\_x2.....ccggGgugguauaacggcuagc..... 1  
Gi1\_4148699\_x2.....uccggugugguauaGggcuagca..... 1  
Gi2\_10986843\_x2.....guuuucacNcaguagaucgg..... 1  
Gi5\_8777611\_x2.....ggCuuucacccaguagauc..... 1  
Gi2\_10954663\_x2.....uccggugugguauUacggcuagca..... 1  
Gi5\_8725781\_x2.....cccaguagaucggguucAau..... 1  
Gi1\_4153637\_x2.....guuuucacUcaguagaucgg..... 1  
G1a\_5977728\_x2.....uccggugugguauaGcggcuag..... 1

Gi3\_28134716\_x2.....guagauccAgguucgauu..... 1  
 Gi5\_8732889\_x2.....ccggugugguauaCcggcua..... 1  
 Gi2\_10890747\_x2.....gguucgauucccggcgauAgg..... 1  
 Gi3\_28146690\_x2.....cgguugugguauaacggcCa..... 1  
 Gi3\_28130172\_x2.....uguuuuuaccUaguagaucgg..... 1  
 Gi3\_28211472\_x2.....ccggugugguauaacAgcua..... 1  
 Gi1\_4108181\_x2.....uccggugugguauaacggcuUgca..... 1  
 Gi5\_8760573\_x2.....guuuucaUccaguagaucgg..... 1  
 Gi1\_4108935\_x2.....guuuucacccaguagaucggA..... 1  
 Gi3\_27984828\_x2.....guuuucaccccGugauc..... 1  
 Gi2\_10930323\_x2.....gguucgauuccGggcauc..... 1  
 Gi1\_4133555\_x2.....uccggugugguauaaUggc..... 1  
 Gi3\_28174660\_x2.....uccgguguUguauaacgg..... 1  
 Gi1\_4124855\_x2.....uggGuuuacccaguagaucgg..... 1  
 Gi5\_8727887\_x2.....uuuaccccNguagaucgg..... 1  
 Gi3\_28154036\_x2.....ucNggugugguauaacggcua..... 1  
 Gi2\_10913593\_x2.....agaucggguCcgauucc..... 1  
 Gl1\_5969786\_x2.....uccggugugguauaacggcuGg..... 1  
 Gi3\_28104068\_x2.....uccggugugguauaacgAcu..... 1  
 Gi1\_4134543\_x2.....guucgauuccUcggcaucgg..... 1  
 Gi3\_28125242\_x2.....gguucgauuAccggcaucg..... 1  
 Gi3\_28248346\_x2.....guuuGcaccaguagaucgg..... 1  
 Gi2\_10865055\_x2.....gguucgaCuccggcaucggagc..... 1  
 Gi1\_4104247\_x2.....guuuucacccaguagaAccg..... 1  
 Gl1\_5919644\_x2.....uccggugugguauaacggcuUgc..... 1  
 Gi1\_4128351\_x2.....uccggugugguauGacggcuagca..... 1  
 Gi2\_10916401\_x2.....ucAggugugguauaacggcuag..... 1  
 Gi2\_10855403\_x2.....guucgauuNccggcaucggagc..... 1  
 Gi3\_28014772\_x2.....Gcggugugguauaacggcuagca..... 1  
 Gi1\_4090701\_x2.....ccggugugguauaacggcCagca..... 1  
 Gi2\_10963291\_x2.....uccAgugugguauaacggcu..... 1  
 Gi5\_8719627\_x2.....gguucgauucccgUaucggag..... 1  
 Gi2\_10976249\_x2.....uccNgugugguauaacggcuagc..... 1  
 Gi3\_28244092\_x2.....ggugGgguauaacggcua..... 1  
 Gi3\_28259416\_x2.....gugugguauaacggcuagcU..... 1  
 Gi1\_4128427\_x2.....ggugGgguauaacggcuagc..... 1  
 Gi5\_8815767\_x2.....ccggGgugguauaacggcuag..... 1  
 Gl1\_5927430\_x2.....Uguucgauucccggaucggga..... 1  
 Gi3\_28106714\_x2.....guuuucacccaguagGucc..... 1  
 Gi3\_28152040\_x2.....gguucAauucccggaucgg..... 1  
 Gi3\_28233898\_x2.....uccggugugguauaacgAcuagca..... 1  
 Gi3\_28244390\_x2.....ucgauucccggaucggagcCc..... 1  
 Gi1\_4137705\_x2.....gguuuucaAccaguagaucgg..... 1  
 Gi3\_28220854\_x2.....Uggugugguauaacggcua..... 1  
 Gl1\_5931642\_x2.....Cguuuucacccaguagaucgg..... 1  
 Gi2\_10937405\_x2.....ccggugugguauaGcggcua..... 1  
 Gi5\_8820787\_x2.....gguucgauucccgGucggag..... 1

Gi2\_10922731\_x2.....gguucgauucccggaUaucgga..... 1  
 Gi3\_28207572\_x2.....Nuuuuuacccaguagauc..... 1  
 Gi1\_4157969\_x2.....uccggugugguauaacUgcuagc..... 1  
 Gi3\_28014012\_x2.....uccggugugguauaacggGuagca..... 1  
 Gi2\_10888709\_x2.....uuuucaccUaguagaucc..... 1  
 Gi5\_8754843\_x2.....agUuccggguucgauucc..... 1  
 Gi1\_4127073\_x2.....ucAggugugguauaacggcua..... 1  
 Gi1\_4314486\_x1.....uuuucacccCguagauccgg..... 1  
 Gi3\_28987790\_x1.....gguuuuAaccaguagauc..... 1  
 Gi1\_4318461\_x1.....cggGgugguauaacggcuagca..... 1  
 Gi3\_28510294\_x1.....gguucgauucccggaU..... 1  
 Gi3\_28350067\_x1.....uccggugugguauaacggcGagcau..... 1  
 G1a\_6245388\_x1.....Aguucgauucccggaucgga..... 1  
 Gi2\_11099225\_x1.....uuuucacccaguagauUcg..... 1  
 Gi5\_9081566\_x1.....gguuuuacaccAaguagauccgg..... 1  
 Gi1\_4373347\_x1.....ggNuuucacccaguagauccgg..... 1  
 Gi5\_8932366\_x1.....ccggCgugguauaacggcua..... 1  
 Gi5\_9104184\_x1.....ugguuuucaUccaguagauccg..... 1  
 Gi1\_4161974\_x1.....guAcgauucccggaucgga..... 1  
 Gi5\_9056987\_x1.....Ucggugugguauaacggcuagc..... 1  
 Gi5\_9079393\_x1.....uccggugAgguauaacgg..... 1  
 Gi1\_4222050\_x1.....guucgauucccggaucgAa..... 1  
 Gi1\_4364094\_x1.....ccggugugguauaacggcuaCcau..... 1  
 G1a\_6144092\_x1.....uggGuuucacccaguagauccgg..... 1  
 Gi3\_28597453\_x1.....cugguuCucacccaguagauc..... 1  
 Gi5\_9005229\_x1.....uccggugugguauaacggcuagcau..... 1  
 Gi3\_28696393\_x1.....guuuucUcccaguagauccg..... 1  
 Gi5\_9004497\_x1.....uccggugCgguauaacggcuagcaugac..... 1  
 G1a\_5989669\_x1.....guucgauucccggaUgga..... 1  
 Gi3\_28633427\_x1.....ccggugugguGuaacggcuag..... 1  
 Gi1\_4327430\_x1.....uucacccaguagaCccgg..... 1  
 Gi3\_28306236\_x1.....guAcgauucccggaucggagc..... 1  
 Gi1\_4163700\_x1.....gguuuucacccaguagauGcg..... 1  
 Gi4\_572354\_x1.....gguuuucacccaguagaCccgg..... 1  
 Gi3\_28346112\_x1.....uuucacccaguagGuccgg..... 1  
 Gi3\_28891813\_x1.....ccggugugguauaacggc..... 1  
 Gi5\_8941087\_x1.....uccggugugguUuaacggcua..... 1  
 Gi5\_9057533\_x1.....uccUgugugguauaacggcuagca..... 1  
 Gi3\_28360187\_x1.....gguuuucacccaguagaC..... 1  
 Gi2\_11119008\_x1.....Aguuuucacccaguagaucc..... 1  
 Gi5\_8981891\_x1.....uccggugGgguauaacggc..... 1  
 Gi1\_4361387\_x1.....gguuuucacAcaguagauccgg..... 1  
 Gi3\_28653640\_x1.....cccggcaucggGgcucuuu..... 1  
 Gi5\_8922038\_x1.....uccggAgugguauaacggcu..... 1  
 Gi2\_11055440\_x1.....ggugugguuaCaacggcuagc..... 1  
 Gi5\_9053796\_x1.....uccgguguAguauaacggcu..... 1  
 Gi5\_9051589\_x1.....ugguuuucacccagCagauc..... 1

Gi5\_8940794\_x1.....ugguuuucacccaguagauU..... 1  
 Gi5\_9129010\_x1.....uccggugugguauaacggAuag..... 1  
 Gi5\_9087738\_x1.....cgguaugguauaacggcu..... 1  
 Gi1\_4276687\_x1.....guguUguauaacggcuag..... 1  
 Gi2\_11222680\_x1.....gCuucacccaguagauccgg..... 1  
 Gi3\_28926412\_x1.....cccaguagUuccggguucgauucc..... 1  
 Gi1\_4350833\_x1.....gAucgauucccggaucgga..... 1  
 Gi1\_4383231\_x1.....uucgauucccggaucggaU..... 1  
 Gi5\_8860295\_x1.....ggugugguauaacggGuagc..... 1  
 Gi5\_8831201\_x1.....gguuAgauucccggaucgga..... 1  
 Gi1\_4352769\_x1.....ugguuuucacccaguagaCc..... 1  
 Gi3\_28855717\_x1.....uucgUuucccggaucgga..... 1  
 Gi2\_11336000\_x1.....ccggugugguauCacggcuag..... 1  
 Gi2\_11309497\_x1.....guuuucacccaguUgaucgg..... 1  
 Gi2\_11111216\_x1.....ccggugugguauaacggcuagG..... 1  
 Gi3\_28743551\_x1.....cggugugguauaacggcuG..... 1  
 Gi3\_28729115\_x1.....gguuAgauucccggauc..... 1  
 Gi3\_28688725\_x1.....cccgUcaucggagcucuuu..... 1  
 Gi5\_8945046\_x1.....ugguuuucacccUguagaucg..... 1  
 Gl1\_6324348\_x1.....uccggAgugguauaacggcuagcau..... 1  
 Gi3\_28915666\_x1.....aucggguucgauucAcgga..... 1  
 Gi3\_28766492\_x1.....gCuucacccaguagau..... 1  
 Gi3\_28698460\_x1.....gguucgauucccggaucggagA..... 1  
 Gi4\_573117\_x1.....uccggAgugguauaacggcuagc..... 1  
 Gi5\_8842526\_x1.....Uccaguagaucggguucgau..... 1  
 Gi3\_28546259\_x1.....uuucacccaguagaucAg..... 1  
 Gi3\_28576444\_x1.....uccgguguCguauaacggc..... 1  
 Gi5\_8981329\_x1.....guAcgauucccggaucggagc..... 1  
 Gi2\_11119773\_x1.....gguucgauucccggaucaggagc..... 1  
 Gi1\_4233066\_x1.....ccggugugguauaacUgcuagc..... 1  
 Gi3\_28495262\_x1.....guuUgauucccggaucg..... 1  
 Gi3\_28713245\_x1.....ccggugugguauaacCggcuagca..... 1  
 Gi3\_28423236\_x1.....gGagauccggguucgauuccggc..... 1  
 Gi3\_28757020\_x1.....ucgauucccgUaucggagc..... 1  
 Gi3\_28290224\_x1.....cgUuucccggaucggag..... 1  
 Gl1\_6174514\_x1.....uccgguguggCauaacgg..... 1  
 Gi1\_4307508\_x1.....ucNggugugguauaacggcuagca..... 1  
 Gi1\_4217079\_x1.....guagaucggguucgauGccc..... 1  
 Gi3\_28617979\_x1.....gguucgauucccgAcaucgg..... 1  
 Gi3\_28944783\_x1.....guucgauNccggcaucg..... 1  
 Gi3\_28818950\_x1.....cggugugCauaacggcu..... 1  
 Gl1\_6259964\_x1.....cccaguUgaucggguucgauucc..... 1  
 Gi2\_11157737\_x1.....guuuucacccGguagaucgg..... 1  
 Gl1\_6221803\_x1.....guucgauucccggaucg..... 0  
 Gi3\_28393806\_x1.....guuuucacccaguagaucAg..... 1  
 Gi1\_4212236\_x1.....uccggugugguauaacUgcuagca..... 1  
 Gl1\_6090993\_x1.....guucgauNccggcaucggagc..... 1



Gi5\_8934083\_x1.....uccggugugguauaacggGuag..... 1  
Gi2\_11224829\_x1.....ggGucgauucccggaucgg..... 1  
Gi3\_28965327\_x1.....Ugauucccggaucggagcucu..... 1  
Gi3\_28900020\_x1.....ccggugugguauaaUggcua..... 1  
Gi2\_11166958\_x1.....ccaNuagauccggguucgauucc..... 1  
Gi5\_8862134\_x1.....uuCcaccaguagaucgg..... 1  
Gi5\_8918525\_x1.....uccggugugguauaacggGua..... 1  
Gi5\_8980963\_x1.....gguucgauucccggcCucgg..... 1  
G1a\_6281501\_x1.....Cuucgauucccggaucggagc..... 1  
Gi2\_11023598\_x1.....ugguuuuAaccaguagaucgg..... 1  
G1a\_6186882\_x1.....uAcggugugguauaacggcuagc..... 1  
Gi2\_11036097\_x1.....ugguuuuacccaguagCuc..... 1  
Gi1\_4216320\_x1.....gguuuucacccagAagaucgg..... 1  
Gi5\_9117084\_x1.....gguucgauucccggaucaggagc..... 1  
G1a\_6118847\_x1.....Ggguuuuacccaguagauc..... 1  
G1a\_6246598\_x1.....Auucgauucccggaucggga..... 1  
Gi1\_4220280\_x1.....ugguuuuacccaguaAaucgg..... 1  
Gi3\_28647329\_x1.....uccggugugguauaacggG..... 1  
Gi2\_11157373\_x1.....agaucggggCucgauucc..... 1  
Gi3\_28652125\_x1.....Cgguucgauucccggaucgg..... 1  
G1a\_28706004\_x1.....gguccgguNugguauaacggcua..... 1  
G1a\_6035439\_x1.....uccggugGguauaacggcuag..... 1  
Gi3\_28625063\_x1.....ccggugugguauaGcggcuagca..... 1  
Gi5\_8846447\_x1.....uggAuuucacccaguagaucgg..... 1  
G1a\_6250363\_x1.....uccggugugguauaacggUua..... 1  
Gi3\_28800450\_x1.....uccggugugguauaacggcuaUcaugacu..... 1  
Gi3\_28737128\_x1.....gUuuuuacccaguagaucggguucgauu..... 1  
Gi2\_11223712\_x1.....uuNucaccaguagaucgg..... 1  
Gi1\_4363263\_x1.....ccggugugguauaacggcuagcU..... 1  
Gi1\_4222962\_x1.....Guccggguucgauucccggaucggag..... 1  
Gi1\_4230905\_x1.....ccggugugguauaacggUuagc..... 1  
Gi5\_8963879\_x1.....Agguuuucacccaguagauc..... 1  
Gi3\_28429253\_x1.....gguucgauucccggcCucgg..... 1  
Gi2\_11084525\_x1.....ggugugguauaacAgcuagc..... 1  
G1a\_6160137\_x1.....gguucgauucccggaucggagcCcuu..... 1  
Gi3\_28348294\_x1.....ggCucgauucccggaucgg..... 1  
Gi5\_8895246\_x1.....Uuagaucggguucgauucccggaucggag..... 1  
Gi4\_571752\_x1.....uccggCgugguauaacggcuagca..... 1  
Gi1\_4183178\_x1.....uuuucacccaguagCuccg..... 1  
Gi2\_11295042\_x1.....gguuuucaNccaguagauc..... 1  
Gi2\_11004083\_x1.....uccggugAgguauaacggcuag..... 1  
Gi5\_8986447\_x1.....cgauucccggaucggCgcucu..... 1  
Gi2\_11173183\_x1.....guucgauucccggaucgCa..... 1  
Gi1\_4338188\_x1.....ggugugguauaacggcuagcaC..... 1  
Gi2\_11359035\_x1.....ggugGguauaacggcuagc..... 1  
Gi3\_28980890\_x1.....agGuccggguucgauucc..... 1  
Gi3\_28283115\_x1.....aAaucggguucgauucc..... 1

Gi5\_9026942\_x1.....guucgauucccgCcaucgg..... 1  
 Gi2\_11172987\_x1.....gguCcgauucccggaucggagc..... 1  
 Gi3\_28305484\_x1.....gguucgauucccggaucgA..... 1  
 Gi3\_28369938\_x1.....gaucUggguucgauucc..... 1  
 Gi5\_8885386\_x1.....guucgauuccUgcaucgg..... 1  
 Gi5\_8933808\_x1.....guucgauAcccggaucgga..... 1  
 Gi3\_28909596\_x1.....gguucgauucccggaucAgg..... 1  
 Gi2\_11245346\_x1.....uuucaccaguagaCccg..... 1  
 Gi1\_4326041\_x1.....cGggugugguauaacggcuag..... 1  
 Gi3\_28437212\_x1.....cgauucccggaCcgagcucu..... 1  
 Gi2\_11316142\_x1.....gguuuacaccaguagCuc..... 1  
 Gi2\_11311011\_x1.....guucgauucccggcCucggagc..... 1  
 Gi5\_8974769\_x1.....uuuacaccAaguagaucgg..... 1  
 Gl1\_6140831\_x1.....uGucaccaguagaucgg..... 1  
 Gi3\_28952379\_x1.....ugguuuacaccaguCgauc..... 1  
 Gl1\_6035441\_x1.....ggCucgauucccggaucgg..... 1  
 Gi2\_11387896\_x1.....guucgGuucccggaucggagc..... 1  
 Gi5\_9062701\_x1.....cCgugugguauaacggcuagca..... 1  
 Gi5\_9137678\_x1.....uccggguucgauucccgga..... 0  
 Gi2\_11128943\_x1.....ggCccgugugguauaacggcuagc..... 1  
 Gi3\_28504192\_x1.....gAuucgauucccggaucgga..... 1  
 Gi2\_11040471\_x1.....ugugAuuaaacggcuagc..... 1  
 Gi3\_28954038\_x1.....guuAgauucccggaucgg..... 1  
 Gi3\_28821034\_x1.....uccgUugugguauaacggcuagcaugacu..... 1  
 Gi5\_8927669\_x1.....gCuucgauucccggaucggagc..... 1  
 Gi1\_4382679\_x1.....ugguuuacaccaguagGuccg..... 1  
 Gi3\_28324700\_x1.....uuuuAaccaguagaucgg..... 1  
 Gi5\_8925465\_x1.....uccggugugguauaacggcuagcaAga..... 1  
 Gl1\_6334093\_x1.....ugguuuucUccaguagaucgg..... 1  
 Gi5\_8834831\_x1.....gguucAauucccggaucgga..... 1  
 Gi5\_8841507\_x1.....guuuucCcccaguagaucgg..... 1  
 Gl1\_6001769\_x1.....gguucgaCucccggaucg..... 1  
 Gl1\_6070133\_x1.....uccggugugguauaacggcuagcC..... 1  
 Gl1\_6055141\_x1.....guucgauNccgggaucgga..... 1  
 Gi5\_9050403\_x1.....ugguGuuacaccaguagaucgg..... 1  
 Gi3\_28850251\_x1.....guucgauucccggaAcgg..... 1  
 Gi5\_9122569\_x1.....ccgguguAguuaaacggcuag..... 1  
 Gi5\_8937840\_x1.....guuuucaAccaguagaucgg..... 1  
 Gi1\_4364850\_x1.....ccgAugugguauaacggcuagca..... 1  
 Gi2\_11033636\_x1.....Gucgauucccggaucgg..... 1  
 Gi2\_11083908\_x1.....ggNuuacaccaguagaucgg..... 1  
 Gi1\_4230540\_x1.....uccggugugguauaacggcuUg..... 1  
 Gi3\_28557038\_x1.....cgauucccggaucggagcucCu..... 1  
 Gi5\_8854383\_x1.....guucgauuAccgggaucg..... 1  
 Gi3\_28749907\_x1.....ugCgguuaaacggcuagc..... 1  
 Gi5\_9085233\_x1.....gguucAauucccggaucg..... 1  
 Gi1\_4332740\_x1.....uccggugugAuuaaacggcuagca..... 1

Gi1a\_6006210\_x1.....gUuucgauucccggaucgga..... 1  
Gi3\_28831620\_x1.....gguucgauucccggaucgga..... 1  
Gi1\_4224313\_x1.....gguuuuacaccaguagauccggU..... 1  
Gi3\_28665093\_x1.....uuuucaccaguUgaucgga..... 1  
Gi3\_28651004\_x1.....uccggugugguauaUcggcuagcaugacu..... 1  
Gi3\_28635474\_x1.....gguucgauuccAggcaucgga..... 1  
Gi2\_11169415\_x1.....uccgAugugguauaacggcuagcaugacu..... 1  
Gi2\_11067963\_x1.....ccggAgugguauaacggc..... 1  
Gi5\_9089332\_x1.....gguuucAccaguagauccg..... 1  
Gi1\_4357967\_x1.....uuuucaccaAuagauccgg..... 1  
Gi3\_28497196\_x1.....uccggugugguauaacggcuagcauUacu..... 1  
Gi3\_28946686\_x1.....gguuuUaccaguagauccg..... 1  
Gi1\_4221365\_x1.....aucGggguucgauucccggaucgga..... 1  
Gi3\_28850589\_x1.....gguuuuacaccaguagUuccg..... 1  
Gi2\_11038420\_x1.....ugguuuucUcccaguagauccg..... 1  
Gi5\_9121790\_x1.....cgUuucccggaucggaucgga..... 1  
Gi3\_28604271\_x1.....gAugugguauaacggcu..... 1  
Gi3\_28891531\_x1.....ggCuuuacaccaguagauccggguuc..... 1  
Gi2\_11112177\_x1.....uuuUaccaguagauccgg..... 1  
Gi5\_8991804\_x1.....gguuuuUaccaguagauccgg..... 1  
Gi1\_4330060\_x1.....accaguagauccggguucgauAcc..... 1  
Gi3\_28960098\_x1.....gguuuuacaccGaguagauccg..... 1  
Gi3\_28276223\_x1.....uccggugCgguauaacggcuagc..... 1  
Gi4\_594993\_x1.....uucgUuucccggaucgga..... 1  
Gi2\_11286423\_x1.....cgguuguguaCaacggcuagc..... 1  
Gi5\_8896189\_x1.....ugguuuuacaccUguagauccg..... 1  
Gi2\_11221186\_x1.....ccggguucgauucccggaucgga..... 1  
Gi2\_11361890\_x1.....cccCguagauccggguucgauucc..... 1  
Gi1a\_6257842\_x1.....gguccggugugguauaacggUuagc..... 1  
Gi2\_11397404\_x1.....uccggugugguauaaAggcuagcau..... 1  
Gi3\_28632886\_x1.....uccggugugguGuaacggcuagc..... 1  
Gi4\_587999\_x1.....uccggugugguGaacgg..... 1  
Gi1\_4256420\_x1.....gguucgauucccggaucggaucgga..... 1  
Gi4\_609702\_x1.....gguucgauucccggaucggaucgga..... 1  
Gi3\_28812461\_x1.....Ucggugugguauaacggcuagcau..... 1  
Gi1\_4335404\_x1.....gguNuucaccaguagauccg..... 1  
Gi2\_11061577\_x1.....uuuuUaccaguagauccgg..... 1  
Gi1\_4218155\_x1.....uccggugugguCaacggcuagcaugacu..... 1  
Gi5\_9019628\_x1.....Ucggugugguauaacggc..... 1  
Gi3\_28703877\_x1.....ggAucgauucccggaucgga..... 1  
Gi2\_11260118\_x1.....gaGccggguucgauucc..... 1  
Gi3\_28897993\_x1.....gguucgauucccggaucggaucgga..... 1  
Gi1\_4305550\_x1.....uuuucaccaguagUuccg..... 1  
Gi3\_28907515\_x1.....gguucgauucccggaucggaucgga..... 1  
Gi2\_11293805\_x1.....uuuucaccaguagUuccg..... 1  
Gi2\_11357695\_x1.....ggCucgauucccggaucg..... 1  
Gi3\_28643116\_x1.....ugguuuucCccaguagauccg..... 1

Gi3\_28289883\_x1.....gauucccggaucggagcuA..... 1  
 Gi1\_4270497\_x1.....Agugugguauaacggcuag..... 1  
 Gi2\_11223487\_x1.....cugguuuucacccaguagauc..... 0  
 Gi3\_28811805\_x1.....gguccggugugguauCacggcua..... 1  
 Gi3\_28973092\_x1.....accCGguagauccggguucgauucc..... 1  
 Gi5\_8869329\_x1.....uUcggugugguauaacggcu..... 1  
 G1a\_6278687\_x1.....gguuuucacccaguagauAcgg..... 1  
 G1a\_6256905\_x1.....uGcggugugguauaacggcuagca..... 1  
 Gi2\_11117225\_x1.....uucGcccaguagauccgg..... 1  
 Gi2\_11173907\_x1.....ugguuuucacccaguagauccgggG..... 1  
 Gi1\_4339569\_x1.....ccggugugguGuaaacggcuagcau..... 1  
 Gi1\_4164320\_x1.....guGcgauucccggaucggga..... 1  
 Gi2\_11179057\_x1.....uucgauucccggaucAga..... 1  
 Gi1\_4250010\_x1.....gUuucgauucccggauc..... 1  
 Gi3\_28540507\_x1.....uccgguAugguauaacggcu..... 1  
 Gi1\_4187265\_x1.....Accggugugguauaacggcu..... 1  
 Gi5\_8972784\_x1.....guuuuUaccaguagaucc..... 1  
 Gi3\_28737299\_x1.....uuucacccaguagaCccgg..... 1  
 Gi1\_4279235\_x1.....gCugugguauaacggcuagc..... 1  
 Gi5\_8922575\_x1.....ugguuuucacccCguagauc..... 1  
 Gi5\_9073746\_x1.....gguucgauuccUggcaucggagc..... 1  
 Gi3\_28653574\_x1.....gguGuucacccaguagauc..... 1  
 Gi3\_28360835\_x1.....uccggugugguGaaacggc..... 1  
 Gi2\_11222953\_x1.....Cguucgauucccggauc..... 1  
 G1a\_6073842\_x1.....uccggugCgguauaacggcuagcau..... 1  
 Gi2\_11169933\_x1.....uuUgauucccggaucgg..... 1  
 Gi5\_8984191\_x1.....uccgguguUguauaacggc..... 1  
 Gi5\_9017461\_x1.....Gccggugugguauaacggcuagcauga..... 1  
 Gi3\_28622539\_x1.....guucgaAucccggaucggga..... 1  
 Gi5\_8941937\_x1.....ugugguauaacggcuagA..... 1  
 Gi1\_4275087\_x1.....gguuuuGaccaguagauccgg..... 1  
 Gi5\_9005117\_x1.....uccgguguggGauaacggcuagca..... 1  
 Gi5\_8871122\_x1.....ucAggugugguauaacggc..... 1  
 Gi3\_28575765\_x1.....gguucgauucccggaucgg..... 1  
 G1a\_6093142\_x1.....cccaguagauccgggCucgauucc..... 1  
 Gi3\_28919046\_x1.....cgauuccAgcaucggagc..... 1  
 Gi2\_11337504\_x1.....gguucgauucccggaucgg..... 1  
 Gi2\_11301708\_x1.....gguUgauucccggaucggagc..... 1  
 Gi2\_11341299\_x1.....gguucgauucccggaucggagc..... 1  
 Gi5\_8869260\_x1.....uuuucacccaguagauCgg..... 1  
 Gi2\_11392815\_x1.....gguuuucacccaguagCuccgg..... 1  
 Gi1\_4385620\_x1.....Uguucgauucccggaucggga..... 1  
 Gi5\_8995657\_x1.....uccggugugguauaacggcuaC..... 1  
 Gi2\_11283903\_x1.....gugugguauaacggcuagA..... 1  
 Gi5\_9024206\_x1.....ggugugguauaacggcuaA..... 1  
 Gi3\_28937931\_x1.....ugguCuucacccaguagauc..... 1  
 Gi3\_28619427\_x1.....uggGuuucacccaguagauc..... 1

Gi2\_11294474\_x1.....uucgauucccggaCcgg..... 1  
 Gi1\_4285519\_x1.....ccggugugguauGacggcuagca..... 1  
 Gi5\_8875879\_x1.....uguuuuacaccagCagaucc..... 1  
 Gi1\_4365045\_x1.....uguuuuacaccaguagauU..... 1  
 Gi3\_28938701\_x1.....gAgugguauaacggcuagc..... 1  
 Gi1\_4328556\_x1.....gguccggugugguauaCcgguagcaugacu..... 1  
 Gi1\_4333349\_x1.....cggugugguauaacggcuag..... 0  
 Gi5\_9103734\_x1.....gguAcgauucccggaucggagc..... 1  
 Gi3\_28631067\_x1.....cgauucccgAcaucggagc..... 1  
 Gi2\_11345746\_x1.....uuucaccaguagauAcg..... 1  
 Gi3\_28968165\_x1.....uucgauucccggaucggG..... 1  
 G1a\_6225255\_x1.....gguuuucUcccaguagauccg..... 1  
 Gi5\_8979611\_x1.....uguuuuacacUcaguagauccg..... 1  
 Gi5\_8968629\_x1.....uguuuuCcaccaguagaucc..... 1  
 Gi1\_4385716\_x1.....uucaccaguagauccGA..... 1  
 Gi3\_28473833\_x1.....guuuucaccaguagauccCg..... 1  
 Gi5\_9127155\_x1.....uccggugugguauaacUgcuagca..... 1  
 Gi2\_11292907\_x1.....gguuuucaccAaguagauccgg..... 1  
 Gi1\_4233729\_x1.....guucgauucccggaucggag..... 0  
 Gi3\_28692269\_x1.....uuucaccaguagauccA..... 1  
 Gi2\_11383412\_x1.....cGaguagauccggguucgauucccgga..... 1  
 G1a\_6299723\_x1.....gguuuucaccaguagaGccg..... 1  
 Gi2\_11114046\_x1.....Nuuucaccaguagauccg..... 1  
 Gi3\_28859224\_x1.....ggGccggugugguauaacggcu..... 1  
 G1a\_6344976\_x1.....uccggguucgauCcccgga..... 1  
 Gi3\_28293381\_x1.....uccggugugguauaacCgcuagcaugacu..... 1  
 G1a\_6306956\_x1.....Cccggguucgauucccgga..... 1  
 Gi2\_11399923\_x1.....uguuuuacaccaguagaucc..... 0  
 Gi1\_4163127\_x1.....uccggugugGauaacggc..... 1  
 G1a\_6228291\_x1.....uccggugugguCuaacggcuagc..... 1  
 Gi5\_9117887\_x1.....uuuGcaccaguagauccgg..... 1  
 Gi3\_28429512\_x1.....uccggugugguuaGaacggcu..... 1  
 Gi2\_11403736\_x1.....ucgauucccggaucggagcCc..... 1  
 Gi3\_28544044\_x1.....uAcggugugguauaacggcuagcau..... 1  
 Gi3\_28557252\_x1.....guagGuccggguucgauu..... 1  
 Gi3\_28865568\_x1.....ggugugguGuaacggcu..... 1  
 Gi3\_28621071\_x1.....guucgauucccggaucgC..... 1  
 G1a\_6072044\_x1.....Cccggugugguauaacggcuagcau..... 1  
 Gi5\_9044161\_x1.....guAcgauucccggaucggga..... 1  
 Gi3\_28827588\_x1.....gguuuucaccaguagUu..... 1  
 Gi2\_11302592\_x1.....ggAucgauucccggaucggag..... 1  
 G1a\_6120475\_x1.....uuuCcaccaguagauccg..... 1  
 Gi5\_8833559\_x1.....ccggugugguUuaacggcu..... 1  
 Gi5\_8879562\_x1.....Agugugguauaacggcuagcau..... 1  
 Gi5\_8883012\_x1.....uccgUugugguauaacggcuagcaugacu..... 1  
 Gi3\_28888618\_x1.....ucgauucccggaCcgagc..... 1  
 Gi3\_28271607\_x1.....ccggugugguauaacggcuC..... 1

G1a\_6108806\_x1.....cugguuuucacccaguaCaucc..... 1  
 G1a\_6211236\_x1.....uuuuGacccaguagauccg..... 1  
 Gi3\_28742515\_x1.....ccggugugguUuaacggcuag..... 1  
 Gi1\_4290488\_x1.....cggugugguauGacggcuagca..... 1  
 Gi5\_8967610\_x1.....cggugugguauaacggcCag..... 1  
 Gi2\_11001836\_x1.....ucAggugugguauaacggcuagcau..... 1  
 Gi5\_8991823\_x1.....uccggugugguauaacgCcuag..... 1  
 Gi2\_11021237\_x1.....ccggCgugguauaacggcu..... 1  
 Gi1\_4313075\_x1.....guucgauucccggaCcg..... 1  
 Gi3\_28329207\_x1.....uucgauGccggcaucgga..... 1  
 Gi3\_28474098\_x1.....Accggcaucggagcucuuu..... 1  
 Gi2\_11014686\_x1.....uuucacccaguagauGcg..... 1  
 Gi5\_8984337\_x1.....uAcggugugguauaacggc..... 1  
 Gi3\_28824712\_x1.....guUugguauaacggcuagca..... 1  
 Gi2\_11015672\_x1.....gguuuucacUcaguagau..... 1  
 Gi3\_28759020\_x1.....uccggugugguauaacggcuagcaugacC..... 1  
 Gi4\_603771\_x1.....uccggugugguauaacggcuAca..... 1  
 Gi5\_8879892\_x1.....guuuucacccagGagauccgg..... 1  
 Gi2\_11217965\_x1.....Cucgauucccggaucgga..... 1  
 Gi2\_11262769\_x1.....uccggugugguauaacUgcuagcau..... 1  
 Gi5\_8984138\_x1.....gguucgauNcccggaucggagc..... 1  
 Gi5\_8983942\_x1.....guucgauucccggaucA..... 1  
 Gi5\_8863239\_x1.....guucgauucccgAcaucg..... 1  
 Gi5\_8998234\_x1.....guuUgauucccggaucgga..... 1  
 Gi5\_9040274\_x1.....uAguuuucacccaguagauc..... 1  
 Gi2\_11118402\_x1.....guuuucacccaguGgauc..... 1  
 Gi3\_28358337\_x1.....guucgauucccgCcaucgga..... 1  
 Gi5\_9012303\_x1.....guuuucacccGguagauc..... 1  
 Gi1\_4176426\_x1.....uuucGcccaguagaucgg..... 1  
 G1a\_6325760\_x1.....uUcggugugguauaacgg..... 1  
 Gi3\_28782440\_x1.....Uccaguagaucggguucgauucc..... 1  
 Gi1\_4289354\_x1.....uccggugugAuauaacgg..... 1  
 Gi3\_28331977\_x1.....aguagaucggguucgauucG..... 1  
 Gi1\_4191839\_x1.....ugguuuCcaccaguagaucgg..... 1  
 Gi3\_28917289\_x1.....ucUauucccggaucgga..... 1  
 Gi1\_4242676\_x1.....ugugguauaacggcuagc..... 0  
 Gi3\_28262498\_x1.....gguucgauucccggaucgUag..... 1  
 Gi1\_4198159\_x1.....gguucgauucAcggcaucgg..... 1  
 Gi5\_8974623\_x1.....guucgauucccggaucUgagc..... 1  
 Gi5\_9021508\_x1.....ccggugugAuauaacggcuag..... 1  
 Gi5\_8837854\_x1.....ccggugCgguauaacggcu..... 1  
 Gi5\_9138541\_x1.....guucgauucccgCcaucg..... 1  
 Gi5\_8976504\_x1.....guucUauucccggaucg..... 1  
 Gi4\_601563\_x1.....uccggGugguauaacggcuagca..... 1  
 Gi5\_9130232\_x1.....ggugugguGuaacggcuagcau..... 1  
 Gi3\_28923713\_x1.....accaguagaucggAuucgauucc..... 1  
 G1a\_6048904\_x1.....ucAggugugguauaacggcuagcau..... 1

Gi3\_28744456\_x1.....auUcggguucgauucccggaucgga..... 1  
 Gi3\_28899226\_x1.....cgGuucccggaucggagc..... 1  
 Gi3\_28554277\_x1.....ugguuuucacccaguagauccAg..... 1  
 Gi2\_11337157\_x1.....ucAggugugguauaacgg..... 1  
 Gi4\_580751\_x1.....uccgUugugguauaacggcuagc..... 1  
 Gi1\_4314633\_x1.....uccggugugguauaaGggcua..... 1  
 Gi3\_28621090\_x1.....ccggugugguauGacggcuagc..... 1  
 Gi1\_4352874\_x1.....ggGucgauucccggaucg..... 1  
 G1a\_6067265\_x1.....uccAgugugguauaacggcuagcau..... 1  
 Gi2\_11158065\_x1.....Cguucgauucccggaucg..... 1  
 Gi3\_28771493\_x1.....cagCagauccggguucgauucc..... 1  
 Gi3\_28914689\_x1.....ccggGgugguauaacggc..... 1  
 Gi2\_11328997\_x1.....uggCuuucacccaguagauccg..... 1  
 Gi1\_4340735\_x1.....ucGggugugguauaacggcua..... 1  
 Gi3\_28763960\_x1.....gguuuuucacccaguagauU..... 1  
 Gi1\_4165240\_x1.....uccggugugguauUacggcua..... 1  
 Gi5\_8838626\_x1.....ugugguauaacAgcuagc..... 1  
 Gi2\_11011465\_x1.....ugguuuucacccaguagauAg..... 1  
 Gi3\_28774144\_x1.....ccggAgugguauaacggcua..... 1  
 Gi2\_11351397\_x1.....uccggugugUuauaacggcuagcau..... 1  
 G1a\_6058158\_x1.....ucGggugugguauaacggcuag..... 1  
 Gi3\_28856162\_x1.....uuuucacAcaguagauccgg..... 1  
 Gi2\_11057120\_x1.....uccggugugguauaacgU..... 1  
 Gi5\_9010382\_x1.....uccgguAugguauaacggcu..... 1  
 Gi5\_8904286\_x1.....ugguuuucacccaguagauAcg..... 1  
 Gi2\_11092337\_x1.....gguucgauucccggaucCg..... 1  
 Gi3\_28496584\_x1.....ccgguguggCauaacggc..... 1  
 Gi2\_11041874\_x1.....uuuucacccUguagauccgg..... 1  
 Gi1\_4186023\_x1.....uucacccaguaAauccgg..... 1  
 Gi5\_8958488\_x1.....guuuuucacccaguagauUcgg..... 1  
 Gi5\_9005318\_x1.....guucgauuAccggcaucggagc..... 1  
 Gi5\_9056250\_x1.....gGuuccggguucgauucccggauc..... 1  
 Gi3\_28881961\_x1.....cgauucccggaucggagcGcu..... 1  
 Gi1\_4269431\_x1.....Auuucacccaguagauccg..... 1  
 Gi4\_611640\_x1.....uccggugugguauaacgAcuagc..... 1  
 Gi2\_11063507\_x1.....uucgauucccggaucggC..... 1  
 Gi5\_8963961\_x1.....ccggugugguauaaUggcuag..... 1  
 Gi2\_11297838\_x1.....ccaguagauccgggCucgauucc..... 1  
 Gi2\_11135421\_x1.....gguuuuucaccUaguagauc..... 1  
 Gi2\_11125562\_x1.....gguuuuucacccaAuagauccgg..... 1  
 G1a\_5985854\_x1.....uccggugAgguauaacgg..... 1  
 Gi2\_11391943\_x1.....ugugguauaacggcuagG..... 1  
 Gi2\_11286599\_x1.....uccggugugguuaGaacggcua..... 1  
 Gi5\_8954916\_x1.....auccgggCucgauucccgga..... 1  
 Gi2\_11372612\_x1.....gauccggguucgauucc..... 0  
 Gi5\_9025787\_x1.....guucgauucccgAcaucgg..... 1  
 G1a\_6283447\_x1.....uccggguucgauUccggca..... 1

Gi5\_9109234\_x1.....uccgguAugguauaacggcuagca..... 1  
 Gi2\_11011644\_x1.....uccggugugUuauaacggcua..... 1  
 Gi3\_28397236\_x1.....uccggugugguauaacgCcuagcau..... 1  
 Gl1a\_6208536\_x1.....gguucgauNcccggcaucgg..... 1  
 Gi1\_4292692\_x1.....gguCcgauucccggaucgg..... 1  
 Gi2\_11305668\_x1.....uccgguUugguauaacggc..... 1  
 Gi2\_11118112\_x1.....uAcggugugguauaacggcuagca..... 1  
 Gi5\_8881333\_x1.....uccUgugugguauaacggcua..... 1  
 Gi2\_11326678\_x1.....ccggugugguauaacggUuagc..... 1  
 Gi5\_9109518\_x1.....ugguuuucacccagCagauccgg..... 1  
 Gi1\_4213335\_x1.....gguuuucacAcaguagauc..... 1  
 Gl1a\_6027597\_x1.....gguucgauucccgGauc..... 1  
 Gi2\_11317867\_x1.....uuuucacccaguagUuccg..... 1  
 Gi2\_11007402\_x1.....gCuucgauucccggaucgga..... 1  
 Gi2\_11053755\_x1.....Auuucacccaguagauc..... 1  
 Gi1\_4296220\_x1.....ggugugguauaacggcuaUc..... 1  
 Gl1a\_6008783\_x1.....guucgaCucccggaucgg..... 1  
 Gi3\_28321774\_x1.....gguccggCgugguauaacggcua..... 1  
 Gi1\_4383242\_x1.....guucgauucccggaucggagcGc..... 1  
 Gi4\_586216\_x1.....guucgaCucccggaucgg..... 1  
 Gi2\_11105022\_x1.....gguuuucacUcaguagaucggguuc..... 1  
 Gi5\_8861140\_x1.....uccggguucgauucccCgc..... 1  
 Gi4\_581278\_x1.....uccggugugguauaacggcuagAau..... 1  
 Gi3\_28923331\_x1.....uccgCugugguauaacggcuag..... 1  
 Gi3\_28316080\_x1.....guucgauCcccggcaucggag..... 1  
 Gi3\_28330736\_x1.....gguuuucGccaguagau..... 1  
 Gi2\_11040513\_x1.....ccgggCgguauaacggcua..... 1  
 Gi5\_9053676\_x1.....Aauccggguucgauucccgga..... 1  
 Gi3\_28534528\_x1.....Auagaucggguucgauu..... 1  
 Gi1\_4259833\_x1.....ggugugguauaacggcuagA..... 1  
 Gi2\_11128985\_x1.....gguccggugugguauaacggc..... 0  
 Gi1\_4186097\_x1.....agaucggguucgaCuccc..... 1  
 Gi3\_28642259\_x1.....ccaguagaucggguucgauuccc..... 0  
 Gi1\_4382899\_x1.....guucgauucccggcUucgg..... 1  
 Gi3\_28560615\_x1.....ccggGgugguauaacggcua..... 1  
 Gi2\_11180653\_x1.....gguuuuUaccaguagauc..... 1  
 Gi3\_28663099\_x1.....Nccggugugguauaacggcuagca..... 1  
 Gi2\_11097063\_x1.....uccggugugguauaacggcuagcaugacA..... 1  
 Gl1a\_6041897\_x1.....uuCucacccaguagaucgg..... 1  
 Gi2\_11306289\_x1.....ccggugugguauaacgCcuagc..... 1  
 Gi1\_4361867\_x1.....uccggguNgauucccgga..... 1  
 Gi1\_4340587\_x1.....ucNggugugguauaacggcuag..... 1  
 Gi5\_8959347\_x1.....gguucUauucccggaucgga..... 1  
 Gi3\_28893113\_x1.....uuuucacccaguagUuccgg..... 1  
 Gi1\_4332359\_x1.....guucgGuucccggaucg..... 1  
 Gi5\_9087880\_x1.....uuuucacccaguagaucgg..... 1  
 Gi1\_4320001\_x1.....uccgAugugguauaacggcuagcau..... 1



Gi2\_11047409\_x1.....gguucgauGccggcauc..... 1  
Gi2\_11229424\_x1.....guucgCuuccggcaucgg..... 1  
Gi1\_4253724\_x1.....ccUgugugguauaacggcuagc..... 1  
Gi2\_11214837\_x1.....uccggugugguauaacUgcuagc..... 1  
Gi1\_4233921\_x1.....uccggGgugguauaacggcuagca..... 1  
Gi1\_4242852\_x1.....Agguuuucacccaguagaucgg..... 1  
Gi1\_4225909\_x1.....ucGggugugguauaacggc..... 1  
Gi3\_28765582\_x1.....ggNuuucacccaguagaucgg..... 1  
Gi3\_28809723\_x1.....gugugguauaacggcAagca..... 1  
Gi2\_11250133\_x1.....ccggugCggauaacggcuag..... 1  
Gi5\_9043785\_x1.....ugguuuucacccaguagCucc..... 1  
Gi2\_11071323\_x1.....guucgauucccgUcaucgg..... 1  
Gi5\_9005733\_x1.....Aggugugguauaacggcu..... 1  
Gi3\_28470487\_x1.....gguNuuucacccaguagauc..... 1  
G1a\_6254387\_x1.....gGucgauucccggaucgga..... 1  
Gi2\_11288484\_x1.....uccggugugguauaaAggc..... 1  
Gi5\_8950441\_x1.....gAuuucacccaguagaucgg..... 1  
Gi3\_28835363\_x1.....ugguuuucacccagAgaucgg..... 1  
Gi3\_28713958\_x1.....uccAgugugguauaacggcuagcaugacu..... 1  
Gi5\_8970593\_x1.....gguucgCuuccggcaucg..... 1  
Gi5\_8892905\_x1.....agaucggguucgaCucc..... 1  
Gi5\_9069626\_x1.....gguucgauuccggcaGcgga..... 1  
Gi5\_9044367\_x1.....uuucacccaguagaucUg..... 1  
Gi1\_4364045\_x1.....gguucgauuccAggcaucgg..... 1  
Gi2\_11379928\_x1.....gguuuucaccUaguagauc..... 1  
Gi5\_8970750\_x1.....gguucgauuccAggcaucg..... 1  
Gi3\_28366871\_x1.....gguucgauuccggAaucggagc..... 1  
Gi3\_28754390\_x1.....uuCacccaguagaucgg..... 1  
Gi5\_9065137\_x1.....gCuccggugugguauaacgg..... 1  
Gi5\_9020530\_x1.....gguucgauuccggcaucAga..... 1  
Gi2\_11125776\_x1.....gguuuucacccGguagauc..... 1  
G1a\_6102916\_x1.....gguuuucacccaguaUaucgg..... 1  
Gi1\_4371148\_x1.....cccaguagaucggguucgCuucc..... 1  
Gi1\_4282446\_x1.....uccggugugguauaacCgcuag..... 1  
Gi5\_9115756\_x1.....Cgugugguauaacggcuagcau..... 1  
G1a\_6152548\_x1.....guuuucacccaguaAaucgg..... 1  
Gi5\_8966619\_x1.....uccggugugguauaacggcuagUauga..... 1  
Gi1\_4308641\_x1.....ugguuuucacccaguagaCccg..... 1  
Gi3\_28403114\_x1.....ccggugugguUuaacggcu..... 1  
Gi3\_28914915\_x1.....cgguucgauuccggcaCcgga..... 1  
G1a\_6179284\_x1.....ugguCuucacccaguagaucgg..... 1  
Gi1\_4306091\_x1.....ccggugGgguauaacggcu..... 1  
Gi2\_11084389\_x1.....gguccgguAugguauaacggcuagcau..... 1  
Gi1\_4304675\_x1.....uuucacccaguagauccA..... 1  
Gi3\_28887583\_x1.....gugugguauaacggcuAc..... 1  
Gi3\_28672321\_x1.....gguucgauuccggcaucAgagc..... 1  
G1a\_6084214\_x1.....gguucgauuccggcGucggag..... 1

Gi5\_9017324\_x1.....caccaAuagauccggguucga..... 1  
Gi1\_4232503\_x1.....cugguuucacccaguagauAcgg..... 1  
Gi5\_8944348\_x1.....guucgauucUcggcaucggagc..... 1  
Gi2\_11143457\_x1.....gguccgguguggCauaacggcuagc..... 1  
Gi1\_4349490\_x1.....guuuucUcccaguagauccgg..... 1  
Gi3\_28411040\_x1.....uuAcacccaguagauccg..... 1  
Gi5\_8836864\_x1.....ugguuucacccaguagauUcg..... 1  
Gi2\_11340621\_x1.....uccUgugugguauaacggcuagcau..... 1  
Gi1\_4205480\_x1.....gguuuucacccaguCgauccgg..... 1  
Gi3\_28702734\_x1.....uucgauuccggcaucggagcCc..... 1  
Gi5\_8918700\_x1.....uccggugugguaGaacggcua..... 1  
G1a\_6187311\_x1.....cugguuucGcccaguagaucc..... 1  
Gi2\_11386236\_x1.....agaNccggguucgauucc..... 1  
Gi2\_11282212\_x1.....ccggCgugguauaacggcuagcau..... 1  
Gi1\_4259818\_x1.....ccggugugNuuaaacggcuag..... 1  
Gi5\_8917933\_x1.....ucUggugugguauaacggcu..... 1  
Gi5\_8970907\_x1.....uccggugugguauUacggcuag..... 1  
Gi2\_11279498\_x1.....uccgguguggGauaacggcuagca..... 1  
Gi5\_9002537\_x1.....guucgauGcccggcaucgg..... 1  
G1a\_6188979\_x1.....uccggugugguauaacggUuagcau..... 1  
Gi3\_28492257\_x1.....aucggguucgauUccggcaucggag..... 1  
Gi3\_28335875\_x1.....Agguucgauuccggcaucg..... 1  
Gi2\_11050997\_x1.....uccNgugugguauaacggcuagcau..... 1  
Gi1\_4318421\_x1.....guucgauuccAgcaucgga..... 1  
Gi1\_4273816\_x1.....guagaucggguCcgauucc..... 1  
Gi3\_28734683\_x1.....cgauuccggcCucggagc..... 1  
Gi3\_28651297\_x1.....ccggugugguauaacggU..... 1  
Gi4\_572220\_x1.....uccgguguNguuaaacggcuagca..... 1  
Gi4\_613195\_x1.....gguuuucacccaguagauccA..... 1  
Gi3\_28820781\_x1.....cUggugugguauaacggcuagc..... 1  
Gi3\_28965677\_x1.....uuuucacccaguagauccAg..... 1  
Gi5\_8936530\_x1.....uAcggugugguauaacggcuagca..... 1  
Gi5\_9118019\_x1.....uccggguucgauucccgA..... 1  
Gi4\_611435\_x1.....gguuuuUaccaguagauccg..... 1  
Gi5\_8976323\_x1.....uuuucacccaguagUuccgg..... 1  
Gi5\_9001559\_x1.....uuuucUccaguagauccgg..... 1  
Gi2\_11365271\_x1.....ugguAuucacccaguagauccgggu..... 1  
Gi5\_9103469\_x1.....aCaucggguucgauuccc..... 1  
Gi5\_8872168\_x1.....cggugugguGuaaacggcuagca..... 1  
Gi5\_8961583\_x1.....ugUuuuucacccaguagauc..... 1  
Gi1\_4207214\_x1.....uccgUguucgauucccgga..... 1  
Gi5\_9133811\_x1.....gguuuucacccaguaAauc..... 1  
Gi2\_11366141\_x1.....uccggugugguauaacggcAag..... 1  
Gi3\_28709106\_x1.....uccggugCgguaaacggcuagcaugacu..... 1  
Gi3\_28731850\_x1.....cggguucgNuuccggcaucgga..... 1  
Gi1\_4209417\_x1.....uccggugugguauaacgUC..... 1  
Gi3\_28869921\_x1.....gugugguGuaaacggcuagc..... 1

Gi5\_8883045\_x1.....cgAguucgauucccggauc..... 1  
 Gi1\_4323995\_x1.....cgguucgauucccggaucggaU..... 1  
 Gi5\_9013469\_x1.....uuuucacccaguagaucUg..... 1  
 Gi2\_11065923\_x1.....uccggugGgguauaacgg..... 1  
 Gi1\_4252280\_x1.....ccgNugugguauaacggcuagca..... 1  
 Gi5\_9052532\_x1.....ugguuuucacccaguagaucgC..... 1  
 Gi2\_11197161\_x1.....ggCucgauucccggaucgg..... 1  
 Gi5\_8895519\_x1.....gguucgGuucccggaucgg..... 1  
 Gi5\_9102431\_x1.....guucgauuccGggcaucgg..... 1  
 Gi2\_11288028\_x1.....gguucgauucccggaucgUagc..... 1  
 Gi1\_4249809\_x1.....ccgCugugguauaacggcuagca..... 1  
 Gi1\_4310796\_x1.....cggCgugguauaacggcu..... 1  
 Gi3\_28488509\_x1.....gguucgauuccUgcaucg..... 1  
 Gi1\_4241101\_x1.....ucAggugugguauaacggcuagcau..... 1  
 Gi2\_11002607\_x1.....gguucgauucccggaucUggagc..... 1  
 Gi2\_11086336\_x1.....uAcggugugguauaacggc..... 1  
 Gi2\_11267915\_x1.....gguucgauCcccggcaucgg..... 1  
 Gi1\_4304893\_x1.....ggAgugguauaacggcuagc..... 1  
 Gi3\_28321589\_x1.....gguucgauucccggaucggagcCc..... 1  
 Gi2\_11192861\_x1.....uccggugugguauaacggcuUcau..... 1  
 Gi1a\_6312913\_x1.....uccNgugugguauaacggcuagc..... 1  
 Gi1\_4203827\_x1.....gCuuuucacccaguagaucgg..... 1  
 Gi2\_11097889\_x1.....gguuuucacccaguagaCc..... 1  
 Gi2\_11200283\_x1.....Gccggugugguauaacggcuagcauga..... 1  
 Gi5\_8925513\_x1.....ccggugugguCuaacggcu..... 1  
 Gi5\_8978723\_x1.....uccggugugguauaacggcuUca..... 1  
 Gi3\_28657041\_x1.....cUggugugguauaacggcu..... 1  
 Gi5\_8891947\_x1.....guucgauucccggaucUga..... 1  
 Gi3\_28792180\_x1.....gguuuucacccaguaCaucgg..... 1  
 Gi2\_11056700\_x1.....guuuucacccaguagaGccg..... 1  
 Gi1\_4323415\_x1.....ggAuuucacccaguagauc..... 1  
 Gi1\_4348384\_x1.....ugguuuucacccaguGgaucgg..... 1  
 Gi5\_9042672\_x1.....ugguuuucacAcaguagauc..... 1  
 Gi5\_8959209\_x1.....cggugugguauaacggcu..... 1  
 Gi5\_8833339\_x1.....gguucgauAccggcaucggagc..... 1  
 Gi3\_28640626\_x1.....ccggugugguauaacggcCagca..... 1  
 Gi5\_8992544\_x1.....uuucacccGguagaucgg..... 1  
 Gi1a\_6076513\_x1.....gguNuucacccaguagaucgg..... 1  
 Gi1\_4204822\_x1.....gguucgauucccggaucgA..... 1  
 Gi3\_28670767\_x1.....ugUuuuucacccaguagaucgg..... 1  
 Gi3\_28778991\_x1.....gguuuucCcccaguagauc..... 1  
 Gi3\_28858473\_x1.....Cuccggugugguauaacggcuagc..... 1  
 Gi1\_4184687\_x1.....uccggAgugguauaacggcu..... 1  
 Gi3\_28457799\_x1.....aUaucggguucgauucccggaucggagc..... 1  
 Gi2\_11097503\_x1.....gguucgauUccggcaucgga..... 1  
 Gi5\_9000872\_x1.....guucgCuucccggaucgga..... 1  
 Gi5\_9056544\_x1.....gCuccggugugguauaacggcuagc..... 1

Gi3\_28635218\_x1.....guagauccggguucgauuAcc..... 1  
Gi3\_28875158\_x1.....gguuuuAaccaguagauccgg..... 1  
Gi1\_4181179\_x1.....guuuucacccUguagauccgg..... 1  
Gi5\_9102109\_x1.....uccggugugguauaCcg..... 1  
Gi3\_28505627\_x1.....cgguuucacccaguagauccggcaucgga..... 1  
Gi2\_11284834\_x1.....gguuuucaccAaguagaucc..... 1  
Gi3\_28432140\_x1.....cugguuuucacUcaguagaucc..... 1  
Gi1\_4221236\_x1.....guuuucacccaguagauccggguucgU..... 1  
Gi5\_9078929\_x1.....ggugugguauGacggcuagcau..... 1  
Gi2\_11291285\_x1.....guucCauucccggaucg..... 1  
G1a\_6166108\_x1.....uccggugugguauaaccggG..... 1  
Gi5\_9095131\_x1.....gguucAauucccggauc..... 1  
Gi1\_4365862\_x1.....caguagauccggguucgGuu..... 1  
Gi5\_9090750\_x1.....gAuucgauucccggaucgga..... 1  
Gi2\_11156313\_x1.....uuCucacccaguagaucc..... 1  
Gi3\_28508229\_x1.....ggCuucacccaguagau..... 1  
Gi1\_4296972\_x1.....ggugugguauaaccggcuaC..... 1  
Gi3\_28624117\_x1.....Cugugguauaaccggcuagca..... 1  
Gi1\_4182366\_x1.....gguuuCcaccaguagauccgg..... 1  
Gi3\_28574258\_x1.....ugGgguauaaccggcuagc..... 1  
Gi3\_28557615\_x1.....gguucgauuccUggcaucggag..... 1  
Gi3\_28329694\_x1.....cgauuccNgcaucggag..... 1  
Gi3\_28889104\_x1.....gguuuucacccaguaAauccgg..... 1  
Gi1\_4269554\_x1.....caguagauccggguCcgauu..... 1  
Gi3\_28306233\_x1.....uccgguguggAauaaccggcuagcau..... 1  
Gi3\_28673314\_x1.....uuuucacccaguagaAccg..... 1  
G1a\_6264014\_x1.....gguuuucacccaguagaCccg..... 1  
Gi2\_11125373\_x1.....cccaguagauccggguucgGuucc..... 1  
Gi2\_11227504\_x1.....guucgauuccUgcaucgg..... 1  
Gi1\_4290509\_x1.....ugAuuuucacccaguagauccg..... 1  
Gi5\_8865468\_x1.....uccggugugguauaaccggGua..... 1  
Gi5\_9090645\_x1.....uccggugugguauaaccggGua..... 1  
Gi4\_597044\_x1.....ucUggugugguauaaccggcuagca..... 1  
G1a\_6112988\_x1.....uccUgugugguauaaccggcuagc..... 1  
Gi1\_4331832\_x1.....uccgCugugguauaaccggcuagcau..... 1  
Gi2\_11277631\_x1.....gggGucgauucccggaucggagc..... 1  
Gi2\_11382857\_x1.....gguccggugugguauaaccggcCagcauga..... 1  
Gi3\_28579668\_x1.....uccggugugguauaaccggGua..... 1  
Gi5\_9062377\_x1.....gguucgauucccggcCucggag..... 1  
Gi5\_9116487\_x1.....cggAgugguauaaccggcua..... 1  
Gi5\_9024646\_x1.....guucgauucccggaAcg..... 1  
Gi3\_28788591\_x1.....aguagauccNgguucgauucc..... 1  
G1a\_6068603\_x1.....guuuAcacccaguagauccg..... 1  
Gi5\_8926953\_x1.....uuuucaccUaguagauccg..... 1  
Gi5\_8986958\_x1.....uccggugugguauaaccggcGag..... 1  
Gi5\_8878815\_x1.....gguucgauucccgguUaucgg..... 1  
Gi2\_11144131\_x1.....uuuucacccaguagauccgU..... 1

Gi3\_28913237\_x1.....Gucgauucccggaucgga..... 1  
Gi5\_8962275\_x1.....guucgauucccggaucggaCc..... 1  
Gi1\_4248327\_x1.....uccgguguAguauaacggcu..... 1  
Gi2\_11297768\_x1.....ggugugguauaacggcuagA..... 1  
Gi2\_11390795\_x1.....ggugugguauaacggcuagG..... 1  
Gi1\_4199478\_x1.....gguguggCauaacggcuagcau..... 1  
Gi5\_8958436\_x1.....gguccGugugguauaacggc..... 1  
G1a\_6161644\_x1.....gguucgauNcccggcaucg..... 1  
Gi3\_28330977\_x1.....ccggugugguCaacggcuagc..... 1  
Gi3\_28417832\_x1.....gguucgauucccggaucU..... 1  
Gi2\_11404288\_x1.....guuuuGaccaguagauccg..... 1  
Gi3\_28579548\_x1.....auccggguuAgauuccggca..... 1  
Gi3\_28625673\_x1.....ccggugugguauCacggcua..... 1  
Gi3\_28904086\_x1.....gguccgguguggCauaacggcuagca..... 1  
Gi2\_11326879\_x1.....gguucgauuccUggcaucgga..... 1  
Gi5\_8947011\_x1.....uuGcaccaguagauccg..... 1  
Gi2\_11205202\_x1.....gguCcgauucccggaucgga..... 1  
Gi1\_4270914\_x1.....uccgguguUguauaacggcuagca..... 1  
G1a\_6316242\_x1.....guuuuAaccaguagauccg..... 1  
Gi5\_8861760\_x1.....ugugguauaacgUcuagc..... 1  
Gi3\_28622760\_x1.....gguccggugugguauaacggcuGgc..... 1  
Gi5\_9055525\_x1.....gAucgauucccggaucgga..... 1  
G1a\_6309233\_x1.....uuuucaccaguagaCccg..... 1  
G1a\_6028217\_x1.....uccAgugugguauaacggcuagca..... 1  
Gi3\_28808908\_x1.....ugguuuucaccaguagauA..... 1  
Gi5\_9048537\_x1.....gguucgauucccggaucggGgcucu..... 1  
Gi3\_28932128\_x1.....gguucgauuccUgcauc..... 1  
G1a\_6072064\_x1.....uccggugugguauaacggU..... 1  
Gi5\_9112730\_x1.....guuuucaccaguagauccG..... 1  
Gi2\_11154365\_x1.....ucGggugugguauaacgg..... 1  
Gi5\_8899033\_x1.....uccggguuNgauuccggc..... 1  
Gi2\_11066750\_x1.....uuucaccaguagauccA..... 1  
Gi5\_9132273\_x1.....uuucaccUaguagauccg..... 1  
Gi3\_28554166\_x1.....aGccggguucgauucccggaucgga..... 1  
Gi5\_8891845\_x1.....uccggugugguauUcggcua..... 1  
Gi1\_4247480\_x1.....uccggugugguauaaAggcuagcau..... 1  
Gi5\_9024849\_x1.....ggugugguGuaacggcuagca..... 1  
Gi1\_4314928\_x1.....ggugugguauaacggcuaAcau..... 1  
Gi5\_8972587\_x1.....ccgguaugguauaacggcua..... 1  
Gi1\_4222883\_x1.....uuuucaccaguaCauccgg..... 1  
Gi3\_28405687\_x1.....ccUgguucgauucccggaucgga..... 1  
Gi5\_9078118\_x1.....cggugugguauCacggcua..... 1  
Gi3\_28495607\_x1.....uccggugugguauaacggcuagcaugCcu..... 1  
Gi3\_28538696\_x1.....gauccggguucgauAccc..... 1  
Gi3\_28676970\_x1.....guucgauucccCgcaucg..... 1  
Gi2\_11135736\_x1.....uuucaccUguagauccg..... 1  
Gi3\_28846097\_x1.....Augguuuucaccaguagauccg..... 1

Gi1\_4378606\_x1.....guagaucCGuucgauucc..... 1  
 Gi3\_28377109\_x1.....uccggugugguauUacggcuag..... 1  
 G1a\_6079848\_x1.....uguuuuuaccAaguagaucgg..... 1  
 Gi3\_28917943\_x1.....ccggugugguauaacCGcuag..... 1  
 Gi3\_28403025\_x1.....guuAucaccaguagaucgg..... 1  
 Gi4\_585557\_x1.....guucgauuccGggcaucg..... 1  
 Gi2\_11245333\_x1.....uguuuuucaUccaguagaucgggu..... 1  
 Gi2\_11231398\_x1.....guucgauuccUgcaucggag..... 1  
 Gi2\_11107684\_x1.....Uggugugguauaacggcua..... 1  
 Gi2\_11139686\_x1.....uccggugugguauUcgg..... 1  
 Gi2\_11377068\_x1.....ccggugugguauaacggcu..... 0  
 Gi5\_8905276\_x1.....ugugguauaacggcAagc..... 1  
 Gi5\_9033798\_x1.....Nguuuuacccaguagaucgg..... 1  
 Gi3\_28958820\_x1.....gguuuuGaccaguagaucgg..... 1  
 Gi5\_9044712\_x1.....gCucgauucccggaucgga..... 1  
 G1a\_6345852\_x1.....cuguuuuuacccCguagauc..... 1  
 Gi2\_11323708\_x1.....ccgguguggAauaacggcua..... 1  
 Gi3\_28765656\_x1.....ccggugugguauaacgAcua..... 1  
 Gi3\_28540844\_x1.....guuuuacccaguagaucGg..... 1  
 Gi5\_9013166\_x1.....Cgauccggguucgauucc..... 1  
 G1a\_5997481\_x1.....uccggugugAuuaaacggc..... 1  
 Gi2\_11248863\_x1.....Auucgauucccggaucg..... 1  
 Gi2\_11283141\_x1.....gugguaCaacggcuagcau..... 1  
 Gi5\_9028543\_x1.....uccggugugguauaacggcCagcaugacu..... 1  
 Gi5\_9084857\_x1.....uGcggguucgauuccggc..... 1  
 Gi2\_11040751\_x1.....uucgauucccggaucgA..... 1  
 Gi3\_28940201\_x1.....ccggCgugguauaacggcuagca..... 1  
 Gi1\_4288361\_x1.....ggugugguauUacggcuag..... 1  
 Gi2\_11393017\_x1.....gguuuuGcccaguagaucgg..... 1  
 Gi2\_11193457\_x1.....ccUgugugguauaacggcuag..... 1  
 Gi1\_4207065\_x1.....guucgauucccggaucAgg..... 1  
 Gi3\_28827616\_x1.....agaucggguAcgauucc..... 1  
 Gi3\_28329186\_x1.....uccgguUugguauaacggcuagcau..... 1  
 Gi5\_8974488\_x1.....uccggugugguauUacggcuagca..... 1  
 Gi4\_568970\_x1.....gguCuucaccaguagaucgg..... 1  
 Gi3\_28581664\_x1.....ccggugCgguauaacggcuag..... 1  
 Gi2\_11293449\_x1.....ccggugugguauCacggcua..... 1  
 Gi3\_28524870\_x1.....cccggcaCggagcucuuu..... 1  
 Gi3\_28875755\_x1.....cuggGuuuacccaguagauc..... 1  
 Gi1\_4246155\_x1.....uccggugugAuuaaacggcu..... 1  
 Gi5\_9013144\_x1.....uccggugugguauaaUggcuagcaugac..... 1  
 G1a\_6169183\_x1.....ugAuuuacccaguagaucgg..... 1  
 Gi5\_8992781\_x1.....gguuuuacccaguagaAccgg..... 1  
 Gi5\_9091933\_x1.....gguucgauucccggaucggaCc..... 1  
 Gi3\_28788250\_x1.....uAguuuuacccaguagaucgg..... 1  
 Gi5\_8856062\_x1.....uuuacccUguagaucgg..... 1  
 Gi3\_28348599\_x1.....cccaguagaucgggAucgauucc..... 1

Gi1\_4168773\_x1.....cggugugguauCacggcuagca..... 1  
Gi5\_8918874\_x1.....uccggugugguauaacggcCagcauga..... 1  
Gi5\_8852317\_x1.....gauccggguucgauucccggcCuc..... 1  
Gi3\_28845642\_x1.....agaucAgggguucgauucc..... 1  
Gi5\_9131896\_x1.....ccggugugguauaacggAuag..... 1  
Gi1\_4287156\_x1.....ccggugugguauUcggcuagc..... 1  
Gi1\_4245238\_x1.....uccggugCgguaaacggcu..... 1  
Gi3\_28339002\_x1.....ccgguguAguauaacggcu..... 1  
Gi5\_9043530\_x1.....cggugugguUuaacggcuagc..... 1  
Gi2\_11180977\_x1.....gguucgauuccUgcaucgg..... 1  
Gi3\_28637452\_x1.....ccggAgugguauaacggcuag..... 1  
Gi5\_9131312\_x1.....ucNggugugguauaacgg..... 1  
Gi2\_11313423\_x1.....ucUggguucgauucccggaucgga..... 1  
Gi5\_9126430\_x1.....uuuucacccaguagauGcgg..... 1  
Gi2\_11349600\_x1.....ucgauucccggaucggGgc..... 1  
Gi3\_28722216\_x1.....Ugauucccggaucggag..... 1  
Gi5\_8839673\_x1.....gguucgauucccgAcaucggagc..... 1  
Gi5\_9040411\_x1.....uuuucacccaCuagauccgg..... 1  
Gi5\_9091799\_x1.....gguucgauucccggaucg..... 1  
Gi3\_28694824\_x1.....gguucgauucccggaucg..... 1  
Gi1\_4356508\_x1.....ucAggugugguauaacgg..... 1  
Gi5\_9108647\_x1.....uccNgugugguauaacggcuagcau..... 1  
Gi2\_11037760\_x1.....guuuucacccaguagauUc..... 1  
G1a\_6119942\_x1.....uccgggCucgauucccgga..... 1  
Gi1\_4282464\_x1.....uccCgugugguauaacggcuagca..... 1  
Gi5\_8885269\_x1.....uccggugGgguauaacggcuagca..... 1  
Gi2\_11139483\_x1.....uccUgugugguauaacgg..... 1  
Gi3\_28660068\_x1.....ugugguauaacgAcuagc..... 1  
Gi5\_8917339\_x1.....gguucgauucccggauc..... 1  
Gi2\_11006787\_x1.....guuuucaUccaguagauccgg..... 1  
Gi2\_11044647\_x1.....guucgauucccggaucggCg..... 1  
Gi5\_8865136\_x1.....ggAgugguauaacggcuagc..... 1  
Gi4\_592923\_x1.....uccgguguNguauaacggcuagc..... 1  
Gi2\_11317402\_x1.....cUggugugguauaacggcuagcau..... 1  
Gi2\_11025112\_x1.....guAcgauucccggaucg..... 1  
G1a\_6229834\_x1.....uccggugugguGuaacgg..... 1  
G1a\_6246977\_x1.....uccggugugguauaacggcuagcG..... 1  
Gi2\_10997558\_x1.....uccggugugguauaacggcuaC..... 1  
Gi3\_28963324\_x1.....gguuuucaNccaguagau..... 1  
Gi3\_28578085\_x1.....cCgguuuucacccaguagau..... 1  
Gi2\_11276529\_x1.....guucgauucccgCcaucggag..... 1  
Gi3\_28561267\_x1.....gguucAauucccggauc..... 1  
Gi2\_11018358\_x1.....uccggugugguauaacgAcuagcaugacug..... 1  
Gi1\_4308442\_x1.....uccgguguNguauaacggcu..... 1  
G1a\_6011296\_x1.....gguucAauucccggaucggga..... 1  
Gi3\_28981979\_x1.....Uguccggugugguauaacggcuagcauga..... 1  
Gi2\_11131620\_x1.....ccaguagauccggguCcgauucc..... 1

Gi3\_28963298\_x1.....cgauucccggcGucggagc..... 1  
Gi5\_9053482\_x1.....guuuucacccaguagauAcg..... 1  
Gi5\_9033047\_x1.....uuuuGacccaguagauccgg..... 1  
Gi3\_28568600\_x1.....guuuucacccaguagauAc..... 1  
Gi3\_28759870\_x1.....agauccggguucgauuccU..... 1  
Gi2\_11268301\_x1.....gCuccggugugguauaacggcuagcau..... 1  
Gi2\_11402619\_x1.....guuuucGcccaguagaucc..... 1  
Gi5\_8836542\_x1.....gGucgauucccggaucggagcucuu..... 1  
Gi5\_9134008\_x1.....uAguuuucacccaguagauac..... 1  
Gi5\_8993026\_x1.....guuuucacccaguagauUc..... 1  
Gi3\_28824280\_x1.....gguuUgauucccggaucggag..... 1  
G1a\_6036913\_x1.....uCGuuuucacccaguagauccg..... 1  
Gi3\_28499201\_x1.....ccggugugguauaacggcuG..... 1  
Gi2\_11202282\_x1.....ggguucgaNuuccggcaucggagc..... 1  
Gi2\_11202205\_x1.....gguuuucaUccaguagauccg..... 1  
Gi3\_28424215\_x1.....ucgNuucccggaucggga..... 1  
Gi3\_28604754\_x1.....ccgggAucgauucccggaucggga..... 1  
Gi3\_28561401\_x1.....cugguuuucacccaguagCuccg..... 1  
G1l\_4386599\_x1.....gguucgauucAcggcaucggga..... 1  
Gi3\_28794031\_x1.....uccggugGgguauaacggcu..... 1  
Gi5\_8899476\_x1.....gguucgauucccggcGucg..... 1  
Gi2\_11330651\_x1.....uccggguucgauucccggcGucgga..... 1  
Gi5\_9124346\_x1.....gaucUggguucgauucccggauc..... 1  
Gi3\_28553670\_x1.....guAcgauucccggaucg..... 1  
G1l\_4373428\_x1.....ggugugguauaacggcCagc..... 1  
Gi5\_8942092\_x1.....gguucgaCucccggaucg..... 1  
Gi5\_9083847\_x1.....gguucgauucccgAcaucgg..... 1  
G1l\_4239222\_x1.....uccggugugguauCacggc..... 1  
Gi5\_9067234\_x1.....auccggguucAauucccgga..... 1  
G1l\_4369001\_x1.....guagauccggguucgauuAcc..... 1  
Gi3\_28421321\_x1.....uccggugugguauCacggcuagcaugacu..... 1  
Gi3\_28413342\_x1.....guuuAcacccaguagauccg..... 1  
Gi3\_28346457\_x1.....gugGgguauaacggcuagc..... 1  
Gi5\_9129708\_x1.....cgUugugguauaacggcuag..... 1  
Gi5\_8878649\_x1.....uccgguguggGauaacggcu..... 1  
Gi3\_28483930\_x1.....cccggUaucggagcucuuu..... 1  
G1l\_4327957\_x1.....uAcggugugguauaacggcuag..... 1  
Gi5\_8964536\_x1.....ugguuuucacccaguCgauccg..... 1  
Gi3\_28261074\_x1.....ccggGgugguauaacggcu..... 1  
Gi5\_9124332\_x1.....Gcggugugguauaacggcuagcau..... 1  
Gi5\_8911119\_x1.....uccggugugguauaacggcuGgcaugacug..... 1  
G1a\_6345994\_x1.....ucGggugugguauaacgg..... 1  
Gi5\_9090132\_x1.....gguucgauGcccggcaucgg..... 1  
Gi2\_11288927\_x1.....uccgguguCguauaacggcu..... 1  
Gi5\_9131202\_x1.....uuucacUcaguagauccg..... 1  
G1a\_6343397\_x1.....gguAuucacccaguagauccg..... 1  
Gi3\_28566362\_x1.....guuuucCcccaguagauccg..... 1



G1a\_6094863\_x1.....gguuGucacccaguagaucgg..... 1  
 Gi3\_28695999\_x1.....ucgauucccAgcaucgga..... 1  
 G1a\_6331094\_x1.....uccggugCgguauaacgg..... 1  
 Gi1\_4240873\_x1.....uccggugAgguauaacggcuagcauga..... 1  
 G1a\_6282241\_x1.....gguuuucacccaguagCuc..... 1  
 Gi1\_4290428\_x1.....guucgauucccggaucCg..... 1  
 Gi1\_4381272\_x1.....ccggugugguauGacggcuagc..... 1  
 Gi3\_28973912\_x1.....cgguguggNauaacggcuagcau..... 1  
 Gi2\_11248871\_x1.....gguucgauucccAgcaucgg..... 1  
 Gi1\_4299884\_x1.....uccggugugguauaaGggc..... 1  
 Gi5\_8867121\_x1.....guuuucacNcaguagauc..... 1  
 Gi2\_11362499\_x1.....uccgguguUguauaacggc..... 1  
 Gi2\_11088923\_x1.....uccgggCucgauucccggaucgga..... 1  
 Gi1\_4268201\_x1.....gguuuucacccaguagaucggA..... 1  
 Gi5\_8870402\_x1.....ggugugguauCacggcuagcau..... 1  
 Gi3\_28851285\_x1.....gugugguauaacggcuAca..... 1  
 Gi5\_8988110\_x1.....ugguuCucacccaguagauc..... 1  
 Gi4\_589863\_x1.....uuuucacccaguagaucgg..... 0  
 Gi5\_8898937\_x1.....guuNgauucccggaucggagc..... 1  
 Gi3\_28390176\_x1.....guucgauucccggaucggG..... 1  
 Gi1\_4297122\_x1.....ccgguAugguauaacggcua..... 1  
 Gi5\_8885570\_x1.....cgauucccggaucggagcuA..... 1  
 Gi2\_11218254\_x1.....ccggugugguauaacggcuagU..... 1  
 Gi5\_9053435\_x1.....uccggugugguauaacggcGagca..... 1  
 Gi3\_28529635\_x1.....gguccggugugguauaCcggcua..... 1  
 Gi2\_11202060\_x1.....uuuucacccaguaAauccg..... 1  
 Gi5\_9024722\_x1.....Auucgauucccggaucgga..... 1  
 Gi3\_28926675\_x1.....ccggugugguauaacggcCa..... 1  
 Gi1\_4314875\_x1.....uuuucacccaguUgaucgg..... 1  
 Gi3\_28369295\_x1.....uuuucacGcaguagaucgg..... 1  
 Gi3\_28613100\_x1.....ugguuuucacccaguUgaucgg..... 1  
 Gi1\_4160108\_x1.....cggugugguCaacggcuagca..... 1  
 Gi3\_28558539\_x1.....gguucgauucccggaucAg..... 1  
 Gi4\_591661\_x1.....gGucgauucccggaucgg..... 1  
 Gi2\_11120441\_x1.....gguucgauucccggaucAgga..... 1  
 Gi5\_9121695\_x1.....ccggugugguGuaacggcuag..... 1  
 Gi1\_4349061\_x1.....gCagaucggguucgauucc..... 1  
 Gi1\_4249775\_x1.....cugguuuucacccaguGgaucgg..... 1  
 Gi3\_28748754\_x1.....gguucgauuccGggcaucgg..... 1  
 Gi3\_28735700\_x1.....gguucgauCcccggaucg..... 1  
 Gi2\_11065283\_x1.....guucgauucccggaucUgag..... 1  
 Gi1\_4315101\_x1.....uccCgugugguauaacggcua..... 1  
 Gi1\_4348714\_x1.....ccggugugguCuaacggcuagca..... 1  
 Gi2\_11396227\_x1.....uuuucacccaguagCucc..... 1  
 Gi5\_8844144\_x1.....ucNggugugguauaacggcuag..... 1  
 Gi3\_28824983\_x1.....Uguuuucacccaguagaucggguucgau..... 1  
 Gi2\_11165190\_x1.....uucacccGguagaucgg..... 1

Gi5\_8832693\_x1.....uccgguguggAuaaacggc..... 1  
 Gi1\_4356364\_x1.....uccggugugguuaaacggcuaUcau..... 1  
 Gi3\_28773930\_x1.....uuucacccGguagauccgg..... 1  
 Gi2\_11299356\_x1.....agauccgAguucgauucc..... 1  
 Gi1\_4204671\_x1.....uuucaccUaguagauccgg..... 1  
 Gl1a\_6014940\_x1.....gugguuaaacggcuagUa..... 1  
 Gi3\_28603179\_x1.....guuuucacccaguagaGccg..... 1  
 Gi5\_9125683\_x1.....uguuuuucaGccaguagaucc..... 1  
 Gi1\_4300611\_x1.....uccCgugugguuaaacggcuagcau..... 1  
 Gi3\_28279992\_x1.....gAuuucacccaguagaucc..... 1  
 Gi3\_28725808\_x1.....gguNcgauucccggaucg..... 1  
 Gi5\_9051881\_x1.....uguuuuucacccaguagaCccgg..... 1  
 Gi5\_8877291\_x1.....gguuuucacccagGagaucc..... 1  
 Gi5\_8924553\_x1.....uccgguguggAuaaacggcuagcau..... 1  
 Gi4\_600740\_x1.....uccgguguNguuaaacggc..... 1  
 Gi2\_11269026\_x1.....uCuucacccaguagauccgg..... 1  
 Gi2\_11342882\_x1.....guucgauucccggaucAgagc..... 1  
 Gi1\_4179032\_x1.....gAuucgauucccggaucg..... 1  
 Gi2\_11179709\_x1.....uccggugAgguuaaacggc..... 1  
 Gi2\_11367087\_x1.....gguucgauucccggaucG..... 1  
 Gi5\_8904813\_x1.....cgggGucgauucccggauc..... 1  
 Gi1\_4173100\_x1.....guucgauucccggaucgC..... 1  
 Gi2\_11202608\_x1.....ggguCcgauucccggaucggagc..... 1  
 Gl1a\_6038324\_x1.....uUcggugugguuaaacggcuag..... 1  
 Gi3\_28868570\_x1.....guuuucacccaguaUauccg..... 1  
 Gi5\_8913735\_x1.....Aguccggugugguuaaacggc..... 1  
 Gi2\_11020685\_x1.....Acggguucgauucccggaucgga..... 1  
 Gi2\_11059106\_x1.....gguccgguNugguuaaacggcuagc..... 1  
 Gi5\_8980877\_x1.....ggCucgauucccggaucg..... 1  
 Gi1\_4208029\_x1.....uccggugugUuaaacggcu..... 1  
 Gi1\_4342811\_x1.....uuuucacccaguagauUcgg..... 1  
 Gl1a\_6300881\_x1.....gugguuaaGcggcuagca..... 1  
 Gi2\_11366790\_x1.....gguuuucacccaguagauGcg..... 1  
 Gl1a\_6077160\_x1.....guucgauucccAgcaucgg..... 1  
 Gi2\_11068788\_x1.....Ugugugguuaaacggcuagcaugacu..... 1  
 Gi1\_4307373\_x1.....uNcggugugguuaaacggcuagc..... 1  
 Gi3\_28522641\_x1.....uccggugugguuaaacUgcuag..... 1  
 Gi2\_11237616\_x1.....Cguucgauucccggaucg..... 1  
 Gl1a\_6149420\_x1.....uccUgugugguuaaacgg..... 1  
 Gi1\_4310967\_x1.....gguuuucacccCguagaucc..... 1  
 Gi3\_28495401\_x1.....gguucgauucccUgcaucggagc..... 1  
 Gi2\_11281119\_x1.....auccUgguucgauucccgga..... 1  
 Gi2\_11263775\_x1.....gguuuGcaccaguagauccg..... 1  
 Gi1\_4215260\_x1.....gguuuGcaccaguagauccg..... 1  
 Gl1a\_6016433\_x1.....uccggugugguUuaaacggc..... 1  
 Gi2\_11000250\_x1.....uguuuuucacccaguagauccA..... 1  
 Gi5\_8964798\_x1.....uccggugugguuaaCggc..... 1

Gi2\_11066095\_x1.....gUuucgauucccggaucggagcucu..... 1  
Gi5\_8832410\_x1.....ggGgugguauaacggcuagcau..... 1  
Gi1\_4185762\_x1.....uccggugGgguauaacggcuagcau..... 1  
Gi5\_8998201\_x1.....ugguuuUacccaguagauccgg..... 1  
Gi2\_11051062\_x1.....uccgauCcccggcaucgg..... 1  
Gi5\_9023175\_x1.....uccggugugguauaacggcuaAcaugacug..... 1  
Gi3\_28881840\_x1.....gguuuucacccagGagauccgg..... 1  
Gi2\_11106954\_x1.....ccgguguggAauaacggcuagcau..... 1  
Gi3\_28818260\_x1.....gCuucgauucccggauc..... 1  
Gi5\_8840835\_x1.....uccggguucgauucUcggc..... 1  
Gi5\_9129753\_x1.....guucgauucccCgcaucg..... 1  
Gi3\_28659296\_x1.....gguucgGuucccggauc..... 1  
Gi3\_28445904\_x1.....ggAccggugugguauaacggcua..... 1  
Gi5\_8837257\_x1.....ucUggugugguauaacggcuagcauga..... 1  
Gi1\_4357924\_x1.....guucgauucccggaucggaU..... 1  
Gi4\_593839\_x1.....Uuuuucacccaguagauccgg..... 1  
Gi3\_28710996\_x1.....ccggugugguauCacggcuagca..... 1  
Gi5\_9084415\_x1.....guuuucacccUguagauccgg..... 1  
Gi3\_28752847\_x1.....gguccgAugugguauaacggcua..... 1  
Gi2\_11019891\_x1.....ugguuuucaccAaguagauccgggu..... 1  
Gi2\_11171564\_x1.....gguucgauucccAgcaucggagc..... 1  
Gi2\_11349997\_x1.....uagaucggguucgauuAc..... 1  
G1a\_6274132\_x1.....ggGuuucacccaguagauc..... 1  
Gi3\_28308977\_x1.....auccgggAucgauucccgga..... 1  
Gi5\_9095365\_x1.....Gggguucgauucccggauc..... 1  
Gi5\_8894453\_x1.....gguccggugugguCuaacggc..... 1  
G1a\_5985962\_x1.....gguucgauucccggaucggagcuA..... 1  
Gi1\_4381040\_x1.....uccggugGgguauaacgg..... 1  
Gi5\_8844175\_x1.....uccgguguCguauaacgg..... 1  
G1a\_6118290\_x1.....uccggugugguauCacggcuag..... 1  
Gi3\_28884052\_x1.....Acggugugguauaacggcua..... 1  
Gi2\_11153887\_x1.....uccgUugugguauaacggcu..... 1  
Gi3\_28447903\_x1.....uucgauucccAgcaucgga..... 1  
Gi3\_28950893\_x1.....uccggugugguauaacgUc..... 1  
Gi5\_8849360\_x1.....uccggugugguauaacgC..... 1  
Gi5\_9099832\_x1.....ccggugugguauaacggcuUg..... 1  
Gi1\_4162440\_x1.....uuuucacccaguagCuccgg..... 1  
Gi3\_28383773\_x1.....Uuucgauucccggaucggagcuc..... 1  
Gi2\_11038496\_x1.....guuuGcaccaguagauccgg..... 1  
Gi2\_11367094\_x1.....gguucgauucccgAcaucg..... 1  
Gi1\_4193054\_x1.....gguucgauucccUgcaucg..... 1  
Gi1\_4366989\_x1.....uUcggugugguauaacggc..... 1  
Gi1\_4260296\_x1.....ccgguguggAauaacggcuag..... 1  
Gi1\_4183749\_x1.....uccNguugugguauaacggc..... 1  
Gi2\_11010588\_x1.....gguuuAcaccaguagaucc..... 1  
Gi1\_4256272\_x1.....ggugugguGuaacggcuagcau..... 1  
G1a\_6152319\_x1.....uccgCugugguauaacggcuagcau..... 1

Gi2\_11142599\_x1.....ucgauucccggaucggUgc..... 1  
Gi1\_4255036\_x1.....uccggugugguaCaacgg..... 1  
Gi2\_11283715\_x1.....gguuuucacccaguagauccC..... 1  
Gi2\_11104261\_x1.....gguucgauuAccggcaucg..... 1  
Gi1\_4201704\_x1.....ccggugugguauaacggc..... 0  
Gi3\_28802346\_x1.....uccggugugguauaacggcuagcaCgacu..... 1  
Gi2\_11306600\_x1.....uagauccggguUgauucc..... 1  
Gi1\_4225477\_x1.....ccggugugguUuaacggcuagca..... 1  
Gi2\_11167419\_x1.....uuuuUaccaguagauccg..... 1  
Gi1\_4315080\_x1.....cgauucccggaucggagcucuuu..... 0  
Gi3\_28473719\_x1.....uccggugugCuaaacggcuagcau..... 1  
Gi5\_8834597\_x1.....ggCuuucacccaguagaucc..... 1  
Gi5\_8940685\_x1.....gguucgauNcccggaucggga..... 1  
Gi3\_28473762\_x1.....ggugugguauaacggcuagca..... 0  
Gi2\_11262536\_x1.....uuuuGaccaguagauccg..... 1  
G1a\_6153259\_x1.....Accggugugguauaacgg..... 1  
Gi2\_11298101\_x1.....ccggugugguaCaacggc..... 1  
Gi2\_11294609\_x1.....Cguucgauucccggaucggga..... 1  
Gi3\_28496006\_x1.....ccggugugguauaaUggcuag..... 1  
Gi2\_11288015\_x1.....uuGucacccaguagaucc..... 1  
Gi3\_28368820\_x1.....gguuuucacccaguaUauc..... 1  
Gi5\_8876509\_x1.....aCccggguucgauucccgga..... 1  
Gi5\_9133922\_x1.....uccggugugguauaacggcuagcaGgac..... 1  
Gi1\_4383080\_x1.....gguuuucaGccaguagauccg..... 1  
Gi3\_28682854\_x1.....ucAauucccggaucgggag..... 1  
Gi3\_28864260\_x1.....uccCgugugguauaacgg..... 1  
G1a\_6107351\_x1.....uccggCgugguauaacggcuagca..... 1  
Gi2\_11229382\_x1.....gCgguauaacggcuagcau..... 1  
Gi3\_28317338\_x1.....gguccgguNugguauaacggcuagcauga..... 1  
Gi3\_28321869\_x1.....uccggugugguauaacggcuGgcaugacu..... 1  
Gi5\_8845573\_x1.....uccggugugUuaaacggcua..... 1  
Gi3\_28278930\_x1.....uccggugugguauaacgCcu..... 1  
Gi5\_8964825\_x1.....gCugugguauaacggcuagcau..... 1  
Gi1\_4262165\_x1.....guagauccCgguucgauuccc..... 1  
Gi5\_8921298\_x1.....ugugguauaaAggcuagc..... 1  
Gi2\_11234613\_x1.....guucgauucccgUcaucg..... 1  
Gi5\_9087219\_x1.....guuuucacccaguagauGcg..... 1  
Gi2\_11060918\_x1.....guucgauucccggaGcggag..... 1  
Gi1\_4190970\_x1.....guUgauccggguucgauuccc..... 1  
Gi1\_4298157\_x1.....guagauccggguucgauucUc..... 1  
Gi2\_11221960\_x1.....uucgauuccAgcaucgga..... 1  
Gi2\_11296882\_x1.....gguccgguguggCauaacg..... 1  
Gi5\_9062535\_x1.....guuuucUcccaguagauccgg..... 1  
Gi5\_8842395\_x1.....cggguucgauUccggcau..... 1  
G1a\_6046171\_x1.....ugguuuucacccagCagauc..... 1  
Gi4\_610218\_x1.....cggNgugguauaacggcuagca..... 1  
Gi5\_9074772\_x1.....ccggugugguauaacgCcu..... 1

Gi1\_4382342\_x1..... agauccggguucgauCccc..... 1  
 Gi1\_4351369\_x1..... uccggugugguauaacggUu..... 1  
 G1a\_6139497\_x1..... uccggugugguGuaacggcuagca..... 1  
 Gi2\_11337943\_x1..... guucgauuAccggcaucg..... 1  
 Gi2\_11145916\_x1..... uucacAcaguagauccgg..... 1  
 Gi2\_11025200\_x1..... ccggGgugguauaacggc..... 1  
 Gi3\_28714881\_x1..... ccggugugguCaacggcuag..... 1  
 Gi3\_28276824\_x1..... gguucgauuccggcaucggagcu..... 0  
 Gi5\_9042545\_x1..... guucgauuccggcauUg..... 1  
 Gi5\_9002787\_x1..... uccggugGgguauaacgg..... 1  
 Gi3\_28500667\_x1..... gCccggugugguauaacggcua..... 1  
 Gi3\_28686088\_x1..... uUcggugugguauaacggcuagcaugacu..... 1  
 G1a\_6271928\_x1..... uuuucacUcaguagaucgg..... 1  
 G1a\_6230744\_x1..... uUcggugugguauaacggcu..... 1  
 Gi3\_28732274\_x1..... auccggguucgauuccggUaucgga..... 1  
 G1a\_6299308\_x1..... ugguuCucacccaguagaucgg..... 1  
 Gi5\_8873382\_x1..... uuuucaAccaguagaucgg..... 1  
 Gi3\_28357686\_x1..... uuucGcccaguagaucgg..... 1  
 Gi3\_28961712\_x1..... uccCgugugguauaacggcuag..... 1  
 Gi3\_28519821\_x1..... gguucgauuccUggcaucggagc..... 1  
 G1a\_6083823\_x1..... guuuucacccaUuagaucgg..... 1  
 Gi5\_9041437\_x1..... cggCgugguauaacggcuagca..... 1  
 Gi4\_580173\_x1..... uccggugugguGuaacggcuagca..... 1  
 Gi5\_9138189\_x1..... uccggugugguauaacggcuUgca..... 1  
 Gi3\_28988801\_x1..... guucgauuccgggcauAgg..... 1  
 Gi3\_28958268\_x1..... guucgauuccgggcaAcg..... 1  
 Gi2\_11259540\_x1..... uccggugugguauaaUggcu..... 1  
 Gi1\_4237722\_x1..... uccggugugCuauaacggcuagc..... 1  
 Gi3\_28436023\_x1..... cggugCgguauaacggcua..... 1  
 G1a\_6179987\_x1..... Aguuuucacccaguagauc..... 1  
 Gi5\_8987235\_x1..... gguuuucacccaguUgauc..... 1  
 Gi3\_28733843\_x1..... ccggugugguauaacggcCag..... 1  
 Gi5\_9051207\_x1..... uccggugugguauaacggUc..... 1  
 Gi2\_11135002\_x1..... guuUgauuccggcaucggagc..... 1  
 Gi3\_28268870\_x1..... ccggugugNuauaacggcuag..... 1  
 G1a\_6134986\_x1..... uccgCugugguauaacggcuag..... 1  
 Gi2\_11102636\_x1..... Cuucgauuccggcaucg..... 1  
 Gi3\_28432558\_x1..... Gccggcaucggagcucuuu..... 1  
 Gi2\_11118105\_x1..... uUcggguucgauuccggcaucgga..... 1  
 Gi3\_28721055\_x1..... ccggugugguauaacggA..... 1  
 Gi3\_28659092\_x1..... ccggugugguCuaacggcua..... 1  
 Gi2\_11175096\_x1..... uccggugugguauaacCgcuagc..... 1  
 Gi3\_28531526\_x1..... gguuUgauuccggcaucgga..... 1  
 Gi5\_8978301\_x1..... cggugugguCuaacggcu..... 1  
 Gi3\_28311531\_x1..... Aagaucggguucgauucc..... 1  
 Gi4\_580796\_x1..... uccggugugguauaacggcuagU..... 1  
 Gi5\_8955156\_x1..... cggugugguGuaacggcua..... 1

Gi2\_11245262\_x1.....gguucgauuccUggcaucgg.....1  
 Gi3\_28403207\_x1.....ccggugugguauaacgAcuagc.....1  
 Gi1\_4304564\_x1.....uAcggugugguauaacgg.....1  
 Gi5\_8929773\_x1.....ggugugguauaacggcuagcCu.....1  
 Gi5\_8939453\_x1.....gguuuucacccaguCgaucc.....1  
 Gi5\_9002455\_x1.....uccgAugugguauaacggcuagcauga.....1  
 Gi1\_4209735\_x1.....uccggugugguauaacggcGag.....1  
 Gi5\_8926159\_x1.....ggGucgauucccggaucg.....1  
 Gi3\_28698303\_x1.....uccggugugguauaaGggcuag.....1  
 Gi2\_11339356\_x1.....uccCgugugguauaacggc.....1  
 G1a\_6072315\_x1.....Agguuuucacccaguagauc.....1  
 Gi1\_4389875\_x1.....guucgauucccggaucggC.....1  
 Gi1\_4344425\_x1.....guucgauucccgCcaucgg.....1  
 Gi2\_11142865\_x1.....gguuAgauucccggaucgg.....1  
 Gi3\_28855196\_x1.....uuuucacccagAagauccgg.....1  
 Gi2\_11161488\_x1.....guucgaCucccggaucggagc.....1  
 Gi3\_28740703\_x1.....guCcgauucccggaucggagc.....1  
 Gi2\_11017077\_x1.....ucUggugugguauaacggcuagcaugacu.....1  
 Gi3\_28539101\_x1.....ggGccggugugguauaacggcuagc.....1  
 Gi3\_28800308\_x1.....gguAuucacccaguagaucc.....1  
 Gi1\_4350140\_x1.....ggugAgguauaacggcuag.....1  
 Gi5\_9080436\_x1.....uuuucaccaAuagaucgg.....1  
 Gi2\_11323072\_x1.....ucNggugugguauaacggcuagc.....1  
 Gi5\_8914967\_x1.....ugguuuucacccaguaAauccg.....1  
 Gi5\_9096865\_x1.....uccgCugugguauaacgg.....1  
 Gi3\_28310326\_x1.....gauccggguCcgauucc.....1  
 Gi2\_11170370\_x1.....uuuucacccaguagauccAg.....1  
 Gi3\_28736181\_x1.....ccgguAugguauaacggcua.....1  
 Gi1\_4359904\_x1.....uuuucacccaguagauccAgg.....1  
 Gi5\_8932724\_x1.....ugguuuucaccUaguagauc.....1  
 Gi5\_9056493\_x1.....ugguCuucacccaguagauccgg.....1  
 Gi3\_28845886\_x1.....ugguuuucacGcaguagauc.....1  
 Gi4\_580329\_x1.....uccggugugguauaacggcCagc.....1  
 Gi4\_599436\_x1.....uccggguucgauucccgga.....0  
 Gi5\_8976065\_x1.....gguucgauucccggaucggUg.....1  
 Gi1\_4306991\_x1.....ccggugugguCuaacggcuagcau.....1  
 Gi5\_8962898\_x1.....guucgauuccUgcaucg.....1  
 Gi2\_11331445\_x1.....Gccggugugguauaacggcuagcaugacu.....1  
 Gi1\_4322510\_x1.....guGuucacccaguagauccgg.....1  
 Gi5\_9015364\_x1.....ugguuCucacccaguagauccgg.....1  
 Gi5\_9120750\_x1.....uccggugugguauaacAgcuagcauga.....1  
 Gi5\_8872269\_x1.....guucgauucccggcGucggag.....1  
 Gi3\_28281242\_x1.....guucgauucccggcCucggagc.....1  
 Gi5\_9099027\_x1.....gguucgaCucccggaucgga.....1  
 Gi2\_11006440\_x1.....cggugugguauaacggcCagc.....1  
 Gi3\_28923891\_x1.....Ugauccggguucgauucc.....1  
 Gi3\_28897907\_x1.....gguuCucacccaguagau.....1

Gi3\_28687301\_x1.....uuuucaccaguagCuccg.....1  
Gi5\_8989155\_x1.....guucgauucccggaucggaAcuc.....1  
Gi3\_28271042\_x1.....uuuucaccaguagauccC.....1  
Gi2\_11374447\_x1.....uAcaccaguagauccgg.....1  
G1a\_6280006\_x1.....gauucccggaucggagcuA.....1  
Gi3\_28683217\_x1.....gguccgguguguaaaccggcuagAa.....1  
Gi3\_28621026\_x1.....guucgauucccgUcaucg.....1  
Gi2\_11202113\_x1.....Auucgauucccggaucggag.....1  
Gi3\_28945916\_x1.....aguagGuccggguucgauucc.....1  
Gi5\_8998882\_x1.....ucNgguguguaaaccggcua.....1  
Gi3\_28725585\_x1.....guucgauuccUggcaucggag.....1  
Gi5\_8952226\_x1.....uccgguUugguaaaccggcuagcau.....1  
Gi5\_8946992\_x1.....cggugGgguaaaccggcuagc.....1  
Gi5\_9128163\_x1.....uccgguguguaaaccggcuagcCugac.....1  
G1a\_6052813\_x1.....gguuuucaAccaguagauccg.....1  
Gi2\_11068339\_x1.....gguucgauucccggaucUg.....1  
Gi2\_11056791\_x1.....agaucggAuucgauucc.....1  
Gi5\_9065720\_x1.....uccgguguggGauaaccggcuagcaugacu.....1  
Gi5\_9061497\_x1.....ggugugguNuaaccggcuagc.....1  
Gi2\_11364146\_x1.....uccgguguguaaUcggcuag.....1  
Gi3\_28882037\_x1.....cggugugguauGacggcua.....1  
Gi4\_597104\_x1.....cccaguagauccggguucgau.....0  
Gi2\_11040407\_x1.....uccgguguguaaaccggcuagcaG.....1  
Gi2\_11338424\_x1.....ucAgguguguaaaccggcua.....1  
Gi3\_28665053\_x1.....agaucggguucgauuAcc.....1  
Gi2\_11225193\_x1.....uccgguguguaaaccggAuagcau.....1  
Gi3\_28650547\_x1.....cgauucccggaucAgggagc.....1  
Gi5\_8963813\_x1.....gguucgauucccggaucAgga.....1  
Gi5\_8845474\_x1.....ugguuuucaccaguUgaucgg.....1  
Gi2\_11263021\_x1.....ccaguagauccggguUgauucc.....1  
Gi3\_28467509\_x1.....guucgauuAccggcaucg.....1  
Gi2\_11177347\_x1.....ccaguagauccggUuucgauucc.....1  
Gi3\_28277894\_x1.....auccgggCucgauuccggca.....1  
Gi3\_28376424\_x1.....auccggguucgauucccgAca.....1  
Gi3\_28357581\_x1.....auccUggguucgauuccggca.....1  
Gi2\_11232317\_x1.....guucgauucccggaAcgg.....1  
Gi1\_4188205\_x1.....ccggCgugguaaaccggc.....1  
Gi5\_9038071\_x1.....uccggGugguaaaccgg.....1  
Gi5\_9034168\_x1.....uccgCugugguaaaccggcuagca.....1  
Gi3\_28373510\_x1.....cuguuuuucaccaguGgaucgg.....1  
Gi2\_11073899\_x1.....guuuucaccaguagauccAg.....1  
Gi2\_11042235\_x1.....guuuucaccUguagauccgg.....1  
Gi5\_8910057\_x1.....guucgauucccggaucggagU.....1  
Gi5\_8913630\_x1.....ggAucgauucccggaucgg.....1  
G1a\_6062944\_x1.....gguuuucacAcaguagaucc.....1  
Gi4\_612650\_x1.....guucgauucccggaucGucgga.....1  
Gi3\_28291812\_x1.....guucgauucccggaucg.....1

Gi1\_4302929\_x1.....ccggugAgguauaacggcuagca..... 1  
Gi5\_8849129\_x1.....ugguuucGcccaguagauccg..... 1  
Gi3\_28668971\_x1.....gguucgauuccUggcauc..... 1  
Gi5\_9060991\_x1.....cggugugguauaacggUuagc..... 1  
Gi5\_8943938\_x1.....uAcggugugguauaacggcuag..... 1  
Gi1\_4310230\_x1.....uuucacccaguagauccgU..... 1  
Gi3\_28512287\_x1.....gguucgauuccUcggcaucg..... 1  
G1a\_6141880\_x1.....gguuuucaccUaguagaucc..... 1  
Gi1\_4355187\_x1.....cgUugugguauaacggcuagca..... 1  
Gi3\_28309019\_x1.....gguucgCuuccggcaucggag..... 1  
G1a\_6172878\_x1.....uccggugugguGuaacggcua..... 1  
Gi5\_8987547\_x1.....cggugugguauaacggcuagcG..... 1  
Gi3\_28633435\_x1.....cggugugguauCacggcua..... 1  
Gi1\_4159187\_x1.....gguucgauucccggcaucggaU..... 1  
Gi1\_4213368\_x1.....gguccggugugguauaacggcuagcaCga..... 1  
Gi3\_28762088\_x1.....ugguuuucacccUguagauccg..... 1  
Gi3\_28591097\_x1.....uccNgugugguauaacggcuag..... 1  
Gi1\_4166305\_x1.....ggGugugguauaacggcuag..... 1  
Gi3\_28519974\_x1.....uuuucaccUaguagauccgg..... 1  
Gi1\_4366246\_x1.....guagauccggguucgauAccc..... 1  
Gi3\_28609004\_x1.....uuucacccaguagauAccg..... 1  
Gi1\_4203373\_x1.....guaAauccggguucgauuccc..... 1  
Gi2\_11316614\_x1.....cUggugugguauaacggcuagc..... 1  
Gi3\_28477161\_x1.....guuNucacccaguagauccg..... 1  
Gi3\_28816320\_x1.....ccggugugguCuaacggcuagc..... 1  
Gi3\_28853288\_x1.....ugguuuucacccaguagauU..... 1  
Gi2\_11240720\_x1.....uccggugugguauaacggcuagcaU..... 1  
Gi3\_28360426\_x1.....cUggugugguauaacggc..... 1  
Gi5\_9110815\_x1.....Ggauccggguucgauucccggcaucggagc..... 1  
G1a\_6227237\_x1.....gguucgauNccggcaucgg..... 1  
Gi2\_11090569\_x1.....guuuucacAcaguagauccgg..... 1  
G1a\_6230351\_x1.....uccggugGguauaacggcua..... 1  
Gi3\_28347985\_x1.....gguucgauAcccggcauc..... 1  
Gi2\_11177244\_x1.....gAucgauucccggcaucgg..... 1  
Gi3\_28822317\_x1.....uccggugugguauaacggGuagcau..... 1  
G1a\_6046753\_x1.....ugguuuucacccaguGgauccg..... 1  
G1a\_6109790\_x1.....uccggugugguauaacggcuagG..... 1  
G1a\_6157322\_x1.....gguuuucacUcaguagauccg..... 1  
Gi3\_28834276\_x1.....gguucgauAcccggcaucgg..... 1  
Gi5\_9012602\_x1.....cggugugguauaacggcuC..... 1  
Gi5\_8871306\_x1.....ugguuuuUaccaguagaucc..... 1  
Gi5\_8860341\_x1.....uccgguguggCauaacggcuagcaugacu..... 1  
Gi3\_28639472\_x1.....gguuuucacccaguagCucc..... 1  
Gi3\_28921742\_x1.....cgguucgauCcccggaucggga..... 1  
Gi5\_9012375\_x1.....gguucgauucccggUaucggagc..... 1  
Gi2\_11141189\_x1.....ggugugguauaacggcuag..... 0  
Gi5\_8936438\_x1.....uccNgugugguauaacggcuagca..... 1



Gi2\_11282186\_x1.....uuuucaccaguagGucc.....1  
G1a\_6218855\_x1.....guAcgauucccggaucgga.....1  
Gi1\_4164669\_x1.....guucgauucAcggcaucgg.....1  
Gi5\_9003967\_x1.....ugugguauaaUggcuagc.....1  
Gi1\_4390363\_x1.....uucaUccaguagaucgg.....1  
Gi3\_28414623\_x1.....guucgauuccAgcaucg.....1  
Gi5\_9024801\_x1.....uuuucaccaguagUuccg.....1  
Gi3\_28659090\_x1.....Aguccggugugguauaacggcuagca.....1  
G1a\_6330457\_x1.....uccggugugguauaaUggc.....1  
G1a\_6276135\_x1.....uccggugCgguauaacggcuagca.....1  
Gi2\_11211973\_x1.....ccggugugguauaacAgcuagc.....1  
Gi3\_28791928\_x1.....guuuucaccaguagUuccg.....1  
Gi1\_4312738\_x1.....gugugguauaacggcuaA.....1  
Gi3\_28614794\_x1.....guuuucacAcaguagauc.....1  
Gi3\_28792862\_x1.....uCucaccaguagaucgg.....1  
Gi3\_28424338\_x1.....gauccggguucgauuccggU.....1  
Gi2\_11341414\_x1.....guucgauGcccggcaucgga.....1  
Gi5\_8991870\_x1.....uuuucaccaguagaucggA.....1  
Gi5\_9126598\_x1.....cccagCagaucggguucgau.....1  
Gi3\_28421230\_x1.....Aguuuucaccaguagauc.....1  
Gi5\_9123738\_x1.....cUggugugguauaacggcua.....1  
Gi3\_28636917\_x1.....gguuuucaccaguagaAccgg.....1  
G1a\_6092063\_x1.....uccggugugguauCacggcua.....1  
Gi2\_11312700\_x1.....uccgAugugguauaacggcu.....1  
Gi5\_8858941\_x1.....uucgauucccggaucggagcuA.....1  
Gi1\_4312124\_x1.....uuuucaccaguagaucUgg.....1  
Gi2\_11007493\_x1.....guucgauuccAggcaucgg.....1  
Gi2\_11048562\_x1.....gguucgGuucccggaucg.....1  
Gi2\_11165678\_x1.....guucgauUccggcaucgg.....1  
Gi3\_28538179\_x1.....aguagaucNggguucgauucccggaucgga.....1  
Gi3\_28392239\_x1.....Aguccggugugguauaacggcuagcauga.....1  
Gi1\_4383338\_x1.....guuuucaccaguaUauccgg.....1  
Gi5\_8888141\_x1.....gguucgauucccggaucggagcucuC.....1  
Gi2\_11088052\_x1.....ggguuUgauucccggaucggag.....1  
Gi2\_11195888\_x1.....guucgauucccggaucggaA.....1  
Gi5\_8832700\_x1.....ggAucgauucccggaucggagcucu.....1  
Gi5\_8990413\_x1.....cgUugugguauaacggcuagc.....1  
Gi3\_28301372\_x1.....uccUgugugguauaacggcuag.....1  
Gi2\_11321495\_x1.....uccgCugugguauaacggcuag.....1  
Gi2\_11104821\_x1.....Cguuuucaccaguagaucgg.....1  
Gi5\_9041005\_x1.....uccggugUuauaacggcuagca.....1  
Gi5\_8907621\_x1.....cggugugguauaacggGuag.....1  
Gi1\_4248689\_x1.....guucgauGcccggcaucgg.....1  
G1a\_6272856\_x1.....gguuuGcaccaguagaucgg.....1  
Gi3\_28440914\_x1.....guucgauucccggaucUg.....1  
Gi5\_8962579\_x1.....ccggugugguauaacggcuGg.....1  
Gi5\_8992709\_x1.....guucgauucccgUaucg.....1

Gi2\_11242588\_x1.....gguucgauAccggcauc..... 1  
Gi1\_4375403\_x1.....uccgguguguaUcggcuagcau..... 1  
Gi5\_8864738\_x1.....uccgguguguaaacgCcuagcaugac..... 1  
Gi3\_28803819\_x1.....cgauucccggaGcggagc..... 1  
Gi5\_8959511\_x1.....guucgauUcggcaucgga..... 1  
Gi3\_28686905\_x1.....uucgauucccggaCcg..... 1  
Gi3\_28642145\_x1.....gguccgguguggCauaacggcuagcauga..... 1  
Gi3\_28319479\_x1.....uuuucacccaguagauGcg..... 1  
Gi5\_8997337\_x1.....ugAuuuucacccaguagau..... 1  
Gi3\_28983948\_x1.....ugguuuucacccaguagauUcgg..... 1  
Gi3\_28779563\_x1.....gguccggugugguUuaacggcua..... 1  
Gi3\_28900177\_x1.....gguuuuucacccaguagaGccg..... 1  
Gi2\_11006976\_x1.....uccggugugguUuaacggcuagcau..... 1  
Gi2\_11331900\_x1.....uuUgauucccggaucgga..... 1  
Gi3\_28386339\_x1.....accaguagauccggguucAauucc..... 1  
Gi5\_8907280\_x1.....guuuuucacccaguagCucc..... 1  
Gi3\_28545834\_x1.....gAucgauucccggaucgga..... 1  
Gi2\_10992987\_x1.....guucgauucccggaucA..... 1  
Gi1\_4342785\_x1.....uucacccagCagauccgg..... 1  
Gi3\_28661794\_x1.....guuuuucacccaguagaucc..... 1  
G1a\_6138288\_x1.....cugguuuucacccaguCgauc..... 1  
Gi5\_8973599\_x1.....Aguucgauucccggaucgga..... 1  
Gi3\_28770839\_x1.....uuuucacccaUuagauccg..... 1  
Gi5\_8964824\_x1.....guucgauucccggaucggaUc..... 1  
Gi2\_11310421\_x1.....uccggugugguuaaacgUc..... 1  
Gi3\_28457642\_x1.....uuuucacccaguaAauccg..... 1  
Gi2\_11147877\_x1.....ugugguauCacggcuagc..... 1  
G1a\_6315929\_x1.....gGucgauucccggaucggagc..... 1  
Gi5\_8929218\_x1.....Aguucgauucccggaucg..... 1  
G1a\_5990155\_x1.....gguucgauucccggaucggGgcucu..... 1  
Gi3\_28398397\_x1.....gCucgauucccggaucg..... 1  
Gi2\_11379824\_x1.....Aguguguaaacggcuagc..... 1  
Gi2\_11134968\_x1.....ccgguguguaaacggcuagcau..... 1  
Gi3\_28657216\_x1.....cgauuccGggcaucggagc..... 1  
Gi5\_8876852\_x1.....cgguguAguuaaacggcuagca..... 1  
Gi4\_597346\_x1.....gguuGucacccaguagauccgg..... 1  
Gi5\_8872726\_x1.....guucgauucccggaucg..... 1  
Gi5\_9079748\_x1.....gguAugguuaaacggcuagcau..... 1  
Gi1\_4313118\_x1.....cccaguGgaucggguucgauuccc..... 1  
Gi3\_28275528\_x1.....uccgguguguaaacUgcuagcau..... 1  
Gi3\_28516924\_x1.....gauccggguucgauCccc..... 1  
Gi1\_4249227\_x1.....gguuuGcaccaguagauccgg..... 1  
Gi3\_28721163\_x1.....guguguaNaacggcuagca..... 1  
Gi3\_28784157\_x1.....uccCguguguaaacggcuagcau..... 1  
Gi2\_11266958\_x1.....gAuuucacccaguagauccg..... 1  
G1a\_6324254\_x1.....cccaguagauccggguucgauuccU..... 1  
Gi2\_11017620\_x1.....uCgauucccggaucgga..... 1

Gi1\_4200455\_x1.....guagauccggguucgauuccU..... 1  
 Gi3\_28951653\_x1.....agauccAgguucgauucc..... 1  
 Gi2\_11346819\_x1.....gguucgauuccAgcaucg..... 1  
 Gi2\_11386877\_x1.....uuAcacccaguagaucg..... 1  
 Gi2\_11015728\_x1.....ccggugugguauUacggcuagca..... 1  
 Gi3\_28606877\_x1.....gAuuuucacccaguagaucggguucgauu..... 1  
 Gi3\_28720229\_x1.....gUuccggugugguauaacggcuagc..... 1  
 Gi3\_28604297\_x1.....ccggugugguauaacAgcu..... 1  
 Gi1\_4249107\_x1.....ggugugguauaacggcua..... 0  
 Gi2\_11249825\_x1.....ccaguagaucggguuAgauucc..... 1  
 Gi5\_8879735\_x1.....cggguucgNuucccgcau..... 1  
 Gi3\_28275563\_x1.....Aggugugguauaacggcua..... 1  
 Gi1\_4211547\_x1.....ggGugugguauaacggcuagc..... 1  
 Gl1a\_6068684\_x1.....ugguuuucNcccaguagaucg..... 1  
 Gi2\_11198915\_x1.....uucgauuccggcaucggagcuA..... 1  
 Gi5\_8850960\_x1.....uccggugugguauGaacggcuagca..... 1  
 Gi3\_28739806\_x1.....ugguuuucacccaguaAauc..... 1  
 Gi3\_28718850\_x1.....ucNggugugguauaacggcuag..... 1  
 Gi2\_11300882\_x1.....guuuucacccaguagaucggguucg..... 0  
 Gi3\_28356803\_x1.....cugguuuucacccaguagGuccg..... 1  
 Gi1\_4389425\_x1.....ugguuuucacccaguagaucAg..... 1  
 Gi3\_28524897\_x1.....guagGuccggguucgauucc..... 1  
 Gi5\_8879790\_x1.....uGgauccggguucgauucc..... 1  
 Gi1\_4388131\_x1.....guuuucacccaguagaucGgg..... 1  
 Gi3\_28464207\_x1.....aguagaucUggguucgauucc..... 1  
 Gi2\_11109719\_x1.....uuuucacccaguagaucAgg..... 1  
 Gl1a\_6169201\_x1.....ugguuuucacUcaguagaucgg..... 1  
 Gi1\_4320204\_x1.....guucgauucccggaucggU..... 1  
 Gi1\_4319030\_x1.....ggugugguauCacggcuagca..... 1  
 Gi3\_28895502\_x1.....gguucgauNcccggcaucgg..... 1  
 Gi1\_4367485\_x1.....guagaucAgguucgauucc..... 1  
 Gi2\_11226528\_x1.....agGuccggguucgauucc..... 1  
 Gi1\_4347571\_x1.....ugUuuuucacccaguagaucg..... 1  
 Gi3\_28819375\_x1.....agaucgggCucgauucc..... 1  
 Gi2\_11294062\_x1.....gAgguauaacggcuagca..... 1  
 Gi2\_11104627\_x1.....ccggguucgauuccggcaucggC..... 1  
 Gi1\_4374095\_x1.....guucgauucccggaucggagcuc..... 0  
 Gi1\_4300793\_x1.....caguaAaucggguucgauu..... 1  
 Gi3\_28658705\_x1.....ccggugCgguauaacggcuagca..... 1  
 Gi2\_11358108\_x1.....agauccggguucgGuucc..... 1  
 Gi5\_9062585\_x1.....guucgauCcccggcaucg..... 1  
 Gi3\_28830042\_x1.....uccggugAgguauaacggcu..... 1  
 Gl1a\_6152794\_x1.....Gugguuuucacccaguagauc..... 1  
 Gi3\_28907955\_x1.....ucGggugugguauaacggc..... 1  
 Gl1a\_6334526\_x1.....Accggugugguauaacggcuagca..... 1  
 Gi1\_4211352\_x1.....uuuAcacccaguagaucg..... 1  
 Gi2\_10994387\_x1.....cUgugugguauaacggcuagca..... 1

Gi5\_8944029\_x1.....guuuucaccagugGucc..... 1  
 Gi5\_9119216\_x1.....gguucgauAcccggaucgg..... 1  
 Gi2\_11363569\_x1.....uucaccagucGauccgg..... 1  
 Gi3\_28603620\_x1.....aucggguucgauucccGca..... 1  
 Gi3\_28274860\_x1.....guuuGcaccagugaucc..... 1  
 Gi4\_584992\_x1.....gguuuucaccaCuagauccg..... 1  
 Gi5\_8931281\_x1.....uuuuUaccagugauccgg..... 1  
 Gi3\_28897281\_x1.....ugguuuuUaccagugauccg..... 1  
 Gi3\_28539644\_x1.....ugugguauNacggcuagc..... 1  
 Gi3\_28582053\_x1.....uuucaccaguaUauccgg..... 1  
 Gi2\_11116802\_x1.....uccggugugguauaacggcuUca..... 1  
 Gi3\_28611258\_x1.....gguAuucaccagugaucc..... 1  
 Gi3\_28457257\_x1.....uUgauucccggaucggga..... 1  
 Gi3\_28400533\_x1.....ugguuuuacAcagugauccg..... 1  
 Gi3\_28892343\_x1.....ggAuucaccagugaucc..... 1  
 Gi3\_28475183\_x1.....guuuuucaccagugauccg..... 1  
 Gi5\_9006080\_x1.....guucgaGucccggaucg..... 1  
 Gi2\_11356626\_x1.....cgguguAguauaacggcu..... 1  
 Gi3\_28645549\_x1.....uccggugugAuaaacggcu..... 1  
 Gi2\_11064094\_x1.....ccUgugauccggguucgauucccgga..... 1  
 Gi2\_11323757\_x1.....uagauAccggguucgauucc..... 1  
 Gi5\_9130071\_x1.....agaucggguCcgauucc..... 1  
 Gi3\_28447506\_x1.....uccggugugguauaacggcGag..... 1  
 Gi1\_4370976\_x1.....ggugCgguauaacggcuag..... 1  
 Gi1\_4275460\_x1.....ccggAgugguauaacggcuagcau..... 1  
 Gi3\_28566275\_x1.....uccgguguCguauaacggcuagcau..... 1  
 Gi5\_9090653\_x1.....guuuucacGcagugaucc..... 1  
 Gi3\_28434511\_x1.....gguucgauucccggaucggG..... 1  
 Gi3\_28872645\_x1.....aucggguucUauucccgga..... 1  
 Gi2\_11395380\_x1.....gAugugguauaacggcuagc..... 1  
 Gi5\_8954226\_x1.....ucUggugugguauaacggcuagcaugacu..... 1  
 Gi5\_9091719\_x1.....uGcggugugguauaacggcuagcauga..... 1  
 Gi5\_9120676\_x1.....uccgUugugguauaacggcu..... 1  
 Gi2\_11247315\_x1.....gguucgauucccggaucgA..... 1  
 Gi2\_11116122\_x1.....Ucagugauccggguucgauucc..... 1  
 Gi5\_8903882\_x1.....cggugugguauaacggAu..... 1  
 Gi3\_28612582\_x1.....cgauCcccggcaucggag..... 1  
 Gi5\_8997651\_x1.....gCucgauucccggaucg..... 1  
 Gi2\_11091092\_x1.....gguucCauucccggaucggga..... 1  
 Gi5\_9097063\_x1.....gugugguauaacggcuagca..... 0  
 Gi5\_9034269\_x1.....ugguuuucacUcagugaucc..... 1  
 Gi1a\_6059421\_x1.....gguucgauucccggaucggagcucu..... 0  
 Gi3\_28501398\_x1.....guucgGuucccggaucggagc..... 1  
 Gi2\_11375323\_x1.....uccCgugugguauaacggcuag..... 1  
 Gi5\_9026757\_x1.....guuuucaccagugauccGg..... 1  
 Gi3\_28330552\_x1.....Acagugauccggguucgauucc..... 1  
 Gi2\_11088330\_x1.....ccgAguucgauucccggaucggga..... 1

Gi1\_4388208\_x1.....ccggugugguauaacAgcuag..... 1  
 Gi3\_28374148\_x1.....Ccgauucccggaucgga..... 1  
 Gi2\_11406628\_x1.....uucacccagAgaucggg..... 1  
 Gi5\_8996640\_x1.....ugguuuucacccaguGgaucgg..... 1  
 Gi2\_11064294\_x1.....gguuGgauucccggauc..... 1  
 Gi2\_11287741\_x1.....uccgguUugguauaacggcuagc..... 1  
 Gi2\_11092194\_x1.....gugguauaacggcAagcau..... 1  
 Gi1\_4206337\_x1.....uccgguguggAuaaacggcuagca..... 1  
 Gi5\_8973228\_x1.....auucccggaucggagcCc..... 1  
 Gi2\_11306265\_x1.....gguuCucacccaguagauc..... 1  
 Gi2\_11007319\_x1.....guuuucGcccaguagaucggg..... 1  
 Gi3\_28335206\_x1.....ccggugugguauaacAgcuag..... 1  
 Gi3\_28417763\_x1.....auccggguucgaCucccgga..... 1  
 Gi2\_11037431\_x1.....agaucggguucgCuucc..... 1  
 G1a\_6251521\_x1.....cccaguagaucggguucgauucAc..... 1  
 G1a\_6141989\_x1.....gguucgaCucccggauc..... 1  
 Gi2\_11370172\_x1.....gguucgauNcccggaucgga..... 1  
 Gi3\_28922359\_x1.....accaguagaucAgguucgauucc..... 1  
 G1a\_6011179\_x1.....gugguauaacggUuagca..... 1  
 Gi3\_28819956\_x1.....guucgauuccCgcaucggagc..... 1  
 Gi1\_4286424\_x1.....gguccggugugAuuaaacggcuagcauga..... 1  
 Gi3\_28436138\_x1.....cggGgugguauaacggcuagcau..... 1  
 Gi2\_11151012\_x1.....uuuucaccNaguagaucggg..... 1  
 Gi4\_597005\_x1.....uccgCugugguauaacggcuagca..... 1  
 G1a\_6354531\_x1.....ucAggugugguauaacggcu..... 1  
 Gi1\_4317750\_x1.....uccggguucgauucccgga..... 0  
 Gi5\_8902421\_x1.....gAuuuucacccaguagauc..... 1  
 Gi5\_8864878\_x1.....gguccgguguggGauaacggc..... 1  
 Gi5\_8968052\_x1.....cggugugguauaacggcuCg..... 1  
 Gi3\_28387598\_x1.....auccggguucgauAcccgga..... 1  
 Gi3\_28489670\_x1.....Ggguuuucacccaguagaucggg..... 1  
 Gi3\_28594535\_x1.....cuggCuucacccaguagauc..... 1  
 Gi5\_8909105\_x1.....guucgauucccggaucggagcGc..... 1  
 Gi3\_28942912\_x1.....guguUguauaacggcuagc..... 1  
 Gi1\_4222950\_x1.....uccggugugguauaacgU..... 1  
 Gi1\_4219658\_x1.....guAuucacccaguagaucgg..... 1  
 Gi3\_28330818\_x1.....uuuucacccaguGgaucgg..... 1  
 Gi1\_4301687\_x1.....gguccggugugguauGacggcuagcaugacu..... 1  
 Gi5\_9103018\_x1.....Cccggugugguauaacggcuagcaugacu..... 1  
 Gi3\_28956417\_x1.....gguuuucacccaguUgau..... 1  
 Gi2\_11258525\_x1.....guuuucacccaguagaucC..... 1  
 Gi2\_11235611\_x1.....uuuucGcccaguagauc..... 1  
 Gi2\_11171839\_x1.....uccggugugguauaacggcGagc..... 1  
 Gi5\_8993360\_x1.....uccggugCgguauaacggcu..... 1  
 Gi3\_28574407\_x1.....ugguuuucacccaguagUuc..... 1  
 Gi5\_9097412\_x1.....uGgaucggguucgauucccgga..... 1  
 Gi1\_4388167\_x1.....cgguguAguauaacggcuagca..... 1

Gi3\_28759305\_x1.....uccggugugguuaaCcgguagcau.....1  
 Gi2\_11364350\_x1.....Ccgauucccggaucggagc.....1  
 Gi3\_28758866\_x1.....gugugAuuaaacggcuagc.....1  
 Gi1\_4358580\_x1.....ccggGgugguuaaacggcuagca.....1  
 Gi5\_9089401\_x1.....ccggugugguuaaacggcuG.....1  
 Gi5\_8864889\_x1.....ugugguuaaacgAcuagc.....1  
 Gi1\_4223388\_x1.....uccggugugguuaAaacggcua.....1  
 Gi2\_10997722\_x1.....uuuucaccccGuagauccg.....1  
 Gi2\_11228712\_x1.....ggguucgauucccggcCucggag.....1  
 Gi5\_9096052\_x1.....ugguAuucacccaguagauc.....1  
 Gi5\_8835677\_x1.....gguucgauucccggaucggCgc.....1  
 Gi2\_11044901\_x1.....guucgauucccggcCucggag.....1  
 Gi1a\_6104447\_x1.....guucAauucccggaucggagc.....1  
 Gi5\_8987819\_x1.....cggugugguuaaacAgcuagc.....1  
 Gi1\_4240017\_x1.....uccggugugguauUacgg.....1  
 Gi5\_9016298\_x1.....cggugugguuaaacggcuagcauAacu.....1  
 Gi2\_11303544\_x1.....gguucgGuucccggaucggagc.....1  
 Gi4\_597756\_x1.....uccgguguggCauaacggcuagc.....1  
 Gi2\_11344144\_x1.....uaAauuccggguucgauucc.....1  
 Gi1\_4359605\_x1.....ccgCugugguuaaacggcuagc.....1  
 Gi3\_28938774\_x1.....ugguuuuAaccaguagaucgg.....1  
 Gi5\_9017332\_x1.....cgguUugguuaaacggcuag.....1  
 Gi3\_28378752\_x1.....gauccggguucgauuccA.....1  
 Gi5\_8921752\_x1.....cggugugAuuaaacggcu.....1  
 Gi2\_11404336\_x1.....uccgguguggGauaacgg.....1  
 Gi3\_28734961\_x1.....gguuuucaAccaguagaucgg.....1  
 Gi3\_28797068\_x1.....guucAauucccggaucg.....1  
 Gi5\_8927511\_x1.....uccggugugUuaaacggcuagcau.....1  
 Gi3\_28921112\_x1.....gguuuucacccaguUgauc.....1  
 Gi3\_28312017\_x1.....gguuuucacGcaguagauc.....1  
 Gi3\_28734720\_x1.....guucgauUccggcaucggag.....1  
 Gi1\_4372871\_x1.....guucgauucccgGaucgg.....1  
 Gi3\_28355103\_x1.....uccNgugugguuaaacggcuagcau.....1  
 Gi1\_4200624\_x1.....ccgguguAguuaaacggcuagcau.....1  
 Gi4\_595791\_x1.....Nccggugugguuaaacggcuagc.....1  
 Gi2\_11355004\_x1.....uccggguucgGuucccggaucgga.....1  
 Gi3\_28573501\_x1.....ucacccagCagaucggguuc.....1  
 Gi5\_8892557\_x1.....uccggugugguauUacggc.....1  
 Gi3\_28754247\_x1.....uccggugugguuaaacCgc.....1  
 Gi4\_572721\_x1.....gguccggugugguuaaacggc.....0  
 Gi3\_28901908\_x1.....Cguccggugugguuaaacggcua.....1  
 Gi1\_4275656\_x1.....guucgauucccCgcaucgg.....1  
 Gi5\_8879939\_x1.....uagauccggguucCauucccgga.....1  
 Gi3\_28426336\_x1.....uccggugugguuaAaacggc.....1  
 Gi5\_9045643\_x1.....agauccggguucgUuuccc.....1  
 Gi5\_9118212\_x1.....guucgauUccggcaucggagc.....1  
 Gi3\_28574821\_x1.....gguucgauucccggcCucgga.....1

Gi3\_28500141\_x1.....uGcgauucccggaucgga..... 1  
 Gi5\_9041372\_x1.....gguNuucacccaguagauccgg..... 1  
 Gl1a\_6015802\_x1.....gguucgauucccggcGucg..... 1  
 Gi5\_8941958\_x1.....gguuuucacccaguagaGccg..... 1  
 Gi1\_4192355\_x1.....cggugugguauaacggcuGgca..... 1  
 Gi2\_11270542\_x1.....ccaguagauGggguucgauucc..... 1  
 Gi1\_4258914\_x1.....guuuucacccaguUgaucgg..... 1  
 Gi3\_28975682\_x1.....ggCuucacccaguagauc..... 1  
 Gi3\_28749656\_x1.....guucAauucccggaucggagc..... 1  
 Gi1\_4253554\_x1.....guucgauucccgGUaucgga..... 1  
 Gi5\_8853338\_x1.....cgguguggAauaacggcu..... 1  
 Gi5\_9088829\_x1.....guucgauucccgGAaucggagc..... 1  
 Gi3\_28405481\_x1.....uccUgugugguauaacggcuagcaugacu..... 1  
 Gi2\_11076116\_x1.....uuuucacccaguagaucggA..... 1  
 Gi1\_4206578\_x1.....Cuuuucacccaguagaucgg..... 1  
 Gi2\_11286746\_x1.....guuuucacccaguagaucUgg..... 1  
 Gi3\_28894007\_x1.....uuucacccCguagaucgg..... 1  
 Gi4\_589877\_x1.....guucgauuccAgcaucgg..... 1  
 Gi2\_11223377\_x1.....gguuuucaUccaguagauc..... 1  
 Gl1a\_6149958\_x1.....uuGucacccaguagaucgg..... 1  
 Gi5\_9005746\_x1.....Guccggguucgauucccgga..... 1  
 Gi3\_28938729\_x1.....guucgauucccggaucggagcuG..... 1  
 Gi3\_28873980\_x1.....gguucgauucccggcUucg..... 1  
 Gi3\_28415015\_x1.....guagaucggguuAgauucc..... 1  
 Gi1\_4281986\_x1.....uccggugCgguauaacggcuagcau..... 1  
 Gi3\_28718298\_x1.....guucgauucccggaucggU..... 1  
 Gi1\_4197268\_x1.....guAugguauaacggcuag..... 1  
 Gi1\_4339580\_x1.....gugguauaacggcuagcau..... 0  
 Gi5\_8998215\_x1.....ugguCuucacccaguagauc..... 1  
 Gi2\_11165985\_x1.....uucgauucccgGUaucgg..... 1  
 Gi2\_11018762\_x1.....gguAcgauucccggaucgg..... 1  
 Gi3\_28905771\_x1.....guucUauucccggaucg..... 1  
 Gi3\_28346413\_x1.....cugguuuucacGcaguagaucgg..... 1  
 Gi3\_28526114\_x1.....aucggguCcgauucccgga..... 1  
 Gi2\_11196177\_x1.....Cccggugugguauaacggcuagcaugacu..... 1  
 Gl1a\_5996108\_x1.....ucUggugugguauaacggcuag..... 1  
 Gi5\_9137335\_x1.....cccGguagaucggguucgau..... 1  
 Gi5\_9073069\_x1.....gAuucgauucccggaucggagcucuu..... 1  
 Gi3\_28923085\_x1.....guuuucacccaguagaAccgg..... 1  
 Gi1\_4294862\_x1.....guucgauuccAgcaucg..... 1  
 Gl1a\_6302868\_x1.....aucggguucgaCucccggc..... 1  
 Gi3\_28571920\_x1.....cugguuuucacccaguaCauccg..... 1  
 Gi3\_28829351\_x1.....gguCcgauucccggaucgga..... 1  
 Gi1\_4381525\_x1.....guucgauuccAggcaucgg..... 1  
 Gi4\_581155\_x1.....uccggugugguauaacAgcuagca..... 1  
 Gi5\_8855127\_x1.....uccggugugguauaacUggcuagcaugacu..... 1  
 Gi5\_8921687\_x1.....gguuuucacccaguaUaucgg..... 1

Gi2\_11179527\_x1.....gguucgauCcccggcaucggagc..... 1  
Gi1\_4191573\_x1.....uccggugugguauaGcggcuagcaugacugg..... 1  
Gi5\_9011023\_x1.....uagaCccggguucgauucccgga..... 1  
Gi3\_28281112\_x1.....gguucgauuccUgcaucgg..... 1  
Gi5\_8891210\_x1.....uccggugugguauaacggUuagcaugacu..... 1  
Gi5\_9015303\_x1.....uccgCugugguauaacggcuagcau..... 1  
Gi3\_28834400\_x1.....guucgauucccgUaucggag..... 1  
Gi2\_11106559\_x1.....uccggugugCuauaacggcua..... 1  
G1a\_6336182\_x1.....gguuuUaccaguagaucg..... 1  
Gi3\_28387968\_x1.....gguuuucaUccaguagau..... 1  
G1a\_6125472\_x1.....gguucgauucccggaucA..... 1  
Gi5\_9125202\_x1.....uccggugugguauaacggGagcauga..... 1  
Gi4\_568204\_x1.....uccggugugguauaCcgcuagc..... 1  
Gi3\_28302131\_x1.....gguucgauucccgUucggag..... 1  
Gi3\_28535292\_x1.....gguuuAcaccaguagau..... 1  
Gi1\_4176671\_x1.....gguuuUaccaguagaucgg..... 1  
Gi2\_11113514\_x1.....ccggugAgguauaacggcua..... 1  
Gi1\_4361573\_x1.....guucgauucccggaucggagcu..... 0  
Gi5\_8981166\_x1.....uccggugugguauaCcgcuagca..... 1  
Gi2\_11193180\_x1.....gguucgauucccggaucgAa..... 1  
Gi3\_28836997\_x1.....guucgauucccgGcucggag..... 1  
Gi2\_11008996\_x1.....gguuuaccccGuagauc..... 1  
Gi5\_9080024\_x1.....uccggugugguauaacggcuaCcau..... 1  
Gi2\_11398700\_x1.....guucgauucccgAcaucggag..... 1  
Gi3\_28540132\_x1.....uccggugugguauaacggcuagcaAgacu..... 1  
G1a\_6026779\_x1.....uccCgugugguauaacggcua..... 1  
Gi5\_8912467\_x1.....ccUaguagaucggguucgau..... 1  
Gi5\_8844944\_x1.....gguucgauucccggaucggaA..... 1  
Gi2\_11292975\_x1.....gguUgguuucccggaucg..... 1  
Gi1\_4366852\_x1.....uccggugugguauaaUggcu..... 1  
Gi3\_28838194\_x1.....guucgauucccggaucgAa..... 1  
Gi2\_11099506\_x1.....uAguuuaccccaguagau..... 1  
Gi2\_11174853\_x1.....ggGuuaccccaguagaucgg..... 1  
Gi5\_9101407\_x1.....agauccggguucgGuucccggaucggagc..... 1  
Gi2\_11066559\_x1.....gugugguaNaacggcuagc..... 1  
Gi5\_9059030\_x1.....gUugugguauaacggcua..... 1  
Gi2\_11164158\_x1.....gguuuaccccagAgaucgg..... 1  
Gi5\_9111378\_x1.....ugguuuucUcccaguagau..... 1  
Gi3\_28556337\_x1.....uGgauucccggaucgga..... 1  
Gi1\_4327151\_x1.....uccggugugguauaUcggcuagca..... 1  
Gi3\_28622028\_x1.....gguuuacNcaguagaucggguucg..... 1  
Gi1\_4163727\_x1.....gguuuGaccaguagaucgg..... 1  
Gi1\_4167265\_x1.....gCuucgauucccggaucgg..... 1  
Gi3\_28734715\_x1.....gguuuaccccaguagauNcg..... 1  
Gi2\_11052701\_x1.....uuuaccccaguagGuccgg..... 1  
Gi1\_4366756\_x1.....uuuUcaUccaguagaucgg..... 1  
Gi2\_11170226\_x1.....gAuucgauucccggaucggag..... 1



Gi3\_28963636\_x1.....ccggugugguuaaCcggc..... 1  
Gi4\_605849\_x1.....uccggugugguuaGacggcua..... 1  
Gi3\_28639889\_x1.....guucgauucccgCcaucg..... 1  
Gi5\_9051819\_x1.....ggugugguuaCaacggcuagcau..... 1  
Gi3\_28507656\_x1.....guagauccggguucgauGccc..... 1  
Gi1a\_6158030\_x1.....Uccaguagaucggguucgauuccc..... 1  
Gi5\_8831253\_x1.....uuuUaccaguagaucgg..... 1  
Gi2\_11183240\_x1.....Gcaguagaucggguucgauucccgga..... 1  
Gi2\_11384950\_x1.....agaCccggguucgauucc..... 1  
Gi3\_28732586\_x1.....guucgCuucccggaucgga..... 1  
Gi1a\_6130507\_x1.....ggucgauucccggaCcg..... 1  
Gi2\_11054805\_x1.....ggAuucaccaguagaucgg..... 1  
Gi1\_4270452\_x1.....ggugugguuaaCcgcuag..... 1  
Gi2\_11129470\_x1.....uccggugugguuaaacgCc..... 1  
Gi5\_8845209\_x1.....Nuuuacaccaguagaucgg..... 1  
Gi1\_4374462\_x1.....caguagaucggguUgauu..... 1  
Gi5\_9057888\_x1.....guuuacaccaguagUuccg..... 1  
Gi5\_9101037\_x1.....guucgCuucccggaucggagc..... 1  
Gi3\_28403797\_x1.....agauccggguucgauGc..... 1  
Gi5\_9133113\_x1.....guucgauucccggaucgagc..... 1  
Gi1\_4276413\_x1.....guuuacaccaguagaucggU..... 1  
Gi5\_9051696\_x1.....guuuacaccaguagaucUg..... 1  
Gi3\_28889742\_x1.....Cguucgauucccggaucg..... 1  
Gi3\_28803447\_x1.....cggCgugguuaaacggcua..... 1  
Gi5\_9049093\_x1.....uccCgugugguuaaacggcuagcau..... 1  
Gi2\_11404962\_x1.....ccggugugguuaaaUggcuagcau..... 1  
Gi3\_28361274\_x1.....agauccggguucgauucUc..... 1  
Gi3\_28771065\_x1.....guCgauccggguucgauuccc..... 1  
Gi5\_8885201\_x1.....gguccgguguggCauaacgg..... 1  
Gi5\_8992081\_x1.....ggucgauUccgggaucgg..... 1  
Gi4\_581610\_x1.....gguuGucaccaguagaucgg..... 1  
Gi1\_4366094\_x1.....gguuuacaccUguagaucgg..... 1  
Gi3\_28407837\_x1.....aucUggguucgauucccgga..... 1  
Gi5\_9016635\_x1.....guGuacaccaguagauc..... 1  
Gi2\_11271198\_x1.....guuuacaccaUuagaucgg..... 1  
Gi2\_11402143\_x1.....cGcaguagaucggguucgauuccc..... 1  
Gi3\_28803494\_x1.....gauccggguucgauucAc..... 1  
Gi2\_11083204\_x1.....uccggugugguuaaacggcuagcaugac..... 0  
Gi2\_11293903\_x1.....ggucgauucccggaucgagc..... 1  
Gi3\_28526016\_x1.....cgauuccgggaucgag..... 1  
Gi1\_4183177\_x1.....Uuccggugugguuaaacggcuagca..... 1  
Gi5\_8958704\_x1.....ggucgauucccggaucggUgc..... 1  
Gi5\_8904794\_x1.....uuuucUccaguagaucgg..... 1  
Gi5\_8941542\_x1.....ccggugugguuaCaacggcua..... 1  
Gi2\_11145780\_x1.....gugugguuaaacggcCagc..... 1  
Gi2\_11004423\_x1.....guuuacaccUaguagauc..... 1  
Gi1\_4205334\_x1.....guucgauucccggaucggagcuAu..... 1

Gi3\_28413034\_x1.....guuuuaccccaguagUuccgg..... 1  
Gi3\_28880027\_x1.....gAuuuaccccaguagauc..... 1  
Gi3\_28795450\_x1.....gguAcggugugguuaaacggcua..... 1  
Gi3\_28935409\_x1.....guuuucaGccaguagauccg..... 1  
Gi3\_28595711\_x1.....uccggugugCuauaacggcuag..... 1  
Gi1\_4338288\_x1.....Auucgauucccggaucgga..... 1  
Gi3\_28906202\_x1.....uccgguCugguauaacgg..... 1  
Gi1\_4159212\_x1.....Ggauccggguucgauuccc..... 1  
Gi2\_11184625\_x1.....uccggugGgguaaacggcua..... 1  
Gi3\_28429426\_x1.....ccggugugCuauaacggcua..... 1  
Gi2\_11321489\_x1.....uccggugugguaGaacgg..... 1  
Gi3\_28301920\_x1.....ccGggcaucggagcucuuu..... 1  
Gi3\_28827143\_x1.....cugguuuaccccUguagauc..... 1  
G1a\_6131183\_x1.....uuuucaccCGuagauccg..... 1  
Gi2\_11306441\_x1.....ggugGgguaaacggcuag..... 1  
Gi5\_8912586\_x1.....gguuuuUacccaguagauc..... 1  
Gi3\_28476850\_x1.....Cguuuaccccaguagaucc..... 1  
Gi5\_8886216\_x1.....gguccggugugguuaaacggU..... 1  
Gi1\_4191153\_x1.....ccggugugguCuaacggcua..... 1  
Gi1\_4174844\_x1.....ucgauucccggaucggagc..... 0  
Gi3\_28773374\_x1.....ugguuuaccccaguagauccgC..... 1  
Gi3\_28817894\_x1.....gguucgauAcccggaucggagc..... 1  
Gi4\_594057\_x1.....uGcggugugguuaaacggcua..... 1  
Gi1\_4286819\_x1.....ggugugguuaaacggcuGgcau..... 1  
Gi3\_28758258\_x1.....ucgauucccggaucAgagc..... 1  
Gi5\_8839110\_x1.....gguucgauucUcggcaucgg..... 1  
Gi5\_9084374\_x1.....ccAgugugguuaaacggcua..... 1  
Gi3\_28586840\_x1.....gguucgauucccggaucggagcuc..... 0  
Gi2\_11384947\_x1.....ugugguuaaacggcuagU..... 1  
Gi2\_11067074\_x1.....gugguauCacggcuagcau..... 1  
Gi2\_11011952\_x1.....ugguuuaccccaguagaCccgggu..... 1  
Gi2\_11329792\_x1.....gguuuaccccUguagauc..... 1  
Gi1\_4323002\_x1.....guucgaCucccggaucggagc..... 1  
Gi2\_11394565\_x1.....gugguuaaacAgcuagcau..... 1  
Gi5\_8878180\_x1.....uccggugugguuaaacggcuagc..... 1  
Gi2\_11049580\_x1.....guucUauucccggaucggag..... 1  
Gi3\_28664978\_x1.....ggCucgauucccggaucggag..... 1  
Gi4\_576224\_x1.....Gccggugugguuaaacggcuagcau..... 1  
Gi3\_28846187\_x1.....uccgguguggGauaacggcuagcau..... 1  
Gi2\_11207051\_x1.....Uguccggugugguuaaacg..... 1  
Gi5\_8949960\_x1.....cggugugguuaaacggcu..... 1  
Gi2\_11350660\_x1.....gguuuaccccAaagauc..... 1  
G1a\_6080920\_x1.....guuuaccccaguGgauccg..... 1  
Gi3\_28870350\_x1.....ccUgugugguuaaacggcu..... 1  
Gi2\_11247266\_x1.....guucgauuccAgcaucggagc..... 1  
Gi1\_4273861\_x1.....uuuucacGcaguagauccg..... 1  
Gi1\_4370239\_x1.....uuuaccccaguCgauccg..... 1

Gi3\_28503229\_x1.....gguucgauucccgUaucgga..... 1  
 Gi2\_11223426\_x1.....ccaguagaucggguucgauCccc..... 1  
 Gi5\_8927842\_x1.....gguucgauucccggaucggC..... 1  
 Gi2\_11307537\_x1.....uCugguauaacggcuagc..... 1  
 Gi1\_4273927\_x1.....uccggugugguauaacggA..... 1  
 Gi5\_8968897\_x1.....uccggugugguauaacAgcu..... 1  
 Gi5\_8912210\_x1.....uUgaucggguucgauucccgga..... 1  
 Gi5\_9134936\_x1.....uguuuuacaccaguagaucUgg..... 1  
 Gi1a\_6349877\_x1.....uccggugugguauaacggcua..... 1  
 Gi5\_8983046\_x1.....cGggugugguauaacggcua..... 1  
 Gi5\_8889758\_x1.....gCuuuacaccaguagauc..... 1  
 Gi2\_11088575\_x1.....uguuuuacaccUaguagauc..... 1  
 Gi2\_11011635\_x1.....ccaguagaucggguucgauUcc..... 1  
 Gi4\_583610\_x1.....uccgguAugguauaacggcuagc..... 1  
 Gi3\_28880892\_x1.....Guccggguucgauucccggaucgga..... 1  
 Gi3\_28475615\_x1.....auccggguucgauCcccggca..... 1  
 Gi3\_28584262\_x1.....ccggugugAuauaacggc..... 1  
 Gi1\_4255501\_x1.....uuuucaccaguUgaucgg..... 1  
 Gi1a\_6252066\_x1.....gCuuuacaccaguagauc..... 1  
 Gi2\_11297063\_x1.....Cgugguauaacggcuagc..... 1  
 Gi2\_11211834\_x1.....ucgauuccAgcaucggagc..... 1  
 Gi5\_9133958\_x1.....cgguguggNauaacggcuag..... 1  
 Gi3\_28836326\_x1.....ccUgugugguauaacggc..... 1  
 Gi5\_8918733\_x1.....uccggugugguauaacggcuUg..... 1  
 Gi3\_28262982\_x1.....guagaucggguucgauuccU..... 1  
 Gi2\_11024109\_x1.....uUgaucuccggcaucggagc..... 1  
 Gi3\_28939479\_x1.....Uggugugguauaacggcuagcau..... 1  
 Gi1\_4375144\_x1.....gGuuacaccaguagauc..... 1  
 Gi5\_8844087\_x1.....guuuGaccaguagaucgg..... 1  
 Gi4\_589084\_x1.....gguucgauucccggaCcg..... 1  
 Gi2\_11110606\_x1.....ccggugugguauCacggc..... 1  
 Gi2\_11386481\_x1.....uguuuuacaccagCagaucgg..... 1  
 Gi5\_9130487\_x1.....guuuuacAcaguagaucgg..... 1  
 Gi3\_28667434\_x1.....guucgUuuccggcaucgga..... 1  
 Gi3\_28614724\_x1.....gguucgauuccGggcaucggagc..... 1  
 Gi5\_8840988\_x1.....gguGcgauucccggaucg..... 1  
 Gi5\_9054397\_x1.....uguuuuacaccaguagUuccg..... 1  
 Gi3\_28871736\_x1.....auccggguucgGuuccggca..... 1  
 Gi1\_4303705\_x1.....guucgauAcccggaucgga..... 1  
 Gi1\_4351273\_x1.....cugguuuuacaccaguagauc..... 0  
 Gi5\_8864321\_x1.....guucgGuuccggcaucggagc..... 1  
 Gi1\_4165967\_x1.....ccgguguggCauaacggcuag..... 1  
 Gi3\_28544315\_x1.....gguucUauuccggcaucggagc..... 1  
 Gi5\_8954166\_x1.....guucgauucccggaucggGgc..... 1  
 Gi2\_11251440\_x1.....uccggugGguauaacggcuag..... 1  
 Gi1\_4188338\_x1.....Nuuacaccaguagaucgg..... 1  
 Gi2\_11057028\_x1.....uccAgugugguauaacggcuag..... 1

Gi3\_28859113\_x1.....ccggugugguauaaAggcuagc.....1  
G1a\_6352467\_x1.....uccgAugugguauaacggcuag.....1  
Gi1\_4199122\_x1.....ggCgugguauaacggcuagc.....1  
Gi1\_4370834\_x1.....ggCucgauucccggaucgg.....1  
Gi5\_9075941\_x1.....cgauCcccggcaucggagcucuuu.....1  
Gi1\_4388966\_x1.....ucgauuccggcGucggagc.....1  
Gi3\_28707083\_x1.....gguucgauucccggaucgAag.....1  
Gi4\_588694\_x1.....uccggugugguauCacggcuagc.....1  
Gi5\_8891372\_x1.....uccggAgugguauaacggc.....1  
Gi3\_28608686\_x1.....cUgugugguauaacggcuagc.....1  
Gi3\_28981845\_x1.....cggugAgguauaacggcua.....1  
Gi3\_28728177\_x1.....agaucgggCucgauucc.....1  
Gi1\_4278672\_x1.....cagCagauccggguucgauuccggc.....1  
Gi1\_4189488\_x1.....ccUgugugguauaacggcuag.....1  
Gi5\_8919686\_x1.....gguucgauucccggaucggG.....1  
Gi3\_28352897\_x1.....Cuucgauucccggaucggagc.....1  
Gi1\_4230398\_x1.....cggugugguauaaUggcuagca.....1  
Gi3\_28376865\_x1.....guuuucacccaguagaucggU.....1  
Gi2\_11112269\_x1.....agaucGggguucgauucc.....1  
Gi5\_8849376\_x1.....gguuuucacccagGagaucc.....1  
G1a\_6256992\_x1.....Cgguuuucacccaguagaucgg.....1  
Gi1\_4200739\_x1.....gguucgauucccggaucggagcA.....1  
Gi2\_11346832\_x1.....agaucggguucgCuucc.....1  
Gi5\_8872709\_x1.....ugguuuucacccaAuagauc.....1  
Gi3\_28721035\_x1.....ccgguguggCauaacggcuag.....1  
Gi3\_28339315\_x1.....ucNggugugguauaacggcu.....1  
Gi2\_11206258\_x1.....cccaguGgauccggguucgauucc.....1  
Gi2\_11195477\_x1.....guucgauucccggaucgUa.....1  
Gi2\_11344060\_x1.....gguuuucaAccaguagauc.....1  
Gi2\_11242597\_x1.....uGucacccaguagaucgg.....1  
Gi3\_28745178\_x1.....cugguuuucacccCguagaucgg.....1  
Gi2\_11076170\_x1.....guucgaAucccggaucggagc.....1  
Gi3\_28768683\_x1.....ggGuuucacccaguagau.....1  
Gi5\_8956351\_x1.....ggugugguNuaacggcuagcau.....1  
Gi2\_11252633\_x1.....ccggugugguauaacggcCag.....1  
Gi3\_28686329\_x1.....agCuccggguucgauucc.....1  
Gi3\_28666967\_x1.....Nguuuucacccaguagaucgg.....1  
Gi3\_28763583\_x1.....uccggugugCuauaacgg.....1  
Gi1\_4209195\_x1.....Cgugugguauaacggcuagc.....1  
Gi2\_11335931\_x1.....uccggugugguauUacggcuag.....1  
Gi5\_8879029\_x1.....ugguuuucacccaguagaCcc.....1  
G1a\_6040059\_x1.....uccggugugguauaacAgc.....1  
Gi2\_11300346\_x1.....gguuGgauucccggaucgga.....1  
Gi2\_11023172\_x1.....uuuucUccaguagaucgg.....1  
Gi5\_9081191\_x1.....gguccggugugguauaGcggcuagc.....1  
Gi1\_4282249\_x1.....gguuAucacccaguagaucgg.....1  
Gi2\_11335096\_x1.....guucgauucccgAcaucggagc.....1

Gi5\_9089120\_x1.....cccaguagaucggguucgGu..... 1  
 Gl1a\_6012496\_x1.....uccgguguNguauaacggcuagcau..... 1  
 Gi5\_8954349\_x1.....guuuucacccaguUgaucgg..... 1  
 Gi5\_8963823\_x1.....guAuucacccaguagauc..... 1  
 Gi3\_28663225\_x1.....ugguuuucacccaguagUuccgg..... 1  
 Gi5\_9119654\_x1.....guuuucacccaCuagaucgg..... 1  
 Gi2\_11340706\_x1.....uuucaccAaguagaucgg..... 1  
 Gi3\_28565965\_x1.....guuuAcacccaguagaucgg..... 1  
 Gi5\_8863997\_x1.....ggugugguCuaacggcuagc..... 1  
 Gi1\_4324241\_x1.....ugguuuucacccaguagaucUg..... 1  
 Gl1a\_6352692\_x1.....Nguuuucacccaguagaucgg..... 1  
 Gi1\_4177335\_x1.....guucgauAcccggaucgg..... 1  
 Gi1\_4353672\_x1.....agauAcggguucgauucc..... 1  
 Gi1\_4338883\_x1.....uagaucggguucgauucccgCca..... 1  
 Gl1a\_6263401\_x1.....ucgauucccAgcaucggagc..... 1  
 Gi5\_8984329\_x1.....gguccggugCgguaaacggcu..... 1  
 Gl1a\_6306807\_x1.....gguuuucacccaguagaU..... 1  
 Gi2\_11253864\_x1.....gguucgauuccggcUucgg..... 1  
 Gi1\_4255937\_x1.....ccgguguAguauaacggcuag..... 1  
 Gi5\_8908950\_x1.....ccgAugugguauaacggcu..... 1  
 Gi1\_4178923\_x1.....gAuuuucacccaguagaucgg..... 1  
 Gi2\_11382270\_x1.....ggugugguauaacggcCagc..... 1  
 Gi3\_28703713\_x1.....uuuNcaccaguagaucgg..... 1  
 Gi2\_11282674\_x1.....gguucgauUccggcauc..... 1  
 Gi5\_9102670\_x1.....uuuGcaccaguagaucgg..... 1  
 Gi1\_4251050\_x1.....gguuuucaccUaguagaucgg..... 1  
 Gi3\_28727162\_x1.....gguccggugGgguaaacggcu..... 1  
 Gi3\_28734374\_x1.....ugguuuucacccaguagauc..... 0  
 Gi4\_586073\_x1.....uccggugGgguaaacggcuagc..... 1  
 Gi5\_9094505\_x1.....cgauuccggcCucggagcucuuu..... 1  
 Gi3\_28639400\_x1.....guagaucAgguucgauucc..... 1  
 Gi2\_11352859\_x1.....ggugugguauaacggcuGgc..... 1  
 Gi4\_567683\_x1.....uccggugugguauaacgAcuagca..... 1  
 Gi3\_28315432\_x1.....gguucgauuccggcaucA..... 1  
 Gi5\_9124724\_x1.....gUugugguauaacggcuagca..... 1  
 Gi2\_11094234\_x1.....guucgauuccggcaucgA..... 1  
 Gi3\_28671128\_x1.....gguCuucacccaguaga..... 1  
 Gi2\_11120079\_x1.....guucgauuccggGaucggagc..... 1  
 Gi4\_609437\_x1.....Gccggugugguauaacggc..... 1  
 Gl1a\_6316227\_x1.....ucGggugugguauaacggc..... 1  
 Gi2\_11131387\_x1.....ugguuuucacccaguGgauc..... 1  
 Gi2\_11361089\_x1.....uucacccaguagCuccgg..... 1  
 Gi1\_4242603\_x1.....guucgauucAcggcaucg..... 1  
 Gi2\_11161316\_x1.....gguguAguauaacggcuagc..... 1  
 Gi2\_11051343\_x1.....gguuuucacccaUuagauc..... 1  
 Gi3\_28445015\_x1.....ccggugugguauaaUggcuagca..... 1  
 Gi1\_4354456\_x1.....ccggugugguauaaUggcuagc..... 1

Gi1a\_6074152\_x1.....uccggugugguaCaacggcuagcau..... 1  
 Gi5\_9026672\_x1.....uuucacccaguagauGcg..... 1  
 Gi2\_11379875\_x1.....uagauccgAguucgauucc..... 1  
 Gi5\_9049556\_x1.....uuuuAacccaguagauccg..... 1  
 Gi3\_28632833\_x1.....gguccggugugguaauaacggcuGgcauga..... 1  
 Gi3\_28572466\_x1.....accaguagauccggguucgauCccc..... 1  
 Gi5\_9063107\_x1.....gguuUgauucccggauc..... 1  
 Gi2\_11116470\_x1.....uccggugugguUuaacggcua..... 1  
 Gi4\_588625\_x1.....uccgguguAguauaacggcuag..... 1  
 Gi4\_607028\_x1.....uuuucacccaguagauccgg..... 0  
 Gi5\_8832279\_x1.....ggugugguaauaGcggcuag..... 1  
 Gi5\_9089363\_x1.....uuuucacccaguagaGccg..... 1  
 Gi3\_28688796\_x1.....ccgguguggCauaacggcuagca..... 1  
 Gi3\_28974393\_x1.....cgguaugguauaacggcua..... 1  
 Gi5\_9108726\_x1.....cggugugguaauaacggcuagcaugaAu..... 1  
 Gi3\_28921367\_x1.....ccggugugguUuaacggcuagc..... 1  
 Gi2\_11199839\_x1.....uccgguCugguauaacggcua..... 1  
 Gi1\_4378852\_x1.....agauccggguucgauucUc..... 1  
 Gi5\_9048790\_x1.....uuuucacccaguagauUcg..... 1  
 Gi3\_28371094\_x1.....guucgauucccggaucAgga..... 1  
 Gi3\_28953753\_x1.....guucgauucccggaGcgg..... 1  
 Gi3\_28765687\_x1.....gguucgauucccggaAcggagc..... 1  
 Gi5\_9108694\_x1.....cgauucccggaucAgagcucuu..... 1  
 Gi4\_577746\_x1.....gguuuucCcccaguagauccg..... 1  
 Gi1\_4314918\_x1.....uccggugugguaauaUcggcua..... 1  
 Gi5\_8904365\_x1.....gguuuucaccGaguagauccg..... 1  
 Gi2\_11254273\_x1.....uccgguguCguauaacgg..... 1  
 Gi4\_582855\_x1.....uccggugugguaauaacggcuCgc..... 1  
 Gi5\_8920669\_x1.....gguguAguauaacggcuagcau..... 1  
 Gi1\_4268137\_x1.....uccggugugguaauaacggcGagcau..... 1  
 Gi5\_8973981\_x1.....cggugCgguaauaacggcu..... 1  
 Gi1\_4284010\_x1.....guuNucacccaguagauccg..... 1  
 Gi1\_4369185\_x1.....ggugugguaauaacggcuGg..... 1  
 Gi5\_8924921\_x1.....gguucgauucccggaucCggCgcucuu..... 1  
 Gi5\_9016980\_x1.....Ucggugugguaauaacggcuagca..... 1  
 Gi3\_28920324\_x1.....uccggguucgauucccgga..... 0  
 Gi3\_28784571\_x1.....uagauccggguucgauucc..... 0  
 Gi3\_28495377\_x1.....guagauccggguucgauucAc..... 1  
 Gi1a\_6071967\_x1.....gAuucgauucccggaucgg..... 1  
 Gi2\_11283480\_x1.....gguucgauucccggaU..... 1  
 Gi3\_28328683\_x1.....ccggguAgaauucccggaucgga..... 1  
 Gi1a\_6236326\_x1.....uccggugugguCuaacgg..... 1  
 Gi5\_9069066\_x1.....guuAucacccaguagauccg..... 1  
 Gi5\_8910739\_x1.....gguucgauuccUggcaucggag..... 1  
 Gi5\_9008700\_x1.....cggguucgauucGcggcau..... 1  
 Gi3\_28423034\_x1.....guucgauuAccggcaucgg..... 1  
 Gi2\_11027454\_x1.....gCuucacccaguagaucc..... 1

Gi2\_11325516\_x1.....Aguucgauucccggaucgga..... 1  
Gi2\_11051735\_x1.....gguucgauCcccggcaucgga..... 1  
Gi5\_8960389\_x1.....uccggugugguauaacggcGagc..... 1  
Gi2\_11321425\_x1.....agaucggguucUauucc..... 1  
Gi2\_11315418\_x1.....Cuucgauucccggaucgagc..... 1  
Gi2\_11304416\_x1.....cgauucccggaucgagc..... 0  
Gi5\_8969058\_x1.....ggGuuucacccaguagaucc..... 1  
Gi3\_28850174\_x1.....cggguucgauuccUggcaucgga..... 1  
Gi5\_8989922\_x1.....uAuucacccaguagaucgg..... 1  
Gi3\_28300933\_x1.....gguucgauucUcggcaucggag..... 1  
Gi2\_11215839\_x1.....ccggugugguauaGcggcuagc..... 1  
Gi1\_4258501\_x1.....Acggugugguauaacggcuagcau..... 1  
Gi3\_28897691\_x1.....guuuuacccGaguagaucgg..... 1  
Gi2\_11096109\_x1.....uccggugugguauaacggcuaCca..... 1  
Gi1\_4213697\_x1.....ggAucgauucccggaucg..... 1  
Gi1\_4321020\_x1.....ggGuuucacccaguagaucgg..... 1  
Gi5\_9132441\_x1.....guuuGcaccaguagaucgg..... 1  
Gi5\_9062105\_x1.....uccgguguCguauaacggcua..... 1  
Gi1\_4213496\_x1.....guucgUuucccggaucgg..... 1  
Gi3\_28555837\_x1.....guagauUcggguucgauucc..... 1  
G1a\_6193224\_x1.....gguucAauucccggaucg..... 1  
Gi1\_4162885\_x1.....cccaguagGuccggguucgauucc..... 1  
Gi2\_11248092\_x1.....uuuNcaccaguagaucgg..... 1  
Gi2\_10993973\_x1.....cAgguugugguauaacggcua..... 1  
Gi1\_4315960\_x1.....guuuuacccaguagauccU..... 1  
Gi2\_11189622\_x1.....uucgauuccggcGucgg..... 1  
Gi1\_4175403\_x1.....uccgguguggAuaaacggcuagcau..... 1  
Gi1\_4165484\_x1.....ccggugugguauaacggcCagc..... 1  
Gi1\_4327634\_x1.....Cgguuuuacccaguagaucgg..... 1  
Gi3\_28846476\_x1.....guucgauucAcggcaucgga..... 1  
G1a\_6234754\_x1.....uccggugAgguauaacggcuagc..... 1  
Gi1\_4179217\_x1.....agauccggguCcgauucc..... 1  
Gi1\_4324939\_x1.....gguucgauNcccggcaucg..... 1  
Gi2\_11341939\_x1.....uuuuacccaAuagaucgg..... 1  
G1a\_6133886\_x1.....uccgUugugguauaacggcuag..... 1  
G1a\_6035185\_x1.....uccggugugguauaaAggcuagcau..... 1  
Gi3\_28784796\_x1.....ggGuuucacccaguagaucggguucgauu..... 1  
Gi2\_11251073\_x1.....ugUuuuuacccaguagaucgggu..... 1  
Gi2\_11146091\_x1.....ugguuuuacccaguagaucg..... 1  
Gi5\_8924867\_x1.....cgguguggNauaacggcuagca..... 1  
Gi4\_613156\_x1.....uuuuacccaguGgaucgg..... 1  
Gi3\_28472811\_x1.....ucgauuccAgcaucggagc..... 1  
Gi2\_11249737\_x1.....guuuuacccaguagGuccgg..... 1  
Gi3\_28894463\_x1.....cugguuuuacGcaguagauc..... 1  
Gi2\_11182679\_x1.....guuUgauucccggaucggag..... 1  
Gi3\_28309899\_x1.....ccggugugguauaacgAcuag..... 1  
Gi3\_28538648\_x1.....ucgauucccggaucggagcu..... 0

Gi5\_9032751\_x1.....Cguucgauucccggaucgga..... 1  
 Gi1\_4252814\_x1.....uccggugugguauaaUggcuagcaugacugg..... 1  
 Gi2\_11014352\_x1.....gugguauaacggcuagUau..... 1  
 Gi5\_9111711\_x1.....cccaguagaucggguucUau..... 1  
 Gi5\_8991578\_x1.....guucgauucccgAcaucggagc..... 1  
 Gi5\_8898701\_x1.....ggNuucacccaguagaucgg..... 1  
 Gi1\_4343448\_x1.....uuuucacccaguagaucggU..... 1  
 Gi1\_4222790\_x1.....Auuuucacccaguagauc..... 1  
 Gi2\_11204912\_x1.....ugguuuucGcccaguagaucgg..... 1  
 Gi2\_11146598\_x1.....uccgguguggAauaacggcua..... 1  
 Gi1\_4338857\_x1.....guuuucacccaguagaucAgg..... 1  
 Gi1\_4190703\_x1.....agaucggguucgauAcc..... 1  
 Gi2\_11322480\_x1.....guucgaGucccggaucgg..... 1  
 Gi3\_28647113\_x1.....ggguucgauuccggcGucgga..... 1  
 Gi2\_11155729\_x1.....ccaguagaucggguucgauuccA..... 1  
 Gi2\_11287924\_x1.....uagaucAgguucgauucc..... 1  
 Gi3\_28347223\_x1.....gguuuucacccaguagaucggguCcgauu..... 1  
 Gi2\_11150472\_x1.....ugNuuuucacccaguagauc..... 1  
 Gi3\_28712208\_x1.....Ugucggugugguauaacggcuagc..... 1  
 Gi1\_4366222\_x1.....guucUauucccggaucgga..... 1  
 Gi3\_28416519\_x1.....cgauucccgUcaucggag..... 1  
 Gi2\_11214913\_x1.....gguuuGcaccaguagaucggguuc..... 1  
 Gi3\_28825255\_x1.....guuuuAaccaguagaucgg..... 1  
 Gi1\_4369378\_x1.....uuuucacUcaguagaucgg..... 1  
 Gi3\_28580431\_x1.....guagaucCgguucgauucc..... 1  
 Gi3\_28715884\_x1.....ugguuuucacccCguagauc..... 1  
 Gi3\_28952545\_x1.....uccggugugguauaGcggcuagca..... 1  
 G1a\_6026394\_x1.....uccggugugguauaUcggcu..... 1  
 Gi3\_28803716\_x1.....cugguuuGcaccaguagauc..... 1  
 Gi5\_8906465\_x1.....uccggugugguauaUcggcu..... 1  
 Gi5\_9045785\_x1.....uucacccaguagaucgg..... 0  
 Gi2\_11333003\_x1.....gguuuuGaccaguagaucgg..... 1  
 Gi2\_11128725\_x1.....uccggguucgaCuuccggcaucgga..... 1  
 Gi1\_4223706\_x1.....cccaguagaucggggCucgauuccc..... 1  
 Gi1\_4256608\_x1.....ggugugguauaacggcuagcGu..... 1  
 Gi1\_4247675\_x1.....guuuucacccaguUgaucgg..... 1  
 Gi3\_28697850\_x1.....guuuucacccaguagaAccggguucg..... 1  
 Gi3\_28377093\_x1.....uuuucacccaguCgaucgg..... 1  
 Gi1\_4280511\_x1.....uccggugugCuauaacggcuag..... 1  
 Gi2\_11324443\_x1.....gguucgCuuccggcaucg..... 1  
 Gi1\_4258057\_x1.....gguuuucacccaguagaUcgg..... 1  
 Gi1\_4316707\_x1.....ccggugugguauCacggcuag..... 1  
 Gi1\_4303641\_x1.....gguuuucacccaguagaucUg..... 1  
 Gi5\_8851454\_x1.....cggugugguauaacggcuagG..... 1  
 Gi1\_4236171\_x1.....uuuucacccaguagaucgg..... 1  
 Gi2\_11152912\_x1.....ggucggugugguauaGcggcuagc..... 1  
 Gi5\_9019430\_x1.....uccggCgugguauaacggcuagcaucg..... 1



Gi3\_28617703\_x1.....guucgauucccgUcaucggag..... 1  
 Gi3\_28377723\_x1.....gguucgauucccggaucggGgc..... 1  
 Gi3\_28526404\_x1.....uccgguguUguauaacggcuag..... 1  
 Gl1a\_6231009\_x1.....uccNgugugguauaacggcuag..... 1  
 Gi2\_11151724\_x1.....uuAucacccaguagauc..... 1  
 Gi5\_9104670\_x1.....ugguuuAcacccaguagaucgg..... 1  
 Gi3\_28850260\_x1.....aucggguucgauucUcggca..... 1  
 Gi2\_11117628\_x1.....guucgauucUcggcaucggag..... 1  
 Gi1\_4236996\_x1.....gguuuuUacccaguagaucgg..... 1  
 Gi3\_28734648\_x1.....gguucgauucccgCcaucgg..... 1  
 Gi5\_9033924\_x1.....guucgauucGcggcaucgga..... 1  
 Gi2\_11185855\_x1.....guucgGuucccggaucg..... 1  
 Gl1a\_6163699\_x1.....gguucgauuccAggcaucgg..... 1  
 Gi1\_4361871\_x1.....gAgaucggguucgauucc..... 1  
 Gi3\_28299306\_x1.....ugguuuucacccaguagaucGc..... 1  
 Gi5\_9064913\_x1.....ugguuuucacccaCuagauc..... 1  
 Gi2\_11400308\_x1.....Cuuuucacccaguagauc..... 1  
 Gi3\_28429190\_x1.....gguucgauucccgAauc..... 1  
 Gi5\_8975078\_x1.....Cguuuucacccaguagauc..... 1  
 Gi3\_28669548\_x1.....uccggugugCuauaacggcuagca..... 1  
 Gi5\_8953222\_x1.....uccggugugguauaacggAuagca..... 1  
 Gi2\_11241357\_x1.....uccggugugguauaacggcuagcauc..... 1  
 Gi3\_28265071\_x1.....gguuuucacccaguagaucG..... 1  
 Gi1\_4175368\_x1.....gguucgauucccggaCcgag..... 1  
 Gi3\_28479677\_x1.....cgUugugguauaacggcu..... 1  
 Gi3\_28947382\_x1.....Cgugguauaacggcuagc..... 1  
 Gi3\_28421134\_x1.....gguucgauucAcggcaucgg..... 1  
 Gi3\_28729312\_x1.....ugugguauaaAggcuagc..... 1  
 Gi2\_11104991\_x1.....gguucgauucccggcCucgga..... 1  
 Gi2\_11290503\_x1.....gguuuucacccagCagauc..... 1  
 Gi5\_8831111\_x1.....guucgauAcccggaucggagc..... 1  
 Gi5\_8859276\_x1.....cUauucccggaucggagcucuu..... 1  
 Gi3\_28694309\_x1.....guNcgauucccggaucgga..... 1  
 Gi2\_11207145\_x1.....ugugguauaacggcuUc..... 1  
 Gi2\_11326008\_x1.....uucgauucccggcCucgga..... 1  
 Gi2\_11399111\_x1.....guucgauucccggaucUg..... 1  
 Gi5\_9101242\_x1.....uccggguucgauuccUggc..... 1  
 Gi3\_28777790\_x1.....Gcggugugguauaacggcuag..... 1  
 Gi3\_28957941\_x1.....cugguuuucacccaguCgauc..... 1  
 Gi5\_9122492\_x1.....aguGgauccggguucgauucccggc..... 1  
 Gi2\_11178532\_x1.....ccaguagaucggguucgauucUc..... 1  
 Gi1\_4385184\_x1.....ugguuuucacccaguagaucggU..... 1  
 Gi1\_4214467\_x1.....ggugugguauaacAgcuag..... 1  
 Gi1\_4386168\_x1.....ccggugugguauaacggcuGcau..... 1  
 Gi5\_9124576\_x1.....uccgguguUguauaacggcuagcaugacu..... 1  
 Gi3\_28434849\_x1.....ccggugugguauGacggc..... 1  
 Gi2\_11371661\_x1.....uccggugugCuauaacgg..... 1

Gi3\_28860577\_x1.....Cuucacccaguagauccgg.....1  
Gi1\_4342999\_x1.....ggugugguauaacggcAagc.....1  
Gi3\_28459557\_x1.....guuuucacccaguCgauccggguucg.....1  
Gi5\_9002736\_x1.....Agugugguauaacggcuagc.....1  
Gi5\_8930022\_x1.....gguNcgauucccggaucgg.....1  
Gi2\_11097236\_x1.....ccggugugguauaaAggcuag.....1  
Gi5\_8858843\_x1.....cggugugguauGacggcuagcaugacu.....1  
Gi5\_8993165\_x1.....ccgguguAguauaacggcua.....1  
Gi3\_28952965\_x1.....gguccggugugguauaUcggcua.....1  
Gi5\_8831242\_x1.....ggGccggugugguauaacggc.....1  
Gi1\_4324899\_x1.....ggugCgguaaacggcuagc.....1  
Gi1\_4321765\_x1.....cAggugugguauaacggcuagca.....1  
Gi5\_8975868\_x1.....ccggugugguauaGcggcua.....1  
Gi3\_28968255\_x1.....gguuuucacccaCuagaucgg.....1  
Gi3\_28281766\_x1.....gguucgauucAcggcaucgga.....1  
Gi5\_8838976\_x1.....uucccggaucggagcCc.....1  
Gi5\_9082445\_x1.....gauccggguucAauucccggauc.....1  
G1a\_6123207\_x1.....Cccggugugguauaacggc.....1  
G1a\_6053636\_x1.....ucAggugugguauaacggcuag.....1  
Gi5\_9057405\_x1.....ugguuuuAacccaguagauccgg.....1  
Gi3\_28503393\_x1.....cugguuuCcaccaguagauccg.....1  
Gi2\_11037120\_x1.....guucgauucccggaucgGg.....1  
G1a\_6168512\_x1.....gguucgauuccAgcaucgg.....1  
Gi2\_11197527\_x1.....gguucgauucUcggcaucgg.....1  
Gi2\_11274015\_x1.....uucNauucccggaucgga.....1  
Gi3\_28909282\_x1.....Auucgauucccggaucg.....1  
Gi3\_28396272\_x1.....cgguguggCauaacggcua.....1  
G1a\_6166151\_x1.....gguuuucGcccaguagauccg.....1  
Gi2\_11018468\_x1.....cggugugguauaCcgguagca.....1  
Gi2\_11388240\_x1.....ccgguguggAauaacggc.....1  
Gi1\_4384304\_x1.....guucgauucccggaAcgg.....1  
Gi3\_28754202\_x1.....ugAgguauaacggcuagc.....1  
Gi5\_8948525\_x1.....cUgugugguauaacggcuagcaugacu.....1  
Gi4\_571951\_x1.....guucGUuucccggaucgg.....1  
Gi2\_11302510\_x1.....uccggugugguauaacggcuUgcau.....1  
Gi5\_8969874\_x1.....ugguCuucacccaguagaucc.....1  
Gi2\_11133882\_x1.....gauucccggaucggagcuA.....1  
Gi3\_28704088\_x1.....Aguucgauucccggaucgga.....1  
Gi1\_4227319\_x1.....uuuucCcccaguagauccg.....1  
Gi2\_11212760\_x1.....gguccggugugguauaacggcuagcaugacuA.....1  
Gi2\_11115921\_x1.....uccggGgugguauaacggcuagcau.....1  
Gi1\_4382331\_x1.....uuucacccNguagauccgg.....1  
Gi5\_9137456\_x1.....uccggugugCuauaacgg.....1  
Gi5\_9052496\_x1.....gguucAauucccggaucggag.....1  
Gi5\_8980953\_x1.....uccggugugguauaacggcuGcaugacu.....1  
G1a\_6208513\_x1.....gguuuucacccUguagauccg.....1  
Gi2\_11101580\_x1.....uccggugugUuauaacggcuag.....1

Gi3\_28435113\_x1.....ccggugugguuaaacggcuagcC.....1  
Gi3\_28805075\_x1.....aguagaucCGAguucgauucccggaucgga.....1  
Gi3\_28309999\_x1.....uccgguCugguuaaacggcuag.....1  
Gi2\_11153540\_x1.....uuuucaccAaguagauc.....1  
G1a\_6265805\_x1.....guucgaGucccggcaucgg.....1  
G1a\_6071978\_x1.....ucAggugugguuaaacggcuagc.....1  
Gi2\_11298728\_x1.....guuNgauucccggaucgg.....1  
Gi2\_11127726\_x1.....gAucgauucccggaucgga.....1  
Gi3\_28581939\_x1.....ggUuucgauucccggaucg.....1  
Gi3\_28968747\_x1.....uucgauucccggaCcgga.....1  
Gi3\_28272358\_x1.....uccggugugUuaaacgg.....1  
Gi5\_9088682\_x1.....ucNggugugguuaaacggc.....1  
Gi1\_4351862\_x1.....cggugAgguuaaacggcuagca.....1  
Gi4\_585948\_x1.....gguuuucacccaguagaucUg.....1  
Gi2\_11241761\_x1.....uccgguAugguuaaacgg.....1  
Gi1\_4274228\_x1.....gNuuuucacccaguagaucgg.....1  
Gi3\_28409122\_x1.....gugguuaaacggcuagca.....0  
Gi3\_28606465\_x1.....cggguucgUuuccggcaucgga.....1  
Gi3\_28628520\_x1.....ccggugugNuuaaacggcu.....1  
Gi3\_28320243\_x1.....gguuuucaUccaguagau.....1  
Gi3\_28323193\_x1.....Cauccggguucgauucc.....1  
Gi4\_581558\_x1.....uccgCugugguuaaacggcuagc.....1  
Gi3\_28671812\_x1.....ccggugugguGuaaacggcua.....1  
Gi1\_4277618\_x1.....gguuuucacGcaguagaucgg.....1  
Gi5\_9022200\_x1.....uccggugugguuaaacggcAag.....1  
Gi1\_4349637\_x1.....ccgguUugguuaaacggcuagca.....1  
Gi1\_4314821\_x1.....uuuucacccaguaAauccg.....1  
Gi3\_28636130\_x1.....gguccggugugguuaaacggcuCgc.....1  
Gi4\_583854\_x1.....ucNggugugguuaaacggcuagca.....1  
Gi5\_8858208\_x1.....guuuucUccaguagaucgg.....1  
Gi2\_11373264\_x1.....gguucgauuccggcCucg.....1  
Gi5\_9127404\_x1.....guucgauucccggaucggagcuG.....1  
Gi5\_8977573\_x1.....guucgauuccAggcaucgg.....1  
G1a\_6204974\_x1.....guuuucaccaAuagaucgg.....1  
Gi5\_8923977\_x1.....cggugugguuaaacggcuCgca.....1  
Gi5\_8925556\_x1.....gguucgauucccggaucggagU.....1  
Gi2\_10995351\_x1.....uccggugugguUuaaacggcuagca.....1  
Gi3\_28917227\_x1.....gAagaucggguucgauucc.....1  
Gi1\_4343911\_x1.....gUuuuucacccaguagaucggguucgau.....1  
Gi3\_28497344\_x1.....gguuGgauuccgggauc.....1  
Gi3\_28327403\_x1.....gguucAauucccggaucg.....1  
Gi3\_28590212\_x1.....gguucgaCucccggaucggagc.....1  
Gi3\_28367697\_x1.....guuuucacccagGagaucgg.....1  
Gi2\_11371106\_x1.....ugguuCucacccaguagauc.....1  
Gi3\_28721324\_x1.....uucgauucccggaucggagc.....0  
Gi1\_4215642\_x1.....guucgaGucccggcaucgg.....1  
G1a\_6273276\_x1.....gguucgauucccggaucggagc.....1

Gi3\_28700783\_x1.....cgauucAcggcaucggagcucu..... 1  
Gi4\_600538\_x1.....gguuuacaccagGagauccgg..... 1  
Gi5\_8992089\_x1.....cggugugguauaacggcuagcaugacA..... 1  
Gi3\_28461439\_x1.....cgauucccggUaucggagc..... 1  
Gi3\_28439743\_x1.....gCuucacccaguagauc..... 1  
Gi5\_8845574\_x1.....uuuacaccGaguagaucgg..... 1  
Gi1\_4383316\_x1.....ggguucgauucccggcaucg..... 0  
G1a\_6271677\_x1.....uccggugugguauaacgCc..... 1  
Gi1\_4177676\_x1.....uuuGaccaguagaucgg..... 1  
Gi2\_11374411\_x1.....ucGggugugguauaacggcuagcau..... 1  
Gi1\_4162989\_x1.....ggugugguauaaAggcuagcau..... 1  
Gi2\_11296765\_x1.....ucNggugugguauaacggcuag..... 1  
Gi2\_11044068\_x1.....Cgguuuacaccaguagauc..... 1  
Gi5\_8947037\_x1.....ccggugugguauaacggcCag..... 1  
Gi5\_9063191\_x1.....ugguuuacGcaguagaucgg..... 1  
Gi2\_11314335\_x1.....uccggugugguauaacggcuagcaCgacu..... 1  
Gi2\_11073041\_x1.....uagauccggguucgauCcc..... 1  
G1a\_6092357\_x1.....uccggugugguauaacAgcuagca..... 1  
Gi1\_4300824\_x1.....ggugugguauaaUggcuagc..... 1  
Gi1\_4258746\_x1.....guucgauuccUggcaucg..... 1  
Gi1\_4188232\_x1.....ccggCgugguauaacggcuagc..... 1  
G1a\_6353985\_x1.....gguuucaNccaguagauc..... 1  
Gi1\_4164534\_x1.....ccggugugguGuaacggcuagc..... 1  
Gi3\_28771309\_x1.....guagUuccggguucgau..... 1  
Gi3\_28398649\_x1.....uuuacacUcaguagaucgg..... 1  
Gi5\_8977135\_x1.....ugguuuacaccagAagauc..... 1  
Gi2\_11381834\_x1.....uucaccUaguagaucgg..... 1  
Gi3\_28808491\_x1.....uuuacaccaguagaucAgg..... 1  
Gi1\_4252032\_x1.....gAucgauucccggcaucg..... 1  
Gi5\_9098426\_x1.....uuuacacGcaguagaucgg..... 1  
Gi3\_28412655\_x1.....ccgCugugguauaacggcua..... 1  
Gi5\_8956022\_x1.....ggCccggugugguauaacggcuagc..... 1  
G1a\_6175094\_x1.....uccgUugugguauaacggcua..... 1  
Gi1\_4330033\_x1.....gUuccggugugguauaacggcuagcaugacu..... 1  
Gi3\_28983569\_x1.....gguCcgauucccggcaucggag..... 1  
Gi5\_8945104\_x1.....uccggugugguCuaacggcuagcau..... 1  
Gi2\_11352878\_x1.....uccgCugugguauaacgg..... 1  
Gi3\_28559175\_x1.....gguucgauuccAggcaucggagc..... 1  
Gi1\_4310630\_x1.....uuuacaccAaguagaucgg..... 1  
Gi2\_11055740\_x1.....Aguuuacaccaguagaucgg..... 1  
G1a\_6241953\_x1.....guucgaCucccggcaucgga..... 1  
Gi2\_11024546\_x1.....ugugguauaacggcuagA..... 1  
Gi3\_28846254\_x1.....gguucgauucccggcCucggagc..... 1  
Gi5\_9032243\_x1.....guucgauucccCgcaucggagc..... 1  
Gi3\_28890187\_x1.....accaguagaucggguucgGuucc..... 1  
G1a\_6210486\_x1.....gguuuacaccaguagaucU..... 1  
Gi5\_8913613\_x1.....caccagCagaucggguucga..... 1

Gi3\_28937500\_x1.....accaguagauccggguucgaCuccc..... 1  
 Gi3\_28501749\_x1.....cggguCcgauucccggaucgga..... 1  
 Gi5\_9066894\_x1.....guucgauucUcggcaucg..... 1  
 Gi1\_4312523\_x1.....uccNgugugguauaacggcuagca..... 1  
 Gi2\_11148408\_x1.....uccgguAugguauaacggcuag..... 1  
 Gi1\_4192523\_x1.....Uggugugguauaacggcuagca..... 1  
 Gi3\_28505226\_x1.....uguuuuucacccagCagauccg..... 1  
 Gi1\_4239478\_x1.....gguuuucacccaguagauccGg..... 1  
 Gi2\_11262916\_x1.....gguuuucacccGguagaucc..... 1  
 Gi2\_11170379\_x1.....uGcgauucccggaucgg..... 1  
 Gi4\_585823\_x1.....cggugugguauaacggcu..... 0  
 Gi5\_8861884\_x1.....uccggugugguauaaAggc..... 1  
 Gi1\_4332792\_x1.....uccggugugguauaacUgcua..... 1  
 Gi5\_9024825\_x1.....uagauccggguucgauucccggc..... 1  
 Gi2\_11302325\_x1.....guuuucacccaguagGucc..... 1  
 Gi5\_9007471\_x1.....cGggugugguauaacggcuag..... 1  
 Gi1\_4295478\_x1.....cuguuuuucacccaguagGuccgg..... 1  
 Gi5\_8834630\_x1.....gguucgauuccAgcaucgga..... 1  
 Gi5\_9065303\_x1.....uccgCugugguauaacggcu..... 1  
 Gi3\_28295276\_x1.....cuguuuuucGcccaguagaucc..... 1  
 Gi4\_593696\_x1.....gguucgauucccggaucggagcuA..... 1  
 Gl1a\_6098600\_x1.....gguucgauucccggaCc..... 1  
 Gi2\_10992851\_x1.....guuUgauucccggaucgga..... 1  
 Gi3\_28333361\_x1.....gugugguauaacggcuagcC..... 1  
 Gi2\_11139290\_x1.....uccggugugguauaacggUuag..... 1  
 Gi1\_4166988\_x1.....uUcggugugguauaacggcu..... 1  
 Gi2\_10999231\_x1.....uccggugugguauaacggGua..... 1  
 Gi5\_9078872\_x1.....gguuuucaUccaguagaucc..... 1  
 Gi5\_8958359\_x1.....gguucgauucccggauc..... 1  
 Gi3\_28789767\_x1.....aCuagauccggguucgauucc..... 1  
 Gi1\_4256537\_x1.....uccggugugguauaacggcuagGau..... 1  
 Gi3\_28268258\_x1.....gguuGucacccaguagaucc..... 1  
 Gi5\_8917699\_x1.....gguuuucacccaguagauccCg..... 1  
 Gi2\_11330315\_x1.....guucgauucccggaucggG..... 1  
 Gi1\_4170497\_x1.....cuguuuuucaccAaguagauccgg..... 1  
 Gi5\_9008407\_x1.....ccUgugugguauaacggcu..... 1  
 Gi3\_28458828\_x1.....uccgCugugguauaacggcu..... 1  
 Gi3\_28777936\_x1.....Agguucgauucccggaucgga..... 1  
 Gi3\_28419933\_x1.....agaucggNuucgauucc..... 1  
 Gi3\_28444618\_x1.....ccggugugguGuaaacggcuagc..... 1  
 Gi1\_4312900\_x1.....gguuuucacccaguagauccAg..... 1  
 Gi3\_28625146\_x1.....guucgauucccggcUucgga..... 1  
 Gi3\_28729928\_x1.....gguGuucacccaguagauccgg..... 1  
 Gl1a\_6235090\_x1.....gguucgauucccggaCcgg..... 1  
 Gi1\_4334072\_x1.....ccggugugguauaacgAcuagc..... 1  
 Gi5\_9069690\_x1.....uGuuuuucacccaguagauccg..... 1  
 Gi2\_11291902\_x1.....ggCucgauucccggaucggag..... 1

Gl1a\_6332228\_x1.....guuuuUaccaguagauccg..... 1  
Gl1a\_6210901\_x1.....uccUgugugguauaacggcua..... 1  
Gi3\_28790567\_x1.....Gcggugugguauaacggcu..... 1  
Gi1\_4183588\_x1.....cccaguagauccAgguucgauucc..... 1  
Gi3\_28465564\_x1.....uuCcaccaguagauccg..... 1  
Gi3\_28626118\_x1.....uccggugugguCuaacggcu..... 1  
Gi2\_11102224\_x1.....uuuucacGcaguagauccg..... 1  
Gi3\_28600314\_x1.....ucAauucccggaucgga..... 1  
Gi3\_28372883\_x1.....gCucgauucccggaucggag..... 1  
Gi3\_28865077\_x1.....agauccgggAucgauucc..... 1  
Gi1\_4275136\_x1.....gAuuucacccaguagauccg..... 1  
Gi5\_9107770\_x1.....cCgugugguauaacggcuagc..... 1  
Gi1\_4283838\_x1.....guucgauucccggaucgCa..... 1  
Gi3\_28604523\_x1.....cggguucgauucccgAcaucgga..... 1  
Gi1\_4227142\_x1.....ggugugguauaCcgcuagc..... 1  
Gi1\_4361268\_x1.....gguuuucacccaguaAauccgg..... 1  
Gi1\_4161625\_x1.....guucgauucccgUcaucgg..... 1  
Gi3\_28664967\_x1.....guagauccggguucgaCuccc..... 1  
Gi2\_11390696\_x1.....agauccggguucAauucc..... 1  
Gi5\_9024869\_x1.....ccggugugguauaacggcuaA..... 1  
Gi1\_4198134\_x1.....uccgguUugguauaacggcuagca..... 1  
Gi2\_11168016\_x1.....ccggCgugguauaacggc..... 1  
Gi3\_28558869\_x1.....guucgUuucccggaucgg..... 1  
Gi1\_4212699\_x1.....ccggugugAuauaacggcua..... 1  
Gi5\_8924727\_x1.....Accggugugguauaacggcuagcaugacug..... 1  
Gi5\_9094665\_x1.....cggugugguCaacggcuagcaugacu..... 1  
Gl1a\_6029950\_x1.....uccggugugguauaacggcuCg..... 1  
Gi3\_28674833\_x1.....ugguuuucacccaguagCuccg..... 1  
Gi1\_4268004\_x1.....uccggugugguauaacCgcuagca..... 1  
Gi5\_9084455\_x1.....gguuuucacccCguagaucc..... 1  
Gi2\_11347824\_x1.....uccgguguCguauaacggcuagca..... 1  
Gi1\_4185889\_x1.....guucgauuAccgggaucgg..... 1  
Gi3\_28440707\_x1.....uccgguguUguauaacggcuagca..... 1  
Gl1a\_5990216\_x1.....uccggugCgguauaacggcua..... 1  
Gi5\_9128855\_x1.....ggugugguauGacggcuagcaugacu..... 1  
Gi1\_4189648\_x1.....ugguuCucacccaguagauccgg..... 1  
Gi1\_4266748\_x1.....uuuucacccaguagauAccg..... 1  
Gi2\_11344631\_x1.....Augugguauaacggcuagc..... 1  
Gi1\_4219302\_x1.....uccgCugugguauaacgg..... 1  
Gi2\_11214794\_x1.....Cuuucacccaguagaucc..... 1  
Gi3\_28525479\_x1.....agCagauccggguucgauucc..... 1  
Gi1\_4287945\_x1.....uuuucacccaguagaGccg..... 1  
Gl1a\_6115796\_x1.....uccggugugguauaacggAuag..... 1  
Gi3\_28409142\_x1.....gguccggugugguauaacggcuCgca..... 1  
Gi5\_8941102\_x1.....ggugugguauaGcggcuagcau..... 1  
Gi2\_11251589\_x1.....guucgauucccgUcaucggagc..... 1  
Gi3\_28987072\_x1.....aAuagauccggguucgauucc..... 1

Gi3\_28884262\_x1.....cccgAcaucggagcucuuu..... 1  
 Gl1a\_6253294\_x1.....Aguucgauucccggauc..... 1  
 Gi2\_11338648\_x1.....ccggugugguGuaacggcuag..... 1  
 Gi5\_8939971\_x1.....uguuuuacaccaguaAaucc..... 1  
 Gi2\_11059428\_x1.....gguuuucaccagugGaucc..... 1  
 Gi5\_8986285\_x1.....uccggugugCuauaacggcuagca..... 1  
 Gi1\_4295239\_x1.....ccggugugguauaacggcCagcau..... 1  
 Gi3\_28756620\_x1.....guuuucacUcaguagauc..... 1  
 Gi5\_8834961\_x1.....gguucgauucccggcCucg..... 1  
 Gi5\_9074066\_x1.....gguuuucaccagugauAcgg..... 1  
 Gi1\_4211157\_x1.....gguGuucaccagugauaccgg..... 1  
 Gi2\_11177513\_x1.....guucgauucccggaucggagcuc..... 0  
 Gi2\_11294150\_x1.....uccggugugguauUacggcuagcau..... 1  
 Gi3\_28498450\_x1.....uguuuuacaccagugaAccg..... 1  
 Gi1\_4231592\_x1.....ggugugguaCaacggcuagcau..... 1  
 Gi1\_4205707\_x1.....ucNggugugguauaacggcuagcau..... 1  
 Gi3\_28784629\_x1.....cuggCuucaccagugauaccg..... 1  
 Gi3\_28760817\_x1.....uguuuuucUcccagugauaccg..... 1  
 Gi5\_9051860\_x1.....cggugugguaCaacggcua..... 1  
 Gi5\_9119608\_x1.....gguuuuGaccagugauaccgg..... 1  
 Gi3\_28604816\_x1.....gguccgguguggGauaacggcua..... 1  
 Gi2\_11154954\_x1.....Cuucgauucccggaucggag..... 1  
 Gi3\_28559545\_x1.....ccggAgugguaauaacggcuagc..... 1  
 Gi5\_9043566\_x1.....uccggugugguauaacggcuU..... 1  
 Gi1\_4274913\_x1.....ugguCuucaccagugauaccgg..... 1  
 Gi3\_28456883\_x1.....uccggugugguauaacCg..... 1  
 Gi2\_11262046\_x1.....gguucgauucccggaucggag..... 1  
 Gi1\_4308143\_x1.....gguuuucacGcaguagaucgg..... 1  
 Gi5\_8935803\_x1.....ggugugguauCacggcuagc..... 1  
 Gi3\_28508555\_x1.....uccggugugguauaacAggcuag..... 1  
 Gi1\_4350596\_x1.....uccgguaAugguauaacgg..... 1  
 Gi3\_28283713\_x1.....gguccggugugguauaacCggcuagc..... 1  
 Gi2\_11237886\_x1.....guucgauucccggcCucgg..... 1  
 Gi1\_4372967\_x1.....uuuucaccagugauacc..... 0  
 Gl1a\_6335511\_x1.....uccgguguNguauaacggc..... 1  
 Gi3\_28974176\_x1.....ggguucgCuucccggaucg..... 1  
 Gi2\_11122510\_x1.....gguucgauucUcggcaucggagc..... 1  
 Gi5\_8917184\_x1.....gguucgauNcccggaucggag..... 1  
 Gi3\_28573061\_x1.....uccggguucgauucccggaCcgga..... 1  
 Gi3\_28689220\_x1.....uuuucaccUguagaucgg..... 1  
 Gi2\_11284719\_x1.....gCuuuucaccagugauaccg..... 1  
 Gi1\_4325817\_x1.....guCcgauucccggaucggga..... 1  
 Gi4\_569970\_x1.....guucgauucccggaucggagcuA..... 1  
 Gi1\_4388583\_x1.....guagaucggguucgaCuccc..... 1  
 Gi2\_11254466\_x1.....guuuucaccagugauaccg..... 1  
 Gi5\_9017749\_x1.....gguucgauucccggaucg..... 1  
 Gl1a\_6074638\_x1.....cGcaguagaucggguucgauucc..... 1

G1a\_6227387\_x1.....ggugugguNuaacggcuagc..... 1  
 Gi1\_4211195\_x1.....uccggugugUuaaaacggcuagcau..... 1  
 Gi2\_11324288\_x1.....gguucgauNcccggcaucg..... 1  
 Gi3\_28284791\_x1.....gaucCGAguucgauuccc..... 1  
 Gi5\_8841115\_x1.....ccggugAgguauaacggcuag..... 1  
 Gi5\_9060780\_x1.....cggugAgguauaacggcuag..... 1  
 Gi5\_8841678\_x1.....cggugugguauaacggUua..... 1  
 Gi3\_28835738\_x1.....gguucgCuucccggaucggagc..... 1  
 Gi3\_28706836\_x1.....Auucgauucccggaucggagc..... 1  
 Gi1\_4344612\_x1.....guucgauucccUgcaucgga..... 1  
 Gi2\_11203924\_x1.....guuuuacaccUaguagauccgg..... 1  
 Gi3\_28459872\_x1.....aucCGUguucgauucccgga..... 1  
 Gi3\_28898608\_x1.....gugGgguauaacggcuagca..... 1  
 Gi5\_9107996\_x1.....guucgauuNccggcaucg..... 1  
 Gi5\_9013375\_x1.....cgUugugguauaacggcua..... 1  
 Gi5\_8951218\_x1.....cggugugguauaacggcCa..... 1  
 Gi5\_9070930\_x1.....aucCGguucgauucccUgca..... 1  
 Gi1\_4299530\_x1.....Cguuuucacccaguagauc..... 1  
 Gi3\_28340381\_x1.....gguuGgauucccggaucgga..... 1  
 Gi5\_9040776\_x1.....uccUgugugguauaacgg..... 1  
 Gi3\_28899170\_x1.....gAgaucCGguucgauu..... 1  
 Gi5\_8837132\_x1.....ggAucgauucccggauc..... 1  
 Gi3\_28927900\_x1.....uccggugugguauaacggcuagcauU..... 1  
 Gi2\_11188886\_x1.....uguuuuucacUcaguagauccg..... 1  
 Gi5\_8847653\_x1.....guuuucacccaguagauccgA..... 1  
 Gi2\_11023009\_x1.....Auucacccaguagauccg..... 1  
 Gi5\_8855538\_x1.....cccCguagauccggguucgau..... 1  
 Gi5\_8926509\_x1.....gCugugguauaacggcuagcaugacu..... 1  
 Gi2\_11217929\_x1.....gauucccggaucggagcC..... 1  
 Gi2\_11302708\_x1.....cgauucccggaucggagcucu..... 0  
 Gi3\_28577470\_x1.....agaucCGguuAgauuccc..... 1  
 Gi2\_11020092\_x1.....ccagGagauccggguucgauucccgga..... 1  
 Gi3\_28296641\_x1.....gguuAgauucccggaucg..... 1  
 Gi4\_571505\_x1.....guucgauucccggaucg..... 0  
 Gi2\_11236970\_x1.....guucgauuccUggcaucg..... 1  
 Gi5\_9059761\_x1.....gguuuucacccaguagGucc..... 1  
 Gi2\_11086644\_x1.....uucacccaguGgaucgg..... 1  
 Gi2\_11034873\_x1.....gguucgauucccggaAcgga..... 1  
 Gi5\_8840174\_x1.....uguuuuucacGcaguagauccg..... 1  
 Gi2\_11265529\_x1.....gguuuucacccaguagauccgGgg..... 1  
 Gi3\_28628050\_x1.....guuuucacccaAuagauccg..... 1  
 Gi5\_9030504\_x1.....caguagGuccggguucgauucccggaucg..... 1  
 Gi1\_4165398\_x1.....uUcggugugguauaacggcuagcauga..... 1  
 Gi5\_9083335\_x1.....ccgguguCguauaacggcua..... 1  
 Gi2\_11154433\_x1.....uccggugugCuauaacggc..... 1  
 Gi1\_4245707\_x1.....guuuucacccaguaAuuccg..... 1  
 Gi5\_8860350\_x1.....uccgAugugguauaacgg..... 1



Gi5\_8973947\_x1.....cgauucccggaucggagcucuuC..... 1  
Gi1\_4199501\_x1.....caguagaCccggguucgau..... 1  
Gi3\_28496023\_x1.....ggugugguauGacggcua..... 1  
Gi1\_4268216\_x1.....uuuucacUcaguagaucgg..... 1  
Gi5\_8886692\_x1.....uccggugugguauaacCgcua..... 1  
Gi5\_9025807\_x1.....uggAuuucacccaguagaucgg..... 1  
Gi3\_28452494\_x1.....gguucgGuucccggaucggagc..... 1  
Gi5\_9052407\_x1.....gguucgauCcccggaucgg..... 1  
Gi3\_28804437\_x1.....guuuucacccUguagauc..... 1  
G1a\_6247338\_x1.....uccUgugugguauaacggcua..... 1  
Gi3\_28880903\_x1.....uuucacccaguagCuccg..... 1  
Gi2\_11311884\_x1.....uccggugugguauAaacggcua..... 1  
Gi2\_11185599\_x1.....gguucgauuccGggcaucgg..... 1  
Gi2\_11322064\_x1.....uCGuuuucacccaguagauc..... 1  
Gi3\_28732581\_x1.....gCuucgauucccggaucgg..... 1  
Gi4\_579462\_x1.....uccggugugguauaacggcua..... 1  
G1a\_6028190\_x1.....Aguucgauucccggaucg..... 1  
Gi2\_11144726\_x1.....guucgauuccUggcaucggagc..... 1  
Gi2\_11293261\_x1.....ccaguagaucAgggguucgauucc..... 1  
Gi1\_4366509\_x1.....uccggugugguauaacggcuaAcau..... 1  
Gi5\_8951383\_x1.....uccgguguUguauaacggcua..... 1  
Gi5\_9119705\_x1.....Aguucgauucccggauc..... 1  
Gi2\_11240182\_x1.....uccggugugguauaUcggc..... 1  
G1a\_6359478\_x1.....guucgauucccggaucAgg..... 1  
G1a\_6294080\_x1.....ugguuuucacccaguagGuccg..... 1  
G1a\_6107326\_x1.....ucUggugugguauaacggcua..... 1  
Gi3\_28702391\_x1.....ggugugguauaaUggcua..... 1  
Gi3\_28428019\_x1.....uccggugugguauaacggUu..... 1  
Gi1\_4221171\_x1.....gguuuucacccaguaCauccg..... 1  
Gi3\_28525357\_x1.....cggGgugguauaacggcua..... 1  
Gi4\_588783\_x1.....Cccggugugguauaacggcua..... 1  
Gi2\_11071830\_x1.....guucAauucccggaucggagc..... 1  
Gi1\_4313891\_x1.....uccggugugguauaacgUcua..... 1  
Gi3\_28346100\_x1.....auccggguucgauuccggcC..... 1  
Gi1\_4360635\_x1.....cGguagaucggguucgau..... 1  
Gi3\_28323649\_x1.....cCauucccggaucggagc..... 1  
Gi5\_9058931\_x1.....uagaucUggguucgauuccggca..... 1  
Gi2\_11122723\_x1.....guucgaCucccggaucg..... 1  
Gi2\_11322036\_x1.....Cccggguucgauucccggaucgga..... 1  
Gi5\_8961488\_x1.....ugGgguauaacggcua..... 1  
Gi2\_11296232\_x1.....gguucgaCucccggaucg..... 1  
Gi2\_11083145\_x1.....uucgCuucccggaucgg..... 1  
Gi2\_11284705\_x1.....guuuucacccCguagaucgg..... 1  
Gi3\_28939639\_x1.....uuuucacccaguaUaucg..... 1  
Gi2\_11284344\_x1.....cccaguagaucggguucgauUcc..... 1  
Gi3\_28964466\_x1.....gguNuucacccaguagauc..... 1  
Gi1\_4376276\_x1.....ugguuuucacccagGagaucgg..... 1

Gi1\_6259667\_x1.....uccggugugguauaacggcuUc..... 1  
 Gi2\_11183907\_x1.....gAuucgauucccggaucggagc..... 1  
 Gi3\_28829148\_x1.....uguuuuaccAaguagauc..... 1  
 Gi1\_4202070\_x1.....guucgauucccCgcaucgga..... 1  
 Gi1\_4372833\_x1.....uccggugGgguauaacggcu..... 1  
 Gi2\_11140180\_x1.....ccggugAgguauaacggc..... 1  
 Gi4\_611418\_x1.....uccggugugguauaacgCcuagc..... 1  
 Gi5\_9123971\_x1.....caguagaucgggGucgauucccggaucg..... 1  
 Gi3\_28792709\_x1.....ccgguguggAauaacggcuagc..... 1  
 Gi3\_28650441\_x1.....cccggcauNggagcucuuu..... 1  
 Gi5\_8848307\_x1.....uguuuuacUcaguagauc..... 1  
 Gi5\_8884584\_x1.....Acggugugguauaacggcuag..... 1  
 Gi2\_11154693\_x1.....gCucgauucccggaucg..... 1  
 Gi1\_6214026\_x1.....Uuucgauucccggaucggagc..... 1  
 Gi1\_4373276\_x1.....guuuuacaccaguagauCg..... 1  
 Gi3\_28845404\_x1.....gguuuucaGccaguagaucc..... 1  
 Gi3\_28861116\_x1.....guagauccgggCucgauu..... 1  
 Gi3\_28490099\_x1.....Nccggugugguauaacggcu..... 1  
 Gi2\_11266840\_x1.....uagaAccggguucgauucc..... 1  
 Gi3\_28725608\_x1.....gguuuuacaccaguagauAccg..... 1  
 Gi2\_11097483\_x1.....guuuuacaccaguagauccAg..... 1  
 Gi1\_4266182\_x1.....guuuucCcccaguagauccg..... 1  
 Gi5\_8908503\_x1.....aUaucggguucgauucccggaucggagc..... 1  
 Gi1\_4360815\_x1.....cgugugguauaacggcuagca..... 1  
 Gi1\_4258670\_x1.....guucgauucccggaucggagcCcu..... 1  
 Gi1\_4386123\_x1.....ccggugugguauaacggcuCgcau..... 1  
 Gi1\_4207497\_x1.....uccggugugguauaacggcuagUau..... 1  
 Gi5\_9077229\_x1.....cgCguucgauucccggauc..... 1  
 Gi1\_4162274\_x1.....uguuuuacaccaguagauccgA..... 1  
 Gi2\_11124906\_x1.....Nuucgauucccggaucgga..... 1  
 Gi3\_28451601\_x1.....gguucgauucccggaucg..... 1  
 Gi1\_4165029\_x1.....uccggGugguauaacggcuagcau..... 1  
 Gi5\_9020282\_x1.....gguucgauucccggcCuc..... 1  
 Gi3\_28756735\_x1.....aguagaucggguucgCuucc..... 1  
 Gi5\_9091851\_x1.....Cguucgauucccggauc..... 1  
 Gi4\_570039\_x1.....guucgauucccggaCcgag..... 1  
 Gi2\_11260754\_x1.....guuuuacUcaguagauccg..... 1  
 Gi3\_28870424\_x1.....uagaCccggguucgauuc..... 1  
 Gi3\_28802416\_x1.....guucgauuccUgcaucg..... 1  
 Gi5\_8992841\_x1.....uccNgugugguauaacggc..... 1  
 Gi1\_4186141\_x1.....uccggugugUauaacgg..... 1  
 Gi1\_6085748\_x1.....uccgUugugguauaacggcuagca..... 1  
 Gi1\_4333868\_x1.....uuAcaccaguagauccgg..... 1  
 Gi3\_28495574\_x1.....agauGcgguucgauucc..... 1  
 Gi4\_606529\_x1.....ggugugguauaacggcuagca..... 0  
 Gi2\_11316727\_x1.....gguucgauucccggaAc..... 1  
 Gi3\_28647124\_x1.....gguuuuAaccaguagaucc..... 1

Gi1\_4339369\_x1.....gguucgauuccUggcaucgg..... 1  
 Gl1a\_6058941\_x1.....gguuuucacAcaguagaucgg..... 1  
 Gi5\_9035783\_x1.....Aguuuucacccaguagauc..... 1  
 Gi2\_11347435\_x1.....uucacccaguagaucAg..... 1  
 Gi1\_4215165\_x1.....auccAgguucgauucccggaucggag..... 1  
 Gi1\_4247011\_x1.....ggugugguGuaacggcuagc..... 1  
 Gi3\_28269971\_x1.....auGcgguucgauucccggaucggag..... 1  
 Gi1\_4326830\_x1.....guuuucacccaguagaCccgg..... 1  
 Gl1a\_6055432\_x1.....uccggugugguauaaGggcuag..... 1  
 Gi3\_28987937\_x1.....gguucgauucGcggcaucgga..... 1  
 Gi3\_28943001\_x1.....auccggguucgauucccggaCcgga..... 1  
 Gi3\_28770708\_x1.....aGccaguagaucggguucgauucc..... 1  
 Gi2\_11242093\_x1.....uccgguguggAauaacgg..... 1  
 Gi1\_4277820\_x1.....uucgauucccggaucgg..... 0  
 Gi2\_11100263\_x1.....uccgguAugguauaacggcuagcau..... 1  
 Gi3\_28637098\_x1.....guuGucacccaguagaucgg..... 1  
 Gi3\_28945333\_x1.....ccggcaucggagcucuuu..... 0  
 Gi3\_28325807\_x1.....uuuuGacccaguagaucgg..... 1  
 Gi5\_8846808\_x1.....uccgCugugguauaacggcuagc..... 1  
 Gi1\_4162795\_x1.....Guucacccaguagaucgg..... 1  
 Gi3\_28785728\_x1.....Cgguuuucacccaguagaucgg..... 1  
 Gi1\_4250569\_x1.....uccgguUugguauaacggcuagc..... 1  
 Gi1\_4344493\_x1.....gUuucgauucccggaucg..... 1  
 Gi3\_28788969\_x1.....ccggugugguauCacggcu..... 1  
 Gi5\_9064924\_x1.....guuuucacccagGagaucgg..... 1  
 Gi5\_8838046\_x1.....cccaguaUaucggguucgau..... 1  
 Gi3\_28661166\_x1.....guucgauucccgUcaucgga..... 1  
 Gi3\_28809834\_x1.....gguucgauucccggaUaggagc..... 1  
 Gi5\_9066384\_x1.....ugUuuuucacccaguagaucgg..... 1  
 Gi3\_28403316\_x1.....gugugguuaGaacggcuagc..... 1  
 Gi2\_11140842\_x1.....gUuuuucacccaguagau..... 1  
 Gi3\_28613876\_x1.....guuuucUccaguagaucgg..... 1  
 Gi1\_4160500\_x1.....ucNggugugguauaacggcuagc..... 1  
 Gi1\_4186409\_x1.....uccggugugguauaacAgcuagcauga..... 1  
 Gi2\_11230113\_x1.....uccggugugguauaacggcAagcau..... 1  
 Gi5\_8903390\_x1.....gguucgauucccggaucgAa..... 1  
 Gi5\_8899518\_x1.....gguucgauuccUggcauc..... 1  
 Gi1\_4275676\_x1.....ggguucgauucccgCcaucggagc..... 1  
 Gi3\_28428108\_x1.....Uccggcaucggagcucuuu..... 1  
 Gi5\_9054561\_x1.....ugguuuucacUcaguagaucgg..... 1  
 Gi2\_11357770\_x1.....guuuucacccaguagaucAgg..... 1  
 Gl1a\_6333654\_x1.....uccgUugugguauaacggc..... 1  
 Gl1a\_6272229\_x1.....uccggugugguGuaacggc..... 1  
 Gi5\_9041055\_x1.....guAcgauucccggaucgg..... 1  
 Gi5\_8843666\_x1.....uccgguguNguauaacggcuagcaugacu..... 1  
 Gi3\_28655823\_x1.....gugugguauaacGcggcuagc..... 1  
 Gi2\_11247684\_x1.....uccggugugguauaacUgcuaagca..... 1

Gi3\_28828962\_x1.....uccgguguAguauaacggcu..... 1  
Gi1\_4161452\_x1.....uccggugugguauUacggcuagca..... 1  
Gi5\_9031932\_x1.....cggugugguauaGcggcuagca..... 1  
Gi5\_9027834\_x1.....uccggugugguNuaacggcua..... 1  
Gi2\_11310390\_x1.....guucAauucccggcaucgg..... 1  
Gi2\_11012395\_x1.....ccggugCgguauaacggcuagc..... 1  
Gi3\_28930468\_x1.....uguuuuacaccaguGgauc..... 1  
Gi1\_4165637\_x1.....uccggugGgguauaacggc..... 1  
G1a\_6236776\_x1.....ucUggguucgauucccggca..... 1  
Gi5\_9131065\_x1.....uuuucaccaguagauUg..... 1  
Gi3\_28719527\_x1.....guagaAccggguucgauucc..... 1  
Gi2\_11218958\_x1.....gauucccggcaCcgagc..... 1  
Gi3\_28467763\_x1.....gguuuAcaccaguagauccgg..... 1  
G1a\_5990104\_x1.....uccggugugguauaacggcuaAcau..... 1  
Gi2\_11324408\_x1.....guuuuacaccAaguagauccg..... 1  
Gi4\_570322\_x1.....gguAuucaccaguagauccg..... 1  
Gi5\_9046579\_x1.....aguagauccggguucgauCcccggc..... 1  
Gi2\_11061395\_x1.....uuuucaccaguagaCccgg..... 1  
Gi1\_4388846\_x1.....ugugguauaacggcuagcU..... 1  
Gi5\_8950581\_x1.....gguucgauucccggcGucggagcucu..... 1  
Gi5\_8953429\_x1.....ucgauuccAggcaucggagcu..... 1  
Gi3\_28369720\_x1.....uguuuucaUccaguagau..... 1  
Gi5\_8893496\_x1.....Gccggugugguauaacggcuagcaugacug..... 1  
Gi1\_4212297\_x1.....guagauccggguucgauuccAc..... 1  
Gi3\_28397068\_x1.....aguagauccggguucgauCcc..... 1  
Gi3\_28851470\_x1.....Cguucgauucccggcaucgg..... 1  
Gi3\_28346352\_x1.....auUcggguucgauucccggca..... 1  
Gi1\_4243048\_x1.....ccggugugguauaacggcuaA..... 1  
Gi1\_4362304\_x1.....uucaccaguagauccAg..... 1  
Gi5\_8867036\_x1.....ggCgugguauaacggcuagc..... 1  
Gi5\_8934912\_x1.....gguuuuacaccaguagauUcgg..... 1  
Gi3\_28667343\_x1.....cgauucccggAaucggagcucu..... 1  
Gi5\_8868710\_x1.....ggugugguNuaacggcuag..... 1  
Gi1\_4315943\_x1.....uccgguguggAuaaacgg..... 1  
Gi2\_11045947\_x1.....guuuAcaccaguagauccgg..... 1  
Gi2\_11386745\_x1.....gguucgauCcccggcaucg..... 1  
Gi2\_11110193\_x1.....guucgauucccggcaucggaU..... 1  
Gi5\_9057942\_x1.....gguuuuacaccaguagaCcc..... 1  
Gi4\_608309\_x1.....gguucgauucccggcaucgga..... 0  
Gi3\_28940332\_x1.....Ugaucggguucgauucc..... 1  
Gi3\_28839307\_x1.....cugguuuuacAcaguagau..... 1  
Gi3\_28372285\_x1.....guGcgauucccggcaucgg..... 1  
Gi2\_11226317\_x1.....uccNgugugguauaacggcuag..... 1  
Gi2\_11268230\_x1.....uuuucaccagCagauccg..... 1  
G1a\_6184396\_x1.....gguuuuacaccagGagauccg..... 1  
Gi3\_28984022\_x1.....uuucGcccaguagauccg..... 1  
Gi1\_4382323\_x1.....caguagauccggAuucgau..... 1

Gi3\_28359290\_x1.....guucgauUccggcaucgga..... 1  
 Gi2\_11251350\_x1.....cGggugugguauaacggcuag..... 1  
 Gi5\_9021981\_x1.....guucgauucccggcCucg..... 1  
 Gi3\_28826447\_x1.....guuuucacccaguagauAcg..... 1  
 Gi2\_11091609\_x1.....uuucacccaguagaucGg..... 1  
 Gi2\_11402074\_x1.....uNcggugugguauaacggcuag..... 1  
 Gi5\_9049400\_x1.....uccgAugugguauaacggcuagcaugacug..... 1  
 Gi5\_8906339\_x1.....uccgguguCguauaacggcuagca..... 1  
 Gi3\_28588502\_x1.....uuuucacccaguagCuccgg..... 1  
 Gi1\_4172731\_x1.....ggugugguNuaacggcuagcau..... 1  
 Gi4\_570865\_x1.....guucgauucccggaucgga..... 0  
 Gi2\_11292220\_x1.....ggugugguauaGcggcuagc..... 1  
 Gi1a\_6053798\_x1.....uccggugugguauCacggcuagcau..... 1  
 Gi5\_9013102\_x1.....uccggugugguauaacggcuagcGuga..... 1  
 Gi5\_8853205\_x1.....ucNggugugguauaacggcuagca..... 1  
 Gi2\_11133518\_x1.....uagauccggguAcgauucc..... 1  
 Gi5\_9091729\_x1.....Nuucgauucccggaucggagc..... 1  
 Gi2\_11009600\_x1.....Cguucgauucccggaucggagc..... 1  
 Gi3\_28930566\_x1.....guucgauucccggaucggagcGc..... 1  
 Gi1a\_6233785\_x1.....ccggugugguauaacggc..... 0  
 Gi3\_28913390\_x1.....ccggugugguauaUcggcuag..... 1  
 Gi2\_11365707\_x1.....ugguuuucacccaCuagauccgggu..... 1  
 Gi1\_4209961\_x1.....uccgAugugguauaacggcu..... 1  
 Gi2\_11193967\_x1.....uccgguCugguauaacggcuagcau..... 1  
 Gi3\_28611525\_x1.....ggGuuucacccaguagauccggguuc..... 1  
 Gi3\_28275278\_x1.....gguCcgauucccggaucgga..... 1  
 Gi1\_4207132\_x1.....uccggugugguauaacUg..... 1  
 Gi5\_8969478\_x1.....ucGggugugguauaacggc..... 1  
 Gi3\_28428126\_x1.....cCgguucgauucccggaucgga..... 1  
 Gi2\_11259583\_x1.....ccaguagGuccggguucgauucc..... 1  
 Gi3\_28457882\_x1.....guuuucacccaguagaCcc..... 1  
 Gi1\_4230766\_x1.....uccggugugguauUacggcuag..... 1  
 Gi2\_11277155\_x1.....gguucgauucccggaucAgag..... 1  
 Gi1a\_6331400\_x1.....uUguuuucacccaguagauc..... 1  
 Gi2\_11380918\_x1.....guuuucacccaguCgauccgg..... 1  
 Gi3\_28669332\_x1.....uuucacccGguagauccg..... 1  
 Gi1\_4240931\_x1.....gGgugguauaacggcuag..... 1  
 Gi5\_9004743\_x1.....uccggugugguGuaacggcu..... 1  
 Gi5\_8830576\_x1.....uuuucacccCguagauccg..... 1  
 Gi4\_574791\_x1.....cggugugguauaacggcuagc..... 0  
 Gi2\_11080243\_x1.....uccggugugguauaacgUcuagc..... 1  
 Gi2\_11238164\_x1.....ucGggugugguauaacggcua..... 1  
 Gi5\_8889610\_x1.....cgauucccgGUaucggagcucuuu..... 1  
 Gi5\_8862807\_x1.....auccggguucgauuccUcggca..... 1  
 Gi1\_4380857\_x1.....guagauAgggguucgauucc..... 1  
 Gi2\_11077193\_x1.....gguuuucaccGaguagauccg..... 1  
 Gi5\_8946010\_x1.....cggAgugguauaacggcuagc..... 1

Gi3\_28892890\_x1.....uguuuuuacccaguagauccgA.....1  
Gi2\_11401829\_x1.....uccNgugugguauaacggcua.....1  
Gi5\_9125380\_x1.....uAuucacccaguagauccg.....1  
Gi5\_9060478\_x1.....cccaguGgauccggguucgau.....1  
Gi4\_596154\_x1.....uguuuuuacccaguagauccgg.....0  
Gi1\_4321857\_x1.....accaguagauccggguucgauucccU.....1  
Gi3\_28588923\_x1.....guucgauucccggaAcggag.....1  
Gi3\_28262097\_x1.....ccAgugugguauaacggcua.....1  
Gi5\_8873266\_x1.....ggugugguauaGcggcuagc.....1  
Gi2\_11099263\_x1.....gguucgauucccggaucggUg.....1  
Gi5\_8865448\_x1.....uccggguucgauuAccggc.....1  
Gi3\_28455365\_x1.....cggNgugguauaacggcua.....1  
Gi1\_4275921\_x1.....ccggugugguauaCcgcuagca.....1  
Gi1\_4334220\_x1.....ccaguagauccggguucgauuccc.....0  
Gi5\_9083663\_x1.....uccggugugguauUacggcuagca.....1  
Gi2\_11071267\_x1.....gUugugguauaacggcuagcaugacu.....1  
Gi3\_28612686\_x1.....gguAugguauaacggcua.....1  
Gi3\_28603845\_x1.....uccggguucgauuccggc.....0  
Gi5\_9079429\_x1.....guuuAcacccaguagauccg.....1  
Gi3\_28845316\_x1.....accagCagauccggguucgauuccc.....1  
Gi2\_11286475\_x1.....uccgguguCguauaacggcuagc.....1  
Gi2\_11294359\_x1.....ccggugugguauaacAgcuag.....1  
Gi1\_4198517\_x1.....ccggugugguauaCcgcu.....1  
Gi1\_4228494\_x1.....guucgauucccggaucgA.....1  
Gi5\_8875241\_x1.....uccggugugguauaacggcuCgcaugacug.....1  
Gi2\_11032254\_x1.....ccUaguagauccggguucgauuccc.....1  
Gi2\_11395182\_x1.....uccggugugguauaUcggcua.....1  
G1a\_6004289\_x1.....uccgguguggCauaacggcuagca.....1  
G1a\_6307436\_x1.....uccggAgugguauaacgg.....1  
Gi5\_8881075\_x1.....Ucggugugguauaacggcuagca.....1  
Gi1\_4290324\_x1.....uccggugugguauaaAggcu.....1  
Gi2\_11316339\_x1.....gguuuuacccaguagauUgg.....1  
Gi3\_28582600\_x1.....gguAuucacccaguagauccgg.....1  
Gi5\_8981332\_x1.....uccggugugguauaacggcCagcaugacug.....1  
Gi1\_4239224\_x1.....gguuuuacccaguagaAccgg.....1  
Gi5\_9029912\_x1.....gguuuuacUcaguagauc.....1  
Gi2\_11234138\_x1.....gguucgauucccgAcauc.....1  
Gi5\_9046755\_x1.....uccggugAgguauaacggcuagca.....1  
Gi1\_4175949\_x1.....guagauccNgguucgauuccc.....1  
Gi3\_28747508\_x1.....guucgauucccggaucAggagc.....1  
Gi3\_28312196\_x1.....uuucacccaguagGuccg.....1  
Gi3\_28778653\_x1.....cuguuuuuacccaguagauUg.....1  
Gi2\_11298716\_x1.....uguuuuuacccaguGgauccg.....1  
Gi3\_28601342\_x1.....ccggugAgguauaacggcuagc.....1  
Gi2\_11325719\_x1.....gguccggugugguauaacggcuCcau.....1  
Gi2\_11201603\_x1.....ggGucgauucccggaucggagc.....1  
Gi5\_8884268\_x1.....gguuuuacNccaguagaucc.....1

Gi1\_4343772\_x1.....Auuucacccaguagaucgg..... 1  
Gi2\_11128572\_x1.....uucacccaguagaucUgg..... 1  
Gi5\_8881740\_x1.....ucAggugugguauaacgg..... 1  
Gi2\_11244409\_x1.....guucgauucccggaucgC..... 1  
Gi2\_11261553\_x1.....guGuucacccaguagauc..... 1  
Gi2\_11247307\_x1.....uuuuuaccNaguagauc..... 1  
Gi5\_8905638\_x1.....guuuuaccAaguagaucgg..... 1  
Gi1\_4305466\_x1.....guuuucaGccaguagaucgg..... 1  
Gi1\_4239745\_x1.....cagAagaucggguucgau..... 1  
Gi2\_11071403\_x1.....ugguuuucacccGguagauc..... 1  
Gi5\_8859196\_x1.....Cccggugugguauaacggcua..... 1  
G1a\_6075066\_x1.....Cccggugugguauaacggcua..... 1  
Gi1\_4366601\_x1.....guucgauuccUggcaucggagc..... 1  
Gi1\_4304795\_x1.....caguagaucggguucgauC..... 1  
Gi2\_11063868\_x1.....ggAucgauucccggaucgga..... 1  
Gi2\_11299309\_x1.....gAucgauucccggaucg..... 1  
Gi3\_28876361\_x1.....Uuccggguucgauuccggca..... 1  
Gi2\_11096854\_x1.....uagaucgNguucgauucc..... 1  
Gi5\_8873760\_x1.....guucgauucccggaucggG..... 1  
Gi5\_9046319\_x1.....cgauucGcggcaucggagcucuuu..... 1  
Gi2\_11141322\_x1.....gugugguauaacggcuCgc..... 1  
Gi4\_613403\_x1.....ugguuuucacccaguagaucggA..... 1  
Gi2\_11238534\_x1.....uccggugugguauaacgg..... 1  
Gi5\_8937277\_x1.....gguucgauuAccggcauc..... 1  
Gi4\_599866\_x1.....uccggAgugguauaacggcuag..... 1  
Gi1\_4366612\_x1.....acUcaguagaucggguucgauucc..... 1  
Gi2\_11108087\_x1.....guuuuacccaguagaAccg..... 1  
Gi1\_4361016\_x1.....uuuucaccaguagaucgg..... 1  
Gi5\_9099002\_x1.....Cguccggugugguauaacggc..... 1  
Gi5\_9034553\_x1.....guuuucacAcaguagauc..... 1  
Gi3\_28653359\_x1.....ggGucgauucccggauc..... 1  
Gi1\_4266503\_x1.....uccggugugguauaacgCcuagca..... 1  
Gi3\_28542275\_x1.....guuuuacccaUuagaucgg..... 1  
Gi2\_11175704\_x1.....ccGguagaucggguucgauucc..... 1  
Gi2\_10997515\_x1.....ggAgugguauaacggcuagc..... 1  
Gi5\_9026824\_x1.....agauAccggguucgauucc..... 1  
Gi3\_28521952\_x1.....aguagaucggguCcgauucccggaucgga..... 1  
Gi2\_11056698\_x1.....uAcggugugguauaacggcuagcau..... 1  
G1a\_6357395\_x1.....uccggugugguauaacggA..... 1  
Gi5\_9047885\_x1.....uAguuuuacccaguagaucgg..... 1  
Gi5\_8888284\_x1.....Uggguucgauucccggauc..... 1  
Gi5\_8962721\_x1.....uCucacccaguagaucgg..... 1  
Gi3\_28986963\_x1.....gguuuuUaccaguagauc..... 1  
Gi3\_28369782\_x1.....gguuuucacccaguagaucGgg..... 1  
G1a\_6168897\_x1.....Augguauaacggcuagca..... 1  
Gi1\_4166820\_x1.....uccggguucgauucccgAcaucgg..... 1  
Gi2\_11074849\_x1.....uccggugugguauaacggcCagcaugacu..... 1

Gi5\_9029947\_x1.....ggugugguGuaacggcuagc..... 1  
Gi3\_28628067\_x1.....uGgauucccggaucggagc..... 1  
Gi1\_4258617\_x1.....gguuuucacccaguagauccU..... 1  
Gi3\_28704977\_x1.....cggguucgauucAcggcaucgga..... 1  
Gi3\_28705930\_x1.....gguucgauucccgUaucggag..... 1  
Gi5\_9071104\_x1.....cggugugguCuaacggcuagc..... 1  
G1a\_6298572\_x1.....guucgauucccggaucAgggagc..... 1  
Gi3\_28837215\_x1.....uccNgugugguauaacggcu..... 1  
Gi5\_9012522\_x1.....uuAcacccaguagauccg..... 1  
Gi2\_11037338\_x1.....uccNgugugguauaacggc..... 1  
Gi1\_4370985\_x1.....caguUgauccggguucgauu..... 1  
Gi1\_4367297\_x1.....gguuuucacccCguagaucgg..... 1  
Gi3\_28329134\_x1.....gguucgauucccggcCucg..... 1  
Gi5\_9095948\_x1.....cggGgugguauaacggcua..... 1  
Gi3\_28465641\_x1.....uucgauucUcggcaucgga..... 1  
Gi2\_11172094\_x1.....uccgguguUguauaacggcuag..... 1  
Gi2\_11346638\_x1.....uccgCugugguauaacggcua..... 1  
Gi5\_9057462\_x1.....ugCgguauaacggcuagc..... 1  
Gi2\_11333774\_x1.....ugugguauaaUggcuagc..... 1  
Gi2\_11124777\_x1.....uccggugugguauaacggAuagca..... 1  
Gi3\_28727055\_x1.....cGggugugguauaacggcuag..... 1  
Gi1\_4203728\_x1.....cccaguagauAcggguucgauucc..... 1  
Gi2\_11402686\_x1.....gguucgaCucccggaucggagc..... 1  
Gi2\_11171836\_x1.....ccggugugguauaacggUuag..... 1  
Gi1\_4219195\_x1.....ccggugugguauCacggcua..... 1  
Gi2\_11175642\_x1.....uuuucacccaguagCuccg..... 1  
Gi3\_28303367\_x1.....uuucacccNguagaucgg..... 1  
Gi1\_4385402\_x1.....uccggugugguauaGcggcu..... 1  
Gi1\_4307038\_x1.....uccgCugugguauaacggcuagca..... 1  
Gi2\_11009766\_x1.....guuuucacccaguagaucggA..... 1  
Gi5\_8853515\_x1.....uccggugugUuauaacggcuagc..... 1  
Gi3\_28442485\_x1.....ccgAugugguauaacggcu..... 1  
Gi2\_11052261\_x1.....gguucgauucccggaucggGgc..... 1  
Gi3\_28805403\_x1.....gguucgauucccggaGc..... 1  
Gi5\_9030542\_x1.....uccggugugguauaacgUcua..... 1  
Gi3\_28482388\_x1.....accaguCgaucggguucgauucc..... 1  
Gi2\_11114223\_x1.....Ggaucggguucgauucc..... 1  
Gi4\_573591\_x1.....uccggugGgguauaacggcuagca..... 1  
Gi1\_4375661\_x1.....ccggugugguauaacggcuagcG..... 1  
Gi3\_28809554\_x1.....gAucgauucccggaucg..... 1  
Gi2\_11140747\_x1.....uccggugugguauaaAgggcuag..... 1  
G1a\_6097245\_x1.....gguucAauucccggaucgg..... 1  
Gi3\_28948171\_x1.....guucgauucUcggcaucggag..... 1  
Gi3\_28767597\_x1.....gauuccggcGucggagc..... 1  
Gi1\_4372688\_x1.....cUguagaucggguucgauu..... 1  
Gi3\_28968983\_x1.....guuuucacccaguagCuccggguucg..... 1  
Gi3\_28466332\_x1.....cAgugugguauaacggcua..... 1





|                     |                               |   |
|---------------------|-------------------------------|---|
| Gi3_10679486_x28316 | .....guucgauucccgugaccgc      | 0 |
| Gi2_2331298_x26781  | .....gguucgauucccgugaccgcC    | 1 |
| Gi3_11135498_x22933 | .....guucgauucccgugaccgc      | 0 |
| Gi3_11495854_x18945 | .....guucgauucccgugacc        | 0 |
| Gi5_3330034_x15390  | .....gguucgauucccgugacc       | 0 |
| Gi3_12109554_x15234 | .....guucgauucccgugaccg       | 0 |
| Gi2_2674577_x14891  | .....gguucgauucccgugacc       | 0 |
| Gi3_12200171_x14863 | .....gguucgauucccgugaccgc     | 0 |
| Gi5_3448945_x14381  | .....gguucgauucccgugaccgcC    | 1 |
| Gi2_2733656_x14266  | .....guucgauucccgugaccgcC     | 1 |
| Gi3_12344733_x14050 | .....gguucgauucccgugaccgc     | 0 |
| Gi5_3504897_x13527  | .....guucgauucccgugacc        | 0 |
| Gi3_12520633_x12901 | .....gguucgauucccgugac        | 0 |
| Gi3_12584466_x12541 | .....gcggucauaguacaguggcCagua | 1 |
| Gi2_2967480_x11523  | .....guucgauucccgugaccgcC     | 1 |
| Gi5_3693055_x9087   | .....guucgauucccgugaccgc      | 0 |
| Gi2_3168366_x9005   | .....guucgauucccgugacc        | 0 |
| Gi5_3763391_x8268   | .....guucgauucccgugaccg       | 0 |
| Gi3_13526642_x8020  | .....gacugucacucacgugaccgg    | 0 |
| Gi2_3320932_x7976   | .....gcggucauaguacaguggcC     | 1 |
| Gi5_3779721_x7731   | .....gguucgauucccgugaccgcC    | 1 |
| Gi2_3405057_x7351   | .....guucgauucccgugaccg       | 0 |
| Gi1_1787151_x7046   | .....ugacugucacucacgugaccgg   | 0 |
| Gi5_3852057_x6747   | .....gacugucacucacgugaccgg    | 0 |
| Gi2_3524711_x6638   | .....guucgauucccgugaccgc      | 0 |
| Gi1_1846394_x6002   | .....gacugucacucacgugaccgg    | 0 |
| Gi1a_2944208_x5638  | .....gcggucauaguacaguggcCagua | 1 |
| Gi3_14467341_x5241  | .....gcggucauaguacaguggcCagua | 1 |
| Gi3_14498663_x5151  | .....gacugucacucacgugaccg     | 0 |
| Gi5_4025138_x4885   | .....guucgauucccgugaccgcC     | 1 |
| Gi5_4053891_x4712   | .....gcggucauaguacaguggcuagu  | 0 |
| Gi3_14743655_x4678  | .....gguucgauucccgugaccg      | 0 |
| Gi2_3802453_x4665   | .....gguucgauucccgugaccg      | 0 |
| Gi3_14762322_x4646  | .....gcggucauaguacaguggc      | 0 |
| Gi2_3879128_x4359   | .....gguucgauucccgugac        | 0 |
| Gi2_3896457_x4271   | .....guucgauucccgugaccgc      | 0 |
| Gi5_4120747_x4189   | .....gguucgauucccgugaccgc     | 0 |
| Gi3_15035452_x4167  | .....ugacugucacucacgugaccgg   | 0 |
| Gi3_15109666_x4067  | .....gcggucauaguacagugg       | 0 |
| Gi3_15186188_x3984  | .....Uguucgauucccgugacc       | 1 |
| Gi2_4003379_x3903   | .....gcggucauaguacaguggcCagua | 1 |
| Gi2_4068395_x3730   | .....gguucgauucccgugaccgc     | 0 |
| Gi5_4231947_x3714   | .....guucgauucccgugaccgcC     | 1 |
| Gi5_4235661_x3710   | .....gguucgauucccgugac        | 0 |
| Gi2_4083236_x3668   | .....gcggucauaguacaguggcCa    | 1 |
| Gi3_15510213_x3544  | .....uucgauucccgugaccgcC      | 1 |
| Gi5_4304557_x3504   | .....gguucgauucccgugaccgc     | 0 |

|                    |                            |   |
|--------------------|----------------------------|---|
| Gi3_15688690_x3320 | ucgauucccgugaccgc          | 0 |
| Gi1_2053144_x3296  | guucAauucccgugaccgc        | 1 |
| Gi5_4403507_x3079  | ugacugucacucacgugaccgg     | 0 |
| Gi3_15942958_x2991 | gauucccgugaccgcCc          | 1 |
| Gi3_15998973_x2911 | Uuucgauucccgugaccgc        | 1 |
| Gi3_16062459_x2853 | ucgauucccgugaccgcCc        | 1 |
| Gi5_4444458_x2828  | guucgauucccgugaccgc        | 0 |
| Gi2_4324640_x2824  | gcggucgauaguacaguggc       | 0 |
| Gi3_16174715_x2760 | gcggucgauaguacaguggcCaguau | 1 |
| Gi3_16267643_x2699 | gUuucgauucccgugacc         | 1 |
| Gi5_4491141_x2688  | gcggucgauaguacaguggcua     | 0 |
| Gi2_4403234_x2603  | gcggucgauaguacaguggcCagu   | 1 |
| Gi2_4436659_x2536  | gguucgauucccgugaccgc       | 0 |
| Gi3_16426804_x2515 | ucgauucccgugaccgc          | 0 |
| Gi5_4591949_x2345  | gcggucgauaguacaguggc       | 0 |
| Gi3_16662301_x2335 | ucgauucccgugaccgcCc        | 1 |
| Gi3_16724307_x2260 | Uuucgauucccgugaccgc        | 1 |
| Gi3_16922399_x2097 | Uuucgauucccgugacc          | 1 |
| Gi1a_3253411_x2082 | gguucgauucccgugacc         | 0 |
| Gi3_16962104_x2076 | cacucacgugaccgggu          | 0 |
| Gi1_2173842_x2072  | gcggucgauaguacaguggcua     | 0 |
| Gi3_17076367_x1998 | uucgauucccgugaccgcCc       | 1 |
| Gi5_4717655_x1992  | gcggucgauaguacaguggcua     | 0 |
| Gi3_17088314_x1984 | gcggucgauaguacaguggcC      | 1 |
| Gi5_4791852_x1828  | gcggucgauaguacaguggcua     | 0 |
| Gi3_17337803_x1806 | uucgauucccgugaccgc         | 0 |
| Gi5_4804536_x1797  | gguucgauucccgugaccgc       | 0 |
| Gi3_17473962_x1725 | ugacugucacucacgugaccgc     | 0 |
| Gi1a_3343790_x1716 | guucgauucccgugaccgcCc      | 1 |
| Gi1a_3348925_x1703 | gguucgauucccgugaccgcCc     | 1 |
| Gi2_4891579_x1701  | Uguucgauucccgugacc         | 1 |
| Gi5_4855143_x1695  | gcggucgauaguacagugg        | 0 |
| Gi5_4863592_x1680  | Uguucgauucccgugacc         | 1 |
| Gi3_17569124_x1672 | Uguucgauucccgugaccgc       | 1 |
| Gi5_4870289_x1663  | gacugucacucacgugaccgc      | 0 |
| Gi3_17579132_x1661 | Uuucgauucccgugaccgc        | 1 |
| Gi3_17661226_x1617 | cgauucccgugaccgcCc         | 1 |
| Gi3_17685407_x1602 | ggguucgauucccgugaccgc      | 0 |
| Gi3_17773868_x1552 | Uguucgauucccgugaccgc       | 1 |
| Gi3_17815473_x1527 | uucgauucccgugaccgc         | 0 |
| Gi1_2269280_x1498  | guucAauucccgugaccgc        | 1 |
| Gi3_17862385_x1497 | cgauucccgugaccgcCc         | 1 |
| Gi3_17886268_x1488 | ggguucgauucccgugacc        | 0 |
| Gi5_4970391_x1463  | Uuucgauucccgugacc          | 1 |
| Gi3_18011328_x1420 | gGucgauucccgugaccgc        | 1 |
| Gi3_18056520_x1402 | ggguucgauucccgugaccgcCc    | 1 |
| Gi3_18083051_x1392 | Uguucgauucccgugacc         | 1 |

|                    |                                |       |   |
|--------------------|--------------------------------|-------|---|
| Gi2_5254444_x1335  | .....cacucacgugacccgggu        | ..... | 0 |
| Gi1_2319585_x1331  | .....gcggucauaguacagugg        | ..... | 0 |
| Gi3_18240610_x1325 | .....cacucacgugacccggguuc      | ..... | 0 |
| Gi2_5353207_x1242  | .....gauucccgugaccgC           | ..... | 1 |
| Gi1a_3502249_x1230 | .....guucgauucccgugaccgC       | ..... | 1 |
| Gi2_5400851_x1204  | .....gacugucacucacgugaccgg     | ..... | 0 |
| Gi5_5120668_x1184  | .....gUuucgauucccgugacc        | ..... | 1 |
| Gi2_5454177_x1162  | .....gauucccgugaccgC           | ..... | 1 |
| Gi3_18613458_x1153 | .....gGucgauucccgugaccgC       | ..... | 1 |
| Gi1_2360148_x1144  | .....ugacugucacucacgugaccg     | ..... | 0 |
| Gi3_18642190_x1144 | .....gUuucgauucccgugaccgC      | ..... | 1 |
| Gi3_18664999_x1137 | .....auucccgugaccgC            | ..... | 1 |
| Gi1_2370323_x1110  | .....gacugucacucacgugaccgg     | ..... | 0 |
| Gi2_5521144_x1107  | .....gUuucgauucccgugacc        | ..... | 1 |
| Gi1_2373642_x1101  | .....gguucgauucccgugaccgC      | ..... | 1 |
| Gi3_18805245_x1077 | .....gUuucgauucccgugaccgC      | ..... | 1 |
| Gi1a_3583083_x1041 | .....gcggucauaguacaguggcuagu   | ..... | 0 |
| Gi5_5200653_x1036  | .....uucgauucccgugaccgC        | ..... | 0 |
| Gi3_18914841_x1032 | .....gGucgauucccgugacc         | ..... | 1 |
| Gi3_18919998_x1030 | .....Uacugucacucacgugaccgg     | ..... | 1 |
| Gi3_18938486_x1024 | .....gcggucauaguacaguggCa      | ..... | 1 |
| Gi2_5668571_x994   | .....Uuucgauucccgugacc         | ..... | 1 |
| Gi2_5671552_x992   | .....ucgauucccgugaccgC         | ..... | 1 |
| Gi1_2408944_x983   | .....guucAuuucccgugacc         | ..... | 1 |
| Gi5_5250653_x972   | .....gcggucauaguacaguggcuaguau | ..... | 0 |
| Gi3_19091568_x968  | .....gUuucgauucccgugac         | ..... | 1 |
| Gi3_19149150_x950  | .....cacucacgugacccggguucga    | ..... | 0 |
| Gi5_5279217_x927   | .....UuucgauucccgugaccgC       | ..... | 1 |
| Gi2_5770405_x921   | .....cacucacgugacccggguuc      | ..... | 0 |
| Gi1_2432861_x917   | .....acugucacucacgugaccgg      | ..... | 0 |
| Gi5_5300323_x903   | .....Uacugucacucacgugaccgg     | ..... | 1 |
| Gi5_5304822_x894   | .....Uuucgauucccgugaccg        | ..... | 1 |
| Gi1a_3686658_x853  | .....guucgauucccgugacc         | ..... | 0 |
| Gi1_2461933_x848   | .....gcggucauaguacaguggcuagua  | ..... | 0 |
| Gi1a_3693438_x842  | .....gguucgauucccgugac         | ..... | 0 |
| Gi1_2475285_x820   | .....gguucAuuucccgugacc        | ..... | 1 |
| Gi1a_3714880_x812  | .....guucgauucccgugaccgC       | ..... | 0 |
| Gi3_19605968_x806  | .....gauucccgugaccgC           | ..... | 1 |
| Gi3_19654758_x793  | .....Cguucgauucccgugacc        | ..... | 1 |
| Gi2_5995361_x788   | .....Uuucgauucccgugaccg        | ..... | 1 |
| Gi1_2505224_x759   | .....Uacugucacucacgugaccgg     | ..... | 1 |
| Gi3_19866098_x741  | .....gacugucacucacgugacc       | ..... | 0 |
| Gi3_20013890_x701  | .....gGucgauucccgugaccg        | ..... | 1 |
| Gi2_6181988_x696   | .....UuucgauucccgugaccgC       | ..... | 1 |
| Gi2_6197229_x688   | .....uucgauucccgugaccgC        | ..... | 1 |
| Gi3_20082250_x681  | .....Uacugucacucacgugaccgg     | ..... | 1 |
| Gi5_5495675_x664   | .....gGucgauucccgugacc         | ..... | 1 |

|                   |                           |   |
|-------------------|---------------------------|---|
| Gi3_20192000_x659 | Ucggucauaguacaguggc       | 1 |
| G1a_3857627_x639  | guucgauucccgugaccg        | 0 |
| Gi5_5526084_x636  | Ucggucauaguacaguggcuagu   | 1 |
| G1a_3870962_x629  | gguucgauucccgugaccgc      | 0 |
| Gi1_2574846_x617  | gguucAauucccgugaccgc      | 1 |
| Gi2_6435284_x597  | ucgauucccgugaccgc         | 0 |
| Gi2_6466558_x584  | gcggucauaguacagugg        | 0 |
| Gi2_6475288_x581  | ucgauucccgugaccgcgCc      | 1 |
| Gi3_20572034_x580 | ggguucgauucccgugaccg      | 0 |
| Gi1_2598632_x575  | uUacugucacucacgugaccgg    | 1 |
| Gi3_20589930_x575 | cgauucccgugaccgcg         | 0 |
| Gi3_20722604_x549 | ggguucgauucccgugaccgc     | 0 |
| Gi2_6576287_x544  | gcggucauaguacaguggcCaguau | 1 |
| Gi3_20806130_x535 | Ucggucauaguacagugg        | 1 |
| Gi3_20830641_x531 | gacugucacucacgugacc       | 0 |
| Gi3_20837003_x529 | cgguucgauucccgugaccgcgCc  | 1 |
| Gi2_6674208_x510  | ggguucgauucccgugaccgcg    | 0 |
| Gi2_6702050_x503  | Uguucgauucccgugaccgc      | 1 |
| Gi3_21022793_x494 | Uguucgauucccgugaccg       | 1 |
| Gi2_6742186_x490  | gGucgauucccgugacc         | 1 |
| Gi5_5707154_x488  | ucgauucccgugaccgc         | 0 |
| Gi3_21107506_x481 | acgugaccggguucgauucc      | 0 |
| Gi1_2661028_x474  | gcggucauaguacaguggc       | 0 |
| Gi1_2661502_x473  | ucAauucccgugaccgc         | 1 |
| Gi2_6792247_x473  | Uguucgauucccgugac         | 1 |
| Gi2_6795552_x472  | acucacgugaccggguuc        | 0 |
| Gi5_5732134_x472  | Uguucgauucccgugac         | 1 |
| Gi5_5757303_x461  | Uguucgauucccgugaccgc      | 1 |
| Gi5_5760521_x459  | gGucgauucccgugaccgc       | 1 |
| Gi2_6848735_x455  | ggguucgauucccgugaccgcgC   | 1 |
| Gi2_6851461_x454  | Uuucgauucccgugaccgcg      | 1 |
| Gi2_6859621_x452  | ggguucgauucccgugacc       | 0 |
| Gi3_21293998_x451 | Cguucgauucccgugaccgc      | 1 |
| G1a_4092592_x436  | gauucccgugaccgcgC         | 1 |
| Gi3_21445937_x428 | gugaccggguucgauucc        | 0 |
| Gi3_21465970_x424 | gugacugucacucacgugaccgg   | 0 |
| Gi1_2696460_x423  | gcggucauaguacaguggcuagu   | 0 |
| G1a_4115753_x421  | gguucgauucccgugaccg       | 0 |
| Gi5_5831681_x415  | gGucgauucccgugaccg        | 1 |
| Gi2_7013711_x412  | Ucggucauaguacaguggc       | 1 |
| Gi2_7050798_x402  | cgauucccgugaccgcgC        | 1 |
| Gi3_21633003_x400 | acucacgugaccggguu         | 0 |
| Gi2_7061630_x399  | Uguucgauucccgugaccgcg     | 1 |
| Gi3_21674720_x395 | guucgauucccgugaccgcgCcu   | 1 |
| Gi3_21711988_x390 | gugaccggguucgauucc        | 0 |
| Gi3_21809835_x375 | gguucgauucccgugaccgcgAc   | 1 |
| Gi2_7156816_x374  | gGucgauucccgugaccgc       | 1 |

|                   |                               |   |
|-------------------|-------------------------------|---|
| Gi5_5898853_x374  | .....ggguucgauucccgugacc      | 0 |
| Gi2_7178398_x370  | .....gGucgauucccgugaccg       | 1 |
| Gi2_7181352_x369  | .....cacucacgugaccggguucga    | 0 |
| Gi5_5909988_x366  | Ucggucauaguacaguggcua         | 1 |
| Gi3_21877150_x365 | .....ucacucacgugaccggguucga   | 0 |
| Gi3_21937399_x356 | .....ggguucgauucccgugaccgCgCc | 1 |
| Gi5_5933712_x355  | .....UguucgauucccgugaccgCg    | 1 |
| Gi3_21992777_x349 | .....gUuucgauucccgugaccg      | 1 |
| Gi3_22026409_x344 | .....uUacugucacucacgugaccgg   | 1 |
| Gi3_22039440_x342 | .....Aguucgauucccgugacc       | 1 |
| Gi5_5970180_x339  | gcggucauaguacaguggcu          | 0 |
| Gi3_22083851_x336 | .....gguucgauNcccggugacc      | 1 |
| Gi2_7348797_x332  | .....gUuucgauucccgugaccgc     | 1 |
| Gi2_7366952_x328  | .....uucgauucccgugaccgc       | 0 |
| Gi5_6012318_x324  | .....Cguucgauucccgugacc       | 1 |
| Gi3_22216116_x319 | .....Aguucgauucccgugaccg      | 1 |
| Gi3_22230763_x318 | .....guucgauucccgugaccgCgC    | 0 |
| Gi5_6023559_x318  | .....gUuucgauucccgugaccgc     | 1 |
| Gi4_319739_x316   | .....gguucgauucccgugaccgCgCc  | 1 |
| Gi5_6038999_x312  | .....UuucgauucccgugaccgCg     | 1 |
| Gi3_22275813_x312 | .....gguucgauucccgugaccgCgUc  | 1 |
| Gi4_320993_x311   | gcggucauaguacaguggcuagua      | 0 |
| Gi2_7452522_x308  | .....ggguucgauucccgugaccgCgCc | 1 |
| Gi2_7457142_x307  | .....ggguucgauucccgugaccg     | 0 |
| Gi1_2813131_x304  | Ucggucauaguacaguggcua         | 1 |
| Gi5_6062095_x304  | .....gucauaguacaguggcuagu     | 0 |
| Gi3_22346064_x304 | .....acugucacucacgugaccg      | 0 |
| Gi2_7481563_x303  | gcggucauaguacaguggcCag        | 1 |
| Gi2_7483381_x303  | .....gUuucgauucccgugac        | 1 |
| Gi5_6065431_x302  | Ucggucauaguacaguggc           | 1 |
| Gi3_22383777_x300 | .....AuucgauucccgugaccgCg     | 1 |
| Gi3_22402306_x298 | gcggucauaguacaguggcCag        | 1 |
| Gi5_6076235_x298  | .....guucgauucccgugaccgCgCcu  | 1 |
| Gi2_7522260_x295  | .....ugacugucacucacgugaccgg   | 0 |
| Gi2_7560397_x287  | .....gUuucgauucccgugaccgCg    | 1 |
| Gi3_22540447_x283 | .....acugucacucacgugaccgg     | 0 |
| Gi5_6126624_x282  | .....uucgauucccgugaccgc       | 0 |
| Gi5_6131127_x281  | .....gUuucgauucccgugac        | 1 |
| Gi3_22581156_x278 | .....gguucgauucccgugaccgCgCcu | 1 |
| Gi2_7619941_x277  | .....Uguucgauucccgugaccg      | 1 |
| Gi1_2851416_x276  | gcggucauaguacaguggcuag        | 0 |
| Gi1_2851967_x275  | .....Ggacugucacucacgugaccgg   | 1 |
| Gi2_7644429_x273  | .....cgauucccgugaccgCgCcu     | 0 |
| Gi1_2856077_x273  | .....ggguucgauucccgugaccgCgC  | 1 |
| Gi3_22672372_x269 | .....acgugaccggguucgauucc     | 0 |
| Gi3_22679097_x269 | .....Cgguucgauucccgugacc      | 1 |
| Gi1_2868179_x266  | .....uucAauucccgugaccgc       | 1 |

|                   |                            |   |
|-------------------|----------------------------|---|
| Gi5_6178664_x266  | .cggucauaguacaguggcua      | 0 |
| Gi5_6177866_x266  | Ucggucauaguacaguggcuag     | 1 |
| Gi5_6181055_x265  | .uUacugucacucacgugaccgg    | 1 |
| Gi5_6202837_x260  | .gaccggguucgauucc          | 0 |
| Gi5_6210340_x258  | gcggucauaguacaguggcuagA    | 1 |
| Gi5_6216760_x256  | .ggguucgauucccgugaccg      | 0 |
| Gi2_7762803_x252  | .ucacucacgugaccgggu        | 0 |
| Gi3_22864983_x251 | .ucacgugaccggguucgauuc     | 0 |
| Gi2_7768838_x251  | .ggguucgauucccgugaccgc     | 0 |
| Gi3_22868497_x251 | .guucgauucccgugaccA        | 1 |
| Gi2_7788801_x248  | .ucgauucccgugaccgg         | 0 |
| Gi5_6250186_x247  | .cauaguacaguggcuagu        | 0 |
| Gi5_6251909_x246  | .gUuucgauucccgugaccgg      | 1 |
| Gi3_22946443_x244 | .gugacugucacucacgugaccg    | 0 |
| Gi3_22951323_x244 | .cacucacgugaccggguucgauucc | 0 |
| Gi1_2912781_x243  | .guucgauucccgugaccggCc     | 1 |
| Gi5_6269947_x241  | Ucggucauaguacagugg         | 1 |
| Gi2_7843328_x239  | .gucauaguacaguggcCaguau    | 1 |
| Gl1a_4486785_x239 | .Uguucgauucccgugacc        | 1 |
| Gi2_7855939_x237  | .auucccgugaccggCc          | 1 |
| Gi5_6292875_x236  | .cucacgugaccggguuc         | 0 |
| Gi1_2929297_x235  | gcggucauaguacaguggcuaguau  | 0 |
| Gi1_2933506_x232  | .uucAauucccgugaccg         | 1 |
| Gi5_6321021_x229  | .gauucccgugaccggCc         | 1 |
| Gi3_23146949_x228 | .acugucacucacgugaccgggu    | 0 |
| Gi2_7925162_x227  | .cgauucccgugaccgg          | 0 |
| Gi3_23176813_x225 | .cauaguacaguggcCagu        | 1 |
| Gi3_23178613_x225 | .ggguucgauucccgCgacc       | 1 |
| Gi5_6351713_x223  | Ucggucauaguacaguggcuagua   | 1 |
| Gi2_7963687_x222  | .uucgauucccgugaccgg        | 0 |
| Gi3_23235434_x221 | .auaguacaguggcCagua        | 1 |
| Gi3_23238086_x221 | .cacucacgugaccggguu        | 0 |
| Gi1_2961568_x220  | .ggguucgauucccgugaccg      | 0 |
| Gi3_23311840_x215 | .guucgauucccgCgaccgc       | 1 |
| Gl1a_4555086_x215 | gcggucauaguacaguggcuagua   | 0 |
| Gi4_350183_x213   | .cucacgugaccggguucgauuc    | 0 |
| Gi1_2978456_x213  | .cacucacgugaccggguucA      | 1 |
| Gi5_6412557_x212  | .Uacugucacucacgugaccg      | 1 |
| Gi3_23370340_x211 | .Cgguucgauucccgugaccgg     | 1 |
| Gi3_23400331_x209 | .gaccggguucgauucc          | 0 |
| Gi5_6428132_x209  | .acugucacucacgugaccgggu    | 0 |
| Gi3_23412611_x208 | .ugacugucacucacgugacc      | 0 |
| Gi2_8079884_x207  | .cgguucgauucccgugacc       | 0 |
| Gi5_6438132_x207  | .acgugaccggguucgauucc      | 0 |
| Gi3_23450765_x205 | .ucacgugaccggguucga        | 0 |
| Gi3_23462618_x204 | .cacucacgugaccggguucgauu   | 0 |
| Gi3_23479079_x203 | .cacgugaccggguucgauucc     | 0 |

|                        |                                   |   |
|------------------------|-----------------------------------|---|
| Gi5_6465769_x202.....  | auaguacaguggcuagua.....           | 0 |
| Gi1_3019257_x198.....  | cacucacgugacccggguu.....          | 0 |
| Gi2_8159475_x197.....  | cggucauaguacaguggcCagua.....      | 1 |
| Gi5_6495916_x197.....  | gguucgauuUccggugaccgc.....        | 1 |
| Gi2_8185236_x194.....  | gGucgauucccgugaccgcg.....         | 1 |
| Gi4_360392_x194.....   | gcggucauaguacaguggcuagu.....      | 0 |
| Gi1_3028663_x194.....  | ucacucacgugacccggguuc.....        | 0 |
| Gi3_23648137_x191..... | Auucgauucccgugaccgc.....          | 1 |
| Gi1a_4632418_x191..... | uucgauucccgugaccgc.....           | 0 |
| Gi2_8219508_x190.....  | cgauucccgugaccgC.....             | 1 |
| Gi2_8229716_x189.....  | cgugacccggguucgauuc.....          | 0 |
| Gi3_23686821_x188..... | cccgguucgauucccgugac.....         | 0 |
| Gi3_23714756_x187..... | gucauaguacaguggcCaguau.....       | 1 |
| Gi3_23705780_x187..... | Ugguucgauucccgugaccgcg.....       | 1 |
| Gi5_6565386_x186.....  | cccgguucgauucccgugacc.....        | 0 |
| Gi2_8248264_x186.....  | cauaguacaguggcCagu.....           | 1 |
| Gi3_23730016_x186..... | cggucauaguacaguggcCagua.....      | 1 |
| Gi5_6570949_x185.....  | cacucacgugacccggguuc.....         | 0 |
| Gi3_23742041_x184..... | cucacgugacccggguucgauu.....       | 0 |
| Gi2_8283694_x182.....  | auaguacaguggcCaguau.....          | 1 |
| Gi3_23825817_x179..... | guucgaCucccgugaccgcg.....         | 1 |
| Gi3_23819373_x179..... | auucccgugaccgCgcuu.....           | 0 |
| Gi5_6631373_x177.....  | cggucauaguacaguggcuagu.....       | 0 |
| Gi3_23880377_x175..... | ucacgugacccgguucgauucc.....       | 0 |
| Gi1_3084832_x175.....  | gguucgauucccgugaccgCcu.....       | 1 |
| Gi3_23901162_x174..... | cauaguacaguggcCaguau.....         | 1 |
| Gi3_23908818_x174..... | guucgaCucccgugaccgc.....          | 1 |
| Gi1_3094388_x172.....  | gguucAauucccgugaccg.....          | 1 |
| Gi3_23944030_x171..... | gacugucacucacgugacUc.....         | 1 |
| Gi2_8388878_x170.....  | cauaguacaguggcCaguau.....         | 1 |
| Gi5_6692452_x169.....  | Uguucgauucccgugaccg.....          | 1 |
| Gi3_24004093_x168..... | guucgauuNccggugaccgc.....         | 1 |
| Gi1a_4707396_x167..... | Ucggucauaguacaguggcuagu.....      | 1 |
| Gi1_3110145_x167.....  | gcggucauaguacaguggcu.....         | 0 |
| Gi1_3119770_x165.....  | gcggucauaguacaguggcCa.....        | 1 |
| Gi2_8442881_x164.....  | Uacugucacucacgugacccg.....        | 1 |
| Gi2_8449277_x164.....  | Aguucgauucccgugacc.....           | 1 |
| Gi1_3120921_x164.....  | Ucggucauaguacagugg.....           | 1 |
| Gi3_24059559_x164..... | gugacugucacucacguga.....          | 0 |
| Gi3_24064315_x164..... | cgugacugucacucacgugacc.....       | 0 |
| Gi3_24070383_x164..... | Ggacugucacucacgugacccg.....       | 1 |
| Gi5_6745028_x162.....  | guucgauucccgugaccgCgcuu.....      | 0 |
| Gi3_24096236_x162..... | uucccgugaccgCgcuuA.....           | 1 |
| Gi5_6747928_x161.....  | acgugacccggguucgauucccgugacc..... | 0 |
| Gi3_24151134_x158..... | cccgugaccgCgcuu.....              | 0 |
| Gi5_6777401_x158.....  | gGucgauucccgugaccgcg.....         | 1 |
| Gi1_3148759_x157.....  | gacugucacucacgugacc.....          | 0 |



|                        |                                |   |
|------------------------|--------------------------------|---|
| Gi2_8526820_x156.....  | gUuucgauucccgugaccg.....       | 1 |
| Gi3_24200317_x155..... | cgugaccggguucgauuccc.....      | 0 |
| Gi5_6794617_x155.....  | cccgguucgauucccgugac.....      | 0 |
| Gi3_24223793_x154..... | gCucgauucccgugaccgc.....       | 1 |
| Gi1a_4748563_x154..... | gcggucauaguacaguggcua.....     | 0 |
| Gi3_24213475_x154..... | acucacgugaccggguucgauu.....    | 0 |
| Gi3_24249908_x152..... | gacugucacucacgugaccggguuc..... | 0 |
| Gi3_24244284_x152..... | Aguucgauucccgugaccgc.....      | 1 |
| Gi5_6828458_x151.....  | gucauaguacaguggcuag.....       | 0 |
| Gi1a_4761107_x151..... | ggguucgauucccgugaccg.....      | 0 |
| Gi3_24276208_x150..... | gguucgauucccgugacc.....        | 1 |
| Gi3_24308898_x148..... | gguucgaCucccgugacc.....        | 1 |
| Gi5_6854471_x148.....  | gguucgauNcccgugacc.....        | 1 |
| Gi3_24306678_x148..... | Ugguucgauucccgugacc.....       | 1 |
| Gi3_24348308_x146..... | guucgauucccgugaccgc.....       | 1 |
| Gi3_24356895_x145..... | guucgauucccgCgacc.....         | 1 |
| Gi3_24363855_x145..... | gguucgauucccgugacc.....        | 1 |
| Gi5_6878828_x145.....  | acugucacucacgugaccgg.....      | 0 |
| Gi1_3199201_x144.....  | guucAuuucccgugaccg.....        | 1 |
| Gi3_24384483_x144..... | gguucgauucccgugaccgU.....      | 1 |
| Gi2_8669149_x142.....  | gguucgauucccgugaccggcu.....    | 0 |
| Gi3_24409641_x142..... | cggucauaguacaguggcC.....       | 1 |
| Gi2_8673835_x142.....  | gacugucacucacgugacc.....       | 0 |
| Gi5_6912781_x141.....  | cauaguacaguggcuaguau.....      | 0 |
| Gi3_24433557_x141..... | gucauaguacaguggcCagu.....      | 1 |
| Gi5_6912640_x141.....  | acugucacucacgugaccggguuc.....  | 0 |
| Gi3_24462389_x139..... | guucgaCucccgugacc.....         | 1 |
| Gi3_24482621_x138..... | gugaccggguucgauuc.....         | 0 |
| Gi3_24485933_x138..... | ggCucgauucccgugacc.....        | 1 |
| Gi2_8705865_x138.....  | cgugacugucacucacgugacc.....    | 0 |
| Gi3_24508707_x137..... | gguucgauucccgugaccgGA.....     | 1 |
| Gi3_24504460_x137..... | cacucacgugaccggguucgauuc.....  | 0 |
| Gi5_6949672_x137.....  | uucgauucccgugaccg.....         | 0 |
| Gi3_24527184_x135..... | gugacugucacucacgugacc.....     | 0 |
| Gi3_24550472_x134..... | gacugucacucacgugaccgg.....     | 0 |
| Gi5_6979336_x134.....  | gguucgauucccgugaccgCcu.....    | 1 |
| Gi5_6981466_x133.....  | ggguucgauucccgugaccgC.....     | 1 |
| Gi2_8768317_x133.....  | gugacugucacucacgugaccg.....    | 0 |
| Gi5_6995775_x132.....  | gugaccggguucgauucc.....        | 0 |
| Gi5_7005601_x131.....  | gUuucgauucccgugaccg.....       | 1 |
| Gi3_24601663_x131..... | augcgugacugucacucacgugacc..... | 0 |
| Gi3_24611226_x131..... | gguucgauNcccgugaccg.....       | 1 |
| Gi3_24624115_x130..... | gugacugucacucacgugacc.....     | 0 |
| Gi1_3259760_x130.....  | gcggucauaguacaguggcCaguau..... | 1 |
| Gi5_7026173_x128.....  | guucgauucccgugaccgCgcuA.....   | 1 |
| Gi5_7030653_x128.....  | ggguucgauucccgugaccgc.....     | 0 |
| Gi1a_4852335_x127..... | guucgauucccgugaccg.....        | 0 |

|                        |                                 |   |
|------------------------|---------------------------------|---|
| Gi3_24675089_x127..... | .Gcgauucccgugaccgc.....         | 1 |
| Gi3_24696550_x126..... | .Aguucgauucccgugaccgc.....      | 1 |
| Gi2_8837808_x126.....  | .gguucgauNcccgugacc.....        | 1 |
| Gi3_24696802_x126..... | .gugacugucacucacgug.....        | 0 |
| Gi1_3281719_x125.....  | .ucauaguacaguggcuagua.....      | 0 |
| Gi3_24712428_x125..... | .cugucacucacgugaccgggu.....     | 0 |
| Gi3_24703678_x125..... | .gguucgauNcccgugaccgc.....      | 1 |
| Gi5_7057093_x125.....  | .Aguucgauucccgugacc.....        | 1 |
| Gi1_3286463_x124.....  | .gguucgauucccgugacc.....        | 0 |
| Gi3_24723482_x124..... | .Aguucgauucccgugacc.....        | 1 |
| Gi3_24720010_x124..... | .cugucacucacgugaccgg.....       | 0 |
| Gi1_3288323_x124.....  | .Uacugucacucacgugaccgc.....     | 1 |
| Gi3_24757785_x122..... | .guucgauNcccgugacc.....         | 1 |
| Gi3_24755467_x122..... | .gCucgauucccgugaccgc.....       | 1 |
| Gi3_24756199_x122..... | .ucauaguacaguggcCagu.....       | 1 |
| Gi1_3298622_x121.....  | .Ucggucauaguacaguggcuagua.....  | 1 |
| Gi3_24772594_x121..... | .gucauaguacaguggcCagua.....     | 1 |
| Gi5_7107583_x120.....  | .Ggacugucacucacgugaccgg.....    | 1 |
| Gi2_8909586_x120.....  | .gguucgauucccgugaccgcGc.....    | 1 |
| Gi3_24784166_x120..... | .gUguucgauucccgugaccgc.....     | 1 |
| Gi2_8921427_x119.....  | .Aguucgauucccgugacc.....        | 1 |
| Gi4_405473_x119.....   | .guucgauucccgugacc.....         | 0 |
| Gi5_7125233_x118.....  | .Ucggucauaguacaguggcuagua.....  | 1 |
| Gi5_7132067_x117.....  | .ccggguucgauucccgugacc.....     | 0 |
| Gi3_24845034_x117..... | .guucgauucccgugaccggcuuu.....   | 0 |
| Gi3_24845502_x117..... | .gUguucgauucccgugacc.....       | 1 |
| Gi3_24848185_x116..... | .guucAauucccgugaccgc.....       | 1 |
| Gi1_3320490_x116.....  | .gugaccggguucAauucc.....        | 1 |
| Gi4_407694_x115.....   | .gcggucauaguacaguggc.....       | 0 |
| Gi3_24874205_x115..... | .gcggucauaguacaguggA.....       | 1 |
| Gl1a_4894099_x115..... | .uucgauucccgugaccgcCc.....      | 1 |
| Gl1a_4894329_x115..... | .ucgauucccgugaccgc.....         | 0 |
| Gi3_24894135_x114..... | .gguucgGuucccgugacc.....        | 1 |
| Gi1_3332220_x114.....  | .cauaguacaguggcuagu.....        | 0 |
| Gi3_24898467_x114..... | .guucgauucccgGgaccgc.....       | 1 |
| Gi2_8986210_x114.....  | .cacucacgugaccggguucgauucc..... | 0 |
| Gl1a_4897890_x114..... | .gucauaguacaguggcuag.....       | 0 |
| Gi1_3337198_x113.....  | .gcggucauaguacaguggcuagA.....   | 1 |
| Gi1_3337085_x113.....  | .acucacgugaccggguucAauucc.....  | 1 |
| Gi3_24907060_x113..... | .Cuucgauucccgugaccgc.....       | 1 |
| Gi3_24926546_x112..... | .gugacugucacucacgugacc.....     | 0 |
| Gi3_24924530_x112..... | .cgauucccgugaccgcggcuuu.....    | 0 |
| Gi5_7191725_x111.....  | .gacugucacucacgugaccgggu.....   | 0 |
| Gi3_24952270_x111..... | .uUacugucacucacgugaccgc.....    | 1 |
| Gl1a_4914320_x111..... | .gUuucgauucccgugacc.....        | 1 |
| Gi3_24976866_x109..... | .guucgauucccgugGccgc.....       | 1 |
| Gi3_24973923_x109..... | .gguucgauCcccgugacc.....        | 1 |

|                        |                                    |   |
|------------------------|------------------------------------|---|
| Gi4_411819_x108.....   | .....gguucgauucccgugacc.....       | 0 |
| Gi5_7222973_x108.....  | .....cggucgauuacaguggcuagua.....   | 0 |
| Gi3_24994155_x108..... | .....ucacucacgugaccggguuc.....     | 0 |
| Gi3_24996531_x108..... | .....cggucgauuacaguggcCagu.....    | 1 |
| Gi3_25016297_x107..... | .....guucgaCucccgugaccg.....       | 1 |
| Gi3_25028118_x106..... | .....ggguucgauucccgugac.....       | 0 |
| Gi3_25023136_x106..... | .....gguucgauNcccgugac.....        | 1 |
| Gi5_7240286_x106.....  | .....guucgauucccgugaccgcgcu.....   | 0 |
| Gi3_25022394_x106..... | .....guucAauucccgugacc.....        | 1 |
| Gi3_25028330_x106..... | .....gaUugucacucacgugaccgg.....    | 1 |
| Gi4_414065_x106.....   | .....gacugucacucacgugaccgg.....    | 0 |
| Gi2_9088767_x105.....  | .....cggguucgauucccgugaccgc.....   | 0 |
| Gi2_9092232_x105.....  | .....ucacgugaccggguucgauucc.....   | 0 |
| Gi3_25052596_x105..... | .....Auucgauucccgugacc.....        | 1 |
| Gi3_25053961_x105..... | .....gCuucgauucccgugacc.....       | 1 |
| Gi3_25043671_x105..... | .....guucgGuucccgugaccgcg.....     | 1 |
| Gi3_25055536_x105..... | .....Gcgauucccgugaccgcg.....       | 1 |
| Gi5_7258681_x104.....  | .....guucgauucccgugaccgcgCA.....   | 1 |
| Gi2_9108197_x104.....  | .....gguucgauucccgugaccgcgUc.....  | 1 |
| Gi3_25060653_x104..... | .....Uacugucacucacgugacc.....      | 1 |
| Gi1a_4944972_x104..... | .....gcggucgauuacaguggcuaguau..... | 0 |
| Gi3_25107683_x102..... | .....guucgGuucccgugaccgc.....      | 1 |
| Gi5_7285342_x102.....  | .....cggguucgauucccgugacc.....     | 0 |
| Gi3_25113293_x102..... | .....gguucgauucccgugacUc.....      | 1 |
| Gi1_3384875_x102.....  | .....guucgauucccgugaccgc.....      | 0 |
| Gi3_25106765_x102..... | .....acucacgugaccggguucgauucc..... | 0 |
| Gi1_3387220_x101.....  | .....cugucacucacgugaccgg.....      | 0 |
| Gi3_25131201_x101..... | .....guucgauNcccgugaccgcg.....     | 1 |
| Gi1_3387321_x101.....  | .....ugacugucNcucacgugaccgg.....   | 1 |
| Gi3_25132312_x101..... | .....gguucgaCucccgugaccgc.....     | 1 |
| Gi2_9176836_x98.....   | .....acucacgugaccggguucga.....     | 0 |
| Gi3_25179007_x98.....  | .....guucgauucccgugGccg.....       | 1 |
| Gi5_7320260_x98.....   | .....guucgaCucccgugacc.....        | 1 |
| Gi3_25188473_x97.....  | .....gguCcgauucccgugacc.....       | 1 |
| Gi5_7346734_x96.....   | .....cacgugaccggguucgauuc.....     | 0 |
| Gi3_25206160_x96.....  | .....accggguucgauucccgugacc.....   | 0 |
| Gi2_9195161_x96.....   | .....cgauucccgugaccgcgguuu.....    | 0 |
| Gi3_25217584_x96.....  | .....Acggucgauuacaguggc.....       | 1 |
| Gi3_25214800_x96.....  | .....gAuucgauucccgugacc.....       | 1 |
| Gi5_7374101_x93.....   | .....gguucgauucccgCgacc.....       | 1 |
| Gi3_25266907_x93.....  | .....guucgauucccgCgaccg.....       | 1 |
| Gi2_9234487_x93.....   | .....gguucgauucccgCgacc.....       | 1 |
| Gi2_9246660_x92.....   | .....Ucggucgauuacagugg.....        | 1 |
| Gi3_25275815_x92.....  | .....gCuucgauucccgugaccg.....      | 1 |
| Gi5_7387896_x92.....   | .....cggguucgauucccgugac.....      | 0 |
| Gi3_25297567_x91.....  | .....gCuucgauucccgugacc.....       | 1 |
| Gi1_3441033_x91.....   | .....uUacugucacucacgugaccg.....    | 1 |

|                  |                            |   |
|------------------|----------------------------|---|
| Gi3_25302845_x91 | Ugguucgauucccgugaccg       | 1 |
| Gi3_25295929_x91 | ggGucgauucccgugacc         | 1 |
| Gi3_25303027_x91 | guucgauucccgugGcc          | 1 |
| Gi3_25310213_x90 | Auucgauucccgugaccg         | 1 |
| G1a_5011979_x90  | acugucacucacgugaccgg       | 0 |
| G1a_5016725_x89  | Uguucgauucccgugac          | 1 |
| Gi3_25329091_x89 | guucgauucccgugaccgA        | 1 |
| Gi2_9281840_x89  | ggguucgauucccguga          | 0 |
| Gi5_7416291_x89  | gguucgauucccgugGcc         | 1 |
| Gi3_25346256_x88 | cucacgugaccggguucgauucc    | 0 |
| Gi5_7429330_x88  | gugacugucacucacgugacc      | 0 |
| Gi5_7427306_x88  | Auucgauucccgugacc          | 1 |
| Gi3_25360248_x88 | ugacugucacucacgugacc       | 0 |
| Gi3_25357784_x88 | guucgauCcccgugaccgc        | 1 |
| Gi3_25354704_x88 | guCcgauucccgugaccgc        | 1 |
| Gi1_3458827_x87  | gucauaguacaguggcuagua      | 0 |
| Gi5_7443514_x87  | ucacgugaccggguucgauucc     | 0 |
| Gi3_25372971_x87 | Cuucgauucccgugacc          | 1 |
| Gi2_9310066_x86  | ggguucgauucccgugac         | 0 |
| Gi1_3465067_x86  | guucgauucccgugacc          | 0 |
| Gi1_3467389_x86  | cacucacgugaccggguucgauuccU | 1 |
| Gi2_9322054_x85  | guucgaCucccgugaccg         | 1 |
| Gi3_25400932_x85 | Cuucgauucccgugaccgcg       | 1 |
| Gi3_25399572_x85 | gguucgauucccgugaccgcgcuuu  | 0 |
| Gi5_7464095_x85  | ggguucgauucccguga          | 0 |
| Gi3_25411727_x85 | ggcCaguaugcgugacuguca      | 1 |
| Gi5_7493906_x83  | gGcugucacucacgugaccgg      | 1 |
| Gi1_3484477_x82  | gugacugucacucacgugacc      | 0 |
| Gi5_7505000_x82  | gaUugucacucacgugaccgg      | 1 |
| Gi1_3487675_x82  | guucgauucccgugaccg         | 0 |
| Gi3_25453169_x82 | cgauucccgugaccgcgcuuA      | 1 |
| Gi1_3483575_x82  | gGcugucacucacgugaccgg      | 1 |
| Gi2_9358606_x82  | gguucgauCcccgugacc         | 1 |
| Gi3_25465223_x82 | gguucgauCcccgugaccgcg      | 1 |
| G1a_5056910_x81  | Uuucgauucccgugaccgc        | 1 |
| Gi4_437546_x81   | gcggucauaguacaguggcuaguau  | 0 |
| Gi3_25475276_x81 | gguucgauucccgugaAc         | 1 |
| Gi3_25481351_x81 | gGcugucacucacgugaccgg      | 1 |
| Gi3_25481270_x81 | gacugucaNucacgugaccgg      | 1 |
| G1a_5059178_x81  | cacucacgugaccgggu          | 0 |
| Gi3_25482890_x81 | gguucgauucccgCgaccgc       | 1 |
| Gi1_3495021_x80  | ucacgugaccggguucAauucc     | 1 |
| Gi3_25488456_x80 | Aacugucacucacgugaccgg      | 1 |
| Gi3_25490696_x80 | gguucgauuccAgugacc         | 1 |
| Gi3_25507925_x79 | guucgauNcccgugaccg         | 1 |
| Gi1_3500985_x79  | acugucacucacgugaccggguuc   | 0 |
| G1a_5069071_x79  | Uuucgauucccgugacc          | 1 |

|                       |                               |   |
|-----------------------|-------------------------------|---|
| Gi3_25507293_x79..... | guucgauucccgugaccgGc.....     | 1 |
| Gi3_25505002_x79..... | gGggucauaguacaguggc.....      | 1 |
| Gi3_25510295_x79..... | guCcgauucccgugaccgG.....      | 1 |
| Gi3_25509347_x79..... | ggucgauucccgugacc.....        | 1 |
| Gi2_9399099_x78.....  | guucgauucccgugaccgGc.....     | 1 |
| Gi2_9421340_x77.....  | cucacgugaccggguucgauucc.....  | 0 |
| Gi3_25555516_x77..... | ggucgauuccUggugacc.....       | 1 |
| Gi4_441432_x77.....   | guucgauucccgugaccG.....       | 0 |
| Gi2_9417490_x77.....  | ugacugucacucacguga.....       | 0 |
| Gi2_9424565_x76.....  | ggCucgauucccgugacc.....       | 1 |
| Gi3_25562098_x76..... | GucgauucccgugaccGc.....       | 1 |
| G1a_5082232_x76.....  | UuucgauucccgugaccG.....       | 1 |
| Gi3_25565290_x76..... | GgacugucacucacgugaccG.....    | 1 |
| Gi3_25559742_x76..... | guCcgauucccgugacc.....        | 1 |
| Gi3_25578510_x75..... | guucgauucccgugaccgGcA.....    | 1 |
| Gi5_7584796_x75.....  | gacugucacucacGaccgg.....      | 1 |
| Gi5_7584346_x75.....  | gugacugucacucacgugaccggG..... | 1 |
| G1a_5088361_x75.....  | UguucgauucccgugaccGc.....     | 1 |
| Gi2_9438682_x75.....  | ggucgauucccgugacc.....        | 1 |
| Gi3_25615623_x74..... | ggguucgauucccguga.....        | 0 |
| Gi5_7598121_x73.....  | AuucgauucccgugaccGc.....      | 1 |
| Gi2_9462807_x73.....  | ggucgauucccgugacc.....        | 1 |
| Gi1_3531890_x72.....  | Ucggucaguacaguggcagu.....     | 1 |
| Gi2_9472799_x72.....  | guucgaCucccgugacc.....        | 1 |
| Gi5_7619276_x71.....  | gCucgauucccgugacc.....        | 1 |
| Gi3_25663659_x71..... | ggAucgauucccgugacc.....       | 1 |
| Gi5_7637448_x70.....  | ugacugucacucacgugaccG.....    | 0 |
| Gi3_25687300_x70..... | ggCucgauucccgugacc.....       | 1 |
| Gi3_25687790_x70..... | ggCucgauucccgugaccGc.....     | 1 |
| Gi5_7635698_x70.....  | cugucacucacgugaccG.....       | 0 |
| G1a_5118292_x70.....  | ucacgugaccggguucgauucc.....   | 0 |
| Gi2_9505101_x70.....  | Auucgauucccgugacc.....        | 1 |
| Gi5_7636398_x70.....  | cgugaccggguucgauuccG.....     | 0 |
| Gi2_9512573_x69.....  | ggucaguacaguggcCagu.....      | 1 |
| Gi2_9520404_x68.....  | gugacugucacucacgugacc.....    | 0 |
| Gi3_25717851_x68..... | CguucgauucccgugaccGc.....     | 1 |
| Gi4_450572_x68.....   | acucacgugaccggguucg.....      | 0 |
| Gi3_25718531_x68..... | guucUauucccgugaccGc.....      | 1 |
| Gi3_25720843_x68..... | Uacugucacucacgugacc.....      | 1 |
| Gi3_25708671_x68..... | guucAauucccgugaccGc.....      | 1 |
| Gi1_3554473_x67.....  | ggucAauucccgugacc.....        | 1 |
| Gi3_25740702_x67..... | guuUgauucccgugaccGc.....      | 1 |
| Gi3_25743717_x67..... | gguuUgauucccgugacc.....       | 1 |
| Gi3_25750945_x66..... | ggCucgauucccgugaccGc.....     | 1 |
| G1a_5140303_x66.....  | gUuucgauucccgugacc.....       | 1 |
| Gi3_25752001_x66..... | ggucgGuucccgugaccGc.....      | 1 |
| Gi2_9549359_x66.....  | ggucgauucccgugaccGcA.....     | 1 |

|                  |                                |       |   |
|------------------|--------------------------------|-------|---|
| Gi3_25751011_x66 | .....gacugucacCcacgugacccgg    | ..... | 1 |
| Gi5_7688818_x66  | .....guucgauucccgCgacc         | ..... | 1 |
| Gi5_7679776_x66  | .....gguucgauucccgugCcc        | ..... | 1 |
| Gi2_9556289_x66  | .....gucauaguacaguggcCagu      | ..... | 1 |
| Gi5_7704606_x65  | .....gCucgauucccgugaccgc       | ..... | 1 |
| Gi3_25768257_x65 | .....guucgauCcccgugaccg        | ..... | 1 |
| Gi3_25768322_x65 | .....guucgauuccAgugaccgc       | ..... | 1 |
| Gi5_7697846_x65  | .....gucauaguacaguggcuagA      | ..... | 1 |
| Gi2_9559611_x65  | .....Cguucgauucccgugacc        | ..... | 1 |
| Gi5_7699341_x65  | .....ucacucacgugacccgguucgauuc | ..... | 0 |
| Gi1_3571432_x64  | .....guucgauucccgugaccgC       | ..... | 1 |
| Gi3_25782875_x64 | .....Gucgauucccgugaccg         | ..... | 1 |
| Gi5_7713957_x64  | .....guucgauuNccggugacc        | ..... | 1 |
| Gi3_25789723_x64 | .....guucgGuucccgugaccg        | ..... | 1 |
| Gi3_25790619_x64 | .....guucgauuccgUugacc         | ..... | 1 |
| Gi3_25788059_x64 | .....gguucgauucccgugacA        | ..... | 1 |
| Gi5_7716765_x63  | .....guucAauucccgugacc         | ..... | 1 |
| Gi5_7716702_x63  | .....Aacugucacucacgugacccgg    | ..... | 1 |
| Gi1_3578407_x63  | Ucggucauaguacaguggc            | ..... | 1 |
| Gi3_25809825_x63 | .....guucgauucccgugaccAc       | ..... | 1 |
| Gi3_25818582_x63 | .....gguucgauucccgugGc         | ..... | 1 |
| Gi3_25814172_x63 | gaUugucacucacgugacccg          | ..... | 1 |
| Gi2_9594477_x62  | .....ucacucacgugacccgguucgauuc | ..... | 0 |
| Gi2_9604955_x62  | .....Uggguucgauucccgugacc      | ..... | 1 |
| Gi5_7736614_x62  | .....gguucgauucccgugaA         | ..... | 1 |
| Gi3_25834425_x62 | .....gguucAauucccgugacc        | ..... | 1 |
| Gi1_3583075_x62  | .....cacucacgugacccgguucAau    | ..... | 1 |
| Gi3_25822521_x62 | .....gguucgaCucccgugac         | ..... | 1 |
| Gi3_25833123_x62 | .....gguucgauucccgugCc         | ..... | 1 |
| Gi3_25828039_x62 | gGggucauaguacagugg             | ..... | 1 |
| Gi3_25839013_x62 | gGcugucacucacgugacccg          | ..... | 1 |
| Gi3_25836223_x62 | .....gguucgauucccgCgac         | ..... | 1 |
| Gi5_7741682_x61  | gugcggucauaguacaguggcuagua     | ..... | 0 |
| Gl1a_5176924_x61 | gcggucauaguacaguggcu           | ..... | 0 |
| Gi3_25843507_x61 | .....guucgauuccUggugaccgc      | ..... | 1 |
| Gi3_25853938_x61 | .....guucgGuucccgugacc         | ..... | 1 |
| Gl1a_5173874_x61 | gcggucauaguacaguggcuag         | ..... | 0 |
| Gi1_3590176_x61  | .....guucgauucccgugaccgCcu     | ..... | 1 |
| Gi5_7762996_x60  | gacugucacCcacgugacccgg         | ..... | 1 |
| Gi1_3590600_x60  | ggucauaguacaguggcua            | ..... | 0 |
| Gi1_3591140_x60  | gucauaguacaguggcuagu           | ..... | 0 |
| Gi3_25885443_x59 | gacugucGcucacgugacccgg         | ..... | 1 |
| Gi3_25886446_x59 | gguucgauucccgCgaccg            | ..... | 1 |
| Gi5_7772071_x59  | .....cacucacgugacccgguucgau    | ..... | 0 |
| Gi3_25893644_x59 | gguucgaCucccgugaccg            | ..... | 1 |
| Gl1a_5188433_x59 | .....gauucccgugaccgCcc         | ..... | 1 |
| Gi5_7771717_x59  | guucgauucccgugGccg             | ..... | 1 |

|                       |                                       |   |
|-----------------------|---------------------------------------|---|
| Gi2_9634380_x59.....  | gguucgauucccgugGccgc.....             | 1 |
| Gi2_9630958_x59.....  | guucgauuNccggugacc.....               | 1 |
| Gi3_25902900_x58..... | guucUauucccgugacc.....                | 1 |
| Gi1_3603112_x58.....  | gguucgauucccgugaccgc.....             | 0 |
| Gi1_3601778_x58.....  | .Aacugucacucacgugaccgg.....           | 1 |
| Gi3_25901624_x58..... | .....acucacgugaccggguucgauucccgA..... | 1 |
| Gi5_7784181_x58.....  | .....guucgauucccgugGcc.....           | 1 |
| Gi3_25936615_x57..... | .....guuUgauucccgugaccg.....          | 1 |
| Gi5_7797169_x57.....  | .....gguucgaCucccgugacc.....          | 1 |
| Gi3_25926412_x57..... | .....gguCcgauucccgugaccgc.....        | 1 |
| Gi3_25918945_x57..... | .....Ugguucgauucccgugaccgc.....       | 1 |
| Gi3_25932853_x57..... | .....guucgauucccgugaccgcgU.....       | 1 |
| Gi4_462186_x57.....   | .....gcggucauaguacaguggcuag.....      | 0 |
| Gi1_3608294_x57.....  | .....gugacugucacucacgugaccgg.....     | 0 |
| Gi5_7792609_x57.....  | .....gguucgauCcccgugacc.....          | 1 |
| Gi5_7790386_x57.....  | .....gacugucacucacgugGcccgg.....      | 1 |
| Gi3_25940038_x56..... | .....gguucgauucccgugaccgcggc.....     | 0 |
| Gi1_3614914_x56.....  | .....gacugucacucacgugaccggguucA.....  | 1 |
| Gi2_9673878_x56.....  | .....gCucgauucccgugacc.....           | 1 |
| Gi5_7813552_x56.....  | .....gGggucauaguacaguggcuagu.....     | 1 |
| Gi2_9672870_x56.....  | .....gguucgauucccgugGcc.....          | 1 |
| Gi3_25951350_x56..... | .....gguucgGuucccgugaccgc.....        | 1 |
| Gi2_9675166_x56.....  | .....gguucgauNcccgugaccgc.....        | 1 |
| Gi1_3612338_x56.....  | .....gacugucacucacgugGcccgg.....      | 1 |
| Gi5_7805096_x56.....  | .....ggGucgauucccgugacc.....          | 1 |
| Gi3_25950454_x56..... | .....ugacugucNcucacgugaccgg.....      | 1 |
| Gi3_25968625_x55..... | .....gacugucacCcacgugacc.....         | 1 |
| Gi3_25972970_x55..... | .....gguucgauucccgugGccgc.....        | 1 |
| Gi5_7818529_x55.....  | .....gCucgauucccgugaccg.....          | 1 |
| Gi3_25962190_x55..... | .....Cuucgauucccgugaccg.....          | 1 |
| Gi3_25965325_x55..... | .....gguucgauucccgugacU.....          | 1 |
| Gi1_3618323_x55.....  | .....gacugucacCcacgugaccgg.....       | 1 |
| Gi2_9680331_x55.....  | .....guucgauucccgGcacc.....           | 1 |
| Gi3_25963290_x55..... | .....gAuucgauucccgugaccgcg.....       | 1 |
| Gi5_7818969_x55.....  | .....ucgauucccgugacUgc.....           | 1 |
| Gi5_7822544_x55.....  | .....guucgaCucccgugaccg.....          | 1 |
| Gi3_25990272_x54..... | .....Uugacugucacucacgugaccgg.....     | 1 |
| Gi3_25979742_x54..... | .....guucgauucccgugaccgcA.....        | 1 |
| Gi1_3623754_x54.....  | .....ugacugucacucacgugGcccgg.....     | 1 |
| Gi5_7841956_x53.....  | .....gcggucauaguacaguggA.....         | 1 |
| Gi5_7850065_x53.....  | .....ggCucgauucccgugacc.....          | 1 |
| Gi3_26014723_x53..... | .....uGcgauucccgugaccgcg.....         | 1 |
| Gi3_25997180_x53..... | .....gguucgCuucccgugacc.....          | 1 |
| Gi5_7843175_x53.....  | .....gacugCcacucacgugaccgg.....       | 1 |
| Gi2_9726498_x52.....  | .....gguucgaCucccgugacc.....          | 1 |
| Gi2_9716254_x52.....  | .....guucgauucccgugGcc.....           | 1 |
| Gi2_9722754_x52.....  | .....Aguucgauucccgugaccgc.....        | 1 |

|                       |                              |                              |   |
|-----------------------|------------------------------|------------------------------|---|
| Gi5_7851231_x52.....  | Acggucauaguacaguggcuagu..... | .....                        | 1 |
| Gi1_3636818_x52.....  | Ggacugucacucacgugaccgg.....  | .....                        | 1 |
| Gi5_7866097_x51.....  | .....                        | gguCcgauucccgugacc.....      | 1 |
| Gi3_26038381_x51..... | .....                        | gguucgauuUccggugacc.....     | 1 |
| Gi3_26049346_x51..... | .....                        | guuUgauucccgugaccgcg.....    | 1 |
| Gi2_9731596_x51.....  | .....                        | gguCcgauucccgugacc.....      | 1 |
| Gi3_26077786_x50..... | .....                        | gguucAauucccgugaccgcg.....   | 1 |
| Gi3_26075186_x50..... | .....                        | guucgauucccgugaAcg.....      | 1 |
| Gi2_9741945_x50.....  | gGggucauaguacaguggc.....     | .....                        | 1 |
| Gi3_26068736_x50..... | .....                        | guucgauucccgugacUgc.....     | 1 |
| Gi5_7884636_x50.....  | .....                        | gguucgauucccgugaccgcgA.....  | 1 |
| Gi3_26068686_x50..... | .....                        | guGcgauucccgugaccgc.....     | 1 |
| Gi2_9749145_x50.....  | .....                        | gguucgauucccgugaUc.....      | 1 |
| Gi3_26070436_x50..... | .....                        | guucgauucccgugaAcgc.....     | 1 |
| G1a_5249881_x50.....  | .....                        | gUuucgauucccgugaccgc.....    | 1 |
| Gi5_7885886_x50.....  | .....                        | guucgauucccgGcaccgc.....     | 1 |
| Gi2_9744945_x50.....  | .....                        | Auucgauucccgugaccgc.....     | 1 |
| Gi2_9752295_x50.....  | .....                        | gguucgauuccAgugacc.....      | 1 |
| Gi5_7899022_x49.....  | .....                        | guCcgauucccgugacc.....       | 1 |
| Gi3_26087994_x49..... | .....                        | guGcgauucccgugaccgcg.....    | 1 |
| Gi3_26095442_x49..... | .....                        | guucgauucccgugaccgAg.....    | 1 |
| Gi5_7896425_x49.....  | .....                        | guucgGuucccgugaccgc.....     | 1 |
| Gi5_7900296_x49.....  | .....                        | gguucgGuucccgugacc.....      | 1 |
| Gi3_26095099_x49..... | .....                        | guucUauucccgugaccgcg.....    | 1 |
| Gi3_26094266_x49..... | .....                        | guAcgauucccgugaccgc.....     | 1 |
| Gi3_26083633_x49..... | Acggucauaguacagugg.....      | .....                        | 1 |
| Gi3_26093041_x49..... | .....                        | Cguucgauucccgugac.....       | 1 |
| Gi2_9768653_x48.....  | .....                        | ggGucgauucccgugacc.....      | 1 |
| Gi3_26113616_x48..... | .....                        | gguCcgauucccgugac.....       | 1 |
| Gi5_7907360_x48.....  | .....                        | guucgauucccgugGccgc.....     | 1 |
| Gi3_26113376_x48..... | gacugucaNucacgugaccgg.....   | .....                        | 1 |
| Gi1_3655769_x48.....  | ggucauaguacaguggcuagua.....  | .....                        | 0 |
| Gi3_26101136_x48..... | .....                        | guucgauucccgugaUcgc.....     | 1 |
| Gi1_3658841_x48.....  | .....                        | Cacugucacucacgugaccgg.....   | 1 |
| Gi3_26112848_x48..... | .....                        | guucgauuccUggugaccgcg.....   | 1 |
| Gi2_9780317_x48.....  | .....                        | Uggauucgauucccgugaccgcg..... | 1 |
| Gi5_7919347_x47.....  | .....                        | Cuucgauucccgugacc.....       | 1 |
| Gi3_26131819_x47..... | .....                        | guuUgauucccgugacc.....       | 1 |
| Gi3_26130221_x47..... | .....                        | gguucgauucccgAugacc.....     | 1 |
| Gi3_26117719_x47..... | .....                        | uGgauucccgugaccgc.....       | 1 |
| Gi3_26126461_x47..... | gcggucauNguacagugg.....      | .....                        | 1 |
| Gi2_9790965_x47.....  | .....                        | ugacugucacucacgugaccgg.....  | 0 |
| Gi3_26124675_x47..... | .....                        | gUguucgauucccgugaccgc.....   | 1 |
| Gi3_26125474_x47..... | .....                        | gguucgauCcccggugaccgc.....   | 1 |
| G1a_5271960_x47.....  | .....                        | gGucgauucccgugacc.....       | 1 |
| Gi1_3659641_x47.....  | .....                        | ugUcugucacucacgugaccgg.....  | 1 |
| Gi2_9794866_x47.....  | .....                        | gguucgaCuucccgugaccgc.....   | 1 |



|                  |                                 |   |
|------------------|---------------------------------|---|
| Gi3_26119411_x47 | .....gguucgauucccgugGccgcg      | 1 |
| Gi2_9784573_x47  | .....ccggguucgauucccgugaccg     | 0 |
| Gi5_7932547_x46  | .....guucgGuucccgugaccg         | 1 |
| Gi3_26140081_x46 | .....gguucgauNcccgugaccg        | 1 |
| Gi5_7936641_x46  | .....Gucgauucccgugaccgcg        | 1 |
| Gi2_9803700_x46  | .....ggucauaguacaguggcCagua     | 1 |
| Gi5_7934801_x46  | .....guucgauucccgguAaccg        | 1 |
| Gi5_7933467_x46  | .....gguucgauucccAgugacc        | 1 |
| Gi3_26142519_x46 | .....guucgauucccAgugaccgcg      | 1 |
| Gi3_26156687_x46 | .....gguucgauucccgGgacc         | 1 |
| Gi5_7928959_x46  | .....gacugucaNucacgugaccg       | 1 |
| Gi2_9798962_x46  | .....guucgauucccgGgaccg         | 1 |
| Gi5_7929879_x46  | .....guucgauCcccgugacc          | 1 |
| Gi5_7932823_x46  | .....Aguucgauucccgugac          | 1 |
| Gi5_7954062_x45  | .....guucgGuucccgugacc          | 1 |
| Gi5_7951722_x45  | .....gacugucGcucacgugaccg       | 1 |
| Gi3_26173393_x45 | .....gguucgauucccgguAacc        | 1 |
| Gi5_7943037_x45  | .....Aguucgauucccgugaccg        | 1 |
| Gi5_7951092_x45  | .....guucgACucccgugaccg         | 1 |
| Gi2_9806874_x45  | .....gguuUgauucccgugacc         | 1 |
| Gi2_9816774_x45  | .....guCcgauucccgugacc          | 1 |
| Gl1_5287143_x45  | .....gucgauaguacaguggcuagu      | 0 |
| Gi3_26176138_x45 | .....guucgauucccgugacUg         | 1 |
| Gi3_26172313_x45 | .....acgugaccggguucgauucccgugac | 0 |
| Gi2_9808539_x45  | .....cccgguucgauucccgugaccg     | 0 |
| Gi5_7943532_x45  | .....ugacugucNcucacgugaccg      | 1 |
| Gi3_26171728_x45 | .....guucgauucccgAugaccg        | 1 |
| Gi3_26175868_x45 | .....gguucgauucAcggugacc        | 1 |
| Gi3_26157958_x45 | .....guucgauUcccgugaccg         | 1 |
| Gi2_9811284_x45  | .....guucgauNcccgugaccg         | 1 |
| Gi5_7951857_x45  | .....Auucgauucccgugaccg         | 1 |
| Gi5_7957895_x44  | .....gcggucgauaguacaguggcuagu   | 0 |
| Gi5_7962075_x44  | .....gacugucCcucacgugaccg       | 1 |
| Gi2_9825150_x44  | .....gCucgauucccgugaccg         | 1 |
| Gi5_7955387_x44  | .....gcggucgauNguacaguggcuagu   | 1 |
| Gi3_26189761_x44 | .....guucgauucccAgugacc         | 1 |
| Gi2_9824710_x44  | .....Uggguucgauucccgugaccg      | 1 |
| Gi3_26181665_x44 | .....guCcgauucccgugaccg         | 1 |
| Gi3_26197505_x44 | .....guucgauucccgGgaccg         | 1 |
| Gi5_7968432_x43  | .....guucgauucccgGgaccg         | 1 |
| Gi5_7966411_x43  | .....Aguucgauucccgugaccg        | 1 |
| Gi1_3680802_x43  | .....cacucacgugaccggguucAauuc   | 1 |
| Gl1_5302208_x43  | .....ugacugucacucacgugaccg      | 0 |
| Gi3_26207034_x43 | .....guucgauucccgugaAcg         | 1 |
| Gi3_26204024_x43 | .....gacugCcucacacgugaccg       | 1 |
| Gi5_7970883_x43  | .....gAuucgauucccgugacc         | 1 |
| Gi1_3682350_x43  | .....auaguacaguggcuagu          | 0 |

|                  |                                                 |   |
|------------------|-------------------------------------------------|---|
| Gi3_26214086_x43 | . . . . . Gacucacgugacccgggu . . . . .          | 1 |
| Gi2_9847000_x43  | . . . . . acucacgugacccggguucgauucc . . . . .   | 0 |
| G1a_5302423_x43  | . . . . . Uguucgauucccgugaccg . . . . .         | 1 |
| Gi1_3690107_x42  | . . . . . gaUugucacucacgugacccgg . . . . .      | 1 |
| Gi3_26221297_x42 | . . . . . guucgauucccgugaccgAc . . . . .        | 1 |
| Gi3_26226337_x42 | . . . . . guucgauucccgAgaccgc . . . . .         | 1 |
| Gi1_3688637_x42  | . . . . . gguucgauucccgugac . . . . .           | 0 |
| Gi2_9848527_x42  | . . . . . gacugucacucacgugacccg . . . . .       | 0 |
| Gi1_3691367_x42  | . . . . . gcggucauaguacaguggcC . . . . .        | 1 |
| Gi3_26239147_x42 | . . . . . ucgauuccNggugaccgc . . . . .          | 1 |
| Gi3_26228773_x42 | . . . . . guucgauucccgugaUc . . . . .           | 1 |
| Gi3_26239567_x42 | . . . . . guucgauAcccgugaccgc . . . . .         | 1 |
| Gi3_26227219_x42 | . . . . . guucgauucUcggugaccgc . . . . .        | 1 |
| Gi3_26223775_x42 | . . . . . cUauucccgugaccgcg . . . . .           | 1 |
| Gi5_7982218_x42  | . . . . . gguucgauuUccggugacc . . . . .         | 1 |
| Gi3_26224237_x42 | . . . . . gguuGgauucccgugacc . . . . .          | 1 |
| Gi3_26237467_x42 | . . . . . guucgauucccgugaccgUg . . . . .        | 1 |
| Gi3_26235829_x42 | . . . . . Cacugucacucacgugacccgg . . . . .      | 1 |
| G1a_5314035_x42  | . . . . . gguucgauucccguga . . . . .            | 0 |
| Gi2_9857683_x42  | . . . . . guucgauCcccgugacc . . . . .           | 1 |
| Gi3_26259216_x41 | . . . . . gcggucauNguacaguggc . . . . .         | 1 |
| Gi2_9874645_x41  | . . . . . gguucgauucccgugaAc . . . . .          | 1 |
| Gi1_3693593_x41  | . . . . . gcggucauaguacaguggcCagua . . . . .    | 1 |
| Gi3_26243964_x41 | . . . . . gguucgauucccgugaccgcC . . . . .       | 1 |
| Gi2_9863739_x41  | . . . . . guucgaCucccgugaccgc . . . . .         | 1 |
| G1a_5318139_x41  | . . . . . gGucgauucccgugaccgc . . . . .         | 1 |
| Gi3_26249950_x41 | . . . . . gguucgauAcccgugacc . . . . .          | 1 |
| Gi2_9870258_x41  | . . . . . guucgauuNccggugaccgcg . . . . .       | 1 |
| Gi3_26247900_x41 | . . . . . gAuucgauucccgugaccgc . . . . .        | 1 |
| Gi3_26260528_x41 | . . . . . guucgauucccgugCccgc . . . . .         | 1 |
| Gi5_8004851_x41  | . . . . . cgugacccggguucgauucccgugacc . . . . . | 0 |
| Gi5_8001571_x41  | . . . . . guucgauuNccggugaccg . . . . .         | 1 |
| Gi2_9876010_x40  | . . . . . guucgauuNccggugaccg . . . . .         | 1 |
| Gi3_26279690_x40 | . . . . . Uugacccggguucgauucc . . . . .         | 1 |
| Gi3_26262890_x40 | . . . . . uGcgauucccgugaccgc . . . . .          | 1 |
| Gi3_26280970_x40 | . . . . . gguucgauucccgugCccgc . . . . .        | 1 |
| Gi3_26277370_x40 | . . . . . guucgauuccUggugaccg . . . . .         | 1 |
| Gi3_26299995_x39 | . . . . . guucgauCcccgugacc . . . . .           | 1 |
| Gi1_3708494_x39  | . . . . . uCacugucacucacgugacccgg . . . . .     | 1 |
| Gi3_26284785_x39 | . . . . . gguucgauucccgugaccgcA . . . . .       | 1 |
| Gi3_26297499_x39 | . . . . . guucgUuucccgugaccgc . . . . .         | 1 |
| Gi3_26293404_x39 | . . . . . guucgauucUcggugaccgcg . . . . .       | 1 |
| Gi3_26301165_x39 | . . . . . Uugacccggguucgauucc . . . . .         | 1 |
| Gi3_26297538_x39 | . . . . . gguucgauuccUgugacc . . . . .          | 1 |
| Gi3_26284668_x39 | . . . . . Aacugucacucacgugacccg . . . . .       | 1 |
| Gi3_26295705_x39 | . . . . . ggGucgauucccgugaccgc . . . . .        | 1 |
| Gi4_482792_x38   | . . . . . Ucggucauaguacaguggcuagua . . . . .    | 1 |

|                  |                             |   |
|------------------|-----------------------------|---|
| Gi3_26325980_x38 | .....guucgCuucccgugaccgc    | 1 |
| Gi2_9903341_x38  | .....gguucAauucccgugacc     | 1 |
| Gi2_9906115_x38  | .....Auucgauucccgugaccg     | 1 |
| Gi1_3714696_x38  | .....Ucggucauaguacaguggcuag | 1 |
| Gi5_8028503_x38  | .....Ucggucauaguacaguggcu   | 1 |
| Gi1_3709338_x38  | .....ugGcugucacucacgugaccgg | 1 |
| Gi3_26325524_x38 | .....gguucAauucccgugaccgc   | 1 |
| Gi2_9903531_x38  | .....gguucgauNcccggugac     | 1 |
| Gi2_9911131_x38  | .....gguucgGuucccgugacc     | 1 |
| Gi3_26326816_x38 | .....ugacugCcacucacgugaccgg | 1 |
| Gi3_26325182_x38 | .....guucgauucccgugacAgc    | 1 |
| Gi3_26310894_x38 | .....uGgauucccgugaccgcg     | 1 |
| Gi1_3710478_x38  | .....gacugucacucacgCgaccgg  | 1 |
| Gi3_26318266_x38 | .....guucgauucccgGgaccgc    | 1 |
| Gi3_26324916_x38 | .....guucgauuUccggugaccgcg  | 1 |
| Gi2_9900643_x38  | .....gCuucgauucccgugacc     | 1 |
| Gi1_3718546_x37  | .....gacugCcacucacgugaccgg  | 1 |
| Gi3_26344111_x37 | .....gAucgauucccgugaccgc    | 1 |
| Gi3_26333455_x37 | .....gguucgauucccgugUcc     | 1 |
| Gi3_26334158_x37 | .....guucgauCcccggugaccg    | 1 |
| Gi5_8044191_x37  | .....gGggucauaguacaguggcua  | 1 |
| Gi3_26337229_x37 | .....ggGucgauucccgugac      | 1 |
| Gi3_26341151_x37 | .....gguucgauucccgugacUgc   | 1 |
| Gi5_8045116_x37  | .....gguucgauuccUggugacc    | 1 |
| Gi5_8051739_x37  | .....Uucauaguacaguggcuagu   | 1 |
| Gi3_26345591_x37 | .....gguucgauuAccggugacc    | 1 |
| Gi2_9924698_x37  | .....gguucgauucccgCgac      | 1 |
| Gi5_8065804_x36  | .....guucgauuccUggugacc     | 1 |
| Gi5_8059504_x36  | .....Uaccggguucgauucc       | 1 |
| Gi1_3724215_x36  | .....Uguucgauucccgugaccg    | 1 |
| Gi2_9941355_x36  | .....guCcgauucccgugaccg     | 1 |
| Gi3_26351723_x36 | .....guucgauucUcgugacc      | 1 |
| Gi5_8066416_x36  | .....gguucgauucccgugaAc     | 1 |
| Gi3_26362847_x36 | .....gguucgauCcccggugac     | 1 |
| Gi3_26369255_x36 | .....gAucgauucccgugacc      | 1 |
| Gi3_26370047_x36 | .....gguucgauuccUggugaccgc  | 1 |
| Gi2_9930591_x36  | .....guucUauucccgugaccg     | 1 |
| Gi3_26362703_x36 | .....guucAauucccgugaccg     | 1 |
| Gi5_8066344_x36  | .....guucgauucccgugaUc      | 1 |
| Gi3_26363135_x36 | .....guucgauucAcggugaccgc   | 1 |
| Gi3_26373719_x36 | .....gacugucacucacgugGcccgg | 1 |
| Gi3_26355755_x36 | .....Ccggucauaguacaguggc    | 1 |
| Gi3_26353307_x36 | .....gguCcgauucccgugaccgcg  | 1 |
| Gi3_26355359_x36 | .....ggGucgauucccgugaccgcg  | 1 |
| Gi1_3730277_x35  | .....gucauaguacaguggcuaguau | 0 |
| Gi3_26390340_x35 | .....guucgauucccgUugaccgc   | 1 |
| Gi5_8074704_x35  | .....gCuucgauucccgugacc     | 1 |

|                  |                               |   |
|------------------|-------------------------------|---|
| Gi2_9950364_x35  | .....guucgauuucccgugGccg      | 1 |
| Gi3_26392510_x35 | .....gguucgauucccAgugaccg     | 1 |
| Gi3_26386665_x35 | .....gguucgauuUccggugaccgc    | 1 |
| Gi3_26390550_x35 | .....gacugucacucacgCgaccgg    | 1 |
| Gi5_8073479_x35  | .....guucAauucccgugaccgc      | 1 |
| Gi5_8072569_x35  | .....gguucgauNcccgugac        | 1 |
| Gi3_26384495_x35 | .....gAuucgauucccgugac        | 1 |
| Gi5_8067494_x35  | .....uGcgauucccgugaccg        | 1 |
| Gi2_9951974_x35  | .....gAuucgauucccgugacc       | 1 |
| Gi3_26376935_x35 | .....gUguucgauucccgugaccg     | 1 |
| Gi3_26377390_x35 | .....gacugucCucacgugaccgg     | 1 |
| Gi3_26384460_x35 | .....gguucgauucccgugaccAc     | 1 |
| Gi5_8073269_x35  | .....gacugucacucacgugaAccg    | 1 |
| Gi3_26392265_x35 | .....cGcucacgugaccgg          | 1 |
| Gi3_26414360_x34 | .....gguucgaCucccgugaccg      | 1 |
| Gi2_9966575_x34  | .....guucgGuucccgugacc        | 1 |
| Gi1_3738351_x34  | .....gacugucaNucacgugaccgg    | 1 |
| Gi3_26418610_x34 | .....guucgauuUccggugacc       | 1 |
| Gi2_9961985_x34  | .....accggguucgauucccgugaccgC | 1 |
| Gl1_5368184_x34  | .....cgugaccggguucgauucccggu  | 0 |
| Gi5_8081931_x34  | .....Cacugucacucacgugaccgg    | 1 |
| Gi1_3735665_x34  | .....ugacugucacucacgCgaccgg   | 1 |
| Gi3_26418644_x34 | .....gCuucgauucccgugaccg      | 1 |
| Gi2_9958211_x34  | .....Aguucgauucccgugaccg      | 1 |
| Gi3_26409668_x34 | .....gguuUgauucccgugaccg      | 1 |
| Gi3_26410960_x34 | .....gacugucacucacgugaAccg    | 1 |
| Gi3_26401338_x34 | .....ggAuucgauucccgugaccgc    | 1 |
| Gi3_26404092_x34 | .....guucgauuccUggugacc       | 1 |
| Gi3_26411130_x34 | .....cgugaccggguucgauucccggu  | 0 |
| Gi2_9967867_x34  | .....Aguucgauucccgugaccg      | 1 |
| Gi3_26408648_x34 | .....guucUauucccgugaccg       | 1 |
| Gi1_3738882_x33  | .....gguucgauucccgugaccU      | 1 |
| Gi1_3739641_x33  | .....guucgauucccgugaccgU      | 1 |
| Gi2_9974199_x33  | .....guucAauucccgugacc        | 1 |
| Gi3_26427337_x33 | .....gguucAauucccgugac        | 1 |
| Gi3_26426314_x33 | .....gcggucauaguacGguggc      | 1 |
| Gi2_9975486_x33  | .....gUguucgauucccgugacc      | 1 |
| Gi3_26442814_x33 | .....guucgauucccgugaccgGA     | 1 |
| Gi3_26424334_x33 | .....guacacucacgugaccggguucg  | 0 |
| Gi2_9982779_x33  | .....uUacugucacucacgugaccgg   | 1 |
| Gi5_8102883_x33  | .....Uggauucgauucccgugacc     | 1 |
| Gi2_9982746_x33  | .....cccggguucgauucccgugaccgc | 0 |
| Gi3_26434861_x33 | .....gguucgauucccUgugac       | 1 |
| Gi5_8099187_x33  | .....guucgauucccAgugacc       | 1 |
| Gi3_26444068_x33 | .....gacuUucacucacgugaccgg    | 1 |
| Gi1_3740598_x33  | .....ugacugucacucacgugacAccg  | 1 |
| Gi5_8104038_x33  | .....gacugucacucCcgugaccgg    | 1 |

|                       |                               |   |
|-----------------------|-------------------------------|---|
| Gi2_9974298_x33.....  | gguucgauucccgugaccgcggc.....  | 0 |
| Gi2_9977466_x33.....  | gguucgauucccgCgaccgcg.....    | 1 |
| Gi3_26420308_x33..... | gCuucgauucccgugac.....        | 1 |
| Gi3_26436511_x33..... | gacugucacucCcgugaccg.....     | 1 |
| Gi2_9978687_x33.....  | gguucgauucccgugaccgCcu.....   | 1 |
| Gi2_9973275_x33.....  | gguucgauucccgCgaccg.....      | 1 |
| Gi2_9980832_x33.....  | Ugguucgauucccgugaccgc.....    | 1 |
| Gi2_9971394_x33.....  | gCucgauucccgugaccgc.....      | 1 |
| Gi3_26420374_x33..... | gguucgauucccgGgaccg.....      | 1 |
| Gi5_8104005_x33.....  | gcggucauaguacaguggcuagau..... | 0 |
| Gi5_8116934_x32.....  | guCcgauucccgugaccgc.....      | 1 |
| Gi1_3745472_x32.....  | Ucggucauaguacaguggcuagau..... | 1 |
| Gi3_26450942_x32..... | guAcgauucccgugacc.....        | 1 |
| Gi3_26461054_x32..... | Uugacugucacucacgugaccg.....   | 1 |
| Gi3_26466366_x32..... | gguucgauucccgugacU.....       | 1 |
| Gi3_26445790_x32..... | Ccggucauaguacagugg.....       | 1 |
| Gi5_8109702_x32.....  | guuUgauucccgugacc.....        | 1 |
| Gi2_9988701_x32.....  | ggAucgauucccgugacc.....       | 1 |
| Gi1_3746304_x32.....  | uAacugucacucacgugaccg.....    | 1 |
| Gi3_26451902_x32..... | gacugucacucacgCgaccg.....     | 1 |
| Gi3_26449918_x32..... | gguucgauucccgugacA.....       | 1 |
| G1a_5384045_x32.....  | gcggucauaguacaguggUuagua..... | 1 |
| Gi5_8112070_x32.....  | gguucgauucccgugaccgAc.....    | 1 |
| Gi5_8109382_x32.....  | gguucgauNcccgugaccgc.....     | 1 |
| Gi3_26456318_x32..... | ucgauuccNggugaccg.....        | 1 |
| Gi2_9996317_x32.....  | gguucgauuccUgugacc.....       | 1 |
| Gi5_8108070_x32.....  | ggAucgauucccgugacc.....       | 1 |
| Gi3_26468222_x32..... | gguucgauucccgugCccg.....      | 1 |
| Gi5_8116678_x32.....  | guucUauucccgugacc.....        | 1 |
| Gi3_26447518_x32..... | ugUcugucacucacgugaccg.....    | 1 |
| Gi1_3748704_x32.....  | gGggucauaguacaguggcua.....    | 1 |
| Gi3_26447454_x32..... | Uuucgauucccgugaccgcg.....     | 1 |
| Gi5_8108582_x32.....  | gguucgauuccAgugaccg.....      | 1 |
| Gi3_26479731_x31..... | ugacugucNcucacgugaccg.....    | 1 |
| Gi5_8122534_x31.....  | gacAgucacucacgugaccg.....     | 1 |
| Gi3_26484691_x31..... | gguucgauuccAgugaccg.....      | 1 |
| G1a_5398572_x31.....  | gUuucgauucccgugaccg.....      | 1 |
| Gi5_8124766_x31.....  | guCcgauucccgugaccg.....       | 1 |
| G1a_5396867_x31.....  | gGucgauucccgugaccg.....       | 1 |
| Gi3_26469687_x31..... | accggguucgauucccgugaccgC..... | 1 |
| Gi2_10011643_x31..... | gguucgCuucccgugacc.....       | 1 |
| Gi3_26471640_x31..... | gguucgauucUcggugaccgc.....    | 1 |
| G1a_5392899_x31.....  | Ucggucauaguacaguggcua.....    | 1 |
| Gi3_26472849_x31..... | gguucgauucccgugaccAcg.....    | 1 |
| Gi5_8130408_x31.....  | gguucAauucccgugacc.....       | 1 |
| Gi3_26497830_x30..... | gacugucacCcacgugaccg.....     | 1 |
| Gi1_3756905_x30.....  | gguucgauucccgugaccg.....      | 0 |

|                       |                                |   |
|-----------------------|--------------------------------|---|
| Gi2_10028425_x30..... | .guucgauucccgGgaccgcg.....     | 1 |
| Gi3_26498610_x30..... | .guGcgauucccgugaccg.....       | 1 |
| Gi3_26509650_x30..... | .ugacugucacucacgCgaccgcg.....  | 1 |
| Gi2_10019875_x30..... | .gguuUgauucccgugaccgc.....     | 1 |
| Gi4_492029_x30.....   | .guucgauucccgugaccgc.....      | 0 |
| Gi3_26495010_x30..... | .gguucgauucccgugacAgc.....     | 1 |
| Gi3_26502720_x30..... | .Cacugucacucacgugaccg.....     | 1 |
| Gi3_26508000_x30..... | .gAucgauucccgugaccgcg.....     | 1 |
| Gi1_3758525_x30.....  | .Cgacugucacucacgugaccg.....    | 1 |
| Gi2_10019335_x30..... | .Cuucgauucccgugacc.....        | 1 |
| Gi3_26505630_x30..... | .gacugucGcucacgugaccg.....     | 1 |
| Gi3_26529640_x29..... | .gucacucacgugaccggguucga.....  | 0 |
| Gi5_8150161_x29.....  | .gguucgauucUcggugacc.....      | 1 |
| Gi5_8149871_x29.....  | .gguucgGuucccgugaccg.....      | 1 |
| Gi3_26530278_x29..... | .gguucgGuucccgugac.....        | 1 |
| Gi2_10039560_x29..... | .guucgauucccgugCcc.....        | 1 |
| Gi2_10035326_x29..... | .gguucgauucccgugacA.....       | 1 |
| Gi2_10031788_x29..... | .guucgaCuucccgugaccg.....      | 1 |
| Gi5_8152510_x29.....  | .gguuUgauucccgugacc.....       | 1 |
| Gi3_26541211_x29..... | .gguuUgauucccgugaccgc.....     | 1 |
| Gi3_26534512_x29..... | .guGcgauucccgugacc.....        | 1 |
| Gi1_3765277_x29.....  | .ggucauaguacaguggcuagu.....    | 0 |
| Gi5_8152916_x29.....  | .Ugguucgauucccgugaccg.....     | 1 |
| Gi5_8150364_x29.....  | .gcggucauaguacaguggcuagC.....  | 1 |
| Gi5_8150190_x29.....  | .guucgauucccgGgacc.....        | 1 |
| Gi1_3765509_x29.....  | .gacuUucacucacgugaccg.....     | 1 |
| Gi3_26526421_x29..... | .gguucgCuucccgugaccgc.....     | 1 |
| Gi5_8147058_x29.....  | .gacuUucacucacgugaccg.....     | 1 |
| Gi5_8145869_x29.....  | .Cuucgauucccgugaccg.....       | 1 |
| Gi3_26529234_x29..... | .gcggucauaguacaguggcuagua..... | 0 |
| Gi2_10039589_x29..... | .Cuucgauucccgugaccg.....       | 1 |
| Gi3_26522216_x29..... | .ggAucgauucccgugaccgcg.....    | 1 |
| Gi3_26518417_x29..... | .gCuucgauucccgugaccgc.....     | 1 |
| Gi3_26521404_x29..... | .cacucacgugaccggc.....         | 1 |
| Gi3_26547161_x28..... | .ugGcugucacucacgugaccg.....    | 1 |
| Gi3_26550941_x28..... | .guucgCuucccgugaccg.....       | 1 |
| Gi5_8156497_x28.....  | .gguucgauucccgGgacc.....       | 1 |
| Gi5_8157029_x28.....  | .Ccggucauaguacaguggcuagu.....  | 1 |
| Gi5_8163693_x28.....  | .guucgauuccUggugaccg.....      | 1 |
| Gi5_8166857_x28.....  | .gguucgauucccgugacA.....       | 1 |
| Gi5_8167193_x28.....  | .gcggucauaguacGguggcuagu.....  | 1 |
| Gi5_8166913_x28.....  | .gguucgauucccgGgac.....        | 1 |
| Gi3_26552565_x28..... | .gguucgCuucccgugaccg.....      | 1 |
| Gi5_8160557_x28.....  | .gacugucacucGcgugaccg.....     | 1 |
| Gi5_8165541_x28.....  | .guucgauucccgugaAgc.....       | 1 |
| Gi3_26566817_x28..... | .gacugucacucacgugaccgC.....    | 1 |
| Gi3_26548953_x28..... | .guucgauucccgGgacc.....        | 1 |

|                       |                                  |   |
|-----------------------|----------------------------------|---|
| Gi5_8160361_x28.....  | gguucgauucccgguAacc.....         | 1 |
| Gi3_26556317_x28..... | gguucgauucccgugacUgcg.....       | 1 |
| Gi5_8157393_x28.....  | guGcgauucccgugacc.....           | 1 |
| Gi5_8160081_x28.....  | Acggucauaguacaguggcua.....       | 1 |
| Gi3_26544837_x28..... | gguucgauucccAgugaccgc.....       | 1 |
| Gi3_26568300_x27..... | gacugucacucGcgugaccgg.....       | 1 |
| Gi2_10069742_x27..... | guucUauucccgugacc.....           | 1 |
| Gi3_26591466_x27..... | guucgauucccgguAaccgc.....        | 1 |
| Gi3_26579910_x27..... | Uaccggguucgauucc.....            | 1 |
| Gi3_26589711_x27..... | guucgauucUcgugaccg.....          | 1 |
| Gi5_8180315_x27.....  | gguucgauucAcggugacc.....         | 1 |
| Gi1_3774657_x27.....  | guucgauucccgugaccU.....          | 1 |
| Gi3_26591898_x27..... | guucgauucccgugCcc.....           | 1 |
| Gi5_8170676_x27.....  | gGggucauaguacaguggc.....         | 1 |
| Gi3_26570649_x27..... | gguucgauucccAgugac.....          | 1 |
| Gi2_10064612_x27..... | gguucgauucccgugaccgcgU.....      | 1 |
| Gi3_26569488_x27..... | guucgauucccgugaccgcC.....        | 1 |
| Gi5_8176859_x27.....  | guucgauucccgugacUg.....          | 1 |
| Gi5_8174996_x27.....  | guucgauuNccggugaccgc.....        | 1 |
| Gi5_8178776_x27.....  | guucgauucUcgugacc.....           | 1 |
| Gi3_26573970_x27..... | gUggucauaguacaguggc.....         | 1 |
| Gi1_3774684_x27.....  | gacCgucacucacgugaccgg.....       | 1 |
| Gi5_8171540_x27.....  | cgugaccggguucgauucccgugaccg..... | 0 |
| Gi3_26567922_x27..... | guucgauucAcggugaccgcg.....       | 1 |
| Gi3_26572350_x27..... | cccggguucgauucccgugaccgcgC.....  | 1 |
| Gi5_8174213_x27.....  | guucgauCcccggugaccgc.....        | 1 |
| Gi3_26591763_x27..... | guucgauucccgugacAgcg.....        | 1 |
| Gi3_26580261_x27..... | gacugCcacucacgugaccgg.....       | 1 |
| Gi2_10085233_x26..... | gguucgauNcccgugaccgcg.....       | 1 |
| Gi5_8188124_x26.....  | guucgauucccgugCcc.....           | 1 |
| Gl1a_5437973_x26..... | gguucgauucccgugacc.....          | 0 |
| Gi5_8186460_x26.....  | gGggucauaguacaguggcuag.....      | 1 |
| Gi5_8181910_x26.....  | guucgauCcccggugaccg.....         | 1 |
| Gi3_26618393_x26..... | gguucgauucUcgugaccgcg.....       | 1 |
| Gi3_26620057_x26..... | gguAcgauucccgugacc.....          | 1 |
| Gi2_10078317_x26..... | gUguucgauucccgugaccgcg.....      | 1 |
| Gi2_10077849_x26..... | gguucgauucUcgugacc.....          | 1 |
| Gi3_26611321_x26..... | cgugacugucacucacgugaccgggu.....  | 0 |
| Gi2_10089653_x26..... | Gacucacgugaccgggu.....           | 1 |
| Gi1_3786105_x26.....  | gauucccgugaccgcgCc.....          | 1 |
| Gi5_8194208_x26.....  | gguucgauucccgugCcc.....          | 1 |
| Gi3_26601675_x26..... | gguucgauuccUgugaccgcg.....       | 1 |
| Gi5_8190542_x26.....  | guGcgauucccgugaccgc.....         | 1 |
| Gi3_26633968_x25..... | gguucgauucccgugaUgcg.....        | 1 |
| Gi3_26644018_x25..... | guucgauucccgugaccgU.....         | 1 |
| Gi5_8196784_x25.....  | gcggucauaguacaguggcuagua.....    | 0 |
| Gl1a_5446912_x25..... | Ucggucauaguacaguggcuagua.....    | 1 |

|                  |                                   |   |
|------------------|-----------------------------------|---|
| Gi3_26628768_x25 | .....gguucgauucccgugaAcgc         | 1 |
| Gi1_3789681_x25  | .....gacugucGcucacgugacccgg       | 1 |
| Gi5_8205709_x25  | .....gUguucgauucccgugacc          | 1 |
| Gi3_26647393_x25 | .....guucgauucccgugacUg           | 1 |
| Gi3_26631118_x25 | .....guAcgauucccgugaccg           | 1 |
| Gi3_26636118_x25 | .....ggAucgauucccgugac            | 1 |
| Gi2_10097647_x25 | .....gguucgauucccgugCc            | 1 |
| Gi1_3793056_x25  | .....gacugucacucGcgugacccgg       | 1 |
| Gi3_26623643_x25 | .....gguUgauucccgugac             | 1 |
| Gi1_3791256_x25  | .....Uacugucacucacgugacc          | 1 |
| Gi3_26647943_x25 | .....gguucgauucccgugaUcg          | 1 |
| Gi5_8204209_x25  | .....gCGgucauNguacaguggc          | 1 |
| Gi2_10101447_x25 | .....gCGgucauaguacaguggcuagu      | 0 |
| Gi1_3791656_x25  | .....ugacugucacucGcgugacccgg      | 1 |
| Gi3_26643818_x25 | .....ugacugucacCcacgugacccgg      | 1 |
| Gi5_8196359_x25  | .....uCaCugucacucacgugacccgg      | 1 |
| Gi2_10093747_x25 | .....gguucgauucccGugaccg          | 1 |
| Gi3_26635918_x25 | .....guucgauucccgAugacc           | 1 |
| Gi2_10100497_x25 | .....guucgauucccgugacUcg          | 1 |
| Gi2_10121491_x24 | .....ggCucgauucccgugac            | 1 |
| Gi3_26662448_x24 | .....gacugucacucacgugaAccg        | 1 |
| Gi1_3795494_x24  | .....guucgauucccgugaccgU          | 1 |
| Gi5_8209752_x24  | .....gguucgauucccgugaUc           | 1 |
| Gi3_26676200_x24 | .....ugacugucacucacgugacAcgg      | 1 |
| Gi3_26672456_x24 | .....gacugucacucGcgugacccg        | 1 |
| Gi5_8212536_x24  | .....gGgucauaguacaguggcuagua      | 1 |
| Gi1_3798422_x24  | .....cacucacgugacccggguucAauucc   | 1 |
| Gi1_3793862_x24  | .....gacugucacucCcgugacccgg       | 1 |
| Gi2_10107547_x24 | .....ucgauucccgugaccgC            | 1 |
| Gi3_26675024_x24 | .....guucgauAcccgugaccg           | 1 |
| Gi3_26673944_x24 | .....ugacccggguucgauucccgugaccgCc | 1 |
| Gi2_10106995_x24 | .....gguucgauucccgugaAcgc         | 1 |
| Gi3_26676968_x24 | .....gguucgauucccgAgacc           | 1 |
| Gi3_26669888_x24 | .....gguucgauuccUggugac           | 1 |
| Gi3_26650760_x24 | .....guucgauucccgAugaccg          | 1 |
| Gi2_10117939_x24 | .....guucGauucccgugaccg           | 1 |
| Gi3_26666144_x24 | .....gcUgucauaguacagugg           | 1 |
| Gi2_10108531_x24 | .....Cuucgauucccgugaccg           | 1 |
| Gi5_8209848_x24  | .....gguucgauNcccgugaccg          | 1 |
| Gi3_26662136_x24 | .....gguucgauucccgGgac            | 1 |
| Gi5_8211408_x24  | .....gCGgucauaguacagCggcuagu      | 1 |
| Gi2_10110403_x24 | .....Auucgauucccgugaccg           | 1 |
| Gi3_26663576_x24 | .....guAcgauucccgugaccg           | 1 |
| Gi5_8233346_x23  | .....guucgauucAcggugacc           | 1 |
| Gi1_3804257_x23  | .....Ucggucauaguacaguggcu         | 1 |
| Gi1_3804050_x23  | .....gCGgucauaguacGguggcu         | 1 |
| Gi2_10124806_x23 | .....Gcgauucccgugaccg             | 1 |



|                  |                               |   |
|------------------|-------------------------------|---|
| Gi3_26694015_x23 | .....gguucgauucccgugaccgcgga  | 1 |
| Gi2_10133086_x23 | .....Acggucauaguacaguggc      | 1 |
| Gi3_26703100_x23 | .....gacugucacucacAugaccg     | 1 |
| Gi5_8224836_x23  | .....guAcgauucccgugacc        | 1 |
| Gi3_26689944_x23 | .....gGgaccgguucgauucc        | 1 |
| Gi3_26696177_x23 | .....gguucgauucccgugUc        | 1 |
| Gi3_26702433_x23 | .....ugacugucGcucacgugaccg    | 1 |
| Gi1_3799450_x23  | .....gacugucacucacgugaccAg    | 1 |
| Gi5_8223249_x23  | .....Cuucgauucccgugaccgc      | 1 |
| Gi3_26704848_x23 | .....Gacucacgugaccgguuc       | 1 |
| Gi5_8231414_x23  | .....guucgauucccgGgaccg       | 1 |
| Gi3_26699029_x23 | .....guucgauuUccgugaccg       | 1 |
| Gi2_10135777_x23 | .....guucgauucccgugGccg       | 1 |
| Gi2_10132603_x23 | .....cacucacgNgaccggu         | 1 |
| Gi3_26696614_x23 | .....gacugucacucacgugGccg     | 1 |
| Gi3_26682308_x23 | .....cccgguucgauucccgugaccgc  | 0 |
| Gi1_3805637_x23  | .....gacugucacucacgugCccg     | 1 |
| Gi3_26705354_x23 | .....gguucgCuucccgugac        | 1 |
| Gi3_26700202_x23 | .....gcgguCguaguacaguggc      | 1 |
| Gi2_10129383_x23 | .....guucgauuccAgugaccgc      | 1 |
| Gi3_26720740_x22 | .....gacGgucacucacgugaccg     | 1 |
| Gi1_3806023_x22  | .....ugacugucacucacgugaccUgg  | 1 |
| Gi4_501004_x22   | .....Ucggucgauaguacaguggcuagu | 1 |
| Gi2_10151762_x22 | .....guucgauucccgugGccg       | 1 |
| Gi3_26731234_x22 | .....gUggucgauaguacagugg      | 1 |
| Gi3_26726988_x22 | .....Ccacucacgugaccgguuc      | 1 |
| Gi5_8234487_x22  | .....gUggucgauaguacaguggcuagu | 1 |
| Gi5_8245509_x22  | .....guuUgauucccgugaccgc      | 1 |
| Gi3_26737064_x22 | .....ggCucgauucccgugaccg      | 1 |
| Gi3_26733632_x22 | .....guucgauucccgguAaccg      | 1 |
| Gi5_8242561_x22  | .....gCGCcauaguacaguggcuagu   | 1 |
| Gi3_26717110_x22 | .....gguucgauucccgGgaccg      | 1 |
| Gi3_26737680_x22 | .....gguucgauucccgugacAgcg    | 1 |
| Gi3_26713260_x22 | .....guucgauucccgugaccC       | 1 |
| Gi5_8240075_x22  | .....ugacugucacCcacgugaccg    | 1 |
| Gi3_26735238_x22 | .....cacucacgNgaccggu         | 1 |
| Gi3_26728770_x22 | .....gguucgauucccgugGccg      | 1 |
| Gi5_8242605_x22  | .....gAucgauucccgugacc        | 1 |
| Gi3_26734226_x22 | .....guucgauucAcgugacc        | 1 |
| Gi2_10146548_x22 | .....guucgGuucccgugaccgc      | 1 |
| Gi2_10142808_x22 | .....gguucgauucccgGgacc       | 1 |
| Gi3_26750487_x21 | .....guucgauucccgAgaccg       | 1 |
| Gi3_26745216_x21 | .....Uugacugucacucacgugacc    | 1 |
| Gi3_26751579_x21 | .....Gacucacgugaccgguucga     | 1 |
| Gi3_26747589_x21 | .....gguucgauUcccgugaccg      | 1 |
| Gi2_10161712_x21 | .....guucAauucccgugaccgc      | 1 |
| Gi2_10162447_x21 | .....gguucgauuccUggugaccgc    | 1 |

|                  |                                 |   |
|------------------|---------------------------------|---|
| Gi3_26753532_x21 | .Uacugucacucacgugacccggguuc     | 1 |
| Gi5_8249520_x21  | .guucgauucccgugaccA             | 1 |
| Gi5_8256786_x21  | .gcUgucgauuacaguggc             | 1 |
| Gi1_5481472_x21  | .gguucgauNcccgugacc             | 1 |
| Gi4_501377_x21   | .guucgauucccgugaccgcCc          | 1 |
| Gi5_8250906_x21  | .gacugucacucaUgugaccgg          | 1 |
| Gi3_26758992_x21 | .guucgCuucccgugaccg             | 1 |
| Gi3_26748681_x21 | .cgugaccggguucgauucccgugacc     | 0 |
| Gi5_8260797_x21  | .gcggucGuaguacaguggcuagu        | 1 |
| Gi2_10167718_x21 | .gcggucanNguacaguggc            | 1 |
| Gi3_26766783_x21 | .guucgauAcccgugacc              | 1 |
| Gi3_26747421_x21 | .gguucgauucccgugaccAcg          | 1 |
| Gi5_8249877_x21  | .guucgauuccUggugaccgc           | 1 |
| Gi2_10158919_x21 | .gguucgCuucccgugacc             | 1 |
| Gi3_26761596_x21 | .guucgCuucccgugacc              | 1 |
| Gi1_3814911_x21  | .gucauaguacaguggcuag            | 0 |
| Gi5_8249100_x21  | .gcggucanNguacaguggcuag         | 1 |
| Gi5_8262645_x21  | .gguucgauuccUgugacc             | 1 |
| Gi3_26750676_x21 | .gacugucCcucacgugaccg           | 1 |
| Gi3_26757018_x21 | .gacugucacucacgugacccggguucgauu | 0 |
| Gi2_10161544_x21 | .guucUauucccgugaccgc            | 1 |
| Gi2_10159780_x21 | .guucgauucccgugaAcg             | 1 |
| Gi3_26743767_x21 | .gacCgucacucacgugaccgg          | 1 |
| Gi3_26763423_x21 | .gacugucacucacgugaccAg          | 1 |
| Gi2_10165345_x21 | .cGcucacgugacccgggu             | 1 |
| Gi2_10158037_x21 | .gguuGgauucccgugacc             | 1 |
| Gi5_8262918_x21  | .gcggucanaguacaguggcCa          | 1 |
| Gi3_26772621_x21 | .guucgauucccgAgaccg             | 1 |
| Gi2_10165072_x21 | .guucgauucccgugaUc              | 1 |
| Gi2_10168327_x21 | .gguucgauucccgugacc             | 1 |
| Gi5_8250507_x21  | .cUgucanaguacaguggcua           | 1 |
| Gi3_26787645_x20 | .guucgGuucccgugaccgc            | 1 |
| Gi4_503673_x20   | .gguucgauucccgugaccgcC          | 1 |
| Gi5_8274989_x20  | .Cguucgauucccgugacc             | 1 |
| Gi3_26791405_x20 | .gguucgUuucccgugacc             | 1 |
| Gi3_26797145_x20 | .gcggGcauaguacaguggc            | 1 |
| Gi1_3823530_x20  | .cgugaccggguucAauucccgugacc     | 1 |
| Gi5_8268629_x20  | .Acggucanaguacaguggc            | 1 |
| Gi5_8269809_x20  | .guucgauucccgugaAc              | 1 |
| Gi3_26796145_x20 | .guucgauucccgAgacc              | 1 |
| Gi5_8271289_x20  | .Ugaccggguucgauucc              | 1 |
| Gi2_10176829_x20 | .guucgauucccgugaAcgc            | 1 |
| Gi5_8272129_x20  | .Uacugucacucacgugaccgggu        | 1 |
| Gi5_8263689_x20  | .Uucauaguacaguggcuag            | 1 |
| Gi1_3824930_x20  | .Uuucgauucccgugaccgc            | 1 |
| Gi1_3824770_x20  | .Acggucanaguacaguggcua          | 1 |
| Gi5_8276169_x20  | .gguucgauuAcccgugacc            | 1 |

|                       |                                   |   |
|-----------------------|-----------------------------------|---|
| Gi2_10176609_x20..... | guucgauucccgugacUg.....           | 1 |
| Gi5_8274329_x20.....  | guucgCuucccgugacc.....            | 1 |
| Gi3_26778005_x20..... | accggguucgauucccgugaccgcg.....    | 0 |
| Gi3_26782525_x20..... | gacugucacucCcgugacccg.....        | 1 |
| Gi2_10188669_x20..... | guucgauuccUggugaccgc.....         | 1 |
| Gi5_8272209_x20.....  | guucgauucccgugacUgc.....          | 1 |
| Gi5_8264409_x20.....  | gguucgCuucccgugacc.....           | 1 |
| Gi2_10184689_x20..... | guucgauCcccgugaccg.....           | 1 |
| Gi3_26773565_x20..... | gguucgauucccgugaccA.....          | 1 |
| Gi3_26779645_x20..... | gguucgauucccgugaccgUg.....        | 1 |
| Gi2_10179109_x20..... | gguucgauucccgugacUgc.....         | 1 |
| Gi2_10173869_x20..... | gCucgauucccgugaccgcg.....         | 1 |
| Gi2_10176789_x20..... | Ccggucauaguacaguggc.....          | 1 |
| Gi5_8273769_x20.....  | Ccggucauaguacaguggcua.....        | 1 |
| Gi5_8272629_x20.....  | gGcugucacucacgugacccg.....        | 1 |
| Gi3_26776545_x20..... | uCacugucacucacgugacccg.....       | 1 |
| Gi5_8276909_x20.....  | gcggucaCaguacaguggcuagua.....     | 1 |
| Gi3_26787165_x20..... | guucgauucccgugaccCc.....          | 1 |
| Gi2_10200005_x19..... | gcggucauaguacGguggc.....          | 1 |
| Gi3_26833996_x19..... | ugacCgucacucacgugacccg.....       | 1 |
| Gi3_26809790_x19..... | guucgauuAcccgugacc.....           | 1 |
| Gi2_10196965_x19..... | guCcgauucccgugaccgc.....          | 1 |
| Gi5_8282232_x19.....  | gguucgauucccgugaccgUc.....        | 1 |
| Gi3_26816516_x19..... | ucacgugacccgguucgauucccgugac..... | 0 |
| Gi2_10207890_x19..... | guucgauuUcccgugaccg.....          | 1 |
| Gi2_10197630_x19..... | Cguucgauucccgugaccgc.....         | 1 |
| Gi3_26818758_x19..... | Ugguucgauucccgugac.....           | 1 |
| Gi2_10197364_x19..... | guucAauucccgugaccgcg.....         | 1 |
| Gi1_3833258_x19.....  | aGugucacucacgugacccg.....         | 1 |
| Gi2_10191512_x19..... | guGcgauucccgugacc.....            | 1 |
| Gi3_26829474_x19..... | gUcugucacucacgugacccg.....        | 1 |
| Gi1_3833695_x19.....  | ugacugucacCcacgugacccg.....       | 1 |
| Gi1_3833201_x19.....  | ugacugucGcucacgugacccg.....       | 1 |
| Gi2_10196148_x19..... | cUauucccgugaccgUc.....            | 1 |
| Gi5_8284778_x19.....  | gcggucauaguacaguggcCagua.....     | 1 |
| Gi3_26820867_x19..... | Cguucgauucccgugaccg.....          | 1 |
| Gi3_26807871_x19..... | gGgacccgguucgauucc.....           | 1 |
| Gi3_26828752_x19..... | gggGuccgauucccgugacc.....         | 1 |
| Gi3_26835516_x19..... | gcggucauaguacCgugg.....           | 1 |
| Gi1_3831928_x19.....  | gGcugucacucacgugacccg.....        | 1 |
| Gi2_10208821_x19..... | gguucgauucccgugGc.....            | 1 |
| Gi3_26831070_x19..... | Uugacugucacucacguga.....          | 1 |
| Gi2_10209087_x19..... | guucAauucccgugaccg.....           | 1 |
| Gi5_8281871_x19.....  | gcggucauaguacaguggcuaguauUc.....  | 1 |
| Gi5_8282612_x19.....  | guucgauucccgguAacc.....           | 1 |
| Gi5_8284949_x19.....  | gguucgauucccgAugacc.....          | 1 |
| Gi3_26841436_x18..... | gacugucacucacgugacccgA.....       | 1 |

|                       |                                     |   |
|-----------------------|-------------------------------------|---|
| Gi3_26850346_x18..... | gguucgauAcccgugaccgcg.....          | 1 |
| Gi5_8303913_x18.....  | .gacugucacucacAugaccg.....          | 1 |
| Gi2_10220350_x18..... | gguCcgauucccgugac.....              | 1 |
| Gi3_26854432_x18..... | gguucgauucccgCugacc.....            | 1 |
| Gi3_26868436_x18..... | .guucgauucccgugacAg.....            | 1 |
| Gi1_3842157_x18.....  | gguucgauucccgugaccg.....            | 0 |
| Gi5_8302131_x18.....  | .Cguucgauucccgugaccg.....           | 1 |
| Gi1_3840393_x18.....  | .ugacugucacucacgugaccAg.....        | 1 |
| Gi3_26873008_x18..... | gguucgauucccgugaGc.....             | 1 |
| Gi2_10224580_x18..... | gguucgaCucccgugaccg.....            | 1 |
| Gi2_10225102_x18..... | Uguucgauucccgugaccgggcu.....        | 1 |
| Gi2_10221448_x18..... | .guucgauuccAgugacc.....             | 1 |
| Gi3_26840608_x18..... | gguucgauucccgugaccg.....            | 0 |
| Gi2_10214518_x18..... | gguucgauNcccgugaccg.....            | 1 |
| Gi5_8298351_x18.....  | .Cgacugucacucacgugaccg.....         | 1 |
| Gi2_10228792_x18..... | gguucgauucccguaAacc.....            | 1 |
| Gi3_26852866_x18..... | .guucgauucccgUugaccg.....           | 1 |
| Gi2_10212124_x18..... | .guucgauuccAgugaccg.....            | 1 |
| Gi5_8294031_x18.....  | gguucgauucccgAgacc.....             | 1 |
| Gi2_10216462_x18..... | .guCcgauucccgugaccg.....            | 1 |
| Gi3_26867950_x18..... | .ugacugucacucacgugaccgA.....        | 1 |
| Gi2_10228504_x18..... | .Cuucgauucccgugaccg.....            | 1 |
| Gi2_10227874_x18..... | gcggucauaguacaguggcua.....          | 0 |
| Gi5_8294769_x18.....  | .guAcgauucccgugaccg.....            | 1 |
| Gi3_26840266_x18..... | .ucgauCcccgugaccg.....              | 1 |
| Gi2_10210036_x18..... | .gUguucgauucccgugaccg.....          | 1 |
| Gi5_8298999_x18.....  | gcggucauNguacaguggcua.....          | 1 |
| Gi2_10228918_x18..... | .gUguucgauucccgugaccg.....          | 1 |
| Gi1a_5520131_x18..... | .Ugguucgauucccgugaccg.....          | 1 |
| Gi3_26861308_x18..... | .gacuguUacucacgugaccg.....          | 1 |
| Gi3_26838682_x18..... | .gAucgauucccgugaccg.....            | 1 |
| Gi3_26857024_x18..... | .ucacgugaccggguucgauucc.....        | 0 |
| Gi5_8301411_x18.....  | .Aacugucacucacgugaccg.....          | 1 |
| Gi2_10224526_x18..... | .guucgauuccAggugacc.....            | 1 |
| Gi3_26856160_x18..... | .guucgauAcccgugaccg.....            | 1 |
| Gi3_26874574_x18..... | .guucgauucccgugaUcgg.....           | 1 |
| Gi5_8303463_x18.....  | gcggucauNguacaguggcuagua.....       | 1 |
| Gi5_8296983_x18.....  | .ucacgugaccggguucgauucccgugacc..... | 0 |
| Gi3_26839294_x18..... | gguucgauucccguaAaccg.....           | 1 |
| Gi3_26858590_x18..... | .ugacugucacucGcgugaccg.....         | 1 |
| Gi5_8295183_x18.....  | gguucgGuuccgugac.....               | 1 |
| Gi5_8308389_x17.....  | .guucgauucccgugacU.....             | 1 |
| Gi5_8320238_x17.....  | .gCucgauucccgugaccg.....            | 1 |
| Gi3_26888276_x17..... | .gCucgauucccgugaccgggc.....         | 1 |
| Gi1_3853336_x17.....  | .gUcugucacucacgugaccg.....          | 1 |
| Gi5_8319847_x17.....  | .ggCucgauucccgugaccg.....           | 1 |
| Gi2_10244978_x17..... | gguucgauCcccgugaccg.....            | 1 |

|                       |                              |   |
|-----------------------|------------------------------|---|
| Gi1a_5521441_x17..... | Uuucgauucccgugaccgcg.....    | 1 |
| Gi5_8315002_x17.....  | ugUcugucacucacgugaccgg.....  | 1 |
| Gi3_26885386_x17..... | guucgauuccAggugaccgc.....    | 1 |
| Gi2_10232823_x17..... | guuUgauucccgugacc.....       | 1 |
| Gi3_26904035_x17..... | gGgacugucacucacgugaccgg..... | 1 |
| Gi2_10236699_x17..... | guucgauuUccggugacc.....      | 1 |
| Gi3_26888718_x17..... | uucgauucccgugaccgGcCu.....   | 1 |
| Gi3_26902624_x17..... | caUucacgugaccgggu.....       | 1 |
| Gi3_26893206_x17..... | gacuUucacucacgugaccgg.....   | 1 |
| Gi2_10233673_x17..... | guucgauucccgugaccAc.....     | 1 |
| Gi5_8320629_x17.....  | gCuucgauucccgugac.....       | 1 |
| Gi5_8318011_x17.....  | gAuucgauucccgugaccgG.....    | 1 |
| Gi5_8318062_x17.....  | gguuUgauucccgugac.....       | 1 |
| Gi5_8311160_x17.....  | ugacugCcacucacgugaccgg.....  | 1 |
| Gi5_8319490_x17.....  | gaUugucacucacgugaccgg.....   | 1 |
| Gi5_8318708_x17.....  | gguucgauucccgugGccgc.....    | 1 |
| Gi3_26910257_x17..... | ggguucgaNuucccgugaccgG.....  | 1 |
| Gi3_26904528_x17..... | guucgauucccgugUccgc.....     | 1 |
| Gi5_8312367_x17.....  | gacugucacucacgugCcccgg.....  | 1 |
| Gi1_3849630_x17.....  | gguucgauucccgugaccgCU.....   | 1 |
| Gi5_8309579_x17.....  | guucgauuUccggugacc.....      | 1 |
| Gi3_26882802_x17..... | ggUuucgauucccgugaccgG.....   | 1 |
| Gi1a_5526048_x17..... | gguucgauucccgugaccgGAc.....  | 1 |
| Gi2_10237549_x17..... | cUugacugucacucacgugacc.....  | 1 |
| Gi5_8307998_x17.....  | guucAauucccgugaccg.....      | 1 |
| Gi3_26876053_x17..... | ugacugucacucacgugaccgC.....  | 1 |
| Gi1_3851211_x17.....  | ugacCgucacucacgugaccgg.....  | 1 |
| Gi2_10244570_x17..... | guucgGuucccgugaccgG.....     | 1 |
| Gi5_8315988_x17.....  | gugacugucacucacgugGcc.....   | 1 |
| Gi3_26903848_x17..... | uuUgauucccgugaccgc.....      | 1 |
| Gi3_26881782_x17..... | gcggucauaguacagCggc.....     | 1 |
| Gi5_8322397_x17.....  | gguucgaCuucccgugaccgc.....   | 1 |
| Gi3_26903202_x17..... | guucgauuAccggugaccgc.....    | 1 |
| Gi1_3846842_x17.....  | gacugucacucacgugacUcgg.....  | 1 |
| Gi2_10231021_x17..... | gguucgauucccgugacU.....      | 1 |
| Gi3_26896878_x17..... | uCacugucacucacgugaccgg.....  | 1 |
| Gi3_26876104_x17..... | Gcacucacgugaccggguucga.....  | 1 |
| Gi3_26913096_x17..... | gguucgauuccAggugacc.....     | 1 |
| Gi3_26901451_x17..... | gguucgauuccUgugaccgc.....    | 1 |
| Gi3_26889857_x17..... | guucgauucccguaAccgG.....     | 1 |
| Gi3_26910495_x17..... | gguucgauucccgugaAcgG.....    | 1 |
| Gi2_10237056_x17..... | Uacugucacucacgugacc.....     | 1 |
| Gi1_3854696_x17.....  | uAucacucacgugaccgg.....      | 1 |
| Gi2_10235424_x17..... | Ugguucgauucccguga.....       | 1 |
| Gi3_26890265_x17..... | gcggucauagCacagugg.....      | 1 |
| Gi2_10250010_x17..... | guAcgauucccgugaccg.....      | 1 |
| Gi1_3850123_x17.....  | gacugucacucacgugaAccgg.....  | 1 |

|                       |                                 |   |
|-----------------------|---------------------------------|---|
| Gi3_26891285_x17..... | .gggGucgauucccgugaccgcg.....    | 1 |
| Gi3_26905089_x17..... | .gguucgauucccgAugac.....        | 1 |
| Gi3_26894515_x17..... | .guucgauucAcggugaccg.....       | 1 |
| Gi1_3847250_x17.....  | .gcggucauNguacaguggcua.....     | 1 |
| Gi5_8337712_x16.....  | .gacugucacucacgugaccUgg.....    | 1 |
| Gi1_3857169_x16.....  | .ugacugCcacucacgugaccgg.....    | 1 |
| Gi5_8324640_x16.....  | .guucgauucccgAugacc.....        | 1 |
| Gi2_10260489_x16..... | .gguucgauucccgugGccgcg.....     | 1 |
| Gi3_26917325_x16..... | .uAacugucacucacgugaccgg.....    | 1 |
| Gi5_8332256_x16.....  | .Gcgauucccgugaccgc.....         | 1 |
| Gi2_10256217_x16..... | .guucgauucccgugaAc.....         | 1 |
| Gi2_10256233_x16..... | .guucgauCcccgugaccgc.....       | 1 |
| Gi2_10262745_x16..... | .gguucgauCcccgugaccgcg.....     | 1 |
| Gi2_10258361_x16..... | .gguucgGuucccgugac.....         | 1 |
| Gi3_26951021_x16..... | .gacugucacucacgugaccUgg.....    | 1 |
| Gi3_26937949_x16..... | .gguucgauucccgugaU.....         | 1 |
| Gi2_10251161_x16..... | .cacucacgugaccgggC.....         | 1 |
| Gi3_26917229_x16..... | .gguucgGuucccgugaccg.....       | 1 |
| Gi3_26927613_x16..... | .ugUcugucacucacgugaccg.....     | 1 |
| Gi2_10258553_x16..... | .ggCucgauucccgugaccg.....       | 1 |
| Gi4_508196_x16.....   | .Ucggucauaguacaguggcuaguau..... | 1 |
| Gi5_8326576_x16.....  | .guucgauuccAgugaccg.....        | 1 |
| Gi2_10271065_x16..... | .gcggucauaguacaguggcuagua.....  | 0 |
| Gi5_8335120_x16.....  | .gguucgauucccgugGccgcg.....     | 1 |
| Gi5_8338080_x16.....  | .gacCgucacucacgugaccgg.....     | 1 |
| Gi3_26941325_x16..... | .guucgaGucccgugacc.....         | 1 |
| Gi2_10252937_x16..... | .gguucgauucccgugaUcgc.....      | 1 |
| Gi2_10257369_x16..... | .cUauucccgugaccgcg.....         | 1 |
| Gi1a_5536061_x16..... | .Ucggucauaguacaguggcuaguau..... | 1 |
| Gi5_8334752_x16.....  | .Uuucgauucccgugaccgcggu.....    | 1 |
| Gi1_3862561_x16.....  | .gUggucauaguacaguggcua.....     | 1 |
| Gi1a_5536013_x16..... | .gacugucacucacgugaccgggu.....   | 0 |
| Gi2_10271929_x16..... | .guucgauucccgGgacc.....         | 1 |
| Gi3_26933501_x16..... | .guucgauucccgugaUcg.....        | 1 |
| Gi3_26918221_x16..... | .ucgauucccgugGccgc.....         | 1 |
| Gi3_26951677_x16..... | .gacugucacucacgugaccA.....      | 1 |
| Gi5_8337824_x16.....  | .ggCucgauucccgugac.....         | 1 |
| Gi5_8327104_x16.....  | .ggGucgauucccgugaccgc.....      | 1 |
| Gi2_10260713_x16..... | .gguucgauucccgCgaccgc.....      | 1 |
| Gi3_26922765_x16..... | .guucgauuAcccgugaccgcg.....     | 1 |
| Gi3_26923389_x16..... | .Uugaccggguucgauuc.....         | 1 |
| Gi5_8322992_x16.....  | .gacugCcacucacgugaccgg.....     | 1 |
| Gi3_26942013_x16..... | .Cgacugucacucacgugaccgg.....    | 1 |
| Gi3_26934205_x16..... | .guucgauucccgUugaccg.....       | 1 |
| Gi3_26936237_x16..... | .gguuAgauucccgugacc.....        | 1 |
| Gi5_8326624_x16.....  | .gcAgucauaguacaguggcuagu.....   | 1 |
| Gi5_8343587_x15.....  | .guucgauucAcggugaccgc.....      | 1 |

|                                                         |   |
|---------------------------------------------------------|---|
| Gi3_26977525_x15.....gcggucauaguacaguggcuagu.....       | 0 |
| Gi5_8348852_x15.....gGggucauaguacagugg.....             | 1 |
| Gi5_8354042_x15.....gcggucauaguGcaguggcuagu.....        | 1 |
| Gi3_26965135_x15.....gacugucacucacgugaUccg.....         | 1 |
| Gi3_26953525_x15.....gguucgauucccgGgaccgcg.....         | 1 |
| Gi1_3869207_x15.....gcggCcauaguacaguggcua.....          | 1 |
| Gi3_26992390_x15.....gguucgauucccgguAaccg.....          | 1 |
| Gi2_10273885_x15.....guucgauucccgugacUgc.....           | 1 |
| Gi5_8344112_x15.....Cguucgauucccgugaccgc.....           | 1 |
| Gi3_26967160_x15.....gacugucacucacgugCcccg.....         | 1 |
| Gi3_26979430_x15.....gGucgauucccgugaccgggc.....         | 1 |
| Gi1_3872537_x15.....cgauucccgugaccgcgCc.....            | 1 |
| Gi2_10277680_x15.....gcggGcauaguacaguggc.....           | 1 |
| Gi3_26961325_x15.....gguucAauucccgugaccg.....           | 1 |
| Gi2_10277410_x15.....guucgauucccgugaccgggcA.....        | 1 |
| Gi3_26975140_x15.....gacugucacucacgugacUccg.....        | 1 |
| Gi5_8338892_x15.....cUgucauaguacaguggcuagu.....         | 1 |
| Gi3_26980630_x15.....gguucgauuUcccgugaccgcg.....        | 1 |
| Gi3_26957440_x15.....gguucgauucAcggugac.....            | 1 |
| Gi2_10282555_x15.....gguucgauCcccgugac.....             | 1 |
| Gi5_8343137_x15.....guucgauucUcggugaccgc.....           | 1 |
| Gi5_8344532_x15.....gcggucauaguacGguggcuag.....         | 1 |
| Gi5_8352197_x15.....gGcauaguacaguggcuagu.....           | 1 |
| Gi3_26965405_x15.....gguucgauAcccgugac.....             | 1 |
| Gi3_26976370_x15.....gacuAucacucacgugacccg.....         | 1 |
| Gi5_8348462_x15.....gguucgauucccgugacUccg.....          | 1 |
| Gi1_3865892_x15.....ugacugucacucacgugaccAgg.....        | 1 |
| Gi2_10275385_x15.....Uugacugucacucacgugacccg.....       | 1 |
| Gi5_8349347_x15.....gcggGcauaguacaguggcuagu.....        | 1 |
| Gi3_26979475_x15.....gguucgauuUcccgugac.....            | 1 |
| Gi1a_5557004_x15.....ugucacucacgugaccggguuc.....        | 0 |
| Gi3_26954425_x15.....gcggucauagCacaguggc.....           | 1 |
| Gi5_8341232_x15.....Auucgauucccgugaccgcg.....           | 1 |
| Gi5_8351897_x15.....gUggucauaguacaguggcua.....          | 1 |
| Gi3_26991865_x15.....gguucgauucUccgugac.....            | 1 |
| Gi3_26955715_x15.....ucAauucccgugaccgc.....             | 1 |
| Gi1_3868817_x15.....gGggucauaguacaguggcuagua.....       | 1 |
| Gi2_10278670_x15.....Cguucgauucccgugac.....             | 1 |
| Gi5_8351507_x15.....guucgauucccgugaAcgc.....            | 1 |
| Gi3_26985100_x15.....Uacugucacucacgugaccggg.....        | 1 |
| Gi5_8344187_x15.....guucgauucccgAugaccgc.....           | 1 |
| Gi5_8346842_x15.....Acggucauaguacaguggcuagua.....       | 1 |
| Gi3_26972230_x15.....gguucgauucccUgugaccgcg.....        | 1 |
| Gi3_26975650_x15.....gugcggucauaguacaguggcCaguaugc..... | 1 |
| Gi5_8348732_x15.....gguucgauucccgugGc.....              | 1 |
| Gi5_8354432_x15.....guuUgauucccgugaccg.....             | 1 |
| Gi1_3866297_x15.....ucgauucccgugaccgcgCc.....           | 1 |

|                       |                              |   |
|-----------------------|------------------------------|---|
| Gi2_10284790_x15..... | .guucgauucUcggugaccg.....    | 1 |
| Gi2_10289380_x15..... | gguucgauucccUgugacc.....     | 1 |
| Gi3_26962045_x15..... | gguucgauucccgugaA.....       | 1 |
| Gi3_26956870_x15..... | gguCcgauucccgugaccg.....     | 1 |
| Gi2_10276600_x15..... | ggGucgauucccgugaccgG.....    | 1 |
| Gi1_3871412_x15.....  | gguucgauucccgugaccgU.....    | 1 |
| Gi5_8349182_x15.....  | UgguucgauucccgugaccG.....    | 1 |
| Gi2_10313557_x14..... | .guucgauuUccggugaccG.....    | 1 |
| Gi2_10306795_x14..... | ggGucgauucccgugaccG.....     | 1 |
| Gi3_27005051_x14..... | gcggucGguacaguggc.....       | 1 |
| Gi5_8356727_x14.....  | .guCcgauucccgugaccgG.....    | 1 |
| Gi3_27030307_x14..... | .gguucgauucAcggugaccG.....   | 1 |
| Gi1a_5568315_x14..... | .Aguucgauucccgugacc.....     | 1 |
| Gi5_8364525_x14.....  | .gguucAauucccgugaccG.....    | 1 |
| Gi2_10311135_x14..... | .guucgauuAccggugaccG.....    | 1 |
| Gi4_511478_x14.....   | .UacugucacucacgugaccG.....   | 1 |
| Gi5_8362355_x14.....  | .gguucgauucccgugaccU.....    | 1 |
| Gi5_8358491_x14.....  | .guCcgauucccgugaccG.....     | 1 |
| Gi1a_5570443_x14..... | .Uucauaguacaguggcua.....     | 1 |
| Gi1_3882386_x14.....  | .gacAgucacucacgugaccG.....   | 1 |
| Gi3_27026891_x14..... | .ucgauucccgugaccGcgCcu.....  | 1 |
| Gi3_27001733_x14..... | .ucgauucccAgugaccG.....      | 1 |
| Gi2_10297821_x14..... | .guucgauucccAgugaccG.....    | 1 |
| Gi2_10301251_x14..... | .guucgauucccgugaccA.....     | 1 |
| Gi3_27013731_x14..... | .AgguucgauucccgugaccG.....   | 1 |
| Gi5_8357595_x14.....  | .GucgauucccgugaccG.....      | 1 |
| Gi2_10307915_x14..... | .gUggucauaguacaguggc.....    | 1 |
| Gi3_27036229_x14..... | .cGcucacgugaccGggguuc.....   | 1 |
| Gi3_27037671_x14..... | .cacucacgNgaccGggguuc.....   | 1 |
| Gi1_3879712_x14.....  | .gGggucauaguacagugg.....     | 1 |
| Gi5_8366149_x14.....  | .gcUgucGauaguacaguggcua..... | 1 |
| Gi2_10313487_x14..... | .guucgauCcccggugaccG.....    | 1 |
| Gi5_8365169_x14.....  | .gUguucgauucccgugaccG.....   | 1 |
| Gi5_8361655_x14.....  | .gguucgauucccgugaccUgc.....  | 1 |
| Gi2_10313865_x14..... | .gguucAauucccgugaccG.....    | 1 |
| Gi3_26998919_x14..... | .gguucgauucccgAugaccG.....   | 1 |
| Gi5_8360479_x14.....  | .ugacugucacucacgugaccG.....  | 1 |
| Gi5_8371623_x14.....  | .guucgauucccgGgaccG.....     | 1 |
| Gi3_27017203_x14..... | .guucgauucccgugUccgG.....    | 1 |
| Gi3_27034157_x14..... | .cacucacgNgaccGggguucga..... | 1 |
| Gi2_10317701_x14..... | .guCcgauucccgugaccG.....     | 1 |
| Gi5_8366975_x14.....  | .gUcugucacucacgugaccG.....   | 1 |
| Gi2_10302973_x14..... | .CguucgauucccgugaccG.....    | 1 |
| Gi5_8356433_x14.....  | .guucgauucccgugaUcg.....     | 1 |
| Gi5_8357889_x14.....  | .ugacugucGcucacgugaccG.....  | 1 |
| Gi3_27022369_x14..... | .gguucgauucAcggugaccG.....   | 1 |
| Gi2_10317771_x14..... | .gguCcgauucccgugaccG.....    | 1 |



|                       |                                |   |
|-----------------------|--------------------------------|---|
| Gi5_8372225_x14.....  | .gacugucacucacgugacUcgg.....   | 1 |
| Gi2_10312605_x14..... | .gguucgauucccgugaccgcA.....    | 1 |
| Gi3_27014305_x14..... | .guucgauucccgugaAc.....        | 1 |
| Gi2_10304863_x14..... | .ggAucgauucccgugaccgcg.....    | 1 |
| Gi2_10302147_x14..... | .guucgauucccgugaccgcA.....     | 1 |
| Gi2_10307495_x14..... | .ggguCcgauucccgugaccgcg.....   | 1 |
| Gi3_26999227_x14..... | .cacucacgugaccgggCuc.....      | 1 |
| Gi5_8363083_x14.....  | .gguucgGuucccgugaccgc.....     | 1 |
| Gi3_27029229_x14..... | .gguucgauucccgAugaccgcg.....   | 1 |
| Gi5_8360661_x14.....  | .gacugucacucacgugacAcgg.....   | 1 |
| Gi2_10313389_x14..... | .guuUgauucccgugaccg.....       | 1 |
| Gi3_27034913_x14..... | .ucgauucccgCgaccgc.....        | 1 |
| Gi3_26997575_x14..... | .gcggucaCaguacaguggc.....      | 1 |
| Gi3_27019541_x14..... | .gacugucacucacgugacAcg.....    | 1 |
| Gi5_8365323_x14.....  | .Uuucgauucccgugaccgcggcuu..... | 1 |
| Gi3_27015005_x14..... | .guucgauucccgugUcc.....        | 1 |
| Gi3_27002895_x14..... | .Agguucgauucccgugacc.....      | 1 |
| Gi3_27029495_x14..... | .gcggCcauaguacagugg.....       | 1 |
| Gi3_27014949_x14..... | .gcggCcauaguacaguggc.....      | 1 |
| Gi3_27036187_x14..... | .gauucccgugaccgcgCcu.....      | 1 |
| Gi5_8372715_x14.....  | .gcggucauNguacagugg.....       | 1 |
| Gi3_27023041_x14..... | .Uuucgauucccgugaccgcggcuu..... | 1 |
| Gi1_3875386_x14.....  | .gcUgucauaguacaguggcua.....    | 1 |
| Gi3_27015033_x14..... | .gAuucgauucccgugaccg.....      | 1 |
| Gi3_26997827_x14..... | .gacugucacucaUgugaccgg.....    | 1 |
| Gi1_3880636_x14.....  | .gacugucacucacgugacAcg.....    | 1 |
| Gi5_8368627_x14.....  | .gcggucauaguacGguggcua.....    | 1 |
| Gi3_27028207_x14..... | .uucgGuucccgugaccgc.....       | 1 |
| Gi5_8355747_x14.....  | .gcggCcauaguacaguggcuag.....   | 1 |
| Gi3_27030615_x14..... | .ggGucgauucccgugaccg.....      | 1 |
| Gi2_10303015_x14..... | .guGcgauucccgugaccgc.....      | 1 |
| Gi3_27018197_x14..... | .gggCucgauucccgugacc.....      | 1 |
| Gi3_26994537_x14..... | .uUacugucacucacgugacc.....     | 1 |
| Gi5_8368725_x14.....  | .Acggucauaguacagugg.....       | 1 |
| Gi2_10312493_x14..... | .Gacucacgugaccggguuc.....      | 1 |
| Gi2_10308517_x14..... | .gguucAauucccgugaccgc.....     | 1 |
| Gi4_511730_x14.....   | .gguucgauucccgugac.....        | 0 |
| Gi2_10316847_x14..... | .gguucgGuucccgugaccgc.....     | 1 |
| Gi2_10322025_x13..... | .Gcacucacgugaccgggu.....       | 1 |
| Gi5_8374716_x13.....  | .gguucgauucccgCgaccgcg.....    | 1 |
| Gi2_10318762_x13..... | .guucgauucccgGgaccgc.....      | 1 |
| Gi1_3884916_x13.....  | .gacugucacucaUgugaccgg.....    | 1 |
| Gi3_27082292_x13..... | .gguuUgauucccgugaccg.....      | 1 |
| Gi3_27041251_x13..... | .cgauucccNgugaccgcg.....       | 1 |
| Gi3_27059490_x13..... | .uuUgauucccgugaccgcg.....      | 1 |
| Gi3_27068356_x13..... | .gcggucCuaguacaguggc.....      | 1 |
| Gi3_27077391_x13..... | .gguucgauucccgugaccgU.....     | 1 |

|                       |                                  |   |
|-----------------------|----------------------------------|---|
| Gi5_8390862_x13.....  | Acggucauaguacaguggcuaguau.....   | 1 |
| Gi3_27073322_x13..... | Uugacugucacucacgugac.....        | 1 |
| Gi3_27040276_x13..... | uucgauucccgugGccgc.....          | 1 |
| Gi5_8383881_x13.....  | Uugcggucauaguacaguggcuagua.....  | 1 |
| Gi1_3890116_x13.....  | guucgauucccgugaccgU.....         | 1 |
| Gi1_3885956_x13.....  | gacugucacucacgugaccgA.....       | 1 |
| Gi5_8390472_x13.....  | ggauucgauCcccgugaccgcg.....      | 1 |
| Gi3_27081850_x13..... | guucgauucccgugaccAcggc.....      | 1 |
| Gi1_3892469_x13.....  | Agacugucacucacgugaccgg.....      | 1 |
| Gi2_10338327_x13..... | ggauucgauucccgGgaccgc.....       | 1 |
| Gi1_3888634_x13.....  | ugacugucacucaUgugaccgg.....      | 1 |
| Gi3_27063442_x13..... | cUugaccggguucgauucc.....         | 1 |
| Gi3_27051430_x13..... | gcggucauaguacGgugg.....          | 1 |
| Gi2_10327446_x13..... | guucgauuccUggugaccg.....         | 1 |
| Gi5_8380189_x13.....  | uucgauucccgugaccgCgC.....        | 1 |
| Gi5_8386429_x13.....  | gcggucauaguacaguggcuGgu.....     | 1 |
| Gi3_27076026_x13..... | guucgauucccgugCccgcg.....        | 1 |
| Gi2_10319503_x13..... | ggauucgauucccgugaUcgcg.....      | 1 |
| Gi1_3884487_x13.....  | gacugucacCcacgugaccg.....        | 1 |
| Gi3_27045970_x13..... | uucccgugaccgCcu.....             | 1 |
| Gi5_8379435_x13.....  | ggauucgauCcccgugac.....          | 1 |
| Gi2_10327914_x13..... | uGgauucccgugaccgc.....           | 1 |
| Gi3_27049987_x13..... | ggUcgauucccgugacc.....           | 1 |
| Gi2_10333335_x13..... | cGcucacgugaccggguuc.....         | 1 |
| Gi5_8381463_x13.....  | uAacugucacucacgugaccgg.....      | 1 |
| Gi3_27039249_x13..... | ggauucgauucccgguAaccgc.....      | 1 |
| Gi2_10320972_x13..... | gcggucauaguacaguggcA.....        | 1 |
| Gi5_8387274_x13.....  | cUggauucgauucccgugacc.....       | 1 |
| Gi5_8385129_x13.....  | ggauucgauucccgCgaccgc.....       | 1 |
| Gi2_10334037_x13..... | cacCcacgugaccgggu.....           | 1 |
| Gi3_27048635_x13..... | gcggucauaguacCguggc.....         | 1 |
| Gi1_3885319_x13.....  | ggauucgauucccgugacU.....         | 1 |
| Gi5_8376458_x13.....  | guucgauucccgugacA.....           | 1 |
| Gi2_10326315_x13..... | ggauucgauucccgugUcc.....         | 1 |
| Gi2_10336234_x13..... | gcggucaCaguacaguggc.....         | 1 |
| Gi3_27073985_x13..... | gaccggguucgauucccgugaccgCgC..... | 1 |
| Gi5_8384193_x13.....  | gcggucaCaguacaguggcuagu.....     | 1 |
| Gi5_8375873_x13.....  | guucgauucUcggugaccg.....         | 1 |
| Gi2_10319139_x13..... | guucgauucUcggugacc.....          | 1 |
| Gi2_10333348_x13..... | Cgauucgauucccgugaccgcg.....      | 1 |
| Gi2_10325457_x13..... | ggGucgauucccgugaccg.....         | 1 |
| Gi2_10342487_x13..... | guucgauuccUggugacc.....          | 1 |
| Gi3_27064014_x13..... | gUcugucacucacgugaccg.....        | 1 |
| Gi5_8384921_x13.....  | ggauucgauucccgugUcc.....         | 1 |
| Gi2_10339055_x13..... | ggauucgauucccgugaccgU.....       | 1 |
| Gi1a_5578152_x13..... | ggauucgauucccgugaccgCgUc.....    | 1 |
| Gi2_10336546_x13..... | cUggauucgauucccgugacc.....       | 1 |

|                  |                             |   |
|------------------|-----------------------------|---|
| Gi2_10319932_x13 | .....guucgauucAcggugacc     | 1 |
| Gi3_27038391_x13 | .....gguucgauucccgAgaccgc   | 1 |
| Gi2_10318736_x13 | .....guuUgauucccgugaccgc    | 1 |
| Gi2_10320231_x13 | .....gguucgauucccgugGccg    | 1 |
| Gi3_27058242_x13 | gcggucauaguGcagugg          | 1 |
| Gi1_3892235_x13  | .....acugucacNcacgugaccgg   | 1 |
| Gi2_10327537_x13 | .....gguucgauAcccgugacc     | 1 |
| Gi3_27057592_x13 | .....gAguucgauucccgugaccgc  | 1 |
| Gi2_10339081_x13 | .....cacucacgNgaccggguuc    | 1 |
| Gi2_10341330_x13 | .....Ggacugucacucacgugaccgg | 1 |
| Gi2_10327654_x13 | .....guucgauucccgugaccgcUc  | 1 |
| Gi2_10346038_x12 | .....gguucgaCucccgugaccg    | 1 |
| Gi3_27109461_x12 | gGcugucacucacgugacc         | 1 |
| Gi2_10364782_x12 | gGcugucacucacgugaccgg       | 1 |
| Gi1_3897986_x12  | Uucauaguacaguggcuagua       | 1 |
| Gi1_3903902_x12  | Ccggucauaguacaguggcua       | 1 |
| Gi3_27106773_x12 | .....gguucgauucccAgugaccg   | 1 |
| Gi1_3899678_x12  | ugacGgucacucacgugaccgg      | 1 |
| Gi4_515880_x12   | Ucggucauaguacaguggc         | 1 |
| Gi5_8395854_x12  | .....ucgauucccgugaccgcCc    | 1 |
| Gi3_27086733_x12 | .....guucgauucccGugaccgc    | 1 |
| Gi2_10344250_x12 | ggCucgauucccgugaccgc        | 1 |
| Gi3_27130737_x12 | .....guucgaGucccgugaccgc    | 1 |
| Gi5_8404950_x12  | gacugucacucacgugGccg        | 1 |
| Gi1_5594923_x12  | .....gguucgauucccgugCcc     | 1 |
| Gi5_8400702_x12  | ugacugucacucGcgugaccgg      | 1 |
| Gi2_10362346_x12 | .....gguuUgauucccgugaccgc   | 1 |
| Gi2_10344118_x12 | .....guucgauucccgGgaccg     | 1 |
| Gi5_8391834_x12  | gcggucauaguacagugAcuagu     | 1 |
| Gi5_8391918_x12  | .....gCuucgauucccgugaccgc   | 1 |
| Gi1_3899114_x12  | ugacugucacucacgugaccgA      | 1 |
| Gi3_27100797_x12 | gacugucacucacguAaccg        | 1 |
| Gi3_27112797_x12 | .....cUcucacgugaccgggu      | 1 |
| Gi3_27112365_x12 | .....cGcucacgugaccggguucga  | 1 |
| Gi1_3900086_x12  | ugacugucacucacgugacUcgg     | 1 |
| Gi5_8391894_x12  | .....gguuGgauucccgugacc     | 1 |
| Gi5_8407818_x12  | gcggucauGguacaguggcuagu     | 1 |
| Gi3_27086505_x12 | .....gguucgauucccgugCccg    | 1 |
| Gi1_3893522_x12  | .....Uuucgauucccgugacc      | 1 |
| Gi1_3902306_x12  | gacugucaNucacgugaccg        | 1 |
| Gi5_8392122_x12  | .....gggGucgauucccgugacc    | 1 |
| Gi2_10364242_x12 | ggGucgauucccgugac           | 1 |
| Gi2_10357018_x12 | .....guucgauucccgAgaccgc    | 1 |
| Gi2_10350250_x12 | gAuucgauucccgugaccgc        | 1 |
| Gi5_8406642_x12  | ugacugucacucacgugGccg       | 1 |
| Gi1_3898694_x12  | gacugucacucacguAaccg        | 1 |
| Gi2_10365310_x12 | .....gguucgCuucccgugaccgc   | 1 |

|                       |                                    |   |
|-----------------------|------------------------------------|---|
| Gi1_3898334_x12.....  | .Gcugucacucacgugacccgg.....        | 1 |
| Gi3_27085365_x12..... | .Ggacugucacucacgugacc.....         | 1 |
| Gi1_3899750_x12.....  | .gcggucauaguGcaguggcua.....        | 1 |
| Gi1a_5588707_x12..... | .....guucgaCucccgugacc.....        | 1 |
| Gi3_27091005_x12..... | .....gguucgauucccgGgaccgc.....     | 1 |
| Gi3_27129045_x12..... | .....Agguucgauucccgugaccgc.....    | 1 |
| Gi1_3897626_x12.....  | .....gacugucacucacgugGcccg.....    | 1 |
| Gi2_10351186_x12..... | .....gacugucaNucacgugacccgg.....   | 1 |
| Gi3_27114261_x12..... | .....gguucgauucccgAgac.....        | 1 |
| Gi3_27103125_x12..... | .....uUgauucccgugaccgc.....        | 1 |
| Gi3_27089673_x12..... | .....gcggucauaguacaguggcAagua..... | 1 |
| Gi1_3896438_x12.....  | .....ugacugucacucacguAaccgg.....   | 1 |
| Gi5_8399154_x12.....  | .....guucgauucccgugaccgA.....      | 1 |
| Gi2_10359310_x12..... | .....gAuucgauucccgugaccg.....      | 1 |
| Gi5_8392806_x12.....  | .....Cuucgauucccgugaccg.....       | 1 |
| Gi5_8397918_x12.....  | .....guucgauAcccgugacc.....        | 1 |
| Gi1a_5591671_x12..... | .....guucgaCucccgugaccgc.....      | 1 |
| Gi3_27094377_x12..... | .....cUcucacgugacccggguuc.....     | 1 |
| Gi3_27128673_x12..... | .....cUugacugucacucacgugacc.....   | 1 |
| Gi3_27085605_x12..... | .....gguucgauAcccgugaccg.....      | 1 |
| Gi1_3893450_x12.....  | .....ugacugucNcucacgugacccg.....   | 1 |
| Gi3_27110289_x12..... | .....guucgauuccCgugacc.....        | 1 |
| Gi5_8406126_x12.....  | .....Acggucauaguacaguggcuag.....   | 1 |
| Gi2_10357990_x12..... | .....gguucgauucccgugaA.....        | 1 |
| Gi5_8398218_x12.....  | .....gacugucacucCcgugacccg.....    | 1 |
| Gi2_10346698_x12..... | .....guucgCuucccgugaccg.....       | 1 |
| Gi5_8404158_x12.....  | .....gcggucauaguacGguggc.....      | 1 |
| Gi3_27091569_x12..... | .....guucgUuucccgugacc.....        | 1 |
| Gi5_8405154_x12.....  | .....guucgCuucccgugaccg.....       | 1 |
| Gi5_8392374_x12.....  | .....gacugucGcucacgugacccg.....    | 1 |
| Gi3_27111669_x12..... | .....gcggAcauaguacagugg.....       | 1 |
| Gi5_8415382_x11.....  | .....Cucgauucccgugaccg.....        | 1 |
| Gi3_27142523_x11..... | .....gacugucacucacgugCcccgg.....   | 1 |
| Gi5_8430155_x11.....  | .....gcggucauaguacGguggcuagua..... | 1 |
| Gi3_27141357_x11..... | .....gguucgauuccUgugaccg.....      | 1 |
| Gi1_3910018_x11.....  | .....Aacugucacucacgugacccg.....    | 1 |
| Gi2_10394596_x11..... | .....guucgCuucccgugacc.....        | 1 |
| Gi5_8423346_x11.....  | .....gguucgauucAcggugac.....       | 1 |
| Gi1_3911019_x11.....  | .....gcgguUauaguacaguggcua.....    | 1 |
| Gi5_8420398_x11.....  | .....Ccggucauaguacaguggc.....      | 1 |
| Gi5_8412588_x11.....  | .....guucgauAcccgugaccg.....       | 1 |
| Gi3_27178130_x11..... | .....gguucgaAuucccgugacc.....      | 1 |
| Gi3_27181320_x11..... | .....gacuAucacucacgugacccgg.....   | 1 |
| Gi2_10393001_x11..... | .....gAuucgauucccgugac.....        | 1 |
| Gi5_8421652_x11.....  | .....guucgauuAcccgugaccg.....      | 1 |
| Gi3_27167724_x11..... | .....guUaccggguucgauucc.....       | 1 |
| Gi3_27157131_x11..... | .....gguucgauucccgugacG.....       | 1 |

|                  |                                    |   |
|------------------|------------------------------------|---|
| Gi3_27146043_x11 | .....gguucgauAcccgugaccgc          | 1 |
| Gi2_10394035_x11 | .....guucgauucccgUugaccgcg         | 1 |
| Gi5_8422268_x11  | .....gcggucgauaguacaguggcuagG      | 1 |
| Gi1_3907994_x11  | .....Acggucgauaguacagugg           | 1 |
| Gi3_27177855_x11 | .....gacugucacucacgugacUcg         | 1 |
| G1a_5615233_x11  | .....gcggucgauaguacCguggcuagu      | 1 |
| G1a_5613968_x11  | .....gucauaguacaguggcCag           | 1 |
| Gi5_8412412_x11  | .....guucUauucccgugaccgc           | 1 |
| Gi2_10397643_x11 | .....Gcgauucccgugaccgcg            | 1 |
| Gi5_8426327_x11  | .....gcggucgauaguacaguggcCag       | 1 |
| Gi2_10370649_x11 | .....gguucgGuucccgugaccgcg         | 1 |
| Gi3_27163258_x11 | .....cacucacAugaccggguuc           | 1 |
| Gi5_8429011_x11  | .....gguucgauNcccgugaccg           | 1 |
| Gi5_8412390_x11  | .....gcggucgauaguacagugUcua        | 1 |
| G1a_5602088_x11  | .....gcggucgauaguacaguggcuagC      | 1 |
| Gi2_10378195_x11 | .....gcUgucgauaguacaguggc          | 1 |
| Gi3_27185148_x11 | .....guucgUuucccgugaccgc           | 1 |
| Gi3_27185412_x11 | .....uucgGuucccgugaccgcg           | 1 |
| Gi1_3904540_x11  | .....uucgauucccgugaccgcgCc         | 1 |
| Gi1_3913395_x11  | .....gacugucacucacgugaccUgg        | 1 |
| Gi5_8423280_x11  | .....ugGcugucacucacgugaccgg        | 1 |
| Gi5_8430221_x11  | .....gcUgucgauaguacaguggcuagu      | 1 |
| Gi1_3906817_x11  | .....Uugacugucacucacgugacc         | 1 |
| Gi5_8419276_x11  | .....gguucgauuccUgugaccgc          | 1 |
| Gi5_8416328_x11  | .....ggGucgauucccgugaccgcg         | 1 |
| Gi3_27165051_x11 | .....gcggucgauGguacagugg           | 1 |
| Gi3_27139784_x11 | .....gcAgucgauaguacagugg           | 1 |
| Gi3_27157076_x11 | .....ucgGuucccgugaccgc             | 1 |
| Gi2_10388568_x11 | .....gguucgauucUcggugac            | 1 |
| Gi5_8428824_x11  | .....gguCcgauucccgugaccgcg         | 1 |
| Gi5_8422818_x11  | .....gguCcgauucccgugaccgc          | 1 |
| Gi5_8410465_x11  | .....gacugucacucacgugaAccg         | 1 |
| Gi5_8418121_x11  | .....gcggucgauaguacaguggcuaguaugcg | 0 |
| Gi5_8414348_x11  | .....gcggucgauaguacaguggcuCgu      | 1 |
| Gi5_8430529_x11  | .....guucgaCucccgugaccgcg          | 1 |
| Gi2_10383783_x11 | .....guucgauucccgAugaccgc          | 1 |
| Gi5_8418770_x11  | .....Cacugucacucacgugaccgg         | 1 |
| G1a_5611449_x11  | .....Aguucgauucccgugac             | 1 |
| G1a_5612461_x11  | .....gUguucgauucccgugaccg          | 1 |
| Gi1_3905640_x11  | .....ugacugAcacucacgugaccgg        | 1 |
| Gi2_10371320_x11 | .....gguucgauucccgugCccggcgc       | 1 |
| Gi5_8418858_x11  | .....guucgauucccCgugacc            | 1 |
| Gi1_3911767_x11  | .....gcggucgauGguacaguggcu         | 1 |
| Gi3_27184950_x11 | .....gCuucgauucccgugaccg           | 1 |
| Gi2_10388678_x11 | .....gguucgauucccgugacAgc          | 1 |
| Gi2_10377194_x11 | .....guucgauucccgugUccg            | 1 |
| Gi5_8414953_x11  | .....guucgaGuucccgugaccgc          | 1 |

|                  |                               |   |
|------------------|-------------------------------|---|
| Gi3_27172729_x11 | .....uucgaCucccgugaccgc       | 1 |
| Gi5_8426965_x11  | .....gAucgauucccgugaccgc      | 1 |
| Gi3_27157846_x11 | .....ucgauucccgugGccgcg       | 1 |
| Gi5_8415184_x11  | .....gguucgaCucccgugac        | 1 |
| Gi1a_5611680_x11 | .....gcggucauNguacagugguagu   | 1 |
| Gi5_8430804_x11  | .....gcggucauaguacagCgg       | 1 |
| Gi3_27169825_x11 | .....guucgauuAcccgugaccg      | 1 |
| Gi5_8413050_x11  | .....guucgauucccgugGccgcg     | 1 |
| Gi2_10381880_x11 | .....gCuucgauucccgugac        | 1 |
| Gi2_10370396_x11 | .....guucgauAcccgugacc        | 1 |
| Gi1_3905310_x11  | .....ugacugucacucacgugaccgc   | 1 |
| Gi2_10386049_x11 | .....gcggucauaguacaguggu      | 0 |
| Gi5_8419177_x11  | .....guucgauucccgAugaccg      | 1 |
| Gi3_27146791_x11 | .....guucgauuccAggugacc       | 1 |
| Gi2_10381209_x11 | .....Aacugucacucacgugaccgc    | 1 |
| Gi5_8424094_x11  | .....gacugucacAcacgugaccgc    | 1 |
| Gi2_10370044_x11 | .....guucgauucccgugaccgcggc   | 0 |
| Gi5_8417263_x11  | .....guucgauucccgugUccg       | 1 |
| Gi3_27168428_x11 | .....gacugAcacucacgugaccgc    | 1 |
| Gi3_27171728_x11 | .....cUauucccgugaccgcggcuuu   | 1 |
| Gi5_8410454_x11  | .....gguucgauucccgugCccgc     | 1 |
| Gi3_27169154_x11 | .....gguuAgauucccgugaccgc     | 1 |
| Gi4_518300_x11   | .....guucgauucccgugaccgcgC    | 1 |
| Gi3_27162290_x11 | .....gcggucaCaguacagugg       | 1 |
| Gi2_10372981_x11 | .....guAcgauucccgugacc        | 1 |
| Gi2_10397632_x11 | .....gguucgauucccgugaAcgcg    | 1 |
| Gi5_8439616_x10  | .....gcggucauaguacagCggcuagua | 1 |
| Gi3_27207312_x10 | .....gacugucacucacgugacAcgg   | 1 |
| Gi3_27198352_x10 | .....guucCauucccgugaccgc      | 1 |
| Gi3_27225082_x10 | .....gguuAgauucccgugac        | 1 |
| Gi2_10426922_x10 | .....gcggCcauaguacaguggc      | 1 |
| Gi2_10423132_x10 | .....Gucgauucccgugaccgc       | 1 |
| Gi2_10411392_x10 | .....cacucacgugaccgcggCuc     | 1 |
| Gi1_3919554_x10  | .....ugacugucacucacgugGccg    | 1 |
| Gi3_27222302_x10 | .....ggAucgauucccgugaccg      | 1 |
| Gi4_519899_x10   | .....guucgauucccgugaccgcgCcu  | 1 |
| Gi3_27208842_x10 | .....Uugacugucacucacgug       | 1 |
| Gi3_27202142_x10 | .....guucgauucccguaAacc       | 1 |
| Gi2_10407462_x10 | .....guucUauucccgugaccgcg     | 1 |
| Gi1_3928294_x10  | .....gacugucacAcacgugaccgc    | 1 |
| Gi3_27219312_x10 | .....gguucgauucccgugUccgcg    | 1 |
| Gi3_27198942_x10 | .....gacugucacucacAugaccg     | 1 |
| Gi1_3922334_x10  | .....gaUugucacucacgugaccgc    | 1 |
| Gi1_3925424_x10  | .....gacuAucacucacgugaccgc    | 1 |
| Gi2_10399582_x10 | .....guucgauucccgugaccgcgAc   | 1 |
| Gi1_3927814_x10  | .....gcUgucauaguacagugg       | 1 |
| Gi2_10409582_x10 | .....aGucacgugaccgcggguuc     | 1 |

Gi1\_3922874\_x10.....gUuucgauucccgugaccg..... 1  
 Gi5\_8441636\_x10.....gcggucauaguacCguggcuag..... 1  
 Gi3\_27234062\_x10.....guucgauuccAggugaccgcg..... 1  
 Gi2\_10416172\_x10.....guucgauucccgugacA..... 1  
 Gi3\_27236392\_x10.....uAacugucacucacgugaccg..... 1  
 Gi2\_10412902\_x10.....uGcgauucccgugaccgc..... 1  
 Gi3\_27223872\_x10.....ggUGcgauucccgugaccgcg..... 1  
 Gi3\_27195592\_x10.....ggucgauuccGggugacc..... 1  
 Gi5\_8446546\_x10.....gCuucgauucccgugaccgc..... 1  
 Gi2\_10403962\_x10.....ggUCcgauucccgugaccgc..... 1  
 Gi5\_8440256\_x10.....gGucgauucccgugaccgcgguu..... 1  
 Gi3\_27236022\_x10.....Augacugucacucacgugaccg..... 1  
 Gi3\_27227812\_x10.....gguuGgauucccgugac..... 1  
 Gi3\_27194612\_x10.....ggUucgauuccUggugaccg..... 1  
 Gi2\_10424822\_x10.....ggAucgauucccgugaccgc..... 1  
 Gi2\_10423972\_x10.....guucgauucccgugaccgAg..... 1  
 Gi2\_10400062\_x10.....gUuucgauucccgugaccgcggu..... 1  
 Gi3\_27231772\_x10.....gcAgucauaguacaguggc..... 1  
 Gi2\_10399472\_x10.....gggGucgauucccgugacc..... 1  
 Gi3\_27209302\_x10.....ggucgauucccgugaccgAg..... 1  
 Gi3\_27209942\_x10.....gcggucGuaguacagugg..... 1  
 Gi3\_27228192\_x10.....ggUucgCuucccgugaccg..... 1  
 Gi5\_8438466\_x10.....gacugucacucacguAaccg..... 1  
 Gi3\_27220232\_x10.....guucgauucccgugaccgGg..... 1  
 Gi2\_10413872\_x10.....auucccgugaccgcgCcu..... 1  
 Gi3\_27200762\_x10.....ucgaCuucccgugaccgc..... 1  
 Gi3\_27206992\_x10.....Gcgugaccgguucgauucc..... 1  
 Gi3\_27223732\_x10.....Uacucacgugaccggu..... 1  
 Gi5\_8435296\_x10.....guucgauucccgugaccgUc..... 1  
 Gi4\_518869\_x10.....Uuucgauucccgugacc..... 1  
 Gi3\_27231962\_x10.....cacucacgCgaccggu..... 1  
 Gi2\_10418882\_x10.....guucgauucccgugaccg..... 1  
 Gi5\_8453096\_x10.....gacuUucacucacgugaccg..... 1  
 Gi2\_10428182\_x10.....gacugucacucacgugaAccg..... 1  
 Gi3\_27234292\_x10.....gcggucauaguaUaguggc..... 1  
 Gi5\_8437286\_x10.....gacugucaUucacgugaccg..... 1  
 Gi5\_8448256\_x10.....gguuUgauucccgugaccgc..... 1  
 Gi1\_3926714\_x10.....gcggucGuaguacaguggcua..... 1  
 Gi2\_10420002\_x10.....ggAucgauucccgugac..... 1  
 Gi2\_10420442\_x10.....gCuucgauucccgugaccg..... 1  
 Gi5\_8448896\_x10.....gcggucauaguacaguggcuaguC..... 1  
 Gi3\_27209452\_x10.....guuAgauucccgugaccg..... 1  
 Gi5\_8443296\_x10.....ggucgauuccUggugaccgc..... 1  
 Gi2\_10419982\_x10.....gacugucacucCcgugaccg..... 1  
 Gi2\_10398092\_x10.....Uggucgauucccgugac..... 1  
 Gi5\_8435446\_x10.....gAuucgauucccgugaccgc..... 1  
 Gi5\_8444126\_x10.....gcggucauaguacGgugg..... 1

|                       |                               |   |
|-----------------------|-------------------------------|---|
| Gi3_27207832_x10..... | .guucgauucccgAugaccg.....     | 1 |
| Gi2_10414912_x10..... | .gguucgauucccgAgaccgc.....    | 1 |
| Gi3_27208652_x10..... | .ucgauucccgGgaccgc.....       | 1 |
| Gi5_8453036_x10.....  | .gcggucauaguGcaguggc.....     | 1 |
| Gi1_3916664_x10.....  | .gacuguUacucacgugaccgg.....   | 1 |
| Gi3_27189862_x10..... | .uucgauucNcggugaccgc.....     | 1 |
| Gi3_27204432_x10..... | .ucgauCcccggugaccgg.....      | 1 |
| Gi5_8440016_x10.....  | .guucgauuccAggugacc.....      | 1 |
| Gi1a_5617457_x10..... | .gguucgGuuccggugacc.....      | 1 |
| Gi5_8444026_x10.....  | .gcggucauaguacagCggc.....     | 1 |
| Gi3_27196192_x10..... | .guucgauucccgugaccggg.....    | 0 |
| Gi5_8434816_x10.....  | .gacuguUacucacgugaccgg.....   | 1 |
| Gi1a_5620757_x10..... | .gguucgauucccgugGcc.....      | 1 |
| Gi3_27189632_x10..... | .guuNgauucccgugacc.....       | 1 |
| Gi2_10419472_x10..... | .gguucgauucccgGgac.....       | 1 |
| Gi3_27188802_x10..... | .gcggucUauaguacaguggc.....    | 1 |
| Gi1_3927784_x10.....  | .cgauuccggugaccgC.....        | 1 |
| Gi1_3926684_x10.....  | .gcggucauNguacagugg.....      | 1 |
| Gi2_10404542_x10..... | .gguucgauucccgugaccAc.....    | 1 |
| Gi5_8437906_x10.....  | .gcggucauagCacaguggcua.....   | 1 |
| Gi1_3924954_x10.....  | .ugacugucacucacgugUcccgg..... | 1 |
| Gi5_8431686_x10.....  | .gacugucacucacgugaccgA.....   | 1 |
| Gi5_8439726_x10.....  | .gacugucacCcacgugaccgg.....   | 1 |
| Gi5_8441826_x10.....  | .guucgauucccgGgaccg.....      | 1 |
| Gi2_10421952_x10..... | .guucgauAcccgugaccg.....      | 1 |
| Gi3_27193572_x10..... | .gacugucUcucacgugaccgg.....   | 1 |
| Gi5_8440486_x10.....  | .guucgauUccggugaccg.....      | 1 |
| Gi3_27189642_x10..... | .guucgauucccgugaccCcg.....    | 1 |
| Gi5_8450366_x10.....  | .gguCcgauucccgugac.....       | 1 |
| Gi3_27211982_x10..... | .uCcgauucccgugaccgg.....      | 1 |
| Gi3_27216012_x10..... | .gcggucauaguacagugAc.....     | 1 |
| Gi3_27204892_x10..... | .gGgacugucacucacgugaccgg..... | 1 |
| Gi3_27227572_x10..... | .Gcacgugaccggguucgauuc.....   | 1 |
| Gi4_519749_x10.....   | .Uguucgauucccgugacc.....      | 1 |
| Gi5_8431236_x10.....  | .gcggucauaguacCguggcuagu..... | 1 |
| Gi2_10415162_x10..... | .gguucgauuccUggugac.....      | 1 |
| Gi1_3922084_x10.....  | .gacugucCucacgugaccgg.....    | 1 |
| Gi3_27274627_x9.....  | .auucccgugaccgCcu.....        | 1 |
| Gi2_10440471_x9.....  | .guAcgauucccgugaccgc.....     | 1 |
| Gi5_8460210_x9.....   | .gacugucacucacgugUcccgg.....  | 1 |
| Gi3_27245674_x9.....  | .gacugucacuUacgugaccgg.....   | 1 |
| Gi5_8464089_x9.....   | .gUguucgauucccgugaccgc.....   | 1 |
| Gi5_8460336_x9.....   | .gguucgaCuuccggugaccgg.....   | 1 |
| Gi2_10438311_x9.....  | .gUguucgauucccguga.....       | 1 |
| Gi2_10455510_x9.....  | .gacuUucacucacgugaccgg.....   | 1 |
| Gi5_8466789_x9.....   | .gcggucauaguacagAggcuagu..... | 1 |
| Gi3_27252010_x9.....  | .gacAgucacucacgugaccgg.....   | 1 |



|                 |                                |   |
|-----------------|--------------------------------|---|
| Gi3_27280432_x9 | .Gcacgugacccggguucgauuccc      | 1 |
| Gi5_8474727_x9  | .ggCucgauuccggugaccg           | 1 |
| Gi3_27275230_x9 | .gacugucaUucacgugacccgg        | 1 |
| Gi3_27253936_x9 | .ucgGuucccgugaccg              | 1 |
| Gi3_27255088_x9 | .guuAgauuccggugaccg            | 1 |
| Gi3_27299035_x9 | .cacucacgugacccggguCc          | 1 |
| Gi5_8471694_x9  | .guucgauuccCgugaccg            | 1 |
| Gi5_8468094_x9  | .guucgauuccAgugaccg            | 1 |
| Gi2_10439148_x9 | .gguucgauuccggugaccggcA        | 1 |
| Gi5_8460615_x9  | .gcgguCguaguacaguggcuagua      | 1 |
| Gi5_8471010_x9  | .gacugucacucaAgugacccgg        | 1 |
| Gi5_8460489_x9  | .uCcgauuccggugaccg             | 1 |
| Gi1a_5637352_x9 | .guucgaCucccgugaccg            | 1 |
| Gi3_27293455_x9 | .guucgUuucccgugaccg            | 1 |
| Gi5_8454018_x9  | .guucgauuccggugCccg            | 1 |
| Gi1a_5653534_x9 | .guucgauuccggCgaccg            | 1 |
| Gi5_8463216_x9  | .ggGucgauuccggugac             | 1 |
| Gi2_10429473_x9 | .gguucgauuccAgugaccg           | 1 |
| Gi3_27258355_x9 | .gguucgauGcccgugacc            | 1 |
| Gi5_8456043_x9  | .gcggucauaguacaguggcuGg        | 1 |
| Gi5_8467293_x9  | .gguucgaCucccgugaccg           | 1 |
| Gi3_27298585_x9 | .ugacugucacucacgugacUcgg       | 1 |
| Gi1_3940975_x9  | .gcggucauaguacagCggcua         | 1 |
| Gi3_27306856_x9 | .gacugucacucacgugaccAgg        | 1 |
| Gi5_8473827_x9  | .gcbgCcauaguacaguggcua         | 1 |
| Gi5_8463513_x9  | .ggAucgauuccggugaccg           | 1 |
| Gi5_8460660_x9  | .Ucggucguaguacaguggcuaguaugcgu | 1 |
| Gi3_27300484_x9 | .gcbgGcauaguacagugg            | 1 |
| Gi3_27276850_x9 | .gGcugucacucacgugacc           | 1 |
| Gi3_27289360_x9 | .gggCucgauuccggugaccg          | 1 |
| Gi5_8472306_x9  | .uucgauuccggugaccgC            | 1 |
| Gi3_27280495_x9 | .cacucacgugacccggCucga         | 1 |
| Gi3_27291169_x9 | .gGccggguucgauuccc             | 1 |
| Gi3_27288262_x9 | .ugacugucacucacgugGccgg        | 1 |
| Gi5_8457330_x9  | .gacuAucacucacgugacccgg        | 1 |
| Gi3_27263539_x9 | .ugacugucacucacgugaccAg        | 1 |
| Gi2_10435323_x9 | .gGgacugucacucacgugaccg        | 1 |
| Gi2_10439994_x9 | .guucgauucUcggugaccg           | 1 |
| Gi3_27287470_x9 | .gacugucacucacguAaccgg         | 1 |
| Gi1_3933667_x9  | .Uucauaguacaguggcuagu          | 1 |
| Gi5_8466654_x9  | .guucUauuccggugaccg            | 1 |
| Gi2_10457247_x9 | .guAcgauuccggugaccg            | 1 |
| Gi1a_5637073_x9 | .Gucgauuccggugaccg             | 1 |
| Gi2_10439598_x9 | .gAuucgauuccggugaccg           | 1 |
| Gi5_8459373_x9  | .gguucgauuccggugaccgA          | 1 |
| Gi3_27298891_x9 | .gaUugucacucacgugacc           | 1 |
| Gi5_8475105_x9  | .gguucgauuccggugCccg           | 1 |

Gi1\_3939760\_x9.....Cacugucacucacgugaccgg..... 1  
 Gl1a\_5653633\_x9.....Ccggucauaguacaguggcuagu..... 1  
 Gi2\_10443630\_x9.....guucgauucccgugaccgCA..... 1  
 Gi2\_10455483\_x9.....caUucacgugaccgggu..... 1  
 Gi3\_27300214\_x9.....gguucgauucccgguCac..... 1  
 Gi3\_27296785\_x9.....ggguucgauucccgugGccgcg..... 1  
 Gi2\_10432569\_x9.....gguucgauuccAgugaccg..... 1  
 Gi5\_8459679\_x9.....guucgCuucccgugaccgC..... 1  
 Gi2\_10449669\_x9.....gguucgauucccgugCccgc..... 1  
 Gi3\_27293095\_x9.....ucgaCucccgugaccgcg..... 1  
 Gi3\_27263800\_x9.....gGgacugucacucacgugacc..... 1  
 Gi3\_27297550\_x9.....gcggucauaguacaguAg..... 1  
 Gi3\_27256510\_x9.....gguucgauucccgguAac..... 1  
 Gi2\_10459011\_x9.....gCuucgauucccgugaccgC..... 1  
 Gi3\_27280999\_x9.....ggUuucgauucccgugacc..... 1  
 Gi3\_27246367\_x9.....gcggucauaguGcaguggc..... 1  
 Gi3\_27268714\_x9.....ggguucgauAcccgugaccgc..... 1  
 Gi1\_3938662\_x9.....gcggucaCaguacaguggcua..... 1  
 Gi2\_10429212\_x9.....gCguucgauucccgugaccg..... 1  
 Gi2\_10436664\_x9.....guucgauucccgGgaccgcg..... 1  
 Gi2\_10452576\_x9.....gcgguucGuaguacaguggc..... 1  
 Gi1\_3929770\_x9.....Uguucgauucccgugacc..... 1  
 Gi5\_8470938\_x9.....gcggucauaguacaguggUua..... 1  
 Gi3\_27254935\_x9.....gacugucacAcacgugaccgg..... 1  
 Gi2\_10438680\_x9.....guucgauucccgAgaccg..... 1  
 Gi3\_27303211\_x9.....ugacugucacucacgugaccUgg..... 1  
 Gi2\_10442064\_x9.....gguucgauucccgGcaccg..... 1  
 Gi1\_3936187\_x9.....gauucccgugacccgC..... 1  
 Gi1\_3931345\_x9.....gacugucacucacgugaccggU..... 1  
 Gi1\_3936583\_x9.....ugacugucacucacgugaUccgg..... 1  
 Gi5\_8454369\_x9.....gcggucauaguacaguggcuG..... 1  
 Gi3\_27272269\_x9.....acugucacNcacgugaccgg..... 1  
 Gl1a\_5638945\_x9.....Acggucauaguacaguggcuagu..... 1  
 Gi1\_3929734\_x9.....gGucgauucccgugacc..... 1  
 Gi2\_10446240\_x9.....guucgauucccgugaAccgcg..... 1  
 Gi3\_27271387\_x9.....gggCucgauucccgugaccgcg..... 1  
 Gi5\_8454387\_x9.....guucgauuAccggugacc..... 1  
 Gi3\_27275761\_x9.....uucgauucccgGcaccgcg..... 1  
 Gi5\_8476671\_x9.....aGaguacaguggcuagua..... 1  
 Gi3\_27303391\_x9.....gguucgauucccgugaccgA..... 1  
 Gi2\_10435062\_x9.....gguucgauuUcggugaccgC..... 1  
 Gi2\_10450875\_x9.....gguucAauucccgugaccg..... 1  
 Gi5\_8470092\_x9.....gcAgucauaguacaguggcuaguau..... 1  
 Gi1\_3929482\_x9.....gcggucauaguacaguggcCagu..... 1  
 Gi2\_10452414\_x9.....gguucgauuccUgugaccgC..... 1  
 Gi2\_10454043\_x9.....guucgauucccgugaUcgc..... 1  
 Gi5\_8485497\_x8.....gcggucauaguacaguggcuGguau..... 1

|                      |                                |   |
|----------------------|--------------------------------|---|
| Gi3_27348377_x8..... | guucgaGucccgugaccg.....        | 1 |
| Gi3_27361889_x8..... | acgugaccNggguucgauucc.....     | 1 |
| Gi5_8489433_x8.....  | guucgauucccgugacUgcg.....      | 1 |
| Gi5_8479081_x8.....  | gcggucauaguacaguggcuaguCu..... | 1 |
| G1a_5666945_x8.....  | gguucgauNcccgugaccg.....       | 1 |
| Gi2_10478930_x8..... | gguuAgauucccgugacc.....        | 1 |
| Gi5_8494401_x8.....  | gcggucauaguacCgugg.....        | 1 |
| Gi2_10475418_x8..... | guucgauucccgguAaccgc.....      | 1 |
| Gi3_27363497_x8..... | cacucacgugGcccggguuc.....      | 1 |
| Gi3_27352473_x8..... | gcggucauaguacaAugg.....        | 1 |
| Gi5_8495217_x8.....  | Ccggucauaguacaguggcuaguau..... | 1 |
| Gi1_3955949_x8.....  | ugacugucacAcacgugaccg.....     | 1 |
| Gi1_3951973_x8.....  | ggguucgauucccgugacc.....       | 0 |
| Gi3_27324129_x8..... | gcggucauaguacaguggU.....       | 1 |
| Gi2_10489690_x8..... | gguucgauUccggugaccgc.....      | 1 |
| Gi2_10495578_x8..... | gguucgauucccgguCac.....        | 1 |
| Gi5_8477001_x8.....  | Cguucgauucccgugaccg.....       | 1 |
| Gi3_27308729_x8..... | cUcucacgugaccggguucga.....     | 1 |
| Gi2_10462738_x8..... | gguucgauUccggugacc.....        | 1 |
| Gi3_27321745_x8..... | gacugucacucaAgugaccg.....      | 1 |
| Gi5_8479337_x8.....  | Agacugucacucacgugaccg.....     | 1 |
| Gi3_27363841_x8..... | gacugucGcucacgugacc.....       | 1 |
| Gi3_27353097_x8..... | ggguucgaNucccgugacc.....       | 1 |
| Gi5_8494721_x8.....  | gguucgauuccAggugacc.....       | 1 |
| Gi2_10481098_x8..... | gguucAauucccgugac.....         | 1 |
| Gi2_10469130_x8..... | gacugucacucacgugGcccg.....     | 1 |
| Gi5_8496009_x8.....  | guucgauuccUggugaccg.....       | 1 |
| Gi3_27335897_x8..... | gacugucacucacgugUccc.....      | 1 |
| G1a_5669529_x8.....  | gguucgauucccgugaUc.....        | 1 |
| Gi2_10464314_x8..... | Agguucgauucccgugaccgc.....     | 1 |
| Gi5_8493857_x8.....  | guucgauucccgAgaccgc.....       | 1 |
| Gi5_8502361_x8.....  | Ucugucacucacgugaccg.....       | 1 |
| Gi5_8493665_x8.....  | gguucgGuucccgugaccg.....       | 1 |
| Gi5_8499241_x8.....  | ucgauucccgugaccgC.....         | 1 |
| Gi3_27354673_x8..... | guucgauucccgCugaccg.....       | 1 |
| Gi5_8482873_x8.....  | ugacugucUcucacgugaccg.....     | 1 |
| Gi5_8502009_x8.....  | Ccggucauaguacaguggcuagua.....  | 1 |
| Gi5_8499585_x8.....  | guucgauucccgguAaccgc.....      | 1 |
| Gi2_10473642_x8..... | gguucgauuccAgugac.....         | 1 |
| Gi3_27349577_x8..... | gaUugucacucacgugacc.....       | 1 |
| Gi3_27334921_x8..... | caUucacgugaccggguucga.....     | 1 |
| Gi3_27324441_x8..... | aGugucacucacgugaccg.....       | 1 |
| Gi5_8494017_x8.....  | ggCucgauucccgugaccg.....       | 1 |
| Gi2_10483530_x8..... | gguucgCuucccgugac.....         | 1 |
| Gi2_10474138_x8..... | guucgauucccgugCccg.....        | 1 |
| Gi5_8491161_x8.....  | gGggucauaguacaguggcuaguau..... | 1 |
| Gi1_3946357_x8.....  | Ugucauaguacaguggcua.....       | 1 |

|                 |                              |   |
|-----------------|------------------------------|---|
| Gi3_27326825_x8 | .....gguAcgauuucccgugaccgcg  | 1 |
| Gi3_27371505_x8 | .....ucAauucccgugaccgcg      | 1 |
| Gi5_8483985_x8  | .....gAucgauuucccgugaccg     | 1 |
| Gi3_27308825_x8 | .....gGgacugucacucacguga     | 1 |
| Gi2_10494386_x8 | .....gAucgauuucccgugaccgcg   | 1 |
| Gi3_27359793_x8 | .....cacucacgugaccGggguuc    | 1 |
| Gi1_3946445_x8  | .....gacugCcacucacgugaccg    | 1 |
| Gl1a_5660681_x8 | .....gGggucauaguacaguggcuagu | 1 |
| Gi3_27351641_x8 | .....guuAgauuucccgugacc      | 1 |
| Gi3_27363865_x8 | .....Agguucgauuucccgugaccg   | 1 |
| Gi2_10498514_x8 | .....gcggucauaguGcaguggc     | 1 |
| Gi1_3946293_x8  | .....gacugucacucacgugaccAgg  | 1 |
| Gi2_10464170_x8 | .....guucgauuucccgguAaccg    | 1 |
| Gi3_27328841_x8 | .....Gcucacgugaccggguu       | 1 |
| Gi2_10493594_x8 | .....guucgauuucccgugaccgcgA  | 1 |
| Gi2_10483058_x8 | .....gggGucgauuucccgugaccgcg | 1 |
| Gi3_27348185_x8 | .....gugaccggguucgauuuccggu  | 0 |
| Gi3_27357169_x8 | .....ugacugucacucacgugaccAgg | 1 |
| Gl1a_5664945_x8 | .....gcAgucauaguacaguggcuagu | 1 |
| Gi3_27331305_x8 | .....gcggucauGcuacagugg      | 1 |
| Gi2_10469778_x8 | .....cUugaccggguucgauuc      | 1 |
| Gi1_3951117_x8  | .....ugUcugucacucacgugaccg   | 1 |
| Gi5_8491529_x8  | .....gguucgauuucccgugaccgcgA | 1 |
| Gi1_3951485_x8  | .....acGgucacucacgugaccg     | 1 |
| Gi5_8483065_x8  | .....guAcgauuucccgugaccg     | 1 |
| Gi5_8494105_x8  | .....gAuucgauuucccgugac      | 1 |
| Gi2_10488538_x8 | .....guucgauuucccgugaccgC    | 1 |
| Gi2_10485402_x8 | .....gguucgauuucUcggugaccgcg | 1 |
| Gi2_10495058_x8 | .....gguuGgauuucccgugaccgc   | 1 |
| Gl1a_5669065_x8 | .....gguucgauuucccgGgacc     | 1 |
| Gi1_3945821_x8  | .....gacugucacucacAugaccgg   | 1 |
| Gi2_10468482_x8 | .....gguucgCuucccgugaccgcg   | 1 |
| Gi1_3950989_x8  | .....gUcugucacucacgugaccg    | 1 |
| Gi5_8481473_x8  | .....gcUgucauaguacaguggcuag  | 1 |
| Gi3_27353257_x8 | .....gguucgauuucUcggugaccg   | 1 |
| Gi3_27311081_x8 | .....gcggucauaguCcagugg      | 1 |
| Gi3_27376201_x8 | .....gguucgauuucccgugaAcg    | 1 |
| Gi5_8477521_x8  | .....gUggucauaguacaguggcuag  | 1 |
| Gi1_3951981_x8  | .....ugacugucacucacgugaccgU  | 1 |
| Gi3_27311001_x8 | .....gguucgauuucccgugaccgG   | 1 |
| Gi5_8491097_x8  | .....guucgauuucccgugaccAc    | 1 |
| Gi2_10490674_x8 | .....gguucgauuAccggugaccgc   | 1 |
| Gi3_27370777_x8 | .....Uugacugucacucacgugacc   | 1 |
| Gi3_27374505_x8 | .....gacAgucacucacgugaccg    | 1 |
| Gi5_8496985_x8  | .....gguucgauCcccggugaccgc   | 1 |
| Gi5_8497121_x8  | .....guucgauuUccggugaccgc    | 1 |
| Gi2_10496018_x8 | .....gguucgUuucccgugacc      | 1 |

|                 |                               |   |
|-----------------|-------------------------------|---|
| Gi5_8490273_x8  | uuUgauucccgugaccg             | 1 |
| Gi3_27340865_x8 | gggGucgauucccgugaccg          | 1 |
| Gi1_3956805_x8  | uAacugucacucacgugaccg         | 1 |
| Gi5_8498961_x8  | gacugucUcucacgugaccg          | 1 |
| Gi2_10475026_x8 | guucgauucccgugacAg            | 1 |
| Gi3_27325217_x8 | gguuGgauucccgugaccg           | 1 |
| Gi5_8500041_x8  | gcggAcauaguacaguggcuagu       | 1 |
| Gi2_10465898_x8 | uUacugucacucacguga            | 1 |
| Gi5_8485649_x8  | gcggucgauaguacaguggcuCg       | 1 |
| Gi2_10494234_x8 | gacugucacCcacgugaccg          | 1 |
| Gi2_10462538_x8 | guuUgauucccgugaccg            | 1 |
| Gi5_8500929_x8  | gcggucgauaguacagCggcuag       | 1 |
| Gi4_524912_x8   | gguCcgauucccgugacc            | 1 |
| Gi2_10470346_x8 | gcggucgauaguacCguggc          | 1 |
| Gi3_27360329_x8 | guucgauucccgCugaccg           | 1 |
| Gi5_8500025_x8  | gguucAauucccgugaccg           | 1 |
| Gi2_10483514_x8 | guucgauucccgAugacc            | 1 |
| Gi5_8478681_x8  | ucgauuccNggugaccg             | 1 |
| Gi5_8499801_x8  | guucgauucccgAgacc             | 1 |
| Gi5_8485857_x8  | gcggucgauaguacaguggcuaguaC    | 1 |
| Gi5_8479417_x8  | gcggAcauaguacaguggc           | 1 |
| Gi2_10481162_x8 | guucgauucccgguAacc            | 1 |
| Gi5_8484449_x8  | gcggucgauaguCcacguggcuagu     | 1 |
| Gi3_27330777_x8 | gacugucCcacgugacc             | 1 |
| Gi1_3942541_x8  | gcggucgauaguacaguggcuaguauAcg | 1 |
| Gi5_8478609_x8  | guucgauuUccggugaccg           | 1 |
| Gi2_10483738_x8 | guucgauucAcggugaccg           | 1 |
| Gi2_10474666_x8 | gacugucGcucacgugaccg          | 1 |
| Gi3_27314097_x8 | gcggucgauaguCcacguggc         | 1 |
| Gi3_27343273_x8 | cacucGcgugaccggguucga         | 1 |
| Gi1_3953469_x8  | gacugAcacucacgugaccg          | 1 |
| Gi3_27334473_x8 | uucgauucccgugaccAcg           | 1 |
| Gi5_8488729_x8  | gcggGcauaguacaguggcu          | 1 |
| Gi2_10482418_x8 | guucgauucccgugaccgUg          | 1 |
| Gi2_10473314_x8 | guucgauuccUggugaccg           | 1 |
| Gi5_8483745_x8  | guucgauucccgugaccAcg          | 1 |
| Gi3_27348985_x8 | gguucgauuccAggugac            | 1 |
| Gi5_8479873_x8  | guucgauuccGggugacc            | 1 |
| Gi3_27311329_x8 | Uguucgauucccgugaccg           | 1 |
| Gi1_5662641_x8  | gguucgaCucccgugacc            | 1 |
| Gi5_8484129_x8  | uucgGuucccgugaccg             | 1 |
| Gi1_5690255_x7  | gGcauaguacaguggcuag           | 1 |
| Gi3_27438549_x7 | gguucgauucccgugacUg           | 1 |
| Gi1_3968196_x7  | ugacugucacucCcgugaccg         | 1 |
| Gi5_8503935_x7  | gcggucgauagCacaguggcuagu      | 1 |
| Gi3_27399321_x7 | gcUgucgauaguacaguggc          | 1 |
| Gi1_3971556_x7  | gUggucgauaguacagugg           | 1 |

|                 |                          |                         |   |
|-----------------|--------------------------|-------------------------|---|
| Gi5_8516493_x7  |                          | gguucgauucccAgugac      | 1 |
| Gi3_27455461_x7 | gcggucCuaguacagugg       |                         | 1 |
| Gi3_27422414_x7 | gcggucgauaguacagCgg      |                         | 1 |
| Gi5_8528477_x7  |                          | gguucAauucccgugaccg     | 1 |
| Gi3_27426257_x7 |                          | cAauucccgugaccg         | 1 |
| Gi3_27418795_x7 |                          | cGcucacgugaccggguu      | 1 |
| Gi1_3961273_x7  | uCacugucacucacgugaccg    |                         | 1 |
| Gi5_8530997_x7  |                          | gacugucCcucacgugaccg    | 1 |
| Gi2_10512158_x7 |                          | gUguucgauucccgugac      | 1 |
| Gi2_10499978_x7 |                          | guucgauucccgugaccgU     | 1 |
| Gi5_8527252_x7  |                          | ugacugucacucacgCgaccgg  | 1 |
| Gi3_27424899_x7 |                          | gggCucgauucccgugaccg    | 1 |
| Gi3_27446599_x7 |                          | cacucacgugaccgggUcgauc  | 1 |
| Gi2_10508175_x7 |                          | cgUuucccgugaccgGcuu     | 1 |
| Gi1a_5697171_x7 |                          | uGcgauucccgugaccg       | 1 |
| Gi1_3973642_x7  |                          | ugacugucacucGcgugaccg   | 1 |
| Gi2_10521825_x7 |                          | Uugacugucacucacgugacc   | 1 |
| Gi4_528825_x7   |                          | guucgauucccgugaccg      | 0 |
| Gi3_27441013_x7 |                          | guucgauucccgugaccUcg    | 1 |
| Gi3_27452696_x7 |                          | guucgauucccgugaccg      | 1 |
| Gi4_529658_x7   |                          | gguucgauucccgugaccgc    | 0 |
| Gi5_8525915_x7  |                          | gguucgauuccUggugac      | 1 |
| Gi5_8527448_x7  |                          | gguucgCuucccgugaccg     | 1 |
| Gi1_3965858_x7  | gcggCcauaguacaguggcuagua |                         | 1 |
| Gi5_8511593_x7  |                          | ucgauucccgugaccgCcu     | 1 |
| Gi1_3967811_x7  |                          | ugacugucacucacgAgaccgg  | 1 |
| Gi3_27383361_x7 |                          | cgauucccgugaccgCcu      | 1 |
| Gi1_3958347_x7  |                          | Uguucgauucccgugaccgc    | 1 |
| Gi5_8529667_x7  | gcggucgauaguGcagugg      |                         | 1 |
| Gi1_3964661_x7  |                          | ugacCgucacucacgugaccg   | 1 |
| Gi2_10517009_x7 | gGggucgauaguacagugg      |                         | 1 |
| Gi4_528832_x7   |                          | gUuucgauucccgugacc      | 1 |
| Gi1_3964955_x7  |                          | Uugacugucacucacgugaccgg | 1 |
| Gi3_27447124_x7 |                          | gguucgAUucccgugaccg     | 1 |
| Gi5_8528043_x7  | gAggucauaguacaguggcuagua |                         | 1 |
| Gi5_8520805_x7  |                          | guucgauucccgugaUcg      | 1 |
| Gi3_27400567_x7 |                          | ucgauucccgugaccgA       | 1 |
| Gi5_8515989_x7  |                          | gguucgauuccGggugacc     | 1 |
| Gi2_10517275_x7 |                          | Gucgauucccgugaccg       | 1 |
| Gi3_27443008_x7 |                          | gguucgauNcccgugaccgGgc  | 1 |
| Gi3_27428980_x7 |                          | ugacugucacucGcgugaccg   | 1 |
| Gi5_8503032_x7  |                          | Aguucgauucccgugaccg     | 1 |
| Gi3_27430415_x7 |                          | gguucgauucccgugaccgc    | 1 |
| Gi3_27418970_x7 |                          | uucAauucccgugaccg       | 1 |
| Gi3_27385384_x7 |                          | guucgauucccCgugaccg     | 1 |
| Gi3_27435287_x7 |                          | uucgauucccgugaccg       | 0 |
| Gi2_10539276_x7 |                          | gguucgauucccCgugacc     | 1 |

|                 |                            |   |
|-----------------|----------------------------|---|
| Gi3_27408974_x7 | .....ggguucgauuccUggugacc  | 1 |
| Gi3_27455930_x7 | .....Ccgauucccgugaccg      | 1 |
| Gi3_27413216_x7 | .....gcggucauaguacaguggcu  | 0 |
| Gi3_27436995_x7 | .....ggguucgauucccgCgacc   | 1 |
| Gi3_27449560_x7 | .....ucUauucccgugaccg      | 1 |
| Gi3_27391453_x7 | .....cacucacgugaccggG      | 1 |
| Gi2_10500734_x7 | .....ggguucgauucccgugGccgc | 1 |
| Gi5_8506987_x7  | .....ugacugucacuUacgugaccg | 1 |
| Gi3_27402051_x7 | .....uUgauucccgugaccg      | 1 |
| Gi3_27442483_x7 | .....aGgugaccggguucgauucc  | 1 |
| Gi3_27426103_x7 | .....uucgauucNcggugaccg    | 1 |
| Gi5_8506819_x7  | .....gacugucacucacCugaccg  | 1 |
| Gi2_10532577_x7 | .....gguAcgauucccgugacc    | 1 |
| G1a_5688092_x7  | .....Uucauaguacaguggcuagu  | 1 |
| Gi5_8510942_x7  | .....guucgGuucccgugaccg    | 1 |
| Gi5_8520189_x7  | .....guucgauucccgugUccgc   | 1 |
| G1a_5684459_x7  | .....gguCcgauucccgugacc    | 1 |
| Gi3_27393196_x7 | .....ggguucgauuAccggugaccg | 1 |
| Gi5_8516549_x7  | .....gguucgauucccgugaccAc  | 1 |
| Gi1_3963030_x7  | .....ugacugucCcacucgugaccg | 1 |
| Gi3_27414364_x7 | .....ggguucgauucccgugUccgc | 1 |
| Gi5_8516388_x7  | .....guucgauucccgugaAccg   | 1 |
| G1a_5697269_x7  | .....gguucgauNcccgugac     | 1 |
| Gi2_10513635_x7 | .....Cacugucacucacgugaccg  | 1 |
| Gi5_8514281_x7  | .....cUggguucgauucccgugac  | 1 |
| Gi4_527026_x7   | .....ggguucgauucccgugaccg  | 0 |
| Gi2_10499341_x7 | .....acucacguNaccggguuc    | 1 |
| Gi2_10520747_x7 | .....gguCcgauucccgugaccg   | 1 |
| Gi3_27407490_x7 | .....guucgauuccGggugaccg   | 1 |
| Gi3_27426418_x7 | .....ggguucgauucccgugacAg  | 1 |
| Gi5_8506560_x7  | .....gguucgauucUcggugaccg  | 1 |
| Gi1_3957598_x7  | .....ugacugCcacucacgugaccg | 1 |
| Gi5_8519391_x7  | .....ggguucgauucccgugaccA  | 1 |
| Gi5_8502878_x7  | .....gguucgauucccgUugacc   | 1 |
| Gi3_27401288_x7 | .....ugGcugucacucacgugaccg | 1 |
| Gi5_8529653_x7  | .....gcgguucGuaguacagugg   | 1 |
| Gi5_8527021_x7  | .....ggGucgauucccgugaccg   | 1 |
| Gi3_27426544_x7 | .....ggguucgaAuucccgugaccg | 1 |
| G1a_5701007_x7  | .....gguucgauucccgugCc     | 1 |
| Gi5_8504894_x7  | .....gguucgauucccgguCac    | 1 |
| Gi5_8507687_x7  | .....guucgauucccgUugaccg   | 1 |
| Gi5_8504194_x7  | .....guucgauuNccggugaccg   | 1 |
| Gi5_8514764_x7  | .....gguAcgauucccgugac     | 1 |
| Gi5_8525957_x7  | .....gguucgauucccgugaAccg  | 1 |
| Gi2_10502218_x7 | .....guucgauucccgugUccg    | 1 |
| Gi3_27453109_x7 | .....ucUauucccgugaccg      | 1 |
| Gi1_3965445_x7  | .....ugGcugucacucacgugaccg | 1 |

|                      |                                   |   |
|----------------------|-----------------------------------|---|
| Gi1_3959467_x7.....  | ucgauucccgugaccgcuU.....          | 1 |
| Gi5_8507407_x7.....  | gcUgucauaguacagugg.....           | 1 |
| Gi5_8514337_x7.....  | Uggucgauucccguga.....             | 1 |
| Gi3_27442966_x7..... | ugacugucGcucacgugaccg.....        | 1 |
| Gi3_27430212_x7..... | cGcucacgugaccggguucgauu.....      | 1 |
| Gi5_8514771_x7.....  | gUggucaguacaguggcuagua.....       | 1 |
| Gi2_10517107_x7..... | gguucgauucccgugaGc.....           | 1 |
| Gi3_27399006_x7..... | ggguucgGuucccgugaccg.....         | 1 |
| Gi3_27413895_x7..... | gugcggucaguacaguggcCaguaugcg..... | 1 |
| Gi5_8528113_x7.....  | gguucgauuccCgugacc.....           | 1 |
| Gi1_3967608_x7.....  | gacugucacucUcgugaccg.....         | 1 |
| Gi3_27445815_x7..... | cacucacgugaccgAguucga.....        | 1 |
| Gi2_10540347_x7..... | gggGucgauucccgugaccg.....         | 1 |
| Gi2_10539234_x7..... | gcAgucauaguacaguggc.....          | 1 |
| Gi5_8511110_x7.....  | uGcgauucccgugaccgc.....           | 1 |
| Gi1_3974118_x7.....  | gcAgucauaguacaguggcua.....        | 1 |
| Gi5_8511453_x7.....  | gacugucacucacgGgaccg.....         | 1 |
| Gi2_10535104_x7..... | gguucgauucccgguAaccgc.....        | 1 |
| Gi3_27413874_x7..... | Gcgugaccggguucgauucc.....         | 1 |
| Gi3_27430597_x7..... | ggguCcgauucccgugaccg.....         | 1 |
| Gi5_8509101_x7.....  | cggucuaNuacaguggcua.....          | 1 |
| Gi5_8518411_x7.....  | ugacGgucacucacgugaccg.....        | 1 |
| Gi3_27430905_x7..... | gguuGgauucccgugaccg.....          | 1 |
| Gi3_27453053_x7..... | gacugucUcucacgugaccg.....         | 1 |
| Gi3_27448251_x7..... | gugacuguNacucacgugaccg.....       | 1 |
| Gi5_8513854_x7.....  | guucgauCcccggugaccg.....          | 1 |
| Gi1_5690465_x7.....  | gAuucgauucccgugacc.....           | 1 |
| Gi2_10516400_x7..... | gguucgauuccUggugaccg.....         | 1 |
| Gi3_27389045_x7..... | gcggucauaguacUguggc.....          | 1 |
| Gi5_8508163_x7.....  | gcbggGcauaguacaguggcuag.....      | 1 |
| Gi3_27398425_x7..... | cacucGcgugaccgggu.....            | 1 |
| Gi5_8509969_x7.....  | gacugucacucacgugaUccgg.....       | 1 |
| Gi3_27394869_x7..... | gacuguUacucacgugaccg.....         | 1 |
| Gi3_27402758_x7..... | guucgauucccgguCaccgc.....         | 1 |
| Gi2_10517373_x7..... | gguucgCuucccgugaccg.....          | 1 |
| Gi1_3963653_x7.....  | gcbggucGuaguacaguggcuagua.....    | 1 |
| Gi3_27424689_x7..... | ucgauucUcggugaccgc.....           | 1 |
| Gi3_27400336_x7..... | gguucgaAuucccgugac.....           | 1 |
| Gi2_10526172_x7..... | gcbggucaguacaguggcuaguau.....     | 0 |
| Gi3_27409835_x7..... | gguucCauucccgugacc.....           | 1 |
| Gi1_3968084_x7.....  | ugacugucaUucacgugaccg.....        | 1 |
| Gi3_27454915_x7..... | cacCcacgugaccggguuc.....          | 1 |
| Gi3_27396983_x7..... | cacCcacgugaccggguucga.....        | 1 |
| Gi5_8521750_x7.....  | gguucgauucccgugaUcgc.....         | 1 |
| Gi5_8519020_x7.....  | gguucgauUccggugac.....            | 1 |
| Gi5_8530717_x7.....  | gcbggucaguUcaguggcuagu.....       | 1 |
| Gi1_3972053_x7.....  | gacugucacucacgGgaccg.....         | 1 |



|                 |                            |   |
|-----------------|----------------------------|---|
| Gi5_8519083_x7  | .gcggucanGnuacaguggcuaguau | 1 |
| Gi1_3961735_x7  | .acugucacucacgCgacccgg     | 1 |
| Gi2_10502589_x7 | .gguucgauucccgugaccA       | 1 |
| Gi1_3960237_x7  | .ugacugucacucacAugacccgg   | 1 |
| Gi3_27481726_x6 | .gauucccgugaccgAc          | 1 |
| Gi3_27507976_x6 | .gguucUauucccgugaccg       | 1 |
| Gi3_27518404_x6 | .guuNgauucccgugaccg        | 1 |
| Gi1_3991891_x6  | .gacugucGcucacgugaccg      | 1 |
| Gi1a_5713258_x6 | .gcggucanaguacGguggcuagu   | 1 |
| Gi5_8556559_x6  | .Agguucgauucccgugacc       | 1 |
| Gi3_27487594_x6 | .ggguucgaNucccgugaccg      | 1 |
| Gi3_27460870_x6 | .gacugucacucUcgugaccgg     | 1 |
| Gi5_8561263_x6  | .gcggucanagCacaguggc       | 1 |
| Gi5_8538943_x6  | .gcggucanaguGcaguggcuag    | 1 |
| Gi2_10582691_x6 | .guucgauucccgugaUcgcg      | 1 |
| Gi5_8532607_x6  | .gcUgucanaguacaguggcuaguau | 1 |
| Gi5_8544181_x6  | .ugacCgucacucacgugaccgg    | 1 |
| Gi5_8536369_x6  | .gcggucanaguacaguAgcua     | 1 |
| Gi3_27520876_x6 | .Augacugucacucacgugaccgg   | 1 |
| Gi5_8539147_x6  | .gcggCcauaguacaguggcuaguau | 1 |
| Gi2_10570943_x6 | .gguucgauucccgugCccgcg     | 1 |
| Gi5_8531479_x6  | .gacugucaNucacgugaccg      | 1 |
| Gi5_8555911_x6  | .gguNcgauucccgugacc        | 1 |
| Gi2_10570799_x6 | .gguucgauuAccggugacc       | 1 |
| Gi2_10579595_x6 | .Accggguucgauucccgugaccgg  | 1 |
| Gi1_3978835_x6  | .gUuucgauucccgugacc        | 1 |
| Gi5_8553067_x6  | .gcggucanGguacaguggcuagua  | 1 |
| Gi1a_5731768_x6 | .gguUgauucccgugacc         | 1 |
| Gi5_8560273_x6  | .guGcgauucccgugaccg        | 1 |
| Gi3_27499270_x6 | .guuGgauucccgugacc         | 1 |
| Gi5_8542051_x6  | .gguucgauucccgCugacc       | 1 |
| Gi1_3991753_x6  | .guucUauucccgugaccg        | 1 |
| Gi5_8539219_x6  | .gguucgaAuucccgugacc       | 1 |
| Gi3_27465982_x6 | .cGgucacucacgugaccgg       | 1 |
| Gi1_3980245_x6  | .ugacugucacuUacgugaccgg    | 1 |
| Gi5_8558173_x6  | .gacugucacucacgugaccAg     | 1 |
| Gi3_27491968_x6 | .gacugucacucacgugaccCg     | 1 |
| Gi3_27468718_x6 | .guucgauucccgugacG         | 1 |
| Gi5_8542747_x6  | .gguucgauuUccggugaccg      | 1 |
| Gi3_27496210_x6 | .gguuAgauucccgugaccg       | 1 |
| Gi3_27522016_x6 | .cUgaccggguucgauuccggu     | 1 |
| Gi2_10587419_x6 | .guucgauucccgugaccAcg      | 1 |
| Gi5_8546143_x6  | .gcUgucanaguacaguggcuagua  | 1 |
| Gi2_10553489_x6 | .guucgauucAcggugaccg       | 1 |
| Gi3_27496468_x6 | .ucgauucccgCgaccg          | 1 |
| Gi1_3977455_x6  | .gcggGcauaguacaguggcu      | 1 |
| Gi2_10580609_x6 | .guucgauuccgguAaccg        | 1 |

|                      |                                 |   |
|----------------------|---------------------------------|---|
| Gi2_10556519_x6..... | cUcucacgugacccgggu.....         | 1 |
| Gi1_3992383_x6.....  | ugaUugucacucacgugacccgg.....    | 1 |
| Gi2_10562675_x6..... | .gacugucacucacgugacccAg.....    | 1 |
| Gi2_10555049_x6..... | .gguucgauucccgguAaccgcg.....    | 1 |
| Gi5_8556757_x6.....  | .gguucgauuccUgugac.....         | 1 |
| Gi3_27524506_x6..... | .gacugucacuUacgugacccg.....     | 1 |
| Gi5_8534209_x6.....  | .gcggucauaguacaguggcCagu.....   | 1 |
| Gi1_3983467_x6.....  | .Uuucgauucccgugacccg.....       | 1 |
| Gi2_10551179_x6..... | .guucgauucccCgugacccg.....      | 1 |
| Gi5_8557507_x6.....  | .gcggucGuaguacaguggc.....       | 1 |
| Gi5_8539339_x6.....  | .gguCcgauucccgugacccg.....      | 1 |
| Gi3_27466378_x6..... | .gcggucauaguacagAgg.....        | 1 |
| Gi3_27469984_x6..... | .ugacCgucacucacgugacccg.....    | 1 |
| Gi3_27548488_x6..... | .gcggucauaguacaguAgc.....       | 1 |
| Gi3_27533968_x6..... | .guucgauuccGggugacccg.....      | 1 |
| Gi1a_5705206_x6..... | .Auucgauucccgugacccg.....       | 1 |
| Gi3_27493696_x6..... | .gguAcgauucccgugac.....         | 1 |
| Gi5_8533669_x6.....  | .guucgUuucccgugacccg.....       | 1 |
| Gi2_10581629_x6..... | .gCuucgauucccgugacccg.....      | 1 |
| Gi5_8556697_x6.....  | .gguucgauucccgugaGc.....        | 1 |
| Gi1a_5704678_x6..... | .gguucgauucccgugaAc.....        | 1 |
| Gi1a_5726998_x6..... | .gguucgauuccAgugacc.....        | 1 |
| Gi3_27498544_x6..... | .Gggguucgauucccgugacc.....      | 1 |
| Gi2_10543115_x6..... | .guucgauuAccggugacccg.....      | 1 |
| Gi2_10562489_x6..... | .guucgauuccCgugacc.....         | 1 |
| Gi5_8549059_x6.....  | .cucGcgugacccggguuc.....        | 1 |
| Gi5_8551483_x6.....  | .acugucacNcacgugacccggguuc..... | 1 |
| Gi3_27543124_x6..... | .gacugucacucacgugUcccgg.....    | 1 |
| Gi2_10590341_x6..... | .uUgauucccgugacccg.....         | 1 |
| Gi5_8558899_x6.....  | .gcggCcauaguacaguggcuagua.....  | 1 |
| Gi2_10559207_x6..... | .guucgauucccgUugacc.....        | 1 |
| Gi5_8546449_x6.....  | .gcggucauaguaUaguggcuagu.....   | 1 |
| Gi5_8549869_x6.....  | .cauaguacGguggcuagu.....        | 1 |
| Gi5_8560573_x6.....  | .ugacAgucacucacgugacccgg.....   | 1 |
| Gi5_8552899_x6.....  | .gcggucauaguacaguggcuUgu.....   | 1 |
| Gi1a_5707642_x6..... | .gguucgauucccgCgaccg.....       | 1 |
| Gi3_27472174_x6..... | .ugacugucCucacgugacccgg.....    | 1 |
| Gi5_8561851_x6.....  | .gguucgauucccgugacccgU.....     | 1 |
| Gi2_10546931_x6..... | .gcggGcauaguacagugg.....        | 1 |
| Gi5_8540755_x6.....  | .gcggucCuaguacaguggcua.....     | 1 |
| Gi2_10555079_x6..... | .cgauucccgugacUgcggcuu.....     | 1 |
| Gi3_27471268_x6..... | .gguucgauucccgugaGcgc.....      | 1 |
| Gi2_10543337_x6..... | .gguucgauucAcggugacccg.....     | 1 |
| Gi2_10550603_x6..... | .Gcacgugacccggguucgauucc.....   | 1 |
| Gi5_8561113_x6.....  | .gcggucGguacaguggcuaguau.....   | 1 |
| Gi5_8562721_x6.....  | .gUggucauaguacagugg.....        | 1 |
| Gi1_3978001_x6.....  | .gugacugucacucacgugacccg.....   | 0 |

|                      |                                   |   |
|----------------------|-----------------------------------|---|
| Gi3_27491806_x6..... | ggNucgauuuccggugacc.....          | 1 |
| Gi5_8532325_x6.....  | guucgaGuuccggugaccg.....          | 1 |
| Gi3_27484084_x6..... | gggGucgauuuccggugaccg.....        | 1 |
| Gi2_10563551_x6..... | guuAgauuuccggugaccgc.....         | 1 |
| Gi3_27465478_x6..... | guUacugucacucacgugaccg.....       | 1 |
| Gi3_27497164_x6..... | uucgauuuccggCgaccgc.....          | 1 |
| Gi3_27480526_x6..... | Aacugucacucacgugacc.....          | 1 |
| G1a_5715166_x6.....  | gcUgucauaguacaguggcuagu.....      | 1 |
| Gi5_8555281_x6.....  | gguucgauAcccggugacc.....          | 1 |
| Gi5_8540299_x6.....  | gcAgucauaguacaguggcua.....        | 1 |
| Gi3_27501610_x6..... | uucgauucUcggugaccgc.....          | 1 |
| Gi2_10572977_x6..... | guucgUuuccggugaccg.....           | 1 |
| Gi2_10550921_x6..... | cacucacgNgaccggguucga.....        | 1 |
| Gi2_10558757_x6..... | gguuUgauuuccggugac.....           | 1 |
| Gi2_10572269_x6..... | gguucgauuuccAgugaccgc.....        | 1 |
| Gi2_10575581_x6..... | caUucacgugaccggguuc.....          | 1 |
| Gi1_3993085_x6.....  | gGggucauaguacaguggcuag.....       | 1 |
| Gi5_8542537_x6.....  | gucauaguacaguggcuagC.....         | 1 |
| Gi5_8544937_x6.....  | ugacugucacucacgugacUcgg.....      | 1 |
| Gi3_27511642_x6..... | uucgauuuccggugGccgcg.....         | 1 |
| Gi2_10561841_x6..... | gguucgGuuccggugaccg.....          | 1 |
| Gi3_27527926_x6..... | guucgauuuccUgugacc.....           | 1 |
| Gi3_27475840_x6..... | gacugucacAcacgugaccg.....         | 1 |
| G1a_5713990_x6.....  | guucgauuuccAgugacc.....           | 1 |
| Gi3_27519406_x6..... | ugacugucacucacgugacAcg.....       | 1 |
| Gi3_27533008_x6..... | guucgauuuccgguCaccg.....          | 1 |
| Gi2_10559855_x6..... | guucgauuuccggugaUcg.....          | 1 |
| Gi2_10552115_x6..... | gcggucauaguacaguggcuag.....       | 0 |
| Gi3_27541102_x6..... | gAguucgauuuccggugacc.....         | 1 |
| Gi5_8531731_x6.....  | guucgaGuuccggugacc.....           | 1 |
| Gi5_8554711_x6.....  | guucgUuuccggugaccg.....           | 1 |
| Gi5_8559607_x6.....  | Uugacugucacucacgugacc.....        | 1 |
| Gi5_8546167_x6.....  | cGcacgugaccggguuc.....            | 1 |
| Gi2_10543769_x6..... | gguucgauuuccggugaccgU.....        | 1 |
| Gi2_10581257_x6..... | guucgauuuccggugacU.....           | 1 |
| Gi5_8559061_x6.....  | gcggGcauaguacagugg.....           | 1 |
| Gi5_8549521_x6.....  | gguAcgauuuccggugaccg.....         | 1 |
| Gi3_27509050_x6..... | cacucacgugaccAgguucga.....        | 1 |
| Gi3_27503428_x6..... | guucgauuuccggugUccg.....          | 1 |
| Gi2_10569791_x6..... | cGcucacgugaccggguucga.....        | 1 |
| Gi2_10546631_x6..... | Gcucacgugaccggguuc.....           | 1 |
| Gi2_10588247_x6..... | gguucgauuuccgCugacc.....          | 1 |
| Gi5_8556649_x6.....  | guuNgauuuccggugacc.....           | 1 |
| Gi3_27478690_x6..... | uCcgauuuccggugaccgc.....          | 1 |
| Gi2_10543751_x6..... | ugucacucacgugaccggguucgauucc..... | 0 |
| Gi1_3983929_x6.....  | Gcauaguacaguggcuagua.....         | 1 |
| Gi5_8531761_x6.....  | gcggucauaguacaguggUuagu.....      | 1 |

G1a\_5707840\_x6.....guucgauucccgGgacc..... 1  
 Gi3\_27488794\_x6.....ggguucgauCcccggugaccg..... 1  
 Gi3\_27538186\_x6.....guuNgauucccgugaccg..... 1  
 Gi2\_10549403\_x6.....cacucacugGccccggu..... 1  
 Gi2\_10558601\_x6.....gAucgauucccgugaccgc..... 1  
 Gi5\_8545357\_x6.....gacugucacuUacgugaccgg..... 1  
 Gi2\_10564289\_x6.....gAucgauucccgugaccg..... 1  
 Gi1\_3980569\_x6.....ugacugucacucacgugacGcgg..... 1  
 Gi1\_3980593\_x6.....ugacugucacucUcugaccgg..... 1  
 Gi5\_8558689\_x6.....ugacugucCcucacgugaccgg..... 1  
 Gi5\_8534221\_x6.....gcggucauaguacaguggcuGgua..... 1  
 Gi3\_27490414\_x6.....ugacugucacucaUgugaccgg..... 1  
 Gi3\_27463366\_x6.....gGgacugucacucacgugaccgg..... 1  
 Gi2\_10586183\_x6.....guucgauucccgugaccC..... 1  
 Gi3\_27512224\_x6.....ugacGgucacucacgugaccgg..... 1  
 Gi3\_27520234\_x6.....gcggucauaguacagugA..... 1  
 Gi3\_27513880\_x6.....gguAcgauucccgugaccgc..... 1  
 Gi2\_10567907\_x6.....guucgauucccgugaccgU..... 1  
 Gi2\_10569293\_x6.....gcgguCcuaguacaguggc..... 1  
 Gi2\_10572323\_x6.....guuNgauucccgugacc..... 1  
 Gi5\_8555035\_x6.....guucgauucccgugaccgUg..... 1  
 Gi5\_8559577\_x6.....gguuAgauucccgugacc..... 1  
 Gi2\_10564325\_x6.....gcgguUauaguacaguggc..... 1  
 Gi5\_8555767\_x6.....guucgauucccgUugaccg..... 1  
 Gi3\_27473650\_x6.....gguucgauNcccggugaccg..... 1  
 G1a\_5714650\_x6.....gcgGCcauaguacaguggcuagua..... 1  
 Gi3\_27511546\_x6.....gguucgauuAccggugac..... 1  
 Gi2\_10565075\_x6.....guucgaGucccggugacc..... 1  
 Gi5\_8539135\_x6.....gcggucauCguacaguggcua..... 1  
 Gi2\_10577807\_x6.....ggguucgaCucccggugaccg..... 1  
 Gi3\_27468934\_x6.....ggguucgGuuccggugacc..... 1  
 Gi3\_27475372\_x6.....uucgauucccgugaccAc..... 1  
 Gi5\_8535025\_x6.....Gccggguucgauucccgugac..... 1  
 Gi3\_27486490\_x6.....ggguucgauuccAgugaccg..... 1  
 Gi3\_27529012\_x6.....guucgauucccgugaGcgc..... 1  
 Gi5\_8558083\_x6.....gcggucauaguacagugCcuagu..... 1  
 Gi1\_3987583\_x6.....uucccgugaccgCgCcu..... 1  
 Gi3\_27489508\_x6.....guucgauucccgugaGcgcg..... 1  
 Gi5\_8531851\_x6.....guucgauucccgAgaccg..... 1  
 Gi3\_27493846\_x6.....gacugucacucacgGgaccgg..... 1  
 Gi5\_8534449\_x6.....gcggucauaguacCguggcuagua..... 1  
 Gi5\_8537509\_x6.....gacNguacacucacgugaccgg..... 1  
 Gi3\_27493174\_x6.....guuGgauucccgugaccg..... 1  
 Gi3\_27498424\_x6.....gcggucauaguacaguggcCaguaugcgugac..... 1  
 Gi3\_27534166\_x6.....ggguucgCuuccggugaccg..... 1  
 Gi3\_27517684\_x6.....cacucaUgugaccggguuc..... 1  
 G1a\_5720728\_x6.....guuUgauucccgugaccgc..... 1

|                 |                                   |   |
|-----------------|-----------------------------------|---|
| Gi5_8552653_x6  | .....gguucgauucAcggugaccgc        | 1 |
| Gi3_27544684_x6 | .....Cucgauucccgugaccgc           | 1 |
| Gi2_10551533_x6 | .....gcggucauNguacagugg           | 1 |
| Gi5_8553091_x6  | .....Ccggucauaguacaguggcuag       | 1 |
| Gi3_27510400_x6 | .....gguucgauucccCgugacc          | 1 |
| Gi1_3993229_x6  | .....cacucacgugaccgggu            | 0 |
| Gi1_3993079_x6  | .....gugcggucauaguacaguggcuaguacg | 0 |
| Gi5_8539825_x6  | .....gauucccgugaccgcgCcu          | 1 |
| Gi3_27461182_x6 | .....ugacugucCucacgugaccgc        | 1 |
| Gi5_8537479_x6  | .....gcggGcauaguacaguggc          | 1 |
| Gi2_10582907_x6 | .....gacugucacucGcgugaccgcg       | 1 |
| Gi5_8549353_x6  | .....gguucgauucUcggugac           | 1 |
| Gi1_3988255_x6  | .....ugacAgucacucacgugaccgcg      | 1 |
| Gi1_3981859_x6  | .....gcggucauaguacCgugg           | 1 |
| Gi3_27485374_x6 | .....gguNcgauucccgugac            | 1 |
| Gi3_27483802_x6 | .....ggguucgaCucccgugaccgcg       | 1 |
| Gi3_27527830_x6 | .....gguucgauucccgugaccUc         | 1 |
| Gi2_10551713_x6 | .....guucgauucccgugCccgc          | 1 |
| Gi2_10543313_x6 | .....gguucgauucccgAgacc           | 1 |
| Gi2_10578503_x6 | .....cUauucccgugaccgcggcuuu       | 1 |
| Gi2_10542881_x6 | .....gcggucauaguacagCggc          | 1 |
| Gi1a_5732026_x6 | .....gcggucauaguacaguggcuagG      | 1 |
| Gi3_27527512_x6 | .....ucgauucccgugaccAc            | 1 |
| Gi3_27499186_x6 | .....gcggucauUguacaguggc          | 1 |
| Gi1_3977377_x6  | .....gguucgauucccgugaccgU         | 1 |
| Gi5_8543377_x6  | .....guucgauucccgugacAgc          | 1 |
| Gi2_10553099_x6 | .....gguucgauucccgAugac           | 1 |
| Gi3_27458194_x6 | .....gcggucauaguacagugCc          | 1 |
| Gi5_8544217_x6  | .....guucgUuucccgugacc            | 1 |
| Gi5_8537017_x6  | .....gcggucauaguacCguggc          | 1 |
| Gi3_27501670_x6 | .....gguNcgauucccgugaccgc         | 1 |
| Gi1_3984163_x6  | .....gcggucauaguacaguggcuG        | 1 |
| Gi1_3978847_x6  | .....gcggucauGguacaguggcuagua     | 1 |
| Gi3_27514810_x6 | .....aGuucccgugaccgcggcuu         | 1 |
| Gi5_8563477_x6  | .....gUggucauaguacaguggcuaguau    | 1 |
| Gi1a_5720302_x6 | .....guucAauucccgugacc            | 1 |
| Gi3_27545860_x6 | .....ucgauucccgugacUgc            | 1 |
| Gi5_8537899_x6  | .....cccgguuNguucccgugac          | 1 |
| Gi3_27547396_x6 | .....gacugucacucacgugaccUg        | 1 |
| Gi5_8559163_x6  | .....guucAauucccgugaccgcg         | 1 |
| Gi3_27526756_x6 | .....ggguucgauucccAgugacc         | 1 |
| Gi2_10578947_x6 | .....gguucgauucccgugaAcg          | 1 |
| Gi3_27495184_x6 | .....gugaccgggGucgauucc           | 1 |
| Gi5_8559955_x6  | .....gacugucacucacgugaccCg        | 1 |
| Gi5_8562031_x6  | .....gcggucauaguacaguggcuC        | 1 |
| Gi5_8543581_x6  | .....guuGgauucccgugacc            | 1 |
| Gi3_27462376_x6 | .....gcggucauaguaUagugg           | 1 |

|                 |                            |   |
|-----------------|----------------------------|---|
| Gi3_27548218_x6 | .gacugAcacucacgugacccg     | 1 |
| Gi3_27500386_x6 | .cgUuucccgugaccg           | 1 |
| Gi3_27593187_x5 | .gguucgauucccgugacGgc      | 1 |
| Gi2_10609995_x5 | .ggguucgauucccgugaAcgc     | 1 |
| Gi3_27608932_x5 | .uucgauucccAgugaccg        | 1 |
| Gi5_8574032_x5  | .gguucgCuucccgugaccg       | 1 |
| Gi3_27597327_x5 | .ggguucgCuucccgugacc       | 1 |
| Gi2_10631015_x5 | .guucgauucccgugUcc         | 1 |
| Gi1_4004030_x5  | .gGcauaguacaguggcuagua     | 1 |
| Gi3_27570167_x5 | .ugacugucacucacguAaccg     | 1 |
| Gi5_8591732_x5  | .gguucgauAcccgugaccg       | 1 |
| Gi3_27554947_x5 | .cGcacgugacccggguucgauucc  | 1 |
| Gi3_27555927_x5 | .aGgugaccggguucgauucc      | 1 |
| Gi5_8599077_x5  | .gguucgauucccAgugaccg      | 1 |
| Gi3_27653827_x5 | .ucgauucccgguAaccg         | 1 |
| Gi3_27623812_x5 | .gguucgauucccgGgaccg       | 1 |
| Gi5_8590627_x5  | .gguAcgauucccgugaccg       | 1 |
| Gi3_27603982_x5 | .cacucacgugacccgggAuc      | 1 |
| Gi3_27630747_x5 | .gCGgAcauaguacaguggc       | 1 |
| Gi5_8591447_x5  | .gcAgucauaguacaguggcu      | 1 |
| Gi1_4006360_x5  | .ugacuguUacucacgugacccg    | 1 |
| Gi1_4005310_x5  | .Gugucacucacgugacccg       | 1 |
| Gi3_27629372_x5 | .gguucgauUgccggugaccg      | 1 |
| Gi1_3998115_x5  | .gCGgucauaguCcagugg        | 1 |
| Gi2_10624770_x5 | .gguucgauucccgugaccAccg    | 1 |
| Gi3_27647407_x5 | .cGgucacucacgugacccgggu    | 1 |
| Gi3_27622132_x5 | .guUacugucacucacgugacccg   | 1 |
| Gi3_27597237_x5 | .guucgauuccAggugaccg       | 1 |
| Gi3_27617432_x5 | .uGacgugacccggguucgauucc   | 1 |
| Gi3_27586227_x5 | .Cgguucgauucccgugaccg      | 1 |
| Gi1_4016985_x5  | .gCGgucauaguacCguggcua     | 1 |
| Gi3_27608247_x5 | .acguUacccgguucgauucc      | 1 |
| Gi5_8584662_x5  | .guucgauucccgUugaccg       | 1 |
| Gi1_4003155_x5  | .gGggucauaguacaguggcuagu   | 1 |
| Gi2_10632910_x5 | .gguucgauAcccgugaccg       | 1 |
| Gi3_27653702_x5 | .Augaccggguucgauucc        | 1 |
| Gi5_8575207_x5  | .gguucgauuccUggugaccg      | 1 |
| Gi5_8571447_x5  | .gCGguUauaguacaguggcua     | 1 |
| Gi1a_5740397_x5 | .guucgauCcccgugacc         | 1 |
| Gi5_8582712_x5  | .gGcauaguacaguggcuag       | 1 |
| Gi3_27606457_x5 | .ugacugucacucacgCgaccg     | 1 |
| Gi3_27600682_x5 | .acucGcgugacccgggu         | 1 |
| Gi2_10632860_x5 | .ggguucgaNuucccgugacc      | 1 |
| Gi2_10631235_x5 | .cGcacgugacccggguucgauucc  | 1 |
| Gi3_27593857_x5 | .cacucacgNgaccggguucgauucc | 1 |
| Gi1_4013655_x5  | .Acggucauaguacaguggcuagua  | 1 |
| Gi1_4006195_x5  | .acucacgugacccggguU        | 1 |

|                      |                                      |   |
|----------------------|--------------------------------------|---|
| Gi2_10591765_x5..... | .....gguucgauucccgugacAgcg.....      | 1 |
| Gi5_8574577_x5.....  | .....gcggucGguacaguggcua.....        | 1 |
| Gi1_4000990_x5.....  | .....acugucacucacgugGcccgg.....      | 1 |
| Gi5_8566202_x5.....  | .....gcggucGguacaguggc.....          | 1 |
| Gi3_27648007_x5..... | .....gcggucGguacaguggc.....          | 1 |
| Gi3_27652257_x5..... | .....cacucacgugaccUgggu.....         | 1 |
| Gi5_8576637_x5.....  | .....cgauucccgugaccgCgC.....         | 1 |
| G1a_5733577_x5.....  | .....gguucgauucccgguCac.....         | 1 |
| G1a_5752207_x5.....  | .....ggGucgauucccgugaccgc.....       | 1 |
| Gi2_10635270_x5..... | .....gguucgauuccAggugacc.....        | 1 |
| Gi5_8579387_x5.....  | .....guuUgauucccgugaccgCg.....       | 1 |
| Gi3_27602407_x5..... | .....guucgauucccgguCaccgCg.....      | 1 |
| Gi5_8583482_x5.....  | .....guucgauucccgGgaccgCg.....       | 1 |
| Gi5_8592537_x5.....  | .....gcggucGguacaguggcua.....        | 1 |
| Gi5_8583132_x5.....  | .....gguucgauucccgugacAgc.....       | 1 |
| Gi2_10643065_x5..... | .....guucgauucccgugaccgCgC.....      | 0 |
| Gi3_27576147_x5..... | .....acugucacNcagugaccCgg.....       | 1 |
| Gi2_10630265_x5..... | .....GacucacgugaccCggguucga.....     | 1 |
| Gi3_27605697_x5..... | .....gguucgauucccgAugaccg.....       | 1 |
| Gi3_27626817_x5..... | .....cacucaUgugaccCgggu.....         | 1 |
| Gi5_8580657_x5.....  | .....gguucgauucccgAugac.....         | 1 |
| Gi3_27583167_x5..... | .....uGacucacgugaccCggguucga.....    | 1 |
| Gi5_8569877_x5.....  | .....guucgauucccgugaccgAg.....       | 1 |
| G1a_5740217_x5.....  | .....gguucgauuccAggugacc.....        | 1 |
| Gi5_8596547_x5.....  | .....gcggCcauaguacaguggc.....        | 1 |
| Gi5_8597647_x5.....  | .....gcggucGguacaguggcua.....        | 1 |
| Gi2_10597210_x5..... | .....gcggucGguacaguggc.....          | 1 |
| Gi1_3998730_x5.....  | .....gcggucGguacaguggc.....          | 1 |
| Gi1_4001830_x5.....  | .....ugacuAucacucacgugaccCgg.....    | 1 |
| Gi1_4008100_x5.....  | .....gacugucacucacgugaccA.....       | 1 |
| Gi3_27628392_x5..... | .....ugacugucacucacgugCcccg.....     | 1 |
| G1a_5734602_x5.....  | .....guucgauucccgugaccgCgCcu.....    | 1 |
| Gi5_8569007_x5.....  | .....gGgacugucacucacgugacc.....      | 1 |
| Gi2_10633995_x5..... | .....acCcacgugaccCggguuc.....        | 1 |
| Gi3_27615837_x5..... | .....Nguucgauucccgugacc.....         | 1 |
| G1a_5759902_x5.....  | .....ggAucgauucccgugacc.....         | 1 |
| Gi3_27649072_x5..... | .....GacucacgugaccCggguucgauucc..... | 1 |
| Gi2_10595310_x5..... | .....guucgauAcccgugaccCgC.....       | 1 |
| Gi2_10615245_x5..... | .....guucgaGucccgugaccCg.....        | 1 |
| Gi3_27557497_x5..... | .....ugacugucacucacAugaccCgg.....    | 1 |
| Gi2_10640685_x5..... | .....guucgauucccgUgaccg.....         | 1 |
| G1a_5763657_x5.....  | .....guucgauucccgCgaccg.....         | 1 |
| Gi2_10640175_x5..... | .....gguucgauuccUgugac.....          | 1 |
| Gi3_27558052_x5..... | .....ugacugucUcucacgugaccCgg.....    | 1 |
| Gi3_27607162_x5..... | .....ucgauucccgugacAgcg.....         | 1 |
| Gi5_8564052_x5.....  | .....guucgauuccGggugaccCgC.....      | 1 |
| Gi3_27616812_x5..... | .....caUucacgugaccCggguuc.....       | 1 |

|                 |                               |   |
|-----------------|-------------------------------|---|
| Gi5_8568067_x5  | .....gguucgauucccgugacUcgcg   | 1 |
| Gi2_10593790_x5 | .....gcggucauaguacaguggA      | 1 |
| Gi3_27635437_x5 | .....guucgauuccGggugaccg      | 1 |
| Gi3_27551067_x5 | .....gacugucacucacAugaccc     | 1 |
| Gi2_10648580_x5 | .....gacugCcacucacgugaccccg   | 1 |
| Gi1_4017195_x5  | .....gcggucauaguacaguggUua    | 1 |
| Gi3_27598882_x5 | .....Gcugucacucacgugacccg     | 1 |
| Gi1a_5737547_x5 | .....gguucgauucccgugCccgc     | 1 |
| Gi1a_5740142_x5 | .....Ucggucauaguacaguggcuag   | 1 |
| Gi3_27622802_x5 | .....gcggucauaguacaguggcua    | 0 |
| Gi1_4002110_x5  | .....gcggucauaguacaguggcCag   | 1 |
| Gi2_10645590_x5 | .....guucgaGucccggugaccg      | 1 |
| Gi5_8597562_x5  | .....gcggucaCaguacaguggcuag   | 1 |
| Gi1a_5737102_x5 | .....gcggucauaguacagCggcuagu  | 1 |
| Gi2_10616050_x5 | .....guucgUuucccgugaccg       | 1 |
| Gi3_27565342_x5 | .....uucgauucUcggugaccgcg     | 1 |
| Gi3_27653737_x5 | .....acucacguNacccggguu       | 1 |
| Gi5_8574532_x5  | .....gcggucaCaguacaguggcua    | 1 |
| Gi4_536788_x5   | .....gguucgauucccgugaccg      | 0 |
| Gi3_27651022_x5 | .....gacugucacucacgCgaccc     | 1 |
| Gi3_27582722_x5 | .....ggguucgauCcccggugaccgc   | 1 |
| Gi3_27613982_x5 | .....gcggucauaguacaguggcA     | 1 |
| Gi3_27628212_x5 | .....ucgaGucccggugaccgc       | 1 |
| Gi5_8599152_x5  | .....gacugAcacucacgugacccg    | 1 |
| Gi5_8599412_x5  | .....Acggucauaguacaguggcu     | 1 |
| Gi1a_5740257_x5 | .....gGucgauucccgugaccgcg     | 1 |
| Gi5_8589457_x5  | .....guuAgauucccgugacc        | 1 |
| Gi1a_5749197_x5 | .....gguucgauuccUgugac        | 1 |
| Gi1_4002795_x5  | .....gUggucauaguacaguggcuagua | 1 |
| Gi3_27585402_x5 | .....guucgauuGccggugacc       | 1 |
| Gi3_27596622_x5 | .....gguucgauuGccggugaccgcg   | 1 |
| Gi5_8583402_x5  | .....guucgauucccgugaccgU      | 1 |
| Gi5_8577912_x5  | .....gguAcgauucccgugacc       | 1 |
| Gi1a_5766682_x5 | .....guucAauucccgugaccg       | 1 |
| Gi3_27613327_x5 | .....gcggucauaguaAaguggc      | 1 |
| Gi5_8577787_x5  | .....guuNgauucccgugaccg       | 1 |
| Gi5_8574097_x5  | .....gcggucauaguGcaguggcua    | 1 |
| Gi2_10650285_x5 | .....gcggucauaguaUaguggc      | 1 |
| Gi1_4012625_x5  | .....gacugucacucacgugacUcg    | 1 |
| Gi2_10634510_x5 | .....gguucgauuccUgugaccgcg    | 1 |
| Gi5_8567792_x5  | .....gguucgauucccgGgaccgc     | 1 |
| Gi3_27639342_x5 | .....cacucacgugacAcggguuc     | 1 |
| Gi3_27625802_x5 | .....guucgauucccgugaccgG      | 1 |
| Gi1_4001285_x5  | .....ucgauucccgugaccgc        | 0 |
| Gi3_27651887_x5 | .....Uguucgauucccgugaccgcgguu | 1 |
| Gi5_8570332_x5  | .....guucgauucccgugaccgcA     | 1 |
| Gi3_27584777_x5 | .....uucgauucccgugaccgcC      | 1 |



|                      |                                     |   |
|----------------------|-------------------------------------|---|
| Gi5_8585687_x5.....  | .gcggucauaAuacaguggc.....           | 1 |
| Gi2_10601400_x5..... | .....gguucgauucccgGgaccgc.....      | 1 |
| Gi5_8581862_x5.....  | .gGggucauaguacaguggcu.....          | 1 |
| Gi2_10621625_x5..... | .....guuAgauucccgugacc.....         | 1 |
| Gi3_27626187_x5..... | .....guucgauucccgugaGc.....         | 1 |
| Gi3_27625597_x5..... | .....gacugCcacucacgugacc.....       | 1 |
| Gi5_8597872_x5.....  | .....gguucgauuccUggugaccg.....      | 1 |
| Gi2_10649630_x5..... | .....gguucgauCcccgugaccg.....       | 1 |
| Gi2_10633725_x5..... | .....gacugucacuUacgugaccgc.....     | 1 |
| G1a_5744597_x5.....  | .....gacugucacucacgugaccg.....      | 0 |
| Gi1_3996265_x5.....  | .....Ugucauaguacaguggcuagua.....    | 1 |
| Gi5_8590557_x5.....  | .....cUgucauaguacaguggcuagua.....   | 1 |
| Gi2_10621745_x5..... | .....gguucgauucAcggugac.....        | 1 |
| Gi5_8577742_x5.....  | .....gguucgauucccgugaAcgcg.....     | 1 |
| Gi1_3998455_x5.....  | .....ugacugucacucacgugaAccg.....    | 1 |
| G1a_5753572_x5.....  | .....gguucgauucccgugGc.....         | 1 |
| Gi2_10645340_x5..... | .....guucgauucccCgugaccgc.....      | 1 |
| Gi3_27603722_x5..... | .....ugacugucacCacgugaccg.....      | 1 |
| Gi5_8596117_x5.....  | .....uucgauucccgugaUcgcg.....       | 1 |
| Gi1_4015670_x5.....  | .....gUuucgauucccgugaccgc.....      | 1 |
| G1a_5740792_x5.....  | .....gcggucauaguacaguggcCagu.....   | 1 |
| G1a_5764617_x5.....  | .....gguucAauucccgugacc.....        | 1 |
| Gi3_27558322_x5..... | .....cgauuccUggugaccgcggcuuu.....   | 1 |
| Gi4_534048_x5.....   | .....gcggucauaguacaguggcuaguC.....  | 1 |
| Gi1_4007570_x5.....  | .....ugacugucacucacgCgaccg.....     | 1 |
| Gi3_27613687_x5..... | .....Ccgauucccgugaccgc.....         | 1 |
| Gi2_10614680_x5..... | .....cacucGcgugacccggu.....         | 1 |
| Gi3_27648822_x5..... | .....acucacgugacccgguC.....         | 1 |
| Gi3_27571532_x5..... | .....gacugucacucacgAgaccg.....      | 1 |
| Gi5_8569317_x5.....  | .....cGuaguacaguggcuagu.....        | 1 |
| Gi3_27583707_x5..... | .....gguucgauucccgguCacc.....       | 1 |
| Gi3_27560957_x5..... | .....ucgauucccgugaccgcUc.....       | 1 |
| Gi1_4014610_x5.....  | .....Cgacugucacucacgugaccg.....     | 1 |
| Gi5_8597092_x5.....  | .....gAucgauucccgugaccgcg.....      | 1 |
| Gi5_8573232_x5.....  | .....gacCgucacucacgugaccg.....      | 1 |
| Gi3_27611982_x5..... | .....gacNguacacucacgugaccg.....     | 1 |
| Gi3_27552147_x5..... | .....acucacgugacccgguCu.....        | 1 |
| Gi3_27550122_x5..... | .....Gacucacgugacccgguu.....        | 1 |
| Gi2_10605605_x5..... | .....uGcgauucccgugaccgcg.....       | 1 |
| Gi3_27618077_x5..... | .....aGucacgugacccgguu.....         | 1 |
| Gi5_8577517_x5.....  | .....gcAgucauaguacaguggcuagua.....  | 1 |
| Gi2_10611540_x5..... | .....gcggucauaguacaguggcAa.....     | 1 |
| Gi3_27648097_x5..... | .....ggguucgCuucccgugaccgc.....     | 1 |
| Gi3_27554212_x5..... | .....ucUcgugacccgguucgauuc.....     | 1 |
| Gi3_27597377_x5..... | .....guuNgauucccgugaccgc.....       | 1 |
| Gi3_27605612_x5..... | .....gGucgauucccgugaccgcggcuuu..... | 1 |
| G1a_5739632_x5.....  | .....Cguucgauucccgugacc.....        | 1 |

|                      |                                     |   |
|----------------------|-------------------------------------|---|
| Gi3_27578562_x5..... | .....ggguucAauucccgugaccgc.....     | 1 |
| Gi1_4015620_x5.....  | .....ugacugucacucacgugaccggU.....   | 1 |
| Gi5_8596752_x5.....  | .....Gucgauucccgugaccg.....         | 1 |
| Gi5_8569222_x5.....  | .....gguucgUuucccgugacc.....        | 1 |
| Gi3_27561532_x5..... | .....gCGgucauaguacaguggcuaguau..... | 0 |
| Gi1_3994035_x5.....  | .....Uucauaguacaguggcuaguau.....    | 1 |
| Gi5_8586932_x5.....  | .....gucauaguNcaguggcuagu.....      | 1 |
| Gi5_8583182_x5.....  | .....gcAgucauaguacaguggc.....       | 1 |
| Gi3_27599297_x5..... | .....uucgauucccgugaccgA.....        | 1 |
| Gi1_4000620_x5.....  | .....auucccgugaccgCcu.....          | 1 |
| Gi5_8584887_x5.....  | .....gacugucacucaUgugaccg.....      | 1 |
| Gi5_8588417_x5.....  | .....gCGgucauaAuacaguggcuagu.....   | 1 |
| Gi5_8589047_x5.....  | .....cgauucccgugaccgC.....          | 1 |
| Gi1_3994040_x5.....  | .....gCGgucauagCacaguggcua.....     | 1 |
| Gi2_10632945_x5..... | .....gguucgauucccgugaccgC.....      | 1 |
| Gi3_27642027_x5..... | .....caUucacgugaccgggu.....         | 1 |
| Gi3_27639762_x5..... | .....ucgauucccgugaccgA.....         | 1 |
| Gi5_8574167_x5.....  | .....ggAucgauucccgugaccgC.....      | 1 |
| Gi2_10609350_x5..... | .....caUucacgugaccggguucga.....     | 1 |
| Gi1_3996430_x5.....  | .....cUcucacgugaccgggu.....         | 1 |
| Gi1_4016120_x5.....  | .....gGggucauaguacaguggc.....       | 1 |
| Gi1a_5752692_x5..... | .....AguucgauucccgugaccgC.....      | 1 |
| Gi3_27590697_x5..... | .....gacugucacucacgugaUccgg.....    | 1 |
| Gi5_8570277_x5.....  | .....ugacugucacucacguAaccgg.....    | 1 |
| Gi2_10638215_x5..... | .....ggCucgauucccgugaccgC.....      | 1 |
| Gi5_8600402_x5.....  | .....uucgauucccgugaccgC.....        | 1 |
| Gi4_537978_x5.....   | .....cGcaccgugaccggguucgauuc.....   | 1 |
| Gi1_4011160_x5.....  | .....Acggucauaguacaguggc.....       | 1 |
| Gi3_27613277_x5..... | .....ugacugCcacucacgugaccg.....     | 1 |
| Gi5_8580987_x5.....  | .....gguuGgauucccgugaccgC.....      | 1 |
| Gi1_4009710_x5.....  | .....gacuUucacucacgugaccg.....      | 1 |
| Gi5_8601987_x5.....  | .....gacugucacucacgugaccAgg.....    | 1 |
| Gi3_27613712_x5..... | .....ucgauucccgguAaccgc.....        | 1 |
| Gi3_27655587_x5..... | .....gCGgucauaguacagAggc.....       | 1 |
| Gi3_27643567_x5..... | .....Agacugucacucacgugaccgg.....    | 1 |
| Gi5_8583522_x5.....  | .....gCGgucauaguacagugAcua.....     | 1 |
| Gi5_8564987_x5.....  | .....ugacugucacAcacgugaccgg.....    | 1 |
| Gi1a_5735912_x5..... | .....gguucgauNcccgugaccgC.....      | 1 |
| Gi2_10608900_x5..... | .....gguucgauucccgGgaccg.....       | 1 |
| Gi1_3994860_x5.....  | .....acCgucacucacgugaccgg.....      | 1 |
| Gi1_4003195_x5.....  | .....gacugucacucacgugaAccg.....     | 1 |
| Gi2_10595660_x5..... | .....guGcgauucccgugaccgC.....       | 1 |
| Gi3_27600312_x5..... | .....uucgauucccgugaccgC.....        | 1 |
| Gi3_27625537_x5..... | .....guucgauucGcgugaccgC.....       | 1 |
| Gi1a_5735682_x5..... | .....gGggucauaguacaguggcuagua.....  | 1 |
| Gi1a_5739802_x5..... | .....gCGgucauGguacaguggcuagu.....   | 1 |
| Gi1a_5736012_x5..... | .....ggCucgauucccgugacc.....        | 1 |

|                 |                            |   |
|-----------------|----------------------------|---|
| Gi1_4010795_x5  | .gacugucacucacgugaUccgg    | 1 |
| Gi2_10608145_x5 | .guucgauucccgugacAgc       | 1 |
| Gi3_27603492_x5 | .gugacccggguucgGuucc       | 1 |
| Gi2_10639840_x5 | .cUggguucgauucccgugaccgc   | 1 |
| Gi5_8596247_x5  | .gcggucgauuacaguggcCaguau  | 1 |
| Gi1a_5751832_x5 | .ggGucgauucccgugacc        | 1 |
| Gi3_27576022_x5 | .acgugacccggguucgCuucc     | 1 |
| Gi3_27633792_x5 | .gacugucaAucacgugaccgg     | 1 |
| Gi2_10595745_x5 | .gggGucgauucccgugaccgc     | 1 |
| Gi1_4000655_x5  | .gacugucacucacgugUcccg     | 1 |
| Gi5_8588437_x5  | .ugacugucacucacgugaUccgg   | 1 |
| Gi5_8592282_x5  | .gacugucacucacgugaccgc     | 1 |
| Gi3_27580542_x5 | .gGgacugucacucacgugacc     | 1 |
| Gi5_8572492_x5  | .Gcacucacgugaccggguucgauuc | 1 |
| Gi3_27611882_x5 | .cacucacgCgaccggguucgauu   | 1 |
| Gi5_8576347_x5  | .ugacugucacucacgugUcccg    | 1 |
| Gi1a_5740747_x5 | .guucgauucccgugGccgc       | 1 |
| Gi3_27620542_x5 | .gcgguUauaguacagugg        | 1 |
| Gi3_27559187_x5 | .cacucacgugGccccggu        | 1 |
| Gi3_27635222_x5 | .ucgauuAccggugaccgc        | 1 |
| Gi1a_5764167_x5 | .Auucgauucccgugacc         | 1 |
| Gi5_8580547_x5  | .ggAucgauucccgugaccgc      | 1 |
| Gi5_8576877_x5  | .uucgauucccgugaccgcg       | 0 |
| Gi1_4005855_x5  | .aUugucacucacgugaccgg      | 1 |
| Gi3_27622582_x5 | .ucUcucacgugaccggguucga    | 1 |
| Gi3_27569187_x5 | .ggguucgauucccgugaUcgcg    | 1 |
| Gi2_10626355_x5 | .Ggauucccgugaccgcggcuu     | 1 |
| Gi3_27640322_x5 | .ggguucgauuccAggugaccgcg   | 1 |
| Gi3_27656657_x5 | .guucgaAuucccgugaccgc      | 1 |
| Gi1_4003560_x5  | .Gcacucacgugaccggguuc      | 1 |
| Gi2_10649520_x5 | .cgugaccggguucgauucc       | 0 |
| Gi5_8595232_x5  | .guucgauucccgugaccC        | 1 |
| Gi2_10614615_x5 | .Agguucgauucccgugacc       | 1 |
| Gi5_8584802_x5  | .gacugucacAcacgugaccg      | 1 |
| Gi5_8600692_x5  | .uucgauucccgugaccgcgCcu    | 1 |
| Gi5_8587982_x5  | .gcggUauaguacagugg         | 1 |
| Gi5_8576177_x5  | .gcggGcauaguacaguggcuagua  | 1 |
| Gi2_10596515_x5 | .ggguucgauucccgugaU        | 1 |
| Gi2_10598060_x5 | .gaUugucacucacgugaccgg     | 1 |
| Gi3_27568912_x5 | .gcggucaAaguacaguggc       | 1 |
| Gi3_27549932_x5 | .guucgauuccCgugaccg        | 1 |
| Gi5_8598072_x5  | .guucgauucccgugacAg        | 1 |
| Gi3_27581977_x5 | .ugacugucaUucacgugaccgg    | 1 |
| Gi1_4023928_x4  | .gGucgauucccgugaccg        | 1 |
| Gi3_27741189_x4 | .acugucacNcacgugaccgggu    | 1 |
| Gi3_27691137_x4 | .ggguucgauuccAggugaccgc    | 1 |
| Gi3_27661345_x4 | .cGcacgugaccggguucgauu     | 1 |

|                 |                              |   |
|-----------------|------------------------------|---|
| Gi1_4030652_x4  | .....acugucacucacgugacAccg   | 1 |
| Gi3_27768665_x4 | .....gcggucauaguacaAuggc     | 1 |
| Gi3_27781125_x4 | .....uUacugucacucacgugaccc   | 1 |
| Gi1_4028804_x4  | .....acAgucacucacgugacccgg   | 1 |
| Gi1_4030176_x4  | .....ucauaguaNaguggcuagua    | 1 |
| Gi3_27792489_x4 | .....gacugucacucaUgugaccgg   | 1 |
| Gi1_4035816_x4  | .....gcggucauGguacaguggc     | 1 |
| Gi2_10667271_x4 | .....cgauuuccggugaccgcC      | 1 |
| Gi5_8607203_x4  | .....guucUauuuccggugaccgg    | 1 |
| Gi3_27751725_x4 | .....uucgauuuccgguaAccgc     | 1 |
| G1a_5796898_x4  | .....gguucgauuccUggugacc     | 1 |
| Gi3_27673277_x4 | .....gguucgaGuuccggugacc     | 1 |
| Gi3_27699957_x4 | .....guucgaAuccggugacc       | 1 |
| Gi3_27717225_x4 | .....gacugCcacucacgugacc     | 1 |
| Gi3_27690173_x4 | .....ucgauuuccggugaccgA      | 1 |
| Gi5_8650187_x4  | .....Gauaguacaguggcuaguau    | 1 |
| Gi3_27684985_x4 | .....gacuguAacucacgugaccgg   | 1 |
| Gi5_8632511_x4  | .....gcgNucauaguacaguggcua   | 1 |
| Gi5_8622567_x4  | .....gcggucauaguacaguggcuaA  | 1 |
| G1a_5805598_x4  | .....gcggucauaguGcaguggcuagu | 1 |
| Gi2_10720991_x4 | .....guucgauuuccggugaccgg    | 0 |
| Gi3_27710401_x4 | .....ugacugucacuUacgugaccgg  | 1 |
| Gi5_8635471_x4  | .....gcggucauGguacagugg      | 1 |
| Gi5_8602231_x4  | .....gacugucacucacgugaccA    | 1 |
| Gi1_4045680_x4  | .....ugacugucacucacgugacAccg | 1 |
| G1a_5791418_x4  | .....Ccggucauaguacaguggcua   | 1 |
| Gi5_8607799_x4  | .....gguucgauuuccgguaAccgcg  | 1 |
| Gi3_27678461_x4 | .....gugacugCcacucacgugaccgg | 1 |
| Gi5_8647879_x4  | .....gacugucacucacgugacUcg   | 1 |
| Gi3_27672281_x4 | .....ugaUugucacucacgugaccgg  | 1 |
| Gi3_27695129_x4 | .....gGgacugucacucacgug      | 1 |
| Gi3_27782245_x4 | .....gUguucgauuuccgguga      | 1 |
| Gi3_27727261_x4 | .....ucgauuuccggugaUcg       | 1 |
| Gi2_10680075_x4 | .....gcggucauaguacaguggU     | 1 |
| Gi3_27689021_x4 | .....guuAgauuuccggugaccg     | 1 |
| Gi5_8610771_x4  | .....gacugAcacucacgugaccgg   | 1 |
| Gi5_8608091_x4  | .....guucgauuuccggugUcc      | 1 |
| Gi5_8613919_x4  | .....gguucgauucGcgugacc      | 1 |
| Gi5_8650483_x4  | .....Gacucacgugaccggguuc     | 1 |
| Gi3_27690781_x4 | .....gguucgauuuccggugacAccg  | 1 |
| Gi3_27791885_x4 | .....Accgauuuccggugaccgc     | 1 |
| Gi5_8627011_x4  | .....gguucgauuuccggugaU      | 1 |
| Gi1_4029228_x4  | .....ugacugucacucacgugaccGgg | 1 |
| Gi5_8619675_x4  | .....gaccgggNucgauucc        | 1 |
| Gi5_8613799_x4  | .....gguucgauuuccggugacAccg  | 1 |
| Gi5_8643311_x4  | .....guucgauuuccUgugacc      | 1 |
| Gi5_8624759_x4  | .....gguucgauucUcgugaccgc    | 1 |

|                 |                                             |   |
|-----------------|---------------------------------------------|---|
| Gi5_8648535_x4  | .....gcgguc <u>auaguacaguggc</u> C.....     | 1 |
| Gi1_4025416_x4  | .....cgugacugucacucacgugacc.....            | 0 |
| Gi5_8628319_x4  | .....cUgacccggguucg <u>auuccggu</u> .....   | 1 |
| Gi5_8618235_x4  | .....gcgguc <u>auaguacGguggcuagu</u> .....  | 1 |
| G1a_5771202_x4  | .....guucgUuucccgugacc.....                 | 1 |
| Gi3_27665217_x4 | .....ugacuAucacucacgugaccgg.....            | 1 |
| Gi3_27778089_x4 | .....guucg <u>auuNccggugaccg</u> ggc.....   | 1 |
| Gi3_27689157_x4 | .....cgauucccgugacUgcg.....                 | 1 |
| Gi5_8603975_x4  | .....uGgauucccgugaccgc.....                 | 1 |
| Gi1_4039476_x4  | .....gacugucacucacgugaccggU.....            | 1 |
| Gi3_27690509_x4 | .....ggUuucg <u>auucccgugaccg</u> .....     | 1 |
| Gi3_27669473_x4 | .....gGgaccggguucg <u>auuc</u> .....        | 1 |
| Gi2_10719727_x4 | .....gggCucg <u>auucccgugacc</u> .....      | 1 |
| G1a_5779402_x4  | .....Ugguucg <u>auucccgugacc</u> .....      | 1 |
| Gi3_27667617_x4 | .....cugucGcucacgugaccggg.....              | 1 |
| Gi2_10719563_x4 | .....gcgguc <u>auaguacGgugg</u> .....       | 1 |
| Gi3_27664597_x4 | .....gacugucacucacgugaccGgg.....            | 1 |
| Gi3_27722217_x4 | .....ucg <u>auucAcggugaccg</u> cg.....      | 1 |
| Gi1_4018960_x4  | .....gcggucG <u>uaguacagugg</u> .....       | 1 |
| Gi5_8633943_x4  | .....gcAgu <u>cauaguacaguggcuag</u> .....   | 1 |
| Gi5_8650107_x4  | .....gcgguc <u>auaguacaguggcuagu</u> G..... | 1 |
| G1a_5787670_x4  | .....gguucA <u>auucccgugaccg</u> .....      | 1 |
| Gi5_8637555_x4  | .....gcgguc <u>auaguacaguA</u> gcuagu.....  | 1 |
| Gi2_10688507_x4 | .....gcgguc <u>auaguC</u> caguggc.....      | 1 |
| Gi2_10713175_x4 | .....guucg <u>auuccgguCacc</u> .....        | 1 |
| Gi3_27677789_x4 | .....gacugucacucacgAgaccgg.....             | 1 |
| Gi4_543230_x4   | .....gguucg <u>auNcccgugacc</u> .....       | 1 |
| Gi5_8626139_x4  | .....gguucg <u>auucccAgugaccg</u> c.....    | 1 |
| G1a_5791110_x4  | .....gguucg <u>auUccggugacc</u> .....       | 1 |
| Gi3_27726977_x4 | .....cacucacgugaccggg <u>uucCa</u> .....    | 1 |
| G1a_5785414_x4  | .....gcgguc <u>auaguacaguA</u> gcuagu.....  | 1 |
| Gi2_10701019_x4 | .....guucgUuucccgugacc.....                 | 1 |
| G1a_5806026_x4  | .....gguucg <u>auucccgugaccg</u> Ccu.....   | 1 |
| Gi1_4038184_x4  | .....gcgguc <u>auUguacaguggcu</u> a.....    | 1 |
| Gi5_8638555_x4  | .....gcgguc <u>auaguGcaguggcu</u> agua..... | 1 |
| G1a_5783402_x4  | .....guucg <u>auucccgugaccg</u> cgUc.....   | 1 |
| G1a_5798862_x4  | .....cUgacccggguucg <u>auuccggu</u> .....   | 1 |
| Gi5_8646959_x4  | .....cGgucacucacgugaccgg.....               | 1 |
| Gi5_8619647_x4  | .....uucg <u>auCcccgugaccg</u> c.....       | 1 |
| Gi1_4043832_x4  | .....uucg <u>auucccgugaccg</u> cgC.....     | 1 |
| Gi1_4027708_x4  | .....Ccggu <u>cauaguacaguggcu</u> agua..... | 1 |
| Gi2_10698303_x4 | .....guucgCuucccgugaccg.....                | 1 |
| Gi3_27697677_x4 | .....cugucacucacgugaccgggG.....             | 1 |
| Gi2_10698675_x4 | .....cacucacgugaccAggu.....                 | 1 |
| Gi3_27711413_x4 | .....acAgu <u>cacucacgugaccg</u> .....      | 1 |
| Gi3_27711437_x4 | .....Gg <u>auucccgugaccg</u> cg.....        | 1 |
| G1a_5781858_x4  | .....Aguucg <u>auucccgugaccg</u> .....      | 1 |

|                 |                                     |   |
|-----------------|-------------------------------------|---|
| Gi3_27680913_x4 | . . . . .gacugucacucacgugaAc        | 1 |
| Gi3_27698201_x4 | . . . . .ugacugucacucacAugaccgg     | 1 |
| Gi1_4035440_x4  | . . . . .Agacugucacucacgugaccgg     | 1 |
| Gi5_8620611_x4  | . . . . .gcgguUauaguacaguggcuaguau  | 1 |
| Gi1_4040220_x4  | . . . . .gcggucauaguGcaguggcuagu    | 1 |
| Gi3_27740033_x4 | . . . . .ugacugucacucacgugaccCA     | 1 |
| Gi2_10716471_x4 | . . . . .gguucgauucccgugaccgA       | 1 |
| Gi2_10659995_x4 | . . . . .gguucgauucccgugCccg        | 1 |
| Gi3_27682805_x4 | . . . . .uucgauucAccggugaccgc       | 1 |
| Gi5_8617523_x4  | . . . . .gcggucauaguacaguggUuag     | 1 |
| Gi5_8648475_x4  | . . . . .gcggucauaguacaguAgcuag     | 1 |
| Gi5_8647055_x4  | . . . . .guucgauAcccgugaccgcg       | 1 |
| Gi3_27668949_x4 | . . . . .ggguUgauucccgugaccgcg      | 1 |
| Gi3_27783625_x4 | . . . . .gguUGgauucccgugaccg        | 1 |
| Gi1_4033568_x4  | . . . . .gcggucauaguacCguggcuagua   | 1 |
| Gi3_27693521_x4 | . . . . .guucgauucccgugacGgc        | 1 |
| Gi5_8623091_x4  | . . . . .ugacugucacucacgugaAccgg    | 1 |
| Gi5_8610219_x4  | . . . . .guucgaAuuccggugacc         | 1 |
| Gi3_27787669_x4 | . . . . .gacugucacucacgugaUc        | 1 |
| Gi2_10696003_x4 | . . . . .gguucgauuccUgugaccg        | 1 |
| Gi3_27784181_x4 | . . . . .gacugucacucacgCgacc        | 1 |
| Gi2_10662187_x4 | . . . . .Ccgauucccgugaccgc          | 1 |
| Gi3_27739425_x4 | . . . . .gguucgaAuucccgugaccg       | 1 |
| Gi3_27676241_x4 | . . . . .gUguucgauucccgugac         | 1 |
| Gi3_27717937_x4 | . . . . .gUcugucacucacgugacc        | 1 |
| Gi2_10658743_x4 | . . . . .Gcacucacgugaccggguucgauucc | 1 |
| Gi2_10663911_x4 | . . . . .Gcucacgugaccggguucga       | 1 |
| Gi2_10723235_x4 | . . . . .gguucgaAuucccgugacc        | 1 |
| Gi2_10675843_x4 | . . . . .guucgauuAccggugacc         | 1 |
| Gi1_4028288_x4  | . . . . .gacugucacuUacgugaccgg      | 1 |
| Gi5_8624167_x4  | . . . . .gguGcgauucccgugacc         | 1 |
| Gi3_27734589_x4 | . . . . .guucCauucccgugaccgcg       | 1 |
| Gi3_27689777_x4 | . . . . .ucgauucccgguUaccgc         | 1 |
| Gi1_4031156_x4  | . . . . .gacugucacucacgCgaccgg      | 1 |
| Gi3_27759161_x4 | . . . . .gacugucacucaGgugaccgg      | 1 |
| Gi1_4030172_x4  | . . . . .gcggucauaguacaguggU        | 1 |
| Gi2_10709387_x4 | . . . . .gguucgauucccgugaccgUg      | 1 |
| Gi5_8634119_x4  | . . . . .gguucCauucccgugaccgcg      | 1 |
| Gi3_27754329_x4 | . . . . .Acacgugaccggguucgauuc      | 1 |
| Gi3_27718713_x4 | . . . . .ugacugucaAucacgugaccgg     | 1 |
| Gi3_27763529_x4 | . . . . .gugacugucacucacgugaAccgg   | 1 |
| Gl1_5778686_x4  | . . . . .gguucgauucccgugacU         | 1 |
| Gi2_10682323_x4 | . . . . .gguucgauuccAggugac         | 1 |
| Gi3_27686169_x4 | . . . . .cGcggguucgauucccgugac      | 1 |
| Gi5_8626623_x4  | . . . . .guucgauuAccggugaccg        | 1 |
| Gi3_27742817_x4 | . . . . .Agacugucacucacgugaccgg     | 1 |
| Gl1_5773114_x4  | . . . . .gUggucauaguacaguggcuagu    | 1 |

|                 |                           |   |
|-----------------|---------------------------|---|
| Gi5_8623727_x4  | uucgauucccgugacUgcg       | 1 |
| Gi3_27731517_x4 | cacucacgugacUcggu         | 1 |
| Gi5_8604807_x4  | gcggucauaguacaguggcuagCau | 1 |
| Gi3_27688997_x4 | cacCcacgugaccgggu         | 1 |
| Gi3_27689577_x4 | gguucgauucccgugaccCcg     | 1 |
| Gi3_27727293_x4 | gguucgauucccCgugaccgc     | 1 |
| Gi5_8645131_x4  | gcggucauaguacUguggcuagu   | 1 |
| Gi2_10661359_x4 | guucgauucccgUugaccgc      | 1 |
| Gi3_27660245_x4 | uucgauucccgGgaccgc        | 1 |
| Gi5_8626315_x4  | Ccggucauaguacagugg        | 1 |
| Gi1_4043032_x4  | gacugucacucacgugacAcg     | 1 |
| Gi3_27706713_x4 | guucCauucccgugacc         | 1 |
| Gi3_27764793_x4 | ugacugucacucacgugacUcg    | 1 |
| Gi3_27746053_x4 | uucgauuccUggugaccgcg      | 1 |
| Gi2_10668735_x4 | gggCucgauucccgugaccgcg    | 1 |
| Gi5_8648939_x4  | gcggucauaguacaguAgcuagua  | 1 |
| Gi2_10697087_x4 | gcAgucauaguacagugg        | 1 |
| Gi2_10708767_x4 | gguucgauucccgugaccgc      | 1 |
| Gi5_8626183_x4  | gguucgauAcccgugaccgcg     | 1 |
| Gi3_27750665_x4 | acugucacucGcgugaccgc      | 1 |
| Gi1_4030700_x4  | gGggucauaguacaguggcu      | 1 |
| Gi5_8610139_x4  | guucgauucccgugaccCc       | 1 |
| Gi2_10703995_x4 | gauucccgugaccgcgU         | 1 |
| Gi3_27768437_x4 | gaccggguucgauCccc         | 1 |
| Gi5_8618611_x4  | uucgauuccNcggugaccgc      | 1 |
| Gi3_27710621_x4 | ggguucgauucccgugacAc      | 1 |
| Gi2_10697327_x4 | guucgauucccgCugaccgc      | 1 |
| Gi2_10709131_x4 | gguucgauucccgguAac        | 1 |
| Gi3_27710169_x4 | cacucacgugCcccggguucga    | 1 |
| Gi3_27753421_x4 | ugacugAcacucacgugaccgcg   | 1 |
| Gi2_10658127_x4 | gguucgauuccAggugaccgc     | 1 |
| Gi4_544014_x4   | Acggucauaguacaguggcuagua  | 1 |
| Gi5_8632911_x4  | Gggucauaguacaguggcuagu    | 1 |
| Gi3_27775749_x4 | gguucgauucccgAgaccgcg     | 1 |
| Gi2_10718603_x4 | gguuAgauucccgugaccgc      | 1 |
| Gi5_8629371_x4  | guucgauucccgugCccgc       | 1 |
| Gi2_10668547_x4 | gguucgauucccgugaGgc       | 1 |
| Gi3_27697657_x4 | gguucUauucccgugacc        | 1 |
| Gi5_8604271_x4  | ugacugucacucacgugaccgc    | 1 |
| Gi5_8613767_x4  | caCaguacaguggcuagu        | 1 |
| Gi5_8612751_x4  | guucgauuccUgugaccgc       | 1 |
| Gi3_27687697_x4 | Gucacgugaccggguucgauucc   | 1 |
| Gi2_10677059_x4 | gAucgauucccgugacc         | 1 |
| Gi5_8618431_x4  | guucgauuccAggugaccgc      | 1 |
| Gi5_8624967_x4  | gguAcgauucccgugaccgc      | 1 |
| Gi3_27667529_x4 | gacugucacucCcgugacc       | 1 |
| Gl1a_5805906_x4 | guucUauucccgugacc         | 1 |

|                 |                                   |   |
|-----------------|-----------------------------------|---|
| Gi5_8623383_x4  | . . . . .gauucccgugaccgcggcA      | 1 |
| Gi3_27686497_x4 | . . . . .cacucacgugaccggguucAa    | 1 |
| Gi3_27671617_x4 | . . . . .acgugaccNggguucgauucc    | 1 |
| Gl1a_5799110_x4 | . . . . .ggCucgauucccgugac        | 1 |
| Gi5_8624315_x4  | . . . . .guucgauucccgugaUcgcg     | 1 |
| Gi3_27678853_x4 | . . . . .gcggucauaguUcaguggc      | 1 |
| Gi1_4038280_x4  | . . . . .gcggucauaguacaguggcAagua | 1 |
| Gi3_27696753_x4 | . . . . .gaAugucacucacgugaccgg    | 1 |
| Gi4_544162_x4   | . . . . .gcggucauaguacaguggcuagC  | 1 |
| Gl1a_5791974_x4 | . . . . .gCuucgauucccgugacc       | 1 |
| Gl1a_5783358_x4 | . . . . .Ucggucauaguacaguggcu     | 1 |
| Gi1_4042604_x4  | . . . . .gGucgauucccgugaccgc      | 1 |
| Gi5_8628447_x4  | . . . . .Gucacgugaccggguuc        | 1 |
| Gi3_27660165_x4 | . . . . .ugacAgucacucacgugaccgg   | 1 |
| Gi1_4032520_x4  | . . . . .Uuucgauucccgugaccg       | 1 |
| Gi3_27675033_x4 | . . . . .cacucacgugacUcggguuc     | 1 |
| Gi5_8650543_x4  | . . . . .gcggucauaguacaAuggcuagu  | 1 |
| Gi5_8623095_x4  | . . . . .Gggucauaguacaguggcua     | 1 |
| Gi5_8620359_x4  | . . . . .uucgauucNcggugaccgcg     | 1 |
| Gi2_10685363_x4 | . . . . .guucgauuccUgugaccgcg     | 1 |
| Gi5_8627363_x4  | . . . . .guucgauucccgugaccUc      | 1 |
| Gi2_10672195_x4 | . . . . .Uacucacgugaccggguuc      | 1 |
| Gi1_4030476_x4  | . . . . .ucgauucccgugaccgcgC      | 1 |
| Gi2_10660495_x4 | . . . . .gugacugCcacucacgugaccgg  | 1 |
| Gl1a_5774070_x4 | . . . . .Cuucgauucccgugaccgc      | 1 |
| Gi2_10661583_x4 | . . . . .guucgauuccUgugaccg       | 1 |
| Gi5_8602283_x4  | . . . . .gacuAucacucacgugaccgg    | 1 |
| Gi3_27695141_x4 | . . . . .acgugaccgggCucgauucc     | 1 |
| Gi3_27731113_x4 | . . . . .gguucgauucccgCugac       | 1 |
| Gi2_10713423_x4 | . . . . .guucgauucccgugaccC       | 1 |
| Gi2_10715435_x4 | . . . . .gcggucauaguacUguggc      | 1 |
| Gi3_27753765_x4 | . . . . .gguucgauuccCgugaccgcg    | 1 |
| Gi3_27784993_x4 | . . . . .gguucgauuccCgugac        | 1 |
| Gi2_10718691_x4 | . . . . .gcggucauCguacagugg       | 1 |
| Gi1_4023796_x4  | . . . . .gcggGcauaguacagugg       | 1 |
| Gi1_4025152_x4  | . . . . .gacNgucacucacgugaccgg    | 1 |
| Gi3_27678005_x4 | . . . . .gcggucauCguacaguggc      | 1 |
| Gi3_27677277_x4 | . . . . .Cgacugucacucacgugaccgg   | 1 |
| Gi2_10694219_x4 | . . . . .gacugucacucacgCgaccgg    | 1 |
| Gi2_10681751_x4 | . . . . .cacucacgugaccggguCcg     | 1 |
| Gi5_8640183_x4  | . . . . .gcggUauaguacaguggc       | 1 |
| Gi5_8613843_x4  | . . . . .cGcggguucgauucccgugacc   | 1 |
| Gi3_27659877_x4 | . . . . .ucgauucccgugacUcg        | 1 |
| Gi3_27663221_x4 | . . . . .gacugucacucaAgugaccgg    | 1 |
| Gi1_4025072_x4  | . . . . .Cggucauaguacaguggc       | 1 |
| Gi5_8636823_x4  | . . . . .uUacugucacucacgugaccgg   | 1 |
| Gi3_27716589_x4 | . . . . .ucgauucccgugaUcgcg       | 1 |



Gi5\_8610875\_x4.....gguucgauucccgAugaccgc..... 1  
 Gi5\_8621667\_x4.....gguucgauucccgugaUcg..... 1  
 Gi3\_27714741\_x4.....ggguucgauucAcggugaccgcg..... 1  
 Gi3\_27667009\_x4.....gacugucacucGcgugacc..... 1  
 Gi2\_10671487\_x4.....gguucgauucccgugacUgcg..... 1  
 Gi5\_8604551\_x4.....Gggguucgauucccgugacc..... 1  
 Gi3\_27689881\_x4.....guucgauucccgugacGg..... 1  
 Gi2\_10723511\_x4.....gcggucgauagucagAggc..... 1  
 Gi5\_8615571\_x4.....gcggucgauagucaguggcu..... 1  
 Gi3\_27714081\_x4.....uucAauucccgugaccgc..... 1  
 Gi3\_27787433\_x4.....ucgauucccgugaccAcg..... 1  
 Gi2\_10680223\_x4.....gcggucgauGguacagugg..... 1  
 Gi5\_8632487\_x4.....guucgauuNccggugaccgcggcu..... 1  
 Gi3\_27779677\_x4.....acucacgugGcccgggu..... 1  
 Gi2\_10678351\_x4.....gguucgauucccgugUccgcg..... 1  
 Gi3\_27723533\_x4.....gguucgauuGccggugacc..... 1  
 Gi3\_27748941\_x4.....ugaUugucacucacgugaccgc..... 1  
 Gi5\_8646059\_x4.....guAcgauucccgugaccgcg..... 1  
 Gi3\_27736025\_x4.....cGcgugaccggguucgauucc..... 1  
 Gi3\_27696289\_x4.....Gacgugaccggguucgauucc..... 1  
 Gi1\_4032492\_x4.....gacugucaUucacgugaccgcg..... 1  
 Gi5\_8634539\_x4.....Ccggucauaguacaguggcu..... 1  
 Gi5\_8628047\_x4.....gguucgauucccgugaccgUg..... 1  
 Gi1\_4027056\_x4.....gcggCcauaguacaguggcuagu..... 1  
 Gi5\_8620783\_x4.....gcggucgauagucaguggcuaguG..... 1  
 Gi2\_10707211\_x4.....guucgauucccgugaccCcg..... 1  
 Gi2\_10704859\_x4.....cggguucgauucccgugaccgcgCc..... 1  
 Gi5\_8602803\_x4.....gguucgauucccgCgaccg..... 1  
 Gi2\_10688127\_x4.....gcggucgauGguacaguggc..... 1  
 Gi2\_10684407\_x4.....acCcacgugaccggguucga..... 1  
 Gi2\_10688331\_x4.....cacucacgugGcccggguuc..... 1  
 Gi3\_27707789\_x4.....caUucacgugaccggguucgau..... 1  
 Gi2\_10684431\_x4.....gguNcgauucccgugacc..... 1  
 Gi1\_4029836\_x4.....ugacugucacCcacgugaccgcg..... 1  
 Gi2\_10724315\_x4.....guucgauucAcggugaccgcg..... 1  
 Gi2\_10694875\_x4.....gacugucCucacgugaccgcg..... 1  
 Gi3\_27770093\_x4.....uucgauucccgugaccgcgUc..... 1  
 Gi1a\_5775506\_x4.....Uacugucacucacgugaccgggu..... 1  
 Gi5\_8633527\_x4.....gguucgauucccgugCccgcg..... 1  
 Gi2\_10687311\_x4.....Cggguucgauucccgugaccgcg..... 1  
 Gi5\_8634091\_x4.....ggAucgauucccgugac..... 1  
 Gi3\_27728981\_x4.....acugucacucacgugaccgcgA..... 1  
 Gi5\_8647015\_x4.....gUggucgauagucaguggc..... 1  
 Gi5\_8621563\_x4.....gcggucgauagCacaguggcuaguau..... 1  
 Gi3\_27744953\_x4.....gguGcgauucccgugaccgcg..... 1  
 Gi1\_4021500\_x4.....gcggucGuaguacaguggcuagu..... 1  
 Gi5\_8611087\_x4.....ucgauucccgugaccgcgGcA..... 1

|                 |                            |   |
|-----------------|----------------------------|---|
| Gi5_8636523_x4  | .gcggucGuaguacaguggcuaguau | 1 |
| G1a_5773246_x4  | .guucgauucccgugacUgc       | 1 |
| Gi2_10720675_x4 | .gguucgauucccgugaUcg       | 1 |
| Gi2_10663271_x4 | .Ggauucccgugaccgcg         | 1 |
| Gi2_10665039_x4 | .Uuucgauucccgugaccgcg      | 1 |
| Gi3_27683193_x4 | .ucgauuUccggugaccgcg       | 1 |
| Gi2_10686043_x4 | .gguucgauAcccgugac         | 1 |
| Gi3_27695901_x4 | .ucgauuccAggugaccgc        | 1 |
| Gi3_27673445_x4 | .Ucggucaaguacaguggcuagua   | 1 |
| Gi3_27713341_x4 | .guucgauuccgCugacc         | 1 |
| Gi5_8642039_x4  | .cauaguacNguggcuagu        | 1 |
| Gi3_27768481_x4 | .gacugucaUucacgugaccg      | 1 |
| G1a_5800738_x4  | .gguucgauCcccgugacc        | 1 |
| Gi3_27738893_x4 | .ggguucgauucccgGgaccgcg    | 1 |
| Gi2_10651303_x4 | .gguucgauucccgugaccgAg     | 1 |
| Gi5_8615263_x4  | .gUcugucacucacgugaccg      | 1 |
| Gi3_27738353_x4 | .acucacguNaccggguucgauu    | 1 |
| Gi3_27746189_x4 | .ggguucgUuucccgugac        | 1 |
| Gi5_8617871_x4  | .uucgauucccgugaccgcC       | 1 |
| Gi3_27747473_x4 | .Aacugucacucacgugacc       | 1 |
| Gi2_10678279_x4 | .acucacgCgaccggguuc        | 1 |
| Gi3_27760269_x4 | .uGacgugaccggguucgauucc    | 1 |
| Gi3_27779545_x4 | .gacugucacucGcgugaccggguuc | 1 |
| G1a_5782250_x4  | .cGcucacgugaccgggu         | 1 |
| Gi3_27750201_x4 | .gacugucacucUcgugaccg      | 1 |
| Gi2_10685635_x4 | .gcggucaaguacagAgg         | 1 |
| Gi1_4046280_x4  | .gGcugucacucacgugacc       | 1 |
| Gi2_10697415_x4 | .guucgauuccUgugacc         | 1 |
| Gi3_27780777_x4 | .gUuucgauucccgugaccgcg     | 1 |
| Gi2_10661403_x4 | .ggguucgauuccCgugac        | 1 |
| Gi3_27701069_x4 | .ucacgugaccggguCcgauuc     | 1 |
| Gi2_10720431_x4 | .gguuUgauucccgugaccg       | 1 |
| Gi5_8608479_x4  | .gcggucaaguacaguggcuaAua   | 1 |
| Gi2_10682911_x4 | .gcggCcauaguacagugg        | 1 |
| Gi5_8647799_x4  | .guucgauucAccggugaccg      | 1 |
| Gi1_4019436_x4  | .acugucacucacgugaccAgg     | 1 |
| Gi3_27774077_x4 | .cacAcacgugaccgggu         | 1 |
| Gi3_27720517_x4 | .gacugucGcucacgugacc       | 1 |
| Gi5_8641583_x4  | .cuUacgugaccggguuc         | 1 |
| Gi3_27791765_x4 | .gacuCucacucacgugaccgg     | 1 |
| G1a_5803258_x4  | .gcggucaaguacaguggcuagA    | 1 |
| Gi5_8628627_x4  | .gguucgauuccggUaaccgc      | 1 |
| Gi5_8634395_x4  | .ugacuAucacucacgugaccgg    | 1 |
| Gi2_10667175_x4 | .Ccggucauaguacagugg        | 1 |
| Gi1_4037332_x4  | .gacCgucacucacgugaccg      | 1 |
| Gi3_27747589_x4 | .gguucgauucGcgugacc        | 1 |
| Gi3_27747941_x4 | .guucgauucccgugacGgcg      | 1 |

|                 |                                     |   |
|-----------------|-------------------------------------|---|
| Gi1_5812390_x4  | .....Acggucauaguacaguggcuaguau..... | 1 |
| Gi2_10661859_x4 | .....gcggucGuaguacagugg.....        | 1 |
| Gi2_10696087_x4 | .....guucgauucccgAugaccg.....       | 1 |
| Gi3_27672269_x4 | .....gcggucauagAacaguggc.....       | 1 |
| Gi5_8650559_x4  | .....guucgauAcccggugaccgc.....      | 1 |
| Gi3_27678481_x4 | .....ucacgugaccggguucCuuc.....      | 1 |
| Gi3_27785933_x4 | .....Uccggugaccgcggcuuu.....        | 1 |
| Gi1_4017936_x4  | .....gcggucauaguacaguggcuaguC.....  | 1 |
| Gi1a_5796634_x4 | .....Ccggucauaguacaguggcuagua.....  | 1 |
| Gi5_8611195_x4  | .....gcggUauaguacaguggcuag.....     | 1 |
| Gi5_8637359_x4  | .....gguucgauucccgugaccgcggcuu..... | 0 |
| Gi2_10702027_x4 | .....gguucgauAcccggugaccg.....      | 1 |
| Gi2_10677419_x4 | .....acAcacgugaccggguuc.....        | 1 |
| Gi2_10672651_x4 | .....gguucgauuccUggugaccg.....      | 1 |
| Gi1_4026332_x4  | .....ugacugucUcucacgugaccgg.....    | 1 |
| Gi1_4029088_x4  | .....gcggucauaguacaguAgcua.....     | 1 |
| Gi5_8638403_x4  | .....gguucgauucccgAgaccgc.....      | 1 |
| Gi3_27725309_x4 | .....ugacugucacuUacgugaccgg.....    | 1 |
| Gi3_27794053_x4 | .....ggguucgauucccgguAaccgcg.....   | 1 |
| Gi5_8620207_x4  | .....gguucAauucccgugac.....         | 1 |
| Gi2_10663955_x4 | .....guucgauucccgguCaccgc.....      | 1 |
| Gi5_8609923_x4  | .....ugacugucacucacgugaccUgg.....   | 1 |
| Gi5_8613963_x4  | .....gcggucauaguacagugAcuag.....    | 1 |
| Gi5_8645455_x4  | .....gUguucgauucccgguga.....        | 1 |
| Gi3_27745437_x4 | .....Uacucacgugaccggguuc.....       | 1 |
| Gi2_10671307_x4 | .....cacucacgCgaccgggu.....         | 1 |
| Gi5_8644063_x4  | .....gguucgCuucccgugac.....         | 1 |
| Gi5_8676089_x3  | .....ucgauuccUggugaccgc.....        | 1 |
| Gi3_27902081_x3 | .....Cucgauucccgugaccgcg.....       | 1 |
| Gi3_27849497_x3 | .....cacucacgugaccgggA.....         | 1 |
| Gi3_27858080_x3 | .....gguucgauucccgguUacc.....       | 1 |
| Gi1a_5819209_x3 | .....gcggucauagAacaguggcuagu.....   | 1 |
| Gi1_4056078_x3  | .....ggguucgauucccgguga.....        | 0 |
| Gi2_10750039_x3 | .....gcggucaCaguacagugg.....        | 1 |
| Gi2_10789102_x3 | .....gcggucauaAuacaguggc.....       | 1 |
| Gi1a_5848780_x3 | .....gguucgauucccgugaccgcgA.....    | 1 |
| Gi3_27800990_x3 | .....ggguUgauucccgugacc.....        | 1 |
| Gi1_4085724_x3  | .....gcggucaCaguacaguggcuagua.....  | 1 |
| Gi5_8655104_x3  | .....gcggucauaguacaguggcuCgua.....  | 1 |
| Gi5_8705222_x3  | .....cccggguucgauucccgugGcc.....    | 1 |
| Gi2_10755271_x3 | .....gguAcgauucccgugac.....         | 1 |
| Gi5_8702186_x3  | .....gacugucacucGcgugaccg.....      | 1 |
| Gi5_8676686_x3  | .....guucgauGccggugacc.....         | 1 |
| Gi4_546129_x3   | .....cuUacgugaccggguucgauuc.....    | 1 |
| Gi5_8683538_x3  | .....gguucUauucccgugacc.....        | 1 |
| Gi3_27825464_x3 | .....gaccAgguucgauucc.....          | 1 |
| Gi2_10761907_x3 | .....ggguucgauucccgugGcc.....       | 1 |

|                      |                                      |   |
|----------------------|--------------------------------------|---|
| Gi2_10747255_x3..... | .....ggguucgGuucccgugacc.....        | 1 |
| G1a_5853880_x3.....  | .....guuUgauucccgugaccg.....         | 1 |
| Gi3_27928502_x3..... | .....Uacucacgugacccggguucga.....     | 1 |
| Gi5_8679098_x3.....  | .....gcggucauaguacagAgggcuag.....    | 1 |
| Gi3_27891152_x3..... | .....acgugGcccggguucgauucc.....      | 1 |
| Gi5_8655578_x3.....  | .....gguucgauucccgugaccgcggc.....    | 0 |
| Gi3_27933944_x3..... | .....gcggucauaguaGaguggc.....        | 1 |
| Gi1_4073079_x3.....  | .....gcggucauagCacaguggcuagua.....   | 1 |
| Gi3_27966941_x3..... | .....cacucacgugacccggguucgGuucc..... | 1 |
| Gi3_27966389_x3..... | .....cacucacgugaccGgggu.....         | 1 |
| Gi5_8657591_x3.....  | .....gcggucCuaguacaguggcuagua.....   | 1 |
| Gi5_8692787_x3.....  | .....uucgauucAcggugaccgc.....        | 1 |
| Gi5_8670239_x3.....  | .....gcgguAauaguacaguggcua.....      | 1 |
| Gi5_8655518_x3.....  | .....gacugucacucaGgugaccgg.....      | 1 |
| Gi3_27936521_x3..... | .....ggguucgauucccgGgacc.....        | 1 |
| Gi3_27853574_x3..... | .....acugucacucacgugacccc.....       | 1 |
| Gi5_8710214_x3.....  | .....ugacugucacucUcgugaccgg.....     | 1 |
| Gi5_8674424_x3.....  | .....gcgguAauaguacaguggcuagu.....    | 1 |
| Gi3_27840074_x3..... | .....Acgauucccgugaccgcg.....         | 1 |
| Gi5_8682695_x3.....  | .....gcggucauaguacaguggcuagGa.....   | 1 |
| Gi5_8714537_x3.....  | .....gGcccggguucgauucc.....          | 1 |
| Gi1_4050504_x3.....  | .....gcggucauaguacaguggcuC.....      | 1 |
| Gi3_27843872_x3..... | .....Uggguucgauucccgugacc.....       | 1 |
| Gi3_27914591_x3..... | .....cgauucccgugaccgcgAc.....        | 1 |
| Gi2_10728913_x3..... | .....gguucgauucccgAugaccgcg.....     | 1 |
| Gi2_10821097_x3..... | .....gguucgauucccgugacUg.....        | 1 |
| Gi5_8692628_x3.....  | .....gcggucauaguaGagugg.....         | 1 |
| Gi2_10740562_x3..... | .....gguucgauucccgugacGgcg.....      | 1 |
| Gi3_27935507_x3..... | .....caUucacgugacccggguucgauuc.....  | 1 |
| G1a_5857642_x3.....  | .....gguucgauucUcgugacc.....         | 1 |
| Gi3_27849089_x3..... | .....gacugucaGucacgugaccgg.....      | 1 |
| Gi5_8715200_x3.....  | .....cacucacgugacccAgguuc.....       | 1 |
| Gi2_10785253_x3..... | .....uUgauucccgugaccgcg.....         | 1 |
| Gi5_8690249_x3.....  | .....gguucgauuccAggugaccgcg.....     | 1 |
| Gi3_27900395_x3..... | .....ucacCcacugacccggguucga.....     | 1 |
| Gi1_4070541_x3.....  | .....acugCcacucacgugaccgg.....       | 1 |
| Gi1_4063506_x3.....  | .....ugacugucacucacAugaccgg.....     | 1 |
| Gi1_4059192_x3.....  | .....cugucacucGcgugaccgg.....        | 1 |
| Gi3_27872207_x3..... | .....ggAuucgauucccgugaccgcg.....     | 1 |
| Gi1_4070082_x3.....  | .....gUggucauaguacaguggcuag.....     | 1 |
| Gi3_27930653_x3..... | .....cacNcacgugacccgggu.....         | 1 |
| Gi1_4063503_x3.....  | .....gcggucCuaguacagugg.....         | 1 |
| G1a_5844613_x3.....  | .....guucgauucccgugCccgc.....        | 1 |
| Gi3_27895346_x3..... | .....gcggucauaguacaguggcuag.....     | 0 |
| Gi5_8708492_x3.....  | .....uucccgugaccgcgGcA.....          | 1 |
| Gi2_10753780_x3..... | .....cgauucccgguAaccgcg.....         | 1 |
| Gi5_8663636_x3.....  | .....gcggucCguacaguggcuagua.....     | 1 |

|                      |                                       |   |
|----------------------|---------------------------------------|---|
| Gi3_27948668_x3..... | .....cacucacgugGccccggguucga.....     | 1 |
| Gi3_27942182_x3..... | .....uucgauucccgugaccgcggcA.....      | 1 |
| G1a_5848213_x3.....  | .....Auucgauucccgugaccg.....          | 1 |
| Gi4_551766_x3.....   | .....gacugucacucacgugaccgg.....       | 0 |
| Gi5_8657015_x3.....  | .....gcggucauaguCcaguggc.....         | 1 |
| Gi5_8661404_x3.....  | .....acugucUcucacgugaccgg.....        | 1 |
| Gi5_8700713_x3.....  | .....gguucgauucccgugaccgcgguA.....    | 1 |
| Gi1_4057743_x3.....  | .....ggguucgauucccgugaccgcgCc.....    | 1 |
| Gi2_10808998_x3..... | .....cgauucccgGgaccgcgguu.....        | 1 |
| G1a_5813998_x3.....  | .....Ggacugucacucacgugaccgg.....      | 1 |
| Gi3_27942299_x3..... | .....ugacugucacAcacgugaccgg.....      | 1 |
| Gi2_10813615_x3..... | .....ggguucgaNuucccgugaccgcg.....     | 1 |
| Gi3_27944672_x3..... | .....cUugacugucacucacgugaccggguu..... | 1 |
| Gi3_27835868_x3..... | .....acGgucacucacgugaccgg.....        | 1 |
| Gi1_4063494_x3.....  | .....gcggucauaguacaguAgcuagua.....    | 1 |
| G1a_5851108_x3.....  | .....gcggucCuaguacaguggcuagu.....     | 1 |
| Gi1_4070058_x3.....  | .....ugaNugucacucacgugaccgg.....      | 1 |
| Gi2_10807228_x3..... | .....ggAuucgauucccgugaccgc.....       | 1 |
| Gi3_27850931_x3..... | .....gaccggguucgGuucc.....            | 1 |
| Gi5_8654237_x3.....  | .....gcgguAauaguacaguggcuagua.....    | 1 |
| Gi5_8702444_x3.....  | .....cggucauaNuacaguggcuagu.....      | 1 |
| Gi2_10811677_x3..... | .....gguucgauucccgugacAg.....         | 1 |
| Gi3_27950927_x3..... | .....cacucacgugacUcggguucgauuc.....   | 1 |
| Gi5_8716103_x3.....  | .....gcAgucauaguacagugg.....          | 1 |
| Gi5_8691245_x3.....  | .....guucgauucccgCugaccgc.....        | 1 |
| Gi3_27906755_x3..... | .....Cgguucgauucccgugaccgc.....       | 1 |
| G1a_5838142_x3.....  | .....gGggucauaguacaguggcuA.....       | 1 |
| Gi5_8664305_x3.....  | .....Ucggucauaguacaguggcuaguauc.....  | 1 |
| Gi5_8695949_x3.....  | .....cGcggguucgauucccgugac.....       | 1 |
| Gi3_27859913_x3..... | .....gacCgucacucacgugacc.....         | 1 |
| Gi3_27926738_x3..... | .....Uguucgauucccgugaccgcg.....       | 1 |
| Gi2_10816747_x3..... | .....uGacucacgugacccggu.....          | 1 |
| Gi3_27903803_x3..... | .....gguNcgauucccgugaccgcg.....       | 1 |
| Gi5_8702756_x3.....  | .....Gacgugacccgguucgauuc.....        | 1 |
| Gi2_10799941_x3..... | .....gaccggguucgauucc.....            | 0 |
| G1a_5817562_x3.....  | .....gguucgauucccgugGccgc.....        | 1 |
| G1a_5827933_x3.....  | .....Gcgauucccgugaccgc.....           | 1 |
| Gi2_10775869_x3..... | .....gacugucacucacgugaccgA.....       | 1 |
| Gi3_27971858_x3..... | .....ucgauuccAgugaccgcg.....          | 1 |
| Gi3_27875576_x3..... | .....ggguucgauucccgugaccgcgA.....     | 1 |
| Gi3_27909986_x3..... | .....ucgauuccUgugaccgcg.....          | 1 |
| Gi1_4050909_x3.....  | .....gcggucauaguacaguggUuagua.....    | 1 |
| Gi2_10742731_x3..... | .....gguucgUuucccgugaccgcg.....       | 1 |
| Gi3_27905555_x3..... | .....ggguucgauucccgugGcc.....         | 1 |
| Gi3_27931670_x3..... | .....uucgauucccgAugaccgcg.....        | 1 |
| Gi1_4069587_x3.....  | .....uucgauucccgugaccg.....           | 0 |
| Gi5_8717321_x3.....  | .....guucgaGuucccgugaccgcg.....       | 1 |

|                      |                                 |   |
|----------------------|---------------------------------|---|
| Gi3_27829994_x3..... | .gacuguAacucacgugacccg.....     | 1 |
| Gi3_27964184_x3..... | .Cguucgauuucccgugaccgaggc.....  | 1 |
| Gi2_10784722_x3..... | .guucgauuucccgAgacc.....        | 1 |
| Gi2_10727872_x3..... | .gguGcgauuucccgugaccgc.....     | 1 |
| Gi3_27884453_x3..... | .Gacucacgugacccggguucgauu.....  | 1 |
| Gi3_27807149_x3..... | .gaccgggNucgauuccc.....         | 1 |
| Gi1_4081233_x3.....  | .gGcauaguacaguggcuagu.....      | 1 |
| Gi2_10797859_x3..... | .gguucgauuucccgugUccg.....      | 1 |
| Gi5_8694992_x3.....  | .gcggUauaguacaguggcuagu.....    | 1 |
| Gi3_27952574_x3..... | .ggguucgauuuccAgugaccgc.....    | 1 |
| Gi3_27815867_x3..... | .gguucgauuucccgugacGgcg.....    | 1 |
| Gi3_27861317_x3..... | .ucgaGuucccgugaccgcg.....       | 1 |
| Gi3_27963632_x3..... | .gcggucauaguacaguggcG.....      | 1 |
| Gi1_4048050_x3.....  | .ggucauaguacGguggcuagu.....     | 1 |
| Gi5_8695718_x3.....  | .gcggucauaguacaguggUuagua.....  | 1 |
| Gi3_27933371_x3..... | .cacucacAugacccggguucga.....    | 1 |
| Gi3_27857387_x3..... | .cacucacgugacccggguC.....       | 1 |
| Gi2_10797877_x3..... | .gguucgaGuucccgugacc.....       | 1 |
| Gi1_4055322_x3.....  | .gcggucauaguacGguggcuag.....    | 1 |
| Gi5_8658824_x3.....  | .gguucgauAcccgugac.....         | 1 |
| Gi5_8693312_x3.....  | .gcggucUuaguacaguggcu.....      | 1 |
| Gi2_10784881_x3..... | .gguucgauuucccgAugaccg.....     | 1 |
| Gi5_8711855_x3.....  | .uAcgauuucccgugaccgcg.....      | 1 |
| Gi3_27836339_x3..... | .uucgauuucccgugaccgcgU.....     | 1 |
| Gi2_10760623_x3..... | .gcgAucauaguacaguggc.....       | 1 |
| Gi2_10750858_x3..... | .cgGuucccgugaccgcgcuu.....      | 1 |
| Gi5_8690531_x3.....  | .gcggucauaguacCguggcuaguau..... | 1 |
| Gi5_8657225_x3.....  | .gacugucacucacgugCcccg.....     | 1 |
| Gi3_27947315_x3..... | .uCacugucacucacgugacc.....      | 1 |
| Gl1a_5851048_x3..... | .cacucacgugGcccggu.....         | 1 |
| Gi1_4088211_x3.....  | .ggguucgauuucccgugaccg.....     | 0 |
| Gi3_27963674_x3..... | .guucgauuucccgugGccgcgcuuu..... | 1 |
| Gi5_8673293_x3.....  | .gguucgauuucccgugacG.....       | 1 |
| Gi3_27829250_x3..... | .cgauuucccgugaccgcgU.....       | 1 |
| Gi3_27973013_x3..... | .ggguucgauuucccgugaccgcC.....   | 1 |
| Gi3_27933299_x3..... | .cacucacgugaccUggguucga.....    | 1 |
| Gi1_4082835_x3.....  | .gacugucacucaAgugaccgg.....     | 1 |
| Gi3_27909125_x3..... | .gcggucaAaguacagugg.....        | 1 |
| Gi3_27940220_x3..... | .acgCgaccggguucgauucc.....      | 1 |
| Gi2_10750372_x3..... | .gcggucauaguacaguAgc.....       | 1 |
| Gl1a_5874967_x3..... | .gguucgaCuucccgugac.....        | 1 |
| Gi2_10806958_x3..... | .guucgauuucccgugaccU.....       | 1 |
| Gi3_27907289_x3..... | .gacugucaNucacgugacc.....       | 1 |
| Gi3_27848903_x3..... | .Nuucgauuucccgugaccgc.....      | 1 |
| Gi1_4077624_x3.....  | .gacugucacucacgugaccGgg.....    | 1 |
| Gi2_10800055_x3..... | .guucgauuucccgugUccgc.....      | 1 |
| Gi5_8678111_x3.....  | .gggCucgauuucccgugacc.....      | 1 |

|                      |                                     |   |
|----------------------|-------------------------------------|---|
| Gi5_8651774_x3.....  | guNcgauucccgugaccgc.....            | 1 |
| Gi5_8698733_x3.....  | uucgauucUcggugaccgc.....            | 1 |
| Gi2_10806853_x3..... | Uguucgauucccgugaccgcggc.....        | 1 |
| Gi3_27835412_x3..... | uucgauucccgugacAgc.....             | 1 |
| Gi2_10794553_x3..... | uuUgauucccgugaccgc.....             | 1 |
| Gi5_8687624_x3.....  | gacugucacucacgCgaccg.....           | 1 |
| Gi2_10811044_x3..... | acugucacucacgugaccgc.....           | 0 |
| G1a_5848837_x3.....  | ggucgauuccAgugaccgc.....            | 1 |
| Gi3_27897173_x3..... | ggguucgauucccgugaccgcA.....         | 1 |
| Gi3_27941072_x3..... | uucgauucccgugaccgcgA.....           | 1 |
| G1a_5851312_x3.....  | gucaguaguacCguggcuag.....           | 1 |
| Gi1_4077780_x3.....  | gcggucaguaguacagCggcuag.....        | 1 |
| Gi3_27864053_x3..... | ggguucgauucccgugaccgcgU.....        | 1 |
| Gi2_10806790_x3..... | guuAgauucccgugaccgc.....            | 1 |
| Gi5_8669204_x3.....  | cacgugaccgcggguucgauucccgugacc..... | 0 |
| Gi3_27891443_x3..... | ggAuucgauucccgugacc.....            | 1 |
| Gi5_8658302_x3.....  | gucaguaguacaguggUuag.....           | 1 |
| Gi2_10784767_x3..... | ggucgauucccgAgac.....               | 1 |
| Gi5_8697038_x3.....  | cgugaccgcggguucAauuccggu.....       | 1 |
| Gi3_27806876_x3..... | gugacugucCucacgugaccgc.....         | 1 |
| Gi5_8691173_x3.....  | guucgauucccgAugaccgc.....           | 1 |
| Gi2_10746415_x3..... | guucgauucccgAgaccgc.....            | 1 |
| Gi3_27886877_x3..... | gacugucacucacgugaccG.....           | 1 |
| Gi5_8666006_x3.....  | ugacugucacucacgugacGcg.....         | 1 |
| G1a_5870131_x3.....  | guucgauCcccggugaccgc.....           | 1 |
| Gi5_8671682_x3.....  | gguuGgauucccgugaccgc.....           | 1 |
| Gi3_27829085_x3..... | Aucgauucccgugaccgc.....             | 1 |
| Gi5_8711369_x3.....  | uucgauucccgCgaccgc.....             | 1 |
| Gi3_27817256_x3..... | Uucacucacgugaccgcggguucg.....       | 1 |
| Gi2_10806904_x3..... | Ggugacugucacucacgugacc.....         | 1 |
| Gi5_8672183_x3.....  | ggucgauucccgAgaccgc.....            | 1 |
| Gi3_27957869_x3..... | ggguucgauucccgAugacc.....           | 1 |
| G1a_5864104_x3.....  | gcggucaguaguacaguggcuagGa.....      | 1 |
| G1a_5822191_x3.....  | Cuucgauucccgugacc.....              | 1 |
| Gi2_10810855_x3..... | ucgauCcccggugaccgc.....             | 1 |
| Gi5_8653283_x3.....  | acCgucacucacgugaccgcgggu.....       | 1 |
| Gi2_10807435_x3..... | ggguuUgauucccgugaccgc.....          | 1 |
| Gi4_548655_x3.....   | gGucgauucccgugaccgc.....            | 1 |
| Gi5_8702114_x3.....  | gGgaccgcggguucgauucc.....           | 1 |
| Gi5_8675102_x3.....  | guucgauucccgguAaccgc.....           | 1 |
| Gi3_27843170_x3..... | ucgauuccUggugaccgc.....             | 1 |
| Gi5_8676329_x3.....  | gcggucaguaguacaguggGuaguau.....     | 1 |
| Gi5_8686448_x3.....  | ggucgauucccgugUccgc.....            | 1 |
| G1a_5870335_x3.....  | gcggucaguaguacagugAcuagu.....       | 1 |
| Gi3_27905795_x3..... | Nuucgauucccgugaccgc.....            | 1 |
| Gi3_27947159_x3..... | guucgauucccgugaccUc.....            | 1 |
| Gi5_8680970_x3.....  | guucgauucccgugaGc.....              | 1 |

|                      |                                 |   |
|----------------------|---------------------------------|---|
| Gi3_27936809_x3..... | guucgauucccgguUaccgc.....       | 1 |
| Gi3_27810917_x3..... | ucacgugacccgggCucga.....        | 1 |
| Gi2_10823926_x3..... | uCcgauucccgguagaccgcg.....      | 1 |
| Gl1a_5814490_x3..... | gcggGcauaguacaguggcuagu.....    | 1 |
| Gi5_8669300_x3.....  | guucgauuccAggugaccg.....        | 1 |
| Gi5_8716244_x3.....  | gcggucouGguacagugg.....         | 1 |
| Gi3_27950702_x3..... | uucgauCcccgguagaccgc.....       | 1 |
| Gi5_8663924_x3.....  | acugucacucacgugacccgggC.....    | 1 |
| Gi3_27871220_x3..... | guucgauuccGggugacc.....         | 1 |
| Gi2_10799992_x3..... | cacucacgAgacccgggu.....         | 1 |
| Gi3_27901469_x3..... | Uucacucacgugacccggguucga.....   | 1 |
| Gi5_8680127_x3.....  | ugacugucacucacAugaccgcg.....    | 1 |
| Gi3_27893945_x3..... | ggauccGggugac.....              | 1 |
| Gi5_8706668_x3.....  | gCuucgauucccgguagaccg.....      | 1 |
| Gi5_8688491_x3.....  | guucgauuccUgugaccgc.....        | 1 |
| Gi3_27954092_x3..... | uucgauucccgguagaccgcA.....      | 1 |
| Gi1_4054299_x3.....  | gcggucouaguacGgugg.....         | 1 |
| Gi4_550329_x3.....   | ggguucgauucccgguagaccgcC.....   | 1 |
| Gi2_10725871_x3..... | ggaucccgguagaccC.....           | 1 |
| Gi4_547692_x3.....   | gGgucouaguacaguggcuagua.....    | 1 |
| Gi2_10782064_x3..... | Cgguucgauucccgguagacc.....      | 1 |
| Gi2_10796359_x3..... | cacucacgugacccggAu.....         | 1 |
| Gi5_8710379_x3.....  | cGggguucgauucccgguagacc.....    | 1 |
| Gi3_27912497_x3..... | cacucacgugacccgggCucgau.....    | 1 |
| Gl1a_5819575_x3..... | Cguucgauucccgguagacc.....       | 1 |
| Gi5_8713016_x3.....  | ggguucgauCcccgguagaccg.....     | 1 |
| Gi3_27814232_x3..... | ugacugucacucCcgugaccgcg.....    | 1 |
| Gi5_8689094_x3.....  | cggucouaguacaguggcuG.....       | 1 |
| Gi5_8703578_x3.....  | gauucccgguagaccgcC.....         | 1 |
| Gi3_27956993_x3..... | gAguucgauucccgguagaccg.....     | 1 |
| Gi3_27864290_x3..... | ggauccGucccgguagaccgc.....      | 1 |
| Gi3_27891563_x3..... | gacugucacuAacgugacccgg.....     | 1 |
| Gi2_10752373_x3..... | cacucacgugacccgggGuc.....       | 1 |
| Gi3_27897059_x3..... | cgauuccAgugaccgcg.....          | 1 |
| Gi5_8670293_x3.....  | guuAgauucccgguagaccg.....       | 1 |
| Gi5_8689808_x3.....  | gcggucouaguacaguAgcu.....       | 1 |
| Gi3_27943082_x3..... | cgGaccggguucgauucccggu.....     | 1 |
| Gi3_27885971_x3..... | gGgacugucacucacgugac.....       | 1 |
| Gi3_27934571_x3..... | Ccagugacccggguucgauucc.....     | 1 |
| Gi5_8693843_x3.....  | uCcgauucccgguagaccgc.....       | 1 |
| Gi3_27880460_x3..... | gugacugucacCcagugacc.....       | 1 |
| Gi5_8698460_x3.....  | gcggucouagCacagugg.....         | 1 |
| Gi3_27951593_x3..... | gaUugucacucacgugacccggguuc..... | 1 |
| Gi3_27964394_x3..... | ugacugucacucacgugacccgU.....    | 1 |
| Gi3_27967427_x3..... | uucgauCcccgguagaccgcg.....      | 1 |
| Gi2_10775968_x3..... | gcggucouaguacagCgg.....         | 1 |
| Gi2_10779805_x3..... | ggauccGucccgguagaccgcg.....     | 1 |



|                      |                               |   |
|----------------------|-------------------------------|---|
| Gi3_27928043_x3..... | uucgaCucccgugaccgcg.....      | 1 |
| Gi3_27933569_x3..... | ucgauucccgugaccgcgCA.....     | 1 |
| Gi5_8664116_x3.....  | gCcauaguacaguggcuagu.....     | 1 |
| Gi3_27921416_x3..... | ggUuucgauucccgugaccgc.....    | 1 |
| Gi3_27807569_x3..... | gcgguCuuaguacaguggc.....      | 1 |
| Gi5_8689001_x3.....  | ugacugucacucacgugaccgA.....   | 1 |
| Gi3_27957347_x3..... | ggguucgauucccgugacAgc.....    | 1 |
| Gi2_10808974_x3..... | ucgauucccgugaccgcgAc.....     | 1 |
| Gi3_27861320_x3..... | aGucacgugaccggguucgauu.....   | 1 |
| Gi5_8694035_x3.....  | gcggucauagCacaguggcuagua..... | 1 |
| Gi3_27886004_x3..... | ugacugCcacucacgugacc.....     | 1 |
| G1a_5847355_x3.....  | Uggguucgauucccgguga.....      | 1 |
| Gi5_8653073_x3.....  | gcgguCguaguacaguggcuag.....   | 1 |
| Gi5_8659139_x3.....  | gacugucacucacgAgaccg.....     | 1 |
| Gi3_27816506_x3..... | ggguucgGuucccgugaccg.....     | 1 |
| Gi5_8713553_x3.....  | ucgauucccgugaccAc.....        | 1 |
| Gi3_27889172_x3..... | ggguucgauucccgugaAcg.....     | 1 |
| Gi5_8692301_x3.....  | gcggucauaguacagCggcu.....     | 1 |
| Gi3_27915911_x3..... | ggguucgauuUccggugaccg.....    | 1 |
| Gi3_27934556_x3..... | ggguucgauucccgugGccgc.....    | 1 |
| Gi5_8681966_x3.....  | Aucauaguacaguggcuag.....      | 1 |
| Gi2_10770934_x3..... | guucCauucccgugaccg.....       | 1 |
| Gi3_27885248_x3..... | Ggugacugucacucacgugacc.....   | 1 |
| Gi5_8687063_x3.....  | ggguucgauucccgguAac.....      | 1 |
| G1a_5848822_x3.....  | gCucgauucccgugacc.....        | 1 |
| Gi3_27880598_x3..... | acGgucacucacgugaccg.....      | 1 |
| Gi3_27821771_x3..... | Uggguucgauucccguga.....       | 1 |
| Gi3_27913031_x3..... | acAgucacucacgugaccgg.....     | 1 |
| Gi2_10741003_x3..... | ggguucgauucccgugGccgc.....    | 1 |
| Gi3_27873155_x3..... | gcgAucauaguacagugg.....       | 1 |
| Gi3_27960044_x3..... | cucacgugaccggguucgauuc.....   | 0 |
| Gi3_27844334_x3..... | Ucgugaccggguucgauucc.....     | 1 |
| G1a_5829583_x3.....  | gggCucgauucccgugaccg.....     | 1 |
| Gi1_4088694_x3.....  | ggguucgauucccgugaccg.....     | 0 |
| Gi3_27863315_x3..... | ugacuguUacucacgugaccgg.....   | 1 |
| Gi5_8667377_x3.....  | gguuAgauucccgugaccgc.....     | 1 |
| Gi3_27838823_x3..... | cacucacgAgaccgggu.....        | 1 |
| Gi1_4073790_x3.....  | uucgauucccgugaccg.....        | 0 |
| Gi3_27923000_x3..... | ucgauuccUgugaccg.....         | 1 |
| Gi3_27799409_x3..... | ggguCcgauucccgugacc.....      | 1 |
| Gi5_8660207_x3.....  | ggguucgCuucccgugacc.....      | 1 |
| Gi5_8712812_x3.....  | cggucAuaguacaguggUua.....     | 1 |
| Gi1_4061592_x3.....  | gacugucUcucacgugaccg.....     | 1 |
| Gi5_8714024_x3.....  | guucgauuccGggugaccg.....      | 1 |
| Gi3_27884648_x3..... | gacugucacucacgugaccAg.....    | 1 |
| Gi2_10773805_x3..... | guucgauucccgugaGcgc.....      | 1 |
| Gi5_8714372_x3.....  | ggguucgauucccgAugaccg.....    | 1 |

|                      |                                       |   |
|----------------------|---------------------------------------|---|
| Gi3_27817235_x3..... | .gGcacucacgugacccggguucga.....        | 1 |
| Gi5_8699057_x3.....  | .....gguucgauuAccggugac.....          | 1 |
| Gi1_4081644_x3.....  | .....cacucacgugacccggguuc.....        | 0 |
| Gi3_27897068_x3..... | .....ucgauucccgugaccgcC.....          | 1 |
| Gi3_27969497_x3..... | .....cccggguucgauuccggGgac.....       | 1 |
| Gi2_10795948_x3..... | .....gguucgauucAcggugaccg.....        | 1 |
| Gi1_4079769_x3.....  | .....gcggucaCaguacagugg.....          | 1 |
| Gi1a_5819143_x3..... | .....Cguucgauucccgugaccgc.....        | 1 |
| Gi5_8713691_x3.....  | .....gguNcgauucccgugac.....           | 1 |
| Gi1_4063191_x3.....  | .....Cuucgauucccgugaccg.....          | 1 |
| Gi5_8700431_x3.....  | .....gguucgauucAcggugaccg.....        | 1 |
| Gi3_27952079_x3..... | .....uucgauucccgugacGg.....           | 1 |
| Gi3_27871997_x3..... | .....cgGgacugucacucacgugacc.....      | 1 |
| Gi2_10787860_x3..... | .....gguucgauuccAggugaccg.....        | 1 |
| Gi2_10816276_x3..... | .....guucgauuUccggugaccg.....         | 1 |
| Gi1_4069932_x3.....  | .....gcggucCuaguacaguggcua.....       | 1 |
| Gi3_27821963_x3..... | .....ugacugucacCcacgugacc.....        | 1 |
| Gi3_27813794_x3..... | .....gguucgauCcccggugacc.....         | 1 |
| Gi3_27950039_x3..... | .....guucgauGcccggugaccg.....         | 1 |
| Gi2_10741789_x3..... | .....cacucaUgugacccgggu.....          | 1 |
| Gi5_8709122_x3.....  | .....gguUgauucccgugaccg.....          | 1 |
| Gi5_8680319_x3.....  | .....gguucgauucccgugacUg.....         | 1 |
| Gi2_10798015_x3..... | .....ucgGuucccgugaccgc.....           | 1 |
| Gi3_27844499_x3..... | .....gugcggucauaguacaguggcCaguau..... | 1 |
| Gi1_4082205_x3.....  | .....uGacucacgugacccggguuc.....       | 1 |
| Gi1_4071753_x3.....  | .....gUggucauaguacaguggcuagu.....     | 1 |
| Gi3_27872183_x3..... | .....cacuUacgugacccgggu.....          | 1 |
| Gi5_8695691_x3.....  | .....ugacugucacucacgugaccAgg.....     | 1 |
| Gi5_8660477_x3.....  | .....gcggucauaguacaguggAuagu.....     | 1 |
| Gi2_10816366_x3..... | .....gUggucauaguacagugg.....          | 1 |
| Gi1_4066866_x3.....  | .....gcggucauaguacagAggc.....         | 1 |
| Gi3_27977309_x3..... | .....Aacucacgugacccgggu.....          | 1 |
| Gi3_27833606_x3..... | .....gguGcgauucccgugacc.....          | 1 |
| Gi1_4060434_x3.....  | .....Acggucauaguacaguggcu.....        | 1 |
| Gi3_27935378_x3..... | .....cacucacgugacGcggguucga.....      | 1 |
| Gi2_10733653_x3..... | .....gguAcgauucccgugaccgc.....        | 1 |
| Gi5_8682536_x3.....  | .....gcgAucauaguacaguggcua.....       | 1 |
| Gi2_10741207_x3..... | .....gAguucgauucccgugacc.....         | 1 |
| Gi1a_5820997_x3..... | .....gguucgauuccUggugac.....          | 1 |
| Gi2_10785838_x3..... | .....gguucgauucccgugUc.....           | 1 |
| Gi3_27899435_x3..... | .....gUcugucacucacgugacc.....         | 1 |
| Gi3_27801743_x3..... | .....Augacugucacucacgugacc.....       | 1 |
| Gi5_8676836_x3.....  | .....guucgauucccgugacGgc.....         | 1 |
| Gi4_551904_x3.....   | .....gGucgauucccgugacc.....           | 1 |
| Gi3_27835328_x3..... | .....gauucccgugaccgUc.....            | 1 |
| Gi5_8701250_x3.....  | .....gacugucacuUaccgugaccg.....       | 1 |
| Gi1_4077246_x3.....  | .....Gacucacgugacccgggu.....          | 1 |

|                 |                                 |   |
|-----------------|---------------------------------|---|
| Gi5_8693732_x3  | .....Gcgggucgauuccggugacc       | 1 |
| Gi5_8658485_x3  | .....uucgauuccAgugaccg          | 1 |
| Gi1_4084539_x3  | .....gcggUauaguacagugg          | 1 |
| Gi5_8705903_x3  | .....gcggucauaAuacaguggcuagua   | 1 |
| Gi2_10732021_x3 | .....gguucgauuccGggugaccgc      | 1 |
| Gi3_27801461_x3 | .....cacucacgNgaccggguu         | 1 |
| Gi5_8699585_x3  | .....guucgauuccggugacG          | 1 |
| Gi5_8652035_x3  | .....aGugucacucacgugaccggguuc   | 1 |
| Gi2_10826281_x3 | .....gguucgauuAccggugac         | 1 |
| Gi5_8672273_x3  | .....gguucgauuccggugaccg        | 0 |
| Gi5_8662745_x3  | .....caUucacgugaccggguuc        | 1 |
| Gi5_8705351_x3  | .....gacugucacucacgAgaccg       | 1 |
| Gi3_27813647_x3 | .....gguucUauuccggugaccgc       | 1 |
| Gi3_27808823_x3 | .....gcggucauaguacaCuggc        | 1 |
| Gi1_4047873_x3  | .....ugacugucacucacgugacUcg     | 1 |
| Gi3_27804509_x3 | .....accggguucgauuccggugCcc     | 1 |
| Gi4_546675_x3   | .....gcggucGuaguacaguggcuagu    | 1 |
| Gi2_10756741_x3 | .....ggguucgauuccggGgacc        | 1 |
| Gi5_8656349_x3  | .....gguucgauuccggugaGcgc       | 1 |
| Gi5_8717675_x3  | .....gcggucauGguacaguggcuag     | 1 |
| Gi2_10787935_x3 | .....uUacugucacucacgugaccg      | 1 |
| Gi1a_5830471_x3 | .....guucgauuccggugaccgAc       | 1 |
| Gi3_27843116_x3 | .....cacucGcgugaccggguuc        | 1 |
| Gi5_8674856_x3  | .....gucauaguNcaguggcuag        | 1 |
| Gi1a_5842390_x3 | .....guucgauuNccggugaccgc       | 1 |
| Gi2_10753690_x3 | .....uuUgauuccggugaccgc         | 1 |
| Gi3_27954266_x3 | .....guucgauuGccggugaccg        | 1 |
| Gi3_27855011_x3 | .....ucgauAccggugaccgc          | 1 |
| Gi1_4080009_x3  | .....gacugucacucacgugCccc       | 1 |
| Gi5_8703644_x3  | .....Ucggucauaguacaguggcuaguaug | 1 |
| Gi5_8699834_x3  | .....guucgauuccgguCacc          | 1 |
| Gi5_8655869_x3  | .....gcggucauGguacaguggcuagu    | 1 |
| Gi5_8703350_x3  | .....gcggucauaguacaguUgc        | 1 |
| Gi3_27960161_x3 | .....Cacugucacucacgugacc        | 1 |
| Gi5_8653391_x3  | .....cucacgugNccggguuc          | 1 |
| Gi3_27961121_x3 | .....ggguGcgauuccggugaccg       | 1 |
| Gi1_4075470_x3  | .....auuccggugaccgCc            | 1 |
| Gi1a_5835328_x3 | .....gguucgauuccggugaGc         | 1 |
| Gi5_8670476_x3  | .....guucCauuccggugacc          | 1 |
| Gi3_27964661_x3 | .....Aguucgauuccggugaccgcuuu    | 1 |
| Gi3_27840179_x3 | .....gguucgauuccggugUccg        | 1 |
| Gi1_4053924_x3  | .....gacugucacucacgugaccAg      | 1 |
| Gi1a_5859661_x3 | .....gCuucgauuccggugac          | 1 |
| Gi5_8708696_x3  | .....gcggucCuaguacaguggc        | 1 |
| Gi3_27937058_x3 | .....ucacucaUgugaccggguucga     | 1 |
| Gi3_27868241_x3 | .....Augacugucacucacgugacc      | 1 |
| Gi3_27974570_x3 | .....cacucacgugaccggGuc         | 1 |

|                 |                                |   |
|-----------------|--------------------------------|---|
| Gi5_8717486_x3  | .....gguucgUuucccgugaccgc      | 1 |
| Gi3_27905381_x3 | .....ucacucacgugaccgggCucga    | 1 |
| Gi3_27966551_x3 | .....cacucacgugaccgAgu         | 1 |
| Gi3_27889730_x3 | .....Cugacugucacucacgugaccgg   | 1 |
| Gi2_10791913_x3 | .....gguucgauNcccggugaccgcggc  | 1 |
| Gi3_27917765_x3 | .....ugacuguAacucacgugaccgg    | 1 |
| Gi5_8651537_x3  | .....ucUcucacgugaccggguucgauuc | 1 |
| Gi3_27950072_x3 | .....auuccggNgaccgcggcuu       | 1 |
| Gi5_8675645_x3  | .....acUgaccggguucgauucc       | 1 |
| Gi1_4085487_x3  | .....gguucgaCucccgugaccg       | 1 |
| Gi2_10771234_x3 | .....guucgCuucccgugaccgc       | 1 |
| Gi2_10751380_x3 | .....gcggucauaguacCgugg        | 1 |
| Gi3_27797843_x3 | .....acgugaccggguucgCuucc      | 1 |
| Gi3_27953762_x3 | .....cacucacgugaccGggguu       | 1 |
| Gi3_27825521_x3 | .....ggguucgauuccggCgaccgcg    | 1 |
| Gi3_27823751_x3 | .....aUugucacucacgugaccg       | 1 |
| Gi1a_5827132_x3 | .....gguucAauucccgugac         | 1 |
| Gi2_10745500_x3 | .....ggAuucgauucccgugaccg      | 1 |
| Gi3_27929873_x3 | .....uucgauucccgugacUgcg       | 1 |
| Gi2_10818544_x3 | .....Uggguucgauucccgugacc      | 1 |
| Gi1a_5867665_x3 | .....gacugucacucacgugaccgg     | 0 |
| Gi1_4085211_x3  | .....uucgauucccgugaccgcU       | 1 |
| Gi3_27938843_x3 | .....gugaccggguucgauCccc       | 1 |
| Gi3_27953051_x3 | .....gcggucauaguacaguggcAagu   | 1 |
| Gi1a_5845174_x3 | .....gcggucaCaguacaguggcuagu   | 1 |
| Gi3_27968375_x3 | .....guuGgauucccgugaccgc       | 1 |
| Gi1_4048668_x3  | .....cacucacgugaccggguucga     | 0 |
| Gi2_10748155_x3 | .....gauucccgugaccgcgCcu       | 1 |
| Gi3_27979559_x3 | .....ugacugucUcucacgugaccg     | 1 |
| Gi3_27899762_x3 | .....gguucgauucccgugaccgcgAcu  | 1 |
| Gi3_27955232_x3 | .....gcggucauagAacagugg        | 1 |
| Gi5_8717489_x3  | .....gucauaguacCguggcuagu      | 1 |
| Gi3_27935945_x3 | .....ugacugucacucacgugaccGgg   | 1 |
| Gi3_27824450_x3 | .....cgaCucccgugaccgcg         | 1 |
| Gi5_8675036_x3  | .....ucAauucccgugaccgc         | 1 |
| Gi5_8710856_x3  | .....aGugucacucacgugaccgggu    | 1 |
| Gi1_4051989_x3  | .....gUucauaguacaguggcuagu     | 1 |
| Gi1a_5867575_x3 | .....guucAauucccgugaccgc       | 1 |
| Gi3_27811607_x3 | .....gugacugucacucagAaccgg     | 1 |
| Gi5_8705948_x3  | .....gcggucauaguacaguggcuaAu   | 1 |
| Gi5_8697203_x3  | .....gugacugCcacucacgugacc     | 1 |
| Gi5_8705675_x3  | .....gguucgauCcccggugaccg      | 1 |
| Gi5_8710043_x3  | .....ugacugucacucCcgugaccgg    | 1 |
| Gi3_27918170_x3 | .....gugacugucacucCcgugaccg    | 1 |
| Gi2_10777573_x3 | .....ggNucgauucccgugacc        | 1 |
| Gi5_8689889_x3  | .....auucccgugaccgcgCcu        | 1 |
| Gi5_8660840_x3  | .....ucgauuccAgugaccgc         | 1 |

Gi4\_549864\_x3 .....gguucgauucccgguaccgCGcu..... 1  
 Gi5\_8717729\_x3.....gcggucgauaguacaguAgc..... 1  
 G1a\_5831365\_x3.....gguucgauucccgGgacc..... 1  
 Gi3\_27936245\_x3.....cgauucccgguGccgCG..... 1  
 Gi3\_27898874\_x3.....gugacccgNguucgauucc..... 1  
 Gi4\_546966\_x3.....gacugucacCcaccgugaccgg..... 1  
 Gi5\_8691023\_x3.....gacugucacucacgugaccAg..... 1  
 Gi1\_4057986\_x3.....gacugucacAcaccgugaccg..... 1  
 Gi1\_4071237\_x3.....guucgauucccgguacU..... 1  
 Gi2\_10731028\_x3.....guucgauucccgCugaccgc..... 1  
 Gi2\_10820923\_x3.....cgugacccggguucgauCc..... 1  
 Gi3\_27908516\_x3.....gacccgggCucgauucc..... 1  
 Gi2\_10758448\_x3.....gacugucacucacgugCcccg..... 1  
 Gi3\_27882242\_x3.....cgauucccgugaccgCA..... 1  
 Gi3\_27822965\_x3.....ggguucgauucccgguGacgCG..... 1  
 Gi5\_8684363\_x3.....gcggucaAaguacaguggcua..... 1  
 Gi2\_10814683\_x3.....gcggucgauaguacaguggcCaguauGcgugac..... 1  
 Gi1\_4077126\_x3.....ugacugucacucaAgugaccg..... 1  
 Gi4\_551991\_x3.....Accgucgauaguacaguggc..... 1  
 Gi3\_27800237\_x3.....gugacugucacucacgugaccC..... 1  
 Gi3\_27977144\_x3.....caUgugaccggguucgauucc..... 1  
 Gi5\_8661344\_x3.....gcggucgauaguacagCggcua..... 1  
 G1a\_5862250\_x3.....gcggucgauaguacaguggcuaAu..... 1  
 Gi2\_10728490\_x3.....uGaccgugaccggguucgauucc..... 1  
 Gi1\_4063455\_x3.....Aacugucacucacgugacc..... 1  
 G1a\_5832520\_x3.....gacugucaGucacgugaccgggu..... 1  
 Gi2\_10747087\_x3.....guucgauucccgguGacGg..... 1  
 Gi3\_27862166\_x3.....ggguucgauuUccggugacc..... 1  
 Gi3\_27824411\_x3.....guucgauuGccggugaccgCG..... 1  
 Gi2\_10729264\_x3.....ggAucgauucccgguGaccg..... 1  
 Gi1\_4074654\_x3.....gcggCcauaguacagugg..... 1  
 Gi1\_4065327\_x3.....gcggucgauaguacaAuggcuagua..... 1  
 Gi3\_27905813\_x3.....gacugucacucacgugGcc..... 1  
 Gi3\_27839366\_x3.....cacuGaccgugaccggguuc..... 1  
 Gi1\_4076568\_x3.....gcggucgauNguacaguggcua..... 1  
 Gi2\_10799758\_x3.....AgguucgauucccgguGaccgCG..... 1  
 G1a\_5818585\_x3.....guucgauucccgAugaccg..... 1  
 Gi5\_8672174\_x3.....gguucgauucccgguGacg..... 1  
 Gi3\_27881024\_x3.....gcgguaAauaguacaguggc..... 1  
 Gi1\_4053939\_x3.....gcggucgauaguacaguggcuaGCa..... 1  
 Gi2\_10808563\_x3.....gguucgauucccgguAaccg..... 1  
 Gi5\_8663795\_x3.....gugacugucacucacgugCcc..... 1  
 Gi1\_4058193\_x3.....gcggucgauaguGcagugg..... 1  
 Gi3\_27950714\_x3.....gcggucauaAuacagugg..... 1  
 Gi2\_10754575\_x3.....GggguucgauucccgguGacc..... 1  
 Gi5\_8707292\_x3.....gGcugucacucacgugaccgggu..... 1  
 Gi3\_27939182\_x3.....cacucacgugCccgggu..... 1

|                      |                                |   |
|----------------------|--------------------------------|---|
| Gi3_27881906_x3..... | ucgauucccgguCaccgc.....        | 1 |
| Gi5_8705321_x3.....  | Gggguucgauucccgguac.....       | 1 |
| Gi3_27811976_x3..... | guucgauGcccggugaccgc.....      | 1 |
| Gi3_27968369_x3..... | cacucacgCgaccggguu.....        | 1 |
| Gi5_8668622_x3.....  | cGcgugaccggguucgauuc.....      | 1 |
| Gl1a_5824471_x3..... | gguucgauucccgguaccgcggc.....   | 0 |
| Gi3_27869975_x3..... | ucacucacgCgaccggguucga.....    | 1 |
| Gi4_547281_x3.....   | cucacgugacGcgguucgauuc.....    | 1 |
| Gi3_27820052_x3..... | gacugucaAucacgugaccgc.....     | 1 |
| Gi4_545904_x3.....   | Ucggucaguacaguggcuag.....      | 1 |
| Gi5_8670608_x3.....  | gcggucaCaguacaguggcuaguau..... | 1 |
| Gi3_27962345_x3..... | uucgauucccgguaccgUg.....       | 1 |
| Gi2_10816798_x3..... | ggguucgauuccAgugaccgcg.....    | 1 |
| Gi2_10784251_x3..... | gguucgauuUccggugaccgcg.....    | 1 |
| Gi2_10744777_x3..... | guucgauAccggugaccgc.....       | 1 |
| Gi2_10783594_x3..... | gguucgauucccgAugaccgc.....     | 1 |
| Gi3_27937793_x3..... | cgGuucccgguaccgcg.....         | 1 |
| Gi5_8664704_x3.....  | cUcggguucgauucccgguac.....     | 1 |
| Gi1_4080573_x3.....  | Ccggucaguacagugg.....          | 1 |
| Gi2_10793053_x3..... | cgaCucccgguaccgcg.....         | 1 |
| Gi3_27878855_x3..... | gcggucaguacagugC.....          | 1 |
| Gl1a_5813284_x3..... | gguucgauucccgguUcc.....        | 1 |
| Gi3_27975914_x3..... | aUgugaccggguucgauucc.....      | 1 |
| Gi5_8694524_x3.....  | gaNugucacucacgugaccgcg.....    | 1 |
| Gi3_27977876_x3..... | cacucacgugaccggAu.....         | 1 |
| Gi2_10802023_x3..... | ucgauucccgguaccAc.....         | 1 |
| Gl1a_5856844_x3..... | ggguucAauucccgguaccg.....      | 1 |
| Gi1_4052832_x3.....  | Ugucauaguacaguggcuagu.....     | 1 |
| Gi5_8711717_x3.....  | acugucacucacgugGcccgggu.....   | 1 |
| Gi3_27900764_x3..... | gacugucacucacgugacGcg.....     | 1 |
| Gi2_10807459_x3..... | Cacugucacucacgugacc.....       | 1 |
| Gi1_4054353_x3.....  | gUucauaguacaguggcuagua.....    | 1 |
| Gi2_10770214_x3..... | gguucgUuucccgguacc.....        | 1 |
| Gi3_27942998_x3..... | gacugucacucacgugGccc.....      | 1 |
| Gi5_8671463_x3.....  | guucgauucccgguaccgcg.....      | 1 |
| Gi3_27907232_x3..... | gacugucacucacguUaccgcg.....    | 1 |
| Gi5_8711939_x3.....  | gguucgCuucccgguaccg.....       | 1 |
| Gi3_27912959_x3..... | Aacugucacucacgugaccggg.....    | 1 |
| Gl1a_5868328_x3..... | gguucgauuccAggugacc.....       | 1 |
| Gi3_27920297_x3..... | cGcgugaccgcggcuuu.....         | 1 |
| Gi3_27845327_x3..... | ggNucgauucccgguacc.....        | 1 |
| Gi2_10751464_x3..... | guucgauGcccggugacc.....        | 1 |
| Gi1_4087512_x3.....  | gcggucaguacagAgg.....          | 1 |
| Gi5_8656928_x3.....  | acugucGcucacgugaccgggu.....    | 1 |
| Gi3_27802175_x3..... | ugacugucacucacgugacGcg.....    | 1 |
| Gi1_4075482_x3.....  | gcggucaguacaguAg.....          | 1 |
| Gi5_8709899_x3.....  | gguuUgauucccgguaccgcg.....     | 1 |

|                 |                               |   |
|-----------------|-------------------------------|---|
| Gi3_27963233_x3 | .....gguAcgauuuccggugaccg     | 1 |
| Gi3_27855617_x3 | .....gguucgauuuccggugaccC     | 1 |
| Gi3_27928133_x3 | .....acucacgugacccggguucgauC  | 1 |
| Gi2_10784002_x3 | .....gguucgauuUccggugac       | 1 |
| Gi3_27837029_x3 | .....Gcacgugacccggguucga      | 1 |
| Gi4_545940_x3   | .....acucacgAgacccggguucg     | 1 |
| Gi5_8698589_x3  | .....gguucgauuUccggugaccg     | 1 |
| Gi1_4059594_x3  | .....gGggucgauuacaguggcuaguau | 1 |
| Gi2_10747237_x3 | .....uCcgauuuccggugaccgc      | 1 |
| Gi3_27937532_x3 | .....acCcacgugacccggguu       | 1 |
| Gi2_10818052_x3 | .....cUcucacgugacccggguucga   | 1 |
| Gi3_27812930_x3 | .....guucgauuccUgugaccgc      | 1 |
| Gi3_27796250_x3 | .....acAgucacucacgugacccgggu  | 1 |
| Gi2_10780387_x3 | .....cgauuccNgugaccgcgcuu     | 1 |
| Gi5_8658497_x3  | .....acgugaccNgguucgauucc     | 1 |
| Gi1a_5868379_x3 | .....gucauaguNcaguggcuag      | 1 |
| Gi5_8662004_x3  | .....guucgauuAcggugaccgcg     | 1 |
| Gi2_10788349_x3 | .....gguucgauuccCgugaccgc     | 1 |
| Gi3_28092516_x2 | .....ugacugucacucUcgugacccgg  | 1 |
| Gi5_8752197_x2  | .....gcfgCcauaguacagugg       | 1 |
| Gi5_8763381_x2  | .....gcfggucauaguacagugA      | 1 |
| Gi1a_5908126_x2 | .....guucgauuccggugaccgcgU    | 1 |
| Gi5_8734583_x2  | .....cccgguucgauuUcgugac      | 1 |
| Gi4_553642_x2   | .....cucacgugacccggguucGuuc   | 1 |
| Gi1a_5951946_x2 | .....gguucgauucccgAgac        | 1 |
| Gi5_8731149_x2  | .....ucgauCcccgugaccgc        | 1 |
| Gi5_8761135_x2  | .....gcfggucauaguacUguggcu    | 1 |
| Gi2_10954217_x2 | .....acucacgugacccgggCuc      | 1 |
| Gi1a_5940982_x2 | .....guucgauucccgugaUcgc      | 1 |
| Gi2_10968711_x2 | .....guNcgauucccgugacc        | 1 |
| Gi1a_5930474_x2 | .....gguucgauucccgCgac        | 1 |
| Gi1_4093363_x2  | .....ugacugucacucacgugaUccg   | 1 |
| Gi3_28021736_x2 | .....guucgauuGccggugaccgc     | 1 |
| Gi2_10844523_x2 | .....gguucgauucccgAgaccgcg    | 1 |
| Gi3_28097356_x2 | .....gacugucacucacgugacccggA  | 1 |
| Gi3_28230924_x2 | .....gguucgauuccGggugaccgc    | 1 |
| Gi2_10898329_x2 | .....cacgugacccggguucgauucc   | 0 |
| Gi5_8755635_x2  | .....Uauaguacaguggcuagu       | 1 |
| Gi5_8813705_x2  | .....guucgauuUcgugaccgcg      | 1 |
| Gi2_10932841_x2 | .....gguucgauuccGggugacc      | 1 |
| Gi5_8770143_x2  | .....gcfggucauaguCcaugggcu    | 1 |
| Gi1a_5928780_x2 | .....guucgauAcccgugaccgc      | 1 |
| Gi2_10934395_x2 | .....ugacugucNcucacguga       | 1 |
| Gi5_8815867_x2  | .....Ccgauucccgugaccgc        | 1 |
| Gi2_10888869_x2 | .....gacugucacucacgugacU      | 1 |
| Gi1_4131997_x2  | .....guucAauuccggugaccgcggc   | 1 |
| Gi3_28121094_x2 | .....ggguucgauuAccggugaccgcg  | 1 |

|                      |                                 |   |
|----------------------|---------------------------------|---|
| Gi3_28012272_x2..... | guucCauucccgugaccg.....         | 1 |
| Gi2_10905397_x2..... | cacucacgugaccUgggu.....         | 1 |
| Gi1_4149221_x2.....  | gaNugucacucacgugaccgg.....      | 1 |
| Gi3_28106192_x2..... | guucgauucccgugaccgG.....        | 1 |
| Gi2_10869921_x2..... | guucgauucGcggugacc.....         | 1 |
| Gi2_10830971_x2..... | ggUuucgauucccgugaccg.....       | 1 |
| Gi5_8729119_x2.....  | cggucauaguacaAuggcua.....       | 1 |
| Gi2_10977605_x2..... | gaccggguucgCuucc.....           | 1 |
| Gi3_28028328_x2..... | gugaccggguucgauucU.....         | 1 |
| Gi3_28219078_x2..... | ugacugucacucacguAaccgg.....     | 1 |
| Gi5_8746825_x2.....  | ugacugucaAucacgugaccgg.....     | 1 |
| Gi5_8816137_x2.....  | cggucauagCacaguggcua.....       | 1 |
| Gi3_28203460_x2..... | gguucgUuucccgugaccg.....        | 1 |
| Gi2_10877371_x2..... | ucgauucccgGgaccg.....           | 1 |
| Gi5_8750961_x2.....  | Ucggucauaguacaguggcuaguucg..... | 1 |
| Gi5_8741863_x2.....  | cggucauaguacaguggcuagCa.....    | 1 |
| Gi3_28162336_x2..... | augcgugacugucacucacgugaAc.....  | 1 |
| Gi3_27996480_x2..... | gacugucacCcacgugacc.....        | 1 |
| Gi1_4158631_x2.....  | gcggucauaguacGguggc.....        | 1 |
| Gi3_27985884_x2..... | Nguucgauucccgugaccg.....        | 1 |
| Gi5_8800507_x2.....  | cgugaccggguucgGuucccgugacc..... | 1 |
| Gi3_28254568_x2..... | ggAuucgauucccgugac.....         | 1 |
| Gi1a_5900470_x2..... | gguucgauuccAggugaccg.....       | 1 |
| Gi5_8794629_x2.....  | gacuCucacucacgugaccgg.....      | 1 |
| Gi1a_5908784_x2..... | gguucgauuccCgugacc.....         | 1 |
| Gi3_28216500_x2..... | gacuCucacucacgugaccg.....       | 1 |
| Gi5_8776541_x2.....  | cccgguucgauuccgAugac.....       | 1 |
| Gi3_28255916_x2..... | guucgauucccgCugaccg.....        | 1 |
| Gi2_10930507_x2..... | uucgauCcccgugaccg.....          | 1 |
| Gi5_8724753_x2.....  | cgauucccgugaccgCcu.....         | 1 |
| Gi3_28255094_x2..... | gcgguaAauaguacagugg.....        | 1 |
| Gi3_28118762_x2..... | ucgauucccgugaccgAc.....         | 1 |
| Gi5_8736091_x2.....  | guucCauucccgugaccg.....         | 1 |
| Gi3_28070986_x2..... | cccgguucgauucccgugUc.....       | 1 |
| Gi5_8770555_x2.....  | ggNucgauucccgugacc.....         | 1 |
| Gi2_10966431_x2..... | gugacugucGcucacgugaccg.....     | 1 |
| Gi2_10968385_x2..... | guucgauuGccggugaccg.....        | 1 |
| Gi5_8723819_x2.....  | gguucgauucccgugaccgU.....       | 1 |
| Gi3_27980386_x2..... | cccgguucgauAcccgugac.....       | 1 |
| Gi3_28009166_x2..... | gugacugCcacucacguga.....        | 1 |
| Gi2_10873279_x2..... | Ugugaccggguucgauuc.....         | 1 |
| Gi2_10987543_x2..... | gacugucacucacgugaccUgg.....     | 1 |
| Gi2_10960449_x2..... | ggguuUgauucccgugacc.....        | 1 |
| Gi1_4135433_x2.....  | gacugucacucCcgugacc.....        | 1 |
| Gi3_28233678_x2..... | Uggguucgauucccgugaccg.....      | 1 |
| Gi5_8771629_x2.....  | gcggucGuaguacaguggcu.....       | 1 |
| Gi5_8823749_x2.....  | guucgUuucccgugaccg.....         | 1 |



|                      |                                 |   |
|----------------------|---------------------------------|---|
| Gi3_28021144_x2..... | gugacccggguucgCuuccc.....       | 1 |
| Gi2_10896921_x2..... | gguuGgauucccgugac.....          | 1 |
| Gi5_8750751_x2.....  | gcggucauaguacaAuggcuaugu.....   | 1 |
| Gi5_8820275_x2.....  | cccgguucgauucccgGgacc.....      | 1 |
| Gi3_28184418_x2..... | aGucacgugacccggguucgauucc.....  | 1 |
| Gi5_8808177_x2.....  | acgugacccggguucgCuuccc.....     | 1 |
| Gi3_28149016_x2..... | ucgauuccGggugaccgcg.....        | 1 |
| Gi3_28068858_x2..... | cacucacgugacAcgggu.....         | 1 |
| G1a_5893248_x2.....  | gcggucauagCacaguggcuagu.....    | 1 |
| Gi1_4121347_x2.....  | gcggucauaguacaguggcuaguCu.....  | 1 |
| Gi4_567194_x2.....   | ggguucgauucccgugaccg.....       | 0 |
| Gi3_28057826_x2..... | ucacgugacccggguucgC.....        | 1 |
| Gi3_28141462_x2..... | uucgaAuucccgugaccgcg.....       | 1 |
| Gi1_4090413_x2.....  | gcggucauaguaGaguggcuagua.....   | 1 |
| Gi1_4113243_x2.....  | ucUcucacgugacccggguuc.....      | 1 |
| G1a_5970608_x2.....  | guucgauucccgAgacc.....          | 1 |
| Gi1_4135911_x2.....  | Gauaguacaguggcuagu.....         | 1 |
| Gi5_8775639_x2.....  | gucauaguGcaguggcuagu.....       | 1 |
| Gi2_10930901_x2..... | ggguucgauucccgAugaccgc.....     | 1 |
| Gi5_8813725_x2.....  | gcggGcauaguacaguggcuaguau.....  | 1 |
| Gi5_8806865_x2.....  | gcggCcauaguacaguggcu.....       | 1 |
| Gi2_10913697_x2..... | gcgguaAuaguacaguggc.....        | 1 |
| Gi3_28071702_x2..... | ucacucacNugacccggguuc.....      | 1 |
| Gi3_28085042_x2..... | Ggacugucacucacgugacc.....       | 1 |
| Gi2_10872615_x2..... | gguucgauucccgugaccgcg.....      | 0 |
| Gi1_4102267_x2.....  | ugacuguGacucacgugaccgg.....     | 1 |
| Gi3_28021118_x2..... | cUcucacgugacccgggu.....         | 1 |
| Gi2_10867145_x2..... | cacucacgugacAcggguuc.....       | 1 |
| Gi2_10936623_x2..... | gcggucaAaguacaguggc.....        | 1 |
| Gi1_4117505_x2.....  | gcggucauaguacaAuggcua.....      | 1 |
| Gi1_4127193_x2.....  | gguucgauucccgugGccg.....        | 1 |
| Gi3_28180108_x2..... | cacucUcgugacccggguucga.....     | 1 |
| Gi5_8724727_x2.....  | gguucgauucccgugaccgAg.....      | 1 |
| Gi1_4120377_x2.....  | ugacugucaUucacgugaccg.....      | 1 |
| Gi3_28068462_x2..... | gguucgauuccGggugaccgcg.....     | 1 |
| G1a_5974386_x2.....  | gcggucauUguacaguggcuagu.....    | 1 |
| Gi3_28194696_x2..... | cucacgugacccggguucgaCucc.....   | 1 |
| Gi2_10924041_x2..... | gugacugucacucCcgugaccg.....     | 1 |
| Gi1_4149923_x2.....  | acugucacucacgugGcccgguuc.....   | 1 |
| G1a_5950298_x2.....  | ucacgugacccggguucgCuuc.....     | 1 |
| Gi5_8743609_x2.....  | Gggucauaguacaguggcuagua.....    | 1 |
| Gi3_28070450_x2..... | ugacugucacucacgugCcccg.....     | 1 |
| Gi3_28163412_x2..... | cgugacugucCucacgugacccgggu..... | 1 |
| Gi2_10968709_x2..... | Uacugucacucacgugaccg.....       | 1 |
| Gi5_8718639_x2.....  | acgugacccggGucgauucc.....       | 1 |
| Gi1_4147087_x2.....  | gcggucanGuacaguggcuag.....      | 1 |
| Gi4_566324_x2.....   | gcgguaUaguacaguggcuagu.....     | 1 |

|                 |                                 |   |
|-----------------|---------------------------------|---|
| Gi5_8775135_x2  | .....acAgucacucacgugaccggguuc   | 1 |
| Gi2_10831681_x2 | .....gguuAgauucccgugaccg        | 1 |
| Gi3_28117924_x2 | .....Auucgauucccgugaccgggc      | 1 |
| Gi1_4150095_x2  | .....gcggucauaguacaguggcuaguaC  | 1 |
| Gi3_28065124_x2 | .....cacucacgugaccAgggguucga    | 1 |
| Gi1_4100687_x2  | .....ucacucacgugaccgggCuc       | 1 |
| Gi2_10987655_x2 | .....gguAcgauucccgugaccg        | 1 |
| Gi5_8825475_x2  | .....gcggucauaguacaguggcuaguUu  | 1 |
| Gi1a_5897714_x2 | .....guAcgauucccgugaccg         | 1 |
| Gi2_10830139_x2 | .....uGgauucccgugaccg           | 1 |
| Gi4_559908_x2   | .....gauucccgugaccgCG           | 1 |
| Gi3_28094592_x2 | .....ggguucgaNuucccgugaccg      | 1 |
| Gi5_8809823_x2  | .....gcggucauaguacaguggGuag     | 1 |
| Gi2_10861593_x2 | .....cgauucccgugaccggcuuA       | 1 |
| Gi1_4144083_x2  | .....ggguucgauucccgugaccg       | 0 |
| Gi1a_5923152_x2 | .....gguucgauucccgugUccgc       | 1 |
| Gi5_8762015_x2  | .....guucgauucccgugaGgc         | 1 |
| Gi5_8798265_x2  | .....uucAauucccgugaccg          | 1 |
| Gi3_28254146_x2 | .....ugacugucacucacgugUcccg     | 1 |
| Gi1_4145631_x2  | .....guucCauucccgugaccg         | 1 |
| Gi3_28012012_x2 | .....gugacugucacucacgugGccc     | 1 |
| Gi1a_5912920_x2 | .....guucgauuccUggugaccg        | 1 |
| Gi1a_5956350_x2 | .....gcggucauaguacGguggcuagua   | 1 |
| Gi2_10956359_x2 | .....ugacugucacucacgugacAcg     | 1 |
| Gi5_8726927_x2  | .....guucgauuccGcgugacc         | 1 |
| Gi3_28240320_x2 | .....acgugaccggguCcgauucc       | 1 |
| Gi3_28130170_x2 | .....cugucacucacgCgaccgggu      | 1 |
| Gi3_28259900_x2 | .....aGugucacucacgugaccg        | 1 |
| Gi5_8777537_x2  | .....cucacgCgaccggguuc          | 1 |
| Gi1_4132399_x2  | .....gcggucauaguacagCggcuaguau  | 1 |
| Gi3_28071596_x2 | .....Ugauucccgugaccg            | 1 |
| Gi1a_5952340_x2 | .....guucgauuNccggugaccg        | 1 |
| Gi3_28224076_x2 | .....gguucgauucccgugaccgcAgcuuu | 1 |
| Gi5_8734299_x2  | .....gcggucauaguaGaguggcuagua   | 1 |
| Gi3_28260394_x2 | .....gugacugucacucacgugCccc     | 1 |
| Gi3_28179752_x2 | .....gguucgauuccAcggugaccg      | 1 |
| Gi5_8750571_x2  | .....gGcggucauaguacaguggcuagua  | 1 |
| Gi2_10979869_x2 | .....cacucacgugaccggguCc        | 1 |
| Gi5_8777837_x2  | .....acAgucacucacgugaccgggu     | 1 |
| Gi5_8805665_x2  | .....gguucgauuccUcgugaccg       | 1 |
| Gi1_4093331_x2  | .....gcggucauagGacaguggcuagua   | 1 |
| Gi3_28217140_x2 | .....gugaccggguGucgauucc        | 1 |
| Gi2_10925543_x2 | .....gacCgucacucacgugaccgg      | 1 |
| Gi3_28246464_x2 | .....ugacugucacucacgugaAccg     | 1 |
| Gi5_8806251_x2  | .....gcggucauaguaAaguggc        | 1 |
| Gi1_4144047_x2  | .....gugGcugucacucacgugacc      | 1 |
| Gi1_4131161_x2  | .....ucacucacgAgaccggguuc       | 1 |

Gi3\_28260072\_x2.....acAcacgugacccggguu..... 1  
 Gi3\_28113114\_x2.....cgauucccgugUccgcg..... 1  
 Gi5\_8829639\_x2.....gacugucacucacguCacccgg..... 1  
 Gi1\_4089493\_x2.....acugucacucacCugacccgg..... 1  
 Gi3\_28253492\_x2.....gugacccgggCucgauucc..... 1  
 Gi3\_28032144\_x2.....cacucacgugCcccgguucgauuc..... 1  
 Gi2\_10986311\_x2.....cgugacugNcacucacgugacc..... 1  
 Gi3\_27998446\_x2.....ugacugucacucacGgacccg..... 1  
 Gi1\_4095899\_x2.....gcfgGcauaguacaguggcuag..... 1  
 Gi5\_8789063\_x2.....gcfggucauaguacUguggcuag..... 1  
 Gl1a\_5974842\_x2.....guucgauucccgugacUg..... 1  
 Gi3\_28245502\_x2.....guucgauucccgGgacccgccc..... 1  
 Gi3\_27982532\_x2.....guucAauucccgugacccgccc..... 1  
 Gi1\_4138435\_x2.....gcfggucauaguaGaguggcu..... 1  
 Gi5\_8744123\_x2.....gguucgauucccgguUaccg..... 1  
 Gi3\_28217844\_x2.....Gcucacgugacccggguucgau..... 1  
 Gi5\_8722741\_x2.....ugacuguUacucacgugacccgg..... 1  
 Gi5\_8735615\_x2.....gcfggucauaguUcagugg..... 1  
 Gi5\_8778839\_x2.....guucgauucccgAgaccgccc..... 1  
 Gi3\_28241764\_x2.....acgugaccNggguucgauucccgugac..... 1  
 Gi3\_27998096\_x2.....acuNucacucacgugacccg..... 1  
 Gi2\_10867611\_x2.....ucgGuucccgugacccgccc..... 1  
 Gi3\_28050422\_x2.....cCugacugucacucacgugacc..... 1  
 Gi5\_8758317\_x2.....gcfggucauagAacaguggcu..... 1  
 Gl1a\_5975756\_x2.....guucgauuccUggugacc..... 1  
 Gi1\_4147983\_x2.....ugacugucacucacgugCcccg..... 1  
 Gi2\_10855543\_x2.....ggguucgauucccgGgacccgccc..... 1  
 Gi3\_28257462\_x2.....ggguucgauAcccgugacccgccc..... 1  
 Gi3\_28089796\_x2.....Gacucacgugacccggguucgauuc..... 1  
 Gi5\_8789365\_x2.....cccgguuNgauucccgugacc..... 1  
 Gi5\_8740177\_x2.....cccgguucgauuccAgugacc..... 1  
 Gl1a\_5889770\_x2.....gggGucgauucccgugacccg..... 1  
 Gi3\_28018096\_x2.....ugacugucacuAacgugacccg..... 1  
 Gi3\_28052694\_x2.....acucacgugacccggguucg..... 0  
 Gi2\_10891297\_x2.....Gccggguucgauucccgugacccgccc..... 1  
 Gi5\_8827763\_x2.....Nuucgauucccgugacc..... 1  
 Gi2\_10841621\_x2.....guucgaAuucccgugacccg..... 1  
 Gi3\_28045832\_x2.....ggguucgauucccgugacccgccc..... 1  
 Gi1\_4152115\_x2.....gcfggucauaguaUaguggcu..... 1  
 Gi2\_10965709\_x2.....ggguucgauucccgAugacc..... 1  
 Gi5\_8829163\_x2.....gacugucaUucacgugacccg..... 1  
 Gl1a\_5892518\_x2.....guucgauuccGggugacc..... 1  
 Gi3\_28054744\_x2.....auucccgugacccgcccC..... 1  
 Gi2\_10853515\_x2.....cacucacgugacccgggCucga..... 1  
 Gi1\_4124927\_x2.....guucgauucccgGgacccg..... 1  
 Gi3\_28018512\_x2.....cacucacgugacccgggCu..... 1  
 Gi3\_28076564\_x2.....ggguucgauucccgugaG..... 1

|                      |                                      |   |
|----------------------|--------------------------------------|---|
| Gi2_10880577_x2..... | .cAgguucgauucccgugacc.....           | 1 |
| Gi5_8819681_x2.....  | .Agguucgauucccgugaccg.....           | 1 |
| Gi2_10991417_x2..... | .ucacucacgugacccgggC.....            | 1 |
| Gi4_561600_x2.....   | .Uguucgauucccgugaccgc.....           | 1 |
| Gi3_28000918_x2..... | .gCguucgauucccgugaccg.....           | 1 |
| Gl1a_5891304_x2..... | .gCGgCcauaguacaguggcuagu.....        | 1 |
| Gi3_28138784_x2..... | .cgauucccgugaccgCGguuG.....          | 1 |
| Gi3_28161918_x2..... | .ugacugCcacucacgugacc.....           | 1 |
| Gi2_10989793_x2..... | .cacucacgugaUccgggu.....             | 1 |
| Gi1_4093979_x2.....  | .gCGgAcauaguacaguggcua.....          | 1 |
| Gi2_10903537_x2..... | .gAguucgauucccgugaccg.....           | 1 |
| Gi1_4126203_x2.....  | .ugacugucacucacgugaGccgg.....        | 1 |
| Gi2_10905661_x2..... | .gugacugucacucacAugaccg.....         | 1 |
| Gi2_10908267_x2..... | .gauucccgugaccgCGAc.....             | 1 |
| Gi1_4129977_x2.....  | .gCGgucauaguacaguggAua.....          | 1 |
| Gi1_4137717_x2.....  | .ucgauucccgugaccgcU.....             | 1 |
| Gi3_28099218_x2..... | .ggguucgauucccgAugaccg.....          | 1 |
| Gi2_10833829_x2..... | .ugacugucGcucacgugaccgg.....         | 1 |
| Gi3_28241888_x2..... | .gugacugucCucacgug.....              | 1 |
| Gi3_28223816_x2..... | .cacuUacgugacccggguucga.....         | 1 |
| Gi3_28080934_x2..... | .gugacuguNacucacgugaccg.....         | 1 |
| Gi1_4128295_x2.....  | .gCGgucauaguacaguggcuaU.....         | 1 |
| Gi2_10958121_x2..... | .cgugacugucacucacgugaUc.....         | 1 |
| Gi1_4124055_x2.....  | .gugCGgucauaguacaguggcuaguugcgu..... | 0 |
| Gi2_10891901_x2..... | .cacucacguAaccCGguuc.....            | 1 |
| Gi1_4129761_x2.....  | .cUaguacaguggcuagu.....              | 1 |
| Gi5_8803735_x2.....  | .ucgauucccgugCccgc.....              | 1 |
| Gi3_28194586_x2..... | .ucgauucccgugaccgCGU.....            | 1 |
| Gi2_10949745_x2..... | .guucgauuccAggugaccg.....            | 1 |
| Gi2_10886719_x2..... | .cggguucgaCucccgugacc.....           | 1 |
| Gi3_28180734_x2..... | .ugacugucacucacgugaAccg.....         | 1 |
| Gi3_28145954_x2..... | .ggguucgauucccgugacUgcg.....         | 1 |
| Gl1a_5972796_x2..... | .uucAauucccgugaccg.....              | 1 |
| Gi3_28063148_x2..... | .cacucacgugaccAgggu.....             | 1 |
| Gi2_10985401_x2..... | .cacucacgugacccggAuuc.....           | 1 |
| Gi5_8787573_x2.....  | .gCGgucauGguacaguggcu.....           | 1 |
| Gi5_8819673_x2.....  | .gCGgucauaguacaguggcuCguau.....      | 1 |
| Gi1_4125915_x2.....  | .guucgauucccgugacGg.....             | 1 |
| Gi2_10918935_x2..... | .Ucggucauaguacaguggcua.....          | 1 |
| Gi2_10938937_x2..... | .gcUgucauaguacaguggcuag.....         | 1 |
| Gi2_10858065_x2..... | .gugacugucacucacgugaccC.....         | 1 |
| Gi1_4136251_x2.....  | .cauaguacaguggcuGgu.....             | 1 |
| Gi5_8761473_x2.....  | .uucgauCcccgugaccgCG.....            | 1 |
| Gi3_28068970_x2..... | .uAgauucccgugaccgCG.....             | 1 |
| Gi5_8802073_x2.....  | .cgggGucgauucccgugac.....            | 1 |
| Gi3_28117850_x2..... | .cacucacgugacccgggCucgauuc.....      | 1 |
| Gi1_4156611_x2.....  | .gacugucacucUcgugaccg.....           | 1 |

|                      |                                     |   |
|----------------------|-------------------------------------|---|
| Gi2_10966169_x2..... | .....ggguucgauucccgugaccgc.....     | 1 |
| Gl1a_5966728_x2..... | .....guucgauucUcggugacc.....        | 1 |
| Gi5_8791579_x2.....  | .....uucgaCucccgugaccgcg.....       | 1 |
| Gi2_10951563_x2..... | .....gauucccgugaccgcgca.....        | 1 |
| Gi1_4113157_x2.....  | .....Ugguucgauucccgugacc.....       | 1 |
| Gi5_8824269_x2.....  | .....ggguucgauucccgugacAg.....      | 1 |
| Gi3_28165954_x2..... | .....ugacGgucacucacgugaccg.....     | 1 |
| Gi3_28056278_x2..... | .....cacuUacgugaccggguucgauucc..... | 1 |
| Gi2_10922087_x2..... | .....ugacugucacucacgCga.....        | 1 |
| Gi2_10979395_x2..... | .....gcggucauaguaAaguggc.....       | 1 |
| Gi4_566852_x2.....   | .....gcggucauaguacagugg.....        | 0 |
| Gi3_27995218_x2..... | .....ucgauucccgguUaccgcg.....       | 1 |
| Gi3_28236000_x2..... | .....gggAucgauucccgugaccg.....      | 1 |
| Gi2_10905575_x2..... | .....acGcacgugaccggguuc.....        | 1 |
| Gi3_28257874_x2..... | .....gacugucaNucacgugacc.....       | 1 |
| Gi3_28119632_x2..... | .....ggguucgauucccgguUaccgc.....    | 1 |
| Gi2_10964401_x2..... | .....guuGgauucccgugaccg.....        | 1 |
| Gi5_8729567_x2.....  | .....cauaguGcaguggcuagu.....        | 1 |
| Gi3_28146432_x2..... | .....gugacugucacucacgCgac.....      | 1 |
| Gi5_8720453_x2.....  | .....ggguucgauuccUgguga.....        | 1 |
| Gi3_28067374_x2..... | .....gacCgucacucacgugacc.....       | 1 |
| Gi2_10899565_x2..... | .....ggguucgauucccgugaccUc.....     | 1 |
| Gi3_28090754_x2..... | .....ugacugAcacucacgugaccg.....     | 1 |
| Gi2_10958979_x2..... | .....uucgauuUccggugaccgc.....       | 1 |
| Gi5_8794559_x2.....  | .....gucgauaguacaguggcCag.....      | 1 |
| Gi5_8819517_x2.....  | .....uucgauuAccggugaccgcg.....      | 1 |
| Gi1_4111809_x2.....  | .....ugaAugucacucacgugaccgg.....    | 1 |
| Gi5_8775655_x2.....  | .....guucgauucccgugaccgcgA.....     | 1 |
| Gi3_28021422_x2..... | .....acucacgugCcccgggu.....         | 1 |
| Gi3_28165008_x2..... | .....Acacucacgugaccggguucga.....    | 1 |
| Gi5_8803525_x2.....  | .....cgguucgauucccgugCcc.....       | 1 |
| Gi2_10846617_x2..... | .....gCuucgauucccgugaccgcgcu.....   | 1 |
| Gi2_10948679_x2..... | .....Uacucacgugaccggguucga.....     | 1 |
| Gi1_4127327_x2.....  | .....gcggCcauaguacaguggcuag.....    | 1 |
| Gi3_28183646_x2..... | .....gacugucacucacgugaccGg.....     | 1 |
| Gi1_4154561_x2.....  | .....gugacugucacucCcgugaccgg.....   | 1 |
| Gi3_28093092_x2..... | .....cugCcacucacgugaccgggu.....     | 1 |
| Gi5_8810913_x2.....  | .....guuGgauucccgugaccgc.....       | 1 |
| Gi5_8738121_x2.....  | .....ggguucgauuccUggugacc.....      | 1 |
| Gi1_4116693_x2.....  | .....guucUauucccgugaccg.....        | 1 |
| Gi2_10943817_x2..... | .....gCguucgauucccgugaccgcg.....    | 1 |
| Gi2_10959763_x2..... | .....cacucacguAaccgggu.....         | 1 |
| Gi5_8812309_x2.....  | .....ggguucgauucccgugacGgcg.....    | 1 |
| Gi1_4105939_x2.....  | .....gacugucacucacgugaccgc.....     | 1 |
| Gi5_8729009_x2.....  | .....gcggucauNguacaguggcu.....      | 1 |
| Gi1_4118247_x2.....  | .....ugacuguAacucacgugaccgg.....    | 1 |
| Gi1_4146733_x2.....  | .....gacGgucacucacgugaccgg.....     | 1 |

|                 |                                   |   |
|-----------------|-----------------------------------|---|
| Gi5_8801635_x2  | . . . . .gaccggguCcgauucc         | 1 |
| Gi1_4157001_x2  | . . . . .gacugucacucacgugaGccg    | 1 |
| Gi3_28050782_x2 | . . . . .gugacugucGcucacgugac     | 1 |
| Gi3_28113148_x2 | . . . . .cgauucccgugaccgAg        | 1 |
| Gi4_554622_x2   | . . . . .Uuucgauuccggugaccg       | 1 |
| Gi5_8814345_x2  | . . . . .gacugucacucacgugaccGgg   | 1 |
| Gi4_564908_x2   | . . . . .gcggucauaguacaguggcCagu  | 1 |
| Gi1_4110673_x2  | . . . . .cgauucccgugaccgcgguu     | 0 |
| Gi5_8816195_x2  | . . . . .gcggucauaguCcagugg       | 1 |
| Gi3_28248124_x2 | . . . . .uucgCuucccgugaccgcg      | 1 |
| Gi3_28166238_x2 | . . . . .uGacgugaccggguucga       | 1 |
| Gi5_8752095_x2  | . . . . .ggUuucgauuccggugaccg     | 1 |
| Gi1_4140287_x2  | . . . . .gacugucacucCcgugaccg     | 1 |
| Gi3_28171110_x2 | . . . . .ugacugucacucacgugacGcgg  | 1 |
| Gi1_4141255_x2  | . . . . .ugacugucacucacgAgaccg    | 1 |
| Gi5_8821089_x2  | . . . . .ucgauucccgugGccgc        | 1 |
| Gi3_28161474_x2 | . . . . .cacgGgaccggguucgauucc    | 1 |
| Gi2_10858021_x2 | . . . . .cgugaccggguucgGuuc       | 1 |
| Gi3_28071442_x2 | . . . . .ggguucgaCuccggugaccgc    | 1 |
| Gi3_28142718_x2 | . . . . .cgugaccggggCucgauucc     | 1 |
| Gi1_4149097_x2  | . . . . .gacugucacucaGgugaccgg    | 1 |
| Gi3_28034414_x2 | . . . . .gugacUcggguucgauucc      | 1 |
| Gi1_4136067_x2  | . . . . .ugacAgucacucacgugaccg    | 1 |
| Gi3_28241906_x2 | . . . . .Gucacgugaccggguucgauu    | 1 |
| Gi3_28083574_x2 | . . . . .ucgUuucccgugaccgc        | 1 |
| Gi1a_5932526_x2 | . . . . .guCcgauucccgugacc        | 1 |
| Gi4_557664_x2   | . . . . .aGucacgugaccggguucg      | 1 |
| Gi2_10899621_x2 | . . . . .auaguacaguggcCagua       | 1 |
| Gi2_10915305_x2 | . . . . .acucacgugaccggguucgauu   | 0 |
| Gi3_28054802_x2 | . . . . .gcggucauaguacaUuggc      | 1 |
| Gi2_10960913_x2 | . . . . .guuNgauucccgugaccgcg     | 1 |
| Gi5_8812759_x2  | . . . . .acugucacCcacgugaccggguuc | 1 |
| Gi2_10959425_x2 | . . . . .cacucacAugaccgggu        | 1 |
| Gi3_28060038_x2 | . . . . .ugacugucacucacgugGccg    | 1 |
| Gi5_8737483_x2  | . . . . .gguucgaAuuccggugac       | 1 |
| Gi3_28010086_x2 | . . . . .ggguucgauucccgugaAcgc    | 1 |
| Gi2_10870061_x2 | . . . . .cacCcacgugaccggguucga    | 1 |
| Gi2_10919491_x2 | . . . . .cGcggguucgauucccgugaccgc | 1 |
| Gi2_10893817_x2 | . . . . .cacucacgugaccAgguuc      | 1 |
| Gi3_28063468_x2 | . . . . .Ucggucauaguacaguggcu     | 1 |
| Gi5_8827619_x2  | . . . . .cacucacgugaccgggCuc      | 1 |
| Gi3_28005464_x2 | . . . . .ucgauuUccggugaccgc       | 1 |
| Gi5_8725645_x2  | . . . . .gCcauaguacaguggcuag      | 1 |
| Gi1_4120005_x2  | . . . . .cacucacgNgaccggguu       | 1 |
| Gi3_28148084_x2 | . . . . .gguucgauucGcggugac       | 1 |
| Gi5_8781809_x2  | . . . . .gcggucauaguaAaguggcua    | 1 |
| Gi2_10845005_x2 | . . . . .guucgUuucccgugaccgc      | 1 |

|                      |                                   |   |
|----------------------|-----------------------------------|---|
| Gi2_10848465_x2..... | cauaguacaguggcuaguau.....         | 0 |
| Gi2_10941001_x2..... | gcggucauaguacagugUc.....          | 1 |
| Gi1_4148785_x2.....  | uucgauucccgugaccgCcu.....         | 1 |
| Gi3_28223994_x2..... | AucgauucccgugaccgCg.....          | 1 |
| Gi3_28189058_x2..... | ucacgugaNccggguucgauuc.....       | 1 |
| Gi1_4125399_x2.....  | gucauaguGcaguggcuaguau.....       | 1 |
| G1a_5979794_x2.....  | gguucgCuucccgugacc.....           | 1 |
| Gi5_8750195_x2.....  | Uccggguucgauucccgugacc.....       | 1 |
| Gi3_28007540_x2..... | ugacugucNcucacgugacc.....         | 1 |
| Gi5_8786047_x2.....  | ggguucgaCucccgugacc.....          | 1 |
| Gi1_4096397_x2.....  | Uguucgauucccgugac.....            | 1 |
| Gi1_4147799_x2.....  | uucgauucccgugaccgU.....           | 1 |
| Gi3_28110338_x2..... | gcggucauaAuacaguggc.....          | 1 |
| Gi2_10850629_x2..... | cacucacgCgaccggguuc.....          | 1 |
| Gi3_28227246_x2..... | gugacugCcacucacgug.....           | 1 |
| Gi2_10972985_x2..... | gguucgaAuucccgugaccgC.....        | 1 |
| Gi1_4141599_x2.....  | gcggGcauaguacaguggc.....          | 1 |
| Gi5_8741391_x2.....  | gcggucauaguaUagugg.....           | 1 |
| Gi3_28157672_x2..... | gacugucacucacgugacGcgg.....       | 1 |
| Gi5_8751005_x2.....  | acugucGcucacgugaccggguuc.....     | 1 |
| Gi1_4148657_x2.....  | gugGcugucacucacgugaccgg.....      | 1 |
| G1a_5896244_x2.....  | uucgauucccgugGccg.....            | 1 |
| Gi3_28002204_x2..... | gugaccggguUgauucc.....            | 1 |
| Gi3_28139524_x2..... | Cgacugucacucacgugacc.....         | 1 |
| Gi5_8768795_x2.....  | gguucgauucccgGgaccg.....          | 1 |
| Gi3_28173580_x2..... | acucacgugaccAgguu.....            | 1 |
| G1a_5974506_x2.....  | gcggCcauaguacaguggcua.....        | 1 |
| Gi1_4138493_x2.....  | gaUugucacucacgugacc.....          | 1 |
| Gi1_4145307_x2.....  | gcUgucauaguacaguggc.....          | 1 |
| Gi5_8826485_x2.....  | uucUauucccgugaccgCg.....          | 1 |
| Gi2_10931693_x2..... | guucgauuccAggugaccgC.....         | 1 |
| Gi3_28112026_x2..... | aUucacgugaccgggu.....             | 1 |
| Gi3_28018878_x2..... | acugucacCcacgugaccgggu.....       | 1 |
| Gi3_28072190_x2..... | gNucgauucccgugaccgCg.....         | 1 |
| Gi2_10903229_x2..... | gugaccggguucgauucccgugaccgCg..... | 1 |
| Gi1_4099409_x2.....  | ucacuAacgugaccggguuc.....         | 1 |
| Gi2_10898137_x2..... | gguucgauucccgAgaccg.....          | 1 |
| Gi2_10871935_x2..... | cgGgaccggguucgauuc.....           | 1 |
| Gi3_28210522_x2..... | gacugucacucacgugUc.....           | 1 |
| Gi5_8760407_x2.....  | ugacuUucacucacgugaccgCg.....      | 1 |
| G1a_5922426_x2.....  | guucgauucccgAugacc.....           | 1 |
| Gi5_8802529_x2.....  | gcggUauaguacaguggcuagua.....      | 1 |
| Gi3_28136012_x2..... | cacucacgugaccAgguuc.....          | 1 |
| Gi5_8816087_x2.....  | guNcgauucccgugacc.....            | 1 |
| Gi5_8739421_x2.....  | cAauucccgugaccgCg.....            | 1 |
| Gi3_28226818_x2..... | acAugaccggguucgauucc.....         | 1 |
| Gi1_4129129_x2.....  | ugacugucacucacgugaccUg.....       | 1 |

|                      |                                    |   |
|----------------------|------------------------------------|---|
| Gi2_10925223_x2..... | ugucacCcacgugacccggguucgauucc..... | 1 |
| Gi3_28224662_x2..... | Ggugacugucacucacgugacccggguu.....  | 1 |
| Gi5_8719943_x2.....  | gucaCaguacaguggcuagu.....          | 1 |
| Gi2_10860081_x2..... | aUucacgugacccggguuc.....           | 1 |
| Gi5_8789895_x2.....  | guucgauucccgugaccgcggc.....        | 0 |
| Gi5_8766027_x2.....  | gacugucacucacgugaUccg.....         | 1 |
| Gi3_28002790_x2..... | gguucgauucGcggugaccgcg.....        | 1 |
| G1a_5937922_x2.....  | guucgCuucccgugaccg.....            | 1 |
| Gi3_28229620_x2..... | cgugacccggguucgauucAc.....         | 1 |
| Gi4_557214_x2.....   | guucgauucccgugaccgcggcA.....       | 1 |
| Gi3_27990658_x2..... | uucgauucAcggugaccgcg.....          | 1 |
| Gi2_10858977_x2..... | guucgauucGcggugaccgc.....          | 1 |
| G1a_5948780_x2.....  | gguCcgauucccgugac.....             | 1 |
| Gi3_28173398_x2..... | cacucUcgugaccgggu.....             | 1 |
| Gi3_27996484_x2..... | ucgauucccgAgaccgc.....             | 1 |
| Gi3_27988530_x2..... | gCguucgauucccgugacc.....           | 1 |
| Gi5_8817301_x2.....  | Cuaguacaguggcuagua.....            | 1 |
| Gi5_8741947_x2.....  | Cgacugucacucacgugacccg.....        | 1 |
| Gi3_28124332_x2..... | gugacugucacuUacgugaccg.....        | 1 |
| Gi3_28150740_x2..... | uucgauucccgguAaccgcg.....          | 1 |
| Gi3_28106234_x2..... | ucacgugacccggguCcgA.....           | 1 |
| Gi3_28149948_x2..... | aGugucacucacgugacccgggu.....       | 1 |
| Gi5_8786697_x2.....  | gcggucaguauacCguggcu.....          | 1 |
| Gi2_10947461_x2..... | ugacugCcacucacgugacccgg.....       | 1 |
| Gi5_8726661_x2.....  | acgugacccggguucgCuucccgugacc.....  | 1 |
| Gi2_10863295_x2..... | guuNgauucccgugaccg.....            | 1 |
| Gi1_4107833_x2.....  | ucaguauacaguggcuagCa.....          | 1 |
| G1a_5911296_x2.....  | gguucgCuucccgugaccgc.....          | 1 |
| Gi3_28178724_x2..... | ucgauAcccgugaccgcg.....            | 1 |
| G1a_5905296_x2.....  | gcggucauNguacaguggcuaguau.....     | 1 |
| Gi3_28259658_x2..... | gcggucaguauacUgugg.....            | 1 |
| Gi5_8809605_x2.....  | Ccacgugacccggguucgauucc.....       | 1 |
| Gi3_28087962_x2..... | uucgauAcccgugaccgc.....            | 1 |
| Gi3_28127068_x2..... | acugucacucacgCgaccg.....           | 1 |
| Gi5_8820765_x2.....  | uucgauucccgugaccgUg.....           | 1 |
| Gi3_28232896_x2..... | ggguucgauucccgguAacc.....          | 1 |
| Gi5_8775345_x2.....  | gcggucauUguacaguggcua.....         | 1 |
| G1a_5963206_x2.....  | acugAcacucacgugacccgg.....         | 1 |
| G1a_5929736_x2.....  | gguucgauuAccggugacc.....           | 1 |
| Gi2_10848295_x2..... | cacucCcgugacccggguucgauucc.....    | 1 |
| Gi3_27988338_x2..... | acgugacccggguucgauuccA.....        | 1 |
| Gi3_28143880_x2..... | gguucgauucccgugaGcg.....           | 1 |
| Gi4_564740_x2.....   | gacugucacucacgugacAccg.....        | 1 |
| Gi2_10934065_x2..... | ucgauucccgGgaccgc.....             | 1 |
| Gi2_10945595_x2..... | gauucccgugaccgcgA.....             | 1 |
| Gi5_8808603_x2.....  | gguucgauuAccggugaccgc.....         | 1 |
| G1a_5936236_x2.....  | gacugucacucacgugacccggg.....       | 0 |



|                 |                                                |   |
|-----------------|------------------------------------------------|---|
| Gi1_4131039_x2  | gcgguc <u>au</u> aguacCguggc                   | 1 |
| Gi1_4140059_x2  | cauaguacagugUcuagu                             | 1 |
| Gi3_28131078_x2 | ggguucgauu <u>ccc</u> ggGgaccgc                | 1 |
| Gi3_28257356_x2 | cacucacgug <u>acc</u> ggAuucga                 | 1 |
| Gi1_4115275_x2  | gcggucCuaguacaguggc                            | 1 |
| Gi5_8734801_x2  | guU <u>acc</u> cgguucgauucc                    | 1 |
| Gi1a_5915452_x2 | guucgauu <u>ccc</u> ggugaAc                    | 1 |
| Gi3_28033302_x2 | gcgguc <u>au</u> aguacaguggcGagua              | 1 |
| Gi1a_5962516_x2 | gcgguc <u>au</u> aguacUguggcuagu               | 1 |
| Gi3_28018300_x2 | ggguucgauu <u>ccc</u> ggugacU                  | 1 |
| Gi5_8728193_x2  | gguucga <u>Au</u> cccggugaccgc                 | 1 |
| Gi5_8724431_x2  | gcggucaCaguacagugg                             | 1 |
| Gi2_10923677_x2 | cgug <u>acc</u> cgguucgauu <u>ccc</u> ggugaccg | 0 |
| Gi2_10946723_x2 | cacucacgug <u>acc</u> gAguuc                   | 1 |
| Gi2_10906237_x2 | cgauC <u>ccc</u> ggugaccgcg                    | 1 |
| Gi5_8768685_x2  | cGuaguacaguggcuaguau                           | 1 |
| Gi3_28168082_x2 | gguucgauu <u>ccc</u> gCugaccgcg                | 1 |
| Gi3_28082424_x2 | guucgauu <u>ccc</u> ggugaccgcgcuu              | 0 |
| Gi3_28178080_x2 | acgug <u>acc</u> cgguucgaCuccc                 | 1 |
| Gi3_28256370_x2 | ugacuguA <u>acu</u> cacgugacc                  | 1 |
| Gi5_8755219_x2  | ggguucgauu <u>U</u> ccggugacc                  | 1 |
| Gi3_28052188_x2 | gguucgauu <u>ccc</u> ggugaGcgcg                | 1 |
| Gi5_8723117_x2  | cAguc <u>acu</u> cacgugaccgcg                  | 1 |
| Gi1_4097629_x2  | gGgacuguc <u>acu</u> cacgugaccgcg              | 1 |
| Gi5_8786379_x2  | gacU <u>cg</u> gguucgauucc                     | 1 |
| Gi2_10897081_x2 | cacucacgug <u>acc</u> cgguucgC                 | 1 |
| Gi3_28220380_x2 | cacucacgugC <u>ccc</u> ggguuc                  | 1 |
| Gi5_8791481_x2  | gguucgauu <u>ccc</u> ggugaccgcC                | 1 |
| Gi2_10850121_x2 | gcgguc <u>au</u> Uguacaguggc                   | 1 |
| Gi3_28036626_x2 | cacuU <u>ac</u> gugacccgguucgauuc              | 1 |
| Gi3_28143236_x2 | guuU <u>gau</u> u <u>ccc</u> ggugaccgcgguuu    | 1 |
| Gi3_28259844_x2 | gcgguc <u>au</u> aguaGagugg                    | 1 |
| Gi5_8722079_x2  | gguucgauu <u>ccc</u> gguaAaccg                 | 1 |
| Gi3_28176968_x2 | gcgguc <u>au</u> aguacaguggc                   | 1 |
| Gi1a_5918150_x2 | gguuU <u>gau</u> u <u>ccc</u> ggugaccgc        | 1 |
| Gi1_4092935_x2  | gacuguc <u>acu</u> cacgugGcc                   | 1 |
| Gi1_4104543_x2  | ugacuguc <u>acu</u> cacguCaccgcg               | 1 |
| Gi3_28127400_x2 | uucgauu <u>ccc</u> ggugacAgcg                  | 1 |
| Gi5_8736621_x2  | ucgauu <u>ccc</u> ggugaccgU                    | 1 |
| Gi2_10975841_x2 | cccggguucgauu <u>ccc</u> ggCgaccgc             | 1 |
| Gi3_28103656_x2 | cacucacgug <u>acc</u> cgguucgauC               | 1 |
| Gi5_8736707_x2  | guucgauu <u>ccc</u> gguaCaccg                  | 1 |
| Gi2_10961189_x2 | cgauu <u>ccc</u> ggugGccgcgguu                 | 1 |
| Gi3_28039118_x2 | gggC <u>uc</u> gauu <u>ccc</u> ggugac          | 1 |
| Gi3_28132288_x2 | ugacuguc <u>acu</u> cacgAgaccgc                | 1 |
| Gi3_28010890_x2 | auaguacaguggcuagua                             | 0 |
| Gi5_8770697_x2  | cacucacgN <u>g</u> acccgguuc                   | 1 |

|                      |                                     |   |
|----------------------|-------------------------------------|---|
| Gi1a_5909582_x2..... | .....gguucgauucccgGgaccgc.....      | 1 |
| Gi2_10872073_x2..... | .....gcggucauagAacaguggc.....       | 1 |
| Gi5_8760869_x2.....  | .....cGcucacgugaccggguuc.....       | 1 |
| Gi1_4157973_x2.....  | .....gguucgauucccgugaccgcUc.....    | 1 |
| Gi1a_5963284_x2..... | .....ugucacucacAugaccggguuc.....    | 1 |
| Gi1_4114237_x2.....  | .....acugucacucacUugaccgg.....      | 1 |
| Gi5_8743791_x2.....  | .....ugacugucacuAacgugaccgg.....    | 1 |
| Gi2_10887767_x2..... | .....ggguucgauucccgGgaccgc.....     | 1 |
| Gi2_10940341_x2..... | .....Ucucacgugaccggguuc.....        | 1 |
| Gi5_8739761_x2.....  | .....guucgauucccgguUaccgc.....      | 1 |
| Gi1_4108463_x2.....  | .....Aguucgauucccgugacc.....        | 1 |
| Gi2_10872529_x2..... | .....ggguucgauucccgugaAc.....       | 1 |
| Gi1_4120039_x2.....  | .....gcggucauCuacagugg.....         | 1 |
| Gi1_4133653_x2.....  | .....gcggucauNguacaguggcuaguau..... | 1 |
| Gi2_10883121_x2..... | .....Aacucacgugaccgggu.....         | 1 |
| Gi2_10830805_x2..... | .....gugaccAgguucgauucc.....        | 1 |
| Gi3_28123470_x2..... | .....gacugucacGcacgugaccgg.....     | 1 |
| Gi3_28111528_x2..... | .....acUcggguucgauucccgugacc.....   | 1 |
| Gi3_28226224_x2..... | .....gguCcgauucccgugaccg.....       | 1 |
| Gi1_4143329_x2.....  | .....cccggguucGcucaccggugac.....    | 1 |
| Gi3_28204438_x2..... | .....gacugucacucacgugacUcgg.....    | 1 |
| Gi2_10875401_x2..... | .....Ccauaguacaguggcuagua.....      | 1 |
| Gi1_4151265_x2.....  | .....gguucgauucccgugaccUcg.....     | 1 |
| Gi2_10831201_x2..... | .....acgugaccggGcugauucc.....       | 1 |
| Gi5_8719091_x2.....  | .....cgauuccNgugaccgcg.....         | 1 |
| Gi2_10925049_x2..... | .....ggguucgauucccgGgaccg.....      | 1 |
| Gi2_10845613_x2..... | .....gcggucauagCacaguggcuagu.....   | 1 |
| Gi1_4120157_x2.....  | .....uUucacucacgugaccggguuc.....    | 1 |
| Gi1a_5887090_x2..... | .....acgugaccggguucgauuccA.....     | 1 |
| Gi5_8724989_x2.....  | .....gguucgauucccgugacUg.....       | 1 |
| Gi1a_5978606_x2..... | .....acugucacucacgugaccUg.....      | 1 |
| Gi3_28019376_x2..... | .....Ucggucauaguacaguggcuagu.....   | 1 |
| Gi3_28041166_x2..... | .....cauaguacaguggcuagG.....        | 1 |
| Gi5_8760191_x2.....  | .....gcggucauaguaGagugg.....        | 1 |
| Gi1_4141693_x2.....  | .....gCucgauucccgugaccgc.....       | 1 |
| Gi1a_5957026_x2..... | .....ggUGcgauucccgugac.....         | 1 |
| Gi3_28144404_x2..... | .....cacucacgugaccggguucU.....      | 1 |
| Gi1_4139271_x2.....  | .....ugacugucacucacgAgaccgg.....    | 1 |
| Gi3_28226952_x2..... | .....ucacucacgugaccAgguuc.....      | 1 |
| Gi1_4094193_x2.....  | .....uucgauucccgugacUgc.....        | 1 |
| Gi3_28025320_x2..... | .....ggguucgauucccgGgacc.....       | 1 |
| Gi5_8733927_x2.....  | .....ggguucgauucccgGgacc.....       | 1 |
| Gi3_27985750_x2..... | .....ucacucacgugGcccggguucga.....   | 1 |
| Gi5_8745751_x2.....  | .....ugacugucacucacgAgaccgg.....    | 1 |
| Gi1a_5882816_x2..... | .....gCucgauucccgugaccg.....        | 1 |
| Gi3_28222394_x2..... | .....ugacugucacucaUgugaccg.....     | 1 |
| Gi2_10959725_x2..... | .....gcggucauaguacaCuggc.....       | 1 |

|                 |                                                |   |
|-----------------|------------------------------------------------|---|
| Gi3_28046130_x2 | . . . . . gacugucacucacguCacccgg . . . . .     | 1 |
| Gi2_10845573_x2 | . . . . . guucCauucccgugacc . . . . .          | 1 |
| G1a_5876704_x2  | . . . . . gguucgauucccgAugacc . . . . .        | 1 |
| Gi3_28001022_x2 | . . . . . gGcugucacucacgugacccggg . . . . .    | 1 |
| Gi1_4152755_x2  | . . . . . acugucacucacgugacUcgg . . . . .      | 1 |
| Gi3_28093018_x2 | . . . . . Ccacucacgugacccggguucga . . . . .    | 1 |
| Gi3_28167000_x2 | . . . . . cucacgugCcccggguucgauucc . . . . .   | 1 |
| G1a_5959782_x2  | . . . . . guucgauucccgugagGcg . . . . .        | 1 |
| Gi3_28175350_x2 | . . . . . Nuucgauucccgugacc . . . . .          | 1 |
| G1a_5931740_x2  | . . . . . ucacgugacccggguucgGuuc . . . . .     | 1 |
| Gi1_4106513_x2  | . . . . . gcgNucauaguacaguggcua . . . . .      | 1 |
| Gi2_10956253_x2 | . . . . . guucgauucccCgugaccgcg . . . . .      | 1 |
| Gi1_4129637_x2  | . . . . . acCgucacucacgugacccggguuc . . . . .  | 1 |
| Gi1_4122317_x2  | . . . . . gUuucgauucccgugac . . . . .          | 1 |
| Gi3_28139258_x2 | . . . . . ucgauucccgugagAcgcg . . . . .        | 1 |
| Gi2_10842705_x2 | . . . . . gcgguUauaguacagugg . . . . .         | 1 |
| Gi5_8783221_x2  | . . . . . gcggucauaguCcaguggcuagua . . . . .   | 1 |
| G1a_5908426_x2  | . . . . . gguucgauucccgguAacc . . . . .        | 1 |
| G1a_5906690_x2  | . . . . . gguucgauucccgugaccgcC . . . . .      | 1 |
| Gi3_28258460_x2 | . . . . . aUucacgugacccggguucgauu . . . . .    | 1 |
| Gi4_564448_x2   | . . . . . gguucgauucccgugaccgcgUc . . . . .    | 1 |
| Gi5_8724083_x2  | . . . . . ugacugGcacucacgugacccgg . . . . .    | 1 |
| Gi1_4095221_x2  | . . . . . gacugucacucacgAgacccgg . . . . .     | 1 |
| Gi2_10953795_x2 | . . . . . ugacugucacucacgCgacccgg . . . . .    | 1 |
| Gi2_10836085_x2 | . . . . . Gcgguucgauucccgugaccg . . . . .      | 1 |
| Gi3_28082612_x2 | . . . . . cacucacgCgacccggguucga . . . . .     | 1 |
| Gi1_4097633_x2  | . . . . . gcggucauagGacaguggc . . . . .        | 1 |
| Gi5_8729695_x2  | . . . . . acugucacCcacgugacccgggu . . . . .    | 1 |
| Gi1_4093739_x2  | . . . . . ucUauucccgugaccgc . . . . .          | 1 |
| Gi5_8746117_x2  | . . . . . gcggucaCaguacaguggc . . . . .        | 1 |
| Gi5_8788177_x2  | . . . . . gggGucgauucccgugaccg . . . . .       | 1 |
| Gi2_10889081_x2 | . . . . . cacAcacgugacccggguuc . . . . .       | 1 |
| Gi3_28012892_x2 | . . . . . gacugucGcucacgugacccggguuc . . . . . | 1 |
| Gi4_558750_x2   | . . . . . cucGcgugacccggguucgauuc . . . . .    | 1 |
| Gi5_8782559_x2  | . . . . . gcggucauaguacaguCgcuagu . . . . .    | 1 |
| Gi1_4109483_x2  | . . . . . acugucaUucacgugacccgg . . . . .      | 1 |
| Gi3_28092206_x2 | . . . . . gacugucacucacUugacccgg . . . . .     | 1 |
| Gi3_28177340_x2 | . . . . . cacucacgCgacccggguucgauuc . . . . .  | 1 |
| Gi4_554402_x2   | . . . . . gacCgucacucacgugacccgg . . . . .     | 1 |
| Gi2_10914571_x2 | . . . . . gguucgauucccgguAacc . . . . .        | 1 |
| Gi5_8764037_x2  | . . . . . uucgauUccggugaccgcg . . . . .        | 1 |
| Gi2_10912391_x2 | . . . . . gguNcgauucccgugaccgcg . . . . .      | 1 |
| Gi2_10872535_x2 | . . . . . gguucgauucccgGgaccg . . . . .        | 1 |
| Gi3_28141266_x2 | . . . . . gguucgaGuucccgugaccg . . . . .       | 1 |
| Gi3_28018816_x2 | . . . . . ugacugucacucacgugaUcc . . . . .      | 1 |
| Gi2_10929735_x2 | . . . . . gguucgauucccgugagAcgcg . . . . .     | 1 |
| Gi3_28020420_x2 | . . . . . gacugucacucUcgugacc . . . . .        | 1 |

Gi3\_28209708\_x2.....ucgauuccAggugaccgcg..... 1  
 Gi3\_28182588\_x2.....uAcgauucccgugaccgcg..... 1  
 Gi5\_8795145\_x2.....auaguacCguggcuagua..... 1  
 Gi5\_8736845\_x2.....ugacugucaUucacgugaccgG..... 1  
 Gi2\_10953665\_x2.....ucgauuccNggugaccgcg..... 1  
 Gi5\_8753863\_x2.....gcggucgauaguacaguggcuaguaugcgG..... 1  
 Gi5\_8740805\_x2.....gcggucUuaguacaguggcua..... 1  
 G1a\_5976164\_x2.....guGcgauucccgugaccg..... 1  
 Gi3\_28221944\_x2.....gguucgauucccgCugaccg..... 1  
 Gi2\_10839725\_x2.....cUggguucgauucccgugaccg..... 1  
 Gi5\_8740247\_x2.....guucgauucccgugaGcg..... 1  
 Gi1\_4120733\_x2.....Auucgauucccgugaccg..... 1  
 Gi1\_4092927\_x2.....gacugucacucacgugaccCG..... 1  
 Gi2\_10947991\_x2.....ggguucgGuucccgugaccgcg..... 1  
 Gi1\_4096895\_x2.....ugacugucacuUacgugaccg..... 1  
 Gi1\_4117701\_x2.....cgauucccgugaccgCGcu..... 1  
 Gi3\_28237950\_x2.....cCugaccggguucgauucc..... 1  
 Gi1\_4128519\_x2.....acugucacucacgugaccCGA..... 1  
 Gi3\_28100100\_x2.....cgCgaccggguucgauucc..... 1  
 Gi3\_28143674\_x2.....cacucacgugaccggguUga..... 1  
 Gi2\_10840567\_x2.....ugacugCcacucacguga..... 1  
 Gi2\_10969861\_x2.....ucgauucccgugUccgc..... 1  
 Gi3\_28049272\_x2.....gcggucgauaguacaguAgcu..... 1  
 G1a\_5908808\_x2.....ggAucgauucccgugaccgC..... 1  
 G1a\_5974804\_x2.....gguucgauucccgAugaccg..... 1  
 Gi3\_28158514\_x2.....cgugaccNggauucccg..... 1  
 Gi3\_28073650\_x2.....cgugacugNcacucacgugacc..... 1  
 Gi3\_27991386\_x2.....cacgugaccggguCcgauucc..... 1  
 Gi3\_28222344\_x2.....cgauucccgugaccgCGA..... 1  
 Gi4\_558954\_x2.....gcUgucauaguacaguggcuagua..... 1  
 Gi2\_10847813\_x2.....Ucggucgauaguacaguggcuagua..... 1  
 Gi3\_28129588\_x2.....acgugaccggguucgaCucc..... 1  
 Gi1\_4126461\_x2.....gcggucgauaguacGguggcuagua..... 1  
 G1a\_5948532\_x2.....gguucgauucccgugaUcg..... 1  
 Gi2\_10851405\_x2.....Ccacgugaccggguucgauucc..... 1  
 Gi2\_10870865\_x2.....gguucgauucccgugaccgCGC..... 1  
 Gi1\_4121297\_x2.....gugaccggguucCauucc..... 1  
 Gi3\_28253326\_x2.....ggNucgauucccgugaccgCG..... 1  
 Gi1\_4146315\_x2.....gcggucgauaguacGguggcuagua..... 1  
 Gi3\_28022748\_x2.....gacugucacucacguAacc..... 1  
 Gi3\_28134376\_x2.....augcgugacugucacucacgugGcc..... 1  
 Gi5\_8818319\_x2.....gcggucgauaguaUaguggcua..... 1  
 Gi2\_10862363\_x2.....gcggucgauaguacaguggcAagu..... 1  
 Gi2\_10947121\_x2.....cacucacgugCcccgggu..... 1  
 Gi3\_28116928\_x2.....gguucgauucccgugaccgGg..... 1  
 Gi5\_8758653\_x2.....Gcgugaccggguucgauucc..... 1  
 G1a\_5968030\_x2.....uGacgugaccggguucgauucc..... 1

|                      |                                    |   |
|----------------------|------------------------------------|---|
| Gi2_10889419_x2..... | ucacucacgugGccccggu.....           | 1 |
| Gi3_27983258_x2..... | guNcgauucccgugaccgc.....           | 1 |
| Gi3_28244286_x2..... | .gacNgcacucacgugaccgc.....         | 1 |
| Gi5_8779171_x2.....  | .gacAgucacucacgugaccgc.....        | 1 |
| Gi2_10977569_x2..... | .....uucgauucccgGgaccgc.....       | 1 |
| Gi5_8764443_x2.....  | .....gguuGgauucccgugac.....        | 1 |
| Gi3_28048028_x2..... | .....ucgNuucccgugaccgc.....        | 1 |
| Gi5_8768969_x2.....  | .....uuUgauucccgugaccgc.....       | 1 |
| Gi1_4116365_x2.....  | Cucauaguacaguggcuagu.....          | 1 |
| Gi5_8726039_x2.....  | .....cacuGacgugacccgguuc.....      | 1 |
| Gi1_4116513_x2.....  | .gacuguGacucacgugaccgc.....        | 1 |
| Gi2_10980289_x2..... | .....ucacgugacccgGauucg.....       | 1 |
| Gi3_28036456_x2..... | .....auucccgugaccgcggcCu.....      | 1 |
| G1a_5923754_x2.....  | .....ggGucgauucccgugac.....        | 1 |
| Gi3_28080090_x2..... | .....cacucacgugUcccggguuc.....     | 1 |
| Gi3_28190322_x2..... | .....acgugaccAgguucg.....          | 1 |
| Gi5_8793609_x2.....  | .gcggucaAaguacaguggcuagua.....     | 1 |
| Gi2_10842919_x2..... | .....aGucacgugacccgguucga.....     | 1 |
| Gi5_8797039_x2.....  | .gcggucauaguacaguggU.....          | 1 |
| Gi2_10914045_x2..... | .....guucgauuGccggugaccgc.....     | 1 |
| Gi3_28167254_x2..... | .....ucacgugacccgguucgaCuc.....    | 1 |
| Gi3_28094710_x2..... | .....guucgauucccgugaccgcU.....     | 1 |
| Gi2_10876477_x2..... | .....gguGcgauucccgugac.....        | 1 |
| Gi5_8729877_x2.....  | .....acugucacNcacgugacccggu.....   | 1 |
| Gi3_27980352_x2..... | .....Ucggucauaguacaguggcua.....    | 1 |
| Gi1_4143225_x2.....  | .....Aguucgauucccgugaccgc.....     | 1 |
| Gi3_27993784_x2..... | .....gguucgauucccgugaUcg.....      | 1 |
| Gi3_28065546_x2..... | .....ugacugucaUucacgugaccgc.....   | 1 |
| G1a_5945854_x2.....  | .....guucgauucccgAgaccgc.....      | 1 |
| Gi1_4126903_x2.....  | .gcggucaAaguacagugg.....           | 1 |
| G1a_5971548_x2.....  | .....guuUgauucccgugacc.....        | 1 |
| Gi3_28001760_x2..... | .....Cgguucgauucccgugac.....       | 1 |
| G1a_5876616_x2.....  | .....guucUauucccgugaccgc.....      | 1 |
| Gi3_28088508_x2..... | .....gCgacccgguucg.....            | 1 |
| Gi3_28110602_x2..... | .....ggguucgauucccgGgaccgc.....    | 1 |
| Gi3_28171564_x2..... | .....cacuGacgugacccgguucga.....    | 1 |
| Gi1_4124661_x2.....  | .gcggucauaguaAaguggcua.....        | 1 |
| Gi5_8768025_x2.....  | .....cauaguacagugUcuaguau.....     | 1 |
| Gi5_8764549_x2.....  | .....gguucgauucccgugaccgcU.....    | 1 |
| Gi2_10884335_x2..... | .....Aguucgauucccgugaccgcggcu..... | 1 |
| Gi3_28215968_x2..... | .....ggguucgaCucccgugacc.....      | 1 |
| Gi3_28119184_x2..... | .....acucacgugacccgguuc.....       | 0 |
| Gi3_28061804_x2..... | .....ucgauucccgugCccgc.....        | 1 |
| Gi3_28022140_x2..... | .gacugucacucacgugaccgc.....        | 1 |
| G1a_5949232_x2.....  | .....gguucgauucccgugaccgc.....     | 0 |
| Gi2_10927777_x2..... | .....guucgauucccgguUaccgc.....     | 1 |
| Gi3_28107172_x2..... | .....ucgauucccgAugaccgc.....       | 1 |

|                 |                             |   |
|-----------------|-----------------------------|---|
| Gi3_28241884_x2 | .cGcucacgugacccggguucgauucc | 1 |
| Gi4_556298_x2   | .cucacgugCcccggguucgauuc    | 1 |
| Gi2_10950653_x2 | .gguucUauucccgugacc         | 1 |
| Gi3_28000646_x2 | .cacucacgugaccUggguuc       | 1 |
| Gi5_8813867_x2  | .ucgauuccNggugaccg          | 1 |
| Gi1_4127673_x2  | .guucgauucccgGaccgc         | 1 |
| Gi1_4100403_x2  | .gcggucauaguacaAuggcuag     | 1 |
| Gi4_558482_x2   | .gcggucauaguacaAuggcuag     | 1 |
| Gi3_28032050_x2 | .aGccggguucgauucccgugacc    | 1 |
| Gi5_8785015_x2  | .auuccggugaccgCgCc          | 1 |
| Gi2_10869317_x2 | .gAggucaguacaguggc          | 1 |
| Gi1_4090873_x2  | .ugacugucacucacgugaccCg     | 1 |
| Gi3_28246336_x2 | .ucacgugaccgAguucgauuc      | 1 |
| Gi1_4108639_x2  | .gacugucUcucacgugaccg       | 1 |
| Gi1_4099955_x2  | .gcggucauaguacagAggcuag     | 1 |
| Gi5_8761163_x2  | .gcggucauaguacaAuggc        | 1 |
| Gi1_4124127_x2  | .gacuguAacucacgugaccg       | 1 |
| Gi3_28253252_x2 | .acugucacucacgugacAcg       | 1 |
| Gi2_10892965_x2 | .Agacugucacucacgugaccg      | 1 |
| Gi2_10888061_x2 | .acugucacucacgugaccgggu     | 0 |
| Gi1_4106055_x2  | .gcAgucauaguacaguggcuagua   | 1 |
| Gi3_28143532_x2 | .uucgauuccAgugaccg          | 1 |
| Gi2_10929805_x2 | .ucacgugaccggguucGGuucc     | 1 |
| Gi1_4123235_x2  | .gUggucaguacaguggc          | 1 |
| Gi5_8728103_x2  | .cgugaccggguucgauucUcgg     | 1 |
| Gi5_8719505_x2  | .cGcucacgugacccggguucgau    | 1 |
| G1a_5962188_x2  | .acugucacucacgugCcccg       | 1 |
| G1a_5973492_x2  | .gguucgauuccUgugaccg        | 1 |
| Gi5_8802093_x2  | .cgguucgauucUcggugac        | 1 |
| G1a_5948542_x2  | .gGcauaguacaguggcuagu       | 1 |
| Gi3_28179478_x2 | .caUucacgugacccggguucgauucc | 1 |
| Gi5_8819317_x2  | .guucgauuGccggugaccg        | 1 |
| Gi5_8762937_x2  | .gaAugucacucacgugaccg       | 1 |
| Gi3_28058886_x2 | .acugucUcucacgugaccg        | 1 |
| Gi3_28065610_x2 | .acugucacCcacgugaccg        | 1 |
| G1a_5915148_x2  | .gcgAucauaguacaguggcua      | 1 |
| G1a_5936486_x2  | .guucgauuNccggugacc         | 1 |
| G1a_5921794_x2  | .guucgGuucccgugaccg         | 1 |
| Gi2_10896497_x2 | .Agguucgauucccgugaccg       | 1 |
| Gi2_10949393_x2 | .cacucacgugacUcggguuc       | 1 |
| G1a_5933734_x2  | .gucaguacaguUgcuag          | 1 |
| Gi2_10932263_x2 | .ucgauuAccggugaccg          | 1 |
| Gi3_28166288_x2 | .cacucacgugaUccgggu         | 1 |
| Gi2_10912387_x2 | .gcggucauagGacaguggc        | 1 |
| Gi5_8736629_x2  | .Cgguucgauucccgugaccg       | 1 |
| Gi3_28252910_x2 | .cacucacguAaccggguucga      | 1 |
| Gi1_4139095_x2  | .ugacugucGcucacgugaccg      | 1 |

|                 |                            |   |
|-----------------|----------------------------|---|
| Gi5_8795933_x2  | gcggucauGguacaguggcuag     | 1 |
| Gi3_28063878_x2 | acucacgugacccggguucgauuAcc | 1 |
| Gi2_10972063_x2 | ccgggCucgauucccgugaccg     | 1 |
| Gi1_4131783_x2  | gcggucauNguacaguggc        | 1 |
| Gi1a_5915168_x2 | gCucgauucccgugaccg         | 1 |
| Gi3_28085496_x2 | uAgauucccgugaccg           | 1 |
| Gi3_28201402_x2 | gugacccggguucgauuUc        | 1 |
| Gi1a_5953516_x2 | guCcgauucccgugaccg         | 1 |
| Gi3_28011388_x2 | cgaGucccgugaccg            | 1 |
| Gi5_8734495_x2  | gguucCauucccgugacc         | 1 |
| Gi3_28007988_x2 | uucgauucccgugaUcgcg        | 1 |
| Gi2_10865479_x2 | gguucgauGcccggugacc        | 1 |
| Gi5_8826513_x2  | gcggucauagGacaguggcuagu    | 1 |
| Gi3_28034336_x2 | ucacucacgugacccgggCuc      | 1 |
| Gi3_28173626_x2 | Augacccggguucgauucc        | 1 |
| Gi5_8777605_x2  | ggguucgauucccgugaccgCc     | 1 |
| Gi5_8736769_x2  | gguucgauucccgguUaccgc      | 1 |
| Gi1a_5906938_x2 | gcggucauaguaGaguggcuagu    | 1 |
| Gi3_27986998_x2 | cgugaccAgguucgauucc        | 1 |
| Gi5_8776441_x2  | gguucgauucccgGgac          | 1 |
| Gi3_28027050_x2 | uUacgugacccggguucgauuc     | 1 |
| Gi3_28155890_x2 | aGgcgugacugucacucacgugacc  | 1 |
| Gi2_10880391_x2 | Nuucgauucccgugacc          | 1 |
| Gi5_8745161_x2  | cugucGcucacgugaccg         | 1 |
| Gi3_28027436_x2 | ugacugucacucacgugaGccg     | 1 |
| Gi3_28085678_x2 | guucgauucGcgugaccg         | 1 |
| Gi2_10898429_x2 | gcggucauGguacaguggc        | 1 |
| Gi5_8739585_x2  | guUauaguacaguggcuagu       | 1 |
| Gi5_8769043_x2  | gcggucUuaguacaguggc        | 1 |
| Gi3_28099532_x2 | accggguucgauucccgCgacc     | 1 |
| Gi2_10889827_x2 | cacucacgugCcccggguucga     | 1 |
| Gi5_8765701_x2  | gguucgauucccgugaccg        | 0 |
| Gi5_8807509_x2  | acgugacccggguucgauCccc     | 1 |
| Gi3_28120290_x2 | Aacucacgugacccggguucga     | 1 |
| Gi5_8767817_x2  | gucauaAuacaguggcuag        | 1 |
| Gi3_28025758_x2 | guUacucacgugacccggguucg    | 1 |
| Gi1_4129841_x2  | gcggucauagCacaguggcuag     | 1 |
| Gi3_28199486_x2 | gacugucacucacgugaccU       | 1 |
| Gi1_4156933_x2  | gcgAucauaguacaguggcua      | 1 |
| Gi1_4150497_x2  | Gucgauucccgugaccg          | 1 |
| Gi3_28182078_x2 | cacgugacccggguucGcuucc     | 1 |
| Gi5_8720615_x2  | Cucauaguacaguggcuagu       | 1 |
| Gi1_4132049_x2  | gcAgucauaguacagugg         | 1 |
| Gi2_10975835_x2 | gguucgauucccgugaccgcU      | 1 |
| Gi5_8813729_x2  | gguucgauucccgGgaccg        | 1 |
| Gi3_28030036_x2 | gacugAcacucacgugacc        | 1 |
| Gi4_554692_x2   | gguucgauucUcggugacc        | 1 |

|                      |                                     |   |
|----------------------|-------------------------------------|---|
| Gi3_28085596_x2..... | acgugacccggguucgauucAc.....         | 1 |
| Gi3_28071172_x2..... | ggguucgAuAcccgugacc.....            | 1 |
| Gi5_8792733_x2.....  | gcggucAuaguacaguggcuagCa.....       | 1 |
| Gi3_28256468_x2..... | ucgauucccgugaccgAg.....             | 1 |
| Gi5_8765897_x2.....  | gguucgUuucccgugac.....              | 1 |
| Gi3_28046846_x2..... | UcggucAuaguacaguggcuag.....         | 1 |
| Gi1_4130777_x2.....  | gcggucAuaguacaAugg.....             | 1 |
| Gi5_8761127_x2.....  | gcggucAuaguacagGggcua.....          | 1 |
| Gi5_8829223_x2.....  | gcggucAuaguacaAuggcuag.....         | 1 |
| Gi3_28229310_x2..... | gcgAucauaguacaguggc.....            | 1 |
| Gi3_28194482_x2..... | Cacugucacucacgugacc.....            | 1 |
| G1a_5910774_x2.....  | ucacgugacccggguucgauucccgugacc..... | 0 |
| G1a_5939078_x2.....  | guucgCuucccgugacc.....              | 1 |
| Gi3_28099018_x2..... | ugacuAucacucacgugaccg.....          | 1 |
| G1a_5920284_x2.....  | gcggucGuaguacaguggcuagu.....        | 1 |
| Gi1_4137277_x2.....  | gcggucAuaguacaguggcuagG.....        | 1 |
| Gi1_4156471_x2.....  | cGuaguacaguggcuagu.....             | 1 |
| Gi1_4100167_x2.....  | gUucauaguacaguggcua.....            | 1 |
| Gi2_10895315_x2..... | Ccgauucccgugaccgcg.....             | 1 |
| Gi4_564078_x2.....   | gcggucAuNguacaguggcuagua.....       | 1 |
| Gi2_10900429_x2..... | gauucccgugaccgUc.....               | 1 |
| Gi2_10848957_x2..... | gAguucgAuucccgugaccg.....           | 1 |
| Gi4_556704_x2.....   | gGggucAuaguacaguggc.....            | 1 |
| Gi3_28139430_x2..... | acugucacucacgugaccCg.....           | 1 |
| Gi5_8798387_x2.....  | gguucgAuucGcggugac.....             | 1 |
| Gi3_27999246_x2..... | CugaccggguucgAuucc.....             | 1 |
| Gi2_10852871_x2..... | gguucgAuucccgugaGcgcg.....          | 1 |
| Gi5_8746065_x2.....  | gguucgAuuccUgugaccgcg.....          | 1 |
| Gi5_8752149_x2.....  | ccUggguucgAuucccgugacc.....         | 1 |
| Gi1_4155769_x2.....  | Uugacugucacucacgugaccg.....         | 1 |
| Gi2_10863781_x2..... | gguucgAuucccgguCaccgcg.....         | 1 |
| Gi3_28086186_x2..... | ggguucgAuucccgAgaccgcg.....         | 1 |
| Gi1_4144949_x2.....  | guucgaCuucccgugaccg.....            | 1 |
| Gi3_27990718_x2..... | ucgauucAcggugaccgc.....             | 1 |
| Gi3_28031060_x2..... | cacucacgugaccggUuuc.....            | 1 |
| Gi3_28071110_x2..... | gguuGgauucccgugaccgcg.....          | 1 |
| Gi1_4138197_x2.....  | gcggucAuaguacagugAc.....            | 1 |
| Gi2_10924705_x2..... | cgauucccgugGccgcg.....              | 1 |
| Gi2_10839255_x2..... | gacuUucacucacgugacc.....            | 1 |
| Gi3_28193874_x2..... | ugacugucacucGcgugacc.....           | 1 |
| Gi2_10920427_x2..... | ucgauucccgugGccgc.....              | 1 |
| Gi1_4155917_x2.....  | cauaguacaguggcCagu.....             | 1 |
| Gi5_8780081_x2.....  | cgugaUccggguucgAuucccggu.....       | 1 |
| Gi5_8769241_x2.....  | gaccggguucgAuCccc.....              | 1 |
| Gi3_28020828_x2..... | acucUcgugaccgggu.....               | 1 |
| Gi3_28123378_x2..... | ucgauucccgugaccgU.....              | 1 |
| Gi5_8749281_x2.....  | gguucgAuAcccgugaccgcg.....          | 1 |



|                 |                                         |   |
|-----------------|-----------------------------------------|---|
| Gi5_8754621_x2  | .....guucgauGccccggugacc.....           | 1 |
| Gi3_28148034_x2 | .....guucgauuuccUgugaccgcg.....         | 1 |
| Gi1_4134517_x2  | .....aGaguacaguggcuagua.....            | 1 |
| Gi2_10981971_x2 | .....gcggucauagCacagugg.....            | 1 |
| Gi3_28125254_x2 | .....gGcacucacgugacccggguucg.....       | 1 |
| Gi3_28138036_x2 | .....cacucaAgugaccgggu.....             | 1 |
| Gi1a_5957060_x2 | .....gGggucauaguacaguggcuaguau.....     | 1 |
| Gi2_10960531_x2 | .....gucauaguacaguggcuagu.....          | 0 |
| Gi1a_5981060_x2 | .....gguucgaCucccgugaccgc.....          | 1 |
| Gi3_28197758_x2 | .....ggguucgauuucccgugCcc.....          | 1 |
| Gi1_4120209_x2  | .....gcggucauUguacaguggcuaguau.....     | 1 |
| Gi1_4150033_x2  | .....ucgauucccgugaccgCcu.....           | 1 |
| Gi3_28183454_x2 | .....gugaGccggguucgauucc.....           | 1 |
| Gi5_8817695_x2  | .....gcgAucauaguacaguggcuagua.....      | 1 |
| Gi3_28051386_x2 | .....acgugGccccggguucgauuucccgugac..... | 1 |
| Gi3_28068452_x2 | .....gguucCauucccgugaccgc.....          | 1 |
| Gi1_4096313_x2  | .....cacucacgugacccgggGucgauucc.....    | 1 |
| Gi3_28015536_x2 | .....ggguucgauuuccCgugaccgCgguuu.....   | 1 |
| Gi3_28074192_x2 | .....cacucacgugacccggguucgC.....        | 1 |
| Gi3_27982150_x2 | .....gaNugucacucacgugaccgc.....         | 1 |
| Gi2_10887701_x2 | .....cacucacAugaccggguuc.....           | 1 |
| Gi2_10949461_x2 | .....ucgNuucccgugaccgc.....             | 1 |
| Gi4_561206_x2   | .....Uuucgauuucccgugaccgc.....          | 1 |
| Gi3_28061456_x2 | .....AguucgauuucccgugaccgCgc.....       | 1 |
| Gi3_28004844_x2 | .....gacugucacucCcgugacc.....           | 1 |
| Gi5_8809967_x2  | .....Gauaguacaguggcuagu.....            | 1 |
| Gi1_4115825_x2  | .....gauuucccgugaccgCcu.....            | 1 |
| Gi1_4142021_x2  | .....gcgCcauaguacaguggc.....            | 1 |
| Gi1a_5955856_x2 | .....ucgauuucccgugaccAc.....            | 1 |
| Gi3_28108984_x2 | .....gcgUucauaguacaguggc.....           | 1 |
| Gi1_4106371_x2  | .....gcggucauaAuacaguggcuagua.....      | 1 |
| Gi3_28212700_x2 | .....uucgaGuucccgugaccgcg.....          | 1 |
| Gi1_4131811_x2  | .....acugucacucacgugaUccgg.....         | 1 |
| Gi2_10889927_x2 | .....guucgaAuucccgugacc.....            | 1 |
| Gi5_8798319_x2  | .....guucgauuuccCgugaccg.....           | 1 |
| Gi5_8826871_x2  | .....ugacugucacucacgugaccAg.....        | 1 |
| Gi3_28037320_x2 | .....acgugacccggguucgauCccc.....        | 1 |
| Gi2_10977273_x2 | .....cgauucccgCgaccgcg.....             | 1 |
| Gi5_8792011_x2  | .....gguucgauuucccgugaccgc.....         | 1 |
| Gi2_10919635_x2 | .....cGcucacgugacccggguucgauucc.....    | 1 |
| Gi2_10847575_x2 | .....ggguucgaNuucccgugaccg.....         | 1 |
| Gi2_10890281_x2 | .....guucgauuuccAggugaccgcg.....        | 1 |
| Gi3_28082506_x2 | .....uucgauuucccgugaccgU.....           | 1 |
| Gi5_8818111_x2  | .....gugaccggguucgGuucc.....            | 1 |
| Gi2_10971119_x2 | .....cgauucccgugaccAgcg.....            | 1 |
| Gi5_8725337_x2  | .....guucgauuucccgugaccAgcg.....        | 1 |
| Gi2_10853631_x2 | .....ggguucgauuucccgugaG.....           | 1 |

|                 |                             |   |
|-----------------|-----------------------------|---|
| Gi1a_5895204_x2 | .gcggGcauaguacaguggcuaguau  | 1 |
| Gi3_28051272_x2 | .gugacccggguucgGuuccc       | 1 |
| Gi3_28235116_x2 | .gugGcccggguucgGuuccc       | 1 |
| Gi3_28157360_x2 | .gacugCcacucacgugacccggguuc | 1 |
| Gi2_10854253_x2 | .ugacugucacucacgugaccUgg    | 1 |
| Gi2_10893707_x2 | .guucgauucccgCugaccgcg      | 1 |
| Gi2_10986161_x2 | .guucgaGuucccgugaccgcg      | 1 |
| Gi1_4111651_x2  | .gcggucauaguacaguggcuaC     | 1 |
| Gi2_10951481_x2 | .uucgauucccAgugaccgcg       | 1 |
| Gi2_10838815_x2 | .guucgauucccgguCaccgcg      | 1 |
| Gi1_4118021_x2  | .ucacucacgugacccgggu        | 0 |
| Gi2_10843581_x2 | .gacuUucacucacgugacccg      | 1 |
| Gi2_10990305_x2 | .cacucacgCgacccggguucga     | 1 |
| Gi3_28158954_x2 | .gguucgauucccgguCaccgc      | 1 |
| Gi4_560434_x2   | .gcggucauGcuacaguggcuagua   | 1 |
| Gi1_4155767_x2  | .gcggucauNguacaguggcu       | 1 |
| Gi2_10978233_x2 | .gacugucacAcacgugacccgg     | 1 |
| Gi1_4096383_x2  | .gguucgauucccgugaccgcgAc    | 1 |
| Gi3_28075364_x2 | .ggguucgauucccgCugacc       | 1 |
| Gi1_4154601_x2  | .Ccggucauaguacaguggcuag     | 1 |
| Gi3_28160722_x2 | .gugacugucacucaUgugaccgg    | 1 |
| Gi3_28180404_x2 | .uucccgugaccgcggcA          | 1 |
| Gi3_28258568_x2 | .gacugucacucacgGgacccg      | 1 |
| Gi5_8731689_x2  | .Cgguucgauucccgugacc        | 1 |
| Gi1_4142915_x2  | .gcggucauaguacagugA         | 1 |
| Gi1a_5948930_x2 | .gguucgauuUccggugac         | 1 |
| Gi4_560908_x2   | .gcggucaCaguacaguggcuagua   | 1 |
| Gi1_4126823_x2  | .gcggucauGcuacaguggcua      | 1 |
| Gi3_28187002_x2 | .gugaccUggguucgauuccc       | 1 |
| Gi2_10923535_x2 | .gugGcugucacucacgugacccg    | 1 |
| Gi5_8801275_x2  | .uucgauucccgCgaccgc         | 1 |
| Gi2_10834327_x2 | .gacugucacucacgugacccCg     | 1 |
| Gi3_28251928_x2 | .ugacugucacucacgugaUccgg    | 1 |
| Gi2_10918131_x2 | .Ggugacccggguucgauuc        | 1 |
| Gi2_10912063_x2 | .uucccgugaccgcgCcu          | 1 |
| Gi5_8795321_x2  | .cccggCucgauucccgugacc      | 1 |
| Gi1_4102625_x2  | .gguucgauucccgugaccgcgA     | 1 |
| Gi3_28215874_x2 | .ggguucgauuUccggugaccgcg    | 1 |
| Gi2_10898601_x2 | .gugacugucacucacgugacccgg   | 0 |
| Gi1a_5932998_x2 | .guucgauucccgGgacc          | 1 |
| Gi3_28189586_x2 | .acugucacucacgugacccgAgu    | 1 |
| Gi3_28080882_x2 | .uucgauuccUggugaccgc        | 1 |
| Gi1a_5886040_x2 | .guucgauucccgUugacc         | 1 |
| Gi2_10923913_x2 | .gacugucUcucacgugacccgg     | 1 |
| Gi3_28163592_x2 | .cacgugacccAgguucgauuccc    | 1 |
| Gi4_567272_x2   | .uucgauucccgugaccgcg        | 0 |
| Gi5_8789347_x2  | .uucgauucccgCgaccg          | 1 |

|                 |                            |   |
|-----------------|----------------------------|---|
| Gi1_4129543_x2  | .gcggucauGguacaguggcuaguau | 1 |
| Gi3_28248950_x2 | .ucUcgugacccggguucgauucc   | 1 |
| Gi5_8802171_x2  | .ggguucgauAcccgugacc       | 1 |
| Gi1_4122065_x2  | .Uguucgauuccggugaccg       | 1 |
| Gi3_28042154_x2 | .acgugaccUgguucgauucc      | 1 |
| Gi1a_5955244_x2 | .guucgauuccggAgaccg        | 1 |
| Gi3_27992682_x2 | .Aaccggguucgauucc          | 1 |
| Gi5_8725793_x2  | .gguucgauuccggUacc         | 1 |
| Gi3_28189670_x2 | .ccUggguucgauuccggugac     | 1 |
| Gi1_4103723_x2  | .cauUguacaguggcuagu        | 1 |
| Gi1a_5876902_x2 | .Uacugucacucacgugaccgg     | 1 |
| Gi3_28246356_x2 | .ucgauucccgAugaccg         | 1 |
| Gi3_28003374_x2 | .Ucgugacccggguucgauucc     | 1 |
| Gi5_8754049_x2  | .cUcggguucgauuccggugacc    | 1 |
| Gi5_8829701_x2  | .uucgauuccggugaccgU        | 1 |
| Gi3_28224768_x2 | .ggguucgauuccAggugacc      | 1 |
| Gi3_27987332_x2 | .ucacgugacccggguucgaCucc   | 1 |
| Gi5_8766309_x2  | .guucgauuccUggugaccg       | 1 |
| Gi3_28094802_x2 | .gacugucacucacgugCcccg     | 1 |
| Gi5_8799397_x2  | .acugucacNcagugaccgg       | 1 |
| Gi3_28141918_x2 | .uucgauUccggugaccg         | 1 |
| Gi3_28119946_x2 | .acgugGcccggguucgauucc     | 1 |
| Gi1_4144499_x2  | .gacugucacucagAgaccg       | 1 |
| Gi1_4104173_x2  | .cggguucgauuccggugaccgCcu  | 1 |
| Gi3_28215216_x2 | .ggguCcgauuccggugaccg      | 1 |
| Gi2_10871439_x2 | .cacucGcgugaccggguuc       | 1 |
| Gi2_10899747_x2 | .cacucacgugaccgggA         | 1 |
| Gi5_8815291_x2  | .gcggucauaguaAaguggcuag    | 1 |
| Gi3_28165624_x2 | .cgugacugucGcucacgugacc    | 1 |
| Gi3_28161748_x2 | .Agugacugucacucacgugacc    | 1 |
| Gi3_28163438_x2 | .gguucgauuccggugaccggcG    | 1 |
| Gi1_4130653_x2  | .ugCcgucacucacgugaccg      | 1 |
| Gi2_10921673_x2 | .gguucgauuccggUacc         | 1 |
| Gi3_28216628_x2 | .Nuucgauuccggugaccg        | 1 |
| Gi5_8784139_x2  | .ggguucAauuccggugacc       | 1 |
| Gi1_4090489_x2  | .ugacugucaAucacgugaccgg    | 1 |
| Gi5_8813279_x2  | .gcggucauaguacaguggcuagGau | 1 |
| Gi3_27988106_x2 | .guNcgauuccggugacc         | 1 |
| Gi1_4092715_x2  | .gUggucauaguacaguggcu      | 1 |
| Gi3_28177858_x2 | .cgUuuccggugaccggcuuu      | 1 |
| Gi2_10952535_x2 | .gguucgauGcccggugaccg      | 1 |
| Gi1_4140859_x2  | .gcggucauaguacagGggc       | 1 |
| Gi1_4122253_x2  | .uucgauuccggugaccg         | 0 |
| Gi3_28224190_x2 | .cugucaAucacgugaccgg       | 1 |
| Gi3_28208106_x2 | .ucgauucccgCugaccg         | 1 |
| Gi3_28163982_x2 | .cgauuccggugaccgUg         | 1 |
| Gi1_4150287_x2  | .Uggguucgauuccggugaccg     | 1 |

|                      |                                      |   |
|----------------------|--------------------------------------|---|
| Gi2_10846311_x2..... | ugacugucacucacgugacccAg.....         | 1 |
| Gi1_4111427_x2.....  | Uugcggucauaguacaguggcuaguauugcg..... | 1 |
| Gi3_28153128_x2..... | acugGcacucacgugacccgg.....           | 1 |
| Gi3_28223730_x2..... | acugucacucacgAgacccg.....            | 1 |
| Gi2_10862621_x2..... | cgUuucccgugaccgcg.....               | 1 |
| Gi2_10890935_x2..... | cacucacgugacccgCgu.....              | 1 |
| Gi5_8756933_x2.....  | cauaUuacaguggcuaguau.....            | 1 |
| Gi2_10924597_x2..... | Uuucgauucccgugaccgcggu.....          | 1 |
| Gi1_4091751_x2.....  | gucauaguNcaguggcuagu.....            | 1 |
| Gi2_10882297_x2..... | cacucacgugacccggguAc.....            | 1 |
| Gi3_28146272_x2..... | guucgCuucccgugaccgcggc.....          | 1 |
| Gi3_27986762_x2..... | acucacgugacUcgggu.....               | 1 |
| Gi3_28144434_x2..... | ucacgugacccgggCucgauuc.....          | 1 |
| Gi2_10940065_x2..... | ggguucgauucccgugaUc.....             | 1 |
| Gi1_4119937_x2.....  | ggCucgauucccgugaccg.....             | 1 |
| Gi2_10868351_x2..... | cgauucccgugaccgcggcCuu.....          | 1 |
| Gi3_28121506_x2..... | cacucacgugacccggguucgaCucc.....      | 1 |
| Gi1_4152195_x2.....  | cGgucacucacgugacccgg.....            | 1 |
| Gi2_10954077_x2..... | gacugucacucacgugacAcgg.....          | 1 |
| Gi3_27996792_x2..... | gguucgauuAccggugaccg.....            | 1 |
| Gi5_8761533_x2.....  | Uacgugacccggguucgauuc.....           | 1 |
| Gi3_28093810_x2..... | gguucgauucccgugaccgcU.....           | 1 |
| Gi5_8819811_x2.....  | acugucacucacgugacccggAu.....         | 1 |
| Gi3_28081084_x2..... | cuUucacucacgugacccgggu.....          | 1 |
| Gi5_8798795_x2.....  | gguucgauucccgugUccg.....             | 1 |
| Gi2_10956363_x2..... | cacucacgCgacccggguucgauucc.....      | 1 |
| Gi2_10942073_x2..... | cacucacgugUcccggguuc.....            | 1 |
| Gi1_4139687_x2.....  | gacugucacucGcgugacccg.....           | 1 |
| Gi5_8738805_x2.....  | ugacugucacucacgugacccUg.....         | 1 |
| Gi3_27992566_x2..... | gcggucauaguacaguCg.....              | 1 |
| Gi3_28201904_x2..... | ucgauucccgGgaccgcg.....              | 1 |
| Gl1_5900404_x2.....  | guucgauucccgugaccAc.....             | 1 |
| Gi5_8822649_x2.....  | gcggucauaguacaCuggcuagu.....         | 1 |
| Gi1_4096239_x2.....  | gcggucaAaguacaguggcua.....           | 1 |
| Gi2_10958275_x2..... | guucgauucccgugaccgcggcC.....         | 1 |
| Gi5_8732813_x2.....  | gguucgauuGccggugac.....              | 1 |
| Gi4_561524_x2.....   | gcggucauaguacCguggcuagua.....        | 1 |
| Gi2_10950025_x2..... | gacugucaUucacgugacccgg.....          | 1 |
| Gi3_28204216_x2..... | Uuucgauucccgugaccgcg.....            | 1 |
| Gi3_28162468_x2..... | gguucgauucccgUugaccg.....            | 1 |
| Gi3_28227354_x2..... | ucacgugGcccggguucga.....             | 1 |
| Gi4_564012_x2.....   | gcggucauaguacaguAgcuagua.....        | 1 |
| Gi5_8789839_x2.....  | cgguucgauucccgugCc.....              | 1 |
| Gi5_8794257_x2.....  | gcggucauaguacagugAcuaguau.....       | 1 |
| Gl1_5887026_x2.....  | guucgauuAcggugaccgc.....             | 1 |
| Gi3_28244798_x2..... | ucgauucccgugaccgUg.....              | 1 |
| Gl1_5923478_x2.....  | gguucgauuccUgugaccg.....             | 1 |

|                 |                         |   |
|-----------------|-------------------------|---|
| Gi1_4112551_x2  | cgguucgauucccgugaccgCg  | 1 |
| Gi3_28205424_x2 | cucacugNcccggguucgau    | 1 |
| Gi3_28182392_x2 | Cugacugucacucacgugaccg  | 1 |
| Gi1_4144721_x2  | acugucacucacgugaccCg    | 1 |
| Gi2_10885647_x2 | Gggguucgauucccgugaccgc  | 1 |
| Gi2_10895019_x2 | ggNucgauucccgugac       | 1 |
| Gi3_28001286_x2 | guucgauCcccgugaccgCgc   | 1 |
| Gi3_27984470_x2 | cacucacgugacGcggu       | 1 |
| Gi2_10850099_x2 | gAguucgauucccgugaccgCg  | 1 |
| Gi2_10874069_x2 | ggguucgCuucccgugaccgCg  | 1 |
| Gi3_28040904_x2 | guucgauucccgAgaccgCgc   | 1 |
| Gi2_10917181_x2 | ggAuucgauucccgugaccgCg  | 1 |
| Gi2_10983709_x2 | ggguucgauucccgAuga      | 1 |
| Gi3_28020886_x2 | cacucacgNgaccggguucgau  | 1 |
| Gi2_10862585_x2 | ggguucgUuucccgugaccgc   | 1 |
| Gi5_8821033_x2  | caUucacgugacccgguucgau  | 1 |
| Gi2_10882809_x2 | uucgauucccgugaccg       | 0 |
| Gi1a_5940036_x2 | Gcacgugacccgguucgauuc   | 1 |
| Gi3_28046328_x2 | guucgauucccgguUacc      | 1 |
| Gi3_28088860_x2 | cucacugNcccggguucgauucc | 1 |
| Gi1a_5953732_x2 | gguGgauucccgugacc       | 1 |
| Gi1_4129591_x2  | ggguucgauucccgugaccgCg  | 1 |
| Gi3_28056912_x2 | ggguucgauucccgugaccgAg  | 1 |
| Gi3_28093402_x2 | gugacuguNacucacgugac    | 1 |
| Gi2_10929731_x2 | ggguucgCuucccgugaccg    | 1 |
| Gi3_28019500_x2 | ggguucgauucccgCgaccg    | 1 |
| Gi5_8736455_x2  | ggguucgauucUcggugacc    | 1 |
| Gi2_10920153_x2 | ugacugucacucGcgugaccCg  | 1 |
| Gi1_4145625_x2  | gacugucacucacgugacGcg   | 1 |
| Gi5_8762565_x2  | acugucacucacgCgaccCg    | 1 |
| Gi5_8757867_x2  | uucgauAcccgugaccgCg     | 1 |
| Gi3_28245514_x2 | gucacucCcgugacccgguucga | 1 |
| Gi5_8748267_x2  | ggguucgauuccGggugaccg   | 1 |
| Gi1_4106333_x2  | ggguucAauucccgugaccCg   | 1 |
| Gi3_28179964_x2 | ggguucgauucUcggugacc    | 1 |
| Gi3_28091352_x2 | gugacugucacCcacgugac    | 1 |
| Gi3_28015974_x2 | acugucacucacgugGccc     | 1 |
| Gi2_10975179_x2 | ggguucgauucUccggugaccg  | 1 |
| Gi2_10885691_x2 | ggguCcgauucccgugacc     | 1 |
| Gi5_8770629_x2  | acugCcacucacgugaccCggu  | 1 |
| Gi2_10831821_x2 | gaAugucacucacgugaccCg   | 1 |
| Gi3_28194598_x2 | cacucacgugaccCggu       | 1 |
| Gi3_28009198_x2 | guucgauucccgguUaccgCg   | 1 |
| Gi5_8808169_x2  | ggguucgauucccgAugaccg   | 1 |
| Gi2_10938341_x2 | gcggucaguacagugAc       | 1 |
| Gi2_10921543_x2 | ggUuucgauucccgugaccg    | 1 |
| Gi3_28233232_x2 | GccggugaccgCgcuuu       | 1 |

|                 |                                     |   |
|-----------------|-------------------------------------|---|
| Gi5_8826309_x2  | .....cucaUgugaccgguuc.....          | 1 |
| Gi1_4107649_x2  | .....acugucacucacgugaccg.....       | 0 |
| Gi2_10968625_x2 | .....Nguucgauucccgugacc.....        | 1 |
| Gi3_28192658_x2 | .....cacucacgugaccgggAucgauuc.....  | 1 |
| Gi3_28030020_x2 | .....guucgauucccgugagaGcg.....      | 1 |
| G1a_5965750_x2  | .....guucgauucccgugaccgU.....       | 1 |
| Gi3_28193158_x2 | .....acgugaccggGucgauucccgugac..... | 1 |
| Gi3_28188850_x2 | .....Gcugucacucacgugaccgggu.....    | 1 |
| Gi2_10861027_x2 | .....Ucggucauaguacaguggcuagu.....   | 1 |
| Gi1_4137497_x2  | .....acugucacucacAugaccg.....       | 1 |
| Gi3_28107130_x2 | .....guNcgauucccgugaccg.....        | 1 |
| Gi5_8745743_x2  | .....gacugucacucUcgugaccg.....      | 1 |
| Gi3_28069016_x2 | .....cacucacgugacUcggguucga.....    | 1 |
| Gi2_10906339_x2 | .....ugacugucacucacgugGccc.....     | 1 |
| Gi1_4109809_x2  | .....gacugucGcucacgugacc.....       | 1 |
| Gi5_8804515_x2  | .....cacgugaccAgguucgauuc.....      | 1 |
| Gi2_10917999_x2 | .....Cucgauucccgugaccgc.....        | 1 |
| Gi3_28110556_x2 | .....guucgauuccUgugaccg.....        | 1 |
| Gi5_8750943_x2  | .....gcggucauagAacaguggcuagu.....   | 1 |
| Gi1_4097945_x2  | .....gcAgucauaguacaguggc.....       | 1 |
| Gi3_28134238_x2 | .....cacgugCcccggguucgauucc.....    | 1 |
| Gi5_8814043_x2  | .....guUauaguacaguggcuag.....       | 1 |
| Gi5_8756627_x2  | .....ugacugucNcucacgugaccg.....     | 1 |
| Gi3_28084964_x2 | .....acucacgugaccggguucGcuucc.....  | 1 |
| Gi3_28026610_x2 | .....ggguucgauucUcggugaccg.....     | 1 |
| Gi5_8727661_x2  | .....guucgauucccgugaccgU.....       | 1 |
| Gi2_10925215_x2 | .....gcUgucauaguacagugg.....        | 1 |
| Gi1_4153261_x2  | .....acugucacucacgugaccgU.....      | 1 |
| Gi5_8772365_x2  | .....uucgauucNcggugaccg.....        | 1 |
| Gi3_28249974_x2 | .....ggguucgauucccgugagaUc.....     | 1 |
| Gi3_28048608_x2 | .....gugacugucacucCcgugacc.....     | 1 |
| Gi2_10988361_x2 | .....cacucUcgugaccgggu.....         | 1 |
| Gi1_4127767_x2  | .....gacugucacuUacgugaccg.....      | 1 |
| Gi4_557244_x2   | .....ggguucgauucccgugGcc.....       | 1 |
| Gi2_10869055_x2 | .....uucgauucccgugaccgUc.....       | 1 |
| Gi3_28538705_x1 | .....gaccggguUgauucc.....           | 1 |
| Gi4_605590_x1   | .....cugucacucacgugaccg.....        | 0 |
| Gi2_11036068_x1 | .....ucacgugaccggguucgaCuucc.....   | 1 |
| G1a_6067099_x1  | .....uCcgauucccgugaccg.....         | 1 |
| Gi1_4231471_x1  | .....uucgauucccgugaccU.....         | 1 |
| Gi1_4292141_x1  | .....gcggucauGguacaguggcuag.....    | 1 |
| Gi1_4378424_x1  | .....ugacugucUcucacgugaccg.....     | 1 |
| G1a_6298550_x1  | .....ggGucgauucccgugaccg.....       | 1 |
| Gi3_28500553_x1 | .....ggguucgauuccUgguga.....        | 1 |
| Gi1_4387570_x1  | .....gcggucauaguaAaguggc.....       | 1 |
| Gi1_4249700_x1  | .....gAgacugucacucacgugacc.....     | 1 |
| Gi5_8894888_x1  | .....ucacgugaNccggguucgauucc.....   | 1 |

|                 |                                          |   |
|-----------------|------------------------------------------|---|
| Gi3_28920820_x1 | .....gCgacccggguucgauucc.....            | 1 |
| Gi3_28674657_x1 | .....acugucacucacgugacUcg.....           | 1 |
| Gi3_28353370_x1 | .....cacucacgugCcccggguucgauu.....       | 1 |
| Gi3_28842556_x1 | .....cccggguucgauucccgugaccgcgU.....     | 1 |
| Gi2_11225808_x1 | .....cacucacgNgacccggguucgauucc.....     | 1 |
| Gi5_8978299_x1  | .....gacugucaAucacgugaccg.....           | 1 |
| Gi2_11030458_x1 | .....gguucCauucccgugaccg.....            | 1 |
| Gi5_9006796_x1  | .....uucgGuucccgugaccg.....              | 1 |
| Gi5_9062493_x1  | .....cggucgauaguacaguggcuaguC.....       | 1 |
| Gi3_28299532_x1 | .....ucGcgugaccggguucga.....             | 1 |
| Gi2_11047208_x1 | .....acgugaccggguucgauucc.....           | 0 |
| Gi2_11346264_x1 | .....gacuCucacucacgugaccg.....           | 1 |
| Gi3_28409412_x1 | .....ucacgCgacccggguucgauuc.....         | 1 |
| Gi3_28911491_x1 | .....gugacugucacucacgugGc.....           | 1 |
| Gi1a_6279368_x1 | .....guucgauucccgUugaccg.....            | 1 |
| Gi5_9103002_x1  | .....gguGcgauucccgugaccg.....            | 1 |
| Gi5_8931171_x1  | .....Augcggucaguacaguggcuagua.....       | 1 |
| Gi3_28335866_x1 | .....cCucacgugaccgggu.....               | 1 |
| Gi2_11127624_x1 | .....Ucggucaguacaguggcuag.....           | 1 |
| Gi5_9028274_x1  | .....cggguucgauCcccgugacc.....           | 1 |
| Gi3_28599910_x1 | .....acucacgugaccggguA.....              | 1 |
| Gi1a_6195411_x1 | .....guucgauucccgugaccgcgA.....          | 1 |
| Gi3_28662306_x1 | .....ugacugucacucacgGgaccg.....          | 1 |
| Gi1_4242363_x1  | .....gacuUucacucacgugacc.....            | 1 |
| Gi3_28620941_x1 | .....ucgauucGcggugaccgc.....             | 1 |
| Gi5_9028629_x1  | .....cacucacgugaccggguucGu.....          | 1 |
| Gi2_11190961_x1 | .....cacuUacgugaccggguuc.....            | 1 |
| Gi5_8912705_x1  | .....cacCcacgugaccggguuc.....            | 1 |
| Gi3_28712170_x1 | .....guucgauucccgugaccgcgcu.....         | 0 |
| Gi1_4282137_x1  | .....ucauUguacaguggcuagua.....           | 1 |
| Gi2_11169846_x1 | .....ggUuucgauucccgugaccgcg.....         | 1 |
| Gi2_11218670_x1 | .....cgugaccGggguucgauuc.....            | 1 |
| Gi1_4268244_x1  | .....gacuCucacucacgugaccg.....           | 1 |
| Gi1_4172685_x1  | .....gcggucauaAuacaguggcua.....          | 1 |
| Gi3_28415591_x1 | .....ggguucgauucccgAgacc.....            | 1 |
| Gi2_11081184_x1 | .....uUacgugaccggguucgauucc.....         | 1 |
| Gi3_28576591_x1 | .....cugucacucacgugaAccgg.....           | 1 |
| Gi3_28784960_x1 | .....gUuucgauucccgugaccgcgcuuu.....      | 1 |
| Gi3_28483700_x1 | .....gugaUugucacucacgugac.....           | 1 |
| Gi5_8901434_x1  | .....Aguucgauucccgugaccgcggc.....        | 1 |
| Gi5_8847419_x1  | .....ucacucacgugCcccggguucgauuc.....     | 1 |
| Gi1_4227761_x1  | .....gugcggucaCaguacaguggcuaguaugcg..... | 1 |
| Gi2_11303188_x1 | .....gugNcugucacucacgugaccg.....         | 1 |
| Gi3_28533851_x1 | .....cacucacgGgaccgggu.....              | 1 |
| Gi5_8933031_x1  | .....cauaguacUguggcuagu.....             | 1 |
| Gi2_11029821_x1 | .....gacugucacucacgugaccggguuc.....      | 0 |
| Gi3_28394474_x1 | .....cauaguacaguggcuaguau.....           | 0 |

|                 |                             |   |
|-----------------|-----------------------------|---|
| Gi3_28428453_x1 | .gugacugucacucacgugacUcgg   | 1 |
| Gi3_28424756_x1 | .gguucgauucccgugaccgUggc    | 1 |
| Gi4_596659_x1   | .gguucgauucccUgugacc        | 1 |
| Gi3_28531689_x1 | .gacugGcacucacgugaccgg      | 1 |
| Gi3_28491145_x1 | .cgguucgauuGccggugaccgc     | 1 |
| Gi3_28441031_x1 | .cugucacCcacgugaccgg        | 1 |
| Gi1a_6137364_x1 | .guucgauucccgugaUcg         | 1 |
| Gi1_4336694_x1  | .gcggucauaguaUaguggcuagua   | 1 |
| Gi2_11085939_x1 | .gguucgauucccCgugaccgc      | 1 |
| Gi3_28705973_x1 | .gAgaccggguucgauucc         | 1 |
| Gi3_28977135_x1 | .cgauucccgugaccgcggcA       | 1 |
| Gi5_8918220_x1  | .Cugcggucauaguacaguggcuagua | 1 |
| Gi1a_6034149_x1 | .ugacugucacucacgugaccgggu   | 0 |
| Gi5_8993511_x1  | .caGaguacaguggcuagu         | 1 |
| Gi2_11404712_x1 | .cccggguucgauuccAgugaccgg   | 1 |
| Gi5_9009495_x1  | .gcggucauaguacagugAcuagua   | 1 |
| Gi3_28680872_x1 | .cacucacgAgaccggguucga      | 1 |
| Gi3_28456062_x1 | .accAgguucgauucccgugacc     | 1 |
| Gi1_4326168_x1  | .ugacuguUacucacgugaccgg     | 1 |
| Gi3_28764164_x1 | .acucacgAgaccggguu          | 1 |
| Gi1_4350724_x1  | .Ccggucauaguacaguggcuaguau  | 1 |
| Gi1_4276252_x1  | .gcggucauaguaUagugg         | 1 |
| Gi5_8931860_x1  | .ugaGugucacucacgugaccgg     | 1 |
| Gi5_8963771_x1  | .gguucgauuccAggugaccgc      | 1 |
| Gi3_28852536_x1 | .gAguucgauucccgugaccgc      | 1 |
| Gi2_11095282_x1 | .uucgauuccUggugaccg         | 1 |
| Gi2_10992723_x1 | .auucccgugaccgcgguu         | 0 |
| Gi5_9035048_x1  | .acugucacucacgGgaccgggu     | 1 |
| Gi3_28949501_x1 | .gugacugucacucacgugaccA     | 1 |
| Gi3_28873136_x1 | .ucacgugacUcggguucga        | 1 |
| Gi4_589850_x1   | .acucacgugaccggguucA        | 1 |
| Gi3_28388707_x1 | .acucacgugacAcggguucgauu    | 1 |
| Gi5_9108312_x1  | .Aggucauaguacaguggcu        | 1 |
| Gi2_11276259_x1 | .cacucCcgugaccggguucga      | 1 |
| Gi1a_6139165_x1 | .gcggucauUguacaguggcuag     | 1 |
| Gi1a_6190288_x1 | .cacucacAugaccgggu          | 1 |
| Gi3_28949120_x1 | .gcgCucauaguacaguggc        | 1 |
| Gi5_9021783_x1  | .gcggucauagCacaguggcuaguaug | 1 |
| Gi3_28679632_x1 | .acgugaccggguucgauucUc      | 1 |
| Gi3_28511369_x1 | .gugacugucacucacgugGcc      | 1 |
| Gi3_28655596_x1 | .gguucgauAcccgugaccg        | 1 |
| Gi3_28938746_x1 | .gcggucauagGacagugg         | 1 |
| Gi1_4384329_x1  | .gcggucauAuacagugg          | 1 |
| Gi3_28749068_x1 | .ggGucgauucccgugaccgcgguu   | 1 |
| Gi2_11242143_x1 | .guucgauuccGggugaccg        | 1 |
| Gi2_11120989_x1 | .gacugucacucacgugaUc        | 1 |
| Gi4_572503_x1   | .gguucgauucccgugaccgAc      | 1 |



|                 |                                      |   |
|-----------------|--------------------------------------|---|
| Gi2_11121476_x1 | .....guucgauuGccggugacc              | 1 |
| Gi3_28586228_x1 | ..gcCgucauaguacaguggc                | 1 |
| Gi3_28614113_x1 | .....cugucacuUacgugacccgggu          | 1 |
| Gi1_4300097_x1  | .....ugacugucacucacgGgacccgg         | 1 |
| Gi5_9071406_x1  | ..gcggucaGaguacaguggcua              | 1 |
| Gi4_604689_x1   | .....guucgauucccgGgacc               | 1 |
| Gi5_8854177_x1  | .....gguucgauucccgugaccCcg           | 1 |
| Gi3_28389591_x1 | ..gugGcugucacucacgugacc              | 1 |
| Gi5_9074585_x1  | .....ggguCcgauucccgugacc             | 1 |
| Gi3_28824058_x1 | .....ucacucacgugacccggguucgG         | 1 |
| Gi5_9131464_x1  | ..gcggucauaguacagugU                 | 1 |
| Gi5_9046301_x1  | .....cauaguacaguggcAagu              | 1 |
| Gi5_9017940_x1  | ..gacugucacucacAugaccg               | 1 |
| Gi5_9031455_x1  | .....gguucgauAcccgugaccg             | 1 |
| Gi2_11164185_x1 | ..gugacuguUacucacgugaccg             | 1 |
| Gi3_28899637_x1 | .....cucacgugacccggguAcgauu          | 1 |
| Gi2_11132747_x1 | ..Acacucacgugacccgggu                | 1 |
| G1a_6122539_x1  | .....cacucacguAaccgggu               | 1 |
| Gi5_8881851_x1  | .....cUgacccggguucgauuccggugacc      | 1 |
| Gi1_4170927_x1  | ..gcggguGauaguacaguggcua             | 1 |
| Gi4_580484_x1   | ..gacugucacucCcgugaccgg              | 1 |
| Gi3_28940332_x1 | .....ugaUccggguucgauucc              | 1 |
| Gi5_9062574_x1  | .....gguucgauuccCgugaccg             | 1 |
| Gi2_11136082_x1 | ..gcggucauaguacaguggcuGgua           | 1 |
| Gi3_28294893_x1 | .....guucgauucccgugaccgcggcC         | 1 |
| Gi5_8971087_x1  | .....gugacAcggguucgauucc             | 1 |
| Gi5_9015812_x1  | .....cucacgugacccggguucgauuccggugacc | 0 |
| Gi1_4248346_x1  | .....cgugacccggguucgauuc             | 0 |
| G1a_6066396_x1  | ..gcggucauaAuacaguggcuagu            | 1 |
| Gi5_9041743_x1  | .....gguucgauucccgugaccA             | 1 |
| G1a_6000078_x1  | .....guucgauucccgugaccA              | 1 |
| G1a_6194174_x1  | .....ucacgugaNccggguucgauuc          | 1 |
| Gi1_4304139_x1  | ..Uucauaguacaguggcuag                | 1 |
| Gi1_4277417_x1  | ..gucauCguacaguggcuagua              | 1 |
| Gi1_4380195_x1  | ..gucauaguacUguggcuagu               | 1 |
| G1a_5981086_x1  | ..gcggucauNguacaguggcuag             | 1 |
| Gi3_28667188_x1 | ..gugacugucacucacguAaccg             | 1 |
| Gi3_28923891_x1 | .....ugaUccggguucgauucc              | 1 |
| Gi4_568477_x1   | ..gUggucauaguacaguggcuagu            | 1 |
| Gi3_28355043_x1 | .....ucacgGgacccggguucga             | 1 |
| Gi1_4340106_x1  | ..gcggucauaguacagugCc                | 1 |
| Gi2_11362692_x1 | .....ggguucgaCuuccggugacc            | 1 |
| Gi3_28636335_x1 | .....acugucacucacgugaccAggu          | 1 |
| Gi2_11075769_x1 | .....gAguucgauucccgugac              | 1 |
| Gi5_9136546_x1  | .....guucgauucccgugacAgcggcuu        | 1 |
| Gi2_11255832_x1 | .....cAauuccggugaccgcgguuu           | 1 |
| G1a_6098517_x1  | .....acugCcacucacgugaccgg            | 1 |

|                 |                                        |   |
|-----------------|----------------------------------------|---|
| Gi1a_6156881_x1 | .....gguucgauucccgugacA.....           | 1 |
| Gi2_11023488_x1 | .....ggguucgaAucccggugac.....          | 1 |
| Gi3_28894143_x1 | .....gacugucUcucacgugacccggg.....      | 1 |
| Gi2_11012342_x1 | .....uucgauucccgugacccgCcu.....        | 1 |
| Gi3_28324183_x1 | .....Aucacgugacccggguucgauucc.....     | 1 |
| Gi5_8847922_x1  | .....ggguucgauucccgugUcc.....          | 1 |
| Gi3_28599856_x1 | .....guucgauucAcggugacccggg.....       | 1 |
| Gi3_28951673_x1 | .....gugacugucacucacgGgaccc.....       | 1 |
| Gi2_11160075_x1 | .....ucGcucacgugacccgggu.....          | 1 |
| Gi4_577843_x1   | .....cauaguacaguggcuaugu.....          | 0 |
| Gi3_28927764_x1 | .....gucacucacgAgacccggguucga.....     | 1 |
| Gi3_28310408_x1 | .....acuguAacucacgugacccgg.....        | 1 |
| Gi2_11157211_x1 | .....ugUcugucacucacguga.....           | 1 |
| Gi3_28897993_x1 | .....gaGccggguucgauucc.....            | 1 |
| Gi1a_6118543_x1 | .....gcfguacauaguacaguggcCaguau.....   | 1 |
| Gi1a_6282248_x1 | .....uucgauuccAggugacccg.....          | 1 |
| Gi3_28339967_x1 | .....accggguucgauucccgGgacc.....       | 1 |
| Gi3_28952503_x1 | .....gacugucacucacgugacAc.....         | 1 |
| Gi3_28657124_x1 | .....Augacccggguucgauuc.....           | 1 |
| Gi3_28434501_x1 | .....cacucacgugacccgAguu.....          | 1 |
| Gi1_4337371_x1  | .....auucccgugacccgcgcuu.....          | 0 |
| Gi3_28704060_x1 | .....uucUauucccgugacccg.....           | 1 |
| Gi2_11236256_x1 | .....acucacgAgacccggguucga.....        | 1 |
| Gi2_11320921_x1 | .....cccgggCucgauucccgugacccg.....     | 1 |
| Gi3_28858857_x1 | .....gacugucacucacAugacc.....          | 1 |
| Gi3_28554564_x1 | .....ccggguucgauucccgugaUcgc.....      | 1 |
| Gi1a_5984644_x1 | .....gguucgauucccgGgac.....            | 1 |
| Gi5_8940321_x1  | .....gguucUauucccgugacccg.....         | 1 |
| Gi2_11191118_x1 | .....ggguucgauucccgugacAgc.....        | 1 |
| Gi1_4299186_x1  | .....cAgucacucacgugacccgg.....         | 1 |
| Gi5_8973596_x1  | .....Ccgugacccggguucgauucccgugacc..... | 1 |
| Gi1_4268167_x1  | .....cauaguacaguggcuaUu.....           | 1 |
| Gi1a_6220905_x1 | .....acugucCcucacgugacccgg.....        | 1 |
| Gi2_11077973_x1 | .....cgauucccgugacccgAc.....           | 1 |
| Gi1_4258754_x1  | .....ggucgauucccgugacccg.....          | 1 |
| Gi1a_6279806_x1 | .....ggguCcgauucccgugac.....           | 1 |
| Gi1_4382291_x1  | .....gguucgauucccgGgacc.....           | 1 |
| Gi3_28828736_x1 | .....ggguucgauuccAgugac.....           | 1 |
| Gi2_11129196_x1 | .....ggguucgauucccgAgacccg.....        | 1 |
| Gi3_28484164_x1 | .....ugacGgucacucacgugacc.....         | 1 |
| Gi2_11170991_x1 | .....ugacugucacucacgugaUccgg.....      | 1 |
| Gi1a_6074672_x1 | .....gguucgauucccgugaUcgc.....         | 1 |
| Gi4_599200_x1   | .....gUggucgauucccgugacccg.....        | 1 |
| Gi5_8846469_x1  | .....guAcgauucccgugacccgcuu.....       | 1 |
| Gi5_8958967_x1  | .....gacugucacCcucgugacccggg.....      | 1 |
| Gi2_11064591_x1 | .....acucacgugacccAgguuc.....          | 1 |
| Gi3_28623544_x1 | .....Uccggguucgauucccgugac.....        | 1 |

|                      |                                         |   |
|----------------------|-----------------------------------------|---|
| Gi2_11061029_x1..... | Ccucacgugacccggguuc.....                | 1 |
| Gi5_9017682_x1.....  | .gcggucauaguacaAuggcuagua.....          | 1 |
| Gi3_28799527_x1..... | .....ucacgugacccggguucgauucccgugGc..... | 1 |
| Gi3_28495135_x1..... | .....cccggugaccgcgguuC.....             | 1 |
| Gi2_11069974_x1..... | .....acucacgugacccggguCc.....           | 1 |
| Gi5_9068071_x1.....  | .....acugucacucacgugUcccggguuc.....     | 1 |
| Gi3_28472660_x1..... | .....gugacccgNguucgauuc.....            | 1 |
| Gi3_28547833_x1..... | .....cccggguucgauucccgAugaccgc.....     | 1 |
| Gi5_8917385_x1.....  | .....cauaguacaguggcuaguGu.....          | 1 |
| G1a_6284687_x1.....  | .....gacugucacucacgugCcccgggu.....      | 1 |
| Gi3_28585507_x1..... | .....Cugacugucacucacgugac.....          | 1 |
| G1a_6143027_x1.....  | .....gguucgGuucccgugac.....             | 1 |
| Gi1_4344222_x1.....  | .....gcggucauaUuacaguggcua.....         | 1 |
| Gi3_28788970_x1..... | .....gugacugucacucacgCgaccgc.....       | 1 |
| Gi3_28957340_x1..... | .....gugacugucUcucacgug.....            | 1 |
| Gi4_582523_x1.....   | .....gcggucauaguacaguggcuaguG.....      | 1 |
| Gi5_8878696_x1.....  | .....ggguuUgauucccgugaccg.....          | 1 |
| Gi5_8942261_x1.....  | .....cgUguucgauucccgugacc.....          | 1 |
| Gi2_11400852_x1..... | .....cggguucgauucccgAugaccgc.....       | 1 |
| Gi4_604757_x1.....   | .....gcggucauUguacaguggcuagua.....      | 1 |
