# Supplementary material for: Giardia lamblia miRNAs as a new diagnostic tool for human giardiasis
Source: PubMed Central journal article supplement (PMC6597124; doi:10.1371/journal.pntd.0007398), 2019-06-17
Supplement: pntd.0007398.s008.pdf [file pntd.0007398.s008.pdf]

# S2 Figure

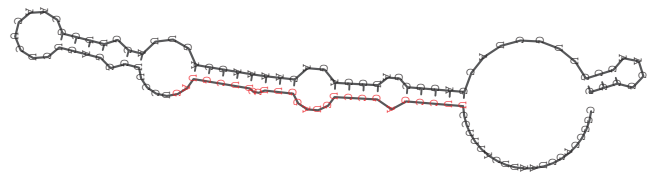

```
>GLCHR05_5465
pri_seq      cgcgcaagcguugcuacgaggcggauggagacaaaagcaguacguucgcaacucucugagggguuccugaugcuuccuuggaugucccgagccuuccuuuacuuauacgaccggc
pri_struct  (((...))).....(((((((.....(((.....))))))..(((((((.....(((.....))))))..)))))).....))))..))))..))..#MM
RNAfold     (((...))).....(((((((.....(((.....))))))..)))))).....)))))).....)))))).....)))))).....)))))).....)))))).....))..0
miR5        .....gaugcuuccuuggaugucccgagccu.....0

Gi3_19756878_x767.....ccuuggaugucccgagccu.....0
Gi3_20371972_x624.....gcuuccuuggaugucccgagccu.....0
Gi3_20831703_x531.....uccuuggaugucccgagccu.....0
Gi3_21816573_x374.....aggcgauggagacaaaagcagu.....0
Gi3_21935972_x357.....gaggcggauggagacaaaagcagu.....0
Gi3_22578925_x279.....gaugcuuccuuggaugucccgagccu.....0
Gi2_7660723_x270.....gcuuccuuggaugucccgagccu.....0
Gi3_22700524_x267.....ugcuuccuuggaugucccgagccu.....0
Gi1_2867381_x266.....gcuuccuuggaugucccgagccu.....0
Gi3_22923146_x246.....ccuuggaugucccgagccuA.....1
Gi3_22967603_x242.....cuuggaugucccgagccuA.....1
Gi3_22970507_x242.....gaugcuuccuuggauguccg.....0
Gi5_6296647_x235.....augcuuccuuggaugucccgagccu.....0
Gi3_23078057_x233.....cuuggaugucccgagccu.....0
Gi3_23375397_x210.....uccuuggaugucccgagccuA.....1
Gi3_23415721_x207.....ugaugcuuccuuggauguccgagcc.....0
Gi3_23447075_x205.....uccuuggaugucccgagccu.....0
Gi3_23581225_x196.....ggcgauggagacaaaagcagu.....0
Gi2_8177666_x195.....uccuuggaugucccgagccu.....0
Gi5_6554375_x187.....cuuggaugucccgagccu.....0
Gi1_3047861_x186.....cuuggaugucccgagccuA.....1
Gi3_23718298_x186.....cgaggcggauggagacaaaagcagu.....0
Gi3_23767757_x183.....ccugaugcuuccuuggauguccgagccu.....0
Gi1_3064383_x181.....augcuuccuuggaugucccgagccu.....0
Gi2_8347457_x175.....uccuuggaugucccgagccu.....0
Gi2_8345882_x175.....uccuuggaugucccgagccu.....0
Gi5_6648918_x174.....uccuuggaugucccgagccuuc.....0
Gi1_3099532_x170.....uccuuggaugucccgagccu.....0
Gi2_8391088_x170.....ugcuuccuuggauguccgagcc.....0
Gi3_24063987_x164.....acgaggcggauggagacaaaagcagu.....0
Gi3_24134126_x159.....cuuccuuggaugucccgagccu.....0
Gi2_8554896_x153.....cguucgcaacucucugagg.....0
Gi3_24403808_x143.....ggcgauggagacaaaagcag.....0
Gi3_24432711_x141.....uccuuggaugucccgagccuuccu.....0
Gi2_8750698_x134.....cuuccuuggaugucccgagccu.....0
Gi3_24625025_x130.....cugaugcuuccuuggauguccgagccu.....0
Gi3_24654048_x128.....augcuuccuuggauguccgagccu.....0
Gi3_24790166_x120.....aguuacguucgcaacucucugagg.....0
Gi2_8940367_x118.....aggcgauggagacaaaagcagu.....0
Gi2_8931989_x118.....gaugcuuccuuggauguccgagccu.....0
Gi2_8952434_x117.....ccugaugcuuccuuggauguccga.....0
Gi3_24864077_x116.....uccugaugcuuccuuggauguccgagccu.....0
Gi2_8962899_x116.....ggcgauggagacaaaagc.....0
Gi3_24922850_x112.....ggcgauggagacaaaagcagu.....0
Gi5_7190615_x111.....aggcgauggagacaaaagcagu.....0
Gi2_9031986_x110.....augcuuccuuggauguccgagcc.....0
Gi5_7345870_x96.....gaugcuuccuuggaugucccgagccu.....0
Gi1_3417573_x95.....uccuuggaugucccgagccuuc.....0
Gi1_3422317_x94.....gaugcuuccuuggaugucccgagccu.....0
Gi1_3426077_x94.....ccuuggaugucccgagccu.....0
Gi1_3430184_x93.....cuuggaugucccgagccu.....0
Gi2_9235789_x93.....uugcuacgaggcggauggagac.....0
Gi2_9226489_x93.....guuacguucgcaacucucugagg.....0
Gi2_9248224_x92.....gaggcggauggagacaaaagcag.....0
Gi3_25318313_x90.....aggcgauggagacaaaagcaguacgu.....0
Gi2_9296450_x87.....ggcgauggagacaaaagcA.....1
Gi3_25470902_x81.....cgaggcggauggagacaaaagca.....0
Gi3_25538858_x78.....aggcgauggagacaaaagcaguA.....1
Gi3_25534412_x78.....ugcuuccuuggauguccgagccu.....0
Gi2_9426389_x76.....ccugaugcuuccuuggauguccgagccu.....0
Gi3_25595535_x75.....cugaugcuuccuuggauguccgagccu.....0
Gi5_7596870_x74.....gaggcggauggagacaaaagcagu.....0
Gi2_9472151_x72.....ugaugcuuccuuggauguccgagccu.....0
Gi3_25660464_x71.....gaggcggauggagacaaaagcagu.....0
Gi2_9497191_x70.....ugcuuccuuggaugucccgagccu.....0
Gi2_9501531_x70.....aggcgauggagacaaaagcagu.....0
Gi3_25702465_x69.....aggcgauggagacaaaagcaguua.....0
Gi1_3551891_x68.....ugaugcuuccuuggaugucccgagccu.....0
Gi3_25760977_x66.....Ucuuccuuggaugucccgagccu.....1
Gi3_25804281_x63.....acucucugagggguuccugaugccu.....0
Gi3_25817448_x63.....uccugaugcuuccuuggauguccgagcc.....0
Gi3_25824133_x62.....Uaggcggauggagacaaaagcagu.....1
Gi1_3595760_x60.....uccuuggauguccAagccu.....1
Gi2_9625265_x60.....gaggcggauggagacaaaagcagu.....0
Gi3_25924246_x57.....gaggcggauggagacaaaagc.....0
Gi3_25931542_x57.....acgaggcggauggagacaaaagc.....0
Gi4_462528_x57.....cugaugcuuccuuggaugucccgagccuuc.....0
Gi2_9724418_x52.....cgaggcggauggagacaaaagcagu.....0
Gi1_3641154_x51.....ggcgauggagaUaaaagc.....1
Gi2_9755045_x50.....gcuuccuuggaugucccgagccuuccuA.....1
Gi3_26091277_x49.....aggcgauggagacaaaag.....0
Gi5_7917279_x47.....aggcgauggagacaaaagcaguacg.....0
```
