# Supplementary material for: Giardia lamblia miRNAs as a new diagnostic tool for human giardiasis
Source: PLoS Negl Trop Dis. 2019 Jun 17;13(6):e0007398. doi: 10.1371/journal.pntd.0007398 (PMC6597124; doi:10.1371/journal.pntd.0007398)
Supplement: S1 Fig — All are lowly expressed, and thus unlikely to exert significant regulation. (PDF) [file pntd.0007398.s007.pdf]

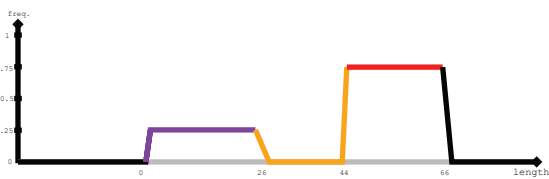[illegible]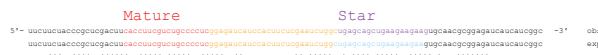[illegible]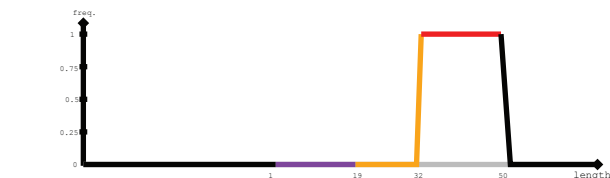[illegible]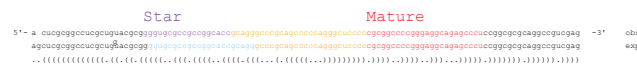[illegible]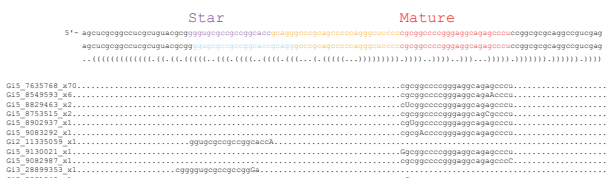

|                      |                                      |    |
|----------------------|--------------------------------------|----|
| G15_783758 x70.....  | .....ggggggccggccggagagagacgctt..... | 0  |
| G15_8549593 x6.....  | .....ggggggccggccggagagagacgctt..... | 0  |
| G15_8549593 x6.....  | .....ggggggccggccggagagagacgctt..... | 1  |
| G15_770311 x2.....   | .....ggggggccggccggagagagacgctt..... | 2  |
| G15_8902937 x1.....  | .....ggggggccggccggagagagacgctt..... | 3  |
| G15_5683392.....     | .....ggggggccggccggagagagacgctt..... | 4  |
| G12_1335059 x1.....  | .....ggggggccggccggagagacgctt.....   | 5  |
| G15_130021 x1.....   | .....ggggggccggccggagagagacgctt..... | 6  |
| G15_2802947.....     | .....ggggggccggccggagagagacgctt..... | 7  |
| G15_28489103 x1..... | .....ggggggccggccggagagagacgctt..... | 8  |
| G15_28489103 x1..... | .....ggggggccggccggagagagacgctt..... | 9  |
| G15_5060210 x1.....  | .....ggggggccggccggagagagacgctt..... | 10 |
| G15_5060210 x1.....  | .....ggggggccggccggagagagacgctt..... | 11 |
| G15_5060297 x1.....  | .....ggggggccggccggagagagacgctt..... | 12 |
| G15_5060297 x1.....  | .....ggggggccggccggagagagacgctt..... | 13 |
| G15_5026193 x1.....  | .....ggggggccggccggagagagacgctt..... | 14 |
